# Supplementary material for: Reliability and Validity of Running Cadence and Stance Time Derived from Instrumented Wireless Earbuds
Source: Sensors (Basel). 2021 Nov 30;21(23):7995. doi: 10.3390/s21237995 (PMC8659722; doi:10.3390/s21237995)
Supplement: Supplementary file 1 [file sensors-21-07995-s001.zip]

Archive with 42 entries (42 files):
- Calculated_variables.csv
- Data_P01_speeds_1.csv
- Data_P02_HeadMovements.csv
- Data_P02_speeds_1.csv
- Data_P02_speeds_2.csv
- Data_P03_HeadMovements.csv
- Data_P03_speeds_1.csv
- Data_P03_speeds_2.csv
- Data_P04_HeadMovements.csv
- Data_P04_speeds_1.csv
- Data_P04_speeds_2.csv
- Data_P05_HeadMovements.csv
- Data_P05_speeds_1.csv
- Data_P05_speeds_2.csv
- Data_P06_HeadMovements.csv
- Data_P06_speeds_1.csv
- Data_P06_speeds_2.csv
- Data_P07_HeadMovements.csv
- Data_P07_speeds_1.csv
- Data_P07_speeds_2.csv
- Data_P08_HeadMovements.csv
- Data_P08_speeds_1.csv
- Data_P08_speeds_2.csv
- Data_P09_HeadMovements.csv
- Data_P09_speeds_1.csv
- Data_P09_speeds_2.csv
- Data_P10_HeadMovements.csv
- Data_P10_speeds_1.csv
- Data_P10_speeds_2.csv
- Data_P11_HeadMovements.csv
- Data_P11_speeds_1.csv
- Data_P11_speeds_2.csv
- Data_P12_HeadMovements.csv
- Data_P12_speeds_1.csv
- Data_P12_speeds_2.csv
- Data_P13_HeadMovements.csv
- Data_P13_speeds_1.csv
- Data_P13_speeds_2.csv
- Data_P14_HeadMovements.csv
- Data_P14_speeds_1.csv
- Data_P14_speeds_2.csv
- description data.pdf
