# Supplementary material for: Reliability and Validity of Running Cadence and Stance Time Derived from Instrumented Wireless Earbuds
Source: Sensors (Basel). 2021 Nov 30;21(23):7995. doi: 10.3390/s21237995 (PMC8659722; doi:10.3390/s21237995)
Supplement: Supplementary file 1 [file sensors-21-07995-s001.zip › Calculated_variables.csv]

ppnr	Cadence_7_1_fp	Cadence_7_1_eb	StanceTime_7_1_fp	StanceTime_7_1_eb	Cadence_10_1_fp	Cadence_10_1_eb	StanceTime_10_1_fp	StanceTime_10_1_eb	Cadence_13_1_fp	Cadence_13_1_eb	StanceTime_13_1_fp	StanceTime_13_1_eb	Cadence_max_1_fp	Cadence_max_1_eb	StanceTime_max_1_fp	StanceTime_max_1_eb	Cadence_7_2_fp	Cadence_7_2_eb	StanceTime_7_2_fp	StanceTime_7_2_eb	Cadence_10_2_fp	Cadence_10_2_eb	StanceTime_10_2_fp	StanceTime_10_2_eb	Cadence_13_2_fp	Cadence_13_2_eb	StanceTime_13_2_fp	StanceTime_13_2_eb	Cadence_max_2_fp	Cadence_max_2_eb	StanceTime_max_2_fp	StanceTime_max_2_eb	Cadence_up_fp	Cadence_up_eb	StanceTime_up_fp	StanceTime_up_eb	Cadence_down_fp	Cadence_down_eb	StanceTime_down_fp	StanceTime_down_eb	Cadence_shake_fp	Cadence_shake_eb	StanceTime_shake_fp	StanceTime_shake_eb	Cadence_nod_fp	Cadence_nod_eb	StanceTime_nod_fp	StanceTime_nod_eb	Cadence_bird_L_fp
1	163.796322936332	164.769502490234	0.286459259259259	0.290792747737978	NaN	NaN	NaN	NaN	NaN	NaN	NaN	NaN	NaN	NaN	NaN	NaN	NaN	NaN	NaN	NaN	NaN	NaN	NaN	NaN	NaN	NaN	NaN	NaN	NaN	NaN	NaN	NaN	NaN	NaN	NaN	NaN	NaN	NaN	NaN	NaN	NaN	NaN	NaN	NaN	NaN	NaN	NaN	NaN	NaN
2	161.245404749604	161.399223675915	0.2884875	0.288145278469043	NaN	NaN	NaN	NaN	NaN	NaN	NaN	NaN	NaN	NaN	NaN	NaN	154.839431743044	155.004012230832	0.314313725490196	0.295147286851828	NaN	NaN	NaN	NaN	NaN	NaN	NaN	NaN	NaN	NaN	NaN	NaN	165.109010388368	164.761309348333	0.276529411764706	0.276077842139211	160.815074379012	160.655794307329	0.283388888888889	0.280897059956865	161.235240807653	161.651472669002	0.279625	0.279328298356876	160.383642601395	160.3837967209	0.280272727272727	0.274351452913633	160.415088785965
3	158.919050102537	158.879119659457	0.287251908396946	0.27893394989144	169.220254771769	168.86095277734	0.235942857142857	0.221771582356348	175.195598867838	175.524807503196	0.205144827586207	0.191566566864637	188.534195620659	193.307737723157	0.176532467532468	0.159272885229124	152.769338014313	153.067100180078	0.304698412698413	0.294108567117796	171.038160627623	170.830579189568	0.236085714285714	0.217643048256838	178.142254949093	178.155138399389	0.20308843537415	0.189865158257301	NaN	NaN	NaN	NaN	168.327613233584	167.749009319748	0.236586206896552	0.219820249898079	168.899680984547	169.045243828508	0.236305084745763	0.222932884989116	168.233307453712	167.950389157792	0.234633333333333	0.222812087018784	168.062160041692	167.959811740028	0.237186440677966	0.222417727610791	168.112242091941
4	157.126927149433	157.002211880903	0.253092307692308	0.257387194262452	152.572049118538	152.593117484572	0.216603174603175	0.213938621092813	157.352148414978	157.532888988312	0.181297709923664	0.215925142846126	158.9342433639	159.127317994623	0.176564885496183	0.211717724336195	152.036410665502	152.114546459992	0.255536	0.258135586033309	153.10627756287	153.087115514399	0.220460317460318	0.215839575803543	154.803486627953	154.808803889923	0.184818897637795	0.194167792783374	158.334660362059	158.3080107597	0.178369230769231	0.207784594631165	153.969546029045	154.071534358598	0.216526315789474	0.210661806403359	154.453528790246	154.488419886501	0.217180327868853	0.215514375623028	154.38747441574	154.457474718557	0.216472727272727	0.2128139704239	154.651432017551	154.739888841696	0.217818181818182	0.214881949713354	153.516189435883
5	157.959408517206	158.019712096164	0.279038167938931	0.268049238159109	162.21869143089	162.25007711182	0.226436090225564	0.225004939209441	172.810211201312	172.587502378998	0.200083916083916	0.196797231261796	181.009723112718	181.091785746397	0.182818791946309	0.179925300724021	161.507145379154	161.633701100487	0.27424060150376	0.269329943423034	164.502844348652	164.400394540994	0.223588235294118	0.223478585637499	176.995657743763	177.012964375927	0.192625850340136	0.195765271642565	182.713793806277	182.702260577088	0.18087417218543	0.178469349669908	163.023504867552	162.966254278043	0.225575757575758	0.224787523251971	162.907436884324	162.946823487717	0.225241379310345	0.224603639383849	163.424303059561	163.230890788642	0.227448275862069	0.236163689816672	163.399104666675	163.134818300957	0.2254375	0.225906320200354	163.152722534318
6	151.122845783014	151.351853902858	0.34135632183908	0.311194356516433	157.743338557687	158.020084741589	0.270091603053435	0.275149467387827	162.778393273623	NaN	0.239392592592593	NaN	NaN	NaN	NaN	NaN	150.864157002433	150.994064213872	0.333387096774194	0.308064849093941	156.074591574753	156.301388024398	0.260170542635659	0.272583899027509	164.383834174242	164.6243229018	0.227588235294118	0.236389312860125	NaN	NaN	NaN	NaN	151.255587871388	151.734042185542	0.322866666666667	0.305271944758979	150.793460088992	150.65601459298	0.323483870967742	0.311486836152189	150.8002768106	144.872168798574	0.324928571428571	0.380996200115207	150.478658087604	150.785559043974	0.337142857142857	0.318804595080274	150.287833319265
7	154.938161634885	155.028686117208	0.26296062992126	0.274776302073349	161.277118685421	161.209296144469	0.234496240601504	0.244960722141409	168.377321984228	168.322499542581	0.205611510791367	0.212889369968847	NaN	NaN	NaN	NaN	154.827570818154	154.862901060559	0.252551181102362	0.258727941398035	158.464123978301	158.470808264287	0.224290076335878	0.233719076191504	168.879683898523	168.817347135615	0.198028571428572	0.204132249987186	NaN	NaN	NaN	NaN	162.122639223072	162.294747065925	0.223133333333333	0.230023295935203	162.44467501129	162.170780401773	0.226903225806452	0.235836228859329	161.718284704501	161.377818420258	0.234363636363636	0.251917318211003	163.212726206524	162.994561828199	0.222733333333333	0.232136043544836	163.456881742078
8	149.780334735032	149.747479517484	0.296209677419355	0.284923932928427	155.456463091214	155.718067004749	0.245859375	0.252539278840689	NaN	NaN	NaN	NaN	NaN	NaN	NaN	NaN	150.958955951684	150.938938725839	0.295048387096774	0.276136300834367	154.689280118525	154.756467876111	0.250046875	0.248438087513217	NaN	NaN	NaN	NaN	NaN	NaN	NaN	NaN	150.585371205204	150.785276730003	0.290962962962963	0.278369297340541	148.854913719676	148.846095298496	0.29225	0.279853601952651	151.460483348836	151.827717747075	0.287931034482758	0.284227776704288	150.208083759983	149.706474105064	0.28951724137931	0.272015167283997	149.920384424993
9	170.557842317848	170.739217046123	0.243642857142857	0.240736262350081	181.605348497441	181.838405895152	0.217377483443709	0.22333937713199	NaN	NaN	NaN	NaN	NaN	NaN	NaN	NaN	167.332966907644	167.243617193538	0.248782608695652	0.241217838969929	180.090737891715	180.269344747237	0.216986486486486	0.219270665504427	NaN	NaN	NaN	NaN	NaN	NaN	NaN	NaN	165.905165384918	166.040141219168	0.249111111111111	0.243739609757997	166.143306206122	166.289481685676	0.2448125	0.239250208300039	167.032375455483	166.956253024046	0.243352941176471	0.241677030024154	165.795641394364	166.141884142577	0.242	0.235632888136745	166.720042793631
10	174.481683513206	174.329195353045	0.208786206896552	0.208391686313882	179.931166812213	179.865615486941	0.182189189189189	0.172295651598474	NaN	NaN	NaN	NaN	NaN	NaN	NaN	NaN	171.726569245786	171.417552151188	0.211801418439716	0.212216350424922	178.567823743276	178.424511420289	0.195006802721089	0.190333545487127	NaN	NaN	NaN	NaN	NaN	NaN	NaN	NaN	175.928922063564	175.989698672898	0.209333333333333	0.206670985530916	171.082619137318	169.626933297623	0.231666666666667	0.231514569114936	173.20512966462	174.387079589967	0.214645161290323	0.202806407755921	173.209987702345	173.186543881205	0.2181875	0.213251040420885	171.078496767787
11	131.983334826129	132.079708362498	NaN	NaN	169.087445642391	168.95687069511	0.244085714285714	0.251890106757365	176.460341522114	176.314666643618	0.215089655172414	0.23287297463708	NaN	NaN	NaN	NaN	131.583329243557	131.599704110337	NaN	NaN	166.83574074175	166.890081558518	0.246434782608696	0.251719548651432	172.325379896474	172.35566621128	0.219146853146853	0.235790350639812	NaN	NaN	NaN	NaN	169.862170524278	169.861360529899	0.24375	0.250995004912544	168.888860418833	168.885611751123	0.243818181818182	0.251512013014694	170.461637598136	168.208707787276	0.242451612903226	0.270816569861006	170.029841633387	169.362509631955	0.243928571428571	0.251941452349538	169.39007046719
12	143.400090443983	143.215201445326	NaN	NaN	179.927775997238	179.934600667809	0.201378378378379	0.216072576731436	186.544828013535	186.770422008275	0.183882352941177	0.206254839920913	193.274085972329	194.360392896089	0.1652125	0.191323275026619	141.240721744114	141.406964014405	NaN	NaN	175.017547349699	174.826561878594	0.205379310344828	0.212754047562134	183.464729166072	183.3848535175	0.184092715231788	0.196034091147247	192.807575421176	NaN	0.165518987341772	NaN	177.844982727762	177.982024598045	0.208971428571429	0.218150716819521	178.842633087161	178.500675293972	0.208555555555556	0.217125026314358	176.608657771317	173.689714453661	0.206333333333333	0.239967932665816	176.889778930348	177.915756674212	0.207314285714286	0.216604046003808	177.273978827206
13	163.267424798416	163.234180700078	0.266592592592593	0.263000015907355	164.435797283052	164.44346154061	0.225691176470588	0.220031769385283	169.2954993934	169.149171102319	0.196271428571429	0.190143468313996	NaN	NaN	NaN	NaN	165.013096559165	164.809600496734	0.271029411764706	0.263723388827614	166.885065978092	166.900950339431	0.226452554744526	0.216682081402733	169.895913168519	169.68980238692	0.197404255319149	0.1887386461035	NaN	NaN	NaN	NaN	168.230623379626	167.525536462223	0.231096774193548	0.225758133488807	167.82829020215	168.065949105054	0.233151515151515	0.22959417459351	169.031926597862	166.201117153126	0.230333333333333	0.251400896612838	168.829571755513	168.905137301513	0.230125	0.223150374191297	167.945957833154
14	159.319852080573	159.510878847947	0.256381679389313	0.25301188797441	164.987893399222	164.966182032254	0.213328467153285	0.21832445929122	173.716615721747	173.929307090271	0.195555555555556	0.196079118859707	187.093663235388	187.374392199228	0.173264516129032	0.169131723832135	161.973058934871	161.895486004454	0.257308270676692	0.25226201553176	164.296050304323	164.118975290434	0.218411764705882	0.221215801823894	171.286011355367	172.007542592009	0.19668085106383	0.19791367384334	182.063345426129	182.309978359233	0.182466666666667	0.176437757307706	163.957912711842	164.271586304154	0.217611111111111	0.220647873561743	162.604230578343	163.172186717692	0.220424242424243	0.226965482881945	163.327665157157	163.36545957775	0.222387096774194	0.224749584953138	163.497779394371	163.692719437348	0.220689655172414	0.222903939450469	165.518279543798
[truncated: 11 more columns]
