# Supplementary material for: Reliability and Validity of Running Cadence and Stance Time Derived from Instrumented Wireless Earbuds
Source: Sensors (Basel). 2021 Nov 30;21(23):7995. doi: 10.3390/s21237995 (PMC8659722; doi:10.3390/s21237995)
Supplement: Supplementary file 1 [file sensors-21-07995-s001.zip › Data_P02_HeadMovements.csv]

time	up_force_plate_1	up_force_plate_2	up_force_plate_3	up_earbuds_1	up_earbuds_2	up_earbuds_3	down_force_plate_1	down_force_plate_2	down_force_plate_3	down_earbuds_1	down_earbuds_2	down_earbuds_3	shake_force_plate_1	shake_force_plate_2	shake_force_plate_3	shake_earbuds_1	shake_earbuds_2	shake_earbuds_3	nod_force_plate_1	nod_force_plate_2	nod_force_plate_3	nod_earbuds_1	nod_earbuds_2	nod_earbuds_3	bird_L_force_plate_1	bird_L_force_plate_2	bird_L_force_plate_3	bird_L_earbuds_1	bird_L_earbuds_2	bird_L_earbuds_3	bird_R_force_plate_1	bird_R_force_plate_2	bird_R_force_plate_3	bird_R_earbuds_1	bird_R_earbuds_2	bird_R_earbuds_3	check_watch_force_plate_1	check_watch_force_plate_2	check_watch_force_plate_3	check_watch_earbuds_1	check_watch_earbuds_2	check_watch_earbuds_3
0	-33.283	99.7586	259.57499	-0.11054	0.22881	0.021289	-47.471	49.614	48.047	-0.027734	0.010449	0.09922	-55.039	124.9719	597.4725	-0.19336	0.66406	-0.34863	-17.996	-190.611	787.0385	-0.96143	0.90362	0.11221	-43.037	99.578	783.5616	-0.36201	1.1193	-0.096778	4.28900000000001	-111.4862	1052.5243	-1.0815	1.0396	0.071289	-46.891	-11.0861	42.13	0.031152	0.037988	-0.055957
0.002	-32.47	90.897	268.586	-0.088671	0.21045	0.022461	-50.06	59.144	28.9956	-0.022461	0.0043945	0.10059	-52.975	127.9366	580.5262	-0.17627	0.6333	-0.33447	-6.15600000000001	-196.159	812.562	-0.98984	0.92617	0.093359	-20.146	93.4279	779.917	-0.3419	1.0854	-0.098145	-28.915	-129.7116	1040.5469	-1.1733	1.1001	0.083008	-30.745	-8.5971	36.152	0.03125	0.04541	-0.061523
0.004	-47.871	106.898	246.97	-0.069141	0.19658	0.020312	-17.124	43.3541	21.286	-0.020508	-0.0010742	0.1041	-59.423	128.173	569.8293	-0.16992	0.61914	-0.32813	0.103999999999999	-213.572	831.26	-1.0012	0.95703	0.062891	-43.725	98.9916	742.444	-0.3251	1.0413	-0.099316	-17.71	-144.05521	1054.919	-1.2104	1.1235	0.082031	-25.663	-21.5569	50.853	0.033301	0.053906	-0.071094
0.006	-35.198	121.563	223.4465	-0.052734	0.18945	0.016113	-24.782	23.3913	23.641	-0.013379	-0.0096681	0.10439	-54.872	140.567	545.631017	-0.1543	0.59131	-0.3125	-31.251	-227.772	863.822	-0.98672	0.98789	0.032812	-43.366	105.4	700.948	-0.30322	1.0064	-0.10098	-31.824	-150.3321	1074.666	-1.269	1.1782	0.081055	-29.747	-18.4422	58.9459	0.032032	0.062402	-0.078223
0.008	-39.284	111.859	209.1784	-0.039941	0.17432	0.017871	-23.128	18.263	25.894	-0.01416	-0.015918	0.10166	-52.908	140.4906	537.33005	-0.1438	0.56933	-0.30151	5.498	-209.834	912.1335	-0.95361	1.0063	-0.0014648	-47.3131	106.772	670.732	-0.29004	0.96777	-0.098633	-15.742	-155.1079	1104.4043	-1.3037	1.2227	0.085205	-28.423	-13.2438	51.6786	0.028906	0.07334	-0.0833
0.01	-46.126	88.374907	202.623	-0.028125	0.16855	0.017383	-37.291	22.9315	30.794	-0.0079102	-0.024609	0.097461	-47.121	126.1024	516.333	-0.13623	0.55127	-0.28662	-24.363	-170.811	960.258	-0.91084	1.0223	-0.02334	-26.941	109.671	662.4909	-0.2709	0.93379	-0.093359	12.713	-158.4717	1114.5637	-1.3262	1.2676	0.083984	-33.1847	-5.533	69.2026	0.026856	0.085156	-0.079981
0.012	-36.156	82.589	187.269	-0.023047	0.15957	0.018555	-21.679	20.0628	34.89369	-0.003418	-0.02832	0.092773	-35.284	124.6384	504.39012	-0.12646	0.52783	-0.27539	-7.163	-128.6892	998.645	-0.87529	1.0228	-0.04043	-40.146	110.8925	662.137	-0.25909	0.90537	-0.092871	-6.462	-145.669	1120.554	-1.3667	1.3247	0.081543	-16.451	-6.204	91.5608	0.022461	0.10156	-0.087891
0.014	-42.289	70.228	174.107	-0.014258	0.15088	0.023145	-48.254	26.638	51.831	-0.0040039	-0.028516	0.095019	-30.567	137.3487	482.3736	-0.1167	0.51563	-0.26953	-12.991	-106.382	1023.599	-0.85107	1.0274	-0.04668	-35.992	117.873	659.179	-0.25127	0.88037	-0.090137	-14.937	-130.9649	1123.3225	-1.3843	1.354	0.080078	-24.826	-17.667	142.2159	0.012793	0.11777	-0.089063
0.016	-59.5074	73.677	169.519	-0.0073242	0.14648	0.02002	-34.856	29.0275	59.164	-0.0066406	-0.023926	0.094043	-46.749	127.6827	458.53	-0.10596	0.49561	-0.24756	-24.134	-95.411	1020.626	-0.84873	1.029	-0.043262	-40.513	141.553	667.496	-0.24385	0.8583	-0.088574	13.575	-107.057	1138.033	-1.4331	1.3989	0.074707	-4.446	1.746	181.6232	-0.0022461	0.13438	-0.088476
0.018	-17.268	70.6914	171.5175	-0.005957	0.13994	0.019141	-44.18	34.4653	58.8809	-0.0089844	-0.023926	0.08623	-46.614	129.4111	437.832	-0.091308	0.47168	-0.24292	-35.905	-99.846	1022.061	-0.87256	1.0493	-0.02832	-42.694	152.644	654.5066	-0.23584	0.83936	-0.089844	13.079	-90.594	1131.913	-1.4805	1.4409	0.065918	-21.131	25.8211	218.003	-0.023339	0.15976	-0.083789
0.02	-38.679	77.335	168.2803	-0.0024414	0.12949	0.019141	-36.206	13.0016	43.399	-0.015723	-0.013477	0.088672	-20.791	138.06779	431.1652	-0.080078	0.45313	-0.23633	-8.654	-112.594	1017.415	-0.92031	1.0781	-0.018457	-54.949	114.391	642.9406	-0.22461	0.81425	-0.091211	23.293	-80.361	1130.094	-1.5273	1.4707	0.0625	-33.287	35.729	254.83	-0.052735	0.19483	-0.073438
0.022	-36.745	80.852	151.561	0.0053711	0.12363	0.019531	-39.083	-3.9119	59.074	-0.027832	0.00048828	0.090332	-66.74	139.9267	416.5089	-0.062988	0.42285	-0.21875	-36.43	-140.3749	1055.186	-0.98154	1.1195	-0.013867	-32.103	101.8182	618.1764	-0.21094	0.78828	-0.09541	6.722	-99.301	1124.959	-1.5874	1.5083	0.067383	-14.814	19.717	358.206	-0.098145	0.23535	-0.053223
0.024	-41.026	79.914	146.385	0.010254	0.11816	0.02168	-31.908	-19.204	58.754	-0.041601	0.017382	0.088086	-66.04	124.6575	412.789	-0.057129	0.41064	-0.21777	-39.774	-156.591	1072.471	-1.0452	1.1675	-0.0083985	-34.818	102.9337	571.891	-0.19297	0.76406	-0.10166	30.2256	-111.6371	1127.524	-1.6108	1.5269	0.066895	-27.798	39.7813	461.487	-0.16094	0.2833	-0.027344
0.026	-20.83	73.1607	142.2622	0.01416	0.11377	0.018066	-52.176	-27.381	77.912	-0.05459	0.036231	0.087012	-41.717	127.68	405.627	-0.036133	0.38281	-0.20361	-70.926	-168.782	1087.26548	-1.1058	1.2177	-0.014355	-45.774	108.5327	537.25	-0.17822	0.73779	-0.098049	9.185	-109.1117	1157.848	-1.6479	1.5532	0.064453	-56.845	73.0023	547.5739	-0.24258	0.34668	0.011621
0.028	-51.8471	63.8956	136.869	0.019336	0.10439	0.018164	-36.438	-21.826	92.2906	-0.067871	0.062403	0.084668	-18.486	135.137	384.32002	-0.022217	0.35449	-0.19165	-66.9518	-166.297	1101.46	-1.1538	1.2622	-0.028809	-34.501	98.656	516.257	-0.16309	0.7041	-0.097168	-1.732	-86.5951	1164.2401	-1.6658	1.5667	0.061279	-50.762	89.629	592.647	-0.3457	0.42207	0.071777
0.03	-32.021	61.2158	112.525	0.022266	0.09541	0.023047	-25.819	9.4348	138.4381	-0.083008	0.083789	0.081055	-61.203	121.5689	365.93803	-0.0092773	0.32813	-0.18262	-53.938	-162.644	1128.5133	-1.184	1.3102	-0.050586	-30.928	116.5451	518.9723	-0.14395	0.67403	-0.096973	-8.956	-75.9517	1163.91787	-1.6738	1.5771	0.058105	-18.776	83.636	623.2689	-0.47715	0.51728	0.14541
0.032	-33.622	57.6487	103.543	0.021484	0.089941	0.024219	-27.261	20.511	176.8252	-0.09668	0.11035	0.07959	-29.267	107.5322	348.7585	0.0048828	0.2959	-0.17383	-22.721	-155.6347	1146.857	-1.1963	1.3575	-0.070312	-40.576	130.4023	531.402	-0.1333	0.6458	-0.093847	-1.819	-59.7379	1159.0752	-1.6694	1.5845	0.055664	-18.065	89.813	668.9663	-0.62646	0.62256	0.22119
0.034	-39.195	73.4966	87.179	0.022656	0.081348	0.027734	-45.886	28.821	233.903	-0.11533	0.14092	0.076074	-35.031	110.6261	333.895	0.016113	0.2793	-0.17041	-52.088	-152.835	1141.443	-1.2091	1.4039	-0.084375	-35.068	134.6634	535.164	-0.12471	0.62041	-0.090332	-16.893	-51.6124	1166.214	-1.666	1.5879	0.053223	-54.4197	60.625	690.9278	-0.79668	0.73887	0.29356
0.036	-15.221	65.0628	94.0329	0.021973	0.073242	0.035645	-49.497	42.503	280.9917	-0.13691	0.17724	0.075879	-32.632	106.897	316.921	0.030762	0.24707	-0.15625	-31.127	-164.274	1148.7243	-1.2177	1.4444	-0.099806	-15.256	113.9479	526.185	-0.12148	0.60273	-0.08418	-24.4389	-56.0654	1189.7735	-1.6558	1.5786	0.050293	-63.3468	34.0335	696.4895	-0.97461	0.86953	0.3584
0.038	-15.64	67.757	95.135	0.018555	0.069824	0.035254	-46.996	66.5549	319.905	-0.16855	0.21552	0.079004	-44.425	105.389	298.2887	0.04248	0.2251	-0.15113	-1.261	-148.2782	1158.4962	-1.2329	1.481	-0.10596	-20.245	121.484	511.8714	-0.12305	0.58594	-0.075684	11.286	-52.32136	1216.05488	-1.6479	1.5747	0.051757	-55.165	-11.8462	681.618	-1.1516	1.0113	0.40801
0.04	-24.334	62.7083	92.756	0.016308	0.058496	0.036621	-35.669	65.1087	379.569	-0.21768	0.25937	0.076367	-26.443	105.2973	283.9485	0.055176	0.20313	-0.14502	-14.229	-140.9093	1159.1372	-1.2614	1.5202	-0.11543	-42.468	120.557	490.5419	-0.12168	0.57783	-0.076758	27.0396	-39.9356	1224.7266	-1.6401	1.5649	0.04834	-38.609	-51.7317	659.015	-1.3154	1.1501	0.42891
0.042	-29.499	74.218	88.960765	0.015136	0.049902	0.039746	-38.2	67.37358	444.633	-0.27832	0.31738	0.076172	-24.307	117.2121	269.2197	0.062012	0.18066	-0.13428	-0.911999999999999	-129.177	1134.1068	-1.2973	1.5574	-0.11943	-46.591	121.012	447.726	-0.12119	0.57041	-0.07539	21.6109	-48.6333	1223.3085	-1.6367	1.5488	0.052246	-60.84	-75.632	636.581	-1.4429	1.2827	0.42578
0.044	-26.608	58.708	88.8664	0.014062	0.042676	0.045801	-27.373	84.0385	514.505	-0.34893	0.37793	0.079981	-48.066	111.88	268.3331	0.069336	0.17383	-0.125	12.984	-116.3849	1139.1958	-1.3422	1.5984	-0.13193	-34.694	116.8211	423.406	-0.11689	0.5583	-0.076172	22.6505	-60.808	1202.772	-1.6284	1.5337	0.053711	-59.896	-56.136	627.277	-1.5241	1.3997	0.39824
0.046	-30.806	54.5853	70.861	0.012695	0.033203	0.043945	-18.47	90.5961	571.619	-0.4375	0.45605	0.09043	-43.961	105.863	261.233	0.07959	0.15039	-0.12598	-17.992	-95.8433	1132.0543	-1.3902	1.6355	-0.13604	-36.444	104.4818	405.485	-0.10674	0.54443	-0.079199	31.8308	-49.233	1204.685	-1.6245	1.5103	0.048828	-60.016	-10.1819	620.1186	-1.5566	1.4891	0.33838
0.048	-12.749	56.1508	52.415	0.011133	0.028223	0.05332	-33.281	79.646	642.9347	-0.53164	0.54864	0.10293	-37.285	112.53	241.6831	0.092041	0.13671	-0.1228	-19.748	-90.3596	1133.513	-1.4307	1.6719	-0.15088	-39.14	81.7743	400.716	-0.095215	0.52881	-0.084473	7.996	-32.788	1200.5225	-1.6141	1.4905	0.047607	-47.947	1.2	671.0573	-1.5391	1.5488	0.2708
0.05	-44.179	57.89507	32.802	0.0095703	0.017871	0.055859	-41.207	49.165	685.487	-0.63877	0.65537	0.12539	-42.904	113.6386	232.7006	0.10059	0.12695	-0.12402	-8.818	-102.301	1152.2128	-1.4577	1.7028	-0.16611	-30.398	87.335	397.7235	-0.070215	0.50264	-0.082324	13.662	-30.905	1212.653	-1.5991	1.4673	0.04541	-61.049	3.768	719.5233	-1.4647	1.5688	0.22392
0.052	-27.32	40.7977	38.638	0.0091796	0.013574	0.059375	-54.623	30.1628	693.502	-0.75391	0.76758	0.15332	-53.102	107.41469	216.455	0.10986	0.11279	-0.1167	-25.172	-98.998	1156.6138	-1.4703	1.7234	-0.1878	-18.515	124.6811	391.1224	-0.050293	0.479	-0.081152	17.205	-52.4408	1215.536	-1.5752	1.4443	0.037598	-29.905	5.672	734.71942	-1.355	1.5552	0.18848
0.054	-27.424	44.9531	61.7274	0.003125	0.0063477	0.063965	-47.922	16.6768	678.646	-0.88399	0.88945	0.17021	-21.833	94.9226	204.347	0.11133	0.10938	-0.11621	-14.393	-93.613	1145.9449	-1.4641	1.7266	-0.20888	-14.606	133.4193	374.627	-0.027246	0.44658	-0.083105	13.471	-54.7229	1196.6634	-1.5586	1.4238	0.037109	-26.164	11.195	719.6027	-1.2239	1.4939	0.16797
0.056	-27.403	49.2666	76.601	0.0058594	0.0024414	0.067871	-67.611	-26.3869	665.41	-1.006	1.0106	0.18555	-20.301	107.2563	181.664	0.11865	0.10547	-0.12109	-23.0883	-109.0896	1127.576	-1.4458	1.7136	-0.22861	-28.082	116.926	365.3771	-0.0062502	0.41729	-0.081152	-34.9344	-46.4196	1173.8868	-1.5322	1.4004	0.032715	-23.969	-13.195	713.019	-1.0875	1.3985	0.15713
0.058	-37.405	58.146	69.262	0.0014647	-0.0036133	0.074023	-25.832	-54.337	622.4636	-1.1169	1.1309	0.18516	-28.376	102.5227	165.3922	0.12061	0.10351	-0.12231	-37.725	-99.6208	1125.247	-1.4121	1.6816	-0.24219	-27.384	102.9928	348.4341	0.012207	0.38672	-0.077637	-8.337	-29.528	1172.7824	-1.509	1.3821	0.025635	-41.159	-45.603	735.157	-0.9629	1.2715	0.16299
0.06	-13.975	62.114	55.7772	-0.00048828	-0.0042973	0.082715	-36.658	-74.936	591.94	-1.2065	1.235	0.17061	-38.894	90.8445	160.0752	0.12012	0.10498	-0.12646	-35.178	-80.7222	1135.16	-1.3767	1.642	-0.24189	-24.67	101.5566	317.201	0.02959	0.35215	-0.075684	2.288	-17.9109	1172.64354	-1.4897	1.3687	0.023438	11.247	-70.188	757.4317	-0.87041	1.1449	0.15918
0.062	-25.729	68.4466	44.114	0.00029309	-0.0046871	0.081542	-7.77	-75.658	588.091	-1.2671	1.3228	0.14893	-13.345	92.9348	165.4701	0.12305	0.10889	-0.12891	4.677	-66.043	1147.0475	-1.3407	1.5925	-0.24355	-18.653	101.399	296.761	0.039258	0.3251	-0.072754	-19.998	-9.7912	1161.9803	-1.4697	1.3438	0.022949	-30.297	-90.7048	765.1476	-0.7998	1.0273	0.16797
0.064	-36.726	50.565	31.651	-0.0032226	-0.012793	0.09541	-9.4545	-55.989	617.7988	-1.2794	1.3733	0.1165	-38.278	93.7192	163.83082	0.12402	0.11572	-0.12598	-8.332	-64.5412	1161.648	-1.3187	1.552	-0.24043	-47.525	103.611	303.3069	0.050196	0.29854	-0.068848	-34.879	-20.1751	1160.7555	-1.4585	1.3384	0.018555	0.459000000000003	-128.478	764.7687	-0.76299	0.93369	0.16553
0.066	-28.655	31.8345	35.222	-0.003418	-0.018066	0.094238	22.0778	-14.3705	647.8415	-1.2457	1.3883	0.094434	-35.311	76.7719	151.6944	0.12695	0.11523	-0.12207	21.84	-59.4349	1195.64	-1.3064	1.5085	-0.23194	-37.464	112.491	291.3656	0.053809	0.27676	-0.06709	10.801	-20.033	1149.5186	-1.4414	1.3262	0.018555	-1.064	-178.417	791.595	-0.73554	0.86387	0.15703
0.068	-28.016	31.7955	33.4008	-0.0016602	-0.022754	0.095802	-6.008	-5.248	654.062	-1.166	1.3524	0.068262	-34.381	73.9384	153.7571	0.12768	0.11963	-0.12256	17.593	-54.0645	1195.11471	-1.3125	1.4824	-0.22705	-56.301	115.16	279.5376	0.059082	0.25732	-0.062988	9.288	-16.122	1165.7606	-1.4277	1.3223	0.021973	28.868	-199.169	820.1902	-0.71718	0.81894	0.13906
0.07	-34.466	30.1897	29.5351	0.0007807	-0.029199	0.093555	2.761	-14.143	652.1	-1.0442	1.2757	0.055957	-16.586	80.4944	148.945	0.12549	0.13379	-0.11816	8.818	-51.7377	1186.5484	-1.318	1.4672	-0.2295	-48.32	107.4267	254.2241	0.062695	0.24336	-0.066308	8.245	-9.6963	1152.7962	-1.4199	1.3203	0.020508	-27.293	-184.184	845.7161	-0.6998	0.79785	0.11397
0.072	-30.551	31.8821	39.6939	0.007809	-0.031152	0.094725	-18.63	-23.352	668.754	-0.90479	1.1685	0.05957	-32.96	87.0696	123.043	0.11963	0.14111	-0.11475	7.042	-41.618	1178.6665	-1.3331	1.4676	-0.22392	-35.632	99.65751	240.162	0.067383	0.23213	-0.067187	-7.147	-20.95	1126.7559	-1.4097	1.313	0.021973	-0.577999999999996	-161.367	834.996	-0.67334	0.7915	0.081055
0.074	-29.033	39.327	33.8037	0.017089	-0.043555	0.093457	-14.018	-13.346	657.12	-0.77549	1.0347	0.072364	-24.158	67.2208	118.9135	0.11768	0.14258	-0.11279	20.562	-39.965	1171.1697	-1.3444	1.4657	-0.22705	-13.152	98.6113	251.0456	0.071679	0.21611	-0.067578	30	-30.64991	1096.093	-1.3994	1.3076	0.024414	-10.914	-154.1872	851.263	-0.64092	0.78818	0.051758
0.076	-27.633	59.436	43.0508	0.022949	-0.046387	0.099609	-32.497	-50.124	681.358	-0.67314	0.9043	0.091113	-32.865	63.8018	104.9946	0.10742	0.15234	-0.10938	-7.30399999999999	-46.2306	1158.542	-1.3546	1.4736	-0.22568	-20.434	87.1502	240.154	0.074219	0.2043	-0.07207	-4.18	-17.3593	1075.5879	-1.3843	1.3052	0.022461	9.669	-131.8227	876.155	-0.61182	0.79385	0.031347
0.078	-21.449	56.34	29.3856	0.03096	-0.04756	0.09873	-52.086	-88.458	688.655	-0.60361	0.78242	0.11299	-46.498	68.0947	92.34564	0.10376	0.15967	-0.1062	-39.2814	-52.329	1168.1583	-1.3643	1.4824	-0.22754	-22.31	78.0843	206.661	0.075195	0.19873	-0.07373	-2.557	-3.8649	1071.4153	-1.3687	1.2935	0.024902	-1.011	-116.6652	928.8617	-0.59463	0.80518	0.019629
0.08	-26.725	50.232	42.853	0.034281	-0.055281	0.093363	-71.851	-127.4209	691.076	-0.57471	0.69571	0.13701	-38.406	70.6882	103.1137	0.098633	0.16895	-0.1001	-32.308	-47.8573	1168.59419	-1.3638	1.4874	-0.22256	-13.569	93.4704	183.041	0.08584	0.18808	-0.078223	-1.297	7.0197	1074.7965	-1.3594	1.291	0.029297	5.779	-79.449	986.051	-0.59687	0.83203	0.019727
0.082	-15.759	30.8669	21.493	0.038579	-0.057613	0.094921	-51.836	-139.822	693.166	-0.57422	0.63525	0.15332	-11.434	60.5091	110.3	0.095215	0.16943	-0.099121	-40.5497	-25.6873	1180.716	-1.3555	1.4957	-0.22012	-36.465	88.51223	184.074	0.088086	0.18027	-0.077148	18.717	18.84554	1066.8306	-1.3413	1.2759	0.029785	1.77	-62.738	1026.966	-0.62842	0.87158	0.026367
0.084	-15.728	27.0029	16.792	0.039455	-0.055076	0.096291	-45.492	-151.634	726.6681	-0.59297	0.60918	0.16807	-17.904	71.063	96.03	0.096191	0.16895	-0.098145	-38.328	-11.1967	1192.5145	-1.3504	1.493	-0.21465	-32.849	86.741	193.9546	0.090039	0.17246	-0.075976	-30.1414	26.75071	1045.532	-1.3247	1.2681	0.033203	22.5033	-68.982	1017.0165	-0.68741	0.91982	0.046191
0.086	-23.819	31.4417	13.02	0.041992	-0.05127	0.093262	-34.928	-144.455	774.85	-0.62061	0.60752	0.17451	-32.812	60.4841	89.923	0.10107	0.16895	-0.10059	-3.698	-6.638	1185.6041	-1.3441	1.4861	-0.20479	-43.964	99.329	193.337	0.089746	0.16514	-0.075781	1.133	12.6145	1032.895	-1.3125	1.2539	0.035156	15.507	-100.63	1022.261	-0.77559	0.9791	0.063379
0.088	-33.774	21.8242	28.8066	0.042867	-0.052646	0.093179	-50.832	-127.14	809.431	-0.646	0.63447	0.17256	-42.552	47.4014	79.285	0.10083	0.16577	-0.094482	-35.651	-10.76537	1169.32298	-1.3379	1.4844	-0.19922	-29.857	113.223	181.28	0.087402	0.15674	-0.073242	0.909999999999997	19.7782	1018.765	-1.2852	1.2324	0.038086	5.088	-116.127	1022.254	-0.87637	1.0346	0.079786
0.09	-4.298	10.39466	48.0633	0.040242	-0.047699	0.094561	-64.819	-115.4359	818.17	-0.66895	0.68066	0.16074	-25.781	52.1272	78.0744	0.10156	0.16357	-0.093262	-23.541	-3.1014	1144.0074	-1.3288	1.4759	-0.1914	-43.5555	108.184	164.6365	0.082813	0.15156	-0.073047	-13.601	32.38	1019.5963	-1.2729	1.2212	0.034668	-6.176	-114.011	1029.5	-0.98252	1.0999	0.089844
0.092	-42.181	11.4355	52.52	0.041	-0.040241	0.086357	-70.503	-120.62883	843.802	-0.67773	0.73242	0.15381	-21.545	63.42	52.6913	0.10303	0.15967	-0.087891	-25.771	-2.2116	1127.3511	-1.3237	1.4716	-0.18573	-28.231	89.857	154.59812	0.079883	0.14522	-0.068945	-25.157	31.105	993.7075	-1.2461	1.2012	0.038086	-25.633	-115.9419	1040.801	-1.0791	1.1582	0.098633
0.094	-15.802	9.6403	49.755	0.042571	-0.031287	0.08293	-46.012	-110.205	880.987	-0.68535	0.79649	0.12324	-39.59	54.584	45.5346	0.10547	0.15088	-0.08252	13.196	-17.7819	1137.4758	-1.3202	1.4673	-0.17831	-30.46	87.08392	138.9826	0.068945	0.14287	-0.066602	1.671	16.5239	976.104	-1.2192	1.1806	0.036621	-21.88	-147.561	1075.415	-1.1535	1.2113	0.10723
0.096	-9.062	21.4065	59.4572	0.041504	-0.021484	0.07959	-68.824	-104.3906	916.288	-0.68877	0.86338	0.09756	-39.293	46.967	41.5533	0.10889	0.14307	-0.07959	-8.659	-10.3499	1130.5176	-1.3166	1.4627	-0.17812	-11.022	78.656	118.889	0.063477	0.14287	-0.061426	-7.924	20.37245	954.011	-1.1953	1.1602	0.032227	-6.417	-160.786	1131.9076	-1.2107	1.2716	0.11533
0.098	-32.479	17.4906	59.65751	0.038848	-0.0075512	0.073242	-69.331	-96.665	919.391	-0.68877	0.92119	0.076464	-21.905	51.0579	53.1468	0.10889	0.13379	-0.072754	5.255	-23.9575	1108.0807	-1.3086	1.4561	-0.17578	-17.118	64.795	119.26	0.062012	0.1377	-0.054199	-25.738	27.6574	945.476	-1.1597	1.1313	0.039063	-0.399000000000001	-135.532	1164.628	-1.2579	1.3275	0.12979
0.1	-39.363	7.7278	56.559	0.035657	0.0088111	0.070874	-74.293	-92.081	938.446	-0.69736	0.97803	0.057911	-23.114	52.2824	52.5577	0.10938	0.13135	-0.069336	-17.102	-31.7594	1094.1106	-1.2996	1.4457	-0.17344	-5.015	63.297	112.183	0.048633	0.13613	-0.056836	-13.966	38.157	934.9532	-1.1426	1.1162	0.037598	-7.938	-94.9943	1184.307	-1.303	1.3808	0.13526
0.102	-24.692	-3.4189	60.448	0.030616	0.026835	0.064308	-43.732	-83.452	947.654	-0.72412	1.0298	0.044922	-33.23	38.2479	53.16383	0.1084	0.12305	-0.064941	-6.515	-13.0943	1086.1941	-1.2856	1.438	-0.17413	-35.551	72.7562	120.2278	0.043066	0.13408	-0.05625	-9.051	46.7699	919.4829	-1.1128	1.0864	0.036133	14.253	-66.827	1197.285	-1.3525	1.4336	0.13818
0.104	-34.242	-2.814	102.907	0.016998	0.048286	0.064691	-50.57	-86.974	973.0582	-0.76328	1.0818	0.036914	-27.946	50.691	46.84832	0.10816	0.11939	-0.056397	-15.733	8.9772	1085.566	-1.2665	1.4274	-0.16947	-27.937	78.93	112.0519	0.035254	0.13291	-0.055079	-12.465	54.0602	896.7346	-1.0898	1.0654	0.035889	14.478	-67.077	1195.262	-1.4036	1.4947	0.146
0.106	-44.255	5.303	157.307	0.00097656	0.071289	0.058594	-56.526	-89.197	983.028	-0.81602	1.1309	0.039258	-22.38	54.12265	39.4502	0.10791	0.11328	-0.052734	-21.016	6.6154	1057.263	-1.2479	1.4134	-0.16865	-45.42	89.47	111.899	0.027344	0.13056	-0.055176	-31.031	52.2481	891.4297	-1.0664	1.0469	0.038086	7.567	-80.901	1167.4142	-1.4628	1.5458	0.1418
0.108	-26.95	8.271	208.8816	-0.016365	0.09935	0.0504	-43.361	-99.3218	1011.146	-0.8711	1.1769	0.050586	-23.445	33.6283	21.023	0.11133	0.10742	-0.049316	-38.949	9.0617	1027.7843	-1.2285	1.3965	-0.16309	-39.755	93.997	95.0561	0.021484	0.13135	-0.053223	-29.899	54.322	888.5901	-1.0386	1.0181	0.040527	17.5657	-99.209	1150.1938	-1.5253	1.5942	0.13164
0.11	-31.32	34.0175	274.218	-0.041336	0.12797	0.046576	-30.04	-105.54	1016.969	-0.93242	1.2231	0.059765	-21.866	26.2487	21.9327	0.1123	0.10596	-0.043457	-31.23	10.0558	1011.734	-1.2048	1.3754	-0.16105	-55.418	75.635	107.1788	0.015625	0.12637	-0.047363	-22.441	79.506	884.63717	-1.0273	1.0039	0.041992	24.5973	-105.09908	1143.425	-1.5811	1.6441	0.13359
0.112	-33.314	80.997	307.8935	-0.072939	0.16668	0.047505	-36.407	-139.117	1056.883	-0.99316	1.2637	0.067871	-18.368	42.769	15.4091	0.11865	0.09668	-0.04248	-31.263	11.6505	1014.464	-1.1883	1.353	-0.15593	-41.224	65.46	92.71	0.010351	0.12481	-0.048438	-17.857	79.829	870.731	-1.0029	0.97852	0.040039	47.0906	-107.445	1164.943	-1.6323	1.6919	0.13428
0.114	-45.188	92.149	359.44429	-0.11046	0.20979	0.043476	-40.949	-148.768	1063.306	-1.0464	1.3097	0.077539	-31.631	40.029	21.5485	0.125	0.084961	-0.038086	-13.668	8.1243	1002.4321	-1.1643	1.3346	-0.14834	-42.827	58.3607	84.503	0.0072265	0.12051	-0.046094	-38.369	65.823	852.6183	-0.98047	0.95508	0.040771	0.633000000000003	-95.5306	1177.738	-1.6704	1.7255	0.1291
0.116	-30.715	93.275	392.003	-0.16357	0.26758	0.042969	-22.778	-136.303	1070.0148	-1.0921	1.3622	0.095801	-49.4971	37.3054	26.4317	0.12939	0.074219	-0.03125	-18.455	9.06289	1002.034	-1.1469	1.3162	-0.14417	-16.608	62.8767	78.178	0.0015625	0.11865	-0.044824	-24.901	59.1011	832.9168	-0.96045	0.93408	0.035645	-9.246	-79.0251	1176.7868	-1.7007	1.7571	0.12315
0.118	-24.431	78.047	447.028	-0.2327	0.33351	0.042734	-19.778	-106.2251	1065.6529	-1.1393	1.415	0.1083	-30.098	38.0576	40.8718	0.13721	0.060547	-0.035645	-33.579	3.5873	982.7323	-1.127	1.2988	-0.13867	-20.613	54.089	79.3143	-0.00097656	0.11621	-0.04248	-41.524	79.0845	799.3425	-0.92969	0.91016	0.038086	-3.75	-44.624	1182.8168	-1.7238	1.7762	0.10947
0.12	-7.825	75.05276	486.507	-0.31465	0.41549	0.052376	-53.857	-98.627	1093.171	-1.1857	1.4798	0.11641	-16.858	40.1333	32.867	0.14453	0.055664	-0.03125	-25.341	-6.429	962.0334	-1.111	1.2829	-0.12984	-23.923	37.7613	70.9063	-0.0013672	0.11211	-0.042578	-16.22	88.8582	774.3918	-0.91992	0.89453	0.040527	14.2606	-21.699	1204.00864	-1.73	1.7853	0.10557
0.122	-30.9767	43.9016	536.2	-0.42104	0.51186	0.060315	-37.761	-91.255	1133.841	-1.2358	1.5474	0.12402	-26.255	31.29494	22.1842	0.15723	0.043945	-0.029297	-27.918	4.104	933.498	-1.0918	1.2726	-0.13047	-41.023	50.1114	75.589	-0.0011719	0.10693	-0.045703	-18.841	78.1674	748.1179	-0.88281	0.86523	0.036133	-3.527	-37.55	1231.0867	-1.7305	1.7813	0.095215
0.124	-28.122	31.5026	569.578	-0.53417	0.62577	0.079417	-41.806	-77.804	1153.196	-1.2949	1.6258	0.13818	-34.99	28.6654	17.1194	0.16235	0.035156	-0.022949	-12.939	21.673	912.5594	-1.0737	1.2512	-0.12243	-45.178	64.2853	61.909	0.0011719	0.090919	-0.041406	-15.312	80.6357	757.0604	-0.86059	0.84204	0.032471	-0.896100000000001	-65.513	1237.669	-1.718	1.7613	0.087109
0.126	-9.608	18.5012	618.5967	-0.65967	0.73682	0.096191	-34.22	-64.6242	1155.344	-1.3602	1.709	0.14824	1.08300000000001	33.74282	11.449	0.16553	0.025391	-0.023438	-29.013	32.0862	908.9826	-1.0483	1.2335	-0.11886	-39.006	58.785	57.4154	0.0050781	0.087109	-0.04248	-50.384	98.2271	735.6432	-0.83594	0.82227	0.031738	2.096	-63.4432	1231.876	-1.7031	1.736	0.075391
0.128	-11.169	17.9123	630.981	-0.77484	0.85692	0.11579	-22.92	-73.76717	1142.8742	-1.4305	1.7926	0.15527	-16.49	36.7196	6.6721	0.17725	0.013184	-0.027344	-16.484	26.4213	885.824	-1.021	1.2114	-0.1123	-39.12	43.255	75.2872	0.0087891	0.072754	-0.044922	-45.497	104.3706	727.9624	-0.80469	0.78516	0.030273	-2.15	-59.8411	1205.56	-1.6863	1.7043	0.071484
0.13	-26.874	-8.5228	651.801	-0.8833	0.97092	0.13192	-15.875	-82.0122	1142.492	-1.4972	1.8735	0.15469	-48.722	22.5576	20.2262	0.17822	0.0083008	-0.032227	-35.248	14.561	889.809	-0.99168	1.183	-0.11527	-51.613	49.1115	62.048	0.014551	0.060059	-0.049805	-28.945	121.3001	713.3634	-0.78516	0.77051	0.031738	21.12	-51.9854	1214.879	-1.6628	1.6667	0.064063
0.132	-14.942	-25.5311	640.409	-0.98812	1.0759	0.13713	-63.206	-74.7467	1117.135	-1.5645	1.957	0.15381	-27.367	5.5333	33.6127	0.18115	0.0014648	-0.038086	-25.598	21.9	874.408	-0.95888	1.1476	-0.12081	-50.741	39.73504	34.123	0.019434	0.048438	-0.053125	-33.482	118.646	711.9097	-0.75342	0.73486	0.029785	27.087	-39.45242	1208.068	-1.6401	1.6255	0.063477
0.134	-18.624	-64.67	645.348	-1.0788	1.1694	0.13945	-90.129	-72.2064	1126.807	-1.6143	2.0243	0.14356	-6.815	12.5722	40.24938	0.17627	0.0090332	-0.036133	-48.125	32.5276	861.512	-0.92211	1.1111	-0.12199	-29.979	40.3588	31.876	0.024121	0.032031	-0.055468	-53.2	123.513	677.497	-0.72485	0.70874	0.026856	0.513000000000002	-16.903	1205.362	-1.6171	1.5958	0.057129
0.136	-32.626	-86.289	632.3187	-1.1421	1.2524	0.13037	-79.358	-60.5671	1148.192	-1.655	2.0833	0.13643	-14.715	18.2669	47.945	0.17383	0.018066	-0.039063	-26.588	45.069	838.058	-0.88372	1.0749	-0.12277	-48.19	47.612	41.303	0.034278	0.016894	-0.064062	-34.576	109.654	666.60664	-0.70215	0.68164	0.027832	0.726999999999999	-0.668999999999999	1213.581	-1.5956	1.5626	0.053418
0.138	-25.516	-103.514	643.9175	-1.1766	1.3046	0.11902	-60.578	-59.579	1185.6084	-1.6878	2.1286	0.1294	-38.1739	16.9148	30.7526	0.16699	0.040527	-0.04541	-32.606	56.599	830.263	-0.84326	1.0356	-0.12842	-20.773	48.63333	54.7968	0.039551	0.0019531	-0.069824	-35.172	117.1715	636.107	-0.66797	0.64648	0.023926	29.9021	-14.352	1235.625	-1.5772	1.5341	0.046777
0.14	-28.051	-81.604	636.398	-1.1805	1.333	0.10568	-85.131	-58.701	1219.551	-1.7016	2.1555	0.12168	-22.517	-2.3041	46.8527	0.16113	0.057617	-0.048828	-24.925	44.166	815.8244	-0.81745	0.99811	-0.12841	-24.077	41.8041	54.555	0.048438	-0.009961	-0.073828	-39.739	111.40543	638.97007	-0.65186	0.62744	0.022949	20.257	-6.002	1252.653	-1.5592	1.517	0.038379
0.142	6.665	-73.301	639.03285	-1.1458	1.3246	0.086448	-90.16251	-55.361	1231.458	-1.7046	2.1665	0.12207	-43.097	3.6599	27.879	0.14502	0.10645	-0.0625	-49.828	30.93	800.7032	-0.78558	0.96026	-0.13073	-26.204	47.4668	40.244	0.055078	-0.020996	-0.080567	-44.483	92.4128	606.7132	-0.61182	0.59814	0.033203	8.296	-12.0541	1239.81943	-1.543	1.5059	0.026367
0.144	-7.145	-58.9943	645.45	-1.0765	1.2841	0.074266	-68.163	-42.119	1214.5408	-1.6893	2.1423	0.11846	-19.749	-26.0174	47.307	0.13012	0.13623	-0.065674	-20.679	37.0815	780.6099	-0.75899	0.92894	-0.13238	-23.331	41.16948	43.9968	0.066016	-0.031933	-0.082911	-41.34	88.7642	586.67546	-0.58765	0.57251	0.022705	8.252	-13.4479	1213.871	-1.5251	1.5026	0.022168
0.146	9.846	-33.2271	648.0591	-0.9917	1.2095	0.068359	-54.5	-28.29	1217.4862	-1.66	2.1075	0.12979	-4.284	-25.7812	48.634	0.12061	0.17285	-0.080566	-28.06	55.03	745.851	-0.73401	0.89523	-0.12333	-23.687	36.9423	39.3253	0.072657	-0.041699	-0.092188	-49.631	113.2431	562.785	-0.56201	0.54932	0.019531	6.162	4.2228	1176.718	-1.5082	1.4959	0.015136
0.148	-17.625	-6.096	666.337	-0.8911	1.1087	0.071302	-58.837	-44.039	1211.2221	-1.6187	2.0622	0.1458	-1.751	-22.0852	88.7204	0.10303	0.22852	-0.104	-22.453	60.689	727.823	-0.71387	0.86719	-0.11963	-62.143	13.5817	52.4899	0.078125	-0.048828	-0.09668	-46.464	104.6799	559.869	-0.53564	0.51904	0.021484	-25.881	18.884	1185.864	-1.4906	1.4978	0.010058
0.15	-1.811	-17.848	666.5141	-0.79447	1.0062	0.078894	-54.536	-64.551	1198.4143	-1.5771	2.0014	0.15879	-33	-1.49344	100.3486	0.096191	0.25635	-0.11377	-58.436	58.591	703.234	-0.69526	0.84216	-0.11777	-38.506	18.27525	35.043	0.07793	-0.05625	-0.099901	-42.998	124.3868	554.7813	-0.52002	0.50781	0.017578	-21.04	17.71093	1196.06	-1.4775	1.4951	0.0066406
0.152	-18.749	-46.382	688.6188	-0.71293	0.90672	0.097611	-33.211	-53.69	1186.498	-1.5356	1.938	0.17188	-36.478	-2.39477	150.7145	0.072754	0.32227	-0.1416	-33.528	88.1146	695.0202	-0.67375	0.81955	-0.11486	-43.557	10.3027	32.27	0.081934	-0.063086	-0.099218	-34.311	124.339	529.3797	-0.49512	0.48047	0.01709	-47.7493	6.2561	1221.386	-1.4624	1.4966	-0.0014648
0.154	-26.144	-77.476	710.4706	-0.65735	0.82624	0.12181	-50.626	-37.419	1197.191	-1.4868	1.8793	0.1834	-21.004	20.1891	194.902	0.051026	0.37963	-0.16479	-55.481	112.156	687.5781	-0.65659	0.79993	-0.11007	-45.922	11.5407	24.084	0.086231	-0.065039	-0.099609	-29.216	136.239	517.7182	-0.47192	0.46508	0.018555	-3.343	17.4115	1206.655	-1.4458	1.4886	-0.0054687
0.156	-30.607	-93.947	714.245	-0.625	0.76367	0.14502	-38.498	-31.966	1225.4507	-1.4482	1.8302	0.19571	-19.391	38.1835	251.017	0.015625	0.44287	-0.18701	-26.091	114.043	695.124	-0.64002	0.78183	-0.10362	-38.595	-2.8347	58.0444	0.083985	-0.055957	-0.10527	-58.23	118.6	511.3197	-0.44824	0.45557	0.020508	-12.175	23.6361	1196.9713	-1.4301	1.4809	-0.010254
0.158	-48.551	-108.2357	726.419	-0.61719	0.72991	0.16327	-28.478	-18.5271	1253.361	-1.4189	1.7892	0.20312	-42.739	44.2055	291.41	-0.039551	0.54541	-0.21338	-20.688	109.85	695.75	-0.62598	0.76563	-0.098633	-26.309	11.874	66.054	0.07666	-0.045898	-0.10889	-46.134	121.7289	512.3694	-0.42383	0.43018	0.019043	17.029	18.79748	1175.4222	-1.4156	1.4664	-0.0063477
0.16	-43.179	-121.5618	763.813	-0.61552	0.71181	0.17715	-33.312	-6.978	1243.942	-1.3976	1.7587	0.20908	-18.664	48.6347	362.339	-0.078613	0.604	-0.22607	-58.902	106.911	673.8199	-0.60747	0.7521	-0.096089	-56.513	15.2098	71.139	0.069531	-0.026953	-0.10909	-22.608	128.824	488.3371	-0.41016	0.42041	0.01123	2.802	5.4645	1161.0055	-1.3958	1.4526	-0.015528
0.162	-37.462	-130.4	780.2779	-0.62021	0.7204	0.18222	-59.374	10.142	1215.052	-1.377	1.7383	0.21436	-7.676	80.8046	410.76	-0.16846	0.74512	-0.25098	-82.6462	100.0092	636.548	-0.59212	0.7344	-0.093819	-35.901	8.4579	73.46378	0.057422	-0.0065428	-0.11269	-33.764	128.9456	450.0407	-0.37891	0.39551	0.0087891	7.734	6.806	1117.8461	-1.3745	1.436	-0.010742
0.164	-43.697	-138.852	805.6646	-0.62724	0.74989	0.18858	-55.506	12.407	1196.6014	-1.3652	1.7219	0.21563	-3.997	90.1471	467.5618	-0.24781	0.87159	-0.25684	-58.191	97.4128	604.443	-0.57258	0.71881	-0.091119	-26.997	-20.973	96.953	0.039063	0.029004	-0.11543	-46.999	119.9155	415.279	-0.35328	0.37744	0.0080567	-15.578	-3.5598	1101.468	-1.3594	1.4135	-0.0092773
0.166	-53.02	-132.302	833.492	-0.63232	0.78857	0.18506	-47.614	27.1274	1188.509	-1.3589	1.7083	0.21025	-21.763	76.1515	516.2358	-0.33252	1.0156	-0.26465	-38.028	97.3158	582.067	-0.55612	0.70377	-0.089844	-41.494	-35.039	102.045	0.01582	0.065137	-0.12012	-35.03	121.7678	418.888	-0.32666	0.36182	0.0083008	8.65	-1.142	1095.392	-1.3389	1.3958	-0.0041015
0.168	-29.21	-126.0443	850.1721	-0.63877	0.83477	0.17675	-56.13	27.4541	1176.267	-1.3417	1.6974	0.20869	3.349	70.838	570.1789	-0.44482	1.2271	-0.25049	-62.225	84.9037	584.7098	-0.53711	0.68555	-0.09082	-45	-47.1807	116.902	-0.0063477	0.10693	-0.12256	-23.477	121.6449	406.233	-0.29248	0.33545	0.0048828	-6.023	16.9526	1107.79877	-1.3221	1.3743	-0.003711
0.17	-36.792	-108.5357	880.1766	-0.6498	0.89064	0.16573	-43.439	11.737	1168.186	-1.3304	1.6825	0.2125	7.145	67.048	607.8757	-0.50488	1.3423	-0.24805	-45.713	74.1363	567.3875	-0.52101	0.66632	-0.083108	-19.295	-37.2801	142.324	-0.033985	0.14854	-0.13222	-52.229	114.16725	393.24763	-0.27344	0.32324	0.0043945	-7.073	46.712	1081.59247	-1.3072	1.3547	-0.0038086
0.172	-33.343	-112.1459	892.247	-0.65605	0.94688	0.1626	-16.462	-3.404	1167.989	-1.312	1.6606	0.21582	-26.205	40.712	638.66205	-0.61182	1.5747	-0.2417	-56.59	91.1716	564.5599	-0.50549	0.64885	-0.078719	-43.539	-15.6124	189.215	-0.065234	0.19863	-0.13828	-14.557	98.0674	383.962	-0.23926	0.30029	0.00048828	-9.004	50.875	1064.1966	-1.2886	1.3403	-0.0014648
0.174	-35.891	-116.057	924.809	-0.67823	1.0036	0.15498	-19.869	15.675	1180.7162	-1.2951	1.6392	0.21816	-36.358	7.7673	661.4284	-0.6814	1.7327	-0.24658	-45.5	113.7739	564.17873	-0.48946	0.62736	-0.071686	-42.016	3.968	248.035	-0.10117	0.24902	-0.14258	-27.351	96.5438	382.3975	-0.21435	0.28393	-0.0036621	5.443	49.496	1053.07698	-1.2757	1.3192	0.0012695
0.176	2.111	-103.9959	936.497	-0.7124	1.0532	0.14355	-37.024	34.7023	1190.522	-1.2746	1.6133	0.22071	-22.175	-21.9459	661.1818	-0.73633	1.8672	-0.25781	-52.639	122.6402	564.7489	-0.47228	0.61016	-0.069629	-59.353	16.6339	334.686	-0.14004	0.30498	-0.14824	-43.409	109.0704	373.3737	-0.18652	0.2627	-0.0092773	-15.003	41.0756	1045.921	-1.2555	1.2934	0.0030274
0.178	-28.657	-97.253	953.477	-0.75673	1.1058	0.146	-28.259	43.548	1183.095	-1.2527	1.5836	0.22617	-46.234	-53.176	651.883	-0.75928	1.9731	-0.29639	-40.965	129.855	542.8039	-0.45996	0.58984	-0.064453	-49.262	57.916	433.5971	-0.19092	0.37451	-0.14893	-44.332	117.731	366.7189	-0.15186	0.24316	-0.010254	-30.841	47.6738	1003.4149	-1.2372	1.2751	0.0038086
0.18	-30.348	-81.493	971.0447	-0.81005	1.1548	0.14677	-17.922	63.62	1144.837	-1.2318	1.553	0.23067	-66.016	-77.455	648.1874	-0.75	1.9863	-0.31641	-52.604	132.881	506.3203	-0.44355	0.57441	-0.059375	-54.191	86.769	525.7487	-0.24863	0.46279	-0.14043	-26.257	119.752	324.4004	-0.1333	0.23193	-0.011719	-10.035	50.6539	956.9521	-1.215	1.2447	0.0039062
0.182	-29.339	-87.079	990.6179	-0.86592	1.1981	0.15654	-38.314	57.758	1129.6469	-1.2109	1.5176	0.2373	-31.839	-76.645	634.0348	-0.65771	1.9302	-0.34326	-50.159	137.03	481.959	-0.42802	0.55673	-0.055078	-35.94	77.0199	595.2686	-0.31778	0.57021	-0.12608	-34.602	114.857	317.5272	-0.10791	0.20752	-0.016113	-7.788	47.0054	936.681	-1.1924	1.2227	0.0039063
0.184	-19.314	-88.769	994.0047	-0.91934	1.2383	0.16016	-40.959	28.1412	1110.426	-1.1869	1.4896	0.24649	-40.582	-51.2798	619.024	-0.53588	1.8108	-0.35425	-53.058	116.212	484.098	-0.4081	0.5415	-0.054688	-62.581	74.0684	634.018	-0.39512	0.70849	-0.10576	-43.74	105.991	296.3187	-0.083008	0.1875	-0.020508	0.445999999999998	48.614	937.413	-1.1698	1.1962	0.013184
0.186	-45.001	-115.3276	1018.0499	-0.97021	1.272	0.16016	-28.107	13.6244	1089.434	-1.1629	1.4594	0.24951	-32.029	-34.8387	615.4413	-0.39258	1.6289	-0.34229	-51.706	108.5147	475.6631	-0.3876	0.52099	-0.054297	-39.562	87.435	657.8175	-0.48965	0.87012	-0.080566	-25.34	91.7425	286.826	-0.071777	0.17627	-0.021484	-14.715	41.2478	940.193	-1.1453	1.1643	0.012012
0.188	-21.452	-142.1217	1048.7475	-1.0161	1.3109	0.16485	-26.511	23.375	1065.071	-1.1386	1.4343	0.25615	-13.161	-23.0394	631.914	-0.20703	1.3276	-0.3042	-48.391	115.2366	464.764	-0.36426	0.49463	-0.053711	-48.47	93.302	674.9768	-0.59668	1.0566	-0.052734	-24.004	95.1263	269.182	-0.050293	0.16309	-0.023438	3.414	47.9678	929.336	-1.1176	1.1342	0.015528
0.19	-29.673	-157.346	1074.7228	-1.0563	1.3557	0.16572	-40.491	37.393	1032.504	-1.1126	1.4034	0.26113	22.9003	-12.5529	652.5682	-0.13184	1.1782	-0.2832	-60.125	117.6657	443.158	-0.33682	0.4751	-0.056836	-40.474	50.081	661.3242	-0.71641	1.2589	-0.031055	-44.863	93.7041	257.6726	-0.038086	0.14892	-0.025879	-29.1879	59.974	940.582	-1.095	1.106	0.01416
0.192	-17.184	-144.42	1061.0772	-1.1004	1.4037	0.17393	-42.509	39.002	1016.05028	-1.0894	1.3755	0.26563	-1.851	-9.6355	667.1585	-0.035645	0.9165	-0.22363	-30.249	110.7907	419.5057	-0.31055	0.45127	-0.058301	-55.107	0.00205999999999995	677.389	-0.83936	1.4571	-0.025489	-48.383	82.745	247.4721	-0.02832	0.13867	-0.021484	-19.564	61.065	915.888	-1.0718	1.0747	0.012695
0.194	-46.9	-139.7453	1057.527	-1.1458	1.4563	0.17656	-24.046	63.4511	1010.8046	-1.058	1.3447	0.2666	-14.712	-9.196	664.1471	-0.0031738	0.76416	-0.19409	-38.297	113.6181	410.881	-0.28516	0.42744	-0.058301	-38.143	-36.991	659.252	-0.95108	1.6493	-0.043457	-11.812	75.0148	250.1856	-0.016113	0.12891	-0.022949	-28.026	46.863	897.2715	-1.0463	1.0443	0.015625
0.196	-32.256	-118.8557	1062.0543	-1.1968	1.5083	0.1792	-40.428	79.255	1009.15	-1.0273	1.3126	0.27207	-26.754	-32.72	677.213	0.0043945	0.65625	-0.1665	-54.249	120.7543	388.8337	-0.26221	0.3999	-0.054785	-51.86	-53.031	646.501	-1.0492	1.8004	-0.080078	-26.724	93.17583	225.1067	-0.011719	0.12158	-0.025879	-20.846	74.29	860.906	-1.0235	1.016	0.013867
0.198	-26.9	-101.4204	1074.4779	-1.2492	1.5738	0.1792	-29.751	76.476	1001.829	-0.99286	1.2821	0.27168	-4.621	-38.086	695.512	-0.011719	0.57959	-0.15674	-45.702	119.4858	391.6318	-0.24072	0.37451	-0.055176	-31.458	-60.998	620.473	-1.1152	1.9102	-0.13477	-35.141	93.37	208.2717	-0.0078125	0.11328	-0.023926	-31.378	81.0497	848.4294	-0.99727	0.98516	0.008789
0.2	-31.032	-88.5834	1104.328	-1.3089	1.6457	0.18027	-34.601	68.012	985.67355	-0.96279	1.2479	0.27295	-26.28	-64.929	702.606	-0.022461	0.5625	-0.15234	-19.117	120.4573	363.0031	-0.21699	0.35371	-0.052539	-30.881	-71.328	619.5228	-1.1249	1.957	-0.1749	-52.521	95.615	206.2298	-0.0024414	0.10718	-0.023682	-14.63	85.3592	811.009	-0.97344	0.95586	0.0099608
0.202	-34.268	-96.3891	1132.387	-1.3684	1.7176	0.17012	-28.354	69.171	967.897	-0.92773	1.21	0.27393	-37.117	-100.724	714.56994	-0.046875	0.56934	-0.15918	-49.578	120.476	374.4992	-0.19424	0.33291	-0.050879	-21.311	-63.6925	607.734	-1.0843	1.9378	-0.21533	-24.64	98.747	195.7644	0.00048828	0.10059	-0.022461	-19.579	68.07	824.718	-0.94873	0.92627	0.010254
0.204	-4.642	-95.74882	1146.845	-1.4238	1.7832	0.16865	-49.501	48.276	926.289	-0.89326	1.1751	0.27188	-33.349	-129.731	741.2271	-0.066651	0.61084	-0.16455	-66.351	111.333	354.7883	-0.17354	0.3083	-0.052441	-37.516	-54.0508	610.483	-0.98935	1.8343	-0.23447	-36.037	99.3602	185.1923	0.0048828	0.094727	-0.021973	-11.272	75.078	806.4865	-0.92568	0.89932	0.0066406
0.206	-8.379	-81.19162	1139.5599	-1.4785	1.8535	0.15723	-45.836	40.3892	895.892	-0.86084	1.1345	0.27187	-33.846	-138.1744	755.002	-0.08252	0.67627	-0.17773	-37.225	104.627	361.6528	-0.15654	0.28701	-0.049512	-43.333	-15.76	609.945	-0.86006	1.6642	-0.23369	-39.471	71.999	176.146	0.0073242	0.089844	-0.021973	-23.647	66.597	803.258	-0.90195	0.87344	0.010059
0.208	-26.68	-84.313	1133.05	-1.5223	1.9176	0.15	-36.368	45.093	875.307	-0.8292	1.0974	0.27187	-48.712	-155.194	781.8968	-0.11914	0.8208	-0.20801	-41.514	123.529	330.9484	-0.1416	0.27197	-0.049805	-54.956	5.097	634.761	-0.7085	1.438	-0.21924	-35.847	64.286	171.1005	0.013672	0.078613	-0.025391	-17.933	88.2058	765.32	-0.875	0.84804	0.013574
0.21	-22.079	-90.75	1110.837	-1.5551	1.9715	0.14346	-37.439	70.089	858.7291	-0.79668	1.0549	0.27158	-39.288	-163.176	809.7121	-0.14575	0.9436	-0.2395	-55.288	121.8651	327.068	-0.125	0.25332	-0.048535	-40.948	20.867	664.147	-0.57803	1.2021	-0.18623	-25.509	76.4196	162.8107	0.019287	0.071289	-0.022461	-25.098	96.756	750.876	-0.8581	0.82002	0.014648
0.212	-27.091	-84.14	1128.59	-1.5793	2.0121	0.13057	-51.624	81.186	866.743	-0.76563	1.0176	0.27197	-34.656	-160.911	836.0833	-0.18066	1.0708	-0.27295	-39.296	104.7456	302.9862	-0.11133	0.23847	-0.047461	-47.936	4.67899999999999	696.3581	-0.48056	0.9782	-0.1541	-37.791	76.5405	151.4379	0.024414	0.061523	-0.024414	-19.635	104.457	741.82622	-0.83398	0.79492	0.013672
0.214	-66.634	-79.8504	1137.1428	-1.5976	2.0403	0.12109	-25.536	107.0716	864.848	-0.74179	0.97578	0.26758	-48.535	-143.128	849.8328	-0.21631	1.2271	-0.31201	-58.663	77.9268	287.5197	-0.094532	0.22754	-0.046289	-44.4837	-19.632	712.4698	-0.42197	0.79932	-0.12403	1.039	82.373	138.806	0.033691	0.050293	-0.023438	-50.864	89.351	728.23642	-0.81279	0.77158	0.012402
0.216	-65.5187	-93.5739	1169.6906	-1.6074	2.0488	0.11719	-22.204	133.014	864.72	-0.71299	0.94228	0.26269	-57.508	-123.8811	865.0262	-0.2417	1.2954	-0.32764	-65.517	88.7771	259.766	-0.080468	0.21875	-0.04375	-2.937	-47.234	731.8066	-0.4001	0.67706	-0.10146	-12.012	82.198	121.8724	0.035645	0.041504	-0.029297	-52.055	97.739	706.692	-0.78554	0.74414	0.012695
0.218	-60.827	-91.9485	1190.59813	-1.6017	2.0519	0.11172	-18.431	135.961	838.1305	-0.69189	0.90479	0.26543	-32.155	-97.075	915.2328	-0.28662	1.4282	-0.35205	-34.968	89.2149	243.807	-0.067871	0.20557	-0.045898	-13.473	-95.7077	736.4871	-0.396	0.60791	-0.095215	-40.379	69.3209	115.4247	0.041992	0.030762	-0.023438	-49.3724	109.6507	676.448	-0.75742	0.72071	0.0095703
0.22	-47.373	-65.2836	1203.3573	-1.5858	2.0388	0.1125	-27.338	113.421	814.7098	-0.67129	0.87168	0.26299	-34.109	-74.721	935.101	-0.32251	1.4964	-0.37842	-30.612	84.7533	246.548	-0.060742	0.1999	-0.042871	-13.341	-143.4168	749.1583	-0.40625	0.58721	-0.11035	-42.06	50.7708	118.493	0.046875	0.023193	-0.024414	-34.391	111.802	652.96	-0.73311	0.69404	0.011328
0.222	-54.286	-46.0291	1202.9113	-1.5698	2.0103	0.11015	-18.355	111.614	782.605	-0.6543	0.84375	0.25684	-42.396	-77.707	951.9139	-0.36133	1.5586	-0.39844	-44.647	84.9274	242.8251	-0.053613	0.19278	-0.038281	-31.37	-156.034	757.0033	-0.41699	0.59492	-0.14112	-22.006	52.0616	122.57	0.050293	0.011719	-0.019531	-31.504	95.5622	633.166	-0.70313	0.67188	0.013672
0.224	-12.341	-40.8348	1204.1353	-1.5446	1.9714	0.11308	-44.011	111.03	769.629	-0.64043	0.81816	0.25156	-51.084	-87.51	955.9021	-0.40576	1.6138	-0.41748	-60.301	83.6476	242.77884	-0.042285	0.18652	-0.039843	9.953	-161.508	748.729	-0.42988	0.61172	-0.17862	-29.124	63.5437	115.42	0.046875	0.0043945	-0.0083008	-33.56	109.28704	609.91439	-0.68125	0.64863	0.0095703
0.226	-39.585	-37.4505	1203.3661	-1.5132	1.9302	0.11768	-46.612	100.8229	734.746	-0.6209	0.7877	0.24639	-15.318	-94.262	980.52602	-0.42725	1.6313	-0.43115	-55.98	91.4506	230.672	-0.036817	0.17832	-0.040723	-5.964	-176.529	784.159	-0.42519	0.64131	-0.22695	-32.741	68.2239	108.5306	0.047363	0.00097656	-0.0019531	-53.027	134.7234	603.459	-0.65508	0.62266	0.0056641
0.228	-9.183	-44.2321	1198.4763	-1.4831	1.8884	0.12734	-28.746	88.47593	742.3482	-0.60097	0.76504	0.23936	-29.438	-88.311	992.6946	-0.4707	1.6582	-0.45703	-48.3	104.013	229.7771	-0.027344	0.1665	-0.042969	-5.497	-188.603	835.253	-0.41211	0.67676	-0.27832	-42.903	56.20956	89.6842	0.041992	0.0014648	0.0019531	-26.285	130.895	597.0841	-0.62852	0.6039	0.0048828
0.23	-21.703	-54.7224	1189.7471	-1.4516	1.8453	0.13682	-15.73	106.4509	726.4738	-0.57988	0.73848	0.23545	-33.922	-107.1752	1003.0737	-0.49633	1.677	-0.47143	-34.541	118.872	211.503	-0.018262	0.15567	-0.043652	-21.148	-164.263	910.062	-0.38975	0.71884	-0.31552	-29.272	65.9856	85.4491	0.036133	-0.00024414	0.01001	-14.437	117.782	603.205	-0.60517	0.58281	0.0029297
0.232	-3.164	-49.9712	1196.1786	-1.4289	1.8078	0.14267	-27.322	130.7385	714.729	-0.55859	0.7168	0.23486	-39.331	-127.1921	1015.396	-0.51758	1.6934	-0.48633	-51.923	104.223	196.0686	-0.0086915	0.14228	-0.04795	-22.03	-97.9333	925.402	-0.37042	0.75907	-0.3538	-22.981	69.466	78.5411	0.023438	-0.00048828	0.018555	-46.747	117.2528	576.3933	-0.58105	0.5625	0.0058594
0.234	-5.627	-35.60847	1211.109159	-1.4061	1.7759	0.14736	-11.419	137.0112	687.8656	-0.54004	0.69199	0.22823	-9.799	-148.464	1050.3783	-0.53711	1.7207	-0.50635	-43.25	88.1054	163.764	0.0010742	0.12861	-0.045996	-14.67	-66.068	949.208	-0.35635	0.80282	-0.37802	-31.309	67.901	78.536	0.012207	0.003418	0.025879	-58.651	124.88702	534.181	-0.55996	0.5458	0.0085936
0.236	-2.062	-31.2824	1195.6783	-1.3853	1.7466	0.1543	-15.63	137.4259	672.2049	-0.51758	0.66797	0.22197	-46.408	-145.189	1063.77519	-0.54053	1.7349	-0.51416	-40.6	76.03843	164.599	0.011621	0.11426	-0.05166	-8.16999999999999	-49.45	962.6389	-0.35742	0.84647	-0.39161	-24.948	57.164	77.1299	0.0063477	0.0043945	0.03125	-67.2861	123.8202	505.162	-0.54434	0.52187	0.0017578
0.238	-32.806	-35.955	1195.2339	-1.3631	1.7213	0.15654	-16.652	137.7737	651.711	-0.50079	0.64961	0.21299	-37.095	-142.332	1083.386	-0.55518	1.7739	-0.5332	-40.884	75.355	169.557	0.016602	0.096191	-0.04834	-16.844	-65.538	983.4932	-0.38477	0.90625	-0.38965	-29.277	52.994	76.313	-0.0019531	0.013184	0.038574	-66.215	122.7399	493.496	-0.52246	0.50469	-0.00058594
0.24	-13.896	-21.108	1181.529	-1.3387	1.6973	0.15977	-22.275	120.74674	637.7985	-0.48262	0.62754	0.20547	-29.03	-120.39767	1089.2692	-0.56641	1.8077	-0.53565	-44.818	51.012	179.9948	0.025586	0.082031	-0.05	-20.722	-82.712	965.057	-0.43792	0.98089	-0.38799	-32.119	40.4268	67.277	-0.0087891	0.015625	0.04126	-43.69	115.7289	492.5303	-0.50273	0.48398	-0.00068359
0.242	-44.1619	-2.6	1177.4033	-1.3168	1.6715	0.16289	-11.379	119.6294	607.9803	-0.46533	0.60352	0.19775	-0.168999999999997	-93.6548	1096.8009	-0.57324	1.8496	-0.53564	-14.868	61.7192	162.1974	0.034082	0.067481	-0.047266	-25.629	-105.2209	980.382	-0.51208	1.0662	-0.38739	-48.681	27.777	56.522	-0.0097656	0.01709	0.049805	-40.326	116.387	473.743	-0.48291	0.46826	0.0039063
0.244	-45.6273	3.0072	1166.199	-1.2913	1.644	0.16807	-31.455	141.2385	609.8033	-0.44746	0.58398	0.19521	-57.409	-98.3518	1102.289	-0.5957	1.8984	-0.55176	-46.716	70.87002	141.4025	0.037598	0.050293	-0.045703	-10.843	-118.941	1002.276	-0.6	1.1627	-0.38076	-27.184	33.7172	61.0044	-0.0083008	0.019531	0.047363	-47.1	114.28	458.772	-0.45566	0.4542	0.00097658
0.246	-19.887	-2.8644	1157.838	-1.2676	1.6211	0.17236	-25.658	139.618	599.6443	-0.43252	0.56338	0.18838	-12.936	-99.7359	1118.324	-0.60205	1.9282	-0.55566	-41.98	83.994	129.4005	0.039941	0.039453	-0.039941	-22.31	-143.15	1021.412	-0.68787	1.267	-0.37814	-39.032	51.5085	50.0614	-0.0087891	0.020996	0.049805	-42.903	140.407	453.8907	-0.43105	0.43907	0.0029297
0.248	-14.605	-1.707	1148.072	-1.2458	1.5932	0.17568	-33.942	132.788	597.1675	-0.41416	0.54541	0.18408	-2.995	-96.6385	1144.266	-0.61475	1.981	-0.55811	-33.691	67.291	140.725	0.038086	0.030273	-0.040039	-59.112	-156.414	1024.2979	-0.77295	1.3794	-0.38965	-37.307	52.565	44.6439	-0.0087891	0.020508	0.057617	-31.139	127.9071	450.3101	-0.40762	0.42227	0.003711
0.25	-17.412	-3.427	1143.151	-1.2249	1.5669	0.18516	-21.226	129.74	581.872	-0.39668	0.52324	0.17529	-2.444	-89.8107	1144.8152	-0.62866	2.0188	-0.56055	-41.91	76.378	138.8236	0.039258	0.020605	-0.038476	-46.609	-145.6498	1036.96	-0.84255	1.4714	-0.39478	-26.268	56.382	38.19544	-0.0029297	0.018555	0.058838	-35.879	120.12118	425.6966	-0.38486	0.4043	0.00625
0.252	-1.31	7.7961	1145.977	-1.2054	1.5419	0.18984	-12.891	135.467	565.374	-0.37793	0.50488	0.16895	-30.752	-91.0787	1151.7015	-0.63672	2.0527	-0.56641	-46.61	66.905	132.6012	0.035156	0.015722	-0.030176	-30.108	-129.1852	1052.0497	-0.89424	1.5622	-0.42298	-26.558	59.875	39.3148	-0.0019531	0.016113	0.062012	-39.213	119.2502	395.3015	-0.36182	0.38965	0.0068359
0.254	3.176	8.7065	1148.538	-1.1944	1.5192	0.19648	-15.272	124.3862	510.656	-0.36113	0.48516	0.16582	4.578	-90.489	1139.621	-0.65527	2.0957	-0.56348	-38.697	68.2729	109.125	0.030468	0.0098633	-0.025098	-15.951	-139.247	1080.039	-0.9239	1.6356	-0.45219	-28.672	53.7734	40.883	0.0048828	0.017578	0.071289	-35.625	123.0446	358.219	-0.33877	0.37529	0.0078125
0.256	-22.002	27.2018	1135.004	-1.1821	1.4985	0.20215	-17.809	113.0075	479.479	-0.34267	0.4625	0.16025	-33.974	-90.1085	1130.236	-0.65283	2.1157	-0.56494	-42.618	60.7926	112.609	0.021485	0.0092773	-0.021973	-41.264	-156.8563	1094.392	-0.92894	1.6924	-0.47629	-34.619	34.1208	48.62776	0.0063477	0.010254	0.070313	-35.395	107.9579	348.467	-0.31758	0.35889	0.0079102
0.258	-11.82	29.7277	1108.261	-1.1735	1.4815	0.20996	-20.82	123.8054	451.964	-0.32588	0.44258	0.15713	-56.738	-80.5153	1143.554	-0.65723	2.1367	-0.56104	-38.906	76.545	106.215	0.0097656	0.012207	-0.013184	-12.417	-151.65681	1090.623	-0.91992	1.7227	-0.50488	-2.143	32.378	49.3862	0.0078125	0.010254	0.075195	-42.331	98.822	360.543	-0.29297	0.34561	0.0059571
0.26	-19.191	28.6239	1091.5357	-1.1654	1.4637	0.21377	-24.984	127.5896	448.372	-0.30849	0.42549	0.1543	-65.12	-98.0548	1174.7008	-0.65528	2.1397	-0.55469	-38.497	69.9471	104.3186	0.00039062	0.015723	-0.0078125	15.409	-130.4586	1079.772	-0.89943	1.7443	-0.51971	-14.485	34.6685	34.168	0.010986	0.0080567	0.079834	-53.418	113.874	338.981	-0.2669	0.33223	0.0072265
0.262	-8.224	28.0134	1076.6006	-1.1545	1.4519	0.2122	-27.67	125.548	459.6121	-0.29346	0.40967	0.14307	-39.993	-81.84172	1192.0467	-0.65039	2.1387	-0.5498	-43.658	77.1074	91.047	-0.011035	0.020801	-0.0016602	9.033	-103.989	1070.597	-0.88	1.7457	-0.53417	-21.426	35.1141	16.3651	0.01416	0.0053711	0.086426	-60.0858	123.463	342.286	-0.24512	0.31836	0.0058594
0.264	-14.416	24.3447	1047.43	-1.1336	1.4301	0.21699	-6.93	126.0575	470.139	-0.2793	0.39199	0.1377	-70.324	-68.9467	1183.9015	-0.63428	2.1274	-0.53076	-27.11	61.0656	88.7417	-0.021972	0.02666	0.0053711	7.46899999999999	-92.6508	1088.2769	-0.87374	1.7457	-0.54042	-50.333	37.985	36.58	0.018555	0.003418	0.092285	-45.311	124.793	317.9544	-0.21963	0.30518	0.0030274
0.266	-4.918	10.866	1031.496	-1.1152	1.4121	0.22168	-19.775	137.5106	467.692	-0.26709	0.37617	0.13613	-63.2691	-46.61	1178.0663	-0.62598	2.1157	-0.51855	-32.78	60.0803	77.972	-0.036426	0.031445	0.014355	2.482	-86.3312	1100.74	-0.87468	1.7433	-0.54656	-24.892	48.222	17.7737	0.016602	0.0024414	0.089355	-13.212	123.782	320.06293	-0.19317	0.28809	0.00019531
0.268	-32.748	12.851	1018.059	-1.0921	1.3909	0.21905	-20.383	149.21	436.077	-0.25303	0.36172	0.13106	-31.84	-37.898	1193.9671	-0.61816	2.0879	-0.50586	-54.062	46.9993	80.49168	-0.046875	0.039551	0.021484	-11.323	-71.787	1096.8634	-0.88672	1.7441	-0.55664	-23.331	40.109	14.4694	0.021973	0.0048828	0.099609	-38.619	112.8539	283.4589	-0.16504	0.27285	-0.0021484
0.27	-14.586	32.496	1011.3984	-1.0656	1.3695	0.21914	-33.36	146.59	424.365	-0.23965	0.346	0.11729	-19.275	-26.4158	1199.834	-0.61157	2.0735	-0.47876	-54.796	53.6412	81.3134	-0.057812	0.043945	0.031934	-22.9046	-75.546	1122.9195	-0.90134	1.7504	-0.56294	-28.669	36.1454	2.2182	0.023438	0.0029297	0.10278	-29.895	108.97455	257.3316	-0.13847	0.25625	-0.0032226
0.272	-35.793	43.3181	991.466	-1.0391	1.3414	0.21875	-10.543	136.504	378.0989	-0.22656	0.33301	0.11523	-19.797	-35.0674	1210.69844	-0.61475	2.0552	-0.46045	-45.652	66.3094	71.845	-0.066895	0.052539	0.037598	-1.02	-92.174	1129.9057	-0.91526	1.7586	-0.57296	-40.459	19.4079	32.7264	0.026855	0.0063477	0.10547	-28.596	113.69726	228.438	-0.10889	0.23779	-0.0043945
0.274	-12.132	55.871	978.642	-1.0104	1.3104	0.22217	-11.896	114.9566	347.592	-0.21191	0.3167	0.10449	-27.949	-54.1841	1210.1341	-0.61865	2.0376	-0.43506	-51.791	65.5227	66.844	-0.073144	0.055664	0.040722	-21.925	-90.922	1140.0185	-0.92785	1.7722	-0.57868	-13.278	34.9246	35.452	0.024414	0.0087891	0.10791	-19.905	96.548	220.252	-0.088672	0.21836	-0.0060547
0.276	-22.456	69.563	970.3675	-0.98389	1.2798	0.21973	-16.048	81.612	323.239	-0.19561	0.29942	0.096973	10.241	-51.70823	1215.30148	-0.62305	2.0293	-0.4248	-48.928	54.3543	61.6403	-0.074512	0.058008	0.043554	-46.511	-86.539	1102.285	-0.93909	1.79	-0.58362	-15.989	25.3177	44.6486	0.022949	0.010742	0.10791	-40.446	88.5705	231.471	-0.063281	0.19746	-0.0085938
0.278	-12.294	66.073	968.7825	-0.954	1.2487	0.22364	-46.7186	62.008	311.3	-0.17802	0.28496	0.084082	-18.733	-31.9134	1214.317	-0.63428	2.0181	-0.40576	-35.358	56.193	71.4619	-0.077148	0.057617	0.050293	-38.4581	-98.8034	1095.429	-0.94092	1.811	-0.59131	-23.93	24.0608	22.7408	0.020996	0.017578	0.10693	-47.34	76.9378	234.344	-0.042968	0.18027	-0.009375
0.28	-49.412	53.668	949.175	-0.92617	1.218	0.22129	-8.338	77.743	304.099	-0.15557	0.26103	0.075781	-18.649	-32.91022	1204.3599	-0.63501	2.009	-0.38598	-42.031	79.962	68.874	-0.073047	0.057227	0.050879	-15.249	-82.1404	1113.449	-0.94826	1.8336	-0.59919	-7.297	17.3436	24.1928	0.017822	0.03003	0.10523	-47.067	98.501	221.743	-0.024414	0.15654	-0.010254
0.282	-18.24	44.1909	923.56	-0.89531	1.1824	0.22168	-25.985	97.725	315.0257	-0.13965	0.2373	0.066406	-24.508	-36.3776	1201.6244	-0.63867	2.002	-0.37305	-34.021	86.786	61.9241	-0.06914	0.055567	0.055664	-45.992	-73.0318	1154.29879	-0.95426	1.8575	-0.60367	-39.351	15.8662	29.5074	0.014648	0.040527	0.10889	-29.267	126.012	213.4245	-0.0097656	0.14014	-0.0083008
0.284	-30.02	45.182	891.893	-0.86582	1.1451	0.21924	-6.463	105.22059	304.422	-0.11602	0.21768	0.062793	-17.878	-22.487	1183.9636	-0.64258	1.9883	-0.35742	-22.187	70.039	67.6456	-0.060156	0.050098	0.056446	-17.218	-63.628	1163.623	-0.96492	1.8789	-0.61485	-45.145	17.0656	28.0417	0.0078125	0.054199	0.10547	-35.61	110.641	213.0608	0.0020508	0.12138	-0.0089842
0.286	-27.888	42.196	859.858	-0.83936	1.1099	0.20898	-21.478	120.05	296.11	-0.093164	0.1957	0.056543	-62.8199	-16.4487	1173.2944	-0.63818	1.981	-0.34814	-28.093	47.8835	56.5379	-0.054199	0.04248	0.059082	-8.105	-55.5616	1181.116	-0.97452	1.8867	-0.61616	-18.059	19.9867	33.2799	0.00097656	0.063965	0.10303	-47.056	86.613	185.5885	0.015918	0.1002	-0.0060547
0.288	-25.772	50.932	842.48392	-0.80879	1.0754	0.21621	-9.164	119.619	268.135	-0.075586	0.16836	0.054199	-36.527	-14.3545	1160.9512	-0.63525	1.9609	-0.34033	-51.362	42.2283	51.9761	-0.047363	0.040039	0.064941	3.816	-31.9946	1174.5767	-0.98438	1.8906	-0.625	-17.723	3.5529	39.6959	-0.01416	0.088379	0.10205	-55.951	70.2919	161.253	0.022559	0.082226	-0.0041016
0.29	-15.545	80.01984	851.9626	-0.78076	1.0438	0.21328	-32.574	98.583	242.4578	-0.058398	0.14717	0.048438	-20.74	-17.8415	1165.6432	-0.63233	1.94	-0.32617	-33.632	36.062	42.921	-0.035645	0.031543	0.064746	3.617	-40.9697	1188.8017	-0.99334	1.8842	-0.62548	-56.471	-12.401	45.1443	-0.021728	0.10498	0.10644	-41.489	70.5537	131.901	0.029297	0.064258	0
0.292	-19.533	101.023	855.994	-0.75224	1.0083	0.21445	-5.049	94.428	231.94	-0.048828	0.12744	0.041016	-14.764	-6.1227	1162.6459	-0.625	1.9199	-0.32129	-27.702	45.3069	65.9261	-0.029981	0.02002	0.066211	9.478	-56.034	1170.73014	-1.0039	1.8713	-0.62135	-32.433	-39.277	50.724	-0.036133	0.12598	0.10986	-26.997	60.473	147.438	0.031738	0.05127	0.0043945
0.294	-16.122	103.442	857.159	-0.72607	0.97471	0.21123	-27.622	100.5237	211.187	-0.036425	0.1126	0.03457	-39.163	-11.4592	1154.0257	-0.61426	1.8794	-0.31055	-31.298	42.2852	56.1172	-0.02373	0.014551	0.061524	-10.864	-45.148	1140.0094	-1.0022	1.8536	-0.61889	-13.145	-27.1458	66.511	-0.051758	0.14697	0.10547	-16.197	57.2076	157.541	0.033496	0.035547	0.0072266
0.296	-8.523	96.54	835.0359	-0.70508	0.94141	0.20947	-36.721	83.829	196.973	-0.024317	0.096582	0.030371	-8.901	-13.48501	1151.531	-0.60547	1.8574	-0.30957	-53.876	41.532	47.5992	-0.016894	0.0041992	0.063672	-5.759	-35.947	1116.207	-1.0034	1.8327	-0.61152	-25.386	-9.5639	78.3436	-0.062988	0.16553	0.10889	-41.47	62.192	154.7655	0.035059	0.021289	0.0089843
0.298	-25.709	89.124	820.5438	-0.68184	0.91328	0.21016	-40.135	67.925	171.677	-0.019628	0.082128	0.027246	-11.205	1.2441	1150.26306	-0.58447	1.8091	-0.30225	-36.549	35.762	50.7881	-0.010254	-0.0014648	0.067383	-12.796	-61.373	1108.547	-1.0015	1.8091	-0.61572	-39.611	-8.5346	117.237	-0.080566	0.19189	0.10693	-54.136	70.2957	140.3213	0.03584	0.008789	0.0082031
0.3	-21.936	84.492	786.488	-0.66319	0.88682	0.20762	-30.14	76.101	165.95	-0.013476	0.071581	0.021777	-30.263	5.8565	1136.1393	-0.57007	1.7715	-0.29468	-27.767	50.64	62.5854	-9.768e-05	-0.00625	0.062305	-17.865	-55.6738303	1121.7487	-0.99694	1.7813	-0.60857	-19.776	-2.8668	134.2483	-0.10595	0.21656	0.10864	-26.47	67.0124	147.982	0.036328	-0.0041016	0.010156
0.302	-36.496	78.3183	754.597	-0.64248	0.86064	0.20528	-21.32	88.1513	173.0606	-0.0058594	0.061035	0.016113	-32.406	6.1719	1116.0332	-0.55029	1.7349	-0.29053	-20.489	39.7685	73.4321	0.0058594	-0.0095703	0.060449	-27.666	-34.4074	1131.5434	-0.98601	1.7584	-0.59935	-35.405	16.7652	169.0932	-0.12402	0.24316	0.10449	-22.539	77.581	146.6092	0.037598	-0.012695	0.0073242
0.304	-24.929	83.2902	721.667	-0.62686	0.83389	0.20342	-34.32	88.731	179.867	-0.0023444	0.053029	0.011231	-20.933	15.7427	1088.5408	-0.53027	1.6816	-0.28516	-44.835	29.07723	78.693	0.016406	-0.011133	0.055762	-22.393	-10.588312	1130.8996	-0.97846	1.7305	-0.59281	-24.614	29.9357	193.039	-0.16211	0.28369	0.10547	-39.569	80.046	126.283	0.033496	-0.024805	0.0064453
0.306	-20.46	87.7096	729.7827	-0.61279	0.80713	0.19824	-21.809	89.875	159.47	0.0031219	0.045215	0.0074235	-21.074	12.2552	1070.8313	-0.51953	1.6621	-0.28223	-33.079	17.7055	67.2405	0.022168	-0.011914	0.053125	-27.024	-1.2693	1134.585	-0.9717	1.7129	-0.59161	-54.146	30.3834	283.3506	-0.19849	0.32032	0.10474	-52.239	74.538	88.6624	0.03418	-0.0375	0.010937
0.308	-9.164	89.331	721.092	-0.59678	0.78526	0.19453	-33.466	87.786	137.143	0.0097656	0.041701	2.2869e-06	-23.356	3.9959	1052.202	-0.49707	1.6152	-0.28906	-10.247	20.3708	55.292	0.021973	-0.0068359	0.048828	-22.337	-10.032	1152.536	-0.96338	1.6958	-0.58643	-31.841	50.2141	346.584	-0.24609	0.36035	0.10742	-37.223	68.361	70.164	0.032618	-0.049219	0.009375
0.31	-6.425	100.7703	722.18	-0.57959	0.76006	0.19306	-15.238	76.445	114.75	0.012012	0.033593	-0.0057596	-25.022	6.702	1040.0281	-0.48291	1.5849	-0.28711	-19.971	5.7682	62.9066	0.022656	0.0036133	0.039648	-12.036	-14.8854	1124.4326	-0.95534	1.6794	-0.58034	-41.398	63.3957	399.289	-0.33057	0.42725	0.11572	-47.994	52.092	78.922	0.031543	-0.056543	0.017383
0.312	-1.577	125.4522	699.42996	-0.56045	0.74052	0.18252	-57.627	47.6684	122.319	0.014648	0.029297	-0.010254	-25.159	23.3387	1042.1318	-0.46826	1.5591	-0.28369	-42.042	-1.95742	71.4346	0.021875	0.014356	0.034863	-25.535	-16.91	1090.7974	-0.94883	1.6664	-0.57356	-29.086	70.7539	438.193	-0.38086	0.45996	0.12695	-18.429	32.977	106.2014	0.025879	-0.062988	0.023438
0.314	-1.888	119.519	690.645	-0.54473	0.71426	0.18828	-41.014	55.204	120.356	0.014647	0.023828	-0.018556	-28.934	36.2309	1019.7213	-0.43994	1.5161	-0.2876	-33.261	-3.8222	73.0492	0.021485	0.029199	0.028222	11.178	-5.065	1068.939	-0.94726	1.6539	-0.56504	-32.648	66.868	490.9184	-0.50732	0.55029	0.14941	-42.718	38.928	108.664	0.02168	-0.070508	0.029004
0.316	-11.775	111.367	657.5224	-0.52832	0.69238	0.18018	-43.864	70.3506	113.0246	0.015435	0.01866	-0.013676	-27.716	30.8073	1017.1868	-0.42773	1.502	-0.28418	-42.622	7.8882	61.4991	0.019922	0.047558	0.024121	1.06	-10.219	1089.716	-0.94989	1.6442	-0.55603	-10.773	73.76	558.9238	-0.61474	0.62793	0.17529	-19.762	68.539333	88.773	0.017871	-0.07627	0.034571
0.318	-17.951	102.9952	630.436	-0.51182	0.66689	0.17802	-26.586	77.00476	115.54616	0.015423	0.012379	-0.023846	-16.102	45.848	992.5764	-0.40186	1.4634	-0.28662	-59.4472	1.9671	87.1465	0.01123	0.063965	0.017578	-5.424	-24.2777	1087.1597	-0.94482	1.6353	-0.54639	-19.955	64.371	605.93069	-0.73975	0.71729	0.21338	-26.85	85.891	80.3307	0.0088866	-0.080566	0.041992
0.32	-36.018	102.0836	610.194	-0.49785	0.6461	0.17266	-37.25	68.948	110.55	0.014841	0.012496	-0.026171	-17.617	56.433	1000.4139	-0.37939	1.436	-0.29053	-21.783	-0.864599999999999	125.996	0.0052735	0.085058	0.0073243	-17.608	-28.922	1085.2029	-0.94385	1.6212	-0.5419	-27.938	41.834	636.0957	-0.9126	0.86475	0.28418	-22.907	60.954	73.8542	-0.0012696	-0.085742	0.050195
0.322	-31.282	93.0862	601.1472	-0.48418	0.62071	0.16758	-17.938	73.203	111.529	0.010254	0.0092773	-0.024902	-34.576	76.363	978.4917	-0.36328	1.4043	-0.28809	-25.84	13.3545	176.4695	-0.0058594	0.10313	0.00078122	6.626	6.818	1066.0871	-0.94337	1.6112	-0.52911	-11.177	10.1291	648.6723	-1.0112	0.93408	0.31641	-45.563	50.372	70.4745	-0.0092773	-0.088867	0.05957
0.324	-20.716	99.3411	608.2915	-0.46524	0.59297	0.16455	-22.962	80.348	89.81	0.0061574	0.0059608	-0.024021	-41.319	54.848	967.5417	-0.33887	1.3711	-0.29004	-30.804	36.8009	191.9386	-0.020313	0.13164	-0.0058593	-21.358	25.5633	1071.904	-0.93009	1.5956	-0.52286	-53.75	-29.3631	644.9303	-1.2124	1.0649	0.3501	-24.066	41.0909	44.1228	-0.016016	-0.088379	0.060938
0.326	-9.018	112.9016	598.2722	-0.44385	0.56787	0.16748	-20.869	64.507	80.3988	0.0027394	0.0067408	-0.030083	-24.765	58.385	940.954	-0.32764	1.3521	-0.28662	-42.349	41.249	236.44	-0.045117	0.16494	-0.013476	-16.884	35.0943	1073.2813	-0.92315	1.5773	-0.50967	-79.5096	-63.097	645.609	-1.3591	1.1653	0.35572	-59.5712	38.8147	31.465	-0.02168	-0.092188	0.068848
0.328	-13.587	119.4349	575.5064	-0.42637	0.54472	0.16055	-24.357	48.8699	70.633	0.00040329	0.0059602	-0.026972	-25.592	52.1668	920.5978	-0.30713	1.313	-0.27881	8.976	63.1115	280.629	-0.07666	0.20557	-0.02002	-24.746	33.5049	1061.0091	-0.91602	1.5645	-0.49707	-51.818	-70.868	639.1419	-1.4766	1.2559	0.34619	-47.318	30.068	40.993	-0.02793	-0.09414	0.073535
0.33	2.243	114.2325	532.5982	-0.41045	0.52041	0.15762	-26.212	44.579	69.416	-0.0052685	0.0067582	-0.026573	-43.408	51.588	901.3095	-0.29102	1.2778	-0.27393	-28.788	62.88693	338.0861	-0.12451	0.25498	-0.015625	-34.905	40.9512	1019.391	-0.90732	1.5501	-0.48623	-19.018	-61.242	620.6161	-1.5547	1.3496	0.30762	-34.436	37.7972	67.952	-0.029394	-0.090332	0.076953
0.332	-1.996	116.0133	516.8018	-0.38584	0.49619	0.16035	-48.032	39.583	63.047	-0.015137	0.0048828	-0.026855	0.295000000000002	65.087	902.9363	-0.28418	1.2632	-0.26904	-13.31	82.9249	376.2254	-0.18301	0.32071	-0.013183	-25.978	40.41769	1015.718	-0.90342	1.5403	-0.4749	-18.411	-50.545	609.72526	-1.5586	1.3828	0.27979	-37.34	54.2525	59.6399	-0.028809	-0.084961	0.083496
0.334	-2.737	115.3181	484.383	-0.36933	0.47676	0.15898	-21.006	49.5702	61.452	-0.017685	0.0091336	-0.025581	-0.128	84.3035	886.54582	-0.27539	1.2246	-0.26563	-7.777	80.921	426.398	-0.25059	0.39766	-0.0049805	-20.052	31.5044	1015.81	-0.89521	1.529	-0.46435	-14.657	-48.267	605.4328	-1.4844	1.3965	0.20557	-41.294	60.1529	49.877	-0.031055	-0.089551	0.087305
0.336	-3.048	112.04288	477.4828	-0.35693	0.45459	0.15625	-36.211	62.14351	66.7284	-0.023652	0.011933	-0.024676	-14.097	79.8224	875.8655	-0.26245	1.1963	-0.25488	-0.441999999999997	86.929	453.1797	-0.33603	0.48789	-2e-08	-10.338	26.3979	1022.1358	-0.89102	1.5211	-0.45703	3.363	-40.59	622.0857	-1.3574	1.3642	0.15088	-6.473	58.042	45.1217	-0.026563	-0.083593	0.089551
0.338	-16.586	114.30153	456.592	-0.33779	0.43281	0.15322	-32.786	81.717	63.514	-0.026426	0.01672	-0.024527	-23.301	91.178	858.5685	-0.25342	1.1724	-0.25146	-27.868	68.7574	496.0923	-0.42334	0.59326	0.010254	-27.074	42.232	1000.196	-0.88086	1.5059	-0.44141	14.334	-3.3441	630.6928	-1.187	1.2896	0.10547	-29.908	49.304	52.1958	-0.025	-0.082422	0.098145
0.34	-17.662	117.3197	462.609	-0.33183	0.41963	0.14873	-47.009	73.764	57.888	-0.031784	0.014774	-0.025311	-12.206	94.525	847.6152	-0.23584	1.1279	-0.24561	-32.937	53.3297	500.5131	-0.51758	0.70508	0.023144	-33.47	37.909	980.994	-0.87285	1.4897	-0.43613	8.182	-6.0053	644.6677	-0.92188	1.1387	0.072754	-54.666	38.366	37.49918	-0.024414	-0.080957	0.10391
0.342	-9.857	120.4496	462.4989	-0.31426	0.40049	0.14561	-27.48	79.623	57.024	-0.033691	0.023438	-0.017578	0.106000000000002	106.581	829.0679	-0.22998	1.1035	-0.23438	-19.049	45.691	526.2114	-0.61446	0.82618	0.039648	-16.303	32.465	957.698	-0.85342	1.4697	-0.42891	4.66500000000001	-18.894	661.278	-0.79688	1.0566	0.062988	-33.066	36.1831	25.582	-0.022461	-0.079102	0.10742
0.344	-20.645	109.7051	461.247	-0.30088	0.38311	0.14375	-22.042	85.118	51.3878	-0.043074	0.028406	-0.017068	-22.939	88.588	802.6828	-0.21094	1.061	-0.22949	-17.782	49.23549	512.2576	-0.70664	0.94805	0.050196	-5.04600000000001	27.6161	957.0697	-0.83584	1.4434	-0.42227	-6.324	-30.685	670.4946	-0.58789	0.875	0.07373	-17.319	47.0644	9.27	-0.017676	-0.075	0.10947
0.346	-9.463	124.839	434.763	-0.28516	0.36328	0.13867	-14.274	60.8853	64.8853	-0.049459	0.026149	-0.017262	-21.509	89.1708	780.6085	-0.19727	1.0266	-0.2229	-12.525	19.084	538.636	-0.79814	1.0655	0.053027	-16.816	39.6666	931.4311	-0.80615	1.4087	-0.41025	-15.784	-27.679	681.444	-0.48584	0.75513	0.074463	-33.064	36.003	32.186	-0.0096679	-0.071679	0.1084
0.348	-16.763	125.298	407.561	-0.26553	0.34238	0.13232	-27.631	34.158	42.743	-0.056138	0.034371	-0.014097	-8.847	106.9475	758.1029	-0.18164	0.99609	-0.21777	-20.334	10.3107	543.8372	-0.86865	1.1743	0.050781	-21.449	31.866	906.744	-0.7749	1.3716	-0.40869	-22.144	-51.414	691.689	-0.42285	0.64844	0.080078	-38.534	25.8239	35.77	-0.0061523	-0.067383	0.10957
0.35	-9.527	115.781	365.3502	-0.2501	0.32402	0.12549	-29.969	32.566	35.583	-0.063786	0.041166	-0.01139	-10.036	109.9975	740.0834	-0.1748	0.95703	-0.20898	-25.795	-2.2279	567.8585	-0.92187	1.2672	0.033301	-34.372	46.232	911.078	-0.74492	1.3303	-0.39609	-57.836	-88.78	729.5062	-0.39014	0.55078	0.096191	-48.588	37.9511	33.0292	0.0039063	-0.062207	0.10518
0.352	-2.007	94.4982	353.584	-0.22861	0.30059	0.12432	-43.263	51.5771	27.735	-0.077148	0.046387	-0.0078125	-12.52	111.9789	727.9272	-0.16895	0.93945	-0.20508	-26.011	7.421	571.4442	-0.95029	1.343	0.0096683	-24.253	51.032	898.234	-0.71533	1.2813	-0.3876	-19.2	-118.692	729.768	-0.38672	0.51807	0.099609	-55.488	64.008	36.713	0.01416	-0.062012	0.10596
0.354	-2.023	83.669	328.254	-0.20908	0.28281	0.11914	-49.047	42.18471	37.57088	-0.082069	0.048593	-0.0072254	20.994	110.5398	722.6026	-0.16113	0.90674	-0.1958	-28.69	-12.81691	579.265	-0.95224	1.3895	-0.016895	-22.037	44.3622	891.14311	-0.69033	1.2361	-0.37432	-56.922	-142.112	748.9281	-0.40527	0.48633	0.10938	-29.14	64.649	39.353	0.020996	-0.059375	0.098048
0.356	-19.638	71.52	333.083	-0.19141	0.26172	0.11621	-41.866	53.1438	57.206	-0.088432	0.051141	-0.0069642	5.061	124.0853	695.9689	-0.15429	0.88013	-0.18896	-30.914	-26.27933	593.599	-0.92373	1.4056	-0.041992	-23.558	62.186	868.833	-0.66504	1.1959	-0.3623	-42.907	-150.534	761.9627	-0.42773	0.49682	0.11474	-11.824	43.113	41.068	0.032812	-0.057422	0.09082
0.358	-16.879	74.218	328.131	-0.16836	0.24082	0.11241	-33.151	57.001	49.987	-0.093056	0.054071	-0.0060385	-16.727	123.5351	683.9331	-0.1543	0.85547	-0.18408	-38.982	-21.999	586.4229	-0.87451	1.396	-0.059082	-43.309	79.111	868.846	-0.64844	1.1572	-0.35547	-27.252	-139.34	799.167	-0.45166	0.52295	0.11621	-6.811	34.5941	31.0547	0.042969	-0.05625	0.079492
0.36	-1.218	96.243	328.7158	-0.15088	0.2205	0.10293	-58.142	52.605	37.94	-0.091037	0.047988	-0.0090239	-11.441	126.081	646.384	-0.14404	0.83008	-0.17236	-65.2217	-16.086	562.1655	-0.80459	1.3505	-0.067578	-29.241	71.951	850.993	-0.62871	1.119	-0.34336	-21.145	-133.482	814.519	-0.49854	0.58691	0.1123	-24.643	35.7994	15.833	0.053711	-0.047558	0.075
0.362	-30.127	121.4069	327.624	-0.13408	0.19863	0.10254	-34.999	49.209	39.189	-0.091309	0.04834	-0.0087891	17.764	128.737	645.2744	-0.13818	0.81299	-0.17334	-47.323	-23.03	550.421	-0.72656	1.2778	-0.067187	-21.485	32.939	845.34	-0.61191	1.0813	-0.33389	-47.648	-129.414	840.80005	-0.52197	0.63623	0.11572	-38.3974	26.305	-1.289	0.058105	-0.043945	0.072266
0.364	-3.923	118.23	311.204	-0.12412	0.18496	0.10147	-34.249	51.2876	51.363	-0.08837	0.039842	-0.0093054	-28.698	125.6888	613.3475	-0.12939	0.78467	-0.17041	-31.012	-28.807	565.46	-0.64688	1.1778	-0.056641	-23.833	28.96547	818.9117	-0.59824	1.0543	-0.3249	-41.154	-123.208	879.0647	-0.57373	0.74658	0.11133	-35.076	17.378	33.059	0.06084	-0.033985	0.071191
0.366	-8.17	122.408	285.7431	-0.11572	0.17041	0.088867	-25.591	47.6258	45.361	-0.082803	0.034293	-0.010424	-26.567	107.8999	615.53	-0.11938	0.76392	-0.16577	-46.356	-35.8638	575.43	-0.57901	1.0647	-0.041504	-34.45	39.02	783.204	-0.57988	1.0217	-0.31963	-33.93	-99.56024	918.3177	-0.62378	0.82544	0.10547	-23.119	31.6325	38.682	0.060938	-0.020606	0.061426
0.368	-6.69	122.226	261.9617	-0.10205	0.15596	0.085644	-41.725	36.493	34.6958	-0.077969	0.026384	-0.016901	-7.799	125.344	599.3758	-0.10645	0.73926	-0.16113	-56.289	-50.5391	590.2413	-0.52734	0.95117	-0.023438	-33.226	51.08	755.182	-0.56543	0.99365	-0.31006	-49.619	-81.055	931.4344	-0.67676	0.90625	0.11035	-38.027	23.8278	33.5162	0.057031	-0.010449	0.055957
0.37	-22.471	100.8183	244.2445	-0.091211	0.14053	0.080078	-36.021	21.7291	24.3234	-0.067574	0.018638	-0.022121	3.991	132.1393	588.2114	-0.094727	0.70264	-0.15576	-59.82	-53.3099	610.712	-0.48448	0.84443	-0.0052733	-44.345	45.628	744.89	-0.54678	0.9668	-0.30156	-48.563	-81.987	946.868	-0.75488	1.0078	0.10205	-40.267	26.3761	38.444	0.057031	0.0055665	0.052246
0.372	-10.555	74.5616	228.809	-0.08457	0.12725	0.075781	-37.669	37.4106	28.1311	-0.062012	0.012207	-0.023926	-24.062	126.5373	554.5677	-0.085449	0.69189	-0.14941	-35.913	-64.6637	644.4904	-0.45811	0.75576	0.012402	-40.1	66.649	738.861	-0.53135	0.94638	-0.28936	-49.699	-82.256	940.5618	-0.7959	1.0527	0.10645	-37.854	26.7059	47.0497	0.053711	0.023438	0.050781
0.374	-24.084	72.367	211.456	-0.079492	0.11651	0.070996	-31.915	37.3683	32.982	-0.058402	0.0020452	-0.030228	9.29	108.8688	529.8635	-0.075195	0.65625	-0.14355	-32.266	-77.01211	673.036	-0.44248	0.69639	0.025683	-30.279	79.7399	742.186	-0.51494	0.92451	-0.28116	-35.28	-83.7	948.723	-0.86475	1.1313	0.1123	-9.156	24.2364	51.41006	0.052051	0.044727	0.039844
0.376	-16.211	87.6	195.146	-0.067871	0.10205	0.066895	-40.651	39.463	49.338	-0.053309	-0.0074632	-0.032913	-10.688	114.9661	497.977	-0.067871	0.63037	-0.14184	-52.193	-96.4881	698.348	-0.43359	0.6624	0.039648	-38.395	90.523	736.224	-0.50361	0.9001	-0.26943	-31.776	-84.507	950.392	-0.91651	1.1772	0.11524	-28.647	14.3236	44.1865	0.043652	0.064844	0.037695
0.378	3.869	79.596	199.3793	-0.061523	0.091113	0.056641	-38.72	40.986	45.402	-0.047994	-0.01727	-0.039945	-10.66	116.42	488.752	-0.063477	0.60596	-0.13232	-67.623	-93.191	704.526	-0.43066	0.65039	0.045898	-30.22	97.886	741.161	-0.49219	0.88086	-0.26074	-26.203	-98.5625	954.392	-0.9624	1.2192	0.11963	-24.977	10.1048	62.694	0.031543	0.087891	0.033008
0.38	0.271999999999998	78.8324	192.3051	-0.052539	0.079883	0.051465	-43.515	31.655	45.5527	-0.043076	-0.023581	-0.044767	-5.352	117.023	483.5973	-0.054199	0.57227	-0.12695	-48.462	-96.1925	703.862	-0.43877	0.66572	0.05166	-41.338	108.319	728.58385	-0.48076	0.85986	-0.25244	-30.951	-107.8681	994.9364	-1.0112	1.2681	0.12793	-36.567	10.546	58.163	0.019825	0.1084	0.030664
0.382	-28.98	99.775	193.137	-0.046289	0.07168	0.04834	-47.203	9.5913	28.639	-0.040039	-0.029297	-0.05127	17.11	124.3199	472.87626	-0.050781	0.55664	-0.125	-71.271	-108.0186	733.755	-0.45235	0.7	0.045508	-56.891	100.481	699.5599	-0.47168	0.83516	-0.24521	-31.929	-105.187	1005.0137	-1.043	1.293	0.13574	-26.598	0.036999999999999	90.434	0.0048828	0.13525	0.027832
0.384	-22.757	108.816	169.0829	-0.039941	0.063477	0.041699	-31.05	-18.8389	42.618	-0.036712	-0.032715	-0.056165	-10.747	132.987	464.1859	-0.042969	0.52246	-0.12207	-74.35	-108.7947	749.213	-0.47461	0.74922	0.03457	-64.2831	86.1099	656.722	-0.46308	0.81172	-0.23662	-35.466	-118.145	1034.9817	-1.105	1.3364	0.14404	-36.773	10.8096	134.4417	-0.015528	0.15889	0.023144
0.386	-11.17	91.055	174.7382	-0.036133	0.062012	0.038086	-33.309	-2.9974	35.289	-0.036621	-0.0329	-0.060027	-22.325	126.144	442.8539	-0.034424	0.50122	-0.1206	-63.034	-103.8999	798.33119	-0.50234	0.81123	0.021191	-58.395	79.881	648.99	-0.45371	0.78828	-0.22471	-31.561	-114.078	1060.7425	-1.1609	1.3782	0.15381	-32.023	37.5482	185.6744	-0.038281	0.18594	0.015722
0.388	-20.105	87.505	162.424	-0.027832	0.052344	0.031055	-29.457	5.5679	48.778	-0.037408	-0.0282	-0.056546	-18.258	123.957	437.0465	-0.026367	0.47559	-0.11523	-60.817	-87.713	813.2909	-0.5332	0.88281	0.0092773	-42.497	88.925	626.359	-0.44336	0.76074	-0.21387	-11.507	-116.9456	1093.1327	-1.2144	1.4243	0.15967	-45.291	76.3843	227.337	-0.065625	0.21563	0.019629
0.39	-14.128	65.821	150.919	-0.024707	0.044824	0.02666	-41.466	0.65305	42.8976	-0.044738	-0.024401	-0.060452	-1.268	138.413	416.4556	-0.010254	0.44189	-0.11621	-88.771	-86.9196	835.0801	-0.55761	0.95176	-0.0045899	-36.23	84.187	626.175	-0.43359	0.73906	-0.20361	-38.178	-108.8259	1088.1814	-1.2988	1.5	0.17285	-51.537	79.5497	283.6655	-0.10381	0.24346	0.024414
0.392	-22.665	65.0979	136.33	-0.023145	0.037012	0.021972	-29.372	-15.4757	63.0813	-0.053223	-0.013672	-0.066406	-6.145	125.4916	390.33998	0.0014648	0.42432	-0.11133	-60.608	-81.0986	888.9588	-0.57725	1.0173	-0.012597	-39.59	95.9563	609.5239	-0.42832	0.72041	-0.19228	-40.1561	-103.987	1102.15	-1.3408	1.5479	0.17969	-63.627	77.834	352.287	-0.1582	0.28369	0.02832
0.394	-4.808	62.624	143.8841	-0.017383	0.032813	0.014942	-56.145	-9.663	83.047	-0.061318	0.0024314	-0.05498	-15.338	111.79486	355.9961	0.020996	0.3833	-0.10693	-54.859	-83.931	908.1966	-0.60342	1.0716	-0.012988	-55.465	135.224	606.459	-0.42285	0.69814	-0.1833	-26.342	-89.687	1104.0737	-1.4199	1.6406	0.18701	-22.162	77.644	426.814	-0.2331	0.33018	0.040234
0.396	-17.832	68.353	141.14954	-0.01416	0.028809	0.012207	-26.145	-28.3131	87.714	-0.074396	0.019216	-0.056447	12.221	99.7885	340.461	0.033692	0.34888	-0.10791	-70.119	-72.469	911.4719	-0.63106	1.1264	-0.0097655	-26.331	148.846	612.471	-0.41435	0.68106	-0.175	-33.329	-77.616	1107.0502	-1.4732	1.7109	0.18555	-23.324	99.11	465.564	-0.32373	0.39092	0.055078
0.398	-19.15	65.8475	142.416	-0.011328	0.020313	0.0086914	-29.893	-31.8878	118.4682	-0.088467	0.036414	-0.058394	20.456	97.398	317.609	0.04834	0.31689	-0.10889	-67.673	-85.46	913.588	-0.65771	1.1743	-0.010254	-29.973	133.474	608.486	-0.41064	0.66455	-0.17188	-51.808	-80.6937	1099.71161	-1.521	1.7778	0.18994	-7.354	95.821	545.142	-0.42842	0.45889	0.07461
0.4	-12.643	65.447	125.306	-0.0076172	0.016797	0.0075195	-9.533	-27.9404	144.472	-0.10898	0.062976	-0.058984	-12.44	92.955	314.7584	0.064941	0.27393	-0.10449	-51.449	-91.86	925.706	-0.68798	1.2171	-0.0095703	-46.522	139.153	587.3344	-0.40986	0.65029	-0.15088	-32.695	-89.0409	1104.6907	-1.5703	1.8652	0.18652	-7.4	82.6913	603.477	-0.53984	0.53145	0.10244
0.402	3.505	65.98	109.0542	-0.0052734	0.0125	0.0075195	-53.557	-23.0543	195.07	-0.1333	0.088867	-0.058594	-16.995	97.30143	303.8387	0.074707	0.24707	-0.10254	-74.251	-99.7127	948.351	-0.71777	1.2517	-0.013575	-61.989	143.139	571.541	-0.40332	0.63691	-0.14111	-32.579	-81.739	1116.43	-1.5913	1.9067	0.18555	-30.634	50.146	672.434	-0.6582	0.61523	0.13086
0.404	-5.387	68.479	99.1894	-0.00048826	0.0074219	0.0075195	-31.588	-10.6744	262.433	-0.16075	0.12394	-0.056836	1.085	115.074	310.097	0.087402	0.21094	-0.10107	-75.559	-95.8166	977.249	-0.74082	1.2803	-0.022168	-49.864	130.934	545.237	-0.39472	0.62598	-0.1333	-45.693	-80.36	1125.882	-1.6323	1.9595	0.18018	-60.3933	25.18353	690.1759	-0.78486	0.70674	0.16563
0.406	-16.562	53.1309	103.478	-0.00048828	0.00097656	0.0068359	-67.667	3.19412	354.328	-0.20099	0.16798	-0.050483	-20.08	118.879	288.0018	0.09668	0.17676	-0.099123	-68.013	-86.82539	993.849	-0.76299	1.3061	-0.035254	-47.111	132.1133	541.698	-0.38545	0.61534	-0.12344	-61.693	-84.5618	1135.549	-1.6528	1.9849	0.17749	-28.579	-17.2452	714.06	-0.90801	0.80547	0.20312
0.408	-13.071	47.6961	109.019	-0.00039062	0.00039062	0.0072266	-33.488	36.2276	454.9434	-0.25177	0.22267	-0.035642	-20.928	105.358	272.9328	0.10449	0.14893	-0.095215	-48.795	-72.1289	1010.1671	-0.78125	1.3379	-0.043945	-37.441	134.3712	535.5968	-0.37354	0.60107	-0.1123	-54.394	-75.5532	1163.82471	-1.6714	1.9985	0.1792	-18.163	-38.0592	736.023	-1.0267	0.90781	0.23515
0.41	-27.652	45.614	102.453	-0.0047851	-0.0027344	0.013184	-71.773	56.7886	546.514	-0.32824	0.28878	-0.012009	-1.31	98.96	261.7663	0.11035	0.11475	-0.088379	-67.29	-73.451	1030.0892	-0.79268	1.3776	-0.048633	-47.833	121.4472	528.1037	-0.36533	0.58506	-0.10615	-67.216	-55.412	1167.0248	-1.6895	1.9883	0.18799	-21.853	-85.3044	745.452	-1.1474	1.0003	0.26387
0.412	-32.459	56.4553	96.0715	-0.0079102	-0.00078126	0.012012	-57.827	63.492	613.267	-0.42334	0.36816	0.017578	-3.576	106.503	248.3649	0.1123	0.10205	-0.090332	-84.3	-79.3133	1037.8897	-0.81836	1.4234	-0.046777	-38.691	110.45665	509.857	-0.35039	0.56797	-0.096777	-45.032	-57.696	1166.62422	-1.6953	1.9727	0.19092	-54.4717	-101.29795	732.355	-1.2607	1.0898	0.28271
0.414	-18.037	65.8252	90.1758	-0.0095703	-0.0025391	0.011621	-64.643	92.575	687.7498	-0.54384	0.47489	0.055662	-22.191	94.5068	221.8317	0.11523	0.07373	-0.084473	-55.596	-85.0717	1052.0405	-0.85586	1.4859	-0.045215	-43.472	125.3792	497.5358	-0.34101	0.55234	-0.089356	-56.402	-61.634	1171.2522	-1.6987	1.936	0.20508	-23.246	-114.2458	708.4391	-1.3601	1.1749	0.28008
0.416	-0.936	69.719	81.0023	-0.019043	-0.0019531	0.020996	-49.798	91.398	714.106	-0.68553	0.60018	0.10351	-9.791	74.5928	206.887	0.11328	0.064698	-0.085449	-56.647	-88.129	1076.4222	-0.91172	1.5629	-0.036719	-36.004	127.3102	492.70797	-0.321	0.53399	-0.087891	-52.128	-49.232	1177.815	-1.6924	1.9023	0.21558	-27.1762	-103.312	701.222	-1.4323	1.2434	0.26445
0.418	-23.126	85.649	70.423	-0.029004	0.0001953	0.015918	-81.6116	44.033	739.3681	-0.83906	0.74433	0.15586	-14.984	78.4978	192.401	0.10791	0.051758	-0.080078	-67.236	-98.10282	1068.0787	-0.97461	1.6484	-0.037598	-41.044	127.146	489.5567	-0.30029	0.51416	-0.077637	-46.411	-44.6117	1191.213	-1.6753	1.8618	0.22412	15.304	-82.935	711.5271	-1.4628	1.2903	0.24023
0.42	-18.262	65.043	66.2521	-0.038965	0.0008789	0.013379	-57.097	1.5784	743.109	-1.0014	0.90292	0.20811	-20.889	81.4908	184.2797	0.104	0.043945	-0.083496	-80.787	-115.6607	1089.5151	-1.0512	1.7474	-0.029004	-34.072	127.8968	459.5658	-0.28174	0.49404	-0.077246	-31.465	-56.527	1174.9179	-1.6479	1.8169	0.2417	15.464	-64.085	722.1581	-1.448	1.3102	0.20898
0.422	-6.191	46.1736	67.66287	-0.047949	0.0020508	0.013379	-44.947	-46.048	729.447	-1.1641	1.0664	0.23779	-14.292	75.8656	185.9497	0.099121	0.041992	-0.082031	-66.901	-91.3528	1077.3414	-1.13	1.8532	-0.028809	-32.936	131.132	444.162	-0.27139	0.47705	-0.071387	-39.765	-66.759	1178.7012	-1.6198	1.7854	0.24438	4.995	-43.593	732.93041	-1.3809	1.3047	0.18311
0.424	-19.571	29.4	64.615	-0.060742	0.0053711	0.0094726	-72.9618	-84.531	703.4239	-1.3189	1.2334	0.2374	-13.576	82.6198	179.20744	0.094238	0.041992	-0.082031	-94.854	-64.6139	1091.978	-1.1972	1.9564	-0.042481	-52.964	125.984	436.721	-0.25928	0.44931	-0.065528	-14.863	-50.113	1187.1965	-1.5908	1.7539	0.25098	-7.076	-27.589	744.7638	-1.2764	1.2686	0.16299
0.426	-24.69	37.24	61.426	-0.066406	0.0092773	0.0083008	-80.176	-93.673	685.0531	-1.4331	1.3922	0.21933	-12.99	95.0002	163.2408	0.087646	0.04663	-0.085937	-96.418	-56.607	1105.7528	-1.251	2.0518	-0.052441	-33.712	128.3848	454.5686	-0.24864	0.43183	-0.059961	-52.7	-37.966	1191.6724	-1.5542	1.7329	0.25391	-6.992	-26.982	758.453	-1.1492	1.2031	0.15713
0.428	-23.138	23.858	43.897	-0.081836	0.014063	0.00039062	-28.361	-97.409	674.072	-1.5034	1.536	0.17676	-26.358	80.004	163.7156	0.085938	0.048828	-0.083984	-74.138	-63.4705	1141.7462	-1.292	2.1289	-0.066406	-53.899	140.9075	443.664	-0.23584	0.41357	-0.053223	-37.648	-21.99071	1210.1275	-1.5347	1.7192	0.25586	1.354	-33.379	801.194	-1.0191	1.1168	0.16533
0.43	-32.156	34.7267	55.743	-0.08916	0.020898	-0.0050781	-26.637	-73.595	645.897	-1.5195	1.6402	0.12422	-49.7249	65.256	164.9925	0.082031	0.052734	-0.088867	-95.578	-67.6563	1152.42052	-1.3094	2.1969	-0.079786	-35.582	147.9734	423.104	-0.22852	0.39746	-0.042578	-28.08	-19.204	1215.5284	-1.502	1.6973	0.25684	-18.892	-36.937	788.6138	-0.90429	1.0195	0.17158
0.432	-26.921	46.2882	47.1368	-0.098144	0.020898	-0.011328	-54.416	-59.92	646.273	-1.4819	1.7017	0.072754	-22.666	68.5175	156.2083	0.078125	0.058594	-0.09082	-104.381	-68.033	1151.3617	-1.3092	2.2438	-0.087402	-48.24	144.942	387.989	-0.21709	0.37939	-0.03789	-30.147	-25.161	1204.41197	-1.4761	1.6861	0.25513	-33.203	-54.91	770.564	-0.82666	0.93213	0.18262
0.434	-30.986	39.0175	39.76	-0.10244	0.023242	-0.020606	-58.618	-33.629	633.186	-1.3855	1.7004	0.032227	8.236	73.7666	139.025	0.070313	0.071777	-0.090332	-93.188	-68.9548	1145.621	-1.2968	2.2641	-0.089355	-35.52	127.707	370.85	-0.20694	0.36963	-0.032031	-46.154	-21.785	1194.64944	-1.4512	1.668	0.2583	-83.7983	-91.825	752.72	-0.77696	0.8588	0.19209
0.436	-31.761	44.066	49.578	-0.1084	0.026367	-0.030273	-64.219	-23.565	661.264	-1.2538	1.6439	0.0086916	-16.818	63.8071	111.7752	0.067627	0.07837	-0.090088	-87.925	-64.2656	1169.526	-1.2793	2.2633	-0.087402	-57.938	128.009	367.4708	-0.19658	0.35205	-0.034766	-53.501	-8.348	1168.801	-1.4233	1.6509	0.26172	-51.199	-130.8241	780.561	-0.73819	0.79894	0.21113
0.438	-27.172	49.909	49.7969	-0.11045	0.02373	-0.037793	-71.132	-12.72	662.73	-1.096	1.5236	-0.0014648	-22.116	64.6281	110.32067	0.061035	0.083008	-0.089844	-109.048	-50.4706	1163.349	-1.2617	2.2422	-0.084473	-24.907	119.68993	339.093	-0.18359	0.33691	-0.036133	-32.91	1.007	1167.354	-1.4058	1.6411	0.26709	-48.019	-161.543	812.59	-0.71162	0.76222	0.22792
0.44	-22.231	48.0849	48.1379	-0.11153	0.023535	-0.040527	-63.674	-24.304	672.751	-0.94726	1.357	9.7657e-05	-12.999	78.9117	120.33495	0.051758	0.089355	-0.09375	-98.74	-58.724	1180.6106	-1.2381	2.2025	-0.076367	-43.215	112.2598	339.968	-0.16279	0.3208	-0.039551	-60.495	-8.7541	1157.18577	-1.3789	1.6152	0.26611	-46.233	-170.92	838.921	-0.68565	0.74034	0.24199
0.442	-17.273	38.2913	44.04	-0.11425	0.023926	-0.045214	-25.289	-30.748	682.733	-0.82227	1.1719	0.012207	-11.909	65.0848	114.4751	0.050781	0.095215	-0.093262	-104.604	-52.235	1185.2298	-1.2175	2.1431	-0.065723	-33.477	105.069	332.919	-0.14443	0.30478	-0.0417	-44.128	-16.6132	1138.4698	-1.3592	1.593	0.26709	-78.9017	-170.697	872.848	-0.67432	0.73682	0.25439
0.444	-26.75	33.4432	29.708	-0.11943	0.019531	-0.05459	-14.267	-59.153	704.016	-0.73994	1.0007	0.037402	-15.65	57.0986	102.207	0.041992	0.10059	-0.093262	-85.303	-38.4142	1202.3132	-1.1917	2.079	-0.052051	-59.089	111.7451	343.979	-0.12061	0.28682	-0.047168	-35.534	-8.995	1141.691	-1.3398	1.5703	0.26953	-38.938	-155.518	893.679	-0.66602	0.75274	0.25772
0.446	-6.281	35.4382	27.988	-0.12207	0.020508	-0.060547	-41.611	-79.934	736.0505	-0.69678	0.85459	0.057422	-2.845	50.3193	92.37298	0.038574	0.11182	-0.089844	-78.393	-32.0835	1228.529	-1.173	2.0121	-0.030859	-47.132	117.83	319.4475	-0.097657	0.27031	-0.056055	-22.698	9.367	1149.18	-1.312	1.5444	0.27344	-60.02	-149.691	928.7954	-0.66994	0.78559	0.25771
0.448	-30.573	19.666	34.9929	-0.12588	0.01709	-0.072657	-35.2413	-108.662	752.281	-0.68662	0.7499	0.077344	-4.664	53.1426	87.8688	0.030273	0.11377	-0.092285	-82.692	-29.4276	1212.8167	-1.1538	1.9438	-0.02002	-63.9982	123.393	304.035	-0.076172	0.24902	-0.052246	-27.294	11.7409	1161.3418	-1.3047	1.5313	0.2793	-78.509	-124.1977	938.0872	-0.69143	0.83912	0.25654
0.45	-20.675	9.6339	42.38895	-0.12676	0.014257	-0.084375	4.327	-122.799	764.51	-0.69541	0.68154	0.077539	-25.579	49.4011	88.548	0.020996	0.12158	-0.094727	-73.816	-27.493	1219.14144	-1.1412	1.8824	-0.0040039	-39.096	140.595	298.161	-0.062012	0.23359	-0.059082	-14.051	9.9223	1154.1851	-1.2871	1.5039	0.27588	-70.282	-115.115	954.1679	-0.7265	0.90993	0.25742
0.452	-36.535	14.9402	38.4554	-0.1252	0.012305	-0.094531	-3.388	-159.6217	755.469	-0.7085	0.65186	0.070313	-21.704	57.3648	90.5358	0.010986	0.1294	-0.095215	-58.504	-15.92008	1199.526	-1.1273	1.8285	0.01416	-47.797	137.727	290.996	-0.042676	0.22041	-0.066211	-38.28	22.2154	1131.2266	-1.2727	1.4856	0.27515	-41.775	-89.733	942.25	-0.77246	0.98438	0.25098
0.454	-28.616	27.044	38.467	-0.12431	0.0096677	-0.1041	-7.301	-211.988	779.877	-0.71953	0.65586	0.054883	-13.171	58.0105	79.444	0.01123	0.13281	-0.09375	-79.184	-18.2436	1210.4119	-1.1223	1.7836	0.024317	-35.715	112.251	267.5979	-0.034082	0.20791	-0.071289	-47.608	17.6739	1110.275	-1.2524	1.4634	0.27246	-84.449	-101.783	940.731	-0.82413	1.062	0.24835
0.456	-42.373	26.6256	40.4321	-0.12402	0.0058594	-0.11426	3.145	-239.602	794.187	-0.7211	0.67637	0.029297	-26.551	51.3697	67.7412	0.0024414	0.13672	-0.10059	-67.899	-14.09	1203.9357	-1.1207	1.7551	0.035937	-50	99.3434	249.966	-0.019434	0.18906	-0.062695	-47.287	3.293	1086.9717	-1.228	1.4399	0.27344	-76.198	-94.905	948.385	-0.88172	1.1378	0.23891
0.458	-19.862	7.6352	47.3027	-0.12021	0.0025391	-0.12988	-9.799	-203.642	854.949	-0.7082	0.7127	-0.0027344	-28.435	40.7452	64.1835	0.0053711	0.13965	-0.097656	-52.477	-1.977	1215.2215	-1.1226	1.7349	0.043457	-45.665	99.835	234.49	-0.0048828	0.16455	-0.058105	-33.643	5.424	1070.901	-1.209	1.4238	0.27441	-69.065	-98.987	972.9559	-0.94072	1.2092	0.23493
0.46	-35.118	6.5379	49.362	-0.11464	0.0041992	-0.13565	-23.908	-166.42	888.3469	-0.69463	0.74951	-0.029883	-3.954	61.4181	68.4089	0.0078125	0.1416	-0.099609	-87.205	9.1708	1203.5197	-1.1314	1.7204	0.049805	-38.679	89.175	234.444	-0.0010742	0.14765	-0.056836	-41.785	30.1185	1054.455	-1.1812	1.395	0.27246	-49.4	-76.848	985.077955	-0.9928	1.2627	0.22606
0.462	-23.964	-6.36786	43.756	-0.11582	0.0026367	-0.14698	0.515000000000001	-135.2713	938.198	-0.68506	0.79736	-0.051758	-12.789	63.8415	60.2279	0.010254	0.13916	-0.095947	-74.411	-1.826	1215.071	-1.1343	1.713	0.058106	-27.178	86.577	228.027	0.0028321	0.13398	-0.056446	-40.759	40.1912	1044.85506	-1.1512	1.3723	0.26856	-59.611	-85.457	1014.9035	-1.043	1.3281	0.22705
0.464	-31.288	-14.4859	57.563	-0.12109	0.0025391	-0.15254	8.876	-93.643	969.256	-0.69629	0.85449	-0.064648	-31.861	50.04685	56.29876	0.010254	0.13477	-0.096191	-52.148	7.664	1194.8011	-1.1343	1.7052	0.065137	-27.389	90.5384	213.1795	0.0008789	0.12305	-0.05918	-39.579	48.586	1019.211	-1.1289	1.3418	0.26611	-34.019	-108.1239	1051.4929	-1.0987	1.3695	0.22261
0.466	-14.272	-10.2156	56.243	-0.11865	0.010254	-0.15723	-10.66	-46.129	978.619	-0.72852	0.9125	-0.063281	-31.496	35.3538	60.2551	0.011719	0.1333	-0.089355	-62.245	10.84012	1190.882	-1.1281	1.7012	0.070801	-40.65	93.724	193.12	-0.00068357	0.11728	-0.058789	-16.362	61.0806	1019.202	-1.0908	1.3125	0.26221	-56.994	-118.5279	1067.0534	-1.1608	1.4127	0.22368
0.468	-20.648	-17.2722	69.9316	-0.12334	0.016602	-0.16308	-15.376	-35.275	998.878	-0.78828	0.98164	-0.056641	1.102	38.116	56.367	0.0092773	0.12646	-0.088379	-82.849	20.7186	1170.9737	-1.1206	1.6919	0.077148	-54.716	91.99	197.593	-0.00048828	0.11523	-0.060547	-35.165	61.39445	1007.8377	-1.0664	1.291	0.2627	-58.24	-103.60293	1073.9764	-1.2177	1.4568	0.22961
0.47	-18.686	-16.8775	73.087527	-0.12646	0.025293	-0.16504	0.668999999999997	-50.017	1014.51	-0.87129	1.0518	-0.049609	-10.775	36.0232	41.106	0.0083008	0.11377	-0.089355	-52.749	19.064	1151.334	-1.1067	1.6753	0.083203	-46.455	95.851	184.0173	0.0029297	0.1081	-0.056445	-44.072	49.5549	1009.946	-1.0288	1.2524	0.25537	-66.925	-108.01	1063.8233	-1.2881	1.498	0.23719
0.472	-30.159	-24.951	131.891	-0.13272	0.033887	-0.16972	-10.252	-94.856	1016.716	-0.95996	1.1201	-0.04541	-41.759	33.6396	47.7658	0.013184	0.10962	-0.085449	-70.76	17.371	1146.09	-1.0886	1.6513	0.083594	-37.04	106.32	177.4527	0.0011718	0.10469	-0.051563	-25.628	57.267	989.354	-1.0027	1.2219	0.25195	-34.909	-119.85	1077.518	-1.3511	1.5396	0.25293
0.474	-24.129	-1.146	166.2234	-0.13877	0.048926	-0.17217	-22.186	-129.7867	1008.435	-1.0565	1.1829	-0.04248	-30.533	40.053	40.688	0.013184	0.10547	-0.085938	-67.064	13.295	1143.184	-1.0663	1.6243	0.085156	-59.067	99.28	153.661	0.0015625	0.10976	-0.051172	-35.22	59.684	983.7538	-0.97461	1.1885	0.25049	-55.309	-126.065	1091.1512	-1.4174	1.5845	0.25692
0.476	-30.599	14.5695	228.395	-0.1499	0.06543	-0.16846	-47.73	-165.17	1005.295	-1.1362	1.2388	-0.05166	-11.447	54.753	28.0775	0.01416	0.092773	-0.07959	-63.647	24.0266	1130.9697	-1.0402	1.5974	0.092383	-42.981	90.2772	141.958	-0.0039063	0.10937	-0.05127	-57.2856	59.515	952.863	-0.93311	1.1411	0.24707	-59.156	-105.699	1108.607	-1.4747	1.6361	0.27172
0.478	-33.231	16.898	280.4	-0.16777	0.092478	-0.16494	-32.482	-152.883	1027.626	-1.1976	1.2829	-0.068067	-40.024	41.8495	29.9903	0.01709	0.084961	-0.08252	-56.589	41.079	1128.4491	-1.0181	1.5688	0.098145	-43.34	90.6222	145.279	-0.0078125	0.11377	-0.050781	-57.956	48.988	955.475	-0.90771	1.1226	0.24219	-69.063	-74.8649	1129.164	-1.5337	1.6861	0.27835
0.48	-33.926	38.9571	361.499	-0.19434	0.12285	-0.15664	-37.767	-137.929	1107.1349	-1.2367	1.3191	-0.083984	-49.8687	39.816379	22.65738	0.017578	0.074707	-0.081055	-74.056	52.34	1118.5424	-1.0013	1.5385	0.10137	-12.95	84.152	142.777	-0.0069336	0.11162	-0.04414	-23.299	60.66007	920.7674	-0.87646	1.0708	0.24121	-9.336	-45.142	1149.706	-1.5749	1.747	0.27656
0.482	-38.452	64.2104	424.286	-0.23262	0.16543	-0.14492	-29.318	-127.8297543	1122.246	-1.2524	1.3501	-0.097168	-19.579	38.2576	39.3103	0.022461	0.0625	-0.081787	-58.364	49.829	1102.9913	-0.9836	1.5106	0.10537	-30.965	69.8811	139.162	-0.010058	0.11269	-0.045214	-27.019	70.6061	915.9654	-0.85302	1.0361	0.23901	-32.67	-39.238	1162.142	-1.6113	1.8086	0.27197
0.484	-34.508	68.6486	514.453	-0.28506	0.221	-0.12871	-41.456	-138.55723	1149.749	-1.258	1.3772	-0.1166	-21.814	40.802	28.342	0.027344	0.052734	-0.083496	-86.908	37.366	1075.1652	-0.96289	1.489	0.1085	-23.024	76.0193	125.045	-0.0077148	0.10996	-0.04209	-38.355	72.415	888.5922	-0.82568	1.0073	0.23926	-44.977	-58.358	1138.96341	-1.6275	1.8645	0.27043
0.486	-23.451	84.6587	591.494	-0.35742	0.29297	-0.10352	-10.557	-125.1071	1151.161	-1.2687	1.3997	-0.1291	-30.716	38.333	36.3309	0.034668	0.039551	-0.085938	-62.546	49.618	1057.5041	-0.94688	1.4691	0.10938	-48.783	91.781	102.2176	-0.0075196	0.10459	-0.037207	-36.729	78.5013	888.3598	-0.7998	0.96484	0.23682	-60.22	-63.718	1117.792	-1.6259	1.904	0.26326
0.488	-16.95	80.049	648.0983	-0.43936	0.37959	-0.066601	-22.873	-127.645	1153.0358	-1.2909	1.4228	-0.13809	2.458	40.72265	14.917	0.03418	0.030762	-0.086914	-74.124	60.8579	1035.197	-0.92969	1.4531	0.10889	-45.579	84.676	85.541	-0.0039063	0.09668	-0.040527	-23.706	96.5844	861.2656	-0.78857	0.94385	0.23682	-45.331	-57.644	1122.934	-1.6257	1.9279	0.25869
0.49	-27.993	71.455	667.47	-0.54092	0.48564	-0.023144	-3.597	-108.0653	1155.7054	-1.3194	1.4554	-0.14473	-8.523	37.488	21.2689	0.041992	0.010254	-0.08252	-64.402	52.125	1023.432	-0.91035	1.4305	0.10928	-52.484	70.079	92.111	-0.0032227	0.093066	-0.030957	-21.761	103.258	855.63778	-0.76514	0.90674	0.23096	-76.325	-64.6951	1133.342	-1.6168	1.9249	0.25375
0.492	-15.4126	55.087	695.483	-0.64951	0.61259	0.020215	-10.081	-115.13461	1151.9921	-1.3569	1.4771	-0.14453	-37.062	32.0866	8.7948	0.044922	0.0039062	-0.09082	-69.522	53.835	1004.251	-0.89209	1.4204	0.1086	-44.424	63.8157	90.8893	-0.0012695	0.083789	-0.026074	-10.376	100.7546	841.398258	-0.7478	0.87915	0.22998	-57.896	-84.2307	1153.4326	-1.603	1.9067	0.25635
0.494	-8.842	17.2402	684.741	-0.77451	0.75713	0.066406	17.527	-99.469	1124.25	-1.4018	1.51	-0.15293	-31.657	22.6701	27.153	0.05127	-0.0053711	-0.090332	-56.112	78.437	999.0763	-0.87178	1.4048	0.10704	-57.603	60.621	78.87	0.0018555	0.072852	-0.019824	-17.948	94.3542	838.5711	-0.72412	0.84912	0.22949	-84.4148	-88.6967	1152.7105	-1.5901	1.8712	0.26192
0.496	-45.0068	-27.548	660.319	-0.91113	0.91016	0.10645	-15.649	-105.632	1137.812	-1.4456	1.5417	-0.15684	-14.204	37.891	19.1753	0.056152	-0.02002	-0.092285	-64.579	85.0972	984.7079	-0.85195	1.3863	0.10313	-55.565	66.3359	71.672	0.0024414	0.068359	-0.01084	-41.111	109.901	805.3643	-0.69873	0.81299	0.22998	-74.918	-58.9177	1156.9027	-1.5715	1.8309	0.26932
0.498	-56.374	-67.895	616.1054	-1.051	1.0755	0.13174	3.785	-110.803	1152.606	-1.4886	1.5683	-0.16113	-30.955	36.525	28.88639	0.062012	-0.027344	-0.10205	-54.294	83.052	983.7778	-0.8291	1.3691	0.10303	-50.725	70.5746	85.19	-0.00048828	0.05957	-0.0058594	-56.3206	113.048	795.196	-0.68213	0.79541	0.21973	-72.144	-31.7691	1175.1187	-1.5516	1.787	0.2747
0.5	-28.402	-93.436	581.64223	-1.1849	1.232	0.14179	-11.745	-89.156	1196.334	-1.5157	1.5991	-0.16348	-38.89	25.63611	9.913	0.067383	-0.035645	-0.099609	-63.93	80.617	976.6642	-0.80664	1.3465	0.10264	-32.043	78.875	80.691	0.000293	0.053906	0.0032227	-30.04	113.575	769.4378	-0.65137	0.75586	0.21777	-47.865	-30.695	1205.619	-1.5318	1.7473	0.28501
0.502	-29.036	-93.681	580.2274	-1.2971	1.3808	0.13984	-2.259	-61.43	1202.465	-1.5371	1.627	-0.16797	-36.603	15.5752	26.7734	0.062744	-0.044678	-0.10693	-88.609	86.225	965.6934	-0.78613	1.3239	0.10195	-44.68	73.499	67.565	-0.002832	0.047656	0.011035	5.328	109.632	742.799	-0.62524	0.73144	0.2107	-55.401	-33.9923	1210.486	-1.5137	1.709	0.29395
0.504	-33.487	-61.528	558.1632	-1.3818	1.5018	0.11689	-39.615	-64.409	1179.793	-1.5475	1.645	-0.17539	-13.398	26.4872	10.612	0.06543	-0.046387	-0.10986	-74.139	72.909	941.3912	-0.76113	1.2984	0.099999	-21.907	73.282	52.811	-0.0020508	0.042578	0.021973	-21.834	105.9988	719.1036	-0.60303	0.70459	0.20703	-31.872	-42.505	1187.89151	-1.4875	1.681	0.29878
0.506	-51.309	-46.164	571.6328	-1.4233	1.5962	0.081055	-23.041	-77.909	1159.321	-1.5504	1.6609	-0.17725	-18.678	13.8589	24.8896	0.06543	-0.049316	-0.11182	-70.948	80.666	914.186	-0.73799	1.272	0.098047	-30.932	61.6979	50.439	-0.0022461	0.036329	0.027441	-33.742	100.239	693.746	-0.57178	0.67822	0.2041	-48.547	-72.054	1170.282	-1.4597	1.6594	0.30354
0.508	-48.128	-4.989	597.9329	-1.4171	1.647	0.037402	-32.717	-96.2255	1158.785	-1.5539	1.6801	-0.17725	-27.405	0.2599	19.59258	0.06543	-0.050293	-0.11816	-48.661	73.695	895.494	-0.71826	1.2446	0.095703	-40.149	54.435	53.434	-0.0063477	0.030273	0.033691	-4.015	112.36	688.598	-0.55811	0.6626	0.20068	-30.116	-68.12	1164.018	-1.4311	1.6379	0.29663
0.51	-47.908	17.523	637.672	-1.3728	1.6586	0.0052735	-29.242	-85.2117	1168.033	-1.5502	1.6893	-0.17891	-20.371	10.9264	40.3141	0.05957	-0.038086	-0.12158	-58.5	84.911	885.9808	-0.69258	1.214	0.09541	-73.6705	47.1559	49.538	-0.00097656	0.025977	0.037696	-3.727	134.488	678.8291	-0.53516	0.63477	0.1958	-33.25	-52.468	1184.8918	-1.3965	1.6175	0.30179
0.512	-57.263	38.2718	646.7248	-1.2873	1.6183	-0.014258	-37.26	-90.342	1187.2861	-1.5527	1.6934	-0.18164	-9.555	16.65212	30.9611	0.054687	-0.02832	-0.13208	-59.463	98.256	865.4139	-0.67529	1.1825	0.094824	-43.95	36.4396	39.371	0.0046875	0.019726	0.041504	-31.556	119.4044	675.889	-0.51929	0.61279	0.19311	-46.062	-25.787	1174.947	-1.3613	1.5918	0.30566
0.514	-30.281	22.096	656.1599	-1.1761	1.5298	-0.027246	-8.352	-65.989	1197.437	-1.5559	1.6956	-0.1831	-31.309	1.8334	33.8938	0.046387	-0.010742	-0.14502	-56.325	121.0733	854.0858	-0.65459	1.154	0.096386	-33.504	51.048	37.429	0.010156	0.012305	0.041114	-4.688	116.6006	649.749	-0.50342	0.59619	0.18994	-61.833	-19.005	1169.14	-1.3234	1.5659	0.30978
0.516	-22.521	-13.095	655.609	-1.0527	1.4043	-0.022461	-2.373	-48.615	1210.8345	-1.5664	1.6925	-0.18095	-37.531	-11.8572	54.9219	0.037598	0.012695	-0.15479	-42.665	125.5119	847.5474	-0.63349	1.1257	0.092187	-35.744	42.2076	31.233	0.018359	0.0069336	0.043848	-15.43	135.707	636.4588	-0.48389	0.57031	0.18311	-42.837	-6.477	1153.67346	-1.2809	1.5394	0.31349
0.518	-27.215	-48.048	662.204	-0.94004	1.247	-0.01875	-0.606000000000002	-48.0361	1221.424	-1.573	1.6844	-0.17861	-35.864	-9.4298	50.479	0.025391	0.03418	-0.15723	-37.24	123.734	839.4691	-0.6167	1.1021	0.088379	-40.115	45.779	39.9279	0.025391	0.00097656	0.04248	-31.942	144.914	612.9169	-0.47314	0.56738	0.17969	-46.147	-1.123	1168.7271	-1.2465	1.5059	0.32015
0.52	-41.48697	-87.883	661.525	-0.84424	1.0919	-0.0050781	11.898	-33.038	1223.59	-1.584	1.6727	-0.17236	-38.088	-33.153	67.415	0.010254	0.083496	-0.18018	-41.538	109.623	825.9046	-0.60098	1.0675	0.081836	-36.616	63.32	40.295	0.036817	-0.0051758	0.044531	-27.839	139.522	602.6218	-0.44727	0.54248	0.17871	-65.508	-6.0155	1153.9516	-1.2189	1.4739	0.3258
0.522	-9.965	-127.7878	700.5098	-0.77549	0.9419	0.0078125	10.744	-10.797	1233.962	-1.5903	1.6567	-0.17334	-32.863	-41.2606	69.618	-0.012451	0.12061	-0.1958	-45.1	124.553	801.5454	-0.57929	1.0406	0.079785	-33.095	71.1	36.813	0.03877	-0.0063476	0.043457	-14.291	134.347	587.1394	-0.43505	0.52759	0.17017	-24.609	2.5123	1141.4534	-1.1929	1.4419	0.33105
0.524	-7.362	-154.067	733.4623	-0.73389	0.8251	0.014063	14.601	-27.226	1236.7202	-1.5965	1.6414	-0.171	-7.861	-38.2945	109.902	-0.037109	0.16357	-0.20996	-62.8624	123.138	777.732	-0.55859	1.0105	0.07666	-9.285	63.826	48.982	0.043847	-0.0063476	0.043066	-32.141	110.94273	569.909	-0.41553	0.51221	0.16016	-59.506	0.388999999999999	1111.762	-1.1769	1.4126	0.33398
0.526	-16.324	-172.119	755.0989	-0.70068	0.73486	0.019043	-6.992	-62.1505	1233.011	-1.5885	1.6247	-0.16953	-6.476	-4.99	134.6059	-0.07373	0.23145	-0.23096	-57.183	104.9675	762.835	-0.53574	0.97676	0.070312	-21.738	33.0204	59.6072	0.041699	-0.003125	0.041211	-13.657	102.638	537.378	-0.38965	0.48828	0.1543	-38.588	-18.232	1103.274	-1.1629	1.3895	0.33701
0.528	-10.371	-187.626	783.6023	-0.67558	0.67207	0.010351	-19.458	-72.6239	1213.511	-1.5804	1.6032	-0.16523	-18.163	-8.1477	197.2156	-0.10156	0.27344	-0.24414	-50.724	102.0221	743.957	-0.51367	0.94531	0.070801	-40.658	19.8102	46.116	0.040039	0.0019531	0.040527	6.296	98.394	513.551	-0.375	0.48047	0.15771	-40.96	-23.3865	1106.369	-1.1586	1.3672	0.33701
0.53	15.018	-173.34	821.6179	-0.64736	0.63438	-0.00058593	-27.109	-33.6321	1193.13	-1.5678	1.5817	-0.16904	-14.294	6.3997	251.902	-0.16162	0.37207	-0.25781	-49.774	113.3173	717.623	-0.4875	0.91035	0.069824	-49.667	21.4045	29.52	0.033398	0.016113	0.041699	-7.823	126.2778	499.967	-0.35254	0.46143	0.1543	-13.943	1.1567	1124.555	-1.1505	1.356	0.33506
0.532	-1.093	-151.124	851.7979	-0.62041	0.61211	-0.014649	-39.854	1.44432	1198.457	-1.5601	1.5649	-0.16846	3.715	30.9356	349.501	-0.22095	0.46069	-0.26831	-52.879	125.2744	703.2295	-0.46611	0.8792	0.068945	-27.151	22.0649	29.994	0.027539	0.032812	0.039746	-25.193	132.0026	492.47845	-0.33667	0.44165	0.1499	-54.411	36.346	1122.213	-1.1465	1.3516	0.33838
0.534	-8.243	-136.5694	868.71478	-0.58926	0.59609	-0.029785	-49.878	16.55888	1226.0988	-1.545	1.5511	-0.1624	-21.811	52.3568	426.988	-0.28564	0.56592	-0.27197	-10.503	130.99457	686.1219	-0.44697	0.84873	0.073242	-36.88	22.54008	52.9667	0.018164	0.055078	0.040137	-13.04	139.675	478.3019	-0.32227	0.42383	0.14502	-33.042	34.6037	1114.053	-1.1386	1.3462	0.34375
0.536	-4.828	-114.108	895.43158	-0.55957	0.5918	-0.035156	-25.518	13.69733	1243.7166	-1.539	1.5426	-0.1666	-42.136	59.741	511.4634	-0.39258	0.73828	-0.27344	-23.795	128.0008	678.6046	-0.42568	0.82158	0.071582	-36.297	20.391	58.303	0.0035156	0.084375	0.036816	-5.192	136.208	469.9661	-0.30322	0.40527	0.13867	-29.016	16.209	1087.6085	-1.1367	1.3441	0.34336
0.538	-13.449	-87.265	924.5627	-0.54043	0.60469	-0.0375	-27.145	16.0849	1243.66	-1.5309	1.5375	-0.16386	-27.302	83.3387	541.905	-0.45361	0.83252	-0.26758	-46.712	123.3736	672.2515	-0.4126	0.79199	0.07373	-49.532	14.4813	49.854	-0.0087891	0.11133	0.030273	-4.915	133.065	460.4552	-0.29883	0.39307	0.13623	-31.655	10.8054	1050.588	-1.1243	1.3457	0.34727
0.54	-10.242	-53.803	963.8015	-0.54238	0.62842	-0.040527	-28.957	14.3169	1236.869	-1.5293	1.5329	-0.1625	-23.272	84.611	570.078	-0.58252	1.0649	-0.26221	-45.772	126.3045	655.2027	-0.40068	0.76758	0.070508	-52.444	8.488	83.5558	-0.02539	0.14473	0.022949	-17.002	111.718	449.8778	-0.27588	0.37939	0.12891	-52.189	8.323	1027.2854	-1.1124	1.345	0.35508
0.542	-13.049	-48.572	1000.5958	-0.57012	0.68272	-0.030371	-12.897	17.3223	1218.617	-1.5269	1.5317	-0.16309	-39.835	72.772	607.898	-0.68555	1.2559	-0.24487	-30.799	135.4425	627.438	-0.3874	0.74394	0.066601	-19.039	24.74	115.4193	-0.039551	0.1834	0.014746	-23.444	116.104	435.4257	-0.25391	0.35791	0.12451	-36.717	20.912	982.778	-1.0972	1.3442	0.35547
0.544	9.67	-55.278	998.1258	-0.62764	0.76651	-0.0125	4.514	22.0462	1193.4816	-1.5217	1.5323	-0.16231	-50.749	44.415	656.8393	-0.78516	1.459	-0.23047	-49.395	141.3998	618.954	-0.37412	0.7209	0.068164	-29.127	36.2631	147.3078	-0.049707	0.21465	0.010059	-2.558	137.888	408.099	-0.24951	0.3501	0.1123	-45.469	21.848	988.052	-1.0813	1.3366	0.35713
0.546	-5.554	-72.598	1009.554	-0.7168	0.85938	0.0019531	-31.891	10.733	1150.78	-1.5151	1.531	-0.1625	-29.388	25.6104	691.425	-0.90771	1.7388	-0.24463	-51.248	126.042	591.3024	-0.36084	0.70049	0.058008	-49.134	25.5276	116.8605	-0.063379	0.24834	0.0032227	-20.067	130.87681	379.431	-0.21631	0.32617	0.10498	-22.288	39.119	979.475	-1.0613	1.329	0.35537
0.548	-17.218	-93.533	1012.189	-0.82793	0.96504	0.016699	-36.558	-6.249	1132.14	-1.507	1.5282	-0.16367	-25.798	1.3991	703.19	-0.96094	1.8633	-0.26611	-52.031	116.258	591.8057	-0.34229	0.67725	0.05957	-51.27	20.525	131.733	-0.077148	0.28174	-0.0083008	-24.506	99.641	352.4066	-0.19605	0.31079	0.096192	-63.266	31.9474	968.3784	-1.0351	1.3193	0.35459
0.55	-37.995	-124.921	1033.3981	-0.94345	1.0708	0.027539	-1.802	-1.3493	1131.819	-1.4922	1.5172	-0.16465	-22.04	-26.386	705.505	-1.043	2.0625	-0.33008	-36.848	132.006	564.4284	-0.32813	0.64825	0.056445	-41.468	43.509	195.066	-0.09805	0.31211	-0.021289	-6.626	92.3403	336.7329	-0.1748	0.29102	0.091309	-32.851	50.101	971.891	-1.0139	1.3029	0.35557
0.552	-20.695	-136.3438	1046.953	-1.0559	1.1802	0.039258	-1.778	25.9639	1133.5055	-1.4741	1.5024	-0.16943	-38.0815	-67.249	713.977	-1.0556	2.1455	-0.38281	-36.629	117.7357	545.4249	-0.31084	0.62588	0.054199	-65.76	68.8582	273.392	-0.11729	0.3376	-0.036621	8.78	111.5847	329.805	-0.14844	0.27197	0.081055	-22.25	71.097	970.272	-0.98633	1.2813	0.3501
0.554	-27.246	-156.2067	1062.6311	-1.1549	1.2834	0.045508	-27.818	40.9525	1140.506	-1.4516	1.4852	-0.16806	-22.773	-79.43	701.7048	-1.0205	2.1641	-0.43555	-16.592	105.8161	523.157	-0.29287	0.60127	0.053809	-48.377	86.082	345.9935	-0.14697	0.37393	-0.045605	-3.03	116.83318	329.3511	-0.13232	0.26025	0.072754	-48.283	75.164	947.7011	-0.9623	1.2558	0.34228
0.556	-30.824	-155.853	1064.53	-1.25	1.375	0.039063	-17.748	55.6965	1129.837	-1.4292	1.463	-0.16905	-35.19	-94.638	688.823	-0.88428	2.061	-0.48779	-25.066	104.3043	506.30938	-0.27764	0.57783	0.055957	-60.901	96.662	380.612	-0.18252	0.41367	-0.051562	13.365	110.8594	323.4209	-0.10986	0.23926	0.064453	-65.031	53.765	917.0442	-0.9334	1.2291	0.33994
0.558	-9.598	-167.17	1105.8106	-1.3135	1.4549	0.02959	-23.535	71.0459	1098.3102	-1.3968	1.4407	-0.16709	-40.458	-95.23	689.1417	-0.78369	1.9536	-0.50146	-34.856	133.60994	483.6304	-0.26074	0.55566	0.055664	-37.911	87.91	436.23	-0.23145	0.46094	-0.052734	-14.136	112.8581	313.1347	-0.099366	0.22559	0.063965	-55.388	44.091	875.105	-0.89746	1.2025	0.33682
0.56	-0.640999999999998	-137.767	1111.296	-1.3535	1.523	0.017187	-27.855	57.634	1068.5728	-1.366	1.4129	-0.16358	-28.279	-83.5499	691.8473	-0.56543	1.6465	-0.49902	-27.084	135.8208	464.562	-0.2459	0.53086	0.053809	-56.607	92.821	501.015	-0.30605	0.5207	-0.047266	-29.163	109.3743	280.881	-0.083496	0.21094	0.058105	-47.946	46.16	845.511	-0.86143	1.1718	0.32598
0.562	-3.02	-117.1265	1129.104	-1.3754	1.5746	0.0082032	-14.792	38.332	1064.7251	-1.3345	1.3823	-0.16699	-35.852	-63.583	670.098	-0.4187	1.3811	-0.47876	-24.669	128.4768	460.9055	-0.23584	0.50869	0.057422	-28.405	77.298	561.842	-0.39727	0.59502	-0.032324	-26.097	94.5866	266.6369	-0.073242	0.18994	0.057129	-37.986	46.547	838.437	-0.83203	1.1348	0.31738
0.564	-11.145	-80.0187	1105.268	-1.3834	1.6002	0.0014648	-20.503	29.117	1041.1993	-1.3019	1.3575	-0.16181	-81.8576	-40.478	664.3865	-0.29688	1.1177	-0.45166	-18.272	121.7468	446.9328	-0.22295	0.48408	0.053516	-60.526	74.719	584.538	-0.50781	0.68213	-0.0069336	4.712	104.997	259.6507	-0.070313	0.18213	0.053223	-14.8	50.127	861.212	-0.80371	1.0984	0.30899
0.566	10.576	-96.489	1115.669	-1.3867	1.6172	-0.0053711	-19.772	37.255	1024.374	-1.2719	1.3262	-0.16064	-48.277	-13.813	679.7481	-0.20605	0.81836	-0.41602	-41.334	120.5933	429.4215	-0.21006	0.4624	0.051953	-41.039	44.741	626.396	-0.63798	0.79072	0.023047	-15.295	109.101	246.3448	-0.061523	0.17432	0.054688	-31.494	79.6376	854.15426	-0.76826	1.0614	0.29922
0.568	25.286	-96.8218	1094.426	-1.3934	1.6253	-0.0074219	-24.945	24.802	993.291	-1.2429	1.2934	-0.15947	-32.05	-17.685	708.0473	-0.17627	0.65528	-0.39355	-41.684	127.881	417.873	-0.19238	0.44238	0.042969	-72.168	16.6695	662.068	-0.78369	0.91357	0.054688	-25.202	105.332	224.5241	-0.058593	0.15649	0.041016	-40.0537	108.4837	835.115	-0.74053	1.0235	0.29453
0.57	29.465	-112.7736	1090.992	-1.3973	1.6219	-0.01123	-29.544	32.928	983.746	-1.2118	1.269	-0.16211	-39.427	-30.372	726.8179	-0.16211	0.53857	-0.39063	-42.235	137.651	405.8443	-0.18057	0.41865	0.048437	-31.967	-23.7529	698.855	-0.93877	1.0437	0.089355	-27.07	81.3242	207.1935	-0.051758	0.14502	0.042969	-19.269	109.628	832.198	-0.70781	0.98242	0.28672
0.572	11.325	-110.9731	1102.538	-1.4051	1.6203	-0.013574	2.613	51.7174	988.1176	-1.1807	1.2383	-0.16113	-42.7166	-83.5467	741.5527	-0.15918	0.4751	-0.39941	-5.627	132.243	388.9358	-0.16211	0.38975	0.039356	-62.307	-57.261	704.29	-1.093	1.1848	0.11182	-14.52	87.2331	200.702	-0.044922	0.13037	0.037109	-15.197	105.007	811.2752	-0.68311	0.94775	0.28125
0.574	21.5909	-100.7287	1122.028	-1.4191	1.6177	-0.016309	-23.943	60.8134	977.452	-1.1499	1.2136	-0.16084	-6.239	-104.579	756.942	-0.15967	0.4668	-0.40918	-39.449	114.0917	360.8477	-0.14609	0.36631	0.036231	-57.363	-86.506	712.277	-1.2266	1.3114	0.1169	-10.396	85.139	188.8015	-0.040039	0.12256	0.031738	-48.368	91.224	802.4896	-0.65244	0.91338	0.27471
0.576	-7.557	-84.0957	1126.256	-1.4312	1.6138	-0.017578	-27.155	57.9033	948.801	-1.1192	1.1856	-0.16113	4.482	-128.5765	787.457	-0.16016	0.48047	-0.43066	-36.625	94.299	327.9122	-0.1293	0.34307	0.02832	-42.453	-95.5301	730.128	-1.334	1.427	0.10606	-13.918	80.1487	187.618	-0.030273	0.10596	0.027832	-56.292	88.212	767.1036	-0.6291	0.87812	0.26495
0.578	-21.452	-84.7029	1132.210259	-1.44	1.6162	-0.016992	-39.346	62.8829	941.2064	-1.0863	1.1621	-0.16074	-5.367	-155.1878	796.636	-0.15698	0.51294	-0.45704	-32.78	103.698	306.174	-0.11182	0.3208	0.023438	-12.782	-94.0104	711.685	-1.3999	1.5298	0.084961	-7.269	87.52315	181.8828	-0.023438	0.092529	0.02002	-46.321	83.5925	738.203	-0.60606	0.84258	0.25752
0.58	-38.851	-62.48	1142.8493	-1.446	1.6185	-0.02373	-1.893	63.55064	922.8223	-1.0561	1.133	-0.16181	0.711999999999996	-196.7475	820.442	-0.15771	0.55859	-0.4873	-17.213	112.644	299.823	-0.094433	0.2998	0.022754	-16.948	-88.0221	699.554	-1.4103	1.5894	0.057422	-0.538	89.525	170.005	-0.015137	0.078125	0.01709	-27.655	91.2247	732.728	-0.58525	0.80674	0.25234
0.582	-12.621	-41.634	1159.5954	-1.4507	1.6263	-0.029199	-34.833	58.246	906.625	-1.0229	1.104	-0.15967	4.532	-200.603	837.716	-0.1626	0.66211	-0.52734	-45.886	98.637	302.67	-0.076758	0.27696	0.016797	-6.78	-78.7772	675.6562	-1.3758	1.6164	0.021778	-21.351	81.841	158.952	-0.0063477	0.060547	0.012207	-26.034	81.473	725.822	-0.55957	0.7793	0.23877
0.584	-15.5569	-27.9748	1191.751	-1.4487	1.6369	-0.029199	-18.519	66.3403	877.827	-0.98682	1.069	-0.15908	-20.249	-196.372	862.3316	-0.16162	0.73145	-0.54004	-15.093	107.9872	275.495	-0.062305	0.25976	0.014844	-8.905	-58.489	678.82	-1.2899	1.5899	-0.0094728	-18.716	74.685	149.8939	-0.0019531	0.052246	0.010254	-23.504	82.7325	691.3338	-0.54404	0.74599	0.2376
0.586	2.162	-51.0404	1203.909	-1.4473	1.6445	-0.038086	-15.983	81.366	886.3551	-0.94883	1.0391	-0.15938	-35.575	-169.761	884.7618	-0.18799	0.88721	-0.5542	-30.367	120.0771	277.217	-0.053223	0.24248	0.013281	7.334	-27.6159	668.58	-1.1631	1.5119	-0.038477	-6.855	80.434	142.9905	0.0053711	0.031738	0.0078125	-9.41500000000001	103.7925	673.4064	-0.52002	0.7165	0.2292
0.588	31.53699	-70.887	1221.611	-1.4465	1.6527	-0.042285	-33.002	77.461	865.4733	-0.91445	1.0031	-0.15898	-5.328	-159.634	937.184	-0.22534	1.0083	-0.56201	-39.956	125.186	265.64378	-0.038086	0.22119	0.010254	-10.335	-35.821	697.637	-1.0078	1.3828	-0.051758	-24.465	83.7323	134.71949	0.0085451	0.02124	0.008789	-7.558	129.468	668.89349	-0.50127	0.68525	0.22373
0.59	37.0566	-51.267	1213.972	-1.4433	1.6583	-0.045606	-40.615	64.416	855.143	-0.88125	0.96856	-0.15684	-1.01	-134.6829	948.8763	-0.28467	1.1372	-0.56006	-35.189	100.225	275.895	-0.030078	0.2044	0.0073242	-4.719	-41.604	719.6006	-0.85146	1.2266	-0.047461	-42.584	71.6694	126.21496	0.0092773	0.0068359	0.0068359	-22.337	112.752	672.7058	-0.48222	0.66133	0.2169
0.592	25.873	-26.552	1212.2778	-1.446	1.6556	-0.054199	-26.127	75.931	840.202	-0.8457	0.93164	-0.15039	-17.972	-129.997	961.5349	-0.38574	1.3047	-0.5625	-33.216	110.305	247.1076	-0.020703	0.19024	0.00097653	-20.953	-37.86	744.009	-0.70429	1.0578	-0.028125	0.508000000000003	67.2006	123.5252	0.012207	-0.0043945	0.0048828	-18.801	101.515	661.205	-0.4624	0.6333	0.20605
0.594	32.662	-10.844	1212.8847	-1.4495	1.6512	-0.057715	-22.835	91.4464	824.033	-0.81641	0.90234	-0.14824	-23.164	-121.946	979.4532	-0.43945	1.3965	-0.55615	-57.68	114.451	216.8712	-0.013281	0.17344	-0.0017578	-25.846	-25.522	746.8816	-0.58633	0.89531	-0.0023438	-6.553	75.2147	116.615	0.010254	-0.0073242	0.0058594	-22.668	114.505	624.0019	-0.44033	0.61084	0.20069
0.596	26.845	1.614	1231.7395	-1.4546	1.6411	-0.058105	-28.83	87.6566	793.8816	-0.78828	0.87304	-0.14424	0.810000000000002	-111.619	1015.7785	-0.55078	1.5547	-0.55078	-48.9398	106.8288	186.575	-0.0054687	0.16182	-0.0020508	-11.792	-36.984	762.9451	-0.50117	0.75743	0.029297	-12.616	62.0616	108.4863	0.003418	-0.020508	0.0078125	-36.149	116.3794	605.51	-0.42041	0.58262	0.1959
0.598	13.1123	4.423	1228.749	-1.4593	1.6298	-0.054297	-25.869	81.118	765.147	-0.76524	0.84532	-0.13095	-1.11300000000001	-108.094	1031.4407	-0.62793	1.6583	-0.5542	-24.397	87.9964	182.122	0.0024414	0.14404	-0.0083008	-38.316	-84.023	763.996	-0.44873	0.65088	0.057129	-1.672	57.5804	108.3163	0.0043945	-0.024414	0.010498	-33.849	104.2016	595.882	-0.39931	0.55567	0.18769
0.6	5.3974	-14.16	1236.5998	-1.4668	1.6149	-0.05625	-35.101	94.648	736.735	-0.74404	0.81865	-0.12568	-29.836	-139.267	1032.0092	-0.69043	1.7383	-0.56445	-27.277	77.686	173.047	0.014648	0.12695	-0.01084	-64.8902	-109.328	757.069	-0.42198	0.58476	0.069727	18.572	54.0769	93.2141	-0.003418	-0.027344	0.01416	-14.713	102.995	589.487	-0.37822	0.53486	0.18301
0.602	12.6769	-24.0601	1238.049	-1.4719	1.5957	-0.056641	-21.342	107.3818	733.577	-0.73193	0.80127	-0.12061	-17.462	-155.6269	1026.601	-0.74414	1.8184	-0.58203	-40.029	63.552	172.0427	0.02002	0.11045	-0.0095703	-71.6517	-149.461	748.961	-0.40645	0.55352	0.079297	-36.207	72.8926	77.4158	-0.0092773	-0.023926	0.012207	-40.298	119.9187	556.7453	-0.35645	0.5127	0.17773
0.604	9.488	-17.7249	1226.549	-1.4718	1.5817	-0.053516	-36.047	111.9238	733.4275	-0.72744	0.78428	-0.11533	-20.841	-143.6058	1022.859	-0.75488	1.8516	-0.59375	-36.621	80.6363	168.7732	0.025879	0.09795	-0.013867	-70.662	-166.651	780.239	-0.40332	0.55078	0.077343	-31.586	61.822	74.3245	-0.012695	-0.026855	0.015137	-23.353	119.9423	539.642	-0.34453	0.49609	0.17451
0.606	-22.086	-11.447	1191.392	-1.4702	1.563	-0.053711	-31.458	113.622	719.433	-0.7128	0.76963	-0.10977	-41.219	-144.8408	1031.4369	-0.75342	1.8794	-0.62061	-18.352	96.5093	163.6965	0.031152	0.081836	-0.011719	-45.959	-166.255	818.2379	-0.40615	0.57109	0.072168	-26.345	58.3	92.778	-0.020996	-0.028809	0.016113	-13.049	114.982	524.9576	-0.33555	0.4793	0.171
0.608	-11.403	4.2895	1176.451	-1.466	1.5438	-0.057324	-39.658	132.588	722.772	-0.69873	0.75791	-0.10391	-52.754	-149.283	1066.925	-0.74268	1.8906	-0.63672	-15.741	95.544	161.2102	0.033203	0.069824	-0.015137	-49.965	-136.567	843.6576	-0.41797	0.61523	0.062988	-8.079	55.82071	92.0282	-0.03125	-0.023438	0.018555	8.831	103.5394	518.4944	-0.32578	0.46445	0.1667
0.61	-24.451	14.1288	1168.35	-1.4554	1.5317	-0.061523	-40.263	130.338	698.066	-0.6876	0.746	-0.097949	-26.782	-152.56	1104.9246	-0.72656	1.8984	-0.65234	-39.494	83.062	156.4382	0.03418	0.05459	-0.015137	-59.35	-116.262	839.6148	-0.43242	0.67558	0.047265	-25.566	49.5419	71.97465	-0.038574	-0.019043	0.019531	-25.2	102.8709	503.0978	-0.31993	0.44922	0.16348
0.612	6.981	13.3616	1198.038	-1.4434	1.5149	-0.054883	-58.2729	116.266	680.716	-0.6665	0.73096	-0.095215	-18.341	-145.7239	1122.16157	-0.7168	1.9141	-0.66211	-30.882	79.546	139.9976	0.034375	0.038965	-0.015527	-48.443	-96.3528	847.5916	-0.45859	0.75254	0.03291	-29.583	38.824723	52.0563	-0.046875	-0.011719	0.023926	-21.987	108.15	477.6179	-0.3125	0.43604	0.15723
0.614	-15.62	-6.116	1208.665	-1.4321	1.5006	-0.057519	-23.632	121.5291	653.3772	-0.64668	0.71641	-0.090821	2.092	-148.3021	1143.5673	-0.71729	1.9243	-0.67334	-21.268	90.285	130.615	0.032813	0.031934	-0.014355	-51.773	-92.495	894.6996	-0.49883	0.83496	0.018848	-30.52	57.0707	76.1438	-0.054199	-0.0092773	0.024902	-27.891	127.9844	448.686	-0.30117	0.4247	0.1501
0.616	21.3433	-8.644	1215.048	-1.4194	1.4927	-0.059082	-44.456	117.5064	622.182	-0.62197	0.69365	-0.091504	-1.839	-131.99378	1156.468	-0.72803	1.9478	-0.6792	-34.337	87.17415	129.1142	0.029785	0.026856	-0.01582	-66.49	-71.802	905.458	-0.54121	0.91758	0.010449	-15.75	62.8029	60.5447	-0.061523	-0.01123	0.026855	-20.653	138.0213	445.064	-0.2878	0.41104	0.14492
0.618	12.925	-0.690999999999999	1178.7292	-1.4082	1.4782	-0.05957	-33.62	92.082	586.028	-0.59619	0.67178	-0.087988	16.843	-96.586	1173.2539	-0.75269	1.9681	-0.69653	-42.175	70.819	117.9451	0.031738	0.018555	-0.016113	-52.627	-76.664	898.2197	-0.58936	1.0024	0.0068359	-16.759	45.88314	52.9375	-0.071778	-0.0068359	0.030273	-38.229	115.166	446.4334	-0.271	0.39814	0.13672
0.62	24.67	-4.904	1153.8114	-1.396	1.4626	-0.060547	-46.739	84.859	562.527	-0.56943	0.64932	-0.085254	-4.148	-83.158	1166.318	-0.76611	1.9868	-0.7124	-20.269	61.4257	108.2457	0.026953	0.011426	-0.01875	-55.822	-64.906	879.653	-0.64912	1.0728	0.0047851	-8.185	31.33522	47.2093	-0.074219	-0.0039063	0.029785	-27.26	100.812	432.5984	-0.25411	0.38008	0.12832
0.622	4.2	-11.452	1113.594	-1.3816	1.4505	-0.059375	-32.75	104.59	552.064	-0.54541	0.62158	-0.083496	4.04	-96.0124	1161.477	-0.77783	2.0005	-0.73682	-23.59	76.27659	99.64104	0.023242	0.006543	-0.022852	-57.69	-81.56	872.921	-0.70703	1.134	0.0082032	-0.182000000000002	30.73	46.166	-0.080566	-0.0029297	0.026855	-22.827	115.959	419.61	-0.2373	0.35742	0.12207
0.624	17.535	-14.7369	1095.232	-1.3622	1.4343	-0.059863	-48.811	120.722	558.2071	-0.5247	0.59717	-0.076562	-5.022	-109.8029	1158.2792	-0.78271	2.0024	-0.74756	-27.291	70.57029	86.5139	0.02207	0.0030273	-0.026367	-65.796	-85.375	889.929	-0.76641	1.1871	0.0019531	-36.198	33.8492	48.4717	-0.079102	-0.0019531	0.026367	-11.363	123.344	403.137	-0.21553	0.34268	0.11719
0.626	3.315	-2.5224	1084.1317	-1.3462	1.4146	-0.057617	-20.749	130.159	569.048	-0.50684	0.57353	-0.072851	21.655	-100.58	1157.199	-0.76904	1.9829	-0.76904	6.54499999999999	63.9048	99.828	0.018652	0.0035157	-0.027539	-60.053	-92.881	908.4546	-0.82383	1.2289	0.0019531	-45.106	32.3078	52.2003	-0.076172	-0.0053711	0.021973	-11.295	102.4299	388.7319	-0.19541	0.32236	0.1084
0.628	-7.205	5.829	1083.8324	-1.3274	1.3883	-0.054004	-49.606	145.37	566.586	-0.49043	0.55049	-0.065039	-14.833	-89.4152	1155.169	-0.76025	1.9631	-0.78345	-15.732	64.53	97.9832	0.01709	-2.2204e-14	-0.026367	-54.495	-85.218	944.339	-0.8667	1.2603	0.0024414	-16.452	42.7927	43.829	-0.071533	-0.0063477	0.021485	-18.849	80.78355	359.7228	-0.1794	0.30088	0.10215
0.63	8.457	15.945	1097.1517	-1.305	1.3685	-0.04707	-45.837	141.888	550.655	-0.47178	0.53223	-0.060547	5.465	-78.3358	1179.444	-0.75	1.9375	-0.79883	-47.544	65.5764	76.5496	0.010742	-0.0018555	-0.025488	-59.148	-94.309	979.812	-0.90303	1.289	0.012695	-8.636	49.964	25.6282	-0.067383	-0.01123	0.020996	-33.423	88.058	327.995	-0.16142	0.28067	0.095801
0.632	7.979	37.9891	1095.0403	-1.2847	1.3466	-0.044727	-50.626	135.079	517.9681	-0.45508	0.51563	-0.052734	8.124	-93.900196	1194.182	-0.73975	1.9028	-0.8042	-35.218	48.50525	70.377	0.0042969	-0.00048829	-0.026074	-48.742	-111.3712	998.726	-0.93907	1.3132	0.016016	-53.259	37.105	22.1587	-0.060059	-0.018555	0.015625	-14.269	93.686	305.635	-0.14111	0.25342	0.083984
0.634	-10.562	50.0684	1071.9006	-1.2619	1.3312	-0.038574	-41.379	132.754	481.681	-0.4375	0.49589	-0.043359	-3.534	-80.7257	1197.798	-0.73926	1.8867	-0.81055	-20.364	57.7098	74.26	-0.0074218	0.0010742	-0.022559	-32.579	-118.7643	991.2912	-0.97031	1.3399	0.027734	-26.142	32.2685	28.8481	-0.056641	-0.020996	0.012207	-6.428	82.453	311.212	-0.1288	0.23574	0.085254
0.636	-5.375	52.073	1042.208	-1.2461	1.3164	-0.036621	-46.473	133.7483	457.39	-0.4207	0.48174	-0.043653	-28.38	-78.9998	1197.4352	-0.74707	1.8633	-0.81836	-40.648	58.0297	68.719	-0.017578	0.0057617	-0.01582	-26.799	-106.0858	986.1305	-1.0113	1.3681	0.037891	-5.489	34.9722	33.43	-0.045898	-0.028809	0.0058594	-12.775	84.8109	311.2452	-0.11308	0.20821	0.079297
0.638	2.288	48.623	1032.8619	-1.2251	1.3046	-0.028125	-53.032	116.253	419.293	-0.40118	0.46494	-0.037012	-5.374	-61.1516	1213.59725	-0.75317	1.8433	-0.8208	-43.861	53.9672	61.22877	-0.030762	0.010742	-0.01416	-49.836	-103.8407	987.3585	-1.0581	1.4067	0.045898	-12.29	37.7513	26.8498	-0.037353	-0.034668	0.0039063	-12.939	97.738	299.2185	-0.09707	0.18555	0.071875
0.64	-29.299	49.985	1023.417	-1.213	1.2997	-0.022657	-50.88	103.562	397.862	-0.37773	0.44932	-0.029199	-0.162000000000006	-41.339	1224.7586	-0.75537	1.8228	-0.8208	-39.392	57.2671	58.4052	-0.037109	0.017285	-0.014258	-43.409	-107.6602	991.5183	-1.111	1.4618	0.055078	-48.385	27.6576	39.2184	-0.033691	-0.039551	-0.003418	-22.911	108.707	280.192	-0.081836	0.16348	0.065918
0.642	-15.749	36.645	996.36	-1.2005	1.288	-0.015234	-48.259	116.528	398.055	-0.35547	0.43408	-0.030273	-14.126	-45.843	1229.5086	-0.76514	1.7876	-0.82373	-35.193	68.363	63.2921	-0.053906	0.021777	-0.0125	-53.741	-101.66245	1007.292	-1.1644	1.5223	0.058399	-1.871	23.189	38.05234	-0.023926	-0.047852	-0.012695	-5.635	107.237	288.086	-0.063477	0.14063	0.061523
0.644	0.481000000000002	23.443	979.127	-1.1847	1.2821	-0.010742	-16.012	121.726	405.4199	-0.33311	0.42012	-0.026953	-1.882	-68.8417	1212.1408	-0.76563	1.7734	-0.83008	-35.824	51.1911	67.074	-0.061328	0.031933	-0.0042969	-51.221	-77.3312	1017.451	-1.216	1.5879	0.056445	-20.368	26.2185	30.266	-0.022461	-0.05127	-0.01123	0.622999999999998	102.916	270.4029	-0.052148	0.11738	0.056543
0.646	17.907	35.544	973.609	-1.1675	1.27	-0.0078125	-41.698	125.8175	413.886	-0.30644	0.40039	-0.025391	28.422	-73.4983	1219.945	-0.76367	1.7422	-0.82617	-24.291	39.2259	64.204	-0.066895	0.037695	-0.013769	-71.3529	-53.4573	1033.971	-1.2609	1.6617	0.050098	-28.188	23.4423	26.4445	-0.010254	-0.057617	-0.021484	-21.089	88.3248	250.1048	-0.038476	0.094922	0.051367
0.648	-0.581000000000003	37.762	979.0619	-1.1488	1.257	-0.003125	-37.641	134.416	392.368	-0.28574	0.38399	-0.026172	23.393	-59.5027	1205.8791	-0.75415	1.7258	-0.82592	-25.48	34.8597	45.8021	-0.071289	0.040039	-0.018555	-22.217	-34.0404	1052.3917	-1.2964	1.7231	0.043457	-45.034	7.0934	40.2703	-0.0095212	-0.056396	-0.022217	-25.39	91.2851	201.4125	-0.025586	0.070313	0.047461
0.65	5.313	42.955	963.9579	-1.1254	1.2379	-0.0010742	-51.995	150.772	357.3782	-0.26035	0.36592	-0.027832	4.486	-47.3992	1202.73976	-0.74951	1.7065	-0.81787	-4.492	40.0921	33.342	-0.06875	0.042773	-0.018066	-36.379	-38.6783	1059.9281	-1.3177	1.7802	0.03457	-24.406	14.5786	36.01162	-0.0068359	-0.056152	-0.027344	-22.269	92.1299	188.274	-0.015918	0.050098	0.045117
0.652	-3.064	56.3186	954.396	-1.098	1.2176	0.0032226	-38.628	146.672	333.639	-0.23535	0.34521	-0.029297	3.309	-43.9508	1201.5326	-0.74512	1.6895	-0.81445	-45.833	27.4396	41.686	-0.068945	0.044141	-0.021387	-28.665	-51.2188	1062.724	-1.3301	1.8321	0.022364	-39.336	9.2102	38.786	-0.010742	-0.053223	-0.030273	-23.281	90.298	177.885	-0.0053711	0.024414	0.041016
0.654	-9.45	76.1919	939.827	-1.0692	1.1942	0.0016601	-57.159	134.504	312.592	-0.21358	0.32002	-0.032324	2.912	-29.5441	1202.0397	-0.73975	1.6841	-0.81006	-50.538	18.9094	50.3119	-0.065039	0.039844	-0.026855	-62.215	-60.53	1051.843	-1.3367	1.8707	0.016113	-25.434	-5.88542	24.365	-0.017578	-0.052734	-0.032227	-10.338	63.803	189.7962	1.6e-08	0.0064452	0.037207
0.656	-18.018	69.53	928.332	-1.0444	1.1724	0.0024414	-41.292	128.183	305.999	-0.18925	0.29883	-0.033398	-15.608	-25.8011	1201.8457	-0.74561	1.6763	-0.80127	-41.913	29.9265	52.6249	-0.062305	0.039355	-0.029492	-52.146	-64.0184	1046.902	-1.3352	1.8903	0.0057617	-23.228	-26.6275	42.072	-0.026367	-0.040527	-0.037598	-3.413	63.138	163.2965	0.0037109	-0.015625	0.034961
0.658	-7.655	66.313	899.128	-1.0105	1.1468	0.0046877	-49.972	117.30438	294.421	-0.16387	0.27187	-0.035352	-8.2	-45.059	1213.3731	-0.74659	1.6733	-0.7915	-36.031	45.0968	36.9228	-0.060547	0.034668	-0.032227	-71.85	-67.81	1062.1196	-1.3354	1.9009	0.003418	-14.99	-11.2854	61.8951	-0.037109	-0.026855	-0.04248	-3.46100000000001	80.7972	171.166	0.0068359	-0.032032	0.027539
0.66	-3.344	74.972	888.316	-0.98467	1.1204	0.010157	-29.433	103.4835	286.9627	-0.14111	0.24629	-0.04209	-6.481	-28.976	1223.7198	-0.75	1.6758	-0.7793	-57.0209	40.0435	29.9549	-0.053418	0.031348	-0.036133	-55.65	-74.435	1063.1393	-1.3323	1.89	-0.00039062	-44.051	-14.8525	67.9959	-0.044922	-0.017578	-0.043945	-32.6931	98.264	160.276157	0.0095703	-0.046778	0.032422
0.662	-6.849	75.8567	870.229	-0.95303	1.0942	0.014062	-49.489	106.7575	292.3147	-0.1167	0.22314	-0.042969	4.115	-15.095	1217.7968	-0.75781	1.6758	-0.76563	-7.997	42.866	49.5854	-0.051563	0.027637	-0.040723	-76.05	-85.642	1101.1211	-1.3285	1.8664	0.0068359	-17.95	-18.4119	61.9693	-0.057617	0.00048828	-0.041504	-13.857	83.729	188.421	0.01416	-0.058105	0.037109
0.664	-11.797	67.78564	850.347	-0.93437	1.0719	0.0077152	-35.572	119.77895	286.72	-0.095411	0.1958	-0.044336	-24.3876	-12.265	1178.6088	-0.76367	1.6777	-0.75977	-40.376	44.022	48.0401	-0.050391	0.027637	-0.048535	-51.92	-64.7192	1093.6888	-1.3203	1.827	0.013477	-18.137	-17.957	77.6524	-0.067627	0.017822	-0.046875	-22.038	84.088	172.5662	0.0058594	-0.067383	0.033203
0.666	-14.052	70.7012	840.4872	-0.90332	1.0449	0.014648	-51.13	124.498	268.785	-0.073926	0.17168	-0.049805	-11.2	-22.47	1159.1451	-0.75928	1.6821	-0.74561	-35.423	27.1546	41.0004	-0.049707	0.022071	-0.052734	-54.803	-63.3347	1113.6586	-1.3062	1.7813	0.018261	-26.814	-32.147	102.2358	-0.081543	0.037598	-0.051758	-25.941	76.7159	131.6428	-0.0006836	-0.071094	0.035742
0.668	-18.551	86.508	821.774	-0.88252	1.0204	0.013476	-36.861	111.356	233.56335	-0.056348	0.14746	-0.050977	12.048	-11.896	1140.9922	-0.75952	1.678	-0.74389	-18.699	11.297	43.0975	-0.053711	0.021484	-0.056641	-27.952	-62.479	1124.8852	-1.293	1.7285	0.029785	-36.263	-48.882	139.2394	-0.1084	0.063477	-0.043945	-32.98	75.5329	99.051	-0.0081054	-0.07539	0.03418
0.67	-28.972	94.7691	799.165	-0.85577	0.99816	0.017089	-48.921	104.4262	212.011	-0.033496	0.12392	-0.054101	-0.263999999999996	-12.94719	1140.1416	-0.75732	1.6704	-0.73389	-1.228	4.4486	39.716	-0.053418	0.021875	-0.070606	-30.584	-72.519	1126.022	-1.2745	1.679	0.037109	-10.518	-31.9545	177.095	-0.11768	0.080078	-0.043457	-17.8	59.406	109.145	-0.01289	-0.07832	0.042969
0.672	-7.731	100.2549	777.8215	-0.83584	0.97745	0.018262	-43.86	102.0492	197.075	-0.019043	0.10107	-0.056152	-6.295	-19.6287	1133.9073	-0.74609	1.6602	-0.7207	-49.136	9.4343	43.502	-0.054297	0.025293	-0.071388	-26.703	-44.928	1082.1511	-1.2558	1.627	0.046191	-6.45200000000001	-7.6864	241.608	-0.15869	0.12451	-0.035156	-13.385	60.8974	113.037	-0.030762	-0.070801	0.044434
0.674	-2.538	112.348	771.4939	-0.80801	0.95371	0.020214	-65.814	93.2508	198.994	-0.0027344	0.083203	-0.057031	15.691	-18.052	1129.8326	-0.74316	1.6504	-0.71094	-22.729	0.9796	34.3775	-0.053125	0.031934	-0.0792	-55.634	-47.9852	1053.367	-1.2366	1.579	0.055176	-39.849	-3.1042	301.367	-0.20752	0.16601	-0.023438	-34.429	62.7741	116.0342	-0.039844	-0.068653	0.046875
0.676	-22.805	122.207	748.96	-0.78809	0.93555	0.021484	-51.629	100.2939	209.6275	0.012988	0.068555	-0.056446	9.922	-9.1398	1119.778	-0.7251	1.6294	-0.69092	-32.625	8.8634	44.6742	-0.056348	0.040723	-0.080566	-34.51	-48.1922	1055.057	-1.2171	1.5419	0.056738	-61.258	2.33519	381.517	-0.2627	0.2168	-0.0063477	-16.024	53.42132	107.374	-0.052441	-0.061035	0.053321
0.678	-33.225	121.428	738.019	-0.7707	0.91386	0.024221	-46.71	118.5386	197.4716	0.022754	0.056836	-0.05332	-7.583	-5.5028	1104.8339	-0.71436	1.6133	-0.68189	-41.312	17.5304	39.0727	-0.0625	0.051758	-0.084961	-29.07	-47.437	1079.4228	-1.1978	1.5083	0.054199	-29.135	38.4127	461.1392	-0.36865	0.29639	0.02832	-4.451	56.7282	106.0085	-0.063769	-0.052832	0.053711
0.68	-30.928	125.246	709.834	-0.75175	0.89217	0.027252	-41.277	120.882	203.144	0.032422	0.0417	-0.05	-11.146	-3.157	1090.001	-0.70605	1.5884	-0.66846	-50.286	-14.5763	62.3878	-0.073143	0.063964	-0.0875	-43.418	-26.824	1085.1372	-1.1736	1.4842	0.054785	-16.549	73.38	527.7236	-0.42871	0.3457	0.053711	-3.454	64.6047	111.8063	-0.078418	-0.04375	0.05586
0.682	-57.7363	115	714.078	-0.73494	0.87615	0.029979	-59.578	109.072	187.222	0.038574	0.036621	-0.046875	8.454	14.84	1084.6581	-0.68506	1.5571	-0.65234	-35.121	-30.783	71.1869	-0.086034	0.080269	-0.087108	-48.686	-25.876	1099.492	-1.1496	1.4586	0.05625	-36.476	87.376	591.4258	-0.56348	0.45898	0.10059	-24.542	51.054	96.1909	-0.086426	-0.035156	0.055664
0.684	-45.758	103.2584	683.6915	-0.72186	0.85916	0.028619	-48.435	109.548	188.323	0.041211	0.028321	-0.045215	-11.939	17.8888	1062.2188	-0.67529	1.5337	-0.64404	-36.888	-33.803178	85.0455	-0.093845	0.096677	-0.089844	-44.11	-18.213	1089.2587	-1.1234	1.4363	0.055078	-30.873	81.47	629.9159	-0.67847	0.55835	0.14258	-22.845	68.767	93.81562	-0.094922	-0.02207	0.056543
0.686	-35.646	93.6274	684.2512	-0.70654	0.84229	0.044434	-48.28	115.824	157.1619	0.04541	0.023243	-0.043066	-22.724	3.365	1046.458	-0.65723	1.4902	-0.62354	-26.305	-25.7034	87.608	-0.11054	0.11767	-0.093944	-38.977	-16.734	1079.6689	-1.103	1.4174	0.052539	-28.406	65.525	654.6995	-0.79688	0.66504	0.18506	-34.836	78.493	67.377	-0.10244	-0.016504	0.058594
0.688	-26.666	116.221	655.2244	-0.69064	0.82541	0.042956	-25.328	84.627	145.3931	0.0458	0.025195	-0.040722	0.502999999999997	-1.2632	1021.064	-0.63867	1.4512	-0.6084	-12.375	-29.85169	114.391	-0.12549	0.1377	-0.095215	-58.056	-10.8994	1063.1656	-1.0742	1.3965	0.051758	-15.368	53.727	662.8597	-0.94922	0.81934	0.24023	-29.302	62.0722	59.397	-0.1083	-0.0083008	0.057032
0.69	-18.255	123.9264	649.8535	-0.67301	0.81461	0.040717	-33.523	66.1278	127.02	0.048047	0.01875	-0.045508	-6.751	30.5093	995.806	-0.62451	1.4321	-0.60205	-18.076	-29.337521	150.407	-0.14141	0.15929	-0.090037	-52.455	-9.067	1041.78	-1.058	1.3793	0.055762	-30.777	14.8656	678.232	-1.0269	0.90674	0.26367	-16.126	43.3728	69.466	-0.1124	0.00087892	0.054102
0.692	-18.591	120.1013	621.1964	-0.65737	0.79743	0.042666	-57.297	55.047	111.583	0.056152	0.015625	-0.046875	-8.789	33.453	985.1736	-0.60742	1.3906	-0.57813	-6.522	-9.78672	207.419	-0.1678	0.18929	-0.09023	-50.928	-7.959	1039.294	-1.041	1.3649	0.058008	-28.184	-10.4334	661.177	-1.1621	1.0605	0.30615	-30.996	38.7855	62.8509	-0.11035	0.0014648	0.050781
0.694	-30.365	111.5178	608.275	-0.6403	0.77986	0.040027	-61.976	62.7474	108.909	0.058691	0.012891	-0.039355	-5.607	29.28	960.6225	-0.59301	1.3674	-0.56713	-20.198	9.3773	251.332	-0.19867	0.22523	-0.085933	-33.93	-20.636	1047.645	-1.034	1.3524	0.060352	-33.501	-40.76	630.138	-1.2556	1.1624	0.31202	-36.52	64.0698	72.955	-0.10762	0.0043945	0.05039
0.696	-44.813	117.318	578.773	-0.62109	0.76172	0.042969	-35.382	60.8633	126.639	0.063867	0.0058594	-0.039062	3.715	26.9612	959.9363	-0.58203	1.3398	-0.55566	-18.219	24.3291	320.7629	-0.24506	0.26586	-0.079205	-39.285	-19.6747	1075.1825	-1.0333	1.3403	0.058984	-59.324	-55.778	594.7204	-1.3335	1.2583	0.29297	-18.868	68.819	71.339	-0.10303	0.0038086	0.045605
0.698	-36.265	120.455	564.093	-0.59803	0.73938	0.046601	-46.648	70.0557	142.48	0.06582	0.0050781	-0.03789	-11.263	46.2121	941.996	-0.56738	1.3066	-0.53906	-17.604	42.006	406.8387	-0.29492	0.31494	-0.073242	-19.635	-5.537	1078.426	-1.0317	1.3306	0.057617	-44.948	-53.587	593.4326	-1.3867	1.3633	0.26123	9.91	58.916	79.681	-0.097948	0.0026367	0.043653
0.7	-44.825	130.8212	546.22	-0.58023	0.71543	0.04329	-51.898	78.163	139.313	0.066113	-0.00029295	-0.033984	-6.946	44.0531	941.725	-0.56201	1.2935	-0.53174	-24.039	61.084	463.4838	-0.36071	0.37851	-0.053641	-23.7	23.8787	1078.467	-1.0298	1.3226	0.067383	-29.152	-39.5062	605.3456	-1.3901	1.4028	0.23975	-5.34800000000001	55.993	80.5105	-0.092481	0.0036133	0.035742
0.702	-14.309	152.239	555.0282	-0.55804	0.69395	0.044031	-45.829	85.074	120.71	0.064453	-0.0024414	-0.032715	7.377	59.97	928.0833	-0.53955	1.2544	-0.51904	-48.039	76.942	509.255	-0.44257	0.45936	-0.029385	-26.257	42.5338	1055.1633	-1.0248	1.3183	0.074903	-52.099	-27.3975	595.9155	-1.3584	1.4434	0.19971	-30.867	44.5419	40.661	-0.083496	0.0014648	0.029785
0.704	-40.148	156.9	539.1248	-0.54066	0.67527	0.043094	-32.981	82.856	96.2646	0.060937	-0.0040039	-0.024707	7.632	51.75	937.6444	-0.52588	1.2275	-0.51489	-13.402	78.172	566.778	-0.53663	0.55653	0.0018106	-39.724	35.1501	1043.1531	-1.0217	1.3121	0.081152	-76.405	-30.899	605.5839	-1.3033	1.435	0.1748	-33.656	42.0274	27.353	-0.074805	-0.0027344	0.024316
0.706	-31.906	137.43	531.128	-0.52588	0.65479	0.046875	-34.735	85.8317	91.6393	0.058203	-0.0080078	-0.02168	-22.52	45.052	901.6137	-0.50977	1.1953	-0.50684	-13.582	79.384	627.041	-0.64553	0.67244	0.041585	-17.594	32.686	1027.894	-1.0187	1.3058	0.084668	-51.857	-31.013	630.031	-1.2241	1.4009	0.15527	-38.345	33.8714	31.474	-0.065137	-0.0057618	0.017383
0.708	-36.058	142.689	513.614	-0.50595	0.6318	0.049571	-36.377	54.6899	80.226	0.046875	-0.0080078	-0.017773	-24.24	28.5872	889.0743	-0.48584	1.1509	-0.49463	-28.111	69.971	653.0171	-0.76123	0.80713	0.078613	-46.111	32.849	1000.768	-1.0112	1.3032	0.093262	-27.408	-11.216	663.8457	-1.105	1.3071	0.13477	-23.71	23.7112	44.4002	-0.058496	-0.0088868	0.0083984
0.71	-13.007	146.0282	498.0236	-0.49018	0.60872	0.048041	-42.986	26.703	78.267	0.036426	-0.009961	-0.0083008	-8.317	50.52332	854.5032	-0.47754	1.1333	-0.48779	-34.3	47.085	675.458	-0.8855	0.95579	0.11143	-40.051	38.578	984.948	-1.0057	1.3018	0.096582	-41.009	-17.085	671.3935	-1.0488	1.2471	0.13232	-48.008	31.9501	44.75195	-0.047363	-0.012891	0.0013672
0.712	-42.256	137.7665	453.454	-0.4675	0.58928	0.049663	-43.719	27.622	70.68	0.023926	-0.0092773	-0.0014648	6.136	65.1363	851.4989	-0.45264	1.0884	-0.47607	4.003	26.0725	650.491	-1.0095	1.1113	0.12948	-26.11	34.736	986.15	-1.0003	1.3005	0.10332	-22.854	-59.757	691.6366	-0.9375	1.1133	0.12988	-41.437	31.4722	55.347	-0.041504	-0.010742	-0.00097656
0.714	-24.121	127.3764	420.464	-0.45078	0.56798	0.046396	-40.533	44.4902	73.423	0.010352	-0.0040039	0.0043945	-28.063	73.94522	831.7515	-0.43848	1.0586	-0.46777	-16.1608	-4.1403	648.229	-1.1219	1.2684	0.13511	-20.264	38.633	972.655	-0.99248	1.2958	0.11074	-23.873	-84.568	701.0693	-0.87598	1.0176	0.13452	-23.312	46.4906	43.8129	-0.035059	-0.0079102	-0.006543
0.716	-31.126	130.8427	391.45	-0.4248	0.54346	0.042969	-45.584	47.1301	73.2314	0.0011719	-0.00078122	0.013379	-1.641	54.71244	828.71187	-0.42725	1.0288	-0.45459	-17.684	-50.065	628.349	-1.2155	1.413	0.11695	-40.873	50.92676	960.99601	-0.98301	1.2935	0.1124	-14.651	-105.5489	710.982	-0.8335	0.92432	0.13623	-6.401	48.391	64.6234	-0.030469	-0.011914	-0.013965
0.718	-26.91	119.9108	381.627	-0.38994	0.51247	0.041992	-53.503	46.11	84.691	-0.0097653	0.003125	0.011426	-17.204	71.56774	809.774	-0.41016	0.98828	-0.45215	-51.982	-80.069	617.167	-1.2822	1.5371	0.078613	-31.737	54.825	944.826	-0.97021	1.2876	0.11719	-25.048	-132.7988	720.3523	-0.78857	0.82861	0.13086	-30.653	38.239	62.0284	-0.028515	-0.0080078	-0.018652
0.72	-38.033	107.612	406.2818	-0.36112	0.48424	0.031379	-50.954	60.272	75.121	-0.018652	0.0043945	0.018945	0.842999999999996	69.3665	810.8252	-0.4043	0.97461	-0.44824	-9.771	-76.627	592.83627	-1.3053	1.6292	0.025758	-27.889	68.56	945.306	-0.96074	1.2803	0.12773	0.381	-156.759	732.8328	-0.76904	0.79932	0.12207	-46.309	30.098	45.02101	-0.025683	-0.0042969	-0.025586
0.722	-35.707	113.50101	400.841	-0.32656	0.44866	0.0294	-43.949	63.968	52.5163	-0.021973	0.0092773	0.024902	-1.253	69.5227	786.5892	-0.38428	0.94385	-0.44287	-32.688	-62.975	584	-1.2858	1.6799	-0.031119	-30.219	66.485	945.5054	-0.94248	1.2614	0.13135	-25.71	-173.387	755.744	-0.72852	0.75781	0.10791	-28.532	31.6762	32.185	-0.023438	-0.0039063	-0.028809
0.724	-44.968	132.6612	405.457	-0.29095	0.42167	0.022029	-42.615	48.7255	46.851	-0.025781	0.0094725	0.028125	-9.517	82.8185	767.2021	-0.37183	0.92261	-0.44311	-37.648	-46.9154	587.577	-1.2204	1.6705	-0.082704	-39.867	43.549	926.0892	-0.92373	1.2505	0.13682	-14.826	-181.402	766.731	-0.70654	0.75098	0.093262	-29.138	-0.134	22.769	-0.025781	0.0026367	-0.028809
0.726	-46.894	151.51	375.3297	-0.25928	0.39063	0.010742	-40.076	31.9122	52.603	-0.032422	0.0096678	0.033984	-33.534	94.932	738.5791	-0.35742	0.90234	-0.43994	-41.596	-39.988	620.224	-1.1079	1.6078	-0.11628	-33.816	28.0569	889.344	-0.90283	1.2277	0.14199	-25.705	-189.577	820.68	-0.68555	0.74609	0.070801	-29.661	-17.2338	51.271	-0.025098	0.013672	-0.032227
0.728	-30.284	143.379	359.1549	-0.23102	0.36266	0.010911	-50.455	35.878	43.887	-0.032422	0.008496	0.039062	-57.7156	94.559	712.6509	-0.3291	0.88086	-0.43945	-35.614	-20.784	620.262	-0.95703	1.4766	-0.13232	-25.203	38.411	863.002	-0.87842	1.2056	0.14795	9.073	-161.202	859.9594	-0.65918	0.76172	0.052734	-31.274	-8.1824	60.8416	-0.033301	0.026172	-0.029883
0.73	-9.693	140.159	324.2328	-0.20501	0.3367	0.003701	-33.192	34.456	42.396	-0.032129	0.0054688	0.040137	-28.335	92.3951	709.277	-0.31836	0.86377	-0.44092	-58.239	-8.169	641.205	-0.79959	1.2859	-0.12764	-13.36	49.433	845.832	-0.85313	1.1781	0.15332	-9.952	-134.9846	904.8	-0.64795	0.77393	0.042969	-55.408	7.4045	46.7745	-0.04082	0.043555	-0.033106
0.732	-24.517	117.9574	303.085	-0.17884	0.30977	0.0035443	-38.207	41.7918	41.5347	-0.028809	0.0029297	0.039551	-6.64	101.739	703.6016	-0.29541	0.84424	-0.43701	-58.846	-8.723	661.5397	-0.66673	1.08	-0.10644	-16.973	70.706	837.6572	-0.82607	1.1513	0.15742	-24.11	-107.005	911.6684	-0.65039	0.81641	0.036133	-42.232	10.43677	54.534	-0.047363	0.058105	-0.029785
0.734	-39.39	96.467	284.957	-0.15298	0.28475	-0.0015502	-29.88	46.1019	54.5808	-0.026074	-0.0019531	0.042871	-7.47	109.6505	682.43345	-0.27563	0.82446	-0.43261	-20.574	-25.967	686.8195	-0.57877	0.8937	-0.075071	-15.811	90.3776	832.486	-0.80068	1.1173	0.16015	-45.005	-90.069	940.6145	-0.67407	0.85474	0.036133	-22.748	-2.111	70.452	-0.056543	0.066407	-0.037891
0.736	-42.172	82.166	283.603	-0.12646	0.26465	-0.0043945	-52.565	51.131	49.964	-0.021777	-0.011523	0.042969	-31.42	108.2883	651.1747	-0.25537	0.80908	-0.42822	-10.642	-59.883	692.216	-0.54287	0.75668	-0.041887	-23.399	118.194	833.935	-0.78281	1.0887	0.1665	-2.993	-61.988	963.3434	-0.72119	0.90234	0.044922	-13.83	-2.447	73.9483	-0.062989	0.08086	-0.039355
0.738	-32.053	98.628	278.019	-0.10107	0.23928	-0.010049	-39.981	44.544	49.87	-0.02334	-0.018946	0.041406	-28.046	104.0644	631.36	-0.24365	0.78076	-0.4209	-44.7962	-96.456	705.5822	-0.54102	0.68359	-0.01709	-15.993	105.769	831.853	-0.76221	1.064	0.16602	-25.363	-85.932	997.3584	-0.80713	0.979	0.056641	-23.323	-10.6028	72.6202	-0.067285	0.092969	-0.038965
0.74	-51.709	102.51	281.02	-0.076382	0.2162	-0.004507	-55.67	51.742	23.54638	-0.016504	-0.030762	0.036914	-23.576	116.8277	619.349	-0.23682	0.77197	-0.41455	-4.423	-134.988	726.905	-0.56307	0.66028	-0.015446	-2.104	96.777	826.641	-0.74854	1.0335	0.17256	-38.939	-106.126	998.6353	-0.86084	1.022	0.070313	-16.134	-19.764	75.108	-0.07832	0.10948	-0.041992
0.742	-35.397	107.2353	261.549	-0.054483	0.1951	-0.0065619	-28.576	32.547874	18.016	-0.0087891	-0.037109	0.032715	-34.554	105.171	618.06085	-0.22754	0.75049	-0.40674	14.726	-157.726	752.022	-0.58348	0.66481	-0.021604	-1.841	94.042	818.4243	-0.73594	1.0088	0.17129	-33.304	-130.7307	1020.279	-0.97607	1.106	0.079102	-11.943	-15.8049	103.707	-0.091797	0.12305	-0.042969
0.744	-25.515	110.529	244.3605	-0.035251	0.17791	-0.0082772	-53.171	17.5773	11.978	0.0012696	-0.04336	0.030859	-26.075	102.5692	598.842	-0.22265	0.73022	-0.39917	11.944	-169.571	770.095	-0.5986	0.68743	-0.049405	-49.8555	100.553	791.6167	-0.72812	0.98379	0.17168	-22.572	-136.6111	1018.717	-1.0581	1.1714	0.092774	-9.242	-8.6992	175.689	-0.11299	0.13935	-0.040821
0.746	-26.065	126.268	218.783	-0.018066	0.15918	-0.011719	-30.672	6.486	20.139	0.011035	-0.053809	0.024609	-29.214	121.894	586.2332	-0.21826	0.71338	-0.38818	-10.689	-189.528	798.0341	-0.60128	0.72255	-0.070209	-57.498	88.7756	745.838	-0.71845	0.96163	0.16934	-69.3945	-147.174	1036.2476	-1.1348	1.2383	0.11182	-53.42	7.9583	224.8086	-0.13457	0.16113	-0.035059
0.748	-47.641	106.773	217.7723	-0.0071842	0.14194	-0.0090845	-34.216	33.5584	15.961	0.019239	-0.060449	0.017969	-54.732	126.823	574.9402	-0.21533	0.69141	-0.37598	8.976	-174.648	832.0388	-0.59375	0.76221	-0.098633	-45.688	94.0317	721.652	-0.70605	0.94141	0.17871	-50.665	-143.1731	1050.9815	-1.2207	1.3184	0.11475	-50.44	22.885	286.8753	-0.16582	0.18496	-0.024512
0.75	-33.555	93.412	207.506	0.0037363	0.1314	-0.0098346	-22.296	49.2203	27.5272	0.031055	-0.068164	0.015918	-51.578	114.186	570.1687	-0.20801	0.6748	-0.37109	-3.006	-142.159	863.8593	-0.58957	0.80739	-0.1133	-19.909	87.985	723.102	-0.69385	0.91162	0.17334	-23.181	-146.5848	1070.6868	-1.2612	1.3579	0.11377	-13.628	65.819	337.5331	-0.20381	0.21563	-0.0087889
0.752	-34.987	96.6843	192.158	0.009588	0.11732	-0.0039888	-33.586	46.5776	37.882	0.04248	-0.074219	0.01123	-32.565	121.038	545.9973	-0.19971	0.65479	-0.36182	11.767	-128.4417	912.225	-0.58346	0.85355	-0.12718	-12.084	101.6509	712.3391	-0.68116	0.88799	0.17295	-15.457	-144.623	1081.0229	-1.3276	1.4282	0.10693	-26.793	82.088	434.9103	-0.25439	0.25439	0.0097656
0.754	-39.027	86.521	184.551	0.013082	0.10819	-0.0029234	-22.562	36.935	45.133	0.049707	-0.077734	0.0022461	-29.901	129.161	526.1312	-0.19482	0.63941	-0.35327	-1.452	-115.2727	939.788	-0.59704	0.90178	-0.13129	-12.179	113.4819	697.1554	-0.66592	0.86494	0.17412	-32.434	-160.484	1110.412	-1.3667	1.4775	0.095459	-58.058	98.898	511.642	-0.32647	0.30283	0.038086
0.756	-29.571	77.4617	176.4113	0.015137	0.097168	-0.00097656	-42.806	37.65	50.915	0.056543	-0.085058	-0.0021484	-44.002	113.8868	499.1706	-0.1875	0.62207	-0.34375	1.541	-93.686	969.578	-0.634	0.9529	-0.12208	-4.891	137.5722	702.5506	-0.64893	0.84189	0.17305	-27.164	-139.91108	1126.2438	-1.4023	1.5293	0.088379	-51.324	89.915	556.729	-0.4165	0.36416	0.08164
0.758	-33.552	88.2832	174.907976	0.017186	0.089362	0.0028267	-36.528	31.03	23.4552	0.060059	-0.08584	-0.0080078	-37.732	95.7085	480.834	-0.18213	0.59521	-0.33496	-20.42	-72.734	977.20638	-0.6958	1.0083	-0.10059	-19.221	135.6472	701.5027	-0.63232	0.81787	0.16992	-1.521	-115.6509	1132.621	-1.437	1.5767	0.080078	-35.025	79.6403	571.543	-0.52979	0.43799	0.12968
0.76	-40.99	101.9977	174.303	0.01709	0.085357	0.0070253	-35.654	21.7174	32.724	0.064355	-0.083106	-0.015918	-18.661	114.7224	471.695	-0.17822	0.58447	-0.32617	10.088	-76.215	978.193	-0.77918	1.074	-0.081764	-28.298	137.572	689.0153	-0.62266	0.79746	0.17031	-14.054	-98.9815	1113.1762	-1.4551	1.5957	0.079102	-9.453	67.6624	607.387	-0.65986	0.52275	0.18535
0.762	-40.328	88.7079	171.563	0.01514	0.081448	0.012105	-21.457	11.2812	21.042	0.060547	-0.081543	-0.019043	-35.76	119.689	471.2367	-0.16113	0.55811	-0.31787	-9.619	-102.664	1019.24	-0.87292	1.1411	-0.061259	-46.758	117.7186	659.0694	-0.60615	0.77842	0.16709	-11.603	-105.2801	1106.2657	-1.4844	1.627	0.071777	-3.887	38.0215	650.9088	-0.80371	0.61963	0.24414
0.764	-29.078	80.845	149.6829	0.015335	0.072071	0.0090807	-36.398	-3.3411	17.238	0.061231	-0.072168	-0.023047	-35.148	113.9383	449.2023	-0.15185	0.5376	-0.31323	9.213	-114.7407	999.978	-0.96899	1.2207	-0.046051	-29.525	128.4206	633.014	-0.59443	0.76045	0.16123	-10.065	-105.7074	1110.341	-1.5142	1.6397	0.070068	-27.193	25.1235	667.953	-0.95889	0.72823	0.2914
0.766	-36.401	72.363	126.005	0.012695	0.066406	0.012695	-47.532	-4.4655	23.641	0.04873	-0.05664	-0.022656	-30.288	121.3983	450.063	-0.13867	0.5166	-0.31152	-37.2005	-142.733	1017.5559	-1.0499	1.3019	-0.042962	-59.4483	113.9155	612.667	-0.57881	0.74424	0.15615	-8.65799999999999	-79.4868	1125.341	-1.5313	1.6426	0.067383	-69.2327	17.2142	632.119	-1.1043	0.84297	0.32881
0.768	-53.919	54.7451	104.678	0.008691	0.062889	0.015236	-41.483	-13.8049	44.2875	0.032715	-0.043359	-0.020703	-30.423	131.2854	428.3692	-0.12402	0.47803	-0.29883	-38.2202	-145.289	1025.531	-1.1206	1.3813	-0.050293	-24.145	103.6378	614.274	-0.56689	0.72656	0.15039	-43.6541	-77.315	1152.327	-1.5537	1.6465	0.066406	-70.0309	-4.9507	606.323	-1.241	0.95703	0.34756
0.77	-36.308	47.3563	108.935	0.0076167	0.059472	0.014646	-32.388	0.6601	87.904	0.016992	-0.022851	-0.027051	-42.848	120.035	410.9289	-0.10986	0.46094	-0.29297	-24.046	-163.246	1070.6112	-1.1639	1.4505	-0.064928	-33.154	114.9324	597.52434	-0.54775	0.70654	0.14394	-18.124	-96.1352	1167.906458	-1.5562	1.6509	0.0625	-46.662	-43.688	614.005	-1.3411	1.0652	0.34394
0.772	-31.197	58.047	111.017	0.0021463	0.055174	0.012305	-23.899	17.5213	113.925	-0.0048828	-0.0039063	-0.027832	-34.317	117.018	386.1345	-0.090332	0.42578	-0.28467	-19.162	-148.4313	1073.1101	-1.182	1.5137	-0.081926	-27.527	124.6472	588.158	-0.52979	0.68799	0.13789	-1.61	-98.5646	1171.2889	-1.5566	1.6494	0.056641	-64.624	-55.676	594.964	-1.4136	1.1528	0.32129
0.774	-39.556	66.6851	123.12111	0.0028313	0.047461	0.014845	-48.961	26.0881	124.85	-0.026563	0.021387	-0.032324	-14.492	116.247	372.6572	-0.076172	0.39843	-0.27685	-33.47	-141.95149	1085.952	-1.182	1.5645	-0.094808	-22.122	118.048	556.3109	-0.5126	0.67158	0.13242	-29.085	-82.134	1152.954	-1.5534	1.6399	0.05542	-61.152	-48.601	558.0869	-1.4369	1.2237	0.27481
0.776	-49.011	68.6361	118.6718	0.0019531	0.044434	0.01416	-35.341	39.2056	144.588	-0.049218	0.046875	-0.037598	-14.312	115.2437	362.3792	-0.058594	0.36963	-0.26807	-17.818	-125.1556	1072.3455	-1.1683	1.6032	-0.11152	5.116	116.4864	550.9568	-0.49775	0.65459	0.12881	-50.8926	-73.383	1153.576	-1.5435	1.6245	0.054688	-72.133	-29.9759	538.396	-1.414	1.2603	0.22188
0.778	-49.377	68.0287	111.757	0.0025392	0.040137	0.014453	-51.887	44.932	182.643	-0.073438	0.07461	-0.042676	-43.873	89.704	346.5318	-0.041992	0.33203	-0.25732	19.729	-129.1316	1095.6141	-1.1602	1.6309	-0.11963	-21.029	130.84	538.3249	-0.47705	0.6333	0.12305	-25.112	-60.739	1166.741	-1.5347	1.6021	0.05127	-45.711	-5.6987	569.865	-1.3409	1.263	0.17461
0.78	-24.886	85.572	98.541	0.0012696	0.03125	0.014258	-53.876	45.238385	236.445	-0.10215	0.10908	-0.047461	-39.056	100.248	341.8783	-0.027832	0.31689	-0.26074	-13.876	-122.7732	1108.261	-1.1561	1.6475	-0.1292	-17.493	129.04394	523.6271	-0.45889	0.61465	0.11817	-5.787	-53.5131	1179.5923	-1.5281	1.5803	0.052246	-46.575	15.7008	607.839	-1.2332	1.2293	0.13525
0.782	-42.144	82.821	73.6623	0.00087886	0.028125	0.012695	-55.582	44.427	301.425	-0.13428	0.14453	-0.047363	-24.776	113.362	326.1227	-0.0048828	0.27734	-0.25049	-6.578	-133.42611	1118.297	-1.1617	1.6617	-0.13145	-27.247	131.693	514.2008	-0.43799	0.59531	0.11231	-41.694	-67.8651	1179.7946	-1.5229	1.5552	0.052246	-49.506	27.7736	628.31	-1.0996	1.166	0.11426
0.784	-27.699	68.342	66.8907	0.0020507	0.025098	0.016308	-23.433	67.578	352.797	-0.17891	0.18584	-0.051172	-27.136	117.8975	314.4353	0.010498	0.25024	-0.24316	14.784	-119.3702	1106.286	-1.1754	1.6722	-0.13379	-28.523	143.4535	503.4208	-0.41885	0.57578	0.10059	-6.229	-78.607	1187.8026	-1.5176	1.5293	0.052734	-31.986	26.3708	627.662	-0.96288	1.0678	0.098632
0.786	-34.548	37.3446	65.785	0.0073242	0.020996	0.013672	-36.837	89.1651	422.5154	-0.23848	0.23711	-0.046192	-30.233	114.6501	301.23	0.024414	0.22705	-0.24121	17.896	-106.9979	1092.2791	-1.201	1.681	-0.13525	-41.7539	140.5587	493.7212	-0.39502	0.55498	0.098923	12.12	-56.2142	1194.9903	-1.5137	1.5117	0.050781	-13.361	20.528	660.758	-0.84375	0.96054	0.089063
0.788	-35.651	31.763	60.171	0.0060548	0.010742	0.018262	-23.967	93.008	501.01	-0.31035	0.29688	-0.044238	-9.572	118.362	276.3028	0.046387	0.1958	-0.23486	7.184	-96.2735	1093.1056	-1.2261	1.6938	-0.14014	-13.259	118.102	477.0676	-0.37256	0.53662	0.09082	1.393	-29.2429	1192.92272	-1.5039	1.4805	0.044434	-49.773	8.758	679.1713	-0.75703	0.85664	0.091015
0.79	-57.65	29.515	55.895	0.0082033	0.0072264	0.017871	-40.892	88.355	569.95	-0.39443	0.36465	-0.034278	-15.719	123.369	264.231	0.052734	0.1792	-0.24072	-1.125	-102.9566	1103.31	-1.2481	1.7007	-0.14414	-36.712	115.779	457.4428	-0.34942	0.50713	0.083203	-16.763	-42.32	1197.0841	-1.5008	1.4632	0.04126	-40.09	-45.498	702.1193	-0.70596	0.76475	0.099023
0.792	-25.537	35.6996	72.4472	0.013281	-0.0021486	0.0167	-36.1192	96.135	606.531	-0.49023	0.44434	-0.0068359	-53.4031	93.0323	257.494	0.074707	0.14746	-0.23633	-7.988	-94.137	1119.169	-1.2695	1.7079	-0.14658	-20.884	130.608	440.3567	-0.32588	0.48135	0.076074	2.372	-52.072	1182.18108	-1.4917	1.438	0.028809	-18.634	-84.809	695.152	-0.68848	0.69922	0.10303
0.794	-41.535	55.4828	68.86235	0.017676	-0.011621	0.020606	-41.944	57.786	644.4992	-0.60068	0.54111	0.015821	-36.52	77.5358	263.5622	0.085449	0.12891	-0.22754	-9.283	-81.3054	1114.249	-1.2867	1.7204	-0.14073	-6.995	113.3149	421.3592	-0.29541	0.454	0.067871	-2.001	-54.267	1183.3506	-1.4717	1.4102	0.028809	-12.405	-123.017	677.501	-0.68174	0.65244	0.1083
0.796	-37.422	72.037	57.7154	0.022949	-0.020508	0.019043	-26.851	13.9371	668.264	-0.72061	0.65225	0.047656	-27.668	89.5231	263.556	0.096191	0.1167	-0.22314	-10.902	-84.4895	1128.77	-1.3011	1.7285	-0.15225	-1.502	99.12521	399.5298	-0.26699	0.42881	0.060058	-17.688	-60.1765	1177.8426	-1.4604	1.395	0.021973	-35.808	-172.195	684.155	-0.69394	0.63476	0.10323
0.798	-53.584	62.795	43.6889	0.030859	-0.029199	0.019434	-39.747	-27.49444	683.8726	-0.85537	0.77373	0.077735	-28.187	97.5137	238.1753	0.11426	0.099121	-0.22559	-10.313	-94.6486	1124.399	-1.3101	1.7329	-0.15186	-34.769	95.062	373.4561	-0.2417	0.39404	0.055176	-29.197	-56.4663	1178.0549	-1.4448	1.3677	0.015625	-27.724	-184.086	726.074	-0.70371	0.6336	0.093848
0.8	-22.704	55.345	47.9463	0.039356	-0.041602	0.018164	-50.569	-49.352	675.068	-0.99835	0.9122	0.11543	-51.3647	93.12707	215.199	0.11621	0.090332	-0.22021	-20.554	-82.6041	1130.653	-1.3206	1.7318	-0.16006	-27.32	97.831	370.8266	-0.21592	0.36768	0.046289	-19.274	-31.5449	1175.6156	-1.4306	1.3476	0.01831	-21.46	-159.416	757.275	-0.70742	0.64375	0.074707
0.802	-42.553	48.0541	52.548494	0.046387	-0.049414	0.022852	-52.337	-67.62	658.03614	-1.1387	1.0547	0.15381	-26.699	105.6516	202.9218	0.125	0.086426	-0.22363	-4.391	-59.1187	1135.5606	-1.3257	1.7314	-0.16152	-8.688	101.352	356.903	-0.19014	0.33389	0.041113	-29.456	-19.1692	1160.5054	-1.4199	1.332	0.012695	-18.367	-126.752	803	-0.69922	0.66602	0.049805
0.804	-38.744	36.553	41.47	0.054882	-0.059082	0.025293	-31.16	-81.451	643.372	-1.2709	1.1955	0.18564	-45.694	105.405	195.7078	0.1333	0.084473	-0.21436	-4.8132	-66.3158	1157.9005	-1.3292	1.731	-0.16191	-6.648	113.4546	350.916	-0.16866	0.30107	0.030957	-49.1	-18.69281	1144.25294	-1.4121	1.3184	0.012207	-19.901	-101.5279	830.451	-0.68125	0.69161	0.028223
0.806	-25.479	27.575	37.46	0.062012	-0.067871	0.028809	-20.352	-63.944	639.059	-1.3804	1.3317	0.19688	-29.485	96.8976	187.74	0.13623	0.088867	-0.2124	34.4873	-57.0443	1184.1083	-1.3371	1.7238	-0.16621	-8.421	118.7689	346.7842	-0.14131	0.26689	0.020996	-34.658	-17.2495	1155.61025	-1.4063	1.3125	0.015137	9.753	-86.172	881.385	-0.66279	0.72217	0.011328
0.808	-15.799	39.6811	24.627	0.067285	-0.072071	0.029883	-8.433	-41.795	652.891	-1.4651	1.4454	0.18945	-24.83	82.94484	182.63716	0.14307	0.098145	-0.21045	23.587	-62.56672	1187.5366	-1.3413	1.7192	-0.17285	-32.223	118.047	328.648	-0.11865	0.24023	0.015137	-11.559	-6.6587	1171.2718	-1.3965	1.3027	0.012695	-5.969	-58.716	907.8302	-0.65302	0.75616	0.0011719
0.81	-43.308	47.7354	33.487	0.068945	-0.075879	0.03584	1.622	-20.5616	654.881	-1.5075	1.5362	0.1668	-13.858	82.27417	173.695	0.14331	0.10645	-0.21044	4.325	-58.8645	1166.69363	-1.3463	1.7119	-0.17275	-25.395	124.082	316.391	-0.098243	0.20615	0.011718	-17.611	-2.0596	1164.1057	-1.3946	1.2998	0.012696	-28.882	-44.75	930.5523	-0.66016	0.79824	0.0027344
0.812	-37.544	44.0183	41.2321	0.074414	-0.077832	0.039355	16.0812	-7.6233	655.4652	-1.5024	1.5923	0.13135	-36.411	67.1012	185.282	0.14453	0.11768	-0.20703	30.0299	-38.8696	1174.7072	-1.3438	1.6976	-0.17735	-26.526	124.602	291.3446	-0.079394	0.17363	0.0036132	-32.239	-9.8007	1159.589	-1.3945	1.2969	0.01123	-28.568	-33.146	939.084	-0.70117	0.8457	0.0092773
0.814	-28.383	40.499	56.962	0.076562	-0.082422	0.038281	6.152	-13.9767	650.816	-1.4382	1.6037	0.10019	-32.844	63.9494	180.7702	0.14551	0.13037	-0.20459	25.535	-18.954	1177.021	-1.3457	1.6824	-0.17774	-21.34	113.988	269.5248	-0.060643	0.14941	-0.00029339	19.948	-8.4605	1133.1833	-1.3862	1.3003	0.0087891	-3.882	-29.643	945.279	-0.771	0.89502	0.028906
0.816	-40.862	52.792	29.576	0.076172	-0.082031	0.046387	4.254	-36.7	661.013	-1.3284	1.5716	0.080274	-12.878	81.1018	168.4577	0.146	0.13916	-0.19824	5.745	-19.48803	1186.7219	-1.338	1.671	-0.18027	-44.41	93.9344	246.682	-0.042772	0.12266	-0.0037111	4.304	-8.8791	1129.943	-1.3804	1.2964	0.0092773	-3.573	-54.872	968.136	-0.86006	0.94658	0.046289
0.818	-51.631	30.6714	22.4466	0.085254	-0.078613	0.04668	-9.849	-52.557	668.706	-1.1769	1.495	0.080664	-9.604	98.077	144.7699	0.14551	0.15234	-0.2002	-18.285	-34.1860503	1176.0096	-1.334	1.6504	-0.18311	-19.464	91.589	232.934	-0.029785	0.10107	-0.010254	-22.277	-21.1542	1098.5015	-1.3647	1.2876	0.0058594	-46.07	-73.3961	983.175	-0.96983	1.0001	0.070898
0.82	-38.431	31.5271	17.376	0.086914	-0.073437	0.046484	-11.989	-44.377	684.427	-1.0167	1.3767	0.089649	-52.5423	83.741	132.2843	0.14331	0.16602	-0.19336	-3.784	-30.4862	1183.556	-1.3257	1.6306	-0.18848	-34.828	105.645	211.537	-0.017482	0.083107	-0.010352	-15.132	-21.8924	1096.12815	-1.3453	1.2778	0.01001	-42.547	-76.4299	1021.9	-1.0769	1.0535	0.092676
0.822	-14.132	36.85963	25.674	0.088867	-0.069141	0.046484	-47.854	-59.026	687.389	-0.86475	1.2417	0.10547	-44.163	81.049	134.8847	0.14063	0.17383	-0.18994	-17.1245	-14.2891	1192.5978	-1.3101	1.6103	-0.18565	-7.947	96.617	218.137	-0.011524	0.061626	-0.013967	10.618	-8.9641	1077.1139	-1.3281	1.2617	0.012695	-36.223	-70.7346	1055.7196	-1.1792	1.1001	0.10986
0.824	-29.534	35.9703	20.225	0.093164	-0.065918	0.048438	-40.598	-104.542	734.0045	-0.75088	1.1021	0.1335	-14.477	78.5367	132.68088	0.13428	0.18457	-0.18213	-19.312	-9.539	1198.285	-1.2913	1.5852	-0.19385	-4.747	87.2749	207.9567	-0.0076189	0.045218	-0.013571	-45.166565	-1.7798	1068.2511	-1.3003	1.2534	0.022949	-27.86	-83.8607	1087.627	-1.2629	1.1524	0.11846
0.826	-35.319	29.369	23.4843	0.10107	-0.063477	0.048828	-70.667	-136.4666	757.2977	-0.67217	0.97471	0.16064	-15.227	74.7114	104.963	0.13184	0.18945	-0.17871	-27.629	8.399	1186.3338	-1.2735	1.5554	-0.19775	-17.193	99.935	207.789	-0.0037129	0.034476	-0.014062	-28.077	2.175	1048.7087	-1.2925	1.2446	0.021973	-26.665	-113.5792	1108.571	-1.3311	1.1993	0.12842
0.828	-30.318	21.9781	39.03928	0.10459	-0.05791	0.047949	-41.681	-149.575	768.543	-0.6292	0.86612	0.1876	-23.23	54.992	105.691	0.12451	0.19482	-0.16846	-12.298	17.0314	1161.0908	-1.2515	1.5298	-0.20264	-42.687	118.264	195.23	-0.003418	0.022949	-0.015137	-21.75	8.4771	1047.0749	-1.271	1.2349	0.030762	-21.909	-116.9528	1100.48011	-1.3842	1.2469	0.13467
0.83	-19.103	23.9333	47.4048	0.1126	-0.054785	0.049903	-57.502	-159.338	789.5315	-0.61513	0.78799	0.20274	-9.738	51.414	110.833	0.11792	0.198	-0.16626	-16.2	17.5426	1141.922	-1.2339	1.4997	-0.20664	-18.436	108.885	185.6894	-0.0039079	0.016597	-0.015332	-15.744	36.3453	1029.206	-1.26	1.2249	0.035156	-26.726	-101.93236	1095.2309	-1.4328	1.2938	0.14638
0.832	-46.182	30.337	47.84	0.11807	-0.048145	0.045215	-48.592	-168.676	812.5932	-0.61328	0.73438	0.21143	-12.598	59.3279	118.947	0.10986	0.19727	-0.15918	-12.886	9.85521	1149.8583	-1.2183	1.4684	-0.20498	-26.48	95.04	187.8055	-0.0078125	0.012207	-0.012793	-29.401	28.562	1030.8103	-1.2456	1.2212	0.043945	-33.3207	-86.9975	1099.972	-1.4771	1.3462	0.14941
0.834	-18.819	27.4044	48.792	0.12119	-0.04248	0.042773	-67.736	-165.645	820.796	-0.61787	0.71553	0.21152	-34.736	57.4219	102.3968	0.10986	0.18848	-0.14844	1.092	3.132	1162.70648	-1.2047	1.4445	-0.19951	-40.891	95.714	178.54773	-0.0097699	0.0090752	-0.015532	-4.204	16.7651	1000.3978	-1.2358	1.2134	0.04834	-3.917	-96.3796	1121.0557	-1.5205	1.4004	0.15362
0.836	-16.887	20.8999	37.03027	0.12549	-0.029297	0.049316	-43.655	-155.844	836.529	-0.61963	0.71289	0.1999	-30.317	75.14	91.51	0.10498	0.18604	-0.14355	11.035	7.648	1147.7323	-1.1952	1.4204	-0.19248	-38.868	91.4293	157.5431	-0.017389	0.003222	-0.01514	-17.245	13.9516	1000.1624	-1.2266	1.209	0.05127	5.237	-83.4929	1123.166	-1.5672	1.4605	0.15713
0.838	-34.791	1.8873	36.886	0.12246	-0.014843	0.040137	-66.85	-158.57	866.752	-0.62236	0.73125	0.19365	-21.245	75.496	84.0732	0.10547	0.18018	-0.12988	-6.951	13.6125	1141.9397	-1.1821	1.4009	-0.19287	-21.759	77.6	143.448	-0.023926	0.003418	-0.015137	-20.431	23.596	973.128	-1.2104	1.2056	0.047852	-11.629	-68.5981	1123.993	-1.6078	1.5129	0.16534
0.84	-58.547	-24.5782	31.789	0.11465	0.0085937	0.04541	-42.277	-147.723	922.3224	-0.62705	0.76699	0.18291	-29.536	72.69	83.5026	0.10157	0.17236	-0.12281	-8.53	21.2914	1111.72117	-1.1745	1.3825	-0.18427	-34.478	73.284	142.586	-0.028016	0.0063414	-0.016894	-26.492	20.0562	965.0074	-1.1922	1.198	0.050538	-11.876	-58.3983	1121.247	-1.667	1.5705	0.13916
0.842	-19.034	-33.1598	57.296	0.09668	0.035547	0.048145	-58.099	-130.9587	972.654	-0.65137	0.81738	0.16699	-36.17	57.5	53.268	0.098633	0.16309	-0.11182	25.304	19.2442	1115.44259	-1.1624	1.3653	-0.18037	-27.296	74.4339	135.72692	-0.030261	0.0088967	-0.015613	-22.12	28.798	960.2974	-1.1743	1.1899	0.04834	31.126	-61.803	1152.0556	-1.7144	1.6353	0.1167
0.844	-27.394	-20.4101	81.764	0.075781	0.064551	0.044238	-52.623	-107.126	972.218	-0.69297	0.88262	0.15303	-45.151	51.4716	51.555	0.092773	0.15527	-0.10547	-3.618	33.679	1108.5855	-1.1554	1.3576	-0.17295	-21.277	66.2716	130.108	-0.034164	0.0077117	-0.016416	-15.906	42.4218	943.4653	-1.1465	1.1758	0.05127	8.423	-48.056	1157.9507	-1.7484	1.6958	0.084668
0.846	-32.427	-13.91188	104.5705	0.052734	0.099121	0.047852	-62.472	-103.81	980.184	-0.74882	0.96015	0.14199	-32.293	45.2085	64.03	0.089844	0.15381	-0.097656	-11.22	15.05284	1090.777	-1.1442	1.3503	-0.17129	-3.095	80.557	116.383	-0.03242	0.015407	-0.01686	-37.023	41.759	924.3719	-1.1353	1.1665	0.04834	-17.094	-55.653	1140.336	-1.7632	1.7419	0.060742
0.848	-25.124	-18.42256	127.9538	0.023926	0.13682	0.045703	-39.065	-92.715	968.7643	-0.81094	1.034	0.13105	-33.542	30.265	79.8625	0.084473	0.14111	-0.086914	-5.058	13.1998	1072.597	-1.1289	1.3379	-0.16992	-17.125	88.981	118.2907	-0.038086	0.010742	-0.012207	-29.12	43.9123	910.1586	-1.1069	1.147	0.050293	-23.577	-60.0657	1132.97	-1.7585	1.7685	0.041602
0.85	-15.742	2.7888	138.64944	-0.00019528	0.17354	0.04375	-41.089	-101.251	968.539	-0.87373	1.0979	0.12305	-23.234	24.68	66.7353	0.077392	0.13525	-0.083008	2.137	13.8642	1048.787	-1.1097	1.3278	-0.16445	-24.277	76.023	116.7569	-0.040682	0.016387	-0.0074676	-39.492	60.6853	902.2554	-1.0861	1.133	0.046875	-32.3606	-57.3973	1139.62	-1.7429	1.777	0.019922
0.852	-48.133	10.1521	176.0964	-0.024804	0.21455	0.04336	-42.954	-113.7916	956.832	-0.93994	1.1489	0.11328	-15.22	48.2066	60.8545	0.072754	0.13086	-0.077637	-40.764	21.7763	1025.219	-1.0891	1.3148	-0.16103	-43.835	67.0644	114.2827	-0.048006	0.0199	-0.0064548	-13.364	75.125807	902.26458	-1.0684	1.1133	0.044434	-23.078	-53.1323	1172.303	-1.7188	1.7773	0.0014648
0.854	-37.919	22.9161	219.1611	-0.046484	0.25703	0.038867	-54.96	-141.687	994.902	-0.9881	1.1953	0.10811	-21.033	55.997	34.7495	0.070801	0.12744	-0.063965	-8.657	25.7217	1012.6451	-1.0707	1.2972	-0.15713	-42.816	76.3753	105.06	-0.052305	0.022949	-0.0036162	-37.732	64.6569	884.80678	-1.0405	1.0903	0.047363	-44.026	-48.2336	1185.5332	-1.685	1.7537	-0.0053711
0.856	-41.25	20.6395	282.4288	-0.070313	0.30225	0.039551	-55.562	-140.834	1038.102	-1.0253	1.2392	0.11054	-35.753	51.723	39.6623	0.0625	0.12695	-0.058594	-12.027	43.95641	1008.6012	-1.0473	1.2774	-0.15098	-44.591	80.1663	94.097	-0.062626	0.024493	-0.00064673	-8.001	58.8768	853.745244	-1.0249	1.0786	0.046875	-13.517	-33.6213	1209.106	-1.6551	1.723	-0.014941
0.858	-31.848	41.3259	316.995	-0.10068	0.3503	0.037109	-43.35	-142.63	1066.93252	-1.0628	1.2735	0.1125	-39.84	48.101	35.1935	0.061523	0.11816	-0.05127	-10.044	49.0583	988.6468	-1.0273	1.2578	-0.13672	-27.47	71.4045	91.204	-0.069336	0.032715	0.0019531	-31.432	70.527	862.1813	-1	1.0527	0.046387	-13.653	-18.8702	1210.6352	-1.6242	1.6782	-0.025098
0.86	-45.977	58.5947	380.139	-0.1334	0.40127	0.035157	-43.742	-128.54	1098.682	-1.1037	1.307	0.11475	-20.974	54.4909	28.5523	0.063232	0.11792	-0.039307	-7.874	16.9454	999.6822	-1.0064	1.2363	-0.12861	-23.859	71.224	90.2859	-0.073708	0.033076	0.0045851	-44.424	81.9802	835.9794	-0.97583	1.0305	0.042236	11.934	-28.9074	1222.7804	-1.5991	1.6384	-0.024414
0.862	-39.964	71.6647	447.771	-0.17832	0.4622	0.039844	-32.477	-109.13438	1111.409	-1.1523	1.3359	0.11768	-39.556	26.3167	27.9316	0.0625	0.11328	-0.030762	-2.204	15.5166	977.58538	-0.98379	1.2121	-0.11973	-36.34	74.229	68.39	-0.078866	0.036747	0.0086459	-39.96	72.4963	837.718	-0.95557	1.0063	0.035645	-1.852	-27.9859	1224.8888	-1.5815	1.5903	-0.021973
0.864	-30.698	80.3927	545.8405	-0.23535	0.52744	0.046289	-39.26	-83.616	1129.976	-1.2074	1.3693	0.12275	-45.472	13.5824	37.1301	0.062988	0.10596	-0.016113	-6.953	38.403	957.625	-0.96543	1.1934	-0.11347	-30.533	91.201	66.377	-0.080913	0.038291	0.0071687	-22.287	66.7679	802.44898	-0.91406	0.96973	0.029785	22.115	-17.8413	1226.2653	-1.5688	1.5496	-0.025488
0.866	0.927	92.1688	621.67106	-0.30908	0.60156	0.058594	-49.076	-71.745	1136.061	-1.2702	1.4157	0.13301	-29.29	27.486	54.72	0.063965	0.095703	-0.026367	-14.961	41.815	928.9626	-0.9456	1.1667	-0.10781	-18.046	74.367	81.1973	-0.084003	0.042631	0.0061881	-65.585	61.03619	781.1256	-0.89844	0.9541	0.027344	9.338	7.91869	1208.2825	-1.5617	1.516	-0.025391
0.868	-11.093	64.452	666.43	-0.40009	0.69326	0.080664	-60.943	-91.706	1142.0092	-1.3284	1.4622	0.14121	4.577	47.6004	34.67	0.070801	0.085938	-0.015137	0.737000000000002	23.624	907.65	-0.92334	1.1392	-0.10059	-22.165	52.0176	84.413	-0.083008	0.044922	0.010254	-48.284	79.05411	752.753	-0.85645	0.91406	0.020508	-3.534	-5.8624	1194.573	-1.5586	1.4879	-0.022266
0.87	-10.361	38.373	692.151	-0.51397	0.79365	0.11631	-22.94	-94.25	1138.2211	-1.3916	1.5166	0.14961	-25.883	52.241	21.6554	0.075195	0.071777	-0.014892	-12.684	22.91357	891.891	-0.90508	1.1119	-0.093066	-37.456	43.7722	68.5258	-0.080468	0.050231	0.0091599	-31.835	86.699847	747.102	-0.82813	0.88867	0.015869	0.325000000000003	-23.898	1205.323	-1.5583	1.4659	-0.027637
0.872	-26.174	8.397	713.398	-0.64482	0.91397	0.16475	-52.328	-93.1044	1133.591	-1.4492	1.5742	0.15283	-22.914	55.131	18.4593	0.088379	0.065918	-0.013184	-13.121	36.5657	877.5908	-0.87734	1.0809	-0.093164	-48.591	47.137	50.676	-0.081132	0.048443	0.01218	-28.64	111.1346	726.214	-0.80078	0.86328	0.012695	18.742	-24.0426	1213.423	-1.5547	1.459	-0.025879
0.874	-24.277	-24.076	706.0697	-0.79678	1.0368	0.21055	-56.991	-81.019	1132.387	-1.4976	1.6407	0.15625	-12.492	47.14	28.972	0.10059	0.050293	-0.014648	-35.9893	52.07	878.306	-0.85273	1.0539	-0.089258	-42.785	51.5348	54.249	-0.078152	0.04965	0.0066304	-43.138	95.01973	728.5437	-0.76172	0.82617	0.0068359	-45.484	1.2507	1218.653	-1.5588	1.4541	-0.029492
0.876	-51.935	-74.7301	691.6499	-0.9624	1.1646	0.24365	-54.386	-75.794	1150.353	-1.541	1.7015	0.15742	-8.145	23.462	26.942	0.11182	0.040039	-0.012207	-14.027	62.639	861.9857	-0.82519	1.0231	-0.089258	-35.443	59.8815	60.412	-0.076055	0.049489	0.0013288	-41.152	90.5731	708.2861	-0.74609	0.8125	0.0083008	-33.9433	23.3287	1217.232	-1.5571	1.4574	-0.032129
0.878	-31.97	-96.517	668.6566	-1.1247	1.2882	0.25156	-43.012	-56.913	1172.9868	-1.5769	1.761	0.15781	-32.416	7.939436	48.82	0.11914	0.026367	-0.019531	-9.271	74.2594	865.3363	-0.79639	0.99414	-0.086426	-47.495	53.0412	52.4804	-0.071777	0.044922	0.0019531	-40.614	97.84402	707.0172	-0.71729	0.78174	0.003418	-24.496	27.8455	1218.3681	-1.5605	1.4594	-0.036035
0.88	-29.416	-89.684	633.738	-1.2605	1.4025	0.24921	-90.823	-49.6834	1186.3711	-1.6082	1.8168	0.1539	-13.971	5.248	31.4052	0.12451	0.025146	-0.021241	-15.614	68.45	830.71354	-0.77198	0.97139	-0.084375	-34.686	42.175	50.393	-0.065233	0.048988	-0.00047889	-36.02	115.4611	693.9573	-0.6997	0.7583	0.00024415	-15.603	15.1537	1206.834	-1.5558	1.4668	-0.039453
0.882	-15.688	-82.028	628.6207	-1.3613	1.504	0.21875	-70.082	-49.238	1202.492	-1.6323	1.8716	0.15723	-40.427	9.5297	31.37	0.12988	0.021484	-0.025391	-23.159	71.261	811.6669	-0.75029	0.94463	-0.079395	-40.049	54.908	57.64	-0.056676	0.041207	-0.0030075	-48.755	106.375	672.618	-0.68164	0.73926	-0.0019531	-57.3499	15.8106	1170.7482	-1.5483	1.4692	-0.040039
0.884	-19.517	-54.605	649.545	-1.3963	1.5674	0.16719	-68.525	-46.339	1199.961	-1.6525	1.9135	0.15244	-26.975	11.336	23.628	0.13428	0.029297	-0.025391	3.424	79.572	779.235	-0.72881	0.9247	-0.07666	-30.782	61.4518	62.7977	-0.050781	0.034259	-0.0065202	-65.077	114.073	640.8879	-0.6499	0.70752	-0.0048828	-18.831	32.4249	1165.6961	-1.5449	1.4738	-0.036524
0.886	12.092	-36.193	665.646	-1.373	1.6035	0.12256	-77.685	-39.262	1201.4248	-1.6675	1.9431	0.15195	-46.401	9.02654	35.6953	0.13574	0.039063	-0.029297	-22.482	72.9786	791.593	-0.71494	0.90108	-0.072656	-39.437	53.3367	69.3604	-0.042224	0.031866	-0.0088745	-63.499	120.368	613.667	-0.63623	0.69678	-0.0068359	-19.613	33.332	1161.655	-1.5375	1.4668	-0.041113
0.888	10.492	-12.1607	667.52	-1.2795	1.5742	0.083887	-89.309	-58.237	1203.217	-1.6764	1.9669	0.14844	-11.105	14.5594	39.2057	0.12646	0.061035	-0.028809	-28.397	62.9859	768.205	-0.70166	0.8833	-0.063965	-27.6	48.4402	51.7756	-0.037598	0.026367	-0.01416	-53.117	109.7946	598.535	-0.604	0.66748	-0.011719	-17.013	14.809	1164.981	-1.5246	1.4625	-0.044629
0.89	6.392	0.486000000000001	657.9825	-1.1296	1.4947	0.05332	-70.624	-72.298	1196.365	-1.6705	1.9768	0.15127	-32.637	9.6684	44.546	0.11963	0.088623	-0.029785	-39.715	53.2162	761.26109	-0.69111	0.86455	-0.065137	-41.547	44.752	27.686	-0.027799	0.016819	-0.016054	-60.454	83.747	591.4756	-0.58667	0.6521	-0.011963	-25.326	1.173	1153.37688	-1.5095	1.4511	-0.044336
0.892	-6.465	1.96899999999999	670.4337	-0.94052	1.3587	0.034179	-64.969	-78.317	1201.155	-1.6621	1.9727	0.15527	-14.088	-8.507	52.713	0.10449	0.11963	-0.036133	-20.217	84.9909	736.3913	-0.68467	0.84385	-0.062891	-23.5	29.915	44.093	-0.020025	0.0084724	-0.022402	-40.842	93.647	583.9456	-0.5625	0.62891	-0.010742	-3.477	9.3902	1151.431	-1.4878	1.4438	-0.043945
0.894	3.203	9.315	683.821	-0.75254	1.1888	0.036816	-63.469	-66.394	1199.5043	-1.6386	1.9645	0.16289	-24.038	-9.9908	67.2937	0.086426	0.16162	-0.044434	-45.993	104.0191	720.4629	-0.67881	0.83095	-0.055469	-46.509	9.76	53.861	-0.010897	0.0050844	-0.022127	-29.496	120.5709	567.20603	-0.53662	0.59912	-0.0097656	4.183	38.798	1138.192	-1.4593	1.4167	-0.044726
0.896	-42.148	-8.672	689.797	-0.58936	1.0122	0.057129	-56.453	-60.054	1205.759	-1.6108	1.9404	0.17373	-3.482	-10.5835	61.711	0.078125	0.18213	-0.053223	-5.074	109.9526	705.5059	-0.66954	0.81621	-0.05586	-44.118	8.6999	64.351	-0.0028462	-0.0066218	-0.037872	-56.409	125.9645	552.6928	-0.52588	0.58838	-0.010254	7.265	47.176	1142.824	-1.4327	1.3962	-0.046289
0.898	-61.334	-62.219	710.117	-0.475	0.8543	0.084668	-45.502	-26.5184	1223.747	-1.5776	1.9141	0.18858	-51.412	-20.7589	72.7165	0.056641	0.23389	-0.071777	-23.021	107.799	696.4773	-0.65625	0.80273	-0.054688	-46.549	24.198	46.294	0.0058594	-0.0063477	-0.034668	-34.941	141.894	533.54288	-0.5	0.56641	-0.013672	-9.467	39.181	1120.8521	-1.4018	1.3739	-0.048242
0.9	-57.373	-109.1516	722.132	-0.40537	0.72734	0.10449	-60.757	17.6578	1226.336	-1.545	1.8827	0.20361	-44.664	-22.3211	110.359	0.0354	0.26855	-0.093263	-46.135	117.689	672.2752	-0.64609	0.78633	-0.050879	-39.441	28.6781	41.714	0.0068484	-0.00027057	-0.041812	-27.31	140.136	522.3065	-0.47559	0.53516	-0.0087891	-13.351	46.272	1082.006	-1.3698	1.3501	-0.049512
0.902	-59.221	-139.0583	740.7617	-0.37022	0.64297	0.13105	-37.98	-4.904	1234.6811	-1.5132	1.8521	0.21973	-26.826	-5.8921	155.251	0.012207	0.30957	-0.11816	-35.427	109.52997	663.9467	-0.63506	0.76738	-0.050195	-52.019	18.128	64.694	0.0069051	-0.00028663	-0.042295	-47.368	130.186	507.7552	-0.46143	0.52686	-0.0053711	-21.007	54.8535	1049.773	-1.3394	1.3247	-0.047363
0.904	-74.304	-138.504	762.552	-0.36104	0.59844	0.1542	-13.337	-28.991	1228.6902	-1.4954	1.8186	0.23242	-29.114	25.75806	198.365	-0.024414	0.37354	-0.14648	-22.213	104.9561	638.911	-0.62256	0.75489	-0.050195	-17.476	12.9681	82.1068	0.0014523	0.005206	-0.045029	-67.843	111.824	490.3192	-0.43311	0.49463	-0.0097656	-32.047	48.328	1033.298	-1.3095	1.2988	-0.05127
0.906	-68.954	-129.1362	784.39479	-0.37061	0.58057	0.16602	-22.137	-34.693	1226.396	-1.4773	1.7907	0.24423	-54.536	46.8385	245.3392	-0.04834	0.4126	-0.16113	-19.505	118.5864	647.3859	-0.60352	0.73633	-0.048828	-50.6743	-5.2965	71.109	-0.0048891	0.014762	-0.045898	-33.959	130.645	486.1437	-0.41553	0.46924	-0.010498	-6.332	40.264	1036.917	-1.2823	1.2747	-0.05127
0.908	-49.437	-139.573	822.0224	-0.39092	0.60381	0.17822	-68.407	-25.201	1191.801	-1.4661	1.7731	0.254	-26.964	66.322	314.0993	-0.10693	0.5083	-0.18506	-48.702	116.9892	628.197	-0.58008	0.71582	-0.055176	-32.595	-23.2222	85.226	-0.013184	0.030273	-0.04541	-50.479	131.6268	466.207	-0.38818	0.44287	-0.0083008	-19.549	55.4642	1032.6428	-1.2522	1.2516	-0.052832
0.91	-68.4899	-151.909	828.5754	-0.41992	0.65195	0.18731	-64.802	-20.831	1178.201	-1.4536	1.7505	0.26582	-18.822	93.829	377.2253	-0.16552	0.59619	-0.19921	-46.774	106.142	614.3935	-0.55957	0.69453	-0.059864	-30.36	-28.8368	93.312	-0.029184	0.045589	-0.046088	-55.091	118.5626	438.3535	-0.3584	0.40967	-0.00097656	-35.65	70.1125	1019.112	-1.2264	1.2184	-0.055469
0.912	-65.35	-170.43	857.5091	-0.46328	0.72461	0.18067	-78.6579	-5.6307	1173.2741	-1.4414	1.7363	0.27148	-20.278	80.375	428.7522	-0.2334	0.69238	-0.21143	-61.2122	119.3286	591.697	-0.5334	0.67422	-0.062891	-27.678	-32.368	123.641	-0.046071	0.070001	-0.042872	-46.017	104.9934	420.31577	-0.34521	0.396	0.00097656	-26.187	74.689	1001.8676	-1.1973	1.1914	-0.052734
0.914	-55.584	-153.54	882.422	-0.50635	0.81221	0.1832	-53.618	10.073	1187.5475	-1.4272	1.7149	0.27832	-15.81	81.3957	471.05	-0.33057	0.84814	-0.22656	-30.475	125.123	589.7129	-0.50566	0.64805	-0.063672	-42.865	-11.20438	111.7539	-0.066779	0.093042	-0.038971	-39.498	108.65576	411.3361	-0.32031	0.37109	0	4.25	76.314	1002.5081	-1.1781	1.1662	-0.052441
0.916	-59.818	-113.5207	911.8152	-0.55566	0.90332	0.17871	-74.862	14.02	1189.339	-1.4078	1.7008	0.28204	-17.258	73.5012	520.751	-0.38379	0.93115	-0.22412	-48.516	111.0777	574.6956	-0.47949	0.62402	-0.06875	-18.908	-4.958	141.257	-0.094907	0.11962	-0.038086	-29.787	102.6079	410.7589	-0.30468	0.35058	0.0083007	-25.945	65.841	989.9091	-1.1567	1.1418	-0.051758
0.918	-69.794	-77.893	921.6707	-0.60742	1.0039	0.17686	-46.1	11.91	1194.364	-1.3921	1.6851	0.28437	-22.462	63.9436	536.401	-0.49561	1.1157	-0.23047	-32.396	114.5739	545.5048	-0.46338	0.59619	-0.068848	-15.94	31.6451	182.9119	-0.12646	0.14795	-0.037109	-26.078	105.86503	397.7064	-0.28857	0.33105	0.0073242	-28.973	53.141	960.0058	-1.132	1.1133	-0.051368
0.92	-43.234	-85.996	939.3595	-0.66133	1.0922	0.17881	-45.769	22.6389	1194.1908	-1.3694	1.663	0.28516	-27.628	37.81547	574.286	-0.57447	1.2688	-0.23096	-42.779	141.1864	520.377	-0.43994	0.5749	-0.062793	-20.833	42.539	296.7843	-0.16017	0.18194	-0.0333	-31.756	106.1672	379.098	-0.27197	0.30908	0.010742	-29.133	49.934	928.579	-1.108	1.092	-0.042578
0.922	-54.224	-77.929	958.2802	-0.71602	1.175	0.18154	-38.75	19.9552	1173.4541	-1.3433	1.645	0.2876	-13.757	27.199	600.2517	-0.64502	1.4185	-0.22803	-31.355	146.27667	505.483	-0.42881	0.55088	-0.058594	-55.543	58.3974	393.344	-0.20177	0.22462	-0.022745	-28.698	124.3458	369.839	-0.26172	0.30225	0.010254	-29.96	56.5071	908.025	-1.084	1.0723	-0.041016
0.924	-35.822	-66.625	972.2833	-0.77978	1.248	0.18613	-61.739	10.1425	1144.9674	-1.3191	1.6202	0.29092	-34.094	9.9419	608.01077	-0.71826	1.6021	-0.23193	-44.538	133.4924	513.624	-0.41162	0.53252	-0.05664	-53.052	80.7777	461.905	-0.25842	0.27267	-0.0016571	-39.064	104.40798	353.451	-0.24561	0.28027	0.012695	-35.969	52	895.995	-1.0577	1.0501	-0.037403
0.926	-46.01	-74.851	997.4508	-0.84766	1.3164	0.19678	-52.823	-6.654	1106.1065	-1.2965	1.5955	0.29325	-51.869	-12.6016	619.3937	-0.75464	1.7063	-0.24829	-19.153	133.9434	504.3073	-0.40234	0.51328	-0.05459	-42.787	95.8363	512.826	-0.33478	0.33888	0.029887	-44.631	104.113	342.2252	-0.22925	0.26685	0.0087892	-24.739	61.716	893.9167	-1.032	1.0313	-0.033496
0.928	-24.741	-83.092	1005.269	-0.91631	1.372	0.19932	-51.183	7.4776	1090.8684	-1.2722	1.5705	0.29637	-55.327	-50.1242	617.823	-0.76563	1.7734	-0.27051	-38.006	144.1124	496.471	-0.39258	0.49805	-0.052246	-39.017	111.5848	576.019	-0.4248	0.4126	0.061035	-47.667	111.3274	327.3454	-0.21289	0.25439	0.013184	-40.494	90.0054	887.656	-1.01	1.0103	-0.025293
0.93	-45.723	-109.2065	1006.966	-0.98037	1.4173	0.20879	-67.176	15.6351	1083.759	-1.2503	1.5408	0.30371	-33.793	-54.6249	634.438	-0.7207	1.7832	-0.30664	-52.029	137.611	481.3221	-0.38173	0.48262	-0.049023	-24.567	110.924	614.961	-0.54384	0.50497	0.10615	-22.435	122.327	310.6781	-0.18701	0.23779	0.0058594	-30.448	113.344	888.283	-0.98525	0.99658	-0.019434
0.932	-50.114	-127.538	1007.539	-1.0319	1.4548	0.21191	-63.963	17.3461	1086.5061	-1.2271	1.5103	0.30176	-33.59	-58.9831	637.3516	-0.66846	1.7505	-0.31592	-35.893	130.956	480.8034	-0.36963	0.46592	-0.047168	-8.33	87.083	643.6903	-0.67733	0.61406	0.1579	-59.058	110.868	297.3988	-0.17529	0.23096	0.013184	-25.875	113.279	889.67	-0.96338	0.97705	-0.016602
0.934	-71.89	-157.904	1025.009	-1.0732	1.4913	0.22969	-46.29	43.148	1075.3346	-1.2009	1.4824	0.30192	-40.926	-63.4314	624.5023	-0.51416	1.6216	-0.32764	-32.608	144.325	451.9209	-0.35635	0.44756	-0.046777	-32.099	75.85	665.161	-0.82343	0.73437	0.19971	-35.305	108.6081	289.4486	-0.1499	0.21094	0.0043945	-12.978	102.319	858.658	-0.94502	0.9542	-0.0080076
0.936	-36.638	-147.06	1059.5486	-1.1055	1.5195	0.24463	-48.272	62.7447	1072.729	-1.1715	1.4512	0.30577	-27.605	-68.761	614.1645	-0.38354	1.465	-0.31713	-57.205	138.965	421.6871	-0.34141	0.43457	-0.043164	-67.4677	46.514	690.584	-0.96846	0.86611	0.2334	-19.623	111.3729	257.723	-0.12866	0.19825	0.0061035	-21.376	96.578	824.923	-0.9251	0.93096	-0.00068358
0.938	-50.572	-142.744	1097.193	-1.1364	1.5556	0.25586	-44.03	68.2445	1024.3733	-1.1409	1.4183	0.30454	1.789	-45.0686	621.629	-0.26465	1.2773	-0.30566	-64.2051	128.9148	395.552	-0.32568	0.42188	-0.04541	-38.918	-15.5631	687.905	-1.105	1.0034	0.25098	-32.648	101.9769	242.0808	-0.11133	0.18506	0.0092773	-34.489	94.4515	790.998	-0.9044	0.90869	0.0036133
0.94	-64.3657	-118.766	1113.69	-1.1739	1.5946	0.26436	-23.171	49.7904	1001.091	-1.1064	1.3854	0.30085	-18.51	-27.6525	614.322	-0.1416	1.0215	-0.27539	-36.859	112.8122	395.493	-0.30655	0.40185	-0.044726	-42.959	-45.3326	657.706	-1.2188	1.1316	0.24492	-44.89	84.5935	239.27	-0.086914	0.17285	0.003418	-60.8201	83.5829	769.717	-0.88115	0.88721	0.0069336
0.942	-52.923	-113.501	1124.738	-1.2126	1.6388	0.27451	-46.867	58.1992	962.576	-1.0679	1.356	0.30029	-29.421	-14.9072	631.6188	-0.099609	0.91406	-0.25488	-38.192	112.828	389.946	-0.2917	0.39043	-0.037988	-43.203	-55.5645	612.78	-1.2902	1.247	0.21923	-22.431	85.9425	230.982	-0.079102	0.16504	0.0029297	-28.948	76.298	767.45	-0.86035	0.86523	0.011719
0.944	-21.458	-85.565	1103.19204	-1.2642	1.6913	0.27813	-53.864	49.8714	946.908	-1.0237	1.3176	0.29633	-24.112	-19.401	640.4919	-0.0625	0.74023	-0.23145	-56.945	114.313	376.1517	-0.27177	0.36777	-0.034082	-63.965	-49.5869	578.081	-1.3163	1.3348	0.18174	-45.309	95.09234	221.759	-0.056641	0.14648	0.0063477	-51.485	90.5674	752.0299	-0.83838	0.84268	0.011523
0.946	-31.518	-96.945	1109.693	-1.3159	1.7485	0.27051	-50.008	39.1498	935.331	-0.98797	1.2823	0.29221	-20.83	-23.45	661.00637	-0.062989	0.65772	-0.21777	-23.967	128.1569	370.896	-0.25137	0.34668	-0.040527	-50.223	-50.641	586.158	-1.2931	1.3864	0.13281	-38.341	81.8743	208.4711	-0.045654	0.13232	0.0056152	-45.8	101.4199	728.895	-0.81699	0.81953	0.015137
0.948	-58.217	-97.7328	1095.7294	-1.3693	1.8086	0.26543	-41.72	36.1985	938.3275	-0.94451	1.2421	0.28433	-50.144	-52.315	680.7085	-0.074707	0.604	-0.21729	-29.224	142.2	349.888	-0.229	0.32861	-0.040039	-62.337	-13.81703	580.165	-1.2246	1.3916	0.086914	-39.916	83.325	210.55618	-0.036133	0.12061	0.0073242	-36.641	121.0442	703.9948	-0.79199	0.7961	0.017481
0.95	-36.539	-100.3847	1107.8151	-1.4129	1.8637	0.25498	-69.535	51.4761	943.7286	-0.90718	1.2002	0.28191	-33.289	-65.666	703.4203	-0.09668	0.5918	-0.21289	-29.471	133.282	356.3362	-0.21065	0.30254	-0.038672	-67.32	1.5057	599.4702	-1.1148	1.3539	0.056543	-30.887	96.854	202.4954	-0.023438	0.10547	0.0087891	-13.267	138.956	717.147	-0.76728	0.76983	0.019141
0.952	-49.678	-87.445	1099.928	-1.4484	1.9094	0.24131	-42.229	56.193	931.745	-0.87061	1.1548	0.27783	-33.025	-72.268	732.7	-0.11182	0.59961	-0.21582	-38.904	116.0705	339.1322	-0.19082	0.27529	-0.038965	-71.274	40.1569	623.062	-0.98096	1.27	0.03877	-57.393	91.4965	194.5918	-0.014648	0.1001	0.010742	-58.747	139.907	696.5334	-0.74414	0.74658	0.020508
0.954	-67.449	-95.519	1128.492	-1.468	1.9457	0.23349	-60.357	75.683	906.569	-0.83429	1.1104	0.2733	-41.92	-92.423	742.622	-0.13965	0.65771	-0.23438	-47.995	107.8241	321.6095	-0.16738	0.25224	-0.04248	-74.7783	68.981	627.363	-0.8458	1.1513	0.030957	-25.565	74.682	181.26463	-0.0024414	0.084473	0.01123	-38.363	129.5526	665.5566	-0.71797	0.72158	0.021875
0.956	-67.259	-94.03	1142.9672	-1.4707	1.9688	0.22803	-28.863	92.757	873.67553	-0.79561	1.054	0.2721	-64.926	-134.1588	765.296	-0.16285	0.73218	-0.2478	-49.94	133.706	299.51475	-0.14404	0.2332	-0.04375	-64.788	75.182	638.81304	-0.73536	1.0164	0.034278	-39.517	76.9017	174.65514	0.0065918	0.070313	0.012695	-44.505	142.3666	627.102	-0.69219	0.69922	0.019336
0.958	-66.984	-80.838	1170.462	-1.473	1.972	0.22373	-55.807	84.0858	839.906	-0.75926	1.0064	0.27063	-48.649	-148.513	782.674	-0.18555	0.82715	-0.27344	-57.036	127.8829	266.23	-0.12402	0.21094	-0.046387	-46.383	48.912	664.297	-0.65967	0.87939	0.040039	-38.989	74.14825	159.6299	0.012695	0.058105	0.012207	-54.581	133.1117	614.105	-0.66328	0.67188	0.023633
0.96	-81.616	-54.189	1164.7333	-1.4747	1.9649	0.21875	-39.741	67.879	813.936	-0.72491	0.95495	0.26772	-62.502	-143.592	818.9555	-0.21484	0.9668	-0.31104	-41.669	110.6211	261.621	-0.10489	0.1874	-0.042969	-50.334	4.683	669.597	-0.61748	0.77734	0.04834	-27.866	58.0542	155.5233	0.025391	0.042969	0.017578	-51.3	105.4525	615.282	-0.64297	0.64473	0.015527
0.962	-99.1172	-62.133	1174.5613	-1.4654	1.9509	0.22578	-53.49	66.196	801.127	-0.69336	0.9082	0.26953	-64.953	-129.726	828.4624	-0.22998	1.0356	-0.33447	-55.864	116.9812	251.638	-0.084863	0.16465	-0.043554	-18.433	-39.337	677.929	-0.60898	0.70098	0.058984	-20.92	53.5069	132.7098	0.029785	0.033691	0.01709	-46.965	98.966	603.3822	-0.62109	0.62061	0.011719
0.964	-85.985	-75.923	1181.652	-1.4531	1.9289	0.22412	-26.758	85.853	793.892	-0.66869	0.87339	0.27289	-75.814	-131.7828	868.2738	-0.25635	1.1484	-0.37207	-42.709	112.62962	240.9706	-0.069629	0.14121	-0.046289	-40.5075	-94.5291	683.693	-0.62773	0.66114	0.060547	-19.814	67.4869	128.078	0.034668	0.021484	0.016113	-62.698	127.5641	581.318	-0.59375	0.60205	0.015918
0.966	-77.611	-86.4541	1184.275	-1.4434	1.9063	0.22705	-45.525	100.7271	793.8065	-0.64739	0.8318	0.27108	-50.591	-112.60235	883.27079	-0.27662	1.2263	-0.39478	-43.514	99.912	242.413	-0.051758	0.12461	-0.045801	-37.799	-146.562	704.476	-0.66103	0.65381	0.05586	-49.945	62.1603	121.8726	0.041503	0.013428	0.021972	-55.265	144.564	558.9167	-0.56563	0.58301	0.01416
0.968	-67.651	-85.484	1176.838	-1.4264	1.8795	0.23603	-31.119	106.565	784.587	-0.62377	0.80031	0.27161	-49.969	-98.4293	903.4648	-0.30225	1.2915	-0.40967	-24.315	99.14741	247.477	-0.039551	0.10449	-0.050293	-27.037	-158.952	737.839	-0.69482	0.67236	0.039551	-46.751	55.36268	124.9524	0.044434	0.0063477	0.025879	-44.211	125.489	543.62864	-0.53828	0.55957	0.011035
0.97	-49.29	-87.942	1191.7791	-1.4132	1.8516	0.23799	-42.814	117.533	776.388	-0.60341	0.76496	0.271	-50.751	-102.563	919.8686	-0.34277	1.3633	-0.42285	-22.828	103.443843	241.0288	-0.020019	0.093847	-0.04248	-14.161	-158.496	746.0415	-0.72324	0.71192	0.010644	-40.351	74.6178	124.24246	0.040039	-0.0039063	0.024414	-51.795	119.153	529.7294	-0.51406	0.53369	0.0090821
0.972	-21.019	-66.588	1207.1556	-1.4023	1.8313	0.23799	-36.626	122.844	748.741	-0.58057	0.73486	0.27197	-53.699	-111.539	959.7257	-0.36621	1.3906	-0.42871	-40.556	107.982	212.3725	-0.0091798	0.082324	-0.044629	-34.275	-151.442	780.0111	-0.73975	0.7542	-0.023047	-12.782	79.5806	110.2735	0.038086	-0.0058594	0.023926	-53.953	129.6706	497.211	-0.4873	0.51318	0.0019531
0.974	-39.582	-36.282	1216.7504	-1.3884	1.8061	0.23457	-44.374	103.326	720.1343	-0.56289	0.70544	0.26807	-28.005	-99.766	968.146	-0.42139	1.438	-0.43506	-50.763	88.8146	189.818	0.0021485	0.074511	-0.041113	-0.663000000000004	-166.778	839.1012	-0.73389	0.7999	-0.058203	-50.006	71.8233	88.2424	0.035645	-0.013184	0.027832	-45.882	126.1079	482.174	-0.46182	0.49092	-0.00029296
0.976	-39.721	-15.8201	1210.212	-1.3706	1.7798	0.23828	-22.959	102.464	701.609	-0.54163	0.67507	0.26649	-52.105	-105.132	987.09661	-0.46851	1.4797	-0.4397	-31.295	104.77	187.054	0.0085936	0.064453	-0.041894	-3.525	-155.584	877.313	-0.71758	0.84082	-0.093359	-37.469	63.4135	90.1617	0.030273	-0.018066	0.029541	-33.419	114.368	462.355	-0.43125	0.47227	0.0022461
0.978	-39.609	-12.158	1222.214	-1.3532	1.7561	0.23838	-34.858	98.533	675.269	-0.51971	0.64773	0.26215	-60.776	-114.021	996.8624	-0.50977	1.5117	-0.44092	-50.749	93.6949	194.6265	0.016113	0.060547	-0.04248	-29.354	-116.06342	882.554	-0.70117	0.875	-0.12207	-33.267	72.6305	78.569	0.023926	-0.02002	0.03125	-37.087	121.6603	472.4895	-0.40039	0.44883	-0.0024414
0.98	-26.105	-11.702	1222.4083	-1.3319	1.7267	0.23935	-34.776	94.389	633.477	-0.49751	0.61882	0.26034	-43.659	-122.282	1028.8389	-0.56592	1.5708	-0.44971	-52.701	77.5163	194.7695	0.017187	0.055761	-0.042187	-43.375	-61.547	893.2756	-0.68682	0.9042	-0.13584	-27.39	64.8759	88.919	0.018555	-0.024902	0.032715	-48.745	129.27902	459.1072	-0.37295	0.42842	-0.0047852
0.982	-52.783	-29.615	1205.9981	-1.3131	1.6939	0.24522	-20.808	97.788	617.442	-0.47266	0.5918	0.25684	-37.667	-124.8429	1029.342	-0.5874	1.6021	-0.46045	-54.852	74.1982	177.5316	0.01875	0.052832	-0.035742	16.395	-52.822	915.446	-0.6878	0.92763	-0.1378	-30.897	49.3544	74.3461	0.012695	-0.021973	0.03125	-56.856	130.15	443.54	-0.35107	0.40674	-0.0073242
0.984	-56.543	-51.68	1189.018	-1.2911	1.6657	0.24912	-31.746	124.154	623.466	-0.45012	0.56711	0.25398	-72.673	-136.6072	1042.511	-0.63135	1.6704	-0.479	-41.015	77.4092	170.6492	0.022656	0.047363	-0.03418	-4.524	-55.333	934.449	-0.71396	0.95225	-0.13154	-10.997	45.41893	71.5238	0.0068359	-0.019531	0.03125	-32.444	144.906	426.451	-0.3248	0.38438	-0.010645
0.986	-57.86	-43.923	1168.332	-1.2676	1.627	0.25049	-21.169	140.00022	637.904	-0.42395	0.54054	0.2501	-64.324	-143.8516	1050.89087	-0.65771	1.7299	-0.49414	-36.381	68.9708	168.26626	0.020605	0.04541	-0.033301	-5.227	-71.459	954.701	-0.76318	0.99227	-0.11953	-46.226	57.8996	52.464	0.0065918	-0.023926	0.030762	-37.668	145.124	412.6736	-0.30849	0.37031	-0.0091798
0.988	-44.478	-22.0249	1157.788	-1.2448	1.6036	0.25782	-18.661	145.981	625.371	-0.40324	0.52143	0.2497	-52.227	-138.2786	1052.4535	-0.68164	1.7891	-0.50879	-14.502	58.0004	153.2857	0.01709	0.053711	-0.038574	-29.873	-78.5789	976.627	-0.82959	1.0366	-0.10352	-23.804	42.6633	50.2488	0.0053711	-0.020508	0.034668	-39.388	126.77	389.2009	-0.28389	0.35313	-0.0048828
0.99	-64.396	-13.9038	1164.5268	-1.2242	1.5696	0.26689	-24.591	151.733	607.942	-0.38591	0.49712	0.24083	-61.52	-124.2669	1062.136	-0.7085	1.8735	-0.5249	-29.643	69.1327	138.6563	9.766e-05	0.064161	-0.045312	-10.378	-83.372	996.6308	-0.91436	1.0852	-0.091016	-40.153	52.4293	57.7084	0.0024414	-0.024902	0.031738	-54.091	113.0483	352.706	-0.26611	0.33848	-0.0023437
0.992	-60.053	-5.397	1169.883	-1.2008	1.5461	0.27471	-36.293	157.272	585.43783	-0.36816	0.46924	0.24023	-72.056	-122.0589	1081.758	-0.71631	1.9204	-0.53271	-38.886	71.0665	108.249	0.0017578	0.061621	-0.020215	-55.2089	-80.779	1011.8309	-1.0011	1.1454	-0.083985	-34.774	61.048	54.53699	0	-0.02832	0.036621	-44.837	115.8427	334.702	-0.25	0.32813	-0.0048828
0.994	-29.086	2.492	1174.767	-1.1842	1.5189	0.28135	-32.289	128.716	560.95	-0.34913	0.44914	0.23261	-30.106	-107.0399	1111.4129	-0.73291	1.9946	-0.54639	-48.695	58.1225	116.206	0.016601	0.040528	-0.0030274	-57.552	-106.214	1023.2225	-1.08	1.2141	-0.086719	-49.964	52.012	49.5394	-0.0092773	-0.025879	0.034668	-46.996	109.408	316.105	-0.23858	0.3165	-0.00048828
0.996	-23.351	12.6437	1179.82	-1.1714	1.5024	0.28906	-39.737	104.9477	537.909	-0.33214	0.42912	0.23125	-38.502	-95.5307	1139.4672	-0.75049	2.0459	-0.5542	-36.807	55.03052	128.507	0.0092776	0.029102	0.0022461	-65.19	-115.2	1039.4184	-1.1534	1.271	-0.099218	-20.641	42.3541	49.8012	-0.0092773	-0.024902	0.035889	-20.124	93.788	329.2339	-0.22354	0.30752	0
0.998	-25.425	4.66942	1163.8458	-1.1539	1.4828	0.29473	-29.625	100.967	517.427	-0.31925	0.4092	0.22227	-50.448	-80.913	1149.4113	-0.76367	2.084	-0.55664	-51.925	66.3488	121.6806	-0.0068359	0.03125	-0.0043945	-34.108	-126.6788	1066.443	-1.2085	1.3286	-0.11182	-42.241	45.47716	53.1846	-0.0092773	-0.022949	0.03125	-22.444	101.7075	308.3459	-0.20869	0.29189	-0.0015625
1	-14.644	0.969000000000001	1150.6185	-1.144	1.4684	0.29961	-36.962	106.726	500.386	-0.30694	0.39005	0.21924	-45.731	-77.992	1160.42	-0.78271	2.1235	-0.55615	-25.214	75.1227	101.559	-0.018555	0.041113	-0.003711	-59.9033	-136.066	1100.83	-1.2404	1.3843	-0.13232	-20.296	64.738	45.6081	-0.017578	-0.025391	0.036133	-30.971	137.111	296.3801	-0.19297	0.28125	-0.0038086
1.002	-29.309	-6.889	1117.827	-1.1307	1.4559	0.30742	-32.115	107.052	475.694	-0.29736	0.37061	0.21191	-27.643	-71.541	1161.4399	-0.79248	2.1372	-0.55322	-66.754	74.3762	92.5811	-0.030078	0.049414	-0.0040039	-32.231	-154.273	1125.6082	-1.262	1.4376	-0.14404	-30.636	53.566	44.185	-0.017578	-0.023438	0.034668	-45.973	151.53	279.5903	-0.17285	0.27344	-0.003418
1.004	-55.416	-15.4905	1072.422	-1.1138	1.4445	0.3166	-21.877	124.2188	471.9069	-0.28212	0.35478	0.20459	-36.142	-79.297	1144.2159	-0.80811	2.1587	-0.54639	-29.789	67.9236	106.8224	-0.033594	0.056836	0.0014648	-21.207	-145.431	1146.445	-1.2792	1.4821	-0.16201	-26.259	45.4711	37.6881	-0.018066	-0.023438	0.038086	-35.606	130.475	294.719	-0.1501	0.25654	-0.011035
1.006	-48.488	-8.4252	1055.257	-1.1025	1.4336	0.3208	-7.41	135.199	469.358	-0.26943	0.33681	0.19667	-77.89	-95.9688	1143.6113	-0.81934	2.166	-0.53735	-49.124	68.807	92.082	-0.041602	0.060449	0.0013672	-14.566	-103.2303	1124.583	-1.2938	1.5179	-0.16709	-15.712	45.5106	41.90046	-0.016357	-0.023437	0.036377	-25.357	116.833	267.3683	-0.12559	0.2416	-0.0093749
1.008	-37.719	9.7106	1063.1714	-1.0935	1.4288	0.32207	-26.648	141.886	454.864	-0.25459	0.32041	0.18926	-68.872	-112.5104	1147.451	-0.83008	2.1699	-0.52197	-37.06	56.5055	74.1771	-0.038574	0.071289	0.0024414	-33.493	-83.367	1121.872	-1.3223	1.5469	-0.17969	-27.085	38.5553	29.6951	-0.013672	-0.022461	0.039551	-43.216	102.5975	240.44213	-0.099805	0.23027	-0.014062
1.01	-53.512	36.9438	1066.953	-1.0737	1.4153	0.32949	-15.788	131.968	450.69	-0.24131	0.3083	0.18555	-53.71	-98.36	1149.492	-0.84814	2.1724	-0.50488	-42.503	54.7231	50.1998	-0.039551	0.076758	-0.0021484	1.605	-74.988	1135.428	-1.3588	1.5701	-0.18281	-47.186	35.8906	36.3149	-0.0078125	-0.019043	0.037598	-44.966	98.7184	200.424	-0.075098	0.20801	-0.013476
1.012	-55.685	59.55876	1057.86	-1.0565	1.4044	0.32637	-24.601	140.26	434.903	-0.22461	0.29639	0.17676	-80.72	-85.337	1169.375	-0.85205	2.1724	-0.49951	-21.665	52.36628	55.648	-0.040528	0.080371	-0.0026367	-5.14100000000001	-82.757	1153.013	-1.4012	1.5949	-0.18418	-38.129	44.0087	27.807	-0.0058594	-0.015137	0.040039	-43.727	95.4435	197.185	-0.054199	0.19482	-0.013184
1.014	-25.008	66.5937	1033.2249	-1.0368	1.3862	0.3249	-26.744	124.5962	415.281	-0.21025	0.27734	0.17529	-92.8599	-69.1619	1175.9085	-0.86719	2.1719	-0.48438	-48.195	49.5733	63.338	-0.036231	0.083496	-0.0038086	-20.071	-81.0221	1132.281	-1.4481	1.6153	-0.18496	-11.308	45.5801	28.572	0.00097656	-0.016113	0.035645	-38.498	104.7832	196.964	-0.029394	0.17871	-0.015332
1.016	-39.984	64.84781	1011.922	-1.0186	1.3691	0.32666	-24.851	105.5123	390.622	-0.19277	0.2627	0.16572	-60.168	-56.3225	1206.03778	-0.87378	2.1722	-0.47242	-54.029	37.9782	53.288	-0.036328	0.078222	-0.00058594	-21.837	-95.6322	1145.005	-1.4923	1.6386	-0.18281	-31.023	31.331	22.355	0.0068359	-0.015625	0.041504	-45.054	95.76665	194.03537	-0.013085	0.16621	-0.014843
1.018	-34.995	46.1241	997.829	-0.99326	1.3466	0.32588	-23.257	96.0073	365.1443	-0.1752	0.2459	0.16612	-64.18	-27.467	1206.75191	-0.87744	2.1626	-0.46436	-47.954	54.3641	65.69633	-0.032715	0.076172	-0.0014648	-16.738	-90.491	1143.735	-1.5293	1.6621	-0.18066	-30.282	23.68502	32.6769	0.015625	-0.0053711	0.033203	-38.562	87.22373	178.656	0.0017586	0.14785	-0.0125
1.02	-43.264	29.0563	965.039	-0.96309	1.3196	0.32539	-39.046	114.1245	337.2645	-0.16416	0.23017	0.15781	-85.168	-37.611	1226.911	-0.87256	2.147	-0.44971	-45.301	64.0447	55.0616	-0.027344	0.07002	-0.0019531	-13.35	-86.998	1150.974	-1.5616	1.6903	-0.18506	-18.908	31.5149	34.7811	0.023926	-0.0039063	0.031738	-23.686	103.832	183.4651	0.01377	0.13105	-0.011426
1.022	-38.997	33.826	943.748	-0.93653	1.2914	0.32422	-21.96	111.4786	331.1814	-0.15039	0.21289	0.1543	-42.442	-46.149	1224.9845	-0.87061	2.1353	-0.43994	-44.599	53.4963	69.136	-0.024609	0.062793	-0.0021484	-52.305	-71.449	1141.856	-1.5839	1.7146	-0.18369	-21.484	42.6906	33.4106	0.032959	0.0019531	0.027588	-28.435	95.981	186.7314	0.026855	0.11865	-0.0058594
1.024	-67.9821	35.236	930.977	-0.90879	1.2631	0.32588	-18.483	110.658	316.438	-0.13545	0.20459	0.15069	-30.078	-49.201	1214.9287	-0.85791	2.1079	-0.42139	-42.082	50.814	59.7934	-0.016797	0.058887	-0.0013672	-52.507	-70.408	1154.6127	-1.5964	1.7442	-0.18603	-26.798	39.606	26.0286	0.037598	0.0024414	0.025879	-41.694	84.521	188.0534	0.039842	0.10186	-0.0038079
1.026	-51.525	34.051	933.6895	-0.88428	1.2368	0.32227	-15.23	115.401	316.588	-0.12451	0.19307	0.15059	-50.721	-48.48842	1184.108	-0.8418	2.0825	-0.40503	-34.177	65.242	46.5226	-0.016016	0.053027	0.0030273	-28.159	-67.09095	1177.06728	-1.6008	1.7603	-0.19062	-17.818	38.2651	21.4862	0.046387	0.011719	0.021973	-37.836	82.241	157.5091	0.048632	0.088478	-0.0019522
1.028	-32.782	34.971	940.7616	-0.85762	1.203	0.31826	-1.721	122.6613	303.8532	-0.11826	0.179	0.14004	-50.056	-61.75644	1176.808	-0.82129	2.0547	-0.3833	-36.497	66.788	33.6078	-0.013184	0.048828	0.0078125	-26.353	-70.949	1203.2358	-1.6011	1.7788	-0.19873	-26.174	35.8136	20.301	0.047363	0.015625	0.021484	-32.213	93.3343	137.395	0.059175	0.077544	0.00077849
1.03	-24.342	58.4197	922.9345	-0.82754	1.1687	0.31767	9.457	106.8643	291.0543	-0.10752	0.16055	0.13467	-36.342	-47.5158	1179.936	-0.80615	2.022	-0.36572	-33.653	48.0778	39.0565	-0.013379	0.047265	0.012695	-34.996	-67.479	1215.7149	-1.6036	1.7784	-0.20469	-30.084	11.8525	18.228	0.054199	0.029297	0.010742	-35.845	89.6666	126.661	0.06699	0.062991	0.0052722
1.032	-39.161	68.872	908.743	-0.80684	1.1332	0.31651	-4.166	84.915	267.317	-0.098633	0.14258	0.12891	-49.195	-21.5162	1182.7317	-0.80273	2.0059	-0.36182	-29.015	40.07	45.928	-0.015528	0.046289	0.019434	15.616	-59.9682	1217.0961	-1.603	1.768	-0.21123	-41.86	-9.6511	43.4165	0.054443	0.041993	0.008789	-40.161	63.7988	128.544	0.071289	0.057129	0.01709
1.034	-38.974	63.3037	867.9115	-0.77842	1.0983	0.31963	-33.234	82.5344	253.14	-0.08877	0.13594	0.125	-60.908	-21.9812	1184.762	-0.80371	1.9824	-0.33594	-15.744	36.753	40.225	-0.0092773	0.045117	0.025293	10.201	-46.009616	1199.292	-1.5995	1.7497	-0.21162	-4.659	9.86	39.5988	0.053223	0.057617	0.0083008	-33.622	72.5665	139.7982	0.076953	0.041497	0.015625
1.036	-44.587	71.0957	855.7453	-0.75537	1.0649	0.31787	-27.609	96.144	229.884	-0.078906	0.12373	0.11983	-60.461	-21.2614	1192.8866	-0.80225	1.9672	-0.32178	-40.64	35.6428	27.6711	-0.0098633	0.045215	0.025	2.072	-33.1221	1183.207	-1.5946	1.7245	-0.20733	-18.449	8.3976	31.59379	0.044434	0.078613	0.0073242	-31.022	86.853	124.782	0.083394	0.033098	0.015537
1.038	-33.597	84.8056	817.502	-0.7333	1.0298	0.31504	-28.854	96.555	219.1375	-0.071485	0.11748	0.11865	-55.939	-11.8469	1199.7714	-0.80469	1.9551	-0.30566	-48.618	38.6281	47.0629	-0.010254	0.044922	0.028809	1.711	-43.206	1192.085	-1.5884	1.688	-0.20068	-33.731	-2.066	38.7383	0.036621	0.094238	0.010254	-35.014	83.484	128.435	0.079489	0.025677	0.020996
1.04	-12.206	77.6707	812.098	-0.71601	0.99414	0.31474	-10.952	112.507	213.8351	-0.063086	0.098436	0.11455	-60.023	-7.5874	1183.4669	-0.80664	1.9395	-0.29102	-31.001	57.069	50.8694	-0.0098632	0.041308	0.032227	21.69	-49.935	1216.4465	-1.5791	1.6455	-0.19326	-39.888	-5.8848	46.2022	0.0097656	0.12988	0.0083008	-5.53400000000001	71.2997	115.828	0.074312	0.019435	0.02745
1.042	-14.572	76.3596	802.117	-0.69726	0.96054	0.31201	-28.164	105.161	213.868	-0.056152	0.089844	0.11523	-75.953	-23.2811	1180.9566	-0.80468	1.9277	-0.27685	-14.657	60.555	40.3637	-0.0060547	0.04375	0.034766	-17.265	-37.0336	1222.514	-1.5709	1.6094	-0.18203	-4.541	5.8781	68.696	-0.0085449	0.1521	0.0014648	-16.706	51.8787	119.7731	0.067871	0.016113	0.035645
1.044	-12.966	97.023	812.54466	-0.68086	0.92832	0.30967	-30.629	86.0241	201.579	-0.051855	0.079199	0.11504	-50.966	-17.1278	1166.0958	-0.80078	1.9102	-0.26709	-53.939	42.801	32.1976	-0.0013672	0.041406	0.032031	-10.516	-34.087	1223.619	-1.5596	1.5801	-0.17304	-30.474	12.3836	89.9899	-0.039063	0.1792	0.00097656	-37.44	57.8776	91.2186	0.057243	0.015536	0.043146
1.046	-50.4702	101.406	797.3692	-0.66553	0.89697	0.30713	-25.333	80.473	196.3702	-0.047071	0.06748	0.11797	-32.748	-8.681	1162.132	-0.78125	1.8828	-0.26172	-31.241	32.669	39.4832	0.0051758	0.041211	0.029883	-18.688	-35.121	1231.4309	-1.5539	1.557	-0.1707	-36.392	5.1602	127.7499	-0.069336	0.21582	0	-45.96	55.01869	81.6341	0.043875	0.01366	0.048911
1.048	-22.974	103.066	791.881	-0.64785	0.86543	0.30225	-22.07	81.874	166.275	-0.043555	0.062793	0.11406	-52.041	-7.084	1119.4989	-0.76953	1.8633	-0.25781	-24.396	34.8187	51.934	0.012207	0.044434	0.029785	-18.711	-7.7513	1221.554	-1.5444	1.5415	-0.15723	-40.464	19.371	176.0106	-0.089355	0.23926	0	-21.015	63.98442	70.95	0.030639	0.015238	0.055144
1.05	-23.957	109.423	757.042	-0.63047	0.83242	0.29912	-2.81	66.593	156.018	-0.037207	0.055566	0.11621	-62.675	-12.1737	1124.95646	-0.74219	1.8281	-0.25195	-31.005	26.5513	68.5047	0.015235	0.04541	0.029492	-64.5534	8.4088	1206.1577	-1.5435	1.5354	-0.14776	-19.781	33.263	208.956	-0.13672	0.28613	0.003418	-34.442	64.02145	89.906	0.02494	0.015612	0.060329
1.052	-13.714	107.409	723.782	-0.61133	0.80234	0.29483	-13.74	61.7781	137.783	-0.041016	0.046875	0.11768	-25.53	14.0922	1117.2259	-0.71802	1.7959	-0.24609	-42.489	20.35	56.88529	0.016211	0.050293	0.031153	-52.945	12.3284	1191.161	-1.5426	1.5359	-0.14004	-43.894	51.4939	260.41	-0.18091	0.3252	0.010986	-45.154	50.76725	81.0897	0.0097656	0.014648	0.069336
1.054	-20.322	97.43279	690.7105	-0.58936	0.77256	0.29404	-23.862	71.16377	116.583	-0.038672	0.043652	0.11523	-27.346	17.2322	1113.3863	-0.69238	1.7637	-0.2417	-7.155	21.1717	48.73611	0.0099608	0.058886	0.03584	-46.179	8.7715	1200.977	-1.5461	1.5402	-0.13613	-25.27	66.12	329.873	-0.23291	0.37012	0.015625	-50.468	50.8029	78.005	0.006765	0.018983	0.073778
1.056	-5.366	101.213	651.971	-0.57129	0.74268	0.28857	-40.4111	72.320084	118.269	-0.037988	0.037207	0.11221	-51.662	11.6883	1077.4501	-0.66553	1.7251	-0.23193	-48.712	9.8092	46.4649	0.0055664	0.068164	0.035254	-21.837	20.0174	1213.8034	-1.5522	1.5474	-0.12959	-19.944	90.529	401.5619	-0.32813	0.4375	0.037598	-30.733	69.105	70.5993	-0.00036857	0.023759	0.078934
1.058	-11.882	102.642	654.499	-0.55186	0.7165	0.28418	-34.022	64.9052	135.6723	-0.036426	0.033691	0.11494	-29.054	-4.216	1069.0895	-0.6582	1.7012	-0.22852	-36.287	-2.83763	66.4614	-0.0063477	0.075684	0.044434	-31.934	22.5515	1209.8777	-1.5522	1.5532	-0.13135	-14.048	98.884	453.80775	-0.37646	0.48096	0.053711	-23.153	59.486	79.358	-0.0050279	0.024902	0.08692
1.06	-28.779	116.434	658.025	-0.53418	0.69385	0.28418	-38.934	60.7865	152.427	-0.03711	0.027539	0.11328	-44.08	3.4959	1060.599	-0.6333	1.6626	-0.22803	-30.151	-11.0473	77.7924	-0.021387	0.088867	0.047363	-7.68	20.0615	1196.824	-1.553	1.5568	-0.12256	-20.748	97.553	497.3471	-0.50586	0.57227	0.080078	-37.762	49.5627	76.6418	-0.012616	0.02547	0.088141
1.062	-19.743	105.9949	666.014	-0.51816	0.66299	0.27598	-39.996	76.963	136.129	-0.040039	0.022461	0.11084	-67.592	1.8939	1048.9263	-0.61597	1.638	-0.2229	-28.064	-12.2446	74.2737	-0.037598	0.10586	0.050782	9.842	20.4036	1200.9	-1.5511	1.5515	-0.12217	2.598	82.178	534.6235	-0.61524	0.65381	0.11694	-35.636	37.2187	60.5908	-0.02002	0.030762	0.097168
1.064	-1.297	126.681	644.3379	-0.50762	0.64121	0.27158	-28.34	84.587	113.1453	-0.038379	0.019238	0.10567	-43.909	6.8603	1033.7675	-0.59912	1.6196	-0.21729	-51.854	-8.9574	78.9995	-0.054004	0.12461	0.052344	14.171	21.029	1185.1665	-1.5442	1.5407	-0.12217	-32.6	75.756	562.3713	-0.73242	0.73828	0.14893	-23.373	44.7712	25.591	-0.022376	0.024563	0.10243
1.066	-21.126	135.965	627.0077	-0.48779	0.62158	0.26855	-34.95	76.385	76.95	-0.036426	0.01543	0.10234	-35.278	20.6693	1025.9897	-0.57568	1.5825	-0.21387	-31.591	-26.3226	110.185	-0.072754	0.1461	0.056543	-19.261	8.7836	1159.8263	-1.5276	1.5243	-0.1206	-28.15	51.2588	580.9929	-0.89209	0.87744	0.20557	-40.396	23.425	31.988	-0.02936	0.021438	0.10555
1.068	-26.228	129.882	608.6239	-0.47412	0.60136	0.26338	-25.97	57.19962	74.374	-0.033691	0.0099609	0.098046	-46.301	35.231	1000.2182	-0.5625	1.5625	-0.21436	-25.46	-18.1724	150.91	-0.092285	0.16748	0.054199	-6.38	24.036	1148.3779	-1.5117	1.5039	-0.11914	-10.47	28.9228	588.3677	-0.97412	0.93994	0.22217	-37.489	22.044	46.348	-0.030132	0.025801	0.11215
1.07	-14.494	108.657	604.0622	-0.45762	0.57871	0.26221	-23.575	55.6786	55.214	-0.030371	0.002832	0.094824	-58.159	32.537	981.6541	-0.53418	1.5239	-0.21387	-22.464	11.7025	195.085	-0.11406	0.19287	0.050098	-21.681	36.743	1131.12587	-1.4814	1.4768	-0.11231	16.789	10.8846	616.3694	-1.1499	1.0649	0.23633	-37.679	35.2022	58.0187	-0.033823	0.023287	0.11896
1.072	-15.123	109.375	577.4836	-0.44512	0.55918	0.2583	-19.71	38.537	67.315	-0.027344	-0.0024414	0.09082	-50.642	34.935	975.14462	-0.51245	1.4909	-0.21411	-37.207	26.9575	245.3666	-0.14151	0.22129	0.044434	-28.676	39.067	1119.625	-1.4531	1.45	-0.10986	-41.90665	-12.8594	636.625	-1.2563	1.1489	0.22583	-53.645	49.6773	44.194	-0.036621	0.019531	0.12158
1.074	-31.644	92.882	546.2367	-0.43096	0.53965	0.2542	-22.554	47.6155	63.414	-0.023926	-0.010156	0.088769	-45.559	56.8987	962.2532	-0.48682	1.4556	-0.21826	-34.43	34.1812	306.7966	-0.17666	0.25879	0.041308	-24.339	42.2973	1102.282	-1.4219	1.4164	-0.11455	-43.748	-37.365	672.8632	-1.3379	1.2246	0.21289	-45.966	44.596	25.9644	-0.036405	0.019748	0.12551
1.076	-11.314	90.588	509.065	-0.41162	0.51953	0.25586	-12.903	49.3074	83.7555	-0.021777	-0.012598	0.085547	-40.231	48.4433	939.4469	-0.45166	1.4082	-0.21973	-12.475	61.8587	385.787	-0.22773	0.30615	0.045508	-13.13	45.5007	1097.312	-1.3945	1.3878	-0.10957	-24.196	-42.267	686.8662	-1.377	1.2988	0.18896	-18.812	48.649	42.6622	-0.036619	0.022538	0.12952
1.078	-9.77	98.106	491.279	-0.40215	0.50772	0.25176	-38.854	64.334	67.0655	-0.020215	-0.016504	0.083984	-40.517	34.7748	906.65	-0.43994	1.3813	-0.21777	-10.128	66.081	431.3312	-0.2915	0.35596	0.051758	-26.772	54.1528	1085.701	-1.3667	1.3599	-0.11035	7.264	-37.1896	678.3617	-1.3628	1.3188	0.17041	-13.813	49.349	57.8046	-0.037187	0.020636	0.13119
1.08	-2.434	122.1528	478.768	-0.39492	0.49062	0.24961	-43.219	67.256	78.165	-0.019629	-0.026953	0.084668	-40.339	45.878	913.862	-0.40967	1.3301	-0.21191	-14.841	70.7389	478.3282	-0.37901	0.42276	0.059375	-32.573	50.126	1071.726	-1.3441	1.3327	-0.10635	-33.694	-42.8066	686.529	-1.2949	1.3242	0.13623	-41.353	40.851	46.3287	-0.031151	0.025218	0.1344
1.082	-10.822	124.0433	496.175	-0.38359	0.47617	0.24531	-34.254	81.996	56.0397	-0.021484	-0.033691	0.083984	-32.804	71.33021	913.801	-0.3916	1.298	-0.21216	9.619	72.099	521.004	-0.48027	0.49961	0.075195	-34.177	53.885	1046.19	-1.321	1.3075	-0.10732	-42.346	-55.755	686.965	-1.2041	1.2871	0.12036	-23.053	40.7216	17.3	-0.025391	0.026367	0.13379
1.084	9.268	124.66	488.852	-0.37549	0.46221	0.23906	-29.004	57.246	55.0856	-0.023926	-0.035547	0.080371	-21.986	65.0749	913.16093	-0.37891	1.2617	-0.20801	-4.217	81.385	557.708	-0.5959	0.59258	0.10528	-4.49	50.252	1048.7875	-1.2987	1.2798	-0.10381	-32.394	-50.88	682.4683	-1.0952	1.2251	0.10742	-18.562	38.4537	2.638	-0.01723	0.028517	0.13214
1.086	-6.669	128.306	485.008	-0.36475	0.4458	0.23145	-39.38	36.592	35.813	-0.024805	-0.041015	0.078223	-34.947	71.462	898.665	-0.36084	1.2163	-0.2002	-9.901	66.7234	602.344	-0.72481	0.69922	0.13994	-23.039	56.625	1014.9232	-1.2749	1.2556	-0.10918	-19.7	-42.618	659.0635	-0.93945	1.0977	0.10889	-21.838	32.0151	17.422	-0.01092	0.030854	0.12617
1.088	-11.389	132.19	459.3523	-0.35088	0.42842	0.22539	-38.275	30.4712	38.871	-0.026758	-0.044922	0.082129	-38.843	84.164	883.4485	-0.35205	1.1938	-0.19922	-14.001	40.5061	652.006	-0.86035	0.81934	0.17188	-28.239	44.08	987.357	-1.2471	1.2285	-0.11475	-39.336	-53.47329	654.8104	-0.87158	1.022	0.11133	-43.297	21.1568	25.8199	-0.00026935	0.036793	0.12177
1.09	-7.135	112.675	438.0554	-0.33447	0.40859	0.21709	-37.167	46.1242	31.502	-0.027539	-0.047949	0.07334	-51.27	88.776	857.2739	-0.33398	1.1504	-0.2041	-6.137	22.0497	670.154	-0.9969	0.95235	0.20547	-10.896	45.097	972.836	-1.2172	1.2027	-0.11933	-22.607	-54.812	645.519	-0.75195	0.87109	0.12256	-21.262	17.4325	42.493	0.0067089	0.039848	0.11557
1.092	-3.074	107.1128	399.697	-0.31416	0.38946	0.21045	-11.39	50.1506	32.9318	-0.027832	-0.054688	0.072754	-52.261	75.647	839.5766	-0.32031	1.1138	-0.19751	-27.151	3.3962	657.486	-1.132	1.0875	0.229	-11.091	48.496	966.464	-1.1828	1.1734	-0.12314	-10.682	-43.5543	666.246	-0.6914	0.7749	0.14209	-29.239	23.0122	34.4504	0.010254	0.045898	0.10791
1.094	-10.627	111.3596	389.367	-0.29219	0.36358	0.20196	-25.981	43.70653	48.2367	-0.024707	-0.057911	0.070313	-18.214	76.4592	816.0548	-0.3042	1.0767	-0.19287	-15.995	-39.695	654.056	-1.257	1.2047	0.2208	-37.285	49.358	964.0776	-1.1449	1.141	-0.13369	-52.478	-40.9407	679.088	-0.64795	0.69385	0.15234	-30.164	16.4398	43.4453	0.018383	0.051666	0.10763
1.096	-27.33	105.321	358.181	-0.26904	0.33643	0.19385	-34.737	46.6467	52.725	-0.02334	-0.060156	0.064746	-32.658	76.4518	800.1599	-0.28174	1.0259	-0.19092	-11.011	-50.363	636.592	-1.3459	1.308	0.19375	-29.637	47.9707	946.287	-1.1107	1.1119	-0.12979	-44.571	-71.1726	716.1357	-0.60938	0.61621	0.16748	-35.136	11.3842	50.8261	0.022059	0.058733	0.1026
1.098	-7.225	85.111	337.1429	-0.24853	0.30879	0.18487	-37.167	60.1346	51.573	-0.025293	-0.066797	0.066309	-35.591	69.011	768.6601	-0.27002	1.0024	-0.18994	-34.791	-67.016	617.799	-1.394	1.3892	0.15625	-30.538	64.5819	939.13	-1.0737	1.0747	-0.12793	-33.924	-88.597	740.0389	-0.5957	0.59766	0.17383	-20.223	23.8995	51.189	0.019412	0.071588	0.099443
1.1	4.414	95.9343	337.1768	-0.22724	0.28692	0.18047	-40.757	56.077	51.7772	-0.021973	-0.069141	0.063867	-22.301	77.581	761.408	-0.24902	0.95215	-0.18311	-27.805	-67.563	589.3644	-1.3812	1.4473	0.11621	-23.571	81.721	933.675	-1.0381	1.0397	-0.12695	-38.929	-94.987	748.245	-0.58398	0.57422	0.18701	-24.707	25.334	38.472	0.012742	0.082235	0.091248
1.102	-10.914	101.256	338.115	-0.20967	0.25723	0.17656	-41.826	46.004	38.7842	-0.016113	-0.069824	0.059082	-2.29	109.8929	741.632	-0.23291	0.91797	-0.17529	-9.72600000000001	-74.998	587.1219	-1.3183	1.4763	0.078125	-1.477	70.746	919.362	-1.0073	1.0056	-0.12598	-78.5815	-110.947	748.752	-0.5835	0.58935	0.18482	-36.227	10.23747	29.327	0.0063477	0.10107	0.091797
1.104	1.099	100.36	340.698	-0.19355	0.23203	0.1751	-40.975	44.6348	25.2	-0.016406	-0.078906	0.057226	-24.576	115.7079	739.38396	-0.22363	0.88135	-0.17285	21.747	-57.638	593.043	-1.2104	1.4653	0.0375	-21.745	67.041	888.9484	-0.97959	0.96924	-0.12636	-64.532	-122.1415	774.479	-0.5874	0.61768	0.18311	-18.986	-25.952	52.291	-0.0019531	0.12095	0.092773
1.106	14.166	101.4792	334.0064	-0.18701	0.2085	0.1665	-39.03	40.1527	7.308	-0.013379	-0.082324	0.053223	-17.635	113.763	723.67	-0.21191	0.84033	-0.16553	-4.994	-29.24	594.827	-1.0621	1.4129	0.0031249	-27.742	65.3305	868.424	-0.95019	0.93379	-0.12471	-65.808	-115.9853	786.323	-0.60547	0.68945	0.17871	-20.008	-18.6323	73.9647	-0.0098447	0.13973	0.094594
1.108	0.582999999999998	104.9385	297.278	-0.17168	0.18496	0.15879	-54.583	37.1035	6.254	-0.009082	-0.087793	0.049317	-13.708	114.883	711.318	-0.20557	0.81934	-0.1582	-26.6012	-14.933	600.6913	-0.896	1.3276	-0.022461	-47.254	62.4157	841.685	-0.92334	0.90479	-0.12305	-65.16	-117.2949	802.444	-0.6167	0.73193	0.17041	-47.679	-15.3527	80.898	-0.023855	0.15924	0.094264
1.11	-18.7	95.8401	276.266	-0.16475	0.16475	0.1539	-37.301	36.56775	31.3712	-0.0051758	-0.089062	0.042481	-9.49	118.706	683.8162	-0.19678	0.7832	-0.15088	-33.758	-19.637	625.3597	-0.7334	1.2049	-0.027539	-20.993	56.7581	835.942	-0.89814	0.8749	-0.12002	-64.78	-140.99	828.9243	-0.66064	0.82959	0.15625	-43.96	-0.7913	95.1943	-0.03879	0.18109	0.089742
1.112	-28.197	91.2496	270.2935	-0.15068	0.14834	0.15234	-31.671	48.5535	48.724	-0.00097656	-0.092773	0.040039	-36.466	102.3512	667.9575	-0.19262	0.7605	-0.14014	-5.629	-22.26	653.987	-0.59043	1.0789	-0.025586	-37.97	71.582	818.5238	-0.87588	0.84932	-0.12002	-39.287	-134.726	864.2415	-0.69433	0.90528	0.15088	-21.951	11.3155	144.2897	-0.05127	0.20313	0.083984
1.114	-13.445	98.7426	254.253	-0.14131	0.14043	0.13838	-39.638	50.4046	61.439	0.0020508	-0.098047	0.03584	-20.464	93.95302	655.4925	-0.18604	0.74072	-0.13623	-35.087	-56.645	672.58	-0.48574	0.95547	-0.011523	-25.687	87.561	803.0362	-0.85166	0.82353	-0.11768	-66.435	-107.911	900.08278	-0.73389	0.98096	0.14893	-48.847	43.828	176.216	-0.069811	0.2244	0.081251
1.116	-22.902	98.2852	231.6281	-0.12939	0.12695	0.13184	-37.493	55.6	55.806	0.0069336	-0.1001	0.030761	-19.951	99.9906	620.0529	-0.17773	0.70996	-0.13184	-28.09	-86.013	663.6843	-0.42168	0.84492	0.007715	-38.981	106.5138	787.436	-0.83428	0.80498	-0.11045	-48.454	-92.0093	914.4591	-0.79053	1.0708	0.13867	-50.909	38.949	216.255	-0.088446	0.24538	0.079
1.118	-25.865	82.8792	216.78453	-0.12022	0.11992	0.1205	-26.695	48.2323	39.3641	0.012793	-0.096192	0.02373	-23.111	107.9611	591.433	-0.17383	0.69336	-0.1167	-31.584	-110.38	672.781	-0.39063	0.75977	0.029297	-17.327	122.181	773.1974	-0.81445	0.78125	-0.11182	-61	-96.692	931.8529	-0.82568	1.1099	0.13818	-40.126	62.152	271.319	-0.11463	0.27195	0.080566
1.12	-28.407	77.8031	223.2135	-0.10869	0.1128	0.10664	-26.88	30.9425	30.316	0.014648	-0.09834	0.02041	-21.744	103.736	578.2029	-0.16406	0.67236	-0.11133	-31.122	-133.1703	698.559	-0.39414	0.70234	0.047656	-27.556	134.754	763.4385	-0.79853	0.76592	-0.10195	-36.516	-78.435	939.8016	-0.88623	1.1841	0.11914	-47.468	85.8021	355.208	-0.15408	0.30115	0.082708
1.122	-2.526	88.4236	212.729	-0.09619	0.10068	0.096876	-43.201	6.7042	31.016	0.014648	-0.095215	0.019043	-10.461	110.5088	570.4	-0.16308	0.65795	-0.10108	-67.2415	-170.418	714.77	-0.41152	0.675	0.064746	-31.772	120.422	749.113	-0.78272	0.74619	-0.098535	-42.849	-82.595	946.1335	-0.92749	1.2288	0.11596	-32.123	80.62415	424.503	-0.2085	0.3457	0.087402
1.124	-10.903	87.0524	202.6149	-0.085742	0.091602	0.084375	-43.236	-5.3999	37.442	0.016211	-0.089844	0.016992	2.213	134.224	565.03198	-0.15625	0.64307	-0.092285	-37.914	-197.753	747.1194	-0.44082	0.67149	0.07373	-65.3648	119.866	714.37871	-0.76826	0.73408	-0.094629	-45.628	-88.717	957.571	-0.95898	1.2637	0.10693	-35.268	67.9826	498.80259	-0.28205	0.39542	0.095315
1.126	6.194	72.5964	188.7423	-0.071777	0.081543	0.07666	-37.137	-6.6597	37.671	0.010645	-0.081445	0.019238	-7.733	129.0474	550.4495	-0.15332	0.62158	-0.085449	-70.02	-173.022	766.046864	-0.47344	0.68828	0.076465	-47.772	123.0332	693.836	-0.75732	0.71924	-0.087011	-53.692	-100.6953	988.06503	-0.99609	1.3008	0.098145	-29.212	85.656	541.6197	-0.37005	0.46145	0.10684
1.128	-3.613	74.1057	162.029	-0.060547	0.07207	0.065234	-48.023	-6.7299	52.971	0.00087892	-0.068555	0.019238	-17.986	117.3285	531.695	-0.15039	0.60938	-0.086426	-51.519	-145.214	790.8736	-0.50195	0.72119	0.074707	-56.9213	112.9693	680.007	-0.74561	0.70557	-0.077637	-45.33	-92.8034	1008.73696	-1.0059	1.3223	0.10205	-39.2565	92.038	592.3568	-0.47747	0.5384	0.12051
1.13	-0.722999999999999	82.18321	150.809	-0.048145	0.061816	0.059082	-31.999	-3.586	78.615	-0.01416	-0.052929	0.023242	-9.471	121.6623	526.0242	-0.146	0.58887	-0.07666	-58.076	-122.845	828.48	-0.53359	0.75996	0.066406	-43.306	92.6801	682.478	-0.72813	0.69034	-0.074902	-65.704	-107.2075	1007.968	-1.0391	1.3516	0.098633	-22.575	59.994	637.0959	-0.59699	0.63429	0.13887
1.132	-42.429	75.1577	142.426	-0.036817	0.054395	0.05166	-40.835	-4.583	81.434	-0.037109	-0.033203	0.02832	-21.481	126.4522	490.486	-0.13501	0.57129	-0.070069	-40.251	-98.613	862.02172	-0.56045	0.81484	0.055371	-52.816	100.2022	671.1632	-0.71113	0.68086	-0.070215	-49.197	-111.2718	1004.504	-1.0652	1.3777	0.10107	-50.131	13.4219	689.377	-0.72559	0.73633	0.16357
1.134	-1.901	77.694	147.0678	-0.030664	0.043554	0.047949	-41.505	4.4513	98.026	-0.057715	-0.011426	0.032031	-38.0192	115.106	475.5604	-0.12061	0.55273	-0.064453	-58.047	-77.442	881.3779	-0.59443	0.87305	0.049121	-38.535	112.2598	641.2322	-0.69082	0.66602	-0.06748	-41.594	-105.5057	1037.0143	-1.0977	1.4121	0.1001	-46.431	-14.327	681.775	-0.85361	0.85458	0.18613
1.136	-16.268	87.896	154.735	-0.019531	0.032227	0.042969	-19.316	-3.2832	104.2579	-0.089063	0.013184	0.038769	-15.27	117.89	461.2501	-0.10596	0.51709	-0.061035	-21.931	-74.903	894.3436	-0.63535	0.93086	0.045996	-41.064	120.97656	621.2653	-0.6708	0.65147	-0.059863	-36.3	-101.0886	1051.866	-1.1582	1.4629	0.11182	-68.21	-49.8432	680.5401	-0.98437	0.9668	0.20557
1.138	-26.61	76.948	157.445	-0.017774	0.021582	0.038672	-9.986	-35.1526	133.9558	-0.11133	0.044043	0.038769	-19.186	121.422	445.347	-0.09375	0.49902	-0.057617	-51.211	-88.057	920.041	-0.68555	0.98828	0.052246	-36.244	123.681	611.39694	-0.64258	0.63672	-0.057617	-61.289	-109.3324	1076.936	-1.2058	1.5183	0.11841	-65.158	-76.185	643.577	-1.1063	1.0793	0.22626
1.14	-39.7461	71.371	138.8412	-0.013965	0.016992	0.03584	-10.675	-22.9789	164.987	-0.14648	0.074121	0.041894	-17.001	113.5361	433.175	-0.069824	0.46436	-0.058105	-16.174	-85.592	941.96	-0.74776	1.0507	0.056739	-52.187	132.4554	596.75912	-0.61807	0.62178	-0.053613	-33.05	-109.6567	1082.6008	-1.2593	1.5806	0.125	-42.865	-95.455	659.2989	-1.2046	1.1802	0.2375
1.142	5.638	78.188	134.6036	-0.014355	0.011133	0.031543	-23.823	-15.3911	201.841	-0.17871	0.10693	0.043945	-22.418	99.9888	402.9615	-0.054443	0.43042	-0.050537	-50.092	-88.987	949.6441	-0.82109	1.1008	0.065918	-44.476	136.3471	573.4662	-0.59453	0.60391	-0.049023	-41.334	-99.7229	1089.2445	-1.3418	1.6641	0.12256	-10.992	-94.388	644.10683	-1.2798	1.2622	0.2334
1.144	-5.731	85.4674	106.816	-0.013867	0.010254	0.031641	-19.042	9.8378	258.899	-0.2164	0.14863	0.048242	2.576	115.3858	395.63284	-0.037109	0.40088	-0.043945	-30.227	-100.499	937.5517	-0.90273	1.1575	0.074902	-28.966	136.0064	557.533	-0.57149	0.58555	-0.049805	-49.204	-86.3912	1084.7248	-1.3779	1.7109	0.12451	-37.4999	-76.929	652.006	-1.3196	1.3155	0.22149
1.146	-14.256	62.1495	98.8807	-0.018066	0.0048828	0.026855	-18.341	40.4474	339.043	-0.26103	0.18565	0.053125	-20.63	109.4423	392.94038	-0.013672	0.35938	-0.039063	-54.673	-118.4888	964.347	-0.98234	1.1989	0.072754	-40.636	136.2261	551.024	-0.55264	0.57549	-0.041406	-59.227	-70.2472	1093.1598	-1.4429	1.7974	0.11816	4.863	-45.63	652.066	-1.3235	1.3387	0.2044
1.148	-1.112	45.8265	89.7834	-0.023633	0.011133	0.024707	-24.982	63.076	415.0339	-0.31416	0.23525	0.060547	-3.34500000000001	98.1131	373.3214	-0.0078125	0.33789	-0.036133	-23.225	-127.0969	983.0967	-1.0527	1.2383	0.064941	-49.939	129.4134	562.5542	-0.53125	0.55176	-0.031738	-40.693	-56.481	1115.0963	-1.4866	1.8547	0.11254	20.6294	-23.0432	679.566	-1.282	1.3293	0.19189
1.15	-1.774	47.0741	78.423	-0.027832	0.012695	0.022168	-47.935	77.88	490.023	-0.38252	0.29033	0.078125	-7.029	94.7282	357.4309	0.0087891	0.29932	-0.030273	-52.574	-157.026	1018.2952	-1.0979	1.2743	0.056933	-62.326	116.396	540.8441	-0.52197	0.54141	-0.02207	-49.963	-43.494	1134.9083	-1.521	1.9028	0.10986	16.158	-6.5299	681.983011	-1.2044	1.2866	0.17763
1.152	-19.876	48.799	79.137	-0.036035	0.013867	0.020996	-39.739	98.859	540.364	-0.46826	0.35303	0.10059	0.677	116.0849	334.077	0.018311	0.2727	-0.026367	-54.9	-145.699	1038.391	-1.13	1.3059	0.051465	-44.57	123.998	517.961	-0.50605	0.52432	-0.015625	-55.712	-64.8929	1148.1117	-1.5581	1.9517	0.11182	-15.104	-27.792	686.27	-1.103	1.2163	0.16797
1.154	-33.566	49.3124	106.7851	-0.039551	0.019043	0.021289	-40.28	101.935	570.64292	-0.57119	0.43252	0.13037	-24.845	98.9753	316.338	0.031738	0.24707	-0.020996	-38.203	-125.84	1062.8252	-1.1491	1.3329	0.046387	-41.308	145.124	487.3881	-0.492	0.50791	-0.007422	-58.521	-75.5366	1160.3659	-1.5742	1.959	0.10986	-13.31	-28.524	693.9879	-0.98484	1.1272	0.16728
1.156	-24.786	64.045	111.101	-0.044434	0.022461	0.018066	-41.704	76.751	594.3193	-0.67813	0.52304	0.16543	-12.023	99.595	325.7007164	0.043457	0.22266	-0.012207	-16.268	-94.344207	1062.1117	-1.164	1.363	0.044531	-22.085	146.225	465.64376	-0.48047	0.49414	-0.0051758	-41.021	-77.1278	1172.035	-1.6016	1.9707	0.11572	-16.531	-28.54	691.913	-0.87158	1.0286	0.16719
1.158	-29.801	75.304	101.959	-0.049414	0.027441	0.018067	-48.969	52.39	616.263	-0.80352	0.62422	0.20762	-23.55	103.525	317.236	0.047363	0.20703	-0.015625	-34.165	-104.6182	1078.48753	-1.1851	1.3931	0.040527	-49.365	123.629	438.9131	-0.46094	0.47852	0.0043945	-70.107	-64.43108	1184.0129	-1.6089	1.958	0.12622	-9.395	-54.821	690.861	-0.77236	0.93721	0.17969
1.16	-20.179	69.066	80.345	-0.052734	0.033008	0.018555	-54.52	27.8443	602.4	-0.93789	0.7332	0.23897	-11.533	122.763	298.9435	0.054688	0.17773	-0.010742	-15.441	-94.391	1091.448	-1.2116	1.4275	0.042773	-43.807	132.5447	417.371	-0.44512	0.4627	0.0072266	-80.544	-72.1925	1170.0337	-1.6113	1.9297	0.13281	-35.996	-87.483	702.4919	-0.70469	0.86348	0.18593
1.162	-28.255	61.168	71.1508	-0.054297	0.036133	0.018164	-59.465	-2.974	631.39497	-1.084	0.84375	0.25439	-15.359	98.379	284.1931	0.05957	0.15967	-0.0083008	-20.581	-84.702	1118.196	-1.2465	1.4711	0.046094	-52.904	144.3062	405.861	-0.42041	0.45108	0.01084	-80.449	-60.4551	1162.473	-1.603	1.8833	0.14355	-53.566	-103.364	733.5445	-0.65381	0.80713	0.19141
1.164	-13.73	59.744	62.647	-0.061816	0.04375	0.019629	-63.068	-29.8773	616.597	-1.2068	0.96592	0.26914	-13.816	81.1241	259.7934	0.063477	0.15234	-0.0083008	-22.971	-71.966	1114.03	-1.2918	1.5164	0.050781	-28.528	124.66	426.208	-0.40049	0.43506	0.013574	-59.084	-40.4519	1174.9705	-1.5938	1.8652	0.14795	-45.657	-107.3077	742.967	-0.61367	0.77578	0.19687
1.166	-28.256	52.1295	43.648	-0.062988	0.039063	0.019531	-45.072	-59.232	630.464	-1.3115	1.0743	0.27432	-6.139	83.6183	232.928	0.069336	0.13965	-0.0083008	-25.592	-85	1130.7	-1.3412	1.5693	0.054199	-31.647	110.4436	424.8462	-0.37685	0.42061	0.016406	-83.8509	-47.671	1192.5011	-1.5645	1.8027	0.1626	-28.179	-136.144	772.9488	-0.5873	0.76289	0.19356
1.168	-17.21	37.7931	35.934	-0.06582	0.044336	0.019238	-35.717	-47.781	626.782	-1.3791	1.1762	0.26377	-13.964	85.5716	224.5262	0.072022	0.12768	-0.0085449	-12.894	-98.631	1116.5002	-1.3901	1.6235	0.050781	-43.856	125.3555	408.3654	-0.35547	0.40674	0.019043	-44.044	-52.8836	1210.683	-1.5379	1.7751	0.17017	-43.543	-167.098	800.0763	-0.5666	0.77539	0.18848
1.17	-4.256	26.058	41.649	-0.071777	0.044141	0.017383	-53.191	-38.2629	617.896	-1.4054	1.2634	0.24004	-12.308	83.5913	207.4653	0.07666	0.12061	-0.010742	-26.258	-91.2748	1109.043	-1.4309	1.6858	0.044726	-54.12	154.757	375.4795	-0.33242	0.38847	0.024805	-42.146	-46.2548	1226.9965	-1.5073	1.7427	0.17578	-51.958	-167.579	819.5089	-0.5501	0.80088	0.17979
1.172	-12.215	32.01	59.296	-0.072559	0.047266	0.013867	-66.391	-28.365	599.465	-1.3945	1.3223	0.20654	1.591	86.804	208.004	0.082031	0.10889	-0.0068359	-55.601	-75.4014	1101.202	-1.4629	1.7433	0.039063	-48.72	164.797	367.389	-0.31064	0.37608	0.027051	-29.855	-35.37482	1206.0897	-1.4644	1.7056	0.1792	-52.011	-159.07	813.3114	-0.53467	0.83643	0.16455
1.174	-40.872	29.6971	71.716	-0.07041	0.044629	0.010547	-51.904	-41.063	621.426	-1.3435	1.3512	0.18135	-8.047	88.229	207.1911	0.082031	0.10889	-0.013184	-57.837	-80.351	1136.545	-1.4911	1.7965	0.023437	-39.446	152.541	354.9616	-0.28838	0.35693	0.022754	-42.243	-44.7586	1198.9029	-1.4429	1.688	0.18262	-69.2049	-153.983	822.848	-0.52539	0.88652	0.14805
1.176	-17.814	40.2	69.989	-0.065918	0.043945	0.0068359	-62.443	-38.86	623.28	-1.2652	1.3517	0.15196	-34.736	83.942	200.0656	0.088867	0.10303	-0.0087891	-54.421	-76.608	1160.366	-1.5034	1.8427	0.014844	-47.143	125.16	331.0617	-0.26358	0.34072	0.026074	-18.792	-35.5611	1190.9234	-1.4043	1.6641	0.18555	-56.082	-146.968	859.749	-0.52187	0.93867	0.133
1.178	-21.699	57.584	47.1328	-0.060352	0.03916	0.0001953	-63.568	-33.689	621.708	-1.1655	1.3146	0.13555	-29.633	83.796	199.5143	0.089844	0.098391	-0.013183	-72.916	-79.0168	1159.5559	-1.5151	1.8813	0.0073242	-54.001	107.0102	311.2308	-0.23926	0.31836	0.021973	-22.391	-23.2848	1186.11445	-1.3765	1.6426	0.18994	-57.265	-124.7628	893.3125	-0.525	0.99336	0.11856
1.18	-33.681	59.85	36.889	-0.051953	0.036523	-0.00078124	-47.774	-29.789	627.64	-1.0588	1.245	0.12354	-10.634	99.605	181.8206	0.087402	0.094238	-0.01416	-80.1899	-74.6123	1158.3092	-1.5213	1.9072	0.0042969	-37.883	103.5093	299.305	-0.21563	0.29825	0.017188	-49.363	-34.2769	1175.4968	-1.3496	1.6289	0.1958	-84.944	-102.8311	910.561	-0.54522	1.0493	0.10908
1.182	-60.0967	42.842	13.28	-0.046875	0.033008	-0.0039062	-37.757	-19.432	653.994	-0.95508	1.1523	0.11816	-35.428	94.052	166.3146	0.087891	0.09375	-0.017578	-68.9637	-57.266	1179.6026	-1.5249	1.9189	0.0012695	-49.404	103.703	291.269	-0.18779	0.27891	0.017968	-56.632	-41.6531	1176.89921	-1.3135	1.6094	0.20361	-72.598	-83.584	925.797	-0.57959	1.0981	0.10742
1.184	-21.282	27.8278	27.968	-0.046094	0.03125	-0.0069336	-41.781	-19.989	687.947	-0.87461	1.0449	0.11651	-26.898	68.0984	149.9008	0.086914	0.090332	-0.018555	-29.022	-48.532	1209.8084	-1.5183	1.9162	0.002832	-38.447	103.068	302.7775	-0.16748	0.25781	0.017188	-60.2774	-22.3887	1164.235	-1.2944	1.6021	0.20898	-42.533	-80.925	954.0847	-0.62627	1.1554	0.10342
1.186	-27.967	34.6394	16.493	-0.046387	0.02832	-0.003418	-29.475	-53.311	728.4694	-0.81142	0.93916	0.1169	-5.988	68.1596	142.7803	0.087891	0.085938	-0.021484	-47.985	-54.864	1205.301	-1.512	1.9009	0.0096681	-59.989	98.035	278.08	-0.13994	0.23574	0.013281	-45.995	-9.1941	1183.5974	-1.269	1.5845	0.2124	-49.051	-85.977	952.7497	-0.68565	1.2033	0.1043
1.188	-18.626	20.556	37.83834	-0.048633	0.032715	-0.0079102	-19.369	-86.75	763.196	-0.77158	0.84541	0.1208	3.811	68.4427	129.207	0.082519	0.0896	-0.019531	-46.089	-86.804	1214.961	-1.4976	1.8696	0.01709	-34.278	117.807	265.702	-0.11328	0.21631	0.013184	-53.245	-4.6861	1154.3226	-1.2515	1.5718	0.22021	-67.822	-108.259	958.8201	-0.75166	1.245	0.099999
1.19	-17.631	27.687	46.9028	-0.049121	0.033887	-0.013477	-10.36	-115.326	788.684	-0.75088	0.76885	0.11865	-16.796	55.0095	135.1476	0.075684	0.09668	-0.020508	-9.654	-72.8852	1190.0972	-1.4798	1.8328	0.025976	-24.542	131.774	243.08089	-0.088184	0.19473	0.0068359	-50.197	-6.33898	1150.7274	-1.2383	1.5547	0.22705	-46.189	-124.9979	960.903	-0.81426	1.2889	0.10508
1.192	-14.333	37.848	62.5	-0.051856	0.033105	-0.014257	-9.376	-147.53737	805.3237	-0.74365	0.7124	0.11572	-11.27	42.78	131.4792	0.063965	0.10107	-0.019043	-2.91200000000001	-60.347	1188.634	-1.4563	1.7938	0.037207	-30.393	123.055	246.8175	-0.067285	0.17715	0.0043946	-35.819	4.65724	1127.209	-1.2266	1.5449	0.23291	-43.37	-143.46	981.345	-0.87695	1.3262	0.11279
1.194	-21.759	47.1108	39.7121	-0.054395	0.035938	-0.020898	-37.142	-162.3536	815.191	-0.73916	0.68115	0.10381	-8.452	58.8235	131.3639	0.061035	0.10791	-0.017578	-19.9	-49.667	1197.8058	-1.4363	1.7449	0.060254	-54.358	127.239	239.3439	-0.041895	0.15762	0.0032227	-34.419	14.4759	1122.501	-1.2202	1.5356	0.23828	-27.012	-171.509	1014.02	-0.9335	1.3649	0.11992
1.196	-20.859	31.1095	26.6245	-0.052246	0.039551	-0.023438	-26.582	-156.968	841.328	-0.73955	0.6708	0.09541	-16.341	59.9684	111.4038	0.050293	0.11475	-0.01709	-23.406	-52.683	1193.8687	-1.4132	1.7137	0.069238	-39.089	117.551	214.8553	-0.022656	0.13818	0.00078124	-48.023	7.173	1126.1188	-1.2104	1.5161	0.24365	-66.789	-169.033	1034.58309	-0.98974	1.404	0.1292
1.198	-38.219	24.4666	26.09539	-0.052148	0.045312	-0.026074	-25.197	-133.858	852.516	-0.73838	0.67744	0.075098	-18.461	68.39	111.9349	0.036621	0.12158	-0.016114	-25.827	-44.14	1203.5308	-1.3906	1.6836	0.080566	-46.746	120.5451	185.809	-0.003418	0.125	-0.0019531	-4.176	8.2581	1118.7307	-1.2065	1.5044	0.24292	-47.244	-145.791	1051.789	-1.0511	1.4458	0.13818
1.2	-18.02	15.1626	13.035	-0.049414	0.045898	-0.027539	-27.487	-133.062	898.564	-0.73955	0.6956	0.060156	-8.697	66.985	112.4897	0.03418	0.12939	-0.016602	-45.7082	-36.9514	1209.535	-1.3751	1.6663	0.090723	-44.579	88.315	183.075	0.017382	0.10791	-0.0021484	-34.896	22.1366	1116.5035	-1.1914	1.4883	0.24561	-38.541	-103.01671	1073.949	-1.1125	1.4994	0.14883
1.202	-34.992	14.7804	10.67	-0.045118	0.047852	-0.031836	-39.003	-114.217	934.183	-0.74658	0.72607	0.04248	-21.921	66.869	104.4558	0.031738	0.13672	-0.022949	-42.154	-35.8869	1234.88	-1.3672	1.6605	0.098926	-35.075	68.089	203.91464	0.035351	0.092285	-0.0025391	-33.447	28.351	1088.038	-1.1641	1.459	0.24951	-36.819	-91.4193	1094.954	-1.1792	1.5649	0.1626
1.204	-41.107	0.4031	18.493	-0.043457	0.049805	-0.035547	-33.395	-88.8279	989.795	-0.76279	0.77237	0.035937	-34.562	61.414	85.3434	0.029297	0.13672	-0.024414	-34.068	-10.96	1247.959	-1.3582	1.6617	0.10283	-34.812	85.836	198.766	0.05332	0.081348	-0.0052735	-48.888	23.4034	1077.4317	-1.1504	1.4453	0.24854	-47.653	-91.315	1127.168	-1.248	1.6289	0.17051
1.206	-38.914	10.35238	39.335	-0.040527	0.04834	-0.038574	-51.981	-54.924	1016.957	-0.79736	0.82812	0.031836	-27.469	58.4662	72.3023	0.032715	0.146	-0.02832	-48.653	11.838	1230.747	-1.3591	1.6632	0.1041	-44.945	98.7822	175.721	0.065723	0.066797	-0.0032226	-16.47	41.366	1049.24	-1.1147	1.4126	0.24756	-32.839	-83.391	1144.016	-1.3246	1.6945	0.17979
1.208	-21.261	8.0654	61.7222	-0.038574	0.051954	-0.039551	-38.914	-53.731	1052.336	-0.8497	0.88906	0.030664	-6.346	61.4821	74.192	0.034912	0.1416	-0.034668	-56.5345	4.928	1193.4085	-1.3511	1.6704	0.10645	-5.841	102.632	149.8083	0.082031	0.052246	-0.0014648	-68.197	36.577	1036.7007	-1.0908	1.3769	0.24585	-35.53	-73.13	1121.4634	-1.3933	1.7679	0.18447
1.21	-29.073	7.66505	66.748	-0.03916	0.050976	-0.038183	-36.936	-69.384	1054.087	-0.91699	0.95566	0.036523	-1.445	45.2223	93.666	0.039551	0.13721	-0.035156	-24.186	-4.3903	1188.719	-1.3439	1.664	0.10576	-29.646	89.408	154.4818	0.091699	0.041699	0.0006836	-47.343	26.4358	1015.2422	-1.0601	1.3462	0.24609	-23.913	-80.57516	1130.851	-1.4523	1.8333	0.18115
1.212	-13.1	9.56854	60.799	-0.037207	0.052148	-0.041699	-5.807	-86.055	1040.877	-0.99268	1.0259	0.039063	-16.108	42.0653	86.3386	0.045898	0.12988	-0.038574	-19.679	7.0929	1191.85	-1.3327	1.6587	0.10703	-52.403	77.1371	131.5356	0.099317	0.032032	0.0014648	-49.918	15.664	1002.956	-1.0215	1.3018	0.24805	-14.112	-90.43545	1135.151	-1.5039	1.8926	0.1875
1.214	-20.614	23.0543	54.7726	-0.043554	0.05957	-0.034571	-55.149	-109.659	1022.295	-1.0706	1.0857	0.047363	7.151	45.321	69.5665	0.05127	0.12646	-0.042969	-17.876	4.169	1187.4732	-1.3171	1.6415	0.11055	-60.241	63.8001	120.758	0.10674	0.020704	0.0014648	-30.693	39.43	974.138	-1.0039	1.2773	0.24463	-27.306	-87.1904	1153.139	-1.5521	1.9343	0.1666
1.216	-15.551	0.1477	33.689	-0.051758	0.068359	-0.03125	-46.741	-116.43133	1047.942	-1.143	1.1453	0.04795	-5.324	57.2295	56.4393	0.055664	0.11328	-0.039551	-34.556	10.736	1180.013	-1.2972	1.622	0.11641	-39.334	74.0261	127.362	0.11231	0.014453	0.0041992	-43.387	33.7433	970.839	-0.96875	1.2305	0.24365	-70.37	-68.1381	1142.9044	-1.5835	1.9677	0.16386
1.218	-38.538	-20.7634	34.471	-0.064161	0.074902	-0.02832	-76.574	-120.7959	1073.5923	-1.2086	1.2078	0.044043	-29.635	46.856	51.0405	0.058349	0.10645	-0.047119	-0.150000000000002	18.022	1158.9174	-1.2793	1.5996	0.125	-41.878	73.294	132.204	0.10889	0.0092773	0.0083008	-16.763	41.0031	954.923	-0.94092	1.1949	0.23388	-58.405	-63.094	1158.7485	-1.6022	1.9927	0.15801
1.22	-19.149	-46.727	46.807	-0.079101	0.087695	-0.024511	-55.467	-111.693	1104.286	-1.2467	1.2603	0.041992	-42.334	34.1722	61.3698	0.063965	0.098633	-0.053711	-0.803000000000001	26.631	1176.5853	-1.2586	1.5707	0.12275	-49.534	70.4662	146.8773	0.10918	0.0032226	0.0092773	-36.334	57.666	960.3496	-0.91797	1.1563	0.23486	-54.867	-61.86	1176.8378	-1.6061	1.9989	0.15791
1.222	-32.33	-39.769	72.503	-0.098245	0.099411	-0.022949	-58.288	-121.058	1130.565	-1.2769	1.3071	0.046387	-5.979	40.9463	49.8286	0.074219	0.083008	-0.05127	-9.043	27.0407	1163.3858	-1.2387	1.5442	0.12822	-44.474	65.27524	128.596	0.10352	0.00029297	0.017285	-44.717	69.402	923.2406	-0.88428	1.1147	0.22461	-67.122	-65.257	1198.2641	-1.5938	1.9883	0.16504
1.224	-28.754	-35.428	100.342	-0.11396	0.11103	-0.020215	-47.57	-124.3801	1143.953	-1.3038	1.3579	0.045605	-51.6378	51.342	34.769	0.076172	0.078125	-0.05957	-24.701	24.21014	1139.893	-1.2164	1.5141	0.1333	-34.683	89.555	96.51138	0.10078	-0.0020508	0.015332	-62.8412	48.848	906.5905	-0.86914	1.0859	0.22021	-75.969	-72.016	1187.8841	-1.5809	1.9632	0.17285
1.226	-25.8547	-16.568	144.3627	-0.12744	0.12891	-0.016113	-34.933	-113.1687	1172.533	-1.3258	1.4008	0.042773	-29.396	42.1396	27.701	0.088379	0.062988	-0.058594	-1.03899999999999	31.4104	1113.1297	-1.1957	1.4852	0.13653	-26.243	90.598	88.0452	0.090625	-0.0066406	0.020606	-48.329	58.296	891.4116	-0.83545	1.0435	0.21289	-55.698	-71.7713	1190.9145	-1.5546	1.9309	0.18359
1.228	5.427	19.7871	196.26196	-0.14395	0.14258	-0.015234	-19.899	-101.494	1169.4094	-1.3605	1.4472	0.036914	-28.842	30.1265	53.4905	0.096436	0.050781	-0.062744	-23.478	33.4231	1093.206	-1.1768	1.4648	0.14258	-49.575	70.992	93.2812	0.085449	-0.0053711	0.024902	-36.564	75.014	878.18207	-0.80786	1.0061	0.2085	-43.475	-61.2804	1192.879	-1.5245	1.8892	0.19648
1.23	0.507999999999999	52.208	262.8676	-0.1626	0.16406	-0.0078124	-36.308	-112.009	1171.672	-1.4017	1.4871	0.033985	-4.412	43.1924	56.3961	0.10059	0.041016	-0.062012	-38.226	20.5676	1074.802	-1.1586	1.4438	0.14492	-30.745	46.7904	79.6876	0.073925	-0.0045899	0.026758	-30.214	71.3732	855.803	-0.77832	0.9668	0.20264	-31.674	-65.918	1219.815	-1.4974	1.8491	0.20947
1.232	7.663	54.005	353.717	-0.18564	0.18516	0.0078127	-25.587	-100.504	1162.4268	-1.4512	1.5322	0.029297	-27.946	49.92355	48.5911	0.10693	0.031738	-0.068848	-30.528	17.4068	1058.338	-1.1378	1.4228	0.14883	-44.018	52.2673	69.282	0.066992	0.0011718	0.028711	-30.854	53.71	834.213	-0.75	0.92578	0.19678	-36.532	-74.583	1211.2086	-1.4727	1.8086	0.21826
1.234	-0.303000000000004	54.6787	455.354	-0.22139	0.21436	0.023633	-25.964	-96.80585	1156.7778	-1.4991	1.572	0.024511	0.719999999999999	39.7781	38.946	0.11182	0.029297	-0.071289	-20.757	44.6617	1036.115	-1.1206	1.4025	0.15	-57.347	38.841	56.85	0.051757	0.0035156	0.032617	-30.287	63.38	826.902	-0.73584	0.90283	0.19775	-24.419	-47.6026	1208.561	-1.4434	1.7706	0.22773
1.236	-5.923	33.344	533.138	-0.27539	0.25146	0.060059	-23.726	-76.2987	1155.512	-1.5445	1.602	0.018164	-26.41	47.402	32.2321	0.1167	0.021484	-0.079102	-50.0636	47.981	1017.8837	-1.1005	1.3845	0.1501	-56.458	32.598	74.794	0.041797	0.0068359	0.037011	-26.202	82.4949	825.7832	-0.7085	0.86182	0.19531	-27.177	-15.4654	1196.4334	-1.4178	1.7383	0.23819
1.238	2.97799999999999	35.5692	577.672	-0.34687	0.29609	0.094725	-29.587	-73.9895	1190.96052	-1.587	1.6314	0.010742	-28.684	39.1969	20.915	0.1167	0.013916	-0.075195	-9.397	41.743	1012.51829	-1.082	1.3594	0.14893	-31.878	35.8091	92.95536	0.036133	0.0087891	0.047852	-33.001	95.9543	809.755	-0.69971	0.8335	0.19433	-27.94	-24.7	1222.5869	-1.3986	1.7183	0.24522
1.24	-17.323	49.884	644.481	-0.44209	0.36221	0.14082	-23.081	-58.0837	1221.8	-1.6157	1.6507	0.0015625	-25.275	22.5905	21.957	0.11865	0.0092773	-0.084961	-0.651000000000003	43.2402	1005.08022	-1.0589	1.3387	0.14629	-65.646	62.1524	65.841	0.028418	0.013281	0.058496	-2.642	101.035	803.941	-0.68359	0.80859	0.19385	-28.466	-35.672	1232.271	-1.3801	1.691	0.254
1.242	7.96	43.38	715.1532	-0.56318	0.44033	0.19199	-28.293	-53.1788	1220.6084	-1.644	1.6626	0.0048828	-25.752	22.6123	18.193	0.12451	0.0058594	-0.097168	-25.614	64.557	987.005	-1.034	1.3121	0.14424	-54.581	70.063	58.214	0.018164	0.015821	0.060938	-16.535	105.745	785.8009	-0.66943	0.78564	0.18994	-30.93	-29.952	1211.9175	-1.3628	1.6704	0.26172
1.244	-70.266	34.75971	728.0832	-0.70869	0.53164	0.24482	-40.499	-67.426	1225.1753	-1.6561	1.6657	-9.7656e-05	-36.102	22.175	25.7741	0.12549	0.0029297	-0.094727	-22.386	59.694	953.3002	-1.0125	1.2883	0.15322	-20.726	73.174	49.00707	0.0083984	0.019727	0.067187	-39.22	102.499	758.4489	-0.6626	0.76904	0.18848	-49.438	-20.848	1203.76853	-1.347	1.6487	0.2664
1.246	-91.982	-1.682	703.345	-0.87305	0.64453	0.29932	-45.981	-62.679	1207.7724	-1.6649	1.6676	-0.0041993	-23.462	17.6604	30.8526	0.13037	-0.0029297	-0.10449	-8.314	54.363	947.324	-0.98975	1.2587	0.1459	-17.505	63.66	55.5488	-0.0018555	0.02539	0.069531	-50.964	100.408	743.1176	-0.63818	0.74268	0.17969	-57.1858	-15.8205	1182.314	-1.3313	1.6289	0.27159
1.248	-82.861	-26.0782	670.944	-1.0476	0.78253	0.3416	-39.983	-67.551	1201.424	-1.668	1.6582	-0.0077149	-36.247	12.3109	33.329	0.13526	-0.0063476	-0.10938	-15.268	52.717	944.937	-0.96094	1.2266	0.14795	-52.274	54.497	34.8035	-0.0087891	0.03125	0.067871	-24.552	104.5097	729.8929	-0.62256	0.72266	0.17773	-34.637	-10.9645	1191.395	-1.3109	1.6133	0.27705
1.25	-65.213	-40.367	658.719	-1.2112	0.93449	0.37168	-42.791	-65.631	1184.887	-1.6672	1.6457	-0.010547	-22.139	32.126	34.0936	0.13818	-0.0063477	-0.10693	-45.056	42.3688	925.223	-0.93936	1.1997	0.15215	-31.003	42.7118	28.907	-0.0071289	0.038184	0.07041	-24.463	103.3664	717.925	-0.60107	0.70361	0.17188	-47.103	6.3158	1178.947	-1.2935	1.5913	0.28242
1.252	-113.37	-67.425	646.384	-1.3605	1.0978	0.37597	-62.9247	-78.6425	1195.253	-1.6655	1.6294	-0.010742	-10.061	38.845	41.8406	0.13623	-0.0029297	-0.10498	-15.123	49.8979	913.2737	-0.91523	1.1668	0.15254	-37.789	48.4759	29.208	-0.0096678	0.041601	0.077344	-38.742	85.8262	686.1188	-0.5791	0.67383	0.16748	-60.3604	-0.104100000000001	1198.057	-1.2695	1.5723	0.28076
1.254	-116.428	-77.1609	621.614	-1.4779	1.2588	0.35937	-40.8369	-89.517	1214.602	-1.6622	1.5991	-0.013672	-16.672	25.9053	38.522	0.12891	0	-0.10938	-28.206	76.3547	895.46806	-0.89179	1.141	0.1541	-38.994	42.414	46.2	-0.0061524	0.04082	0.076953	-23.72	85.9747	672.9699	-0.55786	0.65772	0.16406	-34.06	-0.3408	1196.843	-1.252	1.5529	0.28662
1.256	-111.934	-48.22182	621.811	-1.5562	1.4038	0.32422	-7.59399999999999	-78.745	1239.1295	-1.6578	1.5664	-0.012597	-10.067	6.3083	33.0833	0.11865	0.012695	-0.11133	-7.305	98.67031	892.7777	-0.87227	1.1119	0.15381	-41.907	26.4872	49.8592	-0.0014649	0.045898	0.078125	-1.758	120.1947	645.969	-0.53906	0.63672	0.15771	-6.425	-4.68985	1207.337	-1.2281	1.5375	0.28418
1.258	-88.394	-18.3022	652.245	-1.5843	1.5156	0.27042	-29.817	-60.5061	1239.288	-1.6496	1.5386	-0.0094727	-22.566	3.9969	29.157	0.104	0.025147	-0.11084	-32.73	96.408	877.7063	-0.85254	1.0879	0.15674	-28.776	27.5059	37.6919	0.0063477	0.044922	0.080078	-6.1	123.8949	647.7995	-0.51563	0.60742	0.15283	-22.564	7.0077	1196.618	-1.2097	1.5191	0.28847
1.26	-124.1647	-10.278	715.83485	-1.5551	1.5914	0.21436	-27.334	-51.21495	1252.011	-1.6454	1.5073	-0.0083007	-18.578	-4.1066	24.151	0.091309	0.042969	-0.1123	-21.039	95.7746	858.3277	-0.83555	1.0662	0.15684	-32.665	57.817	29.634	0.0089843	0.041504	0.08125	-8.775	110.4323	640.0934	-0.50635	0.59814	0.14941	-41.642	1.54	1172.327	-1.1943	1.5126	0.28848
1.262	-72.993	-7.08000000000001	751.935	-1.4773	1.6129	0.17882	-20.352	-25.028	1221.3885	-1.6362	1.481	-0.003418	-57.7699	-23.731	44.236	0.070801	0.067871	-0.1167	-12.363	109.99854	837.0503	-0.82275	1.0466	0.15615	-37.321	56.557	27.2591	0.017188	0.036718	0.081739	-18.297	104.7219	628.39	-0.48633	0.56934	0.14795	-26.071	15.4138	1126.367	-1.1836	1.502	0.2876
1.264	-85.2546	-0.278000000000006	753.773	-1.3495	1.5803	0.15186	-24.282	-38.1903	1221.31043	-1.6336	1.4574	-0.0048828	-18.212	-18.7321	62.97904	0.06543	0.083984	-0.12158	-7.145	114.2968	827.997	-0.81338	1.027	0.15342	-31.909	44.189	19.9539	0.023047	0.035547	0.082911	-32.772	108.9897	614.1059	-0.47338	0.55395	0.13989	-24.738	15.4603	1114.574	-1.1639	1.4934	0.28818
1.266	-99.017	-8.124	755.2022	-1.2007	1.5005	0.14941	-38.077	-55.5625	1201.955	-1.6258	1.4387	-0.0071289	-27.763	-23.9131	61.1661	0.054199	0.11035	-0.11816	-28.861	104.7714	820.2558	-0.80586	1.0064	0.15293	-43.02	41.008	31.50901	0.028223	0.032031	0.08457	-49.165	104.37972	589.063	-0.46094	0.53125	0.14014	-39.986	-2.1252	1099.0202	-1.1465	1.4848	0.2874
1.268	-133.344	-27.194	765.6218	-1.0527	1.3753	0.16231	-18.629	-68.0377	1213.673	-1.616	1.4235	-0.009082	-12.842	-22.908	53.2795	0.042236	0.13111	-0.12671	-12.539	116.981	802.9921	-0.79102	0.99023	0.14746	-40.999	49.5336	19.93	0.030762	0.027832	0.085449	-20.633	114.4829	570.552	-0.43896	0.51123	0.13672	-30.229	-0.646000000000001	1097.30337	-1.1309	1.4746	0.28584
1.27	-78.885	-52.578	770.232	-0.93459	1.2367	0.17794	-21.555	-56.1876	1209.971	-1.6078	1.4129	-0.0060547	-38.46	-22.005	82.2708	0.032715	0.15479	-0.12695	-29.316	120.932	795.0965	-0.77852	0.96777	0.13936	-38.27	42.6945	20.464	0.04043	0.024609	0.083887	-21.149	128.965	551.002	-0.42969	0.49902	0.13818	-35.914	20.0601	1081.9609	-1.1102	1.4632	0.28437
1.272	-50.901	-104.15	747.216	-0.85178	1.1023	0.19005	-53.481	-52.64474	1206.601	-1.603	1.4048	-0.0078125	-6.732	-12.937	127.8748	0.018555	0.18359	-0.13525	-31.6702	115.168	780.913	-0.75352	0.94024	0.13692	-25.804	34.234	35.429	0.044531	0.020899	0.080567	-24.107	127.598	535.2372	-0.41016	0.47852	0.13477	-56.4783	41.5343	1077.3636	-1.0869	1.4512	0.28174
1.274	-31.298	-170.274	754.901	-0.80329	0.99092	0.19932	-47.956	-24.0446	1206.0119	-1.5921	1.3962	-0.011426	-24.551	0.955	167.3579	0.0078125	0.20508	-0.13721	-19.59	108.522	779.393	-0.73243	0.91875	0.1334	-36.045	35.9255	38.1651	0.055469	0.012696	0.083691	-33.116	110.1475	526.2701	-0.39575	0.46728	0.1289	-38.658	34.8471	1067.1621	-1.0606	1.4351	0.27597
1.276	-58.496	-206.334	785.622	-0.7793	0.9082	0.19385	-60.81	0.695	1201.426	-1.5847	1.3867	-0.012109	-15.267	4.4668	199.8767	-0.027832	0.24316	-0.14063	7.04799999999999	123.087	754.82034	-0.70635	0.88917	0.12627	-48.643	35.101	14.1735	0.061914	0.012695	0.080664	12.097	109.6602	503.6756	-0.37793	0.45313	0.12695	-13.158	17.8572	1041.83635	-1.0373	1.4164	0.27666
1.278	-6.576	-182.993	846.6119	-0.76009	0.84998	0.18108	-55.482	21.6426	1211.616	-1.575	1.3809	-0.0085938	-14.729	2.568	236.202	-0.075195	0.30566	-0.1416	-35.862	118.7694	720.0975	-0.68018	0.86279	0.11914	-57.918	44.5707	14.152	0.068848	0.010742	0.08252	-2.055	125.5489	492.2229	-0.35645	0.43604	0.125	-26.878	29.12	1016.0799	-1.0092	1.4008	0.27002
1.28	-16.85	-149.088	884.6528	-0.74099	0.8119	0.15906	-53.293	26.36	1200.887	-1.5658	1.377	-0.0033203	-10.243	12.676	300.951	-0.10986	0.34229	-0.13965	-18.607	123.2407	687.1102	-0.65194	0.83397	0.11728	-34.002	50.038	29.7408	0.077539	0.012012	0.078418	-2.014	119.47337	488.368	-0.34863	0.42871	0.12207	-45.856	43.217	989.3871	-0.98037	1.3747	0.26875
1.282	-0.0260000000000034	-138.19911	910.815	-0.71603	0.78537	0.12982	-34.475	13.7982	1197.0711	-1.5586	1.375	-0.0019531	-44.006	25.3983	377.535	-0.19385	0.42871	-0.13086	-2.33	116.514	674.847	-0.62293	0.80613	0.10928	-32.239	28.7024	32.1916	0.083789	0.014746	0.071191	-10.356	119.7084	456.3567	-0.32373	0.40869	0.11133	-54.162	41.958	975.003	-0.95117	1.3438	0.26123
1.284	-14.163	-129.335	937.768	-0.68048	0.76373	0.10362	-15.191	4.209	1171.985	-1.5528	1.3688	0.0017578	-23.215	55.2383	442.6435	-0.27197	0.51221	-0.12011	-12.847	119.974	668.193	-0.60418	0.77878	0.10419	-59.831	21.16589	22.445	0.086914	0.019043	0.068067	5.298	126.0499	437.555	-0.30639	0.39453	0.10694	-32.326	37.2117	961.253	-0.92353	1.3128	0.2582
1.286	-14.946	-104.244	967.6282	-0.64453	0.73633	0.07666	-23.316	-11.75706	1149.152	-1.5436	1.363	0.0041992	-24.187	80.376	489.8118	-0.35498	0.60596	-0.10303	-18.321	112.5104	668.87286	-0.57967	0.75213	0.10127	-36.555	17.2141	31.772	0.086621	0.023242	0.067285	-27.859	123.1657	420.939	-0.29297	0.38086	0.10449	-47.981	39.9641	940.37	-0.89053	1.2853	0.25332
1.288	-40.189	-94.219	1011.295	-0.61363	0.71933	0.072564	-32.705	-12.6259	1112.052	-1.5374	1.3599	0.015137	-17.043	83.586	536.8489	-0.48047	0.76758	-0.072754	-3.319	118.9691	643.9498	-0.55957	0.73047	0.091309	-26.814	18.0174	41.462	0.080078	0.037598	0.058594	-21.544	101.1297	425.32112	-0.27002	0.35889	0.098145	-46.225	48.475	932.8501	-0.85615	1.2524	0.24785
1.29	-43.526	-83.07	1028.9563	-0.59745	0.7117	0.074682	-10.169	5.8034	1120.9409	-1.5259	1.3522	0.012109	-44.248	58.355	562.767	-0.54834	0.86377	-0.053711	-21.568	135.213	655.6059	-0.5348	0.70394	0.083997	-49.936	5.199	69.051	0.075488	0.053711	0.059863	-14.81	115.932	421.333	-0.26025	0.3501	0.092285	-40.927	53.9298	926.8674	-0.82705	1.2143	0.24209
1.292	-28.793	-75.033	1040.4983	-0.60876	0.71738	0.088385	-39.26	24.2502	1117.1082	-1.5176	1.3457	0.020996	-20.183	38.865	607.4378	-0.69482	1.0688	-0.020508	-16.237	139.417	645.3173	-0.50976	0.6783	0.07659	-44.388	-13.8807	87.7217	0.063379	0.07168	0.055859	-6.637	127.233	398.071	-0.23779	0.33105	0.085938	-11.842	67.0982	935.0856	-0.79199	1.1797	0.24072
1.294	-29.377	-70.084	1008.011	-0.66448	0.74233	0.10754	-47.534	16.539	1118.029	-1.5053	1.3414	0.024317	-11.716	43.162	627.4272	-0.81055	1.2368	-0.0095216	-14.633	109.582	623.916	-0.48243	0.65488	0.064517	-34.829	-16.7622	74.1616	0.045801	0.096291	0.052735	-12.112	123.518	372.9487	-0.22778	0.31421	0.083741	-19.46	64.9864	918.781	-0.76474	1.1456	0.23106
1.296	-38.384	-102.7343	1009.718	-0.74756	0.7876	0.13086	-49	26.9111	1105.022	-1.4862	1.3345	0.026269	-13.348	13.6361	646.656	-0.92334	1.4146	-0.0063477	-5.152	110.616	583.8603	-0.45672	0.62741	0.062615	-29.155	3.07978	97.523	0.025977	0.12158	0.052929	-1.043	99.6476	351.0147	-0.21094	0.29883	0.080566	-26.148	59.05	884.5673	-0.73379	1.1129	0.2249
1.298	-44.455	-120.358	1038.705	-0.86119	0.85287	0.14756	-32.691	38.234	1102.689	-1.4694	1.3294	0.027832	-47.14	-19.3291	647.159	-1.0488	1.6484	-0.02832	-12.893	124.6552	547.2551	-0.42871	0.60303	0.056152	-32.446	14.1253	103.342	0.0029297	0.14551	0.055664	-9.806	93.9568	334.1283	-0.19482	0.2749	0.07373	-29.959	67.382	869.4189	-0.71582	1.0789	0.22217
1.3	-76.028	-127.6578	1095.3395	-0.97822	0.92208	0.16319	-58.1656	38.7304	1063.513	-1.4482	1.3197	0.032813	-47.548	-46.106	640.1625	-1.0972	1.7622	-0.04834	-3.501	117.1719	516.777	-0.40286	0.5746	0.053306	-43.644	2.953	132.397	-0.015234	0.1709	0.056934	-5.848	93.941	316.0047	-0.18555	0.26367	0.064941	-27.772	87.153	841.413	-0.69512	1.0504	0.21338
1.302	-83.323	-119.9279	1110.342	-1.0912	0.99478	0.16238	-23.06	26.221	1031.229	-1.4297	1.3125	0.036621	-45.475	-38.239	629.7851	-1.1504	1.9316	-0.10742	-6.184	110.444	517.566	-0.37889	0.54589	0.044815	-40.266	18.0482	155.4736	-0.040235	0.19395	0.054297	6.647	84.085	308.023	-0.17432	0.24463	0.0625	-36.219	70.1669	823.471	-0.67383	1.0244	0.20898
1.304	-83.8295	-155.6107	1125.39	-1.1901	1.0729	0.1626	-45.137	20.003	986.637	-1.4028	1.2976	0.035742	-28.942	-50.756	634.276	-1.1472	2.0022	-0.15161	-8.236	119.838	502.1362	-0.35382	0.52082	0.043226	-49.213	41.7207	209.458	-0.063672	0.21348	0.047265	-7.031	84.3294	295.1632	-0.1648	0.23071	0.055176	-23.898	66.8045	816.0926	-0.6626	0.99833	0.19991
1.306	-65.633	-167.1656	1129.19118	-1.2637	1.1445	0.16553	-39.24	33.2387	966.878	-1.3769	1.2839	0.032227	-47.388	-53.9004	648.827	-1.0991	2.02	-0.19873	-1.781	130.672	488.6957	-0.33281	0.49281	0.040924	-58.505	64.1178	276.989	-0.091504	0.23984	0.034864	-4.043	97.829	290.159	-0.1543	0.21777	0.054688	-39.876	83.3899	797.5117	-0.64883	0.975	0.19131
1.308	-79.8606	-155.8553	1132.8176	-1.3236	1.2156	0.16401	-53.485	38.2371	965.8286	-1.3491	1.2632	0.030664	-37.645	-55.3086	646.888	-0.9707	1.9414	-0.24316	-9.312	127.1902	476.7065	-0.31494	0.47021	0.036133	-55.58	70.9868	379.39	-0.12256	0.26807	0.024902	-36.253	108.084	265.4294	-0.14648	0.19824	0.041992	-41.924	102.1977	786.654	-0.63242	0.94766	0.18311
1.31	-67.685	-125.6338	1126.216	-1.3738	1.2706	0.15463	-12.062	42.111	979.924	-1.314	1.2459	0.031641	-57.204	-45.459	626.6754	-0.87451	1.856	-0.24805	16.613	123.2316	498.129	-0.29586	0.45113	0.035857	-38.203	74.86042	444.874	-0.15928	0.29971	0.022949	-13.246	108.952	271.6698	-0.13672	0.18604	0.040527	-17.376	87.6973	767.1548	-0.61504	0.91953	0.17646
1.312	-70.531	-98.7589	1134.8721	-1.4105	1.3181	0.14289	-46.012	55.235	989.927	-1.2754	1.2207	0.027832	-62.025	-31.087	637.206	-0.67188	1.5996	-0.24902	7.732	138.135	478.10026	-0.28168	0.43036	0.034572	-41.48	87.7285	507.1863	-0.21641	0.34453	0.022559	-10.462	111.874	255.8781	-0.12598	0.16748	0.027832	-3.111	103.4152	756.7463	-0.59277	0.89258	0.17334
1.314	-35.092	-96.2113	1154.874	-1.4451	1.3607	0.13179	-38.267	60.2	966.527	-1.2387	1.199	0.019238	-65.13	-18.85	659.17	-0.531	1.3772	-0.23291	-24.818	118.464	444.2981	-0.2635	0.40909	0.029424	-34.889	119.541	579.7016	-0.2957	0.39727	0.02334	-1.42599999999999	105.883	238.2346	-0.11402	0.15503	0.026856	-19.983	109.4443	720.678	-0.56777	0.86855	0.1664
1.316	-28.576	-105.4566	1173.761	-1.4766	1.3945	0.12549	-30.02	57.755	943.98471	-1.2017	1.163	0.013183	-29.585	-15.784	679.9607	-0.41211	1.1563	-0.21484	-21.015	115.733	414.7035	-0.24731	0.39217	0.027372	2.318	109.894	634.4913	-0.39717	0.46455	0.036133	-39.2756	89.465	213.80868	-0.1001	0.13916	0.024414	-29.597	109.9463	699.986	-0.54649	0.84023	0.15801
1.318	-43.664	-105.7475	1172.927	-1.5039	1.4241	0.11323	-41.689	68.754	905.3115	-1.1596	1.1318	0.0092774	-54.928	-32.419	700.844	-0.3208	0.89697	-0.17725	-4.173	115.546	392.157	-0.22656	0.37305	0.019531	-45.11	90.325	675.9265	-0.51416	0.55322	0.060547	-8.203	81.4411	205.4067	-0.084961	0.12158	0.012695	-11.294	108.5879	687.355	-0.52578	0.81094	0.15215
1.32	-24.437	-90.28007	1164.3068	-1.5323	1.4511	0.10437	-47.916	66.1389	875.287	-1.1157	1.1022	0.0035156	-45.8965	-49.9199	721.7584	-0.2915	0.79492	-0.16309	-12.664	105.9701	376.176	-0.20581	0.34987	0.01463	-84.869	37.884	730.5478	-0.65391	0.65527	0.097363	-11.42	96.31	174.508	-0.080078	0.10938	0.01416	-6.495	110.784	678.519	-0.50254	0.78574	0.14492
1.322	-19.744	-75.153	1165.765	-1.5568	1.4785	0.08805	-52.611	52.3385	830.615	-1.0718	1.064	-0.0053711	-24.612	-57.498	767.3704	-0.2666	0.64697	-0.15088	-31.669	89.9221	362.9049	-0.1793	0.32809	0.0092507	-61.447	-11.947	741.47681	-0.80488	0.76992	0.13779	3.347	82.4511	176.879	-0.064941	0.091309	0.01123	-26.637	92.11032	671.564	-0.48486	0.76123	0.13965
1.324	-51.573	-74.939	1156.1	-1.5794	1.505	0.081648	-52.872	55.934	811.095	-1.0261	1.0302	-0.009863	-10.644	-74.066	772.0627	-0.26148	0.58032	-0.15479	-18.95	95.5994	348.4077	-0.15471	0.30338	0.001182	-52.233	-49.934	767.8024	-0.96504	0.89726	0.18037	-20.608	75.6102	161.3037	-0.055908	0.077392	0.0021973	-44.817	98.1322	659.259	-0.46699	0.73672	0.13692
1.326	-83.847	-93.831	1144.289	-1.5859	1.5254	0.069336	-54.247	81.979	818.7516	-0.9833	0.99424	-0.015918	-21.791	-114.759	799.64	-0.25977	0.5376	-0.16895	-3.849	101.5138	343.1938	-0.12646	0.27845	-0.0029297	-74.4415	-110.348	772.1476	-1.1275	1.0252	0.20645	0.716000000000001	85.4772	164.3553	-0.046875	0.06543	0.0014648	-27.23	118.649	640.34	-0.44717	0.71104	0.13242
1.328	-61.737	-85.394	1147.801	-1.593	1.5421	0.058811	-30.055	82.560115	846.5642	-0.94229	0.95713	-0.020996	-2.098	-150.7875	798.8052	-0.26074	0.5293	-0.19531	2.537	97.884	343.0994	-0.10254	0.25293	-0.0029297	-61.229	-132.275	743.811	-1.2734	1.1484	0.22461	-15.973	96.252	162.9902	-0.040039	0.048828	0.0014648	-15.603	137.59	624.4864	-0.43389	0.69072	0.12539
1.33	-70.025	-87.8013	1171.969	-1.5934	1.5558	0.045759	-39.791	92.081	843.528	-0.90547	0.92266	-0.026269	-7.004	-157.639	801.876	-0.25977	0.52881	-0.20801	14.126	84.074	324.616	-0.083412	0.23449	-0.0058594	-51.0336	-116.201	722.402	-1.3879	1.2594	0.22197	-16.999	82.657	166.606973	-0.040527	0.041992	-0.00048828	-17.523	112.7158	602.0918	-0.4169	0.66904	0.12178
1.332	-67.317	-83.231	1203.92519	-1.5847	1.5652	0.03519	-48.405	102.554	838.831	-0.87012	0.89355	-0.029297	-44.161	-149.12	814.459	-0.27051	0.57227	-0.23584	-6.283	97.2891	297.5772	-0.064475	0.21401	-0.0081593	-15.332	-67.365	696.091	-1.459	1.349	0.20176	-20.448	77.696	162.6863	-0.037109	0.026855	-0.0014648	-17.407	119.9527	573.7495	-0.396	0.646	0.10352
1.334	-52.54	-70.038	1215.2711	-1.581	1.5655	0.021198	-63.515	114.457	804.0835	-0.83828	0.86094	-0.031836	-33.46	-140.631	859.2926	-0.28345	0.64673	-0.24903	-11.616	102.081	267.117	-0.0502	0.19766	-0.0031359	6.827	-46.731	696.72	-1.4684	1.4147	0.17559	-0.776000000000003	86.452	141.3397	-0.041992	0.020996	0.0007324	0.0740000000000052	133.8116	551.195	-0.3789	0.6248	0.099805
1.336	-35.58	-55.428	1218.1515	-1.5737	1.5688	0.016113	-64.832	93.22	763.652	-0.81211	0.83398	-0.032129	-11.689	-126.21	901.0085	-0.31592	0.74658	-0.2583	-37.728	98.873	246.418	-0.042776	0.18289	-0.0057105	10.978	-41.4826	718.678	-1.42	1.4382	0.14492	-32.497	68.7337	116.2211	-0.041992	0.01416	0.0019531	-9.8	135.847	522.765	-0.35411	0.59863	0.092871
1.338	-46.608	-32.607	1212.6029	-1.5723	1.5613	0.00084901	-65.217	86.425	737.111	-0.79414	0.80586	-0.027051	-23.763	-92.4795	916.5762	-0.39111	0.9165	-0.25537	-15.449	90.505	249.128	-0.032715	0.16992	-0.003418	-4.9	-15.3039	718.81726	-1.3179	1.4282	0.1167	-17.96	53.1339	112.4569	-0.049805	0.0087891	0.0053711	-9.564	122.013	531.116	-0.33067	0.57363	0.084277
1.34	-23.418	-32.8382	1204.3378	-1.5742	1.5578	-0.003163	-60.358	81.2638	707.972	-0.77139	0.78369	-0.032032	-45.466	-73.965	939.8777	-0.44678	0.99463	-0.26123	-22.891	102.422	236.116	-0.026209	0.15683	-0.0060971	-4.55399999999999	1.735	719.147	-1.1741	1.3687	0.097755	-13.471	62.7402	109.248	-0.052246	0.0083008	0.0029297	-10.257	122.923798	519.9122	-0.3084	0.54844	0.077637
1.342	-15.85	-31.499	1211.9264	-1.5781	1.5547	-0.014889	-64.589	86.662	689.185	-0.75	0.76367	-0.02832	-13.415	-64.414	979.7091	-0.57373	1.1763	-0.27393	-28.284	104.735	225.95587	-0.015137	0.145	-0.011382	-10.94	-3.904	732.109	-1.0026	1.2755	0.092285	3.073	62.0949	112.2745	-0.0625	0.0029297	0.010254	-28.617	140.799	511.353	-0.2876	0.51953	0.06543
1.344	-2.201	-23.054	1207.3446	-1.5851	1.55	-0.019835	-52.288	96.978	685.541	-0.73994	0.74238	-0.030078	-28.723	-63.333	1002.8814	-0.67749	1.3084	-0.27587	-43.15	95.77084	215.1274	-0.0098003	0.13307	-0.0067415	-24.306	-19.11	763.016	-0.84521	1.1665	0.094239	-21.621	58.1154	99.9974	-0.062744	0.0061035	0.011231	-37.612	142.862	484.7486	-0.26348	0.49687	0.057715
1.346	-34.672	-24.372	1206.561	-1.5933	1.5493	-0.024902	-40.276	119.725	700.9955	-0.71992	0.72383	-0.024707	-24.422	-65.891	1014.7148	-0.78027	1.4395	-0.28223	4.463	92.5388	217.46336	0.00073882	0.12329	-0.010826	-12.362	-39.26	773.266	-0.7208	1.0487	0.11025	-16.348	53.5369	99.0591	-0.064453	0.0097656	0.013184	-8.823	137.053	486.028	-0.23985	0.47188	0.054981
1.348	-2.337	-32.346	1193.435	-1.6036	1.5468	-0.030556	-51.801	126.5349	700.053	-0.70469	0.70547	-0.020801	-35.961	-98.823	1007.0352	-0.89453	1.5957	-0.29785	-9.543	90.170921	196.80767	0.0087891	0.11768	-0.010742	-42.741	-59.074	754.3167	-0.63916	0.94385	0.13086	0.186	59.07151	97.2951	-0.077148	0.015625	0.019043	-2.404	134.825	471.2829	-0.22188	0.44375	0.049512
1.35	-20.221	-23.2772	1195.506	-1.6082	1.543	-0.038166	-49.312	128.581	689.236	-0.68623	0.6917	-0.015625	-14.722	-113.5489	1003.998	-0.93896	1.6626	-0.30908	-15.578	74.2412	170.9692	0.018978	0.10468	-0.010664	-64.406	-84.387	761.53676	-0.60273	0.86592	0.1583	-21.446	55.477	86.3684	-0.077637	0.01416	0.016602	-30.155	121.273	434.5465	-0.20332	0.41934	0.043652
1.352	-17.237	-3.20527	1212.0588	-1.6098	1.5399	-0.051846	-45.181	133.175	655.254	-0.66748	0.6792	-0.012695	-34.631	-122.459	1014.174	-1.0034	1.7622	-0.33789	-14.396	87.8026	138.26	0.029616	0.094493	-0.017021	-58.814	-116.371	794.7575	-0.60342	0.81533	0.18194	-34.742	55.171	81.144	-0.087402	0.017578	0.019043	-17.126	114.3043	396.621	-0.18701	0.39551	0.034668
1.354	-52.356	7.5056	1202.429	-1.6032	1.5296	-0.054388	-63.929	126.817	623.7448	-0.65273	0.65957	-0.0058593	-46.649	-117.015	1035.435	-1.0288	1.814	-0.35279	-2.788	95.3272	136.096	0.034287	0.086699	-0.018149	-45.396	-141.457	808.6663	-0.62451	0.79658	0.19795	-17.382	65.788	68.142	-0.0896	0.023926	0.019043	-23.419	106.69	377.506	-0.17305	0.36953	0.031347
1.356	-51.904	17.6797	1205.43	-1.5879	1.5156	-0.065918	-66.474	113.222	613.031	-0.63477	0.64316	-0.0016601	-46.618	-109.2143	1082.3083	-1.0391	1.8477	-0.37109	-26.546	81.3945	135.402	0.042296	0.081733	-0.018954	-79.84	-165.089	825.0896	-0.65039	0.80761	0.20342	-12.041	62.6637	72.1686	-0.09375	0.027832	0.022949	1.202	96.473	367.996	-0.15683	0.34952	0.029297
1.358	-71.0745	22.9952	1194.78135	-1.5669	1.5042	-0.0667	-68.939	102.6752	581.637	-0.62265	0.62949	0.0030274	-21.345	-88.1835	1108.4558	-1.0288	1.8677	-0.39014	-41.035	71.5256	144.9232	0.047852	0.075195	-0.020996	-60.853	-181.657	830.593	-0.66992	0.83301	0.20117	-29.528	46.6874	59.5507	-0.095215	0.027344	0.020508	-17.733	86.629	374.055	-0.14278	0.32686	0.020313
1.36	-52.382	15.64846	1196.9012	-1.5465	1.4871	-0.066602	-70.925	105.989	562.387	-0.60459	0.61768	0.0075195	-37.544	-95.5202	1134.224	-1.0259	1.8716	-0.40186	-25.054	77.9406	150.9681	0.049702	0.068559	-0.02363	-59.109	-178.64	847.957	-0.67392	0.8792	0.19716	-34.236	45.2124	59.2421	-0.097168	0.029297	0.022461	-17.073	87.596	357.256	-0.1333	0.30811	0.018848
1.362	-48.188	9.91094	1196.3258	-1.5226	1.4774	-0.069337	-57.869	122.433	557.741	-0.58936	0.6001	0.010742	-21.812	-112.14505	1147.79436	-1.0171	1.8774	-0.41357	-31.412	81.1432	143.29863	0.051459	0.071108	-0.025004	-60.213	-168.934	871.059	-0.66806	0.92568	0.18555	-9.373	52.1381	59.5184	-0.093262	0.033691	0.020996	-4.999	120.236	354.239	-0.12061	0.28564	0.016113
1.364	-40.605	21.44744	1183.8011	-1.507	1.4649	-0.071875	-61.081	114.522	553.83611	-0.57607	0.58574	0.016309	-15.698	-105.3557	1154.4956	-1.0193	1.8752	-0.43066	-33.723	75.0237	139.4212	0.055369	0.062893	-0.023438	-94.229	-144.802	889.7691	-0.65713	0.98349	0.17032	-17.554	63.0409	54.1299	-0.096191	0.032714	0.020019	-0.117999999999999	130.412	343.398	-0.10625	0.26523	0.0060547
1.366	-65.844	19.0413	1157.066	-1.4902	1.4502	-0.068359	-50.543	111.7148	551.107	-0.56084	0.57197	0.023047	5.543	-72.6074	1155.8735	-1.022	1.8794	-0.44775	-30.304	71.3208	126.3061	0.055856	0.06387	-0.024218	-63.018	-110.065	921.1072	-0.64268	1.0343	0.1581	-21.891	52.0049	55.3846	-0.093262	0.030762	0.018555	-23.043	117.246	334.974	-0.093848	0.24766	0.0013672
1.368	-48.157	2.629	1153.6102	-1.4746	1.4457	-0.063672	-53.931	132.522	534.706	-0.54482	0.5544	0.028516	-8.282	-76.293	1136.4378	-1.0332	1.877	-0.45703	-15.227	74.9586	106.7924	0.062012	0.059082	-0.022461	-69.378	-69.643	939.313	-0.64551	1.0864	0.15088	-2.55399999999999	35.7671	51.3553	-0.083984	0.030273	0.012695	-31.259	110.681	307.1339	-0.079395	0.22539	-0.0080078
1.37	-50.656	-6.7012	1146.4769	-1.4608	1.4387	-0.057911	-44.615	145.289	515.193	-0.52451	0.53779	0.028906	-5.931	-82.716303	1130.0056	-1.0405	1.8755	-0.46826	-27.587	75.9423	79.029	0.06045	0.0583	-0.025196	-55.472	-48.81	947.0326	-0.66123	1.1388	0.13838	-21.397	40.6644	38.0446	-0.079102	0.030762	0.011719	-13.111	116.79	271.56	-0.060254	0.20146	-0.014062
1.372	-39.578	17.6057	1136.07	-1.446	1.4318	-0.047364	-40.044	139.079	492.1217	-0.50732	0.52002	0.03418	3.435	-77.0828	1137.881	-1.0449	1.8711	-0.48682	-18.211	60.5621	75.176	0.062306	0.056837	-0.026757	-63.578	-60.126	956.5658	-0.69365	1.1892	0.13506	-38.005	33.4805	34.0949	-0.07666	0.017578	0.0068359	-25.955	97.3562	243.073	-0.040039	0.17969	-0.017578
1.374	-47.996	31.8439	1123.409	-1.4359	1.4255	-0.046582	-52.474	120.0133	461.731	-0.48877	0.50156	0.043945	1.038	-65.4666	1143.89	-1.0469	1.8662	-0.49951	-11.307	53.9875	91.755	0.063477	0.053709	-0.024414	-47.446	-68.705	946.399	-0.74131	1.2313	0.12959	-32.383	31.83544	36.8875	-0.073242	0.010254	0.0053711	-4.397	72.718	234.174	-0.017871	0.15742	-0.024903
1.376	-45.09	42.5811	1104.0467	-1.4204	1.4204	-0.038574	-71.677	115.4893	447.939	-0.47031	0.4875	0.050391	-21.766	-54.0378	1161.3744	-1.0425	1.8657	-0.50537	-9.693	60.66654	85.501	0.066698	0.053809	-0.024707	-68.199	-70.656	924.195	-0.79463	1.2706	0.12412	-18.903	40.3508	48.4077	-0.066895	0.0073242	0.0053711	-18.987	70.251	232.7695	-0.0019532	0.13389	-0.028711
1.378	-38.14	54.0794	1087.481	-1.4096	1.4135	-0.035156	-75.267	108.0892	424.133	-0.45469	0.47149	0.055078	-1.163	-40.834	1194.6716	-1.043	1.8613	-0.51465	-54.157	60.6055	90.7069	0.062012	0.054199	-0.019531	-59.413	-97.73738	950.212	-0.85352	1.3027	0.12012	-38.056	44.0192	18.415	-0.067383	0.00048828	0.0053711	-15.51	75.729	210.9511	0.010937	0.11045	-0.032617
1.38	-42.533	47.8702	1064.238	-1.3901	1.4044	-0.032715	-69.754	111.6807	425.528	-0.4334	0.45606	0.063184	-16.339	-36.1233	1204.7397	-1.0488	1.8613	-0.51611	-29.671	62.2378	91.952	0.062891	0.05127	-0.018653	-66.297	-132.265	973.525	-0.90889	1.3314	0.1164	-43.725	30.6864	26.7598	-0.065186	-0.0053711	0.0021973	-22.524	83.8039	206.29	0.02666	0.091504	-0.035742
1.382	-41.66	43.0424	1057.8839	-1.378	1.39	-0.031543	-51.751	126.3873	421.402	-0.41602	0.4375	0.068359	-35.4941	-41.3865	1205.118	-1.0591	1.8716	-0.52686	-25.141	66.162	83.4966	0.061817	0.053418	-0.02002	-43.393	-155.484	1029.59389	-0.96289	1.3625	0.11582	-32.038	32.4703	40.0569	-0.063477	-0.0092773	-0.0024414	6.542	101.513	203.691	0.035156	0.069336	-0.039063
1.384	-40.869	32.659	1041.1621	-1.3579	1.3764	-0.033691	-47.589	124.134	408.6	-0.39571	0.41602	0.071094	-33.866	-50.13086	1194.672	-1.0703	1.8706	-0.53858	-28.983	64.804	88.5801	0.053614	0.052246	-0.019238	-74.996	-140.342	1044.804	-1.0109	1.3848	0.12207	0.518000000000001	33.34461	35.4029	-0.062988	-0.012695	-0.0043945	-17.339	103.068	205.7167	0.043945	0.046973	-0.043848
1.386	-37.256	41.047	1027.2748	-1.3379	1.3516	-0.032227	-58.25	116.702	386.086	-0.3747	0.3997	0.075098	-8.416	-37.3347	1198.819	-1.0845	1.8735	-0.55225	-49.611	58.838	61.4776	0.044727	0.05586	-0.014551	-73.4238	-131.1261	1071.265	-1.0654	1.4201	0.12666	-25.585	31.9328	26.4415	-0.063477	-0.015625	-0.003418	-22.418	93.756	180.8797	0.054004	0.027636	-0.044434
1.388	-69.388	38.974	1006.7939	-1.3177	1.3384	-0.023437	-52.407	119.129	356.8741	-0.35439	0.37705	0.077442	-23.471	-21.4167	1219.9616	-1.0977	1.8672	-0.56445	-31.853	63.315	52.76192	0.04248	0.056152	-0.014648	-41.818	-113.8666	1085.8171	-1.127	1.4512	0.13281	-29.516	25.36284	24.1307	-0.062012	-0.01709	-0.0078125	-45.1893	75.384	172.0579	0.060254	0.014746	-0.045214
1.39	-67.788	43.232	1006.9272	-1.2938	1.3143	-0.023438	-45.845	111.066	345.18	-0.32695	0.35313	0.073633	-31.397	-26.2888	1213.00911	-1.1035	1.8555	-0.56641	-23.756	74.676	38.352	0.036426	0.055762	-0.012891	-35.258	-103.2593	1099.221	-1.1879	1.5	0.1456	-22.634	22.6142	33.603	-0.061279	-0.019287	-0.012695	-15.71	78.7823	143.083	0.062109	0.0006836	-0.044726
1.392	-44.083	50.765	990.384	-1.2687	1.2838	-0.023828	-45.545	94.578	337.985	-0.30029	0.32617	0.07959	-13.182	-36.0141	1216.5567	-1.0938	1.8223	-0.57715	-20.661	55.47597	53.933	0.030469	0.056055	-0.009375	-78.096	-101.7477	1084.3652	-1.2629	1.5551	0.15342	-18	24.2601	39.487	-0.058105	-0.019531	-0.0073242	-29.096	65.1494	147.722	0.062012	-0.011719	-0.044434
1.394	-35.035	49.6562	967.4925	-1.2433	1.2626	-0.020898	-53.279	88.783	315.429	-0.27608	0.30302	0.080469	24.2925	-32.3743	1195.7478	-1.0811	1.7881	-0.58008	-33.071	37.858	53.3825	0.028125	0.053711	-0.011328	-53.76	-88.594	1084.92	-1.3414	1.6172	0.15654	-45.01	8.2864	36.6585	-0.061523	-0.01709	-0.019043	-32.228	48.887	137.785951	0.062988	-0.022559	-0.045019
1.396	-50.713	44.268	940.5402	-1.2163	1.2388	-0.020996	-41.431	107.419	304.999	-0.25127	0.27939	0.078418	0.542999999999999	-23.3944	1204.0615	-1.0645	1.7539	-0.57813	-22.54	38.0237	60.3165	0.027246	0.049219	-0.011328	-40.865	-75.7281	1087.0432	-1.4194	1.6818	0.16152	-13.439	-1.94149	35.52037	-0.063965	-0.016602	-0.02002	-47.606	46.6266	131.639	0.06455	-0.032519	-0.043945
1.398	-41.49	56.1966	910.346	-1.1852	1.2093	-0.017578	-65.789	119.1287	287.523	-0.2247	0.25166	0.076075	-1.965	-11.1323	1201.9016	-1.0444	1.7075	-0.57373	-31.479	43.2514	41.227	0.025391	0.048828	-0.01416	-35.214	-69.7151	1097.6625	-1.4956	1.7427	0.15967	-29.279	9.0996	46.45255	-0.076172	-0.0063477	-0.021973	0.0159999999999982	71.7618	111.9941	0.06377	-0.037207	-0.04707
1.4	-47.861	70.6187	889.403	-1.1539	1.1853	-0.022852	-45.684	118.066	292.9011	-0.20127	0.22451	0.075098	-3.316	-22.0213	1211.56934	-1.0293	1.6748	-0.57422	-34.824	36.49629	61.4093	0.02959	0.046387	-0.016992	-49.086	-72.1202	1121.6145	-1.5497	1.8038	0.15527	-43.163	-4.2372	48.8858	-0.088135	0.001709	-0.022949	-18.545	62.3973	131.7154	0.062598	-0.041308	-0.046094
1.402	-61.824	76.84618	885.117	-1.125	1.1556	-0.023242	-59.804	123.645	292.982	-0.1792	0.1958	0.071289	-5.908	-13.6727	1190.949	-1.019	1.6489	-0.56982	-37.104	36.3841	62.128	0.033008	0.041504	-0.016699	-37.595	-73.1954	1128.3253	-1.5897	1.8571	0.15234	-31.877	-18.564	54.8315	-0.099609	0.012207	-0.023438	-7.58	50.534514	125.3626	0.061035	-0.047363	-0.049805
1.404	-62.399	65.3156	888.5495	-1.098	1.127	-0.023926	-53.601	132.605	280.595	-0.1583	0.17295	0.063281	-34.199	-26.7033	1188.2502	-1.0137	1.6309	-0.5625	-34.514	47.766	41.6411	0.035742	0.041895	-0.020605	-59.767	-55.729	1130.8794	-1.6195	1.9103	0.14687	-6.947	-29.8697	70.5444	-0.12354	0.032715	-0.023438	-20.836	43.59785	119.3873	0.057031	-0.053027	-0.042188
1.406	-45.88	84.627	899.531	-1.0703	1.0996	-0.024902	-54.754	115.019	260.552	-0.13799	0.14727	0.060547	-5.836	-23.0296	1183.1462	-1.0098	1.6191	-0.56152	-48.563	40.122	19.4602	0.037793	0.040625	-0.024121	-74.88	-56.152	1137.5147	-1.6328	1.9433	0.14307	-24.037	-30.8142	78.6698	-0.13525	0.045898	-0.022461	-16.568	55.8171	88.181	0.052637	-0.05	-0.039746
1.408	-62.739	96.523	897.8916	-1.0351	1.0706	-0.025976	-41.451	100.7846	228.139	-0.11689	0.12617	0.056641	-11.906	1.768	1189.41679	-1.0073	1.6118	-0.55029	-41.783	34.8945	16.812	0.041016	0.033691	-0.029297	-83.467	-59.753	1146.6142	-1.6304	1.9614	0.14307	-19.311	-27.79863	86.8047	-0.16309	0.070313	-0.023438	-45.6833	48.5842	65.542	0.047168	-0.051953	-0.031934
1.41	-67.4623	99.54	885.236	-1.0111	1.0406	-0.025293	-59.745	93.111	214.841	-0.095901	0.10381	0.049023	-21.057	21.0763	1174.3031	-1.0035	1.608	-0.54956	-30.388	42.69832	33.408	0.043457	0.032129	-0.031543	-99.038	-70.487	1148.4076	-1.6179	1.9743	0.14395	-6.958	-31.7882	119.698	-0.18921	0.094484	-0.017578	-15.521	48.394	71.899	0.036523	-0.051953	-0.029102
1.412	-51.273	96.094	860.5191	-0.97988	1.0093	-0.028808	-47.83	87.26	193.531	-0.07666	0.077637	0.043945	-41.7655	7.868	1157.48	-0.99707	1.6035	-0.53955	-31.867	27.8516	44.733	0.044043	0.031934	-0.036524	-108.0712	-77.2433	1147.3081	-1.5964	1.9678	0.15097	7.144	-17.3085	171.181	-0.2168	0.12354	-0.013672	-16.567	52.7149	79.6062	0.022461	-0.049805	-0.019043
1.414	-39.564	93.858	825.2635	-0.95137	0.97539	-0.026758	-36.951	89.344	187.863	-0.061328	0.059766	0.043945	-14.651	3.385	1148.8507	-0.99023	1.5977	-0.53516	-23.629	22.7071	48.2961	0.044824	0.02998	-0.038476	-84.772	-78.2117	1148.209	-1.5698	1.957	0.1584	-38.625	-2.59144	220.414	-0.26416	0.1665	-0.0083008	-45.263	62.576	72.03	0.0094727	-0.041992	-0.016894
1.416	-65.3	75.375	795.683	-0.92383	0.94922	-0.028809	-49.478	92.6459	172.031	-0.046582	0.0375	0.032422	-13.186	15.0012	1131.7401	-0.97949	1.5938	-0.52441	-33.738	28.2193	34.50757	0.046582	0.022266	-0.03545	-73.601	-75.031	1168.602	-1.5327	1.9306	0.16836	-7.584	10.93153	300.392	-0.29053	0.19092	0.0029297	-35.987	65.3944	64.575	-0.005957	-0.038965	-0.013281
1.418	-45.789	62.71	751.441	-0.89062	0.91523	-0.025683	-53.513	109.2944	192.1768	-0.036817	0.022266	0.036719	-22.634	18.88981	1112.0693	-0.96875	1.5889	-0.52246	-19.022	30.0798	33.5209	0.053223	0.024414	-0.038574	-35.797	-60.698	1182.5699	-1.4966	1.9009	0.17627	-1.03	36.4392	357.23	-0.36621	0.24756	0.026367	-14.784	66.2747	71.001	-0.02041	-0.027637	-0.0070313
1.42	-62.172	61.899	742.342	-0.86211	0.88321	-0.023145	-66.382	111.704	199.138	-0.025781	0.0061524	0.035156	-10.591	19.4441	1102.8993	-0.95776	1.5735	-0.51049	-19.549	27.362	25.7738	0.049512	0.017969	-0.044629	-66.635	-41.132	1190.342	-1.4574	1.868	0.18613	-9.162	58.0657	424.698	-0.43774	0.30517	0.048095	-18.166	67.7527	69.6263	-0.03457	-0.023242	-0.0024414
1.422	-47	91.154	740.424	-0.83204	0.85	-0.021582	-58.646	114.108	204.235	-0.021973	-0.0043945	0.033203	-9.739	19.489	1094.617	-0.94873	1.5571	-0.50146	-47.572	31.0719	29.326	0.051172	0.015723	-0.050586	-41.184	-43.02221	1177.032	-1.4236	1.8305	0.19934	-28.762	56.546	501.3541	-0.52051	0.36816	0.071289	-28.883	51.0806	57.7908	-0.04541	-0.013672	0.00048828
1.424	-60.793	97.573	758.711	-0.80049	0.81787	-0.01875	-40.79	119.282	178.4472	-0.017773	-0.018164	0.031738	-7.164	14.984	1087.003	-0.93311	1.5376	-0.48389	-40.677	38.006	3.56831	0.052734	0.011035	-0.054102	-24.532	-34.624	1175.246	-1.3876	1.8047	0.21495	-47.941	76.887	582.371	-0.64893	0.4751	0.11328	-7.324	39.9796	33.505	-0.058594	-0.0051758	0.0051758
1.426	-48.04	110.36734	755.658	-0.76758	0.78711	-0.015137	-39.135	99.0796	164.0052	-0.011523	-0.025683	0.031933	-15.588	11.8682	1089.5847	-0.93164	1.5234	-0.47949	-44.067	40.433	7.654	0.059961	0.0083985	-0.055957	-30.901	-36.277	1186.9415	-1.3632	1.7723	0.22462	-24.356	86.928	630.693	-0.7207	0.53809	0.14209	-17.938	42.3548	17.868	-0.064941	0.00029297	0.0097657
1.428	-65.505	133.19	746.319	-0.74062	0.7502	-0.013086	-49.051	73.1477	146.336	-0.0095704	-0.033887	0.031933	4.79	19.3674	1081.2	-0.9165	1.4985	-0.46143	-33.393	22.7107	13.018	0.064453	0.0053711	-0.061523	-52.466	-43.978	1171.3866	-1.3438	1.7441	0.23975	-20.365	73.293	645.9569	-0.87061	0.67627	0.18945	-27.887	36.8622	29.121	-0.071582	0.0041993	0.016016
1.43	-77.14	131.495	706.9945	-0.71514	0.72119	-0.0067383	-48.027	63.09	149.873	-0.0053711	-0.042773	0.028418	-3.386	41.96	1068.516	-0.90454	1.4792	-0.45483	-44.332	-3.67117	43.484	0.070605	0.010644	-0.065723	-51.51	-57.88	1162.031	-1.3247	1.7183	0.25028	-2.102	42.416	661.3511	-1.0022	0.7854	0.21265	-45.86	21.35134	44.0389	-0.079687	0.011914	0.013477
1.432	-71.311	130.761	678.8075	-0.69014	0.69306	-0.00048828	-42.779	78.6214	108.463	-0.003418	-0.047852	0.027832	-17.128	44.26	1035.3749	-0.88379	1.459	-0.44678	-29.49	2.1631	48.7651	0.072754	0.010059	-0.069433	-53.303	-37.6949	1151.307	-1.3152	1.6912	0.26041	-17.732	31.414	673.225	-1.126	0.9043	0.23096	-37.736	40.1257	47.089	-0.085938	0.016113	0.018555
1.434	-65.009	119.944	644.261	-0.66367	0.66602	0.0017578	-46.493	73.9167	115.8416	0.0021484	-0.049805	0.021484	-41.8691	31.5911	1021.38732	-0.86084	1.4282	-0.4292	-49.414	2.5577	48.65546	0.077441	0.019043	-0.066699	-79.0875	-39.635	1137.464	-1.2995	1.6678	0.27213	-27.688	11.0625	682.657	-1.2573	1.0552	0.2373	-31.415	61.754	44.534	-0.087207	0.026367	0.02207
1.436	-56.874	122.40126	613.337	-0.64844	0.64063	0.015137	-27.459	62.2703	118.4401	0.0038086	-0.054004	0.02002	7.258	47.0444	989.8295	-0.85156	1.4141	-0.4248	-27.076	3.6595	37.404	0.075	0.020215	-0.065918	-69.255	-26.037	1154.3541	-1.2885	1.6479	0.28072	-45.403	-21.7711	661.865	-1.3164	1.1309	0.23047	-26.888	62.142	45.0549	-0.09541	0.028711	0.023145
1.438	-57.76	96.285	584.176	-0.62588	0.61914	0.015527	-35.731	74.9811	134.396	0.0010742	-0.059082	0.017676	-26.796	40.9222	975.5112	-0.81885	1.3931	-0.40869	-23.158	-0.5586	54.4028	0.068359	0.02832	-0.062012	-77.215	-3.95774	1147.641	-1.2769	1.6255	0.28516	-20.066	-62.474	644.035	-1.3735	1.2603	0.20508	-35.21	43.3646	56.1925	-0.094629	0.032617	0.021973
1.44	-71.058	85.858	575.868	-0.61162	0.60645	0.019433	-58.419	75.5702	128.202	0.0033203	-0.059766	0.016016	-22.42	30.925	950.596	-0.79712	1.3677	-0.40235	-49.581	4.374	44.4942	0.057031	0.041504	-0.062207	-64.425	15.1425	1149.604	-1.2633	1.6033	0.29218	-17.012	-64.295	629.799	-1.3786	1.3333	0.17822	-21.438	44.1721	50.7895	-0.093066	0.033203	0.020898
1.442	-55.376	105.486	574.15	-0.59131	0.58809	0.019825	-49.185	76.449	125.733	0.0043945	-0.068848	0.02002	-17.488	33.765	952.03	-0.77881	1.3462	-0.39502	-37.217	-6.2413	30.592	0.042676	0.056445	-0.054492	-43.26	7.5157	1153.3754	-1.2491	1.5807	0.29346	-6.203	-54.878	614.59088	-1.3555	1.3838	0.1543	-31.594	34.8072	25.7961	-0.093262	0.035156	0.019531
1.444	-65.174	129.9261	577.5089	-0.56875	0.57188	0.023828	-33.49	77.7331	112.425	-9.7641e-05	-0.069043	0.017578	5.325	51.3674	925.866	-0.75342	1.3169	-0.38135	-22.1	-25.57308	46.245	0.024707	0.074414	-0.056836	-20.842	-8.4675	1156.6757	-1.2397	1.5594	0.29507	-48.159	-42.628	602.431	-1.2783	1.3984	0.12061	-26.611	32.1172	8.228	-0.090234	0.031055	0.018652
1.446	-51.441	154.074	566.56	-0.54834	0.55225	0.027344	-52.081	77.5923	102.6891	0.0027344	-0.073242	0.020704	-23.733	61.2565	921.67432	-0.73682	1.2983	-0.37793	-28.955	-25.7376	86.428	0.0061521	0.093944	-0.056738	-60.078	-3.3765	1148.9811	-1.2254	1.5319	0.29943	-30.371	-23.8605	633.075	-1.2266	1.3789	0.10498	-14.752	29.5936	20.634	-0.084473	0.027246	0.010937
1.448	-55.633	151.321	537.2638	-0.51924	0.53584	0.02793	-50.708	72.1758	76.668	-0.0011718	-0.075977	0.025391	5.445	54.844	908.2202	-0.7124	1.271	-0.36475	-43.3	-31.9168	118.938	-0.01416	0.11816	-0.050293	-45.711	0.7515	1132.5534	-1.2109	1.5078	0.29834	-47.878	2.747	650.806	-1.1167	1.311	0.085449	-25.528	42.69	30.12	-0.078222	0.024121	0.0078125
1.45	-63.48	148.18	517.9733	-0.49297	0.51601	0.029102	-25.074	67.57	69.875	-0.0055664	-0.074316	0.030371	3.887	58.217	911.708	-0.69311	1.2453	-0.35864	-22.644	-37.9494	147.1046	-0.04043	0.1416	-0.049609	-63.458	0.2743	1095.587	-1.1947	1.4837	0.29911	-19.204	-2.211	670.3021	-1.0327	1.2198	0.08667	-52.362	31.9749	20.97578	-0.069922	0.020215	0.0051758
1.452	-86.2895	124.972	498.536	-0.46446	0.49375	0.028711	-35.861	54.8692	58.785	-0.014648	-0.073242	0.033691	-15.435	63.075	888.6608	-0.67041	1.2192	-0.35303	-35.337	-4.7539	193.2746	-0.068945	0.17569	-0.044531	-33.628	5.76934	1095.895	-1.1742	1.4573	0.29785	-29.538	0.783000000000001	680.4677	-0.96094	1.1211	0.091309	-43.048	42.98	34.858	-0.061035	0.012695	-0.00048828
1.454	-77.247	111.2515	496.681	-0.4335	0.46963	0.026953	-52.03	62.2404	77.7438	-0.016504	-0.071777	0.035254	-49.2769	54.0936	868.1298	-0.64551	1.1836	-0.34375	2.35	28.751	258.0172	-0.10996	0.21006	-0.038281	-52.982	18.8455	1088.6955	-1.1553	1.4333	0.30063	-4.683	-7.224	704.6006	-0.88867	0.97949	0.10205	-33.492	52.349	40.904	-0.051074	0.0063476	-0.0040039
1.456	-41.506	130.3451	476.342	-0.39893	0.44873	0.027344	-38.503	56.817	99.958	-0.020801	-0.067383	0.039648	-23.052	60.8107	835.901	-0.63232	1.1626	-0.33838	-10.462	37.607	324.159	-0.1623	0.25967	-0.019238	-40.785	32.2107	1077.454	-1.1394	1.409	0.30191	-8.736	-19.95	723.7343	-0.86719	0.91797	0.10205	-29.643	41.5238	43.889	-0.039648	0.0020508	-0.0051758
1.458	-62.872	131.6803	451.52	-0.36318	0.42246	0.025293	-20.324	59.6812	78.574	-0.022364	-0.066601	0.039648	-27.869	66.5606	820.5638	-0.61035	1.125	-0.32666	-31.07	42.127	399.0196	-0.23389	0.31543	-0.00048828	-42.984	57.3861	1045.323	-1.1182	1.3828	0.3042	-1.234	-63.839	740.6281	-0.83057	0.81885	0.10254	-45.497	23.5767	20.78483	-0.030273	-0.0034179	-0.011426
1.46	-51.82	113.3852	429.4447	-0.33623	0.39502	0.030566	-48.936	62.9686	81.4527	-0.028125	-0.064551	0.041992	-20.616	70.5616	791.781	-0.59546	1.1008	-0.3164	-39.796	80.27	464.241	-0.32061	0.39238	0.034864	-30.926	76.7282	1047.94503	-1.0931	1.3554	0.30592	-5.811	-107.5047	740.1879	-0.81445	0.75879	0.099855	-32.605	24.164	10.8421	-0.020704	-0.013867	-0.020703
1.462	-67.058	117.7705	414.2032	-0.30537	0.37041	0.028613	-48.048	49.8179	60.416	-0.02832	-0.061035	0.046875	-31.716	70.586	789.4733	-0.58154	1.0757	-0.30713	-18.438	82.3997	540.682	-0.43448	0.48193	0.076269	-50.819	61.7121	1036.5774	-1.0691	1.3273	0.30206	39.356	-141.915	728.0885	-0.79248	0.71924	0.08252	-37.84	44.8478	0.0330000000000013	-0.0097656	-0.018066	-0.024414
1.464	-43.599	127.9742	395.905	-0.27871	0.34277	0.02666	-47.827	30.1642	62.483	-0.030859	-0.058594	0.047852	-11.118	82.0103	788.4335	-0.57227	1.043	-0.29785	-51.789	73.8249	625.754	-0.56689	0.59014	0.12744	-38.503	36.67057	1017.7004	-1.037	1.3009	0.30708	15.376	-176.625	735.159	-0.75537	0.68994	0.062988	-5.266	34.486	14.49	-0.00078126	-0.024317	-0.032422
1.466	-65.704	119.2187	386.913	-0.24854	0.31836	0.026855	-26.836	41.6362	55.175	-0.03252	-0.061523	0.049512	-17.431	106.4962	776.4395	-0.56445	1.0293	-0.28809	-55.389	63.6801	682.6442	-0.71709	0.7122	0.17559	-36.192	42.181	972.014	-1.0117	1.2706	0.30223	-0.322999999999997	-184.698	747.893	-0.72803	0.67529	0.04248	-20.175	2.3818	46.3307	0.0039063	-0.03252	-0.041504
1.468	-40.208	107.2082	379.447	-0.22285	0.29365	0.025781	-50.463	48.0412	40.5825	-0.030176	-0.06543	0.054981	-15.853	102.197	762.699	-0.55176	0.99951	-0.27588	-53.083	58.252	706.2817	-0.88086	0.84961	0.22021	-36.347	48.41	952.572	-0.97998	1.2505	0.30176	-3.323	-185.596	791.86	-0.68457	0.65918	0.019043	-39.84	3.9793	47.4591	0.011719	-0.032129	-0.046191
1.47	-56.123	114.6715	357.0586	-0.19961	0.26611	0.025097	-42.888	40.1393	36.1208	-0.033301	-0.06416	0.058105	-12.36	94.279	741.1002	-0.54029	0.97681	-0.26831	-42.362	40.433	700.5	-1.0472	0.99191	0.25205	-48.093	50.078	948.96	-0.94715	1.2148	0.29669	33.451	-160.034	822.56	-0.65405	0.65942	0.0036621	-44.926	23.7677	53.2935	0.019336	-0.029395	-0.052832
1.472	-48.219	114.9823	330.4	-0.1707	0.24697	0.025097	-44.381	29.0236	66.2363	-0.034668	-0.06543	0.062012	-24.333	109.992	725.4068	-0.53516	0.95508	-0.25928	-62.5565	32.668	720.908	-1.1963	1.1316	0.26533	-36.62	43.016	941.771	-0.91445	1.1873	0.29031	0.0690000000000026	-149.1453	855.1059	-0.63867	0.66797	-0.003418	-24.835	17.1784	42.9892	0.018555	-0.025879	-0.057129
1.474	-77.128	107.7147	318.041	-0.14306	0.22373	0.025684	-43.84	48.1037	66.2791	-0.03291	-0.064746	0.068164	-37.29	115.04	708.478868	-0.51465	0.92432	-0.25146	-44.778	-4.1004	727.78	-1.3193	1.2648	0.25869	-39.662	45.6045	922.3594	-0.87663	1.1532	0.28645	19.2588	-130.9657	891.873	-0.65039	0.69629	-0.0039063	-34.854	1.335	76.32	0.015137	-0.020703	-0.058106
1.476	-43.828	120.3546	312.399	-0.11816	0.20166	0.022949	-36.851	56.0943	70.891	-0.033398	-0.063868	0.073828	-66.3048	99.3013	677.5789	-0.50244	0.90381	-0.24951	-82.1349	-32.4108	666.121	-1.3914	1.3836	0.22744	-40.026	66.4836	914.9391	-0.84506	1.1228	0.28224	28.8464	-108.062	923.1962	-0.66992	0.7168	0.003418	-21.946	-2.924	56.6798	0.0070313	-0.006836	-0.06211
1.478	-62.504	144.628	307.761	-0.094043	0.17969	0.023633	-6.958	45.2558	51.924	-0.035742	-0.063868	0.077344	-33.534	94.2512	661.693	-0.48389	0.86963	-0.24609	-82.104	-56.6	634.3895	-1.4141	1.4863	0.18115	-29.469	63.108	893.484	-0.81006	1.0913	0.27295	19.107	-74.169	946.2957	-0.75	0.77734	0.015137	-30.846	-25.4105	51.607	-0.0050781	0.0099609	-0.060938
1.48	-51.908	133.983	297.644	-0.072656	0.16191	0.024121	-45.225	35.3489	50.5185	-0.036816	-0.058789	0.08291	-50.629	99.8027	656.949	-0.46216	0.8396	-0.24439	-68.236	-64.252	617.351	-1.3651	1.5704	0.13183	-28.462	58.8291	892.3199	-0.77681	1.0528	0.2645	-7.308	-69.343	963.3786	-0.83178	0.84009	0.031494	-31.328	-30.4157	61.267	-0.029688	0.02832	-0.06084
1.482	-55.613	123.101	269.126	-0.054297	0.14278	0.024902	-43.45	32.6197	25.218	-0.039551	-0.054688	0.084473	-45.13	116.9365	624.7111	-0.44434	0.81006	-0.23779	-53.026	-56.58	639.19	-1.2711	1.6231	0.089355	-44.774	70.4742	852.9132	-0.74924	1.0194	0.25879	25.58	-72.145	958.904	-0.92383	0.90039	0.039551	-16.761	-19.0856	112.622	-0.053711	0.048828	-0.059082
1.484	-33.051	115.7198	248.0882	-0.036719	0.12285	0.026074	-48.248	14.5364	15.54	-0.039746	-0.051855	0.094336	-34.767	115.8881	613.137	-0.42578	0.77148	-0.23242	-66.424	-46.807	630.952	-1.1371	1.6289	0.053809	-53.993	74.4337	831.6934	-0.72012	0.98639	0.25462	26.6877	-86.081	959.339	-1.0405	0.99463	0.052246	5.186	-8.2163	153.126	-0.082226	0.076953	-0.049805
1.486	-39.723	108.3579	239.4907	-0.024414	0.11328	0.030762	-20.5	23.11247	14.864	-0.038574	-0.044531	0.098437	-10.639	125.789	610.6411	-0.40918	0.75	-0.22803	-81.422	-27.309	654.6567	-0.98693	1.5871	0.030274	-22.098	82.8175	812.756	-0.6918	0.95166	0.24519	4.359	-107.2537	975.665	-1.0938	1.0391	0.058105	-17.379	10.3189	183.5451	-0.11836	0.10898	-0.046387
1.488	-44.099	87.048	218.851	-0.018945	0.098925	0.031348	-48.635	29.5092	18.9267	-0.037793	-0.041016	0.11015	-43.312	117.2887	601.3298	-0.38525	0.71533	-0.21777	-81.728	11.915	664.9368	-0.83789	1.5059	0.019043	-25.423	88.009	823.141	-0.66797	0.9209	0.23682	-4.481	-124.388	1014.9977	-1.1792	1.1099	0.054199	-14.936	31.8327	224.5909	-0.15742	0.1461	-0.035449
1.49	-28.93	77.099	208.971	-0.010742	0.084961	0.037012	-28.241	21.7325	42.2356	-0.033593	-0.029687	0.10459	-37.653	109.8658	588.5849	-0.37207	0.68945	-0.2102	-62.887	27.876	687.3682	-0.71943	1.3724	0.025976	-32.897	85.103	839.7067	-0.64904	0.89082	0.22731	0.780999999999999	-119.3018	1054.7356	-1.2378	1.1743	0.040527	6.845	50.942	293.7618	-0.20459	0.19355	-0.020899
1.492	-52.18	93.28824	192.82	-0.011133	0.079101	0.040527	-40.826	13.939	52.3435	-0.032715	-0.024902	0.1123	-42.603	112.3101	559.50117	-0.35596	0.65869	-0.21045	-74.765	26.08	707.094	-0.63066	1.231	0.033496	-58.998	82.871	817.7435	-0.63341	0.86321	0.22259	-19.4406	-102.4909	1081.141	-1.2598	1.209	0.039551	8.961	44.9869	374.3284	-0.2627	0.24707	-0.0048828
1.494	-64.843	85.8147	194.122	-0.013183	0.073438	0.049805	-49.768	19.2182	61.142	-0.034961	-0.013967	0.11377	-47.263	128.2095	542.754	-0.34521	0.62939	-0.20557	-59.188	-14.569	718.9552	-0.57754	1.0841	0.056153	-41.698	101.366	781.3171	-0.61155	0.83442	0.21131	1.302	-117.8705	1095.8083	-1.2944	1.2661	0.032227	-35.489	42.9329	464.12364	-0.33447	0.31279	0.016211
1.496	-51.617	88.527	208.5026	-0.019531	0.066406	0.060059	-25.317	31.663	49.923	-0.037499	0.00038901	0.11387	-62.559	116.573	522.5623	-0.33203	0.61328	-0.2002	-26.983	-62.376	715.913	-0.5585	0.9624	0.076367	-35.427	120.214	752.0616	-0.59167	0.80591	0.20009	11.858	-128.5377	1099.3	-1.3111	1.3072	0.025146	-22.068	68.2425	532.509	-0.42373	0.38857	0.046387
1.498	-41.485	99.885	200.591	-0.026953	0.066016	0.062012	-23.011	21.5	43.97904	-0.044138	0.012495	0.11621	-45.448	112.057	508.554	-0.31348	0.58252	-0.19678	-31.4598	-103.8399	727.163	-0.55518	0.87158	0.092773	-28.746	115.479	727.1847	-0.57031	0.77539	0.18799	35.98928	-119.0138	1109.205	-1.3325	1.3423	0.015137	-20.982	80.981	590.645	-0.52412	0.47959	0.081543
1.5	-58.588	104.472	188.997	-0.036426	0.062891	0.069336	-26.1	7.9976	43.038	-0.055075	0.033883	0.11924	-55.855	130.4777	492.13	-0.30176	0.5581	-0.19238	-28.448	-163.654	752.1289	-0.5625	0.80547	0.10088	-36.192	100.06546	698.9468	-0.54865	0.74592	0.18673	18.1119	-106.5231	1111.7631	-1.3765	1.3882	0.0078125	-42.786	66.2196	644.965	-0.6459	0.58183	0.12187
1.502	-48.444	86.8177	167.9244	-0.046192	0.064453	0.080273	-22.867	-6.72209	24.624	-0.066406	0.049316	0.11963	-41.938	139.5545	492.5167	-0.28467	0.5376	-0.18799	-3.933	-194.9	757.1282	-0.56846	0.77314	0.098535	-25.07	116.0374983	685.802	-0.52434	0.71927	0.17872	24.9367	-105.9462	1114.8961	-1.4023	1.4121	0.003418	-30.851	39.676	692.659	-0.78516	0.69922	0.16943
1.504	-60.006	72.40532	165.1882	-0.052344	0.062695	0.084277	-37.472	-26.1493	26.4	-0.085556	0.070514	0.12187	-44.026	122.9091	483.2841	-0.2627	0.50537	-0.18115	-2.09	-196.127	763.3742	-0.57158	0.76299	0.084864	-33.111	124.6888	678.892	-0.50519	0.69114	0.17286	26.8327	-106.0281	1109.7685	-1.4565	1.4556	-0.00097656	-37.543	32.9468	741.461	-0.94492	0.82988	0.21162
1.506	-43.796	74.2001	147.985	-0.060547	0.063477	0.086914	-46.108	-29.0646	57.262	-0.10168	0.093675	0.12578	-38.103	115.29731	467.8312	-0.24854	0.48682	-0.18115	-50.859	-200.243	769.395	-0.57012	0.76231	0.061719	-20.12	115.8486	698.778	-0.49249	0.66554	0.16377	46.7965	-107.713	1098.812	-1.4976	1.4869	-0.0075684	-22.402	35.578	767.535	-1.1144	0.9747	0.2502
1.508	-43.471	62.22	130.213	-0.063477	0.062598	0.09551	-23.163	-20.6781	91.6091	-0.11925	0.12025	0.12656	-36.089	123.81441	435.6112	-0.22412	0.45947	-0.17285	-8.09	-197.612	827.5312	-0.55566	0.77246	0.043945	-25.762	117.509	692.9813	-0.48193	0.64209	0.15771	18.9442	-97.859	1092.9951	-1.5347	1.5103	-0.01416	-51.0477	-1.4015	780.779	-1.2811	1.1227	0.28887
1.51	-20.305	50.525	117.6545	-0.062988	0.057813	0.096192	-30.325	1.04562	120.585	-0.14006	0.14348	0.12383	-26.899	122.3153	413.3905	-0.21119	0.43848	-0.16773	4.64100000000001	-177.533	881.5983	-0.52978	0.79873	0.033594	-36.979	132.179	670.0701	-0.47197	0.62295	0.15127	36.3763	-97.8573	1115.2478	-1.5698	1.5454	-0.025391	-61.419	-49.338	766.815	-1.4368	1.2706	0.30176
1.512	-32.395	60.52432	118.0901	-0.066895	0.052344	0.10205	-46.717	25.904	137.4173	-0.15674	0.16748	0.12256	-32.844	117.4495914	394.1925	-0.19336	0.41504	-0.1626	-21.262	-134.8762	908.13	-0.53389	0.82822	0.025488	-55.123	144.496	640.3897	-0.46044	0.60615	0.14394	40.8219	-70.988	1126.514	-1.5859	1.5684	-0.030762	-92.436	-86.501	748.391	-1.5684	1.4141	0.28369
1.514	-44.709	73.373	112.3163	-0.069629	0.047852	0.10342	-59.247	43.199	182.5362	-0.17966	0.19115	0.11806	-28.449	122.5746	400.3764	-0.17041	0.3877	-0.1582	-46.7462	-104.105	920.193	-0.56592	0.86729	0.019239	-44.652	125.37	629.4976	-0.44717	0.58935	0.14004	13.356	-64.395	1129.724	-1.6011	1.6021	-0.041016	-54.152	-91.028	711.006	-1.6477	1.5578	0.2459
1.516	-57.515	61.375	110.3392	-0.070313	0.039063	0.11279	-38.025	63.725	236.115	-0.19932	0.21583	0.1193	-43.088	122.0704	384.623	-0.15527	0.36523	-0.15186	-21.51	-80.502	929.8707	-0.64062	0.92656	0.025586	-22.722	116.59	610.1769	-0.43418	0.57109	0.13525	-1.711	-84.181	1140.7336	-1.602	1.6119	-0.045654	-83.276	-92.99	697.982	-1.6816	1.6867	0.20899
1.518	-48.702	61.402	129.915	-0.071875	0.028027	0.11533	-41.169	59.876	288.596	-0.2282	0.24276	0.10754	-55.754	109.8384	379.3635	-0.14648	0.34473	-0.14844	-16.419	-63.411	952.75	-0.72803	0.98486	0.046387	-35.084	102.5694	596.326	-0.4165	0.55127	0.13086	14.7208	-87.2545	1148.315	-1.605	1.6255	-0.05127	-44.317	-79.015	695.597	-1.6656	1.7754	0.16484
1.52	-36.54	71.173	104.1882	-0.077735	0.01543	0.11914	-23.805	70.7053	350.592	-0.2619	0.27799	0.10322	-46.82	119.4348	370.163	-0.12354	0.32471	-0.146	-43.248	-68.603	977.488	-0.84043	1.0528	0.064551	-52.77	102.8505	558.91559	-0.39863	0.54355	0.11904	22.795	-75.4118	1161.484	-1.5972	1.6294	-0.054688	-67.526	-71.3111	715.166	-1.6053	1.8182	0.11836
1.522	-44.713	63.3519	91.6729	-0.081641	0.00097656	0.12071	-36.332	84.677	388.521	-0.30371	0.31982	0.10791	-30.642	128.302	362.8601	-0.11621	0.30859	-0.14307	-35.337	-94.04	994.4928	-0.95186	1.1185	0.069336	-25.194	109.337	540.213	-0.3835	0.52822	0.11572	-7.4107	-64.6349	1156.3804	-1.5977	1.625	-0.055176	-88.7	-50.534	721.7117	-1.501	1.8184	0.086914
1.524	-56.104	47.7596	63.729	-0.087891	-0.014258	0.12471	-5.899	94.1723	455.108	-0.36195	0.36841	0.1097	-40.983	111.998	336.1191	-0.10059	0.29102	-0.1416	-34.1	-102.192	1010.749	-1.0581	1.1857	0.072461	-22.562	119.144	528.487	-0.36592	0.50947	0.10518	11.471	-54.82096	1155.6401	-1.5942	1.6138	-0.056152	-83.1006	-20.522	746.324	-1.3542	1.7587	0.060352
1.526	-35.747	54.51244	69.688	-0.090332	-0.027832	0.12891	-18.033	95.997	511.83984	-0.43697	0.4261	0.11696	-34.146	94.05	308.9804	-0.081787	0.271	-0.13452	-40.512	-134.91145	1038.933	-1.1425	1.2509	0.059668	-34.635	109.565	537.5475	-0.35254	0.50039	0.10078	23.9877	-48.7567	1159.8931	-1.5903	1.5991	-0.058594	-31.511	10.097	765.531	-1.1922	1.6441	0.049414
1.528	-25.692	64.7927	49.948	-0.092871	-0.038867	0.13115	-27.713	87.701	560.763	-0.52641	0.49553	0.12325	-23.195	102.7333	302.0374	-0.070313	0.25439	-0.13672	-47.6665	-154.2349	1064.3876	-1.2031	1.3066	0.053223	-24.89	110.0197	533.586	-0.34277	0.48926	0.094238	36.3759	-38.4367	1172.80564	-1.584	1.582	-0.05957	-45.867	-22.126	789.3311	-1.0347	1.4859	0.044336
1.53	-23.52	47.5342	67.9468	-0.094238	-0.054981	0.13594	-27.937	76.752	595.509	-0.62579	0.57038	0.14276	-37.427	98.2919	282.995	-0.047852	0.23682	-0.13184	-66.94	-175.4964	1084.8283	-1.226	1.3631	0.039648	-11.873	127.881	522.702	-0.3335	0.47656	0.089648	27.6651	-46.2864	1186.419	-1.5796	1.5532	-0.058594	-50.571	-71.078	793.165	-0.9001	1.3015	0.051855
1.532	-22.635	47.555	64.1265	-0.094238	-0.067871	0.13789	-21.79	61.976	612.803	-0.73242	0.66016	0.16162	-37.976	94.584	282.2427	-0.045898	0.22803	-0.12646	-39.483	-148.2704	1095.949	-1.2296	1.4099	0.028809	-30.21	148.71	506.7149	-0.32734	0.46367	0.086426	74.508	-49.6585	1202.1924	-1.5757	1.5396	-0.059082	-32.464	-107.652	800.879	-0.79395	1.1211	0.057129
1.534	-15.553	47.306	76.8788	-0.095703	-0.080664	0.13809	-66.4058	20.4085	638.7376	-0.83892	0.75071	0.18442	-30.173	94.437	272.2278	-0.040527	0.20947	-0.13086	-59.119	-146.5581	1087.438	-1.228	1.4443	0.015137	-35.991	128.287	490.7936	-0.32227	0.45586	0.084082	37.3939	-18.48	1187.0377	-1.5562	1.5103	-0.056152	-13.402	-119.904	793.844	-0.71445	0.96112	0.067481
1.536	-41.19	48.233	51.0499	-0.096191	-0.088867	0.14697	-53.271	-2.09523	640.017	-0.94535	0.84179	0.197	-35.718	109.7573	264.1581	-0.033447	0.20117	-0.12597	-41.731	-156.926	1111.90857	-1.2243	1.4765	-0.0018555	-43.39	124.249	456.2002	-0.31181	0.4417	0.078027	41.3233	-19.358	1187.3046	-1.5447	1.4944	-0.059082	-14.151	-179.147	822.041	-0.65664	0.83203	0.069824
1.538	-51.988	37.9213	56.3261	-0.089453	-0.10283	0.13916	-54.614	-28.602	642.8229	-1.0445	0.93411	0.20508	-34.079	103.0564	253.9591	-0.029785	0.19727	-0.12695	-27.293	-149.69	1141.653	-1.228	1.5044	-0.015137	-40.544	128.227	422.9413	-0.30469	0.42676	0.075195	26.9149	-28.2709	1185.3369	-1.5371	1.4727	-0.05957	2.083	-223.44	832.1379	-0.61328	0.73907	0.066699
1.54	-36.51	47.2884	51.5916	-0.086035	-0.11006	0.13887	-39.328	-38.499	632.1309	-1.1335	1.0195	0.21589	-38.863	105.834	245.98019	-0.025391	0.18408	-0.10938	-24.35	-109.8842	1154.022	-1.2469	1.5332	-0.027735	-39.641	122.742	398.47	-0.28691	0.41113	0.069043	38.8216	-27.8943	1191.10262	-1.5156	1.4473	-0.064941	-14.065	-225.688	825.7317	-0.58291	0.67412	0.049707
1.542	-33.147	36.3689	40.989	-0.079786	-0.11982	0.13887	-56.356	-50.705	639.6039	-1.2051	1.1074	0.2251	-33.754	112.095	235.8454	-0.022461	0.18066	-0.10889	-44.0423	-101.9905	1148.187	-1.2739	1.5562	-0.032324	6.395	88.494	383.586	-0.2666	0.39668	0.061817	12.131	-18.1206	1188.3668	-1.5068	1.4375	-0.071289	-21.589	-196.733	836.5891	-0.55566	0.62744	0.02832
1.544	-52.95	27.8206	27.43	-0.073731	-0.12403	0.13486	-34.268	-58.814	656.917	-1.2547	1.1757	0.2168	-38.29	108.894	219.4581	-0.023438	0.17627	-0.10352	13.75	-103.7168	1145.133	-1.3137	1.5828	-0.044043	-10.599	83.236	399.3372	-0.24434	0.37364	0.05752	6.7716	-22.666	1176.5359	-1.4878	1.4204	-0.06543	-6.855	-179.366	879.0882	-0.52285	0.59375	0.014942
1.546	-45.321	25.0555	15.434	-0.070801	-0.12646	0.13379	-33.799	-42.053	675.602	-1.2811	1.2231	0.19521	-50.199	89.4989	186.9616	-0.024658	0.17212	-0.10401	-1.875	-113.9917	1154.7468	-1.3468	1.6019	-0.050683	-20.889	100.632	374.40885	-0.2167	0.3501	0.043555	-11.3299	-7.751	1166.347	-1.4739	1.408	-0.069824	11.05	-169.4	952.2517	-0.50224	0.57119	0.0019531
1.548	-29.056	47.03081	23.303	-0.062793	-0.1291	0.13076	-32.348	-17.698	677.346	-1.2718	1.2423	0.17142	-50.11	90.0768	183.241	-0.028809	0.1792	-0.095703	-12.003	-104.031	1131.715563	-1.3745	1.6255	-0.046387	-25.978	114.75929	359.5	-0.18848	0.32422	0.032227	20.2721	11.8923	1158.898	-1.4604	1.395	-0.068848	-13.4	-149.5937	968.347	-0.49404	0.57315	0.00039062
1.55	-21.889	50.6603	41.30153	-0.055762	-0.1292	0.13057	-16.7	2.946	692.598	-1.2178	1.2395	0.15445	-29.058	92.2406	178.867	-0.025879	0.17627	-0.094727	-45.441	-114.688	1119.5635	-1.3949	1.6441	-0.058105	14.751	117.3535	356.386	-0.16142	0.29599	0.019824	-11.701	-6.3955	1140.0036	-1.4453	1.3809	-0.075195	-23.377	-116.511	974.247	-0.50996	0.59922	0.0080077
1.552	-40.261	36.0747	51.474	-0.04834	-0.13037	0.12588	2.395	7.459	662.75	-1.127	1.2051	0.14893	-19.374	90.606	186.818	-0.025391	0.17383	-0.09082	-11.187	-104.816	1117.386	-1.4117	1.652	-0.06377	-14.461	121.199	349.1597	-0.1335	0.26572	0.01123	19.8454	-15.3548	1136.93249	-1.439	1.3784	-0.076172	-28.341	-94.185	991.93	-0.55908	0.646	0.013672
1.554	-17.984	30.06747	48.404	-0.037305	-0.12754	0.12237	-15.413	-8.172	677.361	-1.0288	1.1445	0.13653	-27.249	82.0052	172.91905	-0.018555	0.17236	-0.083008	-48.5138	-107.04	1135.248	-1.4261	1.6594	-0.07002	-34.057	120.269	327.1029	-0.11084	0.23799	0.0014648	19.917	-18.4151	1144.2644	-1.4194	1.3735	-0.081543	-3.025	-79.126	1006.395	-0.65068	0.73496	0.028808
1.556	-24.803	44.9766	28.9651	-0.032715	-0.12256	0.12256	-48.947	-40.403	671.3	-0.92889	1.0715	0.13502	-16.5	81.8714	169.0479	-0.014648	0.17041	-0.080566	-47.615	-112.0236	1137.836	-1.4441	1.6944	-0.087402	-49.6869	109.509	305.7287	-0.08789	0.20616	-0.0043945	42.8335	3.348	1139.1701	-1.4106	1.3628	-0.081299	-19.804	-80.74	1034.68	-0.771	0.8376	0.040332
1.558	-45.234	39.504	23.1355	-0.024414	-0.12041	0.11426	-43.874	-71.6339	703.2358	-0.84105	0.99532	0.13086	-40.822	93.1561	156.052	-0.0063477	0.16064	-0.07959	-62.39789	-100.115	1134.159	-1.4492	1.7217	-0.10693	-17.234	111.396	284.707	-0.071289	0.18018	-0.013184	-3.587	-1.58763	1125.7315	-1.4014	1.3516	-0.086426	-26.832	-106.814	1028.3621	-0.90108	0.94814	0.04502
1.56	-43.743	36.814	22.73	-0.017578	-0.11318	0.1168	-19.326	-77.3004	716.4297	-0.76572	0.91718	0.13812	-38.354	74.8957	151.1068	-0.0043945	0.15186	-0.080566	-43.767	-69.739	1155.013	-1.4528	1.7327	-0.12197	-23.52	112.48949	286.136	-0.057129	0.14795	-0.015918	33.48797	3.5887	1118.54	-1.377	1.3398	-0.091797	-20.031	-128.2613	1043.7293	-1.0301	1.0492	0.051269
1.562	-24.587	35.7085	11.203	-0.0089844	-0.10381	0.10508	-34.283	-93.85477	749.327	-0.71387	0.84375	0.14941	-43.78	69.712	153.9374	0.0073242	0.14746	-0.075195	-38.236	-50.461	1181.6732	-1.4437	1.7363	-0.13262	-19.421	86.7077	265.8037	-0.04834	0.12549	-0.021875	50.1312	16.4576	1111.6438	-1.3677	1.3354	-0.090332	-15.454	-127.5144	1064.1267	-1.1387	1.1484	0.04834
1.564	-45.452	31.096	-0.274000000000001	-0.005957	-0.089355	0.098536	-22.057	-106.6949	782.931	-0.67403	0.7901	0.16054	-15.869	75.2334	141.93138	0.0097656	0.12842	-0.072754	-21.414	-57.5998	1200.6159	-1.4375	1.727	-0.13692	-21.49	62.7319	251.8227	-0.039746	0.10127	-0.023828	32.9299	10.4125	1086.7709	-1.3418	1.3203	-0.09668	-53.792	-138.2894	1109.332	-1.2246	1.2389	0.041895
1.566	-41.984	14.6319	-1.072	-0.0029297	-0.075195	0.094238	-29.453	-122.9511	811.9476	-0.65209	0.74706	0.17149	-37.076	77.4511	120.3211	0.01416	0.11352	-0.07959	-22.933	-69.8312	1213.744	-1.4363	1.7157	-0.1374	-30.286	80.1729	228.4671	-0.032519	0.082813	-0.029199	18.7964	-3.324	1082.9279	-1.3252	1.3062	-0.099368	-46.51	-129.5928	1112.1512	-1.2798	1.3181	0.034277
1.568	-25.068	14.0644	30.7874	-0.0020508	-0.057324	0.083691	-39.409	-129.2402	825.4158	-0.64594	0.72333	0.18344	-30.899	73.3478	115.575	0.025391	0.10596	-0.074219	9.26	-49.171	1219.07496	-1.4414	1.6973	-0.13574	-33.958	80.1448	230.4081	-0.026855	0.064453	-0.037109	28.18248	10.9034	1061.903	-1.3071	1.2925	-0.095215	-25.901	-120.4617	1125.41939	-1.3188	1.3853	0.031934
1.57	-19.672	31.2549	49.49	-0.0017578	-0.039746	0.076367	-42.384	-143.222	850.27666	-0.64172	0.71561	0.19244	-53.323	69.6268	122.9866	0.035156	0.091309	-0.066406	4.603	-47.37	1220.766	-1.4484	1.6797	-0.13906	-7.389	82.1454	225.6299	-0.02334	0.048438	-0.036621	17.8647	16.05362	1038.6149	-1.2837	1.2778	-0.097656	-25.381	-107.6787	1113.781	-1.3456	1.4411	0.029492
1.572	-26.397	29.009	51.516	-0.0041015	-0.022949	0.070508	-46.346	-154.025	868.7425	-0.64893	0.72314	0.19287	-18.317	64.4676	117.657	0.039063	0.080566	-0.065918	10.879	-51.113	1246.4843	-1.4486	1.6609	-0.13106	-13.66	80.2019	211.0604	-0.019336	0.029688	-0.041406	8.188	27.1157	998.339	-1.2734	1.2646	-0.096191	-33.04	-123.1204	1158.35505	-1.375	1.4854	0.021484
1.574	-10.638	20.9321	53.3239	-0.0070313	-0.0052736	0.061133	-71.095	-135.073	878.339	-0.66539	0.74509	0.19894	-32.372	57.244853	112.5199	0.039063	0.065918	-0.067383	-12.896	-39.3746	1241.7273	-1.4451	1.652	-0.1291	-46.817	89.7349	167.871	-0.016602	0.016797	-0.05	22.4347	24.262	1001.2401	-1.2495	1.2524	-0.095703	-2.325	-124.669	1181.071	-1.4161	1.5187	0.014648
1.576	3.155	14.9306	44.026	-0.010742	0.016602	0.053223	-72.238	-112.704	884.896	-0.6832	0.77607	0.19568	-6.09	53.12617	101.3477	0.04004	0.057129	-0.062011	-3.194	-13.4609	1226.4298	-1.443	1.6398	-0.12559	-42.342	91.0717	154.66	-0.01123	0.0046875	-0.049707	17.441	32.5632	995.812	-1.2382	1.2412	-0.09082	-24.865	-100.9973	1197.357	-1.4625	1.5566	-0.0011719
1.578	-19.818	12.7957	29.941	-0.013965	0.034863	0.042285	-72.303	-96.1553	907.309	-0.70819	0.82133	0.19493	-22.05	70.5158	93.7037	0.041992	0.053223	-0.058594	-47.953	-15.7254	1214.4627	-1.4336	1.6348	-0.12354	-32.5	87.8669	159.745	-0.0092773	-0.0053711	-0.052246	8.561	51.6633	994.9249	-1.2207	1.2305	-0.094238	-3.331	-72.663346	1172.401	-1.5062	1.5925	-0.01289
1.58	-18.076	2.4505	29.432	-0.017578	0.054687	0.035937	-50.703	-83.10196	947.248	-0.74557	0.8737	0.19267	-26.303	64.2563	84.0529	0.043457	0.039551	-0.051758	-44.158	-2.2191	1242.936	-1.4225	1.6345	-0.12822	-24.498	86.0343	177.8087	-0.0055664	-0.013477	-0.054199	-0.254	49.859	987.9851	-1.1948	1.2095	-0.090332	-8.839	-73.2672	1165.992	-1.5399	1.6225	-0.030273
1.582	-35.297	10.01827	30.583	-0.032812	0.073438	0.028906	-43.886	-71.9451	993.083	-0.78418	0.92383	0.19971	-54.87	50.5597	76.8831	0.046875	0.036621	-0.05127	-45.662	5.5266	1264.3558	-1.4125	1.6395	-0.12637	-34.208	93.331	166.7997	-0.0081055	-0.023145	-0.052051	40.6681	43.362	985.82	-1.1841	1.1958	-0.087402	10.989	-72.547	1157.3265	-1.5576	1.6484	-0.042969
1.584	-7.128	14.21174	61.874	-0.03916	0.093556	0.019824	-44.928	-79.339	1023.946	-0.82819	0.97096	0.20254	-46.428	50.1656	64.627	0.050293	0.021484	-0.043457	-51.465	9.7139	1257.362	-1.3965	1.643	-0.12637	-27.719	81.9422	163.319	-0.011231	-0.030957	-0.054004	25.2069	42.89	974.3934	-1.1538	1.1704	-0.084961	-20.143	-61.196	1138.8981	-1.5601	1.6722	-0.064063
1.586	-35.814	20.23	83.5504	-0.050781	0.11572	0.014648	-39.979	-88.795	1026.45	-0.87974	1.0141	0.20966	-24.703	54.74248	77.63699	0.050049	0.014404	-0.040283	-61.175	8.572	1247.0449	-1.388	1.6448	-0.12373	-20.043	80.618	146.0529	-0.0094726	-0.034082	-0.054199	0.579999999999998	35.1773	939.3137	-1.1315	1.1506	-0.083008	-31.772	-51.658	1119.809	-1.548	1.6818	-0.085938
1.588	-28.444	14.11198	118.537	-0.061524	0.13613	0.011328	-24.883	-106.549	1023.9194	-0.92896	1.0524	0.2206	-33.97	57.4767	72.4042	0.056152	0.0068359	-0.040039	-48.76	14.063	1235.688	-1.3779	1.6445	-0.12402	-14.384	80.1385	123.0938	-0.01123	-0.039063	-0.052734	-2.439	24.40248	907.933	-1.1094	1.1289	-0.084473	-28.1904	-62.612	1135.636	-1.5245	1.6856	-0.099607
1.59	-38.332	48.193	162.1931	-0.075097	0.15674	0.0094723	-45.068	-111.861	1021.322	-0.97508	1.0776	0.22607	-33.229	51.5713	68.3901	0.060059	-0.00097656	-0.036621	-27.797	19.349	1236.3079	-1.3695	1.6359	-0.11348	-31.016	77.169	98.1227	-0.018066	-0.041992	-0.05	21.54	41.6863	897.713	-1.0703	1.0957	-0.083008	-20.077	-67.1603	1163.802	-1.4928	1.6752	-0.1128
1.592	-18.633	73.368	196.1861	-0.096192	0.17666	0.0008789	-55.646	-141.6546	1014.209	-1.0156	1.1035	0.23779	-26.192	64.252	58.063	0.062988	-0.0024414	-0.03418	-59.267	9.708	1217.2298	-1.3604	1.6302	-0.11084	-32.336	73.4637	83.7629	-0.023829	-0.045215	-0.045117	-0.208000000000002	48.7174	886.293	-1.0527	1.082	-0.082031	-32.518	-68.2301	1175.233	-1.4639	1.6641	-0.11914
1.594	-38.933	89.875	234.5222	-0.1252	0.20293	-0.0023437	-41.316	-157.685	1033.992	-1.0537	1.1278	0.25294	-25.773	59.3562	49.7244	0.067871	-0.0083008	-0.03125	-29.993	4.3814	1206.956	-1.3531	1.6243	-0.10771	-25.484	70.1153	84.055	-0.030078	-0.043261	-0.045117	-8.839	39.416	877.1365	-1.0171	1.0435	-0.078125	-43.876	-58.161	1180.9531	-1.4297	1.6375	-0.11983
1.596	-13.774	78.905	263.584	-0.16602	0.23486	-0.0092773	-51.598	-157.798	1058.0019	-1.0938	1.1586	0.271	-35.354	40.6132	50.886	0.072754	-0.01538	-0.027344	-32.02	7.4177	1190.11115	-1.3428	1.6131	-0.099219	-27.985	57.2363	94.107	-0.038575	-0.038477	-0.03623	12.385	47.325	884.2084	-0.99342	1.0188	-0.07544	-18.769	-36.0591	1188.1862	-1.4101	1.616	-0.11816
1.598	-35.567	81.8355	304.232	-0.22198	0.26504	-0.013477	-69.733	-150.988	1097.157	-1.1516	1.1945	0.28897	-22.866	28.657	49.4267	0.077148	-0.021973	-0.024414	-15.912	2.503	1182.0784	-1.3276	1.6021	-0.094727	-27.732	30.8282	99.366	-0.046387	-0.037109	-0.038574	14.229	80.4752	873.85917	-0.97559	0.99414	-0.072266	-8.272	-19.8771	1205.9737	-1.3985	1.5942	-0.11426
1.6	-25.184	77.4486	358.064	-0.2833	0.31025	-0.0020508	-62.5033	-117.115	1109.402	-1.2211	1.2473	0.32003	-38.233	40.63108	42.0984	0.087402	-0.032715	-0.019531	-35.896	1.32	1176.065	-1.3159	1.586	-0.090723	-30.81	55.5004	114.581	-0.059571	-0.028711	-0.029785	0.125	83.2508	868.5263	-0.94922	0.96094	-0.0625	-8.127	-34.0285	1208.538	-1.4009	1.5767	-0.11328
1.602	-30.463	66.13268	413.557	-0.35244	0.36689	-0.00048828	-45.68	-91.847	1133.632	-1.3076	1.3027	0.34277	-31.523	45.1449	27.22	0.088867	-0.03418	-0.017578	-15.19	18.818	1157.651	-1.2965	1.5711	-0.085254	-32.297	81.79	113.873	-0.071582	-0.020898	-0.029492	12.55	84.019	844.3021	-0.93115	0.94775	-0.061523	-15.826	-60.712	1205.079	-1.416	1.5625	-0.11133
1.604	-2.317	64.6403	491.0232	-0.43281	0.43164	0.012402	-39.617	-67.361	1125.424	-1.4087	1.3704	0.36016	-49.548	45.3735	30.927	0.098145	-0.038086	-0.01123	-23.449	37.8236	1135.5182	-1.2781	1.5472	-0.081347	-37.221	95.755	102.352	-0.08291	-0.010351	-0.025586	6.848	75.474	830.3803	-0.91406	0.92383	-0.057129	17.011	-56.0332	1176.9311	-1.4256	1.5532	-0.10664
1.606	-30.8472	63.4365	527.2333	-0.52637	0.50391	0.040039	-30.044	-93.767	1137.5566	-1.5094	1.4535	0.37031	-16.334	46.7951	38.32	0.10303	-0.040284	-0.0092772	-28.642	31.918	1124.75	-1.2595	1.5261	-0.073633	-29.982	80.264	73.8642	-0.094823	0.0012696	-0.024024	-4.029	88.362	794.3343	-0.8982	0.90259	-0.055176	-3.079	-53.0961	1172.848	-1.4351	1.5423	-0.10332
1.608	-25.0854	52.844	570.1432	-0.63164	0.58828	0.069043	-24.205	-108.79	1157.5628	-1.5984	1.5442	0.37735	-43.402	38.75652	32.3723	0.11084	-0.038574	-0.0068359	-38.604	16.2926	1112.1921	-1.2456	1.5024	-0.071289	-36.657	73.706	65.8088	-0.10449	0.013184	-0.021484	-28.675	72.3746	774.0642	-0.88037	0.88721	-0.052734	17.943	-61.112	1151.469	-1.4366	1.5314	-0.1002
1.61	-26.682	44.745	607.6486	-0.75459	0.68154	0.099512	-24.621	-119.907	1160.058	-1.6782	1.6394	0.3791	-24.646	26.3578	35.3793	0.11328	-0.041016	-0.0014648	-26.12	16.5805	1107.9947	-1.2313	1.4792	-0.069531	-25.851	62.576	42.906	-0.11358	0.024317	-0.018848	5.452	72.5672	765.1299	-0.85107	0.86377	-0.048828	-5.873	-56.937	1171.927	-1.4351	1.523	-0.10196
1.612	-10.88	29.133	650.1717	-0.88818	0.77998	0.13232	-24.978	-109.1084	1142.12	-1.7422	1.7363	0.37646	-34.744	31.569	40.2526	0.11377	-0.037598	-0.00097656	-40.255	38.67	1086.8201	-1.2195	1.4522	-0.070801	-40.448	50.8934	59.16	-0.12236	0.038672	-0.022266	-13.923	88.44754	750.494	-0.83374	0.8435	-0.047364	-18.497	-33.6687	1163.4662	-1.4263	1.5122	-0.095215
1.614	-22.704	12.0831	665.957	-1.019	0.88604	0.15801	-51.474	-106.5624	1134.121	-1.7779	1.821	0.36777	-17.666	49.211	35.1467	0.11475	-0.037598	-0.00048828	-54.0808	35.884	1078.1412	-1.2015	1.4248	-0.071191	-18.201	47.082	65.397	-0.12392	0.045703	-0.019141	-14.784	89.90401	732.7616	-0.80615	0.82959	-0.043945	-33.902	-14.0337	1160.3424	-1.4118	1.498	-0.093848
1.616	-23.478	-17.20472	682.213	-1.145	0.98291	0.16748	-62.035	-95.288	1147.138	-1.8014	1.8907	0.36172	-18.208	48.547	29.79212	0.11987	-0.029785	0.0024414	-55.2021	29.3518	1068.8018	-1.187	1.402	-0.072949	-24.138	44.085	65.833	-0.12471	0.052637	-0.021973	-22.379	97.18163	716.0813	-0.77588	0.79932	-0.036621	-31.472	-14.0246	1174.83	-1.3941	1.4871	-0.093263
1.618	-27.543	-45.403	676.4229	-1.2498	1.076	0.16387	-65.935	-78.967	1164.0393	-1.8182	1.9505	0.34844	-12.649	35.9842	19.7647	0.12109	-0.024902	-0.0043945	-20.958	32.996246	1037.0578	-1.1655	1.3657	-0.072754	-47.792	35.3102	67.0097	-0.12207	0.062012	-0.02002	10.608	103.89153	708.1984	-0.76172	0.78223	-0.047363	-17.305	-9.389	1184.105	-1.3821	1.4774	-0.086624
1.62	-11.74	-63.461	698.9228	-1.3205	1.1594	0.14736	-86.337	-56.0462	1177.393	-1.8167	1.9841	0.33984	-30.214	20.1264	18.828	0.12256	-0.010254	-0.003418	-49.688	33.988	1007.5594	-1.1438	1.3378	-0.069727	-69.207	48.06748	75.2865	-0.11787	0.058789	-0.019629	-13.98	110.5605	691.8104	-0.72803	0.75049	-0.048828	-21.673	8.242	1156.55648	-1.3636	1.4688	-0.087111
1.622	-28.768	-88.518	704.578	-1.3506	1.2262	0.12197	-71.212	-52.767	1195.006	-1.814	2.0005	0.33496	-31.356	4.6925	30.416	0.12158	-0.0063477	-0.0073242	-37.196	31.658	982.9097	-1.118	1.3051	-0.072559	-22.943	64.851	69.462	-0.11221	0.056738	-0.023926	-23.742	111.313	679.7318	-0.69897	0.72973	-0.054932	-36.879	-5.257	1122.9137	-1.3472	1.4634	-0.080566
1.624	-11.863	-93.509	718.916	-1.3369	1.2725	0.092381	-64.284	-51.676	1213.7547	-1.7957	1.9941	0.33438	-29.541	-3.9112	38.942	0.11377	0.011719	-0.0083008	-26.54	37.6483	971.806	-1.0929	1.2723	-0.07334	-8.727	69.64	56.704	-0.10322	0.048926	-0.029394	-28.143	114.925	653.9875	-0.67432	0.70508	-0.053223	-42.9545	-21.0689	1093.987	-1.3343	1.4523	-0.08086
1.626	33.7557	-65.8712	709.757	-1.2891	1.3008	0.058594	-59.657	-54.781	1203.385	-1.7743	1.9723	0.33564	-11.786	8.501	45.2344	0.11158	0.03247	-0.010742	-16.78	45.27701	974.511	-1.0659	1.2391	-0.076953	-53.008	63.615	34.6044	-0.093555	0.044629	-0.028125	-11.247	127.5662	634.884	-0.63623	0.66357	-0.057129	-21.737	-22.5062	1106.775	-1.3261	1.4476	-0.077922
1.628	28.8797	-48.9213	695.4525	-1.2036	1.2972	0.030957	-62.122	-68.178	1201.706	-1.7508	1.9394	0.34346	-11.024	20.4388	44.5503	0.10205	0.058105	-0.010742	-59.963	41.3935	952.6253	-1.0371	1.208	-0.080078	-48.935	55.202	28.9617	-0.087402	0.034668	-0.030762	-42.268	119.0429	625.596	-0.62158	0.646	-0.063477	-20.9	-26.873	1088.7844	-1.3133	1.4387	-0.072851
1.63	26.2586	-54.2098	695.696	-1.0965	1.2625	0.0048828	-46.78	-71.8727	1190.209	-1.7171	1.9036	0.35029	-20.552	3.722	45.40061	0.083984	0.092773	-0.0092773	-24.901	46.132	949.6782	-1.0067	1.172	-0.083399	-40.848	56.3109	32.82	-0.077637	0.028027	-0.036524	-28.925	102.78157	610.71	-0.58887	0.60254	-0.069336	-40.372	-19.09327	1066.629	-1.3026	1.4305	-0.068356
1.632	21.8168	-59.4219	694.327	-0.97423	1.1965	-0.0091798	-40.543	-54.529	1204.4796	-1.6812	1.8579	0.35352	-42.596	-12.698	36.0434	0.071289	0.11279	-0.010254	-43.217	63.91	945.669	-0.97539	1.1359	-0.087598	-39.557	44.295	37.952	-0.072754	0.024805	-0.039551	-29.791	110.7196	593.6917	-0.56909	0.56958	-0.065674	-21.027	9.322	1076.0005	-1.2905	1.4243	-0.062988
1.634	32.7609	-51.6997	701.617	-0.84844	1.107	-0.015723	-55.093	-49.1741	1197.83201	-1.6397	1.8185	0.3585	-27.057	-23.41152	52.9458	0.045898	0.15771	-0.014648	-25.87	57.201	938.6824	-0.94257	1.0953	-0.093067	-39.593	33.947	63.6865	-0.061426	0.01543	-0.041113	-37.936	119.7266	578.8815	-0.5498	0.54102	-0.068848	1.633	25.29735	1069.0129	-1.2758	1.4112	-0.061714
1.636	12.516	-70.4682	711.027	-0.73828	1.0039	-0.015137	-37.385	-41.0846	1218.567	-1.5973	1.7832	0.35517	-18.375	-11.61514	72.046	0.015625	0.20605	-0.02002	-40.138	52.938	921.433	-0.90927	1.0592	-0.092285	-18.061	29.572	66.866	-0.05625	0.014258	-0.046484	-41.595	105.28052	556.9921	-0.51904	0.50146	-0.067871	-13.225	18.6803	1074.2117	-1.2664	1.3997	-0.055461
1.638	1.16999999999999	-90.42517	751.0177	-0.64931	0.90313	0.00078124	-42.646	-33.4285	1209.712	-1.5489	1.7504	0.34775	-37.355	-3.4644	110.4417	0.0039063	0.23096	-0.027832	-47.779	54.5	890.301	-0.87158	1.0181	-0.098633	-40.273	45.0548	58.3995	-0.043457	0.015625	-0.049316	-19.099	99.29394	546.4383	-0.50391	0.4834	-0.069824	-3.674	11.6021	1054.5055	-1.2477	1.3793	-0.054703
1.64	6.682	-88.471	784.0023	-0.58662	0.81221	0.018555	-39.741	-29.0796	1216.958	-1.5052	1.7224	0.34853	-37.06	8.7976	125.523	-0.033203	0.28564	-0.025391	-41.411	73.8149	860.03597	-0.83662	0.97783	-0.099708	-33.288	57.469	31.0396	-0.036719	0.01543	-0.052637	-18.497	112.6672	529.6591	-0.48047	0.45752	-0.062012	1.016	9.89014	1030.04115	-1.2282	1.3587	-0.047852
1.642	-0.271000000000001	-75.968	815.8052	-0.5499	0.74033	0.032226	-41.338	-29.36853	1203.14	-1.457	1.6953	0.34277	-19.471	17.9595	152.302	-0.067627	0.33448	-0.038819	-32.244	64.389	826.399	-0.80694	0.94307	-0.097559	-42.846	49.636	31.942	-0.030566	0.01416	-0.053321	-35.306	125.566	503.527	-0.4646	0.43774	-0.060303	-11.709	13.4699	994.51	-1.2109	1.3418	-0.04834
1.644	-20.463	-83.797	816.84	-0.54219	0.68945	0.047949	-31.639	-35.6574	1201.0338	-1.4104	1.6693	0.33526	-43.511	28.8257	195.904	-0.11133	0.38477	-0.045898	-34.189	50.778	811.917	-0.77998	0.90596	-0.095605	-24.853	49.342	24.9173	-0.023145	0.0098633	-0.056836	-25.21	119.031	489.085	-0.4458	0.42236	-0.060059	-20.123	11.4237	962.965	-1.1862	1.3157	-0.043457
1.646	-22.312	-123.733	832.909	-0.55029	0.66943	0.061523	-43.226	-25.410336	1169.9	-1.3652	1.6453	0.33174	-47.415	41.9004	271.39356	-0.18066	0.46484	-0.056152	-21.141	66.652	789.194	-0.75928	0.87471	-0.092676	-53.393	29.0635	21.8637	-0.019922	0.011621	-0.059082	-31.776	129.7924	483.846	-0.42139	0.40674	-0.060059	-16.24	21.687	961.8227	-1.1583	1.2934	-0.043136
1.648	-25.808	-143.3386	823.1811	-0.57168	0.67051	0.067871	-45.585	-21.5019	1164.3386	-1.3293	1.6187	0.32314	-37.741	68.8507	344.6998	-0.22168	0.51416	-0.06543	-30.931	73.845	789.3559	-0.74365	0.84814	-0.085938	-57.701	13.913	-0.617000000000001	-0.013184	0.0097656	-0.0625	-22.381	131.801	471.2947	-0.41211	0.39844	-0.053711	-24.601	49.8854	939.4193	-1.1332	1.266	-0.03998
1.65	-37.2612	-159.606	835.484	-0.60742	0.69297	0.078125	-71.8805	-20.099	1156.8278	-1.2973	1.5946	0.32002	-22.203	86.934	412.528	-0.32764	0.61865	-0.072754	-48.012	83.8818	781.7692	-0.7291	0.82793	-0.08086	-47.595	5.813	44.115	-0.010644	0.006543	-0.067285	-31.026	118.546	458.6735	-0.38281	0.38477	-0.049805	-33.257	50.0908	932.9944	-1.1118	1.242	-0.038495
1.652	-54.638	-159.291	850.628	-0.65508	0.73399	0.082032	-38.18	-1.037	1174.2202	-1.269	1.5708	0.31152	-33.753	95.097	444.8793	-0.42114	0.71998	-0.080567	-34.587	103.492	785.743	-0.72227	0.80781	-0.077734	-20.936	16.868	65.503	-0.0043945	0.0083008	-0.068848	-31.022	114.8961	438.9814	-0.36572	0.3728	-0.050781	-18.435	39.2448	931.882439	-1.0854	1.2134	-0.034668
1.654	-27.504	-151.996	880.928	-0.70762	0.79531	0.087011	-39.586	12.25691	1183.802	-1.2477	1.5453	0.31025	-16.663	79.192	503.409	-0.52441	0.83203	-0.074219	-38.51	113.494	778.048	-0.71289	0.79688	-0.072657	-46.143	11.304	68.7599	-0.0036133	0.0075195	-0.072754	-19.506	132.1706	419.4072	-0.3418	0.35645	-0.048828	-0.674999999999997	37.089	929.1462	-1.0626	1.1898	-0.03159
1.656	-18.57	-130.844	908.518	-0.77246	0.86133	0.091797	-53.34	12.0364	1173.626	-1.2309	1.5161	0.3127	-16.385	88.223	546.641	-0.67871	1.0098	-0.061035	-52.057	108.299	748.7112	-0.70352	0.7832	-0.070117	-39.9	30.9664	62.908	-0.0022461	0.00625	-0.075879	-2.007	127.493	410.41046	-0.31641	0.33545	-0.048828	-16.562	44.3298	908.768	-1.0353	1.1698	-0.035939
1.658	-20.525	-120.817	936.2464	-0.84648	0.93965	0.10381	-57.373	10.3611	1169.687	-1.2181	1.4868	0.31426	-26.986	63.82424	583.258	-0.76172	1.1035	-0.051758	-55.858	106.201	715.5153	-0.69189	0.7749	-0.069824	-9.729	31.0703	46.367	-0.003418	0.011719	-0.080078	-35.684	114.3992	382.26136	-0.30713	0.32422	-0.050293	-25.872	43.6217	867.7788	-1.0174	1.1468	-0.020444
1.66	-34.266	-111.6592	965.6053	-0.92148	1.018	0.12471	-32.798	18.6826	1124.435	-1.2023	1.4586	0.31856	-39.678	27.37	619.1636	-0.9209	1.3125	-0.036621	-39.449	120.332	686.137	-0.67598	0.76035	-0.071778	-34.933	21.773	44.977	-0.0076172	0.019532	-0.080566	-29.993	119.6921	379.20329	-0.27686	0.2998	-0.039551	-26.202	37.4532	829.362	-0.9952	1.1216	-0.019841
1.662	-18.312	-86.709	1001.35	-1.0035	1.0914	0.13916	-35.345	17.5656	1100.638	-1.1914	1.4316	0.32227	-49.723	-5.2165	637.9518	-1.033	1.472	-0.03833	-42.056	115.1138	665.123	-0.65713	0.74785	-0.074414	-64.222	1.286	53.3536	-0.014649	0.029297	-0.079688	-28.338	114.7596	355.188	-0.26001	0.27954	-0.043213	-3.288	44.156	831.46	-0.97461	1.0938	-0.020996
1.664	-33.362	-65.66	1012.702	-1.0856	1.1622	0.15429	-46.559	23.7675	1072.109	-1.1727	1.4035	0.32568	-52.651	-18.6821	659.174	-1.1284	1.6196	-0.056641	-50.583	88.907	638.268	-0.6333	0.73418	-0.074024	-37.685	-11.421	45.579	-0.02832	0.041797	-0.077734	-19.016	108.8974	352.1545	-0.23975	0.26025	-0.039551	-31.698	43.2631	830.2353	-0.94907	1.0643	-0.020409
1.666	-24.439	-80.531	1012.8636	-1.1655	1.228	0.16699	-37.045	21.6124	1074.014	-1.1553	1.3754	0.3333	-41.119	-45.73985	640.8985	-1.1978	1.772	-0.093262	-28.426	95.493	625.1432	-0.60762	0.71738	-0.074902	-28.578	-31.5902	70.518	-0.045606	0.058106	-0.078418	-23.837	108.1287	328.5641	-0.21387	0.229	-0.040527	-51.2196	55.0116	824.6054	-0.91943	1.0307	-0.018838
1.668	-28.447	-115.969	1007.808	-1.2331	1.2892	0.17617	-50.165	30.5293	1074.967	-1.1369	1.3562	0.33799	-37.207	-72.7299	642.293	-1.1968	1.8149	-0.11572	-37.586	103.794	617.7516	-0.58203	0.69922	-0.068848	-58.8295	-53.112	94.565	-0.066895	0.085449	-0.07666	-9.28	116.429	322.23	-0.19971	0.21094	-0.046875	-20.552	75.972	823.286	-0.88541	0.99454	-0.021151
1.67	-12.635	-125.0908	1004.896	-1.2948	1.3407	0.1832	-31.745	25.3221	1087.941	-1.1152	1.3301	0.34502	-37.29	-71.424	638.533	-1.1304	1.8247	-0.16943	-46.724	109.55747	617.0665	-0.5584	0.67676	-0.066406	-42.522	-57.978	133.724	-0.089258	0.11348	-0.075	-29.44	122.759	304.4942	-0.17578	0.18018	-0.039063	-16.569	83.617	817.8967	-0.84724	0.95372	-0.02332
1.672	-40.431	-140.46	1019.73	-1.3456	1.3876	0.18594	-30.835	33.1053	1079.128	-1.0913	1.313	0.34863	-36.78	-72.496	647.6393	-1.0144	1.7483	-0.2085	-26.693	107.154	610.23102	-0.53789	0.65527	-0.059961	-29.163	-27.8326	138.7138	-0.1167	0.14365	-0.066309	-32.778	108.645	313.16632	-0.16064	0.15723	-0.040528	-15.206	73.9067	797.3318	-0.8125	0.91406	-0.026367
1.674	-33.449	-153.188	1049.669	-1.3901	1.4259	0.18662	-38.958	45.2553	1066.269	-1.071	1.2917	0.35391	-38.936	-64.874	640.5006	-0.85156	1.6094	-0.23926	-54.307	136.188	596.0735	-0.51836	0.63418	-0.056836	-28.234	5.7036	167.1026	-0.14717	0.17373	-0.063575	-24.216	102.1166	301.6634	-0.14453	0.13477	-0.041992	-15.902	69.4716	769.7312	-0.77524	0.87551	-0.026846
1.676	-44.368	-148.234	1097.0719	-1.4253	1.4634	0.18359	-54.376	65.351	1029.0321	-1.0512	1.2735	0.35655	-0.529999999999998	-60.663	652.8991	-0.59375	1.3516	-0.25293	-48.757	140.704	574.6394	-0.50371	0.6127	-0.046973	-33.482	29.3971	247.3067	-0.18174	0.20361	-0.059277	-18.953	111.5191	289.18602	-0.12354	0.11426	-0.047363	-13.029	90.6257	741.8139	-0.74246	0.84217	-0.024966
1.678	-19.645	-112.116	1109.183	-1.4579	1.4973	0.18887	-45.326	58.131	997.0969	-1.0258	1.2511	0.35537	1.075	-24.4338	653.0743	-0.46924	1.2075	-0.24561	-64.40681	115.901	553.626	-0.48584	0.59375	-0.042969	-22.804	49.831	338.1589	-0.22168	0.24219	-0.051758	-36.85	102.5263	257.5287	-0.11523	0.10107	-0.049805	-20.439	81.561	718.924	-0.7151	0.80362	-0.023501
1.68	-50.7639	-109.5	1116.135	-1.4878	1.5361	0.1957	-47.858	48.5476	963.404	-0.99765	1.223	0.35908	15.723	-16.2434	673.9213	-0.26709	0.93018	-0.22559	-54.115	113.7695	530.14	-0.47012	0.57441	-0.041113	-41.231	60.219	448.662	-0.27246	0.28067	-0.039453	-38.576	97.4498	243.2636	-0.098145	0.085938	-0.053223	-11.091	60.799	724.0433	-0.69363	0.77018	-0.024287
1.682	-18.537	-102.134	1128.298	-1.5171	1.5762	0.20352	-45.558	33.217	950.158	-0.96436	1.1938	0.35742	-18.377	-12.563	671.788	-0.16919	0.75732	-0.19971	-59.231	132.4896	506.647	-0.45371	0.5542	-0.039843	-29.986	58.8662	512.047	-0.3375	0.3375	-0.010254	-23.473	103.3955	232.29	-0.087891	0.07666	-0.050781	-0.253999999999998	62.7526	714.7726	-0.67139	0.74072	-0.02832
1.684	-34.33	-101.795	1148.0581	-1.5488	1.6219	0.21201	-46.354	37.24	920.862	-0.93486	1.1603	0.35879	3.956	-21.757	704.5879	-0.11426	0.61768	-0.18213	-31.291	139.651	485.8759	-0.43105	0.53779	-0.038672	-75.894	58.2853	625.374	-0.42461	0.40391	0.037403	-34.761	102.7805	214.279	-0.076172	0.068359	-0.054688	-37.806	84.221	717.6313	-0.6547	0.71159	-0.027719
1.686	-14.961	-104.07	1147.31276	-1.582	1.6699	0.21533	-37.567	41.344	906.992	-0.89512	1.1242	0.35791	-37.901	-34.883	730.9497	-0.10449	0.50293	-0.15234	-53.64	138.7197	463.5315	-0.40937	0.5164	-0.036133	-51.438	94.63681	705.03	-0.54502	0.49541	0.099708	-29.93	89.3768	210.305862	-0.063477	0.064941	-0.051758	-41.069	104.447	700.099	-0.63848	0.68289	-0.028175
1.688	-41.034	-118.71	1154.21576	-1.6078	1.7203	0.21319	-17.438	52.9312	905.3105	-0.85723	1.0863	0.35713	-28.108	-64.025	747.906	-0.11426	0.48047	-0.14941	-26.806	140.2119	461.21611	-0.38525	0.49658	-0.035156	-59.337	87.419	753.008	-0.69824	0.59766	0.16455	-36.075	82.9233	215.2021	-0.054688	0.064453	-0.05957	-31.09	107.543	689.1489	-0.62004	0.65974	-0.030166
1.69	-1.802	-119.993	1144.898	-1.6277	1.7751	0.21123	-41.501	59.7993	912.582	-0.82441	1.042	0.35147	-51.094	-91.378	762.0926	-0.15967	0.479	-0.13818	-29.5	125.0446	465.0817	-0.3584	0.47529	-0.030371	-65.405	73.409	753.2582	-0.88604	0.7292	0.2291	-19.113	84.1511	218.6836	-0.043457	0.058594	-0.05957	-10.404	104.941	672.0641	-0.607	0.63558	-0.032227
1.692	-2.124	-104.2915	1135.323	-1.6433	1.8157	0.20615	-37.345	67.507	901.459	-0.78662	1.0015	0.35059	-17.849	-116.5371	755.019	-0.20459	0.5271	-0.13233	-37.143	119.404	450.712	-0.33144	0.45156	-0.026465	-77.97748	35.4571	776.601	-1.0852	0.87383	0.28106	-31.165	80.3828	207.3323	-0.032959	0.060547	-0.058105	-52.789	107.589	643.6202	-0.5918	0.61328	-0.034668
1.694	-18.729	-86.6519	1141.1672	-1.6519	1.8493	0.2083	-22.789	76.637	881.039	-0.7542	0.95693	0.34824	-58.261	-137.7556	772.856	-0.25195	0.60938	-0.13623	-40.139	136.1168	425.4122	-0.30723	0.43164	-0.027246	-56.2	12.792	758.302	-1.2821	1.0301	0.30957	-31.685	75.32032	199.989	-0.021484	0.0625	-0.054199	-43.583	91.0981	608.5721	-0.57458	0.59388	-0.034873
1.696	-47.961	-61.36618	1157.904	-1.6519	1.8755	0.20703	-33.514	80.802	854.9064	-0.72754	0.91445	0.34385	-50.23	-152.1711	804.006	-0.32178	0.76514	-0.15576	-29.084	151.71	393.348	-0.28672	0.40869	-0.016992	-69.1	-42.839	738.274	-1.4587	1.184	0.30869	-24.252	90.1033	167.5123	-0.0097656	0.058105	-0.056641	-18.049	104.7133	600.473	-0.56048	0.57338	-0.036218
1.698	-23.014	-53.3558	1180.0887	-1.6396	1.8834	0.2126	-53.693	63.4545	833.66	-0.69746	0.87188	0.33877	-75.997	-155.248	854.4134	-0.354	0.854	-0.16943	-54.904	139.127	378.92	-0.26514	0.38525	-0.01416	-82.431	-95.431	706.052	-1.584	1.332	0.27832	-16.234	89.1972	167.85899	-0.0063477	0.057129	-0.057617	-10.748	104.203	589.7	-0.54527	0.55697	-0.03742
1.7	-43.0248	-64.66638	1190.78424	-1.6343	1.8817	0.21992	-45.509	52.7896	791.792	-0.67393	0.83095	0.33272	-39.299	-141.263	873.1047	-0.41553	1.0317	-0.20215	-70.554	128.557	375.388	-0.24775	0.36377	-0.0099611	-62.577	-132.279	687.617	-1.6499	1.4536	0.22031	-29.064	77.5768	154.034508	-0.0029297	0.045898	-0.057129	-37.928	88.83	599.5142	-0.53308	0.54315	-0.040635
1.702	-54.882	-83.3338	1210.5342	-1.6292	1.8673	0.23438	-43.231	71.864	774.677	-0.65088	0.79492	0.32715	-64.247	-148.218	920.2698	-0.45874	1.1584	-0.22607	-40.495	128.351	367.7587	-0.22695	0.34629	-0.0072266	-52.022	-122.309	682.441	-1.6425	1.5392	0.14765	-23.742	71.3707	149.7953	0.0039063	0.04248	-0.055664	-41.411	85.435	576.308	-0.52051	0.53174	-0.042969
1.704	-36.616	-80.624	1207.3692	-1.6166	1.851	0.24483	-37.692	87.532	754.923	-0.62666	0.75098	0.32373	-52.461	-141.224	936.63749	-0.50537	1.2798	-0.24707	-50.746	129.497	353.4751	-0.21055	0.32558	-0.0033203	-53.78	-99.304	675.485	-1.5546	1.5818	0.076562	-17.294	84.1236	131.7351	0.0083008	0.037598	-0.057617	-38.664	114.0958	570.226	-0.50743	0.52208	-0.040428
1.706	-22.926	-58.173	1209.108	-1.6113	1.8242	0.25684	-29.939	83.367	756.1398	-0.60449	0.72031	0.31894	-55.281	-129.9425	965.4944	-0.57227	1.417	-0.26953	-29.781	116.9086	349.349	-0.18965	0.3044	-0.00048828	-49.606	-47.4035	675.009	-1.3955	1.5647	0.023633	-38.694	78.3453	140.0312	0.015137	0.03125	-0.05127	-31.315	124.572	543.4657	-0.50109	0.51692	-0.037308
1.708	-61.396	-44.267	1194.616	-1.6034	1.8024	0.27334	-21.283	85.4149	753.8	-0.58535	0.68789	0.31309	-33.477	-99.976	978.7965	-0.60645	1.4824	-0.27539	-26.068	115.9885	358.0726	-0.17383	0.28711	0.0068359	-79.866	-7.781	697.4125	-1.1934	1.4922	-0.017578	-32.144	74.70611	134.8998	0.013672	0.024902	-0.05127	-51.152	107.81	538.0246	-0.48625	0.50283	-0.036133
1.71	-42.743	-47.73	1198.862	-1.5964	1.7743	0.28711	-34.515	99.1621	728.254	-0.56973	0.66133	0.30908	-59.59	-96.356	993.0907	-0.67773	1.584	-0.28467	-31.037	120.4842	320.3003	-0.1541	0.26895	0.0060547	-117.97848	31.938	717.729	-0.98311	1.3528	-0.035937	-8.966	62.6864	142.90088	0.016113	0.023926	-0.044922	-51.061	107.435	515.87157	-0.47442	0.49453	-0.03369
1.712	-10.836	-49.1534	1206.04427	-1.5855	1.7477	0.29258	-19.417	118.1	708.6949	-0.56152	0.63477	0.30811	-38.317	-103.937	1005.7235	-0.73339	1.6396	-0.29565	-42.246	115.9029	300.3064	-0.13623	0.2543	0.0041992	-114.42216	44.942	719.812	-0.80293	1.1871	-0.043848	-9.035	66.7924	109.6313	0.0095216	0.025147	-0.036621	-45.378	125.363	496.9654	-0.46045	0.48682	-0.031738
1.714	-24.071	-39.244	1229.117	-1.5757	1.7251	0.29492	-28.068	117.724	693.7318	-0.54756	0.61416	0.30323	-26.961	-112.614	1010.1925	-0.77686	1.6821	-0.30225	-20.644	99.4731	267.738	-0.11983	0.24336	0.0038086	-61.603	26.722	740.02375	-0.67441	1.0149	-0.031738	-42.956	56.1733	105.8695	0.0097656	0.023438	-0.030762	-57.192	107.5734	472.161	-0.44434	0.48027	-0.029882
1.716	-22.987	-34.028	1230.282	-1.5562	1.6958	0.29932	-27.123	104.932	678.766	-0.5375	0.59648	0.29131	-44.928	-116.645	1021.648	-0.82813	1.7168	-0.30762	-28.686	90.275	253.3548	-0.10684	0.22539	-0.0024414	-48.726	-14.171	754.369	-0.60772	0.86416	-0.0094726	-25.645	67.7417	95.065	-0.0029297	0.035156	-0.019043	-32.006	91.169	466.175	-0.42998	0.47304	-0.025293
1.718	-10.962	-26.432	1227.0279	-1.534	1.6777	0.30342	-46.137	94.8025	660.917	-0.52461	0.57656	0.28388	-60.211	-115.4969	1038.2328	-0.85107	1.729	-0.30615	-40.252	97.62135	253.644	-0.091797	0.21191	0.00097656	-49.593	-51.086	751.912	-0.59668	0.74463	0.01123	-19.788	68.8957	94.7093	-0.0058594	0.039551	-0.016602	-38.006	113.821	458.329	-0.41083	0.46406	-0.024121
1.72	13.213	-14.15681	1211.4865	-1.5047	1.6512	0.30205	-44.601	83.9593	614.116	-0.51153	0.56016	0.27949	-33.12	-120.1041	1066.9182	-0.88818	1.7583	-0.30029	-60.878	101.39	247.51353	-0.078808	0.20362	-0.0001953	-47.725	-100.193	754.302	-0.62051	0.67344	0.025391	-35.45	70.0295	83.4141	-0.018555	0.05127	-0.010742	-27.775	122.8018	453.7436	-0.39472	0.45371	-0.023732
1.722	-35.391	-21.373	1176.325	-1.4719	1.6207	0.30635	-35.083	93.253	595.902	-0.49512	0.5459	0.26953	-46.338	-125.332	1088.9753	-0.92554	1.7883	-0.29492	-62.3502	104.2	244.6541	-0.062793	0.18935	-0.0006836	-10.457	-134.993	762.856	-0.67178	0.64345	0.020996	-30.142	52.6297	80.04996	-0.029297	0.061768	-0.0036621	-40.29	128.7078	427.966	-0.37012	0.44287	-0.021484
1.724	-16.436	-32.6801	1171.9021	-1.438	1.5917	0.30781	-29.511	103.6781	596.7789	-0.47666	0.53311	0.26153	-64.138	-144.994	1112.1617	-0.96289	1.8242	-0.28613	-43.048	126.125	244.4522	-0.049512	0.18155	-0.0045898	-24.812	-177.81	811.12	-0.72178	0.64814	0.0053711	-34.134	59.72197	82.178	-0.036133	0.071289	0	-10.315	124.9999	416.2786	-0.34522	0.43291	-0.023828
1.726	-14.596	-22.079	1171.6537	-1.4019	1.561	0.30859	-35.137	113.7862	594.06	-0.45361	0.51651	0.25303	-62.266	-152.996	1125.8478	-1.022	1.8931	-0.27441	-38.988	114.474	240.9149	-0.032129	0.16826	-0.0089843	-23.865	-199.529	817.153	-0.75274	0.67578	-0.024414	-28.007	66.27	91.4477	-0.048828	0.085938	0.011719	-34.568	117.188	413.3457	-0.3207	0.41875	-0.026954
1.728	-16.456	-6.901	1175.6369	-1.369	1.5234	0.30635	-39.121	115.169	573.835	-0.429	0.49815	0.24287	-42.181	-137.2233	1142.3334	-1.0562	1.938	-0.26709	-47.936	96.63466	208.7858	-0.01709	0.15674	-0.01123	-37.986	-222.978	858.9075	-0.75732	0.70947	-0.063477	-38.27	61.8198	90.4483	-0.058106	0.093506	0.012451	-37.689	101.331	384.5765	-0.2961	0.40469	-0.023047
1.73	-34.631	-7.839	1169.0049	-1.3304	1.4848	0.30557	-8.27	131.88	554.2896	-0.40977	0.4832	0.23643	-50.898	-109.1	1145.7603	-1.1211	2.0313	-0.2583	-27.446	97.8467	189.659	-0.0060547	0.14776	-0.014844	-12.94	-188.178	893.18962	-0.73867	0.74531	-0.10225	-28.079	50.3523	79.2675	-0.060059	0.10156	0.017578	-65.826	97.2097	374.2014	-0.26983	0.39082	-0.02666
1.732	-18.747	-7.2266	1166.9601	-1.2918	1.4485	0.30713	-28.4674	131.2602	537.043	-0.38867	0.46387	0.22949	-57.143	-114.64	1172.5698	-1.165	2.0987	-0.25879	-30.317	105.0294	153.437	0.0038086	0.13252	-0.020703	-36.779	-161.83	943.396	-0.7041	0.77968	-0.13584	-32.586	51.6692	58.2665	-0.063477	0.10645	0.019531	-27.667	109.72653	355.61	-0.25146	0.375	-0.019531
1.734	-10.266	11.7862	1154.1911	-1.2495	1.411	0.3084	-19.469	111.9716	527.305	-0.37129	0.44649	0.22373	-45.918	-107.935	1177.014	-1.2046	2.1606	-0.26367	-27.956	80.9594	159.985	0.010058	0.12588	-0.021094	-28.954	-137.8738	967.743	-0.66739	0.8164	-0.15849	-39.315	37.9318	42.302	-0.064941	0.1084	0.022461	-51.296	112.165	352.298	-0.22754	0.36455	-0.018457
1.736	-11.383	15.047	1136.8288	-1.2124	1.3735	0.30225	-22.38	102.3007	501.784	-0.35762	0.43164	0.22227	-36.918	-102.359	1170.861	-1.2402	2.2402	-0.26025	-23.366	70.1651	151.2862	0.015528	0.11592	-0.023535	-55.068	-105.96	979.98	-0.65371	0.8586	-0.16592	-23.426	38.4039	44.264	-0.063965	0.11133	0.024414	-28.327	92.0262	339.593	-0.20596	0.35117	-0.019238
1.738	-25.134	3.764	1105.0033	-1.173	1.3369	0.30117	-26.968	118.5442	477.308	-0.34433	0.41367	0.21524	-54.468	-93.351	1164.3458	-1.2534	2.272	-0.25879	-29.605	73.5029	148.3641	0.019531	0.10547	-0.026855	-30.552	-66.695	962.865	-0.67578	0.90674	-0.15186	-32.646	41.6945	45.762	-0.061035	0.11206	0.025147	-46.574	92.947	326.9685	-0.18682	0.33516	-0.021973
1.74	-7.866	11.3919	1087.546	-1.1347	1.2923	0.29942	-52.277	118.5198	467.739	-0.33496	0.39883	0.21914	-48.811	-93.277	1173.52136	-1.2773	2.3203	-0.2583	-55.9413	80.14484	137.1736	0.022656	0.10303	-0.029297	-34.112	-67.577	1002.048	-0.7416	0.95762	-0.13584	-39.931	58.0096	45.4289	-0.060547	0.10205	0.027344	-27.335	114.9415	304.5816	-0.16533	0.32403	-0.023633
1.742	-17.586	27.7439	1073.007	-1.1019	1.2548	0.2955	-21.355	119.805	465.6239	-0.33057	0.3916	0.21094	-39.164	-87.798	1186.7838	-1.2952	2.3469	-0.26319	-52.897	63.3997	167.1641	0.021289	0.10039	-0.026367	-31.947	-80.451	1014.052	-0.84424	1.0184	-0.11133	-42.562	49.1438	46.01837	-0.049316	0.09668	0.030762	-37.071	118.3327	304.32	-0.14941	0.31445	-0.024902
1.744	-36.666	28.079	1075.3763	-1.0682	1.2154	0.29141	-25.966	118.738	457.701	-0.32549	0.3753	0.20772	-45.493	-95.4364	1185.567	-1.312	2.3657	-0.25928	-30.36	72.5832	168.1674	0.027148	0.091797	-0.030664	-33.664	-101.535	1047.1328	-0.96416	1.0806	-0.0875	-34.829	38.20452	54.5046	-0.041016	0.090332	0.034668	-15.075	106.9239	296.743	-0.12988	0.30313	-0.028125
1.746	-22.861	19.9291	1061.6667	-1.0391	1.1758	0.28564	-19.97	129.506	437.255	-0.31797	0.36602	0.20088	-83.738	-104.038	1191.762	-1.3218	2.3716	-0.25146	-46.571	71.928	163.383	0.024805	0.085742	-0.029199	-45.46	-115.6176	1042.371	-1.088	1.1413	-0.084277	-20.409	45.7374	55.8912	-0.026367	0.083496	0.034668	-32.681	106.3986	288.59543	-0.11572	0.29648	-0.029883
1.748	-0.875	22.779	1066.8315	-1.012	1.1485	0.28242	-21.823	126.147	411.702	-0.30703	0.35078	0.18916	-61.01	-103.4243	1201.27	-1.3242	2.3613	-0.24707	-42.69	69.634	114.1362	0.024902	0.086426	-0.029785	-66.2733	-142.3646	1055.7279	-1.2012	1.1973	-0.083496	-32.621	57.494	46.36132	-0.019043	0.075683	0.032227	-45.477	105.2251	263.087	-0.10166	0.29141	-0.032618
1.75	-23.684	23.1331	1045.52337	-0.99443	1.12	0.27715	-8.105	129.267	396.6949	-0.29278	0.33418	0.18018	-64.966	-74.662	1212.6024	-1.3242	2.3301	-0.23926	-31.86	49.1333	95.065	0.023242	0.080469	-0.029687	-53.296	-145.115	1076.35	-1.2764	1.252	-0.083496	-25.19	53.623	31.4676	-0.012695	0.07373	0.027344	-59.162	94.2025	252.101	-0.08457	0.29268	-0.035938
1.752	-37.05	23.2504	1027.017	-0.97646	1.0966	0.27559	-20.065	123.7463	380.176	-0.27295	0.31689	0.17627	-90.652	-68.462	1207.1373	-1.3071	2.2895	-0.23437	-30.228	52.9102	92.543	0.027344	0.078515	-0.030566	-67.875	-136.684	1084.593	-1.3234	1.3024	-0.083887	-23.37	45.199	21.5249	0.0097656	0.066895	0.03125	-46.039	89.4646	239.506	-0.074707	0.2915	-0.039551
1.754	-40.509	41.691	990.4656	-0.96426	1.0793	0.27246	-25.554	115.5385	349.922	-0.25175	0.29248	0.16162	-98.227	-65.741	1217.1643	-1.2827	2.2446	-0.22705	-32.794	50.8978	101.5682	0.025781	0.076172	-0.029785	-87.783	-130.2246	1094.3384	-1.3465	1.348	-0.090137	-15.805	50.5372	23.0257	0.024414	0.058594	0.03418	-45.69	93.2486	230.4551	-0.063574	0.28457	-0.045605
1.756	-9.29	50.9498	970.916	-0.94873	1.0601	0.27246	-10.931	93.559	339.74	-0.22441	0.2709	0.14678	-67.962	-59.533	1205.01335	-1.2358	2.1724	-0.21729	-32.708	52.8606	98.3516	0.023632	0.069336	-0.026953	-76.763	-129.9531	1104.8552	-1.3655	1.3905	-0.09375	-33.777	24.8175	16.908	0.041504	0.040039	0.038086	-65.924	108.135	208.86758	-0.054297	0.27715	-0.054688
1.758	-41.231	44.8881	930.587	-0.93643	1.0511	0.26904	-5.555	104.1485	323.972	-0.19746	0.24472	0.13701	-62.811	-50.4871	1211.958	-1.196	2.1155	-0.20801	-31.348	52.0722	79.5932	0.023438	0.06543	-0.022461	-47.556	-129.535	1123.496	-1.3848	1.4297	-0.098633	-23.515	21.5709	33.1798	0.048828	0.036621	0.031982	-62.619	108.189	191.8733	-0.046094	0.27598	-0.049219
1.76	-18.56	30.175	914.999	-0.92051	1.0336	0.2711	-8.717	110.8409	327.0007	-0.16826	0.21787	0.12295	-67.681	-54.796	1211.16097	-1.1582	2.0645	-0.19873	-20.591	61.7865	87.4869	0.019043	0.062695	-0.017481	-32.353	-126.236	1153.991	-1.4141	1.4683	-0.10019	-19.628	35.0799	34.3819	0.051758	0.038574	0.027832	-38.831	123.848	191.9523	-0.034765	0.26836	-0.051367
1.762	-28.153	41.4243	907.525	-0.90606	1.0215	0.26758	-28.413	120.036	319.976	-0.14258	0.19287	0.11523	-36.447	-68.864	1232.2551	-1.1118	2.0122	-0.19482	-36.089	44.835	98.41662	0.016895	0.059082	-0.018945	-31.179	-117.313	1179.822	-1.4503	1.5068	-0.10459	-26.608	35.499	31.359061	0.056641	0.043457	0.02002	-24.262	115.689	199.6244	-0.022949	0.26855	-0.058594
1.764	-20.94	53.05325	900.943	-0.88652	1.0074	0.27041	-25.092	128.317	317.597	-0.12051	0.16201	0.10703	-38.038	-56.613	1222.31	-1.0933	1.9907	-0.18701	-57.023	47.0232	77.7065	0.01416	0.057519	-0.012696	-7.61	-98.4126	1191.286	-1.4964	1.5427	-0.11045	-21.662	31.5154	20.7679	0.0625	0.05127	0.029297	-48.528	85.2064	200.5944	-0.017188	0.26309	-0.058105
1.766	-37.003	52.3212	899.3256	-0.86182	0.99658	0.26953	-23.274	145.75	298.005	-0.099412	0.13604	0.09707	-31.802	-45.5966	1208.819	-1.0684	1.9512	-0.18848	-46.039	58.672	52.8265	0.011817	0.050098	-0.01543	-6.428	-77.6121	1185.146	-1.5438	1.5781	-0.11484	-36.485	26.0042	37.2755	0.082031	0.029297	0.039063	-34.083	85.5043	189.943	-0.0061523	0.25937	-0.064062
1.768	-21.312	49.09	897.799	-0.84014	0.97861	0.26884	-26.351	115.7618	275.87149	-0.081446	0.10869	0.083398	-54.767	-46.9632	1202.3129	-1.0542	1.9341	-0.18164	-51.258	68.098	38.974	0.0097656	0.04541	-0.0073242	-11.529	-80.5188	1164.1355	-1.5835	1.606	-0.12549	-25.42	15.8813	33.8936	0.083984	0.023193	0.041992	-55.609	97.623	163.012	-0.00068358	0.25312	-0.064453
1.77	-31.671	63.837	876.078	-0.81358	0.96065	0.26719	-4.256	89.2319	256.9334	-0.070801	0.080762	0.075586	-25.62	-32.21	1212.6977	-1.0444	1.9185	-0.1792	-45.139	43.6719	33.957	0.0052734	0.04414	0.00029296	-28.602	-101.237	1163.4805	-1.6198	1.6264	-0.13389	-34.455	14.808	40.2807	0.07666	0.020996	0.039551	-39.89	92.4828	137.737	0.0077147	0.24668	-0.075879
1.772	-26.819	56.085	848.4488	-0.79522	0.93838	0.26328	-18.379	86.8108	233.153	-0.056152	0.060547	0.069336	-64.528	-22.058	1201.392	-1.0347	1.9028	-0.17041	-33.729	39.778	56.158	0.0071289	0.041699	0.0026367	-38.743	-97.442	1158.677	-1.632	1.6427	-0.14053	-7.689	8.5874	35.98298	0.05957	0.03125	0.036621	-40.894	80.004	147.31	0.018066	0.24463	-0.08252
1.774	-26.109	56.398	825.8256	-0.77656	0.92031	0.26445	-31.827	84.128	206.752	-0.047754	0.041699	0.065137	-51.08	-27.875	1196.706	-1.0269	1.895	-0.16943	-28.528	45.8144	47.2068	0.0051758	0.039356	0.0069336	-33.29	-73.437	1159.831	-1.6382	1.6473	-0.15146	-21.975	23.913	40.971	0.048828	0.040527	0.041504	-33.128	85.438	141.6539	0.021972	0.2373	-0.088086
1.776	-11.801	69.69243	797.817	-0.75146	0.90088	0.26123	-32.043	86.4	192.035	-0.045703	0.02793	0.057617	-89.474	-35.258	1188.2403	-1.0063	1.8677	-0.15869	-51.35	60.7187	41.7909	0.0077148	0.033301	0.015723	-56.159	-85.8476	1145.068	-1.6338	1.6439	-0.15899	-23.749	4.5815	41.939	0.032715	0.060547	0.046875	-53.322	90.626	138.482	0.027734	0.23311	-0.092676
1.778	-24.723	96.2972	787.363	-0.74121	0.88066	0.25869	-3.54799999999999	86.0152	201.9486	-0.038672	0.011133	0.055274	-53.695	-22.2031	1167.0393	-0.99243	1.845	-0.15405	-17.622	59.2664	49.5329	0.0043945	0.03125	0.023926	-51.019	-98.57	1165.849	-1.6211	1.6387	-0.16406	-41.174	-10.42547	52.8699	0.0095215	0.079101	0.051758	-38.501	87.978	137.4797	0.035156	0.2292	-0.093848
1.78	-30.617	84.079	758.131	-0.72627	0.86299	0.25771	-6.901	93.0784	213.138	-0.033692	0.0011719	0.049317	-75.734	-7.93096	1152.3258	-0.97217	1.8159	-0.14697	-26.913	50.2855	65.4426	0.0037109	0.027051	0.028418	-60.094	-96.125	1175.801	-1.6048	1.6257	-0.17041	-24.807	-26.9178	78.0236	-0.013184	0.10059	0.057129	-51.675	65.6558	156.072	0.045508	0.22236	-0.10176
1.782	-11.349	83.868	748.871	-0.71611	0.84541	0.25654	-27.384	99.5147	198.177	-0.035156	-0.0068359	0.047852	-50.14	-6.4731	1122.077	-0.94531	1.7715	-0.14404	-41.929	50.727	43.5688	0.003418	0.020019	0.033789	-57.6215	-68.835	1165.2754	-1.5955	1.616	-0.17344	-23.155	-16.961	105.5388	-0.043945	0.13379	0.053223	-28.999	68.9535	143.5416	0.05127	0.21143	-0.10303
1.784	9.532	105.70729	743.0856	-0.70537	0.82901	0.25127	-34.714	109.607	198.692	-0.031445	-0.014941	0.043066	-61.124	-16.5357	1125.935	-0.93311	1.7485	-0.14014	-51.936	38.525	29.11689	0.006543	0.014941	0.033398	-54.012	-59.9795	1184.6475	-1.5896	1.6032	-0.17773	-36.33	-4.7444	134.5727	-0.068359	0.15381	0.05127	-35.754	68.83159	131.2222	0.056152	0.20283	-0.10039
1.786	-23.78	115.376	740.628	-0.6958	0.81641	0.24463	-24.789	98.183	177.3256	-0.031543	-0.018067	0.042285	-22.327	-5.3412	1120.557	-0.90479	1.7017	-0.12891	-41.898	40.7608	14.4397	0.0074219	0.0084961	0.038281	-16.635	-60.244	1194.0137	-1.5909	1.5977	-0.17656	-45.407	12.3077	152.345	-0.10547	0.20068	0.057617	-28.391	77.0696	105.364	0.063574	0.19512	-0.10215
1.788	-17.723	120.125	738.089	-0.68731	0.80176	0.24111	-25.244	92.7159	165.7008	-0.038184	-0.023536	0.043847	-64.435	-10.9531	1128.4573	-0.88526	1.6646	-0.11963	-26.275	38.8774	37.5388	0.01123	0	0.040527	-28.93	-58.86	1202.7814	-1.5981	1.5923	-0.17334	-32.168	38.687	208.71	-0.13892	0.23975	0.062744	-19.853	70.4863	97.744	0.071387	0.18496	-0.10332
1.79	-11.58	120.349	723.353	-0.67783	0.7915	0.23359	-39.512	73.8847	139.56	-0.045605	-0.027441	0.046192	-40.664	-6.0405	1114.344	-0.86475	1.6255	-0.11621	-42.617	34.9453	33.727	0.013477	-0.0082031	0.042676	-25.506	-69.757	1192.9373	-1.6121	1.5879	-0.16729	-36.812	57.336	273.769	-0.18457	0.28125	0.079102	-18.262	62.1413	101.745	0.079297	0.16885	-0.10088
1.792	-18.91	113.189	705.689	-0.66729	0.77939	0.22539	-27.434	64.87277	116.331	-0.049805	-0.032227	0.047363	-54.359	4.0302	1100.564	-0.83594	1.5762	-0.10352	-46.291	34.8743	27.9451	0.022168	-0.018262	0.03916	-14.622	-81.5769	1183.001	-1.626	1.5875	-0.16406	-33.736	64.474	355.9003	-0.27686	0.35205	0.10889	-66.8379	49.95359	97.5994	0.083008	0.15625	-0.099121
1.794	-18.596	84.6566	677.875	-0.6541	0.76894	0.21543	-22.717	71.8835	111.619	-0.059961	-0.026953	0.046582	-47.384	21.679	1054.8712	-0.82617	1.5566	-0.10059	-42.865	51.0204	31.5093	0.030762	-0.026856	0.040723	-0.697000000000003	-67.5942	1193.798	-1.6361	1.5859	-0.16524	-25.918	69.8896	417.4014	-0.33887	0.39453	0.11963	-51.866	57.7038	111.301	0.091211	0.14737	-0.098144
1.796	-17.325	78.8467	647.211	-0.63574	0.75684	0.20557	-29.482	66.2832	116.805	-0.068848	-0.02832	0.048047	-78.2449	-0.0339999999999989	1038.5544	-0.7959	1.5063	-0.094238	-7.603	54.4306	43.9991	0.039746	-0.033203	0.037402	-15.169	-67.54	1202.2399	-1.6415	1.5857	-0.15801	-16.198	77.83152	488.003	-0.48584	0.48877	0.15039	-20.195	82.444	97.232	0.097656	0.13252	-0.095215
1.798	-8.184	101.31	613.726	-0.61797	0.74492	0.19649	-25.8	61.9368	134.147	-0.079394	-0.024805	0.05	-55.027	2.3133	1018.3531	-0.77441	1.4746	-0.09253	-26.538	37.3551	46.835	0.044922	-0.04248	0.041504	-31.882	-48.0166	1190.648	-1.646	1.5825	-0.14893	-15.78	83.3395	521.1434	-0.60351	0.57715	0.16626	-28.374	84.32	103.3692	0.098828	0.11807	-0.095605
1.8	-27.445	104.6283	591.875	-0.59248	0.72705	0.18731	-7.041	67.2633	138.811	-0.087988	-0.019336	0.052929	-63.184	15.8878	1006.7496	-0.74951	1.4419	-0.093262	-24.405	21.98934	45.317	0.05498	-0.046289	0.039844	-56.334	-17.17705	1187.7412	-1.644	1.5802	-0.15069	-34.226	63.4579	581.3655	-0.71631	0.67822	0.19482	-57.559	63.254	86.1056	0.10293	0.10469	-0.087695
1.802	-12.211	90.2513	578.3348	-0.56944	0.71065	0.18106	-32.831	66.6055	122.791	-0.093262	-0.02002	0.055176	-53.812	19.467	982.179	-0.71777	1.3926	-0.087402	-35.922	41.1631	36.8509	0.055371	-0.048144	0.038086	-44.033	10.7775	1204.8039	-1.6422	1.575	-0.14668	-30.284	64.209	602.37161	-0.87793	0.81055	0.22168	-38.744	51.7504	73.287	0.10303	0.095703	-0.084473
1.804	-26.365	107.3732	586.0615	-0.54561	0.69287	0.17597	-17.416	57.6695	103.5815	-0.10127	-0.012597	0.053223	-52.186	20.652	959.465	-0.70264	1.3716	-0.087402	-23.451	45.4693	25.011	0.052637	-0.050488	0.042773	-47.376	11.5977	1237.2569	-1.634	1.5691	-0.14238	-40.271	35.297	638.6869	-0.95361	0.87598	0.21582	-52.6448	57.7996	53.595	0.10645	0.081738	-0.07959
1.806	-0.332000000000001	118.688	596.201	-0.52588	0.67236	0.17236	-33.777	51.286	96.407	-0.10918	-0.016797	0.054394	-43.159	42.196	949.788	-0.66797	1.3281	-0.083008	-28.062	32.8357	45.413	0.045801	-0.041895	0.040235	-40.642	5.6798	1250.8286	-1.6309	1.5631	-0.13653	-29.879	0.296399999999999	640.284	-1.0991	1.0142	0.20557	-25.306	39.848	69.361	0.10654	0.076465	-0.06582
1.808	-16.685	133.902	590.021	-0.50869	0.65674	0.16836	-35.128	59.9563	70.454	-0.11309	-0.014844	0.053614	-26.526	50.1463	951.6998	-0.64672	1.2932	-0.080322	-21.879	20.6974	48.461	0.033203	-0.029785	0.041992	-43.008	-2.149	1234.0425	-1.6245	1.561	-0.12842	-51.192	-33.58111	659.836	-1.1804	1.0983	0.19726	-25.107	24.646	66.5391	0.10303	0.064746	-0.064648
1.81	13.153	128.941	570.2701	-0.4999	0.63799	0.16621	-44.819	61.062	77.742	-0.11543	-0.013672	0.051856	-36.587	53.466	933.53683	-0.62646	1.2603	-0.07959	-30.811	17.6288	40.9264	0.01709	-0.0069338	0.049121	-50.181	17.1839	1214.379	-1.6165	1.5538	-0.12549	-62.292	-57.4532	668.3463	-1.2417	1.1665	0.18848	-36.755	31.7673	53.9809	0.10205	0.058008	-0.053125
1.812	-7.722	130.169	534.545	-0.48896	0.62237	0.16582	-22.282	35.6559	66.244	-0.11279	-0.013672	0.049805	-36.351	50.09	936.945	-0.60742	1.2129	-0.065918	-53.852	10.0172	43.9171	-0.0070312	0.016699	0.050977	-61.8319	11.7388	1194.678	-1.6108	1.5462	-0.11778	-68.3961	-69.1893	669.833	-1.2778	1.2192	0.1665	-50.908	66.483	40.2525	0.099121	0.051758	-0.044434
1.814	-18.908	121.3597	503.316	-0.48262	0.60821	0.16836	-33.997	35.366	86.5763	-0.11826	-0.010254	0.048926	-56.906	61.563	929.3572	-0.60156	1.1934	-0.063965	-45.329	0.697500000000001	70.5586	-0.034375	0.049902	0.052539	-53.331	2.3156	1194.5882	-1.6066	1.5365	-0.1127	-60.197	-80.029	634.86807	-1.2729	1.2271	0.1582	-33.118	63.551	50.1243	0.094726	0.042285	-0.037403
1.816	-38.44	111.7408	472.336	-0.4751	0.59521	0.16699	-4.374	56.30511	81.1024	-0.11729	-0.014453	0.049414	-58.77	55.31	894.6511	-0.58301	1.1523	-0.061523	-16.336	6.0263	92.844	-0.053125	0.085156	0.053516	-39.038	11.4014	1173.423	-1.6009	1.5237	-0.10616	-20.159	-79.707	631.227	-1.2412	1.2168	0.14209	-41.084	63.335	71.1013	0.088965	0.041113	-0.030078
1.818	13.254	105.9771	459.9481	-0.46601	0.58193	0.16309	-34.672	57.6323	83.002	-0.12158	-0.0078125	0.048242	-74.725	60.532	874.592	-0.57105	1.1199	-0.058349	-32.755	0.9372	85.2054	-0.077637	0.11963	0.05957	-60.431	15.9013	1164.327	-1.584	1.5137	-0.10645	0.978999999999999	-50.492	624.3049	-1.1765	1.1779	0.13476	-38.494	37.46123	76.004	0.088965	0.034864	-0.025391
1.82	-14.62	109.4244	446.9639	-0.45118	0.56407	0.15733	-25.754	64.685	67.97	-0.12119	-0.0069336	0.047168	-39.046	62.8257	849.526	-0.56201	1.0864	-0.054199	-38.847	8.49421	97.86325	-0.09375	0.14863	0.055176	-35.997	16.293	1159.564	-1.5719	1.4988	-0.099022	-12.302	-38.7616	633.9704	-1.0933	1.1196	0.13135	-46.491	25.2506	57.6451	0.083106	0.031934	-0.018457
1.822	-27.792	100.7391	449.807	-0.43594	0.54687	0.15225	-39.713	53.8575	58.5455	-0.12354	-0.003418	0.042969	-45.276	63.9219	843.232	-0.54688	1.0459	-0.045898	-33.111	26.921	111.69	-0.10869	0.18027	0.052539	-24.033	21.0949	1175.1624	-1.5537	1.4793	-0.097949	-16.718	-23.7639	647.6334	-0.95752	1.0161	0.12109	-39.428	22.5465	28.148	0.078613	0.02832	-0.0063477
1.824	-17.709	103.2049265	442.8649	-0.41084	0.52939	0.1455	-24.763	30.40955	36.693	-0.12373	0.0039062	0.044531	-32.498	68.8314	815.5298	-0.53906	1.0273	-0.047852	-35.963	49.9661	163.06	-0.11924	0.21114	0.042774	-15.692	26.9388	1138.8896	-1.5381	1.4637	-0.10068	-11.23	-19.0371	647.2004	-0.88428	0.96338	0.11621	-24.66	24.1747	37.704	0.073633	0.02461	-0.002832
1.826	8.878	116.5434	423.628	-0.38281	0.50391	0.13965	-49.175	12.0769	32.393	-0.12588	0.00625	0.043847	-61.787	66.129	818.3422	-0.51807	0.98682	-0.041992	-51.755	45.5976	194.424	-0.13623	0.23984	0.032519	-29.629	22.409	1113.6164	-1.5136	1.4439	-0.098731	-6.469	-15.034	654.224	-0.75586	0.86133	0.11035	-18.875	19.8227	48.753	0.067969	0.024023	-4.0006e-09
1.828	-6.718	124.091	408.5154	-0.35439	0.48056	0.12813	-24.167	26.0985	38.707	-0.12549	0.011328	0.043457	-9.631	80.948	805.02106	-0.49951	0.94971	-0.035644	-50.508	61.1634	253.1529	-0.15088	0.26709	0.021973	-23.024	19.6883	1084.8343	-1.4961	1.4199	-0.1001	-40.389	-30.597	658.3095	-0.67944	0.80298	0.10352	-39.844	18.3483	46.6983	0.060938	0.021289	0.003125
1.83	-5.54799999999999	116.9764	386.82066	-0.32188	0.45274	0.12207	-38.658	43.06055	40.457	-0.12539	0.016309	0.038477	-33.017	81.6198	797.2103	-0.47705	0.9165	-0.032227	-35.952	85.9952	300.4405	-0.1792	0.30049	0.012109	-45.379	23.8824	1065.057	-1.4701	1.4009	-0.10235	-26.123	-47.213	693.6779	-0.62256	0.75635	0.099609	-25.696	19.0802	33.35	0.054004	0.026953	0.005957
1.832	16.479	112.5123	362.7969	-0.2918	0.42617	0.11426	-41.308	50.9589	40.7458	-0.12158	0.020508	0.035156	-33.889	77.1309	768.5337	-0.45068	0.86963	-0.023926	-32.737	98.911	358.0407	-0.22168	0.33672	0.0032227	-55.616	17.9641	1064.5273	-1.4434	1.376	-0.10411	-39.099	-53.559	687.664	-0.5708	0.72021	0.098633	-19.377	25.7113	58.7088	0.043457	0.029785	0.0048828
1.834	-13.207	124.778	337.89	-0.26445	0.40137	0.10674	-44.295	46.822	44.219	-0.11797	0.023242	0.027149	-31.144	93.819	745.4806	-0.43896	0.84766	-0.018066	-27.457	84.147	416.70939	-0.27676	0.37852	0.0020508	-77.393	24.3225	1047.508	-1.4141	1.3506	-0.10723	-58.401	-79.522	710.96	-0.55225	0.71436	0.09375	-41.105	10.5745	72.5218	0.031445	0.036329	0.014746
1.836	-4.631	104.966	333.078	-0.23535	0.36328	0.10107	-36.571	57.904	38.3653	-0.10927	0.030176	0.018066	-32.342	99.198	728.3864	-0.4165	0.80518	-0.013184	-38.208	80.334	466.5798	-0.34639	0.43272	0.005664	-65.471	45.048	1048.491	-1.3862	1.3238	-0.11065	-56.747	-122.191	735.6795	-0.53369	0.71338	0.093262	-47.797	0.6477	82.2259	0.021582	0.047266	0.014063
1.838	-11.311	85.0104	337.1589	-0.20244	0.33164	0.095508	-32.338	52.754	44.971	-0.10342	0.038379	0.0098633	-47.397	88.812	710.1838	-0.40039	0.77759	-0.0083005	-20.676	90.078	498.8547	-0.4292	0.49658	0.015625	-32.971	62.0992	1031.6943	-1.3496	1.2969	-0.11328	-46.061	-148.0839	755.3609	-0.51856	0.72802	0.092773	-23.866	7.3967	59.66769	0.0098632	0.062891	0.01875
1.84	-7.795	91.89183	331.357	-0.17568	0.29931	0.087305	-33.99	45.5505	41.4942	-0.092871	0.035059	0.0069336	-39.865	79.8944	686.8618	-0.39063	0.74854	0.00097656	-35.708	74.7782	528.674	-0.53261	0.56894	0.032227	-40.613	44.992	1000.5886	-1.3146	1.2679	-0.1167	-45.694	-156.04	765.7708	-0.50635	0.74463	0.097656	-20.107	15.29815	38.988	-0.00058594	0.07998	0.018359
1.842	-28.872	101.5845	320.173	-0.15068	0.26767	0.085352	-18.655	43.5176	31.5994	-0.080566	0.037598	-0.0014648	-31.194	85.8722	666.01625	-0.375	0.71777	0.0043945	-26.424	42.0188	568.204	-0.6331	0.65284	0.051172	-43.099	24.8038	973.5841	-1.2726	1.2364	-0.11982	-60.377	-159.333	782.4037	-0.50537	0.78076	0.096191	-36.548	-15.38	43.214	-0.012207	0.1001	0.017578
1.844	-18.507	98.47262	285.55489	-0.12686	0.24209	0.08291	-45.53	35.3325	11.194	-0.069239	0.034668	-0.010156	-32.91	103.872	647.3476	-0.37109	0.7041	0.012207	-32.741	15.95552	595.748	-0.73936	0.74971	0.077734	-29.562	33.85782	940.567	-1.2355	1.2048	-0.12412	-73.127	-155.37	804.585	-0.50781	0.79883	0.099609	-19.672	-29.5547	82.967	-0.025684	0.12021	0.012597
1.846	-14.843	88.4503	267.094	-0.10645	0.20996	0.080078	-46.945	31.85	2.448	-0.063281	0.034863	-0.018262	-27.412	101.8438	622.1429	-0.35986	0.68213	0.017578	-22.685	-5.1933	612.0182	-0.85898	0.84297	0.10107	-42.165	45.6311	910.33	-1.1976	1.1716	-0.12373	-53.994	-125.358	823.4841	-0.52637	0.84961	0.10107	-46.136	-6.674	105.695	-0.037695	0.14024	0.0091797
1.848	2.727	93.0254	245.689	-0.087402	0.18467	0.080274	-53.95	28.6122	20.79	-0.054297	0.032519	-0.021778	0.118000000000002	107.6301	617.8479	-0.35669	0.66724	0.021485	-41.881	-18.7313	622.609	-0.97217	0.93994	0.12109	-63.16	34.5405	928.386	-1.1602	1.1387	-0.12695	-68.264	-112.395	837.0521	-0.5625	0.91016	0.11035	-21.705	25.112	150.6247	-0.049805	0.16367	0.0052734
1.85	-13.713	75.48765	232.294	-0.077343	0.1622	0.081641	-16.58	35.5481	29.2833	-0.048926	0.033105	-0.027344	-10.07	110.299	603.2924	-0.34961	0.65234	0.020996	-30.571	-47.978	643.818	-1.0712	1.0277	0.13447	-26.841	39.3575	919.004	-1.1243	1.1038	-0.12666	-68.237	-108.39	869.8019	-0.58984	0.93994	0.11719	-32.843	45.247	200.967	-0.070703	0.18819	0.00058594
1.852	-7.077	59.1276	226.9587	-0.065624	0.13994	0.078125	-30.708	52.591	35.364	-0.037598	0.02832	-0.034668	-9.884	102.7728	591.5019	-0.34082	0.64258	0.02002	-27.281	-70.667	646.696	-1.1561	1.1048	0.1253	-49.837	47.2294	942.5632	-1.0875	1.0727	-0.12871	-66.564	-103.966	909.81	-0.65869	1.0103	0.13184	-16.386	45.0916	264.8192	-0.09375	0.21924	-0.0029297
1.854	-11.053	72.4907	205.287	-0.052831	0.11797	0.077929	-39.998	56.523	32.4061	-0.033594	0.030859	-0.042969	-23.811	102.0411	562.6477	-0.33398	0.63281	0.024902	-42.783	-69.281	628.701	-1.2022	1.1712	0.11514	-59.8773	78.805	924.842	-1.0527	1.0449	-0.1252	-58.554	-80.098	939.9089	-0.71534	1.0606	0.15625	-57.412	57.3776	308.151	-0.12676	0.2541	-0.0043945
1.856	-11.966	80.8988	217.8803	-0.047363	0.099609	0.075684	-45.0517	51.718	30.7327	-0.026172	0.029785	-0.044433	-26.78	115.363	551.4711	-0.31689	0.61963	0.026855	-17.487	-60.066	598.657	-1.2066	1.2145	0.092969	-42.6982	78.907	913.89	-1.0232	1.0097	-0.12422	-69.078	-77.058	950.6695	-0.78418	1.1074	0.17188	-27.775	56.8977	358.046	-0.17959	0.30195	-0.00058598
1.858	-35.115	80.9443	219.817	-0.039649	0.082912	0.074413	-35.235	53.307	31.7861	-0.020703	0.03291	-0.053418	-41.71	122.198	521.649	-0.30737	0.61353	0.027832	7.838	-35.592	596.9103	-1.1675	1.2329	0.067383	-7.189	79.011	886.156	-0.99609	0.97949	-0.12451	-51.717	-88.825	950.1444	-0.87793	1.1699	0.18408	-41.409	69.7487	426.111	-0.23858	0.36094	-0.0033203
1.86	-13.91	88.652	222.236	-0.031153	0.069634	0.076565	-54.254	35.5501	21.014	-0.013379	0.029297	-0.058496	-42.147	102.365	508.9389	-0.28955	0.59814	0.025391	12.687	-9.1795	588.691	-1.0871	1.2274	0.037889	-53.855	64.0769	850.817	-0.96045	0.94892	-0.12051	-51.676	-99.739	962.954	-0.92529	1.2017	0.19287	15.79	91.84	513.537	-0.31416	0.43223	0.0067383
1.862	-12.276	98.466	187.26585	-0.024515	0.050884	0.066018	-20.708	8.607	23.138	-0.0092773	0.032227	-0.066895	-35.88	108.874	502.3565	-0.27148	0.58203	0.022461	-22.03	-17.8603	595.966	-0.97929	1.1864	0.015722	-50.282	51.9493	787.06678	-0.93096	0.91788	-0.11602	-37.321	-113.0982	954.161	-1.0054	1.2544	0.20459	-26.88	78.8898	586.576	-0.39941	0.51172	0.014648
1.864	-28.187	82.9471	165.8129	-0.019338	0.03477	0.058887	-26.231	5.6324	41.692	-0.0048829	0.029492	-0.071875	-4.996	108.1277	492.0289	-0.25684	0.56738	0.026855	-14.145	-30.3426	604.111	-0.85507	1.12	0.0036125	-25.359	40.376	782.189	-0.89892	0.88662	-0.11523	-76.217	-133.4653	961.419	-1.0586	1.2925	0.20654	-23.794	57.53	593.3963	-0.49326	0.61533	0.028906
1.866	-36.782	64.1875	135.967	-0.010742	0.020508	0.061035	-30.975	19.30612	39.586	-0.0030274	0.033984	-0.078418	-3.879	96.3694	479.9451	-0.2373	0.5498	0.022461	-28.021	-24.251	642.2388	-0.74238	1.031	0.0048833	-27.223	43.465	778.284	-0.871	0.85811	-0.11143	-51.094	-135.401	994.48557	-1.1108	1.3335	0.21826	-40.153	60.218	623.6643	-0.5918	0.73243	0.045898
1.868	-21.389	61.9238	135.75	-0.0043912	0.0058527	0.060257	-41.429	14.5431	41.4669	-0.0026367	0.03789	-0.083496	-17.723	88.6766	454.8947	-0.2185	0.52759	0.022217	-12.927	-24.918	663.3479	-0.64941	0.94141	0.01123	-27.251	36.523	800.8716	-0.8457	0.83398	-0.11182	-74.574	-126.505	1010.2728	-1.1733	1.3833	0.22998	-23.109	56.126	636.278	-0.69336	0.85899	0.065039
1.87	-21.094	72.4802	109.333	-3.3737e-06	-0.0084127	0.062982	-28.971	21.0143	62.98	-0.0027344	0.039844	-0.087109	-12.321	108.439	433.6072	-0.2002	0.50781	0.023926	-18.329	-56.115	700.7382	-0.59727	0.85489	0.02656	-33.347	47.615	787.687	-0.82461	0.81016	-0.10147	-48.152	-127.659	1036.7819	-1.2046	1.4146	0.2373	-57.417	0.83	661.546	-0.80166	0.98918	0.087305
1.872	-5.16	58.28	124.026	-0.0011702	-0.022865	0.061822	-54.831	21.3784	65.301	-0.0019531	0.05127	-0.092773	-4.311	116.02043	411.3418	-0.1709	0.48291	0.016602	-48.705	-65.182	706.5151	-0.57803	0.78175	0.045503	-56.566	79.3331	776.359	-0.79775	0.78603	-0.09834	-54.667	-124.651	1040.6672	-1.2832	1.4824	0.25439	-56.699	-36.47746	640.974	-0.91016	1.1211	0.10205
1.874	10.095	45.381	123.3489	-0.0014648	-0.03507	0.064161	-44.891	-0.202	69.089	-0.011719	0.061816	-0.086328	-15.021	110.2676	403.3927	-0.15161	0.46045	0.010742	-57.486	-80.272	706.4556	-0.58544	0.72667	0.065814	-56.423	119.753	755.1884	-0.77939	0.76455	-0.089746	-32.742	-104.9208	1073.2444	-1.3526	1.5386	0.25903	-60.47337	-56.942	594.285	-1.0108	1.2424	0.11494
1.876	-23.006	43.8379	131.8959	-0.0014648	-0.046875	0.070313	-46.238	-23.15188	81.7297	-0.02666	0.076172	-0.083301	-5.893	110.0681	395.5542	-0.12891	0.43652	0.0092773	-55.964	-103.732	698.074	-0.61142	0.69639	0.085543	-51.305	103.228	731.122	-0.76484	0.74316	-0.083594	-49.01	-77.29	1101.318	-1.4253	1.6001	0.2627	-23.306	-47.976	544.798	-1.0989	1.3449	0.11172
1.878	-22.408	65.5107	131.226	-0.0064365	-0.054872	0.074694	-29.472	-13.6795	105.545	-0.044239	0.090625	-0.087207	-15.234	107.418	389.2885	-0.095215	0.40527	0.0024414	-55.196	-139.525	728.121	-0.63818	0.68604	0.098633	-48.027	105.137	703.227	-0.75146	0.7251	-0.082031	-47.101	-76.114	1106.602	-1.5132	1.6821	0.26807	-6.128	-34.8856	556.119	-1.1617	1.4203	0.10078
1.88	-29.625	58.716	117.742	-0.0078699	-0.059152	0.074707	-29.813	-8.9389	139.69	-0.067774	0.10605	-0.088281	-27.595	103.655	379.9971	-0.077637	0.39111	-0.00048828	-66.555	-160.377	739.913	-0.66427	0.69434	0.11231	-53.339	112.731	666.2533	-0.73633	0.70781	-0.071875	-51.192	-76.919	1104.882	-1.5547	1.7246	0.26025	6.966	-4.176	572.708	-1.1861	1.4601	0.071387
1.882	-13.061	81.094	105.3377	-0.01261	-0.064639	0.075482	-24.777	8.2171	196.854	-0.087402	0.13135	-0.086426	-20.539	108.701	373.356	-0.052246	0.35645	-0.0043945	-36.27	-157.927	763.068	-0.67735	0.71438	0.1211	-56.115	102.3894	655.416	-0.72188	0.69199	-0.068164	-24.268	-83.581	1103.4261	-1.6089	1.8013	0.25195	-7.99	23.045	583.115957	-1.1714	1.4575	0.049805
1.884	-22.73	72.729	86.859	-0.023208	-0.066177	0.082106	-19.753	21.148	260.725	-0.11562	0.16299	-0.071777	-18.325	108.8238	350.1653	-0.024658	0.32885	-0.0061035	-66.378	-145.067	783.346	-0.68516	0.74564	0.12305	-36.961	79.547	648.435	-0.70273	0.67676	-0.061914	-50.718	-86.7493	1099.753	-1.6358	1.8526	0.24658	-7.163	30.2161	583.8222	-1.1068	1.4134	0.032325
1.886	-19.982	47.0794	50.817	-0.023438	-0.072754	0.08252	-12.136	29.9197	336.027	-0.1458	0.2041	-0.049805	-21.624	98.6596	334.4376	-0.0043945	0.30811	-0.011719	-40.036	-125.856	831.198	-0.68428	0.78334	0.12079	-42.653	85.239	650.06	-0.68477	0.66074	-0.056836	-68.066	-89.2135	1106.442	-1.6523	1.8945	0.2334	-18.287	32.1023	614.633	-0.99958	1.325	0.024512
1.888	-19.068	37.7532	57.946	-0.029892	-0.074111	0.080888	-46.45	55.9285	445.2801	-0.19854	0.24981	-0.019336	-18.43	88.5711	290.6019	0.022949	0.2749	-0.017578	-31.579	-107.24122	879.31169	-0.69141	0.82813	0.11621	-50.467	106.137	628.1412	-0.66748	0.64404	-0.053223	-60.147	-75.0286	1116.032	-1.6523	1.9297	0.229	-8.32100000000001	37.7611	639.351	-0.87032	1.1934	0.026465
1.89	-16.314	48.898	69.459	-0.033679	-0.074159	0.083877	-51.201	80.04	523.196	-0.27451	0.30391	0.013086	-4.207	79.5376	277.224	0.035645	0.26221	-0.024414	-52.343	-97.67	901.1	-0.70016	0.87474	0.11494	-65.826	107.85703	615.5424	-0.65029	0.62344	-0.045214	-63.775	-66.8594	1130.0318	-1.6465	1.9355	0.21826	-6.217	48.349	615.104	-0.74512	1.0447	0.043555
1.892	-0.586000000000006	39.0277	86.7131	-0.039926	-0.074879	0.084301	-34.692	112.464	596.204	-0.36768	0.37354	0.05127	-6.461	90.638	265.907	0.055176	0.2373	-0.020508	-65.415	-76.856	921.711	-0.72432	0.92327	0.11816	-34.158	115.399	583.9238	-0.63291	0.60635	-0.039746	-102.6893	-74.7361	1132.4	-1.6245	1.9321	0.21484	-53.629	38.21	601.5289	-0.63428	0.89502	0.062988
1.894	-23.585	43.233	93.282	-0.042889	-0.071527	0.083622	-38.001	119.771	633.4682	-0.47305	0.44883	0.10605	-4.92	87.3455	286.554	0.069824	0.21704	-0.024658	-34.344	-58.239	907.2567	-0.75941	0.97053	0.11895	-54.736	125.792	581.1403	-0.60947	0.58525	-0.038574	-82.785	-80.6647	1153.8667	-1.6108	1.9112	0.20556	-76.406	0.645999999999994	595.674	-0.55527	0.7584	0.084863
1.896	-6.485	55.338	78.375	-0.047852	-0.071777	0.08252	-72.513	90.529	654.744	-0.60117	0.53984	0.16787	-15.93	86.4226	261.0503	0.085938	0.19775	-0.027832	-41.823	-51.97	912.919	-0.80336	1.0108	0.1238	-61.961	108.72	576.8528	-0.59023	0.56211	-0.035254	-74.881	-63.8075	1158.3965	-1.5859	1.8867	0.19727	-61.968	-63.214	621.195	-0.50264	0.64639	0.10078
1.898	-14.468	61.068	52.1861	-0.055642	-0.071417	0.084112	-65.391	48.6456	680.395	-0.74727	0.63594	0.22881	-20.418	90.6181	253.79958	0.09668	0.17285	-0.035645	-57.434	-64.446	907.53	-0.86084	1.0552	0.13379	-77.6168	97.888	561.8139	-0.56641	0.53906	-0.030762	-63.574	-49.393	1183.8544	-1.5508	1.8457	0.20361	-56.918	-108.47	636.114	-0.47881	0.56006	0.11094
1.9	-30.91	54.932	44.231	-0.061052	-0.068831	0.085575	-45.472	29.8165	691.1843	-0.90684	0.7377	0.27441	-28.076	100.777	242.9	0.10156	0.16211	-0.038086	-52.111	-86.2431	932.727	-0.92195	1.0954	0.13574	-63.186	114.9365	538.603	-0.54756	0.51982	-0.025684	-76.695	-60.0275	1179.7461	-1.5273	1.8242	0.20947	-70.248	-146.465	661.8601	-0.45469	0.50059	0.11904
1.902	-52.372	49.4332	46.101	-0.064453	-0.060922	0.085732	-38.628	19.507	680.991	-1.0601	0.84912	0.30566	-14.936	90.824	248.7552	0.11328	0.14551	-0.043457	-39.35	-86.936	959.679	-0.98225	1.1389	0.13704	-62.688	115.969	527.49	-0.52422	0.4998	-0.023047	-55.554	-68.98161	1185.1879	-1.4839	1.7739	0.21045	-49.596	-131.009	672.618	-0.4375	0.45801	0.12207
1.904	-21.062	48.35864	42.071	-0.069984	-0.056171	0.079252	-46.41	-12.148	680.994	-1.1925	0.95713	0.32149	-16.969	90.186	231.977	0.11939	0.1316	-0.046143	-50.462	-107.906	1010.0294	-1.0402	1.1829	0.13939	-45.299	103.525	519.383	-0.50625	0.47715	-0.016406	-48.37	-66.2946	1183.2411	-1.4575	1.7412	0.21338	-37.929	-109.454	678.7703	-0.42607	0.44179	0.11582
1.906	-31.785	37.329	36.019	-0.066895	-0.05127	0.078613	-33.452	-52.074	652.391	-1.2912	1.0644	0.31709	-12.056	88.333	205.0638	0.12061	0.12451	-0.053711	-50.646	-119.317	1059.395	-1.0827	1.2284	0.13944	-44.579	105.4837	506.5501	-0.48291	0.45908	-0.0086914	-59.586	-64.6152	1167.053	-1.4292	1.7114	0.21387	-59.088	-109.256	705.6875	-0.40713	0.44492	0.11055
1.908	-35.594	34.8083	31.094	-0.06912	-0.041547	0.080035	-52.806	-56.387	617.551	-1.3459	1.1551	0.29405	-29.797	76.9538	168.988	0.12354	0.10889	-0.056641	-61.814	-109.12792	1071.601	-1.125	1.2754	0.13867	-38.555	132.659	480.7723	-0.4624	0.44141	-0.0073242	-47.265	-59.5901	1185.9518	-1.4004	1.6836	0.2124	-79.093	-110.742	729.1769	-0.39658	0.45469	0.096484
1.91	-24.609	47.5004	51.2353	-0.064067	-0.036338	0.069002	-47.033	-55.101	598.165	-1.3452	1.2321	0.25068	-17.915	58.3017	170.988	0.12402	0.11035	-0.060547	-36.815	-89.817	1053.4767	-1.1604	1.3295	0.14135	-43.263	126.225	475.9463	-0.44287	0.42246	-0.00058592	-49.338	-41.7408	1170.1271	-1.3828	1.668	0.21143	-76.438	-98.735	758.214	-0.39199	0.48565	0.087207
1.912	-19.062	60.415	53.7831	-0.06065	-0.030455	0.060907	-52.666	-42.897	611.6846	-1.2969	1.2832	0.19434	-20.102	66.558	160.8	0.12061	0.10303	-0.060059	-41.932	-88.694	1051.398	-1.2064	1.3864	0.14095	-38.57	116.976	470.673	-0.42402	0.40908	0.0044922	-51.832	-25.3741	1162.7425	-1.3555	1.6445	0.21582	-96.229	-74.037	778.188	-0.39063	0.5332	0.074707
1.914	-21.847	52.56	57.68	-0.051931	-0.027171	0.054156	-57.559	-19.9852	604.923	-1.2069	1.2889	0.14189	-2.181	63.1473	164.0221	0.11499	0.098145	-0.060791	-62.666	-112.611	1086.3205	-1.2558	1.4506	0.14237	-46.556	110.9623	453.5766	-0.40527	0.39229	0.0091797	-50.315	-30.4811	1151.6899	-1.3347	1.6331	0.22119	-92.035	-72.246	811.588	-0.41094	0.60137	0.067578
1.916	-23.734	48.283	42.44	-0.038086	-0.030273	0.047363	-74.842	1.671	595.514	-1.0785	1.2668	0.094922	-10.535	76.684	159.7047	0.10986	0.095703	-0.061523	-46.043	-112.4475	1095.26907	-1.3116	1.5231	0.14417	-59.541	116.7328	411.32	-0.38066	0.37578	0.011328	-50.191	-36.45432	1180.2148	-1.3179	1.6196	0.22559	-76.487	-65.033	829.474	-0.44121	0.6832	0.062305
1.918	-19.204	38.6015	42.2727	-0.026142	-0.027663	0.039035	-85.974	6.55	591.912	-0.93554	1.2004	0.065625	1.694	71.3744	156.7698	0.10107	0.093262	-0.067383	-36.763	-100.368	1095.272	-1.375	1.6016	0.15186	-63.331	107.7352	396.449	-0.35986	0.36133	0.020508	-51.226	-29.279	1194.2943	-1.3052	1.5981	0.22949	-83.726	-40.392	840.764	-0.49082	0.7707	0.062305
1.92	-33.418	38.1951	18.978	-0.016021	-0.027011	0.027804	-80.693	27.2804	616.913	-0.79443	1.1042	0.048242	-19.359	72.6118	163.111	0.09375	0.095215	-0.066406	-62.292	-83.4055	1090.829	-1.4412	1.6953	0.15444	-51.154	110.702091	395.34	-0.3378	0.34521	0.022168	-50.443	-24.2907	1187.544	-1.2944	1.5884	0.22949	-84.712	-35.489	832.9217	-0.54941	0.85996	0.063281
1.922	-42.751	21.384	19.327	-0.0083807	-0.02936	0.022099	-53.947	30.3343	647.0394	-0.6748	0.98438	0.056152	-32.979	64.3487	146.6169	0.089355	0.089844	-0.066406	-38.664	-77.5546	1106.8916	-1.5017	1.7877	0.15479	-47.144	122.0312	397.5719	-0.31602	0.32744	0.024414	-68.543	-20.7395	1157.9624	-1.2847	1.5708	0.23633	-60.361	-59.015	859.3014	-0.61523	0.95117	0.060547
1.924	-39.982	29.8769	17.885	-0.0050099	-0.030486	0.014075	-30.832	9.562	681.385	-0.59336	0.86523	0.071582	-23.694	63.397	144.7596	0.084717	0.094482	-0.065918	-12.692	-71.152	1109.7506	-1.5509	1.8747	0.15078	-60.969	136.946	372.4453	-0.29102	0.30947	0.025976	-49.372	-0.987500000000001	1157.06262	-1.2766	1.5539	0.23681	-41.13	-86.362	904.0534	-0.67969	1.0348	0.064551
1.926	-12.774	31.7073	27.7032	-0.00097656	-0.030273	0.0083008	-40.943	-35.268	708.506	-0.54873	0.76358	0.089843	-12.108	69.304	116.34102	0.079102	0.092285	-0.066895	-72.916	-70.5504	1108.0745	-1.5786	1.9566	0.14497	-42.92	128.555	354.786	-0.26562	0.29267	0.024414	-65.564	-6.7484	1153.2384	-1.2603	1.5396	0.24609	-53.088	-104.55715	922.5679	-0.7456	1.1161	0.066015
1.928	-30.046	33.3569	21.1318	-0.00025057	-0.030557	0.003827	-22.321	-68.92	725.8954	-0.54287	0.69053	0.11211	-10.359	68.8095	105.9473	0.077637	0.09375	-0.064941	-65.954	-69.723	1108.6075	-1.5898	2.0195	0.13428	-38.012	134.453	344.1268	-0.24072	0.28271	0.025879	-52.609	-14.8244	1150.2859	-1.2437	1.5161	0.24512	-77.971	-115.185	933.7649	-0.80224	1.1907	0.060547
1.93	-36.869	20.9076	44.369	0.00089075	-0.024387	-0.00057409	-30.1036	-103.4915	743.287	-0.57031	0.64688	0.12949	-18.205	65.256	91.508	0.080078	0.088867	-0.069336	-55.282	-79.947	1134.356	-1.5887	2.0592	0.12446	-32.791	136.1702	337.0514	-0.21895	0.26357	0.025098	-53.616	-22.78324	1131.5568	-1.2314	1.5039	0.24805	-50.292	-123.601	953.538	-0.85303	1.2569	0.053711
1.932	-25.942	48.093	47.464	-0.00027407	-0.023117	-0.0097436	-8.269	-140.359	744.93	-0.61133	0.62891	0.13818	-19.136	49.9628	95.464	0.077637	0.085449	-0.071289	-59.649	-82.482	1147.519	-1.582	2.0803	0.11251	-37.133	118.5619	323.8912	-0.19649	0.2498	0.025097	-34.404	2.19369	1122.4613	-1.2065	1.4771	0.25635	-40.704	-110.545	978.353	-0.89941	1.3145	0.054199
1.934	-8.113	56.369	40.201	-0.0063241	-0.014398	-0.014601	-26.551	-180.918	766.484	-0.65508	0.64375	0.13027	-32.034	59.6019	102.47045	0.074463	0.081787	-0.073486	-97.3867	-98.328	1144.376	-1.5657	2.0841	0.10714	-34.879	113.8863	293.7808	-0.17109	0.23731	0.02666	-51.081	1.335	1102.058	-1.1892	1.4592	0.26074	-22.498	-106.017	1012.9219	-0.93906	1.3754	0.05166
1.936	-20.298	40.021	35.5025	-0.0058594	-0.0053711	-0.012207	-9.947	-183.508	758.445	-0.68321	0.67754	0.11231	-8.584	47.151	112.7244	0.074219	0.07959	-0.068848	-66.579	-82.615	1146.5	-1.5432	2.0735	0.10883	-47.824	114.5045	270.705	-0.15439	0.22705	0.028613	-55.46	2.7958	1089.642	-1.1753	1.4399	0.26563	-75.747	-93.3956	1032.979	-0.98037	1.4274	0.04873
1.938	-11.724	14.4487	26.228	-0.013401	0.0047149	-0.021882	-46.858	-184.227	772.452	-0.70586	0.72207	0.090429	-11.528	42.9292	106.134	0.075684	0.074707	-0.067871	-87.5455	-48.9004	1148.0613	-1.5225	2.0469	0.11035	-58.222	104.7031	271.155	-0.13623	0.21338	0.029785	-56.174	3.6665	1090.8636	-1.1523	1.4199	0.26904	-50.001	-70.234	1053.445	-1.0272	1.4868	0.044433
1.94	-25.575	7.3798	21.274	-0.014446	0.012355	-0.027662	-16.902	-154.428	809.391	-0.70332	0.76856	0.064355	-6.02500000000001	45.11215	95.4325	0.073242	0.074707	-0.072266	-81.84	-28.8123	1183.7707	-1.4966	2.0119	0.12156	-60.73	86.4966	267.121	-0.12344	0.20576	0.028516	-35.106	18.4068	1080.7699	-1.1465	1.4141	0.26758	-55.773	-53.457	1065.263	-1.0761	1.5489	0.047168
1.942	-36.225	-3.9372	31.395	-0.016031	0.025238	-0.035872	-22.335	-124.8194	881.07	-0.69141	0.81836	0.049805	-23.741	61.967	62.907	0.071777	0.072266	-0.061035	-74.85	-33.2473	1201.681	-1.4745	1.9718	0.12766	-65.5499	110.852	260.0184	-0.11045	0.19453	0.034766	-51.262	16.2842	1080.32549	-1.1265	1.3892	0.27051	-29.812	-64.233	1085.083	-1.1323	1.6196	0.050293
1.944	-38.44	-8.306	41.515	-0.024021	0.036545	-0.037687	-3.803	-82.351	923.266	-0.68896	0.8626	0.046289	-22.814	57.142	63.8779	0.061523	0.072754	-0.057861	-47.575	-34.329	1215.352	-1.4557	1.9263	0.13635	-64.511	121.56	247.5067	-0.09834	0.18907	0.033203	-42.828	19.4403	1062.1947	-1.1121	1.3762	0.2727	-59.966	-83.834	1092.874	-1.1906	1.6977	0.053516
1.946	-28.244	-13.8673	58.7823	-0.029297	0.049805	-0.037109	-20.609	-50.649	949.81	-0.7042	0.90557	0.060254	-28.292	59.302	65.1586	0.057129	0.07666	-0.054199	-47.429	-15.7508	1212.1847	-1.4402	1.8886	0.1433	-53.925	117.76	237.8011	-0.08584	0.1791	0.03418	-55.775	20.6777	1045.792	-1.0923	1.3618	0.27295	-13.175	-80.544	1056.693	-1.2508	1.7894	0.05332
1.948	-33.509	-0.657999999999999	55.3178	-0.036518	0.065025	-0.039651	-5.308	-41.554	949.9474	-0.75029	0.94971	0.080957	-11.574	48.22563	69.571	0.046875	0.074219	-0.054688	-36.185	-19.9116	1221.5329	-1.4253	1.856	0.15576	-44.451	91.6496	238.8825	-0.079102	0.1748	0.029297	-68.171	36.678	1014.965	-1.0659	1.3423	0.26758	-72.71	-74.583	1038.04	-1.3055	1.8769	0.053711
1.95	-34.614	-10.861	67.515	-0.052326	0.082701	-0.037017	-13.117	-52.989	967.369	-0.82432	0.99816	0.11035	-36.946	42.1214	57.8908	0.041992	0.07373	-0.050293	-34.552	-28.4412	1224.188	-1.4101	1.8296	0.16232	-34.151	96.9932	223.9762	-0.068555	0.171	0.02959	-66.412	30.798	997.9432	-1.0483	1.3267	0.26563	-61.77	-62.635	1038.628	-1.3527	1.9755	0.046973
1.952	-14.237	-17.3209	92.071133	-0.067566	0.10067	-0.033498	-10.513	-64.154	967.444	-0.91797	1.0566	0.13281	-28.818	37.5453	65.355	0.038574	0.072754	-0.052734	-28.982	-16.97	1226.455	-1.3971	1.809	0.16425	-51.428	96.628	190.051	-0.062402	0.17021	0.031152	-47.769	36.9488	983.8304	-1.0117	1.2969	0.26709	-81.736	-58.634	1086.211	-1.3887	2.0703	0.033691
1.954	-12.434	-1.4511	131.7573	-0.086709	0.12255	-0.02998	-49.247	-87.685	966.873	-1.0227	1.1078	0.15791	-27.445	54.5735	69.4589	0.040283	0.069824	-0.052002	-56.654	-9.653	1212.09788	-1.3846	1.7982	0.16466	-61.639	94.0399	183.8166	-0.055762	0.16397	0.031152	-67.024	39.0156	963.887	-0.97924	1.2776	0.26416	-77.84	-42.90017	1117.1293	-1.4197	2.1521	0.017383
1.956	-18.07	-8.1104	166.359	-0.11133	0.13818	-0.030273	-37.248	-110.1021	967.499	-1.1222	1.1621	0.16611	2.258	52.3789	66.947	0.044434	0.064453	-0.052246	-76.532	-13.837	1211.0772	-1.3659	1.7825	0.17149	-37.661	97.8648	175.3882	-0.051465	0.15996	0.032519	-54.684	39.1356	961.4025	-0.95459	1.2524	0.2627	-110.48977	-38.131	1133.801	-1.4334	2.2191	0.003125
1.958	-15.613	1.0804	202.279	-0.13526	0.1626	-0.033396	-55.9772	-124.498	1004.1972	-1.2039	1.2227	0.16221	-17.704	45.6409	44.23638	0.055176	0.057129	-0.054199	-66.4413	-8.617	1205.568	-1.3472	1.7739	0.17383	-25.06	108.3554	185.1693	-0.049805	0.16162	0.029785	-62.209	44.9325	954.2861	-0.91797	1.2207	0.26416	-60.65	-34.857	1146.24481	-1.4315	2.2648	-0.0058593
1.96	-14.183	9.726	256.866	-0.16671	0.17804	-0.02002	-68.662	-120.795	1034.3578	-1.2593	1.2745	0.15313	-14.624	26.8024	35.8859	0.058105	0.054199	-0.055664	-46.265	17.828	1205.684	-1.3322	1.76	0.17256	-52.193	83.2706	175.3481	-0.041895	0.15869	0.03252	-30.904	60.825	962.65118	-0.89941	1.2031	0.26221	-67.202	-36.435	1185.649	-1.4208	2.2835	-0.012109
1.962	-17.869	31.4827	334.566	-0.20538	0.21124	-0.011031	-73.455	-113.201	1072.035	-1.2891	1.3262	0.14551	-25.667	22.5569	25.099	0.060059	0.043945	-0.058105	-74.6497	12.2191	1181.87682	-1.3089	1.7392	0.17246	-60.0058	76.4173	178.6367	-0.03711	0.1501	0.030078	-42.019	64.0569	954.0759	-0.87793	1.168	0.25928	-89.847	-26.017	1173.3662	-1.4023	2.2793	-0.01416
1.964	-20.249	48.7467	417.387	-0.26046	0.24981	-0.0037086	-22.909	-91.3728	1096.396	-1.2989	1.3717	0.13203	-31.81	24.3022	33.9259	0.064697	0.038086	-0.053711	-47.346	10.537	1172.8427	-1.2835	1.713	0.17792	-44.509	75.4713	182.3421	-0.031641	0.15127	0.026953	-38.131	63.237	938.8004	-0.86182	1.145	0.25806	-89.598	-39.5663	1167.0577	-1.3767	2.2546	-0.011816
1.966	-33.547	73.0881	498.953	-0.32813	0.29492	0.013672	-28.054	-81.3586	1108.442	-1.3133	1.4118	0.12676	-31.021	38.98	29.4245	0.063477	0.029785	-0.053223	-33.08	10.621	1151.838	-1.2553	1.6866	0.17998	-31.522	79.0598	172.9464	-0.026856	0.14688	0.024512	-56.069	63.581	905.9114	-0.84619	1.1274	0.25537	-69.532	-40.1336	1150.863	-1.3491	2.2126	-0.0040039
1.968	-21.345	102.642	563.973	-0.41669	0.34951	0.040526	-22.153	-75.00989	1123.8506	-1.3293	1.4481	0.12246	-23.761	45.5942	42.15758	0.064941	0.019531	-0.053223	-22.894	6.355	1149.56	-1.2305	1.6504	0.18555	-53.634	78.5004	153.1247	-0.023438	0.14355	0.022949	-50.762	80.946	895.2304	-0.82373	1.0942	0.25098	-56.368	-38.355	1150.338	-1.3206	2.159	0.0077148
1.97	-35.017	105.728	612.09644	-0.52021	0.4165	0.076655	-21.917	-90.7741	1128.44111	-1.3588	1.4768	0.12422	-20.277	53.2224	29.2377	0.058105	0.015625	-0.052246	-37.171	4.5128	1141.322	-1.2033	1.6174	0.19424	-46.869	74.951	111.1242	-0.016504	0.13887	0.025293	-49.045	79.224	880.2058	-0.80004	1.0696	0.24682	-56.826	-31.1	1160.007	-1.2924	2.0994	0.020215
1.972	-46.815	79.285	636.863	-0.64208	0.49775	0.13564	5.011	-72.3514	1122.0167	-1.3999	1.5063	0.12598	-34.716	36.7735	30.8296	0.062988	0.0048828	-0.056641	-30.543	10.217	1147.9332	-1.1761	1.5841	0.20723	-48.473	82.7444	92.22	-0.012891	0.13184	0.014648	-61.479	63.8373	865.616	-0.78125	1.0449	0.24072	-64.356	-21.3131	1187.83981	-1.2637	2.0352	0.036133
1.974	-44.828	55.734	657.3657	-0.7913	0.58173	0.179	-6.505	-54.4432	1129.7289	-1.4492	1.5262	0.12959	-24.711	30.9606	32.51142	0.060791	-0.0004883	-0.059326	-41.16	26.9274	1139.9881	-1.1495	1.5497	0.21426	-36.433	70.9383	102.339	-0.0085938	0.12441	0.013867	-47.132	73.25797	846.34127	-0.74756	1.0112	0.23926	-57.123	11.841	1204.33984	-1.2424	1.9822	0.047852
1.976	-6.937	49.651	662.4981	-0.95117	0.67578	0.22168	-0.0910000000000011	-47.2452	1143.8589	-1.5059	1.5461	0.13027	-24.639	35.7403	34.3915	0.061523	-0.0068359	-0.062012	-37.345	30.694	1125.9268	-1.1229	1.5175	0.22412	-29.433	49.566	119.8172	-0.0032226	0.1166	0.014746	-47.772	87.4234	823.457	-0.72998	0.99463	0.2373	-48.256	23.2175	1216.8175	-1.2178	1.9343	0.059473
1.978	-27.705	3.4879	649.9964	-1.1118	0.77764	0.24776	-8.66399999999999	-63.208	1161.9886	-1.5527	1.568	0.12715	-17.252	40.4854	27.971	0.066406	-0.010254	-0.064941	-30.088	13.2748	1112.9811	-1.0981	1.4888	0.23242	-21.97	62.3946	129.7842	0.0024414	0.10791	0.018066	-30.659	85.1656	810.4363	-0.69678	0.95947	0.23145	-68.586	10.3239	1222.128	-1.1994	1.8949	0.069238
1.98	-48.9	-43.582	635.5198	-1.257	0.89668	0.26612	-8.9	-46.741	1147.768	-1.5935	1.5865	0.1208	-23.148	40.995	16.4456	0.064453	-0.013184	-0.066406	-28.426	20.53	1076.96824	-1.0733	1.4636	0.24082	-59.704	77.8756	128.401	0.0048828	0.099315	0.017481	-19.911	96.8236	810.1666	-0.67578	0.9336	0.22656	-64.847	8.215	1205.954	-1.186	1.8608	0.075488
1.982	-47.002	-72.518	625.2414	-1.3684	1.0088	0.27041	-33.8724	-48.741	1149.762	-1.6226	1.604	0.11279	-7.468	33.4277	10.636	0.066406	-0.018066	-0.071289	-61.086	41.924	1047.9638	-1.052	1.4395	0.24834	-43.209	68.8824	109.6587	0.0047852	0.095215	0.018457	-19.478	101.49	795.6895	-0.65039	0.90234	0.21777	-75.08	35.9719	1190.7188	-1.1733	1.8403	0.080078
1.984	-40.509	-90.986	598.806	-1.4449	1.1148	0.26357	-22.841	-46.486	1147.7087	-1.6254	1.6175	0.10059	-22.219	29.851	4.762	0.066406	-0.018311	-0.07544	-61.903	42.201	1003.841	-1.0285	1.4176	0.24951	-40.306	59.268	116.460608	0.0086914	0.087012	0.021973	-36.032	111.839	769.1301	-0.62256	0.86572	0.20898	-85.027	46.805	1167.369	-1.1613	1.8211	0.085059
1.986	-42.832	-82.165	602.027	-1.4844	1.207	0.24561	-14.367	-59.6027	1170.1747	-1.6241	1.6161	0.089551	-30.865	26.0791	18.732	0.063477	-0.022949	-0.081543	-41.808	33.369	1005.502	-1.0072	1.3963	0.254	-32.052	69.946	84.3785	0.0079102	0.083691	0.02666	-31.249	96.016	741.4863	-0.60742	0.84766	0.20752	-81.389	15.9743	1172.942	-1.15	1.8054	0.084863
1.988	-34.621	-60.1143	616.7093	-1.4762	1.2731	0.2125	-40.433	-61.1458	1140.399	-1.6148	1.6099	0.077832	-36.031	13.803	46.29	0.0625	-0.025879	-0.092773	-34.059	44.636	1000.59	-0.98828	1.373	0.2583	-69.4731	69.038	59.5093	0.013184	0.07666	0.029785	-26.308	115.7578	735.645	-0.57617	0.80859	0.19287	-37.227	8.2642	1170.455	-1.1332	1.7926	0.083691
1.99	-29.76	-25.339	630.67	-1.4254	1.3098	0.18008	-44.381	-80.876	1149.572	-1.5987	1.6001	0.076563	-31.381	12.9187	49.5402	0.061523	-0.031738	-0.09082	-38.85	46.3438	1011.1101	-0.9624	1.3442	0.25644	-44.188	49.773	46.719	0.015723	0.071289	0.033594	-29.956	112.1565	724.413	-0.54712	0.78271	0.18896	-60.733	9.073	1170.195	-1.1214	1.7805	0.084277
1.992	-62.7971	-11.431	645.702	-1.3461	1.3015	0.15235	-13.607	-64.032	1163.383	-1.5874	1.5825	0.072754	-28.663	9.6213	41.6514	0.058105	-0.029297	-0.095703	-35.087	55.399	992.4824	-0.93935	1.3161	0.26299	-56.338	38.8483	64.779	0.021972	0.065626	0.035547	-43.051	110.891	707.7404	-0.52295	0.75146	0.18408	-51.361	17.426	1172.0688	-1.105	1.7642	0.083496
1.994	-51.887	-12.51	660.865	-1.2328	1.2549	0.13975	-4.518	-47.8535	1219.1137	-1.5805	1.5602	0.069629	-30.606	-0.906999999999998	21.2285	0.046387	-0.021484	-0.1001	-38.834	73.833	994.91931	-0.91201	1.2778	0.25557	-55.639	37.558	76.128	0.028223	0.060547	0.039063	-42.914	107.9682	686.3473	-0.49121	0.71533	0.17627	-46.008	27.423	1176.996	-1.0879	1.7461	0.086231
1.996	-30.846	2.56	688.2575	-1.104	1.1782	0.13037	-18.082	-29.2038	1241.396	-1.5808	1.5415	0.066015	-23.07	6.3765	36.7367	0.041504	-0.019043	-0.1084	-49.49	86.867	976.0514	-0.88067	1.2457	0.25439	-53.658	36.563	76.42947	0.031738	0.050586	0.041992	-38.697	116.3602	681.0822	-0.47217	0.6958	0.16602	-44.012	45.0501	1172.104	-1.072	1.7279	0.086914
1.998	-14.886	-9.222	697.943	-0.9926	1.0652	0.1375	-22.876	-24.491	1248.578	-1.5905	1.5271	0.063281	-21.381	9.4375	35.586	0.025391	-0.00097656	-0.11621	-71.6898	57.731	942.443	-0.85107	1.2036	0.25342	-33.865	46.334	78.212	0.043457	0.040039	0.041992	-18.395	107.8683	666.7354	-0.44385	0.6626	0.16016	-63.162	44.9347	1159.402	-1.056	1.7095	0.092773
2	-21.928	-56.704	733.093	-0.90069	0.95049	0.14912	6.738	-7.573	1231.386	-1.5992	1.5196	0.062891	-19.138	-9.645	41.582	0.011963	0.010498	-0.12012	-60.554	56.68	906.1829	-0.82236	1.1616	0.25185	-32.772	65.00543	77.8286	0.047754	0.034179	0.044336	-21.838	108.9391	644.4781	-0.42407	0.63794	0.15283	-49.219	36.062	1129.2826	-1.0392	1.6882	0.10039
2.002	-25.485	-89.658	740.567	-0.84092	0.85088	0.16513	-5.53	5.22	1226.3543	-1.6094	1.5176	0.05957	-38.038	-25.679	65.7356	-0.0019531	0.024902	-0.12793	-44.6	56.21131	887.86	-0.78741	1.1192	0.24843	-45.221	58.29	66.0866	0.057032	0.024901	0.049318	-11.135	117.0501	623.166	-0.40479	0.61182	0.14844	-51.277	41.907	1117.0612	-1.0215	1.666	0.10693
2.004	-15.184	-115.937	786.1393	-0.81738	0.77187	0.17676	-1.643	3.52501	1228.1908	-1.6245	1.5184	0.052441	-23.96	-35.974	93.8089	-0.027344	0.051758	-0.12939	-50.503	61.54	864.226	-0.75849	1.0755	0.24336	-52.763	45.61	55.98014	0.059375	0.01748	0.056348	-15.819	126.26549	601.75	-0.38232	0.58447	0.14111	-39.628	54.933	1109.449	-1.0074	1.6488	0.11289
2.006	1.73	-140.6077	794.1626	-0.81982	0.71631	0.18018	1.164	-9.3365	1231.747	-1.6378	1.5243	0.046875	-14.854	-28.3178	124.4389	-0.043945	0.069336	-0.13379	-38.07	61.974	860.349	-0.72959	1.0358	0.23984	-46.847	51.369	33.2739	0.064845	0.0011715	0.060548	-20.339	125.2761	599.499	-0.36816	0.57031	0.13916	-64.497	48.998	1106.58	-0.9874	1.6322	0.11514
2.008	-4.237	-196.301	833.3018	-0.83271	0.68565	0.17725	-2.82	-16.8071	1231.094	-1.6503	1.5259	0.047265	-9.683	-14.4689	158.0612	-0.080566	0.11182	-0.13281	-41.038	85.27	859.0076	-0.70654	0.99756	0.23926	-35.787	56.191	31.8472	0.072266	-0.0078125	0.070801	-31.215	121.6226	570.676	-0.35205	0.54199	0.12549	-74.593	49.492	1085.67363	-0.96748	1.6154	0.12256
2.01	10.267	-211.211	830.797	-0.84131	0.67041	0.15898	-38.6529	-7.363	1237.467	-1.6625	1.5329	0.041016	-18.692	2.3278	213.167	-0.125	0.15454	-0.12549	-30.76	101.8917	863.9377	-0.68252	0.95654	0.23477	-55.001	40.3863	25.359	0.069531	-0.016113	0.072851	-20.516	128.4426	568.5986	-0.34058	0.52368	0.11694	-65.427	63.1866	1060.083	-0.94473	1.5967	0.12598
2.012	-9.763	-205.346	844.916	-0.83975	0.67041	0.13633	-50.7542	5.992	1258.0643	-1.6694	1.5347	0.036621	-21.129	24.4656	270.463	-0.18213	0.21338	-0.1167	-37.197	105.731	859.0152	-0.66631	0.92783	0.23574	-35.709	30.3047	36.589	0.072461	-0.025388	0.081542	-36.053	130.199	550.2167	-0.32373	0.50977	0.11035	-57.936	74.54351	1034.7772	-0.91846	1.5786	0.12842
2.014	-39.211	-175.007	863.227	-0.82442	0.67383	0.1081	-27.629	29.341	1278.402	-1.6724	1.537	0.036231	-23.434	32.8594	338.391	-0.2793	0.31348	-0.082031	-20.611	102.418	850.775	-0.65576	0.89697	0.22871	-42.668	37.6305	42.004	0.0709	-0.035154	0.089743	-43.567	121.578	549.066	-0.30664	0.48828	0.10596	-60.36	65.5894	1041.0025	-0.89805	1.5594	0.13203
2.016	-18.466	-143.92	898.7766	-0.79785	0.68262	0.078613	-54.738	55.429	1287.425	-1.6695	1.5316	0.039258	-46.258	46.9543	409.539	-0.34473	0.37061	-0.063965	-52.459	126.315	830.871	-0.64385	0.87217	0.22979	-44.362	43.2495	44.2829	0.076562	-0.039353	0.09502	-26.606	126.757	522.8208	-0.29883	0.47754	0.098633	-52.189	63.1781	1031.5569	-0.87549	1.5322	0.13603
2.018	-7.05	-116.08893	951.4413	-0.76514	0.68955	0.056836	-59.4699	60.961	1271.571	-1.6649	1.5246	0.042774	-30.537	72.4586	484.0533	-0.48145	0.51074	-0.021973	-50.501	120.863	797.117	-0.63574	0.85254	0.22803	-46.181	49.5023	63.049	0.075684	-0.046875	0.1001	-27.136	130.551	508.41866	-0.27686	0.45752	0.09375	-63.196	84.4771	1011.3518	-0.85322	1.5044	0.13682
2.02	-0.314	-89.3366	988.586	-0.75303	0.70479	0.04834	-40.278	41.6841	1257.6406	-1.655	1.5138	0.044141	-20.136	95.162	525.0711	-0.59863	0.64649	0.018555	-64.2348	118.563	764.594	-0.62226	0.83203	0.22275	12.012	45.0989	49.993	0.079886	-0.049905	0.10303	-19.341	123.4709	475.5135	-0.26514	0.44214	0.09375	-62.021	73.2433	986.843	-0.83487	1.4831	0.14014
2.022	-37.3937	-71.421	1030.806	-0.76865	0.729	0.052637	-11.739	25.2663	1235.582	-1.644	1.4956	0.039551	-30.525	84.835	567.1041	-0.72852	0.78418	0.054688	-23.531	108.3435	749.384	-0.60869	0.8169	0.22237	-33.132	53.277	34.1796	0.083103	-0.05049	0.10264	-21.7	107.4138	466.1586	-0.25586	0.42969	0.091309	-62.185	57.70895	971.442	-0.81543	1.4531	0.14355
2.024	0.963000000000001	-60.833	1064.184	-0.825	0.7668	0.062304	-39.723	17.238	1212.94	-1.6226	1.4762	0.039649	-42.553	83.028	582.663	-0.92139	0.99072	0.088379	-42.901	105.8	729.407	-0.59228	0.79814	0.22041	-41.01	49.932	2.3094	0.08624	-0.051661	0.10654	-8.334	111.254	442.617	-0.23975	0.4043	0.083984	-48.906	49.4133	980.269	-0.79658	1.422	0.14795
2.026	-6.322	-61.776	1071.075	-0.92041	0.81299	0.078125	-9.033	7.857	1179.539	-1.6	1.4481	0.038672	-26.936	62.163	624.5795	-1.0171	1.0942	0.092285	-20.711	100.766	717.3005	-0.57187	0.78437	0.217	-55.506	38.21	4.939	0.091309	-0.050778	0.10781	-27.103	106.024	428.003	-0.22998	0.39209	0.073242	-84.094	68.553	967.6024	-0.78018	1.3935	0.15313
2.028	5.244	-93.083	1044.4284	-1.0213	0.87363	0.1002	-17.306	6.747	1175.727	-1.5781	1.4184	0.038281	-47.571	38.3333	644.825	-1.1816	1.3125	0.094727	-33.585	122.67	694.8283	-0.5498	0.77246	0.21387	-31.952	42.2589	28.246	0.09668	-0.049316	0.10938	-14.141	97.868	412.5978	-0.2085	0.37158	0.068359	-52.197	78.093	940.796	-0.76416	1.3603	0.16054
2.03	-5.553	-126.196	1021.139	-1.1327	0.93721	0.11406	-14.878	19.93	1166.157	-1.5541	1.3869	0.03877	-35.392	-10.3636	673.256	-1.2674	1.4651	0.078369	-14.351	134.4545	690.7929	-0.53096	0.75391	0.2082	-47.497	24.014	54.272	0.099102	-0.046399	0.11142	-29.06	112.4347	404.2718	-0.19067	0.35058	0.059326	-48.665	92.077	927.5891	-0.74434	1.3287	0.16729
2.032	-13.184	-150.422	1023.193	-1.232	0.99579	0.12539	-24.215	31.4735	1192.051	-1.5278	1.3599	0.042969	-25.066	-38.008	641.347	-1.3262	1.5996	0.05127	-16.748	135.8414	691.4945	-0.51377	0.73994	0.20693	-39.113	0.9726	47.0425	0.099763	-0.041219	0.11639	-26.111	116.2073	390.3153	-0.16699	0.3252	0.051758	-40.675	96.6255	925.9386	-0.72607	1.2876	0.16602
2.034	-41.008	-160.112	1045.574	-1.3058	1.0505	0.1207	-14.259	37.667	1190.512	-1.5108	1.3331	0.047363	-30.589	-54.005	626.00051	-1.3477	1.7402	-0.0073242	-32.222	125.382	675.2845	-0.49971	0.72432	0.20615	-42.747	8.491	65.3726	0.10296	-0.03694	0.11875	-22.912	100.744	380.3351	-0.1416	0.30029	0.046387	-57.944	100.6547	907.7522	-0.70821	1.2566	0.17656
2.036	-47.727	-160.64	1083.7275	-1.3574	1.1094	0.11768	-26.1	52.531	1190.637	-1.4933	1.3102	0.053613	-40	-60.665	607.081	-1.3359	1.7891	-0.037109	-36.575	127.494	660.919	-0.48691	0.70801	0.2002	-33.786	44.731	45.7124	0.099135	-0.027882	0.12333	-15.796	102	368.6463	-0.12744	0.28613	0.043945	-31.58	86.317	884.87429	-0.69082	1.2256	0.18184
2.038	-32.446	-165.299	1119.449	-1.3774	1.17	0.11338	-28.218	52.103	1153.4411	-1.4773	1.2918	0.054785	-36.179	-61.5536	618.059	-1.248	1.8223	-0.087891	-39.727	146.727	641.4994	-0.47461	0.68896	0.19727	-29.266	44.106	58.704	0.094727	-0.016602	0.12598	-30.028	122.0234	351.9675	-0.09375	0.25586	0.034668	-39.167	103.463	849.715	-0.67403	1.1861	0.17989
2.04	-7.471	-138.376	1132.871	-1.3914	1.2238	0.11172	-55.7512	34.4816	1109.394	-1.4663	1.2747	0.059277	-42.721	-56.2718	623.4935	-1.1502	1.7883	-0.11181	-49.026	137.013	637.605	-0.45967	0.67061	0.18877	-22.766	25.5668	42.6521	0.080472	-0.0029189	0.13123	-24.905	123.083	332.6341	-0.066162	0.22608	0.020752	-37.172	107.5359	830.216	-0.65713	1.1488	0.18311
2.042	-12.7703	-121.2143	1135.53	-1.4027	1.2766	0.099609	-49.535	25.643	1054.574	-1.4502	1.2637	0.0625	-41.433	-50.128	635.165	-1.0293	1.7031	-0.12891	-53.181	119.3734	614.2752	-0.44756	0.65049	0.18711	-37.75	10.9253	41.7803	0.06605	0.01342	0.12994	-5.132	101.0464	302.1633	-0.047363	0.2041	0.012695	-37.476	92.2762	817.9013	-0.63623	1.1157	0.18311
2.044	-8.611	-103.151	1134.182	-1.4266	1.3292	0.087305	-40.767	42.6931	1020.452	-1.4352	1.2519	0.062305	-46.368	-40.379	645.7068	-0.8418	1.5176	-0.13623	-37.019	115.4133	587.3463	-0.4292	0.63173	0.18125	-34.05	1.323642	61.098	0.048704	0.035024	0.13043	-25.304	88.6942	280.109	-0.023438	0.17969	0.0058594	-45.76	96.8288	796.45654	-0.61924	1.0765	0.17617
2.046	9.432	-91.061	1134.607	-1.4546	1.3833	0.077148	-48.32	52.014	1017.505	-1.4163	1.2413	0.066016	-30.922	-24.336	655.9037	-0.75537	1.4028	-0.12842	-28.335	124.3593	554.6152	-0.41133	0.61113	0.17705	-54.156	-1.033	89.122	0.029964	0.055485	0.13465	-6.136	97.8869	252.6859	-0.01123	0.17383	0.0039063	-50.599	121.044	804.931	-0.5958	1.0364	0.17471
2.048	5.706	-90.059	1116.62099	-1.4934	1.4371	0.068945	-43.804	39.731	1024.6458	-1.3901	1.2253	0.070703	-35.937	-2.342	652.206	-0.60938	1.1689	-0.11523	-14.708	97.643	540.0765	-0.39844	0.5957	0.16992	-44.903	15.26	123.894	0.012695	0.077148	0.13574	-24.96	95.86401	245.5009	0.0019531	0.15039	-0.0014648	-45.482	121.542	783.8435	-0.5708	1.0021	0.17353
2.05	22.585	-109.044	1104.865	-1.5328	1.4918	0.058105	-22.886	54.804	1048.7731	-1.3654	1.2092	0.078515	-15.932	-6.32400000000001	665.8497	-0.5354	1.0081	-0.10449	-3.933	111.1201	550.8047	-0.37763	0.56963	0.16504	-38.837	38.92	136.7621	-0.0017606	0.099864	0.135	-8.063	95.4022	224.9766	0.005127	0.13964	-0.0043946	-39.666	106.842	781.7963	-0.54531	0.96075	0.17275
2.052	18.0502	-132.4439	1119.554	-1.566	1.5445	0.043262	-27.779	70.563	1050.365	-1.3438	1.1875	0.08252	-10.368	-47.942	685.5361	-0.48145	0.87158	-0.095215	-9.624	126.9882	540.5453	-0.35928	0.5497	0.15771	-55.259	44.7713	151.7048	-0.013958	0.11666	0.13422	-27.887	84.2252	248.03782	0.0058594	0.12549	-0.0092773	-41.153	120.916	756.2005	-0.52344	0.92188	0.16895
2.054	42.6933	-111.936	1129.869	-1.5924	1.5872	0.026758	-23.765	82.406	1027.044	-1.3083	1.1632	0.091504	-18.039	-76.335	702.0783	-0.43701	0.74268	-0.09668	-20.466	129.07642	520.8494	-0.3417	0.5251	0.15654	-59.818	58.617	183.6379	-0.030436	0.14321	0.13344	-16.721	82.0962	231.502	0.0063477	0.11914	-0.0078125	-32.06	134.8932	719.3223	-0.50293	0.88457	0.16016
2.056	-4.324	-91.5951	1145.5175	-1.6094	1.623	0.01709	-31.911	89.743	991.5133	-1.2817	1.1383	0.094824	-1.718	-115.21651	707.4763	-0.42578	0.69727	-0.097656	-10.862	122.6893	499.662	-0.32217	0.50186	0.15176	-34.482	72.806	253.1944	-0.050049	0.16836	0.1333	-35.589	86.5759	226.358	0.0053711	0.11621	-0.0097656	-42.466	129.4998	668.6	-0.48291	0.84902	0.15791
2.058	-3.037	-65.3008	1159.951	-1.6142	1.6483	0.0001953	-49.641	90.922	974.5136	-1.2523	1.1105	0.09834	-14.458	-142.93315	723.7081	-0.40771	0.64111	-0.11475	-24.323	137.3394	483.026	-0.3042	0.48486	0.14795	-35.832	102.011	305.2717	-0.071777	0.19385	0.12891	-24.871	95.175	207.4214	0.003418	0.11426	-0.0043945	-20.948	125.358	656.431	-0.46181	0.81387	0.15869
2.06	-9.78	-51.641	1174.759	-1.6135	1.6681	-0.014551	-77.961	80.29	934.638	-1.2279	1.0796	0.10293	-8.661	-160.3984	766.1116	-0.38989	0.62426	-0.13599	-33.809	140.893	471.389	-0.29043	0.46201	0.14228	-59.993	107.954	377.50679	-0.11059	0.22722	0.13433	-36.358	101.637	195.1125	-0.00048826	0.10889	-0.0070801	-23.581	129.241	655.952	-0.44727	0.78262	0.15762
2.062	1.62	-49.795	1177.0309	-1.6058	1.6743	-0.018067	-68.554	66.251	921.863	-1.2021	1.0508	0.099609	-5.585	-150.705	782.6154	-0.37988	0.62305	-0.1582	-27.508	132.176	461.411	-0.27383	0.44336	0.13447	-50.044	104.376	458.0203	-0.17142	0.2702	0.14687	-24.853	93.969	164.351	-0.0024414	0.10889	-0.0068359	-20.578	126.1013	651.8553	-0.43262	0.75098	0.15771
2.064	-24.302	-62.5945	1193.099	-1.6019	1.6711	-0.023438	-33.803	66.2879	904.482	-1.1708	1.0182	0.10517	3.027	-165.924	808.718	-0.37256	0.64111	-0.18311	-31.05	136.002	443.6486	-0.26133	0.42344	0.13252	-24.272	92.0117	545.559	-0.26394	0.32519	0.15563	-16.724	72.0923	162.6797	-0.0073242	0.11133	-0.0063477	-41.214	144.0473	648.656	-0.41689	0.71982	0.15449
2.066	-7.67	-68.2175	1205.824	-1.605	1.6665	-0.023438	-46.364	70.503	912.087	-1.1426	0.98672	0.10244	-14.731	-169.248	828.3979	-0.37256	0.65771	-0.19336	-11.006	131.197	433.7883	-0.24716	0.4081	0.12666	-42.841	86.655	618.545	-0.37775	0.39825	0.17495	-23.006	79.3629	140.792	-0.010254	0.10449	0.00048828	-15.278	156.1832	632.0508	-0.40049	0.69111	0.1541
2.068	21.99192	-69.1259	1231.39	-1.6114	1.6591	-0.024024	-32.361	81.563	909.282	-1.1129	0.95625	0.098145	-1.007	-160.329	854.34672	-0.39502	0.7251	-0.20752	-5.175	101.0529	424.2275	-0.23145	0.38379	0.11914	-56.729	54.8724	668.138	-0.51123	0.479	0.19678	-26.645	66.6823	163.3238	-0.015625	0.10791	-0.00048828	-26.773	161.067	616.2912	-0.38057	0.66142	0.14863
2.07	30.486	-54.9998	1220.497	-1.623	1.6544	-0.022363	-44.23	98.209683	888.216	-1.0788	0.92217	0.093457	-15.898	-128.16647	876.1327	-0.43774	0.80054	-0.20068	-9.205	87.304	405.6584	-0.21817	0.36709	0.11016	-68.992	39.553	716.757	-0.65468	0.56921	0.22307	-11.868	51.3917	159.7484	-0.020264	0.10816	0.00024412	-41.278	136.7	594.98	-0.36631	0.62979	0.14844
2.072	7.276	-61.1995	1219.882	-1.6386	1.6497	-0.023145	-27.32	124.153	863.298	-1.041	0.88281	0.089844	-5.116	-99.938	894.197	-0.49805	0.88281	-0.19336	-15.305	98.874	379.521	-0.2002	0.34765	0.10098	-64.814	19.867	745.405	-0.79886	0.66987	0.24873	-23.749	55.4629	153.01307	-0.024414	0.1084	0	-53.412	128.971	565.3224	-0.35205	0.59424	0.14648
2.074	22.757	-43.1037	1224.96095	-1.6552	1.6421	-0.022656	-36.618	117.412	847.8944	-1.0114	0.84902	0.088379	-15.978	-90.929	915.78904	-0.61084	1.0034	-0.18701	-2.45	115.07	342.075	-0.18027	0.32422	0.091601	-74.027	-15.325	757.781	-0.9434	0.78879	0.27452	-19.595	71.643	126.146	-0.032227	0.11084	0.0073242	-31.766	144.363	527.501	-0.32988	0.56133	0.14014
2.076	19.437	-13.404	1222.632	-1.6655	1.6372	-0.027344	-22.37	95.306	821.93358	-0.98233	0.8169	0.083691	8.962	-85.643	923.9023	-0.67871	1.0605	-0.18262	-15.615	110.9146	336.17	-0.1582	0.30293	0.080664	-66.46	-67.429	717.501	-1.09	0.90526	0.29892	-19.142	63.3651	114.44	-0.035645	0.10986	0.0053711	-37.636	140.1813	517.428	-0.31113	0.525	0.13838
2.078	14.141	7.5661	1232.39	-1.6715	1.6262	-0.02959	-46.524	98.592	797.801	-0.94951	0.78721	0.087207	-20.105	-107.561	944.585	-0.8042	1.1782	-0.17041	-24.387	108.8676	319.646	-0.1377	0.28418	0.073242	-46.283	-99.568	701.0018	-1.2261	1.022	0.3125	-22.92	54.758	116.8122	-0.047852	0.10986	0.0063477	-15.141	118.3918	516.98	-0.29356	0.49258	0.13057
2.08	2.488	0.5972	1230.219	-1.6686	1.6126	-0.033887	-50.482	122.644	792.019	-0.92354	0.76045	0.08916	-9.889	-113.309	962.8242	-0.88721	1.2607	-0.17261	-29.856	109.647	331.3916	-0.11123	0.25606	0.063281	-33.09	-104.123	683.7706	-1.3405	1.1286	0.3171	-33.397	64.819	108.78649	-0.052979	0.11011	0.0092773	-41.052	129.7584	509.45108	-0.27442	0.4623	0.12656
2.082	25.117	-8.1704	1226.305	-1.6605	1.5958	-0.038183	-80.2053	124.3258	771.384	-0.90381	0.73584	0.092773	-4.15	-130.935	995.5355	-0.96143	1.3384	-0.17432	-29.681	110.684	313.0162	-0.089355	0.22939	0.057617	-22.6851	-90.044	695.305	-1.426	1.2173	0.29833	-16.349	72.65	93.69799	-0.061035	0.10645	0.0087891	-21.476	151.8523	492.4816	-0.25879	0.43213	0.12354
2.084	12.2152	-26.794	1200.917	-1.6389	1.5721	-0.039844	-51.931	114.5293	772.1612	-0.88301	0.70332	0.093653	-2.918	-126.3331	997.0057	-1.0303	1.4297	-0.18018	-28.2141	105.475	316.5442	-0.067871	0.20713	0.047851	4.721	-48.404	718.4141	-1.4718	1.2864	0.2647	-18.811	61.927	83.1793	-0.074219	0.10693	0.012695	-28.633	157.2464	476.3529	-0.24873	0.40664	0.12129
2.086	-9.495	-34.655	1192.159	-1.6089	1.5435	-0.04248	-50.237	118.7622	765.112	-0.86396	0.68408	0.091015	-22.425	-144.1874	992.2931	-1.0581	1.4712	-0.18408	-12.303	108.554	311.4516	-0.054101	0.18457	0.043555	7.542	-17.711	720.7525	-1.4508	1.3204	0.22775	-30.373	63.9596	89.1055	-0.073242	0.10742	0.013184	-2.154	147.0929	465.8842	-0.23877	0.38838	0.11562
2.088	3.634	-30.8779	1184.411	-1.5857	1.5116	-0.044922	-47.928	135.6795	740.964	-0.84326	0.66103	0.094923	-32.532	-152.4094	1001.156	-1.0991	1.5454	-0.2041	-41.082	111.1602	288.8052	-0.036621	0.15967	0.038574	-17.863	-15.8404	714.8724	-1.3804	1.3267	0.19092	-17.622	69.9747	95.8181	-0.081055	0.11133	0.018066	-24.07	142.563	462.655	-0.23291	0.37002	0.11172
2.09	-10.982	-14.799	1195.8564	-1.5581	1.4829	-0.039746	-41.341	143.728	710.607	-0.82383	0.64433	0.099807	-6.493	-166.143	1031.8073	-1.1218	1.5949	-0.2102	-35.548	103.3149	248.8664	-0.025195	0.13428	0.031543	-2.522	-7.51	731.822	-1.2609	1.3015	0.17585	-12.314	48.1364	86.8498	-0.084961	0.11328	0.010254	-33.868	134.591	431.4948	-0.22647	0.3539	0.10313
2.092	-41.482	4.812	1182.614	-1.5358	1.4536	-0.040527	-25.816	145.864	676.915	-0.80029	0.6333	0.098633	-0.683	-156.616	1051.1711	-1.1426	1.6445	-0.22412	-26.084	89.5416	213.138	-0.014648	0.11865	0.028808	8.186	10.044	749.675	-1.1154	1.2465	0.1598	-7.492	54.3897	64.0367	-0.092285	0.11182	0.01416	-41.95	125.381	394.96	-0.21631	0.34521	0.097168
2.094	-33.3373	1.584	1196.472	-1.5214	1.4296	-0.035254	-48.826	150.7921	655.849	-0.77784	0.6167	0.098438	-13.184	-156.0555	1064.0465	-1.168	1.6934	-0.23828	-16.14	93.975	202.586	-0.0091796	0.090137	0.022559	-6.56	13.811	761.3879	-0.96594	1.1626	0.17114	-24.966	59.0392	57.8007	-0.098145	0.1123	0.015625	-32.329	130.0355	375.483	-0.20029	0.32852	0.095801
2.096	8.743	0.667	1185.9473	-1.5078	1.4023	-0.030762	-58.033	132.6531	644.723	-0.75323	0.60342	0.095605	-2.437	-140.22	1069.72	-1.1846	1.7207	-0.24756	-25.736	75.9638	202.558	0.00097656	0.070801	0.01709	-76.4595	-10.993	739.8521	-0.83614	1.0674	0.1757	-3.825	50.7195	48.0333	-0.10596	0.11621	0.017334	-17.768	132.081	384.159	-0.18476	0.31866	0.092187
2.098	10.68	10.0322	1178.677	-1.4948	1.3817	-0.025879	-61.213	132.2	643.199	-0.72862	0.58623	0.096778	7.795	-115.66564	1071.5054	-1.209	1.7617	-0.26514	-15.148	66.48348	196.502	0.0068359	0.049805	0.010254	-76.945	-52.452	729.712	-0.73389	0.97412	0.18652	-29.282	38.012	51.1261	-0.11523	0.11865	0.016602	-34.086	123.3625	364.2632	-0.16563	0.3085	0.093359
2.1	-13.875	3.454	1145.49	-1.4859	1.3649	-0.020215	-65.456	143.1549	631.441	-0.70548	0.56993	0.094825	10.412	-93.9721	1084.782	-1.2268	1.7825	-0.27515	-31.16	91.6262	184.4146	0.014844	0.029004	0.0072265	-76.218	-94.0648	719.866	-0.66606	0.90025	0.19911	-12.275	42.9	50.8914	-0.11865	0.11816	0.014648	-30.899	127.436654	350.719	-0.14658	0.29961	0.090625
2.102	4.454	-22.1347	1111.819	-1.4774	1.3437	-0.015918	-76.62	143.2163	613.0123	-0.67627	0.55518	0.092773	-0.529	-95.4189	1089.9034	-1.2402	1.8008	-0.28711	-38.163	108.322	181.586	0.021777	0.017285	0.0047852	-39.499	-123.404	752.768	-0.62385	0.84301	0.21054	-23.674	45.641	38.0203	-0.12158	0.11963	0.0087891	-25.256	142.7873	325.4491	-0.12402	0.28613	0.089355
2.104	-1.289	-10.7578	1077.728	-1.4617	1.3234	-0.013574	-59.763	137.792	605.329	-0.64901	0.53299	0.094337	26.16	-95.3154	1121.1102	-1.248	1.8184	-0.2998	-17.393	85.002	200.8911	0.028027	-0.0018554	0.0020508	-77.094	-139.753	804.7344	-0.60938	0.81213	0.21367	-39.507	51.8141	50.05252	-0.11816	0.11182	0.003418	9.854	136.2255	319.1721	-0.10459	0.27539	0.092285
2.106	-3.583	-5.3755	1066.888	-1.4487	1.3052	-0.012207	-58.477	155.6	587.325	-0.61834	0.51053	0.090434	11.296	-77.6122	1116.929	-1.25	1.8262	-0.30322	-31.176	83.716	192.8478	0.033105	-0.017481	0.0018555	-36.87	-130.615	819.8964	-0.60391	0.80898	0.21689	-38.616	36.34798	66.2941	-0.11231	0.10864	-0.0058594	-15	120.0078	306.8301	-0.087402	0.26045	0.092676
2.108	-1.59	-2.2186	1082.5996	-1.4298	1.2812	-0.0051758	-55.416	162.363	572.257	-0.5902	0.491	0.093165	14.2883	-86.1102	1133.565	-1.2529	1.8262	-0.31055	-25.764	101.429	164.235	0.035156	-0.032227	0.00097656	-66.175	-130.271	845.59782	-0.60107	0.82666	0.21582	-24.53	42.7497	59.2945	-0.099121	0.10059	-0.012695	-11.738	111.8189	287.572	-0.068653	0.25186	0.081738
2.11	22.543	15.6583	1097.422	-1.4125	1.2601	0.0047852	-38.146	140.008	556.8173	-0.56307	0.46716	0.094235	11.362	-95.4255	1139.784	-1.2529	1.8164	-0.31641	-15.296	102.288	139.022	0.033984	-0.043945	-0.003125	-61.988	-129.159	868.5785	-0.61172	0.86485	0.20693	-17.521	50.6862	44.74756	-0.081055	0.084473	-0.029297	-28.128	119.0322	257.189	-0.060644	0.24316	0.074512
2.112	-4.315	34.0398	1096.2985	-1.3918	1.2433	0.0071289	-46.657	110.6999	527.7239	-0.53516	0.44482	0.10107	17.821	-85.4762	1155.7455	-1.252	1.8145	-0.31641	-10.564	93.415	124.519	0.033008	-0.055469	-0.0011719	-79.663	-140.402	918.394	-0.62911	0.91916	0.19179	-20.739	48.935	28.035	-0.069336	0.075684	-0.033691	-15.261	111.8093	250.358	-0.04541	0.2334	0.071777
2.114	-8.435	41.982	1063.3704	-1.3795	1.226	0.01748	-50.174	115.799	495.795	-0.51156	0.42034	0.096598	-10.307	-63.8631	1157.8113	-1.2607	1.8047	-0.31348	-35.038	72.192	129.721	0.02832	-0.060156	0.0019531	-44.896	-117.2272	924.96	-0.6502	0.98165	0.17617	-17.655	40.1848	24.9868	-0.044922	0.054199	-0.049316	-36.841	96.92	257.9	-0.037012	0.22197	0.068262
2.116	-23.352	39.779	1038.7843	-1.3672	1.209	0.020996	-64.544	129.749	468.599	-0.48972	0.40063	0.09694	0.199999999999999	-66.4568	1156.3303	-1.2654	1.7933	-0.31567	2.579	66.5372	110.2861	0.020605	-0.068457	0.00097656	-89.099	-93.6808	913.1419	-0.67715	1.0529	0.16738	-12.023	41.3968	24.7635	-0.02832	0.039795	-0.058838	-23.857	106.4506	251.8918	-0.026855	0.2125	0.065723
2.118	-8.051	47.634	998.7556	-1.3504	1.1934	0.027637	-58.544	141.96	457.785	-0.47019	0.38348	0.10631	-23.9533	-61.9445	1165.0243	-1.2715	1.7832	-0.31836	-33.037	61.0265	109.3427	0.011719	-0.069336	0.0053711	-91.325	-77.686	899.605	-0.71387	1.125	0.15625	-22.646	28.38236	28.2955	-0.010254	0.024414	-0.067871	-34.847	116.92	223.772	-0.019824	0.20195	0.06377
2.12	-22.873	46.96979	965.806	-1.3389	1.1844	0.031347	-36.763	135.5448	442.6976	-0.44821	0.36715	0.10586	1.324	-58.20816	1187.596	-1.2827	1.772	-0.32275	-12.893	63.7204	114.2403	0.0050781	-0.069336	0.010059	-74.926	-83.067	938.379	-0.75937	1.1979	0.15127	-37.909	24.4565	38.7336	0.0039063	0.0043945	-0.081543	-26.319	113.844	204.14	-0.014941	0.18818	0.055761
2.122	-33.353	24.731	925.346	-1.3229	1.1669	0.028613	-37.718	140.468	451.338	-0.43359	0.35254	0.11084	2.174	-55.8691	1192.55374	-1.2832	1.7617	-0.32471	-8.177	62.8292	141.5428	-0.0023437	-0.071582	0.0044922	-71.708	-51.673	941.992	-0.81044	1.2649	0.14287	-34.31	20.7814	56.668	0.015137	-0.0092773	-0.085449	-29.447	97.5471	214.3844	-0.0092773	0.17529	0.044434
2.124	-6.783	24.476	942.434	-1.3045	1.1588	0.025782	-68.967	137.308	440.832	-0.41407	0.33939	0.11154	33.01	-62.4177	1197.7814	-1.2788	1.7466	-0.33545	-27.346	76.144	118.72008	-0.0089843	-0.068066	0.008789	-92.056	-55.502	966.0281	-0.86552	1.3224	0.1378	-23.388	40.3364	41.273	0.024902	-0.024902	-0.094238	-11.568	91.7658	209.4012	-0.0018555	0.16582	0.038477
2.126	6.606	44.425	957.417	-1.2813	1.1445	0.030273	-47.841	143.441	437.915	-0.39386	0.32153	0.11122	19.2023	-54.9964	1205.8564	-1.2769	1.7314	-0.33789	-43.282	73.517	107.9401	-0.015625	-0.059864	0.010644	-52.661	-64.309	985.442	-0.92509	1.3702	0.13154	-33.156	36.0881	27.2018	0.031006	-0.035401	-0.098875	-34.458	79.74153	182.848	0.0025391	0.15713	0.034473
2.128	-14.245	52.52374	962.2714	-1.2554	1.1304	0.026953	-36.917	147.452	411.3561	-0.37315	0.31141	0.11165	43.415	-44.9101	1207.5401	-1.2651	1.7173	-0.34375	-18.568	82.223	78.6549	-0.020996	-0.056641	0.013672	-41.286	-88.385	1023.607	-0.97803	1.4165	0.12646	-35.685	39.9116	15.5382	0.040039	-0.04248	-0.10205	-12.078	73.4466	162.2329	0.0095703	0.15049	0.036035
2.13	-4.852	67.457	956.028	-1.2262	1.1102	0.022754	-46.285	139.075	382.513	-0.35319	0.29152	0.11112	14.255	-53.3876	1190.327	-1.2456	1.689	-0.35059	-40.489	75.0289	86.6431	-0.027735	-0.045117	0.017285	-63.034	-95.4003	1038.469	-1.0237	1.4567	0.13174	-38.189	38.3086	15.4999	0.043457	-0.049316	-0.1084	-9.616	78.639	149.109	0.016699	0.1375	0.024316
2.132	6.569	71.656	938.519	-1.1918	1.0875	0.023144	-56.373	116.8973	339.421	-0.32959	0.27783	0.1084	24.057	-46.489	1184.71731	-1.2358	1.6782	-0.354	-38.725	62.8993	85.302	-0.037988	-0.036817	0.016993	-75.778	-116.189	1052.7825	-1.0676	1.4871	0.13955	-15.484	26.9361	23.8965	0.041992	-0.046875	-0.10791	-8.712	74.6654	158.027	0.021484	0.12842	0.031738
2.134	-7.565	74.362	900.894	-1.1592	1.0581	0.02207	-36.805	106.143	316.628	-0.3081	0.26291	0.10324	9.081	-29.3199	1199.055	-1.2104	1.6489	-0.35693	-21.197	50.52501	88.0691	-0.048926	-0.027441	0.020508	-68.8	-114.973	1039.8572	-1.1129	1.5106	0.15284	-21.762	25.0771	19.59158	0.043945	-0.045898	-0.11523	-48.712	58.8967	163.46038	0.024511	0.12363	0.024707
2.136	-30.229	56.123	862.3971	-1.1206	1.0278	0.019043	-53.606	109.711	305.896	-0.28278	0.24324	0.10075	21.9613	-38.332	1196.0269	-1.1967	1.6298	-0.36254	-31.582	66.4022	78.1902	-0.062305	-0.013086	0.026269	-60.543	-117.038	1051.6852	-1.1602	1.5353	0.16739	-7.391	23.8617	19.5426	0.043213	-0.041016	-0.11646	-35.097	72.526	145.553	0.023828	0.11435	0.022461
2.138	-15.605	67.918	838.0151	-1.0816	0.99328	0.020996	-38.877	108.243	317.4493	-0.25788	0.22452	0.094125	-7.8752	-60.6151	1185.6372	-1.1724	1.6099	-0.36377	-37.687	68.1661	83.569	-0.075195	-0.0039063	0.02832	-69.645	-109.499	1050.1027	-1.207	1.5586	0.18701	-11.23	26.9157	20.6942	0.043457	-0.036133	-0.1167	-17.37	90.95	131.882	0.02539	0.10771	0.020508
2.14	-3.7	68.4955	828.309	-1.0447	0.95586	0.015918	-34.504	110.4309	317.904	-0.22879	0.20303	0.09329	-1.074	-42.6642	1162.1549	-1.1538	1.5786	-0.36475	-7.888	58.5841	94.3029	-0.086425	0.0066406	0.03252	-81.275	-102.74205	1065.262	-1.2634	1.5851	0.20332	-33.463	25.11572	26.0741	0.045898	-0.03418	-0.12451	-19.023	82.905	134.382	0.021484	0.099612	0.01914
2.142	-29.482	63.466	816.081	-1.0072	0.91758	0.012012	-50.445	121.046	299.519	-0.20313	0.1748	0.089355	-11.488	-32.773	1158.366	-1.1465	1.5664	-0.36426	-28.735	49.8148	87.355	-0.096386	0.020117	0.032324	-57.179	-67.414	1111.744	-1.3234	1.6215	0.22002	-31.454	16.64452	44.0893	0.046875	-0.033691	-0.12549	-40.186	62.622	122.752	0.019531	0.097656	0.01416
2.144	-15.219	61.804	807.8712	-0.96807	0.88115	0.011621	-50.561	136.212	292.954	-0.17513	0.1544	0.082402	-0.498000000000001	-17.0299	1150.611	-1.1328	1.5469	-0.36328	-40.003	66.579	62.2636	-0.10341	0.024414	0.032324	-45.358	-42.072	1120.485	-1.3813	1.6558	0.22392	-18.788	2.970608	36.6131	0.047852	-0.029297	-0.12891	-30.05	53.9871	108.092	0.019336	0.0875	0.010351
2.146	-1.538	79.1409	804.15602	-0.92969	0.84277	0.0083008	-39.828	114.844	275.0136	-0.14679	0.13109	0.083213	2.149	-21.467	1155.9906	-1.1262	1.5412	-0.35669	-38.989	56.428	45.5322	-0.11084	0.03291	0.030371	-45.451	-54.476	1125.992	-1.4311	1.6938	0.22988	-61.563	8.6385	35.9409	0.046142	-0.019531	-0.12964	-20.873	69.6809	86.007	0.016797	0.079297	0.010351
2.148	0.711999999999996	104.4074	797.042	-0.8957	0.80918	0.0077148	-45.693	101.7169	268.525	-0.1258	0.10624	0.081311	1.113	-14.9123	1160.93252	-1.124	1.5352	-0.35449	-37.997	42.5936	44.518	-0.10986	0.041992	0.033691	-39.489	-78.6059	1125.72	-1.4805	1.7324	0.22949	-26.144	1.46	21.7801	0.037109	-0.010254	-0.12988	-12.54	50.398	88.812	0.017187	0.071875	0.0060547
2.15	-11.005	102.41	766.734	-0.86562	0.7752	0.0072266	-34.975	103.1618	251.323	-0.10945	0.087476	0.083459	10.137	-10.1715	1163.0506	-1.123	1.5371	-0.3457	-34.597	36.8759	54.1456	-0.11025	0.046973	0.033203	-57.182	-72.7796	1097.368	-1.5128	1.7689	0.22617	-27.424	-4.105	28.263	0.022461	0.0029297	-0.12207	-5.127	38.598	93.42	0.019238	0.062598	0.0035156
2.152	3.111	82.488	753.316	-0.83906	0.74707	0.0083984	-65.6426	94.3605	219.199	-0.096191	0.074219	0.084473	13.923	-10.4823	1163.6457	-1.1265	1.5396	-0.34619	-37.72	44.5231	41.3367	-0.10957	0.047265	0.031055	-85.27	-57.5574	1083.78	-1.534	1.7998	0.22324	-14.939	1.45139	43.297	0.012695	0.013672	-0.1167	-21.083	47.2459	90.9454	0.020996	0.056641	-0.0024414
2.154	-28.975	91.2	731.365	-0.81563	0.72197	0.012109	-36.049	84.2043	196.748	-0.086867	0.064256	0.085299	39.5495	-5.8032	1152.5046	-1.1245	1.5415	-0.34033	-49.478	43.0516	39.9788	-0.10605	0.05	0.025586	-92.036	-56.51857	1078.094	-1.5511	1.8202	0.21621	-28.812	-14.538	61.0491	-0.01416	0.038574	-0.11084	-34.13	56.659	68.6978	0.024219	0.046387	0.00068364
2.156	-33.618	87.03	718.178	-0.80029	0.69971	0.015625	-57.649	89.8224	188.243	-0.079371	0.05691	0.086093	17.017	-0.818299999999999	1124.6729	-1.1199	1.5423	-0.33692	-34.81	53.32597	64.2342	-0.10449	0.047754	0.025293	-82.265	-66.8497	1087.552	-1.5615	1.8358	0.21435	-15.567	-38.376	73.4056	-0.035401	0.065185	-0.10303	-24.907	62.315	61.1353	0.024609	0.036524	0.00039062
2.158	-47.4789	82.0436	693.2	-0.78135	0.67784	0.01582	-41.497	98.2859	193.2671	-0.077211	0.05305	0.08419	29.703	-10.286	1105.1434	-1.1113	1.5449	-0.33447	-6.08	61.7497	74.312	-0.099609	0.047852	0.019531	-88.801	-58.545	1100.3584	-1.5601	1.8423	0.21582	-10.239	-31.317	124.6585	-0.063965	0.092773	-0.09668	-20.898	59.342	80.0315	0.025391	0.029101	-0.00039063
2.16	-28.016	93.0094	685.113	-0.7663	0.65772	0.016797	-58.338	101.0442	200.682	-0.07199	0.051949	0.084707	-1.592	-14.352	1076.127	-1.0952	1.5376	-0.32861	-21.969	45.9432	62.473	-0.092676	0.041113	0.014551	-120.3849	-48.178	1102.6493	-1.5572	1.8335	0.21465	0.146999999999998	-13.3351	155.9722	-0.11475	0.13916	-0.083984	-30.704	45.117	84.528	0.024707	0.024317	-0.0012695
2.162	-19.903	107.3805	672.3614	-0.74717	0.64013	0.019922	-22.239	93.308	199.247	-0.067383	0.054199	0.083496	19.542	-5.1288	1077.9552	-1.0815	1.5337	-0.32959	-25.904	53.305	45.417	-0.085742	0.034668	0.0091797	-101.5647	-31.394	1126.592	-1.5529	1.82	0.21534	-3.166	4.8977	203.0849	-0.14209	0.17041	-0.072754	-40.668	32.4048	65.992	0.020996	0.01709	-0.00048828
2.164	-31.739	101.8121	647.8935	-0.72481	0.62285	0.025293	-35.088	99.513	190.1442	-0.061569	0.052826	0.076264	-10.784	4.85981	1081.9578	-1.0586	1.5137	-0.32324	-25.383	55.03	30.7764	-0.074805	0.028418	0.00097656	-83.703	-27.829	1146.6307	-1.5389	1.7949	0.21885	-19.935	19.8929	259.028	-0.20947	0.22559	-0.046387	-37.371	36.2745	43.397	0.014941	0.016015	0.0026367
2.166	-37.728	105.6434	634.794	-0.70068	0.60596	0.02832	-26.724	82.897	162.239	-0.05604	0.056608	0.080111	6.657	7.86026	1063.2701	-1.0391	1.5015	-0.31592	-24.531	39.7025	25.684	-0.06582	0.014844	-0.0040039	-80.549	-31.9462	1156.025	-1.5262	1.7695	0.2335	-19.681	28.252	323.249	-0.28833	0.28931	-0.0053709	-23.071	47.9083	43.241	0.011231	0.01582	0.010254
2.168	-13.603	132.179	615.76591	-0.68096	0.58721	0.031446	-45.494	69.3568	158.89	-0.046362	0.063703	0.071872	-5.691	4.6845	1052.198	-1.019	1.4888	-0.30811	-34.481	12.5331	34.652	-0.054199	0.0083008	-0.0087891	-105.695	-45.7806	1144.6033	-1.5059	1.7363	0.24121	-32.084	38.7158	417.232	-0.37695	0.35938	0.032715	-10.81	40.5829	48.365	0.0061523	0.017383	0.015332
2.17	-4.41099999999999	126.01	610.4223	-0.65947	0.56904	0.039258	-36.162	76.3444	136.145	-0.037752	0.066573	0.069741	5.429	23.7975	1036.89	-1	1.4668	-0.29736	-28.215	11.7495	38.312	-0.045117	0.002832	-0.016797	-71.442	-49.279	1134.965	-1.4927	1.7007	0.25195	-19.806	49.8479	509.232	-0.53125	0.48633	0.09668	-17.758	32.72348	44.9739	-0.0045899	0.018262	0.017383
2.172	-29.278	110.433	599.3539	-0.64268	0.55615	0.045508	-35.427	84.01017	110.978	-0.028809	0.066406	0.069824	-0.484999999999999	22.94089	1047.2633	-0.98633	1.4541	-0.29443	-35.7	24.3412	39.28672	-0.036817	-0.0043946	-0.02041	-57.229	-33.481	1148.248	-1.4746	1.6672	0.26093	-21.777	76.474	595.6521	-0.61572	0.56006	0.13281	-21.551	38.37424	29.009	-0.010254	0.013672	0.016602
2.174	-37.537	99.1375	576.833	-0.62275	0.53857	0.045703	-42.824	72.64573	114.7231	-0.020688	0.06895	0.061884	19.015	19.7595	1028.9193	-0.96045	1.4282	-0.28613	-43.736	20.14961	49.257	-0.030566	-0.009082	-0.025488	-63.67	-22.8827	1157.825	-1.4574	1.6437	0.26367	-28.02	93.251	645.245	-0.78125	0.71777	0.22119	-24.102	45.6459	21.234	-0.018262	0.016309	0.014941
2.176	-41.98	110.8855	553.466	-0.60449	0.52295	0.051758	-46.907	71.8932	127.476	-0.014601	0.070918	0.060547	5.986	20.307	1003.0798	-0.94458	1.4114	-0.27808	-29.043	7.4234	65.9004	-0.028906	-0.01416	-0.029883	-73.355	-22.6236	1159.9604	-1.4425	1.6208	0.27031	-34.702	64.126	697.571	-0.91943	0.85205	0.28369	-34.478	43.8897	41.5808	-0.020117	0.013965	0.016309
2.178	-68.7502	105.543	530.079	-0.5917	0.50498	0.052539	-41.193	84.3531	130.665	-0.0068234	0.073242	0.057402	-0.507000000000001	19.698906	967.6793	-0.92139	1.3931	-0.27051	-42.507	20.4774	58.8603	-0.029785	-0.015137	-0.029297	-63.322	1.325	1157.269	-1.4272	1.603	0.28125	-9.765	34.049	719.8665	-1.0562	0.98682	0.32959	-38.927	28.4013	55.243	-0.016601	0.011231	0.013965
2.18	-53.154	117.3124	536.1428	-0.57568	0.49072	0.053418	-35.208	89.1816	130.556	-0.006056	0.071574	0.05801	-3.932	17.2904	948.341	-0.89404	1.3667	-0.2583	-31.41	18.9678	44.497	-0.033692	-0.0125	-0.028125	-73.957	20.81412	1135.7868	-1.4124	1.5845	0.2831	-16.864	16.6016	746.149	-1.2466	1.1665	0.3457	-27.041	32.071	45.23284	-0.01377	0.0092773	0.0083008
2.182	-23.067	130.846	525.103	-0.55849	0.47197	0.058105	-39.559	89.278	112.4724	-0.00048828	0.069336	0.053711	20.759	31.1168	939.901	-0.88037	1.3521	-0.25146	-43.396	22.9255	32.1194	-0.047168	-0.0083008	-0.023828	-86.88	19.0176	1135.4891	-1.3923	1.5691	0.28838	-23.888	-0.22515	728.742	-1.3384	1.2466	0.32275	-27.053	44.818	36.279	-0.0068359	-0.00048828	0.0073242
2.184	-44.338	133.328	506.466	-0.5377	0.45791	0.054394	-17.063	89.335	93.8034	-0.003026	0.06914	0.051658	10.358	44.0835	926.8168	-0.85742	1.3184	-0.24463	-28.189	4.23033	57.248	-0.063574	0.0014648	-0.026562	-73.775	19.3194	1145.2618	-1.3799	1.5567	0.29307	-44.5162	-61.1667	727.488	-1.4663	1.4009	0.25391	-43.11	26.77	23.225	-0.0081055	-0.00625	0.0050781
2.186	-40.549	110.363	484.3029	-0.51318	0.43604	0.053711	-39.295	79.8857	73.951	-0.0031276	0.069727	0.05372	3.729	40.58	922.44193	-0.83862	1.2991	-0.23828	-28.329	-14.7933	59.769	-0.080176	0.014062	-0.024707	-82.901	40.2065	1141.21255	-1.3652	1.5375	0.29688	-38.682	-80.758	710.6949	-1.5051	1.4973	0.20239	-25.532	9.3162	43.478	-0.0039063	-0.010254	0.00087886
2.188	-29.138	114.7881	475.9762	-0.48681	0.4169	0.052246	-42.159	60.57789	54.872	-0.0039028	0.063487	0.056044	23.049	36.901	920.6324	-0.82227	1.2734	-0.23145	-41.431	-26.428	58.404	-0.1001	0.031738	-0.027832	-78.941	33.5698	1123.028	-1.3496	1.5195	0.29834	-64.733	-101.016	698.6452	-1.498	1.5801	0.15967	-41.807	26.024	39.3712	-0.0039063	-0.012597	-0.0010742
2.19	-22.199	118.6018	469.189	-0.46152	0.3959	0.055371	-46.547	53.50878	61.437	-0.0076192	0.058007	0.052636	11.202	45.662	912.6613	-0.7998	1.2461	-0.2207	-46.948	-30.5035	68.9347	-0.1208	0.051465	-0.028125	-81.12826	14.327	1117.163	-1.3272	1.4964	0.30039	-24.551	-120.454	683.1998	-1.418	1.6172	0.10303	-28.685	24.362	42.326	-0.01084	-0.0090821	0.00058593
2.192	-29.986	113.69	440.57	-0.4334	0.37715	0.057715	-14.158	59.866471	75.4354	-0.0063477	0.059082	0.05127	-3.204	57.6947	896.5994	-0.78662	1.231	-0.21631	-36.196	-35.5104	81.58563	-0.13262	0.068067	-0.029785	-38.088	5.867	1119.67	-1.3011	1.4712	0.30078	-38.02	-116.13	684.34115	-1.3477	1.6055	0.091797	-26.462	16.3072	43.5403	-0.020508	-0.0078125	-0.00097656
2.194	-37.185	99.851	417.9994	-0.41025	0.35576	0.057422	-58.247	60.78254	83.414	-0.0087882	0.055369	0.045605	1.648	69.534	879.3219	-0.76953	1.1992	-0.20508	-12.855	-30.2539	116.2578	-0.14629	0.08916	-0.030957	-68.265	34.7286	1129.2336	-1.2663	1.4419	0.30156	-49.362	-76.7691	697.7683	-1.1934	1.5215	0.072266	-12.73	5.2499	75.7861	-0.032617	0.0018554	-0.0011718
2.196	-30.212	108.493	395.019	-0.38867	0.33545	0.058594	-50.354	66.1636	83.04	-0.011327	0.05244	0.036622	10.32	62.877	859.31612	-0.75611	1.1761	-0.19995	-45.048	-30.322	133.9711	-0.16406	0.1082	-0.032715	-61.083	51.129	1109.793	-1.2314	1.4139	0.30811	-59.775	-53.3042	705.6159	-1.0693	1.4091	0.06958	-42.694	-4.7602	77.8384	-0.043749	0.012305	-0.0017577
2.198	-26.664	111.0266	389.087	-0.36797	0.31709	0.061328	-60.897	73.142	82.317	-0.0078116	0.05088	0.035057	-7.796	64.315	852.1958	-0.74414	1.1484	-0.19482	-40.515	-16.519	173.533	-0.17822	0.1333	-0.024414	-71.349	48.635	1098.782	-1.1973	1.3828	0.31006	-71.182	-26.99	717.8435	-0.95801	1.2598	0.071289	-23.737	-15.8875	73.71248	-0.055469	0.023632	-0.00957
2.2	-45.498	104.343	388.734	-0.34981	0.30039	0.0625	-24.617	81.65	61.8418	-0.0036134	0.04541	0.032617	-22.052	62.434	824.12	-0.72412	1.1196	-0.18896	-32.766	10.9613	227.96	-0.20117	0.16231	-0.0099608	-36.276	31.943	1075.4364	-1.1686	1.3557	0.31591	-46.821	-17.627	729.6146	-0.84766	1.0488	0.091309	-37.104	-11.5264	48.591	-0.063964	0.040137	-0.012988
2.202	-41.118	121.532	383.328	-0.32832	0.28516	0.062109	-52.545	65.977	56.2657	0.003418	0.040039	0.032227	-2.141	54.5625	825.839	-0.71338	1.105	-0.18311	-13.35	24.94173	310.945	-0.24131	0.19472	0.0064452	-64.696	12.0328	1058.8082	-1.1346	1.3254	0.31982	-43.45	-14.073	741.3671	-0.80859	0.95117	0.10645	-15.795	-9.81563	63.461	-0.072754	0.060547	-0.018555
2.204	-32.676	137.511	373.171	-0.31328	0.26631	0.061914	-28.359	53.9694	48.621	0.0054684	0.032227	0.024805	-4.604	66.8291	806.250316	-0.69482	1.0659	-0.1792	-42.56	31.0597	403.382	-0.2917	0.2416	0.029492	-49.078	5.849	1027.7524	-1.1115	1.2984	0.31943	-23.303	-50.379	774.47516	-0.75732	0.77783	0.11572	-35.725	-36.342	89.98	-0.077344	0.074708	-0.024512
2.206	-46.297	124.211	352.2033	-0.29541	0.25244	0.057617	-28.093	44.5734	49.446	0.0064453	0.029785	0.027735	-17.71	77.3672	787.6269	-0.68042	1.0422	-0.17212	-30.34	41.3388	468.753	-0.36045	0.29434	0.065039	-49.356	32.997	1024.573	-1.0867	1.2742	0.3249	-32.618	-87.499	797.356	-0.72803	0.66455	0.11475	-29.991	-59.788	125.06807	-0.085938	0.09004	-0.034961
2.208	-37.826	100.7238	319.281	-0.27764	0.23643	0.063086	-33.795	43.0184	46.132	0.0064454	0.025098	0.030468	-13.239	72.7049	764.8502	-0.66357	1.02	-0.16846	-49.998	74.0703	539.776	-0.46094	0.35352	0.10156	-53.975	55.3964	1010.328	-1.064	1.2524	0.32959	-31.232	-113.54	793.988	-0.7168	0.62793	0.11133	-24.359	-36.929	152.4947	-0.096095	0.10996	-0.041603
2.21	-27.729	112.71	298.564	-0.25674	0.2249	0.055176	-59.041	33.248	55.96269	0.0059572	0.019434	0.026465	-10.519	76.70432	753.532	-0.65039	0.98828	-0.16211	-36.939	96.855	591.177	-0.57187	0.43789	0.15411	-68.575	51.3252	996.118	-1.042	1.2322	0.32842	-7.085	-130.644	800.1812	-0.6875	0.5791	0.097656	-14.071	-6.832	210.793	-0.1083	0.13213	-0.043457
[truncated: 11,894 more rows]
