# Supplementary material for: Reliability and Validity of Running Cadence and Stance Time Derived from Instrumented Wireless Earbuds
Source: Sensors (Basel). 2021 Nov 30;21(23):7995. doi: 10.3390/s21237995 (PMC8659722; doi:10.3390/s21237995)
Supplement: Supplementary file 1 [file sensors-21-07995-s001.zip › Data_P03_HeadMovements.csv]

time	up_force_plate_1	up_force_plate_2	up_force_plate_3	up_earbuds_1	up_earbuds_2	up_earbuds_3	down_force_plate_1	down_force_plate_2	down_force_plate_3	down_earbuds_1	down_earbuds_2	down_earbuds_3	shake_force_plate_1	shake_force_plate_2	shake_force_plate_3	shake_earbuds_1	shake_earbuds_2	shake_earbuds_3	nod_force_plate_1	nod_force_plate_2	nod_force_plate_3	nod_earbuds_1	nod_earbuds_2	nod_earbuds_3	bird_L_force_plate_1	bird_L_force_plate_2	bird_L_force_plate_3	bird_L_earbuds_1	bird_L_earbuds_2	bird_L_earbuds_3	bird_R_force_plate_1	bird_R_force_plate_2	bird_R_force_plate_3	bird_R_earbuds_1	bird_R_earbuds_2	bird_R_earbuds_3	check_watch_force_plate_1	check_watch_force_plate_2	check_watch_force_plate_3	check_watch_earbuds_1	check_watch_earbuds_2	check_watch_earbuds_3
0	0.847999999999999	32.152	9.444	-0.13037	-0.087891	0.14502	67.642	-177.325	1244.235	-1.1152	0.67432	0.099121	77.4288	-27.588	28.808	-0.22754	-0.11475	0.024414	94.8697	152.359	1265.4281	-1.9258	0.65137	0.31396	-6.808	-11.1967	8.3177	0.050293	-0.20166	-0.072754	-31.0579	-22.163	1369.609	-2.6123	1.0372	0.88819	50.0208	-2.61528	44.5551	-0.10547	-0.13037	0.080078
0.002	-20.523	38.759	-10.6029	-0.1211	-0.091797	0.14917	72.3051	-97.439	1194.04049	-1.0972	0.67822	0.099609	49.238	12.3594	16.744642	-0.2461	-0.099121	0.036133	63.07	117.755	1240.596	-1.8491	0.64697	0.30664	15.6	14.5442	-1.808	0.067139	-0.20166	-0.086426	-83.225	-28.9725	1370.577	-2.625	1.0566	0.90869	63.2029	8.02	41.186	-0.11133	-0.13135	0.082764
0.004	3.133	18.7308	23.5618	-0.11328	-0.094238	0.15576	98.299	-120.153	1209.754	-1.0913	0.6665	0.09668	38.031	-18.3969	5.321	-0.25537	-0.087891	0.046387	81.9708	135.7044	1227.127	-1.814	0.65088	0.30078	-18.736	2.8528	-3.8629	0.078613	-0.20508	-0.09668	-46.023	-15.79461	1394.107	-2.6113	1.0703	0.92236	28.751	11.457	14.4421	-0.11523	-0.12939	0.086426
0.006	-16.903	43.055	31.6174	-0.104	-0.095215	0.17041	122.7687	-48.069	1214.3698	-1.0952	0.66455	0.10645	42.528	-14.16039	7.257	-0.2627	-0.077148	0.062012	29.074	168.507	1204.004	-1.7456	0.64111	0.29102	14.682	-7.5902	33.008	0.087891	-0.2002	-0.10645	-71.501	27.3027	1333.598	-2.5898	1.0703	0.92236	72.7704	-6.3605	25.5629	-0.11279	-0.12354	0.096191
0.008	-6.651	9.7658	26.622	-0.09668	-0.09668	0.17236	107.8101	-15.23	1201.712	-1.1245	0.64502	0.11084	34.467	24.6837	-15.4578	-0.26855	-0.071534	0.066894	-2.647	110.914	1213.0911	-1.6999	0.63989	0.28198	22.688	25.6287	25.1735	0.088867	-0.19727	-0.10498	-66.093	-44.1585	1354.601	-2.5522	1.0532	0.92188	39.12	16.27782	-3.3566	-0.11084	-0.11963	0.09082
0.01	3.977	-13.3949	41.772	-0.086914	-0.092773	0.1792	109.75042	-65.836	1259.6375	-1.1636	0.64698	0.12476	34.441	-10.19707	16.2318	-0.27197	-0.068359	0.075684	42.146	137.9874	1203.682	-1.6523	0.63477	0.28271	-18.889	-10.0888	17.1434	0.089355	-0.19971	-0.10938	-58.181	-12.5359	1367.9539	-2.5186	1.0269	0.91455	21.317	5.48	6.3831	-0.099609	-0.1123	0.10107
0.012	-6.485	15.0794	23.0384	-0.078613	-0.090577	0.17749	66.715	-31.201	1243.033	-1.2222	0.65137	0.13721	12.205	13.6553	21.1552	-0.27295	-0.06543	0.074219	-4.83	93.322	1154.413	-1.5952	0.63135	0.26563	29.895	-4.6386	40.526	0.081787	-0.19702	-0.10669	-95.32	-24.058	1377.7023	-2.4785	1.0059	0.90283	51.512	3.8667	29.0906	-0.091553	-0.11084	0.1062
0.014	26.876	-27.1125	43.905	-0.071289	-0.091797	0.17432	37.345	-97.659	1260.5582	-1.3281	0.66797	0.17969	-5.416	19.2776	-7.8451	-0.26709	-0.067871	0.077637	6.312	53.406	1164.471	-1.5684	0.62891	0.2583	17.129	13.4142	-2.049615	0.072266	-0.19775	-0.10303	-63.507	-76.064	1425.6621	-2.4414	0.99023	0.88135	-5.175	29.387	14.8617	-0.089355	-0.10596	0.11328
0.016	29.012	-0.3211	26.476	-0.063965	-0.080078	0.16992	83.333	-123.568	1318.878	-1.3882	0.67822	0.20996	6.192	-6.7465	-0.4954	-0.24951	-0.068359	0.064941	24.09	113.438	1109.4	-1.5059	0.62012	0.24268	21.069	-0.818	6.0416	0.050781	-0.20313	-0.10498	-68.242	-27.301	1399.056	-2.4258	0.98633	0.86768	19.303	13.1499	40.4383	-0.078125	-0.10156	0.11475
0.018	0.859000000000002	11.022	10.1266	-0.05957	-0.078613	0.17139	52.65	-68.7499	1283.0737	-1.5469	0.69922	0.2876	5.675	17.8222	7.6331	-0.22754	-0.068847	0.054687	-1.543	77.015	1077.1306	-1.4688	0.61084	0.23389	44.616	37.143	-9.1647	0.037109	-0.20068	-0.10107	-88.553	-74.233	1400.6257	-2.3892	0.98291	0.85254	22.374	16.6351	26.6928	-0.07666	-0.10059	0.11914
0.02	28.245	-8.5824	17.1547	-0.057617	-0.068848	0.16504	79.378	-140.811	1323.882	-1.6919	0.71777	0.35791	-13.877	-6.9399	10.13	-0.19873	-0.071289	0.047852	58.5744	123.529	1050.8423	-1.4282	0.59912	0.21973	1.671	15.7384	-11.7644	0.01416	-0.20361	-0.088379	-54.085	-73.83	1411.8593	-2.3503	0.98169	0.83618	-45.0303	22.1276	7.8662	-0.072266	-0.091797	0.11963
0.022	33.017	28.314	8.25883	-0.056397	-0.061279	0.1648	113.7413	-140.456	1310.421	-1.8569	0.73193	0.42969	-8.535	-9.8241	6.277	-0.16064	-0.081055	0.028809	37.455	149.711	989.089	-1.3765	0.58838	0.21094	34.388	9.2784	25.0388	-0.0053711	-0.20191	-0.084473	-71.768	-7.9125	1374.40462	-2.3159	0.979	0.8125	-4.206	3.655	22.6524	-0.067383	-0.085205	0.12061
0.024	22.028	-7.655	33.5223	-0.057129	-0.053223	0.16309	105.7434	-145.946	1305.997	-2.0933	0.77002	0.53516	-4.723	26.782	-18.9099	-0.13965	-0.078125	0.018066	17.573	112.9847	988.251	-1.3496	0.57715	0.20703	73.444	26.804	17.4682	-0.025879	-0.2002	-0.077148	-43.021	-41.8	1382.4842	-2.2813	0.9668	0.79248	-14.356	22.9921	-12.5276	-0.059082	-0.077148	0.125
0.026	54.1635	-18.0763	49.5505	-0.066406	-0.039551	0.15723	113.657	-209.398	1354.329	-2.2109	0.79199	0.58057	-17.651	1.6064	-2.019	-0.09082	-0.087891	-0.0024414	33.265	168.796	969.172	-1.2988	0.56348	0.19531	39.0363	-18.9983	41.1729	-0.054688	-0.19189	-0.070313	-12.2999	15.1913	1355.0484	-2.2651	0.96729	0.7832	-46.073	3.074	-5.5794	-0.055664	-0.072266	0.12354
0.028	41.0894	-4.44463	42.0872	-0.071777	-0.027832	0.15869	70.825	-124.983	1345.2802	-2.4316	0.82422	0.64893	-20.075	16.73078	19.7238	-0.049804	-0.099608	-0.018799	-6.111	158.907	934.773	-1.2588	0.55518	0.19019	43.8911	-29.43	54.6575	-0.066406	-0.18994	-0.06543	-51.836	23.0281	1330.24966	-2.2417	0.95166	0.77051	0.389000000000003	-0.8363	23.9275	-0.046387	-0.069336	0.12646
0.03	19.513	-39.8939	48.2459	-0.087891	-0.0083008	0.15186	62.646	-117.351	1360.4396	-2.5577	0.85059	0.68408	2.417	17.2119	16.0577	-0.014648	-0.10791	-0.033691	15.141	149.973	927.724	-1.2246	0.54297	0.18604	44.2225	-11.259	23.747	-0.092773	-0.18262	-0.066406	6.05434	0.289000000000001	1340.191	-2.2227	0.9375	0.76416	-21.984	10.6942	19.607	-0.037109	-0.061035	0.12939
0.032	61.2712	-5.869	57.4893	-0.11011	0.0095217	0.13818	80.22	-111.5013	1380.287	-2.6597	0.8667	0.70117	0.951999999999998	-7.385	15.77319	0.024414	-0.1123	-0.051758	-12.667	189.526	869.281	-1.166	0.52344	0.18018	3.494	-23.768	39.152	-0.11988	-0.18262	-0.053467	22.77695	94.989	1283.114	-2.2144	0.91846	0.75586	0.479999999999997	-31.1729	50.9602	-0.030274	-0.055176	0.12744
0.034	31.422	-1.191	54.6266	-0.13086	0.031738	0.12256	39.104	-22.11	1324.4813	-2.7422	0.88086	0.69287	17.966	34.313	-0.0572999999999997	0.043457	-0.11328	-0.055664	-13.1	135.866	846.1522	-1.1348	0.51758	0.18799	39.449	16.835	47.359	-0.15527	-0.18213	-0.040527	-3.73	88.487	1266.481	-2.1675	0.896	0.74023	29.495	-21.0078	54.90205	-0.025391	-0.050781	0.12012
0.036	16.742	-23.836	106.196	-0.17041	0.067871	0.11426	39.803	-65.821	1316.9583	-2.7593	0.87939	0.68457	25.782	2.4509	6.6295	0.072266	-0.11719	-0.065918	31.653	154.058	817.37	-1.0723	0.49805	0.17725	26.754	-6.6171	76.316	-0.21631	-0.18604	-0.02002	44.137	106.286	1283.006	-2.1169	0.88256	0.72241	-18.844	-19.25	48.2643	-0.023926	-0.037109	0.11133
0.038	30.594	26.425	125.235	-0.19287	0.084961	0.11084	39.79	-18.8647	1331.841	-2.7734	0.87305	0.66064	20.025	6.4636	21.237	0.088623	-0.11328	-0.074463	-12.454	155.47321	752.817	-1.0263	0.48388	0.16626	16.704	-18.9715	129.944	-0.25635	-0.19189	-0.0053711	12.0769	144.332	1250.14	-2.0625	0.875	0.70459	27.022	-38.9	69.447	-0.030762	-0.026855	0.10303
0.04	18.334	7.5369	160.556	-0.24609	0.12354	0.10547	14.781	22.6963	1318.6288	-2.7504	0.86377	0.63476	28.68	48.986	-5.439	0.10547	-0.11084	-0.081055	17.533	108.962	756.622	-0.97656	0.4624	0.1626	40.177	11.2618	155.7784	-0.33838	-0.19678	0.024414	33.831	57.763	1272.7997	-1.9688	0.85156	0.66846	23.323	-27.401	57.909	-0.045898	-0.012207	0.091309
0.042	27.206	13.728	215.32	-0.29882	0.15454	0.10058	22.562	-46.029	1351.7273	-2.7168	0.85352	0.61475	47.313	19.3866	2.233	0.125	-0.11035	-0.094238	30.903	134.3743	703.4087	-0.91113	0.43555	0.15576	16.593	-4.0149	194.8862	-0.39673	-0.20166	0.046875	53.933	74.206	1276.724	-1.9116	0.84229	0.65234	16.349	-46.351	74.4907	-0.061524	0.0063475	0.086181
0.044	-17.7	57.7351	247.0744	-0.35107	0.18701	0.10498	39.272	21.1368	1315.412	-2.6367	0.84375	0.58447	61.876	38.901	27.0253	0.1333	-0.11133	-0.10254	-2.282	107.7006	697.27109	-0.87646	0.42041	0.15088	24.565	35.583	271.165	-0.46143	-0.20898	0.074707	-15.4971	69.687	1266.338	-1.8096	0.80859	0.62256	61.8067	-39.4977	103.704	-0.086426	0.028809	0.084473
0.046	-32.123696	21.872	314.7167	-0.42139	0.22998	0.10938	55.399	-22.8495	1292.518	-2.5952	0.83057	0.56445	55.1734	29.8608	29.335	0.1499	-0.11719	-0.12061	53.978	103.4444	677.556	-0.80811	0.38916	0.14502	-1.599	67.178	287.1264	-0.54785	-0.20752	0.11279	36.0406	32.633	1270.468	-1.7437	0.792	0.60108	28.397	1.3095	129.984	-0.1333	0.053223	0.089844
0.048	-16.363	74.901	360.259	-0.45703	0.25244	0.11914	111.945	-45.132	1326.84	-2.4902	0.81299	0.52393	54.3094	3.3024	49.8	0.1543	-0.11744	-0.13501	41.6068	139.803	645.581	-0.76343	0.36279	0.14673	-6.08	50.9968	332.684	-0.59326	-0.21094	0.13477	6.126	90.4679	1206.8617	-1.6738	0.76563	0.5874	33.391	1.23371	198.457	-0.1582	0.063965	0.090332
0.05	-28.5671	87.557	381.2245	-0.53662	0.29443	0.12451	105.067	23.134	1319.799	-2.4234	0.80029	0.49658	51.0291	34.2876	44.878	0.1582	-0.1167	-0.14697	6.83	106.6317	649.561	-0.71533	0.33789	0.14014	28.684	80.538	387.916	-0.70557	-0.21729	0.17383	-33.7135	52.819	1160.822	-1.5977	0.73438	0.56299	54.8402	37.6411	232.4121	-0.21924	0.092285	0.085938
0.052	-19.453	46.181	437.247	-0.60889	0.32495	0.12818	98.038	-60.8998	1339.3742	-2.3652	0.78906	0.47168	48.919	-2.265	41.2649	0.15186	-0.11377	-0.1582	23.7158	131.045	609.193	-0.65869	0.30713	0.13672	2.31	72.887	441.68	-0.79346	-0.22827	0.21509	0.451000000000001	54.493	1141.7101	-1.562	0.72119	0.55371	20.3196	57.4005	276.1739	-0.2688	0.11353	0.10352
0.054	-41.464	73.551	461.397	-0.68213	0.35742	0.13477	102.1874	-49.3357	1368.5324	-2.3198	0.77979	0.44336	47.8519	-22.053	57.1211	0.14404	-0.11182	-0.15723	-22.109	158.32224	552.3981	-0.60937	0.28369	0.13452	20.183	61.605	556.129079	-0.89453	-0.2417	0.25391	-40.5734	93.91632	1109.505	-1.4937	0.68604	0.53662	52.8135	56.7832	345.4633	-0.32373	0.14111	0.10889
0.056	-44.55599	53.425	532.91	-0.7749	0.3999	0.14844	76.3315	-29.4176	1349.3993	-2.3047	0.77539	0.43994	33.862	-8.0536	49.87552	0.11328	-0.10156	-0.1582	-8.041	139.4	535.911	-0.56592	0.26123	0.13037	34.356	65.144	606.6766	-1.0347	-0.25781	0.30762	-30.8017	59.821	1129.134	-1.4356	0.65772	0.52198	29.916	95.4164	384.8523	-0.39502	0.17822	0.12061
0.058	-15.726	28.4143	620.566	-0.82813	0.42188	0.15771	92.6616	-93.199	1366.081	-2.2949	0.75488	0.42529	23.2468	-36.8898	54.052	0.074463	-0.082031	-0.15527	-5.523	175.4046	484.54	-0.51221	0.22461	0.12061	13.318	-2.549	671.0005	-1.1074	-0.27393	0.3374	-30.9515	99.791	1099.172	-1.3862	0.62939	0.51172	9.27	87.605	425.1719	-0.43799	0.19873	0.12793
0.06	-13.4107	15.277	659.329	-0.93555	0.46484	0.17236	107.4528	5.772	1341.855	-2.2947	0.73706	0.41504	41.557	-10.5691	99.535	0.035645	-0.0625	-0.13574	-22.943	150.44993	466.5818	-0.48535	0.21777	0.12305	70.234	-55.795	756.7287	-1.2695	-0.29492	0.40332	-57.615	121.765	1051.211	-1.3198	0.59131	0.49707	27.459	80.783	478.9682	-0.51904	0.23682	0.14014
0.062	3.082	-57.4627	731.823	-1.0251	0.49609	0.19507	82.38	18.987	1298.928	-2.2949	0.71875	0.40771	36.432	-0.449999999999999	123.775	-0.030273	-0.03125	-0.10645	15.881	129.2672	435.1129	-0.43262	0.18213	0.11963	61.549	-90.79	796.9831	-1.3875	-0.30884	0.44947	-16.6408	99.649	1031.5859	-1.2813	0.57227	0.48242	-33.6683	85.934	520.44	-0.58936	0.26905	0.15577
0.064	6.894	-60.397	794.348	-1.1069	0.52783	0.22852	86.575	18.633	1293.903	-2.2729	0.70166	0.39502	11.583	-28.95326	178.447	-0.065918	-0.015625	-0.09668	6.05	157.403	374.8078	-0.39307	0.15601	0.11255	10.834	-131.9336	852.8515	-1.5073	-0.31689	0.49902	-40.966	177.131	977.9007	-1.2129	0.52539	0.46338	-6.64	27.714	617.303	-0.66309	0.30176	0.17285
0.066	-2.309	-65.752	808.6601	-1.2227	0.5625	0.28369	99.17	106.842	1241.652	-2.2573	0.6958	0.38184	18.241	16.1843	199.97	-0.13721	0.015625	-0.062988	-13.644	126.612	374.1798	-0.354	0.13232	0.10254	31.7063	-102.4792	876.042	-1.6421	-0.31201	0.55371	-34.289	155.626	960.8073	-1.1582	0.4956	0.44775	35.834	4.5966	683.5568	-0.76563	0.34521	0.19434
0.068	32.427	-90.3	867.0642	-1.2773	0.58691	0.32471	92.472	42.4727	1247.8052	-2.1992	0.68652	0.35693	1.146	13.3153	209.5218	-0.1875	0.03833	-0.040772	13.501	137.262	356.0972	-0.29932	0.10059	0.094238	0.231	-100.802	872.8311	-1.6987	-0.31055	0.5625	-18.472	158.597	915.277	-1.0981	0.46143	0.43115	-8.41	-22.027	710.1421	-0.81836	0.36719	0.20215
0.07	26.069	-57.403	865.1051	-1.3823	0.61768	0.4082	107.221	67.751	1267.7	-2.1433	0.67846	0.33691	-9.88	40.2719	282.6078	-0.23926	0.061035	-0.01709	-19.396	152.723	321.692	-0.27393	0.083008	0.095215	-6.729	-100.562	901.128	-1.7656	-0.28613	0.58154	-45.40606	181.123	873.2156	-1.0308	0.42041	0.40625	10.904	-72.238	773.026	-0.92383	0.40723	0.24072
0.072	37.994	-79.8991	852.6037	-1.4585	0.64209	0.4773	111.4538	108.952	1244.3694	-2.0894	0.67041	0.31885	2.725	78.132	320.3627	-0.31299	0.094727	0.013184	13.862	124.87	314	-0.22949	0.052734	0.087402	2.273	-75.442	923.619	-1.7788	-0.25537	0.56152	-20.904	104.5636	870.541	-0.99414	0.40332	0.3999	9.428	-63.75	798.472	-1.0047	0.43603	0.2727
0.074	71.824	-115.407	871.651	-1.5293	0.66602	0.5415	106.14	59.335	1250.08	-2.0186	0.65527	0.30322	-20.261	54.8493	368.991	-0.35498	0.1123	0.029297	11.348	148.091	292.1	-0.20093	0.031494	0.08252	-29.7676	-112.212	929.457	-1.7715	-0.23779	0.53955	-5.368	114.3716	848.629	-0.92725	0.36182	0.37207	7.057	-80.397	799.5213	-1.0835	0.46924	0.3208
0.076	58.876	-105.697	832.885	-1.623	0.68164	0.61768	97.1809	150.135	1224.78	-1.9878	0.65283	0.29834	-10.925	63.0607	443.616	-0.44434	0.14697	0.064453	-42.4783	127.996	287.755	-0.17578	0.0063477	0.077148	14.76866	-121.426	946.28	-1.7378	-0.20215	0.4834	-16.821	103.2626	833.369	-0.87207	0.32812	0.35351	61.43	-96.501	821.322	-1.1895	0.49414	0.39209
0.078	67.0503	-136.675	804.709	-1.6582	0.68359	0.64697	65.126	132.217	1185.567	-1.9292	0.64111	0.29395	3.775	57.557	500.5132	-0.52466	0.17456	0.092284	15.617	118.663	309.6171	-0.1416	-0.017578	0.071777	-23.645	-100.366	903.583	-1.7039	-0.18726	0.44458	22.568	64.182	810.621	-0.82227	0.29883	0.33496	17.36	-84.377	775.322	-1.2363	0.49902	0.42725
0.08	72.774	-130.549	812.389	-1.7031	0.69922	0.68604	52.064	92.6873	1200.546	-1.8933	0.64575	0.2898	23.669	16.2981	601.802	-0.61084	0.20117	0.12305	-0.0309999999999988	134.721	272.673	-0.12256	-0.032227	0.071777	-57.333	-100.9604	903.614	-1.6797	-0.17139	0.40869	42.7398	119.2802	758.8035	-0.75293	0.26025	0.31641	27.702	-113.143	787.482	-1.3237	0.51123	0.50391
0.082	68.5067	-94.0293	755.108	-1.7434	0.70288	0.70532	30.625	146.419	1178.3231	-1.8535	0.64453	0.28857	17.176	12.012	669.442	-0.74365	0.24268	0.16211	-17.387	90.4835	245.1175	-0.093262	-0.054688	0.063477	-11.701	-71.276	899.979	-1.6504	-0.15674	0.36719	35.824	81.28	744.3183	-0.7251	0.24023	0.30615	45.906	-97.052	780.437	-1.3924	0.51098	0.56275
0.084	53.6164	-108.4244	727.623	-1.7773	0.71875	0.71924	18.796	59.208	1194.986	-1.791	0.64551	0.28369	9.464	-49.554	709.074	-0.81836	0.26172	0.19287	27.133	95.5511	236.888	-0.070068	-0.071534	0.053955	-12.38	-61.189	858.177	-1.6362	-0.15527	0.35693	82.3221	96.375	716.1259	-0.66748	0.19678	0.28711	16.119	-75.853	718.091	-1.4526	0.50635	0.61816
0.086	52.3103	-61.436	728.344	-1.7852	0.7168	0.72314	20.703	73.491	1190.3	-1.7656	0.64355	0.27734	20.322	-90.4923	783.028	-0.98584	0.30615	0.25439	-4.033	103.296	199.5643	-0.053711	-0.078613	0.052734	18.906	-93.159	893.473	-1.6484	-0.15234	0.33936	60.9066	132.1092	675.9441	-0.62085	0.16992	0.27734	55.431	-82.984	695.871	-1.5254	0.50586	0.67139
0.088	21.84534	-49.079	752.589	-1.7734	0.72656	0.71533	-4.524	98.8414	1134.517	-1.7026	0.63135	0.26514	8.3527	-79.3287	807.283	-1.1163	0.34863	0.31861	30.815	81.481	193.8954	-0.020996	-0.099121	0.043457	31.121	-95.577	907.2	-1.6648	-0.13769	0.33863	71.48382	97.559	654.0273	-0.5752	0.14258	0.26074	43.441	-38.6534	649.6038	-1.5586	0.51074	0.68896
0.09	31.9937	-74.621	839.821	-1.7285	0.75	0.69873	5.489	30.193	1108.3839	-1.6594	0.62426	0.25708	-3.8	-118.626	836.047	-1.2515	0.39697	0.38867	39.0472	109.242	169.373	-0.013184	-0.10107	0.039063	-28.446	-124.611	962.785	-1.6812	-0.10791	0.33984	107.22	137.293	615.373	-0.51318	0.11279	0.23633	42.003	-30.736	634.559	-1.5815	0.52588	0.72656
0.092	31.3559	-51.838	877.537	-1.6841	0.76709	0.68262	22.212	103.7145	1060.697	-1.6147	0.6167	0.24951	12.8831	-97.269	853.0124	-1.4292	0.47217	0.49414	-1.497	88.058	155.198	0.0092773	-0.1167	0.039551	13.244	-142.435	1050.144	-1.6758	-0.057129	0.33105	60.4773	141.9868	578.293	-0.48047	0.096191	0.229	84.9491	-40.969	671.198	-1.5977	0.5376	0.74366
0.094	4.9241	-111.203	923.4524	-1.625	0.7793	0.66064	20.482	95.2351	1024.005	-1.5547	0.60352	0.23584	16.0071	-79.005	850.072	-1.5073	0.50342	0.55029	42.436	93.468	166.31644	0.015137	-0.12524	0.039795	-5.949	-141.657	1061.094	-1.6602	-0.024902	0.31543	78.156	126.286	559.0313	-0.41699	0.07373	0.20068	37.0573	-18.528	672.43	-1.6016	0.55469	0.76221
0.096	9.309	-136.115	995.281	-1.5444	0.78174	0.63574	42.564	94.5086	996.765	-1.5254	0.60156	0.22705	9.670396	-115.352	871.938	-1.6543	0.57324	0.64697	38.808	111.709	140.715	0.027832	-0.12939	0.044434	-64.051	-185.1634	1092.098	-1.6069	0.030762	0.29883	49.58794	189.061	492.67	-0.36816	0.05664	0.1792	35.408	-58.218	749.43	-1.6108	0.57861	0.77051
0.098	5.958	-140.613	1009.29	-1.5098	0.78516	0.6167	32.168	176.395	951.135	-1.4648	0.58887	0.21436	24.5514	-89.622	847.341	-1.7299	0.60791	0.69336	21.278	88.981	137.0235	0.029297	-0.14258	0.049805	-20.149	-197.523	1118.613	-1.5733	0.064453	0.2898	42.206	157.498	474.823	-0.31689	0.036133	0.15381	61.85	-88.41	813.595	-1.6147	0.59619	0.77246
0.1	0.870000000000005	-217.922	1032.453	-1.4507	0.7915	0.57813	31.446	124.379	956.7086	-1.3999	0.57666	0.20313	9.4845	-96.046	799.812	-1.7891	0.63672	0.71729	42.49	99.342	128.4881	0.034668	-0.13818	0.050293	-31.032	-198.981	1101.2578	-1.5571	0.089355	0.28125	75.8972	156.9958	428.339	-0.2627	0.010742	0.12842	37.5149	-92.013	845.9708	-1.6055	0.63281	0.77979
0.102	0.582000000000001	-211.696	1022.5263	-1.4207	0.80689	0.54761	38.713	154.225	958.554	-1.3716	0.56885	0.19482	-10.007	-99.506	804.707	-1.8022	0.65674	0.69922	-4.597	84.558	111.387	0.040527	-0.13818	0.062988	-25.865	-218.504	1148.255	-1.5483	0.11816	0.28174	11.694	167.1359	393.285	-0.24023	-0.0029297	0.11621	62.1828	-164.396	903.125	-1.5867	0.65552	0.77905
0.104	-41.9117	-231.957	1009.784	-1.3926	0.82227	0.52393	39.376	176.064	924.938	-1.3101	0.55908	0.18359	7.346	-48.535	774.0899	-1.7847	0.66455	0.68115	32.204	57.7657	116.295	0.046875	-0.13745	0.071045	-9.857	-194.375	1170.1695	-1.5542	0.13135	0.2832	22.215	135.16554	383.591	-0.19336	-0.047363	0.10938	47.898	-164.1721	918.785	-1.562	0.67627	0.77148
0.106	-62.9094	-279.666	1079.537	-1.3643	0.83887	0.47705	27.269	108.225	880.1375	-1.2661	0.54858	0.18554	-11.922	-56.5596	742.211	-1.7422	0.66211	0.63135	27.698	67.8018	71.3285	0.051758	-0.12939	0.081055	-30.718	-185.012	1198.9663	-1.5737	0.15479	0.29004	32.009	155.588	347.482	-0.17016	-0.089599	0.099852	26.102	-180.025	943.322	-1.5332	0.67969	0.76025
0.108	-64.845	-228.671	1091.5358	-1.3511	0.84326	0.45068	31.74	173.638	846.0468	-1.2207	0.53711	0.18701	23.342	-29.516	745.524	-1.6889	0.65136	0.58301	-1.76	48.1878	51.53	0.060059	-0.12402	0.095703	44.579	-207.293	1237.646	-1.5889	0.17481	0.30664	-4.925	131.867	362.2804	-0.15283	-0.12061	0.092773	41.189	-237.136	998.8494	-1.5127	0.68359	0.75244
0.11	-58.611	-245.967	1099.2775	-1.3281	0.85059	0.39941	34.11	137.501	813.8495	-1.1616	0.52002	0.18457	60.26	4.14400000000001	732.265	-1.644	0.62744	0.52148	39.57	44.0209	65.9669	0.065918	-0.11719	0.094238	68.3695	-172.282	1202.3068	-1.6074	0.19922	0.31201	17.163	85.4511	348.4892	-0.12891	-0.11377	0.061035	-0.261000000000003	-216.404	1013.803	-1.4692	0.69971	0.71875
0.112	-38.3284	-225.517	1137.755	-1.3037	0.84473	0.3645	25.455	107.305	781.054	-1.1362	0.51221	0.18555	45.272	-43.032	777.66	-1.562	0.57178	0.43945	-3.039	40.4349	51.8657	0.078125	-0.11621	0.09668	48.537	-156.672	1178.109	-1.6401	0.22461	0.34229	-33.427	108.552	313.5872	-0.11279	-0.10352	0.04541	-21.558	-260.454	1067.164	-1.4365	0.72071	0.6958
0.114	-43.0072	-148.341	1133.946	-1.2832	0.83984	0.33057	35.6236	154.064	750.898	-1.0786	0.49268	0.18994	36.652	-31.749	839.0884	-1.5073	0.54395	0.40186	0.0389999999999944	13.2493	46.1323	0.088379	-0.10766	0.10302	107.139	-124.384	1214.1618	-1.6558	0.229	0.35889	-36.212	87.115	305.726	-0.072754	-0.089844	0.034668	4.233	-248.264	1104.55922	-1.4019	0.74561	0.66602
0.116	-28.5645	-160.411	1160.431	-1.2505	0.82861	0.28027	43.0413	69.524	733.4848	-1.0356	0.47706	0.18604	25.056	-52.721	861.6774	-1.4326	0.5	0.33447	25.22	13.6761	53.533	0.104	-0.10742	0.10059	104.8016	-58.971	1211.1388	-1.7012	0.23438	0.3999	4.594	104.127	292.8957	-0.049805	-0.076416	0.020264	-24.497	-165.9844	1098.275	-1.3691	0.76953	0.62451
0.118	-4.544	-100.05	1161.98373	-1.2266	0.8125	0.26123	50.2177	87.9379	732.99	-0.9917	0.45752	0.18457	23.518	-112.43	954.081	-1.4074	0.49878	0.302	-4.154	3.4442	45.069	0.12549	-0.099609	0.10254	89.5287	-70.861	1243.489	-1.7429	0.23267	0.4314	-56.5552	111.648	264.8822	-0.027832	-0.072266	0.0097656	3.883	-167.094	1140.35	-1.3535	0.77734	0.59814
0.12	-11.119	-52.153	1135.367	-1.1968	0.79639	0.21631	46.0409	99.6052	704.911	-0.93213	0.43506	0.18701	11.058	-116.734	986.439	-1.3921	0.51611	0.29492	25.123	-9.813	71.199	0.13672	-0.098633	0.096191	95.0912	-52.583	1242.577	-1.8042	0.2251	0.46973	-27.179	71.73286	251.2294	-0.010254	-0.07373	-0.015137	3.36499999999999	-92.147	1131.763	-1.3281	0.78613	0.53613
0.122	-5.846	-98.3729	1178.157	-1.1777	0.79199	0.18311	51.1908	63.477	697.2322	-0.8999	0.41846	0.18213	-26.816	-180.391	1012.41985	-1.3887	0.5625	0.28613	30.862	15.0622	33.405	0.15234	-0.098633	0.085449	47.614	-65.7695	1257.709	-1.8979	0.19727	0.5293	-11.327	91.82269	220.8087	-0.0073242	-0.070801	-0.01416	-23.693	-71.438	1130.613	-1.311	0.78907	0.49512
0.124	7.281	-53.841	1180.326	-1.1758	0.79199	0.17041	33.444	158.538	656.2261	-0.83398	0.38867	0.1748	7.28100000000001	-198.311	1050.388	-1.3779	0.59863	0.28955	-23.731	5.0618	8.4281	0.15967	-0.10034	0.077148	48.615	-120.414	1309.8905	-1.9585	0.17139	0.56445	-31.594	88.74	210.207	0.01123	-0.086426	-0.032715	15.415	-110.496	1170.45228	-1.3101	0.78955	0.44971
0.126	9.8888	-106.88275	1174.936	-1.2007	0.79736	0.15283	23.173	131.6629	644.5071	-0.78686	0.36377	0.17749	-10.131	-160.643	1046.9	-1.3223	0.65039	0.271	7.923	17.58575	6.066	0.16504	-0.10059	0.068359	64.934	-78.91807	1297.6284	-2.0977	0.12012	0.64111	31.784	98.48	204.53	0.016846	-0.095947	-0.048828	12.29	-55.067	1148.8625	-1.3062	0.78955	0.42383
0.128	13.552	-157.453	1200.7947	-1.2522	0.80152	0.15235	16.642	121.205	608.407142	-0.73584	0.33887	0.17236	-38.54	-201.966	1081.435	-1.2547	0.67309	0.25147	-7.396	22.0766	7.866	0.16455	-0.10254	0.048828	31.358	-105.7899	1303.9355	-2.2048	0.068359	0.70337	-13.126	125.183	176.2055	0.02832	-0.10938	-0.0625	0.528999999999996	-86.38	1171.041	-1.3056	0.77588	0.40795
0.13	-0.3832	-124.459	1206.6396	-1.3257	0.80322	0.15771	-8.241	179.573	540.277	-0.67334	0.30566	0.15869	1.014	-170.839	1129.405	-1.1821	0.68604	0.229	-8.443	-7.933	16.249	0.16211	-0.10205	0.041016	78.3254	-139.492	1346.167	-2.3047	0.026855	0.76611	1.661	102.136	173.9351	0.040039	-0.12305	-0.078613	22.034	-113.9956	1196.964	-1.3057	0.76172	0.38477
0.132	-11.5368	-199.441	1258.0547	-1.4785	0.81055	0.19385	-5.775	132.766	536.7165	-0.64404	0.2915	0.16113	31.962	-149.1453	1129.122	-1.1133	0.69434	0.2085	37.5755	6.1719	6.9294	0.14502	-0.10059	0.023438	71.721	-135.0585	1346.563	-2.4194	-0.025879	0.83398	49.4928	105.341	164.6214	0.05127	-0.12793	-0.087402	-20.637	-90.95	1168.109	-1.2964	0.74658	0.35156
0.134	31.9474	-178.299	1293.189	-1.5659	0.81885	0.2207	-5.577	172.2644	501.3578	-0.58105	0.26074	0.146	70.8673	-158.0757	1170.665	-1.0877	0.69311	0.19654	8.285	-3.105	-8.5993	0.12646	-0.09961	0.018799	69.573	-188.299	1366.307	-2.4624	-0.046875	0.86133	20.416	102.278	119.9163	0.063965	-0.13672	-0.104	5.573	-175.425	1194.3191	-1.2813	0.74805	0.33643
0.136	24.534	-139.2763	1277.19	-1.7617	0.83105	0.27979	-13.842	177.101	470.2898	-0.53662	0.23608	0.13599	93.188	-81.812	1180.698	-1.0762	0.68555	0.19189	18.481	-15.493	20.3066	0.10156	-0.097656	0.012695	105.0353	-153.8591	1371.8668	-2.5249	-0.080078	0.89844	72.427	83.576	122.99571	0.074219	-0.14942	-0.11621	24.569	-181.11	1214.349	-1.2539	0.75	0.29688
0.138	8.6737	-184.586	1318.496	-1.9265	0.84399	0.33422	-15.084	115.088	454.2488	-0.49219	0.21143	0.12695	74.0527	-69.876	1169.0553	-1.0796	0.6792	0.20313	36.539	10.1332	3.2961	0.068848	-0.089844	0.010254	49.063	-101.047	1357.529	-2.5507	-0.10523	0.91455	59.7009	81.625	113.1564	0.086426	-0.15967	-0.12842	12.091	-178.2258	1239.78	-1.2488	0.75904	0.26733
0.14	25.5547	-106.306	1335.8737	-2.0776	0.86182	0.40137	-26.673	156.793	400.351	-0.43506	0.18213	0.11816	97.3485	-48.274	1197.0939	-1.0933	0.68604	0.20557	20.462	-7.714	-9.7242	0.047363	-0.090332	0.010254	42.827	-107.9965	1399.2223	-2.564	-0.12891	0.91406	41.435	70.961	98.6927	0.098145	-0.16699	-0.1416	53.0745	-232.295	1303.402	-1.2578	0.7666	0.24365
0.142	4.4481	-102.23177	1341.90842	-2.2554	0.88135	0.49609	-1.156	123.4197	387.522	-0.40771	0.16602	0.11182	98.7244	9.38	1165.457	-1.1206	0.68994	0.22656	48.288	8.2872	-3.158	0.0053711	-0.080566	0.018066	53.453	-30.016	1376.566	-2.5581	-0.16406	0.90039	86.4784	45.173419	96.4129	0.10303	-0.16846	-0.14844	44.3772	-162.272	1293.678	-1.3105	0.77246	0.21924
0.144	5.708	-102.5449	1371.0626	-2.3394	0.89014	0.54443	7.452	118.848	374.216	-0.35449	0.13428	0.10059	57.199	-35.447	1183.81	-1.145	0.70264	0.23462	22.354	13.518	-8.4	-0.025391	-0.072998	0.031006	19.732	-37.6	1364.3802	-2.5522	-0.18115	0.89258	61.0303	43.8263	53.5264	0.11035	-0.17725	-0.15723	34.9801	-167.784	1310.6073	-1.3633	0.7793	0.21533
0.146	-11.807	-28.089	1344.08	-2.4858	0.9126	0.61914	-5.636	176.24	334.798	-0.31543	0.11499	0.090333	83.892	-27.234	1222.906	-1.1694	0.7124	0.25342	12.918	-5.2819	20.5335	-0.051758	-0.062012	0.04248	45.273	-66.9098	1405.629	-2.5488	-0.22217	0.87158	62.8927	12.1395	77.921	0.11939	-0.1792	-0.16578	79.156	-158.73	1337.1686	-1.5054	0.7876	0.23438
0.148	-45.749	-87.236	1364.854	-2.5752	0.93262	0.68018	12.878	119.34	353.383	-0.28271	0.098145	0.083984	62.589	-26.896	1226.619	-1.207	0.7168	0.24902	48.62319	13.7541	21.2555	-0.087402	-0.050293	0.061035	11.381	-14.921	1388.8586	-2.5405	-0.24268	0.85132	74.9713	10.411	80.379	0.12012	-0.18506	-0.16992	39.8167	-69.654	1311.6983	-1.6465	0.79858	0.2688
0.15	-44.5634	-55.081	1373.245	-2.6538	0.94385	0.73438	2.543	133.957	335.08669	-0.23389	0.067383	0.07373	41.774	-99.451	1288.02	-1.2354	0.71777	0.25635	14.694	8.52854	10.0118	-0.093262	-0.045898	0.070801	0.863	-40.73723	1400.2866	-2.5332	-0.25342	0.83447	18.649	26.4527	65.021	0.125	-0.18994	-0.17285	57.4192	-89.828	1319.4976	-1.8042	0.81396	0.31787
0.152	-55.854	-0.0520000000000067	1334.1005	-2.7358	0.94385	0.7832	-0.201000000000001	118.033	328.4016	-0.2085	0.054688	0.070801	58.874	-93.231	1289.6846	-1.3301	0.73242	0.28369	34.956	-5.77	29.5982	-0.10303	-0.038574	0.082031	59.206	5.29	1392.2677	-2.5112	-0.25391	0.80078	56.129	21.99767	60.987	0.12549	-0.19531	-0.17627	67.5906	-52.474	1344.766	-2.0352	0.83594	0.40674
0.154	-67.418	-41.3539	1317.806	-2.7676	0.94141	0.81104	24.247	72.21	333.4873	-0.16455	0.038574	0.059082	53.036	-133.951	1289.2275	-1.4312	0.74561	0.32764	30.816	8.3575	6.677344	-0.10742	-0.037842	0.090088	35.378	43.11	1344.121	-2.498	-0.25586	0.78955	41.638	33.1921	33.23694	0.12549	-0.19873	-0.17578	-0.113000000000003	-24.977	1341.069	-2.1499	0.8501	0.45508
0.156	-71.775	27.7759	1323.355	-2.8101	0.93213	0.85156	3.079	115.0675	296.5914	-0.13721	0.019776	0.046631	98.393	-167.477	1328.489	-1.5601	0.76514	0.39063	13.36	-4.6444	-0.978199999999999	-0.10986	-0.034668	0.095215	57.411	-23.4747	1372.839	-2.4648	-0.25391	0.76221	-19.864	11.9897	35.236	0.11816	-0.19971	-0.17383	-0.141999999999999	-76.8067	1363.1804	-2.3691	0.87988	0.55908
0.158	-77.451	9.9956	1323.374	-2.8296	0.93555	0.86328	11.763	94.9245	283.073	-0.1084	0.0073242	0.04248	109.473	-123.025	1301.281	-1.7729	0.7915	0.5	67.258	23.7701	-7.345	-0.088379	-0.048828	0.10254	96.495	5.77	1366.516	-2.4404	-0.24487	0.74316	33.522	8.9916	39.2837	0.10938	-0.19873	-0.17236	-3.455	-25.65	1332.156	-2.5144	0.90454	0.63257
0.16	-69.918	-40.5145	1373.23	-2.8511	0.93408	0.875	32.572	87.086	255.672	-0.072754	-0.003418	0.037109	83.445	-156.308	1308.465	-1.8984	0.80859	0.55908	26.686	48.452	-19.187	-0.083496	-0.047363	0.1084	86.297	-39.071	1369.9037	-2.4155	-0.23682	0.72754	3.698	30.2118	-2.6548	0.092773	-0.19531	-0.16016	-13.077	-28.3153	1319.451	-2.6328	0.93457	0.70361
0.162	-49.263	18.874	1384.386	-2.8511	0.9292	0.88281	12.621	130.462	195.056	-0.061035	-0.013672	0.031738	103.231	-123.85709	1329.088	-2.146	0.85107	0.68506	11.524	16.6655	15.654	-0.069824	-0.057617	0.11475	111.5891	-73.20932	1433.509	-2.3882	-0.22461	0.70703	-9.848	17.9264	26.7322	0.069092	-0.19214	-0.1543	-1.436	-39.369	1346.846	-2.7695	0.97266	0.78369
0.164	-65.584	-59.6757	1428.783	-2.8472	0.92236	0.87793	50.3712	86.1111	186.928	-0.025391	-0.027832	0.030273	95.9616	-76.728	1339.1449	-2.3035	0.89868	0.75513	45.562	32.678	22.4083	-0.056153	-0.065918	0.11255	88.3125	-23.199	1420.191	-2.3809	-0.21826	0.70166	1.912	23.1113	27.893	0.047363	-0.1875	-0.15088	-39.5906	29.93066	1311.003	-2.8125	0.98438	0.81885
0.166	-55.437	-50.588	1478.52	-2.8315	0.9126	0.86523	57.0203	113.213	188.369	-0.005615	-0.037354	0.028076	49.929	-116.151	1384.12719	-2.4409	0.94775	0.82031	6	15.5263	1.6668	-0.046387	-0.067871	0.1084	68.658	-81.016	1423.467	-2.3589	-0.20117	0.68555	-44.9769	6.7775	6.4777	0.023926	-0.17725	-0.13818	-15.194	-31.0941	1339.4894	-2.853	1.0122	0.86719
0.168	-57.234	-0.914000000000001	1445.286	-2.8095	0.91064	0.84716	33.16	123.405	178.4798	0.01416	-0.049316	0.026367	50.063	-51.5729	1365.9781	-2.5718	1.0122	0.87109	7.415	6.005	30.333	-0.030762	-0.070801	0.11035	98.6365	-40.9707	1418.506	-2.3445	-0.18164	0.67651	6.976	-7.1369	5.9044	0.0092773	-0.17871	-0.12354	-1.585	-34.78	1403.213	-2.8564	1.0337	0.89161
0.17	-52.684	-56.816	1428.55697	-2.7827	0.9126	0.83398	57.2903	83.957	200.132	0.035156	-0.061523	0.023926	42.292	-28.247	1322.158	-2.6152	1.0381	0.88818	20.542	24.0364	14.4555	-0.023926	-0.070313	0.10547	77.196	8.41	1339.011	-2.3296	-0.16699	0.67188	-7.105	17.0412	-17.8343	-0.019531	-0.17432	-0.10596	-28.8108	-32.746	1414.1	-2.8589	1.0415	0.89844
0.172	-21.1795	23.1963	1408.7925	-2.7319	0.90674	0.81055	47.1017	118.673	167.957	0.046387	-0.062012	0.026367	61.743	-25.357	1345.34	-2.6875	1.0781	0.90674	-16.132	15.4489	19.8522	-0.010742	-0.068359	0.11133	79.083	-13.227	1335.388	-2.3135	-0.14404	0.65674	-52.047	11.4778	-6.688	-0.03833	-0.17358	-0.089844	-15.76	-104.569	1454.096	-2.8394	1.0278	0.9043
0.174	-35.8265	14.5118	1379.943	-2.707	0.89844	0.80322	41.2513	82.663	165.27	0.071777	-0.077637	0.029785	68.979	63.319	1314.3956	-2.7322	1.0945	0.90551	21.086	28.807	9.3661	0.00073245	-0.069825	0.11181	77.738	64.296	1327.396	-2.3022	-0.13477	0.65039	-5.087	4.7493	17.1627	-0.0625	-0.16748	-0.07373	-30.398	-21.1117	1431.215	-2.8076	1.0137	0.90479
0.176	-10.245	-25.4713	1398.159	-2.6479	0.87744	0.7832	30.705	75.8756	148.0207	0.084229	-0.080567	0.036377	34.896	25.086	1289.018	-2.7515	1.0903	0.89648	-3.952	33.8075	-19.7585	0.01123	-0.070801	0.11523	60.732	64.333	1322.3317	-2.2671	-0.1084	0.64063	-32.105	11.8351	-2.0344	-0.082031	-0.16064	-0.061035	-36.2615	-8.843	1399.1781	-2.7402	0.97656	0.89111
0.178	26.2435	41.7373	1359.022	-2.5976	0.86133	0.77148	25.408	108.046	116.9011	0.1001	-0.08252	0.040527	88.772	29.522	1318.639	-2.7144	1.0688	0.86719	-11.875	9.9476	9.224	0.023438	-0.071289	0.11523	100.62005	36.8263	1336.01	-2.2385	-0.091308	0.63306	-11.713	-13.94198	26.3768	-0.093262	-0.1582	-0.050293	-13.562	-12.376	1406.4844	-2.6853	0.96411	0.87622
0.18	-15.7488	-16.591	1357.3655	-2.5449	0.84961	0.75732	33.755	64.899	103.154	0.11572	-0.083496	0.044922	77.299	49.208	1324.151	-2.6992	1.0508	0.83643	23.852	20.4461	33.537	0.033936	-0.070313	0.11304	94.9449	82.337	1293.409	-2.2065	-0.072754	0.61719	18.741	-9.9777	22.22601	-0.1084	-0.15674	-0.039551	-24.843	67.623	1346.6683	-2.6226	0.94775	0.85156
0.182	9.68823	17.277	1366.082	-2.4707	0.83008	0.73291	-2.481	72.156049	87.0479	0.12451	-0.087891	0.052734	73.709	-30.3666	1375.114	-2.627	1.0137	0.78369	-2.613	8.0586	38.217	0.040039	-0.065918	0.11377	62.196	31.691	1299.7026	-2.1719	-0.062988	0.60986	-7.362	-14.425	20.0607	-0.11499	-0.16113	-0.031739	-14.968	6.776	1343.3212	-2.5405	0.92822	0.81836
0.184	22.916	80.562	1321.085	-2.4219	0.82031	0.72607	-0.428000000000001	55.01684	70.5388	0.13965	-0.093262	0.056641	123.3116	9.65	1382.974	-2.5573	0.98755	0.74585	28.627	-0.436999999999999	42.858	0.047363	-0.063477	0.11182	93.3276	80.496	1295.8528	-2.1558	-0.058105	0.60254	62.785	-16.2944	26.534	-0.11279	-0.16699	-0.027832	14.027	35.9598	1362.854	-2.4937	0.92236	0.80664
0.186	26.6016	22.826	1318.718	-2.3105	0.81055	0.68213	9.066	8.516	94.658	0.14941	-0.092041	0.06128	105.1899	-1.398	1358.53	-2.4941	0.96289	0.69971	31.452	16.5038	25.7746	0.052246	-0.061035	0.10107	48.569	128.839	1243.633	-2.1226	-0.043945	0.59375	38.71	27.599	-2.7714	-0.11816	-0.17236	-0.023926	-1.319	65.968	1329.358	-2.4175	0.90381	0.77734
0.188	38.40171	102.765	1286.414	-2.2264	0.80395	0.66577	1.32700000000001	35.94	78.765	0.16016	-0.09668	0.063965	99.729	-26.4129	1394.1395	-2.4175	0.94385	0.65039	-3.921	0.628	31.487	0.056152	-0.051758	0.11377	39.988	89.575	1234.313	-2.1001	-0.036377	0.59156	18.96	24.173	-9.708	-0.12158	-0.17578	-0.02002	21.1245	20.405	1335.333	-2.3679	0.88696	0.76391
0.19	1.2229	90.026	1262.133	-2.1382	0.79346	0.63867	-0.0530000000000008	6.53497	86.241	0.17871	-0.099609	0.071777	100.225	35.12	1388.462	-2.3809	0.92969	0.62939	36.271	5.3248	30.1356	0.052002	-0.040039	0.11353	39.146	133.777	1224.9907	-2.0791	-0.025879	0.58252	93.008	24.9497	6.897	-0.13232	-0.17676	-0.0043945	34.46723	101.204	1307.8188	-2.3257	0.86963	0.75391
0.192	15.2404	38.2857	1291.7194	-2.0273	0.78125	0.60986	-4.389	13.394	78.429	0.18457	-0.10254	0.073242	63.155	-13.3744	1382.4455	-2.3433	0.91455	0.59766	12.059	29.4651	2.182	0.04834	-0.029297	0.11963	-29.949	81.093	1223.2788	-2.0469	-0.011719	0.57666	51.2589	24.554	-9.256	-0.14527	-0.17139	0.0024415	37.9582	84.931	1282.901	-2.2866	0.84033	0.74414
0.194	36.1179	95.911	1272.879	-1.9688	0.77148	0.59375	-15.937	46.007	41.1351	0.20361	-0.10986	0.073242	99.296	17.031	1404.841	-2.3159	0.89551	0.57373	7.916	5.133	21.366	0.035645	-0.010742	0.12305	13.13	35.403	1254.696	-2.0234	-0.0068359	0.56689	51.637	2.0991	15.87	-0.15723	-0.16846	0.01123	63.01939	51.6844	1293.957	-2.2773	0.83203	0.73975
0.196	2.4944	15.985	1263.0445	-1.8691	0.75	0.56494	23.662	18.5161	49.5487	0.21265	-0.11792	0.06665	101.396	75.293	1373.08334	-2.293	0.87109	0.54639	46.8388	7.1276	55.5743	0.024414	-0.0029297	0.12549	5.602	83.043	1198.193	-1.9819	0	0.55273	80.5859	24.6325	16.23474	-0.17725	-0.1543	0.029785	36.993	109.989	1265.4344	-2.2285	0.80469	0.73291
0.198	-3.32	28.469	1251.589	-1.7917	0.73169	0.54614	11.201	47.764	35.3157	0.21729	-0.12402	0.062012	78.353	38.302	1375.81065	-2.2715	0.84961	0.51611	3.681	-19.7285	67.889	0.0019531	0.015625	0.11865	-45.4489	41.179	1171.856	-1.9253	0.010742	0.52783	13.526	29.0077	11.6683	-0.18457	-0.14697	0.037598	41.9992	44.8555	1285.4017	-2.1814	0.78442	0.72144
0.2	-14.9055	81.015	1196.9064	-1.7266	0.70996	0.52979	-23.993	37.3324	9.051	0.22314	-0.13184	0.050781	112.8075	114.876	1335.3993	-2.2554	0.83643	0.50586	33.318	-29.2991	99.592	-0.026856	0.039063	0.10766	10.141	91.3303	1156.034	-1.8965	0.01416	0.51465	75.174	19.5209	40.946	-0.20752	-0.1377	0.05127	49.1988	68.001	1296.203	-2.1206	0.76025	0.70117
0.202	-29.059	25.513	1175.1137	-1.6436	0.68066	0.51318	5.706	11.793	20.4235	0.22607	-0.13428	0.045898	85.86	122.672	1289.219	-2.2246	0.81055	0.47607	56.8673	4.8063	113.9725	-0.059082	0.065918	0.099609	-14.703	115	1083.5681	-1.8335	0.016113	0.49414	72.62472	29.46	11.5832	-0.21826	-0.12842	0.0625	19.266	79.316	1273.98	-2.0391	0.74219	0.67236
0.204	-31.9624	105.4777	1142.434	-1.6089	0.66455	0.50195	-7.052	37.095	8.6612	0.22119	-0.14453	0.032715	92.477	94.501	1297.0515	-2.1885	0.79102	0.44897	6.091	-2.5551	153.0461	-0.11035	0.10547	0.099609	11.365	90.689	1062.465	-1.7859	0.020996	0.47192	16.562	8.16653	0.904	-0.22656	-0.11768	0.069824	37.6197	16.702	1252.662	-1.9902	0.73145	0.65186
0.206	-65.293	102.2897	1106.156	-1.5327	0.63525	0.48633	8.95	2.4684	19.209	0.21655	-0.14771	0.025146	123.9016	157.795	1279.282	-2.1504	0.77539	0.41846	39.752	11.1596	192.9237	-0.1377	0.12402	0.098145	50.476	162.523	1026.409	-1.7339	0.026855	0.45215	50.7206	18.2486	7.056	-0.23145	-0.10498	0.077148	9.841	77.516	1192.4406	-1.8867	0.69482	0.62061
0.208	-46.2365	77.27454	1112.755	-1.4822	0.61841	0.47242	32.256	-6.4276	28.8986	0.20117	-0.15186	0.025391	86.202	121.546	1283.68188	-2.0854	0.7583	0.38281	8.498	39.1589	190.423	-0.20459	0.16064	0.091797	-1.088	157.684	999.715	-1.6655	0.027344	0.42773	8.343	26.272	-2.02	-0.22559	-0.1001	0.078125	4.488	64.509	1155.516	-1.8081	0.66406	0.59326
0.21	-30.3424	157.18	1086.2386	-1.4312	0.59619	0.46484	18.842	17.884	3.7797	0.17432	-0.15771	0.0092773	101.1187	136.548	1309.0926	-2.0508	0.74805	0.36377	-12.53	27.265	228.105	-0.26733	0.19287	0.095215	44.27426	150.783	1029.066	-1.6323	0.028809	0.41992	12.26	1.742	25.9222	-0.21094	-0.09668	0.07373	24.033	54.941	1137.6736	-1.7402	0.63672	0.56689
0.212	-33.8525	99.1265	1063.6561	-1.3608	0.55908	0.45996	47.8	-21.9474	19.0237	0.15576	-0.1582	0.0058594	82.889	178.356	1274.951	-1.9834	0.73828	0.33252	32.6991	65.7598	301.1007	-0.3291	0.22656	0.11035	28.7672	182.528	975.994	-1.5469	0.030762	0.38818	23.563	3.8982	42.558	-0.19189	-0.097657	0.06372	2.867	145.043	1101.0409	-1.6553	0.59961	0.54346
0.214	-11.943	133.336	1046.4781	-1.3257	0.54639	0.45313	57.074	11.4435	-3.089	0.11279	-0.15723	0.0043945	32.347	120.7805	1281.018	-1.9248	0.72998	0.30664	-23.85	62.8294	349.9957	-0.41797	0.26758	0.12646	7.97	132.9502	957.4372	-1.4812	0.036377	0.36792	-28.651	-5.182	27.783	-0.1665	-0.10059	0.04834	2.835	108.316	1093.624	-1.6108	0.57715	0.53027
0.216	-12.231	196.553	985.9775	-1.2573	0.50928	0.44336	13.116	15.8521	-3.505	0.074463	-0.15332	0.0087889	61.916	156.635	1271.066	-1.877	0.72461	0.28955	6.056	47.6238	416.171	-0.46143	0.2876	0.13428	38.7458	152.486	931.268	-1.4136	0.039551	0.34961	-5.246	-4.578	36.068	-0.11816	-0.10303	0.027344	17.15	145.539	1085.2521	-1.5347	0.53564	0.50977
0.218	-14.878	131.077	971.826	-1.2102	0.48559	0.43555	41.858	-3.9223	10.107	0.035156	-0.15039	0.018555	30.278	122.8826	1228.37	-1.8062	0.72119	0.27197	22.166	67.1249	431.1962	-0.5625	0.33838	0.13867	5.927	159.759	867.2621	-1.3159	0.04834	0.31396	-3.761	23.13158	19.4131	-0.098145	-0.11328	0.016113	-2.305	166.481	1051.1987	-1.4802	0.50757	0.49097
0.22	5.038	178.598	927.2902	-1.1538	0.46289	0.42676	55.3304	18.5885	4.3251	-0.01123	-0.13721	0.040527	30.577	69.181	1233.815	-1.7788	0.71533	0.26563	-31.6	37.0516	482.1695	-0.63672	0.37646	0.14551	28.911	123.3631	850.4589	-1.269	0.04834	0.29785	-34.726	16.4896	10.8004	-0.048828	-0.11768	-0.017578	10.064	109.9766	1035.3952	-1.4233	0.4751	0.48145
0.222	7.044	146.714	877.57	-1.0796	0.43115	0.41357	49.3927	-23.0413	31.737	-0.037109	-0.13281	0.047363	44.831	113.0651	1211.28	-1.7168	0.70508	0.24463	-0.0970000000000013	22.5931	553.9914	-0.70947	0.41553	0.15625	46.1506	162.2297	800.98	-1.1689	0.050781	0.2666	-15.107	35.82	15.629	-0.012207	-0.125	-0.040283	2.224	183.223	989.7147	-1.3516	0.43652	0.45947
0.224	9.541	113.8403	875.5643	-1.0425	0.4126	0.40625	35.513	-23.055	30.5388	-0.074219	-0.12012	0.071777	8.057	61.127	1186.928	-1.6717	0.69897	0.23755	-7.098	24.804	605.112	-0.8125	0.46777	0.17236	12.858	134.718826	785.699	-1.1003	0.048095	0.25024	-42.733	35.7	-11.6043	0.023926	-0.13281	-0.0625	-16.443	160.386	968.3305	-1.3101	0.41553	0.45703
0.226	24.019	176.331	838.5418	-0.96631	0.37451	0.38965	24.8033	20.4115	19.2911	-0.10059	-0.10498	0.086914	54.922	88.253	1168.681	-1.6265	0.68799	0.23438	-10.408	-7.624	642.18	-0.8667	0.49365	0.18115	41.1661	107.451	801.5998	-1.0288	0.049316	0.23193	-12.644	5.1754	21.6323	0.052734	-0.13672	-0.082031	11.727	116.9332	949.493	-1.2378	0.3833	0.43555
0.228	34.003	115.6059	830.3547	-0.91211	0.34815	0.3772	55.0792	-7.0655	20.4451	-0.1084	-0.10693	0.098145	42.126	144.5616	1095.761	-1.5703	0.67773	0.22607	41.502	-5.604	680.622	-0.98096	0.54639	0.20898	44.6081	130.9619	756.9256	-0.93994	0.044434	0.20996	12.832	6.1496	36.887	0.065918	-0.13867	-0.09668	-3.319	150.564	899.415	-1.1831	0.35522	0.42773
0.23	50.153	137.08966	814.6827	-0.85303	0.3208	0.3623	38.504	35.204	8.728	-0.12598	-0.10205	0.11523	18.197	108.8924	1073.934	-1.543	0.67188	0.22119	6.313	-31.074	716.408	-1.0679	0.58496	0.23926	20.267	88.79946	753.398	-0.89111	0.04248	0.19629	-23.069	-10.08917	24.9373	0.080566	-0.13477	-0.10303	16.41	84.456	870.2981	-1.127	0.33008	0.41748
0.232	58.8044	167.377	770.2671	-0.771	0.28369	0.34717	5.224	32.896	-6.287	-0.13232	-0.10058	0.12646	59.86	182.156	1048.3228	-1.4941	0.66016	0.21582	16.009	-60.103	799.9437	-1.1572	0.61523	0.27881	46.3352	116.6425	726.388	-0.80664	0.040527	0.17822	19.771	-7.9579	38.15	0.081787	-0.13428	-0.10864	39.185	107.764	858.1559	-1.0537	0.29395	0.40869
0.234	65.563	109.208	764.8183	-0.73242	0.2666	0.33789	18.865	8.5572	-4.798	-0.13232	-0.1001	0.13477	31.103	182.23	1020.401	-1.4561	0.65283	0.21631	41.991	-65.5605	843.608	-1.271	0.65381	0.33594	-6.955	149.034	690.416	-0.73877	0.035645	0.16675	18.791	24.441	10.739	0.081543	-0.12598	-0.11572	18.012	130.579	836.89216	-1.0151	0.27783	0.39844
0.236	93.2755	168.818	740.675	-0.64795	0.2334	0.32275	1.77	41.715	-13.2637	-0.12695	-0.095703	0.15381	46.622	150.312	1013.808	-1.416	0.63965	0.21289	8.738	-95.72506	844.283	-1.3198	0.66699	0.37256	1.454	138.097	675.903	-0.67969	0.029785	0.15674	11.34	5.4604	11.3612	0.070313	-0.1167	-0.11621	53.759	92.842	836.7454	-0.94922	0.23975	0.38184
0.238	91.656	158.052	693.016	-0.58886	0.19873	0.30542	25.241	5.382	12.6885	-0.12451	-0.097168	0.15918	57.9388	189.486	970.008	-1.3687	0.62158	0.20898	68.265	-112.813	870.923	-1.4297	0.67969	0.44775	14.5575	192.845	605.981	-0.59912	0.024414	0.14307	59.31	2.6479	23.2781	0.063965	-0.11328	-0.11523	50.087	138.8682	806.71	-0.90283	0.21728	0.37841
0.24	72.9702	143.9756	666.616	-0.52881	0.17627	0.28613	27.76	4.456	31.28	-0.11621	-0.1001	0.16553	9.01	139.657	935.0243	-1.3418	0.61328	0.20654	62.398	-99.2012	825.119	-1.5007	0.68677	0.49634	-37.7315	169.63	571.64	-0.56201	0.021973	0.1377	12.035	1.279	-6.497	0.049805	-0.096191	-0.11963	62.0402	122.3018	766.0232	-0.86279	0.2002	0.37207
0.242	78.215	198.345	617.5468	-0.43945	0.13916	0.26807	-16.51	25.1277	10.6277	-0.10424	-0.096679	0.1687	45.13	159.66003	909.7597	-1.2871	0.59375	0.18945	51.933	-129.1	810.184	-1.5605	0.68555	0.54932	-21.688	151.939	545.885	-0.49414	0.0078125	0.125	47.5121	-15.1407	22.5734	0.034668	-0.092041	-0.12402	91.1634	102.001	757.253	-0.79834	0.17236	0.36328
0.244	54.53	132.1763	585.3111	-0.40479	0.11914	0.25293	14.359	-12.4009	20.19601	-0.096191	-0.093262	0.17529	40.486	191.023	850.349	-1.2439	0.57544	0.19262	102.8537	-104.002	759.034	-1.6265	0.67432	0.60156	-32.259	186.0846	506.954	-0.44482	0.0024414	0.11914	110.701	6.3022	41.02	0.018555	-0.078125	-0.12646	64.6342	178.362	705.75	-0.76318	0.15771	0.36279
0.246	75.099	152.7962	561.23945	-0.32666	0.083008	0.2251	9.596	30.6343	10.5767	-0.080078	-0.084961	0.17725	2.39599999999999	135.814	826.432	-1.1987	0.55518	0.18555	51.129	-92.269	699.877	-1.6445	0.66797	0.62158	-29.69	151.858	498.4867	-0.39648	-0.0043945	0.1123	42.3972	-10.043	45.574	0	-0.066895	-0.12988	88.596	151.375	680.07	-0.70166	0.13574	0.3501
0.248	49.38	178.822	506.7506	-0.25586	0.042969	0.19238	-12.618	30.1691	5.736	-0.075195	-0.075684	0.18408	27.443	165.2533	809.26	-1.1348	0.53125	0.17236	79.3401	-96.6645	719.204	-1.644	0.66064	0.64355	5.921	159.4712	462.589	-0.33252	-0.021973	0.10498	57.3216	-38.475	62.858	-0.010742	-0.062012	-0.13281	103.1558	179.535	625.84424	-0.65405	0.11938	0.34351
0.25	17.643	128.541	499.1772	-0.22168	0.034668	0.17773	-3.054	5.0761	20.222	-0.063965	-0.069824	0.18799	29.764	116.719	795.5065	-1.0991	0.51807	0.1665	75.124	-83.1947	732.203	-1.617	0.64868	0.63648	-40.1245	141.515	439.886	-0.30371	-0.030762	0.099121	69.5521	-23.68	33.88	-0.039063	-0.042969	-0.15723	49.375	190.629	578.716	-0.60742	0.097168	0.32715
0.252	36.536	184.952	481.468	-0.16211	-0.0058594	0.15088	-7.39299999999999	33.49	7.2132	-0.061036	-0.060547	0.18946	33.947	74.825	793.565	-1.0327	0.48877	0.15234	29.344	-75.63	744.916	-1.5801	0.64063	0.61865	-24.139	109.5783	433.185	-0.24609	-0.041016	0.093262	22.69	-25.6351	28.544	-0.056153	-0.030517	-0.16284	70.571	127.824	576.014	-0.54736	0.06543	0.32275
0.254	14.217	153.96	424.8974	-0.11328	-0.027099	0.12598	13.829	-4.6687	16.8128	-0.055664	-0.049316	0.18701	29.3658	129.013	745.178	-0.98267	0.46655	0.13941	72.486	-78.618	814.357	-1.5293	0.63672	0.60059	-0.145	157.133	376.656	-0.20776	-0.049317	0.095215	83.8983	-10.8589	76.327	-0.077637	-0.012695	-0.16602	61.795	164.40155	534.8591	-0.50513	0.04248	0.30395
0.256	17.092	122.8388	405.7458	-0.073242	-0.055664	0.10449	17.461	-7.0684	33.9553	-0.046875	-0.038086	0.18652	13.17	93.4303	719.4515	-0.93359	0.44238	0.12842	40.9575	-52.006	845.514	-1.5112	0.64014	0.58984	-17.24	142.119	366.799	-0.17627	-0.061523	0.095215	35.724	5.7288	71.716	-0.12305	0.010254	-0.15381	65.7411	145.1333	513.3222	-0.4585	0.016113	0.28711
0.258	16.839	167.609	363.4503	-0.024902	-0.082031	0.079102	12.926	12.9848	34.341	-0.041992	-0.02832	0.18213	38.422	134.7909	704.84	-0.86719	0.41797	0.11523	19.922	-74.824	910.89	-1.4902	0.64453	0.57666	11.411	132.9717	360.146	-0.13477	-0.068848	0.096191	20.102	-12.5476	114.821	-0.15039	0.025879	-0.14941	70.7439	121.802	490.01108	-0.39795	-0.01123	0.2627
0.26	-7.005	113.8996	363.8327	-0.0043945	-0.097656	0.067871	16.429	-23.7586	43.8096	-0.028809	-0.0087891	0.18115	37.698	179.026	661.4524	-0.82007	0.39184	0.10913	65.8247	-86.641	958.17634	-1.4909	0.66894	0.58667	-16.828	145.483	339.0711	-0.11572	-0.077148	0.094238	50.718	2.6074	141.447	-0.21631	0.050781	-0.12744	22.114	160.382	441.4226	-0.36719	-0.031738	0.25244
0.262	0.618000000000002	126.3951	352.148	0.030762	-0.12158	0.043457	23.278	12.8167	39.782	-0.025635	0.0063476	0.17309	-8.844	146.039	634.181	-0.77197	0.36963	0.097656	20.831	-98.997	969.0053	-1.5024	0.6958	0.60352	-1.387	94.1407	349.1274	-0.079102	-0.091797	0.098633	19.433	8.6927	182.65848	-0.27124	0.072021	-0.10986	36.95	115.3149	431.535	-0.31348	-0.063965	0.22754
0.264	-14.403	139.297	320.4041	0.054199	-0.13648	0.032227	43.3977	1.15	29.718	-0.022949	0.023926	0.1665	-12.22	191.5342	598.92	-0.71143	0.33838	0.083984	22.099	-145.234	1033.821	-1.4961	0.72266	0.59814	31.4052	96.73	331.374	-0.057373	-0.10181	0.10156	33.483	10.0932	264.549	-0.32959	0.09668	-0.088379	47.354	141.907	396.0655	-0.27466	-0.088379	0.20874
0.266	-28.713	83.0223	316.8997	0.07666	-0.15088	0.019043	33.876	-28.2015	54.516	-0.026855	0.050293	0.14795	-16.923	176.5762	569.537	-0.67725	0.32471	0.08252	42.676	-172.245	1072.088	-1.4839	0.73682	0.5918	0.241	85.665	309.788	-0.032227	-0.1167	0.10254	3.737	55.8834	305.6741	-0.42041	0.13281	-0.061523	9.573	147.439	374.6538	-0.23486	-0.10742	0.19385
0.268	-13.286	106.677	296.191	0.099121	-0.16455	0.0024414	35.047	8.75	70.66342	-0.030762	0.064453	0.14209	-2.806	160.8733	553.7487	-0.62305	0.29492	0.074219	-6.237	-210.604	1073.385	-1.4487	0.75342	0.56055	35.5412	74.419	297.959	-0.0024414	-0.13135	0.11963	-5.835	58.6039	365.389	-0.46484	0.15625	-0.040039	19.115	104.1761	393.6373	-0.19775	-0.12891	0.16748
0.27	-5.344	68.71223103	273.657	0.11084	-0.16992	-0.003418	48.6152	-28.5515	95.8229	-0.049805	0.099121	0.13428	-1.046	209.667	497.1729	-0.57959	0.27149	0.063965	23.599	-263.286	1115.725	-1.4133	0.77173	0.531	46.4081	116.0596	245.7734	0.012695	-0.14307	0.11572	31.561	49.4641	425.903	-0.56885	0.20215	-0.0063477	-3.944	134.444	358.9408	-0.18164	-0.1416	0.15918
0.272	6.876	55.372	251.924	0.13086	-0.18408	-0.010254	59.461	-20.2493	129.151	-0.065674	0.12745	0.13306	-21.87	172.803	461.0424	-0.53662	0.25342	0.058594	-16.07	-244.041	1116.101	-1.377	0.78906	0.49756	14.004	110.6184	201.712	0.036621	-0.16992	0.12158	-7.72	65.752	443.089	-0.65894	0.23194	0.022217	3.299	102.9591	353.4508	-0.14844	-0.15625	0.13574
0.274	11.246	112.269	198.2757	0.1377	-0.18799	-0.020508	26.6904	-2.504	155.573	-0.088867	0.14844	0.13525	10.904	173.822	430.1236	-0.48096	0.21973	0.050293	-61.2391	-252.404	1134.914	-1.3496	0.81055	0.45557	67.6706	121.6088	185.504	0.055664	-0.1875	0.12208	13.299	24.7363	549.4266	-0.75635	0.27637	0.057617	11.397	78.506	327.5214	-0.11303	-0.16309	0.11865
0.276	12.92	67.873	195.273	0.14209	-0.19385	-0.029297	39.6184	-39.9273	195.7277	-0.1333	0.18848	0.13135	-2.173	193.157	390.39	-0.45654	0.20264	0.047363	-3.38	-226.713	1168.021	-1.3467	0.81445	0.43359	28.865	137.104	162.97	0.072754	-0.20068	0.12207	59.309	8.379	624.9071	-0.90381	0.33301	0.11621	-21.83	105.572	284.0405	-0.089355	-0.17578	0.098633
0.278	23.096	87.287	190.9018	0.15381	-0.20068	-0.037598	14.694	30.7087	223.4088	-0.1582	0.20313	0.12842	-18.7	155.09	399.565	-0.40625	0.17236	0.037598	-36.612	-166.014	1152.1871	-1.334	0.83008	0.39746	29.88	105.394	194.5087	0.095703	-0.2207	0.12305	39.765	-20.069	672.777	-0.98633	0.3623	0.15381	9.043	52.9451	269.67923	-0.054688	-0.18359	0.068848
0.28	35.7357	86.5484	165.768	0.15869	-0.20508	-0.043945	9.538	45.2236	251.3543	-0.21338	0.24756	0.12256	14.474	191.52	390.392	-0.36474	0.14965	0.026855	-0.0100000000000016	-164.622	1183.123	-1.3298	0.83032	0.38281	74.5861	109.354	191.0165	0.10156	-0.22705	0.12354	77.973	-67.279	749.732	-1.165	0.43359	0.23877	4.953	88.8712	219.2387	-0.038574	-0.18848	0.061035
0.282	48.807	34.298	167.3198	0.16211	-0.21191	-0.052246	49.5293	47.321	306.413	-0.26001	0.27856	0.13159	9.527	171.188	370.669	-0.32861	0.12646	0.013672	27.483	-121.937	1200.1836	-1.3276	0.8208	0.36719	21.67	97.834	167.7594	0.12451	-0.2373	0.12451	64.217	-58.769	787.08107	-1.353	0.51416	0.33887	-10.756	113.313	192.826	-0.012207	-0.19873	0.028809
0.284	44.8242	89.58	142.2193	0.16845	-0.22656	-0.060059	-4.166	97.5818	349.023	-0.30322	0.31201	0.14795	6.252	140.334	383.136	-0.28271	0.094727	0.0063477	-7.197	-84.979	1205.4594	-1.312	0.80127	0.35742	48.9172	84.003	172.153	0.13989	-0.24219	0.11963	-3.708	-76.205	840.9597	-1.4463	0.55762	0.39697	26.801	88.97265	194.849	0.0036621	-0.20484	0.012451
0.286	55.389	78.269	133.35	0.16797	-0.23389	-0.060547	-18.054	61.2346	410.3428	-0.37305	0.36035	0.16113	18.569	151.652	359.515	-0.26563	0.081055	0.00097656	40.093	-113.571	1241.791	-1.3047	0.79102	0.354	17.344	97.187	145.593	0.15576	-0.24463	0.11914	39.291	-84.469	883.8851	-1.625	0.62891	0.5083	-4.732	123.886	197.059889	0.02002	-0.21338	-0.0014648
0.288	66.968	74.582	112.4411	0.17236	-0.24609	-0.070313	7.573	63.6221	460.014	-0.41309	0.38281	0.1665	-6.717	85.5904	345.341	-0.23096	0.057129	-0.0097656	17.627	-69.298	1216.585	-1.2925	0.77393	0.33789	7.846	80.433	114.3838	0.17236	-0.24365	0.11084	-0.0399999999999991	-43.438	848.868	-1.7546	0.68189	0.56665	30.02	95.484	195.8952	0.025879	-0.21484	-0.015137
0.29	76.0669	98.906	51.999	0.17188	-0.25391	-0.069336	-6.426	69.82	496.058	-0.49951	0.43018	0.1748	5.727	99.6862	331.424	-0.20483	0.036132	-0.012207	-12.791	-90.484	1221.043	-1.2849	0.77368	0.32959	38.108	74.1934	101.28	0.18115	-0.2417	0.11084	-7.774	-54.032	886.585	-1.8594	0.71484	0.61572	57.621	78.9303	182.4832	0.027344	-0.21338	-0.020508
0.292	56.7363	42.8067	40.067	0.17432	-0.26123	-0.077637	-3.162	7.23047	581.9889	-0.56543	0.47339	0.17798	27.3765	120.4876	284.1451	-0.18359	0.020508	-0.010254	47.78072	-134.60358	1242.4355	-1.2832	0.78223	0.31592	-19.014	71.6182	51.677	0.18945	-0.22998	0.10352	39.173	-59.291	922.169	-1.9512	0.73047	0.63135	19.291	111.434	168.548	0.03418	-0.21582	-0.037598
0.294	62.2874	62.387	41.728	0.17358	-0.26635	-0.07959	-4.61	25.2238	632.6902	-0.63525	0.51611	0.18994	17.552	85.561	277.5515	-0.15625	0.0014648	-0.020996	4.091	-120.2184	1204.227	-1.311	0.79541	0.30664	-3.345	30.3526	79.0006	0.20581	-0.22021	0.09741	0.4268	-65.825	904.822	-1.9761	0.72607	0.62939	50.7432	53.6266	164.45	0.037842	-0.21778	-0.047364
0.296	55.8734	60.9354	35.586	0.17236	-0.26904	-0.089355	-14.966	2.432	646.564	-0.73682	0.56689	0.21094	19.719	126.2594	244.0867	-0.14746	-0.0087891	-0.029297	11.691	-173.067	1243.086	-1.3398	0.80273	0.30322	16.444	31.333	89.531	0.21729	-0.2041	0.092285	-13.517	-115.457	928.879	-1.9888	0.68701	0.59766	49.106	77.655	139.44	0.045898	-0.21826	-0.054688
0.298	41.984	28.319	56.3536	0.16699	-0.27734	-0.092285	25.826	-40.8412	690.747	-0.78857	0.59424	0.2168	31.844	127.262	209.5665	-0.125	-0.025879	-0.035156	21.724	-173.435	1278.596	-1.439	0.81885	0.31641	-28.067	25.525	72.838	0.23047	-0.19043	0.078613	9.589	-73.072	896.6	-2.0007	0.67114	0.57251	33.446	75.7	81.859	0.052734	-0.21436	-0.06543
0.3	29.469	71.861	50.0307	0.16602	-0.27344	-0.092285	29.709	-21.731	725.658	-0.89697	0.63721	0.24805	33.856	109.877	220.1635	-0.10742	-0.038818	-0.040527	-0.264000000000003	-152.105	1302.5522	-1.5557	0.83545	0.33985	9.096	21.0937	85.184	0.23584	-0.18262	0.075684	-14.114	-71.755	912.1461	-2.0039	0.64648	0.55127	73.5514	34.57	72.284	0.062012	-0.21777	-0.075195
0.302	25.782	30.7301	51.8074	0.16162	-0.26709	-0.092773	-15.966	-88.4487	775.836	-0.97779	0.66675	0.27979	32.2743	137.737	195.771	-0.092285	-0.046875	-0.045898	42.8953	-202.715	1358.587	-1.6934	0.84961	0.37744	10.829	44.252	61.081	0.24561	-0.1748	0.068359	23.295	-80.162	931.797	-1.9233	0.60693	0.48633	43.938	63.7692	53.944	0.071289	-0.2207	-0.088867
0.304	13.871	22.7833	52.427	0.15259	-0.26319	-0.094971	23.881	-102.29	802.33431	-1.064	0.69287	0.31348	24.029	92.915	205.27	-0.080566	-0.058594	-0.044922	36.1789	-151.127	1350.529	-1.8901	0.87842	0.44531	-12.639	29.4044	57.513	0.25244	-0.16968	0.063965	46.771	-56	910.437	-1.8535	0.58496	0.44775	52.1587	33.1435	79.12635	0.075684	-0.21826	-0.091797
0.306	14.962	51.28	17.7899	0.14063	-0.25391	-0.09082	38.951	-78.488	788.407	-1.1733	0.71631	0.37061	42.1148	97.058	197.42	-0.072266	-0.063477	-0.041504	25.2498	-159.81	1366.43	-2.0525	0.90454	0.5144	21.873	42.898	44.8678	0.25391	-0.1665	0.056152	39.304	-104.166	932.086	-1.7031	0.53906	0.36865	59.1471	24.066	85.38	0.078613	-0.22607	-0.10156
0.308	1.577	16.7496	5.499	0.11719	-0.23535	-0.084473	55.003	-137.448	813.466	-1.2227	0.71387	0.40381	18.652	110.791	150.552	-0.061523	-0.07666	-0.040039	37.8809	-154.314	1415.462	-2.2168	0.92676	0.58936	-5.965	53.062	4.569	0.24707	-0.1626	0.047852	75.7766	-122.227	971.429	-1.5987	0.49952	0.31152	20.887	48.618	63.3452	0.080078	-0.22949	-0.10498
0.31	-13.776	42.985	-0.280999999999999	0.10547	-0.22559	-0.080566	49.258	-120.472	805.602	-1.3433	0.71729	0.4585	14.644	79.9766	142.2662	-0.055664	-0.077637	-0.032226	2.809	-51.483	1359.704	-2.4277	0.95801	0.69531	-12.647	37.514	16.154	0.24365	-0.1709	0.040527	-7.801	-107.812	999.346	-1.5288	0.47998	0.27051	52.7341	14.1061	88.712	0.081543	-0.23584	-0.10596
0.312	-6.701	45.646	7.7675	0.085449	-0.20703	-0.07373	56.373	-126.697	749.96	-1.4141	0.71044	0.5066	32.956	106.881	119.0618	-0.052246	-0.083496	-0.026855	5.8298	-55.386	1330.452	-2.5195	0.9707	0.73779	25.363	41.782	23.6701	0.22656	-0.18506	0.031738	-12.341	-139.327	1077.476	-1.4746	0.48438	0.24902	40.731	44.727	64.1789	0.079102	-0.24805	-0.10742
0.314	-5.069	7.9959	29.3656	0.068603	-0.20312	-0.066162	79.068	-126.68	724.6811	-1.4766	0.70313	0.54541	4.646	71.9379	87.456	-0.044922	-0.089844	-0.01709	14.24	-35.035	1345.786	-2.6816	0.99023	0.81885	-12.25	10.2373	14.5107	0.21289	-0.19898	0.021484	-32.4146	-117.318	1107.614	-1.4526	0.49658	0.24316	7.801	48.407	33.2676	0.075927	-0.25611	-0.11011
0.316	-9.189	33.67603	13.1154	0.036621	-0.18994	-0.053223	63.5295	-56.3922	675.638	-1.541	0.70117	0.5874	3.024	60.42534	96.7836	-0.039551	-0.09082	-0.0092773	-51.4097	1.873	1320.977	-2.7742	1.0052	0.86743	22.899	-4.2595	8.407612	0.19385	-0.21631	0.012695	-94.483	-143.387	1107.7539	-1.3945	0.52344	0.22217	33.236	43.385	14.88	0.070313	-0.25977	-0.10791
0.318	-16.263	0.566000000000001	24.994	-0.0053711	-0.17773	-0.034668	48.1601	-65.7388	677.381	-1.5625	0.70801	0.60107	22.678	61.9782	82.109	-0.027832	-0.085449	-0.0039063	-28.806	-53.7204	1355.527	-2.8418	1.0117	0.9126	29.754	8.6617	16.6479	0.16357	-0.24023	0.010742	-38.774	-190.818	1172.42	-1.3455	0.54248	0.21729	5.61	73.581	-3.781	0.062012	-0.271	-0.11182
0.32	-14.358	11.8384	33.589	-0.026855	-0.17285	-0.022461	48.768	-69.2091	720.357	-1.582	0.7334	0.62939	-1.554	-3.211	102.177	-0.018554	-0.0896	-0.0019531	-14.259	-2.166	1322.352	-2.8706	1.022	0.94141	17.07	-5.6632	21.1778	0.14307	-0.24951	0.012207	-42.259	-163.288	1151.4329	-1.2891	0.55859	0.21338	-14.173	42.841	16.7757	0.057617	-0.27588	-0.10986
0.322	-13.502	50.527	7.2952	-0.067871	-0.15576	-0.00048828	43.48	-37.432	711.294	-1.5778	0.75806	0.63623	18.348	1.139	110.655	-0.0097656	-0.093262	-0.0019531	-60.595	-10.434	1328.694	-2.8789	1.0254	0.94971	64.9278	13.0879	39.957	0.10059	-0.26025	0.01709	-43.569	-171.046	1169.231	-1.2363	0.58008	0.20947	6.272	19.1356	42.228	0.043945	-0.28223	-0.11328
0.324	-11.822	29.269	3.702	-0.104	-0.14722	0.013916	72.689	-89.18	790.331	-1.561	0.78564	0.64063	1.855	11.2149	63.2796	0.0053711	-0.099121	-0.0019531	-24.6548	-29.0182	1374.9137	-2.873	1.0176	0.96533	40.075	13.975	-7.0874	0.057617	-0.26123	0.032715	20.626	-174.775	1201.2247	-1.2129	0.59082	0.2085	-20.498	29.0254	18.9576	0.024902	-0.28491	-0.1123
0.326	-3.917	41.872	9.1625	-0.13184	-0.14355	0.03418	47.2984	-78.559	843.579	-1.5371	0.82617	0.63428	-0.598000000000006	-6.1916	46.429	0.01709	-0.10156	-0.00097656	-49.0382	17.6833	1349.3698	-2.8415	1.01	0.96094	41.182	-1.785	1.255	0.038574	-0.26074	0.037109	-9.186	-137.689	1190.2271	-1.1816	0.60938	0.21729	0.892999999999997	-20.1219	31.159	0.012207	-0.28125	-0.1084
0.328	-14.19	15.5767	1.4733	-0.16406	-0.14014	0.053711	19.3669	-75.343	877.0063	-1.521	0.84619	0.63184	8.94	38.2338	24.5996	0.029785	-0.10303	-0.0058594	-37.8107	-17.843	1362.734	-2.7983	1.0024	0.94727	57.8986	7.504	12.1567	0.0048828	-0.25635	0.054199	41.037	-168.653	1229.368	-1.1731	0.61548	0.22461	-3.371	10.7709	18.3479	-0.0063477	-0.28271	-0.10205
0.33	23.445	-13.566	24.8746	-0.17578	-0.13623	0.061523	56.255	-134.998	954.883	-1.4683	0.88721	0.62793	-7.686	20.3036	24.236	0.040527	-0.10522	-0.0068359	5.6295	-8.1213	1408.1217	-2.7358	0.99658	0.92383	25.934	-13.2768	26.791	-0.021972	-0.25171	0.070312	87.716	-150.243	1250.161	-1.1709	0.62695	0.23535	-25.642	15.8814	4.4392	-0.01416	-0.28809	-0.099609
0.332	38.281	26.5448	28.8438	-0.19141	-0.12451	0.068359	40.592	-119.186	966.634	-1.4277	0.91065	0.62695	16.432	23.67384	28.3605	0.051758	-0.10547	-0.016602	-70.107	10.758	1407.179	-2.6987	0.98682	0.9043	66.1489	-11.4484	42.69	-0.044434	-0.24854	0.087402	65.4421	-124.439	1223.028	-1.1836	0.63184	0.25244	16.301	4.82186	10.8	-0.023438	-0.28613	-0.09375
0.334	27.571	2.0371	30.0491	-0.20337	-0.11596	0.078614	26.555	-165.7985	986.1261	-1.3823	0.9458	0.63086	13.242	38.7181	7.6669	0.064941	-0.10205	-0.027344	-44.893	-47.7985	1437.451	-2.605	0.97217	0.86621	31.057	-0.1347	21.8695	-0.074219	-0.23633	0.11084	106.631	-139.64	1260.159	-1.1909	0.63916	0.26172	0.643999999999998	22.2128	-10.8134	-0.027832	-0.28296	-0.089112
0.336	54.538	5.93235	65.23	-0.21631	-0.11084	0.087402	25.919	-229.356	1037.2799	-1.3413	0.98291	0.62891	16.789	-2.52768	19.37348	0.071289	-0.10498	-0.027344	0.383000000000001	3.77	1405.239	-2.5376	0.96289	0.83179	-10.692	-8.01364	31.925	-0.085938	-0.22803	0.12402	85.1934	-62.82789	1237.607	-1.2324	0.65039	0.27441	-5.82100000000001	-7.27961	18.6877	-0.036621	-0.2832	-0.080078
0.338	56.82677	19.6782	33.83	-0.2334	-0.097168	0.10645	2.643	-202.332	1050.991	-1.3208	1.0044	0.625	43.756	19.0328	13.65532	0.067383	-0.10107	-0.035156	-19.5105	-2.693	1369.894	-2.4702	0.95557	0.7998	50.6833	18.5559	18.207	-0.1084	-0.21143	0.14795	53.812	-44.638	1228.804	-1.2818	0.66846	0.28345	35.125	-4.51614	35.467	-0.052734	-0.28467	-0.072754
0.34	71.4562	-17.28	16.19	-0.24609	-0.093262	0.11426	-3.962	-260.199	1119.411	-1.2754	1.041	0.60986	0.369	10.6199	-2.3068	0.067872	-0.098144	-0.038086	10.206	-20.7125	1390.926	-2.3945	0.93945	0.76611	17.75	24.18	-11.58974	-0.12378	-0.19775	0.16871	64.25	-63.6015	1258.242	-1.3472	0.69189	0.30713	-0.244	19.8157	29.0552	-0.060547	-0.28857	-0.068359
0.342	52.728	8.6531	-2.423	-0.26514	-0.093262	0.12744	-25.857	-245.024	1161.626	-1.2386	1.0691	0.59838	5.263	6.353	-3.754	0.060547	-0.098633	-0.035645	-13.125	47.0646	1334.121	-2.3652	0.92383	0.74854	1.473	16.2731	-14.612	-0.13086	-0.18848	0.18359	41.748	-28.376	1247.6	-1.4727	0.72949	0.36182	25.933	-13.8352	44.877	-0.078613	-0.29346	-0.060547
0.344	35.758	6.358	2.734	-0.27905	-0.085205	0.1416	-33.7055	-202.2139	1150.808	-1.2051	1.0898	0.57666	45.745	34.526	-18.03917	0.041504	-0.089844	-0.032715	5.123	15.435	1313.243	-2.312	0.90088	0.72656	33.357	36.7201	0.574	-0.13281	-0.17188	0.19678	68.4058	-85.784	1298.665	-1.5542	0.75049	0.39453	50.259	30.172	30.575	-0.092774	-0.29712	-0.050293
0.346	40.024	-14.7821	35.3056	-0.29395	-0.081543	0.15186	-8.458	-228.779	1198.928	-1.1733	1.1157	0.53418	33.53	7.1833	-13.415	0.026855	-0.089355	-0.035645	36.1255	42.366	1298.388	-2.2742	0.87768	0.71704	-5.309	21.7478	0.6446	-0.13477	-0.1626	0.20361	96.9971	-84.113	1345.8768	-1.7476	0.77783	0.49219	15.042	13.7017	21.3411	-0.10742	-0.30078	-0.049316
0.348	46.3161	23.268	31.7609	-0.30518	-0.077148	0.16406	-5.969	-137.597	1197.069	-1.1655	1.1216	0.51465	41.9189	2.70674	6.839	0.00048828	-0.080078	-0.023926	-25.1844	94.64	1282.749	-2.228	0.86377	0.70313	22.471	3.1064	32.989	-0.12646	-0.14648	0.21289	79.63724	-63.346	1346.0989	-1.9138	0.80005	0.57984	62.6016	1.6435	13.508	-0.12598	-0.29883	-0.05127
0.35	43.7472	-18.7299	17.7324	-0.30664	-0.074219	0.1665	15.646	-115.849	1184.4673	-1.166	1.1367	0.479	16.834	19.3316	-4.4187	-0.022705	-0.075927	-0.0068361	24.7725	54.0313	1305.4388	-2.1558	0.84619	0.68164	18.575	11.0326	14.8178	-0.12793	-0.13672	0.21924	120.856	-98.805	1385.4548	-2.0894	0.81982	0.65918	53.5487	35.6212	-3.496	-0.1377	-0.29688	-0.04541
0.352	42.031	-11.398	24.996	-0.30176	-0.063965	0.17676	26.23	-109.79	1218.602	-1.1885	1.1533	0.43799	28.82	-9.1727	11.8055	-0.04834	-0.067871	0.011719	43.6234	108.901	1293.746	-2.1147	0.83936	0.66992	-25.9648	-11.3911	20.7822	-0.11865	-0.12939	0.22168	106.793	-51.306	1357.5723	-2.3213	0.85742	0.75049	29.035	-3.13056	18.299	-0.14014	-0.28955	-0.026855
0.354	33.8741	7.7245	15.8196	-0.28809	-0.056397	0.17945	22.482	-24.584	1215.5177	-1.2031	1.1563	0.42236	48.831	11.3851	25.2222	-0.083496	-0.057617	0.035156	5.535	97.84	1269.2478	-2.0156	0.82031	0.63525	17.05	6.2458	29.5296	-0.11133	-0.12061	0.21924	90.133	-71.871	1323.5663	-2.4233	0.8833	0.79297	66.1626	5.1403	23.3572	-0.14356	-0.281	-0.015869
0.356	37.425	-14.9815	13.767	-0.26953	-0.056641	0.17627	8.544	-78.263	1244.1119	-1.2534	1.1489	0.39404	22.494	1.79	14.7347	-0.096191	-0.054199	0.04834	54.364	69.072	1279.541	-1.935	0.80445	0.60791	-15.524	22.8811	-4.603	-0.10205	-0.12109	0.21875	112.035	-104.037	1364.6095	-2.5718	0.92139	0.81641	31.102	16.45201	10.3947	-0.14795	-0.27539	-0.0058594
0.358	13.236	38.457	-6.071	-0.22021	-0.057129	0.15527	29.031	-81.66	1273.018	-1.2859	1.1389	0.38696	26.62	-11.8098	30.0096	-0.11279	-0.047852	0.075195	23.1776	107.885	1239.837	-1.8496	0.78711	0.58838	-12.211	17.72552	-3.1144	-0.090332	-0.11182	0.21289	53.156	-31.778	1361.3199	-2.6528	0.93799	0.80713	56.4012	-22.8224	27.146	-0.15723	-0.25635	0.0024414
0.36	-15.222	16.85483	-29.0984	-0.19043	-0.064453	0.14844	31.6976	-77.983	1237.556	-1.3223	1.1172	0.36377	48.5233	24.0332	12.67983	-0.12256	-0.044922	0.088623	1.925	51.744	1237.9435	-1.7476	0.76855	0.54297	8.731	24.3113	-0.622	-0.075439	-0.10473	0.2063	31.633	-60.657	1398.3667	-2.6909	0.93408	0.78906	45.444	7.6002	14.8396	-0.16211	-0.25098	0.0063477
0.362	0.181999999999995	-14.548	0.745999999999999	-0.12988	-0.075195	0.11279	35.7783	-148.994	1280.4071	-1.373	1.0996	0.33838	30.036	18.215	5.836	-0.12744	-0.040527	0.10156	51.052	59.415	1225.3935	-1.6963	0.74805	0.53076	-19.094	-1.6237	3.915	-0.064941	-0.096191	0.19824	48.38	-32.6404	1419.579	-2.7065	0.91846	0.74902	26.837	4.931	20.5507	-0.16504	-0.23535	0.012695
0.364	-6.523	12.8261	-0.101800000000001	-0.075439	-0.087158	0.083496	38.838	-117.61858	1299.736	-1.3975	1.0938	0.32275	30.81	28.4727	22.9535	-0.12207	-0.04834	0.11865	-10.157	77.924	1179.2215	-1.6099	0.71924	0.50195	25.118	-13.2223	28.0933	-0.04834	-0.083984	0.18652	8.416	9.17727	1384.9462	-2.707	0.90332	0.73682	43.872	-6.44884	24.2619	-0.16529	-0.22558	0.01709
0.366	-16.228	-24.6046	3.32489	-0.026855	-0.10303	0.054688	31.768	-144.776	1283.6618	-1.439	1.0884	0.29395	19.503	54.633	5.2666	-0.12158	-0.050781	0.11914	-4.523	29.51	1172.133	-1.555	0.69702	0.49243	18.7	6.114992	10.0037	-0.041016	-0.07666	0.18115	34.056	-37.0558	1388.396	-2.6909	0.87158	0.70117	10.364	30.174	-6.1736	-0.1665	-0.21631	0.019043
0.368	-12.757	4.1762	17.1795	0.036621	-0.12646	0.015625	58.964	-201.7	1332.1289	-1.4847	1.0842	0.26684	-5.012	20.365	14.60461	-0.10645	-0.060547	0.12061	-8.125	77.848	1127.9195	-1.5054	0.67041	0.48145	11.681	5.5633	18.9567	-0.02832	-0.060059	0.18359	10.26	25.3317	1370.5119	-2.6453	0.83716	0.67944	9.146	3.4021	10.085	-0.16699	-0.20947	0.024414
0.37	-30.996	21.4496	11.45434	0.060547	-0.13623	0.0014648	55.103211	-154.092	1338.2942371	-1.5469	1.0801	0.24658	43.735	36.025	14.1681	-0.097166	-0.071045	0.13257	-29.4703	71.4503	1110.0333	-1.4468	0.63916	0.47998	42.3549	18.8982	36.774	-0.022217	-0.053711	0.18017	6.91799999999999	36.27023	1342.7936	-2.5933	0.80811	0.65332	15.998	1.0467	15.02759	-0.16699	-0.20703	0.027832
0.372	-12.14	-19.4904	22.1249	0.10791	-0.15869	-0.030762	52.31	-203.197	1355.2033	-1.6621	1.0781	0.23242	17.326	28.5943	3.754	-0.077637	-0.081055	0.13867	-5.408	56.58	1104.1712	-1.4258	0.62305	0.479	21.957	33.581	1.69954	-0.02002	-0.044434	0.17871	68.882	9.394	1387.724	-2.5171	0.77588	0.62305	-9.917	17.3874	12.0881	-0.1543	-0.20361	0.026367
0.374	0.930999999999997	15.433	3.174	0.14941	-0.18115	-0.058105	82.25	-184.789	1398.143	-1.7339	1.0884	0.23047	-8.71700000000001	3.879	32.108	-0.062012	-0.095703	0.14307	-35.444	126.01	1070.193	-1.3691	0.58984	0.47412	40.072	21.38	14.3893	-0.017578	-0.03125	0.17188	51.058	68.5494	1365.6301	-2.4785	0.76367	0.60986	5.868	-11.473	19.4511	-0.15113	-0.19922	0.020752
0.376	-11.904	11.625321	-38.643	0.16455	-0.1875	-0.070313	69.797	-109.35879	1367.988	-1.9038	1.0972	0.23828	22.092	34.0967	29.652	-0.053223	-0.10205	0.14355	-8.595	96.424	1053.19753	-1.3247	0.56298	0.46728	65.78767	39.514	0.843	-0.015625	-0.019531	0.17041	55.412	-0.409000000000002	1377.669	-2.4097	0.75244	0.58154	1.518	13.7862	8.3217	-0.13477	-0.19922	0.013184
0.378	-4.411	-4.0646	-12.179	0.18701	-0.20557	-0.085938	42.759	-138.154	1390.963	-2.0366	1.122	0.26221	13.047	5.7987	22.4174	-0.039063	-0.11816	0.14795	31.648	126.0278	1021.0784	-1.2734	0.54004	0.45557	23.543	23.4966	-2.545	-0.02002	-0.010742	0.16553	98.9336	0.510400000000001	1380.7614	-2.3699	0.75025	0.56128	-18.849	5.4233	12.1673	-0.1123	-0.19775	0.0087891
0.38	18.522	36.2293	-5.854911	0.19458	-0.21119	-0.099364	32.151	-74.544	1378.9938	-2.1694	1.147	0.29297	16.025	19.455	29.1562	-0.026611	-0.12403	0.14502	-6.61799999999999	172.229	946.217	-1.1992	0.50293	0.43652	41.416	3.30221	52.07837	-0.023926	0.0014648	0.15869	70.182	36.2587	1363.1358	-2.3359	0.75391	0.54346	-5.443	-10.2032	26.47868	-0.093504	-0.1914	-0.0051269
0.382	6.104	9.62	5.6888	0.19629	-0.21875	-0.11084	11.561	-46.936	1331.795	-2.3296	1.1646	0.34473	5.318	30.29	17.1684	-0.01709	-0.12842	0.14307	-2.863	128.5	931.48	-1.1563	0.49316	0.42383	47.098	13.623	37.4486	-0.029297	0.012207	0.16064	77.25	11.9741	1382.9799	-2.3198	0.75049	0.53711	-16.697	32.34	-13.2463	-0.07373	-0.1875	-0.019531
0.384	24.415	20.2118	22.714	0.19727	-0.2207	-0.12207	9.046	-86.5383	1367.364	-2.4058	1.1821	0.37402	8.769	-12.289	35.3436	-0.0068359	-0.12793	0.13232	12.939	167.452	914.2272	-1.0815	0.45215	0.39648	27.876	-16.707	48.7077	-0.04248	0.025879	0.15771	68.497	56.65	1382.838	-2.3145	0.74219	0.53271	-1.19	15.7547	-11.0019	-0.052246	-0.18164	-0.038086
0.386	60.9434	37.309	1.414	0.19629	-0.22266	-0.12402	-7.563	4.987	1345.039	-2.543	1.1953	0.42236	13.027	4.6619	43.329	0.0063477	-0.1289	0.13012	-2.401	147.996	889.543	-1.0249	0.43213	0.38428	65.3092	-15.0093	85.671	-0.058105	0.025391	0.1582	53.428	34.04517	1365.757	-2.3081	0.71533	0.52832	10.666	8.89624	5.2809	-0.044922	-0.17871	-0.046875
0.388	30.451	0.134	32.7981	0.18115	-0.21143	-0.12695	-43.1628	-12.1342	1334.745	-2.618	1.2131	0.4502	4.368	-4.4972	18.5358	0.014648	-0.12988	0.11963	41.0066	104.9842	873.497	-0.96826	0.3999	0.375	8.187	0.5965	90.953	-0.090332	0.034668	0.15918	105.4465	-17.099	1383.028	-2.2986	0.69605	0.52392	-14.288	28.7819	7.0161	-0.032227	-0.17139	-0.054688
0.39	48.273	41.345	24.2029	0.16406	-0.20093	-0.12378	-20.654	-16.5567	1357.398	-2.6675	1.229	0.4707	6.127	-29.9632	43.008	0.025879	-0.12598	0.1167	13.791	131.9499	815.11	-0.90625	0.36133	0.36328	4.215	-8.5984	137.954	-0.12134	0.038574	0.16773	108.11743	45.859	1355.753	-2.2866	0.68604	0.5166	22.414	-7.6262	39.153	-0.036133	-0.16797	-0.05835
0.392	74.553	45.775	-10.989	0.14551	-0.18848	-0.12158	-17.026	26.0635	1339.582	-2.6816	1.2559	0.47803	27.348	5.3829	43.865	0.025879	-0.12402	0.12109	13.853	90.084	805.988	-0.875	0.3418	0.35498	49.7893	41.4372	126.283	-0.15674	0.03125	0.17529	89.4447	13.629	1335.1148	-2.2573	0.67041	0.50391	29.044	13.25401	16.2381	-0.039551	-0.16748	-0.064453
0.394	27.753	29.4564	-5.835	0.12109	-0.16943	-0.11816	-43.214	-42.99667	1355.081	-2.6699	1.2617	0.47949	22.724	-18.2416	38.5753	0.024902	-0.11914	0.1123	60.032	123.9751	782.9306	-0.81738	0.30566	0.33838	-19.151	51.873	137.338	-0.21045	0.019043	0.17285	96.728	50.584	1324.5796	-2.2305	0.66699	0.49854	18.08	15.923	7.5188	-0.051758	-0.16602	-0.063477
0.396	29.569	50.869	9.34	0.10449	-0.15674	-0.11621	-26.062	-9.943	1380.1971	-2.627	1.2793	0.46631	38.796	-5.9354	39.3917	0.026367	-0.11841	0.10889	32.464	150.744	732.198	-0.7727	0.28248	0.33032	2.14	47.5865	200.3309	-0.24268	0.0087891	0.18115	70.625	100.855	1286.564	-2.1655	0.65283	0.47656	48.4264	-8.9212	40.5017	-0.060059	-0.16162	-0.064453
0.398	74.43924	-9.7764	39.852	0.083008	-0.13525	-0.11914	-27.4339	-10.291	1385.68	-2.5835	1.2768	0.45727	37.303	12.95	35.1552	0.022461	-0.11719	0.10791	56.577	115.8178	718.347	-0.72852	0.25879	0.31982	0.135000000000002	59.407	240.114	-0.29639	-0.00097656	0.19385	121.0496	57.0085	1280.1526	-2.114	0.65063	0.46508	28.806	25.2128	28.65678	-0.084961	-0.16064	-0.074219
0.4	61.8025	-22.0341	67.285	0.064453	-0.12354	-0.12182	-46.1428	-75.5754	1438.17	-2.541	1.2715	0.4458	18.325	-23.5415	61.0493	0.010742	-0.10547	0.10107	67.0497	151.4097	693.6085	-0.6709	0.23047	0.30713	-38.8012	48.8782	285.1287	-0.35034	-0.0090331	0.20361	128.4526	97.111	1261.001	-2.0581	0.64697	0.4502	31.566	4.4606	11.715	-0.099121	-0.15136	-0.068604
0.402	13.366	-3.233	44.5197	0.038086	-0.10693	-0.125	-27.8022	1.66	1416.724	-2.4668	1.248	0.43262	30.571	-14.128	79.762	0.00048828	-0.097168	0.098145	66.7276	130.408	685.7131	-0.64893	0.21924	0.29492	1.66	74.139	329.059	-0.4043	-0.019043	0.21143	77.6692	98.034	1245.042	-1.9824	0.64453	0.42822	70.2933	-10.19552	16.512	-0.10986	-0.14941	-0.074219
0.404	30.179	-26.1609	67.7124	-0.0053711	-0.083984	-0.12207	-45.068	-44.205	1396.376	-2.4336	1.2402	0.42432	22.371	-37.5651	56.1833	-0.022461	-0.074219	0.088379	108.41	118.62353	677.356	-0.59326	0.19678	0.28223	-15.439	83.182	350.689	-0.48193	-0.030273	0.23047	104.39525	72.7168	1261.777	-1.9448	0.646	0.41797	27.433	3.74	29.3277	-0.13086	-0.14697	-0.078125
0.406	39.174	11.8331	103.529	-0.032227	-0.072266	-0.11523	-18.642	-50.581	1415.039	-2.3667	1.231	0.40381	48.9811	-69.94	84.5953	-0.044434	-0.055664	0.086426	48.536	163.784	621.147	-0.54859	0.17847	0.27051	-26.583	53.918	411.316	-0.53076	-0.040039	0.23828	69.212	147.505	1215.8933	-1.8608	0.64307	0.39404	35.722	-38.011016	74.048	-0.13916	-0.14502	-0.084473
0.408	25.234	14.8538	114.0324	-0.090332	-0.041016	-0.091309	8.616	27.387	1381.986	-2.322	1.2268	0.37768	33.1579	-42.6943	113.369	-0.071289	-0.03418	0.090332	58.281	148.252	592.041947	-0.50977	0.16357	0.26172	-4.926	56.296	415.2263	-0.63086	-0.061035	0.26465	26.062	114.112	1190.039	-1.7715	0.63574	0.37061	48.196	-18.7207	76.6836	-0.15771	-0.13916	-0.095215
0.41	42.063	-2.5194	134.267	-0.15332	-0.026367	-0.076416	-11.634	-20.51716	1362.22	-2.2749	1.2134	0.36914	6.883	-71.494	135.86067	-0.11377	-0.0058594	0.089844	83.7933	157.3482	541.5947	-0.45264	0.13135	0.23828	-38.1559	41.905	427.491	-0.71802	-0.084229	0.28052	23.96	119.912	1167.302	-1.7358	0.6333	0.35352	42.1881	-19.455	70.7264	-0.1836	-0.13379	-0.097657
0.412	12.497	38.863	158.177	-0.2207	-0.010742	-0.055664	15.784	44.8699	1342.27	-2.2188	1.1953	0.35107	15.452	-40.0582	172.7949	-0.13672	0.0097656	0.09082	23.84	180.09	492.637	-0.42822	0.12695	0.22949	-2.89	13.03977	502.492	-0.80566	-0.10547	0.30566	-6.42899999999999	152.0597	1139.322	-1.6616	0.61768	0.33008	62.3377	-39.92508	117.4165	-0.20752	-0.12207	-0.10156
0.414	-5.7	24.1195	221.7974	-0.31543	0.022461	-0.020508	1.325	63.82	1315.6645	-2.1992	1.1875	0.35254	12.1847	5.751	184.561	-0.18848	0.04834	0.095215	43.3381	152.4089	464.169	-0.37549	0.10156	0.20947	6.809	16.3021	567.6803	-0.91797	-0.13184	0.33545	14.337	75.908	1152.3495	-1.6147	0.61108	0.3103	29.896	-6.157	148.8938	-0.25293	-0.11328	-0.1001
0.416	15.072	42.2782	309.695	-0.36279	0.038574	-0.0058594	5.16	13.742	1323.79	-2.1733	1.1724	0.34961	-18.679	-10.021	236.388	-0.23511	0.075684	0.097659	55.6025	184.9415	424.997	-0.33154	0.089111	0.19409	-9.868	-36.8589	626.5078	-0.97217	-0.14844	0.35352	-13.811	120.95433	1109.154	-1.5664	0.60352	0.29004	30.484	-16.9729	182.5502	-0.27881	-0.10449	-0.092773
0.418	-8.001	73.547	327.71	-0.47168	0.07373	0.02832	54.128	109.694	1284.4848	-2.1534	1.1533	0.35156	-3.319	37.971	296.92	-0.2793	0.10254	0.10303	20.316	173.265	426.782	-0.2915	0.074219	0.17432	37.454	-48.305	660.396	-1.0659	-0.17041	0.37598	-26.885	108.09	1064.8379	-1.5039	0.5918	0.2666	61.388	10.86996	217.205	-0.34229	-0.087891	-0.07959
0.42	-12.341	43.7624	396.19473	-0.56006	0.10473	0.061035	35.287	79.713	1248.323	-2.1348	1.1377	0.35596	-29.5774	47.275	346.7568	-0.34619	0.14795	0.10498	36.155	148.6683	418.399	-0.24023	0.051758	0.14844	-9.122	-44.1975	669.1	-1.1335	-0.18555	0.39453	23.984	73.3478	1065.175	-1.4766	0.58203	0.25244	7.497	56.569	244.762	-0.39966	-0.071044	-0.068359
0.422	27.238	54.923	458.554	-0.65869	0.13916	0.092285	45.646	91.064	1265.6101	-2.0957	1.1094	0.36084	-29.0348	51.4756	408.5924	-0.38037	0.16895	0.10889	7.709	161.566	386.819	-0.2124	0.035645	0.13477	16.215	-77.2476	720.464	-1.1895	-0.19092	0.41846	0.252000000000002	141.582	1010.0006	-1.4155	0.56982	0.23389	28.967	25.439	338.9402	-0.45801	-0.054199	-0.049805
0.424	25.634	30.38	500.14276	-0.79492	0.17871	0.13965	47.4488	144.887	1245.575	-2.0762	1.0977	0.35938	-12.4	90.087	446.2952	-0.45801	0.2124	0.1123	12.969	134.086	368.1097	-0.17236	0.011719	0.1123	57.551	-52.0169	718.166	-1.2573	-0.18066	0.44922	8.321	102.8077	986.456	-1.3659	0.56177	0.2168	23.828	55.49173	405.9981	-0.55029	-0.033691	-0.021484
0.426	27.611	-17.724023	580.058	-0.86572	0.20557	0.16943	31.544	62.004	1248.9133	-2.021	1.0649	0.34961	-62.503	56.466	516.4805	-0.52636	0.24341	0.11597	26.402	136.626	364.676	-0.14184	-0.003418	0.10058	4.499	-51.3289	676.5638	-1.2861	-0.17285	0.46875	31.772	126.5877	949.066	-1.3232	0.5498	0.20557	9.585	59.4628	462.4093	-0.60352	-0.015137	0.0048828
0.428	53.654	9.848	634.027	-1.0332	0.25684	0.22998	57.179	85.001	1249.672	-1.9692	1.0395	0.34326	-45.5739	51.184	594.727	-0.59473	0.28174	0.11768	-11.482	133.407	335.894	-0.11426	-0.017578	0.079102	59.5486	-74.559	677.9129	-1.3276	-0.14941	0.50586	-21.982	166.219	916.011	-1.2593	0.53223	0.18945	37.923	34.5741	551.8986	-0.73047	0.0078125	0.034668
0.43	60.016	-64.01	716.024	-1.1626	0.30078	0.27735	32.9483	54.6816	1233.247	-1.9155	1.0142	0.33789	-16.91955	58.406	616.209	-0.69434	0.33496	0.12256	6.019	93.268	326.7515	-0.081055	-0.042969	0.050781	63.0277	-58.6888	649.039	-1.3543	-0.12109	0.53589	2.147	117.974	928.823	-1.2319	0.52686	0.18896	10.086	55.953	604.7199	-0.84449	0.029053	0.067627
0.432	65.127	-114.4017	804.7487	-1.3003	0.34326	0.33838	25.154	-10.897	1233	-1.8569	0.97705	0.32813	-37.7299	-2.541	670.431	-0.75586	0.36328	0.12793	-11.181	128.263	286.7366	-0.057373	-0.052246	0.035156	30.338	-91.546	661.821	-1.3711	-0.095703	0.56201	-0.350000000000001	170.142	906.189	-1.1738	0.50586	0.18213	39.057	2.673	693.1984	-0.9668	0.053711	0.11133
0.434	59.7992	-115.874	851.206	-1.4863	0.41064	0.42822	37.275	73.507	1177.3	-1.8237	0.95459	0.33496	-25.5961	-13.279	712.982	-0.87109	0.42188	0.14404	-9.198	103.018	263.729	-0.03125	-0.063965	0.015137	87.8325	-90.109	673.2752	-1.3906	-0.058105	0.59424	-23.939	175.09	864.2274	-1.136	0.49243	0.18335	79.427	-46.548	754.47759	-1.1445	0.091797	0.18604
0.436	25.2989	-163.873	893.7213	-1.5781	0.44336	0.4751	-0.792999999999999	50.24	1123.163	-1.7544	0.92041	0.33105	-39.616	-40.124	739.242	-0.96192	0.46753	0.1648	37.487	83.9559	261.872	-0.0073242	-0.078125	0.0014648	53.2443	-58.6605	636.173	-1.396	-0.038086	0.60938	20.897	151.9207	843.8127	-1.0957	0.47461	0.18359	40.095	-55.942	775.146	-1.2402	0.11328	0.23486
0.438	17.007	-119.09	901.246	-1.7363	0.5	0.55371	-4.593	59.862	1119.7445	-1.6982	0.88916	0.3247	-13.236	-82.929	795.4117	-1.0508	0.51074	0.19336	-7.359	88.94483	255.614	-0.0014648	-0.083008	-0.0073242	32.488	-54.856	669.881	-1.4063	-0.0068359	0.6333	8.4	193.89	781.82	-1.0483	0.45166	0.18604	39.31	-114.6478	853.396	-1.4517	0.1665	0.34814
0.44	-1.337	-93.374	894.346	-1.8356	0.531	0.59912	-11.053	108.146	1093.2598	-1.6426	0.86523	0.3208	24.35	-77.2546	785.477	-1.166	0.55469	0.25049	7.228	57.707	249.569	0.016602	-0.099609	-0.024414	51.9695	-35.109	708.5395	-1.408	0.013916	0.64526	31.8116	155.7337	757.646	-1.019	0.43701	0.18652	11.9279	-108.3242	892.7999	-1.6109	0.20361	0.4375
0.442	-11.236	-108.19	920.014	-1.894	0.55322	0.61426	-21.498	46.544	1085.9067	-1.5581	0.8208	0.32324	8.336	-119.752	774.321	-1.2241	0.57666	0.28516	45.4634	81.8661	219.571	0.025147	-0.10864	-0.035157	6.631	-37.158	715.803	-1.4106	0.036133	0.64551	41.0733	164.2072	737.346	-0.96729	0.40186	0.19531	-18.458	-103.4137	886.797	-1.7754	0.25	0.53174
0.444	2.398	-73.528	870.243	-1.9629	0.56152	0.62109	-0.292000000000002	108.488	1052.09	-1.5254	0.79492	0.32861	34.523	-134.355	786.57	-1.3203	0.60059	0.35596	-5.814	83.789	196.8718	0.031738	-0.11914	-0.045898	27.948	-77.104	778.085	-1.4087	0.059082	0.65625	24.1294	188.064	702.577	-0.92944	0.38208	0.19776	13.894	-125.401	900.827	-1.9688	0.30078	0.64014
0.446	-7.0033	-111.795	861.0115	-1.9766	0.55859	0.61084	6.949	147.296	1030.195	-1.4487	0.74854	0.32861	36.312	-96.793	752.894	-1.3936	0.60889	0.40991	50.6302	67.1372	195.84151	0.039063	-0.12988	-0.064453	19.539	-66.725	811.429	-1.3984	0.072754	0.65576	57.5337	126.0229	697.632	-0.8916	0.35156	0.19287	-15.686	-86.262	879.235	-2.0464	0.32275	0.67773
0.448	-19.0259	-114.827	878.339	-1.9453	0.5498	0.56592	-4.448	122.1046	1028.504	-1.3963	0.71021	0.32446	9.607	-112.138	745.526	-1.4585	0.61572	0.4541	33.391	95.7509	165.8762	0.04248	-0.13672	-0.071777	-17.51	-95.065	867.1104	-1.3789	0.09375	0.65381	25.062	159.571	662.9577	-0.83008	0.31836	0.19971	-8.2979	-118.88	887.505	-2.166	0.37109	0.71436
0.45	-31.2847	-69.8131	846.5387	-1.8855	0.53882	0.52343	4.733	201.189	957.9515	-1.3389	0.67383	0.32471	39.2619	-79.7784	739.807	-1.5293	0.62012	0.50244	9.723	91.83	127.614	0.04834	-0.14258	-0.085938	6.598	-132.383	928.737	-1.3384	0.12061	0.64453	31.483	152.495	651.194	-0.80078	0.29688	0.19824	3.927	-132.662	876.2	-2.1951	0.39306	0.71631
0.452	-35.0591	-89.438	878.498	-1.8066	0.5293	0.47803	14.24	141.688	904.996	-1.2583	0.62354	0.31738	26.4497	-69.6007	692.757	-1.5508	0.62695	0.521	80.6729	80.57433	122.5681	0.051269	-0.14868	-0.092529	-11.155	-120.75919	910.295	-1.3198	0.13428	0.63867	46.7617	148.636	641.936	-0.73682	0.26123	0.19531	-43.7409	-75.013	802.311	-2.1929	0.41064	0.69727
0.454	-25.328	-55.758	873.589	-1.6597	0.49268	0.396	4.429	122.9	866.805	-1.2202	0.59912	0.31104	12.969	-88.3249	711.528	-1.5742	0.64941	0.54932	36.08	87.207	103.523	0.052734	-0.15723	-0.104	-7.987	-168.201	934.6554	-1.2847	0.1582	0.62207	-5.9876	194.102	605.058	-0.68726	0.229	0.18896	-33.2616	-87.5919	799.5483	-2.1226	0.43213	0.64014
0.456	-11.995	-57.671	851.325	-1.5776	0.46826	0.34473	-2.345	157.098	839.284	-1.1367	0.53516	0.30273	55.8787	-38.075	724.8928	-1.5679	0.66504	0.55445	55.6693	44.7435	125.325	0.054688	-0.16113	-0.11377	19.166	-180.657	955.0352	-1.2671	0.16968	0.61329	7.016	155.3544	590.3109	-0.63916	0.19678	0.17676	-26.328	-47.481	807.688	-2.0781	0.43115	0.604
0.458	17.659	-122.125	889.461	-1.4248	0.39453	0.24951	18.353	80.157	841.1918	-1.0793	0.49487	0.29492	20.07672	-47.713	738.103	-1.5488	0.6875	0.55859	67.27874	49.93638	97.8002	0.056152	-0.16455	-0.11377	-31.056	-162.905	948.2684	-1.2578	0.17773	0.60059	16.1708	157.279	573.013	-0.57422	0.15039	0.1665	-17.532	-18.516	810.096	-1.9546	0.41162	0.51172
0.46	22.364	-92.326	919.077	-1.3261	0.35058	0.18603	35.167	123.9397	801.1946	-1.0259	0.45166	0.29053	39.274	-63.683	790.366	-1.5093	0.69385	0.5459	19.768	37.3288	62.3459	0.057129	-0.16992	-0.125	-20.836	-190.006	990.9005	-1.2637	0.17578	0.58154	-28.757	174.4199	511.9362	-0.54297	0.125	0.15869	35.383	-66.331	837.72	-1.851	0.36865	0.4331
0.462	-10.771	-103.279	946.721	-1.2324	0.30664	0.12988	27.848	124.652	765.948	-0.95313	0.39258	0.2793	26.7492	-52.204	831.335	-1.4746	0.69141	0.53271	62.5093	7.838	73.6831	0.053222	-0.17505	-0.13306	-30.5356	-149.124	1012.5317	-1.2734	0.1748	0.57666	-1.545	142.964	495.566	-0.47607	0.074219	0.14893	50.658	-54.665	834.283	-1.7593	0.31006	0.35742
0.464	-38.5399	-130.588	1028.954	-1.1362	0.26123	0.057617	50.563	67.515	761.8276	-0.91553	0.36865	0.27246	-1.663	-103.78	885.1563	-1.4155	0.69189	0.49707	39.663	32.307	46.574	0.049316	-0.17725	-0.13525	-67.9405	-124.306	1039.5932	-1.3008	0.1582	0.55811	-18.255	178.929	456.8148	-0.43188	0.038574	0.14038	39.176	-81.871	867.959	-1.6445	0.23828	0.28271
0.466	-61.619	-109.183	1059.212	-1.1128	0.25928	0.034668	73.963	125.8619	728.6893	-0.84766	0.31201	0.26416	26.7778	-122.259	954.491	-1.3767	0.71753	0.47729	6.226	37.9161	38.06	0.045898	-0.17773	-0.1416	-4.061	-120.224	1104.273	-1.3281	0.1499	0.54297	-26.291	155.673	438.199	-0.38965	0.0039063	0.13428	18.441	-118.55	929.305	-1.6191	0.22461	0.24854
0.468	-92.513	-192.575	1089.101	-1.1191	0.31543	0.035156	67.8684	90.796	706.9868	-0.79345	0.26953	0.25659	1.9444	-134.2342	964.6094	-1.3477	0.73682	0.47705	37.551	36.7467	31.68	0.040039	-0.17236	-0.14355	-11.58	-66.408	1099.022	-1.3555	0.13574	0.52979	9.64	131.467	436.244	-0.33984	-0.041992	0.12402	0.0500000000000043	-91.151	946.995	-1.6206	0.23193	0.1958
0.47	-73.292	-215.276	1132.425	-1.1547	0.39599	0.065186	88.8508	106.6024	704.444	-0.74463	0.2251	0.25195	-10.469	-197.268	1006.5329	-1.3359	0.75391	0.47607	6.63	58.952	22.8722	0.03418	-0.17041	-0.14551	-23.4701	-70.296	1111.9905	-1.3867	0.12793	0.52197	-43.617	151.188	390.2255	-0.31689	-0.072266	0.12207	-8.7763	-142.18	1000.682	-1.612	0.26001	0.16504
0.472	-38.5001	-187.23	1125.689	-1.2007	0.46533	0.10059	99.265	155.142	649.6941	-0.67969	0.16553	0.24121	1.578	-209.621	1033.86	-1.3433	0.75635	0.48584	15.098	10.16879	54.517	0.025147	-0.16748	-0.14624	8.7373	-58.589	1134.4225	-1.3999	0.13428	0.5166	-21.05467	121.972	371.9247	-0.271	-0.12939	0.1123	-45.376	-178.645	1044.3526	-1.5776	0.29932	0.11572
0.474	-60.1383	-209.54	1154.8986	-1.2476	0.53467	0.15039	72.007	104.8383	628.59165	-0.64795	0.13477	0.23242	-44.6516	-237.28	1066.819	-1.3706	0.7876	0.49854	12.147	6.7149	28.9993	0.015137	-0.15967	-0.14453	-21.289	-20.975	1130.953	-1.4097	0.15527	0.5166	-9.755	139.3176	352.5839	-0.2395	-0.15943	0.10791	-55.559	-181.569	1064.5914	-1.48	0.33838	0.037109
0.476	-2.147	-152.2557	1157.4625	-1.2593	0.56299	0.16309	89.661	147.054	586.2301	-0.58789	0.072266	0.22266	-62.0156	-267.612	1123.975	-1.3767	0.82544	0.49853	-21.194	15.1164	8.9623	0.0039063	-0.15723	-0.14258	17.002	-70.696	1175.995	-1.42	0.18457	0.5127	-46.9	159.877	320.0386	-0.20654	-0.19141	0.10596	-31.237	-238.7	1109.4062	-1.4199	0.35254	-0.00048828
0.478	22.67	-144.573	1134.774	-1.25	0.58643	0.16748	79.715	152.503	531.8999	-0.53662	0.01709	0.19678	-41.6211	-218.454	1136.411	-1.3608	0.85693	0.47852	39.34	18.5781	36.1126	-0.00097656	-0.16016	-0.14063	47.2355	-72.977	1177.4705	-1.4272	0.21582	0.50977	-19.736	125.4258	310.0088	-0.17383	-0.22852	0.10791	-23.262	-193.712	1130.9653	-1.2964	0.37549	-0.071777
0.48	46.179	-149.333	1171.685	-1.2204	0.59302	0.15722	74.094	125.0306	518.824	-0.51221	-0.011719	0.18945	-58.834	-219.93	1162.467	-1.3081	0.87061	0.42969	4.845	46.817	8.5096	-0.019531	-0.15625	-0.13135	-14.20854	-93.976	1162.39	-1.4473	0.25391	0.51465	-36.161	141.3444	279.0767	-0.16113	-0.23975	0.11182	-24.84	-169.868	1130.661	-1.2331	0.39332	-0.10767
0.482	87.348	-76.421	1175.013	-1.1948	0.59814	0.15088	56.166	180.056	472.4066	-0.46582	-0.062988	0.15137	-26.2416	-196.6193	1180.96	-1.2827	0.87158	0.4043	-10.645	28.611	3.074	-0.029785	-0.15454	-0.12354	12.256	-154.781	1225.951	-1.4663	0.26465	0.51953	-20.3602	116.6302	292.4	-0.12451	-0.27051	0.11377	17.367	-194.522	1164.956	-1.1836	0.41309	-0.13281
0.484	109.137	-81.392	1200.2625	-1.1909	0.61182	0.13965	50.2054	141.357	436.79	-0.41358	-0.096925	0.14185	-24.27002	-127.297	1149.9102	-1.2476	0.86182	0.36035	3.453	16.9796	-8.595	-0.036621	-0.15723	-0.12109	3.281	-120.094	1234.633	-1.541	0.26074	0.53027	25.609	91.427	303.631	-0.10205	-0.28443	0.11719	50.3245	-128.898	1143.554	-1.1509	0.44189	-0.14551
0.486	116.541	-53.175	1242.129	-1.209	0.61719	0.14355	69.085	140.9388	420.1071	-0.36279	-0.13477	0.13818	-43.9958	-119.435	1169.7391	-1.2382	0.85987	0.33374	-33.298	38.788	-36.3344	-0.050293	-0.16113	-0.11328	-9.829	-127.481	1247.5186	-1.6358	0.24463	0.54541	1.376	104.20125	264.965	-0.08252	-0.29688	0.11572	74.061	-138.61	1160.4584	-1.1382	0.45313	-0.1416
0.488	101.043	-3.169	1227.181	-1.2876	0.65283	0.16992	41.861	166.964	370.884	-0.31348	-0.18213	0.125	-17.093	-74.085	1181.0126	-1.2441	0.86133	0.31006	14.21	16.999	10.9271	-0.058594	-0.1626	-0.10693	33.7097	-133.861	1285.87	-1.7437	0.22021	0.56641	25.611	81.7906	250.4316	-0.056152	-0.30078	0.1123	97.827	-108.659	1180.823	-1.1304	0.49121	-0.13037
0.49	67.9262	-54.444	1251.743	-1.3906	0.68408	0.22241	28.082	115.81165	372.768	-0.28955	-0.20166	0.1123	-41.8644	-60.607	1163.3097	-1.2612	0.86377	0.29883	11.591	23.0661	17.4	-0.070801	-0.16211	-0.092773	0.956	-80.0219	1272.262	-1.9097	0.1958	0.59521	30.722	88.201	214.028	-0.043945	-0.30176	0.11084	78.814	-32.497	1155.375	-1.1268	0.52271	-0.11597
0.492	73.3608	-37.117	1264.461	-1.5269	0.71338	0.28955	38.897	157.536	352.1868	-0.25342	-0.24268	0.095703	-25.6309	-107.5446	1212.0958	-1.2813	0.86914	0.30713	-27.446	13.3264	13.9858	-0.077148	-0.16113	-0.088623	5.046	-124.8798	1318.789	-1.9917	0.18506	0.61035	6.182	93.868	174.011	-0.027832	-0.30322	0.10938	91.8212	-59.103	1189.4008	-1.1211	0.55371	-0.09375
0.494	58.2183	-64.57502	1264.9157	-1.7539	0.75195	0.39893	12.416	145.638	337.8619	-0.22314	-0.26831	0.085938	7.6505	-71.572	1216.6731	-1.3047	0.86133	0.31396	43.0083	-1.201	25.5769	-0.07959	-0.16162	-0.076172	17.86009	-99.9201	1326.338	-2.1387	0.17773	0.64893	58.3452	66.149	174.763	-0.018799	-0.30493	0.11865	80.811	-29.132	1176.4016	-1.1191	0.59375	-0.058594
0.496	41.411	-125.129	1298.656	-1.8677	0.77197	0.46045	14.829	109.112	351.386	-0.19385	-0.29346	0.070801	-37.606	-93.7701	1228.5914	-1.3377	0.86084	0.32178	23.825	15.3275	17.9128	-0.07959	-0.16309	-0.067383	-45.07	-64.8853	1304.915	-2.2341	0.18311	0.68481	36.7169	91.4894	151.583	-0.016602	-0.30713	0.12646	32.331	-38.97	1156.4557	-1.123	0.61719	-0.047363
0.498	63.3057	-74.891	1311.2153	-2.0996	0.81836	0.58057	-0.036999999999999	133.565	329.491	-0.17236	-0.31982	0.053711	-12.5905	-111.306	1278.46053	-1.3667	0.85791	0.32617	13.747	11.7329	27.7311	-0.081055	-0.16406	-0.062988	-9.9036	-73.406	1347.7106	-2.3276	0.19336	0.71875	37.2136	82.2916	157.7051	-0.012207	-0.31006	0.13232	31.608	-100.667	1199.868	-1.1543	0.65234	-0.0068359
0.5	62.6033	-111.783	1320.738	-2.3066	0.86914	0.68408	-23.077	68.7211	312.025	-0.15576	-0.33057	0.044434	-3.542	-88.2891	1258.574	-1.396	0.86572	0.3335	55.4338	21.5221	29.177	-0.087402	-0.16748	-0.056641	-18.0639	4.46	1323.0084	-2.4292	0.22998	0.7793	83.592	71.105	165.152	-0.012207	-0.31152	0.13281	29.602	-63.8079	1229.927	-1.1973	0.6753	0.029053
0.502	106.4265	-146.651	1366.362	-2.4194	0.90283	0.74023	15.669	83.585	285.546	-0.13232	-0.34766	0.024902	-20.23399	-150.42	1280.994	-1.4272	0.86963	0.3291	12.576	39.909	3.017	-0.095948	-0.16943	-0.042968	-53.439	-7.732	1311.5218	-2.4766	0.25	0.81494	25.392	92.45	121.8955	-0.010742	-0.30957	0.14014	28.9734	-114.36	1265.1787	-1.2671	0.69189	0.092773
0.504	93.8903	-123.539	1336.675	-2.6382	0.96631	0.81445	-8.96100000000001	97.404	235.86113	-0.11328	-0.35059	0.0053712	29.2367	-163.31	1316.2959	-1.4976	0.87646	0.32617	40.988	11.5421	20.8152	-0.10938	-0.16504	-0.039063	-26.2079	-17.19	1327.0699	-2.5664	0.28906	0.87549	35.477	73.2106	126.6985	-0.0080567	-0.30615	0.14185	61.6549	-145.639	1299.4114	-1.4121	0.7168	0.20166
0.506	60.403	-181.575	1342.567	-2.7371	0.98902	0.83716	-7.334	52.639	227.1396	-0.10205	-0.35693	-0.015137	6.5752	-152.853	1313.9967	-1.5779	0.87573	0.33692	66.52922	27.3204	27.6235	-0.12646	-0.16016	-0.025879	-74.289	24.019	1315.6752	-2.6272	0.31763	0.92115	45.072	82.71666	106.337	-0.0029297	-0.29785	0.14404	63.936	-110.464	1281.17914	-1.5574	0.7356	0.3086
0.508	87.178	-127.294	1386.864	-2.8066	1.0059	0.84424	7.458	98.50472	218.1185	-0.089355	-0.35693	-0.019531	24.076	-188.844	1373.733	-1.6768	0.875	0.35938	19.795	8.193	18.6784	-0.13184	-0.15186	-0.017578	-72.923	-29.1819	1366.9612	-2.6816	0.3418	0.96338	-0.927999999999997	84.683	71.178	0.015137	-0.28516	0.14063	86.19	-169.083	1300.6987	-1.73	0.7583	0.42578
0.51	32.173	-83.556	1364.7767	-2.8335	1.0249	0.8125	9.935	78.8472	194.438	-0.085938	-0.35449	-0.030273	46.879	-132.325	1399.047	-1.853	0.88525	0.40869	54.6256	-5.3261	40.634	-0.1377	-0.14795	0.00097656	-54.514	-8.75047	1394.12175	-2.7515	0.3667	1.0176	41.09974	63.8747	71.685	0.022949	-0.27881	0.13721	85.589	-134.7219	1306.337	-1.9761	0.80322	0.58594
0.512	6.187	-100.1418	1386.6799	-2.8218	1.0249	0.79102	60.7766	59.4858	204.213	-0.086426	-0.3418	-0.034668	-8.01559	-120.1272	1379.6358	-2.009	0.89868	0.4563	60.90999	13.2257	20.4241	-0.15088	-0.14404	0.018311	-76.976	18.0477	1368.946	-2.7788	0.37842	1.043	18.791	70.8141	37.859	0.041992	-0.26416	0.13037	57.338	-106.278	1301.917	-2.0933	0.83057	0.6543
0.514	22.995	-22.3397	1360.279	-2.771	0.99756	0.72656	10.506	89.813	178.562	-0.087402	-0.33008	-0.041504	12.3148	-123.141	1393.9574	-2.1694	0.91846	0.51953	10.135	8.0597	26.6286	-0.16406	-0.13672	0.033691	-37.318	-27.2837	1399.29	-2.8335	0.40088	1.082	2.899	50.382	47.365	0.06128	-0.25	0.11938	74.227	-152.0102	1340.453	-2.312	0.89893	0.77002
0.516	-25.698	-24.116	1349.94	-2.7432	0.95654	0.69727	9.44900000000001	73.512	167.686	-0.091309	-0.31738	-0.041992	3.9757	-49.139	1354.021	-2.3828	0.95313	0.62158	49.6774	30.1213	33.0405	-0.18213	-0.12451	0.048828	-58.013	22.1267	1394.4968	-2.8623	0.41797	1.1049	19.259	34.478	57.837	0.085449	-0.24121	0.10889	40.73	-71.745	1350.914	-2.438	0.94092	0.82471
0.518	0.869	-19.714	1374.4721	-2.7363	0.92969	0.68506	51.622	104.383	149.964	-0.10742	-0.29492	-0.041016	-51.2195	-62.6669	1355.071	-2.4819	0.96729	0.67383	21.816	34.9499	4.96	-0.19141	-0.12305	0.055664	-75.247	4.1773	1392.4824	-2.8882	0.43701	1.1152	-25.183	52.325	34.2283	0.11768	-0.22266	0.089844	30.853	-84.052	1328.6309	-2.5332	0.98633	0.8584
0.52	18.132	38.793	1332.5014	-2.7559	0.91602	0.68018	52.096	109.724	111.3935	-0.11084	-0.2749	-0.033203	-17.314	-26.845	1376.1951	-2.646	1.0249	0.78516	24.584	-3.69361	31.8353	-0.19385	-0.11621	0.063477	-20.9306	-20.9934	1437.431	-2.8965	0.46094	1.1274	-4.92	35.028	34.2335	0.13525	-0.20654	0.07959	33.12	-75.936	1325.849	-2.627	1.0117	0.87744
0.522	-18.204	-16.8201	1330.303	-2.771	0.91357	0.67383	74.2434	72.52332	106.808	-0.12402	-0.24658	-0.025879	-55.747	18.563	1359.3135	-2.7544	1.0669	0.84668	39.959	5.177	20.4141	-0.19336	-0.10742	0.069336	-59.791	45.0669	1421.919	-2.8867	0.46875	1.1274	1.114	31.3224	44.1048	0.16797	-0.2002	0.050293	2.781	27.3257	1291.188	-2.6616	1.0181	0.87402
0.524	41.831	-8.513	1375.747	-2.7437	0.88721	0.65527	49.1791	82.4875	96.9868	-0.13159	-0.22558	-0.024903	-61.289	-23.311	1377.471	-2.8379	1.0996	0.90674	-13.951	-6.29	19.59829	-0.18896	-0.10547	0.066406	-51.981	-9.4252	1438.46	-2.8784	0.48096	1.1172	-25.22	27.881	41.3633	0.18628	-0.18335	0.038574	11.12	-13.3762	1296.927	-2.6851	1.0103	0.85156
0.526	60.703	-14.477	1352.6835	-2.7031	0.87011	0.63037	71.0295	42.457	88.6995	-0.13525	-0.20459	-0.015137	-31.148	-0.325999999999997	1382.218	-2.9063	1.1387	0.97314	35.0365	-9.3547	33.482	-0.16699	-0.10498	0.063965	-1.54257	15.23	1434.716	-2.8633	0.49512	1.103	7.426	11.4811	40.0669	0.2041	-0.16797	0.016113	40.813	29.482	1292.031	-2.6553	0.98096	0.82495
0.528	64.574	-80.7835	1368.786	-2.6499	0.86182	0.60742	74.6446	28.579	81.7699	-0.146	-0.17529	-0.0083008	-86.874	-4.751	1366.317	-2.9351	1.1548	0.99805	-2.3	9.3509	10.5448	-0.15674	-0.10596	0.05957	-40.372	63.2465	1367.122	-2.8438	0.50195	1.0962	-23.767	28.453	13.8527	0.21826	-0.14014	-0.010742	49.447	33.397	1283.0075	-2.6152	0.94922	0.78662
0.53	102.2594	-14.782	1338.848	-2.5801	0.84375	0.57666	44.664	51.4699	52.1829	-0.15186	-0.16309	-0.01416	-47.134	-21.365	1408.2536	-2.9629	1.1758	1.0356	-22.053	-11.787	20.185	-0.12451	-0.1123	0.04248	-15.2395	38.105	1365.528	-2.8081	0.51025	1.0723	-21.682	20.9467	8.689	0.22168	-0.13086	-0.025391	85.371	-46.8353	1342.6693	-2.5938	0.87891	0.79541
0.532	71.752	-38.479	1344.06	-2.5562	0.82666	0.56543	58.2204	7.828	64.792	-0.14795	-0.14258	-0.0019531	-50.7335	32.451	1398.613	-2.9615	1.1773	1.0561	16.029	-11.75098	24.4998	-0.097901	-0.11817	0.026855	-18.4425	129.891	1344.019	-2.7866	0.51904	1.0645	14.004	10.2556	19.1127	0.23486	-0.11475	-0.058105	84.0869	12.342	1359.797	-2.5352	0.83789	0.77002
0.534	88.733	-47.2052	1396.828	-2.521	0.80713	0.54102	47.385	14.213	57.1864	-0.14331	-0.13843	-0.0061035	-84.451	-13.132	1393.7007	-2.9312	1.1743	1.0566	-33.867	6.9135	-2.586	-0.06543	-0.12891	0.015137	-45.562	121.901	1348.255	-2.7305	0.5293	1.0376	-35.612	37.1628	-2.9788	0.229	-0.097656	-0.089355	90.044518	-27.692	1344.7107	-2.4331	0.77197	0.70898
0.536	99.9976	20.2993	1379.0611	-2.51	0.78443	0.5354	44.6275	23.8905	46.3842	-0.13232	-0.13428	-0.013184	-47.259	-33.9744	1423.702	-2.8691	1.1465	1.0513	-2.885	-7.4737	23.5114	-0.024902	-0.13525	-0.012695	23.386	93.584	1398.755	-2.6706	0.5354	1.0188	24.994	21.873	10.5873	0.22314	-0.09082	-0.10107	100.982	-38.3317	1331.978	-2.3786	0.78736	0.67895
0.538	72.5386	-38.8259	1378.832	-2.4839	0.76221	0.52246	45.306	-9.541	40.3101	-0.11377	-0.13672	-0.01709	-70.846	-26.8149	1423.064	-2.834	1.1348	1.0415	17.265	13.176681	19.6536	-0.0092773	-0.14404	-0.023438	2.6715	127.546	1377.68	-2.6089	0.54346	1	44.0262	21.8279	17.881	0.19678	-0.081055	-0.1167	85.8727	24.7904	1308.365	-2.3257	0.80127	0.64844
0.54	113.502	-4.36000000000001	1392.088	-2.4316	0.73535	0.49854	22.034	30.6189	31.626	-0.10254	-0.13672	-0.027344	-83.877	-83.637	1452.434	-2.7344	1.0957	1.019	-28.053	8.0458	11.5585	0.015137	-0.15039	-0.043945	-3.5439	65.5696	1389.516	-2.5156	0.55469	0.97314	-2.213	13.794	22.6875	0.16699	-0.075439	-0.11816	54.161	-51.681	1336.505	-2.2539	0.77539	0.61523
0.542	92.2457	33.43	1347.492	-2.3965	0.71875	0.48145	6.394	17.8937	33.419	-0.083008	-0.14648	-0.040527	-43.027	-36.459	1456.529	-2.6638	1.0637	0.99245	26.786	-13.64246	21.3995	0.029541	-0.15332	-0.052735	17.944	99.519	1384.932	-2.4575	0.55908	0.95117	63.7655	-3.3993	41.9012	0.13672	-0.073242	-0.11328	70.408	-14.9205	1361.874	-2.2246	0.75098	0.60791
0.544	77.662	8.392	1331.691208	-2.3081	0.70068	0.4541	25.986	14.4113	41.6556	-0.069092	-0.15112	-0.055176	-62.723	-10.8122	1400.678	-2.5938	1.0391	0.97119	19.751	3.6039	-11.047	0.038086	-0.1543	-0.061035	-22.6868	130.888	1324.771	-2.3511	0.56885	0.91504	33.463	27.37	5.727	0.080566	-0.074219	-0.097656	81.3528	9.6325	1347.548	-2.1914	0.71875	0.58447
0.546	115.328	108.848	1275.114	-2.242	0.68481	0.43677	10.255	42.599	5.5786	-0.058594	-0.15723	-0.06543	-42.374	-20.8951	1387.848	-2.5	1.0146	0.93408	-5.757	-5.073	-3.3629	0.045898	-0.15186	-0.066406	-21.4241	75.733	1310.326	-2.2622	0.56397	0.88135	31.42	21.7067	11.5309	0.052246	-0.078613	-0.086426	62.912	-56.8615	1357.43	-2.1762	0.70385	0.57495
0.548	78.097	105.152	1243.239	-2.1733	0.66846	0.42578	-3.294	14.8781	12.4202	-0.053223	-0.16113	-0.079102	-18.3607	65.415	1342.559	-2.457	1.0039	0.9165	40.289	-4.1454	19.4828	0.046387	-0.14795	-0.070801	-16.75878	121.6724	1262.936	-2.1758	0.55762	0.8501	76.1472	11.4634	22.6325	0.0048828	-0.067871	-0.063477	75.2301	35.894	1331.35	-2.1636	0.70166	0.57617
0.55	82.861	94.686	1289.089	-2.0938	0.64746	0.40674	4.958	18.5777	15.5136	-0.049316	-0.16455	-0.085449	-40.6492	43.444	1303.19	-2.3711	0.98047	0.89209	24.233	20.6832	-4.549	0.043457	-0.13965	-0.074219	-31.635	84.4709	1251.798	-2.0645	0.54883	0.80322	20.095	19.8077	21.2628	-0.02417	-0.055908	-0.040039	50.878	32.046	1297.1792	-2.1504	0.69727	0.56494
0.552	116.35	149.886	1266.9868	-2.0542	0.63721	0.39746	-8.907	33.3198	1.8251	-0.051758	-0.16455	-0.091797	17.47133	51.8778	1327.0078	-2.3122	0.95581	0.86694	22.216	4.7676	13.543	0.034912	-0.13404	-0.07251	-3.351	52.653	1301.573	-2.0098	0.53516	0.77783	51.39721	-14.9014	39.228	-0.045898	-0.046387	-0.019043	74.21	52.8624	1277.645	-2.1445	0.69629	0.56299
0.554	74.823	95.597	1268.427	-1.9746	0.62598	0.37744	-33.305	7.732	5.827	-0.059815	-0.16186	-0.091553	6.5687	90.832	1292.0005	-2.248	0.93164	0.8501	51.5688	23.22054	15.242	0.024902	-0.12646	-0.073242	-46.377	107.7469	1279.028	-1.9028	0.52002	0.74316	54.0479	-9.2181	20.6647	-0.069824	-0.024414	0.0097656	92.019	140.153	1234.444	-2.0996	0.69922	0.5415
0.556	84.7389	131.56	1292.5916	-1.9206	0.61939	0.3645	-0.0679999999999978	39.624	-21.9557	-0.067871	-0.15625	-0.089844	-17.0071	49.3416	1300.5543	-2.1616	0.90674	0.82227	19.584	6.1168	22.6677	0.0097656	-0.1123	-0.071289	-70.202	76.5318	1264.951	-1.832	0.50341	0.71582	24.7157	2.3359	22.85056	-0.080078	-0.016602	0.026367	67.412	80.249	1240.524	-2.0535	0.69849	0.51977
0.558	32.028	142.012	1272.345	-1.8608	0.61377	0.35352	-21.144	18.2946	-10.4064	-0.085938	-0.1416	-0.07373	55.643	98.319	1299.134	-2.1191	0.89453	0.80127	50.074	-21.3963	45.6512	-0.0043945	-0.1045	-0.072021	-37.662	117.5094	1225.9997	-1.7559	0.48438	0.68799	62.8279	-17.547	49.722	-0.081543	0	0.04541	98.1312	114.069	1244.9238	-1.9976	0.68604	0.49414
0.56	1.485	81.1862	1275.372	-1.7852	0.60547	0.34033	-23.688	-4.9409	16.5293	-0.094238	-0.12988	-0.06543	2.142	95.117	1254.8932	-2.0132	0.8667	0.77344	29.533	-15.1517	27.4788	-0.024902	-0.085938	-0.079102	-65.088	179.675	1166.428	-1.666	0.45605	0.65576	38.662	8.3113	15.36	-0.080322	0.0078124	0.0625	68.077	133.724	1244.773	-1.9214	0.67432	0.4707
0.562	25.065	131.3961	1218.758	-1.748	0.59961	0.32471	9.609	31.9938	14.0726	-0.11719	-0.11865	-0.053711	3.565	50.247	1267.186047	-1.9238	0.83936	0.74219	22.555	-18.738	45.6528	-0.056152	-0.066895	-0.077637	-20.619	160.644	1163.741	-1.6172	0.44287	0.63965	24.835	-4.6032	13.816	-0.076172	0.016113	0.080566	40.984	74.446	1275.16	-1.8862	0.66504	0.46094
0.564	-42.618	95.777	1176.7508	-1.6855	0.59766	0.31006	15.958	-5.813	13.6521	-0.12964	-0.10937	-0.044922	19.792	98.29591	1233.0528	-1.8394	0.81299	0.70703	58.5226	-33.528	79.4786	-0.075684	-0.052246	-0.078125	-24.1176	223.737	1124.536	-1.5352	0.41016	0.61426	33.492	1.006	13.021	-0.071777	0.019531	0.097656	36.419	144.399	1246.683	-1.8315	0.65088	0.45117
0.566	-41.081	80.594	1190.5252	-1.6362	0.59668	0.2998	18.627	0.169	36.802	-0.14697	-0.098633	-0.036133	-15.5331	49.909	1206.3296	-1.7261	0.78564	0.66504	30.98	-23.7712	82.53194	-0.12695	-0.026855	-0.075684	-56.958	200.803	1108.269	-1.4685	0.3916	0.59644	4.387	31.603	4.16734	-0.071777	0.014648	0.10742	5.955	99.754	1214.9577	-1.7967	0.64697	0.45288
0.568	-34.098	133.2978	1158.646	-1.5991	0.59131	0.29492	25.967	12.6729	32.651	-0.16406	-0.082031	-0.032227	21.845	49.081	1220.445	-1.6714	0.75635	0.64063	40.112	-36.7242	116.457	-0.16552	-0.0061037	-0.071045	-8.068	165.587	1131.313	-1.4097	0.36377	0.57129	25.261	-1.1899	32.953	-0.068848	0.021484	0.12744	-1.203	77.316	1205.245	-1.7715	0.64307	0.45068
0.57	-43.354	70.1751	1136.5015	-1.5444	0.58838	0.28125	26.471	-19.0576	40.1342	-0.1748	-0.071289	-0.024902	-10.96544	77.175	1166.069	-1.5723	0.7168	0.60107	48.585	-0.874299999999999	125.695	-0.21094	0.013184	-0.068359	-23.8116	198.901	1084.343	-1.3301	0.32813	0.55176	11.601	9.3201	14.9366	-0.064697	0.024903	0.13819	-4.05099999999999	126.0674	1164.7343	-1.7476	0.65088	0.45313
0.572	-5.996	102.478	1114.409	-1.5215	0.58984	0.27979	57.487	30.0047	11.0053	-0.19092	-0.0625	-0.013184	-33.2427	21.625	1158.4738	-1.4951	0.68897	0.5791	3.839	25.0636	173.307	-0.28223	0.043945	-0.058594	-19.992	147.809	1073.593	-1.2891	0.3125	0.54053	-17.028	4.22	-4.7839	-0.060547	0.022461	0.14355	-0.142000000000003	56.186	1157.0686	-1.7246	0.65137	0.45361
0.574	-0.0850000000000009	128.664	1071.704	-1.4761	0.58447	0.26953	52.5821	25.2538	-3.792	-0.20581	-0.052002	-0.0007324	18.45	70.252	1127.08	-1.4297	0.66602	0.55713	42.113	26.3686	257.4898	-0.31543	0.058105	-0.047363	7.983	156.6502	1026.312	-1.2085	0.2832	0.51855	16.889	-3.8647	7.12112	-0.053711	0.033691	0.14746	-3.368	83.9209	1144.164	-1.6797	0.6543	0.43994
0.576	3.147	95.426	1074.892	-1.4353	0.57886	0.26806	44.194	9.6218	27.5225	-0.21826	-0.039063	0.013184	-43.0357	88.029	1082.038	-1.3516	0.62207	0.53271	15.381	71.157	289.0266	-0.39258	0.09082	-0.03418	-10.086	175.881	967.99489	-1.1387	0.24951	0.50244	-25.422	24.0734	6.8073	-0.049805	0.036621	0.15186	2.923	99.772	1127.678	-1.6394	0.65455	0.43115
0.578	42.5322	174.371	1030.222	-1.3975	0.57422	0.25684	31.382	33.855	16.1332	-0.23193	-0.033691	0.029785	-19.677	81.9916	1058.071	-1.3125	0.59961	0.521	-3.17100000000001	75.335	359.7978	-0.45459	0.11988	-0.01294	34.439	116.776	943.406	-1.103	0.23096	0.49219	-16.546	4.0501	14.294	-0.041504	0.047852	0.14893	43.176	49.6036	1101.3068	-1.5918	0.65186	0.42139
0.58	18.908	162.582	981.3669	-1.3398	0.56543	0.24707	53.3643	-8.2797	38.574	-0.2417	-0.019531	0.047852	8.666	152.647	1020.728	-1.2383	0.55273	0.50244	53.711	69.1203	450.204	-0.52588	0.14697	0.0073242	33.5797	155.313	888.979	-1.0249	0.19385	0.47852	1.85899999999999	0.760999999999999	9.061	-0.036133	0.050537	0.14746	41.8531	138.614	1061.6882	-1.5293	0.63965	0.40137
0.582	1.593	154.0128	967.163	-1.3101	0.55908	0.23975	63.7796	14.1692	23.2366	-0.24951	-0.015137	0.060547	-31.592	129.639	1005.6175	-1.1848	0.52173	0.48755	4.388	88.282	511.8678	-0.6377	0.19141	0.037598	14.58	139.048	882.802	-0.97363	0.16845	0.46826	-31.418	20.10343	-9.342	-0.029785	0.057129	0.14063	25.0915	130.093	1027.799	-1.498	0.63281	0.39307
0.584	2.447	203.294	911.165	-1.2495	0.55225	0.22607	47.6951	27.273	9.06509	-0.26172	-0.0024414	0.076905	8.071	137.1227	996.7248	-1.1348	0.49121	0.4751	3.758	44.686	600.0963	-0.69873	0.21484	0.041992	62.033	122.291	883.9583	-0.91992	0.14746	0.45557	15.778	-14.0358	20.4869	-0.016113	0.064453	0.13037	29.206	134.1513	1035.6974	-1.4409	0.62549	0.375
0.586	1.72	137.165	901.41289	-1.2026	0.54395	0.21851	51.86	0.7105	30.852	-0.26904	0.0029297	0.096191	-29.0996	176.236	933.29	-1.0718	0.44775	0.46289	42.853	52.858	655.928	-0.83691	0.26563	0.083008	56.021	183.603	854.325	-0.83789	0.11768	0.44043	15.43	0.3848	29.264	-0.01123	0.067383	0.12549	31.799	194.009	995.5918	-1.3962	0.61645	0.36401
0.588	43.817	177.4715	872.963	-1.1504	0.53223	0.2085	41.572	35.699	8.356	-0.26758	0.018555	0.10742	-33.3726	133.9136	903.775	-1.0366	0.42432	0.45654	-5.641	13.468	708.515	-0.95337	0.31348	0.12109	71.56673	153.8012	836.455	-0.79785	0.10107	0.4292	-8.952	2.499	17.1984	-0.00048828	0.078125	0.1084	23.805	127.4233	963.144	-1.3569	0.60986	0.35156
0.59	1.962	162.43088	835.157	-1.0796	0.51318	0.2041	26.591	16.4937	0.994	-0.26709	0.01709	0.11377	3.305	166.199	865.166	-0.98584	0.38525	0.44824	56.245	-66.162	818.6098	-1.0801	0.3623	0.16895	74.0587	182.0453	784.714	-0.71191	0.07373	0.42334	29.603	-33.5386	33.4487	0.0039062	0.080811	0.096679	20.093	162.4374	921.638	-1.3003	0.59717	0.33887
0.592	16.839	90.293	846.41	-1.0527	0.50293	0.19678	41.99	5.6482	20.9129	-0.26025	0.032715	0.125	-25.155	161.706	807.684	-0.94239	0.36109	0.43823	40.012	-83.968	854.268	-1.2666	0.43945	0.26221	52.2637	218.358	726.7093	-0.65259	0.046387	0.40649	27.396	-10.535	23.146	0.0019531	0.088867	0.088867	9.736	180.046	894.5927	-1.2749	0.58838	0.33203
0.594	63.43	122.1021	800.35	-0.98584	0.48682	0.19238	10.114	22.9681	18.3554	-0.24731	0.034424	0.13257	9.132	125.31388	805.2372	-0.90381	0.3335	0.43701	-26.3851	-117.681	885.3351	-1.3535	0.4834	0.31396	85.4521	168.1566	721.6569	-0.5957	0.019043	0.39307	19.154	-24.993	44.275	-0.012695	0.10742	0.074707	9.343	120.188	901.658	-1.2202	0.57666	0.32031
0.596	36.327	79.714	752.534	-0.93383	0.4707	0.1897	17.58	-19.3201	35.828	-0.23486	0.04248	0.13818	33.465	167.34	761.83546	-0.85547	0.29688	0.42969	27.8448	-126.461	905.373	-1.5371	0.55762	0.43506	66.737	216.606	649.373	-0.52588	-0.010742	0.37402	64.1987	-25.3562	69.489	-0.030762	0.11279	0.070801	20.062	168.821	853.991	-1.1802	0.56201	0.31519
0.598	54.9228	77.753	747.038	-0.88281	0.45117	0.18604	20.111	-3.5548	36.611	-0.21533	0.040039	0.13428	15.548	116.638	757.5337	-0.82617	0.28125	0.42432	-14.4674	-83.6448	892.564	-1.6809	0.61499	0.51098	39.179	197.488	608.971	-0.4917	-0.021973	0.36914	30.313	-3.074	69.496	-0.074219	0.12891	0.06543	25.6689	116.078	822.8801	-1.1367	0.55078	0.30811
0.6	57.8577	146.83948	694.214	-0.81836	0.42969	0.18262	-15.486	9.0933	7.11126	-0.20752	0.040527	0.13184	56.7518	107.9848	749.43933	-0.77588	0.25098	0.41846	-14.744	-117.755	928.273	-1.8125	0.66016	0.57666	71.024	172.5635	585.0382	-0.42139	-0.053711	0.3501	26.4162	-22.714	114.715	-0.1167	0.13989	0.069336	32.3081	97.381	804.373	-1.0698	0.51904	0.29102
0.602	12.458	114.0036	690.3074	-0.78418	0.41895	0.1792	-22.772	-26.51	29.303	-0.19092	0.035645	0.12109	39.548	135.237	703.605	-0.73608	0.23316	0.41382	9.7111	-108.79	905.824	-1.9375	0.69043	0.62744	50.648	211.509	549.99694	-0.37256	-0.073243	0.33813	56.8727	2.351	148.69	-0.16797	0.15283	0.075684	39.8597	135.752	778.0242	-1.0444	0.50439	0.28467
0.604	44.9368	154.751	665.367	-0.7124	0.39111	0.16895	-8.487	8.6232	20.3412	-0.17822	0.029297	0.11426	38.524	105.5569	698.232	-0.69482	0.21338	0.4043	-37.366	-103.34	873.566	-1.9819	0.68994	0.63477	36.238	159.5475	555.6157	-0.32178	-0.09375	0.32031	32.876	14.267	173.4202	-0.24658	0.16357	0.088867	23.942	71.472	778.5536	-0.98193	0.479	0.27148
0.606	1.07	158.995	615.4298	-0.66577	0.37231	0.15918	-6.678	1.44463	-1.048	-0.17529	0.02832	0.10986	79.7456	149.5436	670.681	-0.63477	0.18701	0.39697	-13.29055	-124.497	874.779	-2.0171	0.67627	0.60938	32.59	178.1933	519.2177	-0.26367	-0.11963	0.30615	43.2462	7.01413	224.9025	-0.28906	0.17969	0.094727	13.447	132.602	733.67319	-0.92651	0.45874	0.25781
0.608	-34.8753	116.974	627.879	-0.61133	0.35547	0.16113	-7.824	-1.2571	7.9007	-0.17334	0.029297	0.10303	54.765	150.416	618.54	-0.59814	0.17139	0.38672	-37.9458	-81.092	837.013	-2.0058	0.65088	0.57861	20.938	184.385	475.406	-0.23096	-0.12744	0.2959	26.787	54.98	249.4662	-0.37891	0.19971	0.11621	28.733	156.18	707.0926	-0.87695	0.4375	0.24365
0.61	-28.9722	178.183	584.1	-0.53662	0.32275	0.14941	-2.158	32.343	5.17423	-0.16333	0.029297	0.10107	75.0924	121.2904	599.52	-0.53613	0.14307	0.3623	-59.019	-74.783	841.1937	-1.959	0.62109	0.53613	38.447	140.522	471.4486	-0.18066	-0.1499	0.27686	10.231	64.8178	312.606	-0.4519	0.21192	0.13208	6.483	106.6522	732.133	-0.80273	0.41406	0.23047
0.612	-38.3804	157.22746	534.9603	-0.50928	0.30908	0.13867	-13.225	-11.3165	28.567	-0.15723	0.025879	0.099609	87.4872	165.244	541.388	-0.48559	0.12036	0.34253	5.25	-74.762	842.12	-1.8979	0.57324	0.47852	24.068	188.516	421.6753	-0.14649	-0.1626	0.26294	28.2721	77.4373	393.1655	-0.54492	0.22852	0.15088	-8.913	164.027	688.883	-0.76953	0.39844	0.22314
0.614	-28.589	163.3186	496.341	-0.44727	0.28125	0.11865	17.937	7.6487	22.0737	-0.14258	0.025391	0.099609	37.575	140.737	516.3105	-0.43164	0.09375	0.31738	5.653	-31.736	802.929	-1.8574	0.54785	0.4458	-6.193	172.313	392.863	-0.11768	-0.17432	0.25098	-28.9158	108.462	429.868	-0.66748	0.26367	0.18164	-22.8263	134.8361	650.6828	-0.70508	0.38281	0.20947
0.616	-42.8427	202.101	424.651	-0.39941	0.25439	0.11279	15.046	20.4072	-5.41966	-0.13867	0.018555	0.097656	57.8178	161.647	503.797	-0.36621	0.067871	0.28857	41.442	-90.129	860.095	-1.6968	0.47803	0.3584	25.376	156.8351	388.8577	-0.083984	-0.18994	0.23779	-24.9175	75.019	510.7201	-0.73877	0.28613	0.20068	-14.897	145.403	619.569	-0.66089	0.36426	0.20239
0.618	-57.7523	146.2868	407.262	-0.36182	0.23535	0.10449	2.089	-11.6253	11.884	-0.12012	0.0068359	0.091309	53.633	185.102	440.73652	-0.33057	0.041992	0.271	65.192	-88.986	884.088	-1.5859	0.44214	0.30371	-12.159	174.172	354.5574	-0.066895	-0.20166	0.21777	-24.664	75.286	587.9727	-0.88477	0.33203	0.24365	-24.643	194.566	559.1151	-0.61768	0.35059	0.19336
0.62	-15.996	168.398	407.954	-0.3125	0.20361	0.09375	31.371	22.4427	15.42199	-0.10474	-0.00097655	0.09082	53.914	140.44901	411.238	-0.26758	0.018555	0.22949	-8.498	-89.981	894.947	-1.4966	0.42236	0.25488	10.573	120.471	368.939	-0.051758	-0.21777	0.19775	-49.821	59.633	646.475	-0.9917	0.36181	0.26513	-21.41	137.4457	523.7	-0.5625	0.32422	0.17969
0.622	-31.80513	164.907	362.728	-0.28516	0.18701	0.094727	35.026	5.00503	10.2964	-0.089355	-0.010254	0.077148	67.8888	164.4789	370.122	-0.22437	-0.0046386	0.20508	29.833	-143.369	968.623	-1.4355	0.4248	0.20947	26.299	129.5883	342.212	-0.031738	-0.22852	0.18213	11.405	2.42	721.252	-1.1055	0.38477	0.2959	-10.276	170.574	487.155	-0.53418	0.3125	0.17822
0.624	-38.5972	129.42	387.80187	-0.23975	0.15771	0.08252	30.732	1.0912	10.259	-0.062988	-0.03125	0.066406	18.681	153.084	354.706	-0.18457	-0.022949	0.17676	-1.439	-138.596	1001.077	-1.4136	0.43799	0.20117	-3.274	151.072	303.9272	-0.011719	-0.23828	0.17578	-21.001	-6.574	737.0734	-1.2598	0.41406	0.33252	-6.752	181.887	443.965	-0.48779	0.29053	0.16309
0.626	-38.1235	161.9	366.1158	-0.19434	0.12891	0.083008	52.233	27.076	11.03	-0.054688	-0.034668	0.054688	32.821	135.006	357.6615	-0.13525	-0.05127	0.1416	-37.8262	-174.66	1027.588	-1.3647	0.46143	0.19043	42.495	110.8137	288.5965	0.010254	-0.25098	0.14795	-27.041	-46.112	792.0704	-1.3398	0.42969	0.35205	9.236	136.5801	468.4219	-0.44873	0.281	0.15674
0.628	-34.7134	123.749	354.3312	-0.17773	0.11914	0.078125	39.998	-31.969	34.664	-0.025391	-0.04834	0.03418	30.146	164.501	318.192	-0.11084	-0.065918	0.12305	-4.426	-236.227	1083.961	-1.3196	0.48023	0.17041	25.752	129.7061	236.1327	0.015625	-0.26074	0.13965	31.298	-82.532	846.8665	-1.4824	0.45117	0.39502	-7.174	189.336	451.27192	-0.41406	0.26807	0.15527
0.63	3.429	125.39	348.0035	-0.13623	0.090332	0.071289	51.062	-17.2844	65.8587	-0.017089	-0.057129	0.022216	-19.549	113.437	312.261	-0.072266	-0.089844	0.10498	-43.4062	-213.433	1085.2662	-1.2637	0.50195	0.15771	-4.721	124.318	213.542	0.021973	-0.27295	0.11523	-12.437	-73.46	843.901	-1.5867	0.46216	0.43189	-10.639	152.317	437.798	-0.36523	0.25098	0.14355
0.632	-18.011	145.11	295.866	-0.10743	0.071045	0.064209	36.3661	1.692	50.1691	-0.0087891	-0.069336	-0.0048828	25.525	106.354	307.184	-0.04956	-0.10083	0.083984	-37.1593	-236.444	1116.856	-1.1929	0.53809	0.14404	49.5557	114.05529	187.482	0.02417	-0.28589	0.098875	31.931	-111.211	871.5333	-1.6797	0.4668	0.4668	15.029	153.539	419.1965	-0.33569	0.23852	0.13452
0.634	-24.872	107.7775	295.308	-0.078125	0.053711	0.046387	28.2001	-17.5662	90.9948	-0.018555	-0.062012	-0.043945	1.578	105.98	270.479	-0.028809	-0.11523	0.072754	6.342	-218.488	1142.7805	-1.1587	0.55127	0.14453	26.93	136.282	176.289	0.027344	-0.29834	0.074707	50.281	-115.362	869.779	-1.7788	0.47021	0.52051	15.913	182.075	386.5335	-0.30713	0.2251	0.12939
0.636	13.751	134.89243	297.622	-0.04541	0.02832	0.052734	50.0241	29.915	108.4182	-0.025879	-0.05957	-0.0625	-7.377	59.5401	270.4341	-0.0014648	-0.12256	0.054688	-12.898	-154.5343	1112.7847	-1.1133	0.58594	0.1377	36.656	102.5814	214	0.026855	-0.30469	0.052734	8.54799999999999	-110.275	843.687	-1.8223	0.47754	0.5415	0.785999999999998	108.54539	397.3405	-0.27295	0.20947	0.12451
0.638	24.843	122.99265	252.976	-0.032227	0.020996	0.046387	59.337	22.1149	128.357	-0.053711	-0.035156	-0.080078	7.26	82.4586	241.6028	0.014404	-0.13428	0.04248	44.206	-165.283	1149.6396	-1.0833	0.60034	0.14014	56.596	108.1574	190.217	0.021973	-0.30615	0.040527	58.683	-144.343	836.566	-1.8784	0.49756	0.57422	9.902	131.4586	363.7145	-0.2583	0.19873	0.12012
0.64	31.73	94.75181	246.598	-0.0019531	0	0.041992	49.387	26.4682	167.097	-0.085449	-0.0021971	-0.077393	-41.266	54.24	217.0462	0.027344	-0.13818	0.027832	83.9184	-119.961	1151.4518	-1.0562	0.61377	0.14209	30.655	113.434	171.1988	0.013672	-0.31201	0.021484	51.557	-105.245	772.87	-1.9031	0.51685	0.59033	12.47	130.9929	332.31527	-0.2251	0.18457	0.11865
0.642	42.6947	120.443	211.8128	0.014649	-0.01416	0.040039	38.874	88.698	198.224	-0.13037	0.034668	-0.074219	8.624	42.381	214.8155	0.04541	-0.14795	0.016113	73.6365	-87.474	1139.028	-1.0342	0.61719	0.14111	68.1659	71.6171	154.00859	-0.0061036	-0.31201	0.01416	40.005	-102.105	750.139	-1.9136	0.55127	0.59717	33.082	88.768	324.2112	-0.20142	0.17285	0.11279
0.644	54.6336	100.299	199.5831	0.031738	-0.032715	0.039063	11.64	64.8989	272.8862	-0.20703	0.090332	-0.061523	9.494	68.66	170.924	0.048828	-0.15576	0.011719	114.222	-103.262	1190.607	-1.0288	0.62354	0.13574	37.5981	81.843	119.3345	-0.024414	-0.30713	0.0083008	84.2047	-103.202	749.9197	-1.9097	0.60889	0.59375	8.351	124.7125	294.4438	-0.1792	0.15869	0.10986
0.646	63.706	113.453	200.68	0.049805	-0.053711	0.045898	14.882	85.407	326.963	-0.25781	0.11621	-0.054199	-3.08	48.7732	160.611	0.0625	-0.16113	-0.0043945	85.09281	-39.794	1198.1306	-1.0435	0.62744	0.1416	38.664	56.586	108.3647	-0.050293	-0.29688	0.00097656	43.503	-48.8678	734.409	-1.8984	0.63867	0.59619	17.195	84.975	303.4111	-0.15186	0.1416	0.1123
0.648	55.4001	139.013	165.7195	0.053711	-0.061035	0.047852	12.776	98.119	348.90712	-0.36523	0.18164	-0.043945	37.612	74.3604	147.27	0.069581	-0.16504	-0.013184	50.106	-43.75	1199.9758	-1.0716	0.64087	0.14917	82.9848	39.006	80.7044	-0.060547	-0.28711	-0.00048828	53.7127	-70.7628	759.16	-1.8667	0.69189	0.59375	46.631	95.8029	279.41355	-0.14355	0.13428	0.1123
0.65	50.2766	110.979	162.658	0.060547	-0.073242	0.055664	9.424	48.114	425.6489	-0.44995	0.229	-0.033203	0.866	84.036	115.2194	0.074707	-0.16846	-0.025391	54.307	-55.012	1228.2471	-1.1152	0.6543	0.15723	13.234	64.9891	47.196	-0.078613	-0.27197	-0.00097656	86.31	-59.852	789.459	-1.8398	0.71924	0.59716	23.089	135.384	241.0854	-0.12109	0.11182	0.10938
0.652	50.2922	120.443	167.42	0.072022	-0.086182	0.063721	30.424	66.636	489.787	-0.54688	0.28467	-0.026367	33.438	64.596	116.7373	0.087402	-0.17627	-0.035156	20.746	-24.475	1189.82	-1.2065	0.68018	0.17969	36.137	34.6838	69.4324	-0.079345	-0.26343	-0.0048828	66.34	-43.027	826.014	-1.814	0.73682	0.59961	39.2848	93.488	251.6144	-0.10229	0.10278	0.11157
0.654	52.812	99.9471	149.0659	0.080078	-0.092773	0.072266	13.992	32.887	536.108	-0.67822	0.37549	-0.013672	56.6341	93.034	85.095	0.092285	-0.17822	-0.040527	38.073	-88.143	1227.842	-1.2676	0.69629	0.20215	38.472	40.08	64.444	-0.079102	-0.26025	-0.010742	83.4	-110.639	885.251	-1.7734	0.7793	0.60498	48.9097	129.192	223.746	-0.085938	0.092773	0.11377
0.656	32.044	74.9613	139.171	0.090332	-0.1001	0.085449	2.941	7.047	619.903	-0.74805	0.42529	-0.0024414	28.429	63.5227	72.088	0.093262	-0.18799	-0.05957	34.939	-82.718	1264.647	-1.416	0.72266	0.26367	-8.626	39.6629	62.5614	-0.072266	-0.25049	-0.023438	59.224	-104.539	914.38643	-1.7559	0.79883	0.60986	35.255	130.596	201.87963	-0.055664	0.083496	0.12061
0.658	29.6077	91.1035	122.627	0.099609	-0.10352	0.08252	16.695	12.668	671.324	-0.89209	0.53369	0.02002	62.671	58.8548	79.6521	0.095703	-0.19165	-0.068115	16.355	-90.8812	1273.8575	-1.5564	0.74243	0.32935	20.177	19.2298	64.6308	-0.064941	-0.24756	-0.030273	56.4758	-129.479	972.822	-1.7246	0.83984	0.61182	30.34	102.9697	199.7467	-0.038574	0.078613	0.11816
0.66	2.77	52.8281	106.737	0.11133	-0.10547	0.097656	9.981	-66.815	772.7168	-1.0127	0.625	0.051758	49.818	69.6868	59.3005	0.099609	-0.19922	-0.081543	96.7097	-153.705	1344.669	-1.7129	0.75586	0.39111	-7.15	42.573	29.7025	-0.053223	-0.24219	-0.039551	61.8841	-201.946	1049.872	-1.6782	0.85986	0.5957	1.986	142.886	169.2814	-0.0043945	0.072266	0.11328
0.662	4.786	28.4626	112.433	0.12402	-0.11059	0.10572	-35.1795	-73.087	864.3724	-1.1367	0.72656	0.086914	50.7001	40.0999	40.114	0.10547	-0.20068	-0.104	84.6863	-120.5054	1338.766	-1.9375	0.78516	0.48682	-2.255	22.4854	41.076	-0.04126	-0.24292	-0.048095	26.813	-194.911	1041.062	-1.6499	0.86963	0.5874	16.409	97.30888	173.05415	0.021973	0.068359	0.1123
0.664	4.962	27.3108	73.6689	0.13867	-0.1123	0.10791	-50.584	-76.422	882.9222	-1.2891	0.88281	0.18115	67.1602	48.1564	30.316	0.10693	-0.20703	-0.11084	67.833	-144.7458	1334.716	-2.0483	0.80518	0.52637	36.92	22.107	30.745	-0.033203	-0.23828	-0.049805	35.456	-245.471	1068.02	-1.5776	0.88232	0.55762	19.304	85.0894	169.6374	0.04834	0.063477	0.11328
0.666	-25.417	-8.152	71.1371	0.1582	-0.11377	0.10986	-23.8854	-110.1599	931.546	-1.3628	0.96533	0.23438	23.214	36.2618	7.289	0.10791	-0.21729	-0.13086	97.1312	-140.8703	1357.369	-2.271	0.84814	0.59863	-21.152	39.406	-11.5041	-0.020508	-0.23779	-0.062012	22.558	-248.644	1100.84	-1.5274	0.88379	0.52344	-12.293	96.677	122.2938	0.08252	0.055176	0.10547
0.668	-14.139	30.491	62.4121	0.17236	-0.11182	0.10791	-46.63189	-70.13045	959.626	-1.4917	1.1138	0.34766	53.482	6.6075	34.84324	0.10669	-0.22754	-0.13623	54.893	-66.113	1333.092	-2.4167	0.8772	0.63696	-9.97	10.9944	-7.559	-0.015137	-0.24023	-0.05957	-25.877	-197.775	1119.3481	-1.4849	0.8833	0.4834	5.625	38.4277	123.5815	0.099121	0.052246	0.10352
0.67	-29.133	30.161	51.40469	0.19482	-0.11426	0.095215	-46.4689	-80.811	965.401	-1.5606	1.1988	0.43286	58.7858	20.7914	35.17309	0.10449	-0.23389	-0.13867	47.779	-82.931	1353.649	-2.5508	0.89648	0.65967	11.699	33.1196	-1.8391	-0.003418	-0.23291	-0.056641	-8.56	-226.539	1161.862	-1.439	0.89502	0.43555	2.292	61.334	105.5694	0.12402	0.029785	0.10352
0.672	-14.191	22.1703	51.6229	0.20752	-0.11621	0.083496	-34.528577	-108.534	975.288	-1.6064	1.2363	0.49854	19.128	-2.322	29.529	0.091309	-0.24365	-0.14502	39.405	-49.10969118	1364.7403	-2.6777	0.9082	0.66846	-15.195	27.6507	22.8597	-0.0043945	-0.22973	-0.053222	-20.986	-171.126	1153.1658	-1.4302	0.89941	0.41553	-2.663	48.603	99.36018	0.14258	0.020752	0.099607
0.674	-1.999	42.249	44.29	0.21924	-0.12109	0.071777	-45.8127	-78.711	930.117	-1.646	1.2212	0.52588	39.127	5.5104	40.8031	0.079102	-0.24609	-0.1416	3.987	-10.107	1341.3557	-2.7202	0.9126	0.66504	11.769	-10.8168	37.418	-0.003418	-0.22021	-0.054199	-17.838	-147.488	1163.1738	-1.4277	0.90234	0.36914	6.641	28.7424	85.737	0.16113	0.015137	0.095215
0.676	-33.635	9.8482	38.0747	0.22705	-0.12402	0.043945	-59.147	-116.215	902.057	-1.6401	1.1782	0.52344	26.288	24.0965	18.909	0.0625	-0.25146	-0.14111	46.69	-51.24	1377.926	-2.8008	0.91309	0.65088	-5.841	10.3155	4.7922	0.00048828	-0.2085	-0.04834	6.725	-181.815	1228.0763	-1.4363	0.90747	0.34155	-2.225	69.996	68.784	0.19824	0.020996	0.080078
0.678	-10.772	1.98904	42.432	0.22803	-0.125	0.032227	-80.133	-91.967	893.361	-1.5938	1.0566	0.47021	15.866	6.0152	29.4656	0.047363	-0.25513	-0.13672	51.105	10.8924	1360.571	-2.8194	0.90625	0.63769	-2.852	-18.0706	23.432	-0.0053711	-0.20313	-0.050781	-10.618	-91.863	1212.9399	-1.4448	0.90869	0.32471	15.777	23.315	97.2137	0.21924	0.024414	0.071289
0.68	-18.874	26.631	13.2422	0.2251	-0.12842	0.0053711	-63.98	-47.0701	883.7896	-1.534	0.95435	0.38355	37.194	27.4945	18.5771	0.029785	-0.25684	-0.13428	5.612	13.3593	1335.8165	-2.8159	0.88916	0.61426	25.614	-10.52377	15.4339	-0.0097656	-0.18848	-0.038574	0.725000000000001	-90.575	1198.175	-1.4604	0.90674	0.31348	12.453	35.1251	106.829	0.25879	0.02832	0.058594
0.682	-27.918	3.3777	6.334	0.21094	-0.13354	-0.012695	-40.5606	-69.531	883.487	-1.4448	0.86768	0.2793	3.417	24.1485	-1.3159	0.0024414	-0.25391	-0.11768	62.659	-11.8642	1350.0937	-2.7383	0.85547	0.57373	-4.03899999999999	18.009	-5.9221	-0.013916	-0.1748	-0.032227	24.254	-83.185	1191.623	-1.4746	0.9082	0.31396	-10.631	42.785	77.02	0.28516	0.019532	0.048095
0.684	6.183	36.6637	-5.33	0.19141	-0.13086	-0.034668	13.416	-46.417	890.541	-1.2905	0.78271	0.14551	5.408	28.9614	5.79247	-0.012207	-0.25146	-0.11035	75.667	46.0909	1331.662	-2.6577	0.83154	0.53125	19.354	1.841	-1.249	-0.019043	-0.1626	-0.025391	-19.295	-17.92	1157.738	-1.4805	0.9082	0.31299	7.833	8.5549	54.9615	0.29932	0.017578	0.047363
0.686	-8.972	18.8034	-23.4507	0.15137	-0.13477	-0.05127	6.014	-70.73	913.096	-1.2129	0.75293	0.080078	13.769	38.3359	-5.1954	-0.042969	-0.24805	-0.094238	86.4767	-26.115	1348.952	-2.5776	0.81689	0.50293	47.7426	29.9573	-9.455	-0.028809	-0.14648	-0.016113	9.107	-94.598	1204.1768	-1.4853	0.90918	0.30835	8.322	48.714	26.703858	0.30225	0.0063477	0.043945
0.688	8.855	-5.9323	0.558999999999999	0.13525	-0.13086	-0.059082	-4.502	-116.788	962.794	-1.0645	0.71777	-0.026855	-32.008	19.78854	-10.965	-0.05957	-0.24072	-0.079834	119.055	-26.8617	1350.955	-2.481	0.79834	0.46973	25.974	24.141	18.7493	-0.033691	-0.13818	-0.01123	9.991	-102.671	1227.4347	-1.4819	0.9126	0.29199	15.577	33.3906	13.8432	0.29932	0	0.04541
0.69	53.9705	9.9706	-11.8472	0.082031	-0.12451	-0.062012	23.7743	-72.898	999.3149	-0.96753	0.71509	-0.071777	-2.84	35.611	11.282	-0.076172	-0.24268	-0.066895	76.2456	-14.355	1341.391	-2.4473	0.79785	0.45264	58.2661	3.82941	43.394	-0.041992	-0.12061	-0.0068359	-8.766	-117.644	1247.666	-1.502	0.91309	0.25342	26.853	22.5934	8.45	0.27295	-0.010742	0.05957
0.692	40.2395	-25.7597	8.0611	0.051269	-0.12378	-0.059326	-6.0788	-117.622	1036.2727	-0.87646	0.72607	-0.091309	-11.587	47.579	7.5217	-0.09668	-0.24268	-0.057129	90.2961	-91.535	1392.88302	-2.4097	0.78955	0.4375	26.249	19.8105	18.6165	-0.051026	-0.11157	-0.00024412	29.8301	-206.212	1311.59	-1.5098	0.91309	0.23633	6.858	56.26	-12.787	0.23486	-0.01416	0.078369
0.694	50.511	-9.9325	25.5779	0.018555	-0.1167	-0.054199	-17.7323	-139.8109	1084.7586	-0.81445	0.72754	-0.10547	-8.918	22.1415	22.4309	-0.099121	-0.24219	-0.05127	80.683	-30.8874	1396.074	-2.3974	0.79395	0.42944	32.517	5.55	25.6717	-0.065918	-0.10352	0.0053711	13.056	-166.63301	1312.691	-1.562	0.92822	0.19824	29.1675	10.6791	3.179	0.18848	-0.01416	0.095703
0.696	57.2427	8.6854	5.84199	-0.022461	-0.11035	-0.041016	-24.0704	-142.98	1087.321	-0.81689	0.73193	-0.10742	18.231	27.3015	37.683	-0.10205	-0.23926	-0.042969	48.439	-37.591	1367.595	-2.3921	0.79541	0.42578	72.2004	13.8251	16.5957	-0.082031	-0.088379	0.013184	38.2638	-182.918	1324.095	-1.6318	0.93603	0.16724	44.982	15.137	23.34477	0.11621	-0.0063477	0.12744
0.698	69.978	-27.3018	12.029	-0.042969	-0.1123	-0.030273	-34.272	-226.278	1118.2799	-0.87354	0.76514	-0.13867	0.0499999999999972	15.7392	25.6633	-0.1062	-0.24096	-0.030517	97.741	-62.9566	1373.305	-2.3784	0.77588	0.41602	21.832	35.01	-8.799	-0.088867	-0.077148	0.020996	78.3818	-176.798	1332.2139	-1.7266	0.96094	0.14893	42.2738	18.2302	33.754	0.082031	0.0014648	0.14063
0.7	68.5054	12.2813	0.619	-0.081543	-0.10791	-0.0048828	-17.869	-225.972	1132.9652	-0.91773	0.79907	-0.16968	3.592	4.166	37.699	-0.11523	-0.24219	-0.021484	66.866	18.352	1338.668	-2.3711	0.76563	0.41406	48.4039	18.3774	2.406	-0.10449	-0.052246	0.029785	51.7549	-109.6625	1314.7825	-1.875	0.99609	0.15381	39.326	-13.20532	31.3193	0.018066	0.019043	0.17285
0.702	46.233	22.1918	-5.507	-0.1062	-0.098632	0.014404	-49.988	-219.03	1147.4487	-0.93311	0.82471	-0.20166	29.597	8.4588	24.435	-0.12402	-0.24023	-0.0087891	68.017	-15.171	1336.718	-2.3477	0.74414	0.40381	53.4334	36.7312	-6.618	-0.11084	-0.038086	0.037598	72.05	-143.164	1361.843	-1.959	1.0215	0.16748	25.378	19.2187	11.6532	-0.020996	0.030273	0.19385
0.704	46.7715	14.526	15.132	-0.12598	-0.091797	0.034668	-59.079	-240.044	1204.9486	-0.90576	0.86279	-0.24658	11.541	-13.7695	11.8289	-0.13086	-0.23975	-0.003418	81.56	28.132	1299.1639	-2.3211	0.72876	0.39233	12.115	19.8044	5.738	-0.11816	-0.026855	0.043457	71.763	-109.6367	1392.682	-2.1167	1.0767	0.229	36.132	11.353	8.8124	-0.057617	0.035156	0.21338
0.706	49.6497	46.203	3.60658	-0.13135	-0.087402	0.060547	-14.83	-180.4771	1202.6067	-0.87451	0.87939	-0.26221	44.222	-7.795	25.9893	-0.14063	-0.23975	0.0092773	51.354	85.853	1245.708	-2.2808	0.71729	0.37891	39.012	-2.7453	38.1334	-0.11914	-0.013672	0.047363	45.918	-63.795	1382.609	-2.2276	1.1221	0.29322	46.2568	-13.5296	14.1393	-0.098633	0.047363	0.23047
0.708	27.812	16.6494	13.613051	-0.13232	-0.092773	0.069824	14.614	-177.979	1193.086	-0.81006	0.9126	-0.30029	35.7562	6.2542	14.3255	-0.14258	-0.23706	0.019532	88.9421	24.2739	1270.579	-2.2163	0.70654	0.35352	6.848	12.1572	30.686	-0.11548	-0.0048829	0.052002	35.69889	-115.76	1399.149	-2.3315	1.1685	0.3623	20.6	21.7267	-4.2215	-0.11621	0.053223	0.24316
0.71	22.381	11.989	11.1478	-0.12939	-0.090332	0.09668	34.633	-158.091	1212.699	-0.77783	0.93188	-0.31836	31.27	-0.9854	31.5353	-0.14502	-0.23389	0.027832	69.631	96.017	1259.0628	-2.1714	0.69971	0.34082	10.773	-9.784	23.3318	-0.10547	-0.00048828	0.050293	-0.325000000000003	-37.878	1375.689	-2.4336	1.2266	0.44971	19.906	-11.4329	1.913	-0.14502	0.057617	0.25732
0.712	23.693	31.0981	-1.7606	-0.12305	-0.099365	0.10694	66.495	-74.563	1205.613	-0.76758	0.94531	-0.33887	65.628	15.4613	42.85	-0.14404	-0.229	0.028809	74.632	90.427	1244.2567	-2.0977	0.69531	0.31689	40.2098	-10.11934	35.84	-0.081543	-0.0014648	0.046875	-3.141	-38.759	1344.7359	-2.4844	1.252	0.48291	29.381	0.20644	29.57	-0.15649	0.066651	0.26148
0.714	31.562	16.3428	6.0671	-0.11914	-0.10645	0.11377	36.25784	-77.625	1249.393	-0.78564	0.96045	-0.3501	27.945	4.7839	28.359	-0.14697	-0.229	0.030762	98.4522	68.865	1255.9302	-2.044	0.68311	0.30469	-19.99	11.7155	2.3276	-0.067871	0.0019531	0.038086	10.511	-38.183	1327.606	-2.5391	1.2891	0.5376	35.575	11.58227	30.0139	-0.16016	0.067383	0.26074
0.716	29.074	52.821	-2.81025	-0.10693	-0.11035	0.125	43.0895	-38.111	1284.8033	-0.80664	0.97461	-0.34961	33.96	6.1205	34.325	-0.1499	-0.22461	0.037109	46.799	152.218	1215.8107	-1.9917	0.67334	0.29785	-3.081	0.5579	0.160999999999998	-0.030273	-0.0043945	0.033203	-13.95	32.679	1291.479	-2.5554	1.3001	0.56372	28.171	-19.7874	35.4342	-0.14404	0.068359	0.25195
0.718	1.423	40.18	-9.682	-0.09668	-0.11328	0.1333	26.52202	-14.513	1244.3498	-0.88867	1.0195	-0.3418	67.0924	30.4007	17.2444	-0.15137	-0.22705	0.037842	31.663	86.07168	1218.47	-1.9233	0.6665	0.28467	10.302	29.362	-10.3359	0.00708	-0.011475	0.007324	-9.444	-45.1615	1333.204	-2.5605	1.3027	0.57471	17.252	21.2135	11.9334	-0.13574	0.070313	0.24414
0.72	-19.945	19.0852	24.688	-0.088379	-0.11328	0.14453	1.595	-82.429	1279.7031	-0.97999	1.0572	-0.35498	40.166	9.5301	2.7874	-0.15479	-0.22461	0.046387	23.329	99.242	1204.6555	-1.8867	0.66504	0.28125	-36.619	28.7888	-3.9591	0.043945	-0.018066	-0.0073242	-13.087	-39.7601	1391.4127	-2.5371	1.2832	0.57959	17.657	26.5487	-7.105	-0.099121	0.068848	0.22656
0.722	-7.453	41.5207	15.0063	-0.08252	-0.10865	0.15283	19.966	-61.02	1271.96388	-1.0757	1.1001	-0.36377	80.49	10.0096	22.0324	-0.1499	-0.21729	0.052734	-12.038	129.3817	1171.051	-1.8262	0.65234	0.27393	8.42299999999999	8.2095	32.9045	0.089355	-0.037109	-0.032227	-32.306	-26.9973	1392.412	-2.5293	1.2676	0.58447	20.828	20.0251	27.2707	-0.073486	0.06543	0.20801
0.724	-8.354	-3.35	23.193	-0.078125	-0.10791	0.16016	-15.045	-80.32185	1273.422	-1.2246	1.1816	-0.37012	33.104	11.9842	-2.136	-0.14941	-0.21045	0.057617	9.612	51.464	1180.8562	-1.7822	0.64941	0.26709	-2.645	14.7355	23.4513	0.11182	-0.047363	-0.044922	-10.431	-98.357	1421.268	-2.5112	1.2368	0.58301	-6.436	55.027	-1.0432	-0.04248	0.065918	0.18945
0.726	-27.437	5.344	36.436	-0.072266	-0.10156	0.16309	-12.331	-118.856	1306.73	-1.3066	1.2344	-0.35938	-6.026	-13.34986	6.566	-0.13916	-0.20605	0.060059	-17.926	93.554	1148.6604	-1.7397	0.64111	0.26025	-9.789	-4.589	29.557	0.14063	-0.058105	-0.06543	-19.328	-24.93	1403.342	-2.4764	1.198	0.573	1.385	13.7908	-6.1398	-0.0053711	0.057129	0.16895
0.728	-20.546	26.4208	17.08435	-0.068848	-0.10059	0.1665	11.925	-73.6354	1281.534	-1.478	1.3677	-0.30127	58.0128	-1.0979	19.2433	-0.13037	-0.20361	0.061524	1.025	68.3482	1111.1692	-1.6753	0.62744	0.25049	29.8624	3.3417	32.985	0.15234	-0.062988	-0.070556	-57.372	-42.8258	1378.359	-2.4429	1.1704	0.56104	13.979	25.4738	-2.58422	0.0092773	0.057129	0.16309
0.73	-23.611	-11.8398	32.5095	-0.065918	-0.094238	0.16553	4.625	-137.755	1321.6722	-1.666	1.5254	-0.19482	9.393	-8.7822	8.12955	-0.11816	-0.20117	0.057129	30.047	53.034	1105.204	-1.6494	0.62109	0.24072	-9.019	11.0836	8.4488	0.1582	-0.06543	-0.074707	-33.133	-58.436	1392.311	-2.4019	1.1372	0.54688	1.922	28.4608	2.7552	0.030762	0.053223	0.15088
0.732	-5.836	21.439	23.1381	-0.064942	-0.093994	0.16285	67.642	-161.314	1366.614	-1.7559	1.5996	-0.13525	10.899	-17.5801	37.5504	-0.09082	-0.19678	0.04541	8.99	137.273	1054.2622	-1.5913	0.60791	0.23438	20.092	-5.36529	10.3774	0.15039	-0.069824	-0.076172	-37.25	6.28721	1364.903	-2.3784	1.1196	0.53955	25.531	-7.33	46.348	0.043701	0.050293	0.13965
0.734	-14.287	8.6978	-0.5675	-0.061035	-0.091797	0.15625	70.772	-120.49	1344.882	-1.9336	1.7227	0.0068359	18.127	2.1474	15.9956	-0.069824	-0.19824	0.035156	38.173	103.753	1043.2328	-1.5486	0.59692	0.22339	17.964	25.4464	-13.313	0.14648	-0.066406	-0.07666	-43.7499	-39.7795	1365.908	-2.3369	1.0801	0.52783	0.164000000000001	21.5004	32.54	0.058105	0.048828	0.1333
0.736	4.97	1.2589	26.4397	-0.057129	-0.080566	0.15723	52.124	-162.3008	1373.191	-2.0584	1.7854	0.09326	-13.435	-23.9406	5.43	-0.035645	-0.19727	0.013672	46.067	147.328	1013.7086	-1.5059	0.58789	0.21338	4.649	22.667	-17.7829	0.13135	-0.06543	-0.073242	-19.744	-10.956	1382.7901	-2.3062	1.063	0.51953	9.428	5.4484	16.7036	0.067383	0.051758	0.12646
0.738	21.333	41.563	24.0509	-0.053223	-0.077148	0.15723	78.8596	-85.794	1383.515	-2.1694	1.8149	0.14941	4.538	-13.10635	11.4407	-0.011963	-0.19653	-0.0029297	30.592	182.694	979.813	-1.458	0.57617	0.20557	49.048	5.3984	17.1358	0.11377	-0.06128	-0.068115	-11.5459	23.292	1334.7764	-2.2944	1.0435	0.51807	13.533	-16.5724	22.54053	0.069824	0.053711	0.12451
0.74	20.001	4.2621	27.877	-0.052246	-0.062988	0.14697	24.143	-57.21	1362.872	-2.2534	1.8091	0.18213	1.93	-0.077	-9.6842	0.0087891	-0.19531	-0.022949	47.0922	139.80635	975.511	-1.4316	0.56934	0.20117	28.879	11.9346	21.6423	0.098145	-0.059082	-0.063477	-0.292999999999999	-18.828	1332.4854	-2.2695	1.0313	0.52393	11.18	9.3582	10.1714	0.077148	0.06543	0.11133
0.742	44.141	24.5468	34.099	-0.052246	-0.056641	0.146	30.477	-80.1825	1371.4023	-2.2632	1.7993	0.17236	-27.941	-19.9736	8.742	0.031738	-0.19092	-0.043945	0.564	192.112	940.0517	-1.3828	0.55859	0.19531	28.0945	-12.5292	43.138	0.075684	-0.050781	-0.073242	14.693	88.403	1309.26482	-2.2632	1.0161	0.53027	18.164	-18.3722	16.53042	0.084717	0.078613	0.10376
0.744	47.5926	27.221	22.2112	-0.058594	-0.04834	0.14746	49.912	8.516	1330.2933	-2.2402	1.7773	0.146	0.744999999999997	9.6993	12.103133	0.036133	-0.19043	-0.055664	9.963	185.51	915.389	-1.3444	0.54859	0.19555	75.25	-19.9428	52.753	0.064453	-0.039551	-0.076172	7.162	82.245	1285.225	-2.2578	1	0.53467	26.393	10.501	20.4408	0.092773	0.086914	0.094238
0.746	35.211	-31.194	63.7234	-0.065918	-0.02832	0.1416	17.86	-16.8536	1326.284	-2.2078	1.7785	0.11792	-0.445999999999998	20.8258	-6.5866	0.043457	-0.17627	-0.071777	42.058	152.0961	900.512	-1.3057	0.54102	0.19482	21.318	-8.736	35.6879	0.036621	-0.033691	-0.077148	50.1331	65.431	1304.692	-2.2419	0.98315	0.54614	26.601	21.04227	7.9266	0.10254	0.096191	0.084473
0.748	60.3631	3.5993	67.936	-0.074219	-0.02002	0.14063	30.748	0.5162	1356.0166	-2.1733	1.7935	0.087402	3.726	6.4267	6.7208	0.040527	-0.17139	-0.077636	-6.476	191.173	849.911	-1.2476	0.52734	0.18945	46.338	-32.9001	63.0479	0.011719	-0.021484	-0.082764	58.3175	119.33	1267.018	-2.2163	0.96436	0.55273	43.8295	-23.44046	49.223	0.10645	0.10254	0.080078
0.75	44.9696	7.9792	61.1555	-0.099121	-0.00048828	0.125	29.297	43.485	1335.755	-2.1035	1.8242	0.043457	14.572	27.842	3.985	0.033691	-0.16211	-0.082031	7.402	128.15961	837.5592	-1.2183	0.52002	0.19141	54.986	-8.2545	26.018	-0.014648	-0.0073242	-0.083496	43.9856	44.4048	1280.045	-2.1563	0.93945	0.55127	45.836	-6.3707	61.3293	0.10938	0.11475	0.069824
0.752	42.607	20.3034	89.52	-0.13672	0.022461	0.1084	32.057	-35.393	1339.1344	-2.0728	1.8462	0.027344	-2.902	4.5446	-2.038	0.020508	-0.14307	-0.088867	32.5706	138.7481	814.4364	-1.1577	0.50488	0.18701	-5.114	-1.007	14.541	-0.06543	0.011719	-0.077148	42.0805	83.63636	1288.811	-2.1216	0.92725	0.54688	31.503	-11.4259	49.138	0.10864	0.12354	0.058349
0.754	46.363	63.9783	133.8766	-0.15381	0.036133	0.10205	82.99082	0.904999999999999	1347.2613	-2.0405	1.9009	0.0058594	40.582	20.9894	4.4533	0.013672	-0.13477	-0.091309	23.4656	148.289	775.389	-1.1079	0.49072	0.18237	53.6244	-20.1355	62.8406	-0.089355	0.025879	-0.077637	29.77721	117.218	1264.8098	-2.0215	0.90625	0.5249	31.082	-17.815062	68.7293	0.094727	0.13135	0.061035
0.756	19.645	33.516	177.444	-0.19189	0.069336	0.095215	58.7653	-18.6326	1330.9004	-2.0506	1.9299	0.016846	31.305	37.511	-8.4048	-0.00048828	-0.11621	-0.094238	43.179	92.548	784.038	-1.0581	0.47705	0.17969	48.256	-4.675	92.993	-0.14795	0.050293	-0.067871	53.806	47.325	1268.782	-1.9311	0.89112	0.49267	26.531	21.928	81.93711	0.056641	0.14355	0.072266
0.758	54.16902	34.547	216.8393	-0.23413	0.09717	0.089111	78.5545	-60.556	1360.9507	-2.0679	1.9614	0.036133	21.214	6.2939	21.174	-0.0053711	-0.10595	-0.095215	26.893	132.4069	748.4983	-0.99072	0.45117	0.17432	24.19	-31.795	142.7264	-0.19507	0.073242	-0.058838	51.7908	91.2138	1220.3379	-1.8276	0.88232	0.45654	18.832	-10.0285	114.4638	0.0090331	0.15235	0.087891
0.76	46.2833	48.814	228.1551	-0.27979	0.12451	0.088867	105.834	14.694	1331.6988	-2.1167	1.9829	0.072266	43.297	7.0139	30.808	-0.020508	-0.091309	-0.098633	10.863	124.2906	726.2024	-0.95068	0.43604	0.17578	45.256	-29.9825	184.2732	-0.24658	0.10107	-0.051758	23.872	51.834	1190.3182	-1.6772	0.86865	0.40283	24.296	15.7331	124.194	-0.04834	0.16748	0.11377
0.762	-12.9422	16.693	284.254	-0.33447	0.16016	0.10107	38.839	-39.7847	1335.046	-2.1328	1.9824	0.09082	25.595	-13.163	29.054	-0.03418	-0.071289	-0.10205	49.312	108.6872	722.555	-0.88184	0.41016	0.17285	20.5	11.1402	200.7833	-0.31787	0.13037	-0.033691	46.963	23.256	1192.097	-1.6035	0.86328	0.37744	25.7099	41.216	129.013	-0.13525	0.18555	0.14648
0.764	3.332	68.9314	325.182	-0.36768	0.17676	0.10596	56.443	-30.5344	1371.859	-2.1094	1.9531	0.10645	51.0872	-26.475	56.3056	-0.04541	-0.060303	-0.11108	-5.131	162.913	675.545	-0.82763	0.38867	0.16602	23.841	17.9772	267.77111	-0.35693	0.14551	-0.030762	28.676	107.436	1160.099	-1.4707	0.85547	0.32324	22.612	14.5815	205.0754	-0.18506	0.19824	0.16357
0.766	-6.273	68.788	327.92803	-0.43701	0.21436	0.10889	47.556	14.3617	1348.455	-2.0498	1.916	0.090576	52.5707	-6.966	71.827	-0.063965	-0.049805	-0.11865	-19.7103	111.1112	678.005	-0.771	0.36377	0.16064	29.189	64.3684	296.994	-0.44775	0.18604	-0.01709	8.016	74.5484	1153.6641	-1.3862	0.84424	0.29444	4.863	52.99638	252.861	-0.28076	0.23877	0.20801
0.768	-4.854	55.374	355.949	-0.49634	0.23755	0.10498	28.462	-44.6532	1367.81	-1.9688	1.8652	0.062988	25.521	-44.514897	95.9653	-0.088379	-0.022949	-0.12891	-19.918	144.7711	630.523	-0.70361	0.33252	0.15381	1.87	84.762	341.559	-0.52808	0.21998	0.0029297	9.931	112.509	1100.527	-1.314	0.83154	0.27344	-28.8063	54.8007	296.6227	-0.35425	0.26294	0.23365
0.77	5.361	64.439	365.606	-0.5542	0.26465	0.10791	54.152	22.155	1346.307	-1.8472	1.7993	0.015625	71.1997	-39.13054	102.6173	-0.10693	-0.0078125	-0.12305	-33.44023	178.216	581.119	-0.66895	0.31641	0.1499	34.187	61.5974	433.968	-0.61816	0.24902	0.016113	-10.235	147.596	1052.136	-1.2246	0.81055	0.25098	-7.002	48.962	333.615	-0.42773	0.28516	0.26025
0.772	-44.6869	16.4072	436.111	-0.63379	0.30273	0.11328	28.51	37.223	1285.8411	-1.793	1.7578	-0.0053711	64.773	-9.963	105.168	-0.15039	0.016113	-0.11914	7.806	141.165	546.607	-0.5957	0.28809	0.13721	20.294	80.089	497.1314	-0.75928	0.29688	0.047363	13	113.225	1050.112	-1.1777	0.79883	0.24805	-12.36	81.936	364.3015	-0.52441	0.31836	0.29736
0.774	-21.613	24.4564	504.8219	-0.67139	0.32373	0.11865	33.769	31.6	1294.1896	-1.6738	1.6895	-0.056152	34.813	-20.728	147.278	-0.19043	0.036133	-0.10815	-31.021	180.3637	488.837	-0.54785	0.26343	0.13134	31.561	34.3401	578.854	-0.83789	0.32617	0.063965	1.567	184.486	1041.226	-1.1191	0.78516	0.229	-17.81	41.916	415.38739	-0.5752	0.33691	0.31641
0.776	-21.9838	34.637	545.0409	-0.75439	0.36084	0.13037	55.737	117.328	1245.977	-1.5925	1.6516	-0.10156	66.467	23.9101	207.4082	-0.24121	0.056641	-0.09668	-30.827	153.4715	475.6324	-0.49561	0.24072	0.12549	54.365	-0.0539999999999985	648.825	-1.02	0.3877	0.089355	-1.035	167.215	1026.149	-1.0647	0.76928	0.2185	-22.588	48.283	456.3249	-0.68701	0.36572	0.34961
0.778	-33.445	-24.3815	613.062	-0.82471	0.38648	0.14063	7.544	77.575	1234.607	-1.5112	1.6216	-0.146	26.919	39.727	249.60448	-0.30811	0.07959	-0.069824	11.567	123.192	467.5939	-0.43066	0.21094	0.11377	44.286	-4.7	686.0028	-1.156	0.43823	0.11841	8.45	131.634	992.552	-1.0176	0.75391	0.21436	-40.0102	67.282	471.679	-0.77417	0.3816	0.38697
0.78	-4.114	-24.669	675.5992	-0.89404	0.41748	0.1543	46.047	93.583	1256.89	-1.418	1.5996	-0.20068	46.07	54.175	324.05096	-0.34326	0.095215	-0.061035	-12.13	164.391	422.9001	-0.396	0.19824	0.10645	91.123	-61.516	751.1073	-1.27	0.47803	0.17188	-13.445	168.004	953.924	-0.95264	0.72314	0.19531	-19.4255	17.0566	532.923	-0.87109	0.39648	0.42236
0.782	-21.688	-55.0565	681.544	-0.99219	0.44922	0.18799	50.1988	137.076	1225.125	-1.3613	1.585	-0.22266	78.4776	89.165	398.77	-0.4248	0.12012	-0.035156	3.356	117.255	427.3402	-0.33643	0.16455	0.094727	94.597	-67.674	774.871	-1.4219	0.53809	0.24365	10.898	104.2752	921.2506	-0.91455	0.7124	0.18555	-1.714	21.0857	610.3485	-1.0122	0.4165	0.48047
0.784	-15.394	-66.179	742.082	-1.0425	0.4624	0.20215	26.678	84.49	1241.674	-1.2715	1.5439	-0.26563	30.974	65.887	467.3815	-0.49268	0.14697	-0.020996	8.256	132.46	393.1764	-0.29321	0.13941	0.081055	43.27	-69.79	776.925	-1.4941	0.57227	0.27686	-0.985999999999997	111.0331	894.2419	-0.85596	0.68604	0.16846	-0.617999999999999	-26.667	656.0727	-1.0854	0.4248	0.51367
0.786	10.102	-38.981	761.889	-1.1255	0.49561	0.25195	47.6881	136.714	1222.7689	-1.2026	1.5122	-0.29248	51.533	54.691	551.5358	-0.56592	0.17432	-0.0019531	-11.303	147.475	365.631	-0.24854	0.12061	0.075195	51.643	-93.299	823.562	-1.6182	0.62305	0.33447	-1.322	142.247	853.732	-0.80078	0.64941	0.16162	2.922	-71.35	704.1182	-1.2378	0.44189	0.57813
0.788	-0.0850000000000009	-83.1975	804.1525	-1.1953	0.5127	0.29371	5.69	125.478	1194.0809	-1.1401	1.4829	-0.31396	46.428	43.633	582.3549	-0.6748	0.21191	0.023926	31.81	110.2034	357.758	-0.19678	0.087402	0.058105	13.3403	-62.3675	845.62818	-1.6709	0.65821	0.36573	23.357	79.136	840.0679	-0.77832	0.63281	0.1626	10.161	-43.622	716.72058	-1.3389	0.45899	0.61866
0.79	39.935	-87.064	823.676	-1.2495	0.53076	0.34766	-11.523	73.721	1200.385	-1.0713	1.4316	-0.33008	35.33	-19.86	662.627	-0.74365	0.22852	0.042969	-0.879000000000001	143.9793	331.552	-0.16895	0.075684	0.060547	-5.223	-70.0054	887.495	-1.6992	0.6875	0.37939	31.649	135.751	807.999	-0.73389	0.59424	0.15918	8	-81.3925	746.1509	-1.4351	0.479	0.6543
0.792	70.236	-91.933	770.053	-1.3257	0.54736	0.41357	23.662	120.4916	1148.7511	-1.0425	1.4067	-0.33838	68.651	-48.22	749.0029	-0.88867	0.2627	0.077148	-9.734	115.02654	332.913	-0.12109	0.051758	0.050781	29.6699	-95.427	928.384	-1.6968	0.70752	0.37305	39.997	100.6943	797.363	-0.70068	0.56836	0.14575	27.107	-85.258	778.924	-1.5249	0.50244	0.69287
0.794	71.488	-134.8257	753.478	-1.3691	0.55078	0.44678	-15.586	61.819	1119.898	-0.99854	1.3618	-0.3374	31.195	-93.345	782.2281	-1.0159	0.29834	0.12305	20.06	75.898	326.713	-0.083984	0.033203	0.044677	-2.135	-77.071	900.877	-1.6738	0.70898	0.35498	61.4979	81.881	781.787	-0.66406	0.54883	0.13672	18.026	-70.44	736.353	-1.5581	0.50928	0.70313
0.796	78.947	-111.9046	749.033	-1.4443	0.56738	0.51514	-3.716	71.394	1103.1264	-0.96924	1.3232	-0.33594	12.755	-126.72	860.397	-1.1553	0.3335	0.18213	16.491	106.1308	297.27	-0.051758	0.016602	0.043945	-4.5321	-124.332	915.615	-1.6284	0.69189	0.30371	66.7032	151.748	745.846	-0.60303	0.51074	0.10742	39.794	-129.231	732.271	-1.5913	0.521	0.70898
0.798	79.7551	-92.561	699.699	-1.4946	0.58154	0.55712	1.499	106.9545	1083.4169	-0.94287	1.2954	-0.32568	-0.6275	-107.6835	864.037	-1.3506	0.38037	0.28271	39.8244	77.6132	282.9101	-0.018066	-0.0019531	0.042969	-5.855	-101.6	903.728	-1.6013	0.66822	0.27222	90.5109	105.8604	727.402	-0.56641	0.50293	0.095215	48.768	-100.348	715.724	-1.5757	0.53028	0.68799
0.8	97.9388	-90.327	685.653	-1.5273	0.5918	0.59424	-33.881	58.26	1064.0915	-0.91016	1.2578	-0.31055	-39.4024	-125.522	878.864	-1.4526	0.40869	0.33594	19.288	99.4767	249.9177	-0.00097656	-0.0092773	0.04541	-25.196	-58.373	880.163	-1.5742	0.6416	0.24268	98.1419	151.5487	687.929	-0.48193	0.47119	0.083984	33.416	-104.928	705.307	-1.541	0.53125	0.64697
0.802	106.634	-49.8617	677.818	-1.5508	0.59814	0.60791	28.191	122.336	1031.42865	-0.90186	1.2466	-0.29639	-3.38	-110.598	921.377	-1.6421	0.45752	0.44678	18.02	124.336	216.8449	0.026367	-0.023926	0.04541	4.847	-75.618	898.449	-1.5562	0.604	0.22314	67.291	175.869	624.537	-0.42456	0.448	0.084717	38.006	-117.035	713.923	-1.4468	0.51416	0.58008
0.804	40.19671	-59.955	683.953	-1.5508	0.60742	0.60791	25.8594	115.945	982.212	-0.87646	1.2173	-0.27148	0.942	-100.402	897.473	-1.7605	0.49097	0.50708	59.5117	100.212	203.577	0.042725	-0.034668	0.04834	7.363	-39.445	891.595	-1.5483	0.58838	0.20898	82.6226	123.363	603.264	-0.37402	0.42432	0.075684	28.5009	-61.0935	660.0524	-1.3994	0.49609	0.54834
0.806	24.363	-51.307	742.982	-1.5391	0.62158	0.60791	28.3397	107.268	972.4797	-0.86572	1.1934	-0.24854	-18.7604	-140.994	909.075	-1.8516	0.51367	0.54932	30.637	126.828	188.756	0.056641	-0.047852	0.056641	5.712	-82.883	924.236	-1.5234	0.55957	0.16846	78.281	165.5111	560.8852	-0.31055	0.3833	0.07373	37.136	-76.7267	676.309	-1.3145	0.47217	0.47021
0.808	46.9118	-19.614	769.352	-1.5378	0.63306	0.60205	43.7685	192.101	956.496	-0.84961	1.1738	-0.21875	-13.2546	-124.238	887.508	-1.9473	0.53125	0.55908	20.271	114.955	188.778	0.075195	-0.056641	0.060059	48.649	-140.082	993.0151	-1.4946	0.55127	0.13696	70.8527	121.5336	534.8934	-0.29053	0.36377	0.072754	33.72766	-77.0759	714.654	-1.2639	0.46753	0.43676
0.81	25.138	-54.623	816.593	-1.5405	0.646	0.59766	2.293	158.469	918.8637	-0.8335	1.1431	-0.18213	-84.472	-104.073	852.24	-1.957	0.54102	0.56104	31.365	97.29423	197.068377	0.082275	-0.068115	0.06543	11.208	-114.442	1007.6243	-1.4624	0.55615	0.10303	83.730364	112.973	505.882	-0.25	0.31543	0.070801	0.829000000000001	-45.821	717.532	-1.2339	0.47803	0.41504
0.812	54.7916	-59.765	884.031	-1.5151	0.67334	0.60254	20.336	177.916	889.562	-0.82422	1.125	-0.1665	-64.5997	-89.651	864.6924	-1.957	0.53516	0.55713	16.551	123.54	176.963	0.092285	-0.074707	0.078613	-8.83	-159.166	1071.221	-1.4238	0.57617	0.07373	61.8062	170.465	436.8259	-0.22363	0.27319	0.065918	7.815	-77.031	771.528	-1.2104	0.49072	0.39453
0.814	40.4161	-106.613	925.63	-1.4995	0.68506	0.59863	-11.2054	189.419	844.919	-0.79834	1.0903	-0.13672	-17.036	-49.917	849.994	-1.9343	0.53345	0.52661	38.467	100.859	164.709	0.095703	-0.083496	0.09375	-16.396	-151.1279	1115.281	-1.4058	0.6001	0.063965	74.8645	124.2914	422.2389	-0.2041	0.23389	0.066895	4.731	-48.528	823.608	-1.2031	0.49609	0.38525
0.816	39.4687	-174.0635	957.232	-1.4609	0.69727	0.58252	-31.619	130.299	839.792	-0.77514	1.0588	-0.1206	-18.65	-51.55	830.775	-1.9141	0.53906	0.49268	18.828	112.776	134.33155	0.096191	-0.084961	0.1001	-69.6447	-123.0901	1096.3579	-1.377	0.65234	0.057129	59.964	135.5254	403.802	-0.18994	0.18018	0.066895	1.1194	-53.091	870.1187	-1.1738	0.50732	0.35498
0.818	62.9929	-171.2139	971.254	-1.4253	0.70361	0.54981	7.358	170.546	825.5552	-0.75293	1.0293	-0.10254	60.153	-78.335	871.066	-1.8301	0.54688	0.43555	-15.028	109.797	120.6027	0.10352	-0.086914	0.11182	-40.9959	-169.682	1130.962	-1.363	0.69898	0.049317	27.545	140.63376	382.104	-0.18604	0.15869	0.067383	-9.66	-135.14	943.409	-1.1335	0.50513	0.32617
0.82	-4.372	-214.618	976.456	-1.3882	0.71338	0.51318	-10.294	141.3601	785.3929	-0.71484	0.99609	-0.081543	81.703	-76.797	870.783	-1.7871	0.53516	0.39893	40.4944	67.5128	114.4549	0.10278	-0.090332	0.12329	-43.922	-133.681	1143.011	-1.3477	0.74219	0.045898	48.427	94.408	381.152	-0.1748	0.11475	0.071289	-14.5824	-132.1709	947.061	-1.0874	0.49268	0.2915
0.822	-40.172	-239.699	1003.2514	-1.3413	0.71729	0.45898	-18.0968	109.492686	779.989	-0.69971	0.979	-0.070313	36.777	-124.637	924.169	-1.6812	0.50928	0.32959	4.087	74.6295	95.7034	0.11133	-0.092773	0.13623	-31.382	-142.468	1187.889	-1.3164	0.76855	0.037109	11.456	146.8838	347.124	-0.15722	0.089111	0.069092	6.32	-184.036	966.502	-1.0327	0.47803	0.24316
0.824	-35.138	-226.514	1012.041	-1.3203	0.72461	0.43701	-5.2093	141.059	739.227	-0.66455	0.9458	-0.04541	44.7396	-141.274	984.6497	-1.6086	0.49439	0.29297	-13.449	57.278	87.85	0.11475	-0.089355	0.14209	8.346	-171.389	1276.713	-1.3022	0.77002	0.028809	17.064	116.303	340.7224	-0.14795	0.067383	0.070801	2.253	-206.302	1016.0203	-1.0132	0.47314	0.22412
0.826	-68.6583	-264.487	1044.88	-1.3101	0.73291	0.38672	-9.874	92.594	715.335	-0.63257	0.91284	-0.036132	-13.993	-148.016	1022.6222	-1.5488	0.49121	0.26416	13.869	40.9676	93.3118	0.12061	-0.089844	0.14453	6.36199999999999	-131.0081	1277.063	-1.2827	0.77002	0.0097656	19.323	97.987	327.048	-0.13379	0.039063	0.06543	-34.81558	-177.304	1025.464	-0.98291	0.479	0.18945
0.828	-55.6841	-241.608	1095.481	-1.3093	0.75073	0.34986	13.512	119.822	693.3663	-0.60352	0.87939	-0.022949	-53.814	-189.064	1081.2876	-1.4956	0.49756	0.24023	-34.948	65.28	88.136	0.1377	-0.09082	0.15137	43.7519	-172.8046	1274.337	-1.2847	0.77393	0.0097656	-26.123	119.504	278.6988	-0.12646	0.029785	0.064453	-59.9132	-229.555	1063.949	-0.97656	0.4873	0.18384
0.83	-67.131	-197.6621	1095.752	-1.3105	0.75977	0.3252	-1.297	150.103	653.5602	-0.55176	0.83887	-0.016602	-15.6953	-188.083	1096.4941	-1.4702	0.50879	0.22607	12.339	38.617	84.497	0.15039	-0.086426	0.15185	65.3903	-152.665	1285.574	-1.293	0.7832	0.019531	5.264	66.51244	270.99436	-0.10742	0.0087891	0.064453	-35.791	-201.092	1094.64013	-0.9917	0.49463	0.18652
0.832	-62.51	-174.669	1141.96	-1.3081	0.771	0.30078	-20.741	112.39	666.2294	-0.52051	0.81104	-0.012695	-38.9286	-206.836	1093.14	-1.3984	0.53125	0.19775	13.596	47.693	91.731	0.16602	-0.08252	0.14648	53.087	-101.067	1247.5047	-1.3374	0.81104	0.042969	6.97300000000001	90.3939	231.75	-0.092041	-0.0080566	0.062012	-50.8582	-178.5068	1103.1553	-1.0449	0.51367	0.21436
0.834	-3.289	-97.057	1138.579035	-1.3027	0.77148	0.28955	-1.697	167.254	658.183	-0.45947	0.76807	-0.019531	-18.017	-221.316	1146.4119	-1.3259	0.55786	0.17798	-19.4136	51.62	75.506	0.18457	-0.077637	0.14453	123.107	-119.253	1267.852	-1.3931	0.8418	0.074951	-17.844	106.565	196.914	-0.079102	-0.025391	0.058594	-40.0876	-202.0128	1159.0948	-1.0825	0.52197	0.22998
0.836	-30.5915	-76.917	1123.979	-1.2827	0.76611	0.26074	-23.7141	143.8885	613.043	-0.42236	0.73438	-0.022949	-2.32899999999999	-175.112	1143.39067	-1.2671	0.58545	0.16455	32.952	22.9054	76.695	0.19971	-0.083008	0.12891	110.8888	-55.337	1267.511	-1.4663	0.87549	0.11328	18.948	77.361	212.212	-0.063965	-0.045898	0.044922	-18.796	-120.128	1170.118	-1.1797	0.55859	0.27197
0.838	-6.505	-86.347	1144.615	-1.2744	0.75781	0.23828	-34.1558	137.2231	590.597	-0.37646	0.69873	-0.024902	-12.712	-177.0044	1175.0685	-1.2051	0.61621	0.14795	6.219	51.354	45.37	0.22754	-0.084473	0.10547	61.424	-50.1143	1285.701	-1.5874	0.91846	0.17871	-6.563	124.3374	181.759	-0.057129	-0.054688	0.040039	-22.6604	-107.47	1181.6891	-1.2459	0.57642	0.29688
0.84	38.228	-47.425	1145.2971	-1.2593	0.75635	0.21289	-24.1345	188.675	543.783	-0.32324	0.65869	-0.033691	44.773	-168.218	1219.515	-1.1855	0.63086	0.15137	3.127	37.308	28.6334	0.24048	-0.085938	0.087646	73.901	-86.877	1359.2148	-1.6724	0.94287	0.2168	-1.384	94.4187	174.582	-0.041504	-0.073242	0.027832	-11.519	-102.888	1196.692	-1.3115	0.59375	0.31494
0.842	7.51600000000001	-95.832	1180.75043	-1.2461	0.75879	0.18408	-43.9805	143.0637	520.864	-0.30322	0.64111	-0.040039	62.7212	-121.565	1178.618	-1.1675	0.6333	0.15137	30.635	18.8817	28.5574	0.25049	-0.092285	0.067383	49.585	-59.4774	1361.9399	-1.8608	0.98096	0.30322	35.624	89.679	171.43047	-0.028809	-0.083985	0.013672	7.136	-51.309	1159.9576	-1.3809	0.61426	0.33643
0.844	27.2158	-118.719	1212.6434	-1.2461	0.7666	0.16895	-3.534	161.16584	483.0005	-0.25195	0.60059	-0.039063	94.801	-127.334	1204.304	-1.1677	0.63941	0.16528	-10.931	34.699	13.7913	0.25098	-0.094727	0.052246	58.7823	-92.006	1374.4059	-2.0154	1.009	0.38868	7.095	114.739	145.1422	-0.018555	-0.089355	-0.00048828	24.9507	-98.626	1180.8007	-1.4038	0.61963	0.34033
0.846	-1.2404	-124.674	1193.3382	-1.2656	0.77734	0.14355	0.700999999999997	172.849	401.277	-0.22973	0.57788	-0.034912	130.484	-66.991	1219.061	-1.1777	0.64648	0.1792	24.601	-0.4501	28.9789	0.25049	-0.09668	0.04248	76.6863	-99.189	1384.6703	-2.166	1.043	0.48486	47.381	76.532	151.6962	0.0019531	-0.098633	-0.022949	30.009	-94.841	1206.8884	-1.4292	0.62256	0.33105
0.848	-20.3452	-199.112	1238.28219	-1.3083	0.78686	0.1294	-12.153	125.0817	413.394	-0.20557	0.55518	-0.026855	69.7933	-13.009	1219.196	-1.1968	0.66455	0.21387	37.9161	16.2011	29.089	0.23047	-0.099121	0.025391	40.922	-48.983	1357.4336	-2.3652	1.0879	0.5874	47.42	99.894	138.97	0.010742	-0.094238	-0.036621	0.888999999999999	-94.5782	1191.869	-1.4177	0.62476	0.31396
0.85	39.602	-181.406	1248.1898	-1.3789	0.79297	0.12988	23.36015	151.948	402.9482	-0.17578	0.52344	-0.015137	60.607	-31.41	1257.6515	-1.2207	0.67529	0.22852	17.9442	12.9235	22.7567	0.20777	-0.10132	0.010254	77.614	-93.2748	1400.987	-2.4453	1.1055	0.62744	45.26	101.981	106.4119	0.024414	-0.10107	-0.056641	-1.497	-165.336	1228.223	-1.3882	0.62744	0.28516
0.852	29.5823	-174.927	1224.998	-1.5	0.79883	0.15088	1.75	113.8431	385.1003	-0.16064	0.5083	-0.010254	19.181	-15.081	1255.9544	-1.2598	0.7002	0.25	54.2477	-11.9139	39.1351	0.1792	-0.10205	0.0039063	105.9305	-69.4164	1424.7178	-2.5776	1.1372	0.67383	75.7148	57.5122	100.36	0.03418	-0.10059	-0.062011	16.9989	-138.602	1253.8256	-1.3574	0.62598	0.26855
0.854	48.3898	-189.665	1248.819	-1.5776	0.79932	0.17334	8.749	100.574	391.7327	-0.13281	0.47266	0.011719	-26.69	-57.333	1264.947	-1.3086	0.71289	0.27051	12.768	12.925	7.9722	0.12891	-0.095215	0	64.232	-61.4	1406.954	-2.6338	1.1523	0.68604	48.0458	74.0846	75.169	0.030273	-0.10156	-0.069336	11.0999	-166.509	1261.0905	-1.3574	0.61914	0.28516
0.856	52.841	-126.969	1281.3523	-1.7422	0.80176	0.21875	6.219	146.606	333.6021	-0.12012	0.43506	0.018066	34.281	-97.821	1334.6261	-1.3745	0.72607	0.29395	40.528	-2.6225	10.6757	0.10107	-0.094238	-0.0014648	65.49	-113.5446	1449.884	-2.6523	1.166	0.68408	63.32244	38.6823	79.453	0.025879	-0.10107	-0.067871	19.589	-202.798	1289.4661	-1.4312	0.61621	0.33887
0.858	27.5192	-147.297	1325.8138	-1.8738	0.80396	0.27027	-7.714	107.3125	342.5884	-0.11523	0.41357	0.017578	23.86	-54.1927	1313.2475	-1.5039	0.7334	0.33838	68.7992	-13.22119	12.7233	0.04834	-0.08252	0.0073242	54.54	-56.355	1433.5269	-2.6636	1.1577	0.6582	66.2908	30.366	78.0449	0.017578	-0.104	-0.06543	37.4309	-134.711	1273.423	-1.5523	0.62842	0.41529
0.86	70.342	-140.2465	1369.204	-2.0112	0.81494	0.32568	27.766	112.84982	339.338	-0.095703	0.38086	0.022949	17.865	-90.947	1344.7122	-1.5854	0.73584	0.36816	1.868	2.6778	-1.4383	0.0046385	-0.077393	0.016845	27.193	-63.999	1444.2957	-2.6694	1.145	0.64648	47.395	55.635	67.681	0.0043945	-0.11182	-0.057617	28.3615	-157.075	1301.7025	-1.7188	0.64844	0.51416
0.862	57.27	-87.408	1341.7507	-2.1812	0.83057	0.39746	-3.008	120.9914	291.2036	-0.084472	0.36011	0.026123	82.8527	-95.317	1365.086	-1.7891	0.73633	0.44287	39.235	-28.834	41.0247	-0.037109	-0.0625	0.031738	35.17	-54.0784	1450.669	-2.6934	1.1211	0.62549	61.1927	20.3967	74.51	-0.0085449	-0.11524	-0.055175	16.722	-129.834	1357.416	-1.9961	0.70215	0.65869
0.864	16.0386	-110.6577	1359.6607	-2.269	0.83643	0.43945	-19.6233	80.681	284.0003	-0.070313	0.33789	0.034668	44.846	-103.409	1340.929	-1.955	0.74756	0.52051	35.555	-3.862	27.228	-0.083008	-0.047363	0.049316	13.504	20.251	1414.4478	-2.7127	1.0998	0.60571	38.687	37.473	59.965	-0.019531	-0.11865	-0.049316	-5.9201	-75.765	1323.531	-2.1465	0.7334	0.73096
0.866	22.6067	-42.195	1362.223	-2.439	0.84912	0.52148	27.2792	112.333	244.7087	-0.052734	0.3125	0.050293	85.027	-181.3615	1390.154	-2.1323	0.76807	0.59961	18.547	2.6738	17.4721	-0.10059	-0.035156	0.056152	20.274	-46.033	1449.3092	-2.7241	1.0884	0.58789	41.5883	40.077	40.2659	-0.022949	-0.12451	-0.051758	-11.87785	-131.106	1354.3464	-2.4155	0.82178	0.86133
0.868	-29.327	2.764	1305.88	-2.5405	0.8584	0.58545	4.422	92.8303	225.2305	-0.041992	0.29395	0.056152	107.7782	-152.178	1391.77	-2.3555	0.79492	0.69189	40.237	-17.6729	26.29048	-0.12646	-0.026855	0.075684	23.834	-16.4261	1461.5383	-2.7246	1.0742	0.56885	52.6152	24.8635	42.4616	-0.03125	-0.12842	-0.050293	14.8049	-72.761	1364.079	-2.5669	0.89991	0.93165
0.87	-36.6275	-11.552	1302.815	-2.6401	0.86963	0.64404	11.143	79.1221	230.88568	-0.025879	0.27148	0.068359	40.498	-138.511	1400.523	-2.457	0.8252	0.7251	-1.793	11.2023	-9.1876	-0.13867	-0.020996	0.090088	-11.045	21.983	1417.971	-2.7124	1.0581	0.55469	16.483	62.502	35.0481	-0.038574	-0.13232	-0.061523	-43.028	-65.538	1325.6395	-2.6602	0.9668	0.98682
0.872	-42.8153	45.2584	1312.246	-2.7495	0.88135	0.71094	30.519	120.576	187.583	-0.018311	0.25073	0.079834	69.3929	-127.99023	1440.384	-2.6152	0.88574	0.77588	11.5	3.948	-1.9886	-0.14453	-0.013672	0.099121	27.973	-11.7307	1441.51	-2.6851	1.0142	0.521	2.065	20.9777	46.8282	-0.029785	-0.13379	-0.05542	-54.583	-80.2272	1336.3278	-2.6992	1.0488	1.0122
0.874	-92.689	-12.3103	1317.441	-2.7925	0.88916	0.73828	-11.849	85.2914	177.488	-0.0068359	0.23047	0.093262	44	-36.214	1364.4335	-2.7019	0.93189	0.79224	33.453	7.8384	-2.99536	-0.14258	-0.011719	0.11572	42.154	74.801	1426.3165	-2.6661	0.99463	0.50463	27.946	17.347	49.071	-0.021484	-0.13477	-0.060059	-37.5442	3.659	1310.681	-2.6855	1.0781	1.0044
0.876	-42.8991	-27.5869	1372.3992	-2.8745	0.88721	0.78906	8.661	103.059	177.1649	0.0087891	0.21094	0.10693	16.696	-36.585	1357.108	-2.7695	0.9668	0.79541	2.744	29.707	-9.41126	-0.1333	-0.0073242	0.12158	49.281	31.3611	1420.97725	-2.6484	0.97754	0.49854	-9.037	24.3173	23.3254	-0.0078125	-0.1333	-0.074707	-75.829	-35.809	1331.559	-2.603	1.1333	0.96289
0.878	-46.2874	12.2244	1371.4597	-2.9253	0.87744	0.82813	15.5098	110.879	152.0662	0.014648	0.20654	0.11328	63.896	-15.2859	1371.8079	-2.7964	0.99072	0.77148	8.727	-1.6761	7.47	-0.11816	-0.010742	0.12988	106.5856	-9.862	1420.0045	-2.6362	0.96143	0.49707	5.863	-11.984	27.613	0.0053711	-0.13672	-0.081543	-66.86	-38.8126	1359.906	-2.508	1.1433	0.91723
0.88	-87.828	-38.7812	1410.804	-2.9512	0.875	0.83691	10.711	83.838	146.5399	0.039063	0.18408	0.11475	5.295	28.6406	1336.4133	-2.7925	0.98486	0.75	8.186	17.1683	6.6525	-0.10571	-0.012939	0.13355	81.386	29.344	1382.574	-2.6289	0.95703	0.49268	-6.596	9.7877	13.7749	0.038574	-0.14014	-0.10596	-88.78	0.6158	1328.335	-2.4063	1.1406	0.87158
0.882	-41.6526	-3.973	1443.613	-2.9722	0.87549	0.85645	11.2	119.941	119.488	0.059083	0.16259	0.12598	41.022	-14.7649	1389.969	-2.75	0.96289	0.69873	-4.695	20.82664	-3.7904	-0.094238	-0.012695	0.14111	86.6775	-37.28148	1439.1231	-2.6104	0.94531	0.4873	-41.124	7.321	-1.3	0.052246	-0.15185	-0.11377	-72.352	-54.87	1366.5298	-2.2925	1.1118	0.81836
0.884	-66.439	-19.363	1417.072	-2.9754	0.88013	0.85864	-7.91400000000001	91.916	96.992	0.080566	0.14453	0.13428	79.056	15.8431	1383.858	-2.6941	0.93579	0.6582	18.861	3.3029	13.680916	-0.072266	-0.0058594	0.14307	89.9312	3.18547	1453.831	-2.5786	0.93701	0.47949	5.261	-1.9529	5.12059	0.071777	-0.15674	-0.12354	-33.7246	8.187	1396.376	-2.238	1.0803	0.7893
0.886	-56.5355	-64.455	1434.645	-2.9727	0.875	0.8501	18.936	68.3205	126.8166	0.11963	0.12012	0.14014	37.117	2.66	1348.6516	-2.6265	0.90479	0.62207	-8.627	36.047	5.62251	-0.065918	-0.0043945	0.15283	55.27	37.1645	1404.2492	-2.5366	0.91748	0.46484	-15.353	24.028	-7.2848	0.074707	-0.16895	-0.13477	-65.763	18.374	1384.925	-2.1953	1.0508	0.77197
0.888	-13.7672	8.471	1418.09838	-2.9487	0.87939	0.83203	2.422	81.375	98.4433	0.13574	0.10889	0.14111	112.991	-47.15136	1385.7099	-2.5308	0.87939	0.57568	2.02	4.5769	8.68198	-0.054688	0.00097656	0.16064	100.84976	-7.268	1391.946	-2.4688	0.88867	0.44043	-27.9291	-15.35672	16.507	0.067871	-0.17041	-0.13428	-62.933	-39.809	1397.33	-2.1597	1.0249	0.76465
0.89	-79.486	-4.9002	1405.6064	-2.9312	0.87354	0.82031	1.308	35.336	89.3098	0.16943	0.092773	0.13037	108.39299	2.57	1345.4	-2.4848	0.87354	0.54858	29.044	4.537	8.126334	-0.049316	0.0029296	0.16235	76.644	64.014	1355.5841	-2.4355	0.88477	0.42871	8.481	-17.7286	37.7341	0.048828	-0.16846	-0.12549	-38.077	1.335	1394.643	-2.146	1.022	0.75586
0.892	-13.509	11.46833	1434.594	-2.8823	0.88623	0.79688	13.059	43.341	86.3603	0.19239	0.074951	0.11938	80.832	-54.429	1347.841	-2.4434	0.87305	0.52051	-4.657	17.6587	-18.1652	-0.042969	0.0078125	0.16797	80.339	43.464	1347.7003	-2.353	0.85596	0.40039	-8.692	-0.657100000000001	26.421	0.035888	-0.16797	-0.11254	-55.22	-56.9821	1403.905	-2.127	1.0254	0.75439
0.894	4.301	40.5553	1385.87	-2.8389	0.88477	0.77979	-3.69	46.65	58.7694	0.21143	0.0625	0.10107	116.2329	-47.4029	1373.525	-2.4121	0.87109	0.49463	20.193	-1.4832	5.914	-0.037109	0.013184	0.16895	109.2905	26.528	1353.717	-2.2781	0.84742	0.38575	2.067	-14.0898	41.114	0.018066	-0.15723	-0.10059	-32.915	-47.384	1407.11	-2.1072	1.0418	0.74878
0.896	-30.66787	-1.06	1362.637	-2.7905	0.8833	0.76563	8.708	21.8024	69.3008	0.22949	0.051758	0.074707	50.63	-13.0741	1349.7141	-2.3984	0.85938	0.48682	18.272	26.2257	11.2658	-0.03418	0.013672	0.16504	82.026	96.109	1323.115	-2.209	0.83496	0.37061	17.879	21.6491	10.4164	-0.0073242	-0.14111	-0.07959	-19.3721	31.3133	1354.1773	-2.0913	1.0542	0.74902
0.898	27.6835	47.855	1361.497	-2.7124	0.88135	0.74414	0.582000000000001	52.343	48.2244	0.23096	0.048828	0.060059	54.699	-79.756	1404.885	-2.3745	0.85107	0.47461	18.078	31.2169	25.6802	-0.030273	0.030273	0.16211	90.7858	20.25532	1322.467	-2.1152	0.81836	0.35254	19.186	10.2104	0.5549	-0.015625	-0.13428	-0.070801	-38.568	-15.734	1343.945	-2.0757	1.0688	0.73828
0.9	9.503	81.155	1336.068	-2.6772	0.87549	0.73047	-7.056	33.032	23.434	0.23193	0.057129	0.038574	100.7652	-19.961	1390.7	-2.3647	0.83545	0.47046	55.107	8.6304	46.011	-0.024658	0.040771	0.15503	92.4361	62.285	1309.499	-2.0625	0.81445	0.33789	62.7863	-10.168	5.8093	-0.026855	-0.11328	-0.058105	-2.284	55.9305	1322.4622	-2.0684	1.0703	0.72998
0.902	19.011	65.1493	1367.947	-2.5972	0.87158	0.70898	42.921	30.785	40.6713	0.22754	0.058106	0.027588	26.753	-18.48	1332.731	-2.3535	0.81836	0.46924	16.974	14.7101	33.924	-0.019531	0.054199	0.14697	72.284	92.704	1264.8058	-1.9604	0.80518	0.32275	32.459	16.4181	-2.0339	-0.03711	-0.098634	-0.052734	-21.3107	57.0633	1293.4814	-2.0503	1.0728	0.72363
0.904	70.257	137.624	1328.0428	-2.5224	0.86133	0.69043	46.6669	45.055	59.957	0.21582	0.065918	0.027832	84.7655	-19.169	1331.991	-2.3359	0.80225	0.46191	37.486732	-16.507	63.745	-0.010254	0.074219	0.13574	75.422	70.7359	1245.171	-1.8906	0.79639	0.31177	44.7678	-8.2099	4.852	-0.041504	-0.086914	-0.04248	-5.571	22.4432	1315.085	-2.0261	1.0696	0.71386
0.906	24.51245	114.547	1296.078	-2.4395	0.85547	0.67041	2.902	3.6669	54.946	0.1958	0.085449	0.017578	68.573	80.821	1263.741	-2.3203	0.78906	0.45654	55.5422	-7.295	61.7341	-0.0097656	0.087891	0.12598	47.828	162.501	1210.87	-1.8198	0.7876	0.30078	61.4744	7.007	17.504	-0.055176	-0.064453	-0.03125	28.282	104.298	1311.279	-1.9883	1.0654	0.70264
0.908	48.4419	78.5802	1342.2311	-2.3242	0.8457	0.6333	17.943	35.726	49.082	0.17432	0.097168	0.02002	29.625	64.5925	1246.729	-2.271	0.76416	0.44434	4.524	11.643	48.3947	-0.012695	0.11426	0.11865	20.72	130.9044	1200.8316	-1.7437	0.78369	0.29248	34.296	25.122	7.2201	-0.055176	-0.050293	-0.022949	5.0683	55.5585	1311.7886	-1.9175	1.0532	0.67285
0.91	68.189	104.705	1317.227	-2.2637	0.83984	0.61084	19.534	35.599	11.3028	0.1333	0.12598	0.036133	88.917	95.751	1261.457	-2.2192	0.74975	0.43481	42.708	-19.3492	68.964	-0.025147	0.1294	0.10425	18.681	100.766	1186.134	-1.7007	0.77588	0.28711	78.2165	-13.72452	23.10748	-0.067383	-0.038086	-0.0097656	14.5992	72.003	1315.065	-1.875	1.0459	0.65674
0.912	27.0007	36.57	1306.276	-2.1382	0.82959	0.56836	13.491	7.9119	13.9083	0.10156	0.15234	0.043701	56.095	117.414	1233.678	-2.1558	0.73779	0.41553	42.152	-1.0987	100.3821	-0.038574	0.15039	0.097168	-12.388	146.244	1158.455	-1.6343	0.76221	0.27295	38.087	14.23368	4.0638	-0.07666	-0.026367	0.0068359	2.6279	121.931	1270.135	-1.7871	1.0273	0.62744
0.914	61.104	58.055	1288.168	-2.0469	0.8125	0.53858	44.767	40.368	18.41058	0.061523	0.1792	0.055664	71.195	62.98	1275.3624	-2.0703	0.72949	0.39111	-4.597	3.102	115.9019	-0.066406	0.16943	0.093262	-14.027	58.628	1166.535	-1.5847	0.75513	0.26978	30.1664	11.962	-2.2241	-0.088867	-0.02002	0.010254	-1.8068	59.6437	1253.657	-1.7246	1.018	0.60791
0.916	1.12	54.639	1261.118	-1.9507	0.80127	0.50684	6.211	10.07199	-3.842	0.021973	0.21631	0.07666	98.6831	126.128	1254.3913	-2.0283	0.72607	0.38184	49.2914	-15.3537	183.396	-0.080078	0.18213	0.086914	-15.254	101.3532	1138.998	-1.5313	0.74316	0.25684	73.4266	-2.35168	21.2011	-0.093262	-0.016602	0.015137	22.3975	102.835	1238.97	-1.6655	1.0024	0.58984
0.918	0.847000000000001	-7.68	1255.949	-1.8418	0.77832	0.47363	28.512	5.1321	14.9449	0.0024414	0.22998	0.085938	53.551	126.853	1207.866	-1.937	0.71436	0.35547	17.515	29.7813	206.292	-0.12646	0.20752	0.080078	-26.764	123.394	1066.2408	-1.4624	0.7251	0.24512	30.015	33.304	-3.9261	-0.09082	-0.015381	0.02002	-16.9629	72.2297	1218.62485	-1.5874	0.98682	0.56836
0.92	23.618	59.473	1203.8014	-1.7925	0.76416	0.45898	46.6958	20.5388	6.46	-0.03125	0.25781	0.10938	77.1434	119.598	1207.8622	-1.8786	0.70434	0.3313	-1.412	22.6326	251.243	-0.16773	0.22412	0.082031	7.736	78.926	1033.356	-1.437	0.71436	0.23682	33.246	13.8315	3.16	-0.084961	-0.015625	0.02002	-26.4203	23.703	1226.722	-1.5547	0.97656	0.56299
0.922	-65.4987	66.236	1148.476	-1.7017	0.73389	0.42969	9.025	-27.5392	28.122	-0.04834	0.27759	0.12696	21.782	163.041	1175.6158	-1.8242	0.69531	0.3125	31.9186	45.4748	292.105	-0.21387	0.24268	0.085938	-4.591	155.231	970.067	-1.3711	0.69238	0.22607	49.494	16.9749	-5.673	-0.0625	-0.0078125	0.0039063	-23.038	92.093	1196.601	-1.498	0.94922	0.54785
0.924	-31.1094	87.134	1151.225	-1.6408	0.71021	0.41236	31.095	-1.122	46.205	-0.052246	0.28564	0.14404	-30.183	88.535	1178.3161	-1.7559	0.68945	0.2959	-12.68	78.882	301.9086	-0.27979	0.27051	0.092773	0.728000000000002	129.39	961.305	-1.325	0.67456	0.21386	-3.536	33.0705	4.796	-0.04541	-0.01123	0	-53.329	46.043	1171.4836	-1.4482	0.92969	0.53759
0.926	-38.5421	160.046	1129.323	-1.585	0.68555	0.39893	33.955	-11.279	27.149	-0.052246	0.28857	0.15576	34.92	78.793	1168.0605	-1.7241	0.68604	0.28857	3.10299999999999	62.5166	351.53	-0.31982	0.28662	0.097656	37.216	113.223	948.0596	-1.2847	0.65771	0.20508	15.305	1.217	40.2943	-0.0097656	-0.014648	-0.018066	-49.1532	65.431	1152.72436	-1.4121	0.91406	0.52686
0.928	-64.117	119.959	1135.3534	-1.5146	0.65234	0.38135	18.227	-25.9978	33.978	-0.044922	0.28418	0.15576	-6.167	92.893	1124.932158	-1.666	0.68262	0.27783	-9.894	83.43231	399.4866	-0.41162	0.31592	0.10303	2.854	164.204	920.276	-1.2227	0.63086	0.1958	3.76	17.8916	32.8526	0.029541	-0.014404	-0.032471	-40.93309	120.172	1101.79	-1.3643	0.88086	0.51807
0.93	-0.885999999999999	152.167	1107.172	-1.4819	0.6333	0.37109	35.339	15.6143	18.6446	-0.022461	0.27588	0.15381	6.212	61.257	1144.812	-1.6318	0.67822	0.26635	-38.4889	81.659	441.6668	-0.48047	0.35157	0.10669	5.312	93.4785	907.5884	-1.1914	0.61133	0.1875	-26.0701	13.5907	18.7422	0.06543	-0.013672	-0.053711	-48.4289	86.798	1087.977	-1.3379	0.87109	0.51025
0.932	-37.6259	164.051	1068.835	-1.417	0.59668	0.3584	16.98	-6.7629	16.8021	0.0087889	0.26098	0.15283	31.234	121.3	1110.651	-1.5957	0.68164	0.25684	4.242	39.803	520.8171	-0.5542	0.38623	0.11084	8.915	136.9745	872.7896	-1.1289	0.5874	0.17676	-2.615	-1.1547	23.3055	0.12012	-0.015137	-0.087402	-25.945	158.013	1074.0083	-1.2998	0.83545	0.49414
0.934	-31.457	129.301	1061.789	-1.373	0.56201	0.35327	9.787	5.4512	17.4133	0.041016	0.24561	0.13574	7.864	124.918	1051.5462	-1.5449	0.68555	0.25781	-9.519	36.977	556.58	-0.65625	0.43359	0.13525	-10.607	159.5822	829.19324	-1.0798	0.56714	0.17163	-22.106	38.163	1.6796	0.14746	-0.014648	-0.099609	-48.866	152.588	1045.3177	-1.2605	0.8147	0.47925
0.936	6.963	196.495	995.988	-1.3237	0.53369	0.34668	22.639	29.0384	-4.4537	0.083008	0.22412	0.10205	59.508	117.116	1037.5074	-1.5171	0.68896	0.25439	12.182	-3.94	627.1447	-0.73511	0.46363	0.15015	22.547	128.845	799.1311	-1.0298	0.54541	0.16406	-18.585	17.4296	13.8439	0.18994	-0.010742	-0.12695	-30.9708	120.226	1046.049	-1.2266	0.79297	0.46582
0.938	-40.199	170.964	923.874	-1.2637	0.48828	0.33691	-0.390999999999998	-16.9751	10.3277	0.10352	0.21729	0.083984	63.6403	164.822	974.117	-1.4624	0.69385	0.2417	29.53	-35.7579	663.65075	-0.82031	0.49902	0.16895	19.192	195.294	735.632	-0.95508	0.51514	0.15186	-9.008	14.863	7.998	0.21411	-0.0048828	-0.1438	4.471	172.795	1003.45	-1.1758	0.76367	0.44385
0.94	-15.876	145.2029	902.913	-1.228	0.46973	0.33008	19.27	2.37669	23.776	0.13574	0.20801	0.04541	41.001	139.966	982.8528	-1.4148	0.69018	0.23852	-7.107	-31.264	679.952	-0.92871	0.53516	0.1958	17.8342	150.2256	696.37	-0.91748	0.50049	0.14014	-27.431	37.2306	-12.7731	0.23242	0	-0.16211	-14.545	121.5905	956.5982	-1.1479	0.74658	0.43066
0.942	-5.449	165.7553	871.495	-1.1699	0.42529	0.32666	18.536	13.6532	7.9954	0.15063	0.20557	0.019287	72.4692	167.39	962.799	-1.3691	0.68848	0.22949	35.239	-78.239	719.493	-0.99023	0.55469	0.21338	18.859	134.7448	684.178	-0.8374	0.46533	0.125	-5.144	-4.6018	34.1494	0.24658	0.0029297	-0.17139	-17.996	130.2097	919.6498	-1.0928	0.7168	0.41113
0.944	-18.389	90.564	867.852	-1.116	0.39111	0.31592	26.049	1.8049	17.69751	0.15723	0.20557	0.0039063	30.695	191.486	904.9245	-1.3027	0.67188	0.21533	26.699	-79.58	738.351	-1.0977	0.57617	0.25146	14.2654	174.138	657.5906	-0.78272	0.43848	0.12012	10.818	13.8893	44.366	0.24121	0.0068359	-0.17188	-12.639	163.899	865.3634	-1.0525	0.70044	0.39136
0.946	29.727	108.8432	854.3926	-1.0684	0.35547	0.31104	40.9118	36.369	5.8404	0.15527	0.20703	-0.0078125	6.661	162.868	895.4103	-1.2793	0.66113	0.2085	8.899	-79.607	748.9251	-1.177	0.5852	0.28418	47.2781	99.8015	656.044	-0.72607	0.41064	0.10986	13.01	11.0117	46.362	0.23291	0.01709	-0.16602	10.658	106.005	863.6133	-1.0098	0.67578	0.37256
0.948	16.105	122.619	828.3516	-0.99756	0.31689	0.30078	12.485	7.1049	7.111	0.14941	0.21387	-0.0043945	19.029	194.574	860.5573	-1.2144	0.64307	0.20215	58.332	-117.751	777.649	-1.2461	0.58984	0.32129	44.2621	129.0112	617.63679	-0.65381	0.37549	0.10205	32.355	-4.1891	38.0174	0.22315	0.020019	-0.16919	20.931	146.0121	836.5812	-0.95068	0.64111	0.36328
0.95	40.696	95.8696	838.218	-0.96289	0.29297	0.29541	15.485	4.53762	22.361	0.13672	0.23145	0.0014648	-20.36	170.589	822.647	-1.1655	0.62305	0.19385	47.31	-88.2679	753.067	-1.3413	0.59229	0.36523	14.264	138.811	575.0339	-0.61426	0.35449	0.09668	22.468	30.9025	11.6001	0.19922	0.019531	-0.1626	5.219	125.5889	807.592	-0.92725	0.62061	0.34717
0.952	97.632	160.359	806.781	-0.89063	0.25342	0.28662	24.769	17.8978	-9.2026	0.12305	0.24536	0.0085449	26.193	131	822.0148	-1.1216	0.60889	0.18311	53.812	-109.9661	739.148	-1.3784	0.58838	0.38672	36.316	119.1372	568.4731	-0.54004	0.31934	0.089355	32.099	11.2421	15.09877	0.16699	0.022461	-0.15771	41.2452	97.667	808.8818	-0.87891	0.58398	0.33545
0.954	71.9376	149.686	749.8996	-0.84204	0.22168	0.28051	9.57299999999999	-13.8155	4.697	0.11719	0.25732	0.013672	6.446	145.378	771.358	-1.0522	0.58057	0.17676	63.6211	-117.714	736.537	-1.4375	0.57617	0.44385	7.0578	180.812	512.1485	-0.47314	0.27832	0.083496	61.848	14.0718	20.5672	0.1499	0.025391	-0.15625	66.1535	156.635	792.343	-0.84741	0.55786	0.32495
0.956	116.656	152.5498	721.6996	-0.79053	0.1958	0.27002	13.326	12.9046	15.4051	0.10938	0.27197	0.022949	-2.912	105.44	776.894	-1.0225	0.56641	0.17188	27.915	-73.5858	692.11979	-1.4712	0.57496	0.46973	-15.3353	160.599	478.5949	-0.44141	0.26025	0.07959	18.572	18.1311	8.4081	0.11621	0.027344	-0.15186	57.013	128.6208	758.436	-0.81006	0.53076	0.31445
0.958	108.76	199.42	666.349	-0.72021	0.16064	0.25391	17.749	8.0039	15.0785	0.1084	0.27588	0.019043	49.382	103.1637	747.206	-0.95703	0.53711	0.16553	75.5259	-91.344	689.754	-1.4863	0.57422	0.49072	-24.7151	145.8048	464.3607	-0.37256	0.22021	0.074219	46.73875	-22.84016	27.1297	0.08667	0.030274	-0.14697	64.9249	138.0912	734.1379	-0.75	0.49609	0.29639
0.96	53.291	166.706	646.8922	-0.68555	0.14404	0.24902	15.182	-11.89744	26.717	0.11816	0.28613	0.02002	6.495	115.753	706.645	-0.9021	0.51855	0.15869	76.5398	-67.264	689.232	-1.4922	0.58398	0.51709	-47.13534	168.652	426.7471	-0.32349	0.19409	0.064697	52.157	10.2839	31.686	0.054688	0.03125	-0.14697	70.081	167.522	688.9335	-0.71631	0.47314	0.28906
0.962	99.067	194.489	620.7672	-0.61182	0.1167	0.23584	23.283	14.71298	5.97206	0.12427	0.29077	0.020264	16.055	94.54	689.686	-0.85303	0.49365	0.1543	11.78	-40.885	685.538	-1.4858	0.58936	0.51758	-6.577	111.4926	436.951	-0.27734	0.16211	0.060059	33.445	-1.11418	22.9203	0.015625	0.036621	-0.14404	73.049	112.8451	672.397	-0.65088	0.4248	0.27197
0.964	64.032	179.673	568.9675	-0.56055	0.096194	0.22119	22.966	1.5545	-7.266	0.13574	0.29541	0.022949	44.5182	133.763	647.8547	-0.78516	0.45996	0.14648	31.2096	-71.573	738.788	-1.4785	0.60449	0.521	-29.456	130.4963	390.945	-0.21729	0.12109	0.04834	85.0971	-16.5783	43.814	-0.0063477	0.04248	-0.14258	76.4883	150.899	629.783	-0.59888	0.38916	0.24975
0.966	62.1	133.9153	571.637	-0.49854	0.078613	0.20898	25.025	14.0918999	10.301	0.14941	0.30127	0.023438	-36.784	131.6109	651.474	-0.75146	0.44287	0.13672	31.186	-46.718	774.603	-1.4683	0.62061	0.51831	-53.7948	121.306	358.4886	-0.19287	0.098145	0.045898	27.896	21.1421	19.8974	-0.04248	0.052246	-0.13037	31.822	150.724	561.281	-0.55957	0.35107	0.23389
0.968	72.15316	181.013	515.813	-0.42383	0.054199	0.18994	23.949	47.754	12.0611	0.16113	0.29785	0.019531	-9.048	123.472	630.352	-0.68262	0.40918	0.13184	12.496	-54.258	831.0839	-1.4565	0.63623	0.5166	-13.647	90.7403	345.6878	-0.13623	0.066895	0.037598	28.513	-13.119	35.3204	-0.075196	0.059815	-0.1272	29.857	137.2248	547.888	-0.50342	0.30713	0.20654
0.97	22.222	163.4498	471.9207	-0.39355	0.041016	0.18262	14.638	12.1862	16.347	0.17871	0.30273	0.015137	-21.7458	164.9763	588.065	-0.63012	0.38745	0.12207	30.3698	-102.591	889.8284	-1.4448	0.64893	0.50977	-28.6187	138.249	294.8254	-0.1001	0.039795	0.028809	78.80835	-21.5554	45.8157	-0.104	0.070801	-0.12158	57.791	196.252	508.304	-0.47656	0.29492	0.19775
0.972	54.352	180.2861	451.461	-0.31982	0.010742	0.16113	51.0755	28.7923	23.4011	0.18921	0.29981	0.0053712	-33.5289	134.737	561.8494	-0.57764	0.36279	0.10938	0.940999999999999	-91.669	910.283	-1.4297	0.6543	0.50928	-26.3347	114.439	270.52	-0.062988	0.017578	0.022461	17.363	6.4344	47.5268	-0.15381	0.087402	-0.11572	36.188	149.8065	484.2292	-0.41943	0.26318	0.16943
0.974	35.279	200.718	419.526	-0.26977	-0.0053711	0.14721	25.4007	9.3132	30.5459	0.19971	0.30176	-0.0092773	3.183	145.064	520.156	-0.51465	0.3252	0.09668	12.529	-140.7176	951.5816	-1.4019	0.65479	0.50586	-22.227	111.634	243.62	-0.027344	-0.021484	0.0068359	15.8385	-13.8207	82.746	-0.17871	0.095215	-0.11426	14.306	146.5255	476.20627	-0.38403	0.23657	0.1665
0.976	-6.986	145.9879	419.0079	-0.22119	-0.02832	0.1333	13.634	-7.5792	63.60693	0.21289	0.30664	-0.03125	-38.565	163.344	455.2268	-0.48389	0.30518	0.090332	19.081	-159.902	965.912	-1.3855	0.65259	0.50147	-35.281	146.545	229.4707	-0.0078125	-0.04248	0.0078125	17.112	26.2011	106.7051	-0.2417	0.11865	-0.098145	3.695	169.797	439.2907	-0.3501	0.21484	0.15039
0.978	21.821	153.858	405.118	-0.16357	-0.05127	0.11572	31.7029	61.39	75.98074	0.21338	0.30859	-0.042969	6.618	139.85233	418.8453	-0.42529	0.26904	0.07959	-13.969	-148.873	962.937	-1.3706	0.65283	0.49902	-2.64	95.8616	244.0715	0.019531	-0.076172	0.00048828	-0.591000000000001	25.51322	133.8527	-0.29151	0.13868	-0.088379	20.344	122.8406	431.1115	-0.31885	0.18652	0.13477
0.98	-10.614	135.284	391.492	-0.13721	-0.066895	0.10547	-4.126	70.183	105.747	0.19482	0.32129	-0.080566	23.317	179.161	386.796	-0.38404	0.24096	0.070557	-16.874	-213.467	1025.0162	-1.3447	0.65527	0.48975	9.142	104.7688	232.112	0.041016	-0.093262	-0.009033	34.563	4.073	173.3618	-0.34717	0.15869	-0.068848	21.217	173.41	398.3105	-0.30371	0.18164	0.12402
0.982	-6.253	96.566	397.164	-0.085449	-0.094238	0.081543	-10.075	92.065	145.165	0.14453	0.34814	-0.12305	-22.221	155.314	381.336	-0.34375	0.21484	0.062012	-27.361	-191.078	1043.37	-1.3359	0.65625	0.47998	-27.5572	96.6851	214.848	0.056641	-0.11572	-0.016602	1.976	42.8148	210.7697	-0.43311	0.19189	-0.048828	-25.18	167.58	357.2631	-0.27832	0.16553	0.11768
0.984	-14.972	126.783	374.877	-0.053467	-0.11157	0.071778	-2.864	108.3949	192.668	0.11182	0.37061	-0.14404	35.4315	129.27822	397.723	-0.29443	0.18115	0.051758	-26.725	-187.39738	1059.449	-1.3101	0.65088	0.45703	9.637	70.34	217.84	0.081543	-0.13477	-0.023438	-15.886	30.9914	269.1543	-0.48242	0.20313	-0.034668	-9.75	146.059	360.83318	-0.25903	0.15918	0.11401
0.986	-55.7241	92.516	341.676	-0.01709	-0.125	0.059082	-24.5272	66.0938	247.0774	0.028809	0.43457	-0.16309	15.065	139.999	347.963	-0.27148	0.15869	0.047363	-16.77	-207.82	1079.067	-1.2964	0.65552	0.42993	8.971	99.2721	179.914	0.083496	-0.14697	-0.023438	-1.399	54.134	340.6577	-0.5835	0.24268	-0.0048828	6.87	165.221	331.3291	-0.24512	0.1543	0.10986
0.988	-9.08799999999999	90.7787	301.49074	0.023926	-0.1499	0.048828	17.11	85.468	315.265	-0.045166	0.48926	-0.1604	1.287	113.785	339.98	-0.22217	0.12598	0.035645	-49.083	-129.214	1076.63	-1.291	0.65137	0.40283	17.911	75.2963	154.1912	0.095215	-0.16064	-0.021973	-4.14100000000001	84.032	373.963	-0.6687	0.2627	0.023193	-17.224	94.0989	333.9545	-0.22217	0.15234	0.10742
0.99	-10.601	102.088	244.613	0.038574	-0.15967	0.038086	-2.583	91.669	353.897	-0.13721	0.54785	-0.1499	31.668	117.4596	350.445	-0.18677	0.10522	0.031982	-10.704	-133.989	1109.369	-1.2866	0.65186	0.36328	36.091	71.821	125.085	0.096192	-0.16846	-0.021729	29.59	40.66213	460.419	-0.75732	0.28564	0.05127	-7.176	89.77418	331.8443	-0.21191	0.14844	0.10156
0.992	-39.586	65.1	254.9325	0.075684	-0.1792	0.029785	-59.49	65.24	420.35	-0.26953	0.61963	-0.13477	-23.634	125.613	300.8431	-0.15381	0.082031	0.025391	14.017	-106.275	1118.0882	-1.2983	0.64893	0.34766	11.475	96.128	83.17	0.09668	-0.17334	-0.015625	13.663	55.147	522.929	-0.89404	0.31396	0.10791	-13.7355	105.253	293.4747	-0.19043	0.14551	0.09375
0.994	-1.03	108.7693	232.216	0.097903	-0.19556	0.021484	-15.641	77.623	452.935	-0.3418	0.66406	-0.12451	24.551	97.5529	309.8299	-0.11523	0.043945	0.024902	-27.686	-40.176	1086.002	-1.3159	0.65088	0.31641	66.458	48.4839	106.8347	0.091309	-0.17383	0	22.646	29.4286	581.302	-0.9668	0.33203	0.13721	-0.716000000000001	62.007	294.049	-0.17651	0.13599	0.088623
0.996	16.984	107.4809	215.9188	0.12402	-0.21143	0.015137	-17.8727	34.7948	461.6036	-0.48877	0.7583	-0.10791	29.338	107.035	259.197	-0.098145	0.030273	0.019043	21.649	-90.698	1126.4854	-1.3389	0.64843	0.30786	58.70492	59.7276	85.507	0.086426	-0.17334	0.010742	72.316	-28.3439	695.871	-1.1367	0.35303	0.2002	4.918	103.8509	249.5578	-0.1665	0.12305	0.086426
0.998	24.334	77.5475	223.054	0.1499	-0.23682	0.0083008	-5.047	14.8925	527.1412	-0.58863	0.83204	-0.080322	-6.476	92.487	240.678	-0.06543	0.0043945	0.018555	29.441	-53.574	1150.217	-1.3633	0.64453	0.30029	29.7753	46.115	88.2492	0.085449	-0.16797	0.032715	60.821	-31.574	760.5963	-1.2741	0.37671	0.25317	0.859999999999999	86.0324	213.96	-0.15186	0.10938	0.07959
1	24.234	102.0656	198.585	0.16211	-0.24609	0.0019531	-12.8092	33.3049	567.997	-0.67773	0.91406	-0.044434	44.179	91.487	256.1271	-0.043457	-0.012207	0.017334	4.723	-57.363	1160.557	-1.3745	0.64111	0.29199	67.4888	24.5632	97.003	0.086914	-0.16284	0.048828	74.515	-94.159	835.947	-1.4097	0.39746	0.30908	33.831	74.753	217.4172	-0.146	0.10059	0.078125
1.002	17.014	69.4165	196.609	0.18604	-0.27051	-0.0039063	-44.755	-0.0490000000000013	647.3446	-0.78906	1.0098	0.020508	26.675	113.6883	209.184	-0.020996	-0.028809	0.017578	23.4414	-123.2397	1191.853	-1.3843	0.64307	0.28906	32.604	62.577	69.1758	0.087891	-0.15625	0.061523	63.9342	-112.847	883.1843	-1.585	0.43359	0.38623	38.857	118.451	206.02	-0.12451	0.083008	0.074707
1.004	79.809	88.51	168.00958	0.20605	-0.29492	-0.015625	-11.979	8.20936	722.728	-0.84766	1.0605	0.049805	29.06	105.391	205.0105	-0.00048828	-0.051758	0.024414	0.263999999999999	-91.092	1184.888	-1.3906	0.6543	0.2749	37.613	51.999	59.4478	0.092773	-0.14697	0.070313	7.873	-80.578	889.427	-1.6704	0.45166	0.42578	31.0812	85.279	203.688	-0.10937	0.070801	0.074707
1.006	63.33383	110.387	118.673	0.21875	-0.30518	-0.018555	5.033	-11.0915	748.8549	-0.95264	1.1333	0.10693	35.393	113.547	187.5117	0.0068359	-0.061035	0.026855	7.6861	-155.063	1212.8369	-1.3997	0.66919	0.2605	33.493	59.6043	28.557	0.104	-0.146	0.077148	16.379	-106.876	931.151	-1.8179	0.49072	0.50586	43.32001	94.3194	194.834	-0.10059	0.058594	0.078125
1.008	37.734	71.48642	123.087	0.24121	-0.33203	-0.032715	-18.821	-73.3932	837.257	-1.0278	1.1704	0.1355	-4.345	118.373	167.7751	0.026855	-0.083984	0.033203	16.738	-176.969	1246.676	-1.4116	0.68018	0.23828	-3.639	79.5409	9.916	0.12256	-0.13721	0.079102	-0.331	-65.402	962.1326	-1.9109	0.51538	0.54321	45.5291	106.49	161.8943	-0.088379	0.039063	0.08252
1.01	60.28911	82.851	101.019	0.25268	-0.34204	-0.038818	12.346	-83.316	880.035	-1.1108	1.2036	0.15283	38.184	103.788	180.6025	0.034913	-0.095457	0.041016	6.45	-128.277	1219.28517	-1.4468	0.70264	0.21484	28.489	39.6702	16.519	0.14038	-0.13574	0.079102	-25.764	-39.022	964.248	-1.9648	0.53906	0.55518	53.18	63.6321	162.62988	-0.077881	0.024658	0.085205
1.012	55.9268	51.912	78.078	0.26074	-0.35303	-0.044434	21.791	-112.0311	910.054	-1.209	1.2441	0.16016	43.3309	128.271	138.022	0.046875	-0.11035	0.045898	30.528	-188.916	1251.6561	-1.4805	0.71289	0.20459	6.539	34.9838	10.465	0.15967	-0.13086	0.074219	13.748	-88.427	1006.119	-1.98	0.55518	0.54297	56.626	101.269	118.861	-0.066406	0.010742	0.081055
1.014	86.769	21.95	88.9196	0.27734	-0.37109	-0.056152	54.165	-118.67976	944.642	-1.2432	1.2617	0.17676	-1.314	124.697	118.072	0.059082	-0.12256	0.056641	18.7558	-131.986	1283.115	-1.5684	0.72461	0.19043	-9.374	14.4387	12.5996	0.18359	-0.13525	0.058594	-6.0435	-71.983	996.835	-1.978	0.55908	0.52637	48.8837	75.096	94.755	-0.055176	-0.010742	0.080078
1.016	73.1498	37.142	68.59806	0.28125	-0.37891	-0.060059	73.798	-88.578	928.664	-1.2808	1.2798	0.19727	34.969	112.065	139.3248	0.068604	-0.13282	0.063965	11.81659	-118.5341	1290.418	-1.6611	0.7334	0.19384	19.652	-15.6314	43.509	0.19189	-0.13379	0.05957	-49.708	-103.006	984.025	-1.9233	0.55908	0.47266	47.781	57.1761	98.9748	-0.04834	-0.012695	0.078125
1.018	21.644	5.08	82.8053	0.2876	-0.38867	-0.069824	73.593	-123.0894	938.3518	-1.2944	1.2818	0.2168	-0.743000000000002	113.722	112.2452	0.070313	-0.14404	0.073242	19.5459	-158.787	1313.127	-1.7729	0.74463	0.20703	-22.712	12.321	24.477	0.20264	-0.13965	0.057129	-55.419	-95.9862	974.641	-1.8701	0.5581	0.4187	39.6697	76.7575	80.6122	-0.024902	-0.029785	0.072754
1.02	40.39	27.3986	80.855	0.28321	-0.39112	-0.080078	119.461	-126.911	933.2708	-1.3003	1.2798	0.2373	0.354999999999997	73.593	124.392	0.080566	-0.15479	0.080566	10.8833	-73.675	1297.289	-1.9395	0.74805	0.25146	0.506999999999998	5.268	23.9152	0.20361	-0.14526	0.051758	-57.752	-31.353	941.116	-1.8081	0.5542	0.37109	15.045	36.4665	77.2104	-0.0070803	-0.038086	0.070313
1.022	34.04	44.969	39.3453	0.27881	-0.39258	-0.088867	114.321	-122.109	905.8433	-1.2676	1.2422	0.25	26.459	54.1742	110.892	0.087891	-0.16211	0.077148	-19.8062	-103.2171	1308.1497	-2.0254	0.75781	0.29053	18.521	17.0323	8.285	0.19678	-0.14648	0.050781	-32.545	-50.871	955.355	-1.7554	0.59033	0.31836	28.127	44.3578	71.5869	0.011719	-0.044434	0.0625
1.024	6.632	25.997	24.49	0.26758	-0.38477	-0.094727	97.16	-160.165	921.778	-1.251	1.2188	0.25195	-14.939	32.5636	97.665	0.09375	-0.16992	0.08252	-31.0544	-94.6524	1331.6398	-2.2026	0.76025	0.36523	-9.388	36.882	-6.115	0.18896	-0.146	0.046875	-3.823	-53.324	972.409	-1.7383	0.62402	0.29736	27.087	49.372	61.0362	0.032715	-0.061523	0.0625
1.026	22.751	54.969	29.984	0.25439	-0.38086	-0.093262	109.225	-112.158	930.453	-1.1914	1.168	0.24268	24.193	19.8254	109.303	0.10229	-0.17285	0.082519	-45.678	-16.568	1279.589	-2.335	0.76221	0.43287	-0.792000000000002	-5.61	19.485	0.17822	-0.14893	0.046387	-31.677	-70.99	977.517	-1.6914	0.66406	0.27197	9.444	11.5367	80.739	0.046387	-0.066895	0.057129
1.028	-13.226	49.191	12.515	0.21826	-0.36816	-0.088867	73.2097	-93.142	907.1807	-1.1267	1.1389	0.22925	6.714	40.8588	64.6931	0.10791	-0.17725	0.083984	-31.7147	-59.9481	1283.72	-2.4648	0.76758	0.50391	-25.546	8.9468	12.5349	0.14648	-0.1499	0.046875	-6.605	-135.331	1034.0977	-1.633	0.67016	0.23974	-1.632	50.542	63.3384	0.070313	-0.075684	0.059082
1.03	-2.188	45.529	17.83223	0.18555	-0.34521	-0.074707	95.075	-96.027	931.62	-1.0605	1.1172	0.1958	-19.171	40.708	56.1808	0.11914	-0.1792	0.079102	-51.365	-4.75	1282.624	-2.6108	0.77686	0.58789	-19.788	6.9547	15.0224	0.12402	-0.14893	0.049805	-27.701	-108.058	1066.629	-1.5586	0.66309	0.19678	3.496	31.807	41.29443	0.081299	-0.088868	0.062256
1.032	7.151	70.88	-4.7417	0.14893	-0.32227	-0.059082	87.851	-56.782	937.412	-0.9707	1.1152	0.15674	29.511	35.5998	63.8781	0.125	-0.18359	0.076172	-58.465	5.52	1273.612	-2.6719	0.78711	0.63135	24.772	-4.845	28.8343	0.10303	-0.15039	0.052246	-66.011	-126.303	1104.505	-1.4468	0.66357	0.12402	8.049	18.1981	43.2138	0.087891	-0.10303	0.066406
1.034	-57.7916	23.77011	19.0253	0.1084	-0.29395	-0.046875	28.69	-81.484	941.963	-0.92773	1.1152	0.13428	5.173	46.008	43.5814	0.13672	-0.17383	0.07373	-48.2417	-48.966	1317.0558	-2.7656	0.78125	0.69971	3.177	20.11239	24.8396	0.069824	-0.14893	0.05127	-75.737	-153.982	1151.516	-1.3979	0.66357	0.09668	-10.669	45.218	25.399	0.077148	-0.12061	0.085938
1.036	-15.261	25.7303	48.338	0.086914	-0.27979	-0.035645	71.3771	-73.572	996.126	-0.84717	1.1353	0.104	24.391	21.9075	76.337	0.14478	-0.17676	0.06543	-49.4736	15.8332	1325.8802	-2.814	0.77344	0.74121	4.467	-3.173	32.18	0.052734	-0.15186	0.052246	-87.845	-145.4157	1148.168	-1.3262	0.67578	0.047363	-18.761	15.6101	19.7944	0.065918	-0.12695	0.091309
1.038	-11.353	27.8127	12.832	0.04541	-0.26074	-0.018066	76.6576	-57.714	1034.301	-0.80005	1.1545	0.10279	35.345	23.79308	74.962	0.14795	-0.17432	0.055176	-43.745	-36.83334	1352.7443	-2.8496	0.75977	0.77002	39.2821	17.9349	13.726	0.026367	-0.1499	0.052734	-59.515	-212.646	1175.9244	-1.2891	0.69727	0.018555	-16.769	25.8415	7.13125	0.037109	-0.13867	0.11426
1.04	-34.206	16.1977	-15.8706	0.0080569	-0.2417	-0.0068359	66.41935	-114.108	1098.4115	-0.771	1.1724	0.10059	-5.062	28.0589	45.978	0.14551	-0.16553	0.038574	-42.909	-57.347	1389.7732	-2.8667	0.73682	0.79688	32.407	50.274	-4.05	0.0039063	-0.15308	0.051757	-59.8365	-225.283	1190.11	-1.2832	0.70898	0.019043	-10.939	42.91	-5.08043	0.014404	-0.13599	0.12842
1.042	-7.437	42.553	-20.09343	-0.025879	-0.22559	0.010254	107.173	-138.127	1118.953	-0.76709	1.1841	0.074219	28.845	16.752	50.89	0.14258	-0.16504	0.038086	-39.223	-10.815	1370.212	-2.8647	0.72021	0.80664	63.4084	17.6017	13.021	-0.013184	-0.15527	0.056152	-59.6197	-176.249	1189.325	-1.2856	0.73877	0.022949	-16.194	1.87782	26.1513	-0.0053711	-0.13916	0.14063
1.044	-47.856	21.2758	0.494999999999999	-0.062012	-0.20605	0.022949	61.888	-183.035	1105.5814	-0.7793	1.1836	0.056152	22.247	33.0746	17.3781	0.13477	-0.16016	0.017578	-29.6457	-68.74	1379.412	-2.8535	0.68164	0.80615	37.11	20.08822	16.5241	-0.047852	-0.15088	0.063965	-11.143	-202.863	1237.484	-1.3027	0.7539	0.030029	-4.075	32.001	30.222	-0.022461	-0.12793	0.15869
1.046	-10.049	14.5714	22.2995	-0.083984	-0.1958	0.033691	47.686	-231.048	1122.4185	-0.80615	1.1938	-0.01123	-8.63	15.1115	-1.158	0.11719	-0.15845	0.010498	-27.5484	-12.2934	1377.7129	-2.8415	0.65748	0.80883	27.454	14.2382	13.2844	-0.062012	-0.14551	0.070801	6.726	-135.887	1241.027	-1.3105	0.75977	0.036133	-12.651	5.52055	16.3903	-0.02832	-0.11865	0.16699
1.048	15.643	19.0852	8.3304	-0.12012	-0.18066	0.046875	43.537	-193.378	1136.522	-0.82959	1.2124	-0.05835	45.877	10.0311	-2.375	0.096191	-0.1543	0.0073242	-48.581	31.4051	1347.084	-2.8198	0.6333	0.80273	90.594	-7.1038	27.7982	-0.09668	-0.14648	0.08252	33.988	-127.621	1213.448	-1.3203	0.77441	0.044434	21.593	-1.5695	15.2686	-0.026367	-0.1001	0.16455
1.05	8.15	-7.8485	19.185	-0.1377	-0.17114	0.060791	-26.633	-206.495	1144.5	-0.85303	1.2349	-0.10107	24.032	7.0827	-8.095	0.062012	-0.13965	0.00048828	-22.021	-20.42723	1371.227265	-2.7905	0.60791	0.78906	34.632	-3.9238	16.196	-0.10669	-0.14209	0.093262	96.653	-168.0694	1240.846	-1.3281	0.77637	0.044922	25.968	30.964	-4.596	-0.027344	-0.09082	0.17504
1.052	38.606	4.8526	66.031	-0.14404	-0.16943	0.060547	-10.659	-221.062	1192.7674	-0.896	1.2661	-0.12158	24.841	-17.8539	19.2037	0.045898	-0.13232	0.0014648	5.675	44.5196	1351.39	-2.7793	0.5957	0.78271	21.948	-25.6204	43.587	-0.12061	-0.1377	0.10303	106.675	-86.268	1235.9244	-1.3496	0.79199	0.05127	-3.945	-8.4691	11.178	-0.021973	-0.078613	0.17773
1.054	32.657	10.3665	49.9886	-0.14941	-0.15771	0.060059	-0.652000000000001	-181.344	1193.4739	-0.9248	1.2852	-0.11719	54.779	-5.8524	25.665	0.0063477	-0.11426	0.003418	-5.2385	10.544	1328.3524	-2.7461	0.57129	0.77979	39.731	-4.6634	42.1229	-0.12793	-0.13428	0.12158	106.937	-80.50825	1267.448	-1.378	0.80689	0.062745	27.276	23.289	16.29182	-0.020996	-0.069824	0.18213
1.056	51.6723	14.9611	43.853	-0.15283	-0.14941	0.058105	-23.396	-196.1288	1237.776	-1	1.3135	-0.099609	21.011	-18.1725	15.4797	-0.020996	-0.10229	0.0065918	7.408	11.861	1326.70005	-2.7156	0.55786	0.77343	32.56	28.6792	5.784	-0.12695	-0.1377	0.12842	111.603	-47.96001	1274.742	-1.4282	0.82666	0.085449	48.4528	25.04	6.669	-0.022949	-0.069824	0.18115
1.058	77.632	44.473	3.624	-0.16211	-0.13721	0.069336	20.666	-143.889	1260.278	-1.0393	1.3335	-0.0625	53.2916	-23.9395	38.6834	-0.049316	-0.092285	0.015625	9.0369	98.398	1301.1168	-2.6929	0.53369	0.76172	51.062	6.663	11.839	-0.12793	-0.14404	0.1416	71.2937	10.419	1246.793	-1.5356	0.85693	0.14941	60.4841	-21.1469	35.004	-0.027344	-0.071289	0.18359
1.06	32.207	21.8067	3.978	-0.16797	-0.13061	0.06543	2.875	-87.612	1241.212	-1.064	1.3345	-0.013184	35.269	-10.6617	21.6881	-0.07666	-0.085938	0.02832	19.5979	62.669	1303.6551	-2.6406	0.50586	0.75146	15.889	18.77711	1.791	-0.12036	-0.14184	0.15698	41.793	-74.289	1283.762	-1.6128	0.87744	0.19336	52.354	14.6989	33.869	-0.027343	-0.0708	0.18482
1.062	62.782	1.457	40.9851	-0.17871	-0.12451	0.070801	-4.63	-98.11	1265.773	-1.0581	1.3208	0.03418	6.367	-18.2884	12.783	-0.092285	-0.086426	0.035156	19.329	107.1	1295.5153	-2.5964	0.48706	0.74536	-8.256	-3.4262	7.725	-0.1084	-0.14502	0.16602	63.574	-61.2078	1298.6206	-1.8145	0.90186	0.29541	39.0362	-8.5466	36.298	-0.027344	-0.066406	0.18359
1.064	62.7986	28.68034	9.23445	-0.19873	-0.11816	0.086914	40.142	-54.278	1250.968342	-1.0537	1.3027	0.041016	43.186	-1.265	17.706	-0.11475	-0.079102	0.057617	4.173	134.916	1280.766	-2.5488	0.46387	0.73877	40.672	-18.5785	28.0403	-0.088379	-0.14746	0.17578	65.2866	-72.1423	1301.8043	-1.9851	0.93189	0.38379	54.579	1.7456	30.4502	-0.026855	-0.061035	0.1875
1.066	43.4263	14.0114	3.54362	-0.20605	-0.11328	0.089355	15.594	-83.217	1251.56809	-1.0313	1.2793	-0.0078125	3.38	17.7559	-2.653	-0.125	-0.075684	0.067871	8.9756	62.10448	1316.449	-2.4746	0.4375	0.7251	7.675	13.202	6.413	-0.083984	-0.14746	0.18555	74.7956	-132.826	1353.127	-2.1597	0.96729	0.48779	46.3728	36.786	4.236	-0.029785	-0.058594	0.18799
1.068	86.649	17.6443	37.7492	-0.21875	-0.1001	0.094238	58.924	-107.758	1292.933	-1.0183	1.282	-0.065186	9.521	1.946	5.5704	-0.12695	-0.077637	0.087402	17.0855	126.023	1317.557	-2.4316	0.42383	0.71729	6.379	-9.326	20.5854	-0.065918	-0.15234	0.18506	68.7411	-77.181	1360.26	-2.3745	1.0298	0.61914	44.812	4.0237	11.267	-0.036133	-0.043457	0.19238
1.07	48.6488	-2.8486	42.6443	-0.22046	-0.093261	0.095459	49.634	-74.324	1268.9257	-1.021	1.2993	-0.11719	37.396	5.80667	7.74032	-0.12793	-0.077148	0.098633	9.1393	80.2613	1308.178	-2.3433	0.39502	0.70313	18.842	6.8341	23.5869	-0.049072	-0.15259	0.18579	67.62302	-127.623	1372.063	-2.4805	1.0596	0.6792	40.731	18.60181	19.5284	-0.046387	-0.029541	0.19824
1.072	24.411	-25.3979	41.495	-0.22363	-0.084473	0.095703	16.962	-122.1311	1281.3366	-1.041	1.332	-0.16455	5.104	3.2358	-10.566	-0.12158	-0.07666	0.10303	-7.006	59.787	1287.259	-2.2761	0.37109	0.6914	-43.013	27.262	-7.6375	-0.028809	-0.1499	0.18506	73.517	-142.453	1363.9817	-2.6602	1.1152	0.77979	43.525	21.0881	10.18352	-0.057617	-0.013672	0.20703
1.074	69.0297	14.95467	5.469	-0.21338	-0.071777	0.09375	52.7505	-120.739966	1285.087	-1.0762	1.3594	-0.16943	32.407	9.8041	9.6116	-0.095215	-0.075195	0.11963	-15.6107	112.982	1245.342	-2.2065	0.34814	0.67969	14.076	22.3139	2.272	-0.0053711	-0.14844	0.17529	64.43	-77.059	1311.737	-2.7468	1.1516	0.84008	59.4461	-7.1645	25.2297	-0.075195	0.0039063	0.21533
1.076	23.143	16.82571	-9.271	-0.20947	-0.069824	0.094727	28.222	-121.5674	1270.447	-1.208	1.4307	-0.14648	21.476	33.854	1.2685	-0.075439	-0.083741	0.11865	-18.117	38.742	1241.895	-2.1172	0.31445	0.65576	-11.871	48.932	-20.282	0.0058594	-0.14648	0.17285	52.595	-124.9218	1365.287	-2.7964	1.1782	0.87695	40.9825	27.256	9.0991	-0.084473	0.013672	0.21289
1.078	7.633	-4.7361	32.996	-0.19189	-0.057617	0.083984	36.876	-188.847	1316.658	-1.3262	1.501	-0.087159	-0.246000000000002	28.347	-0.347000000000001	-0.05957	-0.092773	0.11377	-15.472	70.229	1217.062	-2.0659	0.30518	0.64648	-41.3682	18.9964	-2.7375	0.024902	-0.14502	0.1626	21.857	-51.831	1393.851	-2.8203	1.2051	0.88721	4.34	-6.5137	20.23295	-0.086426	0.034668	0.21387
1.08	14.747	10.7147	22.4663	-0.16919	-0.060547	0.075928	87.683	-159.454	1315.365	-1.4473	1.5664	-0.015137	49.197	22.826	20.575	-0.036621	-0.104	0.11035	-40.1995	107.506	1176.6085	-1.9761	0.27979	0.63086	13.149	-10.1291	28.115	0.042969	-0.13965	0.14941	4.641	-15.847	1376.7035	-2.8062	1.2134	0.87988	4.875	-2.3997	25.54393	-0.080322	0.042236	0.20361
1.082	-25.906	-27.5284	12.8348	-0.14063	-0.061035	0.064941	66.8893	-165.238	1303.03	-1.5874	1.6685	0.10205	2.625	26.559	-11.3687	-0.02832	-0.10791	0.10254	-23.881	66.124	1189.2578	-1.9089	0.2583	0.61889	-8.695	6.1571	8.016	0.046875	-0.13867	0.14258	12.744	-61.77673	1403.5093	-2.7637	1.2148	0.83545	9.639	34.617	1.5386	-0.063477	0.052246	0.19141
1.084	0.449999999999999	-6.023	5.98424	-0.099609	-0.072754	0.039063	86.894	-172.04	1345.122	-1.6572	1.7109	0.15527	8.121	6.002	9.5725	-0.015137	-0.11182	0.10107	-30.1587	152.618	1158.7446	-1.8438	0.23975	0.59814	25.552	-10.876	18.3706	0.055176	-0.12988	0.12939	-11.396	14.3726	1394.76886	-2.7002	1.207	0.80127	5.713	-0.48525	7.551	-0.031738	0.064941	0.16797
1.086	-21.664	-4.1797	11.8313	-0.081055	-0.07666	0.036621	77.744	-91.9391	1309.7982	-1.7651	1.7739	0.24707	31.808	13.6297	15.7014	-0.0043946	-0.1228	0.099121	-21.816	126.76	1147.71	-1.7495	0.2085	0.58545	31.454	-3.2593	28.044	0.056396	-0.11841	0.12232	-23.208	-13.2942	1384.706	-2.6445	1.1914	0.75244	-7.387	14.4518	25.0795	-0.014648	0.069824	0.15479
1.088	-41.677	-28.2101	43.816	-0.039551	-0.08252	0.01123	42.2824	-107.5903	1298.6255	-1.8159	1.7994	0.29736	-9.803	10.3346	3.7166	-0.0014648	-0.125	0.094727	-16.183	117.6677	1124.976	-1.7065	0.19629	0.57617	12.257	21.5215	12.0611	0.059082	-0.10254	0.11768	-20.563	0.268899999999999	1384.028	-2.5781	1.1465	0.70605	-21.236	8.512	8.8163	0.030762	0.072266	0.12549
1.09	-2.33600000000001	11.6109	11.9114	-0.0092775	-0.092285	-0.0048826	75.6427	-79.055	1319.155	-1.8647	1.813	0.33691	20.362	-1.329	26.6878	0.00048828	-0.12256	0.09375	-12.671	185.679	1075.67	-1.6143	0.15918	0.55615	30.218	-1.2337	13.824	0.055176	-0.08252	0.104	-7.91699999999999	85.748	1329.613	-2.5469	1.125	0.68604	-14.204	-21.76764	23.948	0.066162	0.074218	0.098634
1.092	-26.424	16.8403	-26.5581	0.016602	-0.098145	-0.019043	56.0736	-31.658	1285.7233	-1.8965	1.8066	0.37549	24.985	15.16513	11.61788	0.0053711	-0.13037	0.090332	0.0809999999999995	115.7132	1080.167	-1.5496	0.13526	0.5437	24.803	35.7922	-8.562	0.054199	-0.073242	0.10547	5.443	26.033	1360.443	-2.5034	1.0981	0.64648	-0.451999999999998	25.5339	13.359	0.10645	0.069824	0.069824
1.094	-19.798	5.3305	-9.996	0.046875	-0.10596	-0.040039	-1.269	-81.0482	1293.2922	-1.896	1.7993	0.38086	-6.459	-3.7696	14.9342	0.00097656	-0.12207	0.092773	10.205	150.798	1032.651	-1.4858	0.10986	0.53027	35.1619	22.6601	-1.394	0.046387	-0.041016	0.093262	44.352	53.105	1395.796	-2.4648	1.08	0.62891	-16.326	-10.9445	23.19	0.16846	0.050293	0.029785
1.096	-7.9	25.2322	-5.07	0.058594	-0.10889	-0.046387	25.782	-27.3966	1275.661	-1.8687	1.7798	0.38672	60.928	10.05707	31.19118	0.0041504	-0.12402	0.086426	1.3	169.234	978.2014	-1.4023	0.077148	0.50586	50.123	-8.1784	40.4527	0.042968	-0.023437	0.090576	57.863	20.497	1395.8727	-2.4258	1.0625	0.59814	-6.981	-23.3383	45.441	0.19482	0.039063	0.01416
1.098	-25.713	-5.9887	22.1527	0.078125	-0.1167	-0.061035	-17.708	-27.02123	1233.402	-1.8428	1.7764	0.3877	16.366	21.9075	21.912	0.0048828	-0.11865	0.082031	9.935	98.565	966.272	-1.3608	0.063477	0.49365	20.233	11.16618	42.417	0.037598	-0.0043945	0.086914	71.629	-50.2791	1439.197	-2.3633	1.0332	0.55518	14.961	12.8648	3.7251	0.24512	0.012207	-0.012207
1.1	29.006	20.3608	4.4023	0.087646	-0.11988	-0.073486	-4.781	-52.101	1273.042	-1.8047	1.7666	0.38965	12.129	11.313	44.958	0.011719	-0.10889	0.074707	23.678	151.7798	931.7289	-1.2695	0.033203	0.47168	43.388	-23.2765	44.2383	0.022461	0.022949	0.07666	87.1413	21.771	1429.32	-2.3315	1.0142	0.53516	8.803	-6.9209	-3.443	0.25781	-0.0080566	-0.034912
1.102	17.166	24.7626	-19.60979	0.098633	-0.12207	-0.085449	2.212	5.79738	1235.791	-1.7363	1.7363	0.37305	66.02776	16.494	57.883	0.01709	-0.10449	0.065918	18.739	101.865	916.1738	-1.2102	0.010498	0.45044	68.44063	-9.4008	64.9949	0.010254	0.034668	0.070313	61.7406	-12.0236	1412.7397	-2.2612	0.96924	0.49414	19.795	27.272	5.106	0.26563	-0.023438	-0.04541
1.104	7.755	-8.467	29.2416	0.092773	-0.12158	-0.094727	-35.61	-41.7732	1237.298	-1.709	1.7275	0.36279	12.175	4.09200000000001	52.0778	0.0097656	-0.090332	0.054688	38.554	79.544	890.9753	-1.1479	-0.013184	0.43262	20.009	23.8177	77.96343	-0.02832	0.063477	0.056641	82.9261	-6.258964	1433.102	-2.2183	0.94433	0.46973	15.983	27.143	7.3387	0.25098	-0.034668	-0.04541
1.106	46.368	16.4068	30.92	0.084473	-0.11328	-0.10254	11.307	-41.043	1272.5383	-1.6504	1.707	0.32764	38.749	-20.859	98.926	-0.0009766	-0.07666	0.038574	48.386	135.5405	857.61855	-1.0723	-0.035645	0.41064	38.845	-0.5537	134.8586	-0.064941	0.09131	0.053223	95.2457	47.5144	1393.605	-2.1772	0.9165	0.44141	13.793	-2.7834	21.8183	0.23145	-0.041016	-0.040527
1.108	30.798	0.504600000000001	-6.087	0.071777	-0.11133	-0.1123	-14.13	-17.781	1275.797	-1.5913	1.6919	0.28271	26.015	-11.5772	108.8692	-0.02002	-0.054199	0.021973	51.4822	75.504	851.0089	-1.0366	-0.046387	0.40332	36.859	31.3994	147.734	-0.10889	0.12061	0.057129	102.7168	-14.231	1387.7108	-2.1133	0.87695	0.40479	40.917	28.96567	10.7344	0.19287	-0.038086	-0.029785
1.11	35.8884	7.1819	-3.35700000000001	0.057861	-0.10718	-0.12036	-25.578	-64.282	1303.11	-1.5605	1.6797	0.26758	11.463	-8.28	140.9955	-0.049316	-0.020508	0.01123	63.684	129.33684	823.16	-0.95654	-0.069336	0.37598	18.2872	36.705	147.354	-0.17432	0.15479	0.06543	103.874046	38.204	1388.134	-2.0737	0.86182	0.38525	55.7877	-16.6013	23.982	0.15698	-0.028564	-0.020264
1.112	72.75	30.2897	-1.195	0.037598	-0.09668	-0.12646	13.007	-25.156	1292.043	-1.5112	1.6489	0.23926	38.317	10.809	186.55729	-0.071289	-0.0043945	0.010742	77.9709	155.824	772.599	-0.89819	-0.082032	0.36182	15.829	24.4505	226.287	-0.21631	0.1748	0.070313	82.6646	71.268	1349.504	-2.0117	0.83203	0.3501	41.1143	-22.6193	70.254	0.12549	-0.018066	-0.010742
1.114	38.015	-21.5182	39.4709	0.003418	-0.081055	-0.13086	-12.217	-28.718	1262.6628	-1.4907	1.6176	0.22534	5.324	39.7618	198.2318	-0.12207	0.02832	0.0087891	87.3142	113.642	733.919	-0.83838	-0.09375	0.3457	-29.762	56.766	269.429	-0.29834	0.2085	0.086426	80.955	56.322	1352.146	-1.9615	0.81641	0.32593	47.1046	2.8788	45.0963	0.083496	-0.0014648	-0.0019531
1.116	73.3091	-12.695	52.2951	-0.015137	-0.069336	-0.125	-6.292	-53.345	1267.44683	-1.4805	1.5918	0.21729	-8.711	37.967	261.74776	-0.1726	0.055176	0.0063477	61.553	189.255	702.1327	-0.7666	-0.10596	0.32715	-15.3006	38.7134	335.053	-0.35889	0.23194	0.092041	99.24	133.316	1322.97	-1.9097	0.79736	0.30859	43.312	-24.6905	31.657	0.066406	0.0083008	-0.00048828
1.118	52.9799	-1.909	26.7403	-0.056152	-0.047363	-0.11523	16.676	24.6311	1203.497	-1.4663	1.5513	0.22412	16.7611	59.656	317.453	-0.2251	0.077637	0.0097656	64.8836	162.1222	679.6762	-0.73047	-0.11816	0.31396	-19.0581	53.1512	385.665	-0.42627	0.25391	0.097168	84.7071	97.736	1289.967	-1.8491	0.77393	0.28906	58.576	-8.6604	38.129	0.020996	0.014648	0.0048828
1.12	43.6715	-18.164	64.1346	-0.093752	-0.029785	-0.10571	-1.261	10.97	1180.561	-1.4604	1.5229	0.22266	-19.657	69.5832	376.468	-0.3042	0.12012	0.0078125	59.964	156.7632	650.9003	-0.65674	-0.12598	0.30273	-41.5983	76.041	421.7984	-0.52783	0.28662	0.10107	73.884	91.516	1309.6051	-1.8179	0.77197	0.28174	56.8901	-6.5984	42.111	-0.013428	0.020263	0.012207
1.122	80.0129	-0.186	106.679	-0.12939	-0.0087891	-0.091797	30.538	21.338	1212.27702	-1.4277	1.4766	0.22217	1.236	52.3668	444.562	-0.34131	0.14111	0.015625	35.251	198.227	603.9645	-0.60132	-0.13648	0.28614	-36.23383	34.2336	493.7304	-0.57764	0.30811	0.10596	83.2312	146.234	1291.295	-1.749	0.76172	0.25488	35.682	-63.0885	89.5176	-0.058105	0.030273	0.020996
1.124	36.387	-10.9543	114.014	-0.17871	0.014648	-0.079102	21.998	71.55	1177.9341	-1.3965	1.4384	0.22974	-0.465	76.8964	468.271	-0.42627	0.18164	0.021973	48.684	125.93	570.841	-0.54639	-0.14209	0.26953	-38.3682	46.886	531.9319	-0.68506	0.34131	0.125	60.922	83.508	1284.8657	-1.696	0.75708	0.23535	49.433	-34.997	85.08	-0.10889	0.040039	0.025879
1.126	53.948	13.3673	119.873	-0.19922	0.026855	-0.071289	18.084	31.7373	1174.1042	-1.3579	1.4048	0.22607	-49.2022	51.781	503.463	-0.49146	0.21045	0.025635	35.719	164.5238	530.6752	-0.47607	-0.14697	0.24512	-50.826	42.664	561.26	-0.77369	0.36646	0.13916	29.807	126.693	1269.2965	-1.6323	0.75537	0.21582	38.0321	-54.0299	106.014	-0.13525	0.046875	0.021484
1.128	39.376	56.426	143.634	-0.24756	0.047363	-0.063965	87.3768	91.052	1162.1808	-1.2954	1.3403	0.22656	-6.388	31.553	577.524	-0.56201	0.24658	0.030762	25.416	188.027	476.785	-0.44092	-0.1543	0.23389	-21.768	-1.58175	640.895	-0.86523	0.38672	0.15918	2.193	132.7018	1239.6983	-1.5425	0.75635	0.18945	22.564	-43.71297	167.032	-0.18066	0.055664	0.020996
1.13	6.58	47.671	203.325	-0.30518	0.0625	-0.061035	61.45	113.654	1139.9923	-1.2676	1.3105	0.23096	-20.148	24.4194	602.9248	-0.66406	0.28906	0.056641	34.599	147.4578	462.189	-0.36963	-0.16211	0.2085	-27.801	10.151	685.291	-0.98584	0.4165	0.19287	-22.888	66.616	1246.5228	-1.502	0.75586	0.17236	21.615	16.1758	183.63	-0.21143	0.065186	0.015869
1.132	12.993	68.483	282.229	-0.33691	0.07959	-0.053223	76.1383	83.385	1170.8728	-1.2173	1.2349	0.22168	-8.9816	-28.7365	667.539	-0.71436	0.31299	0.064453	9.607	202.611	441.46	-0.32496	-0.1687	0.18872	0.652999999999999	-42.251	753.1952	-1.0479	0.43311	0.21143	-30.29	117.055	1222.507	-1.4102	0.75879	0.15479	12.116	12.209615	208.378	-0.24854	0.076172	0.0097656
1.134	0.869	78.4049	290.009035	-0.40576	0.10596	-0.030273	111.234	151.27	1131.5529	-1.1804	1.1814	0.21386	29.566	-40.5057	718.383	-0.82568	0.35596	0.091309	8.908	154.966	427.477	-0.28369	-0.18018	0.16699	37.562	-68.3959	806.875	-1.1733	0.46045	0.26465	-51.5515	58.878	1188.0476	-1.356	0.76758	0.13965	20.338	68.689	249.015	-0.30371	0.094238	0.011719
1.136	-6.174	68.362	371.4179	-0.47705	0.12427	-0.018799	53.7162	103.158	1101.443	-1.146	1.1255	0.20801	-21.568	-60.2432	746.316	-0.91211	0.38574	0.11304	22.789	138.3946	428.655829	-0.2373	-0.18359	0.14307	-6.564	-62.405	823.074	-1.2647	0.47803	0.30713	-48.1782	51.715	1165.8608	-1.3052	0.77588	0.12598	-0.207999999999998	103.628	295.958	-0.35401	0.10718	0.019043
1.138	22.109	88.756	457.464	-0.55615	0.14453	0.00048828	91.86	89.8123	1110.171	-1.1128	1.0688	0.20166	19.732	-100.1214	831.5589	-1.002	0.42188	0.13135	6.02099999999999	170.406	397.7025	-0.21436	-0.18848	0.13037	25.776	-99.8611	876.627	-1.3535	0.49707	0.36475	-28.335	120.2825	1131.058	-1.2476	0.78955	0.11621	-30.048	77.6652	417.625	-0.42529	0.12109	0.037598
1.14	-3.818	41.665	527.568	-0.68311	0.17334	0.036133	69.8453	105.1468	1077.588	-1.0938	1.0391	0.20215	20.551	-106.047	844.5436	-1.105	0.46143	0.17285	22.658	121.711	392.4346	-0.1709	-0.19531	0.10352	50.822	-78.4812	862.033	-1.4668	0.53125	0.44043	-43.324	64.486	1110.0014	-1.2197	0.79297	0.11084	-15.003	118.071	512.0387	-0.55518	0.15332	0.088379
1.142	8.23799999999999	13.2841	585.8894	-0.75391	0.19141	0.061523	38.51	40.816	1070.664	-1.0566	0.97852	0.21045	-8.924	-119.8173	864.3585	-1.1807	0.48731	0.21314	7.016	145.028	372.798	-0.14258	-0.20288	0.088135	65.728	-79.0371	836.004	-1.5117	0.54395	0.47705	-12.664	134.414	1069.4162	-1.1719	0.80273	0.11328	-28.4717	79.909	580.9005	-0.64014	0.16846	0.125
1.144	30.942	21.9474	614.505	-0.90967	0.23145	0.11328	96.2049	88.237	1031.541	-1.0281	0.93774	0.21607	48.264	-137.624	887.378	-1.2617	0.5127	0.25439	5.922	135.796	339.0572	-0.11719	-0.20166	0.072266	110.9681	-117.485	831.342	-1.5957	0.56641	0.5415	-1.278	163.25	1018.169	-1.1336	0.80493	0.10791	-10.931	47.124	673.975	-0.83936	0.20947	0.22266
1.146	-5.641	-46.617	692.591	-1.0379	0.27222	0.16626	19.807	74.2681	1001.1346	-1.0034	0.8999	0.22021	35.852	-122.178	844.859	-1.353	0.52637	0.31348	21.262	91.8176	320.5529	-0.086426	-0.20459	0.050293	67.365	-95.537	784.844	-1.6404	0.5874	0.58521	-1.121	133.0406	1010.258	-1.1016	0.81348	0.10547	6.96	32.607	728.825	-1.0239	0.25317	0.31934
1.148	45.12	-70.391	787.8733	-1.1641	0.31445	0.22412	21.846	53.365	999.4444	-0.97217	0.85205	0.23242	34.798	-142.727	824.347	-1.4023	0.53027	0.35205	9.534	131.926	273.9232	-0.069824	-0.20801	0.043457	82.958	-120.052	776.459	-1.6714	0.60791	0.61914	17.396	197.156	995.2748	-1.043	0.81641	0.10693	-14.628	-50.736	801.147	-1.2153	0.3042	0.42383
1.15	18.652	-87.6884	812.715	-1.334	0.37549	0.33447	46.688	110.0384	953.7549	-0.95557	0.82764	0.23926	70.683	-123.046	782.061	-1.4941	0.53711	0.41211	22.12	96.5348	266.5067	-0.04541	-0.20313	0.024414	109.8938	-116.702	781.739	-1.6895	0.64063	0.65381	-5.052	166.838	958.608	-1.0176	0.81738	0.10498	12.664	-70.443	853.223	-1.4858	0.39893	0.56543
1.152	3.24	-106.0389	834.4618	-1.4214	0.40479	0.38574	9.681	86.8258	921.0253	-0.92822	0.7876	0.24512	26.458	-108.713	729.5978	-1.5528	0.54004	0.45654	24.644	101.5881	264.1086	-0.022217	-0.19678	0.011963	77.386	-63.742	754.0415	-1.6851	0.65674	0.66602	-9.3436	163.6657	949.7028	-0.94922	0.81055	0.095703	35.4764	-75.409	867.531	-1.6128	0.46533	0.63184
1.154	47.937	-73.368	842.67	-1.5742	0.46289	0.48193	58.856	125.861	909.2341	-0.89965	0.76294	0.25293	52.193	-118.511	713.122	-1.6074	0.54492	0.49365	7.627	140.202	229.603	-0.0078125	-0.19385	0.0014648	93.145	-100.9386	803.606	-1.6758	0.67773	0.69189	11.078	203.561	889.7305	-0.89233	0.80688	0.089355	9.656	-136.061	904.18462	-1.8359	0.59766	0.74658
1.156	-12.0718	-72.777	840.6	-1.6658	0.5	0.53173	22.057	167.171	862.776	-0.87158	0.73486	0.25195	53.2226	-84.782	679.507	-1.6558	0.54443	0.52686	55.5782	97.8353	231.782	0.015625	-0.19385	-0.010742	67.0839	-81.052	822.3444	-1.6592	0.69385	0.69629	2.141	125.93	851.314	-0.83984	0.80078	0.080078	22.7116	-125.458	912.264	-1.9439	0.69971	0.8042
1.158	7.8588	-88.238	849.558	-1.7378	0.53174	0.55859	21.708	126.67	866.622	-0.84131	0.70361	0.2627	0.237	-71.44	668.841	-1.668	0.55176	0.53369	48.1455	121.451	215.98	0.025879	-0.19482	-0.022949	44.91909	-51.178	826.131	-1.6426	0.70703	0.70361	20.388	167.0355	819.1512	-0.7749	0.78955	0.065918	6.2931	-145.032	891.51	-2	0.79102	0.81982
1.16	35.199	-72.298	801.8	-1.7715	0.5498	0.55322	59.309	165.941	828.417	-0.82568	0.68896	0.26465	34.511	-71.656	717.229	-1.6758	0.55957	0.55127	47.1606	107.439	206.448	0.04541	-0.19434	-0.03418	92.847	-85.446	893.889	-1.6304	0.74463	0.70605	24.4433	179.145	778.108	-0.74072	0.78174	0.055176	22.8389	-147.77	880.789	-1.9688	0.88477	0.77783
1.162	-10.453	-92.954	783.866	-1.77	0.54834	0.52734	16.801	145.644	790.17247	-0.80127	0.65479	0.26953	17.9411	-27.118	730.294	-1.667	0.57617	0.55346	64.0733	66.2162	192.3077	0.061279	-0.19506	-0.042724	53.3767	-64.158	911.061	-1.625	0.76563	0.71143	35.29504	127.025	787.863	-0.6792	0.7583	0.036621	21.7481	-103.827	855.159	-1.9092	0.90625	0.72705
1.164	22.332	-70.773	793.396	-1.7188	0.55713	0.4458	47.938	108.2617	788.0078	-0.78076	0.6333	0.26709	16.9779	-53.643	791.52	-1.6621	0.59766	0.55615	48.597	110.877	157.5931	0.069336	-0.19434	-0.060547	23.6352	-100.203	952.851	-1.605	0.80322	0.69922	42.681	174.051	768.971	-0.63086	0.72852	0.02832	-12.0352	-132.696	861.945	-1.7666	0.91309	0.59619
1.166	7.962	-50.36	755.348	-1.6669	0.52392	0.39428	57.315	149.3434	741.1973	-0.75977	0.61328	0.26807	44.9492	-73.618	850.465	-1.6421	0.63721	0.55762	55.3239	89.761	125.753	0.084961	-0.19336	-0.070801	46.301	-151.3057	1010.325	-1.5886	0.82496	0.69067	45.815	116.99	755.7677	-0.60693	0.70947	0.03125	6.955	-101.798	855.633	-1.664	0.88183	0.48877
1.168	-9.423	-57.0079	760.241	-1.6284	0.50146	0.35693	8.794	110.4131	710.6246	-0.73193	0.58252	0.26953	-23.6466	-80.756	879.4209	-1.6382	0.65381	0.55371	43.794	80.3625	115.371	0.086426	-0.19336	-0.081055	35.133	-133.1565	1027.362	-1.5737	0.84033	0.66406	47.3678	111.608	740.5791	-0.56885	0.66455	0.038086	9.839	-51.353	810.368	-1.5684	0.8252	0.38721
1.17	58.84	-33.328	758.471	-1.5781	0.44727	0.30469	65.172	117.582	667.8302	-0.7168	0.57227	0.26611	12.457	-142.87	977.474	-1.6357	0.69824	0.56689	40.968	91.673	104.2954	0.1001	-0.1958	-0.097168	30.616	-205.741	1079.35	-1.542	0.86035	0.61182	30.4604	174.801	686.7594	-0.54858	0.63965	0.038331	15.078	-50.733	836.644	-1.48	0.71924	0.26855
1.172	42.412	-45.338	778.17	-1.5293	0.41699	0.27051	65.158	121.3722	640.323	-0.68213	0.54688	0.26611	23.6518	-161.2227	993.921	-1.6272	0.72876	0.57056	52.6075	29.314	102.7473	0.1023	-0.19995	-0.10401	-14.626	-214.215	1091.352	-1.521	0.86572	0.57813	2.97	131.407	675.174	-0.53125	0.60156	0.044434	25.223	1.446	858.817	-1.437	0.64795	0.21094
1.174	52.62	-96.201	840.33	-1.4473	0.38086	0.21582	46.122	67.74	648.22235	-0.65528	0.51953	0.26075	-35.80459	-196.889	1012.0916	-1.6211	0.75781	0.56787	36.359	36.7527	102.037	0.10645	-0.20215	-0.11084	-41.4389	-199.053	1090.5164	-1.4697	0.86523	0.51025	-1.891	183.973	634.36	-0.51025	0.5498	0.054199	27.928	0.335999999999999	868.428	-1.3594	0.51563	0.11963
1.176	75.3964	-84.559	850.918	-1.3875	0.37036	0.17481	100.8723	107.142498	620.12	-0.63232	0.49658	0.25391	-4.852	-269.209	1054.1429	-1.5874	0.79346	0.55078	20.3112	28.36744	88.486	0.11035	-0.20459	-0.12061	-24.335	-246.975	1129.155	-1.4327	0.84619	0.45215	-23.7607	194.342	596.5753	-0.49414	0.51758	0.065918	84.441	-50.196	916.989	-1.3091	0.41846	0.056396
1.178	25.883	-105.74	874.349	-1.333	0.35547	0.13525	103.0313	87.9962	604.892	-0.58984	0.44922	0.24658	-47.709	-264.13	1045.385	-1.5625	0.80273	0.53711	25.642	-0.165000000000001	98.759	0.11182	-0.20898	-0.12646	-64.808	-169.2297	1131.665	-1.4063	0.82031	0.40771	-30.9149	164.9978	576.94	-0.47461	0.47363	0.072266	88.13327	-66.035	959.5688	-1.3008	0.35547	0.012207
1.18	23.403	-124.7063	947.9529	-1.2808	0.354	0.098145	114.7517	89.234	591.838	-0.56934	0.42627	0.23828	-48.0327	-283.556	1084.053	-1.5	0.82617	0.49365	7.639	39.2369	56.3593	0.11572	-0.20654	-0.13672	-62.2396	-157.372	1149.0872	-1.3872	0.79932	0.36914	-54.022	215.226	521.284	-0.45117	0.4375	0.08789	33.744	-139.055	1018.45	-1.3633	0.39063	0.0048828
1.182	-7.532	-115.384	947.2286	-1.2671	0.35596	0.084961	112.9029	141.9174	555.9905	-0.51465	0.38037	0.2251	-19.613	-255.563	1116.083	-1.4568	0.83618	0.45483	11.525	18.1332	38.052	0.11743	-0.21484	-0.14111	-4.595	-162.634	1202.4035	-1.3823	0.78955	0.35547	-67.839	177.7294	508.6381	-0.42383	0.41504	0.10303	24.16	-171.8968	1092.228	-1.3784	0.44482	0.003418
1.184	-21.344	-165.067	987.098	-1.269	0.40381	0.082031	95.049	107.8582	529.0702	-0.47387	0.34302	0.20605	-64.0672	-181.426	1101.256	-1.4102	0.8418	0.41016	0.753	21.74	22.053	0.11768	-0.20703	-0.14502	-14.382	-82.861	1212.9558	-1.3696	0.77686	0.3252	-43.0217	176.6434	478.8984	-0.40088	0.37402	0.099609	16.822	-163.489	1086.4046	-1.3306	0.52295	-0.033203
1.186	0.814	-175.121	1029.108	-1.2698	0.46607	0.10352	122.293	140.8988	488.4732	-0.43994	0.3125	0.19385	-36.233	-180.795	1141.2472	-1.3594	0.84766	0.354	-9.302	46.103	18.621	0.12256	-0.21387	-0.14697	3.214	-122.781	1250.40023	-1.3603	0.77246	0.30615	-58.624	199.769	441.1255	-0.39648	0.33545	0.094727	-37.1757	-222.483	1108.203	-1.2473	0.53247	-0.090088
1.188	-62.198	-166.292	1040.7564	-1.2725	0.52539	0.12988	108.37001	153.03	443.139	-0.38867	0.28467	0.17578	-16.1133	-138.162	1145.6735	-1.3433	0.85596	0.32031	8.866	4.3079	41.7003	0.125	-0.21704	-0.15332	4.643	-97.044	1280.982	-1.3403	0.77979	0.28467	-55.7808	139.711	434.9773	-0.375	0.25879	0.078613	-57.077	-215.665	1142.6407	-1.146	0.51221	-0.15186
1.19	-39.132	-195.213	1104.435	-1.2651	0.57666	0.16064	76.729	108.209	424.785	-0.36816	0.27246	0.16992	-40.6113	-89.744	1127.786	-1.3066	0.85352	0.27002	-10.169	23.0229	28.027	0.12646	-0.21484	-0.16162	4.724	-44.131	1265.753	-1.3276	0.80029	0.2583	-42.8978	166.77	403.357	-0.34058	0.2085	0.074951	-53.101	-213.457	1149.52529	-1.0562	0.46045	-0.21875
1.192	12.149	-137.86124	1119	-1.2632	0.59326	0.16699	96.4946	147.5713	399.7672	-0.32861	0.24268	0.14941	4.134	-107.569	1179.506	-1.2883	0.84986	0.23852	-15.327	17.59593	20.1556	0.12939	-0.21533	-0.16895	41.1066	-102.7675	1293.166	-1.3262	0.81445	0.24561	-40.751	161.052	373.646	-0.31689	0.16943	0.069336	-10.344	-232.534	1216.152	-1.0342	0.4375	-0.229
1.194	-4.966	-112.776	1107.252	-1.2554	0.61572	0.18164	69.565	124.67565	361.927	-0.30346	0.22412	0.13037	3.167	-38.868	1139.005	-1.271	0.84229	0.22656	6.248	-2.4788	22.4259	0.13037	-0.21924	-0.17139	35.073	-68.689	1246.839	-1.353	0.82275	0.23047	-35.1936	122.297	367.1235	-0.2959	0.12988	0.064941	33.57	-159.0811	1237.623	-1.0371	0.40283	-0.21973
1.196	57.66	-101.662	1140.198	-1.2573	0.62451	0.18287	87.069	108.1177	351.741	-0.27832	0.20752	0.1167	-11.732	-54.057	1151.472	-1.2671	0.83057	0.22168	2.009	31.3429	-1.8704	0.12305	-0.22168	-0.17578	21.309	-99.17456	1243.545	-1.4087	0.82813	0.22486	-55.0018	174.265	348.8812	-0.27979	0.11182	0.062012	12.46	-163.835	1242.714	-1.074	0.39429	-0.1875
1.198	61.521	-48.334	1115.168	-1.2593	0.6333	0.18799	58.37	144.33	316.204	-0.24121	0.1875	0.1001	26.6123	-99.849	1188.05	-1.2739	0.82471	0.22021	2.978	9.62663	-11.638	0.11255	-0.22095	-0.17432	28.639	-155.629	1331.383	-1.4941	0.83203	0.24268	-31.65807	125.523	346.45038	-0.25879	0.090332	0.057617	45.728	-143.014	1263.241	-1.1245	0.39404	-0.14648
1.2	67.268	-49.402	1144.016	-1.2793	0.64551	0.20264	21.04	103.0108	317.827	-0.22705	0.17041	0.087402	-24.7544	-92.461	1172.11972	-1.2944	0.82861	0.22998	12.614	15.2412	-17.7	0.098633	-0.22021	-0.17383	20.905	-101.7629	1356.8135	-1.6597	0.83252	0.27881	-10.734	108.786116	328.881	-0.2373	0.072998	0.056152	92.365	-63.548	1240.1786	-1.1953	0.42969	-0.088379
1.202	110.2264	-20.517	1200.8326	-1.2964	0.65088	0.21826	61.856	133.714	318.8435	-0.2041	0.14844	0.070801	-6.3229	-163.823	1226.8721	-1.3211	0.83716	0.23291	-5.894	30.531	-18.9028	0.083008	-0.21729	-0.16406	46.571	-153.876	1381.3163	-1.7534	0.83838	0.30078	-19.8155	120.6317	308.78	-0.21777	0.061035	0.04541	75.554	-59.62	1238.403	-1.2305	0.45117	-0.061035
1.204	54.899	5.726	1192.005	-1.3574	0.6748	0.25391	40.336	126.47	272.75	-0.18457	0.13501	0.05835	12.3109	-172.132	1256.2389	-1.3511	0.85205	0.24219	27.078	-10.804	15.4098	0.07666	-0.21533	-0.16211	69.679	-155.506	1425.7	-1.959	0.83887	0.38232	4.527	56.946	306.844	-0.19775	0.051758	0.044922	116.04958	-1.284	1239.149	-1.3008	0.50781	-0.0078125
1.206	48.005	-48.408	1243.825	-1.4319	0.70288	0.30249	9.288	88.88	289.779	-0.17285	0.1167	0.04834	-13.764	-166.767	1253.3392	-1.418	0.875	0.23975	20.526	0.2744	20.6283	0.058594	-0.2124	-0.14795	68.1	-99.6845	1416.806	-2.1655	0.85596	0.47363	11.645	94.732	274.873	-0.18945	0.04248	0.043457	74.908	18.976	1224.912	-1.3503	0.54273	0.026855
1.208	79.816	-46.082	1246.098	-1.5288	0.7417	0.35889	35.557	125.024	271.008	-0.16064	0.099121	0.030273	22.5046	-223.089	1309.931	-1.4585	0.88135	0.2334	9.7	-0.587000000000002	9.4208	0.048096	-0.20947	-0.14771	82.082	-144.473	1434.751	-2.2656	0.87305	0.52393	30.3797	107.8608	226.6357	-0.18115	0.038574	0.040039	56.067	-41.935	1288.86826	-1.4121	0.57324	0.053711
1.21	26.395	-63.7225	1217.572	-1.6812	0.79736	0.45508	-19.722	91.482	237.338	-0.1543	0.093262	0.027832	19.2204	-180.61	1295.817	-1.5601	0.88916	0.24219	44.619	-18.870919	21.7765	0.036133	-0.20508	-0.13525	69.0661	-71.059	1416.801	-2.4414	0.91016	0.62744	43.372	86.885	197.5	-0.17602	0.034179	0.042725	59.682	-33.672	1315.3126	-1.5156	0.60742	0.095215
1.212	66.385	-88.631	1256.207	-1.7754	0.82813	0.50488	15.801	76.3247	246.1857	-0.13525	0.078613	0.016113	7.81218	-192.698	1313.66	-1.6639	0.88501	0.26928	47.076	28.299	12.433	0.024902	-0.20459	-0.125	41.0119	-71.564	1400.458	-2.5655	0.93945	0.70166	29.0405	131.0277	160.364	-0.17627	0.036133	0.052246	19.859	-88.682	1316.846	-1.5835	0.61768	0.12305
1.214	81.821	-43.828	1245.212	-1.9312	0.87646	0.58789	3.53	91.8689	204.06246	-0.12598	0.065918	0.013428	50.183	-196.548	1371.57	-1.7847	0.87939	0.3125	44.236	9.731447	7.319	0.015137	-0.20166	-0.11914	29.9508	-118.536	1446.452	-2.6753	0.97705	0.7793	31.265	89.663	178.802	-0.18994	0.038574	0.061523	62.972	-123.454	1371.119	-1.7617	0.63574	0.19873
1.216	65.801	-77.74	1299.862	-2.0679	0.89014	0.67578	-20.16	51.0597	210.5222	-0.11768	0.058105	0.0087891	3.2146	-109.60029	1349.2693	-1.9761	0.88135	0.39453	50.702	21.8263	3.202	0.0014648	-0.20068	-0.1084	8.5774	-39.892	1438.7703	-2.7827	1.0317	0.85547	66.7715	103.746	182.3122	-0.19775	0.044434	0.069336	108.1777	-95.083	1381.968	-1.9402	0.65259	0.2749
1.218	150.723	-97.795	1357.771	-2.2324	0.91113	0.77393	33.636	87.236	215.816	-0.097656	0.048828	0.0097656	-12.2731	-121.798	1360.0666	-2.0781	0.88477	0.43311	36.408	50.82	1.71	-0.011719	-0.19824	-0.098632	3.82	-75.9614	1418.6992	-2.8379	1.0508	0.89209	60.922	119.541	151.6793	-0.20459	0.060059	0.094238	101.042	-146.785	1375.7423	-2.1382	0.6792	0.36816
1.22	104.7704	-91.451739	1333.989	-2.4097	0.93994	0.8418	-6.357	84.748	157.9743	-0.089355	0.039551	0.0092773	-1.27	-80.804	1360.2137	-2.2632	0.91064	0.53711	51.1437	3.5597	24.9836	-0.025879	-0.19336	-0.085449	4.041	-55.47	1422.2206	-2.9097	1.0825	0.96289	61.254	63.7465	148.8409	-0.21216	0.061523	0.099607	144.561	-136.221	1368.798	-2.4297	0.73633	0.50537
1.222	114.26341	-127.7034	1378.127	-2.478	0.94482	0.86914	8.622	65.9395	163.3435	-0.07666	0.024902	0.0019531	-52.3552	-17.256	1310.062	-2.3887	0.94238	0.62305	50.0807	33.193	19.938	-0.054688	-0.1875	-0.075195	-31.57	13.551	1396.56	-2.9595	1.0962	0.99121	54.15302	91.6696	140.375	-0.21631	0.065918	0.1123	129.6156	-112.1811	1368.7335	-2.5566	0.7793	0.57275
1.224	153.541	-75.291	1399.043	-2.5859	0.9707	0.90479	38.663	109.196	128.4994	-0.07251	0.014892	-0.0058594	-29.3394	-57.6638	1333.014	-2.5137	0.97266	0.69385	31.172	15.1951	11.1366	-0.067871	-0.18506	-0.06543	-51.328	-38.0151	1400.534	-2.9883	1.1035	1.0142	34.323	78.5859	112.3123	-0.21924	0.073242	0.12402	113.058	-155.019	1441.74	-2.8003	0.86963	0.66797
1.226	64.839	-33.593	1369.336	-2.6445	0.97461	0.90674	9.067	89.048	121.6324	-0.067383	0.0029297	-0.013672	-31.7054	-7.05	1310.721	-2.6602	1.0078	0.78857	39.541	5.6493	15.3544	-0.095215	-0.18457	-0.055176	-35.669	8.821	1392.5325	-2.9922	1.1055	1.022	30.741	56.923	98.001	-0.21582	0.082031	0.12891	138.6228	-95.379	1463.703	-2.9158	0.94165	0.70923
1.228	87.168	-31.8109	1373.6442	-2.6875	0.96094	0.89795	65.8197	85.308	137.823	-0.066406	-0.0092773	-0.02832	-72.624	-17.181	1286.094	-2.7148	1.0166	0.82373	28.696	37.2449	13.6753	-0.11158	-0.17968	-0.046631	-44.9335	-5.3812	1384.91	-2.9824	1.1055	1.02	9.015	86.7547	51.989	-0.20361	0.083984	0.13916	91.821	-66.15	1429.102	-2.9727	0.99805	0.72119
1.23	70.645	19.6129	1324.013	-2.6973	0.91211	0.87744	65.2183	90.295	108.064	-0.069824	-0.019531	-0.035645	-22.4554	-60.7446	1339.062	-2.8105	1.0391	0.89502	14.195	8.98755	18.23	-0.12354	-0.17969	-0.036621	-41.20157	-54.19	1433.98	-2.9546	1.1021	0.99121	18.379	31.652	44.787	-0.18702	0.087159	0.14209	100.434	-57.472	1443.407	-2.9824	1.0352	0.68408
1.232	31.418	-11.87548	1340.552	-2.6851	0.88721	0.86523	42.008	50.495	114.451	-0.076172	-0.026855	-0.036621	-65.205	-4.016	1310.194	-2.8496	1.0449	0.93604	17.187	35.325	8.544	-0.14209	-0.1792	-0.020508	-59.356	22.6003	1441.4534	-2.9024	1.0977	0.97022	-9.815	23.201	65.4378	-0.17041	0.085449	0.13672	73.11	24.945	1409.25364	-2.9648	1.0332	0.65723
1.234	83.945	-18.6876	1389.3531	-2.6328	0.83398	0.82275	67.9154	65.161	111.937	-0.08252	-0.033691	-0.035645	-54.83	-52.4329	1331.217	-2.8809	1.0508	0.9624	-1.5	44.105	-5.414	-0.14209	-0.1709	-0.01709	-31.8827	-11.374	1444.8092	-2.8628	1.0806	0.9375	-24.758	34.4438	47.3312	-0.13184	0.080566	0.13379	19.897	13.3691	1379.639	-2.8999	0.99854	0.57617
1.236	48.721	11.101	1345.5952	-2.5742	0.80029	0.78174	47.513	55.9944	77.5648	-0.092773	-0.035156	-0.030273	-13.53	-50.0899	1361.022	-2.8823	1.0435	0.97656	22.282	-3.2099	10.989	-0.14941	-0.17822	-0.0048828	-27.452	-5.588	1442.239	-2.7944	1.0474	0.89258	-15.53	-0.12259	50.7489	-0.11523	0.076172	0.12402	75.033	50.433	1386.622	-2.8486	0.93164	0.51831
1.238	36.801	-31.129	1366.13	-2.5195	0.77051	0.74268	57.106	45.3584	74.6307	-0.099609	-0.035645	-0.023438	-63.202	-17.962	1345.603	-2.8691	1.0381	0.9751	-4.23	37.519	33.879	-0.14722	-0.1792	0.0063477	-39.0169	57.517	1411.9688	-2.7515	1.0356	0.87598	-23.503	33.541	45.925	-0.077637	0.061523	0.11035	70.219	82.546	1366.542	-2.7788	0.83838	0.47314
1.24	99.173	-1.74454	1384.157	-2.4512	0.72363	0.69678	79.5729	60.6591	48.8996	-0.10303	-0.0354	-0.01709	-44.4204	-81.4926	1389.0898	-2.8281	1.0234	0.96143	-15.692	2.508	42.72	-0.14502	-0.18457	0.013672	-36.1775	-25.8392	1431.682	-2.6792	0.99658	0.8252	-27.104	25.384	37.2819	-0.037842	0.049316	0.096437	38.446	12.863	1407.504	-2.7261	0.72314	0.43164
1.242	68.292	16.1825	1345.0363	-2.4194	0.70459	0.67188	45.992	22.637	40.2252	-0.10156	-0.033691	-0.014648	-27.885	-33.8701	1391.094	-2.7803	1.0039	0.94287	16.609	-18.5846	52.718	-0.13232	-0.18555	0.019531	4.96	24.455487	1431.016	-2.6177	0.97656	0.81054	-17.95	17.5615	37.8126	-0.010254	0.033203	0.072266	83.351	42.339	1423.801	-2.752	0.7041	0.43164
1.244	101.861	-35.2438	1357.983	-2.3828	0.67773	0.63525	53.205	4.436	76.332	-0.087402	-0.025879	-0.012695	-54.932	-38.0198	1387.58	-2.7202	0.98584	0.91406	-6.144	16.1938	13.4594	-0.12842	-0.18652	0.03125	8.081	28.5725	1392.9059	-2.5522	0.95361	0.78809	-9.546	64.75	0.99	0.027832	0.0097656	0.050781	74.863	20.83593	1400.8666	-2.8511	0.78564	0.4834
1.246	115.422	4.826	1333.84	-2.3726	0.66846	0.61573	47.9118	14.6473	48.696	-0.083984	-0.02002	-0.01709	0.154	-71.197	1420.86	-2.6426	0.96875	0.87451	-11.711	-19.8088	29.3413	-0.11768	-0.19287	0.039551	5.104	-7.253	1368.657	-2.4668	0.91992	0.75635	-1.909	32.407	-1.461	0.043945	0	0.026855	93.015	-22.011	1433.991	-2.8767	0.85523	0.50464
1.248	73.407	-19.204	1364.198	-2.375	0.66406	0.59814	25.464	-12.1884	61.223	-0.072754	-0.021484	-0.020996	-23.0231	8.787	1349.747	-2.6011	0.96729	0.84961	6.167	14.7585	19.40546	-0.10962	-0.19605	0.043457	14.084	82.3167	1311.459	-2.4121	0.90234	0.73779	-16.223	41.684	15.8343	0.061523	-0.012695	-0.010254	88.278	23.348	1425.9553	-2.8296	0.87744	0.4917
1.25	103.1282	-28.419	1425.975	-2.3809	0.65137	0.58496	53.6827	7.8771	61.482	-0.058594	-0.023682	-0.026612	-18.3239	-5.9898	1309.697	-2.5	0.95605	0.80811	-2.09	33.8716	-8.656	-0.097656	-0.19385	0.04248	14.713	44.841	1299.559	-2.291	0.87012	0.70264	-27.062	34.87	7.1368	0.072266	-0.013916	-0.044189	54.674	-41.3158	1409.793	-2.7046	0.83447	0.42676
1.252	67.358	32.537	1396.99	-2.3823	0.64893	0.5752	6.869	7.3271	32.3604	-0.050293	-0.032227	-0.02832	10.1693	25.2585	1285.11	-2.4343	0.95239	0.77661	7.874	-2.4642	15.179	-0.083984	-0.19629	0.041016	39.852	70.5097	1316.5798	-2.1902	0.84498	0.66138	-4.031	2.9629	13.1617	0.080566	-0.012695	-0.067871	92.314	-37.869	1436.675	-2.6401	0.8042	0.39795
1.254	74.07	-15.424	1400.426	-2.3887	0.63086	0.55811	14.089	14.9433	27.68728	-0.041992	-0.041504	-0.037598	-23.8472	98.322	1236.985	-2.3828	0.94336	0.74463	9.989	18.8633	14.1137	-0.078125	-0.19678	0.040039	68.7456	132.798	1294.246	-2.0854	0.81885	0.62402	10.304	33.7317	-1.79336	0.073242	-0.0019531	-0.092773	79.796	-0.425999999999998	1411.598	-2.541	0.75	0.34424
1.256	123.1933	16.47	1396.661	-2.3823	0.61475	0.54297	33.212	50.0854	1.224	-0.043945	-0.054199	-0.043945	27.462	48.281	1268.9084	-2.3076	0.93359	0.71924	7.144	-10.7852	25.887	-0.063965	-0.20117	0.035645	66.251	55.3827	1319.484	-1.9507	0.77588	0.57617	14.864	12.8391	2.16109	0.072266	0.0063477	-0.098633	53.753	-42.646	1415.134	-2.4975	0.70849	0.3186
1.258	66.892	45.515	1344.0224	-2.3745	0.60596	0.5293	-31.858	29.0632	0.0350000000000001	-0.040527	-0.061523	-0.04541	41.3706	104.07	1261.803	-2.271	0.93018	0.70605	51.2576	-20.1363	45.807	-0.060547	-0.20679	0.021973	70.313	102.302	1315.173	-1.8774	0.7583	0.55371	47.635	-9.8183	38.7115	0.05127	0.026367	-0.10645	94.9	30.894	1406.068	-2.4668	0.67285	0.30322
1.26	92.309	37.571	1335.961	-2.3511	0.58936	0.51074	-9.922	22.5911	27.9741	-0.04248	-0.074707	-0.042968	19.1933	97.184	1258.871	-2.2109	0.91602	0.67822	22.921	13.5752	16.93113	-0.05957	-0.21143	0.020996	54.392	99.961	1268.6155	-1.7549	0.71289	0.50439	19.703	31.418	11.03388	0.0271	0.04248	-0.10083	64.359	51.193	1343.0397	-2.4219	0.64453	0.28125
1.262	113.3952	112.3378	1301.4	-2.3183	0.57397	0.50195	-20.745	17.946	9.44298	-0.050781	-0.082031	-0.036621	25.0731	42.5991	1287.119	-2.1501	0.90502	0.66821	37.039	-9.1261	8.463581	-0.053223	-0.21387	0.010254	62.0645	65.337	1251.213	-1.6655	0.68212	0.47119	60.2904	11.3609	2.149	0.0019531	0.060547	-0.097656	70.729	31.597	1333.5777	-2.376	0.6455	0.26245
1.264	76.749	92.721	1280.178	-2.2817	0.56592	0.49023	-26.914	-15.5375	-0.60691	-0.066895	-0.10254	-0.024414	6.913	120.135	1255.354	-2.0938	0.90234	0.65088	34.433	10.1533	30.2601	-0.055664	-0.21436	0.0058594	47.8589	152.017	1190.703	-1.5874	0.65381	0.44287	78.1827	18.3187	21.233071	-0.02832	0.07666	-0.083984	113.075	119.127	1293.08805	-2.3105	0.63965	0.24512
1.266	132.32341	74.232	1322.02	-2.2144	0.54443	0.47461	20.114	10.50546	11.99787	-0.07373	-0.11377	-0.010742	6.178	82.822	1237.9265	-2.0054	0.89941	0.63477	30.964	15.4849	6.036	-0.052734	-0.21289	-0.0029297	19.318	103.261	1176.59	-1.5063	0.59814	0.41895	42.853	17.2054	35.473	-0.039551	0.084473	-0.07373	85.785	99.263	1282.4427	-2.2266	0.63086	0.23193
1.268	127.2572	118.407	1296.0834	-2.1851	0.5376	0.46436	-21.724	4.4914	4.16457	-0.10156	-0.12549	-0.003418	23.8279	76.5804	1216.83695	-1.9284	0.88842	0.6145	54.4011	-28.108	15.216	-0.051758	-0.2124	-0.010498	28.618	81.751	1171.1707	-1.4727	0.58008	0.40771	68.8408	-22.6142	51.818	-0.066895	0.098145	-0.06543	138.636	118.789	1303.8245	-2.1836	0.63086	0.22803
1.27	118.1033	76.989	1319.9022	-2.103	0.5376	0.44873	-17.469	-9.9617	13.1549	-0.12036	-0.13525	0.0097654	-12.4486	108.03	1172.0519	-1.8491	0.88232	0.58594	31.154	-18.3584	25.345	-0.057617	-0.21582	-0.020996	26.187	136.053	1118.835	-1.4063	0.5459	0.39502	67.0215	10.0249	36.673	-0.06665	0.10572	-0.059815	138.467	157.999	1273.555	-2.1074	0.62988	0.22021
1.272	133.399	124.853	1310.2603	-2.0356	0.54052	0.43212	34.292	17.2882	-5.438	-0.14111	-0.13721	0.016113	-6.4	11.325	1192.065	-1.7417	0.86768	0.54834	36.466	-36.5569	53.2401	-0.067383	-0.20703	-0.029297	-12.377	68.314	1125.024	-1.3687	0.51904	0.38745	56.072	12.7262	22.6163	-0.06543	0.10889	-0.059082	91.453	90.91	1267.639	-2.0527	0.62891	0.21801
1.274	60.213	158.148	1263.769	-1.9746	0.54883	0.41943	-17.576	-5.19302	-14.453	-0.17383	-0.14404	0.029297	-7.011	56.241	1174.139	-1.6895	0.85742	0.52393	44.327	-66.049	83.92	-0.078613	-0.20654	-0.037109	-25.616	120.77	1113.835	-1.3301	0.49414	0.37842	50.9675	3.3549	42.278	-0.043945	0.11182	-0.058105	115.7794	149.564	1241.774	-2.0015	0.6333	0.21094
1.276	89.391	117.0072	1280.6047	-1.8823	0.55322	0.39648	22.266	-4.3489	21.358	-0.18945	-0.14746	0.036621	-36.07548	39.107	1147.21	-1.5791	0.83008	0.479	21.941	-28.356	62.3906	-0.098633	-0.19287	-0.041016	-5.409	133.197	1069.9097	-1.2788	0.46729	0.37451	42.955	25.739	25.4866	-0.032227	0.11133	-0.060547	68.423	126.438	1217.962	-1.9395	0.62695	0.21191
1.278	76.164	152.755	1230.23	-1.8354	0.55615	0.38916	18.721	20.2255	19.2196	-0.21777	-0.14746	0.04248	-10.071	16.269	1142.789	-1.5007	0.80884	0.44946	41.5588	-45.744	70.531	-0.12476	-0.18677	-0.04248	2.422	99.6066	1020.963	-1.251	0.44629	0.37402	27.974	0.3152	4.509	-0.012207	0.11572	-0.072754	68.66	82.787	1224.5074	-1.9023	0.62793	0.21143
1.28	39.964	129.603	1217.201	-1.7612	0.55713	0.37305	23.032	-8.1792	20.9693	-0.24073	-0.14502	0.058106	-27.314	116.725	1082.947	-1.4331	0.78174	0.4209	40.858	-47.0167	101.725	-0.15479	-0.17627	-0.043945	-2.524	183.804	938.98	-1.1909	0.41748	0.36914	28.675	26.683	-8.0807	0.01001	0.12549	-0.083252	79.595	124.872	1192.711	-1.8374	0.63135	0.2085
1.282	37.907	96.408	1217.758	-1.7116	0.55591	0.3606	62.47844	12.63619	25.221	-0.26611	-0.14355	0.07666	-45.0503	89.9294	1059.20866	-1.3613	0.74512	0.39404	20.637	-12.731	118.651	-0.19629	-0.15088	-0.037109	-14.049	138.5171	943.056	-1.1491	0.38842	0.36743	22.75	31.479	-2.8086	0.038086	0.13379	-0.089355	21.55	50.905	1166.382	-1.7947	0.63159	0.20605
1.284	8.354	148.878	1176.004	-1.6733	0.55225	0.35352	23.73	1.1416	18.0917	-0.29004	-0.14258	0.09668	-2.713	125.0923	1026.2084	-1.334	0.72656	0.37793	34.965	-22.713	172.458	-0.21777	-0.14014	-0.034668	4.615	145.567	953.4092	-1.1035	0.36182	0.36377	7.78	-10.0807	37.848	0.074219	0.14014	-0.091797	48.935	47.831	1169.933	-1.752	0.63281	0.2041
1.286	29.391	114.229	1176.904	-1.623	0.54883	0.34473	34.696	-4.1086	28.3923	-0.29736	-0.13623	0.10742	-20.132	188.833	977.755	-1.2773	0.69434	0.36182	20.882	46.209	207.345	-0.27441	-0.11475	-0.019043	-5.228	192.77	915.354	-1.0488	0.3252	0.35498	-4.291	21.1426	35.928	0.093262	0.14941	-0.09375	27.381	78.011	1120.292	-1.7026	0.63721	0.20703
1.288	60.156	146.461	1144.4514	-1.603	0.54541	0.33789	85.6552	43.426	3.598	-0.31396	-0.13525	0.12549	-11.738	126.3599	997.5017	-1.2419	0.67114	0.35229	2.874	57.522	248.842	-0.32471	-0.1023	-0.016357	-5.273	110.4377	875.189	-1.0151	0.31006	0.35254	-10.773	-3.5374	14.5794	0.11426	0.15479	-0.10156	10.433	33.201	1089.689	-1.6772	0.646	0.20752
1.29	12.018	165.3	1073.589	-1.5649	0.53662	0.33008	42.111	22.4022	-12.176	-0.32202	-0.12866	0.13623	-10.241	173.593	968.68	-1.2046	0.64893	0.34375	15.603	50.6506	332.6314	-0.37939	-0.081543	-0.0073242	13.877	153.189	842.693	-0.94922	0.27441	0.3457	2.549	-18.25229	26.854	0.13281	0.16943	-0.1084	63.337	115.235	1042.175	-1.6328	0.6582	0.20947
1.292	66.436	134.156	1082.5009	-1.5362	0.53125	0.32666	48.004	28.6589	11.71	-0.3252	-0.12793	0.14355	-19.188	155.083	934.944	-1.1641	0.62012	0.354	2.745	89.608	381.729	-0.46729	-0.05127	0.003418	6.885	155.676	806.259	-0.90381	0.24829	0.34131	-24.627	11.6849	24.9293	0.14453	0.17432	-0.10938	29.185	146.562	1002.295	-1.5886	0.65601	0.2063
1.294	79.9793	195.096	1062.919	-1.5093	0.52686	0.32129	56.7102	43.41	10.3105	-0.31689	-0.12744	0.15283	19.281	111.2519	894.784	-1.1436	0.6084	0.34961	1.254	69.952	442.505	-0.51514	-0.039551	0.0053711	51.298	107.846	771.5764	-0.8584	0.2207	0.3374	-16.636	-22.5973	26.3432	0.15625	0.18848	-0.11279	55.022	138.12	989.49123	-1.5347	0.64404	0.19922
1.296	26.535	177.052	1024.2634	-1.4668	0.51758	0.31689	36.073	3.206	14.4155	-0.31445	-0.12744	0.15234	7.204	156.656	842.0201	-1.0947	0.57715	0.34766	33.873	71.42	530.612187	-0.62549	-0.0078125	0.014648	36.601	172.2663	712.632	-0.80273	0.19678	0.3335	-18.34	7.8333	3.695	0.16773	0.19703	-0.11694	61.797	190.385	947.274	-1.4585	0.62061	0.17773
1.298	32.985	168.678	1011.3326	-1.439	0.51514	0.31104	72.367	12.476	18.9552	-0.2959	-0.12549	0.15381	12.964	90.623	832.7625	-1.0598	0.55151	0.34887	36.563	88.412	568.1398	-0.71314	0.017822	0.018311	44.599	125.14	676.25	-0.76953	0.17822	0.32715	-28.7313	22.6514	-22.46816	0.17725	0.20703	-0.12451	-0.452999999999999	149.91	921.6081	-1.4214	0.59814	0.18213
1.3	-3.921	203.294	972.6725	-1.3965	0.5	0.30713	36.7411	1.1518	8.33226	-0.27148	-0.12451	0.15113	44.433	93.458	789.294	-1.0171	0.52881	0.33984	30.84	16.278	637.424	-0.81641	0.036621	0.026367	76.0968	123.043	688.6332	-0.71289	0.15137	0.31494	-7.401	-21.3904	11.4808	0.18457	0.22168	-0.12451	32.769	168.709	931.366	-1.3511	0.5708	0.16602
1.302	2.477	134.3579	978.073	-1.3574	0.49414	0.29663	15.317	-7.3621	41.342	-0.25293	-0.12354	0.15381	28.602	123.0872	752.861	-0.96045	0.48877	0.3291	41.346	3.567	680.114	-0.95947	0.076172	0.036133	84.1636	162.642	647.814	-0.65796	0.13184	0.30151	4.302	-2.2842	25.6496	0.19043	0.23096	-0.12305	11.355	195.632	871.0057	-1.2927	0.54907	0.16089
1.304	45.244	160.3353	937.914	-1.311	0.48096	0.29199	36.91	38.642	21.1059	-0.22705	-0.12939	0.14746	57.5705	52.945	747.236	-0.92529	0.46729	0.32617	54.581	-44.877	723.424	-1.0371	0.096191	0.045898	91.8237	106.31515	638.731	-0.61084	0.11133	0.28711	5.671	-21.996	12.5916	0.19678	0.24609	-0.12158	-18.41	138.23688	827.8654	-1.2339	0.53174	0.15967
1.306	-25.488	166.5378	868.7439	-1.2505	0.46338	0.28174	-7.131	20.2176	3.093	-0.21143	-0.13477	0.1499	47.453	102.555	733.4152	-0.86523	0.4209	0.30713	39.699	-91.532	799.4086	-1.187	0.13281	0.082031	104.0508	162.258	596.186	-0.54297	0.085449	0.26904	12.094	-14.2582	12.3503	0.18995	0.25708	-0.11573	13.099	178.195	784.058	-1.1602	0.5	0.15088
1.308	19.13	121.624	863.152	-1.2168	0.4541	0.26953	-1.951	18.322275	19.7666	-0.18311	-0.13574	0.13525	49.495	101.2995	720.68	-0.82104	0.38452	0.2981	20.8165	-72.526	829.497	-1.2964	0.1582	0.1189	108.889	161.359	565.596	-0.50635	0.071289	0.25586	27.534	40.611	1.7346	0.18018	0.25928	-0.104	-13.834	149.137	746.06	-1.1206	0.48389	0.14941
1.31	47.5528	164.60314	835.686	-1.1465	0.43359	0.2583	-2.716	13.2613	22.4603	-0.16528	-0.13549	0.12402	100.3657	79.382	696.266	-0.76709	0.34375	0.28223	24.947	-102.068	841.349	-1.394	0.19238	0.17236	89.0826	122.8483	546.874	-0.44189	0.038086	0.23584	31.745	4.6623	10.9748	0.15723	0.26172	-0.088867	10.422	101.655	763.791	-1.043	0.45801	0.13867
1.312	11.66	127.9485	816.18081	-1.094	0.41577	0.25049	-22.991	-27.8737	44.327	-0.15283	-0.13037	0.11426	50.6769	154.767	644.436	-0.70068	0.2876	0.271	6.411	-90.272	840.653	-1.5039	0.22803	0.24414	58.596	176.35	473.503	-0.3916	0.017822	0.22143	43	27.234	6.028	0.14551	0.26367	-0.081055	23.991	144.428	732.797	-0.97583	0.43628	0.13306
1.314	61.56575	124.5782	789.0535	-1.0366	0.39893	0.24121	-0.0890000000000022	9.2081	35.4886	-0.13477	-0.12939	0.10596	53.0432	120.1379	609.3119	-0.6665	0.26514	0.26172	-20.0752	-55.409	833.642	-1.5728	0.2439	0.29834	85.826	128.238	437.56	-0.34229	-0.00048828	0.2041	46.66489	36.36	-26.435	0.11572	0.26367	-0.0625	12.407	81.1604	715.171	-0.91406	0.40723	0.12744
1.316	17.823	158.8575	734.8491	-0.9668	0.37012	0.22852	-8.89	12.5489	7.165	-0.13428	-0.13135	0.10352	79.8713	143.726	561.3579	-0.59326	0.21777	0.25	-3.77994	-95.051	849.524	-1.6289	0.25977	0.34863	69.2861	132.374	410.095	-0.29297	-0.029297	0.18555	57.96751	-5.3687	-4.47	0.094724	0.26587	-0.047363	67.006	89.9074	705.452	-0.82568	0.36963	0.11865
1.318	43.243	129.3501	747.9608	-0.92871	0.35449	0.22217	-18.511	-3.712	34.523	-0.12988	-0.12598	0.10059	45.42	178.808	508.013	-0.54029	0.1836	0.23511	-2.273	-66.904	814.184	-1.6772	0.28271	0.39648	44.959	168.808	385.3306	-0.26367	-0.044434	0.1626	62.64248	30.7808	25.3461	0.064453	0.27002	-0.029297	42.7581	116.0925	689.999	-0.79102	0.34863	0.11279
1.32	82.3254	179.0182	719.49	-0.85596	0.32471	0.21387	-0.224999999999994	19.6419	32.01	-0.12915	-0.125	0.095214	60.381	133.5032	485.738	-0.48682	0.14844	0.22461	-21.9449	-58.593	778.403	-1.6914	0.29688	0.41309	43.144	105.311	391.186	-0.21289	-0.070313	0.13965	45.082	6.6395	24.1695	0.023438	0.27246	0.0014648	18.088	89.9412	660.423	-0.71094	0.29785	0.10449
1.322	-25.4709	189.367	670.5904	-0.80469	0.30566	0.20752	-28.677	-5.8591	7.86	-0.12646	-0.11865	0.09375	29.623	180.517	445.022	-0.41602	0.10889	0.20947	-29.7217	-78.166	792.791	-1.7012	0.33154	0.43018	26.226	158.279	345.949	-0.18091	-0.085938	0.11475	65.1431	-8.1432	31.4023	0.0058594	0.27637	0.0097656	43.56218	163.046	600.01379	-0.66186	0.26441	0.096925
1.324	2.506	161.5906	661.5222	-0.75391	0.28613	0.19873	18.072	4.332	22.796	-0.12305	-0.10986	0.083496	24.323	159.626	428.428	-0.38379	0.088867	0.20068	-16.689	-27.676	799.3066	-1.6924	0.36621	0.44263	25.56	128.88	328.6336	-0.14551	-0.098145	0.094238	56.2441	17.8548	15.404	-0.039063	0.28369	0.03125	13.722	159.471	561.905	-0.60742	0.229	0.086426
1.326	21.9915	185.8778	615.236	-0.68164	0.25732	0.18506	19.678	14.9707	34.0958	-0.11963	-0.10449	0.077148	52.0199	131.1134	409.3479	-0.32861	0.053711	0.18799	-4.975	-48.143	802.53	-1.6753	0.39453	0.44727	18.074	87.5328	326.9694	-0.11035	-0.11621	0.071289	54.3253	-23.593278	42.788	-0.072266	0.28857	0.044678	-4.928	143.04	554.9268	-0.54199	0.18604	0.07666
1.328	-15.845	143.3449	590.5115	-0.646	0.24316	0.1792	-14.008	-29.6331	74.66	-0.12061	-0.09668	0.05957	-3.603	170.469	372.7113	-0.28882	0.029053	0.17383	20.957	-70.528	821.719	-1.6636	0.42334	0.45557	0.463999999999999	136.22	292.0037	-0.092285	-0.12012	0.0625	50.107	2.5064	71.077	-0.11475	0.29395	0.059082	7.568	195.3357	499.0518	-0.50732	0.16064	0.068359
1.33	19.468	142.997	550.4412	-0.57617	0.21094	0.16553	33.348	-13.198	90.174	-0.12769	-0.08374	0.040039	7.845	133.866	359.914	-0.25391	0.00097656	0.1626	31.644	-56.396	813.184	-1.6519	0.43408	0.46484	5.756	98.5533	255.636	-0.06543	-0.13135	0.047852	32.69	48.261	79.397	-0.1792	0.29883	0.066895	-7.385	151.76064	476.2188	-0.44922	0.11719	0.056152
1.332	-22.068	182.40953	457.424	-0.52563	0.19287	0.15405	19.405	-38.2752	62.0862	-0.13379	-0.064453	0.024902	11.007	148.542	352.4608	-0.21045	-0.029297	0.14258	23.85	-121.799	862.269	-1.6387	0.44238	0.4751	2.878	116.9645	232.492	-0.046875	-0.13916	0.028809	13.066	37.8394	128.296	-0.21191	0.31055	0.070801	28.053	163.75	447.108	-0.41162	0.081299	0.047607
1.334	-9.276	138.669	473.677	-0.47461	0.17041	0.14014	34.066	-62.4635	94.6546	-0.15625	-0.040039	0.018066	-14.014	172.575	324.4607	-0.19141	-0.041992	0.13281	12.074	-110.62	917.958	-1.6277	0.4392	0.49244	-42.213	137.814	216.12	-0.036621	-0.14063	0.027344	-11.103	87.733	168.249	-0.29004	0.33105	0.088379	8.136	164.548	407.93	-0.375	0.050293	0.038574
1.336	35.308	157.20705	461.454	-0.40771	0.14014	0.11914	53.86745	-39.379	121.4337	-0.16797	-0.017578	0.012207	10.562	118.629	320.99	-0.15723	-0.071289	0.11768	-6.602	-113.261	935.4748	-1.6226	0.43994	0.51172	-27.008	73.2375	239.7043	-0.024902	-0.146	0.01709	-13.6337	67.778	216.69688	-0.35669	0.34668	0.10279	-6.976	118.272	401.9555	-0.33398	0.011719	0.029297
1.338	-27.6433	142.41	422.633	-0.38184	0.12207	0.11182	13.863	-56.094	146.3692	-0.20068	0.016602	0.013184	-15.623	132.076	301.7313	-0.13013	-0.084717	0.10693	-20.196	-179.574	1010.109	-1.623	0.45703	0.5415	-2.83	104.57	222.052	-0.014649	-0.15039	0.012939	-8.147	55.515	270.003	-0.42725	0.35498	0.12158	32.899	165.478	346.184	-0.31592	-0.0024414	0.021973
1.34	6.786	107.9956	428.2544	-0.31738	0.095215	0.095215	66.036	-12.2742	186.763	-0.23487	0.049317	0.019776	-19.367	109.144	298.7934	-0.098633	-0.10449	0.099121	-27.313	-171.854	1039.595	-1.6348	0.47559	0.55713	-13.734	84.9671	191.5585	-0.0024414	-0.15088	0.00097656	-42.12189	96.901	288.341	-0.51807	0.37988	0.15039	12.277	140.6243	308.606	-0.27588	-0.039551	0.015625
1.342	10.135	156.79	381.967	-0.27222	0.072022	0.079346	57.7817	34.1209	200.305	-0.26904	0.078613	0.02832	12.076	67.1619	312.742	-0.075195	-0.12158	0.086426	-39.376	-212.847	1035.83	-1.6504	0.53613	0.59326	-12.433	64.7685	188.097	0.0083008	-0.15723	-0.01123	-54.438	73.373	347.91	-0.56641	0.39551	0.16406	13.534	119.6843	335.94	-0.25049	-0.06128	0.0075682
1.344	-25.23	148.151	376.0218	-0.23047	0.053711	0.070313	31.089	21.6649	281.872	-0.32764	0.11963	0.020508	-4.939	84.637	271.483	-0.057617	-0.12939	0.068359	-23.75	-248.978	1067.7003	-1.6572	0.58423	0.61133	-11.752	112.04	146.504	0.012695	-0.16113	-0.015625	-46.1279	98.405	402.1889	-0.66016	0.41992	0.18408	1.264	144.131	319.4933	-0.22363	-0.080566	0.0043945
1.346	12.934	139.173	361.6327	-0.17432	0.023926	0.062012	73.905	55.9708	375.2189	-0.36475	0.14307	0.022949	-3.6	62.6736	249.153	-0.03125	-0.14746	0.058105	-16.331	-185.39	1071.8848	-1.6616	0.63721	0.62646	12.03	63.8751	142.6	0.022461	-0.16016	-0.026855	-54.011	107.509	422.892	-0.72364	0.42944	0.18702	-38.356	83.3635	321.3411	-0.19092	-0.10889	-0.003418
1.348	-30.335	163.838	300.945	-0.14941	0.0092773	0.058105	40.746	69.4699	443.621	-0.4541	0.19824	0.013672	25.863	84.52468	215.9341	-0.0080569	-0.16113	0.045411	-18.326	-208.658	1124.523	-1.6636	0.70557	0.63672	25.295	70.7567	121.682	0.036621	-0.1648	-0.036622	-39.5373	36.012	468.494	-0.79834	0.44775	0.19287	1.572	95.926	310.427	-0.17432	-0.12549	-0.0053711
1.35	-13.358	124.2684	298.842	-0.10059	-0.018066	0.050781	30.328	73.9462	542.91	-0.53613	0.24512	0.0058594	2.515	110.331	173.8412	0.0073242	-0.17139	0.03418	34.861	-189.4098	1144.899	-1.6538	0.729	0.62891	22.344	88.997	100.213	0.04541	-0.17139	-0.04834	-59.6212	31.71	518.1379	-0.91162	0.50244	0.21387	-15.463	94.4972	275.835	-0.14697	-0.1416	-0.019531
1.352	18.217	136.359	285.1	-0.065918	-0.038086	0.046631	71.5697	96.737	626.1238	-0.64209	0.29639	-0.0058594	34.321	92.5034	186.0712	0.032227	-0.18848	0.014648	56.3564	-143.383	1107.4306	-1.6187	0.74561	0.625	49.4747	42.37721	112.56732	0.055664	-0.17285	-0.060547	-59.184	5.1403	580.0368	-0.9668	0.53857	0.23486	-24.67	54.158	279.505	-0.13159	-0.15699	-0.024658
1.354	-24.969	134.482	263.072	-0.038086	-0.051758	0.043457	-4.85	46.769	699.655	-0.82568	0.37402	-0.023926	30.014	114.162	168.724	0.044434	-0.19092	0.0092773	69.0535	-175.2978	1133.273	-1.5835	0.73926	0.6128	72.9516	76.217	115.319	0.056152	-0.18018	-0.064453	-23.0619	-18.1978	674.377	-1.0879	0.60352	0.27881	21.159	101.0827	244.104	-0.12207	-0.16699	-0.02832
1.356	10.145	112.817	273.011	-0.0019531	-0.070801	0.037109	15.955	5.722	796.2599	-0.93359	0.42285	-0.022461	27.555	99.661	157.6686	0.05957	-0.20898	-0.01123	85.8064	-98.196	1135.828	-1.5527	0.7124	0.604	75.5429	75.1	92.889	0.067383	-0.18604	-0.080078	-5.129	2.615	724.909	-1.167	0.64258	0.31592	-13.354	86.209	186.681	-0.10938	-0.17969	-0.029785
1.358	8.176	138.659	229.973	0.017578	-0.083008	0.034668	19.589	-15.327	825.066	-1.1616	0.53369	0.01709	68.86828	68.8562	183.703	0.072998	-0.21924	-0.026612	105.627	-71.177	1143.39	-1.5386	0.66748	0.58496	69.70111	45.761	67.1266	0.077881	-0.19165	-0.087403	17.289	-56.168	764.0881	-1.2515	0.67822	0.35107	1.762	90.767	168.678	-0.10596	-0.18262	-0.029297
1.36	2.005	111.136	206.4046	0.044434	-0.094727	0.027832	-52.079	-66.927	879.962	-1.4189	0.67188	0.10986	35.03	91.594	146.112	0.087402	-0.22998	-0.042969	97.649	-89.759	1181.9606	-1.5332	0.6543	0.58057	46.102	71.23	50.806	0.08252	-0.19824	-0.094727	15.266	-75.6564	823.608	-1.3569	0.72705	0.4043	-4.512	113.5415	158.3	-0.093262	-0.18555	-0.029785
1.362	44.233	104.51	188.7064	0.063232	-0.10229	0.025635	-14.1012	-60.073	942.169	-1.5464	0.75439	0.18652	61.9394	61.9372	135.57	0.10986	-0.24316	-0.063477	63.4858	-19.884	1158.6078	-1.5288	0.62744	0.54688	69.4736	17.8172	52.4105	0.094727	-0.19873	-0.10498	23.093	-72.0772	839.2226	-1.4082	0.75	0.42627	-11.715	82.555	165.19	-0.077636	-0.18848	-0.029053
1.364	17.509	124.649	171.455	0.083496	-0.11279	0.020508	-68.9823	-58.2683	934.3388	-1.7793	0.92773	0.3833	66.8306	71.4383	101.1705	0.11719	-0.25146	-0.070313	34.131	-104.619446	1177.7417	-1.5346	0.61914	0.51074	73.0896	25.3059	47.7245	0.10449	-0.19531	-0.10596	45.971	-119.431	875.63418	-1.4824	0.78906	0.47314	36.094	112.797	154.688	-0.06543	-0.18506	-0.025879
1.366	43.6386	101.972	178.877	0.093262	-0.12451	0.018555	-72.8142	-89.85	961.735	-1.9197	1.0364	0.54102	15.02	80.655	67.7801	0.13623	-0.2627	-0.091309	51.073	-119.7175	1218.0447	-1.543	0.60742	0.46729	31.0203	43.1979	18.08	0.10938	-0.20605	-0.11377	73.507	-76.083	881.218	-1.5147	0.80713	0.50244	29.4936	104.184	117.0842	-0.064941	-0.18506	-0.011719
1.368	36.23122	129.8776	167.106	0.098145	-0.12988	0.016113	-27.083	-81.74	952.525	-2.0371	1.1289	0.67822	58.2243	35.7715	72.2759	0.14868	-0.26636	-0.10791	41.628	-88.7697	1210.425	-1.5757	0.6001	0.41406	57.3934	18.1924	40.82931	0.1145	-0.20776	-0.11792	94.1897	-92.9318	860.629	-1.5352	0.81445	0.53564	21.444	79.465	126.699	-0.071777	-0.18652	0.0039063
1.37	-10.462	112.728	157.5188	0.097168	-0.14307	0.02002	-85.177	-110.638	937.623	-2.1118	1.1646	0.78711	48.0056	48.0345	52.92482	0.16016	-0.271	-0.12549	57.094	-147.604	1248.481	-1.6094	0.59375	0.39404	46.7134	49.148	37.239	0.11865	-0.21143	-0.11914	117.2363	-140.112	860.891	-1.5488	0.80859	0.55713	45.0051	101.651	115.95	-0.088867	-0.20801	0.035156
1.372	42.687	91.475	152.994	0.095703	-0.14819	0.023926	-59.858	-125.193	949.242	-2.1089	1.1528	0.80469	23.744	27.7407	59.50126	0.17383	-0.2793	-0.13818	47.348	-99.449	1261.172	-1.7129	0.57178	0.37939	13.088	17.1154	39.647	0.11377	-0.21338	-0.1123	119.5143	-119.96	811.746	-1.5503	0.80908	0.57178	7.004	76.9651	84.461	-0.092774	-0.22852	0.056397
1.374	44.497	99.573	128.494	0.09375	-0.15625	0.030762	-85.781	-80.957	877.457	-2.0327	1.0728	0.73438	49.3583	-4.937	79.909	0.17578	-0.27832	-0.1416	50.744	-118.3139	1262.66	-1.8196	0.56079	0.38428	19.737	-3.87369	34.1008	0.10986	-0.21533	-0.11475	127.101	-155.446	772.154	-1.564	0.80322	0.60156	31.122	76.5123	81.154	-0.090332	-0.23047	0.062988
1.376	-1.102	67.786	111.313	0.093262	-0.16211	0.044434	-121.959	-67.6685	847.7742	-1.9165	0.98681	0.61328	13.109	17.8112	63.483	0.18164	-0.27588	-0.14746	70.829	-176.728	1325.485	-1.9453	0.55078	0.39502	-10.298	20.25546	6.0565	0.098633	-0.2168	-0.10498	126.7751	-122.663	760.7365	-1.5752	0.80664	0.6123	28.225	78.6192	48.255	-0.051758	-0.19531	0.035156
1.378	45.5555	65.044	105.029	0.089844	-0.16357	0.05127	-48.156	-25.28	859.901	-1.7363	0.89258	0.46094	22.634	-9.0224	85.426	0.17896	-0.27466	-0.15015	70.081	-111.876	1319.609	-2.105	0.5415	0.40625	23.117	-15.043	30.384	0.096679	-0.21411	-0.10229	94.3312	-63.584	748.953	-1.5679	0.80713	0.61426	9.99	22.126	64.0871	-0.020996	-0.18262	0.026855
1.38	18.201	67.255	73.8868	0.091309	-0.16455	0.058105	-54.00381	-7.252	833.766	-1.4639	0.74609	0.25244	29.262	13.865	52.99261	0.17432	-0.27148	-0.1499	55.02	-143.375	1331.8	-2.1719	0.53125	0.41748	3.964	-0.3902	26.419	0.088867	-0.2124	-0.099609	68.7601	-75.546	762.608	-1.5386	0.82275	0.61523	36.393	30.4566	72.505	0.021484	-0.16309	0.018066
1.382	15.716	36.9624	71.7243	0.1001	-0.16064	0.059082	-8.241	-27.364	876.675	-1.3276	0.67334	0.15625	-16.523	26.7317	27.7855	0.16406	-0.26367	-0.14697	67.126	-109.034	1377.16	-2.2847	0.5083	0.42676	-26.284	11.3839	1.5192	0.081543	-0.20752	-0.088867	65.3321	-35.878	786.692	-1.5176	0.83691	0.61035	7.928	22.2099	39.672	0.031982	-0.16382	0.020264
1.384	19.925	57.9904	49.517	0.10205	-0.15576	0.058594	57.6527	-19.118	884.689	-1.0952	0.54834	-0.0024414	18.06	-0.508699999999999	31.2091	0.15332	-0.26172	-0.14795	45.995	-35.477	1346.7169	-2.3533	0.49218	0.43286	-10.168	-8.34703	-8.856	0.079102	-0.20508	-0.091309	39.4564	-44.957	822.39	-1.4683	0.854	0.6084	16.267	-7.3365	56.242	0.031738	-0.16748	0.025391
1.386	-30.169	38.2156	32.022	0.11963	-0.15576	0.063965	-3.558	-26.095	905.952	-1.0161	0.50488	-0.082275	-9.633	38.294	-4.28569	0.13281	-0.25293	-0.13623	15.201	-68.3831	1337.472	-2.3984	0.47949	0.44189	-27.992	23.3646	-4.0491	0.080078	-0.20508	-0.088867	33.866	-100.113	920.41	-1.4236	0.85278	0.60083	24.046	16.6386	50.965	0.01709	-0.16797	0.022949
1.388	40.694	43.244	68.6574	0.13647	-0.15235	0.054199	38.177	-73.439	1003.173	-0.99805	0.50391	-0.11865	-7.088	20.8798	-4.1429	0.11938	-0.2417	-0.12939	12.527	-5.379	1342.972	-2.4292	0.48682	0.44092	-36.791	7.5092	19.5166	0.06958	-0.20337	-0.10034	37.9809	-77.481	964.2189	-1.376	0.84766	0.59082	5.635	-0.1613	30.4869	0.023194	-0.16577	0.014893
1.39	13.684	46.55	53.738	0.1543	-0.14697	0.047363	46.0198	-85.324	1006.155	-1.0151	0.56104	-0.104	13.378	6.93	1.9768	0.099121	-0.23291	-0.11572	12.439	4.066	1328.983	-2.439	0.49951	0.44238	-19.745	1.388791	29.246	0.062012	-0.20068	-0.1084	24.9516	-123.005	999.4225	-1.3223	0.84473	0.56885	31.652	22.573	31.9773	0.032715	-0.16797	0.014648
1.392	-30.17	14.82438	57.152	0.17969	-0.14209	0.03125	8.697	-140.0544	1039.515	-1.021	0.58545	-0.083984	-26.227	24.612	-13.4083	0.066895	-0.22119	-0.11426	19.808	-36.344	1374.3686	-2.4414	0.5166	0.44629	-23.256	41.883	8.0773	0.078125	-0.20508	-0.086914	13.337	-144.627	1040.643	-1.2949	0.84668	0.55518	31.384	47.391	1.789	0.038574	-0.16895	0.014648
1.394	31.9427	14.4333	53.806	0.19043	-0.14404	0.021973	53.0195	-183.387	1086.4869	-1.0107	0.61035	-0.060059	12.782	-1.6105	12.5	0.047852	-0.21167	-0.09839	36.462	33.0057	1358.8268	-2.4402	0.52563	0.45336	-19.844	-10.8171	17.4858	0.086426	-0.20068	-0.07959	6.385	-147.27301	1026.6353	-1.2515	0.84619	0.52539	-4.034	21.9274	26.0194	0.038086	-0.16992	0.0078125
1.396	4.998	10.6325	28.118	0.2085	-0.146	0.0058594	11.499	-196.836	1073.106	-0.99975	0.62036	-0.076172	4.728	14.3266	7.075	0.032715	-0.20264	-0.092773	41.848	-20.009	1354.5325	-2.4409	0.52979	0.46484	7.978	3.9363	21.9696	0.079102	-0.19922	-0.069336	-15.533	-227.153	1024.09	-1.2321	0.84009	0.49145	16.408	38.28	41.655	0.041504	-0.17383	6.5919e-14
1.398	-5.79499999999999	-6.996	27.4031	0.2168	-0.14648	-0.010986	-2.71	-245.286	1148.6	-0.98975	0.61963	-0.11426	-32.261	17.5182	3.293	0.012207	-0.19971	-0.081055	70.488	-22.09	1403.598	-2.4551	0.52734	0.48486	-6.605	5.6722	-1.52683	0.072265	-0.19677	-0.062256	-3.845	-226.805	1034.855	-1.2202	0.83838	0.44922	-5.033	21.1268	9.8562	0.025878	-0.17383	0.0046387
1.4	20.664	19.0014	-6.764	0.2168	-0.146	-0.020996	49.876	-223.281	1163.293	-0.97217	0.64111	-0.18115	38.176	-1.5595	20.6577	0.0019531	-0.19629	-0.081055	95.0648	14.004	1393.367	-2.4546	0.53174	0.49951	27.24	-10.350124	-9.007	0.062012	-0.19287	-0.056152	-37.014	-211.85	1031.746	-1.2163	0.83447	0.39746	-6.728	-3.1349	9.4164	0.011719	-0.17676	0.0043945
1.402	-32.062	13.8559	-24.852	0.21338	-0.14502	-0.036621	14.45	-199.249	1157.687	-0.96045	0.65576	-0.21875	15.146	20.6242	2.1211	-0.020996	-0.19775	-0.069824	81.74	-58.4668	1383.692	-2.4741	0.53174	0.52832	38.025	38.476	-5.0492	0.051758	-0.18506	-0.045898	-77.8275	-244.921	1110.3092	-1.2183	0.83252	0.36621	28.953	21.1773	-0.6669	-0.013184	-0.19092	0.0068359
1.404	18.556	7.9866	4.5674	0.20947	-0.146	-0.047852	65.35	-224.243	1204.491	-0.93164	0.68945	-0.27734	1.276	5.913	11.0907	-0.046387	-0.19263	-0.056152	118.814	-20.015	1387.8275	-2.4771	0.53418	0.54395	29.789	12.6819	14.258	0.044922	-0.17969	-0.043457	-68.5655	-191.9116	1143.85	-1.2422	0.82227	0.3374	-19.927	2.72342	4.3292	-0.030273	-0.19482	0.010742
1.406	17.074	9.0372	14.7081	0.18555	-0.14844	-0.053223	94.204	-162.442	1180.401	-0.91382	0.71313	-0.2998	57.1747	2.4036	0.5767	-0.071289	-0.18555	-0.043945	73.8868	-22.3823	1366.149	-2.4766	0.53125	0.55566	55.8626	7.3128	33.788	0.025879	-0.1626	-0.030273	-60.594	-186.84493	1139.6065	-1.2583	0.80664	0.34033	8.88	14.9141	21.01504	-0.064941	-0.20215	0.01709
1.408	-6.065	-25.63363	33.774	0.15967	-0.15307	-0.05835	78.1218	-149.065	1180.37126	-0.90625	0.72656	-0.30664	14.52	19.247	-1.3992	-0.10791	-0.17676	-0.026855	53.408	-68.015	1418.951	-2.4565	0.5415	0.57568	48.9956	27.7848	14.9867	0.0041504	-0.14917	-0.017822	-22.629	-164.469	1176.8582	-1.2759	0.79736	0.35254	21.121	26.826	-18.7823	-0.086914	-0.20435	0.021729
1.41	47.6967	-15.88914	31.72	0.12451	-0.15186	-0.055176	121.367	-107.382	1203.169	-0.93311	0.73486	-0.29443	56.8915	-3.9559	23.5955	-0.12695	-0.17139	-0.01123	88.4812	16.2267	1404.291	-2.4448	0.54248	0.57422	65.3785	-22.40073	25.13828	-0.021973	-0.13818	-0.0043945	-15.673	-73.328	1163.572	-1.2944	0.78369	0.3623	1.24	-11.081	3.684	-0.11426	-0.20801	0.03418
1.412	19.75	2.7086	2.645	0.072754	-0.146	-0.044922	71.7527	-30.043	1180.797	-0.95898	0.74023	-0.27979	59.9319	10.23513	27.83472	-0.1499	-0.15869	-0.00097656	72.6667	-40.7805	1387.303	-2.4175	0.5376	0.57617	63.2409	-3.2831	20.7028	-0.064941	-0.12305	0.020996	-16.129	-73.551	1184.66	-1.2959	0.7832	0.35938	39.577	6.7426	42.29	-0.14648	-0.21436	0.046387
1.414	30.849	-14.464	19.2288	0.05127	-0.14355	-0.034668	60.943	-41.851	1205.39	-1.0347	0.75244	-0.24463	22.943	13.5562	16.263	-0.16724	-0.14111	0.0053711	85.6054	-40.3879	1407.057	-2.3864	0.5398	0.57398	40.803	11.2858	19.0754	-0.085938	-0.11035	0.039063	14.137	-29.426	1196.1245	-1.2793	0.77344	0.3208	19.801	-8.90283	38.92	-0.16357	-0.21484	0.049316
1.416	47.03	23.5336	-5.058	0	-0.13086	-0.023438	63.622	-31.213	1221.3055	-1.1014	0.7688	-0.22778	64.0944	4.0452	33.1763	-0.17725	-0.1333	0.017578	73.8281	21.123	1357.73	-2.355	0.54053	0.57031	75.7481	-6.0063	18.2536	-0.12109	-0.090332	0.053711	22.006	-14.673	1182.071	-1.2495	0.77002	0.26025	26.33	-17.7522	40.212	-0.19385	-0.2124	0.0625
1.418	-5.88	17.91326	-18.652	-0.028564	-0.13208	-0.013428	-25.057	-27.701	1204.1501	-1.166	0.79688	-0.21875	46.11	41.459	23.0984	-0.19531	-0.12109	0.026855	63.247	-5.526	1354.06881	-2.3198	0.54346	0.57031	45.271	38.5506	-12.658	-0.14258	-0.072754	0.070069	27.7485	-99.137	1220.407	-1.2319	0.771	0.23438	50.6706	8.9915	23.401	-0.2107	-0.20508	0.069824
1.42	50.029	10.3971	11.932	-0.058105	-0.12646	-0.0039063	-12.746	-87.63586	1239.1831	-1.2417	0.84619	-0.20361	33.571	25.6011	13.5193	-0.20264	-0.11719	0.032227	92.391	76.779	1330.313	-2.2983	0.54736	0.56836	41.882862	23.3513	1.274	-0.16016	-0.056152	0.086426	52.7663	-85.479	1240.05	-1.2202	0.76807	0.15869	6.283	-10.2894	25.8407	-0.2207	-0.19824	0.075684
1.422	50.7107	7.692	10.9959	-0.088379	-0.13086	0.01123	9.896	-51.997	1248.4183	-1.2803	0.875	-0.20898	63.699	28.478	8.3284	-0.21826	-0.1084	0.047363	65.691	95.187	1290.21	-2.2539	0.56152	0.56104	49.535	8.1816	28.46915	-0.16846	-0.040039	0.091309	42.939	-120.539	1234.0569	-1.2344	0.77466	0.11695	28.233	-1.1491	24.02586	-0.22803	-0.19385	0.088379
1.424	0.335999999999999	-13.4498	21.5379	-0.09668	-0.12939	0.01416	-16.159	-95.5897	1258.0096	-1.3921	0.93604	-0.21924	23.316	42.116	0.1229	-0.22144	-0.098631	0.053467	66.055	43.3325	1308.742	-2.2222	0.56445	0.55518	21.89	34.98	5.5305	-0.16602	-0.029297	0.095703	27.575	-162.259	1263.0753	-1.2739	0.79932	0.091797	35.3642	21.2807	-7.1442	-0.2251	-0.18164	0.089355
1.426	40.545	2.8591	29.893	-0.10986	-0.13232	0.025879	37.95	-136.699	1289.9856	-1.4959	0.99292	-0.22021	34.965	21.3053	14.3804	-0.22412	-0.088379	0.059082	79.7566	113.278	1284.3425	-2.1812	0.56689	0.54492	31.476	-1.3372	25.1566	-0.15186	-0.01709	0.094238	25.3486	-114.93077	1258.9111	-1.3667	0.85303	0.072266	25.505	0.40784	2.912	-0.20752	-0.18311	0.1001
1.428	32.528	18.7583	-11.3744	-0.12476	-0.13355	0.035157	36.577	-121.876	1269.5451	-1.6084	1.0605	-0.20215	37.615	21.847	23.037	-0.22266	-0.084961	0.061523	36.232	58.369	1293.7713	-2.1284	0.57471	0.53516	26.469	15.6924	14.1072	-0.12793	-0.0090332	0.080566	16.9514	-170.35	1271.8418	-1.4204	0.88721	0.083008	63.4568	30.059	16.1055	-0.1936	-0.18261	0.1023
1.43	42.038	-1.708	14.8754	-0.12744	-0.13477	0.04834	39.82	-180.293	1308.535	-1.7827	1.1655	-0.14063	-18.332	18.8532	19.9684	-0.21729	-0.072754	0.0625	32.721	55.413	1318.681	-2.0972	0.57666	0.52734	-3.244	17.24868	1.7633	-0.097656	-0.0058594	0.063965	70.095	-180.861	1329.004	-1.5444	0.95459	0.11084	23.714	18.4295	13.4932	-0.17529	-0.18213	0.11084
1.432	44.266	22.856	-8.297	-0.12451	-0.14063	0.06543	80.317	-158.406	1348.508	-1.896	1.229	-0.090332	30.739	-1.555701	40.5789	-0.20264	-0.069824	0.058594	11.582	114.548	1274.238	-2.0391	0.57715	0.51221	-3.54	-9.3788	32.2172	-0.050781	-0.0073242	0.038574	57.379	-141.922	1325.901	-1.6331	1.012	0.15064	25.465	1.789	24.8842	-0.14307	-0.18848	0.12109
1.434	-3.499	14.5916	-29.1871	-0.12646	-0.14111	0.071777	46.345	-115.448	1318.935	-2.1284	1.3735	0.030762	15.023	19.7473	29.249	-0.18212	-0.066407	0.055908	-8.915	43.337	1256.0362	-1.9968	0.58423	0.49975	-15.678	27.1186	-4.244	-0.021484	-0.01416	0.027344	36.262	-177.895	1370.294	-1.707	1.0664	0.19678	66.547	39.334	-0.9646	-0.12549	-0.19141	0.11328
1.436	26.401	13.7792	-2.705	-0.11816	-0.14355	0.084473	59.998	-128.3435	1339.399	-2.2969	1.4692	0.12573	-4.008	2.324	34.732	-0.15967	-0.062988	0.046387	-0.755000000000003	83.001	1228.4474	-1.9526	0.58545	0.49121	-29.306	21.7145	-5.951	0.025391	-0.024902	-0.0087891	59.373	-102.7883	1392.768	-1.7852	1.1445	0.26123	23.581	-2.5021	6.9643	-0.090332	-0.19482	0.11084
1.438	26.182	39.3	-0.6639	-0.11474	-0.14184	0.088379	79.505	-50.923	1340.553	-2.4512	1.5547	0.21191	23.69	3.8337	32.554	-0.11523	-0.069336	0.027832	-17.682	79.047	1177.528	-1.9058	0.58643	0.48145	-28.928	21.162	22.32	0.048584	-0.040528	-0.028809	22.40253	-77.682	1363.483	-1.812	1.187	0.28516	24.299	-6.4959	34.3186	-0.071289	-0.19043	0.10572
1.44	2.106	20.8457	21.9617	-0.11377	-0.14551	0.099609	50.13	-26.765	1313.889	-2.6011	1.6372	0.30908	-34.972	14.7533	6.09791	-0.091309	-0.069336	0.01123	-34.567	30.619	1176.444	-1.8682	0.58789	0.46875	-34.725	39.282	12.6807	0.070313	-0.049805	-0.047852	6.098	-94.591	1375.937	-1.8452	1.2485	0.3252	15.617	13.2799	3.50953	-0.04834	-0.18604	0.095703
1.442	18.033	15.7851	34.561	-0.10059	-0.13428	0.10938	72.115	-18.3223	1320.662	-2.6484	1.6621	0.33447	-1.162	-12.7538	36.482	-0.046387	-0.083008	-0.0014648	4.808	115.413	1147.1854	-1.8223	0.58984	0.45557	-9.957	-10.8823	30.165	0.080078	-0.063965	-0.058105	5.052	-20.141	1343.4876	-1.8628	1.2915	0.35352	0.685000000000002	2.9139	-3.8527	-0.023438	-0.17822	0.089844
1.444	-18.074	30.7367	-1.4637	-0.10254	-0.13672	0.11768	67.696	38.4954	1272.639	-2.6816	1.6836	0.33545	3.079	-1.1683	22.3222	-0.012696	-0.090577	-0.023682	-3.818	72.3569	1132.2326	-1.769	0.59326	0.43896	-11.475	-7.0086	33.831	0.08252	-0.064941	-0.06543	-34.9035	-53.641	1341.3245	-1.8823	1.3286	0.37305	27.997	32.998	8.0159	-0.016602	-0.17334	0.091309
1.446	17.323	11.398	16.4008	-0.09375	-0.12451	0.12158	47.462	17.50295	1292.379	-2.6098	1.665	0.29101	-27.862	-0.236000000000001	18.3182	0.019043	-0.098633	-0.043945	14.242	80.5819	1123.016	-1.7422	0.59473	0.43115	-4.785	-1.12	16.395	0.080566	-0.072266	-0.070313	-53.0344	-38.444	1375.4658	-1.9063	1.3711	0.40918	-15.473	6.1086	7.6447	0.0043945	-0.15576	0.086914
1.448	21.829	28.9252	14.9864	-0.086425	-0.11816	0.12793	122.4157	44.4208	1314.737	-2.5249	1.6431	0.25781	32.2712	-21.8967	34.3658	0.04541	-0.1084	-0.062988	17.884	147.119	1060.9085	-1.6851	0.59619	0.41211	17.348	-31.9219	24.453	0.071533	-0.071778	-0.072998	-71.252	7.31	1347.11	-1.9238	1.3906	0.41748	-3.569	-28.212	31.9311	0.010742	-0.15185	0.091064
1.45	-33.795	18.65047	-14.3859	-0.079102	-0.11279	0.12598	94.27	64.519	1273.153	-2.437	1.6138	0.20313	-9.039	8.7576	22.528	0.057129	-0.10986	-0.075684	21.79	102.3944	1045.069	-1.6316	0.59301	0.40063	-6.286	12.3529	6.474	0.061523	-0.068359	-0.074219	-98.829	-50.681	1343.803	-1.9502	1.4336	0.43994	20.719	7.6833	13.956	0.02002	-0.146	0.08252
1.452	10.679	18.0818	11.28	-0.071777	-0.10059	0.125	134.4894	25.6592	1308.8714	-2.377	1.5918	0.16309	-5.849	-1.6806	28.2073	0.074219	-0.10889	-0.089355	26.229	171.724	1027.1746	-1.5801	0.58789	0.38232	-2.683	25.696	-7.937	0.046875	-0.063965	-0.074219	-74.927	-13.6458	1361.33	-1.981	1.4629	0.46338	10.939	-4.0098	-4.0394	0.023926	-0.12842	0.082031
1.454	20.213	40.709	-13.9819	-0.067871	-0.1001	0.12402	182.105	41.754	1324.9356	-2.2573	1.5337	0.11279	47.2	13.1062	25.6469	0.083985	-0.10864	-0.095947	15.786	182.465	979.664	-1.498	0.58105	0.35889	47.781	32.662	9.774	0.037598	-0.060547	-0.076172	-84.736	-20.26511	1360.505	-2.0117	1.4844	0.48486	16.396	5.306	33.855	0.02832	-0.12402	0.07959
1.456	-6.665	20.2321	23.027	-0.064941	-0.094727	0.12744	103.5311	20.812	1318.382	-2.2226	1.5229	0.093015	5.024	31.536	-10.0226	0.085449	-0.104	-0.1084	9.003	137.7822	981.597	-1.4585	0.58057	0.34277	29.418	42.432	17.5576	0.023438	-0.056152	-0.080566	-77.494	-66.786	1411.944	-2.0464	1.5122	0.51318	3.45099999999999	23.1292	16.4035	0.034668	-0.1084	0.074219
1.458	40.5623	17.3095	48.012	-0.061768	-0.083985	0.12134	132.585	-16.315	1359.4518	-2.1992	1.5156	0.07666	32.889	-6.142153	7.133	0.083008	-0.096191	-0.11426	15.149	194.145	933.031	-1.3647	0.56299	0.31738	39.0428	-10.0465	39.811	0.0068359	-0.04834	-0.089355	-43.6678	-13.463	1410.138	-2.0674	1.5264	0.5249	0.423000000000002	2.2835	5.127	0.038819	-0.097656	0.071777
1.46	-4.607	8.1428	40.441	-0.061035	-0.07666	0.12256	112.2894	16.0564	1332.678	-2.1445	1.4844	0.060547	54.13	10.9747	14.1155	0.083008	-0.095215	-0.11279	16.854	135.6644	921.8646	-1.2995	0.55542	0.29419	53.629	-1.4618	38.779	0.0058594	-0.04248	-0.09668	-68.076	-64.931	1417.239	-2.1011	1.563	0.55664	34.4359	43.278	-12.1482	0.04248	-0.084961	0.064453
1.462	12.881	-13.5331	62.094	-0.069336	-0.064453	0.11621	63.824	-22.3618	1356.3497	-2.103	1.4595	0.044922	25.016	11.7434	5.85132	0.06543	-0.081543	-0.11572	26.79	132.73321	919.092	-1.2363	0.54297	0.27051	55.4668	-2.177	28.088	-0.0078125	-0.032227	-0.10449	-36.967	-62.6075	1445.46	-2.118	1.5901	0.57105	15.379	39.218	-6.386021	0.042969	-0.062012	0.059082
1.464	58.8377	7.938	44.296	-0.074707	-0.056152	0.11475	91.995	-11.854	1370.258	-2.0308	1.4224	0.020508	77.1845	-18.6608	35.7759	0.058838	-0.068359	-0.11817	40.7686	173.89	859.55908	-1.1504	0.52246	0.24316	81.0237	-42.6378	62.408	-0.024414	-0.024903	-0.11816	-20.0249	-8.929	1405.204	-2.1348	1.6133	0.57275	5.012	9.5823	43.8581	0.044434	-0.055664	0.057617
1.466	-5.338	-9.363	38.3351	-0.091309	-0.036621	0.1123	49.752	23.573	1310.06	-1.9775	1.3955	0.0039062	40.8535	-3.1618	14.79358	0.04834	-0.060059	-0.12061	13.482	103.572	839.024	-1.1133	0.50879	0.23096	54.9461	-3.081	36.817	-0.045898	-0.010254	-0.12842	-33.7658	-59.114	1392.7668	-2.127	1.6348	0.56836	26.149	32.6184	31.279	0.033691	-0.030762	0.054199
1.468	27.758	-21.0028	65.4792	-0.1145	-0.021728	0.1106	52.202	-3.69	1317.693	-1.9351	1.3657	-0.0073242	24.538	-34.071	31.79949	0.024902	-0.039551	-0.12207	37.8068	143.152	809.3236	-1.0327	0.49268	0.20898	44.3578	-19.5203	30.394	-0.085449	0.0068359	-0.14941	2.178	7.224	1374.0343	-2.1245	1.6431	0.56055	17.461	3.4888	2.0867	0.025391	-0.014893	0.058106
1.47	19.715	-4.61169	66.177	-0.14014	0.0019531	0.10791	69.527	64.286	1305.21	-1.8745	1.312	-0.019043	60.65677	-21.5651	37.1665	0.010742	-0.030762	-0.12012	30.61808	139.138	784.903268	-0.96973	0.47608	0.19507	55.4524	-20.5235	63.374	-0.10938	0.02002	-0.146	-19.5634	30.515	1330.272	-2.0977	1.6504	0.55176	31.265	13.6532	16.5351	0.013672	0	0.061035
1.472	12.684	-13.718	110.5845	-0.17627	0.03418	0.11377	6.743	90.69	1270.1371	-1.8496	1.293	-0.024902	30.724	-9.557	7.846	-0.017578	-0.0097656	-0.11572	12.08	100.9827	777.4678	-0.92188	0.45898	0.18262	38.607	11.955	101.9224	-0.16504	0.042969	-0.13477	-6.9949	6.585	1339.048	-2.0817	1.6497	0.54174	42.993	16.336	25.0194	-0.0053711	0.032715	0.057129
1.474	70.674	-15.97009	168.0155	-0.20166	0.054199	0.11621	55.728	87.33	1273.9357	-1.7988	1.2598	-0.044922	36.819	-30.5355	32.18	-0.04126	0.0029297	-0.11524	25.9358	175.183	747.6941	-0.84766	0.4375	0.17334	38.9185	-34.128	164.1731	-0.21753	0.066162	-0.12036	33.5552	83.9857	1329.1462	-2.0508	1.6484	0.54248	22.453	-24.941	40.8536	-0.019531	0.044922	0.065918
1.476	21.124	-5.9478	191.9543	-0.25781	0.090332	0.12598	51.78	143.794	1234.2729	-1.75	1.2349	-0.054688	29.946	-2.7185	33.594	-0.069336	0.021484	-0.11182	-9.491	141.5645	732.8458	-0.81055	0.42578	0.16455	50.441	-13.1667	201.773	-0.27588	0.089355	-0.10254	-1.3786	43.166	1318.7435	-2.0171	1.645	0.54492	42.193	11.2244	14.581	-0.037598	0.076172	0.069824
1.478	-6.836	-7.59	251.525	-0.30078	0.11255	0.13134	24.992	118.753	1222.241	-1.6929	1.2095	-0.062988	25.628	-1.557	59.599	-0.11572	0.05127	-0.10986	4.991	152.0844	731.91	-0.74609	0.40381	0.15967	21.66	13.2247	224.766	-0.36475	0.12207	-0.071777	40.7297	67.2517	1348.8394	-2.0015	1.6411	0.54492	33.2347	6.1613	-3.677	-0.052246	0.09888	0.074463
1.48	22.666	43.175	256.933	-0.35156	0.13721	0.13721	55.351	133.964	1233.69425	-1.5977	1.1738	-0.099609	58.4837	-23.6331	128.5498	-0.14014	0.069824	-0.099121	-15.7209	203.846	675.62	-0.7002	0.38354	0.15625	19.773	1.702	291.0847	-0.4082	0.1499	-0.056641	64.6	123.957	1312.43437	-1.9429	1.6157	0.53613	33.683	-9.90134	73.8614	-0.067871	0.11816	0.076172
1.482	-14.4191	64.152	284.6344	-0.41602	0.16895	0.15186	-0.179000000000002	168.004	1194.877	-1.5527	1.1602	-0.11523	40.088	12.292	143.2526	-0.19287	0.10254	-0.085449	-37.71237	143.3518	652.277	-0.65234	0.36523	0.15479	21.66	73.0379	341.4517	-0.50781	0.18115	-0.029297	43.6639	73.771	1299.151	-1.8809	1.5918	0.52222	46.2719	15.3375	92.12	-0.089844	0.14551	0.07666
1.484	7.907	67.3796	352.6837	-0.45361	0.18701	0.15527	23.612	124.809	1210.719	-1.4805	1.1367	-0.1416	38.231	7.4703	188.963	-0.24097	0.12696	-0.06665	-20.0487	184.755	613.629	-0.59277	0.33594	0.14502	-0.696999999999996	80.13071	393.989	-0.58984	0.20947	-0.005371	76.757	127.887	1291.956	-1.8179	1.5649	0.50146	10.014	10.3719	99.003	-0.10254	0.15674	0.073242
1.486	-19.9916	93.624	388.281	-0.53564	0.22461	0.1748	62.2173	139.7454	1193.27	-1.4131	1.1016	-0.146	52.873	32.7573	246.517	-0.29736	0.146	-0.04834	-35.9653	168.2812	574.346	-0.56445	0.3252	0.146	-0.779999999999994	82.5075	486.484	-0.68115	0.24072	0.02002	18.1792	112.396	1266.317	-1.7163	1.5161	0.47314	2.125	51.157	105.4678	-0.14648	0.18896	0.054688
1.488	-52.7116	71.1626	437.761	-0.59864	0.24805	0.18311	-18.127	97.17	1170.296	-1.377	1.0889	-0.15039	5.138	82.59	301.806	-0.37842	0.17871	-0.021973	-28.9198	137.7636	537.9771	-0.50537	0.29199	0.13916	-14.009	98.727	569.765	-0.81787	0.28076	0.057129	15.144	54.5331	1290.36	-1.6733	1.4868	0.45703	21.0809	94.694	153.8508	-0.18433	0.21802	0.047363
1.49	-6.685	66.456	502.4633	-0.67139	0.27539	0.19336	32.955	58.238	1163.391	-1.3223	1.0645	-0.14795	31.757	77.28	380.273	-0.41699	0.19629	-0.013672	-27.8839	193.11	479.835	-0.46289	0.26929	0.13501	7.316	49.726	670.3352	-0.89746	0.30176	0.085449	40.3863	104.876	1264.1822	-1.5874	1.4263	0.42383	-10.011	63.0954	237.1309	-0.22461	0.24951	0.043945
1.492	-35.8824	55.622	551.5238	-0.77441	0.31738	0.21338	47.899	90.67	1109.605	-1.2917	1.0476	-0.14477	45.649	84.011	447.696	-0.51855	0.23242	0.024902	-30.5135	148.3643	467.847	-0.42676	0.24365	0.12695	8.751	22.579	753.566	-1.0698	0.3418	0.13672	-12.1796	41.181	1242.5318	-1.5349	1.3714	0.40503	15.878	91.415	268.9689	-0.29736	0.2876	0.047852
1.494	-35.6382	-8.527	649.9398	-0.82471	0.33838	0.22461	1.689	49.243	1086.2269	-1.2656	1.0254	-0.1416	37.144	62.178	486.547	-0.60425	0.26392	0.044922	-10.44	152.514	466.1936	-0.37646	0.21777	0.12256	12.994	-12.918	804.298	-1.2168	0.37891	0.18628	-7.549	51.667	1236.697	-1.4839	1.3169	0.38672	-16.417	79.2847	267.809	-0.33838	0.30957	0.059082
1.496	5.558	-30.617	680.3241	-0.93896	0.38135	0.25146	58.2003	54.157	1061.75767	-1.2261	0.99072	-0.12695	86.155	3.353	633.225	-0.69629	0.29688	0.071777	-12.0286	168.239	450.4095	-0.35059	0.2002	0.11719	14.2	-97.928	886.5744	-1.3677	0.42432	0.25293	-33.0686	108.5775	1205.785	-1.418	1.2402	0.37256	-34.7284	69.314	356.21305	-0.43555	0.34668	0.070801
1.498	-27.407	-68.003	690.555	-1.0237	0.4148	0.28418	37.597	95.0308	1001.2814	-1.2104	0.98096	-0.11963	96.614	-12.311	701.793	-0.82813	0.3457	0.11621	-22.7765	103.3087	443.4543	-0.29932	0.16309	0.1123	8.626	-94.417	923.6143	-1.562	0.4917	0.35742	-64.9354	67.371	1192.127	-1.3843	1.2017	0.3667	0.847000000000001	85.247	414.164	-0.51148	0.3794	0.09595
1.5	33.789	-89.798	749.257	-1.1118	0.4458	0.32031	57.105	65.7025	1007.7616	-1.1719	0.94531	-0.10303	84.271	-72.641	787.432	-0.90186	0.36865	0.14258	-9.519	141.648	427.988	-0.26636	0.13501	0.10059	20.5369	-108.982	940.746	-1.6519	0.52979	0.41309	-50.234	129.253	1154.827	-1.3257	1.1313	0.35742	-57.425	34.6051	462.3016	-0.58398	0.4082	0.10742
1.502	3.838	-74.12161	778.096	-1.2339	0.48486	0.37891	115.734	132.93	975.6829	-1.1411	0.91992	-0.092285	125.543	-103.219	840.2899	-1.0684	0.42773	0.19727	-2.607	133.716	396.754	-0.23145	0.10547	0.091797	8.8132	-131.365	968.072	-1.8062	0.60596	0.50781	-55.98884	139.671	1106.264	-1.2773	1.0717	0.35743	-22.191	30.271	501.6	-0.69531	0.45215	0.12158
1.504	-38.065	-96.1825	835.638	-1.2949	0.50342	0.41846	53.054	147.287	939.4227	-1.1147	0.896	-0.078125	80.315	-88.931	858.878	-1.199	0.47534	0.25317	8.757	94.1872	384.416	-0.18896	0.073242	0.084473	-17.15	-86.208	956.92425	-1.8767	0.65357	0.55737	-53.1694	127.078	1110.563	-1.2397	1.0142	0.35938	-1.414	21.3214	545.075	-0.74902	0.46973	0.12988
1.506	51.345	-91.4635	871.47992	-1.4194	0.53174	0.50391	80.079	146.4075	935.2721	-1.0664	0.86426	-0.063477	46.2531	-126.2449	919.3266	-1.3335	0.52588	0.31445	-1.566	138.5194	328.3978	-0.17041	0.057617	0.078125	2.6635	-118.003	984.571	-1.9141	0.68555	0.57227	-26.852	215.354	1085.802	-1.1973	0.9375	0.35693	-29.3059	-35.5528	671.364	-0.8457	0.52051	0.16113
1.508	37.767	-86.69614	838.8376	-1.5371	0.55566	0.6001	74.1898	194.766	877.6789	-1.041	0.83984	-0.058105	34.3528	-103.566	921.9689	-1.5039	0.5918	0.4165	8.648	90.56	313.067	-0.12598	0.023926	0.074219	32.49	-123.146	993.283	-1.916	0.7168	0.5459	-29.11	167.214	1071.781	-1.166	0.90039	0.35889	7.275	-38.0935	776.1164	-0.91846	0.54517	0.18652
1.51	29.962	-128.684	859.67	-1.605	0.56104	0.63672	32.048	169.7775	855.465	-0.98438	0.80273	-0.052734	-10.68	-63.584	942.007	-1.5781	0.62793	0.46729	22.724	94.265	299.3474	-0.094969	0.0024412	0.0625	-14.05211	-106.857	939.574	-1.8965	0.71875	0.5249	-16.295	179.292	1057.945	-1.1177	0.83447	0.36328	-9.052	-46.9281	822.297	-0.99951	0.56885	0.20752
1.512	45.055	-116.639	854.757	-1.7148	0.56445	0.71533	62.6557	173.4264	817.291	-0.93824	0.77075	-0.05542	27.944	-90.922	983.52	-1.7168	0.67871	0.54541	21.5211	113.9964	279.6105	-0.06543	-0.016602	0.047852	-19.9834	-146.435	922.695	-1.8511	0.69971	0.46875	-19.428	184.068	999.46	-1.07	0.78344	0.36303	6.20200000000001	-61.378	876.823	-1.1094	0.60352	0.24072
1.514	35.276	-105.8563	787.26	-1.7886	0.57422	0.7417	-3.738	184.781	763.228	-0.89404	0.73682	-0.054199	29.5823	-68.369	984.814	-1.823	0.70215	0.58472	17.789	61.168	278.1925	-0.033691	-0.040527	0.034668	4.751	-90.3132	913.505	-1.8237	0.6709	0.43628	-20.738	114.806	975.37417	-1.0332	0.73633	0.36377	36.848	-56.707	946.5362	-1.1851	0.62793	0.27588
1.516	96.9169	-91.4921	766.154	-1.8491	0.58643	0.75781	7.152	141.8038	761.204	-0.83398	0.68945	-0.053711	-4.229	-104.763	973.696	-1.9004	0.70996	0.61768	29.8651	112.6916	242.5431	-0.016602	-0.059082	0.026855	6.115	-48.169	893.521	-1.8013	0.63135	0.4043	18.553	158.99	953.7654	-0.9707	0.66992	0.36572	12.963	-108.334	992.153	-1.2598	0.64648	0.31396
1.518	77.6877	-58.2514	709.904	-1.8794	0.60498	0.78711	38.116	159.00244	725.252	-0.81006	0.67334	-0.057129	5.64	-114.566	969.393	-1.9531	0.69824	0.62939	49.3564	106.591	225.45682	0.0083008	-0.088379	0.013184	38.229	-54.237	911.209	-1.7637	0.57813	0.35254	0.379999999999995	138.6728	905.448	-0.93701	0.64209	0.36328	52.917	-133.9805	1000.977	-1.3403	0.67041	0.37891
1.52	21.912	-72.1699	699.825	-1.8887	0.61328	0.79541	-23.286	133.1526	696.513	-0.75391	0.63086	-0.061523	-53.653	-65.263	919.709	-1.9714	0.68774	0.61743	31.052	92.586	208.7687	0.021241	-0.10571	0.006836	38.823	-15.319	901.649	-1.7363	0.55664	0.32764	10.86	107.817	893.2592	-0.88037	0.58057	0.35938	91.8915	-119.7555	937.702	-1.3735	0.68311	0.42188
1.522	56.765	-73.9654	736.09	-1.8765	0.62939	0.79395	-4.073	112.1963	703.1839	-0.70898	0.60059	-0.057862	-31.927	-62.383	926.752	-1.9395	0.67773	0.59229	30.898	134.024	174.77	0.032715	-0.12549	-0.0014648	50.365	-56.513	932.929	-1.6875	0.52148	0.2876	59.462	151.86463	853.3545	-0.84057	0.53882	0.35596	101.871	-144.3686	906.608	-1.4102	0.69727	0.50635
1.524	36.9798	-46.99	741.735	-1.852	0.64698	0.78906	-7.676	137.431	678.0655	-0.66602	0.57031	-0.062012	20.895	-27.538	920.717	-1.8574	0.6582	0.54053	35.3255	89.98811	168.232	0.046387	-0.14111	-0.0063477	80.536	-98.539	1002.3518	-1.6575	0.50854	0.26709	56.7	91.999	847.359	-0.79639	0.50049	0.34717	146.2468	-135.605	908.34	-1.4287	0.69434	0.57569
1.526	23.8075	-57.216	813.753	-1.8179	0.67236	0.77734	-9.369	113.39	678.360967	-0.60645	0.52295	-0.062012	-2.855	-37.087	910.755	-1.812	0.64111	0.50342	20.5	107.6685	166.899	0.05127	-0.1499	-0.0053711	42.85	-83.09	1034.214	-1.6265	0.51318	0.25391	81.6098	100.123	839.236	-0.73828	0.45117	0.33643	93.821	-139.942	839.717	-1.4355	0.68555	0.62158
1.528	43.271	-66.698	874.8082	-1.7397	0.69971	0.74805	4.507	122.5242	655.1676	-0.57959	0.50635	-0.063965	67.137	-127.71	961.863	-1.6772	0.58447	0.42188	20.4049	116.223	150.4377	0.057129	-0.1748	-0.0087891	34.2598	-157.246	1094.778	-1.5859	0.54102	0.23193	82.962	137.74323	801.178	-0.70117	0.42969	0.33105	104.336	-148.46	794.034	-1.4312	0.67139	0.66016
1.53	-6.255	-83.076	900.317	-1.6914	0.69531	0.72705	-53.9355	153.824	610.3853	-0.53174	0.46924	-0.054199	59.242	-124.826	1003.051	-1.5808	0.53394	0.36499	10.9	60.8356	151.7723	0.058105	-0.1875	-0.0080567	14.424	-167.5863	1134.572	-1.5518	0.56836	0.22461	96.456	115.608	781.062	-0.65234	0.38477	0.31885	129.8262	-104.751	793.755	-1.4194	0.65283	0.6709
1.532	39.8015	-133.412	983.767	-1.5952	0.68408	0.66992	-25.475	147.89	600.1952	-0.4978	0.44067	-0.057617	-16.451	-158.183	1035.522	-1.4966	0.50635	0.33203	6.996	91.254	127.2927	0.061523	-0.19678	-0.0078125	-6.848	-188.687	1146.8589	-1.4722	0.60791	0.21582	126.224	163.2893	739.802	-0.60889	0.35937	0.30566	55.252	-77.9065	813.251	-1.3809	0.625	0.6665
1.534	32.89	-137.166	982.9992	-1.5227	0.67945	0.62036	-12.503	182.606	564.479	-0.45947	0.41602	-0.046387	-12.4704	-182.0554	1095.263	-1.4395	0.51172	0.30029	-3.063	64.8467	97.4055	0.067383	-0.20703	-0.0024414	-37.878	-252.384	1180.156	-1.4255	0.6355	0.21631	95.6491	167.1799	673.953	-0.56055	0.33008	0.29541	69.5242	-61.187	899.718	-1.3427	0.61669	0.65356
1.536	-13.611	-159.835	1005.415	-1.4624	0.68018	0.58008	-48.716	174.329	532.656	-0.42236	0.38574	-0.035645	-98.57	-135.86	1094.05	-1.4219	0.51904	0.28418	-8.724	37.7828	98.6215	0.067383	-0.21387	0.00097656	-35.397	-199.281	1194.29	-1.3945	0.65234	0.2251	94.65787	154.1249	639.373	-0.50244	0.30518	0.28418	76.939	-19.792	898.278	-1.3101	0.60498	0.64453
1.538	21.933	-185.389	1064.2073	-1.3999	0.69775	0.52148	-27.5746	163.7003	508.7745	-0.40967	0.36914	-0.02832	-110.866	-202.362	1120.79	-1.3828	0.5498	0.26758	-9.057	69.498	69.5571	0.074219	-0.22363	0.0092773	-24.276	-202.719	1218.477	-1.3823	0.67627	0.24707	84.9608	194.5871	606.236	-0.47461	0.29004	0.28125	56.3984	-56.2	947.373	-1.2944	0.60596	0.625
1.54	-28.442	-186.021	1076.6093	-1.3745	0.71143	0.5	-32.2319	189.075	464.3465	-0.3667	0.33252	-0.026367	-36.7403	-209.255	1121.199	-1.323	0.56861	0.25317	-7.36	37.9027	60.125	0.082519	-0.22046	0.013428	-16.681	-215.739	1271.566	-1.3877	0.69141	0.25684	56.336	149.49648	585.8837	-0.41504	0.25977	0.26953	86.145	-76.829	1030.867	-1.3101	0.61572	0.62354
1.542	-38.6997	-236.544	1102.124	-1.3433	0.74463	0.45898	-8.758	163.765	443.682	-0.33886	0.30542	-0.021485	-59.894	-181.994	1118.245	-1.2515	0.58008	0.24561	-0.294999999999998	56.369	65.2469	0.088379	-0.22266	0.017578	29.697	-151.684	1255.884	-1.4019	0.70752	0.28906	74.3019	162.6717	564.086	-0.36328	0.23193	0.24756	64.8713	-92.098	1043.041	-1.3535	0.64844	0.63867
1.544	-25.1637	-242.077	1113.576	-1.3271	0.76319	0.41943	26.121	161.44	409.563	-0.31396	0.27783	-0.022949	-11.162	-210.864	1187.6437	-1.1675	0.59619	0.20703	-14.142	62.317	56.01792	0.10205	-0.2251	0.021484	61.9288	-194.702	1278.563	-1.4143	0.71827	0.31128	42.769	167.3337	508.3252	-0.33789	0.21533	0.24463	64.63453	-130.207	1094.578	-1.4107	0.68506	0.6626
1.546	-72.315	-202.7223	1110.256	-1.3184	0.77344	0.37598	-5.625	180.218	372.176	-0.2793	0.24316	-0.028809	7.344	-149.434	1208.629	-1.1294	0.60498	0.19629	-11.207	31.5845	72.2414	0.10547	-0.22607	0.023926	92.8744	-149.186	1287.444	-1.4277	0.74219	0.33252	29.735	133.636	486.9409	-0.29199	0.18701	0.22559	93.299	-148.671	1108.71244	-1.4883	0.73438	0.68311
1.548	-29.7953	-198.968	1192.239	-1.3198	0.7876	0.32617	47.6107	157.769	373.768	-0.26416	0.22852	-0.038086	17.542	-133.318	1217.796	-1.0703	0.60938	0.19043	6.006	72.128	64.327	0.11865	-0.22412	0.024902	100.0889	-92.968	1259.687	-1.4468	0.76514	0.33984	49.44	166.56518	437.019	-0.26636	0.16723	0.20996	18.54	-210.655	1092.561	-1.5801	0.82031	0.69434
1.55	-27.932	-134.562	1178.46	-1.3223	0.78906	0.3125	74.7295	185.296	355.8633	-0.23242	0.19336	-0.035156	72.2407	-164.7244	1241.374	-1.05	0.60449	0.18823	4.707	43.916	48.202	0.12866	-0.22583	0.020508	112.82	-105.473	1278.288	-1.4653	0.78174	0.33984	4.399	148.90723	409.668	-0.23633	0.14746	0.19678	-14.526	-268.237	1139.6831	-1.605	0.85986	0.68457
1.552	-72.55	-99.82	1147.403	-1.3223	0.79297	0.27295	28.565	144.456	368.915	-0.21045	0.17578	-0.033935	97.026	-103.481	1206.984	-1.0347	0.59814	0.18262	-6.366	31.214	38.866	0.13916	-0.23145	0.015137	106.1836	-5.525	1252.636	-1.5254	0.80273	0.34131	-0.966000000000001	136.8655	396.252	-0.19727	0.125	0.17529	-17.01	-259.034	1152.2649	-1.625	0.89844	0.64697
1.554	1.215	-108.5245	1187.123	-1.3279	0.78638	0.25318	62.2807	122.978	359.314	-0.19385	0.16113	-0.026367	141.604	-94.324	1212.877	-1.0269	0.59717	0.17676	3.768	63.047	20.489	0.14844	-0.23535	0.0058594	71.372	-12.354	1249.234	-1.593	0.81421	0.35962	-3.086	174.246	382.342	-0.18213	0.11719	0.16357	-51.9391	-270.728	1184.331	-1.6318	0.9209	0.61523
1.556	-3.171	-51.974	1181.821	-1.3301	0.77539	0.2334	34.1373	126.29	338.525	-0.17773	0.13281	-0.022949	160.5	-43.973	1232.737	-1.0313	0.59863	0.18115	20.625	17.6334	9.4275	0.14648	-0.23486	-0.0097656	47.836	-51.6643	1293.0533	-1.6797	0.83789	0.39502	-25.317	126.429	377.6606	-0.15527	0.10107	0.14014	-34.99	-247.865	1250.122	-1.627	0.94238	0.58447
1.558	-16.656	-80.651	1219.8847	-1.3135	0.77832	0.21875	29.973	85.4917	331.281	-0.17236	0.125	-0.019531	100.7544	26.399	1205.844	-1.0522	0.60986	0.18066	27.976	41.29	7.855	0.14063	-0.24414	-0.023926	66.99	-14.234	1297.4167	-1.8354	0.86279	0.45801	-0.754999999999995	114.656	377.141	-0.12817	0.095459	0.1206	-61.01058	-179.9473	1243.193	-1.6343	0.95947	0.54785
1.56	32.8496	-98.0095	1219.435	-1.3047	0.78516	0.21191	88.157	101.6812	291.832	-0.16992	0.10254	-0.014648	64.991	-37.401	1263.554	-1.0935	0.62719	0.1836	8.678	41.465	-2.3592	0.11865	-0.24096	-0.038086	64.954	-106.202	1355.472	-1.939	0.88037	0.49561	-32.154	134.783	344.8459	-0.10156	0.087891	0.10547	-32.91	-148.701	1274.7028	-1.6309	0.96289	0.52979
1.562	-10.2079	-87.668	1190.594	-1.2964	0.7915	0.19775	16.374	104.2145	258.44777	-0.17041	0.10058	-0.0012207	34.027	-48.5071	1280.221	-1.1621	0.64746	0.20166	37.444	-3.585987	24.0853	0.09375	-0.23584	-0.04248	83.11	-112.402	1400.013	-2.1382	0.89893	0.55469	-18.335	101.47	329.6797	-0.065918	0.080566	0.075195	15.797	-91.112	1302.2227	-1.6172	0.97852	0.46777
1.564	-8.06	-173.25	1250.477	-1.3096	0.79688	0.18969	44.2719	77.294	252.9355	-0.16895	0.098145	0.0068359	49.0292	-71.1084	1295.9727	-1.3003	0.68213	0.25293	53.3603	24.6692	32.236	0.054688	-0.22461	-0.053711	101.9784	-101.033	1380.17	-2.2791	0.91285	0.59009	-5.642	126.523	291.7743	-0.050781	0.077637	0.063477	-20.174	-45.307	1281.552	-1.5944	0.99633	0.42163
1.566	6.891	-178.467	1254.486	-1.3398	0.80078	0.19092	53.7671	101.289	235.90781	-0.16943	0.098633	0.027344	88.7293	-134.759	1345.617	-1.3887	0.69141	0.30078	39.908	-5.66038	37.853	0.020508	-0.21142	-0.053467	111.716	-173.936	1407.517	-2.394	0.93408	0.61621	-6.267	116.5348	254.4531	-0.021973	0.070313	0.04248	-0.111999999999998	-49.277	1312.3832	-1.5664	1.0215	0.37158
1.568	-11.636	-184.861	1256.945	-1.4355	0.79688	0.20557	-12.024	90.5278	214.3391	-0.17139	0.10449	0.037109	94.567	-70.734	1309.2314	-1.6123	0.7168	0.41309	39.3805	-2.557	46.55	-0.011719	-0.19531	-0.054688	152.1719	-115.6203	1403.9503	-2.4995	0.96631	0.63574	-0.715000000000003	95.6953	238.443	-0.0031738	0.063477	0.023926	34.012	-13.451	1318.076	-1.5347	1.0552	0.31104
1.57	59.527	-203.046	1296.31	-1.5112	0.79346	0.22559	49.1667	94.9152	220.892	-0.16602	0.11133	0.067871	99.2231	-87.769	1312.451	-1.8064	0.7395	0.50269	38.548	18.0453	32.887	-0.049805	-0.17334	-0.047363	127.4585	-128.52708	1384.9649	-2.5269	0.98096	0.63086	20.225	128.1413	209.688	0.010254	0.05957	0.011719	1.084	-43.821	1330.923	-1.5293	1.0703	0.28223
1.572	15.0935	-138.122	1277.555	-1.6987	0.7915	0.27295	14.755	111.087	189.497	-0.16651	0.11768	0.08667	99.425	-115.862	1334.704	-2.0059	0.76563	0.58936	57.174	-13.1773	41.858	-0.067871	-0.17285	-0.04834	108.248	-148.8744	1407.1476	-2.5562	0.99561	0.62402	5.13	93.5054	214.441	0.031738	0.053711	-0.0083008	18.383	-99.299	1361.468	-1.5547	1.0977	0.24365
1.574	3.781	-150.638	1310.5371	-1.8552	0.79175	0.31665	-10.686	82.543	180.4453	-0.16553	0.12646	0.10156	83.862	-85.029	1299.709	-2.2612	0.81201	0.70117	35.442	7.2632	19.665	-0.098145	-0.14258	-0.040039	125.6296	-64.579	1412.188	-2.5635	0.99317	0.61646	36.461	109.113	210.153	0.032227	0.055664	-0.024902	23.955	-88.997	1338.0596	-1.6072	1.117	0.2356
1.576	62.952	-149.817	1365.749	-2.0273	0.78711	0.37842	29.907	101.758	150.2942	-0.15723	0.13037	0.11621	85.638	-158.3	1346.418	-2.3574	0.84766	0.75049	26.591	6.4514	1.0705	-0.11304	-0.1272	-0.033203	92.477	-101.8199	1426.926	-2.5723	0.98438	0.60205	53.3771	137.714	177.1724	0.046387	0.047852	-0.041504	1.69	-155.491	1372.523	-1.6733	1.1411	0.24414
1.578	18.5	-91.2585	1356.3334	-2.2515	0.79932	0.47021	-22.903	109.51	115.762	-0.1499	0.13818	0.12598	82.563	-122.99	1373.757	-2.5273	0.91602	0.80615	35.646	-13.2926	26.1793	-0.12891	-0.11328	-0.023926	77.105	-63.4557	1441.689	-2.5859	0.93359	0.58643	59.847	92.538	172.8653	0.046387	0.043213	-0.057617	22.251	-171.459	1389.138	-1.7866	1.1782	0.28125
1.58	17.5365	-130.963	1400.7921	-2.3511	0.80713	0.5166	2.206	93.594	134.591	-0.13281	0.13672	0.14355	49.581	-54.179	1361.574	-2.6208	0.96069	0.83423	34.035	19.3292	38.417	-0.14941	-0.09082	-0.0073242	66.846	6.6821	1379.721	-2.5977	0.91113	0.57764	82.151	122.893	167.2585	0.050781	0.041016	-0.064453	3.984	-144.887	1356.105	-1.8418	1.2129	0.31299
1.582	8.7673	-86.3451	1396.711	-2.5664	0.8125	0.61182	-13.076	103.2964	112.958	-0.12061	0.14185	0.15088	47.717	-57.983	1374.044	-2.6602	0.99414	0.82861	19.585	-8.9789	34.584	-0.1582	-0.078125	-0.00048828	48.7	-36.0349	1374.746	-2.6113	0.86426	0.57568	71.4297	93.502	138.14294	0.056152	0.041504	-0.077148	47.5214	-170.815	1405.836	-1.9644	1.2622	0.38281
1.584	-48.461	-49.876	1360.6194	-2.6892	0.82495	0.67798	-48.4847	70.4451	94.619	-0.10352	0.14209	0.16406	24.533	27.3212	1341.682	-2.7183	1.0103	0.8125	12.152	-17.0161	32.9727	-0.17334	-0.056152	0.024902	65.774	45.974	1368.8662	-2.6016	0.83691	0.56885	82.6637	67.06	151.4051	0.050781	0.04541	-0.07959	85.395	-147.237	1457.355	-2.0527	1.3144	0.44067
1.586	2.0921	-63.8787	1361.395	-2.8042	0.83838	0.73975	7.327	54.8811	104.7001	-0.073242	0.14697	0.18164	-2.502	18.11	1315.057	-2.7358	1.0142	0.79492	10.579	22.7777	4.7452	-0.17285	-0.040772	0.040771	49.977	59.389	1335.656	-2.5918	0.83203	0.56299	71.509	94.966	98.798	0.040527	0.063965	-0.085938	59.746	-149.288	1458.913	-2.1382	1.3579	0.49414
1.588	-43.2067	24.22	1310.469	-2.9121	0.84766	0.80908	-17.144	48.9805	72.155	-0.057617	0.14746	0.1875	10.79	-23.0101	1340.5137	-2.7197	1.0039	0.76416	17.001	-8.7879	15.1148	-0.1709	-0.027832	0.057129	76.352	17.3814	1373.127	-2.5679	0.82275	0.55859	62.3856	49.9068	104.746	0.038818	0.082764	-0.080566	89.739	-168.352	1492.915	-2.2358	1.4126	0.57764
1.59	-55.3286	1.732	1302.815	-2.9473	0.85547	0.84229	-18.814	5.9552	80.7591	-0.015625	0.14355	0.19043	-3.529	19.1207	1327.1481	-2.698	0.99195	0.74536	-10.514	11.0068	12.51229	-0.16602	-0.010254	0.081055	101.181	78.786	1371.366	-2.5486	0.8274	0.54516	79.52359	67.7916	99.6138	0.028809	0.097656	-0.077637	66.178	-93.306	1469.193	-2.2813	1.4336	0.61816
1.592	-11.885	-24.2271	1352.016	-2.9961	0.86523	0.87744	15.486	13.4716	63.6653	0.012695	0.13745	0.18677	17.193	-34.246	1359.4642	-2.6675	0.99268	0.71875	-8.333	22.0563	-10.9814	-0.16211	-0.0073242	0.093262	77.366	-1.261	1396.185	-2.5332	0.82422	0.54736	55.8392	63.8692	72.5444	0.013184	0.13086	-0.070313	30.0236	-70.067	1464.0187	-2.3687	1.4712	0.69531
1.594	-67.307	5.839	1348.701	-3.031	0.86352	0.90552	-6.217	20.39601	26.271	0.043945	0.1333	0.17334	46.299	1.842	1390.547	-2.5898	0.9707	0.67041	-5.905	-7.7244	1.7982	-0.14893	-0.01123	0.12109	112.348	-19.651	1431.668	-2.5024	0.8208	0.54492	30.528	25.5937	86.304	0.0068359	0.14209	-0.072754	37.365	-31.436	1455.7058	-2.4361	1.482	0.7417
1.596	-62.864	-60.682	1382.1614	-3.0449	0.85156	0.92432	39.414	19.0085	53.508	0.086914	0.11963	0.14746	54.249	36.912	1356.81978	-2.5425	0.95459	0.64063	8.152	12.9027	2.85111	-0.13794	-0.013916	0.13623	114.1963	10.205	1390.7285	-2.4956	0.81689	0.54102	32.1955	45.8293	82.002	-0.003418	0.14648	-0.057129	-6.732	32.1575	1383.551	-2.5034	1.4829	0.78516
1.598	-44.073	-25.8717	1405.2511	-3.0566	0.83203	0.93408	30.046	44.68576	40.946	0.10596	0.11963	0.13428	103.6	-42.169	1361.421	-2.4648	0.9375	0.59521	1.28	-16.534356	5.001	-0.12402	-0.020508	0.15088	74.214	-61.1679	1394.221	-2.4858	0.81104	0.5415	-1.594	19.3768	73.054	-0.0092771	0.15625	-0.056885	-18.618	-9.3289	1388.882	-2.5796	1.4849	0.83691
1.6	-57.496	-3.142	1411.078	-3.0503	0.82861	0.9375	-1.77	37.7903	37.064	0.12842	0.10645	0.095703	119.098	-0.909999999999997	1349.5241	-2.4197	0.93823	0.56567	-0.294999999999995	-14.6505	18.0184	-0.10352	-0.020508	0.15918	96.644	0.188000000000001	1408.44	-2.4607	0.80493	0.53784	2.721	22.0096	73.636	-0.014648	0.15283	-0.053223	-8.91	9.2209	1418.214	-2.6167	1.4829	0.85352
1.602	-33.2829	-49.3217	1443.623	-3.0273	0.8291	0.92236	64.859714	43.85	50.6597	0.13794	0.10254	0.073974	104.3402	-24.976	1353.3439	-2.3882	0.93604	0.54883	9.823	21.5601	6.2028	-0.095215	-0.025391	0.16699	91.23	-0.529999999999999	1385.734	-2.437	0.7915	0.53516	16.77	45.05	37.5975	-0.0068359	0.14746	-0.054199	-70.887	-5.3282	1399.812	-2.6655	1.4556	0.89453
1.604	-70.318	28.5805	1393.0332	-3.0046	0.82007	0.89722	42.7739	44.878	20.2861	0.13818	0.098145	0.055176	106.9762	-49.216	1398.561	-2.3726	0.92822	0.53125	5.267	-14.7209	21.8263	-0.077637	-0.03418	0.17188	88.087	-34.851	1400.654	-2.3823	0.7749	0.52148	-17.845	21.1297	25.9688	0.0019531	0.14063	-0.058594	-42.4498	-52.116	1427.5805	-2.7068	1.4338	0.90943
1.606	-78.578	10.009	1381.128	-2.9565	0.81494	0.86914	49.072	29.3998	29.9161	0.12012	0.10107	0.02832	95.0265	17.0429	1382.095	-2.3726	0.92041	0.52539	14.305	3.4717	18.53533	-0.065185	-0.032959	0.17407	100.364	50.865	1361.35	-2.3452	0.76904	0.51367	-4.721	43.597	20.0767	0.023438	0.12549	-0.069336	-35.7384	13.74294	1424.5299	-2.748	1.4121	0.91455
1.608	-24.1818	-0.9878	1417.0418	-2.8574	0.79736	0.82861	63.361	33.841	22.657	0.10352	0.10986	0.026367	92.1934	-39.824	1373.395	-2.3789	0.89355	0.51514	14.306	5.07151	-14.7224	-0.054199	-0.041504	0.17139	85.701	9.998	1328.555	-2.2617	0.75391	0.48975	-16.959	31.6843	18.6426	0.045654	0.11109	-0.079101	-61.633	-22.979	1426.2947	-2.7715	1.3906	0.92041
1.61	-22.8931	53.443	1399.356	-2.8101	0.78564	0.79688	25.305	24.318	-18.806	0.072754	0.12988	0.027344	97.1608	-1.001	1355.843	-2.3687	0.86963	0.50122	14.027	-10.4149	-7.675	-0.039063	-0.041016	0.17822	112.347	36.274	1338.57	-2.1865	0.75	0.47242	-34.352	4.8271	39.575	0.070313	0.10156	-0.095215	-11.887	-19.205	1441.682	-2.7793	1.3887	0.92236
1.612	-7.623	1.424	1388.337	-2.7124	0.77783	0.75	52.444	19.3126	-0.631	0.033203	0.15869	0.035645	74.019	54.971	1307.9166	-2.3535	0.84766	0.48682	35.265	29.3871	-10.3431	-0.035645	-0.046875	0.17334	102.394	113.037	1293.2201	-2.1089	0.74268	0.44824	-34.7663	26.876	33.304	0.10254	0.091797	-0.11279	-42.45839	19.573	1403.069	-2.771	1.3755	0.91895
1.614	14.7357	36.937	1359.603	-2.6433	0.7644	0.72338	52.8142	35.665	-20.522	0.016113	0.17041	0.042969	107.3625	20.581	1295.089	-2.3164	0.83203	0.46631	19.265	18.3545	-0.1339	-0.01709	-0.048828	0.16748	96.768	53.324	1287.5184	-2.0117	0.72656	0.42236	-36.7349	-1.6308	18.0213	0.11328	0.092285	-0.11865	-55.684	-48.8415	1434.091	-2.7517	1.3567	0.9143
1.616	-4.2144	65.475	1322.5579	-2.5815	0.75244	0.69531	11.331	16.624169	-5.113	-0.0087891	0.19678	0.050781	108.011	109.655	1274.0082	-2.2905	0.82275	0.45703	38.686	15.5831	2.3502	-0.0090329	-0.056397	0.16797	135.0573	129.94	1276.6268	-1.9644	0.72314	0.41211	-19.588	-14.2871	11.4284	0.13086	0.080566	-0.13281	-12.132	-7.7063	1458.321	-2.7261	1.3345	0.9043
1.618	19.0516	32.2542	1327.3354	-2.5059	0.73047	0.66064	63.1335	25.0852	26.72	-0.026123	0.21069	0.054688	105.36889	93.765	1264.4088	-2.23	0.8042	0.43311	44.1255	36.702	0.337400000000001	-0.003418	-0.055176	0.16553	121.7352	133.869	1247.81692	-1.8745	0.70947	0.39404	-15.302	14.6252	-4.6193	0.14136	0.068847	-0.1333	-57.9835	-7.6859	1447.789	-2.6777	1.2988	0.88916
1.62	24.6236	115.423	1281.224	-2.4688	0.72266	0.64307	41.3991	17.9227	22.6306	-0.032715	0.22314	0.062012	114.1592	56.57	1300.117	-2.1775	0.78784	0.41748	47.86393	-1.8122	16.7131	-0.00048828	-0.054199	0.16357	108.6458	99.425	1257.7781	-1.8257	0.7041	0.37671	-8.632	-7.4367	2.345	0.14697	0.056641	-0.13135	-28.807	-14.9751	1447.12	-2.6465	1.2813	0.89111
1.622	12.1968	97.302	1288.241	-2.3784	0.69971	0.60742	27.158	-11.731	46.149	-0.026367	0.23047	0.074707	119.6642	117.742	1255.4569	-2.1226	0.77002	0.40186	52.7587	20.684	28.983	-0.00097656	-0.051758	0.15967	126.614	178.887	1218.361	-1.7769	0.70264	0.36475	6.241	16.2607	-1.601	0.14355	0.031738	-0.13818	-17.0186	54.865	1382.143	-2.5723	1.2539	0.87158
1.624	42.3698	83.944	1325.6408	-2.3005	0.68677	0.57959	40.521	0.794700000000001	35.58	-0.01709	0.23291	0.074219	110.4204	51.7187	1244.721	-2.0469	0.75586	0.37939	40.933	39.286	11.12828	-0.0068359	-0.051758	0.15918	58.885	121.9828	1194.619	-1.7051	0.69678	0.34375	26.78	4.7012	0.548	0.14111	0.020996	-0.1377	-43.3784	26.019	1342.9577	-2.5064	1.2329	0.8501
1.626	13.1958	123.93	1305.302	-2.2168	0.67578	0.55322	-10.293	1.7545	17.9267	-0.0024414	0.22705	0.078125	91.812	98.1825	1218.746	-2.0078	0.75	0.37158	36.762	12.206	4.454	-0.015381	-0.041748	0.16016	54.04	115.772	1197.9094	-1.6714	0.6958	0.33789	37.012	-29.558	41.099	0.13281	-0.0024414	-0.12939	23.6472	68.2452	1322.6418	-2.4336	1.209	0.83643
1.628	33.2305	59.1265	1293.897	-2.1094	0.66016	0.51514	5.434	-1.9586	23.4686	0.015381	0.2124	0.082519	28.226	147.217	1184.031	-1.9194	0.73486	0.35449	27.235	43.888	2.6692	-0.025391	-0.037598	0.16016	55.644	111.47	1176.229	-1.6128	0.68994	0.31738	60.3247	-1.4824	33.939	0.1289	-0.022461	-0.12768	-0.57	118.024	1300.245	-2.334	1.1777	0.81104
1.63	46.936	81.765	1265.123	-2.0234	0.64746	0.48828	0.248000000000005	25.417	7.6529	0.027832	0.19336	0.07666	22.496	89.552	1217.60264	-1.8572	0.72656	0.34008	26.507	22.533	7.3765	-0.040039	-0.029785	0.16406	3.486	13.104	1155.251	-1.5652	0.67993	0.2959	42.235	-12.2997	21.8953	0.12598	-0.039551	-0.12793	18.575	82.436	1306.125	-2.2773	1.1582	0.79834
1.632	-5.101	95.0183	1248.181	-1.9414	0.63525	0.46289	-39.785	17.5617	11.6308	0.059082	0.17578	0.084473	-2.09	133.4918	1192.1	-1.8062	0.71924	0.33105	37.962	-8.282	48.864	-0.044922	-0.032227	0.16162	27.051	61.275	1130.642	-1.5249	0.67529	0.2793	60.085	6.2748	19.9207	0.11865	-0.067383	-0.12109	76.391	117.648	1286.4911	-2.1577	1.1138	0.76563
1.634	29.5391	42.576	1245.028	-1.8374	0.604	0.44043	8.582	10.217849	35.181	0.063477	0.16211	0.083496	-29.123	83.485	1186.132	-1.7407	0.70752	0.31689	40.011	4.867	60.983	-0.069824	-0.021973	0.17041	23.137	54.6732	1087.755	-1.4624	0.66748	0.26465	71.7397	32.19	1.0578	0.11475	-0.078613	-0.11816	38.3064	101.883	1282.7452	-2.0659	1.082	0.73535
1.636	21.024	93.763	1171.941	-1.7891	0.59326	0.42969	-12.358	23.2415	15.7658	0.091309	0.12891	0.087402	-18.642	32.763	1181.46	-1.7168	0.7041	0.31299	7.033	-32.0234	78.6389	-0.093996	-0.015869	0.16943	20.402	44.106	1081.8607	-1.4414	0.66309	0.25586	55.238	-7.1774	0.0599999999999987	0.098633	-0.098633	-0.11963	71.747	63.535	1295.081	-1.9604	1.0493	0.70313
1.638	-18.2373	54.571	1132.3902	-1.707	0.55469	0.4165	-20.785	1.615	32.9841	0.097659	0.1062	0.085205	-24.63	104.0895	1131.2846	-1.6597	0.6958	0.29883	15.289	9.9161	114.094	-0.12354	-0.010254	0.1626	44.349	146.638	1012.071	-1.3867	0.66162	0.24023	64.1136	17.3329	-3.241	0.083252	-0.11572	-0.11157	78.158	116.514	1268.5976	-1.8198	0.99268	0.65625
1.64	-7.893	56.738	1133.576	-1.6443	0.53051	0.40332	34.021	23.4692	18.8594	0.10498	0.07666	0.082031	-14.61	75.505	1098.6444	-1.6189	0.68189	0.29175	-0.274000000000001	32.1345	126.8646	-0.16846	0.0073242	0.16504	33.251	110.9946	967.434	-1.3486	0.65674	0.23608	51.4074	21.0411	-18.1958	0.064941	-0.13184	-0.104	21.4864	71.7146	1238.0569	-1.7273	0.9519	0.62329
1.642	-36.812	127.318	1096.902	-1.5854	0.50146	0.39941	-32.786	30.754	1.48807	0.10645	0.049316	0.07373	16.383	135.091	1042.5	-1.584	0.67334	0.2876	0.161000000000001	13.5428012	172.2724	-0.19434	0.018066	0.16846	39.099	136.988	957.357	-1.312	0.64502	0.22949	68.2197	7.5595	14.705	0.033691	-0.14697	-0.081543	72.761	76.727	1218.945	-1.6367	0.90234	0.58643
1.644	-19.525	93.518	1094.10825	-1.5039	0.46387	0.3916	8.574	10.29646	19.2924	0.11279	0.037598	0.071777	25.302	175.465	982.669	-1.5308	0.66357	0.2666	-7.068	65.466	185.74	-0.24512	0.036133	0.17725	45.964	193.228	935.8296	-1.2671	0.63721	0.22754	62.6386	34.368	31.656	0.010742	-0.15527	-0.088379	18.776	101.135	1179.2909	-1.5215	0.8418	0.54541
1.646	-8.996	139.486	1053.7098	-1.4634	0.44385	0.38672	47.56	21.0852	-3.231	0.11572	0.015625	0.063965	36.014	104.5075	981.311	-1.4905	0.65356	0.25733	-16.617	54.28272	203.562	-0.29395	0.053711	0.17993	9.898	121.7884	937.441	-1.2495	0.62939	0.23047	32.4	3.10434	4.016	-0.025391	-0.16406	-0.06543	8.636	47.105	1178.7891	-1.4683	0.81201	0.52539
1.648	-36.5573	145.649	1017.936	-1.3804	0.40723	0.37305	1.137	-5.0244	14.0401	0.11719	0.0051269	0.063721	25.213	171.168	955.8914	-1.4458	0.64307	0.25146	-3.406	65.9909	290.13	-0.34424	0.068359	0.18604	15.465	172.93	893.315	-1.2065	0.60986	0.23633	36.091	12.0385	8.4066	-0.057862	-0.16748	-0.052978	46.7368	81.309	1129.0038	-1.3726	0.75537	0.49902
1.65	8.19	93.5588	1006.912	-1.3208	0.38013	0.36792	37.845	-3.4129	37.175	0.11816	-0.0019531	0.063965	30.766	156.819	962.2117	-1.3921	0.62549	0.2417	-12.202	105.698	348.208	-0.41309	0.098145	0.19043	2.955	171.725	843.8328	-1.1738	0.58984	0.24292	48.586	33.7592	-5.1072	-0.085938	-0.16748	-0.041016	-32.681	87.6364	1087.229	-1.3164	0.7102	0.47998
1.652	-16.434	143.72	959.184	-1.2559	0.35059	0.35693	30.253	13.4376	26.7845	0.11719	-0.0078125	0.064453	19.435	151.581	946.9724	-1.3608	0.61768	0.23438	-11.593	60.8795	411.424	-0.45117	0.11084	0.18799	5.855	142.5053	827.4552	-1.1528	0.57373	0.25146	22.17	-6.8844	17.1449	-0.12109	-0.16406	-0.024414	2.823	71.387	1094.8777	-1.2622	0.67383	0.46143
1.654	-26.736	123.917	933.6349	-1.1675	0.31104	0.34326	26.942	-11.75942	35.501	0.12207	-0.010742	0.068359	5.479	227.476	899.9862	-1.3022	0.59814	0.22119	-2.491	65.598	463.2423	-0.5376	0.14258	0.18652	27.146	213.093	759.582	-1.1001	0.56543	0.25342	-0.676000000000002	22.2847	13.8084	-0.13037	-0.16016	-0.015625	18.271	127.918	1051.119	-1.1929	0.62646	0.43945
1.656	13.138	115.8051	891.043	-1.1191	0.29102	0.32813	60.299	-5.1215	20.435	0.1167	-0.01123	0.071777	27.846	158.9908	878.5123	-1.2556	0.5769	0.2146	15.705	49.351	491.6001	-0.60937	0.16309	0.18018	-7.836	142.65	729.513	-1.062	0.56152	0.24902	-15.553	26.529	-15.004	-0.14746	-0.1499	-0.0058594	-7.642	111.888	1015.9054	-1.1641	0.60547	0.43359
1.658	-27.886	155.1903	829.274	-1.0308	0.25439	0.31641	26.8	-7.6276	2.3826	0.11255	-0.010986	0.077881	20.654	165.7112	821.464	-1.2051	0.5625	0.20459	17.587	11.8299	585.9666	-0.68652	0.18066	0.17432	12.122	147.83	709.2	-0.96973	0.54785	0.23682	-33.881	12.8585	0.987	-0.14941	-0.14648	0.0029297	35.76	149.498	970.9891	-1.1016	0.56543	0.41846
1.66	10.745	98.182	813.618	-0.96142	0.22388	0.30566	47.6295	-24.4512	18.8712	0.10547	-0.010742	0.08252	15.763	178.58	789.409	-1.1348	0.53613	0.19141	7.718	32.895	653.706	-0.79785	0.21973	0.17773	31.708	163.497	685.46	-0.89892	0.52588	0.22632	-3.872	39.5617	20.4954	-0.14551	-0.14258	0.0073242	-7.808	190.783	920.348	-1.0576	0.53809	0.4082
1.662	35.84	113.281	787.856	-0.89209	0.19434	0.2959	64.5142	1.208	5.9882	0.10156	-0.011719	0.087891	55.7608	114.198	785.4113	-1.1021	0.521	0.18701	24.1589	-2.08623	706.054	-0.85059	0.2373	0.17822	29.821	77.069	700.6105	-0.83789	0.48535	0.21875	-32.689	-1.578	25.605	-0.13672	-0.13916	0.0073242	9.609	147.186	923.5688	-1.0093	0.50732	0.40039
1.664	3.005	118.3572	770.844	-0.81299	0.15283	0.28271	33.971	-12.4718	19.0157	0.09375	-0.013672	0.095215	47.9097	157.54	764.829	-1.0264	0.4873	0.18018	35.468	-43.5947	785.924	-0.95459	0.26416	0.18457	59.4964	127.095	675.132	-0.77393	0.43994	0.19971	-36.068	0.986000000000001	40.353	-0.12793	-0.14404	0.00048828	14.076	179.418	874.468	-0.95654	0.47217	0.38672
1.666	39.7151	71.868	767.1172	-0.76611	0.13574	0.27588	70.3717	-17.2171	44.4149	0.085449	-0.0087891	0.093262	48.7463	125.467	747.485	-0.97705	0.46582	0.16943	66.5222	-47.434	815.094	-1.0337	0.28614	0.20166	47.12249	112.369	646.161	-0.74268	0.41943	0.20264	-22.683	32.1744	14.0555	-0.11328	-0.15674	-0.0087891	-50.919	165.626	817.902	-0.93115	0.45752	0.38281
1.668	41.6184	129.804	706.327	-0.68115	0.098633	0.26367	20.471	4.4391	31.8703	0.076172	-0.0019531	0.090332	73.849	95.27695	725.478	-0.92529	0.43848	0.16406	40.039	-128.725	884.657	-1.103	0.30566	0.22021	50.2733	100.2005	656.246	-0.67725	0.38428	0.19238	-18.322	-0.132299999999999	22.1523	-0.098633	-0.16406	-0.023926	2.251	124.2625	821.342	-0.86865	0.42139	0.36914
1.67	53.816	122.667	673.1182	-0.62378	0.06836	0.25757	31.502	-9.876	54.2079	0.057617	0	0.083984	40.077	150.619	696.245	-0.85107	0.40723	0.15625	49.436	-123.2162	923.511	-1.1812	0.3374	0.2583	43.526	189.859	596.643	-0.6228	0.35718	0.18115	-1.096	28.0221	28.4764	-0.097656	-0.17432	-0.027832	26.208	151.74983	801.919	-0.82593	0.39404	0.36645
1.672	101.568	132.6689	648.3003	-0.56348	0.041992	0.24902	69.8579	12.0209	71.6949	0.016113	0.020996	0.070801	46.0587	108.7945	693.4115	-0.81689	0.38721	0.15625	71.1662	-118.2984	886.828	-1.2124	0.34131	0.28613	4.126	155.6058	555.39	-0.56787	0.33057	0.17432	-20.263	20.7818	-2.421	-0.093262	-0.18408	-0.037598	10.835	100.689	767.0918	-0.7793	0.37305	0.36084
1.674	74.6699	193.688	590.564	-0.49219	0.010742	0.23535	-5.188	18.5188	95.749	-0.0078125	0.033203	0.068359	31.0452	141.9244	666.9944	-0.75586	0.35107	0.15381	82.5315	-149.157	883.649	-1.2617	0.34912	0.35449	-7.853	182.9317	527.944	-0.49512	0.2832	0.15234	6.022	3.8913	9.8441	-0.094971	-0.18896	-0.046143	43.888	107.399	718.3926	-0.72266	0.33301	0.34619
1.676	67.7455	154.209	582.568	-0.45557	0.00097656	0.23193	13.48	9.8815	153.206	-0.064941	0.07373	0.075195	4.432	181.058	625.639	-0.70898	0.32129	0.14746	93.3372	-113.56	837.906	-1.2884	0.34106	0.41138	0.512	205.2119	485.469	-0.45703	0.26318	0.14355	38.643	32.29991	7.0504	-0.096191	-0.19385	-0.046875	28.891	127.8659	675.399	-0.6875	0.32373	0.34033
1.678	72.8701	166.984	545.5069	-0.38037	-0.031738	0.22461	7.912	46.813	157.601	-0.11035	0.10205	0.081055	4.997	148.075	605.627	-0.66113	0.29395	0.1416	81.6708	-130.976	776.097	-1.312	0.33057	0.46094	8.54200000000001	132.365	473.6677	-0.38818	0.21777	0.12451	28.404	5.635	24.1842	-0.11133	-0.18945	-0.041504	61.612	95.1882	679.2911	-0.62305	0.28711	0.31885
1.68	46.983	156.395	516.7005	-0.32714	-0.053711	0.20898	-24.484	37.6276	192.757	-0.16553	0.14014	0.092773	-26.925	201.108	558.121	-0.59277	0.25488	0.13525	91.308	-135.156	746.53334	-1.3398	0.31836	0.52197	10.651	170.19	430.68	-0.3413	0.18481	0.11108	38.771	2.341	55.261	-0.125	-0.18262	-0.041504	106.308	142.4817	656.7921	-0.57373	0.25683	0.30102
1.682	65.1118	114.037	500.3225	-0.27344	-0.073242	0.19141	18.914	53.57052	269.065	-0.25	0.18896	0.11328	-27.606	170.9267	520.281	-0.55957	0.23486	0.12744	83.241	-86.667	710.278	-1.3594	0.31006	0.55029	6.741	148.644	388.5819	-0.29541	0.15088	0.10059	46.9118	24.625	27.857	-0.15186	-0.16797	-0.030273	65.5484	139.943	605.737	-0.51855	0.23096	0.27979
1.684	35.893	163.642	447.9645	-0.20654	-0.094727	0.18018	-59.766882	81.3117	311.5002	-0.29639	0.21729	0.12012	-19.795	144.796	494.497	-0.48877	0.19971	0.11279	59.642	-95.665	719.212	-1.3706	0.29541	0.60156	17.162	126.505	393.642	-0.23975	0.10889	0.083984	43.614	-6.8815	30.78276	-0.17236	-0.15112	-0.023438	104.802	123.128768	595.642	-0.45605	0.19238	0.24805
1.686	32.288	151.751	414.3033	-0.16943	-0.10645	0.16406	-54.5781	77.837	382.7354	-0.38281	0.26758	0.13623	-42.66981	187.396	448.2194	-0.43677	0.16528	0.098386	36.751	-70.804	772.198	-1.3843	0.29151	0.63086	9.377	175.379	353.9042	-0.21045	0.086426	0.077637	76.9931	9.1861	38.285	-0.19434	-0.13721	-0.014648	123.456	165.512	566.53	-0.42529	0.17725	0.23438
1.688	66.993	141.5258	376.9916	-0.10938	-0.12354	0.14404	-6.249	107.849	422.4337	-0.45703	0.31372	0.14014	-19.6438	129.3996	442.9168	-0.38916	0.13184	0.08252	15.14	-46.598	778.577	-1.3931	0.28955	0.6543	2.215	122.425	340.365	-0.15918	0.04834	0.063477	69.1302	6.7203	29.9692	-0.22168	-0.11621	-0.0073242	68.499	141.568	541.1661	-0.36768	0.1416	0.19922
1.69	1.379	167.04	329.989	-0.066651	-0.13574	0.13013	-50.835	85.91	467.325	-0.53418	0.35742	0.13721	-30.15296	147.9651	424.4491	-0.32959	0.09082	0.069824	19.577	-85.384	835.603	-1.4058	0.29346	0.67773	2.951	145.965	315.812	-0.12231	0.01709	0.061767	45.805	-23.7095	36.1232	-0.23193	-0.10596	-0.0053711	93.6355	173.785	504.889	-0.32934	0.11352	0.18018
1.692	3.477	131.6408	338.283	-0.029785	-0.15039	0.11865	-25.6682	29.343	561.94926	-0.63818	0.42139	0.14404	-39.1987	150.568	393.2231	-0.29639	0.06543	0.063965	41.862	-57.517	876.275	-1.4092	0.29419	0.69799	-0.151	165.674	285.807	-0.092285	-0.011719	0.049316	63.2773	-6.0257	31.1303	-0.25684	-0.07959	-0.012695	65.329	184.857	437.489	-0.29248	0.088867	0.16406
1.694	26.538	146.211	338.90092	0.017578	-0.16504	0.10107	-37.69757	32.708	618.0515	-0.69287	0.45166	0.14697	-5.471	108.7939	381.4992	-0.24316	0.023438	0.052246	19.389	-54.796	882.222	-1.416	0.29883	0.71826	-12.705	99.9672	312.2112	-0.058105	-0.051758	0.037109	44.0475	-28.937	33.992	-0.28003	-0.067138	-0.018311	85.1932	148.78119	432.1544	-0.25732	0.062012	0.1416
1.696	6.299	139.954	336.389	0.037598	-0.1748	0.087891	-64.835	12.791	665.99	-0.8042	0.521	0.16797	-25.344	150.736	331.64	-0.20557	-0.0031737	0.047607	15.676	-99.355	955.586	-1.4224	0.29199	0.73926	-3.656	132.7	291.573	-0.037598	-0.068359	0.030762	59.4684	-46.9408	71.288	-0.30029	-0.043945	-0.020996	85.0994	162.7204	397.9135	-0.23779	0.054688	0.12891
1.698	13.073	85.8585	335.836	0.074707	-0.18604	0.068359	28.2434	3.465	722.694	-0.88745	0.57153	0.19189	-20.741	124.496	328.3328	-0.17139	-0.026855	0.037598	25.802	-94.826	987.67	-1.4336	0.29834	0.74072	-20.509	83.6194	278.082	-0.0087891	-0.098633	0.025391	54.8458	-34.1673	80.113	-0.33057	-0.015625	-0.023926	28.607	138.74762	347.245	-0.20215	0.035156	0.10938
1.7	-36.68	114.914	294.81	0.10181	-0.19873	0.061035	7.872	-9.446	757.632	-0.97217	0.61865	0.21777	-0.169000000000004	112.1111	329.415	-0.12305	-0.057617	0.03125	-0.766000000000002	-185.101	1023.4307	-1.4507	0.31787	0.74268	-5.396	58.045	269.613	0.005371	-0.12232	0.020508	25.98	-65.612	90.1436	-0.34717	0.00048828	-0.024902	61.041	131.1673	331.472	-0.17529	0.023193	0.097411
1.702	-30.233	98.199	266.465	0.12158	-0.20898	0.05127	-32.945	-56.266	826.7238	-1.0723	0.68555	0.27002	-8.197	126.8688	317.861	-0.099121	-0.061523	0.027832	5.732	-250.019	1077.316	-1.477	0.33984	0.74219	11.449	95.49525	241.556	0.026855	-0.1416	0.016113	47.064	-32.8213	111.3335	-0.39258	0.030762	-0.026367	53.654	143.361	307.886	-0.15088	0.014648	0.082031
1.704	20.077	96.138	245.5116	0.1416	-0.21777	0.039551	41.367	-55.177	870.1243	-1.123	0.71289	0.29248	19.4896	66.699	321.933	-0.061523	-0.091309	0.020996	-10.901	-256.367	1071.146	-1.5078	0.375	0.73486	10.595	61.429	219.3103	0.041016	-0.1665	0.021973	31.69	-6.4972	127.6175	-0.42603	0.059815	-0.027832	14.16	103.018	317.582	-0.11914	0.0019531	0.067871
1.706	-30.7919	123.195	204.726	0.15137	-0.21826	0.027344	22.23	-77.242	874.113	-1.2046	0.76611	0.3584	18.433	75.545	297.402	-0.04126	-0.098387	0.02124	-37.905	-295.473	1098.7796	-1.5566	0.42578	0.70947	28.759	98.6165	191.973	0.052246	-0.17139	0.020996	10.205	-18.4098	187.5151	-0.45654	0.086426	-0.024902	45.811	122.993	313.911	-0.10449	-0.003418	0.054688
1.708	-19.283	73.114	209.2288	0.16504	-0.22803	0.020508	51.0227	-113.7018	921.148	-1.2627	0.80225	0.40406	17.612	94.64	246.0872	-0.025879	-0.11133	0.022949	-39.305	-233.241	1109.814	-1.5874	0.4585	0.70703	16.339	116.3148	143.137	0.062012	-0.18701	0.029297	-12.777	30.7904	218.6917	-0.49561	0.12305	-0.021484	8.706	123.911	278.2643	-0.080566	-0.01416	0.035645
1.71	-1.748	94.929	191.7158	0.17725	-0.23071	0.015625	61.381	-113.357	883.792	-1.3125	0.82715	0.45068	50.2883	67.199	225.635	-0.015137	-0.12402	0.026855	-50.9696	-183.8239	1083.401	-1.6577	0.51611	0.68506	21.126	74.6911	139.458	0.070313	-0.19629	0.040527	-14.738	43.29988	243.545	-0.51953	0.14746	-0.021484	17.177	93.698	280.663	-0.062011	-0.022461	0.019531
1.712	-15.501	96.2269	171.93	0.18408	-0.2334	0.0053711	46.179	-138.748	863.378	-1.3691	0.85156	0.50244	16.088	120.535	178.242	-0.01416	-0.12793	0.030762	-29.506	-183.0405	1143.42	-1.718	0.55298	0.67261	35.343	104.702	136.2544	0.076172	-0.19873	0.047363	-3.375	45.48703	299.7532	-0.57617	0.19287	-0.025879	10.215	110.792	262.161	-0.044922	-0.037598	0.0063477
1.714	31.084	57.593	187.676	0.19434	-0.23242	-0.003418	104.0743	-140.341	838.219	-1.3867	0.85742	0.52686	42.6136	102.154	161.737	-0.011719	-0.14404	0.043457	14.846	-105.685	1177.3564	-1.7681	0.5835	0.66016	44.575	64.933	126.947	0.083984	-0.20166	0.063477	-0.149000000000001	84.301	352.0727	-0.62964	0.22925	-0.023438	-44.115	92.8643	232.7717	-0.026855	-0.05127	-0.017578
1.716	5.69	76.546	168.078	0.19873	-0.23584	-0.01123	69.363	-105.441	770.9771	-1.4258	0.87207	0.56201	64.706	89.4158	166.2103	-0.018554	-0.14331	0.048828	23.729	-101.884	1208.7256	-1.8125	0.604	0.65674	49.6852	59.555	129.289	0.093506	-0.20459	0.064942	-9.964	52.4345	445.379	-0.69287	0.27197	-0.014648	4.937	98.438	210.2403	-0.018555	-0.055176	-0.025879
1.718	15.622	48.27	172.303	0.2041	-0.23193	-0.019531	60.8337	-121.936	776.7629	-1.4419	0.87549	0.58008	62.4271	112.281	155.14052	-0.020996	-0.14551	0.055176	56.2053	-82.931	1259.634	-1.8281	0.61914	0.65234	25.318	94.476	96.752	0.10449	-0.20508	0.073242	7.5	58.274	515.5181	-0.80029	0.32813	0.0019531	5.744	118.7333	165.4074	-0.0078125	-0.072754	-0.046875
1.72	61.1069	57.0781	139.786	0.20386	-0.23194	-0.026611	72.739	-112.09	760.511	-1.4546	0.87549	0.60352	84.174	71.1918	162.5348	-0.019043	-0.15479	0.05957	39.2579	-27.819	1242.111	-1.8457	0.65137	0.65088	35.0163	59.5483	97.0138	0.11523	-0.19971	0.083984	24.553	58.289	546.313	-0.85889	0.34912	0.0083008	-24.282	74.0736	175.5336	-0.0036621	-0.084473	-0.060792
1.722	28.36	91.307	82.11	0.20117	-0.22949	-0.029297	29.392	-71.784	758.122	-1.4531	0.85254	0.61279	51.42	83.90354	149.11765	-0.018066	-0.15723	0.060059	32.395	-61.326	1249.504	-1.8542	0.68042	0.65332	34.54	85.8556	67.23	0.12109	-0.19775	0.089844	44.724	-2.778	617.278	-1.0127	0.42188	0.049316	18.014	81.53878	166.2768	0.0053711	-0.095215	-0.07373
1.724	60.384	51.1727	85.294	0.2041	-0.22363	-0.03418	47.88199	-91.122	825.537	-1.4526	0.84424	0.61035	29.934	99.24	128.0166	-0.017578	-0.15967	0.069336	37.61	-45.742	1261.046	-1.8608	0.71826	0.6543	34.7025	81.6987	40.137	0.14063	-0.18896	0.09375	70.84	-1.069	672.18	-1.1387	0.47852	0.089846	-13.397	76.5958	139.2191	0.0063477	-0.11133	-0.078613
1.726	58.4478	62.379	76.089	0.1958	-0.22217	-0.038086	30.8619	-80.564	845.033	-1.4507	0.83252	0.5957	49.44	64.5128	128.4039	-0.0078125	-0.16309	0.072509	14.347	-39.527	1214.684	-1.8823	0.771	0.65625	16.52	30.793	38.43	0.15992	-0.18652	0.09668	60.355	-51.413	719.19	-1.272	0.54736	0.14697	18.488	69.803	126.37383	0.0048828	-0.12012	-0.07959
1.728	36.392	48.14322	70.8204	0.19238	-0.22217	-0.04248	10.688	-88.733	895.8865	-1.4565	0.84961	0.59131	6.645	105.983	81.438	0.00048828	-0.16699	0.069824	15.527	-120.355	1244.163	-1.9082	0.79297	0.64502	21.34	51.5471	36.96224	0.1748	-0.18457	0.098633	68.977	-77.537	787.961	-1.4536	0.6377	0.24023	56.3014	102.499	104.6375	0.0019531	-0.13281	-0.087891
1.73	67.91	12.646	71.81	0.17846	-0.22168	-0.042237	38.68683	-130.527	966.229	-1.4551	0.87598	0.59814	18.222	74.349	68.87	0.019531	-0.16943	0.070313	24.4654	-116.657	1281.7374	-1.9727	0.83984	0.62549	33.935	3.9045	36.6031	0.19141	-0.18262	0.09082	75.654	-61.266	816.6115	-1.541	0.68848	0.2915	40.255	77.876	100.4212	0.0031738	-0.14405	-0.087402
1.732	34.7878	30.0461	45.4184	0.16699	-0.22168	-0.047852	9.201	-108.684	981.3932	-1.4668	0.91211	0.63135	21.845	48.9023	63.528	0.032227	-0.1665	0.068848	-19.345	-159.234	1308.9824	-2.0545	0.87427	0.60376	11.863	-7.0905	51.955	0.20313	-0.18115	0.088379	34.92	-122.0309	856.5452	-1.6851	0.77979	0.39893	85.3246	66.1	104.484	-0.00048828	-0.15674	-0.090332
1.734	41.0527	2.0928	69.527	0.15723	-0.22021	-0.044922	-11.3836	-126.309	1017.6114	-1.4707	0.93555	0.65186	-27.804	52.66	52.3982	0.050781	-0.16748	0.062988	17.1782	-190.773	1385.453	-2.1309	0.90234	0.59033	-1.704	16.78133	37.599	0.2168	-0.17871	0.088867	39.6336	-116.351	887.691	-1.7556	0.82496	0.4607	53.66094	73.5992	68.088	-0.0058594	-0.16895	-0.099121
1.736	74.6556	9.958	68.318	0.15137	-0.21826	-0.044434	7.614	-161.467	1062.452	-1.4844	0.9707	0.68408	2.50700000000001	22.4501	61.908	0.073486	-0.16895	0.059814	44.3507	-141.53	1372.823	-2.2397	0.93018	0.58594	16.13	-15.6477	24.7177	0.22266	-0.17847	0.081054	35.942	-94.345	857.88	-1.7949	0.85352	0.4917	52.4259	42.6746	72.056	-0.0058594	-0.17773	-0.099609
1.738	6.745	46.4	19.264	0.13818	-0.21533	-0.052246	-19.395	-170.64	1055.69581	-1.4585	0.98682	0.68701	-9.76000000000001	39.532	54.8127	0.091309	-0.16992	0.057129	24.7055	-185.282	1373.279	-2.2964	0.94385	0.59082	41.358	25.8761	18.0596	0.22607	-0.17871	0.07666	28.1493	-112.699	863.489	-1.8066	0.8584	0.50146	78.2623	45.938	76.3228	0.0063477	-0.19678	-0.11035
1.74	34.3	20.3739	8.896	0.13501	-0.21484	-0.05249	-28.561	-259.458	1100.095	-1.4351	0.98486	0.67773	-20.313	51.955	48.3117	0.1167	-0.17139	0.049316	43.1214	-151.639	1400.386	-2.395	0.97119	0.61328	13.823	35.78	4.315	0.22266	-0.18945	0.055176	43.075	-74.543	853.044	-1.7808	0.84326	0.48535	37.263	33.9559	64.3085	0.021973	-0.21314	-0.10522
1.742	15.744	28.1746	-2.232	0.12695	-0.2168	-0.052246	-38.0721	-265.958	1109.5858	-1.4043	0.99316	0.64893	20.502	20.8557	69.074	0.12646	-0.16797	0.041504	30.3264	-98.1528	1375.401	-2.4644	0.98096	0.63867	-3.394	16.2069	13.45	0.21289	-0.18555	0.055664	14.375	-88.028	819.569	-1.7031	0.79297	0.41455	56.267	14.829	56.9054	0.035645	-0.23779	-0.10059
1.744	-30.47	13.1792	13.436	0.1123	-0.20898	-0.05957	-71.491	-239.024	1121.5316	-1.3894	0.99633	0.62769	-21.582	54.516	38.236	0.14111	-0.17188	0.028809	4.978	-108.8286	1402.3064	-2.5313	0.99414	0.67432	-16.787	48.312	3.461	0.19531	-0.18213	0.043457	-6.289	-94.1577	831.542	-1.626	0.75879	0.3374	83.7622	39.9487	28.3579	0.037598	-0.26123	-0.11523
1.746	20.294	-6.6864	34.7406	0.10547	-0.20703	-0.056641	-45.3176	-246.749	1199.034	-1.3823	0.99658	0.61133	-4.422	46.358	34.96	0.1438	-0.17456	0.017578	8.9511	-23.38	1402.5656	-2.6011	1.0024	0.72168	-3.276	7.27688	1.1678	0.17846	-0.18188	0.039551	20.186	-55.304	806.1152	-1.5391	0.72559	0.26123	46.704	12.1892	27.2816	0.039063	-0.26904	-0.11865
1.748	6.12	25.9001	-1.3794	0.088379	-0.20654	-0.060059	-49.222409	-166.5359	1175.7239	-1.3887	1	0.58643	-7.287	45.039	33.7544	0.14551	-0.17627	0.0058594	-58.939	-21.34	1364.443	-2.6309	1.0059	0.74512	11.361	0.0278	17.9886	0.15283	-0.18066	0.032227	-7.495	-76.584	823.644	-1.4336	0.68945	0.17285	65.59276	-2.191	45.473	0.042969	-0.2998	-0.11914
1.75	-4.42	-6.71	11.0904	0.081543	-0.20044	-0.061523	-43.5964	-146.136	1154.492	-1.4014	1.0059	0.5708	-45.221	50.063	15.3499	0.13525	-0.17285	-0.013672	-54.3963	-43.4109	1390.7569	-2.6948	1.0142	0.79492	-10.716	23.2485	-4.4096	0.10889	-0.17236	0.025879	12.552	-63.495	861.973	-1.3823	0.67432	0.13428	39.967	11.9515	29.056	0.047608	-0.30982	-0.12109
1.752	2.064	-0.9035	18.8622	0.073242	-0.19727	-0.062012	-4.185	-142.27164	1199.617	-1.4277	1.0176	0.54736	3.087	17.5514	21.9767	0.12598	-0.16748	-0.016602	-40.34187	16.8269	1353.2975	-2.7332	1.0198	0.8274	-0.511000000000003	1.239	13.5845	0.088867	-0.16895	0.023926	37.986	-46.58	860.334	-1.314	0.6626	0.077637	10.553	-2.8423	16.428	0.04834	-0.32129	-0.11768
1.754	-35.001	20.9829	-15.7642	0.055176	-0.19775	-0.05957	-25.754	-56.603	1188.314	-1.4385	1.0323	0.54639	-3.024	22.93	1.3513	0.10205	-0.1626	-0.023926	-70.195	-21.3935	1337.277	-2.7598	1.0195	0.854	16.141	39.9792	-3.7173	0.041016	-0.16064	0.024414	30.216	-96.911	903.596	-1.2739	0.67627	0.049316	69.46781	24.0359	18.1527	0.04248	-0.33398	-0.11084
1.756	-4.25	17.39	-15.607	0.039306	-0.19311	-0.054687	-16.5648	-68.674	1238.3427	-1.4434	1.0391	0.54346	8.164	21.5122	-0.758	0.072998	-0.16137	-0.022705	-28.0855	-3.9285	1351.315	-2.7905	1.0181	0.88184	29.831	35.9659	-11.3275	0.0056153	-0.15649	0.025879	31.606	-92.605	952.90253	-1.2412	0.7002	0.032715	24.804	13.58731	6.6801	0.040039	-0.33887	-0.1084
1.758	0.036999999999999	51.713	-25.373	0.019531	-0.1875	-0.054688	5.882	-67.862	1243.507	-1.437	1.0513	0.51758	55.8556	-12.06116	33.243	0.040039	-0.15625	-0.019531	-34.7061	13.2326	1350.825	-2.7969	1.0117	0.89502	2.267	3.7497	14.987	-0.026855	-0.14795	0.030273	-30.666	-115.673	972.8542	-1.1733	0.73096	0.0092773	4.827	-4.6766	33.041	0.030762	-0.34473	-0.099121
1.76	-41.9807	31.3497	1.124	-0.0092773	-0.17773	-0.035645	2.7166	-51.922	1227.684	-1.4253	1.0562	0.4917	40.045	15.1121	32.579	-0.01123	-0.13818	-0.011719	-53.7373	-60.333	1393.631	-2.7969	1.002	0.89502	21.995	31.42	9.666	-0.064941	-0.14063	0.042969	-38.3204	-148.9367	1053.295	-1.1318	0.74023	-0.012695	1.018	30.123	5.398	0.020508	-0.34619	-0.092773
1.762	-0.070999999999998	1.2962	27.965	-0.018066	-0.1748	-0.029297	8.7686	-125.1559	1269.726	-1.395	1.0532	0.43359	44.4131	5.55923	24.857	-0.035156	-0.13477	-0.003418	-10.454	-17.34	1406.977	-2.7872	0.99219	0.88818	50.7005	-2.2255	34.2181	-0.07959	-0.13379	0.045898	-41.0954	-129.9379	1092.03	-1.0371	0.74512	-0.086914	-34.1005	16.8028	-12.8572	0.0063477	-0.34766	-0.078613
1.764	-16.762	11.6926	4.6764	-0.034668	-0.16992	-0.020996	5.896	-107.28414	1233.6451	-1.3746	1.0513	0.3833	61.2017	12.6505	23.559	-0.077148	-0.11865	0.012695	-44.925	-29.2341	1386.067	-2.769	0.97705	0.87695	34.615	-9.301	34.395	-0.10547	-0.12402	0.066895	-77.018	-184.894	1108.99	-0.96582	0.75928	-0.14991	4.322	22.4128	11.863	-0.0078125	-0.34619	-0.067871
1.766	11.285	2.91	21.1274	-0.039795	-0.1687	-0.018311	-6.498	-110.928	1222.574	-1.3613	1.0469	0.34375	35.122	27.589	17.2529	-0.10815	-0.1062	0.031006	-37.3266	-58.5976	1453.4436	-2.7417	0.95361	0.86328	41.0904	14.7649	28.801	-0.11914	-0.11524	0.063476	-48.44943	-218.066	1145.317	-0.90283	0.77148	-0.21387	-39.498	24.8603	-4.3184	-0.017334	-0.34058	-0.055908
1.768	47.0747	21.8068	22.292	-0.044922	-0.16357	-0.018066	20.679	-163.17	1288.025	-1.3823	1.0493	0.28418	68.8109	-14.584	39.467	-0.13184	-0.09375	0.050781	-8.954	13.531	1444.327	-2.7285	0.94141	0.85596	14.208	-20.1441	23.2942	-0.12744	-0.11279	0.071777	-39.446	-190.966	1144.366	-0.84326	0.8208	-0.27197	-52.413	-3.53654	13.876	-0.032227	-0.33545	-0.047852
1.77	-9.204	28.4327	17.4236	-0.043457	-0.15381	-0.018066	-16.9107	-121.00582	1272.019	-1.4126	1.0542	0.26318	53.59	-5.3211	34.458	-0.15479	-0.082031	0.076172	-34.1659	-32.0127	1428.116	-2.6929	0.92627	0.85156	33.836	8.877	27.88	-0.12842	-0.1123	0.081543	-33.903	-227.678	1184.145	-0.83008	0.84766	-0.28125	0.25	18.5164	1.4254	-0.046875	-0.32813	-0.021973
1.772	59.8075	19.7368	16.2252	-0.039551	-0.15625	-0.015137	2.60395	-181.03	1304.5145	-1.4976	1.0688	0.24023	41.3732	-7.6487	17.7337	-0.15942	-0.078369	0.093262	-10.0624	-12.4942	1419.352	-2.6658	0.91773	0.84497	37.399	9.7232	6.6834	-0.12842	-0.10742	0.09082	18.079	-171.9199	1193.947	-0.81836	0.89648	-0.2793	-13.314	10.7224	-3.2267	-0.052246	-0.3252	-0.018066
1.774	62.307	36.7071	-2.3405	-0.039551	-0.1582	-0.0087891	67.371	-193.139	1336.182	-1.5798	1.0823	0.24487	57.957	-26.496	27.651	-0.16357	-0.07666	0.10742	-7.6535	29.6059	1366.5573	-2.6348	0.9082	0.83838	35.003	-4.4808	21.4518	-0.12451	-0.11377	0.098145	29.747	-137.258	1161.3351	-0.82593	0.93091	-0.25342	2.328	-5.392	36.237	-0.06543	-0.31055	-0.0068359
1.776	21.443	30.249	0.440000000000001	-0.045411	-0.16138	-0.0021973	10.5559	-145.6507	1328.793	-1.6782	1.1021	0.26367	35.904	9.8257	26.533	-0.1665	-0.077637	0.12256	-14.826	-17.193	1368.0416	-2.5801	0.88672	0.82275	26.035	37.282	6.883	-0.12353	-0.11401	0.11621	52.7526	-146.987	1191.1394	-0.85547	0.96875	-0.21484	7.531	4.1156	27.626	-0.069336	-0.2998	0.0046387
1.778	54.464	7.9781	38.981	-0.053711	-0.16016	0.0078125	6.1742	-161.71	1378.501	-1.8262	1.1367	0.32764	44.014	-0.281599999999999	28.0193	-0.16357	-0.078125	0.12842	20.111	66.6183	1353.524	-2.5483	0.87939	0.8125	27.808	18.0650645	1.292	-0.12012	-0.1123	0.12598	124.281	-95.88	1191.6957	-0.90332	1.0156	-0.16162	-2.119	-8.1214	6.0396	-0.072266	-0.28809	0.012207
1.78	41.569	23.8226	27.4353	-0.068359	-0.16553	0.01709	10.8931	-67.961	1345.884	-1.9004	1.1543	0.35303	50.649	11.407	18.043	-0.15576	-0.070801	0.1416	-7.092	75.3592	1303.796	-2.478	0.85791	0.80078	46.936	20.0697	20.7242	-0.11279	-0.11572	0.14063	109.5619	-99.697	1193.790197	-0.92139	1.0356	-0.12842	53.5135	9.0779	15.2087	-0.077637	-0.27881	0.022461
1.782	49.2473	0.2119	32.272	-0.075195	-0.16309	0.032227	-33.531	-44.476	1335.3125	-2.0405	1.188	0.42969	9.453	27.9938	-2.106	-0.15015	-0.071778	0.14991	6.8313	58.00113	1319.012	-2.4114	0.84058	0.77563	18.444	26.1584	14.0394	-0.10742	-0.11475	0.14746	147.818	-93.538	1232.627	-0.95264	1.063	-0.091309	37.17	21.007	-2.90644	-0.083984	-0.27295	0.030273
1.784	75.7421	9.1403	28.938	-0.090332	-0.1582	0.036133	-15.204	-67.194	1348.235	-2.1306	1.2278	0.49756	31.933	-4.6532	18.8407	-0.14063	-0.068848	0.15479	31.8696	130.619	1305.388	-2.3413	0.82666	0.76758	30.059	-13.5713	36.265	-0.091309	-0.11426	0.15527	126.787	-51.934	1218.02595	-0.98462	1.0833	-0.077148	11.919	4.3607	22.0708	-0.10254	-0.25684	0.04834
1.786	23.5185	20.3007	20.7713	-0.10034	-0.15381	0.046143	-69.814	3.473	1323.59	-2.2026	1.2622	0.56641	13.332	6.3343	19.5881	-0.12598	-0.069824	0.1626	16.4916	82.342	1292.9069	-2.2495	0.80518	0.74609	19.862	4.2827	26.4081	-0.080078	-0.10937	0.1648	72.5214	-95.5086	1233.2498	-1.0229	1.1138	-0.07959	44.727	27.7308	17.462	-0.12671	-0.23877	0.060303
1.788	52.133	3.2251	40.105	-0.10986	-0.1499	0.053223	-57.654	-37.793	1334.158	-2.2969	1.3164	0.65088	-16.347	1.444	9.9789	-0.11865	-0.072266	0.16113	43.9933	106.241	1314.791	-2.1987	0.79541	0.73633	12.624	14.6282	-3.2765	-0.070801	-0.10498	0.16504	100.43895	-95.053	1241.3372	-1.1226	1.1841	-0.068359	27.189	26.9594	0.115	-0.14404	-0.2207	0.074219
1.79	60.6806	32.7093	17.5677	-0.1084	-0.14258	0.056152	-33.9985	-22.212	1354.8996	-2.3296	1.3423	0.69824	15.926	-27.43791	24.7024	-0.10498	-0.070313	0.16895	15.89083	130.426	1271.9323	-2.0991	0.77979	0.71289	15.056	0.0419999999999998	2.6291	-0.05957	-0.09375	0.16455	58.267	-76.616	1205.494	-1.1919	1.2349	-0.043457	63.932	10.5949	37.657	-0.1626	-0.18652	0.089355
1.792	2.479	24.849	-13.697	-0.10254	-0.14453	0.05957	-101.804	15.278	1327.1914	-2.4004	1.3809	0.76221	-5.775	6.7315	-1.3151	-0.093261	-0.074951	0.16455	-3.791	63.444	1278.0413	-2.028	0.76099	0.70019	-9.151	41.961	-6.855	-0.050781	-0.091797	0.16406	67.395	-114.014	1257.879	-1.3765	1.3579	0.037109	73.253	19.1864	39.424	-0.16309	-0.17236	0.094238
1.794	20.851	7.295	12.848	-0.089844	-0.14014	0.053711	-74.836	-56.7778	1333.51	-2.4275	1.3919	0.80151	-10.518	-16.76972	11.823	-0.08252	-0.075195	0.16357	9.5368	104.615	1260.271	-1.9512	0.74414	0.68115	-20.01	-0.8903	1.72	-0.043457	-0.087402	0.1582	110.3827	-98.668	1284.6133	-1.5894	1.4927	0.15918	31.099	6.0069	31.763	-0.16064	-0.14404	0.10303
1.796	11.293	26.054	15.5862	-0.074219	-0.1438	0.049072	-60.964	-24.6932	1353.282	-2.457	1.3877	0.83057	-9.28599999999999	-3.2702	7.944	-0.070313	-0.076172	0.15869	-19.8133	71.447	1236.1349	-1.8516	0.71582	0.65283	5.509	-18.1483	17.9336	-0.032226	-0.082764	0.15674	77.947	-125.181	1274.54543	-1.6992	1.5566	0.23682	85.7941	17.9946	21.5244	-0.15112	-0.12182	0.10059
1.798	17.487	-10.3991	40.909	-0.053223	-0.14844	0.041016	-72.013	-38.455	1363.3626	-2.4727	1.3574	0.85596	-37.342	35.714	-15.554	-0.056152	-0.072754	0.1582	-16.788	42.683	1245.5797	-1.8047	0.70508	0.63721	3.778	3.16511	16.4506	-0.024902	-0.078613	0.14941	105.1185	-179.384	1331.021	-1.9121	1.6719	0.37451	72.9831	31.5881	-17.6533	-0.13574	-0.10938	0.086914
1.8	21.195	-6.2608	32.37	-0.025391	-0.1499	0.01709	-37.427	-73.068	1398.8303	-2.4702	1.3374	0.86719	-9.208	1.0388	7.137	-0.042969	-0.069336	0.1499	-21.8622	102.721	1213.882	-1.7051	0.67578	0.60791	-1.222	-41.989	33.2531	-0.018066	-0.072266	0.13965	107.7068	-141.2101	1325.267	-2.0366	1.7309	0.45142	29.557	-5.5707	12.1544	-0.098145	-0.09082	0.073242
1.802	-31.8078	-0.8443	2.44421	-0.0053711	-0.1543	0.0043945	-67.109	-10.293	1391.954	-2.4551	1.2871	0.87646	1.924	14.182	18.2924	-0.029785	-0.067627	0.13916	-42.22056	52.017	1200.212	-1.6355	0.6482	0.5857	12.091	4.4109	41.219	-0.016113	-0.069336	0.13818	53.828	-162.1123	1336.1891	-2.1362	1.7603	0.49805	51.4416	0.275300000000001	23.3367	-0.07666	-0.083496	0.061035
1.804	-16.369	-10.69598	39.261	0.031738	-0.16406	-0.018066	-84.829	-52.5928	1395.5594	-2.4333	1.2463	0.86987	6.377	-2.943	14.7765	-0.02002	-0.057129	0.13379	-35.5902	72.9515	1180.311	-1.5698	0.62354	0.55859	4.958	24.08569	9.7086	-0.010742	-0.053711	0.13037	86.176	-122.802	1356.6419	-2.2051	1.7461	0.51611	27.023	3.5119	0.612000000000002	-0.030273	-0.07666	0.036621
1.806	-19.234	16.0193	19.05	0.057862	-0.16504	-0.040284	-39.193	-52.791	1418.105	-2.4136	1.2075	0.86133	27.876	-30.3153	16.3131	-0.0083008	-0.049805	0.12207	-43.4957	124.834	1134.8444	-1.5005	0.59375	0.53174	17.54	5.5973	-2.595	-0.0063476	-0.041503	0.12329	47.59	-49.338	1314.429	-2.2051	1.7207	0.49902	33.446	-3.1213	25.0184	2.6021e-14	-0.065918	0.02124
1.808	-12.965	15.8476	-1.0629	0.082031	-0.16748	-0.050781	-46.085	-12.365	1379.936	-2.3843	1.1587	0.85938	8.787	19.6298	-15.0911	-0.0043945	-0.04541	0.1167	-45.3808	92.075	1130.8635	-1.46	0.57715	0.52197	25.221	44.025	-12.7576	-0.0068359	-0.029297	0.11572	13.922	-68.093	1324.654	-2.1616	1.6392	0.43555	32.481	21.3805	16.9956	0.026855	-0.066895	0.0063477
1.81	-0.128999999999998	0.147	-0.977	0.10254	-0.17188	-0.07666	-17.1149	-74.968	1373.478	-2.375	1.1406	0.854	39.973	11.379	-3.973	0.00048828	-0.031738	0.098633	6.609	164.863	1103.6593	-1.3828	0.53516	0.50098	8.99	4.8001	3.019	-0.0092773	-0.0024414	0.10645	24.563	-6.763	1337.722	-2.0976	1.5723	0.35986	-32.291	-1.1941	36.884	0.047363	-0.056641	-0.0019531
1.812	-28.567	4.3433	-2.035	0.11475	-0.17383	-0.085449	4.9028	-13.7944	1368.539	-2.3535	1.1055	0.84424	46.058	29.22	19.691	0.0026855	-0.017334	0.092529	-18.316	160.599	1057.9776	-1.3266	0.50976	0.48389	17.538	-0.0872999999999999	40.469	-0.015137	0.010742	0.10059	-35.379	5.2427	1329.938	-2.0229	1.4976	0.27441	-1.034	11.694	41.943	0.051758	-0.054199	-0.0058594
1.814	-3.46	-24.4041	36.486	0.11963	-0.17139	-0.10156	-44.703	2.906	1316.3389	-2.3367	1.0832	0.83716	13.837	48.335	10.544	-0.0039063	-0.0014648	0.086426	-2.263	151.76	1042.142	-1.2749	0.48535	0.4707	41.1747	22.8982	31.93955	-0.022949	0.041016	0.097168	-3.693	-22.75153	1379.703	-1.9292	1.4009	0.16748	-1.362	28.16	-5.19564	0.060547	-0.043945	-0.00097656
1.816	32.188	-10.9381	26.3027	0.12305	-0.17286	-0.1084	-1.4246	-5.034	1296.1878	-2.312	1.0649	0.83594	66.9138	-9.743	37.571	-0.016602	0.021973	0.078613	24.7663	203.872	998.772	-1.2026	0.45996	0.45313	30.222	-32.0365	73.3281	-0.048584	0.061524	0.083984	21.598	40.851	1354.292	-1.8984	1.3691	0.12598	-17.076	-0.329000000000001	16.7562	0.062255	-0.035644	-0.00024414
1.818	-19.4	8.9538	-1.92953	0.12402	-0.16797	-0.11816	7.3537	76.277	1247.847	-2.2871	1.043	0.83447	48.066	8.709	52.426	-0.027344	0.029785	0.068848	-1.871	150.733	977.8307	-1.1436	0.4375	0.4375	3.585	5.126	85.56	-0.068848	0.088379	0.067871	-18.586	-0.682000000000002	1336.79924	-1.8726	1.3306	0.069824	19.072	8.7786	28.4742	0.0625	-0.025391	0
1.82	30.897	-16.37373	23.09658	0.11377	-0.16455	-0.12354	-10.66	37.8773	1260.873	-2.2715	1.0352	0.83447	30.244	21.696	89.467	-0.061035	0.061035	0.05957	16.18	147.399	963.371	-1.0835	0.41357	0.42383	25.693	16.03283	101.232	-0.11768	0.12402	0.062012	61.749	-0.835000000000001	1341.7577	-1.8855	1.3205	0.053711	-53.2295	7.7421	5.962	0.061035	-0.017578	-0.0019531
1.822	40.114	5.86556	16.2454	0.10693	-0.15771	-0.13086	24.2962	44.5093	1275.6114	-2.228	1.0112	0.82422	56.8569	14.0805	148.776	-0.09448	0.089356	0.052735	17.223	138.8356	905.88907	-1.0039	0.38672	0.40186	27.135	-0.6678	139.4815	-0.14453	0.14307	0.066895	55.195	39.68671	1324.807	-1.9194	1.3188	0.052246	-13.245	-1.302	14.4505	0.060547	-0.0063477	-0.0039063
1.824	10.044	16.44147	-16.7286	0.09082	-0.14844	-0.14258	5.6604	88.969	1236.2452	-2.1865	0.99609	0.81958	17.695	61.759	147.2587	-0.13525	0.11963	0.047363	8.16	75.723	898.3271	-0.96094	0.37109	0.39355	42.1213	53.249	156.662	-0.21533	0.18018	0.071289	62.002	-8.759	1359.839	-1.9648	1.3086	0.054688	7.423	20.7014	-5.1648	0.049805	0.0053711	-0.01416
1.826	65.5209	13.65697	-4.522	0.085937	-0.13696	-0.14795	29.7	25.49974	1256.5291	-2.1309	0.97656	0.81494	50.9288	43.1708	172.336	-0.19531	0.1665	0.050781	48.177	117.382	861.31765	-0.88037	0.33252	0.37842	23.8653	19.146	209.3	-0.27197	0.20972	0.078125	108.5783	17.794	1388.782	-1.9805	1.3086	0.053223	-22.545	-1.727	13.488	0.033447	0.014893	-0.044434
1.828	28.265	28.5491	4.245	0.078125	-0.12598	-0.15869	27.514	60.322	1252.5	-2.0542	0.94775	0.78223	41.4712	47.425	195.868	-0.22656	0.19434	0.053711	23.783	94.658	818.5962	-0.82397	0.31006	0.36572	-11.498	35.19	268.666	-0.33594	0.23438	0.094238	48.057	-2.216	1389.5941	-1.9819	1.2896	0.03418	11.552	-5.7488	35.96	0.041016	0.020508	-0.05957
1.83	34.5193	-14.7446	43.131	0.05957	-0.11523	-0.16602	-20.3351	57.119	1215.11576	-2.0034	0.93213	0.76953	-11.807	87.961	256.247	-0.30029	0.23975	0.0625	70.9457	83.401	806.396	-0.76953	0.27832	0.34961	-9.0502	71.812	306.9021	-0.42334	0.27051	0.11328	80.509	-43.4659	1432.91	-1.9842	1.2727	0.018799	13.292	11.4525	-0.8617	0.068848	0.022949	-0.057617
1.832	81.5051	-23.1044	52.79573	0.047852	-0.10498	-0.17383	32.898	-0.703000000000003	1220.729	-1.9038	0.90479	0.73828	3.633	62.08857	334.224	-0.35816	0.27246	0.071289	70.3383	135.8918	752.6604	-0.68799	0.25049	0.33203	3.4607	37.0408	362.2704	-0.46875	0.29297	0.12207	118.597	11.262	1410.285	-1.9805	1.2578	0.0092773	5.876	0.558400000000001	9.8565	0.071777	0.029297	-0.065918
1.834	32.665	-11.178	17.7786	0.020508	-0.083496	-0.17627	-0.279	69.1159	1153.6547	-1.823	0.87231	0.70727	-14.0415	95.004	364.6538	-0.41504	0.30566	0.086426	53.505	105.3213	726.1239	-0.64746	0.22754	0.32178	-2.597	70.209	421.6203	-0.56592	0.33398	0.1377	75.8988	-7.327	1391.72	-1.9702	1.2407	-0.0014648	46.315	17.3615	17.89784	0.072754	0.037598	-0.078613
1.836	52.8075	-42.393	60.2631	-0.0078125	-0.069092	-0.18189	-48.1869	26.653	1163.267	-1.7402	0.8418	0.67236	-27.0735	89.572	407.384	-0.49609	0.34668	0.10205	91.4175	127.05748	724.116	-0.57178	0.19287	0.2998	-26.6244	71.391	455.412103	-0.67188	0.37598	0.15381	118.1083	15.687	1394.658	-1.9668	1.2305	-0.00048828	12.286	11.7968	10.504	0.07373	0.044434	-0.084961
1.838	66.2524	-20.925	80.3433	-0.040039	-0.053711	-0.17676	-29.642	34.844	1146.8646	-1.6304	0.80518	0.63184	-11.1	32.7147	465.721	-0.53906	0.36523	0.10449	85.887	151.31	680.5362	-0.51026	0.16138	0.28198	-33.5514	47.196	509.5192	-0.72998	0.40088	0.16602	105.3553	71.178	1328.4198	-1.9512	1.2246	-0.016602	32.552	-1.92973	20.307	0.070801	0.055176	-0.086426
1.84	25.258	-28.971	86.013	-0.097656	-0.024902	-0.16748	-38.418	84.153	1101.7075	-1.5757	0.7876	0.61377	-40.60274	53.412	503.365	-0.63037	0.40869	0.10986	77.629	119.39309	683.446	-0.45264	0.13574	0.25586	-16.4057	76.868	558.0379	-0.84229	0.44385	0.19238	87.831	23.971	1320.664	-1.9189	1.2236	-0.02417	75.6432	20.2839	3.185	0.061523	0.071777	-0.083008
1.842	60.8896	-43.5273	95.415	-0.12646	-0.012207	-0.15771	-27.4839	22.857	1101.545	-1.4844	0.75098	0.57275	-58.845	15.5222	564.663	-0.69482	0.4414	0.12622	81.6357	160.084	630.1265	-0.37646	0.095215	0.23242	-35.345	24.015	607.451	-0.93213	0.48584	0.22266	149.356	83.70299	1310.394	-1.877	1.2227	-0.034668	41.3921	-2.0594	13.5202	0.056641	0.080078	-0.078613
1.844	54.116	-3.7456	128.092	-0.19434	0.012695	-0.1416	-34.4787	89.6174	1068.4263	-1.4092	0.72827	0.54785	-54.44	13.2273	643.5419	-0.76172	0.47852	0.1377	30.88	155.416	568.662	-0.33545	0.07666	0.21436	-30.878	-8.8433	686.147	-1.0249	0.52295	0.24756	99.8215	92.81	1289.026	-1.814	1.2192	-0.05127	78.002	3.187	40.894	0.037109	0.099609	-0.080078
1.846	14.546	-6.7375	197.496	-0.25489	0.030762	-0.12475	-54.6193	125.547	1048.8866	-1.3359	0.69824	0.52393	-60.576	31.2804	689.5459	-0.86279	0.51611	0.15332	51.678	141.7801	528.075	-0.26367	0.041504	0.18701	-5.53	-6.192	716.873	-1.1504	0.56396	0.29346	109.4752	65.014	1316.274	-1.7798	1.2173	-0.055176	53.52004	15.1609	26.3796	0.032715	0.10864	-0.079346
1.848	26.392	11.8297	261.0843	-0.31836	0.057617	-0.11133	-18.242	104.605	1019.1218	-1.252	0.66602	0.49121	-40.90278	-46.058	769.6291	-0.91797	0.54004	0.16113	44.651	183.678	464	-0.21289	0.012451	0.16699	-1.357	-69.85	776.007	-1.2104	0.58203	0.32227	122.7432	119.926	1289.181	-1.7188	1.208	-0.060547	42.235	-6.783	40.5465	0.028809	0.11377	-0.084961
1.85	5.525	65.367	285.9264	-0.41406	0.089844	-0.081055	-32.3293	185.658	987.03306	-1.2046	0.64893	0.4707	-37.13	-61.5805	810.985	-1.0195	0.58203	0.18066	12.325	145.0659	435.474	-0.17334	-0.018555	0.14307	-3.59	-66.954	850.479	-1.3354	0.62256	0.38086	78.233	88.929	1256.1139	-1.685	1.1997	-0.059082	95.6676	18.1809	49.667	0.021484	0.12354	-0.085449
1.852	27.548	46.398	388.58423	-0.46387	0.10156	-0.071777	-42.537	140.964	976.128	-1.1289	0.62305	0.44189	-17.066	-95.2837	859.638	-1.0974	0.60522	0.20117	41.416	153.5121	421.0194	-0.12354	-0.056152	0.11865	-20.204	-90.809	892.052	-1.4209	0.63965	0.43116	89.72715	96.394	1269.16	-1.6597	1.1919	-0.052246	26.835	30.0869	62.458	0.012207	0.12695	-0.094238
1.854	18.922	70.264	475.687	-0.57666	0.14404	-0.045898	-2.462	142.018	948.0876	-1.0684	0.59668	0.41651	9.742	-137.785	910.966	-1.1753	0.62744	0.22461	33.638	168.315	377.1702	-0.10156	-0.068848	0.104	-25.857	-138.0109	931.838	-1.4946	0.65674	0.48242	40.196	131.932	1239.3553	-1.6284	1.1733	-0.037598	20.577	41.7442	128.602	-0.021484	0.13477	-0.10107
1.856	9.217	65.157	558.333	-0.67749	0.16894	-0.010742	-16.892	177.34	898.4473	-1.0073	0.57764	0.40283	11.937	-99.02	903.444	-1.271	0.64307	0.27148	13.712	114.5843	382.3658	-0.065918	-0.099609	0.083496	37.083	-109.7468	930.045	-1.5835	0.67041	0.55469	15.032	76.208	1239.684	-1.6152	1.1641	-0.024902	55.296	70.2831	171.5622	-0.064698	0.14405	-0.093751
1.858	44.37	35.6465	627.866	-0.78467	0.2041	0.01123	-0.710000000000001	103.2049	875.5478	-0.93994	0.54736	0.37695	47.563	-136.825	897.635	-1.3223	0.64648	0.30078	16.417	143.592	380.6224	-0.038086	-0.11402	0.062744	48.562	-142.25	908.425	-1.6265	0.67041	0.58789	34.942	107.744	1221.9738	-1.5977	1.1445	-0.01123	28.096	41.2403	220.8771	-0.12207	0.15625	-0.07666
1.86	48.455	42.7101	670.045	-0.94873	0.25195	0.069336	16.539	141.667	840.8415	-0.90869	0.53369	0.3667	80.875	-152.977	872.462	-1.4121	0.64453	0.35449	3.956	134.571	359.6671	-0.018555	-0.12842	0.043945	55.204	-151.857	897.027	-1.6836	0.67773	0.64307	-31.192	91.565	1182.25204	-1.5757	1.1274	-0.0056152	47.635	37.3338	285.0102	-0.23242	0.17383	-0.027832
1.862	48.359	-28.037	756.413	-1.0464	0.27783	0.11084	1.732	124.998	809.0438	-0.83936	0.50342	0.34033	58.82	-135.788	811.75	-1.451	0.62427	0.39819	34.067	123.526	360.4612	0.0068359	-0.14844	0.024414	51.209	-130.12	853.508	-1.7185	0.67993	0.67993	-38.006	59.083	1180.251	-1.5449	1.1055	-0.0073242	9.128	41.97	347.9962	-0.29883	0.18652	0.0024414
1.864	43.915	-76.156	831.1035	-1.2363	0.34717	0.20557	33.365	68.951	805.5424	-0.77734	0.46484	0.31885	88.8506	-170.203	791.245	-1.4902	0.59961	0.43213	16.815	160.264	306.158	0.02002	-0.1543	0.019043	41.487	-158.963	830.7349	-1.7461	0.67773	0.70557	-0.768000000000001	101.8871	1155.402	-1.4961	1.0781	-0.020508	5.778	15.3696	430.6419	-0.43555	0.2207	0.065918
1.866	1.599	-73.466	874.3372	-1.386	0.40503	0.29224	26.388	126.496	779.9007	-0.74414	0.45313	0.30469	77.3673	-113.242	739.42595	-1.5112	0.56689	0.46973	-11.037	108.6403	279.288	0.037598	-0.15967	0.0048828	72.4072	-128.949	844.7541	-1.7729	0.67432	0.72461	-31.346	67.8212	1122.984	-1.4668	1.0625	-0.025391	64.54	28.5292	507.0451	-0.55616	0.24976	0.11572
1.868	46.57	-134.8824	906.963	-1.5425	0.45947	0.37695	53.8046	94.3723	764.0764	-0.6665	0.4126	0.27881	63.0579	-69.803	703.416	-1.5195	0.55664	0.4873	4.909	124.1	266.39158	0.047363	-0.16504	-0.0065916	58.3585	-107.3979	832.6326	-1.7793	0.67773	0.73096	5.48	75.2475	1111.6506	-1.4102	1.0332	-0.032227	44.841	13.678	539.116	-0.67529	0.2876	0.1709
1.87	43.6774	-113.0847	914.741	-1.7417	0.51514	0.49023	102.303	109.8144	749.32	-0.61304	0.38842	0.26147	75.867	-68.826	730.181	-1.5093	0.55518	0.50732	14.139	128.682	236.3714	0.0625	-0.17236	-0.018555	37.5898	-121.235	847.811	-1.7729	0.69971	0.73828	17.329	124.401	1048.4829	-1.3709	1.0091	-0.046142	65.158	-38.472	675.645	-0.83984	0.34375	0.25049
1.872	-24.123	-100.682	917.738	-1.834	0.53906	0.54541	55.426	164.387	701.4762	-0.56445	0.36084	0.24268	56.9737	-36.398	747.375	-1.4951	0.55517	0.51416	29.321	86.104	231.3628	0.077148	-0.17236	-0.033691	41.9022	-64.891	867.6092	-1.7529	0.72852	0.73388	-2.47	101.7094	1029.81	-1.3379	0.98438	-0.039551	102.383	-59.484	759.12	-0.93311	0.37646	0.29395
1.874	28.17811	-136.348	929.753	-1.9956	0.56494	0.62012	82.6405	121.7113	687.606	-0.49707	0.32617	0.21777	49.149	-62.238	802.38	-1.4746	0.56348	0.51758	42.207	102.0048	221.383	0.089355	-0.17285	-0.041504	47.74217	-58.454	888.594	-1.7129	0.75293	0.72705	30.899	165.888	1003.305	-1.3105	0.95508	-0.027832	76.138	-107.491	856.3153	-1.1289	0.44922	0.39307
1.876	23.1631	-93.348	870.809	-2.0954	0.5813	0.63843	86.3985	157.13	662.859	-0.45703	0.30176	0.2085	77.752	-75.076	848.609	-1.4395	0.57422	0.51855	13.908	83.90466	202.1152	0.098633	-0.17578	-0.056152	36.9881	-66.231	950.951	-1.647	0.77979	0.70605	2.785	177.979	968.765	-1.2983	0.94092	-0.019531	111.582	-118.462	947.21	-1.2908	0.51978	0.47827
1.878	-2.74	-112.781	855.118	-2.1538	0.59326	0.65234	45.3982	138.187	614.231	-0.39941	0.26025	0.18164	58.089	-30.923	877.361	-1.4175	0.57959	0.51953	47.707	89.0621	204.625	0.10839	-0.177	-0.066651	38.821	-42.167	972.415	-1.6055	0.7832	0.69287	13.879	145.5513	967.7543	-1.2656	0.89941	-0.0068359	50.221	-102.445	983.3704	-1.4512	0.59375	0.56934
1.88	3.109	-121.647	867.991	-2.1719	0.58984	0.64795	95.723	101.4418	592.761	-0.35376	0.23559	0.17041	46.7982	-90.347	923.012	-1.3921	0.59912	0.52344	59.5047	131.422	170.81813	0.11182	-0.17773	-0.077148	26.7311	-125.814	1014.813	-1.5098	0.78418	0.65283	27.674	196.008	910.0221	-1.2441	0.87451	0.0024414	-15.2219	-120.1339	1057.537	-1.6699	0.70508	0.70264
1.882	-20.887	-76.1297	839.915	-2.1792	0.5896	0.64648	45.889	154.38	539.6136	-0.31104	0.2085	0.15186	62.0213	-106.399	947.1344	-1.3757	0.60962	0.54175	38.405	99.276	154.836	0.10498	-0.17529	-0.081055	43.9867	-159.3706	1088.076	-1.4333	0.76684	0.61108	12.033	145.7156	893.7637	-1.2158	0.85156	0.012695	8.36	-94.526	1056.472	-1.7656	0.76367	0.76465
1.884	8.456	-104.3221	845.905	-2.1929	0.59326	0.63477	40.276	127.3261	512.48906	-0.25684	0.16895	0.12109	56.5164	-128.817	949.50285	-1.3662	0.62109	0.55322	53.791	111.342	137.557	0.10352	-0.17188	-0.086914	38.098	-163.826	1099.289	-1.3569	0.75049	0.56055	56.0024	146.8347	886.914	-1.1602	0.81738	0.013672	-32.068	-76.977	1033.675	-1.9346	0.86328	0.87451
1.886	41.704	-63.041	851.078	-2.1147	0.56299	0.5752	69.609	144.92509	474.7728	-0.23438	0.15088	0.10791	37.568	-228.641	995.2346	-1.3535	0.63867	0.55518	61.7195	105.749	118.7105	0.099121	-0.1626	-0.087891	-4.873	-223.727	1102.8885	-1.2813	0.7207	0.49219	35.801	176.3966	837.5128	-1.1289	0.79688	0.013672	-7.923	-84.045	1099.162	-2.0134	0.91577	0.92212
1.888	30.609	-47.458	853.873	-2.0508	0.54395	0.53662	-4.421	180.805	410.145	-0.18506	0.11621	0.084961	-0.666000000000004	-227.975	1019.8764	-1.3398	0.65039	0.55029	54.503	61.325	116.318	0.094727	-0.15918	-0.091065	21.499	-200.159	1114.8816	-1.249	0.70898	0.46045	18.73	123.4083	818.293	-1.0562	0.75635	0.0068359	11.675	-72.462	1114.246	-2.062	0.95361	0.93066
1.89	72.285	-104.178	893.853	-1.916	0.52148	0.45947	46.625	116.558	419.6866	-0.15674	0.09424	0.067382	-26.498	-251.553	1050.1738	-1.3086	0.67773	0.52686	66.27612	85.172	114.096	0.092285	-0.15088	-0.093262	-34.6355	-231.789	1122.219	-1.2051	0.68359	0.4043	83.655	154.9717	776.085	-1.0036	0.72583	0.0024414	-14.1656	-97.699	1098.351	-2.0723	0.96289	0.896
1.892	72.439	-76.451	910.0872	-1.8042	0.50147	0.38892	39.914	139.1219	400.3125	-0.13135	0.069824	0.050293	-53.9489	-277.796	1104.1515	-1.2827	0.68653	0.50439	36.927	51.4714	105.438	0.094238	-0.14697	-0.097656	-70.773	-266.901	1169.2862	-1.185	0.67139	0.36523	41.572	130.9457	748.748	-0.95508	0.69141	-0.0078125	23.579	-105.7775	1100.396	-2.0535	0.96802	0.83618
1.894	47.186	-118.698	933.056	-1.6855	0.47949	0.31689	-11.262	123.5258	375.41	-0.10449	0.044922	0.029785	-78.472	-199.074	1083.8883	-1.2593	0.69775	0.47656	45.623	31.9342	99.3154	0.097168	-0.14307	-0.1001	-37.5632	-214.872	1151.4111	-1.1777	0.65625	0.34131	56.4972	112.235	755.3855	-0.89404	0.64502	-0.0039063	-24.831	-96.209	1065.56	-2.0078	0.94336	0.78076
1.896	23.487	-165.372	1012.0534	-1.5503	0.47412	0.24414	31.763	99.5503	380.147	-0.088379	0.033691	0.016602	-67.3033	-201.3528	1116.6125	-1.2417	0.7124	0.43555	51.3554	48.8508	69.50046	0.11475	-0.13965	-0.10645	-45.185	-209.01	1173.673	-1.1758	0.63965	0.33057	79.176	176.174	722.6766	-0.85986	0.62744	-0.0092773	-71.5464	-102.314	1075.239	-1.9473	0.9082	0.69971
1.898	-33.381	-127.7461	1049.1142	-1.5078	0.48242	0.2251	-11.589	154.255	338.079	-0.061523	0.012207	0.0029297	-33.084	-157.955	1133.7776	-1.2363	0.71484	0.40723	28.976	12.55	49.048	0.1233	-0.14039	-0.11182	-40.8115	-163.769	1226.1265	-1.1841	0.6333	0.32813	21.436	143.5	708.534	-0.79932	0.57861	-0.010742	7.962	-71.292	1070.244	-1.9102	0.87109	0.66162
1.9	-29.2122	-213.194	1096.5811	-1.4878	0.54541	0.23145	-6.879	109.632	330.3346	-0.050293	0.0029297	-0.0058594	-42.2753	-73.769	1125.5728	-1.2417	0.71729	0.37695	31.135	35.439	45.974	0.13867	-0.13867	-0.12012	-34.2516	-91.749	1196.5776	-1.1978	0.62354	0.32227	42.02011	164.416	694.196	-0.74926	0.54517	-0.019043	28.459	-56.931	1065.659	-1.748	0.7832	0.54639
1.902	-15.767	-218.723	1131.82256	-1.5069	0.60035	0.26221	19.458	99.1956	306.0434	-0.036621	-0.0073242	-0.012695	-27.7679	-91.494	1157.175	-1.2578	0.7168	0.34814	0.823	37.4235	36.89784	0.16016	-0.14697	-0.13037	-43.7352	-112.846	1216.3597	-1.2137	0.62818	0.31811	10.149	172.174	640.5252	-0.70117	0.51563	-0.020508	55.50103	-92.724	1112.627	-1.626	0.71387	0.45508
1.904	-64.385	-210.924	1133.4059	-1.521	0.64893	0.30176	-35.967	120.386	254.5	-0.029297	-0.022949	-0.02002	-38.317	-17.419	1171.0498	-1.2734	0.71484	0.34033	8.91	6.8137	55.136	0.16455	-0.15234	-0.13721	-14.335	-59.625	1231.12204	-1.2266	0.63672	0.30908	-17.045	135.5655	636.0549	-0.63232	0.47168	-0.032227	50.36	-116.7989	1155.9645	-1.5474	0.68213	0.37109
1.906	-31.277	-243.832	1187.255	-1.5	0.68652	0.3252	12.168	76.066	271.824	-0.026367	-0.026367	-0.029785	-13.441	-6.736	1182.6982	-1.3008	0.70508	0.33252	16.009	27.0799	25.9171	0.18018	-0.16113	-0.146	-19.9416	-38.266	1240.7234	-1.2456	0.6665	0.30029	0.498999999999999	181.802	594.9689	-0.6001	0.45361	-0.036621	-27.191	-126.6767	1168.52	-1.5015	0.69971	0.29688
1.908	4.822	-177.0716	1201.449	-1.4761	0.70361	0.33008	12.982	92.2763	255.364	-0.019043	-0.036621	-0.030273	-8.076	-58.256	1228.118	-1.3232	0.69873	0.32569	-2.727	-8.21941	24.0675	0.18238	-0.17261	-0.15283	-8.903	-88.578	1264.116	-1.2661	0.68213	0.29688	-31.20256	181.288	547.3701	-0.54102	0.41748	-0.045898	-31.023	-150.197	1240.727	-1.4702	0.70996	0.27734
1.91	31.535	-160.243	1190.7	-1.4019	0.70361	0.32568	-0.963000000000001	67.5317	235.4409	-0.014404	-0.049073	-0.032959	4.333	-17.187	1191.3279	-1.3472	0.69385	0.32422	1.622	-5.93662	43.317	0.17627	-0.1748	-0.15918	7.802	-54.104	1239.2924	-1.3477	0.7041	0.2959	-25.3321	158.0834	531.0629	-0.49389	0.38892	-0.050293	-82.83	-133.6864	1261.198	-1.3628	0.7251	0.23193
1.912	74.73759	-159.861	1206.864	-1.3438	0.69189	0.30249	28.064	39.649	222.803	-0.011719	-0.058105	-0.039551	6.189	-100.34548	1196.66343	-1.3691	0.70898	0.32471	-3.461	25.526	28.106	0.16064	-0.17725	-0.15479	-26.9794	-100.257	1232.927	-1.459	0.72412	0.30053	-41.1365	189.217	469.362	-0.45264	0.36133	-0.058594	-142.299	-161.326	1259.7905	-1.2775	0.71753	0.19555
1.914	68.8856	-82.66	1180.121	-1.2827	0.68604	0.2793	17.097	91.2871	163.7109	-0.0083008	-0.074219	-0.039551	14.64	-122.7418	1240.786	-1.3867	0.71094	0.32471	-6.675	7.6427	15.148	0.14893	-0.17432	-0.15234	-28.3389	-142.2	1286.725	-1.5952	0.73389	0.32275	-66.5297	159.86	444.604	-0.3999	0.32568	-0.063965	-62.434	-190.933	1295.392	-1.1953	0.70508	0.1626
1.916	107.4684	-100.13	1213.424	-1.2173	0.67236	0.25635	38.649	77.4897	171.2595	0.00048828	-0.07959	-0.04541	4.815	-102.475	1239.5096	-1.4395	0.72949	0.32422	8.919	28.3009	3.578	0.11621	-0.16064	-0.14209	-6.806	-115.3141	1276.592	-1.7969	0.74707	0.37354	-20.254	172.494	430.609	-0.37207	0.30078	-0.064941	-28.519	-166.701	1268.548	-1.124	0.69043	0.12988
1.918	129.1982	-61.318	1234.4436	-1.1953	0.66895	0.24951	60.1277	101.0947	163.9738	0.01123	-0.095215	-0.058105	25.1467	-198.051	1294.8618	-1.5066	0.74146	0.33228	-23.894	19.6983	-15.747	0.090576	-0.15625	-0.13575	-11.8704	-179.677	1318.6123	-1.9077	0.7583	0.40625	-41.10111	177.716	395.5138	-0.31787	0.26611	-0.07373	-16.669	-192.906	1303.399	-1.0957	0.6875	0.12402
1.92	80.845	-6.22499999999999	1210.092	-1.2031	0.67578	0.24512	29.499	119.332	144.644	0.01587	-0.10938	-0.067627	57.553	-175.249	1313.83	-1.584	0.75195	0.3457	-16.919	-21.898	1.05	0.062988	-0.14551	-0.12158	26.5554	-162.822	1380.364	-2.1436	0.78516	0.48877	-53.4624	145.857	412.181	-0.27197	0.23682	-0.084473	22.837	-169.8076	1324.0257	-1.062	0.67822	0.12256
1.922	80.674	-62.477	1261.717	-1.2515	0.69092	0.26953	70.093	75.8095	143.264	0.022461	-0.12549	-0.077148	63.456	-176.711	1326.404	-1.7173	0.76514	0.37695	17.055	7.2848	-7.8495	0.029785	-0.13525	-0.10742	11.5471	-142.449	1371.375	-2.3052	0.81348	0.56519	-18.8073	167.615	390.541	-0.25098	0.22363	-0.084473	12.099	-127.999	1318.0691	-1.0481	0.67749	0.13086
1.924	64.457	-32.927	1269.518	-1.3403	0.71143	0.3125	67.2838	95.233	112.275	0.032715	-0.1416	-0.099121	89.611	-208.319	1365.985	-1.7925	0.7749	0.40039	12.98	-5.3861	-8.1982	0.018555	-0.13574	-0.097656	13.2133	-182.429	1409.838	-2.4526	0.854	0.64453	-48.8376	138.526	368.22132	-0.20996	0.20361	-0.091309	78.9495	-147.193	1355.814	-1.0405	0.68604	0.13477
1.926	33.771	-50.635	1260.951	-1.4927	0.73975	0.39648	50.33	71.082	109.51	0.041992	-0.14893	-0.11182	77.324	-107.5932	1345.457	-1.9673	0.79541	0.46191	21.005	-11.6789	10.9337	-0.0048828	-0.12842	-0.086914	44.84	-106.2761	1394.56	-2.6304	0.9126	0.74023	-11.14	126.658	374.588	-0.17969	0.18579	-0.093995	101.193	-106.329	1334.0398	-1.061	0.70752	0.1582
1.928	65.058	-105.199	1301.991	-1.5952	0.74268	0.44629	94.61	53.4943	108.6579	0.054199	-0.1665	-0.12988	58.058	-109.12067	1356.398	-2.0982	0.81202	0.52344	15.77	6.76993	5.2465	-0.02417	-0.12134	-0.07373	0.552000000000001	-99.86645	1354.32	-2.7065	0.94775	0.78711	-7.527	143.2697	335.78214	-0.1499	0.17139	-0.093262	91.611	-84.415	1307.8905	-1.0894	0.72705	0.17383
1.93	69.796	-49.3317	1303.134	-1.8003	0.75439	0.54199	40.309	81.303	60.3119	0.066894	-0.17749	-0.13769	68.698	-89.318	1382.146	-2.2266	0.83594	0.59424	11.33	-26.2235	21.2894	-0.04248	-0.11621	-0.069336	3.578	-99.3515	1358.255	-2.8257	1.022	0.86816	-33.226	97.52	315.5309	-0.12109	0.15137	-0.088379	143.806	-68.6553	1367.48838	-1.2041	0.76953	0.23096
1.932	83.77	-105.845	1356.429	-1.9581	0.7627	0.61816	55.275	55.65	54.93	0.07373	-0.18799	-0.14893	40.2076	-36.162	1321.459	-2.4038	0.86768	0.69922	43.75	15.0147	10.87	-0.073242	-0.10596	-0.040527	6.6578	-21.685	1336.723	-2.8757	1.0676	0.90844	17.9	105.349	296.351	-0.11279	0.14355	-0.080078	68.84	-5.751	1333.664	-1.3378	0.79395	0.30371
1.934	139.3411	-122.634	1384.172	-2.0996	0.76758	0.68896	73.816	57.376	48.2549	0.070313	-0.20117	-0.15771	7.288	-89.2373	1315.198	-2.4766	0.88477	0.7583	45.87424	17.4829	-1.441	-0.084473	-0.099609	-0.02832	-36.948	-61.1099	1360.669867	-2.896	1.104	0.93555	1.543	110.5936	258.815	-0.1001	0.12744	-0.072266	20.121	-40.858	1355.237	-1.5034	0.82568	0.39648
1.936	130.3775	-93.61	1361.478	-2.2559	0.78125	0.75244	21.87	41.868	46.2171	0.079102	-0.21094	-0.16406	-0.0189999999999984	-42.9105	1323.488	-2.623	0.92285	0.86377	28.517	1.5124	12.769	-0.11914	-0.089355	0	-20.788	-37.869	1389.6522	-2.9058	1.1274	0.96875	25.3746	72.8417	270.058	-0.093506	0.11792	-0.06128	56.885	-63.5265	1393.8945	-1.7754	0.86719	0.54297
1.938	133.618	-162.6549	1409.626	-2.3276	0.78662	0.76953	43.2982	25.4702	58.9403	0.078613	-0.21777	-0.16992	-38.272	-11.6313	1312.898	-2.7153	0.95068	0.93115	48.668	42.565	2.0876336	-0.14087	-0.076904	0.018799	-46.894	1.302	1352.8589	-2.9121	1.1338	0.97119	54.857	89.596	242.381	-0.091309	0.11035	-0.053223	11.99	-48.7997	1382.695	-1.9219	0.89453	0.61963
1.94	123.5456	-116.965	1453.525	-2.4292	0.80713	0.78418	17.025	48.928	40.162	0.077637	-0.22437	-0.17163	-51.6644	-49.282	1341.139	-2.7808	0.97705	0.99023	48.1676	13.9175	-8.3531	-0.1626	-0.070313	0.035645	-61.995	-51.33059	1363.7524	-2.9043	1.1328	0.98535	31.47	77.5322	213.61017	-0.095215	0.10498	-0.040039	90.7548	-89.361	1423.2502	-2.228	0.95557	0.77539
1.942	79.302	-83.793	1422.177	-2.4734	0.80981	0.78345	-4.582	36.551	42.90402	0.068359	-0.21973	-0.17188	-48.3901	13.8744	1306.022	-2.814	1.0103	1.0249	50.934	9.76	6.4165	-0.18555	-0.055664	0.053223	-23.2561	10.234	1362.3291	-2.8874	1.1252	0.97925	68.5939	79.8841	217.2886	-0.092773	0.10059	-0.022949	160.577	-60.158	1405.578	-2.4236	1.0032	0.87915
1.944	94.405	-91.6171	1409.6689	-2.5093	0.80127	0.77344	36.406	32.742	48.4398	0.055664	-0.22217	-0.16406	-64.393	-44.2286	1323.0744	-2.8335	1.022	1.0391	43.5266	18.2302	10.6961	-0.2024	-0.044677	0.069092	-73.517	13.5939	1335.914	-2.8672	1.1152	0.97021	72.059	122.4888	172.291	-0.097656	0.10938	-0.0058594	122.6141	-65.27053	1390.544	-2.5835	1.0532	0.94922
1.946	70.2	14.0896	1361.594	-2.5972	0.78662	0.76709	-17.174	41.1101	36.851	0.055664	-0.22607	-0.1543	-50.1279	-64.777	1378.072	-2.8237	1.0356	1.0469	40.442	-15.7581	29.0153	-0.21094	-0.035156	0.078613	-53.1258	-26.8922	1371.903	-2.8281	1.0938	0.95557	18.967	100.386	174.83	-0.090577	0.11206	0.0012207	154.389	-104.4357	1422.514	-2.707	1.123	0.98877
1.948	28.398	-15.6352	1366.358	-2.6426	0.7793	0.77393	2.698	14.82	31.6732	0.045898	-0.21875	-0.12744	-57.786	-2.33	1367.843	-2.7956	1.0198	1.0329	46.5364	26.165	13.3855	-0.21973	-0.015137	0.087891	-29.7589	6.717	1383.7991	-2.8086	1.0801	0.9458	63.1192	110.2513	173.43527	-0.09082	0.11328	0.013184	99.746	-87.329	1405.843919	-2.7241	1.1489	0.97461
1.95	55.043	-3.505	1386.4416	-2.7305	0.76758	0.78955	9.406	26.589	29.7982	0.031494	-0.22119	-0.11816	-66.114	-79.1115	1394.2352	-2.7651	1.0034	1.0176	31.943	48.645	-3.189	-0.2168	-0.0078125	0.090332	-87.652	-73.2851	1405.672	-2.7573	1.0591	0.91992	54.8318	98.4896	122.2521	-0.08252	0.11816	0.030273	85.074	-139.583	1419.6388	-2.6909	1.1802	0.92188
1.952	56.944	46.847	1350.0931	-2.7566	0.74731	0.78589	-30.702	34.8024	31.396	0.02002	-0.22119	-0.10889	-61.638	-44.7181	1406.3436	-2.7031	0.97266	0.99658	15.311	29.696	13.658	-0.21094	0	0.094727	-32.538	-71.2301	1429.667	-2.7124	1.0464	0.89649	24.455	66.13301	122.1067	-0.08252	0.12451	0.041016	128.555845	-126.373	1453.894	-2.6816	1.1709	0.90283
1.954	74.22	-16.6448	1392.8254	-2.7539	0.71875	0.78271	13.64	24.3542	22.6098	0.012207	-0.22852	-0.10449	-86.19	-37.973087	1377.0027	-2.6675	0.96338	0.97656	29.546	49.231	6.8965	-0.20044	0.0087891	0.090088	-56.841	-33.8516	1373.104	-2.6636	1.0327	0.87109	38.00075	87.8863	100.8229	-0.072266	0.12988	0.058594	47.894	-56.624	1412.1255	-2.6714	1.1333	0.87109
1.956	76.897	17.3606	1424.555	-2.728	0.69971	0.75879	-20.01	35.74	8.2032	0.0063477	-0.22656	-0.097168	-66.465	-101.248	1394.9814	-2.6011	0.93799	0.94141	12.161	6.5617	9.80137	-0.18066	0.012695	0.080566	-78.491	-70.611	1379.538	-2.5894	1.0103	0.84766	-2.12	62.2916	85.1355	-0.067627	0.13233	0.06958	41.2	-69.81	1403.8788	-2.5918	1.0352	0.80127
1.958	79.3	18.408	1391.431	-2.7026	0.69385	0.74805	-37.862	14.8397	0.6347	0.0063477	-0.22119	-0.093262	-26.5608	-3.5879	1358.2578	-2.5464	0.92431	0.91601	23.151	-2.597	17.4658	-0.14502	0.0097656	0.071777	-23.114	5.8664	1352.071	-2.5601	0.99658	0.83789	15.548	48.34935	92.8814	-0.058105	0.13525	0.078613	43.226	5.143	1376.1352	-2.5625	1.0117	0.77783
1.96	125.6435	-42.3916	1401.735	-2.6504	0.70117	0.72119	14.017	0.3434	25.38	0.0058594	-0.22339	-0.09375	-27.8235	-21.3853	1345.75385	-2.4883	0.92188	0.88525	11.289	19.4617	15.2104	-0.12109	0.012207	0.0625	-31.4882	8.2363	1287.823	-2.48	0.95752	0.80859	2.062	59.11642	57.931	-0.046875	0.13281	0.09082	-4.76000000000001	20.6012	1365.6527	-2.5684	1.0215	0.75244
1.962	117.188	33.7273	1368.366	-2.6208	0.70826	0.69946	-12.551	12.9008	15.76529	0.0053711	-0.22217	-0.093262	-29.057	-9.8659	1354.702	-2.4038	0.90771	0.84766	-10.203	-0.401	31.6031	-0.072266	0.0078125	0.037109	0.655000000000001	-13.161	1298.745	-2.3984	0.92969	0.771	-20.678	18.318	46.374	-0.037598	0.12695	0.091797	29.493	-24.38058	1402.0086	-2.5837	1.0286	0.73755
1.964	88.272	-16.1091	1378.673	-2.5972	0.71436	0.68555	-3.367	-15.2447	37.298	-0.0024414	-0.21924	-0.085449	-17.4352	72.805	1313.2362	-2.3691	0.9043	0.83057	2.48	22.5962	43.517	-0.031006	0.0043946	0.011474	-1.0307	61.3725	1275.481	-2.3418	0.91797	0.75244	0.0350000000000001	31.6979	50.472	-0.01416	0.1167	0.10059	16.815	23.345	1374.7989	-2.5718	1.0239	0.7207
1.966	92.229	-31.583	1428.83	-2.5781	0.7168	0.67383	34.576	8.4601	29.663	-0.0068359	-0.2207	-0.081543	10.285	21.079	1291.824	-2.3027	0.9043	0.80127	-16.263	24.243	0.440000000000001	0.0058594	0.00097656	-0.0083008	-52.64	33.585	1278.452	-2.2227	0.88281	0.70752	-32.55	43.964	39.4823	0.0048829	0.11133	0.094971	38.695	-29.0671	1362.4121	-2.4941	0.99609	0.67822
1.968	82.204	11.0916	1415.274	-2.564	0.71533	0.66992	0.251999999999999	12.3854	20.3419	-0.023926	-0.22363	-0.072266	31.9578	95.155	1270.512	-2.2656	0.8916	0.78516	-18.074	5.0725	12.284	0.050293	-0.010742	-0.037109	27.41016	78.584	1291.034	-2.124	0.85937	0.66699	-28.323	32.392	52.3549	0.027832	0.09668	0.094238	106.9834	-30.0241	1387.426	-2.4487	0.97412	0.66016
1.97	92.745	-70.8324	1424.775	-2.5566	0.70508	0.65674	59.7779	-4.2508	42.079	-0.037353	-0.22436	-0.062744	40.9086	131.783	1253.233	-2.2227	0.88086	0.76807	9.297	37.964	15.8722	0.069824	-0.015625	-0.047852	35.4411	132.67	1235.376	-2.0195	0.83203	0.62744	-10.428	53.776	28.2974	0.063965	0.089355	0.081055	56.19	25.433	1348.6943	-2.3979	0.93994	0.63672
1.972	105.4984	-17.314	1420.76	-2.5359	0.69263	0.65406	46.247	20.3886	15.4546	-0.058105	-0.22461	-0.055176	52.25336	77.5955	1271.968	-2.168	0.86914	0.75244	-14.004	6.85753	29.361	0.09668	-0.014648	-0.064453	-1.156	78.233	1243.8139	-1.8906	0.79492	0.58105	-44.4152	26.5511	22.6933	0.083496	0.080078	0.078125	88.655	-19.759	1330.099	-2.4024	0.92676	0.63428
1.974	83.962	16.407	1387.797	-2.5156	0.67773	0.64893	33.861	-11.1181	21.18375	-0.083496	-0.21191	-0.035156	67.302	161.278	1250.4745	-2.1309	0.8623	0.74463	3.54	4.1052	43.223	0.10913	-0.012695	-0.074463	41.137	118.299	1244.856	-1.8296	0.77393	0.55762	-9.42	20.255384	47.875	0.12451	0.070801	0.058594	117.823	24.548	1325.221	-2.4141	0.92578	0.63916
1.976	111.408	-11.265	1360.4556	-2.4609	0.66602	0.63916	79.3026	-5.5049	33.2827	-0.096191	-0.20752	-0.025879	61.867	104.813	1240.3363	-2.0488	0.84473	0.71729	28.817	16.5783	18.1754	0.12207	-0.0073242	-0.08252	22.0749	96.62	1192.1679	-1.7197	0.73438	0.51416	-1.022	33.303	18.88351	0.15527	0.061523	0.04541	66.572	-2.413	1325.31	-2.418	0.92188	0.63525
1.978	113.337	88.4054	1292.202	-2.4253	0.66455	0.63477	40.192	13.0542	14.494	-0.12598	-0.19189	-0.0053711	68.505	64.497	1262.618	-1.9819	0.83643	0.69531	7.989	-21.1549	18.525	0.12646	0.00097656	-0.085938	34.96685	65.3176	1197.278	-1.6482	0.70483	0.49219	-22.837	20.797	11.727	0.17969	0.049316	0.035645	91.733	-43.6246	1374.4675	-2.4116	0.92236	0.625
1.98	79.503	64.3576	1262.957	-2.3413	0.65283	0.61719	54.6689	-8.7844	30.2845	-0.14649	-0.18115	0.012451	67.336	102.065	1257.202	-1.9067	0.81494	0.67578	43.976	-2.8792	31.772	0.12695	0.0014648	-0.080566	48.764	113.07204	1167.424	-1.5859	0.67773	0.46729	10.664	48.611	11.939	0.19727	0.034668	0.01123	98.1846	25.063	1361.363	-2.3477	0.91406	0.58691
1.982	121.748	69.635	1278.62	-2.2603	0.64698	0.60352	68.0075	3.7388	21.708	-0.1709	-0.16504	0.027344	45.19627	8.485	1248.7395	-1.8086	0.78711	0.64404	30.646	6.9346	3.3408	0.13281	0.011719	-0.092285	-16.667	40.054	1154.584	-1.5137	0.64063	0.44775	-12.602	42.193	-6.274	0.20313	0.02832	0.0048828	78.482	-3.627	1358.613	-2.2754	0.89648	0.55029
1.984	130.9507	128.846	1260.1531	-2.1733	0.64893	0.57617	21.677	-0.5696	5.284229	-0.20557	-0.15137	0.044434	35.146	56.736	1216.95541	-1.7598	0.77344	0.62939	20.925	3.48864	12.541	0.12939	0.016602	-0.08667	30.325	54.688	1140.233	-1.4746	0.61816	0.43994	15.582	14.9934	11.7131	0.19824	0.0097656	-0.0068359	104.076	22.134	1353.716	-2.1948	0.87549	0.50977
1.986	133.7982	63.361	1278.7662	-2.0547	0.64844	0.53467	63.8057	-5.9415	24.9493	-0.21777	-0.14648	0.052246	16.8647	83.514	1159.591	-1.6694	0.74365	0.6084	44.9866	39.254	13.857	0.12402	0.026855	-0.088379	28.543	76.769	1096.799	-1.4082	0.58398	0.43115	52.778	23.338	-0.5171	0.18555	0.0019532	-0.0092773	69.867	82.161	1291.34224	-2.0913	0.83838	0.47656
1.988	115.8579	111.656	1247.7603	-1.9897	0.65088	0.50977	38.79	18.63503	-7.356	-0.23291	-0.13281	0.064941	-22.124	35.124	1154.419	-1.6052	0.71411	0.5852	19.54	6.209	23.3768	0.1123	0.041016	-0.078613	-38.9485	36.297	1102.965	-1.366	0.55395	0.41724	27.199	-5.885	3.62699	0.16357	-0.0083008	-0.0083008	102.956	41.224	1254.709	-2.0508	0.82422	0.45947
1.99	62.799	125.586	1206.0939	-1.8647	0.64893	0.47607	24.074	0.1895	6.739	-0.23975	-0.12207	0.078613	-5.723	124.767	1129.994	-1.5483	0.68408	0.56836	47.039	-14.8047	45.454	0.10352	0.047363	-0.07959	8.7316	106.571	1081.248	-1.3125	0.52637	0.4165	61.8416	2.875	47.197	0.12549	-0.03125	-0.003418	146.3285	107.005	1248.315	-1.9727	0.80664	0.43604
1.992	73.851	68.725	1223.4385	-1.7791	0.64282	0.44677	49.4386	-2.1474	20.754	-0.23877	-0.11377	0.082031	-7.506	90.623	1117.238	-1.4858	0.65186	0.5459	48.9489	-1.5706	8.0045	0.092285	0.05957	-0.081055	-20.126	106.026	1018.77422	-1.251	0.49023	0.40869	57.222	28.0046	30.789	0.098633	-0.035645	0.0024414	93.14	106.288	1242.0926	-1.9167	0.79516	0.4165
1.994	64.156	131.9945	1185.5155	-1.7007	0.64111	0.41992	-6.137	8.3375	-4.6156	-0.23291	-0.10352	0.084961	-17.653	112.836	1109.283	-1.4565	0.63428	0.54395	32.377	-25.6192	18.5885	0.079834	0.071045	-0.078614	0.696999999999996	106.584	991.618	-1.2168	0.47266	0.40479	45.398	-4.459	21.8322	0.049316	-0.053711	0.0087891	142.837	72.422	1265.7735	-1.8594	0.78711	0.40088
1.996	36.718	81.879	1152.192	-1.6094	0.63086	0.39355	13.88	-6.1763	13.1094	-0.21655	-0.1001	0.084717	-16.8236	189.831	1087.491	-1.3921	0.59814	0.52295	56.049	-1.90182	30.789	0.070313	0.087402	-0.078613	31.741	189.118	939.9	-1.1504	0.4375	0.39111	74.9841	18.9798	23.705	0.020752	-0.057129	0.01416	118.985	126.697	1205.9333	-1.7729	0.77979	0.38086
1.998	36.364	58.809	1155.069	-1.5649	0.63135	0.37891	21.65	13.2674	9.7477	-0.19678	-0.099121	0.078613	-32.9903	135.084	1069.067	-1.3491	0.57422	0.51245	33.8586	-3.5639	21.34983	0.050781	0.10352	-0.074707	-39.911	138.834	922.939	-1.0906	0.40625	0.38306	46.7112	12.4973	19.447	-0.0087891	-0.06543	0.023926	78.2565	90.861	1171.4616	-1.73	0.77002	0.37598
2	5.207	118.6326	1112.1175	-1.4941	0.625	0.35986	-22.39	11.5744	2.4531	-0.16602	-0.10352	0.07373	-12.734	185.883	1026.4165	-1.3071	0.54932	0.5	31.983	-33.097	30.147	0.04248	0.1123	-0.072754	8.453	165.93	899.8188	-1.0381	0.375	0.37109	50.704	-3.95078	44.607	-0.036621	-0.063477	0.031738	98.059	107.23442	1144.7499	-1.6421	0.76025	0.35693
2.002	27.306	54.582	1125.7978	-1.4424	0.62109	0.34277	10.963	-3.6624	31.588	-0.14404	-0.10742	0.0625	-13.68	194.139	960.995	-1.252	0.51172	0.48682	46.0171	-3.6747	23.732	0.0083008	0.12402	-0.075195	24.454	182.743	853.5911	-0.96094	0.34082	0.3501	73.5811	26.965	33.0447	-0.043457	-0.06543	0.036133	43.358	143.9171	1100.92714	-1.5778	0.74829	0.33741
2.004	37.873	109.099	1096.651	-1.396	0.62158	0.32617	-26.949	14.6537	-0.616	-0.10693	-0.12305	0.050293	-26.902	132.91963	919.707	-1.2207	0.5	0.48096	15.031	-26.7184	39.979	-0.015869	0.13916	-0.069336	0.0419999999999945	124.265	857.6751	-0.92529	0.32275	0.34229	23.834	-2.1354	33.4144	-0.050781	-0.060059	0.053711	28.246	104.751	1107.8763	-1.5176	0.74023	0.3252
2.006	19.646	148.351	1030.2259	-1.3384	0.61768	0.30664	-18.486	1.351	2.223	-0.072754	-0.12842	0.031739	-29.468	175.46	898.5153	-1.1543	0.45557	0.47021	22.001	-11.4058	103.7311	-0.052246	0.15771	-0.0625	27.535	163.54	825.865	-0.85107	0.28369	0.32324	44.425	3.132	30.447	-0.049805	-0.062988	0.072021	21.676	136.836	1071.264	-1.4355	0.73242	0.30371
2.008	68.163	102.709	1029.5566	-1.2976	0.61011	0.30566	20.107	10.0624	12.896	-0.044922	-0.13574	0.01709	-34.941	114.90547	877.098	-1.1121	0.42797	0.46313	32.784	32.158	107.4973	-0.10547	0.17969	-0.049805	-13.011	130.6526	765.6755	-0.79541	0.25293	0.31103	30.346	9.0326	12.57271	-0.055664	-0.074707	0.081543	-28.452	102.6753	1046.6266	-1.3931	0.71924	0.29688
2.01	60.092	185.894	984.625	-1.2632	0.604	0.29492	-42.556	18.4254	-8.4454	-0.018066	-0.14453	-0.003418	-6.082	97.2415	867.809	-1.064	0.40186	0.45215	10.376	-0.3053	134.849	-0.14209	0.19287	-0.04248	22.49	108.953	738.4896	-0.74463	0.2207	0.29492	16.309	-8.5561	10.1312	-0.062012	-0.083496	0.10254	-0.888999999999999	55.56	1042.3195	-1.3184	0.70703	0.27295
2.012	44.285	157.774	954.2611	-1.2207	0.59375	0.28955	5.636	-2.629	17.6257	-0.0043945	-0.14014	-0.013672	-0.0769999999999982	134.366	837.791	-1.002	0.36719	0.43604	22.526	18.1541	179.653	-0.21826	0.22607	-0.025879	40.31	149.7729	680.837	-0.67773	0.18115	0.28564	37.167	27.464	6.9828	-0.065918	-0.088867	0.10791	-14.226	109.727	983.2783	-1.2634	0.69409	0.26099
2.014	41.169	162.63	927.925	-1.1973	0.59375	0.28955	16.167	18.5698	10.94214	0.01123	-0.13916	-0.030762	7.99	57.994	827.36	-0.97461	0.35059	0.42676	-2.636	33.2062	207.962	-0.28027	0.25464	-0.0065919	-7.462	98.728	676.399	-0.64014	0.16016	0.26758	-10.269	18.9218	-4.806	-0.062988	-0.094727	0.12744	-18.956	82.818	963.8665	-1.2129	0.68359	0.24609
2.016	1.899	214.573	870.983	-1.1499	0.58057	0.27734	-29.174	21.418	10.5035	0.014893	-0.13403	-0.040528	55.662	95.748	802.328	-0.90576	0.31201	0.40918	-5.36	23.281	262.581	-0.35547	0.28223	0.011719	57.5359	126.8583	669.7877	-0.58105	0.12012	0.24609	-21.948	-2.481	30.4858	-0.066162	-0.094971	0.14282	33.915	107.04	932.1529	-1.1445	0.66797	0.23193
2.018	26.391	148.9040103	875.444	-1.1132	0.56884	0.27417	37.7485	7.948	25.9611	0.018066	-0.12695	-0.049316	72.6241	119.3825	750.4418	-0.85083	0.28662	0.39111	22.727	76.068	324.587	-0.46338	0.32275	0.040039	48.2843	131.2849	650.837	-0.52588	0.093505	0.23413	-6.043	23.719	18.2276	-0.066406	-0.09375	0.15527	-1.081	147.511	873.970166	-1.0949	0.65454	0.21924
2.02	29.427	185.81	840.093	-1.0737	0.55908	0.26611	44.755	23.167	18.2962	0.016113	-0.11328	-0.056152	76.847	83.74	742.5889	-0.79248	0.25732	0.37305	-0.567	67.864	379.047	-0.52441	0.34668	0.055664	67.44	82.6881	656.702	-0.47461	0.070801	0.21436	-22.665	-8.0127	13.6935	-0.064453	-0.082031	0.16943	-3.988	102.6116	857.4732	-1.0479	0.64258	0.21094
2.022	7.322	186.751	792.5178	-1.0142	0.5415	0.25781	8.111	15.8964	6.751	0.0087891	-0.10693	-0.060059	96.4713	157.513	706.008	-0.7168	0.21973	0.3501	36.148	50.394	465.552	-0.65283	0.39453	0.097168	105.053	126.6679	614.384	-0.41211	0.040527	0.19287	-13.261	-5.661	25.7506	-0.063477	-0.076172	0.17285	27.8879	149.35	825.5061	-0.99414	0.62988	0.19629
2.024	40.9875	130.87	798.368	-0.97998	0.52588	0.25049	64.1122	33.944	4.95	-0.0039063	-0.089844	-0.064941	98.222	107.0215	689.01	-0.6626	0.19189	0.33056	46.895	40.966	535.8858	-0.76538	0.43383	0.13184	58.732	114.5315	558.109	-0.37695	0.024902	0.18213	-23.66	5.2385	2.9793	-0.059082	-0.064941	0.17383	-15.679	157.153	808.2265	-0.96484	0.63086	0.19678
2.026	32.208	172.969	762.056	-0.91553	0.50146	0.23389	35.98	39.983	0.859999999999999	-0.014404	-0.077637	-0.068603	119.582	97.756	656.053	-0.60498	0.16455	0.31885	45.729	-28.482	629.4177	-0.8833	0.47607	0.16797	68.5032	129.858	523.9942	-0.31738	-0.0078125	0.1582	-30.428	-20.2033	16.0232	-0.05542	-0.060058	0.17065	-2.688	142.86676	792.4501	-0.90137	0.61621	0.18604
2.028	42.469	111.5711	749.1582	-0.86767	0.47632	0.22607	41.026	6.6894	38.9973	-0.025391	-0.062012	-0.062012	96.1	160.696	585.4968	-0.5415	0.12939	0.29492	83.705	-45.725	731.1491	-1.064	0.54248	0.21875	72.3105	171.372	462.5636	-0.27954	-0.025634	0.14258	7.552	12.7555	8.7682	-0.05127	-0.055664	0.17041	-29.118	193.805	733.5285	-0.85376	0.6018	0.17993
2.03	39.546	114.05821	708.0217	-0.81348	0.45557	0.2168	76.6306	6.0874	53.489	-0.044434	-0.047852	-0.079102	92.6046	116.877	561.7573	-0.50586	0.11328	0.28613	72.495	-60.699	777.1388	-1.1611	0.5791	0.2583	50.239	122.8292	418.147	-0.23438	-0.04248	0.12988	-7.245	-3.0529	-1.004	-0.053711	-0.04834	0.16406	-27.878	154.42489	715.6471	-0.81006	0.59229	0.16797
2.032	46.6181	164.998	672.5771	-0.74609	0.41992	0.20068	29.9471	-7.9275	45.8187	-0.050293	-0.037598	-0.07666	82.3906	175.1561	511.269	-0.44092	0.077148	0.25977	48.039	-96.419	856.4428	-1.3613	0.66797	0.33252	56.295	141.275	404.725	-0.1792	-0.061035	0.10938	-13.025	-25.1496	18.542	-0.049805	-0.048828	0.16309	31.097	144.509	695.5036	-0.74561	0.57178	0.15479
2.034	58.661	119.1594	688.8757	-0.70947	0.39795	0.19531	52.73047	-31.0536	58.8458	-0.071289	-0.027344	-0.079102	74.773	187.056	446.337	-0.39331	0.051513	0.2456	50.9882	-74.671	896.4929	-1.5085	0.74243	0.41528	34.551	151.31786	358.674	-0.15771	-0.074707	0.10156	28.657	8.4677	10.6807	-0.050781	-0.038574	0.15479	-12.563	156.362	654.9694	-0.71582	0.55469	0.1499
2.036	33.976	151.2451	678.229	-0.63672	0.36133	0.17871	42.52	7.455	48.551	-0.091553	-0.011963	-0.084717	61.468	127.772	430.312	-0.34717	0.030273	0.22852	9.86	-100.9218	908.834	-1.6494	0.81836	0.49854	44.376	132.86	362.8125	-0.104	-0.088379	0.081055	14.947	-10.1232	0.3136	-0.048095	-0.024902	0.14599	40.5241	119.0449	630.32787	-0.65625	0.53223	0.13916
2.038	15.812	153.012	644.364	-0.58667	0.3352	0.16504	22.906	-1.225	74.964	-0.11377	0.0029297	-0.088379	50.438	175.9169	389.92	-0.29248	0.003418	0.19824	-11.988	-91.974	954.1471	-1.8003	0.9165	0.60352	55.53734	165.431	334.92	-0.071778	-0.10596	0.069336	45.005	10.5308	8.1092	-0.04834	-0.012695	0.1416	70.554	156.089	577.8801	-0.61889	0.50805	0.13769
2.04	12.679	116.104	606.052	-0.53271	0.30957	0.1543	37.96	1.5521	92.267	-0.15137	0.025391	-0.08252	55.94	125.5813	406.1896	-0.2666	-0.0063477	0.18555	-3.947	-52.247	969.159	-1.8516	0.96387	0.646	-7.499	120.1538	316.5628	-0.037109	-0.11816	0.055664	49.1191	27.239	-11.90644	-0.055176	0.01416	0.13623	34.254	148.048	549.503	-0.58301	0.48438	0.13135
2.042	-8.904	173.461	568.905	-0.46387	0.27148	0.1416	26.724	26.3954	100.401	-0.17139	0.040527	-0.079102	42.562	126.3353	409.4144	-0.21387	-0.025879	0.1665	-9.651	-99.777	986.663	-1.8887	1.0391	0.69092	32.507	118.171	309.7098	0.0024414	-0.13184	0.041016	20.647	-3.6228	16.0052	-0.056641	0.026855	0.13721	75.5332	131.5246	549.3258	-0.54102	0.45703	0.12744
2.044	-9.681	135.46	540.897	-0.43311	0.25732	0.13232	37.828	3.29539	153.8255	-0.22656	0.071289	-0.060059	24.099	168.344	366.2199	-0.17749	-0.040772	0.14428	10.2521	-102.579	1003.582	-1.8589	1.0699	0.67675	35.906	132.751	262.1707	0.023926	-0.13965	0.027344	73.5913	16.7802	28.5607	-0.067383	0.04834	0.13379	33.946	173.513	513.8671	-0.51611	0.44775	0.11914
2.046	4.735	146.785	488.3319	-0.37256	0.21826	0.12451	49.507	21.8774	212.494	-0.27417	0.089112	-0.051758	6.76300000000001	105.9176	364.8024	-0.14453	-0.053223	0.12354	-39.705	-110.322	957.291	-1.8003	1.0659	0.62891	3.524	85.868	261.16	0.054199	-0.15723	0.010254	64.8674	-0.2419	12.559	-0.080078	0.070313	0.12695	29.3402	133.888	529.7112	-0.46631	0.4209	0.11426
2.048	-9.206	192.804	425.854	-0.32544	0.18921	0.10987	-16.993	40.571	253.316	-0.32227	0.1123	-0.036133	-24.944	130.621	324.3045	-0.10791	-0.064941	0.10303	-66.2289	-144.124	957.823	-1.6987	1.0337	0.54199	15.044	113.349	236.998	0.074951	-0.16675	-0.0068357	49.0151	-8.7808	49.244	-0.091309	0.084473	0.12354	50.469	121.818	518.018	-0.42773	0.39868	0.10303
2.05	16.4283	138.2653	417.217	-0.28467	0.16211	0.098145	6.302	40.0162	322.427	-0.39014	0.14355	-0.0097656	-25.055	118.624	299.486	-0.093262	-0.073242	0.098145	-28.962	-93.173	943.0429	-1.6309	0.99414	0.49658	-23.099	94.6871	213.982	0.089844	-0.17529	-0.021973	62.6617	17.6302	56.202	-0.13281	0.10156	0.10547	-26.7394	130.2867	476.335	-0.39502	0.37695	0.10107
2.052	14.925	152.433	405.8001	-0.22852	0.13232	0.090332	20.624	79.892	331.3965	-0.42773	0.16016	0.0083008	-21.487	76.0101	300.4154	-0.066406	-0.082031	0.078613	-58.675	-84.468	923.955	-1.5386	0.91064	0.40723	-25.982	66.6301	223.7137	0.1167	-0.19043	-0.041016	32.342	-17.8788	66.799	-0.16113	0.12964	0.094727	-7.814	119.4507	460.26	-0.35156	0.33887	0.094727
2.054	-17.147	155.889	381.796	-0.20264	0.11377	0.083984	13.43	59.142	382.45002	-0.50879	0.19238	0.026367	-46.4494	114.799	258.8691	-0.049561	-0.087891	0.06958	-28.6525	-88.157	936.939	-1.4692	0.83691	0.35009	10.078	91.777	212.859	0.12061	-0.1958	-0.052246	55.1111	-19.338	115.8926	-0.19727	0.15332	0.083496	21.754	169.526	402.632	-0.33594	0.32178	0.091797
2.056	10.788	123.636	380.924	-0.15869	0.081543	0.069336	60.974	34.4606	451.03477	-0.58692	0.21729	0.048096	-26.464	74.0428	253.6928	-0.035156	-0.098145	0.061523	11.197	-74.371	946.394	-1.3804	0.76416	0.28271	-19.265	49.7403	194.453	0.13428	-0.20264	-0.0625	42.4575	-8.607	133.6046	-0.25342	0.19092	0.080566	-10.895	154.981	349.313	-0.30225	0.2876	0.085938
2.058	1.918	177.2	354.3611	-0.12768	0.049316	0.059082	7.187	35.7164	484.591	-0.66357	0.23877	0.074707	-29.741	75.9331	247.4775	-0.016602	-0.10596	0.053711	-3.911	-114.55	982.5534	-1.2612	0.68213	0.19727	-9.437	47.776	189.974	0.13404	-0.2107	-0.06958	5.95	-28.7964	183.6772	-0.28467	0.21045	0.07666	8.841	102.841	348.894	-0.27563	0.25903	0.078125
2.06	-14.053	128.238	348.40903	-0.098145	0.017578	0.045898	34.015	-20.3723	580.701	-0.79443	0.27295	0.11182	-15.83	116.15	217.0699	-0.0073242	-0.1084	0.050781	9.678	-118.797	1053.821	-1.2148	0.6543	0.16748	-7.723	83.8064	143.28464	0.13672	-0.21387	-0.07959	30.1603	16.0931	222.837616	-0.35547	0.25732	0.071289	-31.657	117.3866	308.581	-0.25	0.23633	0.067871
2.062	3.441	107.23785	332.5323	-0.057617	-0.015625	0.03418	67.761	-35.066	653.9765	-0.8667	0.2915	0.125	-1.765	77.7836	217.86243	0.013672	-0.12354	0.037598	-23.5493	-107.162	1078.068	-1.1719	0.63379	0.12549	6.974	65.9136	124.892	0.13135	-0.2207	-0.09082	-12.016	50.463	239.419	-0.40332	0.28735	0.068115	-16.8857	91.6956	317.388	-0.20898	0.2002	0.056641
2.064	-18.497	119.021	276.097	-0.03418	-0.02832	0.027344	30.935	-66.2	693.808	-1.0229	0.33545	0.16895	-1.41699999999999	116.067	198.483	0.029053	-0.13428	0.029785	-89.464	-162.19277	1129.112	-1.1699	0.66016	0.11181	34.943	101.129	105.31	0.13037	-0.21973	-0.088379	-32.1171	64.077	331.342	-0.4541	0.31982	0.069824	19.0077	106.9602	301.0436	-0.19287	0.18408	0.044922
2.066	5.017	67.763	278.006	-0.0014648	-0.0625	0.013184	40.407	-106.5828	762.4081	-1.1365	0.37085	0.21412	16.421	134.273	171.6355	0.047852	-0.14404	0.012207	-64.048	-172.38	1159.231	-1.1606	0.71045	0.10791	9.373	98.848	81.828	0.12012	-0.22412	-0.094238	-21.202	101.8922	382.3272	-0.52148	0.35742	0.082031	-38.0992	129.521	263.6346	-0.15381	0.15088	0.035645
2.068	10.508	98.985	273.0377	0.016358	-0.084473	0.0090334	-2.3829	-75.143	794.0514	-1.2593	0.40967	0.25879	13.47	105.664	164.8588	0.074707	-0.16797	-0.00048828	-81.794	-198.295	1143.9799	-1.1074	0.77441	0.10742	24.469	68.75	96.4704	0.11207	-0.21973	-0.095703	-76.204	84.3252	434.876	-0.55762	0.37451	0.07373	-24.562	105.074	264.753	-0.13281	0.12549	0.02832
2.07	-9.42	100.81819	255.7707	0.041016	-0.10889	0.0024414	-19.495	-73.538	819.0859	-1.4102	0.4707	0.33203	39.9128	139.347	133.56125	0.089355	-0.17773	-0.0087891	-66.2479	-221.586	1165.308	-1.0574	0.79419	0.098144	67.5446	91.071	84.07	0.099121	-0.21729	-0.094727	-38.0042	78.808	508.473	-0.64014	0.42041	0.068359	-18.196	136.262	211.5682	-0.11377	0.10254	0.022949
2.072	31.671	70.871	239.4812	0.058594	-0.1377	-0.0039063	31.231	-55.754	864.9495	-1.4775	0.49805	0.3667	50.3886	96.804	135.2176	0.1123	-0.20313	-0.033691	-33.047	-181.351	1170.7429	-1.0098	0.80469	0.089355	29.003	70.23	84.188	0.083984	-0.2085	-0.090332	-50.244	88.084	537.432	-0.71045	0.45411	0.067139	-53.1245	126.361	188.124	-0.086426	0.066895	0.0087891
2.074	22.713	116.6514	191.907	0.064941	-0.14844	-0.0019531	-2.961	-22.318	867.698	-1.5894	0.55713	0.42188	69.5086	91.915	123.2708	0.12793	-0.22314	-0.051025	-43.936	-200.33	1180.8299	-0.98193	0.80518	0.08252	51.697	68.409	92.441	0.075195	-0.20313	-0.087891	-92.268	48.983	625.377	-0.77539	0.49316	0.070801	5.638	109.9112	201.125	-0.068848	0.052734	0.0014648
2.076	23.004	85.32	193.2635	0.080078	-0.17334	-0.00097656	-13.4046	-62.819	886.51	-1.6502	0.58374	0.45801	61.063	93.452	108.5248	0.14209	-0.23877	-0.070801	17.47	-214.6399	1231.164	-0.97217	0.80518	0.080566	74.923	75.965	50.5369	0.054688	-0.19482	-0.077148	-45.8747	47.1453	679.357	-0.87695	0.5459	0.083496	-32.3743	115.3536	198.4078	-0.04834	0.029785	-0.011719
2.078	52.8828	90.595	196.3801	0.085205	-0.18848	0.0019531	-20.5481	-70.788	901.888	-1.6963	0.60254	0.479	69.156	39.831	103.7901	0.1582	-0.25928	-0.089844	35.2465	-170.638	1212.41548	-0.96436	0.80127	0.083496	24.032	17.094	37.853	0.037597	-0.18872	-0.073242	-43.0129	16.573	679.616	-0.93359	0.56641	0.086914	-10.276	74.672	210.745	-0.027832	0.011231	-0.01538
2.08	31.4747	117.527	154.8921	0.093262	-0.20557	0.0068359	-43.551	-62.8671	892.173	-1.7417	0.61572	0.48242	79.4401	60.1373	108.07	0.16406	-0.271	-0.095215	54.095	-197.8223	1241.61	-0.97216	0.80175	0.088379	59.727	36.5339	18.531	0.023926	-0.18066	-0.070313	-24.359	-29.083	724.091	-1.041	0.6084	0.10645	35.285	72.467	181.457	-0.01123	-0.0029297	-0.018066
2.082	53.7727	89.458	143.891	0.09668	-0.23486	0.0083008	-8.4475	-81.88264	902.175	-1.7534	0.61182	0.48047	64.1062	39.5001	84.5965	0.1709	-0.28857	-0.104	133.529	-147.3187	1277.538	-0.99023	0.80469	0.092285	38.068	27.986	29.308	0.0078125	-0.1709	-0.063477	1.533	-26.238	765.592	-1.1121	0.63599	0.13306	-14.493	72.178	126.9446	0.0073242	-0.022949	-0.02002
2.084	13.787	119.184	109.347	0.091309	-0.23779	0.011719	-18.033	-41.821	884.83054	-1.7598	0.58984	0.46045	83.7314	10.409	88.4692	0.17309	-0.29883	-0.10816	102.822	-87.011	1242.189	-1.0313	0.82813	0.096191	37.143	14.7132	45.6174	-0.003418	-0.16992	-0.0625	-14.98	-79.04589	810.3377	-1.1851	0.66064	0.16797	38.643	40.826	128.03036	0.012207	-0.030273	-0.02002
2.086	19.121	118.719	110.4636	0.093262	-0.25098	0.023438	-17.595	-38.08	864.298	-1.7598	0.58008	0.43579	55.6291	37.18156	60.688	0.17188	-0.30518	-0.11279	96.59	-79.983	1252.411	-1.064	0.84033	0.092773	54.28687	45.381	53.906	-0.019043	-0.16211	-0.054199	30.322	-102.2131	866.621	-1.2715	0.67773	0.21533	45.146	57.745	110.9816	0.026367	-0.04541	-0.016113
2.088	60.296	90.4761	124.44462	0.092285	-0.2583	0.034668	40.58	-55.114	869.622	-1.7339	0.56494	0.39844	51.82	14.2308	47.8809	0.16455	-0.32227	-0.11572	88.3997	-20.602	1235.835	-1.1792	0.87256	0.11426	19.03	1.65579	46.983	-0.037598	-0.15186	-0.046875	63.141	-91.5239	853.656	-1.3081	0.68896	0.24609	23.509	56.039	83.344	0.037354	-0.057862	-0.010254
2.09	0.107999999999997	118.697	71.194	0.089355	-0.25732	0.046875	22.326	-48.085	873.732	-1.7085	0.53564	0.35107	36.059	25.1604	70.391	0.16113	-0.32129	-0.11426	13.357	-39.757	1276.233	-1.3089	0.90405	0.15918	36.373	-6.2365	51.829	-0.04248	-0.14795	-0.043457	58.885	-122.621	845.38	-1.3672	0.70801	0.30566	85.979	52.9932	86.7152	0.046387	-0.06543	-0.0073242
2.092	22.159	67.333	74.6009	0.085449	-0.26709	0.0625	-2.722	-101.871	920.511	-1.6909	0.52295	0.32959	21.178	47.459	49.617	0.15918	-0.34033	-0.11182	34.107	-89.2952	1346.5849	-1.4648	0.93945	0.22412	28.841	19.5046	19.9571	-0.054688	-0.14844	-0.04248	89.861	-116.743	844.259	-1.3931	0.72022	0.35205	44.9771	72.8942	65.787	0.058105	-0.080078	-0.0029297
2.094	31.759	49.8587	86.029	0.082031	-0.26123	0.071777	0.0899999999999963	-109.265	963.9752	-1.6602	0.50781	0.29541	31.142	-2.0575	62.445	0.15185	-0.34522	-0.11255	42.2268	-59.9332	1333.967	-1.7085	1.0044	0.34766	8.602	-3.655	21.4029	-0.061768	-0.1394	-0.036865	71.127	-111.667	793.919	-1.4219	0.73047	0.38916	43.542	45.5437	87.32069	0.070313	-0.082031	5.2042e-14
2.096	-4.15	50.725	69.156	0.091309	-0.25977	0.077148	-53.414	-83.977	1009.579	-1.6335	0.5061	0.2688	3.677	23.5805	52.63	0.14697	-0.354	-0.11426	30.6802	-99.558	1345.48368	-1.8359	1.0449	0.41943	29.371	21.82182	28.9207	-0.077637	-0.13525	-0.03125	84.805	-115.299	760.812	-1.4585	0.75049	0.42236	58.888	49.2291	74.9709	0.08252	-0.091309	0.011719
2.098	39.347	11.916	65.5828	0.09717	-0.25342	0.083252	-45.573	-119.052	1075.842	-1.6074	0.51367	0.2417	-6.74	15.0319	23.065	0.13428	-0.36719	-0.11963	80.965	-95.693	1365.523	-2.1016	1.1328	0.54932	-7.115	22.478	-10.0519	-0.098633	-0.13281	-0.016113	105.984	-62.123	711.0742	-1.4707	0.75977	0.43604	13.324	50.47965	47.1976	0.088868	-0.097903	0.022217
2.1	11.678	40.8	15.359	0.10254	-0.24414	0.086426	-54.11	-118.1518	1060.296	-1.5371	0.53906	0.18701	-14.888	8.6084	23.7405	0.13037	-0.37207	-0.12256	74.707	-71.67107	1326.3221	-2.2603	1.2095	0.61914	-10.309	3.6064	12.081	-0.10693	-0.12549	-0.0087891	57.1678	-66.975	689.916	-1.4883	0.79492	0.44971	54.9102	41.9506	52.0799	0.098633	-0.10645	0.030762
2.102	-19.612	39.343	33.5165	0.12207	-0.22949	0.084473	-69.451	-127.215	1060.1708	-1.4863	0.54883	0.15869	-33.749	49.289	4.59828	0.10645	-0.37158	-0.12305	65.784	-136.3755	1338.4616	-2.373	1.2832	0.66455	-13.483	39.543	-3.2246	-0.13281	-0.12061	0.01123	93.367	-61.2855	712.183	-1.487	0.81959	0.44873	47.09508	63.157	48.393	0.1084	-0.11084	0.036621
2.104	22.564	27.7451	44.7267	0.12793	-0.22217	0.083496	-6.424	-160.114	1089.198	-1.3818	0.55273	0.09668	-21.774	3.38134	-1.868	0.08667	-0.37085	-0.12207	83.967	-103.982	1331.61	-2.4863	1.3652	0.68311	-25.034	16.5295	7.4174	-0.14258	-0.11255	0.020752	84.071	-36.745	698.713	-1.48	0.84912	0.44336	6.304	36.062	35.11	0.11182	-0.11475	0.036133
2.106	-2.913	55.946	50.13	0.1377	-0.2041	0.074707	-39.469	-121.005	1098.26	-1.3171	0.5647	0.06372	-20.76	10.7191	-5.1542	0.068359	-0.3667	-0.11572	42.678	-125.195	1363.585	-2.5078	1.3867	0.69385	-4.817	27.1828	31.611	-0.14697	-0.10645	0.032227	45.6794	-61.317	730.582	-1.4624	0.89014	0.43164	45.0754	29.438	8.396	0.12207	-0.12305	0.041016
2.108	1.008	21.363	53.913	0.13892	-0.19628	0.075439	-26.463	-130.5695	1139.01308	-1.2671	0.58057	0.040527	-49.3051	10.9633	-16.014	0.035156	-0.36377	-0.10303	30.265	-145.1813	1433.996	-2.5151	1.4067	0.64844	-11.345	27.381	12.4822	-0.15137	-0.098145	0.037109	72.631	-66.096	801.734	-1.4531	0.91406	0.42773	19.574	38.344	-24.1401	0.12745	-0.12989	0.048096
2.11	18.564	15.55052	44.294	0.13916	-0.18994	0.068848	18.116	-155.1245	1168.945	-1.2241	0.61377	0.036133	-20.411	-28.535	21.8343	0.014648	-0.36279	-0.096191	34.702	-52.617	1412.899	-2.521	1.395	0.61377	-22.507	-16.2077	24.8263	-0.14502	-0.09082	0.039063	27.0404	-61.407	841.095	-1.4155	0.95752	0.41113	11.767	6.825	14.171	0.13037	-0.13623	0.049316
2.112	-3.37	25.8887	41.2816	0.12988	-0.17725	0.062988	-1.314	-124.454	1153.569	-1.2144	0.62939	0.033691	-24.916	6.3874	33.695	-0.020996	-0.35352	-0.077637	-7.411	-56.105	1401.5843	-2.5034	1.3618	0.57617	8.083	8.5849	30.071	-0.12891	-0.092285	0.037598	15.2618	-124.068	915.1212	-1.3825	0.97583	0.38989	16.187	21.4553	35.3367	0.12451	-0.14648	0.050781
2.114	6.704	-2.42452	18.8317	0.12061	-0.17334	0.056641	66.8125	-141.98	1177.4885	-1.1958	0.66797	0.039063	-22.936	-13.022	17.9477	-0.055908	-0.34644	-0.058349	10.969	-8.4003	1409.002	-2.4858	1.2974	0.51709	14.349	-16.3006	8.361	-0.11621	-0.092773	0.043702	36.98892	-135.776	945.1806	-1.3418	0.99023	0.36865	-16.358	3.6462	30.353	0.125	-0.15234	0.048828
2.116	-5.497	36.575	-22.43502	0.097656	-0.15234	0.056641	97.453	-88.778	1180.0143	-1.1777	0.70117	0.053711	8.893	-22.0145	29.9249	-0.088379	-0.3418	-0.032227	-35.803	42.997	1360.33	-2.4722	1.2603	0.50586	4.595	-24.4533	9.344	-0.10596	-0.09375	0.046875	-18.8522	-169.836	955.602	-1.2764	1.0117	0.33643	26.8331	-9.195	47.005	0.11426	-0.15967	0.04248
2.118	-1.767	30.143	-27.5855	0.074463	-0.13965	0.058838	59.3604	-34.494	1176.4413	-1.1675	0.71729	0.064941	6.02999999999999	-0.6001	5.107	-0.13672	-0.3335	-0.00048828	-24.466	-4.0186	1362.5423	-2.4741	1.2036	0.49023	20.03	16.9748	3.184	-0.09668	-0.10205	0.056152	-12.392	-209.34	1011.4033	-1.2539	1.0098	0.30713	-2.245	-0.0255999999999998	31.372	0.10205	-0.16919	0.03955
2.12	19.371	6.5801	12.9289	0.054688	-0.12744	0.060059	75.411	-52.312	1229.89647	-1.1606	0.74121	0.072266	35.007	-29.426	14.705	-0.15967	-0.32959	0.012695	37.545	28.0767	1357.8012	-2.5046	1.1907	0.48853	12.022	0.167199999999999	3.8843	-0.094727	-0.10547	0.053711	-17.686	-207.298	1018.247	-1.2031	1.0332	0.25049	-47.273	-9.4861	41.518	0.087402	-0.17432	0.02832
2.122	17.982	28.342	14.292	0.030273	-0.11621	0.058105	43.475	-5.414	1214.05372	-1.1645	0.75879	0.080566	34.199	-1.9661	5.9076	-0.19824	-0.32178	0.037109	3.639	0.732000000000001	1340.2601	-2.5469	1.2129	0.49951	43.606	17.8305	31.206	-0.094727	-0.11182	0.060547	-69.9797	-247.109	1036.3167	-1.1755	1.0413	0.20777	-7.698	0.4321	27.0644	0.05957	-0.17969	0.021973
2.124	27.82	-8.2614	39.297	0.01709	-0.11426	0.057129	41.1429	-41.5029	1241.6077	-1.1909	0.77783	0.088379	38.0919	17.2744	-11.758	-0.22925	-0.31519	0.055908	60.609	-35.0523	1392.7772	-2.5566	1.25	0.51416	52.4541	3.5079	15.04257	-0.093262	-0.11768	0.065918	-55.706	-269.1	1095.8182	-1.1519	1.0532	0.15967	-40.217	29.4654	-24.1503	0.04834	-0.17969	0.022949
2.126	38.4854	-2.257	29.201	-0.0063477	-0.10596	0.061523	85.015	-72.786	1293.383	-1.2754	0.80469	0.12207	59.3226	0.37333	7.7458	-0.24707	-0.30127	0.067383	88.9367	6.355	1367.5715	-2.5327	1.2563	0.50391	29.991	-21.2738	18.3541	-0.092773	-0.12158	0.071289	-87.794	-234.95	1107.1549	-1.1445	1.0645	0.09668	-19.446	22.2879	-7.2602	0.0058594	-0.18066	0.021484
2.128	23.691	7.17606	35.5853	-0.026856	-0.10352	0.067871	50.5113	-29.3784	1277.814	-1.3379	0.81982	0.15381	62.785	28.477	9.7107	-0.26074	-0.28467	0.078613	56.908	-34.15	1350.036	-2.4453	1.2422	0.47607	59.7149	19.3397	31.923	-0.086914	-0.12402	0.078613	-82.055	-229.3447	1155.852	-1.1499	1.0688	0.068359	11.888	25.2372	8.793	-0.024659	-0.17407	0.025391
2.13	42.136	-27.288	47.452	-0.044434	-0.10352	0.075195	60.9861	-78.201	1295.163	-1.5098	0.8623	0.24951	64.2988	13.7556	11.918	-0.2666	-0.27783	0.078613	106.6597	-21.005	1361.46	-2.3811	1.2278	0.45092	42.3596	13.44638	6.76056	-0.085449	-0.12451	0.078125	-21.152	-178.433	1175.56291	-1.1875	1.0859	0.012695	0.167999999999999	5.677	21.3052	-0.058594	-0.16455	0.030762
2.132	27.141	9.4321	9.022	-0.06543	-0.10645	0.093262	69.943	-60.5902	1303.37	-1.6729	0.90528	0.33985	71.0816	4.8095	9.9834	-0.27344	-0.27002	0.088867	74.129	4.55	1357.43943	-2.3276	1.2134	0.43066	40.543	11.6227	12.705	-0.081543	-0.12451	0.080566	-54.6573	-116.832	1132.81	-1.2233	1.0989	-0.010254	51.6787	-16.3656	37.062	-0.10156	-0.14697	0.04248
2.134	43.7525	-5.4723	-6.093	-0.078613	-0.1062	0.10279	61.816	-48.564	1301.6297	-1.8496	0.95508	0.44678	76.78653	33.488	10.942	-0.27661	-0.26392	0.092285	68.4357	-48.2978	1397.135	-2.2656	1.1621	0.40869	38.41	40.7877	-3.486	-0.075439	-0.125	0.077881	-19.704	-101.068	1166.27	-1.2437	1.1118	-0.015625	46.4665	16.91799	15.5971	-0.1167	-0.13818	0.043457
2.136	50.3746	-13.3449	10.115	-0.088379	-0.10645	0.11279	81.296	-122.301	1354.205	-2.0757	1.0259	0.58691	83.3392	14.6907	22.5849	-0.28223	-0.25732	0.095215	122.46	-11.825	1415.249	-2.2383	1.1348	0.39844	33.447	18.56	-7.342	-0.0625	-0.12305	0.077637	-9.781	-47.926	1171.3744	-1.2578	1.1191	-0.0078125	9.767	12.2999	26.5103	-0.14307	-0.12354	0.061523
2.138	4.284	12.156	12.148	-0.086426	-0.097656	0.12451	71.214	-87.1157	1328.679	-2.1875	1.0684	0.64307	63.7247	33.002	7.466	-0.28857	-0.24316	0.10059	65.24292	-16.794	1381.108	-2.1855	1.0957	0.3833	61.6402	29.169	13.3618	-0.038086	-0.12744	0.064453	-17.936	-44.903	1187.73803	-1.2554	1.1196	-0.0073242	53.4065	25.441	32.5392	-0.15527	-0.1167	0.071045
2.14	35.479	-17.2706	20.2701	-0.083008	-0.098145	0.125	72.0076	-106.1214	1352.369	-2.3628	1.1313	0.73047	52.15198	39.9	-19.9561	-0.28516	-0.23584	0.099121	77.7766	-35.726	1373.721	-2.1431	1.0689	0.36889	56.479692	28.335	4.9309	-0.020996	-0.13232	0.055664	34.675	-83.181	1224.2876	-1.2397	1.1177	-0.019043	35.556	41.261	-4.7932	-0.16162	-0.10986	0.083496
2.142	46.532	3.53441	28.2775	-0.072754	-0.10449	0.13916	71.442	-102.848	1384.936	-2.4412	1.1672	0.77173	56.6356	6.2726	2.1137	-0.28076	-0.229	0.095703	101.052	41.204	1322.1266	-2.1011	1.0513	0.35938	6.5	-15.1664	29.37	0.013184	-0.13232	0.038574	21.725	-57.539	1224.15387	-1.2172	1.1196	-0.041748	29.177	16.1719	0.860999999999999	-0.16406	-0.10547	0.099609
2.144	2.761	15.411683	0.8917	-0.059815	-0.1123	0.14648	9.469	-11.402	1332.66089	-2.4937	1.1841	0.78711	34.212	25.5097	12.3195	-0.26953	-0.22656	0.084961	59.349	24.672	1288.12	-2.0391	1.0352	0.34619	29.102	9.4801	20.0775	0.04126	-0.13989	0.021972	2.345	-118.1877	1262.229	-1.1914	1.123	-0.074707	70.2057	2.933	11.044	-0.1604	-0.10962	0.10596
2.146	45.7328	-17.1978	25.2424	-0.056641	-0.12354	0.15283	23.917	-43.126	1333.9759	-2.5347	1.1899	0.77734	22.899	2.515	22.255	-0.25098	-0.22656	0.078125	99.3328	47.0502	1291.9037	-2.0073	1.0298	0.33398	12.983	-2.106	13.472	0.06543	-0.14551	0.0043945	73.2774	-127.585	1287.1081	-1.1855	1.1172	-0.12061	10.112	-13.0213	30.232	-0.15527	-0.11621	0.11865
2.148	22.338	18.1674	0.4648	-0.044434	-0.13525	0.15674	34.148	-18.0304	1338.961	-2.5449	1.1836	0.76709	7.726	-3.0274	43.974	-0.21826	-0.23047	0.057129	68.8456	90.546	1261.14938	-1.9292	1.0103	0.31055	0.256	-15.55938	9.7951	0.09668	-0.15381	-0.019531	42.1178	-118.7096	1254.26	-1.1953	1.1172	-0.13525	61.0871	-23.7067	53.982	-0.12549	-0.12305	0.12207
2.15	3.12	16.303	-23.566	-0.038574	-0.13965	0.15869	-5.44299999999999	8.9964	1331.1161	-2.5698	1.1606	0.73047	-24.792	21.9514	31.0158	-0.18408	-0.2273	0.040771	60.5034	34.093	1292.333	-1.8748	0.99292	0.30078	31.547	22.6203	-1.326	0.11523	-0.15186	-0.032715	52.2963	-172.233	1290.496	-1.2524	1.1177	-0.15967	59.6168	-0.8135	31.349	-0.1167	-0.13086	0.13379
2.152	39.172	16.8651	-0.974	-0.029297	-0.14404	0.15918	29.917	-45.806	1367.5343	-2.5652	1.1321	0.70386	-3.171	-11.32719	27.5555	-0.14453	-0.23047	0.020508	111.328	86.194	1276.2363	-1.8257	0.979	0.29199	-43.252	-4.222	8.374	0.14063	-0.16064	-0.054688	70.456	-154.2617	1326.92745	-1.3433	1.1274	-0.16113	36.779	-9.6947	20.9391	-0.088867	-0.14258	0.14063
2.154	-7.712	36.719	-16.4607	-0.017334	-0.14819	0.15869	23.235	31.966	1337.6338	-2.562	1.104	0.67773	-20.662	9.4615	32.642	-0.094727	-0.23584	-0.0048828	33.184	94.965	1220.255	-1.7734	0.96484	0.27686	-28.36	25.5604	30.1796	0.15161	-0.16089	-0.063232	40.7664	-185.49	1363.004	-1.4609	1.1523	-0.14453	60.4211	-12.5962	32.8209	-0.07251	-0.15064	0.13623
2.156	-0.318000000000005	-1.922	9.3845	-0.0087891	-0.14844	0.16064	19.773	22.469	1332.5269	-2.5347	1.063	0.62305	-36.239	38.2231	4.2631	-0.070313	-0.23535	-0.021484	21.535	89.0061	1221.832	-1.7495	0.96924	0.28223	7.838	42.783	12.3027	0.1626	-0.16504	-0.072754	92.756	-209.494	1437.756	-1.6445	1.2012	-0.077148	25.729	13.7719	6.607	-0.054199	-0.15674	0.13086
2.158	18.609	4.1783	16.8738	0.00048828	-0.14209	0.15674	59.609	-6.1503	1352.802	-2.5093	1.0405	0.5918	-10.268	13.7811	14.2853	-0.028809	-0.2334	-0.04834	4.784	158.231	1196.477	-1.7129	0.9668	0.271	-13.461	-5.6539	25.8942	0.16553	-0.16943	-0.086426	72.368	-137.6692	1434.005	-1.7437	1.2329	-0.037109	48.9812	4.9948	4.685	-0.028809	-0.16553	0.12256
2.16	-5.566	17.8273	1.6958	0.00097656	-0.14404	0.15381	54.289	51.377	1301.754	-2.4292	0.98486	0.5332	-32.768	33.152	19.6297	-0.0014648	-0.23364	-0.063965	-51.195	107.795	1181.7757	-1.6833	0.97094	0.26929	0.116999999999997	19.2714	35.74	0.16455	-0.16846	-0.092773	29.1717	-149.651	1440.734	-1.937	1.3071	0.081055	38.77	22.403	2.4072	-0.016113	-0.1665	0.12256
2.162	5.231	-18.1042	11.92493	0.0058594	-0.1416	0.15039	69.926	-4.4689	1319.025	-2.3806	0.94751	0.49463	-44.1304	22.5245	19.3277	0.019531	-0.23438	-0.077637	-7.786	92.098	1185.763	-1.6499	0.97119	0.26074	2.104	5.7635	9.6672	0.15625	-0.16553	-0.10352	46.8333	-116.9217	1431.971	-2.0781	1.3653	0.18067	-8.826	23.2376	5.6038	-0.0014648	-0.16357	0.12061
2.164	-5.906	16.348	5.4008	0.010742	-0.1355	0.1504	85.2293	19.9728	1353.0802	-2.3301	0.91992	0.45801	4.632	1.0997	43.674	0.037109	-0.22656	-0.097656	-38.99517	93.572	1132.22	-1.6001	0.96533	0.24707	13.903	4.626	16.6725	0.14941	-0.16211	-0.11402	-9.107	-57.39	1373.0166	-2.2026	1.4243	0.28711	16.163	5.5996	31.5862	0.0083009	-0.16187	0.11548
2.166	-6.255	2.2421	2.942	0.013184	-0.13086	0.146	50.656	42.529	1354.26074	-2.2891	0.89063	0.41748	-11.56	25.242	25.7745	0.04541	-0.22412	-0.094238	-52.2537	23.437	1141.336	-1.5742	0.95703	0.23975	18.811	44.867	-1.5357	0.14453	-0.15967	-0.12109	-6.689	-75.4723	1376.4177	-2.3184	1.4941	0.40576	-2.53	19.6543	8.5997	0.012695	-0.15723	0.10986
2.168	9.432	9.8419	-10.389	0.016113	-0.11963	0.1416	65.1294	-27.6861	1384.568	-2.269	0.87842	0.40234	-1.021	1.7873	29.91675	0.046387	-0.21582	-0.10596	-12.226	74.8466	1105.068	-1.5098	0.94531	0.22021	-1.189	16.0706	3.27	0.13428	-0.15625	-0.12549	-16.735	-21.839	1369.3717	-2.3711	1.5273	0.46533	-19.381	3.206	3.3425	0.018066	-0.14453	0.11279
2.17	-11.987	40.917	-14.1455	0.0087891	-0.11865	0.14355	62.552	33.926	1349.7422	-2.2437	0.8501	0.37793	15.496	13.0789	29.4525	0.044677	-0.20556	-0.10645	-36.562	86.953	1027.753	-1.4639	0.92871	0.20703	14.23	8.8681	31.1345	0.12207	-0.14795	-0.12793	-76.247	-18.347	1367.451	-2.4233	1.5845	0.54297	2.24	2.0347	24.733	0.018066	-0.13721	0.1123
2.172	20.745	18.7196	21.4517	0.0043945	-0.10205	0.1377	59.641	31.618	1343.4307	-2.2334	0.82861	0.36035	2.731	21.1322	16.4836	0.03418	-0.19824	-0.10498	-13.585	74.4389	1009.462	-1.4121	0.91016	0.19434	26.899	27.6702	11.267	0.10693	-0.14014	-0.1333	-50.083	-52.5491	1400.2069	-2.4761	1.6313	0.59961	-40.1524	26.19	4.743	0.020508	-0.12158	0.10059
2.174	37.118	20.2569	27.178	-0.0029297	-0.090577	0.1372	74.643	18.539	1349.76	-2.2207	0.81445	0.34424	17.661	-26.708	48.4588	0.018066	-0.18115	-0.104	10.145	132.016	963.456	-1.3545	0.88867	0.18555	23.626	2.3835	32.5439	0.090576	-0.12915	-0.13745	-72.486	-9.543	1383.238	-2.4917	1.6489	0.62305	-18.137	18.22617	9.391	0.020019	-0.10718	0.10034
2.176	18.257	33.34603	13.6759	-0.0078125	-0.071777	0.13379	62.727	103.898	1284.5846	-2.1953	0.81445	0.33057	35.644	-4.4283	37.8871	0.0019531	-0.17432	-0.10254	-3.915	96.4012	959.821	-1.3262	0.87305	0.1792	45.23212	7.6649	57.649	0.072266	-0.11816	-0.1416	-108.019	-43.2096	1391.217	-2.5015	1.6704	0.64893	27.649	19.7087	4.0476	0.019531	-0.088867	0.1001
2.178	33.921	-0.606	46.428	-0.027832	-0.052734	0.12939	77.5312	53.6357	1276.086	-2.1831	0.80225	0.31543	59.3924	-22.1232	52.597	-0.029297	-0.15625	-0.098145	38.8652	126.1376	966.493	-1.2676	0.85547	0.16895	27.994	-31.2579	61.5331	0.035645	-0.10059	-0.14209	-59.9566	-31.1838	1416.479	-2.4927	1.6714	0.64843	-20.735	8.382	5.148	0.012695	-0.064941	0.087891
2.18	35.282	16.1013	46.111	-0.039063	-0.036133	0.12646	90.23	79.9999	1281.813	-2.147	0.79541	0.30029	77.9851	-50.624	71.649	-0.053711	-0.14551	-0.095215	6.48	179.283	916.244	-1.2146	0.83326	0.17017	14.404	-52.9365	74.8586	0.020508	-0.092285	-0.14307	-63.7902	3.041	1405.1152	-2.48	1.6685	0.64453	3.692	-32.2355	49.3639	0.01123	-0.055664	0.083008
2.182	38.708	2.114	55.6469	-0.068848	-0.0097656	0.11719	67.192	124.271	1278.5916	-2.1169	0.79126	0.28491	69.90251	-32.3634	66.883	-0.082031	-0.13428	-0.091797	-17.057	140.008	905.083	-1.166	0.81641	0.16748	71.2181	-14.169	57.1745	-0.023438	-0.064453	-0.13525	-65.443	-58.1273	1435.667	-2.4409	1.6392	0.63672	26.907	-26.6262	49.819	0	-0.030762	0.074219
2.184	35.791	10.9354	60.984	-0.094725	0.022705	0.11059	93.8719	76.507	1296.3695	-2.0796	0.7915	0.28223	76.5134	-76.475	87.0294	-0.13086	-0.1167	-0.083496	26.881	185.408	869.164	-1.0996	0.78809	0.14795	58.2707	-35.1113	76.253	-0.066406	-0.04541	-0.12842	-52.114	-32.7884	1444.454	-2.4258	1.627	0.62744	-0.157	-35.414	49.6588	-0.019776	-0.01123	0.066162
2.186	-1.778	55.989	65.169	-0.11865	0.048828	0.11035	75.8955	155.361	1256.459	-2.0215	0.7832	0.26416	76.6157	-64.727	95.886	-0.15479	-0.10498	-0.07666	-9.044	180.215	808.497	-1.0625	0.76758	0.14355	49.944	-14.7572	148.602	-0.1123	-0.021973	-0.11768	-88.588	-45.9921	1435.203	-2.3809	1.6016	0.60986	21.489	-23.6072	90.5611	-0.038574	0.013672	0.052734
2.188	39.0852	38.005	146.6375	-0.16797	0.09375	0.10938	53.2853	138.909	1238.3085	-1.9941	0.78027	0.25977	73.466955	-31.5018	94.297	-0.19873	-0.088867	-0.067383	12.6531	153.5991	786.225	-0.99121	0.72656	0.12744	54.273	16.9324	155.712	-0.18311	0.0048828	-0.089355	-45.396	-87.183	1458.443	-2.3403	1.5971	0.5874	18.352	5.69138	98.047	-0.07959	0.046387	0.034668
2.19	46.5761	40.44846	205.659	-0.19629	0.11084	0.10498	49.366	114.329	1249.4223	-1.9312	0.76807	0.24854	72.22039	-49.675	145.084	-0.24097	-0.075684	-0.05249	40.212	180.2299	742.838	-0.93042	0.69995	0.11865	43.497	3.95433	195.384	-0.22314	0.015625	-0.07959	-18.584	-20.5849	1426.677	-2.3047	1.5889	0.56592	13.494	-4.567549	129.39	-0.09668	0.069336	0.032715
2.192	-5.757	49.1605	223.178	-0.25684	0.15381	0.10596	14.873	182.125	1209.8399	-1.8836	0.76392	0.23584	48.509	9.3219	166.0942	-0.2793	-0.0625	-0.043457	-1.778	124.608	734.113	-0.86865	0.66748	0.10352	57.8031	49.778	253.0744	-0.30811	0.046387	-0.062012	-42.233	-38.3751	1390.0317	-2.2573	1.5825	0.54883	57.8242	31.3688	139.449	-0.14307	0.10986	0.037109
2.194	16.5766	28.4348	269.03	-0.30639	0.17994	0.11353	4.639	121.9985	1204.5563	-1.8296	0.75049	0.22852	51.811	34.3974	188.389	-0.32959	-0.038574	-0.028809	43.2561	136.2661	718.8962	-0.78906	0.61914	0.088379	10.166	44.6232	329.641	-0.38526	0.073975	-0.035156	24.2124	-15.716	1378.6457	-2.2344	1.5801	0.52588	16.822	51.686	160.768	-0.18628	0.14258	0.045166
2.196	16.851	72.3784	319.625	-0.36035	0.2085	0.12012	2.639	134.4224	1187.6506	-1.7671	0.74072	0.21387	65.471	43.21727	270.08335	-0.3584	-0.028809	-0.021973	42.30099	142.633	677.6181	-0.73145	0.58399	0.073487	34.196	30.1741	423.197	-0.46436	0.098633	-0.014648	20.6507	56.00898	1332.767	-2.1772	1.562	0.5	20.6521	51.6447	248.4147	-0.23535	0.1748	0.046875
2.198	-16.5215	65.7893	358.607	-0.44043	0.24365	0.12744	-15.186	141.4834	1171.863	-1.7358	0.74072	0.20361	29.801	87.527	324.4321	-0.4126	-0.0073242	-0.010254	21.822	109.875	662.723	-0.66943	0.54541	0.061523	59.467	73.992	440.37339	-0.58936	0.13574	0.017578	25.7686	22.8175	1337.6104	-2.1414	1.5452	0.48608	33.7095	88.8055	282.542	-0.30469	0.21729	0.061523
2.2	17.272	62.159	393.251	-0.48193	0.25879	0.12842	-9.727	77.172	1161.125	-1.6738	0.72852	0.19336	37.699	48.4919	404.733	-0.4629	0.0083009	-0.0007324	46.415	148.084	650.267	-0.5957	0.49561	0.044922	35.126	57.449	493.947	-0.65283	0.16064	0.042969	73.675	76.1189	1336.2984	-2.105	1.52	0.48438	4.308	83.649	336.164	-0.33643	0.23193	0.066406
2.202	-25.941	83.7853	406.583	-0.57275	0.29395	0.13232	-12.579	134.026	1117.647	-1.6306	0.71606	0.18969	29.628	41.3474	484.3531	-0.51514	0.029297	0.0063477	-18.902	132.261	626.687	-0.55664	0.47168	0.038086	35.306	43.237	601.89	-0.80029	0.20264	0.092773	47.0191	100.997	1312.385	-2.0566	1.4824	0.47705	45.8483	77.9055	378.6641	-0.41162	0.27295	0.080078
2.204	-35.9341	42.1609	455.672	-0.64209	0.32275	0.13526	-9.077	121.903	1102.214	-1.582	0.70703	0.17529	24.208	46.009	517.92	-0.60742	0.053711	0.015625	-1.3998	133.67188	619.475	-0.49121	0.41895	0.024902	47.298	8.579	681.041	-0.92725	0.23633	0.13648	80.5	64.3091	1330.394	-2.0317	1.4595	0.47559	14.601	83.495	406.70086	-0.47363	0.30225	0.091797
2.206	2.017	28.0737	566.797	-0.71143	0.34912	0.1377	9.181	100.8882	1080.914	-1.521	0.69189	0.16797	38.638	-18.102	595.599	-0.65381	0.074707	0.026855	-14.3987	189.8404	567.067	-0.44238	0.38672	0.015137	16.9	-72.436	756.49	-1.0635	0.27588	0.18506	64.396	137.878	1294.364	-1.9741	1.4106	0.47266	-16.137	54.181	459.2803	-0.5376	0.33057	0.098633
2.208	-31.6391	21.8368	614.781	-0.81201	0.38721	0.15967	-1.718	162.56	1031.612	-1.4902	0.68359	0.16309	15.511	-20.707	654.204	-0.77539	0.10547	0.049805	-71.403	163.0424	550.0523	-0.39209	0.35547	0.0048828	67.157	-90.982	806.8901	-1.2637	0.33496	0.27344	36.6726	106.906	1272.891	-1.9267	1.3672	0.47046	5.791	57.536	478.229	-0.6333	0.37158	0.099609
2.21	-9.531	-27.8373	673.1246	-0.86572	0.40381	0.16553	7.351	123.2486	1001.7438	-1.4277	0.66504	0.15479	12.118	-52.537	689.949	-0.8833	0.13989	0.071778	-48.13837	170.0261	526.571	-0.33252	0.31104	-0.0043945	15.91	-111.593	860.7826	-1.3687	0.36963	0.31836	78.204	99.8344	1272.5392	-1.8789	1.3291	0.46191	-25.9704	53.754	531.3677	-0.68311	0.39404	0.10547
2.212	3.084	-22.496	729.0227	-0.97754	0.43066	0.19287	23.407	162.1636	978.7017	-1.3864	0.65234	0.14746	-11.519	-96.786	756.977	-1.0039	0.17285	0.10498	-62.1874	164.941	476.336	-0.30518	0.2915	-0.013672	-37.6465	-128.7214	917.816	-1.5723	0.44238	0.43066	32.0662	126.77	1237.6889	-1.8047	1.2715	0.43994	-2.3011	2.6682	613.6372	-0.77979	0.44092	0.12109
2.214	1.655	-59.5307	769.5485	-1.0633	0.44946	0.22217	-10.258	195.301	961.8884	-1.3438	0.63574	0.14502	-9.9983	-57.164	765.028	-1.1836	0.21973	0.17285	-59.4078	128.428	454.367	-0.25537	0.25049	-0.018066	-18.967	-86.1867	912.357	-1.7729	0.50146	0.53516	7.242	45.983	1251.3657	-1.769	1.2446	0.43213	3.011	-11.4306	651.4407	-0.85303	0.47608	0.14063
2.216	19.967	-89.461	824.3655	-1.1519	0.46826	0.25537	-5.535	141.526	947.6483	-1.2827	0.60645	0.14014	-11.59	-96.0512	801.1277	-1.2793	0.23779	0.20703	-26.527	151.976	418.302	-0.21753	0.22363	-0.023682	-21.596	-100.866	887.2937	-1.8574	0.5293	0.55908	42.13656	71.633	1224.6296	-1.6953	1.1914	0.42041	-36.024	-57.6825	686.5583	-0.93164	0.50488	0.1665
2.218	-14.081	-67.8392	827.25	-1.2671	0.48291	0.31055	-14.365	191.6933	905.276	-1.2607	0.59375	0.14014	-6.0407	-98.898	853.143	-1.4692	0.28662	0.29004	-59.425	129.48	393.798	-0.18799	0.19092	-0.029297	-10.01428	-86.748	923.315	-2.0176	0.57617	0.61768	-22.735	74.603	1195.608	-1.645	1.1445	0.41309	0.533000000000001	-72.524	724.9113	-1.0293	0.5498	0.20801
2.22	4.329	-107.818	846.993	-1.3257	0.4873	0.34473	11.8929	163.05656	880.6991	-1.207	0.56494	0.13477	-5.557	-71.683	839.354	-1.6062	0.32642	0.35083	-33.8594	123.286	372.7739	-0.15088	0.16309	-0.026855	-15.261	-63.249	932.47	-2.0769	0.60767	0.63745	-14.093	47.507	1205.1781	-1.5957	1.1016	0.40234	-39.58	-39.074	739.3933	-1.0723	0.57324	0.23535
2.222	40.666	-107.949	868.423	-1.4448	0.49756	0.42188	19.9712	138.2	852.6971	-1.1641	0.54541	0.1333	-18.4087	-115.781	842.244	-1.7383	0.36084	0.40674	-23.3671	156.375	324.704	-0.13086	0.14746	-0.027832	-43.9093	-110.646	946.307	-2.125	0.63477	0.64697	-27.238	127.768	1151.9156	-1.5327	1.0513	0.39941	-41.5595	-73.2271	787.246	-1.1465	0.60889	0.29346
2.224	35.741	-102.6328	836.134	-1.5327	0.49512	0.48047	7.363	187.578	810.325	-1.1284	0.52002	0.13086	-3.572	-80.755	820.873	-1.8887	0.41309	0.45166	-41.546	125.825	296.372	-0.10303	0.1167	-0.024902	-21.318	-86.517	950.831	-2.1484	0.66211	0.64551	-57.8587	95.753	1119.933	-1.501	1.0254	0.3999	10.032	-74.1557	798.729	-1.2002	0.62988	0.3374
2.226	61.396	-155.042	833.05	-1.6133	0.49805	0.53955	25.306	126.885	782.07278	-1.0762	0.48438	0.13867	-39.5166	-69.4954	788.511	-1.9448	0.43408	0.46289	-27.959	138.9452	302.264	-0.087403	0.097411	-0.016114	-60.9179	-62.508	908.458	-2.1602	0.66504	0.646	-12.708	112.641	1101.106	-1.4395	0.96289	0.396	-28.593	-89.52513	752.393	-1.2441	0.64648	0.38428
2.228	42.079	-125.787	759.013	-1.7168	0.52051	0.60156	44.9489	143.0422	733.71	-1.0547	0.47656	0.13379	-14.46	-68.884	798.9906	-2.0254	0.47656	0.47119	-47.381	136.466	310.222	-0.075684	0.07666	-0.0083008	-41.4974	-68.132	923.708	-2.1699	0.67773	0.65479	-56.2215	152.842	1062.944	-1.3887	0.92285	0.38818	27.707	-110.7912	740.85	-1.2842	0.6582	0.44775
2.23	61.2552	-119.917	725.2954	-1.7539	0.5293	0.64209	12.585	152.0267	710.889	-0.99756	0.44189	0.13672	13.702	-19.961	795.1873	-2.0537	0.51001	0.45801	-11.52	88.3197	325.685	-0.068359	0.055664	0.0043945	30.0533	-37.23	920.881	-2.1412	0.67578	0.61622	-42.516	122.936	1055.532	-1.3315	0.87744	0.38135	19.735	-85.4309	732.679	-1.3008	0.6543	0.48096
2.232	94.2069	-127.288	732.79	-1.8032	0.54736	0.68555	16.069	101.868	718.434	-0.95703	0.42139	0.13745	33.959	-49.878	798.843	-2.0601	0.5376	0.42871	2.8774	98.8883	306.656	-0.063965	0.05127	-0.0019531	29.045	-60.724	900.523	-2.0854	0.66064	0.57422	-8.867	175.502	1020.885	-1.2471	0.81836	0.37256	-30.319	-83.6245	696.096	-1.3301	0.65137	0.53613
2.234	42.1215	-62.7179	696.631	-1.8161	0.5686	0.70386	19.7197	170.4042	692.992076	-0.9126	0.39893	0.14209	71.277	-58.25	832.526	-2.0308	0.56494	0.38672	-24.7362	65.425	273.787	-0.064453	0.044434	0.017578	74.6135	-87.476	946.132	-1.9727	0.63086	0.49463	-52.5168	181.321	965.401	-1.209	0.78711	0.36182	26.166	-81.548	686.7967	-1.3443	0.64013	0.56934
2.236	40.6747	-74.26	720.352	-1.8237	0.59717	0.71191	29.455	147.9031	678.3467	-0.84863	0.3667	0.13965	78.3855	-40.07	846.011	-2.0034	0.57324	0.35693	38.9535	59.044	248.5077	-0.063965	0.032959	0.033448	39.065	-82.706	972.123	-1.8882	0.604	0.44727	-20.216	151.6242	954.863	-1.1206	0.71924	0.34521	7.897	-50.0831	644.527	-1.3555	0.62695	0.59424
2.238	42.496	-67.702	766.783	-1.8047	0.64258	0.71924	19.5584	129.546	647.428	-0.81836	0.35059	0.13867	87.58535	-106.335	914.1005	-1.9351	0.57861	0.31006	33.444	100.8058	182.602	-0.07373	0.028809	0.043945	-25.0457	-117.563	1045.86	-1.6929	0.5542	0.32959	-33.914	180.436	896	-1.0539	0.66675	0.32788	5.3003	-78.3685	677.694	-1.3418	0.60938	0.60986
2.24	14.933	-25.719	799.713	-1.7944	0.66846	0.71875	-30.6758	185.866	608.1081	-0.75586	0.31201	0.13574	77.4046	-94.038	960.513	-1.8933	0.56958	0.26807	19.852	78.7589	172.767	-0.081055	0.025391	0.063477	14.678	-120.962	1146.147	-1.5573	0.53223	0.24975	-20.579	139.5762	869.2371	-0.98438	0.625	0.31152	18.0637	-69.5374	726.514	-1.3281	0.59863	0.60547
2.242	37.266	-76.458	883.0196	-1.7515	0.69775	0.71484	-16.3561	158.49737	583.6631	-0.68652	0.26953	0.1333	49.4562	-107.621	986.549	-1.8198	0.56299	0.23535	51.2883	86.4513	154.306	-0.083008	0.021973	0.075684	-18.215	-147.891	1148.678	-1.4429	0.53955	0.18457	53.556	141.7237	856.676	-0.8999	0.55713	0.28711	-17.4888	-48.744	737.393	-1.3101	0.59424	0.5918
2.244	34.8241	-63.679	917.7847	-1.7185	0.70777	0.69995	-1.007	185.2753	544.6843	-0.6543	0.24951	0.13037	25.97	-169.577	1037.936	-1.7285	0.56445	0.1792	22.2986	64.393	151.7638	-0.085938	0.017578	0.095215	-50.609	-228.269	1180.954	-1.3672	0.5791	0.16211	3.182	143.527	837.227	-0.85498	0.52783	0.27441	25.4761	-72.859	793.562	-1.3137	0.61695	0.59057
[truncated: 11,877 more rows]
