# Supplementary material for: Reliability and Validity of Running Cadence and Stance Time Derived from Instrumented Wireless Earbuds
Source: Sensors (Basel). 2021 Nov 30;21(23):7995. doi: 10.3390/s21237995 (PMC8659722; doi:10.3390/s21237995)
Supplement: Supplementary file 1 [file sensors-21-07995-s001.zip › Data_P03_speeds_1.csv]

time	S7kmh_force_plate_1	S7kmh_force_plate_2	S7kmh_force_plate_3	S7kmh_earbuds_1	S7kmh_earbuds_2	S7kmh_earbuds_3	S10kmh_force_plate_1	S10kmh_force_plate_2	S10kmh_force_plate_3	S10kmh_earbuds_1	S10kmh_earbuds_2	S10kmh_earbuds_3	S13kmh_force_plate_1	S13kmh_force_plate_2	S13kmh_force_plate_3	S13kmh_earbuds_1	S13kmh_earbuds_2	S13kmh_earbuds_3	max_force_plate_1	max_force_plate_2	max_force_plate_3	max_earbuds_1	max_earbuds_2	max_earbuds_3
0	18.765	140.909	950.766	-1.4005	0.65576	0.26973	22.6366	117.952	742.0416	-0.72705	0.49658	0.17139	-37.0835	152.5898	1013.322	-0.92431	0.3938	0.31177	-19.085	25.6317	29.096	0.5	-0.42969	-0.055664
0.002	-10.678	130.279	923.22	-1.3677	0.64952	0.26035	30.2856	138.3613	723.523	-0.65625	0.45703	0.16309	-24.418	184.1178	972.0812	-0.86719	0.34863	0.32275	-49.3655	8.949	35.74	0.49219	-0.40234	-0.081055
0.004	-20.659	115.9175	898.156	-1.3371	0.63437	0.24248	28.1813	147.939	681.554	-0.62891	0.43652	0.16064	-8.361	205.986	940.401	-0.79736	0.28955	0.32959	-66.5425	12.469	18.8467	0.47852	-0.37402	-0.087891
0.006	-22.881	120.33	869.7733	-1.3066	0.62109	0.23096	-1.2117	134.72929	683.581	-0.56445	0.39941	0.14307	33.111	221.098	903.424	-0.76758	0.26367	0.33643	-69.6699	21.204	17.371	0.43213	-0.31543	-0.09668
0.008	-29.714	128.684	845.569	-1.2688	0.60371	0.22217	-7.965	160.851	656.047	-0.51758	0.37061	0.13037	15.53	222.895	863.9597	-0.70508	0.21582	0.34766	-98.883	37.0933	37.2972	0.38965	-0.26782	-0.090576
0.01	-23.845	128.796	807.7365	-1.2336	0.58965	0.21612	-19.3949	155.9075	606.2508	-0.47266	0.34521	0.11719	-1.821	213.2729	793.364	-0.65772	0.17797	0.35425	-91.933	29.8207	50.28	0.33691	-0.2124	-0.077148
0.012	-37.297	120.846	780.7142	-1.1957	0.57285	0.19776	-38.7662	148.5635	575.6904	-0.41162	0.30664	0.10107	-0.248000000000001	217.7276	753.347	-0.62207	0.13965	0.35986	-79.782	27.6049	29.4037	0.25049	-0.12988	-0.052246
0.014	-16.592	105.9053	772.6011	-1.1601	0.55312	0.18554	-21.5938	179.8396	528.767	-0.38818	0.29102	0.095703	17.166	201.733	681.622	-0.56299	0.095215	0.36133	-87.9459	33.2536	5.337	0.20898	-0.094727	-0.040039
0.016	-25.784	120.648	736.566	-1.1206	0.53564	0.18066	-30.4344	157.8155	481.079	-0.33203	0.25439	0.077637	13.084	202.465	657.935	-0.53076	0.069336	0.36377	-72.87	11.702237	29.3117	0.12939	-0.030273	-0.015137
0.018	-23.857	134.743	735.3663	-1.0838	0.51621	0.16651	-46.0293	152.63803	462.9819	-0.29395	0.23023	0.064697	39.052	191.244	579.489	-0.46289	0.022949	0.35938	-69.389	7.3848	37.508	0.070801	0.015381	0.0021973
0.02	-24.27	125.0902	734.841	-1.0432	0.49873	0.15703	-30.7415	173.77	426.4741	-0.26807	0.20313	0.057129	47.552	189.438	569.305	-0.41382	-0.011719	0.35328	-51.494	-3.676043	22.1872	0.019531	0.058594	0.0097656
0.022	-0.613	127.7409	708.377	-1.0018	0.48272	0.14688	-31.94	134.516143	425.0989	-0.22266	0.17041	0.035645	60.9034	172.1155	509.452	-0.36328	-0.047363	0.34131	-1.934	-4.76476	11.2395	-0.038574	0.10938	0.026855
0.024	20.709	122.1764	660.6964	-0.96318	0.46924	0.13653	-41.6517	153.417	422.35462	-0.2124	0.15576	0.034668	78.6451	175.4319	500.491	-0.28271	-0.092773	0.32861	27.843	-6.1315	7.85	-0.061035	0.13232	0.028809
0.026	23.973	124.83776	629.8311	-0.91602	0.45068	0.13037	-35.9092	164.922	371.068	-0.1792	0.12988	0.025391	83.16	149.9879	441.085	-0.24072	-0.11377	0.30664	72.047	-13.401	24.9657	-0.099609	0.17334	0.032715
0.028	47.356	132.202	607.2898	-0.87685	0.43741	0.11914	-21.198	146.432	367.021	-0.16113	0.1145	0.02002	96.1419	164.8814	450.2959	-0.15479	-0.15625	0.27686	72.23	-10.3277	31.298	-0.12549	0.19678	0.032959
0.03	71.6781	137.911	612.637	-0.83623	0.41943	0.11358	-33.059	170.806	353.39	-0.14307	0.09668	0.016602	103.161	156.215	407.082	-0.094972	-0.18555	0.2478	120.026	-16.1642	16.6053	-0.15137	0.21191	0.035156
0.032	73.2497	131.148	589.8123	-0.79482	0.40069	0.10498	-31.0972	161.731	333.206	-0.12988	0.075195	0.022949	95.2222	185.904	412.052	-0.033203	-0.21338	0.21777	132.394	-17.44451	17.7793	-0.19727	0.22998	0.039551
0.034	47.0059	113.218	561.74	-0.76035	0.38145	0.10469	-25.3789	119.925	328.7862	-0.11914	0.067871	0.022949	55.422	187.557	353.0564	0.050781	-0.25244	0.17139	116.221	-12.6934	13.613	-0.21631	0.24268	0.04541
0.036	83.766	104.562	547.8343	-0.72266	0.36133	0.097168	-20.315	131.668	285.6705	-0.11475	0.046387	0.030273	31.898	205.774	311.1506	0.093262	-0.271	0.14795	134.806	-22.004	36.037	-0.26172	0.26367	0.060547
0.038	76.0194	105.7607	529.421	-0.68809	0.3416	0.095117	2.465	96.7665	283.4739	-0.10743	0.03418	0.032714	40.444	185.683	284.4795	0.15771	-0.30664	0.10059	135.341	-12.969	50.658	-0.29052	0.27637	0.068848
0.04	48.62083	124.74	492.3914	-0.65254	0.32432	0.094727	-7.71	78.949	282.881	-0.10303	0.020996	0.041016	13.635	184.684	237.692	0.20727	-0.33056	0.063476	106.707	-35.625	51.456	-0.32617	0.28564	0.069824
0.042	43.1724	119.4306	480.4257	-0.61504	0.30517	0.092383	-1.599	116.6888	247.20454	-0.1001	0.0083008	0.046387	36.013	165.498	234.86466	0.24951	-0.35498	0.024902	89.131	-17.4877	87.335	-0.37646	0.30322	0.05957
0.044	37.6674	120.2308	449.08367	-0.57832	0.28428	0.085938	32.4724	99.4766	223.164	-0.094727	0.0083008	0.051758	20.501	149.8211	190.84221	0.28467	-0.38477	-0.015625	69.5459	17.2269	129.729	-0.40625	0.31494	0.05957
0.046	50.8239	126.692	438.966	-0.53857	0.26807	0.086426	10.353	105.49	199.846	-0.089355	-0.0073242	0.060547	-2.197	123.9922	181.24557	0.30127	-0.39746	-0.034668	40.5824	45.832	216.436	-0.46924	0.34082	0.067383
0.048	2.223	128.714	427.8021	-0.50664	0.24902	0.077148	32.988	115.963	196.1964	-0.087646	-0.019776	0.063965	-10.511	114.1743	147.588	0.32031	-0.42432	-0.074219	55.4323	69.127	281.4024	-0.5398	0.35791	0.064209
0.05	20.489	118.2312	412.5548	-0.46904	0.22744	0.070215	32.4672	88.104	197.0984	-0.080566	-0.025391	0.066895	-15.435	109.449	164.5278	0.32422	-0.43676	-0.09717	11.413	76.183	353.12	-0.61475	0.37158	0.065918
0.052	6.39299999999999	104.47528	413.013	-0.43701	0.21455	0.063574	22.452	103.123	183.837	-0.076172	-0.039551	0.074707	-15.773	117.795	116.5456	0.3208	-0.44092	-0.1123	-35.505	94.661	469.7	-0.73047	0.38379	0.07959
0.054	-7.243	109.497	382.4535	-0.40274	0.19707	0.060742	51.6325	109.79	149.0954	-0.070801	-0.042969	0.08252	-11.231	118.337	149.943	0.31104	-0.44189	-0.1333	-77.556	125.785	609.237	-0.79736	0.39307	0.083496
0.056	-39.8634	104.728	344.936	-0.37061	0.18066	0.058105	16.545	84.218	134.5895	-0.059082	-0.054199	0.084473	-19.938	98.138	105.135	0.29785	-0.44238	-0.14307	-111.337	120.831	731.508	-0.95313	0.41309	0.091797
0.058	-39.379	101.065	317.5553	-0.33925	0.1624	0.055274	8.42	98.867	118.5349	-0.052734	-0.061524	0.088624	-29.189	76.241	118.7	0.2627	-0.43457	-0.15869	-149.584	104.577	838.5636	-1.0664	0.43848	0.11328
0.06	-14.93	89.076	316.624	-0.3125	0.14473	0.058789	24.417	76.7306	98.803	-0.045898	-0.069824	0.095215	-23.168	38.2511	78.7846	0.22729	-0.43017	-0.16358	-146.382	52.947	960.1322	-1.1895	0.46338	0.14307
0.062	-44.811	93.233	298.125	-0.28789	0.13731	0.047852	8.867	55.1644	96.6241	-0.033691	-0.079102	0.097656	-1.904	19.785	89.5407	0.18213	-0.41846	-0.1665	-155.003	-3.17299999999999	1072.668	-1.3677	0.5083	0.19141
0.064	-35.6991	94.205	277.592	-0.26328	0.12383	0.05166	5.755	67.841	75.6904	-0.025391	-0.086426	0.090332	-33.928	-6.244	56.5981	0.11182	-0.39795	-0.1626	-180.261	-71.585	1168.225	-1.4546	0.52979	0.22852
0.066	-42.802	91.3528	268.5851	-0.24219	0.11182	0.054199	13.066	35.1566	66.3478	-0.0097656	-0.092773	0.096191	-8.662	-6.912	59.988	0.046142	-0.37964	-0.15088	-123.683	-149.443	1221.321	-1.6133	0.57031	0.32275
0.068	-11.117	89.5778	290.823	-0.2207	0.10068	0.05293	-8.8	13.38	77.749	0.0092776	-0.10376	0.091797	6.976	-0.177	14.6737	-0.024414	-0.35547	-0.13867	-93.8	-208.523	1248.139	-1.7107	0.58936	0.41553
0.07	-21.921	77.11174	266.0343	-0.1999	0.088183	0.051758	-11.737	40.735	46.66217	0.033691	-0.11328	0.087891	28.8	23.448	13.6586	-0.11475	-0.31396	-0.11133	-71.3074	-277.1209	1264.138	-1.7866	0.5957	0.51123
0.072	-25.503	68.0047	258.1478	-0.1835	0.078027	0.05918	3.348	18.0243	33.9284	0.064453	-0.12158	0.075195	18.866	-1.7812	8.5795	-0.16504	-0.29639	-0.10059	8.694	-308.866	1226.212	-1.8672	0.59375	0.65088
0.074	23.806	61.1218	241.4399	-0.16895	0.063476	0.063476	-10.644	13.4335	39.95949	0.084473	-0.13037	0.072266	45.148	3.301	-0.00999999999999801	-0.25488	-0.25537	-0.074707	79.452	-302.545	1157.054	-1.9111	0.58204	0.73291
0.076	31.175	70.737	213.26314	-0.1543	0.049805	0.069824	-11.772	27.824	41.545	0.11426	-0.14795	0.049805	42.319	-12.214	3.014	-0.32251	-0.22705	-0.062012	115.729	-302.65	1115.34	-1.957	0.57178	0.80518
0.078	38.956	77.214	193.5448	-0.13594	0.038281	0.078418	8.129	9.8271	50.671	0.1333	-0.16211	0.025391	47.0665	-1.1679	-11.793	-0.39355	-0.19482	-0.046387	122.892	-277.159	1052.301	-1.9805	0.57422	0.85596
0.08	24.759	71.455	183.1617	-0.12012	0.034082	0.08418	-29.76	19.1817	25.827	0.14209	-0.16846	0.012695	61.373	-5.4646	14.28	-0.48438	-0.14795	-0.028809	110.9885	-257.3	1004.552	-1.9585	0.56689	0.85938
0.082	62.6957	71.6853	172.747	-0.10019	0.023926	0.093945	3.288	29.547	5.8458	0.15283	-0.17773	-0.012207	75.119	9.228	11.7622	-0.52783	-0.12598	-0.02002	150.56	-190.559	965.74	-1.9004	0.54883	0.83105
0.084	66.0867	73.84211	173.2336	-0.087695	0.012304	0.10576	-3.015	-0.286	10.1481	0.15259	-0.18042	-0.029053	56.76194	5.6864	22.2876	-0.60889	-0.083008	0.0029297	152.13	-140.918	956.429	-1.8708	0.5813	0.78784
0.086	74.7129	77.20683	173.7874	-0.07373	0.0024414	0.11768	-15.47	16.3549	-3.4329	0.14795	-0.18604	-0.043457	42.78	6.189	-21.1975	-0.66309	-0.056885	0.029541	139.752	-94.5902	988.823	-1.8472	0.65283	0.74609
0.088	66.7325	66.7883	172.58	-0.057324	-0.010156	0.12402	23.038	22.354	-16.4633	0.12158	-0.18506	-0.057129	19.939	15.6384	-6.8327	-0.71436	-0.033203	0.057617	108.422	-40.441	1005.548	-1.8408	0.75977	0.67822
0.09	61.72827	58.1483	169.864	-0.043262	-0.022364	0.12685	11.735	3.5747	-1.2783	0.10596	-0.18701	-0.057129	-3.263	9.8525	-59.467	-0.7749	0.0043945	0.092773	120.839	-21.801	1042.121	-1.8413	0.80762	0.65479
0.092	70.1778	51.1346	154.9296	-0.028418	-0.035254	0.13193	15.411	20.2491	-0.42633	0.068359	-0.1748	-0.050293	28.482	19.3246	-4.5764	-0.79688	0.018066	0.10254	161.519	-34.59	1093.555	-1.8652	0.88965	0.60693
0.094	34.713	52.62095	116.552	-0.015625	-0.050195	0.13408	56.1373	0.282961	17.9509	0.030761	-0.16406	-0.034668	10.918	10.982	-37.0467	-0.79883	0.047852	0.12012	129.551	-89.037	1145.998	-1.8848	0.94385	0.56372
0.096	51.271	53.7679	101.568	-0.0029297	-0.064453	0.1333	27.138	-5.5938	28.128	-0.0053711	-0.15332	-0.020508	2.741	3.5355	3.8877	-0.77442	0.062744	0.1189	137.679	-141.039	1206.0278	-1.8945	1	0.50928
0.098	43.97	53.6621	101.4615	0.011914	-0.077832	0.13389	26.303	22.453	5.8142	-0.05127	-0.13574	0.0024414	9.288	-1.181	-4.2643	-0.72852	0.077148	0.11328	157.291	-200.939	1259.347	-1.8804	1.0845	0.43945
0.1	33.214	65.228	108.2838	0.026465	-0.088965	0.13018	58.0201	9.2527	-0.5564	-0.069824	-0.125	0.010254	-9.246	22.8341	43.3263	-0.65576	0.071777	0.10498	89.9771	-261.703	1281.5759	-1.8628	1.1216	0.40723
0.102	6.197	53.474	102.9611	0.043262	-0.10302	0.12627	32.676	13.9777	15.86076	-0.10596	-0.1084	0.033203	-23.463	45.1023	16.334	-0.60156	0.062988	0.087891	11.994	-314.272	1324.2662	-1.8027	1.1875	0.3667
0.104	-2.149	47.08	100.7192	0.056543	-0.12041	0.12119	43.552	26.6158	-4.497	-0.12061	-0.092285	0.044434	0.853999999999999	70.912	34.181	-0.50928	0.03418	0.063477	-53.6415	-375.09	1343.883	-1.7654	1.2258	0.36133
0.106	9.799	33.8265	114.569	0.067383	-0.13037	0.1167	39.705	-2.8241	19.9171	-0.12939	-0.080078	0.058594	-16.918	60.235	5.3506	-0.43994	0.015869	0.041748	-95.686	-384	1381.379	-1.7344	1.2539	0.37988
0.108	-31.685	42.223	106.3817	0.076953	-0.13887	0.10967	13.7	2.3311	7.53	-0.13379	-0.072266	0.073242	-34.0583	45.019	3.381	-0.36377	-0.010742	0.017578	-151.714	-341.704	1401.098	-1.7202	1.2817	0.43213
0.11	-25.903	38.918	90.7873	0.081347	-0.14717	0.10772	38.315	22.5463	3.0195	-0.13184	-0.072266	0.083496	-23.439	15.225	0.09802	-0.21436	-0.057617	0.014648	-167.21	-269.193	1404.293	-1.7202	1.2905	0.46729
0.112	-35.78	51.058	59.1854	0.087598	-0.15655	0.096386	45.5025	-0.1868	23.6459	-0.11279	-0.074219	0.091797	-37.948	2.62208	22.5151	-0.1582	-0.076172	-0.0019531	-155.932	-183.908	1418.869	-1.7358	1.3052	0.54004
0.114	-22.689	43.0441	50.7995	0.083887	-0.15586	0.083496	-1.384	22.5718	18.0585	-0.10278	-0.083008	0.096436	-42.621	-0.619	19.2345	-0.064453	-0.10205	-0.028809	-180.359	-127.008	1445.581	-1.7468	1.3226	0.58863
0.116	-49.649	44.545	40.98	0.077148	-0.15234	0.066406	32.586	37.041	0.6821	-0.091797	-0.089355	0.097168	-0.843999999999998	19.7609	22.64	0.01123	-0.12256	-0.052978	-151.405	-104.872	1455.1731	-1.7729	1.3501	0.63672
0.118	-56.1898	35.576	51.0687	0.067676	-0.15557	0.046289	27.243	19.4344	7.0615	-0.072754	-0.10352	0.094727	2.17	9.01815	44.732	0.088867	-0.15479	-0.075195	-143.309	-59.061	1444.933	-1.8535	1.3984	0.70752
0.12	-18.204	33.712	49.2358	0.058008	-0.15098	0.027148	-3.672	32.145	0.6023	-0.057129	-0.1084	0.085938	0.872	8.0951	33.4341	0.16943	-0.18994	-0.10596	-129.557	-3.22999999999999	1466.9218	-1.9155	1.4224	0.73438
0.122	-3.511	37.952	60.683	0.050977	-0.14863	0.002539	4.976	26.5733	6.83	-0.035645	-0.1123	0.083008	32.2367	13.8699	51.099	0.20508	-0.19922	-0.11328	-119.789	35.502	1487.3645	-2.0913	1.481	0.7959
0.124	1.453	31.405	52.0609	0.040527	-0.14238	-0.010742	-16.866	10.6748	14.8052	-0.015869	-0.11816	0.076172	55.322	-4.90763	19.5166	0.26221	-0.20703	-0.12646	-119.588	29.73	1491.7895	-2.2759	1.5239	0.84766
0.126	-4.159	24.5921	53.0885	0.027344	-0.13721	-0.025391	-6.627	37.8876	2.3058	0.0043945	-0.11865	0.070313	17.218	-7.76324	47.646	0.3086	-0.21069	-0.12646	-91.139	-14.146	1480.827	-2.4824	1.5762	0.90186
0.128	31.964	34.695	49.0048	0.010645	-0.13086	-0.029492	11.384	25.0537	1.8094	0.019531	-0.12305	0.062012	61.138	-18.4593	9.6092	0.35645	-0.22412	-0.12939	-72.159	-66.5742	1498.425	-2.7847	1.6353	0.99512
0.13	31.083	43.018	30.721	-0.0095704	-0.12363	-0.032617	-27.066	6.3443	26.068	0.033691	-0.12305	0.056641	32.556	-17.472	26.168	0.43311	-0.26123	-0.15674	-62.603	-127.702	1547.534	-2.9331	1.6646	1.041
0.132	42.7735	46.439	31.275	-0.023633	-0.1127	-0.02793	-9.01	23.0431	19.8439	0.04834	-0.11914	0.054199	40.3664	-14.1579	-11.549	0.45557	-0.27588	-0.16797	-39.795	-160.843	1591.742	-3.2246	1.6777	1.1372
0.134	36.837	23.8408	34.7026	-0.045606	-0.10938	-0.022754	0.651000000000003	-0.0974000000000004	24.94106	0.058349	-0.11377	0.043701	63.5585	-1.176	44.32	0.48682	-0.2876	-0.18311	13.7083	-168.636	1598.936	-3.4099	1.6746	1.1965
0.136	47.293	18.6292	35.4422	-0.059082	-0.10059	-0.0078125	-19.694	8.7173	18.8908	0.066406	-0.10791	0.037109	28.4617	-14.0796	6.044	0.48877	-0.27783	-0.18676	94.323	-168.761	1611.051	-3.5586	1.6504	1.2407
0.138	66.0651	18.5506	34.458	-0.075	-0.081738	-0.0022461	10.74	25.1441	6.86751	0.076172	-0.099609	0.025391	17.324	10.219	17.276	0.47656	-0.25684	-0.1748	91.52	-163.224	1597.086	-3.6621	1.5957	1.2603
0.14	54.2238	16.4824	33.857	-0.084668	-0.06875	0.0085938	15.257	-1.8032	28.568	0.079102	-0.092773	0.023926	29.441	-4.9868	-15.5113	0.4458	-0.24365	-0.16406	123.966	-151.733	1579.511	-3.6675	1.5688	1.2422
0.142	72.8809	7.7727	44.0744	-0.094433	-0.056641	0.024218	-1.18	7.48766	16.2789	0.082031	-0.073242	0.024902	53.311	10.024	-14.8662	0.42529	-0.24219	-0.15771	155.235	-106.791	1571.103	-3.5742	1.502	1.1899
0.144	52.0629	10.569	39.8674	-0.1003	-0.041602	0.03877	30.392	13.1047	7.9694	0.078369	-0.068603	0.029053	34.095	-18.5092	-17.2027	0.36475	-0.23047	-0.14453	141.168	-46.4758	1541.812	-3.4245	1.4582	1.1238
0.146	73.2714	21.3176	16.3	-0.10352	-0.028809	0.053711	29.144	1.501	27.6035	0.073242	-0.054688	0.027344	46.169	-15.48956	-15.5267	0.30517	-0.21557	-0.12891	139.803	24.67646	1538.1364	-3.2554	1.4204	1.0488
0.148	34.261	24.087	9.148	-0.10625	-0.017871	0.061133	16.898	22.8362	23.1807	0.052734	-0.036133	0.033203	15.86	-16.236	-7.617	0.24072	-0.1958	-0.10449	105.296	83.936	1495.3683	-3.0229	1.3667	0.95703
0.15	36.781	23.3957	25.28584	-0.1043	-0.00625	0.071875	51.6072	24.507	20.15274	0.046387	-0.026367	0.03418	-18.704	1.7773	-16.3	0.14648	-0.1543	-0.072266	55.811	119.933	1471.8614	-2.9155	1.3325	0.92969
0.152	38.551	7.0393	43.491	-0.1082	0.0066406	0.08125	35.198	7.2299	29.84	0.027832	-0.0024414	0.041504	-11.913	10.979	7.389	0.098145	-0.13818	-0.058105	35.9626	157.965	1447.456	-2.7285	1.2539	0.88135
0.154	10.891	12.9916	31.4891	-0.10821	0.017871	0.086035	31.345	21.4727	26.7398	0.0085447	0.013428	0.041015	-22.861	33.952	0.0590000000000011	0.012695	-0.097168	-0.022461	-3.069	173.743	1418.168	-2.6157	1.1929	0.85938
0.156	-5.687	-5.019	37.6954	-0.10986	0.03418	0.089355	69.312	-6.2002	47.7453	-0.012695	0.035645	0.037598	-41.066	29.469	11.2487	-0.038818	-0.070801	-0.0034179	-29.6227	192.262	1406.502	-2.5215	1.125	0.84814
0.158	-13.803	-7.599	45.406	-0.10674	0.044629	0.093262	16.672	-16.4806	57.1352	-0.048828	0.064453	0.033691	-5.332	21.5058	-33.142	-0.081055	-0.055176	0.015137	-64.116	198.122	1396.177	-2.4043	1.043	0.82666
0.16	3.014	-18.677052	61.364	-0.10811	0.057324	0.095117	-0.201000000000001	19.5833	89.0685	-0.069824	0.081055	0.035645	-27.325	21.6946	-4.09	-0.1167	-0.040039	0.022461	-90.968	170.595	1422.916	-2.3394	1.0044	0.81641
0.162	-52.5908	-15.1303	56.4107	-0.11475	0.072168	0.096679	35.1717	15.1167	133.7026	-0.11084	0.10693	0.043945	-17.274	18.2448	-17.5936	-0.13086	-0.029785	0.022461	-107.801	140.154	1434.259	-2.2051	0.92773	0.78369
0.164	-48.792113	-21.9398	48.857	-0.12266	0.084277	0.10586	6.154	24.94	160.0812	-0.15699	0.13355	0.054932	-24.288	23.6392	19.1837	-0.13623	-0.029785	0.018066	-120.203	94.7029	1423.0386	-2.1016	0.87402	0.75733
0.166	-30.229	-29.8871	51.7855	-0.13281	0.093262	0.1084	22.514	60.5976	174.9394	-0.20068	0.15479	0.067871	-7.615	32.3888	-11.554	-0.13501	-0.02832	0.0024414	-113.363	78.2238	1427.9026	-1.9941	0.81836	0.7251
0.168	-34.7815	-25.971	71.47985	-0.14297	0.10488	0.1165	13.072	44.212	215.5517	-0.25977	0.18555	0.084961	-8.795	49.326	10.2918	-0.13086	-0.028809	-0.0043945	-155.18	99.094	1428.489	-1.8496	0.74805	0.6958
0.17	-39.7813	-36.003	92.9638	-0.15498	0.11504	0.12071	-36.529	66.96909	260.1	-0.29395	0.20654	0.09375	16.232	30.0676	6.6374	-0.12549	-0.048828	-0.020508	-179.373	109.319	1420.361	-1.7695	0.70703	0.68066
0.172	-47.47423	-48.2268	108.833	-0.16787	0.12481	0.12031	-20.9828	86.5917	289.5287	-0.37061	0.23193	0.095215	6.8	37.893	60.459	-0.12549	-0.052246	-0.029297	-147.185	116.98483	1390.245	-1.6284	0.65869	0.65234
0.174	-12.311	-31.0505	123.6428	-0.17832	0.13926	0.1207	-18.9978	69.6531	328.98483	-0.43091	0.26099	0.10718	-2.683	27.048	17.369	-0.1377	-0.051758	-0.035156	-116.674	97.443	1339.618	-1.5202	0.62817	0.63452
0.176	-22.2928	6.3026	155.0276	-0.18896	0.15234	0.12207	-27.592	85.793	361.4186	-0.49805	0.28711	0.11768	29.733	29.408	25.103	-0.13965	-0.057129	-0.029785	-79.216	91.646	1307.783	-1.4199	0.60352	0.62549
0.178	-17.03	43.9218	178.8954	-0.20361	0.16123	0.12588	-13.025	62.5824	393.214	-0.58398	0.32813	0.13623	37.9486	14.2404	15.51944	-0.13623	-0.067383	-0.029785	-75.455	141.222	1246.229	-1.2886	0.56299	0.61768
0.18	-17.0465	63.685	209.33	-0.22158	0.17744	0.12705	-29.429	29.4742	453.329	-0.63672	0.34668	0.14746	44.47	8.9427	34.442	-0.13037	-0.09082	-0.041992	-49.5447	191.072	1181.704	-1.2285	0.54004	0.6167
0.182	-7.388	90.46	261.93	-0.24111	0.18994	0.12666	-45.9109	49.955	499.794	-0.74609	0.38623	0.17529	27.37	-2.8982	18.8211	-0.12305	-0.10107	-0.047852	-3.589	230.3958	1103.773	-1.1138	0.49365	0.61328
0.184	4.991	105.93772	306.561	-0.26514	0.20342	0.12666	0.362	21.1357	570.943	-0.83204	0.41626	0.20166	63.3811	19.705	38.0621	-0.11133	-0.10205	-0.07373	51.337	241.5029	1074.268	-1.0234	0.4607	0.60302
0.186	-7.66	105.6387	365.1713	-0.29297	0.21582	0.13232	5.781	-16.006	637.779	-0.91357	0.44482	0.24072	31.1543	2.5314	62.7331	-0.090576	-0.091797	-0.092041	73.168	244.983	1030.535	-0.92578	0.42969	0.59033
0.188	21.4114	92.318	439.35	-0.3295	0.23633	0.12461	15.422	-20.368	695.893	-1.0376	0.48682	0.29883	51.5901	-16.393	90.714	-0.06543	-0.087891	-0.11426	118.697	256.012	985.629	-0.78613	0.38916	0.56494
0.19	24.366	73.559	492.145	-0.37031	0.2582	0.13096	39.897	-62.3181	750.493	-1.0938	0.50684	0.3335	30.2679	-51.57335	90.736	-0.037109	-0.086426	-0.15234	155.795	259.384	962.9199	-0.71045	0.36328	0.54297
0.192	46.6105	48.097	534.346	-0.42031	0.28554	0.13291	12.983	-79.2614	800.1715	-1.2031	0.53809	0.41064	20.758	-53.8077	58.9221	-0.029297	-0.085449	-0.17896	173.586	261.335	926.6641	-0.55957	0.31787	0.4917
0.194	25.9658	7.199	584.836	-0.48115	0.31631	0.13711	35.17	-63.3836	822.016	-1.2791	0.56763	0.4751	22.217	-65.8976	97.1124	-0.032715	-0.085449	-0.18994	182.676	240.4401	884.04649	-0.4165	0.26318	0.43359
0.196	53.8304	-20.012	623.953	-0.54639	0.34619	0.14404	62.218	-82.8319	850.0439	-1.3511	0.58252	0.53809	56.0849	-72.9285	123.7133	-0.067871	-0.060547	-0.19092	208.145	222.113	828.297	-0.34229	0.2334	0.39795
0.198	73.029	-42.31626	652.869	-0.6166	0.37519	0.1499	46.803	-59.532	833.958	-1.4277	0.60156	0.60596	20.867	-78.8262	199.7337	-0.098633	-0.050781	-0.19092	193.32	217.64	793.706	-0.20557	0.16309	0.33594
0.2	72.985	-57.24	664.3294	-0.68701	0.41104	0.16573	93.3684	-72.97508	826.548	-1.4768	0.61157	0.64526	15.803	-66.556	204.874	-0.17529	-0.0083008	-0.16895	195.261	191.178	763.0207	-0.1106	0.10693	0.281
0.202	55.112	-67.935	677.7249	-0.76709	0.44307	0.18642	79.443	-110.595	815.382	-1.5156	0.61914	0.67432	21.692	-26.149	323.743	-0.25146	0.02417	-0.1543	158.08	161.63	723.5218	-0.015137	0.054199	0.22852
0.204	41.181	-68.202	680.313	-0.84072	0.46973	0.21953	70.281	-96.379	788.557	-1.5386	0.62549	0.69727	11.975	-5.334	407.189	-0.33984	0.065918	-0.12988	97.7347	150.44	677.5574	0.085938	-0.02002	0.15869
0.206	67.547	-72.257	681.742	-0.91992	0.48633	0.25342	118.931	-83.1405	765.274	-1.541	0.62891	0.70752	9.73199999999999	14.551	550.266	-0.47461	0.13184	-0.11426	96.9544	183.1333	626.947	0.1333	-0.055664	0.12305
0.208	-1.886	-48.437	663.79	-0.98808	0.49668	0.29111	77.3197	-88.995	767.903	-1.5273	0.62793	0.71191	40.083	10.17414	598.166	-0.55078	0.16846	-0.10205	94.4914	226.884	574.8623	0.22266	-0.12109	0.057129
0.21	5.24	-35.022	648.349	-1.0476	0.50078	0.33594	59.2996	-62.8211	792.106	-1.5095	0.63501	0.71167	34.483	-23.5985	706.875	-0.72266	0.25732	-0.071289	51.128	234.681	532.925	0.27808	-0.1648	0.0026855
0.212	4.296	-25.8739	628.538	-1.1028	0.48906	0.36133	74.671	-68.768	817.196	-1.4922	0.64063	0.71729	41.65	-56.499	766.854	-0.87598	0.32861	-0.027832	49.642	243.681	459.3248	0.33789	-0.20703	-0.046875
0.214	-0.756	5.4694	605.0829	-1.1492	0.48457	0.39336	40.776	-73.134	852.648	-1.4624	0.6499	0.72656	85.269	-81.886	872.983	-1.0464	0.40869	0.021973	-1.953	243.067	408.2783	0.40674	-0.25586	-0.10693
0.216	-18.673	18.6889	588.081	-1.1846	0.47266	0.41602	46.305	-63.25	885.48	-1.4531	0.65625	0.73193	58.744	-91.989	899.908	-1.2944	0.54053	0.12256	-22.379	248.186	376.234	0.44336	-0.2793	-0.13135
0.218	-25.212	8.874	587.481	-1.2203	0.48008	0.43721	54.7664	-71.436	934.0254	-1.439	0.66846	0.73047	71.387	-78.059	940.044	-1.4238	0.60547	0.18799	-39.331	244.722	367.7578	0.50244	-0.32861	-0.18457
0.22	-4.274	3.868	604.185	-1.2499	0.49424	0.45742	19.907	-76.793	970.925	-1.42	0.68213	0.71337	40.403	-90.259	952.021	-1.6777	0.74414	0.32129	-96.322	214.862	331.179	0.54541	-0.35816	-0.23047
0.222	-44.2558	11.02	613.208	-1.2858	0.5208	0.4707	48.662	-102.968	992.688	-1.3804	0.68115	0.66992	-16.404	-101.327	972.66	-1.8425	0.82837	0.40796	-87.0979	172.571	257.9137	0.57666	-0.39209	-0.26172
0.224	-26.9314	-9.428	639.492	-1.3136	0.5501	0.48301	35.823	-144.6408	994.733	-1.3042	0.68604	0.59814	-50.282	-124.444	972.3329	-1.9941	0.90039	0.46436	-90.501	152.2332	186.379	0.61768	-0.43311	-0.31152
0.226	-13.4038	-55.395	667.6564	-1.3296	0.57275	0.49316	6.525	-177.794	1014.5085	-1.2607	0.68945	0.55566	-7.864	-111.462	987.84	-2.125	0.9707	0.49463	-94.7878	150.674	161.715	0.63037	-0.45117	-0.33398
0.228	-26.0411	-83.363	705.4295	-1.3387	0.58564	0.49776	22.204	-199.595	1067.0791	-1.1816	0.68555	0.47314	-10.024	-124.007	1000.153	-2.1538	0.99072	0.4834	-95.6	162.428	163.4483	0.63916	-0.48779	-0.375
0.23	-15.694	-98.55	711.32987	-1.3535	0.5832	0.50068	-30.362	-225.236	1096.26391	-1.1477	0.68579	0.4187	5.806	-131.029	981.178	-2.1074	1.0254	0.39697	-48.4924	126.306	145.185	0.63184	-0.50537	-0.3982
0.232	-26.616	-122.481	733.74514	-1.3727	0.59922	0.5128	-73.9801	-213.329	1114.2262	-1.1328	0.68066	0.37695	-23.273	-134.5686	1014.715	-2.0215	1.0283	0.29663	-34.665	65.553	145.5395	0.60254	-0.51123	-0.42285
0.234	-12.499	-148.155	767.8952	-1.3839	0.61885	0.51367	-27.111	-186.1448	1124.0042	-1.1377	0.68066	0.34473	-27.186	-114.116	1018.19606	-2.0488	1.0625	0.28174	6.198	18.674	129.38	0.55029	-0.52539	-0.44287
0.236	-37.651	-165.175	804.839	-1.3726	0.62939	0.50977	-36.528	-172.0086	1142.2043	-1.1484	0.67969	0.34082	-25.388	-98.066	1064.04	-2.0566	1.1279	0.27197	50.451	4.182	138.458	0.51172	-0.521	-0.44922
0.238	-19.19589	-169.634	821.85335	-1.3306	0.63389	0.49765	-32.587	-131.14	1178.066	-1.1831	0.67432	0.3418	14.089	-89.319	1090.853	-1.9741	1.0786	0.20313	54.8849	32.1763	134.271	0.40332	-0.51465	-0.43799
0.24	-10.44564	-174.806	850.703	-1.2761	0.63291	0.46894	26.386	-93.288	1198.558	-1.2092	0.66919	0.33374	15.706	-97.764	1127.561	-1.7871	0.99805	0.10547	90.492	32.74	100.112	0.29834	-0.49853	-0.41601
0.242	4.91	-152.63	864.9972	-1.2167	0.63135	0.43926	-1.593	-87.187	1219.6811	-1.2305	0.66895	0.32031	42.3797	-130.246	1130.742	-1.6905	1.02	0.052491	117.711	32.4221	47.626	0.17773	-0.47803	-0.37988
0.244	12.215	-122.764	884.3312	-1.1582	0.63418	0.41172	1.372	-65.868	1243.677	-1.2539	0.67285	0.29248	91.1424	-150.702	1198.854	-1.5991	1.0376	-0.0024414	94.146	18.856	21.371	-0.00097656	-0.43701	-0.3208
0.246	9.323	-92.178	891.706	-1.1089	0.63818	0.38086	34.2638	-61.513	1239.3321	-1.2612	0.68896	0.27246	33.371	-187.702	1214.792	-1.459	1.0391	-0.064941	119.882	20.7905	-3	-0.098145	-0.42236	-0.28857
0.248	7.83	-64.187	909.986	-1.0726	0.64512	0.35732	14.393	-82.1286	1254.144	-1.2925	0.7251	0.24219	-30.251	-191.3605	1277.986	-1.3945	1.0527	-0.087402	139.346	40.0003	-3.253	-0.29443	-0.36914	-0.22217
0.25	36.413	-33.252	934.998	-1.0538	0.65967	0.33516	41.9398	-79.97	1247.0757	-1.3462	0.75537	0.22558	-60.242	-227.519	1307.023	-1.3101	1.106	-0.11084	131.68	55.553	-27.5353	-0.43677	-0.32373	-0.15674
0.252	41.5355	-39.546	978.8871	-1.0374	0.6792	0.31445	33.99	-110.2996	1252.277	-1.4316	0.78125	0.22607	-99.267	-216.323	1365.1268	-1.2771	1.1722	-0.072265	130.073	60.517	-25.583	-0.57959	-0.28223	-0.099121
0.254	12.833	-41.394	982.0672	-1.033	0.69902	0.29912	-6.932	-126.392	1279.9919	-1.5923	0.82373	0.25	-109.456	-215.598	1341.885	-1.2593	1.2212	-0.013184	123.039	64.174	-21.90342	-0.76904	-0.22266	-0.02002
0.256	8.445	-68.1635	1006.7707	-1.0366	0.71533	0.28564	34.019	-120.3017	1307.2843	-1.6836	0.84375	0.27832	-44.289	-190.952	1347.674	-1.2734	1.2441	0.059082	100.069	49.313	3.252	-0.86914	-0.19287	0.021973
0.258	6.634	-94.217	1023.581	-1.0555	0.73301	0.27295	40.28882	-142.438	1350.12771	-1.9004	0.875	0.34668	13.377	-187.498	1328.791	-1.291	1.252	0.085938	69.317	65.95	9.174	-1.0566	-0.14648	0.10059
0.26	2.596	-100.8588	1026.4626	-1.0694	0.7499	0.2664	38.12073	-145.943	1375.3982	-2.0781	0.91358	0.41358	51.039	-164.0009	1382.093	-1.3008	1.2705	0.12451	57.4365	55.829	34.7318	-1.1726	-0.11523	0.14819
0.262	-26.998	-121.4384	1039.1982	-1.0878	0.76279	0.25039	61.5984	-113.716	1384.9338	-2.2554	0.94971	0.48828	65.249	-163.282	1406.454	-1.2644	1.2776	0.12866	31.498	40.8165	49.833	-1.2813	-0.097168	0.18701
0.264	-16.401	-148.3369	1051.7899	-1.1072	0.77598	0.23994	55.2508	-101.489	1397.585	-2.4844	1	0.60645	107.095	-148.108	1410.525	-1.2168	1.2754	0.11182	-16.12	22.0411837	42.14	-1.3906	-0.060059	0.22559
0.266	3.216	-171.028	1073.486	-1.1265	0.7915	0.22607	43.5419	-78.0257	1408.196	-2.5894	1.0298	0.66602	117.738	-150.021	1429.749	-1.1753	1.2612	0.046387	-30.946	7.583	38.531	-1.4253	-0.035645	0.24023
0.268	-13.1243	-156.2193	1097.969	-1.1399	0.8041	0.21143	45.5007	-51.032	1404.866	-2.8066	1.0879	0.77393	151.116	-104.0394	1434.053	-1.1621	1.2559	0.019043	-71.5546	-18.031	20.965	-1.4707	0.02002	0.27686
0.27	-17.6578	-129.21292	1116.141	-1.1475	0.81328	0.19707	11.337	-60.128	1417.5538	-2.95	1.1301	0.85181	156.503	-65.62575	1422.563	-1.2109	1.2656	-0.020996	-63.802	-51.97	29.8	-1.4873	0.049073	0.28589
0.272	-9.126	-118.4055	1118.304	-1.1553	0.81953	0.1834	2.639	-45.919	1433.8454	-3.0762	1.1641	0.91455	124.6358	-23.0593	1393.695	-1.3157	1.2902	-0.023438	-93.3809	-51.955	35.111	-1.48	0.081543	0.29932
0.274	-10.5261	-117.531	1143.868	-1.1579	0.8206	0.17217	18.773	-37.534	1427.6248	-3.2065	1.2036	0.97852	83.18	-34.7347	1424.66	-1.4761	1.3208	0.00048828	-121.212	-26.3034	35.0195	-1.4351	0.11523	0.30859
0.276	-26.783	-110.7689	1135.716	-1.1577	0.82275	0.16992	-50.1031	-45.3727	1416.141	-3.2554	1.2163	1	47.01	-66.796	1436.585	-1.7891	1.3809	0.11572	-99.664	-8.4191	42.724	-1.394	0.12354	0.29785
0.278	-37.7619	-105.3266	1137.712	-1.1625	0.8291	0.15967	-45.093	2.9965	1394.958	-3.3081	1.229	1.0273	48.977	-111.021	1494.912	-1.9727	1.4023	0.18115	-74.466	15.0476	37.086	-1.2632	0.1333	0.25879
0.28	-23.22482	-88.4921	1148.5349	-1.1796	0.83486	0.15147	-29.1129	13.9512	1389.683	-3.3094	1.2308	1.0364	108.971	-118.795	1507.7863	-2.3374	1.4478	0.30176	-74.4952	5.621	30.806	-1.126	0.13135	0.22217
0.282	-57.591	-69.565	1153.218	-1.2003	0.8415	0.15147	-57.3417	1.554	1416.44	-3.2983	1.2329	1.0254	183.332	-100.224	1552.5282	-2.5957	1.4756	0.40186	-66.2305	6.683	18.2832	-0.95654	0.11572	0.18115
0.284	-39.982	-58.8	1152.627	-1.2444	0.85244	0.15391	-30.192	9.954636	1427.7013	-3.2441	1.2148	1.0083	161.702	-62.16	1525.828	-2.8198	1.5005	0.48438	-16.61	11.172	5.0633	-0.73242	0.061035	0.10449
0.286	-50.338	-65.0124	1148.569	-1.3086	0.86328	0.15869	-38.2376	-3.5031	1446.792426	-3.2124	1.2075	0.99805	167.4167	-22.952	1494.169	-3.0444	1.5044	0.57617	-8.499	22.3369	4.6455	-0.62646	0.02832	0.066406
0.288	-30.9267	-67.8323	1159.682	-1.3888	0.87178	0.18594	-48.6764	-9.088	1482.006	-3.1426	1.1875	0.96387	152.7032	-3.177	1462.758	-3.1289	1.4961	0.59521	15.245	22.218	16.4146	-0.42188	-0.044922	0.0053711
0.29	-12.675	-72.1049	1181.4362	-1.4891	0.87891	0.2208	-11.573	11.749	1493.129	-3.0921	1.1673	0.93823	122.356	-13.514	1513.575	-3.269	1.4731	0.61719	36.04	-1.1966	10.2269	-0.29077	-0.090576	-0.037598
0.292	-14.6298	-73.867	1210.6298	-1.6121	0.88321	0.26065	-38.0855	6.229	1496.2963	-3.0405	1.1509	0.91406	72.507	-29.217	1545.32972	-3.3172	1.4514	0.63111	47.401	-9.6807	-8.52	-0.16895	-0.13086	-0.074707
0.294	-6.2044	-84.6768	1248.167	-1.7356	0.88936	0.31309	-44.4504	23.7493	1484.8431	-2.9644	1.1255	0.88867	83.111	-36.744	1594.645	-3.314	1.4233	0.62695	84.3444	-8.2	-21.015	-0.02832	-0.17188	-0.12646
0.296	-2.108	-83.8023	1254.98	-1.8633	0.88867	0.37256	5.325	45.733	1439.5006	-2.9253	1.1089	0.86328	23.317	-12.6636	1564.134	-3.3276	1.3911	0.5957	114.222	-4.042	-7.609	0.031738	-0.19238	-0.13965
0.298	-4.4254	-103.087	1270.0213	-1.9729	0.88643	0.43262	-15.892	34.1746	1428.7752	-2.8359	1.0762	0.8208	12.562	48.543	1543.231	-3.2964	1.3853	0.5918	106.033	14.74381	3.360568	0.12451	-0.20264	-0.18945
0.3	-20.7083	-91.9463	1275.4255	-2.0781	0.88594	0.49571	-0.791	57.6121	1430.3635	-2.7586	1.0539	0.78736	-16.685	99.329	1478.517	-3.2202	1.3872	0.55029	118.146	7.0281	5.897	0.22729	-0.21558	-0.21753
0.302	-19.5438	-86.589	1288.6019	-2.1578	0.88125	0.55039	27.0949	69.96456	1410.8452	-2.668	1.0273	0.7583	2.58800000000001	126.2499	1441.895	-3.1452	1.3909	0.52734	143.926	15.81861	-0.7433	0.36426	-0.25244	-0.26074
0.304	-15.795	-67.9049	1295.2422	-2.222	0.86982	0.59687	-0.969000000000001	57.388	1424.8659	-2.5469	0.99219	0.7124	1.895	106.393	1452.512	-3.0581	1.3911	0.49316	128.363	10.0747	20.608	0.52344	-0.33594	-0.34521
0.306	-7.3399	-56.2964	1296.1721	-2.2715	0.86523	0.63525	19.931	86.124	1402.996	-2.4766	0.97168	0.68848	49.357	71.104	1490.799	-2.9082	1.3779	0.4458	115.202	12.9908	35.529	0.56494	-0.35693	-0.37109
0.308	-27.8471	-44.3375	1282.9713	-2.295	0.85147	0.66563	59.0157	85.098	1382.4354	-2.3511	0.93994	0.63574	42.054	46.684	1518.156	-2.8315	1.3638	0.41406	105.395	25.3907	45.4863	0.58789	-0.3252	-0.38477
0.31	-14.5746	-38.7978	1287.6682	-2.3113	0.83369	0.69043	37.2746	83.141	1379.127	-2.2496	0.90722	0.59863	87.4102	37.065	1544.953	-2.689	1.3364	0.36719	83.3501	50.381	17.6134	0.58911	-0.28784	-0.37158
0.312	10.898	-26.6664	1286.345	-2.3288	0.81142	0.70722	64.4864	118.081	1359.7322	-2.146	0.87549	0.5625	96.3881	39.49372	1522.209	-2.5877	1.305	0.33618	73.7055	69.67	26.6264	0.58008	-0.27148	-0.36182
0.314	-6.653	-11.031	1266.614	-2.341	0.78096	0.72852	61.492	107.934	1321.3329	-2.0254	0.83691	0.51611	74.721	53.972	1487.919	-2.4995	1.272	0.30957	39.2978	65.69	29.431	0.57275	-0.29248	-0.35156
0.316	-19.7572	12.0821	1282.0953	-2.3452	0.76123	0.74707	31.41	93.436	1319.445	-1.9585	0.81592	0.49609	90.341	89.79	1438.218	-2.3828	1.2305	0.28369	-3.066	30.357	29.283	0.57251	-0.32739	-0.35425
0.318	-12.1723	14.5864	1264.298	-2.3522	0.74151	0.75449	52.87214	103.224	1264.6198	-1.8394	0.77588	0.46484	86.527	96.456	1426.4949	-2.3076	1.2061	0.27099	-28.651	24.9406	-2.30126	0.56104	-0.36279	-0.35547
0.32	-10.76079	6.908	1276.7297	-2.353	0.72861	0.75976	35.1052	63.04	1252.1909	-1.7344	0.74219	0.44385	64.829	125.303	1444.359	-2.2241	1.1919	0.25146	-52.386	10.0006	0.5655	0.52881	-0.3833	-0.35352
0.322	-26.8517	8.674	1290.6017	-2.3534	0.72275	0.75625	6.855	62.145	1261.84	-1.6831	0.71729	0.43359	74.3412	113.967	1451.188	-2.0918	1.1582	0.23682	-70.055	12.829	12.4009	0.49512	-0.39258	-0.34912
0.324	-35.177	-6.26	1291.4523	-2.3516	0.72471	0.74668	19.289	76.214	1215.765	-1.5835	0.67236	0.42578	94.0602	116.234	1406.188	-2.0273	1.1387	0.22119	-101.028	14.7922	42.6494	0.41113	-0.37012	-0.31348
0.326	-24.9324	-15.3381	1297.579	-2.3398	0.72412	0.73682	-6.959	64.06	1197.472	-1.52	0.63989	0.41919	75.5713	97.088	1354.5262	-1.8945	1.1016	0.19434	-74.026	-6.3244	37.2064	0.3352	-0.34692	-0.27588
0.328	-43.051	-10.3622	1295.858	-2.3296	0.71787	0.73321	-26.772	97.8822	1183.141	-1.4648	0.60938	0.41064	89.061	133.881	1296.047	-1.7976	1.0676	0.17163	-70.6814	-21.7206	19.3477	0.24121	-0.31152	-0.23193
0.33	-35.2136	-15.7572	1271.3156	-2.3188	0.71836	0.72627	-9.169	122.643	1111.4847	-1.3926	0.55859	0.40674	106.593	151.75	1242.372	-1.7124	1.0376	0.13867	-86.0778	-38.5433	32.8227	0.10303	-0.23926	-0.1626
0.332	-47.3254	-19.87361	1259.7052	-2.3168	0.72578	0.72744	-18.186	125.8317	1104.9346	-1.355	0.53857	0.40527	127.4365	198.714	1212.257	-1.6035	0.99805	0.12158	-81.8417	-36.60228	57.216	0.033203	-0.20215	-0.13135
0.334	-24.479	-19.9497	1241.391	-2.3137	0.73985	0.73018	-9.41	158.936	1072.0543	-1.291	0.49121	0.40137	117.106	195.181	1208.698	-1.5503	0.98096	0.12061	-58.9119	-24.8316	53.082	-0.083008	-0.14355	-0.075684
0.336	-38.5651	-7.7154	1228.4852	-2.3057	0.75488	0.72998	3.823	155.174	1022.499	-1.241	0.45996	0.39649	129.656	185.609	1187.643	-1.4526	0.94189	0.11475	-31.2366	-26.2921	5.104	-0.16651	-0.10205	-0.033936
0.338	-30.266	9.6213	1205.8365	-2.2853	0.76738	0.73018	-13.012	138.8207	1036.922	-1.1914	0.42578	0.39014	96.909	159.8	1170.499	-1.3916	0.90673	0.11035	-10.672	-20.9025	3.097	-0.23682	-0.062012	-0.00048828
0.34	-28.2945	18.063	1192.2233	-2.2577	0.78525	0.72735	-18.454	156.338	983.81	-1.1187	0.38525	0.39404	69.1487	176.302	1117.32	-1.332	0.87402	0.10303	-23.852	-32.645	-7.3896	-0.30469	-0.032715	0.037598
0.342	-32.4037	46.212	1197.9875	-2.2249	0.79932	0.72344	11.277	132.4927	936.2184	-1.0811	0.36719	0.39111	28.213	174.876	1073.697	-1.25	0.83301	0.090332	12.674	-13.3617	14.282	-0.33057	-0.023926	0.055664
0.344	-18.5823	57.315	1200.131	-2.1803	0.81035	0.71319	9.866	134.473	907.3192	-1.0093	0.32861	0.38672	17.39	212.0547	1035.458	-1.2046	0.81299	0.081543	52.76382	7.5089	4.348	-0.37939	0.0024414	0.085449
0.346	-31.6097	58.847	1206.605	-2.1304	0.81885	0.69824	15.168	154.761	841.1269	-0.948	0.29809	0.37622	-27.775	181.978	991.579	-1.1172	0.77148	0.071777	72.103	28.339	-15.714	-0.40454	0.023682	0.10523
0.348	-18.95557	62.7822	1189.9039	-2.082	0.82324	0.68858	24.582	126.6597	804.705	-0.88135	0.26709	0.37793	-41.88319	176.456	955.1209	-1.0518	0.73828	0.06543	92.7799	41.026	0.2808	-0.42676	0.043457	0.11475
0.35	-10.0153	64.11541	1172.3227	-2.0284	0.82861	0.67109	21.221	131.9419	797.3384	-0.79736	0.22217	0.36523	-69.228	156.829	930.642	-0.98389	0.70654	0.0625	108.331	41.175	5.5009	-0.43115	0.064941	0.12061
0.352	-9.9505	79.7789	1150.228	-1.9768	0.82861	0.66016	54.651	138.0111	748.099	-0.75195	0.19678	0.35791	-65.1377	187.933	890.5513	-0.89746	0.66113	0.047852	145.961	56.486	1.746	-0.42725	0.067871	0.12451
0.354	-13.369	74.2221	1147.857	-1.9275	0.82197	0.64531	63.7564	104.385	740.583	-0.67285	0.16016	0.34131	-48.9036	220.979	857.31921	-0.84814	0.64404	0.048828	118.609	68.381	-18.7771	-0.41016	0.0625	0.12109
0.356	-14.936	58.8031	1121.3702	-1.8784	0.81982	0.625	70.68	129.467	718.0334	-0.60669	0.13452	0.32519	-36.2525	256.915	801.866	-0.74756	0.59814	0.046875	148.939	49.717	6.498	-0.39209	0.049072	0.11328
0.358	9.791	37.4444	1106.2868	-1.8347	0.81279	0.61094	95.9506	137.1834	670.585	-0.54004	0.10986	0.30469	-25.832	251.85	758.252	-0.67261	0.55542	0.049561	118.691	34.316	10.2256	-0.38135	0.037109	0.10742
0.36	-3.3977	32.5226	1079.24	-1.7952	0.80713	0.60117	97.6377	137.20629	645.043	-0.45703	0.074219	0.28564	-7.079	246.374	741.6052	-0.59961	0.51465	0.047363	65.4625	17.8224	31.551	-0.36084	0.037109	0.098145
0.362	-8.0258	34.5949	1088.0956	-1.7499	0.78839	0.58555	99.3324	170.597	618.498	-0.4126	0.04834	0.27295	-13.46	222.76	706.5967	-0.49854	0.45117	0.053711	83.6485	30.503	15.4726	-0.35156	0.038574	0.087891
0.364	10.9878	49.75291	1092.2282	-1.7118	0.775	0.56963	94.89609	168.261	563.6295	-0.33105	0.015137	0.24365	-33.0814	223.068	683.4728	-0.45068	0.42139	0.049316	66.86661	24.0693	22.3224	-0.32813	0.040527	0.075684
0.366	27.3014	62.51942	1074.9579	-1.6641	0.75977	0.55566	87.2094	161.533	540.124	-0.2727	-0.010987	0.21582	-57.0472	235.2441	650.224	-0.36133	0.34277	0.047363	43.6349	1.55728	40.166	-0.30566	0.031982	0.057129
0.368	-8.183	81.154	1037.2251	-1.6217	0.74433	0.54023	93.4356	172.743	500.919	-0.21729	-0.036621	0.19287	-54.6211	252.083	598.455	-0.29101	0.28955	0.047852	-0.786999999999999	-10.0547	36.956	-0.27197	0.022949	0.036133
0.37	-5.868	88.687	1019.777	-1.5781	0.72616	0.52704	79.088	142.6321	444.357	-0.14844	-0.077637	0.1665	-40.464	256.3347	525.788	-0.2251	0.22998	0.046875	-23.317	-6.6004	33.622	-0.21582	0.0014648	0.0068359
0.372	8.898	82.15761	997.477	-1.53	0.707	0.51727	56.505	146.5375	448.5637	-0.12109	-0.095215	0.15479	-22.2797	218.25829	489.798	-0.13916	0.15137	0.041992	-44.3429	6.7155	40.774	-0.18799	-0.0019531	-0.018066
0.374	-0.741	98.015	983.18	-1.4822	0.6869	0.50223	58.704	165.317	386.623	-0.080078	-0.13672	0.11816	-4.75	185.529	474.0912	-0.10693	0.1167	0.04248	-26.861	2.0563	50.832	-0.1543	1.4572e-13	-0.050293
0.376	-12.32	112.024	965.0704	-1.4351	0.66357	0.49023	59.113	134.4757	377.555	-0.050781	-0.15796	0.098635	24.4387	141.985	461.2842	-0.045898	0.04248	0.025879	-47.028	-10.521	48.343	-0.15699	0.014649	-0.058594
0.378	-13.4146	101.952	913.51363	-1.3862	0.63851	0.47746	35.018	127.549	373.464	-0.027344	-0.18115	0.079102	48.059	127.847	422.3224	-0.001465	-0.015869	0.01831	-105.864	1.598	48.991	-0.17139	0.038574	-0.060059
0.38	10.305	91.6606	893.7172	-1.3352	0.61501	0.46077	21.875	132.319	323.7417	-0.00048828	-0.20508	0.052734	28.4907	116.3156	399.21593	0.033203	-0.071289	0.0092773	-90.134	-11.2004	56.4545	-0.1958	0.061035	-0.069336
0.382	-6.566	89.505	859.721	-1.2865	0.59122	0.45102	10.4	123.634	330.8829	0.01123	-0.20947	0.043945	55.1096	135.76	348.3766	0.064941	-0.13525	-0.0029297	-63.635	-2.021	94.859	-0.21191	0.062012	-0.080078
0.384	-5.218	90.061	844.834	-1.2375	0.56619	0.4327	13.67	141.288	307.9773	0.022461	-0.2207	0.03125	94.791	135.321	325.754	0.064941	-0.16406	-0.0083008	-76.6364	-0.8904	141.761	-0.24219	0.066895	-0.098145
0.386	-4.48399999999999	85.3533	834.4003	-1.189	0.53564	0.42432	4.282	144.244	260.228	0.029785	-0.22705	0.018555	85.059	147.7	298.042	0.065918	-0.2168	-0.02002	-51.412	-2.9033	210.0662	-0.28516	0.075684	-0.10816
0.388	4.905	80.4795	825.362	-1.1423	0.50922	0.40803	-4.293	116.071	276.4225	0.03418	-0.23291	0.012207	27.73	143.4001	273.3636	0.054199	-0.24463	-0.023193	-30.232	3.0325	274.5149	-0.34619	0.086426	-0.104
0.39	4.225	82.9614	808.236	-1.0896	0.48377	0.39337	-9.139	113.817	244.4698	0.03418	-0.22754	0.003418	2.3247	157.494	232.0814	0.035156	-0.26855	-0.030762	-6.233	10.3934	374.692	-0.47803	0.10889	-0.074707
0.392	5.371	76.7579	781.266	-1.0417	0.4563	0.38212	-3.041	86.413	226.19803	0.033203	-0.22461	-0.0048828	-18.0482	131.679	224.7367	-0.012207	-0.28564	-0.026855	38.926	36.573	525.699	-0.56543	0.11963	-0.057129
0.394	2.133	69.536	758.779	-0.99525	0.43096	0.36749	1.811	73.6789	234.626	0.032227	-0.21436	-0.0073242	-14.6543	130.767	171.265	-0.037109	-0.28564	-0.019043	58.291	30.4216	740.086	-0.77197	0.15381	-0.0063477
0.396	9.601	89.79537	728.9256	-0.94678	0.40674	0.35596	-5.132	94.57	194.883	0.033936	-0.21094	-0.017578	-26.325	86.244	142.229	-0.09668	-0.27734	0.0058594	86.537	-2.98067	907.361	-0.94676	0.1897	0.040283
0.398	4.772	107.562	696.8426	-0.90029	0.37984	0.3456	-0.108000000000001	81.8309	166.9832	0.028809	-0.19971	-0.023926	-17.951	97.152	85.766	-0.1477	-0.25122	0.030517	155.488	-20.036	1018.876	-1.147	0.24316	0.10205
0.4	-15.306	101.1695	668.5302	-0.85381	0.35504	0.33295	-5.934	80.574	168.616	0.037598	-0.19434	-0.028809	-25.42	80.5652	64.856	-0.19873	-0.22852	0.062988	209.1557	-54.986	1174.998	-1.4214	0.33838	0.19531
0.402	0.616	98.6465	641.104	-0.80224	0.33015	0.31755	1.951	102.126	118.085	0.037109	-0.19336	-0.027832	-17.927	107.246	49.649	-0.26367	-0.17773	0.11279	260.1554	-105.753	1281.7495	-1.5469	0.39209	0.27979
0.404	27.533	88.9126	632.9635	-0.75003	0.30837	0.3062	24.667	73.4488	115.0432	0.046875	-0.19336	-0.043945	-23.8995	83.092	43.782	-0.29688	-0.146	0.13818	296.1026	-164.51	1400.592	-1.8125	0.53711	0.42334
0.406	30.7182	101.296	594.318	-0.70166	0.2832	0.29102	33.411	73.481	133.599	0.047607	-0.19483	-0.048096	-7.548	101.115	16.303	-0.33887	-0.086426	0.18701	296.008	-181.989	1410.952	-1.9912	0.66992	0.52637
0.408	22.682	103.7184	581.27756	-0.65222	0.25776	0.27891	63.139	71.085	101.5309	0.058105	-0.19092	-0.052734	-22.5768	55.012	36.234	-0.36524	-0.049561	0.21411	229.249	-171.118	1404.031	-2.1367	0.79297	0.60986
0.41	13.6	113.493	535.8602	-0.60125	0.23838	0.26261	54.4652	45.4432	112.691	0.0625	-0.2002	-0.059082	-17.22	54.693	16.208	-0.37939	-0.01416	0.23145	147.73	-199.24	1417.798	-2.2773	0.9082	0.64697
0.412	50.2302	117.1588	516.7883	-0.55163	0.20907	0.24926	50.5543	62.772	91.627	0.062988	-0.20557	-0.064941	-56.0765	28.5673	27.033	-0.38818	0.020508	0.24414	-8.68000000000001	-223.804	1354.661	-2.312	0.94385	0.63232
0.414	14.485	126.407	494.1857	-0.50559	0.19076	0.23447	69.3144	60.062	35.653	0.067383	-0.21338	-0.071777	-42.686	48.361	10.555	-0.38525	0.03418	0.24756	-64.72	-223.316	1294.526	-2.3262	0.95898	0.56299
0.416	16.141	112.1188	477.9962	-0.46631	0.16992	0.22119	71.8187	35.0639	52.6472	0.074219	-0.21705	-0.074219	-60.364	15.6189	15.9041	-0.36328	0.0625	0.23193	-26.12	-186.311	1258.027	-2.2859	0.93824	0.47192
0.418	30.898	100.8315	462.6205	-0.43218	0.1533	0.21269	49.8316	49.94494	39.7445	0.078613	-0.21289	-0.086426	-3.088	38.657	5.75589	-0.34082	0.078125	0.21045	-46.847	-143.4	1271.384	-2.2085	0.9165	0.38672
0.42	24.788	104.8538	446.41638	-0.40115	0.13751	0.20483	57.2339	32.448	11.689	0.099609	-0.21826	-0.10596	-22.3936	5.187	28.08077	-0.3208	0.092285	0.18604	-75.6441	-153.251	1285.598	-2.043	0.87305	0.28564
0.422	8.562	102.7887	435.9805	-0.37039	0.12138	0.19399	42.7047	13.437	52.936	0.10645	-0.21729	-0.1084	9.079	34.0078	3.471	-0.29785	0.10303	0.14746	-80.43	-116.763	1239.931	-1.9429	0.83252	0.22754
0.424	-9.746	92.6967	408.9782	-0.34526	0.10863	0.18614	28.141	23.8271	22.5336	0.11719	-0.21436	-0.11865	17.334	14.7222	19.9149	-0.2793	0.11279	0.12891	-92.89	-119.78	1222.727	-1.7305	0.72852	0.14502
0.426	28.156	84.6948	381.9984	-0.31543	0.091797	0.17969	21.201	-2.0998	25.13387	0.12012	-0.21167	-0.12647	25.036	40.4336	4.729	-0.27051	0.12744	0.11182	-163.839	-90.32	1223.362	-1.6072	0.66968	0.10034
0.428	19.062	88.925	359.9548	-0.29129	0.079332	0.16861	6.321	-3.1594	37.3654	0.12109	-0.20898	-0.12695	34.217	8.0706	18.926	-0.26905	0.14722	0.11059	-138.816	-41.54	1275.235	-1.5151	0.646	0.076172
0.43	13.836	76.9572	349.2671	-0.26621	0.067732	0.16286	16.137	17.4102	1.1872	0.11816	-0.2085	-0.12451	93.777	15.543	24.146	-0.26367	0.16553	0.12158	-78.395	-54.61	1339.0425	-1.4531	0.69141	0.077637
0.432	-2.232	79.594	326.3199	-0.24378	0.054114	0.15533	17.018	6.77742	12.36145	0.11816	-0.20508	-0.12451	62.513	-6.5586	52.863	-0.25439	0.18652	0.13965	11.703	-100.412	1320.702	-1.4468	0.74268	0.085449
0.434	12.571	79.7327	315.4588	-0.22053	0.044528	0.13543	-2.145	9.9584	19.0425	0.11133	-0.19824	-0.12402	63.1899	23.9295	47.466	-0.25098	0.20215	0.14502	29.289	-220.763	1319.6757	-1.4204	0.85986	0.12061
0.436	10.741	93.34	297.36423	-0.19971	0.03125	0.13477	0.677	23.5484	-10.91144	0.099855	-0.19433	-0.12085	57.0296	17.943	44.83	-0.2207	0.22266	0.14893	-59.218	-278.311	1330.6	-1.3862	0.94385	0.11572
0.438	-7.976	86.641	287.2096	-0.17923	0.021255	0.12682	-15.377	0.5129	16.07827	0.088867	-0.1875	-0.1167	46.277	46.722	21.8582	-0.18872	0.22509	0.14722	-156.393	-281.75	1450.375	-1.3726	0.97705	0.11816
0.44	2.01	68.4147	272.5145	-0.16075	0.0091289	0.11304	-35.215	20.26147	-2.7811	0.070313	-0.18262	-0.10107	20.385	28.09	30.6639	-0.14551	0.21484	0.13574	-191.945	-284.256	1552.907	-1.3779	1.0361	0.13037
0.442	-2.803	72.85826	260.6559	-0.14204	0.0017502	0.10251	-14.074	17.3298	-15.1343	0.056885	-0.17285	-0.084229	44.568	5.333	22.3837	-0.085449	0.18701	0.11963	-204.44	-290.764	1531.045	-1.4402	1.0843	0.15528
0.444	12.053	83.4986	244.74	-0.12164	-0.010171	0.097061	-23.482	4.0806	4.1282	0.041016	-0.16211	-0.080078	11.494	-29.018	18.8304	-0.033691	0.15942	0.10888	-153.255	-307.13	1495.878	-1.5605	1.1367	0.18457
0.446	-9.446	80.7119	224.0053	-0.10059	-0.019531	0.089844	-30.217	33.386	2.8636	0.024902	-0.15967	-0.054199	41.6511	-31.5835	27.509	0.01416	0.1333	0.097656	33.669	-255.16	1478.037	-1.7651	1.2036	0.27539
0.448	5.091	81.975	208.9354	-0.079999	-0.026261	0.081653	-1.52	30.356	-5.8155	0.018066	-0.15771	-0.055176	46.1487	-46.163	18.6705	0.075684	0.09375	0.09375	135.32	-157.385	1517.949	-1.894	1.2329	0.3374
0.45	17.183	74.477	190.971	-0.060076	-0.03857	0.070317	-18.019	12.5754	14.5818	0.0039063	-0.15137	-0.046387	3.315	-32.8014	14.73	0.10303	0.08252	0.095703	171.416	-45.04057	1535.5906	-2.166	1.2852	0.45996
0.452	11.677	81.329	175.4382	-0.044057	-0.045597	0.06212	-7.36	18.0853	10.4209	-0.0075685	-0.1499	-0.039551	-36.8888	-15.0796	-7.241	0.15186	0.038086	0.10059	228.174	47.43	1516.3881	-2.3818	1.3194	0.54736
0.454	21.654	73.767	180.0074	-0.025886	-0.052929	0.055276	17.876	2.73211	19.6974	-0.018555	-0.15332	-0.030273	3.711	2.273	-5.0944	0.17676	0.01123	0.085449	277.069	48.023	1536.212	-2.5859	1.3438	0.62744
0.456	9.119	64.0827	178.48749	-0.0063477	-0.060547	0.043457	8.267	5.0623	29.3525	-0.040527	-0.15527	-0.021484	-7.509	0.00950000000000006	-8.4181	0.19873	-0.016602	0.070801	278.663	49.359	1528.69087	-2.814	1.3618	0.70117
0.458	30.55	61.3844	175.3675	0.0089887	-0.061718	0.024993	39.9532	36.1361	-2.3548	-0.052246	-0.1543	-0.016113	-16.99	0.4437	5.5101	0.21973	-0.054199	0.04541	308.07	90.9922	1531.289	-2.8979	1.3716	0.72266
0.46	-1.318	59.8285	165.454	0.027447	-0.064945	0.021578	55.2304	21.2894	15.16961	-0.086914	-0.14697	-0.00097656	-22.181	3.5377	-0.2286	0.22949	-0.071289	0.038574	329.5	146.035	1536.579	-2.9961	1.3516	0.71729
0.462	13.816	59.7512	150.1073	0.042679	-0.074318	0.0094705	39.936	17.672	14.1897	-0.11109	-0.14013	0.0085452	-48.0154	-4.26544	7.9673	0.25098	-0.09082	0.022949	278.106	177.454	1510.378	-3.0176	1.3154	0.68896
0.464	18.601	52.7647	143.1418	0.058302	-0.080273	0.0043936	47.13	26.6645	3.79	-0.13965	-0.12646	0.027344	-53.78556	4.2872	-21.411	0.26587	-0.10303	0.019531	212.251	98.797	1489.741	-3.0034	1.2778	0.66309
0.466	28.935	56.09	126.3002	0.071289	-0.088867	-0.0048828	53.3175	6.4315	14.3038	-0.17139	-0.11621	0.055176	-37.352	-5.92346	-13.039	0.27539	-0.11865	0.022461	178.2698	21.2661	1488.916	-2.9761	1.2124	0.60742
0.468	9.389	58.915	108.4438	0.085253	-0.094922	-0.0052735	48.6451	18.3708	13.2302	-0.18701	-0.10645	0.064941	-23.753	27.382	-29.9395	0.29639	-0.13965	0.034668	186.5	-56.606	1541.96	-2.9644	1.1821	0.58887
0.47	1.514	60.47	93.6019	0.096874	-0.10029	-0.0075191	65.4442	29.78	18.1176	-0.21484	-0.092773	0.10107	-4.677	28.9509	-23.5057	0.30713	-0.15088	0.032227	190.719	-121.408	1609.379	-2.9312	1.1235	0.56055
0.472	44.5326	51.2025	111.3228	0.10625	-0.10654	-0.010644	47.6917	6.5065	37.855	-0.22608	-0.078613	0.11182	17.603	49.548	-23.8753	0.33057	-0.18604	0.037598	194.752	-122.935	1624.05	-2.9341	1.0791	0.54492
0.474	31.073	53.376	110.4066	0.11426	-0.11484	-0.0038087	25.83	24.3837	22.621555	-0.23193	-0.064941	0.11914	-1.244	27.2992	-0.4637	0.34448	-0.20654	0.032227	135.4076	-93.29429	1595.051	-2.937	1.0493	0.54297
0.476	12.71	39.4774	113.144	0.11719	-0.11475	-0.00097656	53.3812	29.768	8.0486	-0.23193	-0.054688	0.13135	18.249	28.648	-8.625	0.35791	-0.23389	0.01416	121.8923	-28.7352	1549.323	-2.937	1.0142	0.54297
0.478	6.296	40.4932	87.0545	0.12285	-0.12227	0.0032227	22.997	6.9696	20.5783	-0.21973	-0.048828	0.13281	48.0202	3.902	13.5834	0.37354	-0.25635	-0.0058594	58.721	4.4032	1552.47	-2.9316	1	0.54443
0.48	30.409	51.882	79.1812	0.12676	-0.12519	0.005664	18.436	22.54621	8.8678	-0.19971	-0.046875	0.12793	40.283	29.50323	4.954	0.38184	-0.27246	-0.016113	-9.26400000000001	-12.977	1536.409	-2.9219	0.98242	0.55518
0.482	5.138	54.652	84.606	0.13105	-0.13067	0.0033204	30.8469	11.3652	2.4571	-0.16016	-0.049317	0.11401	59.0576	21.7223	33.7899	0.38232	-0.29541	-0.036133	-32.701	-5.936	1514.941	-2.8945	0.98633	0.55371
0.484	-7.275	51.792	72.0892	0.13906	-0.13828	0.0020506	-18.65	9.1856	17.8043	-0.12598	-0.053711	0.096191	62.674	46.216	27.8656	0.37402	-0.30396	-0.046875	-72.312	-6.148	1490.965	-2.8433	0.99658	0.54297
0.486	4.857	34.1192	60.0208	0.15088	-0.14746	-0.0092773	1.587	31.3331	7.9627	-0.065918	-0.06543	0.070313	23.5545	24.852	32.857	0.35645	-0.3042	-0.042969	-120.346	69.152	1428.95519	-2.728	1.0142	0.51758
0.488	15.666	32.4655	45.18814	0.15977	-0.15684	-0.025098	3.563	-3.9612	19.3964	-0.036133	-0.067871	0.05957	23.413	42.35	5.876	0.33154	-0.28906	-0.025879	-130.435	153.089	1385.355	-2.6655	1.0122	0.49219
0.49	17.412	34.8817	48.2512	0.1709	-0.1668	-0.034766	-39.971	-5.3648	32.2792	0.015625	-0.084473	0.026855	48.6375	15.06222	20.0041	0.30762	-0.2793	-0.012695	-103.1292	194.4394	1320.956	-2.4976	0.99951	0.44824
0.492	-7.749	27.8064	58.783	0.17285	-0.175	-0.046875	-11.275	24.6153	-0.480999999999998	0.047607	-0.10108	0.011231	57.04	28.4393	21.8621	0.25195	-0.24268	0.0078125	-75.153	215.8431	1271.638	-2.3747	0.97925	0.41284
0.494	12.606	19.7789	64.9184	0.1752	-0.19121	-0.058301	-15.78	5.3397	24.0405	0.075195	-0.10938	0	36.291	1.16499	44.974	0.20239	-0.19946	0.023193	-79.223	186.758	1257.422	-2.2578	0.95117	0.37646
0.496	-0.995999999999995	24.177	50.3825	0.17529	-0.19971	-0.063965	-36.56	16.0018	32.668	0.10303	-0.11914	-0.02832	70.4759	8.4528	25.6405	0.15234	-0.1543	0.035645	-21.766	178.5019	1265.1765	-2.1128	0.90088	0.34961
0.498	4.13	26.444	43.569	0.16455	-0.20146	-0.072461	-3.969	24.3716	-0.94708	0.11572	-0.11914	-0.035645	22.257	-4.16461	35.889	0.097168	-0.077148	0.05957	0.114000000000004	180.157	1282.695	-2.0469	0.87891	0.33936
0.5	11.874	21.4535	36.6905	0.15097	-0.20478	-0.075098	-11.317	-7.8268	19.7746	0.13379	-0.12402	-0.049316	21.142	16.7625	25.621	0.071289	-0.044434	0.070801	47.476	167.453	1274.903	-1.9204	0.8335	0.31738
0.502	4.077	18.9143	31.9671	0.13301	-0.20439	-0.069239	-21.445	-7.0529	0.9804	0.13867	-0.12817	-0.055664	6.571	2.004	35.2821	0.029785	0.026855	0.098633	87.814	153.392	1254.454	-1.8262	0.80371	0.30322
0.504	16.113	27.768	28.63739	0.11465	-0.20566	-0.060547	27.967	4.386	-2.22955	0.14502	-0.125	-0.063477	11.308	19.9259	28.5696	0.0014649	0.074219	0.11426	119.824	135.094	1214.116	-1.7266	0.78125	0.29346
0.506	-11.964	34.767	14.1339	0.089844	-0.2002	-0.049316	1.583	-9.1462	32.56	0.14551	-0.12451	-0.075195	-35.516	-7.086	27.6488	-0.023438	0.12012	0.12744	168.365	150.159	1166.782	-1.5835	0.74512	0.26758
0.508	25.602	24.9971	27.1886	0.057813	-0.19131	-0.038867	19.007	20.209	15.240729	0.14258	-0.12061	-0.08252	-13.254	0.20523	9.65664	-0.046387	0.16895	0.12939	191.685	166.741	1164.422	-1.5088	0.7168	0.25342
0.51	13.647	13.236	38.0753	0.025391	-0.17862	-0.021485	47.6334	17.8333	13.1214	0.14258	-0.11719	-0.083984	-38.5716	-19.9275	24.5067	-0.052246	0.19434	0.13037	198.346	155.182	1175.031	-1.3462	0.66455	0.2207
0.512	30.16	-0.3613	39.7219	-0.010156	-0.1626	-0.0046876	14.649	-0.248999999999999	23.2569	0.14063	-0.11133	-0.091064	-57.7704	-25.83014	-0.902999999999999	-0.064453	0.23926	0.1333	209.754	167.868	1146.707	-1.2216	0.62841	0.20313
0.514	6.975	-1.9725	38.7974	-0.040137	-0.1502	0.0074218	50.353	23.0177	-4.3258	0.13525	-0.11035	-0.095215	-35.047044	-29.7257	7.2375	-0.064698	0.26929	0.13403	179.973	154.322	1087.746	-1.1069	0.5835	0.17188
0.516	12.831	12.0542	20.9327	-0.062988	-0.13867	0.019531	44.589	1.658	3.2537	0.12402	-0.097168	-0.098633	-23.667	-20.71043	-4.323	-0.063965	0.29346	0.13086	168.558	188.252	1011.022	-0.94873	0.53076	0.14844
0.518	32.123	23.8625	23.3242	-0.085547	-0.13985	0.024219	30.402	2.856	32.522	0.12012	-0.094727	-0.098145	-33.83	-17.8537	23.7838	-0.067871	0.32861	0.12549	146.63	217.839	960.9859	-0.87012	0.50391	0.13428
0.52	6.589	24.7743	7.7485	-0.097852	-0.13642	0.028906	61.8712	20.8272	-6.3372	0.10498	-0.083984	-0.095703	6.413	-15.084	43.121	-0.075684	0.34521	0.11816	122.586	243.297	891.731	-0.72607	0.44775	0.11182
0.522	11.595	4.0663	7.438	-0.10136	-0.14111	0.030078	68.444	-3.4592	2.3334	0.085205	-0.07544	-0.10254	-1.784	-28.584404	51.756	-0.090332	0.37891	0.10742	99.511	266.458	857.068	-0.6167	0.40283	0.099364
0.524	8.845	0.688499999999999	7.14028	-0.10605	-0.14043	0.028125	46.3492	11.2674	13.4566	0.067871	-0.063965	-0.10498	-1.238	-19.593	53.177	-0.11988	0.42163	0.085449	71.5006	257.48	857.122	-0.51855	0.3584	0.086426
0.526	36.3469	-4.1059	21.1827	-0.10156	-0.13672	0.029297	59.138	4.765	-1.312	0.035156	-0.047852	-0.10889	-9.719	-19.76965	122.285	-0.15039	0.46582	0.043457	65.72	248.885	842.547	-0.39795	0.29541	0.077148
0.528	14.049	2.3514	30.2616	-0.097461	-0.13448	0.025098	25.462	0.45553	41.624	0.017578	-0.034668	-0.10498	8.1	6.618	193.378	-0.20264	0.53418	0.0087891	23.0763	210.816	840.02	-0.34033	0.26709	0.068848
0.53	0.00600000000000023	0.5318	37.2592	-0.095899	-0.13291	0.017188	24.256	28.1976	56.9306	-0.028809	-0.019531	-0.10205	-0.520999999999997	8.022	239.464	-0.22314	0.57178	-0.0058594	-17.662	189.957	756.52	-0.23193	0.2168	0.067871
0.532	17.281	-7.8178	21.6254	-0.09082	-0.13252	0.015625	48.962	36.748	39.564	-0.071778	0.0004883	-0.098144	32.6044	40.7157	310.674	-0.28857	0.64209	-0.035645	-60.786	206.081	693.115	-0.15381	0.18262	0.065918
0.534	26.611	9.9989	1.797	-0.082227	-0.13193	0.015918	-11.446	37.48951	89.7069	-0.12793	0.020996	-0.084473	-1.2196	63.5905	405.546	-0.36865	0.69825	-0.042236	-112.413	202.38	629.234	-0.081055	0.15137	0.060547
0.536	10.951	13.3433	11.636	-0.077637	-0.13574	0.0029297	-6.433	59.4894	108.808	-0.21191	0.050781	-0.067871	-25.3555	97.908	523.375	-0.44824	0.74805	-0.041504	-153.048	186.01	581.8233	0.013672	0.10693	0.051758
0.538	-3.308	9.4257	4.4729	-0.067578	-0.13565	0.0016602	21.096	52.0443	124.797	-0.25537	0.064941	-0.054199	2.7343	103.485	610.056	-0.58936	0.81689	-0.039551	-201.166	140.45	516.3899	0.057129	0.085449	0.051758
0.54	16.708	-0.3651	12.7371	-0.061035	-0.13975	-0.0025391	-32.443	52.2397	192.6713	-0.35254	0.099609	-0.022461	6.5396	83.456	707.534	-0.67383	0.85742	-0.04834	-195.934	91.295	483.33684	0.14551	0.050293	0.044922
0.542	15.704	5.818	8.7762	-0.055957	-0.13975	-0.0076172	-16.757	66.574	222.418	-0.44214	0.12915	-0.001709	3.714	55.55	802.608	-0.86523	0.94922	-0.054688	-191.86	96.692	438.825	0.20483	0.023926	0.039307
0.544	-8.397	12.3904	15.6429	-0.055274	-0.1373	-0.0079102	-13.629	62.325	268.882	-0.53662	0.16064	0.028809	15.02	4.271	948.6885	-1.0176	1.0351	-0.052246	-192.427	115.013	420.756	0.25586	-0.0029297	0.02832
0.546	21.786	-3.2378	20.9295	-0.047363	-0.13623	-0.0092773	-26.042	56.072	337.1453	-0.67383	0.19971	0.068848	-4.416	-44.672	1025.3355	-1.1777	1.125	-0.036621	-144.308	166.842	381.3154	0.31982	-0.041992	0.012695
0.548	18.038	-9.3451	16.9697	-0.045117	-0.13467	-0.015332	19.626	78.107	371.659	-0.7417	0.22266	0.091309	-2.811	-89.352	1121.701	-1.3887	1.2617	0.020508	-94.523	204.065	326.0831	0.34814	-0.061035	0.0078125
0.55	10.471	9.7944	6.338	-0.036914	-0.13438	-0.017286	19.813	43.382	463.09	-0.89648	0.27686	0.1416	7.704	-134.941	1163.9646	-1.4785	1.3125	0.064941	-38.7378	206.892	275.0598	0.38574	-0.099121	-0.0087891
0.552	-4.034	18.6671	9.937	-0.034179	-0.1293	-0.02002	6.95999999999999	16.792	572.48	-1.0269	0.32617	0.17823	12.076	-184.247	1257.402	-1.6489	1.4243	0.19727	0.0750000000000011	215.473	222.513	0.4065	-0.1333	-0.015869
0.554	21.035	12.03718	6.8164	-0.026758	-0.12754	-0.022949	49.262	-4.672	651.65	-1.1597	0.37451	0.21582	35.898	-212.732	1239.691	-1.738	1.4739	0.32569	8.5373	216.497	195.222	0.40918	-0.1665	-0.03125
0.556	-0.384	3.10869	22.0146	-0.013672	-0.12891	-0.029297	56.447	-55.713	758.3457	-1.3379	0.45313	0.28662	74.1059	-235.3	1223.241	-1.8105	1.5	0.45752	34.997	225.795	181.075	0.3999	-0.20508	-0.050781
0.558	21.202	3.934	16.7023	-0.0046875	-0.12324	-0.034863	32.571	-75.876	855.857	-1.4238	0.49512	0.32861	71.637	-234.106	1138.511	-1.8472	1.4673	0.625	38.7876	206.78	153.85	0.37085	-0.23438	-0.060303
0.56	0.416999999999994	-16.606	13.9086	0.0053711	-0.12236	-0.046192	43.7019	-92.658	927.9476	-1.5894	0.58057	0.42773	40.599	-253.336	1133.453	-1.853	1.4438	0.69434	31.389	162.756	121.3449	0.33447	-0.25586	-0.067383
0.562	26.07	-19.5763	31.3702	0.015137	-0.1208	-0.052051	12.6551	-122.07024	1006.1988	-1.7441	0.65381	0.53223	27.744	-253.783	1080	-1.8354	1.4146	0.76074	73.8088	146.806	120.8487	0.25537	-0.27246	-0.066406
0.564	28.486	-11.333	47.185	0.021778	-0.11895	-0.062012	-8.5528	-86.074	1013.2594	-1.814	0.68604	0.57227	39.672	-228.782	1071.188	-1.7612	1.3911	0.76904	120.122	123.8097	94.691	0.20801	-0.27539	-0.057129
0.566	13.895	0.519000000000002	57.1599	0.023438	-0.11816	-0.066406	5.633	-70.1051	991.54	-1.9316	0.72461	0.63525	44.133	-195.434	1032.335	-1.6245	1.3589	0.73975	152.364	116.4884	91.613	0.09082	-0.27637	-0.028809
0.568	37.668	-27.03004	62.031	0.021191	-0.11084	-0.070605	-14.622	-74.953	1008.374	-1.9893	0.73145	0.65869	24.5	-153.133	1049.477	-1.4116	1.2876	0.66992	176.137	92.7557	101.5523	-0.012695	-0.26172	0.0014645
0.57	27.134	-31.1709	63.073	0.013867	-0.10274	-0.074707	-2.088	-67.804	1012.889	-2.0254	0.72266	0.65283	-3.612	-102.955	1060.564	-1.2891	1.2754	0.60596	142.435	48.8134	88.61	-0.12402	-0.24365	0.039063
0.572	45.563	-31.5242	94.172	0.00058593	-0.096484	-0.075879	11.51987	-110.812	1011.823	-2.0449	0.69727	0.62256	0.928000000000001	-70.715	1059.837	-1.2344	1.3242	0.54736	149.824	24.75768	85.7983	-0.27637	-0.19727	0.10742
0.574	24.4	-7.318	134.8414	-0.015918	-0.083496	-0.076074	-28.71711	-122.885	1017.414	-2.0386	0.68408	0.60449	30.0918	-75.18	1069.522	-1.2266	1.4395	0.52002	149.498	1.6746	84.93	-0.34912	-0.16748	0.13916
0.576	26.588	-0.8656	177.1597	-0.042969	-0.070801	-0.069824	-20.222	-117.509	994.535	-1.998	0.63965	0.56396	29.5585	-123.448	1118.241	-1.2378	1.4946	0.51563	126.534	-17.6991	87.285	-0.48047	-0.092285	0.2085
0.578	37.085	22.962	222.9526	-0.075098	-0.054297	-0.062891	-34.5211	-125.4001	1000.098	-1.9375	0.59619	0.52051	51.7727	-171.611	1175.308	-1.2866	1.5513	0.51563	51.9548	-24.4451	91.973	-0.56836	-0.042236	0.25366
0.58	49.36	37.835	283.456	-0.1123	-0.03955	-0.057519	-52.71435	-100.814	1008.876	-1.8652	0.54297	0.4751	65.523	-227.36752	1254.516	-1.3367	1.5676	0.49243	12.245	-26.0285	81.306	-0.64551	0.0029297	0.29639
0.582	59.674	26.2981	371.8225	-0.15176	-0.020801	-0.054004	2.519	-83.809	995.81	-1.7578	0.47656	0.41504	99.938	-244.888042	1290.4396	-1.3843	1.5923	0.44727	-21.7162	-6.3199	33.51717	-0.73389	0.05127	0.34863
0.584	55.765	3.96501	436.4291	-0.20351	0.0022461	-0.048242	-8.443	-90.085	1013.396	-1.7227	0.46191	0.39063	46.5487	-310.533	1301.622	-1.3804	1.6372	0.36133	-65.125	5.141	12.579	-0.76611	0.074707	0.37842
0.586	81.87	-10.398	485.556	-0.26123	0.025391	-0.029785	-12.826	-81.349	1047.9474	-1.666	0.48047	0.34814	5.445	-338.865	1300.977	-1.3477	1.6504	0.31982	-61.4316	-3.611	-7.946	-0.81787	0.10352	0.43408
0.588	69.164	-10.132	529.7743	-0.32998	0.052441	-0.024121	-18.415	-104.447	1101.17	-1.6052	0.51684	0.32251	-46.614	-378.58	1307.38	-1.2031	1.6367	0.24365	-106.2236	-14.0956	-14.9648	-0.84375	0.11572	0.47461
0.59	53.024	-15.543	593.0482	-0.41064	0.081543	-0.011328	-36.9263	-139.704	1159.811	-1.5146	0.53516	0.29492	-24.107	-334.501	1323.2513	-1.0684	1.5747	0.1958	-119.34781	-8.782	-21.091	-0.85645	0.12061	0.50635
0.592	42.3096	-36.867	627.2338	-0.50908	0.11592	0.0125	-55.372	-165.798	1201.257	-1.3848	0.55566	0.25049	-31.822	-323.568	1363.1473	-0.91846	1.4927	0.15186	-104.078	13.992	-30.4074	-0.86328	0.11523	0.54346
0.594	23.586	-45.2025	632.0194	-0.6167	0.15332	0.038086	-46.238	-195.532	1219.298	-1.3218	0.5708	0.22852	-2.377	-260.552	1372.321	-0.7417	1.4009	0.085449	-99.602	14.769	-13.5239	-0.8501	0.11279	0.55859
0.596	2.4448	-26.816	648.853	-0.73633	0.19287	0.074219	-76.152	-203.329	1235.851	-1.2329	0.6001	0.18652	-15.4099	-244.0145	1393.9579	-0.69141	1.3711	0.041504	-91.999	4.585	18.997721	-0.81592	0.099121	0.58691
0.598	-23.2415	2.496	673.586	-0.87354	0.23115	0.1247	-73.292	-188.604	1249.20246	-1.199	0.63697	0.1814	-42.17935	-177.669	1412.439	-0.62939	1.3384	-0.051758	-89.409	1.37	1.4505	-0.76733	0.091797	0.60913
0.6	-1.02821	3.831	719.837	-1.0109	0.26992	0.18174	-51.762	-178.532	1254.763	-1.1836	0.67578	0.19141	-41.7128	-133.49	1413.986	-0.63477	1.333	-0.12451	-93.6643	9.837	-9.9065	-0.72217	0.08252	0.62402
0.602	9.12	-0.0760000000000005	744.015	-1.1438	0.31445	0.2458	-48.592	-177.377	1263.145	-1.2046	0.73877	0.22168	-18.5685	-25.81	1403.324	-0.68945	1.3418	-0.19141	-62.1491	33.8764	-8.887	-0.63281	0.057129	0.63525
0.604	2.152	-7.1124	732.548	-1.2732	0.3582	0.31348	20.021	-161.424	1301.092	-1.23	0.76416	0.23438	-29.591	2.70999999999999	1408.2671	-0.85107	1.3794	-0.25439	-19.26	18.6444	21.839	-0.59326	0.043457	0.62598
0.606	-35.554	-30.7757	717.171	-1.3926	0.40332	0.37402	54.2953	-159.916	1353.1947	-1.3198	0.82275	0.2627	-37.7124	38.962	1408.6872	-0.97852	1.416	-0.26025	-12.917	4.2302	11.2737	-0.48389	0.013672	0.60693
0.608	-15.546	-36.882	720.417	-1.494	0.43828	0.41836	62.42086	-135.3957	1369.2119	-1.4148	0.87085	0.28833	-67.124	-34.635	1436.3771	-1.2847	1.5122	-0.2041	-2.507	-0.5625	4.45222	-0.40527	-0.0075682	0.58081
0.61	6.248	-27.594	715.3609	-1.5745	0.4751	0.45547	130.729	-79.629	1360.598	-1.5229	0.92236	0.3291	-83.225	-75.247	1451.951	-1.5545	1.5939	-0.11133	60.7803	9.1868	-0.845000000000002	-0.31836	-0.039063	0.55908
0.612	20.729	-17.405	714.175	-1.6343	0.49892	0.47227	129.293	-35.463	1350.456	-1.7065	0.98486	0.39893	-116.281	-154.0606	1497.91	-1.8354	1.6821	0.0092773	102.248	37.9375	16.0668	-0.21143	-0.075195	0.51416
0.614	33.72	-28.329	691.66	-1.6621	0.51543	0.47549	80.02105	-12.976	1349.591	-1.8066	1.0156	0.44775	-100.854	-163.138	1533.5267	-2.1973	1.7969	0.22314	102.987	47.1504	29.1446	-0.16602	-0.093262	0.49268
0.616	36.96	-45.101	701.37	-1.6699	0.5332	0.46143	95.5934	7.944	1354.546	-2.0249	1.0747	0.55371	-79.608	-188.258	1566.244	-2.3672	1.8516	0.3252	147.428	53.061	21.867	-0.066406	-0.13086	0.43164
0.618	40.687	-73.492	718.8382	-1.6607	0.54502	0.43809	46.09	-14.955	1391.193	-2.2012	1.1176	0.63647	-37.972	-149.314	1584.706	-2.6616	1.9341	0.5127	162.099	53.332	19.9747	0.011475	-0.15528	0.38818
0.62	-4.634	-83.997	755.9856	-1.6671	0.55166	0.42383	45.741	-47.97739	1423.234	-2.3789	1.1621	0.71826	-23.2673	-184.029	1601.107	-2.8523	1.9929	0.61792	158.636	38.6157	41.069	0.098145	-0.18604	0.33252
0.622	-21.73	-100.1428	820.121	-1.6706	0.54815	0.4086	69.1834	-63.682	1439.57	-2.5898	1.207	0.79346	-18.3846	-170.866	1616.06	-3	2.0605	0.70166	155.6	43.567	67.358	0.2085	-0.23096	0.25195
0.624	-27.672	-102.5596	855.795	-1.6471	0.53711	0.38526	49.4	-79.929	1452.8727	-2.6831	1.229	0.81982	4.62781	-205.304	1636.861	-3.0996	2.1074	0.76025	131.593	18.5023	61.992	0.26123	-0.25928	0.20996
0.626	7.329	-104.153	865.41	-1.6016	0.52734	0.34473	89.1649	-85.208	1452.0048	-2.8159	1.2485	0.84473	21.0667	-148.491	1624.759	-3.1406	2.1309	0.77588	145.5	14.0258	28.8006	0.36328	-0.31787	0.13037
0.628	-3.31	-120.001	871.7209	-1.5457	0.51992	0.30625	117.2384	-84.448	1439.31983	-2.8794	1.2485	0.84033	-1.8332	-99.361	1596.4	-3.1968	2.1353	0.78516	109.6069	10.203	8.569	0.4419	-0.35889	0.066162
0.63	14.563	-130.756	876.391	-1.5038	0.51963	0.2709	95.2322	-93.489	1444.1267	-2.9063	1.2461	0.81885	0.7236	-27.266	1550.859	-3.1657	2.094	0.78247	39.835	-11.912	33.775	0.51514	-0.40283	0.0092773
0.632	49.28	-138.107	902.035	-1.4862	0.52315	0.24746	103.8081	-90.858	1442.5873	-2.8906	1.209	0.77197	-16.6926	-3.61074	1503.8242	-3.1187	2.0688	0.76172	18.235	-21.046	30.1398	0.60596	-0.45459	-0.051758
0.634	57.748	-125.806	930.154	-1.4984	0.5457	0.24336	95.2242	-80.889	1469.4552	-2.8608	1.1792	0.74414	-13.1576	25.2443	1492.945	-3.0913	2.063	0.74219	11.606	-35.39675	19.37368	0.63965	-0.47754	-0.084961
0.636	53.167	-122.761	969.7364	-1.5117	0.57324	0.24707	17.39	-78.274	1499.227	-2.7866	1.1177	0.68701	-18.7549	26.2906	1450.205	-3.0664	2.0625	0.73877	-2.349	-44.827	12.9305	0.68799	-0.50146	-0.12646
0.638	74.0451	-142.774	973.212	-1.5096	0.61074	0.2415	21.453	-36.961	1479.270856	-2.7317	1.0627	0.64966	-14.0741	52.882	1444.477	-2.9976	2.0435	0.72461	-63.641	-51.1642	29.0111	0.71143	-0.50781	-0.15088
0.64	104.02	-150.9087	988.8479	-1.4792	0.63232	0.22744	2.724	-0.507000000000001	1457.6311	-2.6831	1.02	0.62305	2.852	56.398	1445.919	-2.903	2.0149	0.71215	-72.776	-46.5875	55.829	0.72119	-0.50732	-0.16797
0.642	94.3423	-143.4721	1014.06	-1.4152	0.64248	0.20401	-38.14	16.109	1442.8422	-2.6284	0.98682	0.60742	-23.0723	33.69	1448.1809	-2.7891	1.9941	0.68799	-85.27	-3.028	12.5892	0.70508	-0.49121	-0.17383
0.644	67.4087	-107.094	1031.349	-1.3443	0.64239	0.16592	-7.966	46.338	1409.806	-2.6187	0.97314	0.60156	7.3522	5.7161	1404.077	-2.603	1.9438	0.63867	-83.493	10.937	-8.8518	0.68262	-0.47803	-0.18408
0.646	56.53	-78.6025	1070.6572	-1.2695	0.65723	0.12695	-21.524	42.747	1405.2736	-2.6089	0.97314	0.60352	-8.5674	-20.5457	1385.442	-2.5015	1.9106	0.61719	-81.092	14.856	1.77758	0.63135	-0.43115	-0.17578
0.648	27.941	-72.5384	1090.94895	-1.2036	0.66924	0.082812	12.258	32.515	1430.91	-2.6025	0.98194	0.60424	-7.3128	-25.0096	1361.692	-2.3257	1.8091	0.56641	-113.741	8.84	10.214	0.58203	-0.38965	-0.16308
0.65	17.725	-88.473	1117.2352	-1.148	0.67325	0.04961	43.29	36.508	1414.3488	-2.5801	0.99023	0.60205	-38.856	-31.8906	1406.5125	-2.2138	1.7227	0.53662	-108.763	11.8439	-10.1639	0.52539	-0.34229	-0.14697
0.652	20.061	-103.772	1129.1849	-1.1176	0.67637	0.024218	23.667	3.794	1443.3604	-2.541	0.99219	0.59717	-53.999	-0.778099999999999	1412.307	-2.1128	1.6382	0.51367	-80.342	32.5907	-38.2407	0.43701	-0.27148	-0.11816
0.654	69.738	-106.576	1143.29	-1.0954	0.6831	0.021094	59.789	3.428	1423.368	-2.519	0.99072	0.58691	-54.64	6.281	1396.552	-1.98	1.5181	0.48438	-83.0666	25.4941	-21.8043	0.39063	-0.23486	-0.095215
0.656	68.2	-90.7932	1161.125	-1.1094	0.68555	0.018555	78.098	15.509	1385.46	-2.4624	0.98096	0.57568	-44.5369	40.801	1363.9686	-1.9102	1.459	0.46631	-61.023	30.653	-6.363	0.29736	-0.16553	-0.060547
0.658	47.928	-83.594	1164.50926	-1.1378	0.70498	0.03457	61.133	9.069	1408.2334	-2.4158	0.96899	0.56177	-63.308	30.516	1346.7609	-1.7554	1.3491	0.44336	-33.607	42.773	10.9739	0.22657	-0.11646	-0.036377
0.66	50.332	-93.341	1162.395	-1.1707	0.72227	0.046973	78.7516	13.8015	1406.8401	-2.3691	0.95605	0.54736	-58.917	83.7792	1271.133	-1.646	1.2739	0.417	13.302	57.426	-9.37	0.16309	-0.067383	-0.015137
0.662	64.999	-113.405	1180.6846	-1.2101	0.74688	0.060644	91.4034	13.1547	1402.863	-2.3027	0.93359	0.53809	-37.7414	123.557	1217.139	-1.5332	1.2031	0.39404	61.157	59.21	-0.503	0.092773	-0.00097656	0.0068359
0.664	64.432	-123.302	1218.1536	-1.2377	0.76309	0.07168	64.599	-10.488	1436.58	-2.2637	0.91992	0.53174	-16.182	195.473	1176.801	-1.3901	1.1138	0.36523	89.911	26.3384	29.397	0.054688	0.02832	0.019043
0.666	31.447	-113.886	1241.1735	-1.2666	0.7793	0.075684	100.8509	9.202	1393.44	-2.1792	0.89307	0.51563	-31.5387	210.865	1177.9156	-1.3179	1.0718	0.34863	107.082	16.9064	28.934	-0.0053711	0.091309	0.046875
0.668	23.192	-101.16643	1247.559	-1.3014	0.78769	0.078223	98.8344	25.917	1355.644	-2.1074	0.87597	0.50537	13.61	243.157	1159.962	-1.1919	0.98486	0.32031	120.8	24.1262	39.012	-0.053956	0.1272	0.062745
0.67	16.183	-79.71001	1239.3101	-1.3381	0.80488	0.093555	86.821	59.385	1331.661	-2.0347	0.85596	0.48877	-0.502000000000001	198.804	1115.1	-1.1052	0.91968	0.30298	157.969	34.909	35.174	-0.097656	0.15869	0.083008
0.672	25.335	-64.6531	1247.6247	-1.3991	0.81816	0.11816	118.5049	90.8709	1270.496	-1.9312	0.83252	0.47656	0.317	208.063	1076.7693	-1.0313	0.86328	0.28711	151.202	23.117	58.399	-0.15918	0.19873	0.11426
0.674	11.933	-66.792	1263.0371	-1.4918	0.83438	0.16055	99.103	94.474	1247.741	-1.8789	0.82227	0.46973	-6.269	179.185	1053.9164	-0.9292	0.78271	0.27441	119.603	-28.9897	104.954	-0.18701	0.21924	0.12402
0.676	38.18	-63.54	1262.9879	-1.6016	0.86133	0.22314	95.4666	92.565	1247.8428	-1.7769	0.80322	0.44873	17.864	211.86	1018.36	-0.88086	0.74805	0.27246	131.335	-56.406	110.8902	-0.26025	0.25732	0.13916
0.678	55.401	-62.692	1267.7955	-1.743	0.88516	0.28789	117.612	99.755	1217.7182	-1.7016	0.79297	0.43017	35.5375	177.3455	966.566	-0.78662	0.67822	0.26953	97.437	-38.511	102.4798	-0.34912	0.30127	0.14502
0.68	63.552	-55.6659	1289.1493	-1.8936	0.91884	0.36201	80.6197	80.259	1224.2	-1.6284	0.78271	0.41846	54.398	154.21811	921.601044	-0.72193	0.62378	0.26831	75.342	-7.12166	148.189	-0.38672	0.33203	0.14697
0.682	75.025	-35.927	1296.1744	-2.0488	0.94189	0.44326	58.861	90.123	1231.8478	-1.5483	0.771	0.3916	40.067	85.817	912.321	-0.65771	0.57666	0.26221	69.182	1.78587	220.07	-0.46289	0.38867	0.16504
0.684	98.819	-36.303	1286.4873	-2.2073	0.9747	0.51641	64.846	119.0747	1179.122	-1.4937	0.76221	0.38062	46.484	82.537	895.887	-0.58398	0.50781	0.2583	38.676	-29.32	285.32978	-0.52198	0.43067	0.16895
0.686	133.7461	-38.541	1283.758	-2.355	0.99072	0.57227	14.814	115.857	1160.136	-1.4468	0.75635	0.36523	56.41152	71.077	856.856	-0.54053	0.47217	0.25781	16.343	-25.2603	325.46	-0.60059	0.46484	0.17188
0.688	123.6057	-53.708	1314.062	-2.4798	1.0113	0.63887	16.703	114.285	1140.5526	-1.3887	0.74219	0.35254	59.6327	123.1275	805.246	-0.45752	0.40967	0.24951	-2.0454	12.8972	431.176	-0.69873	0.51123	0.17578
0.69	89.593	-50.5732	1352.2106	-2.5882	1.0317	0.67539	-3.715	95.913	1104.4679	-1.3608	0.74072	0.34766	84.3429	121.298	749.625	-0.40015	0.36206	0.2461	-42.961	60.194	581.147	-0.75781	0.52734	0.18506
0.692	87.243	-33.781	1347.6797	-2.6737	1.047	0.70821	-35.469	78.75	1102.783	-1.3081	0.72705	0.33887	87.995	139.64	686.561	-0.34668	0.31641	0.24219	-105.866	92.964	711.98927	-0.89063	0.56934	0.20264
0.694	95.832	-24.2027	1355.0435	-2.731	1.0581	0.7295	-22.074	83.3112	1075.047	-1.27	0.7251	0.333	65.113	126.704	619.9775	-0.27393	0.25537	0.22754	-151.243	92.797	784.663	-0.99975	0.59546	0.20752
0.696	95.6509	-15.6802	1364.6625	-2.7559	1.0645	0.74268	-34.258	84.4497	1016.289093	-1.2319	0.71143	0.32813	44.25	153.2203	560.537	-0.22143	0.21826	0.20947	-157.918	72.859	827.91	-1.1079	0.62744	0.23047
0.698	71.996	-13.994	1361.134	-2.751	1.0549	0.73623	-32.508	86.753	1010.371	-1.1777	0.7041	0.31738	64.366	160.149	537.684	-0.1665	0.1709	0.19775	-154.469	24.5503	943.3071	-1.2476	0.66504	0.27148
0.7	97.46	-6.9803	1350.46	-2.7085	1.0394	0.7209	2.67	118.471	944.714	-1.1499	0.69775	0.3125	36.64	194.838	498.2172	-0.11426	0.12012	0.16504	-176.432	-44.732	1050.271	-1.3179	0.68018	0.2959
0.702	101.898	2.4823	1329.4599	-2.6526	1.0218	0.69082	-10.683	136.688	893.359	-1.0894	0.67822	0.29834	40.224	183.424	433.1671	-0.085449	0.093262	0.13965	-181.14	-113.983	1083.977	-1.4453	0.68652	0.35156
0.704	90.57686	12.399	1338.902	-2.5872	0.99579	0.66836	-7.934	164.071	888.26	-1.04	0.66455	0.28759	47.644	188.2427	388.7423	-0.0073242	0.028809	0.12598	-128.726	-187.823	1086.008	-1.533	0.677	0.39819
0.706	90.026	3.418	1351.4674	-2.5171	0.95361	0.63672	6.779	185.863	846.702	-0.98584	0.64893	0.27832	40.349	157.091	340.063	0.047851	-0.012451	0.11255	-75.1578	-219.8	1082.4124	-1.6108	0.65576	0.44727
0.708	94.9244	1.226	1336.786	-2.44	0.92012	0.6168	-4.544	168.049	835.8514	-0.91357	0.62256	0.25977	27.135	155.4785	309.015	0.083984	-0.050781	0.087891	-38.224	-242.055	1112.751	-1.6792	0.62158	0.52734
0.71	96.801	4.786	1344.9485	-2.3746	0.89219	0.59268	-1.121	162.356	820.0263	-0.875	0.61035	0.25244	7.785	122.1468	268.768	0.13184	-0.10254	0.052246	-4.648	-263.283	1093.134	-1.7007	0.60205	0.57227
0.712	75.338	20.57468	1334.3564	-2.3235	0.87304	0.57276	-7.653	169.769	771.1934	-0.79834	0.58154	0.23193	-14.603	118.4201	253.192	0.15479	-0.12744	0.031738	56.002	-240.925	1020.033	-1.7051	0.55859	0.64502
0.714	49.668	24.0715	1338.756	-2.2852	0.86123	0.56084	-8.667	144.70355	767.2015	-0.74194	0.55103	0.21851	28.367	100.4015	227.818	0.19385	-0.1665	-0.017578	84.552	-223.595	973.479	-1.7131	0.54321	0.67602
0.716	43.065	44.095	1319.233	-2.2651	0.84229	0.54785	12.457	153.5379	731.845	-0.68896	0.52393	0.20752	27.428	92.511	256.482	0.21021	-0.19849	-0.052979	104.601	-169.398	945.615	-1.7104	0.55811	0.69336
0.718	52.434	41.2252	1315.4251	-2.2507	0.82021	0.53418	7.298	141.8653	674.347	-0.61865	0.48584	0.19238	39.538	77.113	223.6848	0.22461	-0.22168	-0.093262	115.67	-118.4134	934.758	-1.6621	0.58203	0.68213
0.72	10.56	34.3497	1322.491	-2.2367	0.7961	0.52597	22.3819	119.942	670.039	-0.57959	0.4624	0.18555	26.597	83.06	221.1095	0.23438	-0.23389	-0.13916	121.765	-96.2054	896.792	-1.623	0.57129	0.66455
0.722	-2.195	13.992	1300.1724	-2.2195	0.77422	0.51425	51.4472	134.193	634.95	-0.51172	0.42578	0.16992	21.35	96.036	182.327	0.23779	-0.23584	-0.15918	129.025	-79.623191	877.2154	-1.582	0.5752	0.61133
0.724	30.431	11.693	1272.0835	-2.2011	0.75381	0.50156	46.9373	124.682	613.2637	-0.46216	0.39868	0.15772	-6.956	103.476	172.54394	0.22949	-0.23975	-0.19482	85.2985	-64.922	892.293	-1.5933	0.61914	0.59424
0.726	62.597	33.887	1248.161	-2.1753	0.73486	0.48633	46.2535	111.343	609.923	-0.41699	0.37158	0.14648	36.464	119.312	129.623	0.20898	-0.22729	-0.20923	93.389	-14.998	957.233	-1.6499	0.6958	0.5918
0.728	59.868	32.642	1266.427	-2.137	0.72393	0.47715	52.6506	133.799	582.387	-0.36328	0.3374	0.125	45.3733	90.738	125.903	0.18896	-0.20947	-0.21582	102.976	-17.758	1031.08	-1.7866	0.84619	0.61328
0.73	54.967	40.671	1252.0243	-2.1074	0.70957	0.46367	16.9345	128.511	563.8013	-0.33105	0.31543	0.11816	26.907	99.758	62.963	0.16357	-0.18018	-0.21533	122.625	-89.474	1091.572	-1.8594	0.92383	0.64307
0.732	81.6871	55.669	1250.87	-2.0672	0.69825	0.45195	0.763	142.3667	558.74	-0.28125	0.2832	0.10254	36.988	89.061	73.8952	0.1499	-0.16357	-0.21436	110.643	-188.882	1119.11	-1.9448	1.02	0.68652
0.734	87.5998	66.349	1238.5908	-2.0279	0.69394	0.43808	4.824	169.198	497.761	-0.24878	0.25781	0.089844	4.866	122.312	23.354	0.12305	-0.13916	-0.21533	80.204	-292.5212	1162.323	-1.98	1.0484	0.68896
0.736	58.562	60.3817	1223.9152	-1.9878	0.68701	0.42529	-37.5083	164.2867	465.617	-0.21729	0.22949	0.078613	10.25	125.477	27.21	0.10523	-0.1189	-0.21045	86.54	-311.3051	1223.329	-1.9956	1.0786	0.66357
0.738	52	71.012	1201.435	-1.9416	0.68984	0.41846	-35.812	167.587	437.8346	-0.18213	0.20557	0.067871	59.879	119.783	23.268	0.086914	-0.098145	-0.20508	21.0966	-328.162	1273.77	-1.9805	1.1406	0.60107
0.74	78.6535	100.0403	1188.126	-1.905	0.6877	0.40732	-36.7647	159.535	391.0628	-0.16943	0.18652	0.061035	37.9909	62.88672	62.943	0.060547	-0.081055	-0.21289	-28.7882	-354.585	1275.8158	-1.9507	1.1743	0.57227
0.742	67.563	109.5602	1172.4085	-1.8659	0.68691	0.39873	-61.326	130.679	400.057	-0.13965	0.15723	0.056152	57.19809	37.861	68.154	0.053223	-0.069824	-0.2124	-60.9104	-385.04	1279.01	-1.877	1.2246	0.51807
0.744	40.717	88.2444	1144.4561	-1.8318	0.69316	0.38819	-31.8125	132.114	350.843	-0.12329	0.13598	0.048584	46.812	-6.621	55.423	0.029297	-0.049316	-0.21484	-113.889	-401.8	1313.28244	-1.812	1.2495	0.48486
0.746	72.722	69.1207	1116.3107	-1.8027	0.68945	0.37744	-25.1553	116.876	329.46724	-0.11377	0.12402	0.044922	17.491	4.733	28.2277	0.0097654	-0.047851	-0.21802	-152.756	-339.192	1354.131	-1.748	1.2637	0.4834
0.748	113.5924	85.822	1120.459	-1.7662	0.69238	0.37002	-41.9447	93.5359	337.9128	-0.10254	0.095215	0.043945	-10.997	-24.8223	38.529	-0.016113	-0.036133	-0.21484	-187.32	-251.402	1368.493	-1.6836	1.2676	0.50293
0.75	102.85	83.975	1108.9701	-1.7401	0.69756	0.35742	-28.142	114.918	297.342	-0.095703	0.08252	0.039063	23.438	-15.1312	26.0699	-0.056641	-0.018066	-0.20898	-206.923	-181.972	1371.639	-1.6753	1.27	0.51367
0.752	57.515	71.1556	1083.881	-1.7089	0.69756	0.34492	-43.3802	107.547	276.063	-0.088379	0.063965	0.040039	10.811	-28.0215	31.128	-0.085449	-0.0043945	-0.20508	-193.099	-129.538	1369.7253	-1.687	1.2788	0.53125
0.754	88.1091	77.6103	1049.795	-1.6738	0.70078	0.33476	-45.73629	100.088	274.6973	-0.083496	0.052734	0.044678	20.235	-23.9048	18.234	-0.13428	0.017578	-0.18896	-159.721	-118.128	1357.552	-1.7029	1.3005	0.55664
0.756	101.0279	82.3993	1047.2297	-1.6304	0.70947	0.32227	-21.632	106.914	257.9705	-0.078613	0.041992	0.043945	-3.19	-57.7697	24.884	-0.17652	0.039063	-0.177	-108.441	-57.607	1355.538	-1.73	1.3364	0.5752
0.758	52.906	79.8941	1017.1666	-1.5934	0.70683	0.30118	-47.2359	73.7034	250.972	-0.080566	0.029785	0.050293	-34.237	-18.6574	42.5124	-0.22021	0.063965	-0.16455	-84.731	-4.48	1377.731	-1.8198	1.3901	0.60547
0.76	20.495	66.0357	990.96008	-1.5491	0.71114	0.29287	-9.216	67.2026	251.303	-0.076172	0.029785	0.051758	-41.6496	-17.2546	29.2238	-0.28223	0.092773	-0.13672	-117.102	24.838	1430.616	-1.8882	1.4165	0.60938
0.762	37.163	87.0872	981.632	-1.507	0.70645	0.27022	13.861	82.2433	193.224	-0.077148	0.019531	0.058594	20.015	15.2777	0.4085	-0.31592	0.11182	-0.12158	-147.806	39.363	1444.931	-2.082	1.4844	0.62939
0.764	26.757	105.253	978.055	-1.4631	0.69804	0.25898	-6.413	65.196	178.328107	-0.076171	0.01416	0.062256	3.159	4.033	14.461	-0.37158	0.15674	-0.083984	-120.87	-1.7	1472.18774	-2.2693	1.5286	0.65405
0.766	-2.76000000000001	101.7986	937.367	-1.4258	0.68945	0.23926	30.061	85.74	176.9123	-0.07373	0.012695	0.068359	-5.583	24.5957	-9.43279	-0.4043	0.18652	-0.05542	-30.695	-41.851	1515.693	-2.4668	1.5742	0.68408
0.768	8.549	86.584	899.6657	-1.3725	0.6876	0.23135	28.267	89.411	110.999	-0.067871	0.015137	0.083984	8.946	15.5463	-14.78554	-0.42725	0.20947	-0.02832	-13.32499	-97.826	1566.831	-2.7598	1.627	0.74268
0.77	26.296	88.424	860.832	-1.3327	0.67862	0.21055	30.5698	67.2179	120.97	-0.067383	0.012207	0.083496	-15.538	59.379	-17.51	-0.43164	0.23633	-0.0024414	2.4667	-141.294	1584.544	-2.9023	1.6563	0.78174
0.772	27.565	111.252	852.959	-1.2854	0.6669	0.19765	50.4683	80.864	106.5749	-0.053223	0.010742	0.088867	-25.44026	26.9895	-28.191	-0.42188	0.23926	0.0073242	35.629	-143.324	1589.235	-3.1909	1.6841	0.87305
0.774	-0.215999999999994	101.071	834.3618	-1.2409	0.65752	0.1834	54.7575	75.448	82.3553	-0.041992	0.010742	0.095703	-4.303	13.4591	-12.911	-0.38818	0.23877	0.01123	23.6474	-136.982	1615.696	-3.3881	1.6968	0.93897
0.776	-4.718	78.4596	796.96184	-1.1978	0.64111	0.16992	48.0383	60.258	116.097	-0.026367	0.017578	0.1001	4.419	-36.798	-12.082	-0.34839	0.22925	-0.0019531	72.757	-109.59	1636.675	-3.5679	1.6938	0.99219
0.778	44.359	95.769	774.6198	-1.1574	0.62617	0.15752	69.9706	78.475	68.58863	-0.0029297	0.019531	0.10254	24.932	-19.31355	-20.0531	-0.30371	0.20605	-0.019531	107.719	-121.652	1626.395	-3.75	1.6719	1.0454
0.78	25.064	105.657	759.77324	-1.114	0.61387	0.14326	59.1738	53.9218	40.257	0.010742	0.016113	0.10059	43.3939	-19.1999	-8.9466	-0.24072	0.16748	-0.050293	152.762	-118.622	1609.24	-3.8008	1.6543	1.061
0.782	-2.07	105.625	748.8679	-1.0719	0.59511	0.13349	22.074	43.148	74.3059	0.047852	0.016602	0.092773	12.3373	0.511000000000001	13.753	-0.21191	0.14404	-0.066895	129.33	-76.336	1584.111	-3.814	1.6099	1.082
0.784	3.96400000000001	114.3946	708.5719	-1.0357	0.57813	0.12373	36.902	54.5793	34.347	0.071045	0.013428	0.090332	-1.402	0.207999999999998	-7.035	-0.14795	0.093262	-0.087891	72.637	2.04142	1550.427	-3.7729	1.5805	1.0498
0.786	34.001	121.6104	676.743	-0.99023	0.55664	0.11523	28.824	34.522	30.895	0.1001	0.01123	0.086426	43.6415	27.8393	16.9048	-0.10645	0.056641	-0.09912	49.786	95.137	1520.9105	-3.6934	1.5547	1.0151
0.788	36.93	127.4954	660.689	-0.95791	0.54766	0.11123	19.474	30.8594	40.8621	0.13428	0.003418	0.072266	43.236	14.9487	3.196	-0.068359	0.018066	-0.10791	23.9623	116.256	1482.487	-3.5098	1.5293	0.97314
0.79	7.557	96.249	649.63	-0.91953	0.53242	0.10078	1.748	31.998	8.1353	0.15674	-0.0063477	0.061523	35.815	39.335	18.45771	-0.024414	-0.023926	-0.10498	-15.8507	83.8485	1440.358	-3.3804	1.5122	0.95117
0.792	39.078	85.336	639.287	-0.87578	0.51914	0.095313	-5.974	1.3707	23.118	0.18555	-0.018066	0.043457	67.752788	31.1056	21.341	-0.0024414	-0.04541	-0.11035	-32.859	85.128	1401.38	-3.1538	1.438	0.90625
0.794	58.609	108.326	613.814	-0.83769	0.50254	0.09209	-3.357	13.258	33.495	0.2002	-0.021485	0.029785	16.872	37.7167	20.3573	0.039063	-0.086426	-0.10547	-55.5711	101.9019	1413.07	-2.9998	1.3909	0.88013
0.796	56.2361	111.291	578.0189	-0.80176	0.48438	0.084473	-12.053	17.4532	0.366	0.21582	-0.033203	0.010742	-11.897	29.5253	-2.8672	0.067383	-0.12036	-0.11304	-74.993	141.849	1431.863	-2.853	1.3442	0.85547
0.798	42.424	110.5774	569.3233	-0.76426	0.46894	0.079882	-19.812	12.14456	24.5092	0.23291	-0.049805	-0.0068359	13.2006	37.821	-3.771	0.097168	-0.14551	-0.11426	-142.136	115.37	1442.8576	-2.6699	1.2637	0.83545
0.8	62.373	107.5284	524.1639	-0.72383	0.4502	0.070704	-17.927	31.511	29.70456	0.23145	-0.058594	-0.015625	42.194	50.434	9.6625	0.12988	-0.17236	-0.11328	-151.188	78.066	1420.11431	-2.54	1.2051	0.81372
0.802	68.7213	125.307	509.6381	-0.68399	0.43379	0.069532	-5.589	36.324	0.527999999999999	0.22705	-0.066895	-0.024902	28.532	58.576	11.49687	0.14551	-0.18799	-0.11035	-134.751	51.447	1391.052	-2.3999	1.1431	0.78809
0.804	32.621	129.281	488.373	-0.64609	0.41114	0.06543	-30.496	20.4931	19.172508	0.20801	-0.078125	-0.026855	28.397	52.078	4.93875	0.1626	-0.21484	-0.10107	-138.84	27.1839	1421.8176	-2.1992	1.0586	0.74072
0.806	35.521	109.3722	477.756	-0.60156	0.39014	0.064941	-28.652	35.9316	-8.1913	0.19727	-0.083496	-0.025391	-10.443	42.566	24.4988	0.16699	-0.22827	-0.092773	-144.492	79.8232	1422.7362	-2.0952	1.0151	0.71094
0.808	46.836	105.9619	465.54975	-0.56797	0.37246	0.056836	-20.502	23.5038	-9.82666	0.17334	-0.088379	-0.019531	-23.021	6.938	31.8846	0.16895	-0.24219	-0.086426	-167.821	116.7725	1399.7467	-1.8804	0.92432	0.6543
0.81	25.11	109.2658	459.8526	-0.52939	0.34853	0.059375	-17.862	22.8477	22.7938	0.14795	-0.095215	-0.0092771	-10.667	-25.8618	57.043	0.16113	-0.25	-0.067871	-140.767	140.676	1371.05	-1.7285	0.86133	0.60791
0.812	15.436	126.25	427.9768	-0.49072	0.32588	0.053125	4.054	27.69307	0.0786000000000002	0.12646	-0.099609	0.00048828	17.363	-45.5125	59.174	0.15527	-0.25049	-0.063965	-131.309	162.045	1340.86	-1.5835	0.80322	0.56641
0.814	11.917	106.9149	416.188	-0.4499	0.3083	0.051758	21.274	7.1076	3.70602	0.085938	-0.10107	0.014648	-14.594	-38.2001	51.473	0.14746	-0.25635	-0.053223	-117.117	163.9103	1331.381	-1.4077	0.72217	0.51563
0.816	29.013	115.928	391.139	-0.41602	0.2832	0.040527	5.28	6.7649	38.1601	0.066895	-0.099121	0.022461	18.404	-11.6761	29.732	0.13818	-0.25952	-0.053955	-20.02552	216.651	1284.884	-1.3257	0.68604	0.49756
0.818	-2.147	116.06	358.7311	-0.36924	0.26152	0.042285	25.697	30.5477	8.539	0.031738	-0.098633	0.038574	-30.6114	-12.8261	23.7617	0.12695	-0.25244	-0.058594	6.763	259.515	1230.852	-1.1758	0.60938	0.45264
0.82	-12.026	107.777	342.1145	-0.32842	0.23847	0.033789	52.3529	16.5278	32.3103	0.0090332	-0.093994	0.055908	-29.144	-5.1237	-0.432000000000002	0.10986	-0.24805	-0.063965	-3.582	280.915	1212.118	-1.0691	0.54785	0.43603
0.822	3.19	98.553	310.654	-0.28897	0.21543	0.033398	50.4441	15.0509	32.6724	-0.0092773	-0.087891	0.075684	-15.354	-23.2664	21.39919	0.09082	-0.24121	-0.070556	26.367	307.254	1173.1508	-0.97217	0.48682	0.41748
0.824	22.77	100.097	311.4583	-0.24707	0.19356	0.033496	46.3273	16.9972	10.14316	-0.021973	-0.089844	0.09082	26.68	-12.97024	9.496	0.069824	-0.22803	-0.075195	82.388	283.126	1118.8	-0.85742	0.4082	0.40088
0.826	-9.109	91.193	301.9008	-0.21045	0.16943	0.023438	49.555	-0.5812	41.207	-0.030273	-0.09082	0.10059	6.07	-19.1752	3.38159	0.04248	-0.20898	-0.074219	139.201	254.934	1051.53	-0.79883	0.36523	0.39893
0.828	-14.632	96.4823	310.648	-0.17402	0.14854	0.017382	62.2508	2.7359	15.8058	-0.030762	-0.095703	0.11963	28.011	10.3794	8.6621	0.032227	-0.19873	-0.07666	149.423	219.85	1031.0388	-0.6875	0.28809	0.39111
0.83	-1.661	85.8639	291.5405	-0.13711	0.12793	0.010351	50.078	7.4144	13.9313	-0.03125	-0.10132	0.12623	6.447	7.013	4.8065	0.016602	-0.17627	-0.079102	149.182	204.18894	1015.389	-0.60449	0.2373	0.38403
0.832	15.238	101.351	280.1228	-0.10117	0.11035	0.0017578	37.373	-9.3951	24.8403	-0.029297	-0.10986	0.12793	-0.638999999999999	26.5272	-23.444	0.0061035	-0.16308	-0.081055	147.058	219.49149	969.083	-0.52393	0.19189	0.38037
0.834	-2.155	95.7745	269.8686	-0.065039	0.091406	-0.0064454	51.377	12.2727	12.1602	-0.017578	-0.1167	0.1377	3.822	7.2639	-17.821	0.0019531	-0.15234	-0.083496	145.664	192.42	945.306	-0.41113	0.13916	0.36182
0.836	-13.873	84.89273	244.39622	-0.03125	0.070801	-0.0097656	36.577	18.3344	16.04012	-0.003418	-0.11377	0.13818	51.907	19.38353	-7.697	0.0029297	-0.13818	-0.097656	168.466	155.541	905.87356	-0.35547	0.11182	0.3501
0.838	9.898	74.2041	226.6965	0.0033202	0.053028	-0.018262	31.4406	13.0063	34.472	0.0048828	-0.12207	0.13037	40.241	8.163	-8.9345	0.0053711	-0.13232	-0.10449	145.817	99.582	892.472	-0.23828	0.063965	0.33008
0.84	30.089	91.036	206.49922	0.031738	0.032715	-0.020898	36.131	29.425	6.611	0.017822	-0.12451	0.12891	56.4659	33.192	-6.6504	0.01709	-0.12256	-0.125	122.6362	76.68	834.443	-0.15356	0.028076	0.30395
0.842	30.795	81.236	186.934	0.054785	0.011621	-0.030274	4.497	8.86996	23.804	0.026855	-0.12305	0.12793	25.4168	-1.8945	-20.2397	0.019776	-0.11181	-0.13623	102.658	132.985	757.0807	-0.072754	-0.0097656	0.27637
0.844	21.961	73.085	197.3813	0.080469	-0.0045898	-0.022949	-7.342	0.994999999999999	21.9562	0.030762	-0.12256	0.13281	8.542	6.082	-28.801	0.020996	-0.099121	-0.14746	68.83442	169.547	715.6979	0.020508	-0.062988	0.22998
0.846	48.3405	58.85099	189.4454	0.09375	-0.021973	-0.024414	16.489	18.5176	-10.3316	0.031738	-0.11963	0.13281	20.3583	-35.072	1.081	0.019043	-0.075684	-0.15918	50.2949	192.2123	641.286	0.069824	-0.089355	0.20264
0.848	42.557	63.1057	193.5478	0.11299	-0.032715	-0.02373	-7.714	-4.8253	14.48943	0.027832	-0.11621	0.13428	26.12	-10.0302	14.453	0.01709	-0.064453	-0.15918	11.343	186.4173	585.1004	0.15137	-0.1499	0.14795
0.85	30.354	75.2462	178.1235	0.12744	-0.042481	-0.019043	-21.713	-4.6863	20.2521	0.027099	-0.11548	0.13428	19.707	4.3956	4.5253	0	-0.043457	-0.14453	2.27900000000001	195.834	500.881	0.20898	-0.18628	0.10889
0.852	40.14	71.8399	175.8759	0.14033	-0.055762	-0.013184	-0.933	8.61	0.119000000000003	0.027832	-0.10889	0.13135	35.663	60.837	14.8512	-0.009033	-0.024659	-0.13013	7.779	246.317	442.452	0.2627	-0.22754	0.071777
0.854	48.3898	73.014	154.9797	0.1502	-0.066797	-0.0073242	-45.1344	-7.9387	15.7916	0.024414	-0.10254	0.13379	26.012	49.926	13.0862	-0.022461	-0.010254	-0.12061	-30.236	266.209	425.521	0.32617	-0.27539	0.022949
0.856	29.558	60.0613	146.015	0.15479	-0.07666	-0.0078125	-33.5572	7.89862	2.51	0.022461	-0.098633	0.13135	0.339999999999996	66.744	16.845	-0.027344	0.0019531	-0.095703	-66.4393	279.058	384.753	0.35059	-0.30273	-0.0058594
0.858	9.376	54.5099	132.8493	0.15732	-0.080176	-0.0045898	-16.658	5.1512	-2.3376	0.022949	-0.09082	0.12695	-8.72	25.0714	7.3572	-0.029785	0.0048828	-0.097656	-99.5685	251.552	336.1368	0.40283	-0.34521	-0.052734
0.86	25.672	44.4041	125.027	0.16279	-0.087988	0.0038086	-29.069	-6.2354	27.387	0.022216	-0.085449	0.11939	9.897	43.8539	10.1331	-0.02832	0.016113	-0.090332	-59.537	222.776	302.4745	0.43848	-0.3728	-0.080078
0.862	32.023	46.75	130.2343	0.16201	-0.096582	0.0053711	6.341	13.9618	-1.3352	0.019531	-0.075684	0.11963	8.834	20.9286	22.9124	-0.026123	0.014649	-0.095215	-44.737	204.997	259.311	0.46973	-0.39844	-0.11133
0.864	9.579	53.369	119.568	0.167	-0.10586	0.0036133	18.168	18.0918	-14.5745	0.01709	-0.064941	0.11133	-1.567	38.232	39.437	-0.018555	0.020508	-0.1001	-82.0243	176.302	227.905	0.50586	-0.41699	-0.15674
0.866	6.509	40.145	123.6465	0.16064	-0.10791	0.010254	4.647	1.8139	17.6123	0.018066	-0.058594	0.10889	3.643	23.821	29.27	-0.01709	0.024902	-0.11133	-36.058	198.493	192.591	0.51953	-0.42285	-0.18506
0.868	10.977	39.9135	96.346	0.15605	-0.10986	0.01123	32.58	25.4951	-12.816	0.0087891	-0.04248	0.10986	-23.722	38.0021	12.7856	-0.012695	0.027832	-0.10889	-19.236	194.914	178.6905	0.54004	-0.4375	-0.23535
0.87	20.082	26.8763	94.04235	0.15342	-0.11377	0.012012	28.896	13.5533	13.71	0.0051269	-0.026124	0.10596	-30.477	11.4694	16.9959	-0.01123	0.035645	-0.10938	3.95	157.125	181.367	0.55371	-0.43628	-0.27466
0.872	-15.936	32.374	82.6413	0.1417	-0.11572	0.016309	27.793	17.9702	35.522	-0.0043945	-0.0097656	0.10449	-10.828	7.0443	52.595	-0.013184	0.036622	-0.10669	36.6392	125.228	203.937	0.56396	-0.44092	-0.30713
0.874	-7.756	31.3786	72.0247	0.13682	-0.1123	0.016406	61.7735	26.5355	23.19	-0.020996	0.013184	0.089355	17.65	-26.6439	65.883	-0.016113	0.039551	-0.10059	58.8743	69.6178	205.327	0.55713	-0.44678	-0.35352
0.876	-9.857	42.1037	67.4476	0.12402	-0.10742	0.017578	40.759	12.27093	58.284	-0.027832	0.025391	0.077148	0.695999999999998	-34.973	88.653	-0.03418	0.038086	-0.104	91.374	52.428	171.818	0.55322	-0.45459	-0.37598
0.878	-7.017	40.2229	64.4064	0.10537	-0.099513	0.020801	29.149	26.743	77.5997	-0.062988	0.058105	0.058594	32.5802	-51.817	99.3946	-0.050293	0.043457	-0.10693	99.3632	53.75	148.267	0.50684	-0.47412	-0.40527
0.88	-26.212	31.8737	65.5206	0.084277	-0.091797	0.016504	60.6339	50.883	85.665	-0.086181	0.087158	0.058105	-16.9774	-55.031	124.6838	-0.10107	0.054688	-0.11963	90.8149	66.07	124.871	0.44824	-0.47485	-0.41553
0.882	-26.906	31.4925	62.83611	0.069434	-0.08086	0.020019	30.7814	42.6321	148.9856	-0.11865	0.11621	0.060059	-20.777	-52.0109	168.629	-0.15893	0.081055	-0.1189	93.438	73.1857	79.3858	0.36328	-0.46387	-0.41357
0.884	-5.08	31.9632	53.8422	0.045898	-0.074512	0.026758	23.429	59.2882	180.233	-0.17285	0.15137	0.068359	30.215	-33.555	243.1045	-0.22852	0.1167	-0.11035	132.563	20.191	34.259	0.22852	-0.44287	-0.38184
0.886	-1.556	38.401	38.9634	0.021484	-0.0625	0.031738	54.1463	64.5636	204.018	-0.20215	0.16699	0.076172	70.619	-16.7306	263.652	-0.34326	0.16699	-0.085938	119.509	-21.384	-25.9079	0.15088	-0.43164	-0.35693
0.888	-1.127	25.2413	48.6332	-0.0055664	-0.058106	0.037695	19.282	62.6073	266.9071	-0.27002	0.20215	0.087891	35.206	8.919	365.3403	-0.40576	0.20313	-0.065918	118.533	-29.599	-2.1298	-0.036133	-0.39014	-0.28711
0.89	-2.219	14.51901	36.9067	-0.028418	-0.052832	0.051465	4.587	100.36	293.7862	-0.33227	0.22608	0.093995	62.84	42.2085	451.37	-0.5542	0.271	-0.023438	100.956	-0.8632	24.648	-0.1958	-0.35864	-0.22827
0.892	36.928	14.2284	17.183	-0.057324	-0.038769	0.055762	17.557	94.926	324.0443	-0.39844	0.25	0.098633	34.291	45.509	574.823	-0.67261	0.33179	0.011719	105.685	40.312	23.7633	-0.35889	-0.32715	-0.17334
0.894	33.698	21.5999	21.0729	-0.085254	-0.024317	0.068653	2.027	68.163	393.8833	-0.49316	0.28613	0.093262	56.035	35.95	680.372	-0.8042	0.39893	0.044922	85.826	17.8604	3.857	-0.57031	-0.26514	-0.080078
0.896	17.3618	19.3452	24.5555	-0.10742	-0.0083008	0.077148	-2.866	60.24	413.8293	-0.54492	0.30859	0.11426	61.493	-1.47	805.42	-1.0044	0.51416	0.084961	64.6372	-11.001	-9.208	-0.66992	-0.23389	-0.038574
0.898	18.185	19.5099	46.484	-0.12305	0.0040039	0.083886	-21.698	43.647	453.51	-0.64697	0.34717	0.12842	103.288	-45.663	905.454	-1.123	0.58203	0.10498	23.846	-13.28483	7.158	-0.86182	-0.16992	0.05127
0.9	38.9897	15.3071	36.6506	-0.1331	0.017871	0.090332	-33.7787	37.262	556.5249	-0.73144	0.37988	0.14331	92.861	-108.02871	1048.0501	-1.3887	0.73145	0.12695	-25.849	-2.0052	6.794	-0.98631	-0.12378	0.1106
0.902	33.898	18.8171	31.8164	-0.14092	0.022168	0.091504	-5.125	34.733	614.516	-0.81641	0.41504	0.1626	92.971	-139.233	1134.6759	-1.554	0.85523	0.20679	-3.524	27.50225	6.0438	-1.0854	-0.07666	0.16504
0.904	10.979	12.3189	24.175	-0.14531	0.025781	0.093555	-16.319	-1.434	691.166	-0.94238	0.45996	0.21045	52.0734	-158.887	1200.5345	-1.7227	0.97852	0.31299	-55.1601	-2.513	3.946	-1.1782	-0.02832	0.21826
0.906	40.0809	5.2963	12.158	-0.14746	0.022949	0.099121	-19.992	-16.663	754.3689	-1.0039	0.48438	0.23779	-0.3803	-159.926	1192.387	-1.9414	1.1484	0.46826	-90.2137	-25.0446	-4.2726	-1.2124	-0.0073242	0.2373
0.908	45.254	8.149	4.405	-0.14551	0.026465	0.09707	11.328	-34.518	779.3911	-1.1289	0.52832	0.29541	-37.228	-183.08369	1160.4343	-2.0347	1.2114	0.53516	-98.685	-27.668	0.295	-1.2534	0.034668	0.25586
0.91	23.371	22.0277	7.287	-0.14892	0.024414	0.099512	-16.068	-88.2663	847.631	-1.2163	0.56153	0.35596	-42.821	-159.556	1100.125	-2.1558	1.2915	0.62012	-65.7051	8.291	-11.68466	-1.2622	0.070068	0.26587
0.912	26.351	20.964	4.8072	-0.14658	0.027148	0.10577	-2.365	-85.55	873.9	-1.2964	0.58545	0.42285	-109.635	-167.835	1087.669	-2.1833	1.2795	0.62231	-68.113	50.65	-0.134	-1.2554	0.098633	0.26611
0.914	32.0854	17.6865	1.0043	-0.14326	0.032031	0.1084	30.616	-89.421	841.306	-1.3999	0.604	0.50391	-76.782	-134.399	1061.035	-2.1909	1.2407	0.61914	-72.9413	52.669	21.424	-1.2104	0.12354	0.25879
0.916	39.072	8.754	18.5867	-0.14063	0.035645	0.11572	45.577	-106.81665	824.627	-1.4492	0.60742	0.54541	-100.0063	-155.447	1043.618	-2.1582	1.1777	0.5415	-56.055	57.134	29.1441	-1.1719	0.12891	0.24707
0.918	-0.177999999999997	6.5532	20.5653	-0.13565	0.046289	0.1124	64.566	-91.98029	805.991	-1.5366	0.62158	0.61719	-143.911	-121.596	1005.632	-2.1074	1.1152	0.44385	-60.7278	50.4487	14.25442	-1.0586	0.12158	0.21191
0.92	7.336	10.9803	24.5126	-0.121	0.054883	0.11445	64.64	-107.447	776.252	-1.5962	0.62427	0.65528	-159.177	-127.3923	998.496	-1.9277	1.0059	0.25439	-7.03	59.99704	28.96846	-0.94092	0.098632	0.18457
0.922	-4.801	26.569	8.1156	-0.11006	0.062696	0.11445	44.657	-110.829	778.482	-1.6484	0.63477	0.68408	-147.287	-50.9	971.341	-1.7097	0.95191	0.12183	7.225	58.0187	23.3184	-0.81348	0.071777	0.14551
0.924	2.585	28.828	0.223000000000001	-0.10049	0.070215	0.11348	78.9697	-93.5	762.2907	-1.6797	0.65527	0.71143	-134.678	-55.06	972.198	-1.4648	0.83789	-0.01416	-8.274	30.23678	32.957	-0.625	0.01416	0.088379
0.926	-2.516	13.6006	11.5954	-0.093262	0.078613	0.10938	71.3043	-94.302	756.743	-1.6775	0.66724	0.72193	-67.78	-7.62	989.416	-1.1499	0.62256	-0.17871	18.098	43.747	33.901	-0.48389	-0.039795	0.047119
0.928	-19.584	1.10782	17.7493	-0.084668	0.076758	0.11387	50.3307	-89.7739	812.8113	-1.6572	0.68359	0.729	-8.81	-87.9	1040.726	-1.0444	0.54834	-0.25488	55.154	34.2729	37.884	-0.35791	-0.088867	0.0073242
0.93	-3.106	10.5116	1.409	-0.079883	0.076855	0.11631	60.0392	-71.004	822.0007	-1.627	0.70801	0.73682	-3.865	-86.36	1099.87	-0.9751	0.51611	-0.36084	51.8715	15.359	45.7	-0.20801	-0.15283	-0.057617
0.932	1.18	28.4583	5.267	-0.076757	0.081543	0.11591	55.1184	-88.393	854.245	-1.6133	0.72461	0.73877	8.799	-187.039	1151.962	-0.97339	0.58399	-0.37475	100.485	-17.676	52.2618	-0.1416	-0.17529	-0.081543
0.934	-6.162	9.1959	21.6608	-0.073535	0.083692	0.11611	66.416	-81.549	902.324	-1.5859	0.75977	0.74268	-32.1746	-172.101	1181.179	-0.9707	0.67773	-0.34863	102.7911	-64.7354	44.82752	-0.013672	-0.21143	-0.12793
0.936	-6.968	2.731	40.1269	-0.067871	0.086914	0.11377	71.748	-79.889	936.25	-1.5522	0.78662	0.729	-74.226	-246.526	1253.965	-0.93555	0.75977	-0.26172	90.9948	-65.885	-1.4259	0.063721	-0.23608	-0.16162
0.938	12.803	-8.42308	34.961	-0.06289	0.089844	0.12051	42.86821	-108.887	995.3496	-1.5137	0.80078	0.70947	-86.771	-251.714	1302.445	-0.92139	0.79736	-0.21387	108.946	-34.639	7.4924	0.13672	-0.25342	-0.18604
0.94	9.579	-7.569	25.914	-0.059082	0.095117	0.11865	40.0985	-134.4397	1009.5543	-1.4336	0.80078	0.65186	-88.483	-345.26	1335.907	-0.93896	0.87451	-0.13232	135.295	-23.749	28.359	0.2124	-0.27783	-0.20068
0.942	1.696	3.698	33.62	-0.052441	0.099414	0.11631	53.6047	-177.863	1013.5077	-1.3804	0.79346	0.61328	-83.637	-326.83	1361.9999	-0.95581	0.94409	-0.086914	111.259	-16.4365	29.1364	0.24414	-0.28369	-0.21045
0.944	-2.924	10.09	72.042	-0.046387	0.10615	0.11602	6.491	-227.478	1043.2261	-1.2778	0.78564	0.52686	-34.2912	-361.83	1376.2731	-0.97754	1.0156	-0.060547	94.7588	-46.221	23.262	0.30322	-0.26904	-0.23584
0.946	13.734	26.222	90.1188	-0.044922	0.1167	0.10938	-0.495000000000005	-231.039	1063.7162	-1.2136	0.77661	0.46997	22.052	-274.236	1408.45788	-1.0073	1.0981	-0.049316	86.00522	-12.125	0.860000000000001	0.3706	-0.29395	-0.24927
0.948	17.26	42.615	94.4856	-0.042285	0.12471	0.10293	-22.223	-230.555	1094.7626	-1.168	0.76367	0.41553	66.7393	-227.577	1401.251	-1.0349	1.1585	-0.041503	59.43768	23.0838	24.387	0.42822	-0.33057	-0.2793
0.95	26.15077	47.2332	112.7761	-0.047949	0.13125	0.094727	-70.055	-231.504	1130.97466	-1.1328	0.75928	0.35498	111.596	-144.038	1390.486	-1.0815	1.2231	-0.036621	24.5951	42.201	34.0522	0.43994	-0.35498	-0.29883
0.952	20.41	43.2746	150.178	-0.060449	0.13907	0.095117	-63.951	-197.1953	1146.206	-1.125	0.75879	0.33691	178.28	-122.835	1393.8026	-1.2051	1.3262	-0.020996	3.529	39.895	-1.003	0.41846	-0.3374	-0.28809
0.954	8.183	55.0141	179.3868	-0.07793	0.15283	0.099904	-49.4408	-182.617	1173.326	-1.127	0.75977	0.31592	180.144	-74.251	1412.1022	-1.2949	1.3867	-0.0048828	-41.302	6.1752	-47.002	0.3457	-0.27246	-0.25879
0.956	-5.791	81.9551	207.754	-0.10156	0.16309	0.098145	-45.3447	-141.255	1205.728	-1.1377	0.76123	0.30322	194.753	-44.776	1415.172	-1.5293	1.5195	0.086426	-23.592	15.7109	-51.837	0.29516	-0.23413	-0.22803
0.958	-1.603	105.9388	235.841	-0.13164	0.17666	0.10644	-14.905	-78.511	1192.04	-1.1602	0.77148	0.29688	155.288	-1.373	1454.864	-1.7487	1.6219	0.1831	-37.397	34.9944	-22.9437	0.24658	-0.21875	-0.20605
0.96	26.08392	99.851	266.284	-0.16299	0.18525	0.11631	-21.549	-67.518	1218.782	-1.1851	0.7915	0.28516	97.656	1.836	1450.905	-1.9956	1.7095	0.28809	-83.048	47.0734	-14.6523	0.20117	-0.22021	-0.19727
0.962	12.415	85.702	310.863	-0.20244	0.19971	0.12217	-38.906	-48.969	1252.116	-1.2109	0.80273	0.27979	18.382	-19.04351	1464.747	-2.2866	1.7817	0.41357	-68.2489	57.3269	-7.9733	0.17871	-0.22656	-0.19922
0.964	-39.9976	76.413	348.2203	-0.24375	0.21064	0.12666	-18.361	-39.752	1256.2552	-1.2681	0.83643	0.27148	2.505	-52.2735	1436.031	-2.4585	1.8149	0.45508	-65.202	38.6317	-1.02022	0.14697	-0.23242	-0.19336
0.966	-10.5449	67.085	414.499	-0.28906	0.22949	0.125	-16.8085	-86.874	1318.38	-1.3374	0.86718	0.26904	-23.851	-82.095	1476.184	-2.7344	1.8496	0.58643	-50.073	29.456	28.1634	0.1123	-0.2229	-0.19287
0.968	2.066	63.125	460.7944	-0.33271	0.25244	0.13183	-8.443	-88.266	1335.4471	-1.4355	0.89746	0.27539	23.299	-98.247	1506.133	-3.0017	1.8967	0.68481	-53.187	14.281	56.254	0.077637	-0.20801	-0.18701
0.97	-6.811	38.93	534.1712	-0.38525	0.26885	0.13584	-22.8175	-83.1579	1313.639	-1.6089	0.95361	0.30664	48.837	-127.452	1543.367	-3.1563	1.8574	0.6958	-28.54	19.6187	64.05	0.02832	-0.18848	-0.17188
0.972	-40.104	7.8467	594.1814	-0.4415	0.29463	0.13936	-49.8266	-111.749	1366.747	-1.7109	0.97266	0.33643	82.1471	-135.982	1558.054	-3.2026	1.7739	0.68066	-41.0034	19.3393	41.533	0.003418	-0.1748	-0.16797
0.974	-8.321	-38.488	623.727	-0.50879	0.32226	0.13759	3.003	-100.8366	1356.435	-1.9385	1.0215	0.40967	49.351	-164.89	1589.638	-3.1875	1.7627	0.6665	-31.647	-0.5134	21.1292	-0.058594	-0.14697	-0.14502
0.976	-2.777	-47.283	670.5202	-0.58398	0.354	0.14453	16.795	-118.441	1370.573	-2.1228	1.0633	0.48462	68.7987	-137.632	1580.61	-3.127	1.7441	0.58057	-8.776	13.7542	33.59	-0.10913	-0.12133	-0.12427
0.978	-10.593	-37.573	704.566083	-0.66241	0.38721	0.15195	11.5177	-132.642	1441.288	-2.3081	1.1157	0.56641	-0.603000000000002	-135.581	1592.761	-3.0507	1.6836	0.51611	10.045	24.4738	35.583	-0.16162	-0.097656	-0.098633
0.98	-12.913	-52.1101	747.487	-0.74756	0.42061	0.16944	49.658	-111.91046	1463.693	-2.5234	1.1895	0.68066	5.642	-47.918	1557.9531	-2.9473	1.6016	0.45557	46.8241	13.3583	46.697	-0.23096	-0.063477	-0.062012
0.982	5.905	-48.1391	738.052	-0.83077	0.45811	0.19874	51.32	-131.547	1503.105	-2.627	1.2266	0.74072	-15.741	-7.487	1561.437	-2.8184	1.4805	0.38623	70.7947	-0.3653	21.943	-0.26318	-0.040527	-0.047363
0.984	29.582	-63.7637	713.389	-0.92159	0.49268	0.23477	42.301	-112.5475	1533.181	-2.8218	1.3032	0.83594	-34.685	76.544	1519.113	-2.7886	1.4575	0.36963	62.937	-16.2975	35.852	-0.32129	-0.0078125	-0.0058594
0.986	13.953	-65.4503	696.557	-1.0098	0.52734	0.28271	43.7113	-39.025	1465.6448	-2.9502	1.3418	0.89794	-62.2849	64.351	1519.7615	-2.8398	1.4902	0.37256	91.57	-0.5624	40.5739	-0.3562	0.01123	0.017822
0.988	23.46	-74.701	699.706	-1.0984	0.55019	0.3331	32.9574	-38.405	1470.0879	-3.0488	1.3711	0.95166	-33.301	120.483	1501.08	-2.903	1.5325	0.40234	130.186	2.534	43.3671	-0.39063	0.029785	0.038086
0.99	33.039	-65.932	681.172	-1.1788	0.56591	0.38163	17.98	-14.478	1469.6707	-3.146	1.3804	1.0078	-42.088	88.185	1513.781	-2.9297	1.5254	0.42627	121.644	-3.157	0.011000000000001	-0.42188	0.054688	0.056152
0.992	43.3832681	-38.98269	654.0046	-1.2565	0.57724	0.42382	-4.038	8.177	1417.063	-3.1699	1.377	1.0259	-4.797	130.529	1493.97877	-2.9121	1.4688	0.41846	123.858	-12.7662	-15.8834	-0.42627	0.066406	0.058594
0.994	17.383	-33.0481	642.047	-1.317	0.58105	0.46025	-24.2144	-28.4924	1461.2027	-3.1792	1.3579	1.0313	47.9	66.7496	1487.553	-2.8789	1.4375	0.40771	104.7003	-22.8782	12.2823	-0.42969	0.093262	0.070801
0.996	17.1442	-36.6413	647.558	-1.3652	0.57324	0.48291	-22.3327	2.765	1471.6835	-3.155	1.3333	1.0286	86.3892	100.525	1461.15537	-2.771	1.3833	0.37549	85.683	-7.7827	19.595	-0.4104	0.10669	0.076172
0.998	35.341	-36.4107	655.732	-1.3838	0.57383	0.48857	-45.737	-22.8562	1469.0052	-3.1055	1.3105	1.0122	118.74	24.6715	1469.179	-2.6618	1.344	0.35596	61.136	-5.0575	10.877	-0.38135	0.11035	0.068359
1	34.9348	-29.677	667.778	-1.389	0.5755	0.49209	-45.0061	-35.9	1504.293	-3.0308	1.2856	0.98242	165.79	56.8938	1474.886	-2.5503	1.2915	0.32568	65.5613	-16.8172	3.422	-0.3335	0.094238	0.052734
1.002	7.316	-18.038	704.746	-1.3925	0.58409	0.48975	-42.7239	37.645	1462.0411	-3	1.2754	0.96533	140.835	-14.9304	1504.0077	-2.4155	1.2388	0.29395	23.628	-17.2177	11.8292	-0.30713	0.080566	0.043457
1.004	10.8831	-37.665	736.381	-1.3767	0.58819	0.48242	-50.4525	18.2665	1447.5391	-2.9272	1.2524	0.93359	126.957	10.977	1492.243	-2.3496	1.2129	0.27832	-10.558	-29.598	0.379	-0.25098	0.060059	0.015137
1.006	37.6802	-79.885	771.179	-1.3589	0.59619	0.48584	-53.2411	20.589	1497.378	-2.8797	1.2307	0.91382	113.147	-38.784	1496.041	-2.2183	1.1743	0.24463	14.633	9.3377	-18.109	-0.22143	0.04541	-0.0075684
1.008	44.899	-122.1779	785.032	-1.3334	0.60214	0.49324	-59.942	35.626	1473.9371	-2.8335	1.2144	0.89453	91.0145	20.425	1473.959	-2.1142	1.1455	0.22046	-12.61	30.9082	-22.116	-0.18213	0.041016	-0.023438
1.01	27.7425	-145.955	807.8477	-1.3008	0.60715	0.49305	-45.845	-36.56844	1503.256	-2.7637	1.1895	0.86475	108.762	5.15000000000001	1428.898	-2.0176	1.1162	0.20801	-46.6442	24.5975	12.8786	-0.15479	0.043457	-0.040527
1.012	20.423	-154.646	834.35206	-1.2501	0.61021	0.47737	-43.877	-7.6265	1537.628	-2.7241	1.1724	0.85156	88.0781	94.339	1387.205	-1.8901	1.0903	0.18896	-39.959	23.043	43.6762	-0.14551	0.04541	-0.049316
1.014	6.231	-158.838	850.3017	-1.2013	0.61881	0.46429	-55	-4.721	1476.029	-2.627	1.1426	0.81885	75.2157	83.379	1347.2683	-1.8281	1.0771	0.17871	-79.0892	13.525	74.0663	-0.14502	0.051758	-0.062988
1.016	-26.934	-170.809	875.7081	-1.1519	0.62354	0.4502	-42.3584	-15.655	1477.16	-2.5388	1.1135	0.78833	55.612	174.756	1286.951	-1.7207	1.0488	0.16162	-52.8755	51.032	91.1382	-0.16407	0.070313	-0.060791
1.018	-54.1785	-175.239	896.419	-1.1117	0.62481	0.44009	-47.4108	63.224	1407.2254	-2.4429	1.0845	0.75879	58.9532	175.863	1256.434	-1.6469	1.0278	0.1477	-30.7446	69.9028	151.4466	-0.20508	0.088867	-0.051758
1.02	-34.6942	-175.576	919.203	-1.0821	0.62857	0.4271	-40.3235	53.793	1343.759	-2.3164	1.0371	0.71338	53.3071	240.813	1229.95	-1.5698	1.0093	0.13184	-64.2517	47.0498	234.317	-0.30225	0.13525	-0.020508
1.022	-34.8749	-148.0962	960.542	-1.063	0.6373	0.41334	-19.924	64.8764	1375.38112	-2.2456	1.0161	0.6875	57.7424	207.92	1228.025	-1.4731	0.9751	0.12256	-52.786	31.1346	307.50398	-0.37012	0.15625	-0.0024414
1.024	-39.0708	-111.652	982.6881	-1.0509	0.65355	0.40597	-6.023	112.213	1335.6499	-2.1074	0.96875	0.646	37.793	214.932	1206.788	-1.4272	0.95557	0.1167	-2.972	24.026	421.295	-0.50732	0.21143	0.050781
1.026	-59.8234	-86.838	1018.1762	-1.0483	0.6792	0.4043	18.1008	64.3221	1330.2181	-2.0076	0.93042	0.61304	10.301	173.689	1150.784	-1.3496	0.92383	0.10303	14.65	35.066	567.908	-0.63575	0.2544	0.10108
1.028	-40.3852	-59.948	1020.51135	-1.0571	0.6996	0.40067	55.7187	110.722	1354.5766	-1.9097	0.89697	0.58105	-4.557	201.771	1114.278	-1.2984	0.8999	0.093994	22.426	10.5935	735.128	-0.79395	0.30322	0.14844
1.03	-13.647	-56.01	1032.732	-1.0677	0.72882	0.3939	30.9949	136.222	1291.137	-1.7891	0.85352	0.53955	-35.3381	163.982	1094.7153	-1.2505	0.87549	0.085938	84.375	-48.5362	863.555	-1.0327	0.40674	0.24023
1.032	-7.516	-54.475	1065.7766	-1.0824	0.7532	0.38549	40.01745	92.8804	1302.3791	-1.7373	0.83008	0.52441	-86.162	184.6142	1056.71084	-1.1929	0.84033	0.081055	113.688	-82.175	931.761	-1.1519	0.4624	0.30371
1.034	-2.984	-78.334	1090.7565	-1.0981	0.7709	0.37439	57.6969	138.462	1275.7768	-1.6328	0.78125	0.48975	-89.73	138.743	1017.855	-1.1572	0.82813	0.077148	177.078	-136.964	1038.623	-1.3862	0.58057	0.43652
1.036	-15.831	-91.66	1108.88	-1.1147	0.79736	0.36523	33.1359	113.9243	1209.946	-1.5637	0.75219	0.47143	-106.066	152.286	991.97	-1.0854	0.7915	0.078125	256.4607	-165.164	1128.125	-1.5657	0.67701	0.53833
1.038	-28.4018	-116.1338	1109.1895	-1.1312	0.81648	0.34319	52.3932	87.279	1231.2219	-1.5054	0.71533	0.45508	-90.179	129.345	955.569	-1.0286	0.76147	0.075195	282.863	-191.2852	1203.772	-1.7354	0.78418	0.61475
1.04	-31.40901	-131.0805	1114.507	-1.1497	0.83648	0.3274	43.5565	135.4354	1189.802	-1.4404	0.66504	0.43799	-80.296	154.738	922.2131	-0.96436	0.73486	0.078125	252.116	-214.857	1192.885	-1.9097	0.896	0.68262
1.042	-17.257	-149.491	1135.266	-1.1674	0.85053	0.3178	2.836	77.826	1154.3453	-1.4116	0.63916	0.42969	-66.605	162.655	884.447	-0.87451	0.68994	0.078613	224.065	-234.349	1178.365	-1.9766	0.93945	0.69385
1.044	-8.906	-143.585	1160.6288	-1.1859	0.8649	0.30187	19.743	103.564	1151.695	-1.3574	0.59668	0.41943	-14.952	200.91	852.457	-0.82764	0.67041	0.081543	59.832	-272.036	1226.4785	-2.0762	0.98828	0.67139
1.046	14.253	-130.06	1166.38308	-1.2007	0.87744	0.2876	-8.002	128.3622	1072.579	-1.3066	0.5498	0.40674	25.67962	210.378	813.341	-0.73584	0.61963	0.084473	-35.75	-239.97	1196.824	-2.0913	0.99268	0.58594
1.048	10.9698	-120.981	1208.631	-1.2134	0.89053	0.26231	-15.142	80.237	1062.564	-1.2808	0.53174	0.40137	12.7944	236.01	789.761	-0.66308	0.57568	0.081299	-19.64	-207.48	1209.0449	-2.0703	0.9707	0.52881
1.05	32.065	-102.1616	1209.002	-1.2233	0.90583	0.2392	14.283	157.69	1048.749	-1.2275	0.49219	0.39111	38.9419	244.62	749.217	-0.59375	0.53613	0.080078	2.53400000000001	-168.761	1199.459	-1.9917	0.92334	0.41504
1.052	40.85	-100.0486	1238.348	-1.2387	0.92817	0.21673	13.721	161.509	972.3579	-1.1797	0.46387	0.38208	36.2342	265.453	718.9911	-0.50439	0.47656	0.07959	-5.39186	-142.969	1195.779	-1.9067	0.88427	0.34033
1.054	37.7916	-95.86	1245.536	-1.2557	0.94281	0.19705	27.15	152.203	980.435	-1.124	0.43945	0.37305	20.2395	268.514	639.119	-0.4624	0.44678	0.07666	-37.132	-152.859	1217.1642	-1.7808	0.8208	0.25879
1.056	24.0686	-101.9393	1250.4366	-1.2876	0.95947	0.17383	8.234	221.259	932.372	-1.0503	0.39746	0.35742	-7.8915	248.871	605.831	-0.37793	0.3916	0.072754	-33.068	-105.171	1191.085	-1.5918	0.69531	0.15869
1.058	9.364	-77.469	1229.2246	-1.3326	0.97638	0.16313	-11.195	158.125	888.4738	-1.0156	0.37793	0.34961	14.114	229.301	542.07	-0.32153	0.34155	0.070313	-74.7082	-102.75	1205.773	-1.5254	0.63867	0.12549
1.06	3.547	-63.159	1218.114	-1.3887	0.98845	0.15234	12.767	172.505	869.0468	-0.92822	0.33643	0.3252	16.46	182.011	535.735	-0.26904	0.29639	0.062988	-130.882	-81.36	1267.064	-1.4473	0.62891	0.1001
1.062	-23.2152	-45.885	1233.613	-1.4643	1.0014	0.16337	-16.144	190.407	798.471	-0.86475	0.30127	0.30883	61.0658	173.919	490.942	-0.20313	0.23975	0.0625	-98.827	-48.04	1310.746	-1.4478	0.68555	0.12085
1.064	-34.852	-44.138	1259.831	-1.5478	1.0137	0.17726	-14.046	124.982	765.488	-0.80029	0.26904	0.29688	48.919	142.329	473.202	-0.1709	0.21191	0.053711	-45.5709	-99.595	1338.679	-1.4702	0.76221	0.16846
1.066	-32.357	-52.8357	1264.271	-1.646	1.02	0.1958	4.95200000000001	186.115	759.816	-0.70898	0.21387	0.27393	24.507	148.5423	445.4408	-0.12451	0.15381	0.047852	29.427	-152.724	1364.1965	-1.4844	0.86719	0.23145
1.068	-40.3402	-49.1517	1266.6244	-1.7463	1.0251	0.22458	8.639	164.778	693.0258	-0.66602	0.1875	0.25781	37.559	114.662	427.8276	-0.089841	0.10645	0.036377	-23.287	-229.052	1382.165	-1.4683	0.9126	0.24023
1.07	-46.528	-50.14526	1295.7504	-1.8448	1.0368	0.25659	17.001	121.3294	673.14407	-0.58008	0.13232	0.24023	51.2694	134.2469	392.304	-0.062012	0.063965	0.029785	-154.583	-247.2144	1419.404	-1.4194	0.98486	0.23633
1.072	-62.718	-52.3235	1318.6043	-1.9483	1.0442	0.29211	36.312	176.718	646.7716	-0.51855	0.086424	0.22509	38.73035	121.0612	386.7851	-0.041504	0.00048828	0.0092773	-187.7	-219.066	1467.713	-1.3713	1.0188	0.20312
1.074	-45.235	-41.925	1330.3274	-2.0433	1.049	0.32984	42.438	121.21	620.3661	-0.46533	0.039551	0.2085	27.952	142.137	354.7132	-0.036866	-0.027588	-0.0041504	-202.908	-207.0771	1544.906	-1.3242	1.0488	0.17285
1.076	-51.869	-52.705	1343.6691	-2.1284	1.0532	0.37207	85.4824	146.376	618.413	-0.38525	-0.015137	0.17969	-0.957000000000001	104.162	335.349	-0.03418	-0.057617	-0.018066	-188.865	-201.576	1531.2256	-1.3027	1.0918	0.15039
1.078	-77.456	-58.0379	1361.1072	-2.2003	1.0648	0.4074	80.227	166.355	587.184	-0.35596	-0.04541	0.16797	-70.935	136.224	272.1372	-0.052246	-0.091309	-0.024902	-114.655	-233.673	1523.2853	-1.3159	1.1138	0.14551
1.08	-71.888	-51.746	1381.029	-2.2628	1.0706	0.44567	72.72864	107.2836	542.2976	-0.29102	-0.092285	0.13867	-75.73	111.415	224.30966	-0.068359	-0.099121	-0.029785	22.483	-205.676	1528.533	-1.4131	1.1602	0.15967
1.082	-57.569	-41.5687	1375.477	-2.3159	1.0807	0.48472	87.8268	160.537	505.383	-0.24951	-0.12476	0.11743	-81.881	152.4622	179.846	-0.10889	-0.11816	-0.0092773	87.016	-112.757	1549.814	-1.5374	1.1897	0.19849
1.084	-53.665	-23.0384	1361.0822	-2.3709	1.0816	0.52469	76.7438	146.668	456.6687	-0.20947	-0.1499	0.098633	-73.047	115.759	173.636	-0.14892	-0.12524	0.010742	119.821	-41.208	1574.023	-1.6968	1.2124	0.25781
1.086	-70.443	-11.0048	1364.2556	-2.4063	1.082	0.55615	62.518	122.78698	418.0529	-0.16211	-0.18018	0.066406	-62.7572	147.1033	132.841	-0.19092	-0.12646	0.036621	168.157	-9.709	1561.91	-1.9507	1.2407	0.354
1.088	-40.1213	-4.5113	1345.2504	-2.4512	1.0773	0.58985	80.7061	189.725	402.03	-0.14648	-0.19434	0.054199	-48.0637	105.2355	93.829	-0.24805	-0.11914	0.078613	187.087	-28.287	1546.252	-2.0854	1.2485	0.40381
1.09	-45.2376	-4.481	1341.113	-2.4824	1.0774	0.62003	67.9447	118.545	363.83	-0.11279	-0.2168	0.024902	-72.741	134.337	57.844	-0.27197	-0.11182	0.10742	218.118	-29.488	1530.4051	-2.3472	1.2563	0.48926
1.092	-31.6785	13.8338	1322.1382	-2.4922	1.077	0.63916	58.026	123.671	336.4747	-0.093261	-0.22778	0.015625	-40.4364	96.457	58.241	-0.32031	-0.083496	0.15967	257.18	11.87	1508.467	-2.5066	1.258	0.52344
1.094	-26.17	14.67588	1333.1822	-2.502	1.0792	0.65723	45.514	146.7947	310.528	-0.08252	-0.24072	-0.0058594	-20.08	125.361	67.142	-0.34766	-0.063964	0.19458	240.87	39.6453	1520.322	-2.6343	1.2388	0.52734
1.096	-7.5459	35.699	1342.14086	-2.5	1.082	0.6665	40.633	79.986	289.014	-0.066895	-0.24512	-0.02002	5.255	84.027	61.4306	-0.36377	-0.038086	0.23047	214.794	49.909	1521.915	-2.7593	1.2104	0.52637
1.098	3.31473	44.649	1338.5225	-2.5018	1.0751	0.67285	50.415	140.14	270.632672	-0.064941	-0.24805	-0.027344	11.406	105.936	52.8635	-0.36523	-0.0078125	0.26465	165.522	-13.855	1511.131	-2.7944	1.1802	0.52148
1.1	-6.7464	39.94	1336.987825	-2.4895	1.0668	0.67939	26.092	125.268	255.76093	-0.064941	-0.24512	-0.040527	3.434	58.798	40.2418	-0.36084	0.0043945	0.27881	160.257	-73.323	1512.1028	-2.853	1.1216	0.49951
1.102	16.2486	18.3119	1336.7732	-2.4723	1.0668	0.68799	8.78	90.7288	241.3697	-0.066162	-0.24512	-0.048828	1.593	66.171	56.643	-0.34326	0.024902	0.29492	191.893	-94.83	1515.129	-2.8757	1.0779	0.49756
1.104	10.4702	5.7166	1314.9593	-2.4563	1.0678	0.69004	13.132	142.227	221.119	-0.064941	-0.24512	-0.056641	14.685	20.848	38.4413	-0.32227	0.032226	0.28785	195.498	-109.214	1584.838	-2.8965	1.0332	0.49756
1.106	18.5532	5.621	1292.6808	-2.4414	1.0645	0.6958	-6.366	70.0533	210.4537	-0.063965	-0.24658	-0.071289	35.177	44.16989	33.1181	-0.30322	0.039551	0.27393	150.447	-56.43	1565.705	-2.9233	0.99658	0.50586
1.108	11.4955	3.361	1290.0584	-2.4224	1.0542	0.69629	-12.669	81.10065	196.5265	-0.060059	-0.24805	-0.074707	48.1774	3.046	17.5423	-0.271	0.038086	0.24756	126.9479	-10.591	1535.5262	-2.937	0.98291	0.50781
1.11	-8.1354	-0.855999999999998	1280.2793	-2.3979	1.0462	0.70508	-29.388	102.9645	169.352	-0.054688	-0.25098	-0.093262	63.0933	18.6752	17.4888	-0.26074	0.043945	0.23096	113.514	39.218	1525.37	-2.9316	0.97559	0.52002
1.112	-17.2502	-1.683	1257.55	-2.3651	1.0431	0.70117	-27.914	37.584	153.164	-0.050049	-0.2522	-0.10132	58.6138	-13.4201	14.2397	-0.24805	0.047363	0.20752	74.334	71.8778	1508.967	-2.9275	0.98169	0.51733
1.114	-13.5742	-3.788	1213.2315	-2.3285	1.0369	0.69775	-20.291	83.768	132.0983	-0.04834	-0.25342	-0.11133	56.1715	22.17	23.48	-0.2456	0.047607	0.19873	-4.74299999999999	52.959	1513.145	-2.9058	0.99072	0.51953
1.116	-23.1206	8.0172	1195.897	-2.291	1.0293	0.68994	-23.5	65.6259	105.245	-0.036621	-0.26318	-0.12402	86.017	7.074	16.6533	-0.25	0.050781	0.20459	-40.767	87.99	1476.9719	-2.8594	1.0059	0.50146
1.118	-49.9514	27.1573	1210.1098	-2.2404	1.0189	0.68233	-13.432	32.361	110.6433	-0.036621	-0.26904	-0.13232	69.867	37.3454	44.287	-0.25098	0.057617	0.21826	-114.664	123.457	1466.666	-2.8184	1.0176	0.50049
1.12	-35.563	55.633	1185.8798	-2.1843	1.0096	0.66328	-33.178	92.589	97.8708	-0.031738	-0.27148	-0.13867	62.24307	13.7003	54.88	-0.25098	0.05957	0.22363	-138.203	190.199	1434.51	-2.7227	1.0313	0.4751
1.122	-47.2163	60.434	1160.6262	-2.1175	0.99443	0.6418	13.168	52.832	70.3865	-0.024902	-0.2771	-0.14697	76.3133	31.5376	40.679	-0.24951	0.081543	0.22949	-109.954	229.719	1414.3488	-2.6277	1.0373	0.44214
1.124	-48.431	61.911	1141.124	-2.049	0.97988	0.621	25.399	69.808	54.386	-0.01709	-0.27734	-0.15283	51.1793	12.864	32.3908	-0.23999	0.090576	0.23755	-76.083	207.229	1365.617	-2.5327	1.0337	0.41162
1.126	-51.903	53.292	1136.5826	-1.9878	0.95361	0.60742	16.24	111.598	45.038	-0.010254	-0.28613	-0.16309	6.137	28.351	30.267	-0.22217	0.099121	0.24512	-66.6	181.7491	1349.968	-2.3999	1.0161	0.37402
1.128	-38.7416	60.215	1113.1867	-1.9248	0.925	0.59473	49.491	43.0158	41.57	-0.00048828	-0.28467	-0.16846	-32.33	-2.915	13.805	-0.18896	0.094238	0.24707	-76.33	153.735	1340.381	-2.3359	1.002	0.35986
1.13	-54.2389	67.053	1095.8487	-1.8629	0.88907	0.57783	35.379	66.5599	43.737	0.017578	-0.29102	-0.17139	-41.3951	-9.833	23.692	-0.16992	0.092773	0.25391	-60.679	168.691	1356.913	-2.2188	0.97461	0.33252
1.132	-71.342	77.71	1078.32724	-1.7961	0.85274	0.56651	35.6987	55.395	34.8848	0.032959	-0.29273	-0.17554	-47.788	-29.8736	-1.6299	-0.12695	0.072266	0.26514	-22.035	185.019	1353.616	-2.127	0.95019	0.31348
1.134	-47.6306	57.9718	1054.0103	-1.7359	0.82276	0.53945	43.8139	11.328	37.16	0.043457	-0.29785	-0.17285	-30.633	-26.218	13.2368	-0.087646	0.050292	0.27686	12.327	145.308	1356.29749	-2.0352	0.92188	0.29785
1.136	-42.8234	47.6138	1028.6111	-1.6675	0.7876	0.52148	30.863	66.337	13.7114	0.045898	-0.30371	-0.17285	-26.842	-28.464	0.4374	-0.054199	0.021484	0.2793	72.896	125.230443	1311.993	-1.9141	0.88379	0.27002
1.138	-40.4909	43.5717	1001.509	-1.599	0.75859	0.49795	40.557	20.8502	21.0832	0.044434	-0.30518	-0.17188	-40.449	-29.7217	5.5579	-0.0068359	-0.017578	0.27246	95.036	96.839	1278.118	-1.8491	0.86377	0.24902
1.14	-43.8097	53.7982	1012.6583	-1.5305	0.73632	0.47031	54.793	15.6449	10.089699	0.036133	-0.29541	-0.16602	-37.2391	-12.135	2.305	0.013184	-0.041016	0.2627	121.567	125.004	1227.632	-1.7104	0.8208	0.2085
1.142	-16.502	58.1496	999.2808	-1.4621	0.71016	0.43946	32.9917	45.558	-7.2064	0.024414	-0.28833	-0.16015	-26.206	-18.8174	2.583	0.058594	-0.083496	0.23682	137.523	162.631	1213.048	-1.5925	0.79028	0.17553
1.144	9.5168	76.38541	972.6941	-1.3999	0.68857	0.41191	49.8458	-30.8365	19.306	0.014648	-0.27734	-0.14648	-25.427	-9.7272	5.1	0.092775	-0.11182	0.21069	127.822	152.332	1186.031	-1.4629	0.74609	0.14404
1.146	7.877	85.2192	949.3532	-1.3335	0.65674	0.3877	30.999	4.6221	22.2037	-0.0053711	-0.26514	-0.13281	-9.068	-4.148	16.6817	0.12109	-0.14355	0.19434	161.307	128.442	1122.916	-1.3027	0.69629	0.09082
1.148	31.9941	101.614	927.6151	-1.2762	0.62266	0.37256	30.91	5.213	24.74581	-0.012695	-0.2583	-0.12842	2.933	24.6844	-4.4523	0.15967	-0.1748	0.17529	159.533	123.345	1050.2369	-1.2183	0.67236	0.065918
1.15	40.413	105.847	904.167	-1.2218	0.59092	0.35098	50.02	-22.8788	45.2055	-0.029785	-0.25635	-0.11182	-18.167	10.0017	-5.5148	0.17432	-0.19482	0.1626	134.056	161.329	987.361	-1.0581	0.61572	0.024414
1.152	44.0663	116.441	864.0756	-1.1718	0.55498	0.33496	9.174	49.868	18.3787	-0.048828	-0.2522	-0.10156	-25.342	35.1901	-31.4016	0.2002	-0.22754	0.14941	149.817	229.6262	926.914	-0.94605	0.57447	0.0004883
1.154	38.7029	113.213	822.1809	-1.1199	0.52363	0.32119	6.863	15.8602	21.7612	-0.06543	-0.24707	-0.083984	-22.068	9.86268	-22.54646	0.22119	-0.24804	0.14404	150.395	245.459	890.706	-0.83398	0.53076	-0.015625
1.156	46.3598	105.0948	808.6953	-1.0718	0.49268	0.30859	-8.672	17.9323	6.87766	-0.087891	-0.23584	-0.071289	36.283	34.7531	-30.1507	0.2417	-0.27002	0.13672	112.449	274.925	849.22	-0.69727	0.47656	-0.027832
1.158	52.2368	102.07952	765.296	-1.0307	0.46064	0.29804	-35.3	67.652	-16.5006	-0.098145	-0.23047	-0.060059	64.1199	7.7479	-17.369	0.26416	-0.29297	0.12012	71.5685	252.443	841.8449	-0.63672	0.44727	-0.033203
1.16	54.7879	105.8365	742.704	-0.98516	0.43438	0.28897	-12.971	0.319	24.367	-0.10889	-0.22461	-0.049805	67.6395	46.108	-8.491	0.27686	-0.30127	0.11572	57.088	227.554	849.337	-0.51367	0.39551	-0.037109
1.162	41.6523	96.8426	732.9381	-0.93711	0.40586	0.27725	-22.59	28.279	12.554	-0.11718	-0.21753	-0.043457	60.599	17.5955	5.673	0.30127	-0.31982	0.094727	33.7482	230.296	802.5761	-0.42309	0.36035	-0.037842
1.164	26.206	101.7015	705.7152	-0.88369	0.38056	0.2625	-32.983	27.0631	7.5047	-0.12305	-0.21387	-0.032715	80.3699	50.6272	3.3835	0.31934	-0.32666	0.086914	-39.1242	222.842	749.8949	-0.33643	0.32129	-0.035156
1.166	32.9092	105.3389	682.4922	-0.83203	0.34863	0.25439	-17.032	-14.0748	26.33734	-0.12646	-0.20361	-0.026367	69.6149	5.897	26.118	0.33398	-0.33301	0.07959	-54.0912	264.936	696.3815	-0.2168	0.2666	-0.043457
1.168	39.513	107.638	648.4212	-0.78145	0.32158	0.2373	-19.65	44.686	13.8033	-0.12744	-0.19751	-0.026611	67.17	46.974416	35.715	0.34619	-0.32959	0.063965	-98.44	263.3036	646.4473	-0.12866	0.22265	-0.04248
1.17	20.975	105.619	641.0443	-0.73379	0.29434	0.23047	10.318	6.451	21.0647	-0.13135	-0.19922	-0.020996	78.39	5.38544	35.101	0.34863	-0.33008	0.058594	-169.591	241.6679	595.6806	-0.044434	0.17578	-0.045898
1.172	8.555	99.598	625.524	-0.68027	0.25957	0.21445	11.162	-6.4553	30.723	-0.14014	-0.18457	-0.017578	41.637	43.639	19.6709	0.35498	-0.32275	0.054199	-179.322	205.174	544.8571	0.07373	0.11475	-0.053711
1.174	22.487	91.1925	595.989	-0.6376	0.2291	0.20449	-3.838	17.0507	8.4418	-0.14307	-0.18408	-0.012207	18.961	2.7484	18.6729	0.35254	-0.30811	0.043457	-176.634	158.3789	511.859	0.12549	0.084473	-0.062012
1.176	13.22	92.913	567.2679	-0.58643	0.19971	0.19238	9.883	-52.023	20.63821	-0.15234	-0.17432	-0.0039063	1.515	40.419	28.2581	0.34326	-0.29297	0.036621	-151.59	176.213	470.87	0.21729	0.021484	-0.085938
1.178	-28.065	104.506	552.407	-0.54317	0.16768	0.18213	19.82	1.9958	13.3689	-0.16382	-0.16577	0.0036621	-11.724	-9.4946	25.28	0.31836	-0.26123	0.020508	-181.132	210.426	456.198	0.28101	-0.02124	-0.096436
1.18	-22.844	106.861	527.5949	-0.4999	0.13916	0.16787	14.568	9.1153	2.3359	-0.17432	-0.16113	0.012207	8.692	25.6325	39.6751	0.30518	-0.2417	0.016602	-153.635	243.868	423.156	0.33838	-0.072266	-0.10107
1.182	-0.110999999999997	100.9889	513.493	-0.46045	0.11026	0.15732	47.986	-30.2714	20.5514	-0.18604	-0.14941	0.02832	20.286	-11.73956	24.5301	0.27881	-0.19531	0.013672	-91.479	243.525	360.173	0.40088	-0.12207	-0.10059
1.184	-8.915	102.1538	474.401	-0.41846	0.084765	0.13975	18.133	27.621	18.9198	-0.18408	-0.14307	0.035156	-9.096	35.028	39.2948	0.25562	-0.15698	0.016601	-57.8817	185.674	314.0391	0.42188	-0.14355	-0.094238
1.186	-30.141	104.0533	451.0496	-0.37842	0.059082	0.1333	48.5421	5.142	12.002332	-0.19189	-0.13232	0.044434	-3.14	4.0944	26.6862	0.23193	-0.11719	0.021484	-23.823	180.77704	275.362	0.4502	-0.18652	-0.082031
1.188	-5.221	109.0946	423.09408	-0.34443	0.035059	0.11475	79.7189	5.7595	18.21593	-0.18726	-0.12305	0.050293	-25.6059	24.9136	34.776	0.19922	-0.063965	0.028809	-46.504	187.4321	250.9771	0.45288	-0.21948	-0.066162
1.19	21.68	111.248	397.6391	-0.31084	0.016015	0.10039	33.446	46.75	4.02863	-0.17725	-0.11377	0.059082	-38.7139	-21.9468	13.464	0.18066	-0.042969	0.036133	-22.14	196.238	238.425	0.44141	-0.24561	-0.052734
1.192	1.59999999999999	121.004	404.86014	-0.28154	-0.0035157	0.085547	62.2424	-7.78818	11.1556	-0.1582	-0.10352	0.046387	-51.5648	-3.1407	13.4637	0.15039	0.0043945	0.039063	34.9065	172.8134	174.4109	0.40186	-0.27393	-0.031738
1.194	7.522	115.867	387.3403	-0.25986	-0.019141	0.071192	58.294	21.3852	-9.7211	-0.14014	-0.104	0.052246	-35.05	-31.324	11.6497	0.12109	0.039063	0.039063	30.522	89.19	145.8568	0.36377	-0.28369	-0.003418
1.196	30.827	106.665337	364.4486	-0.24023	-0.029297	0.056152	55.1098	29.1633	-20.8489	-0.11182	-0.099609	0.041016	-41.5995	9.2927	16.8849	0.10254	0.056152	0.04541	78.2807	67.085	109.343	0.27393	-0.30127	0.025391
1.198	45.936	109.917	353.4668	-0.21894	-0.044727	0.043847	48.8757	-5.5727	0.73	-0.086426	-0.099121	0.030274	-23.541	-16.1697	4.716	0.077148	0.092773	0.049316	134.131	51.366	113.443	0.18579	-0.30469	0.052002
1.2	42.721	112.732	345.9798	-0.2085	-0.053907	0.033887	18.458	39.251	0.400000000000002	-0.056152	-0.099609	0.014648	-28.222	4.18	9.3478	0.049804	0.11206	0.049805	143.467	68.424	95.642	0.089844	-0.29443	0.07666
1.202	42.1518	97.649	328.5089	-0.19756	-0.061328	0.026855	9.06	-3.7383	13.295	-0.020996	-0.10254	-0.00097656	-24.311	-38.272	1.3205	0.027832	0.13135	0.051758	133.835	62.071	78.121	-0.051758	-0.27539	0.12598
1.204	46.47	74.3286	307.852	-0.19258	-0.065235	0.019824	12.209	0.175000000000001	12.99	-0.0068359	-0.10205	-0.0068359	2.488	-17.5101	-1.1382	-0.00048828	0.15625	0.050781	149.406	15.717	59.94	-0.12598	-0.26514	0.15479
1.206	59.6108	78.1759	273.6447	-0.18945	-0.071777	0.018555	-10.944	49.291	3.27588	0.015625	-0.10645	-0.026367	27.064	-22.1031	-14.4723	-0.015625	0.16895	0.052734	139.161	12.19	58.32	-0.27441	-0.22314	0.20117
1.208	51.7186	55.882	268.6228	-0.18643	-0.071582	0.01875	-5.46	-13.5683	11.53695	0.028808	-0.10425	-0.033935	27.007	0.1677	-8.4779	-0.04541	0.1958	0.058105	132.159	21.5239	48.503	-0.38648	-0.18652	0.23706
1.21	51.468	65.4587	265.1168	-0.18838	-0.075976	0.016113	-13.404	10.1836	20.5637	0.035156	-0.10498	-0.039551	71.8756	6.2837	10.127	-0.064453	0.22022	0.058838	116.166	40.248	28.2664	-0.49072	-0.1499	0.26807
1.212	57.9534	65.6021	243.6313	-0.18994	-0.070117	0.015723	-23.909	19.2955	-12.8122	0.041016	-0.10205	-0.04834	38.2028	7.8163	47.356	-0.087891	0.24268	0.06543	52.6035	58.58	1.9187	-0.62646	-0.1001	0.31006
1.214	50.132	70.2411	250.3389	-0.18838	-0.067383	0.020996	-1.938	-13.19982	9.978	0.041016	-0.097168	-0.048828	52.5186	21.2633	66.411	-0.11572	0.27686	0.070801	-1.665	43.41	11.2454	-0.68701	-0.066406	0.33203
1.216	36.6364	62.9467	229.024	-0.18408	-0.063477	0.024902	-30.249	47.633	7.7939	0.037598	-0.087891	-0.061035	57.8475	60.3555	98.965	-0.13721	0.29297	0.066895	26.694	79.603	11.5554	-0.78467	-0.019531	0.3667
1.218	16.7	53.5839	233.827	-0.18564	-0.06123	0.032617	-13.825	9.8537	20.5464	0.037109	-0.082275	-0.066163	51.6891	108.266	136.261	-0.19385	0.32422	0.042969	-17.722	66.865	-2.22	-0.8501	0.020508	0.39136
1.22	48.10261	62.588	203.2964	-0.17812	-0.06123	0.031641	-3.629	11.7013	25.7076	0.030273	-0.073242	-0.075684	37.45429	134.6534	200.59791	-0.23901	0.35986	0.026855	-38.2761	48.94	0.8354	-0.89404	0.064941	0.41992
1.222	34.601	62.444	188.3371	-0.17266	-0.059277	0.032812	-18.521	58.117	-14.7709	0.027832	-0.068848	-0.078125	70.499	158.802	264.6495	-0.28662	0.396	0.020996	-53.356	25.4128	11.79829	-0.91943	0.12061	0.45898
1.224	1.771	58.798	173.9771	-0.15732	-0.059766	0.025782	9.559	19.3237	14.01485	0.020508	-0.0625	-0.080566	27.474	120.3021	310.5748	-0.3623	0.43896	0.037109	-116.1119	7.555	27.6909	-0.92578	0.1377	0.47803
1.226	-19.016	65.181	144.438	-0.1416	-0.060547	0.018066	2.445	46.961	28.368	0.020508	-0.054688	-0.086426	11.814	103.444	368.477	-0.40918	0.45508	0.044922	-108.808	53.4033	12.1338	-0.92188	0.17334	0.50977
1.228	4.446	72.791	133.8536	-0.11982	-0.065918	0.0061523	-4.719	28.1483	15.1569	0.015137	-0.044189	-0.088867	-0.111999999999995	79.906	457.6689	-0.51123	0.4751	0.059082	-81.154	47.794	20.8143	-0.89697	0.19068	0.53418
1.23	8.525	65.226	142.0099	-0.09912	-0.069531	-0.0078125	23.985	-12.58771	30.534	0.0087891	-0.035645	-0.092285	-2.415	94.641	512.8666	-0.60278	0.49414	0.065918	-96.982	12.553	28.7272	-0.86182	0.19385	0.55176
1.232	-32.818	59.4273	134.2414	-0.080371	-0.079687	-0.025391	22.942	19.9272	37.5004	-0.0092773	-0.02832	-0.10498	3.423	66.936	586.43196	-0.69678	0.521	0.076172	-115.589	-26.0562	33.536	-0.79053	0.19775	0.57422
1.234	-18.528	55.9862	128.5543	-0.059863	-0.085254	-0.037988	30.5307	-26.0483	60.7836	-0.023438	-0.019531	-0.11035	7.857	65.412	643.929	-0.82764	0.56104	0.10205	-103.2263	-47.146	40.694	-0.75195	0.1958	0.58057
1.236	-6.452	48.3163	116.313	-0.039551	-0.094238	-0.046387	28.498	-15.93	90.2166	-0.058105	-0.0039063	-0.10791	-34.7359	-13.4886	735.649	-0.89648	0.58789	0.11914	-84.546	7.2719	25.0308	-0.66406	0.18945	0.58643
1.238	-25.679	42.2194	92.0902	-0.024804	-0.10528	-0.05918	28.5457	12.605	94.533	-0.092776	0.0095213	-0.099364	-9.386	-21.973	838.1129	-1.0327	0.64307	0.15771	-47.0629	7.7691	60.785	-0.58936	0.17725	0.58545
1.24	-18.992	35.0579	89.6537	-0.011816	-0.11563	-0.065429	53.4787	-38.126	107.4212	-0.13721	0.023438	-0.090332	-4.23	-95.7358	920.494	-1.1319	0.67944	0.19385	-4.963	-14.4702	73.365	-0.50049	0.15283	0.57617
1.242	-10.591	29.4407	66.7888	0.0010742	-0.11992	-0.07168	61.2665	7.1983	153.0026	-0.20557	0.040527	-0.070801	-18.844	-85.916	973.097	-1.228	0.70752	0.23291	-1.108	-38.236	20.4827	-0.38672	0.099609	0.54785
1.244	29.857	43.731	59.9189	0.015234	-0.12705	-0.078515	54.627	8.32279	182.92178	-0.24756	0.050781	-0.0625	3.956	-153.17016	1027.186	-1.3438	0.74219	0.3042	40.348	-43.496	-24.101	-0.33105	0.069336	0.53564
1.246	15.977	46.015	74.3551	0.029785	-0.13086	-0.081543	63.659	5.137	230.1866	-0.33203	0.071777	-0.039551	14.2	-151.1328	1021.729	-1.3887	0.75879	0.36084	108.713	4.8295	-1.2794	-0.21191	0.0019531	0.49756
1.248	13.2752	37.212	76.1454	0.037207	-0.13643	-0.079785	29.182	79.0944	276.437	-0.40357	0.088135	-0.018799	16.003	-195.189	1014.042	-1.4468	0.77197	0.46094	111.584	18.015	23.285	-0.13696	-0.050782	0.46728
1.25	32.442	30.3447	62.964	0.047852	-0.13858	-0.086817	24.07	75.3688	328.56757	-0.48145	0.10645	-0.00097656	30.089	-144.442	943.273	-1.4966	0.77002	0.53321	104.582	-1.28416	25.14	-0.064453	-0.085938	0.43506
1.252	27.235	38.1254	73.3912	0.056445	-0.14795	-0.085254	38.011	90.224	404.316	-0.5957	0.13721	0.023438	49.063	-179.211	889.161	-1.5581	0.78564	0.61328	144.843	-7.3788	-15.842	0.021484	-0.14746	0.37842
1.254	30.977	34.9168	59.6028	0.063086	-0.15401	-0.078906	29.456	112.212	462.0188	-0.65576	0.14453	0.04541	62.484	-119.284	842.196	-1.6289	0.81641	0.70361	147.135	-22.24	-15.323073	0.06543	-0.17383	0.34863
1.256	39.846	29.1529	53.16911	0.063477	-0.15869	-0.074219	10.64	51.254926	541.90298	-0.79492	0.18164	0.07666	73.574	-162.305	823.883	-1.6343	0.82275	0.72754	161.766	0.6695	8.87	0.15967	-0.22998	0.2876
1.258	54.3718	20.8463	26.773	0.072363	-0.16778	-0.079102	21.348	58.119	600.63877	-0.91088	0.20581	0.10889	85.8111	-109.173	806.0779	-1.5767	0.76025	0.75293	150.287	17.02808	37.72	0.23877	-0.27784	0.23022
1.26	36.7557	31.385	24.7015	0.077149	-0.17656	-0.070606	11.429	28.616	674.8189	-1.0405	0.23438	0.14502	76.6672	-158.567	848.408	-1.5417	0.698	0.74439	96.399	35.2772	-0.207999999999998	0.31445	-0.32861	0.17578
1.262	33.8309	22.7885	27.2192	0.08418	-0.18633	-0.070606	9.421	-37.409	755.194	-1.2104	0.28662	0.21484	31.33	-104.128	886.505	-1.5425	0.68408	0.72656	85.75443	44.9914	-25.83174	0.40918	-0.39063	0.10352
1.264	51.2506	23.5628	34.5115	0.087402	-0.1917	-0.066016	19.298	-46.997	815.209	-1.2998	0.3125	0.26074	59.566	-139.49	949.201	-1.5464	0.75244	0.7168	101.9994	17.6087	-15.191122	0.44971	-0.41455	0.069824
1.266	52.2547	28.403	31.8606	0.086426	-0.19678	-0.0625	5.89	-114.4434723	879.782	-1.4585	0.37158	0.36475	44.6712	-62.264	965.505	-1.5327	0.79736	0.71484	56.7749	23.3863	6.11	0.52197	-0.46045	0.013184
1.268	52.1659	25.16	26.733	0.079004	-0.19639	-0.056446	-3.902	-122.3418	937.0377	-1.572	0.41235	0.43994	72.569	-92.45	1003.29	-1.4976	0.86377	0.71289	13.623	19.3894	30.7946	0.56421	-0.4834	-0.032715
1.27	21.884	16.4868	34.8871	0.068359	-0.19717	-0.050879	-19.9371	-93.2672	941.581	-1.6733	0.45361	0.5127	86.404	-82.67	1065.938	-1.4714	0.88452	0.71411	22.235	31.393	21.4114	0.58643	-0.50439	-0.069336
1.272	9.033	13.2936	31.0873	0.060156	-0.19404	-0.039551	-30.2805	-126.535	944.448	-1.7852	0.47852	0.56885	110.817	-161.252	1114.31743	-1.4688	0.88672	0.69385	-15.729	41.243	6.3572	0.59668	-0.51318	-0.10107
1.274	34.658	18.0959	22.5807	0.045703	-0.19258	-0.031153	-31.282	-97.154	927.349	-1.8335	0.4917	0.58398	82.1416	-188.6542	1157.342	-1.4717	0.88867	0.62158	-81.727	28.452	29.1008	0.59473	-0.50977	-0.10938
1.276	0.474	21.3003	19.5103	0.022461	-0.19043	-0.02002	-44.18	-81.973	874.44	-1.8945	0.48242	0.57568	79.205	-265.885	1182.0242	-1.4585	0.89502	0.58105	-61.2148	47.866	51.749	0.56885	-0.49268	-0.11914
1.278	-32.719	23.9169	12.168	0.004297	-0.18145	-0.007617	-16.3762	-114.647	871.451	-1.9038	0.46289	0.5459	15.49	-294.377	1209.7339	-1.3862	0.9165	0.49414	-82.1296	40.229	29.30517	0.54028	-0.46679	-0.1228
1.28	-26.27	19.5654	6.9352	-0.016504	-0.17217	0.0045899	-26.543	-70.802	850.345	-1.8984	0.44043	0.50391	-10.037	-312.48	1227.671	-1.3281	0.93067	0.43408	-97.7599	37.34	17.9231	0.50244	-0.42725	-0.12305
1.282	-0.922000000000004	19.3085	18.7495	-0.037598	-0.16201	0.010059	-35.5376	-76.065	826.9514	-1.8491	0.40479	0.44922	-40.418	-277.51	1253.3542	-1.2676	0.93848	0.38721	-93.1956	36.2316	21.6394	0.43896	-0.35889	-0.10254
1.284	-4.283	27.443	20.6833	-0.057129	-0.14815	0.026172	-11.463	-71.694	847.963	-1.8223	0.38574	0.41943	-37.4376	-220.781	1244.091	-1.1816	0.9248	0.34033	-135.959	4.7634	46.689	0.39746	-0.31836	-0.098145
1.286	-34.5175	17.8901	32.0311	-0.077148	-0.13867	0.035156	-13.417	-2.904	830.522	-1.7456	0.36084	0.36279	-57.1837	-173.5361	1291.617	-1.1528	0.9126	0.32129	-112.798	1.2333	36.441	0.30762	-0.23389	-0.073242
1.288	-9.473	6.393902	10.756	-0.09082	-0.12725	0.04043	21.662	-38.384	856.309	-1.6795	0.34082	0.32739	-67.5978	-99.683	1309.577	-1.1074	0.89063	0.28174	-49.4977	-23.2877	26.7608	0.21289	-0.14111	-0.041504
1.29	0.885000000000002	3.194	14.12718	-0.10088	-0.12246	0.044629	64.539	-35.949	886.031	-1.6265	0.33496	0.2959	-67.797	-75.294	1383.0646	-1.0966	0.88721	0.25146	-49.735	-31.3602	28.0437	0.16553	-0.10498	-0.026855
1.292	-22.345	11.7391	16.0822	-0.10869	-0.11191	0.047364	64.078	-40.006	879.298	-1.5898	0.35986	0.27539	-37.6645	-21.877	1429.703	-1.1011	0.90283	0.21094	-24.459	-25.58681	33.485	0.072754	-0.026855	0.0063477
1.294	-10.646	17.6735	18.5953	-0.11094	-0.10918	0.046289	59.881	-91.764	946.473	-1.5711	0.40014	0.27979	-27.9771	-12.685	1462.306	-1.1675	0.95361	0.17627	20.398	-29.979	32.5175	0.012695	0.02539	0.027832
1.296	9.034	18.2522	9.5283	-0.10986	-0.1084	0.044922	63.79445	-69.973	1003.9405	-1.5405	0.44873	0.26855	-24.2298	27.39	1436.525	-1.2217	0.98438	0.17236	34.2289	-9.7713	4.736	-0.037598	0.070313	0.043945
1.298	12	25.0488	8.802706	-0.10723	-0.1043	0.039453	53.853	-125.6626	1054.1736	-1.4648	0.50195	0.25049	-39.83488	6.48099999999999	1454.138	-1.3862	1.0571	0.17188	46.7072	-17.5016	-1.433	-0.089355	0.12158	0.061523
1.3	-3.834	23.683	25.497	-0.096289	-0.10136	0.033594	20.994	-187.786	1126.116	-1.4238	0.52734	0.2373	-37.883	20.703	1429.1177	-1.5778	1.1028	0.21142	111.478	-26.151	16.6226	-0.11426	0.1416	0.066406
1.302	24.214	14.9426	27.924	-0.083398	-0.1041	0.022266	7.899	-181.854	1131.9838	-1.3457	0.58154	0.22217	-58.821	-45.607	1450.554	-1.7793	1.1563	0.26855	106.8502	-18.7894	25.534	-0.15625	0.18262	0.083496
1.304	39.6692	6.9878	21.37406	-0.069629	-0.10429	0.012402	-2.978	-234.878	1140.2272	-1.304	0.61963	0.21875	-72.197	-66.199	1470.3	-2.0747	1.229	0.38184	105.324	-21.06544	8.1027	-0.18384	0.20557	0.084229
1.306	24.178	16.1612	22.0033	-0.055176	-0.10693	0.0019531	4.88200000000001	-196.773	1174.6757	-1.2788	0.6626	0.21924	-33.265	-161.884	1553.862	-2.2241	1.2603	0.44922	150.209	22.7369	-5.848	-0.21094	0.229	0.086426
1.308	44.309	5.0486	19.4329	-0.03711	-0.10557	-0.010645	-6.105	-142.3078	1175.5241	-1.271	0.71338	0.22119	-7.7644	-146.895	1596.46	-2.5098	1.3398	0.59424	129.54	16.34743	-4.0889	-0.25244	0.26563	0.10254
1.31	42.994	-2.112	24.323	-0.02041	-0.10967	-0.020507	40.564	-171.3883	1204.0209	-1.2754	0.73438	0.22803	5.68262	-200.815	1618.877	-2.7051	1.396	0.70288	116.109	15.2989	14.8935	-0.2749	0.2832	0.11279
1.312	60.8319	4.53155	9.9071	-0.0071289	-0.10967	-0.037695	58.473	-121.557	1227.6201	-1.3105	0.76758	0.23193	41.2019	-121.9	1579.216	-2.9063	1.4521	0.80029	128.614	31.1148	12.628	-0.31787	0.31592	0.13184
1.314	44.3377	14.0574	14.0205	0.01084	-0.11016	-0.04668	67.6155	-110.917	1239.691	-1.3487	0.78565	0.23828	43.859	-132.123	1587.369	-3.1479	1.5337	0.91602	108.93	21.4667	17.611	-0.34741	0.34327	0.14673
1.316	41.8655	18.1857	17.8059	0.025391	-0.11084	-0.058594	91.2422	-112.902	1278.5683	-1.4077	0.80322	0.23926	49.161	-51.442	1580.956	-3.2651	1.5649	0.97754	103.861	27.4015	15.96	-0.38672	0.36621	0.15869
1.318	38.395	9.7652	33.586	0.036133	-0.10713	-0.069824	95.0968	-5.16999999999999	1269.436	-1.5156	0.83789	0.25391	68.702	-69.284	1605.798	-3.4531	1.6152	1.0601	78.5767	3.532	91.4146	-0.44629	0.41602	0.15039
1.32	40.99	15.3877	43.11	0.046875	-0.10693	-0.081836	70.637	-4.994	1269.28478	-1.584	0.85547	0.28027	63.392	18.4131	1591.5848	-3.5977	1.6523	1.1255	15.798	10.79	138.533	-0.47998	0.44092	0.15332
1.322	21.428	-1.61953	45.1088	0.057031	-0.10342	-0.095117	70	1.133	1290.793	-1.7554	0.9165	0.35059	56.738	-8.8739	1594.91382	-3.6401	1.6587	1.1445	-19.826	53.1416	194.8144	-0.54248	0.49268	0.15869
1.324	16.827	-15.1693	43.2668	0.062109	-0.10029	-0.10528	42.696	11.201	1268.2134	-1.9177	0.96216	0.42066	12.243	63.399	1574.601	-3.668	1.6641	1.1567	1.306	37.2991	284.645	-0.59937	0.52442	0.15674
1.326	14.098	-14.95	47.9985	0.063477	-0.090332	-0.11523	7.618	-86.8131	1316.984	-2.1011	1.0103	0.5	-17.7017	24.23	1534.138	-3.6465	1.6494	1.1631	-44.084	66.226	357.691	-0.66553	0.54932	0.15039
1.328	16.355	-11.233	51.25883	0.061523	-0.087207	-0.12451	33.702	-69.3519	1364.42367	-2.3472	1.0835	0.61133	-21.474	111.239	1473.211	-3.6069	1.6294	1.1543	-124.735	59.132	480.21	-0.76611	0.57861	0.13135
1.33	-2.563	-15.759	59.1481	0.058984	-0.079199	-0.13262	28.609	-98.829	1383.8828	-2.4683	1.1157	0.66211	1.628	74.681	1464.709	-3.5229	1.5962	1.1445	-144.029	76.066	622.33	-0.82666	0.59863	0.12207
1.332	-4.96	-22.93	66.1929	0.050781	-0.066699	-0.13613	50.151	-141.632	1446.874	-2.6812	1.186	0.75098	-38.7921	106.6544	1470.264	-3.4683	1.5688	1.123	-159.176	108.297	738.878	-0.94531	0.63281	0.094727
1.334	1.627	-19.861	90.2143	0.036035	-0.052441	-0.14375	84.5395	-90.464	1427.545	-2.7964	1.2232	0.79248	-36.149	36.318	1500.8363	-3.3374	1.5073	1.082	-210.213	76.742	886.5239	-1.0389	0.6604	0.081054
1.336	19.387	-14.397	138.6977	0.011719	-0.038574	-0.13965	110.6462	-143.715	1412.759	-2.8887	1.2471	0.8208	-31.526	68.3992	1496.237	-3.2088	1.4583	1.0422	-183.663	49.4208	1017.6923	-1.1343	0.68604	0.073242
1.338	1.04	-3.1515	192.2349	-0.013575	-0.025586	-0.14121	136.1442	-132.532	1447.092	-2.939	1.2446	0.8125	-52.171	31.4226	1498.533	-3.0762	1.4082	0.99658	-164.817	-33.7251	1117.865	-1.2832	0.72656	0.071289
1.34	5.924	5.819	223.5877	-0.045801	-0.0064453	-0.13731	114.4564	-77.9	1440.668	-2.9429	1.2231	0.79688	-92.932	83.703	1503.175	-2.8945	1.3477	0.92627	-171.921	-95.231	1201.051	-1.3438	0.73438	0.095215
1.342	33.336	12.5891	250.989	-0.081347	0.0091793	-0.13536	99.414	-113.6549	1472.5023	-2.8828	1.1563	0.74365	-65.868	45.8021	1502.55	-2.8062	1.3159	0.89844	-115.955	-143.939	1274.162	-1.4692	0.73584	0.15967
1.344	42.182	21.817	312.8345	-0.12051	0.030371	-0.13027	103.4911	-65.3513	1488.814	-2.8093	1.0793	0.6897	-89.521	101.941	1486.0577	-2.627	1.2422	0.83057	-75.433	-223.73	1333.505	-1.5581	0.73291	0.23999
1.346	34.84	13.9852	370.21439	-0.16797	0.051758	-0.125	64.184	-43.6968	1454.766	-2.7183	1.0083	0.65039	-77.917	80.628	1473.128	-2.5074	1.1968	0.78516	-18.6428	-265.0661	1313.421	-1.6323	0.71533	0.3252
1.348	65.02	2.865	401.39	-0.22158	0.075781	-0.11416	63.613	-48.479	1449.161	-2.6089	0.9165	0.60938	-67.848	124.826	1443.505	-2.3848	1.1406	0.73193	64.939	-307.814	1244.513	-1.7183	0.68506	0.42822
1.35	71.317	-22.719	442.7625	-0.28574	0.10361	-0.10498	84.487	56.249	1406.028	-2.5679	0.88232	0.5918	-88.726	101.7111	1408.434	-2.2222	1.0747	0.67188	140.923	-289.062	1169.142	-1.7456	0.68213	0.46484
1.352	54.298	-27.025	487.4024	-0.35449	0.13252	-0.09209	80.931	45.6451	1393.795	-2.5176	0.83301	0.5708	-75.621	159.168	1389.902	-2.144	1.0356	0.64648	174.489	-267.491	1131.391	-1.7539	0.66895	0.51807
1.354	40.6475	-52.0285	534.8443	-0.44395	0.16592	-0.079492	82.974	54.3126	1410.7732	-2.4978	0.81079	0.56469	-42.398	157.771	1347.9803	-1.9785	0.97266	0.59131	177.4063	-264.35	1085.32	-1.7329	0.65381	0.52783
1.356	29.661	-48.007	564.5039	-0.53516	0.20557	-0.052734	84.602	89.443	1397.4742	-2.4819	0.79932	0.5625	-46.676	216.575	1318.0479	-1.8674	0.92163	0.5542	193.282	-220.3	1019.0524	-1.7261	0.64893	0.5293
1.358	33.051	-24.758	585.781	-0.6418	0.24414	-0.021777	87.156	-0.996000000000002	1421.784	-2.4648	0.7998	0.55518	-15.8099	217.687	1292.393	-1.7617	0.86719	0.52588	168.6185	-170.684	1002.873	-1.7656	0.71875	0.52393
1.36	-4.066	-8.3466	626.959	-0.75781	0.28916	0.020117	117.9523	30.843	1460.0483	-2.4648	0.79883	0.55127	7.07	240.177	1268.0275	-1.627	0.78711	0.49854	146.403	-97.319	1029.014	-1.7866	0.77588	0.5166
1.362	-0.627000000000001	-6.135	661.0495	-0.87891	0.33486	0.074805	101.53915	19.32253	1442.191	-2.4512	0.79883	0.54541	7.631	231.748	1261.8231	-1.5679	0.75049	0.48828	151.879	-13.753	1062.331	-1.834	0.88867	0.50635
1.364	1.218	-3.694	694.629	-1.006	0.38096	0.13311	76.739	-19.5589	1443.897	-2.4383	0.7893	0.53247	36.46334	241.043	1240.065	-1.4648	0.66602	0.47021	140.726	25.831	1084.169	-1.8801	0.97388	0.49878
1.366	4.867	-10.5254	701.493	-1.1343	0.42676	0.19434	81.204	59.841	1431.3573	-2.4199	0.77051	0.51611	43.617	231.644	1212.826	-1.3884	0.60767	0.46264	141.499	51.02	1081.446	-1.9233	1.0552	0.50586
1.368	-1.112	-34.8686	725.781	-1.2609	0.46719	0.2625	56.504	7.7775	1421.2709	-2.3813	0.74756	0.49609	51.5828	217.381	1215.2	-1.3159	0.54639	0.45654	137.105	5.93000000000001	1138.917	-1.9683	1.1245	0.49805
1.37	-21.689	-49.0355	733.66	-1.3703	0.50508	0.32285	64.836	-0.156000000000002	1454.804	-2.3589	0.7251	0.48047	72.014	185.3121	1155.574	-1.2324	0.47217	0.45264	101.424	-27.09	1191.4	-1.9902	1.1563	0.48682
1.372	-17.5665	-46.488	731.214	-1.464	0.53554	0.37597	52.894	54.3831	1434.11	-2.3086	0.69141	0.46582	70.4298	158.034	1128.838	-1.1914	0.43115	0.43848	118.439	-78.069	1256.8499	-2.0425	1.229	0.45313
1.374	-4.756	-48.647	719.5723	-1.5508	0.55703	0.41338	46.423	2.439	1421.18	-2.2549	0.6665	0.44727	63.9202	137.461	1064.6112	-1.1147	0.37158	0.44385	107.405	-148.453	1322.219	-2.0655	1.2754	0.4248
1.376	12.345	-76.7337	713.78	-1.6133	0.57617	0.43896	61.523	63.641	1383.8396	-2.1934	0.64258	0.43018	65.1464	121.523	1021.5799	-1.0491	0.32227	0.44287	51.9689	-237.6	1333.287	-2.0586	1.3262	0.40723
1.378	4.904	-85.9142	716.332	-1.6395	0.58467	0.45137	44.811	97.43	1320.738	-2.0996	0.61719	0.4043	60.6531	125.959	965.2395	-0.99023	0.28027	0.44678	-38.193	-321.327	1353.128	-2.0332	1.3672	0.41064
1.38	-15.552	-86.404	738.0524	-1.6522	0.59502	0.44922	41.884	86.3513	1299.31	-2.0449	0.60742	0.39258	36.313	118.883	930.616	-0.91016	0.229	0.44385	-108.019	-349.8	1386.44	-2.0098	1.377	0.42432
1.382	-39.6669	-92.995	779.7452	-1.6378	0.60166	0.43906	92.354	178.217	1268.254	-1.9448	0.59619	0.36914	41.191	163.1252	859.9425	-0.86768	0.20605	0.44336	-163.076	-329.893	1411.382	-1.9546	1.3813	0.4707
1.384	-81.421	-91.014	823.72354	-1.6283	0.59278	0.42393	78.002	139.593	1257.821	-1.8689	0.58667	0.35547	64.1652	159.1893	845.884	-0.7832	0.15527	0.43262	-213.89	-315.926	1430.638	-1.9196	1.3616	0.50342
1.386	-86.055	-91.651	859.3195	-1.6157	0.58447	0.40381	66.741	128.516	1291.44308	-1.8003	0.5791	0.3418	40.479	193.153	780.529	-0.71973	0.12256	0.41992	-180.578	-271.504	1457.939	-1.8828	1.3398	0.52686
1.388	-51.5564	-87.1817	865.7732	-1.5872	0.56387	0.37744	89.056	176.226	1266.99738	-1.7163	0.57178	0.31836	37.481	187.2476	737.304	-0.65771	0.085938	0.40283	-188.629	-220.386	1479.551	-1.8413	1.3188	0.53516
1.39	-44.4768	-95.6467	888.59127	-1.5297	0.54336	0.3373	65.5381	111.549	1262.62849	-1.6797	0.57227	0.31104	15.713	246.312	674.129	-0.56201	0.036621	0.37793	-186.546	-142.314	1457.929	-1.8223	1.3145	0.53467
1.392	-35.399	-104.674	911.058434	-1.4625	0.53321	0.28848	76.355	158.313	1249.6595	-1.6113	0.5791	0.29541	21.012	226.6365	630.603	-0.51758	0.015137	0.36279	-160.738	-83.728	1461.608	-1.8262	1.334	0.54248
1.394	5.001	-92.0994	920.9792	-1.4169	0.53135	0.24355	56.57	145.127	1192.278	-1.5718	0.58545	0.28906	15.258	261.267	571.216	-0.42139	-0.033203	0.32666	-155.681	-28.288	1452.33	-1.8721	1.3623	0.56763
1.396	17.988	-95.073	954.4239	-1.3984	0.54639	0.21729	30.634	86.596	1169.3793	-1.5386	0.59424	0.28271	-3.709	201.4217	530.395	-0.3457	-0.072022	0.30225	-118.386	20.177	1474.718	-1.9727	1.4014	0.60791
1.398	25.773	-107.808	987.30548	-1.4144	0.56611	0.21338	63.904	137.833	1132.129	-1.502	0.60938	0.27246	-6.434	233.786	472.875	-0.27588	-0.10742	0.27344	-104.573	34.273	1475.8691	-2.2085	1.4595	0.6748
1.4	46.8532	-144.8443	1013.7417	-1.4495	0.59404	0.225	28.599	85.532	1111.726	-1.4883	0.61279	0.27051	-5.065	171.09915	447.163	-0.18066	-0.15186	0.229	-90.983	31.6561	1450.612	-2.353	1.4888	0.72656
1.402	72.11	-144.0298	1028.73766	-1.4804	0.63037	0.2375	36.524	80.186	1135.207	-1.4492	0.61621	0.26416	-1.409	206.898	423.778	-0.13574	-0.17529	0.20752	-44.478	9.194	1490.011	-2.6929	1.5688	0.84131
1.404	81.365	-127.7466	1019.034	-1.4783	0.66113	0.23818	43.336	130.453	1080.903	-1.4194	0.6206	0.2561	-1.283	148.8698	395.081	-0.056641	-0.2207	0.16504	-52.94	-55.975	1514.315	-2.9458	1.6352	0.92187
1.406	49.224	-108.7466	1058.08	-1.4414	0.68262	0.22168	44.783	75.7727	1049.9869	-1.3823	0.61963	0.24805	27.592	175.564	370.58	0.006836	-0.25171	0.13232	-37.2231	-81.028	1526.842	-3.1895	1.6992	1.0083
1.408	57.1535	-91.41009	1097.6702	-1.3816	0.69649	0.18828	73.94	145.368	1000.5239	-1.3257	0.604	0.24219	39.844	123.312	329.202	0.05957	-0.27783	0.10742	-3.15	-113.583	1564.4428	-3.4565	1.7603	1.0879
1.41	60.072	-82.2796	1128.2958	-1.318	0.70234	0.14707	44.967	169.06	934.871	-1.3022	0.59229	0.2373	40.772	175.821	318.797	0.12402	-0.31299	0.074219	68.9	-109.259	1593.647	-3.6108	1.7759	1.1147
1.412	55.9228	-76.1709	1133.5068	-1.2574	0.7082	0.11348	51.602	144.7409	921.1468	-1.2407	0.57275	0.23193	46.7247	131.837	309.09794	0.15625	-0.3335	0.051758	128.909	-113.687	1603.435	-3.709	1.7695	1.1274
1.414	50.1349	-79.142	1163.0037	-1.2141	0.71602	0.091504	42.538	208.493	887.463	-1.1812	0.55713	0.2207	55.238	175.156	308.611	0.20459	-0.35986	0.0097656	139.836	-135.758	1587.775	-3.7319	1.7271	1.0957
1.416	70.0124	-70.022	1187.21	-1.1909	0.71729	0.071289	18.707	166.3128	852.7239	-1.1426	0.5459	0.21826	59.3394	134.566	290.482	0.23169	-0.38183	-0.014893	184.377	-108.823	1564.9843	-3.6836	1.6914	1.0591
1.418	104.517	-59.6547	1188.749	-1.1712	0.71738	0.076758	14.202	156.7015	836.752	-1.0625	0.52832	0.20068	76.4215	191.6	238.545	0.25342	-0.39795	-0.037598	172.58	-55.101	1581.7386	-3.5176	1.6172	0.98486
1.42	56.734	-60.352	1189.9278	-1.1761	0.72695	0.086817	-10.045	200.936	780.668	-1.0029	0.51025	0.19433	79.3283	152.011	206.7254	0.27393	-0.42334	-0.069336	121.099	28.8934	1570.7643	-3.3396	1.5627	0.90356
1.422	65.734	-80.483	1193.931	-1.1996	0.74727	0.096582	-20.28	139.344	764.72116	-0.9375	0.48633	0.17822	62.644	183.456	174.5074	0.27881	-0.42822	-0.083008	95.5	94.097	1539.326	-3.1479	1.4976	0.83203
1.424	50.979	-100.137	1201.1723	-1.2263	0.77217	0.11777	-17.277	177.143	723.3683	-0.84912	0.45654	0.16016	59.3939	118.6754	135.605	0.27197	-0.44482	-0.10986	69.337	110.876	1523.59913	-2.9136	1.4146	0.76123
1.426	52.35	-104.152	1219.05108	-1.2559	0.79883	0.14258	-15.484	166.10736	672.204	-0.80469	0.43359	0.15186	59.26	156.48	115.604	0.26587	-0.44824	-0.1272	36.1931	146.241	1504.1425	-2.814	1.3716	0.73145
1.428	20.091	-88.946	1252.1052	-1.2888	0.83115	0.17109	-19.501	95.286	677.3366	-0.71631	0.3999	0.13574	57.35264	92.2878	109.36927	0.25635	-0.44092	-0.14258	-2.121	172.286	1459.9716	-2.6421	1.2847	0.69922
1.43	2.173	-71.8123	1268.5062	-1.3277	0.85693	0.19687	7.771	145.326	635.7951	-0.65258	0.36987	0.12378	53.5153	107.93	83.4361	0.23633	-0.42529	-0.15576	-36.207	224.829	1440.5894	-2.5444	1.2133	0.69532
1.432	11.633	-55.0376	1280.4584	-1.3749	0.87998	0.21172	5.412	98.5207	630.969	-0.59766	0.34082	0.1167	50.2908	58.3919	87.073	0.21533	-0.41504	-0.1626	-91.38	233.508	1424.846	-2.4609	1.1445	0.70166
1.434	-5.058	-43.8047	1263.9322	-1.4304	0.90615	0.23994	12.211	113.1355	617.345	-0.52148	0.30371	0.099121	44.9407	78.985	64.503	0.16943	-0.39404	-0.16113	-126.938	172.055	1406.154	-2.3569	1.062	0.69092
1.436	-13.632	-53.128	1278.9039	-1.4961	0.93555	0.271	9.13	180.247	573.634	-0.48633	0.28809	0.084473	25.624	34.5009	60.3802	0.12036	-0.37011	-0.1543	-115.762	120.3041	1413.2074	-2.2983	1.02	0.68848
1.438	-7.901	-64.627	1303.453	-1.5925	0.96739	0.31133	-12.233	127.9167	548.2869	-0.41455	0.25293	0.072754	17.986	41.9154	81.207	0.05957	-0.35254	-0.14014	-135.714	96.0674	1401.55	-2.168	0.92578	0.67041
1.44	28.063	-61.5413	1318.397	-1.7039	1.0059	0.35869	6.054	179.243	511.1591	-0.36499	0.22436	0.058349	-14.4	-17.4204	78.292	-0.032715	-0.31836	-0.12207	-139.473	91.0759	1430.03	-2.0617	0.85767	0.64282
1.442	49.949	-54.768	1308.557	-1.8425	1.0375	0.41377	-17.5885	164.096	475.219	-0.32324	0.19824	0.049805	-4.372	0.8911	58.036	-0.08252	-0.30322	-0.11084	-161.895	89.238	1439.668	-1.9473	0.78516	0.60596
1.444	36.866	-51.8	1320.6318	-1.9934	1.0813	0.4915	-19.148	131.182	451.439	-0.26514	0.15674	0.021973	-11.044	-32.998	34.987	-0.17773	-0.26563	-0.090332	-189.369	59.023	1397.89346	-1.7891	0.68359	0.5708
1.446	60.193	-60.484	1326.5041	-2.1538	1.1235	0.56348	3.475	194.281	399.9343	-0.23828	0.14111	0.022949	-34.9901	-17.10459	-6.305	-0.26367	-0.22607	-0.070313	-149.262	85.0198	1361.2749	-1.7012	0.63965	0.55322
1.448	89.125	-47.189	1322.348	-2.3152	1.1648	0.62637	10.783	149.1537	381.649	-0.19385	0.10156	0.01709	-38.1242	-31.7907	3.366	-0.31689	-0.20947	-0.057129	-141.083	88.372	1348.739	-1.5391	0.57227	0.53271
1.45	105.1595	-37.928	1316.672	-2.4672	1.2012	0.6794	17.736	157.456	360.2254	-0.16895	0.075439	0.0078127	-42.106	-4.165	-2.2974	-0.40576	-0.16602	-0.035156	-111.242	99.769	1337.251	-1.4245	0.53735	0.53003
1.452	79.502	-35.7788	1330.818	-2.5898	1.2262	0.72314	20.886	188.132	303.57	-0.146	0.045898	0.0019531	-32.154	-7.2395	-5.65479	-0.46729	-0.13525	-0.013428	-56.426	119.627	1263.242	-1.3179	0.51221	0.52881
1.454	90.3481	-26.96	1345.524	-2.6903	1.2358	0.74395	28.233	132.7031	306.805	-0.12012	0.016113	-0.0024414	-37.336	3.72674	0.0156000000000001	-0.52588	-0.11084	0.0048828	-18.751	149.478	1191.37	-1.1963	0.4834	0.52588
1.456	108.3976	-29.7114	1352.88	-2.7612	1.2231	0.74805	28.696	171.693	303.693	-0.11182	0.0053711	-0.0063477	-11.228	3.5014	6.212	-0.60107	-0.074707	0.032227	10.685	214.462	1127.689	-1.1348	0.47266	0.53174
1.458	102.0726	-33.744	1343.814	-2.7723	1.1908	0.73711	36.74681	142.607	292.639	-0.092285	-0.019531	-0.0083008	-17.486	1.2297	7.276	-0.63379	-0.057129	0.04834	40.389	261.752	1081.144	-1.0288	0.44971	0.54883
1.46	101.1411	-36.521	1356.0979	-2.7413	1.1485	0.71465	19.42	103.73467	285.144	-0.081299	-0.040772	-0.0063476	4.297	24.069	-15.411	-0.69092	-0.025391	0.078613	95.4457	293.631	1039.301	-0.94482	0.4353	0.55689
1.462	107.4983	-21.746	1343.8762	-2.6663	1.1142	0.68028	3.719	149.119	254.4694	-0.07666	-0.058105	-0.0078125	4.743	20.5552	-36.5311	-0.71704	-0.0024414	0.10376	127.199	304.599	972.434	-0.86084	0.41455	0.55469
1.464	138.7164	-5.6512	1333.2382	-2.5741	1.0853	0.62969	11.245	99.468	234.3039	-0.070313	-0.074707	-0.0019531	21.55	36.4736	-30.774	-0.73242	0.01709	0.12305	148.213	270.338	964.531	-0.7417	0.38428	0.5332
1.466	115.285	11.71549	1319.948	-2.4727	1.0566	0.58936	12.908	102.934	239.189	-0.06543	-0.082031	0.0053711	30.564	15.4409	-4.2143	-0.71826	0.028809	0.13672	186.071	286.389	934.4899	-0.67725	0.36865	0.52051
1.468	123.201	12.486	1333.317	-2.3929	1.0212	0.54805	-3.277	120.416	205.8217	-0.073242	-0.091309	0.02002	30.8581	24.7983	-17.4633	-0.70117	0.037598	0.13916	191.326	270.077	896.6015	-0.53662	0.31299	0.47461
1.47	113.4915	-0.337999999999999	1341.1683	-2.3183	0.98877	0.51758	2.674	69.673	190.661	-0.06543	-0.10034	0.027832	36.3208	11.5139	2.054	-0.6377	0.030273	0.13428	216.576	269.274	860.073	-0.42554	0.27051	0.43872
1.472	133.3869	-10.6893	1311.586	-2.2636	0.96689	0.49688	15.943	111.3915	176.3476	-0.062988	-0.10205	0.041504	47.4874	30.0631	4.4967	-0.5708	0.02124	0.12524	226.255	245.3811	800.4131	-0.30859	0.21777	0.396
1.474	78.791	-12.1476	1315.8029	-2.2322	0.95683	0.4792	-11.459	86.3845	159.7652	-0.05957	-0.10352	0.054688	37.7035	1.7996	39.149	-0.49219	0.0014648	0.10547	199.07	202.45	775.1373	-0.15723	0.146	0.32959
1.476	65.119	12.8927	1308.351	-2.2148	0.94336	0.46631	-10.161	60.1114	152.2098	-0.054688	-0.1001	0.062988	43.531	29.777	15.99638	-0.38232	-0.035645	0.074219	168.244	202.302	741.985	-0.083008	0.10107	0.29395
1.478	60.727	28.8856	1296.2162	-2.1927	0.93135	0.45645	4.628	111.277	111.4922	-0.052734	-0.10156	0.073242	78.7601	4.8456	-1.6073	-0.3374	-0.061035	0.065918	145.23	193.405	709.002	0.053223	0.018066	0.21973
1.48	27.046	42.0633	1272.8027	-2.1675	0.9083	0.44248	-7.95	78.771	84.016	-0.040039	-0.094727	0.081787	69.115	47.006	2.807	-0.23145	-0.10693	0.046875	91.872	185.564	677.754	0.14649	-0.044434	0.16479
1.482	23.926	42.40416	1253.106	-2.1393	0.8833	0.4331	10.576	85.72	86.435	-0.030762	-0.09082	0.087402	52.53677	-7.8969	33.7385	-0.1543	-0.14331	0.028077	59.667	175.1963	632.586	0.23535	-0.10791	0.10693
1.484	-0.0730000000000075	34.9316	1255.412	-2.105	0.86357	0.41641	12.407	92.617	68.472	-0.012695	-0.085938	0.086914	18.546	36.3964	15.1416	-0.087891	-0.17139	0.0073242	34.528	154.88712	564.206	0.33154	-0.18457	0.027344
1.486	19.676	32.7248	1261.5226	-2.0659	0.84424	0.40283	11.589	49.7793	80.2235	-0.0039063	-0.07959	0.088379	25.406	5.4936	41.482	-0.020996	-0.1875	-0.022949	16.656	201.415	480.71526	0.37549	-0.21631	-0.0097656
1.488	27.974	36.708	1254.2528	-2.0299	0.82832	0.38974	4.926	83.0264	66.2796	0.013672	-0.070801	0.087891	30.544	63.452	11.5204	0.02002	-0.20459	-0.029297	-8.145	223.628	430.57644	0.44678	-0.2749	-0.083984
1.49	35.605	35.09	1258.186	-1.9894	0.80781	0.3792	-4.638	56.2333	38.4666	0.032471	-0.06836	0.08545	20.5418	13.2177	27.684	0.10156	-0.23438	-0.030762	-16.694	240.94	400.707	0.48926	-0.3125	-0.13062
1.492	40.216	39.79	1240.551	-1.9492	0.79727	0.37178	13.488	21.198	51.3046	0.048828	-0.066895	0.090332	-10.12	45.522	26.355	0.14086	-0.24975	-0.037109	-49.291	220.584	353.562	0.53271	-0.34619	-0.18066
1.494	45.002	43.6748	1205.1602	-1.9148	0.78692	0.36357	11.593	33.0233	20.7089	0.07666	-0.068848	0.083008	-11.02	-3.141	24.4873	0.17578	-0.26416	-0.046875	-88.4221	181.163	310.666	0.57324	-0.3877	-0.24365
1.496	59.11	59.1601	1177.1584	-1.875	0.7832	0.35498	18.643	-14.8066	25.771	0.090332	-0.073242	0.078125	-27.209	50.194	5.0481	0.21973	-0.27539	-0.044434	-55.876	175.705	254.5026	0.5835	-0.40381	-0.27344
1.498	25.491	74.7851	1157.191	-1.8254	0.78008	0.34522	10.829	-9.7381	31.0258	0.11816	-0.078125	0.065918	-30.4661	-18.8238	20.5221	0.23535	-0.28223	-0.046875	-68.8221	156.5228	217.8785	0.60596	-0.43018	-0.31934
1.5	33.764	91.6998	1151.5757	-1.7734	0.77578	0.33291	24.02	11.3763	10.15153	0.14209	-0.084961	0.057129	-32.69	23.643	22.6106	0.26221	-0.28076	-0.045898	-104.3739	152.3245	161.841	0.61841	-0.45605	-0.35205
1.502	50.911	90.26621	1131.1212	-1.723	0.76446	0.32315	40.735	-27.6549	29.1133	0.16748	-0.095703	0.04541	-19.192	-43.762	37.812	0.28174	-0.27392	-0.044434	-80.879	153.21	113.614	0.61523	-0.48633	-0.37842
1.504	59.663	86.4085	1109.2326	-1.6731	0.75889	0.31387	29.268	7.7232	20.7545	0.19385	-0.10938	0.024902	-37.641	-0.388999999999999	29.619	0.30566	-0.27441	-0.05127	-49.724	115.4373	98.148	0.58691	-0.50732	-0.40723
1.506	52.306	78.7354	1116.005	-1.6304	0.75049	0.30566	32.967	-1.3193	13.1115	0.20068	-0.10889	0.020996	4.794	-48.486	14.5609	0.33838	-0.28271	-0.070801	-20.315	103.2184	106.147	0.55762	-0.50684	-0.41943
1.508	77.3341	89.4648	1095.085	-1.592	0.7459	0.30322	40.168	-17.4195	24.7297	0.22461	-0.12158	0.00097656	-29.508	-4.3639	41.402	0.354	-0.28271	-0.085938	7.799	60.5016	139.9575	0.49072	-0.48975	-0.43359
1.51	108.788	93.5999	1063.9955	-1.5543	0.7375	0.29268	42.2698	22.7264	9.8826	0.23951	-0.1333	-0.014161	-29.4304	-46.777	14.523	0.3667	-0.2832	-0.10986	39.1186	44.7318	134.03	0.42187	-0.47217	-0.43701
1.512	96.282	103.169	1027.838	-1.5219	0.72304	0.28994	22.519	-12.79291	14.0071	0.24756	-0.13916	-0.027344	1.313	-8.7362	8.903	0.36719	-0.2727	-0.12573	78.9834	45.003	92.539	0.34375	-0.44678	-0.42578
1.514	97.2635	103.014	1016.989	-1.4861	0.71758	0.28642	8.376	9.0864	14.58539	0.24463	-0.15381	-0.036621	6.29	-18.3402	-22.7162	0.35889	-0.26221	-0.13916	112.4565	38.2522	89.678	0.23193	-0.41943	-0.39355
1.516	88.3335	103.2218	986.401	-1.457	0.70508	0.28027	7.877	31.8767	-30.693	0.2417	-0.15723	-0.041016	4.933	26.68376	-14.9121	0.33594	-0.25391	-0.15137	147.822	49.9972	70.3941	0.16553	-0.4082	-0.37842
1.518	111.6527	94.9202	968.6353	-1.4225	0.69551	0.27685	19.094	15.6246	-15.2043	0.22998	-0.1665	-0.040527	28.605	-5.613	-5.5111	0.31689	-0.23975	-0.1543	123.975	32.6483	30.158	0.0024414	-0.38916	-0.33838
1.52	67.768	94.363	953.48513	-1.3933	0.6877	0.27305	13.68	51.904	-7.7948	0.21191	-0.17481	-0.045166	18.819	18.6369	4.8533	0.27686	-0.22314	-0.16211	133.179	22.9659	12.445	-0.13647	-0.36548	-0.29468
1.522	53.3941	95.035	936.6536	-1.3625	0.68574	0.26718	1.749	26.192	-6.3221	0.1875	-0.17676	-0.041016	27.115	6.3812	-7.763	0.2417	-0.20361	-0.15625	153.374	32.9864	-9.003	-0.2876	-0.33789	-0.24365
1.524	52.6539	89.5855	921.069	-1.3301	0.67773	0.26006	25.151	8.9158	19.8551	0.14844	-0.18359	-0.024902	77.5878	35.9731	3.332	0.20508	-0.18945	-0.15771	108.368	37.3744	-0.734999999999999	-0.51465	-0.2959	-0.16504
1.526	23.544	96.1049	893.28	-1.2983	0.67432	0.25488	21.175	27.36367	6.2263	0.12842	-0.18018	-0.013672	72.134	2.4739	0.978999999999999	0.15674	-0.1665	-0.15771	124.866	79.361	18.351525	-0.63477	-0.27393	-0.12207
1.528	15.65	104.0159	881.1905	-1.267	0.65996	0.25381	21.951	-13.7072	23.05427	0.089355	-0.17041	0.0019531	39.3785	18.0458	3.188	0.13574	-0.15332	-0.15332	120.059	85.543	-4.6305	-0.84473	-0.23193	-0.038086
1.53	1.861	107.4705	853.0466	-1.2362	0.64346	0.25293	11.006	-12.3878	29.0854	0.063965	-0.1665	0.02002	58.47	18.6939	-31.754	0.087402	-0.12598	-0.15137	80.81174	65.421	-5.2265	-1.0332	-0.20313	0.032715
1.532	21.218	105.4697	826.3814	-1.2081	0.63018	0.24785	0.259999999999998	17.3081	2.2076	0.037598	-0.16162	0.030273	45.5756	26.6947	-38.5967	0.049561	-0.10303	-0.1416	79.7005	48.572	12.56445	-1.1113	-0.18457	0.063965
1.534	-1.347	114.295	791.7091	-1.1782	0.61611	0.24453	-0.271000000000001	0.4208	-2.823	0.015625	-0.1499	0.051758	35.686	22.8915	-13.977	0.01416	-0.080078	-0.13086	33.5094	23.8564	49.0414	-1.25	-0.12939	0.13037
1.536	-3.7	112.52	776.2453	-1.1382	0.60791	0.23779	-4.135	35.008	-11.9776	0.00097655	-0.14087	0.063721	31.719	13.4387	-5.4417	-0.03418	-0.057129	-0.1123	19.2624	44.7888	57.4577	-1.3337	-0.0874	0.17017
1.538	-20.339	105.041	759.245	-1.1027	0.58906	0.229	-15.07	16.3236	4.2806	-0.0083008	-0.13623	0.075195	26.125	19.0771	-1.6004	-0.054688	-0.048828	-0.104	-6.724	20.508	67.522	-1.3979	-0.041992	0.21436
1.54	1.458	98.183	731.352	-1.0628	0.56924	0.21884	-10.062	-1.76913	28.7423	-0.014648	-0.13086	0.090332	21.165	19.4116	21.2596	-0.097168	-0.031738	-0.091309	-32.104	-15.3294	44.5282	-1.4668	0.019043	0.27051
1.542	5.091	106.196	705.7158	-1.0179	0.55166	0.20596	22.437	27.1404	28.124	-0.01416	-0.1333	0.091797	18.777	44.257	34.775	-0.11914	-0.025391	-0.079834	-72.178	-40.1383	27.2654	-1.4956	0.053223	0.28125
1.544	-26.484	109.343	693.0358	-0.98183	0.52813	0.19717	15.458	7.702	11.7009	-0.0063477	-0.125	0.10205	-15.824	21.4249	58.681	-0.13672	-0.019531	-0.07373	-95.2974	-71.927	22.8847	-1.5044	0.1001	0.32617
1.546	-17.102	108.98489	646.318	-0.94141	0.50293	0.18799	31.236	32.4737	20.3763	0.0031738	-0.12622	0.10767	-32.64	29.4367	38.2489	-0.15039	-0.0087891	-0.069336	-84.739	-52.215	19.9806	-1.4812	0.12671	0.33691
1.548	-20.842	121.7966	627.7319	-0.90078	0.48868	0.17608	19.58	56.119	1.3739	0.015137	-0.125	0.10791	-20.54	13.8393	16.3507	-0.15723	-0.010742	-0.064453	-119.175	-59.588	24.2491	-1.4253	0.14355	0.32422
1.55	10.528	122.1643	614.3624	-0.86524	0.46953	0.16826	30.156	33.1891	11.47	0.030273	-0.125	0.104	-18.755	47.238	12.7183	-0.1543	-0.0068359	-0.0625	-88.334	-56.15	32.24	-1.2808	0.15771	0.28125
1.552	5.013	110.0303	616.876	-0.83164	0.44766	0.15888	41.446	57.51	0.707999999999998	0.03418	-0.12109	0.09668	-9.245	2.426	36.379	-0.14917	-0.0041504	-0.065674	-82.26475	-32.7159	15.0447	-1.1753	0.15576	0.25342
1.554	12.716	105.3815	584.2846	-0.79824	0.43007	0.15088	15.259	19.201178	-1.1154	0.050293	-0.11719	0.095703	-23.9854	10.9544	43.3723	-0.14258	-0.0073242	-0.074219	-96.3424	-22.8531	2.982	-0.95459	0.13672	0.17871
1.556	42.5092	96.3155	555.2759	-0.76123	0.41064	0.14844	26.58	-5.014	42.469	0.054688	-0.1084	0.089843	-42.3921	-36.8102	62.285	-0.13477	-0.012695	-0.087891	-40.2288	19.8651	-2.932	-0.78394	0.10547	0.12134
1.558	37.97	101.2939	535.2367	-0.729	0.3917	0.13994	23.736	24.2831	25.586	0.059082	-0.10107	0.089844	-36.471	-22.627	63.6459	-0.13135	-0.016113	-0.094238	-20.292	34.1768	0.564	-0.61475	0.057129	0.070313
1.56	45.529	103.1333	523.0129	-0.69219	0.36836	0.13769	5.365	-9.46889	21.5083	0.060059	-0.086914	0.085938	-17.891	-58.9761	118.347	-0.14111	-0.0087891	-0.10156	-12.043	47.9109	13.1349	-0.39941	-0.02002	0.010742
1.562	54.551	108.9962	489.3497	-0.65859	0.35312	0.12676	17.638	2.7709	23.57236	0.060547	-0.083008	0.090332	-16.093	-28.058	151.779	-0.16162	-0.0046387	-0.104	17.848	59.6962	2.4812	-0.30273	-0.063477	-0.019043
1.564	84.962	116.779	454.034	-0.6208	0.33496	0.11905	9.844	13.32173	3.4494	0.061523	-0.078613	0.084961	-1.072	-68.493	188.8402	-0.19238	0.00048828	-0.096191	56.49606	36.5579	-6.312	-0.13232	-0.1499	-0.063965
1.566	57.3141	98.91241	450.652	-0.58496	0.3125	0.10742	10.631	-17.8034	26.8096	0.058349	-0.072265	0.082519	11.461	-24.6015	213.342	-0.25391	0.013672	-0.084473	72.178	41.997	-24.268	-0.03125	-0.18604	-0.10498
1.568	50.9722	95.3562	444.72556	-0.54824	0.29638	0.098632	23.223	19.8681	24.456	0.058594	-0.064453	0.081543	15.557	-40.353	283.6896	-0.29395	0.022461	-0.075195	102.2052	22.4922	-23.32	0.060059	-0.21436	-0.13135
1.57	53.658	88.9086	429.6269	-0.51445	0.27891	0.090332	28.164	8.4322	9.7086	0.052734	-0.049316	0.078613	27.946	16.8062	337.198	-0.37158	0.047363	-0.056152	114.4266	23.1263	0.787000000000003	0.19238	-0.23291	-0.18311
1.572	52.571	99.70673	411.9929	-0.47656	0.26055	0.07627	25.478	0.147	39.053	0.053223	-0.042969	0.078125	32.463	-11.785	425.4845	-0.46484	0.072266	-0.041992	90.403	39.639	-7.2304	0.27979	-0.26709	-0.20752
1.574	39.048	101.64005	390.5712	-0.44531	0.23887	0.070019	20.624	30.17951	26.9414	0.049316	-0.027832	0.072266	57.944	44.4917	493.227	-0.51074	0.09375	-0.029297	128.744	20.9428	16.3765	0.39502	-0.33838	-0.25244
1.576	20.098	102.8329	368.36468	-0.41309	0.2168	0.058594	20.732	-10.4715	24.493	0.043457	-0.014648	0.069824	70.6448	5.091	625.3597	-0.63135	0.13623	-0.017578	187.018	24.0421	23.0393	0.42432	-0.34179	-0.26025
1.578	31.089	96.9113	338.4651	-0.38457	0.19707	0.0542	23.082	6.7537	12.011	0.038086	-0.00097656	0.066406	65.523	44.4589	711.187	-0.74243	0.17945	0.0031739	122.481	-10.5223	47.361	0.43652	-0.30322	-0.25293
1.58	25.711	96.129	321.3405	-0.35869	0.17646	0.048535	-4.632	22.538	10.826	0.019531	0.020508	0.0625	76.88486	-45.991	818.0948	-0.86279	0.22217	0.025391	91.3058	-1.674	57.515	0.44971	-0.26123	-0.24512
1.582	7.568	84.642	323.4278	-0.3251	0.16006	0.050489	-8.629	-23.145	39.91	0.0068359	0.033691	0.054199	65.633	-33.891	871.589	-1.0527	0.29004	0.080078	92.8733	36.3844	40.723	0.46289	-0.26465	-0.24512
1.584	-9.568	76.9074	309.2034	-0.30117	0.13535	0.041797	-9.406	8.4964	45.00575	-0.024414	0.06543	0.036133	86.586	-101.871	926.448	-1.1543	0.32471	0.11963	57.2765	37.579	33.347	0.49902	-0.30225	-0.25732
1.586	-0.0629999999999953	70.692	286.8117	-0.26855	0.11475	0.04541	-2.454	-8.994	44.4514	-0.055664	0.094236	0.026856	78.4905	-69.625	941.951	-1.3652	0.40723	0.21631	60.8368	35.3785	46.07081	0.53052	-0.34131	-0.2749
1.588	-6.216	76.642	271.0284	-0.23584	0.098048	0.046875	0.815000000000005	-22.775	83.214	-0.087891	0.12549	0.020508	49.575	-123.972	960.914	-1.5291	0.46949	0.29321	42.819	-2.0883	53.681	0.54834	-0.37451	-0.29688
1.59	-22.725	71.733	268.6854	-0.20625	0.082617	0.053515	-5.748	0.651999999999999	118.343	-0.14648	0.16211	0.027344	4.909	-86.452	943.3803	-1.6792	0.52588	0.37061	-18.883	-3.9204	51.302	0.54883	-0.39941	-0.31689
1.592	-33.816	67.66704	255.6414	-0.17578	0.067773	0.057031	-10.51	-38.967	168.5133	-0.17773	0.18164	0.023926	-14.147	-129.156	933.5066	-1.8564	0.58105	0.43896	-26.113	22.4458	13.5988	0.54199	-0.40576	-0.31201
1.594	-18.466	76.583	232.95177	-0.14239	0.056055	0.058691	13.28	-1.0334	200.148	-0.25391	0.21875	0.042969	-28.469	-103.369	947.149	-1.9219	0.60645	0.45361	-47.00151	4.7618	14.1438	0.49414	-0.39893	-0.30908
1.596	-0.890000000000001	79.412	230.9333	-0.10938	0.038574	0.060547	3.033	29.9922	222.874	-0.31568	0.24585	0.056641	-41.8433	-146.364	941.139	-2.0054	0.6333	0.44727	-94.801	7.9076	6.9322	0.44116	-0.38623	-0.29028
1.598	-32.026	68.3413	233.471	-0.079687	0.026953	0.053711	-24.8183	18.212	290.793	-0.38037	0.27783	0.07373	-47.843	-120.406	937.131	-2.0298	0.65332	0.40405	-96.4231	-11.7132	4.3731	0.36768	-0.36328	-0.25537
1.6	-30.04	65.6282	200.2676	-0.050489	0.011719	0.045898	-29.4179	82.9775	342.222	-0.48047	0.31836	0.086914	-62.787	-132.156	903.645	-1.9878	0.65869	0.34766	-69.7889	-6.025	-11.1242	0.24658	-0.29736	-0.20117
1.602	2.477	76.711	179.64	-0.025489	0.004297	0.037695	-21.9048	82.8586	396.0575	-0.53662	0.34473	0.09375	-102.1225	-91.252	909.657	-1.9058	0.67041	0.25586	-85.507	-21.36	-3.323	0.19287	-0.27637	-0.17285
1.604	21.898	70.372	177.186	9.6993e-05	-0.010742	0.030371	9.648	83.945	457.7146	-0.64697	0.39404	0.11621	-110.025	-51.917	899.111	-1.8472	0.65967	0.19629	-85.288	-45.223	34.735	0.067871	-0.22656	-0.12158
1.606	1.04	53.8919	181.363	0.019043	-0.025879	0.025391	-18.7771	102.327	507.227	-0.73389	0.43775	0.13623	-72.149178	-42.34	927.481	-1.8887	0.66504	0.17383	-58.37595	-38.127	40.1935	-0.024658	-0.18506	-0.076172
1.608	31.51	56.8496	176.2561	0.040235	-0.03125	0.021875	-36.735	48.3648	605.9415	-0.82764	0.48193	0.15918	-41.19802	-55.2	960.385	-1.886	0.71216	0.16235	-78.9434	-29.361	17.563	-0.10547	-0.146	-0.031738
1.61	68.331	65.668	152.4184	0.051856	-0.043555	0.016309	-13.171	28.505	695.139	-0.95264	0.54346	0.19873	-27.983	-99.771	1024.6343	-1.8281	0.71094	0.12988	-34.054	4.331	5.4952	-0.19824	-0.1001	0.01123
1.612	39.112	68.091	139.2047	0.06084	-0.050587	0.013183	19.0685	10.9144	735.95	-1.0215	0.56836	0.22168	-11.709	-102.774	1075.172	-1.7285	0.69434	0.1084	5.562	5.475	1.5092	-0.24316	-0.073242	0.037598
1.614	33.994	66.183	144.9772	0.06709	-0.055372	0.010351	6.866	-54.7247	797.067	-1.144	0.62744	0.29395	1.009	-136.547	1142.416	-1.666	0.66602	0.093262	10.57	-14.1691	4.0441	-0.30273	-0.026367	0.072754
1.616	57.292	63.3414	122.5412	0.069824	-0.056152	0.015625	15.182	-44.274	842.156	-1.2386	0.65992	0.35987	-21.876	-122.755	1180.63	-1.5957	0.63867	0.064941	30.793	3.16971	-17.2171	-0.333	-0.0078125	0.093751
1.618	67.8754	72.327	122.3763	0.067774	-0.061427	0.021971	25.25	-78.65	881.1908	-1.3276	0.68311	0.42139	-9.39	-192.62	1206.67	-1.5837	0.69702	0.066407	51.495	17.1265	-16.1412	-0.354	0.0048828	0.10449
1.62	35.3861	47.194	127.5757	0.069436	-0.055664	0.03115	41.164	-108.536	915.378	-1.4546	0.70361	0.52344	-47.1659	-202.438	1208.9915	-1.5625	0.79297	0.091797	70.3185	52.07	4.65	-0.37158	-0.0024414	0.12207
1.622	38.1682	39.6611	114.512	0.065137	-0.052151	0.044429	61.09	-99.012	902.949	-1.5171	0.70264	0.56543	-51.7095	-256.909	1235.8899	-1.5444	0.91357	0.15869	100.332	71.435	23.896	-0.37695	-0.0068359	0.12793
1.624	54.8138	30.46	124.851	0.063282	-0.05039	0.051364	56.64	-148.592	899.108	-1.6265	0.68799	0.64551	-27.869	-216.804	1269.7435	-1.5508	0.96582	0.21191	121.889	54.175	23.2826	-0.38428	-0.010742	0.13525
1.626	43.893	46.496	118.993	0.058105	-0.046387	0.062988	54.467	-145.052	911.752	-1.6941	0.6726	0.69263	15.007	-232.053	1327.261	-1.5776	1.0298	0.31006	128.079	68.429	-7.1295	-0.38965	-0.0075684	0.13794
1.628	12.792	40.855	95.8956	0.054491	-0.044629	0.071001	60.459	-123.966	860.523	-1.752	0.65039	0.729	51.918	-182.675	1343.826	-1.5886	1.0535	0.34351	141.252	64.619	4.6261	-0.39795	-0.003418	0.14307
1.63	1.777	40.103	82.8595	0.05566	-0.036224	0.079301	52.703	-144.575	835.762	-1.7852	0.63086	0.75635	88.362	-204.431	1342.077	-1.5684	1.0664	0.3501	130.859	70.597	38.261	-0.39014	0.0073242	0.15283
1.632	51.35577	50.168	59.987	0.054102	-0.032324	0.077725	44.303	-100.047	817.1059	-1.7905	0.62646	0.76074	124.103	-140.045	1338.469	-1.4941	1.0654	0.30029	106.358	54.409	50.194	-0.38818	0.013672	0.15527
1.634	12.297	51.481	70.599519	0.051562	-0.028705	0.083702	17.958	-79.6258	799.362	-1.7773	0.62598	0.76221	136.957	-143.934	1332.042	-1.4395	1.0625	0.25635	71.0116	9.4496	31.0905	-0.35205	0.019043	0.15527
1.636	-17.174	32.5985	84.2185	0.052734	-0.022461	0.08252	40.563	-89.446	848.271	-1.7634	0.63697	0.75903	154.813	-45.653	1337.422	-1.3652	1.041	0.16992	93.8652	-16.5142	8.5914	-0.31738	0.01831	0.14282
1.638	-12.312	27.3196	85.3261	0.052938	-0.018371	0.077161	32.8612	-42.189	841.69	-1.752	0.65625	0.75049	175.45	-45.277	1369.083	-1.3554	1.0044	0.13623	54.886	-25.1639	34.09	-0.28125	0.0073242	0.12793
1.64	-2.519	41.195	73.6509	0.053102	-0.015936	0.070946	18.8863	-63.291	893.719	-1.7402	0.69336	0.74658	148.733	-0.356999999999999	1356.473	-1.4097	0.99463	0.15527	6.997	-6.70593	59.423	-0.23438	0.0029297	0.11328
1.642	-31.56	35.521	64.3527	0.056253	-0.011246	0.059214	33.705	-81.023	957.223	-1.7358	0.71143	0.73779	100.5064	-68.043	1389.79	-1.5737	0.97607	0.19141	7.522	1.88214	57.1512	-0.21777	-0.00097656	0.097168
1.644	-56.2938	33.2517	68.9594	0.058118	-0.011037	0.049263	23.391	-68.629	987.54677	-1.7148	0.74219	0.71729	63.055	-61.4639	1384.465	-1.6797	0.96387	0.23096	-29.7078	-34.757	33.415	-0.17773	0.0058594	0.075195
1.646	-16.309	41.563	57.982	0.055176	-0.010254	0.040039	33.7067	-119.421	1054.6831	-1.6841	0.75635	0.69824	46.537	-105.227	1411.337	-1.9219	0.97852	0.3335	-53.6156	-42.508	30.5098	-0.1499	0.0058594	0.059082
1.648	-12.038	50.466	37.3772	0.048818	-0.014505	0.030667	43.1796	-132.917	1094.8199	-1.6362	0.76611	0.66699	47.678	-48.8031	1434.6019	-2.1352	1.0064	0.40039	-43.875	-46.417	35.6671	-0.12451	0.0097656	0.04248
1.65	-16.928	41.911	21.758	0.040634	-0.016935	0.019865	12.106	-170.08	1097.299	-1.5625	0.77539	0.60986	50.429	-84.177	1462.592	-2.3296	1.0181	0.46484	-59.4863	-12.3577	40.4883	-0.10303	0.024902	0.021484
1.652	-30.3043	17.1528	34.407	0.030149	-0.016661	0.013956	-7.783	-255.082	1160.602	-1.5229	0.78174	0.58203	61.157	-52.8195	1441.481	-2.5444	1.0083	0.52539	-68.3183	8.097	11.9555	-0.097412	0.035645	0.0083006
1.654	10.506	20.2323	42.2677	0.019756	-0.013012	0.0096864	7.825	-230.811	1172.345	-1.459	0.78857	0.52295	96.5596	-111.774	1481.818	-2.644	1.0044	0.54492	-77.1375	-21.5044	32.751	-0.10547	0.048828	0.0024414
1.656	30.421	15.8363	47.0223	0.0063477	-0.0078125	0.0073242	-32.761	-260.079	1197.849	-1.4224	0.7915	0.47266	49.341	-76.124	1464.006	-2.7944	0.98682	0.58203	-76.5097	-16.2834	57.426	-0.146	0.063477	-0.0092773
1.658	-2.605	16.0958	33.477	-0.0045632	6.3514e-05	0.0024414	-51.1035	-268.506	1231.844	-1.4141	0.79297	0.45654	42.412	-92.895	1488.361	-2.8767	0.97778	0.58813	-79.4754	-5.204	104.981	-0.1748	0.081055	-0.0043945
1.66	13.353	19.4777	39.2105	-0.013942	0.0043019	0.0103	-40.6158	-225.129	1215.8184	-1.416	0.79883	0.43311	43.197	-23.597	1483.167	-2.9565	0.97119	0.5918	-35.585	37.7486	175.442	-0.26953	0.11719	0.012207
1.662	53.3548	23.0335	48.786	-0.024244	0.011988	0.010098	-34.2305	-244.01	1249.575	-1.4363	0.80347	0.41578	26.109	-19.414	1495.435	-3.0483	0.94189	0.60547	-13.512	55.717	270.028	-0.37305	0.14844	0.031739
1.664	51.30386	31.323	43.436	-0.029137	0.021137	0.016414	11.026	-176.085	1259.2624	-1.4604	0.80908	0.39844	-2.765	33.345	1494.469	-3.0776	0.92822	0.61035	-1.91	17.9144	418.791	-0.50439	0.18652	0.050293
1.666	21.31	20.2677	26.5044	-0.033203	0.026367	0.019531	16.487	-111.294	1234.6022	-1.4917	0.8208	0.38281	10.295	31.209	1461.3208	-3.146	0.89893	0.60352	42.358	36.453	578.747	-0.7207	0.24609	0.072754
1.668	40.3736	19.2773	28.4711	-0.038086	0.026757	0.024705	4.338	-113.053	1265.39876	-1.5	0.83008	0.36377	-9.235	88.11	1452.893	-3.1785	0.88941	0.61108	74.738	22.214	798.232	-0.83008	0.28125	0.097656
1.67	73.6177	16.4243	23.805	-0.039217	0.033307	0.026496	26.127	-51.248	1265.6384	-1.5405	0.8667	0.3418	1.57	79.6834	1467.08	-3.2085	0.91064	0.61719	129.05	-13.633	992.143	-1.0752	0.35938	0.20068
1.672	44.706	5.5405	32.1158	-0.035748	0.038369	0.029964	-6.693	-68.122	1274.0246	-1.5786	0.90039	0.33081	0.274000000000001	112.489	1448.2555	-3.2144	0.92041	0.60547	206.749	-69.436	1144.496	-1.2959	0.45459	0.3086
1.674	37.124	-1.0207	29.0359	-0.030564	0.04041	0.037344	-7.821	-93.9693	1312.2896	-1.6382	0.93604	0.31738	38.219	102.8869	1428.65324	-3.1938	0.92627	0.60352	231.729	-139.38	1254.747	-1.5054	0.56738	0.44824
1.676	44.8237	3.3595	32.79979	-0.020996	0.040527	0.037109	-0.115	-64.147	1304.8115	-1.7593	0.979	0.31543	64.503	113.649	1421.4	-3.1035	0.92773	0.5708	284.0301	-140.972	1316.968	-1.748	0.73047	0.63428
1.678	74.827	18.2223	22.59807	-0.017381	0.041176	0.041823	-22.6718	-121.035	1330.336	-1.834	0.99414	0.32275	118.6184	80.2854	1431.6897	-2.9976	0.92383	0.53907	340.225	-162.295	1353.839	-1.8706	0.81689	0.7041
1.68	20.467	11.6162	27.63705	-0.010714	0.042148	0.04207	-15.3529	-129.938	1364.2084	-2.0059	1.0391	0.36182	122.6477	63.822	1453.748	-2.8804	0.9165	0.50586	371.095	-158.221	1413.353	-2.0605	0.9668	0.75244
1.682	-2.07	4.2456	22.1038	-0.0096858	0.043222	0.046433	-19.8118	-122.5119	1350.186	-2.1531	1.0603	0.41138	125.559	49.749	1448.62297	-2.7188	0.9043	0.46631	307.921	-217.236	1416.077	-2.1509	1.0513	0.73633
1.684	14.03	9.7617	19.0915	-0.010593	0.043479	0.046472	-24.6248	-180.416	1396.268	-2.312	1.0874	0.47559	128.522	54.98	1450.3371	-2.646	0.8999	0.44531	183.733	-300.67	1412.042	-2.2168	1.1172	0.69092
1.686	22.797	19.1371	13.138	-0.010742	0.046875	0.054199	32.3477	-142.7055	1435.0668	-2.5229	1.1274	0.58008	127.039	69.643	1455.798	-2.4907	0.88135	0.41602	5.17	-324.75	1385.777	-2.2437	1.1548	0.60742
1.688	-8.726	-2.8246	36.3962	-0.010492	0.047647	0.056799	17.5639	-155.379	1443.0592	-2.6343	1.145	0.63867	124.65803	77.719	1466.793	-2.3776	0.86401	0.39746	-134.27	-303.77	1351.081	-2.2402	1.1445	0.56885
1.69	-29.726	-26.88721	50.1445	-0.014734	0.050346	0.063477	30.9699	-176.658	1506.031	-2.8315	1.1821	0.7334	133.6583	91.626	1421.377	-2.2656	0.84473	0.37354	-93.43	-204.602	1387.175	-2.1855	1.1152	0.47705
1.692	5.136	-33.2322	51.8808	-0.016662	0.053651	0.065764	40.708	-90.4431	1486.002	-2.9568	1.2014	0.79615	111.5979	102.824	1389.421	-2.1226	0.82471	0.34961	-64.719	-138.454	1381.499	-2.0898	1.0508	0.41357
1.694	-29.117	-16.8734	52.5658	-0.023153	0.061179	0.062464	-15.6275	-103.5855	1475.027	-3.0605	1.2207	0.85205	65.656	130.689	1316.851	-2.0547	0.81055	0.34229	-41.814	-110.364	1362.396	-1.9644	0.96045	0.34375
1.696	-49.5343	-16.902	66.06	-0.035156	0.066406	0.058105	7.331	-63.572	1485.5968	-3.1523	1.2314	0.9165	66.3601	132.634	1307.69365	-1.918	0.79102	0.32275	-34.226	-110.602	1351.682	-1.7808	0.82861	0.25244
1.698	-29.249	-16.3677	87.95864	-0.04681	0.077378	0.058914	-20.738	-0.982999999999997	1432.411	-3.1758	1.2324	0.93896	60.549	176.55	1266.98933	-1.7988	0.76367	0.29004	-110.0384	-114.31	1346.114	-1.6987	0.78369	0.20508
1.7	5.834	2.1979	90.617	-0.060308	0.086457	0.057851	-57.06154	-26.736	1453.199	-3.1934	1.2197	0.96533	92.4753	176.504	1258.3384	-1.7578	0.75586	0.27979	-192.419	-95.64	1416.817	-1.5664	0.72168	0.13818
1.702	-24.8	19.4964	95.184	-0.080261	0.095443	0.062107	-21.5726	39.5084	1451.933	-3.1814	1.2072	0.97779	87.5656	211.431	1212.017	-1.6519	0.73877	0.25928	-188.444	-87.03	1488.271	-1.4956	0.72217	0.11084
1.704	-48.6619	32.6377	137.2046	-0.10268	0.10215	0.062893	-49.314	44.966	1425.171	-3.1577	1.1929	0.97754	48.484	180.255	1178.028	-1.583	0.71777	0.24414	-121.781	-131.906	1526.615	-1.4512	0.75293	0.10889
1.706	-6.1629	52.28822	196.567	-0.12646	0.11279	0.069336	-36.75	3.08251	1464.833	-3.1206	1.1704	0.98047	6.854	205.097	1125.241	-1.5171	0.69971	0.22461	-67.743	-205.36	1512.0701	-1.438	0.84717	0.1582
1.708	-6.887	88.9159	226.7624	-0.15183	0.12089	0.068359	-17.1247	53.774	1455.175	-3.1035	1.1602	0.97314	3.213	191.983	1112.081	-1.4351	0.67041	0.20068	-22.45	-289.807	1462.0185	-1.4609	0.91211	0.18604
1.71	-1.509	104.2057	270.2906	-0.18189	0.1327	0.072855	-52.6655	12.7379	1456.242	-3.0659	1.1372	0.97266	-20.365	230.837	1072.952	-1.3955	0.65234	0.18604	-74.779	-326.04	1499.498	-1.5098	1.0313	0.23193
1.712	-12.241	102.4829	294.515	-0.2155	0.14443	0.072459	-8.314	16.372	1485.1546	-3.0358	1.1135	0.96606	-7.25	183.5705	1060.9953	-1.3164	0.62402	0.15967	-189.584	-316.081	1559.816	-1.5513	1.0972	0.27222
1.714	-12.645	112.0852	360.1429	-0.25418	0.15966	0.070704	-8.937	37.092	1465.603	-2.998	1.0938	0.96338	-35.876	194.4198	1004.72305	-1.2583	0.60376	0.13599	-255.462	-300.5492	1628.1551	-1.6035	1.1465	0.30859
1.716	18.8846	103.673	395.3227	-0.29639	0.17773	0.071777	-38.5909	-33.251	1509.293	-2.9336	1.0664	0.9458	-54.20572	133.125	984.5324	-1.2026	0.58252	0.11865	-254.57	-289.0078	1679.725	-1.7246	1.1992	0.35986
1.718	8.134	85.527	427.512	-0.34591	0.19795	0.07754	-12.9482	-2.499	1521.89	-2.894	1.0454	0.93164	-77.6366	174.7288	954.714	-1.1367	0.56201	0.10693	-206.967	-288.374	1655.326	-1.8125	1.2246	0.38721
1.72	3.995	41.212	468.695	-0.40226	0.21612	0.083597	-43.174	-4.9534	1502.2132	-2.7949	1.0117	0.90674	-79.911	147.8505	917.177	-1.105	0.55322	0.10693	-58.095	-241.594	1672.819	-2.0112	1.2817	0.47461
1.722	39.6123	13.198	519.8042	-0.47062	0.23877	0.09258	-40.0948	-35.7698	1510.091	-2.6989	0.98608	0.88013	-63.2152	224.057	877.546	-1.0464	0.52979	0.10889	131.5423	-112.621	1645.305	-2.197	1.3147	0.55884
1.724	64.806	-21.351	562.659	-0.5464	0.25879	0.10635	-22.0293	42.197	1463.08	-2.605	0.95752	0.8457	-23.8401	181.489	852.101	-0.99437	0.51392	0.10498	216.163	26.812	1642.3875	-2.394	1.3462	0.6543
1.726	36.5571	-48.4188	583.0071	-0.62842	0.28467	0.12061	-40.9474	25.819	1415.9579	-2.4722	0.9165	0.80469	7.954	231.331	791.2394	-0.94092	0.50244	0.11279	216.22	124.166	1662.948	-2.6733	1.3833	0.77539
1.728	32.369	-54.31	590.7079	-0.70683	0.31211	0.14404	1.745	48.203	1402.352	-2.4063	0.89941	0.78418	8.1685	203.561	751.4029	-0.86865	0.47754	0.11523	194.471	129.0894	1651.966	-2.8105	1.3945	0.81494
1.73	64.7444	-43.504	600.2598	-0.79013	0.33974	0.17266	21.2849	96.2	1364.691	-2.2651	0.86182	0.73633	4.808	273.758	707.783	-0.83252	0.46533	0.12012	183.024	77.587	1651.976	-3.0132	1.397	0.85742
1.732	49.43	-26.118	593.7455	-0.86318	0.36201	0.20859	-5.345	47.2186	1370.262	-2.1645	0.83887	0.70263	12.5752	244.753	690.146	-0.75	0.43945	0.12451	225.14	42.964	1647.41	-3.0964	1.3865	0.84888
1.734	2.552	-26.5755	601.463	-0.93887	0.38691	0.25127	29.935	114.36	1350.1372	-2.0684	0.8125	0.67529	5.461	278.928	675.2769	-0.68262	0.41602	0.12598	248.56	56.939	1637.433	-3.1406	1.3633	0.82275
1.736	-1.698	-12.579	589.515	-1.002	0.39648	0.28809	9.4296	131.826	1304.827	-1.937	0.77783	0.63379	9.1522	227.0417	631.898	-0.61768	0.38623	0.12646	251.338	98.81	1616.607	-3.1304	1.3071	0.76367
1.738	4.534	-3.0103	546.299	-1.0583	0.39883	0.32705	18.095	101.655	1318.275	-1.875	0.7627	0.61182	25.101	263.588	587.456	-0.51758	0.34473	0.125	215.931	70.966	1594.44	-3.1089	1.272	0.74023
1.74	-17.336	14.608	537.97	-1.1028	0.39345	0.36113	47.853	163.943	1291.9864	-1.7554	0.72705	0.58105	20.8085	209.253	555.788	-0.46582	0.32324	0.11914	197.0316	-24.637	1591.7771	-3.0703	1.1934	0.68506
1.742	-20.4036	25.0179	533.6612	-1.1314	0.38369	0.38613	-0.00600000000000023	111.0622	1264.3273	-1.6736	0.70044	0.56469	45.5226	242.257	520.6683	-0.36279	0.27588	0.11426	191.168	-114.393	1597.43	-3.0439	1.144	0.65576
1.744	-39.0651	23.6877	526.6096	-1.1523	0.3751	0.40957	21.933	100.365	1260.888	-1.5977	0.66992	0.54346	13.7246	181.768	477.8018	-0.28516	0.23657	0.10157	201.909	-170.19	1653.034	-3.0327	1.1001	0.63086
1.746	3.814	30.7367	510.76	-1.1577	0.37061	0.42773	16.421	117.0747	1220.059	-1.502	0.63477	0.52295	16.161	190.9429	439.9593	-0.21484	0.19189	0.10498	191.96	-166.203	1702.926	-3.0117	1.0566	0.61475
1.748	-23.618	16.361	512.229	-1.1681	0.36601	0.44599	-11.014	47.16	1213.458	-1.4629	0.61914	0.5127	50.8964	128.157	410.8604	-0.10986	0.125	0.083984	120.556	-111.025	1685.27	-2.9883	1.0352	0.60791
1.75	-39.3997	-1.276	533.093	-1.168	0.36846	0.45976	22.94	80.502	1197.884	-1.3828	0.58203	0.50098	56.4893	144.4288	404.742	-0.061035	0.089355	0.074707	49.9311	-34.5774	1618.062	-2.939	0.99463	0.59082
1.752	-28.93	-22.701	570.654	-1.1595	0.37432	0.46523	-16.951	78.818	1121.8823	-1.3337	0.54931	0.49829	44.514	100.944	404.501	0.019043	0.02002	0.052246	48.43	11.1831	1536.469	-2.8938	0.97143	0.57153
1.754	-41.0083	-54.573	586.7711	-1.1495	0.38623	0.46621	-23.093	50.564	1095.375	-1.2793	0.51953	0.49072	16.6549	127.662	347.5394	0.077393	-0.037842	0.032715	-1.185	22.75	1488.549	-2.8257	0.96533	0.56445
1.756	-32.51	-88.794	618.8793	-1.1343	0.40186	0.47266	14.727	130.8214	1050.87	-1.2168	0.48047	0.48291	-37.33	113.265	325.3302	0.12207	-0.089355	0.013184	-57.218	21.177	1478.484	-2.7227	0.97266	0.5376
1.758	-55.9627	-129.416	662.643	-1.1248	0.41348	0.479	-6.752	95.6444	1009.279	-1.1758	0.46289	0.4751	-53.3527	160.427	281.804	0.1665	-0.15576	-0.012207	-115.2164	49.0226	1447.4305	-2.6582	0.97461	0.51611
1.76	-33.5921	-145.493	685.837	-1.1156	0.42441	0.48408	4.59200000000001	118.155	991.5627	-1.0977	0.42969	0.45752	-54.3663	136.04	272.457	0.18652	-0.18506	-0.02832	-152.349	116.513	1395.5214	-2.5151	0.97119	0.47461
1.762	-32.7601	-156.515	691.973	-1.1242	0.43808	0.50166	42.705	182.267	952.6669	-1.0308	0.40186	0.43994	-19.23	164.0997	226.4737	0.2041	-0.24463	-0.056152	-145.447	169.834	1345.016	-2.4021	0.95434	0.45825
1.764	-34.6424	-166.374	711.2594	-1.1429	0.45147	0.51719	17.381	140.443	939.857	-0.96338	0.37451	0.42578	-54.8188	129.28	177.651	0.20679	-0.28247	-0.06836	-130.55	197.619	1308.572	-2.2944	0.93799	0.43359
1.766	-42.0956	-168.882	731.4581	-1.1812	0.47021	0.53271	38.343	192.181	886.3647	-0.86523	0.33887	0.40479	-50.209	134.4601	141.736	0.20605	-0.31689	-0.078125	-88.504	224.104	1253.822	-2.1543	0.9043	0.41064
1.768	-28.85561	-149.493	765.72148	-1.1974	0.5044	0.54532	12.096	198.788	823.949	-0.81592	0.30811	0.38477	-83.985	99.03	133.997	0.17822	-0.35156	-0.066895	-55.053	198.561	1207.18	-2.0898	0.87305	0.396
1.77	19.3035	-133.046134	788.599	-1.1879	0.52696	0.54522	14.194	151.12	809.976	-0.70898	0.26563	0.36426	-73.031	111.179	101.936	0.15283	-0.36035	-0.054688	-53.784	187.578	1208.481	-1.9565	0.8374	0.38867
1.772	15.0182	-123.758	828.3479	-1.1438	0.54375	0.52529	41.922	216.424	754.964	-0.63965	0.23389	0.33936	-29.927	108.911	85.9999	0.10498	-0.37695	-0.027832	-31.578	173.267	1217.1514	-1.8237	0.80615	0.36816
1.774	-4.286	-108.388	866.1239	-1.0966	0.54717	0.4916	8.179	154.7794	707.098	-0.56641	0.19043	0.31689	12.626	107.228	62.347	0.043457	-0.37573	0.0053712	9.5	175.804	1241.388	-1.7515	0.78857	0.35156
1.776	5.398	-86.532	878.7176	-1.0527	0.55078	0.46143	29.33	140.0413	689.8064	-0.47754	0.1416	0.28271	-18.368	90.082	40.233	-0.016602	-0.3667	0.042969	41.6305	186.251	1223.006	-1.605	0.75635	0.31982
1.778	4.746	-57.371	894.7464	-1.0296	0.55244	0.42353	38.801	155.904	647.7262	-0.4126	0.10498	0.26197	-25.626	85.994	48.068	-0.09668	-0.34766	0.10791	74.2655	160.442	1182.079	-1.4841	0.72046	0.28491
1.78	3.752	-47.328	922.8423	-1.0104	0.56299	0.40186	28.901	93.9311	657.7846	-0.35352	0.068359	0.2417	-31.0079	81.338	30.875	-0.13721	-0.33154	0.13818	123.777	151.304	1120.7572	-1.3647	0.68896	0.25293
1.782	-10.128	-43.076	942.692	-1.0108	0.56807	0.38037	70.1874	142.703	640.5685	-0.2793	0.025391	0.20996	-16.011	64.776	45.657	-0.2085	-0.28662	0.1958	148.719	156.809	1069.9679	-1.1987	0.64697	0.21387
1.784	26.7603	-58.1679	949.2008	-1.0162	0.58457	0.36299	58.73485	140.46	570.416	-0.24805	0.0068359	0.19678	5.668	54.161	39.029	-0.25049	-0.2561	0.23242	175.319	143.213	1055.417	-1.1147	0.62158	0.2002
1.786	-16.0265391	-90.868	978.6313	-1.0366	0.60693	0.34473	67.7497	111.1262	573.0258	-0.18311	-0.024902	0.16504	49.0675	8.294	44.858	-0.28662	-0.22314	0.26416	179.951	158.713	1040.606	-0.96436	0.5708	0.16309
1.788	-15.0359	-116.869	1017.6441	-1.0546	0.63213	0.33438	91.348	174.255	529.568	-0.1438	-0.048828	0.14551	56.16551	21.1865	25.4613	-0.31592	-0.17822	0.29004	143.404	156.943	984.038	-0.86108	0.53125	0.14136
1.79	-14.708	-141.784	1060.502	-1.0765	0.6584	0.32969	50.436	131.3826	488.8776	-0.11035	-0.071289	0.12598	51.58824	6.4167	18.2883	-0.3252	-0.15674	0.29932	116.086	153.235	931.902	-0.75244	0.49268	0.12842
1.792	-6.04	-134.3226	1061.4699	-1.0965	0.68496	0.32656	60.155	157.621	457.6759	-0.069336	-0.086426	0.10352	32.673	48.486	19.5035	-0.33691	-0.12207	0.31592	110.811	176.421	850.0826	-0.62256	0.43604	0.10645
1.794	-16.7468	-145.3611	1090.7118	-1.1163	0.70615	0.32735	48.349	177.287	410.65832	-0.056641	-0.097656	0.091309	36.522	10.331	43.609	-0.33618	-0.10523	0.31006	107.228	219.36	789.202	-0.55859	0.40039	0.094727
1.796	-27.90441	-146.3192	1110.5673	-1.127	0.72656	0.32861	27.128	118.6806	401.18607	-0.025391	-0.11426	0.067871	68.03243	41.382	8.157	-0.3418	-0.091797	0.30615	126.324	275.743	742.738	-0.43701	0.34521	0.081543
1.798	-16.9164	-135.3475	1131.651	-1.1368	0.74404	0.32578	30.064	157.243	370.043	-0.012207	-0.1189	0.056396	78.935	5.871	7.7976	-0.33594	-0.077148	0.30127	80.669	259.584	713.775	-0.34667	0.30957	0.074951
1.8	-48.567	-106.657	1145.3549	-1.1387	0.76016	0.32129	21.797	140.666	313.953	-0.0019531	-0.12207	0.044434	59.1475	43.224	2.45066	-0.33301	-0.069336	0.30225	50.415	206.838	706.292	-0.25146	0.27295	0.076172
1.802	-29.923	-98.706	1174.6467	-1.1387	0.78125	0.3127	26.065	128.698	302.489	0.01123	-0.12451	0.03125	51.8242	3.78488	33.783	-0.33496	-0.0625	0.30029	10.9373	172.166	652.265	-0.13623	0.21729	0.070801
1.804	-56.381	-103.7759	1197.2595	-1.1422	0.80107	0.30362	31.701	173.047	259.9363	0.016113	-0.12842	0.019043	14.898	44.53	48.44	-0.33398	-0.054687	0.30566	-45.7391	134.001	595.516	-0.08252	0.19141	0.06543
1.806	-41.041	-93.372	1191.0923	-1.1582	0.81641	0.29932	5.892	110.733	254.6928	0.027344	-0.12939	0.0087891	17.515	-3.2436	44.6825	-0.33057	-0.049316	0.30859	-74.358	153.155	536.829	0.032227	0.13721	0.06543
1.808	-54.017	-75.5856	1183.2688	-1.1854	0.83926	0.27842	34.564	124.507	239.4754	0.030518	-0.12744	0.0012207	6.619	26.5234	21.1005	-0.31543	-0.04541	0.3125	-121.192	163.815	477.345	0.11206	0.099852	0.051513
1.81	-53.714	-77.3092	1194.2232	-1.2267	0.85683	0.26855	25.511	112.039	214.9804	0.031738	-0.1333	-0.0073242	6.27	-23.521	35.12186	-0.30713	-0.046875	0.31445	-154.138	164.406	413.709874	0.19141	0.067871	0.039063
1.812	-49.652	-71.1539	1221.1967	-1.2854	0.87871	0.26152	-0.838999999999999	62.507	239.299	0.037109	-0.13477	-0.016113	-14.47	24.8869	26.8634	-0.28711	-0.044434	0.32422	-179.714	148.933	351.8728	0.29297	0.024414	0.015137
1.814	-48.236	-61.158	1210.397	-1.363	0.89482	0.26572	12.895	89.993	237.399	0.041992	-0.13965	-0.023926	-21.227	-18.8434	30.091	-0.26806	-0.041992	0.33325	-201.775	111.7073	314.065	0.33691	0.00097656	0.00048828
1.816	-30.398	-71.148	1208.878	-1.4536	0.9126	0.27051	-8.111	65.9173	222.383	0.044434	-0.14063	-0.033691	-41.04	24.8833	-5.899	-0.24512	-0.037109	0.33838	-199.763	99.914	288.739	0.41943	-0.033691	-0.035156
1.818	-40.3246	-83.1898	1230.13	-1.5557	0.92784	0.28516	-12.342	51.826	184.3043	0.052002	-0.14111	-0.045411	-48.4439	-45.5878	3.178	-0.19922	-0.029785	0.32568	-162.921	114.868	269.892	0.4729	-0.070313	-0.058594
1.82	-34.589	-86.0545	1279.814	-1.662	0.93701	0.31192	-4.589	81.6652	132.2786	0.060547	-0.14209	-0.053223	-17.251	-17.1691	12.471	-0.16943	-0.027344	0.32813	-139.534	157.04	243.587	0.51221	-0.10596	-0.083496
1.822	-21.2521	-66.3747	1292.8896	-1.771	0.94834	0.34394	-16.365	27.825	119.5791	0.074219	-0.14941	-0.065918	-11.808	-68.492	25.2651	-0.096191	-0.024414	0.31055	-105.606	208.98	187.9835	0.54346	-0.14404	-0.11133
1.824	-24.429	-62.2329	1300.5921	-1.8786	0.95576	0.38144	0.207000000000001	54.8497	110.4774	0.077148	-0.14844	-0.070313	-3.706	-4.6107	16.565	-0.022461	-0.044434	0.28467	-54.1605	221.24	166.0707	0.54297	-0.16846	-0.12646
1.826	-19.7294	-66.3421	1313.8716	-1.9858	0.95752	0.42188	9.132	58.1046	81.194	0.087402	-0.14893	-0.084961	-1.426	-14.18549	18.7916	0.018066	-0.050781	0.27588	-5.98525	228.317	139.02	0.52979	-0.2085	-0.14551
1.828	-41.831	-61.5008	1323.7431	-2.0764	0.96093	0.47783	19.394	25.095	74.9255	0.095948	-0.15088	-0.098388	-33.337	31.201	3.4699	0.07666	-0.078613	0.25195	9.5408	192.175	120.001	0.5039	-0.23389	-0.15015
1.83	-7.2549	-50.4298	1322.8037	-2.1546	0.96787	0.53037	35.8672	68.775	56.3228	0.098633	-0.14941	-0.10645	-41.7073	-12.43489	-0.527999999999999	0.10889	-0.092774	0.23633	24.135	167.963	112.3011	0.45703	-0.25586	-0.14941
1.832	-29.5123	-39.9673	1332.1455	-2.2249	0.9749	0.58193	29.039	52.988	63.987	0.11084	-0.15527	-0.11963	-16.805	23.5554	-35.957	0.14502	-0.10498	0.22119	-6.831	140.097	78.417	0.37158	-0.26709	-0.125
1.834	-31.448	-30.9148	1361.659915	-2.2791	0.97735	0.62764	42.432	43.424	58.5988	0.11328	-0.1543	-0.12549	21.6157	2.3646	-28.7178	0.1875	-0.12402	0.19727	23.574	102.838	74.897	0.3125	-0.26953	-0.10742
1.836	-19.1833	-28.3349	1352.8095	-2.3218	0.9751	0.66895	39.9965	80.722	21.883	0.11719	-0.15576	-0.1333	38.761	32.165	-20.3731	0.20508	-0.12939	0.18506	99.467	86.8785	55.35665	0.16602	-0.26416	-0.059082
1.838	-23.0495	-15.8343	1329.26	-2.3604	0.96845	0.70547	15.636	44.4466	12.86	0.1228	-0.15991	-0.13989	31.1673	7.0357	-6.104	0.24268	-0.1499	0.16309	131.233	38.281	44.899	0.046631	-0.24365	-0.012939
1.84	-20.5231	2.6204	1325.982	-2.3883	0.95117	0.72978	36.103	53.9194	26.9782	0.12402	-0.1626	-0.14795	34.642	25.4634	-20.3651	0.27124	-0.16162	0.1521	157.66	10.022	54.063	-0.072754	-0.21484	0.032227
1.842	-16.5467	21.4458	1349.8153	-2.4027	0.93047	0.74893	12.992	40.1675	9.6888	0.12109	-0.16309	-0.15332	34.0738	13.7723	-10.125	0.30176	-0.17188	0.13721	176.236	9.149	78.9116	-0.2207	-0.15479	0.10107
1.844	-1.0603	34.67	1356.762	-2.4013	0.90869	0.75606	27.897	-8.8778	2.911	0.12598	-0.16553	-0.1582	65.50568	30.633	0.7118	0.33057	-0.18506	0.12939	147.218	-24.43	101.723	-0.29102	-0.12695	0.13867
1.846	-22.6755	53.223	1338.3141	-2.4043	0.88281	0.75342	41.6227	14.7227	-6.80162	0.11768	-0.16309	-0.1626	77.3769	9.6119	20.7691	0.3501	-0.19629	0.10791	161.901	-16.49459	85.991	-0.40918	-0.067383	0.19482
1.848	-26.993	35.155	1337.3978	-2.3883	0.86328	0.74971	2.593	-21.2273	-4.6276	0.11011	-0.16259	-0.16455	76.28	24.849	36.057	0.37988	-0.21045	0.094238	173.289	-43.858	74.811	-0.47852	-0.020019	0.23291
1.85	-50.031	15.509	1350.8219	-2.3719	0.8414	0.74307	18.6	-19.9773	31.4559	0.10254	-0.15625	-0.16504	46.2395	31.8888	4.8835	0.39746	-0.2168	0.080078	125.102	-47.907	59.482	-0.54785	0.017578	0.26855
1.852	-41.755	12.49176678	1352.2202	-2.3532	0.8293	0.73056	34.671	19.35	8.7327	0.091797	-0.15479	-0.16113	28.0543	37.193	-2.3902	0.40625	-0.2207	0.072754	71.7725	-54.793	26.7	-0.61426	0.061523	0.30176
1.854	-55.908	12.9212	1339.2661	-2.3312	0.81797	0.72022	19.532	-9.0174	-0.673000000000002	0.084473	-0.15088	-0.15918	10.213	26.673	14.674	0.40869	-0.22266	0.060059	8.814	-49.606	12.804	-0.64209	0.077637	0.32422
1.856	-54.513	10.9403	1312.642	-2.3184	0.81738	0.71533	23.622	15.2188	12.575	0.066406	-0.15234	-0.15234	25.804	5.428	28.2105	0.40479	-0.22412	0.056152	-5.541	-18.08	-8.293	-0.68945	0.097168	0.36963
1.858	-62.336	-1.172	1319.0594	-2.3142	0.8165	0.71426	3.524	17.4331	6.9881	0.045654	-0.15063	-0.14575	11.629	9.0687	26.8775	0.39502	-0.22363	0.049805	-29.095	5.215	0.224	-0.71729	0.10376	0.39746
1.86	-48.773	8.1921	1301.1	-2.3174	0.81992	0.72061	1.874	5.6466	14.0136	0.030762	-0.15088	-0.13867	32.9785	13.4165	17.4378	0.37891	-0.21509	0.04834	-60.8116	31.0665	6.486	-0.73779	0.10498	0.42871
1.862	-43.914	-1.6002	1293.669	-2.3189	0.8293	0.73077	6.675	54.166	-1.6402	0.010254	-0.15283	-0.12695	10.427	41.074	25.2163	0.35693	-0.21045	0.04834	-96.8522	49.883	-22.9313	-0.73242	0.099609	0.47363
1.864	-56.883	10.3278	1293.7392	-2.3256	0.84062	0.74521	-6.293	38.489	-12.2185	0.0019531	-0.14746	-0.11865	-13.543	29.653	54.576	0.32031	-0.19287	0.051758	-98.756	32.8288	-46.617	-0.72217	0.098145	0.49023
1.866	-46.537	20.0196	1279.57172	-2.3262	0.85352	0.7583	-15.453	26.691	18.8834	-0.011719	-0.14795	-0.10596	-21.309	20.1214	47.984	0.29688	-0.18457	0.049316	-96.336	30.819	-32.402	-0.68164	0.087891	0.52783
1.868	-43.8	43.339	1236.679	-2.3175	0.86807	0.7625	1.134	50.126	2.5942	-0.018554	-0.14673	-0.10108	-3.628	5.1951	6.8696	0.24707	-0.15527	0.055176	-115.282	19.972	2.1512	-0.64844	0.081299	0.54981
1.87	-36.788	56.026	1223.478	-2.3004	0.88047	0.77099	-0.812000000000001	22.623	6.462	-0.029297	-0.14893	-0.084473	-25.567	26.8785	-2.113	0.20533	-0.13355	0.069092	-108.469	36.739	11.775	-0.61133	0.073242	0.56006
1.872	-48.0506	63.134	1221.864	-2.2801	0.89375	0.7667	-12.37	54.062	11.669	-0.031738	-0.15039	-0.080078	-10.813	-4.88946	15.53	0.16309	-0.10742	0.078613	-77.246	36.465	-10.0531	-0.53906	0.057617	0.57471
1.874	-49.5	73.778	1224.9254	-2.2434	0.9041	0.76065	-2.304	37.315	7.108	-0.036621	-0.15186	-0.073242	-35.484	11.6762	34.109	0.099609	-0.071289	0.098145	-77.6413	9.437	-16.614	-0.50244	0.047363	0.57129
1.876	-21.1422	75.753	1220.088	-2.2012	0.91211	0.74951	19.586	9.0566	29.8237	-0.040527	-0.15088	-0.069336	-43.045	-22.7468	49.965	0.075195	-0.056641	0.10254	-64.973	4.5463	-11.628	-0.40918	0.017578	0.55859
1.878	-42.721	61.7811	1213.3867	-2.1648	0.91768	0.7373	24.151	20.26	15.6879	-0.043701	-0.14893	-0.061523	-55.4983	-2.3298	6.58	0.024414	-0.023438	0.11621	-61.814	14.0187	29.913	-0.32886	-0.010254	0.5437
1.88	-30.38	58.3284	1209.9183	-2.1176	0.92559	0.71904	15.074	-10.51	13.1172	-0.050781	-0.14844	-0.054688	-2.957	-39.3869	21.3709	-0.011963	0.00024415	0.12305	-26.163	31.2928	29.847	-0.25	-0.039551	0.52002
1.882	-27.2507	56.5072	1187.8554	-2.0711	0.92051	0.70537	34.064	-13.779	35.811	-0.067871	-0.14551	-0.04248	-17.911	-28.522	27.1647	-0.044922	0.022949	0.12354	40.5389	36.608	33.973	-0.1416	-0.083008	0.48242
1.884	-4.181	65.3169	1161.764	-2.0169	0.91904	0.67754	21.078	9.207	27.05	-0.077637	-0.14258	-0.037598	-0.382999999999999	-60.541	55.8213	-0.083496	0.04248	0.12256	28.6811	5.496	54.703	-0.092285	-0.097168	0.46338
1.886	-14.978	60.6762	1130.235	-1.9648	0.91406	0.66064	14.509	-7.59382	28.67656	-0.10107	-0.1333	-0.021973	25.685	-15.355	30.041	-0.10352	0.056641	0.11719	72.2872	10.4929	46.4453	0.0058594	-0.13672	0.41504
1.888	-17.2408	53.855	1121.645	-1.9119	0.90527	0.63623	41.5574	30.998	36.615	-0.11841	-0.12964	-0.010742	27.0771	-49.4721	55.043	-0.15088	0.078125	0.104	90.6587	11.64146	28.3515	0.062745	-0.15454	0.37549
1.89	5.47999	49.85015	1117.8122	-1.8511	0.89268	0.61719	21.851	17.6177	9.7077	-0.13623	-0.12305	0	19.141	-38.045	80.643	-0.19458	0.10279	0.091553	140.545	46.477	28.1705	0.11816	-0.17139	0.33447
1.892	8.0603	56.3171	1098.266	-1.8019	0.87861	0.59844	11.841	-1.40252	36.9534	-0.1582	-0.11377	0.021973	26.095	-108.911	143.863	-0.23877	0.12451	0.081055	143.096	60.75	32.287	0.19629	-0.19775	0.2915
1.894	2.352	65.7478	1100.665	-1.7523	0.86211	0.57608	49.693	31.58	12.2253	-0.16064	-0.1084	0.028809	44.1307	-76.2528	154.894	-0.30371	0.15869	0.084473	126.091	17.12478	40.8722	0.25196	-0.22876	0.24316
1.896	-27.3642	86.1083	1095.815	-1.6992	0.83984	0.55322	25.829	6.7699	0.4407	-0.17139	-0.10059	0.038574	64.943	-75.6147	233.412	-0.33594	0.17725	0.084473	156.523	3.103	42.614	0.30615	-0.25293	0.2041
1.898	-2.031	103.7855	1052.5562	-1.6447	0.81973	0.53154	27.595	14.54	17.9387	-0.1665	-0.094238	0.049316	48.6042	13.221	309.413	-0.41357	0.21143	0.091309	162.018	1.531	36.4101	0.37402	-0.29346	0.1416
1.9	-13.538	103.42099	1017.1983	-1.5933	0.79463	0.51133	47.5802	35.812	-0.088000000000001	-0.15771	-0.090332	0.049805	16.55241	17.3568	429.1964	-0.4773	0.24683	0.098144	140.419	1.412	42.661	0.40381	-0.31641	0.1084
1.902	-28.38456	99.75611	996.8796	-1.5409	0.76963	0.49257	19.041	-7.893	5.20056	-0.13916	-0.085938	0.049316	5.88	91.106	497.629	-0.54004	0.27344	0.10547	99.612	-13.3611	26	0.45898	-0.35645	0.044922
1.904	-23.3223	96.4931	970.5853	-1.4933	0.7458	0.47286	40.383	18.2533	8.81524	-0.11596	-0.0896	0.038574	15.81812	82.626	573.51	-0.62939	0.31689	0.10449	61.4026	-57.1491	1.16	0.48925	-0.38867	-0.0034182
1.906	-8.4226	102.799	955.8199	-1.4487	0.72314	0.45508	17.443	8.9491	-0.8324	-0.087402	-0.093262	0.025879	18.487	124.222	676.384	-0.68164	0.33398	0.10352	36.668	-47.206	-21.7176	0.51416	-0.41406	-0.041016
1.908	-10.724	93.733	928.1322	-1.4018	0.68975	0.4377	-10.172	-10.6599	26.8055	-0.046387	-0.10156	0.0053711	-6.2945	90.5386	862.1482	-0.7876	0.38428	0.097656	18.627	-39.2903	-8.0465	0.53174	-0.43701	-0.081543
1.91	-22.0742	88.826	908.1117	-1.3574	0.65429	0.42119	22.33	13.475	17.54	-0.024902	-0.10742	-0.0029297	-25.189	74.701	983.359	-0.87842	0.41455	0.10596	-1.941	-24.77	30.3345	0.5332	-0.43896	-0.094727
1.912	-14.827	86.241	888.8552	-1.3137	0.62617	0.40908	-16.898	-17.0167	0.3829	0.012207	-0.11328	-0.024414	-23.837	-14.13	1065.576	-0.96826	0.44971	0.11914	-18.584	-21.5782	39.5413	0.52539	-0.42969	-0.10645
1.914	-4.764	89.3228	859.2898	-1.2687	0.59463	0.3916	-7.316	-17.3739	8.60777	0.039795	-0.12134	-0.034668	4.663	-57.907	1059.711	-1.1099	0.48877	0.15527	-48.619	-30.5092	14.291	0.50269	-0.41382	-0.10913
1.916	-3.662	93.8806	835.74	-1.2188	0.56396	0.38086	14.609	8.5904	-2.9355	0.059082	-0.12744	-0.041504	-6.338	-141.774	1097.061	-1.1836	0.50781	0.18066	-68.5351	-3.55	-17.1533	0.4707	-0.38965	-0.10742
1.918	-28.7106	85.4048	824.3491	-1.1694	0.53183	0.36738	-15.226	-23.093	10.0188	0.073242	-0.12793	-0.046875	24.499	-170.806	1122.049	-1.3105	0.53711	0.26074	-120.705	28.822	-12.37906	0.41309	-0.33984	-0.089844
1.92	-17.6594	96.0047	806.5671	-1.1223	0.50254	0.35449	-0.582000000000001	7.9166	7.42835	0.081055	-0.12939	-0.05127	53.796	-200.59626	1082.212	-1.4087	0.54883	0.34448	-87.216	60.7759	24.023	0.38379	-0.30908	-0.081055
1.922	-5.286	94.0128	762.7924	-1.0683	0.46895	0.34121	-3.572	18.103	-13.3571	0.080078	-0.12744	-0.05957	70.074	-167.7805	1012.329	-1.502	0.5542	0.43018	-74.726	72.805	-7.801	0.31055	-0.24023	-0.047852
1.924	-24.527	89.7416	743.22788	-1.0156	0.43613	0.32529	-3.918	-0.513	12.798	0.079345	-0.12646	-0.061035	55.587	-179.879	960.25	-1.6387	0.54688	0.53613	-83.2308	37.3362	-42.027	0.25878	-0.18408	-0.026855
1.926	-8.209	93.2362	735.5331	-0.9707	0.40625	0.31152	19.823	38.254	-0.389999999999999	0.07666	-0.12598	-0.064453	56.773	-194.082	923.363	-1.7007	0.54492	0.59082	-78.8849	34.9594	-35.943	0.20605	-0.12939	0
1.928	-8.099	106.3153	704.454	-0.91816	0.37422	0.29853	22.691	12.1153	-4.263	0.07666	-0.11719	-0.069336	24.254	-199.854	877.388	-1.8232	0.5293	0.68799	-109.364	37.2564	-2.37076	0.14355	-0.06543	0.027344
1.93	26.849	117.814	671.7514	-0.86474	0.34424	0.28867	30.221	18.0438	7.4897	0.071289	-0.11475	-0.077148	32.897	-165.887	831.763	-1.9136	0.52222	0.75269	-73.5269	75.522	28.8708	0.11475	-0.036621	0.040527
1.932	13.3	113.8091	635.7247	-0.81436	0.31416	0.27774	14.476	54.647	-19.8217	0.078613	-0.1084	-0.080078	1.575	-84.566	801.633	-2.0234	0.53711	0.80225	-22.099	71.133	17.8275	0.070801	0.015137	0.060547
1.934	21.019	114.2653	615.975	-0.76875	0.28926	0.26934	1.191	13.9145	11.637	0.07251	-0.10132	-0.084717	-0.889000000000003	-35.461	823.994	-2.1733	0.60986	0.85645	31.234	35.188	15.9729	0.039063	0.038086	0.074218
1.936	30.015	113.3896	591.4497	-0.72461	0.25879	0.26025	36.314	24.5351	16.3004	0.070801	-0.096191	-0.091309	-29.6607	6.34	852.2018	-2.2358	0.65771	0.88672	48.21906	10.54648	30.005	0.0087891	0.056641	0.088379
1.938	20.239	126.088	561.106	-0.67812	0.23457	0.25108	14.352	17.55517	-5.5775	0.069824	-0.084473	-0.09668	22.4763	-12.422	853.356	-2.2515	0.71729	0.92383	46.7511	-6.066	56.198	-0.033691	0.07666	0.10059
1.94	27.122	110.6514	545.5229	-0.6332	0.20888	0.23916	25.55	-2.1271	12.021	0.070801	-0.081543	-0.10156	35.876	-44.399	881.033	-2.2293	0.70971	0.92407	61.8084	7.4261	54.057	-0.055664	0.081055	0.10547
1.942	4.782	115.28	538.7159	-0.58828	0.18311	0.22822	52.5717	33.479	9.5539	0.075195	-0.081055	-0.1123	58.78	-113.487	928.052	-2.2109	0.7002	0.89111	110.421	13.90866	44.4766	-0.10498	0.099121	0.11816
1.944	30.6482	111.66166	519.3683	-0.54707	0.15869	0.21573	11.002	0.8385	11.383	0.073242	-0.075195	-0.12231	49.735	-146.763	995.254	-2.2148	0.76367	0.86572	139.02	-14.4974	44.909	-0.13989	0.11768	0.1377
1.946	19.366	116.8043	487.4469	-0.50879	0.1333	0.20361	30.265	2.101	32.0285	0.066895	-0.065918	-0.13477	79.451	-201.634	1063.357	-2.2168	0.83203	0.85791	130.937	-13.405	46.898	-0.17334	0.13379	0.1543
1.948	19.674	109.7521	473.5065	-0.46728	0.10987	0.19277	44.6634	24.0617	16.974	0.05127	-0.058105	-0.14844	41.717	-246.869	1079.6914	-2.1909	0.979	0.8125	127.242	-23.1575	39.94	-0.21729	0.16211	0.17578
1.95	5.675	106.4879	451.4427	-0.4293	0.08545	0.17968	19.468	-26.3422	43.089	0.040039	-0.047363	-0.15723	12.4659	-329.333	1124.581	-2.1265	1.0903	0.75781	127.379	-21.152	51.428	-0.23877	0.18115	0.18896
1.952	15.61	100.0514	425.122	-0.39336	0.065527	0.1707	49.594	-3.541	64.9674	-0.0063477	-0.029785	-0.16992	-28.669	-360.28	1147.535	-2.0757	1.1177	0.72852	125.228	-24.7807	40.0506	-0.26855	0.20947	0.21533
1.954	18.097	96.522	405.0871	-0.36485	0.042676	0.15908	30.796	9.03	58.0901	-0.048828	-0.012695	-0.16504	-52.8178	-380.49	1209.2789	-1.957	1.1445	0.63916	100.978	-33.64987	40.357	-0.29199	0.23365	0.23316
1.956	1.794	80.9875	387.9114	-0.33301	0.020508	0.1543	-0.372	10.7658	94.9363	-0.10303	0.0083008	-0.15527	-71.158	-321.36	1250.3907	-1.8335	1.1402	0.55274	69.5073	-14.303	14.58464	-0.31006	0.25781	0.24268
1.958	10.582	82.3868	375.8248	-0.30039	0.0058594	0.15136	14.834	58.893	126.2343	-0.19336	0.032227	-0.13477	-85.563	-271.697	1273.22395	-1.6987	1.1274	0.46387	69.5443	-9.1895	8.85	-0.33398	0.28613	0.26074
1.96	11.779	92.6752	346.8821	-0.27109	-0.012207	0.14756	11.433	34.407	160.745	-0.24414	0.052246	-0.12695	-60.192	-205.003	1277.622	-1.5146	1.1074	0.35303	52.2791	-14.5553	42.493	-0.35059	0.2998	0.26074
1.962	6.029	98.162	339.9475	-0.24531	-0.029786	0.15029	14.953	31.024	229.46	-0.354	0.083496	-0.10205	-46.654	-183.056	1288.367	-1.4238	1.0947	0.31201	30.715	-15.297	77.127	-0.39746	0.33008	0.24561
1.964	-21.46	101.006	327.117	-0.21543	-0.042774	0.14609	17.334	66.64	261.2095	-0.44506	0.11279	-0.080567	-35.825	-134.491	1261.635	-1.2681	1.063	0.25342	-13.109	5.474	136.097	-0.44262	0.36035	0.23389
1.966	-2.026	111.885	288.1754	-0.19238	-0.062988	0.13867	-13.069	45.87618	311.2743	-0.54102	0.14258	-0.054199	-20.197	-103.846	1264.903	-1.1787	1.041	0.21118	-80.289	64.436	206.008	-0.49072	0.39307	0.22656
1.968	3.04	110.925	274.7761	-0.16289	-0.074316	0.1336	8.326	80.402	394.266	-0.6792	0.20264	-0.019531	-1.7505	-29.98	1259.536	-1.1089	1.02	0.17041	-81.167	63.622	312.834	-0.58203	0.43506	0.21484
1.97	2.671	90.7123	262.665	-0.13467	-0.091211	0.11973	11.559	83.844	451.744	-0.74707	0.2334	0.0014648	-21.4687	-17.387	1287.139	-1.0542	1.0044	0.12061	-87.848	61.828	402.768	-0.6333	0.45166	0.21484
1.972	-3.178	75.9751	263.77278	-0.10146	-0.11192	0.10762	18.748	28.262	550.73331	-0.90186	0.30225	0.043457	-45.856	-9.239	1322.2078	-1.0425	1.0024	0.099609	-118.962	57.82	508.764	-0.75146	0.49658	0.21191
1.974	-9.007	89.8011	247.1435	-0.072754	-0.13125	0.08916	43.474	28.1159	647.508	-1.0276	0.36133	0.073975	-76.248	-47.906	1340.066	-1.0557	1.0098	0.058594	-147.138	63.113	637.779	-0.85669	0.52686	0.219
1.976	15.513	91.018	220.1432	-0.039551	-0.15039	0.069824	12.263	-33.4537	722.2	-1.1597	0.42236	0.11377	-93.661	-72.425	1339.031	-1.1219	1.0144	0.035644	-138.072	99.51	745.2956	-0.96631	0.55664	0.2334
1.978	-0.582000000000001	78.561	210.1199	-0.010449	-0.17158	0.052344	43.238	-72.717	847.49375	-1.3433	0.51221	0.18896	-95.051	-108.8936	1385.594	-1.2363	1.0273	0.02002	-176.006	95.2	859.8633	-1.1245	0.60498	0.26563
1.98	1.233	77.241	214.09955	0.019336	-0.1917	0.02959	34.324	-78.11	923.9327	-1.4375	0.55762	0.24268	-74.263	-120.5611	1433.57942	-1.4663	1.0376	0.04248	-174.319	51.953	1001.9452	-1.2031	0.62305	0.28564
1.982	9.483	82.165	198.2989	0.046289	-0.21162	0.010059	-5.259	-146.2938	991.2015	-1.6323	0.65283	0.35156	-46.29	-151.103	1511.533	-1.6147	1.0483	0.078613	-107.389	-21.337	1128.0498	-1.3774	0.66064	0.33545
1.984	31.325	87.023	183.1481	0.070605	-0.22822	-0.0083986	36.9835	-137.723	1030.7741	-1.7635	0.70923	0.44312	-9.7875	-159.833	1568.637	-1.9531	1.0684	0.18018	-82.747	-121.363	1231.0425	-1.4983	0.68384	0.38208
1.986	12.724	70.2007	175.5242	0.089355	-0.2417	-0.021973	0.102	-126.8093	997.157	-1.8887	0.74902	0.51611	-0.700000000000001	-191.331	1588.691	-2.2527	1.0832	0.28125	-48.002	-176.828	1311.78	-1.6147	0.70166	0.43652
1.988	2.293	69.8604	169.1797	0.10488	-0.25166	-0.033887	-24.9651	-143.724	1013.496	-2.0234	0.75977	0.58643	15.4508	-183.913	1601.502	-2.5425	1.0903	0.40137	-29.7216	-226.435	1381.275	-1.7476	0.70459	0.51514
1.99	33.044	61.2639	177.0934	0.11768	-0.2583	-0.042285	-3.451	-100.495	986.736	-2.0718	0.75244	0.59863	18.4436	-168.768	1614.69	-2.9453	1.1074	0.57178	-8.331	-262.737	1429.813	-1.8066	0.70215	0.56006
1.992	19.398	57.712	155.1563	0.12119	-0.26533	-0.052832	-24.937	-106.1	958.928	-2.1284	0.70361	0.59375	22.672	-84.519	1593.28	-3.1328	1.1113	0.66748	104.474	-282.01515	1388.001	-1.8901	0.68262	0.63965
1.994	25.59	46.9262	153.3419	0.12353	-0.26641	-0.048144	-26.982	-127.01	969.029	-2.122	0.66894	0.57666	5.1577	-20.1349	1564.3431	-3.4741	1.1333	0.84668	200.176	-303.943	1329.313	-1.9106	0.66162	0.68994
1.996	12.55	59.841	141.0753	0.11914	-0.27051	-0.048828	-17.6219	-98.336	921.781	-2.0835	0.63721	0.55713	20.3866	29.6699	1528.0952	-3.6919	1.1504	0.94922	223.5616	-310.547	1274.381	-1.9063	0.61719	0.72705
1.998	24.603	60.8663	121.7434	0.12002	-0.26299	-0.051172	-85.262	-131.973	909.5307	-1.998	0.59961	0.50244	-9.331	25.415	1530.59181	-3.8647	1.1782	1.0254	205.3914	-306.34	1221.469	-1.8843	0.57178	0.72607
2	18.225	59.348	104.7171	0.11416	-0.25566	-0.050195	-57.4587	-80.953	915.645	-1.9297	0.57031	0.45752	-28.4713	33.73213	1521.628	-4	1.2148	1.106	185.2596	-299.09	1182.311	-1.8789	0.56836	0.72119
2.002	5.166	52.469	108.1845	0.11143	-0.2541	-0.053321	-37.28	-51.749	897.389	-1.7695	0.49512	0.36279	-44.017	45.74	1494.013	-4	1.2114	1.1172	198.24205	-234.804	1141.266	-1.855	0.63037	0.69531
2.004	25.373	50.075	97.9458	0.1085	-0.24805	-0.058594	-28.419	-72.042	935.185	-1.6589	0.44262	0.29834	-29.483	82.451	1493.302	-4	1.2153	1.1328	193.935	-201.983	1105.1603	-1.8171	0.70337	0.66821
2.006	21.989	56.058	77.6104	0.10498	-0.24805	-0.059082	25.938	-56.47	944.718	-1.5757	0.41553	0.24609	-47.202	98.3293	1495.9277	-3.9731	1.2026	1.1093	192.103	-154.0528	1122.34	-1.7793	0.77148	0.64893
2.008	23.893	46.3812	91.5172	0.10156	-0.24668	-0.063184	-0.414999999999999	-87.701	970.612	-1.5347	0.44189	0.20654	-26.2351	89.339	1510.8508	-3.8672	1.1797	1.0669	122.988	-140.646	1132.806	-1.7378	0.83643	0.61133
2.01	-1.208	43.9202	105.4072	0.10078	-0.23535	-0.064063	9.915	-131.518	1055.0296	-1.5176	0.4668	0.20215	-22.9669	63.0856	1487.084	-3.6519	1.1646	1.0225	102.954	-124.283	1149.867	-1.7358	0.85986	0.58984
2.012	21.611	48.5058	95.857	0.10156	-0.22793	-0.063281	15.844	-110.369	1081.9062	-1.4531	0.50977	0.18994	-26.0531	27.099	1472.879	-3.5522	1.1606	1.0039	92.383	-105.981	1186.641	-1.7617	0.91602	0.56299
2.014	5.328	35.2784	87.263	0.097168	-0.21973	-0.062109	-36.4405	-146.596	1113.164	-1.3777	0.53882	0.17969	-35.652	-2.8808	1486.358	-3.3315	1.1313	0.94922	58.384	-116.956	1235.301	-1.8276	0.99072	0.55566
2.016	-19.419	26.8956	67.094	0.087402	-0.20508	-0.058105	-36.8512	-180.761	1170.709	-1.3086	0.56836	0.16797	-42.41	-24.3339	1519.77285	-3.1885	1.1016	0.91114	78.658	-160.804	1309.1	-1.8667	1.0396	0.55615
2.018	-3.558	15.9551	59.8369	0.073633	-0.19736	-0.050683	-75.292	-193.752	1178.1405	-1.2456	0.62646	0.15137	-71.947	-10.412	1497.988	-3.0503	1.0728	0.875	53.3105	-218.873	1349.704	-1.9277	1.1221	0.5542
2.02	-1.438	30.1544	50.7183	0.060449	-0.19033	-0.05	-91.876	-250.371	1217.578	-1.23	0.67188	0.16211	-41.754	-11.038	1499.185	-2.853	1.0239	0.83594	-4.533	-296.91	1351.0332	-1.9519	1.179	0.5437
2.022	8.686	37.187	32.2244	0.049902	-0.17822	-0.045703	-38.0982	-220.762	1259.042	-1.2358	0.71338	0.17529	-53.564	14.016	1448.521	-2.7651	1.0024	0.80469	-52.2658	-357.7	1352.702	-1.9492	1.2266	0.53369
2.024	-0.193999999999996	24.016	35.107	0.04043	-0.17265	-0.044531	-30.248	-175.566	1247.504	-1.2813	0.7749	0.20947	-63.383	28.14	1423.4855	-2.6011	0.94385	0.75391	-120.954	-380.482	1400.0918	-1.8965	1.2676	0.52002
2.026	6.462	15.6513	43.861156	0.036133	-0.16406	-0.044434	7.868	-175.93239	1291.4351	-1.3203	0.80078	0.22852	-66.4	91.973	1380.011	-2.4683	0.89404	0.70996	-189.756	-360.374	1435.513	-1.8589	1.2778	0.51514
2.028	2.037	20.1711	44.3777	0.023633	-0.1544	-0.03877	64.6105	-111.628	1285.5907	-1.4219	0.85547	0.26807	-45.835	151.726	1347.365	-2.3354	0.84424	0.66797	-180.682	-330.167	1443.3209	-1.7695	1.2852	0.48877
2.03	25.2194	27.67	48.4032	0.0012696	-0.14746	-0.036719	69.4556	-95.4	1263.109	-1.523	0.89844	0.29322	-55.029	230.043	1318.121	-2.1616	0.78369	0.60742	-138.305	-304.478	1454.825	-1.7002	1.2964	0.46435
2.032	12.608	18.4433	52.8138	-0.021777	-0.12832	-0.03164	121.117	-83.864	1305.7	-1.6343	0.95166	0.3291	-17.3239	242.641	1343.67	-2.0815	0.75635	0.57959	-129.43	-258.1102	1461.745	-1.644	1.3208	0.44971
2.034	14.098	24.7595	41.702	-0.045117	-0.11797	-0.018457	132.353	-5.217	1307.165	-1.8042	1.0317	0.3916	16.472	256.661	1308.3475	-1.9209	0.71094	0.53467	-178.448	-190.45	1471.779	-1.6362	1.3716	0.44287
2.036	17.571	20.6813	12.1236	-0.068359	-0.10693	-0.0048828	77.684	-16.875	1335.4347	-1.8984	1.0713	0.42627	46.2793	216.392	1287.6599	-1.7947	0.67065	0.50366	-180.687	-116.87	1496.7135	-1.6719	1.4043	0.43994
2.038	11.484	16.0832	-1.2	-0.096874	-0.09746	0.0088864	89.947	4.316	1371.749	-2.1016	1.1348	0.50635	29.7873	237.629	1245.5323	-1.6675	0.62744	0.46973	-167.71	-31.73	1540.731	-1.8281	1.4668	0.45898
2.04	17.359	12.2762	15.7092	-0.12119	-0.081836	0.017676	23.554	-0.0429999999999993	1347.86	-2.2637	1.1845	0.57227	19.231	222.466	1233.748	-1.5249	0.56885	0.43799	-155.836	6.012	1572.543	-2.023	1.5191	0.48364
2.042	12.143	5.9092	24.1212	-0.14971	-0.070117	0.03291	-15.012	-75.117	1374.04	-2.4175	1.2271	0.64111	20.434	240.45	1219.402	-1.4629	0.53906	0.42432	-87.096	20.529	1558.766	-2.252	1.5605	0.53809
2.044	34.0061	2.91773	17.8948	-0.16865	-0.054394	0.039746	25.933	-54.1405	1402.951	-2.6094	1.2676	0.70752	42.41291	177.469	1180.939	-1.3379	0.47754	0.40771	-44.13	4.505	1536.638	-2.584	1.6172	0.6167
2.046	15.548	-2.12692	20.2637	-0.18652	-0.041504	0.05127	10.027	-81.162	1410.1408	-2.6831	1.2798	0.73535	48.9981	156.454	1123.8806	-1.2612	0.43261	0.39672	-31.3887	-3.529	1553.6284	-2.7539	1.6475	0.67725
2.048	16.924	5.58709	23.1775	-0.19756	-0.02998	0.056446	61.921	-122.588	1453.35	-2.8081	1.3071	0.74805	29.45	93.831	1105.355	-1.1895	0.38086	0.38525	-44.733	-35.845	1566.8699	-3.1074	1.6934	0.78369
2.05	33.743	5.28551	30.2947	-0.20888	-0.020703	0.063477	90.8501	-108.288	1427.74	-2.857	1.3076	0.74414	5.621	108.559	1075.4939	-1.1011	0.33105	0.375	-34.429	-93.879	1593.565	-3.3555	1.7128	0.86182
2.052	28.017	7.3251	11.8614	-0.21201	-0.016016	0.063867	61.218	-173.792	1462.501	-2.8906	1.291	0.71875	-3.958	98.088	1064.863	-1.0488	0.30273	0.37109	-4.0908	-173.874	1622.711	-3.5757	1.7251	0.94336
2.054	22.56	1.8559	4.695	-0.21455	-0.014453	0.068359	108.1231	-159.3095	1494.114	-2.8804	1.2388	0.67676	23.788	157.266	1037.739	-0.9585	0.2583	0.3623	57.767	-231.062	1634.745	-3.8105	1.7031	1.02
2.056	8.006	6.3619	8.046	-0.21729	-0.013672	0.063477	71.9453	-104.053	1453.084	-2.853	1.2114	0.65527	57.8306	143.6286	1011.362	-0.88843	0.2212	0.3606	111.621	-245.9	1637.4848	-3.8862	1.6919	1.0547
2.058	32.296	10.1657	14.2312	-0.21065	-0.01543	0.067773	28.576	-114.62	1454.2749	-2.7671	1.1313	0.61328	81.8491	172.174	944.213	-0.82422	0.18604	0.35498	102.123	-193.208	1630.2808	-3.9336	1.6289	1.0962
2.06	4.956	1.0733	8.4598	-0.20176	-0.016797	0.065918	31.226	-32.053	1434.1586	-2.6883	1.0696	0.5813	67.875	165.12971	892.793	-0.73486	0.14111	0.3457	119.87	-137.909	1626.949	-4	1.6789	1.0022
2.062	4.63500000000001	6.088	26.042	-0.19473	-0.019922	0.061621	-25.653	-13.202	1418.518	-2.6089	1.02	0.55078	65.487	224.64	835.4459	-0.68994	0.12305	0.34229	91.497	-87.439	1619.013	-3.9624	1.6646	1.0273
2.064	9.037	6.3109	18.3621	-0.18076	-0.025	0.05752	2.909	-21.49172	1446.9194	-2.5273	0.98047	0.52197	22.021	229.661	797.208	-0.60498	0.086914	0.33691	34.6224	-44.164	1581.4588	-3.7363	1.5801	0.99658
2.066	11.072	13.253	2.918	-0.16553	-0.027344	0.050293	13.108	40.704	1421.1791	-2.498	0.9668	0.5166	0.0840000000000032	250.017	720.542	-0.54931	0.060058	0.32788	70.751	-7.8481	1561.4845	-3.6191	1.5449	0.93311
2.068	19.618	13.0532	3.4254	-0.15596	-0.031836	0.040137	-18.739	6.5342	1403.3896	-2.4648	0.94141	0.5083	22.281	191.829	685.8407	-0.48926	0.036133	0.32178	49.475	40.37	1522.9875	-3.3633	1.5039	0.88721
2.07	-3.464	8.56036	9.074	-0.14014	-0.034179	0.035937	32.748	16.8505	1434.741	-2.4432	0.93335	0.51294	31.986	179.063	620.8916	-0.41943	0.0083008	0.31543	-3.5031	91.281	1495.6217	-3.1648	1.4636	0.84399
2.072	9.561	2.8864	17.88226	-0.12334	-0.039258	0.025781	21.649	46.4911	1392.0429	-2.4355	0.92188	0.51221	-3.064	148.879	590.7841	-0.38379	-0.0073242	0.30957	-63.457	163.406	1430.287	-2.9878	1.4282	0.79492
2.074	8.487	11.4213	-7.30971	-0.1122	-0.042188	0.021973	44.868	-18.0721	1385.741	-2.4297	0.90234	0.52686	1.687	174.06579	520.557	-0.31885	-0.030762	0.2915	-77.606	185.057	1388.124	-2.7461	1.3594	0.76123
2.076	24.832	17.6169	-7.76	-0.10254	-0.04834	0.012207	122.3884	18.2691	1376.815	-2.4258	0.89355	0.53564	-11.512	172.068	494.973	-0.24414	-0.061035	0.27197	-97.761	183.673	1362.817	-2.6348	1.3193	0.74561
2.078	-7.038	10.92424	22.559	-0.091211	-0.053906	0.010059	51.56	-17.145	1359.057	-2.4214	0.86572	0.54102	23.576	185.705	450.856	-0.2085	-0.07373	0.26416	-115.081	150.386	1359.229	-2.4331	1.2427	0.69824
2.08	15.56	11.45764	32.434	-0.080176	-0.059864	0.0012695	85.8157	-68.4739	1417.5224	-2.404	0.84448	0.54053	53.991	145.72	462.878	-0.13525	-0.104	0.24463	-121.838	109.295	1395.097	-2.282	1.1839	0.66187
2.082	14.351	-1.06855	34.837	-0.07002	-0.059472	-0.011621	102.478	-22.227	1413.376	-2.3784	0.82666	0.54297	68.885	147.149	418.987	-0.081543	-0.12598	0.21899	-134.6	119.448	1401.086	-2.1343	1.1245	0.62109
2.084	11.525	-5.0531	34.5625	-0.058594	-0.066016	-0.012988	47.56	-48.401	1394.5819	-2.334	0.80078	0.53564	50.346	117.32048	420.79577	-0.025879	-0.15088	0.19775	-144.036	127.5	1404.205	-1.9375	1.0293	0.56299
2.086	20.263	-15.2848	35.7367	-0.04541	-0.066406	-0.022949	94.6209	-28.304	1422.933	-2.3003	0.79053	0.53271	74.8012	135.894	374.8203	0.047363	-0.17529	0.16309	-155.946	125.971	1392.2162	-1.8457	0.98047	0.54248
2.088	5.924	-8.4012	44.5281	-0.033301	-0.072852	-0.035547	67.729	28.228	1380.294	-2.2266	0.76367	0.52393	24.094	122.044	341.567	0.086914	-0.19043	0.14063	-148.82	108.6498	1374.254	-1.6616	0.88721	0.5
2.09	28.629	-7.798	40.1013	-0.022461	-0.075293	-0.045996	62.066	4.86199999999999	1348.1176	-2.1643	0.74341	0.51782	27.166	144.763	288.9431	0.16064	-0.22021	0.10107	-112.521	79.8788	1374.238	-1.5341	0.81201	0.4707
2.092	17.253	-6.92	51.9632	-0.019726	-0.077246	-0.0542	108.8623	82.939	1305.535	-2.0977	0.72754	0.51123	33.865	146.3663	250.0152	0.20874	-0.24194	0.063965	-118.601	96.0587	1345.545	-1.4121	0.74316	0.43994
2.094	30.838	-2.54	78.5446	-0.019238	-0.077539	-0.060742	57.716	97.1557	1260.179	-2.0073	0.70361	0.50195	67.879	141.561	200.6459	0.2583	-0.26367	0.03418	-109.324	123.7545	1332.948	-1.2573	0.66064	0.4043
2.096	42.283	-4.4147	108.2902	-0.022461	-0.075195	-0.063965	64.586	75.0537	1290.015	-1.9624	0.69678	0.49316	42.187	125.044	184.2996	0.30908	-0.28809	-0.010742	-20.5318	144.3229	1302.814	-1.1812	0.61768	0.39063
2.098	48.661	8.212066	131.7537	-0.038086	-0.070606	-0.064941	110.5936	142.414	1258.8653	-1.8726	0.67822	0.46875	35.673	144.2612	163.103	0.3291	-0.29883	-0.038086	20.6974	151.199	1233.228	-1.0308	0.52588	0.36816
2.1	33.198	29.9117	174.6439	-0.054493	-0.063379	-0.064746	53.048	102.439	1235.074	-1.8044	0.66723	0.4585	7.308	171.18	132.04	0.3623	-0.31836	-0.079102	30.712	149.635	1152.537	-0.92065	0.45239	0.36279
2.102	13.583	64.25513	219.705	-0.084961	-0.052051	-0.060059	72.1848	126.967	1239.632	-1.7461	0.66211	0.44385	60.6232	167.294	117.839	0.37402	-0.3335	-0.10254	80.4237	182.047	1068.026	-0.82617	0.3877	0.3623
2.104	71.336	82.5641	249.784	-0.11875	-0.035254	-0.054688	49.755	173.708	1211.381	-1.6797	0.66016	0.42822	49.135	136.756	113.3049	0.38135	-0.34912	-0.12891	113.449	201.1515	1009.1	-0.71094	0.29395	0.35791
2.106	36.574	74.5509	288.427	-0.16064	-0.011719	-0.052734	22.859	118.065	1220.6067	-1.6504	0.66016	0.4209	45.12	105.685	131.793	0.37061	-0.37451	-0.15137	131.481	227.42	986.417	-0.6543	0.25195	0.354
2.108	40.677	68.859	334.1483	-0.20791	0.0097656	-0.035937	62.7923	156.549	1196.5134	-1.6094	0.6582	0.41016	54.829	93.977	102.009	0.36084	-0.37891	-0.15967	145.206	229.3	942.214	-0.53857	0.17578	0.34717
2.11	55.544	58.136	420.909	-0.26612	0.033984	-0.029297	-14.605	130.257	1160.2257	-1.5779	0.65991	0.40112	31.0899	90.25	86.906	0.33008	-0.38379	-0.16846	157.725	207.7087	906.8219	-0.44849	0.12964	0.34008
2.112	91.648	47.841	474.466	-0.32783	0.065625	-0.02461	-33.63	79.382	1176.946	-1.5483	0.6626	0.39063	-16.277	87.358	65.9041	0.30273	-0.39063	-0.1709	176.357	200	847.162	-0.36377	0.088867	0.32178
2.114	89.334	17.744	530.4133	-0.39726	0.095607	-0.018652	-14.728	114.839	1146.657	-1.5039	0.66113	0.38525	-19.15	31.5476	71.9392	0.27246	-0.39795	-0.1748	167.008	187.572	813.389	-0.24951	0.038574	0.29834
2.116	47.623	-12.825	583.6948	-0.46484	0.12305	-0.01123	-53.033	67.99	1100.471	-1.4858	0.6626	0.375	-7.666	21.054	60.0333	0.21924	-0.40039	-0.17139	186.919	199.496	780.19	-0.19629	0.0063477	0.28906
2.118	61.8303	-39.0318	616.374	-0.54434	0.15039	0.0057618	-10.811	90.1894	1075.683	-1.4355	0.66016	0.3667	-2.117	-14.912	39.2025	0.19043	-0.40039	-0.16943	171.503	197.957	732.876	-0.082031	-0.046875	0.2583
2.12	12.27848	-54.9661	647.055	-0.63858	0.17774	0.028711	-26.442	125.68	1006.137	-1.3933	0.65162	0.35425	-2.616	1.527	19.7258	0.12891	-0.38867	-0.16797	120.1096	181.769	675.0423	-0.011475	-0.084959	0.22851
2.122	5.858	-39.007	677.495	-0.74717	0.20859	0.062305	-11.737	90.846	1007.00504	-1.3472	0.64697	0.33838	-5.405	-24.1701	47.379	0.07251	-0.3706	-0.15283	103.1687	162.482	636.8417	0.052734	-0.12451	0.19775
2.124	-12.9518	-25.7178	726.7087	-0.86162	0.24912	0.10742	61.80811	161.118	975.896	-1.2671	0.63525	0.3125	-45.3063	0.6611	58.187	0.014648	-0.34912	-0.14551	72.127	135.6132	591.854	0.13965	-0.17725	0.15088
2.126	1.7591	-3.04	737.288	-0.98047	0.2915	0.16357	3.593	170.438	918.497	-1.2285	0.62305	0.30371	-21.652	-20.75	46.726	-0.062012	-0.33398	-0.13281	68.84	134.6196	528.8762	0.18066	-0.19873	0.12793
2.128	-14.3754	-13.2825	743.908	-1.1032	0.33701	0.22275	30.722	156.821	921.4035	-1.1479	0.60107	0.27637	-0.895000000000003	12.4179	4.4501	-0.10547	-0.31396	-0.12695	43.291	173.234	456.606	0.25195	-0.24902	0.084473
2.13	-38.0832	-27.447	751.078	-1.2188	0.38653	0.28584	41.1325	196.757	895.6179	-1.082	0.5791	0.25586	14.803	-12.593	8.4018	-0.1958	-0.28467	-0.10156	0.759	231.099	408.1033	0.30225	-0.2898	0.050293
2.132	-36.645	-39.514	756.324	-1.3238	0.43613	0.35147	-9.012	162.052	870.8113	-1.0171	0.55518	0.2417	22.961	22.5776	22.1001	-0.27002	-0.2539	-0.085205	-17.582	266.887	382.399	0.34863	-0.32422	0.010254
2.134	-37.7316	-39.81388	755.985	-1.4111	0.47256	0.39677	18.183	170.2186	831.9935	-0.93506	0.52393	0.21631	20.721	3.7147	16.8795	-0.34375	-0.2168	-0.068359	-26.509	247.491	360.27641	0.39941	-0.36182	-0.029785
2.136	-15.024	-24.607	723.4829	-1.4805	0.50391	0.43359	-1.026	188.6464	778.7496	-0.89697	0.50439	0.20605	-15.913	43.975	-11.829	-0.43506	-0.1748	-0.036133	-67.61941	223.706	322.6089	0.43018	-0.3916	-0.069336
2.138	-11.422	-31.838	700.493	-1.5294	0.51885	0.4498	-11.227	132.6715	761.1535	-0.82324	0.46875	0.1875	-2.099	4.368	-11.694	-0.47266	-0.15869	-0.019531	-66.208	193.948	286.349	0.45703	-0.41357	-0.10547
2.14	6.139	-47.177	693.313	-1.5578	0.52529	0.45118	21.259	149.9588	733.8632	-0.74951	0.42676	0.17432	30.904	3.539	6.5904	-0.54102	-0.12891	0.0097656	-70.231	191.642	254.148	0.47656	-0.44092	-0.15039
2.142	25.979	-50.049	693.725	-1.5534	0.52177	0.43125	-7.542	118.2259	703.4005	-0.71289	0.41406	0.16846	18.389	-40.1296	-5.9213	-0.58008	-0.10181	0.033936	-100.0734	219.189	198.246	0.47852	-0.44727	-0.17285
2.144	9.64899999999999	-59.355	713.638	-1.5304	0.51142	0.40332	24.363	85.104	680.8205	-0.64404	0.38135	0.15137	39.237	-1.8897	-22.0861	-0.61084	-0.075684	0.056152	-81.3787	213.626	149.327	0.4751	-0.46045	-0.22461
2.146	-0.390999999999998	-62.045	769.0991	-1.5039	0.49609	0.38525	53.667	126.4784	644.4912	-0.59351	0.3523	0.14355	12.165	-11.4282	-19.4732	-0.61914	-0.058594	0.083496	-23.39	170.949	137.5762	0.46191	-0.46045	-0.25732
2.148	-19.912	-61.851	828.865	-1.4909	0.48017	0.37402	34.7833	90.3976	640.1498	-0.54541	0.32422	0.13281	23.706	11.679	-11.0959	-0.62012	-0.054688	0.084473	-13.77	105.0879	132.478259	0.42871	-0.46387	-0.28418
2.15	-8.374	-68.076	858.478	-1.4604	0.46504	0.35567	55.116	112.278	638.352	-0.48193	0.29395	0.12158	20.535	-28.7436	16.6665	-0.5874	-0.037598	0.092285	1.91699999999999	54.752	144.2993	0.35791	-0.44873	-0.30762
2.152	-15.808	-98.433	860.541	-1.4187	0.46113	0.33496	4.2751	155.058	581.692	-0.44727	0.27832	0.11572	52.646	2.991	-7.293	-0.54492	-0.036133	0.091308	38.9788	33.651	151.217	0.31592	-0.44043	-0.30518
2.154	10.991	-129.193	872.7302	-1.3876	0.47431	0.30976	-3.071	124.861	567.791	-0.39063	0.25244	0.1001	40.5643	2.2386	-7.484	-0.49805	-0.035156	0.08252	34.6149	6.622	156.516	0.19336	-0.4082	-0.29248
2.156	16.619	-130.335	893.2172	-1.3535	0.49316	0.28906	-14.4894	168.813	527.685	-0.34619	0.22681	0.091064	73.5189	53.684	-2.7652	-0.41553	-0.04834	0.067871	104.344	-4.225	122.199	0.082029	-0.37573	-0.26196
2.158	27.855	-122.851	900.356	-1.3211	0.50235	0.26338	-45.4371	150.5429	484.123	-0.30762	0.20264	0.080078	14.2693	45.954	23.367	-0.37256	-0.053223	0.062012	108.6527	-25.88	81.478	-0.035156	-0.3291	-0.22021
2.16	39.576	-135.351	931.3058	-1.2955	0.51289	0.25	-38.5217	145.903	476.0907	-0.25781	0.1748	0.068848	6.5	62.465	31.278	-0.28613	-0.079102	0.040039	116.22	-41.4355	52.9912	-0.19238	-0.28467	-0.16211
2.162	40.353	-152.93036	965.8427	-1.272	0.5332	0.23906	-33.6573	192.4852	404.456	-0.23242	0.15527	0.063477	-11.124	25.9587	7.8648	-0.22168	-0.11035	0.029785	135.882	-33.3976	19.245	-0.27002	-0.26465	-0.13574
2.164	77.017	-166.5573	983.8389	-1.2626	0.55224	0.23555	-53.25289	151.1217	379.439	-0.19434	0.12744	0.054199	15.785	27.6105	-16.7113	-0.15771	-0.13721	0.016602	139.012	-23.97	7.75	-0.44141	-0.22949	-0.076172
2.166	93.772	-152.9924	990.6297	-1.2617	0.5791	0.23877	-7.034	140.5376871	356.6663	-0.16577	0.10522	0.053955	0.952999999999999	10.68154	12.6158	-0.082031	-0.17725	0	117.105	9.123	5.428	-0.55298	-0.18482	-0.043702
2.168	95.065	-129.027	1020.29	-1.2493	0.61416	0.23496	-27.881	138.796	311.635	-0.14453	0.081543	0.041504	6.766	23.8251	15.8994	-0.050293	-0.19873	-0.0087891	97.7804	34.5315	-5.2908	-0.66064	-0.146	-0.0068359
2.17	75.557	-99.44	1051.2532	-1.2226	0.64053	0.21787	-17.088	95.8845	326.911	-0.10742	0.05957	0.028809	-25.49	37.721	16.49877	-0.00048828	-0.22363	-0.04834	114.811	46.237	0.248000000000001	-0.78125	-0.096191	0.037598
2.172	79.9799	-82.766	1060.359	-1.1758	0.66279	0.18897	19.748	139.312	300.315	-0.093262	0.049316	0.021484	-14.625	53.1131	-6.053	0.061767	-0.24268	-0.044678	97.2802	44.085	-37.8675	-0.83545	-0.074219	0.056641
2.174	48.409	-75.1555	1058.164	-1.1258	0.67578	0.1582	-29.777	129.324	293.947	-0.065918	0.025879	0.010742	-10.251	29.54	5.606	0.11621	-0.26416	-0.050293	77.3955	40.218	-35.2314	-0.93701	-0.028809	0.099609
2.176	53.243	-76.0656	1094.2396	-1.084	0.68848	0.12842	-7.755	105.192	299.1331	-0.045654	0.008789	0.0080567	3.543	3.139	33.501	0.1709	-0.2832	-0.066895	48.4664	63.05	-26.9299	-1.0019	0.0048831	0.125
2.178	52.0354	-94.6	1146.196	-1.0614	0.69346	0.11513	-4.699	126.637	261.281	-0.024902	-0.0048828	0	4.307	-22.3938	54.447	0.19678	-0.28613	-0.071777	17.413	87.005	-5.7483	-1.0635	0.041992	0.14697
2.18	37.709	-93.3834	1155.164	-1.0563	0.70273	0.11045	-40.4387	94.95579	251.398	-0.0083008	-0.016602	-0.00048828	18.945	-0.155299999999999	51.686	0.24365	-0.29688	-0.087402	0.431000000000001	97.153	4.8942	-1.1362	0.086914	0.18018
2.182	32.058	-102.4039	1149.7482	-1.0743	0.71367	0.11631	19.832	111.6475	245.39702	-0.0058594	-0.027832	0.0029297	-18.114	7.3919	46.6609	0.2666	-0.30665	-0.09961	-11.757	66.22	15.1194	-1.1626	0.10693	0.2002
2.184	35.394	-114.7938	1144.45	-1.1099	0.72588	0.12852	4.492	114.2507	210.2168	0.010742	-0.043457	0.00097656	-4.638	-11.3077	41.112	0.28027	-0.32422	-0.11133	-41.599	9.457	15.9346	-1.1948	0.13037	0.22949
2.186	47.797	-131.9304	1165.9714	-1.1563	0.74805	0.15088	-13.091	73.943	204.2306	0.014649	-0.050293	0.0039063	-9.806	-19.5647	28.1185	0.29199	-0.3291	-0.11084	-56.971	-13.876	25.3804	-1.196	0.13843	0.24195
2.188	41.49	-132.568	1180.3168	-1.1971	0.76992	0.16689	38.1038	107.4542	183.0218	0.017578	-0.057129	0.0092773	-6.675	-22.8448	20.27	0.2998	-0.32422	-0.10498	-92.1138	-11.394	46.686	-1.1753	0.13135	0.24609
2.19	52.382	-128.9745	1189.4643	-1.2395	0.79512	0.18496	23.913	93.005	148.003	0.018066	-0.066406	0.01416	-0.151	-3.542	-12.491	0.30176	-0.3042	-0.11084	-110.496	-3.201	66.63	-1.1113	0.11621	0.2251
2.192	48.562	-127.3383	1218.946	-1.2832	0.81387	0.1959	57.445	91.62	156.4093	0.018066	-0.064941	0.021484	25.382	-0.540000000000001	19.6021	0.29419	-0.29467	-0.11353	-96.899	-3.271	63.101	-1.0571	0.10498	0.2041
2.194	24.038	-104.2012	1237.2012	-1.3465	0.83477	0.21182	48.5707	116.956	119.979	0.01709	-0.073242	0.027344	19.2047	11.6701	30.5082	0.28271	-0.27979	-0.12256	-81.172	-33.9381	39.455	-0.92139	0.066895	0.16602
2.196	25.895	-71.797	1250.658	-1.4175	0.85791	0.23828	18.123	89.61	115.586	0.010986	-0.071045	0.030518	35.8221	-14.02768	25.388	0.25049	-0.26367	-0.11865	-60.6626	-24.0693	18.7673	-0.79395	0.046876	0.13013
2.198	26.027	-65.1642	1254.935	-1.5096	0.88554	0.28203	59.1919	116.447	109.335	0.012207	-0.071289	0.035156	37.346	-11.100971	-22.1005	0.23682	-0.25635	-0.12793	-70.1876	5.5926	14.5694	-0.65625	0.015137	0.092285
2.2	29.834	-66.01683	1274.574	-1.6285	0.92246	0.34199	35.03923	103.464	102.867	0.011719	-0.066406	0.050293	43.1632	-20.3058	-16.3311	0.20459	-0.23926	-0.13037	-57.8911	36.156	34.738	-0.47803	-0.041504	0.04541
2.202	15.528	-67.0469	1272.8237	-1.7766	0.96426	0.41465	27.075	56.412	113.8943	0.01416	-0.067383	0.054199	47.43	6.7419	-15.2117	0.17139	-0.22705	-0.13525	-19.627	51.409	46.363	-0.38525	-0.074707	0.022461
2.204	40.706	-51.2012	1254.8523	-1.9385	1.0135	0.49795	29.234	66.7737	92.0152	0.02002	-0.062012	0.063965	45.71586	9.1244	20.9408	0.15479	-0.2207	-0.13525	10.761	12.2912	41.032	-0.23193	-0.14063	-0.017578
2.206	65.155	-52.5324	1257.0618	-2.105	1.0728	0.58984	-19.79	35.7242	91.293	0.024414	-0.065186	0.070313	21.998	35.4851	-16.238	0.12256	-0.20947	-0.14453	57.962	-12.0448	25.5548	-0.12671	-0.18555	-0.046875
2.208	62.667	-55.11	1286.0152	-2.2652	1.1156	0.6581	18.144	41.6803	78.258	0.03125	-0.070313	0.073242	10.53	18.1886	-3.266	0.099123	-0.20727	-0.14844	67.9544	-15.5346	17.0553	-0.03418	-0.2251	-0.081055
2.21	102.542	-59.748	1297.377	-2.3973	1.1711	0.71533	6.172	53.495	39.1503	0.049316	-0.069824	0.078613	22.901	13.9708	-25.1037	0.077148	-0.20068	-0.14795	77.2919	-8.5195	21.788	0.070313	-0.25977	-0.12109
2.212	112.3448	-46.472	1285.816	-2.4898	1.2176	0.75166	-21.179	11.7208	47.39643	0.058105	-0.069824	0.077148	1.039	-28.23	1.749	0.043945	-0.19141	-0.14844	103.613	-3.208	-10.768	0.11279	-0.26221	-0.14502
2.214	131.4439	-58.7852	1294.296	-2.5461	1.2422	0.76025	7.936	15.8546	45.905015	0.083984	-0.07666	0.077637	6.713	3.071	-14.0266	0.030762	-0.18408	-0.14551	96.5048	-11.445	-24.698	0.2334	-0.26514	-0.18652
2.216	101.758	-45.426	1321.0876	-2.5703	1.2461	0.75439	-20.539	9.604	30.7094	0.10401	-0.081543	0.070556	12.799	1.0869	-1.2255	-0.0083008	-0.16943	-0.13232	110.861	-16.8295	-38.7339	0.33643	-0.32203	-0.24463
2.218	119.2683	-41.0664	1334.0692	-2.5611	1.222	0.73623	-7.185	-9.581	45.117	0.12793	-0.087402	0.065918	2.084	33.253	-24.5	-0.0354	-0.15674	-0.11743	129.063	-34.372	-15.2884	0.41553	-0.37109	-0.27588
2.22	107.9438	-44.673	1338.536	-2.5183	1.1915	0.70713	18.462	28.3358	44.867	0.15625	-0.10596	0.050293	0.151	8.1912	22.283	-0.062012	-0.14209	-0.11328	136.701	-39.427	20.2079	0.43604	-0.38477	-0.29004
2.222	88.379	-48.295	1344.61895	-2.4484	1.1536	0.66455	-24.929	10.2139	37.9	0.1709	-0.11084	0.041504	8.937	30.3036	10.2716	-0.088379	-0.125	-0.10156	107.934	-20.544	14.026	0.42383	-0.36328	-0.27979
2.224	82.507	-50.809	1365.5577	-2.3704	1.1159	0.61934	13.281	14.7578	36.214	0.19482	-0.12158	0.018066	-9.443	14.1182	7.352	-0.10254	-0.11719	-0.089355	88.958	0.6267	18.346	0.38232	-0.30225	-0.24707
2.226	86.7793	-37.063	1364.997	-2.2866	1.0728	0.58203	8.156	32.104	7.9902	0.20923	-0.12866	0.0024414	9.169	56.3771	-5.809	-0.12061	-0.10645	-0.078613	69.979	33.8314	17.8744	0.3623	-0.28443	-0.22632
2.228	95.0827	-19.7251	1340.8039	-2.2026	1.0263	0.54346	-19.152	-3.72284	0.391699999999999	0.22021	-0.1333	-0.011719	-5.533	45.85	18.1272	-0.13062	-0.096192	-0.067627	58.8017	52.857	12.543	0.35986	-0.29199	-0.21777
2.23	76.231	-8.40198	1331.079	-2.1351	1.0001	0.51407	7.642	16.1446	4.5824	0.21777	-0.14453	-0.024902	-13.431	62.809	32.4647	-0.13672	-0.092285	-0.067383	43.122	49.395	25.1994	0.35938	-0.31934	-0.22803
2.232	95.904	10.6359	1329.4164	-2.0831	0.98564	0.48633	-13.768	16.9814	-8.14319	0.21289	-0.14697	-0.031738	-10.451	27.534	39.8511	-0.14697	-0.078613	-0.064941	38.584	59.03	-2.7181	0.3623	-0.33105	-0.23682
2.234	95.975	5.245	1327.335	-2.0527	0.975	0.47363	-2.568	-4.5332	14.1808	0.19482	-0.15723	-0.030762	-6.047	20.4712	8.6213	-0.14551	-0.077637	-0.068848	-10.756	55.857	4.9791	0.35986	-0.3374	-0.2627
2.236	69.477	12.387	1311.2907	-2.043	0.9707	0.4668	41.5929	23.4586	-11.8812	0.17358	-0.15747	-0.025878	-14.503	-4.6847	12.7317	-0.14307	-0.070801	-0.072266	-42.6665	72.876	-11.2996	0.34766	-0.33154	-0.28223
2.238	72.171	2.986	1303.1967	-2.0496	0.95937	0.467	15.29	-18.6316	6.684	0.14258	-0.1582	-0.020508	-1.777	5.4419	22.8042	-0.14014	-0.067871	-0.077636	-79.964	65.698	6.0158	0.32715	-0.31445	-0.28662
2.24	55.347	13.6791	1312.0606	-2.05	0.94804	0.47041	32.149	-17.7555	22.1397	0.10303	-0.15869	-0.0092773	10.825	17.5523	33.91	-0.13965	-0.065918	-0.085938	-89.939	49.746	5.9749	0.28564	-0.29199	-0.28662
2.242	41.507	31.716	1316.70084	-2.0469	0.93007	0.46494	58.9385	3.7053	18.262	0.078613	-0.15186	0.003418	16.65	29.2684	50.128	-0.14063	-0.062012	-0.091309	-69.9889	37.8504	21.1751	0.25391	-0.27979	-0.2793
2.244	15.298	35.5436	1305.28421	-2.0522	0.921	0.45605	51.8205	-10.7272	15.5258	0.031738	-0.146	0.027832	29.9439	-9.97523	62.33905	-0.13867	-0.061035	-0.094727	-83.0347	5.9831	29.485	0.18945	-0.25879	-0.25977
2.246	26.121	32.2049	1302.7925	-2.0405	0.90674	0.45068	63.99	24.2159	14.0524	-0.0048828	-0.13794	0.042236	34.994	-52.76315	67.4525	-0.15137	-0.054688	-0.098633	-85.0065	3.8554	52.619	0.12622	-0.2351	-0.23633
2.248	19.919	20.633	1295.9072	-2.0065	0.88838	0.43858	37.6317	8.7743	-11.0433	-0.03125	-0.12256	0.055176	10.06	-77.239	92.4093	-0.16895	-0.054931	-0.11133	-87.006	2.47689	66.926	0.064453	-0.20996	-0.20947
2.25	36.659	20.1039	1290.471	-1.9804	0.86729	0.42402	26.532	-10.42969	22.65422	-0.061523	-0.10742	0.080078	40.1763	-55.6986	108.0623	-0.19629	-0.049805	-0.11816	-61.0684	-8.5131	62.557	-0.014648	-0.16504	-0.17285
2.252	34.586	10.6625	1273.1709	-1.9507	0.85088	0.41387	45.083	22.5096	-2.5312	-0.07373	-0.104	0.087402	26.6776	-29.749	150.5	-0.23828	-0.030762	-0.11475	-26.977	-33.9969	50.138	-0.060547	-0.14014	-0.15723
2.254	34.383	11.2073	1281.213	-1.9221	0.83535	0.40401	16.83	8.25589	-7.003	-0.089844	-0.089844	0.10742	35.648	-14.2872	198.0297	-0.27246	-0.022949	-0.11523	-14.652	-61.25	39.324	-0.12891	-0.091797	-0.11816
2.256	56.566	20.70189	1257.3072	-1.8887	0.81934	0.39111	25.543	25.2048	28.2279	-0.095214	-0.084961	0.12329	38.057	-22.1064	247.5463	-0.33691	-0.0053711	-0.10352	8.751	-61.731	31.433	-0.16748	-0.064453	-0.1001
2.258	61.208	25.0326	1216.3312	-1.8511	0.8039	0.38232	29.489	28.08842	5.36184	-0.092285	-0.078125	0.13672	58.559	-18.1928	306.438	-0.3982	0.010742	-0.094238	11.748	-44.907	17.2856	-0.19922	-0.035645	-0.075684
2.26	68.877	33.8512	1198.221	-1.8104	0.79305	0.37441	3.785	5.081	11.7862	-0.089844	-0.076172	0.14941	24.985	-4.9	378.778	-0.46729	0.031738	-0.085938	40.51394	-25.3301	19.8745	-0.23486	-0.0039063	-0.054199
2.262	56.138	57.149	1198.736	-1.7702	0.78172	0.36151	37.7545	33.84	2.871	-0.082764	-0.078614	0.15747	26.23	27.4587	490.633	-0.57715	0.064453	-0.06543	73.991	-11.4255	8.581	-0.25879	0.019531	-0.033691
2.264	80.311	72.408	1194.98048	-1.7339	0.77997	0.35233	-6.809	31.769	-22.622159	-0.075684	-0.084473	0.15918	30.475	49.191	612.804	-0.63232	0.085449	-0.055664	86.0648	-13.50091	-0.102	-0.28125	0.042969	-0.025391
2.266	67.262	80.527	1178.1339	-1.7012	0.77344	0.34229	-7.243	18.9829	6.696	-0.064453	-0.087402	0.16846	64.263	35.682	734.006	-0.771	0.13086	-0.026855	102.782	3.406	-3.676	-0.29639	0.057617	0.0073242
2.268	56.731	67.5342	1164.90985	-1.668	0.7703	0.33508	21.974	40.658	8.6917	-0.056641	-0.083496	0.16504	62.618	-7.693	815.001	-0.88452	0.16724	0.0026857	112.863	23.8289	-16.261	-0.30176	0.0625	0.0058594
2.27	70.529	63.9362	1163.7268	-1.6461	0.7711	0.32618	-24.828	9.8491	3.795	-0.038574	-0.080566	0.17139	72.945	-82.276	907.36	-1.0137	0.21191	0.038574	128.817	54.637	-5.173	-0.30371	0.056641	0.014648
2.272	97.938	64.8055	1123.2077	-1.6243	0.77031	0.31763	-8.615	14.4821	22.59598	-0.028076	-0.075439	0.17164	58.067	-134.082	976.315	-1.2056	0.2749	0.097656	124.921	53.847	-3.4621	-0.30225	0.058106	0.02124
2.274	78.8522	62.543	1093.564	-1.6075	0.7645	0.31203	3.866	24.677	9.6036	-0.018066	-0.066406	0.17139	71.947	-159.71	1071.8211	-1.3027	0.31348	0.13721	106.886	37.711	-4.099	-0.30566	0.064941	0.022461
2.276	53.463	72.5791	1065.203	-1.5874	0.76123	0.3042	-32.947	-3.3793	33.109	-0.0068359	-0.060059	0.17188	52.5	-129.877	1099.9533	-1.5117	0.4043	0.24902	96.416	20.5478	-5.97	-0.30615	0.07373	0.020508
2.278	73.1581	72.758	1048.9396	-1.5608	0.75581	0.29712	12.534	21.5932	24.1499	0.003418	-0.055664	0.17041	21.3076	-143.774	1094.4103	-1.6684	0.47022	0.33715	77.653	23.7582	-15.64502	-0.30322	0.07959	0.022461
2.28	79.0438	57.5676	1015.62403	-1.5355	0.75948	0.28237	-23.449	25.2635	-10.5697	0.011719	-0.050781	0.16553	-27.174	-147.0882	1055.1416	-1.8218	0.53174	0.41699	86.682	24.3432	-3.4966	-0.28467	0.076172	0.021484
2.282	59.639	48.4839	1000.3848	-1.5063	0.75884	0.27286	-18.117	18.0718	12.5518	0.014405	-0.045166	0.1604	-66.824	-180.142	1039.4049	-2.0122	0.6001	0.50195	42.992	47.114	12.415496	-0.27198	0.074707	0.013184
2.284	53.339	41.5401	1009.2574	-1.471	0.75471	0.26122	29.279	41.751	15.5635	0.018555	-0.038574	0.15771	-83.122	-153.661	1014.121	-2.0957	0.62891	0.52393	13.029	38.658	9.7359	-0.24707	0.071289	0.0097656
2.286	42.063	53.9565	994.777	-1.4395	0.75	0.25244	6.081	9.858	31.79	0.021484	-0.032715	0.1499	-61.848	-148.554	1040.59	-2.2134	0.67041	0.54443	0.320999999999998	23.3366	13.693	-0.20996	0.064453	-0.003418
2.288	24.697	64.42476	972.8909	-1.4028	0.74342	0.24363	30.772	20.6389	26.2601	0.024414	-0.023926	0.14453	-64.509	-113.036	1013.695	-2.2541	0.67993	0.52417	-36.6763	7.8053	34.564	-0.18945	0.059082	-0.013184
2.29	-0.509999999999998	80.508	929.958	-1.3702	0.73192	0.23296	27.8783	30.617	9.0431	0.024414	-0.010254	0.15381	-76.21	-106.173	1032.351	-2.2729	0.69189	0.47998	-55.3504	-0.438000000000001	56.056	-0.16064	0.05957	-0.025879
2.292	17.904	80.1059	909.8831	-1.3332	0.72193	0.222	31.469	5.334	28.755	0.02124	-0.0029297	0.14648	-83.5186	-94.069	1000.786	-2.1851	0.69189	0.39209	-52.139	15.081	51.951	-0.14453	0.064941	-0.04248
2.294	-3.96	94.0058	884.9164	-1.2949	0.70918	0.21356	57.8044	22.9821	35.535	0.017578	0.010254	0.14697	-73.2184	-78.326	999.657	-2.1328	0.68555	0.34766	-81.721	39.4012	42.963	-0.14014	0.075684	-0.047852
2.296	-6.16800000000001	97.1846	859.461	-1.2559	0.69141	0.20166	24.399	11.5627	11.14673	0.0068359	0.029785	0.14844	-49.0494	-64.39	990.905	-2.0918	0.66797	0.31348	-87.73	44.218	31.916	-0.1377	0.094238	-0.052246
2.298	-15.081	97.149	828.6901	-1.2103	0.67872	0.19096	27.455	-8.6262	31.7791	0.0014648	0.039551	0.14844	-25.5605	-60.65	1020.964	-2.0556	0.6792	0.26953	-77.291	24.746	42.999	-0.14111	0.10303	-0.057129
2.3	-7.059	86.203	810.98	-1.1638	0.6601	0.1811	56.5529	12.8911	36.1214	-0.01416	0.060547	0.14063	9.482	-85.52	1057.493	-1.9312	0.60986	0.18994	-76.0591	-4.0489	39.161	-0.15674	0.11963	-0.059082
2.302	3.262	81.153	781.779	-1.12	0.6398	0.1701	7.939	-16.0442	60.5097	-0.034668	0.081299	0.12402	45.3679	-118.735	1145.446	-1.8042	0.57275	0.13477	-59.836	-3.1529	65.2882	-0.18286	0.13477	-0.061524
2.304	1.048	89.235	749.862	-1.0765	0.62289	0.16035	56.5336	-6.537	96.834	-0.062012	0.10352	0.11182	60.3909	-177.174	1199.518	-1.7612	0.59619	0.1123	-36.036	-9.0638	93.7485	-0.21484	0.15137	-0.066895
2.306	10.964	79.6464	735.7815	-1.0288	0.604	0.1543	35.3704	17.2491	95.6862	-0.10449	0.14209	0.104	-4.28	-236.568	1255.792	-1.6914	0.66504	0.084473	-15.023	20.5005	151.301	-0.27734	0.18652	-0.072266
2.308	9.813	94.915	706.511	-0.99515	0.58797	0.14206	-10.206	1.3568	154.10925	-0.12744	0.16162	0.10352	-41.537	-283.48	1267.2013	-1.6452	0.70337	0.09253	-16.666	32.4742	191.922	-0.31836	0.20996	-0.062012
2.31	16.027	100.785	686.794	-0.94997	0.57083	0.13433	48.4656	25.0668	202.193	-0.18604	0.19873	0.10938	-88.682	-310.4	1319.472	-1.6348	0.74805	0.13281	27.182	30.7339	265.609	-0.43164	0.26855	-0.03125
2.312	19.166	106.644	660.936	-0.91422	0.55771	0.12449	23.495	36.2366	216.2798	-0.2378	0.22144	0.11621	-86.784	-259.621	1335.55116	-1.6748	0.8457	0.20703	81.659	22.8396	403.952	-0.53955	0.30591	-0.0080569
2.314	25.969	94.2157	659.4291	-0.88442	0.54369	0.12065	-1.918	35.9964	267.111	-0.29443	0.24609	0.12402	-53.79512	-246.71	1349.3614	-1.6934	0.89063	0.24365	73.275	24.4603	571.708	-0.67188	0.35156	0.027832
2.316	17.856	92.23255	663.594	-0.84473	0.52637	0.11768	12.958	82.6852	296.4958	-0.38232	0.2832	0.13379	36.216	-219.217	1358.035	-1.7036	0.94189	0.29053	130.3281	27.012	782.385	-0.88477	0.42041	0.10449
2.318	39.56241	103.5192	615.7592	-0.81071	0.51154	0.11243	-38.031	83.8287	363.1386	-0.42871	0.30371	0.12695	63.866	-232.242	1382.9062	-1.6934	0.96436	0.29907	179.6526	12.04296	946.256	-1	0.46289	0.16064
2.32	40.934	87.7295	585.4843	-0.77435	0.49555	0.10576	-19.374	92.78	431.711	-0.52637	0.34766	0.14063	90.226	-209.098	1406.667	-1.6753	0.98877	0.29297	215.9329	-33.827	1107.106	-1.2559	0.58203	0.2915
2.322	41.6714	90.326004	561.9337	-0.73703	0.48272	0.099871	11.913	89.886	475.6178	-0.60547	0.38135	0.15527	100.592	-183.091	1423.0865	-1.6499	1.0132	0.26074	218.948	-91.913	1256.034	-1.4666	0.69531	0.41065
2.324	54.4947	91.02288	559.0261	-0.70164	0.46398	0.09792	-29.714	34.1839	523.749	-0.68066	0.41895	0.17236	144.569	-102.599	1421.9144	-1.6421	1.0259	0.24609	272.981	-164.755	1367.053	-1.6816	0.81641	0.53174
2.326	48.3704	99.014	514.082	-0.66992	0.44531	0.089844	-9.486	20.4392	602.1641727	-0.79688	0.45898	0.20264	144.516	-57.332	1426.1679	-1.6558	1.022	0.23242	314.308	-211.622	1493.359	-1.9482	0.97656	0.70557
2.328	54.3568	103.4979	484.833	-0.63076	0.42535	0.084267	3.617	1.9466	667.94777	-0.85791	0.48291	0.21777	189.425	-9.625	1430.086	-1.7515	0.99658	0.25879	273.017	-245.576	1529	-2.0703	1.0498	0.77979
2.33	35.041	104.3124	480.2186	-0.59724	0.41151	0.082117	16.809	-33.8141	734.842	-0.97998	0.52832	0.26318	127.0026	-18.774	1388.656	-1.8315	0.98877	0.28418	202.974	-231.375	1584.12	-2.2944	1.1362	0.87695
2.332	41.5021	107.6792	470.52035	-0.56444	0.38694	0.082139	52.445	-26.486	773.802	-1.0778	0.55591	0.31226	70.216	-23.31	1408.136	-2.041	0.93555	0.3667	10.522	-258.719	1575.872	-2.4165	1.144	0.8706
2.334	37.057	107.4062	446.6199	-0.52817	0.37506	0.076749	28.062	-71.3294	811.974	-1.1758	0.57129	0.35791	3.142	-69.854	1444.526	-2.2305	0.91211	0.45508	-112.87	-258.117	1475.887	-2.478	1.1089	0.82227
2.336	-0.689	114.807	429.03375	-0.49365	0.35596	0.06543	69.494	-95.455	880.5614	-1.3047	0.58203	0.42676	1.406	-64.8219	1506.824	-2.4355	0.9043	0.52393	-115.86	-249.45	1459.85	-2.4526	1.0015	0.70508
2.338	11.351	111.566	415.7854	-0.46028	0.33536	0.062317	69.413	-91.1809	894.5259	-1.375	0.58789	0.46484	27.029	-87.462	1547.532	-2.687	0.90869	0.6084	-129.367	-204.794	1435.538	-2.394	0.94775	0.63672
2.34	-8.405	101.8185	402.658	-0.43343	0.32014	0.053134	32.299	-125.3391	913.912	-1.4922	0.58301	0.54932	105.7389	-88.228	1561.075	-2.7891	0.9082	0.64014	-123.845	-192.223	1438.779	-2.1602	0.83984	0.479
2.342	13.265	98.5632	374.12066	-0.39945	0.29865	0.046098	100.9644	-99.4686	909.32	-1.5635	0.57617	0.59864	111.047	-131.509	1537.974	-2.9468	0.91455	0.68359	-133.294	-172.284	1403.076	-1.9304	0.73657	0.3501
2.344	-16.238	101.139	353.0549	-0.3633	0.2797	0.037404	80.6371	-98.393	848.824	-1.6172	0.56836	0.64502	109.29	-127.966	1553.947	-3.0144	0.92065	0.69653	-191.889	-133.482	1329.014	-1.6934	0.62402	0.23291
2.346	5.246	102.886	340.8033	-0.32422	0.25732	0.03125	96.657	-127.999	830.394	-1.6738	0.56592	0.69775	80.336	-117.7519	1545.4521	-3.0425	0.92627	0.70117	-242.913	-125.13	1285.089	-1.4492	0.52344	0.12988
2.348	-10.56	94.6	316.8373	-0.2956	0.23594	0.020017	126.8782	-97.108	775.833	-1.6855	0.57227	0.71924	77.546	-51.683	1575.171	-3.0718	0.90479	0.69336	-248.67	-83.78	1280.298	-1.3564	0.51514	0.11768
2.35	-29.762	83.877	291.196	-0.26308	0.21806	0.0075166	82.052	-90.867	718.139	-1.6758	0.59668	0.75049	44.439	-39.948	1577.17829	-3.0781	0.88867	0.68896	-224.68	-49.25	1318.55	-1.2593	0.57227	0.10156
2.352	-18.357	64.4741	294.9863	-0.23886	0.19931	9.657e-05	99.074	-82.332	758.458	-1.6482	0.61792	0.75904	56.172	-4.819	1589.985	-3.1055	0.85742	0.68311	-61.991	-42.86	1365.683	-1.2478	0.65015	0.13281
2.354	-13.626	67.3349	294.6317	-0.21543	0.1875	-0.012305	88.7409	-38.4028	768.701	-1.6113	0.64063	0.76318	22.897	3.215	1570.945	-3.1416	0.84082	0.68872	52.631	-104.248	1404.126	-1.2515	0.74365	0.18311
2.356	-4.466	79.54	273.5251	-0.18506	0.17188	-0.021484	38.508	-49.294	815.58	-1.5527	0.66797	0.76025	-0.164999999999992	55.192	1541.8421	-3.1831	0.82861	0.69727	44.334	-213.745	1403.688	-1.2769	0.86572	0.24072
2.358	-9.738	83.591	252.6115	-0.16406	0.15567	-0.013672	69.647	-47.89	869.222	-1.5254	0.68457	0.76221	-18.086	90.244	1515.981	-3.2183	0.83447	0.71484	-75.345	-285.07	1430.669	-1.3027	0.91211	0.25146
2.36	1.073	71.17579	255.8812	-0.14199	0.14083	-0.0097653	47.17535	-55.645	898.615	-1.4897	0.71338	0.76758	-12.695	133.449	1491.55	-3.2202	0.83838	0.71582	-158.619	-333.085	1524.964	-1.3633	0.99219	0.27979
2.362	-13.22	74.18787	240.8391	-0.11543	0.12715	-0.0085942	26.487	-107.164	968.9312	-1.4815	0.72216	0.77099	18.21	113.7424	1478.3223	-3.1816	0.86719	0.70459	-204.78	-328.644	1600.295	-1.4332	1.044	0.30567
2.364	-4.439	85.275	228.7141	-0.099709	0.11504	-0.00078138	70.62708	-96.937	996.85	-1.4795	0.73633	0.77002	63.432	90.1008	1473.701	-3.1079	0.87646	0.68067	-225.47	-346.544	1620	-1.5156	1.084	0.32275
2.366	26.165	75.292	214.8197	-0.080078	0.09668	0.0014648	5.186	-114.654	1018.079	-1.4619	0.74805	0.75439	92.8893	48.2158	1471.9392	-3.0039	0.87646	0.65283	-62.864	-348.12	1614.629	-1.6772	1.1255	0.3418
2.368	34.8633	57.0263	207.51872	-0.064746	0.082813	0.00097656	14.673	-170.54585	1076.23	-1.4473	0.75	0.73682	84.5253	30.7492	1468.9378	-2.8672	0.87695	0.59424	94.552	-314.03	1567.59	-1.7715	1.1348	0.35742
2.37	37.169	51.571	196.40425	-0.044628	0.07334	0.0021484	36.791	-195.469	1088.382	-1.395	0.76611	0.6748	100.5529	21.838	1453.226	-2.791	0.87891	0.57275	183.6744	-225.4	1549.618	-1.9683	1.1646	0.39844
2.372	26.64	54.9979	160.057	-0.027051	0.063965	-0.00019535	-16.652	-269.254	1101.1788	-1.3432	0.77491	0.62085	71.466	41.228	1454.719	-2.6445	0.85547	0.52393	207.7615	-107.324	1567.9935	-2.1455	1.1797	0.42994
2.374	50.459	61.811	146.9978	-0.0081052	0.053516	0.003711	-21.105	-278.803	1138.0698	-1.2988	0.78418	0.56348	114.52303	28.671	1451.22941	-2.5505	0.82934	0.48852	222.447	-25.875	1566.341	-2.3242	1.1973	0.47119
2.376	39.747	63.126	151.8526	0.0097656	0.041992	-0.0019531	-40.707	-231.839	1128.891	-1.2524	0.79541	0.49512	135.2448	26.479	1469.206	-2.4551	0.79883	0.46045	279.128	-2.002	1588.725	-2.5586	1.2109	0.51709
2.378	39.5489	62.1097	148.95706	0.024903	0.032519	-0.0016601	-85.6545	-236.076	1177.807	-1.2319	0.79736	0.46777	119.59145	25.507	1453.681	-2.3164	0.75977	0.42871	285.13	13.166	1549.4443	-2.6699	1.2119	0.52637
2.38	27.566	56.5645	138.1855	0.040723	0.021289	-0.0032226	-36.938	-177.634	1198.38	-1.2324	0.7959	0.43848	82.675	27.302	1443.063	-2.2476	0.7417	0.40967	318.94	46.068	1530.077	-2.8555	1.1934	0.52783
2.382	28.479	43.2442	139.5062	0.048926	0.020898	-0.0067383	-39.657	-153.716	1169.026	-1.2515	0.78369	0.41602	64.7844	67.143	1383.71667	-2.1152	0.70557	0.38525	310.62	140.89	1545.867	-2.9937	1.1548	0.53125
2.384	38.2413	43.5796	144.987	0.056446	0.014649	-0.0055664	3.675	-138.889	1233.5763	-1.2764	0.78027	0.41064	38.91	113.806	1329.664	-2.0163	0.69165	0.36597	253.691	174.802	1542.897	-3.041	1.125	0.52783
2.386	22.779	40.4151	128.0673	0.064453	0.012695	-0.0058594	38.036	-60.036	1258.35273	-1.3145	0.77832	0.40332	64.564	178.602	1269.815	-1.9233	0.68408	0.34863	178.1589	132.315	1541.129	-3.0952	1.0728	0.52051
2.388	16.745	37.9789	104.6404	0.071778	0.0057617	-0.0076172	3.872	-48.262	1262.9617	-1.3445	0.77466	0.39014	84.084	190.654	1268.4027	-1.8022	0.67041	0.33203	112.938	51.36	1526.3166	-3.1121	1.0325	0.51831
2.39	-2.868	40.277	80.346	0.071484	0.0021484	-0.0086914	59.27068	-46.975	1296.934	-1.3794	0.78564	0.37646	115.4461	200.204	1215.795	-1.748	0.66699	0.3252	124.614	-39.1481	1565.567	-3.1187	1.0005	0.50684
2.392	22.773	35.224	84.344	0.075	-0.0060547	-0.011816	30.18	-37.735	1263.5181	-1.4453	0.80469	0.3667	75.2613	175.609	1204.1136	-1.644	0.65332	0.31641	151.453	-100.984	1633.085	-3.1055	0.97461	0.49316
2.394	-1.787	30.055	83.9368	0.082813	-0.0084962	-0.013867	1.645	-113.3911	1297.8157	-1.4897	0.82275	0.36572	45.72037	194.59	1149.166	-1.5756	0.64063	0.30762	137.051	-105.405	1635.751	-3.0972	0.9751	0.47656
2.396	-3.666	29.286	77.7229	0.086426	-0.016113	-0.020508	59.5612	-140.93	1326.687	-1.6147	0.86084	0.38428	8.3506	181.969	1137.216	-1.5093	0.62939	0.29639	102.6347	-85.0565	1601.86	-3.064	0.98877	0.4668
2.398	-9.751	27.7448	77.3994	0.091699	-0.020605	-0.027637	5.035	-153.611	1296.199	-1.7407	0.88721	0.41284	21.648	197.339	1085.209	-1.4141	0.61133	0.26855	66.225	-47.7245	1548.785	-3.0368	1.01	0.46094
2.4	-21.019	41.228	76.6315	0.095117	-0.025391	-0.037695	8.83	-189.171	1353.451	-1.8867	0.91113	0.45752	13.323	183.98803	1070.5942	-1.3633	0.59766	0.25977	-13.805	-52.768	1513.6273	-3	1.0332	0.45166
2.402	-10.477	26.293	72.44152	0.089648	-0.023829	-0.045507	44.8195	-159.245	1377.486	-2.1108	0.95361	0.52832	-9.48699999999999	194.5547	995.832	-1.2734	0.57715	0.24219	-32.969	-59.013	1528.148	-2.9331	1.0532	0.45654
2.404	-24.428	23.9707	60.2676	0.087012	-0.018848	-0.055664	8.638	-160.794	1389.3101	-2.2305	0.98242	0.57666	-26.759	162.579	983.727	-1.2039	0.55591	0.2273	-65.237	-58.35	1524.967	-2.8945	1.0605	0.46338
2.406	-10.588	11.3063	57.3137	0.08252	-0.011719	-0.065918	87.57	-161.234	1447.222	-2.4707	1.0332	0.67236	-69.432	156.554	941.79	-1.1362	0.53174	0.2168	-98.92766	-41.22	1527.104	-2.8105	1.0664	0.45947
2.408	-15.34	23.44	37.4292	0.060449	-0.0096678	-0.05918	93.399	-105.781	1448.426	-2.6479	1.0727	0.75195	-103.362	143.549	957.119	-1.0508	0.50586	0.20313	-140.284	26.4006	1456.066	-2.7302	1.0642	0.44555
2.41	-7.724	28.484	25.228	0.041211	-0.0030273	-0.058496	40.3297	-120.171	1485.554	-2.814	1.1118	0.82715	-63.0805	170.573	920.348	-1.0073	0.49072	0.19678	-135.249	114.85996	1385.71377	-2.6387	1.0586	0.42822
2.412	-6.861	30.9306	22.8402	0.019727	0.0083007	-0.053027	83.989	-76.124	1508.784	-3.0054	1.1567	0.92773	-24.275	155.541	885.291	-0.91797	0.45703	0.18701	-98.4771	191.383	1312.84	-2.4995	1.0317	0.39844
2.414	-1.446	20.3902	33.9356	-0.0023438	0.012988	-0.04541	14.966	-18.471	1452.35404	-3.0874	1.1743	0.97656	-16.505	171.818	813.214	-0.8501	0.43408	0.18164	-36.401	217.646	1260.177	-2.4258	1.0137	0.37158
2.416	18.071	21.573	34.95099	-0.028809	0.021484	-0.039063	9.943	-39.359	1472.572	-3.2124	1.2134	1.0566	14.672	174.099	770.396	-0.78125	0.41016	0.18213	1.288	189.496	1220.827	-2.2729	0.96924	0.3501
2.418	17.56	17.4744	17.723	-0.048047	0.033593	-0.021973	16.249	13.27	1446.633	-3.2706	1.2344	1.0894	-7.964	235.239	708.104	-0.68896	0.38232	0.17871	2.378	172.8777	1209.92005	-2.1567	0.93896	0.32349
2.42	35.06	8.4931	32.7623	-0.062305	0.044141	-0.0125	-66.2653	13.4491	1402.158	-3.3066	1.2402	1.1118	1.4152	238.21	693.733	-0.64844	0.35938	0.1709	32.487	149.991	1231.13	-2.0508	0.90039	0.30518
2.422	21.205	9.1487	42.1798	-0.075977	0.050781	-0.0093751	-16.618	-0.4322	1434.777	-3.2964	1.2407	1.1182	-4.8016	252.316	648.819	-0.55518	0.32471	0.17139	82.0517	155.892	1221.9019	-1.9116	0.85205	0.26367
2.424	34.661	17.3662	33.6052	-0.08418	0.058984	-0.0027344	-31.3554	48.158	1406.881	-3.2754	1.2305	1.1099	7.2178	228.071	628.063	-0.48511	0.29053	0.16113	134.634	138.207	1196.068	-1.8555	0.83008	0.24609
2.426	29.786	26.822	5.9208	-0.085938	0.067383	0.0068359	-63.15338	5.112	1435.835	-3.2168	1.2188	1.0864	1.943	224.0266	590.783	-0.41016	0.25586	0.15039	189.541	127.865	1172.502	-1.7148	0.79102	0.2085
2.428	40.469	27.114	-2.728	-0.083887	0.069434	0.0090821	-0.0180000000000007	3.92448	1483.8344	-3.1513	1.2065	1.064	10.487	201.558	541.763	-0.31836	0.20508	0.13232	189.866	140.6728	1111.139	-1.6045	0.76563	0.18506
2.43	45.926	16.204	21.4138	-0.080567	0.070313	0.013379	-31.214	13.3375	1470.9909	-3.0938	1.1953	1.0396	-21.9697	216.0591	502.1677	-0.27295	0.1792	0.12549	186.099	150.861	1106.28	-1.4961	0.73535	0.15967
2.432	43.791	16.7583	17.54075	-0.07627	0.075781	0.0090821	-11.775	-32.466	1505.493	-3.0176	1.1699	1.0103	-27.95654	186.917	452.2431	-0.17969	0.11963	0.10303	205.977	164.881	1098.9592	-1.3438	0.67969	0.13525
2.434	44.9368	8.78944	22.20012	-0.064649	0.079883	0.021191	15.4186	7.8	1495.6668	-2.9746	1.1543	1.0015	11.7589	157.882	445.2315	-0.11499	0.073243	0.081787	210.54	153.522	1107.273	-1.2651	0.65479	0.11914
2.436	20.655	13.5131	16.8857	-0.055664	0.081543	0.021973	-57.649	6.993	1484.116	-2.8979	1.1235	0.96484	42.4532	131.162	403.8502	-0.059082	0.030273	0.066406	171.984	139.623	1059.3	-1.1172	0.60156	0.092285
2.438	34.7976	4.2242	25.1714	-0.045605	0.080469	0.02334	0.765999999999998	-4.039	1521.334	-2.8256	1.0972	0.94336	57.312	127.421	367.321	0.0073242	-0.030273	0.040527	130.435	160.445	979.617	-1.0032	0.56421	0.075439
2.44	24.981	7.7484	13.21563	-0.033691	0.084766	0.020996	0.0779999999999994	51.603	1496.904	-2.7456	1.0718	0.91016	71.496	125.9384	338.9731	0.037598	-0.057617	0.033691	100.69	192.196	912.628	-0.89453	0.52734	0.058594
2.442	21.874	12.4565	8.0063	-0.032129	0.085156	0.02334	-31.1337	20.67807	1468.175	-2.6211	1.0313	0.86768	31.0856	129.239	347.649	0.083984	-0.1167	0.0087891	78.669	260.264	872.251	-0.75537	0.4751	0.05127
2.444	1.556	20.9162	13.6734	-0.028028	0.085742	0.025	39.8933	35.548	1454.25	-2.5527	1.0117	0.83838	-1.183	117.322	302.6383	0.11182	-0.15259	-0.0058595	51.9369	276.168	827.345	-0.68701	0.45068	0.046387
2.446	7.116	34.776	4.35047	-0.024414	0.084473	0.025879	-2.012	77.8874	1393.5737	-2.4141	0.97559	0.77979	-10.843	113.4048	304.504	0.13184	-0.18213	-0.013184	37.0381	264.361	811.682	-0.54443	0.40479	0.044434
2.448	2.655	27.9338	10.9903	-0.024219	0.087012	0.030566	12.995	56.003	1393.0005	-2.3037	0.94726	0.7373	-23.7145	113.106	233.5588	0.146	-0.22119	-0.032227	-13.076	250.794	783.549	-0.44238	0.36694	0.038818
2.45	-7.961	13.67698	13.2236	-0.027734	0.090918	0.03125	64.7351	121.638	1382.0216	-2.1909	0.91846	0.69727	-18.2211	118.367	223.7712	0.14453	-0.24023	-0.037109	-35.0394	215.514	765.693	-0.33887	0.32959	0.037598
2.452	-0.422999999999995	-8.615	40.0427	-0.030468	0.095996	0.036328	17.816	124.914	1348.5807	-2.0469	0.87891	0.64893	-23.651	134.045	173.1291	0.13086	-0.26758	-0.037109	-64.961	202.529	707.799	-0.20752	0.27246	0.036621
2.454	-16.929	-1.65303	34.2886	-0.031543	0.095898	0.035449	75.665	98	1354.7078	-1.9766	0.85938	0.62549	-73.203	133.594	144.667	0.10254	-0.29297	-0.031738	-89.729	205.0564	651.211	-0.14307	0.24316	0.033203
2.456	-4.582	7.0696	15.6443	-0.035645	0.099609	0.039063	81.798	131.655	1325.903	-1.8472	0.81689	0.59326	-73.2809	150.32	85.574	0.084473	-0.30225	-0.027344	-116.572	198.018	573.334	-0.019531	0.1875	0.028809
2.458	-6.709	12.56323	12.2351	-0.033692	0.099118	0.046191	37.267	87.139	1306.028	-1.7547	0.79273	0.56641	-37.2488	117.441	79.344	0.035156	-0.31006	-0.0068359	-187.713	186.98	514.269	0.068603	0.13964	0.030762
2.46	-15.097	16.7977	13.7768	-0.035938	0.10039	0.046972	69.785	95.405	1312.748	-1.6738	0.76563	0.54541	-16.793	106.529	62.787	-0.0083011	-0.31152	0.008789	-238.5	138.697	482.3292	0.14697	0.097656	0.021484
2.462	-2.866	17.7009	10.511	-0.036328	0.099999	0.048144	21.924	107.752	1271.126	-1.5698	0.7251	0.51953	5.69	74.431	78.903	-0.052734	-0.30469	0.027344	-209.33	96.547	456.513	0.25342	0.036621	0.012695
2.464	-2.92	18.264	0.9866	-0.03457	0.10313	0.051172	24.2424	40.799	1253.671	-1.5234	0.70605	0.50879	32.416	89.726	60.52543	-0.10791	-0.29004	0.056641	-181.889	72.7	397.965	0.29785	0.012695	0.0087891
2.466	26.627	19.6381	21.3991	-0.032715	0.10986	0.052246	62.2459	54.176	1215.417	-1.4351	0.66455	0.49023	-26.9502	80.159	42.483	-0.13379	-0.27881	0.071289	-148.591	93.116	357.348	0.37793	-0.047852	-0.0019531
2.468	2.693	4.7006	49.703	-0.028223	0.11006	0.052442	-6.578	42.911	1164.3152	-1.3706	0.625	0.47851	-39.172	77.307	27.554	-0.17773	-0.24365	0.083984	-122.93	145.739	325.21	0.42652	-0.084473	-0.016602
2.47	23.159	5.84842	72.2378	-0.023731	0.11006	0.048828	6.314	33.893	1169.8966	-1.3145	0.58984	0.46191	-27.968	45.242	29.985	-0.20435	-0.21533	0.104	-52.5413	167.021	287.2627	0.4707	-0.125	-0.019043
2.472	16.619	10.0214	66.085	-0.024121	0.11279	0.053906	-4.862	109.119	1122.805	-1.2422	0.54395	0.44775	-4.924	40.824	19.607	-0.22412	-0.18799	0.12402	10.6077	179.293	228.039	0.50635	-0.17432	-0.025879
2.474	24.983	28.6569	79.254	-0.025781	0.11748	0.049219	-30.005	94.9484	1095.481	-1.209	0.51855	0.44189	6.852	15.213	20.0822	-0.25195	-0.15479	0.1416	57.6906	174.134	191.888	0.51221	-0.19385	-0.02832
2.476	26.1129	43.2426	107.4733	-0.038574	0.12207	0.040039	11.803	112.6747	1064.5642	-1.1484	0.47656	0.43311	27.161	35.0514	14.6602	-0.27051	-0.13965	0.15137	72.311	178.589	159.859	0.50781	-0.23486	-0.025391
2.478	6.299	55.8039	114.107	-0.051074	0.13994	0.040137	-23.321	148.818	1006.3292	-1.1009	0.44898	0.427	19.9915	13.993	40.5514	-0.30469	-0.10449	0.16748	56.389	206.354	164.9387	0.48877	-0.25757	-0.019287
2.48	33.4977	64.83102	130.747	-0.066211	0.16015	0.041992	10.046	124.034	1012.574	-1.0566	0.42334	0.42139	21.305	20.5687	27.736	-0.32568	-0.078614	0.18262	53.772	189.471	144.777	0.45459	-0.27148	-0.0083008
2.482	6.528	77.1944	172.78259	-0.093555	0.17969	0.04707	45.842	183.915	963.5345	-0.99561	0.40088	0.41992	22.035	-4.4764	30.9405	-0.35059	-0.058594	0.18994	61.39661	161.362	106.082	0.38232	-0.2876	0.0014648
2.484	16.3792	76.7525	217.069	-0.13301	0.19658	0.049902	-22.08	188.142	910.1022	-0.96436	0.38916	0.41699	58.447	14.291	22.7733	-0.37451	-0.03125	0.20996	90.8815	129.0605	81.152	0.33496	-0.28516	0.010254
2.486	-6.612	83.5626	246.306	-0.17236	0.21826	0.061035	12.28	154.7333	883.72	-0.90234	0.36133	0.4165	64.559	-4.971	20.7193	-0.38574	-0.020508	0.21924	128.301	118.7618	57.19	0.22803	-0.27637	0.025879
2.488	26.9557	74.2192	285.7729	-0.21338	0.23213	0.069434	16.704	180.11	814.526	-0.85547	0.33691	0.41528	85.706	27.6163	29.6829	-0.40283	0.00097656	0.23486	149.755	125.741	55.8119	0.13013	-0.25488	0.045899
2.49	0.5	70.0772	324.7319	-0.26543	0.25264	0.077051	13.178	125.4389	797.091	-0.7998	0.32031	0.41846	37.6493	33.2001	33.589	-0.40234	0.012207	0.24585	151.31	104.383	67.9912	0.030273	-0.23047	0.057129
2.492	-22.4616	77.895	366.591	-0.31113	0.27178	0.084863	67.176	123.873	770.1352	-0.72412	0.27783	0.40039	31.417	45.101	14.06	-0.39844	0.023438	0.25439	148.42	72.747	65.487	-0.11035	-0.19141	0.10498
2.494	-12.741	68.899	413.892	-0.36699	0.29551	0.0875	18.36	129.0905	731.0803	-0.68115	0.2666	0.39258	19.576	3.743	29.94392	-0.39063	0.034668	0.2583	127.455	20.18209	76.418	-0.1748	-0.16748	0.12109
2.496	-21.1913	54.044	466.957	-0.42725	0.31836	0.086426	40.354	82.617	717.263	-0.59521	0.23193	0.37012	13.484	1.60622	8.8361	-0.37305	0.037598	0.26221	115.517	5.784	94.915	-0.29736	-0.125	0.16602
2.498	-28.875	22.7	536.10362	-0.48769	0.34356	0.092383	83.6726	116.034	684.2235	-0.52832	0.19458	0.35401	10.05	-17.027	7.9935	-0.33301	0.040039	0.27393	63.096	10.436	98.661	-0.36719	-0.090576	0.19214
2.5	-28.867	4.176	579.4946	-0.56406	0.36407	0.094336	55.428	122.1285	651.359	-0.46289	0.1626	0.33789	14.851	5.489	50.45	-0.29492	0.036621	0.27636	20.4812	-2.2926	84.598	-0.41992	-0.055176	0.20996
2.502	5.748	-18.684	639.1436	-0.63867	0.39571	0.097461	103.3327	117.9539	645.6881	-0.37305	0.11621	0.30908	-17.293	0.0569999999999986	27.1437	-0.25537	0.02002	0.27051	-19.304	9.63442	82.367	-0.46484	0.0058594	0.23291
2.504	4.237	-39.113	693.96	-0.72325	0.42461	0.1042	95.81802	159.796	594.7323	-0.33154	0.09082	0.29004	-14.702	1.269	20.28373	-0.19775	0	0.2627	-86.4152	-5.493	44.0804	-0.4812	0.03711	0.26441
2.506	-15.099	-66.0506	722.619	-0.8125	0.45117	0.11377	99.189	136.923	571.8202	-0.24805	0.041504	0.25928	-3.353	-33.6054	-0.899999999999999	-0.1626	-0.010254	0.25928	-100.888	-7.5114	35.8297	-0.49805	0.055664	0.28906
2.508	-2.876	-71.722	738.7133	-0.9039	0.48438	0.13653	117.6107	163.068	534.8421	-0.16602	-0.0019531	0.22559	-21.31	-40.8018	-12.378	-0.1001	-0.043945	0.24854	-111.41	-19.3112	9.8383	-0.52881	0.075684	0.32373
2.51	37.557	-54.8733	729.569	-0.99132	0.51514	0.16279	64.782	193.113	484.1202	-0.12939	-0.020996	0.21338	-22.26	-36.721	-18.83	-0.054444	-0.064209	0.23511	-114.428	-33.0861	1.50961	-0.53711	0.080078	0.33838
2.512	77.442	-48.6052	731.512	-1.0749	0.53935	0.19678	86.8097	155.53	480.996	-0.063477	-0.064453	0.17969	6.035	7.2797	15.32372	-0.012695	-0.086914	0.21729	-102.931	-31.9075	-4.4378	-0.54492	0.074707	0.35791
2.514	31.14	-56.7734	708.154	-1.1521	0.56143	0.23945	84.4373	175.088	426.192	-0.023194	-0.096436	0.15698	-3.899	15.9835	7.06772	0.033203	-0.10938	0.19385	-114.344	-27.428	-1.613	-0.53442	0.069091	0.3689
2.516	27.849	-60.834	677.514	-1.2163	0.58154	0.28906	28.84	164.845	388.857	0.0092773	-0.12158	0.146	-16.357	14.9694	18.0853	0.063477	-0.12207	0.18213	-78.381	-3.311	-6.2228	-0.51709	0.060059	0.375
2.518	71.956	-38.7373	671.784	-1.2667	0.59365	0.33574	62.1541	146.14335	364.268	0.049805	-0.15869	0.11426	-23.034	-21.0232	1.294	0.11182	-0.1499	0.16699	-77.427	9.099	-3.42	-0.46484	0.053711	0.37305
2.52	74.6167	-46.8016	661.474	-1.2984	0.59853	0.37305	40.166	181.635	310.924	0.065918	-0.16992	0.10303	-35.551	-10.0894	-1.61	0.14624	-0.17187	0.14942	-45.0333	-12.716	-15.125	-0.44141	0.055176	0.36768
2.522	48.2977	-48.1076	651.2436	-1.3093	0.59776	0.39805	8.378	144.391	317.908	0.091797	-0.19043	0.078125	-1.207	15.2102	-27.24731	0.17773	-0.18848	0.13574	-44.067	5.773	-34.24	-0.38379	0.04834	0.37744
2.524	59.2466	-27.595	642.082	-1.2946	0.58848	0.41064	41.319	139.933	312.7034	0.10523	-0.19849	0.066894	26.118	54.543	-3.4388	0.22559	-0.21094	0.12012	-50.917	18.26083	-17.06	-0.34595	0.031739	0.37818
2.526	87.335	-7.544	653.962	-1.2632	0.58447	0.4082	-0.971999999999994	136.394	280.8524	0.11328	-0.20508	0.049805	16.892	51.735	-30.009	0.24854	-0.22021	0.11035	-0.282000000000004	27.8613	11.092	-0.30225	0.0097656	0.37109
2.528	44.999	-0.298999999999999	671.697	-1.2212	0.571	0.39433	7.729	90.736	293.73066	0.12012	-0.20508	0.037109	3.048	43.551	-20.588	0.29248	-0.24658	0.092773	34.3969	33.874	1.3463	-0.25488	-0.029785	0.35986
2.53	39.716	-18.716	701.084	-1.1682	0.55478	0.38223	19.048	110.903	278.065	0.11865	-0.20752	0.028809	26.869	11.361	-24.767	0.32471	-0.26343	0.076172	53.3738	3.84676	11.9115	-0.22314	-0.047363	0.35596
2.532	63.8636	-24.964	727.221	-1.1214	0.53447	0.37168	-37.369	95.561	282.698	0.12207	-0.20117	0.01416	42.0054	-2.348	0.5071	0.35596	-0.27686	0.061035	82.802	2.2507	-5.2392	-0.16406	-0.088379	0.33496
2.534	89.2932	-74.303	768.514	-1.074	0.52295	0.35205	17.222	77.807	273.979	0.11524	-0.20459	0.0075684	61.9276	16.122	25.0489	0.38477	-0.29248	0.041992	130.656	27.9451	2.4471	-0.12207	-0.12427	0.3186
2.536	52.8744	-113.635	782.722	-1.0352	0.52344	0.34521	-11.536	93.387	207.0674	0.1123	-0.19922	-0.00048828	45.4945	27.395	54.1409	0.3999	-0.2998	0.036133	145.066	53.881	8.112	-0.074707	-0.16553	0.29883
2.538	45.4079	-127.21	796.549	-0.99951	0.53096	0.3418	-41.186	62.6041	192.3879	0.11084	-0.20166	-0.012695	50.7149	39.733	24.0598	0.41553	-0.31104	0.024414	147.22	74.96	18.911	-0.01416	-0.21631	0.27734
2.54	34.906	-142.573	800.9866	-0.95146	0.52705	0.33652	18.329	73.9761	172.028	0.10742	-0.20557	-0.017578	47.1374	26.4449	20.8974	0.42041	-0.31226	0.016113	167.032	52.442	28.6245	0.015137	-0.24219	0.2583
2.542	21.757	-157.377	814.3672	-0.91514	0.51025	0.32911	-15.392	87.3154	135.0123	0.10791	-0.19531	-0.019531	41.134	19.3529	11.223	0.42236	-0.31445	0.010254	154.723	29.8763	21.64332	0.08252	-0.30225	0.23535
2.544	-23.966	-180.212	840.4944	-0.89209	0.50323	0.32451	16.599	72.74036	145.3993	0.1106	-0.19702	-0.033204	11.323	-6.2873	17.416	0.41016	-0.31201	-0.00048828	146.724	11.058	36.927	0.13037	-0.34106	0.21314
2.546	-31.507	-175.069	833.468	-0.88623	0.50244	0.32715	19.553	80.4381	112.9794	0.11182	-0.19873	-0.041016	28.215	3.78763	2.104	0.396	-0.30225	0.0058594	122.839	18.9917	60.764	0.17529	-0.37012	0.19336
2.548	-20.917	-139.5795	871.2413	-0.8918	0.51152	0.34092	-10.609	69.725	112.202	0.11182	-0.20166	-0.054688	5.704	11.8684	35.3763	0.36279	-0.27148	0.00048828	93.0881	30.3138	60.991	0.22998	-0.39648	0.16406
2.55	-32.131	-115.691	912.9475	-0.90977	0.53477	0.35341	53.301	55.945	118.588	0.11475	-0.20801	-0.056641	37.762	37.003	30.093	0.33081	-0.24146	0.0046386	63.6366	27.9962	49.553	0.25439	-0.40967	0.15283
2.552	-47.375	-101.915	943.8952	-0.94258	0.56133	0.36826	62.1541	79.098	72.5987	0.12061	-0.20996	-0.07373	13.8492	16.7472	45.9040125	0.29541	-0.21484	0.018555	35.876	17.257	32.509	0.29346	-0.42822	0.11963
2.554	-44.713	-81.123	959.9581	-0.98252	0.58838	0.38545	44.46	64.899	73.3313	0.12745	-0.21655	-0.08496	9.896	7.541	41.42	0.23779	-0.17383	0.033691	-25.177	0.272000000000006	6.4777	0.31177	-0.42944	0.10132
2.556	-23.098	-57.122	968.8487	-1.0264	0.61523	0.39697	74.0589	60.62126	61.3987	0.14014	-0.21777	-0.093262	-11.759	-14.34511	18.3116	0.20703	-0.15186	0.041016	-29.853	-21.067	35.6912	0.32031	-0.42725	0.092285
2.558	-9.706	-42.626	981.2815	-1.0715	0.64063	0.40869	39.2744	59.3382	44.2156	0.15186	-0.21631	-0.10938	3.948	10.06897	1.788	0.14844	-0.11719	0.060059	-58.0629	-22.1583	44.9262	0.30615	-0.41211	0.086426
2.56	-25.502	-37.485	1003.1225	-1.1156	0.66631	0.41455	52.774	15.395	27.1117	0.15918	-0.21729	-0.11377	-18.1373	23.5438	22.6743	0.11621	-0.091308	0.070801	-89.582	-37.59274	35.295	0.28809	-0.39648	0.083984
2.562	1.981	-40.997	1020.984	-1.1605	0.68896	0.42432	57.4274	16.418	9.11	0.15967	-0.2251	-0.12451	0.472000000000001	28.71	23.7387	0.078125	-0.065918	0.078125	-82.7526	-27.036	15.48365	0.23877	-0.34717	0.092773
2.564	0.469000000000001	-53.633	1025.0227	-1.195	0.71279	0.43555	13.031	-6.096	23.01157	0.15234	-0.22192	-0.1355	-29.759	-10.632	18.764	0.035156	-0.037109	0.084961	-93.5592	-38.623	3.0807	0.19702	-0.30371	0.097168
2.566	0.636000000000003	-84.4525	1038.265	-1.2246	0.73438	0.44189	60.9186	-22.6254	41.852	0.14648	-0.21924	-0.12549	-28.829	-34.15429	9.2223	0.012695	-0.019531	0.087891	-95.584	-39.027	20.4184	0.14209	-0.24707	0.10938
2.568	-6.876	-117.0792	1085.0478	-1.2468	0.75557	0.43711	37.937	6.0997	16.1525	0.13232	-0.20459	-0.12695	-30.1449	-48.801	-11.65168	-0.018555	0.012207	0.094727	-81.9733	-19.5669	14.7647	0.076172	-0.16016	0.13525
2.57	8.636	-138.538	1111.8596	-1.2605	0.77237	0.42676	11.437	-6.0606	1.794	0.12744	-0.19531	-0.12549	-2.396	-16.2965	7.8481	-0.04126	0.031006	0.091065	-54.8434	-1.99	1.549	0.047363	-0.12012	0.146
2.572	29.6	-131.905	1124.5323	-1.2605	0.78877	0.41113	35.344818	10.4959	8.992	0.10742	-0.18262	-0.11963	-35.768	-10.667	19.2675	-0.064453	0.05127	0.09668	-84.037	18.3457	-29.7682	-0.0019531	-0.036133	0.16943
2.574	45.28879	-127.12	1154.523	-1.2571	0.80088	0.38955	-17.118	17.561	5.634	0.092774	-0.17749	-0.11426	10.883	14.7587	-0.5487	-0.091797	0.074219	0.10303	-67.48274	8.5729	-2.555	-0.029541	0.019043	0.18115
2.576	69.9294	-109.035	1156.6168	-1.2476	0.81689	0.35742	18.04	11.8777	15.317	0.07666	-0.16797	-0.11182	20.662	2.54	9.176	-0.1084	0.085449	0.1084	-51.4298	5.262369	2.787	-0.056641	0.067871	0.19287
2.578	54.7689	-82.2934	1159.753	-1.2468	0.83135	0.3165	13.326	27.756	-15.6509	0.048828	-0.15869	-0.097168	9.228	-7.605	25.974	-0.13721	0.1123	0.11572	-32.189	20.7546	-18.4414	-0.081055	0.12842	0.19629
2.58	76.166	-83.9428	1171.6369	-1.2496	0.84726	0.28369	-36.19	23.9279	-10.4956	0.03125	-0.15576	-0.094727	19.369	-35.487	40.422	-0.17285	0.13281	0.12402	15.799	25.7868	-23.044	-0.089844	0.14844	0.19434
2.582	59.8145	-81.2056	1192.262	-1.2554	0.85938	0.24971	10.351	14.602	16.36667	0.0048828	-0.14551	-0.078613	29.556	13.879	77.134	-0.19434	0.14795	0.125	43.258	49.2956	-15.4201	-0.10742	0.19238	0.18994
2.584	70.87	-69.656	1206.979	-1.288	0.87061	0.22344	-31.057	29.936	-3.6549	-0.014404	-0.13941	-0.067871	7.988	45.366	125.193	-0.24756	0.17334	0.12305	64.4756	55.575	-5.169	-0.11841	0.22144	0.18164
2.586	60.47	-55.186	1196.617	-1.3374	0.89111	0.20313	-34.435	18.4638	-4.974	-0.037598	-0.14111	-0.052246	42.9411	98.855	181.2394	-0.29004	0.19483	0.12842	129.323	56.21	5.326	-0.13379	0.24219	0.16943
2.588	33.029	-53.57	1183.4733	-1.4045	0.9127	0.19141	-2.647	36.438	-9.436	-0.074219	-0.13525	-0.038086	53.6518	78.4982	265.1236	-0.32959	0.22021	0.13916	168.36	65.69	1.08112	-0.16064	0.26758	0.15723
2.59	5.292	-66.79784	1202.111	-1.4772	0.94297	0.1917	-54.6164	39.383	-19.704	-0.087891	-0.13135	-0.02832	14.1487	74.019	296.561	-0.39746	0.25537	0.14795	149.381	43.3806	34.337	-0.17383	0.28418	0.15527
2.592	-2.947	-58.0041	1191.075	-1.5525	0.97226	0.19521	-25.325	20.3334	21.0723	-0.11865	-0.12842	-0.01416	15.899	56.5509	359.603	-0.44287	0.27197	0.15625	145.011	35.496	47.148	-0.20215	0.31396	0.14209
2.594	-10.06	-49.7038	1193.703	-1.6292	1.0071	0.20732	7.784	37.545	7.2635	-0.13525	-0.12574	-0.0039062	-3.87	98.414	433.103	-0.52344	0.30664	0.17334	115.014	18.97431	53.669	-0.22657	0.34106	0.14209
2.596	-30.1716	-51.3939	1207.513	-1.7012	1.0391	0.21826	-5.888	17.5167	10.2895	-0.15283	-0.12354	0.0019531	-10.0561	114.205	534.3671	-0.59546	0.32349	0.18701	119.222	12.1834	53.562	-0.24609	0.36279	0.14551
2.598	-39.2968	-53.12	1258.9461	-1.7712	1.0605	0.22871	45.2017	-4.85	41.484	-0.17383	-0.11279	0.020996	19.6522	114.306	612.238	-0.67676	0.33594	0.1958	107.063	9.3	44.333	-0.27344	0.38086	0.16064
2.6	-45.211	-49.80127	1279.079	-1.835	1.0891	0.24316	20.408	1.849	27.051	-0.18457	-0.104	0.022949	37.9645	38.306	657.89965	-0.79297	0.37109	0.20459	71.575	-6.935	66.916	-0.2876	0.39697	0.16357
2.602	-43.779	-55.364527	1289.2318	-1.8894	1.1099	0.26348	17.793	-6.826	32.53	-0.20703	-0.095215	0.039551	-9.341	-9.741	743.3459	-0.84717	0.38916	0.21729	37.631	-9.453	104.451	-0.31982	0.4165	0.17529
2.604	-52.4395	-61.3996	1293.9955	-1.9343	1.1247	0.28555	70.6698	36.422	4.59	-0.21998	-0.086181	0.050781	0.804000000000002	-44.271	823.985	-0.97266	0.42285	0.23096	26.879	-16.4988	102.2737	-0.34985	0.43115	0.17261
2.606	-55.8526	-67.9984	1315.027	-1.9766	1.1387	0.30322	31.418	43.161	-4.172	-0.2334	-0.078125	0.060059	-3.669	-57.814	939.9917	-1.0715	0.44702	0.24463	44.5119	11.62	148.7747	-0.38721	0.45215	0.16455
2.608	-53.3354	-42.246	1321.108	-2.0058	1.1509	0.32383	47.513	26.268	34.2007	-0.24414	-0.067871	0.079102	1.225	-75.221	998.117	-1.1738	0.46875	0.2583	-7.369	36.7851	201.1675	-0.44189	0.48877	0.15918
2.61	-62.2772	-30.952	1318.1691	-2.0281	1.159	0.3375	48.396	33.992	19.5604	-0.24658	-0.062012	0.087891	19.308	-108.256	1042.514	-1.3062	0.48682	0.28516	-47.9692	49.6596	292.769	-0.47363	0.50391	0.1582
2.612	-44.4354	-24.501	1333.1376	-2.0457	1.1664	0.35938	28.323	12.358796	23.9002	-0.25	-0.049805	0.095215	43.85	-172.4644	1059.828	-1.3726	0.49854	0.30664	-66.553	64.409	376.834	-0.55664	0.52344	0.15234
2.614	-33.5306	-26.34641	1336.6483	-2.0671	1.1694	0.38125	72.489	8.14362	26.422	-0.24145	-0.04419	0.104	27.273	-206.688	1078.899	-1.5059	0.51221	0.36768	-93.226	68.9465	437.112	-0.63306	0.52955	0.146
2.616	-33.6432	-26.047	1331.0684	-2.0835	1.1685	0.3999	49.82217	16.8388	30.0774	-0.23291	-0.040039	0.095703	31.278	-217.827	1034.794	-1.5991	0.5166	0.42944	-101.955	67.5781	536.734	-0.71484	0.5332	0.15186
2.618	-41.0728	-3.9549	1307.256	-2.1011	1.172	0.42197	28.222	2.411	41.758	-0.19531	-0.037598	0.093262	23.372	-195.676	1029.209	-1.687	0.52002	0.49609	-148.557	78.612	653.1127	-0.85107	0.52588	0.1748
2.62	-7.915	18.4625	1308.3349	-2.116	1.176	0.446	53.4242	22.4739	18.2353	-0.17139	-0.040527	0.085938	23.287	-180.951	967.814	-1.8066	0.5332	0.6001	-168.465	65.578	783.3047	-0.91797	0.51855	0.19092
2.622	20.033	40.224	1321.6448	-2.1379	1.1806	0.46357	11.553	24.439	-6.7674	-0.12061	-0.044434	0.05957	39.763	-164.542	962.327	-1.8643	0.54785	0.64355	-171.473	47.302	874.113	-1.0664	0.50098	0.23486
2.624	27.5188	48.15	1322.676	-2.1559	1.1863	0.48506	21.476	9.868	16.4429	-0.076172	-0.049805	0.040527	83.833	-166.101	911.991	-1.9351	0.57959	0.7207	-127.601	-3.5107	978.831	-1.2207	0.4873	0.29834
2.626	43.5531	23.753	1310.600322	-2.1831	1.1929	0.50391	24.974	11.1886	23.2922	-0.025879	-0.061523	0.01709	56.088	-160.355	903.7058	-1.9558	0.59961	0.77856	-94.801	-83.6972	1065.331	-1.3081	0.47656	0.33203
2.628	53.5143	21.2436	1320.0367	-2.2035	1.2	0.51807	-10.831	-13.7623	28.399	0.025391	-0.080078	-0.01123	41.346	-146.058	870.647	-1.9624	0.62646	0.82422	-76.629	-137.588	1138.026	-1.4468	0.46143	0.42773
2.63	68.432	17.7485	1330.4097	-2.2288	1.2118	0.53047	13.741	-10.5732	28.393	0.059082	-0.095701	-0.034668	-4.982	-110.6092	934.957	-1.9839	0.68506	0.85742	-22.609	-189.147	1218.379	-1.5283	0.44287	0.52075
2.632	42.6345	28.057	1331.1407	-2.2444	1.2243	0.54922	-15.284	11.6603	6.619	0.087891	-0.11328	-0.057617	-0.677999999999999	-72.041	957.72	-1.9863	0.73438	0.87354	42.774	-213.736	1230.201	-1.5918	0.41699	0.62354
2.634	47.8999	18.3204	1316.19013	-2.2557	1.2365	0.55674	-35.032	-25.8192	34.284	0.11328	-0.13672	-0.083496	30.932	-97.839	1023.038	-2.0176	0.83887	0.90479	101.656	-234.664	1217.97	-1.6611	0.38574	0.75635
2.636	58.3668	-1.429	1296.28831	-2.2598	1.248	0.56201	4.507	-5.1151	26.042	0.12549	-0.14844	-0.092773	72.258	-138.182	1070.143	-1.9948	0.90357	0.90747	179.9623	-239.7755	1172.793	-1.6895	0.36621	0.81592
2.638	44.7911	-6.096	1277.01126	-2.2552	1.257	0.56739	-51.3256	6.1283	-16.4198	0.1377	-0.15039	-0.1001	48.4074	-199.211	1116.3351	-1.9644	0.94775	0.88867	210.565	-215.3931	1093.273	-1.7461	0.35791	0.91064
2.64	24.8475	-7.354	1263.4697	-2.2424	1.265	0.56787	-23.239	16.7139	5.3871	0.146	-0.1482	-0.10889	62.2533	-190.936	1138.46	-1.8882	0.99951	0.82422	209.7394	-193.915	1068.993	-1.78	0.37573	0.95434
2.642	11.007	6.3647	1255.887	-2.2233	1.2747	0.57178	9.628	34.3591	5.1501	0.14404	-0.14453	-0.11279	48.0853	-220.018	1192.9202	-1.8335	1.0181	0.78516	235.554	-144.258	1046.388	-1.7925	0.39209	0.95898
2.644	-9.981	29.2872	1242.29786	-2.1977	1.2773	0.5711	-42.026	3.7103	10.5444	0.1416	-0.14551	-0.11475	30.0509	-211.0449	1210.442	-1.7163	1.0366	0.68652	214.018	-121.348	1000.6024	-1.8047	0.4209	0.92334
2.646	-3.294	51.397	1199.639	-2.1738	1.2852	0.56592	15.306	-7.3959	15.76221	0.13184	-0.14209	-0.11426	8.65	-302.497	1234.4825	-1.6044	1.0141	0.59594	222.145	-109.858	1000.6642	-1.8262	0.46094	0.90283
2.648	-6.974	59.753	1187.157	-2.1356	1.2846	0.55869	10.701	0.327	-12.8942	0.12207	-0.13184	-0.11572	16.834	-306.75	1235.801	-1.4746	0.9834	0.5083	192.926	-61.0244	1020.6181	-1.8999	0.57568	0.86523
2.65	-20.726	66.478	1196.5111	-2.0956	1.2849	0.54355	-1.07	-13.9921	17.9481	0.11524	-0.12744	-0.11866	-25.011	-339.513	1252.313	-1.314	0.93799	0.41602	120.992	-48.295	1062.3793	-1.98	0.69678	0.84155
2.652	-35.7362	79.666	1189.7003	-2.0503	1.2786	0.53106	66.5708	10.3906	22.144	0.10938	-0.12158	-0.11377	-56.4534	-243.009	1278.617	-1.248	0.91602	0.37793	96.187	-27.053	1103.673	-2.0625	0.83398	0.83057
2.654	-35.0043	85.742	1175.7658	-2.0007	1.2704	0.51172	11.614	11.705	-5.1234	0.095215	-0.104	-0.11719	-76.527	-215.3603	1316.4478	-1.166	0.87891	0.32422	98.619	-60.723	1136.708	-2.125	1	0.79736
2.656	-42.6958	84.26	1148.05947	-1.9492	1.2578	0.48975	26.835	10.3835	-4.698	0.087891	-0.095215	-0.11914	-64.732	-130.177	1330.4007	-1.1484	0.86475	0.29956	123.722	-122.41	1194.727	-2.1421	1.0718	0.76953
2.658	-58.7735	73.335	1146.65	-1.8995	1.2407	0.46905	49.9184	37.01421	-17.279	0.075195	-0.072754	-0.12012	-39.4083	-131.887	1348.96121	-1.1538	0.85986	0.27734	94.628	-169.38	1241.908	-2.1523	1.2168	0.69531
2.66	-54.9239	76.164	1125.7696	-1.8436	1.2173	0.44258	34.912	15.6556	4.0808	0.060302	-0.0625	-0.12549	-2.131	-66.394	1377.4315	-1.207	0.87012	0.26904	95.465	-226.6732	1279.344	-2.144	1.3247	0.63038
2.662	-43.4576	74.7027	1103.6918	-1.7897	1.1876	0.41914	67.9683	3.99	25.72348	0.041992	-0.046875	-0.12793	-4.267	-76.573	1384.7157	-1.2441	0.88086	0.27393	39.956	-278.163	1305.7096	-2.1245	1.4185	0.56836
2.664	-52.696	69.07969	1076.425	-1.7335	1.1576	0.39189	35.114	5.7907	14.1929	0.013672	-0.022949	-0.13574	-32.0409	-1.40000000000001	1387.1647	-1.3901	0.90869	0.29492	-25.037	-364.422	1328.62499	-2.0762	1.5078	0.49854
2.666	-32.6075	61.7753	1065.007	-1.6772	1.1235	0.3667	31.831	-11.888	34.0609	-0.0014648	-0.011719	-0.14307	-51.249	-19.902	1387.2638	-1.5456	0.93188	0.32446	-98.413	-426.43	1332.3739	-2.0527	1.5293	0.45996
2.668	-25.931	64.0035	1069.7148	-1.6158	1.0848	0.34229	71.7114	4.4887	53.17073	-0.044922	0.012695	-0.13574	-74.591	1.72	1398.675	-1.7358	0.94971	0.36816	-157.211	-425.28	1330.4499	-1.9883	1.5371	0.41895
2.67	12.252	72.595	1061.793	-1.5632	1.0489	0.31152	28.944	18.9435	45.961	-0.085449	0.031982	-0.1272	-80.077	-96.679	1416.9237	-2.021	0.96924	0.44141	-170.65	-377.51	1372.4612	-1.9258	1.5146	0.38525
2.672	35.953	73.31569	1050.74	-1.5069	1.0036	0.28808	36.008	19.706	68.443	-0.12988	0.055664	-0.11426	-44.3148	-117.2306	1462.995	-2.1772	0.979	0.49023	-141.138	-301.794	1408.3612	-1.8491	1.4907	0.354
2.674	43.612	84.0474	1036.491	-1.4535	0.96523	0.26201	21.596	50.3335	76.783	-0.20361	0.084473	-0.092285	-53.719	-183.088	1504.761	-2.4824	1.001	0.62158	-139.858	-242.307	1422.32709	-1.7427	1.4478	0.29834
2.676	53.0572	100.6684	1009.0677	-1.4019	0.92236	0.24365	0.677999999999997	47.938	113.621	-0.24658	0.1001	-0.077637	-63.389	-156.638	1515.627	-2.7146	1.0213	0.72144	-144.337	-179.15	1402.977	-1.6953	1.4375	0.27295
2.678	58.6619	122.242	971.0673	-1.3543	0.87813	0.22305	51.0846	52.813	182.8814	-0.33398	0.12695	-0.050293	-37.0776	-174.147	1555.607	-2.9429	1.0513	0.81738	-167.494	-97.503	1399.448	-1.627	1.4551	0.24072
2.68	67.8573	124.577	942.516	-1.3065	0.83135	0.2082	7.083	65.858	209.0054	-0.40747	0.15235	-0.023682	-22.572	-134.99	1563.429	-3.2129	1.0957	0.92627	-152.677	-16.91	1453.7	-1.6111	1.4964	0.23047
2.682	78.5559	136.978	923.5101	-1.2624	0.79346	0.18282	-34.23	41.565	283.1206	-0.48828	0.17969	-0.0014648	15.5227	-166.604	1552.913	-3.3242	1.1191	0.97217	-105.946	74.053	1475.943	-1.6465	1.5488	0.24561
2.684	74.4454	130.7525	888.4459	-1.2151	0.74541	0.171	2.073	55.377	320.543	-0.59766	0.22217	0.036133	53.9156	-139.436	1561.171	-3.5527	1.168	1.0552	-35.0778	96.3385	1489.933	-1.771	1.6216	0.29395
2.686	80.0168	115.2187	850.06497	-1.1699	0.69922	0.15674	-31.1	73.198	341.1238	-0.65771	0.24365	0.058594	49.6767	-129.884	1552.422	-3.6557	1.186	1.0962	12.203	100.263	1478.6108	-1.8789	1.6445	0.33447
2.688	78.4704	97.8299	826.266337	-1.1251	0.65849	0.14648	5.129	58.105	428.1639	-0.78223	0.30176	0.10498	7.4959	-38.1051	1536.3695	-3.7129	1.2031	1.1196	-7.068	80	1458.955	-2.1479	1.6938	0.43945
2.69	79.6459	94.180209	834.1457	-1.0794	0.61416	0.13476	23.758	51.342	502.896	-0.88476	0.34033	0.13818	-26.304	-14.0963	1519.132	-3.7305	1.2324	1.1235	9.685	15.211	1510.80965	-2.3806	1.7054	0.52466
2.692	64.9164	110.4711	798.8663	-1.0329	0.56846	0.12383	-28.475	19.8376	599.92	-0.98975	0.37842	0.17725	-39.369	31.396	1479.172	-3.6948	1.2407	1.1191	20.967	-30.803	1561.216	-2.6128	1.7212	0.60742
2.694	70.4906	105.76598	772.4403	-0.99007	0.52598	0.11865	22.763	-17.57	701.9029	-1.1406	0.44531	0.23682	-20.3353	30.046	1453.009	-3.6523	1.2617	1.0903	41.9994	-85.764	1589.631	-2.8921	1.7036	0.7002
2.696	67.32	96.5386	753.37407	-0.94287	0.48291	0.11816	30.506	-29.436	765.5104	-1.2207	0.48047	0.27295	-24.9626	34.561	1459.945	-3.5798	1.2497	1.0705	75.28	-128.51	1609.699	-3.0098	1.6836	0.73584
2.698	42.681	107.72201	733.33178	-0.90937	0.44004	0.1167	-11.806	-90.621	875.7962	-1.375	0.54688	0.35107	-24.5346	40.981	1445.095	-3.4917	1.2349	1.0469	122.534	-130.283	1600.951	-3.1792	1.6118	0.7959
2.7	29.918	112.9266	703.1425	-0.87217	0.39893	0.12071	28.327	-110.232	958.499	-1.4792	0.59522	0.42407	-41.293	49.2819	1456.442	-3.3438	1.2031	1.0034	144.982	-138.456	1627.137	-3.2515	1.5424	0.82129
2.702	-6.327	113.52	675.0079	-0.82998	0.36377	0.12461	-4.819	-109.996	973.611	-1.5815	0.646	0.49512	-29.2498	52.77	1439.455	-3.2671	1.1899	0.97852	168.921	-104.892	1622.513	-3.2788	1.4692	0.8291
2.704	0.538000000000004	101.556	661.4067	-0.79004	0.32695	0.12734	-4.7051	-116.582	996.08	-1.6816	0.67578	0.55615	-49.156	38.47582	1425.266	-3.1016	1.1592	0.93018	168.739	-92.396	1609.145	-3.2324	1.3633	0.80713
2.706	-13.261	102.024	639.383	-0.74951	0.29053	0.12354	8.496	-86.963	968.252	-1.7202	0.67822	0.57227	-28.9403	23.311	1404.171	-2.9219	1.1152	0.87354	123.863	-61.434	1589.444	-3.1777	1.3164	0.79541
2.708	-3.854	114.972	614.604	-0.71435	0.26104	0.1293	-45.4778	-91.868	945.978	-1.7695	0.6543	0.56494	-17.8956	-2.6794	1440.158	-2.834	1.0898	0.84229	87.98	3.63595	1571.284	-3.0371	1.2246	0.75635
2.71	-13.367	113.9707	578.7047	-0.6749	0.22979	0.13047	12.105	-105.737	948.534	-1.7663	0.61792	0.52466	-26.716	6.736	1427.835	-2.6655	1.0435	0.77637	61.619	51.08	1548.498	-2.9214	1.1567	0.72656
2.712	-6.989	110.8954	563.0856	-0.63936	0.19736	0.11718	2.9858	-94.836	910.678	-1.7383	0.57373	0.47314	-81.641	12.2727	1439.896	-2.5376	1.0029	0.73536	48.472	99.174	1506.0006	-2.8145	1.0898	0.70166
2.714	-16.333	116.7987	527.932	-0.60303	0.16641	0.11475	-19.5031	-125.019	904.673	-1.6719	0.51758	0.39893	-95.951	49.162	1412.2242	-2.416	0.96289	0.68896	-4.656	112.482	1432.242	-2.6895	1.0078	0.68408
2.716	-11.713	122.164	504.434	-0.56445	0.13379	0.10645	1.507	-131.394	906.783	-1.627	0.49219	0.36475	-104.057	27.913	1418.703	-2.2651	0.90869	0.63477	-45.9928	121.0116	1391.493	-2.6401	0.96143	0.67188
2.718	-3.087	114.2951	496.0663	-0.5335	0.11045	0.10078	-64.2546	-117.2781	895.1931	-1.5151	0.43213	0.28516	-68.125	88.0161	1372.661	-2.1968	0.8833	0.6123	-108.284	155.614	1362.561	-2.5605	0.88574	0.67432
2.72	14.65	126.223	471.6985	-0.50645	0.080957	0.09082	-8.057	-122.018	921.725	-1.4284	0.37793	0.21875	-48.334	106.053	1358.7358	-2.0586	0.83105	0.56885	-124.623	156.352	1364.389	-2.4997	0.82251	0.68579
2.722	30.448	119.896	455.944	-0.48457	0.056739	0.081445	17.291	-86.82	910.436	-1.3711	0.33496	0.16748	-28.262	193.133	1297.55	-1.9538	0.78735	0.54614	-111.409	145.511	1375.788	-2.4316	0.75586	0.69482
2.724	23.397	120.475	433.7393	-0.46006	0.03457	0.071289	-25.963	-65.82	914.031	-1.3672	0.3457	0.12061	-35.833	188.849	1290.6054	-1.8516	0.74805	0.52002	-129.747	90.7311	1372.301	-2.3315	0.68994	0.7002
2.726	32.629	110.778	427.60073	-0.44238	0.012207	0.061523	37.4575	-94.558	971.522	-1.3843	0.37549	0.11475	-35.39878	227.878	1267.796	-1.7324	0.69727	0.50537	-143.224	71.1252	1364.42717	-2.2715	0.66602	0.69775
2.728	54.539	108.1906	422.138742	-0.42754	0.0001953	0.059375	10.065	-80.968	1008.0341	-1.3921	0.45068	0.11377	-20.1439	188.83	1274.176	-1.6699	0.66699	0.49902	-143.735	99.948	1363.7818	-2.1519	0.62842	0.6875
2.73	60.364	98.5074	391.926	-0.41523	-0.015234	0.058007	-10.344	-128.263	1041.62332	-1.3608	0.48291	0.10864	16.025	211.731	1235.065	-1.5664	0.61328	0.4917	-151.269	132.767	1375.8273	-2.0544	0.60718	0.68579
2.732	57.973	89.898	380.75873	-0.40547	-0.026562	0.057617	15.07	-168.274	1111.118	-1.3086	0.50928	0.099121	23.4366	174.438	1231.514	-1.4926	0.57276	0.48779	-119.733	155.962	1350.468	-1.9624	0.58252	0.68555
2.734	85.6197	76.327	354.6095	-0.39795	-0.035058	0.051562	-56.454	-171.205	1127.6887	-1.25	0.55371	0.07666	34.8994	216.203	1180.433	-1.4238	0.5332	0.48486	-103.897	157.474	1327.29824	-1.8398	0.55566	0.6792
2.736	87.2903	75.358	343.3145	-0.39258	-0.039551	0.053223	-67.526	-236.944	1182.816	-1.2275	0.58398	0.073242	21.5203	173.609	1126.4395	-1.335	0.47998	0.479	-62.7974	155.765	1311.038	-1.7749	0.53662	0.67285
2.738	59.0619	79.7444	304.5483	-0.39336	-0.045312	0.050781	-51.5037	-232.895	1190.615	-1.2192	0.67041	0.075195	5.21	201.753	1079.582	-1.291	0.45459	0.47705	-54.3721	194.525	1261.099	-1.6421	0.51172	0.66406
2.74	61.8588	76.3281	287.9023	-0.38858	-0.044238	0.056543	-86.911	-192.997	1158.56	-1.2409	0.73267	0.098146	16.053	129.669	1058.377	-1.2031	0.39941	0.47314	-13.2939	209.46	1243.468	-1.541	0.48608	0.65869
2.742	60.7384	79.159	292.1882	-0.37139	-0.056348	0.065137	-9.371	-197.862	1204.405	-1.2739	0.7876	0.12402	30.238	133.211	1070.451	-1.1424	0.36255	0.46289	25.532	254.726	1179.811	-1.4248	0.46875	0.65088
2.744	59.5937	78.969	284.5318	-0.35859	-0.074511	0.077832	7.133	-147.19	1223.265	-1.3496	0.84375	0.16455	49.8509	75.41	1045.954	-1.0776	0.32373	0.45313	79.6938	267.815	1113.2842	-1.2715	0.4375	0.62744
2.746	51.6366	85.9204	251.492	-0.34619	-0.088867	0.082031	16.626	-151.558	1250.52	-1.396	0.86768	0.18701	51.9319	116.46	986.166	-0.99951	0.271	0.44922	110.1811	291.531	1077.7442	-1.1404	0.41284	0.60669
2.748	31.008	85.28445	247.1481	-0.33311	-0.10879	0.083203	89.575	-148.1799	1290.0269	-1.522	0.92432	0.22656	60.014	109.652	941.063	-0.95459	0.24268	0.44531	113.042	306.469	1041.6184	-1.0112	0.3833	0.57813
2.75	29.76	81.72021	249.6044	-0.31191	-0.12734	0.0792	87.158	-65.938	1266.864	-1.6694	0.99072	0.28076	30.11	171.332	902.9543	-0.875	0.19238	0.43896	154.185	285.13	1016.6896	-0.83203	0.34473	0.53174
2.752	-2.362	88.581	230.566	-0.28847	-0.14219	0.077636	103.204	-64.76	1314.6174	-1.7539	1.0313	0.31885	33.265	153.4175	844.161	-0.8103	0.1582	0.42944	181.601	270.403	981.5169	-0.74463	0.31689	0.50684
2.754	2.33	81.391	198.061	-0.26328	-0.15781	0.069824	113.407	-21.387	1333.621	-1.9429	1.1157	0.40137	48.707	191.267	786.415	-0.74756	0.125	0.41748	174.529	247.4253	936.2762	-0.56689	0.25586	0.45313
2.756	-15.324	68.7807	177.0872	-0.23633	-0.17334	0.067383	53.919	9.285	1288.5305	-2.0984	1.1873	0.47876	48.615	177.163311	728.34	-0.65283	0.088379	0.40186	181.859	228.874	912.702	-0.44141	0.21363	0.41235
2.758	-17.938	60.0157	178.269	-0.21436	-0.17852	0.058887	59.72	-42.398	1318.724	-2.2559	1.2578	0.56592	53.342	215.232	706.2737	-0.60449	0.067383	0.39697	186.406	227.59	878.495	-0.32471	0.1665	0.37109
2.76	-34.085	65.814	157.4998	-0.19258	-0.1957	0.049805	35.404	-31	1325.367	-2.4702	1.3423	0.6792	37.148	190.892	660.767	-0.50781	0.030273	0.36523	167.576	172.824	838.635	-0.17676	0.097168	0.3125
2.762	-34.864	75.108	145.44038	-0.16875	-0.20391	0.033789	17.156	-69.0024	1366.599	-2.5659	1.3833	0.72852	-5.713	218.988	612.5	-0.43847	0.0012207	0.34643	166.474	136.994	777.722	-0.10986	0.066895	0.28662
2.764	-38.526	58.3647	149.591	-0.14463	-0.21367	0.027344	80.88283	-111.795	1426.6103	-2.7397	1.4565	0.79102	8.19600000000001	185.2765	540.847	-0.37109	-0.02832	0.32471	106.6978	101.604	718.732	0.021973	0.0014648	0.23193
2.766	-40.132	57.823	136.751	-0.12305	-0.2207	0.015137	69.721	-78.15	1397.5411	-2.831	1.4902	0.79834	-0.625	184.211	505.648	-0.27637	-0.06543	0.28857	75.044	112.912	677.08749	0.11206	-0.045655	0.18652
2.768	-35.201	46.9704	147.9184	-0.098048	-0.22724	0.0010742	84.582	-130.77	1422.599	-2.8862	1.5122	0.78906	2.553	164.432	456.209	-0.23047	-0.088867	0.271	28.05	149.544	617.9867	0.19336	-0.086914	0.15039
2.77	-14.417	48.264	130.99221	-0.074121	-0.23213	-0.01416	129.0679	-135.727	1449.718	-2.8887	1.5	0.73975	14.634	194.8236	451.8164	-0.13574	-0.13037	0.23096	19.871	154.922	557.2651	0.30029	-0.13623	0.095215
2.772	3.045	43.33533	136.733	-0.055371	-0.23877	-0.027442	93.472	-101.725	1426.041	-2.8564	1.4785	0.6958	27.333	182.846	400.207	-0.073486	-0.16064	0.18604	25.661	177.0699	482.172	0.3457	-0.1626	0.060547
2.774	4.536	55.182	121.02	-0.037402	-0.24101	-0.041211	105.6724	-132.6432	1457.969	-2.7378	1.4009	0.60156	16.933	167.877	399.268	-0.0024414	-0.19189	0.146	-6.625	196.085	417.298	0.43555	-0.21777	0.013184
2.776	15.428	58.959	90.4467	-0.021973	-0.24365	-0.056641	75.581	-66.483	1450.2132	-2.6299	1.3276	0.53076	13.696	133.811	361.06	0.084961	-0.23291	0.094238	-45.147	212.266	383.181	0.48902	-0.25855	-0.022949
2.778	20.169	50.558	85.576	0.0016601	-0.24189	-0.07168	4.94	-46.45	1443.10926	-2.5308	1.2583	0.47559	16.007	128.611	353.6036	0.125	-0.25586	0.074707	-63.7752	251.689	365.515	0.53564	-0.29932	-0.058594
2.78	33.352	37.2735	80.2998	0.013477	-0.23926	-0.084766	40.521	-61.0229	1472.585	-2.4199	1.1758	0.41357	62.334	135.31	320.244	0.19629	-0.29297	0.024902	-78.2713	229.082	325.7692	0.58105	-0.34619	-0.10352
2.782	55.912	42.044	72.568	0.027539	-0.23613	-0.10157	5.233	4.962	1434.9256	-2.3906	1.1445	0.39404	67.0554	143.837	317.613	0.24219	-0.323	-0.012696	-70.8586	228.297	267.244	0.59814	-0.36865	-0.12451
2.784	48.6898	45.50634	74.877	0.040137	-0.22558	-0.11484	-17.648	-24.3697	1414.847	-2.3789	1.0977	0.37061	42.866	137.443	282.484	0.2832	-0.35352	-0.04541	-68.597	211.536	213.158	0.62207	-0.4082	-0.16016
2.786	63.7938	41.2446	82.4112	0.055176	-0.21484	-0.12451	38.065	2.0504	1425.2823	-2.3911	1.0723	0.36499	17.01	123.24	257.366	0.32764	-0.38818	-0.089355	-51.089	216.246	176.039	0.62817	-0.42651	-0.18213
2.788	61.3963	36.7753	79.22488	0.059473	-0.20557	-0.13028	8.67299999999999	35.529	1414.262	-2.4136	1.0552	0.36621	15.604	131.584	192.902	0.34082	-0.3999	-0.11328	-30.391	225.36	147.998	0.62012	-0.43652	-0.19922
2.79	67.1872	44.8425	61.6638	0.064453	-0.19512	-0.13886	40.087	-23.082	1427.19	-2.4409	1.0435	0.37109	34.402	144.2892	166.4794	0.36621	-0.42578	-0.14453	-36.134	199.442	135.941	0.60107	-0.45117	-0.21582
2.792	47.9244	34.958	48.1072	0.065234	-0.17988	-0.14394	68.087	16.66473	1404.4839	-2.4565	1.0376	0.38672	43.769	160.987	140.131	0.37256	-0.43359	-0.16089	-15.709	166.717	136.723	0.58057	-0.45996	-0.22754
2.794	63.5051	29.7765	43.6122	0.058594	-0.15996	-0.14356	45.762	-10.093	1388.975	-2.4805	1.0254	0.39404	49.325	136.6708	130.7414	0.37207	-0.44141	-0.18701	14.117	123.363	158.391	0.51563	-0.46338	-0.23193
2.796	67.2407	28.9483	57.148	0.057617	-0.1416	-0.14746	103.0707	-51.16622	1435.476	-2.4861	1.0202	0.40259	30.995	115.803	111.8782	0.3501	-0.44092	-0.19873	69.1034	90.021	174.394	0.45044	-0.45996	-0.22314
2.798	21.717	43.215	49.2018	0.045899	-0.12178	-0.14541	53.115	1.312	1428.75861	-2.4839	1.0093	0.40527	37.0348	84.4336	110.716	0.33496	-0.44043	-0.20508	81.8847	81.1668	159.416	0.36572	-0.45264	-0.20898
2.8	36.164	33.0722	38.1918	0.033301	-0.09824	-0.14209	41.934	-44.0641	1425.6976	-2.4644	0.99072	0.4043	37.9404	81.559	93.0925	0.30029	-0.43506	-0.20313	91.252	43.653	147.219	0.22217	-0.42871	-0.17969
2.802	13.29	24.55331	43.05	0.016113	-0.074414	-0.13701	85.0508	-30.207	1443.32	-2.4487	0.979	0.40576	34.3535	64.004	116.963	0.26319	-0.42944	-0.20215	125.645	48.5129	117.813	0.14404	-0.41162	-0.15186
2.804	-3.871	20.00729	58.2261	-0.0018554	-0.049902	-0.13027	50.359	14.0058	1420.601	-2.4102	0.95117	0.40674	50.483	69.7	85.479	0.21973	-0.41748	-0.19434	121.726	32.797	96.394	-0.032227	-0.375	-0.097168
2.806	-12.44	31.826	49.7629	-0.019531	-0.024902	-0.12256	94.4035	-41.06	1432.193	-2.3667	0.92724	0.406	29.144	34.507	60.429	0.15332	-0.39746	-0.17529	150.169	13.91	81.2962	-0.17578	-0.34008	-0.045899
2.808	0.102	25.793	37.7569	-0.040039	-0.002539	-0.10439	98.8417	28.557	1390.252	-2.3184	0.9082	0.40479	13.734	46.6331	33.3719662	0.12207	-0.38232	-0.16211	141.486	-8.534	47.2579	-0.31592	-0.31055	0.0063477
2.81	-27.619	22.648	38.447	-0.057324	0.016113	-0.09375	57.396	45.499	1339.998	-2.2417	0.87744	0.40332	0.495000000000001	0.366	39.8946	0.043945	-0.35449	-0.13232	131.367	-36.004	33.8491	-0.49805	-0.26855	0.069336
2.812	-35.5763	27.5182	27.2596	-0.077246	0.029785	-0.085938	108.3239	29.463	1346.723	-2.207	0.86719	0.40088	-12.835	-2.5523	30.739	-0.0039062	-0.32666	-0.11792	107.5356	-24.2307	10.4867	-0.58838	-0.24512	0.10303
2.814	-26.72	25.6648	18.7028	-0.094727	0.043848	-0.070215	95.6559	101.899	1301.074	-2.1211	0.84863	0.3916	-38.998	-52.93769	46.4878	-0.04834	-0.30273	-0.11035	85.71703	6.5392	-3.007	-0.76514	-0.19922	0.17383
2.816	-33.194	13.0882	10.556	-0.10645	0.058594	-0.057129	96.484	55.117	1284.89	-2.0562	0.83008	0.37988	-26.01	-26.04	9.967	-0.10596	-0.271	-0.096191	90.536	11.2842	7.261	-0.88941	-0.1687	0.21997
2.818	-30.835	6.2549	23.4782	-0.11553	0.071192	-0.045215	128.246	74.629	1284.97	-1.9878	0.81885	0.37744	-2.854	-35.4092	12.14202	-0.13623	-0.26172	-0.089844	51.449	13.3784	-13.4924	-1.0093	-0.13184	0.26709
2.82	-35.5835	20.1282	26.122	-0.12334	0.075977	-0.033887	78.418	123.873	1256.321	-1.8945	0.7998	0.36133	-12.406	8.817	14.79435	-0.19727	-0.23096	-0.076172	22.635	-17.4236	-6.43595	-1.1479	-0.086426	0.31836
2.822	-10.226	24.833	23.7587	-0.12646	0.079493	-0.024903	90.0741	78.259	1283.9001	-1.8516	0.79297	0.34619	-10.3	-6.9023	8.2617	-0.24903	-0.21435	-0.061767	0.372	1.0702	-6.8825	-1.2031	-0.063477	0.34033
2.824	-15.729	16.6177	35.5345	-0.11963	0.087305	-0.015625	82.5477	140.701	1247.0928	-1.7695	0.77539	0.33154	1.784	31.5549	1.95	-0.30371	-0.19971	-0.041016	-21.462	17.9898	2.157	-1.2905	-0.022949	0.37793
2.826	-13.264	12.7423	41.095	-0.1167	0.09375	-0.010742	31.444	126.4886	1223.656	-1.7204	0.76099	0.32055	4.929	17.8708	0.745000000000001	-0.37842	-0.17578	-0.013672	-33.503	27.9839	17.482	-1.3367	0.0083008	0.39673
2.828	11.71	8.4644	36.024	-0.10586	0.088086	-0.0092773	40.346	86.102	1231.608	-1.6763	0.75439	0.31055	14.531	33.856	-11.381	-0.40918	-0.16455	-0.00048828	-66.2080382	15.5818	4.228	-1.3687	0.044434	0.41699
2.83	14.488	9.8756	11.7928	-0.092871	0.082813	-0.0041991	10.355	131.957	1189.4828	-1.6206	0.74365	0.2998	15.48	-2.267	-9.1959	-0.45508	-0.14844	0.021973	-86.0904	-26.494	-8.4033	-1.3628	0.090332	0.43848
2.832	26.068	9.6467	14.13751	-0.078418	0.076172	-0.01709	-3.562	82.343	1167.09438	-1.5991	0.74072	0.2959	9.005	21.903	-8.6364	-0.46924	-0.12695	0.039063	-93.809	-30.4171	-10.2157	-1.3438	0.10498	0.44043
2.834	38.9189	12.9773	16.1702	-0.065527	0.070508	-0.015234	11.156	84.55	1143.49079	-1.5522	0.73682	0.2793	11.313	0.2121	-29.808	-0.46436	-0.12695	0.041016	-80.3453	-11.456	-5.3946	-1.2671	0.11621	0.44043
2.836	64.4321	5.8737	16.4181	-0.04834	0.06543	-0.022949	-34.382	122.243	1096.947	-1.5191	0.73194	0.27588	-7.716	32.37423	-6.1546	-0.44482	-0.12256	0.049316	-93.647	12.645	10.5999	-1.1765	0.11646	0.41455
2.838	41.607	-3.4845	17.783	-0.033496	0.059375	-0.029687	-4.56	77.917	1090.4169	-1.48	0.73291	0.26563	3.949	-9.7379	-10.269	-0.42138	-0.12769	0.052979	-67.18	44.1831	6.538	-1.0566	0.10547	0.37549
2.84	34.05	-7.3243	25.2739	-0.022461	0.053809	-0.035938	19.385	133.738	1047.8685	-1.4238	0.72461	0.25098	15.78	13.7834	14.2607	-0.396	-0.13965	0.058594	-69.9912	44.5565	-8.495	-0.85156	0.067383	0.2998
2.842	72.8635	-5.5932	39.1894	-0.012695	0.045215	-0.042969	15.326	147.671	1002.77	-1.3926	0.72266	0.24609	47.0752	1.979	-14.09893	-0.35938	-0.1582	0.070801	-38.768	70.091	3.1577	-0.74121	0.050293	0.26855
2.844	63.9708	0.5179	44.6168	-0.003125	0.041602	-0.044531	44.8758	120.033	989.108	-1.3223	0.70508	0.23438	43.3952	47.948	1.03736	-0.33545	-0.17383	0.068359	-13.163	66.257	20.5592	-0.5293	-0.00097656	0.19629
2.846	50.046	-1.8266	33.0073	-0.003418	0.039063	-0.04541	-4.824	187.057	945.604	-1.269	0.69189	0.22412	73.059	26.9487	9.8954	-0.28857	-0.19775	0.070801	32.4116	66.172	51.051	-0.37549	-0.047119	0.14648
2.848	30.337	-5.7842	33.215842	-0.00097656	0.034863	-0.044336	-0.23	160.218	932.4574	-1.2188	0.67871	0.21875	31.915	27.077	41.6772	-0.24634	-0.2168	0.066651	28.115	53.656	59.727	-0.23389	-0.097656	0.098633
2.85	50.4527	-6.297	38.6682	-0.0041016	0.02832	-0.04668	36.943	165.855	905.2322	-1.1401	0.65381	0.2085	13.748	-5.931	13.9942	-0.20215	-0.23584	0.058594	46.8527	39.718	59.709	-0.073242	-0.15479	0.03125
2.852	24.293	-4.652	35.858	-0.0048828	0.02168	-0.049414	-24.508	195.34	862.013	-1.0991	0.64307	0.20117	45.782	23.29216	22.365	-0.14502	-0.26025	0.046875	66.9227	30.8263	44.687	0.0014648	-0.18018	0.0063477
2.854	30.1009	-21.6901	53.284	-0.014062	0.015918	-0.055078	5.589	126.0456	855.295	-1.0137	0.60938	0.18994	41.7003	15.391	20.6623	-0.11182	-0.27051	0.040039	68.0138	14.9608	30.2245	0.12744	-0.21875	-0.057617
2.856	5.704	-32.029	84.5301	-0.024902	0.018066	-0.056152	17.765	167.54	812.606	-0.95386	0.58032	0.17945	5.96	32.159	55.98	-0.058594	-0.29639	0.014648	121.101	-12.71	30.837	0.21094	-0.2312	-0.10596
2.858	-3.154	-9.26171	99.72144	-0.039648	0.025684	-0.056152	-14.251	149.82	771.1819	-0.89258	0.55273	0.17188	23.904	13.3411	20.6566	-0.021484	-0.31421	-0.00073245	117.797	-21.571	2.3541	0.30664	-0.24951	-0.1377
2.86	-8.442	13.681	115.3205	-0.054688	0.030371	-0.058008	38.1484	112.443	745.505	-0.81055	0.5166	0.15869	-32.535	41.1241	-0.0498000000000001	0.0087891	-0.32813	-0.016602	128.717	-36.223	20.2087	0.41895	-0.2666	-0.17432
2.862	-16.667	33.3693	117.6708	-0.070703	0.039746	-0.060742	10.542	164.051	700.119	-0.77051	0.49756	0.15137	-9.899	36.162	-16.7005	0.036133	-0.34619	-0.030762	107.513	-26.3086	30.836	0.47119	-0.2832	-0.19238
2.864	-16.665	37.2117	167.4242	-0.092578	0.049609	-0.059082	32.3785	115.3646	684.607	-0.6875	0.45313	0.13135	3.708	22.253	3.7913	0.04541	-0.34912	-0.037109	105.742	-48.8537	55.705	0.53711	-0.30518	-0.2168
2.866	-29.228	64.22	195.465	-0.11816	0.065918	-0.061035	87.452	112.3597	670.283	-0.62548	0.42773	0.12964	11.203	2.8518	20.140202	0.060547	-0.35254	-0.037598	105.023	-62.562	50.996	0.54395	-0.2915	-0.22021
2.868	-11.051	70.39	229.38	-0.13896	0.087696	-0.064649	23.3131	133.482	645.087	-0.57178	0.40283	0.10693	-5.252	-9.27	42.568	0.067627	-0.35302	-0.035157	84.7791	-57.698	27.8804	0.54102	-0.27783	-0.20947
2.87	-7.459	63.481	269.2006	-0.17402	0.11387	-0.069824	41.07238	96.2994	636.928	-0.49854	0.36377	0.083984	5.461	-1.575	28.3368	0.070801	-0.34473	-0.028809	79.1094	-26.348	18.7201	0.51904	-0.26318	-0.19727
2.872	0.0279999999999987	54.454	317.9934	-0.21231	0.14082	-0.07334	15.642	150.63	603.833	-0.44873	0.33716	0.06958	-11.289	-8.0415	47.849	0.081543	-0.33789	-0.026855	24.772	14.935	9.3379	0.49829	-0.26172	-0.1836
2.874	32.044	47.281	394.55	-0.26397	0.17501	-0.080372	-19.143	149.248	569.148	-0.40186	0.30859	0.056641	-3.281	-9.49	47.1549	0.085938	-0.32861	-0.028809	11.399	24.756	3.222	0.48486	-0.26611	-0.17773
2.876	30.963	26.6843	425.0177	-0.32227	0.20996	-0.087402	18.991	144.959	525.517	-0.3457	0.2832	0.038574	-5.352	-29.213	17.8133	0.098145	-0.31787	-0.03125	7.739	14.886286	-20.9859	0.4707	-0.28271	-0.16699
2.878	42.363	11.9876	466.325	-0.3953	0.24882	-0.091405	-36.5712	176.8712	466.447	-0.32129	0.26074	0.03125	5.834	-14.2012	-7.296	0.10914	-0.30957	-0.03418	-20.638	23.27532	-40.104	0.46045	-0.29053	-0.16846
2.88	42.972	-4.545	507.466	-0.46863	0.29081	-0.10245	-35.832	131.012	443.654	-0.27246	0.22998	0.018555	-23.546	-11.093	-5.6694	0.11377	-0.30078	-0.042969	-79.9961	12.909	-30.955	0.42773	-0.28955	-0.17676
2.882	13.866	-15.4788	555.695	-0.56394	0.33924	-0.098925	4.687	136.178	419.879	-0.24097	0.20728	0.01294	23.92	16.383	13.2366	0.12256	-0.27979	-0.054688	-61.9108	44.3554	-14.1434	0.39209	-0.27929	-0.17236
2.884	-6.2195	-21.6597	595.879	-0.6656	0.38651	-0.1001	-27.874	149.965	375.6383	-0.21436	0.18652	0.010254	-4.988	-21.523	21.6956	0.12109	-0.27246	-0.060059	-72.4034	47.282	-7.69	0.35303	-0.26416	-0.16699
2.886	13.5776	-23.8829	654.3888	-0.7749	0.44092	-0.09082	0.132000000000001	104.1595	371.16468	-0.18213	0.15723	0.010742	9.07	-15.4799	0.166999999999998	0.12695	-0.25977	-0.07373	-78.507	47.9739	-19.7318	0.29053	-0.22559	-0.1543
2.888	36.9085	-15.0047	685.3221	-0.88345	0.49875	-0.073134	-11.321	134.436	340.64768	-0.16455	0.14697	0.010742	17.532	-29.2611	-12.0549	0.12891	-0.2522	-0.083008	-67.4363	50.7122	-11.6253	0.24902	-0.21338	-0.14795
2.89	34.515	-5.4869	715.628	-0.99491	0.54957	-0.042741	-34.5524	120.448	318.4774	-0.13867	0.11768	0.019531	23.244	23.4144	-17.5132	0.13086	-0.24756	-0.095703	-66.00304	16.283	21.6392	0.17334	-0.17725	-0.12158
2.892	-1.176	-7.5771	738.033	-1.0957	0.60933	0.0029891	17.72	111.7327	305.744	-0.11865	0.099611	0.028809	33.0267	11.91699	7.9811	0.12744	-0.24854	-0.11865	-55.0023	33.281	38.86	0.11108	-0.15185	-0.099119
2.894	-3.6276	-15.3379	736.555	-1.188	0.66177	0.061284	-31.278	147.17	260.036	-0.10107	0.07959	0.032227	43.6098	54.408	3.6752	0.12695	-0.23926	-0.12354	-51.0222	26.8817	40.373	0.047363	-0.12646	-0.076172
2.896	17.99004	-24.2746	747.666	-1.2617	0.70996	0.12598	-29.819	112.209	270.764	-0.079102	0.055664	0.038086	34.9691	19.5685	-9.291	0.11426	-0.22705	-0.13672	-9.204	24.027	33.301	-0.035156	-0.082031	-0.041504
2.898	-0.30214	-10.947	719.5029	-1.3134	0.74761	0.18575	-4.36	112.7538	266.4374	-0.069336	0.042969	0.039063	39.1113	36.46083	-22.379	0.10279	-0.21387	-0.14477	-22.798	23.758	40.4735	-0.074219	-0.064453	-0.027344
2.9	-5.7203	-28.058	706.4814	-1.3355	0.7727	0.23719	-30.7098	120.936	238.8302	-0.051758	0.017578	0.046387	34.324	-4.9702	-17.017	0.091797	-0.19434	-0.146	4.15	4.8771	58.909	-0.13574	-0.036621	0.0029297
2.902	-2.945	-40.1846	694.9699	-1.3362	0.79065	0.27619	7.758	76.239	241.291	-0.037842	0.0043945	0.047852	29.774	24.8744	-6.54	0.070801	-0.17627	-0.14307	41.404	9.0995	58.65	-0.17285	-0.020264	0.026124
2.904	12.581	-44.9024	693.39	-1.3192	0.79238	0.28927	9.411	96.822	195.164	-0.02832	-0.003418	0.049805	14.651	-1.654	-2.4629	0.063477	-0.16309	-0.14111	55.3152	-7.305	34.8051	-0.20801	-0.0078125	0.048828
2.906	-24.484	-32.588	692.013	-1.2813	0.77832	0.28369	-3.887	83.7901	188.0221	-0.016113	-0.025879	0.053711	29.77	45.519	0.7133	0.040039	-0.14258	-0.13623	89.304	-7.737	44.911	-0.25	0.018066	0.074219
2.908	-32.713	-41.352	706.748	-1.249	0.7594	0.26578	40.089	84.0686	161.809	-0.0083008	-0.029297	0.054199	6.508	4.0448	20.3231	0.027099	-0.12988	-0.13159	84.0899	9.7539	37.252	-0.26318	0.032227	0.083984
2.91	-32.195	-43.261	765.403	-1.2164	0.74452	0.22856	20.11	110.351	126.716	0.0058594	-0.042969	0.063477	4.04	20.5578	28.424	0.01123	-0.11279	-0.13086	102.387	11.30245	43.774	-0.2915	0.05127	0.10889
2.912	-50.1644	-44.619	807.504	-1.151	0.71282	0.17648	35.725	83.563	125.804	0.012207	-0.046875	0.071777	0.241	-24.25725	15.9876	-0.00048828	-0.104	-0.125	123.662	14.277	27.0485	-0.30542	0.062745	0.12232
2.914	-63.692	-45.743	830.621	-1.0904	0.69224	0.12782	49.7494	82.3426	124.653	0.024902	-0.053223	0.083008	-6.814	33.7219	1.0023	-0.0097656	-0.099121	-0.12598	124.736	-1.197	11.173	-0.31641	0.066406	0.1416
2.916	-57.3886	-74.5064	845.303	-1.0371	0.68164	0.080566	29.4	95.094	98.9951	0.039063	-0.055664	0.09082	12.479	29.7818	14.111484	-0.020996	-0.083496	-0.12012	111.11	-35.1197	12.859	-0.32422	0.070801	0.13721
2.918	-32.148	-88.954	851.476	-1.0054	0.67716	0.059423	75.911	71.712	99.3946	0.046875	-0.059082	0.097168	5.572	73.111	21.8607	-0.028076	-0.075195	-0.12207	96.864	-16.8474	5.9561	-0.33057	0.075195	0.14258
2.92	-35.646	-89.22164	854.0422	-0.99668	0.68277	0.056014	46.5094	92.807	75.75013	0.064941	-0.064941	0.10156	16.535	15.96851	40.172	-0.040527	-0.062988	-0.12402	76.1104	-12.8447	21.909	-0.33252	0.078125	0.14307
2.922	-20.675	-105.679	857.92083	-1.0129	0.71545	0.077078	7.747	76.105	86.7405	0.084717	-0.061767	0.10791	-16.783	20.7636	30.666	-0.051758	-0.056641	-0.11816	54.74642	-3.9923	5.101	-0.32325	0.078613	0.13379
2.924	-18.674	-125.071	877.6126	-1.044	0.7617	0.11231	51.3738	62.4178	75.8104	0.10742	-0.064453	0.10352	-10.073	-27.485	18.2728	-0.061035	-0.046387	-0.10889	62.67447	-21.80869	-9.213	-0.29834	0.069336	0.11768
2.926	1.779	-137.553	894.8506	-1.0688	0.80518	0.15625	16.204	78.806	23.535	0.13623	-0.063965	0.094727	-19.257	15.5032	35.8845	-0.079102	-0.036621	-0.10303	35.184	-32.8042	-23.2731	-0.24365	0.050293	0.082031
2.928	37.1956	-128.603	895.84315	-1.082	0.84897	0.18653	22.524	47.259	37.64	0.15088	-0.062988	0.089844	-9.708	12.4971	41.261	-0.096191	-0.031494	-0.095459	-5.533	-11.357	-22.8368	-0.21143	0.035645	0.059082
2.93	39.876	-112.355	906.9025	-1.0544	0.87418	0.19863	34.884	38.268	37.8478	0.1875	-0.065918	0.080566	-10.755	31.607	61.684	-0.11768	-0.022461	-0.089844	-32.402	3.594	6.19041	-0.1748	0.010742	0.013672
2.932	53.6956	-103.16	935.597	-1.0064	0.89173	0.18141	-24.831	45.726	33.173	0.21289	-0.066162	0.067872	5.78	-31.2249	48.468	-0.14893	-0.017578	-0.078613	-35.4079	27.502	14.34	-0.16088	0.0090332	-0.0031739
2.934	71.68	-90.6133	960.3378	-0.96069	0.88578	0.15337	10.94	22.2808	43.1551	0.23682	-0.069336	0.054688	-12.334	-29.8071	62.625	-0.16748	-0.019531	-0.081543	-48.5931	14.179	32.348	-0.16553	0.015625	-0.018066
2.936	60.2195	-68.6103	977.3825	-0.92188	0.88086	0.12354	11.092	25.8453	23.6788	0.2583	-0.074707	0.03125	5.061	-49.3928	96.813	-0.21143	-0.0097656	-0.081055	-53.183	-0.728000000000002	46.981	-0.19043	0.032227	-0.03418
2.938	66.139	-62.3303	993.0213	-0.90003	0.89558	0.10734	-27.893	-0.327999999999999	37.622	0.26904	-0.081543	0.016113	16.082	-29.365	172.6872	-0.2522	-0.0029297	-0.065674	-55.0006	29.5606	82.1695	-0.20898	0.037109	-0.035156
2.94	63.9848	-59.1682	1017.5067	-0.89071	0.90815	0.087169	27.748	-7.8628	50.891	0.27441	-0.087402	-0.0058594	47.3665	-23.3342	199.8686	-0.30225	0.0058594	-0.052734	-74.251	64.19	116.6426	-0.26367	0.057617	-0.036621
2.942	93.503	-68.8648	1038.8346	-0.89209	0.92607	0.083008	-20.075	18.341474	18.0696	0.27197	-0.093506	-0.024415	28.448	-0.286999999999999	270.545	-0.38867	0.030273	-0.011719	-65.4553	109.371	193.843	-0.32691	0.067139	-0.038818
2.944	69.3498	-58.9177	1045.766	-0.89659	0.94767	0.082075	3.158	12.7257	17.8226	0.26318	-0.1001	-0.037109	61.642	-4.30519	300.406	-0.43848	0.038574	-0.0014648	-48.25	80.684	280.6576	-0.4082	0.084473	-0.027832
2.946	60.4675	-73.8438	1038.0773	-0.91211	0.95898	0.088867	-0.396000000000001	15.5913	6.9214	0.23877	-0.10645	-0.048828	40.171	-5.575	386.1194	-0.55029	0.064941	0.031738	-3.58599999999999	56.546	401.5235	-0.55664	0.12695	-0.010742
2.948	59.353	-99.4905	1073.405	-0.9256	0.96012	0.094509	-53.3588	14.9065	7.1553	0.2207	-0.10498	-0.049805	40.435	11.6538	437.545	-0.6333	0.082764	0.056641	-19.995	52.641	551.2853	-0.63818	0.14502	0.0019531
2.95	65.3956	-111.174195	1076.9629	-0.94568	0.96263	0.11453	8.713	-13.1819	26.2077	0.1709	-0.10645	-0.047363	33.882	34.348	541.71	-0.73145	0.10352	0.079102	34.717	42.519	758.8302	-0.82422	0.18896	0.042969
2.952	46.981	-114.555	1081.733	-0.96874	0.96143	0.13491	-4.837	15.1299	-0.1671	0.1333	-0.10352	-0.038574	43.686	53.766	637.129	-0.8667	0.14648	0.11084	71.937	18.5735	914.009	-0.98269	0.22583	0.092774
2.954	37.051	-128.39	1109.3802	-0.99541	0.96681	0.15149	-4.546	2.5954	14.816	0.089844	-0.097168	-0.026855	44.641	15.26733	761.703	-0.94043	0.1709	0.12402	101.474	-39.722	1066.072	-1.1582	0.27441	0.14844
2.956	22.568	-124.244	1141.478	-1.0332	0.97852	0.17334	33.184	3.396391	24.616	0.02832	-0.091797	0.0053711	93.657	-41.891	842.419	-1.0957	0.22021	0.17432	172.985	-113.76	1179.954	-1.4116	0.34814	0.25879
2.958	6.051	-107.12383	1156.457	-1.0849	0.97521	0.16707	-5.406	20.1098	11.8556	0.0014648	-0.080566	0.022949	95.606	-128.8298	928.088	-1.2656	0.26953	0.22217	207.518	-174.477	1318.3395	-1.5391	0.39355	0.3208
2.96	3.044	-83.742	1158.26882	-1.1484	0.98132	0.15264	41.557	2.3402	19.53158	-0.049316	-0.064941	0.055176	90.474	-155.039	971.676	-1.355	0.29297	0.25879	239.4386	-244.557	1438.389	-1.8066	0.50684	0.44238
2.962	2.379	-83.6576	1157.5359	-1.2264	0.99377	0.1249	61.4563	10.1517	0.583	-0.080078	-0.056152	0.077881	75.149	-173.234	1040.2693	-1.541	0.33984	0.33252	244.144	-270.7202	1490.598	-1.9685	0.58765	0.54029
2.964	0.159999999999997	-82.2153	1190.732	-1.3087	1.0128	0.10193	7.793	8.621	-9.7227	-0.10059	-0.045898	0.087891	62.2018	-131.032	1062.1157	-1.6819	0.37671	0.39136	167.754	-295.298	1488.934	-2.1089	0.65967	0.60693
2.966	-25.734	-63.434	1192.272	-1.4082	1.0391	0.092285	51.6044	-21.9799	29.9788	-0.1167	-0.036621	0.11865	8.012	-160.8671	1068.747	-1.8203	0.41016	0.43994	7.943	-306.56	1455.174	-2.2554	0.70361	0.59375
2.968	-7.663	-58.8279	1170.2136	-1.5136	1.066	0.11071	54.229	7.1834	5.8317	-0.12012	-0.041016	0.12939	-26.154	-136.0151	1044.158	-1.9688	0.43701	0.4751	-34.45	-265.51	1400.495	-2.2988	0.71289	0.57275
2.97	3.445	-54.1748	1174.4341	-1.6252	1.0906	0.15813	9.114	-3.2731	1.9066	-0.11572	-0.045898	0.14063	-69.662	-163.449	1027.998	-2.0229	0.43848	0.48242	-25.39	-259.81	1386.815	-2.3281	0.70996	0.50049
2.972	16.108	-45.161	1169.979	-1.7429	1.1152	0.2265	64.0891	-3.9408	11.2464	-0.11011	-0.051025	0.15088	-94.0488	-114.048	1014.7605	-2.1113	0.45654	0.44824	-1.16	-248.725	1350.592	-2.2859	0.68969	0.43237
2.974	22.244	-54.033	1185.6659	-1.8534	1.1419	0.30192	25.858	6.2173	7.32826	-0.099609	-0.059082	0.15527	-83.7324	-150.933	1037.761	-2.1268	0.45874	0.40821	14.4747	-275.04	1313.272	-2.2046	0.6626	0.36133
2.976	48.129	-63.501	1172.59	-1.9541	1.1621	0.37158	23.271	-22.4606	21.3216	-0.080566	-0.074219	0.16504	-97.732	-106.216	1055.788	-2.1147	0.47314	0.3457	-48.752	-236.639	1261.2474	-2.0425	0.58691	0.26953
2.978	59.35	-69.8431	1204.6319	-2.0253	1.1864	0.41339	58.9647	11.987	-5.5431	-0.068848	-0.081055	0.16211	-104.831	-154.688	1040.427	-2.0488	0.49023	0.25684	-114.6583	-155.708	1235.939	-1.9688	0.55273	0.22803
2.98	58.711	-75.0349	1237.38641	-2.0699	1.2099	0.43692	12.159	39.003	-22.67486	-0.047852	-0.084961	0.15137	-80.0534	-102.818	1046.1545	-2	0.48828	0.2124	-149.361	-122.23	1233.129	-1.8623	0.50293	0.17041
2.982	74.3415	-71.1605	1252.4465	-2.0695	1.2251	0.43183	20.898	15.5164	13.663	-0.032471	-0.087402	0.14526	-50.5308	-162.175	1061.392	-1.9141	0.45215	0.15869	-132.702	-59.39	1225.692	-1.8181	0.50904	0.15601
2.984	84.679	-69.981	1257.6732	-2.0478	1.2351	0.40918	22.15	32.718	3.648	-0.016602	-0.086426	0.13672	-51.90113	-86.35	1074.616	-1.8611	0.42651	0.11719	-84.339	-53.1	1260.501	-1.7808	0.54932	0.16309
2.986	83.5949	-62.436	1257.5535	-2.0112	1.2427	0.37158	-1.925	5.6824	3.5466	0.0092773	-0.086426	0.12891	-24.0788	-139.727	1128.444	-1.8008	0.41016	0.085938	14.087	-53.32	1306.127	-1.7515	0.61279	0.20654
2.988	90.3182	-45.935	1254.3052	-1.9693	1.2356	0.33184	28.784	12.59287	-11.85	0.017578	-0.086426	0.12451	7.9888	-104.845	1157.343	-1.7827	0.46338	0.083008	65.562	-92.363	1355.3733	-1.7703	0.67847	0.25928
2.99	101.1708	-21.9106	1263.6998	-1.9331	1.2239	0.29619	-12.455	32.4124	-18.0921	0.033691	-0.08252	0.11865	28.0721	-182.774	1238.22	-1.7925	0.52246	0.10938	0.594999999999999	-142.414	1388.945	-1.8262	0.77148	0.31982
2.992	97.91649	-29.7104	1260.8026	-1.9128	1.2114	0.27666	-13.412	13.1952	21.6654	0.045898	-0.080078	0.10791	5.722	-185.7448	1320.278	-1.8394	0.66064	0.18945	-103.375	-186.938	1433.944	-1.8877	0.91211	0.36768
2.994	101.8598	-24.1702	1261.3229	-1.9116	1.2005	0.26768	17.786	35.167	11.5646	0.047852	-0.07666	0.10596	-16.384	-277.801	1354.323	-1.8689	0.75269	0.2644	-179.502	-242.217	1519.716	-1.8921	0.97314	0.37646
2.996	90.2005	-39.494	1269.4024	-1.9277	1.1982	0.271	-50.4789	31.738	-20.116	0.0625	-0.075195	0.088867	-95.981	-272.462	1376.111	-1.877	0.81445	0.32568	-223.633	-266.4985	1577.566	-1.8594	1.0508	0.354
2.998	89.03267	-24.69589	1260.2241	-1.9445	1.2044	0.27578	-15.065	-1.073	1.161	0.071045	-0.068604	0.082031	-92.755	-316.56	1418.3906	-1.8491	0.87451	0.37207	-203.237	-295.69	1580.98	-1.8125	1.0943	0.32886
3	82.1739	-22.5805	1253.1354	-1.9644	1.2133	0.28828	-5.451	30.43	8.66701	0.07666	-0.060547	0.069336	-83.378	-253.515	1444.595	-1.8301	0.89648	0.38135	-79.689	-304.99	1573.412	-1.7871	1.1309	0.30127
3.002	78.665	-8.3879	1249.6105	-1.9784	1.229	0.29375	-17.896	7.2714	29.903	0.083008	-0.052246	0.057129	-10.877	-251.469	1453.2408	-1.7827	0.93994	0.37695	19.246	-281.04	1574.5103	-1.7935	1.1665	0.25586
3.004	67.8005	11.558	1238.824	-1.9961	1.241	0.29932	36.87	25.6522	21.777	0.085938	-0.05127	0.05127	72.257	-195.607	1445.404	-1.7488	0.96118	0.36597	54.842	-225.23	1578.3778	-1.8291	1.1797	0.24414
3.006	33.462	15.7863	1243.4046	-1.9937	1.2593	0.30273	-17.351	42.6479	3.13344	0.092773	-0.03418	0.043945	110.92815	-202.7921	1443.793	-1.7144	0.98291	0.36035	115.453	-146.319	1596.324	-1.9448	1.2095	0.27588
3.008	26.448	13.7308	1249.301	-1.9779	1.2699	0.29219	10.264	0.358999999999998	27.8516	0.093018	-0.018311	0.039795	94.1769	-166.87	1446.589	-1.7124	0.99463	0.34863	156.2973	-73.164	1606.053	-2.0896	1.222	0.33033
3.01	4.009	14.9246	1262.325	-1.9526	1.2778	0.28614	53.521	20.4185	39.021	0.091309	-0.0058594	0.037598	121.495	-149.275	1453.859	-1.7358	1.0005	0.35107	211.476	-36.596	1614.263	-2.271	1.231	0.40576
3.012	-3.781	17.8371	1257.6742	-1.9167	1.2841	0.2705	9.876	19.6353	19.065	0.073242	0.012695	0.027344	157.33	-89.466	1466.1904	-1.8315	1.0103	0.3877	283.19	2.72	1575.8233	-2.5425	1.2485	0.52051
3.014	14.767	6.7778	1254.724	-1.8765	1.2829	0.25059	53.3174	-5.7321	44.575	0.062012	0.01709	0.023438	179.887	-61.13	1473.182	-1.947	1.0119	0.43311	324.31	37.3315	1568.412	-2.6758	1.252	0.56104
3.016	-1.912	5.0581	1222.5523	-1.8281	1.2793	0.22461	21.578	40.961	52.682	0.031738	0.045898	-0.0014648	159.002	-40.176	1485.8004	-2.0972	1.0015	0.48828	291.145	99.751	1565.214	-2.9097	1.2681	0.63965
3.018	-2.75	23.029	1196.0483	-1.7762	1.2738	0.1998	11.149	33.248	96.742	-0.00048825	0.069092	-0.0046387	110.6059	-39.4255	1475.449	-2.3257	0.99268	0.55566	218.527	101.309	1557.252	-3.0466	1.2693	0.67651
3.02	-31.126	32.85	1189.33439	-1.7274	1.2625	0.17451	61.36632	50.945	124.538	-0.030762	0.09668	-0.003418	29.217	-41.9536	1471.506	-2.46	0.98633	0.57666	163.923	34.3944	1535.679	-3.1484	1.2617	0.69873
3.022	-15.137	29.1483	1192.4299	-1.6781	1.25	0.14951	17.037	71.762	136.61089	-0.083984	0.13818	0.0053711	-0.605999999999995	-38.3748	1476.807	-2.6421	0.98291	0.61523	172.3527	-30.8984	1521.803	-3.2266	1.2168	0.69385
3.024	0.650000000000006	32.3899	1209.9495	-1.6406	1.2359	0.12578	11.606	59.1369	187.64793	-0.11182	0.15674	0.012207	5.956	-59.8322	1512.593	-2.7329	0.97705	0.60693	210.793	-104.796	1543.5211	-3.2456	1.186	0.6875
3.026	7.416	47.1882	1189.5669	-1.6035	1.2227	0.10693	61.8296	76.2001	233.157	-0.1792	0.18945	0.022461	56.774	-74.2032	1532.1599	-2.7905	0.95361	0.57031	219.256	-130.138	1569.372	-3.2539	1.0996	0.64893
3.028	15.793	57.904	1161.6289	-1.5782	1.2075	0.09043	11.816	79.3643	245.568	-0.23657	0.21118	0.033691	89.533	-135.198	1574.063	-2.8242	0.88477	0.51416	185.029	-120.872	1561.01	-3.2263	1.0383	0.62915
3.03	7.29199999999999	77.9884	1141.78849	-1.5433	1.1933	0.075879	28.8457	69.51	291.1925	-0.29053	0.23438	0.039063	122.4053	-131.775	1534.502	-2.8257	0.84619	0.49121	175.03	-114.622	1553.494	-3.1875	0.97656	0.60986
3.032	26.6	82.6143	1149.677	-1.5121	1.1808	0.064941	14.545	86.3512	300.3928	-0.375	0.27148	0.051758	87.8448	-157.7308	1551.851	-2.8594	0.75195	0.44189	146.543	-87.576	1511.314	-3.1187	0.9165	0.5918
3.034	43.631	97.012	1126.3903	-1.4788	1.1665	0.053711	7.164	53.0465	349.2224	-0.41504	0.28809	0.054688	72.821	-89.466	1547.816605	-2.8933	0.67944	0.42872	86.67	-82.7053	1503.963	-3.082	0.89648	0.57861
3.036	63.614	93.336	1090.5677	-1.4473	1.1484	0.038086	38.767	41.0906	388.9144	-0.49951	0.32373	0.070313	53.579	-89.381	1567.6419	-2.9258	0.60156	0.43213	54.389	-29.868	1523.821	-2.9902	0.86035	0.55762
3.038	58.7553	72.4305	1079.8786	-1.4128	1.1294	0.027929	-1.16	43.4083	404.194	-0.56836	0.3584	0.087647	51.565	-1.357	1534.5593	-3.0156	0.54297	0.45459	-12.601	40.941	1543.75	-2.9041	0.85279	0.53272
3.04	56.6645	81.1255	1087.9795	-1.3744	1.1114	0.020996	-10.158	20.586	472.9783	-0.63721	0.38574	0.10742	33.572	-7.289	1546.098	-3.0542	0.5415	0.47363	-63.6551	88.0994	1505.32	-2.812	0.84619	0.52148
3.042	69.77259	73.4871	1081.4194	-1.342	1.0922	0.006543	-8.016	11.91373	530.5949	-0.73779	0.43311	0.12988	30.889	60.861	1503.9598	-3.1011	0.55908	0.50488	-89.6395	158.798	1428.287	-2.6797	0.84375	0.48096
3.044	70.3626	75.06339	1050.505	-1.3073	1.0752	0.00048828	-18.431	10.5299	591.5989	-0.78857	0.45557	0.14453	-7.51600000000001	32.158	1525.059	-3.1179	0.57959	0.51246	-109.77531	220.457	1375.367	-2.6094	0.83594	0.45557
3.046	70.3407	66.9006	1016.244	-1.2754	1.0547	-0.0092773	26.9343	-38.3752	643.78	-0.89258	0.50195	0.17969	-5.39699999999999	99.4466	1482.563	-3.1206	0.60596	0.51367	-74.422	257.476	1355.831	-2.4688	0.83008	0.41553
3.048	59.7034	56.969	1007.7048	-1.2352	1.0399	-0.01582	20.243	-34.3909	676.378	-0.97168	0.53222	0.21191	21.939	58.365	1475.5696	-3.0918	0.63867	0.51611	-87.943	263.701	1346.967	-2.3613	0.81006	0.38549
3.05	49.6703	63.6715	981.2242	-1.2035	1.0227	-0.024219	-30.531	-43.7651	707.872	-1.0464	0.55615	0.25	42.544	99.223	1448.675	-3.0679	0.65381	0.5127	-75.768	216.179	1323.945	-2.2617	0.7832	0.36377
3.052	40.558	67.6521	965.1574	-1.1696	1.0019	-0.028516	18.847	-59.3577	797.309	-1.1445	0.58301	0.30273	96.77	23.05	1449.116	-3.0073	0.67822	0.51758	-41.667	173.153	1292.65	-2.1323	0.74854	0.33887
3.054	36.538	76.6432	954.0786	-1.1444	0.98213	-0.030371	-15.272	-50.2125	779.38273	-1.189	0.59424	0.33789	136.1271	68.463	1421.656	-2.9431	0.68677	0.50854	4.53299999999999	133.905	1289.745	-2.0718	0.72803	0.32227
3.056	29.9283	93.284	940.5812	-1.1235	0.96143	-0.037109	8.941	-77.9184	797.239	-1.2788	0.60205	0.41406	151.204	7.8174	1407.293	-2.8687	0.68408	0.49854	43.256	143.21	1274.863	-1.9565	0.69678	0.28809
3.058	5	94.904	913.3423	-1.0904	0.94394	-0.04043	63.4673	-89.4415	780.069	-1.3416	0.60424	0.47022	123.0343	63.269	1381.169	-2.7397	0.67236	0.47998	82.6272	155.893	1243.384	-1.8584	0.6831	0.27758
3.06	-16.24	105.674	884.6279	-1.0598	0.92617	-0.042285	5.837	-94.0645	735.093	-1.3901	0.60303	0.52734	119.7644	6.0102	1401.855	-2.668	0.66211	0.46533	97.4826	134.9213	1211.201	-1.7632	0.66455	0.25977
3.062	-18.603	97.0857	876.9346	-1.0344	0.91406	-0.043457	49.894	-104.181	736.809	-1.4468	0.59229	0.58984	135.28246	29.3949	1403.38998	-2.5117	0.64453	0.43994	128.1826	116.29	1197.371	-1.6245	0.64697	0.22168
3.064	-9.43	100.955	851.19492	-1.0102	0.89766	-0.04502	60.4614	-77.879	692.5172	-1.4663	0.59131	0.61572	140.239	-26.614	1388.614	-2.3979	0.63818	0.41845	112.493	90.139	1205.276	-1.5527	0.63623	0.21729
3.066	-39.8766	104.812	815.2256	-0.97803	0.88135	-0.043945	27.307	-75.956	682.145	-1.5054	0.60205	0.6582	119.9057	46.717	1363.68	-2.2891	0.63672	0.39697	153.931	80.764	1223.657	-1.3984	0.60547	0.17725
3.068	-35.074	89.327	792.5754	-0.95322	0.86787	-0.038965	65.462	-103.469	716.39	-1.5144	0.61011	0.67309	98.5256	29.545	1334.299	-2.1479	0.64014	0.36865	149.595	82.644	1171.101	-1.282	0.58765	0.1521
3.07	-29.43	79.7129	765.6682	-0.92842	0.85263	-0.040723	18.516	-71.4742	732.488	-1.5132	0.62842	0.67969	48.824	113.475	1304.136	-2.0737	0.64795	0.36328	160.816	87.945	1091.815	-1.1719	0.56152	0.12744
3.072	-42.4526	86.911	736.3749	-0.90147	0.83506	-0.040723	26.347	-79.192	780.247	-1.498	0.64648	0.68994	61.575	101.469	1239.794	-1.9531	0.64648	0.32959	163.866	135.152	981.51	-1.0234	0.52539	0.10303
3.074	-43.1485	99.176	715.8773	-0.87676	0.81914	-0.039551	44.6422	-66.717	838.63	-1.4902	0.65723	0.6958	68.318	182.263	1190.819	-1.8735	0.64111	0.30957	160.642	191.103	893.972	-0.95313	0.50098	0.093262
3.076	-36.343	97.2508	699.6665	-0.84375	0.80078	-0.030273	-9.3357	-38.074	868.6896	-1.4897	0.67822	0.71289	95.782	159.619	1150.304	-1.7905	0.63721	0.28906	154.706	241.1855	835.233	-0.81348	0.45313	0.07959
3.078	-14.9896	87.4885	695.7324	-0.81787	0.78037	-0.016309	28.849794	-77.202	914.8598	-1.5017	0.70239	0.7229	102.8926	201.71	1133.492	-1.6909	0.63037	0.26074	122.854	263.367	794.541	-0.71826	0.42236	0.074707
3.08	-26.807	90.522	677.388	-0.78789	0.7539	-0.00625	43.4475	-78.63	921.18868	-1.5137	0.72266	0.7251	67.90709	159.592	1101.751	-1.6421	0.62549	0.25146	100.518	228.986	796.822	-0.63086	0.3916	0.074707
3.082	-11.0386	93.5905	632.228	-0.76524	0.72734	0.01289	16.7197	-90.812	953.3447	-1.5034	0.75049	0.70898	25.548	188.99	1091.0309	-1.5444	0.61279	0.22461	54.797	218.999	787.4156	-0.51611	0.35791	0.083008
3.084	7.311	93.625	628.3737	-0.74112	0.70244	0.023047	29.4463	-151.528	1003.327	-1.4824	0.75586	0.69189	9.076	149.244	1038.209	-1.4448	0.59229	0.1958	36.403	229.153	764.1579	-0.46387	0.34326	0.087891
3.086	29.5588	98.809	613.1771	-0.71338	0.66797	0.03125	-9.297	-142.636	1006.304	-1.4097	0.76221	0.62891	3.052	174.022	1020.8725	-1.4019	0.58545	0.18848	43.8123	251.758	741.3291	-0.36035	0.30664	0.10107
3.088	25.174	94.3523	586.2993	-0.68281	0.63984	0.029199	1.717	-178.56	1041.321	-1.3447	0.76123	0.56689	-18.616	158.7067	994.3419	-1.3081	0.56787	0.16846	-20.924	276.239	657.8462	-0.28052	0.28515	0.10669
3.09	23.205	98.9896	557.1639	-0.64649	0.60567	0.024316	-16.622	-196.797	1090.0055	-1.2808	0.75244	0.49414	-28.042	191.373	940.0695	-1.243	0.56226	0.15332	-83.154	256.037	600.742	-0.20166	0.25586	0.12402
3.092	54.8052	89.6204	535.5396	-0.61133	0.57285	0.023144	-70.961	-164.3116	1095.754	-1.1968	0.73486	0.41992	-75.624	171.48	888.618	-1.1777	0.56152	0.14551	-124.84	245.24118	547.9542	-0.10938	0.21729	0.12598
3.094	56.6677	97.5573	532.5653	-0.57344	0.54785	0.012988	-59.841	-192.48697	1153.691	-1.1724	0.72412	0.38867	-85.957	174.0716	867.5705	-1.0869	0.55469	0.12549	-162.029	207.6992	523.8762	-0.061523	0.19629	0.12842
3.096	53.6171	98.73072	505.4618	-0.54199	0.5166	0.0053711	-33.3936	-147.105	1157.413	-1.1328	0.70117	0.34912	-86.854	129.6094	839.038	-1.0444	0.55127	0.11963	-146.201	172.4693	496.371	0.027832	0.15967	0.13232
3.098	31.464	98.12919	473.249	-0.5082	0.4957	0.00029297	-52.272	-101.508	1168.7058	-1.1284	0.69189	0.32983	-47.0799	138.79	828.958	-0.96094	0.5332	0.11377	-160.299	158.717	461.852	0.092772	0.12646	0.13306
3.1	36.5098	91.5108	443.421	-0.48086	0.46777	-0.0088867	-15.5241	-105.577	1209.386	-1.1445	0.68359	0.31641	-16.602	135.15	781.8	-0.89746	0.52295	0.10303	-167.786	136.926	420.124	0.15576	0.096191	0.13818
3.102	45.6056	86.66131	454.0028	-0.45742	0.4459	-0.011231	-32.84107	-35.453	1199.505	-1.1812	0.69287	0.30469	16.318	182.785	741.208	-0.83398	0.50586	0.10254	-128.503	163.43	382.006	0.23047	0.04834	0.12451
3.104	30.204	92.779	430.6243	-0.43359	0.4252	-0.0096681	-23.1435	-52.92	1233.7521	-1.2036	0.70752	0.31104	25.8938	208.272	714.002	-0.74561	0.47559	0.10107	-78.3462	179.803	348.103	0.26514	0.024414	0.11475
3.106	16.321	95.19374	421.5137	-0.41211	0.40234	0.00097656	4.775	-83.466	1277.755	-1.2715	0.74805	0.32129	24.4173	207.654	676.113	-0.69971	0.46533	0.10156	-58.251	197.48	296.684	0.31836	-0.027832	0.09375
3.108	35.898	102.8006	391.9956	-0.38906	0.38242	0	-29.9056	-49.188	1269.991	-1.3484	0.7898	0.33716	16.7252	219.341	626.668	-0.61475	0.43506	0.092285	-28.9544	209.43	261.2386	0.35889	-0.072754	0.077637
3.11	15.782	98.0414	381.6326	-0.37382	0.36318	0.0086914	-22.0114	-110.064	1306.613	-1.4507	0.83838	0.34961	8.6652	218.6749	589.519	-0.54297	0.41235	0.08667	-5.15	186.5689	239.13	0.36963	-0.097656	0.06543
3.112	-12.81	108.103	359.0145	-0.35039	0.33897	0.019238	-10.0823	-106.1311	1321.491	-1.623	0.9082	0.37549	-5.1259	224.7677	548.874	-0.47217	0.38721	0.08252	-14.443	180.38169	206.846	0.37451	-0.13867	0.055176
3.114	-21.137	96.956	345.9943	-0.33301	0.32149	0.03125	-36.071	-101.8248	1306.4934	-1.7666	0.95899	0.40625	5.269	197.249	518.116	-0.37451	0.34326	0.079102	-2.876	156.8291	181.2144	0.36132	-0.17017	0.040283
3.116	-3.534	71.6968	336.8524	-0.3208	0.29541	0.032227	-34.9877	-155.957	1341.016	-1.9175	1.0063	0.44531	9.102	193.079	493.577	-0.32715	0.32031	0.072754	58.91378	109.216	153.7659	0.34131	-0.20068	0.03418
3.118	-24.329	76.973	312.577	-0.3082	0.27461	0.036621	-40.375	-98.538	1337.74	-2.1309	1.0674	0.52588	14.817	159.378	452.247	-0.23926	0.27588	0.0625	71.1388	77.554	108.7359	0.28906	-0.22461	0.03125
3.12	-39.7809	78.29	301.0434	-0.29131	0.25595	0.041699	-5.36508	-104.409	1368.7388	-2.2402	1.0996	0.57373	7.724	154.4449	418.7046	-0.17676	0.23462	0.0625	98.924	42.33	86.878	0.25879	-0.23682	0.031738
3.122	-33.834	75.88919	275.0445	-0.27139	0.23643	0.051074	23.4067	-136.138	1427.826	-2.4629	1.1621	0.68213	35.8415	109.065	408.716	-0.11572	0.19727	0.058105	128.555	48.976	69.332	0.19043	-0.25293	0.038086
3.124	-33.472	77.2773	268.347107	-0.2542	0.21992	0.056836	-14.7696	-71.6286	1418.556	-2.6394	1.2044	0.76733	46.3926	134.7841	368.7784	-0.04248	0.1499	0.049805	134.219	34.814	58.16	0.12548	-0.26172	0.048828
3.126	-37.632	95.246	240.392	-0.23438	0.20605	0.062988	6.50965	-107.1403	1457.565	-2.8125	1.2422	0.84814	40.0521	108.911	354.8805	-0.010742	0.12305	0.04834	158.067	-0.036999999999999	56.153	0.054688	-0.2583	0.064941
3.128	-14.003	95.064	229.903	-0.20908	0.18623	0.068652	18.9246	-72.982	1479.796	-3.0176	1.2813	0.94189	57.336	137.154	331.282	0.044434	0.076172	0.039551	165.013	-14.6035	22.295	-0.05127	-0.23633	0.091309
3.13	-22.013	79.668	236.43	-0.18389	0.15977	0.073242	-17.21016	-27.143	1429.06365	-3.0918	1.2949	0.99072	30.77524	103.4526	306.5954	0.078369	0.040527	0.025879	145.149	-29.4874	24.4541	-0.10547	-0.21631	0.11279
3.132	-2.212	72.032	243.142	-0.15733	0.14219	0.077539	-10.6058	-73.509	1428.584	-3.207	1.3125	1.061	-27.488	125.363	275.594	0.10645	0.0048828	0.015137	107.993	-3.214	40.312	-0.22314	-0.15625	0.1543
3.134	2.074	76.27	225.3943	-0.13262	0.12471	0.076465	-36.6355	-1.8521	1398.909	-3.2478	1.3157	1.0881	-37.44214	81.191	252.9943	0.13379	-0.043457	0.0092773	77.225	17.6389	62.377	-0.30347	-0.10864	0.18799
3.136	17.079	73.643	199.071	-0.10498	0.09668	0.075684	-71.053	-14.3809	1402.777	-3.2495	1.3169	1.0996	-48.881	137.1247	223.4899	0.13818	-0.064453	-4.1634e-14	53.443	35.586	23.327	-0.38184	-0.053711	0.2251
3.138	30.576	72.435	198.622	-0.080176	0.072656	0.070215	-40.663	-28.7693	1435.203	-3.2031	1.3086	1.0747	-71.924	114.789	189.4338	0.14551	-0.10693	0.00097656	6.813	51.157	6.664	-0.48145	0.022949	0.28174
3.14	32.261	78.1248	193.8103	-0.053418	0.047461	0.063184	-67.204	30.103	1403.968	-3.1558	1.2974	1.0527	-53.8315	155.0945	159.883	0.13647	-0.13794	0.0063477	-33.624	46.694	4.659	-0.5293	0.056152	0.30127
3.142	42.2099	78.8588	166.547	-0.029199	0.02793	0.056933	-53.82	-26.725	1433.9696	-3.0601	1.2837	1.0088	-45.877	98.138	141.3215	0.12061	-0.16455	0.016602	-68.6588	79.134	-8.257	-0.60693	0.11279	0.37061
3.144	30.605	65.089	164.77265	-0.0040039	0.0078126	0.049219	-48.078	-5.35029	1478.812	-2.9859	1.271	0.97168	-86.214	118.788	97.872	0.081543	-0.2041	0.04248	-83.4753	71.047	-10.477	-0.65845	0.13696	0.41235
3.146	42.6027	58.532	155.7099	0.017578	-0.013184	0.045898	-71.38	39.2553	1455.968	-2.918	1.252	0.94385	-50.3906	76.032	78.54	0.059082	-0.21289	0.063965	-51.01	61.2526	-15.7	-0.69531	0.1582	0.46045
3.148	59.22585	51.2056	161.335	0.034472	-0.024316	0.047949	-41.538	-0.514200000000001	1471.9144	-2.8491	1.2231	0.91406	-29.8548	130.169	40.17	0.0048828	-0.22803	0.1084	-63.906	55.2738	2.437	-0.729	0.16553	0.50879
3.15	52.071	51.6026	153.2311	0.049414	-0.037988	0.047754	-54.488	57.441	1448.192	-2.8184	1.209	0.90869	0.613	86.205	44.205	-0.037597	-0.22364	0.14306	-104.822	28.476	34.7938	-0.72998	0.16748	0.52979
3.152	50.7626	44.8309	138.1833	0.055274	-0.048145	0.043457	-89.74	35.006	1448.189	-2.7617	1.1748	0.88721	10.151	123.653	61.7101	-0.076172	-0.21387	0.18506	-97.516	30.489	36.003	-0.71484	0.16162	0.56982
3.154	48.588	51.7046	123.956	0.061133	-0.057422	0.035254	-43.759	5.7227	1473.21608	-2.7119	1.1572	0.87158	10.963	53.497	53.67154	-0.11719	-0.19043	0.23535	-96.992	7.8942	23.6426	-0.68213	0.1499	0.59399
3.156	41.8348	57.4706	131.8466	0.074707	-0.072266	0.030273	-40.491	75.1	1426.8466	-2.644	1.1392	0.85156	-40.362	68.905	45.8722	-0.13916	-0.1792	0.2583	-98.594	-11.9116	26.13663	-0.63281	0.13965	0.60986
3.158	31.899	62.6021	119.802	0.08125	-0.076856	0.022949	-58.67	33.7423	1426.2408	-2.5415	1.1138	0.8252	-13.636	19.0505	43.4554	-0.16211	-0.14209	0.29199	-76.4922	2.4922	48.318	-0.55469	0.1123	0.62158
3.16	15.674	61.162	113.6363	0.093653	-0.0792	0.016895	-46.314	45.229	1446.548	-2.48	1.0981	0.80859	7.13	47.411	51.3194	-0.17065	-0.11768	0.31079	-78.149	-9.4207	53.998	-0.50391	0.095703	0.61523
3.162	12.986	44.17	113.402	0.09834	-0.07959	0.017285	-57.285	89.305	1392.3223	-2.3594	1.0625	0.7749	9.011	15.699	25.1702	-0.1709	-0.091309	0.32275	-25.2124	-6.58784	58.577	-0.39844	0.062012	0.60742
3.164	-6.313	52.413	99.613	0.10195	-0.081543	0.014941	-26.515	51.703	1379.134	-2.261	1.0432	0.74732	51.1266	45.76932	20.3323	-0.15771	-0.073242	0.33057	4.355	-41.157	32.049	-0.31616	0.036377	0.58618
3.166	-16.062	46.769	83.3631	0.10254	-0.081543	0.0043945	-17.9377	119.99	1345.175	-2.1621	1.0176	0.71387	56.685	-4.069	-5.4076	-0.1543	-0.061035	0.33057	38.722	-60.412	34.633	-0.23535	0.0097656	0.56396
3.168	-19.316	42.448	80.83764	0.097951	-0.085351	-0.0010742	-25.0186	125.537	1328.51	-2.0308	0.98096	0.68945	20.921	16.3	21.3771	-0.13965	-0.050781	0.32861	49.272	-32.6641	23.3777	-0.13477	-0.022461	0.5332
3.17	-4.942	34.4486	80.0896	0.09043	-0.087207	-0.014453	-5.8148	102.785	1363.18436	-1.9648	0.9668	0.67236	58.4355	-23.0731	30.2978	-0.13598	-0.04956	0.31885	103.0113	1.716	24.629	-0.085938	-0.041992	0.51465
3.172	-21.457	39.8293	75.5556	0.079492	-0.086426	-0.027735	6.2167	165.347	1316.5625	-1.8491	0.93018	0.64258	74.028	25.1194	36.385	-0.125	-0.046875	0.31885	132.065	26.5728	12.411	0	-0.081543	0.4707
3.174	-32.4961	29.13674	71.6745	0.071191	-0.077246	-0.040137	18.1801	101.4	1322.22496	-1.7683	0.89721	0.62989	60.2733	6.057	21.4019	-0.11816	-0.049805	0.30273	132.968	-6.311	2.471	0.065674	-0.11304	0.43213
3.176	-30.776	28.8605	70.4568	0.0625	-0.062012	-0.046875	3.29319	96.4008	1334.716	-1.6987	0.86768	0.61523	74.814	31.706	41.6864	-0.10889	-0.047363	0.30029	159.891	-29.089	4.135	0.12939	-0.13428	0.39014
3.178	-21.314	30.464	71.1749	0.047754	-0.041406	-0.054199	-31.133	134.937	1295.589	-1.6152	0.82129	0.60303	68.5338	1.3271	49.12	-0.1001	-0.048828	0.29199	127.581	-7.5385	-6.274	0.21143	-0.1665	0.32568
3.18	-27.749	34.677	58.2219	0.040625	-0.02207	-0.05791	17.0236	73.277	1281.948	-1.5815	0.80127	0.59375	20.565	14.7787	34.109	-0.091064	-0.045654	0.28247	143.121	14.1154	-4.846	0.25342	-0.18359	0.29297
3.182	-16.462	29.622	50.2205	0.033594	-0.00097652	-0.059473	-3.778	132.7081	1219.63123	-1.519	0.7583	0.58398	25.247	-1.761	7.999	-0.083008	-0.043945	0.27832	138.112	37.028	7.311	0.34033	-0.21436	0.23584
3.184	-14.785	23.6609	48.7524	0.025683	0.027442	-0.057519	-42.499	132.025	1172.687	-1.4753	0.72583	0.57544	-14.788	12.139	4.96	-0.071777	-0.039551	0.28174	96.1193	19.8448	-4.167	0.39721	-0.23681	0.18164
3.186	4.276	33.421	51.5603	0.022949	0.045898	-0.054199	-30.68514	98.408	1169.3952	-1.4321	0.69385	0.57227	-22.584	8	9.6411	-0.066895	-0.040039	0.27832	66.7395	7.8985	-30.6376	0.45313	-0.25732	0.12793
3.188	22.652	31.9266	52.0458	0.019922	0.062305	-0.051758	-33.9484	167.663	1144.192	-1.3784	0.65088	0.56055	1.934	-2.039	22.1405	-0.044922	-0.033691	0.27686	55.136	27.8989	-22.2861	0.51465	-0.28516	0.058105
3.19	11.558	18.391179	52.591	0.029394	0.081543	-0.05	-33.2914	120.481	1132.1276	-1.353	0.62744	0.55957	-8.211	-7.6723	7.4895	-0.022461	-0.037353	0.2727	54.8724	24.7756	9.9935	0.54932	-0.29443	0.025391
3.192	23.962	14.2027	52.8602	0.035254	0.094043	-0.045703	-12.8174	135.1504	1104.668	-1.2964	0.59131	0.55273	-34.4533	-13.177	2.4511	-0.0019531	-0.039063	0.26904	14.125	39.6976	36.1097	0.604	-0.31494	-0.030762
3.194	55.9321	18.279242	54.0022	0.042285	0.1041	-0.044922	-22.6928	171.375	1065.657	-1.2487	0.56103	0.54809	-40.2398	-26.306	3.711	0.036133	-0.052246	0.25635	-19.479	18.7476	26.9677	0.63623	-0.32568	-0.065918
3.196	51.9583	12.0265	35.0209	0.052246	0.11377	-0.039063	-16.499	111.1396	1044.453	-1.1992	0.5293	0.53857	-16.095	-32.3664	9.083	0.048828	-0.065918	0.25098	-36.22	19.466	4.306	0.65576	-0.33008	-0.094238
3.198	41.9296	8.2981	26.98181	0.057812	0.1209	-0.036426	5.712	169.659	997.835	-1.1152	0.49414	0.51807	-37.526	-6.0186	-10.219	0.080566	-0.086426	0.22949	-64.8773	47.9385	9.661	0.65625	-0.32617	-0.12646
3.2	52.4117	10.9758	19.7068	0.06709	0.13066	-0.026074	-20.483	166.429	941.813	-1.0703	0.47266	0.5083	5.614	1.1659	17.3487	0.10132	-0.10059	0.21216	-88.516	40.401	46.098	0.646	-0.31592	-0.1377
3.202	59.2592	14.2472	11.1124	0.075293	0.13926	-0.020215	-0.671999999999997	123.504	909.868	-0.97803	0.4292	0.48828	-9.399	23.415	10.617	0.12109	-0.11426	0.19336	-103.235	48.865	59.797	0.61182	-0.29248	-0.14453
3.204	43.81	13.0787	14.3172	0.075976	0.1417	-0.018066	-23.7751	175.572	865.5723	-0.90796	0.39331	0.4646	-17.109	-0.4336	6.3042	0.14746	-0.13037	0.1748	-109.194	23.5054	23.8049	0.56982	-0.25976	-0.14331
3.206	40.5729	2.6434	24.3324	0.078613	0.15283	-0.0097656	-14.337	110.612	849.1212	-0.83398	0.3584	0.44482	-30.9334	20.56027	-6.862	0.16016	-0.1416	0.1665	-98.423	14.4813	13.5781	0.5166	-0.22559	-0.12402
3.208	34.996	4.1725	39.6446	0.076074	0.1502	-0.0047852	15.44	123.524	813.746	-0.73828	0.30859	0.41846	-14.708	-8.1151	-15.3417	0.18848	-0.16113	0.15283	-93.552	31.981	21.582	0.42969	-0.16895	-0.090332
3.21	43.6099	16.8371	42.2759	0.077734	0.15625	0.0013672	-11.457	163.53968	761.3485	-0.69092	0.28076	0.39746	-14.739	26.0042	-19.5599	0.21289	-0.18164	0.1377	-90.615	8.5482	53.464	0.37988	-0.14355	-0.071289
3.212	36.291	17.8412	38.6179	0.065625	0.16015	0.0048828	24.346	105.169	747.8421	-0.58936	0.22559	0.36426	22.216	8.3941	-0.3909	0.22217	-0.18896	0.13037	-53.7373	4.849	39.9317	0.2876	-0.083496	-0.030762
3.214	6.934	15.7881	20.8206	0.054394	0.17002	0.012305	31.957	148.2109	700.0997	-0.52026	0.18482	0.33764	57.7272	53.114	-14.2062	0.23828	-0.20361	0.12451	-35.661	-25.6756	3.238	0.2207	-0.048096	0.0026855
3.216	8.401	1.6668	18.78195	0.042969	0.17383	0.024902	33.425	144.3451	675.1336	-0.45654	0.14893	0.30859	44.7214	10.20107	-14.623	0.25074	-0.21045	0.11743	4.65	-29.228	14.1308	0.16602	-0.010254	0.024902
3.218	-8.856	7.7739	-4.5166	0.029297	0.18545	0.031738	63.103	127.4922	645.9089	-0.37646	0.10205	0.27637	24.878	51.607	-8.885	0.26465	-0.21338	0.11182	-2.557	-14.3806	26.844	0.097168	0.033691	0.044922
3.22	-17.833	0.264999999999999	5.23354	0.011231	0.18936	0.043457	49.4876	195.022	603.231	-0.33447	0.07373	0.2627	42.2642	14.2474	10.072	0.2832	-0.22217	0.10449	56.3509	-16.6949	46.7143	0.068359	0.054199	0.04834
3.222	-8.833	-8.388	20.30752	-0.0075195	0.19717	0.054785	72.8967	148.067	594.808	-0.27051	0.026367	0.22852	55.6489	57.37	14.61328	0.29395	-0.22607	0.10449	90.161	-16.0585	25.737	0.021484	0.095215	0.068848
3.224	-7.248	-14.324	35.239	-0.024903	0.20791	0.066211	63.681	155.39563	557.51082	-0.21972	-0.008301	0.20556	80.389	13.8909	47.5215	0.30811	-0.22461	0.094727	106.312	-31.256	-1.078	-0.019287	0.12012	0.070313
3.226	-33.64	-12.492	42.88	-0.040527	0.21533	0.077637	49.8571	199.838	485.979	-0.1792	-0.039551	0.18262	71.2052	43.077	38.5667	0.3164	-0.22657	0.089844	148.591	-35.639	7.725	-0.051758	0.14648	0.079102
3.228	-30.278	-11.76	44.17	-0.057422	0.22735	0.079394	71.1925	134.694	460.998	-0.12891	-0.083984	0.15137	47.238	-23.2912	37.872	0.32568	-0.2251	0.083496	104.535	-16.141	5.23	-0.099609	0.17578	0.092285
3.23	-27.539	-16.0909	85.001	-0.075098	0.22715	0.07334	40.472	174.2152	440.043	-0.10205	-0.098633	0.13574	-0.617999999999999	11.9821	13.131	0.33008	-0.22119	0.074707	123.77	-8.819	23.706	-0.13575	0.19897	0.10572
3.232	-15.005	1.144	99.7149	-0.099709	0.23496	0.078418	40.108	146.076	415.7599	-0.072266	-0.12305	0.11133	26.3697	-20.2786	9.31	0.32617	-0.21826	0.065918	143.935	7.606	-5.839	-0.17285	0.22021	0.11279
3.234	-18.692	12.0603	95.9958	-0.11895	0.25166	0.077246	50.087	115.241	383.1489	-0.044434	-0.14209	0.086426	19.016	33.432	13.7682	0.31836	-0.20508	0.062012	134.058	6.464	-19.254	-0.22266	0.25098	0.13428
3.236	-15.855	16.4871	100.675	-0.14648	0.26611	0.074219	10.867	171.028	331.026	-0.035156	-0.15039	0.07666	16.632	-5.804	23.4545	0.30274	-0.18775	0.0625	99.264	13.62109	-9.9799	-0.24023	0.26416	0.15137
3.238	-9.987	30.06552	126.5356	-0.17051	0.28467	0.075098	34.126	136.1974	329.673	-0.023438	-0.15479	0.057617	-1.858	36.0122	26.2416	0.28711	-0.16992	0.066406	86.7158	36.9872	21.67054	-0.28418	0.29688	0.16699
3.24	-10.365	64.239	173.0519	-0.19326	0.3044	0.084863	32.144	154.701	333.0988	-0.019287	-0.15674	0.049805	20.249	7.11363	29.1152	0.24902	-0.14551	0.069336	77.271	38.9023	52.6966	-0.32056	0.31568	0.18091
3.242	-9.3464	83.614	206.6319	-0.21982	0.32393	0.092676	6.775	171.143	296.694	-0.018555	-0.15576	0.039551	-1.45	37.2816	33.537	0.23242	-0.12842	0.072754	61.094	51.8187	61.203	-0.35791	0.3335	0.18164
3.244	-7.523	90.249	242.179	-0.24365	0.33818	0.097266	40.6814	109.9394	287.787	-0.01709	-0.15283	0.033203	-23.731	-18.5605	32.31	0.19287	-0.09375	0.086914	61.639	65.426	113.564	-0.41895	0.36719	0.18506
3.246	7.267	92.9532	272.135	-0.2666	0.35498	0.094238	2.915	145.83	267.904	-0.016113	-0.15088	0.030273	-28.101	7.7134	22.9058	0.16504	-0.074951	0.093262	-12.847	90.916	183.5508	-0.44727	0.39111	0.18555
3.248	12.1849	102.451	335.0456	-0.29961	0.37256	0.084082	-7.768	117.245	264.79	-0.014648	-0.14502	0.026367	-14.917	-27.8713	17.338	0.14111	-0.050781	0.098145	-41.925	112.439	255.15166	-0.5127	0.42676	0.19434
3.25	-0.258000000000003	95.781	391.3314	-0.33301	0.38535	0.072656	12.346	91.522	256.271	-0.015625	-0.14136	0.015869	-9.611	26.3451	21.309	0.10596	-0.027832	0.10107	-71.558	88.494	338.7246	-0.57813	0.45069	0.1936
3.252	17.9678	72.636	432.094	-0.37832	0.40332	0.050782	-18.59	134.799	190.79408	-0.012695	-0.13818	0.013184	-30.9481	-13.1992	3.977	0.087891	-0.016602	0.10352	-103.825	94.165	412.2694	-0.64844	0.46973	0.1875
3.254	34.644	55.248	481.298	-0.42852	0.43047	0.031933	5.522	97.3545	184.351	-0.0078125	-0.13574	0.0039063	-41.265	7.0135	2.233	0.059082	0.0058594	0.10449	-125.416	68.578	530.1814	-0.75586	0.49414	0.18506
3.256	39.3337	42.4125	519.803	-0.49414	0.46289	0.00097656	-2.184	106.0562	171.0478	-0.0019531	-0.13574	-0.00097656	-32.54	-28.09	-15.787	0.040527	0.0271	0.10572	-116.997	75.743	662.047	-0.81494	0.50635	0.17627
3.258	35.594	9.3931	591.1186	-0.57197	0.50264	-0.028809	-24.335	103.871	164.7484	0.0068359	-0.1377	-0.01709	-23.063	-9.6833	-17.05713	0.018555	0.041992	0.10596	-157.383	76.883	761.425	-0.94531	0.5293	0.17432
3.26	31.468	-16.4956	653.8704	-0.65468	0.54844	-0.057325	-0.254999999999999	53.516	158.9372	0.015625	-0.13794	-0.022705	-1.656	-14.941	0.8316	-0.010254	0.070801	0.10596	-142.52	41.3588	857.293	-1.034	0.54468	0.18018
3.262	56.763	-36.694	696.264024	-0.74297	0.60117	-0.081933	3.961	92.653	133.3447	0.024902	-0.14014	-0.031738	31.71	-14.7045	49.206	-0.020996	0.077637	0.10254	-89.522	-9.00762	968.71	-1.1284	0.54834	0.19043
3.264	42.131	-41.485	710.74653	-0.82705	0.65186	-0.10254	7.127	67.442	134.446	0.041504	-0.14648	-0.043457	28.802	-29.4533	52.948	-0.053223	0.10742	0.10547	-101.854	-83.249	1099.034	-1.2729	0.57471	0.20313
3.266	44.823	-46.854	731.7923	-0.89746	0.70801	-0.11328	36.853	49.18	127.975	0.043945	-0.14941	-0.05127	29.765	-27.9614	75.286	-0.093505	0.12134	0.097901	-64.2993	-135.9601	1215.2533	-1.3379	0.56836	0.229
3.268	33.136	-55.939	746.76	-0.94766	0.75879	-0.10605	26.145	91.187	75.054	0.057129	-0.1582	-0.056152	34.7201	6.21	72.634	-0.12598	0.13867	0.089844	-28.6255	-187.2374	1268.96	-1.4487	0.55225	0.28516
3.27	39.764	-53.54	738.468	-0.98798	0.80205	-0.079102	56.2318	51.043	69.4818	0.068848	-0.16065	-0.063477	27.0803	39.714	150.175	-0.19336	0.18115	0.085449	20.885	-245.8925	1306.573	-1.5223	0.54419	0.34156
3.272	20.33	-33.2595	722.076	-1.0142	0.8415	-0.034179	48.8404	66.8398	70.3935	0.079102	-0.16211	-0.068359	21.55	74.501	212.566	-0.22363	0.20068	0.085449	53.8054	-293.3051	1275.542	-1.5708	0.52295	0.39697
3.274	23.471	-42.3564	706.593	-1.0276	0.86152	0.030176	17.598	57.4865	75.2697	0.094238	-0.16846	-0.07373	56.7639	69.6762	283.936	-0.29297	0.24658	0.088379	121.88924	-313.831	1214.052	-1.6025	0.45996	0.46143
3.276	37.091	-45.1857	715.34	-1.0332	0.87012	0.09668	54.92039	14.78	65.23985	0.10449	-0.17188	-0.084473	54.4956	93.471	334.197	-0.35058	0.27661	0.088135	177.955	-291.817	1155.077	-1.6089	0.43359	0.4834
3.278	34.473	-32.3401	688.7339	-1.028	0.85869	0.1583	18.729	34.3327	26.024996	0.1123	-0.16504	-0.093262	10.0409	70.5926	430.0728	-0.42188	0.30664	0.086426	178.393	-264.437	1065.6549	-1.5981	0.37939	0.51758
3.28	14.333	-20.6174	673.627	-1.026	0.83994	0.20381	25.719	6.5733	31.31	0.12085	-0.16162	-0.10181	-3.762	93.685	507.2094	-0.51807	0.33838	0.098145	167.019	-271.36	1023.5924	-1.5854	0.35156	0.53442
3.282	5.023	-21.867	658.635	-1.0167	0.80245	0.23858	48.104	-9.234	41.119	0.12256	-0.16113	-0.10693	-8.236	60.777131	604.28	-0.5708	0.35205	0.10205	178.7549	-239.499	987.337	-1.5977	0.35352	0.5376
3.284	21.528	-23.976	697.519	-0.98975	0.75947	0.2625	-3.971	14.89891	9.98356	0.12061	-0.15527	-0.11328	5.371	89.264	650.6449	-0.68115	0.38135	0.11035	182.4833	-187.731	982.681	-1.6382	0.43311	0.55273
3.286	10.677	-21.943	703.163	-0.97656	0.71289	0.28467	36.2617	-11.30904	8.5397	0.1167	-0.15283	-0.11719	30.9569	47.209	708.9764	-0.77198	0.40625	0.12451	177.49	-119.2661	1016.508	-1.6719	0.49023	0.57275
3.288	12.709	-33.991	712.569	-0.96338	0.67803	0.28418	38.8599	5.2514	4.703	0.10449	-0.14893	-0.10938	6.616	50.693	804.4899	-0.86377	0.42773	0.13916	127.428	-78.432	1063.609	-1.7617	0.62109	0.62256
3.29	25.905	-66.238	748.3618	-0.96562	0.64727	0.28838	-3.483	5.14882	8.7917	0.095947	-0.14429	-0.10278	-22.0082	-35.357	876.3362	-0.98584	0.44775	0.15918	77.734	-47.42	1093.389	-1.8396	0.71655	0.6731
3.292	35.413	-86.577	784.363	-0.96446	0.64297	0.29971	43.296	-22.265	30.2102	0.080078	-0.1377	-0.10059	-11.927	-51.548	934.858	-1.043	0.45996	0.17773	100.985	-38.1	1135.546	-1.9097	0.7915	0.71826
3.294	16.727	-85.934	807.524	-0.9669	0.654	0.31426	10.077	16.2212	0.7137	0.05957	-0.14258	-0.094238	7.693	-124.13	967.8421	-1.1592	0.4707	0.21973	104.083	-53.58	1193.736	-1.9902	0.86621	0.74365
3.296	28.2902	-115.821	820.461	-0.96631	0.67041	0.32813	6.364	4.5246	-0.996500000000001	0.049805	-0.14307	-0.089844	8.79300000000001	-116.439	1005.358	-1.2456	0.47656	0.26123	62.451	-59.95	1244.578	-2.0347	0.91455	0.75146
3.298	26.0208	-154.459	825.5358	-0.96241	0.67881	0.34326	11.567	-10.87667	8.58234	0.029785	-0.14697	-0.081055	22.348	-193.768	1042.072	-1.3281	0.47852	0.31348	42.719	-116.351	1291.683	-2.1089	1.0259	0.74707
3.3	12.989	-183.336	839.96435	-0.95928	0.68447	0.35664	-23.3	19.9472	3.0378	0.014892	-0.1482	-0.073974	28.295	-162.61	1015.179	-1.4409	0.47607	0.39502	5.0709	-200.913	1320.391	-2.1536	1.1155	0.74243
3.302	7.831	-176.563	854.9753	-0.96279	0.69111	0.36914	-9.997	-7.9749	-3.604	-0.00048828	-0.14795	-0.069824	19.386	-203.454	967.386	-1.4878	0.47119	0.44189	-53.2444	-302.604	1355.566	-2.189	1.1958	0.73926
3.304	1.269	-163.095	870.0752	-0.97656	0.69512	0.38018	-11.984	22.8268	-29.47767	-0.013184	-0.15039	-0.061035	23.582	-122.419	883.884	-1.5796	0.46143	0.53906	-121.04	-385.599	1392.304	-2.2104	1.2798	0.76074
3.306	13.433	-144.1238	894.65748	-1.0005	0.69971	0.38232	-31.481	39.349	-24.3142	-0.02002	-0.15381	-0.057129	26.64	-161.773	854.516	-1.6457	0.45581	0.60376	-145.813	-398.22	1442.166	-2.2188	1.3203	0.78564
3.308	13.25	-129.436	906.5523	-1.0245	0.70303	0.37012	1.059	14.3849	17.7653	-0.033203	-0.15137	-0.047852	3.10100000000001	-93.827	787.317	-1.7144	0.45947	0.65234	-194.796	-386.17	1454.918	-2.2168	1.3594	0.84424
3.31	4.324	-112.595	918.523	-1.0503	0.71338	0.34883	-7.556	39.18	6.763	-0.045166	-0.15064	-0.043702	32.442	-124.49	749.3058	-1.7808	0.49463	0.72266	-189.033	-339.439	1458.384	-2.2195	1.3782	0.87769
3.312	5.665	-97.895	959.10717	-1.0749	0.7372	0.32304	6.833	12.36362	4.409	-0.058594	-0.14893	-0.040527	50.266	-47.9166	752.6578	-1.7983	0.51123	0.75488	-182.455	-274.941	1452.699	-2.2104	1.3911	0.90234
3.314	12.787	-73.679	984.6923	-1.0933	0.76182	0.30351	36.624	-1.71712	23.086	-0.079102	-0.14551	-0.030273	35.1578	-85	786.215	-1.812	0.55225	0.79688	-195.085	-209.4818	1471.0346	-2.1855	1.4063	0.91064
3.316	28.434	-69.582	994.9264	-1.1089	0.78564	0.28711	-0.262	26.095	11.92264	-0.09082	-0.13916	-0.026367	17.5712	-50.789	824.916	-1.8144	0.57911	0.81055	-152.322	-131.049	1527.7432	-2.1694	1.4263	0.9082
3.318	8.412	-69.198	993.30344	-1.1269	0.81142	0.2667	29.13	-0.628	25.0393	-0.1167	-0.13135	-0.012695	26.301	-122.669	864.686	-1.8301	0.62793	0.81299	-130.79	-91.021	1531.6578	-2.1616	1.4634	0.88184
3.32	18.249	-82.242	995.0874	-1.1476	0.84141	0.25889	20.838	24.227	-15.3267	-0.13135	-0.12646	-0.0041504	16.9021	-110.701	892.469	-1.8711	0.71875	0.82471	-96.011	-34.98	1534.088	-2.1882	1.4876	0.85815
3.322	14.715	-112.9173	1034.053	-1.1672	0.86797	0.2542	2.412	36.247	-32.8911	-0.15137	-0.12012	0.0043945	55.152	-159.155	958.792	-1.8843	0.76221	0.82715	-62.108	14.883	1533.248	-2.2617	1.5137	0.82568
3.324	-3.349	-125.346	1049.4866	-1.1843	0.89834	0.26562	49.1438	16.2719	8.891	-0.17773	-0.11035	0.02002	70.763	-136.553	1001.9906	-1.9199	0.83789	0.81689	-48.668	42.53	1511.1353	-2.4238	1.5586	0.80469
3.326	-7.106	-139.4034	1065.665	-1.2012	0.9375	0.27783	31.899	39.377	14.69319	-0.18555	-0.104	0.030273	73.494	-198.1902	1032.519	-1.9316	0.90137	0.79345	-35.593	33.259	1512.882	-2.5288	1.5747	0.79785
3.328	-20.07	-156.241	1085.62572	-1.2111	0.96152	0.29785	38.605	11.2864	32.0605	-0.19971	-0.092773	0.043945	43.0847	-251.409	1040.334	-1.9214	0.95947	0.75488	-38.305	-29.078	1488.574	-2.7734	1.5879	0.80908
3.33	11.779	-172.536	1107.623	-1.2213	0.98633	0.31699	60.1086	16.4023	32.3499	-0.20288	-0.082032	0.061523	17.3944	-310.739	1095.492	-1.8452	1.0103	0.66406	-10.7319	-94.948	1512.232	-2.9521	1.582	0.82861
3.332	3.799	-150.904	1121.401	-1.2229	1.0051	0.33106	19.939	40.7	17.1628	-0.20508	-0.071777	0.070801	-32.401	-316.394	1141.36643	-1.7866	1.0278	0.59766	5.526	-123.983	1547.899	-3.1191	1.5664	0.86279
3.334	15.947	-135.4964	1111.876	-1.2223	1.0203	0.33154	52.7833	4.1101	43.294	-0.19189	-0.061523	0.077148	-20.898	-305.296	1191.189	-1.6426	1.041	0.46924	37.021	-148.638	1583.7587	-3.3145	1.5527	0.90674
3.336	17.151	-131.2244	1116.8659	-1.2188	1.0313	0.31201	55.638	30.8804	19.5041	-0.18018	-0.056641	0.078613	-22.927	-264.446	1226.871	-1.4819	1.0259	0.34082	112.335	-143.676	1623.047	-3.4019	1.5356	0.91992
3.338	19.207	-132.2133	1134.959	-1.2308	1.057	0.27598	8.969	37.1366	-15.5726	-0.14648	-0.05127	0.069824	-46.356	-211.4309	1224.1405	-1.4058	1.0142	0.28564	99.661	-144.63	1591.711	-3.5171	1.5044	0.96582
3.34	-9.077	-110.855	1153.211	-1.2374	1.0817	0.23067	38.475	18.7662	-3.5218	-0.10986	-0.054688	0.055664	-77.071	-162.945	1226.31	-1.2842	0.99023	0.20361	106.618	-136.695	1577.321	-3.5545	1.4709	0.98218
3.342	22.1766	-90.526	1145.5377	-1.255	1.1172	0.18183	14.35	43.713	16.7946	-0.066406	-0.05957	0.035645	-40.9465	-106.389	1238.26	-1.2227	0.97949	0.16895	102.49	-90.817	1579.534	-3.5522	1.438	0.98242
3.344	14.573	-97.1686	1158.7395	-1.2857	1.1575	0.12822	-1.614	9.78	36.032	0	-0.067871	0.0087891	-39.5356	-77.299	1284.656	-1.187	0.96826	0.14893	106.405	-34.455	1585.489	-3.4604	1.395	0.97168
3.346	-11.406	-90.2392	1141.725	-1.3262	1.1943	0.077637	21.07	-2.5651	36.0513	0.029785	-0.072754	-0.003418	-23.671	-33.263	1300.797	-1.1851	0.97705	0.14502	94.692	43.4224	1595.903	-3.3921	1.3696	0.95703
3.348	3.511	-79.064	1145.347	-1.3828	1.2445	0.039551	-14.656	18.6922	21.526	0.083496	-0.091309	-0.035156	-3.5152	-50.197	1332.146	-1.2017	0.99658	0.15137	15.09	82.395	1541.434	-3.2168	1.3281	0.9126
3.35	-4.115	-78.262	1141.18	-1.4397	1.2899	0.020215	-10.4	-17.9352	52.079	0.11499	-0.10717	-0.051269	-21.7702	-28.634	1320.7212	-1.2695	1.0625	0.19482	-15.2659	107.427	1501.9782	-3.0059	1.2793	0.87744
3.352	6.229	-78.155	1148.629	-1.5089	1.3451	0.021777	13.233	10.1253	31.898	0.14307	-0.11865	-0.0625	-74.987	-70.26	1365.106	-1.3706	1.1089	0.21777	-69.958	151.205	1467.586	-2.8979	1.2524	0.85498
3.354	-20.916	-76.0019	1182.8559	-1.5727	1.4025	0.044336	-17.104	15.8246	14.3765	0.16602	-0.13721	-0.083008	-91.967	-68.83	1370.3473	-1.502	1.1484	0.25635	-98.527	184.706	1455.256	-2.6909	1.188	0.82617
3.356	13.711	-74.2434	1210.203	-1.6328	1.4473	0.083496	-7.731	-5.92941	7.062	0.17505	-0.14355	-0.092285	-93.879	-132.6609	1404.32599	-1.7305	1.1797	0.32275	-99.371	198.303	1435.651	-2.5466	1.135	0.80737
3.358	9.209	-81.6243	1230.0333	-1.6856	1.4918	0.12578	-19.795	24.2714	2.4804	0.1792	-0.15479	-0.10205	-55.953	-118.262	1420.434	-1.8594	1.1895	0.35986	-136.94	170.151	1404.61315	-2.4004	1.0723	0.79541
3.36	-14.848	-83.6187	1246.6723	-1.7316	1.5251	0.16709	13.713	-5.623	26.4574	0.18359	-0.15625	-0.10986	-41.84	-176.335	1486.312	-2.1328	1.2002	0.45557	-140.386	123.602	1414.216	-2.2168	0.99023	0.77002
3.362	-14.1388	-83.5055	1244.6646	-1.7706	1.5548	0.21162	22.349	-11.4841	35.755	0.18164	-0.15918	-0.11621	-20.8561	-143.518	1499.509	-2.3477	1.209	0.53955	-160.154	100.8029	1410.037	-2.1323	0.95166	0.75977
3.364	-4.752	-71.1891	1254.8268	-1.8031	1.5773	0.2542	-29.488	13.1187	11.88848	0.16895	-0.16016	-0.12744	-25.0179	-197.747	1566.686	-2.5645	1.2148	0.62939	-154.537	90.9375	1412.284	-1.9351	0.8667	0.72461
3.366	1.888	-70.2339	1262.808	-1.814	1.5728	0.29102	23.393	-25.9373	25.351	0.15942	-0.14868	-0.12281	5.4663	-142.674	1563.92	-2.834	1.2285	0.74463	-139.127	80.1114	1408.821	-1.7988	0.79541	0.69434
3.368	-23.292	-70.9487	1274.233	-1.8241	1.5677	0.31758	28.345	9.5036	26.8627	0.14648	-0.14648	-0.12891	-1.135	-157.358	1609.14	-2.957	1.2227	0.7915	-160.281	70.7447	1386.5086	-1.6621	0.72559	0.66113
3.37	-1.16	-63.8502	1284.2291	-1.8348	1.5496	0.33282	14.959	11.54926	23.6913	0.13086	-0.13037	-0.12354	37.485	-84.3213	1563.993	-3.1792	1.2251	0.89746	-155.758	63	1397.626	-1.4883	0.63867	0.62549
3.372	7.013	-57.537	1275.068	-1.8473	1.5215	0.34766	49.7318	-11.232	7.6309	0.11963	-0.12256	-0.12354	40.589	-98.661	1582.989	-3.3298	1.2273	0.9734	-112.659	83.761	1373.345	-1.4102	0.59961	0.60596
3.374	-27.6507	-37.5807	1260.979	-1.8506	1.483	0.36142	1.446	27.0446	-29.416	0.10205	-0.10938	-0.125	23.284	1.111	1524.368	-3.4409	1.2173	1.0371	-70.678	92.182	1348.052	-1.2695	0.51953	0.57471
3.376	4.841	-6.6713	1274.4696	-1.8491	1.436	0.36328	25.615	10.9073	-8.1349	0.085694	-0.09424	-0.12744	2.804	-16.7825	1525.59	-3.5308	1.2036	1.0957	-38.569	102.907	1295.871	-1.1701	0.46265	0.55371
3.378	5.911	17.9905	1271.72485	-1.8614	1.3788	0.35176	55.962	-1.4876	22.6383	0.067383	-0.080078	-0.12354	-25.4596	59.833	1473.908	-3.5464	1.2017	1.1055	-5.513	125.476	1222.301	-1.0776	0.40674	0.54492
3.38	19.76	25.5702	1264.3577	-1.8608	1.3384	0.35068	5.254	16.8921	18.3465	0.044434	-0.063965	-0.13086	-27.262	8.098	1470.818	-3.5488	1.1895	1.1099	18.95	180.473	1133.77361	-0.96143	0.34229	0.53613
3.382	-0.542999999999999	9.938	1262.808	-1.8702	1.2962	0.33076	37.658	-39.926	42.6831	0.029297	-0.05127	-0.13525	-49.378	62.7956	1439.426	-3.5137	1.1865	1.0953	46.100649	242.9268	1068.24	-0.90967	0.3042	0.53125
3.384	6.5	-8.355	1263.68	-1.8977	1.2483	0.31192	57.2845	-25.5572	43.2537	-0.0053711	-0.032227	-0.1416	-16.5643	22.541	1476.779	-3.4683	1.1567	1.0723	93.247	261.715	1027.181	-0.80273	0.25391	0.52002
3.386	13.938	-7.979	1292.227	-1.8652	1.2559	0.33838	31.799	-10.213	36.8701	-0.040527	-0.01001	-0.14014	-18.58	84.995	1485.4627	-3.3784	1.1294	1.0156	123.55	274.654	988.594	-0.72461	0.22168	0.51318
3.388	16.3862	2.445	1299.4667	-1.9456	1.1841	0.28575	57.8026	-11.4401	56.281	-0.083008	0.014648	-0.13379	-14.0316	24.478	1518.4898	-3.3281	1.1133	0.99658	130.349	267.685	958.574	-0.6543	0.19336	0.50146
3.39	16.7517	-23.442	1280.1527	-1.905	1.2185	0.33545	17.213	46.04	57.946	-0.15039	0.037109	-0.12891	-38.027	43.4892	1502.0435	-3.2104	1.0942	0.9375	163.005	271.466	932.766	-0.56006	0.15625	0.479
3.392	24.598	-14.170489	1246.11	-1.9639	1.1579	0.29287	19.75	22.1137	91.431	-0.18408	0.053711	-0.12695	-50.646	-10.392	1485.915	-3.1189	1.0734	0.89722	173.417	287.112	899.216	-0.50732	0.14502	0.46484
3.394	30.5913	-0.6955	1239.1718	-1.9467	1.1987	0.33438	46.424	15.68088	147.3454	-0.25439	0.081055	-0.11035	-52.215	22.90304	1480.994	-3.0249	1.0571	0.85645	166.102	277.417	864.028	-0.4126	0.11768	0.42773
3.396	-3.267	-5.8528	1238.83	-1.9199	1.2012	0.35596	6.92	38.858	171.28	-0.31861	0.10693	-0.093994	-45.73	2.166	1492.2404	-2.8765	1.0181	0.81836	177.538	257.508	808.4613	-0.33593	0.098146	0.39404
3.398	2.316	-7.6764	1232.045	-1.9612	1.2038	0.34356	1.231	18.8922	239.9133	-0.3877	0.13477	-0.078613	-69.251	57.276	1486.1125	-2.8052	0.99658	0.79297	170.87	236.603	766.402	-0.25732	0.071289	0.3623
3.4	1.018	-1.8157	1224.57	-1.8941	1.2505	0.39668	1.784	71.094	296.5439	-0.49561	0.17432	-0.052246	-66.179	31.148	1452.09912	-2.6597	0.94971	0.76172	127.5959	208.607	738.168	-0.16016	0.039063	0.30811
3.402	34.8145	12.9745	1217.231	-1.9487	1.1958	0.35137	-11.522	96.334	316.98587	-0.54443	0.20166	-0.035645	-79.701	71.9499	1437.438	-2.5552	0.90918	0.74121	77.2128	190.373	708.314	-0.11182	0.023926	0.28076
3.404	7.857	12.1407	1199.2981	-1.8836	1.2617	0.41612	23.308	74.88	378.232	-0.67188	0.25439	-0.0058594	-94.427	63.013	1392.8455	-2.4512	0.87305	0.71338	35.409	154.067	667.504	-0.020996	-0.010742	0.21973
3.406	-3.335	31.2156	1190.961	-1.8809	1.2295	0.39502	1.362	92.941	438.742	-0.77148	0.29907	0.018311	-90.833	127.077	1408.027	-2.3047	0.82813	0.68213	17.028	159.1522	604.078	0.05249	-0.03418	0.17139
3.408	1.026	69.948	1187.788	-1.8747	1.2464	0.39844	6.33499999999999	52.683	534.321	-0.87939	0.34717	0.05127	-51.332	161.384	1388.7915	-2.2363	0.80664	0.66455	6.338	170.1268	549.645	0.12939	-0.057129	0.11621
3.41	11.271	88.814	1171.429	-1.7926	1.2695	0.43681	39.433	24.21954	646.2915	-1.0376	0.41455	0.09668	-23.9094	208.898	1367.6456	-2.0762	0.7666	0.62158	-2.726	192.297	508.249	0.22559	-0.086426	0.035156
3.412	1.328	66.328	1152.787	-1.8391	1.2176	0.37666	6.898	21.629	711.8968	-1.1226	0.45459	0.12598	-27.556	216.364	1314.917	-1.9627	0.73999	0.59472	-30.577	218.9	451.49	0.26611	-0.093262	0
3.414	-6.91200000000001	50.7238	1157.673	-1.7597	1.2671	0.42734	22.097	-55.388	804.6537	-1.293	0.52441	0.19873	-17.26641	234.296	1299.441	-1.8569	0.71338	0.56934	-68.7392	206.717	408.6106	0.32422	-0.10938	-0.055176
3.416	41.3566	50.5857	1143.827	-1.73	1.2349	0.40527	23.227	-77.771	873.3711	-1.4099	0.58667	0.27027	-7.329	219.279	1272.562	-1.728	0.68018	0.55176	-33.51	187.3508	354.1312	0.35864	-0.11865	-0.091308
3.418	19.023	43.1637	1136.06	-1.7375	1.2269	0.37881	10.251	-101.758	905.8	-1.5215	0.63574	0.34717	19.5408	222.026	1302.715	-1.6733	0.65527	0.53809	-51.678	195.179	311.0367	0.37939	-0.13525	-0.11279
3.42	-15.018	35.9071	1114.7144	-1.6328	1.2578	0.42334	26.8471	-130.12614	939.742	-1.6748	0.69336	0.4126	21.5612	202.448	1273.081	-1.5776	0.62158	0.5293	-76.66452	191.362	268.8859	0.38525	-0.15576	-0.14502
3.422	-3.553	35.6865	1075.0528	-1.6473	1.1996	0.36084	-10.3773	-71.1538	913.44	-1.7305	0.7124	0.43506	31.0315	178.4016	1259.813	-1.5318	0.59571	0.52344	-59.1092	192.123	217.0728	0.38281	-0.16992	-0.16504
3.424	22.354	43.2351	1056.031	-1.5983	1.2082	0.37529	-39.8472	-73.36	901.758	-1.8208	0.71338	0.4668	16.84105	142.73	1200.827	-1.4819	0.56885	0.52344	-60.587	163.345483	148.546	0.38623	-0.19141	-0.20947
3.426	19.235	47.9051	1043.499	-1.4897	1.2075	0.41406	-2.822	-87.461	907.394	-1.8462	0.70215	0.45191	26.4469	106.693	1159.173	-1.418	0.53711	0.52295	-42.335	121.0842	124.821	0.3877	-0.20484	-0.24756
3.428	6.39	44.59583	1044.7568	-1.5143	1.1367	0.33232	-14.8993	-69.91	875.269	-1.8589	0.68018	0.42578	-6.749	114.886	1129.5517	-1.3926	0.51758	0.52002	-20.256	113.5602	113.398	0.37354	-0.21094	-0.27734
3.43	53.533	54.9388	1041.711	-1.4483	1.122	0.34111	-8.98772	-112.213	898.793	-1.8257	0.64111	0.36182	26.378	109.313	1071.215	-1.3301	0.48438	0.51416	-6.962	91.2866	127.041	0.33154	-0.20264	-0.29297
3.432	41.338	70.516	1032.237	-1.3511	1.0997	0.35518	-10.2963	-98.479	885.342	-1.8047	0.62891	0.33252	27.289	132.932	1037.5	-1.2761	0.45459	0.50854	21.178	81.8908	131.759	0.2998	-0.18701	-0.29541
3.434	22.522	74.7448	990.32513	-1.3632	1.0296	0.27715	-45.9617	-85.3215	876.275	-1.7241	0.604	0.27002	47.9507	126.189	998.48	-1.2163	0.42334	0.50293	69.759477	48.4304	101.4042	0.22705	-0.16309	-0.29443
3.436	39.377	67.3461	961.9742	-1.3062	1.0034	0.28125	-5.46	-100.083	897.8006	-1.6347	0.56836	0.21826	36.0624	169.4359	967.8295	-1.1304	0.37939	0.48242	104.0379	30.064	86.83294	0.15674	-0.1604	-0.26807
3.438	53.824	81.0514	934.7589	-1.2164	0.97637	0.29394	-1.322	-58.405	889.002	-1.5488	0.51758	0.17285	51.1166	171.023	956.365	-1.0854	0.35986	0.47363	109.975	49.548	73.77	0.076172	-0.1665	-0.24414
3.44	44.185	100.845	900.89	-1.2069	0.91729	0.23066	-3.377	-51.694	893.635	-1.4766	0.48242	0.12158	22.328	211.791	902.9714	-0.9917	0.31006	0.45703	138.698	38.186	74.955	-0.058105	-0.15967	-0.19238
3.442	40.208	97.046	864.8656	-1.1632	0.87822	0.21269	26.465	-83.666	958.717	-1.4717	0.48633	0.098633	43.595	200.547	850.5027	-0.9187	0.2771	0.43652	143.345	39.954	50.2055	-0.12207	-0.14209	-0.16748
3.444	60.162	86.4059	842.8843	-1.0771	0.8502	0.22959	9.243	-66.911	986.3915	-1.5039	0.54395	0.098145	32.9	241.956	777.758	-0.83789	0.24609	0.42529	119.477	15.164	19.264	-0.2373	-0.12061	-0.12598
3.446	46.302	84.56	839.7069	-1.0327	0.80713	0.18896	6.349	-131.472	1057.748	-1.5115	0.60327	0.10156	12.77	203.2356	702.39	-0.74219	0.19629	0.38672	144.376	21.7795	11.144	-0.31274	-0.10962	-0.09082
3.448	53.7401	92.905	828.6675	-1.0159	0.75791	0.14844	-0.740000000000002	-162.916	1124.273	-1.4761	0.65088	0.099609	-0.0650000000000048	241.9582	657.573	-0.68555	0.17871	0.37158	112.536	63.522	8.1698	-0.3833	-0.098633	-0.063965
3.45	39.134	67.4101	810.6857	-0.94912	0.72061	0.16054	-24.6423	-152.697	1140.348	-1.3843	0.69092	0.084473	4.729	193.1068	631.14	-0.57715	0.13916	0.33545	100.973	79.273	3.8077	-0.47266	-0.087402	-0.033691
3.452	51.139	61.2922	783.5306	-0.88623	0.69678	0.1539	-26.8924	-224.255	1203.076	-1.332	0.71484	0.078613	-18.262	207.531	590.101	-0.50367	0.10376	0.30811	93.791	82.787	-0.173	-0.5127	-0.078125	-0.022949
3.454	49.224	66.189	763.8279	-0.854	0.65498	0.1289	-50.293	-205.903	1211.796	-1.2593	0.77588	0.058594	-0.871000000000002	164.4102	559.646	-0.42822	0.073242	0.28271	34.458	57.587	-7.5142	-0.59961	-0.057129	0.0043945
3.456	45.558	96.6473	727.301	-0.80859	0.61426	0.11816	-53.9994	-196.322	1182.134	-1.2351	0.82349	0.050537	11.876	198.172	510.797	-0.32959	0.025879	0.24512	22.135	38.341	7.8073	-0.66577	-0.047363	0.022706
3.458	35.305	85.2579	705.985406	-0.74141	0.58066	0.12979	-21.723	-203.508	1220.023	-1.2319	0.87354	0.050781	26.155	159.6069	484.347	-0.28125	0.0029297	0.23486	10.697	54.729	35.7696	-0.73242	-0.038574	0.039551
3.46	26.755	88.461	680.1073	-0.69443	0.54639	0.11651	-12.368	-116.1215	1242.478	-1.2583	0.92236	0.0625	39.155	202.103	476.1631	-0.18848	-0.041992	0.20166	12.799	44.289	66.14	-0.82422	-0.038086	0.072754
3.462	49.286	92.178	655.7033	-0.66123	0.5042	0.085644	47.801	-131.078	1293.6239	-1.2871	0.93945	0.071289	38.477	153.932	468.8516	-0.11182	-0.087891	0.16699	-31.90825	37.663	56.143	-0.87061	-0.039551	0.087891
3.464	19.949	90.098	645.964	-0.60733	0.46377	0.073633	70.0821	-131.087	1327.145	-1.3687	0.98682	0.098633	36.658	192.137	421.7537	-0.069336	-0.11084	0.15234	-42.343	-20.3796	29.6258	-0.96436	-0.036621	0.11768
3.466	22.027	80.721	623.8855	-0.54639	0.43115	0.069824	66.118	-72.026	1289.896	-1.4656	1.0203	0.12354	29.85	146.341	387.8819	0.01123	-0.15137	0.11572	-71.4336	-45.859	36.051	-1.0264	-0.037597	0.15161
3.468	32.513	89.9319	608.3105	-0.50059	0.40078	0.053028	100.823	-91.2468	1316.127	-1.582	1.0645	0.1626	43.349	182.157	326.349	0.062744	-0.18505	0.085449	-103.96	-39.454	43.667	-1.0757	-0.033203	0.18066
3.47	43.986	105.1392	571.142	-0.45859	0.37188	0.025488	88.0761	-10.547	1332.8233	-1.7593	1.1411	0.24219	45.511	147.6766	323.323	0.12109	-0.21777	0.057129	-85.144	-52.719	62.153	-1.1074	-0.024902	0.21582
3.472	27.49	110.0109	539.868	-0.42344	0.34219	0.009082	76.963	35.58	1317.6973	-1.8652	1.1855	0.29199	55.761	199.88	299.308	0.1875	-0.25439	0.013672	-80.715	-58.011	33.8597	-1.1016	-0.02002	0.22314
3.474	15.17	106.3345	510.55	-0.37627	0.32041	-0.0013672	71.967	-19.9025	1342.819	-2.0894	1.2681	0.39258	33.007	143.0413	274.081	0.22266	-0.27588	0.0024414	-93.5607	-78.717	-0.338999999999999	-1.0586	-0.012695	0.229
3.476	57.04	111.705	486.133	-0.34326	0.29932	-0.01709	27.795	8.973	1329.958	-2.3184	1.3438	0.50049	37.085	180.764	228.8903	0.28271	-0.32031	-0.034668	-66.947	-55.564	-9.635979	-0.9585	-0.01416	0.21338
3.478	32.37	126.664	474.8974	-0.31592	0.28116	-0.027539	10.184	-58.057	1371.456	-2.4214	1.3774	0.5498	47.5782	112.934	187.792	0.31958	-0.35206	-0.062256	-39.1297	-1.81068	-5.6002	-0.88916	-0.01709	0.19238
3.48	21.624	123.574	465.16	-0.28574	0.26387	-0.028711	47.893	-84.393	1434.8144	-2.623	1.4316	0.61963	50.457	152.751	163.7312	0.35156	-0.38623	-0.085449	-37.94289	17.2291	1.131	-0.72461	-0.035156	0.14307
3.482	31.133	102.4408	462.149	-0.26661	0.25371	-0.024805	48.099	-45.8147	1437.5311	-2.7427	1.4605	0.64819	57.9813	116.96164	156.7652	0.3833	-0.42676	-0.12061	-3.312	38.6484	1.459	-0.57861	-0.057861	0.097898
3.484	59.6296	95.25943	448.3389	-0.25176	0.24219	-0.020215	75.8473	-111.959	1451.294	-2.8379	1.4668	0.66016	74.54303	158.637	143.6468	0.39893	-0.4502	-0.1377	43.269	25.37375	-2.243	-0.4292	-0.09082	0.050781
3.486	29.213	95.8097	424.8945	-0.24219	0.229	-0.019531	102.11	-82.5398	1449.743	-2.9097	1.4458	0.63281	38.6469	95.66104	122.6632	0.41553	-0.48779	-0.17285	61.6189	37.6504	11.601	-0.23584	-0.14551	-0.016113
3.488	21.848	93.7558	390.818	-0.22578	0.22187	-0.001465	97.631	-74.225	1442.493	-2.9141	1.4219	0.61182	35.928	109.62	118.0515	0.42041	-0.51245	-0.19702	56.7105	55.319	2.296	-0.15088	-0.1709	-0.053711
3.49	62.9792	85.0084	378.0275	-0.21514	0.21865	0.0079101	101.8499	-119.5496	1486.3274	-2.8784	1.3403	0.54883	21.625	48.7774	96.0915	0.41602	-0.53027	-0.21484	92.384	52.402	6.796	0.0053711	-0.21387	-0.10938
3.492	45.271	100.827	359.868043	-0.20928	0.20459	0.011816	79.734	-27.047	1470.086	-2.8203	1.2695	0.49512	17.254	64.391	117.307	0.40283	-0.55127	-0.24609	100.699	43.359	-31.2528	0.10767	-0.24659	-0.14869
3.494	34.606	100.014	336.73338	-0.20996	0.19268	0.016992	34.355	-25.731	1475.933	-2.7461	1.1973	0.44971	0.651000000000003	30.69	87.249	0.39111	-0.56104	-0.24658	113.659	20.6873	-35.1806	0.20361	-0.27295	-0.17725
3.496	28.404	87.6781	320.5939	-0.20264	0.18945	0.024902	40.216	-11.232	1503.271	-2.6421	1.1216	0.39844	1.557	30.01	67.018	0.35547	-0.56641	-0.25684	138.732	20.4029	-11.916	0.29834	-0.30029	-0.21191
3.498	40.812	79.681	321.416	-0.19248	0.18194	0.027636	29.687	56.72	1458.635	-2.5991	1.0981	0.38037	-7.741	-8.273	34.66489	0.31421	-0.56738	-0.24927	112.546	25.1177	12.1712	0.33105	-0.31201	-0.23438
3.5	37.874	88.638	305.6952	-0.18027	0.17881	0.024218	12.18	13.65267	1441.7199	-2.5352	1.0508	0.35205	-8.736	1.396	13.91	0.26563	-0.55859	-0.24072	103.126	9.9189	32.6774	0.39209	-0.32129	-0.26416
3.502	24.341	92.3345	294.2122	-0.1623	0.16826	0.023438	25.431	66.398	1433.72694	-2.518	1.0327	0.33984	-19.421	-8.462	7.261	0.18652	-0.5415	-0.21631	104.828	6.80907	39.116	0.46314	-0.33985	-0.27564
3.504	27.114	80.4083	276.6885	-0.13544	0.16201	0.020019	13.88	74.289	1429.6443	-2.5112	1.022	0.33691	-14.178	7.33247	3.78	0.1333	-0.52979	-0.20313	82.9493	4.524	54.717	0.52393	-0.37646	-0.29346
3.506	31.643	81.7389	261.9851	-0.11523	0.15625	0.012695	42.775	16.0093	1472.2362	-2.5195	1.0254	0.34326	-21.89	1.5604	10.287	0.026367	-0.48389	-0.16016	52.6288	15.6711	61.807	0.55127	-0.38818	-0.3125
3.508	37.156	87.706	239.14581	-0.09473	0.14268	0.0069347	52.43	68.689	1448.8311	-2.5254	1.0273	0.34717	-0.786000000000001	7.4011	12.6726	-0.06543	-0.44189	-0.135	53.9741	31.416	58.524	0.54883	-0.37695	-0.31348
3.51	16.621	81.177	222.76409	-0.07608	0.13292	0.0029297	65.8157	26.4988	1424.672	-2.5352	1.0273	0.354	-21.521	17.7783	22.6578	-0.15039	-0.40088	-0.10791	15.041	20.1727	49.91	0.51953	-0.34033	-0.29443
3.512	11.518	74.083	202.5801	-0.060061	0.1212	-0.0021455	93.391	11.1982	1461.49367	-2.5427	1.0256	0.36866	9.766	16.997	13.5887	-0.26074	-0.35107	-0.075195	-12.198	16.4446	30.6795	0.48096	-0.31348	-0.27491
3.514	18.87	76.114	196.3067	-0.054397	0.10362	-0.01123	84.816	52.3828	1460.071	-2.5503	1.0181	0.37451	-0.521000000000001	15.9285	6.128	-0.31006	-0.33105	-0.057617	-8.19	6.7156	28.166	0.43604	-0.28271	-0.25586
3.516	14.69	78.57	183.8572	-0.034668	0.091309	-0.012695	75.087	-14.833	1443.15377	-2.5313	1.0039	0.36377	0.785	3.5286	-9.949	-0.40186	-0.2959	-0.037598	-51.9974	18.619	16.0209	0.37598	-0.25684	-0.229
3.518	6.728	68.7427	185.1941	-0.015323	0.090529	-0.01045	68.522	3.5828	1458.806	-2.5112	0.99658	0.36035	2.253	17.9762	-25.8589	-0.46802	-0.26342	-0.0083006	-88.584	36.4949	4.4984	0.34668	-0.24756	-0.22266
3.52	19.883	56.42072	191.47	-0.0080092	0.07312	-0.030385	70.0047	17.0049	1436.998	-2.4492	0.97656	0.34912	17.124	18.0921	-25.5026	-0.52832	-0.23291	0.014648	-85.291	10.22	11.739512	0.28906	-0.23389	-0.2124
3.522	12.022	57.5805	177.3097	0.011959	0.056733	-0.034268	106.01783	-34.746	1456.969	-2.3906	0.958	0.34082	21.796	33.608	-17.7985	-0.58984	-0.19482	0.047363	-80.3977	-3.69763	6.4316	0.2478	-0.22534	-0.20068
3.524	-0.0640000000000001	63.742	158.6908	0.046895	0.071193	-0.032638	97.3841	45.662	1419.556	-2.3296	0.93799	0.32813	43.339	0.790100000000001	-2.8079	-0.60986	-0.18359	0.0625	-77.3647	-27.728	16.837	0.20703	-0.21143	-0.19238
3.526	0.643000000000001	59.7104	155.8936	0.038086	0.041016	-0.087891	76.438	46.103	1341.864	-2.2202	0.90479	0.30762	6.58	6.213	15.0723	-0.63623	-0.1626	0.079102	-60.6104	-17.9001	28.701	0.15723	-0.19336	-0.18555
3.528	12.941	51.3158	143.9881	0.06727	0.042329	-0.069899	85.133	52.168	1329.647	-2.1616	0.89307	0.29297	14.234	-32.0497	6.6621	-0.63648	-0.14331	0.084473	-74.831	-24.83312	23.87251	0.13623	-0.18701	-0.18018
3.53	28.685	56.423	131.991	0.11369	0.072214	-0.069617	80.123	133.729	1288.939	-2.0542	0.86377	0.27783	32.1605	16.8878	16.6789	-0.61475	-0.12305	0.085449	-53.7366	-42.632	8.0534	0.097168	-0.17334	-0.17139
3.532	16.56	51.499	112.2226	0.080879	0.025008	-0.14315	84.608	73.7097	1284.836	-1.9726	0.84863	0.26465	54.9257	12.0619	29.128	-0.56348	-0.10107	0.087402	2.476	-37.0249	4.753	0.066162	-0.15796	-0.16187
3.534	24.764	47.0298	101.32231	0.13282	0.049528	-0.10566	114.483	108.119	1290.8742	-1.8984	0.83398	0.25244	38.906	71.121	20.439	-0.5376	-0.091797	0.085449	-0.622	-24.3568	0.422000000000001	0.034668	-0.14258	-0.15479
3.536	32.891	33.6122	109.6576	0.1499	0.061035	-0.14014	108.854	133.294	1270.2302	-1.7988	0.82031	0.23877	52.1587	28.961	23.2749	-0.47754	-0.089844	0.081055	29.164	-5.8327	1.583	-0.012695	-0.11963	-0.13818
3.538	25.88	42.3081	104.25416	0.12168	0.024534	-0.17358	82.974	87.018	1278.6019	-1.7573	0.81689	0.22754	19.099	49.627	-1.48	-0.42456	-0.094482	0.077149	43.48479	-0.7842	10.0061	-0.041016	-0.10498	-0.13672
3.54	20.9938	43.5111	91.298	0.18002	0.066466	-0.11324	68.1086	168.807	1226.28739	-1.6797	0.80469	0.21338	10.426	-0.71943	16.3676	-0.37207	-0.11133	0.070801	42.00055	9.00376	2.9443	-0.087402	-0.078125	-0.10742
3.542	18.348	42.0475	84.506	0.14594	0.046025	-0.17458	44.882	138.2219	1188.854	-1.6326	0.80005	0.20655	24.937	34.548	14.5445	-0.29883	-0.13623	0.057129	67.76241	18.0399	8.647	-0.13379	-0.061035	-0.08374
3.544	55.2025	44.6909	78.9916	0.13732	0.038711	-0.15857	31.864	117.026	1184.317	-1.5874	0.79541	0.19629	27.018	-7.4791	38.8603	-0.25781	-0.15479	0.046875	98.167	33.958	4.733	-0.16943	-0.044922	-0.061523
3.546	33.364	44.4977	79.1996	0.18164	0.074219	-0.13135	29.386	164.0445	1154.9971	-1.5391	0.7832	0.19141	6.525	42.803	21.6113	-0.18018	-0.18896	0.033203	123.248	63.615	-2.379	-0.22021	-0.020508	-0.035156
3.548	25.958	35.6534	57.6408	0.11622	0.033803	-0.1871	18.048	77.898	1148.2407	-1.5171	0.77979	0.1875	8.227	-15.8133	32.817	-0.1289	-0.20899	0.018311	101.831	83.366	-11.7441	-0.24268	-0.010254	-0.020996
3.55	29.442	20.04943	60.47728	0.14823	0.061969	-0.12015	16.878	98.192	1129.763	-1.4766	0.76953	0.18213	-21.984	20.2372	-6.3729	-0.083008	-0.22412	0.00097656	131.58	62.592	-3.5095	-0.27637	0.0048828	-0.0029297
3.552	46.5309	23.107	59.6279	0.11929	0.062174	-0.15678	7.973	107.7576	1082.59481	-1.4421	0.76684	0.17798	-18.572	-17.5573	3.613	-0.025391	-0.23584	-0.0014648	105.884	70.847	10.4022	-0.29541	0.016358	0.0090333
3.554	24.753	18.8211	45.875	0.08636	0.048537	-0.15855	-1.009	61.03	1077.8393	-1.4043	0.7627	0.17334	-7.852	21.507	5.2857	0.0048828	-0.24414	-0.003418	87.2018	55.441	29.041	-0.31006	0.027344	0.014648
3.556	18.226	9.27921	60.7418	0.10742	0.078613	-0.13086	23.101	145.327	1001.8126	-1.3472	0.75146	0.16357	-8.546	-11.2834	38.303	0.051758	-0.24902	-0.0043945	115.126	38.612	42.584	-0.33203	0.042969	0.026367
3.558	29.169	12.8576	55.7741	0.036516	0.053191	-0.15834	22.464	146.868	952.274	-1.3125	0.74951	0.15723	-10.272	27.739	42.983	0.079834	-0.2461	-0.0014648	56.7691	15.37713	38.55	-0.32861	0.045898	0.02832
3.56	8.538	22.9866	44.5028	0.043781	0.08971	-0.11316	40.079	146.964	934.705	-1.2461	0.73584	0.14404	7.241	-27.0777	40.091	0.10889	-0.24414	-0.0058594	5.366	-17.09677	35.8114	-0.32129	0.050293	0.019531
3.562	19.062	31.732	36.049	-0.015135	0.070337	-0.12438	33.737	225.552	899.102	-1.1917	0.72779	0.13501	8.632	-9.2635	18.5198	0.14111	-0.22803	-0.011719	24.76	2.9136	29.121	-0.30859	0.037353	0.0078124
3.564	6.241	15.0343	46.1714	-0.017862	0.097974	-0.079998	28.574	180.884	894.033	-1.1313	0.70752	0.11475	-23.9271	-49.049	9.9061	0.15771	-0.22314	-0.012207	4.465	4.767	36.6099	-0.29492	0.033203	-0.0063477
3.566	3.738	7.936394	34.7948	-0.089844	0.062988	-0.1001	30.605	210.883	880.6706	-1.0566	0.67969	0.10889	-5.422	-2.98144	12.718	0.18555	-0.20752	-0.018066	-25.8718	-7.4321	45.3115	-0.26611	0.024414	-0.019043
3.568	3.895	12.8078	38.53	-0.090557	0.093778	-0.056359	10.682	223.596	838.269	-1.0073	0.66064	0.10547	-5.5	-9.531	4.443	0.20605	-0.19971	-0.035157	-43.0852	-36.3854	45.604	-0.25342	0.019531	-0.031738
3.57	6.107	21.0655	21.3522	-0.13662	0.073257	-0.051652	3.51	156.8679	834.6863	-0.92725	0.62646	0.095703	6.895	32.4233	-1.866	0.22314	-0.19287	-0.05127	-63.4356	-53.813	37.135	-0.23047	0.01123	-0.055664
3.572	10.607	6.17948	24.70815	-0.11156	0.10544	-0.0028956	11.447	208.763	786.459	-0.86669	0.59228	0.089356	30.5274	0.731	-13.692	0.23584	-0.18994	-0.070801	-69.2612	-27.1302	48.466	-0.21606	0.0080566	-0.070313
3.574	9.372	9.4114	32.78953	-0.16526	0.069227	-0.030019	7.277	171.82	744.9392	-0.80811	0.56299	0.086426	24.146	10.50554	-9.329	0.2373	-0.1875	-0.083008	-55.0341	-13.60918	52.534	-0.20605	0.0073242	-0.080078
3.576	9.482	16.8526	23.754	-0.12061	0.10791	0.041016	31.241	149.2971	727.087	-0.729	0.51611	0.075684	24.476	-19.0305	-13.819	0.24463	-0.17725	-0.10254	-54.4007	-7.3845	82.1468	-0.21094	0.0083008	-0.093262
3.578	-5.102	19.0376	11.737	-0.15434	0.074733	-0.0096071	17.324	185.367	685.492	-0.69287	0.49268	0.072754	33.4357	10.5707	-5.690489	0.24268	-0.17309	-0.11768	-93.838	-19.2615	62.18	-0.22607	0.01709	-0.088379
3.58	13.411	21.7098	9.3007	-0.12998	0.073818	0.008256	25.272	116.2729	658.359	-0.61523	0.44727	0.066895	46.593524	22.45605	7.00624	0.23828	-0.17676	-0.12842	-38.68	-16.8137	73.218	-0.28125	0.030273	-0.082031
3.582	14.128	11.6422	35.164	-0.11738	0.074652	0.0073083	55.8616	147.547	646.393	-0.56274	0.41382	0.063233	40.5634	31.8329	21.2737	0.22998	-0.18457	-0.13867	-44.386	35.241	114.737	-0.3357	0.056397	-0.064941
3.584	1.8	18.1593	15.8564	-0.10264	0.064818	-0.0019453	32.5207	157.452	633.756	-0.51172	0.38281	0.061035	47.4574	17.2711	21.1504	0.21631	-0.1875	-0.14697	-38.668	62.79	196.044	-0.40771	0.08252	-0.04541
3.586	13.53	10.8427	14.2242	-0.077148	0.060059	-0.022949	46.0353	122.00334	641.954	-0.44727	0.33984	0.057617	44.119	12.35889	-9.021	0.18408	-0.18311	-0.15039	39.712	66.225	341.931	-0.53613	0.12793	-0.015625
3.588	8.021	1.27223	22.575	-0.082486	0.0533	-0.01109	9.525	175.192	618.847	-0.42236	0.3208	0.061035	14.204	23.6119	-35.14	0.146	-0.18066	-0.146	28.779	50.957	451.581	-0.61377	0.15479	0.0043945
3.59	30.8422	8.87316	18.3952	-0.03741	0.078578	0.0091563	-4.048	148.357	580.929	-0.36182	0.27734	0.046875	14.784	22.0268	-10.8276	0.12256	-0.1709	-0.14453	58.476	23.9135	622.182	-0.80078	0.21484	0.065918
3.592	14.675	12.2097	22.0413	-0.081688	0.028277	-0.04156	22.308	155.4971	539.432	-0.32227	0.25	0.047364	-1.481	26.193	-6.1567	0.086426	-0.1543	-0.12842	112.977	16.308	766.243	-0.96287	0.2771	0.11938
3.594	22.807	9.1915	17.8358	-0.033107	0.075355	0.014353	-29.1162	204.786	460.749	-0.29004	0.21582	0.04541	12.315	20.3137	21.85045	0.057861	-0.1499	-0.1189	163.686	-19.828	927.391	-1.1401	0.34814	0.18115
3.596	22.671	8.9179	15.55413	-0.088379	0.030273	-0.031738	-28.766	160.4333	443.283	-0.24951	0.1792	0.038086	27.1867	26.8329	10.603	0.03125	-0.14453	-0.10254	179.91039	-50.565	1057.298	-1.394	0.44531	0.2793
3.598	37.974	17.0052	23.3307	-0.039282	0.06258	-0.0029197	-8.569	191.369	407.2461	-0.21948	0.15283	0.037353	30.015	-14.4286	31.588	-0.0073242	-0.12939	-0.085938	248.5071	-95.365	1126.2851	-1.5986	0.54102	0.3584
3.6	30.213	5.64282	10.3671	-0.091793	0.037252	-0.0317	-8.263	169.184	373.34652	-0.19043	0.12402	0.033691	-24.562	12.0234	24.4899	-0.024902	-0.12402	-0.074219	279.0269	-134.258	1247.387	-1.791	0.64063	0.4458
3.602	3.265	2.20858	15.7974	-0.037987	0.075775	0.013466	5.451	101.711	381.3097	-0.16211	0.086914	0.033691	0.0800000000000054	0.598000000000001	44.67	-0.061035	-0.11426	-0.053711	237.4626	-157.236	1272.159	-2.0293	0.77441	0.55176
3.604	27.628	3.7486	12.0111	-0.097834	0.030874	-0.046473	-22.817	128.69	349.4843	-0.14697	0.070313	0.026855	-14.023	67.75	5.5481	-0.081055	-0.10229	-0.042481	172.844	-183.7422	1341.366	-2.1382	0.82959	0.59082
3.606	28.865	17.8702	15.085	-0.055664	0.082031	0.031738	4.363	104.536	352.0103	-0.12744	0.035156	0.032715	15.573	45.574	23.004	-0.10156	-0.092285	-0.03418	11.993	-216.635	1359.095	-2.3237	0.90674	0.60938
3.608	23.156	31.103	6.8475	-0.10373	0.044624	-0.02988	24.002	112.708	327.8711	-0.11547	0.018066	0.028564	5.865	45.108	18.0314	-0.11914	-0.073242	-0.022461	-92.37	-205.987	1294.302	-2.4165	0.94092	0.57641
3.61	17.632	15.8461	10.3745	-0.085526	0.04954	-0.017167	-0.887	148.249	282.416	-0.10791	-0.0078125	0.027832	-7.49	-23.7799	30.31	-0.12793	-0.064453	-0.02002	-63.38	-198.273	1331.273	-2.4526	0.95166	0.5166
3.612	20.272	16.018	16.295	-0.10979	0.050271	-0.026583	-18.344	96.436	269.251	-0.092285	-0.026367	0.02832	-46.1376	1.1139	25.6889	-0.13672	-0.044434	-0.017578	-60.204	-157.36	1320.94	-2.4155	0.91943	0.41699
3.614	9.89	13.2597	25.7858	-0.079182	0.058902	-0.02088	-22.531	117.0109	262.9944	-0.087402	-0.037109	0.034668	-22.5165	-29.5203	35.2581	-0.14355	-0.033447	-0.015137	-74.2764	-148.154	1312.928	-2.3672	0.88281	0.36865
3.616	8.173	16.9369	19.1529	-0.095215	0.044434	-0.062012	5.578	105.0038	243.4753	-0.075684	-0.052734	0.04248	-6.885	-2.233	66.901	-0.15088	-0.01709	-0.014648	-80.5048	-162.425	1281.582	-2.2324	0.82031	0.28027
3.618	15.468	4.1993	26.2312	-0.054209	0.072259	-0.018465	21.471	62.794	236.6927	-0.070556	-0.060791	0.047852	4.78	-52.2876	95.496	-0.16797	-0.0092773	-0.024414	-128.268	-150.3376	1211.565	-2.1169	0.78418	0.22754
3.62	3.491	-0.24857	36.5768	-0.048725	0.062698	-0.066306	-23.011	97.856	216.759	-0.067383	-0.065918	0.056152	5.597	-27.28969	95.2567	-0.1792	-0.00048828	-0.020996	-203.446	-128.665	1209.883	-2.0039	0.75977	0.19385
3.622	0.737000000000002	14.5439	37.5214	-0.0253	0.071676	-0.049907	6.028	65.154	209.365	-0.06543	-0.075684	0.063477	17.617	-78.138	120.807	-0.20996	0.01123	-0.025391	-201.772	-84.41	1262.016	-1.8574	0.76172	0.18799
3.624	-12.634	23.3495	51.7121	-0.020016	0.071389	-0.068257	40.659	75.305	179.6342	-0.05957	-0.077148	0.071289	18.923	-40.6418	145.554	-0.24976	0.018555	-0.026368	-161.998	-71.64	1311.258	-1.7949	0.78125	0.19482
3.626	-12.954	40.459	80.0428	-0.020508	0.04541	-0.098145	22.768	116.105	127.111	-0.058594	-0.085449	0.084473	35.34	-67.52	222.156	-0.29346	0.032227	-0.019043	-76.178	-108.333	1333.738	-1.7012	0.83789	0.23877
3.628	-10.527	55.6633	125.9795	-0.02305	0.076074	-0.097367	36.427	82.0707	106.298	-0.056397	-0.084228	0.093506	37.26	-14.3842	294.428	-0.35889	0.036133	-0.0092773	-1.783	-183.598	1335.38741	-1.6692	0.90162	0.27514
3.63	10.897	72.135	156.522	-0.045017	0.056742	-0.12793	25.723	107.214	99.903	-0.057617	-0.083984	0.097168	49.035	-26.2913	366.2458	-0.40234	0.038574	-0.0053711	-27.135	-214.9871	1329.905	-1.6421	0.9751	0.30078
3.632	25.604	50.5801	183.3576	-0.067288	0.072751	-0.14121	30.377	111.453	95.11	-0.054199	-0.080566	0.11279	54.528	42.577	430.6755	-0.49609	0.052246	0.015137	-120.8558	-238.9165	1400.089	-1.5972	1.0688	0.30664
3.634	36.289	46.9372	228.3635	-0.098338	0.085941	-0.13037	67.6601	74.88	93.5821	-0.05127	-0.074707	0.11768	56.915	30.427	529.901	-0.57276	0.067627	0.032471	-189.23	-261.905	1473.71	-1.5757	1.1011	0.29834
3.636	51.077	42.796	276.998	-0.17432	0.094238	-0.17041	34.723	99.69	72.2908	-0.047363	-0.071777	0.12549	40.601	73.519	635.996	-0.65918	0.086914	0.062012	-192.895	-272.103	1504.943	-1.5195	1.1426	0.271
3.638	28.472	48.859	292.8003	-0.22783	0.14727	-0.12617	14.801	59.2262	97.7339	-0.04834	-0.066895	0.13282	40.093	29.753	763.699	-0.79639	0.11572	0.091309	-204.889	-307.018	1519.414	-1.4939	1.1687	0.23242
3.64	52.308	28.583	317.699	-0.33427	0.17002	-0.15381	21.344	49.249	89.8603	-0.043945	-0.06543	0.14453	50.247	46.994	850.339	-0.87012	0.12695	0.10498	-84.67	-277.75	1508.816	-1.4746	1.1826	0.19873
3.642	68.206	22.4471	365.661	-0.41084	0.23252	-0.099513	19.915	77.848	53.166	-0.038086	-0.060547	0.14795	48.842	-43.599	923.972	-1.0313	0.16699	0.15479	26.903	-224.534	1514.515	-1.4961	1.1895	0.14746
3.644	99.06018	11.1225	416.6825	-0.53067	0.26406	-0.11133	2.276	37.7427	35.532	-0.032227	-0.058105	0.14502	102.042	-77.08	1011.624	-1.1629	0.20239	0.19947	90.038	-133.345	1545.218	-1.5229	1.188	0.12891
3.646	74.1745	-11.9785	474.3526	-0.60889	0.31836	-0.07666	5.484	58.1701	29.334	-0.019531	-0.058105	0.13965	95.5073	-175.698	1069.56	-1.3066	0.24023	0.25928	152.3194	-51.684	1553.8055	-1.6309	1.1895	0.12695
3.648	65.374	-22.9471	512.596	-0.73291	0.37315	-0.072659	-1.36	48.858	11.2	-0.005371	-0.061767	0.13501	61.646	-188.282	1105.268	-1.498	0.29102	0.34326	183.409	-13.026	1571.04	-1.7656	1.1899	0.15381
3.65	63.2145	-25.11687	561.4556	-0.81182	0.42607	-0.047754	12.247	8.7284	23.4643	0.012695	-0.063477	0.12402	26.342	-204.703	1105.928	-1.5938	0.31445	0.38916	228.738	33.994	1578.964	-1.9429	1.1899	0.20459
3.652	16.217	-20.7739	621.4194	-0.9419	0.47178	-0.056348	7.065	47.7248	9.5432	0.035156	-0.069824	0.10986	-0.916	-167.141	1084.311	-1.7764	0.34961	0.46143	258.31	63.508	1561.3562	-2.2207	1.1855	0.29834
3.654	7.5883	-19.9407	665.9138	-1.0003	0.5501	-0.012304	7.447	12.162	37.347	0.050293	-0.070801	0.10352	-47.839	-158.474	1079.904	-1.8962	0.36596	0.49926	285.75	100.256	1565.805	-2.3667	1.1802	0.34277
3.656	-14.4528	-17.08693	711.4159	-1.1494	0.57813	-0.040039	9.287	11.8236	66.591	0.07666	-0.080566	0.087891	-52.818	-127.77	1019.952	-1.9902	0.37012	0.52197	257.099	127.111	1555.902	-2.6426	1.1602	0.41846
3.658	22.3453	-17.6303	741.8427	-1.1884	0.69268	0.0501	-10.411	34.7437	34.374	0.090088	-0.091308	0.073242	-74.888	-118.928	979.611	-2.0859	0.37891	0.5	186.5387	102.753	1554.425	-2.8152	1.1458	0.45288
3.66	16.4969	-6.5748	760.522	-1.3113	0.72266	0.038281	25.162	14.1829	32.3187	0.10547	-0.10107	0.054688	-95.014	-99.288	958.563	-2.0996	0.38086	0.48682	153.7962	63.3023	1573.2686	-2.9526	1.1294	0.46973
3.662	-36.4036	9.9949	777.307	-1.3348	0.82109	0.14688	-21.689	47.981	8.019	0.12012	-0.11719	0.029297	-140.678	-91.716	937.278	-2.0879	0.39551	0.43408	108.569	0.594000000000001	1583.962	-3.0645	1.0898	0.49072
3.664	-26.0034	0.719999999999999	799.856	-1.4284	0.83955	0.14659	-20.45	40.931	-10.921	0.12646	-0.12305	0.019043	-137.073	-88.3348	953.58	-2.0288	0.40625	0.37744	102.6604	-65.237	1600.801	-3.0938	1.0645	0.49756
3.666	-12.747	-19.008	823.374	-1.4331	0.8833	0.21094	-1.07100000000001	24.112	20.4088	0.13477	-0.12842	-0.0087891	-117.876	-56.156	935.4463	-1.9512	0.42139	0.31396	143.503	-101.12	1634.762	-3.1226	1.0122	0.49707
3.668	-32.4467	-35.819	836.4836	-1.4657	0.90029	0.23262	-18.05	47.333	-9.5044	0.13672	-0.13404	-0.020996	-68.4215	-51.68	928.645	-1.8516	0.44141	0.24561	116.5589	-100.5682	1627.751	-3.1243	0.97974	0.50073
3.67	-73.442	-50.3131	851.1021	-1.4491	0.89053	0.24317	31.3817	0.261000000000001	4.4789	0.13184	-0.13965	-0.039063	-15.594	-29.75	941.45	-1.8179	0.46094	0.19678	93.094	-56.597	1622.393	-3.1055	0.96289	0.50049
3.672	-23.5057	-55.4969	870.6167	-1.435	0.89131	0.25605	22.149	-11.8054	51.781	0.12256	-0.1416	-0.046387	10.958	-85.09	982.454	-1.7676	0.50684	0.146	92.584	-37.3437	1601.908	-3.0566	0.96875	0.49756
3.674	-24.2798	-61.8067	883.9407	-1.4014	0.875	0.24912	-1.259	-2.484	40.614	0.1123	-0.14307	-0.050781	-3.554	-105.141	991.738	-1.7002	0.52832	0.12793	19.337	-53.667	1565.4372	-3.0293	0.98047	0.49072
3.676	-41.459	-40.748	884.83	-1.3716	0.8501	0.20898	48.5583	-20.1791	38.7377	0.089844	-0.13916	-0.046875	29.32	-168.589	1048.0404	-1.6074	0.52051	0.10645	-11.605	-53.022	1568.3187	-2.9741	1.0083	0.47461
3.678	-70.9308	-61.6397	889.9393	-1.3284	0.84736	0.22344	30.021	26.496	20.2127	0.072265	-0.1355	-0.041504	14.236	-167.5087	1092.67788	-1.5093	0.50244	0.084961	-71.317	-30.408	1564.294	-2.9253	1.0269	0.46093
3.68	-72.00335	-57.892	891.6421	-1.3044	0.83838	0.19658	15.653	21.4646	6.371	0.048828	-0.1333	-0.029297	-10.74	-226.231	1182.247	-1.4961	0.51904	0.092285	-134.383	61.843	1530.915	-2.8765	1.0376	0.45508
3.682	-61.207	-52.209	927.6481	-1.2985	0.81455	0.1837	45.183	-13.238027	31.5173	0.019531	-0.11865	-0.015625	-56.7858	-252.266	1229.556	-1.5225	0.63867	0.13525	-136.143	135.998	1479.495	-2.7988	1.0391	0.44482
3.684	-49.059	-58.587	956.4533	-1.2821	0.86318	0.21113	29.471	11.2519	19.4504	0.0078125	-0.10986	-0.0048828	-71.221	-305.68	1248.134	-1.5854	0.75195	0.19409	-127.616	179.8954	1417.533	-2.7554	1.0376	0.43848
3.686	-6.2044	-69.6437	969.0704	-1.311	0.83057	0.15918	28.913	-15.13	10.9415	-0.020508	-0.09668	0.016602	-85.728	-275.09	1234.3051	-1.6563	0.86328	0.2666	-89.923	196.075	1364.862	-2.6504	1.0273	0.4126
3.688	-5.136	-82.134	982.538	-1.2578	0.90742	0.22334	40.817	-7.8648	17.1036	-0.03247	-0.084717	0.033936	-7.904	-269.912	1269.51	-1.7305	0.9707	0.36084	-71.744	205.7165	1336.037	-2.5537	1.0195	0.38964
3.69	27.39	-77.8568	991.3241	-1.2496	0.89375	0.19326	20.546	7.1085	25.4226	-0.041016	-0.070801	0.049316	54.575	-198.709	1272.4221	-1.7471	1.0098	0.39014	-65.707	214.278	1335.63	-2.4531	1	0.35498
3.692	18.791	-85.433	999.6848	-1.1683	0.9375	0.19678	18.866	-17.6524	34.6915	-0.040527	-0.050293	0.073242	118.3378	-179.0752	1300.653	-1.7534	1.061	0.41992	-20.736	206.178	1345.8996	-2.3081	0.96143	0.31543
3.694	15.647	-103.7808	1008.5238	-1.1053	0.92402	0.1665	39.137	10.537	3.825	-0.03125	-0.042969	0.081055	139.206	-126.095	1260.898	-1.729	1.0864	0.41016	8.735	185.561	1332.0491	-2.2437	0.93408	0.29492
3.696	37.594	-112.8097	1017.9675	-1.0166	0.92773	0.10889	28.782	17.14989	-20.982	-0.015137	-0.027832	0.083984	162.722	-155.577	1258.714	-1.6875	1.1006	0.37402	90.1734	177.79	1306.492	-2.1016	0.88477	0.26221
3.698	51.8936	-105.0465	1033.2519	-0.96125	0.89092	0.058301	19.85	2.9743	3.744	0.0080566	-0.026367	0.091064	169.664	-99.434	1251.109	-1.6289	1.1016	0.30713	116.106	185.092	1271.133	-1.9939	0.85473	0.23462
3.7	84.323	-95.4694	1043.364	-0.88203	0.90703	0.0093748	9.699	31.807	-3.4954	0.03125	-0.019531	0.088379	171.64	-72.646	1288.379	-1.6147	1.1001	0.28711	149.868	209.114	1267.686	-1.8774	0.82471	0.20605
3.702	55.6202	-91.116	1057.3788	-0.88281	0.83125	-0.08594	9.737	-8.36906	2.1492	0.065918	-0.012207	0.08252	161.156	8.008	1306.383	-1.6387	1.0869	0.28174	140.917	215.16	1264.8615	-1.728	0.77979	0.16309
3.704	75.4079	-86.868	1066.7774	-0.82578	0.88594	-0.059961	4.447	1.0192	-12.30109	0.08252	-0.0073242	0.070801	114.3644	0.774999999999999	1327.123	-1.7322	1.0613	0.30933	139.734	185.5876	1233.719	-1.646	0.76025	0.14258
3.706	73.6646	-86.399	1077.2327	-0.88086	0.80371	-0.14746	-2.572	16.646472	-9.6111	0.11182	0.00048828	0.053711	42.032	1.176	1332.315	-1.8804	1.0298	0.36328	150.221	161.388	1218.642	-1.4761	0.71533	0.098633
3.708	51.183	-71.1593	1103.8852	-0.85801	0.8541	-0.096974	9.13	-28.954	22.1811	0.13452	0.0090334	0.045899	17.134	-70.318	1391.681	-2.1611	0.99414	0.48779	144.105	155.331	1174.876	-1.3559	0.67139	0.055664
3.71	60.4858	-71.563	1121.2631	-0.90107	0.82901	-0.080957	-2.057	3.455	20.007	0.15576	0.012695	0.038574	9.594	-70.3338	1429.263	-2.3179	0.98486	0.55469	141.085	176.381	1134.554	-1.2319	0.63135	0.02002
3.712	56.6	-72.7112	1139.906	-0.89678	0.85596	-0.070801	-19.139	22.5647	-13.753	0.16504	0.027344	0.029785	21.191	-110.89	1464.6193	-2.6089	0.979	0.65723	118.296	218.658	1069.458	-1.0684	0.58105	-0.016602
3.714	72.4729	-72.5254	1153.5408	-0.93399	0.83633	-0.049217	10.072	4.166	-9.252	0.1709	0.02832	0.029297	43.759	-97.986	1488.91	-2.8354	0.98682	0.72266	127.082	229.52	993.7778	-0.99365	0.55713	-0.012207
3.716	37.048	-70.9604	1156.6277	-0.91455	0.89648	0.017578	-19.035	43.577	-13.1185	0.17383	0.039551	0.024902	68.343	-125.831	1479.861	-2.9038	0.99756	0.75	122.809	267.226	928.497	-0.84961	0.50293	-0.03418
3.718	46.57	-70.536	1153.412	-0.95967	0.83252	-0.041992	-1.753	5.1416	3.8594	0.16943	0.04834	0.024414	90.881	-123.677	1493.62	-2.978	0.98584	0.72168	53.1287	272.763	908	-0.72998	0.45459	-0.039063
3.72	25.118	-62.455	1172.02494	-0.95586	0.85039	-0.010351	30.113	5.9483	3.3079	0.1709	0.054199	0.021973	85.797	-124.676	1503.078	-2.9851	0.96997	0.68677	34.637	258.27	910.972	-0.67529	0.4375	-0.031738
3.722	12.431	-47.736	1175.893	-0.98242	0.8668	0.007617	6.596	34.9472	-16.9457	0.16553	0.064941	0.024902	48.095	-95.256	1502.988	-2.9624	0.93604	0.65039	19.211	216.287	877.601	-0.56787	0.40967	-0.028809
3.724	8.5	-65.5589	1191.137	-1.0647	0.82304	-0.068457	16.933	9.9765	11.50115	0.16455	0.075195	0.022217	13.163	-59.885	1525.071	-2.9194	0.8833	0.60156	-16.604	195.3236	820.9692	-0.4917	0.38086	-0.021728
3.726	23.838	-68.2763	1186.69	-1.123	0.85547	-0.055176	22.004	36.9925	31.562	0.16357	0.093262	0.024902	12.335	-16.556	1538.616	-2.9141	0.85449	0.5835	-31.674	204.9425	752.5101	-0.41455	0.3501	-0.011719
3.728	18.598	-60.9324	1206.9378	-1.2355	0.86006	-0.064355	25.435	27.06281	26.067	0.15332	0.104	0.02002	-23.614	29.7594	1501.401	-2.9331	0.79541	0.57813	-98.855	224.379	694.15478	-0.32373	0.32471	0.013672
3.73	-0.643000000000001	-38.801	1220.6039	-1.3593	0.89854	-0.058985	41.808	-3.7061	34.191	0.14697	0.11523	0.0092773	-3.58	86.6559	1457.7232	-2.9794	0.75196	0.57959	-145.061	221.469	631.6384	-0.27539	0.31104	0.020508
3.732	11.333	-45.6936	1227.7609	-1.514	0.93603	-0.010157	31.689	35.445	28.082	0.11084	0.13477	-0.010742	5.316	112.108	1430.238	-3.0059	0.71436	0.59131	-168.711	190.981	561.96	-0.18555	0.27734	0.041992
3.734	13.063	-50.9388	1236.904	-1.631	1.0538	0.098631	28.578	-9.5518	63.0408	0.08252	0.16089	-0.012207	-2.40700000000001	118.953	1435.142	-3.0308	0.68799	0.60547	-188.525	138.336	517.854	-0.1106	0.24341	0.0542
3.736	34.802	-53.609	1250.8404	-1.7983	1.0962	0.13818	28.652	-8.206	94.862	0.043945	0.18945	-0.016602	-13.062	98.6757	1442.17614	-3.041	0.68408	0.60498	-180.314	140.116	496.073	-0.038574	0.21582	0.064453
3.738	44.53	-44.991	1252.3187	-1.8818	1.2193	0.25655	22.046	0.344000000000001	94.8335	-0.02002	0.22803	-0.0073242	54.741	82.78	1435.4706	-3.0229	0.69482	0.60645	-171.498	151.834	458.023	0.058105	0.16309	0.061523
3.74	67.288	-43.2933	1242.051	-1.9718	1.3121	0.33955	28.1734	-38.961	139.0632	-0.063965	0.24463	0.0014648	100.889	68.776	1441.615	-2.9824	0.70654	0.59594	-146.181	180.957	423.545	0.10547	0.13232	0.060059
3.742	76.934	-28.687	1240.1299	-2.0297	1.366	0.36846	4.005	-6.789	191.963	-0.1499	0.27637	0.011719	148.985	42.6448	1453.77	-2.9258	0.71289	0.57275	-112.448	199.255	350.348	0.20215	0.077637	0.049805
3.744	78.571	-16.117	1240.0931	-2.0584	1.4143	0.4001	20.952	8.6854	222.38	-0.22461	0.3103	0.030274	151.677	11.7693	1444.555	-2.8296	0.729	0.54492	-55.3897	200.021	305.102	0.26489	0.035156	0.039551
3.746	106.7361	-22.5013	1237.9719	-2.0586	1.4414	0.41357	27.586	19.2015	264.779	-0.29248	0.34424	0.051758	138.527	-0.588000000000001	1415.636	-2.7773	0.72656	0.52197	-12.84	224.688	281.124	0.32471	-0.0078125	0.020508
3.748	90.804	-39.076	1237.2953	-2.0344	1.4355	0.37861	-6.866	92.395	293.499	-0.3916	0.3999	0.075195	105.8681	-1.741	1399.728	-2.6538	0.70752	0.48047	8.5672	244.46	257.0197	0.39453	-0.060547	0.010254
3.75	119.77866	-40.746	1255.8088	-2.0262	1.4148	0.35479	-1.576	77.2412	375.92	-0.44873	0.43311	0.07959	107.7248	8.327	1393.33	-2.5466	0.68872	0.45288	26.74	253.85	230.2011	0.41992	-0.083008	0.0043945
3.752	112.0471	-36.6619	1264.62798	-1.9906	1.4434	0.35088	3.747	85.2941	457.866	-0.56689	0.50342	0.09082	78.6861	33.27	1402.94	-2.4312	0.66846	0.43018	18.6567	233.4	199.5792	0.45947	-0.13574	-0.0039063
3.754	100.4267	-22.4487	1276.6033	-1.9973	1.3889	0.29405	-18.269	104.403	484.3511	-0.66186	0.55981	0.094238	85.0307	47.623	1386.641	-2.2734	0.63672	0.39697	33.251	197.454	180.8327	0.47193	-0.1709	-0.0036621
3.756	107.2484	-22.0442	1264.9227	-1.9546	1.4028	0.29004	-20.655	47.0568	558.509	-0.7583	0.62158	0.10059	76.9966	91.001	1343.814	-2.1968	0.62061	0.38477	75.4412	173.564	157.0656	0.47168	-0.19873	-0.0053711
3.758	116.2174	-11.1915	1253.982	-1.966	1.3633	0.25928	-20.602	63.077	624.976	-0.90186	0.70947	0.12793	35.43	111.997	1315.4267	-2.0522	0.61377	0.36523	71.859	144.0789	139.9776	0.4541	-0.22949	-0.0078125
3.76	124.5683	-0.5286	1253.1605	-1.937	1.3751	0.25234	-31.4082	37.0075	700.023	-0.98193	0.7583	0.14063	23.854	171.474	1254.887	-1.9492	0.61328	0.34912	104.008	123.047	103.6114	0.4375	-0.23682	-0.0058594
3.762	89.208	6.1432	1259.7305	-1.9464	1.3423	0.22773	9.546	-25.393	750.4194	-1.1323	0.84912	0.20557	60.046	193.452	1238.013	-1.8516	0.61914	0.33496	121.982	98.255	92.517	0.37012	-0.24902	0.0083008
3.764	107.0981	5.42045	1253.6543	-1.9181	1.3654	0.23076	23.6473	-18.997	741.164	-1.2458	0.91285	0.27612	76.817	230.684	1197.397	-1.7305	0.62256	0.30811	121.823	65.694	86.199	0.29712	-0.25806	0.033936
3.766	87.8114	10.9675	1250.6313	-1.9136	1.3345	0.19873	-2.465	-94.4905	784.156	-1.3613	0.96973	0.35205	49.177	210.271	1170.13	-1.6699	0.62207	0.29688	150.603	47.957	97.0664	0.20166	-0.26025	0.063477
3.768	84.54	15.7486	1244.0971	-1.8906	1.3524	0.1875	26.255	-107.949	849.4254	-1.522	1.0415	0.45215	26.928	226.977	1149.566	-1.5659	0.61182	0.27051	128.698	16.3439	94.987	0.049316	-0.24512	0.11865
3.77	50.525	5.8444	1230.3265	-1.8675	1.3544	0.18926	19.214	-102.3156	844.82	-1.5913	1.061	0.50977	16.7031	180.099	1124.241	-1.4859	0.6001	0.25049	84.14	-16.9808	84.527	-0.037598	-0.22949	0.15234
3.772	49.4	18.328	1233.433	-1.869	1.3325	0.1498	39.139	-152.481	854.16	-1.7065	1.0806	0.60156	-27.7214	200.429	1074.619	-1.4199	0.58105	0.22949	71.3529	-16.063	81.257	-0.2085	-0.18652	0.21338
3.774	42.932	32.284	1234.1711	-1.828	1.3517	0.15547	56.536	-137.569	843.121	-1.7722	1.0818	0.64185	-46.2069	168.8632	1067.402	-1.3354	0.56299	0.20605	30.865	-28.9004	96.089	-0.33081	-0.1438	0.2627
3.776	15.388	44.87	1235.9023	-1.8335	1.3091	0.11719	26.177	-150.039	818.099	-1.8159	1.0718	0.66309	-70.223	187.8986	1019.879	-1.2959	0.55078	0.19189	-5.641	-5.186	66.6224	-0.44336	-0.099609	0.30322
3.778	26.207	32.69017	1231.2374	-1.7749	1.3413	0.13545	26.682	-170.023	810.41	-1.8086	1.0723	0.66846	-91.776	131.823	1004.784	-1.2241	0.53467	0.16895	-34.4667	-3.082	26.41	-0.56982	-0.047852	0.34375
3.78	9.672	32.467	1222.9738	-1.7594	1.3109	0.10068	51.145	-91.532	747.644	-1.7734	1.0762	0.65967	-81.03	143.416	970.219	-1.1711	0.52246	0.15771	-74.444	-18.568	-6.861	-0.62646	-0.021973	0.35742
3.782	14.733	51.884	1208.378	-1.7156	1.3289	0.085059	58.7013	-87.392	721.888	-1.6538	1.0649	0.61426	-87.469	106.261	943.1926	-1.1191	0.50977	0.15088	-89.724	-30.637	-38.6122	-0.71289	0.021484	0.40088
3.784	9.141	51.4189	1209.8905	-1.6523	1.3351	0.091113	40.527	-85.249	738.38	-1.5301	1.053	0.56469	-65.994	161.102	904.7335	-1.0562	0.49707	0.13574	-85.654	-9.78933	-42.433	-0.76587	0.045166	0.42993
3.786	18.344	50.3077	1177.6561	-1.6392	1.3052	0.049805	35.612	-49.982	733.033	-1.4058	1.0415	0.51172	-36.9693	151.196	870.736	-1.019	0.49561	0.12988	-76.3337	12.088	-19.0415	-0.80371	0.060547	0.45947
3.788	25.842	52.237	1169.22	-1.5614	1.3392	0.067187	48.555	-92.735	791.715	-1.2729	1.064	0.45508	-13.109	210.915	820.98835	-0.94141	0.48193	0.11865	-98.387	27.547	-6.2775	-0.82813	0.075195	0.49365
3.79	36.188	74.322	1146.538	-1.5261	1.3141	0.021387	55.5543	-71.99	847.487	-1.2358	1.0806	0.42578	31.4835	188.707	790.856	-0.88623	0.46778	0.11084	-75.5752	6.073	-0.0888999999999998	-0.83447	0.083008	0.50391
3.792	49.66	68.1222	1156.9627	-1.5073	1.3048	-0.00087884	22.4487	-68.204	895.001	-1.1914	1.1406	0.42627	39.0997	228.685	749.324	-0.82617	0.45996	0.10107	-71.1826	3.19	-3.9314	-0.81104	0.088867	0.5332
3.794	29.706	71.5454	1149.7797	-1.4323	1.3134	0.029785	13.0451	-123.581	981.4023	-1.1716	1.1721	0.44068	27.0205	209.567	733.389	-0.74072	0.44238	0.093262	-74.0793	10.173	-7.921	-0.77832	0.094482	0.55029
3.796	55.395	80.06224	1129.2992	-1.3926	1.2832	0.0029297	29.1832	-93.667	985.11642	-1.1455	1.1738	0.44971	16.8341	232.279	705.672	-0.69531	0.43262	0.089844	-41.6419	43.1788	9.568	-0.7373	0.099609	0.56543
3.798	43.165	89.3763	1105.727	-1.388	1.2421	-0.030469	15.266	-133.2422	994.314	-1.1074	1.1553	0.41895	-21.0047	204.752	640.6123	-0.6084	0.4043	0.081055	-35.9108	56.902	11.3107	-0.66846	0.10303	0.57764
3.8	65.7866	94.8526	1087.5698	-1.3268	1.2263	-0.0010742	-0.158000000000001	-175.637	1052.009	-1.0796	1.1519	0.39551	-19.1943	241.18668	578.9463	-0.54248	0.37745	0.073731	-22.128	38.7723	6.202	-0.625	0.10498	0.5874
3.802	58.817	92.5132	1069.4598	-1.2863	1.1919	-0.013574	-41.453	-159.414	1068.636	-1.0112	1.1626	0.34082	-34.8503	209.828	536.0925	-0.47412	0.35107	0.074707	25.562	23.738	6.248	-0.52295	0.11426	0.5957
3.804	75.3062	96.8232	1046.2601	-1.2863	1.1456	-0.048926	-18.114	-232.681	1104.6206	-0.95849	1.1626	0.29199	26.422	230.186	496.4782	-0.38574	0.30762	0.064941	41.9728	10.6514	5.8851	-0.44458	0.10059	0.59497
3.806	92.047	96.832	1037.693	-1.2402	1.1309	-0.01123	-21.32	-227.474	1163.752	-0.91113	1.1563	0.24463	16.1962	176.772	498.06063	-0.34473	0.29199	0.06543	59.7622	27.24	18.1242	-0.36475	0.078125	0.58545
3.808	61.61	91.3508	1000.3711	-1.1854	1.1138	-0.01709	-65.829	-196.697	1155.173	-0.88037	1.1411	0.18311	8.3568	166.7369	460.513	-0.26074	0.24512	0.062012	88.2728	40.001	30.417	-0.25342	0.039063	0.56494
3.81	80.5825	91.4743	987.7305	-1.1862	1.0675	-0.04668	-46.6168	-231.561	1201.272	-0.87451	1.1333	0.16016	1.8045	114.348	453.3603	-0.20288	0.2124	0.056641	125.736	30.4532	31.674	-0.2002	0.015625	0.54736
3.812	60.086	102.5382	967.452	-1.1456	1.0487	-0.031055	-29.612	-152.986	1200.931	-0.87891	1.1152	0.14209	24.3401	119.101	432.559	-0.13965	0.18018	0.049316	135.626	37.705	47.37	-0.097168	-0.020508	0.50977
3.814	57.9194	104.1631	959.821	-1.0917	1.038	-0.016797	-32.562	-123.337	1162.29	-0.89551	1.0986	0.14136	27.2649	113.2091	421.028	-0.064941	0.13184	0.034668	139.049	13.6083	48.69	-0.020752	-0.056641	0.46801
3.816	24.654	97.3894	935.4969	-1.085	0.99219	-0.023438	-12.419	-116.503	1186.749	-0.91992	1.0825	0.14453	39.835	141.784	386.659	-0.024902	0.11084	0.022461	151.705	16.0712	56.181	0.056641	-0.086426	0.4209
3.818	35.985	90.9134	908.7966	-1.0585	0.97783	-0.020703	-12.473	-27.958	1180.281	-0.97217	1.061	0.15137	6.1693	140.9996	344.2004	0.053711	0.063965	0.0097656	120.561	8.73739	48.367	0.16064	-0.12988	0.3501
3.82	21.869	95.9278	884.2625	-1.0218	0.95068	-0.010644	-23.90724	-52.81	1213.9539	-0.99902	1.0566	0.15137	-46.0641	154.109	296.232	0.10376	0.025635	-0.0085449	119.111	1.15	25.475	0.20703	-0.15527	0.31201
3.822	-21.522	106.192	874.712	-0.98233	0.93935	0.0096678	-5.943	-57.35	1272.202	-1.0571	1.0591	0.14209	-82.959	135.837	266.99	0.15088	-0.0043945	-0.027344	83.7632	0.567	31.7692	0.31641	-0.19385	0.23047
3.824	3.363	104.3615	857.689	-0.96728	0.90967	-0.0087891	-21.0553	-36.627	1242.249	-1.1054	1.0815	0.13037	-82.944	140.341	234.289	0.20166	-0.050293	-0.044922	52.083	-0.769000000000002	24.784	0.39282	-0.2229	0.16821
3.826	-6.901	108.123	823.841	-0.93896	0.8833	-0.0078125	-32.7319	-115.3169	1277.726	-1.1641	1.1055	0.12793	-92.14	136.905	215.138	0.21973	-0.072266	-0.047852	46.7146	-17.732	38.48697	0.46826	-0.26074	0.10547
3.828	-14.58	113.253	796.5823	-0.90391	0.86211	0.011816	-8.505	-87.779	1304.895	-1.2798	1.1479	0.12793	-59.4444	144.9656	181.137	0.25146	-0.11035	-0.056152	7.213	-39.2121	17.2276	0.54883	-0.31494	0.012695
3.83	-35.408	107.482	768.567	-0.86523	0.8457	0.026172	-26.0444	-112.2427	1297.4705	-1.3647	1.1724	0.13379	-59.1284	141.603	157.7174	0.25585	-0.13843	-0.059082	-25.503	-53.888	29.6874	0.58203	-0.33789	-0.024902
3.832	-34.656	106.65	766.6755	-0.85664	0.8082	0.013281	-14.3868	-167.659	1335.5025	-1.5562	1.2446	0.16943	-66.3265	125.292	132.2818	0.25195	-0.15918	-0.052734	-33.831	-29.8993	1.447	0.63916	-0.38818	-0.097168
3.834	-21.358	104.137	751.489	-0.82901	0.78232	0.016602	2.7669	-132.7034	1349.6796	-1.7305	1.3052	0.22071	-69.884	132.984	102.247	0.23584	-0.18262	-0.038086	-45.519	-10.404	-2.742	0.66333	-0.41821	-0.13965
3.836	-25.59	107.432	718.7279	-0.79199	0.76367	0.035645	-1.5016	-191.741	1394.3445	-1.9082	1.375	0.30273	-15.6959	137.228	93.711	0.21387	-0.18994	-0.025879	-64.8324	4.107	-12.0622	0.68213	-0.43506	-0.17432
3.838	-27.705	103.1525	689.05	-0.76826	0.73994	0.018066	19.7809	-184.239	1436.437	-2.1719	1.4746	0.42627	18.9547	143.374	90.849	0.16846	-0.20117	0.0053711	-71.7786	-10.25	-24.7835	0.67871	-0.44922	-0.18359
3.84	-21.033	100.2584	667.8377	-0.74571	0.70743	0.0027344	10.3584	-122.463	1422.204	-2.2983	1.522	0.48242	22.812	116.364	83.773	0.11084	-0.20166	0.042969	-57.7	-6.314	2.0539	0.65625	-0.44165	-0.17578
3.842	-5.155	113.8591	654.7089	-0.70469	0.68672	0.022265	0.201000000000001	-143.861	1451.677	-2.5542	1.604	0.61133	1.506	105.259	86.7744	0.067383	-0.20752	0.063477	-83.2827	21.413	-2.141	0.61719	-0.42627	-0.16797
3.844	-30.641	130.869	621.4498	-0.65918	0.68066	0.018555	0.3606	-69.619	1464.915	-2.7534	1.6626	0.70898	-0.891999999999999	59.35	72.5729	-0.0083008	-0.19629	0.11523	-93.176	34.197	9.231	0.5542	-0.38477	-0.14551
3.846	-1.83	127.8892	593.974	-0.65723	0.63379	-0.0029297	-26.2	-45.15	1411.125	-2.8306	1.6938	0.75	-12.986	42.7856952	60.83832	-0.061523	-0.18555	0.14966	-60.044	46.4215	7.1061	0.51709	-0.35254	-0.13818
3.848	10.315	115.5912	588.8916	-0.63027	0.60449	0.0081054	-22.9338	-81.9708	1411.6208	-2.9297	1.7344	0.8042	8.087	1.443	65.474	-0.11719	-0.17676	0.18164	-73.9203	29.197	1.247616	0.43457	-0.27197	-0.10156
3.85	36.098	115.6172	579.1459	-0.58086	0.6	0.022265	-33.106	-1.049	1388.984	-2.9468	1.7544	0.81543	21.741	18.435	49.56	-0.17773	-0.15576	0.21924	-40.822	28.9167	-9.776	0.36767	-0.20386	-0.067626
3.852	29.6882	114.446	558.6864	-0.58868	0.55938	-0.00078122	-75.933	-34.1452	1402.585	-2.9238	1.7617	0.80908	33.3748	-0.957999999999998	38.544	-0.20605	-0.13818	0.23779	-4.178	59.461	-7.78633	0.29492	-0.13525	-0.034668
3.854	37.245	113.0367	534.9487	-0.57148	0.53867	0.0018553	-50.3991	-25.1606	1441.928	-2.8477	1.7656	0.7876	61.8023	47.45467	19.3053	-0.24316	-0.11816	0.25879	16.174	47.393	-0.2933	0.20313	-0.052246	-0.0063477
3.856	64.4797	108.6453	516.02864	-0.52832	0.54297	0.034668	-43.91	31.0254	1392.113	-2.7944	1.7642	0.77734	49.9748	24.8126	12.915	-0.2649	-0.10205	0.27441	32.1014	36.923	-3.3349	0.15918	-0.016602	0.0053711
3.858	52.4073	113.5579	491.4011	-0.52851	0.50762	0.013965	-69.025	-37.551	1398.198	-2.6948	1.7642	0.74902	60.6585	41.5175	7.132	-0.28516	-0.086426	0.28174	65.7506	22.2511	22.816	0.065918	0.041016	0.027832
3.86	40.69014	118.0221	474.3845	-0.50684	0.49238	0.020215	-45.22	-3.459	1443.228	-2.6343	1.7573	0.7295	57.556	-0.535	41.1946	-0.31104	-0.068848	0.29883	65.54916	24.7805	38.0211	0.012451	0.081055	0.041748
3.862	23.795	125.1478	452.6185	-0.4752	0.48105	0.04209	-61.578	3.958	1441.094	-2.5879	1.752	0.71533	76.2648	14.229	23.8546	-0.32324	-0.068848	0.30566	106.604	43.372	43.029	-0.041504	0.1123	0.051758
3.864	64.314	115.7443	436.29454	-0.46904	0.45791	0.028906	-46.226	-54.2867	1475.444	-2.5444	1.7349	0.69092	56.556	-21.9057	57.8736	-0.34277	-0.061035	0.3291	136.979	25.3683	65.106	-0.10449	0.16455	0.066406
3.866	39.861	109.55964	427.0007	-0.45752	0.4375	0.023438	-35.391	11.15	1478.1484	-2.5151	1.729	0.68848	47.083	16.4154	49.7105	-0.35742	-0.057128	0.33886	122.051	13.6436	52.209	-0.13232	0.18799	0.070801
3.868	8.901	103.5139	415.8592	-0.45039	0.40097	0.026758	-87.157	-45.167	1457.492	-2.457	1.6973	0.66943	22.422	-12.454	39.314	-0.36865	-0.055664	0.36133	98.06	-10.742	46.68	-0.19385	0.23389	0.084473
3.87	12.844	91.5585	408.7739	-0.4123	0.3956	0.035742	-59.211	-50.228	1470.8601	-2.4072	1.6699	0.64306	-21.7	34.45696	-10.96	-0.38135	-0.052734	0.37109	111.448	-8.685	46.931	-0.22827	0.26294	0.093994
3.872	29.722	97.0237	376.0455	-0.40801	0.36357	0.030664	-31.12	30.0238	1437.7485	-2.3452	1.6431	0.61963	-36.9697	6.192	-21.494	-0.38086	-0.05127	0.37842	108.964	-5.255	41.1157	-0.26318	0.29736	0.097656
3.874	21.567	94.1093	355.6381	-0.38281	0.34092	0.031055	-48.694	-24.5821	1428.0539	-2.2476	1.5981	0.58984	-36.462	21.197	-39.3669	-0.37305	-0.052734	0.3833	73.6366	-25.45	39.8836	-0.30176	0.33105	0.11523
3.876	-31.997	92.7991	339.5732	-0.32373	0.34912	0.062012	-24.7791	40.0174	1422.0229	-2.2007	1.5708	0.57373	-36.2128	-33.161	7.4081	-0.35889	-0.053467	0.38794	79.6726	-35.3956	29.8689	-0.31592	0.3501	0.12158
3.878	-0.235000000000003	88.8716	325.2925	-0.32705	0.30986	0.035157	-30.947	57.8215	1375.7369	-2.0977	1.5059	0.54932	-5.893	-8.3242	7.7946	-0.33496	-0.056152	0.3877	37.896	-36.6139	6.8029	-0.34326	0.37939	0.13525
3.88	-2.08	90.8678	309.8251	-0.29082	0.30019	0.045215	-13.1721	15.8607	1380.2609	-2.0205	1.4609	0.52466	-22.77387	-44.5187	33.906	-0.29688	-0.063477	0.38525	31.413	-25.2304	31.3643	-0.36109	0.39795	0.13403
[truncated: 28,060 more rows]
