# Supplementary material for: Reliability and Validity of Running Cadence and Stance Time Derived from Instrumented Wireless Earbuds
Source: Sensors (Basel). 2021 Nov 30;21(23):7995. doi: 10.3390/s21237995 (PMC8659722; doi:10.3390/s21237995)
Supplement: Supplementary file 1 [file sensors-21-07995-s001.zip › Data_P03_speeds_2.csv]

time	S7kmh_force_plate_1	S7kmh_force_plate_2	S7kmh_force_plate_3	S7kmh_earbuds_1	S7kmh_earbuds_2	S7kmh_earbuds_3	S10kmh_force_plate_1	S10kmh_force_plate_2	S10kmh_force_plate_3	S10kmh_earbuds_1	S10kmh_earbuds_2	S10kmh_earbuds_3	S13kmh_force_plate_1	S13kmh_force_plate_2	S13kmh_force_plate_3	S13kmh_earbuds_1	S13kmh_earbuds_2	S13kmh_earbuds_3	max_force_plate_1	max_force_plate_2	max_force_plate_3	max_earbuds_1	max_earbuds_2	max_earbuds_3
0	20.027	120.176	950.963	-1.0684	1.25	-0.082031	33.0356	12.3371	8.6349	0.047363	-0.12549	0.066406	-63.521	7.812	1371.024	-1.979	0.80811	0.68945	NaN	NaN	NaN	NaN	NaN	NaN
0.002	16.087	108.7631	928.924	-1.0463	1.226	-0.080371	8.4	-4.20228	40.775	0.029297	-0.12744	0.078125	-50.3086	40.267	1321.973	-1.8477	0.76563	0.6665	NaN	NaN	NaN	NaN	NaN	NaN
0.004	29.991	109.6383	880.597	-1.032	1.2039	-0.085254	-21.321	8.886	17.4045	0.017578	-0.12256	0.0896	-53.606	49.609	1321.512	-1.7426	0.73389	0.64404	NaN	NaN	NaN	NaN	NaN	NaN
0.006	11.959	109.956	857.562	-1.0144	1.1808	-0.084082	-4.107	15.9628	36.407	0.0068359	-0.11816	0.099609	-22.99	101.718	1278.073	-1.6328	0.69336	0.62354	NaN	NaN	NaN	NaN	NaN	NaN
0.008	30.936	104.657	833.524	-0.99902	1.1588	-0.081934	-16.958	18.0418	42.608	-0.00097656	-0.11279	0.11621	-13.064	120.867	1243.164	-1.5093	0.64111	0.60059	NaN	NaN	NaN	NaN	NaN	NaN
0.01	43.992	91.6595	847.817	-0.97607	1.1431	-0.080078	-26.176	12.2502	-11.9382	-0.0029297	-0.11279	0.12305	14.831	187.46	1208.825	-1.4148	0.60718	0.58032	NaN	NaN	NaN	NaN	NaN	NaN
0.012	52.59	93.672	821.729	-0.96103	1.1253	-0.076758	-28.221	5.4538	4.6392	-0.0053711	-0.11279	0.12842	35.1492	193.509	1199.312	-1.3223	0.56934	0.56885	NaN	NaN	NaN	NaN	NaN	NaN
0.014	41.441	85.934	800.9508	-0.9375	1.1095	-0.075195	-40.0084	1.6463	33.5089	-0.015869	-0.10644	0.13575	44.642	222.858	1131.933	-1.2183	0.52393	0.54004	NaN	NaN	NaN	NaN	NaN	NaN
0.016	42.716	80.7363	817.157	-0.90586	1.0975	-0.078711	-40.905	9.8075	-7.761	-0.018066	-0.099121	0.13818	15.194	198.91	1094.87	-1.1719	0.48926	0.53174	NaN	NaN	NaN	NaN	NaN	NaN
0.018	56.7911	93.8771	789.436	-0.88203	1.0816	-0.081055	-23.424	5.6783	19.0043	-0.030762	-0.086426	0.14014	19.668	210.506	1047.495	-1.0698	0.44482	0.52051	NaN	NaN	NaN	NaN	NaN	NaN
0.02	44.627	95.612	768.632	-0.86279	1.0718	-0.080566	-2.818	-8.5532	31.6167	-0.037109	-0.080078	0.14453	15.337	173.918	1029.666	-1.0019	0.40381	0.50976	NaN	NaN	NaN	NaN	NaN	NaN
0.022	43.165	105.0861	733.4913	-0.83682	1.0575	-0.080762	-18.271	-25.9982	-0.271000000000001	-0.048828	-0.066406	0.13721	28.929	181.835	1008.901	-0.93652	0.36377	0.50244	NaN	NaN	NaN	NaN	NaN	NaN
0.024	52.08	91.228	698.3873	-0.81592	1.0415	-0.072363	0.535999999999994	-18.3694	42.5592	-0.058594	-0.053466	0.13842	22.037	164.58	975.6723	-0.84619	0.31934	0.48828	NaN	NaN	NaN	NaN	NaN	NaN
0.026	52.229	109.1998	674.359	-0.79131	1.0223	-0.071192	13.752	-11.1321	49.17323	-0.069336	-0.044434	0.13574	38.354	178.396	955.013	-0.8042	0.29834	0.47949	NaN	NaN	NaN	NaN	NaN	NaN
0.028	76.1752	123.747	660.5731	-0.76328	1.0103	-0.063574	7.48	8.738	21.857	-0.091309	-0.027832	0.13232	63.217	135.32	941.216	-0.70117	0.25781	0.4585	NaN	NaN	NaN	NaN	NaN	NaN
0.03	58.982	107.5416	639.8361	-0.73096	0.98877	-0.055176	44.531364	-13.3683	49.9108	-0.10352	-0.015137	0.12744	38.522	131.61668	888.3816	-0.62891	0.23389	0.44043	NaN	NaN	NaN	NaN	NaN	NaN
0.032	51.4501	95.8834	643.045	-0.70254	0.96152	-0.047949	43.9525	-31.2177	57.9482	-0.12695	0.003418	0.12402	55.454	100.966	846.8546	-0.55518	0.20508	0.41992	NaN	NaN	NaN	NaN	NaN	NaN
0.034	65.242	99.0178	616.7004	-0.67949	0.93438	-0.045605	44.032	-44.2322	27.571	-0.14649	0.019775	0.1289	75.635	145.438	826.626	-0.45361	0.16406	0.39014	NaN	NaN	NaN	NaN	NaN	NaN
0.036	74.367	105.205	599.3401	-0.65176	0.9043	-0.043262	69.8728	-54.4952	68.4159	-0.17432	0.041504	0.12354	76.859	161.2178	797.63	-0.40527	0.14355	0.37256	NaN	NaN	NaN	NaN	NaN	NaN
0.038	48.88	106.893	578.8172	-0.62764	0.87099	-0.045215	65.5064	-62.9747	99.3828	-0.22021	0.074219	0.12939	71.9398	198.548	758.85	-0.31641	0.10352	0.3418	NaN	NaN	NaN	NaN	NaN	NaN
0.04	31.467	97.674	566.489	-0.60889	0.84229	-0.047363	47.3549	-64.0866	83.385	-0.24707	0.09082	0.12695	72.531	195.039	703.939	-0.2483	0.064453	0.30712	NaN	NaN	NaN	NaN	NaN	NaN
0.042	42.933	94.6474	545.4987	-0.57763	0.82354	-0.051563	62.3065	-79.0776	122.5446	-0.31934	0.125	0.12061	55.75	216.797	657.6832	-0.17725	0.030762	0.2749	NaN	NaN	NaN	NaN	NaN	NaN
0.044	26.334	106.885	523.97	-0.5584	0.80235	-0.054492	59.8656	-68.458	149.195	-0.38355	0.16162	0.12036	32.71	205.7145	611.0818	-0.093262	-0.013184	0.23926	NaN	NaN	NaN	NaN	NaN	NaN
0.046	-2.072	100.2587	512.7077	-0.53379	0.79023	-0.054492	46.5533	-40.585	161.949	-0.45264	0.19971	0.11621	13.941	228.126	587.1988	-0.050781	-0.037598	0.2124	NaN	NaN	NaN	NaN	NaN	NaN
0.048	13.788	87.7994	523.382	-0.51094	0.77305	-0.046875	47.6736	-4.2846	266.7626	-0.55713	0.24854	0.11719	50.616	209.938	531.8399	0.030762	-0.084473	0.16699	NaN	NaN	NaN	NaN	NaN	NaN
0.05	30.298	84.7534	489.8441	-0.49658	0.74463	-0.035156	34.524	46.9069	332.674	-0.61719	0.2749	0.11621	33.378	195.791	494.2174	0.085452	-0.11743	0.13208	NaN	NaN	NaN	NaN	NaN	NaN
0.052	-1.664	80.9445	482.6089	-0.4834	0.72285	-0.027539	-8.141	88.3653	380.78	-0.74414	0.33301	0.12939	44.15	167.079	443.9172	0.1416	-0.1543	0.096191	NaN	NaN	NaN	NaN	NaN	NaN
0.054	-9.199	79.1711	458.4883	-0.46348	0.69551	-0.025391	2.785	97.7958	501.1788	-0.84058	0.37549	0.15405	45.17	157.1766	422.8551	0.20898	-0.19775	0.050293	NaN	NaN	NaN	NaN	NaN	NaN
0.056	11.341	79.7437	437.537	-0.43848	0.66582	-0.025781	2.819	89.436	599.6434	-0.94092	0.4126	0.18994	32.231	134.3855	374.933	0.24023	-0.2207	0.029297	NaN	NaN	NaN	NaN	NaN	NaN
0.058	26.52	99.149	413.9664	-0.40732	0.63955	-0.022168	-57.9338	73.569	639.0768	-1.0718	0.4585	0.25488	23.658	144.241	373.0387	0.29785	-0.26611	-0.016602	NaN	NaN	NaN	NaN	NaN	NaN
0.06	9.568	105.564	392.448	-0.37988	0.61084	-0.023926	-40.796	65.882	730.153	-1.1387	0.4707	0.28613	45.279	125.761	350.015	0.33301	-0.29761	-0.049316	NaN	NaN	NaN	NaN	NaN	NaN
0.062	17.784	104.0332	384.0349	-0.34649	0.57627	-0.025195	-38.188	39.362	758.108	-1.2729	0.48291	0.37109	66.42939	111.5362	352.7357	0.3623	-0.32715	-0.075684	NaN	NaN	NaN	NaN	NaN	NaN
0.064	13.827	108.8419	382.9956	-0.31455	0.54404	-0.029785	-41.976	18.267	731.3646	-1.3638	0.48437	0.43506	47.855	90.4617	309.6277	0.38574	-0.35596	-0.1123	NaN	NaN	NaN	NaN	NaN	NaN
0.066	14.776	118.72	356.2036	-0.27627	0.51358	-0.03291	12.615	-21.804	761.884	-1.4629	0.4834	0.49854	43.9553	67.302	293.9551	0.39453	-0.375	-0.12549	NaN	NaN	NaN	NaN	NaN	NaN
0.068	10.88	102.8058	345.7925	-0.24092	0.49473	-0.031934	48.129	-61.2312	709.993	-1.5645	0.48242	0.56982	16.34	72.9571	242.704	0.40234	-0.396	-0.15234	NaN	NaN	NaN	NaN	NaN	NaN
0.07	16.967	88.0859	347.7172	-0.19727	0.4668	-0.04834	25.043	-83.015	666.4257	-1.6152	0.48633	0.60693	12.785	87.002	239.513	0.40258	-0.40552	-0.16846	NaN	NaN	NaN	NaN	NaN	NaN
0.072	37.1141	92.1986	319.3527	-0.15303	0.43867	-0.050489	40.897	-97.122	684.021	-1.7007	0.52783	0.66016	54.731	108.5542	173.049	0.39307	-0.41309	-0.19141	NaN	NaN	NaN	NaN	NaN	NaN
0.074	52.0155	98.505	301.8689	-0.12197	0.41065	-0.06084	50.546	-92.408	653.266	-1.7515	0.56641	0.69507	51.1418	113.477	142.3585	0.37549	-0.41357	-0.20801	NaN	NaN	NaN	NaN	NaN	NaN
0.076	46.689	86.272	275.96	-0.090723	0.3794	-0.069824	16.024	-80.848	618.043	-1.7944	0.61572	0.7207	40.584	112.748	107.27	0.36182	-0.40967	-0.21191	NaN	NaN	NaN	NaN	NaN	NaN
0.078	42.793	77.028937	274.7218	-0.056934	0.35283	-0.077539	36.3	-75.356	630.17	-1.8223	0.66797	0.74268	47.533	92.661	110.64	0.32227	-0.39844	-0.21436	NaN	NaN	NaN	NaN	NaN	NaN
0.08	51.128	86.7836	269.416	-0.026367	0.3291	-0.07373	50.319	-57.788	624.46351	-1.832	0.69531	0.73486	44.351	100.175	86.73	0.28637	-0.3894	-0.21557	NaN	NaN	NaN	NaN	NaN	NaN
0.082	56.0415	82.7762	259.334	0.0039064	0.29942	-0.07793	26.82	-4.6711	600.538	-1.8491	0.74072	0.73584	38.828	97.104	71.479	0.24072	-0.37646	-0.20947	NaN	NaN	NaN	NaN	NaN	NaN
0.084	41.742	69.3624	257.85939	0.033106	0.27431	-0.077734	34.86675	32.998	660.765	-1.8618	0.78028	0.73242	41.265	104.872	32.87	0.1626	-0.35107	-0.19141	NaN	NaN	NaN	NaN	NaN	NaN
0.086	44.1166	68.1413	259.954	0.064746	0.24697	-0.08711	61.043	37.475	671.608	-1.8613	0.8125	0.72314	58.159	99.237	50.9803	0.11621	-0.33496	-0.18018	NaN	NaN	NaN	NaN	NaN	NaN
0.088	40.173	66.4042	252.41	0.092385	0.2292	-0.090821	53.9057	20.938	687.551	-1.832	0.85547	0.71973	55.751	91.322	45.3348	0.02002	-0.30957	-0.14893	NaN	NaN	NaN	NaN	NaN	NaN
0.09	32.721	71.153	226.9877	0.12744	0.20508	-0.10254	74.331	-32.552	769.896	-1.7964	0.87549	0.70898	48.51	75.21521	54.589	-0.055176	-0.27758	-0.12891	NaN	NaN	NaN	NaN	NaN	NaN
0.092	25.414	74.3356	206.9375	0.16123	0.18662	-0.11231	107.167	-88.233	790.195	-1.7261	0.89893	0.66797	12.884	75.79	29.0358	-0.13281	-0.24463	-0.095215	NaN	NaN	NaN	NaN	NaN	NaN
0.094	13.66	86.59	199.4534	0.18652	0.17568	-0.12188	68.472	-126.2594	790.7052	-1.6276	0.90747	0.61548	-15.599	37.3118	36.9118	-0.22021	-0.2041	-0.063965	NaN	NaN	NaN	NaN	NaN	NaN
0.096	36.716	86.714	181.714	0.20644	0.16084	-0.1375	38.1952	-161.203	856.1353	-1.5083	0.89697	0.54932	21.852	33.471	42.333	-0.25195	-0.18896	-0.055176	NaN	NaN	NaN	NaN	NaN	NaN
0.098	18.807	88.931	182.902	0.21768	0.15069	-0.15019	28.346	-184.622	866.017	-1.3418	0.875	0.45166	1.053	8.222	41.087	-0.31934	-0.17383	-0.035156	NaN	NaN	NaN	NaN	NaN	NaN
0.1	-5.528	78.747	177.1017	0.22607	0.14551	-0.1543	-32.255	-188.713	884.199	-1.2725	0.86523	0.41309	4.287	5.5037	31.169	-0.36499	-0.16382	-0.02124	NaN	NaN	NaN	NaN	NaN	NaN
0.102	18.943	67.895	166.6775	0.22803	0.1417	-0.16572	-48.9461	-194.064	961.2376	-1.1641	0.86523	0.33887	17.928	-15.9026	44.5	-0.41357	-0.1543	-0.0063477	NaN	NaN	NaN	NaN	NaN	NaN
0.104	17.829	68.912	167.2839	0.21924	0.13975	-0.17226	-39.1769	-186.411	985.15222	-1.1225	0.86768	0.29736	16.703	3.632	30.88004	-0.48047	-0.13721	0.02002	NaN	NaN	NaN	NaN	NaN	NaN
0.106	-3.482	60.524	158.3436	0.20596	0.14483	-0.1707	-56.7779	-166.977	1022.1493	-1.0952	0.87158	0.26172	0.599	-3.367	36.3576	-0.51318	-0.12695	0.038086	NaN	NaN	NaN	NaN	NaN	NaN
0.108	5.18	67.591	142.87293	0.18301	0.16035	-0.17315	-46.8059	-132.9037	1104.152	-1.0977	0.88086	0.22998	41.458	25.2734	29.4512	-0.56543	-0.1123	0.066406	NaN	NaN	NaN	NaN	NaN	NaN
0.11	17.28	74.105	129.6309	0.15967	0.1665	-0.17041	-32.266	-88.614	1106.27	-1.1104	0.88867	0.2124	21.875	15.753	34.551	-0.58741	-0.1001	0.08252	NaN	NaN	NaN	NaN	NaN	NaN
0.112	12.307	78.333	122.9658	0.1332	0.18545	-0.16182	-47.6751	-67.428	1108.17147	-1.1465	0.89258	0.19287	25.506	38.171	51.227	-0.58936	-0.09375	0.09082	NaN	NaN	NaN	NaN	NaN	NaN
0.114	-3.054	68.161	125.35263	0.10342	0.20508	-0.15567	-21.681	-60.142	1122.1847	-1.1833	0.8938	0.1748	36.354	-1.085	38.089	-0.55957	-0.084961	0.083008	NaN	NaN	NaN	NaN	NaN	NaN
0.116	3.588	52.97489	127.13435	0.081543	0.22656	-0.15254	0.336999999999996	-74.861	1097.775	-1.2192	0.88721	0.16406	10.256	16.2331	16.91	-0.53662	-0.086914	0.084961	NaN	NaN	NaN	NaN	NaN	NaN
0.118	23.824	59.058	121.39779	0.063477	0.2498	-0.13642	-17.762	-67.6	1087.108	-1.2788	0.86865	0.14844	-27.998	-6.465	-1.263	-0.48193	-0.090332	0.069336	NaN	NaN	NaN	NaN	NaN	NaN
0.12	21.726	46.978	122.387	0.050293	0.271	-0.12646	-17.149	-80.323	1137.53634	-1.312	0.85693	0.13843	0.443999999999999	3.185	8.469	-0.43726	-0.10279	0.05664	NaN	NaN	NaN	NaN	NaN	NaN
0.122	27.971	41.4471	109.2854	0.039258	0.29326	-0.125	-5.441	-107.221	1132.057	-1.3374	0.84326	0.13379	24.319	-12.3587	23.7761	-0.38623	-0.11816	0.044922	NaN	NaN	NaN	NaN	NaN	NaN
0.124	38.114	46.859	94.3947	0.038086	0.30342	-0.12432	-56.6573	-136.5787	1135.464	-1.3789	0.84375	0.12451	20.898	6.1818	17.74906	-0.31592	-0.14063	0.025391	NaN	NaN	NaN	NaN	NaN	NaN
0.126	42.889	59.087	79.9218	0.042773	0.31123	-0.12315	-29.309	-171.119	1179.10379	-1.4038	0.84619	0.12744	73.8208	-26.052	-0.589	-0.2793	-0.15332	0.01709	NaN	NaN	NaN	NaN	NaN	NaN
0.128	46.876	65.674	70.3134	0.052149	0.31914	-0.125	17.654	-184.957	1187.2543	-1.4785	0.8457	0.1333	26.113	-15.908	15.1925	-0.20605	-0.18359	-0.00048828	NaN	NaN	NaN	NaN	NaN	NaN
0.13	42.512	49.593	82.1875	0.0625	0.31934	-0.125	1.407	-172.343	1198.1818	-1.5671	0.8435	0.15552	34.866	-40.54798	12.193	-0.1455	-0.19947	-0.015381	NaN	NaN	NaN	NaN	NaN	NaN
0.132	52.3922	43.715	83.3789	0.073242	0.3169	-0.12881	24.2346	-158.881	1254.24	-1.6792	0.84424	0.18115	49.7537	-18.4829	19.6495	-0.084961	-0.21826	-0.029785	NaN	NaN	NaN	NaN	NaN	NaN
0.134	50.553	31.302	88.2865	0.081836	0.31084	-0.13242	68.709	-144.8149	1261.791	-1.8574	0.85156	0.23682	38.604	-21.8702	-1.589	-0.0043945	-0.24365	-0.043945	NaN	NaN	NaN	NaN	NaN	NaN
0.136	52.61	32.2255	79.3517	0.088476	0.30576	-0.1293	64.482	-132.0568	1287.435	-1.959	0.84961	0.28076	21.138	-4.2683	16.6743	0.028809	-0.25439	-0.049805	NaN	NaN	NaN	NaN	NaN	NaN
0.138	33.202	32.3112	80.729	0.094824	0.29678	-0.12773	69.105	-117.103	1332.988	-2.1582	0.85645	0.37744	49.521	-0.659799999999999	2.6842	0.087402	-0.26807	-0.07373	NaN	NaN	NaN	NaN	NaN	NaN
0.14	42.871	36.327	71.541	0.094238	0.29004	-0.125	97.654	-107.928	1325.7919	-2.314	0.85888	0.46118	17.161	22.7783	13.7867	0.13818	-0.27637	-0.082031	NaN	NaN	NaN	NaN	NaN	NaN
0.142	48.8048	33.77	51.8482	0.087695	0.28447	-0.12295	37.3658	-77.073	1323.4671	-2.4624	0.86572	0.54785	-8.02	11.373	-27.824	0.15527	-0.28125	-0.088379	NaN	NaN	NaN	NaN	NaN	NaN
0.144	24.094	34.166	46.0869	0.084668	0.275	-0.11485	11.166	-64.025	1347.6575	-2.6406	0.87695	0.6665	3.338	33.894	-10.3175	0.18115	-0.28809	-0.095215	NaN	NaN	NaN	NaN	NaN	NaN
0.146	19.728	22.2634	51.6004	0.076465	0.26797	-0.11211	39.2403	-50.0164	1308.118	-2.7168	0.88477	0.71338	21.376	34.0918	-11.6005	0.19311	-0.29541	-0.099609	NaN	NaN	NaN	NaN	NaN	NaN
0.148	36.177	25.671	62.234	0.064843	0.26465	-0.10352	-18.117	-39.2955	1298.63	-2.8394	0.89893	0.79883	25.474	39.579	0.997	0.19531	-0.30078	-0.095703	NaN	NaN	NaN	NaN	NaN	NaN
0.15	31.669	14.6287	68.8866	0.056152	0.26074	-0.09082	4.384	-34.236	1335.791	-2.9099	0.92017	0.84986	58.7059	40.2564	-8.25566	0.19531	-0.29883	-0.083496	NaN	NaN	NaN	NaN	NaN	NaN
0.152	23.219	-0.31372	76.8235	0.03623	0.2542	-0.079785	-4.229	-34.018	1325.021	-2.957	0.93164	0.88916	13.634	40.69	2.5837	0.19629	-0.29346	-0.084473	NaN	NaN	NaN	NaN	NaN	NaN
0.154	14.524	-8.5236	73.07044	0.020898	0.25976	-0.06914	-43.1258	-22.5286	1357.1334	-2.9937	0.94189	0.92383	-7.831	23.574	1.822	0.19873	-0.29688	-0.077637	NaN	NaN	NaN	NaN	NaN	NaN
0.156	5.185	-5.3797	61.8234	0.0076171	0.25976	-0.058984	-45.471	-10.889	1406.448	-3	0.9375	0.93799	4.096	22.46468	34.715	0.20898	-0.30445	-0.077881	NaN	NaN	NaN	NaN	NaN	NaN
0.158	1.709	0.229700000000001	65.6195	0.0013672	0.2582	-0.05	-18.4604	-7.421	1401.8938	-3.0093	0.93311	0.95898	25.736	21.8343	27.765	0.2124	-0.30859	-0.080566	NaN	NaN	NaN	NaN	NaN	NaN
0.16	-6.323	0.6887	82.5099	-0.010742	0.25537	-0.043945	-47.3355	-9.171	1428.31	-2.9849	0.9248	0.96533	-6.619	22.0099	28.50018	0.20605	-0.29688	-0.08252	NaN	NaN	NaN	NaN	NaN	NaN
0.162	-9.258	11.2637	100.5919	-0.027344	0.25664	-0.045606	-51.5619	-25.795	1445.965	-2.9473	0.91309	0.97119	34.786	11.925	46.361	0.19727	-0.28711	-0.07666	NaN	NaN	NaN	NaN	NaN	NaN
0.164	12.516	38.052	104.6208	-0.041699	0.25645	-0.042578	-21.084	-18.933	1429.6491	-2.8999	0.90479	0.95898	-8.476	-7.663	33.5975	0.17139	-0.25049	-0.062988	NaN	NaN	NaN	NaN	NaN	NaN
0.166	12.759	52.7482	119.7329	-0.070605	0.26738	-0.033984	-75.918	-4.3699	1441.7971	-2.855	0.89893	0.94922	2.01	4.31138	23.136	0.1521	-0.23803	-0.056884	NaN	NaN	NaN	NaN	NaN	NaN
0.168	3.225	63.32333	163.514	-0.091112	0.2792	-0.023535	-70.996	6.37055	1463.49	-2.7534	0.89111	0.9082	15.442	-1.763	22.74424	0.13525	-0.22412	-0.057129	NaN	NaN	NaN	NaN	NaN	NaN
0.17	17.368	69.11	191.042	-0.11426	0.28711	-0.0092773	-39.3246	5.274	1421.3975	-2.6609	0.88013	0.87036	19.74	17.0404	20.302	0.12988	-0.21289	-0.053223	NaN	NaN	NaN	NaN	NaN	NaN
0.172	11.326	93.4766	195.5151	-0.14033	0.30469	0.011328	-72.255	8.286	1400.0891	-2.564	0.87354	0.83203	8.564	6.082	58.737	0.12207	-0.2085	-0.060059	NaN	NaN	NaN	NaN	NaN	NaN
0.174	15.451	103.1372	208.0457	-0.17139	0.31885	0.023926	-52.277	29.505	1401.191	-2.4434	0.86133	0.78564	77.52874	23.0478	43.29	0.11719	-0.19971	-0.069336	NaN	NaN	NaN	NaN	NaN	NaN
0.176	28.847	107.109	235.5551	-0.196	0.3333	0.033691	-13.2	48.6113	1371.8654	-2.396	0.85205	0.76758	43.1913	9.64364	40.654	0.11231	-0.18946	-0.070068	NaN	NaN	NaN	NaN	NaN	NaN
0.178	27.079	96.62	248.764	-0.21963	0.34414	0.039356	-18.773	66.209	1381.4361	-2.3145	0.83789	0.729	24.146	19.588	17.778	0.10059	-0.17773	-0.069824	NaN	NaN	NaN	NaN	NaN	NaN
0.18	16.038	82.222	262.8852	-0.25195	0.36182	0.04248	0.777999999999999	64.721	1385.9776	-2.2603	0.8247	0.70312	35.314	-15.5564	20.8612	0.064941	-0.16211	-0.068848	NaN	NaN	NaN	NaN	NaN	NaN
0.182	40.7073	66.482	279.388	-0.2752	0.3791	0.052734	41.7514	62.942	1345.002	-2.2085	0.81494	0.67773	31.353	2.8106	15.162	0.056152	-0.15527	-0.066895	NaN	NaN	NaN	NaN	NaN	NaN
0.184	40.6672	45.8606	303.4414	-0.308	0.40186	0.059571	29.5336	58.567	1361.2803	-2.1284	0.79932	0.6416	20.612	-11.001	9.4596	0.014648	-0.13867	-0.056152	NaN	NaN	NaN	NaN	NaN	NaN
0.186	42.6194	34.2673	338.4223	-0.33144	0.43818	0.067383	56.835	65.543	1368.507	-2.0874	0.79443	0.61328	72.45882	5.2763	5.489	-0.018555	-0.1228	-0.047363	NaN	NaN	NaN	NaN	NaN	NaN
0.188	40.9561	24.1614	382.3279	-0.36563	0.47266	0.074121	79.014	64.5059	1329.8048	-1.9863	0.7832	0.57861	33.308	-20.208	14.0952	-0.053223	-0.10986	-0.03418	NaN	NaN	NaN	NaN	NaN	NaN
0.19	47.374	22.644	415.653	-0.39502	0.5	0.078613	27.1326	65.301	1310.1394	-1.9138	0.77661	0.55151	1.896	-9.9568	5.829	-0.09668	-0.091797	-0.021484	NaN	NaN	NaN	NaN	NaN	NaN
0.192	40.588	14.604	469.194	-0.43633	0.53477	0.079785	36.5825	59.524	1297.8643	-1.8433	0.76416	0.52148	19.266	-31.935	-0.914000000000001	-0.11279	-0.078125	-0.010742	NaN	NaN	NaN	NaN	NaN	NaN
0.194	39.852	16.91491	496.1927	-0.47461	0.56289	0.083691	31.855497	38.547	1269.3444	-1.7456	0.74268	0.48828	23.767	2.608	1.957	-0.14746	-0.057129	0.0043945	NaN	NaN	NaN	NaN	NaN	NaN
0.196	35.946	16.3827	529.56193	-0.51367	0.59805	0.094629	6.9815	34.734	1258.9472	-1.7061	0.72852	0.47607	8.959	-14.3114	12.15472	-0.17017	-0.04248	0.012696	NaN	NaN	NaN	NaN	NaN	NaN
0.198	22.415	17.7162	582.944	-0.54804	0.62929	0.10713	15.68	37.433	1249.0633	-1.6147	0.70361	0.45508	43.247	-5.456	29.727	-0.1875	-0.02832	0.014648	NaN	NaN	NaN	NaN	NaN	NaN
0.2	19.195	0.204699999999999	594.458	-0.57764	0.66064	0.11523	12.501	51.287	1204.93	-1.5561	0.68408	0.43188	40.855	-23.93062	10.8016	-0.20605	-0.013672	0.019043	NaN	NaN	NaN	NaN	NaN	NaN
0.202	23.951	-5.658	595.132	-0.60986	0.68213	0.1166	-14.956	77.2073	1189.01	-1.4966	0.65869	0.41602	12.93	14.005	-21.227	-0.21338	-0.0083008	0.017578	NaN	NaN	NaN	NaN	NaN	NaN
0.204	36.19	-11.117	596.81864	-0.63213	0.69932	0.11621	6.157	113.637	1183.4812	-1.4204	0.62939	0.40479	11.379	6.821	-9.523	-0.22852	-0.0078125	0.019043	NaN	NaN	NaN	NaN	NaN	NaN
0.206	38.213	-30.3209	600.3483	-0.65713	0.71573	0.11152	3.917	127.963	1141.211	-1.3818	0.60742	0.38672	6.769	36.71134	6.3789	-0.23779	-0.010742	0.014405	NaN	NaN	NaN	NaN	NaN	NaN
0.208	38.764	-37.287	586.65	-0.68428	0.73955	0.1041	-25.23	131.821	1138.8306	-1.3081	0.5708	0.37695	-9.444	17.2149	14.09	-0.25488	-0.012695	0.0078125	NaN	NaN	NaN	NaN	NaN	NaN
0.21	34.719	-21.7329	547.824	-0.70703	0.76172	0.10449	-11.196	139.665	1117.144	-1.2556	0.55151	0.37036	14.279	31.201	36.432	-0.27686	-0.013672	0.00048828	NaN	NaN	NaN	NaN	NaN	NaN
0.212	53.883	-2.633	530.484	-0.73076	0.78369	0.1084	-13.587	128.564	1069.0143	-1.2012	0.5293	0.35693	16.578	-0.742000000000001	22.341	-0.29053	-0.014648	0.00048828	NaN	NaN	NaN	NaN	NaN	NaN
0.214	32.351	2.9439	535.3189	-0.76768	0.80732	0.11611	-42.72234	137.754	1039.101	-1.1206	0.51025	0.34863	-4.716	1.36499999999999	47.5036	-0.31738	-0.0068359	-0.011719	NaN	NaN	NaN	NaN	NaN	NaN
0.216	28.146	-3.6028	537.6784	-0.78213	0.83662	0.13526	-53.4934	127.547	999.1797	-1.084	0.50293	0.34229	-8.27200000000001	-24.061	74.0364	-0.34253	-0.0095213	-0.0097654	NaN	NaN	NaN	NaN	NaN	NaN
0.218	16.909	15.3372	539.82421	-0.78164	0.85058	0.14365	-59.2748	107.5921	952.033	-1.0107	0.47266	0.32324	-9.775	-15.1	95.6362	-0.37451	-0.0063477	-0.012207	NaN	NaN	NaN	NaN	NaN	NaN
0.22	28.237	14.0916	554.866	-0.76416	0.85791	0.1582	-51.829	104.5565	923.924	-0.96362	0.45142	0.31421	33.104	-20.101	132.3093	-0.42773	-0.00048828	-0.0063477	NaN	NaN	NaN	NaN	NaN	NaN
0.222	7.55	17.8972929	591.886	-0.7377	0.85293	0.16172	-17.287	98.2732	911.6009	-0.91797	0.42578	0.30957	46.21	-8.513	208.338	-0.45947	0.0019531	-0.0092773	NaN	NaN	NaN	NaN	NaN	NaN
0.224	19.1219	4.061	614.3997	-0.68984	0.83867	0.15078	-6.43	89.478	867.03	-0.84912	0.38721	0.30322	63.466	-27.24	254.309	-0.5376	0.01416	-0.0048828	NaN	NaN	NaN	NaN	NaN	NaN
0.226	18.304	-4.436	625.8763	-0.64532	0.82305	0.13438	-11.669	102.9145	880.514	-0.81836	0.36816	0.30518	27.002	-19.3498	323.19	-0.60669	0.030274	-0.0036621	NaN	NaN	NaN	NaN	NaN	NaN
0.228	25.245	-20.802	620.113	-0.59541	0.80947	0.11445	37.207	118.358	874.132	-0.75781	0.32617	0.29834	22.655	-8.6885	384.072	-0.6875	0.046387	0	NaN	NaN	NaN	NaN	NaN	NaN
0.23	28.546	-51.377	635.8874	-0.55664	0.78809	0.091309	42.22	122.372	801.1327	-0.70313	0.29663	0.2898	23.729	29.1362	508.9724	-0.81006	0.084473	0.019043	NaN	NaN	NaN	NaN	NaN	NaN
0.232	51.6074	-67.228	636.864	-0.52236	0.77959	0.069043	43.857	130.323	785.163	-0.64453	0.2627	0.27734	63.179	31.05448	604.3441	-0.88477	0.10205	0.031738	NaN	NaN	NaN	NaN	NaN	NaN
0.234	42.308	-78.623	648.961	-0.49756	0.76875	0.049707	79.3873	139.728	759.5531	-0.56348	0.22266	0.26709	64.429	22.473	743.664	-1.0576	0.15381	0.074707	NaN	NaN	NaN	NaN	NaN	NaN
0.236	36.1186	-99.0851	653.1407	-0.48662	0.76211	0.03877	70.1536	145.2446	696.3631	-0.52637	0.20313	0.25244	93.356	-1.193	811.303	-1.209	0.19922	0.125	NaN	NaN	NaN	NaN	NaN	NaN
0.238	35.1896	-114.452	676.98096	-0.48438	0.76992	0.040234	60.0011	170.24	686.5276	-0.44873	0.15771	0.22852	60.064	-47.5666	933.2202	-1.3696	0.24805	0.18652	NaN	NaN	NaN	NaN	NaN	NaN
0.24	-1.703	-107.382	698.7748	-0.48096	0.78223	0.052246	77.4875	158.0944	648.8419	-0.39209	0.12255	0.21729	72.881	-93.237	1019.808	-1.5933	0.31689	0.30518	NaN	NaN	NaN	NaN	NaN	NaN
0.242	6.845	-88.3102	717.2213	-0.48916	0.7917	0.066015	62.817	142.650141	591.0384	-0.33691	0.092773	0.20508	53.835	-135.275	1107.67	-1.7017	0.3501	0.35693	NaN	NaN	NaN	NaN	NaN	NaN
0.244	-21.54	-72.8456	743.7312	-0.49268	0.80088	0.079492	67.026	131.3868	580.1069	-0.27002	0.05127	0.18408	32.925	-154.638	1123.5987	-1.9409	0.40088	0.43945	NaN	NaN	NaN	NaN	NaN	NaN
0.246	-11.89	-48.365	751.5985	-0.49776	0.80947	0.093945	88.75974	125.8231	540.0115	-0.23975	0.032227	0.17725	14.8227	-189.264	1112.618	-2.0996	0.4292	0.48389	NaN	NaN	NaN	NaN	NaN	NaN
0.248	-1.859	-31.45	787.686	-0.49795	0.81631	0.10107	70.2658	134.392373	490.791	-0.17969	-0.0024414	0.15576	46.335	-180.359	1083.028	-2.2324	0.44873	0.50439	NaN	NaN	NaN	NaN	NaN	NaN
0.25	7.384	-25.561	803.61	-0.50537	0.82275	0.097656	54.24	150.04	473.9267	-0.12744	-0.032715	0.13135	-11.069	-213.59	1096.107	-2.353	0.4624	0.49707	NaN	NaN	NaN	NaN	NaN	NaN
0.252	15.821	-48.249	843.631	-0.52461	0.82519	0.086914	73.0201	145.2131	460.0815	-0.099121	-0.04834	0.11719	-36.741	-213.41	1067.0685	-2.3784	0.47803	0.48633	NaN	NaN	NaN	NaN	NaN	NaN
0.254	13.728	-62.932	848.396	-0.55157	0.83281	0.08291	45.022	144.24	412.496	-0.054688	-0.079102	0.094238	-54.4407	-238.066	1073.597	-2.3589	0.51221	0.44189	NaN	NaN	NaN	NaN	NaN	NaN
0.256	22.4914	-60.455	847.9739	-0.59453	0.84805	0.082129	14.08	146.646	420.2924	-0.018555	-0.09961	0.076172	-72.453	-189.678	1046.989	-2.2896	0.53979	0.3938	NaN	NaN	NaN	NaN	NaN	NaN
0.258	5.165	-67.59	862.879	-0.63926	0.87422	0.09414	13.036	140.638	404.8444	0.013672	-0.11914	0.061035	-124.841	-191.403	1053.738	-2.2031	0.57227	0.34277	NaN	NaN	NaN	NaN	NaN	NaN
0.26	-9.677	-75.17671	865.3184	-0.68555	0.9043	0.11426	10.404	138.121	367.6174	0.042969	-0.14404	0.044922	-95.0745	-115.781	1038.875	-2.0249	0.57568	0.26758	NaN	NaN	NaN	NaN	NaN	NaN
0.262	11.587	-90.0495	870.8718	-0.73203	0.93281	0.13818	-4.623	130.378	383.137	0.055664	-0.15527	0.032715	-78.3498	-111.632	1032.166	-1.9277	0.54688	0.22217	NaN	NaN	NaN	NaN	NaN	NaN
0.264	0.0339999999999989	-91.5197	897.739	-0.7711	0.9709	0.16299	-25.386	97.41444	358.676	0.081055	-0.17285	0.019043	-44.952	-43.71	1029.389	-1.7319	0.45361	0.16016	NaN	NaN	NaN	NaN	NaN	NaN
0.266	5.317	-103.9898	918.217	-0.7957	1.0072	0.17744	-33.965	88.036	296.244	0.097902	-0.18408	0.010742	14.244	-100.51	1087.696	-1.6023	0.42798	0.12695	NaN	NaN	NaN	NaN	NaN	NaN
0.268	-8.099	-108.308	972.535	-0.79981	1.0387	0.18164	-15.236	89.811	296.3183	0.11328	-0.19629	-0.0014648	44.088	-72.99	1136.022	-1.5308	0.46338	0.091309	NaN	NaN	NaN	NaN	NaN	NaN
0.27	-0.962000000000002	-108.558	989.736	-0.78467	1.0708	0.18066	-11.062	95.3268	257.5787	0.13037	-0.21094	-0.0097656	46.686	-132.204	1193.071	-1.5117	0.58398	0.10693	NaN	NaN	NaN	NaN	NaN	NaN
0.272	16.527	-91.4719	988.072	-0.75283	1.0842	0.17402	-25.821	92.9692	212.869	0.13574	-0.22266	-0.017578	41.9005	-116.001	1218.376	-1.5378	0.67895	0.14575	NaN	NaN	NaN	NaN	NaN	NaN
0.274	28.1549	-87.7792	989.0107	-0.71992	1.0883	0.15196	-11.186	100.096	239.128	0.14404	-0.2334	-0.028809	-18.961	-198.5181	1252.795	-1.5796	0.76123	0.20117	NaN	NaN	NaN	NaN	NaN	NaN
0.276	39.9823	-77.928	986.3795	-0.67774	1.0898	0.12852	-0.527999999999999	95.64	233.992	0.1521	-0.24048	-0.041504	-66.049	-177.9079	1273.67	-1.5938	0.80078	0.24854	NaN	NaN	NaN	NaN	NaN	NaN
0.278	45.30837	-63.023	976.3616	-0.63223	1.0861	0.097556	-2.576	93.251	199.4421	0.15527	-0.25098	-0.050781	-74.935	-269.073	1326.7398	-1.5952	0.80127	0.25488	NaN	NaN	NaN	NaN	NaN	NaN
0.28	36.956	-59.274	986.9007	-0.58301	1.0771	0.062988	22.017	76.148	229.563	0.15771	-0.25488	-0.066406	-73.2089	-237.466	1358.6306	-1.5835	0.79932	0.24512	NaN	NaN	NaN	NaN	NaN	NaN
0.282	10.499	-71.03	1003.5989	-0.54433	1.0701	0.025684	31.736	86.9246	201.7538	0.16064	-0.26318	-0.076172	-23.861	-280.044	1404.181	-1.5837	0.81567	0.23315	NaN	NaN	NaN	NaN	NaN	NaN
0.284	19.274	-93.15507	1032.1871	-0.51748	1.0563	-0.0057616	22.293	100.431	165.832	0.1626	-0.27246	-0.086426	44.652	-210.878	1418.363	-1.5854	0.84229	0.22461	NaN	NaN	NaN	NaN	NaN	NaN
0.286	14.318	-95.887	1056.867	-0.51904	1.0517	-0.038183	47.534	101.878	169.4421	0.16137	-0.27686	-0.10962	103.4811	-228.004	1441.163	-1.627	0.87402	0.23096	NaN	NaN	NaN	NaN	NaN	NaN
0.288	12.764	-82.612	1056.741	-0.54903	1.0471	-0.064453	61.06415	86.78123	131.577	0.16064	-0.27881	-0.12451	95.0805	-130.664	1436.339	-1.6738	0.88281	0.24072	NaN	NaN	NaN	NaN	NaN	NaN
0.29	2.249	-68.557	1071.2127	-0.60498	1.0571	-0.072754	54.8652	65.6085	112.2286	0.15625	-0.28467	-0.1377	154.469	-118.183	1445.896	-1.8218	0.91064	0.29492	NaN	NaN	NaN	NaN	NaN	NaN
0.292	1.502	-48.8694	1072.3989	-0.68632	1.0826	-0.068946	67.2419	34.7647	129.047	0.15137	-0.28418	-0.14453	189.748	-35.565	1444.076	-1.9663	0.92725	0.3855	NaN	NaN	NaN	NaN	NaN	NaN
0.294	3.083	-38.5203	1088.6683	-0.78203	1.1133	-0.053515	63.4933	14.287	93.4436	0.1416	-0.28906	-0.15723	206.755	-38.887	1452.782	-2.1499	0.94287	0.49316	NaN	NaN	NaN	NaN	NaN	NaN
0.296	3.062	-51.1529	1097.3018	-0.88047	1.157	-0.019531	50.898	21.8264	76.1688	0.13989	-0.28662	-0.1582	176.478	1.806	1467.135681	-2.4473	0.96289	0.65088	NaN	NaN	NaN	NaN	NaN	NaN
0.298	-4.64	-69.83259	1146.423	-0.97579	1.2076	0.017578	80.5909	32.1346	105.357	0.125	-0.28906	-0.15771	127.981	-32.976	1488.9618	-2.5874	0.97705	0.72559	NaN	NaN	NaN	NaN	NaN	NaN
0.3	-5.176	-68.8141	1160.648	-1.0605	1.2539	0.055176	64.7732	28.8422	63.478	0.11475	-0.28125	-0.1499	60.278	-26.131	1506.4276	-2.8594	1.0117	0.83105	NaN	NaN	NaN	NaN	NaN	NaN
0.302	-5.203	-52.18	1180.133	-1.1271	1.2955	0.09873	35.323	34.58018	39.295	0.10352	-0.27734	-0.1499	18.843	-68.386	1482.035	-2.9997	1.0359	0.86352	NaN	NaN	NaN	NaN	NaN	NaN
0.304	-5.694	-53.387	1164.3699	-1.1731	1.3359	0.14062	53.7165	33.3246	61.5505	0.092773	-0.27246	-0.14795	23.581	-74.255	1474.164	-3.0605	1.0449	0.85791	NaN	NaN	NaN	NaN	NaN	NaN
0.306	-15.2422	-45.7913	1165.6085	-1.2094	1.3621	0.17187	46.327	45.467	42.38002	0.085205	-0.26636	-0.14722	77.563	-102.785	1493.07051	-3.0581	1.0396	0.81445	NaN	NaN	NaN	NaN	NaN	NaN
0.308	-16.846	-27.6756	1160.0668	-1.2286	1.3829	0.1957	9.366	55.14	41.2141	0.078613	-0.26025	-0.14258	118.1375	-116.078	1521.744	-3.1167	1.0288	0.80664	NaN	NaN	NaN	NaN	NaN	NaN
0.31	-6.52	-4.727	1159.11	-1.2402	1.4004	0.2168	4.253	47.715	55.013	0.062988	-0.2666	-0.14746	134.2639	-128.395	1518.592	-3.1362	0.9751	0.73047	NaN	NaN	NaN	NaN	NaN	NaN
0.312	-21.825	-10.6766	1181.9148	-1.2439	1.4041	0.23096	0.690000000000005	28.05	14.1677	0.056641	-0.25684	-0.14014	92.402	-149.298	1550.908	-3.0886	0.92505	0.71119	NaN	NaN	NaN	NaN	NaN	NaN
0.314	-15.72	-1.7822	1202.9539	-1.2487	1.4052	0.24414	-27.688	32.451	-13.9597	0.038574	-0.25488	-0.13428	72.614	-158.73447	1528.808	-3.0332	0.89453	0.70264	NaN	NaN	NaN	NaN	NaN	NaN
0.316	-1.003	-2.84135	1213.1013	-1.2565	1.413	0.25625	-16.395	25.123	22.45995	0.026611	-0.25073	-0.12866	55.654	-162.297	1552.95	-3.0015	0.89111	0.66602	NaN	NaN	NaN	NaN	NaN	NaN
0.318	-14.65	11.06532	1226.88	-1.2694	1.4096	0.27881	-31.489	10.1515	-9.728	0.017578	-0.24121	-0.12158	50.26	-87.733	1519.414	-2.98	0.87939	0.63867	NaN	NaN	NaN	NaN	NaN	NaN
0.32	8.2846	2.3732	1231.0549	-1.29	1.4121	0.30127	-36.404	24.2835	-17.2736	0.0029297	-0.2373	-0.11035	34.566	-50.547	1509.843	-2.9058	0.85303	0.5957	NaN	NaN	NaN	NaN	NaN	NaN
0.322	5.5	6.0889	1223.6405	-1.3116	1.422	0.32109	-13.013	20.7454	23.538	-0.0063477	-0.23682	-0.10547	44.655	22.08	1480.378	-2.8257	0.83936	0.56543	NaN	NaN	NaN	NaN	NaN	NaN
0.324	26.5599	13.898	1202.7627	-1.3417	1.4324	0.34463	-14.996	13.301	-13.7951	-0.01416	-0.23291	-0.093262	-18.135	31.149	1472.284	-2.7612	0.82959	0.53613	NaN	NaN	NaN	NaN	NaN	NaN
0.326	16.286	9.889	1198.138	-1.3809	1.4418	0.36337	-24.832	14.7361	3.2371	-0.017334	-0.22901	-0.085205	-25.229	84.435	1411.08	-2.7227	0.80664	0.51416	NaN	NaN	NaN	NaN	NaN	NaN
0.328	11.81	6.6621	1220.09347	-1.4144	1.461	0.38583	-1.135	3.338	32.695	-0.023926	-0.22705	-0.078613	4.883	69.668	1419.983	-2.7109	0.79297	0.51514	NaN	NaN	NaN	NaN	NaN	NaN
0.33	35.3313	9.4771	1220.1446	-1.4468	1.479	0.40723	0.505000000000003	1.144	4.8511	-0.032715	-0.22217	-0.067383	28.018	100.128	1393.161	-2.7031	0.76953	0.50635	NaN	NaN	NaN	NaN	NaN	NaN
0.332	7.921	8.7759	1216.7085	-1.4774	1.4943	0.42393	3.604	9.45531	19.3836	-0.03418	-0.21875	-0.0625	60.079	63.3608	1424.189	-2.6794	0.75805	0.48657	NaN	NaN	NaN	NaN	NaN	NaN
0.334	15.9323	13.3917	1213.1424	-1.5078	1.5064	0.44181	18.012	13.3195	42.469	-0.042969	-0.21484	-0.04834	113.364	112.283	1410.854	-2.6367	0.74609	0.45117	NaN	NaN	NaN	NaN	NaN	NaN
0.336	-3.161	17.951	1219.0497	-1.5206	1.5184	0.45508	16.542	20.5943	15.319	-0.051514	-0.2063	-0.049316	122.9022	65.97	1404.9438	-2.5386	0.71924	0.39844	NaN	NaN	NaN	NaN	NaN	NaN
0.338	4.153	30.355	1207.775	-1.5361	1.5287	0.4667	26.422	22.99169	7.1623	-0.062012	-0.20166	-0.04248	130.8113	98.1287	1396.214	-2.4741	0.69678	0.36963	NaN	NaN	NaN	NaN	NaN	NaN
0.34	2.644	53.152	1188.389	-1.5483	1.5454	0.47461	59.7051	24.197	22.7099	-0.077637	-0.18945	-0.037598	128.6557	42.5405	1437.936	-2.3394	0.66162	0.33105	NaN	NaN	NaN	NaN	NaN	NaN
0.342	-0.302	53.192	1166.9576	-1.5419	1.555	0.48399	53.0084	27.18	-11.3431	-0.089844	-0.18164	-0.033203	128.1305	94.404	1438.101	-2.2544	0.63574	0.30542	NaN	NaN	NaN	NaN	NaN	NaN
0.344	-6.271	47.499	1185.6886	-1.5323	1.5559	0.48634	51.667	22.1327	5.88078	-0.11328	-0.16553	-0.019531	138.499	61.901	1461.495	-2.1797	0.61719	0.29736	NaN	NaN	NaN	NaN	NaN	NaN
0.346	-2.728	58.652	1178.814346	-1.5179	1.5595	0.4836	82.379	16.8819	29.6401	-0.13452	-0.15649	-0.011475	129.3513	121.628	1445.046	-2.0894	0.61572	0.29102	NaN	NaN	NaN	NaN	NaN	NaN
0.348	7.6632	62.447	1169.623	-1.4975	1.5595	0.47804	65.7741	10.8078	-3.473107	-0.15527	-0.14795	0.0019531	101.5919	82.225	1416.075	-2.0562	0.61768	0.28711	NaN	NaN	NaN	NaN	NaN	NaN
0.35	-24.401	59.077	1174.075	-1.4775	1.5586	0.47705	65.0426	7.1467	16.30715	-0.17627	-0.13379	0.019531	85.338	131.205	1378.463	-1.9688	0.61426	0.28223	NaN	NaN	NaN	NaN	NaN	NaN
0.352	-13.5239	57.2143	1171.6007	-1.45	1.5589	0.46556	73.2889	17.5878	37.9462	-0.19043	-0.12012	0.029297	91.922	97.661	1341.652	-1.9011	0.61743	0.27636	NaN	NaN	NaN	NaN	NaN	NaN
0.354	-15.899	60.862	1161.826	-1.422	1.5534	0.45515	48.686	22.5557	-3.265	-0.20361	-0.10938	0.04248	72.492	181.0883	1303.948	-1.8315	0.61572	0.26758	NaN	NaN	NaN	NaN	NaN	NaN
0.356	-10.024	67.778	1137.194	-1.3925	1.5485	0.44416	26.104	32.984	1.303	-0.21216	-0.099366	0.05127	76.4145	157.69385	1272.3208	-1.7339	0.60254	0.24414	NaN	NaN	NaN	NaN	NaN	NaN
0.358	-29.392	61.2261	1136.306	-1.3652	1.5416	0.43442	40.7642	27.9952	36.3661	-0.21387	-0.08252	0.054199	93.7878	222.534	1229.6802	-1.6909	0.59717	0.23779	NaN	NaN	NaN	NaN	NaN	NaN
0.36	-20.553	69.8687	1123.721	-1.3359	1.5332	0.42529	3.372	15.8866	1.357	-0.2041	-0.075195	0.067871	88.761	177.96	1212.428	-1.5835	0.5708	0.22412	NaN	NaN	NaN	NaN	NaN	NaN
0.362	-19.5972	74.7583	1120.6615	-1.3054	1.5218	0.40931	6.387	1.8729	20.1071	-0.19678	-0.068848	0.063477	74.8931	212.748	1176.135	-1.5144	0.55493	0.20922	NaN	NaN	NaN	NaN	NaN	NaN
0.364	-21.807	82.888	1109.3691	-1.2763	1.5111	0.39718	16.609	-16.0596	36.946	-0.1748	-0.063965	0.062012	46.009	163.45	1146.798	-1.4487	0.54248	0.19531	NaN	NaN	NaN	NaN	NaN	NaN
0.366	1.386	69.32251	1104.0709	-1.2499	1.4968	0.38555	-21.979	-16.8492	-13.1268	-0.15527	-0.060791	0.053222	14.694	207.979	1147.821	-1.3647	0.52393	0.17383	NaN	NaN	NaN	NaN	NaN	NaN
0.368	7.496	70.1261	1086.433	-1.214	1.478	0.37489	-10.771	2.9964	21.073	-0.13379	-0.061523	0.042969	17.526	160.294	1100.157	-1.3203	0.51367	0.16064	NaN	NaN	NaN	NaN	NaN	NaN
0.37	24.318	78.406	1058.087	-1.1772	1.4556	0.3623	0.221999999999998	11.0849	32.15	-0.10156	-0.057617	0.030273	-9.831	178.108	1078.175	-1.2437	0.49658	0.14453	NaN	NaN	NaN	NaN	NaN	NaN
0.372	29.879	96.162	1035.394	-1.1422	1.4355	0.34978	-29.124	17.5685	-1.856	-0.084473	-0.058594	0.021484	-43.9993	128.648	1027.4326	-1.1853	0.48389	0.14063	NaN	NaN	NaN	NaN	NaN	NaN
0.374	33.73	93.243	1028.472	-1.0953	1.4044	0.33393	-32.4256	17.8715	13.274	-0.054688	-0.057617	0.0058594	-94.578	134.061	1006.229	-1.1328	0.47266	0.12939	NaN	NaN	NaN	NaN	NaN	NaN
0.376	42.8415	88.0372	1000.986	-1.0519	1.3723	0.31651	-18.216	3.13567	27.4477	-0.036132	-0.061523	-0.0021973	-75.7253	89.429	965.128	-1.0601	0.45557	0.12891	NaN	NaN	NaN	NaN	NaN	NaN
0.378	29.137	93.4797	971.1885	-1.0081	1.3327	0.30087	-30.699	15.1382	-12.202	-0.023926	-0.0625	-0.010742	-52.033	116.6768	915.932	-1.0254	0.44678	0.12988	NaN	NaN	NaN	NaN	NaN	NaN
0.38	35.903	96.7319	944.759	-0.96826	1.2935	0.2832	-14.791	20.70829	23.6609	-0.0078125	-0.058594	-0.016113	-27.345	108.2679	849.52	-0.95654	0.42822	0.12207	NaN	NaN	NaN	NaN	NaN	NaN
0.382	35.243	102.25	939.496	-0.92906	1.2585	0.26524	3.13200000000001	7.1063	32.661	0.0041504	-0.058593	-0.021241	22.036	158.475	843.9646	-0.90406	0.40649	0.12598	NaN	NaN	NaN	NaN	NaN	NaN
0.384	32.809	98.8999	939.874	-0.90024	1.2243	0.24808	-11.178	2.4773	-16.5859	0.0073242	-0.059082	-0.026367	30.949	154.612	791.5284	-0.8457	0.39258	0.12158	NaN	NaN	NaN	NaN	NaN	NaN
0.386	39.9075	94.1508	903.0387	-0.86972	1.1844	0.23496	17.155	1.2464	20.2855	0.022461	-0.058105	-0.030762	38.3419	201.063	766.8398	-0.76904	0.36865	0.11719	NaN	NaN	NaN	NaN	NaN	NaN
0.388	41.399	78.9788	878.512	-0.84903	1.1463	0.22217	45.8842	2.7385	17.75	0.02832	-0.05957	-0.036621	33.3092	195.141	723.732	-0.73047	0.35254	0.10938	NaN	NaN	NaN	NaN	NaN	NaN
0.39	50.5722	69.8446	878.837	-0.82764	1.1138	0.20996	28.021	2.6972	-3.56	0.043945	-0.054199	-0.049316	15.669	221.567	691.079	-0.64648	0.31641	0.11084	NaN	NaN	NaN	NaN	NaN	NaN
0.392	54.601	84.133	857.624	-0.81609	1.0793	0.20493	41.816	3.1405	27.7789	0.054199	-0.049805	-0.062988	-7.206	225.669	631.421	-0.5874	0.29126	0.10132	NaN	NaN	NaN	NaN	NaN	NaN
0.394	56.1528	88.2015	823.3311	-0.79883	1.0488	0.20025	56.7418	10.9097	6.8307	0.05957	-0.043945	-0.071777	7.916	247.9945	617.5782	-0.53271	0.26221	0.094727	NaN	NaN	NaN	NaN	NaN	NaN
0.396	29.84	92.5641	782.113	-0.78055	1.0188	0.1952	49.757	3.92053	-24.506	0.06543	-0.033203	-0.083496	22.953	240.45	559.765	-0.45654	0.22607	0.085449	NaN	NaN	NaN	NaN	NaN	NaN
0.398	29.189	91.276	759.729	-0.75666	0.98684	0.19243	60.3482	-7.513	24.9387	0.05957	-0.027344	-0.09375	7.063	214.8622	528.62983	-0.41553	0.21143	0.083008	NaN	NaN	NaN	NaN	NaN	NaN
0.4	15.411	101.8783	743.071	-0.73828	0.95313	0.18799	71.4054	-15.9757	27.302	0.043945	-0.01416	-0.10547	12.068	191.842	487.793	-0.3418	0.17773	0.074219	NaN	NaN	NaN	NaN	NaN	NaN
0.402	17.398	109.173	733.4851	-0.7141	0.9209	0.18123	45.4602	2.6616	2.481	0.020752	0.0029297	-0.10546	46.8931	180.0277	463.98215	-0.27588	0.14307	0.065918	NaN	NaN	NaN	NaN	NaN	NaN
0.404	7.963	98.008	707.683	-0.6919	0.8858	0.17644	49.6206	0.0975000000000001	43.6463	-0.01123	0.025391	-0.10059	56.6766	177.939	424.6893	-0.24023	0.125	0.058594	NaN	NaN	NaN	NaN	NaN	NaN
0.406	7.93	99.8255	696.067	-0.67123	0.85342	0.16941	62.6216	0.2384	46.3746	-0.080078	0.053711	-0.1001	73.934	169.493	435.798	-0.16992	0.088867	0.047363	NaN	NaN	NaN	NaN	NaN	NaN
0.408	18.934	106.199	669.6411	-0.65133	0.81245	0.16532	27.215	2.4824	23.074	-0.12012	0.076172	-0.10498	81.0458	179.864	418.226	-0.12817	0.067872	0.031494	NaN	NaN	NaN	NaN	NaN	NaN
0.41	20.969	113.608	646.7676	-0.62891	0.7793	0.15723	27.183	-3.146	70.469	-0.19873	0.1123	-0.095703	59.1789	148.918	395.939	-0.083496	0.042969	0.019531	NaN	NaN	NaN	NaN	NaN	NaN
0.412	15.239	118.723	626.7241	-0.60744	0.74495	0.15596	29.164	-22.917	73.363	-0.26953	0.13305	-0.078125	20.107	159.605	367.2915	-0.026855	0.0087891	-0.0048828	NaN	NaN	NaN	NaN	NaN	NaN
0.414	28.851	111.7096	595.958	-0.59318	0.70981	0.14796	17.315	-42.255	96.938	-0.34668	0.15625	-0.062012	-6.279	129.9861	337.833	-0.0029297	-0.0039063	-0.013184	NaN	NaN	NaN	NaN	NaN	NaN
0.416	40.091	105.1304	559.614	-0.57015	0.6758	0.14521	18.959	-39.047	207.472	-0.4668	0.19189	-0.036621	-49.2148	167.6099	308.2758	0.035645	-0.033691	-0.027832	NaN	NaN	NaN	NaN	NaN	NaN
0.418	18.682	98.9563	560.9285	-0.5586	0.64415	0.14326	18.335	-31.887	250.4165	-0.53857	0.21338	-0.02002	-55.328	149.549	299.57	0.060059	-0.056397	-0.037842	NaN	NaN	NaN	NaN	NaN	NaN
0.42	28.261	99.016	544.7103	-0.54297	0.61719	0.14209	20.903	-8.916	279.328	-0.70215	0.26172	0.0073242	-37.9874	172.364	263.414	0.074707	-0.072754	-0.04541	NaN	NaN	NaN	NaN	NaN	NaN
0.422	38.822	101.382	531.56	-0.53085	0.58925	0.14658	29.674	10.222	378.558	-0.83667	0.3059	0.038574	-37.0215	127.872	213.229	0.085938	-0.096191	-0.05127	NaN	NaN	NaN	NaN	NaN	NaN
0.424	52.766	98.901	502.466	-0.51865	0.56454	0.14668	34.383	4.428	465.106	-0.98291	0.36182	0.088379	-48.9602	130.8617	183.2162	0.091309	-0.10596	-0.053711	NaN	NaN	NaN	NaN	NaN	NaN
0.426	35.179	89.2528	488.1144	-0.50498	0.53681	0.1459	44.985	-12.541	523.585	-1.1909	0.43896	0.17969	-26.582	82.7033	147.48	0.098633	-0.12305	-0.05957	NaN	NaN	NaN	NaN	NaN	NaN
0.428	35.365	104.114	469.8145	-0.49023	0.50742	0.14599	62.256	-47.766	664.864	-1.2964	0.48486	0.23438	-37.995	90.017	134.093	0.10034	-0.13135	-0.053223	NaN	NaN	NaN	NaN	NaN	NaN
0.43	63.14412	112.3784	446.501	-0.47363	0.48047	0.14355	40.325	-65.436	703.6424	-1.5054	0.56592	0.35498	-9.121	69.9044	140.988	0.095703	-0.13818	-0.047363	NaN	NaN	NaN	NaN	NaN	NaN
0.432	65.5104	125.084	415.966	-0.45782	0.45625	0.13809	23.644	-73.32	765.693	-1.6551	0.61987	0.43994	11.775	103.735	110.9407	0.074707	-0.14014	-0.024414	NaN	NaN	NaN	NaN	NaN	NaN
0.434	49.347	115.1577	405.3789	-0.43975	0.42852	0.13369	-24.686	-63.64	848.567	-1.7852	0.6582	0.51221	14.236	63.2373	84.45	0.061523	-0.13525	-0.01416	NaN	NaN	NaN	NaN	NaN	NaN
0.436	49.463	106.9908	392.328	-0.42061	0.4043	0.12471	-68.223	-61.35296	820.558	-1.9297	0.67969	0.56299	-7.931	80.337	69.51	0.02832	-0.12549	0.020508	NaN	NaN	NaN	NaN	NaN	NaN
0.438	72.8052	109.467	373.203	-0.40693	0.38095	0.12187	-39.315	-31.7	826.641	-1.9785	0.67969	0.5708	-12.434	31.476	57.594	0.0039065	-0.11963	0.044921	NaN	NaN	NaN	NaN	NaN	NaN
0.44	63.7867	112.226	348.71897	-0.39404	0.35693	0.12012	0.245000000000005	-27.5211	904.325	-2.0059	0.65137	0.54736	-39.74	58.9612	52.266	-0.02002	-0.099121	0.063477	NaN	NaN	NaN	NaN	NaN	NaN
0.442	41.039	107.494	344.2731	-0.37324	0.33672	0.10439	9.252	-40.6722	893.934	-1.9868	0.61377	0.52051	6.112	21.904	56.7758	-0.043457	-0.080566	0.10059	NaN	NaN	NaN	NaN	NaN	NaN
0.444	50.92	97.834	337.9152	-0.36025	0.31836	0.10225	4.3117	-88.59	887.945	-1.9512	0.57227	0.48779	38.7647	30.4914	54.345	-0.051758	-0.074707	0.11426	NaN	NaN	NaN	NaN	NaN	NaN
0.446	36.509	94.1199	306.976	-0.3419	0.30273	0.094824	-7.238	-117.816	902.764	-1.9058	0.51855	0.43506	58.6761	-30.9307	28.723	-0.062988	-0.062012	0.13086	NaN	NaN	NaN	NaN	NaN	NaN
0.448	37.3521	110.276	284.329	-0.33291	0.28652	0.090332	-41.727312	-122.393	849.648	-1.8687	0.48682	0.4082	33.763	-3.7106	20.1824	-0.064698	-0.057861	0.14746	NaN	NaN	NaN	NaN	NaN	NaN
0.45	20.143	102.1398	276.89	-0.32324	0.27393	0.081055	-52.2338	-89.088	848.2447	-1.7456	0.42432	0.34961	78.82	-25.4687	-18.066	-0.064941	-0.055664	0.16016	NaN	NaN	NaN	NaN	NaN	NaN
0.452	21.12	93.361	276.22993	-0.30928	0.26416	0.078125	-27.56154	-65.891	862.712	-1.6502	0.39673	0.29322	59.178	20.838	-8.431	-0.061523	-0.054199	0.16309	NaN	NaN	NaN	NaN	NaN	NaN
0.454	7.64100000000001	79.595	276.325	-0.29297	0.25069	0.071973	-1.203	-56.894	797.831	-1.564	0.37842	0.23486	77.3263	7.611	-17.158	-0.053711	-0.058594	0.16309	NaN	NaN	NaN	NaN	NaN	NaN
0.456	11.388	79.731	262.073	-0.27031	0.23349	0.062597	63.9422	-71.4047	827.581	-1.4624	0.35645	0.16895	90.757	38.7619	4.912	-0.04248	-0.066895	0.15918	NaN	NaN	NaN	NaN	NaN	NaN
0.458	11.595	73.986	248.489	-0.24492	0.21494	0.050488	39.897	-97.495	900.8356	-1.4258	0.35352	0.14209	77.1579	12.728	14.1207	-0.034912	-0.077881	0.15943	NaN	NaN	NaN	NaN	NaN	NaN
0.46	13.661	75.592	247.33	-0.21582	0.19238	0.038574	-31.314	-103.161	909.394	-1.3569	0.36182	0.1167	46.9471	30.8832	31.0688	-0.032715	-0.087402	0.16309	NaN	NaN	NaN	NaN	NaN	NaN
0.462	27.045	79.498	232.5020305	-0.18975	0.17685	0.025488	-50.74	-106.253	970.509	-1.3269	0.3894	0.11109	39.444	11.1677	4.4	-0.039551	-0.10352	0.18408	NaN	NaN	NaN	NaN	NaN	NaN
0.464	1.682	80.473	213.9762	-0.16377	0.15761	0.01416	-68.81	-122.035	1033.31	-1.3052	0.43213	0.1167	-1.686	41.2993	15.6283	-0.047363	-0.10938	0.18164	NaN	NaN	NaN	NaN	NaN	NaN
0.466	14.094	79.293	191.205	-0.14306	0.13965	-0.0038086	-98.197	-140.9274	1020.66676	-1.2832	0.50195	0.13135	3.555	38.1438	-1.1413	-0.059082	-0.12598	0.19238	NaN	NaN	NaN	NaN	NaN	NaN
0.468	4.231	80.412	192.4243	-0.12822	0.12334	-0.013281	-61.932	-166.951	1052.7229	-1.27	0.52979	0.13672	-4.214	62.0206	17.0871	-0.067139	-0.13331	0.20288	NaN	NaN	NaN	NaN	NaN	NaN
0.47	25.317	84.64	174.3136	-0.11523	0.10938	-0.020996	-31.3192	-168.928	1073.925	-1.25	0.58594	0.13379	30.903	39.324	12.0245	-0.074707	-0.13818	0.20605	NaN	NaN	NaN	NaN	NaN	NaN
0.472	33.531	78.292	189.168	-0.10127	0.094238	-0.032226	-46.884	-160.035	1045.156	-1.2334	0.62695	0.13281	-9.015	22.8631	27.065	-0.07959	-0.14453	0.20703	NaN	NaN	NaN	NaN	NaN	NaN
0.474	18.44	73.263	180.944	-0.090918	0.087597	-0.042968	-43.329	-155.599	1108.5329	-1.2202	0.65869	0.12793	-8.72	-11.094	20.9861	-0.083496	-0.14453	0.20313	NaN	NaN	NaN	NaN	NaN	NaN
0.476	25.833	62.8244	160.219	-0.07959	0.081348	-0.046094	-37.038	-151.18482	1143.388	-1.209	0.69727	0.12109	-31.8525	-7.59	27.1809	-0.083496	-0.14307	0.1958	NaN	NaN	NaN	NaN	NaN	NaN
0.478	33.272	67.829	150.1305	-0.065625	0.070899	-0.058008	-3.258	-159.093	1121.9626	-1.1992	0.71387	0.11963	-14.892	3.552	24.4503	-0.076904	-0.13868	0.18798	NaN	NaN	NaN	NaN	NaN	NaN
0.48	35.178	58.3372	144.0432	-0.059082	0.064453	-0.065918	68.36	-148.444	1146.0453	-1.2129	0.74414	0.11865	23.607	10.4344	45.8918	-0.063965	-0.14453	0.18115	NaN	NaN	NaN	NaN	NaN	NaN
0.482	25.374	52.59767	143.69135	-0.041992	0.059277	-0.075879	78.971	-130.788	1163.9182	-1.2456	0.76758	0.12085	10.567	5.7559	41.295	-0.051758	-0.14404	0.1709	NaN	NaN	NaN	NaN	NaN	NaN
0.484	59.14	57.3519	136.4661	-0.032129	0.055469	-0.086523	68.7748	-88.062	1158.302	-1.2974	0.79932	0.12793	-8.56	-2.694	45.868	-0.041016	-0.14844	0.16553	NaN	NaN	NaN	NaN	NaN	NaN
0.486	64.606	56.86	117.6557	-0.02041	0.042969	-0.093554	69.0578	-44.939	1194.476	-1.4189	0.86719	0.17432	-12.227	10.1312	26.4038	-0.017578	-0.16797	0.16016	NaN	NaN	NaN	NaN	NaN	NaN
0.488	44.743	48.59	116.886	-0.0068359	0.035059	-0.10391	42.207	-35.048	1210.772	-1.5039	0.90039	0.20068	-17.158	-0.899999999999999	16.867	0.0056151	-0.18115	0.15845	NaN	NaN	NaN	NaN	NaN	NaN
0.49	52.0727	29.146	115.393	0.0029297	0.025391	-0.10498	9.637	-54.983	1189.756	-1.7026	0.9751	0.28662	-33.448	23.4385	17.2693	0.026855	-0.19238	0.1499	NaN	NaN	NaN	NaN	NaN	NaN
0.492	38.061	33.3641	96.3282	0.012695	0.019043	-0.11514	40.578	-63.3392	1249.9925	-1.8689	1.0198	0.36695	15.381	3.214	39.474	0.05957	-0.21094	0.14063	NaN	NaN	NaN	NaN	NaN	NaN
0.494	59.7693	41.398	103.4669	0.020215	0.0089844	-0.12832	55.5084	-83.842	1268.036	-2.0562	1.061	0.4541	41.545	9.694	20.6374	0.077148	-0.21387	0.13428	NaN	NaN	NaN	NaN	NaN	NaN
0.496	26.239	33.0136	98.8791	0.026465	0.0042969	-0.13692	67.6974	-86.366	1236.948558	-2.293	1.1172	0.56006	65.5971	-25.8207	24.8278	0.10986	-0.22949	0.12207	NaN	NaN	NaN	NaN	NaN	NaN
0.498	32.362	30.1131	90.5998	0.033203	-0.0025391	-0.14326	90.16962	-71.9526	1270.2748	-2.4141	1.1367	0.61572	60.904893	-9.844	-16.082	0.14087	-0.23657	0.11646	NaN	NaN	NaN	NaN	NaN	NaN
0.5	19.695	32.1819	78.488	0.038574	-0.0053711	-0.1499	59.6066	-91.9157	1285.4032	-2.6484	1.1914	0.71387	51.1607	-34.8049	10.694	0.16846	-0.24561	0.10156	NaN	NaN	NaN	NaN	NaN	NaN
0.502	30.157	42.7755	74.8553	0.026465	-0.010547	-0.15166	68.942	-119.9987	1273.712	-2.793	1.2178	0.76806	48.4949	7.779	9.825	0.19727	-0.24854	0.086426	NaN	NaN	NaN	NaN	NaN	NaN
0.504	9.392	34.758	77.8274	0.019043	-0.0097657	-0.14882	93.0923	-123.683	1324.315	-2.896	1.2368	0.80469	82.9867	-7.7996	9.5017	0.21533	-0.25146	0.077148	NaN	NaN	NaN	NaN	NaN	NaN
0.506	10.271	24.425	64.3531	0.0057618	-0.0042969	-0.14531	66.8029	-126.883	1326.9133	-2.959	1.2461	0.81885	85.6279	34.177	7.5284	0.23389	-0.25	0.063477	NaN	NaN	NaN	NaN	NaN	NaN
0.508	29.89	20.4436	49.8097	-0.010156	0.0045898	-0.13466	61.381	-97.925	1325.9158	-2.9722	1.2476	0.81641	64.55029	-25.7507	8.0551	0.2417	-0.24243	0.055176	NaN	NaN	NaN	NaN	NaN	NaN
0.51	28.098	18.4761	66.51	-0.033691	0.012207	-0.12744	44.361	-47.68	1359.887	-2.9429	1.2231	0.78516	43.597	-0.2102	3.247	0.24316	-0.22998	0.043457	NaN	NaN	NaN	NaN	NaN	NaN
0.512	3.211	4.42	62.1816	-0.053516	0.022168	-0.11748	8.719	-40.6215	1351.1853	-2.8784	1.1802	0.73242	8.46	-33.371	17.318	0.23779	-0.21045	0.042969	NaN	NaN	NaN	NaN	NaN	NaN
0.514	-9.119	3.07569	56.7252	-0.075196	0.02793	-0.10332	15.452	-18.47182	1323.08	-2.8184	1.1484	0.71143	4.336	22.659	1.353	0.23193	-0.19385	0.041016	NaN	NaN	NaN	NaN	NaN	NaN
0.516	39.493	22.6275	48.201	-0.098631	0.032227	-0.092383	2.83499999999999	-18.8292	1357.30244	-2.6597	1.0708	0.64453	32.68	-5.5506	1.8023	0.21143	-0.16602	0.046387	NaN	NaN	NaN	NaN	NaN	NaN
0.518	20.507	20.581651	42.9167	-0.12324	0.040137	-0.080762	-18.275	-37.731	1363.3399	-2.5446	1.0129	0.594	37.14	37.8274	10.6241	0.1919	-0.14185	0.052002	NaN	NaN	NaN	NaN	NaN	NaN
0.52	-17.762	15.6402	35.3173	-0.14063	0.047852	-0.066895	15.073	6.7608	1355.7073	-2.439	0.96729	0.55664	19.784	-3.986	-3.9741	0.16748	-0.11377	0.05957	NaN	NaN	NaN	NaN	NaN	NaN
0.522	-2.827	15.18249	40.4199	-0.15684	0.050879	-0.06123	21.992	14.4875	1377.744	-2.353	0.91846	0.51807	30.055	42.836	-8.2231	0.12842	-0.082031	0.074707	NaN	NaN	NaN	NaN	NaN	NaN
0.524	57.319	24.799	44.801	-0.16533	0.054394	-0.055176	23.266	5.017	1362.9944	-2.3262	0.9082	0.50635	6.908	18.139	-6.5703	0.11084	-0.0625	0.081543	NaN	NaN	NaN	NaN	NaN	NaN
0.526	30.169	10.1034	47.555	-0.16181	0.055176	-0.049316	53.244	27.806	1355.895	-2.2925	0.87256	0.47852	-25.987	59.0887	4.7239	0.077148	-0.02832	0.091797	NaN	NaN	NaN	NaN	NaN	NaN
0.528	-6.18	-7.8438	24.96521	-0.15859	0.050684	-0.05	61.766	-5.923	1375.394	-2.2771	0.84888	0.47192	1.86799999999999	17.1026	32.8508	0.048828	-0.0078125	0.10205	NaN	NaN	NaN	NaN	NaN	NaN
0.53	47.8589	8.3359	10.822	-0.14307	0.047363	-0.049805	61.562	-29.6832	1381.226	-2.269	0.81885	0.46094	-4.567	53.96	23.24525	0.027832	0.012207	0.10938	NaN	NaN	NaN	NaN	NaN	NaN
0.532	70.253	18.5291	28.2383	-0.13184	0.041601	-0.055078	70.6498	2.0042	1408.75173	-2.2573	0.77979	0.44482	-9.723	5.251721	13.8907	-0.0014648	0.04248	0.11816	NaN	NaN	NaN	NaN	NaN	NaN
0.534	49.047	13.817	23.0248	-0.11396	0.036133	-0.058398	48.3744	-12.366	1449.986	-2.2534	0.7583	0.4375	-32.353	27.253	26.914	-0.026368	0.05542	0.12939	NaN	NaN	NaN	NaN	NaN	NaN
0.536	23.43	-5.5053	17.442	-0.094824	0.032618	-0.05957	46.391	-9.109	1441.76	-2.2476	0.72119	0.43945	-36.773	-4.39931	25.533	-0.044434	0.07373	0.13672	NaN	NaN	NaN	NaN	NaN	NaN
0.538	50.918	11.4445	27.81	-0.081446	0.026367	-0.056152	59.853	16.392	1407.991	-2.2332	0.69849	0.43139	-42.3927	40.038	26.826	-0.069824	0.094727	0.13721	NaN	NaN	NaN	NaN	NaN	NaN
0.54	58.1069	4.8249	31.3181	-0.072266	0.022949	-0.066406	60.197	3.468	1400.164	-2.209	0.67969	0.42529	17.726	10.568	15.1455	-0.084961	0.10693	0.15332	NaN	NaN	NaN	NaN	NaN	NaN
0.542	27.009	-0.4193	30.8414	-0.067676	0.020606	-0.059277	76.88	28.012	1362.5491	-2.1641	0.66113	0.41846	37.962	24.0713	34.449	-0.11572	0.12256	0.16455	NaN	NaN	NaN	NaN	NaN	NaN
0.544	32.8389	-11.6158	35.204	-0.067578	0.019629	-0.063379	94.4108	63.4859	1342.9272	-2.1343	0.65283	0.41504	33.311	-30.449	55.99	-0.15186	0.14136	0.16919	NaN	NaN	NaN	NaN	NaN	NaN
0.546	31.973	-13.0422	30.7183	-0.066797	0.022364	-0.062207	76.9529	39.0257	1350.3864	-2.0659	0.63525	0.41016	35.107	-26.2071	95.1442	-0.19531	0.1582	0.16943	NaN	NaN	NaN	NaN	NaN	NaN
0.548	53.9787	1.013	31.6961	-0.075781	0.024902	-0.060449	101.8829	56.503	1328.813	-2.0142	0.62305	0.40234	35.9827	-30.133868	102.907	-0.24316	0.19727	0.17725	NaN	NaN	NaN	NaN	NaN	NaN
0.55	18.973	-27.2175	44.4862	-0.080566	0.023926	-0.064453	92.9152	60.349	1324.5342	-1.9585	0.61572	0.39551	13.966	22.3706	140.728	-0.26758	0.2168	0.18799	NaN	NaN	NaN	NaN	NaN	NaN
0.552	25.831	-42.8626	52.784	-0.087305	0.030859	-0.062207	99.15294	45.7756	1337.7365	-1.8804	0.62158	0.38086	48.0108	26.37043	177.3706	-0.33936	0.25098	0.20313	NaN	NaN	NaN	NaN	NaN	NaN
0.554	44.899	-21.052	66.09	-0.099316	0.039062	-0.059766	87.164	90.993	1304.8505	-1.8413	0.61963	0.37305	52.6211	43.779	260.418	-0.39307	0.27612	0.21924	NaN	NaN	NaN	NaN	NaN	NaN
0.556	18.659	-27.21	74.4553	-0.11143	0.052734	-0.057032	66.064	114.102	1293.89147	-1.7598	0.62646	0.35303	55.0907976	42.295	265.896	-0.46045	0.29932	0.2334	NaN	NaN	NaN	NaN	NaN	NaN
0.558	11.105	-33.5583	67.7254	-0.12119	0.06582	-0.052344	29.327	107.5764	1294.863	-1.7077	0.63257	0.33643	21.5115	45.215	308.957	-0.56836	0.33496	0.25439	NaN	NaN	NaN	NaN	NaN	NaN
0.56	12.425	-22.283	89.583	-0.13477	0.080566	-0.05127	19.872	123.493	1270.19275	-1.6602	0.62891	0.31494	0.443000000000001	66.0191	388.728	-0.62549	0.35303	0.2583	NaN	NaN	NaN	NaN	NaN	NaN
0.562	32.603	-0.054000000000002	121.5375	-0.14639	0.093945	-0.046875	2.35	80.348	1258.538	-1.6113	0.62988	0.30225	-38.034	59.8285	477.092	-0.75	0.40039	0.27979	NaN	NaN	NaN	NaN	NaN	NaN
0.564	9.361	27.9169	139.2742	-0.15849	0.1086	-0.049902	-10.291	44.971	1246.0093	-1.5801	0.62988	0.29443	-0.344999999999999	49.1432	544.88	-0.8479	0.43189	0.29809	NaN	NaN	NaN	NaN	NaN	NaN
0.566	6.378	37.0454	161.784	-0.16241	0.11993	-0.055762	0.587000000000003	65.981	1211.693	-1.5449	0.62695	0.27637	3.0935	18.79	596.8425	-0.94336	0.47266	0.32324	NaN	NaN	NaN	NaN	NaN	NaN
0.568	17.752	58.5229	200.442	-0.16407	0.13466	-0.064844	6.791	69.751	1204.3604	-1.5205	0.62256	0.26709	7.7409	14.6716	654.324	-1.0889	0.51855	0.35059	NaN	NaN	NaN	NaN	NaN	NaN
0.57	31.736	85.141	248.119	-0.16699	0.14063	-0.076172	2.735	87.2349	1184.878	-1.4902	0.61914	0.25391	-22.3488	-31.7332	765.1925	-1.1646	0.53955	0.37158	NaN	NaN	NaN	NaN	NaN	NaN
0.572	26.45	83.455	317.4338	-0.16875	0.15606	-0.087695	20.624	120.629	1136.0523	-1.4487	0.60986	0.23633	-47.741	-30.614	828.835	-1.3179	0.57471	0.42188	NaN	NaN	NaN	NaN	NaN	NaN
0.574	22.456	77.244	361.386	-0.17695	0.17226	-0.10263	6.076	97.5604	1110.7518	-1.4277	0.6084	0.229	-72.094	-76.766	885.921	-1.4248	0.60205	0.46607	NaN	NaN	NaN	NaN	NaN	NaN
0.576	65.585	61.645	378.4397	-0.19414	0.19336	-0.1124	7.932	121.553	1087.497	-1.3765	0.60205	0.21484	-23.89	-75.821	918.876	-1.541	0.61719	0.51025	NaN	NaN	NaN	NaN	NaN	NaN
0.578	48.858	41.659	421.9327	-0.22549	0.2166	-0.11953	0.0640000000000001	149.807	1054.206	-1.3376	0.59839	0.2019	-10.524	-156.0473	1006.713	-1.6875	0.63965	0.57227	NaN	NaN	NaN	NaN	NaN	NaN
0.58	54.65	20.0278	470.7637	-0.26904	0.25244	-0.12354	-7.898	140.0531	1041.082	-1.2964	0.59033	0.19385	-4.504	-156.025	1029.434	-1.7437	0.63916	0.60449	NaN	NaN	NaN	NaN	NaN	NaN
0.582	80.437	1.756	519.51399	-0.32773	0.28711	-0.121	-0.538999999999994	174.667	1014.3952	-1.2417	0.57861	0.18262	14.21	-192.431	1043.969	-1.8574	0.63281	0.67432	NaN	NaN	NaN	NaN	NaN	NaN
0.584	83.1396	-11.372	551.265	-0.40108	0.329	-0.11357	-0.681999999999999	169.511	968.5449	-1.2051	0.56641	0.18164	14.839	-132.073	1000.757	-1.9392	0.64575	0.70483	NaN	NaN	NaN	NaN	NaN	NaN
0.586	57.525	-28.6605	590.436	-0.49013	0.37862	-0.094434	4.703	138.0117	944.6136	-1.1392	0.5542	0.17285	9.407	-175.348	973.386	-1.9917	0.6665	0.74219	NaN	NaN	NaN	NaN	NaN	NaN
0.588	16.0444	-36.3971	640.8026	-0.59238	0.43379	-0.07207	11.405	166.618	897.5298	-1.0884	0.53857	0.17236	23.027	-132.9923	963.78	-1.998	0.67871	0.7876	NaN	NaN	NaN	NaN	NaN	NaN
0.59	38.287	-44.01	680.549	-0.7041	0.49463	-0.039551	30.6945	148.8642	880.76752	-1.0352	0.51953	0.16357	69.672	-176.326	941.593	-1.9824	0.67969	0.77979	NaN	NaN	NaN	NaN	NaN	NaN
0.592	25.81684	-30.789	712.866	-0.82383	0.55605	-0.0048826	20.593	146.5105	855.0138	-0.96875	0.49609	0.16064	68.445	-98.863	909.984	-1.9741	0.70947	0.78711	NaN	NaN	NaN	NaN	NaN	NaN
0.594	25.79164	-19.1069	722.696	-0.94365	0.61846	0.03916	10.569	152.5748	822.8245	-0.9292	0.48486	0.15332	49.496	-123.064	917.217	-1.9734	0.76734	0.79175	NaN	NaN	NaN	NaN	NaN	NaN
0.596	21.029	-31.464	732.057	-1.0526	0.68057	0.089551	56.8987	121.0131	802.869	-0.85742	0.45605	0.15332	11.414	-33.958	958.874	-1.9746	0.83301	0.7915	NaN	NaN	NaN	NaN	NaN	NaN
0.598	17.945	-31.243	725.028	-1.1562	0.74736	0.13057	47.8718	120.4712	775.096	-0.80908	0.43286	0.14355	0.8345	-68.836	1022.245	-1.9546	0.89697	0.78125	NaN	NaN	NaN	NaN	NaN	NaN
0.6	-3.292	-33.3201	704.3337	-1.2534	0.81104	0.15527	20.278	142.911	762.9004	-0.75684	0.40918	0.13965	40.906	-39.947	1074.068	-1.9473	0.9209	0.76904	NaN	NaN	NaN	NaN	NaN	NaN
0.602	-12.582	-27.891	720.1176	-1.3056	0.86289	0.1876	21.4826	143.806	754.846	-0.68066	0.375	0.12988	86.554	-108.893	1134.3425	-1.8911	0.97119	0.7334	NaN	NaN	NaN	NaN	NaN	NaN
0.604	11.523	-40.625	729.1598	-1.3122	0.89522	0.23242	9.143	173.169	727.496	-0.64697	0.3584	0.12744	84.704	-76.586	1172.538	-1.8132	0.98755	0.67016	NaN	NaN	NaN	NaN	NaN	NaN
0.606	5.739	-51.834	714.0187	-1.3087	0.91904	0.25312	-3.635	181.577	699.918	-0.57959	0.32471	0.11035	85.171	-150.199	1226.018	-1.7148	1.0059	0.58838	NaN	NaN	NaN	NaN	NaN	NaN
0.608	20.962	-54.132	718.1619	-1.2986	0.93145	0.254	-4.238	167.1864	665.979	-0.53052	0.29956	0.10742	68.3839	-144.7297	1255.579	-1.5679	1.0103	0.47852	NaN	NaN	NaN	NaN	NaN	NaN
0.61	5.753	-67.679	740.0698	-1.2695	0.93555	0.24414	-17.846	173.29997	605.3257	-0.48096	0.27539	0.1001	51.63369	-232.827	1251.945	-1.5112	1.0142	0.42773	NaN	NaN	NaN	NaN	NaN	NaN
0.612	-3.374	-76.959	755.73966	-1.2211	0.92285	0.21367	-14.48	164.20877	583.1695	-0.42676	0.24023	0.075195	24.678	-253.655	1250.031	-1.4199	1.0039	0.35791	NaN	NaN	NaN	NaN	NaN	NaN
0.614	-11.023	-84.947	792.6331	-1.1631	0.89746	0.1624	-16.737	144.881	553.3863	-0.39795	0.22021	0.068359	34.486	-316.62	1298.3854	-1.3865	0.98364	0.34326	NaN	NaN	NaN	NaN	NaN	NaN
0.616	-25.69	-91.336	805.9588	-1.0998	0.8623	0.10576	-39.5679	166.101	504.8717	-0.34473	0.1875	0.058105	-3.013	-290.45	1316.266	-1.3784	0.95361	0.33594	NaN	NaN	NaN	NaN	NaN	NaN
0.618	-15.414	-106.8194	845.614	-1.0469	0.83711	0.052051	-22.98589	151.5557	501.4335	-0.30566	0.16748	0.051758	-23.2838	-271.229	1365.258	-1.4019	0.91943	0.34375	NaN	NaN	NaN	NaN	NaN	NaN
0.62	-18.039	-114.922	866.151	-1.0059	0.80469	0.0024414	-14.784	154.792	460.2248	-0.27295	0.14355	0.043945	-53.947	-192.5185	1362.4669	-1.418	0.91016	0.3501	NaN	NaN	NaN	NaN	NaN	NaN
0.622	8.858	-110.4289	860.4091	-0.98457	0.79336	-0.023047	-32.7186	173.501	426.8789	-0.23389	0.11377	0.035156	-64.804	-171.005	1366.463	-1.437	0.9165	0.36523	NaN	NaN	NaN	NaN	NaN	NaN
0.624	13.632	-117.347	878.7515	-0.98389	0.79971	-0.035937	-15.649	165.039	427.5743	-0.21094	0.10498	0.032227	-62.0985	-130.238	1401.336	-1.4551	0.93164	0.38135	NaN	NaN	NaN	NaN	NaN	NaN
0.626	44.256	-124.7308	894.7403	-0.99835	0.82666	-0.037891	-34.245	161.853	409.392	-0.1792	0.075195	0.024414	-28.999	-106.848	1408.2	-1.4878	0.95361	0.39453	NaN	NaN	NaN	NaN	NaN	NaN
0.628	52.176	-140.1069	915.7396	-1.0089	0.85361	-0.03125	-25.987	163.519	382.8253	-0.14942	0.055908	0.026367	-33.8533	-56.682	1393.102	-1.5879	0.97852	0.42041	NaN	NaN	NaN	NaN	NaN	NaN
0.63	59.5505	-131.682	922.7168	-1.0132	0.87549	-0.031738	6.252	138.8365	396.754	-0.12793	0.036621	0.026855	-31.4746	-7.181	1398.755	-1.6577	0.99072	0.44434	NaN	NaN	NaN	NaN	NaN	NaN
0.632	76.077	-144.3842	943.33019	-1.0036	0.89248	-0.040918	-14.452	123.6441	347.1856	-0.10156	0.015137	0.029785	-73.68	-5.141	1409.37	-1.8726	1.0103	0.50977	NaN	NaN	NaN	NaN	NaN	NaN
0.634	91.01963	-129.1887	954.249	-0.97031	0.89844	-0.056347	-27.5454	98.533	336.4523	-0.093262	0.0024414	0.035645	-77.415	-9.937	1387.083	-2.0769	1.0159	0.5686	NaN	NaN	NaN	NaN	NaN	NaN
0.636	92.1186	-123.7315	963.42	-0.93242	0.89805	-0.07666	15.042	84.874	321.6072	-0.071289	-0.013672	0.041504	-82.176	-62.642	1412.7855	-2.3022	1.022	0.64551	NaN	NaN	NaN	NaN	NaN	NaN
0.638	77.583	-101.5746	966.512	-0.87842	0.89463	-0.10557	-10.744	96.6716	279.0495	-0.062011	-0.024414	0.046387	-59.6376	-79.568	1419.565	-2.6074	1.0293	0.75342	NaN	NaN	NaN	NaN	NaN	NaN
0.64	86.4978	-103.7157	984.06577	-0.81641	0.88086	-0.13574	25.402	105.6084	248.3042	-0.054199	-0.035156	0.057617	-71.717	-128.5578	1471.334	-2.7671	1.0356	0.81055	NaN	NaN	NaN	NaN	NaN	NaN
0.642	83.8575	-100.5554	1005.726	-0.75566	0.85566	-0.18125	46.83224	97.3464	239.9353	-0.047852	-0.052246	0.070313	-39.8127	-118.11852	1482.4926	-3.0586	1.0488	0.92432	NaN	NaN	NaN	NaN	NaN	NaN
0.644	80.2904	-99.2216	1023.867	-0.70518	0.83838	-0.22217	16.381	93.5323	205.6786	-0.043701	-0.062744	0.079834	-41.776	-139.88	1521.756	-3.2485	1.0522	0.98925	NaN	NaN	NaN	NaN	NaN	NaN
0.646	80.9769	-100.9306	1027.9049	-0.67588	0.82901	-0.24561	62.5677	84.692	211.8314	-0.039551	-0.069336	0.090332	-12.6458	-92.2398	1492.64	-3.3965	1.0625	1.0454	NaN	NaN	NaN	NaN	NaN	NaN
0.648	79.9445	-113.45258	1043.55758	-0.66816	0.83164	-0.25723	52.3644	82.7527	199.215	-0.037109	-0.071777	0.10889	5.612	-126.534	1522.511	-3.541	1.0859	1.0708	NaN	NaN	NaN	NaN	NaN	NaN
0.65	83.923	-123.308	1057.0143	-0.68311	0.84424	-0.25537	17.057	105.276	172.242	-0.032715	-0.074707	0.1167	61.084	-74.0221	1493.907	-3.6016	1.1016	1.0659	NaN	NaN	NaN	NaN	NaN	NaN
0.652	59.915	-117.83985	1058.814	-0.71602	0.86817	-0.23398	55.50241	90.224	177.995	-0.024414	-0.078125	0.1333	58.051	-76.029	1538.757	-3.6909	1.1528	1.0723	NaN	NaN	NaN	NaN	NaN	NaN
0.654	74.593	-112.427	1063.255	-0.7542	0.90166	-0.20361	33.711	98.26	149.1937	-0.014893	-0.081543	0.14209	45.0293	24.4861	1509.915	-3.6235	1.1508	1.0649	NaN	NaN	NaN	NaN	NaN	NaN
0.656	53.523	-119.2447	1085.0057	-0.78701	0.93369	-0.17549	7.907	110.58	105.4283	-0.0048828	-0.081543	0.14893	26.951	14.58932	1513.891	-3.5469	1.1299	1.0474	NaN	NaN	NaN	NaN	NaN	NaN
0.658	47.24	-113.9995	1098.94	-0.83565	0.96279	-0.14678	52.7391	93.992	94.3445	0.012695	-0.083496	0.15088	-5.881	85.926	1458.083	-3.4175	1.1235	1.001	NaN	NaN	NaN	NaN	NaN	NaN
0.66	37.842	-113.9859	1108.278	-0.87842	0.98584	-0.11328	28.496	81.919	69.917	0.027344	-0.085449	0.15283	-8.8541	33.8964	1462.304	-3.3491	1.1274	0.96875	NaN	NaN	NaN	NaN	NaN	NaN
0.662	16.668	-102.399	1114.7105	-0.91123	1.0064	-0.078711	-0.905999999999999	57.323	46.663	0.055176	-0.088867	0.15137	-8.334	92.553	1408.352	-3.1558	1.1079	0.92773	NaN	NaN	NaN	NaN	NaN	NaN
0.664	19.358	-99.9716	1132.195	-0.94571	1.0267	-0.042676	33.683	31.2112	54.71	0.077881	-0.096192	0.14795	10.8136	58.3169	1418.542	-2.9727	1.0625	0.86377	NaN	NaN	NaN	NaN	NaN	NaN
0.666	25.31	-81.7371	1133.76202	-0.98907	1.0475	-0.010645	2.899	27.25085	40.864	0.10596	-0.104	0.13916	-10.1423	128.628	1404.349	-2.8838	1.041	0.83838	NaN	NaN	NaN	NaN	NaN	NaN
0.668	50.829	-69.4379	1126.325	-1.04	1.0632	0.0040038	-8.495	13.5244	60.9783	0.13818	-0.11719	0.11719	-8.48756	62.476	1442.048	-2.7222	0.99951	0.78613	NaN	NaN	NaN	NaN	NaN	NaN
0.67	39.894	-64.858	1135	-1.0972	1.0786	0.023438	31.424	18.3663	64.995	0.15186	-0.11914	0.10547	-37.7148	70.863	1433.124	-2.614	0.97095	0.7483	NaN	NaN	NaN	NaN	NaN	NaN
0.672	49.808	-71.778	1146.1353	-1.1799	1.109	0.047949	-26.259	37.273	34.3543	0.17725	-0.13867	0.079102	-28.397	-16.867	1438.756	-2.5156	0.94336	0.71533	NaN	NaN	NaN	NaN	NaN	NaN
0.674	54.247	-68.63	1162.6783	-1.2648	1.1352	0.079785	-4.228	42.774	26.4912	0.19727	-0.14917	0.056152	-46.71	33.0759	1418.771	-2.3765	0.90674	0.6543	NaN	NaN	NaN	NaN	NaN	NaN
0.676	79.168	-63.942	1170.5841	-1.3601	1.1664	0.11768	0.692999999999998	36.225	14.4644	0.20898	-0.1582	0.030273	-37.456	-18.071	1402.4683	-2.3066	0.8877	0.63037	NaN	NaN	NaN	NaN	NaN	NaN
0.678	94.159	-65.536	1175.4257	-1.468	1.2008	0.15908	-44.08	30.588	7.8447871	0.21777	-0.16748	0.0024414	-78.498	64.463	1383.744	-2.1563	0.83398	0.58643	NaN	NaN	NaN	NaN	NaN	NaN
0.68	87.711	-67.283	1196.099	-1.5835	1.2427	0.21143	-0.731000000000002	16.0348	15.60914	0.21924	-0.17041	-0.0097656	-75.441	21.476	1379.1961	-2.0378	0.79809	0.56616	NaN	NaN	NaN	NaN	NaN	NaN
0.682	116.8822	-68.6426	1197.2516	-1.6882	1.2907	0.27305	9.99	17.2421	-1.2833	0.21094	-0.17822	-0.037109	-115.744	68.5366	1339.455	-1.9409	0.76221	0.54102	NaN	NaN	NaN	NaN	NaN	NaN
0.684	113.788	-57.0203	1188.81	-1.768	1.3367	0.33769	2.081	20.9271	-3.2034	0.20752	-0.17969	-0.046631	-81.845	24.645	1326.772	-1.8027	0.71094	0.51611	NaN	NaN	NaN	NaN	NaN	NaN
0.686	114.169	-59.8103	1211.8859	-1.8321	1.3805	0.38496	22.66	12.80358	8.7202	0.19385	-0.18408	-0.055664	-63.8489	97.8393	1293.13541	-1.7358	0.68896	0.50781	NaN	NaN	NaN	NaN	NaN	NaN
0.688	122.39173	-62.561	1217.4385	-1.8755	1.4081	0.41768	12.954	18.8601	-5.0395	0.16602	-0.18408	-0.057129	-41.6158	110.226	1265.6129	-1.603	0.63135	0.48535	NaN	NaN	NaN	NaN	NaN	NaN
0.69	134.636	-62.7515	1222.8685	-1.8999	1.4282	0.43555	14.899	37.558	12.1464	0.15137	-0.18408	-0.055664	-34.7111	195.112	1253.621	-1.52	0.58154	0.47851	NaN	NaN	NaN	NaN	NaN	NaN
0.692	123.117	-55.4495	1231.199	-1.8976	1.4355	0.43926	44.8326	24.5281	7.6389	0.11963	-0.18115	-0.047363	-5.1427	186.128	1193.442	-1.4336	0.5415	0.4624	NaN	NaN	NaN	NaN	NaN	NaN
0.694	121.67977	-47.674	1234.457	-1.8896	1.4364	0.42569	26.467	29.287	-7.1536	0.087646	-0.1792	-0.033203	-5.705	201.923	1159.135	-1.3066	0.46924	0.45166	NaN	NaN	NaN	NaN	NaN	NaN
0.696	130.6543	-42.2439	1247.578	-1.8876	1.4275	0.42178	31.644	16.3195	32.978	0.060547	-0.16992	-0.01709	14.348	152.171	1106.051	-1.248	0.44141	0.43262	NaN	NaN	NaN	NaN	NaN	NaN
0.698	120.5175	-30.602	1225.3537	-1.8779	1.4045	0.41514	50.8801	-1.9372	20.7848	0.026855	-0.16406	0.00097656	36.123	173.004	1075.962	-1.1309	0.38281	0.41016	NaN	NaN	NaN	NaN	NaN	NaN
0.7	111.8361	-23.053	1211.318	-1.8789	1.377	0.40576	25.854	9.9967	11.30365	0.012695	-0.15918	0.012695	36.27	169.476	1053.66	-1.0449	0.34375	0.39893	NaN	NaN	NaN	NaN	NaN	NaN
0.702	87.552	-15.69	1215.4206	-1.8758	1.3492	0.40069	41.087	10.4462	44.25	-0.0097656	-0.15625	0.037598	47.20464	201.844	1036.6861	-0.95654	0.30371	0.38818	NaN	NaN	NaN	NaN	NaN	NaN
0.704	104.5887	0.797000000000001	1221.7229	-1.8718	1.3219	0.39521	52.8508	11.5804	31.8367	-0.02124	-0.15332	0.053467	55.0998	170.8748	975.855	-0.85352	0.25244	0.36816	NaN	NaN	NaN	NaN	NaN	NaN
0.706	85.06	5.795	1219.77	-1.8641	1.2906	0.38272	29.124	14.6669	40.198	-0.027344	-0.15332	0.065918	65.1719	158.78	972.4906	-0.80371	0.23535	0.36621	NaN	NaN	NaN	NaN	NaN	NaN
0.708	59.49	-1.135	1209.1662	-1.8508	1.2676	0.37266	49.3399	4.4522	39.641	-0.032715	-0.15283	0.089844	56.851	115.824	949.8469	-0.71289	0.19922	0.35693	NaN	NaN	NaN	NaN	NaN	NaN
0.71	60.606	-22.367	1232.527	-1.8413	1.2524	0.36816	39.439	7.6167	-3.451	-0.039063	-0.15869	0.095215	92.1863	117.769	921.781	-0.6499	0.16675	0.35205	NaN	NaN	NaN	NaN	NaN	NaN
0.712	38.235	-24.7036	1238.31	-1.8362	1.2365	0.36553	20.575	15.6091	3.8842	-0.038086	-0.1582	0.1123	68.7992	137.719	872.471	-0.5874	0.14258	0.34375	NaN	NaN	NaN	NaN	NaN	NaN
0.714	48.627	-7.504	1222.3778	-1.8297	1.2254	0.36006	38.731	4.2927	24.0067	-0.032226	-0.15845	0.11401	79.2153	168.1285	849.749	-0.50439	0.11182	0.32568	NaN	NaN	NaN	NaN	NaN	NaN
0.716	17.916	-6.489	1210.47	-1.8187	1.2137	0.35147	7.099	7.1305	1.5824	-0.022949	-0.15967	0.11426	61.2387	178.985	798.853	-0.46631	0.097168	0.32129	NaN	NaN	NaN	NaN	NaN	NaN
0.718	49.978	-5.5066	1190.3018	-1.8085	1.2052	0.34727	3.531	4.1903	18.7452	-0.014648	-0.16064	0.11475	65.0204	186.1	762.581	-0.37695	0.064453	0.30029	NaN	NaN	NaN	NaN	NaN	NaN
0.72	35.817	-6.2242	1194.892	-1.7871	1.1875	0.32861	23.69	6.5177	29.3109	-0.013184	-0.15283	0.11377	37.073	191.218	706.866	-0.31274	0.041504	0.27441	NaN	NaN	NaN	NaN	NaN	NaN
0.722	37.243	5.0447	1178.5599	-1.7721	1.176	0.31484	-15.242	15.5686	22.1158	-0.012695	-0.14307	0.11475	54.158	196.296	682.8228	-0.25049	0.016113	0.25146	NaN	NaN	NaN	NaN	NaN	NaN
0.724	46.054	-0.8411	1181.4921	-1.7538	1.1622	0.30312	-8.379	14.9135	43.364	-0.010742	-0.13648	0.11768	43.192	219.995	639.7833	-0.16895	-0.0073242	0.22559	NaN	NaN	NaN	NaN	NaN	NaN
0.726	61.051	11.0203	1188.148	-1.7339	1.143	0.28867	6.698	8.0272	16.198	-0.0092773	-0.12744	0.11475	18.586	222.366	618.008	-0.13135	-0.025879	0.20703	NaN	NaN	NaN	NaN	NaN	NaN
0.728	70.276	0.313659	1191.257	-1.7137	1.1254	0.27881	-23.903	21.5679	-19.2545	-0.014648	-0.11816	0.11816	10.604	238.623	568.599	-0.061523	-0.064453	0.16895	NaN	NaN	NaN	NaN	NaN	NaN
0.73	56.105	21.67	1165.334	-1.6948	1.1118	0.26563	-9.815	0.9704	-7.6491	-0.016602	-0.11475	0.11523	22.64	185.053	506.6626	-0.0058595	-0.09253	0.14624	NaN	NaN	NaN	NaN	NaN	NaN
0.732	75.815	32.953	1147.7007	-1.6791	1.0951	0.25771	14.901	-22.0602	12.197	-0.01416	-0.098145	0.11182	-0.479999999999997	190.0691	452.87	0.042969	-0.1123	0.125	NaN	NaN	NaN	NaN	NaN	NaN
0.734	84.56	54.979	1137.3569	-1.6567	1.0785	0.24726	-9.514	-10.4425	1.734	-0.010986	-0.088623	0.10303	3.024	154.325	431.816	0.097656	-0.14551	0.089355	NaN	NaN	NaN	NaN	NaN	NaN
0.736	88.5864	63.9992	1117.641	-1.6316	1.0652	0.23047	6.987	-14.83822	20.146	-0.0097656	-0.077637	0.104	-1.235	191.6784	413.9674	0.12402	-0.16357	0.067871	NaN	NaN	NaN	NaN	NaN	NaN
0.738	85.183	52.68277	1103.7269	-1.6046	1.047	0.21533	18.136	-3.2662	8.1439	-0.0092773	-0.056641	0.097168	-2.511	161.887	394.675	0.17822	-0.20068	0.03418	NaN	NaN	NaN	NaN	NaN	NaN
0.74	97.6444	43.7566	1107.7848	-1.5801	1.0313	0.20752	-11.725	13.2046	13.3029	-0.0097656	-0.04541	0.092285	-0.155000000000001	164.4292	376.8458	0.21606	-0.22364	0.0092776	NaN	NaN	NaN	NaN	NaN	NaN
0.742	105.2491	43.8843	1106.82	-1.5514	1.0201	0.19082	34.025	5.2	24.44167	-0.011719	-0.026855	0.083496	26.814	91.341	363.2249	0.24414	-0.24316	-0.017578	NaN	NaN	NaN	NaN	NaN	NaN
0.744	103.143	41.63883	1074.735	-1.5262	1.0023	0.17676	32.381	15.6482	1.363	-0.019287	-0.0063476	0.075195	22.482	101.165	340.0742	0.2666	-0.26563	-0.04541	NaN	NaN	NaN	NaN	NaN	NaN
0.746	104.52211	36.1134	1057.1785	-1.5008	0.98711	0.17012	14.972	18.6321	5.398	-0.035645	0.016113	0.058105	30.898	55.859	301.236	0.27881	-0.27295	-0.060547	NaN	NaN	NaN	NaN	NaN	NaN
0.748	82.311	32.7369	1045.0801	-1.4759	0.9749	0.16016	48.5866	-8.35	24.009	-0.067871	0.050293	0.046875	53.317	112.9648	275.985	0.29297	-0.2915	-0.089355	NaN	NaN	NaN	NaN	NaN	NaN
0.75	92.6656	44.6334	1023.4024	-1.4512	0.9668	0.15674	34.069	-6.812	31.8036	-0.084961	0.069824	0.046387	62.6945	92.812	246.1637	0.29126	-0.29858	-0.1062	NaN	NaN	NaN	NaN	NaN	NaN
0.752	76.2188	55.7722	986.544	-1.4212	0.94931	0.15078	29.523	-10.497	44.6474	-0.12646	0.1084	0.043945	71.2774	134.5789	198.3394	0.28955	-0.30664	-0.12451	NaN	NaN	NaN	NaN	NaN	NaN
0.754	69.3687	57.99582	986.0713	-1.3984	0.9336	0.1415	58.6506	5.091	61.8127	-0.17432	0.14087	0.042725	78.1974	81.482	170.442	0.27148	-0.31445	-0.146	NaN	NaN	NaN	NaN	NaN	NaN
0.756	49.533	55.2275	981.7804	-1.3718	0.91875	0.13877	30.592	23.9569	94.84	-0.22119	0.16992	0.047363	47.128	118.7968	127.476	0.25977	-0.3125	-0.15527	NaN	NaN	NaN	NaN	NaN	NaN
0.758	32.56	65.0184	965.723	-1.3447	0.90742	0.13369	25.254	13.9236	144.5908	-0.28955	0.2041	0.05127	58.7287	66.6709	109.616	0.22949	-0.31348	-0.16748	NaN	NaN	NaN	NaN	NaN	NaN
0.76	37.625	67.4651	933.813	-1.3179	0.88916	0.12842	32.7311	29.8434	157.436	-0.33008	0.22119	0.055664	66.691	123.142	107.028	0.19116	-0.30932	-0.1687	NaN	NaN	NaN	NaN	NaN	NaN
0.762	7.65	66.8826	908.26577	-1.2914	0.87422	0.12139	8.384	55.8003	186.269	-0.40967	0.25635	0.060547	61.5627	84.758	90.0613	0.14844	-0.30225	-0.16699	NaN	NaN	NaN	NaN	NaN	NaN
0.764	16.252	76.7132	888.7191	-1.2652	0.85918	0.1125	12.6087	57.6768	236.664	-0.47852	0.28272	0.061523	63.202	127.508	66.5856	0.074707	-0.28516	-0.1499	NaN	NaN	NaN	NaN	NaN	NaN
0.766	13.121	79.712	850.7789	-1.2351	0.84395	0.11094	-9.444	68.1375	293.4892	-0.55078	0.31152	0.067383	95.4547	73.45	43.495	0.03125	-0.27588	-0.14307	NaN	NaN	NaN	NaN	NaN	NaN
0.768	18.445	81.708	827.6436	-1.2149	0.83233	0.10723	-29.3802	82.897	348.96	-0.65137	0.35303	0.079102	61.164	96.822	41.777	-0.063477	-0.25879	-0.12402	NaN	NaN	NaN	NaN	NaN	NaN
0.77	0.143000000000001	81.988	823.2892	-1.1855	0.81836	0.10547	-9.645	81.463	388.282	-0.70264	0.37549	0.090332	45.537	45.325	22.41	-0.12525	-0.23901	-0.10644	NaN	NaN	NaN	NaN	NaN	NaN
0.772	4.68	83.094	795.963	-1.1628	0.80322	0.10283	-33.5768	75.406	414.8046	-0.82178	0.4126	0.11475	51.4112	85.605	28.338	-0.19482	-0.22363	-0.083984	NaN	NaN	NaN	NaN	NaN	NaN
0.774	-6.577	75.336	784.5633	-1.139	0.79033	0.10156	-39.109	68.153	485.7341	-0.95117	0.45557	0.15234	16.026	32.8605	27.6597	-0.28809	-0.19873	-0.057617	NaN	NaN	NaN	NaN	NaN	NaN
0.776	4.326	75.412	778.26052	-1.1124	0.77314	0.095312	-40.5146635	34.546	556.59372	-1.0171	0.47412	0.1792	1.412	56.854	45.9314	-0.33008	-0.18555	-0.04248	NaN	NaN	NaN	NaN	NaN	NaN
0.778	27.596	67.8183	765.877	-1.0818	0.75752	0.090039	-28.4665	26.7459	598.843	-1.1426	0.5166	0.23486	23.953	-6.17444	46.1058	-0.40479	-0.16357	-0.020996	NaN	NaN	NaN	NaN	NaN	NaN
0.78	15.809	77.19945	738.595	-1.0488	0.74219	0.088379	-21.5388	0.469000000000001	643.327	-1.2366	0.54419	0.30151	-14.416	5.7858	37.2656	-0.45092	-0.15674	-0.0043945	NaN	NaN	NaN	NaN	NaN	NaN
0.782	37.6532	78.9608	704.6906	-1.0195	0.72539	0.082031	-12.601	-22.716	678.106	-1.3315	0.56299	0.37061	-42.646	-24.27	16.8753	-0.49072	-0.14941	0.0039063	NaN	NaN	NaN	NaN	NaN	NaN
0.784	35.16	87.901	673.4538	-0.98681	0.70673	0.078711	-23.605	-38.041	755.0441	-1.4453	0.57813	0.4624	-24.549	22.995	21.868	-0.53027	-0.14502	0.011719	NaN	NaN	NaN	NaN	NaN	NaN
0.786	35.969	90.321	666.0752	-0.9583	0.68994	0.075195	-1.061	-67.5483	824.376	-1.502	0.58301	0.50732	-25.883	29.332	17.8018	-0.54297	-0.14258	0.017578	NaN	NaN	NaN	NaN	NaN	NaN
0.788	45.167	93.8283	643.454	-0.92451	0.66689	0.073926	18.585	-79.1639	845.956	-1.6089	0.59424	0.59961	-12.01	52.416	44.8529	-0.56201	-0.1416	0.025391	NaN	NaN	NaN	NaN	NaN	NaN
0.79	55.1591	102.358	615.451	-0.89209	0.64404	0.075195	14.159	-80.17345	855.627	-1.6714	0.5957	0.65039	18.491	15.67738	40.693	-0.57569	-0.13355	0.037353	NaN	NaN	NaN	NaN	NaN	NaN
0.792	81.0609	97.0076	619.0821	-0.85547	0.61777	0.066895	49.325	-101.715	872.069	-1.7168	0.58594	0.69775	-4.509	9.0006	26.526	-0.58252	-0.13086	0.04834	NaN	NaN	NaN	NaN	NaN	NaN
0.794	62.1488	97.9603	604.1054	-0.82148	0.58926	0.067187	60.242	-123.812	820.054	-1.7344	0.56445	0.71924	-16.647	-10.257	16.9838	-0.56836	-0.12061	0.055176	NaN	NaN	NaN	NaN	NaN	NaN
0.796	80.8967	105.297	581.1098	-0.78633	0.56269	0.063672	45.375	-127.763	791.503	-1.7339	0.56787	0.72217	16.862	15.6644	31.446	-0.5398	-0.12134	0.049561	NaN	NaN	NaN	NaN	NaN	NaN
0.798	67.0991	105.784	542.569	-0.75293	0.53223	0.061816	88.5771	-126.994	770.33	-1.7402	0.61328	0.71826	5.364	13.0365	22.5017	-0.49805	-0.12744	0.041016	NaN	NaN	NaN	NaN	NaN	NaN
0.8	64.7183	101.267	518.8712	-0.7207	0.50586	0.064941	89.925	-124.726	726.9987	-1.726	0.65918	0.71972	6.471	16.9475	20.594	-0.41943	-0.14258	0.023438	NaN	NaN	NaN	NaN	NaN	NaN
0.802	44.989	106.052	509.04093	-0.68867	0.48359	0.060937	59.47	-115.396	744.123	-1.6997	0.6958	0.72266	45.59	11.154	23.2731	-0.37451	-0.14893	0.018555	NaN	NaN	NaN	NaN	NaN	NaN
0.804	45.79	115.298	490.1139	-0.65547	0.45723	0.058594	68.19	-102.91	744.176	-1.6504	0.7251	0.71338	41.445	-9.1213	18.9165	-0.28076	-0.17432	0.0019531	NaN	NaN	NaN	NaN	NaN	NaN
0.806	42.6873	117.971	467.3761	-0.62422	0.43652	0.052734	67.557	-89.753	749.25	-1.6226	0.73682	0.70313	25.188	-5.9299	-2.387	-0.21899	-0.19239	-0.0073241	NaN	NaN	NaN	NaN	NaN	NaN
0.808	28.642	112.44	470.92059	-0.59512	0.41133	0.050977	47.464	-73.556	806.184	-1.5645	0.76367	0.68018	49.9697	-20.148396	23.39	-0.15381	-0.20752	-0.012207	NaN	NaN	NaN	NaN	NaN	NaN
0.81	28.058	98.9938	470.4665	-0.56543	0.3916	0.055664	46.0287	-85.105	831.61	-1.5151	0.77734	0.6455	48.9083	10.6243	24.81	-0.074219	-0.22705	-0.026855	NaN	NaN	NaN	NaN	NaN	NaN
0.812	6.409	96.385	433.6216	-0.53213	0.36787	0.054199	39.9333	-96.716	859.402	-1.4629	0.77637	0.60205	72.6059	-25.244	29.945	-0.039063	-0.23242	-0.032227	NaN	NaN	NaN	NaN	NaN	NaN
0.814	13.758	92.935	415.729	-0.50488	0.34726	0.058203	29.0156	-97.052	907.1464	-1.3828	0.7832	0.53955	91.6646	-18.2025	36.3389	0.024414	-0.24561	-0.040527	NaN	NaN	NaN	NaN	NaN	NaN
0.816	-15.218	87.953	401.186	-0.47559	0.32969	0.053516	33.0184	-137.1385	944.02962	-1.3496	0.78125	0.50684	70.3055	-47.86	13.2247	0.066406	-0.25	-0.054931	NaN	NaN	NaN	NaN	NaN	NaN
0.818	0.574999999999996	90.747	374.5169	-0.44941	0.3041	0.057519	13.84	-161.921	980.9456	-1.2896	0.77783	0.45508	32.317	-5.95	-8.29000000000001	0.10303	-0.25684	-0.05957	NaN	NaN	NaN	NaN	NaN	NaN
0.82	-6.01300000000001	91.562	359.7871	-0.41748	0.28174	0.059082	-4.679	-196.614	1002.8245	-1.2737	0.77661	0.4209	54.805132	-19.1231	11.168	0.13916	-0.25537	-0.069336	NaN	NaN	NaN	NaN	NaN	NaN
0.822	-14.009	98.666	332.824	-0.39248	0.26328	0.050098	-1.729	-227.132	1016.164	-1.2749	0.78564	0.39258	21.516	37.0746	-19.0933	0.15576	-0.25732	-0.07373	NaN	NaN	NaN	NaN	NaN	NaN
0.824	3.08	91.1954	328.6182	-0.36699	0.24512	0.043848	-39.987	-225.216	1046.1023	-1.2925	0.79932	0.38281	36.228	9.884949	1.57446	0.18457	-0.26563	-0.078613	NaN	NaN	NaN	NaN	NaN	NaN
0.826	-23.648	86.0413	337.429	-0.33887	0.22793	0.038379	-58.8165	-231.408	1070.2118	-1.3027	0.80566	0.37402	54.064	43.933	-8.7687	0.19654	-0.26953	-0.077636	NaN	NaN	NaN	NaN	NaN	NaN
0.828	5.839	88.64	311.6289	-0.31562	0.21612	0.042676	-47.0848	-237.368	1074.0484	-1.3257	0.81104	0.35547	15.947	-7.7416	-9.0671	0.2124	-0.26904	-0.07959	NaN	NaN	NaN	NaN	NaN	NaN
0.83	-5.016	79.611	302.154	-0.28955	0.20361	0.042969	-50.9728	-204.9973	1095.3264	-1.3396	0.81421	0.33423	-15.761	38.7332	-10.097	0.22168	-0.26758	-0.07666	NaN	NaN	NaN	NaN	NaN	NaN
0.832	20.023	72.522	291.276	-0.26778	0.18643	0.05	-53.1484	-168.688	1128.297	-1.3511	0.82275	0.30273	-6.377	6.896	21.4352	0.229	-0.26318	-0.077148	NaN	NaN	NaN	NaN	NaN	NaN
0.834	21.797	65.7068	269.563	-0.24239	0.17519	0.054785	-65.081	-139.98	1139.907	-1.3667	0.84521	0.27148	-31.213	58.9804	-7.4444	0.23975	-0.25586	-0.080566	NaN	NaN	NaN	NaN	NaN	NaN
0.836	24.999	78.544	240.2368	-0.21387	0.1584	0.059082	-45.0353	-88.584	1179.3814	-1.3789	0.86523	0.24609	-19.288	21.4065	22.032	0.24463	-0.24951	-0.085694	NaN	NaN	NaN	NaN	NaN	NaN
0.838	46.0645	74.0555	228.528	-0.18301	0.1373	0.058789	-38.3592	-77.553	1199.05798	-1.4258	0.8916	0.21143	4.032	49.6199	17.7864	0.25293	-0.24121	-0.088867	NaN	NaN	NaN	NaN	NaN	NaN
0.84	41.406	77.38915	219.515	-0.15088	0.12158	0.051758	-26.096	-76.649	1210.8921	-1.492	0.91626	0.19922	5.851	-6.604	17.6819	0.25732	-0.229	-0.10205	NaN	NaN	NaN	NaN	NaN	NaN
0.842	54.6491	73.38395	226.47405	-0.11924	0.10527	0.048828	-13.09	-66.117	1227.754	-1.5796	0.93408	0.19629	-34.611	28.7531	4.4759	0.25977	-0.22412	-0.10303	NaN	NaN	NaN	NaN	NaN	NaN
0.844	52.6547	70.7369	219.7302	-0.091211	0.091602	0.042871	-6.04	-104.508	1212.30045	-1.7344	0.94531	0.2251	-21.658	-19.3183	12.1734	0.25684	-0.21826	-0.11182	NaN	NaN	NaN	NaN	NaN	NaN
0.846	69.5759	54.833141	223.511	-0.062696	0.079492	0.040527	3.07	-126.0635	1234.2562	-1.8281	0.95508	0.24365	-23.889	27.362	18.8387	0.25317	-0.21509	-0.12354	NaN	NaN	NaN	NaN	NaN	NaN
0.848	55.9696	43.9275	209.706	-0.033692	0.072168	0.036426	3.559	-136.4561	1234.624	-2.0171	0.979	0.30469	4.718	-15.2553	28.9731	0.24268	-0.20947	-0.12744	NaN	NaN	NaN	NaN	NaN	NaN
0.85	60.1264	50.9402	183.9115	-0.012695	0.064941	0.036621	-7.37853	-168.519	1247.724	-2.1607	0.98779	0.3645	30.675	36.199	43.8032	0.21729	-0.20215	-0.13281	NaN	NaN	NaN	NaN	NaN	NaN
0.852	65.0975	56.014	162.8345	0.0073245	0.057031	0.032617	-2.5764	-155.3556	1284.664	-2.2988	1	0.43018	36.572	-7.66287	43.842	0.20801	-0.19336	-0.1333	NaN	NaN	NaN	NaN	NaN	NaN
0.854	49.716	51.94686	151.693	0.021875	0.048438	0.025683	31.239	-154.532	1308.1664	-2.4609	1.0205	0.52588	16.281	30.61	31.9078	0.17188	-0.18457	-0.13477	NaN	NaN	NaN	NaN	NaN	NaN
0.856	45.171	50.8895	141.7034	0.038672	0.045313	0.025293	31.1902	-162.442	1345.324	-2.5327	1.0298	0.57227	33.742	2.2529	41.1147	0.13965	-0.17065	-0.12964	NaN	NaN	NaN	NaN	NaN	NaN
0.858	28.084	54.151	131.5748	0.051367	0.041016	0.022949	28.65915	-137.087	1391.774	-2.6582	1.0547	0.65674	47.087	45.156	23.5004	0.10498	-0.15186	-0.12646	NaN	NaN	NaN	NaN	NaN	NaN
0.86	34.1145	56.3561	133.4014	0.063965	0.031738	0.022949	54.576	-130.8745	1392.413	-2.7237	1.0694	0.70605	55.4154	10.6	23.876	0.050781	-0.13574	-0.11182	NaN	NaN	NaN	NaN	NaN	NaN
0.862	10.666	42.5247	147.993	0.071582	0.030078	0.014355	27.0325	-120.0418	1404.724	-2.7729	1.0767	0.74805	79.2889	26.2803	33.274	0.020508	-0.12109	-0.10596	NaN	NaN	NaN	NaN	NaN	NaN
0.864	17.445	39.84	140.806	0.08252	0.029004	0.012988	19.3091	-87.95	1393.826	-2.8022	1.0786	0.79492	94.239	-18.2468	9.775	-0.027344	-0.098633	-0.089844	NaN	NaN	NaN	NaN	NaN	NaN
0.866	-4.521	33.614	119.603	0.086036	0.024707	0.0036133	15.1688	-85.3651	1383.9215	-2.8081	1.0708	0.8125	42.304	-14.8037	9.7333	-0.070068	-0.079101	-0.078613	NaN	NaN	NaN	NaN	NaN	NaN
0.868	10.571	35.213	106.6735	0.088086	0.024316	-0.0030274	-25.3951	-61.9829	1379.702	-2.8115	1.0488	0.8374	45.7001	-23.9845	11.999	-0.1084	-0.061523	-0.064941	NaN	NaN	NaN	NaN	NaN	NaN
0.87	-3.745	26.72007	102.26978	0.085938	0.025879	-0.0053711	-25.6333	-38.974	1376.678	-2.8142	1.0315	0.85279	50.99	0.3265	9.8809	-0.1499	-0.036133	-0.056152	NaN	NaN	NaN	NaN	NaN	NaN
0.872	-7.638	39.225	91.8052	0.083887	0.029004	-0.0045899	-28.233	-40.92	1362.913	-2.8145	1.0195	0.86768	42.937	-9.7066	15.934	-0.16992	-0.023926	-0.050781	NaN	NaN	NaN	NaN	NaN	NaN
0.874	-2.416	33.9148	76.32	0.077344	0.03291	-0.0044922	-60.1145	-47.959	1365.888	-2.8022	0.99268	0.875	56.653	-2.2848	35.3934	-0.20215	-0.0039063	-0.041016	NaN	NaN	NaN	NaN	NaN	NaN
0.876	-14.891	34.3769	63.361	0.064063	0.041113	-0.0029297	-66.309	-43.281	1382.6151	-2.7944	0.98486	0.87207	45.138	-13.3148	1.627	-0.21851	0.0031738	-0.038574	NaN	NaN	NaN	NaN	NaN	NaN
0.878	-8.047	22.69726	75.8096	0.050879	0.048535	-0.0017578	-63.668	-56.604	1377.7209	-2.769	0.97998	0.87305	7.377	-20.107	14.82	-0.23291	0.0097656	-0.035645	NaN	NaN	NaN	NaN	NaN	NaN
0.88	-6.498	19.9844	84.86	0.038086	0.054199	0.0029297	-66.85	-49.048	1405.297	-2.7451	0.9795	0.86767	-1.447	-11.8772	0.0680000000000014	-0.24951	0.019043	-0.03125	NaN	NaN	NaN	NaN	NaN	NaN
0.882	13.746	23.835	78.137	0.020899	0.062207	0.010059	-52.67	-44.057124	1408.0622	-2.7104	0.9751	0.85938	3.473	-10.312	11.082	-0.25684	0.020996	-0.03125	NaN	NaN	NaN	NaN	NaN	NaN
0.884	7.443	29.151	70.0611	0.0061523	0.067188	0.011524	-68.95	-59.332	1427.528	-2.6602	0.95313	0.85205	-16.728	8.949	16.1446	-0.2749	0.022461	-0.033691	NaN	NaN	NaN	NaN	NaN	NaN
0.886	23.107	27.9398	56.7888	-0.0028321	0.070703	0.0064453	-81.261	-32.5394	1458.6543	-2.6406	0.9375	0.83838	17.293	-14.724	43.623	-0.29248	0.028077	-0.035889	NaN	NaN	NaN	NaN	NaN	NaN
0.888	27.184	29.2626	49.6176	-0.0099611	0.067481	1.6002e-08	-57.915	-22.7714	1436.6694	-2.6011	0.91455	0.82617	5.043	-11.375	27.0366	-0.30518	0.032715	-0.032715	NaN	NaN	NaN	NaN	NaN	NaN
0.89	23.939	39.349	39.321	-0.018066	0.062988	-0.0097656	-69.638	-26.17876	1441.238	-2.5644	0.89648	0.81835	-32.608	-31.535	37.84	-0.33203	0.042969	-0.025391	NaN	NaN	NaN	NaN	NaN	NaN
0.892	65.8727	29.466	40.888	-0.021777	0.061035	-0.015528	-69.595	-3.5	1445.017	-2.5249	0.8833	0.80469	-41.1193	-5.207	49.352	-0.34961	0.05127	-0.022949	NaN	NaN	NaN	NaN	NaN	NaN
0.894	46.996	28.3127	42.2851	-0.027246	0.053516	-0.022852	-32.931	-13.4192	1402.002	-2.457	0.86133	0.78955	-15.487	-24.967	102.087	-0.39941	0.05957	-0.015625	NaN	NaN	NaN	NaN	NaN	NaN
0.896	76.2505	32.608	47.6533	-0.034668	0.051953	-0.027148	-11.7208	-22.7873	1381.241	-2.416	0.85742	0.77197	-29.021	13.447	141.557	-0.44384	0.070312	-0.0014649	NaN	NaN	NaN	NaN	NaN	NaN
0.898	54.6304	14.8687	40.4779	-0.041894	0.047656	-0.027051	-13.565	11.8809	1341.51	-2.3105	0.83984	0.73975	27.198	-27.7971	200.828	-0.49512	0.085449	0.010742	NaN	NaN	NaN	NaN	NaN	NaN
0.9	60.648	8.66261	42.4066	-0.049805	0.047363	-0.027344	1.8634	15.081	1313.743	-2.228	0.83252	0.70849	37.739	23.059	250.8492	-0.57324	0.10596	0.030273	NaN	NaN	NaN	NaN	NaN	NaN
0.902	59.4756	11.176901	41.3633	-0.049609	0.044433	-0.025391	16.06	50.8912	1310.485	-2.1445	0.82617	0.68018	8.226	-3.5681	342.794	-0.61523	0.11133	0.039063	NaN	NaN	NaN	NaN	NaN	NaN
0.904	57.908	28.1	18.296	-0.051953	0.038379	-0.024316	28.9939	82.427	1304.633	-2.0249	0.80908	0.64063	2.272	79.057	428.5975	-0.72266	0.13916	0.049805	NaN	NaN	NaN	NaN	NaN	NaN
0.906	66.886	26.3251	11.42	-0.05	0.033301	-0.016504	40.118	62.877	1316.7755	-1.9402	0.79517	0.60913	55.71	51.1595	534.867	-0.81103	0.16724	0.076904	NaN	NaN	NaN	NaN	NaN	NaN
0.908	36.244	28.6293	11.847	-0.048535	0.033301	-0.0064453	20.6402	66.464	1312.9838	-1.8687	0.78076	0.5791	60.804	93.258	649.2156	-0.91406	0.19824	0.10693	NaN	NaN	NaN	NaN	NaN	NaN
0.91	48.257	28.177	31.8285	-0.047363	0.032227	0.00097656	32.253	62.83	1304.673	-1.7593	0.76025	0.54297	94.591	17.239	745.4119	-1.0801	0.23926	0.16064	NaN	NaN	NaN	NaN	NaN	NaN
0.912	39.131	21.0735	19.9803	-0.054883	0.028223	0.0089844	55.826	39.36553	1290.387	-1.7168	0.74609	0.52979	123.91	16.4838	824.4524	-1.1797	0.26563	0.1958	NaN	NaN	NaN	NaN	NaN	NaN
0.914	32.831	9.57862	39.0439	-0.056445	0.031934	0.016602	11.304	54.29669	1260.1171	-1.6304	0.72314	0.50586	126.9325	-91.7312	940.6418	-1.3804	0.32471	0.29102	NaN	NaN	NaN	NaN	NaN	NaN
0.916	19.784	13.5247	40.08	-0.061914	0.032715	0.027149	20.7248	63.7856	1209.956	-1.5639	0.69971	0.48462	102.677	-87	997.7484	-1.5281	0.37525	0.37744	NaN	NaN	NaN	NaN	NaN	NaN
0.918	12.766	11.5303	29.2962	-0.066015	0.033789	0.037207	13.4093	44.952	1179.532	-1.5054	0.67725	0.46631	122.1701	-179.646	1072.539	-1.6792	0.41748	0.45703	NaN	NaN	NaN	NaN	NaN	NaN
0.92	21.254	21.0299	4.4037	-0.068848	0.03125	0.046387	-9.193	77.543	1145.441	-1.4331	0.64307	0.44922	75.4055	-143.886	1099.972	-1.8965	0.47656	0.51025	NaN	NaN	NaN	NaN	NaN	NaN
0.922	-13.375	26.5973	1.9811	-0.07041	0.029199	0.050684	-6.839	79.987	1134.27	-1.4004	0.62891	0.43994	66.891	-201.427	1079.34	-1.9883	0.49219	0.52832	NaN	NaN	NaN	NaN	NaN	NaN
0.924	-1.876	21.9107	12.5574	-0.072364	0.029492	0.056934	-15.245	84.702	1136.1614	-1.3335	0.59326	0.42529	59.676	-156.816	1064.185	-2.1304	0.52002	0.53418	NaN	NaN	NaN	NaN	NaN	NaN
0.926	-10.902	19.0384	23.1341	-0.075488	0.031446	0.058106	-26.443	107.228	1119.2	-1.2856	0.5669	0.41553	11.681	-194.181	1048.905	-2.2168	0.53711	0.50537	NaN	NaN	NaN	NaN	NaN	NaN
0.928	6.556	3.275	33.71628	-0.082812	0.033789	0.063379	-33.3685	101.119	1094.808	-1.2397	0.53857	0.41211	-27.971	-143.092	1064.127	-2.2378	0.55322	0.48828	NaN	NaN	NaN	NaN	NaN	NaN
0.93	-6.497	-3.381	46.2354	-0.085449	0.038086	0.070801	-38.2976	108.327	1059.273	-1.1758	0.50391	0.39697	-27.3541	-189.834	1041.68	-2.2383	0.60254	0.43018	NaN	NaN	NaN	NaN	NaN	NaN
0.932	9.25	-4.603	56.7382	-0.088867	0.037988	0.076172	-35.12	143.44	1003.0991	-1.1426	0.48633	0.39502	-63.805	-152.961	1029.568	-2.1873	0.63208	0.38355	NaN	NaN	NaN	NaN	NaN	NaN
0.934	21.536	-7.489	69.268	-0.091016	0.041504	0.081543	-31.2911	125.566	985.2194	-1.0703	0.44727	0.38965	-96.65	-165.386	1031.579	-2.0879	0.62842	0.33643	NaN	NaN	NaN	NaN	NaN	NaN
0.936	3.47	6.4306	82.6507	-0.088282	0.042285	0.081153	-38.879	148.885	942.792	-1.0076	0.41626	0.37696	-98.3778	-95.579	1022.205	-1.9546	0.54541	0.25781	NaN	NaN	NaN	NaN	NaN	NaN
0.938	17.747	13.704	94.9642	-0.093164	0.041699	0.084863	-23.439	156.131	889.849	-0.94531	0.38477	0.36719	-94.79	-74.697	1032.998	-1.894	0.51807	0.23779	NaN	NaN	NaN	NaN	NaN	NaN
0.94	16.455	22.3452	117.4058	-0.097168	0.043457	0.076172	1.749	129.432	881.2619	-0.85889	0.34668	0.35254	-76.0788	-42.4	1038.971	-1.7754	0.51563	0.19238	NaN	NaN	NaN	NaN	NaN	NaN
0.942	42.38	38.3301	127.568	-0.10888	0.049805	0.079004	-24.269	120.4704	841.6571	-0.81201	0.32764	0.3418	-18.649	-76.646	1058.214	-1.7254	0.56861	0.18701	NaN	NaN	NaN	NaN	NaN	NaN
0.944	15.92	47.73465	175.393	-0.12032	0.063477	0.072364	2.991	109.4641	823.247	-0.71436	0.27979	0.31836	30.396	-110.281	1139.036	-1.7031	0.65137	0.20752	NaN	NaN	NaN	NaN	NaN	NaN
0.946	30.006	68.1699	213.486	-0.1418	0.075586	0.075879	19.994	80.633	818.376	-0.64673	0.24585	0.30883	31.686	-173.782	1160.0419	-1.6875	0.76172	0.24561	NaN	NaN	NaN	NaN	NaN	NaN
0.948	46.7037	72.2401	233.331	-0.16055	0.092285	0.0833	7.063	109.2756	750.4296	-0.57764	0.21045	0.29102	8.499	-197.502	1200.276	-1.6675	0.79932	0.26172	NaN	NaN	NaN	NaN	NaN	NaN
0.95	39.343	94.374	253.68612	-0.18994	0.10742	0.093262	45.5384	107.0906	721.1309	-0.48438	0.16504	0.26855	-45.2117	-202.5516	1229.877	-1.6069	0.84814	0.28271	NaN	NaN	NaN	NaN	NaN	NaN
0.952	50.2751	86.775	294.9864	-0.22002	0.12334	0.091504	46.232	105.198	701.576	-0.43799	0.14258	0.25391	-118.507	-230.5935	1261.6929	-1.5552	0.87256	0.28296	NaN	NaN	NaN	NaN	NaN	NaN
0.954	37.276	72.401	331.331	-0.25302	0.13779	0.10195	50.755	144.8444	663.2223	-0.34961	0.09375	0.22998	-143.959	-230.582	1296.974	-1.5137	0.89063	0.28369	NaN	NaN	NaN	NaN	NaN	NaN
0.956	42.3626	52.2186	365.337	-0.28506	0.15615	0.11133	96.327	145.7401	639.8141	-0.2893	0.056396	0.20727	-61.249	-278.362	1346.1975	-1.4741	0.91064	0.26563	NaN	NaN	NaN	NaN	NaN	NaN
0.958	19.148	46.448	372.704	-0.32139	0.17344	0.11709	88.3289	147.1043	617.759	-0.23584	0.026367	0.19238	-1.416	-235.498	1333.792	-1.4561	0.91797	0.24854	NaN	NaN	NaN	NaN	NaN	NaN
0.96	41.00717	35.469	409.11	-0.35889	0.1958	0.12695	72.1526	153.662	575.384	-0.16553	-0.022949	0.15918	34.982	-219.052	1376.908	-1.4355	0.92578	0.2251	NaN	NaN	NaN	NaN	NaN	NaN
0.962	35.463	17.1899	488.2366	-0.39736	0.21103	0.13164	86.0963	109.58722	559.121	-0.13525	-0.041016	0.14648	64.606	-143.3176	1397.557	-1.427	0.93335	0.21143	NaN	NaN	NaN	NaN	NaN	NaN
0.964	24.961	0.6015	539.3686	-0.44092	0.22978	0.13702	71.5139	116.4726	515.3607	-0.079102	-0.078125	0.11914	93.89	-127.404	1386.76	-1.4507	0.93213	0.19727	NaN	NaN	NaN	NaN	NaN	NaN
0.966	33.051	-23.515	569.2758	-0.48701	0.2501	0.13623	71.0374	135.398	456.399	-0.044922	-0.1062	0.099121	151.175	-71.078	1366.6966	-1.5425	0.93213	0.20703	NaN	NaN	NaN	NaN	NaN	NaN
0.968	15.937	-41.5616	615.09484	-0.53916	0.27373	0.15098	72.2249	114.7171	433.95	-0.01416	-0.12939	0.078125	204.624	-83.04	1362.032	-1.6094	0.93555	0.23682	NaN	NaN	NaN	NaN	NaN	NaN
0.97	-0.0640000000000001	-52.6256	682.664	-0.5918	0.30078	0.16309	36.946	140.9164	399.045	0.022461	-0.1582	0.053223	224.029	-13.323	1379.6567	-1.8047	0.93359	0.3208	NaN	NaN	NaN	NaN	NaN	NaN
0.972	-1.748	-44.5041	707.161	-0.65166	0.32207	0.17441	30.993	140.81417	350.164	0.035645	-0.16895	0.040527	219.892	-31.559	1420.245	-1.9995	0.93604	0.40772	NaN	NaN	NaN	NaN	NaN	NaN
0.974	13.678	-44.2623	710.346	-0.71573	0.34267	0.18789	23.311	118.7119	350.259	0.064453	-0.19189	0.031738	139.282	14.084	1417.6727	-2.2026	0.93799	0.4917	NaN	NaN	NaN	NaN	NaN	NaN
0.976	16.137	-43.148	699.483	-0.7833	0.36495	0.20391	-0.442999999999998	135.093	335.6204	0.080567	-0.19947	0.012695	71.8218	-44.3123	1433.5827	-2.4546	0.95557	0.57617	NaN	NaN	NaN	NaN	NaN	NaN
0.978	19.017	-33.816	684.015	-0.84717	0.38994	0.22353	14.2	98.3004	333.014	0.092773	-0.20801	-0.00048828	11.916	-55.023	1429.191	-2.5645	0.96875	0.60791	NaN	NaN	NaN	NaN	NaN	NaN
0.98	26.201	-43.5303	670.195	-0.91113	0.41113	0.23926	-1.663	82.9052	331.398	0.10596	-0.21436	-0.021484	48.024	-118.321	1468.281	-2.7383	0.98242	0.65088	NaN	NaN	NaN	NaN	NaN	NaN
0.982	21.916	-41.32777	647.907	-0.96962	0.42978	0.26758	-23.149	95.395	279.8311	0.11328	-0.2168	-0.029785	77.466	-94.451	1480.684	-2.8337	0.97876	0.66431	NaN	NaN	NaN	NaN	NaN	NaN
0.984	44.535	-36.52645	629.088	-1.022	0.44492	0.29697	4.58	77.8889	262.0261	0.11621	-0.22314	-0.041504	112.9036	-118.058	1490.206	-2.9038	0.96533	0.66602	NaN	NaN	NaN	NaN	NaN	NaN
0.986	33.82	-31.8834	593.4024	-1.0755	0.45781	0.32743	-28.508	91.588	243.814	0.12427	-0.22583	-0.045898	100.958	-78.768	1507.639	-2.9995	0.93799	0.66406	NaN	NaN	NaN	NaN	NaN	NaN
0.988	58.48	-10.1345	557.8753	-1.1196	0.47724	0.36249	-36.622	85.653	219.916	0.13379	-0.23291	-0.043457	68.37	-120.652	1541.796	-3.0308	0.92236	0.67285	NaN	NaN	NaN	NaN	NaN	NaN
0.99	38.264	-5.8893	555.759	-1.1523	0.49609	0.40674	6.61	65.59849	210.268	0.14551	-0.23486	-0.04834	36.475	-110.973	1526.12559	-3.0874	0.90576	0.66602	NaN	NaN	NaN	NaN	NaN	NaN
0.992	46.193	6.7116	574.633	-1.1588	0.50137	0.4249	-41.053	84.3956	175.152	0.13965	-0.23584	-0.050293	48.262	-150.761	1539.359	-3.0918	0.88623	0.68457	NaN	NaN	NaN	NaN	NaN	NaN
0.994	33.739	-4.197	590.589	-1.1578	0.50312	0.44874	-19.219	77.3857	161.415	0.13818	-0.23926	-0.055176	27.287	-81.522	1488.556	-3.0625	0.86816	0.68408	NaN	NaN	NaN	NaN	NaN	NaN
0.996	37.9768	-4.053	614.919	-1.1406	0.50469	0.45655	10.663	64.6981	167.029	0.14429	-0.24146	-0.061035	4.38500000000001	-66.297	1496.656	-3.019	0.86475	0.6582	NaN	NaN	NaN	NaN	NaN	NaN
0.998	36.4334	-38.012	652.6353	-1.1063	0.49247	0.45528	-21.428	73.691	150.591	0.15381	-0.24121	-0.071289	-7.479	28.0953	1465.783	-3.0034	0.87549	0.646	NaN	NaN	NaN	NaN	NaN	NaN
1	34.4369	-64.998	673.1897	-1.0708	0.48096	0.44922	33.0254	60.9751	134.0685	0.15967	-0.25049	-0.083008	-41.637	43.829	1420.418	-2.959	0.90039	0.62158	NaN	NaN	NaN	NaN	NaN	NaN
1.002	50.2471	-91.5345	689.437	-1.0342	0.47043	0.43674	31.657	63.3123	114.8	0.1665	-0.25537	-0.086914	-70.262	85.1513	1389.722	-2.9199	0.90137	0.60254	NaN	NaN	NaN	NaN	NaN	NaN
1.004	42.0799	-94.937	675.423	-1.0109	0.46883	0.42326	13.465	85.932	98.793	0.18115	-0.26172	-0.10107	-43.094	53.197	1393.644	-2.8809	0.9043	0.58496	NaN	NaN	NaN	NaN	NaN	NaN
1.006	64.796	-116.4671	684.7703	-0.99411	0.4708	0.41741	69.9085	68.259	101.77	0.18848	-0.26245	-0.11768	-7.962	86.6853	1398.057	-2.8198	0.90283	0.56738	NaN	NaN	NaN	NaN	NaN	NaN
1.008	36.135	-140.891	700.2409	-0.97709	0.47529	0.40777	62.9	67.793	89.616	0.19824	-0.2666	-0.12744	26.898	77.5138	1431.7848	-2.7852	0.90039	0.56104	NaN	NaN	NaN	NaN	NaN	NaN
1.01	15.238	-146.63	704.33	-0.96094	0.47852	0.39844	48.007	70.113	65.9265	0.21436	-0.27686	-0.14258	88.225	103.14	1436.011	-2.7144	0.89697	0.54004	NaN	NaN	NaN	NaN	NaN	NaN
1.012	7.683	-144.003	732.496	-0.95015	0.48324	0.39803	75.886	35.669	50.9533	0.21631	-0.28027	-0.15039	111.6639	73.505	1411.0037	-2.6465	0.88672	0.5232	NaN	NaN	NaN	NaN	NaN	NaN
1.014	8.329	-148.913	771.154	-0.93763	0.49453	0.40109	58.147	28.3327	43.4236	0.21875	-0.28711	-0.15771	107.014	57.319	1422.37	-2.582	0.86719	0.49902	NaN	NaN	NaN	NaN	NaN	NaN
1.016	-19.994	-129.68	795.744	-0.92512	0.50836	0.39864	39.565	30.2848	30.20162	0.2146	-0.28516	-0.16089	125.54	15.768	1419.99	-2.4668	0.83301	0.47607	NaN	NaN	NaN	NaN	NaN	NaN
1.018	-37.0775	-98.671	799.4848	-0.9066	0.51666	0.39619	65.4868	26.644	49.0938	0.20361	-0.28027	-0.15576	153.372	39.4337	1410.827	-2.4019	0.82275	0.46582	NaN	NaN	NaN	NaN	NaN	NaN
1.02	-22.7882	-67.162	811.353	-0.90039	0.53027	0.38525	30.503	52.7639	39.148	0.18506	-0.27441	-0.146	132.711	51.742	1412.287	-2.2734	0.79688	0.43213	NaN	NaN	NaN	NaN	NaN	NaN
1.022	-29.579	-47.906	852.1782	-0.8856	0.54311	0.37186	19.014	39.92568	22.643	0.1748	-0.26514	-0.13916	140.481	103.463	1403.647	-2.1699	0.77637	0.41114	NaN	NaN	NaN	NaN	NaN	NaN
1.024	-14.861	-31.933	882.4752	-0.87594	0.55838	0.35432	52.3108	23.769	33.3891	0.14795	-0.25391	-0.12598	109.102	105.105	1371.811	-2.0757	0.76416	0.38281	NaN	NaN	NaN	NaN	NaN	NaN
1.026	-4.039	-37.676	890.8866	-0.86741	0.56625	0.33355	3.393	35.858	17.5572	0.13013	-0.24097	-0.11914	106.9936	119.907	1352.079	-1.937	0.74268	0.34912	NaN	NaN	NaN	NaN	NaN	NaN
1.028	-16.817	-54.154	917.342	-0.86647	0.57677	0.31371	2.093	28.026	15.5181	0.10693	-0.2251	-0.10547	76.02	125.573	1284.06	-1.8726	0.72705	0.32324	NaN	NaN	NaN	NaN	NaN	NaN
1.03	-1.608	-82.123	945.7986	-0.88477	0.58545	0.29785	15.287	16.2428	21.923	0.074707	-0.20654	-0.09082	78.656	153.3241	1268.383	-1.7437	0.69775	0.2832	NaN	NaN	NaN	NaN	NaN	NaN
1.032	-11.455	-94.031	967.6543	-0.91817	0.60064	0.28824	-13.808	19.1924	8.39	0.0625	-0.20361	-0.090332	71.1445	195.096	1233.709	-1.6462	0.67529	0.25366	NaN	NaN	NaN	NaN	NaN	NaN
1.034	5.966	-110.8362	977.8731	-0.96824	0.62182	0.28179	-1.957	11.4155	9.13207	0.029297	-0.19287	-0.072754	87.457	227.491	1220.646	-1.5493	0.64893	0.22607	NaN	NaN	NaN	NaN	NaN	NaN
1.036	-19.477	-135.9011	985.2325	-1.0265	0.65293	0.28644	-28.345	18.50455	7.4084	0.00048828	-0.18652	-0.060059	57.85181	233.131	1183.0996	-1.4312	0.61182	0.19336	NaN	NaN	NaN	NaN	NaN	NaN
1.038	7.528	-143.459	1005.9059	-1.0764	0.68636	0.29469	-39.03	31.383	-4.327	-0.016602	-0.17871	-0.054688	60.7353	209.602	1142.634	-1.3779	0.60156	0.17041	NaN	NaN	NaN	NaN	NaN	NaN
1.04	8.901	-139.593	1040.597	-1.123	0.72266	0.30127	-13.896	31.585	3.83	-0.049805	-0.17285	-0.041504	40.698	189.737	1137.7583	-1.2773	0.57324	0.14795	NaN	NaN	NaN	NaN	NaN	NaN
1.042	25.9085	-117.6323	1061.1029	-1.1482	0.75891	0.31338	-32.52	30.3657	19.3013	-0.080811	-0.16284	-0.032226	21.837	171.996	1121.343	-1.2127	0.55493	0.12989	NaN	NaN	NaN	NaN	NaN	NaN
1.044	21.1247	-112.0735	1098.331	-1.1683	0.79243	0.31433	-27.294	25.0146	15.7633	-0.11182	-0.15576	-0.020996	-16.153	167.773	1088.633	-1.1499	0.5376	0.11133	NaN	NaN	NaN	NaN	NaN	NaN
1.046	42.9569	-100.8633	1116.474	-1.1732	0.81376	0.31003	5.062	-2.2461	23.0796	-0.14648	-0.146	-0.0029297	-35.96129	153.018	1078.247	-1.0703	0.51758	0.1001	NaN	NaN	NaN	NaN	NaN	NaN
1.048	58.877	-98.174	1116.444	-1.1795	0.83931	0.30384	-21.13	-4.063	19.2147	-0.16455	-0.14648	0.0058594	-76.976	148.838	1026.331	-1.0303	0.50781	0.088379	NaN	NaN	NaN	NaN	NaN	NaN
1.05	38.2577	-81.633	1137.178	-1.1777	0.85547	0.29199	3.968	-0.686	16.7358	-0.20313	-0.13428	0.023926	-99.156	100.223	1013.254	-0.96045	0.49268	0.07373	NaN	NaN	NaN	NaN	NaN	NaN
1.052	60.686	-84.548	1136.872	-1.1789	0.87091	0.27482	32.491	-12.1833	30.952	-0.22681	-0.11963	0.037109	-97.2686	104.54	954.4066	-0.90406	0.4751	0.06958	NaN	NaN	NaN	NaN	NaN	NaN
1.054	36.87	-86.786	1142.3467	-1.1955	0.88924	0.2592	8.356	17.9068	26.3255	-0.24561	-0.11328	0.05127	-89.148	91.123	889.428	-0.84717	0.46143	0.065918	NaN	NaN	NaN	NaN	NaN	NaN
1.056	34.6013	-73.431	1133.162	-1.2219	0.90411	0.24509	47.0987	21.6571	11.2526	-0.26367	-0.097656	0.064453	-74.74987	159.6553	847.722	-0.78467	0.43018	0.068359	NaN	NaN	NaN	NaN	NaN	NaN
1.058	18.544	-73.421	1138.224	-1.2633	0.92498	0.23706	67.33912	14.4012	13.8905	-0.27148	-0.09082	0.076172	-23.0692	163.434	832.04	-0.75244	0.41846	0.070801	NaN	NaN	NaN	NaN	NaN	NaN
1.06	-0.801	-67.9656	1167.805	-1.314	0.94385	0.23438	30.193	17.8477	14.7477	-0.28174	-0.082031	0.095215	-0.823	202.266	796.0696	-0.68799	0.38818	0.069824	NaN	NaN	NaN	NaN	NaN	NaN
1.062	4.735	-73.84	1211.0595	-1.3757	0.9621	0.23322	59.30159	-5.7414	30.2686	-0.28149	-0.077881	0.10425	32.2307	170.874	783.262	-0.61865	0.35889	0.074219	NaN	NaN	NaN	NaN	NaN	NaN
1.064	-19.9325	-79.7379	1213.0464	-1.4389	0.98492	0.24048	54.0639	-3.7392	27.0192	-0.2793	-0.069824	0.11182	43.5878	196.73	710.22	-0.57959	0.33545	0.07959	NaN	NaN	NaN	NaN	NaN	NaN
1.066	-15.031	-81.3938	1236.9532	-1.501	1.0134	0.25415	45.2262	8.3126	14.1262	-0.26318	-0.071289	0.11572	33.8964	179.608	664.818	-0.50537	0.3042	0.067383	NaN	NaN	NaN	NaN	NaN	NaN
1.068	-30.752	-83.1158	1269.09	-1.5701	1.0404	0.27464	93.297	-1.416322	17.8458	-0.24902	-0.071777	0.11523	16.289	245.607	625.358	-0.4458	0.27514	0.063476	NaN	NaN	NaN	NaN	NaN	NaN
1.07	-27.6832	-73.4439	1287.063	-1.6304	1.0708	0.30371	54.69	7.72469	4.122	-0.21875	-0.07666	0.11133	34.1059	230.1449	592.97	-0.38477	0.24463	0.057617	NaN	NaN	NaN	NaN	NaN	NaN
1.072	-22.018	-61.639	1294.524	-1.6923	1.1011	0.33923	32.982	24.2676	3.154	-0.18994	-0.081543	0.096434	25.976	263.849	528.048	-0.30811	0.19971	0.058105	NaN	NaN	NaN	NaN	NaN	NaN
1.074	-33.6753	-67.8938	1296.608	-1.7518	1.1297	0.37428	62.5874	14.9315	9.683	-0.15186	-0.088379	0.080566	36.6094	190.129	517.811	-0.271	0.17529	0.05957	NaN	NaN	NaN	NaN	NaN	NaN
1.076	-31.264	-73.0693	1316.955	-1.8069	1.1513	0.41139	9.054	13.2448	1.402	-0.10254	-0.10059	0.056641	42.159	181.6154	462.63	-0.18945	0.12598	0.062012	NaN	NaN	NaN	NaN	NaN	NaN
1.078	-40.315	-53.0829	1322.0877	-1.8582	1.1758	0.45379	14.445	6.5258	20.4419	-0.077148	-0.11035	0.041992	44.4745	133.142	439.145	-0.13867	0.086428	0.066894	NaN	NaN	NaN	NaN	NaN	NaN
1.08	-24.4754	-31.678	1309.1017364	-1.8921	1.1899	0.49023	40.6447	-24.4901	13.4036	-0.019531	-0.125	0.021484	57.2959	176.053	420.6037	-0.087891	0.048828	0.067871	NaN	NaN	NaN	NaN	NaN	NaN
1.082	-48.4038	-27.5638	1319.435	-1.9314	1.1987	0.52931	-7.473	-13.2248	4.11199	0.015137	-0.13672	0.0075683	82.338	147.198	414.898	-0.026855	0.0019531	0.060547	NaN	NaN	NaN	NaN	NaN	NaN
1.084	-31.277	-29.3757	1324.654	-1.9578	1.198	0.56378	-14.078	8.201	5.2925	0.05127	-0.14258	-0.01416	85.166	173.454	407.44	0.0039063	-0.020508	0.054199	NaN	NaN	NaN	NaN	NaN	NaN
1.086	-10.314	-21.0591	1313.794	-1.9813	1.1926	0.59034	-16.035	0.497	3.9318	0.097656	-0.15039	-0.041016	64.841	113.735	386.105	0.05957	-0.066406	0.039551	NaN	NaN	NaN	NaN	NaN	NaN
1.088	1.903	-2.8239	1308.6071	-1.9969	1.1719	0.61397	-28.665	31.1504	-1.1199	0.11572	-0.15723	-0.052734	33.693	145.283	339.7914	0.10523	-0.094969	0.020507	NaN	NaN	NaN	NaN	NaN	NaN
1.09	5.9955	3.9959	1328.46207	-2.0132	1.1606	0.625	-27.713	15.2538	5.489	0.15186	-0.16064	-0.078125	2.41	123.237	320.4422	0.1416	-0.12305	0.0048828	NaN	NaN	NaN	NaN	NaN	NaN
1.092	8.473	6.0803	1356.285	-2.0282	1.14	0.64649	-18.572	10.4226	4.944	0.17383	-0.16137	-0.093751	-25.805	189.602	285.7269	0.18506	-0.1582	-0.0078125	NaN	NaN	NaN	NaN	NaN	NaN
1.094	18.373	1.84402	1343.4128	-2.041	1.125	0.66221	-20.575	19.3909	-3.56899	0.19189	-0.15674	-0.10889	-61.593	173.3824	268.993	0.20361	-0.17383	-0.016113	NaN	NaN	NaN	NaN	NaN	NaN
1.096	26.4119	3.7105	1334.37476	-2.0566	1.1078	0.67392	-21.627	-3.1285	8.3843	0.20801	-0.15332	-0.12549	-48.11	190.6524	219.365	0.22266	-0.20361	-0.025391	NaN	NaN	NaN	NaN	NaN	NaN
1.098	51.543	-5.1415	1333.5106	-2.0753	1.0907	0.68398	-17.95	7.947	9.4651	0.21338	-0.14795	-0.13477	-67.9927	120.534	204.785	0.22656	-0.2207	-0.030518	NaN	NaN	NaN	NaN	NaN	NaN
1.1	43.5052	-11.35838	1325.836	-2.0933	1.0815	0.69434	-8.46	17.9661	-0.9299	0.21338	-0.13818	-0.14404	-55.8147	121.4683	181.209	0.21484	-0.23486	-0.03125	NaN	NaN	NaN	NaN	NaN	NaN
1.102	35.7869	-18.1666	1323.751	-2.1086	1.0652	0.69736	22.48	-0.457099999999999	-2.9493	0.20899	-0.13061	-0.15113	-88.449	79.636	144.3608	0.19287	-0.24414	-0.021973	NaN	NaN	NaN	NaN	NaN	NaN
1.104	37.7838	-18.1464	1296.5257	-2.1262	1.0557	0.7001	13.466	24.6709	-1.2373	0.2041	-0.12109	-0.15576	-66.5335	117.104	118.0721	0.17578	-0.24268	-0.010254	NaN	NaN	NaN	NaN	NaN	NaN
1.106	24.3405	-16.88151	1282.8823	-2.1355	1.0409	0.71065	36.709	36.093	8.1168	0.18359	-0.10693	-0.15967	-49.301	116.722	106.772	0.12793	-0.23779	0.0058594	NaN	NaN	NaN	NaN	NaN	NaN
1.108	13.552	-10.585	1293.29805	-2.1411	1.0284	0.71367	34.4583	19.4103	19.4047	0.17139	-0.095703	-0.15479	-9.75	128.845	91.5628	0.090333	-0.22632	0.02832	NaN	NaN	NaN	NaN	NaN	NaN
1.11	18.5549	9.059	1253.638	-2.1484	1.0254	0.72119	22.609	33.061	3.487	0.14063	-0.072754	-0.15771	5.7	85.668	77.553	0.041992	-0.21582	0.04834	NaN	NaN	NaN	NaN	NaN	NaN
1.112	12.216	20.2654	1251.8603	-2.1563	1.0175	0.72636	47.2136	19.2732	18.6134	0.11573	-0.052246	-0.15307	-2.697	60.799	69.467	-0.022949	-0.19238	0.07666	NaN	NaN	NaN	NaN	NaN	NaN
1.114	-4.12	36.8163	1249.9032	-2.1582	1.0183	0.73448	60.0946	-3.9061	13.5972	0.080078	-0.032715	-0.14941	-18.496	24.92	82.173	-0.049316	-0.1792	0.099121	NaN	NaN	NaN	NaN	NaN	NaN
1.116	-13.0346	59.775	1242.5871	-2.1578	1.011	0.74424	54.322	11.1071	18.3382	0.022461	-0.0024414	-0.14355	-9.359	28.484	86.421	-0.10596	-0.15381	0.13281	NaN	NaN	NaN	NaN	NaN	NaN
1.118	-11.4504	64.659	1226.05272	-2.1465	1.0097	0.75156	73.8546	6.59625	38.247	-0.003418	0.0097656	-0.13672	5.812	18.257	89.095	-0.13574	-0.13842	0.15088	NaN	NaN	NaN	NaN	NaN	NaN
1.12	-18.1856	56.888	1209.0211	-2.1348	1.0078	0.75635	50.6682	-4.5764	33.8428	-0.078125	0.050781	-0.12061	60.3367	15.66	66.231	-0.16357	-0.12012	0.16748	NaN	NaN	NaN	NaN	NaN	NaN
1.122	-35.8863	43.923	1221.5998	-2.1202	1.013	0.75703	36.121	23.2353	38.6019	-0.14185	0.077637	-0.10693	50.266	-4.845	33.5567	-0.18994	-0.092285	0.19238	NaN	NaN	NaN	NaN	NaN	NaN
1.124	-40.7084	60.581	1197.8863	-2.0942	1.0141	0.75791	69.5382	15.4865	67.1736	-0.2124	0.11084	-0.092773	77.0068	-20.9632	5.781	-0.19678	-0.082031	0.19922	NaN	NaN	NaN	NaN	NaN	NaN
1.126	-34.59	67.201	1177.017	-2.0629	1.0086	0.75401	34.247	22.65	76.374	-0.32031	0.15771	-0.069336	61.7082	-8.6207	-13.495	-0.20361	-0.064941	0.21826	NaN	NaN	NaN	NaN	NaN	NaN
1.128	-41.15197	69.071	1161.8159	-2.029	1.0019	0.74766	36.763	35.0093	119.91811	-0.38428	0.18652	-0.062012	68.2304	-2.272	-1.443	-0.21338	-0.060303	0.22949	NaN	NaN	NaN	NaN	NaN	NaN
1.13	-31.6418	57.0638	1160.8941	-1.9941	0.99023	0.73682	58.448	16.4469	162.34946	-0.51611	0.24854	-0.055176	76.017	18.4026	-3.788	-0.21924	-0.050293	0.23975	NaN	NaN	NaN	NaN	NaN	NaN
1.132	-39.3468	54.2715	1147.6532	-1.9511	0.97744	0.72266	16.563	33.238988	186.2277	-0.59937	0.28931	-0.025635	108.112	-0.294	15.9792	-0.22607	-0.04834	0.25781	NaN	NaN	NaN	NaN	NaN	NaN
1.134	-12.811	50.3943	1124.0036	-1.9081	0.97138	0.70899	23.705	45.0322	241.4815	-0.70117	0.33545	0.0048828	105.97	5.311	18.136	-0.23193	-0.044922	0.26318	NaN	NaN	NaN	NaN	NaN	NaN
1.136	-24.214	59.7043	1126.232	-1.8659	0.95889	0.69492	15.633	37.9426	291.7554	-0.8584	0.40234	0.049805	97.9343	-19.107	11.6028	-0.24268	-0.047363	0.27979	NaN	NaN	NaN	NaN	NaN	NaN
1.138	-15.268	77.1587	1112.9515	-1.8211	0.94493	0.67744	-32.142	65.693	356.8132	-0.94287	0.44189	0.074707	52.05	25.5476	-0.870999999999999	-0.24121	-0.041992	0.28907	NaN	NaN	NaN	NaN	NaN	NaN
1.14	10.812	78.6272	1084.2943	-1.7729	0.93018	0.65332	27.341	53	419.5979	-1.1357	0.52832	0.14551	7.477	21.7068	10.581	-0.23389	-0.041992	0.2959	NaN	NaN	NaN	NaN	NaN	NaN
1.142	19.052	97.651	1047.011	-1.7245	0.91299	0.64102	52.298	32.101	507.232	-1.2771	0.5979	0.21192	7.489	70.863	-8.3961	-0.21826	-0.043457	0.30029	NaN	NaN	NaN	NaN	NaN	NaN
1.144	43.2489	102.32	1045.9701	-1.6789	0.89336	0.61689	5.627	17.635	598.389	-1.4297	0.6748	0.29199	23.034	34.034	1.8042	-0.20361	-0.049805	0.30029	NaN	NaN	NaN	NaN	NaN	NaN
1.146	35.944	114.111	1021.5509	-1.6242	0.8793	0.59737	40.149	-41.027	704.407	-1.623	0.76563	0.40283	-10.447	36.917	-3.73662	-0.17432	-0.060547	0.2959	NaN	NaN	NaN	NaN	NaN	NaN
1.148	61.6309	114.403	994.163	-1.5808	0.85596	0.57637	46.594	-102.7605	791.478	-1.7163	0.80518	0.46094	-24.929	-27.7734	3.1164	-0.14233	-0.068604	0.28369	NaN	NaN	NaN	NaN	NaN	NaN
1.15	61.9024	108.553	970.9496	-1.5327	0.83252	0.55371	-1.387	-101.662	866.0741	-1.8711	0.84766	0.56104	-44.791	9.729	4.318	-0.12305	-0.086426	0.26953	NaN	NaN	NaN	NaN	NaN	NaN
1.152	50.1725	100.808	957.49	-1.4851	0.80869	0.5334	25.1469	-116.246	937.7187	-1.9385	0.85449	0.61865	-52.0057	-15.05	14.3092	-0.09375	-0.097168	0.25439	NaN	NaN	NaN	NaN	NaN	NaN
1.154	66.7875	98.1522	933.2706	-1.4405	0.78799	0.51211	-22.1544	-101.2837	954.9265	-1.998	0.83105	0.64502	-27.437	39.513	29.4587	-0.077148	-0.10693	0.24463	NaN	NaN	NaN	NaN	NaN	NaN
1.156	56.4897	88.4376	903.588	-1.3905	0.76299	0.49219	-52.3343	-72.376	951.129	-2.0137	0.76953	0.6333	-16.354	1.3112	50.677	-0.053223	-0.12939	0.22266	NaN	NaN	NaN	NaN	NaN	NaN
1.158	59.252	95.46959	866.441	-1.3422	0.73457	0.47022	-18.314	-70.174	968.2	-2.0024	0.72803	0.59961	-13.614	37.708	33.1017	-0.03711	-0.14013	0.20996	NaN	NaN	NaN	NaN	NaN	NaN
1.16	43.681	106.5395	847.973	-1.2988	0.70313	0.45068	-13.776	-76.592	964.811	-1.9165	0.65186	0.53516	-8.184	-1.7614	31.21	-0.020996	-0.14648	0.20215	NaN	NaN	NaN	NaN	NaN	NaN
1.162	54.1301	111.689	845.557	-1.2478	0.67901	0.4333	-18.767	-99.101	965.151	-1.8057	0.60669	0.47022	-25.076	42.402	1.282	0.0048828	-0.16309	0.2002	NaN	NaN	NaN	NaN	NaN	NaN
1.164	36.32	107.645	821.087	-1.1987	0.64541	0.41973	-27.714	-133.205	936.832	-1.6777	0.5498	0.38818	-47.9978	11.68551	18.08177	0.023926	-0.17236	0.19287	NaN	NaN	NaN	NaN	NaN	NaN
1.166	42.162	90.1537	801.575	-1.1519	0.6251	0.39629	-30.0481	-125.615	898.33	-1.4995	0.46729	0.27539	-30.238	39.0735	23.1422	0.060059	-0.18408	0.19141	NaN	NaN	NaN	NaN	NaN	NaN
1.168	16.257	85.5921	789.828	-1.104	0.59951	0.37461	-35.3299	-79.306	883.4582	-1.4116	0.43408	0.22607	33.434	-11.542	37.3483	0.085205	-0.19434	0.1836	NaN	NaN	NaN	NaN	NaN	NaN
1.17	23.679	101.268	770.468	-1.0581	0.56689	0.35742	-27.851	-63.751	861.732	-1.2407	0.35645	0.11914	62.217	17.5756	41.044	0.1167	-0.20703	0.17578	NaN	NaN	NaN	NaN	NaN	NaN
1.172	27.703	108.091	739.0928	-1.012	0.53203	0.34307	-13.064	-33.449	868.642	-1.1226	0.28174	0.030273	55.8267	-24.7405	36.6505	0.15674	-0.21973	0.1582	NaN	NaN	NaN	NaN	NaN	NaN
1.174	-12.633	115.526	697.9454	-0.96748	0.50049	0.32579	39.435	-35.928	872.967	-1.0967	0.27734	0.003418	61.073	12.84054	15.477	0.17529	-0.229	0.15186	NaN	NaN	NaN	NaN	NaN	NaN
1.176	7.518	120.809	659.57	-0.92881	0.47275	0.31094	36.781	-65.162	903.577	-1.1128	0.33838	-0.0083008	38.474	-4.982	7.949	0.21191	-0.2417	0.13965	NaN	NaN	NaN	NaN	NaN	NaN
1.178	-13.917	115.295	643.735	-0.8875	0.45039	0.29844	25.478	-70.486	959.435	-1.1526	0.42553	0.015137	75.8652	33.552	3.816	0.22998	-0.2522	0.12378	NaN	NaN	NaN	NaN	NaN	NaN
1.18	-3.069	117.544	621.3547	-0.8457	0.42188	0.28906	0.117999999999999	-84.055	1007.223	-1.1792	0.5083	0.046875	101.859	-0.688000000000001	23.1358	0.24609	-0.25488	0.10791	NaN	NaN	NaN	NaN	NaN	NaN
1.182	-16.089	108.483	618.628	-0.81133	0.39688	0.27744	-45.4048	-114.914	1029.737	-1.1865	0.58398	0.074707	112.4394	-2.0305	35.589	0.26563	-0.25439	0.089355	NaN	NaN	NaN	NaN	NaN	NaN
1.184	8.789	111.7	600.018	-0.77002	0.37207	0.26718	-29.64125	-138.0573	1048.301	-1.1816	0.61816	0.071289	92.064	-46.318	23.176	0.27197	-0.24658	0.081543	NaN	NaN	NaN	NaN	NaN	NaN
1.186	7.008	112.188	565.9521	-0.73291	0.35215	0.26054	-52.04	-176.025	1068.7534	-1.1699	0.66406	0.068359	77.2616	-23.10916	16.84	0.27295	-0.23584	0.06543	NaN	NaN	NaN	NaN	NaN	NaN
1.188	3.752	111.797	546.2099	-0.68916	0.33017	0.25215	-89.206	-197.684	1086.842	-1.1553	0.69775	0.069336	36.3202	-26.699	12.846	0.27027	-0.22388	0.052246	NaN	NaN	NaN	NaN	NaN	NaN
1.19	27.557	103.1263	539.8855	-0.65088	0.30908	0.24561	-20.101	-187.31	1132.118	-1.1499	0.729	0.071289	14.638	8.2838	19.768	0.25781	-0.20996	0.043945	NaN	NaN	NaN	NaN	NaN	NaN
1.192	42.408	111.842	515.612	-0.61201	0.28389	0.23047	-40.391	-183.684	1154.0133	-1.1484	0.76172	0.079102	41.965	5.8289	17.2116	0.24365	-0.18262	0.038086	NaN	NaN	NaN	NaN	NaN	NaN
1.194	52.5601	108.354	484.8507	-0.57783	0.26221	0.22089	-50.402	-170.228	1163.2838	-1.1538	0.77588	0.08252	51.466	-2.43658	2.5639	0.22412	-0.16284	0.038574	NaN	NaN	NaN	NaN	NaN	NaN
1.196	41.62	97.4893	455.8932	-0.54034	0.24072	0.20722	38.342	-127.336	1179.732	-1.2007	0.81592	0.088379	23.175	6.5282263	-19.9576	0.20313	-0.13867	0.041504	NaN	NaN	NaN	NaN	NaN	NaN
1.198	46.3457	90.9274	459.022	-0.49912	0.21738	0.19639	39.9057	-130.518	1203.8	-1.2691	0.86572	0.10547	13.626	10.299	-0.381400000000001	0.16504	-0.099609	0.048828	NaN	NaN	NaN	NaN	NaN	NaN
1.2	67.1488	85.1431	440.867	-0.4585	0.19287	0.18555	68.4836	-92.735	1223.624	-1.3647	0.92725	0.1416	-42.2156	26.492	-13.4872	0.14063	-0.084961	0.050293	NaN	NaN	NaN	NaN	NaN	NaN
1.202	53.7203	86.83523	406.4924	-0.42539	0.17275	0.17461	138.577	-28.322	1231.7851	-1.5386	1.0259	0.22852	-28.055	22.278	8.8715	0.10498	-0.044922	0.062988	NaN	NaN	NaN	NaN	NaN	NaN
1.204	70.4407	78.2365	390.5056	-0.39121	0.15459	0.16475	82.0268	-11.12	1235.9431	-1.6465	1.0703	0.29248	-12.987	32.9744	4.4354	0.070068	-0.021484	0.068848	NaN	NaN	NaN	NaN	NaN	NaN
1.206	64.9865	77.579	361.7004	-0.35605	0.13389	0.15342	55.265	28.692	1246.988	-1.9141	1.1797	0.42041	-12.98	14.788	9.4443	0.036621	0.0058594	0.079102	NaN	NaN	NaN	NaN	NaN	NaN
1.208	74.5066	87.8537	356.862	-0.32666	0.11621	0.14297	57.202	28.325	1251.884	-2.112	1.2473	0.52099	-35.639	29.4948	9.2177	-0.0039063	0.04541	0.084473	NaN	NaN	NaN	NaN	NaN	NaN
1.21	49.403	85.2074	336.4649	-0.29834	0.099609	0.13232	-1.358	-31.7125	1271.908	-2.3047	1.3105	0.61084	-43.288	7.668	20.841	-0.024902	0.064453	0.084473	NaN	NaN	NaN	NaN	NaN	NaN
1.212	68.341	80.9782	326.81248	-0.26846	0.083301	0.12324	13.727	-41.5437	1279.49	-2.5112	1.3813	0.70068	-64.96849	39.3705	-1	-0.066895	0.095703	0.084961	NaN	NaN	NaN	NaN	NaN	NaN
1.214	55.464	84.6924	305.5475	-0.24267	0.064649	0.10537	58.121	-72.434	1307.0691	-2.5996	1.4063	0.73584	-36.2785	15.3323	5.6744	-0.10156	0.11817	0.0979	NaN	NaN	NaN	NaN	NaN	NaN
1.216	57.2157	83.62	291.8703	-0.21455	0.049414	0.097559	49.103	-103.14	1343.104	-2.7456	1.438	0.77734	-16.396	25.7561	8.803	-0.13965	0.14258	0.094238	NaN	NaN	NaN	NaN	NaN	NaN
1.218	31.335	81.767	264.12342	-0.19297	0.036816	0.089648	89.5693	-99.673	1349.041	-2.8003	1.4361	0.79346	10.693	-19.5797	45.935	-0.19385	0.17139	0.094238	NaN	NaN	NaN	NaN	NaN	NaN
1.22	16.525	66.6635	267.5579	-0.17285	0.022461	0.084473	108.1035	-116.235	1353.757	-2.8413	1.4263	0.79688	39.677	-14.4617	67.989	-0.22168	0.19141	0.087402	NaN	NaN	NaN	NaN	NaN	NaN
1.222	26.419	64.96	260.4765	-0.15459	0.0082033	0.073633	84.078	-130.37	1340.3916	-2.8237	1.395	0.77148	46.8731	-50.49897	96.365	-0.28516	0.23242	0.087402	NaN	NaN	NaN	NaN	NaN	NaN
1.224	-2.965	71.8691	233.071	-0.13955	-0.0036133	0.064844	101.685	-94.614	1343.9965	-2.7671	1.3657	0.74414	2.533	11.121	122.5463	-0.3335	0.26123	0.091064	NaN	NaN	NaN	NaN	NaN	NaN
1.226	8.791	65.18018	211.61	-0.1208	-0.012598	0.058203	96.0282	-88.569	1366.774	-2.6699	1.2773	0.67236	23.2653	-9.454	185.843	-0.39258	0.28711	0.091309	NaN	NaN	NaN	NaN	NaN	NaN
1.228	-6.718	65.71327	203.6351	-0.1044	-0.021582	0.049512	45.31	-58.302	1380.328	-2.6309	1.2158	0.64599	67.1774	32.868	220.69186	-0.47705	0.32471	0.10156	NaN	NaN	NaN	NaN	NaN	NaN
1.23	-4.427	66.1059	193.8529	-0.09082	-0.032227	0.043945	50.607	-26.808	1362.198492	-2.6387	1.1719	0.6333	74.7535	10.442	273.5004	-0.52344	0.33691	0.10498	NaN	NaN	NaN	NaN	NaN	NaN
1.232	-19.739	60.3851	179.6277	-0.076172	-0.045508	0.034277	21.119	-38.4059	1362.7599	-2.6602	1.1309	0.62354	60.0196	63.967	301.963	-0.61328	0.37158	0.11963	NaN	NaN	NaN	NaN	NaN	NaN
1.234	-15.087	57.861	188.3181	-0.061133	-0.054785	0.025196	-6.64200000000001	-13.66669	1365.5594	-2.6484	1.1055	0.6167	46.848	40.046	414.8475	-0.69605	0.40015	0.12207	NaN	NaN	NaN	NaN	NaN	NaN
1.236	-0.650000000000006	35.7686	193.807	-0.043555	-0.062988	0.014258	31.487	6.1162	1338.1241	-2.562	1.061	0.56934	8.6551	88.9739	488.6904	-0.77979	0.42822	0.13428	NaN	NaN	NaN	NaN	NaN	NaN
1.238	-0.215	46.93	169.6958	-0.02959	-0.073144	0.005957	22.391	-8.5434	1312.909	-2.4841	1.0188	0.52368	-9.0496	44.684	571.408	-0.89404	0.46924	0.13281	NaN	NaN	NaN	NaN	NaN	NaN
1.24	23.158	51.591	144.8576	-0.013184	-0.081055	-0.00048828	35.24	30.622	1304.911	-2.4194	0.98682	0.48633	24.6386	66.7002	642.4494	-0.95459	0.49072	0.1416	NaN	NaN	NaN	NaN	NaN	NaN
1.242	8.78	59.357	135.4223	-0.0006836	-0.093555	-0.0094726	80.303	27.4939	1298.771	-2.3652	0.94531	0.46436	30.6764	13.616	740.7955	-1.0898	0.53223	0.1665	NaN	NaN	NaN	NaN	NaN	NaN
1.244	34.217	64.706	127.1776	0.011621	-0.098731	-0.017188	73.341	-24.172	1344.196	-2.3574	0.92578	0.45752	-20.8828	23.0397	820.4695	-1.1931	0.55664	0.19702	NaN	NaN	NaN	NaN	NaN	NaN
1.246	29.047	65.776	111.915	0.018262	-0.10225	-0.020703	71.716	-19.445	1351.321	-2.3569	0.89502	0.44629	-1.0507	-58.914	905.792	-1.293	0.58008	0.24023	NaN	NaN	NaN	NaN	NaN	NaN
1.248	26.797	58.036	103.626	0.032617	-0.11416	-0.026465	100.5525	-51.789	1341.382	-2.3562	0.87817	0.44458	-29.094	-68.448	917.929	-1.4453	0.59912	0.31006	NaN	NaN	NaN	NaN	NaN	NaN
1.25	53.1783	42.783	114.1599	0.04248	-0.12305	-0.03418	81.176	-63.822	1378.9739	-2.3452	0.87158	0.44141	-38.8519	-131.754	987.743	-1.5176	0.61523	0.34912	NaN	NaN	NaN	NaN	NaN	NaN
1.252	54.4222	36.84363	120.897	0.054883	-0.13575	-0.039551	78.533	-15.338	1397.014	-2.3042	0.86963	0.43945	5.841	-145.633	1047.0238	-1.6401	0.61768	0.46387	NaN	NaN	NaN	NaN	NaN	NaN
1.254	69.9315	36.459	108.474	0.072559	-0.15	-0.061328	84.2048	-16.72646	1382.875	-2.2729	0.8667	0.43164	29.795	-203.104	1060.38	-1.7315	0.61133	0.55176	NaN	NaN	NaN	NaN	NaN	NaN
1.256	51.843	36.87	81.309	0.092481	-0.16211	-0.07461	69.175	8.815	1355.446	-2.2056	0.85986	0.41504	38.455	-187.76333	1028.14	-1.8105	0.60938	0.62939	NaN	NaN	NaN	NaN	NaN	NaN
1.258	75.2986	41.3861	81.0052	0.11309	-0.1791	-0.10137	75.88	34.329	1318.777	-2.143	0.85791	0.40161	32.705	-215.852	1004.288	-1.897	0.59473	0.71484	NaN	NaN	NaN	NaN	NaN	NaN
1.26	47.1855	49.579	59.079	0.12451	-0.19482	-0.12646	83.315	22.639	1300.303	-2.0801	0.84766	0.38525	22.076	-182.2771	974.791	-1.9395	0.5957	0.74854	NaN	NaN	NaN	NaN	NaN	NaN
1.262	66.96216	46.942	63.121	0.14326	-0.20625	-0.14922	81.24	60.375	1302.969	-1.9956	0.83643	0.35938	-8.714	-188.661	959.087	-1.9995	0.61768	0.81641	NaN	NaN	NaN	NaN	NaN	NaN
1.264	56.2221	38.6568	59.9376	0.16406	-0.2207	-0.16533	101.477	84.416	1282.645	-1.959	0.83008	0.34912	16.882	-164.932	913.2582	-1.9817	0.62915	0.83887	NaN	NaN	NaN	NaN	NaN	NaN
1.266	55.235	34.9522	74.458	0.17657	-0.23282	-0.17627	100.9038	71.199	1270.682	-1.875	0.82031	0.32764	32.615	-141.108	877.586	-1.9414	0.62305	0.82959	NaN	NaN	NaN	NaN	NaN	NaN
1.268	43.454	31.6583	73.285	0.17265	-0.23603	-0.18066	113.8264	88.501	1269.466	-1.8274	0.81616	0.31617	31.927	-81.731	885.593	-1.8926	0.63477	0.79443	NaN	NaN	NaN	NaN	NaN	NaN
1.27	30.446	35.146	63.368	0.1665	-0.23779	-0.18408	127.3578	88.9	1253.0175	-1.7886	0.81201	0.30273	21.9604	-30.85	928.988	-1.8784	0.65869	0.77344	NaN	NaN	NaN	NaN	NaN	NaN
1.272	30.937	36.092	60.2176	0.1581	-0.23545	-0.17646	97.556	82.335	1229.0963	-1.7422	0.81641	0.28564	28.0893	-9.5	974.886	-1.8687	0.71143	0.73926	NaN	NaN	NaN	NaN	NaN	NaN
1.274	4.113	32.686	54.8651	0.14053	-0.23027	-0.17032	101.268	127.347	1222.7121	-1.7144	0.81494	0.27539	13.0965	-28.495	1029.347	-1.8936	0.75634	0.73584	NaN	NaN	NaN	NaN	NaN	NaN
1.276	13.029	32.299	53.7135	0.12061	-0.22363	-0.15742	91.943	116.773	1196.656	-1.6616	0.81885	0.25732	69.192	-75.359	1070.325	-1.9214	0.79932	0.73242	NaN	NaN	NaN	NaN	NaN	NaN
1.278	-3.449	37.452	38.561	0.089356	-0.2083	-0.14375	40.216	86.518	1199.8764	-1.617	0.81177	0.2417	79.078	-95.988	1148.301	-1.9155	0.84326	0.68945	NaN	NaN	NaN	NaN	NaN	NaN
1.28	1.777	32.888	33.3524	0.055664	-0.19434	-0.12646	30.651	74.713	1187.816	-1.5713	0.80176	0.22314	109.726	-122.735	1178.419	-1.8882	0.86377	0.64258	NaN	NaN	NaN	NaN	NaN	NaN
1.282	-2.276	24.8609	45.6771	0.010547	-0.17119	-0.10615	36.202	31.932	1171.5984	-1.5234	0.78906	0.2085	94.055	-145.8376	1198.392	-1.7886	0.89697	0.51367	NaN	NaN	NaN	NaN	NaN	NaN
1.284	-8.365	21.6092	43.733	-0.038574	-0.15283	-0.083301	16.032	41.97	1178.599	-1.5039	0.78125	0.20557	66.58869	-211.493	1231.5366	-1.6885	0.90234	0.41358	NaN	NaN	NaN	NaN	NaN	NaN
1.286	8.001	19.6832	38.1271	-0.080762	-0.13603	-0.060254	6.633	74.10706	1140.112	-1.4624	0.76514	0.18799	-1.76	-277.82	1232.827	-1.5874	0.89307	0.32422	NaN	NaN	NaN	NaN	NaN	NaN
1.288	-17.015	6.7265	46.813	-0.12842	-0.12305	-0.04082	19.401	67.811	1115.104	-1.4265	0.7522	0.17407	25.064	-330.44	1290.248	-1.4824	0.86719	0.26025	NaN	NaN	NaN	NaN	NaN	NaN
1.29	14.963	8.7614	51.383	-0.16016	-0.10693	-0.013672	32.192	107.983	1066.7381	-1.3936	0.73242	0.17041	21.574	-312.52	1312.286	-1.4551	0.85156	0.24463	NaN	NaN	NaN	NaN	NaN	NaN
1.292	1.6	13.6887	47.367	-0.2001	-0.095021	0.0057617	54.234	140.66	1010.73	-1.334	0.71484	0.15674	11.327	-280.653	1346.379	-1.4453	0.82813	0.25049	NaN	NaN	NaN	NaN	NaN	NaN
1.294	6.277	21.982	28.2399	-0.22901	-0.080274	0.02461	59.3	134.793	1015.955	-1.3003	0.70459	0.15381	-6.002	-213.65	1348.513	-1.4722	0.82373	0.26636	NaN	NaN	NaN	NaN	NaN	NaN
1.296	19.685	22.626	34.9649	-0.25947	-0.06582	0.047266	33.583	162.661	991.8403	-1.2363	0.67773	0.14746	1.174	-168.6486	1355.436	-1.5059	0.83594	0.2959	NaN	NaN	NaN	NaN	NaN	NaN
1.298	26.865	27.571	31.5363	-0.28848	-0.05205	0.070996	40.369	170.751	965.4046	-1.1914	0.65186	0.14257	-35.405	-121.408	1346.737	-1.5522	0.87549	0.34082	NaN	NaN	NaN	NaN	NaN	NaN
1.3	48.3	17.4693	30.2938	-0.30811	-0.036133	0.085938	27.257	159.262	965.369	-1.1406	0.62891	0.14404	-6.285	-97.128	1373.198	-1.5776	0.90283	0.36523	NaN	NaN	NaN	NaN	NaN	NaN
1.302	22.358	-0.92371	36.238	-0.31895	-0.024902	0.095899	4.182	173.484	920.631	-1.0679	0.59814	0.14404	-18.973	-55.841	1367.166	-1.6543	0.95801	0.40869	NaN	NaN	NaN	NaN	NaN	NaN
1.304	59.7243	-10.3118	38.992	-0.31768	-0.022754	0.10284	29.458	155.47	884.6826	-1.0124	0.56861	0.13623	-35.8692	-25.035	1389.657	-1.7524	0.99073	0.43798	NaN	NaN	NaN	NaN	NaN	NaN
1.306	53.25	-5.96492	42.3	-0.30948	-0.024317	0.098536	9.602	136.51859	872.376	-0.95508	0.54492	0.125	-35.9493	2.234	1396.4743	-1.8804	1.0181	0.4707	NaN	NaN	NaN	NaN	NaN	NaN
1.308	81.7931	5.8299	29.319	-0.29922	-0.024805	0.093066	17.331	152.8024	813.255	-0.87549	0.50586	0.12402	-56.339	-26.77	1401.354	-2.1309	1.0527	0.53613	NaN	NaN	NaN	NaN	NaN	NaN
1.31	49.438	2.60767	24.1806	-0.29004	-0.022949	0.09082	48.82557	126.999	795.122	-0.83643	0.48926	0.11963	-93.45	-54.734	1384.228	-2.271	1.0708	0.58008	NaN	NaN	NaN	NaN	NaN	NaN
1.312	55.448	14.5082	18.1311	-0.27607	-0.017481	0.088965	14.133	111.847	782.806	-0.76172	0.43945	0.11768	-68.5065	-125.742	1413.786	-2.5776	1.1021	0.69727	NaN	NaN	NaN	NaN	NaN	NaN
1.314	64.1599	8.7926	9.2297	-0.26435	-0.012598	0.08125	40.645	113.3012	744.221	-0.70972	0.40869	0.11425	-44.4238	-154.101	1434.586	-2.8266	1.1309	0.80005	NaN	NaN	NaN	NaN	NaN	NaN
1.316	58.256	13.1076	7.8009	-0.24991	-0.0067383	0.086329	63.263	85.701	756.39847	-0.65967	0.37158	0.11133	-32.9204	-178.318	1485.599	-3.0781	1.1582	0.91064	NaN	NaN	NaN	NaN	NaN	NaN
1.318	47.524	-8.17148	38.447	-0.23672	-0.0074219	0.074414	15.448	96.8178	761.824	-0.60059	0.32178	0.10303	-32.691	-157.704	1499.212	-3.353	1.1919	1.0488	NaN	NaN	NaN	NaN	NaN	NaN
1.32	34.489	-9.4942	36.103	-0.2207	-0.0048828	0.071289	30.0628	127.071	706.41	-0.56348	0.29834	0.10107	9.84152	-154.774	1508.661	-3.4448	1.1958	1.1035	NaN	NaN	NaN	NaN	NaN	NaN
1.322	37.987	-6.3303	32.425	-0.1998	-0.0097654	0.062304	42.7481	125.9982	720.53	-0.49854	0.25391	0.09375	15.2308	-135.2666	1504.0133	-3.6621	1.2148	1.1333	NaN	NaN	NaN	NaN	NaN	NaN
1.324	28.164	1.7637	16.3833	-0.18105	-0.01289	0.059766	3.102	156.2695	674.723	-0.45093	0.22192	0.088867	39.1107	-127.837	1486.089	-3.8301	1.2734	1.1411	NaN	NaN	NaN	NaN	NaN	NaN
1.326	21.294	-6.2952	11.135	-0.167	-0.015625	0.051953	0.551000000000002	165.3119	605.361	-0.40381	0.18457	0.081543	70.6735	-75.585	1504.8778	-3.8066	1.2764	1.1411	NaN	NaN	NaN	NaN	NaN	NaN
1.328	3.233	-10.1428	36.654	-0.15147	-0.017676	0.044922	-6.711	160.029736	599.132	-0.34766	0.13867	0.071777	52.6418	-24.8625	1512.805	-3.7163	1.1978	1.1084	NaN	NaN	NaN	NaN	NaN	NaN
1.33	12.808	-8.45	24.845	-0.13428	-0.019531	0.041016	-16.906	175.7348	531.405	-0.31836	0.11426	0.066406	47.636	41.5134	1502.11	-3.5957	1.1504	1.0415	NaN	NaN	NaN	NaN	NaN	NaN
1.332	8.25	-10.355	27.333	-0.11758	-0.025586	0.029101	-11.264	148.067541	493.075	-0.27148	0.067871	0.058105	12.7179	49.435	1485.913	-3.4604	1.1235	0.97461	NaN	NaN	NaN	NaN	NaN	NaN
1.334	-21.991	-18.278	50.0495	-0.10098	-0.030664	0.022851	-22.499	123.772	505.5816	-0.24243	0.034179	0.063476	4.868	63.749	1459.418	-3.2456	1.0708	0.88867	NaN	NaN	NaN	NaN	NaN	NaN
1.336	8.83	-22.72	75.834	-0.084961	-0.031836	0.0076171	-11.89	153.726	457.37807	-0.20947	0	0.057129	3.109	65.7121	1421.171	-3.1367	1.0488	0.84424	NaN	NaN	NaN	NaN	NaN	NaN
1.338	5.57100000000001	-16.237	77.2886	-0.069434	-0.030859	-0.0024414	19.6643	139.278	450.2737	-0.17285	-0.037109	0.05957	37.46	102.685	1397.697	-2.9468	1.0063	0.77441	NaN	NaN	NaN	NaN	NaN	NaN
1.34	8.208	0.093	86.799	-0.052734	-0.030273	-0.010742	-5.633	135.686	453.513	-0.14941	-0.051758	0.056152	21.1848	114.163	1390.949	-2.8252	0.97608	0.73486	NaN	NaN	NaN	NaN	NaN	NaN
1.342	6.481	13.3624	103.43724	-0.04834	-0.030664	-0.024218	-32.4126	145.781	398.48	-0.11084	-0.081055	0.053711	28.6932	114.025	1415.7081	-2.7144	0.95361	0.70117	NaN	NaN	NaN	NaN	NaN	NaN
1.344	-2.523	31.527	124.8115	-0.041504	-0.030078	-0.033691	-16.011	129.644	393.447	-0.091308	-0.10254	0.04248	3.2425	77.5122	1439.869	-2.6069	0.91455	0.6875	NaN	NaN	NaN	NaN	NaN	NaN
1.346	7.794	43.57936	153.983	-0.044238	-0.024219	-0.036817	-26.045	143.489	381.842	-0.063477	-0.11963	0.037109	2.641	40.58	1449.446	-2.5562	0.89307	0.67773	NaN	NaN	NaN	NaN	NaN	NaN
1.348	18.633	61.6936	165.922	-0.053809	-0.014453	-0.043164	-9.736	144.373	359.997	-0.041504	-0.14746	0.040527	-24.8983	2.204	1458.881	-2.4683	0.83057	0.66406	NaN	NaN	NaN	NaN	NaN	NaN
1.35	52.882	62.7426	218.056	-0.072754	-0.0039063	-0.048828	-4.553	92.057	359.036	-0.040039	-0.15771	0.043945	-13.713	13.592	1457.738	-2.3911	0.79297	0.6582	NaN	NaN	NaN	NaN	NaN	NaN
1.352	15.748	66.241	244.8122	-0.082813	0.0041016	-0.043457	-34.72	94.1642	324.626	-0.03418	-0.16699	0.050781	-58.5577	25.942	1422.706	-2.3022	0.7583	0.64258	NaN	NaN	NaN	NaN	NaN	NaN
1.354	61.23701	57.003	270.0185	-0.11026	0.017676	-0.039844	4.704	95.25806	296.706	-0.030273	-0.17944	0.050293	-40.0666	72.927	1402.517	-2.1582	0.72852	0.61963	NaN	NaN	NaN	NaN	NaN	NaN
1.356	56.006	46.9993	311.2158	-0.14502	0.030176	-0.029688	13.484	93.1872	294.307	-0.030762	-0.19043	0.060547	-82.489	83.572	1386.034	-2.0718	0.72021	0.60059	NaN	NaN	NaN	NaN	NaN	NaN
1.358	69.1068	50.902	359.9619	-0.17744	0.048731	-0.020996	-8.524	125.572	270.1737	-0.032227	-0.18799	0.073242	-69.429	79.405	1375.3978	-1.8984	0.69238	0.56494	NaN	NaN	NaN	NaN	NaN	NaN
1.36	73.935	39.394	406.052	-0.2207	0.069336	-0.010742	36.9591	105.9637	234.231	-0.029785	-0.18652	0.07373	-73.568	65.529	1335.8687	-1.7778	0.66211	0.5498	NaN	NaN	NaN	NaN	NaN	NaN
1.362	95.0058	29.659	445.759	-0.275	0.091602	0.0025391	21.316	97.233	210.563	-0.030273	-0.18457	0.086426	-33.038	99.7131	1296.017294	-1.6616	0.62939	0.54395	NaN	NaN	NaN	NaN	NaN	NaN
1.364	89.0356	11.6552	485.287	-0.33301	0.11582	0.026954	9.604	132.626	183.301	-0.033204	-0.17456	0.095703	-18.956	153.2809	1264.47	-1.5293	0.57227	0.53174	NaN	NaN	NaN	NaN	NaN	NaN
1.366	55.442	-7.8318	552.211	-0.40215	0.13809	0.044531	63.9987	117.994	191.649	-0.035156	-0.16699	0.10791	8.063	210.077	1236.9359	-1.4707	0.55273	0.5293	NaN	NaN	NaN	NaN	NaN	NaN
1.368	66.1775	-26.1236	598.468	-0.48125	0.1707	0.054492	29.6848	118.956	195.302	-0.040527	-0.14893	0.12158	17.139	220.703	1194.7418	-1.3652	0.52539	0.52295	NaN	NaN	NaN	NaN	NaN	NaN
1.37	63.2503	-35.041	660.367	-0.57715	0.20215	0.059082	21.165	124.546	170.3659	-0.035645	-0.146	0.12549	28.817	195.899	1165.292	-1.2773	0.49707	0.5249	NaN	NaN	NaN	NaN	NaN	NaN
1.372	52.8357	-59.3085	713.149	-0.65576	0.23486	0.085156	51.2361	86.138	166.27	-0.03125	-0.12793	0.1333	31.327	176.414	1117.381	-1.2031	0.46875	0.51416	NaN	NaN	NaN	NaN	NaN	NaN
1.374	5.329	-72.1358	723.468	-0.73428	0.25742	0.11875	-3.559	100.521	150.746	-0.02417	-0.11915	0.13575	40.1705	163.861	1102.775	-1.1094	0.4292	0.51025	NaN	NaN	NaN	NaN	NaN	NaN
1.376	8.3096	-61.002	716.655	-0.83232	0.29062	0.14961	6.262	95.99	116.13917	-0.01416	-0.10742	0.13477	29.787	185.53559	1064.811	-1.0542	0.40674	0.50391	NaN	NaN	NaN	NaN	NaN	NaN
1.378	11.1314	-34.9987	700.5776	-0.93633	0.32812	0.18584	45.8416	58.001	119.6453	-0.00048828	-0.094238	0.13428	42.403	175.8646	1040.6	-0.95801	0.35742	0.48877	NaN	NaN	NaN	NaN	NaN	NaN
1.38	-9.5309	-10.724	693.33772	-1.0425	0.37354	0.23145	-10.805	64.8075	79.408	0.010254	-0.088867	0.12842	57.623	157.969	998.3635	-0.88623	0.31933	0.47924	NaN	NaN	NaN	NaN	NaN	NaN
1.382	-17.898	-10.7997	691.6208	-1.1409	0.4249	0.28272	5.322	40.1078	61.613	0.027344	-0.086426	0.11133	68.5559	102.215	981.0616	-0.81934	0.29248	0.46533	NaN	NaN	NaN	NaN	NaN	NaN
1.384	-28.006	-26.034	673.8741	-1.2339	0.47764	0.33125	44.883	19.6435	70.9199	0.039063	-0.090088	0.10547	64.319	91.438	923.682	-0.72998	0.2583	0.4375	NaN	NaN	NaN	NaN	NaN	NaN
1.386	-24.659	-33.3059	672.2572	-1.296	0.52334	0.37812	-10.442	40.859	65.425	0.054688	-0.087402	0.083984	92.706	88.925	904.6336	-0.67334	0.24658	0.42383	NaN	NaN	NaN	NaN	NaN	NaN
1.388	-51.6468	-49.2259	697.53	-1.3437	0.55488	0.4044	-0.108000000000001	33.819	83.758	0.060547	-0.07959	0.053223	99.8715	131.7468	854.2391	-0.56641	0.20947	0.38184	NaN	NaN	NaN	NaN	NaN	NaN
1.39	-36.7968	-36.485	705.1999	-1.3604	0.56934	0.4165	20.617	29.4232	90.232	0.071777	-0.077148	0.041504	95.751	162.429	831.043	-0.48316	0.1792	0.34815	NaN	NaN	NaN	NaN	NaN	NaN
1.392	-1.791	-25.866	716.0643	-1.3542	0.57412	0.41836	-11.762	53.034	46.8898	0.070313	-0.074219	0.012207	102.646	217.309	769.96999	-0.40137	0.14258	0.31494	NaN	NaN	NaN	NaN	NaN	NaN
1.394	-23.11	-31.322	707.215	-1.3297	0.57109	0.40517	5.167	27.7933	47.4121	0.062256	-0.070557	-0.0083006	82.187	199.544	732.747	-0.30127	0.095215	0.27295	NaN	NaN	NaN	NaN	NaN	NaN
1.396	-4.504	-48.615	714.824	-1.2922	0.55468	0.37783	2.263	32.8716	33.34564	0.056152	-0.064453	-0.018066	60.707	209.289	673.294	-0.25537	0.073242	0.25391	NaN	NaN	NaN	NaN	NaN	NaN
1.398	-18.355	-63.61	752.5373	-1.2583	0.54385	0.34873	-21.762	46.6929	4.161	0.04248	-0.060547	-0.030273	54.783	197.442	654.8156	-0.16895	0.020996	0.2168	NaN	NaN	NaN	NaN	NaN	NaN
1.4	39.306	-69.437	774.8165	-1.2124	0.52002	0.31641	-5.237	19.2441	9.868	0.029785	-0.056641	-0.026855	22.565	239.395	607.766	-0.10889	-0.0061035	0.18994	NaN	NaN	NaN	NaN	NaN	NaN
1.402	17.134	-91.99	809.356	-1.1713	0.50576	0.28526	-4.722	26.175	1.4309	0.0068359	-0.05957	-0.025879	13.002	231.944	589.215	-0.050781	-0.039551	0.16602	NaN	NaN	NaN	NaN	NaN	NaN
1.404	23.116	-126.4209	836.344	-1.1341	0.48447	0.25508	10.972	17.02625	-2.7011	-0.0068361	-0.05542	-0.011719	20.389	251.803	522.995	0.02002	-0.077637	0.12939	NaN	NaN	NaN	NaN	NaN	NaN
1.406	40.614	-136.273	838.801	-1.1036	0.46338	0.22734	9.359	-13.2692	20.897	-0.026367	-0.050781	0.0019531	19.645	211.0335	476.199	0.056152	-0.1001	0.11035	NaN	NaN	NaN	NaN	NaN	NaN
1.408	53.8606	-132.491	860.017	-1.0726	0.4544	0.20527	29.636	14.18233	11.0218	-0.044922	-0.056641	0.014648	23.58	206.786	422.762	0.12598	-0.1416	0.074219	NaN	NaN	NaN	NaN	NaN	NaN
1.41	64.9	-140.733	872.4615	-1.0552	0.44971	0.18115	51.3255	7.2686	-3.378	-0.052246	-0.052734	0.032227	17.591	173.00699	400.736	0.17066	-0.16919	0.037598	NaN	NaN	NaN	NaN	NaN	NaN
1.412	46.983	-126.378	874.142	-1.03	0.45029	0.15733	27.565	-8.48994	26.5218	-0.057129	-0.057129	0.050781	1.11499999999999	190.676	381.857	0.20996	-0.19922	0.012695	NaN	NaN	NaN	NaN	NaN	NaN
1.414	96.6303	-109.9518	904.39	-1.0053	0.46211	0.13779	26.468	12.8256	8.026	-0.052734	-0.059082	0.060791	10.555	149.3108	407.863	0.26904	-0.24023	-0.032715	NaN	NaN	NaN	NaN	NaN	NaN
1.416	86.2174	-89.38	931.8134	-0.97832	0.47109	0.11513	34.0652	-19.1725	20.4048	-0.044922	-0.070313	0.071777	37.585	150.574	387.908	0.29199	-0.25977	-0.04541	NaN	NaN	NaN	NaN	NaN	NaN
1.418	73.8077	-93.347	946.1623	-0.95107	0.47978	0.087891	24.204	-14.7545	20.7375	-0.019531	-0.077148	0.080566	38.534	98.226	385.046	0.33447	-0.29785	-0.084961	NaN	NaN	NaN	NaN	NaN	NaN
1.42	99.0722	-89.944	966.5331	-0.91357	0.48682	0.052246	28.712	12.6037	5.36813	-0.010254	-0.083984	0.083496	27.734	105.706	324.517	0.35791	-0.32324	-0.10815	NaN	NaN	NaN	NaN	NaN	NaN
1.422	117.465	-70.63	985.3786	-0.88613	0.49277	0.019141	45.78	-4.8329	26.022	0.0058594	-0.1001	0.091309	24.323	89.275	293.007	0.37451	-0.34375	-0.13428	NaN	NaN	NaN	NaN	NaN	NaN
1.424	117.869	-62.01	997.9091	-0.86015	0.49551	-0.014453	10.483	11.71956	25.42	0.018555	-0.11426	0.094726	37.779	116.695	251.5688	0.3877	-0.36914	-0.15771	NaN	NaN	NaN	NaN	NaN	NaN
1.426	71.3968	-79.873	1004.838	-0.84141	0.49824	-0.039453	38.011	28.8497	-4.7093	0.026367	-0.12549	0.092773	31.83	119.432	221.3814	0.39258	-0.37207	-0.17188	NaN	NaN	NaN	NaN	NaN	NaN
1.428	53.274	-81.3709	1006.99	-0.8375	0.50762	-0.058887	51.5132	-4.0726	5.8728	0.029785	-0.12988	0.089844	64.083	136.753	189.0654	0.39111	-0.38184	-0.19629	NaN	NaN	NaN	NaN	NaN	NaN
1.43	63.078	-96.081	1000.691	-0.84766	0.52344	-0.070313	9.7	14.3746	-1.827	0.033691	-0.13721	0.083008	68.6465	101.015	168.412	0.38379	-0.38892	-0.20972	NaN	NaN	NaN	NaN	NaN	NaN
1.432	52.688	-109.3053	1003.935	-0.86338	0.53623	-0.070215	42.576	10.0951	4.189	0.034668	-0.13574	0.093262	65.046	87.3974	127.922	0.36914	-0.38818	-0.22119	NaN	NaN	NaN	NaN	NaN	NaN
1.434	30.032	-128.217	1034.1826	-0.88975	0.55322	-0.064941	36.954	7.41622	17.82	0.034668	-0.12988	0.092773	59.131	73.7954	115.88	0.33789	-0.38184	-0.23047	NaN	NaN	NaN	NaN	NaN	NaN
1.436	21.114	-126.726	1061.024	-0.91904	0.56611	-0.060254	-16.415	34.441	-8.705189	0.032715	-0.12598	0.086914	61.654	89.462	79.583	0.31543	-0.37988	-0.23242	NaN	NaN	NaN	NaN	NaN	NaN
1.438	28.26	-119.498	1060.829	-0.94648	0.58867	-0.051465	33.9458	23.5549	3.0611	0.029297	-0.1167	0.091797	62.189	101.043	89.9709	0.26123	-0.36963	-0.229	NaN	NaN	NaN	NaN	NaN	NaN
1.44	12.601	-114.9446	1079.751	-0.97217	0.60791	-0.037598	8.275	-0.8346	9.22991	0.022216	-0.11108	0.10034	100.8745	106.697	72.66751	0.21216	-0.35742	-0.21191	NaN	NaN	NaN	NaN	NaN	NaN
1.442	28.486	-124.0864	1097.82	-1.0077	0.62432	-0.027344	-28.16	26.70833	9.807	0.014648	-0.10791	0.10645	85.1887	82.8585	57.365	0.15479	-0.34766	-0.19678	NaN	NaN	NaN	NaN	NaN	NaN
1.444	34.399	-99.67	1105.246	-1.0472	0.64951	-0.012403	33.686	-0.262099999999999	4.20018	0.0087891	-0.093262	0.104	62.5404	53.038	26.853	0.0625	-0.33447	-0.16797	NaN	NaN	NaN	NaN	NaN	NaN
1.446	62.289	-77.11	1108.934	-1.0846	0.67295	-0.0034179	-5.26600000000001	6.5052	6.8007	0.0048828	-0.09082	0.1084	34.562	40.3096	19.904	0.011719	-0.32813	-0.14893	NaN	NaN	NaN	NaN	NaN	NaN
1.448	21.646	-68.436	1101.0727	-1.1329	0.69268	0.0015625	-34.747	27.191	-4.5265	-0.0058594	-0.07373	0.10596	23.069	18.1384	28.787	-0.091797	-0.29443	-0.10645	NaN	NaN	NaN	NaN	NaN	NaN
1.45	39.5	-76.005	1111.8589	-1.1924	0.70898	0.015625	31.748	-13.07447	15.859	-0.0068359	-0.062011	0.10058	-11.182	20.4435	31.7034	-0.16919	-0.27026	-0.074463	NaN	NaN	NaN	NaN	NaN	NaN
1.452	52.358	-65.8441	1131.4803	-1.2661	0.729	0.033301	-10.504	15.7141	10.876	-0.0092773	-0.042969	0.097168	24.926	-3.456	37.614	-0.23926	-0.25732	-0.049805	NaN	NaN	NaN	NaN	NaN	NaN
1.454	80.848	-59.0656	1137.628	-1.3621	0.75703	0.061524	-13.124	32.5001	-8.90742	-0.014648	-0.023438	0.092285	17.738	-1.4903	27.5669	-0.31299	-0.23828	-0.012695	NaN	NaN	NaN	NaN	NaN	NaN
1.456	61.747	-74.3539	1138.0735	-1.4711	0.78555	0.097852	44.4653	4.3972	27.271	-0.018066	-0.016602	0.095215	-5.124	-26.872	30.512	-0.3684	-0.23242	0.010986	NaN	NaN	NaN	NaN	NaN	NaN
1.458	69.696	-78.5115	1136.1877	-1.5906	0.82227	0.14531	5.531	28.8716	21.3591	-0.03125	0.0092773	0.08252	-26.124	8.581	0.172000000000001	-0.42773	-0.22021	0.036133	NaN	NaN	NaN	NaN	NaN	NaN
1.46	94.765	-71.995	1141.9758	-1.7124	0.8667	0.21094	3.068	16.67042	-0.8903	-0.035889	0.024658	0.083252	-12.491	23.487	10.5675	-0.51611	-0.2085	0.07959	NaN	NaN	NaN	NaN	NaN	NaN
1.462	105.496	-55.6503	1156.0977	-1.8338	0.92168	0.2706	57.6121	7.6542	11.7943	-0.051758	0.045898	0.075195	-17.378	57.48	6.0671	-0.55664	-0.19629	0.10205	NaN	NaN	NaN	NaN	NaN	NaN
1.464	138.8818	-69.4892	1186.1272	-1.9539	0.98594	0.33252	10.945	35.515	4.4201	-0.084961	0.07666	0.053223	-7.471	33.321	25.3512	-0.62646	-0.18213	0.14258	NaN	NaN	NaN	NaN	NaN	NaN
1.466	132.8723	-81.4793	1192.5589	-2.0532	1.0414	0.39189	22.277	4.5614	37.997	-0.10645	0.092285	0.041504	9.434	45.012	16.7423	-0.65357	-0.17993	0.1648	NaN	NaN	NaN	NaN	NaN	NaN
1.468	147.543	-72.3192	1197.8368	-2.1259	1.1023	0.43779	44.808	13.8086	79.2184	-0.14893	0.13525	0.027832	10.594	15.4206	40.2755	-0.65771	-0.18311	0.16992	NaN	NaN	NaN	NaN	NaN	NaN
1.47	141.0893	-69.57015	1209.7907	-2.1875	1.1533	0.47168	18.915	67.282	68.597	-0.18213	0.16382	0.030762	-2.098	27.5349	8.43075	-0.63623	-0.17529	0.16016	NaN	NaN	NaN	NaN	NaN	NaN
1.472	131.6479	-68.26541	1221.9631	-2.2108	1.208	0.49883	35.82	58.0325	108.32951	-0.22656	0.19141	0.033203	-29.588	9.11	31.349	-0.62012	-0.16992	0.15234	NaN	NaN	NaN	NaN	NaN	NaN
1.474	125.0365	-50.9625	1238.844	-2.2268	1.2395	0.50703	30.002	84.868	151.171	-0.28613	0.22607	0.037598	-21.518	42.037	5.1472	-0.55029	-0.16455	0.13232	NaN	NaN	NaN	NaN	NaN	NaN
1.476	132.0694	-33.191	1224.2474	-2.2144	1.2551	0.51328	-1.334	91.426	173.542	-0.31836	0.24219	0.038086	12.051	12.893	23.38632	-0.49975	-0.1709	0.11645	NaN	NaN	NaN	NaN	NaN	NaN
1.478	113.5884	-37.9703	1212.9242	-2.2122	1.246	0.50801	34.4509	54.6931	212.45794	-0.38916	0.26807	0.036133	45.457	34.2126	6.5384	-0.44287	-0.17969	0.10254	NaN	NaN	NaN	NaN	NaN	NaN
1.48	77.897	-41.1794	1216.4513	-2.2012	1.2285	0.50342	19.326	78.6304	234.1428	-0.44629	0.29395	0.038818	46.38487	-15.063	18.3169	-0.36279	-0.19531	0.076172	NaN	NaN	NaN	NaN	NaN	NaN
1.482	80.154	-24.9171	1211.0138	-2.1925	1.2016	0.50341	1.689	75.1753	271.95901	-0.5083	0.31543	0.035645	56.12	-5.4902	19.381	-0.32373	-0.20752	0.059082	NaN	NaN	NaN	NaN	NaN	NaN
1.484	94.2202	-1.4146	1216.0603	-2.1866	1.172	0.50078	12.676	52.551	348.1997	-0.59375	0.3584	0.047363	53.2319	-34.6889	31.9743	-0.23193	-0.23438	0.038086	NaN	NaN	NaN	NaN	NaN	NaN
1.486	57.93	-0.761000000000001	1211.484	-2.1819	1.1454	0.50078	-21.08	76.9547	370.9383	-0.63867	0.375	0.054199	50.07	0.6025	27.2682	-0.17627	-0.24854	0.017822	NaN	NaN	NaN	NaN	NaN	NaN
1.488	45.219	-7.223	1210.165	-2.175	1.1242	0.50381	8.479	46.1701	395.814	-0.7417	0.40771	0.073242	68.9638	-21.41	54.041	-0.11719	-0.26025	-0.0078125	NaN	NaN	NaN	NaN	NaN	NaN
1.49	49.607	-1.364	1238.8	-2.1699	1.1152	0.51221	7.674	26.8466	436.69	-0.82177	0.43652	0.09839	106.3689	9.29424	48.921	-0.030273	-0.27588	-0.016602	NaN	NaN	NaN	NaN	NaN	NaN
1.492	73.061	16.255	1222.0059	-2.1683	1.1071	0.51944	-29.856	36.601	481.3419	-0.91016	0.46289	0.12012	56.6559	-26.78912	39.4951	0.0063477	-0.28613	-0.021973	NaN	NaN	NaN	NaN	NaN	NaN
1.494	35.036	5.085	1231.8491	-2.1687	1.111	0.52939	-2.558	-4.1965	572.18874	-1.02	0.49268	0.1665	52.69	0.938	-4.993	0.058105	-0.2832	-0.039551	NaN	NaN	NaN	NaN	NaN	NaN
1.496	44.593	-5.401	1251.968	-2.1641	1.1172	0.54033	1.857	-3.0579	617.2267	-1.0776	0.50781	0.19238	23.6754	-8.4	-4.434	0.095215	-0.27637	-0.049561	NaN	NaN	NaN	NaN	NaN	NaN
1.498	44.095	9.4806	1241.2278	-2.1507	1.1224	0.55293	-12.787	-8.992	669.172	-1.1851	0.54346	0.25488	15.436	25.6396	0.427	0.12158	-0.27148	-0.04834	NaN	NaN	NaN	NaN	NaN	NaN
1.5	44.135	15.3186	1245.3	-2.1367	1.127	0.55322	30.778	-59.4121	748.706	-1.2527	0.5603	0.31738	24.388	-0.695	-4.835	0.14404	-0.26172	-0.056152	NaN	NaN	NaN	NaN	NaN	NaN
1.502	14.552	-0.359999999999999	1223.69045	-2.1139	1.119	0.55439	2.819	-54.2594	802.3369	-1.312	0.56494	0.38281	46.806	23.3669	-5.0522	0.14893	-0.25586	-0.056641	NaN	NaN	NaN	NaN	NaN	NaN
1.504	35.705	6.3118	1210.681	-2.084	1.1109	0.54697	8.212	-81.261	835.09412	-1.3789	0.56738	0.47314	11.169	0.92393	-5.6632	0.16064	-0.23926	-0.052246	NaN	NaN	NaN	NaN	NaN	NaN
1.506	69.911	17.0997	1230.879	-2.05	1.098	0.53096	49.406	-99.352	879.392	-1.4136	0.56543	0.51563	26.988	14.521	-3.1973	0.16675	-0.22803	-0.052491	NaN	NaN	NaN	NaN	NaN	NaN
1.508	64.403	21.696	1223.797	-2.0142	1.0892	0.51143	15.899	-92.319	844.173	-1.4629	0.56543	0.59229	-10.161	-5.331	1.354	0.1792	-0.22021	-0.050781	NaN	NaN	NaN	NaN	NaN	NaN
1.51	69.739	22.5746	1215.8398	-1.98	1.0786	0.49023	78.267	-144.2928	819.894	-1.4771	0.5542	0.62158	-17.318	20.809	25.62886	0.2002	-0.19971	-0.0625	NaN	NaN	NaN	NaN	NaN	NaN
1.512	90.1777	38.043	1212.089	-1.9384	1.0679	0.47285	116.715	-154.963	793.39	-1.4937	0.53955	0.64258	-8.195	7.407	16.7588	0.21436	-0.19727	-0.067383	NaN	NaN	NaN	NaN	NaN	NaN
1.514	117.4143	47.051	1213.301	-1.9067	1.0621	0.45654	48.58	-130.409	713.7807	-1.5	0.52539	0.65869	33.763	7.52	13.9211	0.22852	-0.18311	-0.078125	NaN	NaN	NaN	NaN	NaN	NaN
1.516	102.637	53.8663	1207.0504	-1.8769	1.0496	0.43233	107.23242	-148.42	726.7815	-1.5054	0.53564	0.66797	-18.79	0.77	-3.026	0.23267	-0.17212	-0.088868	NaN	NaN	NaN	NaN	NaN	NaN
1.518	105.0545	70.979	1202.2332	-1.8462	1.0434	0.41279	91.7113	-124.332	728.163	-1.5112	0.5708	0.69043	-19.638	-1.171	-4.322	0.23145	-0.1582	-0.096191	NaN	NaN	NaN	NaN	NaN	NaN
1.52	121.587	85.664	1202.2016	-1.8223	1.0342	0.39307	31.208	-84.986	707.727	-1.5066	0.61109	0.70923	-46.8088	4.7678	-4.16892	0.22217	-0.15088	-0.10596	NaN	NaN	NaN	NaN	NaN	NaN
1.522	111.0134	81.5855	1189.062	-1.7935	1.0277	0.37519	75.582	-94.8436	761.051	-1.4917	0.64502	0.71875	-23.708	11.421	21.6681	0.21094	-0.14746	-0.10596	NaN	NaN	NaN	NaN	NaN	NaN
1.524	97.4234	60.8267	1178.2	-1.7672	1.0183	0.35625	40.782	-52.944	779.896	-1.48	0.67432	0.71973	-5.837	17.3047	25.4044	0.19141	-0.14404	-0.11523	NaN	NaN	NaN	NaN	NaN	NaN
1.526	87.232	59.7907	1179.923	-1.752	1.0055	0.33945	17.985	-40.912	802.093	-1.4702	0.68799	0.71582	29.293	21.6245	39.7771	0.17627	-0.14722	-0.12134	NaN	NaN	NaN	NaN	NaN	NaN
1.528	102.237	68.2199	1177.675	-1.7246	0.99688	0.32559	67.692	-54.558	863.8239	-1.4683	0.70752	0.69141	30.072	22.98	11.2704	0.15576	-0.15137	-0.12695	NaN	NaN	NaN	NaN	NaN	NaN
1.53	87.1853	65.3802	1144.5237	-1.6987	0.99463	0.30762	52.6387	-40.952	875.8927	-1.447	0.71997	0.65796	44.211	26.802	11.45572	0.12695	-0.14551	-0.12549	NaN	NaN	NaN	NaN	NaN	NaN
1.532	57.269	58.6204	1129.4792	-1.6778	0.98409	0.29434	62.844	-99.738	910.913	-1.4253	0.72949	0.61914	27.312	43.985	13.2488	0.10889	-0.1377	-0.12598	NaN	NaN	NaN	NaN	NaN	NaN
1.534	66.312	53.2993	1126.33487	-1.647	0.97666	0.2792	68.362	-148.199	971.503	-1.4102	0.74805	0.5708	32.56	31.0075	24.8085	0.066895	-0.12939	-0.1167	NaN	NaN	NaN	NaN	NaN	NaN
1.536	73.472	57.93162	1120.8494	-1.6219	0.96572	0.26905	27.544	-164.412	964.7888	-1.4077	0.76025	0.54492	49.412	31.46775	19.6003	0.029785	-0.1167	-0.10571	NaN	NaN	NaN	NaN	NaN	NaN
1.538	56.446	73.917	1102.997	-1.603	0.95127	0.26572	23.676	-242.632	1004.5086	-1.4082	0.7793	0.49951	88.122	9.4665	32.8547	-0.011719	-0.11133	-0.09668	NaN	NaN	NaN	NaN	NaN	NaN
1.54	15.722	79.015	1096.165	-1.5796	0.93994	0.26172	-10.278	-224.547	1020.4328	-1.4046	0.79175	0.46631	67.7122	7.768	21.4087	-0.053711	-0.095703	-0.079102	NaN	NaN	NaN	NaN	NaN	NaN
1.542	28.891	76.1081	1097.585	-1.555	0.92764	0.25645	-55.626	-226.047	1027.9839	-1.4004	0.80664	0.44385	64.9997	-4.3807	33.6721	-0.080566	-0.084473	-0.071289	NaN	NaN	NaN	NaN	NaN	NaN
1.544	26.363	93.005	1072.982	-1.5253	0.91924	0.24453	-31.079	-259.028	1069.9182	-1.374	0.82031	0.41064	35.602	7.743	24.0321	-0.11523	-0.073242	-0.058105	NaN	NaN	NaN	NaN	NaN	NaN
1.546	7.116	101.3	1038.2	-1.4956	0.9083	0.23789	-45.7164	-205.016	1091.0645	-1.3613	0.81836	0.39111	16.419	-13.3169	20.0227	-0.13916	-0.060059	-0.048828	NaN	NaN	NaN	NaN	NaN	NaN
1.548	-10.916	97.4931	1015.349	-1.466	0.89258	0.229	-52.3936	-192.8586	1125.6265	-1.332	0.82227	0.34229	58.012	-5.658	6.896	-0.1582	-0.052734	-0.040527	NaN	NaN	NaN	NaN	NaN	NaN
1.55	18.819	100.178	1001.3647	-1.437	0.87354	0.22266	-27.0785	-168.1959	1184.0459	-1.3056	0.81933	0.30053	56.5958	-17.517	29.6897	-0.18213	-0.044434	-0.035156	NaN	NaN	NaN	NaN	NaN	NaN
1.552	2.476	92.951	978.7253	-1.4133	0.8625	0.21719	-43.034	-63.879	1177.9588	-1.2847	0.83057	0.25781	51.8338	1.8959	19.599	-0.19482	-0.037109	-0.035645	NaN	NaN	NaN	NaN	NaN	NaN
1.554	0.887	83.475	954.6028	-1.3866	0.8458	0.20449	5.637	-62.197	1190.8103	-1.2817	0.85205	0.21582	32.2878	-18.8249	32.3324	-0.20361	-0.041016	-0.039551	NaN	NaN	NaN	NaN	NaN	NaN
1.556	27.716	61.8588	965.389	-1.3585	0.83174	0.19941	20.295	-38.149	1194.3736	-1.3008	0.86133	0.18994	24.11	1.326	19.839	-0.21021	-0.038818	-0.036132	NaN	NaN	NaN	NaN	NaN	NaN
1.558	49.918	72.1462	958.621	-1.3288	0.81884	0.18828	-22.335	-19.06	1190.341	-1.3789	0.90234	0.1582	-15.221	-10.6236	30.0862	-0.22217	-0.043945	-0.038574	NaN	NaN	NaN	NaN	NaN	NaN
1.56	48.969	81.0387	922.3173	-1.3008	0.81006	0.19189	27.978	-82.061	1222.117	-1.4764	0.92701	0.14917	12.755	16.239	14.10104	-0.23682	-0.046387	-0.032227	NaN	NaN	NaN	NaN	NaN	NaN
1.562	47.132	79.229	903.8053	-1.2715	0.79649	0.18818	23.411	-95.012	1235.493	-1.5933	0.94775	0.1543	12.831	-10.9098	23.111	-0.24609	-0.047852	-0.032715	NaN	NaN	NaN	NaN	NaN	NaN
1.564	59.5468	80.1728	875.56	-1.2447	0.78828	0.19267	-29.6152	-123.83071	1228.496	-1.7656	0.97656	0.18604	9.318	8.306	4.425	-0.26855	-0.049316	-0.04248	NaN	NaN	NaN	NaN	NaN	NaN
1.566	66.695	94.7574	868.1513	-1.2193	0.77148	0.18682	10.6992	-187.156	1279.669	-1.9002	0.99636	0.22802	-25.116	-21.372	28.019	-0.28564	-0.04834	-0.042968	NaN	NaN	NaN	NaN	NaN	NaN
1.568	69.27713	98.5083	843.4196	-1.1911	0.7583	0.17793	-9.972	-154.089	1269.911	-2.0449	1.0176	0.27588	-36.904	-2.94	20.451	-0.30811	-0.041504	-0.041504	NaN	NaN	NaN	NaN	NaN	NaN
1.57	78	91.503	828.4995	-1.1558	0.7417	0.17236	0.397000000000002	-172.795	1267.042	-2.2256	1.041	0.36865	-57.3205	-17.681	53.829	-0.35742	-0.026855	-0.038574	NaN	NaN	NaN	NaN	NaN	NaN
1.572	74.3654	96.9482	802.4473	-1.1251	0.72451	0.16875	60.818	-158.659	1322.746	-2.3125	1.0605	0.4126	-7.568	-5.143	79.313	-0.38135	-0.023926	-0.03418	NaN	NaN	NaN	NaN	NaN	NaN
1.574	88.504	104.843	786.6944	-1.0957	0.71094	0.1628	35.4411	-107.3724	1334.506	-2.4683	1.0903	0.51074	15.387	-46.0869	160.666	-0.44531	-0.0048828	-0.030762	NaN	NaN	NaN	NaN	NaN	NaN
1.576	67.6404	108.4135	756.956	-1.0672	0.6957	0.15888	53.183	-155.414	1381.82	-2.5874	1.1225	0.57324	36.081	-20.694	171.7355	-0.5	0.0036621	-0.023682	NaN	NaN	NaN	NaN	NaN	NaN
1.578	78.5071	113.42189	743.6664	-1.0401	0.68466	0.16045	47.107	-126.8576	1411.664	-2.687	1.1489	0.646	31.13	-24.3789	253.009	-0.55811	0.016113	-0.020996	NaN	NaN	NaN	NaN	NaN	NaN
1.58	75.9938	121.71	716.754	-1.0098	0.6709	0.15918	17.86805	-99.942	1379.0627	-2.7769	1.1646	0.7168	36.461	24.196	306.7414	-0.65234	0.040039	-0.015625	NaN	NaN	NaN	NaN	NaN	NaN
1.582	66.1791	119.315	688.653	-0.98359	0.65391	0.15928	47.564	-119.458	1386.1143	-2.8198	1.1724	0.75977	11.799	15.1038	417.595	-0.70703	0.056152	-0.018555	NaN	NaN	NaN	NaN	NaN	NaN
1.584	41.628	110.217	672.42968	-0.95694	0.64053	0.1625	12.693	-29.699	1348.133	-2.8848	1.1826	0.81006	50.051	59.419	500.69	-0.83154	0.094727	-0.0024414	NaN	NaN	NaN	NaN	NaN	NaN
1.586	30.333	107.581	655.1163	-0.92725	0.62646	0.16992	-26.6968	-25.152	1298.556	-2.9165	1.1841	0.8335	91.238	52.772	644.018	-0.97803	0.13867	0.024414	NaN	NaN	NaN	NaN	NaN	NaN
1.588	53.474	102.3033	657.6956	-0.90273	0.60762	0.17148	-9.885	-40.918	1322.785	-2.9395	1.1816	0.84814	103.741	54.927	743.091	-1.0679	0.16113	0.050293	NaN	NaN	NaN	NaN	NaN	NaN
1.59	16.218	118.897	621.3506	-0.87695	0.5957	0.16699	-55.8861	-9.443	1328.77	-2.939	1.1646	0.85547	114.433	-1.6284	862.9903	-1.2534	0.21338	0.10449	NaN	NaN	NaN	NaN	NaN	NaN
1.592	8.251	118.271	596.5324	-0.84795	0.57471	0.17607	-52.549	-53.055	1344.646	-2.9253	1.145	0.84277	148.965	-47.256	997.066	-1.408	0.25806	0.17432	NaN	NaN	NaN	NaN	NaN	NaN
1.594	-2.256	118.4455	589.9328	-0.81709	0.55264	0.17109	-51.908	-39.307	1383.9758	-2.894	1.1255	0.83105	104.808	-113.952	1084.247	-1.5698	0.29541	0.25049	NaN	NaN	NaN	NaN	NaN	NaN
1.596	-4.9	110.42	573.8845	-0.79014	0.53428	0.17773	-66.385	-2.8456	1353.625	-2.8677	1.1084	0.82031	150.322	-138.638	1140.297	-1.7886	0.33252	0.34766	NaN	NaN	NaN	NaN	NaN	NaN
1.598	-29.71	117.0429	534.929	-0.76289	0.51328	0.16846	-38.1306	-41.234	1371.202	-2.8472	1.0884	0.80078	131.253	-170.4692	1179.522	-1.916	0.35156	0.37695	NaN	NaN	NaN	NaN	NaN	NaN
1.6	-30.2564	126.703	516.8762	-0.72998	0.49268	0.16748	-50.5035	12.966	1387.8067	-2.793	1.0684	0.77588	66.75	-165.9569	1153.538	-2.1211	0.375	0.44043	NaN	NaN	NaN	NaN	NaN	NaN
1.602	-2.692	116.341	509.4276	-0.7001	0.47373	0.16025	-63.666	-1.309	1378.4596	-2.7773	1.0547	0.76318	9.889	-186.352	1150.726	-2.2358	0.38867	0.47168	NaN	NaN	NaN	NaN	NaN	NaN
1.604	0.297000000000004	111.292	489.072	-0.66504	0.45821	0.15645	-24.11613	-42.595	1423.714	-2.7129	1.0283	0.73486	-8.758	-174.747	1149.316	-2.3301	0.4126	0.48779	NaN	NaN	NaN	NaN	NaN	NaN
1.606	-9.692	119.966	458.1569	-0.63105	0.43594	0.14941	-42.3367	-0.887	1427.585	-2.6631	1.0063	0.7168	-44.074	-167.304	1156.892	-2.3843	0.46143	0.50391	NaN	NaN	NaN	NaN	NaN	NaN
1.608	7.026	120.218	431.8108	-0.59971	0.41983	0.14434	-44	-48.297	1394.4748	-2.6016	0.98047	0.68115	-15.832	-182.243	1191.964	-2.3901	0.4917	0.49707	NaN	NaN	NaN	NaN	NaN	NaN
1.61	33.804	127.247	431.4802	-0.56592	0.39893	0.13916	-16.0479	-13.225	1400.624	-2.5098	0.95215	0.64307	-36.297	-187.751	1166.962	-2.3394	0.56689	0.46436	NaN	NaN	NaN	NaN	NaN	NaN
1.612	21.657	126.231	411.0542	-0.53213	0.37891	0.13506	-33.8132	59.9694	1322.645	-2.4546	0.94189	0.62012	-85.4155	-171.928	1165.046	-2.2336	0.60254	0.40967	NaN	NaN	NaN	NaN	NaN	NaN
1.614	19.225	116.194	391.1863	-0.5001	0.35986	0.13301	-11.1567	13.14	1298.355	-2.3418	0.9082	0.56494	-119.04	-123.591	1137.4514	-2.1152	0.61719	0.33643	NaN	NaN	NaN	NaN	NaN	NaN
1.616	39.081	102.7918	374.0889	-0.46807	0.33642	0.12246	-4.789	73.2257	1297.9347	-2.2549	0.88135	0.52978	-103.179	-86.99	1150.769	-1.9746	0.60254	0.27783	NaN	NaN	NaN	NaN	NaN	NaN
1.618	43.1487	110.2866	365.3585	-0.43047	0.31601	0.12168	-24.4681	91.169	1277.3198	-2.166	0.85547	0.48877	-102.0063	-69.9	1137.271	-1.8965	0.58984	0.25781	NaN	NaN	NaN	NaN	NaN	NaN
1.62	56.05	117.084	340.6346	-0.396	0.29053	0.11426	40.4928	73.9992	1298.2492	-2.0449	0.82813	0.43604	-18.28	-59.259	1168.565	-1.7227	0.54883	0.22217	NaN	NaN	NaN	NaN	NaN	NaN
1.622	50.225	113.969	329.1947	-0.35762	0.26689	0.10498	35.00522	145.578	1310.89	-1.9951	0.80859	0.41748	45.305	-110.813	1214.539	-1.6765	0.58032	0.20947	NaN	NaN	NaN	NaN	NaN	NaN
1.624	69.8987	97.7927	323.3103	-0.32197	0.24316	0.096875	13.694	110.177	1299.515	-1.8887	0.78125	0.37988	59.399	-126.408	1255.4895	-1.6772	0.67432	0.23242	NaN	NaN	NaN	NaN	NaN	NaN
1.626	54.4802	88.15879	311.8668	-0.29033	0.21855	0.086718	60.6915	106.384	1287.9461	-1.8112	0.7561	0.35644	-8.333	-179.071	1275.005	-1.7441	0.81445	0.30322	NaN	NaN	NaN	NaN	NaN	NaN
1.628	71.9801	99.025	290.237	-0.25224	0.19443	0.071971	49.494	135.614	1234.5402	-1.7349	0.73486	0.33643	-68.326	-201.413	1340.547	-1.793	0.87695	0.34619	NaN	NaN	NaN	NaN	NaN	NaN
1.63	63.05993	91.239	277.149	-0.21582	0.1665	0.060547	34.4845	64.958	1205.651	-1.6494	0.70117	0.31396	-123.464	-244.9981	1368.5161	-1.8491	0.96729	0.40723	NaN	NaN	NaN	NaN	NaN	NaN
1.632	64.1977	90.655	277.9305	-0.17901	0.14659	0.049123	41.272	87.9498	1201.6089	-1.5977	0.68262	0.31104	-129.503	-268.268	1404.669	-1.8359	0.9751	0.41113	NaN	NaN	NaN	NaN	NaN	NaN
1.634	66.8379	87.9265	259.5838	-0.14981	0.1208	0.03008	14.2872	65.24	1164.755	-1.519	0.65088	0.29053	-63.9497	-280.054	1413.291	-1.8086	0.9707	0.39502	NaN	NaN	NaN	NaN	NaN	NaN
1.636	30.441	86.1458	233.41066	-0.11505	0.1001	0.021878	-3.785	15.317	1167.945	-1.4536	0.62451	0.28027	11.624	-258.074	1414.399	-1.7666	0.96875	0.35791	NaN	NaN	NaN	NaN	NaN	NaN
1.638	34.731	82.005	226.3012	-0.090925	0.077837	0.0090837	-9.807	85.3471	1146.361	-1.4009	0.59814	0.2793	67.286	-217.823	1409.309	-1.7607	0.98438	0.34326	NaN	NaN	NaN	NaN	NaN	NaN
1.64	4.788	84.995	223.392	-0.063477	0.059082	-0.0019531	-25.335	63.037	1112.2625	-1.3281	0.5625	0.27393	88.751	-148.366	1434.6415	-1.792	1.0039	0.33057	NaN	NaN	NaN	NaN	NaN	NaN
1.642	15.644	80.037	220.093	-0.037103	0.041494	-0.0041097	-27.933	76.98	1105.0694	-1.2949	0.54297	0.27393	119.5275	-120.157	1438.7922	-1.8582	1.0208	0.35572	NaN	NaN	NaN	NaN	NaN	NaN
1.644	-0.935000000000002	76.3106	199.4019	-0.018042	0.025567	-0.015432	-27.468	158.308	1061.6156	-1.2339	0.5083	0.2749	177.019	-95.846	1454.692	-1.9663	1.0278	0.40625	NaN	NaN	NaN	NaN	NaN	NaN
1.646	-14.298	68.6002	184.9344	0.0050008	0.010734	-0.022865	-19.834	121.1245	1036.076	-1.1865	0.48438	0.27686	239.312	-83.685	1458.604	-2.1772	1.0259	0.49023	NaN	NaN	NaN	NaN	NaN	NaN
1.648	2.629	60.6886	189.677	0.021401	0.00087026	-0.030665	5.001	172.873	1027.275	-1.1343	0.45752	0.28271	250.052	-44.518	1453.734	-2.2964	1.021	0.54102	NaN	NaN	NaN	NaN	NaN	NaN
1.65	-3.026	67.485	160.99002	0.033691	-0.01416	-0.036133	-5.371	179.226	973.3915	-1.0757	0.41846	0.28564	220.825	13.171	1460.6376	-2.5249	1.0181	0.60938	NaN	NaN	NaN	NaN	NaN	NaN
1.652	-11.686	62.033	162.484	0.039633	-0.024313	-0.039176	-10.439	120.1648	955.39158	-1.041	0.40039	0.28613	160.853	25.7119	1471.0141	-2.6645	1.0132	0.64551	NaN	NaN	NaN	NaN	NaN	NaN
1.654	-8.9	53.083	152.2814	0.047731	-0.032201	-0.040337	-15.236	186.475	922.3713	-0.96875	0.35889	0.29053	77.615	30.141	1466.712	-2.769	0.99854	0.67285	NaN	NaN	NaN	NaN	NaN	NaN
1.656	3.64	44.2427	149.8909	0.051657	-0.040395	-0.040713	-23.928	146.089	875.664	-0.90943	0.3313	0.29712	40.611	-32.283	1470.126	-2.8628	0.97119	0.65039	NaN	NaN	NaN	NaN	NaN	NaN
1.658	-9.65	44.1159	134.646	0.054302	-0.045012	-0.0372	3.36	133.6547	846.5	-0.85303	0.29834	0.28662	87.076	-59.823	1475.8142	-2.8882	0.95166	0.63281	NaN	NaN	NaN	NaN	NaN	NaN
1.66	-13.471	43.7917	121.9211	0.052246	-0.044434	-0.037109	-3.482	168.222	789.286	-0.76904	0.25537	0.2793	118.689	-103.292	1515.217	-2.916	0.91211	0.60693	NaN	NaN	NaN	NaN	NaN	NaN
1.662	20.349	36.935	123.727	0.050483	-0.046196	-0.032394	8.548	89.945	745.55	-0.72607	0.23438	0.27344	140.5553	-94.976	1542.32	-2.9292	0.88623	0.58252	NaN	NaN	NaN	NaN	NaN	NaN
1.664	16.286	43.9761	113.7705	0.04616	-0.041183	-0.034158	34.231	122.3993	754.0729	-0.64258	0.1875	0.26221	124.79221	-111.908	1541.846	-2.9097	0.83936	0.57959	NaN	NaN	NaN	NaN	NaN	NaN
1.666	25.643	43.6046	101.3741	0.042389	-0.039235	-0.034245	27.101	135.039	724.30452	-0.57886	0.15381	0.24878	130.93	-95.347	1541.7	-2.8882	0.79639	0.58643	NaN	NaN	NaN	NaN	NaN	NaN
1.668	27.417	30.9871	86.2098	0.037347	-0.032464	-0.030036	60.8344	80.942	705.522	-0.51904	0.12158	0.23633	80.163	-125.072	1540.973	-2.8979	0.78369	0.5752	NaN	NaN	NaN	NaN	NaN	NaN
1.67	51.578	24.0293	91.21586	0.030762	-0.027832	-0.028809	85.2673	156.719	706.856	-0.43359	0.073242	0.22119	64.762	-94.721	1528.70337	-2.9136	0.78564	0.57373	NaN	NaN	NaN	NaN	NaN	NaN
1.672	41.314	32.2172	81.2952	0.02051	-0.024754	-0.029211	88.5016	125.1882	673.727	-0.39355	0.049805	0.20801	38.132	-89.6302	1516.621	-2.9062	0.77783	0.56592	NaN	NaN	NaN	NaN	NaN	NaN
1.674	73.2279	41.348	79.5151	0.0089913	-0.01775	-0.030383	104.4372	117.646	644.9017	-0.31641	0.0024414	0.18506	32.125	-5.476	1508.447	-2.8906	0.76953	0.56104	NaN	NaN	NaN	NaN	NaN	NaN
1.676	72.6842	26.2052	64.95565	-0.0029793	-0.012157	-0.027485	76.7351	184.939	590.0993	-0.26465	-0.033447	0.17017	-24.752	24.7737	1496.9381	-2.8472	0.76318	0.55469	NaN	NaN	NaN	NaN	NaN	NaN
1.678	65.4482	17.479475	56.3819	-0.020761	-0.0039438	-0.022612	81.2753	122.62536	554.0433	-0.21094	-0.068848	0.15332	-44.101	86.1543	1452.293	-2.8418	0.75977	0.55518	NaN	NaN	NaN	NaN	NaN	NaN
1.68	57.9531	20.24	49.4866	-0.041992	0.01123	-0.020996	83.7061	134.5193	517.11562	-0.14551	-0.10693	0.13037	-41.044	66.778	1413.135	-2.8179	0.76416	0.54297	NaN	NaN	NaN	NaN	NaN	NaN
1.682	58.9312	29.085	37.3466	-0.056264	0.026305	-0.016719	61.84	165.177	477.39	-0.10791	-0.12988	0.12256	11.304	83.65	1389.323	-2.7908	0.76977	0.53638	NaN	NaN	NaN	NaN	NaN	NaN
1.684	70.3807	21.106	42.65	-0.075453	0.04495	-0.0092753	77.5585	107.2597	448.9726	-0.046875	-0.16797	0.104	19.32	65.379	1377.88	-2.7417	0.77393	0.51758	NaN	NaN	NaN	NaN	NaN	NaN
1.686	42.33	27.349738	51.3137	-0.094263	0.059697	-0.0016703	87.368	169.042	397.491	-0.0061037	-0.19604	0.087403	62.252	98.548	1390.1259	-2.6563	0.77148	0.48096	NaN	NaN	NaN	NaN	NaN	NaN
1.688	45.811	22.9152	44.4984	-0.10957	0.077464	0.0071882	43.217	161.0473	386.095	0.035156	-0.22168	0.070801	95.211	80.502	1397.3693	-2.5991	0.76221	0.46484	NaN	NaN	NaN	NaN	NaN	NaN
1.69	24.547	20.8966	32.21419	-0.12109	0.084473	0.0053711	45.622	125.123	376.827	0.08252	-0.25586	0.047852	134.434	85.786	1394.81	-2.4844	0.74805	0.43652	NaN	NaN	NaN	NaN	NaN	NaN
1.692	23.902	16.8428	34.1645	-0.12632	0.096389	0.0194	37.751	194.662	336.095	0.10693	-0.271	0.036621	132.9835	44.2115	1368.153	-2.4063	0.73535	0.41651	NaN	NaN	NaN	NaN	NaN	NaN
1.694	28.176	10.8414	44.573	-0.12875	0.10624	0.023452	20.114	132.9128	345.4826	0.13818	-0.30371	0.0087891	155.9622	52.782	1359.35	-2.3296	0.71924	0.41162	NaN	NaN	NaN	NaN	NaN	NaN
1.696	26.156	10.6918	29.225	-0.12555	0.11119	0.026304	24.88	130.313	322.354	0.1748	-0.33252	-0.0068359	174.975	43.6521	1365.473	-2.2358	0.70361	0.4043	NaN	NaN	NaN	NaN	NaN	NaN
1.698	7.927	3.9275	14.8268	-0.11769	0.11721	0.026133	5.192	157.305	302.153	0.18604	-0.34717	-0.018555	148.17	73.893	1386.892	-2.189	0.69189	0.40332	NaN	NaN	NaN	NaN	NaN	NaN
1.7	-19.875	6.1979	7.225	-0.11328	0.11621	0.023926	0.903999999999996	87.471	299.704	0.20703	-0.36914	-0.040039	140.073	76.505	1361.604	-2.0874	0.68213	0.39648	NaN	NaN	NaN	NaN	NaN	NaN
1.702	-0.0229999999999961	6.88035	9.6947	-0.09751	0.12094	0.028558	3.961	136.873	255.4216	0.21142	-0.38427	-0.053466	127.762	97.369	1332.193	-2.0015	0.66943	0.37524	NaN	NaN	NaN	NaN	NaN	NaN
1.704	11.291	11.10228	22.9435	-0.093235	0.12655	0.028234	-13.452	123.511	229.925	0.21289	-0.38818	-0.063477	112.42792	88.986	1291.834	-1.9058	0.6626	0.35352	NaN	NaN	NaN	NaN	NaN	NaN
1.706	-12.303	14.5446	18.8113	-0.086246	0.13077	0.029357	0.720000000000006	60.967	232.924	0.21143	-0.39697	-0.087402	110.25	116.565	1237.7686	-1.7671	0.63916	0.32813	NaN	NaN	NaN	NaN	NaN	NaN
1.708	-11.807	8.73082	23.6789	-0.074671	0.13639	0.032691	-19.363	111.5064	213.1201	0.20459	-0.40771	-0.086426	113.2756	152.0441	1168.334	-1.7031	0.62891	0.31201	NaN	NaN	NaN	NaN	NaN	NaN
1.71	2.685	17.6425	18.3656	-0.064453	0.14502	0.032227	1.12	57.765	214.9322	0.19824	-0.40332	-0.098145	101.7838	209.216	1157.1941	-1.5659	0.6001	0.28516	NaN	NaN	NaN	NaN	NaN	NaN
1.712	19.342	23.8799	16.5139	-0.053673	0.14768	0.034898	2.326	62.427	197.506	0.19311	-0.4043	-0.10913	102.569	220.743	1123.522	-1.4812	0.57935	0.26806	NaN	NaN	NaN	NaN	NaN	NaN
1.714	7.23	19.83173	3.0853	-0.043813	0.14325	0.031048	-11.785	110.462	163.583	0.18604	-0.4043	-0.10986	80.85615	198.459	1113.5774	-1.3979	0.5542	0.25098	NaN	NaN	NaN	NaN	NaN	NaN
1.716	33.614	4.17093	15.434	-0.031688	0.14366	0.030667	28.561	62.6554	149.607	0.1665	-0.39502	-0.1123	70.529	172.971	1087.2305	-1.2983	0.52783	0.22754	NaN	NaN	NaN	NaN	NaN	NaN
1.718	30.855	7.9837	-0.0786000000000016	-0.023425	0.14032	0.028136	39.151	111.835	133.149	0.15381	-0.39648	-0.11182	40.139	169.701	1060.789	-1.2239	0.51221	0.20972	NaN	NaN	NaN	NaN	NaN	NaN
1.72	47.4332	17.1969	-6.9898	-0.013672	0.1416	0.027344	26.246	118.755	99.233	0.12451	-0.38232	-0.11426	25.958	188.357	1033.346	-1.1489	0.49951	0.19043	NaN	NaN	NaN	NaN	NaN	NaN
1.722	43.019	13.6804	14.0976	-0.006062	0.1336	0.025779	67.1965	64.73	112.345	0.1018	-0.36547	-0.11035	-24.728	193.052	1022.558	-1.0522	0.47998	0.17383	NaN	NaN	NaN	NaN	NaN	NaN
1.724	55.8208	7.59096	26.3301	-0.003418	0.13067	0.025294	51.218	125.892	99.8663	0.078613	-0.35352	-0.11475	-46.099	200.661	962.328	-1.0078	0.4668	0.16699	NaN	NaN	NaN	NaN	NaN	NaN
1.726	62.4	8.15675	30.5154	-0.0053677	0.12793	0.023342	45.2359	65.638927	100.6949	0.054199	-0.33008	-0.091797	-68.4007	156.552	936.186	-0.92529	0.44971	0.15332	NaN	NaN	NaN	NaN	NaN	NaN
1.728	73.7679	15.9442	27.2409	-1.6988e-06	0.12051	0.029392	81.1838	44.865	84.463022	0.034668	-0.3208	-0.091797	-98.492	126.871	880.59	-0.86255	0.43628	0.14941	NaN	NaN	NaN	NaN	NaN	NaN
1.73	64.0013	6.48909	36.1624	-0.00048828	0.12012	0.030273	59.0816	75.092	58.1203	0.014648	-0.30273	-0.077148	-125.958	85.997	863.19345	-0.80225	0.4209	0.14502	NaN	NaN	NaN	NaN	NaN	NaN
1.732	47.322	27.548	55.9598	-0.0011726	0.11728	0.03418	48.7634	4.103	44.61809	0.00024415	-0.29126	-0.071777	-67.7603	99.707	814.473	-0.72559	0.39893	0.14307	NaN	NaN	NaN	NaN	NaN	NaN
1.734	63.96602	40.089	67.687	0.0032256	0.11582	0.039159	64.38	36.4235	37.679	-0.0073242	-0.28516	-0.074707	-60.3163	114.3409	784.34	-0.68848	0.39063	0.14063	NaN	NaN	NaN	NaN	NaN	NaN
1.736	44.168	56.681	74.724	0.00791	0.11387	0.040724	34.886	50.9866	36.84639	-0.024414	-0.27002	-0.062012	-14.969	151.301	735.0315	-0.61182	0.3667	0.12695	NaN	NaN	NaN	NaN	NaN	NaN
1.738	30.3947	60.1206	126.32197	0.013866	0.11328	0.047949	33.653	-14.433	34.307	-0.03125	-0.26367	-0.058594	24.984	165.899	710.857	-0.55004	0.34765	0.12622	NaN	NaN	NaN	NaN	NaN	NaN
1.74	33.4325	64.9118	148.8306	0.012207	0.10889	0.039063	41.8248	42.8465	25.05	-0.057129	-0.25391	-0.035645	41.4154	191.16	653.7756	-0.48975	0.32959	0.12451	NaN	NaN	NaN	NaN	NaN	NaN
1.742	37.5696	67.4768	174.585	0.0064457	0.10723	0.036133	18.746	4.9745	39.9084	-0.077637	-0.24511	-0.024902	21.6812	185.40434	605.125	-0.40967	0.29541	0.10889	NaN	NaN	NaN	NaN	NaN	NaN
1.744	8.84	76.3	192.295	-0.010546	0.11455	0.035547	25.722	-24.483	55.784	-0.10156	-0.23291	-0.0073242	28.14721	211.5844	555.632	-0.37012	0.28076	0.10303	NaN	NaN	NaN	NaN	NaN	NaN
1.746	-19.87	77.632	198.4268	-0.029686	0.1247	0.028907	11.434	25.67126	27.068	-0.1333	-0.22217	0.0092773	8.175	226.154	545.597	-0.29102	0.24316	0.093262	NaN	NaN	NaN	NaN	NaN	NaN
1.748	11.226	75.839	220.119	-0.059276	0.13994	0.03623	7.045	-18.0479	32.8749	-0.1416	-0.2124	0.023438	12.891	235.5753	500.829	-0.23486	0.21411	0.077881	NaN	NaN	NaN	NaN	NaN	NaN
1.75	-8.005	65.299	209.5179	-0.097168	0.15771	0.040039	-4.7	8.0711	5.22861	-0.1626	-0.18994	0.039551	25.593	185.437	463.0353	-0.18066	0.18359	0.062988	NaN	NaN	NaN	NaN	NaN	NaN
1.752	-26.204	50.134	229.833	-0.14551	0.17979	0.052832	-16.415	34.9398	-9.6282	-0.17431	-0.17944	0.05249	43.791	159.1525	413.116	-0.11133	0.14746	0.046875	NaN	NaN	NaN	NaN	NaN	NaN
1.754	-13.251	35.378	264.7491	-0.19355	0.20117	0.067969	-10.708	-10.6698	-11.5406	-0.18408	-0.16699	0.06543	48.84185	128.695	371.396	-0.080566	0.12891	0.03418	NaN	NaN	NaN	NaN	NaN	NaN
1.756	-5.15	38.226	311.3255	-0.23848	0.225	0.086719	-28.64	46.854	-38.9874	-0.2085	-0.1543	0.081055	80.906	140.373	334.35	-0.015625	0.092285	0.019531	NaN	NaN	NaN	NaN	NaN	NaN
1.758	-23.013	38.607	350.072	-0.29404	0.24697	0.10117	-39.1129	27.782	-20.5962	-0.21729	-0.14746	0.08252	91.424	137.949	342.3372	0.023926	0.070312	0.0014649	NaN	NaN	NaN	NaN	NaN	NaN
1.76	-43.4741	34.0948	366.9517	-0.34229	0.27051	0.11768	-9.348	-10.6783	21.9229	-0.23486	-0.12695	0.11084	101.344	148.662	311.1638	0.064941	0.04541	-0.01709	NaN	NaN	NaN	NaN	NaN	NaN
1.762	-16.952	20.64593	412.986	-0.38711	0.29297	0.12744	-27.825	33.40116	19.0195	-0.24194	-0.11866	0.12012	115.239	117.421	290.0436	0.10498	0.010254	-0.03125	NaN	NaN	NaN	NaN	NaN	NaN
1.764	-8.639	25.8694	466.197	-0.43359	0.31836	0.13652	2.346	-19.6198	24.8208	-0.24756	-0.11816	0.12451	79.0931	111.945	276.7037	0.12305	0.00048828	-0.038574	NaN	NaN	NaN	NaN	NaN	NaN
1.766	8.793	25.595	501.0328	-0.47227	0.34336	0.14199	26.215	-22.1275	17.6505	-0.24365	-0.10303	0.14111	13.98	103.571	242.18	0.15088	-0.02832	-0.050781	NaN	NaN	NaN	NaN	NaN	NaN
1.768	4.842	14.3186	528.9762	-0.50967	0.36641	0.15176	-14.139	38.7459	-17.5641	-0.24463	-0.1001	0.14063	-15.64	133.374	242.543	0.16186	-0.043701	-0.061523	NaN	NaN	NaN	NaN	NaN	NaN
1.77	30.09	-3.7772	564.6775	-0.55273	0.3916	0.16211	37.863	-3.6546	9.04499	-0.23535	-0.097168	0.14404	-33.2534	142.0848	237.935	0.16943	-0.056641	-0.063477	NaN	NaN	NaN	NaN	NaN	NaN
1.772	33.606	-6.025	598.132	-0.5956	0.42089	0.17148	47.021	39.936	-0.3601	-0.22095	-0.10059	0.14697	-80.24	152.173	201.905	0.16943	-0.076172	-0.067871	NaN	NaN	NaN	NaN	NaN	NaN
1.774	36.639	-28.668	631.048	-0.63447	0.44971	0.18477	11.909	37.691	-21.963	-0.20605	-0.10059	0.13574	-71.0955	129.9302	173.981	0.16211	-0.082031	-0.067383	NaN	NaN	NaN	NaN	NaN	NaN
1.776	67.587	-55.28998	652.78	-0.68291	0.48095	0.18906	60.7109	-25.7319	24.981	-0.17676	-0.10596	0.12646	-68.231	111.747	128.3278	0.14697	-0.09375	-0.056641	NaN	NaN	NaN	NaN	NaN	NaN
1.778	92.23399	-56.703	659.502	-0.73242	0.51035	0.19638	41.822	14.3725	27.219	-0.15625	-0.10938	0.12451	-66.3303	95.131	64.991	0.12378	-0.10034	-0.046143	NaN	NaN	NaN	NaN	NaN	NaN
1.78	96.2708	-55.3725	631.1367	-0.77881	0.53857	0.20166	53.8429	-8.3224	22.742	-0.11865	-0.11377	0.10107	-62.29789	92.739	74.4617	0.10059	-0.10645	-0.025879	NaN	NaN	NaN	NaN	NaN	NaN
1.782	80.708	-58.204	625.577	-0.82822	0.56982	0.21172	71.5463	2.4187	36.6033	-0.088623	-0.11889	0.094239	-44.593	96.337	49.5451	0.060059	-0.10547	-0.003418	NaN	NaN	NaN	NaN	NaN	NaN
1.784	102.5565	-57.315	615.9302	-0.87891	0.60664	0.22217	32.763	60.49	-4.9686	-0.056152	-0.12061	0.078125	-27.321	81.494	63.45	0.039551	-0.10498	0.010254	NaN	NaN	NaN	NaN	NaN	NaN
1.786	85.9243	-49.036	613.453	-0.92578	0.64414	0.24131	52.11553	6.1774	-7.0251	-0.021973	-0.13281	0.051758	21.88	76.925	49.226	-0.0029297	-0.099121	0.052246	NaN	NaN	NaN	NaN	NaN	NaN
1.788	77.9023	-33.2222	602.9004	-0.9627	0.67207	0.26103	60.617	31.3516	0.5465	-0.0039063	-0.13379	0.042969	-13.484	47.81	53.634	-0.033691	-0.090332	0.070557	NaN	NaN	NaN	NaN	NaN	NaN
1.79	64.961	-35.137	590.553	-0.99219	0.69922	0.28369	25.566	56.547	-14.0541	0.027344	-0.13721	0.030762	-43.7909	39.675	41.322	-0.069336	-0.077637	0.09375	NaN	NaN	NaN	NaN	NaN	NaN
1.792	42.887	-23.9687	606.9985	-1.0109	0.71914	0.31563	50.809	-13.5683	10.4254	0.046631	-0.14038	0.013428	-47.955	29.9927	73.796	-0.10498	-0.061035	0.125	NaN	NaN	NaN	NaN	NaN	NaN
1.794	42.883	-15.6296	630.8729	-1.0179	0.73213	0.3416	20.989	34.352	23.194	0.062012	-0.146	0.0043945	-2.207	29.116	59.433	-0.11523	-0.049805	0.14209	NaN	NaN	NaN	NaN	NaN	NaN
1.796	39.8984	-21.762	637.7848	-1.0116	0.74307	0.35488	22.868	19.6314	22.7229	0.090332	-0.13721	-0.003418	-1.854	8.489	57.573	-0.13232	-0.030762	0.15771	NaN	NaN	NaN	NaN	NaN	NaN
1.798	20.668	-33.168	653.125	-0.98828	0.74004	0.35791	27.336	-20.5859	28.121	0.094238	-0.13379	-0.018555	51.118	-11.425	14.1626	-0.13647	-0.02417	0.17016	NaN	NaN	NaN	NaN	NaN	NaN
1.8	1.665	-46.887	663.09	-0.95313	0.7334	0.3501	-20.618	40.516	3.5548	0.10303	-0.14307	-0.03418	74.424	-37.316	30.1902	-0.13867	-0.024414	0.18018	NaN	NaN	NaN	NaN	NaN	NaN
1.802	9.558	-61.534	678.5	-0.90927	0.7333	0.34023	-5.522	-15.7559	16.6172	0.11718	-0.13452	-0.031494	71.8765	-29.875	0.742999999999999	-0.13281	-0.020996	0.18945	NaN	NaN	NaN	NaN	NaN	NaN
1.804	-5.827	-77.911	699.69409	-0.8543	0.73174	0.32148	-23.1	8.148	10.0434	0.11133	-0.13086	-0.047363	62.0226	-30.261	-5.882	-0.12695	-0.026855	0.18896	NaN	NaN	NaN	NaN	NaN	NaN
1.806	-19.626	-94.8698	716.2184	-0.80078	0.72666	0.30078	-34.364	44.954	7.0224	0.11328	-0.13281	-0.060059	106.416	1.603	-1.843	-0.11914	-0.041992	0.20361	NaN	NaN	NaN	NaN	NaN	NaN
1.808	12.074	-115.8965	741.5461	-0.74375	0.72227	0.27803	-15.647	-18.2396	31.4281	0.1084	-0.12891	-0.063965	123.392	1.354	33.1915	-0.10987	-0.054199	0.2041	NaN	NaN	NaN	NaN	NaN	NaN
1.81	-19.575	-119.988	754.48021269	-0.69287	0.70947	0.25684	-19.041	30.958	8.1476	0.10449	-0.12061	-0.075684	130.117	9.384	16.687	-0.10547	-0.066406	0.21924	NaN	NaN	NaN	NaN	NaN	NaN
1.812	-29.5731	-124.783	781.5183	-0.6543	0.69453	0.23545	-11.039	3.1778	14.53879	0.091064	-0.10522	-0.089112	98.402	2.4131	28.2582	-0.093262	-0.08252	0.22705	NaN	NaN	NaN	NaN	NaN	NaN
1.814	-43.427	-133.32	807.9114	-0.62793	0.68223	0.225	6.605	-35.737	34.4103	0.067871	-0.09375	-0.10596	80.3728	16.5032	-8.799	-0.080566	-0.094727	0.22949	NaN	NaN	NaN	NaN	NaN	NaN
1.816	-35.4537	-133.297	840.6885	-0.62441	0.68887	0.22305	-17.422	40.937	7.4378	0.062988	-0.076172	-0.10254	25.386	16.2	12.831	-0.063965	-0.11865	0.23828	NaN	NaN	NaN	NaN	NaN	NaN
1.818	-41.629	-114.8492	861.5751	-0.63779	0.70283	0.22725	-6.309	-12.007	16.1405	0.052734	-0.064941	-0.10107	15.474	42.833	7.684	-0.053222	-0.12769	0.23999	NaN	NaN	NaN	NaN	NaN	NaN
1.82	-25.1193	-85.451	877.15	-0.66748	0.72314	0.22949	21.741	12.68059	32.2738	0.032715	-0.04834	-0.11133	-5.624	34.9644	10.7369	-0.042969	-0.13916	0.23535	NaN	NaN	NaN	NaN	NaN	NaN
1.822	6.732	-86.581	906.8332	-0.71172	0.75117	0.2458	-5.955	44.2892	11.384	0.002197	-0.033935	-0.11255	15.163	37.971	-3.48565	-0.012695	-0.1499	0.22754	NaN	NaN	NaN	NaN	NaN	NaN
1.824	23.621	-77.587	918.96692	-0.76035	0.78438	0.25616	44.586	-44.723	44.042	-0.031738	-0.014648	-0.10547	11.178	-4.22359	11.1475	-0.0053711	-0.15332	0.21729	NaN	NaN	NaN	NaN	NaN	NaN
1.826	23.993	-70.503	930.0039	-0.81347	0.82031	0.27021	56.593	7.66	40.747	-0.094727	0.015137	-0.092285	-17.542	-7.27	-15.90637	0.016602	-0.1626	0.21338	NaN	NaN	NaN	NaN	NaN	NaN
1.828	50.867	-67.269	947.6793	-0.86943	0.85713	0.2834	16.152	5.813	36.97	-0.15796	0.035157	-0.078857	-45.269	-24.867	19.0963	0.025146	-0.17017	0.20459	NaN	NaN	NaN	NaN	NaN	NaN
1.83	61.7196	-87.01	985.5016	-0.92432	0.89893	0.30127	52.1835	-53.878	112.99087	-0.22607	0.0625	-0.052246	-24.271	0.353000000000009	9.0886	0.036621	-0.17822	0.19922	NaN	NaN	NaN	NaN	NaN	NaN
1.832	56.4701	-93.733	1000.2529	-0.97305	0.93398	0.31797	53.1806	3.0861	130.8592	-0.32764	0.089355	-0.029297	-23.715	-5.536	-0.2798	0.047852	-0.19287	0.19287	NaN	NaN	NaN	NaN	NaN	NaN
1.834	65.0384	-106.55226	994.98438	-1.0164	0.96524	0.33838	69.5582	-48.471	154.615	-0.37744	0.11182	-0.0073242	-12.234	10.006	24.147	0.054199	-0.19971	0.18994	NaN	NaN	NaN	NaN	NaN	NaN
1.836	51.2438	-123.454	997.869	-1.0523	0.99492	0.35713	74.812	-40.911	197.583	-0.50439	0.15771	0.027832	-33.811	9.91532	30.059	0.071289	-0.22119	0.17822	NaN	NaN	NaN	NaN	NaN	NaN
1.838	52.1553	-124.322	1015.574	-1.0724	1.0155	0.37393	64.578	40.919	238.8769	-0.6062	0.19287	0.058594	-57.0306	32.4451	12.25809	0.088135	-0.23047	0.17065	NaN	NaN	NaN	NaN	NaN	NaN
1.84	49.3511	-113.6425	1041.2695	-1.0742	1.0391	0.38818	68.225	5.7314	314.928	-0.72021	0.22705	0.097168	-60.8472	28.9194	17.8529	0.10889	-0.23682	0.1626	NaN	NaN	NaN	NaN	NaN	NaN
1.842	53.8445	-108.54996	1057.0553	-1.0675	1.045	0.38047	87.315	55.366	368.33	-0.88916	0.28271	0.15674	-25.578	46.068	22.1848	0.13037	-0.24756	0.14941	NaN	NaN	NaN	NaN	NaN	NaN
1.844	46.3005	-119.9358	1070.637	-1.0499	1.045	0.3711	93.268	59.427	430.996	-0.98193	0.31104	0.19287	-30.52	27.238	34.9339	0.14502	-0.25391	0.14111	NaN	NaN	NaN	NaN	NaN	NaN
1.846	39.1937	-120.9	1091.707	-1.0218	1.0435	0.34648	87.901	-38.6751	536.47	-1.1709	0.37109	0.28174	10.617	25.887	30.8365	0.17773	-0.25439	0.12988	NaN	NaN	NaN	NaN	NaN	NaN
1.848	48.827	-102.592	1108.997	-0.98476	1.0355	0.31641	104.26	-5.695	626.6457	-1.3167	0.40796	0.35645	43.363	4.667	4.5649	0.20215	-0.25781	0.11816	NaN	NaN	NaN	NaN	NaN	NaN
1.85	32.994	-84.943	1106.145	-0.94873	1.0278	0.27734	82.532	-75.6482	690.4177	-1.4648	0.44629	0.43311	64.7642	16.3748	5.8412	0.21729	-0.25732	0.11523	NaN	NaN	NaN	NaN	NaN	NaN
1.852	21.616	-89.095	1105.71452	-0.92988	1.0178	0.23623	42.514	-70.477	742.7497	-1.6304	0.48486	0.52832	52.5942	-1.4202	12.045	0.24609	-0.25879	0.10547	NaN	NaN	NaN	NaN	NaN	NaN
1.854	10.358	-89.575	1107.4659	-0.92695	1.0113	0.19971	-4.457	7.449	766.455	-1.709	0.49414	0.56592	78.058	11.9961	20.037	0.25928	-0.2622	0.096191	NaN	NaN	NaN	NaN	NaN	NaN
1.856	-16.2565	-82.648	1109.2154	-0.94414	1.0137	0.17471	-6.57	-68.62086	799.103	-1.8184	0.51074	0.61182	95.6713	12.074	18.6129	0.27393	-0.26221	0.081543	NaN	NaN	NaN	NaN	NaN	NaN
1.858	-33.8443	-70.17	1120.047	-0.97607	1.0263	0.15761	-34.289	-32.7042	827.3206	-1.8599	0.5166	0.625	114.253	14.215	35.255	0.28125	-0.25244	0.064941	NaN	NaN	NaN	NaN	NaN	NaN
1.86	-57.385	-72.888	1139.1059	-1.021	1.0376	0.15039	-60.863	-6.542	839.0757	-1.9063	0.51367	0.62939	106.378	-10.044	36.671	0.28516	-0.24658	0.055664	NaN	NaN	NaN	NaN	NaN	NaN
1.862	-57.0918	-80.2084	1154.93928	-1.083	1.0549	0.15068	-22.966	-82.669	893.199	-1.9336	0.49707	0.62354	85.804	-17.8146	48.749	0.27881	-0.22803	0.043945	NaN	NaN	NaN	NaN	NaN	NaN
1.864	-58.9214	-67.103	1162.2688	-1.1479	1.0798	0.15694	-44.073	-44.557	918.932	-1.9253	0.48877	0.61279	35.936	-31.0613	31.777	0.27246	-0.21118	0.033447	NaN	NaN	NaN	NaN	NaN	NaN
1.866	-59.43	-68.572	1169.6222	-1.2124	1.0974	0.17178	-69.338	-89.027	888.766	-1.8726	0.47314	0.5625	41.9827	-11.428	29.021	0.2583	-0.19141	0.031738	NaN	NaN	NaN	NaN	NaN	NaN
1.868	-47.8239	-71.0907	1187.0061	-1.2765	1.12	0.1834	-67.8522	-128.442	889.278	-1.7995	0.47387	0.51636	47.732	-4.475	11.875	0.23828	-0.16602	0.027344	NaN	NaN	NaN	NaN	NaN	NaN
1.87	-25.05641	-63.163	1207.9004	-1.3311	1.1348	0.19092	-79.9479	-42.523	856.789	-1.7129	0.4585	0.45752	59.6769	4.589	20.0902	0.22363	-0.1499	0.029297	NaN	NaN	NaN	NaN	NaN	NaN
1.872	-32.8021	-61.659	1214.6844	-1.3882	1.1501	0.20342	-53.552	-74.581	846.581	-1.5664	0.4043	0.37744	52.874	3.4177	2.019	0.18799	-0.11768	0.036621	NaN	NaN	NaN	NaN	NaN	NaN
1.874	-21.55839	-65.163	1221.6046	-1.4298	1.1665	0.21367	0.0410000000000039	-45.082	857.813	-1.4883	0.37207	0.33154	32.583	-0.7278	-11.199	0.15576	-0.092283	0.044922	NaN	NaN	NaN	NaN	NaN	NaN
1.876	-16.443	-84.3483	1243.64	-1.4661	1.1865	0.22852	4.643	-2.91799999999999	849.031	-1.3413	0.30322	0.23242	2.488	10.669	-8.925	0.125	-0.066895	0.05127	NaN	NaN	NaN	NaN	NaN	NaN
1.878	-14.583	-69.3745	1243.108	-1.4988	1.2035	0.24483	26.686	-99.3531	898.94	-1.2674	0.27295	0.18164	4.117	14.824	14.1476	0.080566	-0.032715	0.064941	NaN	NaN	NaN	NaN	NaN	NaN
1.88	8.733	-58.196	1230.0433	-1.5293	1.2305	0.26074	25.623	-72.982	960.391	-1.229	0.27344	0.15234	-19.388	4.165	12.5546	0.061523	-0.01416	0.075195	NaN	NaN	NaN	NaN	NaN	NaN
1.882	6.029	-52.1797	1225.7045	-1.5519	1.2485	0.28086	-9.636	-91.06	971.504	-1.2344	0.32471	0.1416	-28.66	17.5532	14.9284	0.025879	0.026855	0.095215	NaN	NaN	NaN	NaN	NaN	NaN
1.884	13.7891	-50.8826	1239.2088	-1.5723	1.2619	0.29804	-14.9812	-137.040179	1018.951	-1.2578	0.375	0.15967	-24.053	17.975	-12.9594	-0.0026854	0.053955	0.10742	NaN	NaN	NaN	NaN	NaN	NaN
1.886	20.5038	-34.7079	1239.124	-1.5887	1.2744	0.3082	-7.5989	-62.506	1035.533	-1.2905	0.46777	0.19629	-41.619	18.5091	1.8006	-0.026855	0.079102	0.11328	NaN	NaN	NaN	NaN	NaN	NaN
1.888	40.74	-17.8878	1218.7038	-1.6003	1.2904	0.32402	-35.836	-114.025	1028.825	-1.3002	0.51905	0.20459	-75.0579	24.488	7.529	-0.068848	0.10791	0.12354	NaN	NaN	NaN	NaN	NaN	NaN
1.89	28.62073	-18.5166	1225.968	-1.6128	1.2935	0.33594	9.761	-134.859	1067.215	-1.292	0.54883	0.19775	-67.8943	15.30746	13.852	-0.087891	0.12842	0.13135	NaN	NaN	NaN	NaN	NaN	NaN
1.892	51.6499	-15.1066	1245.764	-1.6281	1.3	0.35283	21.848	-99.55	1073.232	-1.2656	0.58203	0.18213	-32.891	15.938	18.4273	-0.13281	0.1499	0.14063	NaN	NaN	NaN	NaN	NaN	NaN
1.894	56.413	-5.994	1236.8933	-1.6445	1.3035	0.36328	31.339	-182.274	1123.6931	-1.2534	0.59033	0.17041	-20.448	-24.85478	48.174	-0.17578	0.16797	0.13867	NaN	NaN	NaN	NaN	NaN	NaN
1.896	37.5715	-13.437	1234.5335	-1.6621	1.307	0.3793	43.963	-144.577	1164.049	-1.2261	0.61377	0.15381	32.506	-20.002	68.248	-0.22119	0.19092	0.13721	NaN	NaN	NaN	NaN	NaN	NaN
1.898	27.2671	-25.3679	1226.5896	-1.6808	1.3081	0.39355	49.1219	-115.026	1147.3151	-1.2247	0.62598	0.14502	-0.84	-28.483	119.201	-0.28418	0.22461	0.15381	NaN	NaN	NaN	NaN	NaN	NaN
1.9	16.627	-34.7071	1225.3963	-1.6968	1.3149	0.41162	81.809	-156.2224	1160.9165	-1.2305	0.63867	0.14551	-9.114	18.415	156.3942	-0.31104	0.24512	0.16162	NaN	NaN	NaN	NaN	NaN	NaN
1.902	16.3213	-21.5455	1236.7775	-1.7212	1.3186	0.42871	94.593	-78.121	1170.39532	-1.2891	0.67188	0.16357	3.692	24.474	207.5633	-0.40039	0.28174	0.17822	NaN	NaN	NaN	NaN	NaN	NaN
1.904	-12.9112	-21.5853	1222.1399	-1.7369	1.3235	0.43955	100.766	-85.4868	1171.816	-1.3418	0.69043	0.18359	57.9433	55.609	265.598	-0.4585	0.30713	0.1958	NaN	NaN	NaN	NaN	NaN	NaN
1.906	-33.95067	-20.2833	1218.6674	-1.7541	1.3359	0.45322	95.9665	-86.7723	1204.9466	-1.4922	0.73975	0.24072	32.91972	59.325	328.3247	-0.52344	0.33301	0.21924	NaN	NaN	NaN	NaN	NaN	NaN
1.908	-21.3387	-10.4488	1221.3468	-1.7692	1.3461	0.46299	61.089	3.749	1203.169	-1.6455	0.77247	0.31812	55.3863	88.585	399.4734	-0.63281	0.35938	0.24316	NaN	NaN	NaN	NaN	NaN	NaN
1.91	-43.6447	7.2666	1212.0071	-1.7734	1.3574	0.47119	18.396	-63.069	1227.955	-1.812	0.81104	0.41113	35.4389	76.084	502.514	-0.69238	0.37109	0.24805	NaN	NaN	NaN	NaN	NaN	NaN
1.912	-36.2242	10.5202	1208.3035	-1.7835	1.3595	0.47734	-5.449	-54.3722	1265.6582	-2.0859	0.87305	0.5542	16.1094	87.065	582.416	-0.81934	0.40967	0.27588	NaN	NaN	NaN	NaN	NaN	NaN
1.914	-55.0473	8.8371	1199.9905	-1.7839	1.3646	0.48711	-11.721	-25.0918	1233.46	-2.2168	0.9043	0.62842	-9.6514	42.377	648.017	-0.91674	0.43579	0.30078	NaN	NaN	NaN	NaN	NaN	NaN
1.916	-44.512	21.5598	1191.97148	-1.7776	1.3708	0.48789	32.157	-99.837	1260.9221	-2.4688	0.97852	0.75049	43.463	36.9622	692.9744	-1.0176	0.46289	0.33203	NaN	NaN	NaN	NaN	NaN	NaN
1.918	-47.19563	30.864	1184.2987	-1.7735	1.3749	0.49023	60.328	-30.803	1270.8255	-2.6209	1.0335	0.82984	28.3733	-21.459	770.6097	-1.166	0.48828	0.36572	NaN	NaN	NaN	NaN	NaN	NaN
1.92	-54.464	39.387	1161.963	-1.7578	1.375	0.48779	26.058	-44.062	1265.4396	-2.7554	1.0806	0.88965	32.5127	-20.7126	855.5052	-1.2476	0.50244	0.39063	NaN	NaN	NaN	NaN	NaN	NaN
1.922	-35.068	39.812	1165.9417	-1.7446	1.3722	0.47774	47.164	-108.157	1319.7404	-2.8882	1.1353	0.91797	12.0043	-77.623	912.886	-1.4058	0.52197	0.44141	NaN	NaN	NaN	NaN	NaN	NaN
1.924	-22.6781	53.41	1164.5431	-1.727	1.3711	0.47256	41.804	-37.747	1321.8373	-2.9141	1.1445	0.92529	11.775	-95.926	959.594	-1.5275	0.5354	0.4934	NaN	NaN	NaN	NaN	NaN	NaN
1.926	-10.823	52.346	1146.9091	-1.7054	1.3684	0.4667	36.205	-111.9902	1329.5572	-2.916	1.1328	0.90674	-14.855	-155.3245	995.593	-1.6558	0.54932	0.53906	NaN	NaN	NaN	NaN	NaN	NaN
1.928	-25.962	45.4492	1130.0191	-1.6798	1.362	0.45879	70.866	-104.9714	1373.784	-2.8855	1.1136	0.87817	19.559	-182.363	1052.3139	-1.814	0.54932	0.62305	NaN	NaN	NaN	NaN	NaN	NaN
1.93	-2.922	43.9151	1122.0176	-1.6602	1.3555	0.44873	34.04	-18.593	1330.3011	-2.8608	1.0942	0.84766	10.348	-230.702	1098.693	-1.8804	0.54736	0.66406	NaN	NaN	NaN	NaN	NaN	NaN
1.932	16.575	39.9201	1119.0147	-1.63	1.35	0.43896	34.343	-71.085	1331.55337	-2.8179	1.0513	0.78711	33.219	-201.758	1068.677	-1.9985	0.54541	0.73438	NaN	NaN	NaN	NaN	NaN	NaN
1.934	15.673	34.7749	1091.018	-1.6008	1.3394	0.43252	62.536	-8.616	1337.0843	-2.7676	1.0137	0.76807	30.374	-210.54	1046.191	-2.062	0.55762	0.78223	NaN	NaN	NaN	NaN	NaN	NaN
1.936	30.235	31.7585	1085.35	-1.5692	1.325	0.42549	24.043	7.226	1327.7967	-2.6328	0.91602	0.70947	28.384	-176.295	1018.436	-2.1187	0.58301	0.81836	NaN	NaN	NaN	NaN	NaN	NaN
1.938	48.7638	31.073	1076.44461	-1.5414	1.3125	0.41699	30.975	-64.81	1345.415	-2.5378	0.85864	0.6604	1.232	-194.272	981.6018	-2.1406	0.62109	0.86377	NaN	NaN	NaN	NaN	NaN	NaN
1.94	55.9702	49.1998	1067.78747	-1.5171	1.2896	0.40234	80.142	6.2122	1353.0187	-2.4624	0.81494	0.62109	-5.843	-148.403	949.532	-2.1304	0.63428	0.875	NaN	NaN	NaN	NaN	NaN	NaN
1.942	50.2744	65.122	1045.354	-1.4901	1.2735	0.39668	75.9014	-25.063	1343.5412	-2.3882	0.77002	0.58301	13.13	-161.92	924.855	-2.1089	0.68799	0.87109	NaN	NaN	NaN	NaN	NaN	NaN
1.944	66.975	63.042	1050.5503	-1.4644	1.2534	0.3874	108.0675	-12.671	1369.3274	-2.3555	0.74805	0.56689	30.145	-105.528	942.992	-2.1038	0.75122	0.87281	NaN	NaN	NaN	NaN	NaN	NaN
1.946	68.2915	67.5899	1029.541	-1.4319	1.2343	0.37842	123.9485	84.262	1341.1123	-2.3257	0.72021	0.54639	30.834	-112.144	999.949	-2.1172	0.82227	0.87744	NaN	NaN	NaN	NaN	NaN	NaN
1.948	57.0222	76.6102	1000.97288	-1.4021	1.2081	0.37187	115.2375	8.0318	1329.238	-2.3162	0.70044	0.53711	8.7754	-78.08	1058.79	-2.1265	0.89893	0.88672	NaN	NaN	NaN	NaN	NaN	NaN
1.95	46.361	82.6978	969.769	-1.3711	1.1816	0.36377	142.3252	30.3286	1368.5335	-2.3105	0.68506	0.52783	24.267	-119.395	1088.729	-2.1367	0.93945	0.89111	NaN	NaN	NaN	NaN	NaN	NaN
1.952	34.679	99.027	953.935	-1.3451	1.1525	0.35088	111.4796	38.585	1365.0379	-2.3047	0.6543	0.52197	53.723	-120.711	1184.45	-2.1069	1.0083	0.87012	NaN	NaN	NaN	NaN	NaN	NaN
1.954	42.0706	96.557	955.6081	-1.3157	1.1239	0.34522	78.8464	-33.2881	1392.6371	-2.2983	0.64893	0.51953	60.2443	-181.001	1236.5358	-2.0478	1.043	0.81445	NaN	NaN	NaN	NaN	NaN	NaN
1.956	19.636	97.233	931.1592	-1.2856	1.0961	0.33076	100.0191	58.6682	1420.477	-2.2749	0.64258	0.5166	71.356	-181.164	1266.818	-1.9707	1.0742	0.73877	NaN	NaN	NaN	NaN	NaN	NaN
1.958	4.482	84.3804	909.1039	-1.2583	1.0624	0.31982	81.1113	34.779	1369.101	-2.2251	0.6333	0.51563	97.042	-222.7907	1293.005	-1.8335	1.0942	0.62988	NaN	NaN	NaN	NaN	NaN	NaN
1.96	-5.41099999999999	86.545	908.07447	-1.228	1.0337	0.31055	74.606	6.615	1360.1463	-2.1948	0.62549	0.50732	54.6997	-221.539	1317.134	-1.7695	1.0918	0.57275	NaN	NaN	NaN	NaN	NaN	NaN
1.962	9.568	97.677	901.5857	-1.2004	1.0039	0.30801	75.96	84.5153	1320.0358	-2.1304	0.604	0.50293	37.71	-292.92	1327.5678	-1.6641	1.0781	0.49658	NaN	NaN	NaN	NaN	NaN	NaN
1.964	-2.93	96.433	881.6871	-1.1804	0.97197	0.29649	64.238	26.567	1285.172	-2.0827	0.58814	0.49536	24.076	-327.023	1359.982	-1.6235	1.0542	0.46167	NaN	NaN	NaN	NaN	NaN	NaN
1.966	-21.095	85.712	858.2495	-1.1534	0.94424	0.28945	81.401	64.17	1331.1247	-2.0288	0.57861	0.48242	28.982	-319.822	1384.3714	-1.6069	1.0239	0.44189	NaN	NaN	NaN	NaN	NaN	NaN
1.968	-9.959	79.246	836.6146	-1.1268	0.91738	0.27998	64.469	98.522	1309.401	-1.9414	0.5625	0.46143	14.219	-283.29	1441.164	-1.6187	1.0044	0.43945	NaN	NaN	NaN	NaN	NaN	NaN
1.97	-7.838	78.984	818.588	-1.1001	0.89111	0.27539	58.927	10.129	1298.7712	-1.8984	0.55469	0.44385	35.0271	-216.9596	1453.787	-1.6348	1.0059	0.43604	NaN	NaN	NaN	NaN	NaN	NaN
1.972	-12.791	90.255	811.0746	-1.0741	0.86299	0.27265	70.826	97.882	1291.439	-1.7969	0.53906	0.41064	-15.26	-170.8098	1468.563	-1.6597	1.0356	0.43945	NaN	NaN	NaN	NaN	NaN	NaN
1.974	-12.922	92.634	800.965	-1.0473	0.8334	0.26856	42.41	87.405	1228.838	-1.7214	0.52808	0.38208	21.77	-99.509	1465.8845	-1.7009	1.0598	0.44507	NaN	NaN	NaN	NaN	NaN	NaN
1.976	6.058	96.425	782.376	-1.0226	0.80254	0.26504	35.617	69.8783	1230.5026	-1.6538	0.51514	0.34912	14.907	-99.525	1455.702	-1.7637	1.0762	0.44873	NaN	NaN	NaN	NaN	NaN	NaN
1.978	15.526	101.6016	744.2067	-0.99914	0.78252	0.26768	43.693	169.144	1227.658	-1.5718	0.50244	0.31396	-7.96	-58.19	1448.172	-1.9121	1.0928	0.4751	NaN	NaN	NaN	NaN	NaN	NaN
1.98	-3.289	110.6764	727.1529	-0.97607	0.75439	0.2627	10.432	96.86	1179.8922	-1.5347	0.50244	0.30762	-35.1946	-67.329	1474.5719	-2.0655	1.0976	0.51709	NaN	NaN	NaN	NaN	NaN	NaN
1.982	35.834	111.589	712.2532	-0.94443	0.73154	0.26055	17.879	89.895	1209.266	-1.4702	0.4917	0.26953	-37.1142	-47.598	1516.871	-2.2437	1.0981	0.56055	NaN	NaN	NaN	NaN	NaN	NaN
1.984	51.812	110.703	696.2856	-0.91826	0.70537	0.2581	22.764	125.3188	1192.728	-1.4307	0.48536	0.25342	-67.887	-86.722	1532.89	-2.5215	1.0898	0.64307	NaN	NaN	NaN	NaN	NaN	NaN
1.986	52.559	109.694	669.3819	-0.88467	0.67646	0.25654	18.053	34.182	1151.8671	-1.394	0.48682	0.23682	-62.7325	-75.661	1490.9278	-2.6582	1.0801	0.68408	NaN	NaN	NaN	NaN	NaN	NaN
1.988	62.394	113.169	633.455	-0.85361	0.65186	0.25371	32.98	121.057	1144.51958	-1.3452	0.49072	0.21875	-46.0617	-157.96	1495.8604	-2.9312	1.061	0.7832	NaN	NaN	NaN	NaN	NaN	NaN
1.99	80.1924	109.0853	636.067	-0.82227	0.62012	0.24609	35.304	123.91	1071.735	-1.3198	0.49463	0.2124	-27.678	-143.056	1512.975	-3.1133	1.0478	0.86231	NaN	NaN	NaN	NaN	NaN	NaN
1.992	89.1499	117.07	623.669	-0.78262	0.5959	0.23467	48.249	82.27	1040.383	-1.2715	0.50195	0.20605	-80.299	-202.086	1549.311	-3.2695	1.0293	0.94287	NaN	NaN	NaN	NaN	NaN	NaN
1.994	81.5543	116.986	593.0306	-0.74228	0.56221	0.22148	88.9783	169.054	1028.4976	-1.2331	0.50659	0.20947	-39.2098	-133.849	1561.183	-3.4858	1.0669	0.98242	NaN	NaN	NaN	NaN	NaN	NaN
1.996	88.0923	105.21331	574.37101	-0.69853	0.53213	0.20274	55.2389	107.7699	993.083	-1.1968	0.50635	0.20459	-22.1962	-176.643	1597.868	-3.5293	1.0781	1.0161	NaN	NaN	NaN	NaN	NaN	NaN
1.998	76.4789	100.2251	560.5192	-0.65625	0.50098	0.18897	73.89425	104.5249	1001.261	-1.144	0.51025	0.20166	8.1554	-132.6317	1578.3979	-3.5698	1.0786	1.0547	NaN	NaN	NaN	NaN	NaN	NaN
2	63.721	96.2243	546.5667	-0.62207	0.4668	0.17139	67.2225	172.999	959.5313	-1.1152	0.50879	0.20068	8.3511	-169.49	1584.605	-3.5801	1.0786	1.0464	NaN	NaN	NaN	NaN	NaN	NaN
2.002	71.02909	100.7434	516.1297	-0.58496	0.44092	0.1585	24.37	94.487	931.381	-1.0527	0.50293	0.19385	42.431	-77.94	1548.1648	-3.5269	1.0864	1.043	NaN	NaN	NaN	NaN	NaN	NaN
2.004	73.6692	85.599	487.1992	-0.54824	0.41289	0.14629	52.293	167.728	904.5128	-0.99461	0.49463	0.19312	26.2375	-57.376	1531.89	-3.4219	1.0732	1.0142	NaN	NaN	NaN	NaN	NaN	NaN
2.006	50.65	98.2804	479.24	-0.5248	0.39219	0.13457	22.152	176.3502	844.517	-0.94092	0.479	0.17969	13.903	49.6106	1523.5952	-3.3706	1.0688	1.0039	NaN	NaN	NaN	NaN	NaN	NaN
2.008	46.743	102.2036	453.62138	-0.49697	0.3708	0.12744	28.981	108.681	821.0007	-0.86279	0.45361	0.1709	9.83492	29.4234	1504.104	-3.2578	1.0547	0.979	NaN	NaN	NaN	NaN	NaN	NaN
2.01	33.03	103.61	440.9644	-0.46826	0.35596	0.12256	54.1539	181.189	791.4958	-0.82275	0.44189	0.16455	12.733	68.405	1462.067	-3.1561	1.0345	0.95361	NaN	NaN	NaN	NaN	NaN	NaN
2.012	30.126	93.432	424.471	-0.43916	0.34014	0.11347	13.207	134.3642	746.085	-0.74414	0.41211	0.15479	35.1746	19.7011	1430.782	-3.0464	1.0142	0.93066	NaN	NaN	NaN	NaN	NaN	NaN
2.014	11.826	85.6196	432.763	-0.41319	0.32666	0.10986	8.296	121.6888	737.3141	-0.68652	0.38184	0.14038	11.631	76.142	1399.827	-2.9019	0.98877	0.88867	NaN	NaN	NaN	NaN	NaN	NaN
2.016	23.178	86.8127	386.5846	-0.39209	0.31103	0.083692	10.786	196.192	704.1634	-0.62354	0.35205	0.12988	13.737	42.842	1400.904	-2.834	0.97852	0.86768	NaN	NaN	NaN	NaN	NaN	NaN
2.018	6.256	86.6135	355.4522	-0.36191	0.29473	0.074902	1.117	121.2642	684.9308	-0.54443	0.30811	0.10742	-6.921	85.331	1425.825	-2.6948	0.9458	0.82422	NaN	NaN	NaN	NaN	NaN	NaN
2.02	-4.65900000000001	88.2167	336.723	-0.31592	0.27783	0.079102	10.847	162.145	675.6435	-0.50781	0.29102	0.1001	20.9937	36.1685	1423.964	-2.5835	0.91357	0.80078	NaN	NaN	NaN	NaN	NaN	NaN
2.022	-1.759	87.1179	318.3618	-0.2874	0.25742	0.076953	-8.648	181.077	629.957	-0.43213	0.25342	0.076172	3.1386	34.90906	1434.808	-2.4785	0.87891	0.77002	NaN	NaN	NaN	NaN	NaN	NaN
2.024	-10.358	83.3463	307.77116	-0.26445	0.24336	0.074121	-25.9206	118.74	612.3036	-0.37768	0.22705	0.059814	7.0663	-14.7662	1418.324	-2.3301	0.83203	0.73682	NaN	NaN	NaN	NaN	NaN	NaN
2.026	-6.604	80.7691	287.698	-0.24336	0.22461	0.072168	-33.117	198.039	598.992	-0.32422	0.19873	0.044922	-26.16848	12.191	1418.672	-2.2456	0.81104	0.71484	NaN	NaN	NaN	NaN	NaN	NaN
2.028	13.901	68.917	287.0486	-0.2167	0.20879	0.066406	-45.4304	170.556	552.22	-0.26123	0.15381	0.021973	-38.6071	17.653	1366.2087	-2.0801	0.76563	0.67236	NaN	NaN	NaN	NaN	NaN	NaN
2.03	11.883	73.269	284.862	-0.18896	0.1958	0.058105	-40.44	129.0802	534.6793	-0.23682	0.13232	0.013672	-41.46769	78.7422	1330.2	-1.9431	0.72974	0.63941	NaN	NaN	NaN	NaN	NaN	NaN
2.032	25.858	70.6427	264.5435	-0.15967	0.17813	0.057129	-25.541	200.54	491.9202	-0.1875	0.091797	0.0053711	-55.0935	58.035	1291.834	-1.8105	0.69727	0.60791	NaN	NaN	NaN	NaN	NaN	NaN
2.034	21.211	71.9707	248.2716	-0.12959	0.16387	0.049902	-38.58	115.903	464.79813	-0.1543	0.0625	-0.014404	-71.154	72.074	1294.898	-1.6387	0.64551	0.56689	NaN	NaN	NaN	NaN	NaN	NaN
2.036	50.342	67.9689	236.7452	-0.10498	0.15371	0.043261	-20.272	153.688	460.472	-0.13037	0.033691	-0.020508	-44.02286	49.411	1282.885	-1.5586	0.62695	0.53955	NaN	NaN	NaN	NaN	NaN	NaN
2.038	57.5648	67.6281	210.907	-0.08125	0.1457	0.041406	-12.2151	190.481	425.679	-0.10059	-0.0019531	-0.026367	-37.3434	106.3687	1241.905	-1.3887	0.57031	0.49561	NaN	NaN	NaN	NaN	NaN	NaN
2.04	53.505	78.109	204.3822	-0.057129	0.13818	0.039551	-13.9121	119.8858	398.6844	-0.091797	-0.018066	-0.026855	-22.1761	151.578	1179.8787	-1.2614	0.52466	0.46899	NaN	NaN	NaN	NaN	NaN	NaN
2.042	49.778	65.1077	190.9937	-0.034961	0.12705	0.025293	18.168	176.649	384.8739	-0.076172	-0.04248	-0.023926	-24.972	199.61	1152.8574	-1.144	0.47705	0.44141	NaN	NaN	NaN	NaN	NaN	NaN
2.044	60.616	61.898	190.1461	-0.010449	0.11816	0.014453	16.549	156.482	344.7071	-0.071533	-0.066162	-0.020752	-3.441	215.635	1097.665	-1.0156	0.4043	0.4126	NaN	NaN	NaN	NaN	NaN	NaN
2.046	82.0839	66.3468	176.29989	0.0075196	0.10332	0.003125	14.394	122.0016	324.689	-0.070313	-0.081543	-0.017578	11.568	196.5042	1060.0717	-0.96045	0.36572	0.396	NaN	NaN	NaN	NaN	NaN	NaN
2.048	69.0796	64.9757	164.716042	0.027442	0.089844	-0.0091795	29.074	190.284	319.9404	-0.068848	-0.098633	-0.003418	34.262	179.145	1007.257	-0.85352	0.29541	0.37646	NaN	NaN	NaN	NaN	NaN	NaN
2.05	75.6702	54.1737	157.5963	0.041992	0.073242	-0.024902	28.6291	107.236	309.256	-0.077637	-0.10352	-0.0014648	19.432	141.8777	1019.5322	-0.76855	0.24634	0.36767	NaN	NaN	NaN	NaN	NaN	NaN
2.052	68.5494	56.8839	147.3516	0.056543	0.064453	-0.036621	30.9718	108.065	306.543	-0.086426	-0.10986	0.016113	9.215	137.1646	985.334	-0.69238	0.20605	0.35889	NaN	NaN	NaN	NaN	NaN	NaN
2.054	58.7994	58.9288	133.293	0.067774	0.056446	-0.045996	25.09815	138.5259	280.3878	-0.093994	-0.10889	0.028809	40.2885	129.616	965.682	-0.59375	0.16406	0.34424	NaN	NaN	NaN	NaN	NaN	NaN
2.056	57.475	64.005	128.168	0.064648	0.055664	-0.051465	23.734	64.428	254.3477	-0.10156	-0.11084	0.042969	56.658	145.8952	890.2799	-0.54688	0.13965	0.33545	NaN	NaN	NaN	NaN	NaN	NaN
2.058	44.635	42.1952	127.6426	0.063574	0.050586	-0.059375	38.5	130.54	223.3932	-0.11816	-0.10059	0.074219	65.58	120.454	860.8146	-0.4585	0.11084	0.32568	NaN	NaN	NaN	NaN	NaN	NaN
2.06	34.224	47.14	129.4069	0.061035	0.05127	-0.062988	19.881	116.29	198.3798	-0.12061	-0.092285	0.081543	70.081	105.068	818.029	-0.40113	0.091065	0.30591	NaN	NaN	NaN	NaN	NaN	NaN
2.062	35.6722	49.541	103.9599	0.057519	0.04795	-0.06709	22.345	58.74	184.397	-0.13477	-0.081543	0.11133	101.2116	78.364	776.192	-0.3335	0.076172	0.28857	NaN	NaN	NaN	NaN	NaN	NaN
2.064	25.349	46.154	94.7188	0.059375	0.046777	-0.074609	36.696	129.027	171.9063	-0.13819	-0.070801	0.12793	80.6018	120.8455	714.801	-0.24609	0.049805	0.24951	NaN	NaN	NaN	NaN	NaN	NaN
2.066	7.407	33.7869	96.9046	0.057813	0.044043	-0.075781	13.01	58.411	161.3634	-0.1416	-0.060059	0.14941	77.3059	140.2034	722.453	-0.20264	0.036133	0.23389	NaN	NaN	NaN	NaN	NaN	NaN
2.068	9.646	35.948	102.8934	0.054883	0.043359	-0.07666	34.212	57.9574	172.3794	-0.12646	-0.044434	0.16016	94.23169	175.908	682.6637	-0.11914	0.0063477	0.19238	NaN	NaN	NaN	NaN	NaN	NaN
2.07	12.861	39.284	82.9958	0.052246	0.039063	-0.078125	14.461	106.837	144.783	-0.12061	-0.037109	0.16992	97.325	163.771	644.149	-0.066894	-0.013183	0.1687	NaN	NaN	NaN	NaN	NaN	NaN
2.072	-14.516	41.234	64.884	0.054199	0.035059	-0.085352	-4.066	36.012	124.0013	-0.09375	-0.031738	0.17285	77.388	194.587	576.682	-0.02002	-0.041016	0.1499	NaN	NaN	NaN	NaN	NaN	NaN
2.074	-12.51	40.597	74.8612	0.049512	0.028613	-0.089356	11.349	102.76	95.4626	-0.070069	-0.027832	0.17163	70.363	174.516	518.897	0.029785	-0.072754	0.11426	NaN	NaN	NaN	NaN	NaN	NaN
2.076	-3.725	41.503	77.1068	0.042871	0.030175	-0.091308	-14.89	98.941	55.244	-0.042969	-0.029785	0.1665	46.874	212.631	505.33	0.051758	-0.083496	0.1001	NaN	NaN	NaN	NaN	NaN	NaN
2.078	10.283	50.21	64.0449	0.038769	0.025098	-0.094043	-1.913	19.406	72.2241	-0.0014648	-0.030762	0.15234	14.721	192.476	479.194	0.094727	-0.11475	0.072754	NaN	NaN	NaN	NaN	NaN	NaN
2.08	-6.765	50.698	54.2493	0.027344	0.026855	-0.094727	-0.129000000000001	87.235	38.2946	0.020508	-0.032227	0.14258	30.446	209.52	420.3736	0.12329	-0.13916	0.04834	NaN	NaN	NaN	NaN	NaN	NaN
2.082	14.333	37.198	63.767	0.01084	0.028809	-0.094629	-22.99	17.438	26.681	0.06543	-0.047363	0.13818	47.81	166.6419	373.1565	0.15088	-0.15918	0.026855	NaN	NaN	NaN	NaN	NaN	NaN
2.084	28.191	32.544	56.506	-0.01123	0.033789	-0.089062	-4.284	5.514	38.1951	0.082276	-0.05542	0.11572	32.988	168.981	344.327	0.18408	-0.18213	-0.010742	NaN	NaN	NaN	NaN	NaN	NaN
2.086	25.051	32.857	46.1606	-0.040528	0.04707	-0.080859	0.300999999999995	66.724	29.2225	0.094727	-0.06543	0.097656	7.072	127.90754	316.7513	0.20117	-0.20117	-0.033691	NaN	NaN	NaN	NaN	NaN	NaN
2.088	36.365	36.127	36.78	-0.071875	0.057324	-0.068652	-13.272	-10.3325	30.1384	0.11865	-0.074219	0.076172	0.292999999999999	155.98	326.365	0.22852	-0.22266	-0.056641	NaN	NaN	NaN	NaN	NaN	NaN
2.09	37.39	32.1682	51.21526	-0.10645	0.069824	-0.05127	3.006	24.6477	31.72077	0.12891	-0.082031	0.057373	6.239	119.5726	318.506	0.24365	-0.2439	-0.081543	NaN	NaN	NaN	NaN	NaN	NaN
2.092	59.41	36.8715	55.0926	-0.13447	0.085058	-0.040332	19.616	48.335	-1.384	0.1377	-0.085938	0.043945	16.53	134.307	331.788	0.25537	-0.25781	-0.10107	NaN	NaN	NaN	NaN	NaN	NaN
2.094	52.5269	33.682	50.515	-0.1623	0.09375	-0.023828	18.527	-15.852	4.887	0.13965	-0.095703	0.027832	11.834	85.7242	297.954	0.26563	-0.27441	-0.12744	NaN	NaN	NaN	NaN	NaN	NaN
2.096	54.089	9.2128	46.6203	-0.18262	0.1082	-0.012109	24.128	50.616	12.8511	0.13428	-0.097168	0.02002	17.118	97.142	254.326	0.26807	-0.28223	-0.13721	NaN	NaN	NaN	NaN	NaN	NaN
2.098	66.9424	7.8716	45.602	-0.19746	0.11153	-0.0011719	32.196	8.9314	9.09515	0.12402	-0.10107	0.01709	33.025	82.3711	205.7275	0.26172	-0.30273	-0.16162	NaN	NaN	NaN	NaN	NaN	NaN
2.1	63.5909	13.6525	49.212	-0.2085	0.11279	0.0043945	15.922	-29.936	12.3854	0.11231	-0.10156	0.014893	21.229	119.1601	192.6933	0.25317	-0.30493	-0.1753	NaN	NaN	NaN	NaN	NaN	NaN
2.102	62.5287	20.4021	28.8039	-0.20557	0.1128	0.010058	28.481	37.2745	-4.4987	0.09668	-0.098633	0.020996	20.899	110.33	176.976	0.23975	-0.30957	-0.19043	NaN	NaN	NaN	NaN	NaN	NaN
2.104	52.804	3.8702	34.4284	-0.20078	0.10469	0.012793	54.2753	-34.279	6.60062	0.07373	-0.095703	0.040039	47.607	120.368	173.5	0.21533	-0.31641	-0.20459	NaN	NaN	NaN	NaN	NaN	NaN
2.106	55.567	12.47615	37.57258	-0.18711	0.099609	0.012012	38.045	3.6547	24.899	0.0625	-0.092773	0.040039	72.0723	82.623	121.5951	0.19971	-0.31201	-0.21191	NaN	NaN	NaN	NaN	NaN	NaN
2.108	52.7293	22.498	19.941	-0.16787	0.089551	0.0070313	32.7928	61.46	-7.56	0.04541	-0.091309	0.064941	61.2315	71.045	116.495	0.15967	-0.31396	-0.22314	NaN	NaN	NaN	NaN	NaN	NaN
2.11	40.879	20.0232	36.1448	-0.14551	0.072266	0.003418	53.4666	-3.415	-9.563	0.031494	-0.08667	0.083496	56.507	55.7681	86.6854	0.10938	-0.30371	-0.22217	NaN	NaN	NaN	NaN	NaN	NaN
2.112	34.879	8.1597	39.032	-0.12549	0.060547	-0.0018555	35.472	58.609	-0.8044	0.016602	-0.086914	0.09668	38.46	87.357	67.626	0.08252	-0.29688	-0.21191	NaN	NaN	NaN	NaN	NaN	NaN
2.114	23.225	7.6063	43.182	-0.098632	0.053027	-0.0047852	16.886	29.409	-0.43875	0.0097656	-0.088379	0.11475	54.636	81.944	36.181	0.019531	-0.28711	-0.20264	NaN	NaN	NaN	NaN	NaN	NaN
2.116	9.201	9.6006	18.9972	-0.079883	0.031934	-0.011035	44.849	-10.8628	27.894	0.0078125	-0.088379	0.11865	81.0893	82.5965	30.199	-0.034424	-0.27978	-0.1958	NaN	NaN	NaN	NaN	NaN	NaN
2.118	9.928	4.7589	16.6049	-0.071191	0.020996	-0.016797	28.382	51.825	14.1009	0.016602	-0.095703	0.12842	91.136	46.9776	19.253	-0.09082	-0.26709	-0.18115	NaN	NaN	NaN	NaN	NaN	NaN
2.12	5.961	3.1129	19.7112	-0.057617	0.0078125	-0.016602	6.785	-9.02058	25.665	0.023193	-0.10546	0.13379	52.2212	19.792	48.799	-0.17969	-0.24609	-0.14941	NaN	NaN	NaN	NaN	NaN	NaN
2.122	-6.481	7.2735	29.0093	-0.053223	0.0049805	-0.020801	39.801	-0.3286	47.256	0.035645	-0.11133	0.13428	49.581	2.3189	21.419	-0.22461	-0.23242	-0.13281	NaN	NaN	NaN	NaN	NaN	NaN
2.124	2.016	8.3883	18.6114	-0.051074	0.0016601	-0.020703	-0.463000000000001	45.027	11.7723	0.051758	-0.12842	0.14111	28.255	3.3616	40.3175	-0.3042	-0.20898	-0.10498	NaN	NaN	NaN	NaN	NaN	NaN
2.126	-21.705	-0.5213	13.403	-0.046777	9.7656e-05	-0.016797	8.359	-14.19787	2.611	0.056152	-0.13672	0.1377	35.081	6.655	26.5989	-0.35131	-0.1914	-0.087158	NaN	NaN	NaN	NaN	NaN	NaN
2.128	-3.36300000000001	-6.9562	35.003	-0.049805	0.0030274	-0.015723	11.199	40.398	-2.345	0.070801	-0.14893	0.12402	19.15	-0.7202	16.6291	-0.39502	-0.18115	-0.076172	NaN	NaN	NaN	NaN	NaN	NaN
2.13	14.614	-12.94	54.79	-0.05127	0.0053711	-0.0092773	-20.737	27.747	-3.9323	0.07837	-0.16138	0.11841	38.205	-15.955	8.5103	-0.4375	-0.17432	-0.06543	NaN	NaN	NaN	NaN	NaN	NaN
2.132	7.5	-20.8312	47.65	-0.051563	0.0044922	-0.0086913	-4.008	-35.134	32.937	0.084961	-0.16895	0.10645	23.002	-27.2769	13.2436	-0.45117	-0.16699	-0.05957	NaN	NaN	NaN	NaN	NaN	NaN
2.134	-8.609	-21.9943	40.92711	-0.050586	0.0023437	-0.011035	-5.709	36.109	23.143	0.10059	-0.17041	0.098633	-3.227	-11.417	-7.213	-0.48389	-0.15479	-0.051758	NaN	NaN	NaN	NaN	NaN	NaN
2.136	16.723	-17.6366	45.2015	-0.044727	0.0023437	-0.014941	-15.395	-2.5473	25.612	0.10303	-0.16895	0.092285	-43.7347	12.3431	8.361	-0.5105	-0.14721	-0.035888	NaN	NaN	NaN	NaN	NaN	NaN
2.138	24.348	2.6172	62.7763	-0.03877	0.0013672	-0.023731	12.97	-15.209	48.494	0.10596	-0.15869	0.088379	-16.165	43.0172	1.004	-0.53467	-0.13379	-0.018066	NaN	NaN	NaN	NaN	NaN	NaN
2.14	19.681	28.872	87.6476	-0.034668	0	-0.026855	1.726	44.454	21.1702	0.10376	-0.15161	0.082031	-5.591	34.993	24.7264	-0.54688	-0.12109	0.00097656	NaN	NaN	NaN	NaN	NaN	NaN
2.142	35.289	26.5492	106.765	-0.027051	0.0033203	-0.040039	12.14	-10.56939	3.8	0.10059	-0.13525	0.078613	5.597	41.7537	7.356	-0.54395	-0.11768	0.0043945	NaN	NaN	NaN	NaN	NaN	NaN
2.144	52.1362	36.3142	120.8281	-0.02168	0.0069336	-0.046484	15.296	33.304	4.566	0.091797	-0.11719	0.07666	-12.88	13.408	2.599	-0.51172	-0.11963	0	NaN	NaN	NaN	NaN	NaN	NaN
2.146	55.3739	49.5046	150.76779	-0.020117	0.011621	-0.052344	0.292000000000002	41.623	-12.4746	0.082031	-0.11279	0.070801	-2.319	21.513	9.4299	-0.47461	-0.1228	-0.0012207	NaN	NaN	NaN	NaN	NaN	NaN
2.148	43.385	54.5283	185.5578	-0.030078	0.023145	-0.054004	15.268	-28.146	12.6832	0.06543	-0.089355	0.075684	-24.994	1.6657	30.382	-0.42529	-0.13086	-0.0073242	NaN	NaN	NaN	NaN	NaN	NaN
2.15	60.137	56.1024	216.9757	-0.042969	0.031738	-0.052734	35.062	25.1155	17.5767	0.046875	-0.0708	0.070313	-13.744	34.896	-0.332000000000001	-0.35938	-0.15576	-0.024414	NaN	NaN	NaN	NaN	NaN	NaN
2.152	69.546	56.755	227.072	-0.06289	0.049023	-0.049024	30.044	-13.6376	-5.0493	0.024902	-0.047363	0.074219	5.675	26.5856	10.4145	-0.32275	-0.1626	-0.032227	NaN	NaN	NaN	NaN	NaN	NaN
2.154	74.4039	55.118	235.826	-0.084571	0.070215	-0.044238	40.58	-33.678	28.3391	-0.0063477	-0.015137	0.08252	52.435	38.126	3.63087	-0.25098	-0.19238	-0.047852	NaN	NaN	NaN	NaN	NaN	NaN
2.156	68.755	41.1824	270.0581	-0.11738	0.089746	-0.034863	38.2403	42.074	11.4464	-0.030273	0.00097656	0.087891	34.719	-9.195	24.3081	-0.1936	-0.2146	-0.049805	NaN	NaN	NaN	NaN	NaN	NaN
2.158	66.8903	27.1239	325.1281	-0.15537	0.11133	-0.024609	36.287	-16.6491	10.223	-0.07373	0.033203	0.093262	24.17	3.3954	26.148	-0.1377	-0.23682	-0.05957	NaN	NaN	NaN	NaN	NaN	NaN
2.16	79.008	30.428	389.9823	-0.20117	0.13916	-0.012207	39.008	15.8595	18.965	-0.10962	0.066162	0.086914	17.288	-27.3037	33.882	-0.05957	-0.25488	-0.074707	NaN	NaN	NaN	NaN	NaN	NaN
2.162	81.9417	20.7012	423.861	-0.24844	0.16094	0.0032226	24.7788	25.692	17.583	-0.14795	0.097168	0.084473	36.7947	11.9173	40.235	-0.027344	-0.2666	-0.077637	NaN	NaN	NaN	NaN	NaN	NaN
2.164	58.058	-4.5153	477.3157	-0.30781	0.18653	0.021582	44.012	-49.956	35.748	-0.19141	0.13379	0.084961	73.581	-14.3814	59.779	0.038086	-0.27393	-0.10254	NaN	NaN	NaN	NaN	NaN	NaN
2.166	51.264	-30.62903	533.9911	-0.37461	0.21894	0.037207	42.37	25.1959	58.93156	-0.21582	0.15186	0.085938	69.7791	9.7947	29.969	0.07959	-0.28125	-0.11304	NaN	NaN	NaN	NaN	NaN	NaN
2.168	47.346	-49.2996	586.36377	-0.44199	0.25342	0.062403	19.15	23.84465	69.3269	-0.2793	0.18311	0.085449	62.2943	-16.239	8.2289	0.11523	-0.28906	-0.125	NaN	NaN	NaN	NaN	NaN	NaN
2.17	42.63	-50.577	619.0735	-0.51221	0.28613	0.084473	24.507	-0.295999999999999	131.371	-0.32885	0.20532	0.089843	57.9637	25.0678	-17.532	0.15186	-0.28076	-0.13086	NaN	NaN	NaN	NaN	NaN	NaN
2.172	11.229	-49.054	651.0833	-0.58975	0.32744	0.11113	14.322	93.466	161.0389	-0.38037	0.22998	0.092285	48.721	-7.81	12.96	0.16748	-0.28369	-0.13428	NaN	NaN	NaN	NaN	NaN	NaN
2.174	-2.55	-49.143	685.47	-0.66953	0.36758	0.13672	-19.5412	38.725	179.793	-0.46191	0.26563	0.10205	41.899	28.4622	22.411	0.18506	-0.27832	-0.13232	NaN	NaN	NaN	NaN	NaN	NaN
2.176	-7.7323	-48.3395	689.203	-0.76016	0.40938	0.16446	13.506	67.826	224.693	-0.49951	0.28174	0.10059	43.0112	-1.183	14.9096	0.18774	-0.27173	-0.12769	NaN	NaN	NaN	NaN	NaN	NaN
2.178	-15.70584	-37.5727	680.4634	-0.85225	0.454	0.19404	-15.7796	127.459	249.8791	-0.58643	0.31689	0.104	65.0714	25.9171	1.1168	0.19141	-0.26953	-0.11914	NaN	NaN	NaN	NaN	NaN	NaN
2.18	-28.272	-28.0522	677.879	-0.94189	0.50244	0.23633	-46.5658	65.7175	311.0028	-0.66187	0.34106	0.11132	54.3149	-10.0296	-6.4255	0.19043	-0.25928	-0.11328	NaN	NaN	NaN	NaN	NaN	NaN
2.182	-20.73081	-22.81826	684.214	-1.0434	0.56035	0.2707	-20.371	126.023	354.616	-0.72998	0.37061	0.12451	-0.701000000000001	10.4524	10.936	0.19043	-0.25049	-0.10938	NaN	NaN	NaN	NaN	NaN	NaN
2.184	-15.195	-20.5643	672.054	-1.1441	0.6125	0.31357	-15.352	104.621	376.6996	-0.8335	0.41455	0.1499	-13.648	-8.7828	15.439	0.19678	-0.2417	-0.11084	NaN	NaN	NaN	NaN	NaN	NaN
2.186	-25.378	-30.63054	643.906	-1.2258	0.66992	0.35264	-25.667	16.7461	445.4036	-0.89551	0.43848	0.16748	-20.834	26.3372	-0.847000000000001	0.19604	-0.22852	-0.1045	NaN	NaN	NaN	NaN	NaN	NaN
2.188	-35.426	-36.9751	640.7942	-1.2878	0.72569	0.39199	-22.6117	72.009	494.561	-1.0054	0.47998	0.20264	16.422	6.17	9.632	0.19824	-0.21631	-0.10791	NaN	NaN	NaN	NaN	NaN	NaN
2.19	-11.889	-27.774	639.3191	-1.3218	0.77393	0.41992	-21.4517	-15.3968	561.1907	-1.0959	0.49829	0.23706	7.336	16.9711	30.7026	0.19971	-0.2041	-0.11377	NaN	NaN	NaN	NaN	NaN	NaN
2.192	18.779	-11.421	642.657	-1.3223	0.8081	0.42636	-24.2783	-18.336	628.8926	-1.1802	0.52393	0.27539	5.188	-24.3467	14.9366	0.19727	-0.2002	-0.11572	NaN	NaN	NaN	NaN	NaN	NaN
2.194	10.516	-9.71	645.514	-1.2855	0.82188	0.41309	3.757	37.0787	656.43	-1.2949	0.55469	0.33643	-29.441	-7.7103	1.559	0.18066	-0.19092	-0.12158	NaN	NaN	NaN	NaN	NaN	NaN
2.196	28.276	-46.635	660.002	-1.2066	0.81172	0.37481	8.164	-61.636	714.8158	-1.3398	0.56641	0.36768	-25.724	-13.437	-3.7624	0.16601	-0.18017	-0.11621	NaN	NaN	NaN	NaN	NaN	NaN
2.198	44.9	-61.315	687.6369	-1.1103	0.77285	0.31123	1.458	-37.637	756.6422	-1.4336	0.58301	0.43945	-24.313	6.692	3.61648	0.14355	-0.17334	-0.11816	NaN	NaN	NaN	NaN	NaN	NaN
2.2	51.381	-78.002	720.6843	-1.0137	0.72266	0.24463	36.013	-50.38	798.4601	-1.4949	0.59644	0.49243	-12.948	0.804000000000002	23.474	0.1084	-0.16064	-0.11816	NaN	NaN	NaN	NaN	NaN	NaN
2.202	57.456	-98.914	750.114	-0.92197	0.66768	0.175	27.076	-126.263	859.121	-1.543	0.60547	0.54541	25.638	15.6938	32.9872	0.091309	-0.15283	-0.11572	NaN	NaN	NaN	NaN	NaN	NaN
2.204	70.04456	-119.552	757.522	-0.85078	0.61934	0.11152	50.698	-63.519	879.049	-1.5957	0.60938	0.59033	32.559	23.2131	-4.43628	0.057617	-0.14258	-0.11035	NaN	NaN	NaN	NaN	NaN	NaN
2.206	56.7058	-125.868	764.2545	-0.81055	0.57676	0.064649	73.7577	-106.2084	860.898	-1.627	0.62305	0.61377	16.886	40.314	12.5718	0.034912	-0.13232	-0.10718	NaN	NaN	NaN	NaN	NaN	NaN
2.208	45.905	-127.148	753.8377	-0.80635	0.56553	0.031543	92.313	-138.029	852.564	-1.6533	0.62305	0.64844	20.004	40.3078	16.68	0.0087891	-0.12402	-0.10107	NaN	NaN	NaN	NaN	NaN	NaN
2.21	51.985	-127.888	792.1773	-0.81934	0.57617	0.02002	75.089	-79.8199	810.316	-1.6599	0.61499	0.64966	-4.689	40.132	20.5607	-0.030273	-0.10791	-0.09668	NaN	NaN	NaN	NaN	NaN	NaN
2.212	62.999	-123.2933	811.316	-0.81592	0.58897	0.0064451	81.79	-142.099	757.81785	-1.6733	0.61572	0.64258	38.159	29.6916	17.7967	-0.044922	-0.10205	-0.088867	NaN	NaN	NaN	NaN	NaN	NaN
2.214	68.1515	-124.8413	851.6675	-0.8086	0.59258	-0.013379	94.635	-91.423	740.8002	-1.6812	0.64697	0.6416	67.7141	7.837	26.3966	-0.077637	-0.086426	-0.081543	NaN	NaN	NaN	NaN	NaN	NaN
2.216	60.697	-121.76112	865.557	-0.79453	0.6043	-0.034473	59.638	-49.326	726.58	-1.687	0.67139	0.64258	80.6714	1.6474	12.889	-0.10059	-0.075439	-0.078369	NaN	NaN	NaN	NaN	NaN	NaN
2.218	64.0468	-118.3815	892.8912	-0.78916	0.62861	-0.056054	41.4263	-125.899	758.488	-1.6694	0.72607	0.64258	41.136	-13.4984	36.8154	-0.11719	-0.066406	-0.072266	NaN	NaN	NaN	NaN	NaN	NaN
2.22	66.371	-102.928	921.28	-0.78418	0.65625	-0.068359	36.3431	-59.506	832.2495	-1.6431	0.75049	0.62695	32.226	14.64777	1.002	-0.13867	-0.057129	-0.066895	NaN	NaN	NaN	NaN	NaN	NaN
2.222	77.4557	-74.46	925.8211	-0.77265	0.6836	-0.083594	15.2567	-85.929	850.082	-1.6367	0.75977	0.62354	33.821	12.1263	8.956	-0.15186	-0.049805	-0.064941	NaN	NaN	NaN	NaN	NaN	NaN
2.224	64.646	-67.019	938.9545	-0.76299	0.71064	-0.1001	26.538	-132.417	922.024	-1.623	0.7832	0.58838	58.8086	31.706	0.631	-0.16699	-0.041992	-0.064453	NaN	NaN	NaN	NaN	NaN	NaN
2.226	50.956	-72.33	947.5034	-0.75166	0.74541	-0.12315	28.059	-56.997	975.234	-1.584	0.80224	0.54883	63.512	-12.633	36.731	-0.1792	-0.041992	-0.062744	NaN	NaN	NaN	NaN	NaN	NaN
2.228	41.901	-87.3716	992.696	-0.73437	0.76543	-0.14277	12.86	-133.977	969.8331	-1.5195	0.81055	0.50439	62.2541	-2.4074	28.9029	-0.18799	-0.041504	-0.063477	NaN	NaN	NaN	NaN	NaN	NaN
2.23	16.108	-92.7094	1003.3533	-0.72021	0.7876	-0.15967	32.664	-148.658	1022.592	-1.4238	0.81055	0.43262	41.032	-33.2789	44.266	-0.20361	-0.042969	-0.062988	NaN	NaN	NaN	NaN	NaN	NaN
2.232	20.497	-96.4905	1009.4967	-0.72041	0.80342	-0.16905	19.901	-132.185	1029.8616	-1.3828	0.80273	0.39844	29.486	9.771	31.2498	-0.20801	-0.039063	-0.062012	NaN	NaN	NaN	NaN	NaN	NaN
2.234	20.158	-118.7758	1019.9727	-0.72822	0.81728	-0.16846	-2.908	-253.415	1062.3587	-1.3276	0.81006	0.3374	6.968	-2.3527	34.041	-0.22461	-0.037109	-0.063965	NaN	NaN	NaN	NaN	NaN	NaN
2.236	15.911	-128.51	1036.4472	-0.7501	0.83291	-0.16533	-0.809999999999995	-218.856	1124.071	-1.3005	0.8142	0.30273	2.57	33.156	5.954	-0.23413	-0.03418	-0.058106	NaN	NaN	NaN	NaN	NaN	NaN
2.238	17.593	-130.657	1041.105	-0.78096	0.85459	-0.14776	-37.8642	-241.89	1130.5498	-1.2871	0.81445	0.2793	24.737	-7.268	7.1141	-0.23828	-0.028809	-0.050293	NaN	NaN	NaN	NaN	NaN	NaN
2.24	22.914	-132.991	1048.5912	-0.80615	0.87549	-0.13232	-54.1056	-288.355	1179.0015	-1.2852	0.81445	0.25928	18.955	29.2291	-5.414	-0.25977	-0.022461	-0.049805	NaN	NaN	NaN	NaN	NaN	NaN
2.242	42.325	-125.24465	1083.183	-0.82227	0.90273	-0.1209	-50.9555	-179.2502	1193.385	-1.2925	0.81885	0.24658	-3.286	-6.882	19.261	-0.2788	-0.0092772	-0.047852	NaN	NaN	NaN	NaN	NaN	NaN
2.244	52.001	-123.8167	1116.402	-0.8375	0.93242	-0.11035	-47.4212	-194.8021	1184.399	-1.3066	0.83594	0.2207	-27.057	16.307	45.829	-0.30469	0.0014648	-0.047363	NaN	NaN	NaN	NaN	NaN	NaN
2.246	67.7611	-118.539	1107.019	-0.84922	0.95664	-0.1041	-26.288	-175.708	1220.1019	-1.3179	0.85986	0.20361	-36.54	-40.1072	49.234	-0.33594	0.021484	-0.046387	NaN	NaN	NaN	NaN	NaN	NaN
2.248	57.245	-113.3048	1114.734	-0.86025	0.9792	-0.10127	-10.852	-81.127	1206.861	-1.334	0.88867	0.19873	-17.969	-15.991	72.886	-0.35693	0.033691	-0.044922	NaN	NaN	NaN	NaN	NaN	NaN
2.25	63.435	-100.663	1102.7032	-0.86914	0.99902	-0.095703	17.371	-137.449	1238.255	-1.3833	0.92627	0.1875	18.7	-38.1818	108.79591	-0.41113	0.052734	-0.039063	NaN	NaN	NaN	NaN	NaN	NaN
2.252	58.96	-85.495	1103.5233	-0.89404	1.0179	-0.096387	19.23	-74.213	1281.9001	-1.4297	0.94922	0.18506	33.613	8.059	167.7831	-0.46338	0.06958	-0.033935	NaN	NaN	NaN	NaN	NaN	NaN
2.254	66.178	-76.664	1093.344	-0.93467	1.0435	-0.097559	13.388	-54.794	1271.3478	-1.5562	0.99854	0.2002	10.595	-24.6815	221.255	-0.52197	0.083984	-0.021484	NaN	NaN	NaN	NaN	NaN	NaN
2.256	89.25	-89.932	1104.6552	-0.98662	1.0673	-0.085059	7.41	-144.7591	1305.60744	-1.687	1.0249	0.23438	27.24	18.763	274.481	-0.62012	0.11182	-0.0014648	NaN	NaN	NaN	NaN	NaN	NaN
2.258	86.459	-95.532	1124.80176	-1.0569	1.1034	-0.064551	42.62149	-79.469	1297.384	-1.8457	1.0498	0.26611	10.176	-1.003	343.561	-0.67871	0.13086	0.01123	NaN	NaN	NaN	NaN	NaN	NaN
2.26	87.9203	-94.026	1132.7766	-1.1426	1.1426	-0.037109	13.73	-136.1324	1265.896	-2.0698	1.0728	0.33984	19.341	57.994	470.717	-0.81006	0.16797	0.043457	NaN	NaN	NaN	NaN	NaN	NaN
2.262	80.512	-74.9867	1141.4292	-1.2486	1.1928	0.0030273	19.764	-173.861	1315.72801	-2.1909	1.0884	0.38232	70.296	8.9152	589.153	-0.92578	0.20312	0.077637	NaN	NaN	NaN	NaN	NaN	NaN
2.264	126.6106	-80.0013	1162.4917	-1.3647	1.2603	0.051269	28.9436	-108.465	1334.8271	-2.4355	1.1006	0.4751	97.514	37.71	724.1961	-1.0562	0.24512	0.12549	NaN	NaN	NaN	NaN	NaN	NaN
2.266	116.853	-88.7052	1179.97104	-1.4851	1.3369	0.1169	14.5942	-196.043	1344.101	-2.6162	1.1162	0.55957	109.211	-17.888	833.547	-1.2617	0.31738	0.20752	NaN	NaN	NaN	NaN	NaN	NaN
2.268	111.524	-80.481	1173.113	-1.601	1.4232	0.19268	38.7889	-177.604	1414.893	-2.7813	1.127	0.63574	122.052	-28.621	961.80271	-1.3652	0.36035	0.25732	NaN	NaN	NaN	NaN	NaN	NaN
2.27	107.551	-78.7433	1192.8882	-1.7065	1.5161	0.27539	45.045	-145.751	1417.1253	-2.9897	1.1304	0.72266	129.801	-120.666	1078.2711	-1.5781	0.45898	0.38281	NaN	NaN	NaN	NaN	NaN	NaN
2.272	123.43494	-69.301	1203.098	-1.7847	1.5975	0.34228	24.7797	-194.214	1416.9867	-3.0835	1.1274	0.76172	123.915	-148.724	1159.616	-1.7363	0.52832	0.48316	NaN	NaN	NaN	NaN	NaN	NaN
2.274	101.1793	-74.3019	1222.751	-1.8219	1.6703	0.39219	46.1292	-86.753	1433.388	-3.2109	1.125	0.84619	140.34361	-192.403	1213.12	-1.8848	0.58984	0.56787	NaN	NaN	NaN	NaN	NaN	NaN
2.276	77.676	-62.7305	1207.889	-1.8425	1.7215	0.42617	4.774	-67.365	1408.585	-3.2615	1.1731	0.91333	69.658	-170.757	1234.862	-2.0913	0.65674	0.61621	NaN	NaN	NaN	NaN	NaN	NaN
2.278	92.44849	-53.497	1194.622	-1.8491	1.756	0.44512	-8.226	-96.466	1432.226	-3.3008	1.2227	0.94385	-4.024	-184.832	1200.309	-2.1777	0.67188	0.62939	NaN	NaN	NaN	NaN	NaN	NaN
2.28	61.672	-51.656	1205.9579	-1.8296	1.7778	0.44727	23.49	-16.44	1443.962	-3.3101	1.2739	0.95801	-35.727	-150.132	1206.285	-2.2969	0.7002	0.6333	NaN	NaN	NaN	NaN	NaN	NaN
2.282	46.609	-34.1858	1186.6999	-1.7891	1.7698	0.44043	-28.6328	-81.3141	1404.853	-3.2979	1.2773	0.95947	-44.659	-181.105	1209.08	-2.333	0.70313	0.60547	NaN	NaN	NaN	NaN	NaN	NaN
2.284	43.572	-23.3547	1196.2213	-1.7496	1.7445	0.41455	-46.4601	-59.2187	1436.973	-3.2495	1.2915	0.93359	-55.403	-189.968	1217.3	-2.3394	0.70361	0.56445	NaN	NaN	NaN	NaN	NaN	NaN
2.286	77.772	-17.203	1195.574	-1.698	1.7117	0.38876	-34.0585	11.237	1415.914	-3.2166	1.2786	0.91236	-38.912	-203.872	1202.099	-2.3164	0.70898	0.51611	NaN	NaN	NaN	NaN	NaN	NaN
2.288	72.835	-22.695	1211.6316	-1.6446	1.6671	0.36504	-86.73	-49.896	1382.072	-3.166	1.2539	0.89209	-75.9511	-166.888	1194.285	-2.3159	0.70068	0.50195	NaN	NaN	NaN	NaN	NaN	NaN
2.29	49.907	-25.964	1217.8988	-1.5957	1.6074	0.33643	-42.3543	12.344	1408.875	-3.0742	1.209	0.86279	-128.641	-127.29	1162.323	-2.248	0.64941	0.45752	NaN	NaN	NaN	NaN	NaN	NaN
2.292	49.978	-20.482	1199.153	-1.5518	1.5643	0.31163	-37.3023	-0.263999999999999	1388.4004	-3.019	1.1821	0.8418	-160.203	-99.012	1149.034	-2.1111	0.57739	0.40064	NaN	NaN	NaN	NaN	NaN	NaN
2.294	83.811	4.558	1206.5178	-1.5124	1.5266	0.29063	-57.0374	-88.474	1446.821	-2.9121	1.1348	0.79736	-119.741	-63.19	1112.48	-2.002	0.54688	0.34619	NaN	NaN	NaN	NaN	NaN	NaN
2.296	69.076	-4.78	1215.5755	-1.4858	1.4938	0.27461	-11.4157	-16.831	1471.993	-2.8247	1.1098	0.76904	-50.21713	-79.87	1122.25	-1.8691	0.60352	0.30029	NaN	NaN	NaN	NaN	NaN	NaN
2.298	48.58	-14.2126	1188.40578	-1.4688	1.4675	0.26133	-44.979	-71.087	1447.2767	-2.7305	1.0703	0.73486	42.052	-88.88	1179.617	-1.8354	0.64697	0.28516	NaN	NaN	NaN	NaN	NaN	NaN
2.3	67.769	-14.4637	1172.9055	-1.4668	1.4434	0.25635	-40.667	-68.13	1472.7415	-2.6089	1.0337	0.69141	45.418	-157.6793	1243.073	-1.8047	0.74805	0.30127	NaN	NaN	NaN	NaN	NaN	NaN
2.302	69.931	-19.9072	1193.139	-1.4609	1.4141	0.25127	-23.2351	20.4938	1431.7968	-2.5522	1.02	0.66992	-4.309	-156.23	1257.947	-1.7691	0.81739	0.32568	NaN	NaN	NaN	NaN	NaN	NaN
2.304	40.211	-21.525	1195.774	-1.4577	1.3829	0.24374	-25.914	-38.927	1384.19	-2.4258	0.98242	0.62646	-76.791	-214.1909	1278.66	-1.7144	0.85596	0.33594	NaN	NaN	NaN	NaN	NaN	NaN
2.306	51.088	-25.9524	1192.0161	-1.4604	1.352	0.23671	23.962	22.582	1389.9003	-2.3281	0.95655	0.58936	-97.357	-214.07	1331.3629	-1.6343	0.87744	0.33203	NaN	NaN	NaN	NaN	NaN	NaN
2.308	87.78	-1.3624	1182.549	-1.4649	1.3232	0.23232	6.702	43.2137	1364.8526	-2.2324	0.92969	0.5542	-159.095	-305.119	1395.6407	-1.6016	0.88672	0.32666	NaN	NaN	NaN	NaN	NaN	NaN
2.31	93.123	13.9997	1171.4684	-1.4707	1.293	0.22705	7.0924	-33.915	1373.272	-2.0991	0.896	0.51563	-117.304	-283.071	1391.934	-1.5625	0.93164	0.31299	NaN	NaN	NaN	NaN	NaN	NaN
2.312	78.565	25.883	1169.5126	-1.4704	1.2765	0.22618	43.124	69.56	1369.107	-2.0327	0.87158	0.49512	-24.6432	-324.36	1399.038	-1.5564	0.96656	0.31201	NaN	NaN	NaN	NaN	NaN	NaN
2.314	105.7638	56.633	1154.2271	-1.4785	1.2641	0.2219	11.7391	30.134	1311.994	-1.9077	0.82861	0.46289	31.135	-213.838	1399.479	-1.5562	1.0024	0.30615	NaN	NaN	NaN	NaN	NaN	NaN
2.316	92.6085	53.115	1145.716	-1.4812	1.2566	0.21835	27.485	29.929	1293.528	-1.8115	0.79639	0.44092	63.046	-226.414	1433.9855	-1.582	1.0352	0.27881	NaN	NaN	NaN	NaN	NaN	NaN
2.318	115.2744	61.758	1147.176	-1.473	1.2574	0.21338	61.60446	130.986	1252.736	-1.7207	0.75781	0.42627	111.664	-143.739	1442.5734	-1.6016	1.041	0.27539	NaN	NaN	NaN	NaN	NaN	NaN
2.32	77.868	44.2166	1153.1846	-1.4741	1.2563	0.21191	21.408	55.511	1217.612	-1.606	0.71729	0.39746	134.271	-169.514	1457.116	-1.6655	1.063	0.29492	NaN	NaN	NaN	NaN	NaN	NaN
2.322	71.942	51.349	1149.7004	-1.4627	1.2583	0.21151	50.4039	95.931	1247.74	-1.5513	0.69385	0.39014	195.325	-87.025	1428.199	-1.7641	1.0698	0.33911	NaN	NaN	NaN	NaN	NaN	NaN
2.324	85.8188	63.0721	1142.0605	-1.4486	1.2578	0.20318	51.2322	107.522	1241.0196	-1.4512	0.64844	0.36426	243.069	-90.481	1451.4687	-1.896	1.0806	0.39648	NaN	NaN	NaN	NaN	NaN	NaN
2.326	50.67	66.9891	1123.7819	-1.4298	1.2546	0.20287	22.0201	1.787	1237.571	-1.3852	0.61328	0.34619	243.291	28.183	1446.3223	-2.1016	1.0879	0.48682	NaN	NaN	NaN	NaN	NaN	NaN
2.328	61.528	54.2439	1110.042	-1.4039	1.2492	0.18919	47.6802	74.9081	1242.561	-1.3198	0.58057	0.33594	187.407	17.757	1430.673	-2.207	1.082	0.52881	NaN	NaN	NaN	NaN	NaN	NaN
2.33	47.491	50.6061	1098.5568	-1.3765	1.2407	0.17871	16.46	32.443	1164.7442	-1.2534	0.53271	0.32031	109.782	61.8898	1427.004	-2.4077	1.0728	0.58105	NaN	NaN	NaN	NaN	NaN	NaN
2.332	66.4485	45.3843	1082.0747	-1.3448	1.2263	0.15842	-14.664	16.242	1126.476	-1.2192	0.50879	0.32129	28.451	-47.737	1432.976	-2.5271	1.0588	0.60938	NaN	NaN	NaN	NaN	NaN	NaN
2.334	41.917	45.3072	1087.635	-1.3178	1.2099	0.14155	5.71100000000001	127.409	1083.893	-1.1616	0.46338	0.30859	40.647	-50.5867	1455.7296	-2.6284	1.0396	0.62207	NaN	NaN	NaN	NaN	NaN	NaN
2.336	62.2277	36.7686	1086.6785	-1.2866	1.1965	0.12546	-35.142	59.785	1022.214	-1.1208	0.43189	0.31104	84.7154	-135.526	1517.924	-2.7183	1.0083	0.63379	NaN	NaN	NaN	NaN	NaN	NaN
2.338	54.777	32.7386	1076.275	-1.2532	1.1805	0.1181	-16.237	94.072	1047.5437	-1.0781	0.40674	0.31445	121.417	-80.916	1533.466	-2.7593	0.98877	0.64063	NaN	NaN	NaN	NaN	NaN	NaN
2.34	33.92	58.29	1053.7956	-1.2261	1.1792	0.10205	-9.252	135.976	1013.27	-1.0215	0.36914	0.30957	128.871	-122.568	1533.877	-2.8433	0.95166	0.6582	NaN	NaN	NaN	NaN	NaN	NaN
2.342	33.248	70.464	1036.1248	-1.1956	1.1728	0.087093	-28.259	65.5251	977.5224	-0.99414	0.35254	0.31201	120.58	-93.856	1546.791	-2.917	0.92187	0.6875	NaN	NaN	NaN	NaN	NaN	NaN
2.344	20.761	82.167	1023.2687	-1.1713	1.173	0.078742	24.489	172.262	980.633	-0.92773	0.32031	0.31885	80.712	-142.3732	1515.86372	-2.9761	0.90869	0.71484	NaN	NaN	NaN	NaN	NaN	NaN
2.346	31.275	81.834	1009.1479	-1.1438	1.1691	0.071932	6.313	156.376	911.0755	-0.87231	0.29761	0.31641	46.528	-126.147	1515.7896	-3.0293	0.88477	0.73291	NaN	NaN	NaN	NaN	NaN	NaN
2.348	10.871	78.8409	990.556	-1.114	1.1617	0.057691	7.038	114.3812	877.809	-0.81689	0.27197	0.31982	44.617	-123.072	1516.9872	-3.041	0.87695	0.73486	NaN	NaN	NaN	NaN	NaN	NaN
2.35	30.168	75.1718	972.371	-1.0845	1.1528	0.047852	38.72	198.889	822.355	-0.73877	0.23975	0.31055	15.032	-43.863	1545.529	-3.0503	0.85791	0.7207	NaN	NaN	NaN	NaN	NaN	NaN
2.352	41.21	80.2246	947.148	-1.0476	1.1385	0.036086	4.517	114.961	763.127	-0.67627	0.20996	0.30713	-10.302	-19.553	1525.749	-3.0437	0.86353	0.70581	NaN	NaN	NaN	NaN	NaN	NaN
2.354	21.345	73.384	931.2765	-1.0174	1.1231	0.031144	38.4	121.738	771.0761	-0.61133	0.17969	0.30322	-34.801	50.8899	1497.505	-3.0332	0.86328	0.68896	NaN	NaN	NaN	NaN	NaN	NaN
2.356	43.32	68.86	920.0956	-0.9869	1.1036	0.021501	35.244	158.464	740.888	-0.52539	0.13965	0.29248	-50.104	60.456	1425.79	-2.9937	0.8667	0.67383	NaN	NaN	NaN	NaN	NaN	NaN
2.358	53.983	70.01756	898.8021	-0.95465	1.0847	0.0072588	25.064	69.648	710.2575	-0.48242	0.11621	0.28467	-47.939	90.695	1394.053	-2.9668	0.86426	0.66064	NaN	NaN	NaN	NaN	NaN	NaN
2.36	65.9985	70.781	886.7235	-0.92139	1.0659	-0.0092773	71.189	129.9857	708.937	-0.40039	0.074219	0.26611	-5.611	93.543	1373.132	-2.8887	0.8584	0.62939	NaN	NaN	NaN	NaN	NaN	NaN
2.362	49.263	76.876	864.51195	-0.8949	1.044	-0.030222	58.881	122.379	648.76217	-0.33496	0.041992	0.24633	21.271	113.818	1400.8032	-2.8096	0.84375	0.60229	NaN	NaN	NaN	NaN	NaN	NaN
2.364	46.766	71.742	862.09	-0.85604	1.0215	-0.043735	81.3819	62.287	647.7202	-0.271	0.0097656	0.23047	73.613	109.919	1388.5811	-2.7129	0.83594	0.56885	NaN	NaN	NaN	NaN	NaN	NaN
2.366	61.774	60.3127	854.763	-0.82016	0.99845	-0.063347	110.458	153.921	606.895	-0.19531	-0.035645	0.20752	97.844	74.869	1392.6707	-2.5781	0.8291	0.52197	NaN	NaN	NaN	NaN	NaN	NaN
2.368	60.972	72.6379	832.499	-0.78767	0.97719	-0.080091	84.8241868	106.8474	551.68167	-0.16309	-0.054199	0.19092	127.08885	46.9972	1375.818	-2.5073	0.82471	0.49658	NaN	NaN	NaN	NaN	NaN	NaN
2.37	55.557	73.87	802.9306	-0.75684	0.95313	-0.1001	116.1966	119.5037	544.179	-0.087402	-0.085938	0.16113	166.165	22.574	1367.604	-2.3633	0.80859	0.46143	NaN	NaN	NaN	NaN	NaN	NaN
2.372	45.928	86.594	777.773	-0.7349	0.93314	-0.1108	116.7163	189.407	502.138	-0.037353	-0.11768	0.13842	161.3897	43.752	1363.779	-2.2339	0.79346	0.42969	NaN	NaN	NaN	NaN	NaN	NaN
2.374	61.8181	95.4523	757.9014	-0.70966	0.9109	-0.11758	67.294	106.36657	465.23774	0.0073242	-0.14307	0.11816	154.898	55.2331	1397.05	-2.1777	0.78711	0.4165	NaN	NaN	NaN	NaN	NaN	NaN
2.376	35.618	94.0635	747.2443	-0.68901	0.89721	-0.11876	89.3821	162.771	450.0028	0.0625	-0.17139	0.084961	149.288	82.715	1375.424	-2.0605	0.78516	0.3833	NaN	NaN	NaN	NaN	NaN	NaN
2.378	42.408	91.7843	718.2416	-0.67771	0.88359	-0.11337	69.3858	154.3781	401.513	0.088379	-0.19043	0.072266	152.768	56.831	1372.753	-1.9751	0.77442	0.35205	NaN	NaN	NaN	NaN	NaN	NaN
2.38	41.43	89.9908	709.9567	-0.66162	0.87158	-0.10693	30.301	88.516	377.133	0.13281	-0.21924	0.036621	130.924	64.688	1321.484	-1.8867	0.76563	0.32422	NaN	NaN	NaN	NaN	NaN	NaN
2.382	51.5806	101.237	693.6648	-0.64211	0.85597	-0.097565	67.417	169.832	346.05501	0.16357	-0.23926	0.023682	94.38815	65.07	1261.5115	-1.7593	0.74951	0.29248	NaN	NaN	NaN	NaN	NaN	NaN
2.384	30.182	92.723	665.6361	-0.62825	0.83761	-0.090534	17.413	119.579	295.909	0.18555	-0.25439	0.0024414	85.9482	161.081	1204.401	-1.6992	0.74023	0.26953	NaN	NaN	NaN	NaN	NaN	NaN
2.386	11.365	90.2347	650.8486	-0.61143	0.81458	-0.081943	16.122	98.98532	277.733	0.22119	-0.27637	-0.022461	95.0226	187.151	1173.479	-1.5757	0.71338	0.2373	NaN	NaN	NaN	NaN	NaN	NaN
2.388	30.422	93.5944	638.6387	-0.60362	0.80206	-0.082813	34.881	150.101	268.0369326	0.23096	-0.28467	-0.037109	78.497	247.883	1145.436	-1.4958	0.69507	0.19677	NaN	NaN	NaN	NaN	NaN	NaN
2.39	28.429	106.1593	611.179	-0.58838	0.78369	-0.07373	-2.849	66.7596	251.466	0.24756	-0.30176	-0.056152	97.23	203.036	1155.9874	-1.4136	0.67627	0.16211	NaN	NaN	NaN	NaN	NaN	NaN
2.392	8.601	108.0193	593.633	-0.57676	0.76367	-0.068261	8.711	116.466	259.9904	0.25928	-0.30322	-0.07251	74.0114	202.41	1130.8134	-1.3105	0.64844	0.12988	NaN	NaN	NaN	NaN	NaN	NaN
2.394	-12.515	103.7765	580.5919	-0.56855	0.74237	-0.059764	19.939	117.964	237.74274	0.26563	-0.30566	-0.087891	63.2448	150.732	1102.2475	-1.2607	0.64063	0.11719	NaN	NaN	NaN	NaN	NaN	NaN
2.396	12.653	99.4606	564.744	-0.54784	0.7209	-0.054296	-15.26	31.02	241.0516	0.27148	-0.30566	-0.1001	9.652	198.306	1069.864	-1.1782	0.61572	0.086914	NaN	NaN	NaN	NaN	NaN	NaN
2.398	7.135	110.577	554.062	-0.52871	0.70507	-0.046679	-3.438	96.87	221.4683	0.27393	-0.30371	-0.10791	-8.371	186.246	1053.65	-1.1179	0.60034	0.07666	NaN	NaN	NaN	NaN	NaN	NaN
2.4	-5.815	96.98635	529.7437	-0.50098	0.68652	-0.04248	1.495	55.3863	171.9614	0.27441	-0.29443	-0.11426	-29.532	229.681	1003.47	-1.0664	0.58008	0.062988	NaN	NaN	NaN	NaN	NaN	NaN
2.402	1.526	98.2155	518.9287	-0.47129	0.66543	-0.041601	-20.185	33.8725	151.9191	0.27246	-0.28784	-0.11572	-42.8036	168.174	955.845	-1.0024	0.56201	0.062012	NaN	NaN	NaN	NaN	NaN	NaN
2.404	24.965	98.253	488.6265	-0.44219	0.6377	-0.040429	13.154	108.508	135.3269	0.26953	-0.28271	-0.12061	-107.729	162.023	915.1565	-0.96777	0.55664	0.059082	NaN	NaN	NaN	NaN	NaN	NaN
2.406	22.623	100.36	461.929	-0.4125	0.61387	-0.044336	9.2	41.934	117.389	0.26416	-0.27441	-0.13135	-131.214	80.892	901.9226	-0.90625	0.53516	0.053711	NaN	NaN	NaN	NaN	NaN	NaN
2.408	15.82	116.719	445.873	-0.38428	0.58623	-0.046972	4.101	76.6394	105.342	0.2627	-0.27393	-0.13721	-136.958	125.061	889.813	-0.85401	0.52393	0.049317	NaN	NaN	NaN	NaN	NaN	NaN
2.41	35.708	119.267	440.546	-0.35449	0.56396	-0.051758	34.0778	97.416	99.3391	0.26074	-0.27441	-0.14063	-78.488	111.447	860.035	-0.79932	0.51221	0.049316	NaN	NaN	NaN	NaN	NaN	NaN
2.412	45.495	119.778	422.2352	-0.32676	0.53965	-0.053418	27.918	16.503	96.5146	0.25024	-0.2688	-0.15136	-39.453	180.136	814.198	-0.72021	0.48486	0.058594	NaN	NaN	NaN	NaN	NaN	NaN
2.414	36.876	129.065	399.4337	-0.29541	0.51651	-0.050195	52.141	84.947	103.0803	0.24023	-0.26514	-0.1582	14.195	144.22	758.407	-0.68115	0.46875	0.056641	NaN	NaN	NaN	NaN	NaN	NaN
2.416	33.589	105.6505	391.5201	-0.26377	0.48799	-0.04707	38.859	67.599	66.8657	0.22656	-0.25244	-0.16406	25.4	192.829	718.9417	-0.60938	0.43555	0.062988	NaN	NaN	NaN	NaN	NaN	NaN
2.418	45.2306	97.4784	386.1641	-0.22988	0.46104	-0.04629	57.454	28.2507	53.9394	0.2168	-0.24805	-0.16357	31.9708	176.975	649.427	-0.55029	0.4043	0.062256	NaN	NaN	NaN	NaN	NaN	NaN
2.42	45.2501	101.049	359.48	-0.20361	0.42969	-0.058594	78.55	105.011	32.7339	0.1958	-0.24072	-0.16309	22.49022	241.609	637.423	-0.49121	0.36816	0.066406	NaN	NaN	NaN	NaN	NaN	NaN
2.422	22.641	107.15	345.9082	-0.1836	0.40273	-0.066504	52.7098	24.23139	16.905	0.18188	-0.23169	-0.1582	25.5703	219.3546	618.453	-0.41846	0.31885	0.063965	NaN	NaN	NaN	NaN	NaN	NaN
2.424	49.0779	91.9762	317.422	-0.15635	0.37803	-0.068848	70.1987	18.779	42.3818	0.16943	-0.22412	-0.15918	35.463	247.0215	588.8006	-0.3833	0.29443	0.063965	NaN	NaN	NaN	NaN	NaN	NaN
2.426	42.785	86.1216	318.3292	-0.13447	0.35772	-0.066895	63.172	63.042	16.2886	0.13867	-0.21484	-0.15723	46.9796	191.893	541.5404	-0.30957	0.24512	0.062012	NaN	NaN	NaN	NaN	NaN	NaN
2.428	29.335	95.18	300.2254	-0.11475	0.33857	-0.068359	31.678	-18.5131	26.0527	0.12109	-0.20703	-0.15186	49.7	188.825	490.8248	-0.25317	0.20532	0.055664	NaN	NaN	NaN	NaN	NaN	NaN
2.43	35.624	92.382	281.1146	-0.097656	0.31641	-0.068359	42.469	26.0761	40.459	0.071289	-0.19922	-0.13965	32.065	143.084	433.381	-0.19727	0.17041	0.04834	NaN	NaN	NaN	NaN	NaN	NaN
2.432	42.497	86.927	286.789	-0.082715	0.30049	-0.066699	36.066	19.7844	16.6039	0.029297	-0.18286	-0.1233	52.5666	166.86	425.181	-0.12256	0.11328	0.038086	NaN	NaN	NaN	NaN	NaN	NaN
2.434	31.412	73.377	290.661	-0.071777	0.28701	-0.065332	-0.0910000000000011	-28.768	19.9206	-0.016602	-0.17139	-0.10449	78.17	145.694	384.8	-0.090332	0.088379	0.03418	NaN	NaN	NaN	NaN	NaN	NaN
2.436	23.115	78.4312	276.9222	-0.058496	0.27451	-0.066894	25.96	55.746	10.04936	-0.07666	-0.16016	-0.071777	96.565	164.47365	362.254	-0.02832	0.038086	0.023438	NaN	NaN	NaN	NaN	NaN	NaN
2.438	20.449	75.05176	250.75013	-0.049317	0.26601	-0.064649	5.744	3.9099	-2.617	-0.10303	-0.14941	-0.056152	105.142	125.4258	349.332	0.012451	0.0026856	0.019531	NaN	NaN	NaN	NaN	NaN	NaN
2.44	12.606	80.3562	234.3201	-0.037598	0.25391	-0.060547	-2.748	0.5834	14.8671	-0.14746	-0.13184	-0.025879	88.959	107.6815	354.4745	0.04248	-0.032227	0.01123	NaN	NaN	NaN	NaN	NaN	NaN
2.442	0.747	89.909	223.4623	-0.024511	0.24697	-0.050488	9.912	68.302	8.7547	-0.17432	-0.11767	-0.0024414	36.12	88.187	326.968	0.084473	-0.074219	0.0063477	NaN	NaN	NaN	NaN	NaN	NaN
2.444	-0.722999999999999	92.566	212.6098	-0.01084	0.23369	-0.050488	-24.717	-10.8096	1.022	-0.19873	-0.10791	0.021484	7.459	125.446	319.051	0.1001	-0.09082	0	NaN	NaN	NaN	NaN	NaN	NaN
2.446	-14.14	84.251	197.0519	0.0055664	0.22822	-0.049316	10.548	31.562	15.7443	-0.22949	-0.092773	0.039551	-19.9962	133.845	278.643	0.12402	-0.12207	-0.0078125	NaN	NaN	NaN	NaN	NaN	NaN
2.448	-1.58300000000001	64.9047	197.95	0.021387	0.22393	-0.049707	-9.163	44.634	-5.53956	-0.24561	-0.086914	0.053223	-41.6805	152.764	270.64	0.13868	-0.14307	-0.011474	NaN	NaN	NaN	NaN	NaN	NaN
2.45	21.514	66.322	178.9937	0.040527	0.21094	-0.04834	-42.557	-22.591	17.4789	-0.26563	-0.081543	0.073242	-53.66608	144.3008	216.8032	0.14746	-0.15674	-0.015625	NaN	NaN	NaN	NaN	NaN	NaN
2.452	7.046	61.678	183.956	0.061328	0.19922	-0.061524	-19.852	62.51	14.8006	-0.28736	-0.084717	0.085938	-56.5041	126.551	176.95	0.14355	-0.17139	-0.012695	NaN	NaN	NaN	NaN	NaN	NaN
2.454	2.437	60.73	173.6668	0.075879	0.18759	-0.064551	-39.268	10.7432	-9.514	-0.2959	-0.08252	0.10938	-81.5198	129.012	126.937	0.14014	-0.17969	-0.0097656	NaN	NaN	NaN	NaN	NaN	NaN
2.456	25.2375	52.4092	172.3918	0.094239	0.17666	-0.071582	-1.6	-0.356	20.4094	-0.30225	-0.087891	0.11621	-101.806	112.049	122.123	0.12451	-0.18896	0.003418	NaN	NaN	NaN	NaN	NaN	NaN
2.458	15.066	60.3008	147.7247	0.10391	0.16846	-0.079199	16.531	60.648	7.4731	-0.30322	-0.084473	0.11719	-93.512	121.526	105.5723	0.10473	-0.18945	0.025391	NaN	NaN	NaN	NaN	NaN	NaN
2.46	22.7336	70.754	124.8589	0.10742	0.16162	-0.085449	-0.255000000000003	-29.716	25.6383	-0.29541	-0.09375	0.12109	-69.316	87.778	111.543	0.08252	-0.18604	0.037598	NaN	NaN	NaN	NaN	NaN	NaN
2.462	14.648	53.291	136.6528	0.1041	0.15888	-0.087793	23.91	10.5603	26.161	-0.28491	-0.097168	0.12158	-27.1456	80.55	92.613	0.049316	-0.18896	0.07373	NaN	NaN	NaN	NaN	NaN	NaN
2.464	30.017	48.4173	137.618	0.095606	0.15791	-0.088574	32.0045	23.2939	8.6001	-0.27051	-0.10156	0.12012	-10.803	57.137	86.851	0.029297	-0.18164	0.087402	NaN	NaN	NaN	NaN	NaN	NaN
2.466	28.697	43.6239	123.141	0.084668	0.15791	-0.077637	43.7	-48.316	38.2701	-0.24512	-0.10986	0.11475	-27.252	83.129	61.925	-0.0014648	-0.16064	0.12061	NaN	NaN	NaN	NaN	NaN	NaN
2.468	33.176	43.2065	108.0049	0.06914	0.16172	-0.068164	69.9658	37.222	40.566	-0.22852	-0.10742	0.11279	-35.823	64.3099	54.146	-0.026855	-0.14527	0.13916	NaN	NaN	NaN	NaN	NaN	NaN
2.47	32.178	19.8119	103.428	0.049805	0.17139	-0.060059	29.425	1.214	5.11	-0.20264	-0.11865	0.10547	-17.611	88.292	49.2	-0.046387	-0.12354	0.1626	NaN	NaN	NaN	NaN	NaN	NaN
2.472	43.986	20.6649	118.658	0.033691	0.18027	-0.053223	46.152	-6.7374	6.5769	-0.177	-0.12671	0.098634	18.706	39.184	62.281	-0.05957	-0.10205	0.18311	NaN	NaN	NaN	NaN	NaN	NaN
2.474	54.2344	26.1231	102.7424	0.016602	0.18974	-0.04668	67.24469	65.119	-2.60544	-0.146	-0.13379	0.092285	55.2735	33.476	53.129	-0.064453	-0.091797	0.18652	NaN	NaN	NaN	NaN	NaN	NaN
2.476	42.747	33.16118	89.6725	0.002539	0.19443	-0.041992	15.271	-16.4015	17.3285	-0.104	-0.14893	0.079102	57.9647	-30.124	53.2	-0.066895	-0.070801	0.19287	NaN	NaN	NaN	NaN	NaN	NaN
2.478	53.4396	35.7867	69.9524	-0.01084	0.20205	-0.033984	49.502	8.1331	36.868	-0.083008	-0.15332	0.068359	66.35432	-7.287	26.6999	-0.068116	-0.055664	0.19555	NaN	NaN	NaN	NaN	NaN	NaN
2.48	46.034	27.273	75.3813	-0.029297	0.20557	-0.030273	64.6256	28.8	1.70676	-0.040039	-0.16309	0.043945	63.2866	-34.0761	24.6517	-0.067383	-0.049316	0.19971	NaN	NaN	NaN	NaN	NaN	NaN
2.482	42.413	35.406	78.4792	-0.043164	0.21699	-0.028613	30.515	-35.042	10.5638	-0.00097656	-0.17529	0.03125	72.8438	21.361	16.584	-0.067871	-0.037598	0.20703	NaN	NaN	NaN	NaN	NaN	NaN
2.484	32.652	24.4287	58.5692	-0.048047	0.21797	-0.028516	64.2249	38.686	22.243427	0.013672	-0.17578	0.025391	106.536	-6.1193	8.473	-0.067383	-0.039551	0.20313	NaN	NaN	NaN	NaN	NaN	NaN
2.486	20.494	11.8073	56.9825	-0.051172	0.22422	-0.027344	24.488	4.28249	-1.407	0.064941	-0.17773	0.030273	143.829	24.6691	15.673	-0.067871	-0.02832	0.21729	NaN	NaN	NaN	NaN	NaN	NaN
2.488	25.786	17.53037	59.1149833	-0.050195	0.2208	-0.025879	3.184	-13.06415	11.081	0.054199	-0.20215	-0.010742	141.143	-18.9526	8.775	-0.061523	-0.029297	0.21704	NaN	NaN	NaN	NaN	NaN	NaN
2.49	15.84	13.4891	63.9617	-0.047852	0.21582	-0.031738	22.95	50.5011	-15.5862	0.057617	-0.22461	-0.023926	83.342	30.553	-1.532	-0.056152	-0.036621	0.2168	NaN	NaN	NaN	NaN	NaN	NaN
2.492	9.16999999999999	19.9802	53.942	-0.043945	0.20723	-0.038574	0.716000000000001	-27.25606	1.1158	0.084961	-0.22363	-0.028809	60.7627	-9.2863	19.776	-0.045898	-0.039551	0.22119	NaN	NaN	NaN	NaN	NaN	NaN
2.494	12.712	20.5155	37.6983	-0.037109	0.20127	-0.041895	-19.704	-6.589	28.8962	0.104	-0.21826	-0.032715	42.692	32.396	31.3633	-0.030762	-0.042969	0.22266	NaN	NaN	NaN	NaN	NaN	NaN
2.496	30.186	25.984	35.1721	-0.033594	0.19619	-0.045801	-3.592	18.6361	8.7612	0.125	-0.20996	-0.050293	35.61	-9.725	21.5258	-0.021484	-0.049805	0.21826	NaN	NaN	NaN	NaN	NaN	NaN
2.498	15.011	19.712	34.9235	-0.025684	0.19268	-0.050195	-27.631	-27.599	-1.8611	0.1355	-0.19873	-0.062255	19.345	39.4169	15.7784	-0.0097656	-0.054199	0.20776	NaN	NaN	NaN	NaN	NaN	NaN
2.5	-1.151	-1.133	28.9279	-0.018066	0.18555	-0.055664	-25.918	39.454	3.7954	0.1377	-0.18066	-0.070313	1.579	-13.5583	-6.9614	-0.00097656	-0.054199	0.19727	NaN	NaN	NaN	NaN	NaN	NaN
2.502	8.35	3.154	27.6856	-0.010742	0.17676	-0.061816	-30.93	16.6245	7.327	0.13525	-0.14648	-0.079102	-23.837	33.7527	-1.569	0.0073242	-0.053223	0.18994	NaN	NaN	NaN	NaN	NaN	NaN
2.504	30.217	11.6804	26.09681	-0.0027344	0.18018	-0.066407	-12.252	-19.7619	17.6289	0.13379	-0.13721	-0.081543	-54.44308	-15.356	1.004	0.01416	-0.05664	0.18433	NaN	NaN	NaN	NaN	NaN	NaN
2.506	27.883	8.63926	26.528	0.0046875	0.17822	-0.072656	14.728	47.802	-8.9049	0.12842	-0.125	-0.081543	-62.1626	29.906	-3.569	0.020508	-0.063477	0.18652	NaN	NaN	NaN	NaN	NaN	NaN
2.508	0.555999999999997	3.4889	25.0381	0.010449	0.17715	-0.076172	-11.678	-0.327000000000002	-12.4215	0.12329	-0.11841	-0.087158	-33.396	-16.053	10.168	0.032715	-0.074707	0.20508	NaN	NaN	NaN	NaN	NaN	NaN
2.51	36.267	17.3542	20.6574	0.01123	0.18018	-0.083984	11.775	14.683	23.6461	0.11768	-0.1167	-0.09375	-22.738	4.64	20.4038	0.037109	-0.087891	0.2085	NaN	NaN	NaN	NaN	NaN	NaN
2.512	31.572	26.63	15.245	0.014355	0.18701	-0.086231	18.196	44.2506	4.7287	0.10205	-0.11084	-0.10205	-20.699	-24.12	23.0698	0.040039	-0.1084	0.21143	NaN	NaN	NaN	NaN	NaN	NaN
2.514	19.59	22.3102	21.7632	0.018164	0.19502	-0.092285	7.438	-16.5062	4.3204	0.091309	-0.10303	-0.10547	-47.961	25.728	22.9016	0.045899	-0.12232	0.22095	NaN	NaN	NaN	NaN	NaN	NaN
2.516	29.835	-4.11555	31.93208	0.020508	0.2083	-0.08291	35.8319	40.074	-1.7077	0.067871	-0.080078	-0.10693	-41.2696	12.538	18.9714	0.050781	-0.13721	0.22559	NaN	NaN	NaN	NaN	NaN	NaN
2.518	39.674	-18.9445	44.2789	0.024902	0.2207	-0.075976	41.9203	18.6804	0.4054	0.039794	-0.056396	-0.11109	-55.1681	37.9504	14.2234	0.067871	-0.15381	0.22266	NaN	NaN	NaN	NaN	NaN	NaN
2.52	48.212	-13.022	21.08	0.028809	0.23145	-0.069824	27.937	-19.2354	38.0117	0.0053711	-0.035645	-0.11328	-20.248	10.7166	15.1222	0.082031	-0.16162	0.21875	NaN	NaN	NaN	NaN	NaN	NaN
2.522	34.198	-2.087	24.116	0.031738	0.246	-0.066211	45.231	50.422	35.1734	-0.03418	-0.003418	-0.11377	-14.612	22.4821	8.7131	0.11572	-0.18701	0.21533	NaN	NaN	NaN	NaN	NaN	NaN
2.524	56.7026	-19.867	38.796	0.034668	0.25645	-0.059668	35.176	-4.7838	25.1614	-0.05957	0.0068359	-0.1123	31.785	12.50538	4.61465	0.1416	-0.2019	0.2024	NaN	NaN	NaN	NaN	NaN	NaN
2.526	43.696	-16.436	61.0503	0.037793	0.2623	-0.059277	49.6765	-8.7477	44.2071	-0.11377	0.033691	-0.098633	33.532	35.996	9.9169	0.1665	-0.21729	0.19678	NaN	NaN	NaN	NaN	NaN	NaN
2.528	47.289	-8.988	56.714	0.038086	0.26943	-0.06123	52.9963	27.5705	52.711	-0.16455	0.058349	-0.093994	47.867	22.6569	5.107	0.19629	-0.23682	0.17334	NaN	NaN	NaN	NaN	NaN	NaN
2.53	43.6467	-10.9772	83.805	0.030762	0.27393	-0.064453	47.7441	-28.531	74.2437	-0.21631	0.087891	-0.075684	67.1896	10.6601	28.203	0.21045	-0.24756	0.16113	NaN	NaN	NaN	NaN	NaN	NaN
2.532	36.728	4.24	115.95055	0.019043	0.28564	-0.069629	53.9007	46.337	97.0378	-0.29688	0.11475	-0.049805	87.2067	2.12331	13.04617	0.23047	-0.25781	0.13672	NaN	NaN	NaN	NaN	NaN	NaN
2.534	31.337	24.1667	157.426	0.00058594	0.30312	-0.070215	43.4576	29.203	110.1705	-0.34082	0.13574	-0.035645	110.486	-4.1927	32.9346	0.23999	-0.2666	0.11939	NaN	NaN	NaN	NaN	NaN	NaN
2.536	3.437	41.2744	169.2781	-0.019727	0.33164	-0.071778	33.332	0.127000000000001	155.376	-0.44092	0.16699	-0.0073242	119.666	13.3223	31.56481	0.24512	-0.26416	0.11279	NaN	NaN	NaN	NaN	NaN	NaN
2.538	-9.481	49.961368	183.456	-0.041504	0.36357	-0.054199	25.387	64.062	189.5259	-0.52222	0.19263	0.019287	114.128	1.86	35.658	0.24268	-0.24805	0.09375	NaN	NaN	NaN	NaN	NaN	NaN
2.54	-2.268	68.5979	221.5965	-0.064941	0.39063	-0.044922	14.202	34.649	224.301	-0.60889	0.22119	0.044922	66.6293	18.083	17.023	0.24072	-0.24365	0.088867	NaN	NaN	NaN	NaN	NaN	NaN
2.542	-1.252	98.038	258.8619	-0.087305	0.42354	-0.033398	7.593	63.3169	275.2211	-0.7417	0.2627	0.087402	50.79019	-12.422	21.032	0.22217	-0.22168	0.080078	NaN	NaN	NaN	NaN	NaN	NaN
2.544	-8.259	95.586	289.5456	-0.10557	0.45928	-0.030371	-1.821	92.792	332.576	-0.81689	0.28076	0.10889	59.9009	2.788	-5.148	0.21142	-0.19946	0.078369	NaN	NaN	NaN	NaN	NaN	NaN
2.546	-22.043	88.162	316.9495	-0.12627	0.48818	-0.032324	0.0519999999999996	17.5624	415.226571	-0.97656	0.32813	0.1626	50.654	-26.011	33.462	0.19189	-0.17529	0.077148	NaN	NaN	NaN	NaN	NaN	NaN
2.548	-22.6631	79.665	342.8287	-0.14766	0.51621	-0.03252	9.691	39.894	497.0614	-1.1014	0.36743	0.20777	58.518	10.6639	24.3722	0.16992	-0.14551	0.078125	NaN	NaN	NaN	NaN	NaN	NaN
2.55	-13.672	76.736	378.76083	-0.17041	0.5459	-0.035645	5.693	4.455	565.031	-1.2363	0.40625	0.26172	30.771	-18.9392	38.077	0.15137	-0.125	0.072266	NaN	NaN	NaN	NaN	NaN	NaN
2.552	-9.7821	45.312	436.737	-0.19776	0.57803	-0.040723	25.186	-70.9908	658.334	-1.4126	0.44971	0.35742	10.475	23.2332	11.5195	0.11865	-0.080078	0.076172	NaN	NaN	NaN	NaN	NaN	NaN
2.554	-16.865	16.7826	487.538	-0.22871	0.6125	-0.047656	9.438	-36.387	730.228	-1.4961	0.46777	0.41846	-9.337	-12.3886	7.777	0.091553	-0.052979	0.079101	NaN	NaN	NaN	NaN	NaN	NaN
2.556	-5.304	9.5278	523.1266	-0.27012	0.65	-0.05	-19.555	-97.872	810.464	-1.6987	0.49072	0.46875	-6.688	39.1117	10.116	0.057617	-0.022949	0.07959	NaN	NaN	NaN	NaN	NaN	NaN
2.558	2.748	7.3976	546.0165	-0.31738	0.69492	-0.053516	-7.193	-91.279	871.076	-1.8123	0.49341	0.52124	-18.265	-12.1295	6.756	0.019531	0.013184	0.077148	NaN	NaN	NaN	NaN	NaN	NaN
2.56	-1.986	-0.188000000000001	589.21861	-0.37158	0.74463	-0.04541	-18.2094	-51.24	890.0366	-1.8965	0.48438	0.56738	-27.451	45.683	-4.014	-0.0019531	0.033691	0.084961	NaN	NaN	NaN	NaN	NaN	NaN
2.562	-10.367	-22.4518	645.641	-0.4248	0.79004	-0.035058	-53.8738	-100.198	923.4438	-1.9648	0.47168	0.57959	-42.067	3.0406	3.6	-0.037598	0.067871	0.088867	NaN	NaN	NaN	NaN	NaN	NaN
2.564	20.173	-26.4734	680.139	-0.48662	0.83955	-0.016016	-17.7715	-68.5	960.57	-1.9785	0.46191	0.56689	-70.2359	27.355	0.678000000000001	-0.068848	0.090088	0.085693	NaN	NaN	NaN	NaN	NaN	NaN
2.566	24.84	-18.4047	675.8642	-0.54873	0.89268	-0.0066406	-34.059	-76.329	957.986	-1.9624	0.44385	0.54297	-64.04	-23.401	21.18531	-0.098145	0.11719	0.092285	NaN	NaN	NaN	NaN	NaN	NaN
2.568	43.235	-30.3521	695.458	-0.60586	0.94922	0.011719	-39.01	-115.109	973.595	-1.9283	0.44287	0.50781	-54.6071	19.931	17.4804	-0.13965	0.14404	0.091309	NaN	NaN	NaN	NaN	NaN	NaN
2.57	76.123	-42.3591	710.422	-0.65527	1.002	0.03418	-5.6572	-68.616	940.771	-1.8726	0.43408	0.45898	-14.397	-27.3431	40.6902	-0.15967	0.16113	0.094238	NaN	NaN	NaN	NaN	NaN	NaN
2.572	69.768	-43.4839	710.165	-0.70401	1.0542	0.063965	-60.409	-111.625	908.4931	-1.7813	0.41016	0.39502	-7.832	32.0692	52.5021	-0.22168	0.19531	0.086426	NaN	NaN	NaN	NaN	NaN	NaN
2.574	73.18	-23.969	665.0561	-0.73741	1.1017	0.09414	-61.4146	-93.1898	904.511	-1.7163	0.38867	0.36914	17.45	5.2702	97.62419	-0.26783	0.23096	0.083496	NaN	NaN	NaN	NaN	NaN	NaN
2.576	79.179	-23.3052	640.7441	-0.75576	1.1403	0.13008	-10.45	-38.831	866.372	-1.5879	0.354	0.28027	-1.696	79.155	108.535	-0.31982	0.25732	0.091309	NaN	NaN	NaN	NaN	NaN	NaN
2.578	94.821	-18.7032	617.5897	-0.75683	1.1658	0.16397	4.06	-75.428	885.298	-1.4902	0.34326	0.22338	13.179	51.209	162.102	-0.39014	0.29395	0.10498	NaN	NaN	NaN	NaN	NaN	NaN
2.58	87.299	-13.4768	615.3584	-0.75049	1.1782	0.19824	28.755	-52.921	924.119	-1.3745	0.32568	0.16455	25.469	103.157	220.619	-0.42969	0.3125	0.11768	NaN	NaN	NaN	NaN	NaN	NaN
2.582	68.3086	-10.9314	599.0491	-0.73086	1.1826	0.22275	30.21	-69.054	939.916	-1.2637	0.25977	0.08252	44.9969	59.7703	279.9663	-0.51904	0.34131	0.13574	NaN	NaN	NaN	NaN	NaN	NaN
2.584	79.6063	-15.4632	603.9472	-0.68662	1.1654	0.23203	24.491	-135.105	1013.123	-1.2339	0.25146	0.060547	55.0681	109.522	343.89	-0.59766	0.37109	0.15039	NaN	NaN	NaN	NaN	NaN	NaN
2.586	47.574	-18.0293	622.63366	-0.63857	1.1337	0.21992	14.9393	-91.846	1049.433	-1.2261	0.33545	0.069336	67.082	83.268	406.381	-0.67871	0.39063	0.16846	NaN	NaN	NaN	NaN	NaN	NaN
2.588	38.963	-19.358	642.1623	-0.56709	1.0925	0.19512	-9.0001	-122.9465	1047.51339	-1.249	0.4541	0.097656	38.9053	130.73	476.51	-0.79443	0.4292	0.18262	NaN	NaN	NaN	NaN	NaN	NaN
2.59	18.536	-34.758	662.2924	-0.50195	1.0474	0.16455	-21.333	-146.972	1078.7641	-1.2827	0.56689	0.13086	41.8812	66.55141	528.5717	-0.84961	0.44629	0.19922	NaN	NaN	NaN	NaN	NaN	NaN
2.592	13.855	-52.7744	677.2127	-0.43975	1.0067	0.12812	-24.5836	-123.275	1082.07294	-1.2964	0.66553	0.16162	48.884	64.9317	559.355	-0.9624	0.48486	0.23584	NaN	NaN	NaN	NaN	NaN	NaN
2.594	25.29383	-59.992	699.1724	-0.37734	0.97597	0.09541	-63.6162	-190.279	1110.9788	-1.293	0.69824	0.17578	55	4.731	607.64	-1.0537	0.50733	0.26807	NaN	NaN	NaN	NaN	NaN	NaN
2.596	12.487	-64.997	684.153	-0.32656	0.95332	0.061816	-53.0394	-177.94	1164.287	-1.2734	0.73242	0.17871	43.7015	24.9594	697.8907	-1.1426	0.52539	0.3125	NaN	NaN	NaN	NaN	NaN	NaN
2.598	18.5772	-90.5216	700.1698	-0.2917	0.94189	0.040625	-51.7092	-171.539	1179.6248	-1.2598	0.74414	0.1648	43.805	-28.25	789.5802	-1.2627	0.55957	0.37939	NaN	NaN	NaN	NaN	NaN	NaN
2.6	-8.78100000000001	-123.037	726.606	-0.27295	0.94189	0.027344	-31.677	-223.165	1229.794	-1.2495	0.75244	0.1543	21.4971	-40.3796	875.367	-1.3223	0.57227	0.4165	NaN	NaN	NaN	NaN	NaN	NaN
2.602	-6.434	-129.566	737.7093	-0.24756	0.95254	0.015723	27.547	-130.11	1237.845	-1.2671	0.78467	0.15186	15.778	-104.1912	913.1529	-1.4399	0.59521	0.49609	NaN	NaN	NaN	NaN	NaN	NaN
2.604	-27.674	-128.819	744.04771	-0.22178	0.95401	0.0022461	30.2537	-118.15	1204.28	-1.3032	0.81104	0.15479	-4.2	-125.968	957.251	-1.522	0.60352	0.55762	NaN	NaN	NaN	NaN	NaN	NaN
2.606	-29.2086	-124.347	762.96085	-0.19795	0.94893	-0.014161	63.63144	-86.216	1222.034	-1.4253	0.86182	0.19727	2.277	-159.1472	995.732	-1.5913	0.61084	0.61768	NaN	NaN	NaN	NaN	NaN	NaN
2.608	-34.21	-117.028	782.2066	-0.17832	0.9416	-0.033692	84.969	11.806	1229.502	-1.5701	0.90747	0.25757	-5.986	-157.19	1010.323	-1.6558	0.60986	0.69336	NaN	NaN	NaN	NaN	NaN	NaN
2.61	-35.6023	-95.85123	798.06555	-0.16455	0.93408	-0.048828	49.16	-38.608	1258.802	-1.7358	0.94971	0.3374	13.402	-148.762	989.765	-1.6851	0.60986	0.71289	NaN	NaN	NaN	NaN	NaN	NaN
2.612	-39.2383	-69.902	795.564	-0.16973	0.93555	-0.077539	32.458	-23.185	1303.0022	-2.0059	1	0.46338	25.143	-156.641	953.953	-1.7354	0.62109	0.75537	NaN	NaN	NaN	NaN	NaN	NaN
2.614	-35.791	-57.425	815.5169	-0.18584	0.94267	-0.10498	19.358	-6.411	1319.648	-2.2065	1.0298	0.56153	-9.06	-150.121	904.698	-1.7536	0.64038	0.7893	NaN	NaN	NaN	NaN	NaN	NaN
2.616	-8.194	-56.103	843.637	-0.2128	0.94931	-0.12568	-1.972	-76.045	1339.554	-2.4063	1.0645	0.65332	-17.456	-172.421	897.0386	-1.7363	0.63672	0.80713	NaN	NaN	NaN	NaN	NaN	NaN
2.618	6.135	-59.425	861.1165	-0.24805	0.97676	-0.1331	6.886	-29.5315	1341.864	-2.623	1.084	0.75732	-19.13	-151.886	858.745	-1.6948	0.60205	0.78516	NaN	NaN	NaN	NaN	NaN	NaN
2.62	16.95	-66.111	880.3925	-0.28662	1.0161	-0.12646	23.728	-43.273	1304.05	-2.687	1.104	0.78125	10.952	-139.399	888.139	-1.6953	0.59521	0.76807	NaN	NaN	NaN	NaN	NaN	NaN
2.622	31.9774	-84.4975	889.7193	-0.32696	1.0463	-0.1127	47.062	-70.079	1324.7994	-2.8335	1.1118	0.81836	-13.595	-75.62	908.475	-1.7202	0.63916	0.74414	NaN	NaN	NaN	NaN	NaN	NaN
2.624	33.878	-91.6044	902.93754	-0.35801	1.0759	-0.091895	92.11599	-33.2818	1320.589	-2.9236	1.1136	0.84742	1.886	-73.392	943.732	-1.7485	0.69288	0.72705	NaN	NaN	NaN	NaN	NaN	NaN
2.626	35.8693	-97.4682	911.9734	-0.37286	1.1021	-0.07666	74.2557	-116.979	1353.0034	-2.9688	1.0957	0.85986	-18.94466	-25.998	993.124	-1.7808	0.75537	0.71289	NaN	NaN	NaN	NaN	NaN	NaN
2.628	18.375	-106.2464	910.36	-0.38184	1.125	-0.066504	89.0907	-121.465	1398.074	-2.9063	1.0146	0.84033	29.2999	-87.891	1054.58	-1.7905	0.83252	0.68604	NaN	NaN	NaN	NaN	NaN	NaN
2.63	40.099	-126.189	925.411	-0.37793	1.1465	-0.066895	100.7636	-92.1577	1409.523	-3.0293	1.125	0.6626	18.226	-57.488	1091.971	-1.7754	0.86328	0.64111	NaN	NaN	NaN	NaN	NaN	NaN
2.632	28.8319	-137.561	951.34749	-0.3624	1.1554	-0.076563	69.344	-122.4899	1430.231	-2.8628	1.0962	0.7002	60.997	-114.574	1162.0426	-1.6714	0.89307	0.521	NaN	NaN	NaN	NaN	NaN	NaN
2.634	46.403	-129.522	969.07561	-0.33877	1.1629	-0.093653	79.216	-32.644	1401.647	-2.8132	1.0364	0.69067	72.627	-85.328	1188.9952	-1.5117	0.90039	0.38818	NaN	NaN	NaN	NaN	NaN	NaN
2.636	44.0155	-123.744	997.53	-0.31494	1.18	-0.11709	51.408	-21.997	1350.452	-2.7866	1.02	0.63281	76.984	-180.8626	1227.235	-1.4395	0.89551	0.33496	NaN	NaN	NaN	NaN	NaN	NaN
2.638	47.1557	-121.3229	997.0354	-0.28828	1.185	-0.14092	37.928	-27.5471	1365.2666	-2.7026	0.979	0.60352	49.8647	-200.989	1235.7489	-1.3398	0.88867	0.27197	NaN	NaN	NaN	NaN	NaN	NaN
2.64	39.2506	-107.3456	1010.72	-0.26318	1.1914	-0.16992	47.286	44.835	1362.781	-2.6499	0.94385	0.5957	44.757	-292.501	1249.5208	-1.3054	0.87427	0.26318	NaN	NaN	NaN	NaN	NaN	NaN
2.642	43.1905	-77.529	1011.9653	-0.24922	1.2039	-0.2	17.176	-8.352	1346.358	-2.5586	0.88477	0.5415	23.865	-256.681	1265.034	-1.3042	0.8667	0.2793	NaN	NaN	NaN	NaN	NaN	NaN
2.644	34.8579	-76.651	1015.3886	-0.24316	1.2173	-0.23652	59.388	1.602	1386.5756	-2.5114	0.85572	0.52954	23.2574	-279.671	1321.445	-1.3477	0.87012	0.32764	NaN	NaN	NaN	NaN	NaN	NaN
2.646	-2.671	-62.363	1027.1346	-0.26035	1.247	-0.26856	56.303	22.0348	1367.3718	-2.4897	0.84033	0.52441	1.898	-180.6228	1323.092	-1.3765	0.8833	0.36133	NaN	NaN	NaN	NaN	NaN	NaN
2.648	18.1179	-66.532	1030.024	-0.28174	1.2795	-0.29238	44.821	-28.556	1367.4327	-2.4937	0.83057	0.51563	8.305	-177.25904	1350.899	-1.4429	0.92236	0.43848	NaN	NaN	NaN	NaN	NaN	NaN
2.65	-16.733	-73.068	1038.564	-0.31445	1.3125	-0.31055	113.0776	36.4539	1360.0169	-2.4917	0.8208	0.5127	2.782	-93.544	1367.962	-1.5046	0.96948	0.4895	NaN	NaN	NaN	NaN	NaN	NaN
2.652	-40.7362	-76.897	1054.568	-0.35654	1.355	-0.31689	84.806	23.664	1327.418	-2.4766	0.80469	0.49658	-1.706	-104.634	1375.9529	-1.5742	1.0137	0.53564	NaN	NaN	NaN	NaN	NaN	NaN
2.654	-53.9032	-86.3932	1074.0702	-0.40391	1.4012	-0.32344	80.458	-10.502	1369.2409	-2.4462	0.79492	0.49609	-11.94	-31.644	1390.7637	-1.7124	1.0591	0.58008	NaN	NaN	NaN	NaN	NaN	NaN
2.656	-46.01239	-72.424	1086.4317	-0.44922	1.4449	-0.31328	82.859	30.4252	1382.4692	-2.4004	0.78271	0.47705	-26.6614	-32.185	1405.223	-1.8003	1.0806	0.59668	NaN	NaN	NaN	NaN	NaN	NaN
2.658	-43.789	-73.145	1097.27931	-0.4836	1.4816	-0.30605	27.133	-19.1202	1366.914	-2.3184	0.77344	0.45947	-43.1745	25.202	1415.588	-2.0054	1.1118	0.62256	NaN	NaN	NaN	NaN	NaN	NaN
2.66	-63.658	-74.7202	1112.2209	-0.50879	1.5239	-0.29395	71.058	4.884	1365.9259	-2.2734	0.7666	0.44971	-56.372	-0.105	1421.004	-2.1905	1.1231	0.66919	NaN	NaN	NaN	NaN	NaN	NaN
2.662	-45.396	-78.4432	1135.567	-0.52822	1.5614	-0.28037	64.473	46.7	1343.4788	-2.1797	0.75781	0.42822	-86.442	-6.034	1420.9466	-2.394	1.1226	0.73047	NaN	NaN	NaN	NaN	NaN	NaN
2.664	-39.3221	-78.033	1154.5232	-0.54277	1.5894	-0.27012	40.043	15.257	1339.8119	-2.1104	0.74317	0.41333	-89.103	-70.307	1415.871	-2.7026	1.1196	0.81543	NaN	NaN	NaN	NaN	NaN	NaN
2.666	-40.9133	-68.315	1161.4395	-0.55449	1.6191	-0.26426	87.051	83.308	1306.816	-2.0386	0.73486	0.40039	-90.318	-83.206	1435.2	-2.8594	1.1211	0.86426	NaN	NaN	NaN	NaN	NaN	NaN
2.668	-33.3699	-73.2457	1173.5011	-0.56836	1.6449	-0.25098	67.305	77.1505	1269.0141	-1.9448	0.72119	0.38281	-100.725	-116.676	1458.082	-3.1543	1.1367	0.97705	NaN	NaN	NaN	NaN	NaN	NaN
2.67	-25.517	-70.087	1175.487	-0.59326	1.6626	-0.2373	70.447	35.4949	1272.33866	-1.8999	0.71436	0.37305	-91.513	-96.219	1499.246	-3.3428	1.1538	1.0513	NaN	NaN	NaN	NaN	NaN	NaN
2.672	-3.759	-55.684	1188.899	-0.6167	1.6819	-0.22324	111.5218	101.515	1255.6086	-1.8203	0.69336	0.35596	-45.643	-126.501	1518.649	-3.4941	1.1816	1.1157	NaN	NaN	NaN	NaN	NaN	NaN
2.674	-20.5726	-36.672	1171.7275	-0.64493	1.7	-0.20225	61.802	64.291	1244.599	-1.7546	0.68823	0.34057	-34.43	-117.803	1529.954	-3.6426	1.2012	1.1763	NaN	NaN	NaN	NaN	NaN	NaN
2.676	4.641	-28.729	1168.79227	-0.67695	1.7187	-0.17295	94.223	94.046	1244.3435	-1.6987	0.68604	0.3252	-17.4249	-116.708	1498.5526	-3.689	1.2153	1.1855	NaN	NaN	NaN	NaN	NaN	NaN
2.678	8.8061	-16.2111	1169.0753	-0.70762	1.7309	-0.14668	107.7462	147.767	1200.832	-1.6304	0.68213	0.30957	-10.8143	-87.646	1498.9411	-3.6694	1.1997	1.1738	NaN	NaN	NaN	NaN	NaN	NaN
2.68	34.6388	-11.707	1177.45122	-0.74463	1.7495	-0.10889	47.894	90.79142	1209.1321	-1.5952	0.67236	0.31006	-1.6934	-32.157	1484.414402	-3.6035	1.1865	1.1381	NaN	NaN	NaN	NaN	NaN	NaN
2.682	24.2139	-8.6538	1185.69773	-0.77666	1.7577	-0.07666	69.3198	141.867	1198.697	-1.5327	0.6626	0.28955	5.84342	16.4024	1483.1382	-3.5156	1.1719	1.0835	NaN	NaN	NaN	NaN	NaN	NaN
2.684	29.6721	-12.4675	1196.8356	-0.80703	1.7664	-0.055566	44.079	117.42	1170.813	-1.49	0.65015	0.27612	-1.1686	62.061	1448.953	-3.3555	1.1367	1.0181	NaN	NaN	NaN	NaN	NaN	NaN
2.686	41.2422	-11.1986	1203.2262	-0.82774	1.7707	-0.029004	29.662	78.709	1182.194	-1.4531	0.63672	0.26563	-6.3899	67.742	1452.913	-3.2749	1.0981	0.97852	NaN	NaN	NaN	NaN	NaN	NaN
2.688	41.7811	-12.962	1208.2508	-0.85342	1.7684	-0.0044922	45.785	134.586	1147.763	-1.4058	0.62744	0.25732	-8.004	69.945	1429.988	-3.0859	1.0488	0.91895	NaN	NaN	NaN	NaN	NaN	NaN
2.69	45.6542	-21.3979	1218.571	-0.87695	1.7656	0.016113	-21.815	91.773	1118.346	-1.3862	0.62354	0.25	-15.29957	59.134	1431.711	-2.9668	1.0156	0.87744	NaN	NaN	NaN	NaN	NaN	NaN
2.692	32.8534	-18.1746	1213.792	-0.89453	1.7656	0.033203	11.532	108.0581	1102.8552	-1.3477	0.60645	0.24268	-4.3755	93.118	1402.549	-2.8706	1.0073	0.83594	NaN	NaN	NaN	NaN	NaN	NaN
2.694	47.656	-13.297	1201.2837	-0.91269	1.7606	0.048828	45.922	142.443	1024.407	-1.3142	0.59595	0.23559	26.4667	79.383	1421.6442	-2.7417	0.99854	0.79492	NaN	NaN	NaN	NaN	NaN	NaN
2.696	6.832	-8.0044	1195.8721	-0.92949	1.7656	0.060156	15.747	92.53721	1017.705	-1.2832	0.5835	0.23096	27.175	103.463	1417.393	-2.6855	0.98633	0.77783	NaN	NaN	NaN	NaN	NaN	NaN
2.698	-6.335	-13.5575	1197.8586	-0.94688	1.7692	0.068555	46.269	155.346	1002.1778	-1.2324	0.56641	0.21924	18.531	54.701	1429.077	-2.5698	0.95264	0.74219	NaN	NaN	NaN	NaN	NaN	NaN
2.7	-10.921	-26.8966	1189.4169	-0.9585	1.7817	0.081055	42.699	154.827	966.466	-1.209	0.55469	0.21631	-9.403	57.001	1395.7861	-2.4771	0.91797	0.71753	NaN	NaN	NaN	NaN	NaN	NaN
2.702	-14.4315	-19.0383	1182.8681	-0.96524	1.7963	0.094238	38.73	140.838	964.705	-1.1504	0.53613	0.20361	-22.5977	16.35864	1414.8355	-2.396	0.87744	0.69629	NaN	NaN	NaN	NaN	NaN	NaN
2.704	-26.44142	2.3332	1170.5472	-0.96719	1.816	0.10391	42.7445	196.478	918.354	-1.1052	0.51538	0.19604	-60.746	57.4144	1394.3151	-2.2788	0.83057	0.67188	NaN	NaN	NaN	NaN	NaN	NaN
2.706	-47.7829	11.8491	1173.018	-0.96485	1.8395	0.11211	-13.278	146.9699	898.3202	-1.0513	0.49951	0.18408	-54.763	31.7854	1387.102	-2.2266	0.80664	0.6665	NaN	NaN	NaN	NaN	NaN	NaN
2.708	-30.103	26.9148	1170.963	-0.95254	1.8553	0.11074	-8.117	152.362	879.0405	-0.97803	0.4751	0.17529	-59.213	69.8503	1359.775	-2.105	0.77588	0.64063	NaN	NaN	NaN	NaN	NaN	NaN
2.71	-33.2186	42.6545	1165.0373	-0.93359	1.8652	0.1084	9.872	181.965	828.683	-0.93994	0.45752	0.16357	-76.409	42.914	1355.294	-2.0088	0.75049	0.62866	NaN	NaN	NaN	NaN	NaN	NaN
2.712	-40.6849	44.313	1150.051	-0.91074	1.8701	0.1	-25.079	128.716	799.512	-0.87256	0.42627	0.15527	-106.611	95.216	1308.36	-1.9116	0.72217	0.61133	NaN	NaN	NaN	NaN	NaN	NaN
2.714	-46.8876	36.891	1150.93	-0.88125	1.873	0.091211	-4.418	180.3948	765.1506	-0.82154	0.40577	0.15015	-68.975	91.6281	1288.605	-1.7832	0.6748	0.59131	NaN	NaN	NaN	NaN	NaN	NaN
2.716	-37.1334	38.9759	1147.3876	-0.85625	1.873	0.081836	-9.365	157.7574	750.67301	-0.77051	0.38477	0.14551	-68.84	170.931	1239.335966	-1.7246	0.64844	0.57959	NaN	NaN	NaN	NaN	NaN	NaN
2.718	-33.24908	47.716	1139.8824	-0.83135	1.8725	0.069629	13.784	111.0999	737.305	-0.69824	0.35547	0.14551	-42.685	176.673	1240.31	-1.6094	0.58984	0.56494	NaN	NaN	NaN	NaN	NaN	NaN
2.72	-32.4626	45.21595	1124.6661	-0.79932	1.8667	0.066406	29.626	159.039	690.7131	-0.6665	0.3374	0.14355	-42.1768	243.969	1205.288	-1.5183	0.55297	0.55639	NaN	NaN	NaN	NaN	NaN	NaN
2.722	-9.732	28.592	1116.091	-0.77851	1.8588	0.057031	-0.195	118.3502	685.748	-0.59668	0.30713	0.13721	-24.7669	205.979	1185.126	-1.4448	0.51807	0.54736	NaN	NaN	NaN	NaN	NaN	NaN
2.724	-10.854	25.689	1111.26	-0.7585	1.847	0.058398	46.7067	145.614	673.6372	-0.54834	0.28076	0.13086	-21.134	233.27	1134.5115	-1.3525	0.47461	0.54541	NaN	NaN	NaN	NaN	NaN	NaN
2.726	13.987	34.4198	1089.6371	-0.74014	1.8348	0.05918	32.247	177.196	631.0105	-0.50049	0.25586	0.12402	-18.302	160.3013	1121.06417	-1.3022	0.44775	0.54199	NaN	NaN	NaN	NaN	NaN	NaN
2.728	-16.492	32.2388	1096.8841	-0.7249	1.8175	0.053906	-14.665	130.153	620.12	-0.43945	0.22363	0.11816	-15.778	191.566	1107.167	-1.2168	0.39941	0.53369	NaN	NaN	NaN	NaN	NaN	NaN
2.73	35.4135	48.09506	1078.7064	-0.70996	1.7988	0.040039	-1.973	183.4463	573.166	-0.4082	0.20654	0.11035	-7.043	144.311	1086.1	-1.1538	0.36889	0.52759	NaN	NaN	NaN	NaN	NaN	NaN
2.732	49.6214	52.0202	1070.0291	-0.68897	1.769	0.027148	-41.4926	160.4783	542.463	-0.34131	0.17432	0.099609	27.612	179.088	1037.564	-1.082	0.33691	0.51465	NaN	NaN	NaN	NaN	NaN	NaN
2.734	50.2822	67.8974	1052.4813	-0.6582	1.7371	0.013672	-18.866	145.52528	530.833	-0.29761	0.14966	0.090576	46.400626	116.167	1011.9368	-0.98877	0.29395	0.49805	NaN	NaN	NaN	NaN	NaN	NaN
2.736	56.2041	70.6572	1027.39115	-0.63086	1.7043	-0.0011719	-13.0452	185.408	501.755	-0.25488	0.125	0.077148	37.698	132.947	947.942	-0.93945	0.26855	0.48096	NaN	NaN	NaN	NaN	NaN	NaN
2.738	58.7715	81.017	1021.726	-0.60283	1.669	-0.012207	-23.203	137.6537	463.5425	-0.19727	0.086426	0.060547	63.733	96.583	907.165	-0.83252	0.23096	0.45459	NaN	NaN	NaN	NaN	NaN	NaN
2.74	67.129	83.698	998.5658	-0.5752	1.6348	-0.036133	3.054	149.0194	443.8966	-0.16895	0.069336	0.053223	75.4463	144.028	876.491	-0.76294	0.19799	0.42285	NaN	NaN	NaN	NaN	NaN	NaN
2.742	44.697	86.8311	972.3611	-0.55186	1.604	-0.055664	1.819	157.424	399.038	-0.11719	0.038086	0.032227	80.397	125.685	854.663	-0.68408	0.16895	0.39844	NaN	NaN	NaN	NaN	NaN	NaN
2.744	56.2128	80.5921	963.8147	-0.52832	1.574	-0.071093	2.607	115.6871	393.129	-0.07373	0.0053711	0.013672	101.7689	184.409	851.525	-0.57813	0.125	0.35645	NaN	NaN	NaN	NaN	NaN	NaN
2.746	41.806	82.9896	949.9848	-0.51113	1.5459	-0.086719	4.803	167.881	363.888	-0.050293	-0.0063477	0.0029297	100.773	169.625	806.789	-0.53174	0.097168	0.33203	NaN	NaN	NaN	NaN	NaN	NaN
2.748	44.1524	83.319	927.784	-0.50166	1.5276	-0.091406	-18.6912	147.542	335.594	-0.01123	-0.03125	-0.0097656	103.9167	210.61	742.127	-0.43311	0.054199	0.28662	NaN	NaN	NaN	NaN	NaN	NaN
2.75	33.776	72.5584	900.632	-0.49512	1.5078	-0.087891	1.445	130.687	338.6736	0.010742	-0.052734	-0.020752	77.74475	195.72	701.441	-0.35621	0.01831	0.25513	NaN	NaN	NaN	NaN	NaN	NaN
2.752	9.718	61.6437	890.985	-0.49463	1.4974	-0.080859	5.234	159.247	313.418	0.031738	-0.066406	-0.033691	57.388	234.997	652.361	-0.28711	-0.01416	0.22217	NaN	NaN	NaN	NaN	NaN	NaN
2.754	25.46	68.0464	894.659	-0.49697	1.4845	-0.069141	-35.212	103.8127	310.2865	0.051758	-0.085449	-0.032715	50.01	224.182	598.404	-0.19189	-0.061035	0.17578	NaN	NaN	NaN	NaN	NaN	NaN
2.756	12.298	80.667	872.6774	-0.49971	1.4669	-0.050781	-12.566	124.884	292.7226	0.056152	-0.097656	-0.036621	46.854	243.454	559.0279	-0.15332	-0.083984	0.15137	NaN	NaN	NaN	NaN	NaN	NaN
2.758	7.166	85.368	854.8614	-0.50449	1.4473	-0.044727	-2.984	132.5688	256.61981	0.064453	-0.11426	-0.030273	43.437	206.4588	502.52	-0.075684	-0.125	0.091797	NaN	NaN	NaN	NaN	NaN	NaN
2.76	0.506	72.1513	837.743	-0.50342	1.4302	-0.040527	-12.809	96.838	246.9464	0.066406	-0.12354	-0.023926	20.329	185.77	467.3326	-0.021728	-0.1582	0.073731	NaN	NaN	NaN	NaN	NaN	NaN
2.762	-0.742999999999995	81.9217	812.1434	-0.49531	1.3975	-0.042383	18.8239	137.74	223.69409	0.0625	-0.12549	-0.015625	16.518	170.207	448.353	0.027832	-0.18652	0.033691	NaN	NaN	NaN	NaN	NaN	NaN
2.764	-29.312	100.955	793.493	-0.4835	1.3659	-0.036621	-5.615	102.0224	198.819	0.061523	-0.13184	0.0053711	15.566	168.785	413.8688	0.092285	-0.22607	-0.016602	NaN	NaN	NaN	NaN	NaN	NaN
2.766	-25.086	121.984	773.119	-0.46787	1.3316	-0.043262	11.202	96.3579	187.0102	0.055664	-0.13037	0.01709	1.05	165.087	405.1427	0.11426	-0.24463	-0.034668	NaN	NaN	NaN	NaN	NaN	NaN
2.768	-3.744	107.502	756.03041	-0.45127	1.2954	-0.050293	34.491	127.256	158.6338	0.047363	-0.12646	0.032715	11.628	164.966	409.352	0.16602	-0.27979	-0.072754	NaN	NaN	NaN	NaN	NaN	NaN
2.77	-6.613	103.112	745.3646	-0.43457	1.2588	-0.054688	-4.757	82.012	153.3323	0.038574	-0.12793	0.049317	13.411	157.913	382.434	0.20752	-0.30859	-0.1084	NaN	NaN	NaN	NaN	NaN	NaN
2.772	4.901	107.377	714.2968	-0.41524	1.2248	-0.059082	29.559	105.077	165.283	0.036621	-0.12451	0.055176	15.931	147.029	358.087	0.22559	-0.31836	-0.12207	NaN	NaN	NaN	NaN	NaN	NaN
2.774	5.001	115.295	696.92152	-0.40009	1.1896	-0.06084	26.2268	110.585	144.927	0.043457	-0.11475	0.069824	6.347	137.854	304.9335	0.25342	-0.33789	-0.14746	NaN	NaN	NaN	NaN	NaN	NaN
2.776	43.6386	125.308	686.4117	-0.38096	1.161	-0.058496	3.438	67.2259	144.6434	0.046387	-0.11182	0.070313	-10.22	114.5894	291.235	0.26929	-0.35205	-0.16602	NaN	NaN	NaN	NaN	NaN	NaN
2.778	27.308	124.728	663.6723	-0.3583	1.1281	-0.06084	45.1224	95.2128	103.0521	0.061035	-0.10693	0.073242	2.021	134.0845	259.291	0.28418	-0.36035	-0.18018	NaN	NaN	NaN	NaN	NaN	NaN
2.78	39.113	118.257	641.087	-0.34668	1.0957	-0.061523	13.346	61.315	98.6482	0.071289	-0.10156	0.074219	31.469	110.36	243.288	0.29346	-0.37305	-0.2002	NaN	NaN	NaN	NaN	NaN	NaN
2.782	44.741	101.8836	629.8499	-0.33145	1.0636	-0.05498	3.67899999999999	59.6189	85.1939	0.082031	-0.10303	0.064453	43.878	135.793	200.631	0.29932	-0.37744	-0.21191	NaN	NaN	NaN	NaN	NaN	NaN
2.784	61.7883	108.6617	621.6992	-0.31513	1.0337	-0.054981	29.476	85.35	54.5862	0.095703	-0.10059	0.053711	48.108	103.326	169.263	0.29492	-0.37988	-0.22998	NaN	NaN	NaN	NaN	NaN	NaN
2.786	77.371	114.432	612.308	-0.29951	0.99737	-0.052637	26.522	34.9196	51.3748	0.097168	-0.097656	0.043945	33.484	119.1195	138.175	0.28638	-0.38428	-0.23608	NaN	NaN	NaN	NaN	NaN	NaN
2.788	60.7217	111.11	584.3047	-0.28603	0.96074	-0.055957	15.873	41.9246	53.2929	0.10156	-0.094727	0.024414	65.3506	85.3342	121.374	0.26953	-0.37939	-0.23633	NaN	NaN	NaN	NaN	NaN	NaN
2.79	71.6234	95.0699	574.7363	-0.27295	0.93018	-0.05127	12.453	23.9086	55.186	0.10107	-0.090332	0.013916	59.05	114.0718	96.831	0.22949	-0.37256	-0.23291	NaN	NaN	NaN	NaN	NaN	NaN
2.792	71.683	102.7623	550.522	-0.26309	0.89668	-0.049316	3.146	-8.09621	50.8878	0.1001	-0.087891	0.0019531	85.7698	89.6989	82.4184	0.20752	-0.36768	-0.22852	NaN	NaN	NaN	NaN	NaN	NaN
2.794	87.554	110.6485	529.2441	-0.2503	0.86592	-0.050293	18.975	49.004	36.5799	0.088867	-0.088867	-0.013672	94.31857	109.8082	90.0031	0.14795	-0.35742	-0.2002	NaN	NaN	NaN	NaN	NaN	NaN
2.796	63.994	112.5183	507.7641	-0.24248	0.83584	-0.049902	1.75	18.1267	27.564	0.076172	-0.086914	-0.020996	86.44292	56.63	73.9974	0.093992	-0.34302	-0.18018	NaN	NaN	NaN	NaN	NaN	NaN
2.798	52.89	98.16674	509.082	-0.23057	0.80381	-0.049903	14.615	20.4495	48.9973	0.061035	-0.078613	-0.023926	73.66377	76.8274	59.801	0.031738	-0.32422	-0.15771	NaN	NaN	NaN	NaN	NaN	NaN
2.8	68.205	90.1755	485.6164	-0.21387	0.78125	-0.049805	3.533	41.0349	11.5093	0.040283	-0.080566	-0.021485	59.695	12.986	58.5117	-0.05957	-0.29932	-0.11279	NaN	NaN	NaN	NaN	NaN	NaN
2.802	41.2584	108.217	457.49265	-0.19932	0.75225	-0.048242	1.347	-0.2085	8.7003	0.021484	-0.074707	-0.022461	34.456	41.3831	43.574	-0.10547	-0.28711	-0.09668	NaN	NaN	NaN	NaN	NaN	NaN
2.804	36.178	111.22	439.7917	-0.18418	0.72139	-0.046485	35.108	22.9139	8.3085	-0.0014648	-0.063965	-0.0058594	39.55	-6.448	45.560883	-0.19043	-0.24805	-0.054688	NaN	NaN	NaN	NaN	NaN	NaN
2.806	26.064	109.613	423.939	-0.16621	0.69521	-0.051172	-6.979	3.00742	8.5359	-0.016602	-0.062012	-0.011719	46.79	26.0716	19.595	-0.23609	-0.2207	-0.034912	NaN	NaN	NaN	NaN	NaN	NaN
2.808	31.734	94.152	418.294	-0.15127	0.66397	-0.051855	-5.502	-23.25575	28.9215	-0.035645	-0.055664	0.016602	41.608	-20.7472	6.45	-0.271	-0.20996	-0.026855	NaN	NaN	NaN	NaN	NaN	NaN
2.81	-5.938	100.132	396.554	-0.13623	0.63037	-0.062012	22.918	14.8887	-1.1914	-0.049072	-0.054199	0.032959	-5.368	17.1117	-1.976	-0.31543	-0.20459	-0.020508	NaN	NaN	NaN	NaN	NaN	NaN
2.812	2.618	103.633	368.68237	-0.12295	0.60166	-0.059473	20.302	-7.1651	-7.0101	-0.062988	-0.05127	0.050293	-3.183	-33.9429	9.207	-0.33594	-0.19482	-0.015625	NaN	NaN	NaN	NaN	NaN	NaN
2.814	0.324999999999999	87.2436	358.0272	-0.11221	0.57695	-0.062891	19.945	-1.4949	15.4319	-0.076172	-0.051758	0.071289	-8.37	23.128	11.931	-0.37646	-0.17969	-0.011719	NaN	NaN	NaN	NaN	NaN	NaN
2.816	-7.349	82.4278	347.5587	-0.10401	0.54531	-0.061719	0.628	21.7448	5.276	-0.085938	-0.049805	0.081055	-2.814	-2.588	35.241	-0.40673	-0.17408	0.0004883	NaN	NaN	NaN	NaN	NaN	NaN
2.818	-5.627	80.4241	332.672	-0.097947	0.52149	-0.06123	8.936	2.5714	12.311	-0.089844	-0.051758	0.10156	7.534	45.5737	34.7581	-0.4375	-0.16846	0.014648	NaN	NaN	NaN	NaN	NaN	NaN
2.82	-26.22	71.84814	315.017	-0.089844	0.50195	-0.055664	38.2613	31.135	11.112	-0.083007	-0.053955	0.11255	-18.788	0.614000000000001	26.075	-0.45166	-0.16846	0.027832	NaN	NaN	NaN	NaN	NaN	NaN
2.822	1.198	79.847	308.348	-0.07793	0.47891	-0.053613	33.5972	17.0412	-5.8899	-0.074707	-0.060059	0.11816	-16.278	41.6434	11.417	-0.45215	-0.16943	0.025391	NaN	NaN	NaN	NaN	NaN	NaN
2.824	-12.877	79.668	297.244	-0.063477	0.45635	-0.05293	-1.293	-18.9031	29.588	-0.064453	-0.066895	0.12305	-26.486	-1.764	-12.803	-0.43164	-0.16162	0.02832	NaN	NaN	NaN	NaN	NaN	NaN
2.826	11.894	68.403	274.4872	-0.04668	0.43955	-0.054883	46.141	8.8298	31.619	-0.058594	-0.067871	0.12842	-23.85	51.8407	-7.895	-0.4038	-0.16236	0.023681	NaN	NaN	NaN	NaN	NaN	NaN
2.828	8.019	51.8557	266.6294	-0.026855	0.41328	-0.048047	44.8634	-8.48318	12.9072	-0.04834	-0.072266	0.13721	-36.268	12.01488	-2.5945	-0.36816	-0.1709	0.014648	NaN	NaN	NaN	NaN	NaN	NaN
2.83	36.898	67.1855	253.1895	-0.011719	0.39063	-0.052734	29.805	13.1442	12.546	-0.040772	-0.070069	0.13648	2.261	42.12	12.649	-0.3252	-0.18994	0.0058594	NaN	NaN	NaN	NaN	NaN	NaN
2.832	44.0715	80.721	230.0242	0.010156	0.36358	-0.053125	37.6383	37.751	-9.1775	-0.033691	-0.062988	0.13477	5.242	-10.2876	14.3169	-0.29297	-0.19336	0.0039063	NaN	NaN	NaN	NaN	NaN	NaN
2.834	37.829	73.3422	218.9212	0.025977	0.33526	-0.062304	7.602	4.1609	-0.280000000000001	-0.025391	-0.064453	0.13232	26.298	5.907	21.9712	-0.2251	-0.2207	0	NaN	NaN	NaN	NaN	NaN	NaN
2.836	47.448	46.284	218.2943	0.036524	0.30361	-0.067383	26.9	30.5959	14.8077	-0.020508	-0.060547	0.13232	10.615	-25.4371	33.146	-0.17138	-0.24121	-0.0092774	NaN	NaN	NaN	NaN	NaN	NaN
2.838	34.2	50.1348	219.1021	0.05332	0.27793	-0.075683	23.849	20.7496	-4.7036	-0.013184	-0.060059	0.12695	34.256	12.836	41.578	-0.11865	-0.25684	-0.024902	NaN	NaN	NaN	NaN	NaN	NaN
2.84	59.5503	60.6708	206.84453	0.061523	0.25195	-0.07959	17.441	-3.0087	25.9055	-0.0051269	-0.058838	0.12378	41.8179	0.349	37.32	-0.054688	-0.27783	-0.046875	NaN	NaN	NaN	NaN	NaN	NaN
2.842	57.14367	64.7815	189.0182	0.06836	0.23594	-0.085059	33.583	23.2682	20.16293	-0.00097656	-0.058105	0.12109	102.532	19.9386	19.5054	-0.024414	-0.28662	-0.0625	NaN	NaN	NaN	NaN	NaN	NaN
2.844	52.7431	55.5476	176.22358	0.076758	0.22178	-0.083301	11.917	-9.8618	20.5125	0.0029297	-0.048828	0.1123	55.7691	5.125	17.7711	0.015137	-0.30029	-0.086914	NaN	NaN	NaN	NaN	NaN	NaN
2.846	62.9491	44.8079	160.503	0.088476	0.20732	-0.089551	25.485	2.73273	16.9313	0.0063477	-0.044922	0.11035	69.73052	5.248	24.067	0.037842	-0.30664	-0.092041	NaN	NaN	NaN	NaN	NaN	NaN
2.848	57.8117	53.8348	149.334	0.092676	0.19346	-0.094629	13.365	41.296	-3.674	0.0053711	-0.029785	0.10547	62.4441	-6.598	26.5306	0.053711	-0.30713	-0.097656	NaN	NaN	NaN	NaN	NaN	NaN
2.85	59.36606	58.366	143.215	0.098633	0.18115	-0.10254	-22.398	22.324	-2.085	0.0043945	-0.01709	0.1023	51.825	-2.9601	21.7022	0.060059	-0.3042	-0.086426	NaN	NaN	NaN	NaN	NaN	NaN
2.852	42.602	35.3198	143.8379	0.10361	0.17051	-0.11377	15.121	31.758	13.34702	0.00097656	-0.0029297	0.098633	34.635	12.602	15.3566	0.064941	-0.29736	-0.077637	NaN	NaN	NaN	NaN	NaN	NaN
2.854	49.15	31.0542	143.7522	0.1045	0.16123	-0.12481	4.595	18.0844	-16.4435	-0.0073242	0.018555	0.082031	69.8252	8.717	23.9381	0.061523	-0.28711	-0.05957	NaN	NaN	NaN	NaN	NaN	NaN
2.856	18.578	45.4568	124.5871	0.11582	0.1542	-0.12988	-6.811	-2.604	14.393	-0.015625	0.026367	0.083496	56.90985	17.135	-6.7298	0.05957	-0.26684	-0.051269	NaN	NaN	NaN	NaN	NaN	NaN
2.858	16.453	55.3077	116.6347	0.12226	0.14961	-0.13262	44.2798	25.742	48.58	-0.04248	0.055664	0.072266	35.178	6.334	-1.554	0.05957	-0.24805	-0.035645	NaN	NaN	NaN	NaN	NaN	NaN
2.86	18.25	49.284	109.535	0.12256	0.14893	-0.13525	1.624	-14.7517	43.581	-0.064942	0.082275	0.065674	28.294	25.8313	-13.043	0.070801	-0.23047	-0.027832	NaN	NaN	NaN	NaN	NaN	NaN
2.862	9.731	42.513	108.8969	0.11895	0.14893	-0.14277	13.278	-8.9054	70.1325	-0.092773	0.10449	0.065918	14.117	0.0257000000000001	13.799	0.077637	-0.22021	-0.027832	NaN	NaN	NaN	NaN	NaN	NaN
2.864	-18.412	40.007	93.24	0.11035	0.14561	-0.14405	24.381	37.207	61.628	-0.13477	0.13721	0.066406	-8.965	23.4005	15.542	0.094727	-0.20361	-0.03418	NaN	NaN	NaN	NaN	NaN	NaN
2.866	-30.514	35.5988	75.618	0.096288	0.14795	-0.1499	-9.33	28.5988	86.686	-0.16309	0.15186	0.067383	23.174	-13.4358	26.2264	0.11011	-0.19311	-0.04419	NaN	NaN	NaN	NaN	NaN	NaN
2.868	11.231	41.685	78.4034	0.084277	0.15449	-0.14775	14.55	64.2509	155.2689	-0.21436	0.18408	0.067871	15.598	15.31716	10.041	0.12744	-0.19043	-0.05957	NaN	NaN	NaN	NaN	NaN	NaN
2.87	-4.163	45.613	78.0276	0.066406	0.1626	-0.14648	10.577	66.0573	161.4359	-0.25781	0.20361	0.073242	-12.315	-31.55	28.255	0.14941	-0.18652	-0.071777	NaN	NaN	NaN	NaN	NaN	NaN
2.872	-4.172	45.792	75.6856	0.049219	0.17334	-0.14531	8.974	43.682	200.9605	-0.30273	0.22412	0.085449	-18.371	9.709	10.447	0.15576	-0.18408	-0.083496	NaN	NaN	NaN	NaN	NaN	NaN
2.874	-12.339	33.3626	78.742	0.028418	0.18809	-0.13682	24.2935	87.59	239.617	-0.37549	0.24902	0.095703	-49.553	-18.8435	8.784	0.16406	-0.1792	-0.10156	NaN	NaN	NaN	NaN	NaN	NaN
2.876	11.454	44.185	69.24876	0.0022462	0.20254	-0.13018	-0.678000000000001	69.3192	282.605	-0.43652	0.26758	0.097412	-22.801	27.879	-6.593	0.16235	-0.17041	-0.11328	NaN	NaN	NaN	NaN	NaN	NaN
2.878	8.462	48.155	75.575	-0.028418	0.21953	-0.121	-0.854999999999997	80.487	334.412	-0.49951	0.28369	0.1084	-2.61	-13.4304	11.7171	0.15771	-0.16162	-0.12451	NaN	NaN	NaN	NaN	NaN	NaN
2.88	14.531	42.957	71.7967	-0.056152	0.23877	-0.10596	22.76	99.304	344.7354	-0.58301	0.31641	0.12354	5.564	37.8237	10.4584	0.13574	-0.14209	-0.13037	NaN	NaN	NaN	NaN	NaN	NaN
2.882	18.025	13.8235	61.7593	-0.082129	0.25732	-0.092576	13.937	58.5724	388.66	-0.62891	0.32422	0.13916	-5.587	-5.757	24.7467	0.125	-0.13574	-0.13379	NaN	NaN	NaN	NaN	NaN	NaN
2.884	8.712	27.623	58.91254	-0.098339	0.27305	-0.084277	16.244	70.891	436.25	-0.72607	0.34814	0.16602	8.383	44.186	-4.2193	0.086914	-0.11768	-0.13086	NaN	NaN	NaN	NaN	NaN	NaN
2.886	50.03516	43.752	36.697	-0.11279	0.28711	-0.074121	1.368	41.0925	451.749	-0.80371	0.36523	0.18921	10.268	4.142	30.307	0.057861	-0.1018	-0.125	NaN	NaN	NaN	NaN	NaN	NaN
2.888	41.894	32.191	51.835	-0.12031	0.29551	-0.071973	18.314	4.7708	515.446	-0.88232	0.37793	0.21387	17.609	46.299	21.4122	0.020508	-0.085938	-0.10986	NaN	NaN	NaN	NaN	NaN	NaN
2.89	49.0648	16.1345	58.2706	-0.12012	0.30273	-0.063965	35.3167	20.3658	569.762	-0.99268	0.39502	0.26514	53.219	-9.0537	28.614	-0.026855	-0.060547	-0.099121	NaN	NaN	NaN	NaN	NaN	NaN
2.892	54.2855	21.4133	56.0576	-0.11601	0.30879	-0.067774	-1.934	-29.4691	592.0978	-1.0483	0.40381	0.28857	56.541	36.4872	9.4036	-0.052734	-0.04834	-0.090332	NaN	NaN	NaN	NaN	NaN	NaN
2.894	65.3035	32.724	44.0233	-0.10918	0.30791	-0.070996	26.76	-44.9149	667.18619	-1.1616	0.42822	0.33984	54.5063	-10.7104	6.6406	-0.094727	-0.026367	-0.077148	NaN	NaN	NaN	NaN	NaN	NaN
2.896	61.22959	27.4495	47.917	-0.095508	0.29697	-0.076074	24.506	-30.7889	690.87399	-1.2378	0.43018	0.39697	46.1	45.485	2.79047	-0.12695	-0.0083007	-0.063721	NaN	NaN	NaN	NaN	NaN	NaN
2.898	54.904	26.2783	49.661	-0.083301	0.28672	-0.084375	-16.901	-67.545	742.974	-1.3081	0.43994	0.44775	32.307	-0.229	14.1102	-0.15283	0.003418	-0.055176	NaN	NaN	NaN	NaN	NaN	NaN
2.9	53.4846	27.4304	34.7784	-0.069824	0.27588	-0.09082	14.739	-56.8467	786.7574	-1.3984	0.44873	0.52393	35.832	32.276	16.7784	-0.18701	0.023926	-0.039551	NaN	NaN	NaN	NaN	NaN	NaN
2.902	49.7333	34.339	10.931	-0.05957	0.2625	-0.10029	13.944	-64.1136	771.657	-1.4453	0.45898	0.56494	65.0102	-17.4154	32.7273	-0.20581	0.037353	-0.034668	NaN	NaN	NaN	NaN	NaN	NaN
2.904	46.0201	32.579	38.101	-0.056055	0.25176	-0.1042	10.653	-95.2485	791.549	-1.5249	0.48779	0.62305	77.96573	11.6369	30.1755	-0.22266	0.04541	-0.032227	NaN	NaN	NaN	NaN	NaN	NaN
2.906	40.1432	21.3064	46.833	-0.054102	0.24121	-0.11123	71.414	-79.092	739.038	-1.5659	0.50489	0.6792	48.9887	-33.48	41.4215	-0.2417	0.057617	-0.027344	NaN	NaN	NaN	NaN	NaN	NaN
2.908	36.043	15.2257	44.686	-0.055469	0.2335	-0.11396	29.978	-106.14462	703.785	-1.5933	0.521	0.70313	62.8528	11.0858	43.514	-0.25	0.063965	-0.022949	NaN	NaN	NaN	NaN	NaN	NaN
2.91	12.119	7.0374	40.0519	-0.057617	0.23242	-0.11816	23.517	-102.2822	691.783	-1.6108	0.54834	0.71826	23.718	-24.3964	40.233	-0.2666	0.072754	-0.025391	NaN	NaN	NaN	NaN	NaN	NaN
2.912	0.168999999999997	17.3679	20.216	-0.059375	0.22842	-0.11924	65.2694	-69.4164	642.687	-1.6147	0.56885	0.72266	18.912	14.0415	33.709	-0.28076	0.077148	-0.019532	NaN	NaN	NaN	NaN	NaN	NaN
2.914	19.346	7.1004	52.392	-0.066016	0.22237	-0.12109	22.752	-86.266	624.786	-1.6011	0.62549	0.72656	38.978	-31.1861	54.6494	-0.30127	0.088867	-0.01123	NaN	NaN	NaN	NaN	NaN	NaN
2.916	4.239	1.546	40.5709	-0.072656	0.2208	-0.11992	23.508	-59.243	656.931	-1.5866	0.66773	0.72876	29.078	3.51392	54.7765	-0.34961	0.099121	0.00097656	NaN	NaN	NaN	NaN	NaN	NaN
2.918	-10.156	-14.1257	52.6294	-0.07373	0.22305	-0.11611	7.032	-36.5575	654.901	-1.5703	0.7002	0.73584	-18.971	-11.9542	104.964	-0.37695	0.10254	0.0097656	NaN	NaN	NaN	NaN	NaN	NaN
2.92	-15.861	-25.9705	34.6788	-0.073242	0.21875	-0.11768	-15.363	-46.728	699.915	-1.5547	0.7207	0.73096	-0.810000000000002	21.9351	143.3974	-0.44531	0.1167	0.025879	NaN	NaN	NaN	NaN	NaN	NaN
2.922	6.827	-16.221	48.2574	-0.072168	0.22148	-0.11162	14.73	-19.069	736.269	-1.5449	0.73047	0.72852	-17.478	6.1398	197.352	-0.5044	0.12671	0.03711	NaN	NaN	NaN	NaN	NaN	NaN
2.924	-15.937	-13.869	69.522	-0.067383	0.21191	-0.11406	-8.066	-48.549	771.0418	-1.519	0.75244	0.71289	-18.604	13.781	248.0183	-0.57373	0.14014	0.050293	NaN	NaN	NaN	NaN	NaN	NaN
2.926	-0.188000000000002	-17.774	70.062	-0.05957	0.19903	-0.11757	0.494999999999999	-99.146	856.784	-1.4873	0.76904	0.68653	-6.456	16.494	297.695	-0.67822	0.16797	0.066406	NaN	NaN	NaN	NaN	NaN	NaN
2.928	10.381	-33.5074	90.5857	-0.051855	0.19278	-0.12422	16.9487	-99.467	877.423	-1.4473	0.7832	0.64941	22.228	38.0187	371.3931	-0.7373	0.18066	0.069824	NaN	NaN	NaN	NaN	NaN	NaN
2.93	9.337	-14.551	102.4433	-0.047363	0.18115	-0.13281	19.9535	-151.9451	892.3498	-1.3784	0.79736	0.58008	3.826	61.0247	471.796	-0.8667	0.21826	0.095703	NaN	NaN	NaN	NaN	NaN	NaN
2.932	46.552	8.6048	112.3053	-0.050977	0.17129	-0.13447	40.1466	-166.775	930.9072	-1.3452	0.80322	0.53906	26.152	53.582	555.508	-0.96949	0.25317	0.11719	NaN	NaN	NaN	NaN	NaN	NaN
2.934	31.852	28.0165	153.821	-0.053613	0.16485	-0.13711	7.353	-172.003	928.0601	-1.2886	0.81494	0.4668	31.049	50.455	669.259	-1.085	0.28418	0.15674	NaN	NaN	NaN	NaN	NaN	NaN
2.936	29.513	33.6457	177.0521	-0.059864	0.16601	-0.13867	-28.493	-220.009	932.265	-1.2673	0.823	0.41357	51.055	-4.594	762.65	-1.2627	0.34277	0.21582	NaN	NaN	NaN	NaN	NaN	NaN
2.938	27.058	54.8676	194.5324	-0.064258	0.16865	-0.13496	2.947	-202.713	968.9747	-1.2534	0.83057	0.36719	66.568	-61.796	835.479	-1.3516	0.37988	0.25732	NaN	NaN	NaN	NaN	NaN	NaN
2.94	59.97	71.0746	219.3905	-0.058594	0.16943	-0.12891	-32.465	-191.384	996.8466	-1.2524	0.84229	0.32227	133.551	-129.967	950.44	-1.5391	0.44727	0.35156	NaN	NaN	NaN	NaN	NaN	NaN
2.942	67.0554	70.7291	264.9722	-0.0625	0.16621	-0.13809	-58.4461	-196.151	1078.384	-1.2559	0.84277	0.31152	94.475	-142.778	1008.953	-1.6707	0.49878	0.41138	NaN	NaN	NaN	NaN	NaN	NaN
2.944	62.171	69.986	316.536	-0.071387	0.17041	-0.15097	-21.1437	-120.383	1096.715	-1.2515	0.84033	0.2832	69.8922	-163.446	1081.227	-1.7944	0.54053	0.46484	NaN	NaN	NaN	NaN	NaN	NaN
2.946	86.02699	58.626	344.6793	-0.08506	0.17236	-0.1623	-49.3783	-106.778	1094.8918	-1.2486	0.84424	0.26025	28.218	-131.142	1068.5334	-1.9155	0.58545	0.48633	NaN	NaN	NaN	NaN	NaN	NaN
2.948	83.3856	43.8044	364.421	-0.11113	0.1834	-0.17852	-4.902	-71.516	1123.426	-1.2437	0.85498	0.23682	20.959	-160.62	1032.354	-1.9468	0.59424	0.47949	NaN	NaN	NaN	NaN	NaN	NaN
2.95	107.7707	26.8506	418.075	-0.14893	0.20605	-0.18604	4.651	-25.531	1095.842	-1.2441	0.87109	0.19775	10.812	-105.476	1042.674	-1.9609	0.60547	0.43311	NaN	NaN	NaN	NaN	NaN	NaN
2.952	82.014	-1.23894	474.963	-0.2	0.23505	-0.18936	-32.693	-48.179	1121.3265	-1.2476	0.8833	0.18018	14.224	-132.422	1040.822	-1.9343	0.5979	0.38672	NaN	NaN	NaN	NaN	NaN	NaN
2.954	115.1821	-16.0049	527.6786	-0.25741	0.2744	-0.18945	42.5318	-42.985	1143.165	-1.2754	0.90039	0.15625	9.452	-94.597	1042.739	-1.8906	0.58496	0.3418	NaN	NaN	NaN	NaN	NaN	NaN
2.956	78.315	-42.087	570.255	-0.32303	0.32635	-0.18086	5.096	-59.339	1148.6096	-1.3328	0.91333	0.14477	-5.8062	-131.274	1067.318	-1.8491	0.56494	0.29492	NaN	NaN	NaN	NaN	NaN	NaN
2.958	65.96	-52.4941	612.7453	-0.3993	0.38319	-0.17227	-32.7334	-139.3672	1200.6439	-1.4199	0.92188	0.14404	-61.142	-101.34873	1032.257	-1.832	0.54492	0.27783	NaN	NaN	NaN	NaN	NaN	NaN
2.96	68.7239	-65.40527	668.289	-0.47998	0.44043	-0.15332	-2.6783	-134.0536	1199.6142	-1.5796	0.93018	0.16943	-96.393	-115.132	1031.6056	-1.7412	0.47656	0.23193	NaN	NaN	NaN	NaN	NaN	NaN
2.962	39.819	-72.404	709.342	-0.56215	0.50999	-0.13446	-45.161	-164.831	1222.812	-1.6772	0.9292	0.19043	-83.7695	-52.787	1025.22	-1.6677	0.44141	0.18848	NaN	NaN	NaN	NaN	NaN	NaN
2.964	28.945	-64.1821	730.0453	-0.64207	0.57975	-0.11522	-22.1126	-177.009	1270.544	-1.8765	0.92236	0.25586	-15.119	-58.459	1046.832	-1.6016	0.42773	0.15967	NaN	NaN	NaN	NaN	NaN	NaN
2.966	-5.487	-70.273	716.216	-0.72802	0.65477	-0.093333	-23.063152	-118.783	1239.009	-2.029	0.92407	0.32348	21.908	-17.19	1055.398	-1.5405	0.46045	0.15576	NaN	NaN	NaN	NaN	NaN	NaN
2.968	7.9541	-57.9162	710.0312	-0.80397	0.73757	-0.071462	-19.3554	-145.692	1277.6216	-2.1777	0.92578	0.39111	40.685	-89.132	1112.849	-1.5327	0.48877	0.17188	NaN	NaN	NaN	NaN	NaN	NaN
2.97	-15.012	-45.3354	712.315	-0.87646	0.82275	-0.044922	20.92145	-122.599	1333.758	-2.332	0.90918	0.51855	5.453	-111.533	1157.074	-1.5718	0.57861	0.23633	NaN	NaN	NaN	NaN	NaN	NaN
2.972	-19.5127	-43.6962	703.557	-0.94131	0.91059	-0.0079641	-4.1441	-98.9022	1342.371	-2.4922	0.98242	0.49072	7.041	-198.7597	1233.124	-1.6082	0.65112	0.29883	NaN	NaN	NaN	NaN	NaN	NaN
2.974	-21.318	-53.0406	672.558	-0.98812	0.99438	0.029944	-0.6316	-133.1837	1384.258	-2.6274	0.99072	0.625	-47.7667	-209.343	1260.778	-1.6416	0.70996	0.35986	NaN	NaN	NaN	NaN	NaN	NaN
2.976	-25.1753	-55.1523	648.3169	-1.0084	1.0709	0.06783	26.072	-66.66	1375.985	-2.7165	0.99731	0.69605	-78.359	-248.96	1303.422	-1.6519	0.77393	0.38672	NaN	NaN	NaN	NaN	NaN	NaN
2.978	-25.865	-51.1151	625.038	-1.0111	1.1287	0.10262	-29.0625	-51.212	1354.1054	-2.793	1.0059	0.74072	-121.67	-242.859	1319.214	-1.6445	0.80469	0.39404	NaN	NaN	NaN	NaN	NaN	NaN
2.98	-46.556	-49.537	629.738	-0.97705	1.1616	0.1333	-9.655	-49.725	1368.6778	-2.8809	1.0137	0.80518	-99.367	-252.78	1324.32178	-1.5933	0.85889	0.36328	NaN	NaN	NaN	NaN	NaN	NaN
2.982	-23.744	-50.42	648.067	-0.90948	1.1623	0.13895	-16.515	14.567	1314.6	-2.9063	1.0059	0.82861	-81.68171	-217.573	1329.164	-1.5388	0.88696	0.31591	NaN	NaN	NaN	NaN	NaN	NaN
2.984	-8.708	-45.515	667.802	-0.83712	1.1284	0.11941	-59.224	-28.697	1303.285	-2.9487	1.0044	0.85547	-27.897	-201.16	1358.218	-1.4922	0.91211	0.2749	NaN	NaN	NaN	NaN	NaN	NaN
2.986	13.321	-47.937	675.715	-0.75419	1.0734	0.076261	-9.4309	-17.5264	1356.294	-2.9695	0.99048	0.87573	26.446	-159.434	1370.13	-1.4819	0.92236	0.23438	NaN	NaN	NaN	NaN	NaN	NaN
2.988	28.386	-75.795	717.9481	-0.67045	1.0007	0.012534	-65.676	3.047	1346.145	-2.9727	0.98633	0.88428	58.688	-145.2798	1407.3178	-1.5132	0.92529	0.23145	NaN	NaN	NaN	NaN	NaN	NaN
2.99	31.311	-97.338	747.128	-0.5874	0.93018	-0.063477	-58.728	-52.139	1392.4107	-2.9741	0.96729	0.8877	111.093	-101.835	1403.434	-1.6582	0.9248	0.27979	NaN	NaN	NaN	NaN	NaN	NaN
2.992	57.896	-116.014	763.056	-0.52699	0.85991	-0.13894	-14.4442	-13.8049	1413.698	-2.9766	0.95703	0.88965	162.832	-66.512	1410.6008	-1.8369	0.93799	0.35205	NaN	NaN	NaN	NaN	NaN	NaN
2.994	44.358	-122.0141	772.668	-0.4836	0.81072	-0.20693	-63.338	-11.8146	1393.467	-2.9531	0.9375	0.89111	186.174	-14.623	1422.3676	-2.0469	0.95898	0.44678	NaN	NaN	NaN	NaN	NaN	NaN
2.996	67.41356	-143.886	788.328	-0.47614	0.79229	-0.25144	-21.9514	-38.07937	1435.1554	-2.9229	0.92529	0.87939	157.927	12.531	1393.044	-2.332	1.001	0.56348	NaN	NaN	NaN	NaN	NaN	NaN
2.998	47.355	-164.63	802.629	-0.48776	0.79661	-0.27877	-18.2119	20.748	1415.405	-2.8921	0.92627	0.86523	129.8886	31.358	1402.365	-2.4805	1.0156	0.58984	NaN	NaN	NaN	NaN	NaN	NaN
3	81.1108	-170.926	794.433	-0.49951	0.82471	-0.29004	-65.873	-13.982	1419.7602	-2.8452	0.93018	0.82031	96.63	23.07	1419.471	-2.7124	1.0493	0.61523	NaN	NaN	NaN	NaN	NaN	NaN
3.002	62.225	-166.049	812.678	-0.50441	0.86889	-0.28085	-8.34182	-3.541	1444.149	-2.8081	0.92822	0.80469	53.591	-9.911	1455.837	-2.8006	1.052	0.61743	NaN	NaN	NaN	NaN	NaN	NaN
3.004	49.396	-130.084	848.342	-0.48039	0.91414	-0.27881	-28.157	32.64	1418.836	-2.7241	0.90674	0.75586	50.73	-38.823	1493.486	-2.8491	1.0415	0.60156	NaN	NaN	NaN	NaN	NaN	NaN
3.006	91.9275	-110.2182	889.5951	-0.44881	0.93884	-0.29996	-52.049	-19.9832	1436.57	-2.6684	0.88916	0.73681	81.3059	-77.599	1515.539	-2.8491	1.0063	0.55762	NaN	NaN	NaN	NaN	NaN	NaN
3.008	87.4371	-75.874	900.976	-0.40559	0.94412	-0.33116	-0.5184	42.586	1406.0379	-2.605	0.87158	0.71094	97.373	-88.267	1513.947	-2.8281	0.98535	0.53369	NaN	NaN	NaN	NaN	NaN	NaN
3.01	89.297	-67.124	923.1487	-0.3584	0.93359	-0.36621	-60.363	61.287	1341.189	-2.5269	0.84814	0.67969	121.346	-109.156	1538.116	-2.8003	0.94189	0.51172	NaN	NaN	NaN	NaN	NaN	NaN
3.012	94.2259	-52.715	939.1516	-0.3207	0.92819	-0.40392	-30.3883	57.527	1350.69	-2.4665	0.83716	0.65454	108.101	-93.103	1508.26	-2.8022	0.89551	0.49903	NaN	NaN	NaN	NaN	NaN	NaN
3.014	100.692	-47.676	979.2	-0.30417	0.9257	-0.43234	-11.86127	130.587	1322.46663	-2.3965	0.82617	0.62744	121.6554	-89.155	1523.216	-2.8203	0.85547	0.49902	NaN	NaN	NaN	NaN	NaN	NaN
3.016	72.972	-32.602	991.6336	-0.30314	0.92347	-0.4563	-42.496	97.78	1336.3373	-2.2827	0.81299	0.58203	77.146	-67.923	1541.757	-2.8491	0.81104	0.50098	NaN	NaN	NaN	NaN	NaN	NaN
3.018	55.087	-46.295	991.4849	-0.31668	0.93092	-0.46879	25.963	106.898	1355.97	-2.2168	0.7998	0.55615	42.881	-52.577	1545.717	-2.853	0.79346	0.49121	NaN	NaN	NaN	NaN	NaN	NaN
3.02	33.015	-78.528	994.5245	-0.34375	0.94824	-0.46387	-2.1333	122.872	1302.839	-2.0859	0.76953	0.50439	2.096	-1.23	1505.5066	-2.8535	0.77344	0.47998	NaN	NaN	NaN	NaN	NaN	NaN
3.022	30.495	-100.0952	998.6679	-0.37655	0.96803	-0.43523	-22.18582	54.5606	1338.92732	-1.9834	0.75	0.46728	-6.346	23.599	1487.0369	-2.8445	0.77222	0.46167	NaN	NaN	NaN	NaN	NaN	NaN
3.024	17.997	-115.9549	1013.3197	-0.41499	0.99083	-0.40245	28.3268	99.259	1315.6989	-1.8848	0.72559	0.43311	-43.232	77.277	1441.1299	-2.8159	0.77393	0.44629	NaN	NaN	NaN	NaN	NaN	NaN
3.026	10.434	-124.099	1027.863	-0.44225	1.0082	-0.36707	-23.8157	94.5717	1260.5758	-1.7573	0.6958	0.39453	-38.491	89.12119	1463.738	-2.7651	0.78369	0.42676	NaN	NaN	NaN	NaN	NaN	NaN
3.028	7.061	-134.687	1039.951	-0.45558	1.0176	-0.33977	0.711	63.8402	1273.916	-1.6973	0.67969	0.38086	-42.738	114.2425	1423.48	-2.7383	0.78711	0.41455	NaN	NaN	NaN	NaN	NaN	NaN
3.03	14.022	-132.333	1033.9703	-0.46143	1.0332	-0.32178	1.6654	88.782	1231.477	-1.5815	0.64893	0.34619	-15.991	95.8949	1422.75	-2.6914	0.79102	0.39014	NaN	NaN	NaN	NaN	NaN	NaN
3.032	22.869	-123.983	1043.7408	-0.4776	1.0379	-0.31286	-45.0859	38.486	1231.08	-1.5037	0.62036	0.33227	-12.932	91.1121	1416.534	-2.6382	0.79346	0.37451	NaN	NaN	NaN	NaN	NaN	NaN
3.034	25.278	-125.3194	1065.281	-0.48819	1.0417	-0.29516	-11.9394	58.194	1220.813	-1.4336	0.59326	0.32129	38.364	62.38	1424.578	-2.6094	0.79492	0.36768	NaN	NaN	NaN	NaN	NaN	NaN
3.036	28.883	-102.439	1070.73	-0.4984	1.0437	-0.27639	-31.1799	124.0631	1160.046	-1.3433	0.55615	0.30469	61.322	64.69	1386.4661	-2.541	0.79492	0.34863	NaN	NaN	NaN	NaN	NaN	NaN
3.038	37.559	-72.829	1076.597	-0.52193	1.0471	-0.27549	-52.8903	107.439	1155.298	-1.3042	0.53418	0.30273	108.0587	34.116	1394.409	-2.4785	0.7959	0.33618	NaN	NaN	NaN	NaN	NaN	NaN
3.04	37.283	-64.156	1069.7551	-0.55518	1.0601	-0.271	5.683	164.5032	1133.4366	-1.2329	0.48779	0.29346	107.374	55.156	1369.707	-2.4185	0.79346	0.32422	NaN	NaN	NaN	NaN	NaN	NaN
3.042	58.209	-67.141	1074.161	-0.61186	1.0767	-0.26583	-32.839	166.282	1083.4559	-1.1829	0.45435	0.29443	98.699	20.9748	1407.2997	-2.3237	0.79248	0.31445	NaN	NaN	NaN	NaN	NaN	NaN
3.044	39.974	-69.946	1084.3328	-0.67726	1.1058	-0.25081	-1.993	145.059	1072.1326	-1.1348	0.42285	0.30127	79.0463	39.113	1388.22548	-2.2808	0.78955	0.30811	NaN	NaN	NaN	NaN	NaN	NaN
3.046	73.665	-58.528	1081.359	-0.75189	1.1515	-0.22541	17.68	203.417	1046.307	-1.0762	0.38086	0.30811	71.65774	26.739	1384.654	-2.1929	0.7876	0.29395	NaN	NaN	NaN	NaN	NaN	NaN
3.048	70.205	-61.968	1083.56	-0.83629	1.2125	-0.19757	-17.243	159.416	1039.548	-1.0425	0.3623	0.30908	100.332	94.688	1356.887	-2.1287	0.78735	0.28564	NaN	NaN	NaN	NaN	NaN	NaN
3.05	94.349	-63.5795	1094.957	-0.91846	1.2886	-0.16553	38.045	160.495	1002.4746	-0.97852	0.32227	0.30908	93.604	101.1	1337.291	-2.0625	0.78125	0.26855	NaN	NaN	NaN	NaN	NaN	NaN
3.052	104.6223	-74.796	1113.3593	-0.98565	1.3765	-0.13007	1.238	175.974	914.501	-0.92431	0.29248	0.31299	97.0025	169.881	1278.315	-1.9668	0.76563	0.25146	NaN	NaN	NaN	NaN	NaN	NaN
3.054	107.4237	-73.0885	1139.8074	-1.0375	1.4708	-0.090905	-16.455	112.74	894.858	-0.86572	0.26074	0.31836	90.7423	178.889	1218.987	-1.9141	0.75781	0.24268	NaN	NaN	NaN	NaN	NaN	NaN
3.056	131.0282	-78.9354	1160.9876	-1.08	1.5618	-0.04794	33.206	141.944	862.688	-0.7915	0.2207	0.30469	86.5061	215.134	1159.496	-1.8008	0.73633	0.22412	NaN	NaN	NaN	NaN	NaN	NaN
3.058	109.851	-76.7539	1175.2501	-1.1009	1.6429	-0.01445	-13.09	115.609	837.2057	-0.74463	0.1958	0.30859	74.109	190.732	1161.554	-1.7168	0.71582	0.20434	NaN	NaN	NaN	NaN	NaN	NaN
3.06	132.95	-72.0702	1191.8862	-1.1304	1.7095	-0.0019531	4.675	93.266	827.001	-0.6543	0.14795	0.30273	82.5741	197.009	1139.482	-1.6304	0.69385	0.18262	NaN	NaN	NaN	NaN	NaN	NaN
3.062	111.8403	-73.4575	1193.8375	-1.1405	1.761	0.010156	37.831	134.674191	783.757	-0.58496	0.11109	0.29907	86.045	168.416	1121.981	-1.5156	0.66797	0.15674	NaN	NaN	NaN	NaN	NaN	NaN
3.064	109.8999	-81.052	1200.6156	-1.1504	1.8039	0.017872	29.097	109.3956	777.542	-0.52344	0.076172	0.28369	82.85473	201.277	1107.5864	-1.459	0.64844	0.14111	NaN	NaN	NaN	NaN	NaN	NaN
3.066	96.1145	-74.007	1198.7454	-1.1535	1.8305	0.0049816	65.8994	136.8477	749.748	-0.44482	0.035156	0.26611	56.099	168.655	1071.0849	-1.3403	0.62256	0.12451	NaN	NaN	NaN	NaN	NaN	NaN
3.068	104.13344	-55.70862	1197.1857	-1.1422	1.8508	-0.011425	59.6417	179.618	679.4259	-0.40186	0.013184	0.25537	12.493	189.246	1033.6481	-1.2585	0.60376	0.10473	NaN	NaN	NaN	NaN	NaN	NaN
3.07	88.064	-47.9514	1192.9751	-1.1328	1.8535	-0.033691	52.887	151.6712	669.681	-0.32422	-0.026367	0.23242	-48.05613	166.299	990.843	-1.1851	0.5874	0.09375	NaN	NaN	NaN	NaN	NaN	NaN
3.072	59.734	-48.1884	1173.09535	-1.1126	1.8421	-0.057715	77.7457	188.617	635.376	-0.27148	-0.050048	0.21387	-42.9423	159.778	961.9478	-1.0801	0.55469	0.080566	NaN	NaN	NaN	NaN	NaN	NaN
3.074	69.126	-41.917	1171.6231	-1.0992	1.8289	-0.07295	16.163	176.768	581.4848	-0.22168	-0.077637	0.19434	-81.401	139.091	948.104	-1.0293	0.53711	0.077148	NaN	NaN	NaN	NaN	NaN	NaN
3.076	55.257	-22.9632	1159.9056	-1.0918	1.8113	-0.08584	53.762	153.032	557.433	-0.1543	-0.11182	0.1665	-88.17	143.997	935.174	-0.9292	0.51025	0.069824	NaN	NaN	NaN	NaN	NaN	NaN
3.078	42.011	-9.893	1168.0809	-1.0902	1.7989	-0.087696	55.725	188.61	497.898	-0.12549	-0.12891	0.1582	-100.138	125.229	884.615	-0.85791	0.4834	0.071045	NaN	NaN	NaN	NaN	NaN	NaN
3.08	43.863	-26.909	1180.93758	-1.0898	1.7832	-0.086426	23.85	158.731	470.9934	-0.067383	-0.15234	0.12549	-76.2534	146.688	840.12	-0.79443	0.45557	0.064941	NaN	NaN	NaN	NaN	NaN	NaN
3.082	34.059	-30.198	1173.17408	-1.1047	1.7789	-0.075782	45.35	163.5902	441.047	-0.029053	-0.17603	0.10718	-76.14	145.104	797.1443	-0.70166	0.41992	0.062988	NaN	NaN	NaN	NaN	NaN	NaN
3.084	38.952	-33.337	1167.3546	-1.119	1.7715	-0.066894	19.393	188.212	379.543	0.0092773	-0.19189	0.083496	-28.8464	183.259	744.9541	-0.66064	0.40674	0.054199	NaN	NaN	NaN	NaN	NaN	NaN
3.086	27.026	-24.894	1170.3189	-1.1174	1.7496	-0.061816	28.357	142.6	390.422	0.046387	-0.21533	0.058594	-11.319	201.683	725.965	-0.57422	0.37012	0.054199	NaN	NaN	NaN	NaN	NaN	NaN
3.088	40.27	-22.555	1186.739	-1.1039	1.7222	-0.068164	39.255	161.519	369.715	0.064453	-0.22168	0.047363	20.2548	228.997	675.514	-0.51049	0.34643	0.055664	NaN	NaN	NaN	NaN	NaN	NaN
3.09	36.185	-27.63	1182.871	-1.0957	1.6797	-0.083984	-23.855	145.616	350.67	0.092773	-0.23828	0.032715	-2.756	223.656	637.139	-0.45117	0.31641	0.053711	NaN	NaN	NaN	NaN	NaN	NaN
3.092	50.423	-33.8914	1165.6701	-1.079	1.6431	-0.088574	26.599	123.534	359.4622	0.11036	-0.25367	0.021485	8.1481	221.804	574.0429	-0.37012	0.2832	0.054199	NaN	NaN	NaN	NaN	NaN	NaN
3.094	30.981	-43.173	1154.28841	-1.0662	1.618	-0.090723	34.067	165.019	309.528	0.12305	-0.26416	0.016602	-29.9288	219.511	525.836	-0.33545	0.26611	0.056641	NaN	NaN	NaN	NaN	NaN	NaN
3.096	55.864	-43.579	1143.4163	-1.0541	1.5996	-0.087598	2.456	122.041	324.561	0.13477	-0.28418	0.0039063	-5.864	206.178	505.035	-0.2627	0.22754	0.05957	NaN	NaN	NaN	NaN	NaN	NaN
3.098	63.774	-18.02553	1131.1224	-1.0463	1.5853	-0.084571	29.864	110.911	302.328	0.14111	-0.28857	0	-8.678	203.012	489.193	-0.21069	0.19751	0.060546	NaN	NaN	NaN	NaN	NaN	NaN
3.1	63.923	5.268	1112.599	-1.0352	1.5742	-0.081543	-4.403	121.045	262.1368	0.15283	-0.29834	-0.012207	12.1993	174.915	473.19	-0.15869	0.16699	0.057617	NaN	NaN	NaN	NaN	NaN	NaN
3.102	84.515	8.4456	1101.322	-1.0228	1.5647	-0.08252	15.312	76.38	252.579	0.15747	-0.30201	-0.016114	49.668	171.209	429.911	-0.093262	0.13428	0.049316	NaN	NaN	NaN	NaN	NaN	NaN
3.104	82.633	23.7966	1106.5071	-1.0128	1.5501	-0.090723	31.318	116.279	202.925	0.15576	-0.30859	-0.029297	64.19	132.033	384.6784	-0.064941	0.11426	0.04834	NaN	NaN	NaN	NaN	NaN	NaN
3.106	111.0645	28.861	1105.589	-1.007	1.5419	-0.097364	-35.12	101.779	184.65	0.16406	-0.31104	-0.029785	66.7085	129.366	353.958	-0.0053711	0.08252	0.041016	NaN	NaN	NaN	NaN	NaN	NaN
3.108	97.6981	52.234	1109.997	-0.99502	1.5339	-0.10625	7.575	96.925	179.5955	0.15967	-0.31445	-0.034668	76.6529	114.4462	333.572	0.037353	0.055176	0.026856	NaN	NaN	NaN	NaN	NaN	NaN
3.11	124.081	47.728	1112.76857	-0.97949	1.5254	-0.11816	26.684	121.2285	146.2867	0.15234	-0.31836	-0.037598	84.7348	139.224	308.671	0.075195	0.02832	0.019531	NaN	NaN	NaN	NaN	NaN	NaN
3.112	117.3282	41.04	1107.143	-0.95411	1.5172	-0.13183	11.103	85.768	150.8332	0.14673	-0.32178	-0.041504	82.013	118.4527	308.946	0.11523	-0.0043945	0.019043	NaN	NaN	NaN	NaN	NaN	NaN
3.114	105.00476	41.381	1066.0531	-0.92412	1.5075	-0.14804	54.843	91.828	149.018	0.13672	-0.32617	-0.046387	51.70853	138.1871	266.0558	0.13477	-0.012695	0.017578	NaN	NaN	NaN	NaN	NaN	NaN
3.116	91.234	23.5701	1063.7588	-0.8999	1.506	-0.16797	8.355	98.387	125.6649	0.13672	-0.33105	-0.050293	16.8577	118.3866	276.138	0.16113	-0.038086	0.010254	NaN	NaN	NaN	NaN	NaN	NaN
3.118	82.6429	23.7502	1040.209	-0.87607	1.5067	-0.1876	24.9	80.977	141.1432	0.12744	-0.33252	-0.057129	-25.6119	145.0887	227.4559	0.17603	-0.056152	0.016114	NaN	NaN	NaN	NaN	NaN	NaN
3.12	83.5701	10.234	1049.7465	-0.84961	1.5078	-0.19531	63.619	115.118	72.749	0.11865	-0.33154	-0.066406	-61.731	117.047	192.464	0.18506	-0.068359	0.022949	NaN	NaN	NaN	NaN	NaN	NaN
3.122	71.488	14.386	1037.5105	-0.83242	1.5033	-0.20244	22.538	81.515	48.271	0.11402	-0.33276	-0.071778	-59.559	154.8451	158.769	0.18359	-0.080078	0.025879	NaN	NaN	NaN	NaN	NaN	NaN
3.124	67.92	18.5723	1039.7995	-0.8086	1.5008	-0.20791	36.864	57.2054	77.637	0.11328	-0.33252	-0.072754	-59.346	114.5063	131.222	0.17725	-0.085449	0.030762	NaN	NaN	NaN	NaN	NaN	NaN
3.126	51.814	23.8703	1035.993	-0.79375	1.4867	-0.21299	48.9602	45.1803	50.2641	0.10645	-0.33301	-0.078125	-24.383	135.234	90.805	0.15869	-0.095215	0.041504	NaN	NaN	NaN	NaN	NaN	NaN
3.128	43.097	41.4438	1029.4	-0.77597	1.4754	-0.21308	13.457	4.509	76.187	0.104	-0.32959	-0.081543	-33.963	90.284	81.606	0.14185	-0.096191	0.057617	NaN	NaN	NaN	NaN	NaN	NaN
3.13	37.084	63.741	1008.43416	-0.76514	1.4585	-0.21094	30.1134	13.398	54.877	0.090332	-0.32227	-0.086914	-33.419	110.896	55.345	0.12109	-0.098145	0.074219	NaN	NaN	NaN	NaN	NaN	NaN
3.132	28.526	74.609	1019.308	-0.74815	1.4427	-0.2126	13.728	13.9477	40.0503	0.071289	-0.31739	-0.077881	-51.4064	56.975	71.567	0.091797	-0.094727	0.095703	NaN	NaN	NaN	NaN	NaN	NaN
3.134	28.618	72.646	997.073	-0.74238	1.4254	-0.21289	5.738	0.939500000000001	50.1315	0.047363	-0.30908	-0.070801	-29.213	92.173	76.8895	0.07666	-0.092285	0.11279	NaN	NaN	NaN	NaN	NaN	NaN
3.136	15.89	81.562	970.2305	-0.7291	1.4129	-0.21328	33.222	26.0773	10.252	0.012207	-0.29785	-0.057129	-33.068	54.179	82.443	0.04541	-0.086426	0.13281	NaN	NaN	NaN	NaN	NaN	NaN
3.138	19.694	103.137	945.0968	-0.72012	1.3963	-0.20947	-9.868	14.3383	-9.419	-0.0039063	-0.28662	-0.048828	-22.381	79.042	46.4305	0.017334	-0.083252	0.15674	NaN	NaN	NaN	NaN	NaN	NaN
3.14	-7.608	103.224	925.8649	-0.70801	1.3789	-0.20801	30.072	10.4151	4.82	-0.036133	-0.27539	-0.03418	-17.169	8.69872	63.851	-0.00048828	-0.075195	0.17773	NaN	NaN	NaN	NaN	NaN	NaN
3.142	21.67	97.886	924.989	-0.6961	1.3695	-0.20879	19.3775	19.3227	31.961	-0.066895	-0.26172	-0.015625	-26.258	24.938	36.128	-0.032227	-0.064453	0.20313	NaN	NaN	NaN	NaN	NaN	NaN
3.144	0.0560000000000045	82.527	891.9677	-0.68418	1.3543	-0.21045	2.171	-0.904999999999998	25.331	-0.077637	-0.25977	-0.0053711	-31.0902	-13.108	46.136	-0.04541	-0.056641	0.21582	NaN	NaN	NaN	NaN	NaN	NaN
3.146	25.103	75.7279	871.1233	-0.66934	1.3355	-0.21162	42.5628	9.709	3.9812	-0.09375	-0.25098	0.010254	10.943	24.6978	16.8293	-0.062012	-0.055664	0.2373	NaN	NaN	NaN	NaN	NaN	NaN
3.148	42.795	68.2168	883.822	-0.65449	1.3129	-0.20977	-10.712	21.37375	-24.5082	-0.10816	-0.24682	0.02002	26.962	-13.182	17.8135	-0.075928	-0.04956	0.25171	NaN	NaN	NaN	NaN	NaN	NaN
3.15	44.419	62.16388	878.847	-0.63818	1.2876	-0.2124	-5.549	11.6774	2.4329	-0.12012	-0.2417	0.03125	67.854	16.6827	27.5755	-0.089355	-0.052734	0.25928	NaN	NaN	NaN	NaN	NaN	NaN
3.152	62.202	66.1592	856.791	-0.62119	1.2706	-0.20459	0.100000000000001	33.1095	-7.6555	-0.13086	-0.23438	0.043457	74.2803	-16.8793	31.4696	-0.098633	-0.052734	0.27002	NaN	NaN	NaN	NaN	NaN	NaN
3.154	58.334	68.7832	832.41368	-0.60361	1.2523	-0.20107	-20.471	19.6736	-12.963	-0.14404	-0.23096	0.054199	91.98173	6.476	6.1741	-0.10352	-0.059082	0.27295	NaN	NaN	NaN	NaN	NaN	NaN
3.156	69.234337	70.66574	811.588	-0.58799	1.2311	-0.19912	27.784	15.4616	-1.827	-0.15869	-0.22168	0.065918	81.949	-2.188	12.4738	-0.10986	-0.066406	0.27637	NaN	NaN	NaN	NaN	NaN	NaN
3.158	52.801	67.79306	811.883	-0.57031	1.2086	-0.19541	7.256	12.7887	8.6939	-0.17456	-0.21826	0.078369	101.463	23.3937	11.303	-0.11914	-0.07666	0.28516	NaN	NaN	NaN	NaN	NaN	NaN
3.16	69.49134	70.107	791.973	-0.55322	1.186	-0.18896	-14.876	-24.449	36.538	-0.18652	-0.21533	0.083496	89.704	7.642	27.182	-0.12744	-0.081055	0.2998	NaN	NaN	NaN	NaN	NaN	NaN
3.162	76.47046	75.40342	775.314	-0.52959	1.1627	-0.17959	34.549	-2.878	12.8323	-0.20654	-0.21191	0.08252	91.88808	33.53	8.5387	-0.13672	-0.089355	0.32227	NaN	NaN	NaN	NaN	NaN	NaN
3.164	68.0334	74.3475	752.318	-0.51533	1.131	-0.18213	21.391	25.3735	-4.3544	-0.20996	-0.2124	0.085449	61.9295	26.193	9.0211	-0.14599	-0.094727	0.33349	NaN	NaN	NaN	NaN	NaN	NaN
3.166	60.453	75.6458	714.5875	-0.49737	1.1005	-0.17979	38.819	7.072	21.4044	-0.21973	-0.20801	0.09082	46.37	30.088	7.1986	-0.14648	-0.098633	0.34961	NaN	NaN	NaN	NaN	NaN	NaN
3.168	54.677	96.5851	692.839	-0.48398	1.0725	-0.17627	53.76607	20.674	22.462	-0.21973	-0.20191	0.09082	-0.743000000000002	0.408999999999999	24.5399	-0.14014	-0.10547	0.35449	NaN	NaN	NaN	NaN	NaN	NaN
3.17	80.6217	103.2391	696.82305	-0.4707	1.0371	-0.17188	12.172	-2.39894	9.0992	-0.21729	-0.20117	0.092285	24.765	-7.3172	34.9397	-0.13525	-0.10986	0.35352	NaN	NaN	NaN	NaN	NaN	NaN
3.172	34.993	101.2633	675.27773	-0.45459	1.0118	-0.16055	54.3684	14.1997	0.142000000000003	-0.2124	-0.19922	0.095703	-0.731999999999999	-6.124	24.5908	-0.11572	-0.11719	0.35352	NaN	NaN	NaN	NaN	NaN	NaN
3.174	42.5751	87.47077	656.42935	-0.44345	0.9833	-0.15498	35.0265	36.16803	-5.796	-0.20996	-0.19873	0.091309	16.903	-19.682	9.0749	-0.090332	-0.12207	0.34204	NaN	NaN	NaN	NaN	NaN	NaN
3.176	36.058	90.8336	629.8444	-0.4333	0.95752	-0.15342	-12.724	17.9554	23.0581	-0.19287	-0.1958	0.091309	13.907	-16.2949	8.944	-0.072266	-0.12842	0.3291	NaN	NaN	NaN	NaN	NaN	NaN
3.178	21.091	99.337	622.0884	-0.42608	0.93223	-0.14512	40.705	37.63	27.067	-0.17358	-0.20215	0.083252	5.108	-19.309	0.0259999999999998	-0.042969	-0.1416	0.31592	NaN	NaN	NaN	NaN	NaN	NaN
3.18	4.251	97.417	616.017	-0.41309	0.9043	-0.13867	24.783	22.5913	-10.7365	-0.14941	-0.2041	0.067383	-34.05	5.1643	-8.60100000000001	-0.026367	-0.14795	0.31006	NaN	NaN	NaN	NaN	NaN	NaN
3.182	-12.416	86.2199	581.7812	-0.40078	0.88633	-0.1295	39.121	7.4665	2.4487	-0.10791	-0.20752	0.047852	-17.182	16.254	9.266	0.0068359	-0.1582	0.29395	NaN	NaN	NaN	NaN	NaN	NaN
3.184	12.553	89.6102	562.0348	-0.38633	0.85821	-0.12149	51.0169	23.5876	21.6641	-0.081543	-0.20752	0.034668	-29.533	33.7396	18.7127	0.032715	-0.17676	0.28393	NaN	NaN	NaN	NaN	NaN	NaN
3.186	-28.032	83.0977	551.6037	-0.37422	0.83203	-0.11602	15.416	5.6658	17.59378	-0.032227	-0.21045	0.0058594	-27.692	10.774	44.514	0.054199	-0.19385	0.27393	NaN	NaN	NaN	NaN	NaN	NaN
3.188	-19.64	75.9271	542.7845	-0.36806	0.80547	-0.11855	37.311	20.6566	25.9374	-0.0012208	-0.21386	-0.012695	-32.155	17.8384	22.333	0.084473	-0.20947	0.25098	NaN	NaN	NaN	NaN	NaN	NaN
3.19	-20.475	78.2732	533.088	-0.35449	0.7793	-0.11328	19.116	29.3751	-23.6309	0.030762	-0.21533	-0.035156	-24.547	-1.336	16.7044	0.1001	-0.2207	0.24707	NaN	NaN	NaN	NaN	NaN	NaN
3.192	7.337	100.262	509.7011	-0.34111	0.7583	-0.10518	1.564	-3.8839	8.436	0.063965	-0.22119	-0.056641	-47.975	38.7275	-10.415	0.12939	-0.23633	0.22363	NaN	NaN	NaN	NaN	NaN	NaN
3.194	-10.166	90.4632	492.5835	-0.32227	0.73476	-0.096094	24.002	9.2227	30.248	0.072754	-0.22021	-0.070313	1.711	13.8454	9.655	0.15429	-0.24609	0.21021	NaN	NaN	NaN	NaN	NaN	NaN
3.196	-27.194	84.5887	471.0762	-0.30312	0.70703	-0.091407	-12.045	3.92014	24.078	0.091309	-0.21533	-0.091309	2.126	33.478	-14.267	0.17969	-0.25293	0.18701	NaN	NaN	NaN	NaN	NaN	NaN
3.198	-11.731	87.8525	448.6608	-0.27949	0.67949	-0.084375	-4.276	-8.2276	34.884	0.097414	-0.20996	-0.10376	37.096	9.6922	-0.5376	0.20752	-0.26025	0.16211	NaN	NaN	NaN	NaN	NaN	NaN
3.2	7.955	112.697	434.45859	-0.26074	0.65039	-0.087402	11.901	16.0263	12.3677	0.10498	-0.20361	-0.11084	67.5805	35.3568	-0.9004	0.22314	-0.25928	0.14502	NaN	NaN	NaN	NaN	NaN	NaN
3.202	26.301	98.2438	427.3175	-0.24131	0.62432	-0.084277	-36.59	-5.3965	12.6967	0.09668	-0.19336	-0.12695	74.9353	-5.54	29.799	0.25	-0.25879	0.11475	NaN	NaN	NaN	NaN	NaN	NaN
3.204	16.392	95.21288	411.0133	-0.21709	0.59873	-0.085156	17.328	13.2836	20.89863	0.1001	-0.18506	-0.13232	49.547	14.88	35.892	0.26026	-0.24927	0.093017	NaN	NaN	NaN	NaN	NaN	NaN
3.206	42.3759	96.6046	386.158	-0.20029	0.57647	-0.09336	32.265	28.735	-11.9171	0.094238	-0.16797	-0.1416	62.8595	-17.546	43.203	0.27344	-0.24219	0.072266	NaN	NaN	NaN	NaN	NaN	NaN
3.208	39.11	111.896	369.1977	-0.18076	0.55312	-0.093945	-5.23	6.45774	-4.124	0.088379	-0.15283	-0.14892	65.6554	14.0057	22.438	0.27881	-0.21729	0.046387	NaN	NaN	NaN	NaN	NaN	NaN
3.21	33.9893	102.295	366.843138	-0.16211	0.53857	-0.088379	32.1593	22.3813	24.4101	0.08252	-0.14111	-0.1543	65.363	-22.7103	21.63919	0.27979	-0.20361	0.044922	NaN	NaN	NaN	NaN	NaN	NaN
3.212	44.7435	82.4274	355.6693	-0.14258	0.51933	-0.0875	4.954	8.2277	1.9649	0.070313	-0.12744	-0.16602	91.035	14.1346	25.8199	0.27197	-0.17236	0.030273	NaN	NaN	NaN	NaN	NaN	NaN
3.214	51.62681	81.7316	336.3391	-0.12637	0.50019	-0.081739	9.069	-7.784	25.4602	0.060059	-0.12256	-0.16602	69.7666	-7.261	19.8832	0.25732	-0.14551	0.031006	NaN	NaN	NaN	NaN	NaN	NaN
3.216	62.5217	82.3808	326.66498	-0.10684	0.48379	-0.07666	51.385	23.6539	16.9354	0.034668	-0.099609	-0.17041	23.007	35.6716	8.7662	0.24561	-0.11816	0.030273	NaN	NaN	NaN	NaN	NaN	NaN
3.218	33.954	78.4043	302.5832	-0.08916	0.46699	-0.071387	9.718	-4.317	20.4613	0.012939	-0.081543	-0.17236	38.039	2.363	28.435	0.21729	-0.075195	0.03125	NaN	NaN	NaN	NaN	NaN	NaN
3.22	63.3144	87.6753	291	-0.068359	0.44336	-0.070801	29.929	-12.4347	49.259	-0.01709	-0.068359	-0.16943	55.62	26.669	14.094371	0.19727	-0.05127	0.03125	NaN	NaN	NaN	NaN	NaN	NaN
3.222	38.431	86.868	291.8031	-0.049121	0.42676	-0.068164	22.408	-4.937	19.336	-0.063477	-0.037598	-0.16064	47.0413	-18.0467	28.9415	0.16846	-0.015625	0.03418	NaN	NaN	NaN	NaN	NaN	NaN
3.224	43.9591	94.2214	280.4455	-0.028321	0.40762	-0.064648	4.45	-31.0564	39.435	-0.086914	-0.022949	-0.15283	54.15	15.2945	12.299	0.14722	0.015381	0.038574	NaN	NaN	NaN	NaN	NaN	NaN
3.226	14.122	72.5021	272.6601	-0.010352	0.3916	-0.066992	39.2347	-22.45776	60.4564	-0.14551	0.0053711	-0.13721	23.06	-6.6135	27.1285	0.13135	0.041016	0.038574	NaN	NaN	NaN	NaN	NaN	NaN
3.228	11.769	80.116	263.321	0.013184	0.36943	-0.066895	37.976	-37.2487	75.6763	-0.19287	0.020019	-0.12988	-4.685	17.4356	8.438	0.10254	0.07373	0.034668	NaN	NaN	NaN	NaN	NaN	NaN
3.23	33.553	69.503	250.1026	0.037109	0.34814	-0.064941	39.04	-47.946644	97.1236	-0.25049	0.041992	-0.11816	-16.499	-3.727	21.547	0.089844	0.091797	0.030273	NaN	NaN	NaN	NaN	NaN	NaN
3.232	2.807	81.767	242.2721	0.056445	0.32705	-0.06836	59.212	0.716000000000001	96.7259	-0.33203	0.080078	-0.10156	-22.886	25.134	-10.212	0.066895	0.12061	0.027832	NaN	NaN	NaN	NaN	NaN	NaN
3.234	-3.481	79.987	211.6103	0.081347	0.30684	-0.078125	14.589	2.254	132.8012	-0.375	0.09668	-0.085938	-32.069	3.416	-3.907	0.048339	0.14405	0.028321	NaN	NaN	NaN	NaN	NaN	NaN
3.236	-10.928	87.063	192.8368	0.10127	0.28379	-0.084766	41.171	27.5645	202.99	-0.47266	0.13721	-0.060547	-12.127	21.15796	2.8188	0.026367	0.1626	0.02832	NaN	NaN	NaN	NaN	NaN	NaN
3.238	13.948	88.296	181.0424	0.11758	0.26611	-0.090723	38.1742	59.548	222.9566	-0.56031	0.16748	-0.033447	-49.0351	-7.188	15.6321	-0.0087891	0.1875	0.031738	NaN	NaN	NaN	NaN	NaN	NaN
3.24	-27.325	84.435	189.8557	0.13428	0.24658	-0.10059	11.672	52.3445	256.646	-0.65576	0.19971	-0.0063477	-36.792	2.3926	45.9695	-0.028809	0.20117	0.030273	NaN	NaN	NaN	NaN	NaN	NaN
3.242	-34.0693	76.29	201.9519	0.15205	0.23193	-0.10127	40.92	91.124	310.4441	-0.80127	0.24414	0.043945	-36.5116	-31.5898	49.765	-0.086426	0.23193	0.027344	NaN	NaN	NaN	NaN	NaN	NaN
3.244	-1.101	74.116	190.1365	0.1623	0.21309	-0.10996	-10.057	91.843	359.6529	-0.88232	0.2666	0.068359	4.672	-48.404	62.798	-0.13989	0.25757	0.025635	NaN	NaN	NaN	NaN	NaN	NaN
3.246	-7.459	77.61	171.8915	0.16973	0.19551	-0.11895	16.332	58.098	471.3015	-1.062	0.32373	0.14063	-17.733	-42.5553	83.774	-0.19336	0.28711	0.029785	NaN	NaN	NaN	NaN	NaN	NaN
3.248	-18.621	60.164	166.662	0.16944	0.18887	-0.12617	40.992	69.305	516.307	-1.2043	0.36694	0.20776	43.783	11.645	135.963	-0.26611	0.32861	0.044434	NaN	NaN	NaN	NaN	NaN	NaN
3.25	-6.046	56.151	146.248	0.16895	0.17773	-0.13086	8.217	6.144	583.202	-1.3574	0.41211	0.28369	14.571	30.7456	180.622	-0.31201	0.34668	0.049805	NaN	NaN	NaN	NaN	NaN	NaN
3.252	24.151	61.408	147.7992	0.15937	0.18027	-0.1375	47.694	-32.69	685.6349	-1.5562	0.4751	0.38818	27.4783	57.1576	247.668	-0.40479	0.3877	0.060059	NaN	NaN	NaN	NaN	NaN	NaN
3.254	20.816	68.064	131.0149	0.15244	0.17812	-0.13906	36.44	-55.103	745.3535	-1.6616	0.49951	0.44824	22.6227	37.2873	306.87	-0.47803	0.417	0.077881	NaN	NaN	NaN	NaN	NaN	NaN
3.256	16.866	58.1763	122.0736	0.14072	0.18359	-0.13789	-7.314	-105.818	826.291	-1.8491	0.52686	0.55371	19.7753	37.154	385.86	-0.55664	0.44336	0.093262	NaN	NaN	NaN	NaN	NaN	NaN
3.258	18.974	46.2759	134.199	0.12402	0.19189	-0.13525	30.7761	-95.986	865.852	-1.9714	0.53931	0.61059	-1.933	52.1898	486.782	-0.66943	0.48291	0.10059	NaN	NaN	NaN	NaN	NaN	NaN
3.26	42.3536	51.0638	135.1939	0.11377	0.20703	-0.13379	0.462	-93.1693	895.3078	-2.0713	0.54297	0.64307	30.24215	68.826	595.242	-0.74023	0.49902	0.11084	NaN	NaN	NaN	NaN	NaN	NaN
3.262	53.538	48.725	129.017	0.097363	0.21387	-0.1295	-15.5149	-109.3109	935.197	-2.1558	0.54541	0.63477	17.325	82.384	663.164	-0.86865	0.53174	0.1416	NaN	NaN	NaN	NaN	NaN	NaN
3.264	45.8028	48.2921	115.505	0.08252	0.22763	-0.11866	6.843	-88.326	931.744	-2.168	0.54785	0.61865	13.27	56.772	722.871	-0.97243	0.55493	0.16675	NaN	NaN	NaN	NaN	NaN	NaN
3.266	54.7365	43.8864	98.6728	0.075097	0.24365	-0.11006	-37.66524	-105.811	921.943	-2.1309	0.54297	0.58447	1.577	37.7465	788.118	-1.0776	0.57861	0.19727	NaN	NaN	NaN	NaN	NaN	NaN
3.268	51.399	49.5197	91.4681	0.068652	0.25674	-0.10351	-9.131883	-99.951	930.973	-2.0781	0.53296	0.54053	37.426	-27.511	896.1376	-1.2207	0.60547	0.25146	NaN	NaN	NaN	NaN	NaN	NaN
3.27	57.4844	42.90765	91.6801	0.065918	0.26709	-0.1001	-6.4712	-84.411	904.431	-2.0103	0.51807	0.49121	19.578	-55.658	970.0904	-1.2915	0.62158	0.28516	NaN	NaN	NaN	NaN	NaN	NaN
3.272	35.505	38.1868	82.03601	0.063184	0.2751	-0.093066	-67.045	-113.511	888.26	-1.8965	0.48828	0.41064	46.908	-119.075	1025.986	-1.4248	0.64844	0.35889	NaN	NaN	NaN	NaN	NaN	NaN
3.274	70.635288	40.3355	86.751	0.06377	0.2793	-0.089746	-20.871	-90.932	862.631	-1.7625	0.45679	0.34912	33.123	-145.263	1063.74	-1.5198	0.65551	0.42553	NaN	NaN	NaN	NaN	NaN	NaN
3.276	69.42509	37.795	78.4039	0.063379	0.27969	-0.091699	-28.423	-66.923	842.311	-1.6348	0.41895	0.27295	40.221	-205.209	1097.158	-1.6094	0.66406	0.50537	NaN	NaN	NaN	NaN	NaN	NaN
3.278	19.737	31.241	81.93	0.063672	0.28271	-0.091699	-11.196	-74.868	883.136	-1.5078	0.39355	0.17871	26.044	-226.3226	1093.054	-1.7266	0.66602	0.59229	NaN	NaN	NaN	NaN	NaN	NaN
3.28	30.603	24.88212	75.1562	0.06543	0.28027	-0.089355	32.366	-40.018	923.628	-1.4678	0.39844	0.14502	58.356	-248.02	1064.886	-1.7827	0.6626	0.64258	NaN	NaN	NaN	NaN	NaN	NaN
3.282	22.476	29.7285	63.1761	0.072266	0.28066	-0.086718	16.2	-59.199	927.642	-1.4175	0.4585	0.11426	22.637	-199.523	1019.984	-1.8901	0.6582	0.70703	NaN	NaN	NaN	NaN	NaN	NaN
3.284	38.757	27.9186	58.8111	0.077637	0.27422	-0.08584	51.3007	-94.022	1017.4595	-1.3936	0.5254	0.11206	40.004	-181.81	1003.206	-1.9502	0.64942	0.74292	NaN	NaN	NaN	NaN	NaN	NaN
3.286	-20.434	17.0243	62.5668	0.084277	0.27657	-0.079199	32.44	-104.765	1059.257	-1.3706	0.5874	0.10938	45.486	-140.038	951.077	-1.9985	0.65479	0.75586	NaN	NaN	NaN	NaN	NaN	NaN
3.288	-2.345	18.5253	47.8802	0.09082	0.26757	-0.077246	-16.829	-156.9897	1104.796	-1.3296	0.63818	0.11475	16.614	-146.629	913.0984	-2.0249	0.66455	0.76074	NaN	NaN	NaN	NaN	NaN	NaN
3.29	13.914	26.797	43.1323	0.094238	0.26123	-0.078613	17.857	-174.246	1148.164	-1.3203	0.66016	0.11377	-7.072	-116.536	896.35	-2.0327	0.68994	0.75977	NaN	NaN	NaN	NaN	NaN	NaN
3.292	1.609	25.359	45.1283	0.094238	0.25576	-0.077344	-22.4865	-178.692	1131.725	-1.3081	0.70264	0.11523	-4.66	-105.7	905.664	-2.0508	0.76855	0.73779	NaN	NaN	NaN	NaN	NaN	NaN
3.294	-4.856	6.9179	54.015	0.089258	0.25049	-0.071973	-58.4431	-224.888	1164.872	-1.3113	0.73071	0.11524	22.441	-65.183	954.684	-2.0444	0.83838	0.70313	NaN	NaN	NaN	NaN	NaN	NaN
3.296	4.742	-0.8831	49.0753	0.091602	0.2462	-0.07002	-15.682	-212.711	1178.2532	-1.3203	0.75781	0.12256	8.8594	-47.821	997.482	-2.0464	0.86572	0.67578	NaN	NaN	NaN	NaN	NaN	NaN
3.298	12.128	4.7282	37.9292	0.087403	0.24092	-0.067578	-39.496	-190.395	1164.2765	-1.3359	0.7832	0.12891	34.161	-56.051	1018.611	-2.0522	0.91553	0.62891	NaN	NaN	NaN	NaN	NaN	NaN
3.3	-12.121	9.2376	27.22473	0.084961	0.23828	-0.060547	26.703	-187.0423	1221.6319	-1.3511	0.80127	0.13916	30.558	-98.738	1080.901	-2.0603	0.96607	0.58325	NaN	NaN	NaN	NaN	NaN	NaN
3.302	14.072	4.1678	23.166	0.07959	0.23496	-0.054102	57.387	-141.848	1230.5619	-1.4043	0.83984	0.17334	31.746	-132.014	1120.41	-2.0371	1.0039	0.52979	NaN	NaN	NaN	NaN	NaN	NaN
3.304	17.296	5.5466	23.7236	0.071094	0.22969	-0.044922	18.016	-140.559	1241.1999	-1.4783	0.88599	0.19506	30.8009	-175.682	1183.269	-1.9565	1.0337	0.43457	NaN	NaN	NaN	NaN	NaN	NaN
3.306	23.895	19.92355	11.284	0.060547	0.22578	-0.033985	100.611	-119.195	1267.31095	-1.5898	0.92773	0.22705	51.7588	-207.77871	1212.668	-1.8984	1.0371	0.39697	NaN	NaN	NaN	NaN	NaN	NaN
3.308	38.096	8.8098	13.7856	0.053418	0.22823	-0.021777	99.256	-54.053	1242.012	-1.7964	0.98486	0.30371	24.11	-273.579	1251.433	-1.7813	1.0234	0.3252	NaN	NaN	NaN	NaN	NaN	NaN
3.31	32.81	-7.639	35.9873	0.041992	0.229	-0.010742	71.0718	-45.348	1242.181	-1.9097	1.0083	0.36084	28.929	-304.229	1295.6652	-1.72	1.011	0.30762	NaN	NaN	NaN	NaN	NaN	NaN
3.312	61.18	-2.2308	60.8737	0.03252	0.23116	-0.0017578	85.208	-9.621	1263.0292	-2.1602	1.0459	0.47021	9.634	-325.864	1321.16	-1.6816	1.0059	0.30176	NaN	NaN	NaN	NaN	NaN	NaN
3.314	43.887	3.68549	61.4363	0.023243	0.23145	0.0069337	30.218	-0.672999999999995	1248.681	-2.3377	1.0691	0.54956	1.831	-302.181	1335.17643	-1.6602	1.0039	0.31689	NaN	NaN	NaN	NaN	NaN	NaN
3.316	71.2999	9.96	64.008	0.020899	0.23496	0.016699	16.338	-69.5402	1316.4728	-2.4937	1.1001	0.62061	-20.4163	-258.956	1351.5506	-1.6621	1.0098	0.32861	NaN	NaN	NaN	NaN	NaN	NaN
3.318	55.8001	23.11148	67.7952	0.017383	0.23516	0.025391	12.251	-72.6343	1328.237	-2.6851	1.1099	0.69141	-3.612	-203.883	1356.1785	-1.6616	1.0249	0.32324	NaN	NaN	NaN	NaN	NaN	NaN
3.32	67.7076	45.408	94.0793	0.018066	0.23877	0.031738	-21.276	-108.916	1344.7828	-2.7651	1.1157	0.7168	-7.083	-160.094	1348.7792	-1.6423	1.0413	0.30713	NaN	NaN	NaN	NaN	NaN	NaN
3.322	43.8729	54.5778	102.987	0.016699	0.23633	0.032617	75.8122	-143.215	1403.265	-2.8472	1.1099	0.73096	34.6138	-89.946	1375.935	-1.6211	1.0576	0.28613	NaN	NaN	NaN	NaN	NaN	NaN
3.324	32.368	60.0512	141.9002	0.015332	0.24111	0.024512	73.435	-99.327	1359.52	-2.8389	1.0977	0.70117	20.039	-64.438	1390.5434	-1.6191	1.0703	0.25049	NaN	NaN	NaN	NaN	NaN	NaN
3.326	38.3914	72.0831	160.2977	0.010644	0.24698	0.016309	60.716	-121.486	1357.6471	-2.8105	1.084	0.65771	-5.119	-46.182	1395.7594	-1.6387	1.0781	0.24365	NaN	NaN	NaN	NaN	NaN	NaN
3.328	34.649	91.629	195.0714	-0.0029297	0.25605	0.006543	108.189	-108.157	1366.3946	-2.7202	1.0493	0.5918	-39.0904	-53.547	1391.4936	-1.7417	1.0923	0.25293	NaN	NaN	NaN	NaN	NaN	NaN
3.33	41.047	79.4153	223.9469	-0.017578	0.27197	0.00097656	56.888	-84.436	1374.1909	-2.6782	1.0259	0.56494	-37.8869	-33.852	1400.5037	-1.8982	1.0901	0.2854	NaN	NaN	NaN	NaN	NaN	NaN
3.332	-0.661999999999999	67.0136	249.5835	-0.035352	0.28926	-0.00039062	79.07	-116.347	1433.834	-2.5742	0.97266	0.521	-54.123	-48.407	1419.974	-2.0918	1.0996	0.34619	NaN	NaN	NaN	NaN	NaN	NaN
3.334	37.912	74.309	262.4657	-0.054102	0.31602	-0.0025391	72.3561	-61.273	1431.2	-2.4821	0.9187	0.48071	-42.0558	-62.942	1452.11	-2.3945	1.1055	0.46191	NaN	NaN	NaN	NaN	NaN	NaN
3.336	19.778	77.955	273.358	-0.081054	0.34063	-0.0072266	7.84	-36.517	1407.8069	-2.4097	0.86963	0.44043	-50.8693	-116.499	1438.489	-2.5562	1.1177	0.52344	NaN	NaN	NaN	NaN	NaN	NaN
3.338	-2.518	68.691	298.558	-0.10801	0.37275	-0.0096677	53.774	-23.0576	1429.263	-2.3687	0.82471	0.41406	-33.148	-150.872	1463.821	-2.875	1.1563	0.66943	NaN	NaN	NaN	NaN	NaN	NaN
3.34	6.347	51.199	349.6781	-0.13721	0.41064	-0.0048828	21.358	47.024	1367.621	-2.3745	0.81494	0.41162	-63.645	-194.269	1475.1365	-3.0857	1.1819	0.77808	NaN	NaN	NaN	NaN	NaN	NaN
3.342	10.534	45.624	376.6117	-0.16855	0.44414	-0.0081054	-0.0900000000000034	23.256	1344.65	-2.4063	0.80469	0.41309	-49.426	-188.484	1493.483	-3.269	1.2114	0.875	NaN	NaN	NaN	NaN	NaN	NaN
3.344	16.924	48.79	411.3125	-0.20235	0.48643	-0.0060546	60.88	30.3226	1356.904	-2.4411	0.80297	0.42602	-35.585	-186.88	1520.327	-3.4355	1.2539	0.97217	NaN	NaN	NaN	NaN	NaN	NaN
3.346	5.659	38.939	463.1191	-0.23945	0.53057	-0.011914	34.353	44.4734	1347.23	-2.4766	0.80273	0.43604	33.352	-172.778	1546.251	-3.5	1.2715	0.99951	NaN	NaN	NaN	NaN	NaN	NaN
3.348	28.06	13.5393	530.987	-0.27461	0.57676	-0.018066	66.7988	-20.1212	1404.3786	-2.5034	0.80127	0.45703	15.4794	-147.997	1551.042	-3.6055	1.2891	1.0337	NaN	NaN	NaN	NaN	NaN	NaN
3.35	7.47	7.0586	573.82	-0.31104	0.62158	-0.023438	109.497	7.8859	1402.011	-2.5098	0.80469	0.4624	8.8823	-87.201	1512.274	-3.6101	1.2697	1.0295	NaN	NaN	NaN	NaN	NaN	NaN
3.352	8.107	10.1636	592.395	-0.34775	0.67138	-0.021192	59.376	-1.937	1373.4775	-2.499	0.80273	0.4707	-9.7041	-42.678	1466.779	-3.6011	1.2505	1.0166	NaN	NaN	NaN	NaN	NaN	NaN
3.354	33.983	-5.9975	607.7638	-0.38662	0.72354	-0.016211	89.7305	-27.505	1398.0533	-2.4724	0.7898	0.4624	-10.402	16.6526	1463.7	-3.5073	1.1997	0.96582	NaN	NaN	NaN	NaN	NaN	NaN
3.356	44.201	-13.305	626.024	-0.42529	0.77197	-0.010351	77.906	4.165	1371.7237	-2.4351	0.78955	0.45752	-31.9082	49.339	1422.011	-3.4546	1.1724	0.94336	NaN	NaN	NaN	NaN	NaN	NaN
3.358	73.295	-22.498	643.323	-0.46318	0.82354	-0.0024414	38.766	-34.86175	1366.5452	-2.3555	0.78125	0.4458	-23.172	73.57	1419.107	-3.3086	1.123	0.88525	NaN	NaN	NaN	NaN	NaN	NaN
3.36	62.783	-18.769	623.7238	-0.49561	0.87158	0.003418	88.02006	-16.231	1385.7534	-2.312	0.76611	0.44043	13.8035	69.4896	1401.899	-3.1804	1.0876	0.84009	NaN	NaN	NaN	NaN	NaN	NaN
3.362	100.198	-38.8121	629.875	-0.53447	0.91631	0.015039	38.92	33.178	1363.5413	-2.2104	0.75342	0.42139	8.2324	68.4973	1390.51	-3.0469	1.0625	0.79443	NaN	NaN	NaN	NaN	NaN	NaN
3.364	106.9522	-47.5641	624.241	-0.56885	0.95752	0.025293	55.3577	-0.596999999999994	1375.683	-2.1479	0.74219	0.41162	-5.097	62.486	1397.738	-2.8867	1.0439	0.73584	NaN	NaN	NaN	NaN	NaN	NaN
3.366	111.4617	-32.5207	627.232	-0.59932	0.99659	0.038965	85.1675	62.258	1327.566	-2.0742	0.73633	0.40088	-12.007	62.602	1393.58	-2.8086	1.0391	0.7168	NaN	NaN	NaN	NaN	NaN	NaN
3.368	102.1802	-32.421	607.4069	-0.61582	1.0293	0.05459	24.002	73.6109	1263.921	-1.9741	0.72412	0.38623	5.963	52.337	1387.532	-2.6655	1.0161	0.68652	NaN	NaN	NaN	NaN	NaN	NaN
3.37	106.7113	-18.1064	606.8406	-0.61865	1.0571	0.083496	73.742	69.7157	1264.627	-1.918	0.71484	0.37744	8.8145	27.7181	1416.9758	-2.5737	0.9946	0.66016	NaN	NaN	NaN	NaN	NaN	NaN
3.372	82.7202	-2.7772	602.6757	-0.62002	1.0808	0.10352	76.529	122.092	1247.58165	-1.8115	0.71289	0.34717	4.3495	25.4803	1394.036432	-2.4819	0.96045	0.63477	NaN	NaN	NaN	NaN	NaN	NaN
3.374	67.3107	24.1863	603.912	-0.60577	1.0931	0.12803	45.705	85.713	1247.3304	-1.7332	0.70581	0.32251	-12.7073	3.096	1394.583	-2.3472	0.8999	0.60547	NaN	NaN	NaN	NaN	NaN	NaN
3.376	77.0106	11.0849	632.3582	-0.57412	1.0966	0.14834	107.877	95.487	1248.60108	-1.6523	0.70117	0.29932	-26.2301	12.1216	1387.362	-2.2813	0.87891	0.59229	NaN	NaN	NaN	NaN	NaN	NaN
3.378	46.441	-7.265	661.7208	-0.54268	1.0872	0.1499	49.293	131.116	1198.188	-1.5439	0.68945	0.26221	-63.774	22.614	1384.2281	-2.144	0.82666	0.55762	NaN	NaN	NaN	NaN	NaN	NaN
3.38	54.1448	-26.913	677.7465	-0.49756	1.0728	0.14746	38.065	80.5576	1192.358	-1.5098	0.68457	0.24561	-40.9799	41.4804	1364.5083	-2.0281	0.79175	0.53393	NaN	NaN	NaN	NaN	NaN	NaN
3.382	38.524	-45.078	687.7652	-0.45019	1.0551	0.1332	56.448	133.906	1182.0402	-1.4253	0.66846	0.2207	-44.762	68.216	1345.861	-1.9199	0.75879	0.51074	NaN	NaN	NaN	NaN	NaN	NaN
3.384	53.42649	-66.092	696.6235	-0.39717	1.031	0.10811	1.193	117.5641	1153.4055	-1.3716	0.66455	0.19873	-17.283	125.796	1302.607	-1.7632	0.70557	0.47754	NaN	NaN	NaN	NaN	NaN	NaN
3.386	34.793	-90.824	712.789	-0.35263	1.0083	0.074902	29.74	71.657	1146.55	-1.3242	0.65625	0.17969	5.861	149.188	1263.636	-1.6909	0.67822	0.46094	NaN	NaN	NaN	NaN	NaN	NaN
3.388	46.35	-92.955	708.6303	-0.31738	0.99785	0.045899	6.2	107.738	1102.677	-1.2632	0.65283	0.15967	9.19	191.217	1225.7255	-1.5508	0.625	0.43408	NaN	NaN	NaN	NaN	NaN	NaN
3.39	36.163	-107.2167	715.4071	-0.29297	0.99219	0.015625	-22.803	46.832	1080.259	-1.2402	0.64844	0.14795	-0.0730000000000004	181.881	1189.467	-1.4551	0.58057	0.41431	NaN	NaN	NaN	NaN	NaN	NaN
3.392	-0.0690000000000026	-116.781	731.8998	-0.27822	0.99394	-0.0023438	42.722	59.757	1064.231	-1.1851	0.64893	0.13281	11.762	203.301	1146.615	-1.3633	0.53809	0.40088	NaN	NaN	NaN	NaN	NaN	NaN
3.394	-20.844	-135.234	756.84	-0.27373	1.0035	-0.0084961	-12.63	113.545	989.972	-1.1492	0.64136	0.12549	9.428	190.242	1133.8922	-1.2397	0.4917	0.38965	NaN	NaN	NaN	NaN	NaN	NaN
3.396	-29.615	-132.503	779.215	-0.27529	1.0151	-0.003418	5.65300000000001	89.062	956.873	-1.1064	0.63672	0.12158	41.975	195.177	1093.814	-1.1875	0.4668	0.38428	NaN	NaN	NaN	NaN	NaN	NaN
3.398	-31.583	-113.8354	799.866	-0.2791	1.0208	0.0063476	42.2844	155.352	924.603	-1.0566	0.62891	0.11523	20.447	164.35791	1092.963	-1.0796	0.41357	0.37109	NaN	NaN	NaN	NaN	NaN	NaN
3.4	-38.607	-103.9846	825.828	-0.29736	1.0278	0.011719	19.329	154.51	900.0967	-1.0293	0.62402	0.12012	25.505	154.262	1055.1124	-1.0012	0.37696	0.36133	NaN	NaN	NaN	NaN	NaN	NaN
3.402	-19.658	-88.5534	825.195	-0.32324	1.031	0.014551	67.013	140.577	903.8319	-0.9707	0.60645	0.11768	14.216	128.992	1009.733	-0.92188	0.3457	0.34668	NaN	NaN	NaN	NaN	NaN	NaN
3.404	20.748	-74.805	826.4862	-0.35078	1.034	0.014355	32.7926	187.433	861.866	-0.90674	0.59033	0.12061	22.125	116.9875	974.1088	-0.8208	0.30127	0.32617	NaN	NaN	NaN	NaN	NaN	NaN
3.406	14.789	-66.412	834.3562	-0.38281	1.0402	0.013965	-3.543	143.706	833.8828	-0.87256	0.58252	0.12207	33.276	94.303	959.839	-0.76807	0.27979	0.31445	NaN	NaN	NaN	NaN	NaN	NaN
3.408	56.156	-68.375	861.6061	-0.4083	1.0497	0.017285	28.218	158.0662	810.091	-0.80225	0.55615	0.12158	82.1826	112.382	926.561	-0.67041	0.2251	0.29297	NaN	NaN	NaN	NaN	NaN	NaN
3.41	47.372	-72.017	872.266	-0.43896	1.0552	0.022461	-19.595	183.61	727.903	-0.74145	0.53442	0.11719	86.2578	104.072	888.517	-0.5979	0.19238	0.26611	NaN	NaN	NaN	NaN	NaN	NaN
3.412	65.5274	-77.007	894.2344	-0.46241	1.0651	0.035352	-31.6	136.343	720.378	-0.68701	0.50732	0.11426	76.5614	117.758	831.0893	-0.52783	0.15967	0.24951	NaN	NaN	NaN	NaN	NaN	NaN
3.414	67.549	-100.2725	900.4726	-0.48203	1.0828	0.044629	4.547	164.1504	687.58	-0.61865	0.47021	0.10889	74.9691	134.964	805.99823	-0.44922	0.11816	0.23145	NaN	NaN	NaN	NaN	NaN	NaN
3.416	68.844	-125.377	915.2029	-0.49765	1.1063	0.060645	-0.544999999999998	134.2671	676.6175	-0.5835	0.44775	0.10449	58.6	152.907	767.1291	-0.41016	0.091797	0.21973	NaN	NaN	NaN	NaN	NaN	NaN
3.418	66.596	-123.677	917.3587	-0.49961	1.1246	0.073242	20.2534	104.5173	671.8053	-0.51416	0.4165	0.09668	68.254	179.4138	729.4945	-0.33936	0.053711	0.20557	NaN	NaN	NaN	NaN	NaN	NaN
3.42	66.8881	-110.865	935.67747	-0.5	1.1426	0.083008	2.931	133.1127	619.5501	-0.46216	0.38013	0.088867	91.55	207.35	701.135	-0.28785	0.025635	0.19361	NaN	NaN	NaN	NaN	NaN	NaN
3.422	77.59537	-103.273	950.825	-0.4916	1.159	0.089551	3.346	108.89	604.341	-0.41064	0.35156	0.083984	65.084	219.2074	617.245	-0.24316	0.0053711	0.18652	NaN	NaN	NaN	NaN	NaN	NaN
3.424	58.186	-106.718	976.91	-0.47617	1.1754	0.087207	55.24269	141.072	594.852	-0.34326	0.31201	0.068848	53.945	208.6224	587.847	-0.18262	-0.02002	0.16992	NaN	NaN	NaN	NaN	NaN	NaN
3.426	85.9072	-113.19	983.7952	-0.45742	1.1863	0.080176	7.737	169.444	555.841	-0.31006	0.28955	0.068359	39.968	200.741	518.986	-0.14014	-0.032226	0.15918	NaN	NaN	NaN	NaN	NaN	NaN
3.428	90.1765	-107.028	1002.2062	-0.43916	1.1923	0.069531	-5.608	133.941471	533.3595	-0.24756	0.24756	0.062012	29.74	192.091	484.269	-0.098633	-0.04541	0.1416	NaN	NaN	NaN	NaN	NaN	NaN
3.43	107.945	-106.8986	1024.3203	-0.42041	1.2017	0.052246	7.7698	165.8117	490.2044	-0.20386	0.21753	0.039551	38.972	201.0851	449.242	-0.045898	-0.055664	0.12207	NaN	NaN	NaN	NaN	NaN	NaN
3.432	94.2612	-98.256	1038.086	-0.40752	1.2046	0.025976	-41.5556	162.416	473.3491	-0.16113	0.18799	0.030273	57.007	192.568	442.782	-0.021973	-0.062988	0.10498	NaN	NaN	NaN	NaN	NaN	NaN
3.434	74.1706	-93.326	1029.784	-0.40547	1.2094	-0.0085938	-4.395	156.9203	455.941	-0.11035	0.1499	0.02002	62.07	180.943	408.2924	0.018555	-0.078125	0.088379	NaN	NaN	NaN	NaN	NaN	NaN
3.436	70.3841	-91.094	1008.426	-0.41407	1.229	-0.04336	-15.399	182.272	406.5318	-0.087402	0.13135	0.012207	43.182	147.261	410.0327	0.055908	-0.097658	0.0625	NaN	NaN	NaN	NaN	NaN	NaN
3.438	29.009	-86.14	1008.676	-0.41895	1.251	-0.075195	-33.5	137.0081	373.4459	-0.043457	0.096191	0.0029297	27.543	126.374	364.752	0.091797	-0.12158	0.041992	NaN	NaN	NaN	NaN	NaN	NaN
3.44	3.133	-77.0358	1033.565	-0.43555	1.2871	-0.10449	23.389	127.037	338.88075	-0.015625	0.064942	-0.001709	23.675	109.854	382.241	0.13037	-0.14307	0.010742	NaN	NaN	NaN	NaN	NaN	NaN
3.442	-1.965	-69.7842	1039.738	-0.45264	1.3247	-0.12431	-23.1076	127.318	309.562	0.0078125	0.039063	-0.010254	32.194	131.234	331.8471	0.1499	-0.16211	-0.00048828	NaN	NaN	NaN	NaN	NaN	NaN
3.444	-11.761	-63.9155	1056.378	-0.46983	1.3656	-0.13321	11.903	94.6081	317.643	0.033203	0.0019531	-0.020508	20.748	101.9417	317.583	0.18945	-0.19434	-0.029785	NaN	NaN	NaN	NaN	NaN	NaN
3.446	-30.479	-72.966	1071.8324	-0.49052	1.412	-0.14649	40.5376	134.962	293.471	0.04248	-0.010254	-0.018066	44.694	128.0179	264.8963	0.21924	-0.22266	-0.049072	NaN	NaN	NaN	NaN	NaN	NaN
3.448	-20.138	-78.524	1083.6349	-0.50127	1.4534	-0.15459	-13.804	118.199	272.999	0.058594	-0.040039	-0.024414	18.684	101.808	241.806	0.24365	-0.24658	-0.067871	NaN	NaN	NaN	NaN	NaN	NaN
3.45	2.207	-76.103	1107.652	-0.50146	1.4907	-0.16064	27.357	98.1598	281.16236	0.071045	-0.055908	-0.02124	22.561	119.64	193.689	0.26416	-0.2793	-0.092285	NaN	NaN	NaN	NaN	NaN	NaN
3.452	-18.786	-75.467	1126.7566	-0.50175	1.517	-0.16367	-6.247	123.619	244.9931	0.075684	-0.070801	-0.016113	14.511	98.9903	207.459	0.27197	-0.29102	-0.10303	NaN	NaN	NaN	NaN	NaN	NaN
3.454	-6.694	-76.447	1136.5274	-0.50811	1.5438	-0.17686	-23.416	83.215	249.2786	0.078613	-0.089355	-0.0058594	29.069	123.476	170.173	0.28467	-0.31592	-0.12549	NaN	NaN	NaN	NaN	NaN	NaN
3.456	5.885	-72.409	1136.22554	-0.52764	1.563	-0.19091	32.2547	85.5263	235.155	0.075684	-0.094238	0.0019531	23.796	104.415	151.893	0.28369	-0.32398	-0.1455	NaN	NaN	NaN	NaN	NaN	NaN
3.458	24.256	-56.488	1141.611	-0.54492	1.583	-0.19785	-14.826	85.838	190.7183	0.068359	-0.10449	0.025879	56.165	119.728	101.831	0.28027	-0.33545	-0.16113	NaN	NaN	NaN	NaN	NaN	NaN
3.46	9.001	-51.302	1163.4429	-0.55664	1.5977	-0.2041	6.336	60.969	179.5498	0.063476	-0.10669	0.046387	49.458	84.781	96.592	0.27393	-0.3457	-0.17236	NaN	NaN	NaN	NaN	NaN	NaN
3.462	16.083	-41.4069	1169.3963	-0.57685	1.6232	-0.19326	35.163	90.95	137.267	0.058594	-0.10596	0.068848	52.771	112.536	63.729	0.26416	-0.34424	-0.17969	NaN	NaN	NaN	NaN	NaN	NaN
3.464	26.094	-31.8895	1152.1382	-0.60156	1.6508	-0.18633	-6.441	79.7613	105.915	0.050781	-0.11377	0.098145	44.022	79.7594	90.8636	0.24219	-0.35303	-0.18945	NaN	NaN	NaN	NaN	NaN	NaN
3.466	34.4974	-21.428	1154.403	-0.62539	1.6832	-0.16875	34.593	72.06	128.0876	0.04834	-0.11133	0.10791	26.018	93.153	41.686	0.2168	-0.35498	-0.18896	NaN	NaN	NaN	NaN	NaN	NaN
3.468	37.258	-33.1319	1173.3625	-0.65889	1.7137	-0.15732	23.183	87.037	97.6338	0.05127	-0.11377	0.13574	32.012	49.284	71.377	0.18213	-0.35693	-0.18262	NaN	NaN	NaN	NaN	NaN	NaN
3.47	47.197	-19.2373	1189.1687	-0.69287	1.7427	-0.13525	14.408	46.251	109.6082	0.058593	-0.11816	0.15087	52.966	42.609	52.786	0.12988	-0.36035	-0.17383	NaN	NaN	NaN	NaN	NaN	NaN
3.472	81.6108	-13.6245	1193.07445	-0.73701	1.7645	-0.11074	56.606	67.449	98.955	0.064453	-0.11377	0.16016	27.359	-2.031	65.88	0.10107	-0.35596	-0.16992	NaN	NaN	NaN	NaN	NaN	NaN
3.474	82.2669	4.502	1182.533	-0.77959	1.7845	-0.079395	14.397	62.581	57.8394	0.082031	-0.12256	0.16846	36.924	-5.5834	41.209	0.025391	-0.34131	-0.15088	NaN	NaN	NaN	NaN	NaN	NaN
3.476	81.4568	-11.33	1201.8527	-0.83232	1.7982	-0.049316	34.249	38.9962	80.4025	0.094238	-0.12158	0.16553	-2.283	-37.749	28.3056	-0.03003	-0.32935	-0.13525	NaN	NaN	NaN	NaN	NaN	NaN
3.478	78.1349	-7.523	1207.895	-0.8874	1.8028	-0.017285	27.787	63.9372	39.922	0.11865	-0.13037	0.16455	5.774	-13.886	8.54	-0.091309	-0.31689	-0.11523	NaN	NaN	NaN	NaN	NaN	NaN
3.48	86.762	-8.333	1199.1435	-0.93164	1.7949	0.014648	-19.575	40.38304	20.922	0.13404	-0.13501	0.15674	14.96	-14.668	15.5965	-0.18652	-0.29834	-0.078613	NaN	NaN	NaN	NaN	NaN	NaN
3.482	81.9702	-7.227	1214.105	-0.98369	1.7886	0.041602	38.3494	32.968	37.981	0.14355	-0.14551	0.14258	59.2464	30.2746	16.413	-0.22998	-0.28223	-0.063477	NaN	NaN	NaN	NaN	NaN	NaN
3.484	61.34835	-18.2731	1211.423	-1.0225	1.7743	0.066992	-4.604	32.8063	14.814	0.16406	-0.15283	0.12646	19.904	14.914	17.587	-0.30615	-0.26465	-0.029297	NaN	NaN	NaN	NaN	NaN	NaN
3.486	49.802	-28.56	1213.027	-1.0488	1.7536	0.089258	7.639	2.9068	46.489	0.1665	-0.15625	0.11426	24.965	22.1014	3.685	-0.35596	-0.2544	-0.013672	NaN	NaN	NaN	NaN	NaN	NaN
3.488	41.94	-17.3236	1192.9228	-1.0721	1.7329	0.10742	37.029	8.0133	30.381	0.16797	-0.1665	0.089355	15.844	7.2272	26.91	-0.39453	-0.23975	0.0024414	NaN	NaN	NaN	NaN	NaN	NaN
3.49	20.417	-1.334	1197.4953	-1.0898	1.7148	0.12598	-4.731	8.325	0.6717	0.16284	-0.17553	0.071533	14.487	19.396	29.894	-0.43262	-0.23291	0.018555	NaN	NaN	NaN	NaN	NaN	NaN
3.492	-7.927	7.1527	1209.63532	-1.0977	1.6956	0.12851	19.717	0.940000000000001	17.6684	0.15186	-0.18115	0.053223	-7.946	27.0399	11.8339	-0.44482	-0.22656	0.024902	NaN	NaN	NaN	NaN	NaN	NaN
3.494	-7.402	27.1299	1202.9121	-1.1023	1.6809	0.13477	27.256	19.9604	-13.02523	0.13184	-0.17871	0.038086	32.154	31.4904	-4.1239	-0.46729	-0.22217	0.039063	NaN	NaN	NaN	NaN	NaN	NaN
3.496	-3.085	27.153	1195.5601	-1.0942	1.6657	0.14101	-4.287	16.51609	9.557	0.11768	-0.17822	0.033203	17.19	22.281	-18.453	-0.46484	-0.22705	0.041748	NaN	NaN	NaN	NaN	NaN	NaN
3.498	-12.268	29.943	1200.815	-1.0846	1.6584	0.13896	39.0457	26.4917	20.2323	0.087891	-0.16748	0.026855	-5.133	15.772154	-14.169	-0.44727	-0.23047	0.044434	NaN	NaN	NaN	NaN	NaN	NaN
3.5	4.202	36.621	1206.514	-1.0801	1.6523	0.13818	12.334	34.9272	14.4452	0.059326	-0.16235	0.038086	-15.269	22.3457	-0.515000000000001	-0.40479	-0.23047	0.036133	NaN	NaN	NaN	NaN	NaN	NaN
3.502	2.56	52.73	1193.237	-1.0683	1.6536	0.13858	4.741	10.358	26.5186	0.030762	-0.15137	0.043945	-2.338	12.316	-0.506	-0.37451	-0.23291	0.033691	NaN	NaN	NaN	NaN	NaN	NaN
3.504	11.694	65.309	1185.0406	-1.057	1.6516	0.13526	28.265	17.7293	15.2166	-0.010742	-0.14014	0.053223	28.937	12.572	16.4514	-0.30371	-0.23877	0.019531	NaN	NaN	NaN	NaN	NaN	NaN
3.506	-16.254	57.008	1167.3203	-1.0496	1.659	0.13603	-23.493	26.789	-3.61409	-0.032227	-0.12891	0.056152	47.4024	-8.485	50.917	-0.25244	-0.24658	0.0026855	NaN	NaN	NaN	NaN	NaN	NaN
3.508	-11.77	44.6414	1167.8512	-1.0447	1.6639	0.13984	9.96599999999999	13.1168	7.2817	-0.066406	-0.11279	0.07373	32.791	-13.31	36.228	-0.2002	-0.25879	0.0014648	NaN	NaN	NaN	NaN	NaN	NaN
3.51	14.648	49.3469	1155.3652	-1.0366	1.6802	0.1416	36.882	27.3493	7.8956	-0.083008	-0.10156	0.088867	45.6432	-20.9	33.481	-0.13721	-0.27441	-0.0063477	NaN	NaN	NaN	NaN	NaN	NaN
3.512	10.378	64.4234	1153.83659	-1.0348	1.6875	0.14893	8.425	5.9753	0.279	-0.10059	-0.092773	0.11084	28.152	4.829	27.1183	-0.10742	-0.28125	-0.010742	NaN	NaN	NaN	NaN	NaN	NaN
3.514	23.167	53.4981	1148.3538	-1.0217	1.6989	0.15029	44.6777	-3.3323	23.011	-0.11572	-0.088867	0.13281	26.628	13.202	24.6392	-0.056641	-0.29785	-0.013672	NaN	NaN	NaN	NaN	NaN	NaN
3.516	32.918	50.3433	1153.288	-1.0124	1.7091	0.15381	7.43	16.3544	5.853	-0.11963	-0.091797	0.14746	31.163	24.8853	15.283	-0.025146	-0.30224	-0.016845	NaN	NaN	NaN	NaN	NaN	NaN
3.518	47.763	39.102	1140.076	-0.99482	1.715	0.15117	29.502	1.9206	34.422	-0.1167	-0.095703	0.1626	29.149	24.4494	21.9292	0	-0.30029	-0.022461	NaN	NaN	NaN	NaN	NaN	NaN
3.52	57.736	52.93686	1130.715	-0.98096	1.7173	0.14648	65.5246	19.5377	35.722	-0.10791	-0.1023	0.17578	24.549	27.085	1.321	0.032715	-0.29541	-0.024902	NaN	NaN	NaN	NaN	NaN	NaN
3.522	94.7172	52.3525	1120.7255	-0.96065	1.7136	0.12881	-15.267	15.9193	4.6208	-0.091797	-0.11035	0.18164	30.321	3.8972	14.858	0.050293	-0.28857	-0.025391	NaN	NaN	NaN	NaN	NaN	NaN
3.524	95.8096	62.2101	1112.281	-0.93418	1.7043	0.11514	21.356	-4.8288	25.1527	-0.069824	-0.12061	0.18994	21.255	6.377	22.62	0.070313	-0.27734	-0.025391	NaN	NaN	NaN	NaN	NaN	NaN
3.526	99.9378	82.552	1079.2225	-0.9041	1.693	0.098339	46.3842	16.9416	-0.0317000000000001	-0.058594	-0.12842	0.18408	4.785	2.9154	22.2298	0.077637	-0.26855	-0.020019	NaN	NaN	NaN	NaN	NaN	NaN
3.528	101.1827	80.62	1054.7118	-0.87695	1.6851	0.083496	0.224	0.0370000000000004	9.762	-0.040527	-0.13965	0.17725	37.14	16.2586	6.7814	0.084473	-0.25928	-0.0092773	NaN	NaN	NaN	NaN	NaN	NaN
3.53	96.8359	69.23504	1045.97717	-0.84717	1.6802	0.073242	49.34	8.7957	29.217	-0.023193	-0.14575	0.16895	51.2703	7.4479	5.085	0.084473	-0.24365	0	NaN	NaN	NaN	NaN	NaN	NaN
3.532	98.2668	71.0754	1038.98039	-0.82295	1.6679	0.064355	-6.251	25.6502	2.868	-0.0087891	-0.1416	0.16016	35.655	26.458	14.1247	0.090332	-0.23584	0.0078125	NaN	NaN	NaN	NaN	NaN	NaN
3.534	81.3106	79.7453	1024.2246	-0.80225	1.654	0.052832	-7.47799999999999	5.5256	12.0535	0.0097656	-0.14258	0.15039	23.053	5.208	27.021	0.092285	-0.22461	0.013184	NaN	NaN	NaN	NaN	NaN	NaN
3.536	80.3873	80.7643	1017.3042	-0.78505	1.6384	0.042676	61.5551	33.167	20.8606	0.021728	-0.14185	0.1438	24.637	14.3707	19.841	0.10132	-0.20972	0.0090332	NaN	NaN	NaN	NaN	NaN	NaN
3.538	52.383	68.032	979.183	-0.76358	1.6204	0.026856	7.079	13.3545	3.857	0.029785	-0.13574	0.1333	-12.526	-15.9462	22.637	0.10986	-0.19678	0.0053711	NaN	NaN	NaN	NaN	NaN	NaN
3.54	48.006	72.861	962.2784	-0.7373	1.5957	0.022949	18.141	-14.242	27.8883	0.034668	-0.125	0.125	10.73	-15.1159	9.5835	0.12549	-0.18652	-0.0063477	NaN	NaN	NaN	NaN	NaN	NaN
3.542	43.97	91.0831	931.218	-0.71513	1.5714	0.0063476	35.235	4.9789	9.6528	0.033203	-0.12012	0.12451	10.942	-43.5817	38.6467	0.12939	-0.18408	-0.014648	NaN	NaN	NaN	NaN	NaN	NaN
3.544	34.695	95.932	927.984893	-0.69483	1.5435	-0.0022461	-0.897999999999996	-5.521	6.7032	0.029297	-0.104	0.11719	26.324	-12.775	14.6334	0.14111	-0.17725	-0.037109	NaN	NaN	NaN	NaN	NaN	NaN
3.546	37.522	90.396	926.365	-0.67998	1.5122	-0.012011	39.725	4.7454	14.9463	0.024658	-0.08667	0.11645	4.896	-13.529	7.155	0.14599	-0.18066	-0.051514	NaN	NaN	NaN	NaN	NaN	NaN
3.548	26.426	76.256	893.6177	-0.66054	1.4835	-0.016406	8.689	14.963164	-7.537	0.018066	-0.069336	0.11475	20.374	20.1553	-6.68	0.14844	-0.17871	-0.067383	NaN	NaN	NaN	NaN	NaN	NaN
3.55	32.656	74.574	880.94398	-0.64453	1.4531	-0.020996	-18.275	-3.95925	19.01	0.0097656	-0.047852	0.11328	15.753	11.619	8.064	0.13574	-0.17871	-0.077637	NaN	NaN	NaN	NaN	NaN	NaN
3.552	3.889	84.683	871.1211	-0.62256	1.42	-0.019336	19.778	15.003	6.1491	0.003418	-0.035645	0.11084	18.985	43.899	-6.393	0.13037	-0.17627	-0.086426	NaN	NaN	NaN	NaN	NaN	NaN
3.554	7.194	91.976	853.4501	-0.60498	1.3872	-0.025684	-1.128	6.2733	-1.5065	-0.0043945	-0.013672	0.10645	34.609	24.0253	15.538	0.11084	-0.16748	-0.087891	NaN	NaN	NaN	NaN	NaN	NaN
3.556	4.259	108.024	818.8826	-0.58858	1.3528	-0.024902	11.316	-0.616	25.9325	-0.0095214	0.0019531	0.10742	55.351	30.5353	-4.698	0.075195	-0.15576	-0.078125	NaN	NaN	NaN	NaN	NaN	NaN
3.558	11.374	111.3857	777.13	-0.57451	1.3167	-0.026269	23.279	13.9556	13.5067	-0.017578	0.024414	0.10449	26.63	8.1389	33.1661	0.056641	-0.14648	-0.080078	NaN	NaN	NaN	NaN	NaN	NaN
3.56	-3.116	108.1187	772.1648	-0.55615	1.2817	-0.03125	13.82	8.129	4.02873	-0.025391	0.054688	0.096191	18.088	23.623	22.85649	0.014648	-0.13428	-0.069336	NaN	NaN	NaN	NaN	NaN	NaN
3.562	11.617	116.671	756.9664	-0.54277	1.2418	-0.033984	50.1539	15.9525	10.5914	-0.029785	0.070313	0.094727	-5.609	9.8212	2.179	-0.0080565	-0.12109	-0.0625	NaN	NaN	NaN	NaN	NaN	NaN
3.564	38.302	114.299	747.8914	-0.52354	1.2047	-0.029102	18.498	25.3035	-13.05254	-0.040527	0.099121	0.081543	30.95	21.208	-5.789	-0.034668	-0.10449	-0.05957	NaN	NaN	NaN	NaN	NaN	NaN
3.566	45.42	122.225	718.6307	-0.50518	1.1668	-0.026758	10.334	8.9656	8.919	-0.059326	0.12427	0.060547	36.245	6.945	5.636	-0.064941	-0.079102	-0.043945	NaN	NaN	NaN	NaN	NaN	NaN
3.568	63.491	110.1825	705.031	-0.48955	1.1318	-0.025488	34.741	17.6941	36.0696	-0.084473	0.15186	0.040039	43.15	11.4845	9.789	-0.075684	-0.065918	-0.041016	NaN	NaN	NaN	NaN	NaN	NaN
3.57	68.396	103.5177	694.6035	-0.47217	1.0942	-0.027344	1.896	13.2121	39.5404	-0.12402	0.19629	0.01709	16.371	0.5254	16.0479	-0.097168	-0.041504	-0.034668	NaN	NaN	NaN	NaN	NaN	NaN
3.572	104.6503	114.042	665.9035	-0.45146	1.0579	-0.025293	34.546	5.1095	83.9065	-0.14502	0.21973	0.010254	35.019	20.91	27.2423	-0.10766	-0.03003	-0.034912	NaN	NaN	NaN	NaN	NaN	NaN
3.574	101.36556	117.653	658.51	-0.43428	1.0212	-0.027246	27.763	38.9171	101.686	-0.20264	0.26904	0.012207	8.54	-11.8753	21.6124	-0.12158	-0.020508	-0.036133	NaN	NaN	NaN	NaN	NaN	NaN
3.576	86.9089	116.972	630.7431	-0.4128	0.9833	-0.021777	-25.0301	47.6881	122.8094	-0.25586	0.29493	0.014649	30.67	-8.397	39.7	-0.13232	-0.010254	-0.037598	NaN	NaN	NaN	NaN	NaN	NaN
3.578	108.0587	105.5993	617.1857	-0.39453	0.94707	-0.023535	30.5833	61.2007	179.6169	-0.3208	0.32129	0.020996	31.117	-20.2445	27.09751	-0.13721	-0.012695	-0.040039	NaN	NaN	NaN	NaN	NaN	NaN
3.58	94.0477	114.7534	589.7401	-0.37695	0.91797	-0.029785	8.293	87.6474	191.578	-0.4126	0.36768	0.025879	47.195	13.421	32.7985	-0.15039	-0.010742	-0.044922	NaN	NaN	NaN	NaN	NaN	NaN
3.582	99.06018	118.3133	572.4749	-0.36348	0.88027	-0.032129	-13.883	74.709	240.179	-0.46533	0.38672	0.027344	21.304	18.0989	29.88358	-0.1543	-0.0068359	-0.054688	NaN	NaN	NaN	NaN	NaN	NaN
3.584	91.7452	121.5844	547.8299	-0.34443	0.85303	-0.038183	35.095	84.3714	304.68127	-0.57227	0.43311	0.033203	24.208	39.4314	22.849	-0.16846	-0.01416	-0.048828	NaN	NaN	NaN	NaN	NaN	NaN
3.586	102.2483	126.183	538.3946	-0.32647	0.82959	-0.031152	-25.31	90.558	355.756	-0.66138	0.47095	0.047607	-13.893	27.3171	6.6188	-0.17578	-0.013672	-0.057129	NaN	NaN	NaN	NaN	NaN	NaN
3.588	92.3542	116.28644	524.38235	-0.3126	0.80401	-0.034766	-4.974	61.7388	422.207	-0.74414	0.51074	0.066895	13.153	15.2036	31.4202	-0.18555	-0.018066	-0.063965	NaN	NaN	NaN	NaN	NaN	NaN
3.59	68.54	118.8916	510.6538	-0.30469	0.77734	-0.038574	29.918	69.327	448.9273	-0.85889	0.56299	0.095215	19.8	-24.7667	21.9507	-0.2124	-0.0087891	-0.070801	NaN	NaN	NaN	NaN	NaN	NaN
3.592	60.414	118.931	480.00389	-0.29375	0.75703	-0.038184	-13.114	35.197	476.2068	-0.92529	0.58838	0.1167	14.31	-29.2323	62.638	-0.23999	-0.00024415	-0.064941	NaN	NaN	NaN	NaN	NaN	NaN
3.594	55.444	127.594	457.60613	-0.27959	0.73047	-0.041211	6.418	6.83709	549.15608	-1.0503	0.64307	0.15967	17.179	-36.3755	79.388	-0.27637	0.0087891	-0.061523	NaN	NaN	NaN	NaN	NaN	NaN
3.596	69.941	125.837	447.7434	-0.26709	0.70664	-0.040429	-22.501	17.6668	609.7893	-1.1431	0.67334	0.19385	15.792	-31.6885	137.125	-0.3418	0.022949	-0.046387	NaN	NaN	NaN	NaN	NaN	NaN
3.598	27.772	122.389	429.6962	-0.25625	0.67891	-0.044141	-2.937	-25.8206	688.096	-1.23	0.70459	0.23828	20.07	-33.4203	148.8435	-0.38477	0.031738	-0.038574	NaN	NaN	NaN	NaN	NaN	NaN
3.6	22.632	114.914	419.663	-0.23779	0.65186	-0.043457	41.771	-27.8339	744.92	-1.334	0.73535	0.31885	32.56	-31.6771	209.554	-0.479	0.05127	-0.02002	NaN	NaN	NaN	NaN	NaN	NaN
3.602	15.928	117.182	375.9792	-0.21699	0.61992	-0.041309	-3.973	-39.28	797.444	-1.3784	0.75439	0.36328	45.092	-29.085	247.5	-0.55835	0.06372	-0.0087892	NaN	NaN	NaN	NaN	NaN	NaN
3.604	26.188	111.02	377.9662	-0.19444	0.58839	-0.040529	42.21	-106.4436	907.392	-1.4551	0.75586	0.4585	52.467	-1.764	330.979	-0.64844	0.085449	0.00048828	NaN	NaN	NaN	NaN	NaN	NaN
3.606	-21.54	103.4686	383.125	-0.16749	0.55362	-0.041697	45.533	-114.70967	934.611	-1.5036	0.75562	0.53051	48.215	26.433	419.116	-0.78516	0.12061	0.028809	NaN	NaN	NaN	NaN	NaN	NaN
3.608	-6.343	94.6489	366.217	-0.15303	0.52091	-0.048728	14.781	-134.229	950.716	-1.543	0.75195	0.58643	45.862	44.658	553.035	-0.85938	0.13867	0.03125	NaN	NaN	NaN	NaN	NaN	NaN
3.61	12.386	94.9067	342.7818	-0.13965	0.48877	-0.055664	83.6087	-152.04674	967.243	-1.5938	0.74512	0.63135	51.576	42.5521	649.369	-1.0313	0.17822	0.07666	NaN	NaN	NaN	NaN	NaN	NaN
3.612	1.907	97.928	317.71642	-0.12382	0.45916	-0.056837	75.292	-133.7044	916.175	-1.6035	0.73438	0.64014	67.103	2.464	783.263	-1.1756	0.21875	0.12598	NaN	NaN	NaN	NaN	NaN	NaN
3.614	24.943	84.6418	320.4837	-0.10644	0.43378	-0.059479	83.959	-154.932	901.049	-1.5859	0.71094	0.64307	104.383	-24.451	878.647	-1.3301	0.25781	0.19141	NaN	NaN	NaN	NaN	NaN	NaN
3.616	25.587	75.8078	313.164	-0.094323	0.41267	-0.057899	122.1193	-146.752	864.212	-1.5647	0.69262	0.62573	117.016	-59.866	1001.9324	-1.5547	0.33105	0.29639	NaN	NaN	NaN	NaN	NaN	NaN
3.618	54.342	80.534	288.9864	-0.071761	0.38836	-0.061915	47.408	-118.412	796.798	-1.5444	0.68408	0.60742	137.497	-108.674	1089.6388	-1.6733	0.36475	0.36182	NaN	NaN	NaN	NaN	NaN	NaN
3.62	38.112	85.254	275.06789	-0.048828	0.36035	-0.061035	73.962	-129.498	832.2564	-1.5249	0.70459	0.60156	111.544	-145.551	1156.17677	-1.8887	0.43994	0.50049	NaN	NaN	NaN	NaN	NaN	NaN
3.622	49.3428	78.723	270.277	-0.033127	0.33481	-0.067758	83.8518	-93.19	820.737	-1.5112	0.72021	0.59961	106.789	-167.447	1166.271	-2.0651	0.49511	0.56762	NaN	NaN	NaN	NaN	NaN	NaN
3.624	77.2796	77.22	258.99	-0.019391	0.30984	-0.072621	4.671	-86.7079	824.922	-1.4976	0.75635	0.60156	52.11	-203.862	1164.854	-2.2183	0.5376	0.61426	NaN	NaN	NaN	NaN	NaN	NaN
3.626	70.2202	83.4621	243.3	-0.0049303	0.28101	-0.081224	46.7291	-94.25	878.971	-1.5042	0.77759	0.59498	35.84	-220.655	1135.17	-2.3809	0.57031	0.63818	NaN	NaN	NaN	NaN	NaN	NaN
3.628	86.4856	81.2698	229.7715	0.012851	0.25653	-0.090295	38.5548	-61.299	884.951	-1.5039	0.79883	0.58643	-23.202	-221.474	1160.098	-2.4336	0.58789	0.63135	NaN	NaN	NaN	NaN	NaN	NaN
3.63	74.239	77.5933	226.2477	0.026367	0.23438	-0.098145	44.3235	-83.564	919.069	-1.4883	0.83008	0.55127	-22.406	-178.557	1179.643	-2.4629	0.62109	0.59424	NaN	NaN	NaN	NaN	NaN	NaN
3.632	85.2058	75.67332	214.757	0.038478	0.20957	-0.10963	87.88	-96.113	963.8315	-1.4585	0.84229	0.52637	-18.263	-175.448	1190.04	-2.4126	0.6355	0.54883	NaN	NaN	NaN	NaN	NaN	NaN
3.634	71.584	66.2861	201.9735	0.042789	0.18634	-0.11966	31.077	-96.283	964.471	-1.3979	0.83936	0.46289	-22.0109	-174.37	1161.87	-2.3125	0.6582	0.48682	NaN	NaN	NaN	NaN	NaN	NaN
3.636	65.7875	52.2199	189.65808	0.05018	0.17268	-0.12299	48.654	-167.611	1016.7348	-1.364	0.83423	0.42236	-113.014	-173.99	1146.845	-2.166	0.62109	0.39795	NaN	NaN	NaN	NaN	NaN	NaN
3.638	78.6283	50.099344	182.2594	0.05286	0.15407	-0.1326	57.2006	-210.691	1051.4424	-1.3496	0.83203	0.39111	-105.3373	-126.92	1109.079	-2.0879	0.58301	0.35645	NaN	NaN	NaN	NaN	NaN	NaN
3.64	74.054	60.364	164.6293	0.056641	0.13916	-0.1333	-5.247	-245.688	1048.0498	-1.3457	0.83008	0.37158	-97.62338	-92.156	1117.944	-1.8594	0.48438	0.25635	NaN	NaN	NaN	NaN	NaN	NaN
3.642	86.0123	62.114	154.7894	0.053542	0.13164	-0.14332	11.545	-302.978	1103.369	-1.3535	0.83008	0.36475	-32.84	-26.16	1122.702	-1.7273	0.45508	0.20288	NaN	NaN	NaN	NaN	NaN	NaN
3.644	39.797	54.7202	152.6676	0.049851	0.12657	-0.14692	-20.513	-264.847	1098.1392	-1.3711	0.82422	0.35449	-9.693	-58.67	1156.109	-1.6523	0.49805	0.17773	NaN	NaN	NaN	NaN	NaN	NaN
3.646	45.294	48.0151	141.4601	0.046875	0.12229	-0.14921	-42.8081	-257.235	1123.639	-1.3799	0.83008	0.3479	69.886	-95.385	1208.5286	-1.6172	0.60547	0.19043	NaN	NaN	NaN	NaN	NaN	NaN
3.648	28.041	52.9374	137.5535	0.042631	0.11898	-0.15543	-16.856	-237.259	1160.1065	-1.3931	0.83643	0.33105	73.588	-190.227	1258.936	-1.6172	0.65527	0.21338	NaN	NaN	NaN	NaN	NaN	NaN
3.65	27.451	47.7444	137.1368	0.044434	0.11914	-0.1582	-61.005	-164.838	1152.899	-1.4019	0.85498	0.30762	40.375	-186.9	1289.808	-1.6128	0.73682	0.26855	NaN	NaN	NaN	NaN	NaN	NaN
3.652	-4.779	38.2274	132.3378	0.043302	0.12296	-0.16359	-33.147	-159.112	1196.378	-1.4043	0.87402	0.29053	-33.62	-240.307	1328.567	-1.6043	0.78296	0.29809	NaN	NaN	NaN	NaN	NaN	NaN
3.654	-7.878	37.639	112.241	0.041427	0.12484	-0.16772	17.174	-96.732	1219.055	-1.437	0.91064	0.2627	-71.71	-221.337	1370.091	-1.5815	0.80908	0.30859	NaN	NaN	NaN	NaN	NaN	NaN
3.656	2.375	43.8715	92.73625	0.043921	0.13114	-0.17588	-11.7	-51.473	1210.671	-1.49	0.93286	0.24633	-103.612	-288.663	1381.672	-1.5684	0.83594	0.30225	NaN	NaN	NaN	NaN	NaN	NaN
3.658	-4.082	46.904	81.9057	0.03332	0.13133	-0.17813	24.041	-80.154	1251.37	-1.5615	0.95508	0.23779	-67.65941	-279.919	1392.5684	-1.5605	0.8457	0.2915	NaN	NaN	NaN	NaN	NaN	NaN
3.66	-8.467	35.2561	95.1086	0.024414	0.13818	-0.18652	24.603	-46.169	1236.844	-1.689	0.98096	0.2417	-19.831	-324.61	1380.956	-1.5527	0.87695	0.28174	NaN	NaN	NaN	NaN	NaN	NaN
3.662	-9.638	36.538	77.1295	0.0095403	0.14036	-0.18491	8.695	-85.255	1246.994	-1.7632	0.99463	0.25977	49.659	-253.191	1429.422	-1.5737	0.89502	0.2727	NaN	NaN	NaN	NaN	NaN	NaN
3.664	12.825	35.306	76.603	-0.0033965	0.14623	-0.184	49.4379	-123.013	1259.8479	-1.9258	1.0195	0.31445	81.058	-242.591	1448.688	-1.6182	0.91406	0.2749	NaN	NaN	NaN	NaN	NaN	NaN
3.666	4.468	38.142	71.3491	-0.024898	0.15124	-0.17752	-20.761	-109.1231	1250.06	-2.1108	1.0532	0.39258	135.5321	-142.949	1447.158	-1.7358	0.93213	0.31348	NaN	NaN	NaN	NaN	NaN	NaN
3.668	15.828	28.073	82.4473	-0.04832	0.1584	-0.17119	-26.356	-172.501	1291.957	-2.1978	1.0669	0.43945	197.295	-136.919	1427.185	-1.8262	0.94141	0.354	NaN	NaN	NaN	NaN	NaN	NaN
3.67	42.549	28.311	82.637	-0.066406	0.16895	-0.16211	25.194	-173.871	1318.529	-2.3765	1.1001	0.53711	221.92	-60.075	1420.5651	-2.0503	0.95752	0.45898	NaN	NaN	NaN	NaN	NaN	NaN
3.672	29.293	39.671	55.2876	-0.080745	0.1831	-0.14942	-27.0516	-161.738	1307.5877	-2.5008	1.1282	0.60572	232.768	-66.471	1401.694	-2.2478	0.97046	0.54224	NaN	NaN	NaN	NaN	NaN	NaN
3.674	34.273	30.077	55.8386	-0.097247	0.19085	-0.13365	47.661	-205.118	1352.071	-2.6055	1.1465	0.67383	232.189	4.88200000000001	1390.919	-2.4512	0.97852	0.6123	NaN	NaN	NaN	NaN	NaN	NaN
3.676	33.136	27.9808	49.9284	-0.11097	0.20504	-0.12079	59.454	-171.668	1379.076	-2.7202	1.1646	0.74805	173.537	3.126	1384.055	-2.668	1.0039	0.68896	NaN	NaN	NaN	NaN	NaN	NaN
3.678	58.4508	25.4421	60.212	-0.12241	0.21617	-0.10798	12.8471	-161.614	1393.74	-2.7729	1.1704	0.77344	115.609	25.7962	1439.071	-2.7534	1.0093	0.70459	NaN	NaN	NaN	NaN	NaN	NaN
3.68	41.993	30.3124	43.581	-0.12793	0.22168	-0.095703	59.005	-151.3791	1426.848	-2.8413	1.1782	0.8252	61.569	-41.5721	1455.208	-2.8477	1.0156	0.71729	NaN	NaN	NaN	NaN	NaN	NaN
3.682	80.4285	18.0393	44.8491	-0.13077	0.22213	-0.086581	27.1292	-65.962	1392.89876	-2.8765	1.1714	0.84278	66.474	-62.573	1473.987	-2.8847	1.0049	0.69873	NaN	NaN	NaN	NaN	NaN	NaN
3.684	73.0828	13.46	47.2286	-0.12861	0.22449	-0.077334	17.6602	-69.024	1391.305	-2.8965	1.1699	0.85889	111.887	-113.162	1500.119	-2.918	0.99219	0.69189	NaN	NaN	NaN	NaN	NaN	NaN
3.686	62.6567	21.302	43.1715	-0.12548	0.21942	-0.081676	15.679	-49.5853	1383.556	-2.9136	1.1528	0.86914	135.4922	-121.657	1506.547	-2.9292	0.93994	0.66016	NaN	NaN	NaN	NaN	NaN	NaN
3.688	78.28892	19.2349	34.7727	-0.12461	0.21533	-0.072158	-40.92	-6.18	1339.526	-2.918	1.1484	0.85986	145.94115	-136.726	1509.612	-2.9304	0.91138	0.65503	NaN	NaN	NaN	NaN	NaN	NaN
3.69	63.535	16.352	22.2136	-0.11572	0.20898	-0.076172	0.83	-36.485	1367.402	-2.916	1.123	0.86377	139.58	-107.012	1515.412	-2.9238	0.89648	0.64893	NaN	NaN	NaN	NaN	NaN	NaN
3.692	64.734	24.1413	27.8509	-0.11026	0.20205	-0.079095	-40.63586	-13.007	1376.8436	-2.9018	1.1157	0.8501	140.257	-114.868	1519.2447	-2.9434	0.87891	0.62549	NaN	NaN	NaN	NaN	NaN	NaN
3.694	48.0559	43.634	20.7595	-0.099028	0.19415	-0.082326	-76.376	-32.0913	1373.0128	-2.8887	1.1055	0.83838	89.415	-114.21	1528.0733	-2.9414	0.87109	0.61377	NaN	NaN	NaN	NaN	NaN	NaN
3.696	51.717	22.6663	29.0885	-0.09551	0.1875	-0.081153	-13.586	-75.075	1412.256	-2.8613	1.0938	0.81104	64.558	-92.671	1502.536	-2.8887	0.83984	0.60205	NaN	NaN	NaN	NaN	NaN	NaN
3.698	17.165	19.4473	32.099	-0.092773	0.18437	-0.082516	-40.491	-20.7564	1381.0297	-2.8398	1.0879	0.80029	23.806	-46.616	1499.94	-2.8672	0.83203	0.59228	NaN	NaN	NaN	NaN	NaN	NaN
3.7	9.061	16.6621	27.7755	-0.094238	0.18164	-0.083008	-20.2813	-47.21736	1390.55	-2.7891	1.0703	0.77979	22.249	14.539	1505.663	-2.8457	0.82031	0.58447	NaN	NaN	NaN	NaN	NaN	NaN
3.702	3.319	21.7183	28.69205	-0.095995	0.17392	-0.07744	-2.383	-34.2783	1406.748	-2.7417	1.062	0.75928	-18.44	61.77	1477.013	-2.834	0.81445	0.59033	NaN	NaN	NaN	NaN	NaN	NaN
3.704	0.777999999999999	12.22697	28.2358	-0.098635	0.17393	-0.069823	-64.9248	-7.862	1408.035	-2.7007	1.0415	0.74414	-10.257	116.336	1429.0792	-2.8359	0.8125	0.58643	NaN	NaN	NaN	NaN	NaN	NaN
3.706	-7.974	3.5343	45.372	-0.10137	0.17236	-0.067871	7.205	-65.658	1438.25	-2.6328	1.0137	0.72314	7.51600000000001	106.228	1407.8721	-2.8105	0.81836	0.58154	NaN	NaN	NaN	NaN	NaN	NaN
3.708	-7.413	4.933	28.5374	-0.10323	0.16807	-0.069532	-10.0741	-54.3265	1439.447	-2.5938	1	0.7124	36.3	93.2787	1379.772	-2.7624	0.81567	0.56469	NaN	NaN	NaN	NaN	NaN	NaN
3.71	-10.791	-0.445	28.3722	-0.10156	0.16602	-0.064941	-44.134	-54.0537	1425.071	-2.5054	0.979	0.68555	36.183	64.6469	1377.3286	-2.6914	0.80859	0.53174	NaN	NaN	NaN	NaN	NaN	NaN
3.712	-16.878	-5.22	28.3233	-0.099123	0.15635	-0.060839	6.981	-67.326	1417.277	-2.4255	0.95581	0.66211	84.832	69.418	1383.1206	-2.5586	0.7832	0.48096	NaN	NaN	NaN	NaN	NaN	NaN
3.714	-18.358	-1.993	57.4809	-0.094434	0.14649	-0.066894	-2.613	39.4809	1368.27	-2.3457	0.93164	0.63379	113.44223	44.026	1400.833	-2.4897	0.76807	0.45459	NaN	NaN	NaN	NaN	NaN	NaN
3.716	-9.599	2.419	82.412	-0.088575	0.13555	-0.07041	-14.706	38.1402	1322.042	-2.23	0.91064	0.59961	160.2564	54.9118	1391.3283	-2.355	0.73877	0.42285	NaN	NaN	NaN	NaN	NaN	NaN
3.718	-5.417	11.3924	78.2749	-0.081738	0.125	-0.076953	17.792	57.538	1297.647	-2.1777	0.90234	0.57959	164.768	12.162	1397.871	-2.2691	0.71924	0.39551	NaN	NaN	NaN	NaN	NaN	NaN
3.72	-3.192	26.4938	108.0447	-0.077148	0.12012	-0.087891	-5.485	114.348	1272.002	-2.0664	0.87305	0.54736	169.9228	24.4653	1375.287	-2.1851	0.70557	0.37695	NaN	NaN	NaN	NaN	NaN	NaN
3.722	18.77	45.7023	123.5152	-0.070117	0.11446	-0.10235	41.2825	45.7499	1314.1782	-1.9822	0.85327	0.52466	134.0955	-2.909	1385.629	-2.0776	0.69873	0.34961	NaN	NaN	NaN	NaN	NaN	NaN
3.724	34.367	62.7538	150.1496	-0.069824	0.11143	-0.11026	70.2078	91.629	1312.988	-1.8979	0.83643	0.50586	128.526	35.913	1368.587	-2.019	0.69775	0.33496	NaN	NaN	NaN	NaN	NaN	NaN
3.726	3.605	75.5359	163.1854	-0.067871	0.11299	-0.11807	37.3556	90.793	1296.148	-1.7944	0.80127	0.48535	117.0858	31.15	1365.985	-1.9175	0.68896	0.31055	NaN	NaN	NaN	NaN	NaN	NaN
3.728	30.028	81.0791	187.5881	-0.071387	0.11875	-0.12588	63.9058	50.437	1291.8696	-1.7476	0.78564	0.46875	128.1501	95.824	1317.034	-1.8347	0.68188	0.29565	NaN	NaN	NaN	NaN	NaN	NaN
3.73	50.38	80.847	211.55	-0.077637	0.12646	-0.13086	37.8534	105.653	1260.3731	-1.6616	0.75049	0.45508	134.787	99.322	1250.166	-1.7578	0.66602	0.27686	NaN	NaN	NaN	NaN	NaN	NaN
3.732	71.0902	83.925	244.1493	-0.091211	0.13555	-0.13213	30.035	40.1088	1245.62619	-1.6042	0.71997	0.44604	104.112	158.746	1192.365	-1.6641	0.65234	0.24951	NaN	NaN	NaN	NaN	NaN	NaN
3.734	63.6903	59.419	279.4845	-0.11172	0.15362	-0.13291	67.9668	34.263	1215.5563	-1.5483	0.69385	0.43555	99.5564	148.904	1161.907	-1.6172	0.64648	0.24023	NaN	NaN	NaN	NaN	NaN	NaN
3.736	64.16765	46.3037	305.9357	-0.12968	0.17236	-0.12744	-9.776	74.427	1175.0471	-1.4771	0.65869	0.42383	94.7433	193.971	1140.177	-1.5239	0.63721	0.21777	NaN	NaN	NaN	NaN	NaN	NaN
3.738	84.7542	37.4797	331.0764	-0.15947	0.1914	-0.13594	9.056	8.343	1196.238	-1.4492	0.63965	0.41943	104.6051	188.216	1143.6711	-1.458	0.61963	0.20068	NaN	NaN	NaN	NaN	NaN	NaN
3.74	76.1199	49.442	356.105	-0.19531	0.21143	-0.13867	22.628	66.978	1150.352	-1.3828	0.59863	0.4165	89.51827	211.325	1114.5254	-1.394	0.6001	0.18457	NaN	NaN	NaN	NaN	NaN	NaN
3.742	93.0665	30.6271	421.3972	-0.23721	0.23379	-0.13887	-33.752	74.3919	1109.2539	-1.3399	0.56592	0.40674	96.154	164.127	1074.9009	-1.3047	0.58105	0.16162	NaN	NaN	NaN	NaN	NaN	NaN
3.744	64.331	11.2652	461.46647	-0.28799	0.26094	-0.13965	16.635	62.075	1104.7474	-1.3027	0.53906	0.40332	28.284	172.83	1029.111	-1.2617	0.57129	0.15137	NaN	NaN	NaN	NaN	NaN	NaN
3.746	55.474	-3.09	495.2596	-0.34658	0.29688	-0.13301	-5.78400000000001	144.93	1054.00862	-1.2412	0.49854	0.396	5.19	156.3688	984.629	-1.1675	0.54736	0.12598	NaN	NaN	NaN	NaN	NaN	NaN
3.748	45.717	-2.7602	538.3603	-0.40918	0.33516	-0.12285	14.72	123.04	1051.189	-1.2124	0.48096	0.39551	-42.937	186.4025	982.824	-1.105	0.52832	0.11035	NaN	NaN	NaN	NaN	NaN	NaN
3.75	55.486	-24.6224	598.211	-0.47607	0.38135	-0.10742	39.177	157.133	1019.024	-1.1426	0.44629	0.38818	-34.123	154.218	959.7496	-1.0347	0.51025	0.097656	NaN	NaN	NaN	NaN	NaN	NaN
3.752	33.837	-30.9355	649.117	-0.54365	0.43213	-0.088379	-10.219	210.805	957.641	-1.0905	0.4148	0.37745	-76.0731	140.622	945.727	-0.94287	0.49072	0.078125	NaN	NaN	NaN	NaN	NaN	NaN
3.754	11.092	-37.26229	672.901	-0.61377	0.48945	-0.068164	38.008	149.883	952.379	-1.0352	0.38574	0.37451	-71.4101	83.592	918.941	-0.9043	0.47754	0.070801	NaN	NaN	NaN	NaN	NaN	NaN
3.756	12.295	-35.8189	655.79477	-0.6833	0.54727	-0.051367	19.913	178.621	911.0793	-0.95459	0.34033	0.34912	-85.007	86.4073	882.146	-0.81055	0.44434	0.061523	NaN	NaN	NaN	NaN	NaN	NaN
3.758	-20.9174	-29.8423	658.08515	-0.74609	0.61211	-0.038867	-3.166	148.085	871.1228	-0.91357	0.32275	0.3418	-58.4234	101.225	808.2041	-0.7439	0.41919	0.053956	NaN	NaN	NaN	NaN	NaN	NaN
3.76	-26.6693	-19.807	673.8779	-0.81006	0.68018	-0.020508	49.602	108.895	846.6841	-0.82959	0.28271	0.32129	-27.905	150.835	790.8071	-0.67969	0.39307	0.050293	NaN	NaN	NaN	NaN	NaN	NaN
3.762	-15.311	-12.1774	666.0444	-0.86631	0.7458	0.0035157	1.807	149.95317	802.13831	-0.76245	0.24853	0.30737	12.824	169.569	729.9197	-0.59912	0.36475	0.046387	NaN	NaN	NaN	NaN	NaN	NaN
3.764	-29.691	-10.3546	657.4922	-0.91553	0.80908	0.032324	25.86	88.425	810.2558	-0.69873	0.22021	0.29199	20.083	200.089	701.591	-0.5625	0.34375	0.042969	NaN	NaN	NaN	NaN	NaN	NaN
3.766	-38.1603	-23.9695	651.6824	-0.95732	0.87354	0.055762	72.122	86.339	774.7965	-0.61084	0.1748	0.26318	47.836	197.586	649.7779	-0.48877	0.30957	0.040039	NaN	NaN	NaN	NaN	NaN	NaN
3.768	-36.941	-31.327	658.089	-0.98574	0.92812	0.086035	46.035	124.6582	734.45328	-0.56494	0.15234	0.25195	25.7357	204.566	643.969	-0.43384	0.28663	0.03711	NaN	NaN	NaN	NaN	NaN	NaN
3.77	-18.872	-23.18571	673.6808	-0.98779	0.97314	0.11523	82.0832	90.09	725.3497	-0.48486	0.1084	0.21729	15.754	209.331	593.3367	-0.3833	0.2627	0.035156	NaN	NaN	NaN	NaN	NaN	NaN
3.772	-32.624	-13.223	684.0703	-0.97412	1.0036	0.13301	88.3384	148.1643	677.4987	-0.42285	0.078125	0.19898	-6.702	209.5103	571.004	-0.30811	0.229	0.033203	NaN	NaN	NaN	NaN	NaN	NaN
3.774	-9.325	-8.764	691.577	-0.94024	1.0135	0.13125	70.903	146.373	672.305	-0.36914	0.046387	0.17969	7.398	205.4911	510.802	-0.27393	0.2085	0.033203	NaN	NaN	NaN	NaN	NaN	NaN
3.776	8.758	-17.232	695.56	-0.88281	1.0037	0.10899	114.269	119.551	653.445	-0.30029	0.0097656	0.15088	18.458	182.348	482.178	-0.21533	0.17627	0.029785	NaN	NaN	NaN	NaN	NaN	NaN
3.778	27.776	-30.237	702.792	-0.81279	0.97236	0.064746	85.3118	175.932	596.7811	-0.26416	-0.0039063	0.13623	47.344	169.394	420.0757	-0.16968	0.14576	0.024658	NaN	NaN	NaN	NaN	NaN	NaN
3.78	33.314	-42.465	719.0959	-0.73779	0.93604	0.0048828	72.5406	125.936	582.963	-0.19678	-0.039551	0.10352	88.548	143.17	417.8718	-0.12305	0.11768	0.026855	NaN	NaN	NaN	NaN	NaN	NaN
3.782	53.169	-57.693	743.6806	-0.65781	0.88633	-0.058984	85.6288	145.2161	515.4933	-0.16235	-0.064454	0.086914	84.279	144.427	363.428	-0.071289	0.080566	0.015625	NaN	NaN	NaN	NaN	NaN	NaN
3.784	70.903	-67.477	749.456	-0.58945	0.84883	-0.12188	39.136	172.983	459.9257	-0.12158	-0.083008	0.064941	72.069	123.376	355.4276	-0.043457	0.063477	0.02002	NaN	NaN	NaN	NaN	NaN	NaN
3.786	71.7986	-73.7422	753.9431	-0.53867	0.81211	-0.17617	82.0761	149.4908	427.194	-0.067871	-0.10645	0.046387	92.131	132.253	339.2075	0.0014648	0.029785	0.010742	NaN	NaN	NaN	NaN	NaN	NaN
3.788	68.2037	-90.416	768.3173	-0.51377	0.79951	-0.22529	44.569	180.2569	386.684	-0.045898	-0.11768	0.035645	66.5821	100.935	342.485	0.037354	0.004883	-1.7347e-14	NaN	NaN	NaN	NaN	NaN	NaN
3.79	70.594	-88.692	781.9638	-0.50439	0.80127	-0.25488	19.163	152.0578	372.41	0.0024414	-0.13965	0.019043	57.2756	106.471	312.522	0.06543	-0.022461	-0.012207	NaN	NaN	NaN	NaN	NaN	NaN
3.792	79.5167	-86.592	799.938	-0.49951	0.81631	-0.26631	64.154	103.831	374.8753	0.035888	-0.1543	0.0097659	31.1783	86.427	299.456	0.10693	-0.048828	-0.028809	NaN	NaN	NaN	NaN	NaN	NaN
3.794	69.282	-71.231	808.617	-0.49277	0.83907	-0.27031	9.181	142.617	329.3719	0.068359	-0.17139	-0.0053711	-5.325	118.8182	249.2438	0.11963	-0.063965	-0.039551	NaN	NaN	NaN	NaN	NaN	NaN
3.796	75.4825	-76.7369	829.575	-0.47285	0.8625	-0.2711	9.26	112.917	338.3894	0.12012	-0.19141	-0.016602	-74.851	124.434	221.36868	0.13623	-0.090332	-0.060059	NaN	NaN	NaN	NaN	NaN	NaN
3.798	71.8987	-76.9716	852.3662	-0.44101	0.88243	-0.2793	31.548	125.245	327.964	0.14771	-0.20923	-0.026612	-56.8024	156.3237	177.617	0.14941	-0.11206	-0.067138	NaN	NaN	NaN	NaN	NaN	NaN
3.8	88.1099	-72.614	854.38208	-0.39502	0.89502	-0.2998	-12.897	137.645	290.036	0.17383	-0.22852	-0.038574	-50.9955	145.406	143.153	0.15332	-0.12793	-0.069824	NaN	NaN	NaN	NaN	NaN	NaN
3.802	83.936	-62.666	876.8657	-0.35449	0.90547	-0.33164	24.618	86.321	285.8619	0.20752	-0.24463	-0.049805	-29.254	144.041	108.755	0.13818	-0.14404	-0.069336	NaN	NaN	NaN	NaN	NaN	NaN
3.804	86.5617	-61.252	899.4317	-0.32129	0.90977	-0.36816	4.268	97.6992	253.9167	0.22656	-0.24854	-0.053223	-43.1486	97.48556	100.073	0.13477	-0.15234	-0.062012	NaN	NaN	NaN	NaN	NaN	NaN
3.806	76.7165	-63.711	908.472702	-0.30098	0.90977	-0.4084	-29.962	79.9945	222.085	0.25635	-0.26904	-0.076172	-45.4657	87.332	87.215	0.10596	-0.15967	-0.03418	NaN	NaN	NaN	NaN	NaN	NaN
3.808	59.259	-68.168	897.4767	-0.30322	0.91631	-0.43867	27.417	73.124	221.4688	0.27539	-0.28662	-0.085449	-46.8309	72.029	102.534	0.074463	-0.16797	-0.017822	NaN	NaN	NaN	NaN	NaN	NaN
3.81	45.234	-78.803	913.9696	-0.32422	0.93164	-0.45801	-11.354	96.9641	186.2487	0.29639	-0.30078	-0.098633	-7.557	100.886	84.34222	0.046387	-0.16748	0.012207	NaN	NaN	NaN	NaN	NaN	NaN
3.812	23.732	-80.9035	937.4314	-0.3666	0.96543	-0.4418	-20.081	70.5829	171.2196	0.31836	-0.31641	-0.1167	-19.704	83.985	67.075	-0.0019531	-0.15527	0.049316	NaN	NaN	NaN	NaN	NaN	NaN
3.814	20.443	-84.123	968.5459	-0.43076	1.0048	-0.41572	17.883	90.5702	145.8036	0.32666	-0.32178	-0.125	-11.32	86.607	42.065	-0.021973	-0.14355	0.06543	NaN	NaN	NaN	NaN	NaN	NaN
3.816	22.702	-95.2539	969.9832	-0.49912	1.0512	-0.37939	0.329999999999998	103.169	124.925	0.3457	-0.33447	-0.14941	-19.243	51.5505	35.328	-0.064453	-0.11523	0.099609	NaN	NaN	NaN	NaN	NaN	NaN
3.818	1.858	-106.4197	970.5003	-0.55762	1.0944	-0.33584	45.265	89.945	131.7812	0.35693	-0.34228	-0.16406	-16.64	56.476	39.806	-0.099121	-0.089844	0.12451	NaN	NaN	NaN	NaN	NaN	NaN
3.82	1.791	-112.227	997.352	-0.59473	1.1367	-0.29736	35.499	107.669	106.42086	0.3623	-0.34912	-0.17578	-24.913	23.9584	57.8487	-0.10938	-0.075195	0.13672	NaN	NaN	NaN	NaN	NaN	NaN
3.822	25.05	-97.4278	1015.911	-0.6084	1.1721	-0.26963	31.745	101.334	96.9733	0.36719	-0.35645	-0.19238	3.131	11.5862	61.321	-0.13135	-0.0625	0.16064	NaN	NaN	NaN	NaN	NaN	NaN
3.824	50.431	-80.39	1030.535	-0.61407	1.2035	-0.25527	60.0463	92.754	95.6535	0.36914	-0.35645	-0.19531	37.5232	-19.5058	57.128	-0.13819	-0.049316	0.17871	NaN	NaN	NaN	NaN	NaN	NaN
3.826	44.083	-65.739	1037.154	-0.60391	1.2214	-0.25058	39.171	95.973	61.0354	0.36377	-0.35693	-0.20508	69.76149	-20.0472	25.27782	-0.146	-0.041016	0.18896	NaN	NaN	NaN	NaN	NaN	NaN
3.828	59.918	-72.764	1040.9925	-0.59004	1.2248	-0.25478	64.5639	59.614	77.0945	0.35547	-0.34863	-0.1958	83.4358	-26.3004	19.4508	-0.15234	-0.040039	0.19385	NaN	NaN	NaN	NaN	NaN	NaN
3.83	71.85	-70.271	1050.8024	-0.58203	1.2266	-0.25732	60.8469	38.5497	55.6959	0.33594	-0.34473	-0.18994	78.218	12.012	23.5621	-0.14941	-0.048828	0.19629	NaN	NaN	NaN	NaN	NaN	NaN
3.832	73.727	-51.791	1059.8495	-0.57588	1.2234	-0.27187	17.058	39.5254	35.5849	0.30127	-0.32471	-0.1709	74.979	12.991	12.603	-0.14111	-0.055176	0.19922	NaN	NaN	NaN	NaN	NaN	NaN
3.834	79.763	-60.657	1088.695	-0.59239	1.2215	-0.29492	63.5825	14.528	57.475	0.27734	-0.31836	-0.16357	107.697	39.5632	16.06752	-0.13428	-0.062256	0.19409	NaN	NaN	NaN	NaN	NaN	NaN
3.836	86.212	-59.6354	1098.439	-0.62754	1.2293	-0.30976	33.381	26.702	25.7807	0.25049	-0.30225	-0.14893	101.273	20.3839	3.9685	-0.12207	-0.071777	0.2041	NaN	NaN	NaN	NaN	NaN	NaN
3.838	104.575	-63.6156	1085.5894	-0.68379	1.2455	-0.30723	12.589	14.5262	31.9464	0.22803	-0.28809	-0.13843	67.841	18.4584	15.8261	-0.1084	-0.091797	0.20313	NaN	NaN	NaN	NaN	NaN	NaN
3.84	89.528	-61.4473	1084.1714	-0.76465	1.2813	-0.28467	53.053	5.995	31.0719	0.19922	-0.2793	-0.12939	58.5136	-10.682	27.159788	-0.10352	-0.099609	0.20801	NaN	NaN	NaN	NaN	NaN	NaN
3.842	113.93789	-67.5053	1105.7499	-0.86026	1.3371	-0.24902	5.464	28.3175	12.9293	0.15771	-0.26025	-0.11719	32.162	6.063	39.5184	-0.089355	-0.11768	0.21387	NaN	NaN	NaN	NaN	NaN	NaN
3.844	115.356	-66.3783	1125.21	-0.97148	1.4125	-0.18975	11.621	5.1565	31.6246	0.13623	-0.25195	-0.10742	23.217	10.4182	23.7314	-0.072754	-0.12622	0.21558	NaN	NaN	NaN	NaN	NaN	NaN
3.846	138.2931	-63.1683	1129.89664	-1.0855	1.5109	-0.12256	31.596	10.4738	40.784	0.083984	-0.23389	-0.083984	-9.445	15.768	20.8194	-0.059082	-0.13232	0.21338	NaN	NaN	NaN	NaN	NaN	NaN
3.848	141.8457	-65.9947	1134.0133	-1.1891	1.6186	-0.03291	-21.764	28.4128	29.0177	0.041748	-0.22242	-0.063721	9.141	-2.844	-8.6605	-0.046875	-0.13525	0.21191	NaN	NaN	NaN	NaN	NaN	NaN
3.85	142.9348	-76.60627	1144.9017	-1.2729	1.7212	0.04834	17.855	11.8504	27.9821	-0.0043945	-0.21289	-0.041992	-4.467	0.969000000000001	4.7058	-0.037109	-0.14355	0.20752	NaN	NaN	NaN	NaN	NaN	NaN
3.852	143.4633	-69.56373	1177.833	-1.3185	1.8119	0.11914	13.285	38.963	-0.63902	-0.055664	-0.19531	-0.018066	18.871	-11.4676	-5.046	-0.021484	-0.14404	0.20068	NaN	NaN	NaN	NaN	NaN	NaN
3.854	121.2717	-63.4272	1178.878	-1.352	1.8742	0.15723	-29.183	25.385	-22.8687	-0.074707	-0.19336	-0.0063477	0.292999999999999	-11.24351	4.391	-0.011963	-0.14673	0.18847	NaN	NaN	NaN	NaN	NaN	NaN
3.856	116.743	-56.3664	1181.6702	-1.352	1.9008	0.15527	-6.117	11.2558	-2.083	-0.11182	-0.17676	0.0048828	-17.406	-15.667	-2.162	-0.0014648	-0.14844	0.18604	NaN	NaN	NaN	NaN	NaN	NaN
3.858	90.834	-50.6021	1174.2541	-1.3273	1.9063	0.13067	-36.442	32.2776	-10.0532	-0.13819	-0.16138	0.015381	-39.138	-14.9985	20.1253	0.0073242	-0.1582	0.17627	NaN	NaN	NaN	NaN	NaN	NaN
3.86	81.252	-45.2124	1170.884	-1.2832	1.9004	0.104	-14.271	6.0378	20.7872	-0.16211	-0.14893	0.025391	-7.448	-2.4563	17.0313	0.015625	-0.16211	0.17871	NaN	NaN	NaN	NaN	NaN	NaN
3.862	68.386	-35.6562	1165.0879	-1.233	1.8744	0.066602	13.051	-1.4023	22.5947	-0.19678	-0.13916	0.049805	-33.8	-0.401	43.007	0.02832	-0.16602	0.18652	NaN	NaN	NaN	NaN	NaN	NaN
3.864	58.685	-31.752	1168.6822	-1.1734	1.8406	0.030078	-13.928	-4.4872	26.777	-0.21436	-0.13477	0.061035	-17.043	30.19	14.0418	0.039307	-0.17236	0.18726	NaN	NaN	NaN	NaN	NaN	NaN
3.866	52.407	-23.3993	1172.5652	-1.1238	1.7981	0.0058594	22.932	-24.0416	42.467	-0.25049	-0.12402	0.087402	-29.447	26.1312	20.6394	0.049316	-0.17334	0.18896	NaN	NaN	NaN	NaN	NaN	NaN
3.868	49.237	-18.3242	1166.55	-1.0918	1.7637	-0.016992	7.482	9.22	13.12851	-0.27221	-0.1167	0.10156	-22.706	49.414	-19.146	0.070801	-0.17725	0.18506	NaN	NaN	NaN	NaN	NaN	NaN
3.87	59.623	-24.547	1169.3456	-1.0835	1.7349	-0.036133	22.072	2.732	10.2831	-0.29102	-0.11084	0.11816	-28.102	34.3556	-14.791	0.079102	-0.17871	0.18066	NaN	NaN	NaN	NaN	NaN	NaN
3.872	43.024	-31.333	1166.22624	-1.0748	1.7201	-0.036035	50.2192	-6.78335	6.475	-0.30371	-0.10107	0.13721	36.34	41.7418	-20.207	0.10986	-0.18604	0.17432	NaN	NaN	NaN	NaN	NaN	NaN
3.874	57.091	-23.402	1182.688	-1.075	1.7168	-0.037793	9.915	17.4563	-1.3546	-0.30176	-0.098633	0.14551	40.855	-6.0588	18.139	0.13647	-0.18506	0.17017	NaN	NaN	NaN	NaN	NaN	NaN
3.876	65.267	-5.42	1182.3131	-1.0688	1.709	-0.036621	44.0756	-10.37357	24.8365	-0.29199	-0.093262	0.15283	63.7598	4.49299999999999	18.381	0.16357	-0.18945	0.16016	NaN	NaN	NaN	NaN	NaN	NaN
3.878	60.353	9.516	1177.5663	-1.0746	1.697	-0.035742	61.3142	4.9142	5.59289	-0.26928	-0.09668	0.14184	75.1116	-13.7957	32.506	0.1958	-0.19043	0.14404	NaN	NaN	NaN	NaN	NaN	NaN
3.88	50.006	-3.1592	1185.5607	-1.1011	1.6821	-0.032227	20.717	23.1085	-8.3308	-0.2417	-0.099121	0.13965	76.7841	30.704	27.3361	0.20313	-0.19482	0.13281	NaN	NaN	NaN	NaN	NaN	NaN
3.882	57.064	-11.596	1182.5904	-1.1201	1.6674	-0.016992	53.6649	5.6738	26.2178	-0.19434	-0.10889	0.12256	50.18725	17.6791	25.582	0.2251	-0.19727	0.11621	NaN	NaN	NaN	NaN	NaN	NaN
3.884	58.338	-5.034	1175.2644	-1.1429	1.6555	-0.0078125	43.692	31.518	13.498	-0.16748	-0.11719	0.10693	86.3212	34.5237	29.9638	0.23364	-0.18775	0.10596	NaN	NaN	NaN	NaN	NaN	NaN
3.886	55.931	14.3234	1182.8484	-1.1601	1.6336	-0.0078125	16.706	20.2845	11.7746	-0.10742	-0.13086	0.076172	68.0723	-8.1197	25.6959	0.23926	-0.17773	0.089355	NaN	NaN	NaN	NaN	NaN	NaN
3.888	82.588	15.5731	1177.1112	-1.1694	1.6252	-0.0079102	95.659	13.29135	0.4009	-0.064209	-0.14624	0.054444	81.714	17.40943	26.20937	0.24072	-0.16406	0.076172	NaN	NaN	NaN	NaN	NaN	NaN
3.89	98.587	15.4602	1160.8031	-1.1694	1.6177	-0.016602	28.256	28.684	-23.7229	-0.023926	-0.16211	0.032227	55.4496	-19.1231	19.6857	0.23779	-0.15479	0.071777	NaN	NaN	NaN	NaN	NaN	NaN
3.892	102.5017	23.05376	1140.7562	-1.1555	1.6047	-0.031153	22.039	-4.6032	7.1702	0.012695	-0.17725	0.0078125	30.292	3.901	24.8459	0.22607	-0.13232	0.060059	NaN	NaN	NaN	NaN	NaN	NaN
3.894	107.4893	26.0244	1137.57	-1.1375	1.5925	-0.047168	38.809	9.76109	10.0882	0.030273	-0.18701	-0.0024414	11.525	-24.264	30.073	0.21557	-0.11694	0.058838	NaN	NaN	NaN	NaN	NaN	NaN
3.896	120.3724	32.8973	1148.785	-1.1156	1.5817	-0.06709	-5.568	21.1147	-3.2254	0.054688	-0.19434	-0.019531	48.001	14.881	25.5443	0.1958	-0.097168	0.055176	NaN	NaN	NaN	NaN	NaN	NaN
3.898	123.5735	50.743	1148.0931	-1.0941	1.5742	-0.089455	30.726	-2.0135	17.10888	0.066162	-0.19604	-0.030518	35.68	-7.1958	19.707	0.1709	-0.071289	0.057129	NaN	NaN	NaN	NaN	NaN	NaN
3.9	108.927183	69.077	1111.429	-1.0698	1.561	-0.10889	-1.373	3.706	13.6232	0.07373	-0.19385	-0.041504	34.3607	25.3986	13.863	0.1543	-0.059082	0.060059	NaN	NaN	NaN	NaN	NaN	NaN
3.902	120.8948	70.208	1121.7807	-1.0475	1.5447	-0.12578	-15.199	-6.2895	30.6711	0.081055	-0.19189	-0.052734	19.099	-1.4262	13.8261	0.125	-0.027832	0.064453	NaN	NaN	NaN	NaN	NaN	NaN
3.904	103.4778	67.4226	1111.4339	-1.028	1.534	-0.13613	13.884	2.3973	16.7921	0.083984	-0.18262	-0.064941	-4.592	42.605	14.9482	0.09717	-0.0046386	0.068604	NaN	NaN	NaN	NaN	NaN	NaN
3.906	81.7858	64.6873	1096.375	-1.006	1.5277	-0.1459	-33.717	34.333	-17.4886	0.083008	-0.17139	-0.070801	-27.252	15.00887	6.013	0.071289	0.018555	0.077148	NaN	NaN	NaN	NaN	NaN	NaN
3.908	79.9077	72.182	1074.8876	-0.98516	1.5234	-0.14844	-22.524	14.7449	-4.1513	0.074951	-0.15796	-0.078857	-17.761	34.723	6.7522	0.031738	0.052246	0.09082	NaN	NaN	NaN	NaN	NaN	NaN
3.91	74.4046	57.2083	1060.2391	-0.97021	1.52	-0.15088	-2.797	22.4008	20.4491	0.067871	-0.14697	-0.088867	-17.329	-22.8438	9.7671	0.01709	0.068848	0.096191	NaN	NaN	NaN	NaN	NaN	NaN
3.912	54.632	55.7452	1052.5367	-0.9582	1.5117	-0.16211	-12.251	20.4656	7.8668	0.058594	-0.12158	-0.087891	-40.203	-10.8104	27.0208	-0.01709	0.10498	0.1084	NaN	NaN	NaN	NaN	NaN	NaN
3.914	49.299	57.8721	1032.0801	-0.93818	1.504	-0.16816	28.055	12.99883	12.5357	0.054688	-0.1123	-0.089844	-22.641	-30.45673	26.9677	-0.042724	0.12353	0.11743	NaN	NaN	NaN	NaN	NaN	NaN
3.916	53.105	64.3762	1012.075	-0.92529	1.4974	-0.17129	7.621	35.079	12.0539	0.036133	-0.089844	-0.09082	-34.5649	13.9393	21.0169	-0.067383	0.14502	0.12598	NaN	NaN	NaN	NaN	NaN	NaN
3.918	37.698	70.261	1015.9705	-0.90537	1.4849	-0.17022	-18.189	7.44407	29.418	0.026367	-0.075927	-0.096436	-18.276	-1.9859	12.737	-0.10547	0.16992	0.13086	NaN	NaN	NaN	NaN	NaN	NaN
3.92	33.919	68.622	1013.7487	-0.89258	1.4727	-0.16992	27.95	17.5267	29.9491	0.0097656	-0.061035	-0.10059	3.224	-4.6277	31.653	-0.13281	0.18066	0.13184	NaN	NaN	NaN	NaN	NaN	NaN
3.922	23.892	80.746	990.018	-0.88515	1.4508	-0.16768	11.987	42.817	-11.4578	-0.0058594	-0.041016	-0.10254	19.088	-45.941	30.415	-0.18652	0.21338	0.12354	NaN	NaN	NaN	NaN	NaN	NaN
3.924	33.135	95.813	973.355	-0.86953	1.4317	-0.16289	33.98	13.1188	-4.479	-0.015625	-0.031738	-0.104	15.376	0.36227	56.351	-0.23072	0.2373	0.12573	NaN	NaN	NaN	NaN	NaN	NaN
3.926	17.83	101.179	957.7668	-0.86289	1.4094	-0.16094	48.548	9.4258	17.696	-0.047363	-0.013672	-0.10938	49.547	22.5977	123.826	-0.27686	0.26416	0.12988	NaN	NaN	NaN	NaN	NaN	NaN
3.928	7.354	104.5	936.1647	-0.84551	1.385	-0.15811	8.629	-2.02785	41.141	-0.090332	0.011719	-0.125	35.5681	52.021	221.51101	-0.34717	0.29736	0.14209	NaN	NaN	NaN	NaN	NaN	NaN
3.93	14.204	101.831	915.9248	-0.83154	1.3618	-0.15625	52.3316	-23.9709	64.101	-0.11377	0.026855	-0.12598	11.338	38.576	243.225	-0.38867	0.31348	0.14893	NaN	NaN	NaN	NaN	NaN	NaN
3.932	10.892	98.42	889.479	-0.80918	1.3342	-0.15039	46.19367	4.1262	46.6479	-0.16357	0.054688	-0.10449	24.7067	63.402	292.839	-0.47656	0.3418	0.1665	NaN	NaN	NaN	NaN	NaN	NaN
3.934	10.536	86.7248	889.1302	-0.79375	1.3035	-0.1545	24.7634	-6.73536	67.9912	-0.21509	0.069336	-0.092041	54.0086	59.163	342.541	-0.54712	0.35816	0.1792	NaN	NaN	NaN	NaN	NaN	NaN
3.936	49.569	92.4722	879.3528	-0.77305	1.2734	-0.15801	67.8412	6.0485	89.9028	-0.27197	0.091797	-0.074219	20.3197	88.53	436.5123	-0.63037	0.37744	0.19287	NaN	NaN	NaN	NaN	NaN	NaN
3.938	50.872	95.212	850.9138	-0.75019	1.251	-0.1543	41.363	44.96	77.577	-0.35449	0.12305	-0.046387	24.596	92.079	513.9298	-0.74561	0.41064	0.20117	NaN	NaN	NaN	NaN	NaN	NaN
3.94	52.339	94.124	849.282	-0.72803	1.2202	-0.15674	30.709	37.061	109.172	-0.40137	0.13965	-0.033691	-3.7885	85.307	573.237	-0.80615	0.43018	0.21777	NaN	NaN	NaN	NaN	NaN	NaN
3.942	69.626	90.772	825.9357	-0.7043	1.1961	-0.15996	61.5063	58.5925	151.174	-0.50098	0.17285	0.0019531	13.0889	54.673	589.126	-0.93115	0.46924	0.25049	NaN	NaN	NaN	NaN	NaN	NaN
3.944	70.156	83.4888	797.4522	-0.68262	1.1696	-0.15723	12.681	61.481	196.1496	-0.5813	0.20483	0.032226	7.1959	7.8965	689.552	-1.0398	0.49536	0.27465	NaN	NaN	NaN	NaN	NaN	NaN
3.946	78.8472	102.618	775.266	-0.66192	1.1406	-0.15801	39.888	35.7117	266.552	-0.67139	0.23389	0.061035	2.6125	-27.003	788.5	-1.1465	0.51953	0.30225	NaN	NaN	NaN	NaN	NaN	NaN
3.948	82.4341	109.759	779.2062	-0.63555	1.1084	-0.16016	28.399	66.2317	280.837	-0.79492	0.27148	0.10693	-17.2285	-63.986	900.854	-1.2949	0.5459	0.34814	NaN	NaN	NaN	NaN	NaN	NaN
3.95	91.661	99.9285	768.329	-0.61963	1.0767	-0.16748	4.697	54.254	321.0291	-0.86621	0.29639	0.12793	12.955	-66.095	951.158	-1.4058	0.5625	0.39404	NaN	NaN	NaN	NaN	NaN	NaN
3.952	80.6241	99.4361	754.678	-0.60508	1.0523	-0.16777	42.534	45.0184	401.5165	-1.0181	0.34668	0.18115	-2.002	-102.572	978.957	-1.5229	0.57471	0.43066	NaN	NaN	NaN	NaN	NaN	NaN
3.954	61.706	96.8387	716.53356	-0.58828	1.0278	-0.16865	9.305	46.409	448.803	-1.1372	0.38184	0.23072	-19.756	-141.206	1004.404	-1.668	0.58496	0.48926	NaN	NaN	NaN	NaN	NaN	NaN
3.956	66.706	106.2319	701.91193	-0.57188	1.0059	-0.15927	27.77	1.344	538.148	-1.2686	0.41992	0.2915	-7.85	-196.772	1036.648	-1.7266	0.57617	0.52783	NaN	NaN	NaN	NaN	NaN	NaN
3.958	55.571	112.7729	697.826	-0.55654	0.98467	-0.15498	40.125	-17.2574	612.819	-1.4478	0.47607	0.37891	10.909	-192.9464	1018.415	-1.8413	0.56787	0.60156	NaN	NaN	NaN	NaN	NaN	NaN
3.96	47.43	110.9673	667.713	-0.54639	0.96143	-0.14307	24.935	-43.07	680.349	-1.5371	0.50293	0.43018	10.932	-190.658	990.779	-1.9048	0.55713	0.63062	NaN	NaN	NaN	NaN	NaN	NaN
3.962	61.9877	107.392	642.5062	-0.53711	0.93887	-0.13769	73.343	-100.544	799.23	-1.7051	0.55078	0.52295	38.707	-159.219	956.708	-1.9507	0.55615	0.66797	NaN	NaN	NaN	NaN	NaN	NaN
3.964	42.955	100.8722	614.32663	-0.5251	0.91728	-0.13095	21.837	-84.992	860.331	-1.8169	0.57031	0.57715	26.551	-183.254	933.398	-1.9897	0.57861	0.70313	NaN	NaN	NaN	NaN	NaN	NaN
3.966	36.118	104.3216	605.3437	-0.51455	0.89463	-0.12119	-13.926	-100.869	917.1912	-1.9043	0.58105	0.61963	11.124	-165.587	885.705	-1.9961	0.59473	0.72217	NaN	NaN	NaN	NaN	NaN	NaN
3.968	20.389	121.21	584.2027	-0.49658	0.87246	-0.11592	14.0202	-106.9432	952.977	-1.9761	0.57861	0.63184	49.989	-184.182	867.8744	-1.9414	0.62305	0.74072	NaN	NaN	NaN	NaN	NaN	NaN
3.97	25.775	119.396	574.6284	-0.48438	0.84766	-0.10742	-33.6237	-75.7178	931.833	-1.9883	0.57324	0.62842	50.381	-112.0435	874.208	-1.8999	0.65381	0.73145	NaN	NaN	NaN	NaN	NaN	NaN
3.972	-1.02800000000001	111.1859	567.665	-0.46866	0.82823	-0.10157	-22.916	-87.187	959.13	-1.9917	0.53418	0.61133	16.199	-99.9607	898.936	-1.8613	0.70313	0.7251	NaN	NaN	NaN	NaN	NaN	NaN
3.974	-9.831	111.5795	561.823	-0.45479	0.80478	-0.090136	9.671	-76.3988	934.802	-1.9724	0.51929	0.59009	34.8341	-40.091	950.026	-1.8379	0.771	0.72119	NaN	NaN	NaN	NaN	NaN	NaN
3.976	1.435	107.5433	531.006	-0.44151	0.78017	-0.083105	-31.014	-64.177	896.642	-1.9292	0.49072	0.55469	42.239	-90.519	992.748	-1.8379	0.79492	0.71924	NaN	NaN	NaN	NaN	NaN	NaN
3.978	-7.445	108.7718	511.4925	-0.42686	0.75996	-0.078027	-10.875	-87.045	906.924	-1.834	0.45508	0.5083	35.2423	-70.805	1024.492	-1.8662	0.85547	0.73096	NaN	NaN	NaN	NaN	NaN	NaN
3.98	-17.064	96.3442	500.552	-0.41309	0.73877	-0.066895	-35.7414	-68.161	877.17	-1.7734	0.43359	0.47314	52.011	-156.511	1092.538	-1.8672	0.90723	0.72802	NaN	NaN	NaN	NaN	NaN	NaN
3.982	-14.451	96.6696	475.5913	-0.39531	0.71406	-0.060547	-53.8722	-67.95	874.3864	-1.6265	0.37939	0.40723	80.984	-138.886	1169.634	-1.8394	0.95166	0.69922	NaN	NaN	NaN	NaN	NaN	NaN
3.984	14.764	93.768	438.8227	-0.37705	0.6915	-0.062207	13.165	-73.409	900.726	-1.5005	0.33789	0.34229	72.5458	-227.992	1198.306	-1.7534	0.99268	0.60547	NaN	NaN	NaN	NaN	NaN	NaN
3.986	13.242	91.029	427.4121	-0.35674	0.67002	-0.051269	-0.088000000000001	-33.887	887.795	-1.3965	0.30176	0.27588	79.9538	-207.375	1212.827	-1.689	0.99658	0.55371	NaN	NaN	NaN	NaN	NaN	NaN
3.988	24.87	84.2497	425.1238	-0.3334	0.64395	-0.041308	37.337	-57.902	915.321	-1.3086	0.31006	0.21338	92.988	-296.351	1231.0586	-1.5664	0.99512	0.45947	NaN	NaN	NaN	NaN	NaN	NaN
3.99	44.409	85.9041	418.13	-0.30664	0.62158	-0.038086	69.199	-62.381	943.052	-1.2769	0.32861	0.19775	22.162	-281.304	1244.931	-1.4956	0.97705	0.40283	NaN	NaN	NaN	NaN	NaN	NaN
3.992	45.0924	91.712	393.7107	-0.28379	0.5959	-0.036719	11.706	-53.113	952.934	-1.2383	0.39014	0.18604	12.718	-331.101	1287.845	-1.4541	0.95117	0.36182	NaN	NaN	NaN	NaN	NaN	NaN
3.994	38.603	95.2643	381.3218	-0.26338	0.56905	-0.044141	16.228	-120.222	1032.396	-1.1968	0.43115	0.18164	3.20800000000001	-260.448	1298.389	-1.4512	0.91895	0.33594	NaN	NaN	NaN	NaN	NaN	NaN
3.996	48.739	92.18423	357.5684	-0.24229	0.54287	-0.05	4.222	-126.9534	1062.08	-1.1641	0.45703	0.17529	-22.05	-233.082	1307.876	-1.4644	0.9126	0.33398	NaN	NaN	NaN	NaN	NaN	NaN
[truncated: 28,002 more rows]
