# Supplementary material for: Reliability and Validity of Running Cadence and Stance Time Derived from Instrumented Wireless Earbuds
Source: Sensors (Basel). 2021 Nov 30;21(23):7995. doi: 10.3390/s21237995 (PMC8659722; doi:10.3390/s21237995)
Supplement: Supplementary file 1 [file sensors-21-07995-s001.zip › Data_P04_HeadMovements.csv]

time	up_force_plate_1	up_force_plate_2	up_force_plate_3	up_earbuds_1	up_earbuds_2	up_earbuds_3	down_force_plate_1	down_force_plate_2	down_force_plate_3	down_earbuds_1	down_earbuds_2	down_earbuds_3	shake_force_plate_1	shake_force_plate_2	shake_force_plate_3	shake_earbuds_1	shake_earbuds_2	shake_earbuds_3	nod_force_plate_1	nod_force_plate_2	nod_force_plate_3	nod_earbuds_1	nod_earbuds_2	nod_earbuds_3	bird_L_force_plate_1	bird_L_force_plate_2	bird_L_force_plate_3	bird_L_earbuds_1	bird_L_earbuds_2	bird_L_earbuds_3	bird_R_force_plate_1	bird_R_force_plate_2	bird_R_force_plate_3	bird_R_earbuds_1	bird_R_earbuds_2	bird_R_earbuds_3	check_watch_force_plate_1	check_watch_force_plate_2	check_watch_force_plate_3	check_watch_earbuds_1	check_watch_earbuds_2	check_watch_earbuds_3
0	-107.054	64.0852	16.399	-0.17803	-0.10391	-0.13203	53.764	58.851499	1431.6358	-1.4473	0.88672	-1.6914	29.0624	-181.585	1515.684	-1.0085	1.3006	-2.0652	24.309	21.0304	28.14461	0.033996	0.080134	0.024336	-28.566	52.744	23.496	-0.34458	0.51949	-0.26558	-29.76	-28.707	60.9064	0.17041	0.22559	-0.10645	2.189	15.428	32.23377	0.16406	-0.061035	0.0039063
0.002	-42.55	20.0119	34.3457	-0.25381	-0.039453	-0.19024	84.823	135.764	1431.3803	-1.4275	0.87769	-1.6731	38.145	-144.697	1526.2435	-1.0425	1.3911	-2.1226	-28.389	54.378	15.1485	0.048283	0.061927	0.024405	-78.5794	46.2185	24.933	-0.33445	0.50974	-0.25269	-50.408	-39.526	71.2386	0.15649	0.22094	-0.15284	-48.025	54.878	9.119	0.17344	-0.064356	-0.0055664
0.004	-69.3072	55.006	18.964	-0.31358	0.022949	-0.24267	41.3013	121.328	1395.245	-1.4136	0.86768	-1.6597	12.635	-190.09	1544.321	-1.0625	1.4785	-2.1914	7.465	5.0722	31.5978	0.062988	0.043945	0.02832	-40.501	56.2707	48.4456	-0.32048	0.49615	-0.23659	-42.437	-23.1593	82.8416	0.13965	0.23486	-0.18701	-44.01	27.157	28.766	0.17461	-0.066114	-0.013965
0.006	-75.421	16.64	37.469	-0.36328	0.082031	-0.29199	35.10521	108.782	1429.6811	-1.3901	0.85986	-1.6362	22.45342	-165.385	1590.38	-1.064	1.5083	-2.2144	-20.984	22.6023	22.05364	0.07734	0.027894	0.029686	-44.525	57.958	15.4278	-0.29932	0.47803	-0.21289	-1.327	-0.6367	94.0055	0.10596	0.2666	-0.23486	-28.685	32.1727	26.2453	0.17617	-0.07041	-0.024512
0.008	-44.589	6.2726	26.8164	-0.40762	0.1334	-0.3375	55.932	147.908	1408.134	-1.3767	0.85815	-1.6228	20.81581	-86.033	1555.547	-1.0576	1.5469	-2.2363	-57.629	20.242	24.2211	0.088149	0.012437	0.02999	-67.866	35.9754	29.511	-0.28029	0.44983	-0.19202	-51.655	4.1255	113.6322	0.086914	0.2793	-0.27197	-72.5732	51.7295	23.27402	0.17217	-0.073144	-0.036035
0.01	-93.5101	46.2436	-0.659599999999999	-0.45244	0.19101	-0.37735	-8.7623	99.9345	1383.377	-1.3594	0.85059	-1.6113	15.2247	-92.283	1541.203	-1.0591	1.5498	-2.2563	-17.83	13.6517	32.2302	0.099016	0.00033558	0.027807	0.473999999999997	69.208	42.6227	-0.2592	0.42893	-0.16565	-40.609	9.74712	147.3014	0.053223	0.29785	-0.35107	-38.717	19.1689	56.039	0.1709	-0.07666	-0.04834
0.012	-34.383	18.0532	18.8147	-0.48486	0.24922	-0.40742	28.3106	109.2352	1389.98	-1.3291	0.84766	-1.5938	33.527	-17.317	1547.00436	-1.0645	1.541	-2.2559	-76.5424	61.066	10.5917	0.10602	-0.010452	0.027127	-64.88	51.817	22.91653	-0.23889	0.40783	-0.14104	-44.084	1.9926	176.738	0.026367	0.30957	-0.41431	-69.1365	39.414	43.4542	0.16758	-0.081836	-0.059179
0.014	-24.841	38.651	23.3448	-0.50713	0.30556	-0.43213	7.408	102.255	1340.3557	-1.3164	0.84277	-1.5801	10.293	3.303	1523.134	-1.0615	1.5	-2.2324	-54.786	34.0256	25.911	0.11475	-0.022461	0.027832	-45.962	29.1835	42.866	-0.21359	0.38565	-0.12257	-29.66	5.395	248.0207	0.0019531	0.33398	-0.47754	-82.058	33.146	46.5713	0.17002	-0.088965	-0.065625
0.016	-47.703	39.3297	41.1887	-0.52051	0.35645	-0.44678	-5.317	56.418	1336.6865	-1.2891	0.83398	-1.5439	44.955	-36.0085	1556.431	-1.0542	1.4556	-2.2085	-34.723	31.016	24.5992	0.12095	-0.033109	0.028339	-1.13200000000001	12.9577	24.4185	-0.18604	0.36572	-0.093262	-54.477	16.983	296.743	-0.03418	0.36133	-0.55469	-46.916	3.8818	50.651	0.17002	-0.095215	-0.072265
0.018	-0.0349999999999966	-3.3817	58.8813	-0.51612	0.39307	-0.44951	18.09	111.192	1309.0362	-1.2595	0.82056	-1.5144	48.056	9.1061	1557.507	-1.0176	1.3418	-2.1543	-89.8244	47.1578	6.563	0.12627	-0.047957	0.027266	-59.046	-17.213	26.1433	-0.16142	0.34013	-0.078315	-14.783	47.3277	370.726	-0.053711	0.37842	-0.60498	-93.43027	29.2673	24.239	0.1709	-0.1	-0.080469
0.02	-19.836	33.17387	42.9645	-0.50156	0.41474	-0.44219	-11.577	91.691	1274.181	-1.2251	0.80322	-1.4897	46.946	-25.8404	1532.7666	-0.9983	1.2444	-2.0994	-47.068	17.6685	29.397	0.13237	-0.066528	0.023754	-4.28	-4.386	54.586	-0.13349	0.31151	-0.052042	-49.928	83.153	422.753	-0.10498	0.4165	-0.70459	-74.121	1.611	43.184	0.17188	-0.10107	-0.086914
0.022	-17.995	-4.006	58.607	-0.46797	0.41748	-0.42265	-3.098	87.528	1279.78	-1.1816	0.78125	-1.4512	66.231	-15.7408	1551.9378	-0.98584	1.1606	-2.0483	-61.667	44.7489	38.885	0.14005	-0.08853	0.022334	-37.405	3.0441	41.5098	-0.1081	0.28143	-0.030172	-58.131	104.266	454.21	-0.14331	0.4563	-0.77124	-57.878	8.3987	39.7528	0.17393	-0.10996	-0.091504
0.024	33.361	-4.5645	51.311	-0.41719	0.40488	-0.38847	2.399	123.9263	1247.8377	-1.1523	0.76855	-1.4248	48.771	41.121	1511.988	-0.98779	1.0942	-2.0112	-76.992	37.491	43.978	0.15283	-0.1123	0.025879	-28.889	0.349	57.999	-0.077145	0.24755	-0.0061495	-18.388	91.8101	500.985	-0.18359	0.49707	-0.84082	-86.61085	34.9565	38.8851	0.17207	-0.1164	-0.094531
0.026	-19.287	39.9645	24.6438	-0.35156	0.37012	-0.34424	-24.259	101.231	1202.0539	-1.1074	0.73242	-1.373	43.2122	-1.0877	1520.9155	-0.98828	1.083	-2.0049	-39.883	-0.049000000000003	42.4979	0.16234	-0.13462	0.017374	17.47	18.7695	53.67	-0.046387	0.21338	0.014648	-6.635	76.87992	553.582	-0.25	0.55078	-0.94531	-40.981	4.8306	50.474	0.17129	-0.12109	-0.10195
0.028	14.911	14.0366	16.8382	-0.28506	0.3249	-0.29522	7.606	136.9519	1182.6399	-1.0708	0.70264	-1.3349	90.367	34.2248	1555.14218	-1.0234	1.0918	-2.0098	-66.213	35.8798	28.3616	0.16951	-0.15869	0.023556	-26.602	7.5812	31.952	-0.011331	0.17217	0.042186	-0.484000000000002	64.4632	665.362	-0.28467	0.58447	-0.99951	-46.355	36.387	42.0309	0.16768	-0.12227	-0.10645
0.03	18.663	39.548	20.2554	-0.22168	0.26827	-0.24785	6.493	178.276	1128.7985	-1.0327	0.67236	-1.2964	91.673	5.05	1541.422	-1.0593	1.1175	-2.0119	-53.947	10.779	31.417	0.1779	-0.17505	0.016863	11.12	1.82	60.825	0.023924	0.12783	0.06494	19.42948	43.87689	751.0435	-0.35352	0.67285	-1.083	-51.296	30.1706	36.7276	0.16016	-0.12256	-0.11035
0.032	-26.954	40.9145	32.3012	-0.16621	0.20694	-0.1959	-10.858	153.625	1110.9999	-0.97803	0.63916	-1.2417	67.385	-54.174	1589.83	-1.0898	1.1543	-2.0215	-43.596	18.8295	52.353	0.18221	-0.18921	0.011766	12.1	18.439	41.9014	0.057908	0.079398	0.086424	-25.77071	16.5954	810.771	-0.40454	0.76294	-1.133	5.16800000000001	4.7552	37.86363	0.15391	-0.12461	-0.11914
0.034	5.577	5.805	44.6137	-0.11172	0.15918	-0.14307	30.463	208.524	1090.7138	-0.94629	0.62109	-1.2148	96.885	-9.68626	1567.4574	-1.1113	1.1953	-2.0176	-65.036	40.7499	45.3896	0.18359	-0.19824	0.0048828	-43.222	11.936	31.9437	0.085742	0.035451	0.099416	-40.552	-20.364	852.2252	-0.45654	0.85889	-1.1675	-25.029	32.2483	22.8184	0.15059	-0.12285	-0.12256
0.036	-14.434	35.753	26.5315	-0.071777	0.11426	-0.10254	-5.786	192.8595	1031.9817	-0.88867	0.58203	-1.1582	64.867	-44.933	1513.567	-1.1152	1.2148	-2.0156	-43.98	10.283	37.8832	0.18182	-0.20256	-0.001297	-3.291	17.2558	44.2206	0.11133	-0.0048828	0.11182	2.746	-47.37604	875.7646	-0.50537	0.99902	-1.2012	-20.224	0.561	31.0486	0.14863	-0.1252	-0.12608
0.038	-31.293	21.137	34.12528	-0.034961	0.082324	-0.054395	-0.510999999999996	163.8937	1016.7265	-0.84571	0.55176	-1.1206	86.324	-17.179	1518.8603	-1.1035	1.2227	-2.0039	-24.102	31.535	23.1178	0.17907	-0.20391	-0.015689	-29.616	20.4109	0.991	0.13506	-0.045117	0.12032	-10.798	-87.8627	934.772	-0.52393	1.061	-1.2085	27.44	12.8184	39.776	0.1457	-0.12031	-0.13575
0.04	-8.465	12.8884	32.1752	-0.010059	0.058008	-0.020313	17.034	188.828	986.1673	-0.80322	0.5249	-1.0718	105.227	42.9607	1479.629	-1.0801	1.2036	-1.981	-27.493	24.6188	35.6975	0.17127	-0.20272	-0.028155	-56.359	5.2798	25.2551	0.15156	-0.081934	0.13301	-40.205	-93.4054	972.391	-0.53271	1.1606	-1.23	-14.848	27.9593	21.41872	0.14648	-0.12402	-0.13623
0.042	-62.043	43.755	26.919	0.008691	0.04043	0.0078121	-32.639	140.4751	937.753	-0.74365	0.48779	-1.0239	83.117	2.707	1481.597	-1.0566	1.1719	-1.9512	3.6	-0.1167	50.09	0.16971	-0.20156	-0.039373	-13.587	30.534	22.8206	0.16523	-0.10577	0.14043	-43.421	-89.345	993.814	-0.52026	1.2178	-1.2539	8.692	-6.34665	47.527	0.14521	-0.13037	-0.13291
0.044	-31.842	4.5791	29.5419	0.024512	0.029785	0.025293	6.511	153.6132	930.9565	-0.71191	0.47559	-0.99609	96.589	63.151	1485.835	-1.0234	1.1152	-1.9043	-27.823	46.5639	26.022	0.16797	-0.19971	-0.056152	-66.1416	25.382	8.812	0.17773	-0.1289	0.13926	-0.628	-98.7135	997.463	-0.49023	1.2681	-1.2622	14.176	-3.843	58.0332	0.14687	-0.13721	-0.13848
0.046	-41.231	15.9725	24.1422	0.039551	0.020996	0.043457	-1.235	171.62366	870.415	-0.65186	0.4458	-0.94678	69.006	82.531	1442.7316	-0.99951	1.0903	-1.8804	-0.0640000000000001	24.998	35.5508	0.1663	-0.19825	-0.072445	-39.061	11.4863	33.7944	0.18652	-0.14844	0.13867	-23.605	-127.889	1010.647	-0.43555	1.3008	-1.2676	-28.762	-24.4604	74.5219	0.14844	-0.14736	-0.14824
0.048	-91.711	25.285	36.9884	0.053125	0.018555	0.054394	-48.317	113.149	848.9025	-0.60913	0.42553	-0.90698	79.586	56.95	1458.869	-0.96631	1.0396	-1.8374	4.986	32.544	31.2653	0.16963	-0.19835	-0.09061	-21.846	12.37686	25.9815	0.18643	-0.15586	0.13681	28.1983	-136.623	1001.991	-0.40625	1.3066	-1.2559	14.814	-47.5577	87.427	0.14609	-0.16269	-0.16387
0.05	-49.507	-19.0214	51.1323	0.061816	0.017773	0.066992	-8.285	153.3543	834.964	-0.56006	0.40771	-0.87256	88.852	114.893	1441.0325	-0.93408	1.0083	-1.8037	-43.159	41.0394	36.5367	0.16612	-0.19365	-0.10779	-88.3778	-28.4799	25.4974	0.19395	-0.1625	0.13271	62.082	-127.155	986.641	-0.35791	1.3052	-1.2319	14.14	-6.7438	71.5998	0.13379	-0.18506	-0.18506
0.052	-85.9147	13.45	23.161	0.063379	0.016602	0.075586	-47.47	149.985	792.711	-0.48779	0.37744	-0.8208	42.825	88.092	1390.946	-0.90283	0.98096	-1.769	14.331	2.152	65.359	0.16855	-0.19336	-0.12373	-36.626	-25.784	46.7487	0.19746	-0.16484	0.12959	45.7582	-91.633	952.216	-0.33301	1.2981	-1.1999	9.227	-22.925	112.409	0.11573	-0.18789	-0.20996
0.054	-63.266	2.21	29.6994	0.062988	0.022656	0.074023	-33.293	158.124	764.768	-0.45752	0.36182	-0.79639	49.843	95.106	1389.951	-0.87061	0.95557	-1.7339	10.745	-1.63	69.538	0.16992	-0.19189	-0.14014	-44	-14.2192	5.596	0.2001	-0.16787	0.12422	14.127	-83.3185	960.7339	-0.32422	1.2896	-1.1733	-8.365	3.493687	150.083	0.079004	-0.16885	-0.23554
0.056	-49.157	-12.7753	24.8636	0.060059	0.037109	0.071289	-23.258	200.412	705.656	-0.38623	0.3374	-0.75537	35.76	122.884	1341.884	-0.85547	0.95117	-1.7148	-39.849	-0.633999999999999	81.9	0.16914	-0.18721	-0.16153	-61.27	-13.111	18.4003	0.20264	-0.16504	0.11768	36.0369	-81.284	953.00031	-0.30811	1.2686	-1.1289	-46.826	34.8572	169.973	0.018848	-0.12158	-0.26718
0.058	-103.405	26.1123	25.6413	0.05752	0.049414	0.065234	-80.161	167.8018	647.712	-0.32763	0.32349	-0.71142	0.1829	59.755	1353.802	-0.82178	0.9458	-1.6753	-14.214	-8.8971	100.7829	0.15302	-0.19092	-0.18839	-32.275	27.811	27.404	0.20732	-0.1626	0.10967	39.987	-90.324	950.1182	-0.30225	1.2583	-1.1167	5.12	4.437	216.5707	-0.049023	-0.067774	-0.31231
0.06	-57.575	-10.23578	39.9887	0.04961	0.066308	0.056738	-31.747	182.4888	625.583	-0.27344	0.30518	-0.66992	26.682	101.2544	1371.625	-0.8081	0.93799	-1.643	-12.967	50.565	115.576	0.12997	-0.19326	-0.22901	-66.7488	33.932	-5.9921	0.21143	-0.15401	0.099417	47.614	-88.254	938.0995	-0.271	1.2544	-1.0815	-8.979	46.5433	248.7537	-0.11768	-0.015137	-0.36865
0.062	-51.016	16.3123	21.9272	0.045703	0.082715	0.047363	-41.145	189.8915	558.256	-0.20947	0.27002	-0.61475	29.764	91.962	1312.721	-0.79004	0.92871	-1.6152	-9.596	39.013	173.3013	0.088177	-0.1751	-0.28028	-46.761	23.0699	23.4912	0.22159	-0.15322	0.089258	28.664	-110.083	937.144	-0.24561	1.249	-1.0586	-22.612	73.422	320.176	-0.17901	0.041602	-0.42608
0.064	-79.0866	43.0736	20.8581	0.040234	0.097557	0.035645	-90.8782	161.396	525.1416	-0.17236	0.25439	-0.59424	17.6518	43.675	1303.797	-0.74951	0.91846	-1.5757	-7.276	48.0316	206.469	0.033691	-0.12451	-0.32861	-33.366	33.965	10.825	0.23096	-0.14941	0.081152	-18.631	-128.269	937.163	-0.21533	1.2329	-1.0444	1.806	90.5396	380.544	-0.24463	0.11182	-0.47675
0.066	-2.718	11.2541	35.59	0.038086	0.1084	0.020996	-42.2	198.18	493.4079	-0.10645	0.22021	-0.53369	25.97956	96.4696	1261.1124	-0.73389	0.90479	-1.5532	-68.7937	70.762	224.648	-0.04687	-0.04688	-0.38388	-70.787	10.83578	17.566	0.23584	-0.14893	0.07666	-51.449	-131.832	956.3684	-0.18018	1.1802	-1.0581	-69.19002	141.831	398.11	-0.30361	0.18916	-0.52832
0.068	-27.185	49.957	26.515	0.043262	0.12158	0.00039058	-98.8484	189.416	426.998	-0.058349	0.2002	-0.49682	-0.327999999999999	59.823	1213.381	-0.69922	0.875	-1.5059	2.462	39.814	291.206	-0.13847	0.037688	-0.45741	-13.708	28.554	23.6734	0.24258	-0.14893	0.069531	-20.392	-129.888	979.405	-0.16943	1.1489	-1.0815	-74.165	104.6894	496.821	-0.37363	0.26455	-0.5876
0.07	-38.202	21.7402	17.8301	0.046582	0.12695	-0.011426	-84.239	170.873	403.0187	-0.0097656	0.17871	-0.46533	25.261	81.271	1203.348	-0.67383	0.85205	-1.4605	5.927	91.768	336.9267	-0.22168	0.13378	-0.5332	-26.561	50.865	-6.966	0.24776	-0.14717	0.06709	4.435	-159.07992	998.4429	-0.15381	1.0669	-1.1489	-19.821	100.877	586.838	-0.44482	0.33887	-0.65674
0.072	1.82	0.2395	20.6368	0.056347	0.12539	-0.021582	-54.431	202.85	346.043	0.062012	0.146	-0.41846	18.2983	134.05799	1150.7605	-0.64893	0.83105	-1.4219	-40.8988	117.9941	370.8218	-0.29169	0.23818	-0.60537	-28.254	43.4973	13.83331	0.25088	-0.14365	0.058496	-26.278	-186.401	1046.915	-0.15748	1.0266	-1.2058	-79.046	92.17666	687.083	-0.52959	0.42041	-0.72822
0.074	-35.497	38.309	15.57897	0.064844	0.11562	-0.030957	-95.225	156.9936	320.1482	0.090332	0.12988	-0.39648	-23.487	96.263	1127.4485	-0.60791	0.79541	-1.3589	-0.0260000000000034	99.0205	418.4776	-0.35449	0.35059	-0.66748	16.86	57.764	22.32395	0.24824	-0.13935	0.05166	-22.981	-206.313	1096.974	-0.17822	1.0083	-1.269	-73.073	40.1817	798.0941	-0.62178	0.50713	-0.80459
0.076	12.023	3.9022	24.8791	0.084961	0.10156	-0.039063	-51.294	144.2086	320.5621	0.12646	0.098145	-0.35303	28.1095	163.883	1118.33475	-0.58105	0.77539	-1.3242	-55.051	128.344	456.999	-0.4168	0.44824	-0.72597	-43.598	48.575	1.1189	0.24805	-0.13086	0.043945	-8.035	-218.751	1115.5398	-0.22949	1.041	-1.3525	-67.517	29.8845	843.7494	-0.73077	0.59971	-0.89638
0.078	27.82	18.6197	28.33382	0.10918	0.072265	-0.040332	-51.885	136.4235	283.0891	0.16113	0.074219	-0.32275	-18.044	177.012	1050.2976	-0.521	0.729	-1.2573	-68.488	86.9459	544.351	-0.48037	0.52901	-0.79444	-3.61	28.9487	48.599	0.24307	-0.11875	0.033692	-26.549	-202.122	1126.1363	-0.25781	1.0742	-1.3789	-95.1988	-8.668	912.4077	-0.85332	0.71777	-0.99121
0.08	-23.165	40.0862	5.414	0.13809	0.041797	-0.031836	-75.684	95.557	257.9123	0.19141	0.055664	-0.2998	-1.513	176.3325	1025.018	-0.47729	0.68921	-1.2087	-12.562	79.636	626.2058	-0.54678	0.60479	-0.86162	0.800000000000004	42.122	31.8541	0.23906	-0.1	0.023047	-21.585	-181.572	1147.3607	-0.30859	1.1641	-1.418	-55.668	-64.402	978.597	-0.98096	0.86182	-1.0874
0.082	14.422	-2.7997	19.7776	0.1709	0.0074219	-0.030274	-19.668	116.0933	246.9732	0.22461	0.035645	-0.26025	34.81	225.794	987.1064	-0.43311	0.65088	-1.1509	-67.451	95.169	710.5022	-0.6125	0.67627	-0.91904	-50.122	6.1401	38.9523	0.23711	-0.079687	0.010547	-25.87	-177.411	1158.5033	-0.31396	1.2224	-1.4196	-73.056	-74.61	979.541	-1.1179	1.0255	-1.1823
0.084	-20.878	36.263	18.3728	0.19893	-0.024121	-0.021484	-51.082	100.2574	217.9936	0.23584	0.024414	-0.24121	-17.926	170.3446	941.4479	-0.38232	0.59863	-1.0913	-52.526	34.482	799.84	-0.67969	0.74609	-0.9707	14.639	1.2745	53.59	0.22949	-0.054589	-0.0020508	-72.923	-181.611	1158.5086	-0.30078	1.2705	-1.4121	-44.32	-129.424	1000.2604	-1.2359	1.1887	-1.2781
0.086	-4.283	20.835	37.361	0.23242	-0.058594	-0.012207	-23.965	77.987	190.88	0.25684	0.01123	-0.21045	10.928	168.52895	922.128	-0.35889	0.5752	-1.0562	-67.073	2.166	841.5892	-0.75537	0.81181	-1.0374	-27.204	12.6745	27.0664	0.23145	-0.035156	-0.0083008	-117.3011	-153.904	1176.684	-0.27637	1.2856	-1.3901	-30.249	-137.7403	999.5572	-1.3102	1.3309	-1.3547
0.088	22.084	-2.53916	36.856	0.25459	-0.0916	-0.0046875	-21.763	105.4157	158.6442	0.26465	0.0058594	-0.18799	24.989	173.9878	881.35	-0.31592	0.53271	-0.98779	-62.36	-40.5666	890.8206	-0.82607	0.87666	-1.0992	-33.317	1.936	42.476	0.22392	-0.018945	-0.010742	-86.825	-123.645	1181.6444	-0.25781	1.2715	-1.3809	-104.706	-125.985	1027.729	-1.3266	1.4305	-1.4035
0.09	-32.698	37.4228	22.7598	0.26865	-0.11885	0.0057617	-62.254	71.032	132.0591	0.27441	0.0068359	-0.16309	-2.032	136.601	858.6678	-0.27148	0.47998	-0.92139	-33.853	-92.1753	932.651	-0.89405	0.94893	-1.1464	17.123	29.945	37.4687	0.2209	0.0020508	-0.014063	-92.4201	-84.421	1170.2294	-0.20947	1.2231	-1.3784	-80.339	-147.846	1025.356	-1.2988	1.4805	-1.4424
0.092	-31.986	4.7552	27.7517	0.27998	-0.14736	0.012793	-12.912	58.5971	143.755	0.26709	0.013184	-0.13672	29.553	168.7241	848.1529	-0.25146	0.4585	-0.89014	-40.183	-86.037	948.0554	-0.95313	1.026	-1.185	-51.718	38.702	20.1513	0.2209	0.012597	-0.023437	-102.772	-82.432	1198.713	-0.18408	1.1736	-1.4051	-66.867	-119.025	971.391	-1.2255	1.4714	-1.4536
0.094	-40.003	37.939	20.7889	0.28144	-0.17246	0.022265	-6.31	61.168	113.9601	0.26367	0.01709	-0.12451	-18.807	155.8373	798.0342	-0.20605	0.41602	-0.82617	-28.066	-123.742	983.296	-1	1.0977	-1.2227	-38.231	26.74948	54.939	0.2084	0.025977	-0.030664	-93.013	-96.125	1190.5775	-0.15674	1.1274	-1.4292	-72.103	-106.752	949.052	-1.1344	1.4203	-1.4566
0.096	-63.953	61.275919	25.0123	0.27539	-0.19189	0.025391	-24.489	44.0773	100.671	0.24512	0.03418	-0.11279	-41.799	119.649	764.932	-0.17407	0.38379	-0.77393	-54.338	-139.0709	996.048	-1.0242	1.1547	-1.2461	-22.907	63.859	37.2515	0.19922	0.037109	-0.03418	-63.252	-103.4588	1182.886	-0.15186	1.0864	-1.4624	-45.103	-125.593	951.875	-1.0504	1.3293	-1.4367
0.098	-27.257	24.3203	26.257	0.25957	-0.20928	0.02959	17.163	68.129	87.84902	0.23071	0.043457	-0.099853	-31.037	158.3854	737.617	-0.14209	0.35596	-0.72607	-104.369	-115.923	993.121	-1.0227	1.1836	-1.2671	-59.425	35.8879	42.2047	0.19336	0.045118	-0.037598	-70.794	-94.8871	1206.6258	-0.16406	1.0762	-1.4883	-84.427	-83.657	960.2423	-0.98017	1.2034	-1.4021
0.1	-71.4554	57.112	22.1874	0.23672	-0.21924	0.034473	-38.693	71.597	50.176	0.2041	0.058594	-0.087891	-62.517	138.715	681.142	-0.097656	0.31348	-0.66504	-43.816	-157.534	974.812	-0.99921	1.1742	-1.2851	-15.171	36.5068	50.6895	0.18213	0.058789	-0.03457	-48.454	-103.2652	1220.7271	-0.17285	1.0942	-1.5444	-54.411	-100.514	983.05558	-0.93896	1.0532	-1.353
0.102	-69.067	25.8917	42.0085	0.21094	-0.22353	0.031347	-21.238	47.0588	62.6908	0.16455	0.086426	-0.080078	-34.28	152.667	660.137	-0.074707	0.29297	-0.62695	-79.88	-124.535	943.455	-0.95713	1.1351	-1.2858	-42.408	30.7405	29.515	0.1751	0.073633	-0.044336	-61.517	-105.067	1240.821	-0.17236	1.1187	-1.6016	-28.358	-95.182	983.906	-0.9209	0.8918	-1.2951
0.104	-38.595	5.0762	44.0948	0.17783	-0.22207	0.031152	-2.955	60.885	51.4836	0.13086	0.094727	-0.077148	-31.765	178.0788	594.76395	-0.032715	0.25	-0.56152	-120.445	-121.477	919.752	-0.91113	1.0625	-1.2754	-71.4259	10.672	40.6621	0.16475	0.088769	-0.054199	-71.488	-115.54	1240.01	-0.16699	1.147	-1.6616	-82.9512	-108.853	995.551	-0.89903	0.73555	-1.2461
0.106	-102.6982	45.1249	29.939	0.14746	-0.21484	0.035156	-32.759	40.5321	47.185	0.077148	0.12256	-0.073242	-79.644	150.139	538.8411	-0.0051267	0.22583	-0.50928	-68.435	-149.784	923.188	-0.85898	0.96015	-1.2562	-33.841	31.9256	36.9024	0.15674	0.10547	-0.063965	-68.138	-124.221	1232.0393	-0.16162	1.1802	-1.7202	-49.572	-143.601	1019.221	-0.87285	0.63047	-1.2043
0.108	-74.263	10.543	42.907	0.11397	-0.20009	0.022852	15.293	21.366	71.226	0.04126	0.13892	-0.070556	-27.463	191.4874	520.2434	0.017578	0.19824	-0.45654	-107.599	-107.266	915.5295	-0.81328	0.84746	-1.2277	-86.1848	18.65671	22.5317	0.1459	0.12197	-0.072071	-67.75	-132.021	1231.337373	-0.16846	1.1914	-1.7461	-54.381	-134.157	1047.352	-0.84727	0.57403	-1.1758
0.11	-47.989	14.7242	35.0984	0.080566	-0.19238	0.012109	-22.183	17.6933	45.8339	0.0053711	0.1499	-0.063965	-64.616	193.2993	476.4978	0.056152	0.15771	-0.39502	-87.651	-135.53	941.559	-0.77539	0.74004	-1.1992	-55.255	-2.215	47.394	0.13682	0.1458	-0.087403	-75.888	-128.34	1254.166	-0.19189	1.229	-1.7769	-90.93	-163.552	1093.401	-0.81396	0.5542	-1.1714
0.112	-91.82015	28.235	35.766	0.061426	-0.18183	0.0050782	-57.245	-14.101	35.4403	-0.031738	0.15869	-0.068359	-46.411	161.3723	441.429	0.071777	0.13574	-0.37012	-40.389	-130.738	959.1884	-0.74131	0.6376	-1.1683	-38.025	14.4822	42.4367	0.1294	0.16689	-0.097168	-82.609	-115.436	1250.892	-0.21655	1.2678	-1.7927	-47.751	-214.8184	1158.768	-0.77959	0.5669	-1.1796
0.114	-36.996	-10.301	45.994	0.040039	-0.17002	-0.0021484	-14.752	2.4495	41.02943	-0.04834	0.16064	-0.070313	-19.805	190.223	395.7688	0.10498	0.09375	-0.31445	-92.6989	-111.618	969.335	-0.71289	0.5625	-1.1406	-66.201	-41.856	75.90156	0.12539	0.18936	-0.10391	-67.974	-100.005	1240.318	-0.23584	1.2993	-1.812	-76.26	-230.545	1188.9953	-0.75156	0.58711	-1.1875
0.116	-54.528	33.8326	25.9049	0.023438	-0.15625	-0.010742	-61.519	5.7474	26.6039	-0.066406	0.16455	-0.063965	-79.6687	149.849	326.958	0.12158	0.059326	-0.27393	-55.737	-138.212	1006.8148	-0.69062	0.51914	-1.1311	-22.733	-55.589	105.488	0.12305	0.20605	-0.1167	-75.234	-91.892	1234.2273	-0.25781	1.334	-1.8203	-34.098	-310.953	1244.4	-0.72656	0.60899	-1.2156
0.118	-54.078	21.597	36.3669	0.020899	-0.14971	-0.019336	-29.788	-15.6753	46.121	-0.075195	0.15894	-0.071289	-60.484	135.774	305.829	0.14063	0.028809	-0.23486	-43.867	-117.618	1034.169	-0.671	0.49463	-1.1405	-45.343	-48.301	91.624	0.11972	0.21191	-0.15205	-59.517	-87.3199	1249.574	-0.26465	1.3457	-1.8223	11.341	-307.602	1260.885	-0.72129	0.62637	-1.2582
0.12	-15.925	0.1811	50.4941	0.011231	-0.14287	-0.026074	-23.539	2.8014	30.4125	-0.081055	0.15625	-0.072754	-62.291	145.715	265.67	0.16113	0.0019531	-0.18555	-92.643	-157.8092	1071.9714	-0.65537	0.47744	-1.1499	-22.108	-56.728	114.118	0.10537	0.21836	-0.18193	-56.565	-77.7203	1247.1405	-0.27441	1.3516	-1.8281	-34.5776	-278.429	1258.125	-0.729	0.64795	-1.3062
0.122	-43.835	30.3968	34.77	0.0053711	-0.14053	-0.035449	-84.6444	-3.6315	12.4081	-0.069824	0.14697	-0.084961	-77.948	102.0567	243.4206	0.15869	-0.0068359	-0.16504	-37.106	-215.607	1135.216	-0.63232	0.48311	-1.1651	-27.292	-13.9562	154.2837	0.090137	0.23594	-0.21787	-54.292	-43.7477	1238.861	-0.27417	1.342	-1.8279	-12.444	-248.949	1296.6179	-0.75703	0.69316	-1.3611
0.124	-22.515	-7.369	37.3534	-0.0039063	-0.13867	-0.044629	-29.698	7.0605	28.2967	-0.062012	0.14697	-0.082031	-18.518	113.1614	234.3727	0.16162	-0.01416	-0.12598	-45.567	-237.416	1152.7001	-0.61426	0.50781	-1.1855	-76.027	11.5122	179.701	0.065332	0.26396	-0.24424	-55.021	-9.5053	1243.465	-0.27979	1.3286	-1.8198	9.6	-187.6724	1314.9322	-0.79688	0.77617	-1.4019
0.126	12.4	10.0546	34.2813	-0.0097656	-0.13574	-0.049805	-51.384	31.2963	11.282	-0.044922	0.13281	-0.078125	-49.283	93.3444	204.749	0.15894	-0.02832	-0.10205	-47.854	-295.89	1204.375	-0.60127	0.53408	-1.2235	-43.998	-6.0391	228.844	0.024414	0.29004	-0.27734	-66.275	-6.4152	1239.742	-0.29102	1.3018	-1.8086	-38.853	-171.4466	1333.2227	-0.84219	0.87539	-1.4301
0.128	-17.293	41.65	37.256	-0.01875	-0.13369	-0.060157	-56.517	21.71	28.104	-0.032715	0.11963	-0.076172	-57.186	63.121	201.5149	0.14893	-0.038086	-0.077148	6.505	-281.506	1224.2095	-0.59727	0.5711	-1.2658	-14.898	25.0167	269.704	-0.013867	0.30518	-0.3291	-88.12	-24.8683	1252.7352	-0.29785	1.293	-1.8027	7.599	-161.0905	1364.481	-0.88476	0.9707	-1.4515
0.13	12.451	8.9011	43.679	-0.026269	-0.13135	-0.069824	7.458	24.67644	18.6253	-0.017578	0.1084	-0.07373	6.965	78.3936	188.2238	0.13721	-0.041992	-0.04834	-15.096	-248.528	1242.836	-0.60547	0.61367	-1.3381	-66.049	35.1789	363.9089	-0.058496	0.3208	-0.37978	-89.942	-42.86316	1269.9114	-0.31104	1.2759	-1.7866	3.963	-129.763	1377.1725	-0.91016	1.0361	-1.4648
0.132	-1.41099999999999	49.847	12.5388	-0.023145	-0.13721	-0.074511	-52.15	18.7069	1.94	0.0063477	0.094238	-0.070801	-45.556	59.016	146.7805	0.12695	-0.041504	-0.03125	12.426	-232.688	1303.13144	-0.63858	0.67783	-1.3976	2.334	74.9316	487.756	-0.11631	0.34385	-0.43135	-91.18	-47.5494	1258.851	-0.32154	1.2695	-1.7783	-9.066	-132.275	1402.5428	-0.90762	1.0527	-1.4686
0.134	3.107	15.47968	17.5053	-0.017578	-0.13437	-0.081152	-39.941	14.9187	32.398	0.016602	0.084473	-0.069824	-5.454	39.722	138.472	0.10449	-0.035156	-0.023438	30.9556	-173.9942	1316.0744	-0.68213	0.77588	-1.4507	-49.993	106.1094	519.458	-0.17217	0.36192	-0.49893	-81.663	-60.2791	1253.9684	-0.32861	1.2583	-1.769	48.7363	-83.808	1411.67209	-0.88496	1.0359	-1.466
0.136	14.055	-11.5478	22.7972	-0.0097656	-0.13477	-0.08252	-14.87	39.308	12.6791	0.036621	0.068359	-0.070801	-0.627000000000002	39.8009	90.8588	0.084961	-0.023438	-0.020264	11.6892	-154.6617	1346.8099	-0.7332	0.89551	-1.4988	-82.245	83.345	596.223	-0.24512	0.38428	-0.5708	-98.224	-62.5537	1287.8958	-0.33545	1.2544	-1.77	21.877	-72.594	1391.841	-0.85762	0.98515	-1.4598
0.138	-33.318	20.6803	23.237	-0.0052735	-0.13955	-0.090429	-51.126	29.0326	7.0379	0.04834	0.062988	-0.063232	-46.906	10.483	88.26972	0.067871	-0.012695	-0.024902	57.0788	-122.781	1382.943	-0.77217	1.0067	-1.5413	9.771	84.796	705.68	-0.31895	0.41035	-0.65078	-118.385	-61.0415	1282.948	-0.33984	1.25	-1.7676	50.1293	-81.678	1417.4615	-0.85635	0.9044	-1.4667
0.14	15.798	-15.99482	35.3232	0.00097656	-0.1414	-0.10108	-3.73200000000001	15.1205	19.755	0.064941	0.05127	-0.063965	1.145	45.922	87.86947	0.037598	0.0029297	-0.03125	34.5821	-96.852	1402.61628	-0.78232	1.0895	-1.5585	-44.815	56.6321	815.563	-0.40225	0.43603	-0.73818	-110.008	-61.1431	1272.615	-0.34521	1.2446	-1.7573	63.6797	-67.149	1435.958	-0.88867	0.82813	-1.498
0.142	-6.806	13.3016	16.313	0.0076172	-0.14297	-0.10811	-27.125	24.736	-3.594	0.069824	0.036621	-0.0625	-28.137	65.756	59.4456	0.022949	0.012695	-0.036133	30.666	-89.712	1438.877	-0.76484	1.1172	-1.557	-18.649	18.9711	931.484	-0.49404	0.47549	-0.82451	-70.85	-53.19	1283.8516	-0.35596	1.25	-1.7578	22.125	-101.211	1472.37376	-0.94639	0.80908	-1.5421
0.144	-50.906	29.7969	22.6483	0.016894	-0.14209	-0.11475	-42.61	0.782999999999999	27.8713	0.075684	0.027344	-0.064453	-18.603	47.9398	60.5591	-0.023926	0.032715	-0.047363	67.5468	-65.181	1428.1229	-0.73096	1.1079	-1.5464	8.009	4.261	947.0213	-0.59482	0.52979	-0.90869	-74.722	-35.453	1273.264	-0.35938	1.2578	-1.7568	61.6304	-117.655	1516.349	-1.0316	0.84843	-1.6152
0.146	-5.834	-26.7184	79.2123	0.022461	-0.14355	-0.12256	11.378	4.931	43.742	0.098145	0.013672	-0.057617	11.693	58.1	46.9944	-0.060547	0.054199	-0.059082	25.2309	-63.115	1416.082	-0.69903	1.0611	-1.5412	-130.419	-47.514	1002.976	-0.70264	0.60986	-0.98584	-84.436	-16.32947	1280.169	-0.36377	1.2622	-1.7476	35.6129	-114.023	1519.0447	-1.1215	0.93515	-1.7075
0.148	-57.043	5.167	82.818	0.032227	-0.14365	-0.13193	-31.547	16.7892	21.383	0.11719	-0.0056154	-0.053467	-56.127	39.828	29.2708	-0.1001	0.080566	-0.069824	70.3893	-83.42	1443.2769	-0.6707	1.0047	-1.541	-109.982	-83.428	1052.046	-0.81045	0.70068	-1.0509	-74.74	-1.546	1299.803	-0.3706	1.2662	-1.7392	13.472	-136.352	1546.335	-1.2178	1.0605	-1.8013
0.15	-43.198	3.2394	98.5279	0.037305	-0.14541	-0.15254	-10.02	1.28	43.317	0.1377	-0.021973	-0.049805	-8.582	24.52959	42.6447	-0.16406	0.12109	-0.095215	65.331	-73.249	1433.5583	-0.66836	0.94375	-1.5629	-116.778	-90.782	1007.845	-0.91172	0.8086	-1.0998	-73.014	25.5426	1279.3415	-0.37256	1.2759	-1.728	49.7033	-122.864	1554.946	-1.3022	1.2104	-1.8921
0.152	15.74	8.3276	107.51	0.033008	-0.14775	-0.18223	8.23	29.208	28.0656	0.16357	-0.043457	-0.044922	-13.935	43.449	43.191	-0.18555	0.15039	-0.10938	13.447	-92.6951	1439.533	-0.69844	0.90566	-1.5912	-100.424	-131.694	996.157	-1.0004	0.92383	-1.1377	-52.289	36.3761	1272.1364	-0.37842	1.2778	-1.7085	5.385	-123.825	1541.864	-1.3584	1.344	-1.9775
0.154	-71.8764	56.9572	165.6472	0.016992	-0.13672	-0.21533	-35.694	24.6523	24.71888	0.17041	-0.056641	-0.048828	-54.998	22.83	51.097	-0.21875	0.1958	-0.12988	64.154	-109.5677	1445.4031	-0.75488	0.90039	-1.627	-56.327	-112.238	974.41	-1.0683	1.0355	-1.1664	-25.465	27.5021	1275.8784	-0.38379	1.2734	-1.6992	26.0863	-96.284	1557.276	-1.3851	1.4532	-2.0393
0.156	-61.6474	32.842	229.3832	-0.017578	-0.098633	-0.25391	12.072	18.6421	39.6003	0.2002	-0.080078	-0.036621	-6.492	16.9008	50.6	-0.23144	0.22705	-0.14087	22.7276	-118.2096	1449.5884	-0.83047	0.93985	-1.6961	-93.7837	-114.663	962.0705	-1.103	1.1313	-1.1694	-51.115	42.754	1260.6201	-0.39453	1.2676	-1.6738	26.2648	-40.698	1549.503	-1.3882	1.5181	-2.0878
0.158	-38.177	53.1329	253.452	-0.076465	-0.039062	-0.30791	-8.448	43.233	19.0051	0.22852	-0.10498	-0.035156	-47.775	15.4304	22.0081	-0.23486	0.25439	-0.16211	-14.8551	-148.77	1475.988	-0.90703	1.0139	-1.7802	-82.742	-99.484	960.631	-1.1114	1.2097	-1.1579	-56.867	53.614	1248.977	-0.39697	1.2568	-1.6596	-9.4112	-21.8347	1548.7123	-1.376	1.5436	-2.1248
0.16	-49.4017	77.62	302.646	-0.14414	0.019629	-0.38105	-39.361	24.5893	30.5484	0.23193	-0.1167	-0.036621	-46.032	-4.062	30.4047	-0.23486	0.28613	-0.1543	29.40042	-151.958	1497.461	-0.96641	1.124	-1.8615	-34.033	-40.1246	904.2999	-1.1037	1.2572	-1.1371	-33.483	57.077	1239.815	-0.40723	1.248	-1.6445	37.019	6.8334	1559.4812	-1.3535	1.5371	-2.1484
0.162	-0.702999999999996	64.265	395.774	-0.20977	0.087988	-0.46192	6.976	24.8437	43.8408	0.24414	-0.12451	-0.032715	-16.158	14.5891	27.1471	-0.23096	0.2998	-0.15527	-3.02	-132.116	1481.1261	-1.0132	1.2374	-1.9386	3.2819	-26.905	893.796	-1.0928	1.2721	-1.1136	-52.23	56.163	1231.2008	-0.42383	1.2324	-1.6211	15.1283	16.4727	1538.46	-1.3342	1.5104	-2.1545
0.164	-19.316	146.973	478.307	-0.27373	0.17217	-0.53662	-59.0262	36.483	12.121	0.25464	-0.12988	-0.034668	-96.105	15.4929	25.075	-0.21924	0.30957	-0.14648	11.8116	-104.774	1498.234	-1.0464	1.3345	-2.0112	61.9814	-12.6679	927.198	-1.0797	1.2633	-1.0801	-35.271	45.2947	1238.109	-0.4248	1.2207	-1.6113	6.994	0.2639	1526.655	-1.3148	1.4649	-2.148
0.166	-47.7798	154.9737	538.5742	-0.34961	0.27832	-0.61914	-38.419	19.6749	35.115	0.25488	-0.13477	-0.033203	-37.655	-14.9917	47.141	-0.20069	0.30127	-0.13599	27.1863	-45.961	1494.966	-1.068	1.4035	-2.064	-0.458000000000006	13.182	911.7428	-1.0703	1.2334	-1.0391	-18.173	19.981	1245.26	-0.43555	1.209	-1.5898	51.6745	17.45545	1521.203	-1.3059	1.4129	-2.1391
0.168	-34.274	130.424	609.7352	-0.43848	0.39512	-0.71065	-27.405	36.486	25.39179	0.25439	-0.13037	-0.034668	-27.776	2.55842	7.871	-0.18311	0.28418	-0.12305	-21.9251	-23.08	1472.4526	-1.0746	1.4465	-2.0992	-36.834	-28.508	914.189	-1.0736	1.1854	-1.0064	-25.145	24.412	1222.1442	-0.44092	1.2054	-1.5642	3.1378	16.1358	1502.961	-1.302	1.354	-2.1093
0.17	-48.448	138.003	721.837	-0.5418	0.5207	-0.80313	-66.659	32.01087	29.934	0.25488	-0.12695	-0.035645	-84.86216	-6.128	10.4223	-0.15381	0.24023	-0.095215	19.343	4.019	1490.1146	-1.0793	1.4684	-2.1243	-1.83	-25.404	940.297	-1.0948	1.1302	-0.96474	-20.283	32.407	1217.8736	-0.44727	1.1914	-1.5459	13.0463	14.0451	1524.72314	-1.2891	1.2842	-2.0762
0.172	-17.147	58.539	878.228	-0.65976	0.64805	-0.89844	-16.162	17.1429	55.363	0.25293	-0.11963	-0.037109	-14.419	11.7139	35.3131	-0.13721	0.22168	-0.083496	26.7174	12.987	1478.885	-1.0843	1.4806	-2.1359	-81.033	-62.506	947.2461	-1.1245	1.095	-0.93037	9.681	35.514	1214.302	-0.44727	1.1816	-1.5078	32.662	33.1177	1533.2618	-1.276	1.2228	-2.0369
0.174	-50.425	47.0415	972.9336	-0.78486	0.7708	-0.99855	-37.916	15.7727	27.7787	0.25366	-0.10962	-0.044922	-29.362	42.932	10.9564	-0.11768	0.17627	-0.052246	-6.56274	-13.2559	1479.4342	-1.0947	1.4805	-2.1426	-39.105	-118.745	993.356	-1.1663	1.0873	-0.90068	-19.501	48.5157	1200.672	-0.4458	1.1685	-1.4878	4.4731	11.4511	1523.33881	-1.2616	1.1732	-2.0023
0.176	-43.743	31.069	1022.9555	-0.92383	0.89453	-1.1016	-55.086	-1.297	46.1818	0.25049	-0.1001	-0.048828	-51.842	36.944	31.1549	-0.11401	0.14551	-0.038818	48.128	-11.6253	1481.64	-1.0926	1.4537	-2.1268	6.79500000000001	-138.713	993.041	-1.1997	1.1216	-0.87451	-27.567	66.9544	1156.9191	-0.44434	1.1377	-1.4492	52.552	6.9635	1551.445	-1.2507	1.145	-1.9819
0.178	-16.471	-35.469	1069.969	-1.0557	1.0326	-1.1991	-29.245	-5.9337	45.7027	0.24561	-0.083984	-0.053711	-10.44	59.331	8.225	-0.1084	0.12109	-0.016113	7.7339	-4.7249	1441.503	-1.087	1.3989	-2.0948	-47.709	-202.075	1024.961	-1.2113	1.1682	-0.83262	-18.751	81.3515	1131.824	-0.4414	1.1191	-1.4189	49.279	6.01811	1523.6366	-1.2508	1.1439	-1.9709
0.18	-66.852	-25.993	1107.116	-1.1859	1.1832	-1.2871	-58.711	11.558	24.3874	0.24072	-0.071777	-0.057617	-59.131	38.0391	4.8685	-0.10645	0.099121	-0.0063477	31.81997	1.5961	1439.0034	-1.0808	1.3193	-2.0667	-20.737	-221.7997	1119.85	-1.2005	1.2079	-0.79482	-45.319	94.1237	1102.202	-0.43262	1.0977	-1.3789	20.2509	-12.652	1523.2851	-1.2529	1.1504	-1.9629
0.182	-31.356	-76.109	1129.34	-1.2996	1.3336	-1.3696	-16.747	-8.433	35.595	0.23779	-0.054199	-0.061523	-18.179	17.8419	39.608	-0.10107	0.09082	-0.00048828	54.987	31.092	1446.8039	-1.0597	1.2302	-2.0225	-19.98	-245.259	1154.8996	-1.1704	1.2059	-0.77802	-58.151	96.171	1099.0861	-0.41992	1.0625	-1.3301	71.205	-0.734	1523.588	-1.247	1.1557	-1.9505
0.184	-0.494	-132.8098	1132.2912	-1.372	1.4773	-1.4352	-31.952	20.6469	22.0495	0.23511	-0.041015	-0.063232	-5.964	33.397	12.2829	-0.094238	0.077637	0.018555	17.0268	15.8776	1454.3114	-1.0444	1.1567	-1.9829	-13.364	-306.99	1218.603	-1.1276	1.1589	-0.79502	-45.457	98.5008	1100.832	-0.40869	1.0474	-1.3003	33.048	-10.785	1510.8	-1.2437	1.1505	-1.9351
0.186	-53.473	-132.995	1117.4998	-1.396	1.5845	-1.4897	-75.2616	11.6809	25.0801	0.23291	-0.030762	-0.062012	-35.462	19.9033	15.7697	-0.078857	0.067383	0.015381	76.124	9.20472	1491.395	-1.0344	1.1078	-1.9582	54.835	-279.381	1249.141	-1.082	1.0859	-0.82813	-47.968	115.6864	1067.6899	-0.3877	1.0078	-1.2539	66.715	1.629	1504.209	-1.23	1.1439	-1.9175
0.188	-54.414	-177.965	1146.774	-1.3628	1.621	-1.5181	-20.995	3.686	44.04	0.22852	-0.019531	-0.070801	5.748	10.81288	33.9988	-0.062012	0.057129	0.01709	62.106	0.0264000000000006	1482.0744	-1.0285	1.0824	-1.9445	16.385	-257.409	1244.9066	-1.0473	1.0338	-0.87832	-42.0454	127.60891	1025.89	-0.36352	0.9729	-1.2102	99.492	38.3343	1467.7868	-1.2258	1.1308	-1.8887
0.19	-71.645	-155.869	1122.85	-1.2858	1.6107	-1.5186	-21.41	24.1733	17.556	0.22412	-0.016602	-0.075195	-34.707	15.1523	15.493	-0.041016	0.047363	0.021484	66.815	-18.05	1485.919	-1.0188	1.0766	-1.941	-23.831	-202.565	1306.961	-1.0422	1.0125	-0.93984	-25.113	111.12833	1020.6791	-0.34668	0.93555	-1.168	53.118	57.9586	1441.58415	-1.2197	1.1172	-1.8633
0.192	-122.543	-141.972	1063.921	-1.1781	1.5403	-1.5022	-33.271	9.752	35.4879	0.2207	-0.013184	-0.068848	-23.786	0.926	41.535	-0.032227	0.040527	0.022461	104.402	-8.2063	1478.494	-1.006	1.0791	-1.9381	-17.621	-112.07	1327.257	-1.0606	1.0144	-1.0161	-39.911	113.6446	1001.1053	-0.31787	0.88477	-1.124	83.477	97.426	1444.617	-1.2004	1.1035	-1.8309
0.194	-46.811	-167.515	1037.991	-1.0602	1.4144	-1.4524	-1.70800000000001	9.849	34.6552	0.21484	-0.012452	-0.064697	4.426	17.5181	40.3687	-0.0083008	0.025879	0.03418	48.166	0.212	1431.906	-0.99756	1.0767	-1.9351	-77.413	-103.1384	1341.661	-1.0925	1.0581	-1.089	-40.413	120.47833	971.7597	-0.30566	0.86182	-1.0933	50.816	117.085	1415.617	-1.1812	1.0863	-1.7949
0.196	-88.558	-122.573	1003.7354	-0.96045	1.2349	-1.394	-42.088	23.26809	5.219	0.20605	-0.010742	-0.060547	-23.847	28.5277	20.8625	0.0090331	0.01416	0.040283	95.024	11.539	1416.305	-0.99825	1.0709	-1.9248	-69.371	-94.127	1387.396	-1.1187	1.1294	-1.1636	-9.25	111.616	973.8084	-0.27832	0.82178	-1.0425	39.5559	103.893	1394.2969	-1.1629	1.0625	-1.7617
0.198	-101.895	-130.753	1006.39492	-0.89453	1.0324	-1.3105	1.373	10.7024	20.01505	0.18945	-0.0087891	-0.061035	9.97	13.3294	44.663	0.024902	0.0053711	0.046387	93.798	48.7075	1395.6269	-0.99717	1.0618	-1.9116	-113.22	-93.959	1358.1557	-1.1194	1.2084	-1.2426	-24.097	95.785	941.53861	-0.25416	0.77954	-0.9988	63.514	110.602	1377.2586	-1.139	1.049	-1.7286
0.2	-44.881	-131.776	1020.729	-0.82461	0.83086	-1.2324	3.516	26.5239	9.3149	0.17773	-0.0048828	-0.055664	-32.012	22.419	18.726	0.050293	-0.016602	0.056152	54.02	62.8031	1380.8455	-0.98896	1.0591	-1.905	-138.0496	-125.596	1374.429	-1.0854	1.2805	-1.318	-28.783	80.351	936.9386	-0.22803	0.74658	-0.95654	0.323	104.393	1341.139	-1.1172	1.0293	-1.6934
0.202	-120.6083	-114.709	1035.958	-0.77344	0.66719	-1.1805	-42.971	17.9225	20.8744	0.1626	-0.00048828	-0.049316	-35.558	10.158	27.25712	0.060547	-0.026855	0.061523	112.108	78.7379	1409.226	-0.98808	1.0513	-1.8982	-114.603	-64.535	1385.796	-1.0244	1.3375	-1.3898	-35.472	73.726	915.8923	-0.19482	0.69775	-0.90088	32.0468	99.56132	1334.3997	-1.0949	1.008	-1.6627
0.204	-102.5556	-169.571	1057.499	-0.73184	0.56172	-1.1627	6.836	1.3279	52.735	0.15479	0.0034179	-0.044678	11.796	12.1542	42.6992	0.085938	-0.045898	0.075684	79.655	98.918	1385.6369	-0.99023	1.0449	-1.877	-151.7504	-61.976	1369.018	-0.94463	1.3702	-1.4521	-32.643	96.84	875.355	-0.17725	0.67578	-0.875	27.988	119.238	1313.9053	-1.0702	0.99346	-1.6374
0.206	-75.0441	-181.906	1060.979	-0.69287	0.51514	-1.1538	-19.082	8.9121	20.075	0.14111	0.012695	-0.04541	-44.777	37.0777	32.8828	0.10474	-0.064697	0.087403	48.641	76.509	1362.5383	-0.99668	1.0443	-1.8547	-150.676	-83.9692	1413.7438	-0.875	1.3828	-1.5234	-31.19	112.8624	833.8515	-0.13525	0.62451	-0.81592	-32.5547	99.615	1286.07609	-1.0444	0.98408	-1.6077
0.208	-100.405	-198.799	1074.198	-0.6669	0.51787	-1.1511	-39.199	-8.474	22.1386	0.12158	0.023926	-0.047852	-40.458	21.5491	51.768	0.12549	-0.087891	0.097168	87.431	89.84	1343.5857	-0.99287	1.0397	-1.8382	-129.503	-82.0134	1427.2271	-0.81982	1.3686	-1.6072	0.850999999999999	106.8886	827.836	-0.11084	0.58569	-0.77588	30.808	92.391	1297.748	-1.0186	0.97334	-1.5739
0.21	-44.169	-227.6356	1121.928	-0.65859	0.53008	-1.1762	4.718	-12.4983	36.8306	0.11035	0.027832	-0.044922	-2.52	38.032	30.9614	0.1416	-0.12061	0.11035	20.2101	110.394	1302.716	-0.97647	1.0264	-1.8124	-155.55	-154.565	1466.3587	-0.79141	1.3404	-1.7106	-13.454	120.5173	773.5173	-0.077637	0.53857	-0.73486	-1.135	93.138	1252.726	-1.0015	0.96338	-1.5444
0.212	-43.9937	-206.39983	1186.885	-0.6582	0.54922	-1.2102	-44.214	12.7214	24.6158	0.093262	0.041992	-0.041016	-71.8709	46.254	9.3328	0.15234	-0.12842	0.1084	27.2635	93.9592	1307.2514	-0.95811	0.99304	-1.7741	-120.945	-166.517	1542.521	-0.78985	1.3186	-1.8183	-0.965999999999998	130.9367	734.1917	-0.035156	0.48145	-0.68164	-31.506	83.197	1215.116	-0.97519	0.94668	-1.5096
0.214	-51.9728	-256.925	1250.7909	-0.67021	0.59072	-1.2624	-6.125	6.334	31.117	0.081787	0.049561	-0.03833	-44.231	32.733	38.496	0.16748	-0.16016	0.11621	41.519	114.399	1288.0638	-0.93506	0.96338	-1.7437	-105.14	-133.872	1544.949	-0.79892	1.3222	-1.9384	42.629	149.0337	710.3103	-0.015137	0.45557	-0.65576	11.412	105.9744	1196.777	-0.95235	0.93359	-1.4699
0.216	17.781	-294.185	1275.714	-0.70508	0.65918	-1.3203	1.384	21.986	4.652	0.068359	0.056641	-0.035645	-49.724	33.618	23.23956	0.17236	-0.18018	0.12305	-14.3584	93.081	1279.7868	-0.90957	0.92832	-1.7121	-134.689	-151.86	1563.905	-0.82764	1.3579	-2.0522	34.952	159.35055	672.4821	0.018555	0.38965	-0.60547	-51.7921	127.7614	1131.6066	-0.92735	0.90703	-1.4293
0.218	31.19912	-314.699	1299.9474	-0.7502	0.74707	-1.3904	-67.73399	26.7606	2.3347	0.041504	0.075684	-0.033691	-67.795	0.747999999999998	37.4057	0.17578	-0.20313	0.12451	35.051	77.035	1279.832	-0.8834	0.90166	-1.678	-126.088	-107.433	1563.006	-0.87617	1.4246	-2.1328	29.231	161.8015	642.6678	0.046875	0.34399	-0.57226	-40.902	123.759	1104.9703	-0.89736	0.88272	-1.3868
0.22	53.722	-345.372	1333.5581	-0.7959	0.83555	-1.4562	-10.698	6.79886	38.134	0.026367	0.084961	-0.037109	-0.613999999999997	-21.8165	35.99171	0.17578	-0.22168	0.12207	-3.2821	72.192	1250.6372	-0.86035	0.87862	-1.6425	-172.9939	-114.533	1521.194	-0.92373	1.5197	-2.2116	11.951	157.4053	624.22655	0.066895	0.30029	-0.52881	-18.571	147.4041	1074.327	-0.86475	0.85107	-1.3394
0.222	79.807	-276.785	1354.104	-0.83301	0.92968	-1.5043	-29.151	40.4448	16.2939	-0.0068359	0.10596	-0.033691	-72.0999	-7.2001	21.926	0.1748	-0.2251	0.12207	-14.522	57.345	1216.7591	-0.83135	0.85986	-1.6104	-167.753	-134.995	1535.0097	-0.96748	1.6305	-2.2742	11.514	164.3752	567.941	0.089844	0.24854	-0.47949	-75.644	152.926	1036.75	-0.83164	0.82109	-1.2879
0.224	51.174	-215.9158	1391.061	-0.86318	1.0191	-1.5257	-63.626	26.909	33.7434	-0.025391	0.12232	-0.034668	-54.555	-3.939	52.7859	0.17822	-0.2251	0.12109	28.297	83.012	1194.597	-0.80029	0.83838	-1.5737	-96.146	-52.295	1535.548	-1.0006	1.7397	-2.3139	4.038	150.955	544.447	0.10205	0.23096	-0.45264	-5.843	181.6277	1030.402	-0.79843	0.79043	-1.2422
0.226	84.233	-193.028	1415.334	-0.87695	1.0742	-1.543	-13.667	22.3912	34.28663	-0.047852	0.14453	-0.035645	0.0150000000000006	18.71332	42.5083	0.17676	-0.21777	0.11474	-4.098	107.5809	1143.0633	-0.76982	0.81729	-1.5358	-122.846	-30.052	1527.721	-1.022	1.8384	-2.3413	9.494	140.8006	542.2545	0.12891	0.18213	-0.3999	-42.514	224.273	965.063	-0.76875	0.75605	-1.1954
0.228	80.675	-148.073	1432.487	-0.85781	1.067	-1.544	-64.9548	34.791	2.459	-0.077148	0.16602	-0.038574	-61.723	24.0831	24.235	0.17871	-0.2085	0.1084	10.882	108.8437	1109.3137	-0.73809	0.80137	-1.4894	-79.927	2.918	1549.303	-1.0476	1.9107	-2.33	-4.079	132.255	480.5248	0.146	0.14502	-0.3606	-52.781	220.84	935.5272	-0.73291	0.72197	-1.1396
0.23	73.412	-159.512	1450.356	-0.81279	0.9995	-1.5288	-36.316	17.1406	26.9088	-0.089844	0.17822	-0.040039	-31.395	12.2506	38.458	0.17871	-0.19531	0.10303	-6.138	135.631	1077.958	-0.71074	0.77324	-1.441	-87.206	34.70572	1509.239	-1.0718	1.9618	-2.312	-28.29	118.429	449.251	0.16406	0.11182	-0.32422	-3.138	220.348	909.8608	-0.69189	0.68408	-1.0854
0.232	91.121	-117.017	1441.0329	-0.75693	0.88897	-1.5159	-18.009	41.431	0.928000000000001	-0.10742	0.19775	-0.052246	-26.842	18.3002	12.3733	0.17822	-0.19141	0.1001	-25.1839	137.9882	1048.023	-0.68437	0.74121	-1.3944	-124.095	-1.977252	1515.802	-1.105	1.9864	-2.2905	-5.451	116.4695	438.2289	0.18506	0.0625	-0.27979	-40.676	211.976	845.767	-0.65107	0.64912	-1.0325
0.234	74.283	-78.377	1455.417	-0.73066	0.77012	-1.5268	-64.443	34.8838	12.5888786	-0.11328	0.21362	-0.057373	-43.603	9.765	23.1861	0.18311	-0.16406	0.083008	33.22	143.0703	1038.6059	-0.65674	0.70801	-1.3477	-23.653	58.425	1529.3463	-1.1324	1.9758	-2.2399	-19.699	117.6181	393.778	0.19043	0.037598	-0.25586	-11.945	178.779	830.70468	-0.60537	0.60439	-0.97959
0.236	110.668	-96.094	1484.7829	-0.74365	0.68994	-1.5542	-16.589	10.6504	44.068	-0.11328	0.23145	-0.067871	-4.145	-0.80673	41.488	0.18945	-0.14112	0.079346	-18.572	182.498	993.945	-0.6332	0.67031	-1.2994	-55.321	48.245	1539.05165	-1.168	1.9336	-2.1777	-23.08	96.013	387.8721	0.2002	-0.0087891	-0.21387	-20.407	183.0493	803.3743	-0.56084	0.55713	-0.92569
0.238	123.049	-76.196	1495.387	-0.82793	0.70547	-1.5969	-50.703	22.511	26.323	-0.10059	0.24414	-0.078125	-47.901	24.6832	12.662	0.19482	-0.11865	0.072754	-11.132	170.891	958.874	-0.6	0.63418	-1.2488	-69.581	41.0453	1571.478	-1.2034	1.8638	-2.1159	-0.505000000000003	89.525	378.465	0.20508	-0.03833	-0.1875	-43.155	180.968	771.5271	-0.50879	0.50801	-0.8791
0.24	80.536	-108.751	1490.49731	-0.94874	0.79698	-1.6631	-51.081	1.866	33.4688	-0.093262	0.25342	-0.085449	-32.743	9.467	31.4679	0.1958	-0.098633	0.062988	16.534	172.041	929.687929	-0.56602	0.60098	-1.2	-66.501	75.294	1545.546	-1.2446	1.7895	-2.0554	-32.48	97.8024	333.8888	0.20947	-0.070801	-0.16406	-9.63	158.3624	760.709	-0.45654	0.4585	-0.82568
0.242	116.769	-134.791	1506.2021	-1.0745	0.94854	-1.7554	0.263000000000005	6.5297	46.0807	-0.085938	0.2583	-0.094727	14.973	24.642	14.404	0.19776	-0.085938	0.060059	-29.69	196.629	877.605	-0.52842	0.56973	-1.1465	-149.736	20.7064	1538.253	-1.2868	1.7192	-1.996	-47.047	103.674	320.5905	0.2041	-0.11084	-0.14307	-53.954	186.6048	698.6794	-0.40606	0.41142	-0.76836
0.244	63.98	-127.9484	1520.8854	-1.1708	1.1173	-1.8548	-45.017	12.5958	52.4528	-0.082519	0.26196	-0.10962	-35.605	38.4942	-1.5166	0.19629	-0.074219	0.053223	-7.70800000000001	154.506	865.26	-0.49121	0.53271	-1.0913	-126.142	7.0706	1564.785	-1.327	1.6749	-1.963	-36.334	99.2605	293.1583	0.19873	-0.12842	-0.12451	-56.375	164.667	680.303	-0.36133	0.37119	-0.71318
0.246	-5.5985	-137.705	1551.767	-1.2339	1.2661	-1.9409	-10.439	-31.609	95.0549	-0.088867	0.26807	-0.12207	6.117	25.6141	33.521	0.18994	-0.0625	0.045898	15.902	164.532	848.778	-0.45518	0.50196	-1.0408	-119	12.281	1546.005	-1.3516	1.6445	-1.9473	-46.718	109.1799	255.0747	0.18896	-0.15186	-0.10303	-22.684	164.8785	657.419	-0.31563	0.3294	-0.66162
0.248	46.15	-116.7254	1568.368	-1.2537	1.3756	-2.0084	-29.129	-7.139	81.472	-0.12305	0.2959	-0.13037	-1.355	44.148	22.865	0.18701	-0.058594	0.04541	-29.133	142.396	813.85924	-0.41446	0.4707	-0.98711	-132.394	-25.1438	1533.649	-1.369	1.638	-1.9351	-47.003	111.707	235.7919	0.17822	-0.16358	-0.088379	-67.986	189.39735	586.3493	-0.26963	0.29082	-0.60694
0.25	6.9466	-124.465	1571.375	-1.2613	1.443	-2.0559	-32.017	17.5818	84.62034	-0.13916	0.30908	-0.13525	-37.678	15.12	29.073	0.17822	-0.04248	0.037109	2.01300000000001	120.791	786.5779	-0.37344	0.44101	-0.93868	-107.816	17.89391	1546.9447	-1.3706	1.6319	-1.9284	-39.864	116.698	224.272988	0.16748	-0.17334	-0.079102	-42.791	160.625	553.56	-0.21924	0.25537	-0.5542
0.252	-9.9083	-153.901	1587.627	-1.2644	1.4711	-2.0949	5.695	31.98	136.805	-0.19043	0.33643	-0.15527	6.67	-8.544	52.541	0.16724	-0.030761	0.034424	-38.515	154.8747	741.709	-0.33291	0.40684	-0.88213	-138.2378	31.4479	1533.3679	-1.3687	1.6198	-1.9234	-58.594	104.35	191.679	0.15332	-0.18262	-0.068848	-21.159	190.1132	521.7648	-0.1709	0.21807	-0.50566
0.254	30.185	-138.168	1582.03	-1.2693	1.4886	-2.1224	-54.139	62.198	185.0773	-0.22754	0.35767	-0.17286	-38.91	-4.099	17.329	0.16016	-0.016602	0.023438	-61.09	139.299	704.6665	-0.29004	0.37549	-0.82666	-128.219	28.921	1554.938	-1.3551	1.6094	-1.9199	-49.168	89.663	194.5808	0.15137	-0.18506	-0.0625	-75.546	193.8242	469.5364	-0.12627	0.18232	-0.45625
0.256	-25.1232	-111.848	1548.63	-1.2832	1.4863	-2.1289	-51.343	37.6511	229.9971	-0.27197	0.37939	-0.18896	-27.966	-15.979	47.624	0.14404	0.0083008	0.018066	-8.955	151.3289	685.897	-0.24531	0.34111	-0.77246	-115.374	101.248	1531.561	-1.3379	1.5957	-1.9063	-33.279	76.6658	196.66	0.13477	-0.19434	-0.054688	-21.736	168.7795	444.512	-0.081738	0.14365	-0.40547
0.258	3.2787	-62.9912	1540.535	-1.3052	1.4735	-2.1249	-18.967	30.4862	286.866	-0.34619	0.41602	-0.21484	-1.503	16.9142	32.7377	0.14014	0.019043	0.01416	-64.261	175.2477	634.128	-0.21153	0.30938	-0.71953	-144.272	105.423	1489.063	-1.317	1.574	-1.883	-26.125	73.7423	151.951	0.12623	-0.19898	-0.053955	-78.492	206.335	380.8532	-0.036621	0.10879	-0.35107
0.26	23.9963	-12.519	1549.121	-1.3311	1.4315	-2.1077	-55.054	49.8286	329.4162	-0.39014	0.43994	-0.229	-72.306	28.845	15.6406	0.12451	0.045898	0.0024414	-67.371	139.8892	600.982	-0.16973	0.28047	-0.66563	-104.389	141.6085	1486.0771	-1.2913	1.5435	-1.8483	-19.042	58.8698	141.9199	0.10791	-0.20215	-0.053711	-90.587	181.1517	348.33745	0.010254	0.08252	-0.30664
0.262	0.35613	-10.7739	1528.447	-1.3448	1.3819	-2.0761	-26.982	59.178	435.778	-0.4834	0.48828	-0.25195	-26.719	21.66083	26.56	0.11474	0.064942	-0.003418	-42.819	176.151	575.8594	-0.13603	0.25391	-0.61104	-137.6212	201.121	1448.319	-1.2647	1.5075	-1.8109	-26.34	49.051	136.7257	0.080078	-0.19922	-0.058105	-45.399	174.346	333.7872	0.05791	0.045605	-0.26133
0.264	35.305	-12.162	1537.6089	-1.3524	1.3203	-2.0469	-19.971	112.09132	503.6327	-0.55591	0.53857	-0.27807	-40.538	30.817	15.9605	0.10986	0.08252	-0.011719	-75.817	195.275	531.78921	-0.10156	0.22266	-0.56445	-163.3374	175.6	1441.0219	-1.2322	1.4669	-1.7686	-26.761	43.7362	97.5649	0.066406	-0.19287	-0.065918	-101.12048	184.139	273.033	0.099512	0.0080078	-0.21738
0.266	35.124	3.20009	1527.716	-1.3452	1.2661	-2.0151	-72.599	126.9993	517.691	-0.63281	0.58594	-0.30371	-57.378	17.4549	17.5528	0.098145	0.10742	-0.020508	-55.28	175.783	503.537	-0.067968	0.19492	-0.51006	-98.828	192.647	1439.314	-1.1973	1.4238	-1.7207	-21.878	34.522	111.361	0.035156	-0.18359	-0.067383	-83.307	121.7345	253.360763	0.13858	-0.029102	-0.17207
0.268	38.371	4.6742	1527.3145	-1.3304	1.2262	-1.9928	-19.758	98.3359	579.58	-0.73682	0.65381	-0.34424	-14.504	19.3971	41.6621	0.09082	0.12207	-0.025391	-89.963	203.8711	430.609	-0.042773	0.17295	-0.45694	-132.9529	144.081	1390.1769	-1.1629	1.374	-1.6666	7.251	30.783	113.885	0.012451	-0.16528	-0.081055	-71.399	122.559	221.139	0.17295	-0.057519	-0.13086
0.27	53.336	32.4455	1523.873953	-1.3237	1.2012	-1.9745	-4.009	106.393	649.884	-0.78857	0.6958	-0.36475	-34.676	37.619957	22.071	0.087402	0.14502	-0.027832	-78.804	158.511	402.1094	-0.017383	0.14873	-0.40225	-130.9313	96.819	1382.335	-1.1311	1.3216	-1.612	-9.133	27.643	84.2009	-0.015137	-0.14404	-0.089844	-89.3254	114.157	203.8948	0.19873	-0.093262	-0.094238
0.272	21.1631	21.1845	1503.77	-1.3233	1.1907	-1.9616	1.475	67.687	806.666	-0.90674	0.77295	-0.40771	-53.069	21.148	46.5652	0.079834	0.16479	-0.029541	-64.427	144.7614	366.12747	0.0054689	0.12618	-0.35547	-90.279	128.6445	1347.6148	-1.0952	1.2685	-1.5573	-1.372	19.6249	98.8346	-0.049316	-0.10596	-0.10596	-56.091	71.469	199.711	0.21865	-0.11709	-0.056738
0.274	83.274	0.151999999999999	1499.6505	-1.3314	1.1889	-1.9556	18.835	44.4351	891.534	-0.99755	0.82715	-0.43481	-27.712	30.6483	35.521	0.072754	0.18066	-0.033691	-106.5428	178.287	323.2001	0.024414	0.10986	-0.31445	-116.741	101.419	1318.574	-1.0721	1.2164	-1.4982	-0.759999999999998	36.0999	98.0396	-0.070313	-0.079102	-0.11572	-76.168	109.078	163.83201	0.23594	-0.13272	-0.021777
0.276	95.542	-4.959	1510.4553	-1.3491	1.1909	-1.9526	-43.258	4.3187	884.2945	-1.082	0.88184	-0.45703	-69.6466	42.8146	20.0524	0.0625	0.2002	-0.033203	-51.842	130.9916	296.743	0.050684	0.087305	-0.27442	-56.231	120.791	1327.345	-1.0503	1.1626	-1.4429	-15.217	33.825	67.5289	-0.097168	-0.035156	-0.13281	-66.927	71.98	154.736	0.23945	-0.14365	0.008301
0.278	52.8342	-21.7925592	1529.9584	-1.3616	1.193	-1.9507	-41.3882	-61.4345	900.899	-1.2017	0.9458	-0.49854	-27.972	30.6286	47.458	0.059082	0.21484	-0.032715	-64.936	153.901	270.1629	0.075293	0.064258	-0.23076	-22.509	126.861	1287.792	-1.0334	1.1143	-1.3853	2.29	29.5303	68.026	-0.11914	-0.0046388	-0.14453	-27.919	52.954	136.92	0.23496	-0.14765	0.028418
0.28	109.222	-10.395	1539.76	-1.3694	1.1895	-1.9456	-54.927	-67.2154	908.02616	-1.2495	0.97705	-0.521	-23.07	43.918	21.5237	0.050781	0.23242	-0.040039	-111.98	138.253	255.0138	0.091699	0.049023	-0.19014	-65.015	72.942	1262.921	-1.0207	1.0674	-1.33	-11.757	33.41	49.656	-0.13135	0.026367	-0.16113	-71.2586	75.104	111.51566	0.23389	-0.14697	0.050293
0.282	75.757	5.459	1515.8363	-1.3655	1.1731	-1.9299	-67.768	-74.739	922.72963	-1.3281	1.0137	-0.56543	-58.128	20.4502	30.7427	0.046631	0.24951	-0.039063	-38.758	87.461	251.7988	0.10683	0.034375	-0.14903	-20.33	93.231	1246.49	-1.0098	1.0174	-1.2848	-8.45	32.17325	16.4953	-0.14844	0.05957	-0.16406	-31.485	11.362	100.929	0.23261	-0.14502	0.060938
0.284	102.42	-1.22	1508.566	-1.3482	1.1534	-1.9152	-10.786	-77.2197	927.6278	-1.3787	1.0315	-0.59448	-27.947	-0.39577	33.6102	0.039063	0.26953	-0.049805	-61.577	112.987	211.9481	0.11768	0.030273	-0.1167	-34.198	108.776	1184.4862	-0.9995	0.97412	-1.2421	-19.532	26.0182	26.548	-0.14893	0.072754	-0.16797	-23.009	35.4576	80.6431	0.22158	-0.13838	0.069629
0.286	130.681	24.528	1491.217	-1.3179	1.1255	-1.894	-33.706	-65.0895	888.837	-1.4229	1.0391	-0.62207	-43.771	-1.6822	17.782	0.034668	0.28955	-0.049316	-60.981	70.3	194.8449	0.13437	0.029004	-0.092971	-32.826	137.675	1158.337	-0.98926	0.93555	-1.2012	-30.281	35.9259	22.03	-0.15527	0.095703	-0.16895	-48.802	47.8086	53.206	0.19814	-0.12744	0.068457
0.288	76.747	26.354	1462.6539	-1.2846	1.0912	-1.8678	-38.2804	-106.145	928.508	-1.4604	1.0454	-0.65576	-28.611	-16.254	43.33	0.032227	0.29492	-0.053711	-6.928	63.6177	177.5781	0.14365	0.026758	-0.068164	1.209	207.751	1110.8842	-0.97002	0.89678	-1.1567	-28.934	38.9748	12.4236	-0.1543	0.09668	-0.16504	-5.754	14.8932	63.6797	0.16699	-0.1042	0.05459
0.29	120.764	47.665	1448.125	-1.2484	1.0492	-1.844	52.244	-119.297	944.687	-1.48	1.0435	-0.68457	-1.267	-2.8665	42.5514	0.038574	0.31836	-0.054199	-63.057	93.2262	140.1118	0.15147	0.024023	-0.041211	-58.677	197.867	1042.042	-0.95371	0.86641	-1.1172	-17.177	26.146	39.51021	-0.14893	0.1001	-0.16113	-35.181	77.341	28.225	0.13916	-0.068359	0.032227
0.292	88.273	98.231	1414.8977	-1.2019	1.0176	-1.8193	37.232	-88.577	916.623	-1.498	1.043	-0.71143	-41.219	19.2003	25.6944	0.036377	0.32471	-0.063233	-34.321	36.618	113.908	0.15635	0.020898	-0.020703	-24.123	190.46	1015.3081	-0.92402	0.84141	-1.0735	-36.378	12.186	44.646	-0.13916	0.086914	-0.14697	-20.755	42.8403	32.2762	0.1	-0.031348	0.013281
0.294	53.747	111.7	1391.1671	-1.1537	0.98887	-1.7983	89.59	-70.855	918.251	-1.5074	1.0415	-0.73486	16.202	15.8732	44.697	0.037598	0.33057	-0.072754	-19.571	49.9622	92.162	0.15381	0.017578	-0.0024414	-31.354	209.11	953.533	-0.88613	0.81191	-1.0236	-59.507	9.3131	29.6754	-0.12867	0.068115	-0.13916	-2.495	35.699	33.5199	0.057324	0.013379	-0.0078124
0.296	59.881	123.092	1380.9238	-1.1172	0.95605	-1.7734	84.441	-35.92966	891.6078	-1.5054	1.0435	-0.76416	-7.161	25.5859	50	0.040039	0.30908	-0.11865	-56.955	43.831	73.323	0.15235	0.015722	0.01543	-61.927	192.3605	936.0312	-0.84766	0.78125	-0.9707	-36.818	12.5731	50.849	-0.1167	0.051758	-0.12988	-49.148	67.729	30.2129	0.011621	0.062598	-0.032422
0.298	8.7329	139.085	1361.066	-1.0892	0.93457	-1.7443	12.32	-45.2042	906.5387	-1.4922	1.0371	-0.78906	-55.133	-0.2299	84.4215	0.036621	0.29785	-0.14697	-6.31	9.583	96.85088	0.14687	0.0088867	0.027148	8.254	216.098	904.5922	-0.79668	0.74844	-0.9211	-54.399	16.0338	23.9545	-0.10889	0.028809	-0.11865	6.547	7.4	44.009	-0.033106	0.11064	-0.060059
0.3	9.5742	123.48	1347.36129	-1.0661	0.92666	-1.7241	55.604	-74.973	937.51234	-1.4819	1.0376	-0.8042	-1.17899999999999	5.9238	123.3414	0.010742	0.29932	-0.2124	-10.514	76.854	78.149	0.14102	0.011621	0.032226	-41.43	213.976	828.364	-0.73731	0.71133	-0.86875	-40.21	3.8644	0.142000000000001	-0.10693	0.018066	-0.11377	-3.202	25.2254	37.22004	-0.069824	0.15186	-0.087402
0.302	20.876	129.485	1331.4298	-1.0415	0.9294	-1.7097	37.489	-67.655	927.235	-1.4604	1.0366	-0.82959	-7.34699999999999	38.326	111.1246	-0.02002	0.31787	-0.25855	-18.233	54.5951	58.6945	0.12647	0.0071289	0.030957	-38.924	174.757	806.374	-0.67246	0.66601	-0.81719	-54.401	-2.892	24.13480512	-0.10889	0.0053711	-0.10352	-39.985	26.397	36.95621	-0.10879	0.19395	-0.11113
0.304	-43.5185	135.974544	1277.701	-1.0074	0.92793	-1.6902	9.449	-116.833	954.7792	-1.4392	1.0422	-0.8523	-21.031	23.9167	157.4379	-0.069336	0.33691	-0.32031	-12.597	37.951	51.965	0.11035	0.0078125	0.027832	-6.543	186.6606	768.541	-0.61455	0.61504	-0.75313	-82.7599	-0.888999999999999	18.9491	-0.10546	0.0019531	-0.10376	-2.413	-21.5177	24.6147	-0.13945	0.22959	-0.13017
0.306	-14.8586	114.563	1249.2594	-0.98242	0.92773	-1.6621	34.975	-133.912	997.2074	-1.3965	1.0254	-0.87598	-29.436	44.91	226.502	-0.1416	0.36328	-0.42188	-33.827	71.015	38.88585	0.086914	0.010644	0.015332	-87.67577	160.053	739.4412	-0.55957	0.56445	-0.69385	-32.606	6.4299	8.279	-0.095215	-0.0039063	-0.10107	-25.934	35.8429	17.806	-0.1664	0.25381	-0.14932
0.308	-16.8691	126.5359	1253.8235	-0.95645	0.9249	-1.6416	-23.817	-152.318	995.244	-1.3105	0.98633	-0.91797	-85.947	64.7225	262.247	-0.17236	0.37744	-0.47412	-14.552	14.1018	34.2275	0.063086	0.020215	0.0010742	-28.444	158.39	744.017	-0.50439	0.51748	-0.63584	-38.204	11.196	30.8997	-0.077148	-0.012207	-0.10059	-36.082	11.485	19.0698	-0.18448	0.27696	-0.15967
0.31	-37.736	99.529	1240.93697	-0.93183	0.91641	-1.6074	-15.518	-188.611	1051.213	-1.2383	0.94775	-0.93506	-33.562	43.9151	349.9011	-0.2373	0.42041	-0.58154	-20.635	39.625	32.516	0.033008	0.038184	-0.01416	-52.934	199.5	689.376	-0.45244	0.46856	-0.57422	-26.707	27.9746	36.8522	-0.069336	-0.019043	-0.1001	-24.415	6.4477	19.8018	-0.20215	0.28662	-0.1665
0.312	-6.259	91.464	1240.382	-0.91035	0.9082	-1.5742	19.302	-169.85	1094.597	-1.1758	0.92188	-0.94922	-26.351	86.3411	414.7544	-0.29053	0.4607	-0.67359	-34.921	44.259696	47.9389	-0.010156	0.060938	-0.035645	-99.101	166.7385	651.621	-0.39033	0.41895	-0.51133	-11.116	25.5495	10.4232	-0.041016	-0.030762	-0.10352	-64.56	41.4286	23.169	-0.21221	0.29375	-0.17119
0.314	-40.577	119.6299	1186.3379	-0.88321	0.89101	-1.5383	-16.867	-202.11	1149.7901	-1.1392	0.88721	-0.97021	-55.477	80.523	515.927	-0.34033	0.5083	-0.75928	-34.289	-6.91081	71.357	-0.05127	0.087891	-0.0625	-38.282	178.796	608.346	-0.34472	0.37266	-0.45166	-24.252	26.3633	34.8473	-0.02002	-0.051269	-0.10229	-45.894	-18.13	29.046	-0.21132	0.29218	-0.17109
0.316	-44.8356	118.094	1142.942	-0.85059	0.86328	-1.4941	26.353	-225.465	1220.942	-1.1406	0.88086	-0.98047	-6.73099999999999	78.035	587.0488	-0.42822	0.57666	-0.88525	-54.319	36.4896	53.9913	-0.098632	0.12461	-0.092868	-75.4016	176.93947	526.417	-0.29199	0.32568	-0.3916	-33.966	29.31	16.8549	0.0019531	-0.066895	-0.098145	-45.259	17.27717	25.6032	-0.20898	0.28008	-0.16914
0.318	-11.692	161.256	1112.2342	-0.81191	0.83028	-1.4487	-0.221000000000004	-198.646	1246.65938	-1.1904	0.8916	-1.0156	-49.19553	98.3016	624.276	-0.47168	0.60791	-0.95459	-56.503	3.867	30.2852	-0.14395	0.16738	-0.12431	-40.315	142.28	486.3515	-0.24356	0.27852	-0.33017	-7.979	27.18	2.805	0.035645	-0.10205	-0.09082	-63.45	44.132	24.7289	-0.1961	0.27178	-0.15615
0.32	-47.7313	179.2068	1048.193	-0.76846	0.80049	-1.3999	-20.647	-179.615	1270.4743	-1.2398	0.91699	-1.042	-11.723	51.365	756.849	-0.57031	0.68457	-1.0879	-39.048	-2.5251	10.9533	-0.18613	0.20996	-0.15323	-18.885	167.6369	457.6107	-0.19531	0.23184	-0.26992	-9.455	28.7833	47.453	0.053223	-0.11865	-0.087891	-44.098	10.074	33.9139	-0.18213	0.25732	-0.13867
0.322	-0.152000000000001	157.945	1034.4076	-0.72198	0.76572	-1.3574	-1.793	-106.4022	1316.3612	-1.2905	0.94385	-1.0698	29.00477	43.684	885.4401	-0.65381	0.7627	-1.1733	-67.154	36.004	-6.4989	-0.22217	0.24697	-0.18184	-71.58742	168.557	404.5581	-0.14453	0.18457	-0.21133	-38.078	26.8127	16.5814	0.087891	-0.16211	-0.076172	-50.491	71.954	17.763	-0.1624	0.24004	-0.12519
0.324	-8.567	180.249	990.549	-0.67783	0.73135	-1.3106	-48.336	-87.1482	1356.227	-1.3398	0.99219	-1.1113	-50.8387	27.945	974.575	-0.74023	0.85352	-1.248	-44.023	-20.45193	21.4268	-0.24463	0.28564	-0.19971	2.71	179.886	374.3585	-0.097361	0.13594	-0.15615	-2.592	16.7668	4.886	0.11572	-0.18408	-0.067138	-59.343	55.4408	10.7275	-0.14902	0.21504	-0.11319
0.326	-10.292	178.58263	956.1416	-0.64063	0.69531	-1.2559	-72.134	-118.8909	1392.746	-1.3574	1.0176	-1.1289	7.266	-25.60657	1041.539	-0.8457	1.0039	-1.3184	-58.411	16.06893	29.751	-0.26123	0.31494	-0.21709	-1.329	212.848	316.272	-0.057617	0.080078	-0.10596	-1.68	20.6999	45.6783	0.13379	-0.20996	-0.063477	-42.779	48.83	16.8986	-0.1377	0.19004	-0.10342
0.328	28.305	200.527	947.485	-0.60283	0.66865	-1.2087	-61.781	-96.988	1400.05	-1.3848	1.0742	-1.1777	-24.82	-38.683	1052.6498	-0.88818	1.0845	-1.3491	-61.495	29.279	28.11614	-0.26914	0.34765	-0.23203	-46.408	187.205	279.1802	-0.0045899	0.021387	-0.051172	-19.587	24.3739	12.3186	0.15674	-0.23535	-0.061035	-68.907	74.142	20.0338	-0.12744	0.16719	-0.085937
0.33	-11.747	241.201	895.2102	-0.5543	0.64199	-1.1657	-112.6686	-109.746	1403.2177	-1.4034	1.1211	-1.2119	-112.974	-85.1266	1108.0939	-0.94482	1.2407	-1.3921	-24.252	-6.9639	39.724	-0.27618	0.36914	-0.23945	15.842	178.974	272.598	0.039356	-0.038965	-0.00097652	15.745	12.7174	22.90582	0.16943	-0.24561	-0.060547	-34.985	15.4907	43.647	-0.11914	0.15137	-0.074219
0.332	8.117	206.515	846.493	-0.50977	0.60528	-1.1101	-89.9529	-79.902	1432.3766	-1.416	1.1602	-1.2461	-39.34	-103.7931	1141.18	-0.94799	1.3357	-1.4148	-69.991	53.1977	34.98963	-0.2793	0.38067	-0.23984	-20.366	176.927	232.9658	0.081933	-0.097558	0.040429	-3.186	10.3422	55.524	0.18262	-0.26318	-0.061035	-40.163	23.6602	39.4336	-0.10801	0.13536	-0.063086
0.334	32.984	189.324	825.509	-0.45693	0.57031	-1.0621	-84.0284	-42.248	1434.833	-1.4551	1.2285	-1.2871	-50.518	-99.6695	1116.5273	-0.92529	1.397	-1.4409	-64.662	49.8359	26.6232	-0.27686	0.38916	-0.23975	-12.388	133.62325	227.3481	0.11631	-0.15898	0.076172	-4.769	10.33505	12.0591	0.19043	-0.27295	-0.065918	-62.2443	25.895	30.106	-0.094629	0.11856	-0.050879
0.336	-30.558	197.989	770.041	-0.39844	0.5293	-1.0176	-91.7659	-84.1197	1447.8	-1.4805	1.2578	-1.3105	-10.01	-141.138	1136.898	-0.85742	1.4268	-1.4648	-16.555	42.888	30.611	-0.27187	0.39531	-0.23223	20.054	137.18	200.5127	0.14453	-0.2124	0.11377	5.135	19.4991	21.6122	0.19775	-0.28174	-0.069336	-17.301	-24.8281	37.3794	-0.073145	0.10293	-0.038769
0.338	15.799	157.5351	761.2784	-0.33701	0.48486	-0.96143	-44.884	-79.8708	1463.24	-1.5698	1.3374	-1.3569	31.2805	-142.12	1116.817	-0.81006	1.4282	-1.4663	-58.986	96.659	-5.63	-0.26543	0.39492	-0.21875	-28.856	109.2503	187.6143	0.16084	-0.26113	0.14609	-28.639	19.4905	52.8135	0.20703	-0.28613	-0.078125	-55.348	31.9607	42.8216	-0.050098	0.084668	-0.028516
0.34	-15.689	176.8313	737.5225	-0.28691	0.44297	-0.91367	-76.564	-95.445	1483.982	-1.6607	1.3941	-1.3902	-0.00519999999999943	-144.902	1104.328	-0.7124	1.4126	-1.4526	-45.858	18.8954	12.19879	-0.25567	0.38281	-0.20781	36.267	81.7516	181.173	0.16982	-0.30352	0.17002	-45.899	25.3894	9.9863	0.2124	-0.2793	-0.088379	-32.233	26.5184	42.478	-0.023926	0.060059	-0.010254
0.342	-51.846	150.188	692.345	-0.23222	0.40195	-0.86406	-62.218	-119.078	1549.215	-1.7705	1.4531	-1.4336	51.25	-138.367	1132.863	-0.65014	1.3781	-1.4206	-20.781	2.20987	31.4294	-0.24013	0.36299	-0.18691	13.535	93.3322	134.6442	0.16748	-0.33398	0.19229	-13.16	35.6864	24.24441	0.22021	-0.27686	-0.097656	-7.248	13.4164	43.959	0.0041017	0.038281	0.0125
0.344	-26.777	130.645	672.203	-0.18232	0.36319	-0.81025	-12.087	-75.998	1561.003	-1.9277	1.543	-1.4863	60.586	-82.91	1089.717	-0.60205	1.3384	-1.3745	-36.06	8.73	24.6904	-0.22119	0.34033	-0.16357	-31.92	49.775	111.333	0.15596	-0.35957	0.20049	-31.981	33.1248	51.221	0.22705	-0.26856	-0.10766	-38.946	59.342	34.4617	0.028809	0.0125	0.030859
0.346	-60.826	168.8291	607.5713	-0.13281	0.32031	-0.75977	-50.02	-88.931	1553.819	-2.0103	1.5962	-1.5151	44.8376	-83.343	1077.913	-0.56934	1.2842	-1.2939	-32.825	-25.1858	42.758	-0.20117	0.31377	-0.14199	12.568	44.8906	124.266	0.14355	-0.37891	0.20654	-66.215	21.2817	19.3862	0.23584	-0.26074	-0.11426	1.32	-2.17	41.147	0.049121	-0.019922	0.05
0.348	-59.157	141.853	578.365	-0.08369	0.2873	-0.70283	-24.583	-78.003	1565.132	-2.1484	1.6953	-1.5625	78.533	-94.7507	1077.685	-0.55859	1.2695	-1.2539	-25.156	57.482	23.4359	-0.1836	0.28515	-0.12148	-29.896	54.9783	102.49969	0.11348	-0.39082	0.20332	-32.128	9.3334	46.8259	0.23486	-0.24658	-0.12939	-5.492	8.2775	53.5881	0.067675	-0.054199	0.066504
0.35	-50.511	160.563	544.134	-0.039746	0.25762	-0.65088	-36.148	-56.9685	1562.7227	-2.2358	1.7671	-1.602	22.657	-101.314	1073.816	-0.53467	1.2612	-1.189	-39.542	38.9243	37.296	-0.16914	0.25938	-0.10312	-1.975	32.745	109.526	0.086524	-0.39882	0.19961	-54.001	13.0017	54.693	0.2373	-0.24512	-0.13477	-23.403	31.702	49.0536	0.083008	-0.083984	0.08252
0.352	-95.5542	186.9051	498.671	0.0043945	0.23106	-0.60048	-65.196	-98.486	1581.747	-2.3047	1.8281	-1.6367	15.576	-143.512	1119.8412	-0.51294	1.2542	-1.157	-15.025	19.3598	51.163	-0.14912	0.23203	-0.084765	5.225	42.8767	84.4822	0.04707	-0.38477	0.18711	-55.358	21.3232	-1.4992	0.2373	-0.22656	-0.14795	-2.26	-5.5325	47.303	0.10283	-0.1126	0.1001
0.354	-70.716	150.812	458.358	0.047461	0.20518	-0.54844	-23.164	-65.6275	1590.45	-2.3535	1.9023	-1.668	40.874	-123.437	1148.9541	-0.49658	1.2261	-1.1577	-11.499	54.2659	29.7519	-0.12598	0.21289	-0.061035	-58.223	31.49	49.4247	-0.002051	-0.36074	0.1627	-22.122	16.873	27.8442	0.23095	-0.20923	-0.16456	-30.245	49.524	36.3948	0.11904	-0.14121	0.10723
0.356	-86.299	188.3046	408.493	0.086914	0.18164	-0.5	-49.64	-57.9927	1556.836	-2.3647	1.9282	-1.6772	-24.209	-121.78	1154.237	-0.48242	1.168	-1.2168	-14.367	-16.8469	27.7267	-0.10527	0.1875	-0.043164	-32.963	25.7441	69.7418	-0.06543	-0.32129	0.12842	-62.718	6.2445	39.193	0.23438	-0.19482	-0.17529	-42.59	25.3447	29.328	0.13388	-0.16817	0.11387
0.358	-115.4385	172.331	353.303	0.12871	0.16006	-0.44013	-46.587	-62.2117	1567.924	-2.3711	1.9453	-1.6836	-12.024	-139.571	1194.801	-0.49219	1.1348	-1.2598	-17.977	16.7702	39.949	-0.080957	0.16181	-0.02002	-55.756	70.636	47.7195	-0.12646	-0.26494	0.094436	-63.646	6.396	10.2208	0.23779	-0.18604	-0.19727	-17.72	12.283	29.868	0.1499	-0.1877	0.11309
0.36	-78.022	146.2758	331.1555	0.16621	0.1417	-0.3917	-0.831000000000003	-13.858	1562.407	-2.3564	1.9414	-1.6757	-12.913	-135.899	1209.425	-0.521	1.0962	-1.353	-37.859	36.502	47.6924	-0.055957	0.13994	0.0018554	-71.425	68.405	41.312	-0.19356	-0.19854	0.052539	-13.588	11.593	51.151	0.23779	-0.18604	-0.21045	-36.087	61.524	24.38348	0.16357	-0.20654	0.1123
0.362	-107.1493	184.556	294.052	0.2041	0.12295	-0.33857	-60.944	-39.2924	1552.849	-2.334	1.918	-1.6504	-67.423	-186.969	1264.79	-0.57422	1.1153	-1.4161	-27.389	0.0299999999999976	48.6236	-0.029199	0.11231	0.029199	-31.394	52.409	64.655	-0.2584	-0.1251	0.013867	-28.422	-1.703	59.0681	0.23486	-0.19092	-0.23779	-38.856	2.8161	38.141	0.17236	-0.22148	0.104
0.364	-92.704	145.1506	261.4735	0.24346	0.10215	-0.28632	-19.989	-23.4672	1575.109	-2.3008	1.8594	-1.623	-20.379	-204.637	1340.624	-0.646	1.1626	-1.4634	-43.389	57.797	28.8058	-0.0024414	0.08252	0.052734	-88.9313	41.072	39.787	-0.32246	-0.047461	-0.025488	-44.201	-13.8217	49.4911	0.22949	-0.18774	-0.25513	-50.111	12.4829	43.7088	0.17334	-0.23027	0.10401
0.366	-97.787	141.931	230.6661	0.2832	0.072266	-0.23682	-5.816	14.3047	1563.2287	-2.2852	1.8223	-1.5996	-30.491	-216.987	1379.298	-0.73486	1.2563	-1.4897	-30.186	37.28216	18.4023	0.028808	0.041504	0.07207	-73.891	-13.486	29.44015	-0.37988	0.029785	-0.072754	-28.54	-22.7934	72.585	0.21631	-0.16992	-0.271	-55.179	6.059	33.891	0.17881	-0.23379	0.091894
0.368	-98.2194	131.88873	175.964	0.31895	0.038281	-0.19131	-66.558	-0.122	1581.055	-2.2417	1.7388	-1.5425	-28.214	-262.607	1423.373	-0.76514	1.313	-1.4937	-29.155	25.617	36.037	0.052246	-0.00078116	0.09541	-25.195	-9.4036	22.345	-0.42344	0.10781	-0.10937	-40.16	-19.719	67.569	0.18262	-0.13574	-0.29102	-28.553	-54.647	33.0377	0.17305	-0.23135	0.076465
0.37	-48.513	70.854	179.003878	0.35147	0.0020507	-0.14932	-44.658	41.9166	1596.9384	-2.2095	1.6763	-1.5024	-9.16999999999999	-220.599	1431.435467	-0.79297	1.3828	-1.4707	-72.8817	64.825	31.2213	0.076074	-0.045703	0.11221	-80.8542	2.537	17.365	-0.4497	0.1793	-0.14746	-19.736	-8.77	37.6721	0.15674	-0.11084	-0.30371	-48.777	7.189	34.4303	0.17041	-0.21924	0.067871
0.372	-66.175	108.3452	150.434	0.37412	-0.030371	-0.1083	-67.432	29.12487	1554.9	-2.1816	1.6172	-1.4668	-88.5035	-198.023	1447.128	-0.78125	1.396	-1.4526	-38.415	10.8213	40.1388	0.094727	-0.091603	0.12607	-41.239	-20.541	39.2646	-0.46885	0.23868	-0.17441	17.373	-5.2195	74.4014	0.11963	-0.07373	-0.33545	-48.083	2.042	33.119	0.16728	-0.20097	0.053125
0.374	-45.622	85.49	133.0629	0.39736	-0.061621	-0.071679	-73.672	0.427	1540.8597	-2.1323	1.5649	-1.4214	-66.41	-178.76	1492.1856	-0.74902	1.377	-1.4414	-53.666	18.9392	38.3954	0.11523	-0.13574	0.1377	-40.403	-2.5223	14.6719	-0.48154	0.29062	-0.19697	-10.521	-21.416	75.782	0.098875	-0.047852	-0.35473	-41.555	3.8931	30.152	0.16055	-0.17393	0.042188
0.376	-7.168	49.056	137.7274	0.41113	-0.084473	-0.040039	-62.615	25.1839	1532.0891	-2.1089	1.5376	-1.3979	-78.719	-111.351	1484.0028	-0.69873	1.3013	-1.4409	-69.096	14.711	28.121	0.13301	-0.1747	0.15088	-66.751	-19.1679	23.632	-0.48096	0.34619	-0.22168	11.237	-32.0823	50.423	0.080566	-0.021973	-0.37451	-70.273	52.24	13.2727	0.15391	-0.14541	0.024219
0.378	-57.716	75.4172	116.3542	0.41777	-0.10195	-0.016894	-127.29006	2.938	1521.9232	-2.0542	1.5005	-1.3589	-155.1158	-117.9546	1511.178	-0.68701	1.2407	-1.4468	-38.314	-47.961	39.4307	0.14952	-0.20693	0.15761	0.548000000000002	-10.7892	29.546	-0.47686	0.38448	-0.23496	10.118	-16.48536	105.7446	0.05127	0.0039063	-0.40625	-49.719	6.06563	11.232594	0.15908	-0.11826	0.012012
0.38	-9.296	16.046	106.095	0.41426	-0.11465	-0.0038086	-89.801	16.497	1544.729	-1.9976	1.4761	-1.334	-127.5473	-100.55	1527.168	-0.72021	1.1313	-1.4897	-60.033	16.848	33.702	0.15811	-0.24053	0.16074	-53.451	17.7094	24.8744	-0.46563	0.41914	-0.2414	4.065	6.239	130.5018	0.037109	0.011719	-0.42529	-60.929	18.1819	19.11063	0.16602	-0.088379	-0.00097656
0.382	15.096	30.693	94.7616	0.39824	-0.11973	0.012598	-96.8908	49.0312	1518.14	-1.9434	1.4551	-1.3027	-146.808	-64.225	1494.649	-0.77563	1.1037	-1.5476	-47.679	13.194	24.67574	0.17304	-0.26954	0.16621	-26.078	1.5916	42.666	-0.43907	0.44492	-0.24258	27.284	9.154	116.8941	-0.0029297	0.029297	-0.46582	-59.172	21.888	15.21	0.17725	-0.066015	-0.0050781
0.384	-26.634	59.5641	57.9993	0.36504	-0.1166	0.015039	-108.983	29.903	1521.075	-1.8765	1.4204	-1.2651	-148.5802	-80.527	1542.6749	-0.83984	1.127	-1.623	-20.523	17.2143	39.225	0.18652	-0.29297	0.17041	7.432	18.12791	21.8904	-0.40732	0.45908	-0.23076	23.696	7.0427	181.685	-0.035401	0.037598	-0.50464	-30.411	-21.0037	31.6359	0.19511	-0.046192	-0.013184
0.386	13.935	11.3056	50.0481	0.32471	-0.10254	0.0024414	-56.822	72.5091	1522.7915	-1.8394	1.4009	-1.2495	-70.489	-43.911	1542.3383	-0.92725	1.2261	-1.7573	-81.14343	58.943	39.7027	0.20469	-0.31396	0.16836	-47.33	38.7201	3.025	-0.37109	0.45508	-0.20898	-14.26	28.10743	189.5527	-0.078125	0.045898	-0.55176	-56.399	44.7048	11.401	0.20449	-0.03252	-0.01709
0.388	6.964	57.095	44.701	0.2707	-0.072461	-0.011035	-87.946	87.3402	1487.4	-1.7773	1.3691	-1.207	-89.91	-62.7042	1538.635	-0.96875	1.2871	-1.8184	-42.242	-6.4067	32.6128	0.21631	-0.32412	0.16709	13.199	14.5728	12.918	-0.32666	0.42939	-0.18711	11.319	55.7538	197.148	-0.15527	0.087891	-0.62305	-46.412	36.3868	1.9423	0.21299	-0.024414	-0.024316
0.39	-24.332	35.8887	35.427	0.21377	-0.02666	-0.033496	-78.399	86.044	1476.4966	-1.7356	1.344	-1.1678	-66.421	-72.813	1571.952	-1.0488	1.4355	-1.9355	-19.015	7.791	23.396	0.22959	-0.32451	0.16045	-2.58	34.341	-9.493	-0.28134	0.38448	-0.14892	27.089	96.8193	290.288	-0.20215	0.12207	-0.65137	-9.609	28.731	20.6023	0.21582	-0.01709	-0.035645
0.392	26.521	17.4014	44.4482	0.14307	0.033887	-0.055371	-62.915	143.824	1462.9757	-1.6914	1.3145	-1.1367	-69.522	-42.9579	1548.8694	-1.123	1.6016	-2.0332	-62.89	27.4955	11.667	0.23984	-0.32129	0.15547	-14.978	43.7065	-2.518	-0.22862	0.33369	-0.11963	-39.789	99.2172	321.7732	-0.30469	0.20703	-0.74609	-30.9	74.246	12.0098	0.21241	-0.0088866	-0.037793
0.394	0.776000000000003	64.029	26.577	0.077051	0.093652	-0.085743	-91.329	127.839	1441.3261	-1.6367	1.2656	-1.0938	-103.813	-83.287	1586.05	-1.1538	1.6841	-2.0718	-39.961	-20.6744	28.9911	0.24219	-0.30957	0.14697	30.609	44.627	8.80378	-0.18105	0.2709	-0.078418	-44.479	86.4265	364.658	-0.38404	0.28467	-0.81397	-19.284	13.6232	23.8421	0.20742	0.00078126	-0.045801
0.396	-8.355	22.5739	39.5382	0.012695	0.16357	-0.11328	-31.968	135.222	1440.925	-1.6074	1.2402	-1.0723	-43.151	-68.1325	1612.523	-1.2046	1.8462	-2.1401	-28.153	43.344	31.372	0.2416	-0.29287	0.13301	-38.178	73.022	-1.899	-0.1377	0.20898	-0.044434	-28.871	83.8448	462.3988	-0.45605	0.36914	-0.88867	-4.695	27.6104	32.3563	0.20274	0.010547	-0.057129
0.398	-16.873	50.695	35.0338	-0.05	0.22646	-0.1416	-16.056	150.138	1407.471	-1.5488	1.1816	-1.0273	-68.469	-66.6622	1601.987	-1.2439	1.9466	-2.1687	-32.136	32.75	16.6201	0.24287	-0.26943	0.11807	-12.171	35.4325	23.7269	-0.085058	0.14678	-0.0083983	-79.474	84.5338	489.28	-0.54688	0.49805	-0.9707	-38.032	35.8517	34.54482	0.19024	0.02373	-0.062793
0.4	-43.693	70.867	17.2437	-0.10332	0.28633	-0.16435	-57.726	107.7793	1377.42002	-1.5026	1.1447	-0.99291	-88.95	-121.9	1625.177	-1.2788	2.0259	-2.1831	-7.207	23.583	15.8424	0.2417	-0.24678	0.10205	8.595	26.691	23.5111	-0.037598	0.090918	0.022657	-45.491	69.887	535.167	-0.58008	0.56738	-1.0059	-11.866	-18.39227	43.4504	0.17432	0.041016	-0.070313
0.402	-20.267	11.8643	23.4357	-0.13066	0.33047	-0.1835	-9.27399999999999	130.6839	1369.8306	-1.4526	1.1021	-0.95654	-71.96	-102.397	1604.2	-1.3081	2.0786	-2.1812	-23.199	56.645	15.2497	0.2417	-0.22266	0.085156	-48.174	28.5427	34.03471	0.012012	0.040137	0.050781	-53.034	45.205	608.419	-0.64209	0.69385	-1.0601	-21.723	29.28006	41.3212	0.1622	0.056054	-0.076953
0.404	-49.374	37.547	23.4276	-0.14961	0.36172	-0.19961	-23.62	134.5551	1323.7157	-1.3867	1.0518	-0.91016	-114.102	-98.203	1568.9141	-1.3125	2.0884	-2.1733	-11.736	2.0622	31.642	0.24365	-0.19434	0.070801	-11.339	-11.312	58.543	0.05752	-0.0028319	0.070117	-83.6897	22.8709	614.274	-0.66357	0.77295	-1.0903	-30.057	8.441	22.92574	0.14658	0.068554	-0.085449
0.406	-55.409	10.775	41.0378	-0.15186	0.37695	-0.21191	-25.533	117.503	1306.451	-1.3535	1.0176	-0.89063	-94.363	-75.838	1577.087	-1.3086	2.0742	-2.1348	-19.912	23.0529	41.8179	0.2417	-0.16797	0.05459	-36.545	21.4658	34.2056	0.095703	-0.04541	0.085449	-51.432	17.5293	637.1131	-0.66162	0.83838	-1.1069	-8.024	7.3303	30.0829	0.13369	0.08457	-0.09248
0.408	-42.048	-16.569	40.285	-0.14258	0.38144	-0.21748	27.486	156.737	1274.7762	-1.291	0.95703	-0.83984	-39.78	-11.201	1547.3202	-1.29	2.0142	-2.0718	-27.686	37.9883086	20.6373	0.23828	-0.13623	0.037403	-72.205	24.5229	27.708	0.13428	-0.080078	0.09873	-69.522	-5.9778	659.851	-0.63477	0.87793	-1.1191	-37.184	66.52	25.7487	0.12237	0.097557	-0.094824
0.41	-73.7075	39.6169	39.1193	-0.13272	0.38779	-0.21328	-11.874	120.4106	1224.5362	-1.2403	0.91797	-0.79883	-63.388	-21.5545	1535.667	-1.2734	1.9297	-2.0078	-10.991	-15.922	25.544	0.23633	-0.10576	0.020215	-23.43	21.9234	38.618	0.16426	-0.1127	0.10567	-97.21262	-36.237	643.2834	-0.60498	0.87549	-1.1206	-24.673	33.6538	28.913	0.11182	0.10693	-0.097168
0.412	-73.8635	-5.9346	41.658	-0.11748	0.38154	-0.20703	16.512	128.001	1209.748	-1.1948	0.87744	-0.75928	-32.869	1.28	1533.4607	-1.2383	1.7988	-1.9199	-28.047	23.0013	26.5548	0.23154	-0.075489	0.0089842	-52.47	54.741	26.5867	0.19082	-0.14277	0.1166	-69.869	-52.223	656.7182	-0.53467	0.8208	-1.1235	-21.778	43.537	43.3618	0.096973	0.11827	-0.1003
0.414	-85.651	6.4555	21.2924	-0.1041	0.37197	-0.20117	15.832	156.4904	1192.2466	-1.1348	0.82813	-0.70898	-64.402	13.6634	1506.886	-1.2261	1.7407	-1.8784	-37.432	-0.202	30.0601	0.22266	-0.045898	-0.0058594	-51.621	9.178	38.866	0.21104	-0.16093	0.11719	-69.266	-53.201	679.001	-0.48291	0.76123	-1.1319	-39.816	52.839847	37.5086	0.086133	0.12813	-0.092676
0.416	-86.3452	38.8447	7.7825	-0.087402	0.3584	-0.18555	-26.658	150.357	1155.262	-1.105	0.79834	-0.68701	-91.217	0.00699999999999967	1520.1589	-1.207	1.6621	-1.8164	-25.901	7.472798	29.815	0.21123	-0.015528	-0.018555	-32.047	12.2517	49.32	0.22266	-0.17773	0.11328	-87.3463	-49.28	640.3654	-0.43994	0.6958	-1.1401	-27.795	-2.207	40.781	0.069726	0.12891	-0.093848
0.418	-60.262	-2.04	10.9863	-0.076465	0.33847	-0.17032	34.878	184.1953	1133.846	-1.041	0.74121	-0.63086	-65.817	39.5886	1504.5417	-1.198	1.638	-1.7966	-50.836	69.127	17.67229	0.19961	0.010352	-0.028028	-87.29982	36.123	42.5927	0.2332	-0.18271	0.11426	-69.185	-49.575	652.6645	-0.40869	0.59229	-1.1567	-36.818	42.9362	36.078	0.05625	0.13252	-0.095703
0.42	-66.163	48.476	31.7255	-0.059082	0.31172	-0.14824	-21.011	191.768	1055.2265	-0.99656	0.69433	-0.59497	-115.276	21.133	1449.233	-1.1792	1.6216	-1.7886	-38.52	24.1997	31.021	0.18281	0.038867	-0.038574	-47.758	20.4202	56.8398	0.2337	-0.17724	0.10244	-89.233	-60.8098	690.995	-0.39795	0.54736	-1.1655	-48.945	29.0473	29.331	0.040039	0.13721	-0.098145
0.422	-60.498	40.1611	39.691	-0.041504	0.28593	-0.13262	-33.532	178.9982	1021.3049	-0.94336	0.64648	-0.55371	-122.197	14.9735	1446.8079	-1.1445	1.5977	-1.7832	-43.473	33.169	42.2567	0.16484	0.066504	-0.053321	-52.307	47.828	41.5854	0.23174	-0.1706	0.083691	-66.962	-46.658	663.2059	-0.38574	0.48828	-1.1875	-42.697	25.6257	41.948	0.021875	0.14971	-0.099804
0.424	-29.099	10.7537	50.398	-0.02207	0.25918	-0.1207	24.78	200.967	992.5014	-0.875	0.58398	-0.49463	-116.488	32.19	1413.303	-1.1152	1.5791	-1.7793	-49.286	38.3417	30.5921	0.14551	0.092773	-0.06543	-64.562	48.09669	33.8888	0.22461	-0.15859	0.07041	-19.959	-25.095	676.4049	-0.38354	0.48755	-1.2131	-59.305	74.948	35.5058	0.0054687	0.15908	-0.099904
0.426	-50.384	75.6155	23.7043	-0.0063477	0.23193	-0.10596	-35.766	185.5977	934.5588	-0.83984	0.54883	-0.46436	-160.6631	4.9296	1423.784	-1.0664	1.5391	-1.7715	-27.011	-6.03	21.93	0.12578	0.12529	-0.079297	-15.172	28.224	35.247	0.22217	-0.13965	0.050293	-35.182	-13.066	690.4793	-0.38818	0.51416	-1.2456	-51.15	11.8905	45.877	-0.0054688	0.17548	-0.10225
0.428	-16.669	21.017	20.4545	0.01084	0.20234	-0.096288	-13.428	174.2166	910.2356	-0.77002	0.48975	-0.41064	-98.392	28.6408	1468.4557	-1.0341	1.5087	-1.7666	-46.607	53.8738	20.67104	0.10371	0.15449	-0.09629	-69.2572	46.966	16.5041	0.21778	-0.12461	0.032617	-22.367	-32.426	691.825	-0.38232	0.5874	-1.2847	-53.614	11.6024	48.2913	-0.020606	0.19121	-0.1041
0.43	-17.063	38.624	31.2355	0.025	0.16934	-0.079199	-10.987	180.13626	866.9238	-0.7146	0.43677	-0.36792	-141.1466	28.9019	1443.27588	-1.0142	1.4771	-1.7495	-69.875	35.6373	33.5008	0.089649	0.18457	-0.10449	-50.949	12.4751	48.77	0.20801	-0.10703	0.0086913	-10.869	-65.512	732.596	-0.37354	0.62744	-1.3042	-68.3229	23.3315	36.3467	-0.03125	0.20898	-0.104
0.432	-39.906	61.2426	27.5847	0.041406	0.13379	-0.07334	-48.74905	154.894	819.86	-0.65918	0.38965	-0.32813	-140.4882	-12.16	1448.361	-1.001	1.4297	-1.7266	-53.936	21.9254	31.3279	0.073536	0.21787	-0.11944	-17.778	10.41241	54.438	0.20567	-0.088281	-0.0084959	-21.781	-84.271	757.7306	-0.3457	0.69971	-1.3276	-33.029	-35.72	66.332	-0.039453	0.22637	-0.11016
0.434	-1.858	-0.2698	25.96	0.052148	0.10293	-0.05918	10.302	162.56	807.6704	-0.57764	0.31738	-0.27344	-94.962	16.557	1431.79334	-0.99512	1.4121	-1.7168	-62.004	69.244	21.33964	0.060547	0.24805	-0.13037	-47.781	10.599	47.9126	0.20401	-0.073731	-0.024902	24.348	-115.637	765.2928	-0.32007	0.72534	-1.3416	-57.732	-12.398174	91.2199	-0.046679	0.23672	-0.11289
0.436	-4.699	23.3809	33.69449	0.067383	0.077637	-0.053223	-31.91	178.167	743.4694	-0.53906	0.28418	-0.25	-156.9647	17.893	1397.134	-0.97998	1.3755	-1.687	-45.575	16.864	40.021	0.045215	0.27852	-0.14092	8.805	-38.0681	58.385	0.20068	-0.064941	-0.041504	60.7266	-145.32311	822.1256	-0.29248	0.74219	-1.3555	-67.578	-40.755	86.119	-0.050586	0.24375	-0.10977
0.438	-23.008	3.881	29.8872	0.085841	0.055468	-0.040918	-35.962	152.333	715.965	-0.46777	0.21875	-0.2002	-109.704	46.069	1412.407	-0.96973	1.3525	-1.6582	-32.567	-0.4546	76.2475	0.038379	0.30683	-0.14951	-8.653	-12.4678	28.572	0.20674	-0.053418	-0.053808	6.538	-173.735	876.686	-0.26123	0.74414	-1.3672	-15.138	-63.644	102.9006	-0.05957	0.24629	-0.12559
0.44	12.119	-28.974	43.9621	0.1043	0.036522	-0.02705	10.029	180.162	679.506	-0.40942	0.16821	-0.16455	-88.568	102.9091	1381.669	-0.95703	1.332	-1.6328	-62.027	-10.7329	83.577	0.026269	0.33144	-0.15889	-30.205	-12.373	32.86521	0.2126	-0.044238	-0.061231	-3.599	-184.406	867.3342	-0.24146	0.73657	-1.3758	-37.251	3.12012	104.2989	-0.076172	0.23779	-0.14258
0.442	0.893000000000001	35.9673	45.139	0.12071	0.014256	-0.012206	-62.4703	173.9617	602.1632	-0.36084	0.11865	-0.12451	-134.4183	97.8956	1353.7663	-0.93311	1.2974	-1.5835	-51.666	-51.851	96.9081	0.0093751	0.35107	-0.1706	27.801	-2.14102	39.716	0.22393	-0.043066	-0.068652	34.754	-179.996	912.2978	-0.23291	0.7251	-1.394	-44.765	-16.8827	158.4237	-0.092286	0.23633	-0.16328
0.444	-3.36499999999999	2.527	30.9506	0.14141	-0.0056651	0.00068456	5.306	146.759	581.904	-0.28857	0.049316	-0.075195	-68.379	129.025	1342.4856	-0.91309	1.2813	-1.5615	-19.633	12.2211	87.6429	-0.0068359	0.36475	-0.19238	-20.25	35.469	13.94197	0.22754	-0.048145	-0.070312	24.882	-175.585	958.3147	-0.22266	0.6958	-1.4214	-42.567	21.84608	198.6742	-0.11455	0.24766	-0.18242
0.446	10.537	13.4522	48.3665	0.15771	-0.025391	0.013672	1.156	167.7441	529.448	-0.25	0.019531	-0.053711	-86.034	136.471	1302.051	-0.88232	1.2466	-1.5151	-36.248	8.448	124.6972	-0.028027	0.36797	-0.21856	-16.031	0.0229999999999997	32.665	0.22998	-0.055176	-0.070313	46.0337	-174.389	966.3982	-0.22021	0.69141	-1.4297	-65.293	37.645	237.209	-0.14619	0.26172	-0.2082
0.448	-4.192	31.69921	49.7777	0.1793	-0.04824	0.02617	-26.232	144.436	472.8115	-0.16846	-0.045898	-0.012695	-88.617	120.123	1286.7709	-0.84692	1.2112	-1.4676	-63.948	-14.6735	195.7087	-0.052246	0.3665	-0.25049	20.532	-2.3891	31.3679	0.23388	-0.063672	-0.072266	43.5294	-166.382	1032.911	-0.21924	0.69385	-1.4507	-34.372	-8.0588	304.2581	-0.18564	0.27109	-0.24766
0.45	1.059	-19.2563	46.723	0.19619	-0.071577	0.040526	45.855	134.712	450.3177	-0.11303	-0.097169	0.018066	-27.127	143.426	1261.8807	-0.81104	1.1782	-1.4233	-66.043	28.9294	206.766	-0.078418	0.37588	-0.28174	-54.3	11.8373	17.4614	0.23926	-0.075684	-0.066895	4.669	-132.156	1055.411	-0.22681	0.69703	-1.4636	-27.503	54.38311	391.3022	-0.22412	0.27832	-0.30176
0.452	-26.012	34.984	37.2818	0.21142	-0.094232	0.0499	-1.013	165.5772	385.881	-0.053223	-0.14746	0.047363	-85.125	127.874	1214.4556	-0.7627	1.1274	-1.3647	-27.302	-0.661999999999999	277.073	-0.1122	0.38633	-0.30771	5.71	-12.70095	39.9326	0.23926	-0.087012	-0.065332	32.0954	-93.798065	1071.3637	-0.23535	0.69922	-1.4941	-30.674	60.687	471.5432	-0.26035	0.29238	-0.36328
0.454	-32.53	32.10184	33.14504	0.22402	-0.11689	0.057324	6.463	139.4475	359.915	0.023438	-0.21436	0.083496	-62.783	103.5923	1193.31	-0.73535	1.0977	-1.334	-26.107	50.9386	360.3235	-0.14404	0.39404	-0.34766	-11.132	33.566	8.634	0.23516	-0.097852	-0.060254	25.7873	-74.0422	1128.166	-0.25098	0.69727	-1.5469	-31.56	64.5265	551.77472	-0.29902	0.31133	-0.43555
0.456	-37.572	-3.0438	29.7886	0.23486	-0.13525	0.05957	38.945	158.226	317.369	0.066895	-0.25928	0.10986	-16.73	118.9008	1152.542	-0.6875	1.0352	-1.2686	-37.153	100.8592	455.39041	-0.18066	0.39453	-0.39688	-53.324	30.828	19.4772	0.22998	-0.10498	-0.054688	-13.803	-74.593	1148.348	-0.25879	0.70117	-1.5762	-40.239	131.551	638.244	-0.34394	0.3293	-0.50898
0.458	-64.58	49.9037	27.01	0.23222	-0.15001	0.066413	-12.076	151.63	264.916	0.11377	-0.30225	0.13379	-49.594	105.918	1131.00164	-0.656	0.99536	-1.2175	-16.078	75.933	518.6797	-0.21416	0.39687	-0.45039	-0.714000000000006	21.9618	11.5874	0.21328	-0.11015	-0.054102	17.19	-77.5385	1141.8428	-0.30078	0.72168	-1.6445	10.349	81.026	757.643	-0.39951	0.35107	-0.59424
0.46	-53.967	-0.297799999999999	21.3602	0.23311	-0.15967	0.072659	26.484	111.2301	256.2639	0.15186	-0.34668	0.14941	3.83300000000001	136.0965	1133.526	-0.62646	0.94971	-1.1714	-22.334	119.094	559.183	-0.25088	0.39531	-0.50977	-58.422	36.801	-12.1558	0.2	-0.11553	-0.053711	23.022	-66.212	1160.2075	-0.34155	0.76269	-1.685	16.515	73.006	881.7647	-0.45996	0.38135	-0.69092
0.462	-57.087	13.7795	27.7812	0.2335	-0.16631	0.073827	13.723	141.271	214.544	0.16895	-0.36768	0.1626	0.888000000000005	138.6059	1102.34895	-0.59082	0.89063	-1.1094	-29.405	91.8698	630.498	-0.2957	0.40039	-0.57402	-51.093	4.924	23.351	0.18399	-0.11592	-0.051758	-11.293	-56.317	1163.738	-0.38428	0.81104	-1.7241	3.888	58.0943	965.91	-0.53037	0.40674	-0.79952
0.464	-72.1897	45.272	22.7863	0.23056	-0.16406	0.071585	-12.596	109.558	196.807	0.19678	-0.41016	0.1748	-27.359	101.971	1072.531	-0.56836	0.86328	-1.0723	35.348	64.4448	749.1294	-0.3418	0.40234	-0.6416	-25.924	12.3108	15.2235	0.16572	-0.10986	-0.056738	22.7787	-61.7692	1183.137	-0.44434	0.88867	-1.7734	21.006	-41.5711	1011.268	-0.61221	0.45128	-0.91007
0.466	-59.451	-11.43349	39.0444	0.22803	-0.16309	0.069336	23.872	104.6943	191.5634	0.2041	-0.43652	0.18921	11.379	114.8756	1032.572	-0.52686	0.81982	-1.0112	13.654	90.752	852.52905	-0.39775	0.41221	-0.71475	-74.357	21.944	29.5863	0.15039	-0.11133	-0.062012	4.333	-68.5235	1237.0162	-0.46436	0.93311	-1.7925	-66.1511	-35.72	1049.4494	-0.70479	0.51143	-1.0151
0.468	-72.358	35.7198	37.29485	0.22227	-0.15401	0.069926	-18.02	130.321	154.48974	0.20996	-0.44775	0.19043	-40.129	121.8252648	987.2701	-0.49804	0.78076	-0.96191	-0.508000000000003	16.6809	927.486	-0.45889	0.43017	-0.78808	-44.485	-13.135	35.0472	0.13437	-0.10664	-0.07041	-1.262	-78.88	1226.6175	-0.48047	0.98926	-1.8203	-87.922	-68.8867	1075.738	-0.81094	0.59297	-1.0979
0.47	-67.5993	12.698	21.6975	0.22293	-0.14443	0.064548	5.849	87.131	151.823	0.21191	-0.45361	0.19238	-16.733	115.0699	966.973	-0.46631	0.74756	-0.90967	-6.447	-7.385	955.1206	-0.51631	0.45517	-0.87246	-59.5586	5.5989	23.3414	0.11738	-0.10478	-0.072754	25.388	-84.602	1250.589	-0.48072	1.0112	-1.8442	-55.221	-91.6839	1061.411	-0.92725	0.70264	-1.1675
0.472	-39.873	-26.0575	21.1991	0.22724	-0.14056	0.062617	22.227	93.623	128.974	0.20703	-0.45264	0.19482	-21.157	149.595	928.8546	-0.42188	0.7041	-0.84375	-52.8006	-42.9542	963.39	-0.57988	0.48379	-0.95391	-62.918	-0.478000000000002	29.45	0.1045	-0.10283	-0.078614	2.3135	-96.885	1328.754	-0.47412	1.022	-1.8628	-52.438	-53.3297	1030.5479	-1.0243	0.82997	-1.2102
0.474	-74.47	18.1552	32.104	0.23114	-0.13312	0.059365	-41.734	87.4838	86.8571	0.20264	-0.43994	0.18408	-76.38	137.4556	864.9834	-0.39795	0.68408	-0.81494	-60.965	-123.894	992.3217	-0.6499	0.53369	-1.019	-30.711	-2.38725	28.3989	0.091211	-0.098731	-0.085156	2.899	-84.341	1350.464	-0.45996	0.99365	-1.8979	-32.512	-109.776	1007.654	-1.1051	0.95544	-1.2406
0.476	-60.147	-14.5887	31.9888	0.23584	-0.12549	0.058594	-3.486	41.871	92.3016	0.18433	-0.42456	0.17822	-11.064	156.5555	837.1641	-0.3457	0.63281	-0.74219	-60.68	-104.91194	1016.127	-0.71641	0.59668	-1.0623	-58.056	50.628	0.132	0.088867	-0.09082	-0.096191	53.21	-74.6688	1360.087	-0.45068	0.96924	-1.9214	-14.159	-113.03	1021.912	-1.1617	1.0777	-1.2504
0.478	-33.814	13.3874	24.3571	0.23904	-0.12758	0.056379	-39.212	77.96373	71.537	0.15479	-0.4082	0.17188	-48.8712	170.1338	792.132	-0.30469	0.59302	-0.69116	-66.776	-127.681	1008.5095	-0.77812	0.67519	-1.1043	-52.329	35.579	10.2045	0.083984	-0.089355	-0.097363	32.765	-54.2217	1354.724	-0.45215	0.91602	-1.9766	-21.797	-76.037	976.978	-1.1813	1.17	-1.246
0.48	-59.678	59.482	9.8722	0.23888	-0.1296	0.054092	-66.322	58.115	63.584	0.104	-0.36816	0.16455	-53.0602	153.904	760.8889	-0.25928	0.55078	-0.63574	-46.733	-133.2082	1013.858	-0.83281	0.75801	-1.1356	-41.641	40.504	8.737	0.083789	-0.089453	-0.10137	41.667	-50.38399	1340.9877	-0.46436	0.8999	-2.0196	8.5205	-74.662	965.472	-1.1563	1.2422	-1.2432
0.482	-27.724	2.6778	15.5511	0.23886	-0.12977	0.050088	-8.378	37.2054	67.07429	0.064941	-0.34375	0.14697	7.16699999999999	162.5891	737.9923	-0.20703	0.49365	-0.56055	-47.8395	-87.04038	1011.863	-0.87491	0.83564	-1.1552	-67.5761	59.41	11.654	0.083789	-0.087109	-0.10059	83.235	-48.3709	1358.731	-0.49121	0.91016	-2.0605	56.18	-12.73	951.0677	-1.1031	1.2703	-1.2402
0.484	-21.67	34.122	18.2817	0.23395	-0.12215	0.047634	-65.8119	63.826	29.9	-0.013672	-0.28125	0.13086	-64.7388	163.2223	663.984	-0.17334	0.46729	-0.53467	-4.4667	-131.22	977.553	-0.90771	0.90088	-1.1772	-5.449	17.8992	43.1362	0.085742	-0.09043	-0.10244	40.237	-37.0526	1384.0787	-0.53662	0.96143	-2.1226	47.1026	-41.135	934.5614	-1.0274	1.279	-1.2405
0.486	-20.42	26.2817	10.35108	0.22705	-0.11377	0.044434	-53.08	39.567	37.615	-0.0813	-0.23242	0.11621	-36.319	145.117	639.3902	-0.1123	0.40088	-0.46973	23.5174	-97.066	953.881	-0.91524	0.94882	-1.1832	-10.451	47.591	30.0176	0.084961	-0.089844	-0.10547	59.709	-22.2963	1370.1957	-0.56055	1.001	-2.1426	38.004	-59.882	950.8953	-0.95197	1.2536	-1.2433
0.488	2.216	2.9339	22.4775	0.21956	-0.10188	0.033564	-44.873	69.954	48.5234	-0.146	-0.18311	0.10693	-18.044	168.894	611.8023	-0.067871	0.35351	-0.41894	15.5378	-64.054	923.033	-0.91514	0.98291	-1.1906	-35.499	37.7241	35.2767	0.083594	-0.094727	-0.10557	96.876	-18.1757	1377.591	-0.60352	1.0957	-2.1934	-20.599	-27.387	962.118	-0.90751	1.2022	-1.2288
0.49	-1.773	68.4	36.2537	0.20854	-0.089873	0.028901	-83.2965	82.144	44.8628	-0.23096	-0.11865	0.073242	-65.50647	151.389	572.2205	-0.024414	0.29932	-0.37256	22.8297	-96.338	915.5806	-0.90576	1.0001	-1.1999	12.146	35.157	40.675	0.077539	-0.1041	-0.10683	75.652	-2.905	1393.5888	-0.62231	1.1662	-2.2165	-7.306	-75.986	989.3394	-0.89551	1.1484	-1.2012
0.492	-2.632	23.0785	30.8272	0.19828	-0.071706	0.018442	-33.933	26.6176	50.9	-0.27051	-0.085938	0.057617	-23.136	145.6402	569.017	0.032715	0.23682	-0.31543	16.192	-61.859	924.455	-0.89551	1.0189	-1.2115	-39.356	67.177	29.7285	0.075196	-0.11074	-0.10644	81.443	0.2235	1374.381	-0.62988	1.2168	-2.2344	-5.1	-71.397	1026.8807	-0.90925	1.1033	-1.1785
0.494	11.542	18.7609	35.172	0.18887	-0.05187	0.0067231	-48.867	34.0013	42.3392	-0.34814	-0.020508	0.031738	-33.043	154.9103	510.59755	0.058594	0.20361	-0.28857	-13.586	-96.934	943.0593	-0.88672	1.0313	-1.2188	-2.397	44.7145	35.616	0.074219	-0.11592	-0.10996	104.116	19.9614	1403.2932	-0.6377	1.252	-2.252	-57.239	-77.707	1039.426	-0.93305	1.1024	-1.1512
0.496	6.553	62.444	15.6705	0.17773	-0.032715	0.0019531	-67.348	9.958	35.4705	-0.3999	0.030273	0.010742	-41.007	129.217	462.6299	0.10791	0.13477	-0.23096	0.863	-127.95	961.4413	-0.88604	1.0511	-1.2272	27.648	22.2341	46.77	0.072266	-0.12354	-0.10889	72.166	44.1313	1415.7823	-0.63672	1.2539	-2.252	-26.068	-164.779	1062.488	-0.94092	1.1266	-1.1137
0.498	-8.53	10.1897	18.72631	0.16225	-0.0081708	-0.011286	4.501	-7.0373	44.2779	-0.44336	0.083008	-0.0073242	17.372	135.085	441.5862	0.13427	0.08252	-0.19776	0.762	-100.547	969.405	-0.89698	1.0767	-1.2233	-24.526	-4.936	72.5031	0.070898	-0.12607	-0.11865	93.472	54.53	1407.3802	-0.62695	1.2383	-2.2461	-29.012	-187.798	1117.59	-0.93398	1.1575	-1.0816
0.5	-13.781	46.293	48.073	0.15134	0.014188	-0.020251	-44.761	41.7901	19.2254	-0.4873	0.1377	-0.027344	-38.106	143.58	387.7082	0.16504	0.036621	-0.16846	-23.424	-161.673	1003.342	-0.90596	1.1247	-1.2144	-15.986	-59.386	118.0905	0.069825	-0.13701	-0.12627	103.454	32.804	1440.1954	-0.61694	1.2085	-2.2295	-52.026	-235.339	1158.538	-0.90381	1.1704	-1.0718
0.502	-18.521	21.0624	37.1008	0.13495	0.036516	-0.026674	-32.148	7.3497	29.478	-0.50195	0.16748	-0.035156	-7.53599999999999	100.896	369.304	0.20117	-0.025879	-0.12842	-45.614	-169.599	1045.991	-0.91299	1.1843	-1.1899	-10.557	-16.176	115.9595	0.063965	-0.15186	-0.14423	64.636	26.48657	1450.2262	-0.60303	1.1743	-2.1997	-20.423	-266.607	1225.716	-0.85771	1.1528	-1.0906
0.504	-23.742	-21.6334	43.112	0.12734	0.057543	-0.036992	-14.695	6.4345	24.0211	-0.5249	0.21045	-0.059082	19.064	121.8138	334.0981	0.21191	-0.048828	-0.12109	-68.47	-181.846	1086.459	-0.9165	1.2368	-1.1821	16.005	19.1884	133.873	0.048438	-0.16142	-0.17197	75.506	21.4831	1440.527	-0.58594	1.0918	-2.1543	-12.737	-222.663	1258.633	-0.80877	1.1303	-1.1313
0.506	-46.181	30.7073	38.5339	0.1167	0.070313	-0.047852	-41.069	10.9203	24.619	-0.5354	0.23291	-0.070557	-14.983	115.145	299.06688	0.23828	-0.10205	-0.098633	-28.405	-238.777	1153.727	-0.90449	1.2658	-1.1752	52.0676	22.9585	197.018	0.018066	-0.15039	-0.19873	85.669	31.784	1465.5611	-0.57568	1.0474	-2.1265	32.274	-239.373	1258.739	-0.77851	1.1083	-1.1784
0.508	-28.625	-4.293	32.4241	0.10867	0.085177	-0.049664	1.409	-29.7103	43.78	-0.52441	0.24805	-0.085938	36.535	105.0438	281.6949	0.25098	-0.13379	-0.07959	-27.184	-222.939	1221.476	-0.8835	1.2794	-1.1745	-48.613	67.5016	224.689	-0.040137	-0.09961	-0.23408	55.063	35.103	1461.054	-0.56006	0.95947	-2.0698	23.55	-177.269	1282.15928	-0.76594	1.0941	-1.2311
0.51	-24.987	12.5018	45.0576	0.098336	0.10027	-0.051156	10.997	14.7826	30.4118	-0.49414	0.24561	-0.095703	5.363	133.92	233.257	0.25391	-0.15674	-0.068359	-27.509	-252.773	1252.568	-0.8585	1.2684	-1.1854	-11.892	43.656	278.8524	-0.117	-0.037793	-0.27774	70.943	31.991	1442.161	-0.54565	0.90747	-2.0412	-38.656	-118.346	1317.529	-0.76709	1.0894	-1.2808
0.512	-71.3734	57.9449	25.8984	0.086712	0.11355	-0.055239	-11.436	11.873	55.688	-0.46924	0.24561	-0.10449	13.205	119.597	223.243	0.2583	-0.17969	-0.052734	-5.145	-264.503	1283.893	-0.84024	1.2318	-1.2311	38.424	41.936	329.6481	-0.2002	0.019238	-0.3375	57.701	40.8216	1460.952	-0.54199	0.87109	-2.0098	-42.064	-118.806	1352.912	-0.79719	1.0965	-1.3196
0.514	-60.64	19.1849	34.799	0.081436	0.12725	-0.060844	21.111	-2.44152	48.3163	-0.41699	0.21582	-0.11621	42.324	130.003	186.5449	0.25537	-0.18213	-0.046875	-20.804	-177.095	1301.8369	-0.82764	1.188	-1.2827	-3.571	96.7691	398.996	-0.28154	0.086425	-0.39971	40.084	62.3164	1437.931	-0.53711	0.85645	-1.9902	-69.647	-71.226	1377.013	-0.83243	1.1092	-1.3446
0.516	-63.488	52.584	44.3843	0.075195	0.14502	-0.062988	-27.042	39.741	12.691	-0.37109	0.18799	-0.11621	-20.615	129.5468	155.0257	0.24902	-0.19043	-0.044434	-12.207	-152.731	1339.792	-0.82686	1.1512	-1.3405	31.09	82.495	512.103	-0.37012	0.16895	-0.4585	63.421	71.50415	1425.7956	-0.53662	0.86182	-1.9683	-110.212428	-75.986	1394.687	-0.8637	1.1364	-1.3656
0.518	-65.574	33.529	43.7353	0.06962	0.159	-0.067416	4.746	12.69917	9.0793	-0.32031	0.16064	-0.11035	-4.302	78.4979	138.3263	0.24463	-0.1936	-0.039062	-28.189	-103.08689	1393.297	-0.84013	1.1349	-1.389	3.15	114.7078	520.8172	-0.45869	0.25986	-0.53037	62.168	83.2706	1440.3792	-0.53076	0.86572	-1.9468	-118.23096	-78.233	1400.2453	-0.88878	1.1622	-1.3946
0.52	-50.788	-10.7022	53.064	0.060263	0.17839	-0.074991	10.914	19.31395	9.6374	-0.25537	0.12402	-0.11328	14.257	89.914	118.4234	0.23633	-0.19336	-0.046387	-80.557	-94.5689	1408.194	-0.8624	1.1376	-1.4268	-52.269	92.6941	573.263	-0.55674	0.35518	-0.60771	10.37	99.302	1408.7407	-0.53516	0.86572	-1.9272	-134.452	-16.879	1388.351	-0.90137	1.1797	-1.416
0.522	-77.2312	47.2149	25.889	0.055497	0.19518	-0.080519	-44.915	38.6075	18.1344	-0.2207	0.10645	-0.11523	-26.319	87.7115	116.7441	0.22119	-0.18799	-0.056152	-88.805	-136.824	1416.157	-0.88779	1.1513	-1.4503	-17.06	52.895	650.781	-0.64658	0.44502	-0.67647	45.436	101.0627	1390.5621	-0.53516	0.8584	-1.9043	-109.108	-37.059	1380.211	-0.90109	1.1915	-1.4418
0.524	-76.0377	20.727	23.8572	0.054307	0.21212	-0.090238	0.330999999999996	-6.4213	37.057	-0.16357	0.07373	-0.11426	21.75	59.1015	126.4895	0.21191	-0.18018	-0.063477	-107.339	-87.138	1446.6628	-0.8999	1.1763	-1.4683	-43.202	74.5666	752.192	-0.74336	0.53379	-0.75156	31.61	109.51	1389.3234	-0.52881	0.83643	-1.8745	-97.732	-28.502	1399.156	-0.89523	1.1933	-1.4871
0.526	-52.31	25.4616	32.8762	0.050293	0.23486	-0.10059	-22.62	20.0562	10.79	-0.11401	0.049317	-0.11304	-25.187	90.447	86.834	0.17969	-0.1665	-0.084473	-133.292	-61.288	1441.138	-0.89746	1.2031	-1.4926	-20.364	23.766	878.239	-0.84326	0.62744	-0.82178	27.1782	118.453	1378.929	-0.52783	0.81982	-1.8589	-124.5935	-41.5272	1432.921	-0.89569	1.1891	-1.5528
0.528	-63.951	42.59638	30.4362	0.050088	0.25152	-0.10739	-55.8638	8.021	19.821	-0.072266	0.029785	-0.11426	-37.613	50.386	75.76761	0.15064	-0.15161	-0.10352	-91.542	-56.691	1447.673	-0.8792	1.2271	-1.5081	-29.84	-17.0071	932.1215	-0.95069	0.71846	-0.90362	52.504	112.424	1361.853	-0.52881	0.78369	-1.8257	-84.296	-107.821	1471.825	-0.91321	1.1883	-1.6324
0.53	-51.91	-28.45	36.446	0.045999	0.26991	-0.11039	-1.92299999999999	-23.6242	38.7282	-0.016113	0.0092773	-0.11182	-8.858	53.0405	67.5347	0.1084	-0.12793	-0.12207	-111.4513	-13.656	1454.354	-0.85693	1.2345	-1.5398	-81.9709	-68.7117	957.7663	-1.0448	0.80772	-0.98349	36.33	109.7047	1364.17	-0.5293	0.75879	-1.7974	-90.601	-110.106	1516.517	-0.94775	1.2192	-1.7173
0.532	-22.777	8.12001	41.2786	0.046387	0.29413	-0.11662	-53.866	26.7237	27.4731	0.01123	0.0039063	-0.10693	-61.9265	68.1504	41.847	0.049316	-0.083496	-0.15967	-116.5335	-62.808	1452.9136	-0.8418	1.2256	-1.5737	-17.765	-152.2698	1009.0463	-1.1335	0.89639	-1.0519	41.753	110.2762	1335.751	-0.53076	0.73291	-1.771	-100.298	-122.72	1532.01	-1.0002	1.2672	-1.8038
0.534	-38.622	-3.5305	65.926	0.042474	0.31145	-0.12266	-33.921	-9.7655	23.236	0.063965	-0.0039063	-0.10693	-32.403	18.035	59.7566	0.019531	-0.060059	-0.17188	-78.466	-66.8735	1487.32003	-0.83545	1.2134	-1.6206	-20.954	-142.135	1038.4699	-1.2084	0.98769	-1.1116	57.176	105.026	1322.6458	-0.52686	0.70752	-1.7378	-43.673	-132.361	1535.797	-1.0574	1.3333	-1.8898
0.536	-18.16	-54.34	93.03	0.04248	0.32617	-0.13037	-28.918	6.5696	7.5345	0.092041	-0.0048828	-0.10058	-26.637	36.44	58.5621	-0.037109	-0.010742	-0.2085	-92.209	-76.787	1495.7213	-0.86543	1.1963	-1.6854	-27.361	-164.382	1069.035	-1.2656	1.0625	-1.1543	59.4611	111.718	1328.8172	-0.52734	0.69336	-1.7188	-76.214	-81.619	1526.785	-1.1102	1.4114	-1.9732
0.538	-31.172	2.20211	107.521	0.03614	0.33105	-0.14481	-87.2775	36.2984	5.9855	0.11572	-0.0019531	-0.099609	-86.8216	31.499	53.3086	-0.079834	0.027344	-0.23584	-82.609	-135.562	1527.595	-0.90742	1.191	-1.7539	11.936	-197.153	1065.741	-1.2922	1.1153	-1.1895	35.7513	112.965	1287.7327	-0.51709	0.67041	-1.6851	-122.3036	-97.094	1512.683	-1.1531	1.5008	-2.0391
0.54	-7.03700000000001	-18.8458	90.67258	0.027264	0.32667	-0.17701	-52.995	-9.6537	25.5807	0.13525	0.0053711	-0.092773	-33.071	8.2741	76.293	-0.11768	0.066406	-0.2627	-76.276	-122.181	1553.531	-0.96016	1.2032	-1.8246	-92.4555	-166.636	1044.7806	-1.2828	1.1402	-1.2094	50.0912	114.747	1269.3895	-0.50684	0.66065	-1.6519	-112.721	-73.50232	1550.017	-1.1904	1.5957	-2.0977
0.542	-26.563	10.78451	145.306	0.012024	0.32744	-0.20867	-43.527	19.2763	25.4759	0.14502	0.0073242	-0.094727	-63.6087	48.558	48.5499	-0.16553	0.1123	-0.29004	-92.033	-134.035	1530.3051	-1.0112	1.238	-1.9058	-77.991	-205.309	1077.083	-1.252	1.1219	-1.2199	53.832	126.6031	1268.905	-0.49219	0.64453	-1.6191	-119.981	-41.474	1553.6037	-1.2285	1.6913	-2.1418
0.544	-41.077	48.035	201.227	-0.019124	0.34209	-0.23886	-51.305	11.783	20.8034	0.16162	0.010254	-0.092773	-58.007	29.3594	32.83342	-0.19141	0.14404	-0.30957	-94.597	-148.567	1536.3003	-1.0547	1.293	-1.9824	-53.648	-192.8	1032.848	-1.2063	1.0679	-1.2227	24.2061	135.8134	1218.0784	-0.47217	0.63525	-1.5757	-85.415	-45.315	1542.554	-1.2601	1.7727	-2.1807
0.546	-39.537	7.1953	253.007	-0.066895	0.36572	-0.27002	-25.935	-9.25017	25.20539	0.17163	0.012695	-0.093261	-18.472	30.312	33.2235	-0.21387	0.16895	-0.3252	-94.218	-101.524	1531.9257	-1.0919	1.3734	-2.0435	-101.597	-170.23	981.059	-1.1558	0.99658	-1.2231	33.9314	136.8817	1223.239	-0.46143	0.63232	-1.5542	-68.372	-1.53599999999999	1544.4496	-1.2821	1.842	-2.2043
0.548	-15.237	61.484	322.137	-0.12482	0.38242	-0.33058	-80.51954	50.403	17.982	0.18311	0.013184	-0.092773	-71.025	49.217	25.016	-0.23389	0.19922	-0.3374	-97.172	-102.03176	1513.562	-1.1316	1.4638	-2.0933	-55.682	-169.431	956.234	-1.1078	0.91914	-1.2168	26.012	146.3901	1194.497	-0.43994	0.60986	-1.5034	-59.338	18.1994	1504.319	-1.3004	1.8861	-2.2083
0.55	-17.412	97.06	396.5156	-0.18468	0.4004	-0.39514	-40.751	33.0805	23.4661	0.2002	0.0083008	-0.092773	-12.028	-7.9597	36.643	-0.23975	0.20557	-0.3374	-86.577	-59.385	1533.9528	-1.1769	1.5653	-2.137	-78.293	-131.549	927.622	-1.071	0.84892	-1.2022	20.371	157.6992	1133.8085	-0.42578	0.59912	-1.4653	-51.076	8.167	1497.694	-1.3179	1.9067	-2.2026
0.552	-17.24	78.0165	512.059	-0.24249	0.42618	-0.46545	-11.801	40.873	9.96934	0.20605	0.0068359	-0.093262	-15.038	10.9321	19.17382	-0.2417	0.21533	-0.34131	-92.274	4.913	1516.216	-1.2174	1.6721	-2.1826	-90.214	-142.765	944.05	-1.0429	0.78643	-1.1906	34.624	174.18193	1114.598	-0.4126	0.58545	-1.4233	-64.533	59.528	1500.954	-1.3331	1.8989	-2.1776
0.554	-37.831	132.9975	562.948	-0.3086	0.45723	-0.54034	-46.586	55.465	6.2089	0.21582	0.012695	-0.09082	-43.947	13.443	21.1043	-0.23755	0.21924	-0.34082	-64.877	-14.276	1512.323	-1.252	1.7754	-2.2207	-56.441	-146.766	952.086	-1.0182	0.72812	-1.1832	15.797	167.1946	1078.179	-0.39648	0.57617	-1.3682	-47.471	46.3365	1498.721	-1.3469	1.8745	-2.1413
0.556	-43.609	85.0903	610.125	-0.37939	0.48047	-0.62793	-13.92	-4.4011	33.617	0.21655	0.013672	-0.095703	-6.897	-24.653	36.46	-0.22412	0.21143	-0.33154	-48.21	2.412	1521.189	-1.2797	1.8438	-2.2453	-69.706	-128.496	953.564	-0.98584	0.69971	-1.1792	4.453	150.41	1041.612	-0.38428	0.56641	-1.3379	-30.241	46.2456	1543.531	-1.3547	1.8323	-2.1022
0.558	-6.426	88.3	725.0998	-0.45312	0.50898	-0.70351	-18.804	25.151	23.8514	0.22412	0.014648	-0.091797	-25.667	37.483	28.1072	-0.20361	0.19043	-0.30273	-70.385	-5.317	1494.932	-1.3014	1.895	-2.2601	-58.589	-168.379	989.504	-0.94609	0.69571	-1.1738	-5.152	149.084	1033.17417	-0.36182	0.54639	-1.2749	-60.355	65.7796	1533.522	-1.3591	1.7752	-2.0551
0.56	-14.813	109.152	858.3442	-0.53261	0.54141	-0.78495	-20.183	27.4479	34.7008	0.23438	0.0087891	-0.095215	-22.466	10.6694	49.011	-0.18701	0.17529	-0.28955	-25.518	-13.5397	1512.9505	-1.3277	1.9149	-2.2558	-25.817	-172.548	997.566	-0.90888	0.70283	-1.1847	-18.17	161.4784	1007.6292	-0.34936	0.52466	-1.2253	-53.011	23.3798	1518.2595	-1.3643	1.7109	-2.0117
0.562	-16.049	32.074	975.064	-0.62324	0.57187	-0.86777	-1.672	-3.49671	37.3804	0.23584	0.0068359	-0.091797	19.47	13.31078	20.7988	-0.15576	0.13623	-0.26025	-40.807	40.2506	1505.3256	-1.3498	1.9209	-2.233	-94.6548	-186.415	1023.657	-0.86357	0.70752	-1.1932	-28.166	160.4152	964.3293	-0.33398	0.50781	-1.1777	-106.339	36.747	1545.3266	-1.3693	1.669	-1.9768
0.564	-1.33	10.635	1014.7876	-0.71084	0.61162	-0.95303	-22.194	38.0336	23.5833	0.23877	0.0078125	-0.09668	-35.794	33.585	22.7477	-0.12842	0.10059	-0.23877	-70.93	21.8717	1497.08026	-1.3691	1.9063	-2.2012	-65.164	-219.895	1098.5893	-0.82675	0.70488	-1.2065	-27.984	158.6502	951.2588	-0.31201	0.49658	-1.1167	-122.373	23.5438	1532.8948	-1.3788	1.6353	-1.9433
0.566	-91.425	-44.5845	1011.754124	-0.80029	0.6665	-1.019	4.972	1.43	43.831	0.23926	0.0036621	-0.087403	16.267	-17.9864	36.297	-0.10498	0.071777	-0.2085	-64.658	12.269	1507.1022	-1.3745	1.8759	-2.1652	-33.399	-226.6675	1125.5537	-0.78857	0.68799	-1.2241	-63.464	165.7972	910.1644	-0.30322	0.48047	-1.082	-84.171	-4.3692	1530.823	-1.3866	1.6228	-1.9246
0.568	-116.0354	-114.796	1070.923	-0.88965	0.74463	-1.0705	10.331	7.4771	20.6192	0.23828	0.0024414	-0.087402	2.406	10.5942	23.97131	-0.06543	0.029297	-0.17383	-98.24	24.463	1498.1679	-1.3765	1.8243	-2.1233	-38.14	-296.259	1175.257	-0.76934	0.68242	-1.2559	-56.881	177.0038	876.5856	-0.28418	0.46387	-1.0098	-123.396	33.192	1515.245	-1.3781	1.6156	-1.9035
0.57	-130.808	-74.98375	1094.8957	-0.97763	0.82783	-1.1061	-17.627	43.0876	-0.9887	0.23145	0.0024414	-0.085938	-40.408	19.73	21.3127	-0.047363	0.01416	-0.15674	-83.639	-39.38976	1507.153	-1.3722	1.7599	-2.0768	-2.249	-319.968	1216.766	-0.75537	0.68838	-1.3026	-37.78	187.2705	865.6402	-0.27076	0.45362	-0.96021	-124.1064	15.696	1527.3152	-1.3706	1.6138	-1.8784
0.572	-110.768	-127.017	1101.5703	-1.0511	0.91533	-1.1249	7.184	3.3998	31.049	0.229	0.00097656	-0.087891	28.225	-16.0301	26.2119	-0.011719	-0.012695	-0.12793	-86.705	-22.616	1504.271	-1.3742	1.7048	-2.0354	-41.843	-305.632	1219.236	-0.77061	0.71768	-1.3702	-67.45	187.313	830.7263	-0.25342	0.43994	-0.90186	-81.045	53.009	1547.8986	-1.3544	1.6011	-1.8505
0.574	-83.926	-122.8401	1088.128	-1.0968	0.99503	-1.1397	-9.7	41.093	38.364	0.21533	-0.00097656	-0.086914	-27.063	37.67992	8.334	0.012451	-0.031739	-0.10742	-140.63	-32.518	1474.3654	-1.3809	1.6621	-2.002	-13.875	-290.777	1268.8074	-0.80323	0.78701	-1.431	-66.335	167.1198	793.0337	-0.22021	0.42627	-0.8291	-112.8916	111.179	1510.7151	-1.3452	1.5853	-1.8202
0.576	-71.211	-101.744	1068.557	-1.1221	1.0547	-1.1572	-36.17	32.0688	39.855	0.21167	-0.0026856	-0.08545	-52.84	17.642	37.496	0.037109	-0.050781	-0.087402	-108.743	-47.925	1480.5689	-1.377	1.6395	-1.9777	32.648	-211.6786	1303.16299	-0.8623	0.87695	-1.4863	-45.226	177.9452	753.4942	-0.20557	0.4165	-0.79443	-92.284	108.057	1498.535	-1.3363	1.5606	-1.7886
0.578	-23.8887	-149.522	1043.12	-1.1015	1.0862	-1.1688	1.131	-5.8439	42.0017	0.2002	-0.0068359	-0.084961	0.559000000000005	14.2435	17.7511	0.060547	-0.06543	-0.064941	-120.943	24.1351	1451.0418	-1.3623	1.6281	-1.9469	-11.937	-178.4945	1346.28	-0.91387	0.9668	-1.5336	-55.259	193.662	699.4545	-0.18652	0.39551	-0.72949	-97.45	154.4071	1491.045	-1.3248	1.5287	-1.7482
0.58	-8.837474	-75.912	1018.965	-1.0507	1.1036	-1.1616	-43.48	37.4606	19.774	0.19385	-0.012207	-0.088379	-55.846	53.237	7.3245	0.077637	-0.069824	-0.054688	-117.776	29.071	1430.269	-1.3404	1.6086	-1.9273	39.6162	-172.552	1389.943	-0.94893	1.0356	-1.5741	-46.615	189.1152	661.1557	-0.16601	0.37109	-0.67578	-93.422	160.3544	1444.6784	-1.3149	1.4966	-1.7085
0.582	3.5032	-37.9063	986.23	-0.99014	1.0923	-1.1456	-42.184	11.254	34.2295	0.18945	-0.010254	-0.085449	-33.966	7.9119	23.1582	0.092773	-0.083008	-0.030273	-96.45	48.957	1450.923	-1.3089	1.5825	-1.8944	45.484	-141.739	1383.8141	-0.94854	1.0821	-1.605	-40.487	195.1584	630.3068	-0.15039	0.34375	-0.62109	-77.201	144.101	1436.1041	-1.3027	1.4603	-1.6648
0.584	19.432	-51.33	986.466	-0.92881	1.0821	-1.1261	-27.404	23.89	39.3036	0.18213	-0.018555	-0.091797	-33.942	31.993	15.604	0.10303	-0.077637	-0.020996	-137.226	97.3293	1435.306	-1.2783	1.5508	-1.8555	-11.8489	-138.516	1403.753	-0.91631	1.1037	-1.6222	-56.423	184.5226	582.73898	-0.125	0.31055	-0.55176	-93.417	189.432	1413.003	-1.2847	1.4219	-1.6152
0.586	13.068	-9.3654	986.7268	-0.86914	1.0664	-1.1035	-73.5395	57.2389	20.9523	0.17725	-0.023926	-0.092041	-59.634	33.2657	14.922	0.11133	-0.075684	-0.0087891	-94.543	75.6304	1424.789	-1.2444	1.5185	-1.8175	47.6861	-85.206	1414.004	-0.87256	1.1128	-1.6362	-49.318	184.9309	561.7236	-0.11182	0.29346	-0.521	-78.058	154.665	1390.9751	-1.2664	1.3825	-1.5719
0.588	10.872	-83.0958	987.953	-0.81533	1.052	-1.0841	-29.859	5.1867	24.756	0.1709	-0.026855	-0.094238	-34.064	-17.39938	33.073	0.11475	-0.069824	0.0019531	-85.531	124.855	1404.24706	-1.2191	1.4825	-1.7776	46.1648	-67.539	1391.6021	-0.8332	1.1031	-1.6617	-48.184	196.02	531.6224	-0.087402	0.2583	-0.44629	-61.262	145.1	1384.227	-1.2355	1.3371	-1.5219
0.59	13.211	-98.485	1011.3069	-0.76963	1.0435	-1.0671	-47.533	13.4224	21.5744	0.17041	-0.032227	-0.094727	-82.5252	31.9887	25.5915	0.11914	-0.066406	0.011719	-104.62	128.171	1365.2489	-1.1948	1.445	-1.737	45.8114	-115.066	1420.6417	-0.8249	1.1048	-1.6854	-47.474	189.505	476.2161	-0.06543	0.21289	-0.38623	-96.1826	152.176	1357.4149	-1.2007	1.2876	-1.4722
0.592	-16.955	-77.112	1020.1306	-0.729	1.045	-1.0523	-71.1787	-0.506	25.9726	0.1665	-0.041016	-0.094238	-70.081	16.92	31.7757	0.11133	-0.053223	0.021484	-84.447	89.86	1350.8648	-1.1694	1.408	-1.6963	85.314	-113.403	1418.2461	-0.85342	1.1013	-1.7335	-28.651	183.346	449.9082	-0.05127	0.18848	-0.35303	-63.855	101.9074	1340.393	-1.1671	1.2384	-1.4227
0.594	-5.791	-131.385	1022.7008	-0.70097	1.0586	-1.0439	-25.006	-24.0064	46.998	0.15479	-0.050293	-0.098145	-22.336	15.6930839	32.9197	0.1062	-0.035401	0.024903	-107.445	131.149	1326.208	-1.1479	1.3716	-1.6519	32.774981	-150.5037	1428.63347	-0.91601	1.1266	-1.7762	-28.626	178.294	419.22156	-0.024902	0.14648	-0.28809	-39.771	126.76835	1331.1355	-1.1356	1.1895	-1.3721
0.596	-38.894	-126.182	1018.977	-0.68213	1.0708	-1.0425	-62.2768	25.3104	46.3936	0.14843	-0.061768	-0.10108	-60.1908	58.3271	10.84	0.098145	-0.02002	0.029297	-89.307	101.15107	1303.672	-1.1276	1.3298	-1.6054	68.04	-173.251	1454.943	-0.99951	1.1919	-1.8296	-46.414	167.003	363.964	-0.012451	0.10962	-0.24536	-27.197	123.051	1303.725	-1.1024	1.1447	-1.3257
0.598	-45.089	-156.775	1053.834	-0.67315	1.0804	-1.0684	-40.71	-4.9	43.5485	0.14453	-0.074707	-0.104	-27.633	6.5702	33.6194	0.087402	-0.0014648	0.026367	-85.181	99.9922	1313.746	-1.1026	1.2884	-1.5604	52.305	-162.812	1439.546	-1.0738	1.2683	-1.9035	-25.373	169.5642	353.62355	-0.0039063	0.081543	-0.20996	-19.475	87.577	1284.356	-1.0696	1.096	-1.2771
0.6	-21.102	-226.0437	1121.862	-0.67041	1.0819	-1.1124	-50.761	-4.5376	36.2134	0.14111	-0.089355	-0.11133	-51.787	21.3443	31.1202	0.078125	0.0048828	0.026367	-64.219	134.0454	1286.1086	-1.0702	1.2388	-1.5077	-3.495	-189.63	1452.08	-1.139	1.3513	-1.9761	-7.731	144.8975	340.791	0.0029297	0.042969	-0.16162	-21.631	125.24	1246.0597	-1.0361	1.0527	-1.2305
0.602	-39.534	-231.995	1194.5756	-0.68018	1.0792	-1.1745	-71.141	21.149	23.436	0.13965	-0.098633	-0.10645	-50.847	23.631	27.1383	0.075195	0.021484	0.027832	-6.954	87.715	1288.946	-1.0386	1.1914	-1.4688	41.519	-184.581	1472.105	-1.1687	1.4216	-2.0448	-28.151	125.95646	296.408	0.0058594	0.020508	-0.14404	-15.173	102.526	1202.0896	-0.99492	1.0066	-1.1875
0.604	-26.473	-272.996	1247.397	-0.69463	1.0882	-1.2376	-11.628	-19.1905	26.9508	0.13672	-0.11182	-0.11475	0.691000000000003	-20.9618	39.1974	0.072754	0.033691	0.025635	-24.215	110.453	1270.6452	-1.0059	1.1367	-1.4219	15.0644	-178.65	1466.5958	-1.1823	1.4798	-2.0929	-18.837	127.6417	282.305	0	-0.0063477	-0.10645	-4.943	132.847	1177.3961	-0.95176	0.95664	-1.142
0.606	-16.627	-279.796	1292.576	-0.71143	1.1196	-1.2964	-27.62	29.454	14.94755	0.12988	-0.12354	-0.11719	-47.104	36.8186	21.6643	0.080078	0.038086	0.021973	-26.436	93.528	1215.5988	-0.96992	1.0809	-1.3766	9.295	-182.517	1526.151	-1.1777	1.5254	-2.1348	-26.863	130.00376	256.7711	-0.0029297	-0.030029	-0.080079	-23.14	195.7662	1131.8171	-0.90137	0.90547	-1.1026
0.608	-19.914	-224.684	1296.2883	-0.74189	1.1477	-1.3376	-46.841	31.1834	13.3018	0.12207	-0.13037	-0.12207	-17.871	22.63239	43.222	0.08252	0.04834	0.026855	10.221	60.805	1193.728	-0.93526	1.0267	-1.3382	45.614	-124.0678	1502.656	-1.1685	1.5561	-2.1696	-48.972	119.21965	214.673	-0.0048828	-0.046387	-0.058105	9.274	184.634	1105.492	-0.85508	0.85489	-1.0611
0.61	-25.954	-214.212	1306.2976	-0.77246	1.1759	-1.376	11.325	-3.3422	24.3131	0.10889	-0.13623	-0.13232	7.669	24.1826	37.1937	0.085938	0.044922	0.02002	-21.822	124.136	1151.4665	-0.90596	0.98018	-1.2933	10.643	-98.0661	1489.766	-1.1568	1.5785	-2.1863	-19.184	111.0743	209.8899	-0.0083008	-0.063965	-0.037598	-13.094	219.237	1056.8524	-0.81055	0.81055	-1.0215
0.612	-58.13	-130.3991	1349.8985	-0.80137	1.2056	-1.4011	-25.919	30.118	17.353	0.10254	-0.14136	-0.14136	-41.61	64.631	25.1661	0.094238	0.047852	0.016113	-29.05	119.606	1102.8856	-0.8708	0.94033	-1.2548	21.4895	-63.5348	1489.9249	-1.1428	1.5739	-2.1879	-48.381	99.49	192.193	-0.012695	-0.074219	-0.03125	-33.373	199.38	1001.1112	-0.76347	0.77032	-0.98262
0.614	-106.245	-93.1828	1375.699	-0.81748	1.2218	-1.4177	-1.16	2.969	27.699	0.095703	-0.14893	-0.14746	7.417	14.3755	39.571	0.10376	0.049805	0.015137	-5.41	151.515	1093.0278	-0.83545	0.90479	-1.2124	24.9479	-34.134	1444.545	-1.1207	1.5355	-2.1586	-53.087	89.9357	162.21159	-0.020996	-0.09375	-0.023926	-15.803	173.44	980.8233	-0.71074	0.73203	-0.94101
0.616	-140.765	-127.332	1409.986	-0.81543	1.2305	-1.4316	15.499	8.54988	30.505552	0.098633	-0.15576	-0.15918	-6.205	28.0239	28.8587	0.11475	0.046387	0.010742	-40.891	190.259	1035.229	-0.80361	0.87099	-1.1702	2.959	-52.341	1447.77	-1.0996	1.4629	-2.1309	-14.89	88.3992	168.9991	-0.028076	-0.096191	-0.015137	-25.675	209.488	945.9329	-0.65996	0.69766	-0.90352
0.618	-176.268	-94.046	1419.8595	-0.81065	1.2331	-1.4415	-25.795	41.7212	25.4407	0.098145	-0.15625	-0.16309	-23.405	14.8318	32.4352	0.12939	0.036133	0.01416	-23.798	149.0048	1009.0851	-0.76806	0.83936	-1.1272	36.47412	-38.0576	1458.1921	-1.077	1.3679	-2.0747	-48.893	76.1574	144.0284	-0.032227	-0.10059	-0.01416	-28.074	177.6746	895.752	-0.59912	0.66006	-0.85635
0.62	-200.179	-91.524	1422.75	-0.78955	1.2313	-1.4566	12.263	-0.9707	26.8749	0.099121	-0.16309	-0.17676	25.889	-22.8972	33.3453	0.13428	0.030273	0.0068359	-25.118	191.602	987.1866	-0.73291	0.80811	-1.0808	21.7214	-28.122	1451.856	-1.0659	1.2669	-2.0116	-46.452	64.634	132.694	-0.043945	-0.104	-0.016602	-11.572	177.6374	860.137	-0.53906	0.62305	-0.80664
0.622	-156.1643	-67.886	1436.083	-0.77744	1.2224	-1.4796	-7.58	33.421	5.456	0.10206	-0.17163	-0.18189	-16.436	27.026	23.395	0.15283	0.011719	0.0063477	-20.786	181.6909	956.4909	-0.69775	0.78154	-1.0376	8.2556	-50.3274	1457.892	-1.0612	1.1809	-1.9507	-28.505	65.9046	129.205	-0.047363	-0.10107	-0.02002	-54.346	199.6014	805.623	-0.47725	0.58271	-0.76474
0.624	-160.9618	-21.056	1434.846	-0.77608	1.2083	-1.5311	-28.56	19.2441	0.746	0.11084	-0.17383	-0.19189	-20.042	11.3402	25.6369	0.16577	-0.0056151	0.0041504	2.888	152.1563	919.1447	-0.65381	0.75439	-0.98975	33.235	-22.17	1452.22	-1.0684	1.1131	-1.9019	-53.964	59.29454	95.5647	-0.043457	-0.10254	-0.01709	-33.796	145.576	802.4345	-0.41133	0.5418	-0.71426
0.626	-156.9666	-60.455	1448.144	-0.78125	1.1992	-1.5938	24.368	-13.4533	25.323	0.12354	-0.18018	-0.20264	4.911	5.7454	29.5291	0.17627	-0.023438	0.0029297	-13.067	186.136	871.085	-0.60215	0.72695	-0.93906	2.2513	-35.2266	1428.785	-1.0859	1.0723	-1.8672	-34.638	48.875	80.6594	-0.051758	-0.098144	-0.018066	-18.507	182.2425	784.015	-0.34961	0.49882	-0.6627
0.628	-149.173	-57.511	1494.9279	-0.81338	1.2202	-1.6677	-32.458	21.9328	20.5531	0.13037	-0.18408	-0.20752	-39.489	46.9592	26.6965	0.17773	-0.045898	-0.0043945	-13.601	133.914	841.476	-0.55713	0.68994	-0.8997	46.4611	-44.3165	1455.684	-1.1099	1.0497	-1.8443	-24.281	33.819	73.102	-0.05127	-0.096191	-0.018555	-48.5312	173.562	719.291	-0.28574	0.4501	-0.60752
0.63	-147.9324	-65.265	1518.11	-0.871	1.2555	-1.7452	-32.468	-11.8193	32.2084	0.14258	-0.18701	-0.21777	-14.74	-8.1303	33.978	0.18018	-0.058105	-0.0078125	-16.154	124.704	827.5295	-0.51026	0.65635	-0.84424	60.1517	-24.831	1459.2976	-1.1408	1.0379	-1.8343	-45.569	15.416	52.7335	-0.056152	-0.092773	-0.022949	-14.592	137.681	693.409	-0.22363	0.40039	-0.55664
0.632	-116.361	-120.68	1565.156	-0.95185	1.3169	-1.8339	-9.749	-0.93787	22.9674	0.1543	-0.18067	-0.22486	-28.085	13.43714	33.20326	0.18018	-0.073242	-0.017578	-27.112	161.048	776.3752	-0.46758	0.62774	-0.79765	11.166	-53.43	1475.55	-1.1756	1.0437	-1.8285	-47.449	22.2442	43.796	-0.062012	-0.088379	-0.029785	-33.659	183.0001	643.915	-0.15996	0.35068	-0.50185
0.634	-104.408	-88.673	1576.675	-1.0472	1.3994	-1.9248	-47.625	47.9008	24.44	0.1665	-0.1875	-0.23291	-59.148	23.3812	35.62827	0.18262	-0.081787	-0.019776	-32.784	112.385	758.445	-0.41797	0.59082	-0.74707	68.886	-38.001	1489.261	-1.2013	1.0479	-1.8252	-12.273	34.078	60.509	-0.068848	-0.080566	-0.029785	-37.501	148.723	587.4697	-0.10342	0.29385	-0.45488
0.636	-113.73	-106.761	1578.756	-1.1421	1.5005	-2.0034	-15.787	2.8829	66.6716	0.15723	-0.19873	-0.2666	-31.014	-22.0932	32.4652	0.17871	-0.089355	-0.030273	-42.038	146.2453	710.437	-0.37773	0.55752	-0.69287	41.867	-31.724	1467.8201	-1.2188	1.0547	-1.8223	-28.283	23.937	54.097	-0.073242	-0.068848	-0.028564	-14.561	160.714	542.2445	-0.049121	0.2458	-0.39746
0.638	-116.973	-104.77	1565.16	-1.2253	1.6142	-2.0858	-29.136	26.4731	94.568	0.146	-0.19092	-0.28223	-44.144	18.38166	16.04	0.18311	-0.10107	-0.039063	-65.6156	133.7136	670.6875	-0.33535	0.52539	-0.64297	42.5532	-41.5894	1460.094	-1.2284	1.0579	-1.813	-15.763	15.2084	49.9763	-0.078613	-0.055664	-0.023438	-14.995	191.418	483.317	-0.0022464	0.1998	-0.33554
0.64	-148.2866	-67.0451	1538.0201	-1.2934	1.7337	-2.1518	-73.0339	55.1568	90.8013	0.10205	-0.15234	-0.29492	-57.416	4.446	20.5642	0.18066	-0.10449	-0.048828	-36.317	111.778	632.419	-0.29707	0.49414	-0.59219	94.211	10.751955	1438.444	-1.2363	1.0525	-1.7996	-8.663	7.5429	55.514	-0.083496	-0.039551	-0.019043	-23.487	148.5796	455.723	0.038574	0.15088	-0.28613
0.642	-118.778	-99.2327	1536.61	-1.3415	1.8529	-2.2109	14.405	40.078	105.0754	0.033935	-0.096926	-0.31836	-40.123	10.9622	20.5452	0.18164	-0.11768	-0.05957	-25.466	162.1197	556.183	-0.25224	0.46123	-0.54131	41.5846	21.22682	1407.1405	-1.2383	1.0436	-1.7907	-39.597	22.5638	31.0609	-0.086426	-0.02832	-0.019043	-10.428	196.639	411.833	0.079493	0.098826	-0.24267
0.644	-111.794	-70.043	1548.246	-1.3777	1.966	-2.2594	-13.231	89.339	145.2813	-0.045898	-0.041016	-0.35156	-74.8981	51.5639	27.3014	0.18872	-0.1206	-0.067627	-18.28	116.684	518.8	-0.2124	0.42334	-0.48975	50.038	48.2798	1401.4821	-1.2394	1.0336	-1.7785	12.357	35.6286	33.915	-0.085938	-0.0087891	-0.012695	-10.309	194.492	354.9398	0.11914	0.039941	-0.19746
0.646	-112.988	-18.751	1557.3305	-1.3965	2.0508	-2.293	-59.76177	68.354	226.1095	-0.1582	0.041016	-0.40234	-43.899	14.7535	33.596	0.18945	-0.12598	-0.077148	-12.883	130.6888	486.8521	-0.17032	0.38457	-0.43789	56.04	79.069	1391.9992	-1.2354	1.0273	-1.7637	-4.35	30.0959	33.8456	-0.085449	-0.00097655	-0.010498	2.05099999999999	169.978	321.2455	0.15586	-0.0077148	-0.1498
0.648	-65.092	-29.704	1549.8271	-1.3962	2.1065	-2.3103	-37.016	79.9568	265.154	-0.21582	0.092285	-0.42871	-37.849	26.9776	32.137	0.18994	-0.13232	-0.08252	-19.676	175.469	436.192	-0.1292	0.33985	-0.38222	32.7609	69.116	1379.60241	-1.2209	1.0194	-1.7443	-39.751	11.2271	8.6175	-0.086914	0.0063477	-0.0087891	-4.164	201.538	274.692	0.18632	-0.054102	-0.10908
0.65	-51.914	36.1626	1541.121	-1.3886	2.134	-2.3051	-21	87.9337	304.201	-0.33398	0.1875	-0.48633	-70.2759	21.16	21.9571	0.18994	-0.13623	-0.083984	12.917	143.5683	410.1665	-0.085448	0.29883	-0.33614	73.485	77.175	1393.665	-1.1956	1.0079	-1.7202	-2.617	10.0985	-10.5638	-0.084473	0.021973	-0.0058594	0.302	134.5568	259.2969	0.21094	-0.09668	-0.063965
0.652	-54.296	35.636	1513.442	-1.3793	2.1285	-2.2863	20.099	67.549	372.119	-0.4309	0.26392	-0.54175	-17.55	-19.4425	36.1803	0.18896	-0.1416	-0.09375	11.311	187.469	353.046	-0.038965	0.25586	-0.27178	43.84	92.485	1361.142	-1.1706	0.99228	-1.6983	-6.298	13.0868	1.3972	-0.081543	0.035156	-0.003418	-1.464	122.675069	241.6294	0.229	-0.13662	-0.026172
0.654	-41.109	38.1535	1514.92	-1.3793	2.0832	-2.2457	6.161	106.70927	455.014	-0.53271	0.35254	-0.59619	-52.138	16.8953	25.837	0.18896	-0.13965	-0.098633	5.964	155.852	303.0607	0.003418	0.20947	-0.22949	19.5106	77.5098	1347.3901	-1.1428	0.97129	-1.6713	-14.348	13.97349	15.2413	-0.075684	0.05127	-0.00097656	-13.005	139.7138	203.339	0.23994	-0.17686	0.0056641
0.656	-71.122	86.2655	1508.7722	-1.3804	2.0259	-2.1929	-21.522	120.7296	508.91917	-0.67627	0.479	-0.68311	-38.974	5.849	7.4877	0.18848	-0.14209	-0.10547	-1.082	108.969	283.4909	0.050586	0.15166	-0.17227	45.9022	103.201	1343.9126	-1.1113	0.94922	-1.6426	-6.894	16.6184	28.2693	-0.064941	0.062988	0.0046387	9.025	80.4049	207.016	0.2501	-0.21396	0.033789
0.658	-62.595	42.4803	1515.0389	-1.3932	1.9545	-2.135	-3.272	85.967	575.237	-0.75391	0.54297	-0.72949	-13.957	6.7935	30.9107	0.19141	-0.13818	-0.11084	-20.675	158.02	230.086	0.10029	0.091308	-0.12353	-18.0246	90.15	1314.271	-1.0781	0.92403	-1.6147	-20.777	16.2027	31.126	-0.052246	0.072266	0.0068359	-14.697	122.926	185.6953	0.25478	-0.246	0.062891
0.66	-86.976	56.353	1527.9266	-1.4047	1.8918	-2.0738	-34.56	102.203	686.785	-0.92969	0.69531	-0.83398	-44.566	52.435	13.8784	0.18604	-0.14404	-0.10986	-5.976	102.9241	209.20356	0.14443	0.02998	-0.077442	3.801	66.184	1318.767	-1.0527	0.90205	-1.5894	-40.456	20.7697	11.80419	-0.032715	0.074219	0.013184	-1.86199999999999	89.31352	154.2403	0.25635	-0.27246	0.088379
0.662	-126.2446	59.702	1514.851976	-1.4199	1.8375	-2.0266	-24.576	15.3388	835.7612	-1.0764	0.83619	-0.91138	-4.021	13.3464	38.692	0.17871	-0.146	-0.11572	4.821	97.324	208.6634	0.19111	-0.033496	-0.035156	12.181	74.8889	1309.403	-1.0328	0.88525	-1.5585	-12.004	17.566	23.948	-0.027832	0.075684	0.013184	8.669	56.16691	130.132	0.2458	-0.28486	0.10556
0.664	-109.59	4.3235	1515.49	-1.4276	1.7972	-1.9966	-7.88500000000001	-12.6058	936.535	-1.2378	0.98877	-0.99951	-3.166	23.715	24.0769	0.17798	-0.14721	-0.12305	-18.667	108.2188	181.2917	0.23682	-0.097656	0.0029297	-29.7216	31.854	1284.0776	-1.009	0.87774	-1.5355	-31.566	16.1706	40.12949	-0.013184	0.074707	0.010254	-29.132	95.458	93.902	0.24111	-0.29873	0.11494
0.666	-123.183	37.0018	1519.1014	-1.4175	1.7681	-1.9644	-5.424	-25.4015	995.897	-1.459	1.2227	-1.1191	-31.192	25.652	14.3968	0.17773	-0.1543	-0.12793	-13.834	51.2006	164.001	0.26396	-0.1544	0.037793	16.545	44.793	1285.956	-0.98828	0.86816	-1.5098	-57.581	11.7039	9.971	-0.0026855	0.069092	0.014648	-24.4	28.604	95.221	0.22198	-0.31006	0.11338
0.668	-155.697	14.949	1479.1307	-1.3929	1.738	-1.9386	12.204	-94.2592	1065.017	-1.5659	1.3442	-1.1743	9.172	-12.3248	39.324	0.17871	-0.1582	-0.13623	7.905	94.9226	140.9957	0.2915	-0.20967	0.065137	-10.423	66.238	1214.5671	-0.96241	0.8671	-1.4741	-15.857	24.35907	16.9786	0.0029297	0.06543	0.0063477	-8.565	39.36	110.1596	0.20488	-0.32041	0.10557
0.67	-156.813	-9.12	1500.9113	-1.3667	1.7083	-1.921	-47.95	-96.85	1125.2066	-1.7476	1.5649	-1.2866	-7.434	26.6229	33.7748	0.18164	-0.16406	-0.13818	-10.872	81.6257	116.99481	0.30283	-0.26279	0.08584	-17.051	70.614	1194.776	-0.93809	0.85411	-1.4387	-42.044	20.8147	7.5581	0.0097656	0.063477	0.0024414	-29.388	63.533	96.681594	0.18604	-0.3291	0.097168
0.672	-162.7781	52.881	1496.7421	-1.3323	1.6708	-1.8913	-56.394	-112.111	1138.8959	-1.8408	1.6992	-1.3652	-20.827	18.325	26.7245	0.18213	-0.1709	-0.14404	-14.899	49.163	109.178	0.32011	-0.31016	0.10479	16.682	115.011	1155.8744	-0.90568	0.83809	-1.4062	-43.834	13.98079	18.1456	0.014648	0.068359	-0.0043945	-38.184	21.266	68.33291	0.15351	-0.32773	0.080176
0.674	-149.7623	41.872	1480.607	-1.2986	1.6288	-1.8603	12.001	-171.3851	1122.8723	-1.896	1.8013	-1.4292	16.261	18.4855	23.0652	0.17872	-0.17456	-0.15381	-4.838	90.2659	95.3972	0.33008	-0.35352	0.12012	-56.3427	123.56025	1111.6097	-0.87189	0.81231	-1.3603	-16.644	18.7836	37.3521	0.025879	0.070801	-0.014648	-35.058	80.597	55.9537	0.1123	-0.31758	0.05586
0.676	-136.594	103.124	1484.356	-1.2695	1.5859	-1.8262	-20.174	-154.306	1098.2995	-1.8887	1.8818	-1.4961	-21.822	35.469	50.7584	0.16064	-0.18799	-0.17236	-19.023	36.642	80.2324	0.33662	-0.38086	0.12305	-1.338	127.7463	1096.742	-0.83057	0.78564	-1.3198	-53.557	16.076	26.413	0.041016	0.076416	-0.024414	-66.607	78.69	39.6368	0.058399	-0.29063	0.021485
0.678	-156.85731	141.297	1451.798	-1.2334	1.5348	-1.7926	-57.149	-219.401	1138.552	-1.8726	1.9009	-1.5171	-15.915	-20.5741	77.635	0.1167	-0.18604	-0.21094	-30.681	54.42	73.23	0.33691	-0.40986	0.12597	9.269	152.26	1070.569	-0.79481	0.74872	-1.2749	-38.516	32.843	20.4146	0.055664	0.086914	-0.032227	-67.539	66.87	50.028	0.0019532	-0.24668	-0.026074
0.68	-142.627	115.376	1439.674	-1.2026	1.4868	-1.7436	-93.538	-213.179	1146.343	-1.812	1.8667	-1.5542	-14.459	4.332	105.0164	0.083008	-0.16162	-0.22607	-51.51	82.2759	63.8469	0.33145	-0.43018	0.12012	-38.967	156.0117	1053.3662	-0.75494	0.71188	-1.2223	-24.119	36.1288	39.8294	0.080566	0.098145	-0.040527	-54.951	97.326	43.17742	-0.060059	-0.19189	-0.074707
0.682	-135.698	183.074	1412.73166	-1.1745	1.4384	-1.6984	-141.324	-185.801	1119.754	-1.7514	1.7925	-1.562	4.83	31.2603	105.6536	-0.0063477	-0.086426	-0.26953	-48.98	32.4147	66.778	0.32295	-0.45039	0.11211	15.874	150.3961	1028.907	-0.71549	0.67242	-1.1712	-53.003	36.9104	29.7883	0.091309	0.099609	-0.043457	-61.079	6.5172	46.8583	-0.12344	-0.13174	-0.12266
0.684	-129.944	177.667	1366.3652	-1.1514	1.3963	-1.6549	-84.788	-206.047	1105.642	-1.6914	1.6719	-1.541	24.6791	3.6211	152.1488	-0.085451	-0.025879	-0.31421	-56.203	93.244	65.224	0.30762	-0.45703	0.085938	-27.467	152.5313	965.389	-0.67242	0.62935	-1.1182	-44.334	20.9032	20.7161	0.11328	0.10596	-0.044434	-45.752	-2.04481	53.8059	-0.18701	-0.066601	-0.17383
0.686	-111.221	166.487	1353.67741	-1.1265	1.354	-1.603	-53.642	-171.323	1094.7319	-1.5801	1.4629	-1.4805	-52.0862	51.1727	208.816	-0.1665	0.036621	-0.36963	-61.01	78.58	45.5813	0.26855	-0.45215	0.053906	-36.347	128.571	931.9387	-0.62695	0.58984	-1.0684	-22.275	16.74329	27.2023	0.12549	0.10596	-0.041748	-49.032	17.423	40.602	-0.25069	0.0041018	-0.22422
0.688	-118.5	183.227	1328.626	-1.0982	1.3049	-1.5553	-82.391	-167.3553	1087.1892	-1.5308	1.3345	-1.439	-31.524	25.227	242.974	-0.26465	0.13379	-0.44971	-66.334	40.058	38.23419	0.23037	-0.42861	0.029688	9.442	133.1068	914.0339	-0.58163	0.53953	-1.0182	-36.496	15.17328	22.5097	0.14258	0.10596	-0.04248	-47.88	-30.9921	42.2704	-0.31074	0.073437	-0.27432
0.69	-98.449	119.8064	1304.7043	-1.0683	1.2587	-1.5073	-67.856	-195.805	1094.034	-1.4316	1.0527	-1.3633	17.885	20.9651	295.3827	-0.33057	0.21851	-0.49976	-56.153	70.137	38.575	0.18428	-0.38487	-0.0074207	-28.314	139.7505	877.9539	-0.53463	0.48726	-0.96732	-29.999	19.8417	19.788	0.16113	0.096191	-0.03125	-35.223	25.035	38.161	-0.36182	0.15527	-0.32031
0.692	-99.204	118.5389	1277.1039	-1.0323	1.215	-1.4542	-92.3072	-156.427	1098.012	-1.3562	0.86255	-1.3279	7.941	92.9005	353.2025	-0.40137	0.30176	-0.56689	-62.353	13.389	42.0085	0.12812	-0.32696	-0.054589	-18.912	100.254	860.465	-0.48894	0.44508	-0.92208	0.439	21.1245	45.064	0.16602	0.099609	-0.025391	-42.49	9.909	24.687	-0.40078	0.22343	-0.36972
0.694	-84.974	129.2403	1233.27	-1.0002	1.166	-1.3971	-100.09928	-197.68	1150.879	-1.2788	0.69971	-1.3062	14.723	89.1238	450.35	-0.49805	0.40869	-0.66406	-45.013	20.38	58.183	0.070313	-0.25586	-0.10156	-11.054	111.105	833.2192	-0.44761	0.40873	-0.87318	-32.44	15.1782	33.201	0.17334	0.089844	-0.029297	-48.098	-27.002	30.867	-0.42568	0.28457	-0.39951
0.696	-43.652	111.905	1228.8886	-0.9668	1.1172	-1.3359	-56.1923	-190.115	1180.0925	-1.1831	0.5249	-1.3062	-7.894	131.002	507.4737	-0.55615	0.46533	-0.71045	-40.78	35.502	34.29	0.02158	-0.19121	-0.14873	-73.206	92.913	794.5303	-0.41016	0.37646	-0.82422	-6.59	14.2755	32.2645	0.1814	0.091553	-0.026367	-28.155	15.3733	29.56116	-0.43701	0.34043	-0.42803
0.698	-50.632	152.4144	1215.2697	-0.92803	1.0694	-1.2831	-94.6469	-211.611	1198.997	-1.1401	0.45996	-1.3091	-56.6782	145.7823	558.012	-0.6748	0.5957	-0.80762	-35.918	-14.433	47.429	-0.024514	-0.12666	-0.19268	-39.521	87.291	765.168	-0.3739	0.34887	-0.77819	6.796	21.2051	44.267	0.18408	0.084961	-0.020996	-12.084	-20.6622	37.737	-0.42539	0.38701	-0.44336
0.7	-24.891	123.649	1187.033	-0.875	1.0192	-1.2285	-55.757	-259.682	1213.309	-1.0718	0.37549	-1.3335	-21.767	84.2639	639.622	-0.77784	0.70459	-0.88525	-41.813	28.496	63.2851	-0.058498	-0.066499	-0.23018	-48.956	134.438	710.36468	-0.34012	0.32871	-0.7375	-18.733	8.0695	23.0725	0.18506	0.076172	-0.021484	-22.114	-1.4404	45.021	-0.40234	0.41699	-0.44629
0.702	1.11299999999999	99.596	1155.339	-0.82968	0.96601	-1.166	-66.0656	-253.174	1261.038	-1.0515	0.36255	-1.3738	-11.15	104.67	713.477	-0.89063	0.81641	-0.97266	-45.453	7.109	51.527	-0.090236	-0.017576	-0.2627	-59.996	131.88	650.1653	-0.30723	0.31045	-0.69012	-8.71899999999999	11.5464	29.38298	0.18213	0.073242	-0.021973	-26.036	33.8143	28.2566	-0.37178	0.43633	-0.43867
0.704	-27.849	141.184	1105.9198	-0.79209	0.90479	-1.1032	-51.97	-278.039	1292.9358	-1.0542	0.3999	-1.4077	-17.209	67.29	805.0647	-1.0186	0.97754	-1.0859	-21.777	-12.8533	58.329	-0.10986	0.024902	-0.29639	-13.105	147.3679	638.9218	-0.27783	0.28907	-0.64064	-30.391	23.8945	32.5771	0.18604	0.063477	-0.021973	-11.705	-11.3493	15.6522	-0.33262	0.43574	-0.42188
0.706	-4.608	126.776	1070.312	-0.76807	0.84814	-1.0493	30.671	-295.237	1344.768	-1.0879	0.50488	-1.4492	-33.722	40.796	874.276	-1.0737	1.0649	-1.1362	-15.626	38.364	30.9178	-0.1331	0.066499	-0.3205	-78.817	177.2633	579.8097	-0.24463	0.27197	-0.59326	-35.131	16.9363	20.9877	0.18189	0.057129	-0.023193	-12.255	50.151	12.859	-0.29043	0.41269	-0.39765
0.708	3.197	185.041	1030.14889	-0.72812	0.80498	-0.99591	34.1937	-284.521	1360.414	-1.105	0.56104	-1.4683	-72.881	48.869	880.3736	-1.1636	1.2251	-1.2026	-37.763	-12.8546	20.2255	-0.15253	0.10253	-0.3332	-41.145	158.3804	552.7869	-0.21873	0.25425	-0.54417	-4.783	19.94066	24.8491	0.18213	0.052246	-0.023926	-26.109	39.1753	3.277	-0.24141	0.3708	-0.36524
0.71	-31.352	226.135	970.198	-0.68057	0.76846	-0.94228	53.635	-323.988	1399.4206	-1.1074	0.6543	-1.5098	-39.176	-21.463	903.652	-1.1853	1.3196	-1.2507	-37.259	6.1027	32.972	-0.16542	0.13573	-0.34062	-40.468	199.413	497.9159	-0.19028	0.23653	-0.49504	-17.63	9.0976	46.474	0.18066	0.04541	-0.023926	-15.996	25.3109	10.2142	-0.19824	0.31738	-0.3252
0.712	-30.077	177.616	935.528	-0.63213	0.72236	-0.88955	94.9	-273.681	1445.722	-1.0757	0.70361	-1.5274	-22.346	-25.886	924.683	-1.1714	1.3794	-1.2798	-18.912	35.3631	27.34	-0.18047	0.16962	-0.34482	-98.8701	184.0936	447.4933	-0.16349	0.21555	-0.44468	-46.724	6.8264	26.212	0.18408	0.051758	-0.023926	-12.068	76.404	9.6489	-0.16172	0.2583	-0.28398
0.714	-33.879	203.195	905.784	-0.58144	0.68145	-0.83691	47.313	-233.5758	1477.2459	-1.0156	0.73047	-1.5449	-36.303	-46.6497	917.319	-1.0957	1.3848	-1.293	-22.372	-7.290486	21.0324	-0.18262	0.19482	-0.34619	-46.369	154.867	427.906	-0.13361	0.19494	-0.4048	-8.644	22.9941	43.6494	0.17578	0.054688	-0.025879	-29.422	15.66575	5.6911	-0.12968	0.20888	-0.23213
0.716	-50.294	176.533	864.9539	-0.5293	0.64551	-0.78516	96.156	-194.2086	1507.073	-0.9375	0.72217	-1.5645	-18.35	-115.695	911.786	-1.0371	1.3555	-1.2949	-6.043	48.118	32.5419	-0.17939	0.21905	-0.33251	-83.431	169.779	360.919	-0.10303	0.17334	-0.34766	-12.508	21.0838	34.7747	0.17676	0.060058	-0.036133	-8.897	15.0063	20.76298	-0.1082	0.16201	-0.18721
0.718	-37.74	174.123	832.7484	-0.47881	0.60703	-0.73349	93.111	-144.967	1499.582	-0.91016	0.70313	-1.5762	-68.4	-88.334	875.5644	-0.88477	1.2344	-1.2676	-16.95	33.6133	21.815	-0.16444	0.22774	-0.32059	-89.988	143.33428	316.925	-0.068192	0.14194	-0.29439	-47.549	9.7548	14.7245	0.17725	0.064941	-0.048828	-37.062	32.5149	7.273	-0.08291	0.12588	-0.14443
0.72	-54.145	225.339	774.962	-0.42968	0.57148	-0.6832	28.845	-137.243	1504.0209	-0.9043	0.68457	-1.6035	-80.92	-123.528	870.098	-0.781	1.093	-1.2414	-19.067	26.2844	27.4903	-0.1445	0.22147	-0.30222	-44.192	140.027	301.373	-0.045614	0.1059	-0.24236	-16.047	12.656	19.1969	0.18066	0.073242	-0.060547	-20.044	-27.6745	21.9502	-0.059082	0.10059	-0.11084
0.722	-59.623	175.4928	738.8275	-0.38008	0.53203	-0.63281	74.548	-115.224	1513.4216	-0.94995	0.69995	-1.6335	-68.768	-126.387	857.868	-0.70508	0.94141	-1.2109	0.366	65.009	15.867	-0.10856	0.20564	-0.2783	-95.745	154.756	271.183	-0.026549	0.07268	-0.19853	-49.339	-8.7955	20.3681	0.17578	0.077637	-0.069336	-37.208	28.273	46.3448	-0.025586	0.081641	-0.080762
0.724	-62.163	181.5263	712.016	-0.32949	0.49043	-0.58144	73.563	-91.869	1540.028	-1.0254	0.73438	-1.6914	-107.601	-81.236	788.429	-0.63818	0.71191	-1.1714	-18.984	5.58199	16.8791	-0.064941	0.17432	-0.24951	-55.563	110.7104	275.8924	-0.0093329	0.045676	-0.16075	-51.576	2.578	16.1841	0.17871	0.091309	-0.07959	-60.085	20.6688	31.1066	0.002539	0.071289	-0.051465
0.726	-52.132	178.9467	669.186	-0.28027	0.45361	-0.53564	76.28	-111.122	1562.4851	-1.1558	0.82666	-1.7759	-81.422	-108.084	778.38	-0.61182	0.61182	-1.1489	-32.26	6.8096	30.0949	-0.029055	0.12928	-0.22152	-49.779	133.822	248.6651	0.0039063	0.023926	-0.12158	-20.358	12.328	28.0113	0.17725	0.10742	-0.085938	-61.029	3.5956	26.741	0.018945	0.064258	-0.022559
0.728	-44.809	132.046	651.927	-0.23086	0.40801	-0.48711	145.38	-95.972	1545.9131	-1.2207	0.8877	-1.8242	-89.116	-79.954	779.1216	-0.58789	0.45703	-1.1426	-31.022	19.57962	27.081	0.0019028	0.087281	-0.18246	-80.474	114.3641	220.1606	0.01077	0.0046669	-0.090059	-50.92	5.3842	33.915	0.1748	0.12109	-0.098633	-51.893	56.678	21.0019	0.026368	0.061524	0.0037109
0.73	-61.3419	176.6019	628.072	-0.17832	0.35908	-0.44092	83.493	-102.76174	1527.694	-1.3472	1.0405	-1.9253	-139.6621	-66.244	812.5346	-0.5874	0.41333	-1.1482	-40.682	-24.4311	30.0317	0.020227	0.042724	-0.14612	-7.06399999999999	78.843	223.832	0.019057	-0.00078538	-0.059012	-44.662	8.82522	23.3175	0.17334	0.13818	-0.10791	-50.914	16.3578	22.8713	0.026367	0.060059	0.021973
0.732	-71.0111	146.5903	585.861	-0.12441	0.31182	-0.39014	72.955	-117.597	1544.1272	-1.4158	1.1623	-2.0125	-82.112	-109.522	850.7349	-0.59717	0.43604	-1.1665	-63.261	29.678	33.9019	0.032575	0.012307	-0.11795	-47.922	110.2698	179.3631	0.02361	-0.009008	-0.034971	-23.967	13.7466	32.0428	0.17432	0.14453	-0.11426	-51.777	21.3699	45.9911	0.021875	0.053906	0.037988
0.734	-68.6813	145.12	536.121	-0.080468	0.26933	-0.3415	67.705	-107.40236	1581.013	-1.4683	1.2778	-2.0815	-73.387	-108.417	859.803	-0.63232	0.53955	-1.2241	-68.02	21.157	28.935	0.041016	-0.010742	-0.094727	-52.718	72.46	157.253	0.035815	-0.013694	-0.017725	-53.469	12.5093	28.6532	0.16455	0.16113	-0.12744	-41.436	49.3443	21.539	0.014942	0.051953	0.054785
0.736	-54.1834	174.80796	468.7293	-0.03125	0.2207	-0.29639	29.7503	-106.989	1592.246	-1.5156	1.4043	-2.1504	-84.4118	-154.161	887.567	-0.64844	0.60352	-1.25	-54.926	0.80511	37.946	0.054818	-0.023699	-0.074994	-9.851	62.9733	132.7628	0.046387	-0.013672	-0.003418	-27.154	13.1324	10.633	0.16211	0.16797	-0.13745	-53.06	6.52	22.05713	0.014942	0.050391	0.064942
0.738	-30.285	111.123	426.741	0.016016	0.17568	-0.25234	62.992	-117.916	1624.614	-1.5347	1.4575	-2.1831	-46.094	-172.26	909.89	-0.66406	0.71094	-1.3105	-57.401	43.4411	20.5132	0.059759	-0.027725	-0.06106	-61.019	96.53	96.5731	0.05162	-0.015203	0.010195	-9.94900000000001	18.2185	34.426067	0.15479	0.16797	-0.1626	-58.047	61.0987	44.1553	0.019043	0.039746	0.078028
0.74	-40.88	136.4151	384.1018	0.059571	0.12314	-0.20498	18.1495	-114.888	1623.457	-1.5605	1.5547	-2.2148	-89.3463	-165.999	946.754	-0.64551	0.7666	-1.3398	-60.957	-6.823	15.7729	0.073018	-0.028148	-0.050979	-23.306	49.2689	101.2316	0.049085	-0.016489	0.014497	-48.945	-4.589	32.8637	0.14551	0.15723	-0.21094	-55.441	40.4881	32.452	0.026855	0.029297	0.084961
0.742	-42.984	154.3563	355.6553	0.1045	0.068848	-0.1628	-13.2655	-147.167	1611.501	-1.563	1.607	-2.2173	-59.044	-200.9874	1019.9533	-0.61328	0.79883	-1.3574	-45.816	9.4366	33.0698	0.090391	-0.030729	-0.041821	-27.393	86.308	83.5116	0.05258	-0.0079543	0.021043	-23.897	-19.9294	42.786	0.13696	0.16431	-0.23633	-38.636	27.2539	43.556	0.032519	0.024512	0.09082
0.744	-26.59	128.0176	331.8914	0.13652	0.017187	-0.11846	18.7292	-130.467	1581.7873	-1.562	1.6333	-2.2124	-56.288	-199.25	1080.655	-0.55566	0.79883	-1.3691	-46.1	47.7946	33.2654	0.1001	-0.029785	-0.030762	-41.449	92.183	67.6287	0.044732	-0.0039534	0.018137	-3.221	-13.2215	59.788	0.12256	0.1792	-0.2666	-29.005	80.541	26.0697	0.035156	0.010351	0.097363
0.746	-9.13500000000001	183.318	285.9268	0.16992	-0.039063	-0.079102	-7.1107	-98.3228	1538.7476	-1.543	1.6035	-2.1621	-56.101	-221.957	1141.2198	-0.53564	0.77783	-1.3794	-62.122	11.29	43.443	0.11721	-0.029848	-0.02331	-8.011	55.397	78.121	0.033691	0.0087891	0.010254	-26.441	-30.6661	63.764	0.095703	0.20947	-0.30615	-44.715	26.6199	19.1478	0.035938	0.0041016	0.096191
0.748	3.774	150.445	243.4539	0.19805	-0.094631	-0.034961	46.52	-91.836	1532.4841	-1.5288	1.5767	-2.1216	-4.86	-287.269	1190.279	-0.51855	0.73828	-1.3945	-32.564	63.174	39.33291	0.12495	-0.02635	-0.0152	-55.094	90.137	58.544	0.014947	0.021149	-0.010136	-13.453	-21.067	110.092	0.084473	0.22559	-0.33057	-40.491	26.889	45.3654	0.038476	-0.0035156	0.092871
0.75	28.218	133.4682	225.987	0.22344	-0.14287	0.00078116	85.243	-75.027	1524.7649	-1.4819	1.4907	-2.0464	-20.648	-261.109	1225.721	-0.53491	0.72486	-1.4104	-53.196	53.963	12.4463	0.12655	-0.021215	-0.018746	-20.418	27.316	61.708	-0.0043038	0.040623	-0.031414	-28.157	-18.4422	130.5311	0.060547	0.25537	-0.37598	-42.479	28.0497	46.2152	0.049316	-0.01123	0.087402
0.752	18.504	158.2866	190.459	0.23984	-0.18857	0.035937	23.3484	-85.4233	1504.181	-1.4554	1.4065	-1.991	-16.248	-238.306	1266.026	-0.56592	0.74316	-1.4331	-65.208	27.076	26.7152	0.12795	-0.02032	-0.015625	-3.723	16.5763	71.38	-0.028884	0.065219	-0.053311	-34.088	-27.8824	154.0532	0.037353	0.27612	-0.42553	-17.888	-32.6648	48.878	0.055274	-0.020215	0.07959
0.754	5.896	92.21	180.64426	0.25283	-0.22578	0.062989	53.723	-83.1286	1515.6457	-1.4375	1.3164	-1.9238	33.341	-186.975	1301.605	-0.62256	0.81299	-1.4683	-44.923	63.219	40.1221	0.12109	-0.012207	-0.0073242	-31.139	51.659	53.9367	-0.054053	0.10046	-0.078955	-7.139	-28.5998	175.901	0.015625	0.2959	-0.4751	-9.318	12.3882	52.3563	0.071094	-0.026074	0.077539
0.756	15.826	109.8231	163.6415	0.25684	-0.26318	0.090332	47.438	-51.982	1509.2385	-1.4409	1.2104	-1.8472	-7.462	-118.691	1338.175	-0.65771	0.86182	-1.4839	-60.159	14.9309	23.4704	0.1157	-0.00053144	-0.0028739	-7.965	-4.681	69.641	-0.081543	0.14063	-0.10791	-28.424	-25.0745	234.6955	-0.010742	0.33105	-0.55469	-27.025	-3.6222	33.50374	0.084766	-0.034277	0.073633
0.758	4.648	100.27572	145.337	0.24756	-0.29268	0.10927	51.389	-54.394	1501.223	-1.4426	1.1721	-1.8074	12.747	-131.2961	1370.685	-0.69629	0.95508	-1.5176	-20.495	16.1605	38.812	0.10485	0.017246	-0.010024	-35.983	25.7596	63.164	-0.10476	0.1818	-0.136	-32.529	-2.6656	290.5412	-0.03125	0.3501	-0.59326	-15.352	0.5485	39.2444	0.098634	-0.044238	0.068848
0.76	13.845	40.3755	141.995	0.23975	-0.31319	0.12139	111.905	-23.3096	1481.0106	-1.4551	1.1563	-1.7842	48.4212	-110.319	1394.984	-0.70264	1.0178	-1.551	-24.089	23.1404	19.9275	0.097989	0.042039	-0.011281	-68.221	17.78	46.807	-0.13386	0.21588	-0.16218	-10.481	48.9177	343.115	-0.083496	0.38281	-0.69141	3.734	54.472	36.5476	0.1123	-0.050781	0.060547
0.762	18.308	68.064	117.2241	0.22412	-0.32452	0.12569	45.951	-17.0868	1431.898	-1.4629	1.1475	-1.7559	6.804	-100.983	1402.411	-0.68408	1.0493	-1.5835	-40.318	-22.09204	40.322	0.089862	0.068971	-0.0097656	-10.722	-23.0797	56.065	-0.16004	0.2491	-0.17938	-9.454	74.3856	412.637	-0.12329	0.41456	-0.77271	-29.137	12.8775	24.278	0.12774	-0.061035	0.05459
0.764	-16.556	40.681	83.578	0.20166	-0.33418	0.12266	109.692	-22.68	1435.291	-1.4702	1.1528	-1.7378	58.58781	-98.788	1424.18675	-0.66016	1.0508	-1.6211	2.169	31.3021	57.3275	0.091797	0.085938	-0.010742	-44.323	21.6874	31.556	-0.18143	0.27519	-0.19912	-49.05	78.7847	477.3082	-0.16748	0.44678	-0.84619	-15.555	10.9666	46.233	0.14316	-0.064551	0.050097
0.766	-18.894	39.2581	72.2068	0.18359	-0.33545	0.11816	116.56	-0.844999999999999	1456.9431	-1.4648	1.1465	-1.7275	57.478	-73.956	1412.417	-0.65527	1.041	-1.6328	-3.187	35.1697	34.4356	0.098323	0.095722	-0.0071646	-45.463	-27.0912	36.3118	-0.19775	0.29297	-0.20557	5.838	85.505	558.599	-0.23486	0.51367	-0.93555	-20.015	18.4628	36.7281	0.1627	-0.073926	0.039941
0.768	-13.812	74.5045	67.245	0.16289	-0.33467	0.1083	71.181	-12.422	1472.931	-1.4475	1.1526	-1.7166	28.231	-114.889	1415.2258	-0.69922	1.0273	-1.6855	-8.896	19.682	41.214	0.11095	0.097013	-0.0025051	-23.885	-22.2742	28.175	-0.19473	0.31133	-0.21817	24.187	83.3562	628.292	-0.27002	0.55322	-0.98193	-37.463	-19.1339	28.7423	0.18086	-0.079687	0.030274
0.77	-32.389	10.601	75.5933	0.13838	-0.33506	0.087793	137.292	-29.2086	1477.573	-1.4219	1.1416	-1.6973	52.818	-135.164	1435.3345	-0.75415	1.0334	-1.741	-10.109	46.6629	46.2859	0.12611	0.091262	0.0032118	-73.978	26.58777	20.29	-0.19374	0.31504	-0.21807	2.163	92.492	668.9926	-0.34326	0.61963	-1.0688	-5.785	36.251	32.0284	0.20264	-0.094727	0.015137
0.772	-27.484	28.892	78.7144	0.11494	-0.32608	0.070605	124.157	-36.5029	1438.2689	-1.3892	1.104	-1.6577	13.162	-129.553	1456.6553	-0.82422	1.0645	-1.7988	-36.765	-0.175000000000001	37.1593	0.14723	0.077762	0.0096603	-41.382	-8.9166	27.949	-0.18476	0.31856	-0.22002	15.4527	82.749	747.35831	-0.39576	0.67651	-1.1214	-45.555	37.207	4.6971	0.22061	-0.10361	0.0084962
0.774	-36.295	38.385	52.4342	0.08711	-0.31142	0.045313	109.017	-46.494	1419.0175	-1.3647	1.0767	-1.6362	25.039	-144.34	1507.914	-0.9375	1.1328	-1.8906	-23.391	4.645	51.0128	0.16504	0.059082	0.021484	-23.644	32.5956	21.9917	-0.17197	0.30596	-0.20947	-30.751	42.973	797.2721	-0.44482	0.7334	-1.1641	-52.061	17.771	26.861	0.24111	-0.11807	-0.0006836
0.776	-62.027	14.4046	47.0308	0.048828	-0.28662	0.01709	134.2	-21.7229	1402.4552	-1.3262	1.0303	-1.5918	47.1484	-114.7243	1532.703	-0.99414	1.1836	-1.9414	-29.039	36.5466	18.532	0.18533	0.032503	0.02865	-42.766	36.711	17.9104	-0.15674	0.29102	-0.19824	-40.449	-9.47	808.259	-0.5	0.8125	-1.1992	-19.808	49.993	27.8992	0.26338	-0.12822	-0.01123
0.778	-69.43	86.686	45.692	0.0035157	-0.25498	-0.015137	108.434	10.541	1378.83421	-1.2895	0.99416	-1.5644	-13.7126	-100.73	1542.8815	-1.0879	1.3066	-2.0508	-41.614	1.6278	24.3673	0.19674	0.0050931	0.031395	-17.852	1.3098	27.7857	-0.14619	0.27754	-0.18359	-2.72	-40.94762	844.45083	-0.51563	0.85791	-1.2046	-46.486	-11.084	13.3228	0.28047	-0.14326	-0.025
0.78	-71.31	66.172	34.7119	-0.047461	-0.20986	-0.051172	94.021	14.666	1357.022	-1.2534	0.95361	-1.5327	14.0332	-119.708	1584.707	-1.1568	1.4063	-2.1163	-33.853	49.29	38.0586	0.20651	-0.017569	0.032072	-48.512	54.408	10.862	-0.12891	0.25986	-0.1669	-26.901	-75.878	853.742	-0.52686	0.92432	-1.2114	-60.69	-2.6875	38.2651	0.29834	-0.15527	-0.033203
0.782	-68.804	39.7711	40.31033	-0.099024	-0.1583	-0.096481	78.561	43.834	1334.30072	-1.1914	0.89746	-1.4922	-11.279	-103.607	1599.3618	-1.2158	1.5	-2.1875	-44.947	47.013	23.597	0.21985	-0.038898	0.032525	-50.803	15.765	20.4151	-0.10977	0.24229	-0.15205	-61.082	-84.3311	867.58	-0.5188	0.96314	-1.2146	-51.157	25.8742	23.6411	0.31435	-0.16729	-0.044532
0.784	-74.6066	45.085	30.334	-0.14795	-0.10351	-0.13799	40.9895	52.1908	1327.5404	-1.1636	0.86768	-1.4702	-30.441	-114.091	1606.889	-1.2832	1.5996	-2.2598	-32.399	10.35212	39.75141	0.22705	-0.061035	0.034668	-16.413	0.9884	17.5704	-0.095313	0.22002	-0.14151	-52.666	-85.3423	878.995	-0.49365	0.99268	-1.2085	-56.72	-23.15353	31.8548	0.31856	-0.17686	-0.060547
0.786	-64.846	-31.903	38.0876	-0.19678	-0.042969	-0.17773	44.421	56.329	1328.92829	-1.1123	0.81836	-1.4277	36.3624	-91.343	1615.779	-1.3003	1.645	-2.2866	-47.796	52.85	30.9211	0.23295	-0.079807	0.028423	-53.659	18.4341	1.8395	-0.076172	0.19971	-0.12891	-58.686	-85.874	850.5	-0.43213	1.0215	-1.1895	-46.639	16.633	35.391	0.31934	-0.18076	-0.069531
0.788	-59.273	6.8326	39.2206	-0.23946	0.016895	-0.21885	35.0879	96.496	1292.1782	-1.0691	0.78785	-1.3962	-16.8994	-55.211	1598.6392	-1.335	1.7012	-2.332	-58.038	-3.513	46.184	0.24521	-0.095836	0.021469	-23.634	-42.72	8.7009	-0.06084	0.17549	-0.11836	-26.384	-79.494	826.354	-0.40137	1.0361	-1.1777	-55.695	2.835	17.6654	0.30742	-0.17295	-0.090234
0.79	-69.328	16.0728	16.067	-0.28496	0.073048	-0.25889	7.707	97.9152	1261.8878	-1.0225	0.75586	-1.3711	-6.55	-35.3651	1609.8042	-1.3508	1.7239	-2.3435	-22.581	3.05	51.313	0.2468	-0.10914	0.017566	-19.897	-2.0519	3.6	-0.039453	0.15616	-0.10967	33.465	-73.551	831.332	-0.3457	1.0469	-1.1328	-52.95	-15.307	21.8458	0.29053	-0.16309	-0.09668
0.792	-56.541	-12.4032	14.2615	-0.32637	0.13633	-0.29599	15.828	105.852	1242.715	-0.96094	0.72119	-1.334	21.01552	-11.128	1593.697	-1.3687	1.7231	-2.3374	-57.534	19.023	23.971	0.25088	-0.12384	0.013945	-49.753	34.9566	26.8278	-0.019531	0.13193	-0.1042	-0.718	-65.049	802.859	-0.32226	1.0591	-1.1206	-53.15	41.6959	36.0379	0.26787	-0.14346	-0.11025
0.794	-50.582	33.9511	20.33342	-0.35576	0.18262	-0.3336	-41.8191	111.0532	1173.196	-0.92383	0.70703	-1.3135	-16.73774	-12.1606	1583.94	-1.3843	1.6958	-2.3159	-67.318	-27.2781	27.68418	0.25732	-0.13574	0.0053711	-9.449	7.76755	35.747	0.0009767	0.11397	-0.087793	-0.670999999999999	-51.27	794.4341	-0.31299	1.0786	-1.1069	-50.763	17.60709	17.6642	0.24648	-0.11904	-0.12822
0.796	-44.878	-10.7104	21.2583	-0.37598	0.22656	-0.36523	-15.913	75.439	1156.7713	-0.85498	0.68213	-1.2671	33.3138	-15.4626	1588.258	-1.3887	1.666	-2.2969	-42.641	18.2205	36.0697	0.26347	-0.14628	-0.00077393	-32	51.0546	15.81	0.020996	0.095703	-0.082031	12.021	-39.7071	807.163	-0.31152	1.1016	-1.1094	-33.493	29.4739	27.266	0.22344	-0.09912	-0.14229
0.798	-13.458	-15.43	50.0458	-0.38076	0.26191	-0.38945	-2.38	107.0667	1147.9525	-0.80761	0.65869	-1.2261	20.14	1.0189	1586.0934	-1.3848	1.5859	-2.2402	-68.7703	18.29785	36.6426	0.26854	-0.15584	-0.005653	-10.752	4.274	17.6091	0.044434	0.071973	-0.067285	-14.015	-36.218	803.6846	-0.31836	1.1172	-1.1133	-47.651	57.589	1.501	0.20283	-0.079199	-0.15527
0.8	-6.77	33.0086	42.8238	-0.37461	0.29199	-0.41016	-49.748	111.285	1128.6645	-0.75684	0.63965	-1.1885	-1.041	-0.3765	1588.18166	-1.3759	1.5107	-2.1948	-59.818	-3.65301	42.538	0.27559	-0.17031	-0.012692	-6.243	-6.66712	24.181	0.066016	0.04961	-0.05127	23.691	-54.465	810.54046	-0.33447	1.1685	-1.1343	-24.894	1.448	6.31435	0.18604	-0.062988	-0.16895
0.802	-12.564	-9.54629	45.388	-0.36289	0.31191	-0.41758	17.119	93.795	1107.824	-0.69385	0.60986	-1.1274	38.9046	-11.414	1601.0865	-1.3711	1.4414	-2.1523	-43.636	40.295	30.013	0.28008	-0.18154	-0.021572	-39.007	59.851	12.656	0.089062	0.019531	-0.034863	27.31	-87.469	822.9017	-0.34717	1.2168	-1.1567	-16.387	42.3846	30.4685	0.17217	-0.052832	-0.1789
0.804	8.406	44.565	32.9224	-0.34258	0.32598	-0.41562	-39.1979	102.0824	1049.827	-0.66602	0.58691	-1.0918	17.7219	2.519	1585.6188	-1.3706	1.3872	-2.0972	-64.489	5.4367	16.9743	0.28613	-0.19141	-0.032715	-10.642	18.8503	25.4361	0.1166	-0.016601	-0.019629	-35.502	-119.721	838.323	-0.35303	1.2759	-1.1694	-36.999	48.9212	12.6909	0.15283	-0.045118	-0.18759
0.806	-12.089	46.276	9.142	-0.31836	0.31641	-0.40625	-43.2246	87.811	1015.8287	-0.6001	0.55029	-1.0288	51.512	-24.112	1588.859	-1.3628	1.3677	-2.0825	-40.786	16.2509	38.4182	0.28711	-0.19727	-0.047366	-30.016	61.063	21.9586	0.13672	-0.047363	-0.003418	-57.167	-141.534	871.246	-0.35156	1.3574	-1.1738	-12.601	27.3099	26.428	0.13799	-0.047852	-0.19385
0.808	4.556	5.16257	8.8383	-0.28242	0.30362	-0.3959	5.818	108.232	1007.157	-0.55395	0.51807	-0.9751	84.936	-16.9636	1589.845	-1.3472	1.3403	-2.0503	-20.862	39.184	23.191	0.2875	-0.20479	-0.062407	-54.135	68.874	12.5691	0.15596	-0.086426	0.012012	-39.83	-155.987	913.692	-0.34912	1.394	-1.1714	-12.539	74.585	34.096	0.12471	-0.046582	-0.19981
0.81	20.412	46.699	14.2315	-0.24521	0.27939	-0.3708	-29.124	151.672	963.705	-0.50732	0.48975	-0.92334	44.8862	3.548	1581.6589	-1.323	1.3156	-2.028	-38.94	-3.347	16.6974	0.28164	-0.20517	-0.080376	-15.737	12.8111	25.6442	0.16953	-0.12568	0.022754	-58.72	-191.7796	938.9337	-0.33838	1.4146	-1.1899	-34.346	20.81767	19.8048	0.11475	-0.056641	-0.20313
0.812	-3.298	17.4254	12.8551	-0.20772	0.25088	-0.34112	7.401	131.194	942.823	-0.44678	0.44238	-0.85303	75.641	3.493	1577.7868	-1.3008	1.2813	-2.0039	-13.653	42.4913	20.3914	0.27891	-0.20156	-0.098145	-46.296	61.706	18.0049	0.18555	-0.16006	0.036426	-8.602	-231.045	982.251	-0.32935	1.3828	-1.2437	-2.271	24.9813	38.4193	0.11035	-0.066699	-0.20215
0.814	-18.376	30.713	21.1506	-0.16699	0.2085	-0.31074	8.094	151.805	908.665	-0.42432	0.41846	-0.81201	62.648	24.0423	1566.8418	-1.2759	1.2427	-1.9604	-23.435	33.7184	11.0954	0.27393	-0.19385	-0.11133	-48.246	36.49456	30.9437	0.1999	-0.18526	0.037109	6.11	-248.412	1027.5165	-0.31836	1.3359	-1.3027	2.721	45.1996	22.958	0.1124	-0.086718	-0.20196
0.816	-2.23500000000001	65.475	14.9882	-0.12061	0.16699	-0.27734	-37.1145	154.7883	843.153	-0.37158	0.37646	-0.7417	43.463	1.548	1556.5	-1.2573	1.2192	-1.9409	-24.681	15.4027	33.788	0.26621	-0.18359	-0.12832	-10.793	21.9117	41.4019	0.20752	-0.20361	0.040527	-31.886	-256.547	1066.3152	-0.30615	1.2773	-1.3672	-31.001	-20.2576	23.8294	0.11357	-0.10704	-0.19649
0.818	-19.499	4.8402	11.81286	-0.07666	0.12686	-0.24375	16.846	136.4652	843.1315	-0.33178	0.34571	-0.69311	102.614	-4.473	1544.227	-1.2241	1.1626	-1.896	-13.567	69.124	34.2113	0.25557	-0.16944	-0.14638	-57.405	53.1531	25.8754	0.21943	-0.21699	0.043652	6.962	-228.631	1121.5055	-0.31445	1.2539	-1.4033	-19.662	19.51101	46.91211	0.11436	-0.12597	-0.18799
0.82	-7.546	27.9083	26.4882	-0.034961	0.085058	-0.21152	15.812	178.8259	803.5888	-0.29004	0.31641	-0.64063	51.763	28.343	1509.4354	-1.197	1.1223	-1.8611	-16.005	21.204	24.555	0.24424	-0.15069	-0.16358	-28.873	-13.8564	33.113	0.2251	-0.22968	0.045214	-5.886	-216.905	1166.93	-0.35156	1.2393	-1.4668	-31.189	18.0596	28.88125	0.10791	-0.146	-0.17822
0.822	-13.339	18.3265	18.01748	-0.0076172	0.053418	-0.17637	15.769	146.6255	750.262	-0.24512	0.27783	-0.57959	57.741	36.546	1486.0659	-1.1602	1.0859	-1.8242	-10.098	9.28076	38.596	0.23047	-0.13105	-0.17295	-28.245	7.2883	39.0835	0.23526	-0.22891	0.046778	-31.641	-191.478	1192.066	-0.38599	1.2537	-1.4964	-32.134	-1.941	36.819	0.096876	-0.15762	-0.17588
0.824	-38.126	-10.8959	35.985	0.013867	0.032129	-0.14687	41.667	136.039	713.5021	-0.22754	0.25488	-0.54492	73.456	87.965	1469.075	-1.1133	1.0449	-1.7813	-21.837	20.3279	18.7445	0.21631	-0.11523	-0.18408	-57.268	24.266	41.233	0.24844	-0.22314	0.046387	-12.354	-164.702	1210.074	-0.41016	1.2754	-1.5156	-10.348	43.761	55.3139	0.083789	-0.16533	-0.17187
0.826	-38.471	42.16266	49.1153	0.03125	0.01416	-0.11377	-20.623	161.458	649.715	-0.1875	0.22754	-0.48438	30.5855	120.95	1455.016	-1.0879	1.0234	-1.7539	-49.55	-23.194	24.0009	0.20566	-0.097462	-0.19258	-30.375	-1.348	55.225	0.26025	-0.21289	0.046875	-43.273	-129.91289	1226.4059	-0.41846	1.3071	-1.5317	-50.025	-17.63329	71.9244	0.069336	-0.17471	-0.16602
0.828	-78.452	10.281	41.373	0.036426	0.0030274	-0.08623	6.944	117.87276	636.857	-0.16113	0.2041	-0.44092	68.409	120.2	1450.856	-1.0327	0.97607	-1.6968	-17.901	27.9992	29.1414	0.19893	-0.091601	-0.20674	-42.447	51.176	40.0454	0.26855	-0.20215	0.041895	-78.678	-115.588	1219.695	-0.40186	1.3267	-1.5308	-43.818	-1.4535	107.3902	0.052734	-0.19004	-0.17227
0.83	-77.269	13.741	43.457	0.043066	-0.00039063	-0.060937	11.465	154.4606	606.7196	-0.13525	0.18457	-0.39697	25.589	117.59	1428.5733	-1.002	0.94287	-1.6694	-30.316	25.1456	15.07878	0.1915	-0.081445	-0.21533	-38.591	31.8112	41.374	0.27324	-0.18984	0.034472	-65.812	-107.985	1246.827	-0.36865	1.3306	-1.5229	-2.094	36.014	105.774	0.030762	-0.21387	-0.18945
0.832	-50.154	41.9326	18.0366	0.050488	-0.00625	-0.033985	-34.508	151.197	577.1997	-0.10303	0.1582	-0.34619	-4.437	105.2371	1417.2511	-0.96826	0.9126	-1.644	-37.781	9.689	76.203	0.18789	-0.076074	-0.22041	-36.742	9.0659	40.6003	0.27559	-0.1711	0.029004	-70.989	-97.476	1266.8379	-0.33667	1.3108	-1.5232	-15.297	2.48198	143.449	-0.0085936	-0.23047	-0.2167
0.834	-57.24	0.817	15.0372	0.05166	-0.0036133	-0.01084	-7.235	114.885	539.197	-0.085449	0.14063	-0.31445	27.5269	95.72435	1407.833	-0.93115	0.88428	-1.5952	-27.97	55.0847	107.634	0.18213	-0.074219	-0.22852	-46.34	37.82569	33.6213	0.27451	-0.14922	0.024805	-61.7802	-97.122	1249.88	-0.30518	1.2837	-1.5298	-48.907	39.3404	217.3718	-0.06084	-0.21348	-0.23652
0.836	-64.858	31.85373	35.1264	0.051758	-0.0073242	0.010742	-60.648	156.276	486.472	-0.053223	0.10742	-0.26465	-29.1732	125.2352	1350.004	-0.91211	0.875	-1.5791	-54.508	41.727	119.9606	0.1708	-0.076367	-0.2416	-29.468	-9.8672	37.5429	0.27686	-0.13086	0.021484	-20.286	-104.117	1271.883	-0.27051	1.2227	-1.5723	-59.352	29.7364	231.903	-0.12608	-0.16504	-0.26738
0.838	-89.0903	37.66666	31.8469	0.050683	-0.011523	0.023926	-52.95	126.573	477.961	-0.040283	0.080078	-0.23682	-4.501	113.722	1327.73995	-0.87744	0.85889	-1.5386	21.079	75.21684	157.252	0.15146	-0.091307	-0.2669	-37.115	28.51	27.6793	0.27529	-0.11484	0.02168	-50.659	-118.04	1298.6958	-0.25439	1.1914	-1.6074	-16.984	-5.4009	285.6132	-0.20703	-0.10625	-0.31651
0.84	-78.1041	5.736	38.641	0.053711	-0.014258	0.037988	-43.336	133.4445	443.353	-0.024902	0.058105	-0.20361	0.468	117.453	1325.5799	-0.84619	0.85205	-1.5034	-11.416	114.5026	179.6324	0.11631	-0.10615	-0.30166	-40.665	41.319	36.8536	0.2748	-0.11406	0.013281	-55.357	-117.9407	1309.9901	-0.24805	1.1528	-1.6909	-6.77	67.6711	337.7163	-0.29297	-0.04541	-0.38379
0.842	-40.896	42.965	44.56507	0.058399	-0.016211	0.053613	-82.2225	148.9269	392.244	-0.010254	0.038086	-0.15479	-43.7846	115.454	1286.2207	-0.82959	0.84619	-1.4761	-64.655	85.532	251.7301	0.070704	-0.088281	-0.33701	-15.685	1.071	39.5884	0.27168	-0.10234	0.014453	-25.468	-102.6922	1347.319	-0.25245	1.1521	-1.7487	-11.027	52.593	447.114	-0.36572	0.015625	-0.45576
0.844	-62.783	11.762	21.1246	0.057715	-0.016504	0.062793	-55.913	98.9656	356.153	-0.010254	0.026367	-0.13477	-22.615	107.3	1277.503	-0.80615	0.84424	-1.4272	-16.107	109.9058	288.2685	-0.0014648	-0.04248	-0.37061	-39.791	39.1902	24.2424	0.27139	-0.097363	0.010351	-41.077	-112.408	1361.486	-0.26465	1.1763	-1.812	1.013	84.802	544.829	-0.43935	0.079981	-0.525
0.846	-36.86	17.3836	29.1399	0.062012	-0.013672	0.074219	-92.602	118.3413	308.728	-0.01416	0.0087891	-0.092285	-25.413	148.86	1248.4428	-0.7788	0.82861	-1.395	-33.82	103.625066	320.697	-0.099511	0.01836	-0.43076	-17.541	3.654	40.6224	0.2666	-0.089844	0.0092773	-36.496	-138.217	1369.1092	-0.29541	1.2485	-1.8921	-24.096	115.3409	594.153	-0.50771	0.14912	-0.6043
0.848	-19.322	69.333	31.719	0.060156	-0.010254	0.077637	-98.6638	119.93	271.879	-0.015869	-0.0009766	-0.070313	-31.735	159.7786	1215.166	-0.74414	0.81055	-1.3574	-30.952	106.378	393.889	-0.2044	0.092383	-0.50059	-1.92	-13.1483	41.5795	0.26475	-0.078614	0.0016602	-38.022	-150.472	1402.4257	-0.30908	1.2935	-1.9292	-47.529	51.995	697.5723	-0.59023	0.22656	-0.70547
0.85	-53.177	19.5334	31.0739	0.07041	-0.0083984	0.078418	-68.566	78.253	261.472	-0.019043	-0.010254	-0.053711	3.143	167.501	1182.6205	-0.68555	0.77148	-1.2813	-3.444	156.5281	453.497	-0.31104	0.19082	-0.57598	-44.018	28.479	32.6277	0.2626	-0.06875	-0.0026367	-72.447	-146.379	1422.709	-0.33643	1.3794	-1.9897	19.415	65.63419	819.87	-0.67432	0.31006	-0.81006
0.852	-12.769	23.49931	61.512	0.079785	-0.010742	0.078028	-85.47	122.8414	229.2414	-0.025391	-0.01709	-0.029785	-42.911	185.679	1118.918	-0.65625	0.74219	-1.2471	-30.726	125.199	498.2839	-0.41143	0.30449	-0.64687	-16.036	-27.1986	41.946	0.2544	-0.055469	-0.01123	-60.592	-120.4823	1412.886	-0.35523	1.4295	-2.0271	-37.343	42.4083	931.3038	-0.77109	0.41973	-0.92871
0.854	-14.153	2.6717	35.3385	0.097365	-0.013574	0.081348	-83.7184	71.059	191.9098	-0.02832	-0.020508	-0.020996	-23.916	153.361	1082.062	-0.59717	0.68604	-1.1753	-36.362	105.7765	548.743	-0.50732	0.42529	-0.72119	-23.676	-4.71206	41.5894	0.24531	-0.036914	-0.018066	-29.253	-88.7754	1438.845	-0.36914	1.4707	-2.0566	-42.05	-16.0723	1033.83	-0.88154	0.5419	-1.055
0.856	-8.259	-43.262	36.3793	0.11523	-0.024902	0.080078	-71.519	63.6384	169.325606	-0.032715	-0.027832	-0.0092773	0.0989999999999966	170.6285	1067.667	-0.55787	0.64331	-1.1277	-41.031	105.5357	617.464	-0.59658	0.53994	-0.80869	-42.26	6.0963	30.4052	0.23975	-0.023926	-0.024902	-66.314	-77.792	1425.459	-0.39014	1.5181	-2.0854	-18.027	0.806999999999995	1073.911	-1.0066	0.67588	-1.1835
0.858	13.763	18.3724	32.727	0.14043	-0.043066	0.078809	-93.1072	106.288	120.83	-0.039063	-0.027099	-0.0012207	-36.603	192.3039	1034.809	-0.51758	0.60645	-1.0752	-27.996	40.399	709.0031	-0.6832	0.65527	-0.89336	-4.992	-37.2998	39.153	0.22735	-0.0050781	-0.03125	-88.076	-66.228	1409.0096	-0.3999	1.5396	-2.0972	-65.877	-67.259	1100.258	-1.1384	0.85264	-1.304
0.86	-14.469	7.69917	15.465	0.16533	-0.056347	0.075977	-56.043	60.3488	103.8783	-0.046387	-0.027344	0.00048828	-8.009	194.262	1007.559	-0.46973	0.54785	-0.99414	-1.091	46.076	806.8275	-0.74882	0.76465	-0.97226	-33.837	30.916	22.2054	0.21093	0.0083008	-0.037305	-60.988	-35.898	1443.0243	-0.4082	1.5742	-2.123	-31.994	-90.197	1132.424	-1.2715	1.0586	-1.4121
0.862	-3.08900000000001	18.3763	28.3373	0.18291	-0.061816	0.079882	-41.836	99.482	102.8628	-0.055176	-0.024414	-0.0058594	-20.079	220.466	954.45826	-0.44189	0.52051	-0.95508	-60.351	13.8783	858.0352	-0.81885	0.86748	-1.0556	-46.581	9.5128	12.9165	0.2	0.019629	-0.040821	-57.161	-18.956	1421.709	-0.41308	1.5816	-2.1274	-39.107	-88.264	1110.9913	-1.3794	1.2718	-1.4997
0.864	13.248	41.301	14.412	0.18926	-0.068262	0.071484	-45.183	85.1357	83.9053	-0.064941	-0.020996	-0.0083008	-38.993	190.994	906.3248	-0.3999	0.46729	-0.88037	-74.576	-29.54066	910.0171	-0.88477	0.95508	-1.1309	-21.405	0.24397	28.8117	0.19023	0.035742	-0.043652	-32.759	-5.877	1429.158	-0.42139	1.5708	-2.1147	-47.237	-171.426	1090.285	-1.4456	1.4774	-1.5561
0.866	-19.995	-11.20078	21.5275	0.20068	-0.068359	0.066895	-4.317	9.73	85.0334	-0.089355	-0.014648	-0.022949	3.526	164.8749	885.3835	-0.36572	0.43628	-0.82666	-45.403	-2.218	949.3714	-0.92695	1.0459	-1.1935	-43.14	47.0534	8.85	0.1792	0.047363	-0.046387	-55.641	1.39	1457.953	-0.43604	1.5298	-2.1089	-45.484	-152.187	1080.874	-1.4393	1.6228	-1.5718
0.868	5.22900000000001	11.34358	52.483	0.19892	-0.06875	0.056054	-18.938	56.01809	62.341	-0.10278	-0.0075684	-0.039062	-29.858	178.2449	839.455	-0.33203	0.40527	-0.77539	-90.671	-47.48	975.9629	-0.95693	1.1333	-1.2431	-34.972	-6.792	6.4841	0.16572	0.05791	-0.051758	-74.812	-22.3092	1439.2714	-0.44287	1.5122	-2.0933	-84.276	-169.146	1072.26	-1.3627	1.6902	-1.5572
0.87	-5.348	19.0729	29.8576	0.19883	-0.063476	0.045117	1.639	26.7468	44.685	-0.12012	0.0024414	-0.057617	-31.422	148.341	810.957	-0.28857	0.37158	-0.7085	-69.933	-63.573	993.5	-0.96943	1.2052	-1.2806	-6.094	21.4182	15.76083	0.1502	0.065723	-0.05293	-46.763	-25.31748	1456.4961	-0.46094	1.4766	-2.0684	-109.216	-208.152	1033.371	-1.2456	1.6606	-1.5386
0.872	-22.963	5.051793	31.376	0.19727	-0.063086	0.038086	22.546	40.012	48.998	-0.14795	0.018066	-0.085449	-18.917	156.8034	784.027	-0.26465	0.35742	-0.67383	-91.277	-79.4352	966.96989	-0.96348	1.2437	-1.3004	-48.363	44.5799	3.2632	0.13887	0.079395	-0.054102	-74.187	-32.3852	1471.367	-0.48072	1.4685	-2.0495	-78.398	-150.328	973.665	-1.1112	1.5288	-1.5034
0.874	-25.098	59.339	21.26	0.19297	-0.060742	0.029102	0.484999999999999	66.142	27.32493	-0.15967	0.022949	-0.10156	-74.275	180.2534	729.499	-0.22119	0.33545	-0.60596	-105.921	-150.931	953.702	-0.93115	1.2603	-1.3062	-33.323	6.3876	13.098	0.12324	0.088086	-0.054492	-86.454	-48.7391	1460.349	-0.49951	1.4771	-2.0366	-84.063	-162.168	917.149	-0.98203	1.3293	-1.4328
0.876	-48.509	30.269	-1.927	0.19385	-0.063477	0.019531	19.745	-3.395506	25.5502	-0.19775	0.050781	-0.12939	-52.846	160.1288	689.048	-0.18482	0.32617	-0.55371	-115.446	-133.62	960.583	-0.8874	1.2182	-1.2872	-37.262	67.194	13.57	0.10986	0.098633	-0.056641	-67.218	-45.7189	1463.931	-0.52344	1.4941	-2.0176	-88.245	-130.968	915.474	-0.91601	1.0797	-1.3418
0.878	-37.361	7.5989	32.5047	0.18818	-0.065235	0.0096681	8.03700000000001	23.5612	18.252	-0.21997	0.07544	-0.1482	-50.387	202.703	638.996	-0.15625	0.31299	-0.50146	-150.98	-144.418	918.4113	-0.82529	1.1428	-1.2659	-49.66	40.2504	20.1323	0.10068	0.10889	-0.055664	-106.179	-40.2383	1448.4324	-0.52881	1.5063	-2.0112	-94.678	-75.881	888.866	-0.88779	0.82119	-1.2409
0.88	-53.917	35.709	11.1258	0.17714	-0.071972	0.0029297	-8.771	27.4784	31.2741	-0.24561	0.10645	-0.17188	-62.743	190.4467	581.787	-0.11523	0.28809	-0.44336	-147.597	-165.797	905.848	-0.75263	1.0288	-1.2409	-35.443	5.75991	32.4404	0.090625	0.11767	-0.054394	-105.8962	-40.1647	1438.912	-0.53223	1.5215	-1.9922	-99.77	-120.787	876.938	-0.85498	0.57471	-1.1489
0.882	-70.975	-10.783	22.1753	0.16934	-0.078223	-0.0033204	21.546	-5.0168	70.519	-0.27148	0.15234	-0.19922	-47.689	167.6942	556.627	-0.099121	0.27588	-0.40576	-122.062	-117.506	881.3823	-0.68769	0.9002	-1.2094	-51.995	31.3351	13.806	0.083985	0.12705	-0.053222	-71.95	-38.191	1440.3496	-0.5249	1.5171	-1.9643	-83.3374	-113.564	905.952	-0.83301	0.40293	-1.0896
0.884	-53.823	27.2159	43.8095	0.16133	-0.09336	-0.012109	0.147999999999996	64.361	53.2241	-0.27979	0.17285	-0.20996	-110.6123	200.48315	498.577	-0.057129	0.24414	-0.33398	-159.38	-125.871	868.048	-0.646	0.77197	-1.1753	-44.125	-19.86427	23.17648	0.074023	0.13086	-0.050684	-79.697	-43.459	1448.717	-0.51123	1.5044	-1.9351	-91.767	-133.265	917.184	-0.80332	0.30967	-1.0518
0.886	-71.8899	35.1309	24.7553	0.15771	-0.10693	-0.02002	-2.177	30.5406	37.0686	-0.29834	0.2124	-0.23389	-81.559	150.218	468.4038	-0.026367	0.21631	-0.29273	-151.929	-116.879	917.83299	-0.61474	0.64883	-1.1463	-32.388	26.613	12.0221	0.067871	0.13916	-0.044922	-90.28	-36.8163	1432.256	-0.49805	1.4727	-1.8965	-62.6281	-203.319	965.6617	-0.77519	0.28857	-1.0366
0.888	-77.501	-13.127	37.572	0.16093	-0.12559	-0.025293	-9.032	27.6176	12.3987	-0.3042	0.2356	-0.2395	-57.696	164.4007	423.255	0.003418	0.18799	-0.24902	-150.352	-92.187	934.905	-0.60156	0.54893	-1.121	-38.767	43.4439	11.21656	0.057813	0.1419	-0.046582	-48.006	3.086	1422.755	-0.48828	1.4551	-1.875	-56.5994	-179.041	980.829	-0.75215	0.31309	-1.0274
0.89	-48.168	20.282	26.4948	0.15801	-0.14463	-0.030371	-40.726	61.389	3.918	-0.3042	0.25732	-0.24463	-96.941	183.7011	356.3529	0.032227	0.14893	-0.19727	-151.255	-145.812	969.7049	-0.59766	0.48486	-1.1245	-17.14	-0.2969	37.536	0.052051	0.14639	-0.041407	-70.982	23.999	1408.9633	-0.47656	1.4141	-1.8359	-65.935	-211.8831	1010.425	-0.72998	0.35303	-1.0249
0.892	-70.674	-4.123	14.134	0.1627	-0.16377	-0.039746	-9.947	4.0985	35.993	-0.29688	0.29102	-0.23535	-57.914	138.7366	337.5702	0.047363	0.13037	-0.16943	-124.66	-128.557	995.6997	-0.60088	0.46416	-1.1372	-41.203	55.744	13.7343	0.043457	0.15225	-0.041407	-64.239	41.6975	1387.9427	-0.47803	1.3794	-1.8003	-24.629	-243.928	1087.03897	-0.71172	0.38652	-1.0625
0.894	-54.666	9.9532	38.137	0.16787	-0.18643	-0.044727	-24.755	32.1772	45.769	-0.29199	0.30371	-0.23047	-79.907	185.561	286.097	0.068359	0.094238	-0.12891	-146.326	-141.175	999.408	-0.61035	0.47559	-1.1699	-17.709	26.2184	21.3938	0.034668	0.15489	-0.043847	-38.05	65.818	1392.553	-0.48535	1.3657	-1.7847	-2.907	-241.881	1116.0935	-0.70039	0.40957	-1.117
0.896	-44.853	59.781	32.683	0.16992	-0.2041	-0.047363	-54.3591	33.3715	39.6943	-0.26953	0.31348	-0.21191	-112.0714	171.5217	258.0253	0.080078	0.073486	-0.097898	-133.5343	-179.335	1048.6277	-0.62217	0.51748	-1.2044	-11.604	20.0529	43.825	0.027344	0.16406	-0.046387	-71.713	66.501	1365.833	-0.50146	1.3423	-1.7515	28.081	-316.812	1172.088	-0.70078	0.42715	-1.1861
0.898	-79.7305	18.6404	19.7909	0.17383	-0.21982	-0.053418	-49.525	-11.3134	40.8145	-0.24878	0.30787	-0.1919	-69.717	134.7294	236.1877	0.094238	0.058105	-0.072754	-109.535	-149.456	1097.348	-0.64619	0.58017	-1.2507	-49.042	73.052	43.6179	0.020996	0.17158	-0.050879	-60.557	60.336	1351.5704	-0.521	1.3262	-1.7246	58.1545	-324.154	1228.5778	-0.71856	0.45879	-1.2577
0.9	-32.459	43.988	28.2606	0.17558	-0.23262	-0.057227	-87.5884	43.739	29.808	-0.22949	0.29639	-0.16553	-90.948	152.4774	206.059	0.1001	0.048828	-0.041016	-113.903	-188.855	1125.84624	-0.6665	0.65049	-1.296	-2.901	2.081	96.3947	0.014648	0.18252	-0.056543	-52.488	58.035	1334.87	-0.53857	1.3052	-1.6948	42.972	-301.406	1248.999	-0.76807	0.51172	-1.3262
0.902	-27.88	39.0602	12.8298	0.17246	-0.24668	-0.062305	-84.6707	14.652	29.7569	-0.21094	0.27783	-0.13379	-49.409	92.579	194.1489	0.10059	0.04248	-0.026855	-84.588	-215.969	1194.622	-0.68691	0.71367	-1.3322	-29.979	15.9891	102.916	0.010742	0.18877	-0.069434	-91.659	30.8676	1332.842	-0.56006	1.2817	-1.6558	47.5064	-300.615	1301.1896	-0.83184	0.60527	-1.381
0.904	-38.585	1.745	36.346	0.16944	-0.25117	-0.073535	-43.868	13.2284	33.2688	-0.2002	0.27344	-0.12598	-29.155	107.9504	165.9186	0.094727	0.041992	-0.0097656	-35.893	-205.994	1210.635	-0.69971	0.75244	-1.394	-50.74	39.696	88.6446	0.0026367	0.18847	-0.1002	-57.48	29.94	1315.7475	-0.55908	1.2661	-1.6323	69.525	-206.4462	1355.3296	-0.89599	0.73018	-1.4338
0.906	14.438	45.7076	41.0868	0.16602	-0.25928	-0.080566	-73.762	50.712	35.7851	-0.18164	0.25488	-0.095215	-56.754	123.5701	133.036	0.093994	0.047119	-0.0014648	-44.526	-281.233	1228.681	-0.71836	0.76875	-1.4582	-2.959	4.6504	115.537	-0.0024414	0.18213	-0.13525	-35.723	38.054	1290.16271	-0.5542	1.2192	-1.5933	56.358	-177.213	1377.704	-0.95186	0.86182	-1.4842
0.908	-18.021	30.5579	16.93236	0.16738	-0.26269	-0.080762	-74.791	-19.7476	44.245	-0.15186	0.2334	-0.064941	-27.923	71.6615	138.274	0.085449	0.046875	0.01709	-22.812	-243.338	1287.8746	-0.74092	0.79775	-1.5231	-62.207	76.483	179.0767	-0.023926	0.19258	-0.17343	-35.652	39.491	1270.84805	-0.54467	1.1799	-1.5525	73.362	-168.325	1440.986	-0.96602	0.9713	-1.5293
0.91	-7.21	22.33997	41.148	0.16543	-0.26328	-0.081445	-56.901	5.4414	45.2451	-0.1377	0.21777	-0.046875	-31.547	101.619	116.955	0.07373	0.059082	0.0092773	-20.77	-205.502	1316.8075	-0.78506	0.85908	-1.5814	-70.694	55.2415	232.5116	-0.055664	0.20937	-0.21562	-33.284	50.388	1250.3262	-0.53076	1.1431	-1.5112	60.984	-104.586	1458.922	-0.94971	1.0435	-1.5649
0.912	9.463	36.308	63.4328	0.15762	-0.25664	-0.084179	-45.302	4.219	39.63517	-0.10547	0.18799	-0.0092773	-31.23	59.926	104.488	0.064941	0.062988	0.010742	-24.359	-194.576	1383.248	-0.83887	0.95917	-1.6162	-43.494	12.3293	278.27	-0.097464	0.23047	-0.26719	-22.755	73.697	1253.242	-0.51416	1.0859	-1.459	50.2542	-128.755	1460.767	-0.92051	1.0647	-1.6045
0.914	-3.276	-33.2701	64.2547	0.14473	-0.2502	-0.090918	-27.272	-18.2894	37.307	-0.085449	0.16137	0.012207	-5.952	23.0395	93.344	0.043945	0.071289	-0.0014648	23.287	-114.196	1417.897	-0.88623	1.0728	-1.6401	-58.801	45.229	309.8713	-0.14336	0.25371	-0.34082	-26.007	82.246	1248.434	-0.50781	1.0605	-1.4219	88.648	-101.503	1492.5541	-0.90235	1.0527	-1.6371
0.916	13.105	-15.3462	97.3119	0.12646	-0.24902	-0.098145	-41.508	46.0049	37.3157	-0.060547	0.13623	0.044434	-27.91	81.3712	42.85	0.01831	0.080078	-0.008789	9.153	-128.178	1425.048	-0.90196	1.1675	-1.65	-48.066	3.942	404.07	-0.18848	0.28418	-0.39941	-16.248	101.956	1205.125	-0.48633	1.0098	-1.373	73.457	-91.962	1473.604	-0.91016	1.0527	-1.6801
0.918	25.019	-11.3446	93.6199	0.10098	-0.2457	-0.12324	-24.217	10.8516	20.8162	-0.040039	0.095215	0.083984	-15.115	35.5308	45.449	-0.013672	0.096191	-0.019043	-14.608	-121.388	1470.19	-0.87608	1.2067	-1.646	-33.201	68.625	487.387	-0.23555	0.32832	-0.47558	-10.704	105.205	1164.4216	-0.46363	0.96704	-1.3279	58.63149	-157.4746	1488.8744	-0.94687	1.0703	-1.7281
0.92	7.34099999999999	-42.923	143.315	0.069922	-0.22617	-0.1415	-15.824	3.148	18.1229	-0.025391	0.069336	0.098633	-20.204	60.011	42.035	-0.057617	0.10938	-0.030273	-0.289999999999999	-52.579	1474.5365	-0.82373	1.188	-1.6272	-81.853	115.7861	529.8929	-0.28008	0.38017	-0.55537	-45.708	95.38295	1123.3029	-0.43311	0.92041	-1.2866	50.5134	-123.6767	1510.2608	-1.0059	1.1055	-1.7813
0.922	-3.498	8.69123	190.87	0.019141	-0.18672	-0.15908	-25.654	34.911	11.024	-0.010742	0.023438	0.12549	-22.299	81.9	40.082	-0.079102	0.12256	-0.042969	3.367	-90.08	1469.851	-0.75879	1.1178	-1.6127	-74.725	66.18612	602.613	-0.33164	0.42627	-0.64756	-47.755	115.981	1073.858	-0.39697	0.86182	-1.2241	34.9949	-153.791	1502.318	-1.0707	1.1533	-1.8408
0.924	-21.403	-13.46113	190.659	-0.046777	-0.11983	-0.17969	11.24	-17.4621	29.7162	0.0043946	-0.018555	0.14551	17.607	24.76026	61.274	-0.125	0.14502	-0.063477	18.743	-72.694	1494.3702	-0.70264	1.0352	-1.6289	-58.458	92.592	721.866	-0.39746	0.47343	-0.74043	-48.153	140.164	1060.312	-0.37549	0.82764	-1.1958	28.3421	-181.059	1545.121	-1.1155	1.2185	-1.9061
0.926	12.873	-30.54	258.4519	-0.12451	-0.047852	-0.21533	6.672	17.1898	42.8122	0.019043	-0.058594	0.1626	0.558999999999997	54.729	66.022	-0.16211	0.16358	-0.078613	-24.913	-91.0945	1470.604	-0.68311	0.96142	-1.6687	-69.972	35.4427	856.7741978	-0.47363	0.51953	-0.84766	-33.882	138.059	1022.718	-0.33691	0.76367	-1.1309	-9.7941	-137.746	1563.6	-1.1319	1.2896	-1.9671
0.928	22.611	41.1255	327.39	-0.2038	0.014942	-0.26338	-0.0920000000000059	19.6552	18.2758	0.031738	-0.10498	0.18213	-13.766	35.9047	65.405	-0.19238	0.18457	-0.09668	-14.374	-127.308	1503.2231	-0.71602	0.91328	-1.7086	-5.993	-4.01884	942.182	-0.55107	0.57686	-0.96348	-32.296	145.481	993.533	-0.31201	0.72168	-1.0894	-15.0166	-193.174	1590.313	-1.153	1.3512	-2.0299
0.93	-20.831	33.11	414.474	-0.2831	0.071486	-0.30967	16.346	-23.1525	14.20891	0.032715	-0.12451	0.18359	-3.75	21.3849	65.862	-0.22412	0.20801	-0.12549	-2.554	-79.581	1517.8537	-0.78906	0.91563	-1.7586	-37.956	13.45623	1003.166	-0.64179	0.64766	-1.0695	-41.987	138.654	981.797	-0.28467	0.68311	-1.0444	-25.428	-188.028	1626.929	-1.1797	1.4023	-2.0898
0.932	14.111	107.5111	493.1408	-0.35146	0.13125	-0.36358	-0.0420000000000016	43.255	21.3472	0.041992	-0.15918	0.1875	-36.344	76.221	29.493	-0.2334	0.22559	-0.13672	-50.666	-98.376	1518.1467	-0.87217	0.96943	-1.8302	-82.7248	-55.0859	1054.11	-0.74453	0.74336	-1.1652	-33.565	131.1811	963.0002	-0.24951	0.63525	-0.98193	-45.6854	-167.058	1609.0714	-1.2105	1.4493	-2.1362
0.934	-55.865	124.231	556.246	-0.42227	0.19327	-0.42666	15.229	14.0568	30.167	0.049316	-0.1792	0.19433	-22.661	11.085	23.81429	-0.25	0.24658	-0.15234	-40.012	-99.619	1581.138	-0.94287	1.0571	-1.9136	-86.431	-57.898	1079.4016	-0.86055	0.86015	-1.2461	-8.344	152.6217	921.489	-0.2373	0.6084	-0.95117	-24.061	-193.162	1607.646	-1.2399	1.491	-2.1793
0.936	-73.417	66.479	646.911	-0.50049	0.26416	-0.48828	29.122	0.49199	44.398	0.055664	-0.19238	0.18848	-25.733	7.681	29.9589	-0.25464	0.25952	-0.15601	-53.5369	-63.0963	1571.6156	-0.98272	1.1633	-1.9944	-68.659	-67.872	1055.493	-0.96826	1.0063	-1.3032	-2.306	130.325	930.273	-0.20557	0.55713	-0.88818	-19.004289	-111.8648	1600.803	-1.2488	1.5172	-2.2078
0.938	-44.649	99.6276	731.408	-0.59502	0.33975	-0.56084	-19.925	33.48081	21.7842	0.066895	-0.20654	0.18555	-61.3898	12.5808	11.443	-0.25244	0.27197	-0.15723	-82.4628	-108.946	1581.1529	-1.0076	1.2697	-2.0629	-13.981	-117.79	1041.4032	-1.056	1.1701	-1.3291	-21.077	111.187	890.519	-0.17578	0.51367	-0.84375	-25.2167	-80.154	1569.1439	-1.2448	1.5056	-2.2065
0.94	-62.151	68.04074	797.7483	-0.69932	0.4253	-0.64677	-14.971	-30.25	12.80235	0.07666	-0.20947	0.18359	-33.515	-37.763	40.0789	-0.24268	0.26563	-0.14941	-80.9625	-79.134	1623.824	-1.0307	1.3537	-2.1266	-23.186	-89.457	1042.396	-1.1081	1.3236	-1.3351	-22.868	106.1302	855.482	-0.14844	0.4668	-0.80469	15.604	-75.5865	1581.9867	-1.2397	1.4663	-2.1987
0.942	-55.453	56.363	900.952	-0.82041	0.53389	-0.73545	-10.507	12.62828	14.969	0.084473	-0.21289	0.18359	-45.545	28.52	42.3205	-0.23584	0.26318	-0.146	-82.1682	-59.6126	1608.1824	-1.0535	1.416	-2.1813	-8.4642	-125.034	1064.956	-1.1222	1.4548	-1.3132	-13.306	112.1349	820.918	-0.10986	0.41846	-0.73584	-14.4839	-19.1031	1572.043	-1.2316	1.4009	-2.1866
0.944	-108.7928	71.166	957.078	-0.95294	0.66543	-0.82949	-48.141	15.8499	20.291	0.094238	-0.2102	0.17554	-75.1485	21.3872	33.6872	-0.21094	0.23828	-0.12939	-79.4555	-93.672	1618.96	-1.0762	1.457	-2.2207	23.5014	-117.121	1039.55	-1.0966	1.53	-1.2845	-6.376	135.77805	778.39993	-0.086426	0.38916	-0.7124	13.023	-65.893	1561.75557	-1.2269	1.33	-2.1751
0.946	-123.783	-24.075	966.8782	-1.084	0.81055	-0.92188	-29.758	-15.02	31.548	0.104	-0.20508	0.17383	-48.328	-5.38616	41.425	-0.19263	0.2185	-0.11719	-59.8805	-30.0235	1600.6828	-1.095	1.4851	-2.2564	15.4438	-60.443	1003.1906	-1.0469	1.5684	-1.2676	-25.291	145.2547	751.8404	-0.053223	0.34229	-0.65381	37.099	-42.0487	1574.67267	-1.2315	1.2651	-2.1579
0.948	-73.55	-51.621	969.853	-1.2137	0.96406	-1.0125	-42.972	39.551	25.2262	0.11475	-0.19873	0.16406	-60.096	48.41	23.1279	-0.16895	0.18945	-0.10986	-63.2816	-33.4095	1550.65	-1.1223	1.5082	-2.284	80.5	-99.541	997.699	-0.97109	1.5537	-1.247	-10.336	129.9613	712.995	-0.02124	0.3147	-0.60987	30.3692	-7.0492	1538.147	-1.2457	1.2191	-2.1371
0.95	-51.602	-77.2566	951.9993	-1.3222	1.1182	-1.0926	-53.342	7.67389	14.3778	0.12305	-0.19385	0.15576	-38.627	3.135	36.3743	-0.1416	0.14697	-0.091797	-40.635	-38.149	1562.974	-1.143	1.5203	-2.2937	79.955	-69.941	996.334	-0.90391	1.5062	-1.2063	-5.401	154.259	656.5074	0.0073242	0.2832	-0.56641	35.8915	-50.3805	1538.1553	-1.2695	1.1855	-2.1152
0.952	-58.923	-142.57	981.545	-1.4	1.2623	-1.1602	-58.617	4.71844	30.343	0.12939	-0.18262	0.14844	-25.437	19.1434	40.6263	-0.12451	0.12354	-0.07666	-32.773	12.9832	1556.681	-1.1594	1.5102	-2.291	32.706	-57.3262	998.129	-0.86329	1.4234	-1.1484	-9.959	168.772	610.61	0.045898	0.24512	-0.51172	48.689	9.582	1539.882	-1.2791	1.1813	-2.0955
0.954	-61.3094	-116.192	961.626	-1.429	1.3718	-1.211	-86.7384	61.7552	17.934	0.13598	-0.1753	0.14062	-39.645	40.8887	34.2459	-0.09375	0.085938	-0.0625	-51.131	-40.633	1563.8879	-1.1655	1.4731	-2.2769	34.869	-96.617	1017.003	-0.83955	1.3249	-1.0774	12.168	150.128	595.798	0.061035	0.22363	-0.48438	54.871	-7.279	1519.228	-1.2809	1.1833	-2.0679
0.956	-93.2871	-126.757	927.894	-1.4136	1.4419	-1.2495	-49.255	11.617	17.8614	0.13672	-0.1709	0.13721	-30.338	-14.6956	31.3343	-0.073974	0.058349	-0.042969	-15.52	-13.6935	1573.334	-1.165	1.4143	-2.2505	-4.17	-40.601	1007.21	-0.83545	1.2329	-1.0073	6.943	156.899	563.2	0.097168	0.18555	-0.43457	72.686	-37.035	1569.9634	-1.2653	1.1708	-2.0475
0.958	-90.785	-132.202	902.739	-1.3657	1.448	-1.2661	-51.638	39.541	17.256	0.14307	-0.16016	0.12988	-45.471	48.442	23.1352	-0.050293	0.035156	-0.031738	-23.477	-7.656	1535.786	-1.1613	1.3582	-2.2211	-2.129	-60.512	1036.98571	-0.81963	1.1502	-0.96465	9.129	153.101	514.144	0.12671	0.15625	-0.39331	89.175	16.869	1561.394	-1.2433	1.1321	-2.023
0.96	-42.263	-91.302	867.274	-1.2895	1.407	-1.2774	-66.6527	40.5051	7.615	0.146	-0.14893	0.12402	-49.268	24.9126	17.0101	-0.020996	0.0078125	-0.010254	-6.473	-42.39357	1531.7342	-1.1532	1.3117	-2.1926	28.452	-85.268	1058.7541	-0.8001	1.093	-0.94756	24.815	155.161	468.0743	0.15186	0.13184	-0.35498	66.097	-39.71	1551.008	-1.2227	1.084	-2
0.962	-72.56	-115.805	823.517	-1.1945	1.3153	-1.2746	-60.783	-10.727692	24.6052	0.14404	-0.12598	0.11523	-19.628	-9.96033	25.9262	-0.003418	-0.0053711	-0.0039063	22.095	19.6948	1550.5502	-1.1463	1.2767	-2.1655	-21.459	-76.571	1071.282	-0.76885	1.0552	-0.95108	0.25	162.756	411.76	0.18994	0.097168	-0.29785	78.601	-10.8022	1569.796	-1.213	1.0394	-1.9778
0.964	-84.464	-63.19	783.1561	-1.096	1.1798	-1.2479	-55.446	43.247	31.2086	0.14697	-0.11035	0.10694	-42.654	38.274	12.5936	0.032227	-0.033203	0.012207	4.428	8.0834	1531.39649	-1.1426	1.2568	-2.1484	-25.042	-143.173	1114.267	-0.73398	1.0181	-0.97783	-4.418	136.62385	402.4002	0.20605	0.083496	-0.26904	89.297	3.545	1527.912	-1.2182	1.0002	-1.9586
0.966	-80.558	-30.242	756.403	-1.0146	1.0156	-1.2109	-35.219	26.9455	24.6001	0.14502	-0.099609	0.093262	-15.57	-25.452	25.883	0.058838	-0.053711	0.022461	36.108	6.2055	1540.968	-1.1379	1.2494	-2.1323	-36.764	-181.9435	1180.607	-0.70166	0.98682	-1.0249	-12.132	127.4551	386.656	0.24805	0.037109	-0.22314	88.151	-39.0839	1519.766	-1.235	0.97558	-1.9457
0.968	-81.714	-84.609	772.2611	-0.9377	0.84141	-1.167	-47.61	18.3821	24.935	0.14014	-0.066406	0.076172	-4.847	-2.6641	27.457	0.087402	-0.075195	0.037598	45.6789	55.02	1511.9275	-1.1277	1.243	-2.121	-37.001	-208.705	1224.88	-0.67705	0.96396	-1.079	-24.398	116.4727	340.2833	0.27027	0.000244	-0.17846	121.462	27.3683	1498.158	-1.2643	0.96826	-1.9312
0.97	-31.855	-52.316	793.2989	-0.86211	0.67813	-1.1215	-41.012	55.391	15.805	0.14063	-0.054199	0.067871	-23.484	27.2235	24.47522	0.12305	-0.10449	0.046387	23.483	-0.5259	1510.915	-1.1109	1.2294	-2.1057	-11.088	-254.415	1281.117	-0.66767	0.96045	-1.1366	-19.906	94.8978	319.471	0.29541	-0.039063	-0.14648	77.706	25.185	1466.5095	-1.2852	0.97852	-1.9121
0.972	-29.828	-88.345	776.459	-0.79609	0.56445	-1.0954	-14.156	-9.4316	28.63924	0.13477	-0.02002	0.061035	3.534	-20.0843	28.855	0.1416	-0.11768	0.056152	53.2977	22.1439	1519.59	-1.0951	1.2182	-2.0865	-15.535	-209.917	1298.384	-0.67588	0.9749	-1.1893	-16.481	82.05518	292.5142	0.32275	-0.094238	-0.10059	58.746	43.2815	1477.3841	-1.2966	1.0065	-1.8948
0.974	-26.376	-135.442	821.87	-0.73447	0.49209	-1.0896	-25.79	23.2324	42.99701	0.13135	-0.0019531	0.051269	-17.273	41.9955	20.075	0.17041	-0.14648	0.068848	53.3995	34.3288	1486.5323	-1.0796	1.2056	-2.0601	-34.453	-199.157	1311.8065	-0.69795	1.0083	-1.2351	-35.159	54.415	262.7917	0.33057	-0.12158	-0.079102	27.933	107.928	1441.578	-1.2933	1.0304	-1.8778
0.976	-38.563	-132.909	859.784	-0.6792	0.46533	-1.0894	-1.63200000000001	33.0359	32.2786	0.12451	0.01416	0.038086	-4.236	17.487	27.2454	0.18506	-0.16211	0.075928	45.315	5.964	1486.055	-1.065	1.1925	-2.0419	-68.551	-163.5376	1340.8862	-0.73193	1.0435	-1.2671	-15.299	54.553	234.3288	0.33643	-0.17334	-0.050293	27.2484	83.551	1418.2474	-1.273	1.0461	-1.8512
0.978	-59.3003	-200.508	912.232	-0.62988	0.46914	-1.1014	16.868	-19.1853	40.175	0.1084	0.040527	0.028809	3.039	-4.7782	37.704	0.19971	-0.17578	0.085938	43.5065	64.3496	1459.2631	-1.0448	1.1732	-2.0073	-111.8086	-102.87	1371.02584	-0.76397	1.0809	-1.3023	-17.736	76.371	194.6178	0.33765	-0.20776	-0.02832	12.8887	115.87	1417.8351	-1.2412	1.0506	-1.8185
0.98	8.325	-202.9909	993.435	-0.59043	0.48359	-1.1024	-3.994	37.991	52.125	0.10693	0.054688	0.018555	-37.021	59.967	28.5993	0.20801	-0.18311	0.087891	8.174	60.4115	1418.4543	-1.0234	1.1462	-1.9718	-111.608	-123.5792	1413.506	-0.78115	1.113	-1.3218	-21.757	80.152	190.38111	0.33105	-0.2334	-0.010742	7.89538	123.676	1375.668	-1.2007	1.0376	-1.7808
0.982	13.398	-209.686	1026.3014	-0.55683	0.49609	-1.1101	1.752	13.68708	24.6613	0.095703	0.082031	0.01123	-16.389	4.0854	30.465	0.20898	-0.18555	0.097168	14.222	72.104	1405.8499	-1.0004	1.1152	-1.9356	-117.5176	-106.691	1430.777	-0.77529	1.1282	-1.3519	-12.745	76.02	176.2772	0.32275	-0.26172	0.0083008	-2.96	77.6333	1365.4814	-1.1698	1.0134	-1.7408
0.984	-16.67	-291.561	1078.812	-0.52002	0.49424	-1.1249	18.366	10.37118	29.0534	0.087647	0.099856	0.0043946	-19.279	11.4519	24.6859	0.20996	-0.18994	0.094238	1.957	147.808	1392.1177	-0.97314	1.0884	-1.9019	-182.136	-79.176	1437.62746	-0.76758	1.1258	-1.3805	-36.016	70.035	144.7859	0.31104	-0.27344	0.01416	-17.6102	115.6569	1356.624	-1.1397	0.97744	-1.7053
0.986	-0.593000000000004	-267.01	1119.0092	-0.49658	0.48486	-1.1401	3.18	58.36	36.3076	0.086914	0.11523	-0.0029297	-39.639	46.5482	8.2932	0.20752	-0.18823	0.093262	-37.187	101.863	1378.81	-0.94521	1.0583	-1.8601	-170.466	-79.852	1453.179	-0.771	1.0962	-1.4077	-31.484	77.7382	150.446	0.30078	-0.29102	0.021973	-22.8066	99.646	1312.3151	-1.1089	0.93799	-1.6683
0.988	-27.549	-257.999	1138.94	-0.49101	0.45312	-1.1686	0.252000000000002	3.8429	44.8	0.07959	0.12891	-0.0092773	-26.647	-14.02	6.5933	0.20361	-0.18555	0.097656	-17.57	110.019	1375.403	-0.91562	1.0238	-1.8228	-135.1654	-12.465	1458.884	-0.78037	1.0563	-1.4538	-17.09	89.938	120.882	0.29151	-0.30371	0.025635	-9.615	84.578	1314.202	-1.0818	0.89941	-1.624
0.99	-13.992	-244.609	1198.975	-0.50156	0.44082	-1.1996	4.09399999999999	14.9472	54.618	0.075684	0.13184	-0.010742	-32.109	43.0731	15.824	0.19336	-0.17334	0.084473	-50.0995	111.0806	1317.1145	-0.88906	0.99102	-1.7776	-116.586	-5.183	1470.918	-0.80224	1.0298	-1.5221	-37.667	82.48	96.3233	0.28223	-0.31104	0.026855	-15.078	128.18	1284.91402	-1.0522	0.87158	-1.5952
0.992	12.046	-169.483	1214.751	-0.55508	0.46231	-1.2422	-15.101	19.9705	26.7834	0.074707	0.13574	-0.01416	-54.244	32.1717	20.6414	0.19189	-0.16553	0.079102	-58.9249	64.722	1315.368	-0.8665	0.95694	-1.7368	-83.371	-16.609	1516.705	-0.81983	1.0216	-1.621	-35.494	60.245	105.7999	0.271	-0.32422	0.0068359	-33.133	71.167	1250.868	-1.0301	0.84951	-1.5501
0.994	-12.61	-194.943	1230.507	-0.64092	0.53301	-1.2894	0.68	-16.6356	34.4886	0.06958	0.13599	-0.01416	-50.608	1.9425	40.331	0.18799	-0.1543	0.067383	-25.826	121.937	1304.1407	-0.8374	0.92627	-1.6968	-113.988	-29.2701	1542.67362	-0.83916	1.0437	-1.7208	-33.993	62.073	60.2353	0.26611	-0.32422	0.00048828	-9.425	92.1339	1259.0024	-1.0058	0.83057	-1.5108
0.996	4.306	-156.6642	1266.694	-0.74609	0.63867	-1.3438	-24.579	37.346	38.274771	0.067383	0.13477	-0.01416	-48.123	54.3114	33.6676	0.18213	-0.13379	0.058105	-69.9951	117.477	1254.3164	-0.80224	0.8915	-1.655	-87.623	-95.614	1586.127	-0.88184	1.0977	-1.8262	-47.263	50.4838	47.55	0.24609	-0.31934	-0.014648	-20.579	120.469	1202.2405	-0.98389	0.81611	-1.4687
0.998	-5.235	-102.938	1280.766	-0.85332	0.76894	-1.4022	-46.868	11.853	30.954	0.062988	0.14111	-0.017578	-43.086	-2.393	26.193	0.17871	-0.125	0.049805	-68.271	114.996	1241.601	-0.76241	0.85654	-1.6151	-67.022	-87.28	1617.211	-0.93897	1.1989	-1.9338	-19.491	44.4355	55.455	0.21899	-0.3103	-0.031494	-36.03	92.797	1164.546	-0.95547	0.79375	-1.4261
1	-6.593	-123.121	1327.994	-0.94697	0.89932	-1.4675	-31.629	-6.2971	33.5161	0.058594	0.14111	-0.01709	-30.428	13.69564	30.8456	0.17188	-0.10449	0.035156	-58.78	163.39713	1193.176	-0.73701	0.82099	-1.5804	-97.052	-70.48	1617.88	-1.0035	1.3289	-2.0359	-14.381	49.5921	25.203	0.19141	-0.29102	-0.050781	-4.597	151.283	1137.8951	-0.92529	0.77197	-1.3862
1.002	36.7616	-68.498	1324.6328	-1.0111	1.0149	-1.5331	-51.022	37.9046	20.3437	0.049316	0.14795	-0.02002	-38.983	43.2731	16.212	0.17285	-0.085938	0.033936	-77.196	116.28	1175.4475	-0.71114	0.79589	-1.5299	-56.892	-100.043	1635.215	-1.0722	1.4805	-2.1375	-41.847	17.517	40.4264	0.1543	-0.2583	-0.084961	-31.873	128.6013	1071.234	-0.88593	0.73984	-1.3394
1.004	47.0171	-70.986	1311.475	-1.0528	1.1033	-1.5826	-65.2765	-25.6392	28.2267	0.038818	0.15283	-0.025879	-59.257	-7.1649	30.5883	0.16895	-0.074219	0.025391	-54.946	146.9056	1181.209	-0.69092	0.77588	-1.4878	-89.609	-88.962	1637.3069	-1.1245	1.6329	-2.2187	-3.312	21.474	55.837	0.13477	-0.23877	-0.095703	-8.764	121.1492	1051.7683	-0.85	0.70918	-1.291
1.006	17.235	-127.237	1354.199	-1.0605	1.1533	-1.6143	-56.237	6.6335	44.9831	0.03418	0.15625	-0.033203	-48.386	41.8439	38.2322	0.16797	-0.062012	0.01416	-49.999	169.9228	1123.9236	-0.6789	0.76055	-1.4453	-120.553	-102.342	1624.288	-1.1714	1.7759	-2.2808	-5.376	21.3509	32.6826	0.10303	-0.18799	-0.12402	0.457000000000001	173.037	1020.625	-0.80235	0.67793	-1.2379
1.008	13.638	-95.938	1391.926	-1.0587	1.1577	-1.6419	-59.378	21.778	33.7677	0.028809	0.16992	-0.047852	-36.217	22.2256	32.901	0.16797	-0.053223	0.014648	-49.668	131.804	1097.2269	-0.65664	0.74238	-1.4039	-80.295	-103.594	1650.038	-1.1994	1.9014	-2.3271	-16.195	10.485	66.782	0.084961	-0.15039	-0.14551	2.463	138.8129	990.32	-0.76211	0.64687	-1.1811
1.01	13.994	-139.3847	1438.129	-1.0522	1.1263	-1.6636	-47.434	-25.3857	21.9185	0.026367	0.1792	-0.053223	-33.451	-0.65042	41.913	0.17041	-0.049805	0.003418	-60.455	181.059	1048.2346	-0.63046	0.71934	-1.3575	-73.329	-42.3999	1649.1	-1.2043	2.0097	-2.3621	14.307	24.61	47.1634	0.068848	-0.11328	-0.16797	17.589	169.919	974.404	-0.7207	0.61279	-1.1201
1.012	25.137	-139.536	1488.985	-1.0518	1.0751	-1.6944	-62.985	29.3217	12.9165	0.024902	0.19385	-0.064941	-37.983	53.377	35.7296	0.16968	-0.046142	0.0036621	-62.925	165.0249	990.312	-0.59804	0.69883	-1.309	-50.856	-43.1502	1631.163	-1.2136	2.0926	-2.3777	-32.141	10.6689	12.792	0.048828	-0.067383	-0.19385	4.283	178.878	899.2554	-0.66963	0.57568	-1.061
1.014	36.7702	-128.107	1487.802	-1.0749	1.0349	-1.7339	-77.7888	-4.9284	23.457	0.0271	0.2085	-0.064698	-14.081	13.0693	29.51701	0.16504	-0.040039	0.00097656	-23.551	166.4891	993.0913	-0.55615	0.68018	-1.2505	-29.593	-24.153	1620.8717	-1.2117	2.1377	-2.3856	-33.093	17.5007	41.7071	0.040039	-0.046875	-0.20313	-3.775	130.1523	865.57807	-0.61953	0.53379	-1.0016
1.016	13.281	-205.056	1503.757	-1.1206	1.0249	-1.7769	-38.984	-14.0518	29.72	0.023926	0.21289	-0.078125	-16.837	19.7986	32.6652	0.15723	-0.037109	-0.010742	-29.602	217.028	966.1945	-0.52715	0.66074	-1.1955	-60.634	-6.419	1584.185	-1.2144	2.1431	-2.3823	-4.307	51.978	20.286	0.029785	-0.012695	-0.22266	-10.411	174.3916	833.558	-0.56211	0.49239	-0.94063
1.018	5.56	-174.155	1530.7194	-1.206	1.0374	-1.8245	-52.047	53.076	14.947	0.018066	0.19775	-0.10254	-38.92	45.605	21.595	0.15088	-0.032715	-0.0087891	-48.612	166.0565	925.37	-0.49395	0.63877	-1.1405	-31.191	-21.2831	1585.0167	-1.2208	2.1007	-2.3509	-28.178	31.114	2.891	0.019531	0.016602	-0.24073	-9.433	139.6945	796.8153	-0.50655	0.44346	-0.88457
1.02	3.099	-166.355	1526.8868	-1.2976	1.0768	-1.8844	-39.064	-15.316	56.696	0.01416	0.18262	-0.12793	-15.749	-15.3236	34.982	0.13818	-0.020996	-0.023438	-27.155	178.42	888.7623	-0.46113	0.60791	-1.08	-53.308	32.48852	1577.79	-1.2323	2.0399	-2.3132	-11.595	29.869	40.688	0.018066	0.036133	-0.25146	-35.809	116.429	773.921	-0.45703	0.39453	-0.82813
1.022	37.41981	-174.305	1560.88	-1.3758	1.1549	-1.9484	-30.398	2.0411	87.795	-0.012207	0.16553	-0.18701	-10.025	20.0667	40.8103	0.12573	-0.017822	-0.029296	-39.781	181.1309	840.418	-0.42705	0.57334	-1.022	-84.666	41.79	1561.6096	-1.2401	1.965	-2.2695	-26.412	41.119	1.7881	0.015137	0.056641	-0.25879	-46.358	152.9045	733.9354	-0.40302	0.35791	-0.77392
1.024	63.204	-90.4663	1564.976	-1.4277	1.2316	-2.0116	-59.308	25.720071	91.148	-0.036133	0.1731	-0.22266	-14.113	15.2772	30.0897	0.11768	-0.0097656	-0.036621	-57.88	145.808	807.408	-0.39355	0.53174	-0.95898	-74.507	37.76661	1570.0491	-1.2397	1.8931	-2.2311	-50.298	20.196	3.304	0.019043	0.066406	-0.25781	-71.06	120.7636	693.209	-0.3539	0.32246	-0.71855
1.026	19.24103	-112.667	1549.558	-1.4644	1.2974	-2.0659	0.825000000000003	5.5964	109.7711	-0.067383	0.17676	-0.26611	4.847	5.31922	41.864	0.097656	0.0053711	-0.049316	-26.808	189.5199	776.195	-0.35517	0.48643	-0.89404	-121.6531	68.23	1547.219	-1.2319	1.8403	-2.2026	-20.794	37.476	45.343	0.01709	0.07959	-0.26025	-51.691	153.8773	659.4363	-0.30547	0.29473	-0.66582
1.028	36.952	-68.3024	1556.647	-1.483	1.3459	-2.1193	-44.324	70.0622	157.487	-0.12207	0.17773	-0.35107	-19.949	61.251	41.2136	0.091797	0.013184	-0.053711	-55.973	152.8092	725.7594	-0.3166	0.44141	-0.83477	-110.138	40.5772	1542.106	-1.2209	1.7971	-2.1752	-18.872	32.4673	2.308	0.019776	0.08667	-0.26196	-73.181	172.6466	592.87474	-0.26181	0.26748	-0.61631
1.03	30.547	-10.303	1544.279	-1.4905	1.3868	-2.1616	-51.316	59.5061	238.073	-0.14844	0.18799	-0.40088	-16.944	14.7378	35.0749	0.076172	0.035645	-0.061523	-66.701	149.1178	710.5055	-0.27754	0.39961	-0.77266	-103.359	36.447	1564.3358	-1.2106	1.7676	-2.1625	-39.54	5.749	31.5766	0.021484	0.088379	-0.26025	-76.815	121.37	555.131	-0.22656	0.23633	-0.56006
1.032	35.7305	-42.4099	1556.6926	-1.4999	1.4212	-2.1882	-17.583	47.2407	310.8197	-0.20215	0.22119	-0.4917	-8.182	7.1443	53.452	0.064697	0.050048	-0.071289	-71.88	197.678	675.3915	-0.23867	0.35859	-0.71094	-126.463	30.5022	1556.50656	-1.1883	1.7539	-2.1465	-11.204	27.1187	43.687	0.025879	0.088379	-0.25977	-63.423	166.18118	532.2472	-0.19131	0.21338	-0.50654
1.034	59.008	4.416	1575.9156	-1.5232	1.4549	-2.2072	-24.065	93.424	369.838	-0.24414	0.25147	-0.56397	-26.541	23.08717	31.9288	0.053711	0.0625	-0.074219	-96.988	161.4017	624.8205	-0.19629	0.31885	-0.6499	-95.785	-3.193	1552.00715	-1.1657	1.736	-2.1273	-35.248	24.4723	2.846	0.023438	0.088379	-0.25391	-102.833	127.803	476.0108	-0.15723	0.19043	-0.4542
1.036	14.5911	-5.958	1547.494	-1.5522	1.4712	-2.2026	-3.395	60.1662	458.307	-0.28906	0.29102	-0.63867	-21.737	-40.061	30.22	0.036621	0.084961	-0.086914	-59.223	187.574	600.103	-0.1582	0.28858	-0.59522	-137.2226	24.168	1555.378	-1.1475	1.7051	-2.1035	-22.732	11.4061	47.662	0.020508	0.094727	-0.24902	-90.638	128.022	445.433	-0.11777	0.1709	-0.39599
1.038	18.5469	-48.681	1545.15	-1.5741	1.4665	-2.1905	12.517	103.277	565.718	-0.35938	0.35645	-0.72754	-24.947	9.89039	34.0227	0.030762	0.095215	-0.090332	-98.753	189.521	540.25532	-0.12802	0.25478	-0.53857	-132.2372	26.492	1543.8628	-1.1269	1.6603	-2.0651	-30.254	36.0922	48.288	0.01709	0.09375	-0.23486	-86.4567	173.467	387.2331	-0.079883	0.14307	-0.3541
1.04	38.656	-4.735	1562.525	-1.5807	1.4388	-2.1659	-19.112	122.0742	606.3572	-0.40332	0.38672	-0.76904	-43.756	16.6	15.7558	0.017578	0.11475	-0.096191	-126.427	139.2442	515.082	-0.095606	0.22393	-0.48037	-73.411	34.942	1533.679	-1.1121	1.6109	-2.0274	-58.221	-4.6742	26.669	0.01416	0.097168	-0.24268	-109.769	130.117	347.1756	-0.044434	0.11768	-0.29932
1.042	25.2485	-34.9192	1557.596	-1.5714	1.3903	-2.1253	-14.243	61.0444	653.526	-0.50098	0.4707	-0.86523	-40.354	1.63426	22.904	0.011963	0.1294	-0.10083	-81.033	175.1204	461.317	-0.065723	0.19629	-0.42676	-120.073	95.035	1503.9713	-1.1055	1.566	-1.9957	-36.749	-10.74656	66.056	0.0078125	0.11084	-0.23389	-68.423	156.8945	307.591	-0.0016603	0.084179	-0.25498
1.044	49.6373	-23.4638	1581.1885	-1.5446	1.3289	-2.0922	-4.744	94.251	723.919	-0.58081	0.53711	-0.93555	-50.535	65.204	22.7609	0.003418	0.13818	-0.10254	-113.335	142.4229	411.429	-0.037109	0.17188	-0.37695	-112.884	102.161	1464.007	-1.1066	1.5287	-1.958	-34.841	21.2818	25.7584	0.0021972	0.11377	-0.2312	-95.583	171.165	249.338	0.037207	0.050195	-0.21455
1.046	45.342	-8.0158	1566.9609	-1.5234	1.2744	-2.0586	-2.658	50.6415	845.4455	-0.65576	0.60986	-0.99561	-31.464	9.6209	25.5339	0	0.15332	-0.10352	-110.88	147.3753	377.8015	-0.012402	0.14668	-0.32979	-88.187	141.67	1447.0546	-1.1006	1.5	-1.916	-47.868	-5.80666	20.2941	-0.00048828	0.11572	-0.2251	-128.8534	130.17175	202.492	0.071192	0.01543	-0.1708
1.048	38.992	-70.657	1584.222	-1.5081	1.2423	-2.0316	-8.355	12.1413	951.703	-0.75342	0.7251	-1.0503	-33.739	6.6058	42.37	-0.0029297	0.15869	-0.10156	-99.793	170.618	341.477	0.016113	0.11836	-0.28037	-103.5042	179.242	1421.46	-1.0923	1.478	-1.8735	-20.862	26.1153	52.905	-0.012207	0.12939	-0.21729	-73.646	153.501	214.508	0.10586	-0.013184	-0.13222
1.05	36.9453	-34.477	1611.674	-1.5086	1.2299	-2.0203	-25.867	26.273	992.0003	-0.78955	0.78369	-1.0776	-48.126	28.2586	34.7618	-0.0024414	0.1709	-0.10303	-131.562	130.7282	313.1727	0.041504	0.090235	-0.23272	-56.933	147.397	1418.0218	-1.0871	1.4531	-1.8304	-38.078	35.7387	2.0703	-0.015137	0.13477	-0.21191	-77.134	106.0643	200.42677	0.1333	-0.036621	-0.091797
1.052	39.442	-32.71	1586.828	-1.5175	1.2365	-2.0152	-48.098	-58.18	993.801	-0.85498	0.90283	-1.0874	-44.793	-25.9504	21.2105	-0.0029296	0.17822	-0.09839	-92.761	155.109	278.4203	0.063379	0.060059	-0.19531	-43.204	175.558	1401.38209	-1.0656	1.4207	-1.7816	-19.643	11.032	12.044765	-0.021973	0.14111	-0.19971	-48.631	91.318	192.05	0.15332	-0.058789	-0.054394
1.054	56.5207	-40.246	1578.664	-1.5262	1.2508	-2.0055	-89.7301	-48.2956	1018.1197	-0.88818	1.0063	-1.103	-54.877	24.6314	31.8015	-0.0048828	0.18652	-0.09668	-100.4963	158.283	214.216	0.078125	0.036621	-0.15869	-34.819	158.4267	1357.53728	-1.0373	1.3845	-1.7291	1.35100000000001	42.93644	35.5418	-0.023194	0.15137	-0.19335	-17.614	123.3173	138.299	0.16641	-0.081738	-0.022168
1.056	58.966	42.9875	1543.209	-1.5332	1.2637	-1.9941	-100.725	-50.2291	1036.46	-0.8916	1.041	-1.1035	-55.748	25.8013	9.4302	-0.0083008	0.20166	-0.092285	-114.754	113.47812	210.505	0.097168	0.0071288	-0.12617	-21.864	139.047	1336.7471	-1.0117	1.3379	-1.6719	-32.616	12.3329	19.94805	-0.029785	0.1543	-0.18408	-39.213	87.6355	115.2245	0.18437	-0.10205	0.0012695
1.058	32.039	30.0227	1498.7101	-1.5214	1.2864	-1.9769	-65.973	-89.225	1036.111	-0.87109	1.0801	-1.0898	-41.479	-0.968	12.3709	-0.0063477	0.20313	-0.092285	-66.335	136.37	199.7808	0.10801	-0.010937	-0.094922	-51.691	187.069	1280.637	-0.97324	1.2932	-1.6127	-13.019	-8.6358	69.43	-0.029297	0.15771	-0.16748	-28.284	101.7802	126.05423	0.19717	-0.11787	0.017773
1.06	25.43755	55.903	1506.8042	-1.4973	1.2848	-1.957	-63.623	-55.6631	1020.847	-0.84448	1.0901	-1.0769	-47.18	49.185	15.145	0.00048828	0.21191	-0.086914	-72.903	104.14251	168.00012	0.11191	-0.023828	-0.067578	-36.201	170.073	1267.9179	-0.93672	1.2418	-1.5586	-4.278	33.422	57.722	-0.027832	0.1543	-0.15674	-21.606	101.3195	88.8993	0.20117	-0.13135	0.036621
1.062	38.427	110.791	1478.204	-1.4598	1.2621	-1.9227	-63.5605	-80.2467	1000.616	-0.82031	1.0957	-1.0684	-31.156	0.2206	13.24955	-0.00024414	0.22168	-0.084961	-45.566	100.0166	154.9327	0.11445	-0.032129	-0.044726	9.381	176.423	1271.001	-0.89766	1.1886	-1.4867	-37.927	-2.3577	7.5041	-0.026367	0.15381	-0.14307	-38.501	39.114	92.583	0.19472	-0.13603	0.043359
1.064	53.503	72.52	1486.909	-1.4126	1.2183	-1.879	-53.739	-94.267	995.506	-0.78076	1.0991	-1.0298	-26.842	14.1483	36.6156	0.0019531	0.23242	-0.083984	-40.056	116.365	121.8122	0.12061	-0.030762	-0.021484	-6.041	166.3392	1234.19	-0.86162	1.1275	-1.4171	-10.214	6.4345	42.435	-0.026123	0.14893	-0.1272	-5.198	56.5957	72.3648	0.18721	-0.13242	0.050293
1.066	65.055	125.923	1473.663	-1.3628	1.1606	-1.8276	-35.3066	-49.017	968.0209	-0.75586	1.0898	-1.0078	-30.808	44.8917	26.4998	0.0043945	0.24219	-0.082031	-55.382	76.4344	108.321	0.11885	-0.029981	-0.0071288	5.191	103.767	1211.655	-0.82227	1.0684	-1.3516	-31.492	13.18629	9.52	-0.021484	0.1377	-0.11035	-16.746	20.3667	61.1627	0.17939	-0.125	0.042871
1.068	31.4467	117.855	1432.0539	-1.315	1.0924	-1.7838	-10.721	-82.186	931.859	-0.729	1.061	-0.97217	-32.028	-19.9139	35.5396	0.0048828	0.25098	-0.084961	-9.31999999999999	87.4077	115.095	0.11846	-0.028125	0.0017578	-20.28	125.634	1176.4152	-0.78379	1.0131	-1.2801	-51.806	-33.414	4.573	-0.0097656	0.12305	-0.091309	-1.182	27.43458	78.55736	0.15234	-0.11406	0.028028
1.07	18.132	80.5464	1433.3128	-1.2612	1.0243	-1.7307	-10.047	-50.2522	934.953	-0.72436	1.0452	-0.9314	-13.509	17.9251	38.8835	0.0097656	0.25635	-0.098633	-32.888	78.981	76.54658	0.11885	-0.01875	0.011524	-10.142	139.759	1133.4299	-0.72715	0.95078	-1.2135	6.683	17.5269	26.9276	-0.0058594	0.11768	-0.085449	-10.054	67.809	59.0695	0.12549	-0.09082	0.0097656
1.072	40.6855	138.2781	1411.90501	-1.221	0.96611	-1.6905	-29.165	-59.8827	945.947	-0.71826	1.0493	-0.89209	-14.276	-10.5801	50.4545	0.0087891	0.25293	-0.12329	-45.663	39.3011	58.4516	0.11348	-0.0067383	0.0079102	7.162	144.965	1115.601	-0.68496	0.89609	-1.144	-12.008	6.4731	0.112000000000002	-0.00097656	0.10107	-0.060059	-32.207	36.8703	47.6079	0.077149	-0.05332	-0.0074217
1.074	35.5739	93.127	1403.728	-1.1889	0.91855	-1.651	-17.541	-130.6205	957.63411	-0.71143	1.0649	-0.85693	-17.999	-38.8038	81.0231	0.011719	0.25391	-0.15576	7.096	58.628	60.7996	0.104	0.0073242	0.011719	-17.226	197.808	1046.8337	-0.64668	0.83027	-1.0732	-31.12	-23.75956	36.5746	0.0073242	0.08789	-0.04541	8.339	51.866	61.9714	0.02705	-0.0069336	-0.031152
1.076	46.4806	92.595	1405.319	-1.1587	0.88525	-1.6089	-37.321	-123.602	967.675	-0.70654	1.0649	-0.854	-28.949	45.783	98.0014	0	0.27051	-0.19922	-32.477	32.1194	45.7083	0.095021	0.016601	0.0051758	-21.504	169.6392	995.9956	-0.60205	0.76563	-1.0117	-3.394	22.805	46.17	0.011719	0.069336	-0.03418	-25.856	40.6811	44.4219	-0.027246	0.046191	-0.057714
1.078	15.7238	111.789	1368.446	-1.1331	0.86611	-1.5773	-38.027	-160.692	986.7978	-0.69287	1.0649	-0.87646	2.886	14.42384	107.45088	-0.010742	0.2832	-0.22656	-4.226	34.291	61.939	0.083985	0.027149	-0.014551	-13.166	178.421	964.1647	-0.55478	0.70732	-0.94502	-31.104	0.353200000000001	10.1996	0.02002	0.053223	-0.015137	-46.53	11.8295	61.761	-0.080957	0.10059	-0.087889
1.08	-7.335	75.304	1346.305	-1.113	0.84853	-1.5452	-47.026	-179.916	1022.565	-0.68115	1.0591	-0.91553	-22.685	34.027	176.74743	-0.04248	0.29639	-0.28418	6.561	57.233	53.1104	0.058203	0.04082	-0.028222	-51.8439	208.9499	925.70386	-0.50908	0.65029	-0.88115	-34.785	12.893	41.712	0.028809	0.043457	-0.0063477	-10.057	56.028	52.2258	-0.12744	0.15332	-0.12061
1.082	11.225	118.9013	1350.967	-1.093	0.84971	-1.5073	-66.719	-136.165	1045.607	-0.68262	1.0488	-0.97656	-52.054	49.1125	212.715	-0.076904	0.30908	-0.3545	-30.498	40.7552	49.41	0.023828	0.067285	-0.054981	-24.535	182.1523	901.36	-0.46612	0.58975	-0.82373	-10.253	52.591	19.9436	0.039063	0.017578	0.0024414	-57.729	28.76984	37.6868	-0.16963	0.19492	-0.14766
1.084	-4.622	121.8654	1293.697	-1.0709	0.83769	-1.4713	-51.26	-190.69	1062.374	-0.69922	1.0547	-1.1016	-48.609	-21.5026	247.06	-0.11963	0.32275	-0.42627	-5.637	53.3229	76.327	-0.0097656	0.091309	-0.077148	-22.682	211.7412	844.0106	-0.42177	0.53975	-0.76397	-52.332	8.7127	-2.921	0.052735	0.0034179	0.01123	-40.267	13.528	50.8341	-0.19912	0.23086	-0.16602
1.086	-4.47199999999999	95.597	1266.111	-1.0444	0.82959	-1.439	-35.055	-197.03251	1112.878	-0.72266	1.0703	-1.1641	-28.104	23.9964	338.085	-0.18555	0.35449	-0.53418	-30.053	61.685	55.172	-0.044336	0.12598	-0.10469	-46.8808	188.786	775.0622	-0.37646	0.48486	-0.70459	-46.633	24.7026	23.2864	0.063965	-0.01709	0.01709	-62.161	24.7342	32.364	-0.21826	0.26055	-0.18633
1.088	24.515	161.6918	1210.276	-1.0191	0.82383	-1.4033	-45.764	-203.214	1172.440543	-0.77295	1.1294	-1.2856	-43.35	68.9085	440.372	-0.2207	0.37549	-0.58936	-41.193	31.058	45.801	-0.081152	0.15547	-0.12715	-16.014	154.992	733.977	-0.33437	0.44356	-0.65254	-30.495	31.6846	-9.73	0.084473	-0.040039	0.027832	-85.9673	-17.4345	28.5305	-0.23008	0.2833	-0.19599
1.09	-23.799	138.649	1160.503	-0.99239	0.8086	-1.3613	-37.301	-252.672	1221.365	-0.823	1.2093	-1.3543	-41.737	90.0524	547.022	-0.31494	0.41797	-0.72656	-13.885	44.743	32.86825	-0.11631	0.19414	-0.15059	-34.133	201.924	673.935	-0.28916	0.3914	-0.60156	-45.721	-8.1463	5.044	0.086426	-0.057129	0.02832	-45.938	7.9541	57.906	-0.23682	0.29248	-0.19678
1.092	-24.117	173.3535	1158.636	-0.96426	0.78867	-1.3223	-28.676	-224.465	1271.995	-0.86572	1.2974	-1.4077	-41.391	168.616	623.147	-0.39404	0.4624	-0.8418	-63.132	14.491	27.7907	-0.15479	0.23232	-0.16592	-28.441	167.9431	659.7489	-0.24307	0.34766	-0.54843	-28.984	33.62024	35.9381	0.10596	-0.083008	0.023926	-72.1633	22.1325	37.5383	-0.24355	0.29492	-0.19912
1.094	-0.246000000000002	214.635	1123.7876	-0.93926	0.76972	-1.276	-44.639	-211.559	1278.9941	-0.88818	1.4058	-1.4546	-46.346	104.4888	742.538	-0.47705	0.51709	-0.95557	-69.885	7.019	54.34532	-0.18701	0.2666	-0.18213	-9.802	178.805	630.623	-0.1959	0.30478	-0.49698	-23.156	18.482	3.935	0.11792	-0.10571	0.023682	-88.477	-3.3856	35.575	-0.24707	0.29756	-0.19336
1.096	-14.521	178.0875	1089.325	-0.90967	0.74365	-1.229	-36.458	-188.231	1300.9449	-0.88525	1.4517	-1.4683	-38.852	81.6308	877.992	-0.60791	0.62305	-1.0859	-43.033	28.5562	30.44	-0.21084	0.29707	-0.19736	-48.0152	175.79128	578.1738	-0.15039	0.25977	-0.44336	-38.933	-1.6139	33.137	0.13867	-0.12891	0.017578	-43.369	29.555	27.83	-0.24707	0.29756	-0.18555
1.098	-12.667	208.614	1048.7359	-0.87705	0.72139	-1.1852	-80.224	-100.981	1320.607	-0.85742	1.5098	-1.5	-13.715	87.727	979.601	-0.67383	0.68896	-1.1465	-77.63	7.535	14.5816	-0.22871	0.32051	-0.20781	-21.821	115.011	554.736	-0.10176	0.21172	-0.39629	-30.244	49.09	42.9226	0.1748	-0.16602	0.0043945	-70.612	-0.552200000000001	17.875	-0.2457	0.29209	-0.17158
1.1	-30.712	201.098	991.293	-0.83516	0.69688	-1.1398	-106.644	-117.7686	1326.9724	-0.82788	1.5237	-1.5319	-8.835	5.5993	1048.222	-0.80127	0.85742	-1.2188	-56.462	27.9247	48.876	-0.23926	0.33535	-0.21914	-20.084	149.8117	503.6738	-0.056054	0.16436	-0.34482	-23.905	3.9039	7.3651	0.19238	-0.18213	-0.00097656	-58.4	-8.044	38.888	-0.25146	0.28809	-0.15723
1.102	-45.62	174.811	984.533	-0.79531	0.66719	-1.0867	-124.362	-102.044	1355.174096	-0.81055	1.5215	-1.5742	-67.108015	10.303	1089.005	-0.88354	0.99194	-1.2468	-77.8262	38.319	25.5024	-0.246	0.34228	-0.21289	-18.581	127.954	450.2939	-0.010742	0.11279	-0.29053	-24.387	0.1308	45.253	0.23389	-0.21729	-0.012695	-23.031	14.561	30.9082	-0.24961	0.28272	-0.13974
1.104	-19.032	211.406	959.881	-0.74795	0.64111	-1.0308	-168.6777	-91.448	1367.819	-0.81201	1.4985	-1.6519	-114.82	-27.012	1082.31	-0.94531	1.125	-1.2617	-78.662	9.6608	42.3973	-0.24951	0.34326	-0.20459	8.59999999999999	108.326	421.06	0.027636	0.059668	-0.24228	-34.636	39.7909	21.8209	0.26465	-0.24292	-0.022705	-51.126	-11.5838	29.889	-0.25195	0.2664	-0.13106
1.106	-44.213	152.56	917.7635	-0.69727	0.60059	-0.97656	-157.7473	-119.413	1376.7991	-0.82959	1.4849	-1.6948	-102.43	-81.494	1051.637	-0.98828	1.2734	-1.2686	-35.149	36.1112	37.6863	-0.25498	0.34306	-0.2002	-3.819	151.6293	366.8957	0.066895	0.0043945	-0.19629	-26.79	-12.5443	14.301	0.29053	-0.2666	-0.033691	-33.223	27.7795	33.597	-0.24961	0.25156	-0.12442
1.108	-26.717	134.395	904.292	-0.64893	0.56367	-0.92842	-164.933	-71.858	1393.949	-0.87061	1.4907	-1.7886	-74.397	-47.4082	1008.7265	-0.98584	1.3247	-1.2778	-65.758	5.072	22.0648	-0.25869	0.33936	-0.18711	2.881	103.111	326.17069	0.10322	-0.051563	-0.15039	-8.38	36.349	58.5842	0.33203	-0.29443	-0.04834	-20.994	38.829	4.4211	-0.2418	0.23682	-0.11748
1.11	-40.541	144.448	845.36444	-0.59492	0.53223	-0.87813	-152.85851	-72.959	1401.4947	-0.90112	1.5071	-1.867	-39.856	-92.135	1003.173	-0.94092	1.3511	-1.271	-44.556	6.744	49.3556	-0.25908	0.3335	-0.17578	20.823	117.344	294.4417	0.13115	-0.10967	-0.10947	-37.483	46.642	11.267	0.34766	-0.30859	-0.058594	-26.839	10.8784	12.7947	-0.22314	0.22314	-0.10986
1.112	-67.315	117.244	797.9053	-0.53281	0.492	-0.81914	-123.788	-96.15761	1418.08942	-0.93555	1.5449	-1.9375	-11.907	-94.517	1020.172	-0.88452	1.3176	-1.2664	-38.02	17.9673	45.6631	-0.26065	0.32676	-0.16562	11.369	139.261	249.1347	0.16826	-0.16123	-0.079394	-16.769	-4.1812	32.389	0.37158	-0.32959	-0.073242	9.358	42.51	15.6879	-0.20664	0.20615	-0.096582
1.114	-34.247	178.8074	767.8159	-0.4752	0.45518	-0.76445	-163.1882	-62.4076	1418.344	-0.98828	1.6133	-2.0078	-21.051	-62.2209	987.3997	-0.81836	1.252	-1.2656	-72.718	5.17	28.7807	-0.25146	0.31104	-0.15039	36.032	97.25227	233.853	0.1877	-0.21279	-0.047949	-12.429	50.015	50.929	0.38868	-0.34595	-0.079834	-20.952	6.3371	-0.9261	-0.18896	0.1876	-0.087598
1.116	-59.998	179.33869	703.9802	-0.41797	0.42383	-0.70752	-141.653	-96.656	1437.01	-1.0234	1.6563	-2.043	0.37142	-103.881	980.815	-0.74805	1.1367	-1.252	-11.812	26.655	30.6892	-0.24619	0.29756	-0.13428	19.977	149.219	193.999	0.20557	-0.25879	-0.018066	-28.046	25.4175	0.4049	0.39795	-0.35254	-0.10303	-11.126	-5.1504	24.12723	-0.1585	0.16728	-0.080176
1.118	-53.092	152.279	679.891	-0.37002	0.38887	-0.64951	-97.26	-90.388	1462.124	-1.0693	1.7715	-2.0938	37.912	-56.047	963.867	-0.73193	1.0864	-1.2319	-31.606	40.479	-0.814	-0.23154	0.2794	-0.11943	-8.27	121.924	160.581	0.2128	-0.28975	0.00019532	5.023	16.7181	22.8594	0.40332	-0.35889	-0.12109	-10.417	20.50338	8.222	-0.12959	0.14561	-0.069043
1.12	-20.09	177.48176	629.6869	-0.32198	0.35576	-0.59209	-117.281	-73.127	1485.304	-1.0837	1.8499	-2.117	61.7289	-45.246	950.061	-0.74219	0.99512	-1.1992	-40.4	23.327	25.5235	-0.21787	0.2622	-0.10029	-4.486	91.9471	135.851	0.2167	-0.31787	0.01875	-11.163	59.208	26.8609	0.40381	-0.35156	-0.13428	-29.292	5.0445	21.2487	-0.097168	0.12695	-0.053711
1.122	-72.253	144.786	562.677	-0.27666	0.32178	-0.53076	-100.198	-102.536	1494.568	-1.0859	1.9141	-2.123	58.563	-47.15	959.407	-0.77271	0.97387	-1.1735	18.519	32.79	47.22498	-0.20058	0.24394	-0.082129	-12.028	131.736	101.224	0.21709	-0.33115	0.033594	-22.766	-0.1909	-0.0767999999999986	0.40039	-0.3418	-0.15723	14.012	33.8861	40.936	-0.073047	0.10107	-0.037402
1.124	-42.466	181.9876	550.9006	-0.23154	0.29326	-0.4749	-128.995	-83.437	1505.843	-1.0869	1.959	-2.1113	10.33	5.01600000000001	963.98	-0.80029	0.98682	-1.146	-37.002	-0.18862	17.5127	-0.17432	0.2168	-0.064453	-4.109	78.4445	119.5779	0.2124	-0.33926	0.036328	4.377	10.1535	54.7251	0.40356	-0.32715	-0.1709	-9.636	37.3855	6.82029	-0.042968	0.074609	-0.01875
1.126	-43.754	230.989	491.6187	-0.18506	0.26221	-0.41357	-133.906	-77.023	1491.111	-1.0859	1.959	-2.0977	-27.023	-37.144	993.887	-0.79248	1.0552	-1.105	-10.381	-12.764	39.158	-0.15859	0.18701	-0.045508	-6.133	92.104	108.7294	0.20215	-0.34082	0.03125	-39.084	38.26818	38.8472	0.40234	-0.31445	-0.19141	-15.411	20.6247	18.4557	-0.0125	0.044141	-0.0011719
1.128	-80.335	200.958	428.688	-0.1375	0.23115	-0.36386	-99.62	-93.318	1481.992	-1.0962	1.9341	-2.0522	-29.011	-72.873	1041.905	-0.77881	1.0786	-1.0894	12.282	15.9744	20.0869	-0.1332	0.15391	-0.017481	-19.902	113.27	59.449	0.19971	-0.33467	0.032422	-26.516	-14.70922	24.1378	0.39795	-0.29883	-0.20898	6.211	52.957	39.65075	0.010937	0.016797	0.016406
1.13	-39.1	203.625	379.0992	-0.084375	0.1959	-0.31055	-128.255	-37.306	1471.2491	-1.1072	1.8938	-2.0164	-26.207	-95.533	1048.483	-0.73096	1.083	-1.0898	-33.648	10.8106	38.297	-0.11055	0.11836	0.0055664	-29.254	58.418	60.6002	0.18828	-0.32393	0.024121	-13.145	22.6624	64.754	0.39453	-0.29004	-0.22119	-47.839	23.1018	21.5082	0.045898	-0.014648	0.032227
1.132	-77.89	164.805	327.557	-0.03789	0.15683	-0.2543	-96.248	-41.831	1468.9885	-1.1206	1.8442	-1.9741	-14.481	-174.888	1058.3277	-0.69019	1.0476	-1.1023	20.756	30.436	43.1386	-0.085351	0.081641	0.028809	-53.772	99.174	55.574	0.17149	-0.31377	0.0045898	-44.363	22.251	54.97	0.36816	-0.29248	-0.26758	-51.943	7.376	50.751	0.074317	-0.047559	0.047851
1.134	-82.404	133.8598	305.289	0.0055665	0.12041	-0.20244	-59.364	-15.841	1492.261	-1.1401	1.7583	-1.9019	-0.631	-173.1853	1091.515	-0.66211	1.002	-1.1279	-8.65199999999999	46.055	5.574	-0.0625	0.041016	0.050781	-62.802	41.606	63.5542	0.1417	-0.29277	-0.019922	-18.235	-28.7042	78.3774	0.32812	-0.28735	-0.31372	-29.772	25.35435	30.7582	0.10459	-0.080371	0.062891
1.136	-27.776	157.518	280.221	0.048828	0.077637	-0.15576	-72.199	20.899	1476.005	-1.1523	1.7188	-1.873	-35.709	-194.693	1112.356	-0.65771	0.95361	-1.1694	-37.331	13.8323	26.0335	-0.03916	0.00029308	0.074903	-24.671	8.212	74.3533	0.10693	-0.26416	-0.044434	-30.311	3.0123	93.1426	0.26221	-0.25732	-0.36133	-69.596	3.471	13.3897	0.12334	-0.11162	0.065234
1.138	-75.983	120.9259	249.61069	0.086426	0.041993	-0.11133	-49.607	-12.0902	1477.3243	-1.1919	1.6685	-1.8198	-38.517	-242.289	1170.1602	-0.66943	0.93994	-1.1987	-2.155	30.847	32.8698	-0.012304	-0.043457	0.090039	-49.554	53.2535	51.8555	0.066699	-0.22969	-0.081543	-32.659	-33.327	65.847	0.15039	-0.16748	-0.43018	-36.021	33.8309	34.4829	0.14619	-0.13985	0.08086
1.14	-45.736	111.49	231.6904	0.11758	0.01084	-0.065723	-53.52	1.8601	1491.5218	-1.2178	1.6524	-1.7969	-14.873	-230.221	1229.69	-0.7207	0.93359	-1.248	-47.646	8.3832	27.7455	0.011524	-0.083301	0.10566	-75.245	10.91	55.1289	0.019336	-0.18369	-0.10723	17.07	-22.5313	126.034	0.088379	-0.11426	-0.46875	-69.4276	55.406	18.964	0.1626	-0.16211	0.092285
1.142	-49.798	109.7515	189.7245	0.14336	-0.021191	-0.034082	-61.814	7.934	1483.718	-1.2437	1.6489	-1.7827	2.101	-244.963	1275.989	-0.78027	0.97852	-1.291	-29.864	3.533	41.112	0.03291	-0.12822	0.11651	-66.07	50.837	65.406	-0.027929	-0.13135	-0.14277	1.908	53.5137	183.75812	-0.047852	0.0043945	-0.56982	-82.9103	35.0432	32.7348	0.17226	-0.18007	0.096387
1.144	-63.286	70.848	181.357	0.16143	-0.051953	0.001758	-74.418	-24.637	1494.412	-1.2666	1.6484	-1.7754	-4.209	-219.42	1321.35	-0.81592	1.0132	-1.3071	-30.441	24.883	17.9886	0.056641	-0.16309	0.12109	-65.341	76.744	38.2551	-0.081153	-0.079395	-0.17627	-22.932	21.829	190.225	-0.13574	0.10205	-0.64282	-33.347	62.044	42.5351	0.17764	-0.18799	0.096386
1.146	-30.395	99.3822	173.285	0.17334	-0.078125	0.026855	-111.091	26.9243	1478.5987	-1.2686	1.6484	-1.7734	-56.768	-138.13	1349.5703	-0.86523	1.1016	-1.3418	-96.8214	11.19514	23.437	0.075097	-0.19883	0.12813	-54.739	27.3089	37.28	-0.1377	-0.029785	-0.20557	-18.842	38.73	249.6317	-0.20654	0.20459	-0.71045	-82.0452	25.004	29.6928	0.18506	-0.19111	0.095215
1.148	-59.26	88.7221	151.857	0.17715	-0.091016	0.049902	-104.925	-8.4092	1453.4137	-1.2744	1.6387	-1.7695	-88.294	-121.9796	1357.6896	-0.88721	1.1636	-1.3642	-32.488	29.7356	48.361	0.1	-0.22842	0.13252	-58.616	59.714	40.8255	-0.19072	0.030078	-0.24063	11.323	52.738	277.18047	-0.2915	0.32471	-0.80322	-58.425	10.02	52.358	0.18574	-0.18936	0.090527
1.15	-44.628	59.757	140.768	0.17793	-0.099706	0.070703	-101.873	-2.952	1479.296	-1.2641	1.6264	-1.7573	-113.891	-61.764	1392.3644	-0.90039	1.2021	-1.3867	-59.103	49.162	11.6207	0.11914	-0.25342	0.12978	-49.619	10.9569	48.1691	-0.23994	0.080664	-0.27295	27.9171	14.667	344.493	-0.33496	0.37354	-0.8501	-43.976	33.49477	29.203	0.18213	-0.18164	0.085449
1.152	-49.998	65.29094	101.289	0.17207	-0.10322	0.090625	-146.317	21.2235	1474.0449	-1.2578	1.6035	-1.75	-149.8297	-39.748	1396.123	-0.91748	1.2271	-1.4448	-75.477	32.136	17.0005	0.13447	-0.26817	0.12891	-40.814	-8.80082	66.2025	-0.27588	0.1334	-0.30966	31.2901	89.6783	417.517	-0.39795	0.45654	-0.94873	-62.98	16.002	30.5694	0.18535	-0.1709	0.078516
1.154	-61.208	32.514	70.5699	0.16201	-0.094629	0.092676	-132.788	-15.3365	1474.4445	-1.2285	1.5762	-1.7344	-137.841	-76.979	1410.659	-0.93213	1.2388	-1.48	-38.888	40.2874	33.3056	0.15674	-0.2793	0.12646	-31.628	59.1721	45.87029	-0.2998	0.18135	-0.33398	1.742	93.0468	418.4812	-0.44555	0.51465	-1.0249	-29.766	41.7273	42.6049	0.18623	-0.15283	0.074609
1.156	-12.296	57.96293	70.0017	0.14844	-0.084961	0.094238	-132.877	5.675	1494.3186	-1.2085	1.5591	-1.7261	-159.437	-32.411	1415.881	-0.95654	1.2329	-1.5679	-95.2526	20.6817	21.6728	0.17969	-0.28779	0.12334	-31.13	13.0573	29.6092	-0.31738	0.2207	-0.34961	5.10899999999999	62.69775	481.039	-0.49902	0.56836	-1.1055	-50.7532	40.266	25.606	0.18974	-0.13525	0.064453
1.158	-27.159	84.314	52.3403	0.12998	-0.072656	0.090918	-149.3671	12.198	1461.6406	-1.1738	1.5254	-1.6963	-173.385	-39.44	1410.316	-0.98536	1.2408	-1.6372	-45.027	10.1	46.3397	0.19824	-0.28164	0.11523	-31.418	29.1044	32.859	-0.3291	0.26074	-0.36719	1.452	89.645	568.055	-0.58691	0.6377	-1.2217	-42.623	10.3102	40.804	0.19502	-0.11709	0.061621
1.16	-60.496	59.974	38.3672	0.10976	-0.056152	0.076367	-128.848	5.529	1475.223	-1.1448	1.4944	-1.6775	-136.724	-42.509	1455.784	-1.019	1.2671	-1.7124	-40.959	24.2552	18.29508	0.21504	-0.27344	0.1082	-19.326	43.7594	29.3285	-0.33955	0.28984	-0.37177	5.465	24.687	632.683	-0.63086	0.68164	-1.2813	-20.816	26.088	41.25111	0.19678	-0.10205	0.055664
1.162	-21.828	73.42	50.02029	0.082422	-0.039355	0.066601	-145.9645	69.024	1456.1042	-1.1128	1.4712	-1.6597	-126.206	-7.1981	1458.058	-1.0854	1.3267	-1.8218	-81.57	13.107	16.6304	0.23838	-0.25547	0.1001	-6.511	-3.9784	32.672	-0.3501	0.3164	-0.37334	1.55	17.675	741.637	-0.70898	0.78809	-1.373	-55.862	10.41941	32.6782	0.20478	-0.092676	0.046484
1.164	-45.44	59.6092	24.7281	0.046972	-0.013574	0.055567	-127.614	60.367	1425.0704	-1.0703	1.4258	-1.6289	-118.543	-71.626	1498.546	-1.1128	1.3696	-1.8765	-32.801	22.0925	54.938	0.25635	-0.23877	0.088379	3.712	33.0999	43.9348	-0.35166	0.33643	-0.36992	-26.815	25.751	792.8571	-0.76221	0.88233	-1.4292	-26.113	0.3071	53.214	0.20508	-0.085059	0.04209
1.166	-37.934	30.307	61.6874	0.0083008	0.01123	0.039551	-143.199	85.2212	1426.2394	-1.0488	1.4004	-1.6074	-95.824	-95.017	1555.043	-1.1777	1.4688	-1.9863	-56.916	48.277	11.523	0.26866	-0.21533	0.079394	-18.396	-8.5003	60.555	-0.34668	0.34961	-0.36719	-20.727	-74.462	850.561	-0.79053	0.9751	-1.4683	-4.314	19.2158	39.3915	0.20742	-0.078418	0.039746
1.168	15.75	49.418	70.4113	-0.032715	0.040234	0.019141	-169.4781	122.1544	1396.26	-1.0254	1.3516	-1.5586	-112.947	-104.244	1572.421	-1.2104	1.5571	-2.061	-59.646	30.563	35.2356	0.27978	-0.19892	0.067773	-2.378	-32.971	70.897	-0.33926	0.35078	-0.35156	-22.901	-66.088	917.205	-0.78369	1.0688	-1.5073	-29.776	-3.7889	27.9812	0.20742	-0.07539	0.037402
1.17	-47.853	15.067	50.363	-0.068262	0.064453	-0.0037109	-118.706	93.9395	1387.2967	-1.0061	1.3137	-1.5281	-83.012	-130.199	1613.451	-1.2427	1.647	-2.1265	-3.127	46.038	37.7622	0.2958	-0.1794	0.056055	4.922	17.5043	41.5695	-0.32198	0.33711	-0.3293	-46.445	-80.279	894.073	-0.75781	1.0977	-1.5176	32.484	12.68277	38.835	0.20264	-0.068359	0.029785
1.172	-10.222	20.673	55.4109	-0.11084	0.085157	-0.029883	-102.213	118.529	1377.0508	-0.98438	1.2793	-1.4922	-108.308	-58.2384	1618.632	-1.2695	1.7813	-2.2051	-52.11	24.6732	28.6833	0.30078	-0.16914	0.041211	-0.517000000000003	-29.283	19.2812	-0.29619	0.31289	-0.30508	-1.34699999999999	-147.2438	882.6144	-0.65332	1.1016	-1.5371	-9.252	27.103	23.14412	0.19092	-0.061328	0.021289
1.174	-16.687	25.1124	40.41	-0.15039	0.10937	-0.053907	-120.8388	114.336	1339.6896	-0.95459	1.2349	-1.4468	-111.636	-58.887	1615.599	-1.2827	1.8481	-2.2339	-23.051	4.661	49.358	0.31055	-0.15918	0.032227	-3.622	9.3876	27.9328	-0.26826	0.28125	-0.27715	-27.175	-121.3367	891.35683	-0.55103	1.0579	-1.5378	-23.141	9.1889	55.658	0.18086	-0.045411	0.0096676
1.176	-66.435	-14.96842	49.0435	-0.19141	0.13525	-0.079102	-88.826	64.7887	1328.622	-0.93652	1.2109	-1.4258	-94.534	-90.427	1624.423	-1.3008	1.9609	-2.2773	0.873000000000005	14.2766	39.8091	0.32138	-0.14941	0.021875	-26.4	36.0942	23.7581	-0.23145	0.24707	-0.24463	-93.3903	-153.818	884.796	-0.45264	1.0044	-1.5503	22.798	42.181	49.7541	0.16719	-0.030567	-0.0020508
1.178	-4.716	6.2637	54.153	-0.2334	0.16543	-0.096096	-96.925	108.8349	1287.191	-0.90479	1.1724	-1.3843	-136.893	-55.754	1601.0689	-1.3182	2.0291	-2.2898	-32.21	8.794	25.56534	0.32354	-0.13721	0.0066407	-19.637	-10.2639	25.515	-0.19697	0.20596	-0.20928	-72.671	-170.072	918.842	-0.37354	0.91602	-1.5703	-40.67	23.1852	19.7054	0.15606	-0.0098632	-0.012305
1.18	-28.262	-7.39006	27.33437	-0.27139	0.19912	-0.1123	-80.193	97.937	1265.1347	-0.88769	1.1474	-1.355	-115.351	-72.0815	1598.439	-1.3276	2.0728	-2.2905	3.67	26.7163	47.741	0.31572	-0.12353	-0.0085938	-25.979	27.5809	29.0695	-0.16465	0.16826	-0.175	-84.798	-96.172	895.388	-0.35547	0.87988	-1.5801	-23.775	-0.68	41.519	0.14063	0.0078125	-0.025879
1.182	-56.26	-12.2049	30.2884	-0.30068	0.22803	-0.12598	-42.332	106.598	1260.9176	-0.86865	1.1274	-1.3159	-58.595	-36.082	1606.892	-1.3179	2.0825	-2.269	-5.576	37.8878	30.79906	0.30879	-0.10772	-0.020703	-46.003	-5.1458	14.9398	-0.13301	0.13311	-0.13594	-111.486	-150.68	850.339	-0.35742	0.83496	-1.5918	-12.989	11.562141	27.9932	0.1332	0.027832	-0.035743
1.184	-26.965	17.0571	16.215	-0.32119	0.24668	-0.13868	-28.774	140.84	1221.998	-0.8335	1.0981	-1.2729	-56.988	9.516	1588.6555	-1.3042	2.0688	-2.2456	-17.816	24.3879	42.8634	0.28955	-0.092285	-0.039551	-49.577	-19.5574	26.5171	-0.10117	0.10537	-0.10069	-75.943	-143.025	880.5547	-0.37597	0.8352	-1.6023	-62.282	-14.0818	28.9244	0.12334	0.042871	-0.045899
1.186	-61.202	6.0527	21.396	-0.33984	0.26318	-0.14063	-9.851	93.2	1204.7984	-0.81641	1.082	-1.248	-36.595	-13.337	1577.2744	-1.2852	2.0137	-2.1973	7.328	36.296	38.2642	0.27471	-0.065137	-0.056055	-36.964	40.0416	18.957	-0.075684	0.079102	-0.074219	-108.114	-104.5188	884.21112	-0.39648	0.85986	-1.5991	-29.492	16.2329	26.2315	0.11396	0.062012	-0.05293
1.188	-17.499	23.314	39.7888	-0.34463	0.26797	-0.13759	-13.046	135.91652	1179.6372	-0.76904	1.0552	-1.1909	-64.34	34.181	1569.671	-1.2866	1.9634	-2.1577	-40.342	19.2795	21.915	0.25186	-0.042675	-0.070508	-39.082	-0.529	-0.192999999999998	-0.045801	0.057715	-0.045313	-108.883	-134.999	890.3664	-0.41797	0.9165	-1.6147	-36.906	26.329	-3.338	0.11055	0.073925	-0.052148
1.19	-21.955	35.5868	23.98925	-0.34531	0.26846	-0.12871	-8.806	141.8676	1142.9499	-0.73096	1.0259	-1.1538	-59.908	26.394	1547.852	-1.2886	1.9048	-2.1226	-21.137	2.6007	53.6738	0.23467	-0.016504	-0.085352	-45.346	27.7952	15.9299	-0.017969	0.037402	-0.010449	-70.482	-83.242	937.2753	-0.41895	0.94532	-1.6123	-75.935	2.4495	30.175	0.10205	0.083008	-0.061523
1.192	-43.043	15.7026	41.811	-0.3418	0.26103	-0.12012	-0.825000000000003	122.6411	1132.34	-0.68848	1	-1.1152	-59.176	23.805	1580.7	-1.2852	1.834	-2.0859	-21.402	22.8941	37.5029	0.21533	0.0029297	-0.098341	-73.28132	44.794	12.8646	0.0035156	0.013574	0.0067383	-83.261	-105.902	944.412	-0.40527	0.95508	-1.6152	-30.646	25.763	37.808588	0.090136	0.091894	-0.062305
1.194	-15.204	42.363	41.1378	-0.32939	0.24638	-0.104	-18.22	186.896	1081.9819	-0.62842	0.95361	-1.0552	-97.642	90.7316	1581.21187	-1.2788	1.8091	-2.0718	-56.885	0.277999999999999	40.6655	0.19434	0.026367	-0.10889	-81.291	-16.0215	23.8472	0.02041	-0.0032227	0.028125	-65.986	-176.883	977.955	-0.37061	0.94629	-1.625	-68.182	4.695	16.2643	0.082617	0.096679	-0.058691
1.196	-58.161	50.082	7.684	-0.31543	0.22949	-0.091797	-22.433	148.996	1041.6227	-0.59766	0.92773	-1.0234	-106.107	53.099	1574.59	-1.2788	1.7603	-2.0405	-19.619	8.526515	37.9598	0.17305	0.050293	-0.12139	-54.704	40.1575	19.964	0.03125	-0.021973	0.04248	-66.2765	-144.953	1032.788	-0.35352	0.93018	-1.6226	-59.168	5.613	33.575	0.075976	0.10097	-0.062989
1.198	-45.922	32.241	28.0572	-0.29932	0.20596	-0.073049	-25.16	163.999	1017.004	-0.54492	0.875	-0.9668	-121.571	47.1668	1586.9983	-1.2705	1.7304	-2.0185	-70.6219	24.872	11.168	0.15351	0.06875	-0.13379	-58.021	21.4853	10.2903	0.046387	-0.031836	0.058203	-79.8056	-191.861	1015.712	-0.33984	0.89258	-1.6211	-47.078	29.63363	28.3541	0.067871	0.10576	-0.064453
1.2	-22.142	37.699	22.2312	-0.28389	0.17911	-0.061821	-36.672	196.628	975.899	-0.50024	0.83862	-0.91772	-158.829	32.798	1573.635	-1.269	1.7114	-2.0005	-64.223	12.249	37.1408	0.13946	0.087109	-0.13457	-55.701	-4.0741	26.20681	0.058985	-0.04248	0.072461	-53.962	-217.43	1088.595	-0.34961	0.85742	-1.6328	-76.9829	-1.523	18.7034	0.063965	0.11328	-0.061523
1.202	-59.281	-9.38512	17.2336	-0.26241	0.15372	-0.042682	-24.146	162.2143	961.3106	-0.46143	0.79932	-0.87256	-137.353	-28.0379	1577.715	-1.2534	1.6782	-1.9692	-16.545	37.605	46.7757	0.12549	0.10341	-0.14238	-46.429	35.4308	18.835	0.069922	-0.049903	0.082617	-61.731	-217.958	1127.4651	-0.36865	0.82861	-1.6519	-45.638	25.313	25.1831	0.062207	0.11699	-0.057617
1.204	-30.058	-21.6302	32.1941	-0.24317	0.12803	-0.023638	-27.251	193.723	932.3333	-0.40576	0.74463	-0.81006	-144.944	6.577	1580.22661	-1.2451	1.6582	-1.9492	-72.542	29.2356	20.5769	0.11719	0.11768	-0.14893	-52.467	-19.1671	24.1322	0.082227	-0.055762	0.092773	-69.93	-308.281	1139.608	-0.39258	0.81934	-1.6934	-59.801	38.388	-10.7236	0.055761	0.12109	-0.056641
1.206	-53.61	2.0135	2.844	-0.22021	0.10742	-0.013184	-26.631	186.3797	879.9885	-0.35937	0.70557	-0.75976	-145.0671	-2.618	1550.57545	-1.2261	1.606	-1.9116	-54.871	3.5785	40.1265	0.10049	0.13213	-0.15117	-40.121	19.06388	31.0516	0.092773	-0.062988	0.099609	-11.425	-303.924	1195.737	-0.4043	0.82861	-1.7144	-60.498	19.3671	14.105	0.052246	0.12617	-0.060546
1.208	-56.154	-11.4341	24.533	-0.19833	0.081728	0.0032297	-27.154	157.0167	849.7964	-0.31836	0.66504	-0.70703	-135.763	4.973	1564.48504	-1.2126	1.5539	-1.8757	-42.668	15.3197	21.487	0.091016	0.14472	-0.15449	-17.676	49.431	25.0916	0.10205	-0.070215	0.10146	3.498	-268.696	1194.1288	-0.43701	0.87305	-1.7432	-34.461	40.564	32.21864	0.044922	0.13135	-0.057519
1.21	4.403	27.219	49.449	-0.1742	0.061021	0.023746	-37.084	196.9266	816.777	-0.25586	0.6123	-0.64063	-158.6099	72.694	1528.5841	-1.2021	1.5078	-1.8301	-103.1641	0.7439	24.1857	0.079688	0.15879	-0.1584	-28.747	11.5809	29.033	0.10771	-0.07207	0.10166	20.654	-284.667	1220.7077	-0.4624	0.93213	-1.7539	-59.338	27.084711	14.2808	0.037598	0.13281	-0.05957
1.212	-41.399	22.2748	16.7681	-0.14684	0.042262	0.040153	-45.032	161.88	795.914	-0.23193	0.5835	-0.61279	-134.59	48.577	1509.714	-1.1831	1.4614	-1.7671	-32.778	11.8352	42.7519	0.07041	0.17539	-0.16074	-19.633	74.95	34.1584	0.10928	-0.068946	0.098145	25.232	-202.3168	1280.293	-0.47412	0.99463	-1.7534	-21.458	23.1774	38.0713	0.032031	0.13926	-0.061914
1.214	-37.083	2.4089	27.472	-0.11589	0.02264	0.059298	-51.849	165.9971	784.596	-0.17529	0.51953	-0.54102	-115.821	88.98	1497.823	-1.1675	1.436	-1.7397	-54.199	33.528	7.0716	0.061035	0.19287	-0.15723	-15.696	48.053	8.4844	0.1123	-0.066797	0.085156	-9.543	-168.66	1275.988	-0.46338	1.0396	-1.7476	-19.299	46.623	7.221	0.028124	0.14551	-0.065332
1.216	-3.7	25.3961	26.4835	-0.078613	0.00097656	0.081055	-67.999	195.3987	723.473	-0.1333	0.46949	-0.49903	-129.104	122.5954	1452.937	-1.1416	1.3848	-1.6797	-86.2268	15.87472	23.281	0.055078	0.20879	-0.15967	-2.654	17.076	27.06811	0.11377	-0.057617	0.071777	29.706	-157.54448	1308.75	-0.44336	1.0381	-1.7305	-47.708	16.6189	17.4646	0.020313	0.15488	-0.068067
1.218	-67.5135	26.0058	31.2507	-0.044877	-0.023774	0.092844	-57.961	152.2281	684.313	-0.093262	0.42139	-0.45068	-105.3	117.8068	1451.167	-1.1121	1.3459	-1.6306	-22.25	33.241	31.813	0.046777	0.22754	-0.15918	-10.51	54.0116	43.0675	0.11553	-0.049707	0.056348	17.248	-91.575	1326.297	-0.38379	0.99609	-1.6953	7.496	25.6551	38.6139	0.013184	0.16445	-0.070605
1.22	-4.933	42.4412	53.553	-0.014083	-0.048752	0.11422	-62.938	194.815	641.5477	-0.047363	0.35791	-0.39502	-105.555	176.409	1424.473	-1.0864	1.3052	-1.5796	-49.67	26.7218	11.843	0.04209	0.24551	-0.15488	-9.067	4.482	30.9312	0.11738	-0.034765	0.040332	-24.029	-109.562	1331.514	-0.33594	0.92139	-1.6616	-9.26	41.779	6.57	0.012207	0.17041	-0.071777
1.222	-17.203	49.792	10.3329	0.022217	-0.076045	0.1298	-60.3277	188.6842	577.89	-0.019043	0.32324	-0.36426	-101.5283	167.009	1386.208	-1.0522	1.2524	-1.5093	-19.153	-8.099	56.8976	0.039551	0.26016	-0.15635	7.459	23.7257	48.5397	0.12402	-0.01875	0.021192	24.544	-93.604	1356.741	-0.29688	0.82422	-1.6328	-13.789	24.2222	18.0692	0.0083008	0.18124	-0.077441
1.224	-59.387	18.7759	13.302	0.054486	-0.10072	0.14596	-45.817	157.9408	546.9063	0.030273	0.25732	-0.31006	-59.501	144.366	1378.2242	-1.0347	1.231	-1.478	-19.004	-7.705	58.008	0.037109	0.27344	-0.15332	-7.037	57.282	20.869	0.13194	-0.0051758	0.0036133	4.181	-54.334	1330.8116	-0.27539	0.68066	-1.623	7.044	46.058	47.9563	0.0068351	0.18515	-0.081541
1.226	-16.901	36.777	17.7508	0.083984	-0.12158	0.1543	-43.4589	196.555	502.1844	0.066162	0.20678	-0.26563	-60.478	176.302	1340.1987	-1	1.1855	-1.4043	-50.208	-30.2374	90.527	0.035938	0.27705	-0.16513	-23.837	21.2995	16.7458	0.14502	0.0063477	-0.0092773	7.072	-102.549	1336.9523	-0.28125	0.61523	-1.6289	-42.975	32.2345	40.7093	0.0091794	0.19219	-0.092476
1.228	-42.907	37.862	8.9153	0.10629	-0.14437	0.16279	-41.456	133.175	470.212	0.099609	0.15869	-0.22607	-51.163	138.2223	1305.276	-0.96972	1.1484	-1.3467	32.552	-1.3096	109.613	0.028125	0.27031	-0.18496	-4.105	66.748	36.673	0.15401	0.015625	-0.02168	21.887	-90.51	1373.794	-0.31006	0.54541	-1.6694	0.512999999999998	17.6142	82.872	0.015722	0.19834	-0.099022
1.23	-23.211	33.80686	33.072	0.13339	-0.16154	0.16773	-9.57	135.7726	448.256	0.1377	0.099121	-0.17334	-43.702	149.032	1294.681	-0.93018	1.106	-1.2847	-24.198	38.685	117.8601	0.014844	0.25312	-0.22246	-21.421	35.4745	32.04	0.16563	0.021289	-0.03252	-16.034	-93.8753	1365.665	-0.3628	0.55786	-1.7236	3.437	20.7986	89.429	0.018066	0.2085	-0.10889
1.232	-14.059	44.719	31.9324	0.14908	-0.17918	0.17141	-6.75	167.96153	392.159664	0.16064	0.070801	-0.15039	-33.102	156.8685	1261.0524	-0.88428	1.0425	-1.1968	-42.947	36.35734	197.497	-0.0044921	0.2458	-0.27256	-19.906	-10.3324	57.924	0.16992	0.024023	-0.039551	11.292	-146.115	1387.4746	-0.43359	0.62744	-1.7925	-73.029	-3.6656	105.4831	0.022463	0.21445	-0.11925
1.234	-53.023	10.7821	25.223	0.16513	-0.19084	0.16895	15.183	124.7285	357.927	0.19482	0.012695	-0.10205	-10.894	99.709	1248.251	-0.85693	1.0083	-1.1577	-20.348	51.477	243.0644	-0.03418	0.25537	-0.31006	-26.941	22.993	54.7315	0.17422	0.023145	-0.047363	-15.664	-99.248	1438.3087	-0.52539	0.77783	-1.896	-26.735	29.4004	160.52	0.023336	0.21454	-0.14329
1.236	-29.625	-9.149	52.938	0.17529	-0.19775	0.16016	14.217	152.953	317.3269	0.21485	-0.022461	-0.060547	-2.12	127.212	1206.0944	-0.80762	0.93799	-1.0815	-53.584	48.5455	299.957	-0.07373	0.27529	-0.35928	-61.016	-24.3301	43.1311	0.17725	0.016602	-0.049316	-38.3722	-107.009	1440.2628	-0.56201	0.86377	-1.9429	-22.768	49.997	161.0215	0.017864	0.20204	-0.18667
1.238	-25.363	8.841	22.524	0.18474	-0.20213	0.1533	-14.247	133.2745	278.4867	0.22705	-0.059082	-0.027832	0.0820000000000007	106.652	1167.0132	-0.77026	0.88403	-1.0144	-20.225	54.507	390.643	-0.11719	0.28779	-0.42763	-38.587	1.824	53.3416	0.17793	0.013769	-0.056641	-31.6494	-145.779	1478.091	-0.61572	1.0181	-2.0171	-93.077	52.307	239.473	0.0013485	0.2003	-0.22376
1.24	-47.948	3.997	39.859	0.18699	-0.19903	0.14108	-8.266	98.4873	245.5303	0.24268	-0.10596	0.012695	-7.596	112.398	1153.3093	-0.72998	0.83252	-0.95068	-23.968	97.6653	470.7051	-0.16016	0.29522	-0.51006	-52.763	42.3813	24.4405	0.18447	0.0023437	-0.05664	-66.8769	-107.546	1489.076	-0.63892	1.1067	-2.0583	-71.429	83.479	286.672	-0.031738	0.21533	-0.26221
1.242	-12.563	34.8899	54.244	0.19509	-0.19359	0.12769	16.01	129.2385	216.114	0.24707	-0.13086	0.028809	-7.672	204.386	1108.147	-0.68018	0.76807	-0.87061	-58.864	102.633	548.8648	-0.19834	0.31308	-0.60176	-71.827	0.556886	25.8206	0.17939	-0.0097655	-0.058984	-50.4723	-130.052	1459.574	-0.66357	1.1626	-2.0874	-98.478	65.8253	326.545	-0.080878	0.2286	-0.31573
1.244	-56.723	30.1198	26.9427	0.19403	-0.17603	0.10932	14.606	65.417	204.7148	0.24707	-0.16211	0.060059	-4.258	185.615	1080.246	-0.66455	0.73291	-0.8374	-0.0940000000000012	103.8043	628.9999	-0.24414	0.3418	-0.69141	-49.187	49.395	38.3598	0.17441	-0.019922	-0.05752	-10.392	-98.036	1466.672	-0.68896	1.1973	-2.1094	-87.629	72.045	441.7816	-0.13272	0.24574	-0.38698
1.246	-47.577	17.425	42.503	0.19434	-0.15479	0.090332	7.417	74.3881	194.832	0.24097	-0.18847	0.082763	3.556	216.275	1040.391	-0.6084	0.67383	-0.75879	-36.024	121.858	699.922	-0.2915	0.379	-0.78408	-57.984	21.7443	32.43198	0.16113	-0.032715	-0.058105	-32.44788	-25.402	1423.71	-0.69922	1.2129	-2.1113	-63.683	116.8396	530.0247	-0.19049	0.26447	-0.45762
1.248	-25.514	32.501	25.3084	0.19149	-0.12874	0.06614	4.431	94.72224	155.8759	0.22705	-0.2124	0.099609	-29.863	224.771	981.9978	-0.55665	0.63818	-0.70459	8.664	89.9724	850.0432	-0.34844	0.42461	-0.87149	-58.666	-8.6982	51.293	0.15234	-0.043359	-0.059375	-21.244	-57.5369	1421.068	-0.72021	1.2251	-2.1167	-103.656	100.8959	607.06	-0.2499	0.29821	-0.53569
1.25	-76.753	17.3927	27.2202	0.19045	-0.098914	0.045844	10.231	51.45	138.3098	0.2085	-0.23926	0.11133	-25.7	175.06146	945.9914	-0.50977	0.59668	-0.65039	18.441	87.264	971.0126	-0.40937	0.47187	-0.95859	-61.301	34.7176	41.8571	0.14493	-0.051758	-0.060644	11.194	-3.2485	1442.655	-0.73511	1.2385	-2.111	-60.957	100.6072	687.2403	-0.31494	0.33936	-0.61475
1.252	-20.973	25.10596	53.622	0.18984	-0.066821	0.016371	9.325	93.6248	117.2704	0.19824	-0.24609	0.11426	-45.043	220.7478	902.776	-0.44141	0.5498	-0.57764	-53.2439	41.9218	1016.6652	-0.47774	0.51407	-1.0473	-53.871	-8.167	33.1763	0.13594	-0.059961	-0.062598	-8.946	1.5702	1400.272	-0.74365	1.2349	-2.0972	-80.9874	72.9198	770.344	-0.37413	0.38668	-0.69079
1.254	-25.343	40.848	21.545	0.18686	-0.040089	-0.0018602	-10.466	67.4967	89.912	0.16455	-0.26514	0.12207	-34.739	200.655	836.964	-0.40967	0.52148	-0.54102	-36.386	-18.252	1083.025	-0.54834	0.55908	-1.1304	-50.115	3.472	41.3616	0.12891	-0.073437	-0.062109	41.4534	-32.101	1426.2485	-0.73633	1.2031	-2.0723	-96.0307	24.322	900.208	-0.44068	0.43293	-0.76833
1.256	-56.528	11.704	23.209	0.18896	-0.010254	-0.021973	-7.372	46.2739	98.225	0.13892	-0.2705	0.1189	-16.596	209.6911	801.1015	-0.33984	0.46875	-0.47656	-72.5615	-39.448	1110.4098	-0.61748	0.6211	-1.1995	-45.525	25.0303	11.23	0.11963	-0.085938	-0.064453	38.1615	28.1011	1452.2923	-0.72607	1.1802	-2.0542	-33.681	15.2953	1016.557	-0.51405	0.47084	-0.86355
1.258	-4.945	25.8413	33.054	0.19206	0.0033239	-0.036377	-19.815	82.72603	63.657	0.10889	-0.26563	0.11035	-34.058	244.43	743.416	-0.2898	0.42139	-0.42309	-128.1186	-93.712	1132.6064	-0.69571	0.69883	-1.2488	-39.636	-21.9137	22.4648	0.11553	-0.10049	-0.065528	23.5856	2.8942	1414.1319	-0.70703	1.1172	-2.0117	-61.993	-27.783	1058.682	-0.59411	0.51418	-0.95516
1.26	-51.979	22.7569	17.953	0.19364	0.016219	-0.04536	-39.121	32.035	52.182	0.057129	-0.24805	0.084961	-44.635	187.0705	708.4814	-0.23486	0.37354	-0.36963	-62.254	-113.475	1152.70296	-0.76992	0.79493	-1.2723	-29.263	29.736	30.5095	0.11494	-0.11289	-0.066113	47.6821	12.2958	1440.1338	-0.7019	1.0842	-1.9861	-109.4613	-76.7214	1147.312	-0.67725	0.56689	-1.0415
1.262	-32.598	18.842	45.228	0.19774	0.025862	-0.055631	-50.64	55.63562	59.7797	0.033691	-0.23486	0.070801	-37.426	208.65	691.3	-0.16699	0.30273	-0.30615	-74.098	-112.842	1109.98	-0.85098	0.89746	-1.2776	-35.128	9.5753	29.0215	0.11025	-0.125	-0.07041	29.5246	53.57	1419.232	-0.70898	1.0703	-1.9688	-82.201	-98.331	1177.5065	-0.77143	0.64303	-1.1198
1.264	-12.77	35.918	41.0931	0.19739	0.033862	-0.063457	-68.5938	60.5285	49.344	-0.018066	-0.20557	0.046387	-48.4893	211.2154	647.4119	-0.12939	0.26758	-0.2793	-79.0879	-137.452	1121.123	-0.91846	1.0112	-1.2788	-33.106	-20.9359	37.425	0.10801	-0.13867	-0.077051	54.337	-14.676	1431.5252	-0.71338	1.0747	-1.9546	-97.6966	-157.433	1170.966	-0.87154	0.73022	-1.1833
1.266	-61.173	14.39169	30.7646	0.19873	0.040527	-0.070801	-69.786	12.1391	49.921	-0.054443	-0.16894	0.023925	-42.198	152.1997	626.04	-0.070801	0.18945	-0.21729	-7.054	-105.107	1126.854	-0.95967	1.0936	-1.2751	-18.707	29.2689	17.722	0.10547	-0.15186	-0.077637	78.222	-16.403	1468.3894	-0.71533	1.0825	-1.9468	-30.986	-152.797	1184.886	-0.96822	0.83957	-1.2331
1.268	-19.155	-7.539	55.8577	0.19309	0.048202	-0.077057	-53.84	63.255	36.8252	-0.091309	-0.12793	-0.0024414	-42.006	181.1095	579.515	-0.022705	0.13159	-0.17041	-36.1549	-94.255	1071.021	-0.98154	1.1503	-1.2659	-13.045	-16.7989	12.7477	0.099904	-0.16523	-0.079004	36.5584	-6.2556	1434.595	-0.7168	1.0879	-1.9375	-18.976	-142.052	1156.754	-1.0568	0.95999	-1.2667
1.27	-19.823	-2.1832	45.01	0.18713	0.054569	-0.08444	-69.005	28.5541	37.4999	-0.13623	-0.066895	-0.041504	-39	135.176	523.2674	0.022949	0.07666	-0.12842	2.762	-85.324	1056.734	-0.97685	1.1729	-1.2612	8.64	-4.341	39.8279	0.093652	-0.171	-0.083301	73.534	-47.866	1437.9839	-0.70801	1.0786	-1.9263	-2.168	-173.869	1162.451	-1.1289	1.0781	-1.2871
1.272	-55.682	-14.2193	43.7529	0.18311	0.064311	-0.091916	-56.46	13.1022	32.39973	-0.16357	-0.041992	-0.064941	-33.444	130.838	484.7453	0.068359	-0.0048828	-0.070313	78.047	-46.739	999.4589	-0.94844	1.1633	-1.2564	4.774	24.9235	20.3023	0.084277	-0.18037	-0.086816	67	5.7414	1464.921	-0.69971	1.0645	-1.916	58.245	-124.701	1139.718	-1.1569	1.1856	-1.2846
1.274	3.691	4.9586	37.21824	0.1744	0.071683	-0.096549	-52.437	51.0989	17.504	-0.20996	0.020996	-0.099121	-15.101	171.3488	421.66665	0.094238	-0.046875	-0.041992	42.305	-68.668	998.05317	-0.91895	1.1431	-1.2407	-13.849	-14.9634	22.4341	0.083399	-0.18526	-0.094531	39.65504	-1.073	1423.094	-0.68506	1.0317	-1.9077	16.2812	-96.85	1084.258	-1.1508	1.2675	-1.2776
1.276	-39.948	16.8542	-0.448999999999998	0.16553	0.080078	-0.1001	-51.289	-1.096	16.665	-0.22924	0.063232	-0.13012	-11.365	126.6207	384.373	0.1377	-0.11719	0.0039063	53.9192	-58.825	1021.2293	-0.89785	1.1157	-1.2059	5.297	37.535	20.6988	0.082031	-0.19092	-0.097168	64.929	-21.4703	1423.946	-0.67236	1.0161	-1.9038	76.835	-103.136	1097.122	-1.1018	1.3168	-1.26
1.278	-57.29	12.6586	32.2612	0.1573	0.092913	-0.10318	-45.071	12.152	29.5259	-0.23877	0.10596	-0.15674	7.717	152.174	354.444	0.16284	-0.16113	0.029541	21.793	-55.352	990.263	-0.88936	1.0965	-1.1601	-21.549	37.308	0.305999999999999	0.086231	-0.19912	-0.10391	43.3355	49.2103	1410.18	-0.64795	0.98975	-1.8862	136.416	-61.606	1083.859	-1.039	1.3288	-1.2288
1.28	-17.031	41.544	16.3327	0.1445	0.098882	-0.10762	-32.392	26.2285	26.0517	-0.24023	0.1543	-0.17969	5.528	150.555	299.5084	0.19043	-0.21045	0.053711	9.244	-105.144	1023.7592	-0.88467	1.0841	-1.1054	-13.065	18.1275	12.3726	0.087305	-0.20801	-0.10654	39.3033	44.2084	1372.71999	-0.62939	0.96923	-1.8716	57.8992	-80.0961	1080.66798	-0.9707	1.3027	-1.1816
1.282	-31.037	23.3832	15.16639	0.13197	0.11058	-0.10172	-38.377	-10.0698	30.06	-0.23096	0.17676	-0.19238	7.002	104.2619	265.3814	0.22314	-0.27637	0.088379	8.201	-89.227	1023.955	-0.88115	1.0747	-1.055	5.902	60.563	25.743	0.090039	-0.21621	-0.11162	44.464	81.498	1393.9917	-0.60986	0.95947	-1.8589	68.753	-93.279	1101.029	-0.9281	1.2421	-1.137
1.284	-3.432	16.92352	46.683	0.11677	0.11749	-0.098526	-27.412	49.08	32.6333	-0.21484	0.21631	-0.20117	19.219	155.5252	218.97	0.23486	-0.30127	0.095703	-33.371	-104.008	1015.712	-0.86719	1.0566	-1.0195	-25.605	-17.6308	48.285	0.093652	-0.22207	-0.11318	3.438	136.605	1367.2065	-0.58008	0.94531	-1.8398	39.493	-81.495	1073.75	-0.91083	1.1687	-1.094
1.286	-41.833	34.755	24.004	0.10059	0.12695	-0.10107	-12.066	35.604	19.2848	-0.18726	0.24024	-0.20605	20.985	112.189	196.31903	0.25146	-0.34131	0.11182	1.339	-145.533	1056.471	-0.84219	1.0231	-1.0051	-46.322	-15.0616	82.111	0.092285	-0.23193	-0.12598	4.3486	88.808	1339.0438	-0.55664	0.93848	-1.8262	3.664	-123.02	1111.6317	-0.91111	1.1049	-1.067
1.288	-51.282	13.3248	30.1337	0.077747	0.1411	-0.096783	-22.873	15.07728	31.727	-0.16162	0.25684	-0.20898	29.387	107.4976	172.5254	0.25439	-0.36963	0.11914	10.741	-141.057	1077.249	-0.81562	0.98398	-1.0062	-25.375	24.9168	83.84	0.083203	-0.25264	-0.14541	24.87077	120.15	1347.27476	-0.51563	0.92578	-1.8086	28.931	-95.452	1139.3874	-0.92173	1.0631	-1.0335
1.29	2.606	31.043	28.208995	0.064862	0.14891	-0.094049	-3.998	53.145	25.2649	-0.125	0.26611	-0.20313	9.267	142.342	130.7252	0.25	-0.38037	0.12012	-51.572	-220.191	1145.049	-0.79883	0.93594	-1.0355	-10.019	6.2705	106.7619	0.069336	-0.26533	-0.17032	-15.5954	112.456	1303.217	-0.48682	0.90625	-1.7779	-19.816	-105.793	1150.613	-0.93164	1.0352	-1.0313
1.292	-54.016	33.717	-1.5181	0.048842	0.16142	-0.088579	-8.185	-0.3127	16.578	-0.10938	0.27295	-0.20117	-0.235999999999997	90.557	119.9168	0.25098	-0.38916	0.10645	-1.734	-259.613	1228.628	-0.79463	0.88877	-1.0858	-1.188	67.0295	165.7634	0.040039	-0.25244	-0.20196	-20.7945	61.2012	1321.5891	-0.46387	0.88135	-1.7554	-26.17	-157.89	1216.499	-0.94818	1.0262	-1.0536
1.294	-37.355	16.7909	29.548	0.032332	0.17412	-0.081644	10.922	16.1604	29.4794	-0.087402	0.2749	-0.19531	16.69	107.641	117.9175	0.24	-0.39184	0.094971	-13.268	-262.678	1240.1335	-0.7998	0.85938	-1.1445	-59.4908	71.7663	184.878	-0.0081053	-0.2083	-0.23125	-2.025	106.3835	1338.5	-0.44482	0.85596	-1.7319	-21.246	-157.1741	1246.521	-0.95927	1.0305	-1.1026
1.296	-23.444	33.2124	21.2822	0.019043	0.18359	-0.080566	30.329	35.7847	23.774	-0.074951	0.27564	-0.1875	-5.353	101.197	99.5465	0.22607	-0.39111	0.079102	-17.852	-296.742	1278.24	-0.82344	0.85312	-1.2189	-55.815	38.3296	235.6036	-0.077148	-0.15479	-0.27295	-21.3524	79.324	1289.3469	-0.43945	0.8457	-1.7109	-49.544	-254.748	1309.2004	-0.96251	1.0571	-1.1583
1.298	-70.2831	10.0467	7.4462	0.0064431	0.19728	-0.077148	-8.59	2.5301	32.248	-0.064453	0.27734	-0.17627	-11.699	52.629	90.355	0.19189	-0.37256	0.043945	-2.152	-202.966	1299.9674	-0.84483	0.86729	-1.2803	8.6	88.755	278.4561	-0.15302	-0.088573	-0.33506	3.918	51.859	1290.367	-0.43115	0.8208	-1.6831	-33.294	-290.975	1373.256	-0.98154	1.103	-1.2274
1.3	-27.68	3.6013	36.754	-0.0033212	0.21094	-0.070995	10.864	51.833	35.72	-0.04541	0.27783	-0.15967	-4.103	75.80496	59.617	0.1665	-0.36035	0.023926	-64.586	-152.61297	1313.0479	-0.87178	0.90205	-1.3402	-11.516	59.131	364.476	-0.22959	-0.017676	-0.39512	-8.927	82.97	1252.5418	-0.43896	0.81519	-1.6599	-28.902	-244.729	1371.483	-0.99951	1.1626	-1.2808
1.302	-42.63	15.48013	22.0272	-0.0099629	0.21875	-0.066307	-4.738	27.3194	17.3655	-0.039551	0.2793	-0.1499	-29.69	13.481	40.405	0.10596	-0.30664	-0.031738	-81.699	-140.0472	1366.433	-0.87969	0.95469	-1.3834	-15.475	92.9589	444.15	-0.29795	0.063965	-0.45098	-13.623	38.703	1212.5696	-0.43896	0.81104	-1.6343	-48.383	-255.074	1390.1211	-1.0158	1.2257	-1.3301
1.304	-66.222	-2.02	35.443	-0.022853	0.22099	-0.067285	-2.666	6.0917	34.586	-0.025391	0.27148	-0.12988	-44.198	0.936	48.7637	0.053222	-0.25415	-0.081299	-96.357	-87.408	1371.4158	-0.88428	1.0024	-1.4136	-17.475	137.8637	469.9373	-0.36885	0.15927	-0.51241	14.274	69.769	1228.038	-0.43506	0.81104	-1.5972	-74.755	-161.653	1418.717	-1.0347	1.2859	-1.3605
1.306	3.983	11.521	36.57	-0.02832	0.22705	-0.056152	0.272999999999996	46.122	43.0144	-0.010742	0.25928	-0.11303	-32.493	28.601	35.888	-0.00048828	-0.19434	-0.12744	-161.006	-139.6253	1375.556	-0.87939	1.0446	-1.4354	-40.523	103.6819	531.622	-0.44531	0.26025	-0.58203	-9.933	111.0163	1184.19734	-0.43359	0.80566	-1.5703	-142.9991	-130.6043	1425.996	-1.0452	1.3338	-1.3733
1.308	-42.92	30.804	3.22	-0.034375	0.23457	-0.051465	-30.165	3.1814	31.4994	-0.0039063	0.24951	-0.098633	-36.224	-7.771	39.481	-0.072754	-0.11377	-0.20361	-158.6411	-118.892	1409.775	-0.87129	1.0715	-1.4637	-13.646	140.927	623.259	-0.52666	0.35889	-0.6542	1.019	82.3584	1175.247	-0.4165	0.79053	-1.519	-118.448	-121.0042	1478.779	-1.0462	1.3473	-1.3894
1.31	-61.018	29.0705	30.5914	-0.040429	0.23985	-0.04375	-20.572	10.42677	53.9498	0.0048828	0.23291	-0.071289	-36.394	39.7019	58.826	-0.11377	-0.068848	-0.23828	-169.923	-47.054	1396.23	-0.84941	1.0808	-1.5074	-32.167	119.4872	711.24	-0.61357	0.45879	-0.72803	12.898	138.3071	1152.208	-0.40209	0.7688	-1.4743	-115.539	-43.102	1499.4698	-1.0391	1.332	-1.4199
1.312	-11.411	53.997	39.8946	-0.046679	0.24649	-0.041798	-37.964	22.6773	33.1158	0.0029297	0.22949	-0.058594	-71.6624	57.4929	34.87547	-0.18213	0.016602	-0.3208	-175.0131	-59.006	1406.826	-0.81768	1.0815	-1.5618	-23.78	50.3605	826.391	-0.71084	0.55528	-0.80967	-8.581	157.668	1070.9393	-0.37988	0.74365	-1.4258	-192.497	-57.2927	1511.0884	-1.0283	1.3006	-1.4447
1.314	-39.512	46.744	28.2576	-0.045801	0.25127	-0.035938	-59.12	-14.3456	32.07	-0.0039063	0.21484	-0.033691	-86.5788	18.5224	41.5232	-0.23389	0.083985	-0.38159	-136.7374	-3.309	1412.095	-0.79053	1.0669	-1.6226	-17.29	67.642	876.379	-0.81563	0.65937	-0.90195	16.683	135.47097	1061.9863	-0.35156	0.70117	-1.3496	-174.847	-26.632	1540.9222	-1.0249	1.2661	-1.4885
1.316	-27.129	4.231	92.695	-0.050781	0.25928	-0.036621	-38.809	33.8733	33.3339	-0.0092773	0.20386	-0.017578	-53.001	65.771	41.5036	-0.27783	0.15381	-0.43164	-145.11	-24.583	1416.742	-0.78213	1.0501	-1.6885	-33.936	-19.456	930.387	-0.9375	0.78125	-0.99023	11.275	206.768	1034.0045	-0.33594	0.67773	-1.3125	-154.873	26.438	1500.678	-1.0245	1.2368	-1.5412
1.318	-34.857	-2.669	78.02	-0.045996	0.26347	-0.042969	-50.737	16.9451	15.7083	-0.018555	0.19092	-0.0014648	-73.5831	23.8801	36.1952	-0.32764	0.24414	-0.48486	-126.43	-84.21	1459.789	-0.78857	1.0443	-1.769	-24.436	-56.618	987.569	-1.0616	0.93184	-1.0752	22.475	174.114	971.275	-0.30078	0.61328	-1.2324	-145.914	-6.984	1507.8163	-1.0403	1.2151	-1.6075
1.32	-73.176	-23.7464	111.9778	-0.047949	0.25595	-0.05713	-58.584	8.2865	39.08	-0.024414	0.17578	0.012207	-67.832	17.4422	38.1772	-0.34521	0.28955	-0.50732	-79.29	-63.5571	1497.396	-0.80303	1.0681	-1.8616	-36.503	-67.169	986.0267	-1.1863	1.0836	-1.157	26.463	154.9676	966.3672	-0.27173	0.56763	-1.1668	-84.458	27.4835	1528.0941	-1.0566	1.2129	-1.6855
1.322	-4.183	18.9143	118.68481	-0.0542	0.24541	-0.093458	-59.6859	37.7435	42.6489	-0.027832	0.16699	0.019531	-56.426	44.069	15.804	-0.38086	0.37793	-0.54688	-110.493	-130.53	1524.321	-0.81797	1.1106	-1.9488	-16.174	-139.212	980.6905	-1.2855	1.232	-1.2383	-19.961	179.68	918.494	-0.24609	0.52051	-1.105	-108.232	-16.8768	1520.6757	-1.0803	1.2313	-1.766
1.324	-76.002	47.5785	163.8944	-0.070313	0.24492	-0.12588	-68.4197	-17.7009	32.9308	-0.033691	0.1416	0.026367	-64.284	4.1996	7.3486	-0.38843	0.43458	-0.56201	-104.045	-119.593	1541.704	-0.83301	1.166	-2.0293	-0.619999999999997	-120.83	975.77	-1.3379	1.3619	-1.2977	2.773	121.7676	888.9379	-0.21094	0.46191	-1.0229	-94.465	-93.955	1572.255	-1.1047	1.273	-1.8432
1.326	-65.976	31.1319	240.2587	-0.090332	0.25928	-0.16699	-51.38	-1.907	49.6996	-0.025879	0.12475	0.034668	-38.573	45.046	12.9283	-0.38672	0.47803	-0.56494	-95.086	-97.756	1517.554	-0.85215	1.2398	-2.1145	-55.741	-138.564	968.337	-1.3296	1.4595	-1.3335	0.095000000000006	159.0719	898.2616	-0.19434	0.43164	-0.99023	-77.637	-63.495	1586.2771	-1.1348	1.3359	-1.921
1.328	-30.421	29.5172	283.04	-0.12139	0.27461	-0.21396	-56.298	21.8508	22.547	-0.017578	0.10889	0.045898	-25.498	45.411	9.5396	-0.36475	0.50391	-0.54395	-119.707	-147.543	1516.508	-0.88389	1.3239	-2.1964	-74.18	-185.569	986.75	-1.2814	1.4822	-1.3459	-44.214	171.5806	832.5551	-0.17041	0.38672	-0.9126	-85.463	-121.729	1590.631	-1.1667	1.413	-1.987
1.33	-61.119	14.121	328.461	-0.16475	0.28096	-0.27607	-43.993	-16.1821	24.49164	-0.0039063	0.078125	0.063965	-22.243	5.175	36.892	-0.34033	0.49854	-0.52002	-82.012	-101.784	1518.968	-0.9167	1.4223	-2.2698	-54.179	-140.942	939.391	-1.2129	1.4543	-1.3414	-46.318	112.525	815.5791	-0.15503	0.36011	-0.85376	-60.818	-119.163	1606.913	-1.2051	1.5039	-2.0449
1.332	-32.584	39.875	450.731	-0.20498	0.28955	-0.34678	-29.546	35.796	32.523	0.0063477	0.064941	0.066406	-1.825	38.6401	44.886	-0.28613	0.4751	-0.47168	-98.208	-102.429	1493.6712	-0.96152	1.5283	-2.3217	-64.995	-176.405	892.89	-1.1434	1.3762	-1.3258	-47.856	173.1209	814.566	-0.14307	0.33545	-0.7998	-70.423	-93.89	1575.548	-1.2386	1.5997	-2.1007
1.334	-45.551	91.985	539.7607	-0.25489	0.30479	-0.425	-49.241	15.8626	16.5554	0.022461	0.031738	0.085938	-9.209	-2.8181	42.07761	-0.23486	0.42065	-0.4231	-81.435	-97.955141	1520.527	-1.0039	1.6387	-2.3613	-53.291	-168.907	921.161	-1.0849	1.2522	-1.2993	-87.5745	142.521	743.7105	-0.12305	0.31055	-0.72266	-112.815	-145.835	1567.046	-1.2694	1.7055	-2.1491
1.336	-82.498	89.291	604.2344	-0.31299	0.32715	-0.50732	-43.775	-0.4496	28.6494	0.04126	0.01001	0.08667	-6.434	-13.7412	65.151	-0.18604	0.35645	-0.36768	-41.154	-15.783	1517.13547	-1.0308	1.7442	-2.3983	-56.34	-129.96379	929.86907	-1.0444	1.0923	-1.2456	-55.837	123.938	743.149	-0.11035	0.2959	-0.6875	-85.902	-79.78376	1563.143	-1.2898	1.7962	-2.1804
1.338	-26.909	94.6371	668.873	-0.37129	0.36386	-0.60098	-25.077	24.2756	36.3547	0.054199	-0.01709	0.096191	5.24	28.8335	37.182	-0.12793	0.25684	-0.2832	-39.917	-31.358	1495.7112	-1.0441	1.8345	-2.4148	-61.83	-157.826	941.6246	-1.0179	0.90596	-1.1811	-77.969	175.3061	694.025	-0.088379	0.28174	-0.61279	-93.375	-49.284	1539.8291	-1.3017	1.8623	-2.199
1.34	-53.634	74.697	750.77	-0.43339	0.40781	-0.69727	-20.457	-26.7245	17.8904	0.070801	-0.044922	0.10205	6.245	-9.94	37.223	-0.10449	0.20996	-0.24658	-20.044	-23.1259	1496.395	-1.055	1.9017	-2.4132	-56.926	-124.297	943.437	-0.99219	0.72578	-1.1114	-98.638	135.73	613.575	-0.061523	0.24902	-0.54102	-69.224	-34.904	1550.459	-1.2998	1.9102	-2.2051
1.342	-33.7	27.5738	914.70743	-0.50293	0.44766	-0.79414	4.453	4.0183	23.1851	0.078613	-0.061523	0.10693	0.565999999999995	29.537	29.9287	-0.061523	0.13232	-0.16699	-18.1	14.327	1464.147	-1.0676	1.9281	-2.389	-50.062	-134.579	936.928	-0.95391	0.58438	-1.0582	-67.229	172.025	599.735	-0.047852	0.23584	-0.49707	-22.595	31.693	1532.7956	-1.2862	1.9282	-2.194
1.344	-3.423	29.4787	1006.1222	-0.58174	0.48935	-0.89541	2.27	28.3299	9.036	0.09375	-0.090332	0.10889	-12.49	37.461	8.307	-0.04126	0.088135	-0.11694	-44.209	-14.6084	1465.9633	-1.0811	1.9258	-2.3574	-33.171	-178.293	969.694	-0.91758	0.50449	-1.0154	-93.936	220.363	537.226	-0.024414	0.20508	-0.42529	-40.9	2.813	1486.883	-1.2738	1.9255	-2.1698
1.346	-42.249	-11.967	1034.6139	-0.66797	0.53906	-0.99805	2.672	-5.44163	18.0894	0.099853	-0.11133	0.1128	-5.27500000000001	3.9398	24.71213	-0.022461	0.062012	-0.070313	-20.665	42.2663	1482.9932	-1.096	1.8966	-2.3167	-37.9009	-133.656	982.12	-0.88086	0.4707	-0.99414	-98.934	167.9162	497.306	-0.0078123	0.18237	-0.37573	-36.225	19.9428	1485.885	-1.2522	1.911	-2.1405
1.348	-50.727	-65.056	1100.94	-0.75722	0.61211	-1.0826	23.549	41.1718	21.1537	0.10693	-0.13184	0.10938	18.267	46.196	39.7562	-0.0019531	0.036621	-0.018066	-73.585	37.355	1470.35745	-1.1101	1.842	-2.2668	-45.186	-185.865	1020.306	-0.84532	0.46348	-0.99844	-77.175	209.597	484.23018	0.0039063	0.15527	-0.32861	-65.945	66.267	1444.875	-1.2308	1.8743	-2.096
1.35	-93.71	-91.344	1111.68	-0.85723	0.69844	-1.1539	6.614	16.9583	6.47896	0.12158	-0.15674	0.10547	-22.832	4.504	33.188	0.0068359	0.03418	0	-94.994	12.9108	1473.2265	-1.1321	1.7686	-2.2136	-37.235	-239.0723	1110.6079	-0.80107	0.46601	-1.0031	-85.861	193.355	412.012	0.023926	0.12012	-0.27148	-99.485	7.128	1465.1003	-1.2207	1.8184	-2.0508
1.352	-121.482	-143.073	1129.1532	-0.96621	0.79883	-1.2105	6.525	1.4742	19.32881	0.12744	-0.16406	0.10645	-10.378	-3.3496	38.575	0.016602	0.024902	0.032227	-62.713	40.6249	1463.096	-1.1532	1.6999	-2.1626	-31.067	-255.169	1139.961	-0.75459	0.475	-1.0135	-87.256	148.7143	391.5923	0.03418	0.10205	-0.24268	-76.376	50.3615	1459.4838	-1.2186	1.7487	-2.0025
1.354	-14.901	-144.758	1140.2655	-1.0663	0.91221	-1.2452	-0.164000000000001	42.239	21.0919	0.13721	-0.18506	0.10645	-4.509	36.886	18.033	0.021241	0.017334	0.063477	-140.1	-23.7533	1459.3562	-1.1797	1.6289	-2.1211	2.85	-321.006	1178.069	-0.71963	0.47627	-1.0386	-79.678	197.399	371.5663	0.044922	0.067871	-0.19238	-122.597	28.8773	1425.699	-1.2195	1.6853	-1.9597
1.356	-46.499	-131.593	1109.7811	-1.1343	1.019	-1.2808	-19.883	8.5952	23.1251	0.14746	-0.2085	0.10645	-43.255	0.9273	9.8473	0.029785	0.0092773	0.084961	-108.213	-33.85	1481.7624	-1.1884	1.5794	-2.0884	42.9499	-295.804	1217.8056	-0.69775	0.48291	-1.0708	-64.382	156.69	301.807	0.052978	0.04419	-0.15845	-135.368	-14.7448	1456.831	-1.2315	1.6365	-1.9257
1.358	-46.4265	-167.45	1155.144	-1.1646	1.1065	-1.2872	-6.302	23.007	29.4331	0.14941	-0.21338	0.097168	-35.853	39.819	36.6924	0.040527	0.0039063	0.11377	-110.595	-12.5263	1461.681	-1.1968	1.538	-2.0557	41.6935	-264.017	1211	-0.70928	0.51045	-1.1167	-63.516	142.4141	296.0021	0.061035	0.022461	-0.13086	-116.4115	24.733	1458.366	-1.2356	1.5971	-1.8947
1.36	22.1951	-152.488	1131.341	-1.1566	1.1691	-1.291	-19.662	30.8825	10.038	0.15674	-0.22949	0.09082	-35.402	34.9129	30.9647	0.040039	0.0058594	0.12109	-152.57748	-48.021	1475.5295	-1.2026	1.4954	-2.0256	40.6964	-248.704	1249.078	-0.75127	0.57861	-1.1745	-60.443	186.982	273.55235	0.069336	0	-0.093262	-164.9786	-17.5714	1442.5251	-1.2397	1.561	-1.8706
1.362	-15.5748	-137.722	1101.737	-1.1129	1.2176	-1.2965	-46.925	-12.3552	5.56095	0.16455	-0.23828	0.089112	-64.874	-7.2926	33.415	0.042969	-0.0019531	0.13916	-110.6877	11.348	1480.5605	-1.2077	1.4675	-2.0073	55.892	-164.455	1294.235	-0.80478	0.66885	-1.2374	-52.075	89.09	246.40807	0.072754	-0.0073242	-0.074707	-132.176	-9.9821	1470.877	-1.2449	1.5223	-1.8395
1.364	81.28	-119.746	1094.921	-1.0492	1.2477	-1.2933	-20.64	28.9314	30.4206	0.16943	-0.24951	0.07666	-51.522	23.5143	36.6275	0.042969	-0.011719	0.14941	-125.7429	22.048	1442.9486	-1.2007	1.4458	-1.9858	64.458	-176.634	1332.874	-0.85898	0.7707	-1.2902	-16.406	109.363	252.8975	0.075684	-0.023926	-0.050293	-132.8155	31.123	1431.0551	-1.2469	1.4863	-1.8059
1.366	85.345	-85.6825	1066.7238	-0.98584	1.2563	-1.2847	-36.571	25.9668	14.4263	0.17578	-0.25537	0.063477	-95.96679	-8.5263	25	0.043945	-0.023438	0.15576	-122.877	29.062	1437.502	-1.1864	1.4225	-1.9556	80.41	-181.014	1402.432	-0.90576	0.87158	-1.3335	-10.619	117.6166	215.3398	0.079101	-0.031739	-0.038086	-149.378	-7.508	1430.9866	-1.2426	1.4485	-1.7734
1.368	12.678	-112.92362	1082.766	-0.92842	1.2423	-1.2608	-52.239	14.8001	21.2358	0.18115	-0.25928	0.058594	-79.329	-3.3086	50.529	0.033691	-0.032227	0.15576	-109.193	92.0709	1414.668	-1.164	1.3903	-1.919	59.194	-124.858	1378.702	-0.90889	0.94365	-1.3611	-22.599	54.58	200.347	0.077148	-0.035156	-0.030762	-85.023	52.807	1423.4244	-1.2411	1.4214	-1.7431
1.37	35.597	-109.048	1098.2104	-0.88799	1.2204	-1.239	-28.959	58.746	27.9594	0.18604	-0.2583	0.046875	-41.108	27.9725	33.8558	0.034668	-0.035645	0.15332	-126.6256	81.2055	1373.78775	-1.1484	1.3591	-1.88	65.896	-128.578	1362.8018	-0.88164	0.9832	-1.3817	5.777	88.7841	193.029	0.073242	-0.029785	-0.020996	-115.811	75.148	1395.6973	-1.2241	1.3853	-1.7183
1.372	9.72	-111.559	1056.109	-0.87119	1.1981	-1.2073	-65.724	7.3072	25.5763	0.19312	-0.25684	0.028809	-61.579	-18.9455	15.7577	0.041016	-0.040039	0.14209	-96.4441	105.233	1377.311	-1.1388	1.3299	-1.8381	93.797	-64.906	1369.765	-0.83984	0.975	-1.3945	-18.703	64.6784	138.9984	0.067383	-0.025879	-0.019043	-103.014	91.763	1388.697	-1.2052	1.339	-1.6821
1.374	2.217	-154.467	1099.6673	-0.86006	1.1883	-1.1593	-59.599	18.591	54.084	0.19824	-0.25098	0.017578	-54.937	-1.645	36.6728	0.046875	-0.048828	0.13721	-85.2565	133.376	1332.11	-1.1299	1.3125	-1.7988	78.056	-30.761	1347.684	-0.7877	0.92783	-1.4124	-15.327	20.441	130.4685	0.049805	-0.013184	-0.023438	-68.408	166.0031	1345.6137	-1.1836	1.2894	-1.6465
1.376	16.107	-133.714	1100.7958	-0.854	1.1763	-1.1069	-45.756	34.53638	34.2122	0.20459	-0.24023	-0.0068359	-44.576	7.1859	9.357	0.054199	-0.054199	0.12646	-97.947	94.155	1305.31015	-1.1197	1.296	-1.756	93.508	-79.057	1391.5095	-0.75928	0.86768	-1.4429	-4.058	79.1679	106.8317	0.029541	0.00097655	-0.032471	-98.304	163.962	1304.60322	-1.1593	1.2457	-1.6074
1.378	-23.285	-156.758	1094.221	-0.84687	1.1664	-1.0793	-76.7554	-1.7148	26.8615	0.2085	-0.23145	-0.014648	-53.517	1.839	33.277	0.057617	-0.062988	0.11084	-46.248	126.275	1278.4765	-1.1073	1.2735	-1.7085	114.962	-58.2	1407.6075	-0.76963	0.8331	-1.479	-30.171	34.1217	89.2759	0.0029297	0.018066	-0.043945	-73.347	174.719	1293.9591	-1.1279	1.2064	-1.5635
1.38	-13.778	-179.619	1152.662	-0.82393	1.1458	-1.0706	-44.385	46.868	45.2583	0.20508	-0.20459	-0.036133	-31.013	63.556	33.50705	0.073242	-0.063965	0.10059	-82.474	120.081	1247.9684	-1.0933	1.2407	-1.6601	83.583	-104.87922	1414.9342	-0.8167	0.8415	-1.5355	-9.315	67.928	119.661	-0.033203	0.042969	-0.061035	-54.381	199.832	1260.008	-1.1069	1.1665	-1.5151
1.382	-24.204	-180.7777	1169.352	-0.7958	1.1192	-1.0956	-65.44	34.4462	14.525	0.19824	-0.18481	-0.052002	-24.976	27.0839	21.7842	0.091309	-0.067871	0.077148	-49.221	98.9527	1242.22	-1.075	1.2137	-1.6078	59.437	-136.486	1465.935	-0.8917	0.88291	-1.6112	-13.315	106.483	73.0931	-0.055176	0.058594	-0.073242	-51.813	138.534	1234.6476	-1.0754	1.1309	-1.4748
1.384	-40.076	-263.418	1257.326	-0.76885	1.0865	-1.1391	-51.485	11.1513	30.0891	0.18945	-0.16016	-0.069824	-18.773	4.0378	30.598	0.10278	-0.071289	0.05664	2.405	137.508	1227.3487	-1.0513	1.1821	-1.5532	41.793	-90.101	1457.3563	-0.97902	0.96535	-1.7036	-43.287	40.3	52.010659	-0.104	0.089844	-0.097168	-28.273	155.245	1223.8687	-1.0487	1.0958	-1.4233
1.386	28.25	-275.894	1318.646	-0.75	1.0527	-1.1934	-33.76	47.386	20.21884	0.17383	-0.13672	-0.091309	-4.187	30.5247	17.057	0.11963	-0.075195	0.042969	-37.132	93.1123	1206.647	-1.0159	1.1509	-1.5065	57.022	-117.459	1478.66	-1.0586	1.0879	-1.8008	-22.674	57.7137	77.075	-0.13745	0.12256	-0.11646	-44.41	138.857	1191.9965	-1.0206	1.0552	-1.3781
1.388	3.861	-281.044	1307.932	-0.75752	1.0456	-1.2525	-53.368	-3.11314	19.9148	0.16748	-0.12012	-0.104	-20.937	-11.94353	22.2982	0.14941	-0.079102	0.01416	22.136	85.989	1209.595	-0.98174	1.1111	-1.4581	56.469	-112.369	1519.756	-1.1281	1.2385	-1.9012	-34.496	45.2399	37.2958	-0.17285	0.1499	-0.13184	-30.915	99.214	1203.886	-0.99402	1.0218	-1.3278
1.39	-17.071	-275.508	1338.222	-0.78184	1.0648	-1.2996	-10.327	15.4093	58.58	0.16406	-0.099609	-0.12549	20.935	31.7882	35.464	0.16113	-0.082031	0.0014648	40.238	104.529	1164.303	-0.94853	1.0544	-1.3976	11.2869	-99.12	1508.807	-1.1808	1.3755	-1.9843	-38.124	-10.19	59.1638	-0.20898	0.19141	-0.15381	27.574	143.1602	1172.3202	-0.96094	0.99414	-1.2773
1.392	-21.646	-174.0747	1349.413	-0.83105	1.1062	-1.334	-3.25	33.2161	45.1355	0.16358	-0.083985	-0.13745	-18.417	45.921	23.2891	0.19238	-0.094238	-0.021973	-6.132	59.838	1115.115	-0.92773	0.99218	-1.3407	39.179	-128.539	1548.798	-1.2097	1.4942	-2.0686	-28.644	47.498	68.2487	-0.21777	0.20508	-0.15674	-4.853	108.491	1131.205	-0.93154	0.96728	-1.2273
1.394	-100.362	-151.67443	1361.354	-0.88164	1.1545	-1.36	-6.891	-6.0652	45.632	0.16406	-0.074707	-0.1582	-7.10700000000001	4.885	18.2821	0.2146	-0.10425	-0.044922	38.38	114.94271	1100.183	-0.89795	0.93994	-1.2847	21.9627	-58.9843	1541.719	-1.2188	1.58	-2.1356	-64.9713	7.724	15.262	-0.22852	0.23145	-0.16553	15.883	111.878	1120.952	-0.90488	0.94219	-1.1805
1.396	-99.39	-150.4307	1408.358	-0.92188	1.1953	-1.3809	7.879	26.0286	41.2133	0.15967	-0.078613	-0.18896	17.745	42.49	13.339	0.24219	-0.11865	-0.062988	-13.922	132.823	1054.1202	-0.86103	0.89268	-1.2327	31.5757	-40.7756	1505.0439	-1.2148	1.6318	-2.1836	-57.383	-7.842	51.962	-0.22265	0.23388	-0.16137	18.436	139.2636	1081.701	-0.87324	0.91758	-1.1222
1.398	-121.016	-121.6	1401.5033	-0.92969	1.2203	-1.4149	-1.607	-4.876	61.14803	0.14844	-0.088867	-0.20996	-22.662	8.4841	-0.388000000000002	0.27393	-0.13281	-0.080566	3.851	132.6253	1044.781	-0.82227	0.83984	-1.1836	56.817	-54.572	1504.8307	-1.2104	1.651	-2.206	-55.886	37.81877	50.0086	-0.21436	0.23242	-0.15283	-25.466	93.228	1041.319	-0.84082	0.8875	-1.0731
1.4	-163.8306	-161.083	1424.557	-0.91914	1.2238	-1.4508	6.448	-29.1	94.2985	0.11963	-0.077637	-0.24707	12.994	6.3353	48.987	0.28857	-0.13721	-0.091309	26.509	179.458	1010.5919	-0.78359	0.79102	-1.123	23.6756	-12.3122	1482.274	-1.2116	1.6447	-2.2097	-61.117	-20.16365	18.1647	-0.18701	0.21045	-0.13818	4.621	146.1083	1017.541	-0.80615	0.86572	-1.019
1.402	-156.342	-94.646	1434.6515	-0.90508	1.2113	-1.4875	9.517	32.475	100.3183	0.07251	-0.03711	-0.27417	-1.211	32.1863	38.5132	0.31445	-0.15674	-0.10742	-32.319	146.3355	955.29056	-0.7458	0.73799	-1.0728	57.901	-46.047	1486.9909	-1.2151	1.6161	-2.185	-35.267	0.942	50.9529	-0.17139	0.1958	-0.125	-36.715	144.017	952.7463	-0.76631	0.8375	-0.96855
1.404	-169.736	-42.193	1415.12	-0.90557	1.1823	-1.5356	33.8343	13.344	102.1572	0.0092773	0.013184	-0.30225	-29.778	-5.458	31.22	0.32153	-0.16431	-0.11792	-5.838	158.4528	922.2868	-0.7168	0.69531	-1.0166	53.132	-17.3677	1508.548	-1.2297	1.5535	-2.1477	-50.363	15.5963	37.8852	-0.1416	0.15967	-0.095703	-10.448	147.0529	924.6493	-0.72149	0.80234	-0.91485
1.406	-149.7575	-57.157	1439.5266	-0.92139	1.1685	-1.5952	26.3397	33.2575	144.517	-0.091797	0.08252	-0.37109	-11.179	13.5454	40.7565	0.32666	-0.17529	-0.12793	-19.926	193.692	875.957	-0.68448	0.66377	-0.96182	46.836	34.07	1494.24057	-1.2363	1.4727	-2.1133	-66.23	-40.2	31.936	-0.11719	0.12939	-0.068115	0.414000000000001	215.647	879.167	-0.67657	0.75508	-0.85742
1.408	-71.735	-21.348	1436.6697	-0.95674	1.1714	-1.6591	-12.768	56.9499	188.536	-0.13232	0.11377	-0.40771	-32.673	27.9947	11.093	0.31348	-0.16504	-0.14014	-57.534	181.222	837.0488	-0.64258	0.63281	-0.91025	73.69	-4.418	1524.978	-1.2267	1.3757	-2.0684	-31.089	29.3434	41.6036	-0.09668	0.097656	-0.042969	-69.3318	204.379	815.24	-0.63135	0.70849	-0.79951
1.41	-113.588	-69.903	1441.8739	-1.0039	1.1914	-1.7258	0.124000000000002	10.611	220.4176	-0.21777	0.18896	-0.48145	-50.424	11.1256	27.837	0.3042	-0.16553	-0.14746	-18.186	198.4831	813.8522	-0.60664	0.60625	-0.85713	77.729	51.01	1512.8426	-1.2223	1.2746	-2.0086	-40.757	15.5019	-8.7581	-0.068848	0.054199	-0.0068359	-39.162	209.235	814.058	-0.59131	0.66455	-0.73193
1.412	-111.216	-121.196	1499.3306	-1.0575	1.2277	-1.7973	35.898	58.242	276.489	-0.28199	0.25391	-0.53028	-27.913	63.236	34.5996	0.28857	-0.1543	-0.16162	-41.846	184.2356	762.937	-0.56299	0.57647	-0.80576	85.97	13.1251	1485.8893	-1.2395	1.1996	-1.9602	-17.936	-4.277	-2.0401	-0.058594	0.035156	0.0097656	-34.522	215.488	753.3605	-0.54492	0.61328	-0.67383
1.414	-82.331	-94.714	1521.6508	-1.1055	1.2801	-1.8668	18.698	84.761	325.30552	-0.34814	0.31885	-0.57373	-48.038	35.86	17.4587	0.27343	-0.13477	-0.1709	-65.2097	157.628	756.7632	-0.51367	0.54688	-0.75098	95.216	-26.4491	1523.7811	-1.2594	1.1676	-1.9365	11.502	66.197	26.2353	-0.03418	0.0019531	0.042969	-69.317	160.543	712.8108	-0.4917	0.56338	-0.61475
1.416	-115.686	-130.662	1531.837	-1.1387	1.3535	-1.9336	1.699	86.651	405.509	-0.44971	0.40088	-0.66357	-63.8598	24.0903	30.9964	0.25928	-0.12012	-0.17871	-50.7072	181.8719	737.5219	-0.46651	0.51182	-0.7002	101.44	6.3229	1521.9366	-1.2837	1.1646	-1.9312	-21.701	20.092	1.766	-0.017334	-0.031251	0.062011	-13.382	179.333	694.4632	-0.44013	0.51143	-0.56513
1.418	-82.727	-99.589	1542.535	-1.172	1.4378	-1.9978	7.576	145.3864	449.5953	-0.49658	0.43896	-0.70459	-55.2434	38.8294	27.61	0.23486	-0.095215	-0.1875	-71.38291	160.395	697.8981	-0.42197	0.48037	-0.64541	101.889	-43.942	1508.897	-1.2971	1.1882	-1.9341	-4.16399999999999	31.4952	25.28	0.0063477	-0.058594	0.07959	-38.443	165.3265	626.738	-0.38242	0.45684	-0.50605
1.42	-105.255	-108.258	1514.299	-1.1921	1.5313	-2.0534	-56.687	106.9981	486.505	-0.59717	0.52295	-0.78271	-84.45	-16.0472	36.0654	0.2251	-0.085938	-0.19287	-41.317	155.625	678.356	-0.37276	0.44443	-0.59385	106.195	-14.693	1521.726	-1.3003	1.211	-1.9404	11.121	64.056	24.5142	0.024414	-0.094727	0.10059	-51.653	145.804	599.686	-0.33105	0.4043	-0.44824
1.422	-125.431	-169.622	1525.52	-1.2108	1.622	-2.1026	-72.08	105.5767	568.9922	-0.66748	0.58008	-0.84375	-54.642	16.5766	49.0936	0.19775	-0.0625	-0.20459	-75.523	156.4453	609.4002	-0.32363	0.40625	-0.54121	87.495	-9.243	1495.7813	-1.3022	1.2334	-1.9439	-25.909	-24.627	5.66526	0.03418	-0.11133	0.10693	-28.126	161.4244	583.0607	-0.28066	0.35752	-0.39854
1.424	-87.805	-104.6291	1515.1843	-1.2306	1.7136	-2.1392	-56.798	106.443	618.083	-0.73096	0.63525	-0.8999	-52.422	36.9107	25.3783	0.18286	-0.04541	-0.20532	-95.374	114.826	577.8735	-0.2793	0.36768	-0.4873	113.423	-55.676	1502.546	-1.3064	1.2513	-1.9412	1.596	8.7968	33.1638	0.049316	-0.14453	0.1123	-72.0232	118.252	550.368	-0.23467	0.30811	-0.34746
1.426	-115.934	-95.1083	1512.2833	-1.2461	1.7852	-2.168	-54.151	43.186	674.67	-0.80762	0.69922	-0.97852	-74.039	8.1134	34.0045	0.16992	-0.032227	-0.21582	-23.933	116.709	540.6926	-0.23173	0.31465	-0.43574	110.79	13.229	1489.513	-1.3066	1.2578	-1.9316	-2.879	22.968	14.9336	0.049805	-0.16114	0.11744	-31.595	111.505	537.601	-0.19053	0.2624	-0.30019
1.428	-65.07	-68.126	1540.883	-1.2601	1.8431	-2.1765	-77.069	59.344	741.1243	-0.83154	0.73291	-1.0112	-42.311	49.046	40.4994	0.14893	-0.019043	-0.20703	-56.019	122.119	491.8187	-0.18642	0.26328	-0.3833	76.872	16.321	1455.6326	-1.2991	1.2495	-1.915	-8.861	-5.22698	2.687	0.050781	-0.17725	0.11865	-6.749	118.17697	469.456	-0.14287	0.21797	-0.25225
1.43	-39.976	-12.245	1499.877	-1.2672	1.8785	-2.1649	-113.381	20.8003	768.962	-0.87207	0.78125	-1.0625	-55.194	2.69043	35.0761	0.14404	-0.013184	-0.20947	-33.572	109.423	475.575	-0.13721	0.21485	-0.33994	114.024	42.9413	1448.43487	-1.2883	1.2212	-1.8845	9.95	62.453	36.1712	0.052246	-0.18555	0.12207	-44.65	89.059	426.345	-0.10303	0.17236	-0.21387
1.432	-54.213	-53.41667	1463.753	-1.2707	1.8968	-2.1402	-141.3872	-26.20506	808.0476	-0.88086	0.81397	-1.0894	-30.98	-2.8263	45.332	0.13672	-0.011719	-0.2002	0.860999999999997	140.3296	432.0147	-0.087502	0.16406	-0.29541	94.083	93.443	1413.24	-1.2684	1.1895	-1.8521	-26.929	8.5746	19.8576	0.048828	-0.18945	0.12158	7.182	117.279	390.4152	-0.059082	0.12451	-0.16914
1.434	-32.35	-17.233	1467.133	-1.2663	1.8874	-2.102	-72.885	-8.9011	802.9639	-0.87891	0.83789	-1.1094	-18.637	13.65901	26.6232	0.1311	-0.011963	-0.19751	-31.975	136.7775	382.106	-0.040527	0.11475	-0.24902	68.591	61.205	1393.03942	-1.2444	1.1575	-1.822	-11.807	-24.2164	42.562	0.053223	-0.1875	0.11914	-11.948	119.7051	335.0472	-0.020996	0.079492	-0.13057
1.436	-52.851	6.002	1449.224	-1.2651	1.8657	-2.0542	-56.549	-67.024	807.2824	-0.84521	0.85205	-1.1138	-30.523	-19.614	23.907	0.13428	-0.018555	-0.18994	29.417	134.2462	354.0951	0.0065427	0.066309	-0.20401	56.919	78.551	1390.34275	-1.2085	1.1216	-1.7944	7.322	34.6456	36.6315	0.058837	-0.17749	0.11084	5.334	110.269	292.0242	0.017676	0.036914	-0.091895
1.438	-51.298	-16.2522	1480.28	-1.2751	1.8206	-1.9997	-47.488	-72.256	861.407	-0.81836	0.8457	-1.1191	-19.65	17.2158	48.6731	0.13232	-0.033203	-0.18359	23.905	146.824	298.115	0.047851	0.011622	-0.16348	50.733	99.01	1364.308	-1.1723	1.0834	-1.7568	-36.197	-16.382	11.4923	0.065918	-0.16699	0.10693	22.12	134.395	254.2789	0.054297	-0.0091796	-0.068457
1.44	-57.014	35.603	1465.8	-1.285	1.7708	-1.9549	-74.40874	-61.5547	853.819	-0.74561	0.80908	-1.1187	-12.896	27.905	17.4086	0.14356	-0.050049	-0.17358	-11.713	106.2442	260.7458	0.086523	-0.041112	-0.12246	52.774	77.8841	1355.3482	-1.1431	1.0425	-1.7188	-29.291	31.5827	46.3154	0.075195	-0.15576	0.09375	-4.64	127.125	225.9647	0.096191	-0.052734	-0.040039
1.442	-120.7565	-5.321	1439.401	-1.301	1.7251	-1.9117	-110.4263	-117.689	866.567	-0.69433	0.76318	-1.124	-8.543	3.15477	37.603	0.14795	-0.067383	-0.1626	57.236	101.425	241.8269	0.11836	-0.092772	-0.089454	21.744	135.322	1340.32	-1.1228	1.009	-1.6874	-30.302	66.143	28.8959	0.083984	-0.14893	0.078125	37.338	145.794	230.4354	0.12617	-0.097168	-0.007422
1.444	-96.096	-32.5052	1448.979	-1.319	1.6826	-1.8795	-77.455	-95.516	873.904	-0.64893	0.70752	-1.1323	27.836	42.265	34.38	0.14893	-0.088379	-0.15137	-12.621	114.079	203.156	0.15283	-0.1416	-0.055176	15.5433	121.0758	1292.674	-1.1035	0.99139	-1.6518	-60.444	-2.578963	22.6232	0.095215	-0.12646	0.066406	19.054	171.938	180.5552	0.15498	-0.14091	0.016211
1.446	-89.249	8.221	1438.456	-1.3394	1.645	-1.8491	-84.986	-112.883	823.693	-0.60791	0.63477	-1.1484	-14.121	18.0348	22.7201	0.14893	-0.10498	-0.14746	3.394	81.686	193.7173	0.1793	-0.1793	-0.033495	30.6142	90	1302.6913032	-1.0757	0.97314	-1.6245	-35.959	54.9	35.124	0.10766	-0.12133	0.053955	-17.445	137.6246	129.65323	0.18389	-0.18115	0.036524
1.448	-135.272	-34.7505	1461.722	-1.3536	1.6101	-1.8239	-91.33	-115.211	817.667	-0.59668	0.61328	-1.1641	2.57	15.0993	39.5196	0.14209	-0.11768	-0.13916	51.861	96.213	165.283	0.2042	-0.21836	-0.013769	14.3906	120.4	1273.899	-1.0395	0.94954	-1.5909	-58.897	32.699	19.19165	0.12109	-0.11328	0.044434	30.839	113.934	127.0105	0.20244	-0.2166	0.050586
1.45	-103.526	-10.099	1470.082	-1.3624	1.5844	-1.8065	-74.434	-49.521	793.471	-0.5957	0.58203	-1.1797	15.178	42.007	18.486	0.1394	-0.12793	-0.14233	-13.677	78.898	141.0098	0.21982	-0.25625	0.0022477	15.2876	52.904	1262.0094	-1.0031	0.92332	-1.5545	-74.561	3.8709	37.904	0.13281	-0.10352	0.032227	-23.232	88.9213	103.714	0.22412	-0.24316	0.06543
1.452	-120.1971	-0.351	1443.5153	-1.3573	1.5645	-1.7905	-123.107	-88.417	798.647	-0.60302	0.58545	-1.2021	-22	-2.7681	14.9857	0.13232	-0.14355	-0.14941	15.185	51.0377	137.4214	0.23926	-0.29463	0.022852	18.914	81.306	1267.7438	-0.96589	0.89807	-1.5242	-33.879	73.268	46.3095	0.13867	-0.10059	0.025879	-20.265	58.763	116.4036	0.23643	-0.26885	0.074512
1.454	-149.0728	-46.6973	1448.211	-1.347	1.5452	-1.7732	-75.294	-95.238	857.4448	-0.61328	0.60547	-1.2305	13.055	-15.8688	69.534	0.11719	-0.16992	-0.17236	0.686	71.739	107.717	0.25146	-0.32764	0.036133	4.4408	118.0041	1208.269	-0.93956	0.86762	-1.4839	-55.781	16.9932	12.421	0.14648	-0.091797	0.0097656	33.045	76.435	103.089	0.2461	-0.28574	0.073437
1.456	-96.619	20.5	1446.6788	-1.332	1.5156	-1.748	-54.248	-100.709	872.6868	-0.62695	0.64258	-1.2754	-9.137	-39.3265	60.912	0.10205	-0.1792	-0.18848	-38.539	39.8372	107.70017	0.25781	-0.3498	0.045409	10.575	103.3967	1194.809	-0.92139	0.84717	-1.4448	-60.65	3.168	38.72	0.14697	-0.08667	0.00024415	-39.82	56.9718	71.6605	0.2543	-0.30371	0.067969
1.458	-130.045	22.888	1426.441	-1.3178	1.4893	-1.7224	-26.048	-178.68882	908.66	-0.63428	0.67041	-1.3042	-46.213	-55.353	72.9051	0.052734	-0.1626	-0.2251	12.056	24.93373	101.2226	0.26211	-0.36953	0.05039	15.709	172.97	1162.3289	-0.89009	0.84387	-1.4128	-16.707	28.5635	32.9439	0.15186	-0.08252	-0.0087891	-39.667	42.5981	94.169	0.26504	-0.3166	0.063965
1.46	-118.422	45.461	1427.285	-1.3082	1.4703	-1.6953	1.757	-160.4649	938.188	-0.64209	0.73389	-1.3491	6.883	17.0668	101.5898	-0.008301	-0.11059	-0.24634	-49.205	40.8005	79.9472	0.25743	-0.37813	0.050001	-1.791	154.073	1106.0077	-0.87128	0.82892	-1.3547	-44.254	-47.052	20.7005	0.1499	-0.075684	-0.016602	-54.603	60.3866	66.3728	0.26807	-0.32764	0.057617
1.462	-99.252	118.354	1388.6092	-1.2828	1.4488	-1.6668	-42.722	-184.451	972.858	-0.65039	0.78687	-1.3963	-17.25	21.4351	131.8393	-0.07666	-0.059082	-0.28271	-51.414	19.533	89.285	0.24727	-0.37617	0.042579	13.414	146.555	1109.976	-0.85136	0.80151	-1.2848	-40.325	9.586	52.086	0.1499	-0.071289	-0.021484	-70.51	37.638	47.8174	0.2583	-0.33076	0.048731
1.464	-136.31412	93.176	1372.4047	-1.2586	1.4164	-1.6312	-35.619	-207.35632	1047.742	-0.66602	0.83789	-1.4375	-41.862	12.4388	207.4545	-0.18652	0.015137	-0.3667	-26.431	48.6986	67.5943	0.23486	-0.37305	0.033203	16.8866	204.99	1066.9524	-0.81417	0.75835	-1.2243	-24.01	30.947	34.2565	0.15674	-0.066406	-0.019043	-9.487	32.11	63.2241	0.24609	-0.33506	0.033887
1.466	-93.882	128.339	1354.9324	-1.2363	1.377	-1.582	-13.376	-152.097	1093.224	-0.6792	0.91064	-1.5073	-24.148	30.784	212.904	-0.23584	0.051758	-0.41748	-98.0935	56.733	55.3391	0.21542	-0.36269	0.018062	11.647	168.1399	1045.6288	-0.74902	0.72363	-1.1768	-34.224	-11.1595	30.0568	0.15625	-0.05542	-0.025878	-66.297	38.447	54.2835	0.22929	-0.32764	0.010449
1.468	-85.306	134.435	1321.3596	-1.213	1.3361	-1.5378	-18.769	-186.19	1127.657	-0.68945	0.95117	-1.5439	-21.226	-39.47241	268.008	-0.33643	0.12939	-0.49756	-74.695	53.2623	61.43	0.19558	-0.33767	-0.0013936	30.436	207.562	1010.3163	-0.67225	0.67492	-1.1117	-2.866	42.8645	54.12	0.16211	-0.04541	-0.02832	-78.305	21.594	72.7526	0.19765	-0.31377	-0.01123
1.47	-89.561	100.705	1313.346	-1.1918	1.3055	-1.5004	-6.528	-216.397	1167.681	-0.73389	1.0376	-1.605	13.711	13.154	353.6312	-0.41016	0.20801	-0.56568	-92.8755	76.634	35.9751	0.17136	-0.30406	-0.031086	14.667	206.767	949.73017	-0.61805	0.61985	-1.0419	-21.375	0.9354	13.1709	0.16699	-0.041504	-0.024902	-44.055	54.9234	66.3483	0.16016	-0.29688	-0.038574
1.472	-50.992	151.506	1282.0783	-1.1687	1.2769	-1.4633	-30.436	-207.143	1202.954	-0.77905	1.1057	-1.655	-13.752	69.5635	444.911	-0.49658	0.28125	-0.646	-91.4396	42.4981	46.807	0.13698	-0.26246	-0.060085	12.662	162.883	926.1317	-0.58163	0.56874	-0.98161	-21.526	-29.9573	26.1212	0.17285	-0.038086	-0.031738	-84.9727	68.9087	23.5381	0.11446	-0.27198	-0.065527
1.474	-90.848	105.61543	1251.8401	-1.1368	1.2475	-1.4197	-56.705	-250.216	1263.9158	-0.82617	1.1777	-1.7012	-32.087	89.3224	507.742	-0.61719	0.39648	-0.76367	-40.601	28.7103	43.2193	0.10693	-0.21924	-0.087402	17.916	215.385	895.5671	-0.55366	0.52518	-0.91974	13.095	42.8887	49.783	0.18506	-0.023926	-0.030273	-51.759	70.863	24.7476	0.067968	-0.23779	-0.096094
1.476	-47.413	105.613	1240.2525	-1.1138	1.2153	-1.3765	-18.366	-191.872	1306.019	-0.87646	1.2681	-1.7397	-30.309	139.185	569.6166	-0.67969	0.46582	-0.82129	-106.424	39.47259	12.093	0.074465	-0.16795	-0.13294	-11.124	192.7083	864.4993	-0.52588	0.48633	-0.86328	-9.886	-6.4133	11.4936	0.1914	-0.022705	-0.030762	-67.888	77.586	23.5876	0.01836	-0.20068	-0.12696
1.478	-16.496	141.4999	1232.904	-1.0803	1.1832	-1.3301	-16.782	-164.8706	1316.781	-0.88281	1.3066	-1.7559	-78.367	99.84	613.337	-0.81445	0.59961	-0.94336	-68.394	13.499	18.0861	0.041104	-0.11845	-0.17438	-15.807	172.2191	875.705	-0.49025	0.4479	-0.8001	0.689999999999998	24.5467	45.435	0.19141	-0.018555	-0.036133	-73.171	56.07	38.15332	-0.027734	-0.15313	-0.16699
1.48	-19.318	90.5	1224.935	-1.0495	1.1516	-1.2749	-28.81	-187.3221	1337.914	-0.87256	1.3521	-1.7749	-50.356	59.82575	735.712	-0.91846	0.7085	-1.041	-38.391	33.1628	33.0954	0.013008	-0.066495	-0.21226	-24.061	190.405	835.346	-0.44431	0.40322	-0.73957	2.217	48.896	15.2472	0.18457	-0.018066	-0.041992	-17.029	40.477	42.2361	-0.078613	-0.10498	-0.2041
1.482	41.408	97.109	1216.092	-1.0182	1.1142	-1.2343	-23.542	-136.924	1346.0693	-0.84277	1.3525	-1.7725	-16.796	81.042	827.6359	-1.0186	0.82031	-1.1338	-75.784	48.307	31.3197	-0.017118	-0.01305	-0.2433	-54.481	130.488	788.469	-0.38619	0.35815	-0.67887	-4.676	-23.0932	-3.8182	0.17822	-0.02002	-0.041992	-66.80147	27.1845	31.457	-0.12461	-0.055273	-0.23692
1.484	-21.309	106.0708	1139.7627	-0.98125	1.0795	-1.1815	-24.114	-149.957	1359.3322	-0.81494	1.3169	-1.7632	-68.447	5.3158	908.7257	-1.1211	0.99023	-1.2383	-11.025	27.7563	57.099	-0.042969	0.036621	-0.27051	-41.056	158.1911	742.142	-0.33856	0.31338	-0.61545	6.461	31.1718	43.34	0.16699	-0.0024414	-0.049805	-58.933	-11.374	59.916	-0.16319	-0.0053712	-0.26953
1.486	-28.519	89.034	1130.046	-0.94385	1.0454	-1.1323	-11.919	-127.6567	1414.0214	-0.7832	1.2192	-1.7671	-49.405	-20.531	968.143	-1.1606	1.0786	-1.2847	-34.509	45.498	27.8674	-0.068692	0.079421	-0.29468	-61.586	157.674	672.2612	-0.29102	0.26855	-0.54883	-29.312	21.0289	15.3944	0.15747	0.013184	-0.056641	-7.769	-2.8336	43.4171	-0.19209	0.043457	-0.30391
1.488	33.409	149.0968	1101.8374	-0.89688	1.0012	-1.0775	2.969	-78.385	1428.9027	-0.7832	1.1543	-1.793	-41.946	-74.584	945.178	-1.2124	1.23	-1.3491	-47.265	23.8174	24.1905	-0.093665	0.11876	-0.31589	-65.933	131.371	652.279	-0.25027	0.22916	-0.50308	-26.595	-13.8058	18.495	0.15088	0.033203	-0.06543	-42.11	2.726	27.6739	-0.21582	0.08955	-0.33047
1.49	-25.783	137.563	1049.3443	-0.85557	0.954	-1.0226	-18.467	-152.605	1426.4079	-0.82617	1.0498	-1.832	-40.495	-146.8657	978.505	-1.2026	1.3095	-1.3823	5.649	8.2167	53.898	-0.1097	0.14764	-0.33201	-67.392	184.5127	627.3598	-0.215	0.19146	-0.44821	-2.912	45.8911	42.1834	0.13281	0.056152	-0.068359	20.22	6.0569	37.497	-0.22949	0.12988	-0.34326
1.492	-23.153	138.09	1033.026	-0.81494	0.91182	-0.97412	-22.666	-153.6305	1449.0823	-0.89478	1.0183	-1.8758	13.194	-124.1916	999.2546	-1.1714	1.3462	-1.4038	-23.147	25.0626	37.9966	-0.11438	0.17061	-0.33458	-77.723	152.769	590.313	-0.18182	0.15554	-0.39319	-47.76	-18.3483	9.1192	0.12256	0.078857	-0.073242	-3.075	26.1998	31.0418	-0.24649	0.16797	-0.35254
1.494	-11.501	162.1	980.9482	-0.77119	0.86924	-0.91963	-23.841	-142.8037	1459.05969	-0.979	1.0337	-1.9292	-14.792	-152.8826	996.6836	-1.0854	1.2974	-1.4194	-1.881	-0.725999999999999	43.6835	-0.11084	0.18652	-0.33838	-71.585	145.912	552.712	-0.15464	0.11899	-0.34425	-36.833	-23.7667	28.9019	0.11719	0.097656	-0.07666	-29.815	1.6961	68.292	-0.25743	0.19951	-0.3582
1.496	-49.952	147.6423	938.6971	-0.73535	0.83008	-0.87207	-15.295	-166.133	1483.133	-1.1074	1.1348	-2.002	-38.626	-175.754	1021.286	-1.0327	1.2476	-1.4214	33.151	14.3854	45.906	-0.10086	0.18814	-0.32628	-85.161	185.74248	487.9854	-0.12354	0.087891	-0.29199	-36.546	26.723	35.4835	0.11182	0.12158	-0.087891	40.746	-11.5834	76.451	-0.25859	0.22373	-0.35742
1.498	-6.932	183.031	918.2732	-0.69463	0.79698	-0.81943	21.824	-88.294	1509.146	-1.1636	1.2056	-2.0347	-44.885	-138.262	1016.404	-0.92041	1.1001	-1.4097	-19.074	22.2704	29.9562	-0.085571	0.1802	-0.31426	-91.881	144.237	433.76312	-0.096415	0.053937	-0.24721	-65.279	-22.6841	12.3562	0.10107	0.13525	-0.091797	-18.51	-0.4013	37.6081	-0.25781	0.23476	-0.34931
1.5	-14.647	201.914	869.72	-0.6544	0.7622	-0.76709	-4.104	-123.995	1491.0086	-1.2397	1.3442	-2.1089	-65.473	-199.987	1000.451	-0.86572	0.96827	-1.394	33.367	13.5273	37.5367	-0.062839	0.16169	-0.29044	-78.494	185.689	397.7012	-0.061258	0.024347	-0.19575	-31.16	25.3832	34.8494	0.082031	0.15576	-0.093262	-16.143	-13.6958	40.094	-0.24365	0.24072	-0.3374
1.502	-30.145	163.627	838.6122	-0.60674	0.729	-0.71162	6.367	-142.731	1534.2658	-1.2627	1.4169	-2.1474	-43.923	-196.379	987.948	-0.82617	0.82617	-1.3691	5.17700000000001	53.831	18.2626	-0.038659	0.12193	-0.26182	-95.747	182.666	341.925	-0.031572	-0.012753	-0.15043	-49.768	44.98	15.263	0.063232	0.17749	-0.10132	7.944	20.2896	25.698	-0.22354	0.2333	-0.31514
1.504	5.508	185.2847	789.207	-0.55664	0.69531	-0.6625	6.393	-102.223	1542.806	-1.2734	1.459	-2.1699	-58.688	-170.373	941.583	-0.79297	0.66504	-1.332	-31.074	50.6761	25.6262	-0.018066	0.071289	-0.22998	-93.246	128.1567	300.0459	-0.0060646	-0.045298	-0.1051	-70.378	-14.7674	-1.0648	0.044922	0.19971	-0.10693	-46.251	37.7228	14.65	-0.19688	0.21816	-0.28818
1.506	-62.8978	159.374	734.72	-0.50977	0.66357	-0.61133	2.093	-141.351	1559.2843	-1.2769	1.4692	-2.1909	-73.003	-171.597	940.679	-0.78271	0.59619	-1.3198	16.808	31.0237	36.208	-0.0050806	0.014605	-0.19342	-71.206	152.6219	272.386	0.017578	-0.07666	-0.068848	-25.544	38.4371	20.6182	0.025879	0.23193	-0.11426	-6.066	32.5092	10.8165	-0.16914	0.19199	-0.25928
1.508	-34.411	158.382	733.7801	-0.44658	0.62217	-0.56279	44.042	-96.283	1598.334	-1.2849	1.4739	-2.2019	-47.325	-115.248	954.7884	-0.7627	0.53076	-1.3125	-36.022	27.9356	25.837	0.0029561	-0.039813	-0.16008	-89.153	114.726	250.551	0.036039	-0.097757	-0.033586	-43.011	24.2663	5.814	0.018066	0.24951	-0.11768	-24.767	52.747	-16.0449	-0.14131	0.16396	-0.23017
1.51	-14.137	180.636	713.9951	-0.38886	0.57558	-0.51074	42.9714	-69.2656	1567.5212	-1.3013	1.4868	-2.2085	-83.823	-120.545	954.811	-0.74268	0.54883	-1.335	-20.927	-0.439	43.0183	-0.00089925	-0.072186	-0.13168	-61.748	115.093157	243.4706	0.044144	-0.11866	-0.0034112	-61.898	10.071	18.0055	0.0039063	0.27148	-0.13135	-60.371	27.4277	15.9296	-0.11279	0.13672	-0.20117
1.512	-63.3281	154.2699	668.614	-0.32754	0.52442	-0.45645	32.6185	-97.0116	1571.1241	-1.3237	1.4888	-2.2124	-70.545	-148.489	1003.3427	-0.71777	0.59766	-1.3672	-28.14	9.1291	36.2501	-0.0063105	-0.085431	-0.10646	-28.237	139.252	202.314	0.045702	-0.13624	0.027451	-17.02	69.348	49.6317	-0.0092774	0.27588	-0.15674	-18.688	8.5657	40.1298	-0.092285	0.12275	-0.17119
1.514	-23.023	141.3143	635.996	-0.26338	0.46787	-0.40791	29.75	-24.676	1560.713	-1.334	1.4746	-2.209	-33.934	-144.807	1004.712	-0.67334	0.6958	-1.4019	-78.9553	32.86457	34.2424	-0.010254	-0.084961	-0.088867	-56.776	84.862	167.798	0.040527	-0.13984	0.047365	-46.69	-16.6661	46.621	-0.023438	0.28613	-0.18457	-59.533	15.20474	19.986	-0.077051	0.10927	-0.1459
1.516	-61.5613	148.465	557.726	-0.20215	0.41211	-0.35791	19.045	-46.8815	1557.635	-1.3579	1.4282	-2.187	-58.0715	-233.054	1022.06	-0.65234	0.74609	-1.418	-42.355	23.4421	50.5223	-0.012686	-0.070576	-0.071374	-27.725	91.1144	161.053	0.03418	-0.14111	0.063477	-33.434	-21.8694	80.2237	-0.049316	0.30713	-0.2168	-50.795	-1.228	23.8084	-0.057519	0.10576	-0.12207
1.518	-51.9479	125.633	535.6177	-0.1498	0.34951	-0.30869	48.3235	-37.05668	1596.8056	-1.3687	1.3862	-2.1616	-66.6603	-247.32	1088.737	-0.62256	0.80322	-1.4565	-89.1407	49.657	8.49	-0.015448	-0.05466	-0.058219	-18.018	66.708	126.381	0.026075	-0.12988	0.08164	4.873	11.3684	72.3197	-0.062012	0.32568	-0.229	-38.49	9.7252	32.9376	-0.049707	0.10527	-0.099218
1.52	0.0730000000000004	147.2684	498.6507	-0.097555	0.29179	-0.26045	32.5068	18.3363	1582.603	-1.3765	1.3423	-2.1479	-71.345	-253.581	1097.899	-0.60303	0.81397	-1.4907	-91.3707	22.1028	27.953	-0.01972	-0.038751	-0.045634	-38.328	29.254	130.832	0.017579	-0.1169	0.090722	-24.648	-65.75064	61.9322	-0.092773	0.36328	-0.26221	-99.39864	-0.564	23.848	-0.034668	0.11523	-0.07666
1.522	-36.914	136.979	439.246	-0.044043	0.22851	-0.21826	12.057	-29.3693	1569.012	-1.3818	1.3154	-2.1426	-49.311	-313.232	1158.4134	-0.59033	0.81738	-1.5215	-50.805	-9.1195	49.1026	-0.018618	-0.021736	-0.030994	-7.698	67.9283	102.00236	0.0058601	-0.095021	0.098144	-16.23	-1.112	118.106	-0.11475	0.38745	-0.29614	-57.666	-16.756	43.112	-0.030273	0.12812	-0.057129
1.524	11.286	126.295	430.639	0.0051759	0.16436	-0.17158	15.5218	0.661999999999999	1585.243	-1.3784	1.3091	-2.1382	-11.409	-303.272	1203.467	-0.59521	0.83447	-1.564	-94.25372	8.761	34.6587	-0.021973	-0.0092773	-0.024902	-35.331	28.04387	80.4288	0.0015629	-0.071778	0.096189	-25.809	1.426	131.679	-0.13086	0.4082	-0.33838	-72.038	13.23661	4.3427	-0.018555	0.1378	-0.039453
1.526	19.902	139.465	382.5579	0.04834	0.10449	-0.13281	11.3457	10.1867	1565.641	-1.3525	1.3086	-2.1348	-33.39	-339.118	1218.152	-0.61279	0.85303	-1.5845	-61.521	-17.455	47.7973	-0.024527	0.0074697	-0.0070073	-26.974	36.868	78.50554	-0.0058594	-0.050781	0.086426	-39.274	-51.197	172.593	-0.15186	0.42725	-0.396	-73.523	16.7889	10.5846377	-0.011524	0.14248	-0.027344
1.528	-7.546	128.3749	336.1627	0.095994	0.050488	-0.089942	23.432	-40.315	1586.516	-1.3305	1.2949	-2.1206	-10.187	-377.043	1275.148	-0.64941	0.91211	-1.6211	-51.892	-1.9756	42.2535	-0.036423	0.019096	0.0018021	-2.901	83.075	49.588	-0.020215	-0.029199	0.072168	24.345	10.8887	258.6285	-0.16357	0.43799	-0.43115	-34.156	22.2846	34.4743	-0.00039062	0.14482	-0.016211
1.53	41.473	140.875	309.679	0.12647	-0.0030272	-0.058301	36.964	18.2898	1590.284	-1.3042	1.2778	-2.1108	22.144	-308.386	1290.9173	-0.67408	0.97876	-1.6419	-113.342	22.9323	29.6518	-0.035871	0.030787	0.011016	-33.582	48.348	46.5884	-0.041211	-0.004687	0.052343	-18.227	-19.61191	290.8559	-0.1958	0.44922	-0.51074	-78.8825	30.95395	18.307	0.0092773	0.14355	-0.0029297
1.532	1.937	163.44	264.0199	0.15459	-0.049512	-0.023926	27.0465	-1.8645	1578.9978	-1.2637	1.25	-2.0898	0.751000000000001	-304.665	1330.2074	-0.68555	1.0293	-1.6465	-47.791	9.0413	40.3934	-0.039504	0.045911	0.022474	-0.213999999999999	68.606	46.05861	-0.068946	0.023829	0.023828	-24.389	13.409	386.598	-0.23242	0.45825	-0.58203	-42.502	10.351	34.6668	0.011426	0.13574	0.010352
1.534	-5.626	131.6307	245.3445	0.18682	-0.10264	0.004883	23.832	5.032	1591.0087	-1.2363	1.2305	-2.0781	35.8336	-262.6827	1392.549	-0.67334	1.0649	-1.646	-45.972	47.26	14.2511	-0.047852	0.062988	0.033691	-29.379	48.47	36.3121	-0.097949	0.057813	-0.0050785	9.625	113.648	444.3276	-0.271	0.47021	-0.65381	-15.632	20.1251	20.2951	0.012402	0.1334	0.01709
1.536	35.376	130.422	211.992	0.21436	-0.1499	0.032227	0.9059	64.1311	1578.09	-1.1772	1.1841	-2.0483	21.0839	-219.361	1372.342	-0.6582	1.0566	-1.6504	-70.104	35.0144	25.6787	-0.05438	0.078188	0.036724	-30.021	15.5923	48.86465	-0.13867	0.093262	-0.044434	-16.104	80.438	477.271	-0.34717	0.50244	-0.74951	-59.122	31.3614	28.9406	0.0038085	0.13222	0.021387
1.538	-37.17	120.2629	155.683	0.23242	-0.1872	0.051172	9.298	12.172	1573.828	-1.1355	1.1507	-2.0241	26.8089	-239.20559	1372.058	-0.63281	1	-1.6719	-0.628999999999998	24.5482	31.2615	-0.052703	0.093378	0.04376	-21.107	75.086	34.722	-0.18193	0.13603	-0.073145	11.623	114.239	578.5644	-0.39063	0.52344	-0.80664	-9.15	33.65064	49.497	-0.0021484	0.13125	0.02168
1.54	3.388	96.1124	160.4536	0.24384	-0.21894	0.067969	35.4361	41.9136	1579.873	-1.1011	1.1138	-1.9956	40.2848	-157.676	1402.3882	-0.6355	0.94654	-1.7107	-50.535	37.205	20.4885	-0.043717	0.102	0.051606	-49.489	45.6579	16.9044	-0.23066	0.17607	-0.12207	33.755	123.131	636.2073	-0.479	0.57178	-0.90967	-14.747	78.601	9.143	-0.0058594	0.13281	0.015137
1.542	28.604	119.887	150.8622	0.24463	-0.24317	0.076172	23.4568	59.084	1530.3928	-1.062	1.0864	-1.9604	31.4263	-104.643	1386.242	-0.67383	0.91602	-1.752	-25.196	5.784	36.0449	-0.032202	0.10302	0.058606	-19.683	48.7116	48.807	-0.28926	0.22139	-0.16582	20.9374	60.08662	716.8845	-0.54639	0.62256	-0.97461	-41.9	70.616	-1.67668	-0.0067383	0.13506	0.017383
1.544	-25.077	97.7967	128.509	0.24062	-0.26357	0.079688	-7.4382	16.2075	1526.866	-1.0425	1.0747	-1.9409	62.693	-104.777	1436.5058	-0.80664	0.93652	-1.8184	22.401	8.79	31.2504	-0.018066	0.10205	0.063477	-44.077	74.651	40.1404	-0.34111	0.27119	-0.2084	32.0322	100.8623	824.945	-0.61523	0.68848	-1.0234	15.855	57.817	14.2467	-0.0071289	0.13379	0.016895
1.546	20.691	69.1054	110.272	0.2334	-0.27881	0.08252	21.9815	91.236	1507.7679	-1.0127	1.0586	-1.9082	86.836	-49.716	1446.988	-0.88086	0.97461	-1.8613	-17.32	27.0769	17.0646	-0.0013818	0.094152	0.062792	-79.955	19.2833	28.9616	-0.37695	0.32129	-0.24902	-39.2812	48.2378	849.9043	-0.69727	0.78906	-1.0684	-35.527	37.764	24.64119	-0.0059571	0.13535	0.015332
1.548	-8.264	81.145	73.855	0.22226	-0.28398	0.076172	28.8712	84.11	1469.8782	-0.99121	1.04	-1.8838	59.0528	-125.998	1458.5765	-1.0176	1.0957	-1.9707	21.617	5.4099	13.4807	0.01453	0.082347	0.073149	-46.718	38.1019	46.455768	-0.40283	0.37256	-0.28467	-42.4917	-24.5579	881.823	-0.73975	0.84229	-1.0864	-9.503	-2.416	62.657	0.0014649	0.13174	0.011426
1.55	-29.273	53.779	95.052	0.21035	-0.27705	0.071191	33.7221	88.1294	1485.241	-0.97607	1.0376	-1.8521	84.143	-156.5921	1516.136	-1.0979	1.2093	-2.0427	0.113999999999997	43.543	13.4655	0.033675	0.062809	0.07626	-59.218	16.0521	38.122	-0.41631	0.41768	-0.31494	1.766	-4.307	899.012	-0.80664	0.94141	-1.1191	30.071	0.8504	46.4869	0.014648	0.12988	0.011719
1.552	7.044	56.899	94.827	0.19433	-0.26455	0.06416	38.3582	123.882	1451.90928	-0.96094	1.0215	-1.8145	76.808	-131.482	1488.63429	-1.1611	1.3115	-2.1113	-11.208	38.4044	31.634	0.046675	0.050201	0.059867	-54.83	-15.2517	54.364	-0.42451	0.45713	-0.33173	-56.484	-83.246	870.4555	-0.83178	1.0008	-1.133	-16.145	7.05	36.0368	0.037402	0.11651	0.013574
1.554	-49.137	67.493	68.8294	0.17569	-0.25752	0.046973	14.221	58.666	1436.6885	-0.95117	1.0176	-1.791	38.6333	-179.218	1509.829	-1.1968	1.4224	-2.1812	30.61	20.1105	40.619	0.064453	0.029785	0.052246	-41.141	27.7405	51.4954	-0.42959	0.48848	-0.34307	-51.666	-94.394	912.817	-0.8335	1.0444	-1.1401	-4.23399999999999	3.404	46.3132	0.059278	0.0999	0.015332
1.556	-39.513	37.009	65.772	0.15088	-0.24121	0.025879	33.9173	89.5554	1428.8786	-0.93262	1.0039	-1.7549	44.4333	-133.92	1536.5362	-1.2031	1.457	-2.207	-18.601	30.2203	22.1285	0.081938	0.012885	0.049804	-78.174	6.0103	15.749723	-0.43066	0.50977	-0.3418	-57.996	-72.466	903.4851	-0.80469	1.0723	-1.1426	-11.107	30.839	28.2315	0.077246	0.081152	0.015722
1.558	-60.069	53.7167	46.6951	0.11602	-0.21201	0.00058596	41.3289	110.4082	1393.5476	-0.91943	0.99512	-1.7197	33.2	-143.666	1527.4941	-1.1719	1.4961	-2.2402	-10.634	-3.708	35.406	0.095121	-0.002249	0.043944	-48.016	19.3889	36.715	-0.42383	0.52138	-0.3293	-93.9476	-140.659	884.4462	-0.7793	1.0859	-1.1367	-35.069	32.0466	22.7783	0.099218	0.059863	0.01875
1.56	-97.8949	51.575	51.1287	0.083789	-0.17588	-0.02793	34.666	84.264	1384.568	-0.89795	0.98291	-1.6851	-1.215	-198.176	1587.793	-1.1372	1.4917	-2.2436	-1.764	4.888	28.0615	0.10528	-0.011623	0.041992	-26.105	48.0265	26.615	-0.41611	0.52149	-0.31074	-29.607	-95.696	927.145	-0.72656	1.1113	-1.1348	-0.912999999999997	20.7047	24.3425	0.11963	0.037109	0.025391
1.562	-32.741	49.2214	62.854	0.045117	-0.13877	-0.059961	42.7969	140.718	1362.492	-0.87012	0.9668	-1.625	4.28251	-136.991	1586.348	-1.1113	1.4668	-2.2344	-65.405	35.4698	20.3671	0.11563	-0.018752	0.031641	-69.335	1.796	49.065	-0.40439	0.51133	-0.2916	3.933	-80.947	902.781	-0.70117	1.1323	-1.1333	-41.371	39.726	26.3145	0.13369	0.014942	0.018359
1.564	-73.3252	72.819	34.5856	-0.00039064	-0.10674	-0.095021	10.401	97.56	1301.2935	-0.86621	0.95898	-1.5938	-7.3996	-157.724	1574.779	-1.0947	1.4131	-2.1992	-24.163	16.4306	35.536	0.13232	-0.029297	0.02832	-20.298	32.7013	60.712	-0.38448	0.48008	-0.26064	5.1302	-115.9	886.3909	-0.68359	1.1563	-1.1367	-35.342	16.3949	56.099	0.14307	-0.012207	0.023731
1.566	-80.5656	31.2186	44.766	-0.041992	-0.069336	-0.12451	-6.379	94.999	1296.8629	-0.83594	0.92969	-1.5313	18.6102	-102.28813	1589.826	-1.0933	1.3696	-2.1714	-60.256	51.261	26.2781	0.14072	-0.037011	0.027246	-26.749	26.08406	31.933	-0.35938	0.43896	-0.23047	35.8682	-44.725	912.544	-0.68848	1.2031	-1.1455	-34.956	23.4988	47.6143	0.15283	-0.036426	0.021387
1.568	-22.049	16.44876	44.85	-0.093654	-0.030859	-0.1585	0.956	149.163766	1264.5301	-0.81372	0.90844	-1.4822	3.3932	-28.613	1538.6909	-1.0835	1.2466	-2.1128	-66.71	40.2893	27.024	0.15293	-0.053027	0.021679	-35.451	4.002	36.7929	-0.33115	0.38652	-0.19609	5.274	-64.094	873.1597	-0.69238	1.2285	-1.1543	-95.7553	35.9729	31.9089	0.16104	-0.057324	0.020312
1.57	-88.8105	31.078	27.513	-0.14238	0.0073241	-0.19326	-0.100000000000001	127.328	1251.399	-0.78564	0.8833	-1.4272	12.495	-55.24398	1528.198	-1.0764	1.133	-2.0564	-30.056	22.7876	38.2177	0.15957	-0.062402	0.020899	1.428	30.7429	37.243148	-0.31045	0.32998	-0.16182	16.9146	-62.926	900.4286	-0.70898	1.2852	-1.1699	-35.594	21.6716	41.2341	0.1665	-0.081055	0.017578
1.572	-2.648	11.683	42.2303	-0.19433	0.042871	-0.22529	22.108	163.7621	1232.997	-0.74561	0.83936	-1.3491	31.6138	-8.444	1522.488	-1.0742	1.0332	-2.0117	-86.21891	53.6351	10.511	0.16455	-0.071582	0.018652	-24.377	5.1121	20.8123	-0.28428	0.28233	-0.13017	60.5294	-34.049	929.4706	-0.71655	1.3333	-1.1795	-63.452	41.697	30.64271	0.17129	-0.10225	0.016113
1.574	-21.998	36.5736	26.3317	-0.23809	0.075781	-0.26084	-1.373	170.208	1147.913	-0.72363	0.81445	-1.3105	8.8454	-19.6055	1499.271	-1.0781	0.95117	-1.9648	-73.392	21.967	44.4146	0.17529	-0.086914	0.023926	2.53599999999999	19.2663	31.414	-0.25869	0.2376	-0.099413	6.21700000000001	-125.451	922.55	-0.71338	1.3794	-1.1831	-88.9389	29.3173	19.2656	0.16943	-0.12412	0.015429
1.576	-86.8514	24.058	27.3035	-0.28027	0.10889	-0.28662	-39.485	129.7637	1109.516	-0.67773	0.76172	-1.2305	39.214	-37.97	1531.4633	-1.0854	0.93799	-1.9546	-68.43	34.0942	36.4655	0.1834	-0.099218	0.016504	1.356	32.814	21.6789	-0.22461	0.20361	-0.072266	3.359	-142.623	965.126	-0.67969	1.418	-1.1641	-24.475	19.4333	34.5118	0.16592	-0.14014	0.008789
1.578	2.56	6.7756	44.732	-0.31211	0.13711	-0.31465	1.48	180.0725	1083.124	-0.64184	0.71973	-1.1702	25.955	31.683	1512.36	-1.0977	0.93555	-1.9512	-118.6885	35.124	38.67122	0.19131	-0.11836	0.020899	-44.696	-11.6297	25.0576	-0.18994	0.16826	-0.038574	-2.36	-133.655	989.004	-0.646	1.4136	-1.1577	-91.725	33.307	19.608	0.16573	-0.15401	0.003125
1.58	-38.255	30.1773	26.379	-0.34278	0.16631	-0.32002	-35.06	150.274	1047.15062	-0.60059	0.67822	-1.1108	20.5594	9.127	1493.033	-1.1035	0.95166	-1.9458	-46.384	-2.347	54.372	0.19952	-0.13516	0.018164	-12.97	9.0044	53.3801	-0.14815	0.13545	-0.0061523	-35.9	-194.9499	1013.361	-0.58008	1.3516	-1.1836	-67.376	-1.636	47.491	0.16455	-0.1626	-0.00097656
1.582	-28.258	0.456000000000003	43.5191	-0.3709	0.19014	-0.33369	-37.879	161.384	1045.497	-0.54395	0.61523	-1.0327	47.03	-4.064	1518.5064	-1.1147	0.96436	-1.9507	-67.908	22.6791	32.88156	0.20752	-0.15273	0.017871	-12.734	-0.141	26.4997	-0.11025	0.09834	0.021973	1.527	-166.765045	1084.1176	-0.52637	1.2642	-1.2221	-42.165	-15.9797	46.5645	0.15938	-0.16943	-0.0071289
1.584	26.753	-2.496	48.18	-0.38975	0.20645	-0.34268	-32.092	196.781	987.004	-0.521	0.58691	-0.99219	40.22	15.925	1488.543	-1.1323	0.99072	-1.9468	-101.1749	28.418	48.777	0.2124	-0.16846	0.016602	-13.157	-22.701	41.993	-0.073242	0.057324	0.051562	27.617	-201.318	1113.8052	-0.49609	1.166	-1.2695	-92.9261	-19.893	34.1333	0.15879	-0.17422	-0.013965
1.586	-38.467	19.3496	46.5257	-0.3999	0.21924	-0.34277	-79.6376	149.9825	940.031	-0.46973	0.54199	-0.92188	43.1659	-61.0602	1502.328	-1.1411	1.0024	-1.9468	-32.239	23.0411	50.377	0.21504	-0.17929	0.012598	10.179	1.121	30.009	-0.037598	0.0083008	0.074219	-4.476	-258.534	1163.3699	-0.53662	1.0376	-1.3257	-25.309	-32.1872	49.681	0.15489	-0.18281	-0.01748
1.588	3.444	-1.6502	40.94	-0.4043	0.22383	-0.33584	-56.541	181.19	920.370554	-0.42651	0.50318	-0.85914	75.279	-34.2412	1542.582	-1.1543	1.0273	-1.9434	-56.527	44.0326	27.047	0.21084	-0.18555	0.0078125	-42.423	-18.9942	3.768	-0.0045899	-0.038965	0.098438	-5.712	-211.492	1214.468113	-0.52783	1.0532	-1.3081	-23.206	12.3408	41.1499	0.15361	-0.18125	-0.02832
1.59	7.152	18.7782	13.719	-0.39092	0.21904	-0.31924	-56.252	189.5728	865.9871	-0.38867	0.4707	-0.80469	75.089	-40.038	1508.5396	-1.1538	1.0317	-1.9233	-47.396	6.085	35.4327	0.20381	-0.18594	0.0042969	-28.317	0.1125	36.1769	0.028223	-0.091504	0.12353	3.702	-223.322	1216.833	-0.60596	1.0962	-1.4351	-50.536	20.562	41.658	0.15381	-0.18555	-0.034668
1.592	-22.53	20.6149	23.92912	-0.36787	0.20147	-0.2919	-68.398	159.54	842.518	-0.3418	0.43359	-0.72656	64.759	-67.988	1517.773	-1.1479	1.0317	-1.9097	-20.644	-7.977	43.7085	0.19599	-0.18174	-0.0042968	-10.509	38.969	16.42183	0.048926	-0.13838	0.1415	20.706	-191.109	1293.171	-0.60718	1.1555	-1.487	2.67	17.9914	37.56	0.15976	-0.19053	-0.038184
1.594	14.534	8.1628	38.356	-0.33242	0.17588	-0.25801	-34.762	193.4171	795.3991	-0.31543	0.4082	-0.69531	95.015	2.3	1487.501	-1.1245	1.0142	-1.8804	-29.225	11.919	28.424	0.18896	-0.17529	-0.012695	-46.625	8.36502	12.2261	0.076856	-0.18632	0.15977	0.186	-112.3458	1344.843	-0.61768	1.1509	-1.5835	-28.219	34.969	-3.3561	0.16035	-0.19345	-0.04541
1.596	-9.048	43.5241	20.586	-0.28711	0.13281	-0.21875	-97.4259	155.19	737.02	-0.26318	0.37354	-0.61865	85.246	-26.4626	1445.81	-1.1003	0.99683	-1.8591	20.226	-1.7103	47.0949	0.1792	-0.17285	-0.020508	-35.128	29.0647	35.8006	0.098633	-0.22607	0.17236	-44.252	-157.735	1318.474	-0.55615	1.1157	-1.5952	-18.564	8.2054	14.0952	0.16543	-0.20361	-0.048925
1.598	-25.621	18.957	30.2825	-0.246	0.09092	-0.18057	-68.609	161.766	726.5039	-0.22901	0.34742	-0.56372	102.846	-13.9641	1451.735	-1.0684	0.97754	-1.8398	-4.205	43.954	29.5203	0.16817	-0.16855	-0.032422	-67.666	17.3818	10.647	0.10947	-0.26074	0.17822	-46.604	-131.8183	1340.3851	-0.51025	1.1079	-1.5757	9.52700000000001	21.1609	13.1863	0.16993	-0.21025	-0.058203
1.6	-9.57400000000001	20.9612	15.27	-0.19619	0.048438	-0.14121	-41.276	200.771523	671.3991	-0.19287	0.32471	-0.51123	76.279	53.763	1419.1624	-1.0342	0.95313	-1.8047	-14.394	47.46	47.685	0.1623	-0.16386	-0.047266	-66.763	-5.46	11.339	0.12598	-0.29248	0.17842	-71.558	-99.272	1339.0044	-0.47803	1.0981	-1.6089	-32.553	32.1342	15.045	0.17041	-0.22266	-0.065918
1.602	-56.445	27.402	21.3117	-0.15322	0.009375	-0.098242	-65.686	179.7067	613.762	-0.14404	0.2915	-0.43896	58.873	11.2061	1412.559	-1.0122	0.94775	-1.7886	28.362	26.7183	39.2979	0.15449	-0.15556	-0.060938	-30.219	38.1642	19.386	0.13926	-0.3167	0.1792	-92.7773	-131.797	1353.7368	-0.48828	1.091	-1.656	16.319	5.63317	54.6215	0.16855	-0.22471	-0.07666
1.604	-26.288	-3.4164	38.691	-0.10898	-0.022656	-0.059473	-42.582	197.854	587.373	-0.12256	0.26953	-0.40283	90.714	84.675	1403.6452	-0.98584	0.93408	-1.7524	-7.885	35.175	27.6779	0.15039	-0.1582	-0.07373	-63.5848	21.6769	2.5733	0.14922	-0.33701	0.17158	-88.119	-62.592	1380.1996	-0.51367	1.0962	-1.687	11.65	-0.027000000000001	58.476	0.16768	-0.22607	-0.089551
1.606	-30.574	18.5656	16.812	-0.071289	-0.04541	-0.015137	-70.577	199.768	515.2133	-0.075195	0.23438	-0.33789	60.02	93.678	1355.1	-0.95532	0.9292	-1.7246	11.812	-16.6103	82.8942	0.14248	-0.14814	-0.085254	-54.114	19.427	23.8993	0.16357	-0.34912	0.16211	-107.4653	-68.837	1342.046	-0.58398	1.1118	-1.7554	-43.46	-10.6685	64.6607	0.15752	-0.23584	-0.10557
1.608	-63.805	19.0614	22.3577	-0.037207	-0.061035	0.013867	-82.564	174.636	480.1969	-0.034912	0.19873	-0.29321	61.187	84.134	1350.3607	-0.93359	0.92578	-1.7051	4.485	-6.26	100.074	0.13848	-0.13896	-0.10039	-31.611	36.473	0.666999999999998	0.17227	-0.35948	0.15391	-106.7108	-115.435	1380.228	-0.61865	1.1274	-1.7866	17.152	-9.0476	82.944	0.14522	-0.24111	-0.13457
1.61	-43.05	5.3376	36.1912	-0.0083004	-0.072363	0.040235	-25.136	214.569	448.411	-0.0019531	0.16357	-0.24756	63.335	144.676	1322.221	-0.89307	0.91846	-1.6714	-32.398	31.3351	107.433	0.12715	-0.14209	-0.12227	-76.955	11.545824	-5.34365	0.1791	-0.3543	0.1374	-80.559	-69.726	1436.247	-0.70264	1.1802	-1.8491	2.562	23.3815	89.9512	0.12256	-0.24268	-0.1665
1.612	-104.959	39.416	15.08	0.015136	-0.077832	0.066797	-60.018	178.9403	391.0295	0.044922	0.10889	-0.19238	23.4728	97.459	1306.047	-0.875	0.91309	-1.6582	48.7144	23.962	127.99923	0.11299	-0.14971	-0.15215	-30.873	43.25	28.952	0.18144	-0.3418	0.11943	-98.35	-109.628	1451.3267	-0.78198	1.2346	-1.9055	-24.378	12.752	157.68395	0.088283	-0.22207	-0.19756
1.614	-53.596	14.053	33.945	0.035351	-0.077539	0.081836	-50.871	158.2009	384.642	0.068848	0.087402	-0.16748	17.6903	90.642	1330.141	-0.83545	0.89502	-1.6226	-6.093	65.435	149.263	0.083984	-0.1626	-0.19043	-38.359	44.8594	35.7838	0.18203	-0.32637	0.10224	-65.047	-93.008	1520.573	-0.85156	1.3027	-1.957	-26.953	26.08	186.37	0.038964	-0.17685	-0.22901
1.616	-17.776	-0.320200000000001	29.6899	0.047363	-0.073242	0.09082	-37.267	171.369	337.1362	0.10107	0.033691	-0.12402	33.73	97.5073	1289.4005	-0.80762	0.8833	-1.6001	-56.63756	68.636	211.572	0.033105	-0.14199	-0.23389	-50.83	13.683	41.205	0.17725	-0.29639	0.084961	-36.628	-55.6454	1526.392	-0.94189	1.3931	-2.0151	-30.095	4.848	215.255	-0.023926	-0.12608	-0.27197
1.618	-94.2381	21.7897	20.3633	0.064551	-0.063769	0.099023	-68.186	133.20898	285.0363	0.12793	0.0056153	-0.090088	6.4977	20.16	1277.486	-0.78564	0.86768	-1.5776	14.486	53.4983	262.9523	-0.039453	-0.098538	-0.2792	-24.173	26.02435	38.48	0.16856	-0.26563	0.064258	-91.8327	-133.667	1511.333	-0.98828	1.4414	-2.0293	22.723	-8.34	309.2717	-0.093947	-0.079394	-0.33056
1.62	-51.795	2.8322	41.286	0.072168	-0.053223	0.10283	-31.011	159.442	264.88639	0.14893	-0.020508	-0.0625	12.835	56.975	1273.166	-0.76953	0.84668	-1.5371	-19.668	85.6908	282.3977	-0.12656	-0.038379	-0.346	-54.038	0.7618	13.191	0.16201	-0.23271	0.043848	-92.902	-114.448	1567.74	-1.0605	1.5547	-2.0508	-12.044	53.807	380.1239	-0.15674	-0.033691	-0.39404
1.622	-32.318	21.5748	24.6733	0.080371	-0.037598	0.10283	-42.483	158.81	224.2129	0.16748	-0.049316	-0.023438	-7.019	52.76	1204.148	-0.75928	0.83838	-1.5229	-20.865	83.165	365.243	-0.2206	0.029297	-0.42344	-21.687	13.0577	38.154	0.16045	-0.19795	0.025879	-87.327	-108.465	1521.734	-1.1214	1.6301	-2.072	-50.0946	107.793	467.2932	-0.22139	0.022168	-0.45693
1.624	-79.019897	39.16128837	19.0579	0.089844	-0.019727	0.095117	-47.824	116.0156	206.07	0.17383	-0.060059	-0.0073242	-2.232	41.632	1187.3106	-0.73242	0.82324	-1.4727	-3.477	87.2371	394.682	-0.30762	0.12305	-0.50977	-12.198	56.497	17.8749	0.16074	-0.1707	0.0074218	-85.934	-135.667	1520.989	-1.1812	1.6899	-2.0835	-19.28	142.288	525.4022	-0.28652	0.092286	-0.5168
1.626	-14.653	14.2458	39.513	0.09375	-0.00048828	0.091797	-29.64	127.93183	187.4452	0.18262	-0.066406	0.011719	-1.004	112.1905	1165.1738	-0.70606	0.80762	-1.4302	-51.7773	100.1273	407.2307	-0.38311	0.225	-0.57471	-39.09	37.74	17.7884	0.16895	-0.14453	-0.0048828	-63.258	-65.1918	1553.758	-1.248	1.7461	-2.0703	-97.6513	168.254	573.179	-0.36231	0.16573	-0.58164
1.628	-46.211	45.1	16.1376	0.096582	0.012695	0.080664	-65.029	91.985	138.201	0.17822	-0.063721	0.031006	-22.667	84.166	1139.795	-0.68066	0.78711	-1.3867	-42.786	69.2506	470.2733	-0.45039	0.33183	-0.65273	4.30099999999999	51.89	28.06605	0.17539	-0.12226	-0.01582	-79.955	-85.25	1512.5504	-1.2749	1.7661	-2.0503	-57.586	140.341	688.7927	-0.44638	0.24024	-0.65938
1.63	-51.562	25.7199	27.5238	0.099416	0.025977	0.069824	-45.174	86.385	150.9362	0.1709	-0.050293	0.041016	-5.184	98.746	1131.336	-0.62744	0.74854	-1.3276	-63.114	107.589	505.558	-0.50742	0.42598	-0.73555	-11.098	44.298	12.393	0.1835	-0.10537	-0.028515	-74.955	-93.5002	1541.2519	-1.3276	1.7837	-2.0229	-24.123	124.574	808.86831	-0.54443	0.32666	-0.74561
1.632	2.367	24.9525	28.6336	0.099023	0.041602	0.051074	-28.294	108.456	130.76742	0.15381	-0.029785	0.046875	-6.634	156.246	1051.1249	-0.60303	0.71924	-1.2964	-55.9809	90.4498	613.4546	-0.5583	0.51279	-0.81357	-13.642	4.199	60.379	0.18936	-0.087402	-0.033984	-57.722	-16.704	1540.926	-1.3599	1.7954	-1.999	-93.152	90.849	899.06	-0.64424	0.41631	-0.83037
1.634	-52.115	48.187	12.6176	0.10605	0.05752	0.034473	-53.944	61.1627	118.535	0.14355	-0.022949	0.050781	-33.31	122.7069	1018.5358	-0.54492	0.66406	-1.2256	-23.406	58.093	712.1234	-0.60547	0.5918	-0.88281	10.646	33.16512	57.737	0.18604	-0.075195	-0.037012	-42.743	-44.5495	1508.4622	-1.3906	1.7988	-1.9746	-63.479	32.547	963.209	-0.76045	0.50791	-0.92822
1.636	-4.97	7.5297	40.759	0.10986	0.063965	0.018555	-30.853	70.0852	105.857	0.12598	-0.0019531	0.044922	17.446	189.683	1004.989	-0.50244	0.62207	-1.1734	-93.545	44.633	771.8068	-0.64883	0.66309	-0.94668	-26.51	29.5541	33.368	0.18652	-0.065918	-0.039551	-19.637	-17.3834	1548.5299	-1.4351	1.7915	-1.9526	-74.81	2.677	982.3805	-0.88662	0.61533	-1.0309
1.638	6.143	24.1294	30.2639	0.11592	0.070117	0.0055665	-51.469	60.444	62.2286	0.10449	0.0080567	0.030273	8.724	182.028	943.897	-0.45508	0.57227	-1.1172	-89.658	-22.5762	838.996	-0.68945	0.72597	-1.0129	-10.991	32.2376	49.788	0.18233	-0.05293	-0.049511	-47.943	19.7386	1532.21411	-1.4688	1.7842	-1.9345	-99.524	-34.6361	1019.6572	-1.014	0.75049	-1.1171
1.64	-20.881	25.09	26.2861	0.11905	0.074512	-0.010937	-70.551	36.198	58.2144	0.084473	0.021484	0.020996	-4.507	164.2614	923.56114	-0.39355	0.51123	-1.0542	-35.168	-65.427	896.087	-0.73711	0.79082	-1.0754	-21.047	48.22	29.07844	0.17217	-0.040137	-0.053125	-63.316	-24.4066	1524.18	-1.5039	1.7832	-1.9297	-25.808	-71.8922	1053.9331	-1.1387	0.90625	-1.1992
1.642	18.137	1.506	31.7967	0.12334	0.076074	-0.023437	-28.865	51.5745	54.4468	0.053223	0.041992	0.0039063	24.753	208.553	891.0351	-0.36914	0.48145	-1.0215	-66.553	-70.823	944.074	-0.78056	0.8539	-1.1215	-68.914	5.6833	29.745	0.16123	-0.028027	-0.052344	-57.644	16.877365	1568.8334	-1.541	1.7969	-1.9121	-40.02	-86.2716	1022.8274	-1.2326	1.0596	-1.2764
1.644	-8.704	39.568	11.475	0.12852	0.073731	-0.038867	-60.722	34.2527	41.014	0.033203	0.04834	-0.00048828	-16.027	156.048	853.055	-0.31982	0.42432	-0.94873	-13.855	-119.338	973.612	-0.83008	0.91113	-1.166	-2.036	24.8822	55.708	0.14327	-0.02041	-0.053223	-60.647	2.9516	1531.7161	-1.5488	1.8047	-1.9102	-83.946	-143.273	1020.105	-1.2934	1.1982	-1.3317
1.646	-13.424	36.55	39.467	0.14502	0.068359	-0.044922	-26.96	18.639	59.24	-0.0087891	0.069336	-0.028809	-6.78	166.193	852.4973	-0.28808	0.3894	-0.90015	-57.251	-104.283	954.6699	-0.87442	0.96035	-1.2029	-33.859	24.2532	30.93135	0.12695	-0.0063477	-0.056641	-71.862	-48.56	1557.192	-1.5347	1.7974	-1.8931	-63.291	-137.467	1021.154	-1.3023	1.2978	-1.3609
1.648	14.429	26.1183	38.362	0.1583	0.056543	-0.048047	-4.02200000000001	28.7778	47.295	-0.047363	0.088867	-0.046875	-13.68	177.855	799.5306	-0.25732	0.35596	-0.85693	-71.913	-136.3292	981.203	-0.90381	1.0055	-1.2398	-64.355	-6.552	50.743	0.11103	0.0025391	-0.057227	-87.683	-4.5432	1557.314	-1.5139	1.7669	-1.8757	-87.026	-132.306	991.676	-1.2642	1.3354	-1.3779
1.65	-33.595	29.4566	25.81523	0.17861	0.037012	-0.054981	-60.044	-8.146	48.4006	-0.086914	0.11133	-0.06543	-30.932	116.007	776.021	-0.22266	0.32324	-0.79492	-32.58	-155.297	1004.613	-0.92217	1.0271	-1.2534	-23.068	16.4464	60.4492	0.10049	0.0099609	-0.06123	-104.29	-36.7412	1493.427	-1.4844	1.7344	-1.8516	-65.753	-145.855	971.924	-1.189	1.3188	-1.3726
1.652	-8.532	-10.6204	52.799	0.20088	0.018261	-0.051856	-21.566	16.0258	69.72	-0.14209	0.14355	-0.086426	-20.513	137.288	762.5828	-0.20996	0.31494	-0.76416	-106.355	-140.147	972.124	-0.91826	1.0197	-1.2643	-59.093	-13.7627	31.2239	0.091894	0.013476	-0.063574	-102.167	-38.767	1528.16	-1.4478	1.6821	-1.8101	-72.346	-114.001	916.036	-1.0863	1.2395	-1.366
1.654	-46.107	12.4234	24.0688	0.21534	-0.003418	-0.056738	-15.12	23.4028	34.976	-0.17798	0.1709	-0.10717	-40.247	119.546	709.3618	-0.17676	0.29639	-0.70654	-62.993	-172.23	964.522	-0.89648	0.9834	-1.2734	-42.422	-11.21	44.744	0.091113	0.016797	-0.059863	-101.385	16.777	1538.402	-1.4233	1.6528	-1.7964	-103.758	-130.819	899.576	-0.97617	1.1196	-1.3355
1.656	-51.136	30.124	23.8972	0.22803	-0.025391	-0.056641	-29.033	10.125	36.391	-0.19971	0.19482	-0.12646	-42.703	108.529	683.93	-0.15161	0.28418	-0.6499	-56.58	-166.351	920.3778	-0.85186	0.92197	-1.2741	-30.04	11.1063	20.7413	0.085449	0.022949	-0.060547	-92.196	-40.05123	1502.6278	-1.3652	1.5918	-1.7559	-47.761	-119.982	911.644	-0.89336	0.9547	-1.3012
1.658	-8.44900000000001	17.6846	41.5692	0.23486	-0.041504	-0.056836	2.647	21.2915	31.8804	-0.21631	0.21533	-0.13428	-23.758	173.0105	646.7632	-0.12598	0.27197	-0.60791	-121.235	-158.008	924.9703	-0.80371	0.8414	-1.2711	-68.92	-0.410999999999998	19.6467	0.070117	0.026465	-0.05918	-94.41	-1.8	1528.804	-1.3264	1.5422	-1.7312	-83.713	-72.063	877.606	-0.85235	0.767	-1.257
1.66	-73.007	46.6689	18.2	0.24073	-0.056445	-0.063379	-50.148	-6.75414	14.327	-0.21924	0.22021	-0.13721	-55.265	147.1353	598.057	-0.081055	0.25342	-0.54883	-56.014	-166.331	965.392	-0.75215	0.75781	-1.2617	-46.806	32.3371	45.7355	0.063574	0.043457	-0.059277	-101.5101	47.902	1479.8612	-1.2925	1.4946	-1.6987	-73.128	-88.661	901.607	-0.83789	0.58984	-1.2168
1.662	-58.696	18.254	37.2451	0.24776	-0.068164	-0.064942	-9.122	-19.1641	36.2933	-0.21631	0.22803	-0.14258	-47.571	152.59362	579.429	-0.060059	0.24365	-0.51221	-52.288	-125.349	956.562	-0.70996	0.67734	-1.2397	-71.7408	36.287	21.713	0.047949	0.052441	-0.066308	-106.254	26.497	1465.404	-1.2588	1.4395	-1.6738	-39.379	-95.277	893.958	-0.84678	0.46728	-1.1813
1.664	-20.646	5.721	26.1903	0.24658	-0.077539	-0.063183	3.812	7.6254	16.994	-0.2085	0.22192	-0.13452	-51.751	175.974	510.6312	-0.0092773	0.21143	-0.44629	-72.656	-139.481	987.7173	-0.6792	0.60059	-1.2183	-52.022	4.1494	30.2027	0.036523	0.069727	-0.068457	-83.604	114.398	1494.515	-1.2383	1.4121	-1.6572	-82.9538	-148.753	907.705	-0.86211	0.41231	-1.1586
1.666	-78.28	35.153	25.705	0.24072	-0.087891	-0.062988	-48.902	7.636	13.03181	-0.19824	0.21436	-0.12842	-92	140.12	464.6988	0.025391	0.18457	-0.39965	-36.07	-136.316	1007.245	-0.66748	0.54756	-1.1923	-2.203	16.6698	37.5708	0.026855	0.088867	-0.070313	-108.53	115.066	1438.283	-1.2012	1.3711	-1.6191	-38.959	-206.714	971.001	-0.86914	0.42637	-1.1602
1.668	-41.603	9.963	50.9103	0.23672	-0.090527	-0.062793	2.654	22.7537	21.7092	-0.17041	0.19971	-0.11621	-51.64	176.3047	431.7062	0.057129	0.15234	-0.35254	-79.86095	-114.692	1011.424	-0.66123	0.51728	-1.1718	-50.615	-3.4665	18.9864	0.015039	0.11142	-0.067383	-86.46	92.166	1418.5394	-1.1763	1.3394	-1.5923	-40.135	-210.434	992.112	-0.85654	0.47627	-1.1728
1.67	-58.037	29.8644	38.7809	0.22773	-0.096386	-0.061328	-19.299	22.2241	-1.406	-0.16113	0.18262	-0.1084	-68.123	160.8611	375.9849	0.090332	0.10889	-0.29004	-86.05782	-146.78	1070.022	-0.6581	0.50166	-1.1741	-36.507	-14.146	24.2499	0.00625	0.12822	-0.070411	-64.197	143.178	1399.497	-1.1504	1.3008	-1.5645	-73.4461	-258.685	1060.7371	-0.82959	0.5415	-1.1948
1.672	-91.0904	14.85	29.0645	0.21914	-0.10498	-0.059375	-26.848	12.7087	16.0495	-0.13379	0.1499	-0.094727	-81.19	137.8255	347.8992	0.10254	0.085449	-0.26172	-57.827	-169.804	1107.2001	-0.65576	0.50069	-1.1884	-23.706	22.4139	1.571	-0.003125	0.14658	-0.075488	-93.5614	80.9373	1347.35	-1.1113	1.25	-1.5273	-2.754	-267.256	1109.599	-0.79717	0.60869	-1.2185
1.674	-28.331	-17.5083	34.5121	0.20801	-0.11387	-0.061133	5.294	32.529	22.0721	-0.11279	0.12231	-0.078613	-59.358	173.1	303.904	0.12891	0.04541	-0.2002	-98.57772	-226.232	1156.3091	-0.64795	0.52002	-1.2065	-49.127	-6.5918	20.4036	-0.010254	0.16338	-0.078711	-53.496	97.35064	1369.6445	-1.0894	1.2329	-1.5054	-34.887	-275.99	1142.3153	-0.77978	0.654	-1.2589
1.676	-66.916	18.0344	23.2105	0.19531	-0.11572	-0.059082	-36.598	7.1872	15.1385	-0.092773	0.094727	-0.062988	-97.437	127.011	262.81	0.14234	0.02124	-0.16552	-60.453	-286.662	1192.331	-0.65391	0.53427	-1.2414	9.22	-14.970532	70.7006	-0.01709	0.17725	-0.082031	-27.376	128.3473	1344.3073	-1.0386	1.1821	-1.4604	-28.178	-321.191	1196.308	-0.77236	0.67002	-1.3093
1.678	-63.99	16.5913	36.8859	0.18203	-0.11651	-0.061133	-26.566	4.222	42.2084	-0.069336	0.065918	-0.050781	-66.213	138.661	248.1174	0.15332	-0.00097656	-0.12598	-48.917	-274.797	1202.827	-0.67959	0.54932	-1.3007	-32.756	-25.9553	54.827	-0.029004	0.18643	-0.093945	-44.612	67.498	1305.3375	-0.99486	1.1458	-1.4206	29.655	-294.459	1212.83743	-0.78574	0.67324	-1.3658
1.68	-10.695	18.4949	42.53062	0.16426	-0.11943	-0.054688	-17.551	26.927	18.763	-0.055176	0.044434	-0.043945	-65.385	147.336	224.134	0.1665	-0.028809	-0.083984	-58.995	-292.366	1235.2006	-0.7124	0.57275	-1.382	-31.543	-44.543	81.3403	-0.043652	0.18135	-0.1124	-3.806	103.071	1313.219	-0.95361	1.106	-1.3765	-22.891	-284.422	1242.7322	-0.81641	0.69385	-1.416
1.682	-51.406	41.049	10.047	0.1502	-0.12451	-0.058594	-68.822	13.3664	4.631	-0.02832	0.02002	-0.023926	-82.568	89.0654	211.905	0.16895	-0.042969	-0.069336	-3.40199999999999	-261.563	1277.2591	-0.74824	0.62422	-1.4742	30.893	6.572	101.694	-0.056543	0.1794	-0.13818	-16.042	94.2658	1254.3265	-0.90039	1.0469	-1.3154	-4.583	-258.804	1316.736	-0.87724	0.75908	-1.4647
1.684	-29.446	-2.2773	32.5794	0.13916	-0.12569	-0.058203	-13.684	36.886	24.6241	-0.0080568	0.00048825	-0.012207	-28.286	96.2495	210.1828	0.17725	-0.060547	-0.029785	2.343	-224.561	1310.634	-0.78662	0.70752	-1.5542	-68.561	3.9329	161.7845	-0.079492	0.18652	-0.16504	-24.648	60.679	1241.064	-0.87354	1.0181	-1.2866	14.698	-180.9275	1340.3833	-0.94375	0.84648	-1.511
1.686	-9.494	7.508	28.1739	0.13037	-0.12793	-0.060547	-35.631	33.162	8.6702	0.014648	-0.019043	0.0014648	-49.619	64.471	171.714	0.16748	-0.066162	-0.012939	3.337	-229.905	1361.8193	-0.83115	0.81709	-1.6142	-52.24	-2.59159	230.9044	-0.10938	0.20801	-0.18994	20.448	144.224	1236.261	-0.82568	0.96924	-1.2183	-23.8401	-172.197	1355.3677	-1	0.93555	-1.557
1.688	-17.588	5.204	32.2478	0.12432	-0.13193	-0.060547	-59.742	1.562	33.077	0.053711	-0.049805	0.021484	-42.326	37.539	163.469	0.15674	-0.05957	0.00048828	26.76	-199.3333	1400.6104	-0.87686	0.92471	-1.6522	-32.3	4.1112	230.798	-0.15048	0.22334	-0.23193	17.302	116.1556	1168.7373	-0.78442	0.93384	-1.1658	28.3194	-117.546	1370.9823	-1.0328	1.0127	-1.5822
1.69	31.401	-2.0054	29.303	0.11387	-0.13867	-0.064355	-29.26	15.5388	28.024	0.072754	-0.064453	0.027344	-16.483	69.3989	139.9819	0.12549	-0.046875	0.010254	8.723	-185.12716	1408.4457	-0.89717	1.0177	-1.6804	-61.119	-21.954	267.1529	-0.19043	0.23819	-0.28301	-3.531	111.1562	1157.4764	-0.74561	0.89697	-1.1069	-2.74	-80.493	1385.087	-1.0371	1.0723	-1.6055
1.692	-8.823	44.634	8.9143	0.11074	-0.14336	-0.063183	-68.4522	6.8849	11.41414	0.099121	-0.089355	0.04541	-23.764	42.5249	114.988	0.1123	-0.037109	0.0078125	7.997	-173.5467	1432.68	-0.89121	1.0635	-1.6854	-37.425	37.6728	363.461	-0.23301	0.2542	-0.34355	1.952	154.021	1111.835	-0.69141	0.84766	-1.04	5.07700000000001	-67.603	1413.9108	-1.0172	1.0957	-1.6214
1.694	-31.321	33.685	28.626	0.10527	-0.14463	-0.067481	-26.025	18.6642	37.595	0.1189	-0.11499	0.057373	-20.125	45.5401	114.125	0.066895	-0.012695	0.0014648	25.271	-93.99	1415.7621	-0.85596	1.063	-1.6655	-61.522	98.954	431.1676	-0.26963	0.27666	-0.4081	-16.938	112.8179	1050.226	-0.6709	0.82227	-1	70.9484	-11.928	1431.7989	-0.98584	1.0958	-1.6378
1.696	9.48699999999999	26.9521	26.0651	0.10205	-0.15479	-0.071289	-13.383	40.907	28.3222	0.13965	-0.1377	0.068848	-10.52	51.48	74.7275	0.033935	0.010498	-0.0083007	23.002	-98.649	1406.57163	-0.81562	1.0139	-1.639	-79.94	117.889	504.4172	-0.30469	0.30762	-0.48828	4.118	160.514	1064.263	-0.62207	0.77832	-0.91992	20.222	-35.681	1455.0474	-0.95459	1.0591	-1.6518
1.698	-20.003	35.426	11.172	0.10625	-0.16123	-0.076465	-61.912	26.8233	19.1887	0.15723	-0.16162	0.075195	-39.33	18.6859	62.67862	0.00048828	0.037598	-0.029297	78.104	-78.823	1401.2045	-0.78086	0.95547	-1.6258	-64.825	145.203	581.255	-0.34453	0.3457	-0.57822	6.246	189.078	1002.915	-0.58691	0.74463	-0.86963	32.476	-82.873	1501.1031	-0.93252	1.0065	-1.6763
1.7	-1.003	-28.462	68.0896	0.10693	-0.17246	-0.080176	-18.184	35.1583	26.2071	0.16846	-0.17383	0.081543	5.501	48.8809	67.391	-0.039063	0.08252	-0.054199	42.9763	-86.981	1401.39	-0.76836	0.89609	-1.6352	-72.927	95.2296	675.268	-0.38789	0.38477	-0.67129	-15.933	141.619	949.9405	-0.55273	0.70801	-0.81055	46.7266	-99.66128	1503.343	-0.93701	0.95557	-1.7124
1.702	-26.754	-28.181	76.185	0.10771	-0.17793	-0.08252	-42.121	37.009	18.425	0.18115	-0.18652	0.084961	-28.437	50.8805	28.518	-0.054199	0.10596	-0.067871	52.4956	-124.079	1432.868522	-0.79404	0.85049	-1.6542	-47.109	37.262	831.8918	-0.4375	0.43047	-0.77402	1.146	192.639	935.4418	-0.5	0.65625	-0.74023	-6.503	-164.215	1519.4344	-0.97744	0.93233	-1.7614
1.704	-56.435	-10.07273	91.43046	0.10166	-0.19004	-0.093651	-41.008	28.7547	49.929	0.18701	-0.19311	0.082276	-33.191	32.90763	30.254	-0.086914	0.13867	-0.09668	95.887	-104.886	1455.261	-0.85889	0.82666	-1.6704	-48.564	44.2167	913.27627	-0.49023	0.47441	-0.89336	-10.156	158.8428	859.578	-0.47217	0.63428	-0.70215	45.3891	-137.566	1547.112	-1.0425	0.94424	-1.8288
1.706	51.437	1.3544	114.909	0.090332	-0.20557	-0.1123	-12.854	36.481	57.924	0.19238	-0.19531	0.07959	14.025	62.297	28.4899	-0.11133	0.17408	-0.10987	20.5536	-129.1833	1454.0078	-0.94268	0.84834	-1.7167	-74.885	3.9891	930.032	-0.55713	0.53369	-0.99951	-0.651999999999997	145.383	857.2711	-0.41406	0.57617	-0.62109	6.466	-132.297	1546.268	-1.1186	0.99772	-1.9018
1.708	-16.715	43.458	132.27644	0.054981	-0.20166	-0.13565	-39.073	16.731254	18.4508	0.18945	-0.19141	0.07373	-34.335	45.2592	29.2346	-0.13721	0.19824	-0.13086	46.9974	-145.714	1471.619	-1.0199	0.91797	-1.7914	-88.3495	-3.14	969.919	-0.63389	0.60723	-1.0943	14.962	187.1977	834.884	-0.37207	0.53125	-0.56446	-30.3282	-153.989	1584.158	-1.1798	1.0952	-1.9837
1.71	-48.7	37.371	192.4702	0.0025386	-0.16611	-0.1623	-9.182	7.1608	33.112	0.19336	-0.18408	0.067383	-2.276	46.6409	65.654	-0.17041	0.23193	-0.15186	39.0624	-123.3444	1468.7303	-1.0809	1.0359	-1.8774	-114.5441	-26.848	981.957	-0.71953	0.70078	-1.1691	-30.843	132.035	754.4748	-0.32666	0.48584	-0.51025	4.104	-126.7846	1599.628	-1.2358	1.2056	-2.0679
1.712	-1.308	20.9392	243.4037	-0.069336	-0.10557	-0.19316	-27.04	18.5809	19.481	0.19678	-0.16846	0.053223	-5.55399999999999	51.7134	39.0139	-0.18701	0.24658	-0.15771	-26.481	-146.047	1493.111	-1.1344	1.1848	-1.9547	-131.0751	-81.026	982.425	-0.79922	0.80625	-1.2176	-18.521	134.7752	759.322	-0.26514	0.42529	-0.43311	-31.9107	-155.266	1605.807	-1.2801	1.3094	-2.1371
1.714	-37.2377	53.701	288.363	-0.15293	-0.043946	-0.24443	-50.083	7.3842	34.2735	0.19873	-0.15039	0.039307	-47.808	26.294	35.212	-0.21045	0.26611	-0.17285	33.833	-111.727	1533.13	-1.1797	1.3301	-2.0234	-57.598	-84.93602	967.816345	-0.87119	0.93193	-1.2548	-29.709	168.315	713.223	-0.22998	0.39453	-0.39355	21.378	-143.184	1630.515	-1.2999	1.397	-2.1874
1.716	8.614	57.826	395.09	-0.23877	0.01123	-0.31055	14.582	20.62908	54.6965	0.19629	-0.12988	0.02832	-7.565	36.8475	31.8313	-0.21704	0.2771	-0.18579	4.223	-83.4516	1516.798	-1.2072	1.4533	-2.099	-85.1251	-117.162	933.8696	-0.91992	1.0605	-1.2656	-35.778	117.4762	645.082	-0.1792	0.33203	-0.33008	22.25836	-75.5815	1592.9472	-1.305	1.4544	-2.2284
1.718	-6.075	108.3687	465.936	-0.31973	0.075683	-0.37978	-6.05099999999999	20.0083	33.5971	0.20557	-0.10352	0.010254	-61.394	6.567	6.295	-0.22656	0.28271	-0.19336	-15.2157	-83.6487	1520.766	-1.2233	1.5533	-2.1546	-61.3503	-152.011	992.919	-0.94678	1.1796	-1.2659	3.629	159.4149	648.565	-0.13818	0.27978	-0.28101	-26.2333	-53.55	1585.61	-1.2916	1.4861	-2.2601
1.72	-52.5512	133.795	523.5446	-0.40342	0.14932	-0.45068	-30.416	1.868	48.655	0.20947	-0.09375	0.0043945	-58.828	-20.5522	31.5125	-0.23242	0.28467	-0.19531	10.572	-47.682	1498.787	-1.2191	1.6201	-2.1831	-30.923	-115.56	978.497	-0.94453	1.2715	-1.2633	-25.675	144.4579	559.299	-0.095215	0.2334	-0.23291	33.4315	7.5	1596.864	-1.2695	1.4922	-2.2715
1.722	-33.764	104.7872	601.0214	-0.49717	0.22744	-0.53857	14.093	9.33445	36.04089	0.2168	-0.069336	-0.012207	-18.268	-6.2874	22.267	-0.22803	0.28369	-0.19531	-36.0402	-51.2874	1474.29	-1.2031	1.659	-2.1965	-17.3638	-126.348	948.544	-0.9293	1.3359	-1.2543	-53.0487	102.11	496.9723	-0.04541	0.16748	-0.16602	-4.497	26.7199	1578.7	-1.2548	1.4741	-2.27
1.724	-55.99	135.666	641.807	-0.59424	0.3166	-0.63574	-42.999	5.6022	20.9643	0.22143	-0.054443	-0.02124	-81.5293	-17.5147	13.7928	-0.22266	0.28076	-0.1875	-5.058	-51.988	1458.8819	-1.1914	1.6738	-2.1895	82.694	-84.874	947.57	-0.89795	1.372	-1.2507	11.101	151.6886	493.0993	-0.017578	0.13818	-0.13574	-2.426	16.2587	1579.4566	-1.2465	1.441	-2.2547
1.726	-43.042	111.3372	776.02788	-0.70068	0.42432	-0.73584	-13.932	11.52	40.414	0.22412	-0.043945	-0.02832	-56.48	7.076	35.5721	-0.2163	0.27222	-0.1809	12.587	-22.2183	1449.857	-1.1738	1.6539	-2.1734	62.772	-65.46286	933.139	-0.87109	1.375	-1.2539	3.689	133.9229	410.255	0.040527	0.072266	-0.075195	35.0751	44.393	1599.34018	-1.2512	1.3894	-2.225
1.728	-31.891	80.302	895.092	-0.80918	0.55059	-0.84317	-10.089	31.418	18.985	0.22656	-0.036621	-0.04248	-52.431	42.1427	18.271	-0.20996	0.26367	-0.16895	-19.1394	-42.216	1441.4657	-1.1453	1.6047	-2.1399	29.688	-76.856	985.331	-0.85371	1.3455	-1.2526	-0.217999999999996	121.836	393.8906	0.074463	0.025391	-0.035157	-14.095	35.096	1593.026	-1.258	1.3131	-2.1846
1.73	-95.806	57.882	959.731	-0.93478	0.68028	-0.95743	-51.058	3.3455	28.9408	0.23145	-0.024902	-0.050781	-73.022	33.6746	23.5323	-0.19189	0.25049	-0.15527	0.0990000000000002	-19.0185	1449.5213	-1.1203	1.5031	-2.0836	62.713	-46.699	1031.8256	-0.85908	1.3028	-1.2401	38.944	153.6317	359.3778	0.11035	-0.023438	-0.00048828	5.243	16.5501	1603.2327	-1.2666	1.2129	-2.1367
1.732	-34.317	-24.2046	1018.438	-1.0656	0.82676	-1.0789	-3.091	8.2864	40.5184	0.23291	-0.01416	-0.063477	-1.787	49.4773	34.1494	-0.18311	0.23682	-0.13428	-20.8067	12.4279	1441.341	-1.1042	1.3688	-2.0175	6.34699999999999	-93.105	1035.328	-0.88994	1.2642	-1.2257	-11.577	98.1426	293.8444	0.15332	-0.089355	0.043457	27.4325	40.2464	1580.904	-1.2758	1.1347	-2.109
1.734	-25.45	-61.559	1015.8595	-1.1951	0.98146	-1.1842	-38.164	16.1234	16.913	0.23218	-0.0053711	-0.069824	-41.708	34.6706	25.21744	-0.16504	0.21777	-0.12012	-1.859	10.0956	1437.5787	-1.084	1.2324	-1.9492	-1.014	-163.223	1091.43082	-0.93213	1.2507	-1.2032	-0.167999999999999	135.6531	282.6873	0.1748	-0.12012	0.063477	-5.829	-19.9471	1584.5757	-1.296	1.086	-2.0991
1.736	-63.001	-87.492	1037.992	-1.3125	1.1465	-1.2734	-46.134	11.513	24.5558	0.23145	0.0019531	-0.072754	-46.651	18.3508	45.741	-0.13232	0.1875	-0.089844	28.1485	21.5432	1443.2275	-1.0597	1.1227	-1.8991	27.544	-185.201	1092.836	-0.97412	1.272	-1.1655	27.239	144.506	235.5853	0.20703	-0.1792	0.094238	54.306	-21.5832	1612.168	-1.3206	1.0786	-2.0878
1.738	-0.744999999999997	-119.385	1036.7482	-1.4019	1.2965	-1.3531	-6.544	26.8299	29.7017	0.22803	0.012207	-0.097656	-4.27500000000001	48.074	28.271	-0.12158	0.17285	-0.077148	-13.734	-1.1324	1457.8909	-1.0453	1.0403	-1.866	-11.054	-251.776	1099.902	-0.99385	1.3023	-1.129	-10.05	93.3919	206.0896	0.23145	-0.22046	0.11206	53.492	-13.2183	1597.1973	-1.3354	1.088	-2.0764
1.74	-38.69	-106.299	1008.2112	-1.4401	1.4304	-1.4097	-63.773	13.4032	15.5058	0.22217	0.020508	-0.096191	-58.3381	35.2817	13.043	-0.09375	0.1377	-0.052246	35.1219	-35.4362	1461.353	-1.048	1.0016	-1.8469	32.785	-244.8025	1163.862	-0.99365	1.3132	-1.1101	17.702	128.096	209.051	0.24609	-0.25293	0.125	4.862	-43.42496	1610.145	-1.3418	1.1133	-2.0703
1.742	-65.945	-118.848	1019.351	-1.4183	1.5256	-1.4315	-34.614	-13.096	37.101	0.21777	0.035156	-0.10938	-25.39	30.96061	35.596	-0.067627	0.11109	-0.028809	66.128	-16.6307	1448.3715	-1.0578	0.99228	-1.8444	-3.47600000000001	-232.3138	1184.137	-0.97881	1.2992	-1.1202	11.258	103.6001	145.423	0.26074	-0.28955	0.1416	48.771	-3.705	1612.375	-1.3395	1.1222	-2.0641
1.744	-48.315	-138.937	1016.411	-1.3428	1.5533	-1.4279	-31.395	0.191902	12.7136	0.20849	0.043945	-0.10864	-19.781	28.905	11.4404	-0.04541	0.083496	-0.010254	41.1882	-34.0765	1445.158	-1.0605	1.0117	-1.8594	-12.702	-277.083	1281.511	-0.95752	1.2702	-1.1399	-17.035	69.5401	131.035	0.26611	-0.31006	0.14551	40.98	-8.984	1573.394	-1.326	1.1173	-2.0444
1.746	-109.646	-139.486	973.109	-1.2358	1.5063	-1.4175	-63.368	-11.0663	23.2871	0.19922	0.050781	-0.11279	-34.21	2.6981	16.4216	-0.015625	0.05127	0.010254	66.105	-20.7717	1451.466	-1.048	1.0353	-1.8773	55.4721	-274.095	1340.08	-0.94971	1.2339	-1.1772	26.765	105.0856	130.426	0.271	-0.33984	0.15381	54.982	-3.71	1559.272	-1.314	1.095	-2.0136
1.748	-63.361	-160.078	949.664	-1.0961	1.3836	-1.3832	-18.645	6.8639	43.113	0.18018	0.060547	-0.11279	1.006	27.834	33.13746	-0.0029297	0.031738	0.022949	49.2381	3.804	1420.2316	-1.0324	1.0543	-1.886	45.8558	-305.447	1359.9723	-0.96436	1.1958	-1.2315	0.477999999999994	52.5252	101.04	0.27172	-0.35694	0.15234	76.029	50.80686	1517.6615	-1.3015	1.0602	-1.9784
1.75	-53.301	-113.924	901.8675	-0.96143	1.2185	-1.337	-49.262	19.5439	18.309	0.17139	0.061523	-0.11719	-33.71	15.3043	26.7353	0.026855	-0.003418	0.044922	39.0875	-8.999	1402.9251	-1.0125	1.0633	-1.891	32.528	-300.4	1427.59	-1.0027	1.1773	-1.2918	2.948	60.045	117.7491	0.27051	-0.36816	0.14551	35.9514	33.962	1495.0015	-1.2925	1.02	-1.9409
1.752	-80.497	-107.0058	889.6922	-0.86416	1.0204	-1.2648	-47.032	11.335	21.9725	0.15332	0.074707	-0.11426	-0.756999999999998	-8.573	57.655	0.046387	-0.026856	0.058594	76.402	32.6317	1402.61881	-0.99404	1.0694	-1.8794	11.433	-197.619	1442.3441	-1.0429	1.1895	-1.3461	1.893	77.03941	92.6803	0.25977	-0.37256	0.125	75.302	91.443	1475.2395	-1.2766	0.99101	-1.9
1.754	-55.019	-104.154	910.8997	-0.78808	0.80254	-1.1924	-9.171	18.6306	19.871	0.14086	0.076904	-0.11743	7.421	0.0547999999999993	54.8621	0.064941	-0.050293	0.075195	35.0079	35.7644	1389.7778	-0.97656	1.0625	-1.8691	-42.708	-173.929	1459.778	-1.0928	1.2246	-1.3777	-39.398	26.868	46.905	0.24902	-0.3667	0.1167	12.6239	117.661	1428.02276	-1.2616	0.95928	-1.8604
1.756	-78.86	-81.508	890.016	-0.71094	0.58789	-1.125	-48.556	23.88811	11.522	0.125	0.081543	-0.1167	-35.618	-16.0526	25.6066	0.084473	-0.081055	0.092285	74.705	38.3597	1392.368	-0.96406	1.0453	-1.8429	-66.312	-123.554	1491.756	-1.1191	1.2695	-1.3926	-13.341	57.7414	66.93498	0.21924	-0.34619	0.088379	20.0704	112.179	1414.4784	-1.2424	0.93311	-1.8226
1.758	-62.867	-133.267	907.129	-0.65117	0.43252	-1.0742	-14.567	1.1612	46.383	0.10059	0.087891	-0.11475	16.221	-8.4282	44.345	0.094727	-0.091309	0.097168	77.446	82.685	1360.5896	-0.9456	1.0169	-1.8179	-99.9045	-98.563	1466.8324	-1.1106	1.2987	-1.3965	-39.762	63.0023	50.2931	0.17993	-0.31689	0.063476	68.471	143.974	1399.1043	-1.2261	0.90947	-1.7825
1.76	-25.5	-142.678	941.052	-0.60166	0.34668	-1.0553	-12.471	27.282	10.469361	0.089844	0.093262	-0.11621	-20.426	28.092	28.7685	0.1123	-0.10693	0.1084	13.7133	76.802	1329.367	-0.92295	0.98565	-1.7851	-112.4456	-141.229	1497.059	-1.075	1.2906	-1.4107	-61.977	32.93	45.0806	0.13672	-0.28027	0.037598	-0.497	114.251	1370.596	-1.2061	0.88867	-1.75
1.762	-79.448	-146.373	952.115	-0.57627	0.3291	-1.0518	-49.192	10.62626	12.1669	0.057617	0.10205	-0.10938	-44.257	40.5008	38.411	0.12891	-0.1189	0.11597	63.506	94.903	1337.2153	-0.90313	0.9543	-1.7523	-85.5906	-94.267	1509.527	-1.0379	1.2465	-1.4362	-10.479	81.07	54.09591	0.077148	-0.21631	-0.0029297	17.102	102.1829	1368.8451	-1.1789	0.87676	-1.7143
1.764	-65.1427	-193.102	1003.191	-0.57237	0.36006	-1.069	-5.64	26.506	19.28807	0.04126	0.11694	-0.11792	11.033	48.49	32.48	0.13916	-0.13232	0.11963	12.676	106.047	1319.932	-0.88428	0.92334	-1.7163	-121.467	-96.011	1491.608	-1.0161	1.182	-1.4677	-64.1445	45.76	14.718	0.049805	-0.1875	-0.025879	19.02	113.29038	1342.2051	-1.1441	0.8668	-1.6836
1.766	-37.168	-206.3	1047.708	-0.58984	0.41602	-1.1035	-39.424	44.749	12.081	0.019531	0.12793	-0.11768	-40.353	25.672	9.15	0.16016	-0.13965	0.125	-7.818	88.1257	1298.453	-0.86358	0.89775	-1.6901	-87.3842	-113.982	1515.814	-1.0205	1.1279	-1.5195	-65.637	17.6742	46.2189	-0.0048828	-0.12354	-0.068848	-18.381	84.29	1311.775	-1.1133	0.85547	-1.6558
1.768	-85.0335	-267.478	1100.4477	-0.61143	0.47998	-1.146	-19.916	23.116	30.362	0.0043945	0.13965	-0.11963	-45.007	4.9765	34.199	0.16992	-0.14209	0.13037	20.469	111.773	1283.8443	-0.85078	0.87383	-1.6617	-68.141	-74.382	1503.451	-1.0488	1.1008	-1.5868	-20.968	46.8268	54.13	-0.03711	-0.082275	-0.10034	41.3976	94.522	1312.576	-1.0812	0.85	-1.6219
1.77	4.422	-303.242	1158.583	-0.63028	0.54903	-1.1954	30.415	36.993	25.1055	-0.0063477	0.15234	-0.12158	-20.904	18.7507	26.8	0.17822	-0.14893	0.12793	-30.223	110.8367	1254.282	-0.83281	0.85195	-1.6328	-94.16	-128.57	1512.80678	-1.0851	1.1075	-1.6604	-59.406	12.7087	10.676	-0.069336	-0.041504	-0.12744	-17.966	96.261	1274.7342	-1.0542	0.8501	-1.5933
1.772	2.872	-296.368	1169.321	-0.64082	0.60488	-1.2512	-43.351	19.8903	18.7246	-0.01709	0.16846	-0.11719	-70.824	9.5914	23.355	0.18481	-0.15088	0.13135	-20.606	81.683	1246.4777	-0.81201	0.83858	-1.6063	-40.859	-130.249	1582.413	-1.1272	1.1442	-1.7386	-14.457	37.6422	33.3193	-0.11719	0.0097656	-0.16211	-27.076	76.748	1255.869	-1.0266	0.84932	-1.5605
1.774	-3.754	-321.803	1218.567	-0.64551	0.64912	-1.3083	-13.964	8.301	42.025	-0.022461	0.17334	-0.11474	-38.324	15.3597	36.036	0.19287	-0.15186	0.12549	-23.295	84.2379	1233.2764	-0.79834	0.82666	-1.5825	-48.574	-115.465	1607.982	-1.1724	1.2128	-1.8208	-28.606	48.013	26.8486	-0.14258	0.03418	-0.17773	15.803	110.6199	1238.277	-1.0055	0.84883	-1.5278
1.776	30.607	-266.728	1238.7866	-0.66602	0.69287	-1.377	-2.839	30.225	28.8757	-0.030273	0.18115	-0.11328	-37.124	31.707	11.4396	0.20947	-0.15381	0.12207	-61.4614	65.742	1209.3737	-0.78926	0.81856	-1.5525	-54.433	-154.268	1660.602	-1.2202	1.3071	-1.8999	-74.248	-6.4125	17.09262	-0.18799	0.077637	-0.20557	-42.3846	131.9549	1167.2352	-0.99023	0.84063	-1.493
1.778	-12.136	-223.072	1272.19	-0.71201	0.76475	-1.4271	-47.513	7.4419	16.4914	-0.034668	0.18896	-0.10498	-69.207	2.878	20.7529	0.21533	-0.15137	0.11914	-18.1	69.895	1206.3359	-0.78008	0.81601	-1.5258	-17.392	-101.2944	1671.798	-1.2616	1.4204	-1.9718	-10.328	27.6088	52.968	-0.21241	0.10425	-0.21778	-41.217	125.524	1150.217	-0.97051	0.8291	-1.4518
1.78	29.5192	-211.8028	1327.403	-0.78906	0.85351	-1.485	-4.926	13.7725	35.701	-0.03418	0.19434	-0.099609	-18.177	9.3998	36.747	0.22656	-0.14941	0.1123	-46.919	113.6335	1163.674	-0.77031	0.80937	-1.498	-84.318	-118.049	1631.046	-1.3042	1.5344	-2.0362	-21.005	30.7189	30.257	-0.22461	0.13037	-0.22021	-23.32	169.885	1082.811	-0.94873	0.81982	-1.4038
1.782	55.313	-168.916	1347.046	-0.8836	0.96289	-1.5319	-32.666	21.6243	13.32087	-0.042969	0.2002	-0.090332	-56.07	11.1054	12.8547	0.23145	-0.14331	0.10816	-67.15	114.8402	1146.7306	-0.75918	0.80918	-1.4644	-81.435	-145.285	1639.981	-1.3433	1.647	-2.0862	-34.21	0.558999999999999	27.48347	-0.23389	0.14307	-0.2124	-61.727	162.9792	1033.113	-0.91982	0.79619	-1.3501
1.784	11.8389	-165.094	1372.879	-0.96914	1.065	-1.5784	-41.032	9.766	43.436	-0.04419	0.20411	-0.085937	-55.401	-1.374	33.054	0.2373	-0.13672	0.104	-44.684	157.498	1113.2185	-0.73828	0.80859	-1.4307	-38.976	-83.783	1589.17	-1.3804	1.7607	-2.119	0.475999999999999	27.2803	60.0328	-0.2373	0.14551	-0.20166	1.06	185.808	1019.067	-0.87803	0.76767	-1.2964
1.786	33.7592	-130.632	1382.352	-1.022	1.1509	-1.6128	-8.498	34.8334	34.3403	-0.047363	0.20801	-0.083008	-28.974	17.0673	33.9303	0.23877	-0.12695	0.098633	-63.115	170.097	1063.1289	-0.71289	0.80059	-1.3897	-76.532	-103.493	1581.5671	-1.4214	1.8657	-2.144	-36.645	-7.8355	37.1847	-0.23193	0.13525	-0.18213	-30.424	222.318	972.463	-0.83545	0.73213	-1.2444
1.788	42.4206	-70.028	1375.8025	-1.0381	1.2092	-1.6369	-56.4435	36.3889	17.0604	-0.05127	0.21436	-0.073242	-60.498	-3.717	20.1975	0.24512	-0.11768	0.092773	-21.159	156.786	1050.645	-0.68535	0.78789	-1.348	-38.358	-40.169	1604.4496	-1.4378	1.9563	-2.1734	-22.092	11.0388	38.876	-0.22705	0.11279	-0.15283	-43.723	209.791	951.8269	-0.78838	0.68272	-1.1814
1.79	47.9662	-74.694	1391.3128	-1.0328	1.2344	-1.6566	-24.999	22.8992	44.108	-0.057617	0.21777	-0.064941	-23.689	-6.871	37.446	0.24805	-0.10693	0.088379	-22.335	174.552	1020.2295	-0.65957	0.77227	-1.2996	-13.741	7.987	1598.194	-1.4523	2.0126	-2.1827	19.223	46.306	28.6619	-0.22021	0.10596	-0.13965	-10.83	230.35	926.6435	-0.73633	0.63965	-1.1289
1.792	90.194	-68.652	1409.0115	-1.0097	1.2364	-1.6813	-22.38	34.74	24.7058	-0.058105	0.22314	-0.063965	-23.545	15.6353	5.0924	0.24951	-0.097166	0.080322	-82.7734	165.3893	976.1139	-0.62383	0.75059	-1.2498	-17.861	-28.8332	1608.9928	-1.4612	2.0255	-2.1682	-16.1	-5.50693	11.6494	-0.20996	0.066895	-0.10059	-59.435	230.875	873.173	-0.68301	0.59004	-1.0727
1.794	53.7993	-92.393	1420.6266	-0.99453	1.2191	-1.7137	-69.731	15.7463	25.2983	-0.065918	0.21875	-0.064209	-48.665	18.6007	22.403	0.25049	-0.085449	0.076172	-1.089	158.119	965.342	-0.5874	0.72607	-1.1929	-0.594000000000001	17.1464	1599.0133	-1.4646	2.0108	-2.1342	-10.028	9.1496	44.338	-0.19434	0.047119	-0.08081	-36.987	198.7268	852.9471	-0.62558	0.5414	-1.0121
1.796	72.051	-134.728	1457.2054	-0.99365	1.2134	-1.7515	-14.012	15.7209	52.181	-0.069824	0.20752	-0.077637	-2.877	51.662	29.928	0.24854	-0.07959	0.067871	-20.551	184.721	913.3946	-0.5457	0.6959	-1.1385	-27.284	15.6738	1566.8625	-1.4644	1.9771	-2.0972	-0.914000000000001	29.915	30.9036	-0.18213	0.029297	-0.053711	-30.006	197.406	806.9472	-0.57363	0.49297	-0.95742
1.798	59.041	-130.2957	1479.7642	-1.0281	1.2277	-1.7918	-40.348	1.197	66.1959	-0.083496	0.19189	-0.1123	-40.686	51.676	0.269000000000002	0.24707	-0.077148	0.061035	-18.787	169.0132	878.4173	-0.50977	0.66172	-1.0809	-19.332	5.0063	1591.958	-1.4584	1.9264	-2.0455	-32.178	1.6918	14.0176	-0.16602	0.01416	-0.033203	-76.46	163.6959	754.3113	-0.51592	0.44717	-0.89892
1.8	4.039	-148.707	1499.088	-1.0823	1.2567	-1.8366	-73.67	-28.4258	104.802	-0.093262	0.18457	-0.13574	-15.49	34.4017	20.9851	0.23535	-0.06543	0.047363	0.5	170.192	874.104	-0.46484	0.62304	-1.0367	-37.475	54.52	1579.4843	-1.4461	1.8597	-2.0039	13.758	42.5984	43.7173	-0.15381	0.015137	-0.018555	-40.481	153.2837	752.18	-0.46289	0.40039	-0.8418
1.802	48.221	-153.456	1525.305	-1.1561	1.2969	-1.8885	-18.585	-1.5139	112.38639	-0.11133	0.2002	-0.1792	1.324	32.5842	22.198	0.23047	-0.061035	0.040527	-47.15	172.4257	826.08187	-0.42041	0.58916	-0.97978	-95.871	0.446999999999999	1560.6802	-1.4371	1.7891	-1.9574	-8.652	4.4956	27.0791	-0.13721	0.0092773	0.0019531	-79.484	160.2653	711.9281	-0.40528	0.3586	-0.78437
1.804	27.968	-143.125	1514.7049	-1.2215	1.3535	-1.9414	-49.407	3.9074	98.4015	-0.14502	0.21436	-0.23438	-38.554	7.427	23.3283	0.2207	-0.050781	0.038574	-7.485	154.0584	819.698	-0.37646	0.54932	-0.92334	-99.181	-22.909	1579.565	-1.4204	1.7314	-1.9255	-33.139	-20.9337	38.886	-0.12304	0.016846	0.015625	-73.411	127.495	680.823	-0.34795	0.31944	-0.72686
1.806	-2.932	-165.586	1557.64	-1.2622	1.4048	-1.9761	-54.005	13.032	170.3124	-0.1709	0.21338	-0.27051	14.376	5.04	48.98	0.20264	-0.040527	0.02002	-27.263	179.497	796.267	-0.34014	0.51475	-0.86514	-118.7045	-37.5889	1543.7007	-1.4023	1.6895	-1.8984	-17.511	27.655	34.514	-0.11426	0.021973	0.024414	-32.196	148.8869	635.299	-0.29131	0.28154	-0.67178
1.808	40.1419	-128.312	1585.423	-1.2753	1.4403	-2.0034	-50.985	24.6979	204.86	-0.21875	0.21777	-0.36133	-3.405	35.25	27.7191	0.19287	-0.035645	0.0063477	-79.794	158.359	744.928	-0.29932	0.48125	-0.81347	-132.6498	-93.43	1556.083	-1.3931	1.6554	-1.8692	-57.082	-4.4571	5.9722	-0.094238	0.033203	0.035156	-91.053	163.959	569.5625	-0.23809	0.24443	-0.61104
1.81	4.7688	-85.9656	1582.264	-1.2663	1.4548	-2.0226	-82.371	-9.8423	265.363	-0.26099	0.23316	-0.44165	-33.44	30.9479	23.322	0.16992	-0.020508	-0.0058594	-15.024	130.614	714.088	-0.26065	0.44453	-0.76387	-118.1716	-38.443	1552.8477	-1.3824	1.625	-1.8459	-37.173	22.46882	36.2443	-0.081543	0.035156	0.036133	-46.062	142.834	544.827	-0.18848	0.20898	-0.57031
1.812	-10.4947	-72.466	1596.753	-1.253	1.4454	-2.0319	-7.741	-0.602	328.58	-0.30615	0.25537	-0.52686	16.482	26.7459	39.263	0.156	-0.0029297	-0.015137	-53.535	170.6998	657.8993	-0.21934	0.40645	-0.71855	-125.5928	-33.8999	1514.45115	-1.3711	1.6051	-1.8221	-20.65	33.9816	34.1867	-0.062988	0.050293	0.050293	-50.51	184.433	496.8595	-0.1414	0.17168	-0.50586
1.814	37.282	-29.6424	1576.35058	-1.2515	1.4222	-2.0363	-44.297	44.602	387.514	-0.37988	0.30225	-0.64941	-43.754	18.9681	28.9219	0.14453	0.012695	-0.024902	-77.48	158.877	636.126	-0.18213	0.36914	-0.66992	-115.786	-45.6738	1528.976	-1.3504	1.5726	-1.7875	-64.967	-29.8418	8.738	-0.043457	0.052246	0.056152	-104.166	171.3705	437.106	-0.098049	0.14736	-0.44873
1.816	8.8699	-46.143	1534.694	-1.2554	1.395	-2.0308	-49.464	70.291	500.748	-0.4165	0.32715	-0.71094	-31.245	-7.41	30.7976	0.12793	0.040039	-0.04248	-29.27	175.2107	617.323	-0.14336	0.33906	-0.625	-112.8348	22.215	1513.296	-1.3296	1.5376	-1.7534	-34.503	8.615	22.4963	-0.028809	0.063477	0.050293	-46.923	154.731	390.557	-0.059766	0.12119	-0.39717
1.818	31.2843	-47.9167	1537.3	-1.273	1.3712	-2.0255	-19.858	123.5502	548.7915	-0.49951	0.39258	-0.84717	0.936999999999998	11.49789	36.7669	0.12158	0.050293	-0.046387	-76.585	195.9264	554.2399	-0.10908	0.31172	-0.5833	-131.8719	-18.269	1473.452	-1.3105	1.497	-1.7116	-35.669	8.957	8.024	-0.019531	0.07666	0.041016	-78.526	178.814	336.5953	-0.018164	0.095899	-0.34395
1.82	25.19214	-18.271	1527.586	-1.3011	1.3392	-2.0077	-84.177	130.468	595.478	-0.57447	0.44165	-0.9607	-72.229	12.12	25.4613	0.10986	0.074219	-0.057617	-63.929	167.155	519.276	-0.07002	0.29101	-0.5415	-80.555	15.781	1488.73	-1.2933	1.4591	-1.6636	-66.375	-13.856	27.1362	-0.013672	0.07959	0.039551	-86.254	151.72	308.4124	0.017578	0.068359	-0.29297
1.822	9.915	-19.2546	1534.802	-1.3366	1.3044	-1.9831	10.559	103.8852	727.631	-0.65723	0.50391	-1.0723	-21.096	11.81	51.3713	0.10058	0.093752	-0.066651	-74.724	181.4756	473.1544	-0.034473	0.27256	-0.49834	-99.385	68.5826	1440.569	-1.2765	1.422	-1.6194	-17.554	25.1619	56.565	-0.0068359	0.098633	0.02832	-35.323	163.127	268.802	0.055762	0.04873	-0.24697
1.824	62.376	17.8023	1537.2575	-1.3582	1.2658	-1.9526	50.0278	86.163	853.914	-0.78613	0.61523	-1.1963	-16.449	36.336	29.765	0.088379	0.11475	-0.072266	-97.3	163.485	422.421	-0.0058594	0.25537	-0.46533	-118.335	54.2765	1417.823	-1.2637	1.3788	-1.5739	-51.279	-3.09676	17.1551	-0.0039063	0.1084	0.017578	-101.4609	166.185	213.058	0.086524	0.019434	-0.20176
1.826	0.0524	8.85286	1521.33	-1.3755	1.2407	-1.9292	-9.115	27.4703	978.9191	-0.85156	0.68066	-1.2539	-61.158	20.0229	21.5445	0.07959	0.13916	-0.081055	-58.697	141.6244	395.6138	0.024219	0.23242	-0.42861	-76.213	129.2	1403.481	-1.2529	1.3398	-1.5273	-47.567	1.4975	8.6837	0.00048828	0.12695	0.0097656	-76.581	120.2199	186.5	0.11856	-0.0055664	-0.15918
1.828	25.6321	-14.3012	1541.523	-1.381	1.2233	-1.9221	59.97	-12.3134	1021.4835	-0.97461	0.8418	-1.3359	-16.704	36.975	33.141	0.070801	0.15088	-0.082031	-126.513012	177.8812	344.664	0.046875	0.21738	-0.38897	-101.5896	116.472	1352.058	-1.2417	1.3029	-1.4866	-1.40900000000001	48.588	19.982	0.0043945	0.14258	-0.0078125	-58.46	127.113	176.3311	0.14854	-0.026953	-0.12226
1.83	67.466	-3.228	1544.27	-1.3873	1.2049	-1.9047	-27.1437	-32.058	1022.1027	-1.0464	0.97901	-1.3691	-58.149	42.628	23.6126	0.057129	0.17529	-0.083008	-99.388	148.0077	319.4069	0.075	0.19824	-0.35694	-71.509	75.773	1350.6039	-1.2266	1.2677	-1.4446	-69.534	-0.58228	12.27	0.013184	0.15088	-0.012695	-75.032	94.02562	143.1756	0.17236	-0.050293	-0.084961
1.832	40.3008	-20.5547	1559.4203	-1.3885	1.1928	-1.8855	-68.285	-69.58144	1095.03	-1.0952	1.1099	-1.3862	-46.967	31.7795	46.298	0.043945	0.18896	-0.093018	-82.776	153.495	308.8088	0.098244	0.18037	-0.32168	-44.385	105.753	1336.4394	-1.2094	1.2356	-1.4056	-37.093	29.6623	34.1904	0.022949	0.16064	-0.026367	-14.87	65.7179	133.077	0.18955	-0.073926	-0.054101
1.834	81.866	-14.5056	1578.355	-1.3908	1.1783	-1.8662	-19.445	-68.408	1112.083	-1.1016	1.25	-1.3926	-18.53	38.307	31.617	0.031738	0.20654	-0.10303	-118.6804	171.257	276.8414	0.11621	0.1665	-0.29639	-80.693	49.0071	1308.3547	-1.1892	1.2042	-1.3665	-3.472	52.995	17.4419	0.031982	0.15918	-0.029785	-71.727	82.5329	101.494	0.20088	-0.093262	-0.028516
1.836	55.59	-6.5823	1548.6569	-1.394	1.1528	-1.8491	-27.723	-97.7916	1107.032	-1.0801	1.3105	-1.3965	-76.1746	6.4529	30.6179	0.024902	0.23047	-0.10303	-75.14	116.20164	243.3222	0.14463	0.1499	-0.26435	-13.99	67.662	1303.7235	-1.1689	1.1738	-1.3242	-34.353	-7.1132	-5.005	0.049316	0.15283	-0.039063	-72.63	35.531	109.1468	0.204	-0.11123	-0.010547
1.838	54.529	-27.5793	1542.8638	-1.394	1.1261	-1.8331	4.401	-135.686	1126.273	-1.0171	1.3677	-1.4058	-45.78	-5.7965	34.7872	0.025391	0.2417	-0.104	-69.833	131.874	214.384	0.1665	0.13193	-0.23155	14.901	91.956	1255.359	-1.1401	1.1402	-1.2936	5.704	20.225	26.8588	0.066406	0.14453	-0.04834	-26.163	25.941	112.0796	0.20127	-0.11816	0.0089843
1.84	91.879	-9.9422	1527.8357	-1.3898	1.102	-1.816	29.0471	-152.93	1126.48822	-0.95239	1.3958	-1.4021	-41.959	11.85025	21.577	0.016113	0.26367	-0.1084	-82.452	103.105	194.826	0.18135	0.11436	-0.20263	-13.448	42.86	1235.8504	-1.1051	1.111	-1.2517	-9.568	2.4435	16.4492	0.074219	0.13672	-0.049805	-51.49	40.625	79.2709	0.18701	-0.12012	0.026855
1.842	67.113	7.226	1515.4458	-1.384	1.0757	-1.7961	15.036	-188.764	1124.06	-0.89648	1.4082	-1.3926	-53.697	0.448	19.4075	0.011719	0.28296	-0.11182	-25.422	56.82	186.8598	0.19765	0.097365	-0.17295	33.357	79.533	1206.6417	-1.0727	1.0809	-1.2053	-16.717	-0.2885	21.916	0.097168	0.11914	-0.040039	-22.914	1.991	72.873	0.16689	-0.1207	0.031934
1.844	80.895	13.943	1511.246	-1.3652	1.0554	-1.7763	47.8212	-142.147	1116.028	-0.85303	1.395	-1.3569	-28.272	18.963	39.3363	0.01416	0.30078	-0.10938	-59.891	83.584	158.4582	0.20117	0.081543	-0.15137	9.918	69.83	1165.08169	-1.0369	1.0451	-1.1607	24.517	73.072	23.755	0.10889	0.098388	-0.036866	-25.616	33.723	53.4648	0.14179	-0.11787	0.030175
1.846	78.189	65.309	1475.2619	-1.3374	1.0317	-1.7554	81.408	-65.18	1058.5	-0.85156	1.3789	-1.3271	-33.265	22.263	30.367	0.019531	0.3252	-0.11377	-59.66	37.832	122.8129	0.20976	0.074707	-0.12988	-12.262	73.3337	1158.988	-1.0015	1.0063	-1.1177	-20.128	9.29607	11.8803	0.12109	0.078125	-0.03125	-58.494	43.4799	27.65	0.11484	-0.10772	0.022754
1.848	33.123	73.293	1450.574	-1.3081	1.0025	-1.7311	77.899	-72.796	1055.829	-0.86426	1.3359	-1.2559	-16.023	-9.0032	45.818	0.021484	0.33398	-0.1123	-14.744	45.2568	116.8018	0.20977	0.067578	-0.11104	13.402	151.78	1112.0433	-0.96094	0.975	-1.0707	-7.073	6.6435	35.9858	0.13721	0.053223	-0.02832	-3.896	25.908	26.96304	0.081445	-0.093653	0.0076171
1.85	71.006	75.146	1445.9849	-1.2694	0.97491	-1.6984	70.955	-43.597	1066.8065	-0.87695	1.3023	-1.2066	0.256	-0.7839	36.9314	0.03125	0.3501	-0.11133	-69.885	87.776	84.2	0.20508	0.063281	-0.099316	-28.484	133.295	1071.1377	-0.91524	0.94023	-1.0203	-6.953	40.843	32.008	0.1377	0.040039	-0.026367	-39.604	62.873	-3.147	0.043945	-0.063477	-0.0048828
1.852	54.42	106.483	1415.3504	-1.2358	0.94678	-1.6733	20.567	-66.336	1067.2882	-0.87646	1.2847	-1.1714	-41.272	-5.222	37.3893	0.031006	0.35034	-0.12475	-16.946	44.449	71.3442	0.20459	0.058789	-0.084375	-15.99	152.872	1031.2453	-0.86485	0.90313	-0.97149	-24.043	-10.1916	6.3627	0.15088	0.010742	-0.020996	-36.36	28.5849	15.998612	-0.0024412	-0.026856	-0.022852
1.854	12.8101	90.2853	1397.9506	-1.1964	0.91963	-1.6454	49.434	-99.546	1084.1778	-0.86084	1.2837	-1.1362	-0.753999999999998	-19.9107	77.5251	0.021973	0.34375	-0.15234	-17.021	73.81	61.598	0.19678	0.053223	-0.07959	-26.134	173.319	954.828	-0.81318	0.87022	-0.93076	4.11199999999999	48.509	29.9481	0.16089	-0.011231	-0.019043	10.616	30.224	44.8407	-0.049707	0.011231	-0.050684
1.856	59.851	120.136	1393.3052	-1.1577	0.89697	-1.6206	53.5423	-79.753	1071.3997	-0.84766	1.2813	-1.1289	-28.227	9.904	85.531	0.0083008	0.3335	-0.19971	-54.37	44.0496	63.507	0.18652	0.043457	-0.081153	-46.231	135.2974	932.5903	-0.76367	0.83398	-0.88281	-25.695	30.002	27.0857	0.16992	-0.030762	-0.018066	-48.998	71.38171	37.175	-0.10439	0.052637	-0.078808
1.858	-16.6964	122.6675	1369.9329	-1.1227	0.87295	-1.5958	-21.499	-128.264	1065.7233	-0.82422	1.2627	-1.1387	-41.155	4.867726	100.4186	-0.0063477	0.34229	-0.21533	15.157	7.9014	78.7	0.17363	0.036328	-0.090918	-5.255	194.737	905.738	-0.70938	0.79805	-0.83379	-41.125	-22.461	36.6748	0.18359	-0.056641	-0.012207	-16.036	48.0855	38.4893	-0.15342	0.092189	-0.11055
1.86	-12.521	108.845	1349.2102	-1.0875	0.84805	-1.5774	-1.644	-142.734	1080.489	-0.81397	1.2427	-1.1675	35.365	32.15	134.9931	-0.043945	0.35889	-0.24854	-12.076	56.171	53.1715	0.1498	0.035547	-0.10264	-40.922	189.768	865.0578	-0.66064	0.76054	-0.78789	-17.855	51.521	29.1712	0.18799	-0.068848	-0.015137	-24.584	74.477	22.9355	-0.20068	0.13135	-0.13525
1.862	17.252	134.631	1324.863	-1.0637	0.83594	-1.555	-0.447000000000003	-140.655	1082.372	-0.80518	1.2134	-1.2124	-43.805	41.319	179.8319	-0.08667	0.3584	-0.29736	-23.501	24.6848	46.945	0.12051	0.044238	-0.11982	-24.741	168.706	850.8469	-0.60479	0.7211	-0.74218	-42.095	15.8628	8.0348	0.19287	-0.083008	-0.0063477	-67.155	62.9217	18.6954	-0.24062	0.16074	-0.15664
1.864	-34.9538	112.253	1297.662	-1.0454	0.83662	-1.536	-44.62	-212.883	1157.8	-0.79736	1.1763	-1.2788	-65.215	35.3936	246.4533	-0.14014	0.35596	-0.35693	17.516	31.968	31.51824	0.085938	0.066406	-0.14453	4.618	203.02	796.176	-0.54932	0.67275	-0.68818	-34.337	24.87298	42.884	0.20362	-0.097656	-0.0043946	2.753	5.5094	34.804	-0.27178	0.1913	-0.17901
1.866	19.823	98.466	1303.205	-1.0313	0.84961	-1.5195	0.189	-210.364	1243.774	-0.80029	1.1655	-1.312	-28.388	47.379	292.165	-0.21582	0.35352	-0.45117	-38.037	74.969	33.0209	0.049024	0.10244	-0.16211	-56.174	163.9821	751.542	-0.49561	0.62744	-0.64502	-21.904	61.592	42.4699	0.20898	-0.11133	-0.00097656	-52.65	25.1032	19.558	-0.29755	0.21123	-0.19502
1.868	-17.198	109.8124	1255.4259	-1.0125	0.86192	-1.5012	-21.196	-267.264	1292.999	-0.80029	1.1431	-1.3647	-73.535	44.941	349.151	-0.2627	0.35742	-0.50586	-15.108	18.519	47.586	0.0097658	0.14697	-0.18545	-29.52	166.7614	733.3909	-0.44004	0.58418	-0.59902	-74.287	-12.29419	30.3616	0.20996	-0.1333	-0.0029297	-48.28	-9.079	40.1741	-0.30694	0.22647	-0.20752
1.87	-47.9034	86.115	1216.2191	-0.98828	0.87226	-1.4781	7.588	-305.942	1345.388	-0.80005	1.1331	-1.3992	-26.194	65.825	465.658	-0.35107	0.38232	-0.6167	-23.766	40.66	30.9943	-0.025781	0.18525	-0.21084	-39.474	177.6958	695.5737	-0.38233	0.53789	-0.55156	-40.65	33.9164	29.512	0.21045	-0.14258	-0.0029297	-14.065	-19.7989	54.7505	-0.31641	0.23389	-0.21924
1.872	-4.273	107.524	1199.9796	-0.95898	0.87656	-1.448	21.829	-244.355	1347.0467	-0.79736	1.1392	-1.4194	-39.897	114.1971	541.8156	-0.42579	0.39405	-0.71631	-57.667	21.9401	31.6109	-0.048828	0.22334	-0.23262	-82.3668	136.774	660.015	-0.32373	0.49062	-0.51289	-22.475	25.3047	22.6519	0.2002	-0.14941	-0.0014648	-67.1161	19.529	43.2366	-0.30683	0.24199	-0.2209
1.874	-47.783	138.562	1144.515	-0.93008	0.86836	-1.4172	-52.083	-234.442	1352.6784	-0.79395	1.1357	-1.4277	-75.475	113.778	627.64	-0.51025	0.4126	-0.82813	-36.07	-27.8166	49.472	-0.069336	0.25635	-0.24707	-24.631	161.9806	643.759	-0.26172	0.43574	-0.46778	-61.256	-35.0963	51.748	0.19434	-0.15039	-0.0026855	-33.246	-5.307	37.5235	-0.29766	0.24258	-0.21679
1.876	-23.188	152.0976	1121.0524	-0.89453	0.85156	-1.3789	-22.364	-186.598	1394.092	-0.78711	1.1309	-1.4297	-14.205	107.8655	743.601	-0.63037	0.4458	-0.9917	-75.7993	34.3463	24.115	-0.079297	0.27314	-0.2624	-53.342	147.5871	587.85	-0.20117	0.37891	-0.42578	-29.499	31.0635	61.133	0.18408	-0.1543	-0.0083008	-37.361	37.265	12.1597	-0.28437	0.2418	-0.21094
1.878	-7.28	180.727	1084.6814	-0.85576	0.8294	-1.3359	-50.854	-139.486	1390.1066	-0.76221	1.1138	-1.4585	-51.75252	91.537	849.414	-0.68604	0.47998	-1.0591	-47.105	2.719	20.0742	-0.085742	0.28868	-0.27158	-39.41	131.5096	540.424	-0.14306	0.32968	-0.38242	-54.723	-8.7268	15.1076	0.16992	-0.15381	-0.01416	-66.529	59.4736	22.6579	-0.27383	0.23399	-0.20342
1.88	-41.541	187.866	1037.4311	-0.81972	0.79688	-1.2887	-115.8718	-171.907	1427.632	-0.73535	1.0977	-1.4951	-38.3221	45.6175	978.9781	-0.82324	0.58203	-1.1895	-45.239	11.9743	24.336	-0.095508	0.29922	-0.27315	9.255	159.835	484.3392	-0.083692	0.27793	-0.33897	-64.454	9.9351	16.5619	0.16406	-0.15088	-0.015625	-30.745	21.5412	53.336	-0.26025	0.2251	-0.19434
1.882	-2.846	189.095	1038.09	-0.77051	0.76016	-1.248	-104.3203	-119.143	1433.4272	-0.7168	1.0703	-1.5391	15.206	18.5071	1033.143	-0.92505	0.6936	-1.2536	-93.3073	55.4245	19.6868	-0.11426	0.3041	-0.27861	-35.679	136.2386	434.6242	-0.026269	0.22168	-0.29561	-1.485	64.307	31.2085	0.14941	-0.14453	-0.021973	-55.72	63.692	42.5814	-0.25029	0.2125	-0.1834
1.884	-30.143	211.961	980.85643	-0.72803	0.72432	-1.1971	-128.266	-104.071	1437.075	-0.72412	1.0396	-1.6245	-52.3942	-20.3928	1054.88	-1.0239	0.83643	-1.3081	-33.829	3.365	36.251	-0.12939	0.30908	-0.28418	18.301	137.271	412.093	0.032715	0.17295	-0.25	-47.547	-26.484	28.9174	0.14502	-0.13965	-0.031494	-34.826	32.8928	50.58	-0.23818	0.20322	-0.17393
1.886	-16.558	194.202	946.936	-0.67871	0.69141	-1.1426	-119.0377	-84.987	1468.758	-0.73828	1.041	-1.6934	-80.576	-81.1335	1107.844	-1.1328	1.0332	-1.334	-59.297	51.041	28.1242	-0.14404	0.31142	-0.27803	32.2559	151.3207	349.716	0.087891	0.12109	-0.20801	-12.206	9.422	44.2496	0.13574	-0.13037	-0.032715	-18.599	28.865	39.2702	-0.22881	0.19189	-0.16338
1.888	19.309	184.0778	918.1338	-0.6293	0.6541	-1.0938	-73.644	-15.731	1457.347	-0.78516	1.0801	-1.7969	-95.5792	-78.302	1089.3816	-1.1735	1.1691	-1.3415	-78.6669	57.8597	28.9737	-0.16328	0.32197	-0.27725	0.152000000000001	121.855	309.9442	0.14443	0.064258	-0.17051	-2.383	17.8796	22.553	0.12744	-0.12256	-0.03418	-62.135	71.137	24.013	-0.21513	0.18096	-0.15107
1.89	-41.033	194.8412	852.522	-0.58222	0.61445	-1.0398	-91.532	-57.277	1469.882	-0.8269	1.1311	-1.8845	-83.022	-119.234	1079.14064	-1.1738	1.2871	-1.3379	-29.262	-3.808	36.3502	-0.17383	0.33252	-0.26943	52.239	146.966	276.0983	0.196	0.009375	-0.13291	-49.556	-27.9421	26.2286	0.12988	-0.11719	-0.026855	-24.88	27.39904	34.00668	-0.19238	0.16553	-0.13721
1.892	-8.791	182.789	832.5326	-0.52442	0.5707	-0.9875	-60.11	-61.3293	1504.6186	-0.86523	1.1914	-1.957	-2.578	-105.509	1079.474	-1.123	1.3789	-1.3379	-71.647	46.8016	24.692	-0.1792	0.34267	-0.25654	2.399	148.052	239.7234	0.25029	-0.047266	-0.098926	6.306	35.8681	45.0713	0.1167	-0.1167	-0.038086	-31.172	42.212	16.4476	-0.16631	0.15107	-0.11983
1.894	-9.392	203.696	811.6385	-0.46855	0.53379	-0.93535	-64.77	-72.6796	1517.58882	-0.91748	1.311	-2.0366	-20.84	-117.141	1067.9743	-1.0781	1.3984	-1.3398	-54.181	5.047	23.4422	-0.17627	0.34668	-0.24268	13.923	128.9384	229.841	0.29131	-0.10947	-0.066992	-15.653	-5.01608	19.9504	0.10791	-0.12012	-0.040039	-64.603	35.1938	28.9191	-0.13515	0.13399	-0.098244
1.896	-65.851	185.44911	775.288	-0.41992	0.49609	-0.88184	-87.673	-146.152	1555.429	-0.93799	1.3794	-2.0776	-0.241	-152.582	1095.502	-0.96289	1.3916	-1.3418	-21.682	14.6125	15.7406	-0.16064	0.33242	-0.22841	22.942	147.908	194.9347	0.32666	-0.16699	-0.039551	-11.906	-5.886	17.1984	0.096191	-0.11963	-0.043457	-9.825	-21.0834	49.001	-0.10899	0.11797	-0.077539
1.898	-28.029	146.5183	747.525	-0.36709	0.46543	-0.83399	-28.205	-97.247	1589.611	-0.97021	1.5181	-2.1401	39.804	-121.054	1064.357	-0.88257	1.3567	-1.3405	-60.956	53.677	25.51185	-0.146	0.3126	-0.22256	-10.681	107.312	168.1713	0.35742	-0.21221	-0.020605	21.766	62.036	2.1209	0.087891	-0.12109	-0.040527	-53.349	14.4151	37.7537	-0.078906	0.095994	-0.052832
1.9	-57.237	168.3819	690.4128	-0.32285	0.43633	-0.77617	-60.901	-103.601	1557.763	-0.9773	1.6204	-2.1639	13.37057	-93.187	1015.51	-0.82959	1.3013	-1.3198	-39.671	22.3237	35.831	-0.12373	0.29151	-0.19795	27.394	84.5542	171.3697	0.38086	-0.25673	-0.0051758	-28.977	-15.7351	11.5058	0.088379	-0.12061	-0.044922	-33.266	-23.1451	56.637	-0.049316	0.071289	-0.027344
1.902	-78.749	157.182	654.7969	-0.27676	0.41054	-0.73086	-79.084	-128.881	1572.493	-0.97803	1.7114	-2.1694	99.476	-87.099	1042.523	-0.80859	1.2324	-1.2832	-28.531	47.258	45.1915	-0.099803	0.26172	-0.18125	11.431	79.4753	134.726	0.39141	-0.29619	0.010449	-8.39700000000001	9.4624	28.96257	0.080078	-0.12158	-0.052734	-1.412	-25.979	42.4363	-0.01748	0.046094	-0.0026368
1.904	-21.888	163.057	623.0551	-0.23691	0.37988	-0.67578	-75.585	-100.678	1561.0114	-0.99023	1.8086	-2.166	83.336	-53.082	1024.1	-0.81104	1.2134	-1.2612	-38.146	40.2392	39.1793	-0.07959	0.23242	-0.15967	-21.632	38.754	112.21847	0.39639	-0.3208	0.018359	-8.503	27.2756	16.761	0.082032	-0.12109	-0.059082	-41.144	26.3725	34.1819	0.0029298	0.016504	0.020801
1.906	-63.41	190.111	564.7946	-0.19824	0.35596	-0.61963	-93.7	-159.232	1545.105	-1	1.834	-2.1543	19.22	-97.02	1046.3712	-0.83398	1.2148	-1.2285	-3.273	-18.9603	33.1975	-0.059571	0.20166	-0.13662	21.076	46.729	91.8363	0.40186	-0.3418	0.024414	-32.614	-30.67263	22.4351	0.078613	-0.11572	-0.06543	-24.096	-11.7672	52.608	0.027539	-0.013574	0.047364
1.908	-59.882	161.688	526.331	-0.15576	0.32979	-0.56943	-53.449	-131.969	1562.858	-1.0254	1.8496	-2.1191	66.729	-95.883	1071.084	-0.84155	1.2473	-1.196	-23.362	32.0392	32.9477	-0.046094	0.1794	-0.1166	-44.418	39.207	56.959	0.39404	-0.34336	0.017676	8.493	33.9262	18.609	0.077637	-0.12451	-0.085449	-4.87	14.2659	43.2811	0.048535	-0.040918	0.070703
1.91	-40.456	180.007	491.2387	-0.11221	0.30664	-0.51562	-42.171	-66.639	1544.27897	-1.0561	1.8247	-2.0874	-3.391	-101.022	1066.577	-0.83008	1.2891	-1.1641	-5.17100000000001	-5.802	44.0884	-0.029297	0.15009	-0.093945	-22.626	14.881	71.4869	0.38154	-0.34326	0.010352	-33.79	2.286	25.719	0.074707	-0.13037	-0.095215	-52.716	35.534	38.2894	0.068848	-0.073242	0.08252
1.912	-100.3095	186.5223	436.8869	-0.073926	0.2875	-0.46562	-50.047	-83.6481	1537.1121	-1.0859	1.7773	-2.0547	-10.345	-142.525	1122.06844	-0.78467	1.3267	-1.146	3.311	6.9884	38.58244	-0.012988	0.12705	-0.068066	-6.623	41.483	62.5145	0.36436	-0.34014	-0.002539	-24.444	-37.982	65.6846	0.062012	-0.13281	-0.13574	-11.838	-11.9657	37.157	0.084863	-0.10381	0.10537
1.914	-52.421	158.1739	400.519	-0.033496	0.26465	-0.40986	-4.23999999999999	-3.525	1517.14	-1.1299	1.6738	-2.0029	35.397	-139.78	1128.6531	-0.75537	1.3208	-1.1519	-23.827	52.5031	34.05	-0.0024414	0.10498	-0.044434	-83.5807	30.251	48.1619	0.34219	-0.32285	-0.012793	-16.706	29.0939	69.7999	0.0354	-0.11548	-0.16748	-29.113	47.828	11.742	0.10586	-0.12881	0.12422
1.916	-73.509	181.447	337.179	0.0073242	0.24072	-0.36426	-45.26	2.553	1474.977	-1.1543	1.624	-1.9785	-1.305	-197.479	1138.405	-0.69922	1.2793	-1.1973	-12.275	6.83575	33.041	0.0125	0.078418	-0.019238	-47.786	19.964	71.2563	0.31006	-0.29395	-0.037598	-46.627	-18.9152	82.6783	-0.0073242	-0.076172	-0.2041	-53.487	25.0449	16.2425	0.11836	-0.15381	0.12852
1.918	-110.7696	151.6335	300.113	0.045606	0.21602	-0.31191	-23.704	24.0887	1485.2871	-1.2017	1.5454	-1.9409	-1.596	-246.53	1200.647	-0.66407	1.2266	-1.2402	-28.591	41.035	25.4183	0.029004	0.051758	0.0085938	-54.913	41.385	40.592	0.26309	-0.25625	-0.066211	26.2228	29.8257	132.505	-0.077637	-0.017578	-0.2666	-21.115	13.0741	15.4335	0.1249	-0.1749	0.13525
1.92	-62.625	129.4823	273.536	0.074707	0.18438	-0.2666	-4.403	81.37	1488.1463	-1.2342	1.5207	-1.9265	-9.759	-254.59	1237.232	-0.64404	1.1743	-1.2827	-37.658	48.8748	38.01464	0.039551	0.025586	0.033984	-95.23748	31.9435	41.3468	0.21084	-0.2126	-0.10088	-0.228999999999999	51.342	167.687	-0.11328	0.012207	-0.30029	-63.504	45.6011	2.223	0.13135	-0.1875	0.13574
1.922	-105.9853	146.3591	220.159	0.10518	0.15625	-0.22011	-70.052	31.8265	1496.0206	-1.2568	1.5176	-1.9258	-35.7	-304.546	1306.978	-0.64404	1.1147	-1.3228	-23.323	1.37771	46.6306	0.051758	-0.0001953	0.055566	-37.236	47.881	37.9524	0.15693	-0.16846	-0.13642	-90.0341	-17.2021	206.8	-0.18359	0.075195	-0.37695	-24.228	-3.242	22.524	0.13262	-0.1998	0.13965
1.924	-67.961	107.4649	207.225	0.12901	0.13204	-0.18017	-50.97	41.755	1489.7818	-1.2612	1.5376	-1.9331	13.65	-267.935	1339.78	-0.65674	1.104	-1.3413	-41.694	45.323	35.99	0.061035	-0.027832	0.075195	-73.3809	57.394	5.327	0.10303	-0.12041	-0.1709	-8.843	37.9835	244.062	-0.25098	0.14038	-0.43896	-34.717	25.9776	28.8408	0.13506	-0.20439	0.13506
1.926	-38.623	122.694	182.0685	0.1499	0.10547	-0.14648	-67.876	41.714	1473.058	-1.2539	1.5488	-1.9277	5.833	-234.964	1345.394	-0.70264	1.0923	-1.3618	-46.929	-2.6922	38.6397	0.068067	-0.064649	0.090527	-73.194	32.3041	9.7348	0.05127	-0.068848	-0.19678	2.459	36.7386	292.674	-0.32227	0.20215	-0.50195	-55.638	35.9888	23.92376	0.13388	-0.20596	0.12568
1.928	-90.1143	131.089	162.6258	0.16953	0.087891	-0.11523	-115.902	-10.4291	1463.8621	-1.2202	1.5522	-1.9155	-38.35	-222.767	1379.9308	-0.73413	1.1009	-1.363	-36.873	-9.8718	35.835903	0.069336	-0.091992	0.10411	-45.737	44.656	1.18	-0.0068356	-0.020703	-0.23086	7.116	44.068	407.112	-0.41602	0.28906	-0.59375	-19.042	-12.7119	26.9202	0.13106	-0.19815	0.11914
1.93	-27.94	92.4402	159.03	0.17725	0.073633	-0.078809	-70.901	32.0323	1489.6863	-1.1931	1.551	-1.903	-39.341	-155.2901	1406.7748	-0.76172	1.1133	-1.377	-72.5519	36.2267	14.164	0.065821	-0.11934	0.11231	-76.728	20.703	5.6053	-0.06289	0.023242	-0.25869	34.4923	132.243	461.2347	-0.46777	0.33496	-0.63965	-53.178	38.9837	7.947	0.13281	-0.19141	0.11279
1.932	-50.04	113.845	120.993	0.18623	0.057618	-0.051466	-86.129	19.1953	1463.417	-1.1641	1.5449	-1.8848	-110.8617	-143.0986	1415.7297	-0.76807	1.1313	-1.4019	-34.691	-6.33966	16.1608	0.066992	-0.13887	0.12099	-26.543	6.365	23.9318	-0.12187	0.068164	-0.29111	-47.528	84.3959	503.5616	-0.57764	0.43164	-0.73193	-50.128	-5.394	28.8792	0.13213	-0.17988	0.097462
1.934	-58.53	66.836	109.19082	0.1915	0.042578	-0.030762	-95.894	-3.551	1495.2585	-1.1284	1.5278	-1.855	-104.829	-139.8684	1466.05	-0.76953	1.1328	-1.4238	-64.48	40.033	22.7561	0.070313	-0.16016	0.12793	-25.486	25.7482	11.8019	-0.17305	0.1086	-0.31406	-31.502	106.525	598.4938	-0.6648	0.50611	-0.80151	-23.971	-16.874	29.0926	0.13262	-0.16719	0.08125
1.936	-5.608	25.917	118.936	0.18994	0.024414	-0.01709	-73.2733	52.39845	1506.5803	-1.1094	1.5117	-1.8359	-110.7727	-88.348	1458.4103	-0.77686	1.145	-1.48	-76.279	44.0406	25.261	0.072266	-0.17002	0.13731	-41.809	7.141	28.1963	-0.21973	0.15039	-0.33203	4.546	118.306	676.085	-0.75781	0.58203	-0.87402	-71.126	21.1216	27.6896	0.13535	-0.14883	0.073047
1.938	-48.289	58.1389	88.5293	0.18819	0.014648	-0.0021484	-97.1397	25.281	1489.715	-1.084	1.4707	-1.7754	-163.607	-114.803	1469.839	-0.80103	1.1643	-1.5408	-31.431	-7.6637	40.1089	0.073535	-0.17988	0.13965	10.848	16.201	26.8527	-0.2581	0.18535	-0.34004	-17.779	33.666	786.147	-0.86279	0.69043	-0.97021	-18.879	0.5463	30.921	0.1415	-0.12891	0.059961
1.94	-5.373	21.2686	73.164	0.17402	9.747e-05	0.0024412	-70.409	67.047	1472.581	-1.0515	1.4368	-1.737	-128.52998	-71.13	1487.57	-0.83398	1.1855	-1.6172	-58.945	34.1476	29.703	0.080176	-0.18847	0.14355	-38.489	31.956	11.5778	-0.28643	0.22197	-0.35049	-14.116	49.038	859.093	-0.93237	0.76538	-1.0281	-43.818	40.051	11.93332	0.14355	-0.11182	0.057129
1.942	-6.259	43.158	56.2613	0.15488	-0.0092782	9.7595e-05	-79.974	109.463	1417.21	-1.0269	1.4087	-1.6851	-125.1401	-47.286	1469.176	-0.90381	1.2407	-1.7397	-58.236	-1.719	34.6119	0.088379	-0.18486	0.1458	-7.117	16.2724	47.689	-0.29853	0.25049	-0.35595	-61.221	4.414	856.5541	-0.98779	0.82861	-1.0835	-69.9149	58.366	17.5143	0.15303	-0.098244	0.047656
1.944	-59.762	70.616	18.414	0.13027	-0.0125	-0.0082038	-110.674	96.239	1389.764	-0.99609	1.3613	-1.6152	-103.44	-72.8297	1513.0557	-0.93164	1.2754	-1.8086	-39.966	-10.92142	38.5284	0.09668	-0.1875	0.15186	14.625	33.5294	34.874	-0.30547	0.2707	-0.34883	-56.209	-66.528	899.07	-1.0229	0.89502	-1.1362	-13.687	15.0724	26.7866	0.16387	-0.09043	0.03877
1.946	-4.222	29.757	36.797	0.090332	-0.0078125	-0.018066	-63.109	167.75	1373.6285	-0.98047	1.3398	-1.5762	-56.112	-38.346	1525.9946	-0.99951	1.3716	-1.9292	-83.4893	42.069	22.2427	0.1083	-0.18301	0.1543	-33.267	27.0829	32.9143	-0.2998	0.28125	-0.34375	-3.437	-23.946	919.02	-1.0308	0.90869	-1.1558	-55.353	63.863	0.657999999999998	0.17207	-0.080664	0.033691
1.948	-23.015	74.693	25.0761	0.042291	0.0086886	-0.029978	-71.977	168.956	1340.0054	-0.95264	1.2935	-1.5073	-101.443	-90.571	1550.628	-1.052	1.4621	-2.0173	-40.776	4.6865	11.51857	0.11748	-0.17676	0.14834	19.192	18.0932	44.4359	-0.28194	0.27793	-0.32422	-51.7553	-108.3786	921.565	-1.0137	0.91016	-1.1797	-25.09	37.825	16.3247	0.18223	-0.070508	0.024805
1.95	-18.417	34.1388	41.2305	-0.010632	0.027241	-0.058587	-64.138	161.263	1333.4044	-0.92163	1.2505	-1.4507	-59.448	-138.644	1607.573	-1.1074	1.5596	-2.0977	-32.411	41.3962	11.339	0.12646	-0.17207	0.14131	-5.33000000000001	44.728	15.362	-0.25742	0.26699	-0.30478	-28.181	-116.3887	937.241	-0.98437	0.88964	-1.1954	7.705	27.2581	39.06816	0.19043	-0.064453	0.018066
1.952	13.289	4.1887	68.444	-0.067268	0.047162	-0.089835	-20.049	195.831	1324.7896	-0.88867	1.209	-1.4023	-41.54	-118.33	1603.395	-1.1616	1.7036	-2.1851	-49.043	51.222	17.69391	0.14014	-0.16709	0.13613	-9.585	32.794	25.5581	-0.22656	0.24472	-0.27197	-36.972	-104.5574	896.7283	-0.94482	0.85889	-1.2007	-69.977	63.1396	38.0732	0.19824	-0.059277	0.011816
1.954	-34.048	53.97913	54.0921	-0.12518	0.083781	-0.11757	-75.185	147.128	1281.2714	-0.85156	1.1523	-1.3301	-87.237	-144.83	1591.084	-1.188	1.7759	-2.2163	-14.297	-2.03177	30.2229	0.15137	-0.1582	0.13086	37.215	32.6129	30.202	-0.19434	0.20987	-0.23301	-88.519	-175.406	911.662	-0.90283	0.81494	-1.2007	-14.857	24.5474	48.414	0.20371	-0.050976	0.0036134
1.956	-18.206	14.6	52.97	-0.17871	0.125	-0.1416	-27.677	149.529	1268.0603	-0.82837	1.1086	-1.279	-40.192	-98.513	1606.815	-1.2168	1.9199	-2.2852	-20.263	40.2201	28.2321	0.16631	-0.14883	0.12324	-29.992	50.9575	0.6786	-0.15625	0.16553	-0.19531	-42.257	-120.179	933.308	-0.89014	0.7915	-1.1968	-9.755	44.208	28.0554	0.2041	-0.044727	9.7599e-05
1.958	-11.257	47.906	23.581	-0.22541	0.17034	-0.16154	-34.19	155.61	1220.2688	-0.81006	1.0688	-1.2319	-76.596	-87.41	1574.8094	-1.2234	2.0042	-2.3064	-25.902	6.572	29.134	0.17402	-0.13946	0.11328	-10.528	30.9364	34.364	-0.11797	0.11436	-0.16104	-89.414	-105.796	868.268	-0.86768	0.75977	-1.2036	-52.831	52.2826	32.5807	0.20401	-0.04043	-0.010351
1.96	-46.009	68.9987	13.9417	-0.26321	0.21097	-0.18371	-55.559	118.464	1196.7524	-0.78857	1.0181	-1.1597	-106.506	-113.08	1593.226	-1.2266	2.0547	-2.3154	-6.595	3.6296	24.3764	0.17598	-0.12851	0.098047	-3.58499999999999	52.371	35.8451	-0.082715	0.071192	-0.12031	-102.703	-145.07	861.601	-0.86475	0.75342	-1.2075	-22.21	3.79006	41.6968	0.19287	-0.032227	-0.019043
1.962	-36.841	2.65376	23.0849	-0.2886	0.24457	-0.20207	15.896	129.759	1218.26	-0.78125	0.99023	-1.1348	-45.829	-45.806	1593.0294	-1.2222	2.0845	-2.3022	-17.675	46.0486	25.6747	0.18008	-0.11152	0.084472	-73.4366	45.996	49.123	-0.047558	0.034472	-0.085157	-54.075	-72.6655	831.7244	-0.86475	0.76221	-1.228	-28.427	28.2472	53.8264	0.18418	-0.029297	-0.025879
1.964	-54.305	36.2695	18.9157	-0.29863	0.27033	-0.20752	-16.508	116.558	1150.3778	-0.74609	0.93945	-1.0605	-59.771	-43.269	1573.3337	-1.2144	2.0825	-2.2847	-8.061	6.0131	32.364	0.18213	-0.094727	0.070801	-21.584	21.09336	61.454	-0.020508	0.0070313	-0.042774	-136.1111	-119.2804	839.4022	-0.875	0.80469	-1.252	-39.73	-1.556	50.88391	0.17373	-0.021386	-0.031348
1.966	-53.747	5.238	40.9609	-0.29443	0.28662	-0.20996	-11.749	91.351	1141.798	-0.71875	0.90479	-1.0112	-10.854	-23.559	1601.841	-1.1875	2.0449	-2.248	-26.369	39.776	34.292	0.18575	-0.073438	0.054786	-36.074	15.158051	43.7499	0.0073242	-0.02002	-0.012207	-116.258	-112.426	900.659	-0.88477	0.8418	-1.2646	-18.394	-8.97283	47.0637	0.16005	-0.015917	-0.039942
1.968	-26.923	-23.4664	43.9962	-0.28119	0.28663	-0.20831	20.25	132.7379	1114.978	-0.68555	0.87012	-0.95898	-16.959	27.455	1562.518	-1.1767	1.9868	-2.2026	-20.495	51.697	32.227	0.18594	-0.056347	0.037988	-94.3099	-6.128	45.0733	0.027832	-0.041504	0.021191	-65.326	-82.623	896.613	-0.90234	0.91992	-1.3125	-55.356	29.0449	50.3361	0.14287	-0.0049799	-0.051954
1.97	-75.4782	27.9425	37.76268	-0.25947	0.27973	-0.20012	-31.305	125.84	1067.028	-0.62793	0.82227	-0.88867	-74.342	-8.43327	1540.763	-1.1777	1.9082	-2.1504	-16.203	3.580392	42.211	0.1914	-0.040332	0.02041	-41.865	-8.1632	53.1923	0.046289	-0.05498	0.047461	-112.421	-184.162	926.538	-0.91406	0.99123	-1.3569	-22.346	-8.0287	45.269	0.12744	0.0058594	-0.060547
1.972	-67.689	-8.022	34.7826	-0.22903	0.26414	-0.19348	12.81	149.6828	1045.046	-0.60107	0.79736	-0.84717	-26.991	30.2058	1552.682	-1.1821	1.8032	-2.0679	-43.136	44.3456	33.2963	0.19121	-0.016602	0.005957	-79.9908	10.4012	24.09985	0.054883	-0.059668	0.06582	-49.149	-181.856	964.919	-0.92773	1.0684	-1.3984	-15.577	32.643	35.8302	0.11484	0.016406	-0.066698
1.974	-45.456	27.0511	30.5552	-0.20181	0.24022	-0.18022	-1.33	179.783	977.5318	-0.53662	0.73877	-0.771	-48.63	41.4764	1527.168	-1.1816	1.7578	-2.041	-34.37	10.555	39.41761	0.19629	0.00048828	-0.013672	-70.322	-0.402000000000001	41.057	0.061816	-0.059375	0.086914	-69.9882	-204.058	953.342	-0.93555	1.1699	-1.4551	-51.526	52.8285	37.5395	0.10039	0.031441	-0.070506
1.976	-63.901	54.1546	19.0478	-0.17139	0.21533	-0.16455	-27.48	142.578	915.5547	-0.4956	0.68848	-0.71875	-77.216	17.673	1562.57	-1.1929	1.688	-1.9897	-22.86	4.9345	31.4344	0.19316	0.022363	-0.02334	-36.06	11.1148	39.2344	0.062988	-0.056641	0.098145	-81.7414	-274.797	1028.5036	-0.93799	1.2095	-1.4839	-30.963	19.7253	47.292	0.09219	0.046286	-0.077536
1.978	-16.128	4.9032	40.512	-0.14643	0.18485	-0.15	4.834	168.9205	878.6231	-0.44727	0.63867	-0.65625	-64.38	54.731	1548.0944	-1.1831	1.6499	-1.9566	-52.043	39.381	7.4242	0.19111	0.038965	-0.032226	-77.661	0.756	39.0018	0.058887	-0.050098	0.10185	-37.513	-228.5494	1076.622059	-0.92578	1.2656	-1.5566	-49.126	45.136	45.7954	0.08047	0.061716	-0.083984
1.98	-59.522	49.5443	40.79164	-0.12525	0.1525	-0.1284	-52.069	193.0491	821.788	-0.38232	0.57422	-0.58154	-105.678	21.7846	1515.367	-1.1719	1.6191	-1.9395	-27.489	-1.094	26.271	0.18565	0.051856	-0.048633	-46.036	0.974	62.959	0.053711	-0.041895	0.10694	-62.194	-301.171	1116.8068503	-0.91382	1.2942	-1.6121	-40.42	18.9237	43.1539	0.070801	0.076172	-0.084961
1.982	-57.545	30.481	41.244	-0.10928	0.12387	-0.10997	-41.387	192.7374	802.2096	-0.35498	0.5376	-0.54053	-104.403	6.6435	1534.4321	-1.1597	1.5806	-1.894	-45.038	37.3123	37.4302	0.17373	0.070508	-0.054492	-53.185	26.23543	35.364	0.048633	-0.027442	0.10967	-22.79	-332.939	1187.801	-0.90771	1.3071	-1.6655	-26.178	6.42476	31.356	0.059372	0.093365	-0.09092
1.984	-6.035	5.2146	39.6122	-0.096541	0.097661	-0.09034	-7.635	231.215	765.9496	-0.29004	0.46436	-0.46924	-122.7838	23.399	1515.018	-1.1479	1.561	-1.8804	-72.5314	59.5897	34.0385	0.16064	0.088867	-0.05957	-56.175	10.946	52.9584	0.04834	-0.011621	0.10332	12.127	-304.822	1196.464	-0.89844	1.3125	-1.7285	-71.7316	42.386	15.084	0.051642	0.10763	-0.088962
1.986	-49.525	51.0362	19.774	-0.083984	0.080078	-0.068359	-52.206	200.6022	712.42	-0.24219	0.41162	-0.41992	-135.6835	-34.19815	1516.594	-1.1465	1.5332	-1.8457	-20.583	17.0967	40.893	0.14629	0.10996	-0.071191	-21.458	7.515	42.27128	0.045898	0.0019531	0.09668	-3.073	-357.901	1244.704	-0.89453	1.3164	-1.75	-29.477	3.753	35.4165	0.035632	0.12209	-0.091317
1.988	-30.833	-9.7523	28.9365	-0.069592	0.061228	-0.04537	-9.695	169.9447	689.8919	-0.20117	0.35742	-0.36133	-96.612	-7.649	1524.788	-1.1362	1.5131	-1.8188	-58.875	54.5236	42.7415	0.13975	0.13027	-0.079687	-57.945	26.3165	13.7051	0.048633	0.015528	0.087695	35.2425	-261.166	1308.701	-0.87207	1.3047	-1.7813	-40.713	16.5511	30.0203	0.02831	0.13947	-0.089359
1.99	-12.107	5.8803	25.6776	-0.055694	0.053488	-0.024427	-28.963	173.172	643.159	-0.14551	0.28955	-0.2959	-135.7319	20.892	1483.7868	-1.1211	1.4902	-1.791	-91.2904	18.611	35.9216	0.12764	0.15059	-0.083203	-13.957	1.5867	15.9247	0.047558	0.034961	0.071582	19.812	-191.686	1312.196	-0.84155	1.2751	-1.783	-67.857	15.095	21.351	0.018066	0.15234	-0.087891
1.992	-48.268	36.0212	20.074	-0.044809	0.039168	-0.001818	-34.577	140.636	611.5262	-0.11768	0.26221	-0.2627	-148.36018	14.128	1480.8809	-1.0996	1.4629	-1.7441	-55.228	-0.2759	38.1717	0.11778	0.17432	-0.08623	-7.501	14.0279	12.5179	0.055761	0.047461	0.061816	28.5	-200.2157	1339.953	-0.81006	1.2407	-1.7847	-26.997	-22.624	43.688	0.007825	0.16541	-0.090624
1.994	-7.069	-5.590528	32.754	-0.030977	0.025588	0.015522	-7.145	154.9149	590.75	-0.063477	0.19873	-0.19824	-103.059	95.123	1475.2772	-1.0869	1.4434	-1.7188	-61.763	36.2899	36.4165	0.10938	0.19287	-0.087402	-51.86	21.9527	15.68821	0.064746	0.061621	0.042969	42.8842	-117.132	1363.3992	-0.77881	1.1558	-1.771	-33.858	13.2958	29.737146	-0.00074853	0.17808	-0.088284
1.996	-22.787	42.511	25.5823	-0.016602	0.011719	0.042969	-54.1734	137.4227	527.0679	-0.025635	0.14795	-0.14941	-134.7026	100.2943	1435.8711	-1.0493	1.4146	-1.6675	-59.124	-5.7546	29.4282	0.098244	0.21055	-0.089551	16.305	2.585	42.1835	0.069824	0.073242	0.027832	-18.148	-136.059	1380.5164	-0.77881	1.1079	-1.7612	-48.071	-7.849	34.2762	-0.011284	0.1902	-0.084016
1.998	-36.596	19.9234	35.0816	0.0005254	-0.0069288	0.06632	-46.47	103.88	494.952	0.010742	0.10205	-0.10889	-93.576	99.4826	1435.712	-1.0195	1.3848	-1.626	-48.05	22.249	29.0382	0.090234	0.22373	-0.097949	5.622	18.7599	3.421	0.085352	0.083203	0.019043	26.729	-128.285	1442.25756	-0.79102	1.0234	-1.748	-12.419	-18.7258	41.6168	-0.019572	0.1988	-0.08167
2	7.704	-13.5398	36.483	0.018378	-0.026524	0.089821	-8.234	124.6413	439.4091	0.0625	0.033691	-0.05957	-60.406	137.212	1403.6254	-0.99414	1.3506	-1.582	-54.588	27.9164	43.7877	0.076953	0.23623	-0.096777	-14.758	-8.238	23.7972	0.10283	0.091504	0.0077148	73.997	-54.864	1427.089	-0.81128	0.97681	-1.7566	-55.082	30.5303	16.873	-0.028809	0.2041	-0.081055
2.002	-19.899	35.82232	27.153	0.035643	-0.040475	0.11053	-50.4628	97.082	400.3425	0.089844	0.0039063	-0.037109	-118.4878	98.8154	1371.3005	-0.96191	1.2988	-1.5156	-29.197	-31.3755	73.3875	0.06709	0.25263	-0.10215	31.008	-12.6607	35.59001	0.12314	0.092676	-0.0028321	15.517	-124.3361	1435.644	-0.84375	0.95996	-1.7773	-23.63	-21.9637	48.885	-0.03225	0.21394	-0.078613
2.004	-5.38	-19.8776	41.22779	0.05512	-0.06182	0.12762	7.063	89.022	392.221	0.1333	-0.061523	0.0043945	-56.866	143.484	1357.1127	-0.94238	1.2695	-1.4785	-40.339	16.5956	87.002	0.060547	0.26221	-0.104	-15.021	1.5206	12.537	0.13516	0.09248	-0.010449	51.9925	-93.775	1490.9057	-0.91406	1.0059	-1.834	-18.961	-11.439	80.6648	-0.037323	0.21424	-0.074613
2.006	-10.182	12.88271	39.6574	0.069824	-0.076172	0.13867	-14.714	128.586	331.7981	0.15918	-0.10327	0.03125	-49.005	150.259	1309.244	-0.91357	1.2144	-1.4116	-30.47	-9.5127	109.4187	0.047851	0.26631	-0.1209	-1.228	-0.4221	25.8766	0.15283	0.094238	-0.020508	24.641	-78.5	1476.6163	-0.96436	1.0474	-1.8647	-76.514	3.7928	93.3904	-0.040903	0.21567	-0.071605
2.008	-38.373	37.7278	44.8367	0.08143	-0.095609	0.14698	-33.957	106.0707	279.03515	0.17969	-0.14697	0.049316	-65.727	111.2847	1289.679	-0.8877	1.1704	-1.3545	-0.145999999999994	-10.0752	127.6104	0.033984	0.25664	-0.14951	5.456	36.888	12.5786	0.17939	0.08418	-0.02998	3.55099999999999	-131.272	1516.83	-1.0898	1.1602	-1.9453	-2.566	5.739	109.9417	-0.04832	0.20937	-0.083034
2.01	-10.528	-6.0174	33.646	0.095178	-0.11583	0.14774	42.947	130.808	245.945	0.1958	-0.18701	0.070801	-2.02200000000001	137.037	1278.942	-0.85986	1.1343	-1.2954	-43.991	34.5925	177.117	0.019922	0.25234	-0.18584	-49.782	36.41	0.0731999999999999	0.20947	0.070117	-0.037793	46.359	-79.0473	1560.613	-1.1878	1.2479	-2.0008	-15.381	74.563	126.5177	-0.061523	0.19336	-0.11963
2.012	-37.728	38.057	0.2889	0.11085	-0.12803	0.14759	-11.441	149.579	201.571	0.20459	-0.19971	0.073242	-40.196	89.8722	1235.4564	-0.82227	1.0723	-1.2227	-34.796	4.9791	217.065	-0.0098632	0.25879	-0.22217	2.677	19.9805	33.1459	0.23486	0.051367	-0.042481	-14.434	-129.09	1561.0531	-1.269	1.3228	-2.0464	-75.643	63.3534	202.97492	-0.081221	0.18907	-0.15259
2.014	-41.943	32.5001	10.55503	0.11927	-0.14262	0.14279	-3.329	126.06026	210.0047	0.20654	-0.23047	0.087891	-21.19	77.963	1222.161	-0.79834	1.0396	-1.189	-45.075	29.918	247.794	-0.040527	0.2832	-0.26367	-41	30.613	10.359	0.25791	0.036719	-0.044824	-10.7173	-158.395	1630.534	-1.3438	1.373	-2.0742	-59.542	38.6275	260.342	-0.10638	0.1894	-0.1834
2.016	-31.523	7.219	23.184	0.12646	-0.15479	0.13965	49.858	143.739	183.061	0.20142	-0.23193	0.091553	9.948	112.9474	1191.7271	-0.75732	0.97119	-1.1089	-37.281	63.0101	318.30046	-0.081739	0.30322	-0.31241	-60.198	26.3324	21.7522	0.27832	0.022461	-0.052734	4.54358	-115.135	1616.505	-1.3652	1.3828	-2.0801	-67.03	55.7717	305.867	-0.14694	0.19446	-0.23004
2.018	-68.345	55.322	23.54	0.13671	-0.15975	0.13339	-28.714	122.812	138.4243	0.19385	-0.23535	0.095703	-20.343	88.3	1148.302	-0.72387	0.92212	-1.0535	-11.478	58.4394	416.947	-0.11924	0.31904	-0.37383	-8.303	25.682	20.8533	0.29677	0.0092775	-0.052637	-63.616	-173.565	1602.829	-1.3926	1.3828	-2.0801	-42.679	45.173	398.3586	-0.19755	0.19722	-0.29123
2.02	-31.081	-6.923	38.9442	0.13528	-0.16389	0.12262	5.432	96.43	136.532	0.17627	-0.22119	0.081543	41.408	105.316	1123.529	-0.69482	0.87842	-0.99268	-36.666	142.905	484.732	-0.15908	0.32998	-0.44883	-62.5688	47.785	6.589	0.30557	9.7664e-05	-0.061621	-3.657	-114.178	1626.588	-1.4156	1.3681	-2.0703	-64.982	102.2714	505.9738	-0.25439	0.2085	-0.37012
2.022	-31.907	5.19032	33.829	0.13884	-0.16118	0.11108	5.58900000000001	107.629	118.741	0.16309	-0.2085	0.067383	4.322	117.0199	1055.2775	-0.6543	0.81445	-0.92188	-43.042	116.9113	552.056	-0.19073	0.34668	-0.53145	-65.022	31.8114	18.515	0.31338	-0.0041992	-0.064746	10.46	-72.813	1562.6083	-1.4355	1.3516	-2.0625	-66.107	140.0493	605.6963	-0.32311	0.22053	-0.47473
2.024	-74.0556	27.4027	30.1979	0.14315	-0.15288	0.098893	-3.94799999999999	72.75339	101.8421	0.14648	-0.18945	0.040527	-17.077	111.292	1021.3437	-0.63184	0.7793	-0.88477	-7.38999999999999	93.447	639.241	-0.22949	0.36328	-0.61279	-43.331	35.35	8.3236	0.31006	-0.011426	-0.071094	-37.21432	-93.7442	1567.7832	-1.4722	1.3062	-2.0249	-26.5	113.1346	688.8685	-0.39035	0.25065	-0.58603
2.026	-28.765	-14.948	30.806	0.14502	-0.14014	0.086426	32.866	70.063	95.0153	0.11841	-0.16187	0.014892	35.395	174.677	1002.7031	-0.57666	0.72314	-0.80811	0.395	112.1584	777.534	-0.26836	0.38477	-0.70117	-79.1044	42.8023	18.575	0.30469	-0.01123	-0.077148	27.5492	-4.803	1585.854	-1.481	1.2856	-2.0034	-62.1785	122.113	765.116	-0.45874	0.2952	-0.70725
2.028	-59.564	58.676	11.58152	0.14523	-0.12239	0.076057	-47.7818	55.065	57.016	0.091797	-0.12891	-0.015625	-28.415	189.74	958.282	-0.53125	0.68262	-0.75635	2.386	53.604	912.984	-0.32403	0.41719	-0.79883	-43.676	33.0849	44.177	0.29844	-0.012109	-0.087012	13.8641	-26.1585	1563.96	-1.498	1.2363	-1.9609	-44.2429	68.0751	881.27	-0.53854	0.34758	-0.83953
2.03	-60.562	58.837	19.1182	0.14642	-0.10453	0.067537	-30.181	13.506	82.9819	0.043457	-0.077637	-0.063477	-4.102	185.948	930.228	-0.48193	0.64697	-0.69629	7.672	67.549	975.9563	-0.38731	0.45625	-0.89727	-61.935	41.5394	48.4205	0.28857	-0.0092773	-0.094043	33.711	-35.953	1596.3337	-1.5015	1.2085	-1.9307	-11.881	5.0723	1008.112	-0.62256	0.40576	-0.97314
2.032	-22.846	7.0861	29.066	0.15737	-0.086947	0.05621	6.092	24.15	88.9999	0.020996	-0.049805	-0.092773	-7.981	201.653	863.8266	-0.41406	0.58594	-0.62988	-5.147	60.122	991.387	-0.46123	0.49932	-1.0077	-76.014	22.693	50.2364	0.27959	-0.0096679	-0.09873	63.294	21.961	1575.9836	-1.5078	1.1953	-1.9082	-38.349	4.9557	1066.893	-0.70658	0.48305	-1.0847
2.034	-56.578	33.4244	17.2084	0.16965	-0.074396	0.050274	-45.885	35.52	82.298	-0.028809	0.021973	-0.13379	-54.075	160.5006	798.561	-0.38428	0.55322	-0.59912	-58.1256	-8.95	1047.865	-0.54199	0.5625	-1.1113	-31.318	16.79554	54.466	0.27237	-0.015234	-0.10332	17.3584	-21.2279	1550.991	-1.5059	1.1914	-1.8926	-70.626	-68.07492	1112.53	-0.79455	0.57734	-1.1786
2.036	-56.054	-27.14495	29.5439	0.18018	-0.06543	0.044434	-8.008	24.382	78.007	-0.070313	0.075195	-0.16968	-5.82	167.3279	782.7604	-0.32373	0.48193	-0.53174	-89.9978	13.711	1067.48	-0.62969	0.6541	-1.1933	-60.6235	24.6563	32.0395	0.26416	-0.025391	-0.10449	57.989	26.22502	1569.1407	-1.5039	1.1973	-1.8867	-109.1123	-77.886	1120.757	-0.89018	0.68627	-1.2558
2.038	-34.058	4.5975	34.67162	0.18973	-0.062115	0.037893	-35.44	52.05	46.2169	-0.10742	0.12256	-0.20508	-31.448	185.8499	726.375	-0.27148	0.4165	-0.4624	-55.63	-33.8995	1049.9776	-0.71934	0.76572	-1.2509	-36.087	-2.4369	39.847	0.25713	-0.039258	-0.10732	51.982	39.9856	1544.661	-1.4937	1.2153	-1.894	-119.4651	-98.5526	1128.537	-0.97801	0.81474	-1.3029
2.04	-43.668	42.37198	28.3665	0.19824	-0.059562	0.032711	-65.9	33.66	51.832	-0.14063	0.18311	-0.24561	-51.072	157.235	693.4397	-0.24023	0.38623	-0.4248	-12.279	-70.936	1032.901	-0.80215	0.89384	-1.2915	-36.505	19.3709	28.7187	0.25049	-0.046777	-0.11094	46.3633	-29.243	1570.1	-1.49	1.219	-1.8885	-51.753	-142.181	1142.3546	-1.0518	0.95313	-1.3359
2.042	-25.922	19.47257	32.558	0.20449	-0.063086	0.032719	-37.992	39.2678	50.524	-0.15576	0.20313	-0.26563	-12.268	183.38	664.4732	-0.17969	0.32813	-0.36133	-57.7407	-64.921	1021.58	-0.86524	1.032	-1.302	-57.813	30.4753	17.871	0.2462	-0.057715	-0.10547	82.335	0.213000000000001	1602.643	-1.4785	1.2227	-1.8789	-30.995	-115.584	1137.289	-1.0996	1.0898	-1.358
2.044	-26.983	62.858	12.1295	0.20752	-0.066211	0.024221	-79.4809	55.812	32.7388	-0.17578	0.25	-0.29199	-73.0222	163.05403	601.324	-0.13184	0.27417	-0.31201	-38.6818	-129.242	1042.061	-0.90674	1.1426	-1.3008	3.922	33.3082	47.069	0.23701	-0.059668	-0.10596	60.207	-37.358	1573.8634	-1.4668	1.2246	-1.873	0.4699	-150.896	1121.644	-1.1229	1.2185	-1.3605
2.046	-19.034	36.8938	13.1511	0.20508	-0.063477	0.022461	-22.313	20.0793	45.487	-0.18042	0.27564	-0.31592	-41.848	140.521	590.597	-0.07959	0.23047	-0.27002	12.387	-89.84	1012.771	-0.90615	1.2188	-1.2972	-18.468	48.587	44.7108	0.22949	-0.0625	-0.1084	75.624	-50.9642	1587.8095	-1.4531	1.2207	-1.8672	32.0964	-146.514	1113.556	-1.1188	1.3169	-1.3562
2.048	-1.783	0.6002	44.992	0.20215	-0.057225	0.014157	-22.024	27.903	48.2269	-0.18359	0.29004	-0.33203	-26.852	167.4007	562.667	-0.018555	0.16016	-0.21143	4.87353	-31.504	979.2375	-0.87412	1.27	-1.2999	-11.353	21.971	55.06	0.22295	-0.055274	-0.1045	96.702	-5.623	1557.378	-1.4238	1.2051	-1.8516	11.948	-91.498	1069.447	-1.0928	1.3751	-1.3511
2.05	-19.078	47.83366	43.0152	0.1873	-0.049213	0.0027305	-75.996	30.75598	20.234	-0.17822	0.31104	-0.34375	-60.342	143.534	509.963	0.010254	0.13135	-0.18457	58.409	-51.856	983.545	-0.81904	1.2743	-1.2956	38.748	11.2393	58.908	0.21192	-0.051758	-0.10752	56.6477	-57.219	1534.285	-1.3897	1.1919	-1.835	66.464	-111.026	1043.977	-1.0405	1.3911	-1.3511
2.052	-15.346	9.118	42.4228	0.1791	-0.03281	-0.004297	-20.004	16.95299	14.3519	-0.17334	0.31787	-0.34521	-11.645	144.353	485.478	0.06543	0.056152	-0.13086	44.647	-6.473	967.1773	-0.7625	1.2414	-1.2955	-15.119	34.8882	30.84297	0.20059	-0.044726	-0.10752	100.418	-9.237	1557.753	-1.3491	1.1665	-1.814	94.616	-69.83	1033.906	-0.98654	1.3647	-1.3355
2.054	-17.318	22.5465	36.2673	0.16953	-0.027537	-0.014747	-50.489	44.845	-4.548	-0.15771	0.31641	-0.34717	-46.2548	149.2822	430.7554	0.10962	0.0036625	-0.096682	40.9568	-33.916	993.5623	-0.70898	1.1914	-1.2813	-7.42	13.3351	49.275	0.19228	-0.038086	-0.10899	92.886	30.1485	1514.691	-1.2847	1.1216	-1.7847	31.766	-62.519	1035.953	-0.9435	1.3198	-1.3034
2.056	-31.673	34.8383	30.193	0.15234	-0.010254	-0.02832	-58.176	8.013	25.742	-0.14355	0.31323	-0.33813	-33.127	124.256	384.7171	0.14453	-0.043945	-0.053223	35.145	-47.913	1010.70234	-0.67988	1.1137	-1.2578	24.355	16.72249	38.0687	0.18555	-0.032715	-0.10498	58.906	1.457	1506.322	-1.2485	1.1021	-1.7729	65.923	-116.79	1032.09349	-0.92254	1.2722	-1.2519
2.058	-12.909	-15.1824	33.374	0.14307	0.004296	-0.037206	2.077	-22.772	55.66	-0.1167	0.29834	-0.32275	25.197	138.8773	347.9622	0.18359	-0.11084	-0.015137	-1.958	-47.566	1047.8789	-0.66865	1.0447	-1.2272	-29.666	5.4645	24.6019	0.17637	-0.030859	-0.099317	93.563	80.778	1502.0507	-1.1953	1.0586	-1.748	26.503	-97.888	1021.541	-0.9215	1.2384	-1.1926
2.06	-31.494	27.1064	23.28316	0.12803	0.02119	-0.045604	-44.559	-7.4429	38.4853	-0.07373	0.25928	-0.30518	-17.782	142.175	304.4195	0.20459	-0.14307	-0.0019531	6.974	-100.515	1076.178	-0.67842	1.0021	-1.1855	-4.988	-12.1092	31.833	0.16894	-0.028418	-0.093652	34.903	77.258	1454.1392	-1.1623	1.0325	-1.7292	-8.943	-123.235	1040.9964	-0.93164	1.2207	-1.1201
2.062	-29.436	28.71506	35.109	0.11201	0.038378	-0.058886	-10.693	-26.1252	47.445	-0.049316	0.22266	-0.28467	2.963	129.2506	278.9972	0.23877	-0.19922	0.024902	1.593	-113.006	1072.7264	-0.67832	0.99395	-1.142	-19.742	4.9323	16.445	0.1584	-0.031152	-0.087402	31.8671	100.183	1446.0162	-1.1304	1.0142	-1.7202	38.297	-125.079	1069.282	-0.92823	1.2058	-1.049
2.064	-26.403	5.2448	41.317	0.096779	0.05332	-0.066211	5.078	-10.5999	44.8683	0.0014648	0.17188	-0.25146	2.637	159.264	241.236	0.25684	-0.24219	0.04541	-15.035	-112.535	1085.776	-0.66309	1.002	-1.1055	-43.671	5.063	36.7188	0.15254	-0.039551	-0.080273	62.603	164.594	1408.592	-1.0894	1.0093	-1.7026	-8.472	-125.237	1068.844	-0.91448	1.1793	-0.99693
2.066	-50.789	50.4588	29.0285	0.086426	0.068359	-0.075195	-41.712	4.051	40.7876	0.033692	0.12866	-0.22924	-24.99	141.2594	203.648	0.27197	-0.2749	0.063965	31.171	-161.3045	1149.743	-0.61543	0.99941	-1.0799	-9.423	1.3509	42.902	0.14453	-0.049805	-0.075195	-9.1928	93.877	1385.335	-1.0718	1.0044	-1.6948	-9.343	-196.548	1096.042	-0.88635	1.1403	-0.97423
2.068	-27.237	5.209	37.4275	0.071777	0.084473	-0.081445	13.722	-14.421	30.3731	0.065918	0.091797	-0.20703	40.887	122.0501	196.91063	0.28418	-0.31104	0.073242	1.552	-134.4729	1190.629	-0.5709	0.97237	-1.0843	-55.979	14.6463	32.9279	0.13789	-0.069336	-0.072363	20.5252	107.719	1403.695	-1.0391	1.002	-1.6797	-22.682	-236.4884	1131.696	-0.85987	1.0996	-0.98329
2.07	-25.067	5.26	35.7154	0.055957	0.10166	-0.09043	-8.624	29.7806	-6.178	0.10352	0.043945	-0.1709	10.069	117.645	161.5222	0.28174	-0.32568	0.076172	-3.466	-178.99	1253.5	-0.53183	0.92002	-1.1288	-44.001	-18.9296	44.909	0.13867	-0.088867	-0.067578	-1.8351	99.656	1365.33978	-1.012	1.0012	-1.6687	-42.648	-272.168	1211.5603	-0.84326	1.0669	-1.0132
2.072	-62.75	21.219	31.519	0.043066	0.1212	-0.093164	-29.475	14.8628	-1.8182	0.11865	0.029785	-0.15967	-9.566	87.7068	153.515	0.28125	-0.34814	0.069824	30.9	-216.792	1280.426	-0.51846	0.8792	-1.1966	-13.376	-5.7614	31.1488	0.12851	-0.10761	-0.064453	-15.0857	67.797	1343.80718	-0.98047	0.99805	-1.6563	18.69	-300.116	1263.753	-0.8545	1.0389	-1.0666
2.074	-29.326	-16.7926	44.6621	0.026269	0.14258	-0.099416	16.217	4.7848	19.0584	0.15088	0.00048828	-0.13574	37.363	93.483	147.0108	0.2727	-0.35572	0.065918	-1.393	-194.658	1293.4672	-0.53613	0.86377	-1.2749	-65.836	5.554	42.9142	0.12226	-0.12461	-0.058496	47.8258	106.439	1340.962	-0.93213	0.979	-1.6187	5.436	-258.299	1281.653	-0.88819	1.0408	-1.121
2.076	-47.674	42.03	31.835	0.013184	0.1543	-0.10938	-31.669	26.2158	15.5548	0.16504	-0.01587	-0.11963	-27.796	103.169	109.854	0.2583	-0.36279	0.054199	21.211	-184.105	1322.45817	-0.59756	0.88115	-1.3579	-43.538	-19.6568	90.0932	0.11182	-0.13818	-0.061035	2.094	67.201	1300.855	-0.90674	0.95752	-1.5991	-24.76	-254.486	1296.783	-0.93937	1.0591	-1.1824
2.078	-67.5254	44.223	20.64229	0.0014649	0.1792	-0.099218	-7.93	13.16	20.2218	0.18164	-0.022949	-0.10693	-1.288	67.164	122.7733	0.23438	-0.36426	0.026855	-9.976	-124.1232	1359.2891	-0.67881	0.93955	-1.4186	-73.327	36.538	84.934	0.099022	-0.15645	-0.063379	-17.583	59.513	1287.704	-0.86084	0.92334	-1.5464	-34.21	-229.694	1278.508	-1.0003	1.1102	-1.2238
2.08	-31.873	5.9741	29.8672	-0.009668	0.20107	-0.10088	-4.975	38.017	4.493	0.1958	-0.033691	-0.083984	11.048	65.716	102.3236	0.21631	-0.35791	0.012695	-76.865	-67.6029	1395.6152	-0.76748	1.036	-1.4644	-70.6098	48.6449	103.8699	0.080957	-0.17998	-0.074414	26.1376	114.4082	1262.772	-0.82495	0.89038	-1.5085	-97.538	-178.1121	1292.9	-1.0547	1.1777	-1.2539
2.082	-64.072	39.235	25.225	-0.020606	0.21826	-0.10284	-57.4649	52.4359	10.792	0.20068	-0.041016	-0.077148	-39.59	32.905	73.5302	0.18311	-0.34229	-0.020508	-71.109	-86.047	1426.187	-0.83183	1.1447	-1.4858	16.717	52.161	131.8947	0.053613	-0.19287	-0.096289	-1.687	91.3413	1219.7353	-0.78662	0.85791	-1.4624	-88.498	-173.374	1346.0013	-1.0998	1.2551	-1.2741
2.084	-64.632	-5.3691	17.5963	-0.02998	0.23672	-0.10176	4.384	22.266	20.594	0.20557	-0.052246	-0.061523	2.5	14.359	73.4627	0.14843	-0.31445	-0.051758	-84.5704	-45.288	1429.47239	-0.86035	1.2363	-1.502	-80.169	62.28547	183.717	0.009668	-0.17969	-0.12451	19.0978	121.0864	1211.021	-0.73828	0.80566	-1.4043	-111.25	-150.1145	1398.361	-1.1188	1.3215	-1.3015
2.086	-29.578	0.93929	15.8104	-0.032715	0.25439	-0.094238	-22.915	44.063	5.047	0.20508	-0.052978	-0.04663	-44.657	34.987	41.43	0.11084	-0.2749	-0.084961	-110.769	-51.032	1434.5777	-0.86172	1.2805	-1.5067	-73.5923	49.38	255.538	-0.0625	-0.12988	-0.1665	9.134	129.76	1156.0832	-0.69605	0.76733	-1.3601	-188.016	-134.5871	1407.2512	-1.1164	1.3652	-1.3281
2.088	-60.953	26.1412	28.098	-0.041211	0.26289	-0.094727	-57.582	18.4264	14.0878	0.20215	-0.054688	-0.038086	-61.659	20.178	51.7413	0.051758	-0.2207	-0.13965	-90.7754	-51.467	1456.46	-0.83613	1.2895	-1.5143	-3.98999999999999	64.5678	289.271	-0.15888	-0.060644	-0.21709	-31.157	118.21383	1091.7262	-0.6499	0.7251	-1.312	-150.3017	-118.345	1409.641	-1.1024	1.3781	-1.3621
2.09	-36.171	-13.6715	40.9042	-0.043847	0.27256	-0.089355	-8.408	1.85	25.5132	0.19385	-0.050293	-0.015625	-16.071	21.371	60.4556	0.023438	-0.18555	-0.16846	-96.2766	-26.118	1453.408	-0.8041	1.263	-1.5339	-15.614	86.7248	332.9076	-0.26035	0.016211	-0.2834	24.783	185.42	1063.75	-0.5874	0.67041	-1.2437	-158.6562	-53.46	1410.601	-1.0874	1.3716	-1.4116
2.092	-12.552	28.535	32.2628	-0.049316	0.28427	-0.083887	-67.8825	14.6785	11.16	0.18555	-0.046387	-0.0083008	-68.602	40.4601	46.7728	-0.02832	-0.1123	-0.21924	-82.713	-57.83	1453.939	-0.78496	1.2158	-1.5713	29.667	95.162	424.266	-0.36933	0.10879	-0.35176	22.586	186.895	1020.004	-0.55225	0.64795	-1.2124	-155.8045	-37.151	1434.435	-1.0795	1.3533	-1.474
2.094	-22.711	26.8389	19.3073	-0.04834	0.29043	-0.075293	-56.034	-12.628	44.188	0.16895	-0.039551	0.0029297	-51.124	15.475	60.17	-0.066651	-0.052002	-0.26123	-86.363	-56.275	1479.3575	-0.77344	1.1758	-1.6191	12.223	120.3946	454.42462	-0.4751	0.21143	-0.42627	4.062	181.9638	1016.62	-0.48828	0.5957	-1.1426	-93.632	-35.276	1451.832	-1.0824	1.3332	-1.5438
2.096	-14.479	-19.4325	38.396	-0.051758	0.30029	-0.067871	-21.939	4.53949	19.062	0.15869	-0.030273	0.011231	-60.063	47.668	39.6844	-0.099121	0.0039063	-0.30322	-97.63085	-43.637	1506.822	-0.79258	1.15	-1.6719	-17.606	112.4951	516.9561	-0.57715	0.31543	-0.50879	39.023	210.208	989.457	-0.4541	0.56274	-1.0896	-121.486	-47.46	1464.5774	-1.0925	1.3301	-1.6258
2.098	-39.666	15.2567	68.263	-0.052734	0.30908	-0.063867	-67.4688	23.5826	23.4006	0.14648	-0.022461	0.017578	-96.1073	49.9705	33.4554	-0.14063	0.07959	-0.34863	-58.816	-99.402	1544.73	-0.83506	1.1407	-1.7159	8.036	94.591	602.894	-0.66758	0.41738	-0.59902	-18.405	174.839	924.6576	-0.41797	0.52832	-1.0391	-120.638	-113.567	1502.092	-1.1136	1.3386	-1.7069
2.1	-36.351	-28.7721	84.9792	-0.052051	0.31093	-0.059668	-26.367	3.086	54.809	0.13428	-0.010742	0.033203	-43.288	32.801	44.6273	-0.15967	0.11426	-0.37061	-63.356	-62.745	1556.814	-0.8792	1.1583	-1.796	-26.418	97.596	675.4	-0.75342	0.52783	-0.68584	25.485	202.607	910.879	-0.36719	0.49023	-0.9668	-84.126	-137.236	1530.788	-1.1304	1.3618	-1.7847
2.102	-5.151	-18.446	99.0204	-0.053223	0.3039	-0.072168	-57.24	42.777	26.5611	0.13037	-0.0095214	0.039063	-64.606	46.427	11.927	-0.18262	0.18213	-0.40967	-66.774	-65.571	1555.289	-0.90811	1.1958	-1.8835	-0.951999999999998	43.68983	807.9901	-0.82959	0.63994	-0.76748	2.721	191.045	868.024	-0.34131	0.46533	-0.92725	-100.883	-137.867	1520.494	-1.1599	1.4036	-1.8562
2.104	-6.725	14.8318	109.7517	-0.060644	0.2917	-0.086621	-73.5377	31.645	32.1822	0.12451	-0.0043945	0.043945	-57.568	-7.1387	21.0737	-0.19532	0.2212	-0.42505	-42.848	-67.805	1572.441	-0.92725	1.2544	-1.9644	-11.901	27.6692	877.1744	-0.91329	0.75273	-0.85576	-47.337	144.8458	835.218	-0.28809	0.42236	-0.84912	-60.4	-134.309	1518.753	-1.1842	1.4595	-1.9218
2.106	-37.979	-31.6418	167.4781	-0.071777	0.28906	-0.10742	2.373	25.421	26.0047	0.12451	-0.0029297	0.054199	-16.293	-14.7384	17.9891	-0.19824	0.26074	-0.43457	-92.5691	-55.989696	1547.57724	-0.93574	1.3211	-2.0375	-82.17	6.5431	912.931	-0.99756	0.86768	-0.94482	-9.66599999999999	160.8061	815.019	-0.25025	0.39405	-0.79053	-69.916	-103.267	1514.911	-1.2026	1.5317	-1.9792
2.108	-48.506	15.54826	193.642	-0.095702	0.29297	-0.12978	-47.531	61.687	12.885	0.12598	-0.0019531	0.056152	-73.3	20.2026	17.63345	-0.19824	0.2959	-0.43701	-71.915	-93.9315	1542.035	-0.94834	1.3903	-2.0983	-28.687	-52.684	968.8824	-1.0722	0.98486	-1.0186	-62.395	127.089	749.961	-0.20947	0.36523	-0.73438	-128.462	-112.579	1501.15388	-1.2095	1.6163	-2.0228
2.11	-58.454	11.62191	246.364	-0.12226	0.29229	-0.15928	-12.568	27.8774	38.777	0.12549	-0.0029297	0.067871	-21.508	-1.393	34.04	-0.18994	0.31055	-0.43262	-50.7	-81.052	1529.056	-0.96592	1.4775	-2.1566	-63.647	-41.789	1003.088	-1.1289	1.1	-1.0836	-48.282	128.723	737.2852	-0.16553	0.32764	-0.6543	-85.569	-117.575	1527.088	-1.2227	1.7012	-2.0527
2.112	-27.027	6.5775	320.206	-0.15664	0.29111	-0.20146	-7.744	29.533	34.91328	0.12427	-0.0058594	0.075927	-6.319	26.8335	20.0967	-0.16797	0.31592	-0.41553	-68.962	-36.25	1506.5733	-0.98145	1.5654	-2.2026	-75.661	-64.769	1041.469	-1.1653	1.205	-1.1332	-24.544	151.170429	721.671	-0.14014	0.31104	-0.61328	-94.802	-93.197	1538.7541	-1.2308	1.7688	-2.0656
2.114	-62.256	88.9503	400.914	-0.19746	0.28467	-0.25733	-53.052	43.4867	20.6417	0.11865	-0.0097656	0.075684	-33.798	21.678	31.0288	-0.14576	0.30567	-0.39771	-19.107	-28.792	1527.4538	-0.98926	1.6523	-2.2441	-28.91	-79.353	1054.167	-1.1766	1.2851	-1.1766	-95.9859	130.255	660.467	-0.096191	0.26855	-0.53467	-39.14	-76.655	1569.647	-1.2307	1.82	-2.0839
2.116	-40.595	68.544	503.078	-0.23584	0.28271	-0.31982	-8.39	3.6406	46.252	0.12354	-0.014648	0.080566	20.813	-14.4193	41.774	-0.12158	0.28516	-0.37988	-29.357	25.6847	1503.558	-0.99365	1.7146	-2.2682	-93.108	-100.2925	1020.4537	-1.1572	1.3359	-1.2031	-47.752	151.563	626.851	-0.064697	0.24072	-0.47364	3.224	-39.706	1544.6436	-1.2187	1.854	-2.0889
2.118	-31.981	85.1199	562.9286	-0.29023	0.28281	-0.39873	-20.963	34.514	36.064	0.12305	-0.022949	0.083496	-19.494	14.6845	17.363	-0.084961	0.24268	-0.33398	-36.389	26.5786	1503.1422	-1.0004	1.7559	-2.2805	-118.546	-147.689	1059.851	-1.1015	1.3403	-1.2245	-69.325	166.123	559.8835	-0.040527	0.21631	-0.4209	-51.993	-0.311	1505.105	-1.2051	1.8542	-2.0837
2.12	-67.087	117.429	626.422	-0.34433	0.2875	-0.48516	-16.791	19.9591	41.402	0.12256	-0.031738	0.079102	2.672	-2.815	34.876	-0.064941	0.21484	-0.31104	11.421	20.4727	1499.4173	-1.0016	1.7672	-2.2785	-114.115	-149.717	1046.487	-1.0256	1.2945	-1.2287	-107.977	145.981	515.7105	-0.0019531	0.18213	-0.34717	-21.088	8.9038	1493.951	-1.2007	1.8364	-2.064
2.122	-5.379	72.4154	760.29	-0.40293	0.29922	-0.57735	15.328	4.265	31.363	0.125	-0.043457	0.087402	30.805	10.853	25.6307	-0.026367	0.16016	-0.27051	-32.103	49.2591	1496.5728	-0.99856	1.7519	-2.2669	-173.891	-145.893	1007.684	-0.93457	1.2058	-1.2127	-41.108	161.97365	486.712	0.014648	0.16455	-0.30957	-46.47	51.443	1487.041	-1.209	1.8105	-2.0301
2.124	-11.622	96.087	874.4426	-0.47744	0.31826	-0.68447	-32.252	23.2795	16.121	0.13232	-0.053711	0.084473	-39.953	44.976	10.3402	0.0043947	0.12646	-0.23413	-31.079	17.027	1504.174	-0.99365	1.7192	-2.2534	-135.093	-149.742	979.904	-0.84053	1.0839	-1.1784	-93.1259	149.6235	417.99894	0.051758	0.12842	-0.24463	-42.586	45.786	1503.582	-1.22	1.7722	-1.9898
2.126	-40.008	57.82705	951.283	-0.55664	0.34326	-0.78711	-3.689	-10.1161	36.2604	0.13232	-0.074219	0.081055	2.941	17.9254	30.276	0.035645	0.094727	-0.20068	-31.83	30.772	1502.3593	-0.9832	1.669	-2.2176	-163.402	-117.46	931.6045	-0.77686	0.93994	-1.147	-69.579	160.1278	371.5201	0.08252	0.097168	-0.19848	-19.005	27.2173	1533.468	-1.2312	1.7297	-1.9465
2.128	-1.687	-14.568	980.207	-0.6333	0.40478	-0.89736	-1.79	-9.4531	55.606	0.12842	-0.083496	0.079102	4.601	37.068	9.342	0.070313	0.060059	-0.16211	-76.145	56.779	1492.778	-0.97627	1.6176	-2.18	-196.05887	-140.368046	962.2755	-0.71982	0.79785	-1.1064	-34.427	165.023	331.437	0.1167	0.062012	-0.15479	-90.406	20.7953	1520.7658	-1.2355	1.6797	-1.9058
2.13	-70.1335	-20.398	998.9379	-0.72256	0.4751	-0.97607	-34.585	2.079	44.708	0.11963	-0.095703	0.069336	-32.876	38.0427	11.32443	0.084473	0.037598	-0.13623	-79.292	10.2008	1498.89	-0.979	1.5736	-2.1491	-132.211	-132.851	1006.9671	-0.67803	0.68759	-1.0941	-97.0519	125.9353	296.649	0.15332	0.023926	-0.099121	-97.742	-18.8103	1506.1142	-1.2397	1.6372	-1.8726
2.132	-95.9626	-84.2939	1049.347	-0.82295	0.56845	-1.0398	9.662	-16.72989	50.889	0.11035	-0.10254	0.061279	13.657	13.7725	27.4742	0.10742	0.018555	-0.11182	-92.3	33.4631	1507.5491	-0.98848	1.5438	-2.1219	-164.3599	-121.651	1012.457	-0.65537	0.629	-1.1066	-56.452	123.1636	268.72585	0.17139	0.0078125	-0.077148	-97.54	-10.897	1498.098	-1.2389	1.6123	-1.8447
2.134	-60.465	-92.6808	1041.356	-0.92012	0.67656	-1.0854	-30.474	29.1603	27.80562	0.098633	-0.10498	0.049805	-23.367	46.419	12.095	0.11597	0.0085447	-0.088134	-107.099	30.163	1498.751	-0.99805	1.5332	-2.0977	-128.8755	-151.908	1063.9475	-0.65108	0.63623	-1.14	-55.277	123.055	228.007	0.19727	-0.016602	-0.030762	-149.8954	9.6638	1506.562	-1.2354	1.604	-1.821
2.136	-71.574	-75.546	1020.41425	-1.0186	0.79297	-1.127	-46.877	18.1079	32.736	0.089844	-0.10791	0.039551	-32.047	22.7631	27.4044	0.11914	0.00097656	-0.068359	-84.862	17.682	1487.255	-1.0032	1.5263	-2.0807	-98.584	-148.411	1068.372	-0.67188	0.71143	-1.1929	-57.488	102.1525	210.9495	0.21143	-0.034668	0.0021973	-112.724	-7.8369	1529.282	-1.2354	1.5993	-1.8007
2.138	-44.8681	-127.828	994.765	-1.0985	0.90928	-1.154	-0.117000000000004	11.1389	27.5127	0.080566	-0.097656	0.026367	-10.055	20.0532	22.1549	0.12207	-0.0058594	-0.044434	-120.4196	48.745	1473.2874	-1.0081	1.5243	-2.0628	-123.062	-176.625	1088.363	-0.6958	0.81787	-1.2693	-5.127	101.9448	207.6931	0.2251	-0.055176	0.033203	-109.188	27.802	1518.4098	-1.235	1.5908	-1.7928
2.14	-18.9486	-110.245	1005.1891	-1.1389	1.0138	-1.1741	-60.4606	42.1112	-4.299	0.080078	-0.098633	-0.00097656	-69.518	26.8891	10.404	0.11572	-0.0043945	-0.032227	-103.247	34.05	1466.6947	-1.0128	1.5087	-2.0347	-83.004	-199.4055	1153.1716	-0.69775	0.92744	-1.3495	-51.84	70.6836	175.3619	0.23535	-0.064453	0.057617	-156.496	24.335	1498.936	-1.2324	1.5742	-1.7734
2.142	-12.7969	-103.087	992.932	-1.1499	1.0849	-1.1804	-36.836	6.252	14.4887	0.084229	-0.089844	-0.013428	-35.584	-2.71	37.15	0.11035	-0.0048828	-0.0073242	-84.298	59.231	1454.7639	-1.0229	1.4904	-2.0057	-58.827	-187.2024	1175.2756	-0.67627	1.006	-1.4241	-24.275	55.487	154.195	0.23682	-0.064941	0.066895	-113.884	38.209	1520.031	-1.2387	1.5531	-1.7484
2.144	41.625	-91.777	973.721	-1.1281	1.1268	-1.1923	-17.496	6.7364	17.6	0.090332	-0.089355	-0.029785	-33.387	20.0096	38.8364	0.10279	-0.0073243	0.010742	-123.8289	92.101	1433.5406	-1.0249	1.4731	-1.98	-60.155	-234.911	1235.459	-0.64101	1.0488	-1.4855	13.457	65.0735	132.5898	0.2373	-0.072754	0.087891	-134.0258	81.626	1499.833	-1.241	1.5356	-1.7207
2.146	64.331	-16.192	953.2635	-1.0854	1.1528	-1.1987	-81.8106	20.4041	24.5184	0.10059	-0.088867	-0.042969	-93.3442	35.9782	37.9647	0.093262	-0.011719	0.021484	-101.734	81.586	1415.117	-1.0232	1.4404	-1.9479	5.85899999999999	-244.96	1278.676	-0.60107	1.063	-1.5405	-19.249	46.075	115.95367	0.23779	-0.074707	0.091553	-107.94	75.361	1469.491	-1.243	1.5078	-1.6922
2.148	69.497	-37.498	944.019	-1.0355	1.173	-1.1938	-24.762	-2.6298	39.248	0.10889	-0.091797	-0.050781	-44.379	14.1507	50.359	0.07959	-0.0029297	0.039063	-98.503	146.6728	1408.0335	-1.023	1.4082	-1.9157	-28.307	-272.04	1294.5692	-0.58271	1.0575	-1.5843	18.415	17.16	132.106	0.22949	-0.072266	0.081543	-70.39	87.28	1440.303	-1.2335	1.4763	-1.6639
2.15	57.9266	-45.703	951.4419	-0.98877	1.1875	-1.1859	-39.225	34.0856	21.108	0.11377	-0.093262	-0.06543	-73.9596	31.2068	20.344	0.064941	0.0024414	0.038574	-81.719	162.558	1370.9931	-1.0137	1.3816	-1.8906	6.67	-293.88	1346.6576	-0.58906	1.0683	-1.6175	-14.519	15.20617	92.0336	0.2124	-0.067871	0.075195	-125.6455	93.1598	1396.755	-1.209	1.4375	-1.6309
2.152	28.15	-55.581	963.056	-0.95088	1.1934	-1.1722	-74.253	14.339	38.522	0.12011	-0.095459	-0.071777	-69.4332	-1.092	33.4929	0.047363	0.015137	0.05127	-49.831	161.921	1358.7038	-1.0007	1.3529	-1.8433	86.0054	-238.143	1375.201	-0.60821	1.0992	-1.6399	-27.966	17.2	60.68025	0.19775	-0.065918	0.067871	-86.063	84.478	1387.7516	-1.1791	1.3955	-1.5901
2.154	44.33	-108.763	994.2221	-0.92637	1.1975	-1.1471	-25.763	-11.6049	37.5614	0.12305	-0.10352	-0.073242	-32.572	-5.47714	30.0282	0.036377	0.028809	0.058105	-95.1782	179.957	1349.9579	-0.9917	1.3228	-1.8022	26.918	-215.438	1401.6183	-0.63653	1.1338	-1.6619	28.461	45.149	45.143	0.1582	-0.041992	0.027344	-78.945	123.388	1360.127	-1.1512	1.3527	-1.552
2.156	3.176	-97.871	1016.404	-0.9043	1.209	-1.1094	-52.493	11.895	11.896	0.1333	-0.10693	-0.085449	-83.0583	24.7132	19.456	0.025391	0.045898	0.063965	-42.973	136.0593	1312.7146	-0.97461	1.2953	-1.7519	43.0018	-184.641	1445.063	-0.65576	1.1528	-1.6733	-5.859	52.2	21.201	0.12305	-0.010986	-0.0024415	-78.546	119.985	1336.3436	-1.1156	1.3086	-1.5118
2.158	-20.56	-122.08	1019.828	-0.8956	1.2325	-1.0583	-30.244	-19.5885	20.8006	0.13672	-0.11523	-0.089355	-35.027	14.1275	33.5847	0.012695	0.052734	0.064453	-34.943	114.7685	1300.0121	-0.95693	1.2642	-1.7058	63.2483	-136.784	1436.611	-0.64766	1.141	-1.6877	-21.933	33.8795	35.807	0.083984	0.024902	-0.038086	-56.005	105.145	1339.583	-1.0757	1.2683	-1.4717
2.16	4.663	-171.042	1029.977	-0.8917	1.2548	-1.0097	-23.087	4.19376	8.89	0.15283	-0.12158	-0.099121	-39.958	42.942	29.1715	0.012207	0.058105	0.062012	-63.263	122.2302	1239.2628	-0.92998	1.2263	-1.6554	14.046	-134.788	1471.9176	-0.62579	1.1133	-1.6918	-4.108	45.531	15.8415	0.039551	0.088379	-0.082031	-96.95	109.59	1291.76	-1.0386	1.2271	-1.4312
2.162	-42.448	-171.243	1056.84	-0.88232	1.2485	-0.98779	-55.179	20.4965	14.6918	0.15991	-0.12891	-0.10547	-61.212	41.3102	35.3721	0.01709	0.06543	0.049805	9.508	88.279	1240.767	-0.89434	1.1793	-1.6055	59.39586	-88.843	1501.1438	-0.61094	1.0789	-1.7082	-58.607	46.51	14.741	0.015137	0.10889	-0.099121	-59.842	74.259	1268.423	-1.0076	1.185	-1.3922
2.164	-12.231	-221.948	1116.831	-0.86328	1.2254	-0.9918	-4.725	-9.6867	26.5334	0.17041	-0.13428	-0.10352	14.396	4.9304	40.371	0.022949	0.071289	0.04126	-0.867000000000004	135.2127	1227.009	-0.85303	1.1274	-1.5493	33.295	-79.135	1497.1593	-0.62607	1.047	-1.7487	-0.183	48.5313	49.9268	-0.024902	0.16016	-0.15039	-18.257	91.7766	1251.8816	-0.97695	1.1461	-1.3533
2.166	16.332	-247.111	1193.913	-0.84375	1.1992	-1.0166	-31.679	28.76	5.1243	0.17871	-0.14844	-0.11133	-24.119	38.253	22.8423	0.031738	0.075195	0.03418	-0.436999999999998	129.878	1188.8205	-0.81709	1.0745	-1.4962	31.516	-106.9827	1517.4145	-0.6665	1.0469	-1.8027	-23.698	51.9418	32.523	-0.045899	0.18774	-0.17505	-27.347	125.051	1223.551	-0.94414	1.1071	-1.3135
2.168	-22.247	-244.598	1232.421	-0.8334	1.1797	-1.0666	-34.825	30.85837	23.23	0.18408	-0.15479	-0.11475	-20.028	5.804	39.8166	0.04541	0.074707	0.022949	23.416	111.0394	1160.188	-0.78789	1.0258	-1.4473	47.813	-82.058	1490.6609	-0.74046	1.0912	-1.8608	-66.982	32.5396	24.5759	-0.06543	0.21289	-0.19482	38.865	99.795	1212.103	-0.91738	1.0642	-1.276
2.17	-1.379	-278.51	1270.878	-0.83662	1.1706	-1.1221	16.798	21.1631	40.418	0.18701	-0.15674	-0.12451	13.823	1.4008	32.9238	0.05957	0.074707	0.01416	-7.84	143.992	1127.8679	-0.76016	0.97696	-1.3898	-11.143	-89.7713	1459.485	-0.82762	1.1614	-1.9297	-5.66	26.6091	25.9486	-0.079102	0.23486	-0.21973	15.784	112.699	1160.3107	-0.88428	1.0259	-1.2378
2.172	-3.752	-226.011	1271.781	-0.84951	1.1749	-1.1804	-28.123	58.547	21.217	0.19262	-0.15991	-0.12598	-40.504	19.5527	32.40485	0.074219	0.081543	0.0043945	11.36	124.5035	1104.81	-0.73379	0.93652	-1.3422	0.405999999999999	-90.66607	1505.5598	-0.92139	1.2442	-2.0173	-81.4716	34.2532	3.071	-0.090332	0.2373	-0.2207	-9.528	103.202	1113.9598	-0.85146	0.97588	-1.2003
2.174	-49.123	-168.142	1291.3525	-0.87051	1.1902	-1.2234	6.913	28.17455	21.2057	0.19238	-0.16455	-0.12988	26.014	-13.7228	38.16	0.084961	0.08081	-0.0070801	16.612	167.752	1059.523	-0.70898	0.89258	-1.293	-1.295	-69.029	1512.2088	-0.99939	1.3312	-2.0978	-38.957	11.4054	42.545	-0.098633	0.24414	-0.22412	33.763	112.2033	1106.7323	-0.81719	0.92773	-1.1556
2.176	-50.342	-127.7003	1325.28	-0.8877	1.2324	-1.2588	4.531	34.153	-4.322	0.19287	-0.17139	-0.14551	23.418	15.65016	10.5408	0.098145	0.077637	-0.016602	-14.828	198.78	998.052	-0.67627	0.84991	-1.2368	-40.5065	-112.307	1543.0565	-1.0542	1.4048	-2.1636	-30.862	-0.398400000000001	38.583	-0.10034	0.24243	-0.21826	-15.759	168.0538	1057.2336	-0.77929	0.87891	-1.1123
2.178	-105.753	-76.358	1333.8326	-0.91103	1.2735	-1.2761	-34.622	43.1853	-1.065	0.19189	-0.18066	-0.14551	-22.808	18.511	11.0032	0.12207	0.068359	-0.03418	12.867	160.107	974.0707	-0.64639	0.81299	-1.1808	-19.2536	-97.084	1584.3509	-1.0933	1.4495	-2.2167	-95.8493	-6.2404	24.849	-0.10303	0.23682	-0.2002	-0.490000000000002	159.221	1030.9999	-0.74356	0.83516	-1.0677
2.18	-130.009	-92.463	1344.22491	-0.91787	1.3083	-1.3069	18.34	6.5612	27.071	0.18848	-0.19678	-0.17139	14.846	-1.0009	30.8	0.13672	0.058105	-0.035645	3.452	199.689	937.309	-0.62334	0.77197	-1.1296	-94.074	-103.416	1592.04556	-1.1202	1.4707	-2.2597	-30.818	-4.8636	35.984	-0.10254	0.22559	-0.17578	-39.145	188.49	972.452	-0.70313	0.7959	-1.0264
2.182	-128.766	-88.454	1365.8508	-0.91553	1.3192	-1.3335	-18.899	5.884	57.4146	0.17773	-0.22095	-0.20093	-27.457	35.397	25.9422	0.1499	0.039063	-0.047852	-18.689	181.3946	898.0173	-0.58623	0.73682	-1.0749	-93.455	-109.428	1631.209	-1.1429	1.466	-2.2863	-61.9915	10.489	9.875	-0.092285	0.21387	-0.16504	-90.172	189.965	916.166	-0.65781	0.75293	-0.98027
2.184	-155.056	-39.094	1375.62	-0.89912	1.3032	-1.3698	-28.965	-25.27931	92.407	0.15088	-0.22559	-0.23926	-32.496	9.649	33.572	0.15967	0.022705	-0.053467	-4.953	176.6508	868.798	-0.54834	0.70166	-1.019	-36.646	-57.2968	1613.671	-1.1703	1.4511	-2.3024	-66.302	11.897	32.63493	-0.07373	0.18701	-0.13623	-34.795	153.0275	910.10967	-0.61407	0.71045	-0.93867
2.186	-119.812	-54.407	1395.0377	-0.88086	1.2813	-1.4082	-9.28299999999999	-26.97	114.6209	0.081543	-0.1792	-0.28223	24.607	-3.8499	25.5742	0.17041	0.0019531	-0.063965	-20.156	207.165	827.0842	-0.50566	0.66524	-0.9625	-86.0479	-53.45636	1575.8929	-1.2124	1.436	-2.314	-9.744	18.3481	45.2053	-0.055909	0.16992	-0.11817	-39.879	194.701	875.7029	-0.56719	0.67138	-0.8957
2.188	-104.606	-45.977	1392.087	-0.87422	1.2443	-1.4604	-10.044	28.233	107.7308	0.036133	-0.1416	-0.30469	-44.864	11.717	15.5684	0.18311	-0.027344	-0.075195	-15.019	182.426	786.9534	-0.4585	0.62461	-0.90176	-34.432	-24.341	1598.128	-1.2589	1.4155	-2.3113	-51.554	41.3709	26.0193	-0.043457	0.14258	-0.097168	-53.214	190.7366	850.917	-0.52207	0.63457	-0.83965
2.19	-127.1694	-43.939	1396.73	-0.8792	1.2158	-1.5175	-0.469999999999999	-0.114999999999998	159.886	-0.061523	-0.068848	-0.38916	-14.502	-4.9259	24.7249	0.18774	-0.04712	-0.082276	-39.479	190.355	728.559	-0.41201	0.58593	-0.84668	0.583	21.839	1578.724	-1.3088	1.3923	-2.3005	-4.497	28.3146	37.524	-0.024902	0.11377	-0.074219	-19.878	179.6802	825.69453	-0.48096	0.6001	-0.78955
2.192	-99.207	-75.2959	1434.6552	-0.90224	1.1958	-1.5827	-1.831	17.2642	206.121	-0.12695	-0.015869	-0.4668	-31.609	38.466	11.5848	0.18994	-0.063965	-0.09375	-45.5579	178.7538	690.815	-0.35889	0.54268	-0.79014	-30.56225	-15.4509	1594.109	-1.3535	1.3609	-2.2833	4.941	39.251	32.657	-0.018066	0.10303	-0.06543	-70.848	205.9512	765.708	-0.43877	0.56963	-0.73857
2.194	-83.121	-71.735	1471.3704	-0.92998	1.1946	-1.6487	-49.0048	26.854	239.238	-0.18555	0.04248	-0.54541	-66.4365	50.9436	10.5086	0.2041	-0.085449	-0.10596	-30.116	129.361	687.2126	-0.30908	0.49805	-0.73047	8.638	14.2157	1614.8038	-1.3838	1.3308	-2.2594	-47.06	44.229	33.788	-0.00048828	0.080078	-0.048828	-53.45	166.828	739.20991	-0.40059	0.54043	-0.68672
2.196	-68.256	-110.513	1502.869	-0.96484	1.2168	-1.7168	16.8	-6.6758	296.5372	-0.26563	0.1377	-0.65234	-27.414	24.8257	30.936	0.20752	-0.093262	-0.11328	-49.348	167.919	665.448	-0.26123	0.44834	-0.67344	-1.515	12.558	1572.7232	-1.4004	1.3086	-2.2305	11.074	36.596	33.184	0.012939	0.065186	-0.035889	-31.358	178.0702	719.585	-0.3541	0.50957	-0.63516
2.198	-52.86	-134.538	1534.745	-0.9949	1.2541	-1.7928	19.1224	53.615	365.419	-0.30762	0.18652	-0.71387	-76.2015	33.246	23.4832	0.22363	-0.11719	-0.12695	-57.4361	150.259	614.712	-0.21396	0.40527	-0.6246	18.949	-4.525	1564.3156	-1.4108	1.2932	-2.2089	-8.628	40.995	0.847	0.026855	0.049805	-0.028809	-60.9516	177.616	670.88	-0.31162	0.48057	-0.57998
2.2	-92.518	-116.221	1538.617	-1.0202	1.3067	-1.8648	-29.459	75.97	471.374	-0.41699	0.29785	-0.84766	-63.388	-2.005	26.2626	0.22876	-0.13428	-0.13745	-26.199	145.9776	590.542	-0.16318	0.35605	-0.56211	42.6833	42.482	1536.1403	-1.4104	1.2874	-2.1918	-21.166	13.787	24.7986	0.047363	0.038086	-0.013672	-44.566	130.673	627.278	-0.2666	0.44922	-0.52344
2.202	-71.738	-136.565	1528.935	-1.0402	1.3743	-1.9331	16.38	106.8265	532.359	-0.51904	0.4021	-0.96434	-46.484	-7.6628	27.7205	0.2373	-0.14551	-0.14209	-35.049	194.497	526.4443	-0.11426	0.30927	-0.50429	-2.997	29.9077	1518.9498	-1.4064	1.2851	-2.1676	36.486	-5.31882	30.3763	0.055664	0.033203	-0.011719	-78.449613	164.4065	588.1453	-0.21797	0.41055	-0.47051
2.204	-77.981	-107.486	1516.9773	-1.0619	1.4477	-1.9873	-57.384	144.575	573.374	-0.64258	0.52246	-1.082	-82.18808	25.856	16.3776	0.24902	-0.16602	-0.13721	-20.591	150.1914	484.089	-0.068848	0.26172	-0.45215	56.1824	27.647	1555.567	-1.3989	1.2784	-2.1457	-51.269	-5.99	31.0818	0.066406	0.019043	0.003418	-85.8997	163.468	546.3112	-0.17686	0.37266	-0.41436
2.206	-108.362	-76.4915	1515.921	-1.084	1.5293	-2.0371	-40.426	101.4616	684.56	-0.84473	0.7207	-1.2539	-41.469	3.995	24.7452	0.25195	-0.17188	-0.15479	-11.953	149.2222	443.612	-0.019732	0.21602	-0.39942	80.76	40.89936	1561.2677	-1.3882	1.2661	-2.1206	2.834	-9.6758	47.099	0.073242	0.0019531	0.0043946	-32.092	144.3867	514.935	-0.13271	0.32891	-0.35889
2.208	-56.917	-75.1295	1548.423	-1.1001	1.6179	-2.0833	8.147	88.896	800.3	-0.9585	0.83643	-1.3423	-55.583	23.967	20.0763	0.25635	-0.18262	-0.14746	-26.777	156.941	386.6448	0.022546	0.16681	-0.3506	52.971	-9.7537	1569.92	-1.3733	1.2466	-2.0949	11.585	8.9226	27.926	0.088867	-0.016113	0.0083008	-34.551	174.1723	462.044	-0.091016	0.28115	-0.30059
2.21	-44.772	-7.404	1531.2629	-1.1175	1.6961	-2.1121	-73.312	66.567	929.7528	-1.1831	1.1118	-1.5151	-57.177	27.2552	12.6113	0.2583	-0.19165	-0.14819	5.868	116.293	364.365	0.069813	0.11837	-0.30099	98.922	8.783	1577.5959	-1.3539	1.2208	-2.0531	-31.634	5.2	38.222	0.10742	-0.043457	0.028809	0.82	133.51752	431.385	-0.047852	0.23389	-0.25439
2.212	-39.754	-0.438000000000001	1532.5614	-1.1414	1.7567	-2.1328	-48.093	-1.8517	1013.225	-1.3123	1.3479	-1.617	-20.979	5.6837	26.9314	0.25684	-0.20264	-0.14648	-5.08600000000001	163.7625	323.668	0.10527	0.070029	-0.25401	83.747	15.322	1539.7337	-1.3299	1.1865	-2.0216	18.629	-20.4236	41.175	0.11914	-0.053711	0.033691	-6.231	155.277	395.7542	-0.0084963	0.17891	-0.20381
2.214	-13.684	10.4222	1538.387	-1.1664	1.8031	-2.1359	-39.54	-33.351	1011.707	-1.3804	1.5747	-1.6968	-50.428	46.947	30.07412	0.24951	-0.21094	-0.14502	-22.731	142.9489	278.61	0.1377	0.023926	-0.2085	74.7202	9.25	1535.001	-1.3097	1.1664	-1.9913	-41.856	2.3975	26.2831	0.1333	-0.092773	0.041504	-17.535	175.179	346.052	0.027832	0.12812	-0.15059
2.216	-49.488	43.935	1529.309	-1.1895	1.8301	-2.1328	-58.441	-80.829	1065.069	-1.3413	1.8208	-1.7339	-35.737	26.848	39.2768	0.24219	-0.2168	-0.14307	29.808	134.7301	255.3272	0.16935	-0.01672	-0.1705	100.334	56.6409	1512.159	-1.2886	1.1431	-1.9526	-34.905	4.886	35.8438	0.15112	-0.1123	0.051513	30.682	128.2289	312.85409	0.061426	0.072656	-0.10019
2.218	-12.344	25.3996	1531.2329	-1.2209	1.8361	-2.1053	-34.368	-107.961	1102.419	-1.2715	1.9023	-1.7285	-0.253999999999998	17.2862	42.1979	0.23389	-0.22461	-0.13867	0.964999999999996	177.517	208.8703	0.20032	-0.062632	-0.13493	46.0198	20.619	1483.065	-1.2603	1.1164	-1.9198	12.365	10.1951	44.8815	0.16016	-0.12939	0.058594	10.549	146.893	276.9063	0.096092	0.023926	-0.057715
2.22	-28.524	41.3093	1536.4508	-1.2457	1.8343	-2.0684	-57.689	-104.27	1086.949	-1.0444	1.9087	-1.7007	-42.967	37.3961	19.152	0.21728	-0.22412	-0.13965	-10.733	121.996	199.467	0.23353	-0.10483	-0.097425	60.447	20.907	1489.261	-1.2152	1.082	-1.8846	-61.763	20.9335	29.872	0.17383	-0.15625	0.068359	0.738	111.647	251.535	0.12061	-0.030273	-0.01709
2.222	-109.617	37.7142	1529.908	-1.2735	1.8129	-2.0289	-23.219	-171.624	1083.8937	-0.83447	1.7915	-1.6587	7.29	5.7421	26.834	0.20654	-0.22559	-0.13525	17.089	134.566	192.3494	0.25549	-0.15474	-0.065603	37.479	51.1602	1452.3339	-1.1661	1.0477	-1.8524	-43.903	3.196	35.8667	0.18115	-0.1665	0.071289	12.562	82.159	230.3683	0.14678	-0.084473	0.01377
2.224	-59.434	-1.4278	1528.7645	-1.3047	1.7816	-1.9824	-50.619	-178.245	1056.119	-0.63818	1.5962	-1.5972	1.035	30.68	24.7783	0.1958	-0.22266	-0.14404	-6.012	135.6555	163.7961	0.27295	-0.1958	-0.046875	-3.814	46.22	1428.737	-1.1202	1.0244	-1.8161	-38.537	21.3754	-2.923	0.19873	-0.1748	0.077637	-16.029	130.134	175.362	0.16729	-0.1293	0.040821
2.226	-104.253	25.9502	1526.164	-1.3369	1.75	-1.9316	-118.5058	-196.105	1065.635	-0.50928	1.2446	-1.4878	-24.484	38.5305	25.5405	0.18945	-0.22021	-0.14453	12.802	69.497	161.368	0.28542	-0.23606	-0.029315	34.9829	96.5233	1415.8404	-1.082	1.0039	-1.7891	-88.8221	37.828	2.757	0.20899	-0.17822	0.078857	2.83	82.5208	166.10612	0.18409	-0.17735	0.061914
[truncated: 11,886 more rows]
