# Supplementary material for: Reliability and Validity of Running Cadence and Stance Time Derived from Instrumented Wireless Earbuds
Source: Sensors (Basel). 2021 Nov 30;21(23):7995. doi: 10.3390/s21237995 (PMC8659722; doi:10.3390/s21237995)
Supplement: Supplementary file 1 [file sensors-21-07995-s001.zip › Data_P04_speeds_1.csv]

time	S7kmh_force_plate_1	S7kmh_force_plate_2	S7kmh_force_plate_3	S7kmh_earbuds_1	S7kmh_earbuds_2	S7kmh_earbuds_3	S10kmh_force_plate_1	S10kmh_force_plate_2	S10kmh_force_plate_3	S10kmh_earbuds_1	S10kmh_earbuds_2	S10kmh_earbuds_3	S13kmh_force_plate_1	S13kmh_force_plate_2	S13kmh_force_plate_3	S13kmh_earbuds_1	S13kmh_earbuds_2	S13kmh_earbuds_3	max_force_plate_1	max_force_plate_2	max_force_plate_3	max_earbuds_1	max_earbuds_2	max_earbuds_3
0	-52.1831	12.7035	37.3622	0.16406	-0.07373	-0.018555	36.895	-101.031	988.036	-0.66162	1.2075	-1.394	-62.8435	-36.971	43.7305	0.33203	-0.01123	0.0032227	-105.6554	-4.805	15.2304	-0.035742	-0.077246	-0.13164
0.002	-35.297	11.81738	36.99	0.16113	-0.07373	-0.014648	40.899	-94.543	985.901	-0.6709	1.2285	-1.4141	-71.7559	-23.59	10.6463	0.34532	-0.028808	0.011816	-97.74	9.383	10.9862	-0.025586	-0.10732	-0.12803
0.004	-26.502	9.28936	10.7672	0.16211	-0.062988	-0.013672	-1.57400000000001	-131.64	1017.871	-0.69482	1.3071	-1.4448	-73.7467	-21.999	16.1469	0.35976	-0.045215	0.027051	-124.4591	-14.936	39.154	-0.0076173	-0.13819	-0.12373
0.006	-49.787	14.8221	6.0479	0.16089	-0.05664	-0.015381	13.122	-134.585	1038.276	-0.6958	1.3843	-1.4556	-90.9491	27.437	-4.5872	0.37373	-0.059961	0.040235	-100.6326	8.3	27.3163	0.008203	-0.1793	-0.12793
0.008	-33.263	16.0199	-9.617	0.16504	-0.047363	-0.011719	-30.321	-185.894	1083.563	-0.69531	1.4648	-1.459	-57.124	27.17632	26.79144	0.38916	-0.075684	0.053711	-109.671	-29.1303	36.293	0.026855	-0.21777	-0.1377
0.01	-38.012	20.1677	20.315	0.16943	-0.041504	-0.003418	-70.455	-225.301	1130.6101	-0.66357	1.5376	-1.4419	-47.369	78.7617	36.9831	0.39658	-0.092675	0.062696	-75.8294	2.358	27.877	0.040723	-0.24434	-0.14073
0.012	-39.915	19.74	12.534	0.16797	-0.037598	-0.0048828	-59.577	-223.487	1141.294	-0.63525	1.5532	-1.4409	-42.043	51.974	9.052	0.4082	-0.11201	0.075098	-80.5978	-30.8447	23.8206	0.057813	-0.26768	-0.14971
0.014	-36.6397	11.7836	9.6461	0.17285	-0.036621	0.00097656	-87.451	-259.3885	1206.874	-0.55273	1.5254	-1.4551	-43.6759	71.335	9.0358	0.4125	-0.12803	0.089941	-24.632	21.267	30.9715	0.08125	-0.28134	-0.16689
0.016	-31.951	8.1731	7.66841	0.177	-0.037598	0.0029297	-37.469	-262.208	1255.9899	-0.49438	1.4798	-1.4836	-69.90637	20.159	14.018	0.41621	-0.14824	0.098927	1.198	10.816	1.894	0.10254	-0.29844	-0.19209
0.018	-28.51	14.5536	35.7759	0.18311	-0.040039	0.0073242	-31.738	-266.997	1290.315	-0.45068	1.4224	-1.5269	-39.597	42.292	18.9753	0.42041	-0.16553	0.10889	4.694	61.1571	29.5479	0.12598	-0.31201	-0.20898
0.02	-36.981	16.5343	35.502	0.18408	-0.037109	0.010742	-52.814	-285.155	1352.64	-0.46387	1.3574	-1.5908	-9.305	16.0627	41.2623	0.41611	-0.17432	0.10488	36.611	45.257	12.273	0.15293	-0.32705	-0.22256
0.022	-45.06	25.6479	26.7172	0.18799	-0.038574	0.0083008	-17.492	-259.673	1382.938	-0.48779	1.3359	-1.6211	30.473	44.019	30.250579	0.41182	-0.17842	0.11973	79.9468	62.081	56.542	0.16074	-0.3417	-0.25166
0.024	-24.706	19.4772	16.0148	0.1875	-0.031738	0.010742	-33.664	-277.042	1415.196	-0.57471	1.3267	-1.6733	23.234	-3.63371	14.6288	0.40713	-0.17686	0.12286	37.27	32.6766	31.5056	0.17168	-0.34326	-0.26885
0.026	-27.781	-0.996500000000001	7.5733	0.19434	-0.026611	0.012207	-40.8	-215.741	1446.799	-0.6543	1.3418	-1.7109	35.439	10.851	49.354	0.39961	-0.17187	0.11972	69.179	41.659	102.369	0.171	-0.33936	-0.29336
0.028	-22.154	-15.824	5.787	0.19287	-0.018066	0.0078125	-52.85	-163.5503	1428.869	-0.68555	1.3555	-1.7305	14.618	-24.75293	44.605	0.38916	-0.16064	0.12109	65.894	9.7412	91.958	0.16113	-0.31641	-0.31982
0.03	-23.588	-5.9197	17.979	0.19482	-0.011719	0.0087891	-115.91	-154.0588	1441.8545	-0.71045	1.3853	-1.7554	27.929	6.944	56.122	0.37969	-0.14932	0.11308	27.519	23.6982	144.129	0.1335	-0.28662	-0.34756
0.032	-2.23	19.7442	8.814	0.19434	-0.0039063	0.01123	-98.844	-112.586	1443.59	-0.70532	1.3909	-1.7752	54.485	-14.9216	73.926	0.36953	-0.13515	0.10341	62.6575	54.111	157.761	0.09248	-0.26953	-0.41211
0.034	-23.686	32.2998	19.8849	0.18945	0.0083008	0.0063477	-128.414	-138.638	1464.902	-0.6875	1.3853	-1.7866	32.094	10.1997	78.882	0.35977	-0.11484	0.097948	95.172	62.444	249.095	0.040136	-0.24414	-0.48477
0.036	-10.964	42.145	28.69	0.1853	0.013428	0.003418	-123.7083	-124.843	1495.6351	-0.66162	1.3599	-1.814	26.854	-16.8716	68.701	0.35196	-0.096876	0.091211	42.71934	72.436	322.279	-0.02666	-0.17978	-0.55762
0.038	-0.0389999999999944	33.296	27.113	0.18311	0.025391	0.0019531	-79.099	-90.295	1476.011	-0.65674	1.3491	-1.8354	-2.028	-2.736	55.833	0.34375	-0.07373	0.083984	23.798	50.6153	463.5077	-0.12402	-0.089844	-0.64893
0.04	-25.649	33.118	37.255	0.16992	0.037109	0.0029297	-111.311	-123.971	1509.6174	-0.6792	1.3384	-1.8882	-32.993	-20.8784	18.1096	0.34785	-0.050684	0.073242	35.715	83.9517	552.114	-0.24355	0.013868	-0.76162
0.042	-27.205	30.516	25.933	0.16748	0.039063	-0.0014648	-90.846	-95.96	1522.0568	-0.71534	1.345	-1.9363	-60.2265	16.0475	30.173	0.34395	-0.03125	0.066406	-1.993	122.7865	728.9699	-0.37832	0.14218	-0.89219
0.044	-13.06	31.744	24.663	0.15479	0.053711	-0.0024414	-94.155	-128.3918	1549.8464	-0.75391	1.3652	-1.9922	-27.811	4.2492	24.721	0.34551	-0.012109	0.066016	-22.119	182.089	936.31064	-0.51621	0.2918	-1.0269
0.046	-26.3	23.84614	35.307	0.15039	0.067383	-0.0039063	-68.984	-152.007	1576.295	-0.82568	1.4028	-2.0659	-29.319	26.658	34.782	0.34219	-0.00078125	0.060645	-87.08	114.7793	1102.11538	-0.67266	0.47989	-1.1686
0.048	-37.837	6.8394	31.8189	0.14111	0.083008	-0.0048828	-19.735	-153.612	1577.006	-0.86523	1.4316	-2.1035	-35.798	4.12	9.7074	0.33789	0.0078125	0.060059	-153.485	105.903	1213.241	-0.83838	0.68994	-1.3228
0.05	-19.297	-0.623900000000001	12.979	0.13672	0.098633	-0.0092773	-65.445	-208.034	1623.621	-0.94336	1.5059	-2.1719	-48.703	7.1879	22.09005	0.34043	0.012305	0.058691	-144.866	26.6375	1282.799	-1.0184	0.91563	-1.4797
0.052	-26.015	3.4601	30.333	0.13037	0.11035	-0.015137	-63.258	-171.711	1621.112	-0.99609	1.5713	-2.208	-60.39	-19.883	12.8039	0.34385	0.014063	0.053711	-104.365	-2.523	1325.315	-1.2046	1.1661	-1.6503
0.054	-44.567	4.617	33.397	0.12354	0.12842	-0.023926	-68.216	-156.814	1600.0392	-1.0327	1.6372	-2.2339	-76.2908	-6.276	30.869	0.34736	0.016797	0.050196	-203.003	-79.923	1392.435	-1.3882	1.4364	-1.8175
0.056	-38.705	23.821	38.387	0.11963	0.13916	-0.03003	-117.683	-144.534	1600.151	-1.064	1.7134	-2.2612	-64.3377	-16.497	9.9834	0.34717	0.016504	0.042969	-177.577	-92.325	1402.577	-1.529	1.7128	-1.9618
0.058	-30.175	26.1868	50.521	0.1167	0.15576	-0.038574	-94.92	-98.244	1560.297	-1.0679	1.7485	-2.2612	-80.376	-1.3429	19.871	0.34424	0.012695	0.032227	-185.23	-202.101	1304.947	-1.6284	1.9771	-2.0776
0.06	-43.1444	18.2065	38.6592	0.11621	0.17529	-0.055664	-98.596	-115.9658	1565.5241	-1.0757	1.7876	-2.2642	-74.2511	0.00999999999999801	-1.506	0.33428	0.016211	0.023047	-184.947	-249.658	1247.237	-1.67	2.1722	-2.1634
0.062	-36.005	-4.0856	43.175	0.11377	0.18164	-0.066406	-116.791	-91.489	1547.2709	-1.0786	1.7974	-2.2505	-85.5004	-6.512	19.2354	0.32578	0.020215	0.016992	-231.022	-323.94	1176.882	-1.6389	2.2634	-2.1999
0.064	-35.123	-6.41	61.314	0.10498	0.18213	-0.10791	-78.417	-45.957	1559.2	-1.0801	1.791	-2.2285	-69.9987	8.486	19.4256	0.31445	0.02373	0.002539	-183.755	-308.35	1150.493	-1.5339	2.2287	-2.2019
0.066	-35.802	-14.746	63.472	0.095459	0.18164	-0.14331	-68.329	-35.5586	1574.89	-1.0913	1.77	-2.189	-76.72069	0.8814	-1.4213	0.2958	0.033203	-0.010645	-175.238	-285.46	1075.119	-1.3539	2.0289	-2.167
0.068	-43.2269	-5.113	62.333	0.083496	0.19189	-0.18555	-57.898	0.629999999999999	1553.1346	-1.104	1.7466	-2.1616	-25.903	13.759	15.4864	0.27881	0.04248	-0.025879	-175.88	-211.09	1051.0941	-1.1426	1.6953	-2.0996
0.07	-53.0962	1.756	68.906	0.060547	0.23633	-0.2251	-60.831	-17.4786	1536.8559	-1.1343	1.6919	-2.1011	-29.579	2.7036	26.537	0.2626	0.055468	-0.042871	-166.399	-193.679	1022.666	-0.98642	1.3189	-2.0169
0.072	-50.119	7.2063	94.696	0.039063	0.25732	-0.25439	-83.298	-6.772	1518.756	-1.1508	1.6529	-2.0601	24.077	21.124	6.591	0.24278	0.070801	-0.058594	-118.529	-162.417	1060.094	-0.87568	0.97431	-1.9499
0.074	-32.856	-7.8502	135.523	0.014648	0.29004	-0.31445	-54.503	-1.1818	1500.036	-1.168	1.6211	-2.0273	7.676	18.849	16.278	0.2248	0.089941	-0.078125	-82.187	-143.768	1059.701	-0.796	0.73525	-1.8906
0.076	-35.221	-9.5195	169.0608	0.0039063	0.30982	-0.37549	-103.89	-39.183	1531.40151	-1.1777	1.6016	-1.9883	18.99	40.934	12.8664	0.20625	0.11329	-0.091992	-60.184	-112.48	1132.7861	-0.75078	0.61172	-1.8722
0.078	-37.72009	0.419600000000001	188.987	-0.01123	0.3252	-0.43408	-103.123	-36.82132	1525.123	-1.1704	1.5962	-1.9692	-6.225	25.903	22.5605	0.19238	0.13916	-0.099121	-61.989	-106.51	1187.559	-0.72607	0.57764	-1.8745
0.08	-42.9509	9.42141	239.247	-0.031738	0.354	-0.52393	-106.56	-76.9239	1533.146	-1.1499	1.5903	-1.9409	28.132	68.233	28.3034	0.18701	0.16446	-0.10625	-82.4795	-148.43	1252.0029	-0.7295	0.6127	-1.8963
0.082	-55.321	28.9129	305.468	-0.057617	0.36768	-0.57813	-122.1973	-78.971	1521.456	-1.1228	1.5744	-1.9177	24.985	49.59	29.2516	0.1833	0.18633	-0.10557	-44.951	-200.528	1260.513	-0.72549	0.69385	-1.9292
0.084	-50.3614	61.3372	373.201	-0.11035	0.39111	-0.69873	-100.004	-39.5883	1487.062	-1.0933	1.5513	-1.8901	45.404	69.398	30.5947	0.18564	0.20039	-0.10401	5.074	-301.8773	1291.741	-0.67783	0.81728	-1.9651
0.086	-29.594	99.4039	431.368	-0.15991	0.42798	-0.79126	-126.7807	-43.111	1495.7261	-1.0483	1.5063	-1.8433	16.054	7.136	73.954	0.19854	0.21348	-0.093945	51.067	-357.045	1330.133	-0.6127	0.94863	-2.0088
0.088	-19.833	117.5882	501.4236	-0.20703	0.46924	-0.88037	-90.681	16.625	1452.9805	-1.0254	1.4805	-1.8262	6.945	7.1544	59.68	0.21338	0.2168	-0.080078	110.144	-414.09	1401.973	-0.54199	1.0405	-2.019
0.09	-22.757	124.6897	556.888	-0.28564	0.52686	-1.0171	-48.746	40.98	1452.1906	-0.98438	1.4277	-1.7891	-11.498	-28.5002	54.761	0.22442	0.21162	-0.064062	68.625	-407.64	1472.249	-0.46094	1.0526	-1.9554
0.092	-31.656	123.5639	669.277	-0.3291	0.55469	-1.0762	-77.452	56.934	1434.13	-0.96924	1.395	-1.7622	14.865	-0.558	47.768	0.23555	0.19912	-0.049024	61.93279	-442.4	1519.699	-0.37197	0.99681	-1.8351
0.094	-28.881	106.539	771.804	-0.40625	0.63965	-1.2109	-29.613	88.9818	1412.474	-0.95166	1.355	-1.7319	-7.882	-32.1086	49.3664	0.24453	0.18779	-0.032227	97.758	-390.565	1579.0436	-0.2794	0.8667	-1.7089
0.096	-3.522	69.923	838.648	-0.46729	0.72412	-1.2876	-42.068	83.096	1393.879	-0.94141	1.3105	-1.6895	-4.124	9.25	48.2899	0.2502	0.17285	-0.015332	67.0979	-354.076	1606.844	-0.18584	0.68555	-1.6058
0.098	14.432	30.201	863.972	-0.51074	0.81885	-1.3433	-41.697	118.266	1340.065	-0.9375	1.2871	-1.6641	-30.994	-22.081	47.989	0.25732	0.15918	-0.003418	51.6	-235.6424	1678.719	-0.097168	0.46729	-1.5522
0.1	4.036	-12.403	904.602	-0.54688	0.95215	-1.375	-29.014	151.66	1316.0324	-0.91797	1.2324	-1.6191	-43.612	24.102	11.4191	0.26719	0.14766	0.0060547	-13.812	-201.958	1701.314	-0.031836	0.28037	-1.5451
0.102	-10.48	-51.602	941.709	-0.55957	1.0176	-1.3887	-49.847	136.758	1290.132075	-0.88916	1.1972	-1.5816	-77.4975	-10.6821	32.6132	0.27256	0.14717	0.0092772	-39.16	-80.498	1721.903	-0.0070312	0.16123	-1.584
0.104	-19.869	-65.24703	975.0615	-0.54834	1.1157	-1.3892	-41.046	130.024	1253.333	-0.86328	1.1533	-1.541	-71.1285	23.3661	43.192	0.2749	0.1499	-0.0024414	-105.274	-56.76	1705.5032	-0.05586	0.15693	-1.6746
0.106	5.46099999999999	-61.45017	1013.247	-0.50781	1.1475	-1.3848	-50.071	92.308	1225.11	-0.82373	1.1001	-1.4839	-67.0576	-20.052	56.885	0.27627	0.17139	-0.009668	-36.659	6.667	1705.87	-0.19961	0.29111	-1.8113
0.108	12.841	-84.273	1019.598	-0.45313	1.1621	-1.377	-45.141	83.2795	1205.5377	-0.79785	1.0781	-1.459	-55.487	21.2409	33.86343	0.2793	0.19482	-0.018555	-29.176	-27.823	1653.386	-0.39063	0.52637	-1.9521
0.11	3.741	-116.465	1053.321	-0.38818	1.147	-1.3687	-13.973	99.8281	1175.1417	-0.76563	1.0254	-1.3926	-75.4964	-23.2363	25.5949	0.28692	0.21514	-0.025586	-24.153	-20.398	1643.33	-0.57793	0.79082	-2.094
0.112	-9.065	-120.504	1078.359	-0.36035	1.1328	-1.3613	-16.116	81.535	1168.525	-0.74854	0.98731	-1.3472	-85.7364	19.5684	15.892	0.28476	0.22657	-0.03711	-35.784	-75.3351	1629.265	-0.72773	1.057	-2.245
0.114	-4.211	-83.587	1059.433	-0.3252	1.1138	-1.3198	1.707	98.319	1132.961	-0.73096	0.95361	-1.3022	-84.121	-16.91833	16.0584	0.2793	0.24336	-0.05625	-32.014	-67.43	1700.8887	-0.83555	1.2937	-2.3762
0.116	5.025	-59.693	1044.987	-0.32324	1.112	-1.2781	-16.535	92.824	1103.853	-0.7002	0.91211	-1.2422	-72.5491	23.6922	-5.6395	0.27197	0.25088	-0.07334	-25.127	-120.311	1725.043	-0.90284	1.4624	-2.4544
0.118	19.114	-23.815	1044.047	-0.33447	1.1138	-1.23	-8.147	86.771	1080.229	-0.68164	0.8877	-1.2129	-44.813	-6.488	-3.2567	0.25977	0.25879	-0.099609	-8.153	-120.264	1777.729	-0.9375	1.5625	-2.5059
0.12	3.928	-10.537	1016.297	-0.34131	1.1157	-1.1851	21.422	128.656	1019.077	-0.65088	0.84814	-1.1499	-31.296	8.539	-5.768	0.24971	0.27432	-0.12002	-35.768	-148.498	1793.909	-0.94698	1.5858	-2.5223
0.122	-8.021	-13.175	996.48502	-0.34131	1.1274	-1.1812	-14.736	135.696	979.258	-0.61914	0.82031	-1.0991	-18.483	-43.54357	20.5924	0.23799	0.29053	-0.14619	-53.2217	-136.179	1792.219	-0.94326	1.5724	-2.5225
0.124	-0.603999999999999	-11.603	989.781	-0.33936	1.145	-1.1772	-11.39	174.617	928.2023	-0.58984	0.79492	-1.0547	-16.41	-13.836	28.4884	0.2333	0.30576	-0.18096	-83.933	-132.373	1782.152	-0.94248	1.5317	-2.5148
0.126	27.062	5.36799999999999	992.289	-0.34619	1.1575	-1.1824	-23.256	197.542	876.195	-0.54883	0.76367	-0.98926	2.016	-26.349	35.7519	0.21777	0.30879	-0.2251	-105.91	-116.052	1785.91	-0.95859	1.4641	-2.4902
0.128	14.939	-12.63	1022.7623	-0.36621	1.1738	-1.1816	-39.527	173.669	845.2797	-0.52148	0.74805	-0.95117	-19.893	32.564	122.134	0.20215	0.30811	-0.27002	-64.644634	-88.365	1756.693	-0.98193	1.3833	-2.4565
0.13	-6.051	-51.072	1035.264	-0.38965	1.1914	-1.1719	-17.115	177.408	803.096	-0.47168	0.71533	-0.88428	22.178	31.7105	145.4617	0.16309	0.27031	-0.36758	7.281	-65.402	1713.776	-0.99794	1.3076	-2.416
0.132	-2.91	-109.532	1030.911	-0.396	1.2026	-1.1733	-33.354	158.79326	781.8087	-0.42553	0.69263	-0.83374	17.209	113.255	223.4048	0.11407	0.22236	-0.49687	12.061	-5.354	1682.898	-1.0204	1.2669	-2.3886
0.134	-17.609	-135.837	1060.794	-0.40137	1.1997	-1.1909	-25.991	152.253	740.3679	-0.37939	0.66455	-0.78271	-38.771	175.183	268.119	0.034766	0.19463	-0.64297	-7.873	23.471	1644.508	-1.0501	1.2747	-2.3761
0.136	-29.214	-166.799	1118.798	-0.40039	1.1563	-1.2422	-21.077	169.115	674.534	-0.31885	0.61572	-0.71143	-52.108	241.408	407.720793	-0.060936	0.2169	-0.78252	74.7212	108.2153	1633.241	-1.0803	1.3252	-2.3803
0.138	-40.706	-172.561	1164.0462	-0.39941	1.1323	-1.271	-13.345	151.9106	653.44289	-0.2915	0.58643	-0.67676	-23.5175	227.743	549.8331	-0.17334	0.27881	-0.92725	69.712	132.5263	1594.075	-1.0991	1.4009	-2.3843
0.14	-44.827	-176.492	1180.043	-0.41064	1.1274	-1.3452	-15.135	161.303	587.648	-0.2373	0.53125	-0.60352	-10.107	217.101	704.305	-0.27656	0.36387	-1.0694	85.2819	184.1287	1582.82	-1.1239	1.4637	-2.384
0.142	-39.5	-182.779	1188.19	-0.43555	1.1497	-1.3845	-8.27200000000001	145.997	575.5513	-0.19629	0.4856	-0.55103	-9.983	196.494	835.656	-0.36709	0.47041	-1.1909	86.705	151.835	1581.713	-1.1422	1.5139	-2.3676
0.144	-47.471	-186.962	1199.691	-0.46875	1.1875	-1.418	10.379	94.822	540.429	-0.15479	0.43604	-0.49561	-28.623	209.299	1062.094	-0.44834	0.56767	-1.3233	83.721	172.321	1580.318	-1.1519	1.5338	-2.3383
0.146	-43.923	-150.5248	1232.107	-0.521	1.249	-1.4619	-15.23	107.218	494.68587	-0.088867	0.37158	-0.43115	-4.343	162.771	1232.7	-0.52724	0.64228	-1.4667	55.711	157.665	1576.57	-1.1398	1.5184	-2.2922
0.148	-24.866	-117.456	1277.386	-0.53418	1.2813	-1.4746	-34.379	81.932	476.853	-0.05957	0.33594	-0.39648	5.309	90.17	1361.94	-0.60547	0.71777	-1.6094	72.365	171.543	1606.897	-1.104	1.4907	-2.2397
0.15	-31.1899	-93.462	1287.73	-0.53516	1.3203	-1.4941	2.842	80.62	418.58	0.0087891	0.26367	-0.33008	-13.188	9.754	1430.6908	-0.65205	0.83955	-1.71	56.353	130.98	1592.44	-1.0495	1.4397	-2.188
0.152	-49.993	-79.73	1292.761	-0.51074	1.3237	-1.5034	-7.974	106.8702	363.0424	0.075195	0.19385	-0.26514	-72.4795	-107.336	1497.674	-0.69092	0.99814	-1.7784	57.563	107.281	1610.21	-0.9918	1.3863	-2.1363
0.154	-59.9926	-56.183	1282.181	-0.48486	1.3027	-1.5098	5.112	95.02024	310.759	0.10107	0.15479	-0.23779	-40.3936	-179.349	1566.375	-0.71201	1.1794	-1.8003	37.2158	70.168	1581.2185	-0.95234	1.3399	-2.0828
0.156	-35.309	-38.142	1275.8113	-0.45459	1.252	-1.5293	5.377	111.707	259.6727	0.16016	0.083984	-0.1875	-23.965	-267.359	1613.66	-0.69853	1.3636	-1.7923	38.375	58.407	1590.644	-0.92471	1.3019	-2.0321
0.158	-37.666	-18.261	1284.095	-0.44971	1.229	-1.5522	-21.057	95.0905	239.06862	0.20264	0.03833	-0.14526	6.879	-286.739	1573.538	-0.67383	1.5039	-1.7559	44.2939	90.832	1570.224	-0.90625	1.2813	-1.9932
0.16	-38.225	-13.085	1295.0887	-0.43408	1.1836	-1.6055	-3.47	86.447	214.76831	0.23828	-0.0092773	-0.10596	23.75	-345.375	1515.39	-0.6374	1.5536	-1.7277	44.137	115.196	1536.366	-0.8791	1.2721	-1.9565
0.162	-65.9643	-24.742	1301.306	-0.42188	1.1633	-1.658	12.087	133.756	187.997	0.28027	-0.068359	-0.062988	38.361	-356.226	1444.236	-0.59492	1.5321	-1.7107	23.935	154.761	1452.355	-0.85557	1.2525	-1.9175
0.164	-70.683	-60.788	1330.893	-0.41113	1.1509	-1.7163	5.999	90.912	159.7483	0.29297	-0.096191	-0.043945	22.926	-390.67	1392.209	-0.56523	1.4258	-1.7092	-11.836	157.002	1422.2102	-0.82236	1.2216	-1.8608
0.166	-70.135	-94.5103	1365.586	-0.40283	1.1782	-1.7866	19.294	94.2645	117.603	0.31641	-0.14844	-0.0053711	34.264	-308.967	1306.748	-0.56621	1.2881	-1.7084	-20.854	217.7313	1390.075	-0.79414	1.1778	-1.7941
0.168	-31.4346	-110.6184	1367.162	-0.40332	1.2012	-1.8164	-1.92	75.473	108.197	0.3313	-0.18579	0.01001	75.368	-265.863	1252.441	-0.59375	1.1602	-1.6973	-42.33	250.034	1386.138	-0.75049	1.1216	-1.7261
0.17	-28.093	-116.5771	1362.717	-0.41016	1.2754	-1.875	-12.697	35.3581	87.7505	0.34766	-0.21777	0.023438	83.184	-145.252	1201.3164	-0.64814	1.0534	-1.7222	-51.2273	328.571	1353.457	-0.69521	1.0599	-1.6419
0.172	-34.3636	-108.6999	1343.878	-0.41944	1.3316	-1.9092	-14.646	73.9	79.3695	0.34766	-0.25537	0.041016	61.428	-132.346	1199.1691	-0.68955	1.0114	-1.7874	-70.6664	331.025	1302.623	-0.63838	0.97822	-1.5676
0.174	-49.9196	-95.2746	1321.784	-0.42822	1.3828	-1.9277	-1.666	29.9474	85.726	0.34131	-0.27979	0.046875	39.859	-66.29	1170.816	-0.68916	1.0845	-1.8425	-52.34045	352.417	1232.8087	-0.57509	0.88837	-1.4904
0.176	-46.6026	-110.0579	1323.908	-0.43848	1.4375	-1.9434	-22.154	24.915	63.4185	0.33594	-0.31006	0.048828	11.951	-148.702	1172.082	-0.67002	1.2412	-1.8779	-78.6397	284.447	1158.827	-0.51533	0.79404	-1.4212
0.178	-51.6446	-111.4468	1347.188	-0.43945	1.457	-1.9473	-44.742	30.3882	56.045	0.32325	-0.32837	0.047119	49.51358	-101.18	1203.746	-0.63867	1.418	-1.8984	-54.254	272.4901	1125.4841	-0.45508	0.69531	-1.3457
0.18	-43.1832	-100.0191	1365.277	-0.42725	1.4771	-1.937	-15.153	-5.525	37.23	0.31006	-0.34375	0.04248	81.944	-173.483	1305.2015	-0.59033	1.5608	-1.9084	-34.981	218.428	1101.3336	-0.4129	0.60753	-1.2739
0.182	-49.909	-63.70389	1345.751	-0.41968	1.481	-1.9214	-34.106	47.663	18.07	0.28906	-0.35742	0.035645	76.731	-95.529	1349.1211	-0.53467	1.6528	-1.893	14.457	222.844	1062.6492	-0.36798	0.54142	-1.2045
0.184	-66.038	-36.9722	1315.354	-0.40234	1.4707	-1.9004	-26.183	0.713000000000001	58.546	0.27686	-0.35693	0.029297	71.026	-233.8924	1361.9921	-0.47647	1.6654	-1.8477	-46.791	188.832	1001.635	-0.33009	0.49181	-1.1361
0.186	-93.21	-9.2594	1287.053	-0.396	1.4399	-1.855	-5.75700000000001	2.6409	43.49	0.24854	-0.35156	0.013672	42.563	-284.512	1412.495	-0.43457	1.6006	-1.7936	-20.606	202.842	996.283	-0.29327	0.46114	-1.0571
0.188	-91.709	19.802	1262.427	-0.39697	1.4146	-1.8257	-40.501	39.6962	43.7372	0.22461	-0.34497	0.00024415	-32.418	-422.557	1501.744	-0.41113	1.4883	-1.7305	-46.251	185.208	932.888	-0.25244	0.43555	-0.98193
0.19	-63.186	7.501	1251.487	-0.38379	1.3613	-1.7852	-15.031	26.11078	31.136	0.19922	-0.32227	-0.024902	-92.221	-414.939	1532.2258	-0.4126	1.3452	-1.6755	-11.159	209.976	939.145	-0.19548	0.40595	-0.91276
0.192	-63.22	-11.996	1237.722	-0.36718	1.3254	-1.7566	-24.1	71.787	14.568	0.15527	-0.28955	-0.060547	-70.129	-450.897	1623.434	-0.42881	1.2122	-1.6319	-29.526	244.6912	851.594	-0.12904	0.37595	-0.82863
0.194	-84.221	-24.234	1245.871	-0.35107	1.2856	-1.7329	-26.614	54.88765	28.6079	0.14014	-0.26709	-0.07666	-89.491	-359.707	1660.171	-0.42763	1.0946	-1.5972	-34.337	258.975	794.0935	-0.06537	0.33882	-0.7329
0.196	-76.66	-25.078	1256.699	-0.34473	1.2583	-1.7007	-32.743	43.513	18.0608	0.10303	-0.21191	-0.11035	-134.573	-352.164	1664.378	-0.43301	1.0212	-1.5856	-51.492	287.293	707.437	-0.00024238	0.28715	-0.64975
0.198	-80.551	-33.06	1253.126	-0.3418	1.2461	-1.6895	-45.863	57.153	13.461	0.06665	-0.16626	-0.14331	-93.956	-236.5616	1655.26	-0.46045	1.0093	-1.5991	-38.994	266.387	640.561	0.060059	0.22168	-0.57227
0.2	-84.616	-41.038	1270.358	-0.34912	1.229	-1.6772	-23.766	-2.8608	40.462	0.035645	-0.12109	-0.16797	-80.449	-207.112	1696.905	-0.51201	1.063	-1.6699	-40.992	289.66	544.573	0.10715	0.14885	-0.48919
0.202	-73.226	-59.0183	1253.036	-0.35766	1.2122	-1.659	-13.961	14.99894	32.8848	-0.0048828	-0.058105	-0.20557	-130.275	-107.107	1677.589	-0.56279	1.1532	-1.7756	-38.256	267.5883	497.0143	0.15474	0.077863	-0.40795
0.204	-78.022	-67.358	1242.532	-0.37012	1.1953	-1.6387	-25.455	3.04	46.628	-0.019043	-0.029785	-0.21729	-116.852	-50.077	1696.733	-0.61084	1.2583	-1.898	-33.466	289.0668	405.34	0.19265	0.010709	-0.32798
0.206	-97.464	-61.08	1238.023	-0.37598	1.1797	-1.6172	-18.15	-12.5021	27.0796	-0.046875	0.022461	-0.23975	-147.094	43.907	1698.449	-0.64639	1.3767	-2.0159	-76.39	248.0529	361.519	0.22054	-0.04476	-0.24792
0.208	-93.192	-34.418	1226.015	-0.37695	1.1699	-1.6016	-5.82	24.5413	13.8273	-0.058838	0.052735	-0.25293	-154.716	85.657	1718.963	-0.67188	1.4902	-2.125	-30.479	262.677	305.619	0.23633	-0.094727	-0.1626
0.21	-82.216	-22.0167	1213.635	-0.36523	1.1504	-1.5762	9.807	-17.638	35.5084	-0.063965	0.080566	-0.2627	-164.244	103.891	1716.834	-0.69424	1.587	-2.2314	-72.248	209.734	279.9131	0.25384	-0.13891	-0.09373
0.212	-83.473	-9.7719	1188.711	-0.35742	1.1418	-1.5568	5.446	1.103	44.3499	-0.058105	0.10059	-0.26611	-168.469	49.499	1685.693	-0.72344	1.6785	-2.3215	-55.771	200.355	236.1059	0.26745	-0.18719	-0.030576
0.214	-90.591	2.4967	1160.531	-0.34521	1.1294	-1.5327	19.026	-7.535	72.082	-0.053223	0.10742	-0.2666	-161.842	14.615	1693.3295	-0.7539	1.7832	-2.3965	-102.265	134.002	201.044	0.27353	-0.23178	0.016421
0.216	-70.284	30.607	1139.348	-0.33301	1.1143	-1.5078	24.329	-25.7861	58.118	-0.030762	0.11426	-0.26953	-155.617	-52.618	1742.232	-0.78125	1.8854	-2.4576	-103.4126	152.862	168.812	0.27558	-0.27251	0.054409
0.218	-64.826	60.66	1132.555	-0.32471	1.1016	-1.4922	-16.165	29.9216	28.0565	-0.016358	0.10888	-0.25024	-134.085	-100.304	1801.651	-0.79688	1.9844	-2.498	-132.674	116.983	153.283	0.27148	-0.30029	0.082031
0.22	-45.20483	96.342	1130.078	-0.31396	1.0796	-1.4683	-24.798	3.0213	25.1241	-0.0029297	0.10352	-0.24365	-58.887	-147.972	1819.749	-0.80537	2.0634	-2.5206	-113.4766	95.01	172.03	0.25122	-0.30662	0.10405
0.222	-41.4741	92.025	1133.809	-0.31348	1.0615	-1.4467	-23.859	18.6957	12.1164	0.015625	0.1001	-0.22461	-45.61	-199.327	1834.927	-0.80977	2.1098	-2.5426	-113.228	26.626	151.758	0.21558	-0.30606	0.11127
0.224	-34.114	72.087	1112.72	-0.31152	1.0454	-1.4194	-24.809	38.227	9.6555	0.016602	0.093262	-0.21436	-52.414	-213.04	1807.44	-0.80586	2.1301	-2.5519	-83.988	-4.554	137.242	0.16283	-0.28773	0.1098
0.226	-46.6644	55.3111	1087.4533	-0.30957	1.0244	-1.3867	8.466	5.60086	13.7647	0.025879	0.084473	-0.19385	-49.038	-218.978	1777.46	-0.79229	2.1323	-2.5579	-77.1313	-19.694	78.04	0.095809	-0.25537	0.092342
0.228	-43.97094	57.1794	1064.8079	-0.31152	1.0186	-1.3701	-19.989	28.393	9.376	0.031006	0.079345	-0.1748	27.2643	-150.574	1744.888	-0.78125	2.1211	-2.5645	-58.4645	-1.203	61.24	0.013184	-0.21045	0.067383
0.23	-44.1634	59.8682	1062.242	-0.30762	0.99561	-1.3315	-27.045	0.122	41.753311	0.035156	0.072266	-0.15723	30.8716	-91.077	1789.543	-0.77598	2.0998	-2.5623	-42.48	14.06	28.945	-0.095288	-0.14194	0.029951
0.232	-44.0465	60.7236	1056.898	-0.30665	0.97876	-1.2961	-14.666	-7.882	28.09177	0.038574	0.071777	-0.13574	17.3542	2.471	1742.245	-0.76553	2.0743	-2.5409	-0.750999999999998	28.7626	20.4889	-0.21627	-0.050643	-0.023779
0.234	-54.4136	43.951	1045.886	-0.30225	0.95947	-1.2651	-21.327	34.6331	-1.861	0.043457	0.071289	-0.12793	-14.8252	9.422	1744.511	-0.73819	2.0524	-2.5112	4.574	27.9619	-19.147	-0.34695	0.045193	-0.094408
0.236	-44.1479	37.8653	1012.109	-0.28662	0.92627	-1.2202	1.24	-2.679	12.2304	0.047363	0.064941	-0.10645	-11.248	85.487	1666.9946	-0.69951	2.0157	-2.4808	-16.737	11.94	7.2447	-0.46786	0.15182	-0.16088
0.238	-29.843	36.70068	988.164	-0.28418	0.91016	-1.1934	-20.633	10.6296	9.6945	0.044434	0.057129	-0.096926	-54.968	88.94	1612.242	-0.65381	1.9673	-2.4429	-29.229	44.1652	-21.2534	-0.56836	0.24805	-0.22314
0.24	-45.921	47.9822	980.812	-0.27246	0.86914	-1.1416	-43.167	-23.9868	50.763	0.04834	0.053711	-0.084961	-63.3039	180.779	1545.321	-0.60254	1.9139	-2.3901	-19.474	46.5804	38.139	-0.64314	0.32956	-0.27447
0.242	-23.214	71.634	968.999	-0.26538	0.83301	-1.1054	-30.007	-38.445	34.529	0.055176	0.047852	-0.07373	-37.269	165.603	1565.6409	-0.56514	1.8513	-2.3331	-4.126	95.302	11.6787	-0.69481	0.39746	-0.31781
0.244	-12.577	95.617	925.031	-0.25537	0.79834	-1.064	-43.052	8.6532	21.13911	0.057129	0.044434	-0.061035	-25.2248	199.078	1499.199	-0.53819	1.7681	-2.2788	7.876	53.008	41.4739	-0.73204	0.45072	-0.36009
0.246	-20.831	97.514	872.9645	-0.23975	0.74658	-1.0132	-30.617	-29.136	36.302	0.063965	0.046387	-0.058594	-64.064	102.508	1506.211	-0.51172	1.681	-2.2106	16.142	54.687	30.3951	-0.76017	0.49391	-0.39952
0.248	-51.5542	96.868	877.514	-0.23584	0.7251	-0.98779	-34.335	13.0845	17.2019	0.065918	0.043702	-0.052247	-87.326	99.485	1477.507	-0.48975	1.6021	-2.146	34.509	-14.2546	23.665	-0.77686	0.53564	-0.4292
0.25	-30.362	105.491	853.697	-0.22705	0.67529	-0.94287	-46.451	20.1947	10.118	0.067383	0.043945	-0.044434	-69.23	16.2729	1501.4046	-0.4627	1.5314	-2.0807	45.437	11.327	4.215	-0.78598	0.58457	-0.44245
0.252	-49.42	127.438	825.449	-0.2207	0.64477	-0.90844	-3.574	-1.52021	4.6274	0.071289	0.04834	-0.040527	-103.474	86.428	1522.484	-0.43496	1.4684	-2.0168	42.381	-22.031	17.789	-0.78398	0.63793	-0.44206
0.254	-44.228	143.001	803.632	-0.21289	0.6167	-0.87305	-13.545	49.247	2.431	0.074707	0.04541	-0.040039	-122.387	68.8025	1507.51	-0.41231	1.4101	-1.9516	48.956	6.981	27.1711	-0.77161	0.68026	-0.44287
0.256	-44.8846	136.336	772.156	-0.19092	0.57666	-0.8335	-4.3	2.353	35.612	0.082031	0.050781	-0.032227	-106.249	138.409	1470.172	-0.39199	1.3623	-1.892	2.453	-29.063	32.142	-0.74813	0.70232	-0.43689
0.258	-30.817	107.832	757.676	-0.17725	0.55518	-0.81006	4.888	15.28936	37.101	0.088623	0.055175	-0.031739	-100.076	81.079	1498.651	-0.36572	1.3228	-1.8296	10.775	-6.698	28.118	-0.71191	0.71387	-0.42578
0.26	-43.989	87.2721	732.802	-0.15479	0.51953	-0.76758	-13.364	40.726	18.69529	0.093262	0.056152	-0.030273	-143.316	117.1602	1470.776	-0.34453	1.2935	-1.7588	-37.993	-17.8668	23.35	-0.66065	0.70776	-0.39589
0.262	-25.508	85.3446	698.5375	-0.13379	0.4978	-0.74194	-2.037	11.52755	14.3747	0.10742	0.047852	-0.020508	-143.079	79.298	1413.705	-0.3253	1.2634	-1.6777	-31.109	24.8092	80.122	-0.60426	0.69032	-0.36097
0.264	-10.057	84.7892	683.167	-0.10742	0.47314	-0.70654	-13.247	58.214	8.501	0.11768	0.044922	-0.015625	-121.789	171.753	1357.701	-0.30928	1.2286	-1.5905	-65.4287	41.263	70.332	-0.54414	0.66221	-0.31684
0.266	-29.733	82.2343	677.937	-0.075195	0.44922	-0.65918	-2.689	15.7294	36.538	0.12549	0.031738	-0.012695	-96.307	175.338	1291.299	-0.2957	1.183	-1.494	-41.959	76.109	93.569	-0.47938	0.62737	-0.26074
0.268	-38.47	70.7751	654.974	-0.05957	0.42871	-0.63867	-8.614	-0.4368	31.118	0.13355	0.016602	-0.0021973	-65.5361	268.03	1241.782	-0.27734	1.123	-1.3955	-78.26086	52.7417	29.321	-0.41309	0.58203	-0.19873
0.27	-12.32	77.3	643.17	-0.024902	0.39551	-0.59326	-9.302	21.8746	8.37	0.14063	0.0039063	0.0029297	-13.623	232.191	1173.119	-0.25674	1.0589	-1.2915	-54.524	30.1929	34.2	-0.34127	0.54253	-0.14476
0.272	-3.436	81.017	610.681	0.0063477	0.36182	-0.54639	-13.813	-25.919	35.346	0.15137	-0.019531	0.0068359	27.809	269.851	1105.1209	-0.23252	1.0017	-1.1972	-53.866	34.054	-6.567	-0.27361	0.48581	-0.086292
0.274	-25.339	89.183	588.743	0.020508	0.34375	-0.52393	-19.992	15.9753	26.1922	0.15869	-0.034668	0.011719	44.523	210.357	1070.4185	-0.21377	0.93799	-1.1015	-66.555	23.4941	23.00428	-0.20445	0.42057	-0.034709
0.276	-10.655	92.7327	557.455	0.059082	0.30127	-0.48193	0.330999999999996	4.384	43.224	0.17188	-0.055664	0.016602	22.224	270.514	1045.1881	-0.18887	0.86699	-1.0063	-51.44	28.192	-7.6463	-0.1425	0.35784	0.0056477
0.278	-21.069	108.7189	521.943	0.084229	0.27392	-0.44727	11.846	1.776	23.6844	0.17945	-0.076172	0.016846	26.47	235.284	1011.535	-0.16357	0.80322	-0.91162	-72.425	-17.0146	31.894	-0.086426	0.2915	0.04248
0.28	-18.112	113.8861	461.6184	0.11328	0.24365	-0.41357	-10.854	37.3521	12.2032	0.18945	-0.094727	0.020508	86.727	278.098	963.149	-0.13184	0.74619	-0.81631	-95.8849	-12.172	19.4271	-0.037781	0.22762	0.058012
0.282	-10.561	105.5579	451.877	0.14648	0.20215	-0.37158	-17.888	-7.52	43.843	0.19678	-0.11426	0.019531	96.3302	206.697	927.502	-0.093164	0.68408	-0.7292	-61.0814	-42.717	50.833	0.011339	0.17313	0.072759
0.284	8.2	97.126	418.421	0.16504	0.18408	-0.35205	-20.263	33.2243	39.8393	0.198	-0.12305	0.024414	93.132	201.013	903.581	-0.044336	0.62549	-0.64326	-18.233	0.5886	37.881	0.053918	0.12391	0.088773
0.286	-8.515	94	394.491	0.20264	0.13965	-0.31543	-20.586	31.9651	32.8136	0.19971	-0.13281	0.026855	59.257	115.901	849.899	0.011914	0.56914	-0.55742	-28.308	-17.79233	60.705	0.097856	0.08564	0.10019
0.288	-15.863	97.524	375.737	0.22681	0.1084	-0.2876	-15.794	11.58363	17.2133	0.19727	-0.13672	0.022461	76.129	126.47	783.19	0.070313	0.5083	-0.46777	-31.676	17.7288	29.019	0.14111	0.053711	0.11035
0.29	-9.142	105.841	354.973	0.24756	0.074707	-0.26123	-32.583	57.894	7.004	0.19678	-0.14355	0.020508	87.1415	110.491	719.723	0.1417	0.43516	-0.37578	-35.718	-23.9031	33.9162	0.18105	0.026467	0.11074
0.292	-16.975	96.477	338.04	0.27441	0.041504	-0.23682	-43.738	0.308999999999999	24.247	0.19043	-0.14844	0.015625	106.602	159.49	660.509	0.21162	0.34658	-0.28369	4.11	16.6208	4.817	0.22012	0.0021498	0.10976
0.294	-24.981	87.993	303.5905	0.29102	0.026855	-0.22461	-41.917	7.5132	34.5651	0.19043	-0.15723	0.016113	125.3489	139.0581	589.155	0.28037	0.24697	-0.18838	63.032	-19.692	11.3088	0.26621	-0.015429	0.10586
0.296	-20.329	64.40335	288.225	0.32275	-0.024902	-0.19482	-34.204	15.3566	30.4905	0.18262	-0.16016	0.0097656	95.105	165.63359	505.618	0.34824	0.13311	-0.10166	46.676	23.577	28.7459	0.30166	-0.027831	0.10195
0.298	-23.053	70.0658	262.659	0.33642	-0.060058	-0.18262	-31.278	-29.74	30.2095	0.17627	-0.16699	0.0083008	44.059	144.4607	433.14	0.4082	0.01709	-0.033203	-3.865	12.323	13.2556	0.33691	-0.043457	0.10059
0.3	-49.2258	58.1653	258.333	0.34668	-0.088379	-0.17578	-15.798	18.9979	40.1556	0.17041	-0.1709	0.0019531	19.569	176.841	410.936	0.46191	-0.092874	0.038379	15.954	58.1978	27.1426	0.36074	-0.056544	0.10254
0.302	-44.393	56.2603	251.861	0.34766	-0.10938	-0.17188	-28.23	-21.7513	53.5446	0.15771	-0.17383	-0.0053711	10.261	188.715	365.363	0.51153	-0.2002	0.10283	27.008	40.4023	-13.1822	0.38281	-0.068555	0.10078
0.304	-28.553	44.05632	236.067	0.33984	-0.11426	-0.16846	-9.543	-8.0496	18.784	0.14844	-0.17773	-0.011963	-1.68600000000001	211.254	300.023	0.55449	-0.31465	0.16651	8.573	45.377	5.0427	0.39766	-0.080665	0.10234
0.306	-32.395	41.5322	218.87	0.32422	-0.11426	-0.17969	-14.76	20.5722	24.3328	0.13721	-0.17871	-0.021484	-24.866	205.339	234.987	0.58545	-0.42177	0.21084	30.594	29.277	0.584999999999997	0.40381	-0.087696	0.1041
0.308	-45.153	39.3118	193.608	0.3164	-0.10376	-0.17773	-5.101	-29.7985	39.519	0.12939	-0.17773	-0.03418	-35.554	185.594	168.636	0.6001	-0.51709	0.24805	27.874	33.779	38.9823	0.40527	-0.095703	0.098633
0.31	-55.3544	53.8661	165.523	0.30615	-0.092773	-0.18408	-6.733	7.9118	35.27561	0.11865	-0.17773	-0.037109	-102.9737	168.993	100.459	0.5959	-0.5918	0.27285	-13.943	33.6954	12.333	0.39804	-0.09541	0.095605
0.312	-40.186	65.728	157.737	0.29639	-0.077148	-0.19434	-0.746000000000002	-12.93002	31.717	0.10791	-0.17627	-0.053223	-102.2944	167.026	101.829	0.56592	-0.63818	0.29395	-16.443	13.6946	36.526	0.40127	-0.089648	0.094239
0.314	-40.045	65.189	126.4069	0.28906	-0.066895	-0.19971	-10.563	-12.4998	19.0487	0.095216	-0.17114	-0.060791	-72.002	155.151	71.7	0.52608	-0.65459	0.29941	-57.014	10.126	25.707	0.39893	-0.082227	0.093067
0.316	-37.003	52.985	116.2841	0.28906	-0.060547	-0.21533	-24.065	44.349	0.934999999999999	0.088867	-0.16504	-0.069824	-51.329	123.693	102.525	0.47862	-0.63154	0.28653	-36.062	-13.032	81.805	0.39912	-0.068067	0.088477
0.318	-34.642	58.56	118.14	0.28076	-0.050293	-0.22242	-6.048	-7.7826	31.114	0.071777	-0.1499	-0.078613	-39.891	88.196	125.217	0.42432	-0.58447	0.26416	-21.056	11.27	51.1816	0.39795	-0.056152	0.086914
0.32	-26.528	56.4	102.299	0.27246	-0.041504	-0.23389	6.393	36.98	18.0961	0.067871	-0.14209	-0.093262	-43.471	26.0534	109.218	0.37148	-0.52403	0.22334	-38.935	-4.414	57.038	0.39053	-0.04961	0.089648
0.322	-40.035	63.146	98.625	0.25342	-0.032227	-0.25	-5.48	14.9283	7.2634	0.057617	-0.1333	-0.10986	-45.63	15.883	83.459	0.31397	-0.44717	0.17276	-84.1039	34.8688	21.035	0.38281	-0.040235	0.083399
0.324	-21.27	63.828	94.491	0.2417	-0.023926	-0.26025	3.695	-14.7856	11.3946	0.059082	-0.13086	-0.11547	-34.716	-20.885	90.714	0.25146	-0.35732	0.11025	-64.471	-1.98236	45.22	0.37344	-0.033203	0.083008
0.326	-42.075	66.42	92.292	0.2251	-0.0048828	-0.27588	-15.179	30.964	13.1996	0.0625	-0.12891	-0.12646	-58.7022	-2.823	71.6398	0.17979	-0.25986	0.038672	-82.5802	26.8805	27.061	0.36475	-0.028418	0.078613
0.328	-25.937	49.756	70.3256	0.20971	0.0056152	-0.2876	1.021	-11.2512	28.125	0.070313	-0.12744	-0.13477	-19.789	-9.862	79.594	0.10254	-0.16064	-0.043457	-46.96	-15.9815	31.841	0.35352	-0.026367	0.077148
0.33	-28.155	27.1069	75.138	0.19971	0.012207	-0.2959	3.938	23.7665	0.5961	0.068848	-0.13086	-0.14355	12.012	32.255	45.516	0.025977	-0.06533	-0.13047	-54.205	21.0488	25.429	0.33555	-0.020899	0.071191
0.332	6.885	18.5778	61.973	0.19385	0.027344	-0.30371	-6.927	21.6735	8.3218	0.072754	-0.13037	-0.15088	19.77	10.021	33.8103	-0.049511	0.029687	-0.2209	-75.189	7.241	56.4693	0.31993	-0.012305	0.064844
0.334	-38.426	30.658	56.145	0.18945	0.031738	-0.30908	-19.06	-32.258	27.249	0.06958	-0.13501	-0.16137	28.379	38.53604	25.3967	-0.12099	0.12305	-0.30059	-76.4992	54.525	45.2	0.29922	-0.0072265	0.055078
0.336	-17.542	31.514	68.455	0.18115	0.038574	-0.31641	-24.211	15.708	75.668	0.071289	-0.1333	-0.16895	-0.689999999999998	7.378	28.6813	-0.19043	0.20976	-0.38828	-48.47	24.327	26.876	0.27822	0.0019531	0.049707
0.338	-17.253	31.538	62.169	0.17504	0.046143	-0.30908	-7.942	-17.9339	99.191	0.065918	-0.14063	-0.19434	12.016	71.534	13.279	-0.25049	0.30225	-0.47998	-25.08	36.884	26.6744	0.25635	0.014648	0.037109
0.34	-16.911	22.3183	43.054	0.16504	0.050293	-0.30127	-37.009	13.98902	103.3121	0.059082	-0.14844	-0.2124	37.999	43.585	30.711	-0.29932	0.38887	-0.56406	-29.811	-6.24645	13.4765	0.23584	0.025879	0.032617
0.342	-35.576	19.0465	55.199	0.16162	0.047852	-0.29346	10.468	66.976	115.322	0.027832	-0.16016	-0.2627	51.356	62.682	25.7432	-0.33477	0.47305	-0.63672	0.403000000000006	-1.4339	36.848	0.2126	0.041894	0.022266
0.344	-11.249	31.96205	55.254	0.16113	0.051758	-0.29004	29.62123	42.4998	189.7713	-0.020264	-0.13256	-0.28833	71.5533	13.4527	56.076	-0.35117	0.54492	-0.69141	9.583	-11.8391	6.544	0.18838	0.050488	0.0058594
0.346	-22.69	52.523	49.765	0.1543	0.040527	-0.26807	-30.3132	102.419	228.481	-0.081543	-0.091309	-0.32373	36.995	56.841	19.964	-0.33965	0.60381	-0.72998	16.515	-1.7598	20.4766	0.16406	0.058105	-0.0016602
0.348	-46.29479	60.075	30.891	0.14843	0.033447	-0.25537	-17.564	75.393	288.0907	-0.1875	-0.016113	-0.38867	9.511	8.52812	16.081	-0.30713	0.63135	-0.7417	21.807	-2.5985	-11.6212	0.14355	0.068359	-0.0092773
0.35	-40.319	40.599	30.975	0.13623	0.02832	-0.23877	19.277	62.886	366.2635	-0.24609	0.021973	-0.43652	-24.209	35.046	14.402	-0.2626	0.62226	-0.74414	37.348	-13.1273	56.31	0.12725	0.07207	-0.01875
0.352	-42.417	40.647	21.904	0.11865	0.023438	-0.22705	17.086	130.46236	443.1577	-0.34424	0.11816	-0.50635	-27.558	-48.611	62.4879	-0.20146	0.58174	-0.7206	28.881	-1.582	24.176	0.11592	0.076758	-0.025684
0.354	-49.517	24.5626	27.1867	0.10547	0.024414	-0.21924	8.307	99.378	556.749	-0.4231	0.198	-0.56177	-39.038	-26.0293	68.1421	-0.13545	0.50049	-0.67217	28.803	3.1909	61.134	0.10303	0.078711	-0.029981
0.356	-45.5474	34.4169	23.7255	0.078125	0.033691	-0.20996	3.67400000000001	125.3364	567.254	-0.50977	0.27148	-0.62695	-31.148	-84.744	40.373	-0.071386	0.3834	-0.60489	1.159	32.5034	21.4431	0.093945	0.078613	-0.028613
0.358	-26.747	39.212	29.1805	0.055908	0.049317	-0.20215	-10.367	98.51209	609.073	-0.62793	0.36914	-0.70898	-61.3561	-43.261	18.0362	-0.015137	0.24805	-0.5332	2.878	11.924	29.4129	0.085449	0.083984	-0.03418
0.36	-35.627	39.377	44.458	0.032227	0.061523	-0.19189	-36.347	51.097	716.79	-0.69287	0.42041	-0.75146	-102.034	-78.094	32.648	0.036523	0.11748	-0.44434	-1.219	32.872	7.553	0.077832	0.083789	-0.033203
0.362	-49.0819	15.2353	35.266	0.015625	0.080566	-0.18848	-6.48199999999999	62.348	804.8092	-0.83154	0.52979	-0.84717	-117.548	-1.411	24.9575	0.081542	-0.0052734	-0.36123	12.015	3.135	24.0461	0.07334	0.089453	-0.031152
0.364	-48.3625	11.6716	38.058	0.0053711	0.085938	-0.18359	-31.868	-9.32351	898.61	-0.93165	0.6084	-0.92383	-80.035	-1.261	10.6695	0.11592	-0.10293	-0.28467	-6.43	32.1183	-10.608	0.067871	0.091406	-0.028027
0.366	-37.788	5.1127	34.7552	-0.012207	0.098145	-0.16943	-52.228	-25.083	914.4557	-1.0234	0.69141	-1.0049	-52.36	69.3455	29.4327	0.13682	-0.17803	-0.22217	-14.678	19.5911	27.275	0.062207	0.098047	-0.024414
0.368	-43.5049	14.486	35.03767	-0.015136	0.1062	-0.1648	-46.446	-68.65199	938.9382	-1.1128	0.79736	-1.0913	-33.235	12.196	31.1731	0.1416	-0.22217	-0.16504	-13.558	61.9644	24.99	0.064941	0.10498	-0.014648
0.37	-58.8749	4.6594	37.006	-0.020996	0.10791	-0.14648	-47.657	-139.239	984.358	-1.1519	0.85205	-1.1313	-67.1284	32.015	42.9415	0.13868	-0.2376	-0.12158	-47.921	34.52077	40.1154	0.066993	0.10811	-0.0057616
0.372	-41.318	8.8819	49.3004	-0.018555	0.10498	-0.13232	-27.632	-100.1462	990.134	-1.1948	0.9458	-1.1831	-92.374	-4.977	28.4264	0.12793	-0.2334	-0.093359	-42.338	54.8436	55.978	0.073731	0.11123	0.0043946
0.374	-31.632	4.2457	29.3545	-0.019043	0.104	-0.11572	-0.966999999999999	-129.56	981.513	-1.1961	0.99145	-1.2028	-74.148	34.7542	-16.823782	0.10215	-0.20137	-0.081641	-68.893	9.176	53.104	0.080762	0.11162	0.0079102
0.376	-18.509	3.9251	30.2855	-0.020508	0.095215	-0.09668	-27.76	-137.309	928.3626	-1.1836	1.0156	-1.2129	-41.08	21.8774	-10.0787	0.075	-0.15264	-0.071484	-89.7907	25.9969	47.6483	0.088867	0.11426	0.016504
0.378	-25.751	13.3296	43.636	-0.015136	0.083984	-0.078369	-80.5398	-136.364	919.812	-1.1479	1.0132	-1.2241	-26.153	37.835	-5.608	0.046875	-0.095703	-0.067383	-74.678	-6.588	31.872	0.10059	0.11523	0.022949
0.38	-8.937	27.521	35.0791	-0.0097656	0.064941	-0.061523	-72.832	-179.776	941.662	-1.125	0.99805	-1.2285	-39.177	4.2454	-16.03835	0.018262	-0.032519	-0.071777	-81.166	7.26049	36.604	0.11358	0.12442	0.025
0.382	-17.167	30.726	31.5897	9.541e-15	0.045898	-0.044922	-61.043	-136.987	894.859	-1.0796	0.95557	-1.231	-15.592	25.239	-8.143	-0.0041991	0.029199	-0.079102	-66.1194	-5.42319	12.474	0.12188	0.1417	0.028711
0.384	-5.918	32.208	32.44	0.0053711	0.03418	-0.035645	-76.964	-150.933	877.27924	-1.0466	0.91235	-1.238	-15.815	3.317	12.1808	-0.019043	0.075684	-0.083008	-64.793	4.0995	49.441	0.13086	0.15928	0.024805
0.386	-25.175	17.8195	36.5641	0.013184	0.0078125	-0.023926	-69.607	-154.485	858.916	-1.0195	0.87109	-1.2402	0.911000000000001	9.985	52.146	-0.02793	0.11543	-0.086328	-43.517	-11.3214	37.854	0.13076	0.17676	0.022852
0.388	-22.112	7.7354	28.823	0.019775	-0.0048826	-0.015381	-84.13	-128.602	856.215	-0.99219	0.81836	-1.2363	26.619	-6.415	81.155	-0.033203	0.13916	-0.077148	-29.327	0.0490000000000013	60.886	0.12988	0.19287	0.017578
0.39	-14.199	-5.9462	30.4856	0.024414	-0.020508	-0.01123	-75.105	-159.527	892.67	-0.98926	0.7998	-1.2344	52.642	0.5285	56.8308	-0.034766	0.15098	-0.061914	-32.1	16.8538	21.4731	0.11865	0.2042	0.0037109
0.392	-10.921	5.384	18.6778	0.039063	-0.038574	-0.0078125	-41.043	-117.703	916.92	-0.96436	0.78369	-1.2397	83.942	0.720000000000001	32.717	-0.027735	0.15694	-0.045215	-25.606	31.316	46.279	0.10254	0.22636	-0.0085938
0.394	-23.714	12.5041	24.5566	0.04248	-0.052246	-0.014648	-47.161	-156.491	973.1661	-0.948	0.79029	-1.2478	52.893	7.7488	37.319	-0.016797	0.15146	-0.026855	-25.831	33.579	14.19692	0.089649	0.24863	-0.030078
0.396	-26.132	-1.8739	33.996	0.060059	-0.069824	-0.01123	-22.784	-223.977	1016.54781	-0.93506	0.81299	-1.2729	10.512	6.1928	44.624	-9.762e-05	0.13691	-0.0064454	1.022	3.5819	62.79	0.076758	0.26738	-0.059473
0.398	-15.55	-14.6372	39.856	0.073487	-0.081543	-0.01709	-34.9853	-231.03	1029.265	-0.9292	0.85791	-1.3081	3.293	23.886	33.319	0.0097656	0.11084	0.0092773	-3.02500000000001	14.0912	12.9583	0.06543	0.29004	-0.098145
0.4	-24.876	-5.0018	37.166	0.097168	-0.095215	-0.02002	-28.279	-267.211	1097.4922	-0.93506	0.88623	-1.3296	-1.314	51.747	12.8967	0.019922	0.084473	0.026269	18.44	-9.1974	30.7573	0.054492	0.31309	-0.13594
0.402	-14.338	-10.4407	28.8231	0.12109	-0.11035	-0.029785	-2.39100000000001	-271.02	1149.7327	-0.9585	0.94385	-1.3726	3.119	46.0572	15.729	0.028711	0.057031	0.039258	17.071	32.043	0.314	0.052539	0.33985	-0.18252
0.404	-38.505	3.9221	32.107	0.13525	-0.11621	-0.035156	-0.0549999999999997	-293.236	1194.63799	-0.98438	0.99123	-1.416	-21.467	52.375	30.0399	0.038477	0.035157	0.048632	49.162	-4.3971	30.1194	0.052148	0.36562	-0.23252
0.406	-32.07	14.3341	31.085	0.16113	-0.12793	-0.043945	4.065	-342.699	1218.608	-1.0073	1.0356	-1.4546	-11.485	14.214	48.8852	0.045801	0.010742	0.061718	15.019	25.4857	47.04147	0.050976	0.39199	-0.28955
0.408	-45.322	10.34	24.78	0.18091	-0.13575	-0.044922	2.798	-314.467	1227.219	-1.0288	1.0767	-1.5093	-48.897	23.40867	38.936	0.05957	-0.0019531	0.068848	43.883	-28.3367	100.327	0.047852	0.42188	-0.3457
0.41	-37.244	-6.601	8.25	0.19482	-0.14648	-0.048828	45.905	-311.679	1286.1616	-1.0313	1.0977	-1.5381	-72.9903	-9.8279	30.8392	0.07705	-0.021875	0.076368	8.019	7.432	129.874	0.035352	0.45371	-0.41446
0.412	-58.2956	5.745	20.519	0.21387	-0.16016	-0.054688	62.9858	-254.169	1331.0304	-1.0293	1.1396	-1.5752	-66.2108	10.26	42.8573	0.091308	-0.044238	0.08086	14.179	5.56	170.1633	0.013379	0.47324	-0.50235
0.414	-38.127	12.1193	24.70074	0.22022	-0.17066	-0.057129	25.884	-200.8075	1407.058	-1.0073	1.1665	-1.6069	-55.596	-33.67	67.3497	0.10576	-0.070801	0.091406	-13.89	64.091	238.2872	-0.014746	0.49746	-0.60469
0.416	-51.891	17.3804	20.5074	0.229	-0.17334	-0.066895	64.571	-212.0965	1419.218	-0.99805	1.1816	-1.6074	-48.158	4.7064	39.258	0.12266	-0.10488	0.095508	-63.263	51.069	343.578	-0.050293	0.53731	-0.70644
0.418	-49.7081	21.992	21.4271	0.23877	-0.18311	-0.068359	54.075	-169.675	1401.4954	-0.95508	1.1895	-1.624	-71.32273	-22.4988	32.531	0.13135	-0.1377	0.1001	-78.291	81.7947	495.389	-0.091797	0.5918	-0.80469
0.42	-38.264	22.644	26.4571	0.24658	-0.19092	-0.068359	25.9296	-155.5693	1428.40244	-0.91894	1.1767	-1.6358	-85.5201	15.775	17.8281	0.14345	-0.16328	0.10127	-64.919	71.503	676.665	-0.13906	0.64131	-0.90097
0.422	-31.046	3.5821	12.283	0.24805	-0.19482	-0.077148	47.4083	-120.751	1443.1449	-0.87695	1.1367	-1.6387	-104.195	-59.547	39.112	0.14893	-0.18555	0.095996	-51.064	105.332	957.768	-0.19043	0.68682	-1.0093
0.424	-37.806	-8.92	24.91773	0.24536	-0.20239	-0.086915	25.609	-87.535	1457.0887	-0.83447	1.0708	-1.6479	-103.4196	-28.41183	48.066	0.15205	-0.19687	0.090918	-107.078	89.985	1197.177	-0.242	0.70791	-1.1499
0.426	-33.3743	-0.357000000000003	45.762	0.23438	-0.21338	-0.10645	36.6064	-110.072	1466.03	-0.82568	1.0288	-1.6558	-51.871	-64.423	50.131	0.1459	-0.20313	0.076074	-102.617	56.402	1460.365	-0.31768	0.72441	-1.3299
0.428	-22.502	-3.222	60.625	0.20264	-0.22559	-0.15186	37.8635	-108.287	1457.317	-0.84375	0.96875	-1.6885	-30.855	4.7137	13.934	0.14355	-0.20264	0.060059	-101.782266	-18.923	1588.457	-0.39551	0.75146	-1.5229
0.43	-25.687	3.555	67.72	0.17139	-0.21094	-0.17725	12.508	-139.387	1502.4548	-0.89356	0.95264	-1.7246	-26.562	-18.3387	25.612	0.1417	-0.19599	0.041601	-96.8632	-111.746	1743.801	-0.51181	0.82959	-1.6997
0.432	-23.892	17.6235	93.954	0.10205	-0.13818	-0.22852	21.381	-162.437	1524.484	-0.96387	0.9668	-1.7754	-26.821	52.0974	-5.7239	0.1419	-0.17959	0.025488	-109.951	-142.377	1779.99	-0.66123	0.96026	-1.8315
0.434	-4.614	44.846	105.179	0.036376	-0.079103	-0.28052	21.253	-139.063	1540.7288	-1.0684	1.0352	-1.8564	-34.372	17.9403	-2.0123	0.14034	-0.16162	0.0079102	-117.548	-183.068	1773.353	-0.83037	1.1552	-1.8936
0.436	-1.913	58.5917	137.836	-0.022461	-0.02002	-0.34277	5.654	-154.446	1573.958	-1.1265	1.0884	-1.8999	-7.857	82.88	-6.5461	0.14384	-0.14551	-0.010547	-120.123	-208.2857	1670.329	-0.99512	1.4178	-1.8802
0.438	-18.491	79.6439	185.099	-0.083008	0.057129	-0.42188	9.7137	-129.992	1571.832	-1.209	1.2012	-1.9902	30.325	16.5227	17.9367	0.14844	-0.12744	-0.023926	-125.017	-293.803	1613.59	-1.1226	1.6938	-1.8433
0.44	3.645	90.657	207.135	-0.1123	0.097168	-0.4541	3.09749	-137.359	1594.352	-1.2544	1.2847	-2.0435	34.227	50.98	23.0174	0.16289	-0.12422	-0.032911	-24.3352	-328.72	1522.619	-1.1711	1.8949	-1.8407
0.442	12.143	106.038	235.234	-0.16309	0.17969	-0.52637	5.8715	-146.225	1607.06	-1.2891	1.3418	-2.0859	43.644	-20.2406	38.585	0.17461	-0.12442	-0.039356	62.5662	-420.53	1507.379	-1.1371	2.0094	-1.8777
0.444	0.933999999999997	95.646	268.589	-0.20532	0.23877	-0.58594	2.395	-100.0676	1606.2981	-1.3096	1.4063	-2.1191	25.646	30.7727	11.425	0.18985	-0.13614	-0.043261	111.162	-401.09	1393.0666	-1.0356	2.0203	-1.9433
0.446	-14.112	118.362	303.443	-0.25146	0.29688	-0.63672	31.001	-80.831	1607.828	-1.3145	1.4258	-2.1348	11.431	-17.47	4.9929	0.20234	-0.15283	-0.053614	144.067	-401.48	1369.4667	-0.91885	1.9657	-2.0192
0.448	-8.34500000000001	140.821	338.577	-0.31104	0.36963	-0.70264	43.524	-65.3369	1580.472	-1.3262	1.4492	-2.1406	19.329	32.34898	21.7169	0.20703	-0.16699	-0.05127	128.515	-284.7189	1317.225	-0.85107	1.8677	-2.0776
0.45	1.098	138.541	383.641	-0.34473	0.40625	-0.73438	3.66	-52.02642	1574.94	-1.3374	1.4537	-2.1363	24.755	-25.3492	31.8594	0.19609	-0.16768	-0.05791	101.402	-230.906	1335.079	-0.85908	1.7851	-2.0989
0.452	-50.383	136.973	434.2156	-0.39648	0.47412	-0.79639	47.457	-70.428	1560.001	-1.3452	1.438	-2.1147	24.615	30.908	21.3435	0.17422	-0.1625	-0.066406	63.387	-92.41	1298.203	-0.91465	1.7414	-2.0957
0.454	-50.468	129.162	498.58	-0.43946	0.52637	-0.83643	88.763	-25.819	1564.295	-1.3569	1.3882	-2.0776	8.968	-2.223	9.1924	0.15234	-0.14766	-0.08164	113.2721	-110.4	1343.1055	-0.98653	1.7492	-2.0863
0.456	-50.22	97.2591	532.155	-0.47559	0.58203	-0.875	59.076	-24.434	1580.6089	-1.3569	1.3589	-2.0562	-12.054	43.756	28.6972	0.12422	-0.11777	-0.10166	87.639	-52.74	1403.8128	-1.0347	1.7887	-2.0843
0.458	-50.155	81.875	569.543	-0.51172	0.64453	-0.91797	78.984	-18.5077	1571.3467	-1.3667	1.2778	-2.0073	-40.283	6.733	64.355	0.10205	-0.084473	-0.125	72.196	-131.3	1480.917	-1.0391	1.8633	-2.0664
0.46	-62.676	77.779	616.134	-0.52295	0.66895	-0.9375	61.704	-2.5705	1570.914	-1.3741	1.2294	-1.9765	-45.999	28.933	56.127	0.075391	-0.044043	-0.13975	45.0608	-123.2	1516.507	-0.99012	1.9353	-2.0402
0.462	-53.9332	59.838	656.407	-0.5249	0.69971	-0.96436	74.49	-27.2718	1552.234	-1.3906	1.1934	-1.9531	-27.802	-7.033	46.46906	0.058105	-0.010156	-0.14785	47.4713	-293.925	1554.8616	-0.9333	1.9781	-1.9803
0.464	-84	32.2457	681.522	-0.51123	0.70752	-0.98072	106.821	3.578	1561.329	-1.4116	1.186	-1.9351	-35.671	35.4395	39.871	0.051074	0.015234	-0.15371	89.8505	-358.277	1607.729	-0.86924	1.9679	-1.8944
0.466	-86.273	17.3084	701.988	-0.48779	0.69873	-0.98975	102.03	-15.187	1592.563	-1.4199	1.1914	-1.9355	-50.0137	20.9502	47.6409	0.048535	0.032813	-0.15362	77.388	-493	1613.178	-0.80664	1.8813	-1.7973
0.468	-89.652	2.2444	733.247	-0.43848	0.67383	-0.98633	93.208	-43.4569	1592.449	-1.4277	1.1973	-1.9336	-77.823	46.508	54.796	0.060059	0.046875	-0.14893	105.547	-489.62	1638.359	-0.73926	1.7246	-1.7012
0.47	-66.923	-0.504999999999999	766.72	-0.40771	0.64893	-0.9917	88.71	-15.8314	1566.3556	-1.4285	1.2024	-1.9343	-80.8316	27.748	23.2503	0.069433	0.040918	-0.14756	47.247	-494.79	1676.98	-0.66807	1.5269	-1.6212
0.472	-97.184	-21.0942	798.895	-0.34766	0.57422	-0.99707	79.98	-40.464	1558.103	-1.4307	1.2012	-1.9277	-92.2572	24.66	14.91767	0.073047	0.017773	-0.13906	35.843	-378.53	1753.5385	-0.61709	1.3274	-1.5699
0.474	-75.509	-11.115	791.921	-0.29736	0.51586	-0.98901	81.968	-13.76552	1535.1133	-1.4116	1.1958	-1.9116	-91.493	-4.73999	20.3607	0.078906	-0.0087893	-0.13945	-58.81	-347.28	1784.7435	-0.57764	1.1521	-1.5663
0.476	-68.4946	-25.736	766.179	-0.26025	0.45947	-0.99365	98.49	-7.159	1513.5627	-1.4063	1.1875	-1.9043	-62.9645	-33.522	43.1769	0.080567	-0.034961	-0.13242	-93.5794	-289.66	1849.16	-0.56533	1.004	-1.6144
0.478	-74.947	-46.345	736.628	-0.21533	0.38086	-1.0156	94.363	-14.8	1493.356	-1.3848	1.1582	-1.8828	-54.5158	-28.9067	59.2416	0.075195	-0.057129	-0.12842	-189.604	-261.051	1838.45	-0.57471	0.88916	-1.6997
0.48	-82.149	-69.1603	742.07	-0.19678	0.35205	-1.0308	61.498	47.9055	1459.513	-1.3545	1.1299	-1.8618	-43.888	-17.548	60.854	0.073828	-0.0792	-0.12979	-225.128	-148.0052	1856.783	-0.61826	0.84092	-1.8118
0.482	-76.249	-50.78046	723.402	-0.18506	0.33008	-1.0679	63.49	36.8441	1465.651	-1.3208	1.104	-1.8413	-63.85364	-6.456	29.67	0.07832	-0.097656	-0.12461	-272.39	-21.871	1799.6357	-0.67812	0.88593	-1.9312
0.484	-51.737	-36.1913	714.488	-0.20044	0.35669	-1.1032	83.624	70.735	1450.002	-1.2769	1.0669	-1.8101	-29.581	-21.5369	39.572	0.081054	-0.11719	-0.12578	-220.149	93.029	1778.12759	-0.7418	1.0254	-2.0449
0.486	-62.4117	-22.3026	718.6903	-0.22266	0.40332	-1.1426	38.678	100.228	1430.262	-1.2573	1.0493	-1.7925	-11.269	-11.927	25.9427	0.092089	-0.14356	-0.12548	-209.444	145.5618	1714.277	-0.81299	1.2226	-2.1552
0.488	-61.64161	-40.6156	736.6721	-0.26074	0.47949	-1.1875	28.6095	74.5647	1411.406	-1.2246	1.0156	-1.7598	16.691	-11.5631	11.6554	0.098633	-0.17432	-0.12598	-170.153	81.8911	1715.815	-0.87305	1.4219	-2.2598
0.49	-56.642	-50.381	761.592	-0.27588	0.52051	-1.2109	43.9776	133.91	1380.702	-1.1958	0.99318	-1.732	24.531	21.0286	16.4405	0.10547	-0.20879	-0.12763	-171.694	28.0502	1691.23	-0.91006	1.5855	-2.3353
0.492	-11.818	-73.009	797.4	-0.29004	0.59375	-1.2471	10.27041	114.625	1380.899	-1.1641	0.97461	-1.707	9.926	-6.03	26.4134	0.1128	-0.23985	-0.13448	-142.4213	-78.922	1727.277	-0.93819	1.7154	-2.3796
0.494	-12.019	-84.043	831.924	-0.2898	0.63013	-1.2771	16.0048	118.98591	1360.8729	-1.127	0.95898	-1.6719	0.358999999999998	11.115	18.8034	0.12178	-0.26445	-0.13682	-97.51	-80.171	1777.695	-0.96865	1.8223	-2.4155
0.496	16.172	-107.187	899.926	-0.28564	0.65967	-1.3062	24.1118	127.99553	1340.6075	-1.1152	0.95703	-1.6543	10.408	-29.746	17.7068	0.12969	-0.28321	-0.14424	-74.295	-134.478	1822.215	-1.0001	1.9087	-2.4452
0.498	26.481	-126.947	919.707	-0.28857	0.69385	-1.3394	22.29	84.133	1319.527	-1.084	0.94531	-1.6172	11.784	19.6525	-5.89473	0.13818	-0.30273	-0.16357	-108.5944	-116.041	1822.37	-1.0308	1.9683	-2.4663
0.5	33.917	-152.559	943.875	-0.29199	0.71924	-1.3589	13.675	123.86423	1304.3765	-1.054	0.93676	-1.5847	36.034	8.9298	-3.56	0.13652	-0.31523	-0.18213	-117.34861	-179.539	1793.76	-1.063	1.9999	-2.479
0.502	31.646	-153.65197	971.676	-0.32031	0.76172	-1.416	19.4509	111.713	1285.531	-1.0332	0.92578	-1.5547	49.022	63.755	17.36556	0.13887	-0.31475	-0.20664	-98.9066	-166.98	1781.569	-1.093	2.0028	-2.4788
0.504	32.044	-166.125	1012.737	-0.35083	0.79419	-1.4641	18.947	98.8228	1230.0569	-0.99658	0.90674	-1.5054	9.232	20.612	65.3308	0.13183	-0.30224	-0.23906	-52.791	-199.504	1789.25	-1.113	1.9782	-2.4612
0.506	0.181000000000004	-156.845	1067.383	-0.37988	0.83984	-1.5156	18.756	154.1955	1203.279	-0.97705	0.89697	-1.4731	-8.345	55.72	97.5839	0.11709	-0.29268	-0.28876	-0.0189999999999984	-122.427	1827.662	-1.1302	1.9464	-2.4353
0.508	-15.009	-154.402	1110.35	-0.43115	0.92236	-1.5835	29.1719	120.029	1186.315	-0.93701	0.86377	-1.4253	1.405	18.6425	149.6626	0.087402	-0.28271	-0.3667	69.865	-75.9721	1777.481	-1.1479	1.9106	-2.3921
0.51	-11.275	-155.358	1141.497	-0.46191	0.96729	-1.6069	30.1359	148.64	1140.081	-0.9021	0.8352	-1.3786	-13.254	81.242	194.5822	0.031931	-0.24648	-0.45615	106.13508	-16.5033	1732.723	-1.1419	1.8667	-2.3473
0.512	-20.575	-156.186	1161.705	-0.50977	1.0518	-1.668	33.8291	152.336	1128.36628	-0.87891	0.80859	-1.332	6.542	70.6561	313.083	-0.060749	-0.1622	-0.55274	106.3995	-5.4464	1624.721	-1.1202	1.8157	-2.3081
0.514	-19.47	-149.768	1214.076	-0.53882	1.1133	-1.6992	24.304	142.4051	1101.925	-0.83594	0.77148	-1.2676	-11.1	154.362	395.877	-0.18341	-0.03954	-0.67228	90.254	23.461	1589.133	-1.0889	1.7673	-2.2613
0.516	-2.3	-114.6136	1223.899	-0.5625	1.1719	-1.7344	20.055	213.9	1048.9961	-0.80615	0.75439	-1.229	-33.069	141.204	518.323	-0.31983	0.11095	-0.81691	86.534	91.376	1511.5396	-1.0599	1.7113	-2.2071
0.518	-0.399999999999999	-81.433	1230.569	-0.58252	1.2192	-1.7534	36.834	181.1946	1028.062	-0.7373	0.69824	-1.1582	-58.021	196.776	618.14528	-0.44385	0.27881	-0.98438	103.228	159.601	1529.979	-1.0366	1.647	-2.1479
0.52	-15.421	-49.04	1242.57	-0.58301	1.2349	-1.7554	24.755	205.057	972.9847	-0.68848	0.65186	-1.1045	-76.34885	151.6025	813.7094	-0.55468	0.4658	-1.1607	16.231	202.718	1494.7833	-1.009	1.5883	-2.0918
0.522	-14.052	-44.827	1266.672	-0.57324	1.2422	-1.7559	6.342	194.8719	936.7694	-0.64063	0.6084	-1.0449	-134.262	193.915	977.44	-0.65876	0.6689	-1.3554	-19.904	164.037	1475.227	-0.97998	1.5247	-2.0316
0.524	-15.702	-48.082	1281.794	-0.56054	1.2192	-1.7427	7.21700000000001	140.1173	907.252	-0.57959	0.55908	-0.9751	-119.96	139.801	1117.6945	-0.77282	0.88294	-1.5601	-39.147	139.664	1402.237	-0.94326	1.4529	-1.9706
0.526	-25.615	-60.7	1294.977	-0.55078	1.1836	-1.7266	-6.713	199.2049	858.416	-0.54834	0.53271	-0.93994	-94.648	157.388	1210.024	-0.88259	1.1474	-1.7357	-40.997	87.2828	1397.465	-0.91259	1.3835	-1.904
0.528	-37.858	-65.875	1318.355	-0.5415	1.0996	-1.7012	-16.861	162.389	836.2964	-0.49365	0.48291	-0.86572	-81.182	52.725	1295.71	-0.98584	1.4243	-1.8823	-63.634	122.0462	1391.765	-0.88867	1.3086	-1.8398
0.53	-48.925	-65.965	1328.859	-0.54492	1.0547	-1.6875	-15.752	161.9435	784.4833	-0.44971	0.43969	-0.80835	-78.01586	8.554	1379.399	-1.0612	1.6776	-2.0218	-60.8763	109.778879	1439.5081	-0.86094	1.2317	-1.7711
0.532	-46.173	-65.976	1327.534	-0.55127	0.96143	-1.6733	-45.122	173.7776	754.247	-0.4082	0.40234	-0.75391	-71.0912	-127.876	1420.267	-1.06	1.8897	-2.1199	-113.407	121.5474	1427.376	-0.82959	1.1595	-1.7081
0.534	-59.74	-96.281	1348.47	-0.57105	0.90845	-1.6775	-60.943	126.472	714.822	-0.34961	0.35742	-0.67773	-54.736	-146.385	1349.943	-0.97714	2.0397	-2.1777	-144.102	72.778	1437.367	-0.80302	1.0907	-1.644
0.536	-39.954	-95.885	1364.656	-0.59424	0.88721	-1.7065	-36.341	181.3721	661.02176	-0.31836	0.32959	-0.64063	-57.627	-257.209	1272.622	-0.84509	2.0773	-2.1966	-136.762	82.445	1408.157	-0.77373	1.0329	-1.5788
0.538	-29.974	-92.207	1379.264	-0.63965	0.90918	-1.7656	-36.068	160.405	636.175	-0.26904	0.27783	-0.57275	-80.088	-269.632	1204.94	-0.70117	2.0195	-2.1836	-129.4627	49.2	1369.27	-0.74756	0.97705	-1.5112
0.54	-5.554	-84.294	1388.305	-0.66064	0.93701	-1.8022	-73.39	154.4918	583.442	-0.23096	0.24805	-0.51953	-106.693	-324.58	1175.273	-0.57488	1.8452	-2.1205	-151.752	112.86	1289.414	-0.7166	0.92734	-1.442
0.542	-8.736	-72.1327	1398.582	-0.71631	1.0063	-1.8765	-65.377	183.7722	532.82102	-0.19238	0.21777	-0.46484	-126.537	-267.9	1100.025	-0.49254	1.568	-2.0475	-140.854	137.611	1211.17	-0.68076	0.88213	-1.3726
0.544	15.953	-48.25	1411.42	-0.75049	1.064	-1.9321	-65.783	119.968	486.31	-0.13965	0.17578	-0.3877	-89.4804	-260.03	1092.21154	-0.44414	1.2333	-1.9788	-134.106	202.2782	1154.905	-0.63115	0.83565	-1.3144
0.546	15.995	-42.442	1411.931	-0.78467	1.1157	-1.98	-93.567	172.0942	414.092	-0.11035	0.15161	-0.34326	-111.898	-212.563	1062.6695	-0.39303	0.89138	-1.8981	-120.488	208.132	1086.007	-0.58105	0.78223	-1.2514
0.548	23.587	-42.37	1412.772	-0.82568	1.1685	-2.0347	-59.776	143.893	369.159	-0.079102	0.12793	-0.29883	-129.687	-174.558	1069.216	-0.3501	0.61816	-1.8184	-102.9879	245.466	1090.2969	-0.52393	0.73193	-1.1831
0.55	12.035	-39.162	1427.955	-0.8457	1.1953	-2.0566	-54.284	126.2848	324.209	-0.034668	0.1001	-0.23486	-99.932	-132.926	1114.606	-0.32745	0.50989	-1.7765	-72.49319	265.215	1031.07864	-0.47735	0.68535	-1.1196
0.552	33.273	-19.1215	1414.229	-0.87256	1.2231	-2.0815	-85.7812	182.512	270.423	-0.013184	0.082031	-0.20117	-84.741	-83.74	1113.8956	-0.33892	0.52851	-1.7859	-37.699	290.727	1017.136	-0.42334	0.64619	-1.0526
0.554	18.105	5.95485	1399.4403	-0.89014	1.2563	-2.0972	-45.928	109.075	268.9358	0.032227	0.041016	-0.1499	-81.838	-91.71	1155.4766	-0.36631	0.61588	-1.822	-48.8669	316.706	945.893	-0.37568	0.60478	-0.98778
0.556	38.001	30.577	1418.3961	-0.8999	1.27	-2.0991	-42.057	133.407	222.723	0.057129	0.017822	-0.1084	-36.6385	-109.27	1175.144	-0.35363	0.71803	-1.8611	16.27	303.542	926.889	-0.32695	0.56797	-0.91621
0.558	30.498	37.229	1416.696	-0.89258	1.2754	-2.0957	-50.937	116.7118	200.7153	0.091797	-0.0053711	-0.075195	5.998	-194.869	1219.687	-0.30127	0.80273	-1.8926	101.155	277.197	869.141	-0.27197	0.52979	-0.84473
0.56	33.473	32.251	1421.772	-0.8728	1.2688	-2.0857	-35.527	76.0236	180.689	0.13232	-0.038574	-0.021973	-0.924999999999997	-231.237	1237.854	-0.22207	0.86532	-1.9085	125.503	203.0186	844.937	-0.21728	0.48779	-0.78174
0.562	29.241	13.3493	1437.014	-0.85107	1.2485	-2.0737	-27.722	145.133	137.088	0.15332	-0.055176	-0.0019531	11.564	-334.0678	1276.604	-0.14802	0.8847	-1.903	140.572	154.957	737.405	-0.16142	0.45088	-0.71162
0.564	21.733	17.7127	1454.489	-0.81494	1.2036	-2.0425	-25.646	85.50219	134.4939	0.19287	-0.091797	0.038086	0.573	-358.128	1332.371	-0.07832	0.8437	-1.8514	137.785	91.238	700.62	-0.10478	0.41885	-0.63077
0.566	38.308	13.0243	1458.744	-0.79785	1.1777	-2.0273	-15.8	81.0441	118.682	0.21997	-0.1228	0.062744	-49.509	-436.614	1453.492	-0.0011171	0.75649	-1.7581	115.865	114.896	634.7369	-0.050683	0.3831	-0.55303
0.568	32.437	19.7101	1453.097	-0.76611	1.1274	-1.9819	-0.835999999999999	60.229	97.422	0.23877	-0.13721	0.078613	-84.986	-406.61	1476.951	0.078125	0.62451	-1.644	138.928	113.63	628.041	0.0083008	0.3457	-0.48291
0.57	25.636	15.5163	1436.681	-0.75488	1.0971	-1.9556	-0.975000000000001	-16.741	87.894	0.25342	-0.16943	0.098145	-62.514	-428.513	1528.161	0.1623	0.4334	-1.5754	166.932	144.1333	540.217	0.066211	0.29248	-0.39902
0.572	6.66500000000001	23.526	1414.127	-0.74268	1.0767	-1.9312	10.662	50.5795	63.1906	0.25439	-0.18359	0.10547	-30.651	-326.948	1532.928	0.24504	0.2423	-1.5457	108.024	108.4313	499.647	0.12256	0.22392	-0.32647
0.574	1.637	23.7492	1401.504	-0.72021	1.063	-1.9058	5.625	22.3125	78.896	0.23828	-0.19922	0.10791	-8.733	-284.614	1624.472	0.28225	0.12667	-1.5779	74.6416	125.963	407.776	0.18115	0.1583	-0.24678
0.576	-9.783	30.2746	1424.902	-0.71094	1.0566	-1.8945	-9.87	29.7586	56.309	0.21777	-0.20215	0.10156	-3.97	-148.531	1648.59	0.21808	0.14449	-1.6637	26.368	122.764	347.658	0.23467	0.088381	-0.16768
0.578	-14.834	44.7633	1417.538	-0.67969	1.0313	-1.8691	7.91999999999999	58.379	22.169	0.18945	-0.19482	0.092773	9.71	-101.57	1690.058	0.048828	0.31592	-1.832	20.201	178.235	283.1223	0.28613	0.0083008	-0.087402
0.58	-21.604	48.3149	1402.199	-0.65674	1.0147	-1.8535	-4.139	-3.8045	38.6381	0.13037	-0.1543	0.063477	52.3	-4.89	1709.861	-0.14069	0.57608	-2.0155	15.689	204.799	244.904	0.33906	-0.077733	-0.017285
0.582	-23.973	47.8388	1387.592	-0.63379	0.98828	-1.832	-0.622999999999998	56.0711	21.331	0.092773	-0.12061	0.041016	68.2095	0.0400000000000063	1718.304	-0.30211	0.85977	-2.2031	13.71	220.195	203.0221	0.39502	-0.17402	0.046289
0.584	-35.624	63.778	1364.185	-0.59717	0.96533	-1.814	0.597999999999999	23.531	55.29249	0.021484	-0.047852	0.00097656	96.4845	55.48	1692.917	-0.42614	1.1363	-2.3862	-20.362	177.5522	149.311	0.4458	-0.2791	0.11075
0.586	-20.1	79.488	1327.033	-0.57666	0.95752	-1.8062	-13.943	21.1022	67.751	-0.03125	0.016846	-0.028321	112.2483	22.387	1713.217	-0.4979	1.3708	-2.5523	-65.7022	145.55	111.829	0.4792	-0.37823	0.15723
0.588	-22.351	97.585	1302.66	-0.54346	0.93408	-1.7788	-33.268	75.928	26.7523	-0.072266	0.083496	-0.061523	98.602	42.8136	1683.9149	-0.52588	1.5488	-2.6758	-93.0249	127.887	65.367	0.49707	-0.4707	0.19482
0.59	-14.474	90.553	1300.579	-0.51587	0.92798	-1.7663	-12.249	7.1199	33.546	-0.12305	0.1665	-0.094238	10.094	-38.114	1694.05	-0.53413	1.6544	-2.753	-140.484	110.653	94.053	0.4999	-0.54277	0.2249
0.592	-16.028	86.11	1304.891	-0.49121	0.9165	-1.7476	-20.441	55.024	22.7664	-0.13721	0.19141	-0.12842	-7.83899999999999	-53.21	1693.414	-0.53613	1.7013	-2.7907	-127.357	84.84	49.7029	0.48838	-0.60283	0.23994
0.594	4.584	66.945	1286.764	-0.46631	0.9126	-1.7241	-31.27	25.919	18.5851	-0.16211	0.23877	-0.14941	8.313	-130.707	1740.512	-0.54564	1.691	-2.805	-128.411	45.8193	46.685	0.47431	-0.64815	0.24502
0.596	8.827	58.0045	1272.657	-0.45654	0.90674	-1.7085	-27.353	-15.721	37.272	-0.17383	0.26148	-0.16577	21.211	-117.412	1791.679	-0.55364	1.6532	-2.7914	-153.114	27.016	6.779	0.4501	-0.68487	0.24922
0.598	19.072	53.8856	1251.294	-0.43701	0.89697	-1.6772	-52.7922	36.8453	23.986	-0.17871	0.28174	-0.17236	59.492	-142.328	1824.236	-0.55811	1.5845	-2.7729	-141.854	-13.697	54.778	0.42188	-0.7168	0.24316
0.6	7.65300000000001	75.2148	1213.899	-0.42797	0.88208	-1.6565	-40.601	-24.0208	49.2917	-0.17139	0.28906	-0.17236	75.21	-101.06	1832.461	-0.57713	1.4973	-2.7488	-126.377	0.908000000000001	61.6616	0.38028	-0.73321	0.21611
0.602	5.284	80.8197	1195.868	-0.41943	0.87158	-1.6284	-31.263	-1.096	28.641	-0.15674	0.2915	-0.1792	92.07	-113.218	1857.71	-0.61206	1.4126	-2.717	-106.5401	1.101	137.191	0.33545	-0.73369	0.17022
0.604	1.883	78.858	1190.51	-0.41113	0.84961	-1.5898	-30.958	4.859	20.548	-0.12793	0.28174	-0.16504	58.505	-67.0773	1849.378	-0.65229	1.3506	-2.6792	-49.478	27.509	103.365	0.27685	-0.71377	0.11162
0.606	10.74	82.0244	1167.802	-0.41211	0.84375	-1.5625	-38.757	-30.7337	27.708	-0.1001	0.26294	-0.15893	24.143	-63.158	1796.667	-0.70574	1.3252	-2.6486	-4.34500000000001	13.091	111.255	0.20391	-0.67285	0.045215
0.608	25.494	82.4917	1143.8308	-0.40869	0.82617	-1.5283	-32.906	44.178	17.9158	-0.077637	0.23779	-0.14795	46.667	-1.792	1749.948	-0.74951	1.3462	-2.6323	-14.417	35.835	45.317	0.12354	-0.60303	-0.030273
0.61	17.228	104.2803	1136.26	-0.40967	0.81445	-1.4947	-20.214	2.7772	55.553	-0.047852	0.19824	-0.13574	24.781	13.7896	1707.994	-0.78464	1.3922	-2.6253	36.38	20.9838	36.029	0.013379	-0.4999	-0.11103
0.612	-2.446	123.271	1120.631	-0.40723	0.8042	-1.4624	-27.847	9.23	47.159	-0.038086	0.1792	-0.13232	-6.07400000000001	96.242	1659.7129	-0.80331	1.4371	-2.6153	43.875	44.7379	3.86111	-0.10801	-0.37851	-0.20009
0.614	13.864	145.475	1082.889	-0.39209	0.79297	-1.416	0.773000000000003	20.048	26.3375	-0.026367	0.14404	-0.12842	-33.256	133.765	1616.776	-0.80918	1.457	-2.5859	62.619	26.6593	20.3851	-0.22793	-0.24571	-0.29111
0.616	24.069	147.452	1053.776	-0.38623	0.78564	-1.3901	1.535	-30.5977	29.0987	-0.016846	0.12475	-0.12842	-10.884	172.062	1597.438	-0.79318	1.4479	-2.5459	61.911	35.3733	-1.418	-0.32461	-0.10762	-0.38203
0.618	8.235	145.687	1041.085	-0.37207	0.76172	-1.3311	-10.679	38.3158	6.075	-0.011719	0.104	-0.11914	-16.176	157.793	1602.875	-0.76563	1.4063	-2.4941	91.0456	29.7664	3.977	-0.40625	0.030762	-0.45508
0.62	-11.879	135.606	1014.755	-0.354	0.74731	-1.2937	18.672	13.175	14.346	-0.010742	0.087402	-0.11426	2.202	162.829	1567.99	-0.7289	1.3369	-2.4339	89.4539	41.8752	16.247	-0.47207	0.17051	-0.52548
0.622	-13.408	136.8314	970.633	-0.33496	0.72852	-1.248	-12.618	5.0593	9.11839	-0.0083008	0.083496	-0.11328	41.062	144.0278	1528.411	-0.68758	1.2712	-2.3749	100.0352	54.404	25.787588	-0.51142	0.30654	-0.58779
0.624	-27.103	133.8204	944.603	-0.31201	0.69971	-1.1851	-6.9	37.34	-4.40544	0.00048828	0.068359	-0.10986	82.696	158.059	1544.905	-0.64579	1.2106	-2.3089	82.181	49.1215	65.949	-0.53877	0.43545	-0.64131
0.626	-60.6234	141.486	921.954	-0.29834	0.67822	-1.1577	12.505	-47.251	36.39	0.014648	0.062011	-0.1062	62.189	156.548	1555.58	-0.61103	1.1635	-2.2507	42.79	24.0664	41.4899	-0.55615	0.54795	-0.67861
0.628	-61.7471	117.4128	891.8302	-0.26611	0.64063	-1.0977	-0.642000000000003	13.8293	32.5105	0.025391	0.049805	-0.10205	61.499	144.504	1561.804	-0.56836	1.127	-2.1895	53.846	-7.298	57.898	-0.56738	0.63672	-0.69922
0.63	-51.132	121.44	877.617	-0.24414	0.60596	-1.0474	15.398	-1.7147	35.0372	0.053711	0.027832	-0.090332	55.535	127.88	1540.7497	-0.52676	1.0986	-2.1357	45.687	-29.468	25.972	-0.56152	0.70371	-0.70176
0.632	-73.704	115.5304	849.319	-0.22168	0.56934	-1.002	-2.078	-17.9464	27.9903	0.062988	0.018066	-0.088867	79.474	103.513	1537.0436	-0.48184	1.0696	-2.0781	26.337	-56.205	50.283	-0.54649	0.74336	-0.68789
0.634	-83.298	126.602	825.096	-0.19385	0.52441	-0.93311	-4.03	39.1776	11.479	0.094727	-0.003418	-0.075684	34.757	108.385	1547.618	-0.44004	1.0457	-2.0254	-6.89100000000001	-46.5057	19.3526	-0.52539	0.75547	-0.65313
0.636	-67.6539	145.257	802.805	-0.18018	0.50391	-0.9082	-4.764	-31.1298	31.6892	0.11352	-0.024414	-0.06543	60.92	125.433	1528.758	-0.40391	1.0241	-1.9681	-45.807	-47.7482	35.014	-0.4835	0.74072	-0.61016
0.638	-54.6013	155.368	784.32	-0.15869	0.46484	-0.84961	-13.969	4.9666	12.427	0.13818	-0.045898	-0.058594	65.281	165.047	1468.28	-0.37842	1.0063	-1.9116	-91.868	-1.07	-5.198	-0.43604	0.69922	-0.55078
0.64	-65.1765	145.071	734.438	-0.14087	0.43579	-0.79956	-9.669	8.43393	20.9649	0.16211	-0.072266	-0.041016	71.537	178.0735	1406.998	-0.3542	0.97881	-1.8503	-105.204	-5.884	36.441	-0.37949	0.62998	-0.49141
0.642	-71.668	142.91	691.05	-0.12451	0.41016	-0.76465	-36.663	-18.6159	14.6028	0.17139	-0.076172	-0.035156	19.783	201.715	1332.935	-0.32686	0.94775	-1.7893	-119.655	18.3791	4.2008	-0.31895	0.54101	-0.42363
0.644	-69.884	143.489	665.4448	-0.10449	0.38672	-0.70605	-35.582	52.076	12.6003	0.19238	-0.098633	-0.023926	32.339	208.487	1289.525	-0.29014	0.91182	-1.7222	-130.647	23.23083	23.8125	-0.25801	0.4418	-0.35606
0.646	-92.985	148.583	663.089	-0.094238	0.37402	-0.67969	-29.078	-1.5406	37.253	0.2107	-0.10767	-0.016601	44.75	291.904	1248.427	-0.25733	0.86143	-1.6573	-124.1967	51.2593	7.6014	-0.2	0.35186	-0.28975
0.648	-79.404	151.767	615.435	-0.073242	0.35107	-0.63184	-35.947	19.67522	12.4955	0.22217	-0.11963	-0.011719	60.249	332.979	1246.681	-0.22314	0.80908	-1.5815	-134.041	42.419	28.0582	-0.14209	0.26611	-0.22607
0.65	-59.9994	163.393	580.104	-0.057862	0.33301	-0.59473	-29.794	37.44729	9.2846	0.23242	-0.13379	-0.0048828	33.877	366.381	1206.516	-0.19268	0.74951	-1.5011	-159.082	64.879	3.215	-0.10342	0.20527	-0.1793
0.652	-56.3002	169.492	531.794	-0.040527	0.31836	-0.55762	-32.404	-16.0801	23.2796	0.24023	-0.13477	-0.0029297	-3.569	315.291	1163.985	-0.1582	0.68867	-1.4168	-106.3219	31.394	7.636	-0.071582	0.15507	-0.13154
0.654	-71.75661	150.332	497.56	-0.01416	0.2959	-0.5127	-40.171	57.2437	5.953	0.24512	-0.13867	0.0039063	-21.076	301.211	1094.376	-0.12343	0.6293	-1.3324	-99.0991	45.955	-2.313	-0.044238	0.11055	-0.095605
0.656	-34.027	150.096	459.1298	-0.0014648	0.27832	-0.4917	-22.721	10.7964	19.9492	0.24781	-0.13501	0.0019531	-36.008	240.103	1063.316	-0.082422	0.56328	-1.2424	-58.149	32.964	20.071	-0.024317	0.073145	-0.070117
0.658	-18.423	160.457	450.711	0.029785	0.25049	-0.45117	-28.466	19.4325	3.74152	0.24902	-0.12939	0.0014648	-35.088	243.053	1034.252	-0.049316	0.49414	-1.1563	-42.93	39.8358	34.145	-0.0024414	0.036621	-0.049805
0.66	-19.2576	164.177	442.509	0.046875	0.229	-0.41943	-19.145	43.0495	-2.9549	0.25732	-0.1167	0.00097656	-55.76275	177.389	1005.985	-0.024121	0.42842	-1.0752	-14.091	17.973	48.9864	0.016602	-9.772e-05	-0.033593
0.662	-22.3426	132.3781	420.227	0.061523	0.20654	-0.39111	-41.107	-22.8878	44.233	0.25537	-0.1123	-0.0019531	-57.9807	192.598	944.451	0.0052735	0.36836	-0.98496	-34.01	2.3662	40.321	0.041504	-0.033398	-0.019727
0.664	-11.236	128.396	390.584	0.074707	0.18359	-0.35547	-29.359	33.741	35.8955	0.25635	-0.10352	-0.003418	-73.265	140.693	887.788	0.034571	0.32187	-0.89746	11.651	-29.7426	29.9169	0.067285	-0.073633	-0.00058592
0.666	-23.225	130.765	375.343	0.083984	0.16846	-0.33154	-5.381	7.5678	27.4414	0.26001	-0.094726	-0.0053711	-98.611	179.368	800.16056	0.061133	0.28037	-0.81651	38.799	-27.5256	46.8808	0.096192	-0.11113	0.016114
0.668	-33.838	136.739	352.862	0.1001	0.13965	-0.30762	-28.374	3.2152	33.289	0.25928	-0.084961	-0.010742	-118.076	149.895	764.25204	0.087891	0.23633	-0.73828	47.692	-8.4648	46.115	0.13135	-0.1499	0.029297
0.67	-31.753	133.604	322.267	0.10156	0.12574	-0.28833	-17.694	48.0976	17.8478	0.25781	-0.080078	-0.010254	-98.7809	212.297	709.1713	0.11787	0.19629	-0.64942	83.4383	8.247	62.8885	0.16319	-0.18916	0.04209
0.672	-24.6465	133.2	312.206	0.099609	0.11768	-0.27832	2.797	-23.3851	38.6221	0.25512	-0.076416	-0.011718	-91.145	196.831	684.02	0.13857	0.15136	-0.56406	92.5228	30.8011	34.6771	0.19043	-0.22813	0.051758
0.674	-40.7314	109.835	283.607	0.10254	0.12109	-0.24854	9.334	27.21134	9.517	0.25195	-0.076172	-0.015625	-47.051	251.865	603.852	0.15654	0.10879	-0.48398	82.9885	22.5417	55.309	0.2209	-0.25625	0.062305
0.676	-40.031	88.699	263.577	0.10156	0.125	-0.24316	18.111	23.472	15.0294	0.24219	-0.075195	-0.013184	-72.303	209.363	540.406	0.17295	0.069043	-0.40225	79.8055	34.4171	14.2247	0.23779	-0.27422	0.067481
0.678	-35.908	85.4617	237.638	0.097656	0.13428	-0.23291	-4.524	-7.3305	40.041	0.23779	-0.069824	-0.01123	-62.539	260.525	470.466	0.18164	0.032227	-0.32471	96.1502	28.9448	40.755	0.24268	-0.28711	0.071777
0.68	-42.787	92.829	240.621	0.097901	0.13965	-0.22095	-7.07700000000001	47.394	45.6539	0.22217	-0.063965	-0.016602	-69.553	208.313	401.686	0.18867	-0.0088867	-0.24756	45.502	46.647	11.5494	0.24638	-0.2916	0.076074
0.682	-62.9796	81.209	198.852	0.099121	0.14502	-0.21436	18.892	-11.3901	60.267	0.21362	-0.059326	-0.016358	-30.0588	267.282	317.994	0.19717	-0.049707	-0.17842	69.296	38.2685	43.695	0.23496	-0.28193	0.075097
0.684	-61.0844	85.468	188.223	0.094238	0.15723	-0.20117	3.285	22.1513	20.82696	0.20557	-0.054199	-0.019043	-71.447	214.11807	274.4831	0.19678	-0.090723	-0.11045	9.478	43.995	14.2789	0.2166	-0.26865	0.070801
0.686	-51.95687	108.591	178.388	0.092773	0.16357	-0.19678	-14.82	35.343	15.3759	0.19189	-0.04248	-0.021973	-53.9662	240.105	215.4174	0.19463	-0.12959	-0.05752	-12.885	4.215	26.1233	0.19853	-0.24297	0.064844
0.688	-60.798	97.459	167.516	0.095703	0.15869	-0.18506	-15.873	-15.9896	44.2502	0.18262	-0.036133	-0.025391	-59.034	148.08	211.756	0.17871	-0.16797	-0.015137	-68.811	0.2382	5.34963	0.18701	-0.22363	0.058105
0.69	-82.936	82.161	141.078	0.097656	0.15332	-0.17334	-14.094	44.787	17.22	0.16602	-0.015137	-0.029785	-24.558	149.437	166.1783	0.16465	-0.19785	0.016602	-57.245	-24.0376	37.657	0.16787	-0.20254	0.051367
0.692	-53.5705	70.3374	125.606	0.095703	0.14258	-0.16895	-12.799	-12.9038	33.6751	0.15381	-0.0080566	-0.028809	-47.2837	75.7414	161.6561	0.14345	-0.21064	0.040039	-92.603	-7.5729	22.4822	0.16192	-0.18662	0.044336
0.694	-78.4589	73.874	107.944	0.095215	0.12988	-0.16602	-19.455	-15.1043	26.0175	0.14502	0.0043945	-0.030273	-25.672	123.633	140.765	0.11729	-0.21533	0.057617	-78.218	-10.4146	43.045	0.15761	-0.17099	0.038867
0.696	-82.2822	54.826	104.353	0.090821	0.125	-0.15698	-5.422	6.61823	29.0112	0.13184	0.019043	-0.029297	-26.2207	83.417	152.97	0.087402	-0.21484	0.052442	-97.3579	-10.68	28.212	0.16299	-0.16689	0.036425
0.698	-53.4667	37.2169	103.411	0.091797	0.11523	-0.15186	-30.045	-45.09	56.032	0.12207	0.026855	-0.028809	12.44	117.216	125.027	0.058105	-0.20459	0.038086	-99.7225	-32.118	11.4759	0.15723	-0.16895	0.04248
0.7	-28.507	32.0782	92.613	0.085449	0.10156	-0.14355	-35.42	32.479	15.8936	0.10107	0.037598	-0.02832	13.314	51.3738	146.177	0.014844	-0.18379	0.011523	-130.486	-18.934	21.2366	0.15303	-0.16748	0.040039
0.702	-49.6016	31.249	87.173	0.081543	0.098145	-0.13916	-14.526	1.5357	14.814121	0.090332	0.04834	-0.027588	4.741	54.985	105.337	-0.035254	-0.15264	-0.03252	-127.419	-9.518	24.597	0.13867	-0.1623	0.036524
0.704	-33.989	16.8206	65.568	0.084473	0.083008	-0.12695	-55.648	-7.77096	21.0904	0.070313	0.058594	-0.032227	-28.1764	2.031	103.181	-0.091114	-0.097168	-0.085645	-125.716	25.745	48.6798	0.11993	-0.14863	0.029883
0.706	-33.65	37.629	71.016	0.08667	0.076904	-0.11841	-33.585	28.14981	17.769	0.054199	0.074707	-0.025879	-31.717	37.153	70.704	-0.15215	-0.016113	-0.14424	-85.843	35.535	21.0812	0.10069	-0.12764	0.023438
0.708	-21.341	47.361	53.645	0.090332	0.067383	-0.11572	-26.681	-38.806	40.8077	0.047852	0.078613	-0.028809	-51.4474	11.6974	57.3161	-0.2168	0.087891	-0.19434	-96.14181	40.3328	27.295	0.084473	-0.10645	0.015137
0.71	-13.089	30.6553	57.713	0.089355	0.056152	-0.10986	-37.252	25.8944	0.846	0.029297	0.10303	-0.026855	-27.066	47.646	33.511	-0.27354	0.1919	-0.24394	-81.475	35.345	-10.039	0.068164	-0.088476	0.0044922
0.712	-1.503	15.8397	45.5615	0.087402	0.05127	-0.104	-2.881	19.9286	-1.497	0.016845	0.11402	-0.023926	-46.823	17.5547	22.9018	-0.31495	0.29444	-0.28926	-54.215	22.6826	21.616	0.063379	-0.077735	-0.0011719
0.714	-2.207	19.8098	51.196	0.091309	0.038574	-0.09375	-47.842	-6.641	27.542	0.0029297	0.13135	-0.024902	-48.097	42.005	-9.375	-0.34659	0.38428	-0.3334	-17.22	48.576	18.9577	0.057129	-0.069922	-0.0093749
0.716	-14.301	19.2142	45.225	0.093995	0.029541	-0.08667	-38.897	47.45	11.6832	-0.011719	0.15088	-0.032227	-81.088	17.6694	2.989819	-0.36269	0.45235	-0.37207	28.65	35.156	37.704	0.050977	-0.065723	-0.016211
0.718	-16.376	13.2589	53.853	0.10059	0.010254	-0.077637	3.172	-21.7326	30.867	-0.019043	0.16162	-0.020508	-49.085	46.628	19.1519	-0.37256	0.51221	-0.40381	27.408	47.024	13.574	0.047852	-0.070313	-0.013672
0.72	-11.053	25.9966	44.308	0.10693	-0.00097656	-0.064453	-3.073	11.3178	1.943208	-0.031738	0.18506	-0.023926	-64.5296	44.678	49.97	-0.38349	0.56563	-0.43701	55.294	23.473	33.341	0.044531	-0.078613	-0.024414
0.722	8.102	42.463	35.854	0.11279	-0.014648	-0.059082	-20.653	20.3977	8.8213	-0.044678	0.19922	-0.022705	-17.534	44.754	53.0331	-0.39511	0.61113	-0.46465	46.844	29.4485	8.41	0.041699	-0.091113	-0.026562
0.724	-7.699	25.975	9.84682	0.12158	-0.031738	-0.049316	-6.127	-25.5381	29.1516	-0.049805	0.21533	-0.025391	-39.215	11.9222	51.5045	-0.40957	0.65293	-0.48301	82.111	3.078	44.6861	0.040137	-0.10127	-0.036719
0.726	-21.208	13.2207	10.9014	0.12671	-0.043701	-0.041504	5.15499999999999	48.1476	1.076	-0.062012	0.23389	-0.029785	-23.695	-7.492	44.86649	-0.42783	0.69541	-0.4917	45.591	13.784	36.04745	0.034961	-0.11299	-0.045117
0.728	-12.298	22.02356	21.3493	0.12939	-0.060059	-0.030762	-6.153	1.346	9.5211	-0.064453	0.24219	-0.029297	-52.0112	-32.8149	57.132	-0.43262	0.7334	-0.49609	93.691	0.1538	66.925	0.023926	-0.11182	-0.056641
0.73	-25.498	3.244	26.108	0.13428	-0.074219	-0.026855	8.769	8.39219	-3.5899	-0.067871	0.25879	-0.035156	-51.275	-44.29047	40.707	-0.43066	0.7498	-0.48887	69.6865	9.77	49.984	0.013867	-0.10869	-0.074512
0.732	-35.037	-10.1437	37.221	0.13818	-0.074707	-0.026367	11.785	28.481	20.5097	-0.072754	0.27271	-0.044434	-49.1787	-36.255	30.065	-0.41572	0.75342	-0.48447	101.2837	-0.295000000000002	48.1986	0.0049805	-0.09541	-0.0958
0.734	-22.36	-10.7391	33.3422	0.14258	-0.082031	-0.02002	-13.269	-27.347	93.363	-0.078125	0.28369	-0.052734	-14.187	-47.403	13.11884	-0.38487	0.73975	-0.4669	29.083	6.821	39.462	-0.00087888	-0.079395	-0.12041
0.736	-36.709	2.395	31.4415	0.14673	-0.084961	-0.011475	0.113999999999997	35.844	85.0605	-0.078125	0.28564	-0.075684	-13.109	-24.428	3.5654	-0.34453	0.7043	-0.4377	23.114	8.761	48.958	-0.0018555	-0.06543	-0.1418
0.738	-52.7977	6.3308	25.2746	0.15186	-0.087402	-0.0073242	-20.739	0.7552	112.9272	-0.078125	0.28223	-0.094238	-2.577	-31.415	11.2748	-0.30469	0.65625	-0.39453	-20.301	18.8555	46.596	0.0063477	-0.05127	-0.16016
0.74	-66.3884	17.0326	35.2134	0.15918	-0.084961	-0.0043945	-11.123	22.8551	139.4851	-0.094727	0.271	-0.15625	-23.019	1.7192	-11.1825	-0.26025	0.60635	-0.33818	-7.605	18.2287	24.1455	0.02793	-0.041407	-0.17745
0.742	-44.076	23.0485	25.93452	0.16846	-0.088379	0.0014648	-8.055	68.113	149.023	-0.11011	0.27051	-0.1958	-6.781	3.349	35.577	-0.21328	0.55039	-0.27461	-43.905	12.061	16.374	0.049316	-0.037598	-0.19151
0.744	-57.2164	9.583	11.728	0.17871	-0.083496	0.00097656	-45.366	23.683	245.0576	-0.13477	0.27441	-0.24219	10.066	47.8589	35.3908	-0.16992	0.49102	-0.20586	-59.668	7.451	20.96429	0.068848	-0.036035	-0.20049
0.746	-66.7872	-4.8969	9.971	0.18505	-0.083008	0.0014648	-64.256	93.7429	287.43	-0.18262	0.29102	-0.31787	29.758	27.593	56.457	-0.12295	0.43115	-0.13867	-85.3729	3.5738	39.2948	0.089258	-0.040918	-0.19883
0.748	-62.664	-1.0944	19.5475	0.18994	-0.079102	0.0029297	-28.353	75.0873	360.971	-0.20752	0.30371	-0.36279	9.093	62.048	25.757	-0.084473	0.36768	-0.07373	-102.2774	26.301	9.8517	0.10645	-0.053223	-0.20605
0.75	-38.154	16.86	14.4393	0.2002	-0.07373	-0.003418	-45.673	62.081	477.286	-0.26953	0.34033	-0.45752	19.338	28.7858	7.6962	-0.045313	0.30488	-0.010352	-103.306	23.6959	22.086	0.12656	-0.061523	-0.20049
0.752	-46.843	18.2685	15.0843	0.20264	-0.066895	-0.0029297	-48.427	120.7182	557.401	-0.30835	0.37182	-0.52905	-19.826	52.836	-26.7276	-0.0057616	0.23945	0.044727	-120.869	22.5373	18.8488	0.14658	-0.075879	-0.19932
0.754	-38.766	16.5519	22.6178	0.2085	-0.0625	-0.0048828	-7.409	66.262	638.413	-0.35791	0.40137	-0.60547	-26.214	8.4979	22.4377	0.031348	0.17461	0.095506	-92.9374	7.4253	52.416	0.16924	-0.091894	-0.19736
0.756	-25.025	19.8667	15.4925	0.20263	-0.05542	-0.0058594	-35.006	110.0481	666.149	-0.44238	0.42188	-0.71387	-29.933	26.851	-12.7114	0.071875	0.11123	0.13672	-108.3901	0.129999999999999	30.2499	0.18477	-0.10508	-0.19355
0.758	-24.31	20.987	20.363	0.19678	-0.04541	-0.0019531	-18.7854	92.8401	716.378	-0.48438	0.43066	-0.76855	-21.442	-26.8367	22.661	0.11475	0.044922	0.1709	-89.401	-26.761	43.823	0.20166	-0.1167	-0.18848
0.76	-37.741	26.9147	20.5213	0.1958	-0.032227	-0.0097656	-10.131	24.2441	824.9055	-0.58936	0.45752	-0.85498	-23.549	3.331	19.127	0.15235	-0.02461	0.19824	-119.063	-20.789	10.5409	0.20947	-0.11914	-0.18174
0.762	-22.989	18.7032	23.3432	0.19678	-0.030273	-0.0073242	6.465	52.432	891.2831	-0.68701	0.48926	-0.90576	-18.636	-42.4553	43.819	0.18564	-0.091602	0.2168	-94.305	-27.16	20.0458	0.21455	-0.12002	-0.17656
0.764	-2.383	17.4592	12.915	0.1958	-0.020508	-0.0048828	-16.356	-34.912	952.091	-0.78564	0.53564	-0.95264	-43.536	15.286	48.691	0.21572	-0.14668	0.22266	-78.1962	3.424	-11.523	0.21846	-0.1165	-0.1711
0.766	-17.953	3.93767	20.6378	0.19848	-0.01416	0.0012207	-18.992	-49.919	952.3298	-0.91406	0.63477	-1.0137	-48.2599	-14.311	54.86	0.24024	-0.18389	0.22031	-18.486	12.218	1.528	0.21269	-0.11397	-0.16094
0.768	-13.15	2.80033	14.63741	0.19531	-0.0058594	0.0053711	-9.135	-67.4232	969.6637	-0.97217	0.69775	-1.0308	-37.842	43.5975	17.81776	0.26807	-0.19678	0.21533	4.482	38.635	5.746	0.21143	-0.11084	-0.16162
0.77	1.831	-8.16275	44.452472	0.18799	-0.00048828	0.013184	-71.71	-134.315	1031.424	-1.0664	0.83398	-1.0566	-42.6985	8.9718	42.82967	0.28711	-0.20029	0.20605	38.283	33.9521	44.949	0.19678	-0.11426	-0.15254
0.772	-1.094	19.2799	34.6465	0.18262	0.0019531	0.015625	-14.014	-75.10768	1023.5618	-1.105	0.93701	-1.0635	-16.969	47.18	32.4377	0.31377	-0.17793	0.20576	5.547	46.519	46.5427	0.1793	-0.1126	-0.15381
0.774	-16.169	25.27	30.1032	0.17383	0.0097656	0.017578	27.281	-106.474	1024.244	-1.1182	1.0195	-1.0645	-47.3286	19.0564	49.859	0.3372	-0.14707	0.20459	64.372	50.823	54.627	0.15781	-0.1001	-0.15381
0.776	3.143	35.844	25.2819	0.16797	0.012695	0.019287	6.401	-116.242	1009.135	-1.1187	1.0942	-1.0718	-62.18	51.839	20.793	0.36699	-0.11474	0.20225	70.0178	56.774	27.957	0.12725	-0.085742	-0.16016
0.778	-0.543999999999997	22.57209	22.5311	0.16113	0.023926	0.020508	31.4087	-85.4991	999.1459	-1.1074	1.1133	-1.0801	-70.941	11.923	30.8146	0.39355	-0.088867	0.20215	75.8694	36.7771	41.7488	0.1001	-0.072754	-0.17432
0.78	-18.12	16.705	14.7806	0.1543	0.036133	0.020508	51.5061	-137.869	1016.213	-1.0708	1.1431	-1.0835	-50.577	40.4497	33.3434	0.42334	-0.07666	0.20205	51.691	13.4613	26.074	0.069922	-0.058203	-0.18701
0.782	-27.59	12.6256	37.1525	0.1499	0.04541	0.02002	52.318	-57.965	992.9366	-1.0358	1.1516	-1.0827	-52.6152	0.289999999999999	41.21226	0.44355	-0.077734	0.19707	66.874	8.496	15.576	0.045606	-0.042676	-0.21367
0.784	-24.556	24.5293	34.74008	0.14209	0.063477	0.024414	90.837	-73.48	993.2813	-1.0117	1.1543	-1.0801	-22.095	28.411	20.8	0.46347	-0.090234	0.18418	32.922	8.133	75.269	0.028808	-0.027442	-0.24844
0.786	-28.513	23.5857	24.6703	0.13574	0.073486	0.020996	58.834	-134.0772	1025.008	-0.99023	1.1426	-1.0742	10.21	-8.1213	28.8496	0.46953	-0.10108	0.17627	51.41	-0.438000000000001	94.484	0.0062499	-0.015918	-0.28369
0.788	-50.672	20.2414	23.3085	0.12598	0.083984	0.016602	24.818	-116.771	1018.399	-0.97998	1.1411	-1.0601	-13.225	-6.694	31.144	0.47119	-0.11719	0.1748	37.787	17.463	171.85618	-0.015625	-0.0063477	-0.33545
0.79	-62.6948	12.5364	32.506	0.11816	0.10205	0.01123	40.45	-185.451	1049.99297	-0.97656	1.1563	-1.0254	-30.322	-36.678	40.885948	0.45996	-0.12422	0.15879	63.2787	43.905	194.6001	-0.04541	-0.010644	-0.41201
0.792	-51.624	12.8358	44.4663	0.11572	0.11182	0.0073242	41.284	-148.823	1060.195	-0.97119	1.1705	-0.999	-5.649	-20.6439	50.457	0.45215	-0.12324	0.14229	62.046	60.232	253.2567	-0.090332	0.00625	-0.49854
0.794	-41.4538	21.6607	20.49408	0.11084	0.13281	-0.003418	-2.993	-136.239	1090.3345	-0.96289	1.1934	-0.99219	-12.416	-21.3918	41.956	0.44863	-0.11074	0.12783	-7.411	73.1794	331.922	-0.16025	0.05625	-0.5751
0.796	-50.2587	17.35382	27.4128	0.10522	0.14747	-0.00708	-31.726	-199.779	1120.4661	-0.94873	1.1997	-1.0093	25.736	-7.296	69.867	0.4416	-0.0875	0.11758	-53.05916	56.03528	468.9671	-0.25732	0.14297	-0.6583
0.798	-46.32	13.9234	34.1789	0.10107	0.1665	-0.013672	-25.999	-171.468	1127.233	-0.93945	1.1992	-1.0439	9.987	-15.012	57.7932	0.43555	-0.063965	0.10498	-54.199	83.647	587.1229	-0.37793	0.24023	-0.77734
0.8	-48.307	7.7794	31.9454	0.10059	0.18359	-0.027832	-21.919	-219.996	1201.586	-0.91748	1.1763	-1.1284	4.596	-9.2696	37.226	0.43233	-0.038574	0.092675	-0.177	119.66666	819.0472	-0.50283	0.35791	-0.90166
0.802	-57.238	4.2808	33.2734	0.10352	0.19189	-0.032227	-7.957	-220.948	1269.569389	-0.89209	1.1528	-1.2261	-36.4873	-9.74973	20.3151	0.42861	-0.012305	0.080371	-87.2432	114.2727	952.076	-0.62636	0.49638	-1.0231
0.804	-40.805	3.8687	39.131	0.10059	0.21191	-0.044922	-17.994	-193.125	1318.568	-0.89258	1.1523	-1.2734	-1.892	-0.00600000000000023	1.0088	0.4333	0.012305	0.077246	-150.261	58.024	1112.976	-0.75996	0.63545	-1.1575
0.806	-42.657	3.80743	35.6847	0.10303	0.22925	-0.047119	-42.877	-255.366	1356.852	-0.88867	1.1602	-1.3535	-22.866	8.0684	-11.106	0.43369	0.025782	0.071777	-141.9091	3.298	1202.333	-0.89697	0.76435	-1.3112
0.808	-31.411	12.3275	33.112	0.10889	0.24902	-0.054688	-44.553	-182.047	1334.11642	-0.88965	1.189	-1.3892	-0.459000000000003	19.4092	8.45919	0.43115	0.032227	0.070801	-86.519	-63.014	1332.3186	-1.0332	0.89648	-1.4551
0.81	-46.4113	23.1696	39.2734	0.11084	0.26416	-0.064453	-35.997	-160.323	1371.9036	-0.88574	1.2227	-1.418	-8.484	26.458	-10.3037	0.41621	0.033105	0.06582	-111.03	-118.659	1413.178	-1.1537	1.0467	-1.5858
0.812	-20.764	20.5909	31.159293	0.11572	0.26807	-0.071289	-64.524	-145.9192	1408.87	-0.87305	1.2754	-1.4414	-21.688	18.921	16.1256	0.39873	0.030469	0.061133	-76.635	-195.5782	1439.727	-1.2664	1.2012	-1.7133
0.814	-29.704	4.36166	31.4029	0.10986	0.27441	-0.092285	-72.027	-85.655	1413.5563	-0.85889	1.2935	-1.4526	-28.77	25.447	34.8479	0.38115	0.026172	0.051367	-159.713	-255.473	1388.567	-1.3574	1.3726	-1.8324
0.816	-11.042	5.292	49.011	0.10474	0.26099	-0.12354	-102.251	-153.0716	1460.338	-0.8335	1.2935	-1.4897	-12.011	13.942	31.8758	0.36113	0.028613	0.044727	-105.1937	-298.286	1320.822	-1.4027	1.5461	-1.9187
0.818	-17.367	-8.728	69.868	0.095215	0.26172	-0.15674	-128.7131	-121.482	1446.362	-0.81934	1.2737	-1.5173	-54.809	41.6453	25.1946	0.3374	0.033203	0.031738	-154.2965	-306.09	1284.442	-1.4175	1.7017	-1.9722
0.82	9.344	-1.228	74.739	0.067871	0.28857	-0.20117	-110.5547	-102.6082	1458.4	-0.81787	1.2495	-1.5659	-29.373	21.047	12.056	0.30635	0.046875	0.024317	-131.119	-309.42	1263.734	-1.3833	1.7968	-2.0048
0.822	-7.772	8.60017	100.305	0.05127	0.30078	-0.2168	-87.652	-120.77816	1479.137	-0.84375	1.2148	-1.6309	-31.488	28.944	-2.409	0.27939	0.065332	0.00625	-88.165	-317.18	1240.032	-1.3074	1.7996	-2.0328
0.824	-25.645	28.5536	144.858	0.0043945	0.33203	-0.27393	-83.9	-44.328	1476.1773	-0.86865	1.2095	-1.6675	-51.181	-6.2352	27.439	0.25088	0.087988	-0.0046875	-45.182	-307.58	1197.6471	-1.1992	1.7117	-2.0348
0.826	-30.8724	20.4315	192.101	-0.021729	0.34693	-0.33057	-73.01	-76.6837	1514.308	-0.93164	1.2129	-1.7363	-87.165	6.883945	12.7881	0.22715	0.10957	-0.023047	-35.399	-294.933	1179.842	-1.0839	1.5345	-2.0026
0.828	-17.256	36.0218	209.885	-0.047363	0.36084	-0.39063	-67.41	-61.5	1538.9406	-0.98047	1.2314	-1.8003	-67.276	-16.4013	38.001	0.20166	0.12842	-0.037598	-23.482	-222.727	1183.095	-1.0063	1.2954	-1.937
0.83	-46.782	48.4541	246.9274	-0.080078	0.38721	-0.47607	-53.485	-54.885	1554.3618	-1.0288	1.2544	-1.8706	-45.6183	14.52072	36.9555	0.18389	0.14414	-0.056445	17.111	-158.19	1231.996	-0.96173	1.0616	-1.8586
0.832	-71.463	85.623	290.381	-0.11279	0.39844	-0.5503	-33.606	-122.164	1604.654	-1.0874	1.2954	-1.9604	-41.664	-4.3715	56.946	0.16748	0.15781	-0.067969	24.739	-87.65	1245.343	-0.92823	0.86849	-1.7866
0.834	-73.976	97.9836	381.242	-0.15332	0.41797	-0.63965	-25.584	-75.627	1600.968	-1.123	1.3262	-2.0059	-20.856	42.376	40	0.15068	0.1668	-0.075	-7.61	-113.17	1295.12	-0.90909	0.75559	-1.7394
0.836	-48.782	130.241	439.967	-0.21436	0.45801	-0.75195	-17.773	-90.928	1597.258	-1.1934	1.4043	-2.0762	-28.154	15.5617	52.8341	0.1375	0.18057	-0.074902	-58.48	-132.23	1319.878	-0.91474	0.71104	-1.7186
0.838	-49.1644	142.63	499.5741	-0.25	0.49023	-0.80469	-54.031	-85.7507	1576.13653	-1.2395	1.4866	-2.1199	-25.625	38.96222	24.7709	0.12451	0.19287	-0.067383	-10.235	-214.134	1377.116	-0.92529	0.729	-1.7241
0.84	-34.63	125.441	547.2907	-0.32227	0.55371	-0.9082	-67.93	-37.192	1565.11714	-1.2734	1.5762	-2.1504	-12.658	1.7039	39.743	0.11396	0.19443	-0.058691	15.334	-251.139	1417.595	-0.94297	0.80707	-1.7602
0.842	-26.371	106.636	626.971	-0.38477	0.60694	-0.9907	-77.982	-96.717	1592.498	-1.3042	1.7056	-2.1851	-21.225	33.096	17.44337	0.10772	0.19356	-0.044726	54.4069	-358.836	1520.632	-0.93289	0.92364	-1.7913
0.844	-51.301	97.815	720.25	-0.44189	0.66211	-1.0684	-59.942	-55.1756	1592.528	-1.3047	1.7656	-2.2012	-3.919	11.1654	40.633	0.10108	0.192	-0.031836	40.61551	-381.388	1516.2087	-0.90396	1.0346	-1.7772
0.846	-36.298	88.816	786.953	-0.51318	0.75439	-1.1538	-46.593	-57.5333	1591.1459	-1.2871	1.8633	-2.2129	13.69	44.359	34.7729	0.10254	0.18535	-0.0037109	77.184	-461.685	1539.7712	-0.83918	1.0847	-1.7273
0.848	-23.24	62.715	826.749	-0.54297	0.80566	-1.1855	-56.789	-69.466	1568.987	-1.2744	1.9004	-2.2138	-5.124	0.4861	64.483	0.10547	0.17529	0.0078125	58.591	-459.52	1553.711	-0.729	1.0298	-1.646
0.85	-8.606	18.1	843.96	-0.5835	0.90088	-1.2231	-33.366	4.707	1529.931	-1.2603	1.9204	-2.1948	-11.708	9.1233	44.012	0.10821	0.16982	0.033301	55.8698	-471.747	1664.50155	-0.59737	0.85765	-1.5446
0.852	-17.598	-23.083	885.303	-0.58886	0.97461	-1.231	-36.748	-28.2973	1524.218	-1.2661	1.9185	-2.1519	-23.367	-34.728	58.3	0.11153	0.15586	0.046875	69.816	-358.086	1714.7156	-0.47926	0.63647	-1.4697
0.854	-54.75	-54.4637	922.611	-0.57422	1.0313	-1.2285	-49.165	19.2279	1524.85492	-1.2749	1.9106	-2.1323	-12.129	-9.1672	20.6243	0.11309	0.14258	0.060156	62.849	-313.198	1791.716	-0.38934	0.41979	-1.4305
0.856	-15.499	-49.5098	955.509	-0.5332	1.0684	-1.2207	-31.92	25.6678	1525.074	-1.3022	1.8774	-2.0737	-1.761	-37.8229	42.2778	0.11064	0.1336	0.074219	0.3892	-203.645	1786.254	-0.35985	0.24918	-1.4387
0.858	2.179	-60.6776	972.76	-0.49658	1.0728	-1.2046	-85.94	-40.166	1543.086	-1.3245	1.8294	-2.0388	39.106	-7.8521	15.0482	0.10449	0.12939	0.075195	-45.125	-190.216	1779.212	-0.40723	0.1416	-1.502
0.86	15.372	-64.7524	963.525	-0.41455	1.0571	-1.1616	-85.59	20.8676	1520.6843	-1.3481	1.7798	-2.0034	-4.628	-38.995	32.9483	0.098729	0.12607	0.078516	-64.432	-84.18	1758.184	-0.53098	0.17754	-1.6173
0.862	-0.661000000000001	-95.731	962.397	-0.35352	1.0291	-1.1199	-104.039	-2.4956	1500.4412	-1.3682	1.7266	-1.9668	-26.865	4.459	5.6668	0.098145	0.12383	0.076074	-8.393	-42.716	1763.32	-0.72217	0.36975	-1.763
0.864	16.822	-78.852	940.096	-0.30811	0.99658	-1.0737	-75.431	10.4413	1502.7005	-1.373	1.709	-1.9512	-20.376	-19.9826	13.0762	0.098926	0.12734	0.070215	24.905	34.82	1763.2063	-0.92412	0.65624	-1.9394
0.866	1.205	-42.027	928.06	-0.26611	0.95947	-1.0034	-76.49	52.919	1463.727	-1.3687	1.6841	-1.9272	-19.988	10.733	24.65434	0.10488	0.12998	0.061719	63.5528	-17.37	1768.706	-1.0741	0.97866	-2.13
0.868	18.56	-1.154	904.141	-0.26221	0.9458	-0.97998	-107.952	-11.4355	1487.4067	-1.3633	1.6739	-1.9229	-39.5372	5.6801	51.3353	0.10742	0.13477	0.050293	67.265	-47.128	1755.733	-1.1714	1.3013	-2.3257
0.87	13.146	14.7081	909.311	-0.26953	0.92578	-0.94141	-95.271	23.4525	1452.36	-1.3438	1.6563	-1.9004	-12.355	32.97177	21.0854	0.11875	0.14063	0.026269	65.83	-103.443	1739.341	-1.2298	1.5917	-2.4833
0.872	6.199	25.6915	902.652	-0.27979	0.93775	-0.94116	-87.564	18.74916	1437.6807	-1.3164	1.6152	-1.877	-53.9187	18.3237	16.56	0.12276	0.14736	0.0014649	93.84	-90.716	1782.8574	-1.2545	1.8224	-2.5982
0.874	-7.444	20.7815	876.9917	-0.29297	0.96533	-0.95264	-67.894	22.208	1461.628	-1.2964	1.5962	-1.8589	-52.188	32.4298	-8.4281	0.12236	0.15634	-0.035254	88.417	-97.572	1795.963	-1.2655	1.9666	-2.6802
0.876	-1.498	8.633	888.746	-0.30859	1.0293	-0.98242	-45.975	95.6605	1446.827	-1.2656	1.5566	-1.8184	-86.6545	13.7175	30.374	0.11738	0.16358	-0.075684	66.77	-120.661	1856.267	-1.2652	2.0235	-2.7457
0.878	10.877	-3.936	934.941	-0.31982	1.0664	-0.99414	-70.555	49.889	1433.004	-1.2383	1.5234	-1.79	-63.133	26.1954	87.061	0.10156	0.16455	-0.13672	21.1843	-150.811	1840.011	-1.2461	2.0156	-2.7891
0.88	-18.29	-12.532	957.826	-0.34863	1.1274	-1.019	-66.183	82.354	1398.2442	-1.207	1.4883	-1.7559	-58.367169	29.313	130.56	0.075684	0.14502	-0.23838	25.692	-187.367	1861.165	-1.2177	1.9486	-2.7944
0.882	-36.1282	-59.399	975.633	-0.36792	1.1702	-1.0491	-37.902	114.6371	1348.4385	-1.1733	1.438	-1.7036	-39.612	77.185	193.57	0.031445	0.12637	-0.37002	23.387	-157.915	1848.01	-1.1748	1.8309	-2.7817
0.884	-33.2927	-101.648	1007.243	-0.37646	1.1938	-1.0815	-57.609	101.9868	1338.609	-1.1558	1.4087	-1.6772	-86.954	103.493	292.47	-0.020117	0.12989	-0.5122	81.146	-122.331	1863.946	-1.1479	1.67	-2.7416
0.886	-42.9286	-135.5377	1050.541	-0.375	1.1836	-1.1504	-28.925	179.211	1315.2756	-1.123	1.3457	-1.627	-84.115	117.082	408.417	-0.083693	0.16114	-0.66172	46.873	-8.782	1807.693	-1.1241	1.5026	-2.6768
0.888	-53.1555	-161.688	1091.44	-0.36768	1.1646	-1.187	-21.129	147.056	1286.8883	-1.0947	1.3066	-1.584	-90.82	135.593	512.7692	-0.15137	0.2168	-0.81445	84.757	36.3019	1760.264	-1.0835	1.3677	-2.6226
0.89	-76.1802	-185.694	1113.612	-0.36182	1.1392	-1.269	-25.942	129.4946	1253.146	-1.0698	1.2642	-1.5444	-73.283	149.471	668.5447	-0.21211	0.29522	-0.96542	62.654	100.818	1680.287	-1.0361	1.2799	-2.5941
0.892	-71.1541	-185.277	1143.432	-0.36767	1.1412	-1.311	-3.126	148.274	1214.126	-1.0249	1.2075	-1.4761	-87.344	176.84341	853.7087	-0.26016	0.3832	-1.1179	115.681	114.99699	1690.73	-0.99111	1.2403	-2.5718
0.894	-102.805	-180.09	1160.973	-0.40039	1.1484	-1.3652	-14.947	89.514	1221.364	-1.0054	1.1763	-1.4487	-46.4557	180.938	1063.6	-0.31406	0.475	-1.2793	91.963	161.81675	1675.706	-0.95287	1.2259	-2.5391
0.896	-93.413	-163.1765	1192.744	-0.45068	1.1763	-1.4292	19.459	143.696	1198.476	-0.9585	1.1274	-1.3784	-38.655	151.3424	1209.747	-0.37724	0.55811	-1.4261	111.225	172.873	1692.592	-0.92936	1.2145	-2.503
0.898	-93.94	-145.0553	1233.234	-0.47021	1.2036	-1.4526	6.04499999999999	154.9115	1160.996	-0.92163	1.0838	-1.324	-43.474	109.085	1295.089	-0.44531	0.67188	-1.5527	66.858	202.313	1657.512	-0.896	1.2075	-2.4683
0.9	-69.723	-103.063	1264.941	-0.46777	1.25	-1.498	-15.709	133.324	1134.222	-0.87646	1.0425	-1.2651	-42.021	33.5984	1403.581	-0.51836	0.81758	-1.6225	34.9888	191.946	1639.979	-0.87099	1.1963	-2.4136
0.902	-77.69	-73.05	1270.261	-0.44238	1.2739	-1.5064	15.141	171.935	1066.1434	-0.81299	0.97998	-1.187	-10.131	-74.654	1489.635	-0.58593	0.9797	-1.6492	48.326	206.671	1582.04	-0.86072	1.1663	-2.3468
0.904	-84.324	-41.224	1273.802	-0.40723	1.2734	-1.5195	4.564	128.7715	1032.5506	-0.77734	0.9502	-1.1445	11.356	-122.002	1507.634	-0.63789	1.1574	-1.6324	64.38	190.213	1566.363	-0.87008	1.1272	-2.2745
0.906	-80.653	-10.447	1273.422	-0.34814	1.2368	-1.5405	12.591	154.254	1023.0374	-0.7124	0.87939	-1.0679	57.243	-178.675	1471.38	-0.6707	1.3232	-1.5998	51.788	172.181	1562.956	-0.87573	1.0884	-2.213
0.908	-39.5987	2.768	1275.152	-0.31738	1.2148	-1.5625	25.511	180.2929	979.5855	-0.66894	0.81762	-1.0134	105.327	-212.009	1390.689	-0.68164	1.4551	-1.5879	35.21	127.5464	1571.4843	-0.87109	1.0508	-2.1523
0.91	-36.832	-20.707	1281.616	-0.28125	1.1621	-1.623	-25.527	132.385	954.4696	-0.61914	0.76465	-0.95215	132.507	-298.088	1385.302	-0.6794	1.5405	-1.6048	22.398353	97.836	1580.46964	-0.85231	1.0116	-2.092
0.912	-42.233	-42.669	1296.663	-0.28467	1.1355	-1.6745	1.959	162.369207	909.67385	-0.55615	0.69775	-0.87451	116.908	-326.19	1316.35	-0.68487	1.5981	-1.6343	35.972	98.973	1549.202	-0.83394	0.97446	-2.031
0.914	-54.6038	-75.8884	1332.793	-0.30127	1.127	-1.7344	-12.327	177.0173	853.2808	-0.52832	0.6626	-0.83545	115.052	-339.51	1251.63605	-0.71025	1.6196	-1.6706	71.88	106.772	1544.159	-0.82066	0.94956	-1.9733
0.916	-31.2465	-80.793	1334.449	-0.33594	1.1445	-1.8184	-3.962	178.509	820.189	-0.45996	0.59668	-0.76465	129.168	-284.934	1203.28	-0.7625	1.6213	-1.7127	80.025	135.523	1493.49	-0.8035	0.93514	-1.9115
0.918	-34.23143	-88.1945	1354.65	-0.35254	1.1587	-1.8589	45.9832	213.327	772.792	-0.41528	0.54223	-0.70971	118.369	-259.455	1234.528	-0.80273	1.6055	-1.7588	50.0696	155.239	1437.107	-0.78516	0.92578	-1.8477
0.92	-29.5981	-82.8107	1373.62	-0.38574	1.2212	-1.9272	-15.229	185.0564	723.4018	-0.36475	0.49658	-0.65088	66.062	-189.397	1258.249	-0.82217	1.5997	-1.7925	11.857	190.074	1370.037	-0.74144	0.909	-1.7708
0.922	-8.454	-97.98	1374.258	-0.42188	1.2813	-1.9756	-24.383	177.6826	696.226	-0.30859	0.43164	-0.58105	74.14	-148.838	1239.413	-0.81328	1.6125	-1.8262	7.8982	240.065	1343.185	-0.69986	0.88948	-1.6973
0.924	-8.069	-98.404	1361.571	-0.4541	1.3496	-2.0098	16.828	179.88725	648.726	-0.27148	0.39697	-0.54834	96.597	-137.71	1223.291	-0.78555	1.6441	-1.8601	1.612	291.539	1287.045	-0.65609	0.86096	-1.6188
0.926	-32.179215	-100.94	1374.922	-0.479	1.4302	-2.0444	-4.157	142.604	635.5414	-0.21045	0.33594	-0.47705	73.518	-132.98	1274.049	-0.7583	1.6849	-1.8925	41.8109	312.238	1255.16	-0.61066	0.81438	-1.5402
0.928	-30.4856	-88.9999	1402.155	-0.48877	1.4653	-2.0542	30.779	160.1573	586.952	-0.17139	0.29126	-0.43018	72.173	-136.08	1270.144	-0.73535	1.7153	-1.9351	19.393	317.573	1133.8289	-0.56494	0.76367	-1.4609
0.93	-33.8295	-89.8664	1408.442	-0.49072	1.5142	-2.0483	-13.858	148.894	526.6659	-0.12695	0.24219	-0.38477	87.009	-136.118	1334.8186	-0.69297	1.7424	-1.9564	6.191	303.112	1081.071	-0.51747	0.7038	-1.3819
0.932	-46.233	-64.0609	1401.322	-0.48682	1.5341	-2.0362	-17.45	125.8766	484.9149	-0.071777	0.18506	-0.31885	133.9334	-172.316	1401.256	-0.64951	1.7684	-1.9487	-37.361	282.89402	1020.131	-0.46874	0.6495	-1.2895
0.934	-67.89	-36.962	1357.53	-0.47754	1.5391	-2.0156	12.289	159.085	441.4992	-0.030762	0.1377	-0.27002	57.929	-255.945	1445.7168	-0.59209	1.7829	-1.914	7.389	274.171	1005.6695	-0.4332	0.5995	-1.1933
0.936	-68.605	-16.5824	1339.902	-0.47266	1.499	-1.9629	-17.086	129.0659	419.738	0.0068359	0.089844	-0.22607	2.98700000000001	-350.694	1476.8845	-0.53408	1.7697	-1.881	2.126	262.566	978.298	-0.3912	0.55683	-1.1033
0.938	-79.923	11.5668	1330.109	-0.48047	1.4648	-1.9336	42.627	108.763	384.484	0.05957	0.029785	-0.1665	-64.50573	-411.582	1570.007	-0.47363	1.7148	-1.8516	38.321	236.513	947.226	-0.33984	0.50977	-1.002
0.94	-92.905	25.6807	1329.3522	-0.50732	1.395	-1.8823	25.957	114.7583	338.2365	0.085938	-0.0048828	-0.146	-109.427	-404.938	1637.696	-0.4249	1.5979	-1.8345	-11.028	206.356	858.2049	-0.28399	0.45743	-0.90196
0.942	-103.599	16.735	1314.22582	-0.5293	1.3433	-1.8344	-18.033	88.904	302.332	0.1333	-0.080566	-0.090332	-148.371	-352.302	1692.506	-0.3916	1.4453	-1.8235	-21.607	209.191	807.3455	-0.22803	0.39073	-0.81241
0.944	-101.433	-1.423	1330.971	-0.55469	1.3032	-1.7925	49.953	109.3565	276.1245	0.15918	-0.1333	-0.056397	-89.1	-285.049	1695.187	-0.37129	1.2859	-1.8078	-90.445	215.17	751.9056	-0.16358	0.31338	-0.71358
0.946	-130.281	-27.4451	1330.257	-0.58887	1.2734	-1.7617	-0.265000000000001	128.6453	234.9524	0.18604	-0.1792	-0.026855	-79.0064	-231.31	1735.784	-0.35869	1.1737	-1.8055	-33.183	234.341	709.601	-0.10137	0.23731	-0.61602
0.948	-115.292	-37.9067	1334.052	-0.6001	1.2646	-1.7539	19.448	110.4612	205.59	0.21777	-0.24023	0.015625	-74.5028	-142.098	1744.636	-0.35352	1.1016	-1.8301	-73.604	226.624	645.1714	-0.04248	0.16309	-0.52393
0.95	-117.478	-38.271	1334.21	-0.61914	1.2637	-1.7383	39.167	126.666	174.124	0.23096	-0.26709	0.029297	-70.264	-129.0265	1740.265	-0.35918	1.059	-1.8883	-55.915	217.539	561.438	0.017872	0.086035	-0.44589
0.952	-86.046	-27.579	1327.439	-0.62866	1.2717	-1.7361	-37.147	97.9409	143.225	0.25	-0.30811	0.056641	-44.998	-43.451	1762.965	-0.37002	1.0476	-1.9804	-87.537	212.4434	503.613	0.07295	0.00087739	-0.36201
0.954	-118.521	-35.7912	1319.581	-0.63428	1.2798	-1.7339	13.015	77.8331	137.5157	0.27222	-0.33618	0.070069	-55.67	-26.04	1805.028	-0.39658	1.0812	-2.1016	-97.787	228.5033	426.4165	0.12842	-0.074904	-0.28466
0.956	-120.789	-38.09	1318.487	-0.63232	1.2876	-1.728	2.263	108.573	107.533	0.29492	-0.36426	0.084473	-49.8223	24.387	1810.914	-0.44043	1.1639	-2.2252	-87.714	274.919	377.937	0.1833	-0.15352	-0.20039
0.958	-102.732	-54.82	1320.347	-0.62646	1.2876	-1.7261	-11.158	60.5151	88.9437	0.32031	-0.40137	0.087402	-67.367	6.58500000000001	1770.961	-0.49609	1.2754	-2.3496	-74.717	287.463	274.98765	0.22656	-0.22607	-0.1167
0.96	-66.998	-29.6461	1303.939	-0.60889	1.2817	-1.7163	10.739	63.8247	87.808	0.3335	-0.42285	0.085938	-77.131	22.277	1730.247	-0.54346	1.4189	-2.4616	-72.315	263.715	226.546	0.2667	-0.29971	-0.042188
0.962	-77.377	-26.2608	1291.48	-0.59521	1.2739	-1.6997	-34.059	64.8983	57.94	0.34619	-0.45117	0.07666	-101.225	-19.07	1710.572	-0.57901	1.5771	-2.5749	-104.049	210.834	152.534	0.30274	-0.38037	0.014062
0.964	-78.715	-8.18	1254.643	-0.57617	1.2695	-1.6875	-34.639	30.353	44.5321	0.34424	-0.4668	0.063721	-93.536	-25.422	1734.994	-0.60713	1.7551	-2.6608	-73.095	171.746	153.494	0.33633	-0.46045	0.061328
0.966	-71.992	5.6449	1221.746	-0.55615	1.2544	-1.6616	-17.253	63.48	44.9698	0.33398	-0.47461	0.045898	-75.5088	-76.665	1774.7083	-0.63721	1.9294	-2.7175	-70.643	156.19	119.047	0.35527	-0.53555	0.10332
0.968	-52.637	42.192	1195.505	-0.54956	1.2356	-1.6413	-39.368	46.6525	49.2416	0.30908	-0.46826	0.0097656	-6.28	-80.371	1851.957	-0.67578	2.0996	-2.748	-53.889	154.791	132.662	0.36475	-0.59912	0.12402
0.97	-40.2295	70.256	1185.5322	-0.54053	1.2192	-1.6128	-15.639	28.319	64.595	0.28809	-0.45898	-0.012207	-11.674	-136.324	1873.054	-0.7207	2.2277	-2.7445	-88.2954	115.114	97.8505	0.36397	-0.65869	0.13867
0.972	-22.2329	83.536	1190.732	-0.53271	1.1919	-1.5757	-30.093	42.6551	51.7906	0.23291	-0.42383	-0.054199	4.32	-134.907	1875.635	-0.76523	2.3149	-2.725	-91.552	61.703	84.352	0.35401	-0.69912	0.14072
0.974	-16.0211	78.269	1197.939	-0.52686	1.186	-1.563	-43.622	13.384	34.4845	0.1831	-0.38501	-0.093263	13.9654	-144.98	1876.657	-0.81407	2.3348	-2.6942	-75.968	21.3559	66.09166	0.32588	-0.70772	0.13447
0.976	-26.4229	71.949	1191.713	-0.51953	1.1563	-1.5332	-26.132	28.1757	39.6438	0.13477	-0.33398	-0.13428	31.2366	-89.845	1851.359	-0.85342	2.2856	-2.6577	3.994	-11.344	102.034	0.27871	-0.68711	0.10713
0.978	-33.7105	47.468	1171.523	-0.51319	1.1372	-1.5019	-39.33	47.1608	30.5194	0.069824	-0.25586	-0.19336	-8.1071	-65.165	1800.188	-0.90674	2.1899	-2.605	-31.537	-42.7549	104.403	0.21143	-0.63818	0.063477
0.98	-6.062	46.7902	1155.593	-0.51025	1.1074	-1.4766	-26.461	12.049	38.349	0.040527	-0.2124	-0.21484	22.873	0.952999999999999	1788.121	-0.98389	2.0562	-2.5239	-0.417999999999999	-56.9931	110.288	0.13028	-0.57207	0.0098634
0.982	-19.264	39.6367	1139.273	-0.51709	1.0864	-1.4331	-31.196	35.383	33.9358	-0.025391	-0.13477	-0.26855	9.186	14.875	1732.612	-1.0499	1.9145	-2.4456	-1.972	-58.8854	53.30052	0.049707	-0.47031	-0.053711
0.984	-18.941	34.110741	1122.871	-0.51563	1.0723	-1.4141	-40.806	15.3304	7.754	-0.074219	-0.075684	-0.30249	-14.064	62.0752	1681.617	-1.0792	1.7806	-2.3702	21.255	-42.7351	16.359	-0.039355	-0.34726	-0.13067
0.986	-56.7177	32.4131	1099.208	-0.50781	1.0391	-1.373	-20.385	-3.6115	40.1	-0.11475	-0.015625	-0.3291	-56.075	69.54289	1627.665	-1.0817	1.6854	-2.3138	22.203	-20.632	13.6402	-0.13388	-0.22871	-0.21416
0.988	-44.7137	37.395	1084.732	-0.49902	1.0149	-1.3357	-13.995	28.6963	47.7676	-0.15479	0.069824	-0.35938	-41.8607	105.4613	1581.739	-1.062	1.6255	-2.269	42.292	12.2285	21.4069	-0.22559	-0.11035	-0.29053
0.99	-60.577	45.80632	1069.149	-0.48535	0.98633	-1.2988	-6.985	14.861	24.1162	-0.17334	0.10596	-0.37061	-82.766	109.3573	1597.9999	-1.033	1.6065	-2.2256	12.245	34.564	28.4999	-0.29883	0.0068356	-0.36074
0.992	-49.1296	64.956	1061.485	-0.45898	0.93164	-1.2461	18.117	25.2263	28.8232	-0.18701	0.16797	-0.37744	-82.36	149.747	1567.707	-0.9876	1.5935	-2.1792	-14.327	52.974	4.9996	-0.35732	0.11797	-0.42041
0.994	-61.8232	81.726	1039.186	-0.44775	0.90869	-1.2241	-27.553	36.5946	19.57	-0.17895	0.21021	-0.38354	-71.524	148.038	1536.957	-0.93604	1.5825	-2.1292	-40.368	66.608	-1.444	-0.39717	0.22578	-0.47354
0.996	-48.4801	110.362	998.873	-0.41699	0.85156	-1.1758	4.549	-9.9731	34.795	-0.16309	0.24072	-0.375	-68.12	149.434	1536.171	-0.87588	1.5698	-2.0761	-41.753	57.119	-7.9314	-0.42861	0.32354	-0.52138
0.998	-69.28859	119.337	963.464	-0.39648	0.81616	-1.1335	29.048	4.8559	58.894	-0.13818	0.25879	-0.35547	-97.161	103.971	1534.507957	-0.82031	1.5391	-2.0117	2.647	62.281	16.48328	-0.44531	0.41309	-0.54785
1	-61.5924	119.905	942.184	-0.375	0.7832	-1.0986	-17.554	9.1103	40.049	-0.11865	0.26025	-0.34229	-131.777	100.142	1503.564	-0.77637	1.4951	-1.9412	24.28	69.4363	9.26	-0.45283	0.50381	-0.56357
1.002	-56.484	118.526	933.165	-0.34082	0.73535	-1.0527	17.048	-8.6613	46.72	-0.087402	0.25635	-0.30518	-95.63	101.242	1508.3034	-0.74561	1.4368	-1.8589	3.643	74.93	14.597	-0.4622	0.57637	-0.56797
1.004	-28.59	135.873	902.805	-0.32568	0.71143	-1.021	-10.396	16.9146	35.475	-0.058594	0.23852	-0.27221	-93.202	95.1234	1503.458	-0.71201	1.365	-1.7761	-26.629	34.4612	-9.23699999999999	-0.46612	0.63262	-0.57696
1.006	-71.5946	126.615	860.612	-0.29199	0.66211	-0.97656	-31.615	-2.959	18.318	-0.038086	0.2168	-0.24072	-82.1464	91.4405	1504.088	-0.67803	1.2813	-1.6921	-10.658	10.907	33.4446	-0.46641	0.66778	-0.57285
1.008	-56.5007	133.417	840.857	-0.26782	0.62085	-0.94166	26.334	-6.6452	33.7803	-0.020996	0.18701	-0.20361	-93.7536	83.58	1474.53	-0.64404	1.188	-1.6089	-41.549	-34.517	38.7818	-0.45459	0.68604	-0.56201
1.01	-54.308	114.7106	836.858	-0.24609	0.58691	-0.9043	-21.119	23.7525	3.143	-0.012207	0.18066	-0.1792	-38.3118	87.397	1394.693	-0.6336	1.1014	-1.5377	4.579	-29.639	65.843	-0.44395	0.68652	-0.53896
1.012	-38.677	110.794	792.785	-0.21533	0.55127	-0.85889	-8.17	-9.3279	29.893	-0.0039063	0.16162	-0.14746	-79.873	119.859	1368.698	-0.6207	1.0258	-1.4723	-54.376	-51.2238	36.542	-0.42569	0.67412	-0.50849
1.014	-33.932	85.41475	769.8725	-0.20068	0.53271	-0.83154	6.931	4.0127	33.3182	-0.0021973	0.16016	-0.12012	-67.7119	160.858	1312.89	-0.60782	0.97227	-1.4086	-67.372	-24.691	46.9836	-0.39834	0.64873	-0.46201
1.016	-6.747	75.3316	762.834	-0.1709	0.50195	-0.7832	-44.709	12.3117	20.5168	0.00097656	0.16846	-0.10498	-68.7707	205.0804	1269.3	-0.58574	0.9374	-1.3497	-125.683	-7.5234	30.359	-0.36143	0.61202	-0.40791
1.018	-2.20200000000001	68.447	760.723	-0.1416	0.47021	-0.7522	-6.518	-15.793	31.79	0.0063477	0.17383	-0.080078	11.053	267.858	1204.602	-0.56006	0.91846	-1.2808	-45.782	30.068	45.0702	-0.31836	0.56055	-0.34766
1.02	-3.43	77.6206	738.061	-0.11426	0.44238	-0.71582	-15.862	23.6857	15.2263	0.01123	0.17334	-0.067383	-1.957	284.069	1161.429	-0.53291	0.90439	-1.2268	-66.605	41.6034	48.7072	-0.26885	0.51162	-0.28428
1.022	2.367	92.2861	714.557	-0.07373	0.39453	-0.66162	-35.95	7.888	22.359041	0.023926	0.17969	-0.048828	22.189	284.375	1105.283	-0.4918	0.89961	-1.1512	-26.85	61.024	51.887	-0.21709	0.46211	-0.22285
1.024	41.105	108.169	678.646	-0.054688	0.37842	-0.64209	-19.617	-4.79283	38.793	0.028565	0.18213	-0.035156	22.573	244.164	1098.015	-0.44062	0.88711	-1.0793	-52.279	41.1781	37.932	-0.16279	0.40547	-0.16972
1.026	13.726	112.83	638.04	-0.019043	0.33398	-0.58789	-55.614	20.0574	4.855	0.033203	0.18408	-0.023926	66.9824	237.947	1050.538	-0.37705	0.85752	-0.99756	-41.753	49.458	26.082	-0.11729	0.34776	-0.12148
1.028	13.312	123.868	601.387	0.0053711	0.30127	-0.55786	-43.275	-13.4026	13.34384	0.038574	0.17676	-0.012695	51.136	216.9398	1040.549	-0.31152	0.81104	-0.91455	-37.112	50.248	20.6028	-0.071777	0.28662	-0.07959
1.03	-8.472	123.4977	571.674	0.032715	0.26611	-0.52539	-4.432	10.4863	14.3356	0.040039	0.17041	-0.003418	85.332	230.692	960.106	-0.23721	0.75273	-0.83301	-4.378	51.0738	24.6247	-0.031153	0.23291	-0.048633
1.032	26.683	122.2838	545.092	0.070801	0.22168	-0.48242	-47.167	21.6603	9.9716	0.036621	0.16357	0.0048828	69.002	188.491	900.565	-0.16875	0.69375	-0.74844	-10.536	20.60283	19.8775	0.0012695	0.17608	-0.022656
1.034	6.418	123.562	496.225	0.088379	0.20166	-0.46289	-14.488	-25.2582	33.36	0.033691	0.14917	0.003418	75.882	169.939	811.5575	-0.098437	0.62109	-0.66016	-11.032	-11.9092	12.8914	0.027832	0.12685	0.0027344
1.036	7.254	112.276	464.7987	0.11719	0.16455	-0.42334	-40.036	3.95768	20.0005	0.036133	0.13525	0.0097656	29.167	126.067	764.3134	-0.027539	0.54971	-0.56943	-3.577	-16.8121	20.4264	0.046973	0.088867	0.023926
1.038	-19.695	102.7441	459.104	0.13428	0.13745	-0.39038	-35.48	1.083	17.53447	0.039063	0.1123	0.010742	23.967	124.584	710.888	0.037598	0.46924	-0.48096	-13.85	-8.393657	19.0694	0.067383	0.054688	0.038574
1.04	0.936	113.393	413.088	0.1543	0.11377	-0.3584	18.506	1.7018	32.427	0.041504	0.10791	0.012207	24.866	115.082	703.241	0.098926	0.38223	-0.3916	23.09	0.0298999999999996	51.508	0.081543	0.02373	0.044336
1.042	-31.768	115.236	384.955	0.18115	0.09082	-0.33789	-15.688	36.2346	14.1567	0.044922	0.091309	0.01416	35.285	151.104	642.336	0.16377	0.29365	-0.30957	-8.272	-29.7959	51.953	0.091698	0.0069336	0.057715
1.044	-26.352	118.029	368.2881	0.19092	0.07666	-0.31641	-4.746	7.1056	19.802	0.053467	0.079346	0.016113	35.543	161.53536	588.669	0.22627	0.21162	-0.23809	29.719	-45.605	48.526	0.10849	-0.0012695	0.062012
1.046	-47.301	92.6277	362.736	0.19971	0.052246	-0.28955	7.796	27.2951	7.6693	0.063477	0.066406	0.012207	38.722	195.586	505.639	0.29726	0.13213	-0.15957	-15.991	-60.358	33.07	0.12343	-0.0071289	0.066894
1.048	-39.465	91.37	328.366	0.20874	0.036621	-0.27246	-25.781	46.6832	-2.577	0.07959	0.039551	0.01416	23.089	179.787	431.444	0.36475	0.054688	-0.086426	30.031	-17.766	36.793	0.1416	-0.010254	0.072754
1.05	-74.8174	80.365	308.471	0.21191	0.020508	-0.25439	7.41	-7.1807	38.543	0.094238	0.023926	0.015137	3.378	203.228	385.3387	0.43027	-0.035644	-0.020508	7.184	2.257	20.3509	0.16767	-0.017286	0.073144
1.052	-60.0162	76.916	290.397	0.21533	0.0063477	-0.24316	-3.89	24.197	33.8308	0.11963	-0.0039063	0.01709	-12.818	190.719	311.614	0.49121	-0.11465	0.037012	29.578	47.274	38.184	0.18691	-0.027539	0.074121
1.054	-65.0458	62.7085	285.59	0.22168	-0.0019531	-0.23486	-8.474	10.8603	24.791	0.1372	-0.021972	0.021485	-35.394	194.973	229.362	0.54746	-0.20762	0.088184	-24.329	36.696	-4.4855	0.20918	-0.043555	0.077246
1.056	-46.284	70.3587	259.636	0.23193	-0.019043	-0.21631	14.611	0.5778	16.4911	0.15137	-0.043457	0.023438	-37.111	157.4302	180.679	0.59434	-0.29512	0.13154	-29.008	61.8304	-14.3745	0.23155	-0.05957	0.080176
1.058	-58.3698	67.913	248.754	0.22436	-0.032227	-0.20605	-24.479	51.362	11.287	0.1748	-0.069336	0.020996	-49.408	132.713	123.529	0.62988	-0.38477	0.16211	-26.6	45.0877	-13.822	0.24561	-0.074707	0.087891
1.06	-53.2715	73.8842	211.747	0.21436	-0.035645	-0.19775	-0.457999999999998	10.376	25.3747	0.18408	-0.081055	0.018555	-60.081	109.0136	92.08	0.6455	-0.4668	0.18476	-9.634	56.915	21.0927	0.25567	-0.089356	0.09375
1.062	-61.448	66.0987	198.878	0.19971	-0.042969	-0.19727	10.719	17.2412	22.67	0.20313	-0.11084	0.01709	-73.109	106.7	106.5088	0.63848	-0.53222	0.1999	-33.797	43.464	12.5659	0.26279	-0.099415	0.098437
1.064	-49.117	74.271	165.037	0.19775	-0.047363	-0.19385	-29.384	33.3711	18.367	0.23096	-0.13623	0.016113	-39.27	106.644	79.3916	0.62871	-0.58886	0.20654	-58.406	50.081	32.534	0.27686	-0.11347	0.10625
1.066	-43.483	81.258	157.609	0.18848	-0.053223	-0.18115	1.447	-14.61353	39.685	0.24658	-0.15186	0.013672	-30.409	114.041	106.849	0.60879	-0.62959	0.21035	-88.6633	25.723	17.473	0.28594	-0.12158	0.11347
1.068	-18.07	84.981	145.984	0.18066	-0.061279	-0.18701	-29.713	21.9514	39.8551	0.26563	-0.17822	0.01123	28.759	84.301	101.573	0.58936	-0.66846	0.20361	-71.298	19.963	22.124	0.29346	-0.12891	0.11963
1.07	-24.155	70.139	130.963	0.16846	-0.063965	-0.19092	-33.929	10.111	37.6977	0.2793	-0.19263	0.011231	9.932	51.762	105.081	0.54766	-0.69482	0.17129	-74.6886	9.908	28.46	0.29375	-0.13272	0.12031
1.072	-11.723	64.331	120.913	0.14844	-0.066406	-0.18994	3.354	1.62049	26.876	0.28809	-0.21045	0.0097656	-7.663	32.3158	80.024	0.48877	-0.7003	0.12119	-38.23	12.005	44.8332	0.29404	-0.13692	0.11777
1.074	-24.572	56.7	113.247	0.13818	-0.061523	-0.19434	-41.43	42.3698	15.2498	0.29053	-0.2251	0.0048828	-22.542	13.403	90.046	0.42432	-0.67412	0.049707	-30.651	11.034	57.1862	0.28779	-0.13652	0.11387
1.076	13.12	60.378	109.0255	0.10791	-0.042969	-0.19824	-24.004	-0.715	36.1852	0.2876	-0.22852	0.0039063	-22.102	20.0816	67.212	0.33203	-0.61133	-0.029004	-55.286	-5.865	49.2751	0.28438	-0.13281	0.11445
1.078	3.038	65.22	101.011	0.088379	-0.029785	-0.20069	-23.333	4.1512	31.5816	0.28369	-0.23096	0.0048828	-23.4275	-11.5764	77.034	0.22412	-0.51025	-0.11914	-36.133	-18.5711	38.804	0.27588	-0.13037	0.10742
1.08	12.292	53.317	80.963	0.073242	-0.015137	-0.19971	-64.406	24.6886	23.802	0.27539	-0.22851	-0.0021973	26.7639	-13.063	41.1548	0.10528	-0.38829	-0.22022	-34.057	-30.4558	44.6666	0.26338	-0.12734	0.10381
1.082	11.708	25.2431	79.526	0.056152	0.010254	-0.20117	-15.027	-0.5188	30.41	0.26221	-0.22559	-0.010254	19.801	-13.64	32.3507	-0.011817	-0.25293	-0.32666	-22.095	3.736	55.426	0.24882	-0.12549	0.097266
1.084	2.88	26.2792	63.626	0.049805	0.023438	-0.20264	-34.582	31.6336	33.9852	0.24658	-0.21436	-0.021973	14.393	21.5153	9.542	-0.11182	-0.12714	-0.43603	-15.186	15.4748	47.139	0.22813	-0.11377	0.089453
1.086	-15.024	32.429	68.022	0.039551	0.039551	-0.19971	-30.95	4.72	36.0668	0.24268	-0.20801	-0.029785	-0.485999999999997	18.48237	1.6908	-0.19121	-0.0052732	-0.53867	2.636	44.9352	55.265	0.20401	-0.10674	0.077246
1.088	-8.072	31.709	60.04	0.029785	0.045655	-0.1936	-13.259	-21.496	28.4256	0.22998	-0.19727	-0.043457	4.559	49.235	-7.6906	-0.24658	0.11279	-0.62451	-57.148	36.6493	14.3983	0.18213	-0.09668	0.0625
1.09	-14.931	20.156	64.512	0.022949	0.052734	-0.18115	-47.022	25.719	12.442	0.22241	-0.18726	-0.05249	-14.09	43.027	28.5525	-0.28174	0.2373	-0.69258	-7.904	47.384	33.987	0.1541	-0.079492	0.048632
1.092	-22.71	24.47157	51.321	0.015625	0.056641	-0.17871	-3.592	-14.3962	33.2702	0.21191	-0.18262	-0.066895	28.956	55.866	25.7912	-0.29629	0.35244	-0.74893	-7.421	30.171	14.8837	0.12578	-0.054394	0.035059
1.094	-44.139	29.406	35.435	0.0078125	0.061035	-0.17188	0.0350000000000037	2.7175	41.8747	0.19922	-0.16797	-0.083496	14.406	19.0691	68.876	-0.30019	0.47744	-0.7833	52.911	28.5913	32.6766	0.1	-0.029394	0.019824
1.096	-24.876	42.594	35.26	-0.00097656	0.062012	-0.16113	-21.585	14.19	31.3008	0.19434	-0.16162	-0.093262	-15.485	27.1418	57.207	-0.2874	0.57451	-0.80361	28.939	-3.7676	17.3408	0.070117	0.00058596	0.0013672
1.098	-42.9298	43.067	38.04	-0.0029297	0.061524	-0.15015	10.665	-21.028	18.7385	0.18506	-0.15332	-0.11182	-55.985	2.83205	78.241	-0.28418	0.64697	-0.80225	23.702	-1.7673	24.6247	0.044922	0.02832	-0.013672
1.1	-55.456	43.5301	28.484	-0.0073242	0.062988	-0.13965	-10.364	11.2307	12.762	0.17847	-0.14648	-0.12427	-26.551	31.5635	37.687	-0.27266	0.68564	-0.7874	-14.888	-23.323	17.7237	0.024512	0.059277	-0.027929
1.102	-61.1566	33.4044	26.7712	-0.012695	0.061035	-0.12646	-7.071	3.8985	21.49668	0.17139	-0.13525	-0.13574	-68.4949	-10.6024	26.55723	-0.2541	0.6959	-0.75703	33.94	-5.724	31.6848	0.0096679	0.086328	-0.03916
1.104	-60.6005	37.803	16.8344	-0.016113	0.05957	-0.11914	13.571	-7.6631	33.059	0.1626	-0.11963	-0.15137	-32.611	-26.153	7.61	-0.23652	0.68926	-0.72149	20.274	-19.10646	22.737	-0.0024414	0.10664	-0.045801
1.106	-64.8467	38.491	22.3864	-0.023926	0.063477	-0.10986	-8.251	24.6376	23.4927	0.15918	-0.11182	-0.16064	-65.504	-77.531	21.1675	-0.21357	0.66045	-0.66807	-6.833	0.754000000000001	37.456	-0.012598	0.12588	-0.050195
1.108	-68.3747	33.9955	15.1618	-0.040039	0.064941	-0.10156	7.64700000000001	-27.253	53.2705	0.15088	-0.10205	-0.17969	-67.046	-60.222	0.426200000000001	-0.19043	0.60938	-0.61133	-38.858	-4.6657	22.2232	-0.016113	0.14502	-0.054688
1.11	-73.9838	18.0416	41.719	-0.044434	0.061523	-0.092285	-7.725	-29.604	62.463	0.14966	-0.10889	-0.20069	-88.962	-40.379	27.867	-0.16845	0.53506	-0.54306	-47.584	8.22800000000001	22.3482	-0.026367	0.15859	-0.059863
1.112	-65.4806	12.9582	38.1217	-0.054199	0.066895	-0.089355	-26.691	-1.0735	80.623	0.14795	-0.12207	-0.23193	-52.151	-7.103	14.9881	-0.14316	0.44893	-0.47207	-47.985	6.539	11.002	-0.027832	0.17451	-0.063183
1.114	-60.2001	6.2268	38.1918	-0.059814	0.06836	-0.084961	57.902	1.9006	107.9991	0.11572	-0.13525	-0.29443	-75.23548	7.673	45.329	-0.11035	0.36065	-0.40488	-33.54	-1.873	14.4511	-0.027442	0.18155	-0.065137
1.116	-59.7889	4.549	36.8471	-0.061523	0.066406	-0.081055	14.531	58.973	129.605	0.097656	-0.13037	-0.31348	-15.799	28.814	38.5363	-0.078027	0.28359	-0.33174	-23.434	4.454	42.7063	-0.027637	0.18701	-0.063769
1.118	-45.16	13.6055	45.8178	-0.062988	0.071289	-0.079102	-9.538	53.7574	185.971	0.020508	-0.091797	-0.35547	-34.785	24.7044	49.7558	-0.043457	0.21436	-0.26953	-56.228	14.82	27.4348	-0.02002	0.1958	-0.0625
1.12	-22.053	15.4328	33.3583	-0.061523	0.067871	-0.07666	-1.015	17.3476	246.5621	-0.044922	-0.049316	-0.4082	-24.957	46.511	18.7506	-0.022364	0.15576	-0.22549	-33.304	57.499	17.261	-0.02168	0.19746	-0.062695
1.122	-28.075	19.76234	22.60294	-0.054688	0.064941	-0.076172	-0.370000000000001	52.202	303.842	-0.11475	-0.0068359	-0.48438	-40.22833	27.88	18.9116	-0.0004883	0.10655	-0.17442	-63.701	66.4703	0.236000000000001	-0.014453	0.20664	-0.063086
1.124	-13.412	16.5028	17.3731	-0.046875	0.062011	-0.070557	30.911	56.089	378.246	-0.20068	0.068848	-0.57666	-24.634	48.3323	2.5716	0.0088867	0.066699	-0.13067	-48.216	79.956	7.253	-0.0085938	0.21328	-0.057226
1.126	-0.376999999999995	10.2839	45.9639	-0.039551	0.058594	-0.06543	14.481	91.7802	452.498	-0.24268	0.11523	-0.61865	-42.795	32.2107	-12.53906	0.0125	0.032031	-0.096386	-79.762	55.5905	10.466	0.00058594	0.2209	-0.058789
1.128	15.437	4.85319	37.0114	-0.02832	0.048828	-0.065918	-41.035	126.3009	509.5561	-0.34131	0.21191	-0.70459	0.967000000000006	26.2686	-27.2153	0.018555	0.0043945	-0.074219	-43.847	41.431	35.537	0.011719	0.2251	-0.04834
1.13	-18.864	9.41005	29.356	-0.016113	0.041992	-0.061523	-30.501	91.7114	552.771	-0.42432	0.28271	-0.78393	10.561	-11.62	-3.612	0.015918	-0.0079101	-0.055176	-75.6713	3.1431	36.506	0.031641	0.22705	-0.035547
1.132	-1.201	24.913	35.321	0.0014648	0.030273	-0.053711	-26.201	103.39	604.848	-0.50537	0.36377	-0.85498	1.921	-12.634	31.8621	0.0089845	-0.02334	-0.038379	-41.381	12.25775	56.837	0.048242	0.22637	-0.025586
1.134	2.365	31.953	30.4349	0.014161	0.016357	-0.044678	-31.182	77.3524	659.6271	-0.60938	0.47852	-0.94922	-19.395	-29.2356	51.405	0.0015625	-0.026856	-0.031348	-48.922	-14.7133	58.36	0.060351	0.21778	-0.024414
1.136	6.53	33.392	21.2609	0.027344	0.003418	-0.035645	-19.994	47.953	737.738	-0.65967	0.53369	-0.98975	7.114	11.745	48.968	-0.0080078	-0.023242	-0.022461	-11.304	6.4928	70.75	0.077246	0.20957	-0.020996
1.138	-6.786	19.5242	35.2052	0.044434	-0.021484	-0.027344	-41.735	54.917	794.815	-0.75391	0.63477	-1.0742	18.899	4.0865	45.9686	-0.010254	-0.018555	-0.013184	-24.695	-9.517	37.8501	0.094238	0.19482	-0.016113
1.14	20.367	20.1733	29.7802	0.055664	-0.035645	-0.025391	-88.781	0.7134	820.483	-0.81909	0.70923	-1.1346	34.48	11.2655	41.3889	-0.0026367	-0.011328	-0.0054688	15.907	8.7799	52.9224	0.095508	0.18965	-0.016016
1.142	5.725	2.0328	33.55545	0.064941	-0.051758	-0.030273	-76.741	-42.097	836.1269	-0.8667	0.77588	-1.1812	28.782	-4.204	29.4569	0.0084962	-0.0074219	-0.00029297	-10.009	-2.3638	31.93348	0.10059	0.18037	-0.019726
1.144	-21.162	8.2934	23.13639	0.07373	-0.064453	-0.02002	-63.274	-46.343	817.2259	-0.88672	0.85156	-1.2266	8.47	30.93	23.1173	0.031152	-0.0066406	0.013379	25.419	7.7063	48.482	0.10215	0.18193	-0.024805
1.146	-32.427	-0.5965	40.0102	0.083008	-0.078125	-0.019531	-9.886	-89.513	855.296	-0.88037	0.8833	-1.2456	-6.38200000000001	33.128	30.7995	0.054785	-0.021387	0.029687	5.393	1.3818	30.361	0.095898	0.18926	-0.037403
1.148	-28.944	-7.5706	34.5857	0.088379	-0.087402	-0.023438	-11.088	-70.287	860.961	-0.84521	0.90283	-1.2729	-38.968	45.325	60.17	0.075684	-0.041016	0.041504	17.156	3.315	29.989	0.084473	0.19922	-0.057617
1.15	-30.751	-6.0891	36.327	0.098145	-0.09082	-0.022949	-58.8413	-77.27	809.6203	-0.79273	0.87329	-1.2854	-48.6985	11.947	38.84866	0.09668	-0.066504	0.058203	2.694	9.5869	34.3676	0.073731	0.22051	-0.088477
1.152	-57.9082	-6.4205	36.405	0.10645	-0.1001	-0.024902	-56.888	-92.8794	811.252	-0.73584	0.81885	-1.2905	-33.807	16.2779	56.6589	0.11065	-0.092187	0.066894	10.4	20.2668	50.424	0.058692	0.24424	-0.12647
1.154	-51.7243	1.6189	35.1197	0.11597	-0.11182	-0.027832	-61.923	-56.0878	806.322	-0.65625	0.72266	-1.293	-21.619	18.1615	13.277	0.12666	-0.11289	0.07666	14.944	36.9873	32.5247	0.043457	0.25986	-0.17998
1.156	-59.8396	18.3261	27.079	0.12598	-0.11816	-0.02832	-36	-86.601	826.766	-0.62646	0.67236	-1.2983	-41.001	21.4458	14.1821	0.13594	-0.13574	0.079687	12.991	35.0097	49.26	0.028516	0.27842	-0.23731
1.158	-69.0607	21.65797	25.102457	0.14258	-0.12646	-0.035645	-26.557	-96.625	814.251	-0.5957	0.57129	-1.3086	-67.1252	16.0089	15.1781	0.14063	-0.1582	0.082031	14.734	24.9843	81.91818	0.0092773	0.30469	-0.29834
1.16	-68.7906	14.7346	14.42732	0.15039	-0.13525	-0.036133	-83.034	-79.532	777.114	-0.5874	0.51123	-1.3256	-68.5815	15.7412	27.924	0.15586	-0.17686	0.089844	-35.669	-4.07435	110.502	-0.012597	0.33008	-0.37676
1.162	-55.318	6.2982	32.8558	0.16504	-0.14697	-0.039063	-70.298	-111.4348	809.386	-0.59277	0.46875	-1.3477	-50.121	0.874000000000001	20.6428	0.16875	-0.2	0.088867	-24.77	53.799	162.089	-0.038379	0.35742	-0.46055
1.164	-47.044	-9.9839	28.33825	0.17383	-0.15748	-0.038086	-59.285	-107.8	845.497	-0.60889	0.4585	-1.3784	-29.475	-9.8383	48.818	0.17852	-0.22032	0.083789	-13.712	48.93	206.259	-0.080566	0.38047	-0.5543
1.166	-61.4029	5.4403	24.9941	0.18848	-0.16699	-0.044922	-57.637	-127.934	867.995	-0.62012	0.46924	-1.4126	-20.893	-27.9344	47.5535	0.18769	-0.23574	0.082226	-50.253	86.283	324.6229	-0.12061	0.41123	-0.65713
1.168	-50.5746	11.054	39.398	0.19922	-0.18848	-0.05127	21.253	-167.639	903.4986	-0.63135	0.53369	-1.4546	-55.036	-24.6433	78.024	0.2002	-0.24365	0.068848	-125.033	75.708	462.157	-0.16553	0.45215	-0.74805
1.17	-43.576	25.585	25.4308	0.20166	-0.19434	-0.054199	-15.766	-171.944	908.134	-0.64258	0.59131	-1.4995	-64.2247	-4.043	41.687	0.20332	-0.24736	0.062793	-69.349	109.529	611.34	-0.22168	0.49482	-0.84053
1.172	-32.485	18.86842	24.1983	0.20361	-0.20459	-0.063477	-41.77	-220.661	989.524	-0.65137	0.64746	-1.541	-79.467	-5.2905	40.837	0.20557	-0.24326	0.057617	-93.744	120.3021	825.154	-0.27636	0.53252	-0.93506
1.174	-45.682	13.435	12.1596	0.20483	-0.20679	-0.078125	-11.1	-231.0493	1063.7941	-0.65625	0.70703	-1.5977	-41.907	-4.8955	12.3814	0.20869	-0.23271	0.049805	-32.404	180.056	1063.352	-0.33613	0.56845	-1.0304
1.176	-14.321	-2.0545	13.036	0.20361	-0.21094	-0.087402	-27.683	-220.834	1110.5561	-0.65771	0.74658	-1.6108	-30.527	-33.3616	25.9008	0.21055	-0.22334	0.038965	-68.721	118.975	1242.541	-0.40147	0.59873	-1.1458
1.178	-12.055	-2.2097	22.0142	0.19873	-0.20166	-0.10254	27.534	-261.815	1169.937	-0.6582	0.80762	-1.6445	6.582	-13.98553	-4.7778	0.20947	-0.2085	0.023926	-30.663	91.342	1349.892	-0.47412	0.62549	-1.2729
1.18	1.341	-6.38237	30.2758	0.19482	-0.1958	-0.10889	-6.405	-266.614	1181.2636	-0.67114	0.83716	-1.6809	-22.94	5.6893	15.9972	0.2083	-0.19502	0.0072266	-86.702	3.036	1406.602	-0.54912	0.67588	-1.4038
1.182	-2.077	-3.5049	46.872	0.18457	-0.17871	-0.12939	-31.845	-282.418	1199.71	-0.68701	0.87354	-1.7222	-1.004	40.2423	-3.01546	0.20059	-0.18448	-0.0037109	-91.679	-51.149	1524.9338	-0.62891	0.75488	-1.5082
1.184	12.353	-11.996	37.86	0.1709	-0.17481	-0.15284	6.181	-252.123	1238.5422	-0.72021	0.93018	-1.7729	-13.534	34.5378	16.1512	0.19668	-0.17392	-0.020899	-95.5675	-121.938	1563.805	-0.71328	0.86504	-1.5762
1.186	0.0869999999999962	-0.8667	41.945	0.15234	-0.17822	-0.18555	-2.714	-184.4586	1281.9068	-0.73584	0.96143	-1.7964	34	25.124	18.8378	0.19824	-0.15889	-0.03164	-89.314	-146.536	1539.789	-0.80215	1.0121	-1.6156
1.188	-3.172	13.52193	42.5019	0.11914	-0.1792	-0.23877	14.357	-172.2419	1335.758	-0.78662	1.0435	-1.8296	14.74	-0.347	29.50213	0.20068	-0.15137	-0.046875	-28.672	-218.29	1414.35	-0.88672	1.1738	-1.627
1.19	13.402	34.126	74.294	0.095703	-0.16846	-0.26611	26.998	-178.5657	1369.204	-0.83594	1.123	-1.8467	47.51	26.081	21.0636	0.20117	-0.13808	-0.057129	-27.593	-240.595	1337.146	-0.96064	1.3194	-1.6513
1.192	11.306	55.684	73.191	0.027344	-0.11328	-0.31641	-22.2735	-181.49851	1361.637	-0.85156	1.1641	-1.8535	9.044	17.2041	33.78386	0.20859	-0.1294	-0.063965	30.1947	-257.45	1317.193	-1.003	1.4271	-1.6936
1.194	5.659	65.375	97.214	-0.043457	-0.062744	-0.36987	5.693	-188.7184	1379.9523	-0.84326	1.2134	-1.8491	-13.584	41.5346	17.4877	0.21054	-0.12549	-0.074902	117.843	-222.677	1298.31	-1.0155	1.4911	-1.7577
1.196	1.796	58.371	137.876	-0.11279	-0.0092773	-0.43506	20.226	-136.096	1386.9655	-0.81153	1.2075	-1.833	-50.535	21.5193	3.182	0.21318	-0.11963	-0.080566	152.628	-199.877	1258.471	-0.98467	1.5337	-1.8347
1.198	8.819	60.3108	181.472	-0.18506	0.076172	-0.50928	0.444000000000003	-101.417	1392.2317	-0.77344	1.1758	-1.8281	-12.611	26.0703	1.8802	0.21338	-0.1167	-0.083008	172.046	-183.956	1222.0505	-0.9541	1.5527	-1.9297
1.2	-5.54	76.0079	220.082	-0.21631	0.12354	-0.54639	24.841	-109.15	1418.625	-0.74365	1.105	-1.8276	-21.596	-17.28	26.276	0.20674	-0.11543	-0.094043	129.227	-169.147	1232.811	-0.9416	1.5639	-2.0166
1.202	-6.881	95.194	253.246	-0.27441	0.22217	-0.62061	-18.409	-120.429	1414.22	-0.74072	1.0605	-1.8301	6.209	-3.5358	48.3981	0.19678	-0.11309	-0.1041	97.162	-103.43	1211.4146	-0.94677	1.602	-2.0632
1.204	-25.689	109.465	286.691	-0.31226	0.28784	-0.67456	-10.927	-143.043	1435.349	-0.78467	0.99658	-1.8569	-23.955	-28.6137	54.134	0.17881	-0.10488	-0.11543	114.0539	-38.66	1250.8	-0.96865	1.6723	-2.0772
1.206	-33.175	118.155	339.421	-0.34961	0.34424	-0.729	43.0861	-138.908	1486.5287	-0.85791	0.9873	-1.8931	-44.62	24.486	54.739	0.16162	-0.096973	-0.12871	98.6604	-2.09999999999999	1301.094	-0.98711	1.7574	-2.0656
1.208	-37.779	118.92	361.116	-0.39063	0.40869	-0.79883	5.8	-108.715	1518.0357	-0.94531	1.0156	-1.9355	-63.2596	11.1008	36.6103	0.13818	-0.086914	-0.13965	70.736	-19.75	1352.925	-0.99121	1.8496	-2.0371
1.21	-19.17	115.93	394.9814	-0.40527	0.4375	-0.82813	41.6094	-108.147	1554.405	-1.0479	1.1074	-1.9941	-14.586	27.6	23.438	0.12227	-0.073537	-0.15742	10.9448	-111.28	1341.776	-0.96563	1.917	-1.9924
1.212	-41.977	89.5	454.06	-0.43896	0.48877	-0.88623	12.237	-102.7696	1551.271	-1.0894	1.1704	-2.0288	-47.77	5.76129	28.5743	0.10967	-0.055961	-0.16914	55.117	-235.3519	1385.343	-0.91358	1.9544	-1.9405
1.214	-56.805	94.701	504.936	-0.47681	0.51855	-0.93701	-19.5445	-111.937	1559.127	-1.1426	1.2793	-2.0859	-39.291	42.7627	21.0051	0.098344	-0.036042	-0.17773	41.868	-357.276	1435.758	-0.84326	1.9419	-1.8749
1.216	-65.5453	81.582	577.793	-0.51709	0.54346	-0.98975	42.6861	-115.9547	1573.079	-1.1672	1.346	-2.117	-56.8028	32.2367	46.0795	0.09258	-0.02305	-0.18867	47.958	-386.51	1525.999	-0.77178	1.8673	-1.8116
1.218	-52.876	64.842	638.797	-0.57373	0.57861	-1.061	18.3693	-82.98194	1575.042	-1.1797	1.3906	-2.1367	-53.3635	60.793	40.9963	0.087891	-0.0068359	-0.19092	12.042	-393.47	1518.942	-0.7041	1.7422	-1.7402
1.22	-41.2886	44.4617	722.887	-0.5957	0.59766	-1.0908	38.1423	-54.2272	1564.3666	-1.1914	1.4258	-2.1621	-92.339	2.526	45.941	0.087983	-0.00077487	-0.19551	42.005	-354.86	1553.056	-0.65342	1.598	-1.6661
1.222	-48.9833	38.678	762.63	-0.64893	0.66162	-1.1577	46.8949	-44.0681685	1568.12	-1.1895	1.4336	-2.168	-59.1912	2.2222	34.754	0.073727	0.011525	-0.19053	-32.252	-354.568	1580.984	-0.60889	1.4345	-1.5898
1.224	-40.144	30.58	782.974	-0.68213	0.70972	-1.1966	1.2003	-15.6744	1536.641	-1.1787	1.4395	-2.1758	-45.68	-40.1254	37.6463	0.066296	0.010346	-0.18974	-37.129	-280.295	1665.448	-0.58037	1.2708	-1.5363
1.226	-48.2322	22.1896	824.718	-0.70459	0.76025	-1.2358	46.624	-37.334	1551.894	-1.1726	1.4206	-2.1736	-25.083	-7.1371	28.8553	0.059374	0.0037036	-0.19072	-79.203	-251.831	1738.564	-0.56201	1.1243	-1.5093
1.228	-27.658	-6.576	861.304	-0.69922	0.8125	-1.2695	70.419	-25.9717	1578.049	-1.1694	1.3892	-2.1655	-18.898	-16.8628	47.625	0.056641	-0.0043945	-0.18115	-130.614	-146.94	1814.409	-0.55859	1.0068	-1.5039
1.23	-35.82	-32.203	893.192	-0.68359	0.83203	-1.2813	53.826	-6.11691	1570.621	-1.1816	1.3379	-2.1523	-17.351	11.355	26.9243	0.050306	-0.031022	-0.17288	-206.644	-98.298	1787.95	-0.57285	0.93321	-1.5326
1.232	-26.84	-56.642	900.157	-0.61572	0.85596	-1.2847	94.206	-9.424	1578.254	-1.1851	1.3032	-2.1401	-26.628	-16.0148	4.489	0.047662	-0.054872	-0.16176	-261.804	2.038	1751.8106	-0.62773	0.90196	-1.5908
1.234	-15.403	-85.9959	910.816	-0.55078	0.8418	-1.2954	44.147	7.955	1550.142	-1.1987	1.229	-2.1147	14.705	-2.605	24.5093	0.049587	-0.083401	-0.14966	-247.097	50.101	1699.58	-0.69688	0.93398	-1.6923
1.236	-5.774	-92.75	905.921	-0.48584	0.80518	-1.2964	23.6383	-2.68346	1552.338	-1.2048	1.1897	-2.0974	12.924	-37.0281	27.617	0.05019	-0.1122	-0.14201	-177.5494	132.308	1676.697	-0.76172	1.0383	-1.8258
1.238	-35.4296	-80.201	905.854	-0.41113	0.73486	-1.2983	79.917	-14.012	1544.5976	-1.2065	1.1567	-2.0718	20.454	-4.379	29.8141	0.053711	-0.13818	-0.13525	-135.696	120.525	1693.754	-0.84912	1.1782	-1.9565
1.24	-44.159	-61.084	877.398	-0.39063	0.70801	-1.2852	76.073	3.81	1528.805	-1.2012	1.1367	-2.0547	23.779	-9.9873	46.396	0.055854	-0.16775	-0.13243	-170.4	90.386	1699.987	-0.98128	1.3498	-2.0701
1.242	-9.628	-45.4917	869.436	-0.37939	0.66748	-1.2769	90.464	-18.61077	1552.974	-1.1968	1.1255	-2.0522	-21.275	29.077	38.284	0.060928	-0.19616	-0.12949	-179.258	-14.9166	1709.576	-1.1177	1.5472	-2.1804
1.244	-18.943	-37.7681	845.91	-0.39795	0.65088	-1.2729	50.766	-14.5959	1552.5716	-1.1738	1.0957	-2.0234	-22.359	15.82859	13.4385	0.059339	-0.21712	-0.13169	-169.51791	-44.887	1732.923	-1.2009	1.7507	-2.2745
1.246	-43.141	-32.321	847.1106	-0.40576	0.65186	-1.269	23.975	-14.4827	1561.882	-1.157	1.0647	-2.0057	3.98	18.66	22.815	0.060171	-0.23928	-0.14205	-99.189	-83.941	1785.5768	-1.2469	1.9176	-2.3531
1.248	-34.856	-45.409	860.3001	-0.41699	0.65039	-1.2764	82.801	-7.0186	1550.209	-1.1406	1.0293	-1.9844	1.237	3.6933	-10.3816	0.057129	-0.24902	-0.14404	-80.371	-75.886	1785.676	-1.2637	2.0449	-2.3867
1.25	-15.53	-42.715	909.212	-0.40966	0.65747	-1.281	59.406	13.228	1524.12	-1.1079	0.99268	-1.9565	-16.423	31.877	-0.036999999999999	0.054008	-0.26271	-0.15639	-65.281	-74.553	1800.673	-1.2777	2.1278	-2.4105
1.252	-4.193	-47.297	919.763	-0.40039	0.66992	-1.2871	57.182	12.41	1510.568	-1.0952	0.9751	-1.9448	19.725	35.33913	-2.19	0.053017	-0.27262	-0.17587	-151.4342	-81.283	1777.709	-1.3	2.1766	-2.4262
1.254	-6.222	-61.96	938.709	-0.37549	0.68408	-1.2925	68.952	23.2491	1485.9672	-1.0596	0.94141	-1.9141	-26.669	35.0276	32.3491	0.050074	-0.28235	-0.19733	-104.6061	-94.459	1798.717	-1.3277	2.2082	-2.432
1.256	19.173	-99.427	973.481	-0.36475	0.68408	-1.3003	35.235	77.3124	1458.568	-1.042	0.9209	-1.8916	-46.424	5.697	78.784	0.052725	-0.28466	-0.22481	-64.637	-82.5736	1822.363	-1.348	2.2149	-2.4413
1.258	6.685	-115.471	1005.792	-0.35303	0.67334	-1.3159	78.452	87.899	1457.003	-1.019	0.90723	-1.8667	-32.99	-11.095	133.029	0.059082	-0.28467	-0.25977	0.0170000000000101	-24.2368	1851.644	-1.3574	2.1934	-2.4395
1.26	9.727	-131.445	1034.514	-0.36377	0.65527	-1.3501	58.028	84.151	1455.2858	-0.98975	0.89893	-1.8394	-8.23999999999999	13	168.886	0.056622	-0.308	-0.33361	66.358	13.4508	1781.7	-1.3695	2.1363	-2.3989
1.262	-2.73399999999999	-151.8075	1066.881	-0.38281	0.63867	-1.3887	26.91	67.84534	1435.372	-0.97461	0.89453	-1.8242	-34.026	79.933	251.056	0.034766	-0.31522	-0.44288	76.847	63.292	1708.179	-1.3866	2.0755	-2.3549
1.264	-6.29499999999999	-171.749	1111.797	-0.43652	0.6582	-1.4473	66.201	45.5104	1419.227	-0.94482	0.87891	-1.7944	-24.011	149.515	308.761	-0.02957	-0.25472	-0.56238	-4.23400000000001	86.345	1642.185	-1.3882	2.0036	-2.3065
1.266	-21.087	-180.245	1141.19	-0.46875	0.67285	-1.4863	13.6211	88.73965	1381.045	-0.93213	0.86475	-1.77	-45.946	190.179	438.015	-0.13208	-0.14752	-0.70286	-13.288	141.963	1641.3446	-1.3818	1.9397	-2.2448
1.268	-27.146	-186.818	1161.043	-0.54297	0.74805	-1.5488	32.8659	96.093	1364.2226	-0.92578	0.85547	-1.75	-46.16	192.983	492.371	-0.24805	-0.010742	-0.87891	18.086	175.532	1619.852	-1.3594	1.8828	-2.1875
1.27	-25.425	-152.638	1188.175	-0.59106	0.81372	-1.5911	53.926	100.7791	1355.9002	-0.90625	0.83984	-1.7227	-47.502	160.2347	651.51	-0.35308	0.16266	-1.0536	25.105	197.4277	1617.657	-1.3369	1.8256	-2.1409
1.272	-6.204	-114.67608	1224.024	-0.62891	0.88086	-1.6289	22.7567	122.963	1314.4748	-0.90527	0.83252	-1.7104	-38.459	161.339	774.821	-0.45646	0.36466	-1.2179	-39.389	197.341	1567.088	-1.2957	1.7863	-2.0969
1.274	10.192	-82.062	1238.96	-0.64258	0.94727	-1.667	41.924	89.533	1302.69584	-0.89404	0.82861	-1.6792	-109.789	162.92849	972.555	-0.56372	0.57675	-1.3681	-63.035	202.102	1532.364	-1.2438	1.7492	-2.0449
1.276	18.854	-71.446	1251.911	-0.63867	0.97461	-1.6719	37.698339	93.2783	1284.456	-0.88697	0.82105	-1.6521	-97.136	184.667	1126.759	-0.68494	0.79189	-1.5328	-96.022	204.335	1498.307	-1.1992	1.6945	-1.9903
1.278	48.42	-61.695	1261.352	-0.61523	1.002	-1.668	19.789	103.7469	1276.651	-0.87549	0.81592	-1.6245	-60.199	146.539	1223.915	-0.80811	1.0044	-1.6792	-96.111	192.8635	1513.952	-1.146	1.6274	-1.9253
1.28	58.417	-50.965	1272.737	-0.59253	0.99856	-1.6689	44.079	104.922	1253.012	-0.85498	0.81104	-1.5913	-49.644	80.173	1222.577	-0.90933	1.2311	-1.7977	-70.659	170.4815	1562.054	-1.0875	1.5602	-1.8657
1.282	70.904	-42.415	1278.383	-0.57422	0.98828	-1.6738	15.915	151.74	1190.3449	-0.84375	0.80371	-1.5703	-62.695	-35.86299	1283.24	-0.9725	1.4777	-1.8706	-114.88399	129.215	1561.088	-1.038	1.4962	-1.8007
1.284	40.095	-57.187	1273.1454	-0.56445	0.94922	-1.6777	16.4	141.8617	1145.8212	-0.81836	0.7832	-1.5176	-58.0364	-87.261	1336.331	-0.97257	1.7133	-1.9204	-113.621	130.404	1533.552	-0.98174	1.4337	-1.7428
1.286	33.849	-67.612	1273.68	-0.5791	0.93164	-1.6836	22.443	129.2833	1120.109	-0.79174	0.76294	-1.4773	-42.6454	-163.878	1348.168	-0.90553	1.8901	-1.9427	-145.676	141.599	1475.5152	-0.91953	1.3613	-1.6859
1.288	31.884	-76.9469	1268.802	-0.61914	0.89648	-1.6875	-17.667	152.35071	1096.554	-0.75732	0.74072	-1.4331	-14.8211	-173.826	1308.001	-0.77588	1.9692	-1.9409	-137.215	194.079	1470.334	-0.85693	1.2837	-1.6206
1.29	26.759	-75.8693	1285.609	-0.65796	0.88013	-1.7019	13.569	151.36736	1074.47	-0.7124	0.69775	-1.3765	-69.2444	-259.318	1234.209	-0.62563	1.9076	-1.9107	-124.498	200.137	1393.056	-0.79336	1.2139	-1.5379
1.292	28.117	-95.0683	1317.251	-0.69092	0.87158	-1.7202	16.519	185.249	1039.2423	-0.69238	0.67773	-1.334	-125.75	-284.886	1142.42	-0.49643	1.7524	-1.8669	-99.76	209.781	1334.623	-0.73476	1.1495	-1.4605
1.294	38.877	-97.978	1326.824	-0.73047	0.88867	-1.7793	4.398	199.1058	1005.562	-0.64551	0.63477	-1.2656	-154.3612	-320.93	1095.805	-0.431	1.5228	-1.8162	-121.146	196.55	1251.581	-0.67461	1.0995	-1.3793
1.296	43.123	-97.173	1346.782	-0.74463	0.9126	-1.812	-0.984000000000002	159.4934	978.533	-0.60449	0.59863	-1.2143	-178.771	-240.494	1035.558	-0.41502	1.2403	-1.764	-59.4582	239.9673	1223.614	-0.60732	1.0493	-1.294
1.298	42.187	-82.7022	1341.743	-0.78076	0.98096	-1.8726	-38.668	176.4167	934.9927	-0.56738	0.56738	-1.166	-168.206	-177.582	1016.832	-0.40088	0.93896	-1.7124	-75.71008	278.486	1216.65	-0.53223	0.99023	-1.2051
1.3	52.279	-90.307	1348.019	-0.8064	1.0413	-1.9109	-23.518	162.769	903.339	-0.52051	0.52344	-1.0977	-145.916	-76.146	1025.301	-0.38849	0.68651	-1.6981	-20.81	363.15	1175.419	-0.44434	0.93066	-1.1189
1.302	70.648	-80.3844	1350.021	-0.8291	1.0938	-1.9395	-2.322	165.1465	883.299	-0.49951	0.50635	-1.064	-170.199	-91.522	1009.2807	-0.39314	0.54419	-1.7199	-30.584	352.767	1093.5106	-0.35225	0.8624	-1.036
1.304	62.862	-70.389	1358.525	-0.8501	1.145	-1.9585	-57.2114	199.6243	845.63	-0.45361	0.47607	-1.0015	-194.294	-62.24	1032.889	-0.43569	0.55308	-1.7749	39.456485	351.5	1046.1253	-0.26318	0.7874	-0.95478
1.306	46.112	-44.159	1335.681	-0.85352	1.1543	-1.9668	-52.798	155.8815	810.039	-0.42553	0.45337	-0.95532	-179.478	-154.064	1037.112	-0.52242	0.70109	-1.8451	-2.566	302.121	963.953	-0.1751	0.70849	-0.87392
1.308	41.201	-32.444	1333.985	-0.854	1.1616	-1.9565	-48.923	172.6843	761.5493	-0.38818	0.43555	-0.90234	-157.889	-135.2	1089.786	-0.58594	0.90625	-1.9219	64.8949	296.228	949.738	-0.094238	0.62939	-0.79443
1.31	35.47	-2.537	1317.594	-0.85278	1.1521	-1.9451	-65.68	183.376	704.6228	-0.34131	0.40869	-0.83447	-88.435	-205.11	1145.639	-0.61357	1.0943	-1.9976	104.345	289.643	901.9947	-0.017188	0.54951	-0.71856
1.312	28.658	2.917	1323.927	-0.84961	1.1367	-1.9297	-20.3	149.401	685.881	-0.31445	0.39941	-0.7998	-64.904	-175.56	1206.276	-0.57918	1.2154	-2.035	140.644	266.6774	838.767	0.052442	0.46699	-0.64766
1.314	25.82	7.7625	1302.58546	-0.83984	1.0996	-1.8945	-43.74	188.0996	648.5552	-0.26758	0.37744	-0.72217	-76.879	-285.809	1221.316	-0.512	1.2606	-2.0186	139.681	214.8443	758.746	0.11846	0.38965	-0.57031
1.316	37.979	13.0918	1289.7331	-0.8335	1.0708	-1.8823	-59.052	154.738	595.25	-0.22778	0.35718	-0.67017	-105.548	-307.679	1260.2317	-0.43691	1.2227	-1.9793	122.408	166.532	698.495	0.18965	0.31944	-0.48252
1.318	41.784	26.4085	1291.093	-0.81592	1.0122	-1.8354	-34.413	158.8698	566.511	-0.18213	0.3374	-0.61279	-121.9	-425.108	1324.016	-0.3623	1.1309	-1.918	131.287	170.24	625.6101	0.26221	0.25391	-0.39648
1.32	31.858	17.3957	1301.345	-0.80249	0.96606	-1.8005	-80.1575	191.1249	502.548	-0.12988	0.2998	-0.53516	-113.325	-405.173	1413.8783	-0.29102	1.0185	-1.8201	132.882	191.051	607.191	0.33164	0.18692	-0.31807
1.322	47.364	1.405	1298.517	-0.78613	0.92871	-1.7715	-18.587	148.6313	472.566	-0.086672	0.271	-0.47803	-87.678	-436.354	1480.7217	-0.23467	0.90392	-1.7231	151.747	244.74	562.303	0.40869	0.10722	-0.2374
1.324	73.017	-20.388	1297.831	-0.75928	0.89502	-1.7378	-41.504	162.4436	426.5335	-0.044922	0.24023	-0.4209	-62.1327	-365.978	1571.91	-0.18076	0.78282	-1.6418	83.939	211.4041	473.242	0.48369	0.01582	-0.16006
1.326	77.505	-22.025	1300.741	-0.74561	0.88525	-1.73	-54.605	153.6338	366.657	0.010254	0.18799	-0.34521	-33.5909	-328.837	1631.456	-0.13672	0.65069	-1.6009	70.093	217.233	384.0104	0.55791	-0.077443	-0.080276
1.328	55.892	-29.516	1301.694	-0.71045	0.87549	-1.7163	-44.326	113.3675	342.1712	0.038574	0.16162	-0.31396	-15.276	-235.0996	1653.07	-0.10742	0.53076	-1.6011	25.2948	174.46835	304.2789	0.63037	-0.16846	-0.00097656
1.33	44.166	-28.058412	1301.05	-0.68652	0.87109	-1.7041	-49.33	152.5875	290.607	0.090332	0.10059	-0.25293	10.914	-184.266	1683.096	-0.12148	0.45781	-1.6387	16.927	214.1634	248.33	0.675	-0.26894	0.075195
1.332	58.011	-11.7758	1270.131	-0.6626	0.86572	-1.6948	-15.596	108.584	274.4996	0.12281	0.055176	-0.21411	25.296	-109.061	1697.673	-0.17833	0.45127	-1.7077	2.844	210.1614	220.185	0.6999	-0.36738	0.13291
1.334	60.906	3.9361	1252.206	-0.62354	0.85205	-1.6753	-1.242	81.0507	246.383	0.15137	0.015137	-0.17383	48.124	-61.085	1720.253	-0.28965	0.52353	-1.8238	21.747	230.404	179.7484	0.70693	-0.46425	0.17861
1.336	50.564	5.7563	1225.667	-0.60547	0.84082	-1.6602	-23.363	111.9591	218.3545	0.19141	-0.033203	-0.12842	57.562	-8.958	1716.666	-0.41279	0.67588	-1.9595	-51.9214	180.1402	121.814	0.69863	-0.56172	0.22002
1.338	50.109	12.8309	1224.841	-0.57422	0.81641	-1.6348	-14.958	61.3465	191.8558	0.20361	-0.048828	-0.10303	95.463	10.835	1694.271	-0.52002	0.87744	-2.1128	-44.1074	164.81	107.87	0.68701	-0.63623	0.2583
1.34	51.06	30.6609	1204.53	-0.55298	0.80151	-1.6189	-18.459	92.1377	179.0113	0.229	-0.079102	-0.061523	76.668	-26.894	1689.725	-0.60469	1.076	-2.2572	-89.588	107.788	64.313	0.66562	-0.7041	0.27461
1.342	38.982	47.8359	1187.037	-0.53857	0.79102	-1.6035	-24.54	75.834	164.9057	0.24219	-0.098634	-0.034179	24.172	-70.4974	1692.431	-0.66523	1.2469	-2.395	-74.1061	90.793	71.165	0.63564	-0.77451	0.28935
1.344	36.175	61.393	1183.65	-0.52246	0.77686	-1.5742	-2.536	32.017	148.482	0.2583	-0.10986	-0.015137	-40.094	-122.786	1710.937	-0.6957	1.3641	-2.4973	-126.413	73.1586	43.7681	0.59659	-0.84639	0.28428
1.346	55.346	77.95	1153.45	-0.51123	0.77588	-1.5601	-17.349	79.9048	91.023	0.27246	-0.13672	0.0078125	-60.405783	-134.271	1774.032	-0.7128	1.4505	-2.5678	-101.0902	52.507	41.634	0.55127	-0.90986	0.26309
1.348	51.363	89.78	1140.026	-0.50195	0.75977	-1.5313	-25.091	30.811	73.81	0.27588	-0.14795	0.01416	-64.1365	-154.578	1863	-0.72852	1.5098	-2.625	-130.512	35.397	42.423	0.48633	-0.95898	0.22217
1.35	41.053	91.859	1130.89	-0.49219	0.75147	-1.5064	-8.536	26.9554	72.7369	0.27686	-0.15234	0.019531	-43.1692	-130.567	1881.956	-0.74229	1.5476	-2.6579	-100.36472	-11.481	66.782	0.39492	-0.97188	0.16094
1.352	47.951	80.703	1136.048	-0.48486	0.74561	-1.478	-20.965	59.171	64.4796	0.27026	-0.16089	0.023926	-28.1639	-159.575	1890.56	-0.76123	1.5579	-2.6803	-91.1521	-22.993	81.801	0.28008	-0.95235	0.090524
1.354	43.574	82.857	1117.87	-0.47217	0.72412	-1.4448	2.673	12.0712	79.644	0.25879	-0.16113	0.027344	-3.838	-143.209	1841.683	-0.7792	1.5486	-2.6991	-59.677	-19.226	106.549	0.14062	-0.88711	0.0014648
1.356	19.94	65.5968	1112.936	-0.46973	0.71094	-1.4297	-12.767	48.747	52.036	0.22803	-0.15039	0.0063477	-68.2538	-155.568	1835.213	-0.80547	1.5336	-2.7039	-29.184	17.573	83.2202	-0.02334	-0.78047	-0.097365
1.358	12.261	44.9903	1094.087	-0.45654	0.68408	-1.3921	-26.627	29.9359	38.56	0.20605	-0.1377	-0.0048828	-89.5758	-87.106	1824.907	-0.83936	1.5083	-2.7163	-4.291	29.0566	64.3901	-0.19971	-0.63379	-0.20947
1.36	7.787	39.443	1072.498	-0.44873	0.6665	-1.3667	-12.328	-17.7864	41.031	0.14941	-0.10107	-0.027344	-104.389	-99.0918	1836.958	-0.87822	1.4925	-2.721	5.806	62.655	11.174	-0.36445	-0.45107	-0.3332
1.362	-5.419	61.455	1034.22	-0.44092	0.65186	-1.3394	-35.483	47.7601	16.712	0.09497	-0.062012	-0.049804	-72.453	-12.316	1786.659	-0.9123	1.4879	-2.7187	24.445	24.4194	4.341	-0.51983	-0.25723	-0.46934
1.364	-17.275	75.7484	1011.837	-0.42578	0.63379	-1.3027	-27.168	25.654	8.4805	0.044434	-0.015625	-0.077148	-121.106	-15.027	1772.23	-0.94472	1.5063	-2.7067	43.83	40.284	7.94	-0.63271	-0.063867	-0.6041
1.366	-5.605	89.5507	1003.762	-0.42334	0.61914	-1.2754	6.12	23.01	20.26225	-0.019531	0.050781	-0.12207	-134.281	75.598	1699.03	-0.96523	1.5432	-2.6881	26.904	10.6184	13.743	-0.71152	0.13291	-0.72383
1.368	-2.397	100.456	1000.188	-0.3999	0.6084	-1.2437	-22.651	42.143	27.2264	-0.052246	0.086914	-0.13525	-146.842	78.47	1689.069	-0.98193	1.5757	-2.6636	71.465	54.925	20.724	-0.75391	0.33105	-0.83789
1.37	-12.561	113.429	977.519	-0.38232	0.59277	-1.208	-42.817	-24.8227	28.625	-0.10986	0.1582	-0.16064	-130.904	169.917	1632.882	-0.96963	1.5794	-2.6397	33.81	37.55532	31.4497	-0.77305	0.53477	-0.89892
1.372	-9.358	111.07	956.503	-0.36475	0.57813	-1.1758	-23.902	25.544	25.9086	-0.13721	0.20264	-0.17383	-107.937	136.701	1659.865	-0.93916	1.5571	-2.6046	71.844	84.924	58.677	-0.77197	0.70049	-0.95615
1.374	12.348	123.18	944.188	-0.33838	0.54736	-1.1284	-18.852	39.0025	25.5232	-0.15674	0.23438	-0.18213	-23.682	183.904	1636.68094	-0.90752	1.5083	-2.5534	47.104	51.5135	53.76	-0.75557	0.81612	-0.99287
1.376	19.188	140.412	898.725	-0.32568	0.53564	-1.105	-12.421	-6.2482	49.927	-0.15771	0.2666	-0.18701	4.692	95.0427	1663.91	-0.86592	1.4411	-2.4945	75.684	50.1454	55.417	-0.72334	0.87784	-0.98779
1.378	-7.212	140.632	858.617	-0.29932	0.50342	-1.0581	-24.428	44.1337	15.297	-0.14795	0.27539	-0.18066	16.573	109.045	1655.987	-0.82959	1.3735	-2.4292	6.428	-9.655	9.5254	-0.67773	0.91211	-0.96484
1.38	-24.75	130.652	822.8558	-0.2815	0.48511	-1.0261	-28.111	3.0218	3.4228	-0.12939	0.27881	-0.16455	40.333	42.259	1665.887	-0.79287	1.3139	-2.363	16.765	-26.3648	34.82	-0.61845	0.90108	-0.91924
1.382	-17.511	108.6292	820.708	-0.2627	0.46143	-0.99268	-19.849	9.7991	5.7878	-0.10962	0.26709	-0.14868	51.163	103.292	1640.644	-0.75987	1.2653	-2.2936	-5.645	-62.793	40.4408	-0.5415	0.85322	-0.85772
1.384	-19.768	105.158	795.029	-0.23975	0.43311	-0.94873	-16.988	53.12883	8.06	-0.093262	0.24658	-0.13379	65.851	55.733	1642.457	-0.71533	1.2278	-2.2234	-3.52699999999999	-50.7035	55.344	-0.46104	0.7587	-0.77959
1.386	-27.912	102.4145	784.774	-0.2229	0.41431	-0.91724	13.46	-16.434	36.4857	-0.07959	0.2168	-0.11475	71.693	119.774	1587.061	-0.66992	1.1922	-2.1574	-41.811	-56.212	22.6171	-0.3749	0.62558	-0.68711
1.388	-20.027	109.8003	760.846	-0.2041	0.39648	-0.88477	-28.883	10.5855	37.341	-0.070801	0.19678	-0.10205	93.1699	60.775	1568.673	-0.62354	1.1465	-2.0977	-54.94	-41.12443	21.9594	-0.2915	0.46826	-0.59326
1.39	-14.275	112.1506	744.722	-0.18115	0.3833	-0.84131	-26.775	25.5369	18.5486	-0.055664	0.15674	-0.092285	68.4397	122.305	1545.098	-0.5708	1.0921	-2.029	-78.3596	-15.5961	8.0715	-0.21933	0.30566	-0.49903
1.392	-29.738	104.1129	722.146	-0.17334	0.375	-0.82031	-0.994	-3.79308	35.9	-0.049561	0.13355	-0.082764	70.954	86.644	1526.838	-0.51631	1.0298	-1.9698	-79.6355	19.5875	46.0302	-0.14737	0.18183	-0.4209
1.394	-37.379	101.24569	702.688	-0.15381	0.35352	-0.7749	-4.013	58.905	38.9435	-0.045898	0.10693	-0.073242	34.956	156.43	1486.459	-0.46905	0.97002	-1.9108	-93.6853	58.328	31.0084	-0.096192	0.087304	-0.35606
1.396	-14.975	102.5172	681.264	-0.13672	0.34155	-0.74561	1.31	12.9467	42.339	-0.035645	0.086914	-0.068359	29.152	151.421	1459.142	-0.42422	0.90567	-1.851	-96.7505	36.2726	35.087	-0.052929	0.029004	-0.30801
1.398	-10.081	117	646.462	-0.11768	0.32568	-0.71143	6.552	9.6989	30.147	-0.028809	0.077637	-0.066406	32.349	237.764	1423.137	-0.38867	0.83301	-1.7949	-106.987	34.3505	11.062	-0.01709	-0.0053711	-0.27051
1.4	-24.558	127.959	623.781	-0.089844	0.30273	-0.67041	-22.856	42.0375	7.753	-0.016113	0.058594	-0.062988	31.661	243.826	1386.094	-0.36259	0.78232	-1.7388	-108.1323	-4.61	1.66	0.0080076	-0.02373	-0.2417
1.402	-37.524	129.854	600.833	-0.081543	0.29834	-0.64844	-15.305	-15.01536	29.17583	-0.0041503	0.055176	-0.060302	-7.565	307.508	1335.677	-0.34023	0.73994	-1.6816	-75.8488	46.65	-18.95	0.033301	-0.039453	-0.21553
1.404	-34.478	136.36	567.382	-0.058594	0.27686	-0.60205	-23.471	16.3339	46.1053	0.0058594	0.045898	-0.058594	-7.899	265	1251.498	-0.32344	0.71533	-1.6171	-96.699	40.15	-10.0272	0.044238	-0.046093	-0.1917
1.406	-42.34	144.419	536.6591	-0.044433	0.2605	-0.57544	-12.742	19.392	46.327	0.022461	0.037598	-0.055176	-38.2679	270.452	1233.5094	-0.29991	0.69854	-1.5429	-52.731	76.2836	5.44464	0.055273	-0.054981	-0.16944
1.408	-46.1886	125.2218	510.4099	-0.028809	0.24512	-0.53809	4.32299999999999	-28.209	33.592	0.029785	0.032715	-0.049805	-92.491	217.846	1196.5011	-0.27344	0.68262	-1.4688	-67.848	26.453	26.0783	0.060547	-0.060059	-0.15234
1.41	-53.31985	114.4256	486.465	-0.015137	0.22412	-0.50098	-16.767	24.119	26.996	0.040527	0.020996	-0.039551	-107.953	236.1904	1173.027	-0.23653	0.65947	-1.3815	-20.598	26.04125	14.1236	0.065821	-0.072851	-0.12842
1.412	-48.5208	120.6526	466.013	-0.013672	0.21436	-0.48389	-17.858	-10.64754	26.4964	0.046875	0.017822	-0.038085	-85.102	192.889	1120.885	-0.19258	0.62032	-1.2887	-4.08	-17.02489	35.1526	0.071192	-0.084765	-0.10205
1.414	-32.63	137.661	425.413	-0.00097656	0.2002	-0.45605	-27.145	-3.0074	38.9243	0.058594	0.012695	-0.033203	-125.8	181.814	1094.181	-0.13633	0.57032	-1.1914	25.633	17.586	62.16	0.079394	-0.10664	-0.07666
1.416	-38.96	134.537	402.223	0.0078125	0.19409	-0.42407	-17.492	37.612	22.875	0.065918	0.0078125	-0.023438	-183.178	147.091	1029.84	-0.086423	0.51074	-1.0971	15.118	-20.8963	62.1293	0.090528	-0.12657	-0.055762
1.418	-32.82	123.248	393.285	0.01416	0.17773	-0.39648	-14.839	-19.781	18.9808	0.070313	0.0043945	-0.02002	-203.54	151.318	984.362	-0.033691	0.44043	-1.0117	34.399	5.5627	61.8919	0.104	-0.146	-0.03125
1.42	-34.79	122.718	379.77	0.023438	0.1665	-0.37646	-25.166	3.9891	34.7911	0.089844	-0.0024414	-0.013184	-182.606	149.77821	915.919	0.020313	0.36289	-0.92236	25.727	-12.6657	12.69	0.121	-0.16533	-0.013965
1.422	-33.081	125.053	369.266	0.024902	0.1582	-0.36523	-35.678	-0.0864000000000011	35.8798	0.10498	-0.013672	-0.0034179	-159.288	185.0767	879.679	0.072265	0.2832	-0.84062	35.357	23.3299	22.524	0.13799	-0.17871	-0.0035156
1.424	-30.811	117.753	374.327	0.022461	0.15723	-0.34961	-28.127	-34.323	24.948	0.12012	-0.023438	0.0029297	-115.81	206.391	812.4909	0.11328	0.21563	-0.75781	73.943	25.94677	36.9291	0.14306	-0.18692	0.012891
1.426	-25.062	110.8868	372.393	0.015869	0.15552	-0.33569	-27.302	41.598	24.7003	0.13672	-0.039063	0.015137	-99.489	231.2	745.4352	0.14532	0.15928	-0.679	81.125	52.296	76.306	0.15332	-0.18457	0.022559
1.428	-37.933	107.9147	333.544	0.015625	0.15967	-0.3252	-14.186	17.6586	18.5002	0.15234	-0.049805	0.025391	-87.958	251.207	662.8564	0.17236	0.10938	-0.60303	20.652	53.9446	33.068	0.16455	-0.1792	0.029785
1.43	-26.241	90.4076	289.535	0.01416	0.1709	-0.31982	-15.825	-7.6848	29.7585	0.16602	-0.071777	0.036133	-61.711	263.554	629.65	0.19423	0.07959	-0.52041	29.147	41.8458	39.512	0.16924	-0.1665	0.027344
1.432	-33.449	82.9804	258.65	0.01416	0.17334	-0.31055	-15.186	22.3499	11.302	0.17847	-0.083984	0.047607	-73.2	259.627	578.1726	0.21983	0.055859	-0.44424	15.314	27.5767	7.718	0.17627	-0.15781	0.024707
1.434	-36.12	90.0397	246.409	0.015625	0.17578	-0.29736	-21.694	-28.281	-3.2498	0.18701	-0.10059	0.059082	-47.373	237.256	541.788	0.2417	0.036719	-0.37862	23.946	11.014	42.4271	0.18135	-0.14492	0.022754
1.436	-35.972	99.15	249.061	0.015869	0.17602	-0.29078	-19.176	19.10044	26.7433	0.19971	-0.11279	0.070313	-36.2418	239.681	452.251	0.26045	0.020019	-0.31074	12.264	29.82	13.7982	0.1874	-0.13291	0.021778
1.438	-19.287	107.287	243.77	0.020508	0.18408	-0.28857	-10.163	26.807	17.5955	0.20313	-0.12549	0.076172	-37.28	222.4417	376.149	0.28369	0.0097656	-0.24219	-28.979	6.68354	40.487	0.18506	-0.12158	0.020508
1.44	-23.284	97.674	227.001	0.026855	0.1875	-0.2793	-5.596	-30.401	33.484	0.20801	-0.13428	0.075195	-55.795	213.7314	297.1098	0.30264	0.0012695	-0.17881	-68.0818	15.1118	21.6786	0.18819	-0.11406	0.018555
1.442	-13.412	102.245	198.7449	0.023926	0.18896	-0.271	-26.408	31.66	5.5579	0.21045	-0.14087	0.080811	-55.1212	178.182	262.172	0.31845	-0.00625	-0.11602	-87.4215	-33.385	31.8191	0.18643	-0.10391	0.0095703
1.444	-27.276	98.08	196.365	0.021973	0.19336	-0.26807	-15.737	3.19502	1.8945	0.21289	-0.14355	0.083008	-41.605	201.793	230.554	0.32705	-0.017578	-0.070703	-69.117	-3.116	20.753	0.179	-0.090234	0.011523
1.446	-23.338	96.561	186.867	0.021729	0.19141	-0.26562	-3.178	-8.328886	31.1408	0.2124	-0.14307	0.086914	-5.3203	157.6374	213.553	0.33154	-0.038574	-0.033008	-80.3244	-39.7284	45.087	0.17686	-0.078711	0.0015626
1.448	-23.104	95.211	173.764	0.024902	0.19189	-0.25928	5.232	46.724	27.2635	0.20703	-0.14453	0.083984	15.7379	151.466	207.915	0.32471	-0.052734	-0.011719	-70.225	-0.5	60.506	0.17236	-0.067871	-0.0063477
1.45	-30.919	94.407	157.334	0.027344	0.18945	-0.25342	-11.012	-12.7017	9.1183	0.20557	-0.13672	0.080566	4.173	93.6007	215.905	0.30772	-0.062695	0.014746	-111.721	-36.1477	32.9937	0.16963	-0.053907	-0.017871
1.452	-44.3043	73.009	150.607	0.032715	0.18994	-0.25098	-12.035	21.1925	18.0433	0.19922	-0.12744	0.080566	9.42	105.705	174.362	0.28066	-0.062695	0.024804	-98.4179	-6.372	14.32721	0.16279	-0.037305	-0.035058
1.454	-30.447	59.127	141.345	0.040039	0.18604	-0.24023	-23.438	32.9843	1.691	0.19434	-0.12207	0.073242	2.627	66.504	157.809	0.24316	-0.063086	0.019727	-116.284	-28.1512	-8.31617	0.16006	-0.018945	-0.049512
1.456	-24.646	46.22468	121.224	0.046143	0.1792	-0.23267	-4.039	-10.9815	20.6997	0.18262	-0.1084	0.075684	-23.652	91.857	113.562	0.19834	-0.045605	0.0041992	-52.774	32.377	23.7238	0.15244	-0.0038085	-0.062305
1.458	-34.738	52.788	120.844	0.052246	0.17236	-0.22949	5.238	46.6539	26.1465	0.17822	-0.096438	0.069824	-49.94756	32.43018	74.941	0.146	-0.010254	-0.018066	-62.932	20.194	21.8352	0.146	0.01709	-0.07959
1.46	-45.72	46.1203	124.002	0.062012	0.15723	-0.21191	-21.937	16.9143	7.8256	0.16992	-0.08252	0.065918	-72.1763	54.784	53.0208	0.092775	0.040527	-0.048633	-40.601	46.757	19.3844	0.14024	0.029004	-0.091699
1.462	-22.316	36.81968	127.738	0.064453	0.15283	-0.20654	-15.259	7.9075	24.0523	0.1582	-0.064941	0.060547	-87.8929	26.224	38.881	0.032617	0.094434	-0.09463	-48.409	22.3628	-0.439	0.13731	0.039453	-0.10118
1.464	-42.471	30.2968	99.586	0.080566	0.13281	-0.19287	-37.656	53.01	26.5278	0.15332	-0.056641	0.061523	-100.63227	64.016	26.6659	-0.027148	0.1499	-0.15635	-57.655	50.08842	25.5832	0.14395	0.044531	-0.10664
1.466	-32.335	30.9302	81.171	0.083252	0.125	-0.18189	-29.805	-7.9463	38.6511	0.14404	-0.038574	0.056641	-84.4366	22.4248	40.291	-0.094921	0.2124	-0.21719	0.323	24.69542	9.868	0.15566	0.046485	-0.11094
1.468	-47.525	34.169	85.125	0.09082	0.10938	-0.1748	-7.479	21.45528	31.4612	0.1377	-0.026611	0.056152	-112.1224	27.474	26.0819	-0.16113	0.27002	-0.28613	32.652	48.9639	48.535	0.16699	0.038574	-0.104
1.47	-25.099	48.895	85.866	0.10547	0.094727	-0.15771	-19.331	37.26731	14.801	0.13086	-0.016602	0.054199	-101.896	-19.9367	23.562	-0.21768	0.34424	-0.33896	30.796	45.47	-5.807	0.1833	0.024609	-0.09043
1.472	-45.047	58.5	72.097	0.11084	0.084473	-0.15137	-25.936	-2.9853	26.5669	0.12109	-0.0053711	0.049805	-75.6471	4.544	35.767	-0.25879	0.41953	-0.37676	11.605	29.734	19.354	0.20117	-0.0033225	-0.080468
1.474	-36.762	60.133	51.151	0.12354	0.0625	-0.13965	-34.398	46.341	28.059	0.11963	-0.00048828	0.047363	-69.022	-14.64303	37.38288	-0.2877	0.4832	-0.4123	38.857	33.555	3.379	0.21524	-0.036135	-0.060935
1.476	-34.109	56.466	60.336	0.1355	0.049316	-0.12915	-9.945	8.7483	23.7917	0.10645	0.015137	0.042969	-44.207	24.6306	39.627	-0.30528	0.53496	-0.44141	57.589	9.929	32.1357	0.22207	-0.073538	-0.04951
1.478	-11.038	44.6149	60.959	0.13623	0.030762	-0.12207	-24.48	-9.77901	45.607	0.092773	0.021973	0.03833	-40.711	-8.1929	34.0249	-0.31348	0.5791	-0.45898	74.422	24.8497	43.1899	0.23193	-0.11279	-0.03418
1.48	-36.385	34.795	64.169	0.15381	0.0092773	-0.10352	-19.874	33.6667	32.3293	0.083984	0.035156	0.029297	-60.4381	26.5762	3.391	-0.31494	0.6124	-0.47002	50.425	-13.0162	78.694	0.23428	-0.14101	-0.018947
1.482	-31.913	26.8209	39.1496	0.15527	0.00097656	-0.099609	-12.931	-19.416	44.699	0.066406	0.053711	0.024414	-51.677	-16.1712	13.73295	-0.31934	0.64141	-0.46796	26.987	4.611	64.8104	0.22686	-0.16357	-0.011035
1.484	-19.382	20.9532	44.681	0.16406	-0.022461	-0.087891	-13.398	13.0179	36.2324	0.059082	0.067383	0.021484	-17.017	4.9486	35.434	-0.32793	0.65547	-0.45039	18.303	-7.671	69.1626	0.21162	-0.17568	-0.0051788
1.486	-16.762	25.159	31.701	0.16504	-0.033936	-0.083008	-35.04	34.0416	12.343	0.041992	0.088379	0.010254	-4.506	-41.205	40.6699	-0.32646	0.65928	-0.421	25.171	37.3861	34.6709	0.18897	-0.18223	-0.0058594
1.488	-45.774	10.0674	52.185	0.16846	-0.047363	-0.074219	-23.007	-6.44074	26.335	0.036621	0.10767	0.0061035	19.932	-5.9792	43.6139	-0.32422	0.64893	-0.38623	-0.717000000000006	3.375	44.775	0.16846	-0.18359	-0.012207
1.49	-12.187	12.7162	40.866	0.16943	-0.059082	-0.064941	-8.587	43.455	29.25895	0.029785	0.12793	-0.0053711	24.804	-35.128	3.085	-0.30996	0.62226	-0.33926	-23.505	27.8286	24.86889	0.14218	-0.17431	-0.017188
1.492	-9.792	8.2826	45.572	0.16797	-0.061523	-0.062012	-5.822	-5.0621	27.2163	0.019043	0.15332	-0.0073242	13.564	18.3946	9.469	-0.28662	0.58565	-0.29101	-49.113	0.3857	27.808	0.12048	-0.15624	-0.027846
1.494	-20.079	19.7405	44.622	0.16162	-0.064941	-0.05127	-9.301	-22.9708	46.5225	0.012695	0.1665	-0.015137	38.834	10.4756	-4.08117	-0.25654	0.53252	-0.23867	-67.269	33.818	30.092	0.089221	-0.12886	-0.036427
1.496	-37.214	8.13441	49.473	0.15625	-0.060303	-0.046143	-17.514	22.4845	22.48	0.0073242	0.19141	-0.022949	37.138	53.417	23.1739	-0.22597	0.48496	-0.18262	-59.557	9.9777	22.6363	0.058763	-0.093223	-0.044925
1.498	0.396000000000001	12.5385	57.328	0.15137	-0.054199	-0.041992	-16.133	-25.9379	27.671	0.0080567	0.2085	-0.029541	50.7993	40.5617	33.28	-0.18652	0.43164	-0.12939	-64.866	25.5892	59.296	0.027832	-0.053223	-0.059082
1.5	-11.568	13.8062	48.146	0.15234	-0.050781	-0.035156	-0.866000000000007	14.8809	40.962	0.0048828	0.22607	-0.038086	52.1499	43.7743	37.639	-0.14199	0.38818	-0.071973	-95.5617	-3.4981	34.8609	0.0066519	-0.020165	-0.073908
1.502	-24.986	14.6241	33.789	0.15381	-0.044922	-0.026855	-4.924	17.8885	15.02087	0.0029297	0.25049	-0.044434	37.668	6.62	40.292	-0.096485	0.33945	-0.018652	-72.692	13.9141	53.732	-0.0078951	0.0058916	-0.077041
1.504	-39.505	-1.9822	27.4804	0.15918	-0.038574	-0.020508	-17.423	-22.9122	29.9114	0.010254	0.26074	-0.051758	2.251	5.477	47.18033	-0.050781	0.2961	0.030176	-104.917	6.94	17.34104	-0.014516	0.022313	-0.077451
1.506	-14.581	3.1674	23.1849	0.15991	-0.036621	-0.01709	-6.47799999999999	0.954000000000001	54.176	0.013184	0.28027	-0.059082	1.813	-16.414	18.3813	-0.0065428	0.25557	0.077051	-69.8187	6.579	37.444	-0.01894	0.028591	-0.081838
1.508	-40.88	20.7836	12.416	0.16455	-0.02832	-0.0092773	-20.333	-44.179	77.5788	0.0095214	0.28589	-0.071533	-24.419	-1.62348	26.9723	0.033691	0.2168	0.12207	-83.5871	-6.823	7.4008	-0.012695	0.03125	-0.081543
1.51	-23.82	27.2597	12.5706	0.16553	-0.024414	-0.0039063	-19.51	-35.20529	117.5485	0.00097656	0.28076	-0.097168	-25.986	-2.90555	0.273999999999997	0.065039	0.1709	0.16182	-51.36	-33.589	25.7912	-0.0040733	0.024498	-0.086616
1.512	-33.674	16.5887	14.6234	0.16846	-0.019043	0.0029297	3.43	33.3416	110.2835	-0.016602	0.28174	-0.14014	-40.977	4.262	15.233	0.096094	0.12442	0.19023	-65.905	-22.953	-23.5377	0.0068958	0.010017	-0.087068
1.514	-23.116	7.40543	35.30901	0.17041	-0.019531	0.0024414	-41.726	-20.8605	147.7299	-0.035645	0.28809	-0.16309	-79.9049	24.5581	13.9226	0.11992	0.063477	0.20195	-50.077	-35.1429	22.9016	0.0089933	-0.010378	-0.090966
1.516	-37.085	8.4656	24.3548	0.17163	-0.0061035	0.013184	-53.964	3.5823	192.921	-0.070313	0.31787	-0.20605	-83.4789	26.285	16.316	0.13867	0.010645	0.21104	-44.6864	8.832	20.0894	0.014899	-0.035341	-0.091684
1.518	-40.309	1.3557	28.191	0.17139	-0.0014648	0.013672	-60.556	17.1963	223.613	-0.10693	0.3313	-0.25098	-76.14711	32.949	36.185	0.1543	-0.037109	0.20508	-18.247	13.332	55.966	0.020508	-0.05957	-0.089844
1.52	-35.036	12.2629	39.0088	0.16943	0.015625	0.019043	-34.823	-2.9164	302.8159	-0.13867	0.34717	-0.30908	-92.9308	9.352	53.8706	0.16924	-0.059961	0.20107	35.476	56.295	25.4272	0.021167	-0.088482	-0.095703
1.522	-21.18	14.2344	29.2616	0.16968	0.030029	0.017334	-25.434	94.4696	368.5801	-0.18945	0.37256	-0.3833	-80.6414	9.655	35.9725	0.17969	-0.061719	0.19414	22.848	22.8143	23.9953	0.014632	-0.1135	-0.10526
1.524	-47.479	4.183	14.055	0.16895	0.042969	0.011719	-42.438	91.8166	450.9153	-0.21533	0.38477	-0.43066	-62.647	-2.714	43.034	0.19414	-0.057032	0.17813	7.895	59.055	7.51	0.0077627	-0.12887	-0.11966
1.526	-44.1	-5.5201	13.678	0.1665	0.063477	0.010742	-35.278	85.3825	512.8789	-0.2793	0.40771	-0.52344	-62.7496	21.444	51.5264	0.20908	-0.032715	0.16396	19.919	27.8521	35.825	-0.0053336	-0.14191	-0.14132
1.528	-39.011	4.473	10.746	0.16504	0.07373	0.0068359	-35.4356	115.771	540.99	-0.33814	0.42847	-0.59229	-83.133	11.1748	27.1918	0.23242	-0.0063477	0.15137	73.9669	54.672	94.634	-0.013672	-0.14258	-0.17725
1.53	-27.39	12.8946	14.4321	0.16943	0.093262	-0.0014648	5.504	58.557	628.485	-0.40137	0.44971	-0.66162	-54.8177	34.975	24.1584	0.26357	0.015234	0.14365	50.639	-7.9964	77.453	-0.028413	-0.12926	-0.22258
1.532	-37.185	9.6474	36.361	0.16358	0.10694	-0.019532	35.8767	83.0899	756.4189	-0.50195	0.47461	-0.76563	-67.461	1.309	19.2455	0.29453	0.033301	0.13379	47.133	25.678	143.726	-0.045927	-0.13793	-0.292
1.534	-27.207	-0.5986	37.733	0.16162	0.11572	-0.036133	3.225	66.684	829.13	-0.55811	0.48926	-0.82275	-45.215	29.1729	3.0201	0.32813	0.041894	0.1295	53.4052	10.6065	186.079	-0.077761	-0.15484	-0.39657
1.536	-15.182	0.932799999999999	39.746	0.15283	0.13672	-0.064941	11.415	-10.12	875.753	-0.67383	0.53223	-0.9209	-33.633	-4.703	29.15705	0.35771	0.040332	0.12695	66.5	80.941	292.2915	-0.12309	-0.13315	-0.50931
1.538	-6.395	11.269	27.0334	0.14551	0.1543	-0.080566	-13.5823	11.948	865.4847	-0.76806	0.5874	-0.98586	-20.499	7.9341	36.8426	0.37646	0.031738	0.11621	-1.518	72.853	368.721	-0.1875	-0.061523	-0.62305
1.54	-39.032	3.379	47.894	0.13135	0.19092	-0.10498	-35.106	-48.5794	882.4484	-0.85693	0.65479	-1.0483	8.08	-41.352	46.8629	0.39131	0.024317	0.11865	32.951	67.918	460.9711	-0.28227	0.041278	-0.75396
1.542	-8.626	-0.370999999999999	68.81	0.11866	0.22754	-0.12867	-28.254	-88.725	931.335	-0.95068	0.7583	-1.0874	22.358	-3.413	34.064	0.40029	0.0093751	0.11543	34.145	46.982	562.198	-0.37024	0.15224	-0.88038
1.544	-27.58	-8.612	59.41	0.11279	0.25977	-0.15527	-9.004	-58.8136	924.31154	-0.98584	0.81299	-1.1089	19.353	-47.035	48.188	0.40186	0.0027344	0.11895	18.925	99.7368	759.8762	-0.46959	0.281	-1.0197
1.546	-27.282	-13.982	59.046	0.11475	0.29932	-0.18457	-4.11900000000001	-112.026	909.076	-1.0151	0.9165	-1.1362	51.722	17.099	43.01	0.39785	0.0025391	0.11406	-9.783	95.1957	947.074	-0.58387	0.41905	-1.167
1.548	-24.151	-33.783	76.659	0.11719	0.31104	-0.19971	16.3761	-90.946	909.925	-0.99416	0.98193	-1.1441	65.269	9.1835	48.935	0.40039	0.0029297	0.11279	-44.91	63.3676	1136.478	-0.71436	0.56104	-1.3315
1.55	-16.162	-40.4195	94.695	0.12842	0.32471	-0.22754	29.021	-81.828	888.482	-0.94531	1.0225	-1.1426	44.54	52.161	14.4732	0.40323	0.0060547	0.10918	-115.221	24.32145	1264.06	-0.86817	0.71803	-1.5141
1.552	-43.161	-30.1478	112.556	0.12622	0.3313	-0.2478	57.727	-105.099	891.941	-0.83984	1.0527	-1.1211	29.534	0.978	20.0592	0.40508	0.012403	0.10616	-72.006	-49.302	1382.9318	-1.041	0.9141	-1.6762
1.554	-39.336	-15.2646	133.324	0.11719	0.33154	-0.27783	66.564	-21.1536	883.123	-0.78271	1.0552	-1.1167	19.532	21.5079	5.6935	0.40976	0.0057617	0.10264	-42.382	-105.393	1436.504	-1.2295	1.174	-1.8327
1.556	-36.1945	-12.9712	164.037	0.084473	0.32813	-0.32666	63.483	-30.8849	868.6212	-0.67969	1.041	-1.0918	-7.042	-44.345	30.13578	0.41543	0.0006836	0.099608	-129.8679	-177.859	1566.92	-1.4079	1.4713	-1.9973
1.558	-27.072	2.8788	204.053	0.05957	0.3252	-0.3623	43.853	-44.3431	905.07876	-0.63696	1.0302	-1.0859	-8.705	10.335	17.932	0.41406	-0.013672	0.093262	-158.41	-197.651	1519.97	-1.5254	1.7871	-2.127
1.56	-56.007815	40.24	210.038	-0.003418	0.32861	-0.43701	38.525	-23.118	922.816	-0.61768	1.0122	-1.0718	-1.668	-27.1867	24.167	0.40752	-0.030566	0.08916	-160.277	-283.8284	1474.325	-1.543	2.0455	-2.1877
1.562	-47.1223	60.319	275.861	-0.056397	0.34131	-0.50953	8.233	-115.298	946.9993	-0.62891	1.0078	-1.0684	-34.189	38.889	19.7523	0.39649	-0.043652	0.078125	-161.288	-318.777	1331.683	-1.4748	2.1767	-2.205
1.564	-46.4336	98.556	341.372	-0.11768	0.36475	-0.5874	-0.774999999999999	-128.636	989.3788	-0.64648	1.0195	-1.0703	-38.108	1.586	1.6264	0.37773	-0.05459	0.063281	-175.5947	-419.13	1275.516	-1.3384	2.1518	-2.2077
1.566	-40.168	122.546	386.879	-0.20898	0.42773	-0.69629	-12.547	-129.162	996.804	-0.68359	1.083	-1.0645	-44.865	57.12	11.818	0.35752	-0.058789	0.047168	-148.959	-406.1	1235.159	-1.1596	1.9771	-2.2029
1.568	-46.466	120.391	444.571	-0.25	0.46289	-0.74609	-37.298	-184.049	1017.683	-0.70556	1.1536	-1.0716	-54.0685	23.846	17.6214	0.33203	-0.05957	0.027344	-142.949	-435.24	1189.54	-0.96094	1.6543	-2.1621
1.57	-35.816	93.609	499.209	-0.33301	0.5415	-0.85693	-52.486	-162.178	1053.271	-0.7085	1.2212	-1.0776	-53.7	49.232	36.43	0.30733	-0.051758	0.010352	-147.559	-312.5	1116.9078	-0.82694	1.2567	-2.0953
1.572	-20.924	89.869	587.705	-0.38427	0.59912	-0.94287	-52.069	-200.29	1106.699	-0.68701	1.2798	-1.1304	-61.98114	-7.0391	43.465	0.27568	-0.042676	-0.00039066	-126.455	-277.866	1122.12252	-0.73553	0.86843	-2.0218
1.574	-35.348	88.75	633.157	-0.42822	0.66162	-1.02	-27.854	-242.622	1182.3808	-0.66357	1.2925	-1.1636	-108.044	9.135	25.128	0.25381	-0.02627	-0.014063	-106.122	-170.853	1130.9361	-0.67104	0.56205	-1.9722
1.576	-22.225	59.254	679.34	-0.48389	0.75635	-1.1089	-26.103	-217.744	1228.1141	-0.61328	1.2813	-1.25	-85.474	-22.547	24.46	0.2334	-0.0034179	-0.028223	-70.257	-173.435	1126.631	-0.63789	0.40159	-1.9658
1.578	-9.95200000000001	17.20499	712.149	-0.50977	0.80859	-1.1416	-24.956	-278.114	1267.358	-0.58057	1.2524	-1.3472	-94.5919	22.6386	21.388	0.21631	0.020996	-0.041016	-15.285	-105.71	1170.2487	-0.63623	0.39697	-1.9839
1.58	-37.368	-3.2675	752.951	-0.55225	0.91455	-1.187	-18.996	-242.083	1308.321	-0.58154	1.2505	-1.3921	-86.4258	-5.606	42.4798	0.19775	0.04502	-0.04668	-86.8148	-154.8	1194.469	-0.6756	0.50863	-2.0227
1.582	-20.37	-11.184	779.907	-0.5664	0.97851	-1.1983	-41.822	-154.315	1306.7658	-0.61279	1.2578	-1.4668	-75.7217	36.24	27.8998	0.1793	0.068457	-0.051465	-65.538	-159.87	1248.867	-0.72032	0.66293	-2.048
1.584	-6.333	-29.744	825.69	-0.56445	1.0234	-1.2031	-48.373	-146.857	1334.361	-0.66406	1.2905	-1.5083	-38.166	17.0323	19.9341	0.16211	0.09502	-0.055371	-62.8092	-253.567	1258.575	-0.72226	0.80941	-2.0687
1.586	0.487000000000002	-13.2839	857.501	-0.52637	1.041	-1.1953	-61.116	-92.524	1361.799	-0.70654	1.3247	-1.5444	-52.5658	40.351	18.6206	0.1459	0.11484	-0.058984	15.505	-276.65	1307.411	-0.67421	0.92032	-2.0742
1.588	-6.203	-14.747	859.031	-0.49707	1.0342	-1.1797	-105.9843	-106.7835	1379.71634	-0.73633	1.3555	-1.585	-30.732	18.5683	25.027	0.13037	0.12744	-0.058594	55.4226	-374.277	1343.087	-0.56885	0.94385	-2.0366
1.59	0.734999999999999	-31.8	857.864	-0.42285	0.99268	-1.1558	-91.851	-125.756	1408.9757	-0.73047	1.3691	-1.5996	-6.335	14.8604	58.122	0.12021	0.13701	-0.055957	92.971	-392.093	1421.7769	-0.42423	0.84161	-1.9486
1.592	-20.368	-42.201	878.786	-0.38037	0.9331	-1.123	-95.86	-47.183	1415.659	-0.69336	1.3672	-1.6211	5.783	-8.3988	44.868	0.11162	0.13829	-0.051075	63.484	-457.31	1455.384	-0.28868	0.68273	-1.8198
1.594	-6.412	-34.462	868.104	-0.35107	0.88135	-1.0894	-61.921	-54.736	1418.502	-0.66797	1.3481	-1.6499	14.834	-1.638471	50.3442	0.09873	0.13594	-0.048731	85.367	-456.58	1560.1644	-0.18125	0.49796	-1.6944
1.596	5.922	-11.32868	855.704	-0.34131	0.83057	-1.0532	-44.412	-51.293	1453.316	-0.65039	1.3184	-1.6855	36.2412	2.1624	41.1519	0.085059	0.12637	-0.03916	76.59	-438.31	1592.0194	-0.10401	0.30733	-1.5969
1.598	-6.645	3.938	842.593	-0.34131	0.81641	-1.0352	-71.985	-44.424	1444.9455	-0.64941	1.2832	-1.7559	17.92	7.3206	51.313	0.07666	0.12158	-0.032227	132.678	-363.727	1665.634	-0.047852	0.15674	-1.5483
1.6	-23.562	17.7775	826.5589	-0.34912	0.81738	-1.0215	-53.85	-118.006	1478.231	-0.66748	1.2681	-1.7964	32.059	14.5757	35.6587	0.066504	0.11182	-0.027441	94.067	-299.724	1688.545	-0.018945	0.053905	-1.5512
1.602	-26.5273	20.4493	823.029	-0.36279	0.84106	-1.0192	-43.183	-76.614	1520.3554	-0.7124	1.2539	-1.875	24.405	5.294	28.3622	0.061524	0.10449	-0.023047	60.654	-229.989	1720.368	-0.036037	0.0080077	-1.5983
1.604	-27.794	23.0383	828.6742	-0.37012	0.87158	-1.0288	-27.753	-88.475	1541.979	-0.75855	1.2615	-1.9383	25.388	7.49128	14.394	0.055273	0.094336	-0.019922	-9.983	-144.859	1704.6125	-0.11572	0.033009	-1.7179
1.606	-44.0446	5.849	866.3013	-0.3833	0.92334	-1.0435	-10.393	-127.281	1586.142	-0.80811	1.2856	-2.0015	32.983	-18.9351	41.012	0.052735	0.086816	-0.014649	-38.9057	-82.61	1714.2484	-0.26328	0.17032	-1.866
1.608	-25.933	-9.931	903.37	-0.38672	0.95068	-1.0581	-35.51	-63.887	1572.2034	-0.88721	1.354	-2.0952	37.188	-15.8536	34.4669	0.04834	0.081543	-0.011719	1.395	-17.26	1735.129	-0.45313	0.3916	-2.0195
1.61	-54.37	-38.818	926.8	-0.38721	1.0063	-1.0737	-57.942	-104.219	1565.7733	-0.92578	1.3984	-2.1367	-0.0339999999999989	-29.2761	31.90316	0.046289	0.075977	-0.0076172	-6.927	-36.46	1720.0684	-0.64072	0.68262	-2.2088
1.612	-80.176	-57.94	940.716	-0.38648	1.0305	-1.0808	-62.529	-84.161	1574.9591	-1.0054	1.5142	-2.2085	2.29	12.946	20.0275	0.0458	0.066504	-0.0037109	45.49	-47.748	1685.1226	-0.796	0.99737	-2.4085
1.614	-92.213	-92.7389	969.684	-0.38965	1.041	-1.0859	-80.772	-44.9876	1556.621	-1.0571	1.6143	-2.2607	-14.376	-12.893	26.732	0.042285	0.059863	-0.0017578	27.978	-116.141	1642.964	-0.89092	1.2923	-2.5643
1.616	-70.3272	-102.9845	983.058	-0.3877	1.0332	-1.1016	-73.851	-75.7792	1578.467	-1.0972	1.7114	-2.2964	-42.797	27.678	19.9302	0.04248	0.05166	0.003418	2.231	-102.209	1671	-0.92588	1.5018	-2.6628
1.618	-73.874	-93.4365	993.8499	-0.38086	1.021	-1.104	-85.357	-3.684	1578.0477	-1.144	1.8384	-2.3296	-41.274	2.7742	12.5847	0.037598	0.047363	0.0019531	-2.916	-147.414	1713.0516	-0.92236	1.5942	-2.7183
1.62	-89.184	-99.822	1007.0918	-0.36279	0.99463	-1.1226	-76.614	11.9072	1558.625	-1.1631	1.8809	-2.3379	-51.352	49.534	-1.4284	0.029199	0.040137	0.003418	14.887	-134.843	1802.619	-0.89004	1.5889	-2.7389
1.622	-88.998	-112.071	1030.172	-0.36084	0.96509	-1.1394	-58.733	-8.0704	1560.717	-1.1836	1.9531	-2.3398	-72.9456	9.5381	20.91688	0.027344	0.041602	0.0086914	0.819000000000003	-181.57	1812.575	-0.86094	1.525	-2.7336
1.624	-92.612	-102.099	1057.941	-0.37305	0.92822	-1.1606	-71.357	51.3513	1553.803	-1.1975	1.9758	-2.3245	-78.9801	33.7428	17.442	0.027344	0.043946	0.0075195	-25.1156	-154.979	1842.396	-0.84531	1.4258	-2.7055
1.626	-89.074	-78.5549	1084.424	-0.39404	0.88721	-1.2183	-70.912	35.4091	1554.4063	-1.2129	1.9766	-2.2988	-92.2896	-25.12935	26.1069	0.02832	0.045898	0.0091796	-35.6163	-190.565	1810.117	-0.84824	1.3115	-2.6689
1.628	-96.449	-49.999	1117.52	-0.40137	0.88135	-1.2476	-60.481	72.0191	1573.2689	-1.248	1.9551	-2.2461	-88.26519	17.782	20.959	0.035645	0.046387	0.011719	-77.315	-141.958	1818.326	-0.86279	1.2017	-2.6392
1.63	-70.993	-30.98	1131.795	-0.43359	0.88965	-1.3262	-96.121	91.1	1566.6598	-1.2676	1.9277	-2.2188	-76.3216	-22.8098	24.407	0.044727	0.056738	0.0054688	-72.962	-128.683	1788.346	-0.87227	1.1015	-2.6004
1.632	-79.39	-3.108	1147.827	-0.47022	0.91675	-1.3699	-96.187	22.6514	1580.695	-1.3159	1.8599	-2.1538	-63.5825	42.118	21.272	0.055567	0.065527	0.0018554	-30.188	-75.836	1762.619	-0.88867	1.0442	-2.5769
1.634	-74.659	22.016	1145.79751	-0.50342	0.95654	-1.4087	-115.699	32.1748	1587.826	-1.3418	1.8174	-2.1172	-62.7819	-7.631	26.3806	0.057519	0.078027	-0.0032226	-27.74	-67.608	1660.968	-0.93555	1.0723	-2.5723
1.636	-60.707	26.631	1170.74	-0.51367	1.0059	-1.457	-118.0986	18.877	1569.678	-1.3628	1.7817	-2.0815	-73.8485	45.0793	0.45195	0.062988	0.10508	-0.016016	16.316	-22.526	1611.894	-0.98155	1.1599	-2.5874
1.638	-44.78648	15.466	1193.262	-0.49951	1.02	-1.4722	-97.428	0.616	1587.69	-1.3672	1.75	-2.0547	-56.2274	-11.2873	24.004	0.067871	0.12842	-0.030762	12.789	26.475	1563.993	-1.0059	1.2578	-2.6016
1.64	-59.046	3.199	1208.165	-0.45508	1.0117	-1.4824	-110.231	54.16	1561.714	-1.3574	1.75	-2.043	-40.178	39.5482	20.3525	0.063086	0.15117	-0.053516	33.499	82.189	1558.881	-1.0037	1.3103	-2.6027
1.642	-57.482	-23.939	1209.183	-0.42749	0.99924	-1.4939	-114.329	16.02	1537.3857	-1.3301	1.7402	-2.0254	-8.21	-6.138	57.019	0.051172	0.16787	-0.086231	52.316	159.6811	1552.502	-0.96709	1.3106	-2.5729
1.644	-44.782	-45.9431	1206.222	-0.40234	0.98633	-1.5059	-88.582	20.993	1536.3104	-1.2891	1.7314	-2.0097	-24.536	39.641	112.417	0.030859	0.19131	-0.11982	62.9515	172.091	1583.345	-0.91553	1.2701	-2.5401
1.646	-56.011	-66.072	1214.927	-0.38818	0.97705	-1.5288	-65.773	65.086	1529.8056	-1.2476	1.7134	-1.9878	17.456	-10.6548	131.72	0.0062501	0.21504	-0.16973	51.697	192.948	1562.742	-0.875	1.2074	-2.4899
1.648	-48.738	-71.6653	1224.602	-0.39795	0.98291	-1.5464	-51.165	51.682	1541.521	-1.1968	1.688	-1.9526	12.575	53.596	174.419	-0.024414	0.22363	-0.24023	77.84	142.647	1547.786	-0.8584	1.1426	-2.4336
1.65	-41.8535	-92.441	1227.094	-0.42285	1.0005	-1.5796	-66.443	94.942	1526.497	-1.1738	1.668	-1.9297	-21.513	44.9389	228.751	-0.062695	0.23291	-0.34111	85.058	166.979	1552.178	-0.87539	1.0894	-2.3635
1.652	-53.892	-74.9167	1246.654	-0.4458	1.0078	-1.6162	-68.419	112.3225	1484.6264	-1.1387	1.6182	-1.875	-24.3624	133.149	297.3626	-0.11582	0.25049	-0.45625	43.323	137.443	1580.2519	-0.88437	1.0551	-2.2981
1.654	-58.205	-64.3039	1241.36	-0.47852	1.0288	-1.6606	-45.448	109.6233	1469.432	-1.1236	1.5806	-1.8335	16.6442	108.985	434.7127	-0.17559	0.28642	-0.57617	55.881	146.607	1594.0063	-0.86914	1.0203	-2.2359
1.656	-68.149	-37.156	1267.388	-0.52686	1.0801	-1.7188	-27.307	183.895	1422.057	-1.1128	1.5396	-1.7827	14.255	171.0163	523.276	-0.24893	0.34619	-0.70947	56.994	61.8697	1556.9945	-0.83877	0.98096	-2.1739
1.658	-55.087	-30.33	1298.369	-0.5542	1.1196	-1.7495	-34.406	147.666	1392.3576	-1.0938	1.4766	-1.7109	-10.7261	144.142	658.95	-0.32422	0.42188	-0.84668	65.502	57.21	1530.819	-0.79102	0.93359	-2.1016
1.66	-76.75	-18.367	1302.945	-0.604	1.2075	-1.8062	-28.408	147.911	1391.82	-1.083	1.4434	-1.6797	-0.0399999999999991	191.8433	843.991	-0.39219	0.51289	-0.97403	47.92138	28.568	1510.805	-0.74961	0.88262	-2.0334
1.662	-70.749	4.986	1284.404	-0.64453	1.3008	-1.8555	-29.612	162.83	1353.793	-1.0527	1.3672	-1.6055	-24.925	151.77449	1023.471	-0.46553	0.60439	-1.0999	85.119	82.083	1513.957	-0.7167	0.82989	-1.9644
1.664	-110.374	11.7377	1257.269	-0.65576	1.3501	-1.8726	-18.227	97.4923	1323.2484	-1.0281	1.3147	-1.5535	17.96	148.622	1180.622	-0.54756	0.6919	-1.2311	33.8272	92.399	1457.254	-0.70107	0.78457	-1.9049
1.666	-124.903	19.3622	1249.846	-0.65674	1.4219	-1.8887	-8.138	119.5556	1306.567	-0.99561	1.2661	-1.4937	46.782	74.243	1245.236	-0.63018	0.79991	-1.3447	14.884	134.827	1430.26	-0.68613	0.76113	-1.8561
1.668	-113.13	33.342	1241.595	-0.64184	1.4675	-1.9031	2.155	96.629	1274.7563	-0.93945	1.1934	-1.4238	-7.16900000000001	21.934	1279.442	-0.70508	0.9375	-1.4307	0.0260000000000034	162.2381	1362.5208	-0.65186	0.75244	-1.8003
1.67	-113.044	30.0086	1239.0204	-0.61523	1.4941	-1.8984	8.52600000000001	72.693	1272.113	-0.91309	1.166	-1.3848	-20.15	-59.533	1332.174	-0.77158	1.1024	-1.4735	1.869	218.506	1334.402	-0.61367	0.75215	-1.7428
1.672	-116.824	20.4998	1248.313	-0.58301	1.4873	-1.8799	-12.802	133.703	1223.9689	-0.86133	1.0977	-1.3105	-33.765	-103.479	1357.814	-0.82149	1.2797	-1.4965	-47.194	269.528	1267.9985	-0.58887	0.74375	-1.6765
1.674	-132.304	1.728	1259.007	-0.56836	1.4727	-1.8691	-21.238	102.309	1194.245	-0.82226	1.0537	-1.2554	-21.406	-153.978	1291.441	-0.8418	1.4469	-1.4887	-54.883	301.357	1249.761	-0.56504	0.72852	-1.609
1.676	-108.507	-7.853	1282.851	-0.55469	1.4355	-1.8262	5.411	124.87401	1182.202	-0.78369	1.0063	-1.1987	22.821	-185.783	1256.19	-0.83604	1.5761	-1.4825	-63.512	321.318	1184.3786	-0.52334	0.71982	-1.5454
1.678	-123.929	-9.403	1293.815	-0.5669	1.396	-1.7836	-14.713	160.6986	1128.4098	-0.72754	0.94043	-1.123	22.677	-216.712	1197.942	-0.8125	1.6621	-1.4785	-95.868	274.404	1145.378	-0.47461	0.70117	-1.4727
1.68	-106.469	-21.437	1310.172	-0.58545	1.3599	-1.7417	-20.815	148.3059	1077.9246	-0.7002	0.90918	-1.0889	21.213	-239.567	1195.915	-0.78145	1.6779	-1.4987	-91.5525	260.252	1073.297	-0.43399	0.67578	-1.3906
1.682	-103.128	-22.1736	1281.103	-0.61523	1.3164	-1.6875	-18.578	206.571	1021.046	-0.6416	0.85352	-1.0176	31.746	-192.485	1128.951	-0.76396	1.6388	-1.5429	-70.076	200.208	1040.212	-0.38037	0.64121	-1.3156
1.684	-93.938	-19.7655	1256.83	-0.6333	1.3071	-1.6636	-33.574	191.31116	972.389	-0.59619	0.81202	-0.9624	48.253	-158.109	1109.839	-0.76631	1.5731	-1.596	-35.086	200.333	977.8704	-0.29951	0.5834	-1.2265
1.686	-107.858	-8.5798	1245.677	-0.6499	1.3052	-1.6187	-30.971	169.8923	954.8726	-0.55469	0.77148	-0.91016	20.98	-88.877	1078.738	-0.7958	1.4999	-1.6559	-64.317	163.777	946.5648	-0.21611	0.51572	-1.1363
1.688	-95.125	-2.3767	1235.804	-0.65747	1.3088	-1.5925	-10.826	217.998	900.7511	-0.49023	0.70898	-0.8418	11.31	-106.512	1105.027	-0.83545	1.4556	-1.7163	-61.963	181.36	884.088	-0.14111	0.43848	-1.0459
1.69	-85.635	-3.756923	1218.505	-0.65674	1.3164	-1.5645	-2.654	177.7379	857.546	-0.45703	0.67773	-0.79688	5.651	-45.898	1097.634	-0.86484	1.4828	-1.7656	-71.742	152.367	852.65744	-0.087499	0.3748	-0.95742
1.692	-83.441	14.5904	1199.161	-0.6543	1.3105	-1.5244	14.884	200.204	827.13	-0.38623	0.61621	-0.7168	18.162	-84.96	1139.6348	-0.87227	1.5687	-1.8078	-39.843	187.376	807.675	-0.042676	0.31523	-0.86787
1.694	-69.676	9.4796	1193.62	-0.6499	1.2983	-1.4995	-4.534	222.528	777.837	-0.33057	0.56275	-0.65796	45.722	-47.05	1164.134	-0.85976	1.6922	-1.8391	-60.577	163.924	761.0558	0.0034178	0.25781	-0.78584
1.696	-63.139	21.1888	1180.499	-0.64111	1.2739	-1.4526	-17.6	169.6891	740.979	-0.2749	0.50879	-0.59766	59.409948	-134.407	1265.8398	-0.81738	1.8017	-1.8713	-55.228	211.786	711.2467	0.060351	0.20605	-0.70019
1.698	-56.383	40.1575	1158.927	-0.62818	1.2464	-1.4158	-1.153	208.4878	701.563	-0.18896	0.43555	-0.51953	68.3858	-118.255	1316.478	-0.75488	1.877	-1.8906	-68.345	228.155	662.9223	0.12402	0.146	-0.61133
1.7	-55.3198	59.193	1158.642	-0.60986	1.2153	-1.3784	16.783	182.974	663.8418	-0.15088	0.39795	-0.48193	75.687	-239.7427	1355.901	-0.66191	1.919	-1.8728	-65.867	267.784	600.7963	0.17412	0.086717	-0.52969
1.702	-44.4006	68.923	1162.808	-0.58984	1.166	-1.334	-2.72	142.506	642.424	-0.072266	0.31641	-0.40039	69.284	-253.534	1382.878	-0.55889	1.9255	-1.8339	-52.535	269.88	492.3561	0.22139	0.035644	-0.44922
1.704	-50.5159	67.983	1163.394	-0.57861	1.1411	-1.311	-0.602	181.82	593.817	-0.024658	0.26025	-0.3479	33.649	-357.352	1464.49	-0.4585	1.8774	-1.7867	-38.08	267.468	434.1181	0.25772	-0.0022461	-0.36954
1.706	-64.431	69.821	1152.48	-0.57813	1.0918	-1.2715	-6.219	142.329	546.855	0.021484	0.2041	-0.29443	-17.566	-314.851	1521.498	-0.3584	1.7695	-1.7403	-53.658	258.66	332.48	0.28261	-0.027442	-0.28701
1.708	-45.7273	64.0417	1133.497	-0.57202	1.0666	-1.2458	16.585	164.115	511.674	0.07959	0.13135	-0.21924	-64.476	-352.1	1598.556	-0.27979	1.6055	-1.7002	-19.744	234.046	283.336	0.30859	-0.053223	-0.20508
1.71	-52.415	48.1499	1132.749	-0.56543	1.0469	-1.2188	29.482	176.80955	444.214	0.11035	0.080078	-0.1709	-102.453	-245.063	1626.716	-0.21299	1.4126	-1.6636	-49.247	225.656	214.647	0.31211	-0.067285	-0.13232
1.712	-66.9589	55.1797	1124.373	-0.55322	1.0063	-1.1851	22.6	115.144	402.2214	0.13623	0.033691	-0.12598	-130.637	-244.522	1673.028	-0.16182	1.2214	-1.644	-24.016	197.056	201.55	0.31104	-0.087403	-0.072656
1.714	-69.743	48.9688	1068.829	-0.54688	0.98828	-1.1621	32.07	155.27	356.354	0.16943	-0.022949	-0.066406	-97.256	-118.9691	1716.559	-0.12041	1.0698	-1.6471	-38.496	174.594	157.39	0.30908	-0.1081	-0.014063
1.716	-62.9315	43.8734	1049.339	-0.52539	0.93945	-1.123	8.497	143.973	314.031	0.18652	-0.053711	-0.04248	-57.4409	-103.1029	1768.046	-0.098047	0.95694	-1.681	-47.416	128.618	161.723	0.30391	-0.11777	0.028809
1.718	-72.1242	37.168	1035.914	-0.51416	0.91797	-1.1006	18.422	141.2429	295.3418	0.22607	-0.11084	0.012695	-30.047	1.27200000000001	1777.459	-0.094238	0.88721	-1.7495	-77.068	121.77	124.0433	0.2832	-0.12402	0.075195
1.72	-79.8685	46.0864	1024.142	-0.49609	0.8916	-1.0703	40.3568	191.36	242.8347	0.25464	-0.15772	0.047119	-55.8976	-20.237	1793.299	-0.13008	0.87226	-1.8512	-67.214	83.407	162.493	0.25508	-0.13389	0.11992
1.722	-60.4595	73.14	999.092	-0.47266	0.85156	-1.0254	12.177	129.067	215.641	0.271	-0.1958	0.075195	-91.883	46.546	1731.916	-0.19375	0.9332	-1.9578	-66.213	75.298	122.595	0.21533	-0.15576	0.15391
1.724	-62.587	94.732	982.438	-0.45703	0.8291	-1.0098	-6.012	130.65	203.354	0.28467	-0.24512	0.10205	-94.49	16.801	1730.22	-0.28985	1.0539	-2.0778	-82.408	17.6591	137.04	0.16533	-0.17959	0.16562
1.726	-59.3448	109.895	953.836	-0.43457	0.79102	-0.9668	-19.642	143.582	167.688	0.28125	-0.2627	0.11572	-102.979	73.6813	1710.382	-0.40342	1.2001	-2.21	-52.504	24.6328	108.772	0.11104	-0.18408	0.17002
1.728	-80.83	119.256	931.696	-0.41406	0.76563	-0.93165	-27.815	86.5279	154.7277	0.2749	-0.28467	0.13232	-107.231	35.827	1725.884	-0.50537	1.3638	-2.3354	-52.415	-46.586	77.375	0.053711	-0.19141	0.15771
1.73	-47.7831	113.626	916.382	-0.39111	0.73877	-0.89795	-4.663	113.0529	139.161	0.26587	-0.29639	0.14111	-128.65	32.225	1740.617	-0.59365	1.5423	-2.4351	-39.57	-43.6603	52.2161	-0.019336	-0.19717	0.12266
1.732	-51.8121	127.693	890.763	-0.36621	0.70361	-0.85107	-23.885	68.076	114.5866	0.24854	-0.30762	0.14502	-145.601	-37.8242	1791.835	-0.66201	1.7305	-2.5198	-57.2387	-65.386	33.7375	-0.096875	-0.19356	0.085742
1.734	-53.4904	115.332	869.703	-0.35107	0.68408	-0.82764	-26.881	27.626	106.8505	0.23145	-0.31445	0.14209	-151.226	-56.436	1844.582	-0.72217	1.9181	-2.587	-9.175	-24.287	19.7662	-0.18711	-0.16777	0.036914
1.736	-39.063	103.573	837.572	-0.31494	0.64746	-0.77783	0.887	68.122	76.881	0.21826	-0.31885	0.1377	-115.471	-100.088	1879.305	-0.77246	2.0779	-2.6362	-4.121	-13.581	20.2631	-0.29707	-0.10752	-0.022949
1.738	-30.628	96.8003	804.935	-0.29468	0.61645	-0.7395	-31.467	13.362	65.4241	0.18359	-0.3208	0.11768	-81.014	-85.6729	1881.555	-0.81836	2.207	-2.6758	-16.932	27.0165	-4.2304	-0.40576	-0.018066	-0.091797
1.74	-32.496	87.7732	789.2793	-0.26855	0.58203	-0.70313	-35.804	31.1845	74.358	0.14258	-0.31617	0.10571	-42.213	-99.294	1853.28	-0.85752	2.2905	-2.6915	-47.598	13.8954	-10.9457	-0.50215	0.1002	-0.16103
1.742	-28.084	84.739	756.5193	-0.24023	0.55273	-0.66211	-31.367	35.6253	66.7805	0.089844	-0.30029	0.075195	-14.6844	-67.0839	1827.02	-0.89434	2.3117	-2.6902	-29.807	43.192	5.27586	-0.58066	0.22432	-0.23301
1.744	-19.152	85.0355	737.9	-0.2251	0.5293	-0.63965	-49.93	-16.247	62.308	0.019531	-0.25977	0.036133	9.788	-31.706	1801.798	-0.92871	2.2883	-2.6777	-32.252	56.725	1.98196	-0.62481	0.33448	-0.30489
1.746	-17.134	89.8786	718.809	-0.18408	0.49609	-0.59277	-21.765	28.302	61.545	-0.025879	-0.23584	0.0083008	9.475	34.8025	1791.0883	-0.96025	2.236	-2.6514	-19.865	63.743	43.949	-0.63887	0.43711	-0.35742
1.748	-18.795	98.301	708.885	-0.15747	0.46802	-0.55664	-35.836	1.05	43.459	-0.10938	-0.17725	-0.038574	11.652	69.031	1762.8829	-1.0059	2.1602	-2.6055	-9.101	47.9507	-2.977	-0.63867	0.53125	-0.38867
1.75	-6.618	101.581	675.974	-0.12793	0.44336	-0.52148	-28.882	-0.4661	42.79776	-0.17432	-0.1206	-0.073975	-9.218	94.663	1743.473	-1.0573	2.0776	-2.5435	-15.026	19.11014	23.786	-0.61641	0.61162	-0.41006
1.752	4.226	120.31	639.967	-0.083984	0.41016	-0.48145	-17.815	71.819	16.855	-0.24023	-0.061035	-0.10986	-41.9165	130.142	1720.055	-1.0975	1.9876	-2.4819	9.29	22.336	-12.26	-0.58389	0.65947	-0.41855
1.754	5.523	131.213	614.604	-0.059082	0.38428	-0.46338	-9.79600000000001	26.713	8.3192	-0.31494	0.024414	-0.16406	-44.349	147.953	1689.968	-1.11	1.9103	-2.4163	33.36	-5.53	37.8451	-0.54873	0.67705	-0.42168
1.756	-0.402000000000001	132.512	595.297	-0.021484	0.33984	-0.42578	-13.723	25.4353	22.0088	-0.34961	0.06543	-0.19287	-64.996	187.054	1636.227	-1.1024	1.8605	-2.3658	31.257	16.063	11.56516	-0.50664	0.67617	-0.41289
1.758	-3.769	136.8136	565.107	0.0085451	0.30688	-0.39697	-16.914	23.118	22.2718	-0.38867	0.14014	-0.24219	-53.255	178.431	1637.32781	-1.0894	1.8462	-2.3081	17.704	-24.4094	29.842	-0.46826	0.6499	-0.39307
1.76	-21.654	146.466	511.59098	0.04834	0.27002	-0.37061	-16.304	-30.988	33.015	-0.39892	0.18726	-0.27099	-64.326	197.053	1580.67	-1.0623	1.8455	-2.2662	3.102	-6.181	-0.626999999999999	-0.43359	0.61016	-0.36836
1.762	-13.763	123.001	498.581	0.09668	0.20947	-0.32764	13.414	16.304	23.5832	-0.4043	0.22656	-0.29199	-68.044	186.692	1576.2116	-1.0218	1.8403	-2.2097	-2.209	-30.1767	35.122	-0.40157	0.57852	-0.33516
1.764	-31.334	111.82	476.384	0.11963	0.18457	-0.31348	0.656999999999996	2.6433	9.2617	-0.39307	0.26709	-0.31543	-70.624	195.253	1569.974	-0.97022	1.8169	-2.1456	-20.624	17.73	35.159	-0.37226	0.54375	-0.30118
1.766	-27.469	103.956	442.805	0.16504	0.12842	-0.28369	-10.914	-10.32111	24.0021	-0.38184	0.28613	-0.31934	-66.015	143.982	1619.43	-0.92754	1.7701	-2.0646	-16.614	18.4095	77.865	-0.32451	0.51904	-0.26631
1.768	-45.728	113.37	398.688	0.20483	0.090334	-0.27124	18.046	33.3674	12.401	-0.35547	0.31543	-0.31934	-62.911	144.166	1634.962	-0.87695	1.7129	-1.9727	-52.53	70.751	47.10795	-0.26465	0.5	-0.23438
1.77	-43.6785	118.956	362.418	0.24023	0.058594	-0.26221	-0.567	-24.336	4.7124	-0.32105	0.32568	-0.31104	-86.83	90.397	1616.971	-0.83193	1.6365	-1.88	-48.991	47.756	57.5236	-0.20137	0.47725	-0.1959
1.772	-45.156	106.61	369.843	0.28809	0.016602	-0.24072	20.567	-6.8446	34.864	-0.28906	0.32129	-0.29736	-112.119	117.466	1566.668	-0.77998	1.5462	-1.7831	-37.106	83.96	46.7823	-0.12881	0.44854	-0.15283
1.774	-47.023	104.614	349.478	0.30615	-0.0039063	-0.24023	7.327	14.4419	23.008	-0.23486	0.29736	-0.27197	-120.243	91.311	1551.96	-0.72803	1.4443	-1.6905	-57.556	50.8427	44.6506	-0.055371	0.41729	-0.11143
1.776	-56.9112	98.149	334.774	0.3501	-0.035156	-0.23047	-32.108	-11.8221	29.1077	-0.21045	0.27783	-0.25732	-122.839	156.655	1493.497	-0.6835	1.3428	-1.6028	-45.917	63.644	50.566	0.0088867	0.38262	-0.07539
1.778	-63.6145	99.965	324.918	0.37207	-0.050781	-0.22754	-4.721	44.006	36.2019	-0.15283	0.24121	-0.21631	-105.043	138.453	1467.331	-0.646	1.2456	-1.5112	-19.901	17.0883	9.8141	0.062988	0.33594	-0.041992
1.78	-43.8991	97.756	308.459	0.39307	-0.063965	-0.22607	-17.85	19.6555	10.5929	-0.12524	0.20898	-0.1853	-102.634	222.02	1397.296	-0.6167	1.1679	-1.4269	-41.094	7.1652	28.49721	0.10381	0.28379	-0.013281
1.782	-56.9991	96.6	282.615	0.40479	-0.071289	-0.23682	-18.218	1.276	19.5475	-0.09375	0.18408	-0.16357	-112.095	212.828	1360.645	-0.57959	1.1052	-1.3534	-54.285	-19.7376	-11.0886	0.1415	0.23281	0.0048827
1.784	-45.6023	94.119	257.444	0.41162	-0.069824	-0.23633	0.826999999999998	42.95377	10.361	-0.068359	0.15479	-0.13184	-109.769	280.759	1318.243	-0.52686	1.0583	-1.2784	-50.882	-18.17551	37.7386	0.17666	0.18632	0.025586
1.786	-51.233	91.47	227.023	0.40625	-0.061035	-0.25146	-49.818	11.078	-2.678	-0.053223	0.14307	-0.11426	-71.3878	256.524	1284.322	-0.46885	1.0161	-1.203	-49.822	-15.843	34.0273	0.20156	0.14463	0.040332
1.788	-50.1833	84.206	203.974	0.39965	-0.046143	-0.25879	-42.634	42.2609	17.956	-0.035156	0.13428	-0.097168	-21.066	307.494	1216.001	-0.39844	0.96973	-1.1211	-32.151	-21.6032	76.292	0.21924	0.11523	0.054688
1.79	-30.01	80.4645	179.691	0.38574	-0.022949	-0.26953	-24.014	58.213	9.694	-0.018066	0.12695	-0.085449	17.867	250.891	1180.77	-0.32715	0.93047	-1.044	-38.035	-18.8145	56.425	0.24453	0.093556	0.073438
1.792	-54.61087	81.2644	158.719	0.35742	0.010742	-0.2832	-45.909	0.9096	23.312	-0.0043945	0.12842	-0.068848	20.545	265.74	1118.876	-0.25596	0.8962	-0.9626	-53.537	-27.7602	75.466	0.27041	0.075489	0.084278
1.794	-41.528	76.7202	168.51	0.34277	0.036621	-0.29199	-19.142	28.7874	30.82	0.020508	0.13428	-0.057129	9.576	209.632	1078.656	-0.18291	0.84502	-0.87392	-46.666	-2.5941	25.6899	0.29697	0.054004	0.097168
1.796	-23.562	77.9497	157.125	0.31104	0.08252	-0.30469	-28.073	4.3068	25.5005	0.032227	0.1377	-0.053223	30.445	256.045	1009.807	-0.10908	0.78936	-0.79189	13.707	-24.892	41.726	0.33272	0.036426	0.11035
1.798	-6.653	78.84	131.312	0.29443	0.11158	-0.30957	-41.764	-11.9947	51.293	0.056641	0.13965	-0.040039	33.415	199.1611	961.175	-0.035156	0.71533	-0.71045	-7.783	2.387	-9.7768	0.36572	0.014648	0.12354
1.8	-18.768	76.22	146.011	0.271	0.13184	-0.31299	-38.22	30.1032	53.0743	0.065674	0.14063	-0.035889	67.745	237.7464	938.084	0.019629	0.62744	-0.63662	9.588	-14.3926	18.2681	0.38916	-0.0033203	0.13389
1.802	-8.725	66.011	136.813	0.23828	0.15186	-0.3208	-44.112	-7.031	35.2769	0.07959	0.13574	-0.025879	62.313	161.63	890.166	0.082519	0.53262	-0.55937	3.435	34.816	-21.0285	0.41172	-0.02207	0.13584
1.804	10.217	69.916	114.792	0.21655	0.15601	-0.32422	-10.956	7.381	39.3484	0.089844	0.13086	-0.01416	62.112	193.973	835.537	0.1372	0.4459	-0.47578	22.909	6.09399999999999	-6.4871	0.4336	-0.041602	0.13936
1.806	-19.916	70.993	94.443	0.19141	0.15771	-0.32178	-8.374	19.8679	15.125	0.095703	0.12744	-0.0063477	73.0917	140.648	791.327	0.18779	0.35625	-0.39453	12.619	53.901	-7.5915	0.44727	-0.058594	0.1417
1.808	-8.41	60.045	93.523	0.1665	0.15479	-0.31787	-23.425	-15.7665	24.1179	0.10449	0.11182	-0.0029297	73.072	192.296	715.88	0.24072	0.26563	-0.30908	11.709	30.973	13.95792	0.45703	-0.075684	0.14844
1.81	-10.182	38.8626	82.745	0.15137	0.15479	-0.30713	-0.177999999999997	33.297	38.0388	0.11206	0.104	0.0061035	59.593	168.5198	650.554	0.28076	0.17549	-0.22686	-25.653	63.265	23.1243	0.45586	-0.092578	0.15137
1.812	-21.511	32.5922	69.924	0.11914	0.14893	-0.30518	-23.128	18.6188	29.836	0.11816	0.092285	0.010254	83.864	244.574	572.0631	0.3126	0.08984	-0.14931	12.856	31.302	11.2199	0.44893	-0.10449	0.16113
1.814	-34.208	34.2764	52.61	0.10523	0.14893	-0.29444	1.097	-0.3965	58.182	0.12842	0.079102	0.02002	51.047	230.721	483.174	0.35283	0.0003908	-0.078223	-1.465	36.722	15.718	0.44111	-0.11269	0.16621
1.816	-18.058	27.97	79.633	0.092773	0.146	-0.28613	30.547	20.1465	41.134	0.13232	0.074219	0.019043	66.307	293.652	427.448	0.3836	-0.09297	-0.012305	-22.126	-2.7146	22.7271	0.42725	-0.1124	0.17784
1.818	-25.881	19.1507	77.505	0.071289	0.1333	-0.27197	-15.045	-19.4875	23.2062	0.13184	0.052246	0.024902	49.45	250.327	396.046	0.41064	-0.18555	0.041992	-31.409	11.3771	41.63093	0.41211	-0.12109	0.17188
1.82	-38.927	17.7671	77.632	0.069336	0.125	-0.26172	0.00200000000000244	4.6976	31.5167	0.13501	0.042236	0.032959	21.649	273.047	346.232	0.4167	-0.27978	0.10361	-45.589	6.218	26.129	0.39336	-0.11611	0.17139
1.822	-50.854	37.825	42.2265	0.06543	0.11084	-0.24365	14.158	42.229	3.231	0.13721	0.032227	0.032227	-3.593	205.862	311.663	0.41016	-0.37559	0.16123	-33.549	28.4205	40.096	0.37461	-0.11231	0.17568
1.824	-47.5321	39.883	31.302	0.062256	0.10278	-0.22827	-18.629	13.1653	10.11258	0.13525	0.025391	0.030762	-11.112	214.754	249.974	0.38711	-0.467	0.2085	-30.647	16.189	15.836	0.35625	-0.11348	0.1706
1.826	-32.238	33.116	47.039	0.062012	0.092773	-0.2124	12.037	32.416	33.835	0.13721	0.018555	0.032715	-52.678	162.1082	209.516	0.3541	-0.5416	0.24336	-59.021	14.09422	64.866	0.33428	-0.11338	0.16446
1.828	-58.7513	40.315	27.098	0.060547	0.077637	-0.2041	-8.192	-19.972562	13.1984	0.13135	0.010742	0.030762	-46.32	185.741	179.707	0.30859	-0.59619	0.27148	-45.251	15.8845	41.2625	0.31641	-0.10645	0.16455
1.83	-62.7321	30.881	40.51	0.061523	0.070313	-0.19678	-3.017	-39.724	41.815	0.14307	-0.0012207	0.026856	-45.73	147.8904	143.127	0.26035	-0.63467	0.29043	-13.584	11.5667	65.014	0.29053	-0.10723	0.15693
1.832	-52.174	22.6813	46.633	0.056641	0.058594	-0.18799	20.516	1.6861	35.0713	0.15088	-0.01416	0.027344	-34.612	157.049	122.828	0.22002	-0.65577	0.29277	-50.867	19.1317	36.6938	0.26543	-0.10508	0.1502
1.834	-51.6587	12.267	47.598	0.050049	0.048095	-0.18237	-30.678	-21.01442	27.2824	0.16504	-0.044922	0.024414	-61.6863	107.69	126.8939	0.18526	-0.6667	0.26973	-65.955	18.0138	69.731	0.23692	-0.096874	0.14121
1.836	-59.594	15.11108	51.347	0.049805	0.046875	-0.18018	-17.664	2.77	37.2833	0.17188	-0.060547	0.022949	-53.77	80.278	125.459	0.15176	-0.66826	0.23311	-57.787	46.43	32.917	0.20605	-0.094238	0.13184
1.838	-59.6912	11.3178	27.077	0.042969	0.040039	-0.17188	-25.672	18.0237	1.329	0.18164	-0.09082	0.021973	-63.2357	27.8938	144.468	0.11279	-0.65332	0.18359	-21.777	24.2069	39.13738	0.1792	-0.082031	0.125
1.84	-42.184	16.0354	27.1022	0.037598	0.04541	-0.16797	-41.896	-18.2778	-3.435	0.18799	-0.11426	0.018066	-34.771	12.5204	133.038	0.049316	-0.6125	0.11865	-34.413	52.395	6.433	0.154	-0.07334	0.10752
1.842	-54.7493	22.197542	20.1639	0.035645	0.054199	-0.16943	-30.302	19.789	11.6967	0.18799	-0.12939	0.01709	-17.869	-9.3634	117.282	-0.034668	-0.53398	0.035547	-36.172	8.9673	40.158	0.12227	-0.055371	0.090625
1.844	-27.259	10.1925	19.5911	0.040039	0.060302	-0.16894	-38.875	8.9063	0.9016	0.18701	-0.146	0.016602	-4.07400000000001	-3.2266	87.485	-0.14131	-0.4125	-0.070703	-66.064	20.5836	32.76	0.099219	-0.032715	0.078125
1.846	-27	-3.527	30.986	0.04834	0.06543	-0.16699	-37.837	6.7249	28.1751	0.18091	-0.16015	0.011718	-34.894	-16.5647	46.094	-0.25449	-0.26358	-0.18164	-17.398	-24.942	47.324	0.082617	-0.0092772	0.058301
1.848	-22.879	-7.682753	38.863	0.060059	0.067871	-0.15918	-26.434	44.47	15.7731	0.17627	-0.17236	0.0024414	-8.385	-8.775	19.1004	-0.35791	-0.1001	-0.3042	12.449	-1.1219	10.1298	0.059082	0.014648	0.036133
1.85	-10.304	4.6086	33.9412	0.063477	0.070801	-0.15332	-51.8681	-5.1016	4.0684	0.16797	-0.18506	-0.0039063	-8.151	19.128	2.147	-0.44219	0.053418	-0.42871	27.329	-36.347	43.449	0.047754	0.038281	0.021387
1.852	-2.811	15.2972	30.9479	0.086914	0.067383	-0.15039	-28.137	1.652	34.3553	0.16895	-0.18799	-0.0087891	10.799	30.3771	-4.3233	-0.49912	0.21133	-0.55361	-8.783	-11.2718	32.518	0.040527	0.058105	0.0022461
1.854	-11.197	13.6521	37.1464	0.10157	0.061767	-0.14136	-7.406	28.38173	14.598	0.16895	-0.19678	-0.023438	4.54	50.861	15.8382	-0.55069	0.37071	-0.66299	9.375	-36.1014	22.3848	0.042871	0.076465	-0.012988
1.856	-7.004	15.5592	35.6415	0.11719	0.054199	-0.13574	-46.934	4.065	9.0353	0.16772	-0.20166	-0.029541	-6.217	16.7765	13.622	-0.59248	0.53194	-0.75401	-5.211	-1.832	24.6709	0.044726	0.083008	-0.023242
1.858	0.192	11.01782	16.58678	0.1416	0.037109	-0.12549	2.108	52.045	19.643	0.16113	-0.21094	-0.041016	-16.613	21.944	9.6568	-0.63086	0.67773	-0.83008	27.585	-8.21	10.0384	0.046387	0.087402	-0.032715
1.86	-23.825	14.8575	4.00642	0.15186	0.030273	-0.11865	-30.527	25.344	-2.9548	0.15332	-0.21094	-0.057129	19.311	5.067	45.059	-0.65478	0.79756	-0.90205	5.417	-2.384	50.878	0.046387	0.095215	-0.034473
1.862	-5.925	7.2439	23.0754	0.16504	0.016113	-0.1084	-23.016	-6.4773	31.811	0.14746	-0.2124	-0.060059	14.092	30.9837	37.8268	-0.66328	0.88906	-0.94375	-5.81999999999999	0.207000000000001	21.3396	0.048633	0.1043	-0.038281
1.864	-7.812	3.55056	20.38452	0.18213	0.0083007	-0.11059	6.623	16.84846	30.5062	0.14014	-0.21582	-0.080566	36.868	0.3569	45.725	-0.64258	0.94336	-0.95664	-12.482	14.4944	16.785	0.048633	0.11719	-0.042187
1.866	-17.343	19.29474	10.1284	0.19043	-0.0019531	-0.099121	-25.75	-18.2463	27.6078	0.13159	-0.22021	-0.085694	29.627	24.11	17.5543	-0.60527	0.95176	-0.94551	-20.945	28.9891	-34.4721	0.050098	0.12793	-0.042969
1.868	-25.511	18.454	13.5229	0.20068	-0.019043	-0.10107	19.409	-2.4421	54.506	0.12646	-0.21875	-0.096191	-4.872	-17.6933	2.7442	-0.54785	0.92578	-0.92188	-4.542	37.507	16.0596	0.051758	0.13818	-0.038574
1.87	-8.941	12.0391	24.1409	0.20801	-0.027832	-0.095215	-5.307	28.6683	15.847	0.11865	-0.22168	-0.11182	-31.195	5.508	-7.8994	-0.48369	0.84941	-0.86328	-33.357	54.8656	9.388	0.055078	0.14502	-0.04082
1.872	-21.228	-2.1997	29.4405	0.21387	-0.043457	-0.098633	-35.263	6.5539	24.2988	0.1167	-0.22607	-0.11816	-33.98	-55.517	19.5418	-0.41846	0.74443	-0.79658	11.46	40.0373	42.9271	0.057032	0.146	-0.037305
1.874	-44.423	12.024	26.8854	0.22021	-0.05249	-0.10595	21.492	50.778	13.6507	0.11182	-0.22607	-0.12891	-63.5663	-20.638	11.7729	-0.35283	0.61787	-0.71768	-23.102	58.5482	5.29799999999999	0.060937	0.14912	-0.036914
1.876	-24.52	16.2894	26.4001	0.23242	-0.060547	-0.11328	14.213	34.6003	8.0477	0.10767	-0.22485	-0.13989	-47.2786	-52.8666	53.4556	-0.29082	0.4833	-0.62412	-29.324	27.918	44.9378	0.063672	0.14951	-0.03916
1.878	-45.492	15.29778	25.607	0.24805	-0.07373	-0.125	-0.0570000000000022	12.522	34.614	0.10498	-0.22559	-0.14795	-49.476	17.8342	34.921	-0.23096	0.35352	-0.53223	-72.3153	37.635	18.546	0.063965	0.15234	-0.039063
1.88	-44.034	11.8101	13.9145	0.2583	-0.071777	-0.12842	11.158	38.146	28.3038	0.10205	-0.22803	-0.16162	-64.6914	5.217	55.12343	-0.17852	0.25352	-0.44912	-67.543	13.2841	58.6754	0.059863	0.15615	-0.043262
1.882	-57.915	16.7277	3.9805	0.28125	-0.081055	-0.13965	-18.514	6.0632	33.5533	0.095703	-0.229	-0.16797	-61.638	81.078	19.9547	-0.12021	0.18144	-0.3795	-42.853	45.0523	24.4026	0.052246	0.16465	-0.050976
1.884	-56.7526	9.1413	11.3851	0.30029	-0.085205	-0.14795	-12.756	20.2136	59	0.095215	-0.23438	-0.18408	-60.9698	35.9051	17.1603	-0.068653	0.1209	-0.30957	-53.233	-5.09607	41.3717	0.054199	0.18106	-0.064258
1.886	-55.868	10.66019	35.7639	0.31787	-0.085938	-0.15332	-9.947	35.3099	54.0483	0.091065	-0.23218	-0.19262	-62.979	89.361	9.9969	-0.030958	0.077345	-0.24873	-73.8433	9.5739	44.4467	0.048828	0.20342	-0.078614
1.888	-59.3086	12.5254	40.6902	0.34131	-0.088867	-0.1665	-17.632	-47.257	73.3181	0.083984	-0.23486	-0.19775	-54.499	20.5365	40.39966	-0.0063477	0.030762	-0.18994	-59.467	-22.16501	48.3755	0.05127	0.22363	-0.087891
1.89	-29.837	18.2768	27.37941	0.35059	-0.095703	-0.16211	-18.835	-19.7613	87.643	0.06543	-0.25293	-0.24268	-38.364	51.758	27.965	0.0016601	-0.013673	-0.14355	-50.978	18.3626	35.209	0.057226	0.24863	-0.099314
1.892	-52.8196	11.2132	18.1816	0.37549	-0.10449	-0.17725	-30.012	-3.7638	88.35	0.050781	-0.25537	-0.26953	-31.858	-16.1748	48.5317	-0.0023439	-0.047658	-0.10273	-15.182	12.6845	38.2141	0.063672	0.27403	-0.1124
1.894	-33.041	25.0006	27.229431	0.38501	-0.11475	-0.18018	18.803	12.7549	143.367838	0.0043945	-0.22266	-0.30762	-28.59	17.553	12.531	-0.0093757	-0.072267	-0.063669	-17.873	36.754	50.67071	0.06875	0.29668	-0.12529
1.896	-32.747	27.8789	12.2916	0.39453	-0.12207	-0.18701	-0.732999999999997	51.54097	187.783	-0.048828	-0.17065	-0.33448	-55.9051	-32.28476	32.1339	-0.023242	-0.083203	-0.038475	-19.552	15.11069	43.1611	0.072168	0.31377	-0.13262
1.898	-26.519	20.4462	22.5135	0.39893	-0.14795	-0.2168	-47.607	-2.955	222.944	-0.11719	-0.11914	-0.38281	-57.47	24.0615	22.0391	-0.036133	-0.088867	-0.01123	-25.711	20.6809	49.502	0.076172	0.33398	-0.1416
1.9	-21.085	13.62424	59.304	0.39453	-0.16211	-0.24023	4.145	-16.046	288.3298	-0.21387	-0.049316	-0.46094	-28.078	-24.31401	28.35326	-0.040135	-0.080566	0.0087859	5.695	6.468	26.2158	0.074121	0.35596	-0.15723
1.902	-32.335	7.215	73.399	0.37646	-0.18994	-0.29541	24.0143	38.039	321.545	-0.25391	-0.01416	-0.49805	10.508	15.9879	38.0541	-0.038476	-0.07422	0.028317	-22.149	22.9542	57.915	0.068164	0.37041	-0.1711
1.904	11.354	15.8395	108.796	0.34399	-0.17749	-0.3352	17.2683	53.005	413.755	-0.32471	0.068359	-0.56934	19.749	-16.2915	46.248	-0.040429	-0.060944	0.040427	-18.214	14.1653	36.692	0.05957	0.3833	-0.18867
1.906	10.596	29.616	110.722	0.30078	-0.13818	-0.37451	35.7971	123.7239	504.138	-0.38526	0.1333	-0.62696	22.108	9.1513	47.649	-0.033794	-0.055471	0.056344	5.21899999999999	2.375	54.707	0.047168	0.3957	-0.21006
1.908	11.473	48.2882	139.612	0.22217	-0.067383	-0.43408	-13.017	130.4	525.8572	-0.45361	0.19678	-0.69287	-4.501	-21.7403	45.898	-0.020508	-0.050781	0.071777	6.72799999999999	3.23489	37.392	0.026367	0.40479	-0.23486
1.91	12.288	68.674	169.6	0.17822	-0.027832	-0.47656	-34.358	87.0652	592.957	-0.56152	0.29785	-0.78711	14.511	3.4957	39.4935	0.004108	-0.06016	0.082524	4.843	-26.9705	95.93881	0.0078127	0.41514	-0.26787
1.912	9.963	74.3656	189.857	0.10938	0.052734	-0.55469	23.263	107.019	653.865	-0.61719	0.35059	-0.83203	6.595	-4.8419	44.7153	0.020229	-0.073744	0.090153	-15.725	3.374	105.989	-0.011523	0.42305	-0.30937
1.914	12.672	73.4035	228.082	0.072022	0.11865	-0.61059	-0.0790000000000006	50.2205	748.3433	-0.73145	0.4668	-0.92188	35.708	38.3027	55.411	0.035855	-0.08624	0.10577	9.792	28.779	195.252431	-0.038086	0.42812	-0.37461
1.916	27.221	75.1218	284.418	0.033691	0.18311	-0.6626	-12.289	32.9441	853.646	-0.82299	0.54834	-0.99876	15.839	23.8254	23.0115	0.049522	-0.098741	0.11309	-11.9	83.856	239.719	-0.069531	0.42481	-0.45938
1.918	17.721	89.1718	311.947	-0.021973	0.27393	-0.74561	-10.359	19.81	866.6302	-0.90967	0.64209	-1.0737	1.943	29.712	5.02235	0.060059	-0.11426	0.11865	-22.453	68.531	368.9962	-0.10449	0.43359	-0.55957
1.92	-1.504	103.679	345.914	-0.049805	0.31006	-0.77686	-49.689	-66.379	872.632	-1.0156	0.78418	-1.1523	-25.206	3.1143	-16.7932	0.073116	-0.12518	0.11513	-63.893	109.9	488.2602	-0.14853	0.46729	-0.66006
1.922	16.446	113.71	367.477	-0.10107	0.38477	-0.83789	-0.604999999999997	-62.886	895.048	-1.0684	0.85742	-1.1855	-26.953	7.5879	-16.4185	0.089268	-0.13246	0.11308	-45.869	89.616	629.7987	-0.20039	0.51113	-0.75488
1.924	32.333	107.764	395.667	-0.14038	0.43506	-0.89087	-15.509	-92.2869	881.4861	-1.1465	0.99609	-1.2578	-45.369	6.746	13.3091	0.1162	-0.14305	0.11309	-54.055	144.3353	824.552	-0.26172	0.55489	-0.86113
1.926	-2.879	100.759	455.027	-0.17822	0.48291	-0.9375	-18.642	-125.016	909.854	-1.1618	1.0784	-1.2937	-9.677	-4.454	34.59808	0.13459	-0.15629	0.10336	-13.467	120.6021	1045.567	-0.32695	0.6043	-0.96835
1.928	-40.031	88.787	505.177	-0.22705	0.54541	-0.97998	-11.844	-87.836	863.0878	-1.1431	1.1284	-1.312	-16.609	-8.769	41.8166	0.15869	-0.17188	0.095703	-94.00232	99.169	1218.932	-0.39404	0.64307	-1.0894
1.93	-31.622	61.7042	551.806	-0.25146	0.56055	-1.0039	-64.707	-118.224	861.943	-1.0601	1.1353	-1.3237	-38.907	-21.201	62.128	0.18301	-0.18651	0.087974	-43.333	18.3884	1348.595	-0.4624	0.67568	-1.2309
1.932	-25.321	51.4858	584.427	-0.30713	0.59229	-1.0605	-51.179	-121.663	884.498	-1.0039	1.1074	-1.3242	-71.6844	-1.624	39.703	0.19979	-0.1993	0.0789	-33.5711	-43.79	1447.529	-0.53808	0.7164	-1.3691
1.934	-50.987	29.2108	625.072	-0.35205	0.61743	-1.1011	-40.882	-103.486	820.382	-0.86475	1.0132	-1.3042	-69.7763	6.983	26.405	0.20864	-0.21017	0.068268	-67.9704	-125.86	1568.9114	-0.62598	0.77578	-1.4942
1.936	-41.543	17.5725	693.465	-0.396	0.64111	-1.1392	-72.204	-124.39	798.704	-0.77759	0.91528	-1.2839	-67.54097	33.097	17.695	0.20906	-0.21532	0.052583	-110.6193	-140.696	1663.392	-0.72725	0.85381	-1.5981
1.938	-48.1489	-1.442	735.017	-0.45703	0.69336	-1.1875	-44.948	-58.9597	789.198	-0.71729	0.80127	-1.2593	-57.487	-1.627	10.9307	0.20459	-0.20996	0.037598	-144.0762	-183.7771	1628.246	-0.82422	0.96484	-1.6563
1.94	-49.339	-29.4399	784.886	-0.50293	0.72608	-1.2115	-78.656	-54.679	784.8586	-0.67188	0.63184	-1.2188	-58.5711	9.7861	10.4363	0.1957	-0.19113	0.019003	-83.4225	-232.26	1563.962	-0.92265	1.1062	-1.6887
1.942	-46.6087	-45.059	819.928	-0.54248	0.76904	-1.2319	-88.491	-73.686	841.32469	-0.65723	0.55859	-1.209	-51.299	-30.429	20.7285	0.18755	-0.17338	-0.010586	-30.594	-283.831	1472.39	-0.99726	1.2654	-1.7211
1.944	-37.183	-79.0427	880.245	-0.57471	0.8208	-1.2563	-51.305	-48.019	848.893	-0.64404	0.45752	-1.2085	-69.3294	11.638	24.20311	0.18214	-0.14544	-0.028944	15.3448	-313.14	1447.706	-1.0516	1.4112	-1.7348
1.946	-45.315	-95.1825	922.184	-0.58594	0.84082	-1.2656	-60.8818	-115.304	865.98	-0.63769	0.43896	-1.2227	-34.632	0.00199999999999889	41.0287	0.17627	-0.12525	-0.047786	72.7129	-295.82	1368.562	-1.0653	1.5264	-1.7646
1.948	-43.248	-87.867	917.331	-0.5752	0.85742	-1.2871	-21.312	-164.293	943.43	-0.63672	0.45703	-1.2461	-46.634	55.64	31.7751	0.17627	-0.10547	-0.067871	105.749	-272.56	1340.1182	-1.0464	1.606	-1.8022
1.95	-41.001	-101.0842	909.952	-0.55176	0.84864	-1.3008	-42.101	-163.523	951.176	-0.64551	0.5293	-1.2949	-11.373	22.4394	42.768	0.1814	-0.098966	-0.091031	109.572	-208.283	1261.438	-1.0059	1.6389	-1.8358
1.952	-71.789	-108.1573	916.043	-0.52148	0.83301	-1.3145	-52.9307	-223.8333	1012.2913	-0.65088	0.56787	-1.3198	-7.284	72.346	18.861	0.18481	-0.099663	-0.1002	86.177	-191.797	1278.9997	-0.9626	1.6464	-1.8737
1.954	-47.4009	-129.621	922.427	-0.48145	0.81152	-1.3164	5.508	-215.784	1066.6287	-0.64893	0.63965	-1.375	7.782	11.61211	22.4016	0.18619	-0.10683	-0.10904	99.4538	-123.21	1240.42523	-0.9458	1.6264	-1.8937
1.956	-26.68	-122.878	897.064	-0.46631	0.80322	-1.3198	-11.503	-242.856	1089.6899	-0.656	0.68554	-1.4091	-0.201999999999998	43.822	12.38346	0.19273	-0.11746	-0.12055	114.3062	-116.82	1268.114	-0.94629	1.5975	-1.8904
1.958	-7.099	-112.7616	903.709	-0.44971	0.78857	-1.3159	-3.414	-301.799	1147.098	-0.66602	0.70508	-1.4512	-11.893	-11.0258	29.2792	0.19531	-0.12646	-0.125	75.014	-64.61	1275.86234	-0.94775	1.5786	-1.8667
1.96	-36.659	-99.06595	903.901	-0.44458	0.78198	-1.3162	46.6175	-276.55	1200.5235	-0.68018	0.70557	-1.521	-3.436	20.0547	28.2227	0.20364	-0.1361	-0.13494	35.143	-101.43	1353.3951	-0.9293	1.5469	-1.8363
1.962	-25.346	-92.9129	885.016	-0.44043	0.77197	-1.3149	36.373	-290.826	1227.69544	-0.69141	0.70313	-1.5566	19.602	-23.7269	50.9592	0.20859	-0.14266	-0.13485	-35.148	-96.84	1361.821	-0.89473	1.5162	-1.8067
1.964	-12.894	-88.012	884.80636	-0.43213	0.76563	-1.3242	37.9455	-251.801	1290.806	-0.74316	0.75586	-1.6152	35.752	22.8274	34.725	0.2107	-0.14447	-0.13921	34.912	-250.067	1409.251	-0.83535	1.5053	-1.7754
1.966	10.571	-89.095	901.929	-0.43066	0.76367	-1.3203	57.024	-169.8982	1302.7373	-0.81104	0.83496	-1.6509	12.111	-18.0262	59.5869	0.20957	-0.14334	-0.13816	45.988	-308.772	1433.914	-0.77734	1.4996	-1.7392
1.968	15.667	-103.594	956.397	-0.42334	0.77588	-1.3198	59.489	-189.898	1319.489	-0.87646	0.93115	-1.6851	6.624	14.3687	36.329	0.2041	-0.13574	-0.14063	36.648	-430.82	1521.089	-0.73438	1.4688	-1.7188
1.97	40.43	-120.789	986.841	-0.4165	0.79248	-1.3238	67.727	-127.881	1356.678	-0.91992	1.0586	-1.7324	-7.044	-29.1075	37.047	0.205	-0.13522	-0.14978	22.539	-405.89	1526.605	-0.70283	1.4206	-1.6872
1.972	38.614	-142.035	1007.108	-0.41211	0.80664	-1.332	40.0798	-103.735	1350.83846	-0.91479	1.1126	-1.7654	-20.104	14.218	8.16924	0.2023	-0.12331	-0.1522	22.925	-459.26	1597.381	-0.67246	1.3511	-1.648
1.974	35.378	-159.407	1026.633	-0.40674	0.80908	-1.353	44.8344	-99.689	1402.248	-0.88086	1.127	-1.7832	-4.932	-24.1759	28.958	0.19385	-0.11882	-0.15152	-14.543	-368.741	1645.187	-0.64746	1.2707	-1.6199
1.976	25.626	-184.64	1064.52	-0.40527	0.80176	-1.3672	88.148	-40.462	1422.9743	-0.81055	1.0801	-1.8086	3.282	27.3841	6.5707	0.19416	-0.10861	-0.14721	-26.182	-383.76	1699.571	-0.62666	1.1796	-1.6063
1.978	38.958	-189.8255	1074.397	-0.39844	0.78516	-1.4063	50.098	-81.664	1420.962	-0.77148	1.0371	-1.8203	-25.052	-8.4518	44.589	0.18262	-0.10107	-0.14307	-47.553	-284.935	1728.027	-0.6167	1.0806	-1.6167
1.98	36.934	-188.198	1102.594	-0.40161	0.77759	-1.4319	55.095283	-117.4686	1462.2167	-0.74316	0.94727	-1.8477	-39.397	32.8314	16.8846	0.18211	-0.10175	-0.13493	-134.566	-291.44	1757.397	-0.61494	0.98155	-1.663
1.982	-4.056	-194.959	1135.951	-0.41846	0.77197	-1.4673	44.0793	-95.1357	1451.434	-0.77539	0.9082	-1.8711	-69.0231	1.33	46.841	0.16804	-0.098161	-0.1233	-219.268	-167.653	1776.68568	-0.64355	0.90469	-1.759
1.984	-1.912	-204.655	1167.247	-0.45215	0.77148	-1.5059	33.394	-151.44	1479.7127	-0.8335	0.88916	-1.9097	-55.1834	38.9201	46.4823	0.15511	-0.10088	-0.11276	-263.193	-96.5414	1772.929	-0.6916	0.88633	-1.8852
1.986	-8.18	-192.047	1194.763	-0.47656	0.78125	-1.5293	43.998	-118.413	1527.252	-0.92969	0.90625	-1.9707	-52.2734	2.472	56.651	0.13514	-0.1093	-0.10008	-246.585	45.398	1746.902	-0.76719	0.95293	-2.0127
1.988	-10.634	-149.2587	1203.919	-0.52539	0.80957	-1.5625	21.8301	-124.21	1522.859	-0.97803	0.92822	-2.0054	-33.898	23.0476	10.3445	0.12549	-0.12305	-0.090332	-221.67	64.733	1715.5	-0.87109	1.084	-2.1309
1.99	7.134	-131.309	1229.078	-0.55029	0.85938	-1.58	15.5054	-172.49	1576.268	-1.0601	1.0122	-2.0679	-56.5539	-18.5627	4.8766	0.12061	-0.15027	-0.090621	-178.4658	105.2436	1752.022	-0.99845	1.2607	-2.2467
1.992	6.97199999999999	-119.096	1258.256	-0.57275	0.90186	-1.5835	8.8681	-132.411	1594.345	-1.1136	1.0804	-2.1286	-70.226	-0.913	-10.0177	0.11875	-0.17828	-0.080179	-210.0932	58.4788	1715.391	-1.1141	1.436	-2.3523
1.994	12.665	-98.263	1268.831	-0.58203	0.9707	-1.5879	-5.7241	-153.314	1576.978	-1.1597	1.1489	-2.1812	-85.525	-26.9357	25.192	0.11953	-0.21813	-0.085632	-204.481	49.2719	1765.655	-1.2047	1.6094	-2.4367
1.996	36.183	-79.874	1254.724	-0.5835	1.0005	-1.5835	8.39	-134.219	1598.54	-1.2104	1.2231	-2.2378	-65.2731	-4.15600000000001	22.3259	0.12149	-0.25185	-0.09492	-192.2803	-1.8017	1771.425	-1.271	1.7759	-2.4979
1.998	26.642	-70.458	1253.982	-0.57764	1.0356	-1.5815	20.9812	-46.3248	1546.0368	-1.2319	1.2485	-2.2534	-39.3356	-11.719	37.0212	0.12988	-0.2793	-0.10596	-107.292	-66.741	1831.17948	-1.3164	1.9277	-2.5449
2	23.901	-70.85	1250.71	-0.56836	1.0269	-1.5825	4.9951	-62.6433	1520.3607	-1.2617	1.2871	-2.2813	-7.721	17.151	50.686	0.13262	-0.29727	-0.12061	-120.353	-105.828	1813.112	-1.3456	2.0478	-2.5804
2.002	9.3	-82.298	1241.452	-0.5708	1.0054	-1.5972	40.372	-9.712	1530.729	-1.2676	1.2959	-2.2905	-26.09	6.8895	40.7319	0.14688	-0.30742	-0.13819	-103.529	-144.632	1822.009	-1.3707	2.1508	-2.5961
2.004	16.339	-100.176	1244.691	-0.57813	0.95508	-1.6133	30.4152	0.5496	1507.396	-1.2622	1.2866	-2.2866	-24.714	28.315	33.4131	0.1586	-0.31445	-0.16592	-150.403	-124.673	1800.608	-1.4004	2.2164	-2.6008
2.006	-9.562	-118.6804	1245.699	-0.59131	0.93018	-1.6284	49.188	-49.236	1545.1432	-1.2495	1.2573	-2.271	-21.539	34.566	4.2943	0.17158	-0.31914	-0.19033	-108.569	-141.614	1827.411	-1.4262	2.2404	-2.5969
2.008	38.274	-137.3137	1276.995	-0.625	0.89844	-1.6719	86.28	23.2042	1539.033	-1.2441	1.2363	-2.2578	-6.068	17.12416	13.3267	0.18799	-0.32422	-0.21826	-97.67	-92.7511	1827.518	-1.4468	2.2251	-2.5698
2.01	38.111	-140.503	1288.222	-0.66138	0.8938	-1.7009	65.457	9.9691	1504.581	-1.228	1.1841	-2.228	-1.76	28.4693	5.3347	0.19482	-0.31397	-0.24082	-42.178	-106.526	1831.751	-1.4518	2.1619	-2.5244
2.012	33.861	-144.112	1286.493	-0.71094	0.91406	-1.7324	72.692	5.1813	1530.5922	-1.228	1.1303	-2.1987	20.915	9.415	25.9833	0.19414	-0.29932	-0.2663	25.058	-40.3232	1792.613	-1.4387	2.0539	-2.4656
2.014	20.384	-126.2607	1292.393	-0.76758	0.97656	-1.7832	87.773	51.549	1518.833	-1.2285	1.0762	-2.168	0.751000000000001	23.3385	25.5045	0.19102	-0.28057	-0.30342	71.6	-24.5716	1746.655	-1.4195	1.9246	-2.3918
2.016	68.39	-115.32353	1290.397	-0.78662	1.0122	-1.7983	81.594	-12.1923	1515.22069	-1.2397	1.0376	-2.144	14.927	18.36209	38.1296	0.18477	-0.26445	-0.34268	26.199	59.135	1674.645	-1.4154	1.8002	-2.3209
2.018	75.646	-104.7068	1295.417	-0.81641	1.082	-1.8301	122.336	12.9055	1554.526	-1.248	1.0313	-2.1406	-5.803	34.5596	31.6364	0.18555	-0.24316	-0.38135	10.442	95.776	1638.5852	-1.3901	1.6958	-2.2554
2.02	72.235	-101.03	1290.559	-0.83228	1.1204	-1.8425	106.899	11.202	1546.151	-1.2593	1.0454	-2.1265	0.321999999999996	4.724	83.72	0.17315	-0.2293	-0.42695	20.794	173.902	1586.3792	-1.3616	1.6189	-2.2206
2.022	78.422	-103.418	1293.081	-0.84131	1.1528	-1.8472	91.401	-38.3861	1560.716	-1.2563	1.0635	-2.1153	3.631	-1.5077	104.744	0.15	-0.22168	-0.48418	2.767	163.325	1563.74348	-1.3121	1.5668	-2.1777
2.024	81.04	-86.43	1288.005	-0.84473	1.1777	-1.834	103.03	22.249	1544.9479	-1.2461	1.0742	-2.1035	36.571	-20.7942	140.766	0.096483	-0.20683	-0.56739	-28.534	183.16	1571.3933	-1.2593	1.5219	-2.1336
2.026	62.089	-74.216	1260.871	-0.8418	1.1797	-1.8262	85.271	-8.342	1509.457	-1.2202	1.0757	-2.0737	8.201	37.44509	170.329	0.022069	-0.15928	-0.65195	-67.191	148.669	1531.751	-1.2045	1.4775	-2.0803
2.028	27.428	-60.344	1245.87042	-0.83203	1.168	-1.8047	103.819	-1.226	1509.587	-1.2026	1.0688	-2.062	16.562	53.2945	249.483	-0.074219	-0.066406	-0.74414	-68.365	150.559	1519.013	-1.1543	1.4238	-2.0254
2.03	61.187	-49.9123	1228.96884	-0.82056	1.1419	-1.782	107.237	70.71526	1472.353	-1.1636	1.0435	-2.0151	-16.456	111.891	344.05807	-0.18711	0.046581	-0.86074	-93.919	135.612	1456.814	-1.1024	1.3782	-1.9765
2.032	59.734	-35.001	1250.415	-0.81396	1.1021	-1.7593	71.239	50.6678	1455.224	-1.1343	1.0156	-1.9756	-17.275	84.5221	470.2886	-0.29443	0.16504	-1.0077	-103.5385	117.9848	1483.8996	-1.046	1.3296	-1.9245
2.034	49.713	-27.834	1248.269	-0.81201	1.0415	-1.7183	76.39	116	1447.2615	-1.103	0.98682	-1.9351	-6.58500000000001	125.844	668.3264	-0.39717	0.29238	-1.1608	-108.6752	116.804	1469.083	-0.99872	1.2753	-1.8742
2.036	43.059	-42.4418	1276.494	-0.80957	1.0098	-1.7021	60.681	137.098	1423.033	-1.0645	0.94922	-1.8828	1.04000000000001	105.3231	902.034	-0.50273	0.425	-1.3266	-105.727	94.607	1470.951	-0.9624	1.2185	-1.8182
2.038	60.031	-53.7639	1283.011	-0.80762	0.96875	-1.6699	55.143	109.4401	1425.7718	-1.0449	0.93262	-1.8535	-41.727	137.512	1099.688	-0.62842	0.57275	-1.5073	-140.61421	97.843	1437.5285	-0.93115	1.1626	-1.7593
2.04	58.293	-53.8972	1299.057	-0.80664	0.95703	-1.6479	45.073	170.846	1411.6889	-0.99561	0.90479	-1.8042	-65.6805	60.608	1245.0302	-0.77383	0.7748	-1.6824	-147.596	106.64	1449.709	-0.9085	1.1253	-1.6993
2.042	39.657	-48.146	1273.691	-0.80225	0.95947	-1.6382	18.0094	140.027	1363.065	-0.96704	0.88403	-1.7732	-66.6361	54.5672	1317.1467	-0.93516	1.0227	-1.8555	-164.996	150.88	1366.789	-0.88272	1.1071	-1.6325
2.044	51.6	-53.132	1254.817	-0.79834	0.96924	-1.6265	14.1257	124.1695	1366.0049	-0.94531	0.8623	-1.7383	-21.778	-56.254	1442.4699	-1.0926	1.3191	-2.0137	-160.602	155.605	1318.163	-0.84365	1.0946	-1.5575
2.046	48.756	-51.802	1248.924	-0.79688	0.97656	-1.6172	1.820394	161.436	1348.13032	-0.91406	0.84277	-1.6992	-24.133	-82.15	1482.329	-1.1996	1.6547	-2.1527	-159.31	195.243	1223.919	-0.79414	1.0603	-1.4738
2.048	18.432	-52.0279	1249.432	-0.77783	0.98682	-1.5913	-10.2008	95.098	1337.918	-0.90381	0.83643	-1.6792	11.887	-176.185	1508.221	-1.2202	1.979	-2.2593	-117.09	214.27753	1201.666	-0.72998	1.0181	-1.3843
2.05	29.036	-63.8325	1226.592	-0.75952	0.98071	-1.5681	8.6788	110.207	1330.6085	-0.88623	0.82471	-1.6392	9.126	-190.873	1443.496	-1.1433	2.2011	-2.3208	-105.33734	283.918	1128.282	-0.65625	0.96504	-1.299
2.052	28.191	-53.60626	1226.545	-0.73438	0.96289	-1.5469	23.501	107.844	1274.355	-0.87671	0.82007	-1.6082	-18.5025	-278.468	1385.04	-1.032	2.272	-2.355	-73.87713	291.064	1078.896	-0.5793	0.90488	-1.2114
2.054	32.992	-38.9058	1220.62	-0.7124	0.93506	-1.5034	-21.075	66.234	1255.6244	-0.86279	0.8208	-1.5786	-63.893	-298.013	1339.605	-0.91865	2.1595	-2.3534	-98.716	338.817	1018.853	-0.50117	0.83769	-1.1286
2.056	15.354	-24.978	1202.852	-0.70605	0.92188	-1.4824	15.314	128.133	1244.6712	-0.84814	0.81299	-1.5386	-119.1932	-361.48	1267.705	-0.80674	1.8897	-2.279	-25.204	314.773	978.635	-0.42315	0.77763	-1.0429
2.058	43.998	-11.7927	1176.376	-0.69141	0.9043	-1.4492	1.98	109.578	1194.327	-0.8374	0.81201	-1.5093	-97.813	-307.77	1195.421	-0.71582	1.5313	-2.1621	1.06	317.804	932.805	-0.34619	0.71289	-0.95313
2.06	23.385	9.1014	1165.63	-0.68311	0.88989	-1.4226	13.962	116.221	1188.178	-0.81494	0.79736	-1.4565	-81.071	-306.5	1165.484	-0.64756	1.2005	-2.053	38.874	271.18	873.801	-0.27773	0.64746	-0.86601
2.062	46.358	27.2413	1146.197	-0.6709	0.87695	-1.3965	25.0522	157.222	1128.52556	-0.7998	0.78808	-1.415	-104.143	-221.17	1146.458	-0.56846	0.89922	-1.939	62.171	260.812	829.0517	-0.21396	0.57451	-0.78252
2.064	40.343	13.3063	1136.931	-0.6543	0.85742	-1.3633	-17.793	129.9305	1080.18813	-0.77637	0.77344	-1.3652	-107.698	-166.66	1142.757	-0.50479	0.65976	-1.8379	130.61	225.648	785.958	-0.14053	0.50927	-0.69072
2.066	36.228	10.104	1131.76	-0.6499	0.83838	-1.3501	22.565	189.615	1065.9995	-0.74219	0.73828	-1.3027	-50.755	-115.25	1143.129	-0.47051	0.52696	-1.7647	103.947	193.858	748.528	-0.06416	0.45283	-0.59873
2.068	41.693	15.3709	1131.587	-0.62646	0.82568	-1.312	26.003	216.713	1004.762	-0.71973	0.71875	-1.2676	-38.02	-108.56	1205.8513	-0.46484	0.48047	-1.7266	105.72	163.873	671.236	0.0092773	0.38135	-0.49707
2.07	60.514	22.6151	1105.404	-0.61914	0.81201	-1.2881	1.609	194.98841	972.5333	-0.66309	0.67822	-1.1948	-23.762	-89.84	1235.4941	-0.49453	0.51865	-1.736	135.014	138.3889	619.512	0.089549	0.30439	-0.40625
2.072	53.735	11.6131	1082.562	-0.6084	0.79688	-1.2646	39.89	231.517	951.97748	-0.62403	0.64746	-1.1372	-0.920000000000002	-131.43	1266.224	-0.53369	0.61377	-1.7726	147.606	138.579	523.941	0.16309	0.22578	-0.3205
2.074	36.934	-7.76886	1067.541	-0.59033	0.78076	-1.2319	10.206	171.4352	887.4546	-0.58838	0.61572	-1.0781	53.231	-183.05	1296.236	-0.53565	0.74697	-1.8128	134.604	140.9609	481.9328	0.23223	0.14414	-0.23848
2.076	45.566	-7.4486	1066.068	-0.58057	0.77002	-1.2202	16.019	170.4189	872.8387	-0.54395	0.57227	-0.99805	21.773	-267.009	1337.205	-0.51475	0.89443	-1.8306	96.547	154.5975	378.12689	0.3001	0.061133	-0.16572
2.078	40.622	-6.9775	1046.015	-0.56104	0.74658	-1.1958	6.633	204.947	833.073	-0.52246	0.55176	-0.95898	23.654	-347.05	1372.389	-0.47119	1.022	-1.7944	67.7109	154.4394	335.482	0.36816	-0.025391	-0.090332
2.08	29.186	6.2608	1015.47	-0.54297	0.7207	-1.1699	-25.938	153.4011	788.8229	-0.46924	0.51514	-0.88623	-19.046	-400.131	1438.272	-0.38281	1.0231	-1.6973	58.356	170.3147	254.166	0.43086	-0.12207	-0.015234
2.082	19.491	20.6972	1012.444	-0.5332	0.71338	-1.1602	-3.135	160.7402	777.237	-0.43042	0.47974	-0.82544	-51.866	-443.3	1499.351	-0.26807	0.87256	-1.5815	40.039	155.8926	240.237	0.475	-0.22197	0.051368
2.084	25.608	44.0859	991.793	-0.52539	0.70215	-1.1328	-46.17	147.498	712.9617	-0.39648	0.44238	-0.76953	-80.573	-456.66	1546.948	-0.16885	0.60576	-1.4874	4.139	185.823	162.8415	0.5039	-0.31299	0.10371
2.086	10.262	67.795	972.204	-0.51342	0.69653	-1.1091	-69.44	114.598	675.7454	-0.33643	0.39746	-0.68896	-40.968	-420.39	1623.026	-0.11992	0.33301	-1.45	15.9	192.446	143.094	0.53213	-0.39912	0.15029
2.088	5.215	80.948	950.092	-0.50586	0.69922	-1.0898	-13.426	167.131	644.8785	-0.30664	0.37695	-0.64746	14.606	-353.643	1656.374	-0.12744	0.13379	-1.4507	-7.539	194.441	76.045	0.5542	-0.47803	0.19971
2.09	18.572	93.832	933.327	-0.49756	0.68896	-1.0464	-61.725	157.1903	600.229	-0.25488	0.33691	-0.57617	61.623	-262.961	1723.279	-0.24736	0.07373	-1.5202	-59.1178	148.484	79.887	0.56182	-0.54912	0.23389
2.092	-1.379	89.736	928.12	-0.49023	0.68945	-1.0254	-72.856	161.5116	574.824	-0.21215	0.30444	-0.51587	81.436	-178.178	1722.951	-0.45429	0.17422	-1.6426	-86.3065	106.419	43.512	0.55674	-0.61279	0.24775
2.094	-1.84699999999999	92.579	898.474	-0.46533	0.68213	-0.98193	-45.387	189.761	511.958	-0.17236	0.26904	-0.45947	117.888	-97.359	1718.922	-0.68555	0.44688	-1.8145	-97.1982	64.347	29.189	0.53798	-0.67295	0.25283
2.096	-4.96	83.295	865.016	-0.44947	0.66529	-0.94605	-90.462	147.329	460.7203	-0.11523	0.21875	-0.38379	135.8227	-20.14	1709.811	-0.86045	0.78252	-2.0218	-142.206	50.1087	6.926	0.50967	-0.72451	0.25029
2.098	-11.972	79.967	826.239	-0.43262	0.64746	-0.9126	-53.115	174.1958	411.021428	-0.076172	0.18384	-0.32886	175.295	37.744	1730.686	-0.95898	1.1133	-2.2266	-131.651	20.727	10.188	0.47705	-0.76514	0.23926
2.1	-22.759	67.688	820.745	-0.40576	0.62256	-0.86377	-66.208	179.7757	348.653	-0.041504	0.14648	-0.27539	148.8744	73.3897	1701.8852	-0.97969	1.4065	-2.3987	-137.9131	4.477	43.1799	0.43067	-0.80137	0.21836
2.102	-30.122	76.989	790.0844	-0.38867	0.6001	-0.83936	-92.4669	153.253	326.8517	0.0053711	0.099609	-0.21094	130.73281	73.1466	1708.99747	-0.94746	1.636	-2.5303	-136.8891	-11.709	53.436	0.35987	-0.82099	0.17549
2.104	-23.719	73.5698	779.429	-0.36279	0.55225	-0.79443	-36.997	190.195	277.717	0.024902	0.072754	-0.18262	68.381	27.524	1683.138	-0.91074	1.772	-2.6085	-121.0455	-36.215	69.591	0.26182	-0.81787	0.11377
2.106	-41.066	82.179	772.34	-0.34472	0.51709	-0.75806	-66.804	150.327	242.805	0.05957	0.021973	-0.12598	20.522	-15.902	1704.965	-0.89346	1.8003	-2.638	-72.5103	-30.032	66.6654	0.14824	-0.77979	0.045411
2.108	-33.131	77.3321	748.313	-0.33252	0.48438	-0.729	-70.639	128.608	223.7963	0.07837	-0.013916	-0.084961	32.759	-64.484	1728.7069	-0.8916	1.7617	-2.6367	-45.298	-4.572	98.9558	0.02002	-0.69922	-0.037598
2.11	-24.943	84.253	725.849	-0.31543	0.44531	-0.68848	-43.414	148.862	191.465	0.094238	-0.047852	-0.050781	87.085	-103.311	1798.256	-0.90782	1.6703	-2.6199	-2.274	34.345	47.217	-0.12432	-0.57773	-0.13819
2.112	-18.15	81.72	707.198	-0.30273	0.42969	-0.66992	-51.712	115.8995	182.0422	0.11475	-0.083008	-0.0097656	100.47	-114.703	1827.114	-0.91211	1.5516	-2.5957	15.938	47.995	46.2626	-0.27257	-0.42225	-0.24971
2.114	-24.808	93.668	698.439	-0.2876	0.39355	-0.63672	-8.774	117.8203	187.3031	0.11914	-0.094727	0.0073242	116.754	-133.17	1830.092	-0.91094	1.4285	-2.5594	15.973	71.451	7.9035	-0.39405	-0.25858	-0.36456
2.116	5.678	106.647	670.179	-0.27051	0.3833	-0.60742	-19.056	99.55449	154.225	0.12939	-0.12354	0.038086	113.424	-118.849	1820.324	-0.89355	1.2965	-2.5235	23.114	43.042	23.2548	-0.49541	-0.093743	-0.46671
2.118	-11.377	108.652	632.238	-0.25391	0.3667	-0.58203	-16.924	36.818	148.481	0.13867	-0.13428	0.059326	125.935	-99.3326	1814.956	-0.87061	1.186	-2.4819	34.018	50.682	9.92	-0.56836	0.065918	-0.55664
2.12	-13.556	112.034	619.901	-0.23877	0.3457	-0.54395	34.526	50.76	136.1529	0.14014	-0.14551	0.076172	84.361	-62.254	1810.15	-0.85244	1.1245	-2.4548	41.756	48.345	50.309	-0.60654	0.21941	-0.63153
2.122	-21.221	110.5789	594.441	-0.22852	0.33936	-0.52295	-7.546	31.82	102.6119	0.14111	-0.14502	0.094727	68.226	-33.119	1782	-0.84697	1.1263	-2.4553	48.937	77.715	19.216	-0.62949	0.37301	-0.70741
2.124	-8.576	119.839	553.343	-0.20703	0.31934	-0.48828	28.301	26.09	102.042	0.13525	-0.14209	0.092773	62.566	13.079	1752.601	-0.84268	1.172	-2.4777	95.704	66.1133	50.6468	-0.63379	0.51168	-0.76171
2.126	-4.592	126.64	520.082	-0.19482	0.3103	-0.4646	26.12	60.289	62.6051	0.125	-0.13672	0.095703	19.535	42.473	1693.433	-0.84795	1.2313	-2.4929	59.382	55.4898	22.357	-0.62325	0.62323	-0.79609
2.128	-20.671	117.711	501.207	-0.1792	0.2998	-0.44189	-23.154	26.8004	56.093	0.10718	-0.11987	0.082275	-14.332	120.045	1649.965	-0.85547	1.2734	-2.4922	55.065	22.9779	30.278	-0.59814	0.70068	-0.8042
2.13	-15.611	115.4218	469.457	-0.15918	0.27637	-0.4082	19.409	27.4457	55.5931	0.084961	-0.1001	0.069336	-24.121	166.991	1585.38	-0.85283	1.2948	-2.4852	30.999	1.076	9.1074	-0.57069	0.74298	-0.79452
2.132	-4.437	108.3105	457.068	-0.15234	0.26904	-0.396	20.637	34.817	47.271	0.035645	-0.062988	0.043945	12.962	223.857	1544.989	-0.84317	1.2879	-2.4519	77.0217	-30.174	56.063	-0.54402	0.75909	-0.76452
2.134	-3.837	111.9526	435.9987	-0.13232	0.24268	-0.36377	-7.104	16.896	60.853	0.0068359	-0.036621	0.027832	10.35	220.874	1531.866	-0.81894	1.2567	-2.4098	36.593	-48.591	63.583	-0.51354	0.75281	-0.72231
2.136	-11.226	116.523	440.171	-0.11474	0.22949	-0.35083	25.718	60.225	59.275	-0.050293	0.013672	-0.0092773	50.464	208.977	1506.2874	-0.78487	1.2038	-2.3528	35.608	-58.753	78.478	-0.47672	0.70972	-0.66987
2.138	-18.668	111.641	429.131	-0.10596	0.21777	-0.32715	-48.299	43.915	35.9398	-0.092532	0.053223	-0.041015	83.916	161.7676	1511.976	-0.74463	1.1431	-2.2905	-39.729	-62.281	62.456	-0.42285	0.64111	-0.60498
2.14	-10.065	106.916	403.545	-0.083984	0.20264	-0.32129	-11.878	49.0778	42.518	-0.13965	0.099609	-0.072754	135.19	146.959	1526.959	-0.68779	1.079	-2.2355	-57.947	-52.9455	33.078	-0.36944	0.55297	-0.53206
2.142	-27.75	108.221	393.09	-0.075195	0.19336	-0.30469	10.619	58.978	15.092	-0.20215	0.17041	-0.11426	103.862	122.492	1541.055	-0.62412	1.0251	-2.1824	-91.7097	-24.925	26.686	-0.30527	0.45473	-0.45303
2.144	-18.119	105.036	374.294	-0.057129	0.1792	-0.29053	-52.168	9.858	34.4696	-0.22266	0.20117	-0.13184	131.744	128.94	1553.287	-0.55538	0.98057	-2.1276	-79.8237	11.471	6.199283	-0.24168	0.35324	-0.38362
2.146	-26.398	91.2204	347.34	-0.045411	0.17212	-0.28467	-21.035	-5.3193	57.802	-0.25928	0.25781	-0.16113	101.509	107.632	1529.974	-0.49453	0.93828	-2.0754	-102.8887	22.5832	10.4592	-0.18796	0.27064	-0.31942
2.148	-29.145	90.0579	328.246	-0.031738	0.16309	-0.27637	-38.348	-8.66901	33.0654	-0.27197	0.29077	-0.18042	120.306	122.4037	1499.353	-0.44092	0.90869	-2.0249	-120.097	32.04395	-14.2577	-0.14404	0.2085	-0.26318
2.15	-33.31	89.163	296.378	-0.0053711	0.16455	-0.26416	-60.053	-31.9315	45.0411	-0.2749	0.31104	-0.19482	89.9	120.046	1495.174	-0.40068	0.88682	-1.9816	-118.501	32.10117	3.181	-0.11138	0.16561	-0.21361
2.152	-39.337	89.6987	292.521	0.0053711	0.16113	-0.26074	-27.662	-21.4055	32.2459	-0.271	0.32422	-0.20654	120.262	136.334	1458.358	-0.36993	0.875	-1.9387	-126.832	30.767	-13.072	-0.081367	0.1359	-0.17366
2.154	-46.8744	80.65351	283.974	0.022461	0.16162	-0.25293	-70.806	-35.468	13.9852	-0.26318	0.32471	-0.20361	84.698	116.46	1406.559	-0.33985	0.86484	-1.8981	-90.5405	38.529	19.42024	-0.056629	0.10767	-0.14026
2.156	-40.277	80.926	272.232	0.035401	0.15942	-0.24927	-48.7	-33.3284	22.7112	-0.24561	0.31396	-0.19824	84.519	147.149	1345.502	-0.30996	0.85215	-1.8549	-106.8406	58.413	-3.7741	-0.038944	0.0787	-0.11421
2.158	-34.7238	84.936	263.053	0.049316	0.16016	-0.24561	-23.708	10.560593	-2.508	-0.22558	0.29614	-0.18823	40.324	164.208	1304.761	-0.27832	0.84619	-1.8081	-73.494	55.0861	21.9267	-0.021484	0.049805	-0.087402
2.16	-37.98	99.148	256.049	0.063965	0.16455	-0.23926	-59.094	6.8233	21.718428	-0.20703	0.27344	-0.17578	81.776	236.549	1249.796	-0.24707	0.82832	-1.7475	-65.086	49.3488	8.21	-0.011189	0.022846	-0.068552
2.162	-27.112	93.541	223.714	0.073242	0.1665	-0.23535	-20.809	17.9727	49.244	-0.17969	0.23682	-0.15381	97.226	289.188	1211.416	-0.22256	0.80605	-1.6789	-29.151	11.782	39.0437	-0.00070718	-0.002193	-0.050306
2.164	-21.006	91.837	186.978	0.082031	0.16846	-0.24561	-33.004	20.8201	27.2291	-0.16748	0.21729	-0.14209	102.551	322.5	1143.2834	-0.19014	0.77597	-1.5941	-53.503	2.228	8.312	0.0061283	-0.022688	-0.034633
2.166	-26.026	89.665	180.685	0.09375	0.17163	-0.2312	-9.835	-0.215	36.944	-0.146	0.17676	-0.12402	78.452	321.703	1119.16563	-0.15322	0.72608	-1.5058	-2.96	-19.0471	35.1774	0.018518	-0.043861	-0.027522
2.168	-50.0635	85.1559	176.222	0.10596	0.17041	-0.22852	34.721	31.821	17.7189	-0.12671	0.15356	-0.10937	31.518	301.155	1059.542	-0.11768	0.65967	-1.4155	-3.588	-9.364751	28.293	0.025391	-0.058594	-0.010742
2.17	-27.197	71.2525	164.811	0.11279	0.16895	-0.22656	-38.743	29.908	-8.2254	-0.11572	0.12842	-0.094238	-2.938	276.282	1012.7431	-0.082813	0.58105	-1.3144	39.262	-4.6881	53.9827	0.039662	-0.082866	-0.00078485
2.172	-11.46	54.6557	148.999	0.11426	0.17041	-0.22852	6.173	21.5116	12.4181	-0.097168	0.10156	-0.083008	-9.204	255.542	984.365	-0.040527	0.50235	-1.2168	36.518	17.7286	54.5037	0.058905	-0.097222	0.010949
2.174	-27.921	44.5342	152.946	0.12012	0.17529	-0.22217	13.316	38.848	-18.06945	-0.084473	0.09082	-0.075195	-26.082	217.112	958.522	0.00048828	0.41953	-1.1117	49.319	13.9633	58.765	0.077686	-0.11308	0.025519
2.176	-26.556	42.8501	153.007	0.12232	0.18017	-0.21753	-6.845	2.62	-13.1005	-0.058105	0.06543	-0.057129	-61.8863	163.349	917.958	0.038281	0.34101	-1.002	73.398	22.8317	49.295	0.10266	-0.12418	0.033734
2.178	-10.719	38.6937	126.16	0.12549	0.18213	-0.21387	51.334	-7.4082	24.1472	-0.042481	0.05542	-0.048095	-107.074	146.641	852.774	0.08252	0.27197	-0.88232	92.7764	40.537	50.859	0.125	-0.14063	0.044434
2.18	-24.359	38.001	114.855	0.12891	0.18213	-0.20166	-18.268	-9.1961	10.7703	-0.016602	0.043945	-0.037109	-130.221	143.14	778.795	0.11221	0.18233	-0.78232	54.483	51.118	48.014	0.15455	-0.15498	0.052603
2.182	-4.871	41.457	92.891	0.12744	0.18359	-0.19531	-4.473	-14.0867	47.855	0.0053711	0.020508	-0.01709	-115.159	180.8404	726.284	0.15254	0.091993	-0.67402	72.32	67.518	26.53005	0.17124	-0.1731	0.062117
2.184	-11.356	41.8972	94.478	0.12158	0.18359	-0.18701	46.344	17.1132	34.0959	0.01709	0.013184	-0.0092773	-97.872	184.607	661.482	0.18574	0.0044923	-0.57246	49.888	55.489	18.21	0.1876	-0.19117	0.074311
2.186	-6.994	41.4595	82.731	0.12159	0.17798	-0.18091	-29.772	9.8058	19.4373	0.048828	-0.0073242	0.003418	-72.6106	213.97	591.7437	0.21006	-0.085839	-0.47773	40.559	40.056	10.151	0.19514	-0.20735	0.081396
2.188	-27.864	40.3511	89.748	0.12598	0.17432	-0.17578	9.158	-5.7316	45.235	0.06958	-0.025391	0.010498	-63.2663	196.676	530.5068	0.23145	-0.17041	-0.38623	3.556	13.606	35.597	0.20166	-0.21729	0.092773
2.19	-6.846	43.362	76.564	0.12402	0.16016	-0.15918	7.572	18.5714	12.6322	0.088379	-0.041992	0.025391	-26.969	221.856	469.522	0.2374	-0.23359	-0.2959	-16.397	7.6	36.928	0.20064	-0.23179	0.10431
2.192	-30.979	38.554	84.385	0.12451	0.1543	-0.15576	-30.4	22.251	13.4768	0.11279	-0.063477	0.044434	-59.0577	203.091	439.105	0.22998	-0.28496	-0.20683	-45.457	-9.9115	57.106	0.20321	-0.24186	0.10352
2.194	-44.636	35.74	73.476	0.12256	0.14307	-0.14111	-13.697	45.1184	25.3039	0.12158	-0.072266	0.052246	-49.575	253.363	381.329	0.20655	-0.31895	-0.13379	-65.977	-9.66086	37.732	0.20514	-0.25332	0.10542
2.196	-30.29	35.053	65.774	0.12452	0.13012	-0.13525	-19.646	48.898	20.3183	0.14453	-0.092285	0.063477	-39.166	235.127	327.216	0.18193	-0.34913	-0.061621	-68.805	-34.952	50.202	0.21051	-0.25963	0.10454
2.198	-19.071	46.461	48.992	0.12646	0.11865	-0.12402	-54.41	16.2163	39.654	0.15625	-0.10278	0.073975	-37.1696	255.775	239.725	0.15186	-0.37402	-0.0083008	-102.8744	-37.1635	21.915	0.21094	-0.25879	0.104
2.2	-32.755	35.514	29.7	0.12354	0.1001	-0.11328	-27.461	23.9071	33.5381	0.16748	-0.1123	0.082031	-60.0122	196.9554	211.089	0.11524	-0.38731	0.04209	-69.961	-38.5577	27.7812	0.20769	-0.25283	0.096655
2.202	-42.307	27.989	29.601	0.12402	0.088867	-0.10498	-64.8746	19.2453	11.225	0.18701	-0.12451	0.09082	-48.557	186.668	115.2036	0.084766	-0.40107	0.087696	-113.401	-28.569	8.7637	0.20267	-0.24145	0.088618
2.204	-32.232	22.428	27.907	0.12158	0.070801	-0.094238	-50.413	15.3091	34.7872	0.19238	-0.13086	0.099609	-65.9819	134.755	115.7789	0.052344	-0.41045	0.11895	-80.8307	-23.998	39.2948	0.19217	-0.22504	0.076527
2.206	-27.728	24.903	50.784	0.11548	0.064453	-0.086426	-27.698	37.991	14.5331	0.20898	-0.14404	0.11133	-20.545	135.751	69.856	0.0044924	-0.41006	0.13486	-123.194	-3.992	21.56823	0.1826	-0.2072	0.06335
2.208	-18.827	21.2091	53.232	0.11426	0.050781	-0.080566	-72.84	16.2149	17.2682	0.21582	-0.15601	0.11988	-34.955	57.673	105.0854	-0.043457	-0.40137	0.14697	-91.2183	-1.279	28.99	0.17627	-0.18945	0.051758
2.21	-39.832	9.5416	54.531	0.10645	0.043457	-0.072754	-25.992	14.9425	28.802	0.21729	-0.16504	0.12354	25.807	60.992	116.348	-0.10215	-0.38799	0.13125	-97.8641	20.53	5.985	0.17334	-0.17335	0.039561
2.212	-48.445	5.2126	56.429	0.10059	0.041016	-0.072266	-35.155	9.78	12.556	0.22461	-0.18164	0.12939	25.281	-3.2957	132.429	-0.1708	-0.36465	0.10254	-51.912	40.1734	12.341	0.17022	-0.16289	0.026957
2.214	-36.282	23.6419	57.897	0.091309	0.034668	-0.06543	-35.086	-13.533	68.096	0.229	-0.18457	0.13135	74.451	34.724	113.186	-0.24033	-0.31777	0.070508	-88.2216	54.936	1.9795	0.16748	-0.15587	0.020711
2.216	-34.229	35.5094	31.595	0.086426	0.039551	-0.054688	-9.507	-2.456	65.78	0.22754	-0.19238	0.13623	24.505	-8.085	146.027	-0.31416	-0.26093	0.024414	-43.173	54.01326	9.4028	0.16621	-0.14464	0.013382
2.218	-38.186	26.4365	9.8322	0.083008	0.036133	-0.05127	-42.591	-1.3804	45.564	0.22388	-0.19507	0.13526	9.606	34.0994	96.048	-0.39648	-0.1958	-0.046387	-32.537	42.276	-11.759	0.16016	-0.13623	0.0078125
2.22	-23.371	24.01	17.2189	0.07959	0.038574	-0.039551	6.162	-5.16	53.887	0.22314	-0.19238	0.1333	-28.2939	-15.623	92.119	-0.46484	-0.091113	-0.10195	12.939	34.4916	-3.353	0.15596	-0.13154	-0.0016599
2.222	-33.217	14.1958	25.0172	0.079346	0.039307	-0.031983	9.852	11.7122	16.708	0.22266	-0.18848	0.125	-20.204	21.0703	30.186	-0.529	0.031543	-0.15371	13.174	30.465	17.507	0.15459	-0.13145	-0.0039097
2.224	-11.882	12.1318	22.5562	0.081055	0.041016	-0.023926	-34.206	-0.3895	12.955	0.21729	-0.18311	0.13037	-62.4985	-20.182	14.166	-0.58838	0.15849	-0.20918	39.668	36.8668	23.275	0.14521	-0.13223	-0.01172
2.226	-24.079	10.9116	37.277	0.07666	0.040039	-0.010742	24.553	8.4908	21.673	0.20605	-0.1665	0.12256	-47.601	15.8445	-0.290299999999999	-0.63057	0.27588	-0.2708	47.381	34.6419	36.217	0.13096	-0.1246	-0.020118
2.228	-18.682	15.7241	42.193	0.077148	0.043457	-0.0058594	-5.037	24.522	-1.947	0.19238	-0.14404	0.10889	-108.197	-19.48	11.0917	-0.646	0.37793	-0.3335	69.8929	29.6914	21.1562	0.11865	-0.11377	-0.030273
2.23	-11.73	17.9899	30.5625	0.078613	0.036621	0.01123	2.052	13.2005	21.9134	0.18945	-0.13379	0.097168	-91.7301	40.14229	-17.3934	-0.64453	0.45859	-0.38291	57.09	7.2269	52.042	0.093166	-0.095509	-0.046679
2.232	-16.993	13.8736	16.52	0.081543	0.032226	0.015137	45.068	13.3662	46.711682	0.17725	-0.10205	0.086426	-83.844	25.52915	6.134	-0.63555	0.53047	-0.43339	31.509	3.4565	46.47	0.072463	-0.07344	-0.063182
2.234	-34.481	18.70369	15.1972	0.079102	0.028809	0.024902	-16.275	2.301	26.524448	0.16724	-0.087402	0.077636	-33.579	62.325	25.1219	-0.62891	0.59414	-0.4791	95.469	6.948	80.73	0.050197	-0.044533	-0.078417
2.236	-11.677	32.957	14.3062	0.07959	0.021484	0.036621	28.501	-9.9477	52.192	0.1582	-0.070313	0.061523	-36.673	29.268	48.855	-0.61631	0.64814	-0.51397	46.961	22.5363	48.4896	0.033692	-0.02002	-0.092773
2.238	-7.815	22.943	17.17928	0.077637	0.020996	0.039063	20.751	24.6672	18.1205	0.14941	-0.048828	0.05127	-11.151	48.214	18.7893	-0.60547	0.69336	-0.53809	23.197	16.6249	52.467	0.015625	-0.0029297	-0.10742
2.24	-22.566	12.513	15.1766	0.07666	0.013184	0.046387	-24.118	9.1157	15.0843	0.14209	-0.034668	0.037598	-54.3202	6.177	1.5552	-0.59775	0.71631	-0.55518	-4.815	17.48732	26.0989	0.0092773	0.013868	-0.11641
2.242	-38.696	-3.24987	35.67341	0.071777	0.010742	0.050537	14.26	-4.1543	35.0209	0.1333	-0.02002	0.025391	-35.845	15.521	16.3202	-0.58506	0.72236	-0.57529	3.912	13.4357	39.247	0.0012693	0.02207	-0.12666
2.244	-8.906	11.5915	39.60567	0.068848	0.0097656	0.052734	-26.662	5.2526	3.306	0.12549	-0.0095217	0.014893	-64.8026	-29.8779	31.135	-0.56474	0.71846	-0.57607	-36.543	14.6706	18.576	-0.0053712	0.029883	-0.13682
2.246	-36.453	7.0273	30.54102	0.066895	0.01123	0.054688	-36.742	-20.0263	21.15613	0.11328	0.0019531	0.0039063	-31.744	-37.2223	46.08	-0.53125	0.71035	-0.56816	0.0500000000000043	26.242	48.34	-0.0092773	0.02998	-0.13399
2.248	-42.339	19.1205	29.0075	0.067383	0.0068359	0.058105	-4.009	-13.8921	15.007	0.099609	0.021484	-0.0097656	-48.1079	-56.138	44.8982	-0.48828	0.69727	-0.54492	-65.611	28.532	28.3772	-0.0083008	0.029785	-0.13232
2.25	-28.018	11.9836	29.2412	0.066895	0.013672	0.054688	-54.377	-14.8993	25.362	0.091797	0.032715	-0.012207	-40.017	-43.7018	15.754	-0.44726	0.68438	-0.50899	-79.5099	21.9518	53.155	-0.012695	0.022949	-0.13877
2.252	-28.759	23.1359	27.30782	0.062256	0.021485	0.056153	-36.588	-17.5778	38.982	0.070801	0.050293	-0.034668	-58.2594	-22.599	26.746	-0.39072	0.66182	-0.46123	-90.9737	10.1842	21.5974	0.00019526	0.015918	-0.13994
2.254	-35.6006	22.6061	5.037	0.062012	0.025391	0.052734	-33.385	23.701	3.3523	0.052978	0.070556	-0.041748	-10.22	20.09764	3.731	-0.33252	0.62784	-0.40146	-90.5901	8.517	35.4499	0.011133	0.0014649	-0.13486
2.256	-38.16	18.9134	12.5424	0.064453	0.033691	0.046875	-55.531	13.5909	7.444012	0.039551	0.091309	-0.053223	1.572	42.7914	5.6649	-0.27422	0.58926	-0.33584	-116.9993	-4.516	28.50582	0.025098	-0.016894	-0.12803
2.258	-40.185	16.0997	19.2337	0.066406	0.039063	0.049316	-10.64	20.2572	22.81	0.017578	0.12109	-0.067871	56.94	61.5277	15.3304	-0.2041	0.54395	-0.27002	-69	-7.594	41.939	0.034668	-0.039063	-0.12402
2.26	-29.694	13.03165	45.9127	0.065918	0.050293	0.045898	-55.274	36.123	4.7596	0.0053711	0.1333	-0.074219	41.54	46.534	29.386	-0.13877	0.48701	-0.20303	-111.293	-26.3765	33.2491	0.043653	-0.064844	-0.12226
2.262	-31.885	9.9015	33.779	0.067383	0.060302	0.042725	-54.468	21.421	10.10868	-0.016113	0.16504	-0.085938	33.679	27.253	52.9365	-0.068555	0.42314	-0.13906	-89.4186	-29.72	12.5772	0.053613	-0.087207	-0.11797
2.264	-55.73325	11.4518	29.5401	0.067871	0.069824	0.039063	-16.929	35.323	8.309	-0.028808	0.19238	-0.096681	32.989	28.749	61.437	-0.0064454	0.35127	-0.078126	-80.2204	-37.9465	14.508184	0.065723	-0.11299	-0.11484
2.266	-38.27	20.7142	35.255	0.071289	0.080078	0.040527	-53.775	30.1646	8.103	-0.043457	0.22021	-0.11035	21.717	31.333	44.0372	0.050488	0.28066	-0.023144	-66.402	-29.835	9.42489	0.081543	-0.13652	-0.12383
2.268	-24.475	14.9963	33.5495	0.068848	0.094238	0.036621	-14.545	14.4574	57.012	-0.052246	0.25537	-0.12549	-9.055	52.693	24.1563	0.10547	0.20703	0.027832	-67.327	-4.619	13.96614	0.095703	-0.16162	-0.12695
2.27	-40.945	21.3694	23.3908	0.070313	0.10059	0.026367	-9.707	8.9503	32.875	-0.061523	0.27148	-0.13037	-8.406	27.5231	35.1928	0.15605	0.14278	0.065332	-10.42	29.34	13.6147	0.11513	-0.19043	-0.13203
2.272	-45.046	25.4991	15.4341	0.064697	0.10694	0.022461	-40.572	-36.374	39.3073	-0.068848	0.30176	-0.15137	-26.519	4.857	4.032	0.19726	0.085645	0.09873	-5.274	32.0414	7.9542	0.12735	-0.21494	-0.14365
2.274	-16.985	12.30021	34.3645	0.058105	0.1084	0.01123	-3.903	-36.8412	84.298	-0.078614	0.31446	-0.17603	-43.079	-26.09	3.177	0.23008	0.025097	0.12608	-1.5	44.7698	3.869	0.1375	-0.23486	-0.15498
2.276	-24.296	-1.184	53.995	0.044922	0.10352	-0.025879	0.171999999999997	-7.088	82.8516	-0.084473	0.32568	-0.20508	-48.7995	-14.962	1.5043	0.26045	-0.027734	0.13858	39.671	35.0536	28.3661	0.13613	-0.24912	-0.17354
2.278	-26.26	-32.3272	79.554	0.032715	0.10303	-0.05127	4.919	-28.522	139.615	-0.1001	0.35596	-0.24463	-51.96632	-22.6542	44.377	0.29443	-0.074707	0.15723	31.275	47.506	26.886	0.13184	-0.25781	-0.20166
2.28	-17.766	-17.4299	90.994	0.0092773	0.1084	-0.09082	22.887	-17.0272	178.5147	-0.11133	0.36426	-0.26416	-46.581	-8.362	54.825	0.31572	-0.10625	0.16719	61.073	56.489	59.106	0.12803	-0.25224	-0.23018
2.282	-32.7846	8.9864	90.53	-0.012695	0.12646	-0.12183	-27.084	-7.51272	198.534	-0.1377	0.3877	-0.31055	-38.241	-42.3508	77.747	0.33984	-0.13262	0.17217	75.2463	48.635	76.08	0.1251	-0.24844	-0.25869
2.284	-39.3996	37.584	115.947	-0.036133	0.14648	-0.16162	6.938	-32.188	286.948	-0.16553	0.40357	-0.35718	-32.756	-3.19	47.3185	0.35703	-0.142	0.17061	48.363	33.2945	112.168	0.1208	-0.2375	-0.29424
2.286	-34.9434	45.7381	137.69	-0.083984	0.15332	-0.22852	28.3	24.9431	373.55828	-0.19727	0.41553	-0.41406	-37.505	3.63399999999999	57.593	0.37305	-0.14073	0.16524	17.968	49.279	151.158	0.10909	-0.24355	-0.35088
2.288	-53.894	52.8007	167.4952	-0.10742	0.17236	-0.2627	-17.827	48.7334	465.899	-0.24756	0.44385	-0.48975	-34.175	30.365	39.863	0.38916	-0.13184	0.16064	117.59	72.339	230.6486	0.084961	-0.24463	-0.42529
2.29	-35.6036	61.51	203.94	-0.16064	0.19189	-0.34131	34.299	78.0182	538.427	-0.27246	0.45557	-0.53906	-68.0677	19.49782	45.569	0.40674	-0.11133	0.15537	31.7111	91.542	295.274	0.043066	-0.23018	-0.49648
2.292	-48.7518	62.9811	252.617	-0.19922	0.20727	-0.39917	-3.649	96.68	581.5647	-0.33398	0.47266	-0.625	-86.5301	45.539	-11.8387	0.42217	-0.094238	0.14932	28.425	96.1086	413.4077	-0.031055	-0.18759	-0.57773
2.294	-68.603	70.8356	302.963	-0.24268	0.22705	-0.46045	3.597	78.6012	654.9285	-0.39038	0.48413	-0.70117	-66.6593	14.006	-4.5093	0.43623	-0.074707	0.14619	6.843	59.9294	495.848	-0.13457	-0.12158	-0.68594
2.296	-53.4645	75.3716	368.909	-0.29443	0.24463	-0.54639	60.0718	81.128	724.18685	-0.45313	0.5	-0.771	-55.354	29.4088	-4.4466	0.45342	-0.058594	0.14414	46.008	87.4526	633.3215	-0.25498	-0.028516	-0.80557
2.298	-22.573	102.079	409.498	-0.32227	0.26123	-0.58203	-2.11	83.2944	795.477	-0.54297	0.53027	-0.86328	-57.5657	-14.8996	22.474	0.46045	-0.041016	0.13379	-17.269	121.872	786.0537	-0.37842	0.086426	-0.93311
2.3	-13.909	93.063	438.723	-0.37256	0.30078	-0.65771	18.206	31.5265	907.927	-0.58838	0.55908	-0.90625	-34.755	9.4339	12.9702	0.46963	-0.030273	0.129	-24.876	100.393	998.3283	-0.51397	0.2335	-1.0638
2.302	-37.527	88.043	485.0589	-0.41528	0.33374	-0.71436	-11.709	-0.437000000000001	930.5978	-0.68359	0.61719	-0.98828	-45.3942	-6.0792	22.3268	0.46465	-0.016113	0.12198	-109.896	59.345	1138.831	-0.6709	0.41133	-1.2079
2.304	-35.003	61.2774	532.0515	-0.45801	0.36621	-0.77344	-52.124	-75.167	961.599	-0.75659	0.67578	-1.0327	-6.465	17.016	21.1105	0.46269	-0.0040039	0.11182	-153.815	28.5739	1261.264	-0.84786	0.60508	-1.3637
2.306	-39.094	65.809	607.311	-0.521	0.40381	-0.86963	-36.525	-100.0535	991.67	-0.8335	0.74268	-1.0718	-3.05	-13.212	64.42	0.454	0.010547	0.10342	-122.25	-47.572	1353.1103	-1.0444	0.83057	-1.5276
2.308	-26.958	59.475	656.611	-0.55469	0.43066	-0.91602	-95.102	-102.0454	1000.4192	-0.92578	0.83984	-1.1113	53.052	8.16999999999999	38.045	0.43652	0.028809	0.094727	-119.682	-119.738	1422.748	-1.2437	1.0903	-1.6851
2.31	-15.136	28.01528	723.457	-0.61426	0.48877	-1.0034	-93.625	-130.252	1035.205	-0.96875	0.89453	-1.125	7.175	-20.3387	27.3735	0.42471	0.047949	0.084179	-199.681	-205.998	1521.173	-1.4266	1.38	-1.8255
2.312	-13.769	-11.7076	758.189	-0.65332	0.53272	-1.0591	-56.896	-123.2544	1018.7025	-1.0435	1.0024	-1.1597	26.894	19.911	17.5724	0.40625	0.066113	0.078516	-173.379	-256.968	1501.144	-1.5757	1.6926	-1.9428
2.314	-28.232	-37.3098	807.928	-0.68652	0.58789	-1.0957	-84.6843	-142.723	1000.6408	-1.0789	1.0745	-1.1848	-2.749	-9.2559	37.2532	0.38789	0.079394	0.07539	-180.742	-315.675	1437.104	-1.6678	1.9739	-2.071
2.316	-51.91	-39.70347	868.316	-0.73389	0.67041	-1.1382	-42.606	-173.898	1012.291	-1.0933	1.1255	-1.2026	8.438	14.01533	34.78035	0.37354	0.094238	0.071093	-203.89	-359.405	1355.849	-1.6641	2.177	-2.1476
2.318	-23.55	-26.222	894.383	-0.75049	0.71826	-1.1421	12.651	-124.962	982.6799	-1.1094	1.168	-1.2344	3.777	-13.033	48.23395	0.36328	0.09375	0.065918	-182.8531	-396.66	1348.799	-1.5723	2.2637	-2.1758
2.32	14.89	-26.828	917.4	-0.78516	0.79883	-1.1543	-4.955	-118.294	975.907	-1.1016	1.1797	-1.248	13.946	9.4612	23.991	0.36142	0.09502	0.066895	-148.526	-386.73	1296.118	-1.415	2.2044	-2.1851
2.322	12.832	-33.2866	928.53	-0.78467	0.85938	-1.1524	37.855	-92.417	978.479	-1.0918	1.2031	-1.2695	-20.664	1.6016	23.579	0.35625	0.087109	0.069336	-149.27	-367.78	1246.788	-1.2499	2.04	-2.1854
2.324	-3.762	-56.905	908.37	-0.78418	0.9043	-1.1426	-4.87	-70.277	959.9983	-1.085	1.2227	-1.2715	-7.726	36.7693	19.639	0.34766	0.075781	0.075976	-187.242	-288.876	1173.013	-1.1096	1.7888	-2.1585
2.326	-16.991	-61.1913	917.287	-0.77832	0.95508	-1.1152	-4.436	-107.70511	997.3716	-1.0757	1.2466	-1.2583	-35.914	30.728	15.71481	0.33261	0.064161	0.080176	-136.263	-258.901	1181.5987	-1.0363	1.4756	-2.0893
2.328	17.867	-52.4872	893.683	-0.77734	0.96875	-1.1035	42.446	-106.273	1009.782	-1.0581	1.2681	-1.2339	-20.676	62.4565	10.4165	0.31299	0.053223	0.080566	-126.59	-208.764	1163.476	-0.98633	1.1465	-1.9961
2.33	-0.0570000000000022	-33.6226	900.714	-0.77148	0.98828	-1.0742	-10.244	-138.946	1016.643	-1.0527	1.2852	-1.2129	-4.365	34.953	28.7861	0.29385	0.049414	0.077246	-35.079	-186.651	1181.92	-0.95283	0.87725	-1.9005
2.332	-19.543	-41.0743	887.605	-0.77441	0.98926	-1.0474	-13.437	-171.206	1065.246	-1.019	1.3149	-1.1636	-2.784	36.2299	35.8295	0.27334	0.046289	0.072461	-69.693	-149.89	1183.422	-0.93896	0.7292	-1.8374
2.334	-26.139	-49.90488	873.603	-0.76367	0.98438	-1.0254	0.554000000000002	-150.639	1071.371	-0.9895	1.3172	-1.1394	-56.6422	1.5029	44.4295	0.25264	0.047461	0.063867	-56.611	-150.76	1257.483	-0.93779	0.71944	-1.8237
2.336	-13.063	-32.283	858.739	-0.76465	0.97266	-1	-42.135	-193.194	1113.665	-0.9624	1.3032	-1.1265	-56.871	6.546	43.2167	0.22832	0.047949	0.054004	-65.6523	-165.88	1305.639	-0.94101	0.78594	-1.8406
2.338	-20.834	-12.338	868.8297	-0.76367	0.9668	-0.99023	-0.775999999999996	-213.0278	1178.5974	-0.92725	1.2622	-1.1421	-79.1659	-9.9675	41.9976	0.21191	0.049805	0.045898	-22.328	-219.766	1363.369	-0.93799	0.88916	-1.8569
2.34	-48.8167	-20.972	902.7839	-0.77441	0.97852	-0.96387	7.354	-218.9416	1208.5156	-0.91797	1.2402	-1.1611	-63.7003	-5.438	49.1228	0.19101	0.058985	0.033399	1.21	-290.262	1385.698	-0.90303	0.98269	-1.8513
2.342	-53.1482	-34.463	946.847	-0.79395	0.9939	-0.94702	-7.45800000000001	-269.918	1285.527	-0.91797	1.2051	-1.209	-73.17769	-27.16697	29.7888	0.17559	0.066602	0.026172	89.631	-366.968	1431.634	-0.83868	1.0414	-1.8281
2.344	-51.0277	-59.178	951.557	-0.80811	1.0083	-0.93701	15.985	-242.211	1315.76	-0.93164	1.1963	-1.251	-55.091	-14.0191	21.2124	0.15606	0.074023	0.015625	88.685	-419.765	1465.277	-0.72773	1.0312	-1.7843
2.346	-52.0696	-95.718	965.739	-0.82373	1.0356	-0.93701	-19.484	-233.338	1325.4055	-0.94971	1.2017	-1.2876	-71.3838	-8.84	12.5845	0.14326	0.083008	0.0033203	57.8952	-442.11	1543.9566	-0.59258	0.94658	-1.7061
2.348	-78.105	-128.0983	1012.623	-0.81641	1.0469	-0.93945	-1.152	-216.384	1383.425	-0.97852	1.2305	-1.334	-51.1892	11.8691	22.3068	0.13379	0.088379	-0.0043945	70.3768	-460.72	1603.795	-0.47412	0.81104	-1.606
2.35	-54.3838	-150.8118	1039.562	-0.81836	1.043	-0.95801	11.733	-152.783	1363.138	-0.98438	1.2559	-1.3438	-48.593	22.181	32.4	0.12324	0.094141	-0.013086	84.481	-420.79	1653.8959	-0.38125	0.6539	-1.5262
2.352	-54.1916	-140.57031	1053.331	-0.81323	1.0237	-0.98706	-72.275	-160.983	1359.407	-0.96875	1.2891	-1.3613	-30.474	2.855	34.153	0.11602	0.10215	-0.021094	87.797	-381.516	1710.464	-0.32832	0.48008	-1.5063
2.354	-85.505	-131.977	1036.38237	-0.80811	0.99463	-1.0425	-54.544	-128.7862	1383.8107	-0.94824	1.292	-1.3779	-11.023	-1.623	44.50092	0.10625	0.11347	-0.019922	54.8777	-305.57	1759.723	-0.29512	0.34141	-1.5129
2.356	-132.675	-147.133	1085.797	-0.8125	0.95508	-1.1055	-106.147	-91.579	1374.561	-0.92188	1.2773	-1.3975	2.002	3.055	44.2871	0.10069	0.13027	-0.018555	35.666	-258.398	1801.84	-0.30674	0.25976	-1.5509
2.358	-104.878	-144.286	1124.548	-0.81983	0.93603	-1.1509	-130.8717	-104.94	1419.3366	-0.90039	1.2363	-1.4375	-6.263	20.0681	22.129	0.091797	0.15039	-0.013672	-15.776	-153.008	1767.327	-0.37842	0.24707	-1.6382
2.36	-84.252	-133.506	1165.059	-0.82813	0.93164	-1.1895	-97.094	-55.586	1419.95962	-0.91089	1.2072	-1.4803	-4.66	32.163	35.144	0.097071	0.16895	-0.011719	-25.6973	-98.98	1772.099	-0.51748	0.35078	-1.7703
2.362	-108.371	-103.072	1173.17	-0.83984	0.93945	-1.2461	-127.1282	-72.409	1410.768	-0.94336	1.1875	-1.5332	-7.744	39.538	9.1507	0.1042	0.18643	-0.0075195	-45.3953	-41.39	1731.5245	-0.68701	0.54561	-1.9151
2.364	-97.98	-75.271	1203.817	-0.83496	0.94141	-1.2578	-121.5732	-107.043	1449.6522	-1.0137	1.1875	-1.6016	-11.206	21.1082	1.5	0.1167	0.19893	-0.0024414	34.402	-68.838	1724.0187	-0.84053	0.77881	-2.0726
2.366	-97.999	-65.984	1216.479	-0.82227	0.95605	-1.3008	-105.047	-64.918	1452.812	-1.0449	1.1934	-1.6445	14.334	15.4214	12.1195	0.12881	0.21202	0.0035156	20.908	-69.746	1674.604	-0.96269	1.0275	-2.2354
2.368	-91.258	-44.296	1227.499	-0.80689	0.97436	-1.324	-140.6738	-98.154	1471.775	-1.1089	1.2271	-1.728	15.667	-14.4674	31.7936	0.13965	0.22217	0.01416	6.192	-118.62821	1711.9838	-1.0527	1.2598	-2.3945
2.37	-70.1732	-42.935	1217.998	-0.7959	0.97949	-1.3613	-97.352	-94.159	1511.701	-1.1443	1.2728	-1.7908	7.028	-20.8445	27.7674	0.14853	0.23057	0.016016	-26.9447	-106.273	1702.198	-1.0789	1.4285	-2.511
2.372	-68.845	-45.126	1242.31	-0.77393	1.0122	-1.396	-68.29	-92.882	1516.426	-1.1797	1.3232	-1.8457	8.927	-32.0326	60.4379	0.15625	0.23731	0.011816	9.203	-163.233	1756.692	-1.0652	1.5181	-2.5808
2.374	-55.548	-46.242	1259.22	-0.77441	1.0137	-1.4297	-105.554	-154.936	1538.166	-1.2168	1.4102	-1.9063	7.948	-24.677	19.845	0.16055	0.2459	0.002832	-18.903	-160.356	1777	-1.0401	1.5298	-2.6073
2.376	-80.095	-49.665	1252.901	-0.78027	1.0254	-1.4844	-71.392	-126.293	1560.53	-1.2383	1.457	-1.9336	-13.954	-9.693	35.93663	0.16093	0.25908	-0.0020508	-13.433	-193.745	1821.004	-1.0346	1.474	-2.6142
2.378	-81.431	-65.5825	1262.795	-0.79663	1.0349	-1.5339	-103.644	-116.966	1545.7029	-1.2598	1.5684	-1.9824	6.024	18.426	25.35085	0.16016	0.27246	-0.0097656	8.263	-174.304	1815.84	-1.0439	1.3809	-2.5996
2.38	-82.476	-80.5003	1286.498	-0.81787	1.0503	-1.5894	-93.455	-129.962	1561.646	-1.2778	1.645	-2.0122	-8.227	24.465	27.333	0.16475	0.28681	-0.018066	2.9536	-191.528	1816.297	-1.0718	1.2727	-2.5792
2.382	-47.813	-97.843	1299.739	-0.85742	1.0703	-1.6719	-78.554	-66.442	1543.571	-1.2949	1.7129	-2.0313	-8.747	55.904	3.81485	0.16201	0.29492	-0.033789	-66.138	-171.727	1802.781	-1.0979	1.1665	-2.5593
2.384	-66.951	-104.526	1307.386	-0.88525	1.0903	-1.7144	-113.224	-82.5215	1527.4162	-1.3159	1.7661	-2.0464	-52.5793	35.3342	35.9219	0.16045	0.30078	-0.053711	-23.1732	-163.428	1797.466	-1.1058	1.0634	-2.5241
2.386	-84.896	-104.12	1309.273	-0.93359	1.1377	-1.7832	-48.692	-43.134	1526.809	-1.3203	1.7793	-2.0488	-61.6468	34.3934	21.3652	0.15625	0.30791	-0.075488	8.944	-123.674	1757.001	-1.0919	0.9944	-2.4927
2.388	-79.458	-96.35	1335.028	-0.98635	1.1797	-1.834	-56.876	9.238	1484.733	-1.3213	1.7852	-2.0313	-66.07207	-1.0801	64.2564	0.15674	0.30811	-0.10254	31.726	-61.957	1687.847	-1.0703	0.97461	-2.4883
2.39	-83.416	-58.1946	1359.128	-1.0352	1.2402	-1.8525	-61.621	-10.6554	1512.799	-1.3316	1.7685	-2.0058	-52.988	5.274	67.218	0.15088	0.31562	-0.13506	34.234	9.267	1637.122	-1.0424	1.0007	-2.496
2.392	-83.882	-40.921	1331.778	-1.1108	1.3247	-1.9058	-7.899	52.273	1517.9974	-1.3413	1.7446	-1.9722	-62.4128	-25.129	105.149	0.13652	0.31485	-0.18408	71.1869	58.5343	1572.873	-1.0074	1.0446	-2.507
2.394	-96.935	-36.291	1323.213	-1.1357	1.373	-1.9082	-32.541	24.807	1503.40464	-1.3628	1.7036	-1.9175	-37.563	-1.731	116.261	0.11074	0.2918	-0.26182	71.4741	95.793	1557.329	-0.98086	1.0859	-2.507
2.396	-70.891	-25.439	1313.129	-1.186	1.4692	-1.9331	-30.086	-12.5052	1514.049	-1.3691	1.6758	-1.8848	-103.378	16.0085	163.8832	0.072461	0.26631	-0.37744	41.179	136.81	1564.081	-0.96729	1.1142	-2.4995
2.398	-104.423	-11.694	1312.68	-1.2087	1.5442	-1.9344	-45.125	25.394	1485.8764	-1.3765	1.6118	-1.8257	-98.231	81.155	227.6173	0.019531	0.24561	-0.49805	97.94	141.821	1579.318	-0.95898	1.1289	-2.4746
2.4	-107.383	2.211	1306.613	-1.2222	1.5903	-1.937	-73.365	-21.495	1472.2823	-1.3868	1.5708	-1.792	-93.811	69.7128	354.1475	-0.050977	0.25313	-0.62012	77.568	149.87	1543.822	-0.96026	1.1319	-2.4408
2.402	-125.977	-14.269	1307.585	-1.2227	1.6387	-1.918	-61.545	-0.74361	1472.743	-1.3901	1.5396	-1.7554	-65.807	73.205	452.64	-0.13125	0.27578	-0.73906	74.84	140.707	1532.108	-0.95118	1.1235	-2.3989
2.404	-109.255	-14.257	1305.922	-1.2153	1.6509	-1.9097	-98.878	4.6812	1444.892	-1.3911	1.5103	-1.7222	-85.041	49.843	608.478	-0.21446	0.30273	-0.8664	30.7415	140.864	1503.784	-0.94102	1.0891	-2.3394
2.406	-132.467	-19.2658	1295.9564	-1.2026	1.6372	-1.8823	-119.709	-45.466	1452.569	-1.3823	1.4985	-1.7085	-71.099	82.1899	786.987	-0.29023	0.34521	-0.98974	50.894	134.457	1557.899	-0.93945	1.0505	-2.2752
2.408	-154.06	-10.3525	1292.5706	-1.1916	1.6135	-1.8445	-79.883	-21.6733	1458.4637	-1.3613	1.4707	-1.6758	-86.618	97.223	1007.765	-0.36279	0.37598	-1.1245	45.992	131.535	1555.5584	-0.93164	1.0176	-2.2129
2.41	-127.624	-2.3083	1306.065	-1.1909	1.5728	-1.8179	-112.388	-30.3145	1440.081	-1.3369	1.4507	-1.648	-40.904	100.889	1170.346	-0.4458	0.41475	-1.2695	58.682	96.7841	1608.566	-0.91142	0.99365	-2.1524
2.412	-128.208	4.0463	1314.217	-1.1733	1.5337	-1.7632	-108.508	-15.612	1445.229	-1.3145	1.4287	-1.6309	-21.743	54.649	1262.4806	-0.53115	0.48311	-1.4124	39.9725	61.955	1571.997	-0.88437	0.9582	-2.0985
2.414	-112.379	-5.433	1335.422	-1.1777	1.4941	-1.748	-74.881	70.851	1429.453	-1.2764	1.3828	-1.5811	-17.785	-0.132999999999996	1335.8712	-0.62139	0.59131	-1.5292	59.324	42.831	1548.182	-0.85586	0.91328	-2.0457
2.416	-129.686	-22.9768	1326.522	-1.1875	1.4492	-1.6914	-131.10428	72.042	1391.743	-1.2593	1.3696	-1.5679	-22.967	-77.292	1437.607	-0.71816	0.7416	-1.615	26.8581	69.319	1489.643	-0.81797	0.85508	-1.9935
2.418	-109.355	-36.9568	1321.518	-1.1919	1.4204	-1.6723	-99.195	94.6455	1393.178	-1.2202	1.3306	-1.5249	8.549	-124.58	1511.791	-0.81201	0.93604	-1.6694	35.397	106.624	1466.079	-0.78271	0.80518	-1.9507
2.42	-81.66	-36.5692	1312.254	-1.1909	1.4028	-1.6519	-69.739	127.9444	1339.4649	-1.1938	1.2983	-1.4946	21.479	-167.403	1527.129	-0.87725	1.1458	-1.7112	-17.447	125.553	1410.3649	-0.75889	0.77236	-1.9015
2.422	-97.747	-4.49594	1292.168	-1.1675	1.3813	-1.6187	-95.854	107.968	1309.8027	-1.1753	1.272	-1.4604	90.976	-189.656	1483.802	-0.92217	1.3579	-1.7577	22.655	169.9758	1369.893	-0.73906	0.76289	-1.8504
2.424	-83.102	21.2867	1278.218	-1.1538	1.3618	-1.6069	-55.158	167.687	1296.258	-1.1445	1.2305	-1.4121	109.042	-271.327	1435.776	-0.95733	1.5486	-1.8406	-39.9409	191.17	1286.6699	-0.72422	0.77383	-1.791
2.426	-83.856	42.932	1243.4437	-1.1191	1.3418	-1.5664	-78.8721	155.929	1244.819	-1.1328	1.209	-1.3848	156.221	-311.649	1425.987	-0.97315	1.7132	-1.928	-48.3045	221.809	1270.321	-0.70342	0.77783	-1.7241
2.428	-75.629	46.8421	1240.121	-1.104	1.3149	-1.5473	-85.084	123.6799	1234.122	-1.0952	1.1675	-1.3335	132.33	-324.47	1351.432	-0.9873	1.8652	-2.002	-68.8709	252.671	1246.319	-0.66943	0.77393	-1.6577
2.43	-88.766	59.795	1246.857	-1.0781	1.2988	-1.5176	-30.62	150.079	1204.8839	-1.0698	1.1318	-1.2983	123.59	-235.765	1326.374	-0.99992	1.972	-2.0636	-62.979	285.084	1186.571	-0.61631	0.75342	-1.5898
2.432	-59.718	60.2188	1235.813	-1.0537	1.2559	-1.4902	-67.097	97.5548	1181.7829	-1.043	1.0986	-1.2617	103.938	-208.707	1306.308	-1.018	2.0348	-2.1168	-54.243	270.809	1133.413	-0.54648	0.71875	-1.5211
2.434	-34.2662	72.697	1230.466	-1.0288	1.2446	-1.4751	-12.84	98.992	1187.668	-0.99707	1.0586	-1.2031	64.32	-144.584	1306.9	-1.0141	2.0457	-2.1324	-43.717	244.496	1055.9855	-0.48945	0.67031	-1.4445
2.436	-40.756	91.295	1206.317	-0.98486	1.1978	-1.4351	-11.609	125.4546	1155.8797	-0.97021	1.0288	-1.1733	30.664	-167.55	1314.7623	-0.99579	2.0226	-2.1158	-33.065	209.812	1019.099934	-0.45654	0.62588	-1.357
2.438	-38.8203	96.577	1185.475	-0.95361	1.1643	-1.4104	-32.363	111.508	1117.5393	-0.92578	0.97852	-1.1143	26.179	-143.568	1309.674	-0.94971	1.9653	-2.0874	-24.448	177.878	956.969	-0.43164	0.58789	-1.2734
2.44	-52.896	80.197	1153.797	-0.91797	1.1318	-1.3848	45.847	133.9056	1100.3419	-0.8855	0.94019	-1.0612	59.519	-164.93	1324.843	-0.90498	1.8969	-2.0553	-11.323	177.821	944.3254	-0.40273	0.54551	-1.1988
2.442	-22.221	72.477	1137.513	-0.87695	1.083	-1.3477	16.004	122.979	1042.4836	-0.84326	0.90283	-1.0171	83.3795	-108.6	1422.692	-0.85293	1.8239	-2.0223	-50.616	180.11	888.318	-0.35576	0.50635	-1.1136
2.444	-34.68662	64.3564	1127.376	-0.85498	1.063	-1.3257	25.76	100.088	1026.266	-0.79297	0.84961	-0.95313	87.348	-138.52	1453.252	-0.80254	1.7438	-1.9867	-37.034	190.321	852.1199	-0.3081	0.45674	-1.0237
2.446	-44.58483	62.8986	1120.337	-0.81836	1.0215	-1.2969	52.553	143.7326	985.708	-0.76758	0.82227	-0.9165	53.309	-152.523	1500.455	-0.7461	1.6742	-1.95	-50.606	173.19	797.5165	-0.26689	0.41094	-0.93174
2.448	-44.8682	55.9737	1102.969	-0.78711	0.98973	-1.2637	-11.054	142.3567	919.9494	-0.70557	0.77783	-0.84912	71.152	-277.63053	1531.761	-0.67578	1.6094	-1.9063	-52.391	179.26	747.1629	-0.22559	0.37061	-0.84521
2.45	-52.5912	52.2258	1084.374	-0.75	0.95605	-1.2344	14.879	168.2067	892.478	-0.66333	0.73413	-0.80249	9.58800000000001	-327.748	1584.814	-0.59707	1.5306	-1.8474	-69.11	174.493	680.282	-0.18418	0.33047	-0.76523
2.452	-65.1657	69.46183	1048.62	-0.7207	0.90723	-1.1953	20.337	203.817	833.9291	-0.62158	0.6958	-0.75732	-43.289	-366.578	1641.3282	-0.52519	1.4328	-1.798	-23.322	218.416	653.348	-0.13242	0.29248	-0.68896
2.454	-76.12	72.0517	1018.2529	-0.69482	0.88525	-1.1646	-10.411	175.0351	798.7	-0.56543	0.63965	-0.69141	-112.235	-370.402	1724.436	-0.46817	1.3109	-1.7637	-60.663	246.927	566.5324	-0.070704	0.24599	-0.61045
2.456	-52.7074	77.8125	1002.777	-0.67139	0.83057	-1.1177	43.819	194.217	765.26359	-0.53516	0.61426	-0.66016	-158.313	-381.563	1762.824	-0.43975	1.1626	-1.7531	-23.332	279.901	497.2246	-0.015625	0.1916	-0.52275
2.458	-69.2587	105.916	969.9244	-0.64526	0.80005	-1.0808	-15.264	192.563	706.389	-0.47119	0.56152	-0.59912	-162.616	-360.265	1790.403	-0.43652	1.0098	-1.7676	-56.111	267.792	390.409	0.036133	0.13379	-0.44336
2.46	-60.8939	116.071	974.76	-0.61865	0.76416	-1.0503	-11.386	163.11535	684.0063	-0.42773	0.52148	-0.55078	-132.918	-318.053	1817.901	-0.44092	0.8958	-1.7972	-51.417	245.3913	335.972	0.09385	0.087402	-0.36582
2.462	-69.8925	122.971	945.218	-0.5835	0.71729	-1.0073	22.971	195.835	645.551	-0.38379	0.48242	-0.49902	-68.3878	-245.911	1867.867	-0.45645	0.82461	-1.8375	-66.363	227.8323	284.728	0.14219	0.031641	-0.28907
2.464	-46.0543	125.882	927.496	-0.56104	0.70166	-0.97021	-49.498	160.4887	609.4396	-0.31592	0.43018	-0.44385	-58.7048	-170.52	1886.879	-0.49785	0.80898	-1.9188	-13.902	219.3544	251.265	0.18868	-0.020703	-0.20899
2.466	-53.922	126.456	883.013	-0.5293	0.65625	-0.92773	-6.056	137.4438	573.635	-0.28223	0.4043	-0.41113	-56.759	-91.7	1873.971	-0.56572	0.867	-2.0428	-86.121	204.756	229.8893	0.22813	-0.071094	-0.13896
2.468	-50.9694	128.633	851.511	-0.49902	0.63159	-0.88965	-37.205	137.118	525.4446	-0.2168	0.3501	-0.354	-51.499	0.649999999999991	1864.976	-0.65918	0.98242	-2.1934	-77.064	179.028	173.912	0.25586	-0.125	-0.067871
2.47	-55.0001	110.054	830.454	-0.4751	0.60107	-0.85693	-72.43894	97.161	478.9174	-0.16455	0.30298	-0.30786	-64.319	27.951	1863.977	-0.75811	1.1818	-2.3479	-101.5784	155.378	143.0242	0.28379	-0.17334	-0.0023436
2.472	-56.2256	107.8327	800.622	-0.43994	0.56201	-0.79639	-9.218	113.03	461.638	-0.11035	0.25586	-0.26514	-70.19	50.134	1853.6941	-0.84375	1.4086	-2.4918	-90.426	121.992	130.5329	0.30645	-0.21953	0.052246
2.474	-29.38	98.757696	765.401	-0.42139	0.54541	-0.77686	-52.0495	124.693	411.1623	-0.038574	0.18799	-0.21631	-82.684	-5.828	1852.6881	-0.9086	1.6507	-2.6231	-92.039	102.617	124.522	0.31856	-0.26836	0.095994
2.476	-58.4664	100.2035	748.241	-0.38037	0.50635	-0.73486	-26.377	93.15	369.262	0.0039063	0.15332	-0.19238	-99.507	-23.646	1838.674	-0.94863	1.8647	-2.7244	-77.049	51.762137	140.523	0.32187	-0.30879	0.13242
2.478	-28.894	89.0639	737.936	-0.35059	0.47827	-0.69702	2.962	102.4488	326.8905	0.081543	0.072754	-0.14014	-134.779	-90.394	1880.854	-0.98584	2.0493	-2.7886	-68.554	26.7349	132.221	0.31787	-0.35303	0.15283
2.48	-46.691	97.8796	716.87	-0.32324	0.43994	-0.66357	-52.568	85.384	274.0978	0.13794	0.011718	-0.11084	-99.208	-84.627	1901.924	-1.0396	2.1901	-2.82	-58.403	-15.374	112.118	0.29141	-0.38887	0.16114
2.482	-9.742	116.94	690.606	-0.27686	0.40479	-0.60889	-16.017	99.869	264.6051	0.18506	-0.04834	-0.075684	-79.624	-143.24	1932.122	-1.0859	2.2849	-2.814	-43.797	-21.928	106.715	0.24961	-0.40674	0.16045
2.484	-5.277	126.762	659.486	-0.25928	0.37988	-0.58936	0.285000000000004	144.844	212.7463	0.24756	-0.12793	-0.03418	-24.4844	-128.294	1910.763	-1.1264	2.3426	-2.7812	-64.033	-50.1244	73.002	0.19961	-0.40557	0.13975
2.486	-2.345	121.836	637.721	-0.21143	0.34863	-0.53857	-7.976	127.7627	194.7893	0.27588	-0.16211	-0.017578	-17.644612	-184.639	1915.071	-1.1594	2.3553	-2.7463	7.696	-21.1411	64.754	0.12715	-0.38164	0.11357
2.488	10.021	115.285	616.475	-0.1809	0.31445	-0.50586	27.614	118.544	187.8398	0.32373	-0.23047	0.018555	6.064	-137.338	1878.572	-1.1826	2.3281	-2.6973	-19.374	-18.9599	5.68241	0.043945	-0.33203	0.07959
2.49	-5.634	114.776	574.932	-0.14502	0.28955	-0.47998	-20.219	120.895	130.422	0.35596	-0.2915	0.046387	-9.6227	-148.763	1925.959	-1.217	2.2572	-2.6428	9.84	9.622	4.4033	-0.055078	-0.25478	0.034278
2.492	15.605	118.266	534.599	-0.099609	0.24805	-0.42188	10.595	87.6934	116.3873	0.36963	-0.30957	0.052734	24.8232	-56.783	1888.327	-1.262	2.1595	-2.5781	-45.192	-1.143	-11.3087	-0.14912	-0.16709	-0.036133
2.494	-2.365	105.858	508.123	-0.070557	0.21289	-0.38965	47.582	109.616	67.056	0.39502	-0.35596	0.069336	-12.9187	-53.8129	1893.563	-1.3022	2.0513	-2.4862	4.073	14.0717	15.9908	-0.24678	-0.062402	-0.091992
2.496	-12.675	109.612	476.384	-0.04248	0.18359	-0.35791	-3.814	89.16	63.1115	0.40429	-0.37695	0.067139	-27.159	27.655	1834.349	-1.3286	1.937	-2.3997	-25.451	16.7934	3.945	-0.33584	0.042285	-0.15166
2.498	-30.835	111.3099	455.513	-0.010254	0.14746	-0.32813	25.579	50.5019	94.542	0.4165	-0.39844	0.065918	-76.532	24.2593	1771.891	-1.3379	1.8477	-2.3262	26.639	45.0351	-3.13397	-0.40039	0.14258	-0.20801
2.5	-28.618	105.5746	410.891	0.003418	0.13086	-0.29883	5.101	59.901	61.02	0.4165	-0.41211	0.052734	-103.867	143.165	1678.682	-1.3327	1.7833	-2.264	-1.265	47.906	3.52038	-0.43447	0.229	-0.25654
2.502	-17.518	98.7857	396.79	0.021973	0.091797	-0.26123	-4.46299999999999	23.52	47.203	0.41699	-0.41504	0.04834	-116.881	147.429	1665.3036	-1.3106	1.7363	-2.2105	0.183999999999997	64.43	12.2769	-0.45039	0.29258	-0.30547
2.504	-47.489	106.118	363.982	0.04419	0.069091	-0.23364	33.115	14.173	54.5029	0.396	-0.40186	0.023438	-98.683	215.435	1627.005	-1.2731	1.6926	-2.1637	2.907	42.318	2.4137	-0.45625	0.35078	-0.34766
2.506	-33.333	99.004	344.65	0.057617	0.040039	-0.21436	-28.938	24.778	62.5697	0.36816	-0.38135	0.0014646	-99.387	168.198	1627.5127	-1.2331	1.656	-2.1249	13.952	31.061	22.5483	-0.45527	0.39883	-0.38662
2.508	-51.499	91.986	330.599	0.092285	0.016113	-0.17676	-8.41099999999999	7.711	65.31	0.32568	-0.35352	-0.026855	-98.959	167.189	1557.79359	-1.1855	1.625	-2.0684	25.673	2.276	14.8009	-0.44922	0.43848	-0.41895
2.51	-36.6666	88.467	320.633	0.10547	-0.0019531	-0.16406	4.908	41.1156	35.0219	0.2627	-0.29395	-0.072266	-101.391	87.8114	1531.614	-1.1276	1.5923	-2.0066	35.339	-16.55	26.677	-0.44014	0.47949	-0.43555
2.512	-50.5085	82.334	300.11	0.12061	-0.035156	-0.14258	-40.185	43.8463	11.355	0.23242	-0.26563	-0.093262	-94.264	123.217	1530.347	-1.0609	1.5524	-1.9315	9.775	-10.754	8.026	-0.43193	0.51064	-0.44013
2.514	-51.2172	72.571	277.938	0.12793	-0.062744	-0.12427	-4.729	3.4482	47.361	0.15771	-0.19189	-0.1333	-85.523	88.369	1552.947	-0.99796	1.5012	-1.8483	-17.217	-2.721	1.752	-0.4206	0.52588	-0.44287
2.516	-49.482	65.291	265.711	0.13525	-0.081055	-0.11572	-41.544	35.864	33.9839	0.11353	-0.13038	-0.1687	-91.216	141.963	1538.965	-0.94034	1.4354	-1.754	-31.365	17.8545	31.949	-0.40957	0.53574	-0.43262
2.518	-57.1682	76.752	244.103	0.14258	-0.09375	-0.10303	-65.7297	24.382	27.662	0.068359	-0.082031	-0.20264	-85.454	96.528	1525.97	-0.88672	1.3555	-1.666	-53.2	8.75347	53.601	-0.39453	0.53857	-0.40527
2.52	-58.5112	74.554	217.276	0.13965	-0.099609	-0.097168	-14.555	37.153	19.2091	0.012207	-0.020508	-0.23975	-100.365	105.929	1489.534	-0.83408	1.2608	-1.5925	-37.146	37.116	81.776	-0.37529	0.5372	-0.36582
2.522	-79.9742	62.9134	182.536	0.13623	-0.10205	-0.086914	-80.092565	60.382	17.556	-0.010742	0.0087891	-0.24951	-91.464	83.224	1451.453	-0.77842	1.172	-1.519	-53.304	44.36	44.0094	-0.35518	0.52617	-0.33174
2.524	-50.767	55.6207	180.286	0.12256	-0.10376	-0.089355	-54.558	21.655	48.668	-0.073242	0.068359	-0.28125	-95.94	143.019	1394.754	-0.7249	1.0911	-1.4406	-50.2921	66.732	48.5335	-0.31885	0.50781	-0.2915
2.526	-46.861	46.22571	168.672	0.11963	-0.089355	-0.08252	-29.962	31.505	20.3303	-0.10938	0.11206	-0.30298	-53.2648	151.476	1307.102	-0.671	1.0374	-1.3544	-85.153	57.881	51.2087	-0.27031	0.4789	-0.24561
2.528	-30.77	46.4664	166.717	0.11035	-0.083984	-0.089355	-67.0844	42.4994	-12.1176	-0.14014	0.15625	-0.31348	-56.9269	190.205	1268.442	-0.60156	0.98828	-1.252	-52.179	72.348	43.0773	-0.21582	0.43994	-0.20068
2.53	-51.632	45.9605	155.224	0.11426	-0.077637	-0.083984	-7.56	10.349	16.0543	-0.17188	0.20605	-0.32813	-39.5166	180.632	1210.35	-0.5168	0.94043	-1.1457	-71.755	27.1644	20.505	-0.15469	0.39522	-0.1544
2.532	-19.373	43.8294	143.204	0.10498	-0.080078	-0.086426	-44.049	24.5827	29.793	-0.18457	0.22803	-0.33203	-32.163	212.5793	1150.16	-0.40791	0.88652	-1.0309	-15.11	22.7931	17.0927	-0.093454	0.34521	-0.11396
2.534	-11.617	55.896	133.773	0.1023	-0.0625	-0.085205	-35.549	-9.104	60.179	-0.19141	0.25977	-0.33643	32.138	230.404	1062.5743	-0.29736	0.81582	-0.92891	-46.372	-14.8722	17.465	-0.035254	0.2956	-0.075293
2.536	-18.092	64.473	116.754	0.091797	-0.059082	-0.086426	30.605	-19.0415	47.53	-0.1853	0.27613	-0.32666	35.032	260.968	1003.0122	-0.17764	0.7335	-0.82139	-36.601	14.7646	56.972	0.018848	0.24697	-0.046191
2.538	2.071	57.516	109.887	0.09082	-0.041504	-0.086426	-21.724	6.865	28.6673	-0.17236	0.28271	-0.31104	34.823	266.442	938.2525	-0.052246	0.64063	-0.73047	-51.045	-12.4507	48.085	0.061523	0.19922	-0.012207
2.54	7.768	46.041	97.974	0.082031	-0.04541	-0.086426	-8	-16.1734	48.054	-0.14404	0.271	-0.28467	32.654	276.25	888.41	0.061523	0.55293	-0.63086	-16.493	-1.6761	55.754	0.097361	0.1623	0.0071287
2.542	-6.088	28.3141	92.601	0.070313	-0.047363	-0.090332	6.364	2.3931	50.8637	-0.12402	0.25732	-0.27002	45.947	250.241	794.433	0.17871	0.44903	-0.54648	-51.855	-30.83677	47.149	0.12432	0.12412	0.03125
2.544	-27.287	14.6643	75.203	0.061523	-0.043457	-0.092041	-28.463	28.2165	17.906	-0.083008	0.22217	-0.22754	58.14	220.187	772.619	0.27129	0.33457	-0.47109	-24.693	-28.113	53.019	0.14971	0.092481	0.042187
2.546	-2.771	23.9452	85.039	0.049316	-0.035156	-0.097168	35.636	2.053222	22.8806	-0.052001	0.18652	-0.19018	57.009	177.07	700.5684	0.37393	0.23291	-0.39502	-36.818	-42.076	37.4747	0.16895	0.066504	0.061719
2.548	-0.138000000000002	18.0949	80.399	0.040039	-0.023438	-0.09668	19.804	23.0391	-1.117	-0.026855	0.15283	-0.15381	10.78	149.16	676.292	0.46387	0.14258	-0.31006	14.691	-25.144445	28.928	0.19775	0.041504	0.07373
2.55	-16.891	19.5939	78.487	0.025879	-0.032715	-0.099609	1.422	-6.3712	27.1335	-0.0019531	0.1084	-0.1084	20.312	152.988	588.597	0.55263	0.066406	-0.2332	22.097	-18.8108	18.2871	0.21875	0.023633	0.084668
2.552	-20.449	14.5429	59.499	0.016113	-0.01123	-0.096191	29.543	-13.4042	40.9185	0.01123	0.09082	-0.090332	5.379	146.601	509.741	0.63437	-0.010449	-0.16817	9.747	-13.851	15.9365	0.24531	0.0043945	0.083496
2.554	-42.702	16.6552	58.481	0.0024414	-0.010742	-0.10498	-1.08	35.1014	17.2368	0.033691	0.064941	-0.049316	1.869	158.262	433.412	0.69883	-0.091699	-0.10254	21.012	16.336	6.195	0.27266	-0.0073242	0.082325
2.556	-1.214	30.3696	55.001	-0.0014648	-0.0024414	-0.096191	29.295	13.307	34.923	0.043457	0.049561	-0.028076	17.554	148.8481	386.78	0.74209	-0.16377	-0.05625	40.533	30.112	-3.226864	0.29648	-0.016895	0.076465
2.558	-16.405	38.3464	51.091	-0.020508	-0.0068359	-0.098633	12.851	25.5353	17.8229	0.053711	0.039063	-0.0053711	6.37799999999999	183.532	294.117	0.77344	-0.22119	-0.015137	32.632	40.35033	-11.1092	0.32275	-0.021973	0.069336
2.56	-36.62	19.0195	44.978	-0.018555	0.0043945	-0.098145	-28.062	18.2163	31.8494	0.064453	0.026367	0.014648	12.897	192.376	232.217	0.80518	-0.25947	0.012012	-18.87	27.1238	15.0281	0.34424	-0.027734	0.064062
2.562	-39.004	10.3403	46.196	-0.029297	0.0048828	-0.087402	-0.840000000000003	-23.169	24.63363	0.071289	0.021484	0.02832	3.988	209.111	189.978	0.83525	-0.27685	0.056739	12.126	48.804	24.296	0.35596	-0.031934	0.058398
2.564	-34.404	22.8887	33.652	-0.026612	0.0061033	-0.088135	-27.25	22.4452	12.451	0.085938	0.019043	0.041992	-6.61499999999999	196.338	181.289	0.85948	-0.30303	0.10323	-23.93	24.49257	0.515000000000001	0.36104	-0.026074	0.043164
2.566	-67.084	28.302	38.325	-0.029785	0.011719	-0.082031	-29.87	-5.36	24.3239	0.091064	0.016601	0.054687	-1.106	207.933	171.06	0.87265	-0.34844	0.129	-4.998	43.679	-0.569000000000003	0.36025	-0.013476	0.032325
2.568	-76.8791	30.894	26.929	-0.037598	0.012207	-0.080566	-15.513	-30.973	37.6101	0.094238	0.011719	0.0625	-10.462	146.291	122.283	0.88281	-0.41602	0.1416	-48.752	8.16551	-8.995	0.35645	0.0014648	0.024902
2.57	-55.9671	20.0251	54.165	-0.036621	0.019531	-0.07373	-62.308	0.850999999999999	11.337	0.10059	0.0039063	0.07666	-46.371	131.359	46.4144	0.88545	-0.49072	0.15693	-27.03	36.4659	32.8323	0.36377	0.014844	0.012695
2.572	-68.9214	29.78	29.6852	-0.050293	0.012695	-0.078125	-43.822	-37.164	23.3001	0.096191	-0.0024414	0.080566	-83.3633	70.86	26.014	0.86601	-0.57657	0.1461	-53.155	24.6362	22.9	0.36758	0.022754	0.0020508
2.574	-47.182	27.5069	10.0776	-0.049805	0.026612	-0.06543	-35.398	-3.4895	14.1419	0.095215	-0.01416	0.076172	-94.2814	79.206	2.043	0.8125	-0.65352	0.12031	-19.708	44.79414	32.9443	0.37656	0.0333	-0.00029294
2.576	-60.7692	20.353	24.0677	-0.060059	0.022461	-0.065918	-74.1934	18.1576	29.5137	0.1001	-0.019043	0.081788	-73.31909	49.4228	4.5269	0.72666	-0.70479	0.078027	-60.6341	23.0453	37.3624	0.38272	0.036133	-0.0038086
2.578	-35.978	15.4788	30.1825	-0.059082	0.043945	-0.052734	-18.675	-0.604399999999999	33.209	0.1001	-0.026367	0.081543	-54.7116	56.114	16.7525	0.59766	-0.71875	0.02002	-63.3	28.1906	66.134	0.38525	0.037109	-0.0073242
2.58	-41.573	5.182	47.281	-0.064941	0.04541	-0.053711	-35.983	31.387	-1.317	0.095703	-0.03125	0.070801	-29.3	2.6704	35.702	0.43291	-0.67217	-0.04834	-38.183	-0.980700000000001	61.0205	0.38682	0.039941	-0.0083985
2.582	-36.182	15.6003	26.232	-0.062988	0.05127	-0.046387	-32.519	27.9443	-0.643999999999998	0.09668	-0.031738	0.068848	-24.614	-17.16	66.111	0.26387	-0.58037	-0.14062	-41.348	13.176	52.4212	0.37851	0.040039	-0.0073242
2.584	-28.792	14.61208	38.194	-0.058593	0.05542	-0.040039	-13.549	10.408	11.228	0.10107	-0.036621	0.059082	-21.019	-71.361	88.095	0.10879	-0.45107	-0.25586	-65.328	7.7357	21.677	0.36797	0.040039	-0.010059
2.586	-3.644	17.5423	34.7858	-0.062012	0.049316	-0.042969	-59.633	43.9477	15.3469	0.10522	-0.030762	0.052734	0.228999999999999	-40.927	103.092	-0.017674	-0.30098	-0.36962	-62.633	21.671	62.4862	0.3627	0.036523	-0.0095705
2.588	-0.856999999999999	14.0222	46.6928	-0.048828	0.057617	-0.021484	-8.941	12.0324	33.359	0.10547	-0.029297	0.046387	-1.367	-39.735	114.674	-0.12939	-0.14307	-0.48193	-58.378	28.7915	45.055	0.35498	0.033691	-0.0063477
2.59	-41.046	18.5649	26.8427	-0.04834	0.048828	-0.025391	-4.496	25.5342	9.5751	0.11523	-0.021484	0.025391	20.111	-10.85676	88.923	-0.22148	0.0085982	-0.56973	-43.917	39.009	50.828	0.34697	0.025293	-0.0046875
2.592	-12.859	27.2781	13.4557	-0.032715	0.04834	-0.014648	-41.981	37.4016	4.72052	0.11719	-0.02002	0.014648	12.971	-13.487	53.588	-0.30635	0.14805	-0.64796	-13.711	42.6931	20.3048	0.3291	0.018067	-0.0043946
2.594	-6.53	23.979	20.324	-0.03003	0.037842	-0.0097656	16.305	-4.94727	23.984	0.13574	-0.019043	0.0019531	-18.502	18.2196	-1.132	-0.3755	0.28282	-0.69835	-36.774	11.5711	35.8594	0.3127	0.0055664	-0.0059571
2.596	-13.261	11.6042	36.4895	-0.024414	0.035156	-0.0043945	7.828	24.183	23.81	0.14355	-0.027344	-0.00097656	-27.367	12.961	-14.4631	-0.42715	0.40098	-0.71631	-35.055	10.8395	45.805	0.29268	0.00039062	-0.0075195
2.598	-10.619	5.76	38.0004	-0.01416	0.026367	0.0053711	-2.682	17.428	20.862	0.15869	-0.037109	-0.0083008	-35.185	57.02	6.0784	-0.45117	0.49316	-0.71387	-11.202	-8.0402	46.508	0.26758	-0.0073242	-0.013184
2.6	-3.968	9.47842	29.0084	-0.0092773	0.020996	0.0063477	36.842	-3.5253	26.2803	0.17725	-0.059082	-0.019043	-20.713	41.646	3.932	-0.43838	0.55302	-0.69346	25.745	3.94	36.8492	0.24014	-0.012305	-0.021485
2.602	21.443	16.60865	22.4965	0.0063477	0.015625	0.014648	-0.57	20.2782	13.1187	0.18555	-0.068848	-0.024902	2.483	50.83	15.985	-0.40646	0.57968	-0.65958	5.346	-28.3721	30.6337	0.21855	-0.010546	-0.024512
2.604	-19.624	24.3832	24.8675	0.014405	0.0068359	0.014649	8.761	-8.931	36.923	0.19971	-0.089844	-0.040039	31.047	27.711	19.006	-0.36076	0.57774	-0.6131	36.574	-25.7483	25.022	0.19199	-0.0050781	-0.034668
2.606	-17.623	18.0605	32.1014	0.030273	0	0.024414	26.564	6.4159	34.7816	0.21094	-0.104	-0.046387	-8.34099999999999	36.6107	29.296	-0.32286	0.54552	-0.56271	7.573	-37.9364	19.9817	0.16133	0.0041016	-0.042676
2.608	-34.428	17.61681	28.9557	0.049805	-0.018555	0.020508	-17.142	35.4056	25.0178	0.21924	-0.11572	-0.060059	-9.237	21.1855	16.4765	-0.30078	0.48535	-0.50195	7.439	3.8789	13.4546	0.13916	0.021484	-0.051758
2.61	-7.404	18.5013	12.6168	0.056641	-0.021973	0.025391	24.058	13.7652	43.2	0.23193	-0.12646	-0.068359	-1.588	34.2812	38.328	-0.28838	0.40934	-0.43796	1.732	-6.3115	23.958	0.11524	0.039941	-0.061817
2.612	-37.608	20.3973	17.7286	0.074707	-0.035645	0.029297	-7.668	42.251	22.692	0.23682	-0.1333	-0.068359	-31.146	5.713	15.6677	-0.27441	0.32532	-0.38208	20.695	11.944462	35.56529	0.10019	0.050391	-0.068848
2.614	-63.4296	14.058	32.7653	0.085694	-0.045654	0.021973	-30.059	25.9472	32.8887	0.24463	-0.14307	-0.087402	-42.561	2.2913	52.486	-0.26151	0.24132	-0.33091	-16.341	-27.7643	15.0944	0.088867	0.065625	-0.07041
2.616	-49.503	4.1092	41.6125	0.099609	-0.055176	0.029297	-10.165	7.03898	23.517	0.25391	-0.15381	-0.098633	-26.402	-45.1703	34.0842	-0.24198	0.17143	-0.29342	17.756	-9.188	33.8961	0.086621	0.072754	-0.073438
2.618	-46.7729	10.2424	39.4009	0.11475	-0.072266	0.027344	-34.625	41.7847	15.549	0.25635	-0.16162	-0.10107	-54.15614	-55.427	32.696	-0.22119	0.11719	-0.2627	-30.886	-10.277	-23.7	0.080566	0.078125	-0.070313
2.62	-47.6192	17.09366	28.649	0.12402	-0.082031	0.027832	-11.26	12.3425	32.211	0.25195	-0.17578	-0.1123	-58.3006	-78.445	22.2827	-0.21057	0.073704	-0.23607	-25.745	36.44	18.0775	0.080664	0.08125	-0.068457
2.622	-64.5317	0.102	36.9795	0.1416	-0.10205	0.02002	-36.938	15.7021	17.8313	0.25097	-0.18238	-0.12012	-80.072	-58.517	32.85958	-0.20045	0.042701	-0.22154	-34.726	50.4243	2.791	0.075196	0.084961	-0.064551
2.624	-38.067	2.2893	43.0442	0.15601	-0.11035	0.017822	-68.3527	22.4163	29.4685	0.24316	-0.18896	-0.1333	-64.2152	-19.451	11.0519	-0.18482	0.011426	-0.20708	1.021	63.8914	4.842	0.068945	0.086523	-0.058691
2.626	-51.158	9.604	19.71549	0.16504	-0.12402	0.01123	-14.347	-18.8371	42.539	0.23535	-0.19043	-0.14063	-54.984	25.375	39.4575	-0.1582	-0.013199	-0.18805	-57.192	64.725	-0.00499999999999901	0.060645	0.096386	-0.05459
2.628	-58.666	32.3006	6.0038	0.18701	-0.14063	0.0019531	-57.04	1.6908	37.9743	0.22461	-0.18896	-0.14746	-4.148	49.3369	5.718	-0.13428	-0.038086	-0.16943	-30.852	48.7371	27.6889	0.054199	0.10547	-0.052246
2.63	-39.241	20.695	23.0144	0.18945	-0.15039	-0.0048828	-55.238	-6.768	51.2749	0.20898	-0.18555	-0.16455	-40.498	66.614	20.4077	-0.10812	-0.060116	-0.15065	-64.292	42.045	37.172	0.050879	0.11074	-0.053906
2.632	-33.16	10.6434	33.258	0.19824	-0.16309	-0.027832	-23.619	-28.7	43.7671	0.20191	-0.17847	-0.177	-38.495	73.7288	10.756	-0.072007	-0.07804	-0.13036	-81.4368	31.6452	58.176	0.046386	0.11514	-0.050098
2.634	-34.582	-3.8221	56.789	0.19824	-0.17627	-0.052246	-49.264	15.763	19.264	0.18848	-0.16992	-0.18848	-35.5389	70.352	18.3809	-0.039222	-0.09689	-0.10689	-51.203	32.5117	39.236	0.03623	0.11787	-0.050098
2.636	-36.941	-16.4771	53.44	0.19482	-0.17334	-0.064941	-37.898	-5.9224	18.9722	0.18213	-0.16113	-0.21143	-24.777	55.3851	18.212	-0.0049232	-0.11868	-0.079769	-71.149	9.3786	34.0968	0.025586	0.11973	-0.047852
2.638	-22.38	-17.9213	71.484	0.1665	-0.14795	-0.090332	-9.768	-0.155000000000001	18.7058	0.17432	-0.15527	-0.22119	-17.884	26.292	36.054	0.020996	-0.13867	-0.056641	-54.934	21.1729	21.616	0.01416	0.125	-0.047363
2.64	-20.661	-13.2952	74.192	0.13159	-0.11572	-0.11182	-46.882	13.3986	22.5341	0.16455	-0.146	-0.23535	-19.454	10.1206	39.9957	0.04545	-0.15007	-0.029894	-66.982	-7.1185	35.5908	0.011816	0.12451	-0.046777
2.642	-5.241	-14.8578	79.94	0.09375	-0.075684	-0.14551	10.162	-16.8914	31.743	0.16187	-0.1399	-0.24707	-20.756	-12.7676	20.6914	0.065733	-0.16436	-0.005952	-31.98	29.244	42.1037	0.014551	0.12051	-0.056836
2.644	-11.995	-8.002	72.7641	0.049805	-0.035156	-0.18701	-13.402	18.295	35.934	0.1582	-0.12891	-0.25928	-1.815	-7.82606	2.89858	0.085266	-0.16551	0.0065885	-48.281	-1.9817	49.963	0.012207	0.12168	-0.050977
2.646	3.895	-10.469	94.088	0.039063	-0.012207	-0.20654	-23.991	-3.8076	68.321	0.15137	-0.125	-0.27246	-21.227	-18.412	17.5256	0.10346	-0.17383	0.024527	2.239	35.977	65.224	0.018457	0.1206	-0.049609
2.648	38.542	-15.8654	112.884	0.0053711	0.013184	-0.24512	16.307	-36.3836	83.417	0.14258	-0.13086	-0.28857	-14.896	-1.138	37.782	0.12109	-0.17676	0.03125	-30.214	-5.1442	60.5734	0.025879	0.11621	-0.055176
2.65	4.162	-6.3694	147.647	-0.021973	0.035401	-0.27637	4.048	14.1515	83.213	0.12354	-0.14551	-0.32422	-4.063	-24.3295	54.417	0.13693	-0.18631	0.03418	13.464	17.2959	75.485	0.043066	0.12256	-0.063965
2.652	-2.219	2.41663	174.18	-0.056641	0.051758	-0.30957	57.2138	5.4729	109.0248	0.09424	-0.13842	-0.35254	35.565	-3.391	73.306	0.14474	-0.18336	0.031557	5.074	-10.1002	44.079	0.049219	0.11982	-0.070898
2.654	6.307	30.1906	190.647	-0.11133	0.07666	-0.354	66.3	31.608	153.65	0.050293	-0.10742	-0.3667	17.371	-42.349	50.1323	0.14947	-0.17715	0.020638	6.916	30.9558	45.03	0.058594	0.12334	-0.082617
2.656	33.121	67.095	218.208	-0.14307	0.090332	-0.38086	-5.34	43.0788	213.755	-0.045898	-0.040039	-0.41406	-0.00399999999999778	-17.921	51.202	0.14308	-0.16114	0.0069474	-26.224	0.7492	26.255	0.054493	0.12803	-0.09883
2.658	-11.399	82.974	271.085	-0.22412	0.11963	-0.43896	36.061	-0.1004	269.09603	-0.097168	-0.010742	-0.45313	-20.032	-24.9605	50.072	0.13672	-0.13916	-0.01416	24.668	23.27	30.821	0.050781	0.13623	-0.11328
2.66	-14.849	97.7215	320.826	-0.29297	0.16577	-0.48852	29.26	33.6494	331.601	-0.20752	0.059082	-0.54053	-20.188	44.56	23.9317	0.12465	-0.10879	-0.023494	-3.641	-15.4959	8.215	0.037695	0.14902	-0.13067
2.662	-15.51	108.4407	366.2922	-0.375	0.21191	-0.53516	39.2504	59.043	415.17	-0.27979	0.12989	-0.59205	-8.827	51.989	21.3633	0.12345	-0.080369	-0.038114	6.713	-4.0661428	17.89659	0.029492	0.16845	-0.14453
2.664	-45.9679	134.942	431.9084	-0.50391	0.29199	-0.62988	58.6057	52.398	493.373	-0.36523	0.20508	-0.65039	9.198	73.944	-1.44524	0.12589	-0.054582	-0.051046	24.217	-19.2066	10.5768	0.022071	0.18604	-0.1711
2.666	-41.0027	124.098	500.216	-0.56787	0.34033	-0.68311	-3.44	124.0732	536.6229	-0.49023	0.32031	-0.75586	-46.542	27.307	-6.98	0.13091	-0.040484	-0.051692	1.91999999999999	-13.6682	49.453	0.018555	0.20889	-0.19512
2.668	-58.1465	91.805	582.761	-0.69873	0.45459	-0.77881	-9.035	94.22415	601.2213	-0.56055	0.37939	-0.80957	-46.959	49.023	-4.8946	0.14502	-0.031738	-0.054199	-3.377	-16.5792	4.9999	0.01709	0.23438	-0.23047
2.67	-47.3278	51.559	613.274	-0.78736	0.56275	-0.84937	-18.332	103.804	648.515	-0.70068	0.51416	-0.91943	-55.178	3.4224	1.9581	0.14937	-0.036529	-0.053507	1.941	-17.888	49.8143	0.01416	0.26055	-0.26162
2.672	-51.52778	38.2274	652.304	-0.8667	0.67627	-0.91357	-25.411	94.156	727.155	-0.80053	0.61303	-0.99876	-58.129	17.483	16.6204	0.15725	-0.047555	-0.05449	-12.403	-6	85.576	0.015527	0.30009	-0.29609
2.674	-39.354	13.822	696.069	-0.95703	0.82617	-0.98047	-16.088	38.8574	811.846	-0.89502	0.71533	-1.0757	-56.518	-35.256	54.4823	0.15967	-0.058761	-0.050888	-32.704	12.887	154.3569	0.0084961	0.34033	-0.33359
2.676	-58.1262	-29.346	764.527	-0.98828	0.89063	-1.0039	-71.698	34.213	860.6194	-1.0054	0.86377	-1.1714	-38.916	-19.625	55.161	0.16107	-0.063858	-0.047768	-40.953	79.742	187.505	-0.013672	0.37695	-0.38886
2.678	-42.558	-58.3071	784.309	-1.0215	1	-1.0508	-107.648	-13.2877	901.7859	-1.0488	0.92676	-1.2168	-18.013	-34.1144	32.319	0.15088	-0.063477	-0.052246	-73.189	82.639	254.376	-0.049805	0.39648	-0.47168
2.68	-45.9519	-67.3772	779.97	-1.0234	1.042	-1.0791	-88.047	-71.753	923.2127	-1.1133	1.043	-1.3008	-29.944	2.616	34.157	0.14529	-0.056435	-0.055393	-119.608	125.48	364.151	-0.091892	0.41191	-0.5749
2.682	-79.94	-79.32529	785.391	-1.0063	1.062	-1.0952	-112.85656	-68.4337	921.7286	-1.1348	1.1191	-1.3437	-53.3912	-13.204	19.2626	0.13295	-0.047904	-0.057463	-104.644	105.3685	533.882	-0.14824	0.4416	-0.68281
2.684	-74.116	-94.654	833.254	-0.96582	1.0391	-1.1074	-52.833	-131.925	963.145	-1.1382	1.1782	-1.3784	-65.323	20.517	40.344	0.12323	-0.039729	-0.065645	-81.882	149.635	713.861	-0.21816	0.48145	-0.78555
2.686	-83.27	-92.659	831.609	-0.94238	1.0161	-1.1128	-55.451	-139.701	969.5312	-1.1108	1.2017	-1.3882	-43.785	-13.71469	32.4252	0.11336	-0.036133	-0.060249	-89.583	158.097	949.784	-0.2917	0.52217	-0.89971
2.688	-68.812	-71.4885	824.242	-0.90234	0.94336	-1.1172	-117.74	-134.948	968.0195	-1.0894	1.1763	-1.394	-22.631	7.1188	25.547	0.104	-0.035156	-0.057617	-88.245	183.812	1179.778	-0.3667	0.55908	-1.0249
2.69	-82.556	-76.951	807.044	-0.87622	0.88306	-1.1268	-87.699	-163.987	974.088	-1.0273	1.0977	-1.4004	-16.971	-24.73945	29.305	0.095614	-0.038568	-0.054787	-126.2076	100.188	1351.661	-0.43799	0.58077	-1.1685
2.692	-67.619	-66.0619	807.815	-0.85547	0.81934	-1.1289	-109.455	-141.833	960.002	-0.96118	1.0012	-1.3942	-14.335	8.6374	34.568	0.095114	-0.044034	-0.046294	-42.537	64.243	1490.495	-0.50723	0.60039	-1.3214
2.694	-80.0773	-53.2131	812.191	-0.8418	0.74219	-1.1328	-102.427	-158.058	985.164	-0.90234	0.89453	-1.3828	-42.08	9.233	33.4263	0.098629	-0.054189	-0.036147	-43.0214	-53.998	1558.555	-0.58731	0.63945	-1.468
2.696	-55.2044	-22.488	789.9133	-0.83936	0.71729	-1.1343	-50.946	-176.674	962.391	-0.8418	0.74316	-1.3555	-33.589	62.086	8.6265	0.098243	-0.065425	-0.022663	-31.577	-80.845	1701.339	-0.67949	0.6918	-1.595
2.698	-37.617	-22.589	801.77268	-0.82959	0.70654	-1.144	-100.852	-139.071	921.19356	-0.82178	0.67871	-1.3433	9.893	60.369	-6.8874	0.09668	-0.074707	-0.0058594	-49.6872	-145.501	1681.94	-0.78271	0.77588	-1.6812
2.7	-30.051	-31.609	817.45	-0.82691	0.7185	-1.1614	-90.427	-155.19552	942.2577	-0.79102	0.5874	-1.3379	0.753	75.299	16.1283	0.1	-0.08135	0.0067397	-20.854	-191.1488	1650.74	-0.8874	0.92569	-1.7018
2.702	-9.999	-68.956	831.0018	-0.81982	0.73877	-1.1724	-73.253	-126.792	948.951	-0.76465	0.56348	-1.3545	34.922	37.016	18.0418	0.10517	-0.093953	0.02149	-27.079	-275.122	1523.045	-0.98388	1.1048	-1.6975
2.704	-3.59	-112.552	856.404	-0.78906	0.76172	-1.1855	-82.294	-122.236	976.799	-0.7417	0.57471	-1.3745	-6.161	15.0587	43.8818	0.1126	-0.11661	0.040238	85.06965	-322.61	1457.64	-1.0546	1.2778	-1.6886
2.706	0.988	-157.523	888.664	-0.76953	0.75977	-1.1943	1.668	-150.002	995.305	-0.70703	0.625	-1.4053	15.939	-10.997	36.1246	0.12168	-0.13829	0.052931	156.3202	-359.36	1386.117	-1.0763	1.4264	-1.6935
2.708	8.871	-183.4887	910.528	-0.71973	0.74805	-1.1895	-15.899	-169.707	1004.656	-0.69873	0.65479	-1.4272	-23.98	-15.2539	49.4229	0.13232	-0.17041	0.063477	229.88	-311.19	1311.724	-1.0547	1.5195	-1.7344
2.71	-2.86	-187.895	951.191	-0.67432	0.72217	-1.1758	-53.208	-228.503	1073.348	-0.68164	0.70313	-1.4688	1.346	-28.3244	54.604	0.13447	-0.19844	0.076854	194.232	-261.6	1230.11	-0.98781	1.5577	-1.7786
2.712	-3.662	-189.943	947.303	-0.63818	0.69092	-1.1597	-9.235	-245.286	1134.4143	-0.66308	0.73633	-1.4995	-21.84	-26.9373	54.8699	0.1416	-0.2251	0.08916	184.356	-221.809	1234.63365	-0.91436	1.5524	-1.8253
2.714	-22.417	-196.493	993.424	-0.59766	0.63672	-1.1543	-10.617	-215.6627	1174.0996	-0.65479	0.76025	-1.5151	2.893	-18.5168	18.3321	0.14004	-0.24892	0.08877	188.462	-177.73	1237.414	-0.88349	1.5106	-1.8827
2.716	-6.21400000000001	-192.961	1054.655	-0.58154	0.61572	-1.1509	3.027	-254.991	1240.067	-0.67041	0.77197	-1.5522	-25.693	-1.363	41.709	0.13643	-0.26514	0.087695	194.017	-131.63	1241.816	-0.91778	1.4514	-1.9256
2.718	-29.17	-173.732	1092.687	-0.57178	0.57471	-1.1655	21.864	-275.154	1257.2678	-0.68115	0.7876	-1.5757	-42.278	10.46192	12.1282	0.13477	-0.28223	0.087402	220.226	-83.73	1294.294	-0.99951	1.4136	-1.9585
2.72	-12.452	-140.3146	1121.929	-0.59009	0.56738	-1.1807	-35.456	-308.875	1276.356	-0.69434	0.8418	-1.6289	-55.566	4.1943	31.193	0.12754	-0.28379	0.080566	168.376	-64.35	1359.735	-1.0914	1.4363	-1.9774
2.722	-7.312	-128.4711	1163.621	-0.62256	0.58008	-1.1948	4.39	-310.673	1316.5374	-0.72119	0.90772	-1.6651	-25.839	30.3806	20.36	0.1165	-0.27773	0.069433	101.149	-63.52	1412.882	-1.1602	1.4982	-1.9882
2.724	-9.68	-94.773	1176.777	-0.69336	0.63086	-1.2227	11.435	-253.595	1352.4907	-0.76074	0.97852	-1.6992	-47.116	9.2331	35.249	0.098534	-0.25664	0.051856	42.628	-147.517	1427.577	-1.2087	1.5762	-1.996
2.726	7.423	-69.574	1186.705	-0.73828	0.66357	-1.2402	-24.786	-251.286	1409.965	-0.82227	1.082	-1.7305	1.175	27.9	28.592	0.075683	-0.22949	0.025097	76.587	-293.8412	1482.361	-1.2206	1.661	-1.9972
2.728	17.193	-60.864	1176.42	-0.80664	0.74023	-1.2734	15.879	-229.8457	1425.211	-0.83789	1.1367	-1.748	-42.1192	5.9031	60.9555	0.058594	-0.19385	-0.003418	73.8097	-431.84	1535.856	-1.2036	1.729	-1.9761
2.73	16.241	-61.892	1192.508	-0.8479	0.7898	-1.2937	-19.386	-214.6482	1402.2449	-0.8374	1.2231	-1.7632	-57.742	31.507	28.1182	0.036816	-0.16094	-0.025293	83.14296	-471.16	1611.115	-1.158	1.7603	-1.9408
2.732	10.784	-52.123	1197.931	-0.88135	0.83252	-1.3101	-13.171	-227.2948	1422.3432	-0.82251	1.2395	-1.7664	-62.1497	22.9848	29.047	0.022461	-0.12812	-0.046386	64.5432	-489.74	1618.423	-1.0918	1.752	-1.8906
2.734	2.136	-55.629	1207.442	-0.90967	0.87549	-1.314	17.183	-166.73	1425.2453	-0.79492	1.2188	-1.7754	-44.655	51.035	0.275000000000002	0.0095705	-0.098438	-0.072558	35.22	-410.18	1689.2394	-1.018	1.686	-1.8332
2.736	-30.741	-76.27	1218.033	-0.91943	0.89111	-1.3198	-22.498	-139.612	1438.0162	-0.76221	1.1636	-1.7944	-53.655	8.2963	6.9927	0.0017578	-0.072949	-0.09209	18.393	-370.95	1742.575	-0.95449	1.5701	-1.7838
2.738	-16.44	-101.2156	1225.874	-0.92871	0.90625	-1.3281	2.198	-122.801	1450.3491	-0.76221	1.1294	-1.8101	-23.987	8.222	9.9406	0.003418	-0.057129	-0.11279	2.931	-299.95	1820.9716	-0.90576	1.4194	-1.7417
2.74	-11.141	-122.9613	1238.616	-0.93115	0.90137	-1.3276	-11.922	-111.691	1431.636	-0.79541	1.0825	-1.855	-34.785	-48.151	23.9409	0.0072266	-0.04668	-0.13115	-37.8	-275.5	1840.0123	-0.86845	1.2803	-1.7208
2.742	-13.422	-128.366	1248.8	-0.92725	0.88721	-1.3296	-30.586	-148.5126	1453.92	-0.86499	1.0828	-1.8933	-50.119	-22.099	24.3813	0.010937	-0.040918	-0.15	-83.2053	-166.365	1892.84	-0.83965	1.1539	-1.7242
2.744	-17.388	-136.334	1269.315	-0.9375	0.85547	-1.3418	28.72	-140.8863	1476.98342	-0.95313	1.1006	-1.9375	-32.54	-49.965	57.0897	0.01875	-0.036621	-0.16992	-149.32	-93.756	1877.3133	-0.82207	1.0645	-1.7699
2.746	1.931	-124.3313	1270.602	-0.94189	0.83643	-1.3511	11.639	-135.8636	1487.1423	-1.0625	1.1699	-2.0078	-14.87	-5.34	54.663	0.027246	-0.034375	-0.1875	-192.348	41.665	1871.1364	-0.83653	1.018	-1.8449
2.748	11.56	-117.2442	1300.854	-0.97998	0.80908	-1.3882	1.636	-162.176	1511.807	-1.1238	1.2454	-2.0574	-16.413	-26.50651	38.782	0.033691	-0.030762	-0.21289	-204.799	92.893	1791.586	-0.88623	1.0356	-1.9409
2.75	7.15000000000001	-101.6926	1279.203	-1.0236	0.80688	-1.4216	19.9327	-147.8358	1521.993	-1.1636	1.3188	-2.0972	14.875	35.3884	23.65	0.044336	-0.024903	-0.23027	-82.319	165.033	1757.954	-0.96924	1.1149	-2.038
2.752	31.196	-103.1354	1289.386	-1.0815	0.82275	-1.4565	-19.4368	-167.124	1524.409	-1.187	1.3872	-2.1382	10.09	16.769	9.5495	0.056445	-0.021191	-0.25196	-75.775	102.9105	1747.527	-1.0492	1.2446	-2.1465
2.754	28.339	-81.175	1269.096	-1.1641	0.88086	-1.5215	27.0896	-162.861	1554.481	-1.1934	1.4043	-2.1523	-11.11	68.105	7.4484	0.070898	-0.025098	-0.27852	-80.3669	68.17	1788.936	-1.1086	1.3883	-2.2543
2.756	27.064	-64.412	1267.057	-1.209	0.91992	-1.5508	63.536	-129.4206	1524.583	-1.1904	1.4063	-2.1563	-4.503	17.07	28.8172	0.084082	-0.035156	-0.30098	-73.159	-25.1622	1843.715	-1.1398	1.5246	-2.3379
2.758	26.373	-48.272	1276.807	-1.2715	0.99023	-1.6074	33.5227	-125.425	1534.687	-1.1885	1.396	-2.1573	-18.739	40.201	25.967	0.10449	-0.043945	-0.31396	-23.742	-55.737	1878.5978	-1.1577	1.6567	-2.4038
2.76	12.283	-52.571	1264.889	-1.311	1.0396	-1.6402	68.116	-81.7672	1533.0341	-1.189	1.3755	-2.144	-2.101	-1.01968	23.387	0.11943	-0.057129	-0.33652	68.7831	-103.578	1895.931	-1.1742	1.7842	-2.4479
2.762	33.152	-51.1771	1265.7161	-1.3374	1.0845	-1.6772	33.716	-63.7982	1498.366	-1.1904	1.3301	-2.1035	15.203	35.2236	26.647	0.13028	-0.067383	-0.35899	73.309	-117.954	1902.434	-1.182	1.9	-2.4797
2.764	22.916	-39.3834	1263.6882	-1.3491	1.1294	-1.7046	48.38	-76.098	1512.7274	-1.1855	1.3008	-2.082	-3.728	-3.0034	24.781	0.14746	-0.077539	-0.38789	58.28	-153.266	1877.117	-1.1899	1.9985	-2.5016
2.766	26.9	-16.8207	1269.9002	-1.3569	1.1519	-1.7202	102.128	-41.175	1517.151	-1.1816	1.2266	-2.043	-30.134	34.8516	27.312	0.15381	-0.086719	-0.42392	25.909	-173.356	1857.357	-1.1942	2.0714	-2.5298
2.768	31.709	0.392000000000001	1280.482	-1.3555	1.1855	-1.7441	75.742	-32.5218	1502.3647	-1.1904	1.1582	-1.999	-30.141	-0.7157	13.0735	0.16846	-0.08252	-0.46191	35.4415	-141.795	1890.646	-1.2051	2.125	-2.5547
2.77	49.843	-6.565	1299.981	-1.3516	1.2012	-1.748	74.243	-13.972	1498.419	-1.1987	1.1021	-1.9565	-37.953	29.701	18.3876	0.17129	-0.079883	-0.51142	39.2098	-102.664	1902.923	-1.2252	2.1428	-2.5506
2.772	64.262	-17.251	1300.93	-1.3472	1.1919	-1.7456	53.401	21.58	1480.269	-1.2183	1.0591	-1.9214	-17.207	-10.4358	35.865	0.16563	-0.066211	-0.5581	130.191	-39.3808	1877.641	-1.2492	2.1255	-2.5296
2.774	48.536	-44.375	1315.385	-1.3413	1.1704	-1.728	29.8288	22.2456	1479.388	-1.2188	1.0469	-1.9063	-21.344	0.0922000000000001	87.933	0.1625	-0.044336	-0.60928	156.653	-16.2983	1776.467	-1.2589	2.0688	-2.4832
2.776	68.523	-73.29471	1316.239	-1.3298	1.1428	-1.7127	74.069	18.1738	1504.24028	-1.2183	1.0454	-1.8823	-43.462	-34.7866	132.732	0.14658	-0.026562	-0.67851	145.708	25.9943	1701.0468	-1.251	1.9846	-2.4229
2.778	47.019	-61.8047	1328.296	-1.3164	1.1133	-1.6914	58.738	-12.7471	1492.9469	-1.2195	1.0393	-1.8601	-45.87	5.7667	166.75	0.12207	-0.0092773	-0.76758	96.941	49.345	1596.301	-1.2349	1.8735	-2.3569
2.78	58.373	-51.6886	1320.201	-1.3008	1.0762	-1.6611	49.2	-67.972	1503.714	-1.2192	1.0298	-1.8335	-34.479	20.2578	196.671	0.077344	0.031445	-0.8584	116.709	114.297	1584.8859	-1.1961	1.7632	-2.2789
2.782	31.871	-50.0641	1301.004	-1.2964	1.061	-1.6489	56.793	-45.189	1504.1672	-1.2168	1.0176	-1.8105	-52.913	81.159	267.818	0.017969	0.083398	-0.95069	57.387	154.778	1547.32	-1.1593	1.6468	-2.2132
2.784	50.228	-38.2679	1284.871	-1.2832	1.0449	-1.6309	2.8323	-44.52	1476.1185	-1.2163	1.0122	-1.7954	-28.651	74.3564	355.4687	-0.06289	0.15058	-1.0636	53.269	186.662	1551.331	-1.1191	1.5557	-2.1511
2.786	48.27	-27.2629	1267.075	-1.2715	1.0445	-1.6192	32.0674	-29.8664	1484.357	-1.2144	0.98975	-1.771	-10.015	130.9069	503.824	-0.15401	0.22324	-1.1998	14.341	163.5468	1488.602	-1.0815	1.4817	-2.1069
2.788	38.521	-4.7115	1275.746	-1.2583	1.0415	-1.605	55.9742	4.965	1469.543	-1.2012	0.97705	-1.7495	-6.578	155.308	708.537	-0.24561	0.30518	-1.3589	-24.441	172.2957	1474.697	-1.0464	1.436	-2.0542
2.79	14.207	4.82973	1280.641	-1.2417	1.0298	-1.5894	13.5157	-14.221	1450.122	-1.186	0.95752	-1.7339	-30.691	211.104	938.617	-0.34795	0.39883	-1.5648	-69.5227	179.253	1456.654	-1.0097	1.4006	-2.0071
2.792	30.22	21.36929	1270.975	-1.2241	1.0239	-1.5718	61.009	8.352	1430.9878	-1.1675	0.93799	-1.7007	-47.032	199.752	1159.051	-0.4708	0.53838	-1.7565	-85.8099	183.292	1493.1601	-0.95684	1.3529	-1.9525
2.794	38.299	25.2821	1265.575	-1.1934	1.0039	-1.5547	23.4158	32.8736	1404.36	-1.1538	0.93018	-1.689	-98.474	176.181	1330.3886	-0.62861	0.74619	-1.9417	-74.702	173.34	1507.6342	-0.89129	1.2905	-1.8855
2.796	27.747	27.4208	1256.063	-1.1684	0.98193	-1.5415	11.6313	36.519	1405.3107	-1.1309	0.90723	-1.666	-88.119	132.861	1463.529	-0.82978	1.0042	-2.1518	-121.988	133.1575	1481.398	-0.83502	1.2321	-1.8315
2.798	32.965	20.7038	1248.029	-1.1479	0.96533	-1.5249	61.65	75.513	1387.566	-1.1054	0.89746	-1.6533	-57.403	76.009	1614.634	-1.0405	1.311	-2.3472	-111.869	113.362	1465.072	-0.77881	1.1626	-1.7808
2.8	43.251	25.6081	1234.233	-1.1172	0.93555	-1.5098	13.273	80.803	1336.1005	-1.0776	0.88525	-1.6323	-55.6759	11.166	1641.595	-1.2373	1.706	-2.5088	-101.036	92.89	1430.217	-0.73187	1.1071	-1.7183
2.802	30.393	39.6865	1230.743	-1.1011	0.92041	-1.4956	29.59228	85.4948	1311.0483	-1.0405	0.86377	-1.6226	-78.968	-65.514	1605.821	-1.3869	2.1223	-2.6535	-73.717	129.87	1385.472	-0.68877	1.051	-1.6595
2.804	3.32400000000001	35.194	1224.194	-1.0771	0.90234	-1.4785	27.7954	108.079	1304.34	-1.019	0.86084	-1.6167	-84.2808	-155.2519	1525.826	-1.4826	2.5063	-2.7821	-93.472	152.82	1327.3439	-0.64842	1.0062	-1.5855
2.806	15.847	6.39443	1217.839	-1.0581	0.88818	-1.4614	-2.309	100.986	1284.925	-0.97803	0.85205	-1.5894	-131.513	-253.697	1462.595	-1.4778	2.7862	-2.8649	-65.527	204.38	1264.5379	-0.61242	0.96203	-1.5128
2.808	25.23	-6.9219	1215.054	-1.0371	0.87891	-1.4502	60.0515	120.3832	1289.101	-0.95679	0.84741	-1.5739	-122.718	-293.429	1403.006	-1.3862	2.8853	-2.8999	-46.2489	210.597	1218.208	-0.57617	0.92383	-1.4277
2.81	7.169	-4.8804	1200.466	-1.0151	0.87158	-1.437	18.48	128.0297	1247.5391	-0.92725	0.84814	-1.5581	-120.20453	-341.26	1391.46	-1.2041	2.7303	-2.8596	10.741	279.499	1174.6244	-0.53068	0.88326	-1.3491
2.812	23.833	4.15	1198.485	-1.0054	0.87158	-1.4253	28.307	87.206	1224.6638	-0.89453	0.83789	-1.5313	-129.078	-294.423	1330.165	-0.97012	2.3894	-2.7758	-1.5	287.178	1111.7396	-0.47923	0.83946	-1.2707
2.814	4.244	28.3716	1184.717	-0.99414	0.85938	-1.4072	68.2811	85.5647	1200.1087	-0.8833	0.84424	-1.521	-179.79	-296.184	1324.681	-0.77285	1.9446	-2.6426	44.3616	358.08	1087.586	-0.42205	0.78974	-1.1878
2.816	12.815	51.772	1165.207	-0.98999	0.85669	-1.3869	4.631	80.001	1156.8793	-0.84766	0.83594	-1.4785	-203.117	-187.6183	1298.969	-0.67412	1.547	-2.4714	32.4097	332.088	1038.3278	-0.36205	0.73363	-1.0983
2.818	19.088	73.92	1140.399	-0.98633	0.85156	-1.375	38.475	76.5838	1155.192	-0.81665	0.81812	-1.4392	-183.494	-161.969	1308.688	-0.63232	1.2212	-2.3394	81.613	331.171	987.0829	-0.2998	0.66943	-1.0063
2.82	17.189	77.354	1133.004	-0.97314	0.84424	-1.3452	37.496	120.022	1110.5933	-0.79004	0.79492	-1.3965	-173.463	-19.06	1304.9067	-0.5955	1.0051	-2.2164	65.844	279.947	909.368	-0.23426	0.59349	-0.91956
2.822	37.501	89.237	1129.714	-0.96777	0.83691	-1.3301	-25.1822	122.013	1075.9722	-0.74756	0.75439	-1.3394	-158.324	-32.11	1360.7374	-0.55235	0.88321	-2.0941	158.653	265.062	883.177	-0.17377	0.5051	-0.82979
2.824	24.311	111.962	1107.451	-0.94678	0.8208	-1.3022	21.079	116.1325	1056.8079	-0.72412	0.73291	-1.312	-175.494	69.13	1371.0975	-0.51368	0.81953	-1.9976	174.083	228.604	808.795	-0.10702	0.42065	-0.73577
2.826	21.88	112.354	1088.019	-0.92847	0.81079	-1.2732	-13.138	144.3073	1007.062	-0.67383	0.67773	-1.2549	-142.904	-25.47	1420.483	-0.46074	0.79258	-1.9301	189.065	186.1797	759.131	-0.043773	0.3543	-0.63984
2.828	-13.566	105.374	1061.086	-0.90771	0.79443	-1.2476	-17.417	156.2341	979.071	-0.64136	0.63697	-1.2029	-111.617	-54.98	1452.726	-0.37744	0.79297	-1.8828	147.103	148.913	680.648	0.01416	0.28174	-0.54004
2.83	7.935	94.471	1046.055	-0.87842	0.76904	-1.2065	15.808	188.582	947.6001	-0.61133	0.59766	-1.1582	-99.306	-242.145	1480.115	-0.27402	0.80176	-1.8383	153.72	115.86	642.883	0.076078	0.22015	-0.4561
2.832	12.675	78.3784	1030.975	-0.85986	0.75244	-1.1851	-23.61	195.4174	892.081	-0.56641	0.54395	-1.0957	-75.95	-282.1302	1496.823	-0.18134	0.80771	-1.7902	147.18	111.37	603.292	0.1325	0.15883	-0.3806
2.834	-18.992	73.3052	1009.495	-0.82422	0.71777	-1.1465	-18.62	165.2147	874.2907	-0.53955	0.521	-1.0688	-74.5375	-413.483	1551.847	-0.13526	0.78154	-1.7522	153.303	105.181	540.686	0.19521	0.10124	-0.31152
2.836	-17.159	68.2815	1005.781	-0.79687	0.68896	-1.1089	-21.208	191.011	838.9245	-0.49512	0.47803	-1.0156	-100.9386	-374.784	1574.267	-0.12061	0.70147	-1.7427	117.794	142.242	457.47464	0.2551	0.043429	-0.24901
2.838	8.673	79.8139	976.221	-0.76904	0.66455	-1.0728	-37.719	170.907	790.5924	-0.45996	0.44482	-0.96216	-85.4238	-448	1589.442	-0.10254	0.58643	-1.7495	77.968	146.9595	402.6264	0.31738	-0.02002	-0.18262
2.84	4.259	79.8322	956.416	-0.73047	0.62695	-1.0293	-11.04	155.486	776.903	-0.42041	0.41309	-0.91406	-47.522	-348.153	1634.9378	-0.09834	0.48369	-1.7663	17.4788	209.857	311.245	0.37325	-0.087143	-0.11774
2.842	-27.314	77.1525	941.965	-0.7124	0.60449	-1.002	-72.617	187.3245	728.39618	-0.36865	0.38232	-0.85693	-2.856	-329.03	1701.629	-0.1209	0.41182	-1.7906	-4.0249	205.491	264.828	0.42791	-0.16437	-0.061805
2.844	-1.731	63.3711	937.153	-0.67529	0.56592	-0.95752	-79.915	158.2942	689.60486	-0.33838	0.36475	-0.82568	29.78	-179.538	1746.712	-0.18379	0.40479	-1.8468	-22.2714	249.611	212.588	0.47263	-0.25125	-0.0093435
2.846	-11.006	71.9838	910.285	-0.65015	0.5354	-0.91797	-51.72	160.981	657.7973	-0.28369	0.33496	-0.75879	49.1405	-118.761	1801.405	-0.26807	0.46572	-1.9218	-58.9884	200.9526	187.0946	0.51835	-0.33957	0.030823
2.848	-20.751	96.684	889.292	-0.62891	0.50586	-0.87891	-86.8458	175.462634	594.5517	-0.24853	0.31128	-0.70581	79.586	22.754	1817.231	-0.34375	0.57373	-2	-25.823	212.6148	125.973	0.55127	-0.42627	0.062012
2.85	-46.736	112.017	858.388	-0.58936	0.46533	-0.83447	-43.419	132.218	593.226	-0.2085	0.29346	-0.65381	100.3383	65.937	1811.965	-0.39707	0.7002	-2.0772	-86.7527	147.479	74.975	0.56125	-0.52499	0.086603
2.852	-33.815	112.778	828.237	-0.57275	0.44629	-0.81445	-31.403	150.1525	560.706	-0.16553	0.2666	-0.59082	146.254	133.516	1750.223	-0.42305	0.81641	-2.157	-56.2722	147.52	55.42	0.57117	-0.61274	0.10841
2.854	-21.709	117.857	805.485	-0.5415	0.41553	-0.76318	-64.851	143.883	503.809	-0.14111	0.25	-0.55322	125.562	102.233	1693.345	-0.42031	0.90664	-2.2363	-112.356	97.992	28.098	0.56531	-0.69981	0.11153
2.856	-46.466	130.511	751.693	-0.51953	0.38843	-0.72901	-23.476	136.6189	465.396	-0.087402	0.21875	-0.48389	86.7094	95.155	1650.51	-0.41426	0.96992	-2.2928	-94.3666	96.756	37.0242	0.54213	-0.78686	0.108
2.858	-34.342	131.292	728.255	-0.49023	0.36768	-0.69238	-42.518	163.80801	413.90405	-0.051758	0.19263	-0.43628	39.471	31.5417	1652.475	-0.42578	1.0127	-2.3359	-162.228	61.3735	29.63	0.5083	-0.86475	0.09082
2.86	-28.282	124.4585	703.003	-0.46094	0.33447	-0.64844	-22.525	130.396	387.55	-0.0092773	0.16357	-0.38965	33.983	30.8444	1656.32	-0.45537	1.0405	-2.362	-97.4752	65.23	48.969	0.46295	-0.92379	0.05209
2.862	-25.572	124.3099	689.944	-0.44434	0.32324	-0.63477	-3.33	136.2153	350.058	0.040527	0.11816	-0.32422	41.758	-29.958	1681.027	-0.5042	1.0649	-2.3753	-112.339	33.8044	63.2	0.39414	-0.95702	-0.0015022
2.864	-41.058	119.818	659.603	-0.41895	0.28223	-0.58398	-55.52	152.7965	269.46	0.058594	0.091797	-0.30469	36.077	-66.848	1734.36	-0.55654	1.0853	-2.3925	-85.5503	16.404	116.736	0.2914	-0.95392	-0.070632
2.866	-20.988	107.775	636.88	-0.39209	0.2622	-0.55322	-32.99	108.4471	252.305	0.094727	0.049316	-0.23975	2.231	-128.447	1739.471	-0.59414	1.0871	-2.409	-77.6407	-3.795	115.116	0.1772	-0.89368	-0.14165
2.868	-17.322	96.3467	612.431	-0.37158	0.24609	-0.52344	-31.569	132.312	228.284	0.12109	0.017334	-0.2041	-33.6837	-125.007	1781.665	-0.60254	1.0884	-2.4155	-33.508	-14.534	125.345	0.038086	-0.79492	-0.24951
2.87	-24.529	103.984	581.048	-0.34863	0.21973	-0.48193	-45.698	115.7095	197.5819	0.14111	-0.0039063	-0.16406	-15.25	-103.511	1805.998	-0.61016	1.0805	-2.4273	7.426	0.675700000000001	78.18	-0.11381	-0.64049	-0.36995
2.872	-24.422	103.141	553.7171	-0.33936	0.21338	-0.4585	4.41400000000001	74.13847	192.646	0.16846	-0.02832	-0.11914	-50.6203	-52.037	1836.131	-0.61904	1.0841	-2.432	45.183	3.0147	65.713	-0.26283	-0.46205	-0.49154
2.874	-28.358	111.552	538.786	-0.30615	0.19922	-0.41748	-31.739	107.637	142.1916	0.17969	-0.036133	-0.096191	-58.689	-1.8051	1788.835	-0.64131	1.0962	-2.4401	84.001	41.0987	16.3247	-0.37961	-0.27769	-0.61028
2.876	-11.358	103.5389	527.084	-0.28516	0.1875	-0.38892	-19.499	66.7616	140.8578	0.20557	-0.056641	-0.05127	-80.9276	25.065	1735.641	-0.67051	1.1174	-2.4386	84.059	30.7155	17.1996	-0.46856	-0.095973	-0.71895
2.878	-24.231	97.1419	487.211	-0.26416	0.17432	-0.35596	-12.865	59.8616	134.6863	0.22314	-0.077637	-0.027344	-98.991	83.685	1645.463	-0.70605	1.1504	-2.4355	82.3924	59.994	4.7279	-0.52686	0.084473	-0.81299
2.88	-11.689	83.27	466.087	-0.22998	0.15186	-0.31592	-37.915	74.5524	98.4315	0.23096	-0.083008	-0.02002	-112.1499	121.69	1607.401	-0.73447	1.1839	-2.4216	55.052	18.1608	25.53177	-0.56758	0.26874	-0.88046
2.882	-19.164	91.866	444.531	-0.21143	0.14111	-0.29541	3.608	15.768	102.715	0.2373	-0.094238	-0.0014648	-96.7734	185.327	1544.0972	-0.75889	1.2094	-2.4027	58.843	49.466	21.681	-0.5957	0.44003	-0.93125
2.884	-12.254	102.945	412.665	-0.18018	0.1123	-0.26025	-13.045	42.12	80.1845	0.2395	-0.10303	0.0065918	-79.7413	192.043	1561.677	-0.77295	1.2235	-2.3714	77.4453	17.4473	51.3349	-0.6043	0.58457	-0.9664
2.886	-16.897	103.273	374.816	-0.16284	0.10474	-0.22925	-44.823	16.09	77.4026	0.23291	-0.10205	-0.0019531	-44.247	205.27	1519.9998	-0.78525	1.2265	-2.3325	77.3478	59.406	52.845	-0.59199	0.67813	-0.96904
2.888	-44.239	94.5391	342.951	-0.14404	0.084961	-0.20264	-14.115	-17.227198	74.9107	0.21387	-0.097656	-0.0024414	-67.125	168.901	1499.24	-0.79004	1.2158	-2.2871	30.923	29.887	51.659	-0.56592	0.72998	-0.9585
2.89	-11.121	85.9389	344.6	-0.11816	0.068848	-0.17041	-51.864	43.0557	36.026	0.19873	-0.086426	-0.0083008	-40.795	201.828	1431.603	-0.7832	1.1852	-2.243	10.228	31.3811	29.8165	-0.52793	0.75215	-0.92168
2.892	-19.676	94.019	302.269	-0.11084	0.056152	-0.15479	-32.191	2.8373	40.497	0.14893	-0.055176	-0.029297	-2.657	190.6034	1415.837	-0.76572	1.152	-2.2011	-25.665	-26.3843	25.037	-0.48741	0.73721	-0.86396
2.894	-21.036	111.628	275.6432	-0.083496	0.029785	-0.12451	-4.992	8.3584	41.9999	0.10938	-0.022461	-0.048584	5.918	261.889	1431.152	-0.73564	1.0993	-2.1601	-13.923	-32.7892	20.3693	-0.43741	0.69268	-0.80459
2.896	-46.374	112.008	269.028	-0.066651	0.019532	-0.10474	-55.454	43.3047	27.216	0.066895	0.014648	-0.067383	9.56	229.038	1481.91	-0.70049	1.044	-2.1204	-0.786000000000001	-85.999	19.312778	-0.38008	0.62227	-0.74219
2.898	-23.347	97.215	264.829	-0.046875	0.0043945	-0.083496	-17.915	-9.4807	24.61757	0.02002	0.073242	-0.10205	27.802	243.526	1491.938	-0.67188	1.0176	-2.0703	-23.744	-66.7513	41.6592	-0.31543	0.52539	-0.66992
2.9	-28.191	84.883	243.43	-0.015625	-0.016602	-0.061035	-22.068	39.892	23.916	-0.00048828	0.10059	-0.1167	63.49669	142.255	1518.793	-0.63838	1.0153	-2.0136	-81.2537	-69.8627	1.249	-0.24424	0.41387	-0.58399
2.902	-37.027	74.89	222.58	-0.0078125	-0.025391	-0.057129	-42.661	37.547	24.4447	-0.040039	0.15479	-0.14844	60.348	126.929	1484.159	-0.60342	1.0044	-1.9511	-81.962	-30.822	32.8636	-0.16846	0.31396	-0.50234
2.904	-29.609	60.6881	210.297	0.013184	-0.041016	-0.036133	13.379	0.677	37.69	-0.065674	0.18774	-0.16651	81.8688	71.099	1434.045	-0.54834	0.97588	-1.8874	-147.708	1.601	-10.1034	-0.10205	0.22842	-0.43398
2.906	-31.009	50.503	182.684	0.028077	-0.046387	-0.028808	-26.657	46.86	18.2333	-0.085938	0.21338	-0.18066	87.9947	137.35	1366.14	-0.4873	0.9166	-1.8143	-125.522	30.9008	20.7651	-0.050195	0.17197	-0.37969
2.908	-39.417	56.9925	175.163	0.035645	-0.055664	-0.024902	-26.668	-2.3241	8.6163	-0.095703	0.23584	-0.19141	80.958	127.034	1298.98	-0.43115	0.84912	-1.7397	-133.051	44.9638	8.2873	-0.0097656	0.13818	-0.33203
2.91	-60.3681	55.223	147.704	0.05127	-0.065918	-0.029297	-6.047	6.84	6.1	-0.10352	0.24072	-0.19482	63.844	195.007	1231.654	-0.38213	0.78271	-1.6491	-102.3008	49.64	29.1548	0.019238	0.11025	-0.29892
2.912	-42.548	42.654	142.871	0.059571	-0.071289	-0.026856	-28.38	36.8578	10.1542	-0.104	0.24609	-0.19482	54.4955	157.179	1192.6886	-0.33457	0.71875	-1.5528	-133.87	70.293	-7.874	0.046192	0.081152	-0.26533
2.914	-44.18	34.339	139.69	0.068848	-0.071289	-0.024414	-1.435	-23.143	26.2495	-0.10083	0.24145	-0.18945	1.198	250.3142	1121.259	-0.29004	0.65976	-1.4524	-104.666	67.3236	23.397	0.060645	0.047168	-0.23448
2.916	-26.336	40.64	120.528	0.069336	-0.060547	-0.039063	-12.769	16.5693	14.661	-0.092285	0.23438	-0.18555	-15.89	264.402	1099.6075	-0.23525	0.60518	-1.3554	-89.81458	88.991	-8.534	0.065625	0.021192	-0.20342
2.918	-33.025	45.235	113.575	0.066406	-0.057617	-0.043457	-21.87	12.984	14.77	-0.083984	0.22266	-0.17334	-41.1197	366.489	1069.483	-0.17334	0.52979	-1.252	-64.792	44.8119	11.587	0.06543	-0.00097656	-0.18408
2.92	-34.508	46.492	101.131	0.067871	-0.042969	-0.057617	3.208	-24.5472	35.1797	-0.078125	0.21143	-0.16357	-73.715	338.907	1044.207	-0.10762	0.44014	-1.1582	-7.618	60.2391	-5.644	0.061231	-0.014453	-0.16504
2.922	-14.904	39.871	88.98	0.061768	-0.029053	-0.067139	-6.303	42.6579	25.1238	-0.069336	0.18799	-0.14941	-92.401	367.685	1013.209	-0.044629	0.35429	-1.0617	-16.424	8.201	25.1765	0.05	-0.023144	-0.14346
2.924	-30.435	42.406	68.815	0.057617	-0.019043	-0.080566	1.724	7.818	30.708	-0.065429	0.17212	-0.13769	-86.28	268.426	944.985	0.01045	0.27578	-0.9711	14.352	40.594	44.0849	0.041797	-0.030567	-0.12705
2.926	-26.749	32.3647	66.1407	0.046387	0	-0.097168	3.569	20.8238	23.5854	-0.060059	0.1626	-0.12549	-100.281	262.775	885.324	0.054785	0.20996	-0.87851	25.988	4.0968	58.284	0.043262	-0.033594	-0.10664
2.928	-36.75	35.9547	54.707	0.046875	0.01416	-0.10547	-25.738	52.652	20.7487	-0.054688	0.14941	-0.10986	-138.211	189.0328	814.328	0.09668	0.14502	-0.78857	57.33	20.76531	64.085	0.041016	-0.034668	-0.080078
2.93	-19.374	50.828	58.785	0.041504	0.026855	-0.12305	-1.945	3.2336	25.7009	-0.053711	0.1416	-0.10107	-173.019	237.157	748.515	0.14492	0.087206	-0.6876	47.405	-47.39	57.249	0.052246	-0.036523	-0.063965
2.932	-29.335	47.756	61.058	0.035645	0.038331	-0.13013	-14.029	43.56	25.37	-0.045898	0.13525	-0.084473	-190.019	186.945	688.363	0.19882	0.037403	-0.58779	76.1479	-7.792	64.1137	0.067773	-0.03877	-0.03877
2.934	-34.169	34.715	53.985	0.035156	0.050781	-0.1377	-19.814	34.3426	23.8991	-0.036377	0.12402	-0.073487	-156.366	209.7979	627.896	0.25078	-0.021973	-0.48701	50.182	-19.033	63.04564	0.087696	-0.045801	-0.018848
2.936	-8.82400000000001	21.8307	49.508	0.030762	0.055664	-0.1543	0.117000000000004	-2.6228	36.8442	-0.028809	0.11865	-0.058594	-183.352	129.744	566.003	0.2999	-0.077539	-0.40078	86.1243	34.4693	74.216	0.1126	-0.052832	0.002246
2.938	-21.522	19.229468	38.136	0.030762	0.057617	-0.14746	-44.859	46.7476	37.635	-0.015137	0.10156	-0.055664	-183.816	155.6213	529.31	0.3418	-0.13281	-0.31592	74.0106	21.014	46.265	0.12744	-0.061523	0.01709
2.94	-17.546	22.6646	43.998	0.037109	0.067871	-0.16162	-22.465	7.9231	27.493	-0.0053711	0.094727	-0.041016	-170.158	142.216537	462.322	0.37861	-0.18623	-0.23574	46.839	43.9322	53.784	0.15371	-0.06836	0.033203
2.942	-37.022	24.535	50.445	0.04126	0.066406	-0.16015	-24.659	4.3806	27.0392	0.013184	0.072754	-0.027344	-134.384	218.455	427.229	0.39971	-0.23486	-0.15947	30.163	28.8138	15.7153	0.16631	-0.081445	0.053125
2.944	-22.658	15.6681	54.676	0.04248	0.06543	-0.1626	-47.618	43.2033	18.2151	0.03125	0.049072	-0.012695	-97.825	235.145	371.748	0.41064	-0.2751	-0.10596	36.3	24.7632	28.9146	0.16631	-0.099021	0.070703
2.946	-10.428	23.2304	38.256	0.052246	0.057617	-0.16504	-8.936	-26.3985	42.118	0.049805	0.027344	0.00048828	-79.947	293.435	304.443	0.40137	-0.29619	-0.061328	9.124	17.242	5.755	0.16592	-0.11914	0.090625
2.948	-35.951	26.843	39.778	0.05127	0.052734	-0.15771	-28.131	-4.7299	49.7874	0.075195	-0.0014648	0.018066	-49.005	267.337	233.0617	0.36963	-0.3125	-0.023926	-18.758	11.1816	36.616	0.15869	-0.13818	0.10254
2.95	-29.049	23.1805	47.2166	0.057129	0.041992	-0.15527	-40.557	3.934	45.9266	0.087402	-0.02002	0.023438	-9.0909	255.879	174.3053	0.31416	-0.30547	-0.0020508	-57.436	1.6349	14.1647	0.15781	-0.15225	0.1167
2.952	-31.662	17.7855	49.5916	0.056885	0.036377	-0.15381	-9.019	-26.1196	42.28945	0.11182	-0.052246	0.039063	-33.7816	189.145	131.866	0.24697	-0.28496	0.015527	-67.832	-14.84076	44.125	0.1586	-0.16602	0.12627
2.954	-25.156	31.834	35.5977	0.058594	0.032715	-0.15381	-31.776	33.4196	31.764	0.12745	-0.082031	0.051758	-18.3519	167.061	124.551	0.1708	-0.2502	0.026855	-104.414	-7.1748	3.4203	0.15039	-0.18125	0.13213
2.956	-60.6343	35.4654	23.6204	0.061523	0.02832	-0.14209	-12.067	3.349	37.155	0.14502	-0.10547	0.05957	0.113	116.898	96.312	0.09238	-0.20977	0.027637	-87.9952	-35.2408	32.013	0.14502	-0.19336	0.13164
2.958	-28.524	16.4142	34.175	0.065918	0.022461	-0.13428	-12.422	-3.7137	29.0759	0.16553	-0.13428	0.070313	22.001	91.2531	58.413	0.012695	-0.16846	0.015625	-107.7779	-11.876	14.5555	0.13672	-0.19092	0.12842
2.96	-15.65	2.9261	19.4493	0.071289	0.019043	-0.13232	-41.769	35.65	19.40067	0.17285	-0.14795	0.075684	33.474	36.1884	48.582	-0.066016	-0.13222	-0.011914	-117.762	-34.3367	25.488	0.12783	-0.18291	0.11855
2.962	-17.848	17.2036	20.8374	0.074951	0.014648	-0.12402	-13.24	-27.3717	24.2782	0.19385	-0.17383	0.081543	48.27	9.443	41.397	-0.15664	-0.088672	-0.041992	-107.641	-2.401	7.9064	0.12139	-0.17109	0.10225
2.964	-42.832	20.875	24.389	0.077148	0.0063477	-0.12158	-13.265	10.0901	25.8598	0.19996	-0.19287	0.089111	28.518	13.536	56.266	-0.25	-0.041016	-0.087696	-120.791	-33.84	14.884	0.1167	-0.15625	0.085058
2.966	-32.179	19.42032	39.3597	0.085938	-0.0014648	-0.10791	-14.477	8.388	25.7813	0.21045	-0.20508	0.092773	39.082	21.897	88.399	-0.34697	0.023926	-0.13037	-103.5438	4.13200000000001	1.097	0.1126	-0.13017	0.06582
2.968	-20.681	18.6554	35.8643	0.089355	-0.0083008	-0.1001	0.137	-21.4183	23.7193	0.22119	-0.21289	0.098145	44.212	29.0076	112.018	-0.43311	0.097168	-0.17627	-87.351	-10.55	25.4479	0.10205	-0.11084	0.048828
2.97	-38.822	19.5175	26.3807	0.089844	-0.022949	-0.085938	-17.278	36.6923	6.955	0.22314	-0.21631	0.099609	38.83	-10.597874	142.766	-0.50479	0.17529	-0.21533	-63.217	56.568	18.0472	0.10137	-0.087207	0.026953
2.972	-39.945	-5.91315	27.452	0.093017	-0.03418	-0.06958	3.697	5.21	16.6133	0.22607	-0.21875	0.10059	-10.056	-38.685	137.654	-0.56367	0.24805	-0.25263	-41.335	43.4998	1.626	0.1001	-0.068848	0.0079101
2.974	-30.688	-4.692	22.18115	0.097656	-0.04834	-0.056152	13.65	-1.1201	28.1083	0.23194	-0.21948	0.098389	-21.803	-49.941	81.505	-0.60508	0.31094	-0.27803	-22.588	91.493	34.088	0.10088	-0.056738	-0.0057617
2.976	-8.091	8.3514	27.8989	0.10059	-0.062012	-0.034668	-14.96	25.3338	23.1852	0.23486	-0.21143	0.098145	-59.8826	-0.219000000000001	37.432	-0.62637	0.35703	-0.30156	-27.639	56.03	14.973	0.11338	-0.04961	-0.020508
2.978	-39.643	16.4028	32.757	0.11035	-0.069824	-0.022949	2.565	-28.8619	28.6507	0.23633	-0.20313	0.092773	-85.4515	1.239	12.4334	-0.63672	0.39453	-0.32031	20.945	61.313	40.72948	0.12939	-0.049805	-0.03125
2.98	-28.44	8.7053	34.6738	0.10645	-0.080566	-0.0039063	-5.71400000000001	-0.916600000000001	16.7088	0.23486	-0.19434	0.094238	-95.083	44.089	-12.0326	-0.63633	0.42529	-0.33086	46.016	34.203	12.6665	0.14131	-0.058203	-0.039258
2.982	-14.541	3.591	44.3222	0.11084	-0.094727	0.012207	-28.829	7.3623	3.5663	0.23389	-0.17969	0.092285	-110.64	28.5965	-36.3592	-0.62647	0.4458	-0.33741	48.035	41.356	22.9728	0.15352	-0.069531	-0.044239
2.984	-31.788	14.2823	26.9005	0.10986	-0.10352	0.020508	-18.335	-37.28	33.7682	0.23266	-0.16772	0.085205	-97.969	53.47	-51.506	-0.61435	0.46416	-0.34013	23.126	38.021	-7.141	0.16367	-0.08086	-0.043457
2.986	-24.53	20.16131	34.1671	0.10449	-0.10547	0.039063	-31.532	32.3439	7.513	0.23096	-0.15234	0.081055	-78.186	19.2668	-3.9363	-0.59463	0.48057	-0.33115	55.024	35.019	50.4656	0.16826	-0.090722	-0.047559
2.988	-34.182	12.1787	23.9686	0.10059	-0.10693	0.041504	-0.653999999999996	10.611	1.1067	0.22559	-0.13965	0.077148	-91.197	50.9359	23.442	-0.56641	0.49414	-0.31445	61.972	29.046	34.856	0.17139	-0.097168	-0.058105
2.99	-13.567	14.0014	26.4442	0.104	-0.11523	0.05957	-18.355	13.5671	9.3851	0.22217	-0.13184	0.07373	-97.8828	13.626	56.1807	-0.5208	0.4999	-0.28311	85.4448	0.6791	68.414	0.17412	-0.10019	-0.058789
2.992	-37.272	17.2113	14.5975	0.099365	-0.11426	0.067139	-36.857	49.995	14.8062	0.21094	-0.11035	0.063965	-84.0014	59.609	48.2883	-0.45811	0.4955	-0.26416	88.8286	8.1781	60.121	0.17383	-0.10498	-0.066406
2.994	-16.051	5.0729	17.5338	0.098145	-0.10986	0.075684	-9.576	-6.1821	31.965	0.19922	-0.10132	0.056152	-66.8914	4.219	47.3729	-0.3874	0.48926	-0.23174	51.639	-23.54851	93.339	0.17305	-0.1085	-0.072265
2.996	-23.237	-2.5023	33.6815	0.088379	-0.10449	0.079102	-18.565	36.1207	22.757	0.19043	-0.081055	0.04834	-51.3667	22.256	49.332	-0.31572	0.46797	-0.19785	28.733	7.275	57.126	0.17461	-0.10811	-0.077539
2.998	-29.625	5.5567	42.274	0.088379	-0.10156	0.078613	-27.537	32.292	7.1317	0.17139	-0.056152	0.038574	-17.14	-57.372	42.293	-0.24316	0.43604	-0.16016	3.15499999999999	-4.747	73.612	0.17285	-0.10498	-0.082031
3	-30.681	13.2771	38.561	0.082031	-0.088379	0.083496	-20.231	-14.3933	25.997	0.16553	-0.037109	0.030762	-60.6189	-27.28693	0.556999999999999	-0.1752	0.4044	-0.12217	-15.495	17.331	26.2405	0.16748	-0.095703	-0.093457
3.002	-46.14	14.6099	31.2064	0.080323	-0.072998	0.082764	-48.443	47.8914	30.3414	0.146	-0.0092773	0.022461	-36.206	-70.644	-2.2853	-0.1128	0.36953	-0.083789	-37.975	-21.0622	42.322	0.16455	-0.090234	-0.10224
3.004	-21.47	10.0051	35.3272	0.074219	-0.058594	0.081055	-34.758	17.7633	22.83	0.12305	0.012695	0.0083008	14.439	-11.0305	12.657	-0.051074	0.32344	-0.052539	-64.979	1.461	29.2931	0.1626	-0.085547	-0.10967
3.006	-21.723	4.5489	24.7436	0.07373	-0.039063	0.07373	-15.662	20.8314	19.2332	0.1167	0.026367	0.0083008	28.012	-50.426	30.984	0.0055663	0.27314	-0.026269	-87.0429	-25.9924	22.5596	0.1623	-0.073926	-0.11953
3.008	-27.202	6.703	25.43269	0.068848	-0.027344	0.070801	-37.278	46.4143	19.4525	0.1001	0.051758	-0.0029297	47.237	14.0442	24.909	0.059082	0.23291	0.0063477	-100.5662	26.6666	23.49914	0.15967	-0.066895	-0.12695
3.01	-46.298	-7.7475	15.2626	0.061523	0	0.058594	-21.944	-16.9153	31.0889	0.083984	0.068115	-0.0092771	67.1774	-17.9418	34.7532	0.11348	0.21025	0.038086	-95.1704	9.5752	22.62791	0.15801	-0.066406	-0.13154
3.012	-34.257	-1.827	14.9869	0.058106	0.020507	0.050538	-21.891	11.439	34.8766	0.073242	0.088867	-0.015625	42.82	69.525	19.0035	0.15899	0.17998	0.066016	-72.035	43.1576	23.7284	0.15332	-0.056055	-0.13506
3.014	-32.984	2.3666	17.061	0.058105	0.037598	0.046875	-34.487	23.3342	34.0205	0.056641	0.10547	-0.02002	37.318	40.6953	59.962	0.19609	0.1456	0.085547	-93.25	-1.554	9.3932	0.13965	-0.048633	-0.13662
3.016	-40.861	16.2826	15.9016	0.046875	0.070801	0.022949	9.368	-14.6968	34.049	0.05127	0.11523	-0.026855	46.959	104.43	30.57	0.23321	0.10859	0.099024	-96.7516	-3.193	14.6395	0.12578	-0.044238	-0.1458
3.018	-28.937	16.6379	30.8682	0.046387	0.083984	0.015137	-8.977	29.97432	35.7486	0.029785	0.14111	-0.031738	46.166	54.693	23.7531	0.2583	0.078125	0.11279	-119.452	-31.401	9.5323	0.11963	-0.033691	-0.13965
3.02	-25.653	19.4807	24.6913	0.043457	0.1167	-0.0029297	-14.77	3.445	47.692	0.016358	0.15918	-0.040283	35.665	81.676	4.0337	0.271	0.05625	0.12734	-91.9169	-3.417	52.892	0.11924	-0.024414	-0.14355
3.022	-33.158	17.1235	23.4546	0.041504	0.1377	-0.016846	2.66099999999999	10.407	26.151	0.0014648	0.17725	-0.044922	32.531	2.1974	16.6	0.27578	0.043457	0.13642	-74.5435	-11.557	17.98	0.125	-0.019238	-0.14561
3.024	-41.897	20.0713	27.4734	0.043945	0.15918	-0.031738	0.225000000000001	58.9319	14.728	-0.014648	0.20557	-0.051758	-14.955	9.5469	33.4439	0.27852	0.03291	0.1415	-57.567	13.15	22.0531	0.1332	-0.025488	-0.1417
3.026	-30.898	5.326	17.3691	0.041992	0.1875	-0.058105	-3.267	7.4416	31.1109	-0.022949	0.21777	-0.054199	-52.422	-49.591	35.7842	0.27979	0.025391	0.14463	-48.484	5.556	-28.2515	0.14043	-0.033398	-0.13379
3.028	-32.122	1.059	35.184	0.043945	0.19629	-0.07666	-11.271	25.869	37.8739	-0.03418	0.24805	-0.0625	-43.288	-7.83475	37.1606	0.28564	0.027832	0.14795	-26.646	-0.942	5.6477	0.14697	-0.039063	-0.12402
3.03	-29.117	-5.828	39.923	0.044434	0.21973	-0.11426	-21.095	15.1719	26.335	-0.037354	0.26758	-0.068848	-50.69845	-33.5773	36.25078	0.29561	0.026562	0.146	-21.425	23.2145	-4.974	0.15039	-0.043457	-0.11924
3.032	-21.921	-19.232	49.066	0.03833	0.24072	-0.14087	4.746	-21.2215	30.019	-0.040039	0.29102	-0.071289	-48.864	-19.4583	37.1047	0.31416	0.02334	0.1415	16.725	28.29	40.0091	0.14483	-0.050098	-0.11582
3.034	-35.881	-18.118	57.483	0.030273	0.26758	-0.16797	-8.48200000000001	22.6379	20.0679	-0.039551	0.31543	-0.078613	-62.6214	-43.5849	38.457	0.32979	0.016699	0.13642	47.451	58.788	27.6863	0.13779	-0.052832	-0.11895
3.036	-31.632	4.882	73.982	0.0058594	0.3042	-0.2124	-27.728	-8.40436	33.051	-0.036621	0.32715	-0.070801	-106.2255	-15.845	25.5591	0.34473	0.00625	0.12695	77.9634	46.637	44.3446	0.12295	-0.048633	-0.1247
3.038	-46.0331	13.6546	97.428	-0.0014648	0.32129	-0.23584	-8.453	-12.0342	44.5036	-0.024414	0.35547	-0.097656	-104.292	-18.452	33.37858	0.35547	0.00097656	0.12305	60.248	73.731	26.656	0.10352	-0.037598	-0.13721
3.04	-14.542	23.5418	123.912	-0.022461	0.35889	-0.28369	-21.34	36.2465	34.264	-0.020507	0.37281	-0.094727	-87.4698	15.237	68.973	0.36699	0.0018555	0.12002	56.785	39.7365	41.26241	0.074121	-0.024024	-0.1667
3.042	-44.8594	12.9854	149.069	-0.039063	0.38599	-0.31592	15.889	-42.819	66.727	-0.0092773	0.38281	-0.099121	-89.171	23.0061	47.008	0.37637	0.0038086	0.11289	64.213	72.533	25.8	0.048926	-0.003711	-0.19463
3.044	-59.1589	25.9448	160.739	-0.05957	0.40625	-0.34668	-45.339	-31.3567	92.192	-0.003418	0.37695	-0.12549	-87.766	40.368	35.774	0.37325	0.01123	0.10547	47.697	37.127	47.7929	0.024707	0.017774	-0.22744
3.046	-63.406	44.8099	169.045	-0.10352	0.42383	-0.39063	-47.226	-19.7668	126.40703	-0.0063477	0.36621	-0.14893	-50.34146	49.69	17.502	0.375	0.020313	0.098923	49.4866	46.9076	89.4902	0.0099608	0.042481	-0.25469
3.048	-80.947	61.3779	224.119	-0.13135	0.42432	-0.41553	-1.793	-24.1902	151.399	-0.019531	0.35645	-0.19238	-77.2588	36.199	3.911	0.37402	0.032227	0.084961	52.034	-28.934	115.6199	0.0073242	0.062988	-0.28271
3.05	-63.76	86.715	292.436	-0.19385	0.43604	-0.47412	-45.248	52.939	185.4579	-0.039063	0.36059	-0.22608	-79.3405	35.7874	-1.801	0.37607	0.048926	0.083887	7.244	-7.516	152.96085	-0.0015625	0.057422	-0.32168
3.052	-63.32	103.852	345.421	-0.27783	0.44775	-0.54736	-52.019	27.4536	236.8707	-0.078613	0.36719	-0.26611	-28.65	11.0874	-10.5351	0.38467	0.061328	0.079394	16.288	-8.1801	185.85134	-0.02959	0.033887	-0.37636
3.054	-54.616	109.423	403.3951	-0.32959	0.46143	-0.59131	-61.811	9.71	311.352	-0.15283	0.37744	-0.35059	-30.411	7.5165	-15.9971	0.3878	0.071094	0.070801	24.497	58.823	260.1034	-0.078808	0.019824	-0.44902
3.056	-84.803	106.816	477.7017	-0.45605	0.49658	-0.68115	-67.702	65.3204	386.191	-0.19189	0.38525	-0.39893	-1.89899999999999	-8.6468	16.545	0.38613	0.080176	0.065039	-31.911	55.0353	354.9282	-0.14258	0.046973	-0.52217
3.058	-51.2826	89.218	587.486	-0.55859	0.54102	-0.76123	-22.714	59.9	475.70064	-0.27344	0.41406	-0.49805	46.4404	2.09	35.039	0.38867	0.092285	0.0625	-35.741	58.628	460.5609	-0.22412	0.104	-0.60107
3.06	-44.084	89.53	665.582	-0.66748	0.59814	-0.83936	-7.332	122.1001	562.6681	-0.3457	0.44287	-0.59082	34.841	-33.6238	54.039	0.38575	0.093848	0.058594	-25.002	24.058	537.836	-0.32969	0.17822	-0.71514
3.062	-59.5957	82.273	757.96	-0.81055	0.71289	-0.92969	-36.0835	127.51582	621.981	-0.42676	0.47559	-0.67773	32.61	2.746	56.769	0.3835	0.091407	0.056445	-47.274	82.66	737.516	-0.44649	0.26513	-0.84375
3.064	-58.39895	48.744	827.182	-0.87451	0.77979	-0.9624	-15.056	63.8152	678.4732	-0.54199	0.52539	-0.78564	45.168	-33.2803	64.041	0.37529	0.088281	0.051758	-64.2929	103.206	931.403	-0.56211	0.37373	-0.98671
3.066	-39.9147	13.2087	855.62	-0.98633	0.91602	-1.0234	17.8737	87.79	755.896	-0.59863	0.55713	-0.84229	55.618	23.4675	47.2938	0.3668	0.076855	0.033106	-88.989	80.7793	1121.417	-0.69326	0.48828	-1.1511
3.068	-27.811	-5.945	896.975	-1.0474	1.021	-1.0649	45.205	34.7139	878.77	-0.72559	0.62109	-0.94727	53.94	-17.9719	46.346	0.354	0.070801	0.021484	-176.1191	46.54	1233.178	-0.83838	0.62354	-1.3374
3.07	-45.777	-5.8691	929.149	-1.0938	1.1084	-1.1094	31.3582	-8.358	966.235	-0.81909	0.68287	-1.0252	56.348	21.4219	16.9133	0.33106	0.065918	0.012305	-123.906	-44.727	1362.399	-1.0161	0.80068	-1.538
3.072	-20.705	-18.6243	964.575	-1.1143	1.1807	-1.1387	0.625	-10.541	995.7372	-0.89893	0.75244	-1.0894	18.376	-18.5764	4.69408	0.31084	0.069434	-0.0036133	-66.911	-113.593	1432.6526	-1.209	1.0508	-1.709
3.074	4.138	-32.318	981.71	-1.1084	1.2012	-1.1504	5.726	-112.8825	1009.2824	-0.99756	0.85986	-1.1685	-16.18	38.1854	3.60316	0.29131	0.073339	-0.016113	-129.4332	-201.4127	1584.267	-1.4121	1.3773	-1.8778
3.076	-1.723	-48.397	966.034	-1.0645	1.2207	-1.1465	-16.319	-110.4459	1022.128	-1.0366	0.92236	-1.2046	-21.755	1.9136	31.9431	0.27158	0.082324	-0.032129	-142.17225	-214.0087	1542.13	-1.5931	1.7479	-2.0634
3.078	10.822	-48.842	951.657	-1.03	1.2102	-1.1336	-32.208	-119.79	1077.4512	-1.0938	1.043	-1.252	-23.433	62.317	33.6824	0.25439	0.089355	-0.04541	-156.87319	-277.923	1509.638	-1.6914	2.1348	-2.1895
3.08	12.975	-45.639	949.948	-0.99805	1.1895	-1.1113	12.458	-156.678	1086.638	-1.113	1.1194	-1.2927	-2.65300000000001	19.5795	42.368	0.23789	0.095899	-0.055176	-151.6384	-277.152	1403.611	-1.6458	2.4476	-2.2345
3.082	9.494	-26.9715	939.554	-0.9707	1.1445	-1.0742	20.263	-124.5269	1064.909	-1.1069	1.1802	-1.3228	-4.97	66.279	38.332	0.22295	0.1043	-0.065235	-156.313	-378.53	1365.939	-1.505	2.5759	-2.2444
3.084	-13.646	-4.317	940.299	-0.95703	1.1152	-1.0508	30.7119	-150.076	1053.118	-1.0581	1.2251	-1.3472	-47.643	-5.2402	42.0235	0.21357	0.11055	-0.072656	-140.274	-367.68	1328.321	-1.3019	2.5165	-2.2226
3.086	-12.554	24.3431	927.927	-0.92578	1.0566	-0.99902	52.626	-147.468	1055.242	-1.0313	1.2334	-1.3477	-76.5764	36.2947	15.2847	0.20361	0.11084	-0.080469	-120.12	-401.6	1308.654	-1.0934	2.2761	-2.1646
3.088	-9.665	19.8255	928.6525	-0.9021	1.0228	-0.96656	59.078	-86.338	1041.568	-0.96436	1.2368	-1.3511	-93.1087	-17.7606	11.2814	0.19336	0.11084	-0.088379	-130.972	-289.388	1243.405	-0.91943	1.8638	-2.0581
3.09	9.04	21.954	950.031	-0.88574	1.0039	-0.93945	98.12	-104.743	1029.196	-0.92066	1.2327	-1.3484	-83.3561	30.1132	-4.6979	0.18262	0.11279	-0.088086	-123.502	-255.9546	1232.022	-0.84649	1.3892	-1.9135
3.092	3.637	10.973	964.274	-0.86328	1.0117	-0.91016	83.913	-60.482	993.2927	-0.875	1.2109	-1.3359	-84.9383	-31.404	34.5988	0.17598	0.11094	-0.096192	-91.809	-137.041	1213.149	-0.78897	0.95283	-1.7971
3.094	-22.343	-21.073	984.968	-0.84961	1.0313	-0.90234	27.0998	-60.2453	977.835	-0.8208	1.1802	-1.3081	-92.636	9.3891	43.022	0.1748	0.11562	-0.089551	-57.831	-124.63	1182.775	-0.73389	0.62198	-1.7093
3.096	-23.364	-55.644	1006.738	-0.82227	1.0605	-0.89063	63.23127	-109.352	1000.183	-0.79688	1.1621	-1.293	-89.728	-43.369	65.609	0.16914	0.11924	-0.089161	-23.089	-61.88	1195.697	-0.6873	0.45371	-1.6483
3.098	-32.398	-81.674	1006.577	-0.79394	1.0679	-0.88574	25.782	-109.552	1038.059	-0.75391	1.1621	-1.248	-98.395	10.681	44.1229	0.16309	0.11426	-0.081543	-87.49077	-107.68	1229.135	-0.65674	0.40088	-1.6128
3.1	-31.2814	-103.3313	1026	-0.76123	1.0728	-0.89209	5.46899999999999	-153.968	1084.9786	-0.73559	1.178	-1.2146	-79.482	-28.187	59.198	0.15	0.11787	-0.07002	-121.384	-90.65	1309.487	-0.66621	0.4334	-1.5963
3.102	-49.45766	-137.56	1053.601	-0.71289	1.0596	-0.89746	6.066	-190.851	1123.4216	-0.70703	1.1914	-1.1855	-71.76	24.15718	18.1154	0.13779	0.11328	-0.059082	-96.009	-187.13	1336.11	-0.69453	0.51133	-1.5994
3.104	-66.861	-168.889	1072.015	-0.68799	1.0435	-0.90381	-45.8109	-168.523	1139.302	-0.66895	1.1895	-1.1895	-15.675	-15.783	10.4386	0.12451	0.11641	-0.045801	-51.211	-252.238	1374.613	-0.68828	0.60781	-1.6103
3.106	-100.293	-162.538	1091.525	-0.65479	0.99854	-0.92725	-33.457	-211.1165	1159.059	-0.65479	1.1704	-1.2085	3.379	28.7838	-16.5228	0.11367	0.12354	-0.03125	-13.794	-376.362	1388.468	-0.63819	0.70225	-1.6075
3.108	-103.609	-152.009	1105.871	-0.66016	0.96045	-0.95362	-36.913	-226.503	1226.004	-0.60986	1.1196	-1.2554	15.51	-3.6972	7.7903	0.10352	0.12793	-0.018555	12.427	-409.633	1451.3212	-0.55518	0.7583	-1.5933
3.11	-121.02	-125.217	1146.625	-0.6792	0.94775	-0.98779	-51.226	-227.895	1288.6452	-0.59423	1.0798	-1.3025	-8.965	34.80339	29.793	0.10312	0.13672	-0.0071289	2.124	-474.27	1467.268	-0.45195	0.71504	-1.551
3.112	-109.185	-96.684	1170.493	-0.73047	0.96289	-1.0449	1.164	-280.038	1322.571	-0.59473	1.0527	-1.3594	4.065	12.0724	40.174	0.099613	0.14336	0.0021484	24.462	-475.37	1558.3001	-0.34687	0.60567	-1.4828
3.114	-95.056	-70.104	1170.322	-0.75781	0.98242	-1.0723	9.255	-263.443	1368.557	-0.61426	1.0586	-1.4199	32.608	50.1534	30.7034	0.094141	0.14297	0.01582	14.6433	-477.31	1606.7295	-0.25899	0.43926	-1.4235
3.116	-92.333	-39.719	1168.0859	-0.82666	1.0376	-1.1255	-17.056	-272.803	1398.132	-0.63428	1.0845	-1.4409	42.378	27.1116	34.3165	0.092969	0.15176	0.017676	81.004	-411.504	1694.707	-0.19756	0.25498	-1.4115
3.118	-106.698	-29.173	1180.7849	-0.86426	1.0879	-1.166	-13.598	-243.399	1426.619	-0.68701	1.1411	-1.4819	38.81	25.035	48.1504	0.086914	0.16064	0.016113	33.984	-353.995	1688.595	-0.14844	0.11133	-1.4434
3.12	-86.613	-19.004	1191.9034	-0.89355	1.1338	-1.1914	-38.928	-155.708	1435.6643	-0.7168	1.1845	-1.4981	34.415	-4.9403	38.382	0.080274	0.16856	0.0011719	14.41	-304.785	1733.824	-0.13916	0.062793	-1.4867
3.122	-72.97	-10.522	1207.09	-0.90186	1.1763	-1.2476	-52.424	-152.215	1437.133	-0.73486	1.2153	-1.5112	26.866	-10.2627	32.341	0.076758	0.18594	-0.016797	-60.336	-194.402	1717.345	-0.21406	0.10996	-1.5852
3.124	-92.792	-16.171	1199.65	-0.89697	1.1821	-1.2671	-73.337	-118.273	1441.8081	-0.74512	1.2324	-1.5313	26.419	-26.1108	1.536	0.066601	0.20195	-0.039453	-68.6388	-125.273	1714.413	-0.37187	0.29746	-1.7367
3.126	-80.965	-39.745	1200.694	-0.90234	1.1816	-1.3027	-119.83171	-108.861	1445.286	-0.73779	1.231	-1.5425	34.863	-17.80852	18.8983	0.052442	0.23174	-0.057227	-13.842	-36.199	1681.2544	-0.5499	0.56494	-1.9175
3.128	-85.765	-47.836	1226.652	-0.90845	1.1858	-1.3391	-72.937	-104.762	1446.256	-0.74756	1.2036	-1.5815	13.586	-20.7403	26.97396	0.035645	0.27148	-0.085938	43.247	-53.073	1678.999	-0.69873	0.86377	-2.0991
3.13	-66.106	-50.854	1234.81	-0.92188	1.2012	-1.3828	-87.2052	-51.47	1459.431	-0.77197	1.188	-1.6245	4.164	-10.965	35.5818	0.029004	0.30987	-0.10391	67.937	-52.331	1668.838	-0.80039	1.1676	-2.2985
3.132	-64.397	-60.4195	1267.199	-0.93945	1.2207	-1.4434	-58.454	-62.688	1499.9724	-0.80664	1.1836	-1.6836	-5.04000000000001	9.796	39.2814	0.033203	0.33936	-0.12949	71.974	-99.442	1659.208	-0.85918	1.4208	-2.4624
3.134	-50.953	-74.29	1271.246	-0.95117	1.2383	-1.4785	-23.063	-92.868	1505.724	-0.88086	1.2148	-1.7656	-39.65	8.816	44.7666	0.039453	0.3581	-0.15723	44.8759	-48.7911	1678.153	-0.87402	1.5833	-2.5734
3.136	-53.149	-80.727	1292.202	-0.97998	1.2778	-1.5522	-62.008	-90.172	1495.6432	-0.94531	1.2607	-1.8223	-79.6248	32.9829	61.968	0.051367	0.37158	-0.18838	33.4046	-93.956	1703.882	-0.85752	1.6495	-2.6349
3.138	-53.0998	-70.4182	1298.811	-1.002	1.3008	-1.6094	-39.728	-136.647	1516.716	-1.0117	1.3262	-1.8965	-76.296	-6.384	103.967	0.056152	0.38184	-0.22998	49.38699	-89.782	1766.457	-0.8252	1.6504	-2.6836
3.14	-38.871	-65.2181	1305.847	-1.0269	1.3286	-1.6519	-9.81	-135.293	1538.991	-1.0942	1.4399	-1.9917	-77.8568	10.2344	98.3068	0.053516	0.37344	-0.29844	-3.083	-160.699	1793.567	-0.80742	1.5994	-2.6994
3.142	-42.3369	-55.8097	1308.194	-1.062	1.3735	-1.7104	-41.534	-130.556	1553.457	-1.1323	1.4985	-2.0347	-87.4176	2.349	150.2754	0.04082	0.36416	-0.40693	-13.434	-141.484	1830.118	-0.80518	1.5212	-2.6882
3.144	-52.229	-17.483	1308.027	-1.0762	1.3945	-1.7344	-16.874	-164.68	1569.069	-1.1948	1.6372	-2.1128	-111.323	63.807	220.552	0.020898	0.36807	-0.52022	-26.339	-168.667	1812.497	-0.82197	1.4231	-2.6612
3.146	-49.8	-8.246	1310.738	-1.1001	1.437	-1.7612	-64.739	-140.563	1553.644216	-1.2317	1.7317	-2.1521	-139.221	47.399	368.282	-0.014551	0.40166	-0.64287	-54.981	-135.354	1835.133	-0.84688	1.3098	-2.6273
3.148	-73.123	11.1628	1299.693	-1.1081	1.4748	-1.7781	-79.315	-146.678	1539.2703	-1.2593	1.8188	-2.1851	-142.249	63.846	454.8489	-0.058594	0.44727	-0.76758	-67.707	-133.155	1781.098	-0.86523	1.1914	-2.5859
3.15	-68.054	18.5767	1291.794	-1.1128	1.5044	-1.7808	-41.662	-137.505	1542.5047	-1.2852	1.918	-2.209	-97.87	20.1996	589.4735	-0.10723	0.5082	-0.90586	-44.002	-80.039	1757.713	-0.86319	1.1095	-2.578
3.152	-90.061	27.9247	1283.518	-1.1089	1.5278	-1.7749	-98.348	-68.8811	1523.9625	-1.2905	1.9536	-2.2104	-106.406	67.572	765.2803	-0.1541	0.57236	-1.0441	-31.72	-42.4332	1681.533	-0.88007	1.0859	-2.5965
3.154	-79.186	23.4505	1271.810666	-1.1074	1.5273	-1.7695	-77.852	-49.071	1530.735	-1.2949	1.9766	-2.2012	-101.78	66.8046	1037.25	-0.21035	0.62783	-1.1898	9.186	26.4415	1670.165	-0.91797	1.1293	-2.6266
3.156	-127.915	14.94452	1271.2456	-1.0991	1.5122	-1.7397	-30.288	-1.561	1522.419	-1.2973	1.9643	-2.1772	-63.6948	127.112	1252.0207	-0.28164	0.66211	-1.3698	-22.173	82.733	1634.725	-0.9669	1.2145	-2.6602
3.158	-116.726	13.7437	1268.3659	-1.0948	1.4844	-1.7066	-68.487	29.2801	1508.412	-1.291	1.9297	-2.1426	-32.329	70.1825	1428.024	-0.36084	0.6958	-1.5815	-47.913	111.637	1650.7444	-1.0186	1.3105	-2.6797
3.16	-122.551	15.6588	1295.324	-1.082	1.4453	-1.6719	-49.026	18.2026	1521.1247	-1.2866	1.8481	-2.0776	-23.692	73.572	1511.799	-0.45693	0.76689	-1.7848	-33.046	165.211	1609.6414	-1.0489	1.3812	-2.681
3.162	-131.34	4.78	1314.555	-1.0645	1.377	-1.6211	-49.724	41.617	1519.366	-1.2808	1.7915	-2.0435	-12.034	-79.273	1628.13	-0.55166	0.90088	-1.9346	-7.227	164.472	1608.1665	-1.0386	1.4055	-2.6625
3.164	-120.607	0.0169999999999995	1327.368	-1.062	1.3501	-1.5874	-45.899	41.964	1499.486	-1.2773	1.6855	-1.9648	-6.535	-111.907	1731.08	-0.65595	1.0903	-2.0093	-28.5529	178.119	1591.009	-1.0035	1.3773	-2.5984
3.166	-112.504	-0.806000000000001	1310.243	-1.0757	1.3052	-1.5464	-74.721	25.5935	1512.7054	-1.2839	1.6282	-1.9226	35.492	-213.444	1720.86	-0.74463	1.3148	-2.0396	-3.27699999999999	150.435	1594.899	-0.98907	1.3008	-2.5113
3.168	-124.71	-5.179	1315.54	-1.0803	1.2961	-1.531	-101.436	36.7569	1484.13	-1.2866	1.5923	-1.8921	107.174	-171.034	1624.57	-0.79639	1.5298	-2.0542	29.06	174.036	1565.374	-0.97852	1.2266	-2.4219
3.17	-141.144	-2.0865	1324.62	-1.084	1.2881	-1.5176	-80.385	-12.96834	1470.29133	-1.2749	1.5669	-1.8745	135.36	-263.913	1515.53	-0.79092	1.7165	-2.0538	45.876	128.843	1564.681	-0.94365	1.1599	-2.344
3.172	-117.928	-4.8142	1308.762	-1.0864	1.2739	-1.5015	-66.113	-4.2421	1471.026	-1.2578	1.5547	-1.8633	140.992	-311.392	1386.418	-0.75264	1.818	-2.05	27.3557	128.561	1578.9862	-0.89219	1.0864	-2.2645
3.174	-86.377	10.95026	1292.793	-1.0859	1.2705	-1.4863	-97.3594	6.1284	1479.62	-1.2104	1.5259	-1.8394	145.7143	-427.52	1258.729	-0.68818	1.8214	-2.0559	29.9679	41.734	1603.123	-0.83867	1.0023	-2.1828
3.176	-80.117	31.3752	1274.32	-1.084	1.2559	-1.4727	-70.758	-22.0561	1495.834	-1.1756	1.5003	-1.8123	140.835	-365.55	1182.664	-0.62227	1.7566	-2.0555	56.02796	44.949	1599.847	-0.7919	0.93662	-2.1103
3.178	-112.659	50.8414	1289.841	-1.0837	1.2542	-1.4538	-74.66	-6.9492	1484.877	-1.1362	1.4692	-1.7847	119.54	-332.76	1160.553	-0.5708	1.6411	-2.0425	42.661	12.73	1572.606	-0.75781	0.89453	-2.0547
3.18	-89.726	72.6219	1284.954	-1.0796	1.2505	-1.4351	-86.844	-0.281999999999996	1452.2708	-1.0918	1.4238	-1.75	72.102	-200.301	1201.501	-0.56904	1.5208	-2.0366	58.124	52.487	1548.965	-0.73056	0.87627	-1.9933
3.182	-72.984	91.748	1262.497	-1.0635	1.2422	-1.4199	-33.236	11.605	1452.771	-1.0762	1.4004	-1.7266	34.294	-149.405	1217.356	-0.59834	1.4282	-2.0389	47.114	57.822	1458.685	-0.70586	0.8582	-1.9484
3.184	-59.4416	120.473	1260.077	-1.0576	1.2383	-1.4004	-60.321	70.447	1415.7627	-1.0469	1.3535	-1.6826	-24.16	-96.74	1209.6439	-0.63077	1.4044	-2.0628	46.951	102.402	1414.054	-0.66328	0.83594	-1.8988
3.186	-38.1846	126.35	1272.393	-1.0469	1.2266	-1.3652	-39.246	86.573	1398.848	-1.0295	1.324	-1.6501	-30.7749	-103.7	1260.716	-0.65869	1.4675	-2.0837	4.528	153.668	1347.6371	-0.62314	0.8081	-1.8365
3.188	-11.981	114.966	1250.299	-1.0313	1.209	-1.3262	-26.704	122.193	1373.9983	-1.0229	1.2915	-1.6147	-10.988	-111.09	1309.1058	-0.69092	1.5845	-2.0972	48.054	231.126	1335.2195	-0.59277	0.76758	-1.7783
3.19	-8.3832	106.9	1230.737	-1.0273	1.1992	-1.3135	-54.398	147.131	1343.1271	-1.0112	1.2603	-1.562	2.9005	-80.56	1359.466	-0.71045	1.7309	-2.1153	-3.277	277.907	1262.872	-0.56318	0.74307	-1.7194
3.192	-14.723	93.096	1209.489	-0.99414	1.1797	-1.2773	-17.814	128.73	1350.927	-1.002	1.2441	-1.5371	12.8205	-124.79	1422.389	-0.71192	1.8519	-2.1219	-9.846	296.661	1239.6396	-0.54219	0.72695	-1.65
3.194	-13.86	79.7185	1209.108	-0.97998	1.1617	-1.2515	-19.352	142.58	1312.4034	-0.97656	1.2168	-1.4824	-35.661	-218.729	1442.429	-0.68379	1.927	-2.1062	-39.672	318.011	1155.779	-0.51211	0.71719	-1.5723
3.196	-4.635	68.18362	1198.531	-0.96436	1.145	-1.2202	-33.767	141.939	1271.60682	-0.95142	1.1844	-1.4373	-95.578	-359.299	1466.285766	-0.63848	1.9389	-2.0592	-65.801	296.96	1139.5569	-0.4874	0.70127	-1.4859
3.198	-7.316	69.2784	1170.76	-0.9458	1.1196	-1.1792	-25.952	109.052	1253.4192	-0.92236	1.1509	-1.3892	-138.169	-467.188	1523.79416	-0.58887	1.8848	-1.9824	-68.148	302.21136	1076.9389	-0.45459	0.67627	-1.3979
3.2	-17.805	64.223	1160.147	-0.93701	1.1099	-1.1548	-43.017	134.648146	1205.475	-0.87695	1.0928	-1.3281	-186.413	-523.6	1607.587	-0.54024	1.74	-1.9002	-74.202	240.603	1055.0129	-0.40977	0.6415	-1.3159
3.202	-36.911	65.596	1151.461	-0.91406	1.0859	-1.1152	-8.451	96.815	1180.4146	-0.84961	1.0586	-1.2959	-237.83	-468.47	1656.372	-0.49834	1.5361	-1.8288	-52.648	246.844	987.548	-0.34727	0.60079	-1.2211
3.204	-32.9024	78.787	1134.743	-0.89038	1.0618	-1.0867	4.349	99.883	1184.951	-0.80518	0.99854	-1.2319	-231.672	-404.304	1712.378	-0.46318	1.3158	-1.7913	-78.153	190.284	969.201	-0.27617	0.55235	-1.1226
3.206	-47.0926	98.0803	1098.459	-0.86768	1.0356	-1.0522	-15.162	112.136	1158.3859	-0.77515	0.9563	-1.1824	-190.015	-304.304	1740.774	-0.44131	1.1249	-1.7771	-80.4264	205.963	919.289	-0.20107	0.48935	-1.0302
3.208	-35.6262	105.4997	1071.104	-0.83789	0.99805	-1.0098	17.759	67.305	1150.72	-0.75195	0.91797	-1.1406	-165.108	-254.628	1785.898	-0.44287	0.98291	-1.7905	-119.1936	185.872	906.596	-0.12646	0.41211	-0.93799
3.21	-47.6183	107.4416	1061.15	-0.82471	0.979	-0.98779	-8.809	105.99	1093.1231	-0.71338	0.86377	-1.0659	-139.855	-167.892	1769.013	-0.48281	0.90332	-1.847	-118.0535	213.426	845.6196	-0.066406	0.32793	-0.83877
3.212	-43.059	129.893	1025.4	-0.80322	0.93799	-0.94482	-24.795	113.041	1049.304	-0.69141	0.84033	-1.0464	-86.2142	-118.358	1795.043	-0.53272	0.88681	-1.9253	-116.03	186.839	799.159	-0.008398	0.25361	-0.74844
3.214	-48.303	143.081	1005.485	-0.78149	0.90844	-0.91381	-2.426	113.88	1016.815	-0.64258	0.78906	-0.97852	-61.382	11.718	1768.497	-0.57529	0.94189	-2.0054	-115.7	219.3598	724.883	0.047461	0.17158	-0.67148
3.216	-59.302	156.268	981.489	-0.76172	0.88086	-0.87695	-12.084	160.0894	933.157	-0.60986	0.75293	-0.93408	-65	62.266	1763.209	-0.60185	1.06	-2.0832	-135.7385	217.5527	661.7282	0.10019	0.091113	-0.58877
3.218	-62.82169	154.314	965.402	-0.72998	0.84424	-0.8374	-21.521	146.2121	899.432	-0.56836	0.7168	-0.89063	-12.66	108.179	1736.171	-0.61133	1.2148	-2.168	-97.166	253.5	608.0254	0.15234	0.02002	-0.50537
3.22	-61.5211	142.984	926.491	-0.71045	0.81885	-0.81592	-24.023	169.911	879.327	-0.51709	0.67627	-0.82764	-5.1163	31.488	1760.036	-0.61074	1.3537	-2.2463	-112.306	256.4581	540.882	0.19922	-0.041406	-0.42598
3.222	-64.2363	127.464	898.366	-0.67676	0.77734	-0.77051	-33.7299	190.636	834.992	-0.48486	0.65771	-0.79639	-29.6905	-11.381	1707.578	-0.60654	1.4654	-2.3104	-87.081	272.716	478.308	0.23847	-0.09502	-0.34756
3.224	-66.931	114.7562	877.885	-0.6504	0.74707	-0.73194	5.393	166.824	812.752	-0.43359	0.61182	-0.73584	-44.714	-94.1269	1738.788	-0.59717	1.5388	-2.3588	-50.257	259.54	379.817	0.26347	-0.12666	-0.27256
3.226	-58.942	109.274	845.116	-0.6167	0.7168	-0.69531	-10.061	207.645	755.09	-0.38892	0.57739	-0.68823	-37.7164	-106.739	1746.792	-0.58965	1.5879	-2.3828	-51.148	257.221	329.19	0.28027	-0.14531	-0.19805
3.228	-54.117	110.5469	833.617	-0.57373	0.67236	-0.64893	-4.098	176.2956	710.52	-0.34326	0.54346	-0.646	-17.4414	-152.558	1857.18	-0.59521	1.6255	-2.4019	-53.45	233.76	238.151	0.28613	-0.14746	-0.13232
3.23	-55.377	107.8805	797.613	-0.5542	0.64355	-0.62549	4.765	156.0279	665.807	-0.28418	0.49072	-0.58496	5.288	-139.831	1841.957	-0.61504	1.6431	-2.415	-31.134	188.181	242.446	0.28652	-0.14834	-0.078027
3.232	-31.085	105.797	784.648	-0.50244	0.59619	-0.57275	-11.381	197.8079	617.031	-0.24707	0.46045	-0.55225	66.099	-199.747	1853.418	-0.65547	1.6515	-2.4301	-40.718	180.728	175.55408	0.27647	-0.14346	-0.033008
3.234	-13.58	111.0303	761.526	-0.46655	0.55395	-0.53736	5.575	153.7402	587.6545	-0.18652	0.39941	-0.49609	50.224	-212.947	1845.825	-0.70899	1.6668	-2.4274	-63.712	120.135	162.44	0.25381	-0.12353	0.0017579
3.236	10.186	129.6	740.428	-0.43311	0.51221	-0.50488	16.84	165.5323	580.169	-0.13501	0.36035	-0.45191	24.068	-242.525	1851.477	-0.76338	1.6759	-2.4046	-58.939	110.8511	116.976	0.22725	-0.094433	0.03418
3.238	6.348	136.235	714.843	-0.38428	0.45264	-0.45166	-11.178	159.1842	535.901	-0.087891	0.31152	-0.40576	-8.616	-143.3492	1825.566	-0.80664	1.6855	-2.3887	-54.87	43.156	139.16	0.18652	-0.068359	0.05957
3.24	12.506	134.149	685.74	-0.3584	0.42871	-0.42969	15.684	94.593	503.452	-0.02002	0.25098	-0.33594	-1.328	-76.536	1831.457	-0.83487	1.6952	-2.3743	-43.455	24.925	108.299	0.14024	-0.046387	0.062793
3.242	23.704	125.025	634.614	-0.31445	0.37207	-0.38135	11.841	138.8077	449.9883	0.013672	0.21777	-0.30518	-31.23215	24.619	1772.623	-0.85186	1.6962	-2.348	-7.97200000000001	-8.973	145.091	0.092285	-0.037402	0.055078
3.244	4.519	129.229	598.7134	-0.2854	0.33447	-0.35498	-6.263	125.522	408.2799	0.080078	0.14502	-0.24316	-92.079	29.078	1699.539	-0.86514	1.6805	-2.326	-4.546	4.951	86.131	0.03916	-0.033105	0.046875
3.246	0.143000000000001	124.9155	561.4623	-0.25244	0.29492	-0.32178	17.199	107.2351	387.656	0.125	0.095703	-0.19702	-104.761	78.606	1606.423	-0.86475	1.6574	-2.3192	17.192	-46.2193	95.208	-0.018848	-0.025	0.033887
3.248	7.39	125.0191	536.419	-0.21826	0.24609	-0.27979	12.921	154.0812	319.515	0.17041	0.035645	-0.1582	-141.387	81.414	1566.416	-0.84961	1.625	-2.3125	-3.143	-33.02171	41.35351	-0.086914	-0.0048828	0.014648
3.25	9.721	125.7616	490.881	-0.19482	0.22705	-0.25928	-1.669	109.9828	283.717	0.21875	-0.037598	-0.11084	-173.125	155.346	1570.064	-0.84961	1.5937	-2.2949	-23.323	-44.6348	28.8894	-0.16836	0.022754	-0.016894
3.252	-21.931	131.449	475.644	-0.1582	0.17871	-0.22559	12.563	140.071	246.4978	0.23828	-0.073242	-0.088867	-204.28	129.112	1574.4562	-0.87441	1.5723	-2.2781	-12.977	-0.544	2.0765	-0.26621	0.06543	-0.051563
3.254	-20.181	117.7074	443.866	-0.12573	0.14722	-0.19995	1.53100000000001	159.7232	211.429	0.26807	-0.13721	-0.054688	-191.521	137.992	1544.202	-0.89746	1.5617	-2.2433	-27.057	14.477	-0.573	-0.36738	0.11855	-0.098045
3.256	-8.56	109.738	416.593	-0.089844	0.11475	-0.18066	11.559	123.3125	210.743	0.28369	-0.17432	-0.030762	-191.258	85.275	1525.68	-0.89453	1.5586	-2.2012	-66.742	52.3156	-2.9617	-0.46445	0.17588	-0.16094
3.258	-20.487	112.965	394.056	-0.054688	0.064941	-0.14453	4.456	163.594	184.29233	0.2915	-0.20459	-0.010742	-179.471	83.791	1509.509	-0.87451	1.5444	-2.1401	-91.8032	52.0398	-36.385	-0.53467	0.23926	-0.2168
3.26	-20.187	107.216	368.992	-0.038086	0.041992	-0.13379	-4.04	116.0623	157.9699	0.2998	-0.24414	0.010254	-184.082	58.997	1496.1852	-0.83955	1.5112	-2.0614	-63.087	67.921	-10.771	-0.57627	0.30771	-0.26436
3.262	-44.541	89.899	351.806	-0.0083008	-0.0024414	-0.10791	-12.343	81.7661	140.8812	0.29834	-0.25	0.015137	-146.752	96.433	1540.767	-0.80586	1.4574	-1.9711	-51.704	82.909	-13.186	-0.61064	0.36924	-0.31357
3.264	-57.2541	92.2	325.121	0.0083006	-0.032959	-0.092285	-19.232	110.421	103.233	0.29834	-0.26758	0.02002	-135.43	75.856	1554.461	-0.77109	1.393	-1.8808	-29.791	89.934	26.8775	-0.63721	0.43017	-0.35772
3.266	-53.7374	92.229	301.518	0.022461	-0.059082	-0.086426	15.775	46.16794	97.835	0.28906	-0.27734	0.023926	-125.812	66.485	1559.148	-0.74082	1.3148	-1.7973	-15.749	97.372	-5.756	-0.66015	0.48965	-0.39161
3.268	-68.1873	90.015	280.37	0.040039	-0.086426	-0.072266	-26.083	65.997	99.4792	0.28369	-0.28027	0.018066	-115.377	18.883	1530.366	-0.7085	1.231	-1.7261	-13.936	54.55	25.6062	-0.67969	0.5542	-0.41797
3.27	-80.337	80.44	278.308	0.041992	-0.097168	-0.068848	-39.843	71.4275	74.254	0.26074	-0.28516	0.00097656	-60.5015	18.933	1483.277	-0.69033	1.1382	-1.679	-31.166	37.4222	-1.957	-0.68233	0.61026	-0.43369
3.272	-80.705	81.5	244.276	0.059082	-0.11182	-0.058594	-18.846	9.992	69.3046	0.23413	-0.28785	-0.013428	-42.144	28.711	1457.122	-0.68633	1.0711	-1.639	-13.193	-4.204	72.061	-0.67597	0.65508	-0.44101
3.274	-66.1005	93.791	221.12	0.069824	-0.11938	-0.054932	-35.01	42.034	76.6177	0.19238	-0.28369	-0.032227	-19.4959	98.594	1373.37	-0.69883	1.057	-1.5937	-18.239	-0.332999999999998	49.9923	-0.65684	0.67032	-0.44219
3.276	-83.887	88.719	192.516	0.081055	-0.12354	-0.047363	-28.074	-1.6	70.7488	0.13086	-0.26367	-0.055664	-26.9531	153.342	1321.226	-0.70284	1.0747	-1.5431	-19.111	-31.2292	83.342	-0.61465	0.6748	-0.43359
3.278	-74.6223	67.605	197.303	0.095703	-0.12793	-0.044922	-18.759	-9.985	72.522	0.094727	-0.25	-0.07373	38.4439	217.009	1285.32	-0.68945	1.0879	-1.4941	-33.465	-12.1953	24.1915	-0.56836	0.67041	-0.41455
3.28	-49.237	65.795	175.471	0.10254	-0.1333	-0.04541	-33.083	36.5376	48.1238	0.030762	-0.19678	-0.10986	50.3462	234.575	1209.203	-0.64248	1.086	-1.4333	-32.594	-26.88871	58.697	-0.51221	0.64814	-0.37813
3.282	-38.921	62.608	151.408	0.10547	-0.13037	-0.045898	-17.565	-12.8994	36.8556	-0.016602	-0.15698	-0.14258	81.5714	250.836	1164.599	-0.57754	1.0601	-1.3672	-17.594	14.327	43.62	-0.45254	0.61572	-0.33467
3.284	-45.165	64.366	138.416	0.1084	-0.12475	-0.046143	-19.328	30.6	34.3458	-0.062988	-0.11279	-0.17236	69.847	261.979	1107.754	-0.51073	1.0238	-1.2895	11.221	7.779	82.657	-0.3916	0.57041	-0.27881
3.286	-31.48	69.234	137.083	0.10693	-0.11719	-0.05127	-23.19	42.1	29.9106	-0.12549	-0.035645	-0.20898	76.236	252.985	1083.868	-0.44726	0.97285	-1.2024	3.242	41.0639	64.997	-0.32344	0.52676	-0.22578
3.288	-11.441	68.248	140.978	0.085938	-0.098145	-0.047852	-14.846	0.6043	25.2556	-0.14502	-0.013672	-0.23145	46.5044	238.833	1076.455	-0.37842	0.91455	-1.1108	8.576	13.129	54.509	-0.26025	0.48389	-0.17236
3.29	-1.641	75.502	121.472	0.078613	-0.094238	-0.053223	-9.395	55.045	20.866	-0.18701	0.046387	-0.26514	65.4364	196.758	1025.04	-0.30773	0.846	-1.0124	4.025	51.671	53.364	-0.1999	0.44346	-0.11357
3.292	-24.904	45.629	115.639	0.059082	-0.075195	-0.062012	-37.82	18.87	19.997	-0.20142	0.088623	-0.28809	78.801	166.74	993.261	-0.23605	0.76086	-0.90735	-10.406	36.7373	45.218	-0.13399	0.39766	-0.065918
3.294	11.813	29.644	100.329	0.039795	-0.062011	-0.069336	-24.207	-5.58423	29.9706	-0.2168	0.12793	-0.30762	56.979	120.465	951.598	-0.15598	0.67258	-0.80735	-11.064	43.6508	29.359	-0.073047	0.34492	-0.015137
3.296	10.071	25.307	94.123	0.023438	-0.046875	-0.072266	-3.263	34.7311	31.576	-0.23096	0.16699	-0.32617	-14.749	122.072	892.874	-0.080779	0.58088	-0.71213	3.265	-6.999	21.706	-0.014844	0.28779	0.028418
3.298	0.146000000000001	30.6639	100.819	0.0043945	-0.027344	-0.081543	1.23	-29.095	16.8058	-0.2334	0.18115	-0.33301	-62.6226	106.47	808.0492	-0.01123	0.49268	-0.62158	-34.447	-10.4056	8.2812	0.038574	0.22217	0.0625
3.3	-1.254	22.7039	95.376	-0.0068359	-0.013184	-0.086426	1.128	-5.9299	15.9308	-0.23486	0.20557	-0.33252	-62.0368	127.075	755.609	0.058721	0.40201	-0.53375	-28.529	-20.4977	-16.47133	0.080566	0.15244	0.091113
3.302	7.844	20.2704	87.35	-0.023926	0.0097656	-0.097168	-0.737000000000002	-3.4296	7.296	-0.22583	0.21241	-0.3269	-63.4076	113.5803	693.91304	0.11761	0.3133	-0.46509	-21.615	-13.7429	17.2556	0.11758	0.089941	0.11484
3.304	4.754	23.054	62.419	-0.041504	0.022949	-0.10401	5.362	-41.126	26.10972	-0.20605	0.21289	-0.31738	-53.46	154.6135	647.9455	0.16138	0.225	-0.40178	-33.804	-23.019	7.05034	0.15039	0.033692	0.1332
3.306	-8.977	31.88	58.922	-0.052734	0.041992	-0.11182	1.148	22.2304	25.116	-0.17285	0.18799	-0.29443	-62.673	140.863	598.488	0.20287	0.14877	-0.33001	-38.023	-36.512	41.4529	0.17764	-0.010937	0.15254
3.308	-14.301	27.781	59.526	-0.064941	0.05957	-0.11523	-7.717	-4.2902	25.507	-0.15527	0.17041	-0.27734	-63.875	201.902	520.98	0.2417	0.083984	-0.25049	-29.274	-34.8174	20.8851	0.19922	-0.041016	0.17627
3.31	-11.903	36.56	61.136	-0.072266	0.071777	-0.11816	-4.753	-18.1313	24.153	-0.11035	0.13135	-0.24512	-71.971	207.07	489.149	0.28568	0.024426	-0.17209	-35.459	-38.2357	37.4993	0.21279	-0.068457	0.18896
3.312	-21.229	53.183	40.424	-0.080078	0.08252	-0.12646	-13.261	29.3154	16.8385	-0.077148	0.088137	-0.21045	-72.322	266.268	442.434	0.34474	-0.047765	-0.1019	-42.618	-5.986	5.244	0.23389	-0.085059	0.20127
3.314	-44.0618	47.014	33.873	-0.084717	0.094238	-0.11914	-28.521	-9.0329	10.8801	-0.055176	0.04834	-0.18066	-87.796	238.773	377.969	0.4052	-0.1379	-0.027745	-37.171	2.549	33.596	0.25615	-0.10068	0.20908
3.316	-51.94	30.3075	40.336	-0.085938	0.10596	-0.11963	-17.314	36.039	17.9074	-0.027832	0.010742	-0.14551	-41.913	256.735	282.679	0.45784	-0.24504	0.033402	-56.984	33.489	-10.635	0.28194	-0.1084	0.20127
3.318	-64.6027	23.3945	42.086	-0.081055	0.10596	-0.1123	-4.378	42.3534	5.0131	-0.01416	-0.003418	-0.12842	-55.895	176.1092	203.207	0.50098	-0.35791	0.086426	-21.667	31.6368	12.09809	0.30615	-0.11377	0.19873
3.32	-71.2528	25.933	38.851	-0.076172	0.104	-0.1123	-21.915	-4.83615	19.2828	0.0024414	-0.024414	-0.10742	-55.284	180.669	138.404	0.50739	-0.46253	0.12432	-55.767	77.71	-16.744	0.33056	-0.11983	0.19424
3.322	-86.425	28.515	27.68	-0.066406	0.091797	-0.099121	-28.838	54.741	12.319	0.019043	-0.032959	-0.086914	-63.137	107.318	118.446	0.49937	-0.55585	0.15327	-14.899	55.761	4.03	0.34727	-0.12627	0.18388
3.324	-79.5044	10.2335	48.3203	-0.061035	0.086182	-0.092285	-25.301	25.6145	-5.565	0.034668	-0.034668	-0.072754	-41.705	142.191	82.157	0.48118	-0.63095	0.18591	-33.896	79.885	-7.391	0.36015	-0.12432	0.16475
3.326	-69.91156	21.4249	31.2872	-0.05957	0.07666	-0.083496	-14.322	22.7812	10.3694	0.048828	-0.039063	-0.057617	14.988	87.266	122.378	0.44632	-0.69597	0.2126	-15.643	61.219	28.188	0.36289	-0.12657	0.14531
3.328	-54.6597	7.0816	29.2524	-0.062988	0.069824	-0.072754	-36.253	65.929	11.5592	0.056152	-0.038574	-0.050293	75.7971	109.342	101.856	0.4082	-0.75879	0.23145	-43.135	75.654	10.633	0.36523	-0.11865	0.12939
3.33	-76.85585	6.61	29.851	-0.072754	0.072266	-0.068115	-30.244	-8.0812	14.1537	0.07373	-0.046387	-0.039551	71.3029	12.332	153.766	0.36146	-0.80252	0.23081	-33.929	36.6559	29.711	0.36328	-0.10635	0.11289
3.332	-60.4873	-4.531	30.171	-0.083984	0.076172	-0.064941	-35.451	-2.124	41.965	0.078858	-0.052491	-0.026611	71.414	50.921	131.798	0.30354	-0.83015	0.21008	-27.912	41.9882	27.859	0.35889	-0.085351	0.092285
3.334	-46.734	5.4156	38.846	-0.09668	0.086426	-0.061035	-39.146	12.14	31.0495	0.083496	-0.059082	-0.019043	71.9949	7.9172	129.151	0.23277	-0.84375	0.16446	5.127	8.052	35.11	0.36006	-0.065039	0.073535
3.336	-46.3707	15.3612	32.0043	-0.10107	0.091797	-0.057129	-27.025	-37.036	38.393	0.085449	-0.060547	-0.012695	86.1669	58.447	93.363	0.14197	-0.81224	0.10541	-15.227	22.3402	63.259	0.36807	-0.041895	0.057227
3.338	-44.602	11.6688	44.936	-0.10547	0.10156	-0.063477	-26.416	39.2346	46.3408	0.088867	-0.060547	-0.0097656	46.741	-20.062	84.418	0.032715	-0.73193	0.025391	-5.306	3.9501	67.207	0.37256	-0.013672	0.04834
3.34	-8.13500000000001	14.7522	40.9491	-0.104	0.10693	-0.062745	-21.086	29.60607	30.656	0.087891	-0.056152	0.0048828	48.562	-0.952999999999999	32.267	-0.088325	-0.59641	-0.070091	10.737	-4.992	100.224	0.37471	0.0033203	0.034277
3.342	-8.502	5.905	33.0508	-0.1001	0.10742	-0.061035	-12.761	9.0889	29.75596	0.089844	-0.054443	0.0095214	29.7331	-53.03	21.2786	-0.21529	-0.42669	-0.19065	-11.695	-18.5405	62.9954	0.37412	0.016895	0.019922
3.344	-19.488	19.0991	24.9174	-0.094727	0.10693	-0.051758	-19.447	43.2379	28.0255	0.086914	-0.048828	0.0078125	33.307	12.4502	-13.0596	-0.32624	-0.24673	-0.30974	13.549	-21.364	78.213	0.36592	0.027832	0.0125
3.346	-20.839	20.0806	26.5706	-0.085449	0.098633	-0.049805	-13.247	-19.3089	36.272	0.085449	-0.036133	0.0053711	-9.97	-19.4122	2.188	-0.40672	-0.086538	-0.42583	-8.22000000000001	-7.74477	35.6925	0.35821	0.034375	-0.0011719
3.348	4.587	16.1891	20.65434	-0.075684	0.089355	-0.043945	5.027	13.4439	53.56	0.081543	-0.029297	0.0048828	-32.084	53.09	4.077	-0.46436	0.061523	-0.52881	-2.61	-12.25288	51.894	0.34668	0.042969	-0.013672
3.35	16.003	20.9285	19.8921	-0.064453	0.078858	-0.036133	3.7	39.0846	32.0152	0.081055	-0.015137	0.0083008	-63.256	18.9219	10.8341	-0.51024	0.19616	-0.6147	-38.683	4.4435	15.5139	0.33437	0.052246	-0.022363
3.352	14.654	10.762	22.5169	-0.053711	0.069336	-0.032227	-13.699	-12.6515	33.3061	0.078125	-0.0034179	0.0041504	-24.995	78.821	-10.6949	-0.53345	0.32264	-0.67655	-34.723	1.49614	48.377	0.31572	0.055957	-0.036817
3.354	22.248	-6.4967	16.378	-0.037109	0.053223	-0.021973	2.236	43.309	25.8115	0.074707	0.0029297	-0.0014648	-36.4601	38	21.8167	-0.54429	0.43622	-0.72158	-39.67	30.35904	19.3304	0.29346	0.056347	-0.044629
3.356	10.398	-4.5465	29.1453	-0.031738	0.043457	-0.018555	-17.301	20.53671	9.545	0.071777	0.02002	-0.0024414	-53.709	62.0871	32.162	-0.53915	0.51228	-0.73565	-8.478	7.2029	48.892	0.26582	0.061816	-0.053906
3.358	-4.751	10.906	17.42915	-0.014648	0.032227	-0.015625	-5.923	8.9503	32.753	0.070801	0.024414	-0.00097656	-114.409	7.716	63.432	-0.52344	0.5625	-0.74023	-4.912	21.699	0.2967	0.23682	0.066406	-0.058105
3.36	-13.437	16.9705	37.9887	-0.001709	0.012695	-0.0085449	0.490000000000002	40.694	27.982	0.070801	0.024414	-0.0068359	-105.847	17.734	46.729	-0.49086	0.57504	-0.72952	-30.205	-10.2425	19.6364	0.20645	0.080761	-0.066113
3.362	-4.842	7.8493	40.9687	0.010742	0.0019531	-0.011719	2.227	-25.398	32.1134	0.080322	0.021729	-0.011963	-134.914	-24.951	21.247	-0.44622	0.55952	-0.70013	-41.933	15.4735	13.089	0.17822	0.091895	-0.070898
3.364	-22.284	1.9129	17.9258	0.032715	-0.021484	-0.0024414	-14.614	-11.2853	50.858	0.087891	0.015625	-0.013184	-94.5703	-11.13	35.773	-0.40051	0.52993	-0.65594	-10.742	-10.0576	16.922	0.14854	0.1083	-0.068555
3.366	-45.474	12.3562	12.42508	0.040527	-0.028809	-0.0087891	-20.421	-3.851	24.371	0.097656	0.0039063	-0.012207	-112.278	-59.865	34.24445	-0.35138	0.47791	-0.60341	-35.083	4.822	3.523	0.12022	0.11777	-0.075488
3.368	-53.8103	11.6227	23.0682	0.056152	-0.041016	-0.01416	-10.521	-44.1582	30.4871	0.104	-0.0048828	-0.012695	-98.6513	-48.6874	20.5917	-0.29346	0.40869	-0.54932	-21.633	-24.531	-3.1055	0.094238	0.13037	-0.069336
3.37	-49.281	6.70992	31.6812	0.070069	-0.052735	-0.021485	-6.348	4.511	20.7874	0.11182	-0.025879	-0.015625	-118.756	-40.29	1.50383	-0.2287	0.31983	-0.47634	-67.919	-11.368	-9.9882	0.064453	0.14268	-0.07168
3.372	-57.194	10.8551	23.387261	0.084961	-0.056641	-0.025879	-20.214	-1.5576	0.7746	0.12476	-0.031495	-0.019288	-53.0659	-6.9417	5.8841	-0.15841	0.22091	-0.40736	-58.337	-7.329	8.3927	0.043359	0.15283	-0.071582
3.374	-45.277	13.128	5.8415	0.10303	-0.068359	-0.032715	-33.02	-5.94421	29.585	0.13086	-0.046875	-0.021484	-62.0564	12.3825	32.4438	-0.088546	0.12802	-0.34178	-76.563	29.0794	26.209	0.023828	0.16455	-0.067676
3.376	-67.1094	3.297	16.729	0.11182	-0.074219	-0.040527	-14.253	43.131	11.432	0.14307	-0.061035	-0.027344	4.642	30.4164	53.9527	-0.03439	0.050478	-0.28771	-13.267	27.861	24.6871	0.0073243	0.17402	-0.070898
3.378	-65.47557	0.172999999999998	29.6237	0.125	-0.076172	-0.053711	-25.836	-16.0933	19.9524	0.14795	-0.072266	-0.035156	15.229	35.4003	41.4057	0.0092773	-0.0058594	-0.24414	-31.405	17.9862	33.14464	-0.0068359	0.17969	-0.068359
3.38	-65.1075	13.522	21.5457	0.13843	-0.081298	-0.05957	-24.448	8.9095	32.4716	0.15723	-0.088379	-0.039063	53.118	40.484	49.6236	0.042261	-0.038943	-0.20042	-17.949	10.4966	12.281	-0.016699	0.17998	-0.063379
3.382	-58.1535	27.7855	14.6603	0.15039	-0.085449	-0.068359	-32.488	20.7002	14.145	0.16553	-0.10376	-0.043213	34.001	52.8068	44.2064	0.063556	-0.056919	-0.17503	-9.432	26.257	9.532	-0.016211	0.1831	-0.066699
3.384	-59.638	28.535	28.2127	0.1665	-0.10205	-0.080078	-36.13	-21.072	10.6977	0.17529	-0.12109	-0.057129	23.519	27.8719	56.807	0.077627	-0.070204	-0.14729	-21.663	60.349	0.654000000000003	-0.0099611	0.17685	-0.063575
3.386	-49.7977	18.77639	18.8113	0.1792	-0.10596	-0.089355	-22.685	39.598	14.718	0.18311	-0.13232	-0.067383	36.018	40.064	18.1663	0.086911	-0.07949	-0.12549	-14.465	81.149	43.6724	0.0045898	0.16543	-0.052637
3.388	-47.207	11.59227	20.0277	0.18799	-0.11523	-0.093262	-32.013	24.8701	-1.4789	0.18799	-0.14404	-0.063965	71.5702	16.9486	-1.5073	0.098633	-0.081055	-0.10889	-11.434	85.313	6.624	0.019531	0.15332	-0.046875
3.39	-46.591	6.74084	32.8673	0.19482	-0.12671	-0.10352	-37.558	-7.6071	17.36249	0.1958	-0.1582	-0.075195	53.2174	27.831	-19.15173	0.10254	-0.091405	-0.09316	-2.249	59.881	41.7408	0.024805	0.12842	-0.033691
3.392	-49.359	-2.076	47.901	0.19971	-0.12646	-0.1123	-19.299	41.3584	15.0987	0.19848	-0.1665	-0.083496	42.835	-26.5852	-4.657	0.11113	-0.091307	-0.075973	-33.26	58.5994	20.963	0.030957	0.11211	-0.02998
3.394	-10.218	1.824	25.129	0.19727	-0.13721	-0.12354	-17.422	-18.5724	-1.4038	0.2002	-0.1748	-0.091309	32.915	-17.6152	1.268	0.12129	-0.093655	-0.060346	-3.538	9.0175	81.46	0.029785	0.10195	-0.021387
3.396	-3.692	11.941	21.363	0.19531	-0.13184	-0.13281	-5.757	8.4597	23.6327	0.19678	-0.18506	-0.10254	12.843	-30.439	32.0781	0.13419	-0.095703	-0.04912	-34.522	24.1205	81.917	0.029785	0.094434	-0.0125
3.398	7.913	15.6852	44.795	0.18555	-0.13428	-0.16211	-8.108	19.9423	28.9251	0.19751	-0.18774	-0.11426	29.363	8.4683	40.95128	0.14551	-0.096191	-0.035645	-3.384	-6.899	94.126	0.027344	0.094727	-0.003418
3.4	3.023	1.1807	51.219	0.16479	-0.12695	-0.18604	-2.908	-33.284	37.846	0.19336	-0.19482	-0.12695	33.244	-24.338	72.94	0.1583	-0.099612	-0.027539	1.812	3.638	46.1347	0.023633	0.094141	0.0090819
3.402	21.542	-3.932	52.043	0.13574	-0.11035	-0.21631	-1.655	19.1688	33.5829	0.18652	-0.19531	-0.13721	-11.505	-1.019	72.943	0.17588	-0.10176	-0.019337	27.071	-29.00516	49.0125	0.019824	0.089356	0.014453
3.404	21.905	14.665	55.1002	0.072266	-0.058594	-0.24561	-17.69	15.3797	6.6824	0.18018	-0.19727	-0.14795	-22.883	-18.215	53.484	0.18955	-0.1041	-0.011524	-24.455	-17.6585	19.5569	0.017871	0.082325	0.020703
3.406	8.55099999999999	21.6541	78.309	0.036621	-0.020996	-0.2627	-15.539	4.65368	6.7015	0.16406	-0.1875	-0.16064	-43.736	46.0507	19.72654	0.20322	-0.10752	-0.0016604	-11.823	-35.724	58.888	0.014551	0.072169	0.024609
3.408	28.324	16.723	112.741	-0.029785	0.037109	-0.31641	-14.449	58.159	17.9498	0.15649	-0.18652	-0.17261	-76.3706	32.7289	24.865	0.2124	-0.11035	0.003418	-47.229	3.347	62.182	0.010254	0.064941	0.025391
3.41	17.546	24.83241	131.151	-0.07251	0.077881	-0.35816	-16.924	18.8923	12.0594	0.14697	-0.18701	-0.18359	-108.553	60.404	5.0877	0.2209	-0.11475	0.010742	-20.495	-10.559	54.805	0.0077147	0.057812	0.024219
3.412	7.993	50.1988	145.892	-0.10645	0.1123	-0.39697	13.215	38.8132	19.1753	0.13525	-0.17871	-0.20313	-105.615	5.5065	18.2135	0.22929	-0.1249	0.014257	-27.63	-8.1841	37.235	0.0031243	0.058203	0.028125
3.414	17.18	58.7052	174.158	-0.16357	0.17725	-0.43848	19.637	37.05665	45.158	0.12988	-0.17773	-0.20898	-110.032	21.9763	0.187999999999999	0.23477	-0.12959	0.018164	-40.759	-21.9872	19.7996	-0.0027345	0.059766	0.023437
3.416	-0.875999999999998	61.9729	206.566	-0.19482	0.2085	-0.45752	-7.40300000000001	-49.167	83.9966	0.12891	-0.19287	-0.2334	-112.901	-13.8694	18.482	0.23965	-0.1292	0.025782	-38.161	-1.2209	28.2607	-0.011817	0.066113	0.018651
3.418	-20.921	88.406	243.459	-0.25781	0.26074	-0.50488	-15.164	-0.2865	90.8048	0.11596	-0.21558	-0.2627	-110.432	23.43	24.8023	0.24072	-0.12549	0.023438	-12.427	21.7887	12.6381	-0.020996	0.075195	0.0083008
3.42	-23.062	106.005	271.365	-0.30688	0.30517	-0.54273	10.381	7.5899	96.372	0.09668	-0.23145	-0.29688	-114.746	-12.546	37.153	0.24248	-0.12178	0.020019	-29.195	27.2005	14.68963	-0.021387	0.095899	-0.00068234
3.422	-3.677	113.041	296.761	-0.35107	0.34229	-0.58252	33.885	17.3644	131.527	0.040039	-0.20508	-0.3335	-82.8804	33.931	12.5377	0.24619	-0.11934	0.018261	-41.786	23.1944	-11.58693	-0.01836	0.12246	-0.013766
3.424	-3.522	92.797	335.863	-0.41064	0.39014	-0.63428	-0.548999999999999	64.776	185.8436	0.0043945	-0.17383	-0.35205	-45.2399	-11.69	49.674	0.24658	-0.11426	0.022168	-29.501	4.3372	-1.381	-0.019921	0.1494	-0.030171
3.426	-40.958	104.786	379.481	-0.44336	0.41211	-0.66016	-39.596	-0.873000000000001	224.425	-0.093262	-0.1123	-0.41016	-22.293	14.298	32.338	0.24736	-0.11006	0.016406	-50.342	9.907	-9.344	-0.022657	0.17529	-0.044719
3.428	-49.3127	97.436	437.055	-0.51221	0.46143	-0.72021	5.648	0.734999999999999	279.443	-0.16504	-0.069336	-0.47534	-16.345	-18.96	56.64	0.24707	-0.10352	0.015625	-29.894	-8.074	1.0379	-0.019043	0.19971	-0.068359
3.43	-73.2277	91.528	501.015	-0.56885	0.49195	-0.77173	21.49	45.307	334.884	-0.229	-0.016602	-0.53516	3.297	13.768	35.9	0.25205	-0.10381	0.021094	-34.907	4.937	-12.0187	-0.026859	0.22569	-0.091902
3.432	-58.283	85.868	549.221	-0.62451	0.53711	-0.82813	14.964	22.397	437.975	-0.31445	0.066895	-0.61133	-30.798	-23.6997	36.7486	0.25371	-0.11123	0.018848	-44.646	-5.236	23.8509	-0.039076	0.25276	-0.11564
3.434	-59.339574	77.348	616	-0.69482	0.60791	-0.88232	9.622	103.707	523.78	-0.36523	0.10938	-0.65039	10.926	4.1748	29.5484	0.25293	-0.12139	0.02041	-41.717	13.876	19.196	-0.051964	0.2809	-0.13634
3.436	-41.346	51.159	645.819	-0.72705	0.65381	-0.90771	-4.732	99.9579	555.3307	-0.48145	0.20898	-0.74414	21.0317	-27.8226	44.2748	0.25166	-0.13701	0.02002	12.828	-2.3302	97.751	-0.068954	0.30813	-0.16223
3.438	-54.6606	4.7963	704.192	-0.77881	0.7251	-0.95947	-20.589	83.5983	616.815832	-0.57666	0.2893	-0.83105	47.449	-0.7647	34.6258	0.24658	-0.15088	0.021484	-25.573	17.8294	111.287	-0.09082	0.33154	-0.19189
3.44	-44.894	-20.1205	739.567	-0.79639	0.77149	-0.9939	-9.979	116.049	691.8986	-0.67432	0.38135	-0.91553	52.8316	-7.1234	34.1606	0.22695	-0.16524	0.015625	-31.99	41.265	181.727	-0.11422	0.34666	-0.23351
3.442	-48.3785	-40.059	773.735	-0.80225	0.79932	-1.021	-11.663	59.6599	796.406	-0.80615	0.50928	-1.0288	53.105	32.6855	11.1358	0.20576	-0.17188	0.009082	-23.56	102.181	211.137	-0.14046	0.35672	-0.30257
3.444	-47.127	-68.7901	821.133	-0.77539	0.79102	-1.0488	-32.681	46.6191	886.897	-0.88037	0.57178	-1.0874	27.315	48.681	10.83588	0.18388	-0.16641	0.002832	-45.881	91.918	321.598	-0.17239	0.36103	-0.3888
3.446	-48.6957	-91.3891	823.573	-0.74805	0.77539	-1.0605	-61.802	30.971	906.15	-1.0093	0.70557	-1.2065	63.828	53.6593	-3.0343	0.16172	-0.15967	-0.0048828	-95.237	104.443	420.728	-0.2066	0.38366	-0.4878
3.448	-39.77374	-105.7776	819.815	-0.68945	0.70605	-1.084	-65.352	-84.9678	911.577	-1.0855	0.8208	-1.273	47.015	21.566	11.7418	0.14404	-0.14746	-0.013184	-13.606	65.8854	571.593	-0.25244	0.42627	-0.58301
3.45	-46.328	-94.3095	828.287	-0.65772	0.64843	-1.0962	-38.838	-86.769	943.93258	-1.1421	0.93799	-1.3354	53.607	9.296	32.298	0.13643	-0.13848	-0.030273	-60.444	88.046	800.415	-0.30903	0.48243	-0.69401
3.452	-57.425	-86.775	834.835	-0.63818	0.60791	-1.1108	-13.769	-128.744	960.946	-1.1895	1.0762	-1.3906	25.996	-7.57494	41.2778	0.13164	-0.12871	-0.040821	-10.212	117.3069	1056.2227	-0.36513	0.53973	-0.81962
3.454	-48.505	-78.455	827.706	-0.63672	0.57617	-1.126	-2.272	-164.85	974.429	-1.1831	1.1313	-1.4116	-0.607999999999997	-1.482	44.2353	0.12773	-0.12129	-0.056054	-36.052	101.326	1293.21	-0.43021	0.58512	-0.97426
3.456	-45.6886	-63.895	823.903	-0.64844	0.57324	-1.1367	-39.3414	-130.745	937.096	-1.1245	1.1821	-1.4136	-76.3991	7.9215	30.12598	0.13086	-0.1125	-0.063183	-16.756	36.3599	1462.338	-0.49435	0.62891	-1.1573
3.458	-55.737	-62.6359	817.954	-0.65869	0.58447	-1.1597	-61.458	-185.263	911.398	-1.0447	1.1584	-1.4089	-61.183	21.2924	21.7333	0.1333	-0.10889	-0.069824	-19.964	-51.757	1576.637	-0.57568	0.67383	-1.3623
3.46	-55.5771	-71.2488	825.666	-0.6665	0.61425	-1.1787	-42.578	-176.285	903.127	-0.9502	1.0898	-1.3965	-80.28279	25.1811	20.2594	0.13262	-0.11104	-0.078711	7.624	-122.123	1693.531	-0.67535	0.7471	-1.5553
3.462	-64.202	-78.812	823.844	-0.66113	0.64551	-1.1992	-55.872	-141.256	870.205	-0.82227	0.95508	-1.3809	-73.268	8.537	24.4514	0.1291	-0.10889	-0.080273	-38.531	-170.548	1793.863	-0.79208	0.86558	-1.7189
3.464	-45.97	-57.78	833.2928	-0.65527	0.69336	-1.2246	-37.334	-174.295	834.657	-0.77344	0.87012	-1.3535	-93.036	6.1374	6.7183	0.1248	-0.10811	-0.086914	-101.2163	-174.158	1720.26	-0.91874	1.0591	-1.8171
3.466	-31.623	-59.14	868.4016	-0.65357	0.73169	-1.2429	-26.285	-108.778	803.207	-0.7085	0.68408	-1.3101	-84.8527	-15.2733	52.6477	0.11407	-0.10332	-0.098145	-103.593	-230.984	1634.7	-1.0409	1.3228	-1.8513
3.468	-19.45	-79.292	909.1116	-0.65088	0.76221	-1.2554	-50.957	-110.802	797.37	-0.68164	0.56201	-1.2744	-117.369	-5.517	38.9566	0.10156	-0.094238	-0.104	-99.749	-287.339	1488.62	-1.1563	1.6055	-1.8428
3.47	-24.292	-118.62	945.153	-0.6499	0.78662	-1.2749	-45.545	-115.201	832.06621	-0.66797	0.46875	-1.251	-86.7924	-19.756	53.8763	0.088965	-0.081543	-0.11933	-27.9061	-363.33	1420.934	-1.2065	1.8506	-1.842
3.472	-33.181	-139.581	978.567	-0.6543	0.78906	-1.2832	-33.23	-63.679	840.801	-0.64844	0.40625	-1.252	-79.846	-0.189	43.6905	0.076367	-0.071973	-0.13155	50.513	-343.44	1332.969	-1.184	1.9642	-1.8761
3.474	-8.384	-170.041	1017.8	-0.65771	0.79932	-1.2983	1.177	-117.769	862.637	-0.63965	0.40527	-1.2578	-60.794	-7.231	24.53065	0.064648	-0.068457	-0.14717	104.054	-341.07	1282.96	-1.0764	1.9513	-1.9465
3.476	-36.463	-176.432	1057.185	-0.66528	0.80152	-1.3123	-1.679	-133.749	896.223	-0.61719	0.42969	-1.291	-65.616	46.053	21.4365	0.050098	-0.053223	-0.15927	87.176	-251.49	1193.93	-0.95598	1.862	-2.0111
3.478	-44.183	-181.805	1081.004	-0.67334	0.80908	-1.3276	-18.4444	-143.287	924.852	-0.6062	0.47486	-1.3171	-48.4503	43.863	42.967	0.039551	-0.047363	-0.16895	75.166	-224.8954	1197.467	-0.91553	1.7329	-2.0269
3.48	-56.924	-184.484	1100.887	-0.68115	0.79932	-1.3452	-21.0503	-230.641	987.079	-0.60352	0.52832	-1.3418	-66.448	74.214	10.693	0.039551	-0.043359	-0.18447	18.451	-113.768	1147.105	-0.95331	1.6502	-1.9809
3.482	-39.81	-189.04	1139.072	-0.68555	0.79492	-1.3594	28.6834	-220.3875	1026.218	-0.61133	0.6084	-1.3809	-43.2876	19.0118	26.552	0.043067	-0.039942	-0.19424	22.602	-91.23	1184.936	-0.99703	1.6327	-1.9197
3.484	-50.836	-180.317	1176.295	-0.70264	0.77979	-1.3882	49.711	-256.373	1062.4196	-0.60889	0.64502	-1.396	2.171	0.494382	19.8963	0.046582	-0.042676	-0.20283	3.629	-22.26	1195.887	-1.0252	1.6894	-1.8528
3.486	-42.943	-150.6853	1201.202	-0.73096	0.78418	-1.4073	32.507	-315.472	1123.528	-0.60938	0.68555	-1.4355	10.2	-47.117	53.28805	0.052637	-0.044433	-0.20625	-51.913	-70.72	1302.191	-1.026	1.774	-1.7902
3.488	-8.612	-132.171	1231.105	-0.76709	0.78955	-1.4253	31.6975	-288.462	1159.412	-0.61158	0.69556	-1.4656	30.897	-10.883	51.8953	0.055664	-0.055664	-0.21045	-111.2964	-45.03	1342.868	-0.99561	1.856	-1.7358
3.49	-8.726	-103.465	1244.564	-0.80127	0.83057	-1.4624	25.029	-298.946	1178.3465	-0.63232	0.71729	-1.5044	42.0761	-26.64063	44.762	0.064062	-0.064453	-0.21308	-87.6334	-161.238	1402.131	-0.94043	1.9106	-1.6859
3.492	15.98	-89.004	1240.789	-0.82227	0.84961	-1.4746	52.666	-259.251	1223.265	-0.69336	0.79102	-1.5488	34.217	23.98	18.9472	0.075977	-0.075879	-0.21485	-42.213	-237.39	1409.14	-0.8713	1.908	-1.6434
3.494	36.15	-66.785	1230.887	-0.84131	0.89697	-1.4878	48.0711	-201.643	1276.873	-0.73584	0.84814	-1.5698	52.5875	-2.7156	27.7044	0.083398	-0.086426	-0.21719	3.58699999999999	-367.66	1454.1334	-0.80092	1.8209	-1.5966
3.496	66.226	-62.511	1249.608	-0.85424	0.92505	-1.4988	75.811	-217.975	1310.943	-0.81396	0.96143	-1.6108	58.1213	20.5359	-0.757999999999999	0.092285	-0.096094	-0.22149	-18.34	-397.69	1498.5111	-0.72321	1.675	-1.552
3.498	45.671	-57.73	1271.754	-0.85742	0.94141	-1.5098	55.37	-153.443	1315.7252	-0.84742	1.0452	-1.6297	55.6402	-8.9403	15.4719	0.10254	-0.10498	-0.2207	21.984	-465.76	1544.157	-0.6499	1.4907	-1.5015
3.5	17.484	-68.647	1273.753	-0.85547	0.94922	-1.5156	31.603	-116.577	1307.348	-0.84766	1.1191	-1.6445	40.127	29.60029	16.704	0.11387	-0.11768	-0.22285	9.45099999999999	-403.77	1631.317	-0.59792	1.297	-1.466
3.502	-1.373	-76.496	1285.445	-0.85596	0.94385	-1.5229	52.2	-105.17	1320.7263	-0.81006	1.1548	-1.6577	24.85	-2.1491	47.7594	0.12324	-0.13145	-0.22197	-40.31	-376.13	1736.5866	-0.56434	1.1187	-1.4692
3.504	9.216	-78.7438	1299.672	-0.86865	0.92236	-1.5464	43.8198	-22.833	1343.2451	-0.78711	1.1426	-1.6621	3.37	21.0394	40.9646	0.13457	-0.14785	-0.22822	-42.151	-278.066	1811.673	-0.54449	0.97948	-1.4946
3.506	21.319	-83.88224	1331.003	-0.89136	0.91236	-1.5779	59.2426	-43.235	1338.993	-0.75195	1.0752	-1.6719	-28.941	-18.852	45.4774	0.13858	-0.16524	-0.2336	-107.31	-242.476	1814.422	-0.52967	0.87898	-1.5484
3.508	23.979	-94.977	1335.235	-0.93115	0.9126	-1.6187	76.777	-77.783	1353.7401	-0.74731	1.0139	-1.6912	-11.705	14.0915	13.9422	0.1416	-0.18457	-0.24658	-157.2193	-150.2286	1827.137	-0.5332	0.81055	-1.6406
3.51	36.755	-104.058	1337.75	-0.99561	0.93799	-1.6831	54.579	-79.384	1365.961	-0.77051	0.94727	-1.7246	-36.154	6.8417	24.6967	0.14619	-0.19824	-0.26211	-243.697	-47.139	1799.10381	-0.57066	0.80447	-1.7649
3.512	21.333	-106.6539	1349.997	-1.0269	0.96338	-1.7163	32.6648	-158.21	1397.572	-0.84033	0.89893	-1.7612	-48.257	54.033	6.6995	0.14629	-0.20508	-0.28369	-215.874	62.326	1815.0732	-0.62415	0.87603	-1.8917
3.514	46.214	-100.3528	1367.385	-1.0972	1.0356	-1.7866	46.7905	-148.276	1440.311	-0.89648	0.89648	-1.7949	-93.404	35.978	23.9286	0.14551	-0.20117	-0.31182	-194.523	121.024	1778.2196	-0.70538	1.0276	-2.0105
3.516	56.821	-108.9989	1377.393	-1.1429	1.1067	-1.8367	40.839	-155.099	1420.4809	-0.99561	0.92822	-1.8647	-89.0611	45.9403	-4.93847	0.14024	-0.19053	-0.33398	-125.601	96.3	1797.8022	-0.80562	1.2255	-2.1361
3.518	49.76	-90.281	1385.812	-1.1777	1.1748	-1.8867	51.2292	-198.079	1437.093	-1.0584	0.9905	-1.9148	-93.489	-9.7261	8.075	0.13916	-0.16992	-0.36621	-115.784	60.073	1762.991	-0.89795	1.4302	-2.2554
3.52	50.612	-71.918	1380.88	-1.2188	1.2598	-1.9355	26.917	-160.654	1459.8058	-1.1113	1.0664	-1.9668	-75.953	-15.503	14.866	0.13291	-0.14883	-0.40166	-82.514	-35.6308	1769.929	-0.96495	1.6261	-2.3412
3.522	31.576	-42.633	1364.487	-1.2202	1.2925	-1.9565	2.4852	-187.169	1476.48	-1.1563	1.1582	-2.0313	-83.0627	-38.448	82.365	0.13057	-0.12891	-0.43789	-90.924	-54.306	1756.692	-1.0149	1.8095	-2.4118
3.524	25.258	-17.272	1340.347	-1.2202	1.3384	-1.9897	34.834	-173.714	1513.737	-1.1736	1.2053	-2.0642	-78.4221	10.469	134.311	0.12705	-0.11875	-0.47852	-62.296	-117.1	1836.608	-1.0555	1.9641	-2.4602
3.526	4.149	-3.878	1340.3665	-1.2066	1.357	-1.9966	41.727	-98.4871	1503.416	-1.1914	1.2324	-2.1016	-83.0878	40.5997	179.28	0.11543	-0.12959	-0.54932	-75.019	-135.097	1857.784	-1.0922	2.0808	-2.5102
3.528	10.736	-6.36	1350.8937	-1.1851	1.3481	-1.9917	52.07	-116.824	1494.736	-1.2031	1.2637	-2.1289	-53.08	95.205	195.6789	0.094238	-0.13818	-0.63477	-65.488	-204.773	1878.987	-1.1191	2.1504	-2.5391
3.53	14.538	-15.30213	1358.5	-1.1499	1.3032	-1.978	65.036	-64.10128	1481.465	-1.2109	1.2715	-2.1426	-67.885	109.3658	247.9912	0.04375	-0.10947	-0.72881	-146.749	-197.811	1826.438	-1.1334	2.1858	-2.5494
3.532	10.06	-10.0508	1351.288	-1.1333	1.2729	-1.9624	55.286	-35.5938	1437.422	-1.2324	1.2754	-2.1484	-11.288	130.8905	355.092	-0.044434	-0.050098	-0.83428	-119.7062	-235.703	1831.06	-1.1554	2.1824	-2.5426
3.534	31.598	-6.824	1350.412	-1.1045	1.1953	-1.9268	84.494	-37.2915	1450.726	-1.2476	1.2632	-2.144	-26.224	147.318	456.3602	-0.15068	0.038965	-0.96006	-124.8711	-159.297	1813.917	-1.1817	2.1609	-2.5312
3.536	22.529	-0.152999999999999	1377.639	-1.0847	1.1399	-1.8865	87.498	34.62	1459.845	-1.248	1.2422	-2.1289	-15.057	178.638	559.3322	-0.26631	0.15225	-1.0976	-55.972	-121.582	1815.883	-1.2178	2.1408	-2.5068
3.538	63.538	-14.088	1387.409	-1.0728	1.0845	-1.8608	102.422	16.1601	1478.4792	-1.2476	1.1841	-2.1108	15.75	164.154	688.193	-0.37354	0.28564	-1.2417	-28.542	-26.452	1781.633	-1.2539	2.1211	-2.4766
3.54	53.722	-19.012	1379.009	-1.0542	1.0396	-1.8413	87.566	2.684	1507.53105	-1.2422	1.1504	-2.0898	7.859	161.697	874.457	-0.47236	0.43203	-1.39	50.055	-15.86123	1729.883	-1.2729	2.0919	-2.4183
3.542	67.977	-25.006	1379.871	-1.0444	1.0298	-1.8306	73.794	35.0279	1489.639	-1.2534	1.0767	-2.0659	-63.561	122.8273	1040.364	-0.58643	0.575	-1.5488	65.786	38.4441	1674.935	-1.2762	2.0488	-2.3715
3.544	33.268	-36.2528	1394.04	-1.0171	1.0171	-1.8198	95.674	-16.129	1495.9904	-1.2547	1.0461	-2.0524	1.7401	94.033	1164.7225	-0.71299	0.71953	-1.709	39.782	72.624	1625.573	-1.2707	1.9972	-2.3105
3.546	45.689	-27.22544	1386.215	-0.99659	1.0132	-1.812	90.261	4.788	1531.576	-1.2603	1.0356	-2.0386	58.525	55.042	1230.168	-0.8585	0.88779	-1.8525	40.314	153.2107	1611.8892	-1.2565	1.9325	-2.2538
3.548	38.627	-21.5998	1369.264	-0.97217	1.0005	-1.8062	89.454	-7.74	1526.355	-1.2734	1.041	-2.0293	48.6186	-18.556	1318.507	-1.0269	1.0903	-1.9741	8.09299999999999	207.7683	1575.285	-1.2363	1.8555	-2.1934
3.55	34.913	-8.366	1342.887	-0.94043	0.97363	-1.7891	100.431	-69.897	1548.083	-1.2778	1.0532	-2.019	7.452	-91.98	1398.242	-1.2046	1.3219	-2.1124	-26.596	232.04	1553.439	-1.2121	1.7789	-2.1316
3.552	39.82	1.35	1335.365	-0.92383	0.95898	-1.7813	76.741	-27.62075	1522.435	-1.2896	1.0767	-2.0034	31.466	-200.335	1432.418	-1.3456	1.5591	-2.2441	-83.329	208.886	1498.438	-1.1804	1.6907	-2.0707
3.554	31.025	8.492	1309.889	-0.89014	0.92822	-1.7622	96.458	-50.8369	1496.9401	-1.2776	1.0871	-1.9885	26.066	-245.8931	1389.73	-1.4081	1.7904	-2.3393	-77.268	186.523	1512.012	-1.1375	1.6023	-2.0113
3.556	42.77	37.135	1312.839	-0.87207	0.9126	-1.749	112.878	-36.5578	1515.031	-1.2573	1.0894	-1.9604	8.689	-318.056	1364.917	-1.3788	1.9681	-2.3812	-102.2348	194.602	1484.136	-1.0932	1.5143	-1.9427
3.558	34.664	55.808	1309.195	-0.85156	0.9043	-1.7383	83.883	30.02	1485.009	-1.2227	1.0586	-1.9238	-53.071	-333.739	1330.89	-1.2598	2.0762	-2.3809	-81.91	191.867	1562.1786	-1.0483	1.4302	-1.8696
3.56	60.288	74.531	1301.393	-0.83936	0.89014	-1.7202	76.57	-4.16	1448.646	-1.2007	1.0376	-1.8921	-99.7485	-331.56	1313.539	-1.0624	2.0665	-2.3507	-112.2876	191.578	1554.915	-1.0006	1.3555	-1.8084
3.562	61.218	61.254	1291.847	-0.83252	0.89307	-1.7007	75.999	36.5255	1429.9264	-1.1582	0.99023	-1.8457	-137.523	-252.57	1228.763	-0.84873	1.9442	-2.2953	-109.23871	130.0574	1571.5927	-0.94951	1.2856	-1.7441
3.564	46.224	57.543	1270.091	-0.81982	0.89307	-1.687	50.106	54.418	1396.3637	-1.1235	0.95263	-1.811	-124.478	-207.119	1202.621	-0.67139	1.6911	-2.203	-84.842	132.956	1526.822	-0.90264	1.2161	-1.6831
3.566	37.835	60.664	1264.259	-0.81128	0.89087	-1.6658	49.819	38.209	1398.694	-1.1011	0.91553	-1.7729	-159.532	-179.091	1182.012	-0.58505	1.3814	-2.0932	-58.798	88.534	1525.942	-0.86201	1.1579	-1.6253
3.568	43.446	68.622	1245.616	-0.80664	0.88672	-1.6445	70.341	129.456	1376.059	-1.0601	0.8833	-1.7261	-195.855	-169.678	1182.894	-0.55811	1.0903	-1.9565	-100.918	126.85	1481.375	-0.82031	1.1113	-1.5645
3.57	37.868	41.24086	1231.394	-0.79297	0.87109	-1.6094	45.364	119.344	1309.395	-1.0361	0.86914	-1.7041	-178.524	-138.279	1169.089	-0.5711	0.87559	-1.85	-96.6199	146.762	1449.189	-0.77695	1.0709	-1.5072
3.572	-8.19	30.6102	1220.933	-0.79053	0.86475	-1.5952	31.71	123.984	1312.84	-0.99609	0.85156	-1.6641	-166.637	-115.38	1188.267	-0.60694	0.74365	-1.7813	-97.3785	192.678	1340.5634	-0.73213	1.04	-1.4358
3.574	-13.444	14.641	1216.968	-0.78564	0.8501	-1.5562	42.16	138.884	1296.214	-0.96606	0.83471	-1.6375	-145.864	-116.75	1225.775	-0.63935	0.68857	-1.7489	-76.7222	211.34	1293.7174	-0.68408	1.0099	-1.3644
3.576	-10.497	18.007	1190.937	-0.77588	0.83301	-1.5249	46.282	59.463	1306.704	-0.93945	0.81836	-1.6084	-100.347	-147.35	1283.059	-0.65107	0.68682	-1.7261	-73.151	250.528	1221.9801	-0.62832	0.97324	-1.2884
3.578	-0.719000000000001	35.653	1177.083	-0.76318	0.8208	-1.4927	69.588	70.579	1334.422	-0.90186	0.80713	-1.5698	-36.777	-213.711	1304.6178	-0.64307	0.73486	-1.6948	-62.689	260.796	1178.001	-0.56396	0.93213	-1.2065
3.58	-17.078	68.8981	1163.53	-0.74658	0.80078	-1.4512	57.418	67.752	1299.773	-0.88818	0.80908	-1.5522	-14.448	-257.825	1338.7582	-0.58281	0.79824	-1.6488	-77.0691	276.607	1132.262	-0.49316	0.88496	-1.1236
3.582	-16.544	84.783	1135.33	-0.73193	0.78955	-1.4292	43.974	25.945	1296.052	-0.8623	0.80176	-1.5176	-5.47199999999999	-317.831	1368.218	-0.49218	0.83711	-1.586	-34.1534	284.776	1076.9271	-0.41787	0.83252	-1.0421
3.584	5.442	96.19	1103.039	-0.70703	0.76953	-1.3828	45.034	78.826	1257.3654	-0.84693	0.79419	-1.4905	-41.724	-353.344	1449.938	-0.38672	0.81992	-1.5219	-38.7511	292.834	1035.5112	-0.33506	0.77041	-0.96046
3.586	-18.517	101.492	1072.876	-0.68359	0.74755	-1.3389	43.64686	79.703	1218.1015	-0.83545	0.79053	-1.4585	-14.261	-399.292	1543.55	-0.26973	0.73389	-1.4638	33.7739	247.1682	948.6501	-0.25127	0.70185	-0.87978
3.588	3.24299999999999	116.274	1063.462	-0.65967	0.7251	-1.3042	49.3973	96.443	1200.56006	-0.82178	0.77783	-1.4194	-2.93600000000001	-422.51	1626.495	-0.15967	0.59229	-1.4233	78.2707	207.228	905.426	-0.1709	0.61914	-0.79102
3.59	-10.277	124.303	1058.437	-0.62842	0.69385	-1.2612	47.9805	150.55497	1156.917	-0.81396	0.77393	-1.394	42.759	-424.073	1662.103	-0.090039	0.42891	-1.4237	96.2101	193.988	839.178	-0.091016	0.54151	-0.70635
3.592	5.298	133.119	1021.017	-0.61328	0.68164	-1.2344	31.6643	119.452223	1156.389	-0.79492	0.76563	-1.3516	74.155	-400.72	1680.397	-0.059765	0.28672	-1.4578	104.038	169.022	795.719	-0.018067	0.46485	-0.62188
3.594	-10.132	131.207	978.483	-0.5791	0.64941	-1.1738	23.4571	165.113	1145.908	-0.77563	0.75952	-1.3122	123.076	-304.937	1724.911	-0.1125	0.20704	-1.525	101.34	147.739	707.379	0.052637	0.37929	-0.54765
3.596	-24.706	122.322	955.227	-0.55371	0.62403	-1.1377	52.999	190.063	1080.647	-0.75391	0.74609	-1.2695	129.146	-212.917	1771.758	-0.25371	0.21231	-1.6554	85.629	129.866	665.561	0.12949	0.30313	-0.46651
3.598	-23.105	98.0232	958.861	-0.53223	0.604	-1.0942	55.3521	166.6585	1062.462	-0.72021	0.72314	-1.2046	165.9262	-113.554	1759.246	-0.46387	0.32715	-1.8066	89.769	136.544	561.7683	0.20947	0.23047	-0.38281
3.6	-22.019	93.1049	924.368	-0.50244	0.56592	-1.0347	52.3835	216.873	1017.39558	-0.70361	0.71143	-1.1831	220.981	-77.47	1766.4	-0.68945	0.54375	-1.9807	102.823	148.558	529.2707	0.28242	0.16104	-0.29922
3.602	-9.464	94.3666	883.9092	-0.48535	0.5542	-1.0093	34.685	186.0619	958.777	-0.66797	0.68359	-1.123	224.96	-32.035	1777.038	-0.88135	0.80244	-2.1827	51.3466	191.35654	430.173	0.36338	0.089941	-0.21992
3.604	-27.71	93.1465	864.714	-0.45898	0.52588	-0.95557	31.628	182.6221	939.255	-0.64282	0.65893	-1.0671	200.622	-25.666	1750.3884	-1.0255	1.0981	-2.394	24.76	224.45	393.4334	0.4501	0.010645	-0.13867
3.606	-11.754	82.5576	864.61	-0.43018	0.49365	-0.89893	16.4207	214.2695	909.611	-0.61279	0.62744	-1.021	197.102	16.886	1759.846	-1.111	1.395	-2.5638	-3.997	257.687	299.647	0.52715	-0.073536	-0.056543
3.608	-14.203	87.0144	831.45	-0.41602	0.47656	-0.86523	11.057	138.049	896.86837	-0.56885	0.58447	-0.9585	135.348	9.9035	1776.392	-1.144	1.6587	-2.6909	19.017	276.331	275.1544	0.59473	-0.1665	0.01709
3.61	-4.907	96.522	816.047	-0.38672	0.44141	-0.80859	13.837	139.5334	897.992	-0.55029	0.56104	-0.92139	84.644	22.923	1790.3238	-1.1351	1.8415	-2.7725	-10.892	282.225	207.795	0.64443	-0.26699	0.077442
3.612	-19.867	112.953	790.683	-0.36816	0.41968	-0.77392	-30.161	130.26	831.663	-0.50342	0.51709	-0.85107	32.316	-57.4862	1796.396	-1.1027	1.9246	-2.8254	43.696	251.6834	192.464	0.68193	-0.36944	0.12745
3.614	-12.728	117.774	768.671	-0.34424	0.39697	-0.72705	-36.64	98.631	806.271	-0.46386	0.48145	-0.81054	63.016	-104.3228	1838.628	-1.0606	1.9254	-2.8504	7.039	236.828	149.044	0.6999	-0.45928	0.1751
3.616	-21.316	121.949	731.117	-0.32031	0.36621	-0.68066	-16.254	151.2684	764.9752	-0.42529	0.44287	-0.75928	19.346	-169.672	1892.485	-1.0281	1.8654	-2.8491	-4.47300000000001	213.7032	109.973	0.71006	-0.54444	0.2249
3.618	-47.0879	132.834	684.699	-0.30664	0.34814	-0.65381	-47.081	127.044	727.162	-0.37549	0.39746	-0.68896	34.801	-145.206	1895.155	-1.0024	1.7759	-2.8218	-42.213	175.961	87.113	0.70947	-0.63525	0.25391
3.62	-35.265	124.9583	663.504	-0.28076	0.31934	-0.60596	-21.144	134.35	707.021	-0.35498	0.37988	-0.65088	22.51	-151.632	1862.737	-0.98662	1.6669	-2.7823	-72.45319	135.531	51.303	0.69795	-0.73213	0.26045
3.622	-43.0141	119.426	629.413	-0.25977	0.30029	-0.56811	-11.439	169.398	634.745	-0.32031	0.35059	-0.58691	18.371	-99.71414	1845.754	-0.97305	1.5359	-2.7222	-130.391	82.526	50.724	0.66631	-0.8249	0.25284
3.624	-33.262	120.468	581.969	-0.24316	0.27979	-0.53369	-39.409	136.735	581.9954	-0.29321	0.33326	-0.53467	-20.896	-109.351	1846.014	-0.95273	1.3969	-2.6348	-139.187	46.265	63.1791	0.61943	-0.90459	0.23018
3.626	-72.4497	112.5076	548.542	-0.21631	0.25684	-0.49121	-38.996	188.3636	544.0138	-0.2627	0.3125	-0.48633	-20.627	-76.918	1794.554	-0.91719	1.2945	-2.5629	-129.207	21.6199	94.1339	0.55596	-0.96221	0.18437
3.628	-45.689	117.943	532.074	-0.20117	0.24707	-0.46875	-20.72	200.111	485.4273	-0.21387	0.28076	-0.41943	-25.223	-57.66	1760.383	-0.88965	1.248	-2.5137	-104.9675	3.2648	89.2544	0.45459	-0.98779	0.12549
3.63	-42.557	118.764	509.687	-0.17676	0.23096	-0.4248	-39.136	163.2884	428.7184	-0.19385	0.26465	-0.38281	-35.449	19.658	1729.233	-0.86738	1.2529	-2.4875	-110.064	-20.392	114.385	0.30157	-0.94843	0.045898
3.632	-43.968	132.135	478.334	-0.15918	0.21655	-0.39038	-33.804	203.309	383.628	-0.14648	0.22705	-0.3125	-90.21	45.24	1732.29	-0.85332	1.2765	-2.4641	-81.8168	-45.0768	112.893	0.11806	-0.86133	-0.048829
3.634	-34.683	133.113	452.808	-0.14258	0.20557	-0.36279	-41.842	149.3593	343.3644	-0.11718	0.19653	-0.26709	-84.987	131.783	1680.127	-0.83262	1.2965	-2.4394	-23.689	-47.512	139.401	-0.09404	-0.70508	-0.16719
3.636	-35.168	122.657	444.367	-0.11621	0.19189	-0.32178	-37.672	142.3954	307.659	-0.084473	0.17236	-0.21777	-30.936	146.133	1616.726	-0.80937	1.3005	-2.4058	35.274	-25.7692	99.013	-0.2914	-0.50127	-0.30615
3.638	-38.227	120.614	436.14	-0.10449	0.17822	-0.30957	-25.356	188.694	267.091	-0.04541	0.12842	-0.16357	11.621	187.732	1569.284	-0.7832	1.293	-2.3633	50.332	6.673	87.023	-0.46045	-0.28467	-0.43457
3.64	-63.36698	116.646	412.904	-0.076172	0.16162	-0.2666	-22.661	142.37	242.1771	-0.027832	0.10254	-0.13477	46.024	153.5814	1531.575	-0.76045	1.2556	-2.3159	35.716	6.4164	10.9813	-0.58603	-0.071679	-0.55625
3.642	-45.449	103.923	388.977	-0.057373	0.14624	-0.24707	-2.813	172.699	219.087	0.0063477	0.052246	-0.083496	85.959	166.336	1500.905	-0.74277	1.2102	-2.261	27.275	14.7585	13.3016	-0.67852	0.1292	-0.66914
3.644	-38.92	86.403	362.301	-0.044434	0.13428	-0.22168	-26.691	135.6921	198.342	0.023438	0.022217	-0.051269	143.289	138.403	1521.652	-0.71582	1.159	-2.2121	-22.335	7.0426	-12.2764	-0.74336	0.32803	-0.76523
3.646	-43.386	87.3745	332.07	-0.025879	0.11572	-0.19775	-19.551	75.936	188.2337	0.043457	-0.00097656	-0.023438	157.9216	119.85	1521.255	-0.68779	1.1215	-2.1628	5.306	6.3872	-3.1433	-0.76904	0.51513	-0.83662
3.648	-32.754	92.5768	300.371	-0.019043	0.10791	-0.18555	-1.898	107.983	172.37968	0.070313	-0.029785	0.012207	179.095	70.625	1507.72	-0.66357	1.0825	-2.105	10.462	16.743	-8.7383	-0.76709	0.68213	-0.87646
3.65	-37.503	97.454	282.133	-0.00048828	0.096191	-0.16602	-6.632	60.881	160.351	0.07666	-0.044922	0.02832	179.7984	57.392	1501.239	-0.64082	1.0485	-2.0516	54.775	38.8488	6.4064	-0.75342	0.79111	-0.9083
3.652	-12.78	86.2895	271.82	0.0083008	0.089112	-0.15064	5.308	66.635	159.432	0.088867	-0.070801	0.060059	206.795	55.666	1448.3438	-0.61064	1.0196	-1.9921	24.236	37.378	-0.4617	-0.72295	0.87041	-0.92139
3.654	-22.402	81.037	238.984	0.019043	0.083984	-0.13721	-7.209	83.0033	119.9229	0.092773	-0.084961	0.071777	155.4996	95.469	1436.426	-0.5751	0.98368	-1.9296	55.027	42.295	10.70025	-0.67568	0.90517	-0.91005
3.656	-15.558	74.764	224.83	0.029785	0.071289	-0.12061	-36.452	18.496	89.9198	0.091309	-0.089844	0.079102	148.8646	137.094	1400.838	-0.53389	0.94268	-1.8676	6.001	18.8365	5.4987	-0.62246	0.9125	-0.875
3.658	-22.279	71.103	234.464	0.035156	0.071777	-0.11279	-7.91999999999999	59.0856	74.3555	0.077148	-0.099121	0.07666	111.6589	151.829	1392.776	-0.48779	0.89502	-1.7954	34.173	-5.84	13.5202	-0.57129	0.89648	-0.81836
3.66	-2.132	84.583	215.057	0.04834	0.065918	-0.10254	-10.023	68.1743	43.585	0.064209	-0.090088	0.067139	125.048	150.558	1339.539	-0.44385	0.84209	-1.7236	29.827	-44.537	16.139	-0.51748	0.8374	-0.75166
3.662	-9.446	84.961	187.937	0.052979	0.065186	-0.094484	-31.038	50.1113	60.9915	0.046875	-0.08252	0.0625	83.158	144.97	1292.262	-0.40009	0.79189	-1.6456	42.564	-40.942	9.04	-0.47461	0.75664	-0.68086
3.664	-32.822	84.526	183.754	0.060059	0.06543	-0.091309	-10.293	82.085	52.303	0.013672	-0.056152	0.047852	82.594	181.1948	1203.028	-0.36572	0.72627	-1.5659	-30.257	-43.148	3.398	-0.43516	0.65547	-0.60156
3.666	-32.076	75.575	174.336	0.061523	0.072266	-0.084473	-43.949	27.6738	38.0321	-0.0063477	-0.040527	0.035645	52.65	223.562	1148.152	-0.32725	0.67373	-1.4892	-55.139	-12.811	3.217	-0.38955	0.55254	-0.52256
3.668	-33.822	64.5955	147.571	0.055176	0.076172	-0.083008	-28.883	37.4629	55.904	-0.055176	-0.0039063	0.00048828	26.92	282.343	1077.9972	-0.28857	0.61768	-1.394	-92.0411	5.0804	32.3356	-0.33398	0.45508	-0.44922
3.67	-25.254	50.9137	126.513	0.055176	0.085449	-0.07959	16.55	57.2297	43.9123	-0.093749	0.024658	-0.034668	-31.01	280.207	1035.6545	-0.24697	0.55303	-1.303	-99.2663	41.755	12.4101	-0.27099	0.37471	-0.38789
3.672	-47.099	48.8971	113.545	0.052002	0.093262	-0.07959	-30.838	30.602	52.142	-0.13086	0.05957	-0.062012	-28.778	271.628	970.1518	-0.20459	0.49815	-1.1975	-78.9782	65.948	34.0526	-0.20606	0.30976	-0.33242
3.674	-25.992	24.4034	114.565	0.05127	0.098633	-0.077148	-13.653	67.5148	64.41	-0.1748	0.1084	-0.098633	-86.637	224.006	931.949	-0.15654	0.43682	-1.0894	-92.9298	90.898	7.906	-0.14942	0.25235	-0.28438
3.676	-32.475	13.9459	108.519	0.041504	0.10059	-0.072266	-30.922	32.4093	13.85	-0.19531	0.13574	-0.11377	-115.542	227.152	892.901	-0.10059	0.36924	-0.97659	-93.2408	88.978	41.468	-0.10234	0.19209	-0.2376
3.678	-25.564	10.1324	87.399	0.032715	0.10498	-0.077637	-32.813	-1.924	35.104	-0.23145	0.18506	-0.14648	-151.1	211.8498	874.311	-0.05127	0.29346	-0.87646	-122.15778	87.533	36.694	-0.058105	0.13721	-0.1958
3.68	-36.983	14.3831	88.559	0.03418	0.10645	-0.08252	-10.318	5.739	44.4215	-0.24829	0.21948	-0.16211	-164.284	217.883	815.216	0.010059	0.21396	-0.77744	-62.775	62.2711	46.1075	-0.019434	0.082129	-0.15498
3.682	-32.171	25.773	83.372	0.03247	0.11206	-0.082276	-30.861	-52.879	33.406	-0.25635	0.24658	-0.17432	-194.535	185.386	770.684	0.066895	0.13213	-0.67276	-75.6234	48.746	9.805	0.012402	0.030273	-0.11484
3.684	-34.167	39.99	82.846	0.025879	0.11279	-0.086426	-26.934	-39.259	49.066	-0.25928	0.27979	-0.17725	-193.633	163.97	672.09	0.1126	0.058692	-0.56533	-30.278	42.123	41.401	0.044824	-0.017383	-0.078125
3.686	-48.62	57.756	56.808	0.018066	0.11133	-0.083496	-29.001	-3.4429	21.139	-0.25293	0.28027	-0.18311	-175.182	111.944	623.836	0.15108	-0.015137	-0.47246	-46.326	19.68894	36.3334	0.081348	-0.063086	-0.041504
3.688	-42.9432	52.502	65.875	0.01416	0.10986	-0.09082	-40.264	-18.6865	23.01443	-0.2417	0.28711	-0.1748	-160.881	128.8091	553.952	0.18604	-0.087402	-0.38525	-8.814	14.5849	65.105	0.11816	-0.1167	-0.0087891
3.69	-54.414	29.30084	62.826	0.0097656	0.11182	-0.092285	-9.876	26.2878	40.6665	-0.21802	0.27612	-0.15674	-135.324	146.1939	485.005	0.21016	-0.1543	-0.30342	-43.725	9.5365	64.531	0.15381	-0.17158	0.028808
3.692	-46.099	25.7473	53.042	0.0065918	0.1106	-0.093017	-11.933	19.3286	17.7989	-0.19385	0.25342	-0.13916	-96.778	212.526	426.1004	0.22032	-0.21348	-0.22695	-1.398	-17.7835	70.722	0.18633	-0.22051	0.057715
3.694	-36.927	21.303	46.205	0.0048828	0.10693	-0.098633	4.017	-3.299	22.389	-0.16016	0.20996	-0.10596	-70.7892	221.865	380.177	0.2164	-0.25605	-0.16718	2.148	-54.23665	68.185	0.21446	-0.26191	0.083105
3.696	-28.468	21.574	54.295	0.0048828	0.10352	-0.097168	9.266	34.59001	27.265	-0.14014	0.18799	-0.092773	-45.8983	227.812	330.088	0.19853	-0.29053	-0.11865	26.523	-60.715	70.569	0.23369	-0.29424	0.10127
3.698	-25.096	14.505	49.874	0.0083008	0.10596	-0.096191	-19.948	5.7459	19.99	-0.10303	0.1416	-0.05957	-14.8109	203.118	300.981	0.17627	-0.31348	-0.083984	14.933	-52.6127	52.58922	0.24561	-0.31592	0.11377
3.7	-31.432	18.6227	38.97	0.014648	0.10205	-0.094727	6.338	17.3838	26.705866	-0.081055	0.10547	-0.038086	9.7086	209.823	244.997	0.16338	-0.32666	-0.04336	38.732	-17.1658	47.919	0.2457	-0.33799	0.12295
3.702	-6.392	12.8149	23.408	0.018066	0.097656	-0.094727	10.695	37.453	4.115	-0.057129	0.066406	-0.015625	3.1552	199.4164	197.041	0.14834	-0.3336	-0.01836	19.067	-18.118	45.737	0.24121	-0.35322	0.12842
3.704	-16.988	16.0628	26.183	0.020508	0.083984	-0.086426	-19.458	-13.0909	-0.0174000000000003	-0.020996	0.023438	0.0078125	6.563	191.967	163.96	0.13701	-0.33125	0.0054687	61.393	-5.894	25.9563	0.23652	-0.35244	0.12373
3.706	-9.831	15.6018	37.915	0.030762	0.07666	-0.084961	1.175	11.5058	17.0992	-0.0073242	0.0048828	0.019531	14.654	168.524	102.601	0.12168	-0.31054	0.015625	56.607	14.302	11.4778	0.2335	-0.35323	0.11982
3.708	-14.992	14.8528	40.01	0.036133	0.066406	-0.088379	-34.846	5.6935	0.307799999999999	0.025879	-0.022461	0.037598	15.812	151.8009	54.214	0.10449	-0.28076	0.017578	31.665	32.1771	-3.208	0.23486	-0.35449	0.11182
3.71	-20.892	15.3395	56.011	0.043457	0.049805	-0.078125	-28.557	0.7419	19.4952	0.050049	-0.036866	0.051025	64.8087	105.787	39.3917	0.081836	-0.24297	0.016602	49.342	32.653	-0.187999999999999	0.22598	-0.34473	0.11025
3.712	-27.23	5.358	49.94	0.049561	0.039795	-0.078614	2.013	23.9116	26.263	0.067383	-0.054199	0.068848	52.3829	58.58028	52.865	0.05498	-0.19892	0.013281	32.889	37.9094	-11.897	0.21846	-0.34121	0.094726
3.714	-7.972	6.6129	28.5361	0.052246	0.031738	-0.074219	-11.354	-25.8853	24.4752	0.095215	-0.077148	0.07373	52.5775	28.5478	78.684	0.01748	-0.15791	1.2e-08	-2.97	17.9706	7.2318	0.21924	-0.33067	0.081055
3.716	-11.688	6.0254	41.708	0.0625	0.020508	-0.067871	-5.318	-38.0675	34.961	0.10449	-0.092773	0.075684	42.1077	-1.484	96.114	-0.025488	-0.12353	-0.026953	-35.949	12.0546	-19.801	0.21172	-0.32402	0.070801
3.718	-25.172	15.5196	37.6781	0.066406	0.015625	-0.067383	-5.908	-8.2862	19.0127	0.12939	-0.10986	0.081543	58.758	-18.9542	82.32	-0.07373	-0.09668	-0.059082	-42.086	7.596	-2.014	0.20898	-0.31787	0.057617
3.72	-9.78599999999999	19.4643	29.7964	0.082031	0.0048828	-0.064453	-51.922	-13.9768	18.2982	0.14771	-0.12622	0.084228	25.372	-41.864	111.805	-0.12246	-0.063769	-0.10527	-96.396	5.026	-12.216	0.21299	-0.30615	0.047851
3.722	-15.07	14.8475	-4.2392	0.09375	-0.0034179	-0.056885	-6.48	45.414	31.728	0.16602	-0.14063	0.080078	-2.113	-35.37863	74.659	-0.17383	-0.021386	-0.15225	-54.979	7	21.72978	0.21025	-0.29121	0.034473
3.724	-5.69799999999999	17.887	-0.5943	0.10986	-0.0092773	-0.049316	-1.878	41.135	3.996524	0.18604	-0.15332	0.081055	-45.147	-19.0774	65.365	-0.22969	0.034473	-0.20147	-98.9559	12.663	16.2968	0.20635	-0.27246	0.02041
3.726	-38.004	14.282	31.5197	0.12402	-0.019531	-0.041504	-46.069	24.1836	25.1811	0.19482	-0.15479	0.08252	-77.188	26.651	24.566	-0.27148	0.099414	-0.25986	-77.645	20.812	25.8563	0.20195	-0.24775	0.0011719
3.728	-27.539	8.4513	23.6377	0.12939	-0.020996	-0.033203	-23.557	39.141	21.059	0.22021	-0.16113	0.080078	-113.893	31.5335	34.656	-0.31152	0.17041	-0.31641	-85.6597	10.802	16.143	0.1958	-0.22266	-0.019043
3.73	-32.5336	9.2132	24.2338	0.14307	-0.03418	-0.026855	-51.158	15.4892	-8.7	0.22949	-0.15967	0.079834	-128.292	46.9378	38.4696	-0.34336	0.24551	-0.36836	-57.745	16.78	36.855	0.18418	-0.19414	-0.043945
3.732	-41.557	13.0918	29.974	0.15064	-0.038086	-0.014892	-27.447	28.5737	29.5384	0.23926	-0.16553	0.080566	-152.668	18.6283	31.323	-0.35986	0.32412	-0.42139	-112.351	16.5485	24.47	0.1749	-0.16485	-0.063965
3.734	-48.2471	11.2895	40.6406	0.15967	-0.050293	-0.0024414	-17.036	44.923	15.4971	0.24756	-0.16309	0.071289	-130.9	26.26334	-19.26898	-0.3751	0.4003	-0.46357	-43.36	47.0488	50.2282	0.16709	-0.14062	-0.081934
3.736	-52.391	-0.4908	37.5112	0.16406	-0.058105	0.010254	-31.723	3.5399	5.29686	0.26025	-0.15918	0.066895	-131.302	13.062	16.838	-0.37783	0.4749	-0.4877	-74.8666	46.474	39.3947	0.15303	-0.11739	-0.10127
3.738	-26.454	17.2112	17.0659	0.1626	-0.068848	0.018066	-1.669	30.4082	29.0143	0.26221	-0.15723	0.055664	-109.6884	25.011	-0.682	-0.37451	0.55127	-0.51123	-50.955	74.219	53.9648	0.14014	-0.092773	-0.12158
3.74	-56.258	15.924	11.9868	0.15918	-0.073242	0.023926	-16.524	19.5598	0.5961	0.26367	-0.15406	0.046875	-111.087	10.768	34.2506	-0.36651	0.60215	-0.50176	-56.467	55.224	46.7944	0.129	-0.074219	-0.13047
3.742	-40.539	9.7538	16.77202	0.15771	-0.064941	0.030273	-25.211	7.477	30.2464	0.26514	-0.13867	0.041016	-30.337	36.096	-2.1757	-0.34179	0.64219	-0.48535	-53.772	52.201	45.906	0.12276	-0.052246	-0.14346
3.744	-27.668	-0.600200000000001	24.1246	0.15283	-0.062988	0.036621	1.01	32.3242	56.747	0.25439	-0.12109	0.029785	-51.88053	14.3827	10.95	-0.30586	0.65742	-0.45645	-29.271	47.2284	45.619	0.1208	-0.035058	-0.15049
3.746	-41.483	6.488	18.4174	0.14893	-0.058594	0.041016	-24.671	1.05	31.0709	0.24902	-0.11523	0.020996	-13.066	27.125	20.9295	-0.26455	0.64951	-0.42021	25.94	29.0646	47.554	0.11885	-0.023339	-0.15859
3.748	-18.774	5.2874	19.05617	0.14111	-0.046142	0.045166	-6.407	-7.071	48.0301	0.24072	-0.084473	0.0087891	-25.873	-10.3641	68.233	-0.21973	0.62598	-0.37695	38.553	11.51	42.6261	0.12158	-0.01123	-0.16504
3.75	-47.147	10.3736	39.9567	0.13428	-0.029785	0.047363	-4.33	9.2353	26.641	0.23339	-0.063477	-0.0029297	-28.706	-15.753	21.8467	-0.16885	0.58769	-0.31856	7.012	-4.13125	32.2016	0.12187	-0.0086914	-0.16611
3.752	-26.828	18.2854	27.77352	0.125	-0.0073242	0.040527	-20.87	-25.9447	22.0405	0.23096	-0.04248	-0.012695	-31.639	-52.109	43.2223	-0.11425	0.533	-0.26055	55.368	-20.3546	43.9232	0.12266	-0.009082	-0.17237
3.754	-45.339	27.9893	25.155	0.11426	0.010742	0.041992	5.848	22.8716	39.21	0.22461	-0.01416	-0.026855	34.971	-40.753	22.778	-0.060742	0.46621	-0.20117	40.136	-20.3153	49.196	0.12695	-0.02041	-0.17627
3.756	-22.129	35.133	19.4733	0.1084	0.033691	0.039551	-6.822	39.663	9.1916	0.2207	-0.0068359	-0.026855	21.467	-52.4996	53.7553	-0.0041994	0.39707	-0.1459	68.34	-14.3662	62.828	0.13047	-0.023926	-0.17607
3.758	-19.092	17.1021	29.2133	0.10352	0.048828	0.03833	-15.33	21.7704	29.136	0.21826	0.0068359	-0.036621	65.623	-1.1716	31.9312	0.052734	0.33398	-0.09082	34.813	-22.59547	50.172	0.12695	-0.028809	-0.1748
3.76	-17.894	19.479	31.04668	0.09375	0.067871	0.037598	3.98099999999999	31.78	32.674	0.2129	0.017334	-0.047852	71.9373	16.31	0.96501	0.10361	0.28555	-0.041309	41.084	-20.0433	59.653	0.12403	-0.035742	-0.1752
3.762	-6.008	12.6114	31.3396	0.088379	0.083984	0.036133	-25.723	3.3635	23.6094	0.2124	0.030762	-0.061523	84.7036	75.986	-26.09	0.14258	0.23594	-0.0024414	-3.749	-28.0705	30.406	0.11768	-0.040625	-0.1751
3.764	-24.776	12.5123	20.9032	0.083008	0.092285	0.033691	2.965	9.257	48.2511	0.1958	0.044434	-0.061523	70.0141	56.59	27.6976	0.16563	0.19219	0.028027	24.013	-15.63468	38.204	0.10596	-0.036328	-0.17705
3.766	-10.735	-5.1893	33.3518	0.076172	0.10596	0.031738	1.707	32.2342	14.483	0.1875	0.051758	-0.065918	88.7414	59.1622	36.352	0.18408	0.14844	0.062695	-19.946	-20.3466	6.4801	0.089355	-0.031348	-0.18144
3.768	-20.811	5.28	26.8022	0.073974	0.11718	0.028321	-42.391	-2.85	29.744	0.16602	0.066895	-0.069824	61.48378	14.3634	51.52095	0.19922	0.11572	0.088867	-1.16	-13.3626	2.7586	0.069336	-0.021484	-0.19482
3.77	-11.582	7.4056	21.55	0.07373	0.12793	0.023926	-5.569	14.3584	31.5948	0.14966	0.082519	-0.075683	55.449	24.8097	41.9009	0.21367	0.080371	0.11015	-35.189	-7.5636	-22.164	0.052051	0.0011719	-0.19707
3.772	-19.085	9.275348	29.882	0.075195	0.14746	0.020508	-39.398	6.10816	14.0239	0.13623	0.096191	-0.086426	4.539	-3.748	50.4542	0.22647	0.042676	0.13086	-42.104	17.329	-10.6857	0.032617	0.023242	-0.2001
3.774	-7.23699999999999	14.5567	23.7903	0.075195	0.15283	0.016602	-23.393	-26.576	35.162	0.12012	0.11963	-0.090332	-23.389	20.0318	45.108	0.23584	0.012598	0.1461	-67.6343	33.452	-32.6854	0.015039	0.045507	-0.20361
3.776	-25.395	24.9357	14.3176	0.078125	0.17383	0.0097656	-2.428	5.4331	37.1035	0.11084	0.12939	-0.094238	-92.3758	-0.82	-1.53176	0.24639	-0.012891	0.15937	-35.692	54.453	-0.536947	0.0032226	0.062109	-0.19922
3.778	-32.57	18.8961	28.1414	0.07959	0.1853	0.0014649	-45.057	-15.0893	30.923	0.095215	0.14502	-0.10645	-74.779	24.8502	-8.94	0.25732	-0.030762	0.16797	-89.2132	42.3681	22.422	5.5511e-14	0.068359	-0.19531
3.78	-32.611	11.5638	58.316	0.081543	0.18994	-0.0048828	-28.948	-16.9851	46.6334	0.083984	0.15967	-0.1106	-92.176	4.753	-1.512	0.26699	-0.04502	0.17305	-89.977	48.965	25.1649	0.0066406	0.058398	-0.18984
3.782	-36.343	-3.632439	55.701	0.083008	0.19873	-0.032715	-11.814	2.1482	12.783	0.076172	0.16943	-0.11621	-77.9469	2.24	41.3913	0.28184	-0.053711	0.18086	-90.2782	28.7267	27.603	0.013965	0.0333	-0.17256
3.784	-28.564	-9.481	63.822	0.080078	0.20264	-0.04834	-45.235	-27.844	1.044	0.061523	0.18311	-0.11475	-95.368	-39.728	67.631	0.2916	-0.057227	0.18008	-84.06242	21.9307	29.2984	0.018652	0.0012694	-0.15381
3.786	-45.238	-13.572	53.576	0.069824	0.22461	-0.067871	5.793	8.9671	30.0488	0.04956	0.19995	-0.11962	-100.555	-32.451	58.654	0.30928	-0.061133	0.18291	-95.48847	14.7366	32.143	0.024707	-0.033691	-0.14434
3.788	-42.673	-9.765	67.502	0.054688	0.24267	-0.094968	-17.479	15.6738	8.5118	0.040039	0.20947	-0.11768	-109.654	-34.1024	40.468	0.32471	-0.059082	0.18262	-82.6932	29.5607	24.868	0.033691	-0.067383	-0.12988
3.79	-46.5213	-9.337	70.246	0.046387	0.27002	-0.12305	-34.966	2.4931	12.63678	0.024902	0.2251	-0.12061	-91.3083	-2.585	45.591	0.33867	-0.05459	0.16875	-59.4493	26.9191	21.36	0.036817	-0.10986	-0.1167
3.792	-53.4114	-7.473	86.87	0.032227	0.29004	-0.15576	-2.782	49.489	7.4946	0.019043	0.23145	-0.12402	-87.98354	-0.914000000000001	43.1181	0.3542	-0.053907	0.16475	-47.358	16.603	4.539	0.038477	-0.13535	-0.11592
3.794	-54.49066	-12.238	105.656	0.025879	0.29834	-0.18311	-27.84	21.5432	-0.3355	0.010254	0.24902	-0.11963	-90.0938	37.9296	29.1013	0.36631	-0.050781	0.15927	-36.869	16.7624	25.8428	0.039258	-0.15918	-0.12139
3.796	-46.966	-17.8003	141.438	0.01123	0.32178	-0.22705	-0.0769999999999982	17.1962	33.5004	0.003418	0.25928	-0.11963	-91.956	45.486	2.4431	0.37422	-0.044824	0.15469	-32.654	17.5621	44.438	0.033594	-0.1752	-0.12685
3.798	-41.2845	-14.65989	169.9	-0.0078124	0.33862	-0.26636	7.277	25.9361	12.82	-0.00048828	0.271	-0.11865	-71.3703	56.583	-10.9921	0.375	-0.039063	0.14502	16.163	39.581	73.092	0.023438	-0.18896	-0.1416
3.8	-86.083	9.6512	208.042	-0.030273	0.3584	-0.31055	-41.601	-12.2312	7.2778	-0.0068359	0.28662	-0.11572	-64.5333	25.4588	14.5589	0.37441	-0.035937	0.13613	25.186	41.736	64.313	0.011426	-0.19268	-0.15732
3.802	-55.705	23.8149	239.317	-0.070801	0.37744	-0.38525	-2.694	13.72409	21.5705	-0.0097656	0.28955	-0.11328	-39.142	23.105	28.4095	0.37099	-0.031836	0.12754	40.251	45.02	74.283	0.0051758	-0.19278	-0.18409
3.804	-71.251	48.5893	290.177	-0.095703	0.38574	-0.42676	-23.127	17.0665	1.5116	-0.0078125	0.29932	-0.11084	-0.878	5.5616	15.361	0.36553	-0.031055	0.11699	7.315	37.542	52.2561	0.0047851	-0.18496	-0.20909
3.806	-66.5851	76.881	331.435	-0.1582	0.42139	-0.51367	-19.367	-2.8802	19.7986	-0.0036621	0.30566	-0.10522	28.661	7.6667	27.517	0.3623	-0.027441	0.10605	72.375	37.7047	66.072	0.011523	-0.17978	-0.23262
3.808	-55.7419	95.062	376.4656	-0.21778	0.4502	-0.5918	27.697	23.0266	42.4591	-0.0039063	0.30811	-0.104	62.3341	-18.0379	43.6492	0.35645	-0.022949	0.10254	31.411	14.151	76.1733	0.020996	-0.18213	-0.25781
3.81	-48.5953	107.86	445.1935	-0.28516	0.47998	-0.6792	-21.843	-25.0494	55.598	-0.003418	0.2915	-0.12061	58.21496	-12.811	61.249	0.35205	-0.021875	0.09883	74.6775	14.228	116.801	0.029199	-0.19258	-0.28711
3.812	-37.651	110.051	537.181	-0.38574	0.5332	-0.80469	-17.62	-15.7826	117.0716	-0.0068359	0.27051	-0.14307	62.634	-21.117	37.675	0.34649	-0.025391	0.09414	-13.834	-3.071	142.0235	0.041895	-0.20977	-0.31924
3.814	-42.7	105.259	617.37	-0.44189	0.56738	-0.85742	-3.35899999999999	36.7696	135.3238	-0.023926	0.24414	-0.18506	68.2208	-0.16	4.29284	0.33594	-0.031641	0.091406	49.872	31.2209	204.03	0.04541	-0.23946	-0.38564
3.816	5.382	79.962	685.393	-0.55273	0.65137	-0.96875	-27.348	33.226	196.606	-0.049072	0.24365	-0.21777	81.6292	13.9158	6.6695	0.33144	-0.041406	0.092187	45.7988	31.611	237.8929	0.037598	-0.25459	-0.45821
3.818	-14.026	44.4308	750.526	-0.63501	0.73755	-1.0427	-21.623	67.3385	253.14379	-0.07959	0.24854	-0.25879	66.771	10.5619	43.3509	0.31445	-0.043945	0.085449	25.215	56.652	340.737	-0.0048828	-0.23193	-0.5293
3.82	-22.764	16.153	798.496	-0.70313	0.83203	-1.0967	-58.02	72.426	275.673	-0.13672	0.24512	-0.33691	46.283	-10.449756	34.7865	0.29551	-0.050391	0.080957	-20.769	42.8	434.4668	-0.089746	-0.16777	-0.61162
3.822	-22.275	-17.425	832.052	-0.771	0.96338	-1.1499	-48.757	51.0821	358.661	-0.16699	0.24072	-0.38623	15.715	-15.8143	55.6661	0.27559	-0.054492	0.077246	19.589	67.433	526.489	-0.20733	-0.073926	-0.72177
3.824	-8.886	-33.566	856.889	-0.79639	1.0278	-1.1655	-17.732	120.9	438.7098	-0.22705	0.25049	-0.48682	0.0470000000000006	-5.2453	32.842	0.25019	-0.052149	0.070606	17.627	117.9618	647.74	-0.33897	0.049121	-0.84951
3.826	-8.871	-38.844	876.434	-0.80127	1.1382	-1.1968	-60.372	123.2059	523.75	-0.2749	0.26636	-0.55567	-38.351	2.2272	44.01022	0.22461	-0.045605	0.059766	-28.528	162.6099	800.2479	-0.4748	0.19951	-0.98281
3.828	5.041	-45.1825	877.666	-0.78272	1.1997	-1.2104	-18.869	120.82344	616.81	-0.32959	0.28369	-0.62842	-11.198	31.358	29.89388	0.20508	-0.036133	0.052734	-50.711	115.9994	978.835	-0.60742	0.37402	-1.1211
3.83	8.622	-60.362	887.71	-0.75195	1.2402	-1.2168	-22.728	109.9315	637.735	-0.41211	0.31836	-0.72656	-64.405	46.426	20.1858	0.18467	-0.027832	0.040527	-143.1914	71.5161	1127.228	-0.76181	0.56514	-1.2763
3.832	-22.04	-67.495	891.24	-0.68506	1.2466	-1.2104	-32.026	50.72	696.4616	-0.45557	0.34961	-0.76953	-29.158	71.272	-25.7572	0.16836	-0.016211	0.030957	-139.208	25.4335	1253.999	-0.91386	0.76523	-1.4398
3.834	-3.835	-52.325	907.853	-0.64648	1.2402	-1.2041	40.1676	47.928	776.9534	-0.55518	0.41846	-0.83936	-68.5668	50.136	8.005	0.15078	-0.008789	0.02002	-127.237	-31.807	1332.731	-1.0694	0.9887	-1.5961
3.836	2.233	-47.979	897.45	-0.58203	1.2051	-1.1875	12.9943	37.0373	859.9156	-0.62744	0.47314	-0.89843	-85.7849	16.807	15.5312	0.14141	0.0006836	0.012207	-101.779	-86.159	1417.655	-1.21	1.2459	-1.7224
3.838	-24.521	-14.4842	890.506	-0.54444	1.1675	-1.1602	-30.241	-14.3312	948.576	-0.69922	0.5332	-0.96289	-125.689	-22.945	56.864	0.12744	0.0097656	-0.0039063	-174.71	-130.574	1465.129	-1.3374	1.5278	-1.855
3.84	-38.814	-5.343	884.565	-0.52051	1.1338	-1.1309	-2.283	-25.448	963.7585	-0.78906	0.62305	-1.043	-88.8992	-13.426	41.9846	0.11914	0.02002	-0.0084962	-130.6625	-168.8524	1432.968	-1.4157	1.7847	-1.9853
3.842	-44.1716	21.2944	866.6701	-0.49512	1.0869	-1.0908	-37.37	-101.7156	955.6042	-0.83008	0.66797	-1.0762	-105.738	-9.7478	53.7408	0.11397	0.032324	-0.016992	-166.068	-236.989	1346.8146	-1.4438	1.9954	-2.062
3.844	-35.3311	33.978	859.8262	-0.48096	1.0737	-1.0728	-45.027	-139.055	1017.385	-0.8999	0.78467	-1.1353	-94.2253	13.365	35.5313	0.10694	0.040136	-0.026758	-148.2191	-259.486	1305.138	-1.4142	2.1126	-2.1026
3.846	-61.708368	30.874	896.1155	-0.46094	1.0605	-1.0537	-41.455	-124.6088	1053.6686	-0.93433	0.87719	-1.1599	-106.387	-11.5591	38.5588	0.1002	0.045703	-0.035937	-160.407	-306.81	1283.502	-1.3479	2.1271	-2.1253
3.848	-43.8279	3.509	920.1539	-0.44555	1.0603	-1.0403	-37.465	-153.38	1072.437	-0.95898	0.97266	-1.1816	-99.2348	0.516000000000002	11.8352	0.1001	0.054199	-0.041504	-89.401	-286.88	1255.045	-1.2734	2.0469	-2.1367
3.85	-51.6293	-43.561	958.395	-0.43604	1.063	-1.0347	-11.576	-130.669	1074.351	-0.97852	1.0732	-1.209	-102.717	-13.7735	10.332	0.10176	0.058105	-0.043457	-130.8	-292.16	1163.726	-1.1866	1.8116	-2.0862
3.852	-70.234	-80.628	969.585	-0.4209	1.0474	-1.0229	-17.779	-132.3846	1047.8579	-0.98145	1.1113	-1.2188	-27.184	18.302	6.3858	0.10381	0.062305	-0.045996	-128.027	-220.287	1124.6348	-1.1078	1.4895	-1.9953
3.854	-58.9827	-117.559	990.303	-0.42041	1.0337	-1.0171	10.879	-173.144	1046.819	-0.97803	1.1606	-1.2319	-36.975	-7.2758	56.8403	0.10811	0.061133	-0.044824	-123.49	-182.081	1139.202	-1.0261	1.1508	-1.8918
3.856	-68.67	-144.4073	1030.568	-0.41064	0.98828	-1.0229	76.47	-129.002	1042.194	-0.97509	1.1821	-1.2456	10.225	20.546	39.58916	0.10986	0.058496	-0.046191	-60.415	-96.993	1152.6147	-0.93721	0.8622	-1.8004
3.858	-55.5279	-165.637	1041.681	-0.41504	0.95801	-1.0411	61.5221	-120.495	1024.013	-0.96826	1.2056	-1.2534	25.059	-5.1159	39.3443	0.10693	0.054688	-0.042969	-36.747	-87.62	1123.131	-0.85498	0.67822	-1.7319
3.86	-103.544	-171.805	1060.156	-0.42236	0.93213	-1.0688	50.3838	-123.8238	1037.49	-0.9585	1.2378	-1.2612	30.303	31.035	28.4462	0.10332	0.056543	-0.040918	2.126	-82.11	1153.1123	-0.80332	0.62334	-1.7006
3.862	-80.988	-181.61	1098.133	-0.45996	0.93506	-1.1245	33.0127	-106.519	1032.396	-0.96289	1.252	-1.248	38.424	-0.0394999999999994	26.6879	0.095605	0.057715	-0.042676	-46.4923	-147.73	1217.404	-0.78867	0.64453	-1.6957
3.864	-93.776	-167.203	1149.136	-0.48584	0.94385	-1.1577	13.026	-179.7858	1044.677	-0.94873	1.2915	-1.2144	67.6509	46.0818	32.9727	0.094434	0.057715	-0.046973	-20.742	-174.36	1284.3283	-0.80468	0.7	-1.7054
3.866	-88.852	-128.949	1177.838	-0.55273	0.99414	-1.2363	28.97	-200.253	1087.388	-0.93432	1.3235	-1.1755	63.1184	14.064	38.097	0.08711	0.057227	-0.039258	-10.225	-252.298	1320.417	-0.8124	0.76104	-1.7196
3.868	-89.53	-88.223	1193.78	-0.61621	1.043	-1.2832	10.958	-200.682	1085.892	-0.91406	1.3418	-1.1445	67.7724	46.246	4.8545	0.087402	0.062988	-0.04834	79.9738	-291.5467	1359.69960954	-0.78906	0.81152	-1.7168
[truncated: 28,066 more rows]
