# Supplementary material for: Reliability and Validity of Running Cadence and Stance Time Derived from Instrumented Wireless Earbuds
Source: Sensors (Basel). 2021 Nov 30;21(23):7995. doi: 10.3390/s21237995 (PMC8659722; doi:10.3390/s21237995)
Supplement: Supplementary file 1 [file sensors-21-07995-s001.zip › Data_P04_speeds_2.csv]

time	S7kmh_force_plate_1	S7kmh_force_plate_2	S7kmh_force_plate_3	S7kmh_earbuds_1	S7kmh_earbuds_2	S7kmh_earbuds_3	S10kmh_force_plate_1	S10kmh_force_plate_2	S10kmh_force_plate_3	S10kmh_earbuds_1	S10kmh_earbuds_2	S10kmh_earbuds_3	S13kmh_force_plate_1	S13kmh_force_plate_2	S13kmh_force_plate_3	S13kmh_earbuds_1	S13kmh_earbuds_2	S13kmh_earbuds_3	max_force_plate_1	max_force_plate_2	max_force_plate_3	max_earbuds_1	max_earbuds_2	max_earbuds_3
0	-77.09	-109.53	971.4747	-0.52051	0.69238	-1.4434	-24.056	33.605	24.8345	0.22314	-0.15381	-0.13623	-9.313	135.012	1146.43	-0.66284	0.94263	-1.6248	-52.674	-37.2427	43.217	-0.066406	0.25009	-0.13272
0.002	-89.343	-113.0594	981.4883	-0.51733	0.68433	-1.4099	-38.017	22.5053	17.3229	0.2251	-0.15796	-0.14453	17.649	33.6734	1259.545	-0.73291	1.0903	-1.6831	-57.119	0.0851999999999995	86.184	-0.080957	0.2667	-0.16465
0.004	-110.323	-114.033	990.4435	-0.50732	0.68604	-1.3745	-9.39	4.96827	19.5165	0.22705	-0.15674	-0.15039	64.8152	20.662	1304.58	-0.80273	1.2773	-1.7305	-80.9	23.2979	142.724	-0.10479	0.27139	-0.20605
0.006	-69.614	-121.824	994.4882	-0.49561	0.67529	-1.3296	-39.057	49.8828	10.659	0.23438	-0.16211	-0.16016	-9.534	-92.322	1449.73	-0.83398	1.3711	-1.7422	-42.589	88.685	222.234	-0.14268	0.28545	-0.27344
0.008	-48.052	-117.172	1004.903	-0.49219	0.67676	-1.3125	-30.217	2.328	15.175	0.23486	-0.16064	-0.16504	-111.2103	-88.095	1511.683	-0.84912	1.5249	-1.769	-99.503	105.871	286.251	-0.18848	0.30469	-0.34766
0.01	-66.308	-122.031	1038.823	-0.50781	0.69727	-1.3027	-23.656	25.4918	4.556	0.23291	-0.1665	-0.17188	-135.4769	-183.172	1435.004	-0.82495	1.6057	-1.7791	-103.306	132.842	415.708	-0.25508	0.33428	-0.42646
0.012	-88.7467	-146.036	1096.39458	-0.53858	0.74512	-1.3062	-55.416	46.5831	10.971	0.22974	-0.16919	-0.1792	-100.0502	-162.1248	1343.973	-0.79834	1.6431	-1.771	-72.874	120.897	494.509	-0.33506	0.37129	-0.51582
0.014	-61.18	-171.0159	1124.1988	-0.57959	0.80322	-1.3296	-33.058	-1.69144	28.0364	0.22266	-0.17676	-0.19385	-79.585	-226.895	1294.513	-0.75928	1.5962	-1.7515	-56.138	136.83	747.834	-0.42451	0.40606	-0.61465
0.016	-14.846	-189.411	1147.97	-0.64307	0.89893	-1.3755	-33.545	31.532	66.8731	0.20068	-0.20752	-0.2373	-37.801	-203.086	1247.439	-0.7417	1.5317	-1.7378	-52.719	182.601	974.061	-0.52041	0.44444	-0.72588
0.018	4.068	-204.731	1161.9688	-0.67334	0.93994	-1.4097	-28.915	-6.2127	91.882604	0.18311	-0.22363	-0.26758	-6.947	-221.794	1221.085	-0.70313	1.3535	-1.7207	-54.962	145.397	1238.375	-0.62305	0.48145	-0.85352
0.02	-5.419	-223.987	1198.4168	-0.7124	1.0122	-1.48	-34.543	-23.9587	107.9231	0.12109	-0.21533	-0.32471	-11.921	-153.002	1154	-0.68408	1.249	-1.7246	-43.858	108.759	1327.304	-0.72735	0.529	-0.99804
0.022	-14.904	-231.505	1213.3311	-0.7312	1.0593	-1.5457	-34.31	48.5986	122.151	0.038574	-0.16431	-0.36011	-45.2069	-170.538	1125.4408	-0.67432	1.2075	-1.7515	-27.934	-13.973	1443.408	-0.83506	0.59287	-1.1385
0.024	4.51900000000001	-208.169	1232.4424	-0.74365	1.1118	-1.6069	25.7349	48.3844	169.8471	-0.055664	-0.11035	-0.4209	-28.6929	-128.39	1146.5361	-0.67383	1.3164	-1.793	-34.781	-62.673	1513.8367	-0.95225	0.68193	-1.2605
0.026	42.2	-192.078	1260.8663	-0.75635	1.1724	-1.6636	-3.568	86.467	220.682	-0.21045	-0.025391	-0.53076	11.795	-111.981	1146.6762	-0.68701	1.4146	-1.8022	-45.448	-133.447	1673.552	-1.0789	0.7836	-1.352
0.028	19.106	-193.764	1285.3188	-0.76318	1.1978	-1.688	-63.0882	120.7957	269.416	-0.27783	0.021484	-0.58398	55.102	-54.55	1167.6291	-0.7207	1.6348	-1.8145	-111.582	-108.779	1655.137	-1.1992	0.91016	-1.4004
0.03	27.8047	-197.056	1312.6455	-0.76172	1.2266	-1.7227	7.276	72.4785	324.2094	-0.41309	0.14648	-0.67285	31.715	-48.99	1246.7492	-0.73047	1.8379	-1.8066	-109.565	-180.0599	1601.074	-1.2998	1.0555	-1.4158
0.032	11.609	-184.814	1325.931	-0.75781	1.2246	-1.7363	18.217	118.005	397.3492	-0.50879	0.25342	-0.74609	-69.4492	-104.35	1316.7906	-0.7207	1.9043	-1.791	-83.49	-242.35	1489.23	-1.3823	1.2122	-1.423
0.034	34.9388	-133.028	1337.96972	-0.75488	1.2207	-1.7441	5.21	126.2268	481.437	-0.61035	0.36328	-0.82422	-69.8519	-172.453	1357.197	-0.67871	1.9414	-1.7363	-33.24078	-351.65	1452.816	-1.4261	1.3638	-1.4402
0.036	37.9762	-101.133	1363.3652	-0.75146	1.1802	-1.7534	12.239	107.6913	527.632	-0.73486	0.51611	-0.92725	-21.037	-253.1	1387.136	-0.62988	1.876	-1.6875	63.5164	-321.86	1401.456	-1.4219	1.4903	-1.4543
0.038	39.158	-92.053	1355.34	-0.74658	1.147	-1.7705	-61.1125	143.824	560.7089	-0.80029	0.59717	-0.97607	4.004	-318.436	1409.0645	-0.57031	1.748	-1.6465	121.8724	-313.06	1349.112	-1.3789	1.5801	-1.4922
0.04	25.883	-105.782	1370.367	-0.74805	1.1035	-1.7832	-23.804	70.9383	632.6314	-0.90234	0.74609	-1.0845	36.637	-377.984	1458.4911	-0.49805	1.4961	-1.5879	113.0273	-196.684	1300.083	-1.3212	1.6208	-1.5356
0.042	16.763	-117.281	1357.9946	-0.76563	1.0488	-1.8008	-19.243	63.363	703.1271	-0.96363	0.85278	-1.1677	39.369	-397.112	1489.4451	-0.46533	1.3599	-1.5737	47.8785	-187.236	1257.045	-1.2719	1.6325	-1.5613
0.044	9.504	-131.1708	1378.6979	-0.77686	1.0366	-1.812	-50.149	55.3018	784.6697	-1.0054	0.95166	-1.2476	53.793	-420.993	1543.9407	-0.41797	1.1001	-1.5669	55.482	-134.704	1240.802	-1.2539	1.609	-1.5864
0.046	2.547	-132.437	1391.2872	-0.79639	1.0298	-1.853	-41.466	-17.5603	857.9809	-1.0195	1.0605	-1.3105	38.619	-377.1	1599.097	-0.39404	0.95605	-1.5918	41.073	-158.793	1211.634	-1.2685	1.5954	-1.599
0.048	5.828	-129.883	1394.908	-0.81347	1.0562	-1.8901	-85.865	-25.473	909.001	-1.0112	1.1079	-1.3472	78.4866	-351.59	1654.061	-0.37646	0.86084	-1.6343	78.398	-92.86	1288.4416	-1.3003	1.6021	-1.5874
0.05	-14.208	-125.637	1400.8207	-0.83203	1.0918	-1.918	-86.923	-99.8528	969.5006	-0.97363	1.1602	-1.4063	35.929	-254.938	1695.238	-0.37061	0.83008	-1.7188	20.776	-95.69	1356.0728	-1.3451	1.6131	-1.5557
0.052	-31.9174	-131.331	1381.261	-0.86377	1.1606	-1.9614	-49.066	-162.2364	1004.855	-0.93847	1.1675	-1.4292	-33.25	-200.697	1719.346	-0.38184	0.84424	-1.7769	-23.947	-67.23	1417.9858	-1.3796	1.6232	-1.5281
0.054	-14.505	-125.061	1405.5155	-0.87451	1.1919	-1.978	-81.014	-148.017	1000.865	-0.90576	1.1431	-1.4429	-94.825	-96.213	1710.712	-0.39844	0.93359	-1.9219	-59.451	-137.03	1385.11	-1.3785	1.6337	-1.519
0.056	-7.416	-119.154	1419.04216	-0.875	1.2324	-2.002	-58.257	-186.356	994.997	-0.85742	1.0664	-1.4551	-145.364	-61.177	1716.055	-0.42481	1.0515	-2.0378	-13.592	-245.409	1434.947	-1.3322	1.6436	-1.5307
0.058	-6.803	-98.0265	1445.475	-0.88282	1.2495	-2.0074	-71.698	-169.966	971.083	-0.83008	1.0234	-1.4531	-161.056	33.08	1718.8762	-0.44971	1.1841	-2.1558	-1.109	-370.014	1464.571	-1.2617	1.6543	-1.5625
0.06	-17.772	-93.8005	1449.539	-0.88867	1.252	-2.0078	-123.6657	-150.623	970.809	-0.79102	0.91895	-1.4492	-154.982	6.051	1730.34	-0.49414	1.3657	-2.2983	-11.404	-432.6	1574.856	-1.1781	1.6563	-1.5863
0.062	10.2244	-70.205	1424.9036	-0.9043	1.2285	-1.9883	-81.106	-188.672	976.688	-0.76954	0.8335	-1.4429	-166.687	37.151	1718.351	-0.51221	1.4497	-2.355	-17.847	-409.07	1590.697	-1.1038	1.6313	-1.603
0.064	16.487	-56.734	1400.398	-0.91162	1.2134	-1.98	-95.73	-154.164	954.48	-0.74609	0.75	-1.4365	-192.972	-38.725	1715.068	-0.54395	1.6035	-2.4551	-5.959	-373.1	1642.1145	-1.0335	1.5798	-1.6093
0.066	0.959000000000003	-49.1722	1401.963	-0.90967	1.1694	-1.9526	-96.797	-184.702	924.7825	-0.7124	0.67432	-1.4253	-217.406	4.659	1723.493	-0.56177	1.717	-2.5139	-16.637	-280.659	1654.766	-0.98223	1.5035	-1.6277
0.068	18.372	-61.67204	1403.6128	-0.90502	1.1281	-1.9236	-79.953	-185.973	906.859	-0.70313	0.64941	-1.4199	-187.5671	-73.265	1750.842	-0.57617	1.8242	-2.5566	-12.254	-255.274	1745.1786	-0.95996	1.4219	-1.6602
0.07	28.0123	-48.3367	1381.103	-0.90234	1.082	-1.8926	-100.516	-136.3355	919.726	-0.68945	0.65039	-1.4121	-150.237	-77.049	1794.219	-0.59375	1.9336	-2.5898	-56.024	-182.663	1775.487	-0.9752	1.3406	-1.7172
0.072	50.129	-51.9837	1374.0411	-0.89063	1.0215	-1.8516	-72.028	-147.314	960.68317	-0.68383	0.66602	-1.4327	-159.0426	-162.421	1817.143	-0.604	1.979	-2.605	-105.689	-171.694	1836.75	-1.0234	1.2877	-1.786
0.074	38.2475	-53.7638	1381.118	-0.88818	0.99658	-1.8315	-54.763	-125.696	979.6065	-0.67432	0.68213	-1.4526	-187.544	-133.095	1844.943	-0.625	2.0352	-2.625	-189.835	-24.732	1844.858	-1.0937	1.2651	-1.8632
0.076	42.6136	-65.1998	1399.687	-0.88184	0.95508	-1.8008	-50.732	-145.109	999.348	-0.6709	0.70703	-1.4658	-173.218	-184.674	1857.818	-0.65308	2.053	-2.6326	-233.938	38.712	1816.615	-1.1552	1.2963	-1.9482
0.078	66.387	-59.2888	1389.3647	-0.87866	0.93774	-1.781	-6.847	-219.337	1031.586	-0.67578	0.71582	-1.4668	-173.037	-104.854	1870.257	-0.69531	2.0498	-2.6348	-211.743	154.413	1772.0375	-1.209	1.3555	-2.0195
0.08	76.448	-50.5323	1368.19007	-0.88086	0.93164	-1.7617	-33.0242	-207.351	1077.727	-0.69092	0.73096	-1.4956	-181.4274	-117.322	1868.025	-0.7666	2.0469	-2.625	-160.8149	107.582	1725.652	-1.2561	1.427	-2.1018
0.082	74.456	-53.8562	1387.3525	-0.88379	0.93652	-1.7559	-57.01381	-227.36738	1129.0685	-0.71582	0.73926	-1.5235	-128.638	-17.568	1826.705	-0.8042	2.0474	-2.6089	-131.389	99.1934	1718.021	-1.3034	1.5138	-2.1944
0.084	66.724	-73.53	1398.9972	-0.88672	0.94531	-1.7539	3.496	-264.073	1167.3646	-0.75195	0.75977	-1.5508	-102.762	-18.125	1794.175	-0.87842	2.0356	-2.5737	-176.180865	-10.192	1741.888	-1.3542	1.6231	-2.2803
0.086	52.265	-63.1139	1403.077	-0.88232	0.95166	-1.7339	-11.903	-274.893	1184.726	-0.8208	0.84033	-1.5815	-65.463	78.9835	1758.819	-0.92383	2.0141	-2.5415	-194.256	-1.399	1800.946	-1.4044	1.7583	-2.3558
0.088	57.901	-47.3145	1372.441	-0.87939	0.95312	-1.7212	-3.093	-339.756	1223.9296	-0.86084	0.90088	-1.5972	-26.508	63.1802	1737.788	-0.95605	1.9785	-2.4961	-145.566	-66.02479	1840.375	-1.4531	1.9219	-2.4219
0.09	55.606	-41.7015	1344.4611	-0.87109	0.95117	-1.709	42.568	-337.185	1249.9028	-0.94922	1.0186	-1.625	-7.59	126.201	1721.90402	-0.97266	1.918	-2.4316	-90.279	-60.4939	1898.659	-1.4889	2.0893	-2.4728
0.092	59.048	-47.7579	1324.5793	-0.86084	0.94189	-1.6919	29.191	-307.225	1298.5645	-0.98926	1.0972	-1.6469	23.682	101.455	1669.934	-0.9707	1.8848	-2.3945	-104.032	-126.392	1882.121	-1.5012	2.2356	-2.5043
0.094	15.8546	-29.5455	1317.96941	-0.85693	0.93994	-1.6812	56.5961	-271.026	1362.546	-0.99414	1.1523	-1.6484	11.073	148.4402	1630.279	-0.95459	1.8169	-2.3257	-101.712	-125.838	1901.074	-1.5015	2.3485	-2.5273
0.096	19.706	-22.921	1302.83646	-0.84717	0.93311	-1.6753	46.9211	-198.50058	1385.23	-0.96289	1.1582	-1.6504	2.00800000000001	112.271	1610.668	-0.94434	1.7696	-2.2549	-144.922	-133.707	1860.672	-1.5082	2.4027	-2.5269
0.098	25.2231	-16.7872	1296.4712	-0.8418	0.92627	-1.6611	13.2145	-177.7696	1401.77359	-0.93799	1.1353	-1.6499	-30.265	142.416	1589.806	-0.93359	1.7148	-2.1816	-117.6416	-78.055	1921.373	-1.5234	2.4121	-2.5078
0.1	39.545	-18.8675	1295.8057	-0.83203	0.91797	-1.6504	56.5225	-175.073	1408.39776	-0.91406	1.0771	-1.6582	-9.60900000000001	106.0443	1621.3754	-0.91016	1.6514	-2.0781	-111.53	-21.3794	1908.726	-1.5447	2.3838	-2.4705
0.102	12.615	-0.8958	1267.5228	-0.82178	0.91064	-1.6362	-3.942	-126.3	1431.7972	-0.92163	1.0403	-1.6667	-22.935	119.061	1657.388	-0.89258	1.623	-2.0254	-51.024	19.1296	1897.215	-1.5784	2.3126	-2.4147
0.104	-5.946	11.4353	1268.6042	-0.81592	0.90869	-1.6245	13.179	-125.295	1470.7843	-0.95703	1.0254	-1.6914	-39.296	58.204	1663.145	-0.84326	1.5493	-1.9155	-26.114	39.878	1777.263	-1.6128	2.2126	-2.3491
0.106	-15.354	20.7042	1252.66192	-0.80273	0.89844	-1.6074	39.9378	-88.087	1477.6472	-1.0332	1.0234	-1.7305	-71.454	80.4914	1655.739	-0.80761	1.479	-1.8422	29.595	31.7247	1720.182	-1.6418	2.0925	-2.2754
0.108	3.9645	23.2537	1231.2167	-0.78955	0.89112	-1.5952	-35.52924	-91.648	1471.9154	-1.0684	1.0234	-1.7559	-86.561	56.605	1610.657	-0.77344	1.4043	-1.7754	6.652	92.5584	1651	-1.6543	1.9746	-2.1963
0.11	4.349	11.8112	1233.878	-0.76904	0.87939	-1.5796	5.731	-133.454	1483.4384	-1.1445	1.0566	-1.8145	-106.941	94.029	1570.5901	-0.73438	1.3047	-1.6953	12.565	132.4439	1635.2392	-1.6481	1.8879	-2.1332
0.112	-21.895	-11.2407	1201.349	-0.75	0.86133	-1.5605	-2.547	-133.707	1488.189	-1.1824	1.1106	-1.8572	-85.184	113.289	1560.23	-0.71826	1.2622	-1.6558	5.03799999999999	220.118	1598.3928	-1.6269	1.8262	-2.0792
0.114	-6.942	-19.8399	1206.485	-0.74365	0.85596	-1.5425	-22.051	-147.492	1512.438	-1.2178	1.1719	-1.9043	-102.0971	140.56	1518.004	-0.69141	1.1855	-1.5879	-15.626	193.6933	1572.801	-1.5925	1.7841	-2.0245
0.116	16.83	-3.099	1163.8759	-0.72168	0.83789	-1.5195	23.447	-163.162	1551.243	-1.2471	1.2559	-1.9707	-113.869	140.649	1469.359	-0.66919	1.133	-1.5251	-37.676	191.9293	1540.057	-1.5607	1.7494	-1.9705
0.118	10.199	12.3888	1158.85041	-0.70117	0.8208	-1.5015	-32.3871	-154.904	1568.7486	-1.2534	1.2896	-2.0063	-152.878	173.417	1436.489	-0.63965	1.0918	-1.4668	-58.447	170.254	1502.565	-1.5171	1.7153	-1.9175
0.12	-0.146999999999998	26.8103	1156.299	-0.67822	0.80518	-1.4839	-28.5028	-181.946	1600.726	-1.2793	1.3418	-2.0488	-143.169	226.593	1375.6815	-0.5835	1.0298	-1.3765	-41.225	232.805	1507.771	-1.4777	1.6808	-1.8699
0.122	19.466	22.0986	1124.5294	-0.64551	0.77344	-1.459	-21.776	-175.112	1608.894	-1.2949	1.3887	-2.0781	-134.3391	278.936	1328.877	-0.5498	1.0059	-1.3262	-78.611	226.391	1527.2603	-1.4195	1.6531	-1.818
0.124	16.439	52.9697	1110.0819	-0.62842	0.76416	-1.4448	-43.5731	-151.646	1623.689	-1.3042	1.4087	-2.0894	-139.2751	303.106	1276.323	-0.46826	0.93994	-1.2192	-103.8351	226.192	1545.0058	-1.35	1.6141	-1.764
0.126	11.617	73.66306	1084.3973	-0.60059	0.74609	-1.416	13.738	-143.227	1632.365	-1.3179	1.4282	-2.1069	-133.94187	300.579	1226.677	-0.40015	0.88648	-1.1419	-120.9813	146.699	1533.3566	-1.2766	1.5687	-1.7024
0.128	16.577	80.5329	1078.77682	-0.57568	0.73584	-1.395	7.4838	-83.286	1614.668	-1.3274	1.4192	-2.1033	-109.1981	294.633	1178.338	-0.3252	0.82813	-1.0586	-123.389	127.139	1510.502	-1.2104	1.52	-1.6382
0.13	31.291	85.5043	1058.334	-0.5625	0.72852	-1.3711	-23.6628	-53.449	1601.6948	-1.332	1.4023	-2.0938	-92.918	263.523	1168.629	-0.22461	0.74902	-0.95508	-88.8988	123.8	1452.129	-1.1423	1.4722	-1.5657
0.132	24.944	94.732	1028.573	-0.53467	0.71582	-1.3315	30.878	-39.996	1595.658	-1.3301	1.3594	-2.0762	-83.818	270.91	1123.708	-0.17969	0.69922	-0.91016	-65.4269	173.203	1438.9	-1.0827	1.4266	-1.5007
0.134	17.336	108.163	996.5295	-0.52686	0.70557	-1.312	29.816	-13.2024	1585.058	-1.3359	1.332	-2.0645	-34.43	239.928	1097.536	-0.084473	0.60889	-0.80859	-98.499	201.873	1355.82	-1.0245	1.388	-1.4253
0.136	25.604	95.903	993.8396	-0.49316	0.68555	-1.2617	50.01	-46.344	1594.9343	-1.3296	1.2817	-2.0522	-14.813	244.3793	1018.7139	-0.020264	0.5437	-0.73413	-113.422	223.987	1327.787	-0.97578	1.3443	-1.3482
0.138	24.285	97.8425	956.1768	-0.4663	0.66089	-1.2214	74.034	-39.3156	1599.1758	-1.324	1.2483	-2.0511	8.275	197.237	992.7128	0.033691	0.47998	-0.66357	-101.082	250.222	1238.657	-0.91406	1.3027	-1.2734
0.14	3.517	97.434648	943.3785	-0.43799	0.63086	-1.1855	50.145	-23.08594	1598.5181	-1.3257	1.23	-2.0464	62.63643	207.246	949.129	0.098633	0.4082	-0.57617	-38.053	252.741	1212.487	-0.84688	1.2562	-1.1895
0.142	6.32299999999999	94.7487	906.4536	-0.40283	0.59229	-1.1304	64.05	-29.0206	1581.11259	-1.3262	1.2344	-2.0371	103.306	164.037	915.125	0.12939	0.37744	-0.53174	-31.743	308.873	1149.701	-0.7707	1.2035	-1.1027
0.144	-9.082	85.668	880.6071	-0.3877	0.57031	-1.1016	64.053	-11.248	1573.1421	-1.3296	1.2485	-2.0386	104.423	219.768	832.95	0.1875	0.32324	-0.43848	-62.917	308.993	1128.758	-0.68281	1.1398	-1.0203
0.146	-14.81	83.786	866.1039	-0.36426	0.53125	-1.0498	45.892	-34.5163	1575.312	-1.3223	1.2676	-2.0254	112.169	202.5785	760.704	0.23121	0.27954	-0.37402	-72.922	339.344	1053.8153	-0.59873	1.0659	-0.9294
0.148	-42.151	86.199	836.9842	-0.34473	0.49707	-1.0054	90.798	-61.3446	1586.615	-1.3171	1.2775	-2.0163	110.568	266.363	673.83496	0.27783	0.22949	-0.30566	-56.68	292.514	1027.49533	-0.50537	0.99365	-0.8335
0.15	-39.405	97.577	838.263	-0.32275	0.46582	-0.97266	67.777	-46.8237	1572.78179	-1.3003	1.272	-1.9937	96.484	236.492	622.5161	0.33496	0.16748	-0.20947	-2.5131	282.158	949.0297	-0.41758	0.90606	-0.75117
0.152	-29.73	106.1925	808.691	-0.28857	0.42627	-0.92236	45.677	-68.824	1565.7111	-1.2676	1.2314	-1.9707	90.657	293.343	553.7394	0.37012	0.12939	-0.16406	53.7312	214.575	911.877	-0.3293	0.81651	-0.66279
0.154	-49.349	108.9625	785.7471	-0.27393	0.40771	-0.896	70.401	-44.483	1556.41312	-1.252	1.2021	-1.9521	102.053	251.723	521.472	0.42871	0.04248	-0.071289	89.726	222.003	821.777	-0.23437	0.72588	-0.57138
0.156	-57.537	124.4243	757.0192	-0.24658	0.36914	-0.8457	30.0207	-34.0055	1532.7041	-1.2124	1.147	-1.9214	65.582	299.993	451.367	0.46826	-0.029053	-0.0041505	85.937	182.104	754.933	-0.15078	0.63086	-0.49004
0.158	-63.572	115.4878	728.00491	-0.22827	0.3501	-0.81934	68.023	-31.7426	1531.782	-1.185	1.1118	-1.896	31.429	235.9811	406.445	0.49707	-0.10693	0.044922	70.763	202.885	664.3217	-0.06543	0.5332	-0.40918
0.16	-66.136	120.08	710.794	-0.20654	0.33154	-0.78857	63.896	10.285	1503.577	-1.1563	1.0742	-1.875	32.6523	272.641	325.236	0.51953	-0.22168	0.10791	104.473	144.453	648.539	0.017188	0.4289	-0.32539
0.162	-46.932	126.4499	652.01033	-0.18262	0.31201	-0.74951	31.135	29.955	1478.664	-1.1094	1.0342	-1.8398	24.517	195.504	258.895	0.52588	-0.28271	0.14111	120.303	134.476	604.476	0.10137	0.32744	-0.23955
0.164	-68.398	117.44543	625.37192	-0.1665	0.30469	-0.73047	49.312	63.364	1473.4243	-1.0854	1.0181	-1.8286	1.373	228.5297	205.852	0.51904	-0.39307	0.1875	114.201	110.666	528.86	0.18496	0.22275	-0.16181
0.166	-65.824	111.7044	593.9742	-0.14258	0.28467	-0.68506	-2.564	115.455	1450.223	-1.0352	0.98535	-1.8047	-18.558	147.35	186.2521	0.49438	-0.4668	0.20679	112.305	144.847	462.1921	0.26826	0.1127	-0.086228
0.168	-67.622	97.77	575.6874	-0.11963	0.27295	-0.6416	18.5353	108.476	1440.5107	-1.002	0.97168	-1.7832	-62.749	178.617	151.8309	0.45117	-0.53027	0.21484	50.659	177.218	361.416	0.33984	0.0014648	-0.020508
0.17	-56.46	119.8814	546.2632	-0.10693	0.26611	-0.62451	35.9188	106.002	1428.4788	-0.9707	0.96875	-1.7637	-81.322	83.426	146.1502	0.38525	-0.59473	0.21924	23.9649	223.723	329.9296	0.404	-0.10801	0.048437
0.172	-52.232	126.9648	519.8938	-0.079102	0.24658	-0.58545	-18.3992	100.5952	1380.998	-0.93359	0.96094	-1.7363	-93.496	94.837	132.1467	0.3418	-0.63672	0.20483	9.3471	252.151	246.26	0.45088	-0.21582	0.10146
0.174	-30.292	120.44308	500.6601	-0.060791	0.23022	-0.55176	6.9962	72.5367	1376.3449	-0.91357	0.95557	-1.7202	-122.46	-6.613	149.633	0.30811	-0.67041	0.18799	18.65	228.104	206.1706	0.50127	-0.31855	0.15224
0.176	-15.339	119.2094	480.0031	-0.038574	0.20557	-0.52002	-7.897	114.187	1375.388	-0.88965	0.94141	-1.6855	-131.462	57.86	113.0067	0.25195	-0.70313	0.15039	11.494	205.874	118.952	0.56348	-0.42207	0.19931
0.178	-31.469	124.988	446.7913	-0.0063477	0.18604	-0.47803	-0.911999999999999	123.2609	1352.5189	-0.88037	0.93262	-1.6543	-130.3251	11.262	87.1140079	0.20654	-0.70166	0.12549	14.086	169.6998	117.271	0.63818	-0.51709	0.24023
0.18	-36.747	119.904	423.0036	0.0063477	0.1748	-0.46045	29.3295	89.691	1355.778	-0.86621	0.92188	-1.6191	-141.904	92.104	38.302	0.091309	-0.64893	0.045898	-29.375	167.8486	78.557	0.70303	-0.61455	0.26729
0.182	-19.361	114.8061	411.1119	0.029297	0.14844	-0.41406	-16.639	85.888	1308.05197	-0.84863	0.90625	-1.5801	-132.79	33.603	26.63	-0.025634	-0.57251	-0.027344	-32.125	147.3684	109.116	0.74717	-0.71553	0.29854
0.184	-6.085	108.23648	372.9972	0.047119	0.12867	-0.38403	-0.827000000000002	54.153	1288.3792	-0.83887	0.89453	-1.5488	-90.6841	73.591	12.251	-0.13867	-0.47363	-0.11621	-37.478	141.9332	45.4	0.76709	-0.80342	0.31416
0.186	-35.524	115.6203	350.242	0.063965	0.10596	-0.35742	37.2135	89.6181	1259.3974	-0.80615	0.86572	-1.4878	-68.211	4.4909	35.625	-0.2832	-0.31592	-0.25195	-58.249	83.7512	60.0523	0.76553	-0.88331	0.32373
0.188	-22.575	113.696	336.5882	0.083496	0.081543	-0.32227	0.391999999999999	137.5528	1224.90402	-0.78564	0.83935	-1.4419	-19.397	55.7195	25.08	-0.34814	-0.2334	-0.31494	-103.925	78.166	20.998	0.73633	-0.95508	0.32227
0.19	-11.369	113.4262	314.367	0.095215	0.067871	-0.3042	19.776	129.0979	1196.611	-0.75146	0.80225	-1.3882	-32.924	24.9993	26.49	-0.45996	-0.049316	-0.44336	-129.13	44.427	64.1761	0.66602	-0.99062	0.29825
0.192	-15.795	120.5877	283.3093	0.1167	0.050293	-0.26514	13.233	160.599	1147.9159	-0.69727	0.75586	-1.3145	-23.198	89.001	-0.263999999999999	-0.52563	0.084472	-0.53686	-120.0659	69.457	65.4356	0.57171	-0.99102	0.2631
0.194	-17.171	103.36286	265.299446	0.1294	0.038818	-0.2439	-15.553	161.946	1096.8612	-0.67432	0.73291	-1.2729	-2.987	37.582	11.1231	-0.58105	0.2251	-0.61865	-129.915	32.33758	111.471	0.4436	-0.95041	0.2131
0.196	-43.927	96.4874	257.9043	0.1416	0.023438	-0.22119	22.071	163.94	1076.7917	-0.60791	0.6665	-1.1899	33.119	77.142	5.6405	-0.63525	0.41455	-0.71631	-113.3408	19.9413	102.962	0.28471	-0.87639	0.1465
0.198	-31.174	88.2459	243.6502	0.15332	0.019043	-0.19678	-1.5	205.124	1048.4795	-0.55713	0.61377	-1.1299	23.731	24.39938	23.914	-0.6499	0.50195	-0.75537	-89.2539	-28.2203	105.193	0.10205	-0.75879	0.065918
0.2	-42.088	80.8542	225.7335	0.16357	0.010742	-0.18848	26.849	183.479	1033.394	-0.51318	0.56494	-1.0659	41.444	62.486	35.6577	-0.67188	0.66602	-0.80469	-54.832	-14.9655	85.45	-0.088169	-0.60814	-0.040569
0.202	-50.734	84.0365	204.61628	0.18066	0.0043945	-0.16455	11.344	183.81	981.928	-0.45166	0.48828	-0.98242	45	20.175	60.902	-0.66577	0.75	-0.81519	-12.496	11.06	70.489	-0.26734	-0.44468	-0.13963
0.204	-64.963	72.9016	200.001	0.18896	-0.0014648	-0.15454	-45.918	182.2311	904.002	-0.42041	0.45361	-0.94287	39.873	43.504	47.2066	-0.63818	0.80518	-0.81494	-1.807	50.849	64.336	-0.43729	-0.28489	-0.23654
0.206	-72.478	86.4198	175.1271	0.19873	-0.0043945	-0.14063	3.119	135.86	875	-0.3667	0.39307	-0.86475	28.933	-12.0892	43.5942	-0.58008	0.84375	-0.79102	-2.089	56.72213	39.235	-0.60335	-0.11997	-0.3289
0.208	-75.7275	85.26	155.1146	0.21191	-0.0083008	-0.12939	-32.776	167.1582	848.74	-0.32861	0.34913	-0.80224	35.471	-3.5737	52.1194	-0.54199	0.8457	-0.76563	-15.905	41.8142	31.8805	-0.74756	0.047363	-0.42334
0.21	-80.498	65.3576	154.0144	0.20996	-0.010254	-0.11475	-47.011	156.677	823.573	-0.29053	0.30811	-0.74561	8.584	-20.7992	43.998	-0.4458	0.80811	-0.69873	-7.823	19.121	-4.87	-0.8443	0.20941	-0.49529
0.212	-73.478	38.565	132.5815	0.22314	-0.0097656	-0.11084	-26.381	133.8582	793.282	-0.24707	0.25879	-0.66602	3.50700000000001	25.347	44.255	-0.37622	0.74244	-0.63745	13.39	10.5302	28.206	-0.90375	0.35108	-0.55207
0.214	-73.736	34.169	122.5343	0.22143	-0.0070801	-0.10742	-95.0296	165.7546	744.9615	-0.229	0.2373	-0.62109	-18.547	31.945	41.29	-0.31885	0.6665	-0.56982	19.27	26.0269	30.3521	-0.91784	0.46471	-0.60013
0.216	-57.6	33.7751	100.7646	0.22314	-0.0058594	-0.104	-82.1677	130.892	712.695	-0.17871	0.19922	-0.54492	-51.43	49.3294	47.492	-0.25684	0.54492	-0.48047	11.579	29.7889	88.455	-0.90008	0.55616	-0.63158
0.218	-51.945	36.61917	99.02608	0.22119	-0.0029297	-0.10107	-65.425	134.233	675.611	-0.14258	0.17871	-0.48315	-85.2927	43.7048	44.043	-0.2334	0.48096	-0.42871	1.073	38.27537	44.3314	-0.86963	0.64307	-0.6499
0.22	-49.186	42.4766	91.54255	0.2207	-0.0024414	-0.099609	-99.5501	171.138	594.184	-0.1001	0.15137	-0.42578	-72.266	33.516	49.916	-0.18799	0.35059	-0.34131	-14.313	-5.766	53.385	-0.8196	0.72308	-0.65939
0.222	-60.804	42.6092	79.47603	0.21387	0.0014648	-0.099121	-81.998	141.348	545.566	-0.050781	0.10645	-0.35254	-87.761	20.197808	29.0843	-0.15088	0.27124	-0.28637	-5.498	-22.245	2.398	-0.77521	0.78872	-0.65577
0.224	-44.498	50.6961	68.0067	0.20581	0.0046387	-0.10156	-73.002	187.2112	493.8548	-0.024902	0.083984	-0.31836	-93.2405	24.9937	44.3529	-0.10986	0.21484	-0.23779	16.414	-62.524	38.038	-0.7274	0.8167	-0.63745
0.226	-25.214	52.2784	75.47039	0.19971	0.0063477	-0.097656	-104.39513	166.643	446.11	0.020508	0.032715	-0.24609	-125.894	40.213	34.4302	-0.052734	0.146	-0.1958	-8.622	-44.80912	6.848	-0.67029	0.81364	-0.59959
0.228	-37.584	51.0924	62.36699	0.18945	0.014648	-0.10498	-85.617	134.719	413.0474	0.054199	-0.0070803	-0.20337	-128.997	18.364	42.6578	-0.030273	0.11035	-0.17139	0.563000000000002	-50.7957	23.167	-0.60938	0.77148	-0.55273
0.23	-11.385	43.6706	67.1834	0.18408	0.014648	-0.104	-82.4294	182.2145	357.3701	0.084473	-0.049316	-0.15967	-128.53	13.87	25.3035	0.012207	0.04248	-0.11865	-43.698	-18.576	-22.778	-0.54444	0.70312	-0.49391
0.232	-36.41	38.5306	48.5051	0.17188	0.030273	-0.10352	-63.079	142.7298	307.1006	0.11865	-0.092773	-0.10352	-111.9102	-19.412	21.5502	0.030518	0.0026855	-0.090574	-48.9394	-29.55	-0.433	-0.46136	0.60829	-0.43459
0.234	-13.077	32.8302	44.5409	0.16845	0.03418	-0.10328	-64.375	146.4511	281.5281	0.13086	-0.11914	-0.074219	-110.886	14.639	11.0391	0.052734	-0.038086	-0.060059	-69.753	8.922	-12.6514	-0.37244	0.49944	-0.37203
0.236	3.55	29.6363	45.6342	0.16113	0.037598	-0.10742	-108.5799	167.61	229.535	0.15674	-0.15625	-0.020508	-99.4067	-2.879	35.829	0.076172	-0.080078	-0.02002	-75.813	31.9883	21.7319	-0.28228	0.38326	-0.30689
0.238	7.886	31.0318	26.2697	0.15381	0.041504	-0.10645	-53.656	99.4961	212.128	0.16064	-0.18408	0.0043943	-66.0896	32.47	23.0363	0.083496	-0.10498	-0.00048828	-112.81846	85.199	32.8135	-0.19043	0.25928	-0.24268
0.24	-8.603	25.8842	41.5563	0.15186	0.039063	-0.104	-50.229	144.51	175.192	0.16943	-0.20752	0.026367	-63.0273	-13.421	40.8088	0.11377	-0.14893	0.038574	-117.899	80.815	27.1245	-0.1157	0.14269	-0.19262
0.242	-7.344	35.977	38.23469	0.15088	0.038574	-0.1084	-44.689	116.1567	163.863	0.18164	-0.22217	0.054688	-56.211	5.8945	37.5068	0.1267	-0.18848	0.059326	-110.7153	100.019	14.888	-0.054989	0.046249	-0.14839
0.244	-1.748	37.6115	29.2899	0.14941	0.039307	-0.10767	-20.116	69.7934	161.213	0.17627	-0.23486	0.069336	-26.31	-33.6704	39.64983	0.14209	-0.22217	0.085449	-111.232	62.45	-10.011	0.0056235	-0.032141	-0.11023
0.246	-14.411	31.5292	36.9723	0.1499	0.03418	-0.10645	-41.285	109.5068	127.06	0.18213	-0.24414	0.070801	8.54000000000001	35.76	29.449	0.15967	-0.26367	0.10693	-82.444	64.686	8.1068	0.052098	-0.094546	-0.09472
0.248	-13.176	13.6107	44.926	0.14209	0.029785	-0.10889	-17.646	60.365	111.3199	0.16919	-0.24463	0.069092	7.486	31.269	27.012	0.16553	-0.2793	0.12061	-71.511	49.352	-4.9148	0.080078	-0.1499	-0.074219
0.25	-43.376	5.0649	44.259	0.14355	0.028809	-0.10303	-2.304	55.4727	88.1886	0.1543	-0.23486	0.0625	22.523	102.063	10.128	0.16016	-0.29248	0.13135	-78.682	48.21052	29.2786	0.10556	-0.19874	-0.061486
0.252	-38.561	21.10783	36.4982	0.14014	0.015137	-0.10596	-18.625	55.403	66.2924	0.12793	-0.20557	0.049316	27.571	55.03	23.2072	0.15113	-0.2832	0.12744	-49.735	42.553	11.6845	0.12896	-0.2325	-0.057356
0.254	-40.006	36.777	21.86	0.13624	0.0080567	-0.10644	2.247	-19.8396	70.603	0.10889	-0.18701	0.035156	33.75	68.291	9.1741	0.14258	-0.2749	0.12646	-36.242	29.2741	64.218	0.15015	-0.26832	-0.050465
0.256	-39.106	36.017	34.2245	0.13623	-0.0014648	-0.10596	-5.758	48.0626	44.863	0.062012	-0.1333	-0.0014648	41.388	7.01067	27.9177	0.12354	-0.25537	0.11914	-33.411	17.332	54.264	0.16455	-0.29199	-0.049126
0.258	-46.191	19.81135	25.211	0.1377	-0.01123	-0.10791	-30.775	39.64977	17.106	0.024658	-0.087648	-0.026612	39.574	51.652	5.5938	0.12109	-0.24512	0.11621	-12.374	-16.33141	109.512	0.18701	-0.30957	-0.045898
0.26	-48.177	13.3383	15.0274	0.14063	-0.015137	-0.10449	-7.759	23.954	38.2956	-0.019531	-0.042969	-0.059082	14.864	18.21806	36.4078	0.11475	-0.21729	0.10156	-25.05	-2.32806	71.327	0.19705	-0.32627	-0.038336
0.262	-49.927	21.7211	15.4422	0.1377	-0.022949	-0.11182	-32.286	90.714	33.099	-0.072266	0.022949	-0.10449	11.265	68.512	44.0447	0.11646	-0.19507	0.091308	-20.635	-1.713	98.075	0.21136	-0.34469	-0.035704
0.264	-67.928	25.1976	29.8451	0.13794	-0.028809	-0.10474	-11.331	38.2625	31.69385	-0.097656	0.053711	-0.12842	3.214	23.9364	51.088	0.12354	-0.1792	0.081055	-10.497	20.085	49.24146	0.21907	-0.35369	-0.033691
0.266	-65.699	24.8296	36.6534	0.13672	-0.035645	-0.10596	-22.45	52.202	41.9112	-0.15332	0.12646	-0.17188	-20.822	45.435	30.5889	0.14355	-0.17383	0.077148	28.865	1.1532	70.963	0.21869	-0.35859	-0.038634
0.268	-71.322	19.115	24.4338	0.13477	-0.04541	-0.10645	-68.9137	68.037	32.6806	-0.20557	0.19092	-0.21143	-23.54	-13.4851	46.833	0.15234	-0.16943	0.078125	6.533	24.5657	34.247	0.21289	-0.36133	-0.041504
0.27	-72.612	26.8904	18.5042	0.13477	-0.047363	-0.10596	-19.038	-1.38907	51.343	-0.23047	0.22461	-0.22217	-46.074	28.933	39.79	0.15869	-0.18018	0.069336	17.472	-3.4863	47.493	0.2067	-0.35194	-0.045333
0.272	-50.128	22.4602	27.002	0.13672	-0.058594	-0.11328	-45.236	49.325	51.987	-0.26025	0.27783	-0.24463	-81.233	3.02293	69.239	0.1604	-0.18383	0.064697	2.539	27.64015	28.5227	0.19459	-0.3396	-0.045713
0.274	-50.979	34.5463	28.365	0.13282	-0.0625	-0.11303	-60.492	26.3689	22.404	-0.27539	0.30762	-0.25464	-71.632	50.9098	43.904	0.16016	-0.18359	0.058105	17.778	5.7	38.3273	0.18326	-0.32161	-0.049627
0.276	-36.283	34.8092	19.6745	0.13086	-0.062012	-0.11523	-38.954	-1.3987	13.0436	-0.27832	0.32617	-0.2627	-117.937	3.354	35.536	0.15234	-0.18213	0.046875	14.002	28.1071	11.236	0.17489	-0.30534	-0.061352
0.278	-45.044	32.6983	30.0893	0.12842	-0.063477	-0.11621	-56.1513	37.2346	17.533	-0.26318	0.33789	-0.26123	-108.044	20.345	45.661	0.15332	-0.18262	0.043945	20.991	1.562	13.2098	0.17236	-0.28174	-0.070801
0.28	-19.283	25.05781	27.39929	0.12646	-0.058105	-0.11523	-48.79	-21.9952	34.883	-0.25488	0.33936	-0.25879	-125.774	-20.4487	46.618	0.14844	-0.16553	0.025391	-39.074	-2.5307	18.685	0.1628	-0.25774	-0.077042
0.282	-30.522	13.0093	32.1484	0.11865	-0.054199	-0.11914	-61.243	-3.384218	54.478	-0.22998	0.33252	-0.23926	-103.1562	26.997	49.959	0.14527	-0.15503	0.0080565	-46.379	-12.34758	24.9209	0.15627	-0.22903	-0.080752
0.284	-10.021	19.821	15.7184	0.11597	-0.051758	-0.11329	-67.38661	32.5564	42.4185	-0.21753	0.31762	-0.21997	-126.077	42.86	49.0565	0.13867	-0.14111	-0.0087891	-82.134	-4.8396	23.759	0.13947	-0.20246	-0.08467
0.286	-35.304	24.985	28.2086	0.11572	-0.049316	-0.11963	-35.152	-31.457	44.118	-0.19922	0.29932	-0.19629	-98.9761	73.6815	31.6054	0.12793	-0.10986	-0.027832	-66.818	-2.6073	-2.555	0.12061	-0.1795	-0.090621
0.288	-21.062	33.6135	29.6692	0.10693	-0.043457	-0.11426	-56.588	22.812	47.3144	-0.1748	0.25537	-0.15723	-103.3366	34.35	36.0142	0.12842	-0.09668	-0.040039	-82.8243	-6.0017	19.3738	0.104	-0.1582	-0.09668
0.29	0.718999999999994	35.3874	26.6444	0.104	-0.043457	-0.11279	-45.548	16.8692	40.338	-0.16699	0.23291	-0.14258	-79.314	17.049	30.7638	0.11963	-0.065918	-0.058594	-79.0641	-14.4557	5.16	0.078413	-0.1334	-0.10117
0.292	-11.304	34.7334	22.9226	0.1001	-0.039063	-0.099121	-23.898	13.1351	38.273	-0.1377	0.18799	-0.10547	-72.982	-20.43566	15.7643	0.11914	-0.049072	-0.06665	-102.1028	-14.9636	41.79289	0.054583	-0.10946	-0.10723
0.294	-9.006	24.3555	32.3244	0.097168	-0.037598	-0.099855	-30.502	73.263	35.4973	-0.11475	0.15527	-0.068604	-46.924	0.417999999999999	18.2793	0.11182	-0.02832	-0.074219	-95.53597	0.828999999999997	-1.803	0.029974	-0.076261	-0.11543
0.296	-21.017	19.7968	37.4698	0.092773	-0.036133	-0.09668	-16.644	13.2663	28.7002	-0.092773	0.11963	-0.054199	-43.781	3.793	42.826739	0.10742	-0.010254	-0.086426	-84.74347	15.359	14.8283	0.0065403	-0.047262	-0.11865
0.298	-1.293	26.3518	38.2797	0.085449	-0.032227	-0.078613	-21.483	13.7154	35.1298	-0.062012	0.075195	-0.016602	-11.753	19.219	41.376	0.10938	0.0024414	-0.089355	-91.5576	45.553	-21.0998	-0.018555	-0.0092773	-0.11914
0.3	-16.978	32.0802	33.92293	0.086426	-0.03125	-0.077637	-13.69	38.7937	29.5734	-0.050293	0.059082	0	-7.702	17.3138	33.49949	0.11572	0.0078125	-0.087891	-57.958	35.56572	19.0199	-0.045116	0.022165	-0.125
0.302	-24.659	22.93844	40.2149	0.080078	-0.02832	-0.070801	-2.934	-28.033	16.6729	-0.02002	0.026367	0.027832	25.191	10.014	10.2022	0.1211	0.0083008	-0.088623	-96.993	76.989	3.568	-0.0583	0.046288	-0.13057
0.304	-26.293	16.6062	35.0279	0.074463	-0.023193	-0.063965	-9.094	25.5885	19.1644	0.0012207	0.0012207	0.04834	8.188	15.16158	14.4952	0.13574	0.003418	-0.084473	-69.445	66.753	40.0012	-0.062207	0.062304	-0.12393
0.306	-49.738	25.3761	24.4304	0.069824	-0.019531	-0.0625	-26.273	-4.206	21.2568	0.022461	-0.022461	0.0625	30.295	25.6691	37.9573	0.15088	-0.014648	-0.07959	-59.756	88.227	22.477	-0.062402	0.070898	-0.11885
0.308	-48.757	33.475	24.5336	0.061035	-0.0087891	-0.055176	-15.113	-38.742	31.4803	0.040527	-0.04541	0.086426	17.484	35.9637	31.85082	0.16162	-0.021973	-0.073242	-13.263	54.014	62.714	-0.061523	0.070313	-0.11182
0.31	-42.414	31.4967	37.9029	0.056397	0.00073245	-0.048828	-16.714	22.456	28.6319	0.047852	-0.058105	0.09082	39.777	27.8297	32.7529	0.17236	-0.033691	-0.064453	-55.3486	59.12	32.811	-0.057422	0.057617	-0.10127
0.312	-54.6	21.0348	26.7916	0.047852	0.01123	-0.056152	-21.997	-5.4744	19.7776	0.060059	-0.081543	0.10205	39.46	29.3093	19.5413	0.17432	-0.046387	-0.049805	-9.726	37.17	42.584	-0.051856	0.048926	-0.086719
0.314	-58.885	23.0884	28.426	0.039551	0.028809	-0.056641	-5.064	6.7444	38.5722	0.067383	-0.094482	0.10791	20.505	1.9622	29.401	0.17334	-0.052734	-0.052734	-32.584	49.026	43.0046	-0.05459	0.031738	-0.075781
0.316	-66.921	23.3648	41.9668	0.041992	0.036133	-0.0625	-20.841	33.2871	37.1381	0.078125	-0.10547	0.11182	-9.10400000000001	37.976	13.7793	0.16064	-0.050781	-0.05127	-3.50700000000001	19.0833	47.913	-0.048731	0.012304	-0.062695
0.318	-50.718	14.2085	38.974	0.044434	0.060059	-0.064453	-23.567	-33.485	33.278	0.09668	-0.11328	0.11426	-4.557	40.608	17.5312	0.15527	-0.050781	-0.044433	-1.3	23.5361	51.811	-0.048828	-0.0087891	-0.048828
0.32	-47.241	12.8344	54.1013	0.043946	0.074463	-0.066894	-28.033	23.9207	24.6012	0.10205	-0.12207	0.11328	-49.326	87.698	6.96	0.14746	-0.051758	-0.040039	40.3	-2.413	47.148	-0.046582	-0.025	-0.03877
0.322	-62.914	19.7372	33.1682	0.041992	0.09082	-0.069336	-41.5796	10.051	11.0012	0.10742	-0.13672	0.11768	-40.188	59.742	38.8586	0.13379	-0.057129	-0.050293	15.61	-4.68	58.033	-0.043164	-0.038281	-0.02959
0.324	-82.6206	28.6408	20.5201	0.051758	0.10156	-0.074219	-27.208	-13.5207	28.6387	0.1206	-0.14111	0.1189	-42.275	58.744	41.9592	0.12598	-0.049805	-0.049316	34.265	-9.702	70.336	-0.044727	-0.053125	-0.014746
0.326	-36.034	28.0967	27.527	0.058105	0.10986	-0.079102	-65.5629	50.372	21.168	0.12451	-0.14697	0.11377	-63.755	-6.5235	59.176	0.10938	-0.050781	-0.056152	4.976	-9.5772	97.428	-0.047461	-0.066113	-0.0097655
0.328	-48.587	15.7135	24.8534	0.072754	0.11768	-0.086426	-56.662	15.6337	-10.55421	0.13086	-0.1499	0.10938	-101.76	21.34331	41.15	0.098387	-0.04541	-0.067383	-21.536	-9.1042	52.023	-0.04248	-0.070801	-9.4369e-14
0.33	-34.911	24.7595	28.7555	0.079102	0.12451	-0.09082	-54.248	25.5	15.7082	0.13574	-0.15381	0.10693	-111.9356	10.585	45.227	0.089844	-0.040039	-0.075195	-8.573	-4.6442	58.212	-0.043457	-0.083008	0.0024414
0.332	-30.311	6.84817	31.8837	0.09082	0.13135	-0.10059	-70.6387	65.13	9.782	0.14453	-0.1499	0.10352	-116.7891	55.881	49.1596	0.072266	-0.031738	-0.083008	-32.019	2.4824	11.9016	-0.051856	-0.089942	0.008789
0.334	-24.539	19.2744	31.47678	0.10889	0.13623	-0.11816	-41.66	-12.16366	29.00408	0.14673	-0.14746	0.099855	-110.959	17.3326	58.429	0.070801	-0.029785	-0.085449	-48.487	-12.56826	39.3459	-0.058887	-0.093848	0.008789
0.336	-29.708	32.407	45.9774	0.11426	0.13818	-0.11865	-38.803	32.284	34.9102	0.14795	-0.14453	0.089844	-108.0554	36.0999	38.11	0.067383	-0.027832	-0.094727	-78.717	15.1433	14.865	-0.058008	-0.095215	0.0057617
0.338	-29.222	31.4366	36.6643	0.12793	0.14307	-0.12939	-51.2559	9.2888	19.0208	0.15137	-0.12939	0.085449	-110.79	-11.4342	51.325	0.069336	-0.031739	-0.096436	-58.787	8.9058	23.2827	-0.058105	-0.10498	-0.00097656
0.34	-3.275	9.1035	42.456	0.14502	0.14697	-0.14551	-30.801	-15.0479	32.4	0.15576	-0.12695	0.080566	-96.8713	24.435	28.2012	0.071777	-0.042969	-0.10547	-71.5918	22.405	-18.847	-0.053223	-0.11035	-0.0053711
0.342	-19.294	11.02264	27.157	0.1543	0.14746	-0.15771	-44.433	31.4401	28.2177	0.16162	-0.11182	0.07373	-90.76953	5.142	46.754	0.078613	-0.045898	-0.1084	-49.4	-0.0130000000000017	24.211	-0.042383	-0.1167	-0.0069336
0.344	-0.213999999999999	19.96369	13.0842	0.18115	0.14355	-0.17627	-33.259	2.162	13.78246	0.1648	-0.10693	0.072754	-83.196	46.69323	22.6051	0.084473	-0.053711	-0.10303	-73.215	-4.954	-1.235	-0.024414	-0.12178	-0.0057617
0.346	-15.017	21.5314	17.821	0.19141	0.14258	-0.17969	-27.787	22.277	17.9783	0.16992	-0.10205	0.072754	-62.516	8.5754	43.292	0.098145	-0.062988	-0.11523	-77.266	-7.282	36.757	-0.0097654	-0.12607	-0.0090821
0.348	-9.055	1.50878	53.729	0.20605	0.12354	-0.20459	-33.329	61.474	9.899	0.17383	-0.095703	0.065918	-14.183	40.8115	38.42977	0.10913	-0.071045	-0.12281	-99.001	18.1546	12.93506	0.0043945	-0.12939	-0.014648
0.35	-22.072	0.81354	90.7653	0.20727	0.10205	-0.24024	-33.347	-7.1371	43.279	0.17529	-0.097168	0.060547	-17.073	-10.7728	59.833	0.11963	-0.079102	-0.13184	-83.8797	1.201	33.1676	0.016211	-0.13682	-0.022657
0.352	-27.513	27.2347	94.3411	0.20264	0.086914	-0.28613	-12.371	34.656	46.4604	0.17725	-0.092773	0.062012	-7.716	33.374	37.627	0.14014	-0.087891	-0.15137	-111.106	28.6285	-0.0700000000000003	0.033398	-0.14043	-0.027637
0.354	-17.927	36.6717	112.7994	0.18701	0.090332	-0.33252	-7.982	20.3862	20.8955	0.17261	-0.093261	0.055176	-9.061	10.39799	51.289	0.15088	-0.088867	-0.16211	-72.0628	14.4213	2.0444	0.04668	-0.14473	-0.040527
0.356	-56.209	44.1216	156.7448	0.16943	0.10107	-0.35938	-6.226	-2.7239	29.285	0.16406	-0.092773	0.053711	6.188	48.0692	17.9719	0.16406	-0.087891	-0.18555	-89.2974	27.313	-5.341	0.061621	-0.14941	-0.050977
0.358	-59.979	65.961	192.5225	0.11719	0.12207	-0.43164	-20.801	57.825	27.8077	0.15137	-0.089355	0.04834	21.672	11.8774	25.848	0.18066	-0.0979	-0.21582	-46.474	26.24758	7.207	0.07959	-0.15137	-0.058594
0.36	-73.457	79.5044	209.0387	0.072021	0.14673	-0.50586	-19.467	20.39901	27.2357	0.14307	-0.081055	0.040527	48.148	18.402	14.205	0.19629	-0.10986	-0.24561	-73.016	38.663	23.331	0.088379	-0.15078	-0.073536
0.362	-76.45	66.64292	241.114	0.026367	0.17969	-0.56836	-1.939	29.9545	33.4031	0.12012	-0.07373	0.031738	17.326	-28.2685	16.42121	0.22217	-0.11768	-0.2915	-13.184	43.1746	14.3413	0.09629	-0.14443	-0.09297
0.364	-86.772	62.421	270.1582	-0.022949	0.23779	-0.63672	-0.605000000000004	56.59	25.1479	0.10425	-0.059327	0.027344	17.318	9.014	14.9643	0.23047	-0.12012	-0.31836	-27.455	46.364	33.688	0.10684	-0.14287	-0.11054
0.366	-84.525	75.286	314.8262	-0.052246	0.26855	-0.67578	-31.226	-6.9015	37.694	0.091797	-0.044434	0.017578	5.882	-1.6624	29.6272	0.24609	-0.11426	-0.35791	15.504	63.539	40.657	0.12285	-0.1375	-0.12227
0.368	-85.494	95.7418	366.7221	-0.1123	0.33301	-0.75049	-15.223	30.9082	55.9471	0.067871	-0.028809	0.0048828	5.535	34.7656	20.0615	0.25049	-0.1001	-0.39795	16.27	72.973	63.995	0.13477	-0.13477	-0.13232
0.37	-127.6922	116.5568	412.646	-0.15625	0.38452	-0.80712	-22.205	12.8734	37.842172	0.0625	-0.013184	-0.0019531	-16.329	27.926	41.0146	0.24902	-0.087891	-0.44336	-0.122999999999998	79.904	42.893	0.15156	-0.13711	-0.14033
0.372	-88.31	111.377333	473.492	-0.21094	0.44287	-0.86035	-25.162	-25.008	40.2165	0.040039	0.0048828	-0.01123	2.31	41.7409	89.33	0.2251	-0.089844	-0.53467	0.530000000000001	58.595	71.283	0.16436	-0.13379	-0.15274
0.374	-78.302	97.8313	551.418	-0.29395	0.5	-0.95117	-46.767	27.0665	34.1861	0.02832	0.026124	-0.020996	-23.828	16.37429	102.416	0.20313	-0.087891	-0.5874	12.995	35.5935	91.257	0.16748	-0.12871	-0.1711
0.376	-56.649	90.907	661.7078	-0.34668	0.52881	-1.0059	-51.16	-16.18564	35.38	0.01416	0.04248	-0.027344	-35.029	55.0122	142.333	0.12646	-0.031738	-0.6958	2.951	5.7036	155.61609	0.15166	-0.1249	-0.21524
0.378	-94.1155	67.885	763.3065	-0.44482	0.58936	-1.1147	-36.032	-4.5426	52.513	0	0.06543	-0.034668	-49.6686	76.946	183.556	0.031494	0.054199	-0.79566	-4.631	31.2039	200.433	0.10986	-0.12695	-0.26514
0.38	-61.2885	57.2348	813.034	-0.52833	0.65381	-1.1851	-56.903	32.239	22.8785	-0.0048828	0.075195	-0.039063	-45.5825	109.295	256.4097	-0.081055	0.16846	-0.90576	68.4384	38.6498	274.68	0.030859	-0.082519	-0.32149
0.382	-39.143	39.109	867.6221	-0.61572	0.72705	-1.2515	-48.637	-7.6247	22.1533	-0.011719	0.097656	-0.042969	-97.379	114.048	352.726	-0.25391	0.36084	-1.064	15.73659	82.801	319.8812	-0.089062	0.0048829	-0.3914
0.384	-61.073	20.226	944.718	-0.73242	0.86133	-1.3086	-45.224	36.8233	42.6472	-0.019776	0.11035	-0.048584	-69.952	95.1149	414.593	-0.34717	0.47314	-1.145	-18.3	66.675	431.737	-0.2375	0.13262	-0.4918
0.386	-51.212	-14.4563	1032.214	-0.78076	0.93604	-1.3335	-46.196	16.382	27.5513	-0.021973	0.12451	-0.050293	-67.769	82.3707	532.71	-0.54443	0.71143	-1.3315	-21.049	60.852	475.357	-0.40185	0.28447	-0.62031
0.388	-24.538	-30.6443	1060.7922	-0.85742	1.0762	-1.373	-28.079	-17.214	35.878	-0.023926	0.14502	-0.05127	-52.3	123.805	695.695	-0.69067	0.8811	-1.4841	38.324	75.588	628.9551	-0.5459	0.44678	-0.75781
0.39	-6.18	-41.80374	1072.8926	-0.88989	1.1457	-1.3962	-60.0161	28.1702	24.8752	-0.029785	0.15137	-0.050293	-79.5168	143.352	919.921	-0.83154	1.0317	-1.6519	-17.18	135.595	784.7975	-0.67041	0.6292	-0.89697
0.392	-11.922	-73.76	1098.9936	-0.90234	1.1992	-1.4219	-60.489	-7.305	17.2834	-0.026855	0.16406	-0.055664	-63.958	121.1392	1078.134	-0.97217	1.2739	-1.8608	6.477	119.65	957.266	-0.78594	0.8168	-1.0445
0.394	36.0585	-115.709	1117.926	-0.88623	1.2466	-1.437	-34.82	8.0662	33.1515	-0.024414	0.17407	-0.056152	-103.163	77.577	1227.129	-1.0386	1.4321	-1.9312	-83.6497	80.7147	1074.801	-0.90469	1.0075	-1.1961
0.396	56.9755	-121.012	1107.098	-0.87109	1.2578	-1.4375	-50.012	50.0008	11.133	-0.023438	0.1792	-0.046875	-66.2	-6.992	1363.42	-1.1621	1.7813	-2.1035	-97.287	23.1079	1205.25	-1.0341	1.2003	-1.3364
0.398	79.019	-86.426	1071.383	-0.8457	1.291	-1.4238	-21.555	-6.7531	15.7559	-0.020508	0.18799	-0.051758	-32.856	-70.428	1496.0416	-1.2364	2.0274	-2.2178	-96.499	-59.083	1306.982	-1.1836	1.4043	-1.4746
0.4	91.83	-83.889	1074.9969	-0.82495	1.2956	-1.3904	-18.263	26.8202	30.8878	-0.015137	0.19482	-0.049316	-53.891	-138.863	1619.214	-1.2632	2.2446	-2.2905	-69.882	-127.694	1415.645	-1.3609	1.6271	-1.6128
0.402	47.476	-85.722	1091.2858	-0.80908	1.2935	-1.3462	-41.99	-3.244	9.5218	-0.015625	0.19873	-0.046387	-99.949	-152.218	1665.587	-1.2397	2.3872	-2.3413	-139.4013	-163.891	1492.019	-1.5355	1.8554	-1.7375
0.404	75.696	-72.2095	1112.3173	-0.78076	1.2681	-1.2729	-20.882	-36.185	29.6295	-0.015137	0.20874	-0.043946	-105.167	-220.418	1637.753	-1.21	2.3691	-2.3359	-135.1064	-205.3	1407.223	-1.682	2.0652	-1.8574
0.406	67.4689	-53.236	1111.845	-0.76514	1.2466	-1.2397	1.185	28.3511	21.965	-0.015625	0.21729	-0.044434	-103.4862	-271.699	1577.335	-1.1055	2.1074	-2.2383	-171.867	-246.453	1338.792	-1.717	2.2119	-1.9365
0.408	69.725	-42.516	1120.6888	-0.7207	1.1973	-1.1953	-26.48	-8.0081	16.942	-0.013672	0.22559	-0.04541	-89.427	-362.594	1530.25	-0.96902	1.7688	-2.1307	-186.58	-275.689	1245.738	-1.6367	2.2686	-1.9727
0.41	35.7712	-59.622	1125.206	-0.67846	1.1574	-1.1647	-7.887	3.62	26.7675	-0.0068359	0.23145	-0.044434	-52.471	-381.92	1458.005	-0.82813	1.4141	-2.0371	-178.854	-326.783	1216.91	-1.4518	2.181	-1.9694
0.412	40.2137	-69.703	1096.3315	-0.62646	1.1216	-1.1382	-16.267	41.6966	3.2	0.0063477	0.24023	-0.052734	-57.26	-435.56	1415.425	-0.64795	0.98682	-1.9292	-179.367	-326.21	1178.513	-1.2222	1.9771	-1.9167
0.414	31.854	-61.494	1098.7041	-0.56787	1.0698	-1.1362	-12.019	-0.4691	34.5102	0.013184	0.23291	-0.079102	-102.153	-377.26	1327.485	-0.57861	0.81787	-1.8901	-179.738	-351.86	1135.885	-1.0085	1.6907	-1.8421
0.416	-0.427	-59.229	1128.909	-0.53955	1.0317	-1.1499	-5.058	37.647	66.12	0.02002	0.22168	-0.10205	-99.14	-350.651	1295.1655	-0.51807	0.64893	-1.8511	-167.569	-276.456	1090.884	-0.86416	1.3558	-1.7591
0.418	11.12	-85.4966	1173.0058	-0.48877	0.96924	-1.1948	-28.299	8.5975	79.801	0.017578	0.21729	-0.14111	-78.144	-233.509	1253.227	-0.54102	0.67041	-1.8633	-167.914	-221.707	1146.3102	-0.79004	1.0039	-1.6621
0.42	-18.722	-142.295	1185.901	-0.45727	0.93066	-1.2363	-17.687	-18.6934	108.6794	-0.00048825	0.22095	-0.17652	-50.049	-185.445	1284.32	-0.61279	0.76221	-1.894	-153.927	-114.31	1120.791	-0.77978	0.75791	-1.5878
0.422	-20.371	-179.329	1211.2712	-0.43701	0.90479	-1.2847	-37.325	43.649	131.814	-0.035156	0.23633	-0.20996	-36.063	-132.844	1286.715	-0.70508	0.89844	-1.9043	-91.593	-103.11	1162.1182	-0.82207	0.63106	-1.5614
0.424	-25.514	-170.732	1241.7351	-0.4248	0.90039	-1.3574	-58.866	17.8535	168.5959	-0.094727	0.24805	-0.2793	-74.243	-151.74	1334.075	-0.71631	0.93994	-1.896	-88.064	-71.74	1169.754	-0.89824	0.63144	-1.5774
0.426	-15.659	-149.218	1269.366	-0.42578	0.90527	-1.3945	-66.266	24.7391	217.7495	-0.12988	0.25879	-0.32422	-149.794	-151.54	1382.227	-0.6709	0.98242	-1.8613	-107.752	-143.79	1256.446	-0.97724	0.69952	-1.5985
0.428	-43.6053	-145.615	1287.4691	-0.44189	0.94775	-1.4565	-83.809	72.575	260.047	-0.20117	0.28809	-0.41699	-132.563	-179.981	1424.1296	-0.59521	0.9624	-1.8012	-137.713	-160.06	1295.356	-1.0278	0.77393	-1.6304
0.43	-77.023	-145.0645	1284.30152	-0.46314	0.98756	-1.4954	-67.974	19.346	345.9923	-0.26074	0.31568	-0.48511	-112.2668	-232.834	1443.536	-0.49756	0.89111	-1.7124	-91.459	-245.899	1370.998	-1.0137	0.85918	-1.659
0.432	-93.92929	-164.0954	1300.8689	-0.48096	1.021	-1.5288	-71.385	88.8382	423.6831	-0.31006	0.34277	-0.55811	-43.862	-302.931	1473.978	-0.37891	0.72266	-1.5967	-76.495	-288.9034	1389.921	-0.96865	0.9747	-1.6936
0.434	-93.3841	-148.8132	1318.734	-0.49561	1.0371	-1.5684	-61.437	95.297	521.8557	-0.39209	0.39697	-0.65088	-11.99	-385.345	1497.296	-0.34229	0.61328	-1.5488	19.426	-400.482	1467.6918	-0.91357	1.0892	-1.7042
0.436	-63.453	-107.9743	1355.249	-0.50537	1.0288	-1.5874	-55.046	71.041	590.9658	-0.43896	0.42236	-0.7085	5.7859	-428.307	1542.513	-0.2793	0.37891	-1.5156	-10.292	-422.04	1492.89993	-0.83916	1.1458	-1.6921
0.438	-86.7368	-71.4486	1357.4485	-0.51416	1.0005	-1.6333	-60.4619	109.6514	641.205	-0.53564	0.47021	-0.82373	-0.245100000000001	-494.27	1599.013	-0.25782	0.25879	-1.5166	12.044	-484.88	1562.595	-0.74121	1.125	-1.6465
0.44	-62.987	-62.371	1352.874	-0.52026	0.98462	-1.6653	-36.6565	61.957	734.0469	-0.60669	0.51709	-0.90796	1.358	-476.75	1663.7403	-0.27393	0.20557	-1.5483	32.045	-447.49	1632.043	-0.64551	1.0232	-1.5849
0.442	-68.481	-70.113	1354.5667	-0.5332	0.97266	-1.6973	-13.976	57.944	853.3	-0.69629	0.57031	-0.98145	33.202	-441.5	1716.529	-0.38916	0.2876	-1.6851	54.5152	-446.25	1713.252	-0.58008	0.9043	-1.5223
0.444	-56.304	-54.032	1359.955	-0.55615	0.96533	-1.7378	-35.845	68.043	943.724	-0.82373	0.66504	-1.0718	32.8553	-349.645	1730.3465	-0.48584	0.39307	-1.7788	41.416	-344.475	1763.831	-0.56211	0.80586	-1.4793
0.446	-28.326	-43.4587	1385.3322	-0.56445	0.96094	-1.7617	-25.825	-22.227	969.231	-0.88037	0.72412	-1.1108	52.8493	-297.2665	1774.7657	-0.68213	0.70557	-1.98	14.574	-309.537	1784.424	-0.6123	0.75195	-1.4738
0.448	-18.83	-66.3707	1412.889	-0.58301	0.96289	-1.8105	-49.0119	-22.159	1006.461	-0.99512	0.84961	-1.166	23.766	-194.805	1808.291	-0.8501	1.0327	-2.1753	-1.156	-235.147	1770.2496	-0.71533	0.76758	-1.5039
0.45	-26.432	-85.4572	1427.257	-0.59766	0.97754	-1.8594	-84.4978	-70.1845	1016.3969	-1.0552	0.95557	-1.1973	16.963	-145.685	1836.977	-0.9043	1.1836	-2.2793	-68.8185	-186.702	1757.1448	-0.86367	0.88457	-1.5896
0.452	-55.387	-88.06267	1437.068	-0.61279	0.99268	-1.8784	-57.585	-118.457	1040.8422	-1.0913	1.0571	-1.2222	28.9582	-51.3	1845.738	-0.95703	1.4238	-2.4531	-54.35	-92.84	1793.2877	-1.0199	1.0572	-1.7097
0.454	-24.485	-82.06545	1433.3838	-0.64648	1.0332	-1.9141	-26.361	-81.27922	1037.2807	-1.0859	1.1719	-1.2461	67.923	-57.168	1845.133	-0.94019	1.511	-2.5408	-31.95	-43.641	1780.976	-1.162	1.2603	-1.8549
0.456	-32.354	-92.3251	1444.051	-0.66821	1.0764	-1.9422	-10.074	-137.408	1032.684	-1.0605	1.207	-1.2539	112.355	-14.56	1801.503	-0.9082	1.5352	-2.6016	-11.921	-25.98	1770.4169	-1.2895	1.457	-2.0019
0.458	-29.979	-89.5134	1433.356	-0.69727	1.1309	-1.9668	7.034	-144.818	1043.756	-0.99414	1.2305	-1.252	108.324	-77.43	1791.712	-0.87793	1.4746	-2.6406	-21.456	-62.832	1717.27	-1.3936	1.6387	-2.1465
0.46	-39.866	-81.2517	1438.014	-0.72217	1.1958	-1.9937	8.33313	-102.396	1032.277	-0.94116	1.2199	-1.2448	121.071	-43.455	1789.054	-0.87695	1.4336	-2.6523	3.851	-103.903	1739.946	-1.471	1.7767	-2.2647
0.462	-49.474	-70.4007	1422.591	-0.73779	1.2251	-1.9956	31.6929	-140.15	1003.089	-0.8999	1.1958	-1.228	109.037	-116.582	1804.844	-0.88086	1.332	-2.6699	-17.081	-95.817	1735.747	-1.521	1.8693	-2.3597
0.464	-38.431	-64.41318	1429.132	-0.78076	1.2827	-1.9995	58.742	-86.439	994.167	-0.86719	1.1709	-1.1934	70.024	-107.878	1837.453	-0.89429	1.2502	-2.6706	25.606	-117.222	1822.6402	-1.5523	1.9037	-2.4268
0.466	-38.552	-73.439	1434.9211	-0.81225	1.3157	-1.9988	46.49582	-81.956	976.533	-0.86523	1.1621	-1.1719	42.693	-206.376	1889.549	-0.9082	1.1719	-2.6484	-42.046	-106.122	1847.858	-1.5577	1.8915	-2.4702
0.468	-23.076	-43.957	1407.255	-0.83545	1.3398	-1.998	23.522	-110.943	978.8441	-0.86377	1.1694	-1.1069	30.83645	-181.436	1896.189	-0.9248	1.0742	-2.5996	-71.5024	-153.453	1879.322	-1.543	1.8496	-2.4922
0.47	-45.591	-42.4604	1401.62099	-0.85938	1.3613	-1.9805	49.178	-91.432	994.583	-0.86109	1.1911	-1.0618	41.3391	-230.961	1930.156	-0.92725	1.0356	-2.5933	-95.446	-135.825	1854.839	-1.5203	1.7675	-2.4875
0.472	-41.234	-14.7967	1385.834	-0.86475	1.3638	-1.9644	5.121	-152.325	1008.949	-0.85254	1.207	-1.0215	14.076	-163.084	1912.425	-0.89648	1.0068	-2.5957	-103.591	-156.993	1897.101	-1.494	1.6661	-2.4683
0.474	-62.377	-12.766	1399.194	-0.87109	1.3477	-1.9453	-36.51	-178.111	1045.5419	-0.83154	1.2153	-1.0034	-22.051	-197.177	1911.081	-0.85596	1.0073	-2.5962	-138.085	-92.102	1875.423	-1.4851	1.5704	-2.4374
0.476	-88.612	-8.558	1393.7362	-0.86401	1.3313	-1.9265	-63.949	-143.114	1064.855	-0.81152	1.2207	-1.0146	-61.908	-96.6324	1891.514	-0.82031	1.0068	-2.5996	-95.9596	-68.16886	1874.628	-1.484	1.4879	-2.4063
0.478	-86.602	-21.97	1396.249	-0.85498	1.3149	-1.9097	-44.151	-193.682	1074.48	-0.7749	1.2407	-1.0503	-79.844	-116.562	1857.63	-0.80957	1.0137	-2.5977	-94.7251	8.415	1809.6525	-1.4902	1.4355	-2.3711
0.48	-93.861	-39.647	1379.6254	-0.85352	1.2891	-1.8926	-62.217	-179.715	1124.333	-0.75074	1.2434	-1.0954	-41.1109	-3.2547	1794.33	-0.81836	1.0313	-2.5938	-88.7306	28.6093	1771.659	-1.4839	1.4204	-2.3511
0.482	-86.2349	-48.9928	1365.40046	-0.85156	1.2803	-1.8809	-82.349	-205.17	1162.94	-0.73682	1.2437	-1.1519	-28.9745	-11.6829	1740.544	-0.87451	1.1001	-2.5874	-53.725	93.7892	1737.561	-1.4692	1.4105	-2.3379
0.484	-119.86325	-46.531	1358.225	-0.85742	1.2852	-1.8652	-69.295	-275.342	1229.6648	-0.73291	1.2485	-1.228	-28.068	77.9859	1693.896	-0.91699	1.1479	-2.5752	-3.42599999999999	111.094	1727.478	-1.4313	1.4039	-2.3187
0.486	-95.7497	-38.737	1339.0694	-0.85987	1.3027	-1.8652	-70.3449	-249.28	1275.77291	-0.73779	1.2583	-1.2622	-26.948	48.043	1649.503	-0.93506	1.186	-2.5503	-14.395	176.2705	1715.808	-1.3854	1.3872	-2.296
0.488	-74.226	-38.249	1330.2081	-0.85156	1.3164	-1.8496	-71.045	-268.513	1294.87498	-0.75342	1.2974	-1.3159	-33.2667	113.3661	1595.272	-0.9292	1.1997	-2.4976	-8.98800000000001	209.549	1723.9926	-1.3491	1.356	-2.2671
0.49	-50.136	-25.0431	1334.3411	-0.82813	1.3223	-1.8379	-51.364	-257.516	1345.4235	-0.76856	1.3301	-1.3428	-64.857	60.0452	1603.345	-0.90576	1.1919	-2.4546	-31.958	230.212	1728.33063	-1.3424	1.3299	-2.2276
0.492	-63.771	-30.1621	1331.2299	-0.81396	1.3228	-1.8276	-92.89	-185.468	1358.945	-0.78027	1.3496	-1.3633	-21.935	107.385	1582.936	-0.85254	1.1699	-2.3711	-20.205	213.633	1688.9811	-1.3424	1.3102	-2.1836
0.494	-64.237	-28.1217	1335.8703	-0.78125	1.3184	-1.8057	-95.591	-190.3931	1377.5858	-0.79492	1.3457	-1.4102	17.7225	43.706	1575.756	-0.80737	1.1301	-2.2946	-4.423	188.14	1690.391	-1.3354	1.2898	-2.1351
0.496	-42.779	-11.47959	1336.128	-0.75977	1.3076	-1.7822	-124.408	-137.828	1403.3421	-0.7998	1.3291	-1.4355	13.553	111.254	1533.348	-0.76123	1.0796	-2.2183	4.535	158.883	1646.3069	-1.3047	1.2582	-2.0754
0.498	-44.63	19.59509	1319.541	-0.7417	1.2856	-1.7554	-144.6464	-110.806	1427.1567	-0.81348	1.2949	-1.5098	-18.236	70.457	1545.676	-0.70264	0.9917	-2.1167	9.097	115.187	1641.693	-1.2515	1.2192	-1.9995
0.5	-31.837	43.982	1295.7557	-0.72119	1.2544	-1.7202	-134.2303	-140.653	1444.627	-0.83764	1.2653	-1.5622	0.891999999999996	110.501	1523.731	-0.67529	0.95459	-2.0737	-31.797	103.583	1600.07897	-1.1835	1.1657	-1.9288
0.502	-37.478	52.552	1273.1482	-0.71484	1.2383	-1.7031	-150.6955	-87.528	1437.472	-0.86084	1.2388	-1.6226	-5.239	44.199	1542.854	-0.63623	0.86963	-1.9976	-14.682	79.347	1598.092	-1.1057	1.1064	-1.8436
0.504	-36.621	63.037	1252.9838	-0.71191	1.2056	-1.6694	-146.0814	-74.205	1432.853	-0.8999	1.2368	-1.7007	21.721	81.409	1521.636	-0.61572	0.82666	-1.959	-4.055	73.168	1551.8184	-1.0339	1.0485	-1.7624
0.506	-39.728	73.119	1237.4739	-0.71534	1.1829	-1.6423	-92.656	-72.863	1450.044	-0.91943	1.2388	-1.7378	61.1476	40.008	1523.059	-0.60107	0.80518	-1.9136	54.95	54.343	1569.421	-0.96954	0.99104	-1.6816
0.508	-27.753	79.523	1231.8667	-0.7085	1.1626	-1.6206	-92.647	-22.83	1469.479	-0.9707	1.2754	-1.8242	107.789	92.231	1460.47	-0.59473	0.80273	-1.8359	4.43	74.448	1504.146	-0.90186	0.93604	-1.6011
0.51	-10.376	73.26035	1219.0111	-0.69727	1.1367	-1.582	-97.532	-73.877	1494.224	-1.0105	1.3235	-1.8855	53.013	90.0235	1414.6442	-0.59766	0.7998	-1.8047	-15.783	105.082	1490.076	-0.83848	0.87813	-1.5363
0.512	5.696	66.276	1209.05727	-0.69287	1.1255	-1.5679	-75.283	-69.83524	1546.25	-1.0488	1.3955	-1.9414	27.632	159.6887	1346.08698	-0.59473	0.78125	-1.7402	-71.179	175.681	1411.7625	-0.78086	0.81914	-1.4738
0.514	10.651	65.273	1180.6943	-0.68115	1.104	-1.5298	-72.668	-73.712	1561.3841	-1.0928	1.5117	-2.0098	29.448	179.508	1315.9236	-0.57128	0.76684	-1.6814	-57.428	233.161	1373.855	-0.74024	0.76445	-1.4145
0.516	-19.105	59.702	1177.6117	-0.66651	1.0891	-1.4988	-27.8	-118.231	1589.736	-1.1133	1.5781	-2.043	25.446	249.57	1258.76732	-0.54199	0.75195	-1.627	-100.927	299.159	1280.034	-0.71387	0.72383	-1.3558
0.518	5.14700000000001	71.933	1154.557	-0.64941	1.0723	-1.4648	-59.768	-82.17	1604.783	-1.1553	1.7031	-2.0918	-11.717	249.144	1239.418	-0.47803	0.71533	-1.5308	-75.068	308.56	1238.2025	-0.68604	0.70557	-1.3003
0.52	-14.344	65.5512	1149.218	-0.61719	1.0391	-1.4102	-92.157	-94.748	1603.947	-1.1753	1.7837	-2.1069	-10.769	289.245	1194.0231	-0.43799	0.68945	-1.4863	-114.643	308.974	1145.518	-0.65244	0.68584	-1.2423
0.522	-39.546	80.185	1118.405	-0.60303	1.022	-1.3784	-90.873	-107.575	1586.302	-1.2031	1.8516	-2.125	-47.153	254.402	1157.916	-0.36133	0.62891	-1.3867	-118.689	293.749	1098.505	-0.60107	0.66924	-1.1851
0.524	-60.8112	77.608	1096.7636	-0.56934	0.97852	-1.3164	-110.111	-55.2139	1575.2213	-1.2427	1.9204	-2.1265	-75.304	257.621	1087.958	-0.28711	0.57178	-1.2993	-164.242	283.953	1071.479	-0.54443	0.64619	-1.1152
0.526	-54.302	86.473	1048.244	-0.53979	0.9436	-1.2683	-105.862	-93.3879	1573.772	-1.2593	1.9478	-2.1206	-115.906	205.4497	1024.825	-0.2207	0.51367	-1.2168	-120.4575	269.9355	1031.5041	-0.47002	0.62236	-1.038
0.528	-45.8458	89.0964	1008.673	-0.51416	0.91162	-1.2241	-97.294	-53.014	1594.945	-1.3047	1.9727	-2.0957	-71.415	198.351	989.046	-0.12598	0.43994	-1.1089	-112.851	241.5039	967.915	-0.38965	0.5957	-0.96289
0.53	-73.061	88.4849	994.9595	-0.4834	0.85938	-1.1602	-89.104	-6.12	1585.0462	-1.3318	1.9759	-2.0681	-95.12	164.134	962.3	-0.07666	0.39307	-1.0503	-99.559	231.577	893.05	-0.2919	0.54209	-0.86923
0.532	-64.7228	86.115	980.347	-0.46631	0.83545	-1.1289	-73.704	-29.5113	1563.9627	-1.355	1.9653	-2.0308	-102.144	173.537	898.23012	0.019531	0.29443	-0.94678	-115.322	220.714	853.122	-0.19356	0.47959	-0.78545
0.534	-52.284	102.68	952.271	-0.43213	0.78857	-1.062	-108.517	16.0881	1552.829	-1.3843	1.9263	-1.9858	-134.4454	163.694	836.5504	0.088376	0.21924	-0.87549	-148.147	241.519	820.5083	-0.097071	0.40381	-0.69756
0.536	-48.5219	109.2253	910.5236	-0.40527	0.74853	-1.0161	-99.751	-0.8809	1533.4728	-1.3921	1.897	-1.9624	-153.837	171.264	793.46	0.15723	0.15234	-0.80664	-146.625	262.713	797.547	-0.0005864	0.31904	-0.60654
0.538	-35.737	116.4451	887.5227	-0.38037	0.71338	-0.97607	-99.502	-5.6855	1536.8678	-1.4023	1.8418	-1.9316	-185.908	165.921	734.85	0.24365	0.084473	-0.70264	-151.6992	259.3089	722.898	0.084961	0.24121	-0.51807
0.54	-29.261	117.4187	871.553	-0.3418	0.66406	-0.91797	-136.9998	49.9719	1529.1932	-1.407	1.8049	-1.9158	-152.7157	176.878	669.851	0.27344	0.045898	-0.64893	-124.632	243.941	699.061	0.15576	0.15635	-0.43018
0.542	-20.353	120.3491	839.315	-0.32227	0.63916	-0.88623	-125.541	3.833	1520.08692	-1.4038	1.772	-1.9097	-158.7507	178.367	605.0749	0.3374	-0.012695	-0.55957	-119.407	237.3199	604.7802	0.21338	0.07666	-0.34151
0.544	-46.8	110.763	802.61	-0.28955	0.58691	-0.83789	-132.324	12.31785	1529.7603	-1.3794	1.731	-1.9038	-132.24	198.362	555.6049	0.37745	-0.055176	-0.49023	-112.261	245.18	555.279	0.26338	0.0028321	-0.24931
0.546	-24.776	98.2692	776.682	-0.25757	0.54883	-0.79614	-170.318	15.0112	1522.1123	-1.3647	1.7173	-1.896	-120.703	209.7428	492.683	0.41113	-0.095703	-0.43555	-124.215	278.021	442.8507	0.3081	-0.061718	-0.17099
0.548	-36.6577	84.025	759.367	-0.23291	0.51074	-0.75439	-159.04	-24.798	1516.449	-1.3296	1.6802	-1.8765	-88.905	218.075	438.7674	0.45508	-0.14258	-0.36475	-111.627	291.31	402.683	0.33838	-0.12012	-0.09375
0.55	-15.047	89.3009	743.831	-0.20313	0.46777	-0.70898	-137.41495	12.3698	1510.2869	-1.3025	1.6516	-1.8601	-108.837	232.646	359.581	0.4751	-0.16406	-0.3291	-100.495	286.714	302.3138	0.36641	-0.17139	-0.022754
0.552	-12.452	94.7657	694.411	-0.18115	0.44531	-0.68652	-132.4447	-9.494	1493.6531	-1.2734	1.625	-1.8438	-54.991	223.9274	291.046	0.50049	-0.20117	-0.26758	-75.324	247.6603	272.9638	0.39297	-0.20918	0.032031
0.554	-3.865	107.738	665.093	-0.14746	0.39893	-0.64014	-129.786	-24.742974	1507.092	-1.2339	1.5728	-1.8081	-54.497	208.46	241.13	0.5122	-0.21289	-0.23267	-81.191	206.2415	210.816	0.42071	-0.24473	0.08711
0.556	11.007	107.2121	630.0468	-0.12378	0.36572	-0.59912	-127.202	32.383	1478.6656	-1.2168	1.5449	-1.793	-38.25	198.492	213.903	0.50977	-0.22021	-0.19629	-41.673	178.4417	180.551	0.44277	-0.27793	0.13496
0.558	10.883	102.2092	594.8713	-0.097168	0.33545	-0.57129	-99.179	13.755	1460.3879	-1.1816	1.4922	-1.75	-34.083	181.678	160.416	0.49707	-0.21826	-0.16016	-84.859	167.259	155.157	0.45166	-0.31006	0.17334
0.56	36.038	96.46	579.9942	-0.064453	0.29053	-0.52246	-88.998	56.534	1442.4965	-1.1523	1.4355	-1.707	-43.914	148.0976	132.83	0.48779	-0.2124	-0.14697	-78.814	141.7769	148.3342	0.44638	-0.31973	0.19815
0.562	34.008	108.7122	547.9655	-0.043945	0.26855	-0.49561	-96.663	93.291	1423.4463	-1.1401	1.4146	-1.6812	-45.487	126.287	94.9714	0.46436	-0.20752	-0.13477	-81.32	96.632	105.9486	0.42461	-0.32403	0.21758
0.564	56.9157	104.516	508.8159487	-0.0053711	0.22998	-0.45313	-70.084	76.4801	1414.362	-1.1113	1.3555	-1.6348	-47.056	101.6942	110.124	0.44312	-0.19629	-0.1228	-45.375	49.1537	109.361	0.37539	-0.31973	0.22265
0.566	6.367	108.0118	470.3932	0.023438	0.19311	-0.41845	-87.251	135.119	1381.8621	-1.0847	1.3186	-1.5935	-25.495	99.447	107.556	0.40869	-0.17773	-0.10938	-91.3466	11.0199	117.12	0.31357	-0.29795	0.22403
0.568	0.157999999999994	112.355	449.777	0.051758	0.1626	-0.39063	-56.376	144.187	1341.5907	-1.0566	1.2754	-1.5586	8.8	64.5079	127.792	0.34229	-0.14502	-0.13281	-47.324	-25.317	106.609	0.23682	-0.26563	0.20313
0.57	-18.947	124.93	424.918	0.090332	0.12158	-0.3501	-40.538	109.216	1321.8156	-1.0127	1.2285	-1.499	1.845	65.651	106.9596	0.30127	-0.12158	-0.14844	-68.409	-28.2259	100.333	0.13897	-0.21465	0.17304
0.572	-8.212	124.676	391.38	0.1084	0.096191	-0.33057	-57.206	144.839	1293.513	-0.98633	1.2002	-1.4727	-1.78100000000001	44.3865	124.7573	0.19922	-0.054199	-0.18848	-54.6407	-39.315	44.2775	0.029883	-0.14511	0.13349
0.574	-18.086	109.789	366.7781	0.14502	0.054199	-0.29443	-55.397	102.9927	1258.5087	-0.93359	1.1484	-1.4082	4.834	35.0296	76.5969	0.12598	0.011231	-0.23023	-50.918	-39.8644	32.448	-0.077148	-0.05957	0.085058
0.576	-42.093	100.038	349.4582	0.1792	0.022217	-0.26928	-35.586	131.8576	1240.628	-0.89453	1.1098	-1.3603	-31.591	13.004	56.366	0.049316	0.078613	-0.2749	-33.871	-37.089	7.846	-0.18838	0.040429	0.03125
0.578	-36.9	85.8131	325.6567	0.20557	-0.010742	-0.24902	-14.347	166.675	1215.489	-0.85742	1.0605	-1.3105	-29.919	26.23691	25.5342	-0.056641	0.18604	-0.34229	-25.36	-27.4097	19.22	-0.30713	0.14746	-0.036621
0.58	-27.861	83.759	278.203	0.24023	-0.060547	-0.22119	-20.89	99.732	1208.515	-0.80176	1.002	-1.2383	-54.627	17.2627	26.52326	-0.10254	0.23828	-0.37012	-19.459	-3.46	-11.6789	-0.41064	0.26162	-0.1084
0.582	-29.036	84.012	263.6923	0.25244	-0.07959	-0.21143	-23.645	136.8643	1170.5631	-0.76855	0.9707	-1.1992	-52.518	47.386	10.9857	-0.16553	0.34082	-0.4165	-22.83	44.142	2.5767	-0.51524	0.36172	-0.17851
0.584	-43.269	79.31	256.76151	0.27588	-0.11768	-0.20264	-36.647	119.067	1138.433	-0.71338	0.90283	-1.1284	-85.8562	45.389	38.6766	-0.19677	0.41162	-0.45166	-107.47	76.221	-19.275	-0.60742	0.45078	-0.24843
0.586	-40.367	69.476	245.5476	0.30127	-0.146	-0.1792	-37.443	103.8478	1116.564	-0.67212	0.8562	-1.0769	-88.998	63.954	9.3149	-0.21191	0.4707	-0.48047	-53.501	109.516	0.7255	-0.68106	0.53711	-0.30527
0.588	-48.829	78.247	233.3742	0.30518	-0.16162	-0.17334	-47.604	166.199	1072.5223	-0.62988	0.80273	-1.0254	-97.7704	40.729	61.911	-0.21094	0.53467	-0.48877	-66.5	105.6	-14.4331	-0.73828	0.61719	-0.35107
0.59	-69.9069	92.3099	221.3732	0.3291	-0.18652	-0.17334	-63.906	130.1167	1034.6388	-0.57471	0.7417	-0.95264	-84.122	47.4555	56.364	-0.20386	0.57373	-0.48413	-18.982	92.79	21.6551	-0.77324	0.69121	-0.38252
0.592	-53.153	93.3928	221.561	0.33911	-0.20069	-0.16699	-59.557	168.678	992.7484	-0.54883	0.70898	-0.91602	-80.827	28.9918	63.2324	-0.19238	0.60156	-0.46289	-48.205	60.917	-1.704	-0.79736	0.7583	-0.40049
0.594	-59.459	85.1299	185.515	0.35498	-0.21436	-0.16748	-62.051	196.293	931.279	-0.49219	0.65234	-0.85156	-55.829	48.5049	25.102225	-0.17822	0.61084	-0.42871	8.294	60.027	31.797	-0.81611	0.8083	-0.41924
0.596	-57.499	84.1382	147.4023	0.37158	-0.23096	-0.16504	-57.346	153.0068	912.51695	-0.45483	0.61548	-0.78784	-70.085	8.2874	33.24	-0.17236	0.61035	-0.40869	-49.7945	36.588	2.445	-0.81553	0.85518	-0.4333
0.598	-55.334	73.54	124.216	0.375	-0.23438	-0.16504	-56.544	201.564	882.7712	-0.41504	0.57373	-0.73486	-67.901	12.882	7.3972	-0.16016	0.57861	-0.35498	10.625	35.325	31.281	-0.80811	0.88721	-0.43115
0.6	-20.846	72.328	122.119	0.39014	-0.24463	-0.17041	-45.263	188.5006	836.61	-0.36475	0.52441	-0.6665	-87.4055	-31.9329	34.984	-0.14722	0.54858	-0.31055	-20.78	-6.5214	50.845	-0.79033	0.89599	-0.42285
0.602	-17.725	61.2405	117.4673	0.38671	-0.24366	-0.17676	-37.773	172.6893	801.964	-0.3335	0.50146	-0.63037	-52.724	-17.953	20.018	-0.13672	0.50635	-0.26025	-10.336	-12.379	57.181	-0.76289	0.88535	-0.39825
0.604	-23.288	65.829452	103.687	0.38477	-0.24414	-0.18604	-49.405	228.879	743.546	-0.28174	0.44727	-0.55811	-59.2784	-38.3342	45.0382	-0.12012	0.44727	-0.19824	-14.567	-22.3167	65.151	-0.72031	0.86621	-0.35293
0.606	-12.626	57.4653	99.797	0.37744	-0.2417	-0.19336	-31.506	172.235	711.59813	-0.24341	0.41015	-0.5105	-7.52500000000001	6.216	31.598	-0.10986	0.42236	-0.16846	-21.069	-7.887	52.406	-0.65976	0.81367	-0.30117
0.608	-16.933	69.8311	89.85163	0.37109	-0.23486	-0.19727	-24.639	175.7358	674.0174	-0.20752	0.37207	-0.4585	-26.204	-1.185	55.2525	-0.078125	0.37939	-0.11182	-78.6159	1.7447	92.387	-0.58838	0.73682	-0.24463
0.61	-0.139999999999993	65.2664	79.9041	0.3501	-0.21729	-0.20557	-33.014	181.1405	624.53336	-0.15527	0.32666	-0.38623	-5.423	38.98741	28.5897	-0.04541	0.34472	-0.07373	-65.237	24.4925	86.786	-0.49532	0.65127	-0.1833
0.612	-1.267	62.5617	67.08	0.33081	-0.19824	-0.21607	-25.415	149.8706	601.713	-0.12988	0.30078	-0.35107	-20.959	20.0925	26.9909	-0.015137	0.31396	-0.038086	-42.805	32.221	78.982	-0.40977	0.56397	-0.12119
0.614	3.181	47.6539	73.621	0.31201	-0.17627	-0.22607	-22.345	189.246	554.5215	-0.079102	0.24951	-0.2793	2.506	49.2731	15.9735	0.023926	0.271	0.0014648	-40.159	39.6176	34.241	-0.32188	0.47803	-0.065723
0.616	-7.667	44.437479	75.0836	0.28467	-0.14258	-0.23779	-4.088	148.4681	533.9	-0.04834	0.20581	-0.23169	0.711999999999996	34.844	30.0998	0.041504	0.24512	0.015625	-24.59	28.5221	33.686	-0.24463	0.39746	-0.0055666
0.618	-6.481	44.5952	65.182	0.26904	-0.12988	-0.24414	-2.94900000000001	114.5462	489.998	-0.012207	0.15771	-0.18359	7.211	63.8164	15.294	0.066406	0.19727	0.046387	-53.777	32.8773	36.6893	-0.17676	0.31055	0.048828
0.62	-28.834	48.976	59.2137	0.24658	-0.10107	-0.26221	-10.06	140.9426	434.952	0.025879	0.097656	-0.12451	-16.028	49.233	28.04	0.070801	0.16236	0.063477	-64.155	54.2122	53.348	-0.1209	0.23291	0.098728
0.622	-38.222	48.611	59.955	0.22461	-0.079834	-0.26904	9.828	85.457	398.228	0.044922	0.064941	-0.094238	-11.287	45.057	20.145	0.072754	0.12793	0.071777	-46.452	31.072	30.042	-0.073144	0.16445	0.13809
0.624	-19.312	44.848	59.8944	0.20166	-0.054199	-0.27246	20.961	123.924	367.069	0.083008	0.0039063	-0.05127	-35.47	16.3862	18.235	0.075684	0.085449	0.08252	-28.618	-2.133	24.6773	-0.031348	0.10625	0.16817
0.626	-26.079	47.88026	31.966	0.1748	-0.023926	-0.28174	0.234999999999999	143.0939	319.0271	0.10693	-0.046631	-0.023682	-1.87800000000001	23.1405	14.468	0.075195	0.072266	0.087891	-72.402	-38.871	-8.415	0.0062501	0.055664	0.19375
0.628	-41.425	34.842	43.8949	0.16113	-0.0068359	-0.28467	18.411	102.775	290.6006	0.12354	-0.089355	-0.00097656	-25.679	18.459	8.476	0.077637	0.057129	0.094238	-42.793	-37.1529	4.973	0.040039	0.010742	0.21094
0.63	-42.943	29.029	33.4517	0.13232	0.01709	-0.29297	12.722	147.7911	242.902	0.14355	-0.13818	0.025879	-9.17700000000001	44.432	21.3505	0.089111	0.045898	0.10572	-70.968	-23.229	23.134	0.067676	-0.023535	0.22285
0.632	-48.374	28.816	32.5148	0.12036	0.033203	-0.29224	5.105	117.5232	212.9112	0.15088	-0.15918	0.039551	-51.284	24.949	38.5513	0.10205	0.041992	0.11475	-45.71	-1.7211	37.651	0.094628	-0.055371	0.23008
0.634	-58.379	35.7857	17.3697	0.10693	0.045898	-0.28271	-5.735	96.0069	205.6179	0.1665	-0.19336	0.068848	-67.428	22.7275	41.902	0.13184	0.043945	0.12207	-68.205	-22.29418	31.0963	0.11377	-0.0792	0.23008
0.636	-57.537	43.7195	30.867822	0.089355	0.064941	-0.28418	-19.016	135.2988	171.637	0.16675	-0.21729	0.078125	-83.978	0.0129999999999999	59.043	0.14648	0.044434	0.12988	-50.6647	-22.6892	37.706	0.12959	-0.092578	0.23076
0.638	-51.606	35.8168	42.2133	0.07959	0.069824	-0.2832	-32.516	77.001	145.3943	0.16748	-0.24023	0.084961	-75.228	20.551	52.054	0.19434	0.037598	0.13525	-55.9	-34.3489	4.032	0.15088	-0.09668	0.23047
0.64	-84.794	29.6318	40.9133	0.066406	0.08252	-0.27148	-38.426	102.5054	124.0506	0.16699	-0.26123	0.086914	-79.807	19.7627	45.3098	0.23072	0.023926	0.14356	13.346	16.4636	27.5009	0.17588	-0.096777	0.22149
0.642	-80.001	33.5842	43.2929	0.058838	0.092286	-0.26294	-26.292	84.3512	109.843	0.16846	-0.26611	0.083496	-62.35	40.9269	55.547	0.2749	0.010742	0.14551	-31.465	30.374	14.7978	0.19482	-0.10049	0.21524
0.644	-78.2655	37.5458	39.8858	0.054199	0.09668	-0.25146	-39.137	35.949	95.9365	0.16309	-0.27148	0.064453	-81.5086	44.96	44.11269	0.31201	-0.020996	0.14893	-36.983	59.6971	12.7789	0.22139	-0.104	0.20703
0.646	-45.012	20.92028	41.5716	0.043945	0.10156	-0.23193	-38.5	85.3722	60.648	0.1477	-0.26855	0.056396	-79.115	61.067	34.604	0.32861	-0.038086	0.14844	-36.017	55.778	-19.5267	0.24707	-0.10303	0.19395
0.648	-65.36	18.532	22.2015	0.041016	0.10156	-0.22314	-64.167	55.5832	47.571	0.13037	-0.25635	0.036133	-77.322	34.317	18.1357	0.34717	-0.064941	0.15332	-14.513	57.0459	-20.3546	0.26709	-0.11084	0.18359
0.65	-52.003	14.8556	5.14	0.035156	0.10107	-0.20752	-74.9423	49.721	58.465	0.089844	-0.2251	0.0024414	-68.174	30.6212	17.1676	0.35449	-0.077149	0.15308	-26.413	52.417	-23.7221	0.2831	-0.11377	0.17266
0.652	-46.285	11.936	8.439	0.033936	0.095948	-0.19263	-50.445	65.745	56.919	0.066406	-0.20557	-0.019043	-83.021	16.2993	20.7066	0.35889	-0.083984	0.146	-5.72	70.11	14.28166	0.29472	-0.11035	0.16943
0.654	-12.099	26.707	26.86748	0.030273	0.094727	-0.1792	-61.666	-10.339	56.33784	0.012695	-0.15234	-0.050293	-63.749	37.913	33.5373	0.35791	-0.084473	0.14209	-28.309	93.074	58.708	0.29746	-0.10566	0.14638
0.656	-30.429	32.2913	46.0614	0.022949	0.094238	-0.17041	-47.716	17.667	48.2226	-0.02832	-0.10864	-0.082764	-44.009	27.0183	47.2457	0.35791	-0.081543	0.13721	-56.636	85.417	32.934	0.29639	-0.088769	0.13203
0.658	-35.663	30.19265	51.299	0.014648	0.098633	-0.16309	-53.477	29.1075	46.83138	-0.06543	-0.069824	-0.11621	-44.281	26.21	60.582	0.36084	-0.072266	0.12793	-26.579	58.42	46.436	0.29297	-0.078613	0.11865
0.66	-4.867	15.3073	54.979	0.00097656	0.104	-0.15771	-58.391	19.4844	59.034	-0.1123	-0.022461	-0.15479	-28.872	-5.889	40.284	0.35987	-0.063232	0.11987	-54.068	14.5271	44.303	0.28603	-0.06416	0.097167
0.662	-10.083	22.262	45.569	-0.011719	0.11768	-0.15283	-39.757	72.934	41.35242	-0.12842	0.0019531	-0.17432	-36.176	-10.154	45.14	0.36328	-0.049316	0.11279	-12.185	0.387	67.66	0.28321	-0.04668	0.075293
0.664	1.741	35.816	31.9053	-0.022949	0.12842	-0.15234	-48.024	41.811	9.0927	-0.16455	0.04248	-0.20605	-3.214	-5.457	23.523	0.35645	-0.030273	0.104	-50.504	-15.382	74.377	0.28593	-0.02832	0.052246
0.666	-16.207	27.861	28.1943	-0.038086	0.14893	-0.14844	-41.422	28.997	14.2252	-0.18188	0.069824	-0.22681	-5.666	19.2755	39.3945	0.35547	-0.019043	0.10156	-11.909	9.012	76.448	0.27695	-0.021485	0.030176
0.668	-13.317	23.219	26.0058	-0.046875	0.15771	-0.15186	-25.836	34.8673	13.006	-0.1958	0.093262	-0.24561	1.791	23.084347	35.0851	0.35156	-0.011719	0.084473	-71.7954	1.925	33.7735	0.27197	-0.01709	0.014648
0.67	-12.625	21.9966	15.0115	-0.05127	0.17871	-0.15088	-19.646	-6.2016	33.151	-0.20313	0.1167	-0.25439	10.915	2.55766	44.4343	0.34082	-0.0068359	0.077881	-46.082	-1.161	55.517	0.25303	-0.01416	-0.0073243
0.672	-6.669	18.4863	10.725	-0.051758	0.18506	-0.14624	-4.292	35.3596	43.416	-0.20068	0.12793	-0.25928	-3.696	-8.799	15.3835	0.3335	-0.013184	0.069824	-54.67	-30.7259	60.862	0.23604	-0.011524	-0.023438
0.674	-20.145	16.7141	38.5575	-0.052734	0.19043	-0.14307	-25.195	37.582	16.8577	-0.18457	0.14063	-0.26025	-11.278	-4.4794	29.6067	0.30908	-0.020996	0.064453	-22.106	-5.92	83.604	0.21533	-0.0048828	-0.045313
0.676	-6.04499999999999	18.7369	48.443	-0.043457	0.18799	-0.13135	-12.687	1.67879	40.626	-0.16308	0.1455	-0.25415	-14.923	17.358	21.339	0.30225	-0.027832	0.062012	-63.2	6.557	64.477	0.19307	0.0030273	-0.062598
0.678	-7.137	16.233398	42.3934	-0.040527	0.18359	-0.12402	26.977	42.074	37.3413	-0.13477	0.1416	-0.24316	-30.295	39.476	47.842	0.28027	-0.030762	0.054688	-50.419	29.3712	64.828	0.16895	0.0053711	-0.072266
0.68	-34.274	25.5294	18.66596	-0.027832	0.17139	-0.11035	1.066	14.2325	20.9552	-0.088379	0.11328	-0.21924	-33.245	63.7363	41.1836	0.25806	-0.032227	0.048828	-88.0743	20.806	23.737	0.14912	0.0060547	-0.088867
0.682	-50.207	27.2683	37.9432	-0.016358	0.14917	-0.097415	-1.298	18.971	38.554	-0.059082	0.09668	-0.20117	-33.864	46.843	32.8658	0.23193	-0.031738	0.038574	-59.566	19.145	28.1723	0.12676	0.0095703	-0.10078
0.684	-37.769	11.9918	41.564	0.0024414	0.12793	-0.084473	-2.871	47.304	43.0984	-0.0063477	0.050293	-0.16797	-43.766	42.9608	-0.864600000000001	0.20264	-0.024414	0.025879	-42.155	1.801	9.922	0.10645	0.016601	-0.10976
0.686	-68.18	13.60877	37.9421	0.018555	0.09668	-0.07373	-40.446	-7.7875	44.0355	0.026123	0.0097658	-0.13965	-46.607	22.0118	14.8926	0.18262	-0.012207	0.015625	-39.164	2.026	4.1026	0.091406	0.022656	-0.11748
0.688	-63.395	19.0951	21.66934	0.026367	0.081055	-0.066406	-15.476	10.0811	52.9365	0.052246	-0.025391	-0.10791	-57.66	35.6234	2.3798	0.15771	0.010742	-0.00097656	-41.935	2.689	-0.730999999999998	0.077637	0.032227	-0.12305
0.69	-75.4279	25.307	15.4452	0.040039	0.055176	-0.063477	-16.976	-1.0782	22.6652	0.083496	-0.066406	-0.070313	-75.517	36.855	41.443	0.14404	0.043213	-0.013184	-43.142	12.7064	9.899	0.066211	0.037207	-0.12539
0.692	-62.817	21.772	33.08782	0.052246	0.035888	-0.059814	-30.986	-19.8632	26.3198	0.098145	-0.083496	-0.048828	-46.797	48.20539	26.655	0.13135	0.06543	-0.018555	-43.755	2.961	-0.583	0.061621	0.044043	-0.12597
0.694	-76.793	23.7693	25.41111	0.062988	0.017578	-0.060547	-40.076	42.283	38.966	0.12061	-0.10156	-0.012695	-80.1077	20.2789	35.009	0.11426	0.092285	-0.035645	-31.562	-8.7478	13.7811	0.05459	0.046777	-0.11973
0.696	-54.68	16.0201	18.9345	0.083496	-0.0063477	-0.060547	-55.984	25.0295	29.0569	0.13794	-0.11109	0.0075684	-71.731	25.361	33.0414	0.10645	0.10254	-0.035156	-9.255	-8.89021	20.6466	0.054004	0.057226	-0.11582
0.698	-55.674	13.2703	27.9488	0.09082	-0.018066	-0.061523	-37.167	29.75099	32.4307	0.15186	-0.11523	0.026367	-101.1862	4.58817	31.26066	0.10059	0.12012	-0.040527	-41.358	-10.7897	17.6301	0.053711	0.062988	-0.11035
0.7	-51.074	19.0413	36.9831	0.10986	-0.037598	-0.063477	-48.5643	38.9373	21.9862	0.15771	-0.11279	0.053223	-78.484	47.4187	37.697	0.10132	0.1272	-0.038818	-31.352	15.5571	20.9276	0.058301	0.068164	-0.10781
0.702	-48.46	18.5859	29.56245	0.12646	-0.05542	-0.064209	-59.769	-15.4765	21.4056	0.1665	-0.10986	0.062988	-98.1052	44.933	48.227	0.10059	0.12793	-0.036621	-37.194	28.7375	4.028	0.063574	0.072559	-0.10468
0.704	-51.194	23.0996	28.3767	0.13477	-0.073242	-0.062988	-46.396	3.57	46.833	0.15479	-0.096191	0.083496	-57.871	54.234	34.505	0.095703	0.12012	-0.033203	-27.427	52.473	5.583	0.070215	0.073339	-0.10117
0.706	-30.52	23.1573	37.6233	0.16113	-0.095215	-0.073242	-42.337	15.765	29.31	0.14551	-0.072266	0.09082	-59.351	12.825	47.265	0.09375	0.10889	-0.029297	-36.584	32.5213	18.4169	0.077734	0.070801	-0.095313
0.708	-33.943	28.3932	32.4965	0.17285	-0.10498	-0.075195	-75.4053	-5.1119	28.1303	0.13721	-0.058594	0.092285	-34.26	17.263	39.878	0.091309	0.091797	-0.029297	-12.164	40.684	43.126	0.083984	0.066895	-0.092773
0.71	-22.715	23.4838	27.3489	0.19238	-0.13086	-0.075684	-65.9548	30.3994	33.6997	0.12402	-0.035645	0.10205	-41.283	-3.6247	34.60088	0.088379	0.078857	-0.02539	-48.466	31.714	9.008	0.086133	0.059277	-0.085742
0.712	-38.103	15.3052	31.6386	0.20972	-0.14429	-0.081299	-72.3198	-7.4712	31.104	0.12231	-0.022217	0.1084	-23.003	38.965	41.8808	0.083008	0.066895	-0.027832	-7.838	78.793	26.3675	0.088965	0.055762	-0.078711
0.714	-19.082	12.0489	35.9002	0.2251	-0.15527	-0.086914	-45.363	-5.445	42.84	0.11768	-0.011719	0.11182	-32.331	31.273	44.3646	0.071289	0.050781	-0.029297	-52.826	79.947	13.713	0.085059	0.050293	-0.077148
0.716	-8.64	16.6076	29.349	0.24219	-0.17334	-0.092285	-12.088	19.07	14.438	0.1167	-0.003418	0.11279	-13.825	56.67674	54.977	0.067383	0.040527	-0.028809	-9.313	91.709	38.668	0.081348	0.044238	-0.076953
0.718	-5.12	16.6344	15.7863	0.24951	-0.17969	-0.095215	-59.765	-24.3587	14.812	0.11865	-0.0014648	0.11328	-6.273	27.71	42.527	0.060547	0.039063	-0.017578	-56.955	55.983	51.1589	0.080078	0.040039	-0.081055
0.72	3.22199999999999	24.86868	23.2539	0.26318	-0.18652	-0.10352	-30.375	15.546	52.6691	0.11572	0.010254	0.10645	7.966	31.2544	37.93013	0.053955	0.039307	-0.020508	-27.35	38.1945	67.22	0.072461	0.043164	-0.080469
0.722	4.076	25.4676	14.6792	0.26953	-0.19165	-0.11157	-19.524	8.711	29.795	0.1062	0.0075684	0.10205	-26.881	-4.7069	46.872	0.050781	0.038086	-0.018555	-61.249	12.95541	47.533	0.069238	0.04248	-0.083008
0.724	-6.827	23.1231	29.1138	0.27344	-0.19531	-0.11572	-8.802	-25.43955	30.9654	0.094238	0.014648	0.085938	-17.895	11.8904	47.311	0.052246	0.036621	-0.015625	-43.853	21.518	69.219	0.07041	0.045605	-0.087696
0.726	-20.758	28.3117	19.30353	0.28955	-0.1958	-0.12939	13.227	13.871	24.93425	0.072754	0.036621	0.07373	-29.108	-3.09284	39.2643	0.050293	0.034668	-0.012207	-70.5291	2.9181	71.679	0.066113	0.055371	-0.096094
0.728	-16.673	27.0625	37.9905	0.29443	-0.19287	-0.13745	-23.299	-0.9178	4.8658	0.063477	0.044434	0.060059	21.682	17.672	54.6379	0.047363	0.032227	-0.013672	-41.613	-7.135	79.971	0.063965	0.063477	-0.094238
0.73	-22.309	20.99528	46.038	0.30713	-0.19287	-0.14551	-15.245	24.9831	39.3957	0.043945	0.061035	0.04248	-2.588	-14.6938	38.238	0.041992	0.02832	-0.011719	-63.223	-15.7369	68.64	0.061426	0.072754	-0.10322
0.732	-36.598	12.6901	54.3541	0.2998	-0.19482	-0.16797	-1.066	60.052	16.373	0.030518	0.079834	0.025879	-14.532	5.888	42.547	0.038574	0.029297	-0.012695	-45.907	-41.3119	51.21	0.061328	0.087695	-0.11211
0.734	-52.543	13.7229	59.803	0.29541	-0.20947	-0.19238	-23.102	16.1161	1.7883	0.025879	0.097168	0.010254	-37.142	-5.685	25.9823	0.031738	0.033203	-0.018555	-32.498	-27.83232	30.4658	0.059765	0.097461	-0.12227
0.736	-46.324	34.9086	89.1196	0.26367	-0.21045	-0.23242	-1.683	31.6011	24.835794	0.02002	0.11133	-0.010254	-37.907	38.0652	-0.2645	0.019287	0.040771	-0.026855	-56.12	-9.072	20.5544	0.05957	0.10869	-0.13184
0.738	11.129	52.179	100.4125	0.21704	-0.1687	-0.26441	-4.152	2.3223	13.995	0.023926	0.11475	-0.014648	-54.03	39.23741	3.625	0.010254	0.058594	-0.038086	-39.556	20.386	33.4686	0.058105	0.12207	-0.14014
0.74	-38.99	62.5154	127.625	0.16113	-0.11523	-0.30566	-20.293	-19.8513	22.8478	0.027832	0.11963	-0.024902	-65.3	41.044	36.4832	-0.0029297	0.083984	-0.055176	-76.226	8.022	46.37555	0.059473	0.13584	-0.14932
0.742	-53.6743	69.71	166.4199	0.075195	-0.041016	-0.37549	11.855	34.826	23.665	0.034179	0.11524	-0.028809	-65.884	16.6182	33.625	-0.00097656	0.10498	-0.064453	-34.835	15.1776	45.8171	0.056152	0.14727	-0.16084
0.744	-59.53	70.561	191.145	0.040039	-0.0053711	-0.41553	-36.315	30.807	6.8112	0.043457	0.10449	-0.037109	-64.342	25.938	41.232	-0.003418	0.13867	-0.075195	-57.336	-6.8363	19.3671	0.058496	0.16797	-0.17061
0.746	-22.373	77.927	244.7403	-0.025391	0.074219	-0.48828	-55.701	19.03925	45.711	0.05957	0.085449	-0.033691	-80.737	15.067	14.905	-0.0048828	0.16455	-0.090576	-17.878	19.4804	12.7639	0.064551	0.18711	-0.18194
0.748	-14.685	100.368	279.9991	-0.068115	0.14502	-0.54223	-38.249	33.7329	22.6681	0.06543	0.072266	-0.031738	-94.36388	42.984	25.598	-0.0019531	0.18652	-0.10254	-53.144	10.47921	4.065	0.06543	0.20996	-0.19385
0.75	-30.646	103.696	313.592	-0.11816	0.21973	-0.59863	-47.053	-15.18703	15.0622	0.080078	0.046387	-0.033691	-76.046	49.545	25.7849	0.0078125	0.21631	-0.11768	-29.208	40.648	25.2215	0.064355	0.23457	-0.2083
0.752	-19.675	121.18197	352.397	-0.18359	0.30713	-0.67334	-35.672	29.0954	30.24878	0.088135	0.027343	-0.033936	-84.2169	54.559	20.449	0.01709	0.22803	-0.13135	-45.409	13.1741	-7.916	0.063574	0.26055	-0.21953
0.754	-22.111	132.162	384.386	-0.22266	0.35791	-0.71143	-68.9231	37.603	26.5587	0.09375	0.012695	-0.038086	-53.794	44.6113	16.07881	0.036621	0.25195	-0.15039	-6.185	16.7864	4.1947	0.056543	0.28555	-0.23125
0.756	-22.851	131.434	447.7472	-0.30859	0.44629	-0.78711	-64.63	5.3543	43.6939	0.104	-0.0043945	-0.036621	-78.0308	24.2	17.4277	0.055176	0.26856	-0.15967	-35.978	-26.6728	-24.4793	0.051954	0.30791	-0.2456
0.758	-37.618	125.17	508.4606222	-0.3728	0.51954	-0.83936	-32.994	34.1191	39.6661	0.1084	-0.013672	-0.035645	-77.727	1.958	18.8064	0.07666	0.28369	-0.17188	-5.468	6.416	0.952	0.045898	0.32617	-0.2627
0.76	-9.21700000000001	106.147	548.8253	-0.44092	0.59229	-0.88232	-72.6095	15.93136	15.65419	0.11719	-0.024902	-0.036621	-77.7636	12.3063	40.0719	0.097656	0.30469	-0.18701	-54.184	-4.7811	61.817	0.045508	0.34219	-0.2835
0.762	-7.20699999999999	80.2855	594.9461	-0.5415	0.69238	-0.96045	-47.984	7.9385	24.19	0.12207	-0.038086	-0.035888	-36.636	21.997	26.1249	0.11035	0.30664	-0.19385	-24.119	20.0977	126.4407	0.041895	0.34336	-0.31875
0.764	-41.318	64.57341	653.0721	-0.5874	0.73779	-0.99561	-45.896	46.756	33.7671	0.13037	-0.051758	-0.038574	-27.722	35.718	54.076	0.12305	0.30225	-0.22168	-76.945	45.705	193.7366	0.023926	0.33203	-0.36992
0.766	-59.437	38.4316	738.39588	-0.66699	0.82031	-1.0625	-69.006	21.8147	40.968	0.13379	-0.066895	-0.038574	0.602000000000004	46.932	49.4674	0.13428	0.29126	-0.24633	-31.93	84.655	242.84	-0.011426	0.31787	-0.44688
0.768	-42.53	36.1563	766.022	-0.71167	0.88208	-1.0993	-27.044	49.839	47.7553	0.13428	-0.074707	-0.04248	-24.376	38.3544	64.747	0.13818	0.27832	-0.26611	-48.986	87.607	308.604	-0.075195	0.32471	-0.54053
0.77	-30.539	21.6028	804.211	-0.74365	0.9292	-1.1235	-34.989	34.5068	19.8052	0.13916	-0.090332	-0.048828	-8.29599999999999	47.396	63.875	0.13818	0.24561	-0.32178	-87.374	107.717	430.22516	-0.17324	0.35215	-0.64492
0.772	-48.382	6.02802	813.4343	-0.75928	0.96436	-1.1499	-44.234	-17.7381	36.841	0.13697	-0.10522	-0.049073	-23.124	34.4993	115.761	0.12256	0.22949	-0.37305	-100.381	109.899	546.403	-0.29326	0.39424	-0.75459
0.774	-35.925	-7.2251	860.565	-0.74902	0.96875	-1.1553	-9.078	3.9745	49.799	0.13623	-0.11768	-0.055176	-31.951	54.5754	146.903	0.077637	0.2041	-0.50146	-92.889	106.559	731.273	-0.41631	0.45009	-0.87217
0.776	-63.153	-24.1338	881.301	-0.69873	0.92529	-1.1499	-33.192	-0.1024	32.7342	0.14111	-0.12891	-0.064941	-26.054	73.472	225.5407	0.023438	0.22583	-0.60181	-62.094	132.936	938.035	-0.53896	0.51202	-1.0063
0.778	-77.349	-23.6461	880.164	-0.64136	0.84986	-1.135	-9.293	12.8562	44.813	0.13525	-0.13623	-0.065918	20.952	93.804	263.106	-0.048828	0.27002	-0.70752	-101.243	106.3036	1189.659	-0.66455	0.56494	-1.1597
0.78	-71.381	-39.918	870.011	-0.57617	0.75	-1.1172	-9.799	48.875	29.0863	0.13428	-0.14307	-0.075684	-44.978	72.127	356.3612	-0.15381	0.37158	-0.85205	-74.797	41.4105	1367.732	-0.78077	0.62295	-1.3378
0.782	-78.723	-48.464	856.455	-0.49463	0.604	-1.103	-30.847	-9.4289	42.239	0.12915	-0.14014	-0.083252	-48.62	114.965	462.7937	-0.2041	0.42432	-0.92822	-115.564	-67.5836	1537.385	-0.89844	0.68945	-1.5125
0.784	-86.643	-57.896	849.399	-0.46143	0.53564	-1.0933	9.744	-3.37	61.062	0.12549	-0.14014	-0.090332	-30.765	107.3011	576.8026	-0.32031	0.55078	-1.0938	-124.9764	-123.8	1697.49	-1.0343	0.79102	-1.6625
0.786	-123.813	-47.07	817.6044	-0.43018	0.42676	-1.0815	-7.171	0.389999999999999	14.8722	0.11963	-0.14404	-0.10449	-44.558	151.5542	699.9637	-0.41528	0.64477	-1.24	-95.6182	-182.278	1809.055	-1.1855	0.91953	-1.766
0.788	-108.945	-41.22191	805.06527	-0.42554	0.38818	-1.0847	-7.684	-16.163	36.8086	0.11279	-0.14844	-0.1084	-54.1	153.804	931.4207	-0.51758	0.72656	-1.4014	-77.74365	-188.036	1834.87	-1.3364	1.0796	-1.814
0.79	-121.627	-42.707	816.4801	-0.42725	0.38428	-1.0894	0.545000000000002	30.22884	38.2306	0.10449	-0.15576	-0.12109	-8.23699999999999	144.9661	1078.168	-0.65625	0.86523	-1.5947	-155.38	-250.8542	1727.555	-1.4664	1.2801	-1.791
0.792	-79.416	-51.521	810.51532	-0.42334	0.41846	-1.1079	-27.648	7.7847	38.6981	0.098876	-0.17163	-0.13843	-81.3166	69.672	1231.401	-0.72852	0.94336	-1.668	-104.375	-281.657	1609.554	-1.5456	1.4899	-1.7464
0.794	-80.4021	-59.321	800.397	-0.42139	0.44678	-1.1167	-14.442	-19.5057	66.96667	0.080566	-0.18945	-0.17529	-49.4956	25.817	1339.416	-0.84814	1.1528	-1.7866	-118.539	-350.73	1521.223	-1.555	1.654	-1.7104
0.796	-91.1982	-72.857	826.605	-0.4043	0.49805	-1.1309	-4.346	-8.12	51.585	0.047363	-0.19824	-0.20898	-58.202	-70.1056	1435.0126	-0.91944	1.335	-1.815	-17.270373	-351.21	1453.752	-1.4665	1.7538	-1.7064
0.798	-77.87	-99.832	870.105	-0.39014	0.52636	-1.1389	-39.627	-52.5258	73.8238	0.025879	-0.17871	-0.2251	-83.047	-78.8845	1542.549	-0.97949	1.5254	-1.8184	74.049	-379.75	1370.995	-1.3184	1.7754	-1.7246
0.8	-81.552	-115.4812	898.7253	-0.37598	0.54102	-1.1465	13.927	-1.6743	124.067	-0.030273	-0.13525	-0.2666	-107.48	-121.6811	1592.193	-1.0229	1.731	-1.8042	147.722	-331.72	1322.628	-1.1678	1.7416	-1.7529
0.802	-37.082	-133.1164	920.561	-0.37109	0.53369	-1.1616	-14.394	23.853	143.568	-0.079101	-0.10229	-0.31861	-95.6255	-130.9821	1505.544	-1.0171	1.8013	-1.8022	104.0498	-287.27	1275.28	-1.0911	1.7083	-1.762
0.804	-45.052	-143.6531	940.784	-0.375	0.52734	-1.1699	-60.5992	3.028	176.304	-0.12646	-0.072266	-0.37451	-56.577	-214.727	1447.562	-0.97021	1.8403	-1.7964	109.279	-149.861	1294.393	-1.1462	1.6798	-1.7281
0.806	-7.385	-146.1683	967.2287	-0.38672	0.52344	-1.1992	-28.6782	38.5565	200.354	-0.18164	-0.017578	-0.44238	-41.453	-237.962	1401.154	-0.90991	1.7581	-1.7878	76.5392	-112.85	1269.715	-1.2832	1.6625	-1.6789
0.808	-17.067	-152.3962	1009.0947	-0.40649	0.5415	-1.2319	-25.446	-17.143	238.204	-0.21338	0.0087891	-0.47656	12.6268	-275.79	1363.974	-0.85645	1.6211	-1.7734	58.035	-40.24	1270.144	-1.4233	1.6938	-1.6167
0.81	-2.784	-150.295	1018.4791	-0.43652	0.57324	-1.2813	5.534	-9.722	321.071	-0.27734	0.064453	-0.56104	72.584	-229.966	1332.073	-0.80029	1.438	-1.7339	38.543	-72.08	1317.033	-1.5106	1.7664	-1.5672
0.812	24.104	-160.887	1055.6855	-0.48193	0.63037	-1.3608	3.669	74.644	380.9861	-0.33862	0.10986	-0.64062	97.049	-207.29	1267.1883	-0.79883	1.3711	-1.7188	15.608	-65.66	1382.819	-1.5327	1.8493	-1.532
0.814	21.073	-156.983	1066.4777	-0.5	0.66992	-1.4023	-32.65504	89.8123	427.06119	-0.40479	0.16309	-0.71826	83.65	-149.678	1254.64	-0.80225	1.3149	-1.7085	-16.291	-143.14	1437.192	-1.4765	1.8962	-1.5225
0.816	30.829	-151.41	1102.24	-0.53906	0.75146	-1.4922	-6.589	125.939	506.5389	-0.50879	0.25537	-0.81055	86.777	-123.299	1234.258	-0.80859	1.3628	-1.7133	5.207	-191.684	1493.757	-1.3709	1.9006	-1.533
0.818	18.344	-124.5516	1118.87345	-0.55737	0.81763	-1.5447	-30.781	111.578	554.022	-0.56641	0.30859	-0.8623	111.931	-80.148	1236.409	-0.80615	1.4575	-1.7007	18.2047	-325.901	1538.9455	-1.25	1.8789	-1.5469
0.82	39.487	-93.128	1151.9157	-0.56592	0.88818	-1.5952	-34.745	52.697	640.1436	-0.69434	0.42578	-0.98633	115.9735	-39	1277.3919	-0.78125	1.6074	-1.6504	16.317	-390.38	1540.78	-1.1557	1.8338	-1.5576
0.822	47.4569	-76.075	1184.65	-0.58398	0.98242	-1.6367	19.097	88.56337	702.665	-0.79004	0.53614	-1.0586	75.032	-11.93	1361.86	-0.75342	1.6646	-1.6187	82.89	-460.7	1581.4525	-1.1126	1.7708	-1.5512
0.824	38.9165	-55.727	1203.276	-0.58887	1.02	-1.6519	-32.345	67.7955	761.247	-0.88184	0.65625	-1.1309	33.522	-45.93	1412.2125	-0.69092	1.6899	-1.5728	62.313	-437.81	1655.821	-1.097	1.6868	-1.5446
0.826	40.1165	-47.689	1214.1464	-0.59229	1.0728	-1.6616	-70.584	27.3805	837.6113	-0.97266	0.83643	-1.2021	34.508	-88.87	1458.519	-0.63233	1.6343	-1.5611	71.037	-397.37	1778.677	-1.0768	1.5724	-1.542
0.828	27.562	-39.608	1225.5046	-0.58935	1.0967	-1.6611	-64.9	18.812	841.3748	-1.0015	0.92432	-1.2319	63.669	-170.197	1467.361	-0.56543	1.5215	-1.5703	34.983	-298.86	1815.384	-1.043	1.4258	-1.5684
0.83	30.901	-50.776	1250.98093	-0.5874	1.106	-1.6538	-64.838	-47.295	840.994	-0.99756	1.0649	-1.2671	68.726	-262.443	1531.7534	-0.50586	1.3262	-1.582	-2.504	-253.118	1853.223	-0.99851	1.2921	-1.6118
0.832	-10.98	-63.9198	1254.60015	-0.57178	1.1001	-1.6558	4.825	-46.4396	849.279	-0.94531	1.1201	-1.2734	23.839	-319.744	1561.837	-0.49316	1.2363	-1.582	-97.92	-185.989	1834.6327	-0.96436	1.1731	-1.6777
0.834	22.229	-58.8783	1260.6457	-0.56934	1.0898	-1.666	-11.998	-67.0616	821.7679	-0.86865	1.1284	-1.271	4.462	-350.39	1583.967	-0.49316	1.0811	-1.6152	-155.623	-111.977	1866.666	-0.95185	1.0857	-1.7573
0.836	-16.614	-78.106	1291.821	-0.58838	1.061	-1.6587	-75.6034	-124.132	848.636	-0.7417	1.0415	-1.2554	16.835	-349.621	1627.982	-0.49121	1.021	-1.6753	-221.836	-19.443	1857.043	-0.96816	1.0475	-1.8498
0.838	-18.114	-82.523	1314.187	-0.60937	1.0376	-1.6665	-50.15	-92.594	850.462	-0.68506	0.9751	-1.2397	-10.382	-332.815	1713.7853	-0.5	0.97266	-1.7383	-195.331	65.59	1852.004	-1.0059	1.0566	-1.9414
0.84	-35.4647	-85.04	1323.359	-0.63477	1.0176	-1.6836	-74.073	-96.549	815.442	-0.61377	0.81299	-1.2026	-7.967	-285.036	1751.984	-0.53662	0.94385	-1.8374	-170.772	99.344	1807.689	-1.0488	1.1293	-2.0313
0.842	-37.7466	-68.8662	1340.081	-0.68115	1.0181	-1.7144	-43.764	-100.787	814.084	-0.6001	0.69873	-1.1734	-63.043	-228.737	1800.378	-0.56055	0.96338	-1.9155	-114.367	88.045	1797.1434	-1.0948	1.2294	-2.1191
0.844	-29.2582	-64.8204	1344.997	-0.7124	1.0298	-1.7358	-78.161	-82.29	768.1514	-0.60938	0.60547	-1.1504	-99.657	-175.716	1804.62	-0.59033	1.0659	-2.0835	-112.309	26.453	1755.085	-1.135	1.3329	-2.196
0.846	-29.438	-61.4777	1337.8296	-0.77148	1.084	-1.7881	-104.804	-110.367	755.315	-0.64746	0.54688	-1.1191	-189.587	-109.2126	1816.245	-0.59961	1.1826	-2.2002	-94.3035	-34.6924	1779.979	-1.1657	1.4374	-2.27
0.848	-16.4784	-56.8485	1336.8144	-0.80689	1.1341	-1.827	-107.734	-68.992	787.749	-0.68237	0.54297	-1.1252	-219.237	-30.343	1827.636	-0.60449	1.2969	-2.2832	-51.31	-101.456	1833.238	-1.1875	1.5527	-2.3379
0.85	-43.98085	-57.2671	1336.8452	-0.8335	1.186	-1.8589	-121.17727	-43.702	788.958	-0.70605	0.57617	-1.1445	-199.368	43.488	1801.924	-0.6333	1.4263	-2.3726	-17.728	-120.693	1891.674	-1.1906	1.6673	-2.4136
0.852	-11.6157	-43.638	1342.9677	-0.87305	1.2363	-1.8926	-87.303	-104.066	843.513	-0.72266	0.6748	-1.1846	-157.871	72.4267	1784.277	-0.66211	1.4766	-2.4141	-28.643	-147.677	1906.58	-1.1719	1.7754	-2.4812
0.854	-8.505	-39.471	1353.3029	-0.8877	1.2598	-1.9004	-59.63	-120.328	858.039	-0.7207	0.73047	-1.2139	-168.626	61.271	1767.666	-0.7168	1.6035	-2.502	-71.9255	-158.124	1919.736	-1.1496	1.8477	-2.5231
0.856	6.654	-24.076	1338.489	-0.91309	1.2754	-1.9121	-82.9423	-162.2	863.824	-0.70898	0.82422	-1.2773	-185.799	21.1116	1749.911	-0.73755	1.7102	-2.5652	-110.781	-202.363	1863.13	-1.1316	1.8937	-2.5371
0.858	36.8049	-16.3281	1345.2199	-0.91992	1.269	-1.9194	-79.4	-184.993	928.122	-0.69532	0.87744	-1.3159	-180.802	-1.3422	1747.305	-0.7373	1.8125	-2.627	-90.4768	-191.241	1865.468	-1.1401	1.9165	-2.5229
0.86	33.0668	-9.854	1351.267	-0.92188	1.2539	-1.9102	-56.8653	-157.742	954.798	-0.68652	0.91211	-1.3652	-127.788	-33.748	1787.9317	-0.70117	1.9141	-2.6699	-49.913	-146.413	1864.824	-1.1818	1.912	-2.5044
0.862	52.3618	-8.385	1352.1562	-0.92041	1.2114	-1.8979	-69.19247	-213.999	1004.028	-0.6748	0.91162	-1.4351	-81.526	-66.803	1812.959	-0.68311	1.9536	-2.6733	-23.354	-70.5426	1808.398	-1.235	1.911	-2.469
0.864	41.6771	-6.517	1367.1832	-0.91943	1.186	-1.8901	-39.751	-233.828	1063.48	-0.67383	0.90918	-1.4707	-52.716	-108.568	1839.353	-0.66162	1.9946	-2.6772	46.659	-20.054	1734.73	-1.2866	1.8954	-2.4261
0.866	52.093	-14.639	1387.4167	-0.92188	1.1289	-1.8613	-26.388	-256.812	1073.3947	-0.6875	0.92773	-1.5293	-76.057	-124.851	1846.718	-0.66943	2.0122	-2.6694	46.946	6.18854	1640.236	-1.3325	1.8672	-2.37
0.868	66.494	-25.6367	1398.43	-0.91211	1.0684	-1.8418	-37.557	-305.158	1114.6426	-0.71021	0.96484	-1.5718	-49.857	-117.413	1839.653	-0.69092	2.0044	-2.6499	91.2899	36.6835	1602.878	-1.3711	1.8223	-2.3145
0.87	68.821	-30.45167	1398.84695	-0.90625	1.041	-1.8262	-2.454	-239.82	1156.517	-0.73389	1.0142	-1.603	-66.064	-80.779	1830.574	-0.76123	1.981	-2.6069	89.4473	67.7465	1573.062	-1.3921	1.7887	-2.2522
0.872	76.837	-19.247	1389.27946	-0.90381	0.99854	-1.814	-20.232	-220.036	1176.2355	-0.75586	1.0801	-1.6289	-37.327	-58.892	1841.35	-0.82422	1.9512	-2.5615	120.472	163.078	1570.9958	-1.407	1.7657	-2.1991
0.874	54.834	-11.1167	1390.7136	-0.90723	0.9834	-1.8047	-10.62	-215.089	1216.956	-0.75342	1.106	-1.6382	-0.796999999999997	-16.286	1806.09	-0.88672	1.9023	-2.5098	37.13	213.494	1531.237	-1.412	1.7497	-2.1558
0.876	82.746	-8.2926	1407.929	-0.90967	0.98096	-1.8022	25.621	-147.2368	1214.164	-0.73779	1.1313	-1.646	42.15	27.4949	1764.3109	-0.95264	1.8267	-2.437	9.669	228.872	1523.479	-1.3984	1.7293	-2.1066
0.878	58.565	3.742	1375.4149	-0.91211	0.99219	-1.8066	7.827	-159.3795	1216.9696	-0.70727	1.1214	-1.658	78.006	75.105	1710.43	-0.97363	1.7832	-2.4004	-78.87	194.154	1479.5	-1.3755	1.6978	-2.0581
0.88	50.4244	13.8011	1381.9467	-0.90869	1.0063	-1.8042	36.0514	-139.888	1279.063407	-0.67822	1.1001	-1.6694	68.317	109.857	1668.574	-0.98193	1.7134	-2.3315	-62.829	197.16	1488.277	-1.3533	1.6592	-1.9889
0.882	34.662	7.94291	1390.9409	-0.89453	1.0254	-1.8086	37.9244	-98.097	1282.34	-0.65283	1.061	-1.689	41.647	154.453	1626.13	-0.97119	1.6607	-2.2817	-79.4696	174.857	1471.978	-1.3161	1.6204	-1.9178
0.884	34.9641	24.992	1394.9583	-0.8894	1.0335	-1.7888	8.84	-120.827	1311.893	-0.65771	1.0376	-1.6987	33.98	171.859	1593.6753	-0.95508	1.6211	-2.2383	-43.526	158.237	1496.67	-1.2681	1.5716	-1.8448
0.886	16.7592	33.907	1381.6373	-0.88428	1.0337	-1.7798	46.48235	-68.246	1309.6046	-0.68359	1.0059	-1.7324	26.199	198.27	1566.136	-0.90527	1.5723	-2.1719	-95.862	138.216	1468.313	-1.2116	1.5112	-1.7696
0.888	-0.678999999999998	52.964	1367.81406	-0.875	1.0293	-1.7715	24.4847	-106.3	1297.665	-0.73901	1.0012	-1.7605	-14.216	186.407	1579.18	-0.87744	1.5552	-2.1323	-93.066	123.7368	1464.64	-1.1445	1.4434	-1.6895
0.89	-10.27	53.462	1373.49456	-0.86572	1.0239	-1.7651	24.252	-145.906	1348.1059	-0.80859	1.0117	-1.7969	-25.336	182.513	1571.345	-0.81299	1.5098	-2.0645	-74.264	99.732	1429.664	-1.0769	1.381	-1.6094
0.892	-31.2076	56.599	1345.2236	-0.8501	1.0063	-1.7573	34.369	-97.18418	1355.721	-0.90967	1.0688	-1.8696	-30.705	166.178	1563.5382	-0.77197	1.4663	-2.0043	-48.766	103.36	1428.759	-1.0097	1.3091	-1.5264
0.894	-18.092	58.1833	1337.5669	-0.84008	0.99537	-1.7458	23.8291	-131.006	1373.6147	-0.95508	1.1094	-1.8945	-68.551	173.364	1551.865	-0.73047	1.4199	-1.9473	-66.0588	109.8	1372.538	-0.94444	1.2368	-1.444
0.896	-41.881	59.413	1336.0314	-0.8374	0.98877	-1.7339	40.0727	-109.044	1431.9399	-1.0366	1.2075	-1.9585	-127.846	163.796	1562.024	-0.67529	1.3667	-1.8628	-60.5211	133.85	1304.548	-0.87451	1.1587	-1.3484
0.898	-6.641	38.015	1328.443	-0.82959	0.979	-1.7163	3.49452	-100.831	1437.5583	-1.0864	1.2705	-1.9991	-124.19	151.0399	1549.26	-0.64648	1.3379	-1.8125	-72.821	196.209	1239.299	-0.79443	1.0659	-1.2554
0.9	-21.7612	24.002	1304.8462	-0.81787	0.97314	-1.7104	-27.1396	-169.276	1495.99	-1.123	1.3223	-2.0273	-124.968	114.1525	1534.802	-0.58008	1.2793	-1.7168	-100.018	244.162	1183.2799	-0.70918	0.97557	-1.1522
0.902	-18.9034	27.299	1286.78284	-0.79102	0.96484	-1.6875	4.042	-119.704	1513.149	-1.1592	1.3613	-2.0684	-108.2058	127.346	1506.372	-0.52808	1.2229	-1.6346	-44.0234	296.964	1130.2243	-0.62665	0.88428	-1.0587
0.904	-12.56	41.538	1289.27561	-0.76513	0.94434	-1.6709	-2.9187	-97.54	1486.3426	-1.1738	1.3613	-2.082	-125.475	125.784	1478.267	-0.47754	1.1587	-1.5562	-41.198	285.118	1073.598	-0.53212	0.80302	-0.9626
0.906	11.279	48.2601	1270.14435	-0.74609	0.92285	-1.6484	20.5694	-86.1886	1503.518	-1.2012	1.3672	-2.1016	-134.095	149.27	1401.663	-0.40967	1.0747	-1.437	-35.2503	308.264	1018.337	-0.43183	0.70742	-0.88124
0.908	8.468	52.232194	1249.5541	-0.71826	0.88965	-1.6187	0.8759	-1.782	1497.3018	-1.2256	1.3555	-2.1054	-152.72	161.416	1336.921	-0.38086	1.0313	-1.375	-20.1294	276.621	937.771	-0.32861	0.61279	-0.79443
0.91	-22.5733	67.3271	1218.7299	-0.70264	0.87549	-1.6011	-8.835	-11.694	1482.976	-1.2461	1.3359	-2.0996	-120.077	208.845	1267.9288	-0.31836	0.95313	-1.2793	15.0569	275.763	889.674	-0.2298	0.52648	-0.69962
0.912	31.4246	74.609	1220.0856	-0.66797	0.84082	-1.5801	14.6977	9.2974	1511.876	-1.2715	1.2949	-2.0742	-91.601241	232.4258	1248.6426	-0.26514	0.89819	-1.1892	21.478	222.388	836.426	-0.13987	0.44299	-0.60275
0.914	33.6713	84.783	1216.3875	-0.63111	0.81079	-1.5534	35.306	34.042	1491.942	-1.2803	1.2598	-2.0625	-33.249	282.378	1188.6312	-0.21582	0.83496	-1.1084	119.901	202.727	812.579	-0.05354	0.36643	-0.51917
0.916	31.1503	92.017	1191.33188	-0.60205	0.78564	-1.5308	34.3829	-30.649	1515.706	-1.2988	1.1973	-2.0332	-46.209	290.698	1153.0365	-0.14355	0.74707	-1.0137	115.415	135.797	719.732	0.025958	0.28595	-0.43205
0.918	49.8091	96.134	1179.6217	-0.56689	0.75049	-1.4956	53.361	7.71238	1539.1879	-1.3008	1.1509	-2.0083	-28.342	308.578	1081.8025	-0.11084	0.70557	-0.96045	139.942	130.898	645.441	0.11084	0.20605	-0.34668
0.92	39.8038	97.7967	1153.82573	-0.55322	0.73682	-1.4839	45.441	14.665	1498.7358	-1.3066	1.1191	-1.9941	-32.4701	280.376	1039.765	-0.038086	0.63916	-0.87646	86.138	110.792	554.5275	0.206	0.1235	-0.27322
0.922	61.0953	106.027	1134.4696	-0.54053	0.71533	-1.4507	29.125	-5.802	1527.854	-1.3149	1.0942	-1.98	23.9415	300.041	964.769	0.0065919	0.5918	-0.80371	138.883	141.172	522.209	0.29948	0.030969	-0.20101
0.924	38.343	129.8021	1098.5943	-0.53149	0.70483	-1.4255	81.199	46.6482	1535.5973	-1.3223	1.0898	-1.9746	55.877	260.273	926.689	0.046875	0.55713	-0.73584	89.527	147.547	465.159	0.38114	-0.067489	-0.12678
0.926	54.4426	132.337	1090.9349	-0.52734	0.69971	-1.3979	49.386	-10.8761	1535.653	-1.3262	1.0889	-1.9707	121.419	258.77907	867.82	0.10791	0.51611	-0.6333	134.904	166.76	418.359	0.45532	-0.16258	-0.064709
0.928	41.997	126.656	1089.463	-0.51953	0.69336	-1.3574	53.777	4.6741	1575.296	-1.3272	1.0947	-1.9531	121.435	210.92541	839.2742	0.13135	0.49805	-0.58203	76.721	181.941	330.064	0.51416	-0.25098	-0.0073242
0.93	45.393	111.952	1063.7363	-0.51563	0.69531	-1.3359	83.226	39.2063	1564.1845	-1.3223	1.0957	-1.9473	114.876	228.927	803.588	0.18848	0.44873	-0.47705	31.5832	203.273	278.92	0.5633	-0.33922	0.052069
0.932	8.82	111.5767	1042.0258	-0.49707	0.68359	-1.2871	43.273	-24.058	1572.076	-1.3179	1.0962	-1.939	107.846	185.161	741.066	0.23071	0.40235	-0.40161	-25.0325	250.869	210.2562	0.59403	-0.42924	0.10194
0.934	-2.658	103.025	1022.7533	-0.4729	0.66626	-1.2488	82.225	21.499	1580.773	-1.3105	1.0898	-1.9297	139.111	202.889	653.95	0.26855	0.35303	-0.32813	-19.788	254.153	172.25	0.63225	-0.51117	0.13241
0.936	-7.58	97.4014	1011.973	-0.4502	0.64746	-1.2109	82.666	17.239	1539.297	-1.2886	1.0854	-1.9116	139.564	173.0178	603.081	0.31934	0.2749	-0.22852	-9.593	269.892	136.026	0.67144	-0.59376	0.17004
0.938	-26.535	110.0865	968.7031	-0.42041	0.60986	-1.1616	65.43	8.099	1546.111	-1.2722	1.0789	-1.8938	135.749	217.1361	526.474	0.3335	0.22803	-0.18164	7.65	211.069	96.04	0.70947	-0.67432	0.21289
0.94	-38.662	118.22703	926.2659	-0.40039	0.5957	-1.1279	85.144	80.6208	1523.9566	-1.25	1.0684	-1.8828	110.684	209.291	475.51	0.35938	0.13477	-0.10596	21.217	192.5316	66.706	0.71851	-0.75631	0.24504
0.942	-43.347	129.56355	904.465	-0.37012	0.55566	-1.0723	37.234	51.8723	1501.90226	-1.2163	1.0552	-1.8608	79.755	265.092	428.2759	0.37476	0.050537	-0.044189	-41.152	126.106	41.594	0.70486	-0.81972	0.25862
0.944	-52.42	129.5842	892.8071	-0.35376	0.53149	-1.0354	52.984	87.6715	1524.079	-1.2046	1.0474	-1.8433	-4.8116	225.885	383.549	0.36865	-0.041504	-0.0024414	-66.4831	113.5293	41.48	0.67258	-0.87131	0.25574
0.946	-65.3772	127.614	847.8886	-0.33398	0.50586	-0.99609	52.679	127.625	1482.506	-1.1577	1.0181	-1.8179	11.1348	262.99	324.88	0.33887	-0.16846	0.054199	-129.627	77.717	57.223	0.62362	-0.90726	0.24958
0.948	-77.806959	136.709	836.4785	-0.30664	0.47559	-0.94336	44.229	94.5278	1471.81215	-1.1335	0.99441	-1.7946	-21.3893	221.279	283.9049	0.32031	-0.229	0.083984	-137.429	86.678	58.931	0.54736	-0.93115	0.23389
0.95	-66.0398	145.689	795.1395	-0.28857	0.46143	-0.91553	37.793	132.614	1461.9379	-1.1069	0.96729	-1.7769	-6.358	277.438	213.073	0.28369	-0.33154	0.13916	-158.695	24.14579	79.386	0.43883	-0.92808	0.19436
0.952	-68.5695	148.9757	767.2087	-0.26025	0.43799	-0.86084	13.767	114.253	1429.0581	-1.0742	0.93945	-1.7539	-39.487	215.987	173.743	0.25586	-0.39722	0.17041	-111.2934	24.0736	102.808	0.30945	-0.89434	0.14358
0.954	-70.194	157.982	732.1144	-0.23658	0.41773	-0.82789	12.305	79.131	1445.376	-1.064	0.92822	-1.7437	-65.706	231.818	148.1289	0.22559	-0.45459	0.18799	-167.945	-33.1275	97.158	0.14304	-0.81705	0.08726
0.956	-84.7914	149.812	710.144	-0.20947	0.40234	-0.78662	33.256	125.663	1426.2217	-1.0425	0.90869	-1.7183	-101.867	136.7457	113.7916	0.18408	-0.51904	0.18408	-108.443	-30.095	134.845	-0.049496	-0.70527	0.016479
0.958	-60.695	148.399	693.3869	-0.17725	0.37842	-0.73975	5.4103	77.227	1398.828	-1.0322	0.89844	-1.6953	-108.301	134.0272	85.74141	0.14941	-0.55225	0.17041	-107.3033	-43.463	120.578	-0.26172	-0.55029	-0.08252
0.96	-67.167	136.7715	658.9741	-0.16357	0.3667	-0.71631	18.25472	85.533	1408.2895	-1.0137	0.89453	-1.6758	-126.531	47.635	81.352	0.087891	-0.60742	0.13867	-36.504	-9.74	116.059	-0.48238	-0.35717	-0.21108
0.962	-54.016	135.1391	615.3864	-0.12402	0.34131	-0.66406	13.47	124.945	1360.361	-0.9917	0.88525	-1.6401	-131.637	76.296	98.9408	0.033204	-0.63818	0.11328	10.924	-7.243	55.77217	-0.67642	-0.14621	-0.33485
0.964	-42.854	129.973	570.176	-0.10669	0.31739	-0.63038	-3.916	92.818	1331.818	-0.97656	0.87891	-1.623	-124.9838	16.627	118.626	-0.030273	-0.64209	0.077148	49.232	10.953	29.0343	-0.83695	0.063143	-0.45136
0.966	-24.654	136.02	553.682	-0.085449	0.2959	-0.59766	48.3553	152.1854	1335.9305	-0.94287	0.85596	-1.5835	-131.4704	56.428	120.826	-0.13672	-0.61084	-0.00048828	11.452	13.13842	-0.4077	-0.95283	0.25841	-0.55749
0.968	-13.463	135.664	518.834	-0.063477	0.2749	-0.55713	-6.507	151.248	1268.33475	-0.90698	0.82739	-1.5495	-132.561	-17.938	84.845	-0.19287	-0.58203	-0.043457	10.141	19.7823	41.115	-1.0249	0.43799	-0.64404
0.97	-22.622	144.9931	482.41476	-0.053711	0.26318	-0.53711	-9.711	118.2041	1255.875	-0.87256	0.79834	-1.5093	-114.1346	16.082	76.055	-0.2959	-0.46924	-0.14404	3.725	44.055	18.6334	-1.06	0.58387	-0.7069
0.972	-4.57100000000001	133.6633	471.1646	-0.031738	0.23926	-0.49707	24.5798	182.872	1211.106	-0.81787	0.75049	-1.4565	-60.152	-45.632	86.471	-0.37255	-0.34473	-0.22851	-18.643	35.4517	24.75257	-1.0604	0.70848	-0.74482
0.974	-7.337	148.8517	456.125	-0.013427	0.22436	-0.46777	-21.19	169.9782	1179.06	-0.79248	0.72705	-1.4253	-15.477	13.082	61.6117	-0.44971	-0.19971	-0.31396	-2.314	49.532	-12.106	-1.0477	0.80875	-0.76721
0.976	11.446	144.808	435.655	0.0019531	0.21094	-0.43994	25.667	191.4158	1190.0844	-0.73193	0.67041	-1.3608	24.206	-14.2547	39.125	-0.53076	-0.010254	-0.43115	18.874	21.131	7.928	-1.0157	0.89422	-0.77792
0.978	-6.308	156.307	395.1734	0.032715	0.19678	-0.39697	35.4192	212.784	1133.083	-0.6914	0.62988	-1.3169	28.385	51.6199	18.2995	-0.56494	0.085449	-0.48193	15.04	38.9704	-2.195	-0.96094	0.95117	-0.77148
0.98	-13.398	141.088	379.8833	0.044434	0.18945	-0.38574	-0.208000000000006	174.2007	1089.201	-0.64404	0.58936	-1.2729	22.643	6.008	8.0906	-0.60693	0.26025	-0.57178	24.374	2.344	28.177	-0.8935	0.97266	-0.74305
0.982	-17.554	138.747	357.0965	0.067871	0.17139	-0.34912	11.396	225.287	1070.027	-0.5874	0.53369	-1.2026	21.61	53.5714	3.074	-0.61987	0.38818	-0.61866	16.27	14.4503	23.0022	-0.80312	0.94328	-0.69396
0.984	-12.538	131.779	313.9132	0.078369	0.15723	-0.32739	2.611	218.242	1022.214	-0.55957	0.50195	-1.1699	47.078	21.38	0.827	-0.62012	0.50684	-0.65918	2.988	-55.558	21.3916	-0.69321	0.8586	-0.62929
0.986	-34.031	130.761	297.5205	0.087402	0.14648	-0.30469	-21.519	186.9111	1006.949	-0.5	0.4585	-1.0952	49.655	81.388	1.5965	-0.60156	0.62891	-0.69531	44.573	-38.3908	10.913	-0.56144	0.74161	-0.55266
0.988	-41.719	121.3271	281.7337	0.10498	0.13721	-0.27539	-4.849	215.963	972.8372	-0.46118	0.427	-1.0467	67.515	47.004	27.48	-0.58545	0.67041	-0.70068	-9.18	-63.79481	-0.378999999999998	-0.41602	0.59961	-0.46777
0.99	-43.979	113.2201	278.08655	0.10693	0.13232	-0.26807	-40.499	167.169	941.6702	-0.42334	0.39795	-0.99561	35.019	75.598	29.5638	-0.52246	0.72852	-0.6875	-34.379	-3.691	1.439	-0.27683	0.4447	-0.37997
0.992	-49.52	105.2533	248.1241	0.11426	0.12256	-0.24756	-26.16	165.279	930.3066	-0.37842	0.36328	-0.92334	8.077	25.9623	-0.808	-0.47095	0.73169	-0.65601	-101.68916	-7.585	9.953	-0.15925	0.28787	-0.29496
0.994	-68.763	97.7949	234.683	0.11743	0.12426	-0.22876	-48.503	207.534888	879.4055	-0.333	0.34473	-0.86816	-12.644	42.355	8.802	-0.4165	0.70654	-0.61279	-86.4057	51.9753	23.31	-0.068	0.14585	-0.21264
0.996	-70.361	96.398	211.1412	0.12061	0.12402	-0.21582	-80.8	180.65	844.113	-0.29932	0.31885	-0.81201	12.562	-10.4099	16.7257	-0.33203	0.61328	-0.53711	-160.152	45.533	-1.0338	-0.012234	0.037251	-0.15226
0.998	-61.958	86.1912	210.5376	0.12451	0.12646	-0.19678	-42.08	221.0207	806.073	-0.25635	0.29248	-0.73389	-18.991	5.8753	48.639	-0.29395	0.55908	-0.49316	-96.9638	88.631	27.9432	0.029297	-0.04248	-0.099121
1	-88.126	72.804	186.5315	0.1333	0.12695	-0.18555	-71.546	212.0483	736.8861	-0.23438	0.27344	-0.69141	-13.301	-13.018	45.441	-0.19678	0.42627	-0.40576	-125.592	85.475	23.367	0.059943	-0.090489	-0.070136
1.002	-92.4336	79.3547	171.9666	0.14111	0.12451	-0.17383	-81.643	188.7605	707.893	-0.19141	0.24463	-0.61523	-58.5569	13.7918	42.521	-0.13721	0.31812	-0.3396	-100.499	100.111	56.724	0.079	-0.13201	-0.033136
1.004	-74.768	82.0978	168.2789	0.15283	0.11768	-0.15576	-56.328	229.486	661.00956	-0.15943	0.21777	-0.55494	-84.038856	11.51	25.978	-0.08252	0.20654	-0.28418	-97.3509	91.811	26.707	0.079397	-0.15194	-0.012414
1.006	-79.6592	86.109	134.43109	0.14844	0.11279	-0.15381	-96.056	202.01494	610.3575	-0.13379	0.19385	-0.49902	-122.901	27.51546	35.726	-0.023438	0.084961	-0.21777	-92.6062	85.6479	52.818	0.073735	-0.16494	0.0061477
1.008	-89.1057	73.1485	137.017	0.15576	0.099121	-0.14746	-74.718	209.9895	576.5427	-0.089355	0.16211	-0.42432	-108.0865	29.8848	25.9396	0.015137	0.019532	-0.18677	-107.18	52.478	2.9265	0.064453	-0.16504	0.011719
1.01	-86.303	63.20716	124.3636	0.15357	0.10108	-0.1333	-101.5924	224.428	513.113	-0.075195	0.14111	-0.38818	-128.903	42.388	37.047	0.042969	-0.027832	-0.15771	-56.286	18.895	36.815	0.064259	-0.15761	0.018459
1.012	-47.479	53.73273	116.6942	0.15332	0.092773	-0.12695	-110.0801	175.4599	476.6358	-0.041504	0.10107	-0.31348	-115.16	51.843	34.7956	0.066406	-0.068359	-0.13477	-50.666	13.568	26.76309	0.069925	-0.14443	0.024906
1.014	-40.266	57.99413	77.1298	0.14355	0.085938	-0.11865	-65.184	195.497	442.6638	-0.015381	0.071289	-0.26147	-129.478	56.01	71.375	0.069824	-0.07666	-0.12598	-52.255	-5.586	71.765	0.080861	-0.13349	0.032325
1.016	-35.804	50.5633	66.284	0.14355	0.081055	-0.11475	-91.225	187.277	381.5683	0.0063477	0.038574	-0.21436	-127.737	60.309	42.5809	0.066406	-0.083008	-0.10596	-28.603	4.095	68.098	0.10332	-0.125	0.035352
1.018	-19.003	56.0385	70.8079	0.13818	0.067383	-0.1167	-87.496	167.9522	348.3239	0.026855	0	-0.1582	-122.1455	54.773	42.682	0.053222	-0.072754	-0.095215	-39.315	-36.393	96.07	0.13379	-0.125	0.040527
1.02	-16.882	52.0271	67.3948	0.13721	0.064209	-0.11401	-42.256	180.628	323.1766	0.038086	-0.011719	-0.13037	-102.8573	59.5616	17.0918	0.044434	-0.060547	-0.084473	-20.313	-32.0291	80.932	0.16074	-0.13144	0.049707
1.022	-2.019	56.996	62.2575	0.13428	0.055664	-0.11279	-80.793	131.208	281.3361	0.04834	-0.037109	-0.074707	-98.0536	28.7012	24.1156	0.044922	-0.031738	-0.069336	-4.765	-61.636	89.857	0.18828	-0.14492	0.054004
1.024	-9.431	53.9718	58.1305	0.12402	0.055664	-0.11523	-37.161	110.432	269.4941	0.052978	-0.055909	-0.042236	-56.391	42.8725	22.2524	0.052734	-0.029297	-0.063477	35.208	-12.5548	79.05	0.21133	-0.16367	0.05791
1.026	-2.448	30.9861	78.988	0.11816	0.057617	-0.11865	-36.011	111.036	239.8324	0.052246	-0.067383	-0.020508	-37.513	9.747	59.173	0.075195	-0.033203	-0.040527	17.349	-15.5992	56.0619	0.22412	-0.17891	0.062695
1.028	16.985	37.5128	80.886	0.10693	0.059082	-0.1167	-62.478	80.216	216.569	0.035645	-0.07959	0.0053711	-34.931	15.898	43.249	0.093508	-0.042969	-0.024902	39.394	29.8625	22.6426	0.22266	-0.18896	0.078613
1.03	-3.932	34.5617	57.6046	0.094971	0.059814	-0.1228	1.29499999999999	99.0922	210.201	0.024902	-0.081543	0.015625	-5.431	-42.368	62.56	0.11816	-0.062988	-0.0068359	9.38	-2.229	-20.2553	0.21973	-0.19522	0.073926
1.032	-18.478	31.2585	41.4741	0.086426	0.064941	-0.12354	-53	92.3489	158.0973	-0.0014648	-0.081055	0.029297	28.062	-16.8817	55.559	0.14502	-0.097168	0.018066	21.467	32.745	-13.1114	0.20352	-0.19698	0.068262
1.034	-3.546	22.3676	33.70316	0.081055	0.069336	-0.11865	-45.136	69.8259	128.7451	-0.025879	-0.073974	0.030029	27.4	-36.53	57.1851	0.15186	-0.1167	0.023926	15.271	7.664	-4.409	0.1914	-0.19267	0.060449
1.036	-3.743	20.93828	29.526	0.075195	0.068848	-0.12646	0.841999999999999	78.4005	106.126	-0.049805	-0.063965	0.027344	56.604	22.4395	52.5161	0.16846	-0.14648	0.04248	22.981	44.8223	15.9803	0.18467	-0.18672	0.055175
1.038	-13.478	24.00324	21.84701	0.074707	0.068848	-0.12012	-49.431	33.424	99.065	-0.078613	-0.043945	0.015625	38.737	-2.3726	53.739	0.17554	-0.16407	0.051758	1.731	29.4527	-8.06	0.1748	-0.17432	0.041504
1.04	-11.231	25.56	49.0356	0.073974	0.064209	-0.11474	-12.215	32.565	98.9	-0.09082	-0.02832	0.0053711	28.857	44.5864	28.6419	0.18018	-0.17529	0.05957	-27.48	48.4744	19.8863	0.17392	-0.15557	0.030175
1.042	-20.826	32.4397	42.0235	0.073242	0.059082	-0.11523	-4.579	58.045	66.5	-0.1167	0.003418	-0.010254	28.2	-1.8269	18.496	0.1792	-0.19336	0.071289	-66.851	20.7072	-8.085	0.17002	-0.14277	0.01289
1.044	-39.498	32.9196	48.2571	0.074219	0.046387	-0.1084	-43.185	40.59652	65.918	-0.13306	0.022705	-0.022217	23.5	41.44268	2.731	0.1748	-0.19336	0.070801	-70.481	10.91732	15.99153	0.16963	-0.13379	0.0015625
1.046	-61.745	21.6876	33.4165	0.078125	0.040039	-0.10254	-12.506	47.738	57.143	-0.14648	0.043457	-0.039551	16.428	1.343	9.295	0.17969	-0.18896	0.075195	-100.165	1.454	-0.204000000000001	0.1624	-0.11944	-0.010938
1.048	-64.898	17.665	43.5669	0.078613	0.023926	-0.099609	-50.215	36.4377	29.1751	-0.16602	0.064453	-0.067871	18.087	62.8967	26.241	0.17407	-0.18067	0.071045	-104.1064	-4.573	28.2232	0.14551	-0.10449	-0.025391
1.05	-63.211	19.8381	38.3827	0.085205	0.016358	-0.096191	-28.711	18.773	37.6335	-0.18066	0.071289	-0.078125	0.143000000000001	32.3486	18.626	0.18213	-0.16992	0.069336	-92.6938	-2.746	-6.497	0.12695	-0.076856	-0.03623
1.052	-63.1286	26.1795	23.2213	0.084961	0.010742	-0.09375	3.437	49.3493	27.363	-0.20947	0.084473	-0.10498	-32.901	71.771	9.348	0.19092	-0.16162	0.068359	-98.60583	-4.149	29.27104	0.099612	-0.061328	-0.047559
1.054	-73.984	30.17614	20.1494	0.086914	0.003418	-0.086426	-64.8573	23.257	32.561	-0.23047	0.097655	-0.12061	-62.2154	13.9436	16.834	0.19922	-0.1582	0.066406	-106.732	17.994	4.6989	0.071484	-0.046484	-0.05498
1.056	-79.7888	29.451	16.4204	0.081543	0	-0.083496	-45.794	4.305	53.428	-0.24756	0.10938	-0.13818	-88.025	40.3519	22.1349	0.21191	-0.16504	0.061523	-85.4343	15.004	36.81	0.043848	-0.037109	-0.063575
1.058	-66.591	18.0823	38.1654	0.077637	-0.0063477	-0.085938	-45.525	20.0599	31.403	-0.26709	0.12305	-0.15771	-101.66891	-3.8	29.87216	0.22021	-0.16724	0.056885	-85.7751	54.09	33.718	0.026367	-0.026855	-0.076172
1.06	-69.058	23.0199	22.9647	0.07788	-0.01001	-0.077393	-68.771	-0.356999999999999	17.0278	-0.27295	0.13477	-0.16553	-78.55	44.614	26.62735	0.22607	-0.1709	0.049805	-85.222	48.195	64.975	0.016406	-0.025098	-0.076953
1.062	-70.476	7.453	35.0766	0.080078	-0.0083008	-0.075195	-23.638	15.8041	24.47809	-0.2832	0.15234	-0.1748	-125.1969	10.4901	37.7191	0.22656	-0.16797	0.039551	-59.897	91.01	46.7356	0.010938	-0.030371	-0.083203
1.064	-45.203	11.8681	34.6581	0.085938	-0.015625	-0.071777	-73.5127	18.9872	8.6601	-0.28515	0.15698	-0.17505	-140.229	45.2906	28.399	0.22217	-0.16846	0.035156	-73.4645	58.537	51.9931	0.0078125	-0.040527	-0.088281
1.066	-52.803	10.5637	28.3478	0.09082	-0.018066	-0.063965	-62.07	7.94588	38.007	-0.28125	0.16602	-0.17139	-131.775	-18.8964	36.7655	0.20605	-0.15723	0.019043	-63.986	98.825	46.7754	0.0058594	-0.049316	-0.084766
1.068	-52.141	25.8642	16.31883	0.098633	-0.024414	-0.064453	-29.248	36.549	19.983	-0.27148	0.18408	-0.16357	-125.185	31.7977	42.2949	0.19556	-0.14258	0.0036621	-61.366	38.8431	48.543	0.0083008	-0.061523	-0.084961
1.07	-38.557	23.12801	17.4559	0.099365	-0.028321	-0.060058	-68.6886	22.285	10.743	-0.25928	0.17529	-0.14502	-109.1691	-4.654	51.947	0.18262	-0.12256	-0.013672	-39.268	54.867	47.314	0.0048828	-0.065821	-0.083398
1.072	-22.684	26.71049	25.51071	0.095703	-0.030273	-0.057129	-28.03	13.5	33.61114	-0.24219	0.16797	-0.125	-82.287	49.757	55.10878	0.16455	-0.089355	-0.04248	-8.285	2.6333	39.3751	0.0057618	-0.070996	-0.083984
1.074	-16.815	32.0097	25.4807	0.09668	-0.033203	-0.054199	-17.52	31.3653	14.687	-0.22143	0.15063	-0.10278	-86.5338	35.789	47.538	0.15674	-0.069824	-0.055176	25.519	30.1651	42.71	0.0018554	-0.07373	-0.079687
1.076	-1.189	32.383	26.2456	0.094727	-0.033691	-0.053223	-39.968	22.91615	23.691	-0.19727	0.12891	-0.07666	-72.156	73.828	32.6309	0.146	-0.044434	-0.069824	6.08	-18.3888	39.3284	-0.0018555	-0.069043	-0.076562
1.078	-2.657	29.8474	28.7833	0.090332	-0.034668	-0.053223	-6.207	50.643	26.337	-0.17236	0.095215	-0.042969	-59.433	50.406	21.6041	0.14526	-0.031494	-0.082763	44.47	-1.835	70.449	-0.011719	-0.076172	-0.068848
1.08	4.315	24.3206	38.7638	0.086914	-0.03125	-0.051026	-38.487	49.121	17.5764	-0.15283	0.076172	-0.025391	-39.272	61.234	40.71	0.14746	-0.021973	-0.091309	28.878	-31.7911	45.0969	-0.0083008	-0.08125	-0.068848
1.082	7.842	21.2587	30.3555	0.088867	-0.031738	-0.057617	-27.133	17.73	45.784	-0.12598	0.040039	0.003418	-18.071	17.01916	37.582	0.15381	-0.018066	-0.098145	41.76	-16.615	79.647	-0.0036133	-0.0875	-0.065137
1.084	-7.901	21.01786	12.1725	0.090332	-0.017578	-0.050781	-9.111	10.6612	46.693	-0.10815	0.014893	0.024659	4.566	32.428	55.0574	0.15723	-0.028809	-0.097168	19.461	-36.004	40.4484	-0.0075195	-0.095313	-0.06045
1.086	-9.033	16.7408	20.7065	0.095215	-0.018555	-0.047852	-40.269	1.282	14.278	-0.092285	-0.0087891	0.044434	23.56	21.249	42.2823	0.1709	-0.047852	-0.091309	12.928	-19.6886	74.732	-0.0055664	-0.10059	-0.05664
1.088	4.8	22.5467	28.1891	0.097656	-0.0039063	-0.04541	-0.591999999999999	24.4479	31.37059	-0.070801	-0.039551	0.06543	26.264	38.52	44.0799	0.17749	-0.064453	-0.082276	-19.882	-2.0389	22.639	-0.0073242	-0.10352	-0.053711
1.09	-17.969	35.5745	30.6137	0.10254	0.0043945	-0.043945	-15.004	44.024	31.331	-0.059082	-0.054199	0.072754	41.204	16.4249	38.123	0.17627	-0.077148	-0.073242	-20.465	-9.065	39.972	-0.016504	-0.10996	-0.051562
1.092	-32.014	33.5121	20.9168	0.10596	0.0087891	-0.043945	-38.883	15.067	33.9571	-0.043457	-0.069336	0.077637	38.65	5.0737	36.745	0.16797	-0.10303	-0.062988	-56.423	6.0121	5.2204	-0.021484	-0.10791	-0.053028
1.094	-22.862	30.1058	33.57333	0.10693	0.020508	-0.046387	11.702	-0.2483	43.189	-0.0354	-0.085938	0.091065	46.053	-9.1426	23.0369	0.16699	-0.10889	-0.05957	-66.793	-8.4609	23.1841	-0.020313	-0.10909	-0.05459
1.096	-30.487	28.482074	37.48	0.10889	0.020996	-0.04541	-22.886	2.9676	29.315	-0.018555	-0.095215	0.10352	32.884	-0.8932	52.414	0.15576	-0.1167	-0.054199	-42.342	32.904	-28.732	-0.020996	-0.10918	-0.055567
1.098	-54.168	23.4448	33.632	0.10352	0.024414	-0.046387	-17.319	3.684	59.592	-0.0087891	-0.1001	0.10449	20.567	13.4001	47.035	0.1499	-0.1228	-0.051514	-43.71	13.9101	-13.766	-0.016113	-0.11182	-0.062012
1.1	-56.655	19.49859	35.9793	0.1062	0.034912	-0.044678	3.991	21.3608	52.9171	-0.003418	-0.10449	0.10596	-0.235999999999997	7.5421	52.8349	0.14404	-0.12256	-0.053223	-60.342	52.952	-14.151	-0.0084963	-0.11055	-0.063281
1.102	-60.94	21.4344	30.5606	0.10449	0.04248	-0.044434	-60.222	22.949	42.4026	0.01416	-0.10938	0.11035	-6.215	12.181	35.5024	0.13623	-0.12598	-0.050781	-97.9403	30.0413	12.231	0.0029297	-0.11582	-0.067774
1.104	-62.001	29.7018	30.9837	0.10693	0.047852	-0.046387	-19.125	7.1982	38.8606	0.020752	-0.11255	0.10816	-33.041	-22.5983	16.347	0.13623	-0.12451	-0.050293	-92.0638	59.59454	5.1872	0.011914	-0.1209	-0.068164
1.106	-71.294	35.3792	11.605	0.10742	0.055176	-0.045898	-30.113	25.2563	9.69	0.03418	-0.11865	0.10986	-57.768	5.426	17.3689	0.12207	-0.12598	-0.060547	-105.285	15.328	20.03101	0.02002	-0.12959	-0.071582
1.108	-78.729	26.5061	23.6042	0.10449	0.066895	-0.053223	-78.2957	-3.041	44.5007	0.054688	-0.12012	0.10449	-53.795	13.8781	29.536	0.11866	-0.12305	-0.061035	-98.5234	40.6884	14.36808	0.028809	-0.14111	-0.077637
1.11	-69.789	30.7553	25.3428	0.10498	0.074951	-0.053711	-32.378	3.5593	45.8694	0.065918	-0.12305	0.10059	-71.272	68.228	15.4228	0.10791	-0.11572	-0.064941	-107.9908	7.7062	46.726	0.029688	-0.16035	-0.082715
1.112	-69.7402	28.223	29.7731	0.10596	0.083496	-0.050293	-59.961	20.5991	21.8375	0.075684	-0.12256	0.093262	-99.2538	41.912	27.55283	0.097656	-0.11279	-0.071777	-106.1014	38.853	63.574	0.031445	-0.17266	-0.091504
1.114	-71.108	34.418	23.731	0.10596	0.095703	-0.051758	-65.882	10.9611	27.9645	0.086669	-0.12329	0.092529	-112.419	60.7817	3.4424	0.091309	-0.11084	-0.076172	-75.643	5.61538	33.9487	0.032617	-0.17773	-0.098928
1.116	-61.332	20.5933	34.9775	0.099609	0.10498	-0.053223	-21.979	19.8886	9.959	0.096191	-0.11963	0.086914	-133.7704	7.05	12.816	0.082031	-0.095703	-0.075684	-72.995	30.359	36.5663	0.035156	-0.18095	-0.1123
1.118	-39.316	22.63791	55.08	0.10107	0.11084	-0.058105	-66.912	0.222000000000001	23.302807	0.098145	-0.11035	0.064453	-121.849	48.369	19.611	0.077636	-0.082276	-0.073242	-74.1326	0.3034	2.505	0.038574	-0.18018	-0.12012
1.12	-46.87	17.0719	42.603	0.1023	0.12597	-0.062256	-14.72	-19.775	49.357	0.10156	-0.10498	0.066895	-113.2189	-0.337	40.451	0.072266	-0.080566	-0.08252	-31.974	36.8497	38.2993	0.035449	-0.17734	-0.13203
1.122	-37.745	24.34606	22.7069	0.10156	0.13525	-0.063477	-41.46	1.1619	21.2344	0.10742	-0.091797	0.055176	-121.9348	60.1664	45.2439	0.076172	-0.085938	-0.084961	-18.386	45.4537	15.587	0.032618	-0.17295	-0.14277
1.124	-31.548	28.5847	33.156	0.10645	0.14355	-0.067871	-80.0172	3.956	24.6642	0.11597	-0.081543	0.047363	-114.622	7.1637	45.863	0.078125	-0.087402	-0.085938	2.037	57.8151	52.897	0.030664	-0.16905	-0.1459
1.126	-12.23	32.494	47.5445	0.10791	0.14746	-0.065918	-2.94	16.38997	39.52995	0.11963	-0.068359	0.036133	-86.4706	50.4892	17.8383	0.092285	-0.10693	-0.083984	-3.829	57.254	33.812	0.02461	-0.16114	-0.15527
1.128	6.86499999999999	7.55412	59.1506	0.10107	0.14697	-0.086426	-51.734	23.675	6.173	0.12891	-0.056152	0.026855	-77.2874	-12.920485	13.52336	0.10254	-0.12647	-0.084229	14.493	48.297	95.068	0.022461	-0.15576	-0.16846
1.13	-11.789	-17.1296	59.0884	0.097412	0.14599	-0.1084	-41.063	-1.493	25.03	0.13525	-0.052246	0.01709	-65.252	36.378	33.251	0.10156	-0.15479	-0.088379	5.3	50.94	115.804	0.019824	-0.16465	-0.1791
1.132	-6.97499999999999	-20.8059	71.7492	0.088867	0.14551	-0.13574	-19.253	11.8303	2.307	0.14893	-0.043457	0.0063477	-45.04	7.393	44.2214	0.099121	-0.18994	-0.10254	46.821	16.5386	165.253	0.014746	-0.17364	-0.19375
1.134	1.008	-10.096	75.0163	0.075195	0.16113	-0.15771	-52.6937	14.2897	11.9994	0.15772	-0.043213	0.0024414	-17.949	77.274	45.2085	0.09082	-0.20898	-0.1123	-4.326	23.80441	142.057	0.0014648	-0.19395	-0.22578
1.136	-11.354	-7.524	103.403	0.063477	0.17627	-0.17822	-3.297	-0.5247	42.586	0.1626	-0.046387	-0.0014648	11.147	19.4861	40.3601	0.078125	-0.229	-0.13574	32.816	14.1355	221.765	-0.024218	-0.20146	-0.26846
1.138	-29.478	-3.634	108.627	0.037109	0.20898	-0.2041	-14.673	22.873	17.3343	0.16943	-0.049805	-0.010742	2.188	56.431	39.0954	0.060547	-0.2395	-0.16699	60.8247	52.017	228.325	-0.080078	-0.16748	-0.3125
1.14	-13.138	-15.8811	132.1868	0.024414	0.22876	-0.2373	-31.29	6.256	25.7755	0.17163	-0.053711	-0.014649	8.467	-19.3766	84.226	0.04248	-0.24414	-0.20703	21.61	24.978	342.596	-0.18399	-0.098338	-0.37002
1.142	-16.202	-7.0441	149.2769	0.012207	0.24072	-0.26318	19.711	22.9048	11.306	0.16992	-0.059082	-0.021484	40.112	24.4888	87.1894	-0.003418	-0.24219	-0.28125	-18.358	42.552	381.286	-0.31338	-0.021386	-0.45781
1.144	-39.127	10.42583	183.858	0	0.24072	-0.31055	-16.398	45.6015	2.677	0.1626	-0.063965	-0.026855	30.64	-13.273	110.9161	-0.036133	-0.22949	-0.32617	8.231	-25.731	477.877	-0.45127	0.070801	-0.56953
1.146	-44.402	22.9222	229.4294	-0.011963	0.23486	-0.35327	-20.838	21.0014	21.15305	0.15967	-0.060059	-0.031738	50.105	52.729	121.3229	-0.10498	-0.1582	-0.41162	23.054	51.664	626.4156	-0.58496	0.20059	-0.68848
1.148	-41.138	48.17	272.2136	-0.030762	0.22119	-0.40771	0.231000000000002	36.131	27.43596	0.15137	-0.058594	-0.036621	52.44052	6.931	168.632	-0.19775	-0.059082	-0.51904	-42.544	78.365	772.044	-0.72021	0.36182	-0.81396
1.15	-62.704	71.9276	329.3263	-0.082031	0.19531	-0.49219	-43.697	23.97	24.8191	0.15235	-0.057373	-0.048096	36.366	43.748	258.8677	-0.24658	-0.018066	-0.58936	-17.537	129.197	938.809	-0.87656	0.54121	-0.96796
1.152	-62.478	85.7498	374.537	-0.11475	0.18848	-0.54053	-8.027	4.88435	41.71	0.14648	-0.050781	-0.054199	10.39	-23.45715	306.9134	-0.32422	0.056152	-0.75	-87.9461	67.426	1053.491	-1.0538	0.74189	-1.1407
1.154	-55.112	81.9548	440.1805	-0.19092	0.19678	-0.63525	-30.16	15.4024	27.8022	0.14551	-0.044434	-0.063477	27.143	-3.542	363.292	-0.38526	0.13086	-0.88086	-111.731	36.5268	1196.158	-1.2534	0.97274	-1.3216
1.156	-37.975	100.72147	509.0107	-0.25635	0.21802	-0.71948	-74.136	1.7446	19.4846	0.14404	-0.038574	-0.066406	19.622	-13.203	505.7406	-0.45996	0.2168	-1.0146	-120.862	-69.356	1278.32	-1.4702	1.2448	-1.4981
1.158	-38.91	112.439	596.43	-0.32568	0.24707	-0.80859	-18.576	25.033	24.6902	0.13525	-0.031738	-0.073242	-13.965	86.923	644.904	-0.58643	0.37158	-1.2202	-85.644	-106.138	1369.704	-1.6968	1.5474	-1.6714
1.16	-57.114	101.281	650.63819	-0.42139	0.30176	-0.93213	-60.326	51.426	4.735	0.12671	-0.024902	-0.075195	-48.265	94.597	784.4262	-0.66895	0.45703	-1.3418	-153.9169	-158.607	1399.236	-1.8849	1.8695	-1.836
1.162	-80.842	72.513	712.03	-0.47217	0.34814	-0.98779	-39.339	21.6134	43.1562	0.11768	-0.016602	-0.077148	-60.99	122.1867	942.431	-0.86133	0.66602	-1.5898	-156.906	-191.396	1424.182	-1.9946	2.1563	-1.991
1.164	-71.726	42.214	743.4215	-0.56006	0.46338	-1.0776	-19.04	22.0816	32.4244	0.10547	-0.0063477	-0.087891	-95.474	71.5527	1080.722	-1.0017	0.88403	-1.7702	-182.969	-245.36239	1338.3557	-1.9543	2.3715	-2.0789
1.166	-46.39	1.10539	776.2427	-0.61646	0.55981	-1.1296	-74.5827	13.6165	34.2568	0.095703	0.0014648	-0.088379	-159.872	61.723	1256.733	-1.1392	1.1587	-1.9214	-175.822	-287.842	1289.391	-1.7933	2.4896	-2.098
1.168	-80.947	-18.5045	826.8572	-0.66797	0.6582	-1.1641	-31.365	9.2354	38.31	0.078125	0.018555	-0.089844	-130.121	5.5024	1343.811	-1.2808	1.6079	-2.0776	-152.118	-297.62	1207.271	-1.5801	2.4609	-2.0898
1.17	-85.278	-19.81	857.598	-0.71826	0.77295	-1.189	-47.547	32.621	22.34923	0.062988	0.029053	-0.097168	-141.944	-38.001	1393.742	-1.3218	1.8306	-2.1362	-158.517	-308.8	1217.605	-1.3569	2.2672	-2.0238
1.172	-61.397	-27.33	869.5581	-0.72852	0.81641	-1.1875	-75.0452	30.57731	36.665	0.047363	0.044922	-0.098145	-158.134	-100.106	1437.908	-1.3198	2.2134	-2.1968	-186.107	-293.22	1108.181	-1.1519	1.9289	-1.9027
1.174	-44.498	-39.414	858.6552	-0.72412	0.88428	-1.1929	-12.083	16.8473	41.973	0.023926	0.067383	-0.098633	-201.338	-178.7715	1431.333	-1.2568	2.3594	-2.2661	-174.79	-258.07	1098.389	-1.0246	1.4843	-1.7527
1.176	-28.269	-45.007	872.753	-0.69068	0.90942	-1.1795	-59.4366	30.0492	19.9944	0.01416	0.076172	-0.098633	-203.048	-230	1337.561	-1.1338	2.3945	-2.3105	-131.631	-167.257	1052.228	-0.94805	1.0582	-1.607
1.178	4.07700000000001	-30.93689	885.155	-0.6499	0.91064	-1.1675	-43.02	6.287	39.5764	-0.0063477	0.10254	-0.10156	-183.397	-265.13	1262.955	-0.95459	2.2173	-2.2749	-106.087	-145.453	1098.2918	-0.89844	0.70703	-1.4922
1.18	26.801	-8.356	872.136	-0.58984	0.88281	-1.1504	-20.777	22.8715	38.8184	-0.023926	0.11914	-0.10058	-162.116	-257.65	1192.345	-0.87598	2.0469	-2.2129	-86.855	-79.14	1070.032	-0.87558	0.51348	-1.4486
1.182	0.481000000000002	-5.3128	880.887	-0.55469	0.86133	-1.1348	-61.2133	11.0929	33.822	-0.039063	0.1416	-0.10156	-156.18	-290.26	1179.6825	-0.7417	1.5996	-2.0938	-68.129	-119.37	1101.1173	-0.85869	0.44571	-1.4426
1.184	-16.223	-13.4776	876.93	-0.4917	0.81445	-1.0918	-16.182	4.0544	42.258	-0.055664	0.16846	-0.10596	-166.346	-256.74	1130.655	-0.66723	1.2751	-2.0076	-104.388	-89.22	1121.1063	-0.87119	0.44727	-1.4676
1.186	5.767	-19.4314	882.832	-0.46557	0.78198	-1.0769	-22.597	15.8781	31.1205	-0.063965	0.1709	-0.11035	-143.177	-253.471	1077.16	-0.57422	0.99805	-1.9082	-79.507	-161.82	1192.0578	-0.8792	0.46885	-1.4874
1.188	19.546	-4.787	883.6558	-0.44775	0.77197	-1.0718	-29.632	-34.258	60.82692	-0.082031	0.1792	-0.1333	-74.955	-171.2123	1054.041	-0.4668	0.79297	-1.7988	-44.886	-184.935	1229.2325	-0.86475	0.49854	-1.5142
1.19	0.713999999999999	-2.687	871.5906	-0.45215	0.79443	-1.0776	13.442	-57.433	91.2434	-0.099122	0.19433	-0.15356	-77.508	-151.965	1091.9279	-0.43359	0.75488	-1.7676	-9.891	-321.082	1272.573	-0.78652	0.5668	-1.5535
1.192	-34.034	-11.62	885.477	-0.4541	0.82031	-1.0928	-37.42	-30.4821	86.9505	-0.12061	0.21631	-0.16895	-65.693	-57.78	1077.124	-0.40967	0.73145	-1.7676	57.3703	-340.401	1297.8282	-0.68594	0.65938	-1.5914
1.194	-45.434	-28.418	894.024	-0.45752	0.88525	-1.1206	-21.007	-28.386	119.559	-0.14941	0.25781	-0.19775	-60.955	-90.34	1118.676	-0.41137	0.75903	-1.7722	20.091	-453.81	1332.619	-0.57851	0.72618	-1.6019
1.196	-59.599	-61.121	906.691	-0.45557	0.93799	-1.1391	-1.723	7.5545	147.5774	-0.17285	0.26709	-0.21289	-41.9856	-95.75	1154.912	-0.41992	0.81494	-1.7808	47.1463	-442.45	1407.163	-0.46563	0.7084	-1.5748
1.198	-60.53	-79.9063	913.925	-0.44775	0.99756	-1.1499	-60.549	-7.29367	180.362	-0.21045	0.2876	-0.26855	-21.5801	-200.25	1205.268	-0.40869	0.9375	-1.7813	64.85	-504.05	1494.793	-0.35303	0.61865	-1.5308
1.2	-45.727	-119.822	951.12712	-0.43262	1.0625	-1.1563	-19.826	-37.461	220.7829	-0.24146	0.30786	-0.30957	20.2898	-233.982	1252.162	-0.38965	0.99609	-1.7773	125.996	-416.56	1594.759	-0.26534	0.50449	-1.4897
1.202	-61.333	-131.351	991.8114	-0.42725	1.0854	-1.1538	-35.89	-19.09165	248.438	-0.26904	0.33154	-0.35693	52.8033	-321.312	1270.877	-0.31445	1.0059	-1.7461	97.376	-398.478	1603.496	-0.21807	0.40596	-1.4573
1.204	-76.27	-128.993	1026.7396	-0.41113	1.0957	-1.1719	-67.16	-7.254	340.603	-0.31982	0.3584	-0.43164	63.9011	-339.157	1280.88	-0.22779	0.90943	-1.6941	85.973	-283.011	1649.838	-0.23213	0.36064	-1.4557
1.206	-96.752	-119.811	1045.4611	-0.40234	1.0742	-1.1992	-20.989	31.19	425.658	-0.34814	0.37451	-0.48193	72.361	-414.802	1325.717	-0.13623	0.771	-1.6323	-0.5697	-240.1578	1619.641	-0.31084	0.3832	-1.491
1.208	-85.164	-120.923	1075.8333	-0.39258	1.0396	-1.2378	-83.195	87.5786	480.4217	-0.41748	0.41309	-0.5708	85.636	-445.96	1379.693	-0.033203	0.57178	-1.5586	-32.548	-142.244	1665.356	-0.44336	0.47412	-1.5723
1.21	-91.466	-135.006	1107.534	-0.4043	1.0098	-1.2891	-81.824	74.909	541.3084	-0.47901	0.45069	-0.646	116.406	-481.04	1471.715	-0.0019531	0.49609	-1.5332	-33.605	-125.202	1637.305	-0.61533	0.63076	-1.6853
1.212	-114.006	-127.289	1112.2315	-0.41406	1.0098	-1.3066	-15.67	89.3142	583.419	-0.54736	0.49561	-0.73193	125.371	-420.55	1564.543	0.025391	0.38135	-1.5073	8.936	-71.567	1668.8107	-0.79336	0.81055	-1.8231
1.214	-140.6807	-112.02037	1120.829	-0.45117	1.0254	-1.3438	-43.306	99.494	683.618	-0.64795	0.56104	-0.84717	91.093	-364.818	1609.384	-0.0002445	0.35571	-1.5227	17.379	-59.526	1633.903	-0.95586	1.0152	-1.9715
1.216	-140.90739	-86.7571	1135.875	-0.48828	1.0532	-1.3706	-12.593	74.71	813.0659	-0.69531	0.59961	-0.90039	17.589	-247.1609	1639.006	-0.073242	0.37305	-1.5796	50.034	-38.842	1631.604	-1.114	1.2231	-2.1265
1.218	-121.226	-71.849	1153.5415	-0.52051	1.084	-1.3936	-41.2208	62.846	872.19779	-0.78955	0.70117	-0.98926	-4.01956	-166.571	1633.714	-0.2373	0.47412	-1.73	1.522	-42.569	1613.84	-1.2612	1.4224	-2.2847
1.22	-135.8633	-64.55	1149.8178	-0.54492	1.1172	-1.4238	-85.787	-2.1811	880.152	-0.8623	0.78272	-1.0395	-30.2766	-114.073	1625.46	-0.32227	0.58057	-1.8374	-7.327	-43.081	1666.211	-1.3793	1.6012	-2.4219
1.222	-111.551	-70.8609	1163.1011	-0.54883	1.127	-1.4316	-42.014	-47.67	877.809	-0.92236	0.86963	-1.0718	-12.576	-106.107	1622.84	-0.47656	0.84082	-2.0566	-18.771	-70.3101	1704.6205	-1.4667	1.7509	-2.523
1.224	-97.217	-78.9291	1211.3301	-0.54932	1.1255	-1.4604	-98.8566	-58.221	876.523487	-0.99316	0.9751	-1.1011	-31.246	-100.157	1624.719	-0.57226	1.0703	-2.209	-18.79	-120.456	1785.852	-1.5229	1.8493	-2.5933
1.226	-83.871	-67.5713	1236.7107	-0.54541	1.1037	-1.4891	-92.289	-87.5798	915.677	-1.0132	1.0181	-1.1167	4.903	-85.898	1632.299	-0.65576	1.3013	-2.3589	-43.133	-110.421	1824.143	-1.5506	1.8998	-2.6334
1.228	-80.284	-55.295	1261.127	-0.54639	1.0825	-1.5171	-47.243	-61.722	890.6107	-1.0186	1.0996	-1.124	-14.048	-96.882	1644.432	-0.72461	1.5586	-2.5039	-70.2358	-134.811	1817.098	-1.5542	1.9028	-2.644
1.23	-75.611	-57.949	1270.446	-0.56348	1.0566	-1.5703	-96.536	-74.149	863.307	-1.0037	1.1408	-1.1238	-0.744999999999999	-102.334	1627.811	-0.73584	1.6411	-2.5581	-63.545	-86.019	1809.45	-1.5249	1.8302	-2.6097
1.232	-62.266	-75.6225	1284.109	-0.57031	1.042	-1.5996	-33.665	-103.266	889.0043	-0.97656	1.166	-1.127	-11.972	-129.119	1645.428	-0.72607	1.7095	-2.6401	-78.845	-117.769	1802.873	-1.4823	1.7119	-2.5468
1.234	-64.858	-89.8992	1284.2167	-0.58936	1.0415	-1.6577	-8.4847	-86.251	880.0239	-0.90967	1.1665	-1.1401	1.995	-152.888	1674.52569	-0.70801	1.6985	-2.6736	-62.3076	-68.588	1824.038	-1.453	1.5536	-2.4706
1.236	-78.446	-86.6725	1293.6772	-0.6018	1.0481	-1.7136	18.317	-87.407	902.752	-0.88037	1.1567	-1.146	2.437	-174.092	1740.027	-0.69287	1.6704	-2.6851	-52.8008	-95.182	1784.201	-1.4457	1.3988	-2.3875
1.238	-78.545	-80.5329	1314.341	-0.60938	1.0723	-1.7695	76.553	-47.645	909.797	-0.8291	1.1211	-1.1563	-31.3843	-157.673	1804.976	-0.68555	1.5996	-2.6816	-15.059	-12.4491	1743.517	-1.457	1.291	-2.3164
1.24	-68.988	-65.5166	1340.464	-0.61084	1.1235	-1.8374	20.84005	-24.558	905.29029	-0.80688	1.1081	-1.1736	-56.069	-152.468	1838.924	-0.68311	1.5513	-2.6714	-17.739	1.2565	1692.7328	-1.491	1.2469	-2.2711
1.242	-56.532	-57.097	1353.183	-0.61133	1.1465	-1.8711	31.5441	-55.364	969.92	-0.80371	1.1035	-1.1797	-24.9726	-112.595	1836.556	-0.66162	1.375	-2.6309	-9.238	73.0099	1680.246	-1.5282	1.2485	-2.2362
1.244	-91.069	-51.246318	1342.628	-0.625	1.207	-1.916	65.0353	-61.888	996.35509	-0.81787	1.1411	-1.1772	-0.6221	-128.1147	1841.563	-0.6333	1.2426	-2.6001	-12.777	88.0983	1622.211	-1.5505	1.2653	-2.21
1.246	-75.18	-59.9031	1356.486	-0.63305	1.2492	-1.9441	20.761	-103.493	1029.373	-0.82471	1.1665	-1.1753	15.6313	-98.593	1808.8614	-0.59912	1.1392	-2.5776	-1.648	139.873	1614.14929	-1.5461	1.2856	-2.1844
1.248	-61.493	-39.5112	1358.9391	-0.63086	1.2949	-1.9766	31.593	-133.771	1070.2999	-0.82373	1.2251	-1.1831	14.739	-91.3179	1774.0815	-0.59326	1.0679	-2.5737	4.677	135.174	1574.614	-1.5142	1.2915	-2.1519
1.25	-72.101	-13.706	1369.7124	-0.62744	1.3423	-1.9976	0.365000000000002	-140.445	1083.458	-0.79565	1.2405	-1.2044	43.2872	18.1503	1732.8408	-0.61523	1.0605	-2.5898	18.222	155.913	1610.409	-1.4752	1.2854	-2.1244
1.252	-94.915	4.542	1368.8541	-0.62646	1.354	-1.9995	-52.758	-196.279	1130.714	-0.75732	1.2466	-1.2397	60.769	49.998	1714.5542	-0.69092	1.123	-2.6055	18.42	158.877	1576.116	-1.4299	1.2614	-2.0909
1.254	-104.221	3.2493	1364.579	-0.63477	1.377	-2.0098	11.738	-209.3044	1179.4579	-0.70703	1.2305	-1.2998	85.935	117.958	1694.5312	-0.76147	1.2082	-2.613	34.862	148.669	1599.3282	-1.3831	1.2286	-2.0472
1.256	-130.502	-6.8636	1368.2429	-0.63013	1.3958	-2.0154	-1.809	-223.177	1209.2001	-0.68652	1.2227	-1.334	80.522	73.174	1663.304	-0.81836	1.2891	-2.6113	30.921	127.532	1590.875	-1.3249	1.1868	-1.9987
1.258	-144.964	-6.874	1376.4085	-0.62451	1.4067	-2.0054	24.543	-271.224	1268.386	-0.68115	1.2134	-1.4097	90.684	105.4486	1608.936	-0.85742	1.332	-2.5742	45.9852	76.5056	1620.141	-1.2578	1.1406	-1.9473
1.26	-148.359	-10.8659	1382.74	-0.62549	1.3892	-1.98	53.4991	-253.221	1312.119	-0.69946	1.2132	-1.4558	73.9777	87.29	1625.967	-0.86865	1.3286	-2.5444	74.893	67.455	1574.209	-1.1908	1.0957	-1.901
1.262	-142.964	-12.9738	1384.6023	-0.63623	1.3813	-1.9604	-12.782	-236.541	1351.812	-0.73779	1.2388	-1.4917	82.135	146.748	1635.661	-0.85107	1.272	-2.4604	59.139	32.628	1558.799	-1.1267	1.0536	-1.8441
1.264	-154.4524	-24.033	1397.0788	-0.66162	1.3696	-1.9409	16.428	-194.701	1409.32	-0.78857	1.2729	-1.5229	49.1523	98.224	1641.3317	-0.83496	1.209	-2.3906	11.155	75.86	1541.399	-1.0736	1.0114	-1.7893
1.266	-172.3632	-29.4958	1386.27	-0.6687	1.383	-1.9333	15.441	-126.0172	1411.318	-0.80859	1.292	-1.5352	48.0402	132.025	1642.4281	-0.80957	1.1357	-2.3223	18.996	56.87	1518.126	-1.0308	0.96895	-1.733
1.268	-153.49865	-39.73	1379.99	-0.66797	1.3994	-1.9258	-53.38	-161.901	1449.623	-0.83789	1.3184	-1.5586	30.6288	52.6926	1640.5671	-0.74512	1.041	-2.2441	9.788	115.089	1444.33782	-0.98584	0.91846	-1.6772
1.27	-131.687	-42.529	1387.80389	-0.66553	1.4028	-1.9136	-46.194	-164.073	1462.569	-0.84546	1.3342	-1.5867	57.391	79.622	1641.318	-0.71289	0.98926	-2.2012	-30.635	103.57	1388.2222	-0.94316	0.87031	-1.622
1.272	-128.129	-27.8201	1387.1068	-0.66748	1.4009	-1.9038	-96.99	-144.339	1438.941	-0.86035	1.3379	-1.623	38.282	20.494	1655.146	-0.66797	0.88965	-2.1055	-13.312	190.1761	1349.6854	-0.89726	0.82031	-1.5618
1.274	-130.573	-8.4109	1381.9471	-0.69482	1.4087	-1.8862	-112.791	-141.989	1461.87708	-0.88281	1.333	-1.6875	9.533	92.612	1628.271	-0.64966	0.84351	-2.0388	-16.684	231.977	1309.477	-0.85664	0.77031	-1.5039
1.276	-130.875	15.244	1377.918	-0.70996	1.4141	-1.8789	-80.49817	-71.856	1455.037	-0.89844	1.332	-1.7129	-1.577	54.189	1601.628	-0.63623	0.80713	-1.9878	-70.9163	314.828	1286.0917	-0.81621	0.7248	-1.4447
1.278	-125.766	19.7056	1384.853	-0.71436	1.4126	-1.8667	-112.224	-84.751	1450.397	-0.94824	1.3418	-1.7695	12.638	117.761	1548.916	-0.59375	0.76367	-1.9277	-85.86408	323.269	1240.256	-0.77197	0.68799	-1.3862
1.28	-103.063	17.930991	1368.219	-0.71484	1.4023	-1.8457	-93.162	-122.5592	1486.4257	-0.9978	1.3597	-1.8113	-1.77	67.961	1530.346	-0.56299	0.74756	-1.9038	-68.3595	359.299	1202.0378	-0.721	0.65322	-1.3218
1.282	-88.726	30.6598	1362.143	-0.71045	1.3931	-1.8257	-69.799	-99.9007	1481.559	-1.0527	1.3887	-1.8496	8.184	162.831	1509.9948	-0.49854	0.69824	-1.8413	-91.6579	312.026	1109.013	-0.66562	0.61895	-1.2613
1.284	-87.206	45.577	1331.3894	-0.71582	1.3594	-1.791	-75.917	-141.193	1536.9714	-1.123	1.4375	-1.9102	-5.929	158.8373	1502.196	-0.45215	0.66211	-1.7793	-77.869	302.4569	1076.69	-0.60508	0.57168	-1.1914
1.286	-86.142	65.933	1325.658	-0.72266	1.3359	-1.7637	-28.565	-108.4	1600.042	-1.1734	1.4917	-1.9536	-41.3502	280.213	1463.9779	-0.43701	0.6626	-1.7505	-96.676	295.6635	1019.365	-0.5375	0.52158	-1.1187
1.288	-59.447	85.617	1329.997	-0.72266	1.3281	-1.75	-44.955	-91.45	1624.852	-1.2275	1.5566	-1.9961	-74.303	245.958	1432.1216	-0.42041	0.67236	-1.6987	-84.896	286.3027	1036.5932	-0.46338	0.47705	-1.0405
1.29	-57.498	78.172	1315.6851	-0.72266	1.3047	-1.7266	-40.769	-126.499	1650.246	-1.2988	1.6504	-2.0508	-83.987	328.425	1393.9182	-0.41064	0.70288	-1.6569	-88.63	263.8583	974.3012	-0.38925	0.41885	-0.95567
1.292	-58.602	58.94399	1324.906	-0.71802	1.2864	-1.7	-31.233	-95.728	1627.198	-1.332	1.7002	-2.0723	-72.5934	245.988	1347.4647	-0.38867	0.7207	-1.6064	-94.1	214.141	957.002	-0.30625	0.36152	-0.87695
1.294	-40.301	57.681	1314.034	-0.72852	1.2715	-1.6797	-81.535	-114.298	1612.37861	-1.3901	1.7935	-2.105	-21.424	291.07	1274.545	-0.35547	0.72949	-1.5313	-111.5975	228.471	889.541	-0.22265	0.29004	-0.80156
1.296	-37.362	53.124	1307.229	-0.73242	1.2539	-1.6445	-74.574	-105.399	1634.905	-1.4287	1.8555	-2.1094	-27.477	206.676	1222.932	-0.32422	0.72266	-1.4844	-76.764	213.681	888.124	-0.14961	0.21855	-0.72129
1.298	-57.678	72.978	1295.958	-0.73535	1.2461	-1.627	-50.571	-52.357	1607.6422	-1.4585	1.9087	-2.1187	-38.391	254.8615	1201.4804	-0.27734	0.6875	-1.3994	-84.549	247.3297	825.594	-0.081543	0.15234	-0.64063
1.3	-64.575	62.9272	1293.525	-0.73584	1.2188	-1.5918	-84.265	-65.2105	1603.1253	-1.4878	1.9575	-2.1187	-24.286	171.236	1167.2116	-0.229	0.63867	-1.3296	-115.586	235.1205	779.872	-0.024316	0.080666	-0.56533
1.302	-57.236	71.1257	1270.943	-0.73315	1.2009	-1.5544	-38.26	-28.287	1599.11	-1.5029	1.9727	-2.1113	-16.085	212.03	1131.6101	-0.18359	0.5791	-1.2676	-76.271	260.9983	696.799	0.025684	0.027246	-0.48945
1.304	-57.662	65.6979	1231.7744	-0.72461	1.1738	-1.5156	-30.672	-12.957	1568.094	-1.52	1.979	-2.0874	3.117	156.242	1092.8456	-0.12207	0.48828	-1.1719	-72.49	233.426	631.103	0.062793	-0.019238	-0.41445
1.306	-85.553	76.0875	1206.5268	-0.71338	1.1333	-1.4644	-33.419	-25.089	1581.134	-1.531	1.9661	-2.0594	12.348	228.896	1077.5939	-0.095703	0.43994	-1.1245	-68.385	256.453	535.5595	0.093652	-0.054004	-0.33565
1.308	-87.51	97.364	1188.2167	-0.70459	1.1196	-1.4487	0.779999999999994	44.601	1582.1345	-1.5327	1.938	-2.0308	7.98	201.143	1040.1301	-0.04541	0.35059	-1.0215	-67.033	232.184	474.558881	0.12988	-0.086426	-0.26074
1.31	-84.948	108.399	1178.2528	-0.68799	1.0786	-1.3979	-40.028	54.0618	1573.2856	-1.541	1.8867	-1.9844	-10.764	292.061	981.5898	-0.014649	0.29932	-0.948	-60.336	261.642	413.76251	0.15791	-0.1084	-0.19189
1.312	-82.521	123.1648	1152.3227	-0.67554	1.0481	-1.3616	-45.825	50.911	1595.9888	-1.5366	1.8599	-1.9653	-33.373	258.955	924.1698	0.024414	0.25439	-0.87158	-88.884	234.7334	370.93335	0.19746	-0.12754	-0.13155
1.314	-98.747	117.6404	1119.4364	-0.65869	1.0161	-1.3218	-52.752	71.553	1579.02	-1.521	1.8013	-1.9194	-32.377	324.349	870.628	0.071777	0.19824	-0.77539	-36.812	235.995	310.9841	0.23144	-0.15293	-0.071778
1.316	-88.856	111.0601	1113.932	-0.64209	0.97412	-1.2681	-97.178	10.5757	1570.8325	-1.4997	1.7619	-1.8894	-24.228	272.137	813.655	0.098145	0.17383	-0.73047	-59.395	177.64207	224.537	0.26308	-0.17559	-0.020313
1.318	-89.105	116.3989	1091.311	-0.62842	0.95752	-1.2388	-60.645	17.6063	1572.8457	-1.4727	1.7266	-1.8711	-42.815	300.367	742.6578	0.14697	0.12305	-0.63672	-84.98	163.834	177.01	0.28809	-0.19824	0.027832
1.32	-104.283	130.1908	1064.02088	-0.59619	0.91357	-1.1851	-102.352	14.5706	1554.60421	-1.4292	1.6802	-1.8315	-24.962	260.419	680.679	0.17823	0.088135	-0.56885	-107.091	135.9486	138.119	0.30694	-0.20351	0.069922
1.322	-93.263	140.5745	1044.0253	-0.57617	0.87695	-1.1494	-142.567	-18.033	1556.31	-1.4063	1.6621	-1.8164	-38.406	290.583	626.674	0.20752	0.065918	-0.50439	-106.913	141.317	141.849	0.30371	-0.21211	0.10547
1.324	-79.866	129.419	1031.8406	-0.55078	0.83789	-1.1074	-100.5819	16.0899	1544.3641	-1.3496	1.6211	-1.7813	-23.384	247.9717	557.3246	0.24854	0.028809	-0.41846	-97.374	122.0101	116.367	0.29473	-0.21133	0.11875
1.326	-74.865	115.8165	991.5374	-0.51563	0.7876	-1.0522	-135.173	-4.411	1504.6388	-1.3088	1.5862	-1.7478	-38.922	255.39309	477.1335	0.26416	0.0092773	-0.38623	-64.379	56.344	100.1916	0.26592	-0.21299	0.12607
1.328	-80.3312	103.8766	961.946	-0.49951	0.76611	-1.0269	-94.055	-0.988999999999997	1504.311	-1.2729	1.5552	-1.7085	-51.098	213.0748	412.9938	0.28809	-0.030273	-0.29736	-77.258	-1.562	94.4847	0.22705	-0.20508	0.13525
1.33	-70.378	97.524	942.3123	-0.46777	0.7207	-0.97754	-52.165	50.306	1486.392	-1.2402	1.5078	-1.6641	-90.397	224.757	389.0733	0.29736	-0.055176	-0.24414	-84.48	-26.728	113.057	0.16963	-0.18925	0.12217
1.332	-52.949	102.833	928.273	-0.44019	0.68335	-0.93433	-115.3107	37.213	1492.187	-1.2163	1.4829	-1.6421	-107.086	205.402	345.683	0.30029	-0.085449	-0.19189	-50.505	8.815	75.4629	0.10381	-0.15556	0.10557
1.334	-34.115	113.262	891.026	-0.41357	0.6499	-0.89795	-71.868	87.9794	1489.403	-1.1826	1.418	-1.5938	-144.4549	200.602	331.137	0.29639	-0.11621	-0.13574	-48.857	26.0128	75.7445	0.025293	-0.10947	0.077832
1.336	-27.045	123.864	850.3299	-0.37598	0.60107	-0.84814	-59.958	107.5219	1447.1291	-1.1547	1.3653	-1.5518	-130.6558	171.2955	291.055	0.29639	-0.12354	-0.10498	-59.999	38.3367	-15.573	-0.058887	-0.045215	0.030567
1.338	-25.26	125.8706	823.7785	-0.354	0.5791	-0.82129	-72.579	88.1248	1439.833	-1.1289	1.3184	-1.5117	-137.78	129.834	271.371	0.27979	-0.13232	-0.050293	-55.376	4.5785	2.61	-0.1499	0.032227	-0.019531
1.34	-2.98	134.98109	804.8028	-0.31885	0.53516	-0.77539	-31.207	136.057	1403.834	-1.0957	1.248	-1.4551	-140.146	93.378	217.87	0.27076	-0.14062	-0.014405	-55.17	21.1336	-24.985	-0.24463	0.12031	-0.073144
1.342	7.01600000000001	143.6327	782.6208	-0.28759	0.50049	-0.7373	-87.897	137.772	1359.815	-1.0796	1.2173	-1.4331	-126.2378	81.972	175.6354	0.25049	-0.15479	-0.00048828	-59.644	16.8429	13.2729	-0.3458	0.22041	-0.12851
1.344	-12.122	156.339	734.1879	-0.25244	0.46631	-0.69678	-58.369	143.864	1345.1575	-1.0366	1.147	-1.3706	-85.231	104.479	118.6247	0.20361	-0.17041	0.00097656	-69.965	79.531	8.2378	-0.42588	0.31416	-0.18008
1.346	-0.364000000000004	151.643	707.9786	-0.20996	0.42188	-0.64355	-38.632	154.338	1302.2656	-0.99854	1.0981	-1.3267	-73.161	80.211	83.2475	0.17676	-0.17871	-0.012695	-51.776	72.916	33.6978	-0.4919	0.39951	-0.2292
1.348	2.444	153.95	666.798	-0.19092	0.39795	-0.61572	-71.542	100.8909	1303.541	-0.96484	1.0459	-1.2852	-62.56	69.222	44.3968	0.097656	-0.1748	-0.052734	-39.901	109.584	24.081	-0.54395	0.47119	-0.27051
1.35	-10.164	148.664	621.61	-0.1499	0.34912	-0.56006	13.033	95.983	1301.367	-0.90332	0.98242	-1.2246	-54.594	19.897	24.715	0.017822	-0.14087	-0.096923	-12.02	76.669	16.0802	-0.58359	0.52412	-0.31201
1.352	-24.509	151.444	595.4799	-0.12133	0.31543	-0.52197	6.289	85.678	1249.2565	-0.875	0.95313	-1.1934	-49.642	37.784	18.719	-0.071777	-0.09082	-0.14648	-11.337	91.674	17.9373	-0.61211	0.56621	-0.3541
1.354	-22.311	136.4523	574.5223	-0.092773	0.27832	-0.48096	-3.084	68.768	1218.0978	-0.81982	0.89893	-1.1323	-22.647	9.914	47.561	-0.19531	0.023438	-0.22363	-15.28	49.8152	42.533	-0.63007	0.60059	-0.37832
1.356	-18.553	133.879	541.094	-0.053711	0.23877	-0.42578	30.094	105.843	1188.5265	-0.78296	0.85815	-1.0896	-25.553	53.1029	46.8504	-0.25684	0.093262	-0.25781	5.167	38.645	64.565	-0.65224	0.62939	-0.39541
1.358	-43.437	119.2277	507.3078	-0.035156	0.21387	-0.40479	-10.246	106.699	1141.5126	-0.75244	0.81885	-1.0464	-28.049	40.9551	55.287	-0.35547	0.24805	-0.32813	-4.317	9.296	51.742	-0.6626	0.6543	-0.41406
1.36	-46.314	113.1154	479.3743	-0.0029297	0.17236	-0.35889	19.42	115.069	1127.167	-0.6958	0.77783	-0.98389	-9.333	83.211	20.5872	-0.39917	0.35474	-0.39185	6.543	-0.751000000000001	38.9043	-0.66152	0.67441	-0.41563
1.362	-28.802	104.0254	446.0441	0.023193	0.13941	-0.32495	33.685	156.477	1088.966	-0.67236	0.75439	-0.95068	-17.572	28.856	12.356	-0.43018	0.45459	-0.44727	-24.31	-30.6594	25.31093	-0.65469	0.68867	-0.41367
1.364	-37.441	106.7207	430.94742	0.042969	0.11084	-0.28955	-17.813	134.5029	1039.8371	-0.6167	0.70557	-0.88818	-5.16	54.622	-0.215999999999999	-0.44922	0.56836	-0.50586	-23.345	-38.0614	86.491	-0.63007	0.69531	-0.39844
1.366	-77.334	103.0469	398.4438	0.0625	0.07373	-0.25049	12.074	149.152	1011.2673	-0.58105	0.67139	-0.84668	1.158	-2.639071	38.5432	-0.44678	0.61768	-0.5376	-36.832	-15.8417	68.47	-0.59746	0.67988	-0.37597
1.368	-80.8817	92.11	375.2397	0.068359	0.062012	-0.23438	-40.2594	177.158	935.7	-0.53125	0.63672	-0.80176	29.292	44.949	30.8466	-0.43896	0.69189	-0.5708	-36.684	-8.6315	110.777	-0.55957	0.6582	-0.34424
1.37	-77.696	94.6932	360.2338	0.085938	0.030762	-0.20264	-37.429	165.601	895.0676	-0.47412	0.58057	-0.73193	21.374	-22.4652	31.054	-0.43311	0.74072	-0.57959	-42.58051	11.5131	41.1858	-0.50684	0.61894	-0.30215
1.372	-86.1798	103.3739	324.7045	0.092529	0.011719	-0.17895	25.921	200.7083	855.601	-0.44531	0.55273	-0.69727	14.188	19.282	-1.5	-0.42334	0.78223	-0.58008	-40.873	-1.0706	76.763	-0.44365	0.57187	-0.25274
1.374	-98.7633	105.2713	287.0232	0.095215	-0.00097656	-0.16211	-40.534	178.6891	789.686	-0.38477	0.49561	-0.63867	-3.321	-34.4442	15.233	-0.41602	0.79883	-0.57227	-52.605	17.0206	35.858	-0.37803	0.51562	-0.19961
1.376	-64.777	117.2	267.1335	0.10449	-0.018066	-0.13428	0.00900000000000034	165.7675	773.3932	-0.33472	0.45435	-0.58887	-20.738	32.8839	17.921	-0.40869	0.79834	-0.56152	-46.463	7.993	44.5382	-0.30439	0.45322	-0.14267
1.378	-66.962	112.263	239.5921	0.11328	-0.023438	-0.12207	8.269	203.661	740.593	-0.28369	0.41211	-0.53955	-22.613	17.0853	45.577	-0.39209	0.77783	-0.53076	-63.172	46.6357	-9.934	-0.24512	0.39307	-0.08252
1.38	-59.446	115.9792	203.2262	0.125	-0.043945	-0.10498	-34.0024	192.8157	701.9569	-0.22314	0.34961	-0.47461	-48.108	89.741	41.101	-0.37207	0.7456	-0.49658	-89.1437	6.472	16.096	-0.18076	0.32305	-0.02002
1.382	-66.5127	90.5287	197.2948	0.13574	-0.053955	-0.087158	11.655	183.7219	683.701	-0.18408	0.32178	-0.44531	-69.2106	46.396	51.854	-0.35449	0.7124	-0.45898	-75.0403	25.4228	-5.3147	-0.12774	0.25234	0.036914
1.384	-39.066	76.7984	194.4434	0.14014	-0.063965	-0.078613	-42.8281	174.7407	622.0753	-0.1167	0.25488	-0.38281	-78.957	90.95	46.709996	-0.31592	0.65576	-0.39404	-73.393	-14.17245	33.19308	-0.076173	0.18593	0.09043
1.386	-25.743	71.166	179.5628	0.14697	-0.070801	-0.067871	-64.26239	133.882	573.4467	-0.065918	0.20678	-0.33178	-87.8865	32.575	53.158	-0.29297	0.625	-0.3623	-56.024	20.5097	5.8965	-0.030079	0.13028	0.13809
1.388	-26.074	80.6193	165.8056	0.14404	-0.073242	-0.065918	-2.243	162.06191	527.104	-0.0083008	0.15771	-0.28711	-84.466	77.939	30.4179	-0.23438	0.56543	-0.29297	-62.303	-2.4836	18.7479	0.0048828	0.076172	0.17578
1.39	-23.39	73.343	142.807711	0.14307	-0.079102	-0.057129	-30.519	161.169	477.636	0.055176	0.084961	-0.23145	-65.479	21.524	46.9085	-0.18481	0.51318	-0.24951	-66.222	21.4989	0.753999999999998	0.041797	0.026953	0.20596
1.392	-27.449	64.8918	139.8452	0.14086	-0.078613	-0.059571	-15.576	134.441	466.56	0.087891	0.053711	-0.19629	-99.6408	45.9778	37.8015	-0.13428	0.45752	-0.1875	-61.557	-13.0119	-1.959	0.069141	-0.010645	0.23262
1.394	-8.139	62.8561	135.22	0.14014	-0.07666	-0.058105	8.951	150.99	424.629	0.15625	-0.0053711	-0.1333	-92.5691	-5.16	47.302	-0.064453	0.38232	-0.13477	-51.85	3.863	4.661	0.085937	-0.040723	0.25175
1.396	-15.467	42.549	122.1	0.13135	-0.07666	-0.05957	-31.153	123.0471	376.7488	0.19727	-0.055665	-0.1062	-80.125	22.6	36.239	-0.03418	0.34863	-0.10986	-44.412	-16.4225	16.5961	0.10264	-0.07168	0.26015
1.398	-12.343	33.8675	108.8056	0.12988	-0.077148	-0.058594	28.4	126.76122	351.0044	0.23682	-0.10449	-0.069336	-80.1056	-14.719	28.49133	0.0068359	0.2666	-0.064453	-40.874	10.8676	46.758	0.11621	-0.092773	0.26807
1.4	2.434	26.2649	104.2014	0.12744	-0.070313	-0.062988	2.454	155.8463	288.797	0.27393	-0.16309	-0.023438	-75.207	25.112	43.288	0.035401	0.21094	-0.035645	-14.342	17.406	22.5785	0.13506	-0.10596	0.26816
1.402	4.427	38.3684	83.19994	0.12744	-0.068116	-0.069336	-0.790000000000006	125.5555	266.929	0.28809	-0.18945	-0.0053711	-73.438	-10.915	40.457	0.052734	0.15576	-0.0083008	-27.155	40.972	31.2964	0.1665	-0.11836	0.27266
1.404	-14.025	42.0381	59.1574	0.12598	-0.0625	-0.074707	35.315	146.509	223.23919	0.30176	-0.23682	0.018555	-56.539	30.3078	46.618	0.070313	0.071777	0.022949	-27.573	74.031	-5.9113	0.18877	-0.12656	0.27461
1.406	-13.952	31.8233	72.5338	0.11865	-0.057617	-0.084473	-38.683	157.188	170.998	0.31323	-0.27344	0.037597	-46.625	-1.4729	56.264	0.07373	0.033203	0.036621	0.602000000000004	71.697	31.609	0.21172	-0.129	0.26963
1.408	-12.256	41.0821	54.543	0.11279	-0.053223	-0.085449	8.412	123.9625	178.4773	0.3252	-0.30664	0.056152	-20.161	13.8439	56.597	0.087402	-0.030273	0.072754	-1.234	73.943	29.8198	0.23486	-0.13232	0.26465
1.41	-22.403	49.9322	59.0063	0.10596	-0.042969	-0.10254	-5.954	134.499	164.2747	0.33643	-0.34131	0.067871	-24.673	-19.0776	55.661	0.099856	-0.062012	0.095215	4.128	52.55	63.087	0.24912	-0.13056	0.25332
1.412	-43.189	49.392	54.0949	0.10059	-0.036377	-0.11035	-32.983	118.628	144.36	0.3335	-0.35449	0.07373	-9.96399999999999	12.814	37.991	0.104	-0.081055	0.12061	-27.378	59.463	7.234	0.26602	-0.12442	0.23819
1.414	-41.263	49.0694	45.4807	0.097168	-0.030273	-0.12305	25.72	97.813	134.99	0.32275	-0.3623	0.077637	-2.056	24.38874	7.5593	0.125	-0.1123	0.14258	-15.28	42.249	49.79	0.27109	-0.11426	0.22451
1.416	-42.946	56.281	34.6613	0.095703	-0.022949	-0.13867	-30.911	111.189	110.9327	0.30493	-0.35938	0.067627	16.402	61.6558	4.27	0.13525	-0.12109	0.15869	-36.324	56.1864	4.403	0.27842	-0.10244	0.21055
1.418	-55.623	48.40711	34.165692	0.092285	-0.014648	-0.14844	-37.682	52.173	105.4026	0.27979	-0.3501	0.05127	21.831	46.519	4.0827	0.1582	-0.14404	0.18457	-10.72	18.485	72.33	0.27783	-0.089844	0.1958
1.42	-89.5	29.2345	22.9374	0.086426	-0.0053711	-0.16455	3.141	27.1478	91.71591	0.24023	-0.33301	0.040527	17.722	26.5247	18.3389	0.17504	-0.16455	0.19262	-44.543	26.898	57.122	0.2794	-0.073145	0.17529
1.422	-73.311	20.968	40.6393	0.083984	0.0014648	-0.18604	-54.927	40.816	44.0362	0.22119	-0.3252	0.032227	10.596	9.4482	13.2872	0.1958	-0.17822	0.20801	-18.443	-15.1756	85.348	0.28116	-0.054004	0.15547
1.424	-70.187	24.399	44.7528	0.085449	0.01416	-0.19385	-25.561	12.61	62.929	0.18018	-0.30078	0.003418	-10.807	-3.345	9.683	0.21094	-0.19629	0.21826	-52.302	2.347	66.176	0.27608	-0.036035	0.14102
1.426	-53.041	31.8261	30.4712	0.094238	0.027832	-0.21387	-29.556	46.5855	65.6155	0.14013	-0.2749	-0.021241	-26.201	22.7331	26.5404	0.22314	-0.20386	0.22632	-23.084	-24.8603	69.203	0.27481	-0.026172	0.11943
1.428	-78.5577	15.0629	31.04489	0.098389	0.043457	-0.22583	-90.18498	21.908	64.8128	0.096191	-0.25098	-0.043457	-25.545	27.5598	52.6052	0.23438	-0.21094	0.23779	-54.129	-10.9212	59.8156	0.27441	-0.018066	0.1001
1.43	-59.677	17.1141	28.9456	0.10547	0.059082	-0.23438	-35.308	4.212	77.66	0.034668	-0.21143	-0.077148	-28.76	39.696	40.2551	0.24658	-0.22021	0.24121	-64.035	-35.6707	55.3387	0.27285	-0.015722	0.083106
1.432	-56.271	19.721	17.3806	0.11865	0.068359	-0.24365	-73.566	41.1219	58.6498	-0.0095213	-0.17773	-0.10547	-35.019	18.48899	24.6933	0.25049	-0.2207	0.23926	-82.941	-6.3566	43.6635	0.27021	-0.019532	0.063379
1.434	-53.761	21.788	14.3678	0.12939	0.075195	-0.25586	-64.8232	20.368	65.081	-0.063477	-0.14795	-0.13281	-59.638	35.1036	15.1346	0.25342	-0.21973	0.23633	-85.1822	-25.1842	23.43	0.26905	-0.023828	0.049316
1.436	-49.382	15.049	43.9634	0.14404	0.079102	-0.24902	-26.869	18.8439	46.8928	-0.12842	-0.095215	-0.16406	-64.286	10.271	35.5445	0.25855	-0.21435	0.23071	-68.702	1.3195	35.772	0.2543	-0.029102	0.036816
1.438	-36.72	20.636	54.503	0.15576	0.073731	-0.24414	-84.6333	35.9508	22.365	-0.15918	-0.072754	-0.17969	-81.103	49.712	41.5229	0.25586	-0.20361	0.21973	-67.424	6.339	34.0171	0.24414	-0.036133	0.022461
1.44	-20.888	30.8019	36.539	0.16162	0.068848	-0.23877	-40.491	3.38	13.2251	-0.21973	-0.029297	-0.21436	-67.07	26.8961	46.9158	0.2583	-0.17969	0.19775	-79.81	19.3809	52.449	0.22168	-0.035742	0.0044921
1.442	-33.49	33.322	18.3163	0.16406	0.050781	-0.23193	-35.299	32.295	4.477	-0.26075	0.0092775	-0.24072	-79.9615	55.572	26.581	0.26514	-0.16943	0.19531	-53.732	23.9701	-5.161	0.20195	-0.030469	-0.009668
1.444	-14.024	37.864	18.7972	0.16016	0.043945	-0.23047	-54.317	12.986	18.7982	-0.29395	0.039063	-0.25635	-78.7057	10.014	33.685	0.26172	-0.14746	0.18018	-51.004	23.7342	12.443	0.18047	-0.023047	-0.026074
1.446	-12.576	45.967	25.8374	0.15234	0.041016	-0.22217	-10.871	-14.545	25.7762	-0.32373	0.075684	-0.27637	-108.9686	34.66571	18.792	0.26538	-0.1311	0.16235	-65.45	28.9671	-48.7608	0.15586	-0.010156	-0.040234
1.448	-8.957	40.653	29.1054	0.14526	0.037842	-0.2146	-45.29	27.5045	12.722	-0.32764	0.090332	-0.28467	-83.6414	12.7485	50.328	0.271	-0.1123	0.146	-35.044	17.0688	5.913	0.13623	0.0053711	-0.049316
1.45	0.829999999999998	21.9582	12.6304	0.1333	0.038574	-0.21289	-47.364	-1.358	37.6792	-0.32715	0.11133	-0.28369	-82.083	71.673	58.787	0.26709	-0.088867	0.12842	-26.616	31.72431	-16.157	0.11553	0.026953	-0.066504
1.452	-6.998	14.0603	25.5688	0.11182	0.047852	-0.21338	8.294	-2.5815	33.81278	-0.3147	0.11596	-0.28271	-78.8697	44.329	58.44	0.26709	-0.078125	0.12256	-21.113	12.8682	36.4751	0.093946	0.051368	-0.076074
1.454	-0.338999999999999	15.7035	41.34638	0.097656	0.062012	-0.20996	-23.892	16.9665	26.7077	-0.29883	0.11768	-0.27686	-56.6	77.046	38.2995	0.25879	-0.059082	0.094727	-49.682	33.84629	-3.2641	0.076758	0.076758	-0.083496
1.456	-11.117	26.7979	34.808	0.079102	0.081543	-0.21045	10.017	-27.716	32.022	-0.27441	0.11182	-0.26123	-59.925	-1.0523	22.3728	0.25366	-0.048584	0.082031	-17.758	5.4153	33.882	0.063379	0.09336	-0.087305
1.458	-8.339	35.576	23.7123	0.059326	0.091797	-0.19995	-8.099	14.6971	14.282	-0.25293	0.10889	-0.25049	-51.622	34.9621	15.1095	0.24365	-0.032715	0.064941	-46.037	38.021	13.346	0.056641	0.104	-0.088379
1.46	-9.728	31.6146	34.086	0.047852	0.104	-0.19336	-43.706	25.1221	19.038	-0.21973	0.092773	-0.22852	-36.337	-17.012	43.177	0.22852	-0.010254	0.041992	2.647	26.478	42.447	0.056543	0.11035	-0.083008
1.462	-10.527	23.595	35.4788	0.033691	0.11377	-0.18213	8.798	-2.2416	32.4133	-0.19482	0.078369	-0.20507	-5.835	36.3303	50.381	0.22119	0.003418	0.035645	10.141	44.672	33.324	0.058691	0.11357	-0.074023
1.464	-37.369	10.3761	39.9301	0.03418	0.11475	-0.17627	-15.144	29.23202	5.465	-0.16748	0.063965	-0.18506	-17.683	-13.4922	59.485	0.20654	0.018555	0.018555	-17.511	16.2219	53.581	0.065332	0.11045	-0.06543
1.466	-63.392	11.43243	44.5865	0.035156	0.10303	-0.16113	-20.64	-0.983000000000001	21.771	-0.13721	0.044434	-0.15479	12.29	31.428	41.9066	0.198	0.029785	0.014404	-21.557	31.7161	21.7947	0.063574	0.10166	-0.05498
1.468	-36.516	20.0769	22.5924	0.040772	0.092529	-0.14209	1.97799999999999	8.39676	15.4923	-0.12354	0.039063	-0.13477	1.143	-11.84196	32.863	0.19287	0.036133	0.0048828	-0.357999999999997	20.4665	31.139	0.063965	0.09375	-0.044434
1.47	-62.856	34.1357	21.0103	0.045898	0.07666	-0.12598	-59.6805	52.113	11.201	-0.10205	0.019531	-0.1084	3.636	44.2228	31.141	0.19043	0.038574	0.00048828	-20.044	65.328	22.458	0.059863	0.08291	-0.040918
1.472	-55.303	35.2742	15.5273	0.058594	0.050781	-0.10156	3.097	16.5573	29.5994	-0.082764	0.0070801	-0.086426	6.554	-3.9379	42.152	0.18652	0.038574	-0.003418	-8.96599999999999	57.1838	45.638	0.058398	0.074805	-0.037597
1.474	-73.001	21.80277	26.3793	0.064941	0.035645	-0.088379	-11.883	41.367	12.59	-0.071289	0.0043945	-0.066895	-1.96899999999999	41.6155	28.4652	0.18262	0.03418	-0.0087891	-43.759	61.009	75.388	0.05957	0.068554	-0.034863
1.476	-45.803	30.8948	30.36463	0.077148	0.0092773	-0.069824	-57.902	41.9855	14.6038	-0.047363	-0.00097656	-0.036133	-28.464	-13.80023	35.2418	0.18506	0.028564	-0.005127	-45.206	43.3385	57.772	0.066211	0.066309	-0.028907
1.478	-65.2894	29.1921	34.3875	0.084961	-0.012695	-0.056885	-22.001	10.7248	31.3451	-0.046875	0	-0.022949	1.785	20.2163	20.197	0.18115	0.029297	-0.0048828	-62.676	36.723	73.384	0.064453	0.063965	-0.037598
1.48	-68.178	32.2043	31.8166	0.096191	-0.033203	-0.040527	-67.153	40.22	24.437	-0.036133	-0.0053711	-0.0039063	-6.239	-9.3732	24.985	0.18066	0.022949	-0.0039063	-45.743	19.55	55.315	0.069824	0.07334	-0.037695
1.482	-69.8567	23.8306	39.14	0.097656	-0.054688	-0.032227	-64.078	19.7217	48.741	-0.02417	-0.0095216	0.0031738	-15.006	40.805	26.9625	0.1792	0.022461	-0.0063477	-59.844	5.5378	84.285	0.07334	0.080469	-0.034668
1.484	-60.143	20.138	40.3491	0.104	-0.068848	-0.020508	-39.054	8.2711	51.373	-0.01709	-0.0058594	0.010742	-50.068	9.374	22.753	0.18506	0.020508	-0.0068359	-58.681	-5.928	51.4877	0.077636	0.094922	-0.039746
1.486	-46.508	26.9665	20.6193	0.10059	-0.09082	-0.017578	-79.0845	34.8073	32.9144	-0.0014648	-0.010742	0.01416	-60.028	57.3542	3.967	0.1853	0.017578	-0.01416	-57.916	-16.80558	52.9037	0.08125	0.11328	-0.042578
1.488	-65.477	20.34872	29.6642	0.10938	-0.10767	-0.01294	-24.541	-10.409	38.707	0.00097656	-0.0087891	0.019531	-71.8791	30.6207	21.564	0.18408	0.020508	-0.022949	-82.111	-14.463	4.777	0.086426	0.13184	-0.044434
1.49	-39.271	12.5711	38.9506	0.11426	-0.11914	-0.01709	-44.528	3.0189	32.9083	0.02002	-0.0024414	0.025879	-45.836	45.2652	49.0217	0.18262	0.024414	-0.030762	-62.952	-43.856	43.5419	0.083301	0.15606	-0.054688
1.492	-34.493	8.2478	45.4825	0.12598	-0.13623	-0.019531	-84.7746	10.886	34.0314	0.035644	0.0058593	0.026123	-60.189	10.8062	56.0487	0.18506	0.023438	-0.027832	-85.5748	-19.169	24.0394	0.079297	0.17988	-0.056348
1.494	-40.208	13.4344	36.8073	0.13623	-0.14893	-0.020996	-28.466	2.02053	41.733	0.047363	0.011719	0.028809	-80.336	23.912	30.81689	0.17822	0.033203	-0.035156	-54.871	-23.4378	68.988	0.071875	0.20723	-0.062989
1.496	-30.725	12.94991	29.8684	0.14209	-0.17139	-0.029297	-50.521	57.411	28.1293	0.056641	0.015625	0.026367	-105.1918	8.5008	23.8757	0.17188	0.039795	-0.033203	-54.662	10.116	18.2091	0.059375	0.23555	-0.067773
1.498	-1.228	19.1108	34.8344	0.14819	-0.18896	-0.038086	-8.835	20.838	45.4115	0.063965	0.028809	0.025879	-101.2387	30.7289	18.728	0.16992	0.05127	-0.030273	-52.269	-7.8969	49.3238	0.040039	0.26416	-0.074707
1.5	12.552	21.2468	27.3008	0.15771	-0.20215	-0.050293	-8.067	1.7445	45.2666	0.063477	0.038574	0.018066	-114.071	30.313	16.897	0.16992	0.055664	-0.023926	-76.784	22.3837	7.368	0.020801	0.28946	-0.088672
1.502	-12.8	27.721	26.678	0.17041	-0.21729	-0.069824	-61.2498	36.7903	41.3582	0.068116	0.043213	0.015137	-59.142	34.0372	41.4885	0.17334	0.059082	-0.017578	-18.844	3.38317	11.311	-0.00039068	0.32724	-0.10284
1.504	-4.875	23.997	26.0003	0.18164	-0.21924	-0.075684	-16.02	7.9919	43.534	0.072754	0.054688	0.01123	-63.862	32.204	29.7252	0.1748	0.056641	-0.0092773	-49.926	36.994	-10.424	-0.022657	0.35693	-0.11807
1.506	-3.465	20.6787	33.7733	0.20068	-0.23145	-0.1001	-10.681	32.74	39.289	0.07373	0.056152	0.0024414	-66.314	35.5664	26.8399	0.17993	0.049316	0.001709	-9.57	14.2703	38.755	-0.039551	0.38564	-0.14951
1.508	-11.905	27.728	41.9886	0.21631	-0.23853	-0.10767	-47.972	28.5765	39.534	0.075195	0.061523	-0.0014648	-58.3442	47.658	37.2802	0.18604	0.044922	0.0063477	-24.52	15.996	70.53	-0.059082	0.4126	-0.18311
1.51	-11.427	20.3195	32.1341	0.23193	-0.24072	-0.1167	11.555	-10.33515	32.577	0.07959	0.07373	-0.0087891	-48.506	42.51706	38.2603	0.18945	0.042969	0.01416	-28.871	-9.3039	96.063	-0.081738	0.42852	-0.23574
1.512	-28.276	17.3824	28.663	0.25781	-0.24707	-0.13086	-22.572	28.646	-2.118	0.073242	0.080322	-0.015625	-37.164	54.445	43.212	0.18555	0.043945	0.011719	-23.453	29.453	127.111	-0.1042	0.44053	-0.30225
1.514	-13.251	14.8857	24.3867	0.27295	-0.25	-0.13232	-17.466	7.785	27.0372	0.075684	0.088379	-0.018555	-4.831	34.079	56.7502	0.18506	0.061035	0.015137	-11.7	52.3772	197.9174	-0.1335	0.46084	-0.38193
1.516	-34.287	28.616	17.5626	0.29297	-0.25244	-0.14502	15.56	0.0122	45.5239	0.072266	0.10059	-0.028809	2.533	35.1399	40.0099	0.16797	0.085205	0.0078122	-60.246	69.816	323.6511	-0.17998	0.48789	-0.46338
1.518	-30.404	19.4497	27.4321	0.30493	-0.25439	-0.15478	-34.163	25.274	38.6157	0.074219	0.1001	-0.03418	-17.236	11.88	51.341	0.16016	0.11475	-0.0019531	-54.201	60.0178	446.666	-0.23535	0.51904	-0.54932
1.52	-54.11	13.78804	48.19	0.31445	-0.25781	-0.1626	3.508	-36.6832	46.507	0.076172	0.099121	-0.041016	-20.795	30.1462	42.912	0.14941	0.15869	-0.013184	-20.087	53.203	556	-0.29883	0.55527	-0.64531
1.522	-17.825	-8.7718	63.7356	0.31348	-0.27539	-0.19189	-18.15	-18.7978	26.57583	0.081055	0.095215	-0.041504	-17.982	9.9251	38.409	0.146	0.18066	-0.02002	-47.447	85.4929	706.776	-0.37217	0.59932	-0.74678
1.524	-69.353	-13.511	65.8105	0.30908	-0.28857	-0.21094	-53.273	-5.669	31.8925	0.088379	0.085938	-0.040527	-5.268	41.229	30.7214	0.13574	0.22266	-0.034668	-15.725	123.479	990.7176	-0.45693	0.64502	-0.85029
1.526	-54.103	-9.4998	68.0976	0.27588	-0.27783	-0.25244	-7.251	-12.9486	37.444	0.099609	0.074219	-0.050781	13.192	-5.0408	25.03	0.13281	0.2522	-0.043701	-31.293	114.138	1184.275	-0.55215	0.68047	-0.96289
1.528	-36.725	6.7101	89.36673	0.23267	-0.23047	-0.28101	-52.402	44.294	7.521	0.104	0.0625	-0.050781	10.131	19.10694	28.2295	0.12549	0.27979	-0.053711	-55.477	53.679	1374.984	-0.66357	0.729	-1.0952
1.53	-35.988	25.3878	115.82936	0.17334	-0.1709	-0.31592	-58.445	30.1083	1.4705	0.10791	0.042969	-0.056641	-10.57	-20.7475	50.312	0.11963	0.31104	-0.071289	-38.712	-8.281	1435.464	-0.78301	0.79375	-1.2133
1.532	-53.87061	30.1185	132.6749	0.089355	-0.087891	-0.38232	-33.294	5.1946	13.205	0.11084	0.027099	-0.057129	-24.845	23.1219	38.167	0.11719	0.32373	-0.081055	-37.9278	-113.133	1592.246	-0.91718	0.88203	-1.3136
1.534	-68.584	21.588	142.792	0.058105	-0.062012	-0.43018	-70.2316	31.5683	15.357	0.11377	0.011719	-0.062012	-21.994	-6.684	58.305	0.10254	0.34473	-0.1084	-102.9439	-152.724	1725.541	-1.0547	0.99296	-1.3887
1.536	-26.498	22.134	191.8808	-0.0043945	0.012695	-0.49463	-33.605	-14.7883	40.5269	0.11621	-0.0063477	-0.068359	-29.428	38.405805	36.6387	0.092041	0.35913	-0.12719	-135.4774	-204.5394	1710.19	-1.183	1.1273	-1.4284
1.538	-9.525	49.7138	238.972	-0.044434	0.076172	-0.5481	-38.802	23.3503	23.0287	0.1167	-0.019043	-0.070313	-46.185	-2.4821	47.59183	0.07666	0.37451	-0.16064	-156.2283	-220.0271	1579.12	-1.2886	1.2749	-1.4565
1.54	-0.663	82.9882	262.896	-0.092285	0.14307	-0.60107	-79.4248	30.121	27.26396	0.11621	-0.037109	-0.076172	-47.676	53.867	23.262	0.062012	0.39111	-0.21143	-108.2295	-290.788	1525.071	-1.3513	1.4171	-1.4821
1.542	-8.683	102.5852	291.5932	-0.15869	0.22754	-0.67969	-41.768	2.1183	30.3912	0.11353	-0.050537	-0.087647	-70.068	8.7866	35.01697	0.054688	0.39893	-0.23828	-101.661	-319.62	1459.934	-1.3792	1.5533	-1.5085
1.544	11.947	104.9892	339.702	-0.19727	0.26172	-0.72266	-57.027	35.4565	12.806	0.11523	-0.060059	-0.094238	-83.223	49.0304	48.4715	0.025391	0.39502	-0.34912	-11.0031	-361.85	1428.883	-1.3476	1.6583	-1.5432
1.546	8.074	104.3031	406.568	-0.27588	0.34668	-0.80469	-55.968	2.187	5.1403	0.12012	-0.07666	-0.10352	-90.4502	-10.449	115.3265	-0.0070799	0.3833	-0.4541	52.5018	-298.21	1329.3595	-1.2772	1.7052	-1.5909
1.548	-9.06	97.39512	458.2936	-0.34424	0.42188	-0.86621	-15.956	7.3854	23.8066	0.11768	-0.083496	-0.1084	-113.8332	44.77	104.962	-0.039063	0.38281	-0.56982	81.0139	-271.66	1291.4591	-1.1948	1.7114	-1.6362
1.55	23.486	91.01	524.05053	-0.42139	0.50732	-0.93311	-62.0168	39.0973	15.028	0.1167	-0.10205	-0.11377	-96.2639	50.328	180.352	-0.10596	0.42236	-0.7124	-6.728	-181.664	1284.6187	-1.1476	1.6926	-1.682
1.552	29.709	83.118	597.451	-0.53125	0.61328	-1.0488	-24.623	-14.7668	31.8997	0.11841	-0.11011	-0.12207	-71.569	122.6338	229.032	-0.146	0.4585	-0.78467	8.433	-168.443	1284.183	-1.1601	1.6903	-1.7222
1.554	-12.666	70.92	674.3475	-0.58203	0.66992	-1.1016	-24.029	11.2437	16.713	0.11719	-0.12012	-0.12256	-143.554	84.9394	367.734	-0.22314	0.54346	-0.92725	25.927	-84.93	1223.7986	-1.2292	1.7181	-1.7257
1.556	-40.409	36.974	706.8181	-0.67334	0.80322	-1.2046	-41.72	14.934	26.8729	0.11279	-0.12793	-0.13428	-132.783	153.8147	504.057	-0.27051	0.60791	-1.0308	36.223	-104.85	1236.962	-1.3184	1.775	-1.7188
1.558	-16.706	12.1871	736.714	-0.72461	0.92237	-1.2681	14.944	-1.69325	42.935	0.11328	-0.13281	-0.14014	-107.54	120.0527	592.937	-0.3252	0.66406	-1.1484	3.971	-72.88	1283.982	-1.3843	1.8364	-1.7007
1.56	16.636	-12.5474	782.5193	-0.77002	1.0337	-1.3315	-20.852	47.512	25.7082	0.11865	-0.14258	-0.146	-102.105	170.801	781.971	-0.3999	0.6958	-1.3491	-44.148	-139.03	1322.752	-1.3889	1.8932	-1.6802
1.562	-8.694	-23.4895	814.2758	-0.78516	1.1387	-1.3838	-18.041	36.562	29.669	0.11743	-0.15039	-0.1521	-83.112	151.197	1015.732	-0.44434	0.71289	-1.4609	-41.051	-160.8	1390.499	-1.3182	1.9317	-1.6519
1.564	-37.731	-60.2099	836.99	-0.74804	1.1777	-1.4004	-6.617	41.0476	20.0375	0.12012	-0.16162	-0.1582	-72.762	137.244	1217.21	-0.51563	0.79883	-1.6621	-28.838	-274.487	1384.433	-1.1991	1.9353	-1.6186
1.566	-52.268	-78.299	828.15126	-0.68848	1.1699	-1.4023	-33.389	73.459	18.1782	0.12305	-0.16504	-0.16602	-77.478	54.145	1381.382	-0.60742	0.94238	-1.8164	8.01300000000001	-359.4	1435.513	-1.0654	1.8964	-1.5821
1.568	-48.237	-72.557	830.052	-0.55127	1.0757	-1.3882	4.61	4.5877	35.0766	0.12061	-0.1665	-0.16455	-56.817	-7.15	1467.902	-0.65527	1.042	-1.8574	-40.939	-436.308	1448.8493	-0.93848	1.8164	-1.543
1.57	-60.704	-70.182	828.874	-0.47119	0.99609	-1.377	-2.199	12.7473	33.666	0.12891	-0.17529	-0.17529	-86.4339	-118.298	1609.0405	-0.74219	1.291	-1.8926	-12.04	-444.86	1528.114	-0.84512	1.699	-1.5022
1.572	-73.971	-67.418	815.045	-0.33301	0.8125	-1.3379	-28.196	14.1704	26.2596	0.12915	-0.18066	-0.17724	-83.229	-138.303	1724.785	-0.8186	1.4753	-1.8836	-5.904	-403.69	1587.7779	-0.78008	1.5551	-1.4617
1.574	-94.834	-73.408	815.802	-0.26904	0.66846	-1.3159	-7.952	-3.187	31.0776	0.13477	-0.18408	-0.17969	-103.592	-164.395	1706.431	-0.87744	1.6294	-1.8921	2.85000000000001	-364.402	1691.506	-0.75079	1.4117	-1.441
1.576	-92.395	-58.9387	823.8789	-0.23389	0.53711	-1.2871	-63.6889	48.742	28.7554	0.13965	-0.18555	-0.18555	-39.946	-161.556	1593.245	-0.90381	1.7661	-1.9116	-52.837	-289.69	1720.6993	-0.74932	1.2815	-1.454
1.578	-93.8867	-61.9712	822.8017	-0.21582	0.41602	-1.2539	-32.007	22.4766	53.478	0.13843	-0.18823	-0.19043	-37.8766	-225.834	1545.678	-0.89551	1.791	-1.9297	-38.001	-251.653	1811.353	-0.7627	1.1846	-1.502
1.58	-100.7974	-69.5721	820.1205	-0.22266	0.38623	-1.248	-0.383000000000003	5.1915	52.51	0.13623	-0.19922	-0.20313	5.045	-285.23	1518.62	-0.82178	1.75	-1.9395	-129.61	-176.377	1765.4332	-0.79795	1.1201	-1.5945
1.582	-61.481	-68.431	821.985	-0.24756	0.3833	-1.2437	-50.088	11.6714	61.0672	0.12158	-0.22754	-0.2373	46.3833	-286.41	1475.624	-0.75049	1.6528	-1.9077	-184.9518	-123.773	1791.12	-0.854	1.1079	-1.705
1.584	-62.563	-81.891	824.619	-0.28785	0.43482	-1.2615	-41.292	-55.913	96.863	0.10156	-0.22754	-0.25732	81.755	-272.49	1444.966	-0.69824	1.543	-1.8594	-261.835	20.457	1790.035	-0.929	1.1595	-1.8222
1.586	-82.4781	-84.863	844.602	-0.32861	0.51123	-1.2847	-63.6824	-9.8291	116.052	0.052734	-0.19238	-0.28516	71.518	-229.159	1407.954	-0.67334	1.4243	-1.7925	-238.541	55.322	1809.635	-1.0212	1.2722	-1.9508
1.588	-86.184	-108.988	888.742	-0.38037	0.61768	-1.312	-25.969	21.706	140.9519	-0.018554	-0.14404	-0.31885	50.6912	-217.348	1421.28301	-0.67188	1.4033	-1.7754	-200.045	95.17	1750.798696	-1.1245	1.4165	-2.0854
1.59	-49.656	-142.9719	937.0775	-0.396	0.65869	-1.3296	31.5251	10.1437	189.898	-0.10254	-0.091797	-0.37158	33.48	-158.672	1389.113	-0.6543	1.4395	-1.7344	-188.599	-5.96599999999999	1743.855	-1.2067	1.5751	-2.21
1.592	-9.612	-186.005	970.33	-0.41211	0.69629	-1.3496	-69.739	53.70453	221.534	-0.21973	-0.012695	-0.46045	29.111	-152.98	1371.343	-0.64526	1.4917	-1.7046	-223.646	-4.866	1729.556	-1.2757	1.7367	-2.3207
1.594	-18.815	-214.696	991.717	-0.40576	0.69336	-1.3569	-57.5038	26.564	272.9339	-0.27051	0.033691	-0.50879	3.175	-52.45	1405.3357	-0.63916	1.541	-1.668	-201.8538	-60.644	1745.337	-1.334	1.8926	-2.4195
1.596	7.634	-218.402	1008.5717	-0.39648	0.67773	-1.3633	20.085	25.2814	332.0199	-0.38232	0.13721	-0.59473	-43.566	-76.16	1460.6132	-0.63281	1.5801	-1.6426	-172.49	-27.525	1800.368	-1.3859	2.0438	-2.4936
1.598	10.735	-207.137	1032.662	-0.40332	0.64258	-1.3711	-1.936	105.9609	420.9878	-0.47656	0.2168	-0.66602	-108.366	-64.06	1487.654	-0.63037	1.5747	-1.6401	-156.113	-90.438	1847.832	-1.4297	2.1855	-2.5488
1.6	35.573	-198.097	1067.6443	-0.41602	0.62744	-1.3804	5.511	98.064	517.341	-0.58057	0.30518	-0.74561	-90.7821	-184.063	1541.801	-0.63037	1.4966	-1.6714	-148.296	-109.79	1888.407	-1.4494	2.2967	-2.5877
1.602	29.322	-188.55	1105.3947	-0.4541	0.6123	-1.4063	-3.206	116.2938	567.5019	-0.72852	0.44043	-0.86133	-67.096	-269.611	1560.327	-0.61914	1.4209	-1.6933	-117.546	-174.501	1882.014	-1.446	2.3716	-2.6011
1.604	31.711	-186.244	1128.301	-0.49756	0.61841	-1.4346	-47.73	91.454	616.432	-0.81055	0.51172	-0.91406	-45.049	-388.46	1609.316	-0.61328	1.3486	-1.707	-150.3133	-174.57	1892.829	-1.4288	2.3934	-2.5854
1.606	58.901	-168.7577	1166.087	-0.53467	0.63818	-1.478	-2.87400000000001	29.849	722.16	-0.97852	0.66309	-1.0381	-70.067	-383.46	1652.977	-0.61084	1.2476	-1.7222	-199.045	-167.093	1885.086	-1.4135	2.3697	-2.5353
1.608	45.7866	-138.522	1200.821	-0.58447	0.70264	-1.5269	1.79	80.7673	826.035	-1.1062	0.78881	-1.1257	-50.268	-409.95	1676.001	-0.62451	1.2114	-1.7437	-166.1967	-112.734	1881.872	-1.418	2.3086	-2.457
1.61	48.2409	-108.298	1226.671	-0.60693	0.75049	-1.5483	-45.09	40.61204	928.434	-1.2192	0.92627	-1.2104	-75.683	-354.9	1721.692	-0.646	1.1372	-1.8218	-126.788	-74.2365	1771.225	-1.4461	2.2192	-2.3766
1.612	44.27928	-90.464	1216.991	-0.63916	0.84521	-1.5933	-19.508	-3.588	984.94	-1.332	1.126	-1.3154	-65.567	-331.613	1769.234	-0.65137	1.1099	-1.9204	-72.861	-47.6477	1725.741	-1.4836	2.1109	-2.2949
1.614	61.5038	-86.065	1216.7878	-0.65503	0.90942	-1.616	-54.767	-41.302	969.01961	-1.3652	1.207	-1.3574	-114.578	-252.86	1818.839	-0.64746	1.1133	-2.0332	-44.597	-13.16163	1633.895	-1.5051	2.0051	-2.2211
1.616	57.294	-98.492	1222.103	-0.65283	0.95752	-1.6323	-54.282	-140.2147	998.227	-1.355	1.3208	-1.4097	-115.336	-241.376	1857.9875	-0.65576	1.1743	-2.1694	13.384	6.27839	1619.246	-1.5223	1.9152	-2.166
1.618	35.8154	-119.25	1249.094	-0.64795	0.98486	-1.6421	-38.664	-132.157	1002.8558	-1.2922	1.345	-1.4441	-198.9175	-182.667	1856.3106	-0.67139	1.2271	-2.2339	-20.093	93.829	1561.468	-1.5293	1.8652	-2.1211
1.62	30.97736	-129.2673	1282.1118	-0.64453	0.99512	-1.6465	-50.564	-142.02	980.8173	-1.189	1.3384	-1.4507	-276.051	-115.0219	1841.485	-0.71533	1.3813	-2.3569	-17.374	130.735	1587.5673	-1.5374	1.8317	-2.0757
1.622	15.641	-131.7816	1289.1608	-0.64355	0.98096	-1.6499	-6.145	-182.164	963.303	-1.0273	1.2676	-1.4492	-290.666	10.598	1828.0794	-0.76245	1.5061	-2.4529	-17.385	193.655	1534.333	-1.5336	1.8086	-2.0254
1.624	19.065	-125.1338	1289.337	-0.65454	0.95874	-1.6541	-89.9702	-156.802	930.4095	-0.95508	1.2129	-1.4375	-221.453	59.591	1783.098	-0.81201	1.6372	-2.5483	-13.884	164.349	1507.818	-1.5102	1.7836	-1.9769
1.626	-10.856	-135.808	1301.436	-0.67236	0.93604	-1.6597	-87.598	-189.986	936.585	-0.86084	1.0688	-1.4058	-146.889	88.206	1774.501	-0.89014	1.8159	-2.6655	-67.101	175.947	1464.785	-1.4717	1.7453	-1.9188
1.628	-32.8851	-139.344	1310.8783	-0.69873	0.91064	-1.6909	-52.968	-176.103	908.346	-0.82763	0.94678	-1.3842	-160.988	45.882	1785.839	-0.93115	1.9106	-2.7183	-94.431	160.88	1491.698	-1.4102	1.6953	-1.8457
1.63	-25.407	-145.204	1339.715	-0.72607	0.90283	-1.7104	-114.903	-121.754	859.1682	-0.82031	0.82422	-1.3535	-163.247	29.591	1812.195	-0.97705	2.0825	-2.7944	-106.993	180.685	1482.619	-1.3395	1.6379	-1.7703
1.632	-27.1509	-131.328	1351.778	-0.77246	0.91602	-1.7539	-74.061	-122.557	869.81	-0.81201	0.68604	-1.3179	-133.253	-6.9796	1835.043	-0.9895	2.2014	-2.8249	-121.599	153.229	1507.7769	-1.2605	1.5638	-1.6921
1.634	-11.8404	-133.009	1364.341	-0.81274	0.948	-1.8006	-66.537	-75.34	851.159	-0.81299	0.63525	-1.3081	-120.619	-41.098	1879.619	-0.97852	2.293	-2.8398	-177.946	137.074	1471.2896	-1.1749	1.4814	-1.6073
1.636	-11.3233	-132.876	1385.928	-0.84912	1.0063	-1.853	-115.8131	-68.83	874.626	-0.81885	0.60107	-1.312	-109.19	-96.358	1880.798	-0.94824	2.3516	-2.8262	-119.5361	85.035	1474.4383	-1.0965	1.3929	-1.5224
1.638	7.4853	-115.1365	1366.6641	-0.88672	1.0869	-1.918	-68.4958	-108.891	897.495	-0.82593	0.61157	-1.3362	-117.945	-139.375	1880.653	-0.93994	2.3481	-2.814	-94.216	97.075	1441.589	-1.0176	1.3086	-1.4395
1.64	-3.747	-84.4259	1356.5682	-0.896	1.1274	-1.939	-86.785	-131.03	929.618	-0.82422	0.64453	-1.3711	-144.037	-151.944	1851.902	-0.93115	2.3032	-2.7573	-115.655	111.627	1397.695	-0.94249	1.2251	-1.364
1.642	10.145	-66.354	1341.0633	-0.9043	1.1895	-1.9922	-62.3813	-190.902	982.634	-0.81006	0.69775	-1.3979	-171.8151	-141.085	1853.427	-0.95093	2.2297	-2.6911	-129.459	158.563	1375.153	-0.87619	1.136	-1.2893
1.644	28.193	-62.4927	1357.263	-0.89746	1.2207	-2.0141	-31.078	-201.34	1013.6124	-0.8042	0.71631	-1.4194	-166.399	-107.668	1866.421	-0.98584	2.1392	-2.6235	-122.684	172.079	1307.403	-0.81369	1.0516	-1.2112
1.646	32.2561	-56.7092	1363.8764	-0.88867	1.2402	-2.0352	-80.141	-195.543	1036.969	-0.7749	0.74658	-1.4507	-114.332	-89.752	1853.179	-1.0347	2.0161	-2.5229	-115.389	190.775	1261.163	-0.76153	0.97091	-1.1418
1.648	34.516	-58.7373	1376.10948	-0.89307	1.2603	-2.0522	-37.115	-275.7173	1106.57904	-0.7583	0.74634	-1.4754	-61.31	-34.9516	1820.217	-1.0483	1.9575	-2.4702	-116.0048	208.129	1188.9818	-0.71631	0.91846	-1.0718
1.65	53.529	-59.8793	1382.3615	-0.896	1.269	-2.062	-10.012	-305.725	1151.0647	-0.74463	0.73779	-1.4858	-12.321	1.1998	1773.7691	-1.064	1.856	-2.3765	-119.881	253.511	1178.754	-0.66238	0.86589	-1.0012
1.652	81.049	-52.1511	1395.322	-0.90381	1.2661	-2.0562	-25.11	-343.844	1195.385	-0.75439	0.7417	-1.4937	-0.825999999999993	74.266	1699.965	-1.0559	1.7942	-2.3172	-123.2375	315.258	1116.8691	-0.59701	0.81244	-0.93079
1.654	88.443	-42.1594	1393.3967	-0.8999	1.2485	-2.0483	38.989	-365.665	1227.042	-0.76904	0.75244	-1.5034	-34.749	100.0895	1650.554	-1.0327	1.7446	-2.2593	-104.791	335.225	1079.3511	-0.51102	0.74955	-0.85304
1.656	98.606	-29.162	1408.0615	-0.88867	1.2168	-2.0391	37.469	-327.499	1252.91422	-0.82031	0.77344	-1.5029	-64.902	178.331	1610.661	-0.98584	1.6997	-2.1792	-107.092	323.857	984.206	-0.41613	0.68441	-0.77308
1.658	90.699	-44.9805	1421.49	-0.88672	1.1602	-2.0127	18.869	-295.14	1299.499	-0.84644	0.79322	-1.4958	-82.958	164.4821	1606.624	-0.9624	1.6724	-2.1362	-79.941	262.685	956.6488	-0.31445	0.61182	-0.68896
1.66	105.069	-50.6488	1450.4658	-0.88818	1.1294	-2.0034	45.7651	-224.204	1333.462	-0.85303	0.80322	-1.4897	-86.053	192.503	1589.467	-0.90869	1.6118	-2.0464	0.184999999999995	227.958	893.4636	-0.2148	0.52971	-0.61272
1.662	96.798	-61.04577	1474.998	-0.89209	1.0952	-1.9839	28.342	-156.545	1357.568	-0.83154	0.79834	-1.4897	-111.806	118.688	1566.136	-0.87158	1.5566	-1.9815	53.542	197.364	868.034	-0.11982	0.44723	-0.53241
1.664	86.933	-64.4535	1451.138	-0.88867	1.083	-1.9814	51.649	-158.989	1388.266	-0.81641	0.78027	-1.4941	-138.593	149.894	1523.395	-0.83789	1.498	-1.916	37.881	191.603	762.6919	-0.029274	0.36722	-0.45119
1.666	78.616	-67.64	1441.593	-0.88477	1.0762	-1.9727	41.6982	-128.26	1411.103	-0.79248	0.73291	-1.4956	-131.64	122.223	1506.204	-0.78857	1.4185	-1.8257	58.8591	166.664	728.559	0.050647	0.28757	-0.3779
1.668	63.944	-47.253	1422.23749	-0.87793	1.0742	-1.9629	-0.9763	-118.783	1407.917	-0.8059	0.70874	-1.5179	-127.274	188.063	1464.835	-0.7583	1.3823	-1.7847	72.051	147.782	651.9806	0.11914	0.19971	-0.30518
1.67	55.463	-22.9796	1407.4018	-0.87646	1.0708	-1.9497	50.588	-97.849	1416.7608	-0.84229	0.7124	-1.5464	-134.005	123.429	1460.2815	-0.69629	1.2969	-1.6855	90.759	116.662	619.0048	0.17807	0.11437	-0.22936
1.672	38.5217	-20.3671	1397.3667	-0.86133	1.0605	-1.9219	50.1878	-70.756	1387.2	-0.92188	0.75781	-1.6113	-125.90847	126.949	1439.848	-0.65161	1.2439	-1.6023	92.872	125.232	558.7074	0.23585	0.030604	-0.16463
1.674	48.258	-17.5019	1400.024234	-0.84253	1.0444	-1.9128	25.473	-129.9712	1405.3673	-0.97217	0.79932	-1.644	-81.532	54.127	1448.10538	-0.60742	1.1914	-1.5117	109.742	138	522.422	0.28299	-0.055384	-0.10105
1.676	23.2982	-11.9815	1403.6637	-0.81836	1.0195	-1.8887	41.161	-157.0078	1427.3565	-1.085	0.88672	-1.7266	-77.913	112.934	1413.822	-0.54639	1.1255	-1.3862	44.4222	184.383	445.8416	0.32016	-0.14209	-0.047841
1.678	18.5181	10.08696	1388.7038	-0.78174	0.9751	-1.8569	-3.961	-171.676	1444.172	-1.1638	0.96899	-1.7907	-104.9375	100.42	1393.742	-0.5166	1.0898	-1.3301	29.7901	222.653	362.192	0.35449	-0.21777	0.0068359
1.68	11.723	21.6728	1385.0419	-0.76709	0.9458	-1.8374	8.965	-196.844	1500.094	-1.2339	1.0581	-1.8491	-112.8921	204.158	1328.04	-0.44873	1.0122	-1.2124	-2.97	236.437	281.138	0.39396	-0.28604	0.054662
1.682	2.989	20.1911	1376.090774	-0.74951	0.90869	-1.8022	20.25621	-175.075	1527.657	-1.3047	1.168	-1.9219	-113.4682	173.886	1254.4611	-0.40284	0.93945	-1.1294	8.908	232.692	219.0447	0.43719	-0.35844	0.099112
1.684	5.932	16.0747	1354.8975	-0.74927	0.88989	-1.784	-48.383	-185.565	1557.311	-1.3257	1.2114	-1.9565	-86.902	264.293	1172.481	-0.34912	0.87158	-1.0425	-11.96	209.665	192.57	0.4857	-0.4242	0.13802
1.686	-18.2353	12.12728	1352.8376	-0.73828	0.87891	-1.7676	-15.5471	-195.429	1569.819	-1.3511	1.2739	-2.0083	-67.971	232.154	1135.813	-0.28174	0.78955	-0.93115	12.358	201.4968	123.384	0.52489	-0.50151	0.17107
1.688	-20.1487	2.4225	1326.8324	-0.71436	0.86475	-1.7417	-38.2408	-175.046	1543.8849	-1.3658	1.3052	-2.0415	-29.862	315.73	1086.7374	-0.25488	0.74219	-0.875	-19.208	215.1317	104.064	0.57129	-0.57471	0.19775
1.69	-14.1893	-6.7439	1336.293	-0.70264	0.86182	-1.73	-47.0364	-154.221	1552.5183	-1.377	1.3203	-2.0625	-37.078	276.264	1048.8116	-0.18994	0.65088	-0.77002	-31.187	199.928	77.872	0.60488	-0.64444	0.21914
1.692	-0.1665	5.509	1303.8926	-0.68555	0.8457	-1.7051	18.5821	-104.8834	1562.5523	-1.3843	1.3228	-2.0796	-54.6468	317.27	960.22	-0.14917	0.583	-0.67773	-39.281	163.7093	78.3039	0.6206	-0.70758	0.23024
1.694	3.1588	8.922	1279.0459	-0.67676	0.84179	-1.6904	-30.4714	-61.6191	1563.1902	-1.3945	1.3203	-2.0801	-72.878	244.298	919.4337	-0.104	0.51563	-0.59277	-84.951	121.5611	31.7493	0.62613	-0.76629	0.2343
1.696	15.236	12.123	1259.2628	-0.66748	0.84033	-1.6733	3.5085	-33.3676	1571.8324	-1.4038	1.3013	-2.0659	13.537	272.884	853.074	-0.044922	0.41846	-0.49951	-99.7561	88.307	62.822	0.6048	-0.81654	0.22702
1.698	36.7367	10.38	1249.8565	-0.66016	0.83203	-1.6484	40.71	-13.68142	1544.51	-1.4099	1.2658	-2.0476	81.02023	210.423	825.8657	-0.01416	0.37793	-0.44971	-132.918	63.531	50.642	0.56982	-0.85107	0.19873
1.7	28.317	30.95926	1245.55744	-0.65723	0.83105	-1.6328	8.1642	-14.1951	1540.844	-1.4136	1.2271	-2.0308	97.21574	269.7968	774.8818	0.053711	0.30127	-0.3501	-123.328	49.866	126.17	0.49806	-0.86131	0.15818
1.702	28.20382	48.0596	1236.8138	-0.646	0.81104	-1.5972	56.013	-10.6076	1545.8953	-1.416	1.1758	-2.0078	84.468	202.234	751.602	0.11426	0.23828	-0.25439	-160.758	27.4226	104.38	0.40197	-0.8419	0.099377
1.704	46.0676	66.327	1229.389	-0.62988	0.78906	-1.5625	44.5084	30.66329	1547.42	-1.418	1.1602	-1.9922	73.061	233.4264	698.604	0.14697	0.20313	-0.20313	-129.283	-7.918	126.97	0.27649	-0.79786	0.030475
1.706	65.195	84.232	1197.7717	-0.62207	0.78174	-1.5366	40.8988	18.7513	1540.617	-1.4292	1.1548	-1.98	61.321	140.038	635.601	0.21143	0.11523	-0.11279	-132.4118	-21.354	80.874	0.12734	-0.715	-0.052171
1.708	50.1395	91.706	1165.5957	-0.60254	0.76172	-1.5	67.748	5.418	1559.822	-1.4467	1.1685	-1.9692	70.8267	172.235	549.674	0.25318	0.039306	-0.051269	-70.865	-31.691	81.174	-0.043457	-0.60107	-0.14355
1.71	32.784	95.586	1138.308	-0.58765	0.7439	-1.4676	37.001	-13.51	1545.312	-1.4668	1.1914	-1.9668	59.2415	117.482	518.0744	0.2876	-0.046387	0.0019531	-70.1236	-11.02	60.9829	-0.2263	-0.44619	-0.25284
1.712	24.591	85.555	1133.0698	-0.56836	0.7251	-1.4272	76.372	-47.5392	1571.3475	-1.4888	1.2231	-1.9604	55.4477	181.271	449.541	0.33398	-0.1543	0.065918	1.18	17.032	65.322	-0.40784	-0.2724	-0.37581
1.714	48.922	105.063	1105.73796	-0.5498	0.69336	-1.3779	96.012	-36.0479	1575.89	-1.4937	1.2339	-1.9526	4.606	162.251	394.1013	0.3501	-0.20703	0.091797	3.405	17.9851	52.627	-0.56368	-0.089789	-0.49935
1.716	48.1635	91.742	1092.475	-0.53809	0.68164	-1.3496	55.988	-35.503	1556.837	-1.4883	1.2383	-1.9434	-13.2484	217.406	308.7036	0.37891	-0.30859	0.14307	32.989	22.872	50.439	-0.69283	0.096109	-0.60189
1.718	20.249	76.44953	1060.257	-0.51416	0.65625	-1.2949	91.471	-47.109	1563.416	-1.4682	1.227	-1.9243	-35.4642	167.76434	265.89	0.38525	-0.36767	0.16894	2.206	11.495	25.537	-0.78906	0.27344	-0.68066
1.72	15.938	62.0099	1054.537	-0.49072	0.63599	-1.2546	73.882	-37.467	1531.478	-1.4414	1.2051	-1.9043	-13.926	209.388	221.666	0.39111	-0.41748	0.18799	4.302	29.357	3.128	-0.85413	0.44036	-0.75293
1.722	12.317	72.01	1034.5518	-0.46045	0.61768	-1.2124	63.129	-34.1124	1523.379	-1.396	1.1626	-1.8706	-14.854	170.4414	200.5514	0.38379	-0.47217	0.20557	14.582	45.051	17.764	-0.89306	0.59215	-0.8025
1.724	6.29	90.777	989.9951	-0.4292	0.58545	-1.1401	120.809	14.02	1506.707	-1.3572	1.1204	-1.8494	12.63	223.8642	135.496	0.38525	-0.49561	0.21045	24.962	63.232	21.01991	-0.90823	0.71579	-0.83878
1.726	-33.548	97.864	974.6593	-0.41211	0.57227	-1.1094	59.231	55.0077	1476.1939	-1.3184	1.0781	-1.8232	-3.939	157.2959	119.764	0.39014	-0.56396	0.21338	1.677	46.6055	53.6642	-0.89558	0.81233	-0.85579
1.728	-33.57	87.9542	954.992	-0.37451	0.53369	-1.0425	68.805	67.2222	1488.9929	-1.2876	1.0317	-1.7866	-37.704	146.498	112.732	0.39355	-0.61719	0.20508	-9.355	21.5451	17.5635	-0.86523	0.87695	-0.86719
1.73	-56.246	90.3781	924.0236	-0.3501	0.50317	-0.99388	57.643	105.544	1475.818	-1.2671	1.0161	-1.7729	-87.2175	54.001	112.67	0.38916	-0.66553	0.17725	5.55099999999999	-25.954	29.7517	-0.80894	0.91805	-0.85187
1.732	-70.5282	91.104	888.6302	-0.32373	0.47314	-0.94482	-0.0386000000000002	112.158	1447.731	-1.2246	0.99023	-1.7441	-75.981	58.906	70.6692	0.35205	-0.69482	0.12451	14.966	-40.865	-4.3699	-0.73798	0.92893	-0.82369
1.734	-56.2334	109.6953	860.1544	-0.2915	0.42627	-0.88818	53.269	108.26	1437.437	-1.1916	0.96997	-1.7219	-106.922	37.895	51.1648	0.3125	-0.70264	0.092773	31.211	-44.791	19.3451	-0.64736	0.89301	-0.7651
1.736	-63.5037	116.5571	845.321	-0.27686	0.39941	-0.85547	17.5091	121.369	1410.7192	-1.1577	0.96143	-1.6987	-105.32025	70.215	52.745	0.21533	-0.65576	0.0083008	14.652	-31.226	1.621	-0.55502	0.806	-0.6888
1.738	-55.62	127.418	799.1472	-0.25098	0.36426	-0.79883	-15.7694	114.102	1401.0636	-1.125	0.94629	-1.668	-100.58028	27.2185	69.295	0.12354	-0.58325	-0.063233	13.316	-20.46	31.73758	-0.46484	0.69434	-0.6123
1.74	-94.5457	130.40348	747.0755	-0.23413	0.33374	-0.75757	18.3041	94.078	1400.7413	-1.1113	0.9375	-1.6523	-103.6554	29.223	55.9606	0.02832	-0.49023	-0.15234	-45.545	-25.915	5.7	-0.37283	0.56618	-0.52537
1.742	-74.149	137.7606	710.9916	-0.22021	0.31201	-0.7124	0.2956	92.152	1369.34	-1.0776	0.9126	-1.6167	-83.8019	-17.579	68.026	-0.11133	-0.33594	-0.28174	-57.1901	-11.013	27.525	-0.28279	0.43268	-0.4405
1.744	-45.024	122.546	678.241	-0.20068	0.28955	-0.66943	24.1887	53.956	1367.2657	-1.0576	0.89258	-1.5918	-41.36	-12.884	74.398	-0.17676	-0.24658	-0.35449	-114.883	20.05473	7.5334	-0.20545	0.29479	-0.35496
1.746	-50.673	135.0798	650.4733	-0.18896	0.27881	-0.64209	21.5632	50.303	1354.503	-1.041	0.87402	-1.5635	-8.11	-16.2473	86.323	-0.28906	-0.062012	-0.49023	-79.527	71.668	32.424	-0.1456	0.17489	-0.28115
1.748	-48.167	125.3232	628.3435	-0.17139	0.25537	-0.59521	-29.1111	57.136	1323.424	-1.0151	0.84814	-1.5229	17.934	48.6599	47.982	-0.35449	0.091554	-0.58496	-127.1718	92.627	23.1889	-0.094238	0.083496	-0.21631
1.75	-40.002	124.1218	604.0584	-0.15063	0.24512	-0.55932	26.0436	59.478	1311.778	-1.0015	0.83643	-1.5034	17.36	81.991	1.839	-0.41162	0.25244	-0.66699	-136.928	99.087	30.8438	-0.057814	0.025199	-0.17159
1.752	-6.688	118.1309	575.4095	-0.12695	0.23682	-0.52979	15.5847	111.866	1273.2227	-0.97217	0.81396	-1.4565	23.512	89.87	14.076	-0.47998	0.46729	-0.75146	-141.695	74.046	1.326	-0.03506	-0.018454	-0.14004
1.754	-30.367	117.4653	539.126	-0.10645	0.21924	-0.48633	-7.8597	106.9825	1254.656	-0.94825	0.79736	-1.4224	-19.117	51.095	7.5364	-0.50293	0.56055	-0.78125	-85.5132	63.049	-4.208	-0.020215	-0.050878	-0.10723
1.756	-25.777	99.67044	524.688	-0.091309	0.20947	-0.47021	39.5842	120.9734	1232.807	-0.92139	0.77979	-1.3833	-27.993	30.5459	36.867	-0.53271	0.71143	-0.81982	-97.9187	44.2452	5.418	-0.016895	-0.073242	-0.083204
1.758	-8.873	104.11019	495.355	-0.0625	0.18701	-0.42969	-11.419	163.2857	1167.063	-0.88037	0.74658	-1.3257	-36.236	49.6211	18.2706	-0.53638	0.7727	-0.8274	-58.549	46.262	28.7288	-0.025391	-0.084473	-0.066406
1.76	4.304	113.5898	458.5943	-0.039551	0.17627	-0.39941	21.441	162.0253	1132.748	-0.85352	0.7334	-1.2949	3.998	65.841	35.94016	-0.52148	0.81445	-0.82031	-83.804	55.4459	45.2673	-0.024316	-0.085352	-0.051367
1.762	-12.268	117.1295	420.1137	-0.01709	0.15967	-0.36914	47.89244	192.107	1085.759	-0.79492	0.6958	-1.228	6.937	86.449	35.4813	-0.46094	0.82422	-0.79492	-64.418	47.579	41.4843	-0.026855	-0.075585	-0.038574
1.764	-5.02	106.02	392.6377	0.0058594	0.13477	-0.3335	1.234	183.257	1044.0334	-0.74658	0.66552	-1.1719	-14.641	50.169	35.092	-0.42432	0.80713	-0.771	-36.483	4.123	44.8887	-0.020606	-0.061523	-0.030762
1.766	-1.898	99.9415	366.9069	0.02002	0.12354	-0.31543	64.1283	161.07	1027.491	-0.69922	0.62695	-1.1191	-31.026	19.61461	6.9004	-0.33789	0.7207	-0.6875	-13.752	-20.875	69.217	-0.005664	-0.050195	-0.01914
1.768	14.243	118.7112	338.9279	0.040039	0.10986	-0.28467	21.547	183.486	977.832	-0.6416	0.57813	-1.0371	-16.047	-19.173	38.094	-0.27295	0.61914	-0.61132	-32.273	-32.372	110.058	0.01709	-0.041992	-0.003418
1.77	-4.869	113.4522	321.7647	0.056397	0.097658	-0.26245	0.551000000000002	153.723	942.762	-0.61377	0.55518	-0.99756	-7.40000000000001	-19.964	47.231	-0.2041	0.50781	-0.52881	-27.107	-15.21988	98.367	0.049023	-0.044727	0.010059
1.772	-13.092	112.0076	300.1801	0.07373	0.090332	-0.23682	30.139	136.385	942.1934	-0.56299	0.50537	-0.92334	-9.11199999999999	-25.175	81.4107	-0.12256	0.33203	-0.41357	19.483	0.157	90.702	0.081251	-0.062011	0.02373
1.774	-19.071	111.8278	288.0373	0.094727	0.083984	-0.20361	-42.524	156.69	897.862	-0.52343	0.47387	-0.86743	-14.405	1.517	67.12	-0.084961	0.25195	-0.36621	-34.305	-10.584	30.7793	0.12461	-0.087011	0.047558
1.776	-25.342	116.1981	249.7468	0.10791	0.083984	-0.18506	-2.244	131.537	875.291	-0.48535	0.43848	-0.8125	-59.192	-12.083	54.05	-0.030762	0.11719	-0.27637	19.454	-5.3686	32.0723	0.15742	-0.1169	0.062012
1.778	-45.99	113.2461	231.2243	0.13477	0.071777	-0.16016	-10.905	153.1222	838.9839	-0.43555	0.39648	-0.74023	-103.7133	20.129	24.1793	0.010742	0.045655	-0.22095	19.817	-1.287	9.467	0.18701	-0.1499	0.08252
1.78	-42.145	93.3799	212.7838	0.15723	0.059571	-0.13184	-67.86	153.557	792.718	-0.41357	0.37549	-0.69678	-108.967	4.532	36.6638	0.044922	-0.0083008	-0.17969	59.149	20.925	37.50607	0.19892	-0.18057	0.091699
1.782	-71.459	90.6443	182.3794	0.17139	0.04541	-0.11963	-26.209	126.1773	772.767	-0.36133	0.33984	-0.63281	-110.59265	37.197	22.465	0.081543	-0.053223	-0.13428	20.631	29.871	16.139	0.20976	-0.20967	0.095313
1.784	-81.6515	86.8427	164.0925	0.18701	0.03125	-0.11035	-65.646	176.159	709.2576	-0.32373	0.31518	-0.5752	-105.1083	30.0287	42.513	0.091797	-0.062988	-0.12158	38.267	27.258	43.017	0.21211	-0.24092	0.10039
1.786	-95.61681	86.5875	156.482	0.19092	0.021973	-0.10449	-89.9938	157.247	651.5243	-0.2832	0.29102	-0.51953	-76.8089	45.648	30.406	0.095703	-0.083984	-0.094238	-15.54	16.1173	13.6644	0.20918	-0.26367	0.10576
1.788	-59.616	72.591	139.0608	0.19824	0.011719	-0.09082	-34.019	163.077	614.4538	-0.23926	0.25977	-0.44727	-88.0172	28.3166	39.13	0.093262	-0.08374	-0.080078	13.933	27.4016	-0.4892	0.19678	-0.27979	0.09668
1.79	-78.111	64.052	136.5522	0.2002	0.0078125	-0.084472	-82.1844	199.843	567.189	-0.21143	0.24316	-0.41504	-74.82	42.286	20.821	0.07959	-0.077148	-0.064453	-14.472	13.8571	-9.023	0.18125	-0.28438	0.085156
1.792	-75.575	63.519	113.3173	0.19727	0.003418	-0.084961	-84.951	176.328	526.9033	-0.16016	0.21045	-0.35059	-65.299	7.996	15.0585	0.085938	-0.064453	-0.060547	-65.18	22.7833	17.6379	0.15938	-0.27666	0.072461
1.794	-85.132	53.1608	98.8713	0.18994	0.0053711	-0.085938	-67.74	208.29	451.441	-0.11622	0.17139	-0.29834	-46.593	35.326	-5.4654	0.093262	-0.055176	-0.056152	-91.49286	2.383	24.87	0.13594	-0.25478	0.050977
1.796	-58.697	55.8323	94.6554	0.19678	0.0087891	-0.086914	-92.9303	216.925	400.636	-0.080078	0.1416	-0.25146	-51.289	20.0216	30.6092	0.1084	-0.047363	-0.046875	-84.0183	1.5483	17.027	0.12022	-0.22402	0.022852
1.798	-51.882	55.5123	86.5829	0.19141	0.01709	-0.094238	-52.277	173.054	385.1019	-0.022949	0.099121	-0.19189	-16.436	45.2368	18.672	0.12524	-0.053711	-0.037354	-85.4705	-14.526	-6.553	0.10205	-0.19531	-0.0029297
1.8	-60.852	55.1883	76.7049	0.18676	0.02539	-0.10376	-93.2453	205.943	349.401	-0.0058594	0.078125	-0.16357	-25.77	-0.601	55.6248	0.14844	-0.061035	-0.025879	-101.6596	-8.152	7.9525	0.09375	-0.16289	-0.020996
1.802	-42.239	41.331	70.7795	0.18018	0.036621	-0.11035	-83.933	164.683	303.2552	0.041992	0.036133	-0.11133	-28.394	1.634	33.6029	0.17773	-0.083496	-0.01416	-109.05215	3.4519	37.0478	0.08418	-0.13184	-0.052344
1.804	-43.373	50.4307	57.0035	0.16748	0.053223	-0.12207	-62.907	143.18	281.2683	0.07251	0.0056151	-0.071289	-44.491	-35.4736	36.2038	0.19287	-0.1001	-0.0097656	-108.7635	29.158	24.4934	0.076758	-0.097852	-0.073828
1.806	-24.262	63.91	43.9542	0.16504	0.068359	-0.12305	-92.4113	158.2439	259.114	0.10059	-0.022461	-0.037598	-26.073	11.4275	26.045	0.21289	-0.12305	0.0014648	-91.8182	36.0795	24.299	0.073047	-0.069726	-0.091016
1.808	-32.564	58.769	52.6193	0.15527	0.088379	-0.14111	-40.081	100.344	270.08	0.13184	-0.055664	0.0019531	-19.073	14.742	31.852	0.22656	-0.13867	0.0043945	-77.16578	31.891	16.4664	0.071289	-0.041992	-0.099121
1.81	-10.58	41.118	49.2418	0.14648	0.10425	-0.14965	-17.839	112.3466	235.495	0.14502	-0.069824	0.023926	32.902	53.521	37.832	0.23633	-0.15186	0.0043945	-89.45131	30.6414	37.01442	0.076465	-0.025391	-0.11192
1.812	-2.605	32.7641	48.58723	0.14355	0.1123	-0.1499	-28.992	120.9438	187.3159	0.1665	-0.095215	0.056641	-4.881	38.4276	35.1834	0.24902	-0.16797	0.0063477	-87.3833	49.888	45.99523	0.077734	-0.022364	-0.11201
1.814	4.37	39.2184	30.5427	0.13965	0.1167	-0.15723	-4.874	68.6522	183.903	0.17896	-0.11255	0.072754	19.871	49.529	13.9708	0.25098	-0.16992	0.010254	-54.335	70.68	56.49737	0.077344	-0.025098	-0.1042
1.816	16.268	35.5243	46.2267	0.1377	0.11475	-0.15918	-27.874	107.4407	145.8305	0.18945	-0.12207	0.087402	-12.677	46.557	19.2168	0.24902	-0.16699	0.0024414	-62.79	86.72	14.5669	0.074023	-0.038965	-0.099805
1.818	8.367	33.7586	41.9373	0.14014	0.10596	-0.15479	-16.272	54.531	128.367	0.19678	-0.12695	0.099121	-0.774999999999999	71.7842	8.6626	0.25268	-0.16187	0.0043945	-35.134	70.63	22.6703	0.068359	-0.05957	-0.09375
1.82	13.69	33.49583	40.1644	0.14111	0.099365	-0.15088	16.318	35.973	127.518	0.19775	-0.12695	0.10449	-29.711	46.525	19.031	0.25098	-0.15527	-0.003418	-74.1179	44.198	22.5807	0.063086	-0.080469	-0.088379
1.822	8.337	38.0741	32.7886	0.14209	0.092285	-0.14844	-27.857	62.45757	98.389	0.19092	-0.12354	0.099609	-2.514	64.833	30.225	0.24707	-0.14453	-0.012695	-8.212	31.997	43.245	0.057226	-0.097852	-0.083887
1.824	-10.429	24.4906	42.0346	0.14551	0.079102	-0.13867	-11.233	13.8235	91.666	0.17651	-0.11621	0.089112	-28.482	39.2148	43.6928	0.24365	-0.146	-0.01416	-7.096	14.74464	52.214	0.048242	-0.11582	-0.082325
1.826	-10.306	17.8149	50.2949	0.14648	0.071289	-0.13623	-5.556	68.822	85.70651	0.15576	-0.097656	0.083008	-30.879	43.254	38.304	0.23975	-0.13916	-0.027832	30.559	21.2283	88.993	0.046485	-0.11611	-0.077051
1.828	-36.617	25.133	50.071	0.15576	0.058105	-0.12354	-36.281	107.625	41.2731	0.11182	-0.064941	0.064941	-87.5082	11.158	56.31	0.2334	-0.13648	-0.029541	5.198	-7.8144	59.942	0.038086	-0.11279	-0.071777
1.83	-52.073	24.6462	43.237	0.15674	0.043457	-0.11694	-15.013	68.506	47.086	0.086914	-0.040527	0.047363	-103.6467	20.9581	39.596	0.22559	-0.13086	-0.037598	58.782	-9.804	60.005	0.031543	-0.1042	-0.073047
1.832	-58.226	20.9787	30.09	0.1582	0.036621	-0.11182	-44.691	86.986	41.0811	0.040039	0.0097656	0.01709	-102.3058	13.7014	45.457	0.21045	-0.11719	-0.043945	18.114	-22.8581	41.315	0.022461	-0.086133	-0.070898
1.834	-33.267	11.6521	24.4976	0.15723	0.019043	-0.10059	-32.338	14.464	44.23055	0.0024415	0.04419	-0.010986	-59.611	17.577	43.494	0.20508	-0.10889	-0.043457	48.977	-10.434	40.454	0.013867	-0.069726	-0.068164
1.836	-56.984	18.5167	22.5383	0.16309	0.011719	-0.094238	11.592	-6.822	57.3338	-0.041016	0.080078	-0.038574	-79.6727	-10.138	43.5303	0.17969	-0.095703	-0.050781	-7.474	-14.9561	73.25	0.0060547	-0.058301	-0.071094
1.838	-45.927	20.1899	36.42227	0.16699	-0.00097656	-0.085938	-46.823	34.329	58.8759	-0.10254	0.12939	-0.067871	-67.625	-15.396	53.138	0.16016	-0.082032	-0.055908	4.237	-3.165	64.628	-0.00097656	-0.039551	-0.072266
1.84	-81.0716	24.2926	40.891	0.16553	-0.017578	-0.081055	-42.551	-25.902	59.088	-0.13232	0.15479	-0.085449	-104.0357	-28.29	47.254	0.13574	-0.066406	-0.06543	-25.082	-20.18284	29.6397	-0.01377	-0.029688	-0.07002
1.842	-62.026	26.1251	28.537	0.16504	-0.019043	-0.077148	-50.167	-4.0422	49.321	-0.18066	0.20215	-0.10889	-72.939	1.139	43.241	0.1123	-0.043945	-0.074219	-37.669	-5.3553	8.5758	-0.020898	-0.019238	-0.066895
1.844	-77.905	26.2653	33.229	0.16553	-0.035156	-0.067871	-69.1549	5.309	26.5042	-0.20972	0.22998	-0.13233	-57.547	17.808	46.4471	0.098633	-0.029297	-0.081787	-64.141	-9.5894	5.252	-0.02168	-0.014942	-0.069629
1.846	-81.9565	24.0973	35.794	0.16333	-0.045654	-0.060303	-48.009	-36.903	18.6159	-0.22705	0.25098	-0.1416	-39.915	35.49338	45.507	0.083496	-0.015625	-0.08252	-70.6	19.9678	18.037	-0.021973	-0.015234	-0.067773
1.848	-79.909	11.0738	37.4543	0.15918	-0.056152	-0.051758	-65.256	20.7641	22.72	-0.23779	0.27002	-0.15088	-61.12	55.672	35.1137	0.074219	0	-0.083984	-39.672	41.265	17.7	-0.015625	-0.025391	-0.069336
1.85	-66.2405	20.3745	29.2497	0.15186	-0.062988	-0.043457	-71.6719	-8.7892	35.600324	-0.24414	0.27734	-0.15186	-41.859	44.839	46.0086	0.068848	0.0053711	-0.08252	-63.746	41.4729	-6.12	-0.0041992	-0.033496	-0.074218
1.852	-48.089	29.7962	23.5051	0.14697	-0.069824	-0.038086	-53.444	-30.0984	29.5636	-0.23877	0.28369	-0.14697	-57.518	35.789	22.519	0.066406	0.0063477	-0.079102	-64.4439	45.2675	-3.099	0.0077149	-0.050488	-0.067285
1.854	-63.503	15.87544	21.4996	0.14307	-0.077637	-0.026367	-67.5542	29.2514	25.136	-0.23072	0.2832	-0.14599	-42.463	11.9758	34.056	0.06543	0.00024415	-0.075683	-121.439	16.024	1.578	0.023731	-0.068848	-0.069238
1.856	-36.563	6.82147	28.0377	0.13525	-0.075195	-0.024414	-40.167	-9.788	23.1833	-0.21973	0.27637	-0.1377	-35.205	6.730139	16.8967	0.066895	-0.0058594	-0.071777	-80.668	16.988	32.8717	0.031933	-0.082129	-0.069336
1.858	-41.064	14.4167	27.4399	0.13232	-0.078613	-0.018066	-32.509	26.873571	22.4646	-0.20508	0.2583	-0.11621	-6.978	2.037	5.362	0.075684	-0.024414	-0.06543	-113.8577	20.549	18.5154	0.040527	-0.096191	-0.064453
1.86	-17.504	24.0158	14.5797	0.13135	-0.082031	-0.013672	-39.917	50.38178	15.287	-0.19287	0.24756	-0.11035	7.427	24.805	0.437999999999995	0.078613	-0.032227	-0.058594	-90.2166	32.5465	35.496	0.04668	-0.11836	-0.070899
1.862	-2.558	19.9646	30.2701	0.12988	-0.082031	-0.010742	-5.077	7.725	14.563	-0.17676	0.22656	-0.087402	15.283	17.797	17.223	0.084961	-0.048828	-0.052246	-108.637	10.3918	5.9247	0.056934	-0.14101	-0.078027
1.864	-1.649	14.8757	30.3273	0.12793	-0.078613	-0.0063477	-32.049	75.109	-0.119	-0.15088	0.19873	-0.064453	-19.747	24.266	14.0053	0.084961	-0.062256	-0.04004	-86.6408	7.62251	16.6685	0.076074	-0.16758	-0.08584
1.866	-0.43	17.0684	40.355	0.12402	-0.074463	-0.0039062	-34.169	36.92859	7.124	-0.13721	0.18604	-0.052734	-3.074	19.5566	28.1085	0.080078	-0.061523	-0.031738	-93.1118	-1.6524	4.912	0.094433	-0.19023	-0.093066
1.868	-13.385	19.78805	30.3333	0.11865	-0.071289	-0.00048828	3.146	-8.2045	27.4621	-0.11328	0.15283	-0.020508	8.737	27.810675	16.142	0.068359	-0.084473	-0.032715	-33.879	25.3145	38.756	0.1123	-0.22168	-0.10156
1.87	-1.509	13.50844	43.233	0.11328	-0.0625	0.0029297	-19.003	18.475	8.9	-0.091065	0.13037	-0.0043946	-2.416	22.7879	49.6684	0.063477	-0.087891	-0.029785	-67.377	38.256	33.0943	0.13086	-0.24521	-0.10938
1.872	-2.153	16.1826	18.5894	0.11035	-0.058594	0.0073242	6.091	-40.764	15.6648	-0.072266	0.10742	0.0087891	-14	42.346	46.4179	0.050293	-0.094727	-0.032715	-13.838	63.3904	41.937	0.13877	-0.26338	-0.12149
1.874	6.778	31.745	20.6775	0.10986	-0.047852	0.0078125	-16.725	-1.5608	24.34517	-0.041016	0.076172	0.032715	-38.472	26.9899	44.66142	0.035401	-0.093018	-0.037353	-0.711000000000006	48.117	28.1866	0.13916	-0.28095	-0.13477
1.876	-13.446	33.713	17.3901	0.10962	-0.03833	0.013428	-39.409	37.2599	28.3595	-0.027344	0.061523	0.04248	-43.078	42.0875	28.7689	0.023926	-0.097656	-0.045898	11.944	57.0509	51.871	0.13633	-0.28379	-0.14834
1.878	-18.559	28.754	21.111434	0.11182	-0.027832	0.013672	1.052	-10.992	47.44	0.0078125	0.026855	0.061523	-73.6626	26.2463	12.5649	0.016602	-0.10107	-0.066406	-2.096	39.6535	57.828	0.12793	-0.28223	-0.16895
1.88	-2.09500000000001	15.6294	38.8397	0.11377	-0.023438	0.013672	2.97499999999999	38.9836	36.977	0.029053	0.00048825	0.073242	-54.549	35.7808	12.684	0.011719	-0.10156	-0.069824	27.807	47.5156	85.889	0.11543	-0.27851	-0.19424
1.882	-31.925	15.809	35.7162	0.11377	-0.016113	0.017578	2.441	15.344	7.5405	0.050293	-0.023438	0.086426	-77.0296	39.392	41.54	0	-0.094238	-0.080566	21.886	42.22	63.892	0.10235	-0.26904	-0.21817
1.884	-35.233	8.46	32.31	0.11572	-0.012207	0.023926	-6.688	-3.0544	30.4513	0.077148	-0.050781	0.098145	-37.277	66.3	32.3824	-3.4694e-15	-0.09375	-0.092286	5.646	35.38	41.8236	0.091015	-0.25147	-0.23965
1.886	-61.193	18.83	36.3014	0.11255	-0.0053711	0.025635	-27.807	70.35	29.977	0.088867	-0.063965	0.104	-57.469	58.697	40.679	0.0014648	-0.087891	-0.097656	7.11	20.0985	70.382	0.074805	-0.23691	-0.26553
1.888	-40.66	29.7623	23.91119	0.11133	0.0048828	0.029785	-47.514	12.4935	35.0563	0.10889	-0.090332	0.10889	-61.871	63.02846	37.057	0.015137	-0.085938	-0.10547	31.302	-9.8907	116.978	0.056152	-0.22266	-0.29443
1.89	-70.948	40.8234	11.9388	0.11279	0.0083008	0.026855	-33.97	40.2	39.377	0.12525	-0.10742	0.11328	-94.0118	18.43335	52.724	0.024414	-0.086914	-0.10303	-17.277	5.0985	159.957	0.023828	-0.21094	-0.3374
1.892	-66.602	35.9788	20.0986	0.11084	0.013184	0.022461	-56.1061	45.966	14.8143	0.13867	-0.11914	0.11719	-85.871	13.042	58.343	0.049316	-0.10645	-0.10303	10.11	31.768	202.662	-0.021094	-0.19414	-0.39102
1.894	-77.0346	18.8186	25.58685	0.11084	0.025391	0.016113	-52.162	-11.5968	20.8603	0.15039	-0.13037	0.11963	-81.556	-4.5316	77.591	0.066406	-0.11816	-0.10059	53.651	79.3929	263.588	-0.086328	-0.15	-0.44961
1.896	-72.3546	19.9834	31.1612	0.10865	0.033448	0.015625	-49.66	55.694	28.0518	0.16064	-0.13232	0.1167	-48.826	21.93	65.1186	0.083496	-0.12842	-0.10254	-23.2805	103.503	351.734	-0.18564	-0.069824	-0.51601
1.898	-71.435	16.4048	36.9377	0.10498	0.044922	0.01416	-65.768	49.051	22.97	0.17041	-0.13965	0.11084	-76.4967	15.7287	75.6646	0.095703	-0.14697	-0.099121	-47.4462	102.119	470.106	-0.31787	0.021484	-0.60107
1.9	-82.3634	20.3556	29.7648	0.099121	0.056641	0.0058594	-58.401	26.813	29.6763	0.17212	-0.13867	0.1062	-61.62	25.333	37.39	0.095703	-0.15039	-0.097656	-30.63	69.38	549.278	-0.4709	0.14346	-0.70127
1.902	-64.857	21.5798	33.2203	0.096191	0.063965	0.0043945	-71.811	51.5187	34.5529	0.18164	-0.14014	0.10352	-86.5152	-6.59887	20.2827	0.09375	-0.16162	-0.098145	-18.749	113.968	692.096	-0.625	0.29043	-0.81211
1.904	-51.766	30.0476	25.2316	0.094238	0.083984	-0.0048828	-43.958	-40.6326	42.636	0.18994	-0.13232	0.093262	-36.677	4.194	13.6378	0.091797	-0.1643	-0.10328	-83.368	125.417	822.714	-0.79883	0.46504	-0.93281
1.906	-33.419	31.4146	5.7081	0.094726	0.1001	-0.0065918	-39.225	-28.534	38.4343	0.19385	-0.12891	0.089844	-40.683	-4.6036	28.6844	0.091797	-0.1626	-0.10303	-37.863	133.453	995.085	-0.9874	0.65478	-1.0766
1.908	-47.834	33.4189	14.024	0.10205	0.11523	-0.0078125	-52.681	14.134	42.4886	0.20361	-0.12646	0.076172	2.40199999999999	20.494	42.6358	0.10645	-0.16016	-0.10645	-156.374	77.925	1091.997	-1.1758	0.8457	-1.2383
1.91	-32.668	28.976	27.09563	0.1123	0.13281	-0.015625	-32.524	-14.3687	47.873	0.20874	-0.1206	0.069336	4.503	11.1	59.9731	0.1123	-0.16113	-0.11133	-107.008	21.098	1232.858	-1.356	1.049	-1.4053
1.912	-29.01	29.44017	33.9527	0.1167	0.14404	-0.020996	-45.054	48.723	43.124	0.2124	-0.11377	0.05957	1.606	24.557	23.17618	0.13281	-0.18066	-0.11523	-104.706	-86.535	1336.503	-1.5237	1.2767	-1.5749
1.914	-29.014	27.8721	30.7622	0.12256	0.15381	-0.034668	-47.323	16.7066	25.0012	0.22314	-0.099121	0.052734	-27.103	16.4719	22.3	0.14966	-0.18847	-0.12256	-79.4308	-152.037	1455.965	-1.6749	1.5239	-1.7441
1.916	0.103000000000002	27.1113	41.65947	0.1272	0.16578	-0.040284	-21.046	-17.5002	33.031	0.22754	-0.086426	0.052246	6.219	34.538	13.8255	0.16016	-0.20557	-0.11719	-143.89	-199.493	1532.009	-1.7795	1.7867	-1.8764
1.918	-5.042	19.1862	36.36158	0.125	0.17822	-0.047363	-29.91	36.8796	20.828	0.23047	-0.075684	0.040039	-11.025	28.638	26.0196	0.16309	-0.22021	-0.14111	-74.3549	-207.9082	1537.799	-1.8452	2.0083	-2.0015
1.92	2.468	23.3288	25.715	0.12158	0.19678	-0.054199	-21.057	-13.2817	35.4646	0.23169	-0.064453	0.033203	-4.63	53.88	26.5474	0.16406	-0.22119	-0.14893	-96.701	-264.91	1496.996	-1.8279	2.1561	-2.0939
1.922	-14.611	27.027	19.043	0.11572	0.20361	-0.065918	-2.724	20.3759	46.7507	0.23291	-0.057129	0.022949	-19.04	31.9195	15.8897	0.15723	-0.21191	-0.17236	-96.158	-291.291	1478.592	-1.7429	2.2505	-2.1479
1.924	-7.608	37.621	29.85207	0.10498	0.22168	-0.078125	-15.546	43.9939	16.588	0.22998	-0.049316	0.01709	-25.276	18.1739	14.6076	0.1482	-0.19433	-0.19873	-55.489	-356.982	1440.715	-1.6402	2.2454	-2.1702
1.926	19.737	16.8087	54.902	0.092773	0.22729	-0.096193	2.258	-16.1881	22.5433	0.23145	-0.042969	0.012695	-53.002	-12.58	30.943	0.14014	-0.18848	-0.23389	-47.872	-358.59	1366.348	-1.55	2.1425	-2.1703
1.928	-20.537	-6.4464	62.439	0.07959	0.22314	-0.13135	-12.97	34.6883	17.55658	0.22412	-0.026855	0.0014648	-27.714	-16.176	81.16	0.10938	-0.19629	-0.30664	-79.742	-344.133	1307.778	-1.4644	1.9243	-2.1089
1.93	-12.91	-14.6443	78.6837	0.053223	0.21436	-0.18945	-6.179	1.918	23.1992	0.21533	-0.017578	-0.0083009	-50.825	-5.6237	97.329	0.083984	-0.19287	-0.35742	-84.581	-265.325	1266.9778	-1.4162	1.5979	-2.0018
1.932	-20.977	3.89713	76.5079	0.04248	0.22559	-0.20215	12.062	-16.9901	48.629	0.20313	-0.0073242	-0.017578	-23.905	54.2768	143.86	0.011719	-0.15527	-0.4502	-54.78	-250.207	1260.41803	-1.3875	1.2731	-1.882
1.934	-23.102	9.037	125.98	0.012207	0.26758	-0.24268	-23.516	48.7415	29.3596	0.19141	0.0039063	-0.023926	9.866	89.233	190.859	-0.067383	-0.093503	-0.53638	-22.92	-194.117	1232.7934	-1.3402	1.0172	-1.78
1.936	-64.458	26.8242	163.8952	-0.025879	0.29981	-0.28931	-21.572	-10.1101	22.8567	0.18604	0.010742	-0.038086	-36.3746	126.869	284.175	-0.16553	-0.010742	-0.63721	3.647	-185.104	1239.3483	-1.285	0.85635	-1.7225
1.938	-72.745	17.5966	176.7337	-0.065918	0.3208	-0.34326	-15.277	-9.5589	40.4187	0.16895	0.027344	-0.043945	-76.0981	116.544	357.1852	-0.29102	0.12061	-0.79492	-29.8611	-149.172	1230.5	-1.2261	0.76416	-1.687
1.94	-60.133	17.67498	196.814	-0.1123	0.34619	-0.41553	-38.495	-2.162	23.609	0.15918	0.03833	-0.054199	-58.755058	102.8772	431.2147	-0.36475	0.18994	-0.87939	-2.29165	-168.06	1323.811	-1.1603	0.71592	-1.6724
1.942	-75.963	25.4896	228.0352	-0.12793	0.35938	-0.44727	-26.479	-49.688	25.2291	0.14453	0.043945	-0.056152	-47.117	111.736	540.702	-0.51563	0.36914	-1.0547	-20.2942	-180.37	1382.169	-1.0932	0.68877	-1.6534
1.944	-94.689	57.565	292.5146	-0.17041	0.39502	-0.51709	-52.285	33.9587	22.0002	0.13428	0.063477	-0.069336	-54.009	159.107	702.0333	-0.63842	0.51294	-1.2063	22.04811	-215.128	1463.5214	-1.0152	0.6919	-1.6346
1.946	-108.476	93.3938	363.5815	-0.21558	0.41895	-0.58936	-57.7755	31.0231	4.9508	0.12402	0.07373	-0.072266	-48.83	172.902	874.926	-0.78125	0.66406	-1.3848	51.6283	-286.7304	1466.09	-0.93662	0.70108	-1.6095
1.948	-96.138	106.8762	403.941	-0.25928	0.43799	-0.67041	-46.778	5.5889	19.724	0.11572	0.092773	-0.074219	-60.849	143.146	1007.189	-0.98242	0.89551	-1.6055	101.052	-387.71	1518.06507	-0.84961	0.67969	-1.5664
1.95	-95.2074	94.0619	436.281	-0.32178	0.47021	-0.7749	-63.548	47.741	16.4394	0.10498	0.10303	-0.077393	-98.633	80.9497	1106.017	-1.0825	1.0454	-1.7065	48.55	-447.84	1554.687	-0.74404	0.61514	-1.5227
1.952	-75.7916	90.7738	524.1547	-0.35596	0.49268	-0.82568	-48.044	-0.00999999999999801	7.3627	0.094727	0.11621	-0.084961	-93.437	6.384	1236.734	-1.2559	1.4043	-1.8984	36.8855	-483.25	1639.727	-0.6335	0.51485	-1.4776
1.954	-39.501	83.3026	614.5161	-0.43506	0.53564	-0.94873	-47.754	29.3297	15.175	0.082031	0.13281	-0.085938	-59.375	-53.849	1313.54	-1.3309	1.7034	-2.0164	72.98	-483.95	1692.4621	-0.53037	0.4	-1.4464
1.956	-31.75	87.5188	723.705	-0.49146	0.573	-1.0598	-52.779	50.7676	16.366	0.076172	0.13916	-0.083496	-84.492	-82.972	1435.448	-1.3374	2.0083	-2.0854	75.228	-449.01	1750.944	-0.4793	0.31582	-1.4228
1.958	-76.8319	72.231	772.6749	-0.55225	0.62744	-1.1528	-49.167	2.32157	22.9655	0.0625	0.1582	-0.084473	-83.574	-113.105	1468.012	-1.2534	2.272	-2.146	53.137	-401.098	1737.043	-0.4917	0.28369	-1.4214
1.96	-83.4634	38.7898	799.4119	-0.63086	0.73242	-1.2822	-54.916	57.225	21.1928	0.055664	0.17505	-0.09082	-119.614	-184.981	1437.94	-1.1636	2.3091	-2.1597	67.128	-336.137	1757.901	-0.59688	0.32285	-1.4674
1.962	-38.044	-6.689	864.433	-0.66455	0.79297	-1.3379	-53.726	33.146	16.0593	0.047363	0.18701	-0.092773	-129.0037	-247.618	1366.789	-0.98389	2.2056	-2.1499	28.6125	-276.3692	1743.622	-0.77725	0.44551	-1.5538
1.964	-55.504	-41.8108	943.7247	-0.73633	0.93164	-1.4336	-22.46	-14.0411	22.2331	0.032227	0.21143	-0.094238	-138.4006	-315.066	1320.419	-0.88012	1.9944	-2.1042	27.856	-168.102	1786.7956	-0.99014	0.64434	-1.6988
1.966	-47.21	-55.0321	1009.9073	-0.78418	1.0439	-1.4926	-44.37	32.366	15.6322	0.026367	0.22119	-0.091797	-128.221	-305.92	1250.005	-0.80957	1.7148	-2.0332	42.167	-95.791	1810.4943	-1.1811	0.87168	-1.8647
1.968	-39.977	-69.3027	1043.9708	-0.81934	1.1426	-1.5449	-52.079	-15.5688	27.8267	0.01123	0.24365	-0.092285	-121.484	-294.84	1223.498	-0.75098	1.2856	-1.9585	76.671	-40.938	1784.957	-1.3354	1.1216	-2.0444
1.97	-22.837	-94.8129	1060.6264	-0.84961	1.2539	-1.5918	-26.712	20.6057	30.0518	0.0024414	0.26441	-0.098877	-122.457	-256.766	1154.4884	-0.70703	1.0635	-1.9141	111.666	-24.322	1749.119	-1.4446	1.3922	-2.2184
1.972	-5.748	-118.33	1072.866	-0.84863	1.3052	-1.603	-20.741	49.35272	23.511	-0.0043945	0.28174	-0.097656	-137.999	-256.435	1142.22	-0.60254	0.70313	-1.832	114.327	6.131	1706.874	-1.5281	1.6352	-2.3996
1.974	23.852	-113.968	1080.811	-0.79639	1.3696	-1.6187	-8.402	-17.7503	38.751	-0.003418	0.29395	-0.10303	-118.642	-215.0805	1131.844	-0.56153	0.59473	-1.8149	79.977	-8.38099999999999	1711.45	-1.5765	1.8211	-2.5543
1.976	59.9251	-103.986	1073.526	-0.73413	1.382	-1.614	-2.8	21.80596	36.1852	-0.0073242	0.30518	-0.10352	-120.71	-165.387	1152.392	-0.56445	0.58789	-1.8418	67.125	-18.696	1719.318	-1.5949	1.9363	-2.6606
1.978	29.415	-83.823	1081.264	-0.65234	1.3652	-1.5879	1.262	20.6942	19.0427	-0.010742	0.30859	-0.11475	-111.218	-145.53	1181.76	-0.60693	0.73682	-1.8687	113.803	-91.7304	1786.22	-1.603	1.9985	-2.728
1.98	35.162	-83.025	1075.177	-0.55713	1.2817	-1.5327	9.036	16.3235	62.407	-0.016601	0.29981	-0.12988	-120.005	-141.36	1245.873	-0.656	0.8684	-1.8982	74.231	-124.049	1767.437	-1.5991	1.9912	-2.749
1.982	-3.121	-86.434	1080.4443	-0.49316	1.1904	-1.4819	-8.953	60.259	87.84874	-0.018555	0.28027	-0.16113	-136.225	-179.144	1306.609	-0.67139	0.98096	-1.9155	125.983	-189.679	1814.229	-1.5672	1.9051	-2.7375
1.984	20.446	-86.6181	1083.2544	-0.44727	1.0957	-1.416	-29.315	-3.435	111.292	-0.043457	0.2793	-0.20166	-130.656	-203.704	1343.811	-0.62793	1.0566	-1.8926	103.323	-170.501	1802.97	-1.4723	1.7179	-2.6754
1.986	18.808	-99.4537	1090.059	-0.39453	0.99609	-1.3359	-18.355	11.73195	149.9081	-0.062012	0.28418	-0.22168	-94.1023	-281.03	1371.019	-0.58203	1.0391	-1.8516	75.479	-162.333	1828.657	-1.3565	1.4553	-2.5779
1.988	5.752	-98.216	1078.944	-0.37842	0.96729	-1.3101	-25.401	48.48463	159.8442	-0.11768	0.2998	-0.2793	-72.559	-335.522	1422.411	-0.45508	0.91016	-1.7383	52.76845	-135.471	1814.805	-1.2495	1.1821	-2.4663
1.99	-20.74	-94.448	1080.1154	-0.34375	0.93652	-1.249	-56.536	11.517	227.5499	-0.16651	0.29859	-0.33985	-39.022	-400.377	1488.761597	-0.36499	0.76123	-1.6513	111.769	-118.431	1827.754	-1.1765	0.97137	-2.3869
1.992	-73.769	-91.166	1079.243	-0.32251	0.94775	-1.1904	-72.477	72.789	286.871	-0.21484	0.30762	-0.4082	-38.669	-411.866	1524.16	-0.28662	0.60986	-1.5767	64.5734	-74.881	1779.384	-1.1488	0.85957	-2.3453
1.994	-52.742	-99.124	1116.1669	-0.31299	0.95898	-1.1357	-56.513	51.6309	347.262	-0.28076	0.32275	-0.48779	3.487	-463.68	1594.482	-0.22168	0.41113	-1.5361	83.361	-18.18	1768.932	-1.1738	0.8541	-2.3313
1.996	-70.136	-122.0547	1146.9576	-0.30225	0.94336	-1.0977	-49.096	34.06	435.701	-0.3208	0.33643	-0.53857	38.438	-427.7	1653.003	-0.20703	0.32422	-1.5469	82.774	55.3205	1687.671	-1.23	0.92119	-2.3386
1.998	-58.927	-161.616	1180.4651	-0.30078	0.90625	-1.1025	-65.836	99.4169	513.4645	-0.41309	0.36328	-0.63184	73.2974	-412.55	1708.419	-0.26221	0.27344	-1.5938	93.416	99.641	1663.7495	-1.2949	1.0488	-2.3516
2	-85.377	-218.545	1216.8897	-0.29053	0.82422	-1.1387	-46.5	40.57	588.906	-0.48681	0.38867	-0.70654	28.12	-317.054	1723.494	-0.38379	0.35718	-1.7041	62.781	132.54	1600.681	-1.3181	1.1753	-2.3581
2.002	-79.909	-229.489	1228.6954	-0.28101	0.76392	-1.1789	-59.547	55.373	650.795	-0.56494	0.42139	-0.77295	-0.279	-264.9504	1777.954	-0.56396	0.52881	-1.8687	83.828	124.886	1576.8976	-1.309	1.2848	-2.3656
2.004	-79.908	-206.862	1254.634	-0.29053	0.72656	-1.2285	-78.5993	74.258	704.8393	-0.66846	0.46729	-0.87451	-20.403	-162.281	1785.071	-0.82031	0.8418	-2.1133	98.951	108.466	1555.203	-1.2773	1.3477	-2.3496
2.006	-100.926	-178.287	1267.757	-0.35693	0.73926	-1.3198	-34.69	31.686	776.7516	-0.72363	0.49805	-0.92773	-3.461	-131.039	1823.3891	-0.92773	1.0176	-2.2539	66.878	101.82	1537.215	-1.224	1.3533	-2.3037
2.008	-84.749	-179.5269	1278.002	-0.41455	0.77197	-1.3608	-27.95835	63.164	888.4546	-0.8335	0.57178	-1.0112	13.958	-67.12	1817.491	-1.0684	1.377	-2.5293	68.266	104.576	1532.391	-1.1694	1.3052	-2.2319
2.01	-123.16	-190.1901	1282.6972	-0.52344	0.88477	-1.4277	-44.6686	-11.00157	945.8515	-0.93701	0.66357	-1.0874	57.536	-69.08	1813.2156	-1.102	1.5962	-2.6782	62.588	108.6005	1496.569	-1.1159	1.222	-2.1554
2.012	-130.8804	-182.1288	1289.4419	-0.59619	0.97948	-1.4649	-42.459	-77.5403	964.6913	-0.98633	0.72461	-1.123	38.719	-36.297	1789.35	-1.1118	1.7349	-2.7964	52.034	100.2036	1500.748	-1.0776	1.1224	-2.0644
2.014	-140.7335	-153.7721	1291.598	-0.646	1.0571	-1.5034	-79.0431	-50.87	973.593	-1.0469	0.83398	-1.166	14.205	-69.915	1800.431	-1.0801	1.7617	-2.8848	45.342	86.244	1499.096	-1.0514	1.0423	-1.982
2.016	-118.604	-117.4587	1315.115	-0.67139	1.1255	-1.5444	-79.648	-123.261	1008.609	-1.0662	0.91674	-1.1784	0.768000000000001	-63.602	1813.039	-1.0566	1.7363	-2.9043	71.174	72.907	1515.079	-1.021	0.98369	-1.9077
2.018	-104.228	-103.9298	1324.5707	-0.67969	1.1426	-1.5469	-58.803	-120.3261	1033.9288	-1.0645	0.98633	-1.1875	28.044	-138.949	1868.8973	-1.019	1.6665	-2.9292	41.76	68.907	1507.842	-0.99023	0.95313	-1.8516
2.02	-107.671	-93.787	1312.8936	-0.67773	1.1348	-1.5625	-47.179	-115.5125	1043.5044	-1.0229	1.0493	-1.1948	54.522	-158.951	1906.576	-0.98437	1.581	-2.9189	71.445	87.701	1533.26	-0.95371	0.93105	-1.783
2.022	-79.071	-84.505	1324.029	-0.67285	1.1082	-1.5817	-25.631	-169.421	1027.147	-0.99414	1.0693	-1.1973	14.941	-211.945	1954.705	-0.94287	1.4673	-2.896	43.571	92.13	1454.638	-0.91758	0.91641	-1.7235
2.024	-97.503	-79.274	1326.238	-0.66992	1.0781	-1.6113	-1.939	-121.239	1005.0184	-0.91992	1.0879	-1.1875	-31.619	-178.549	1948.342	-0.91113	1.2559	-2.8203	62.404	127.689	1401.734	-0.87969	0.90195	-1.6637
2.026	-58.475	-66.974	1358.9821	-0.67139	1.0337	-1.6636	17.5989	-124.275	996.5762	-0.87646	1.0864	-1.1757	-63.3691	-177.215	1951.436	-0.90381	1.1411	-2.771	29.268	146.29692	1290.9057	-0.85058	0.8832	-1.6022
2.028	-71.637	-83.765	1390.729	-0.68311	1.02	-1.6929	21.84048	-121.128	1003.644	-0.86084	1.0767	-1.1577	-61.8553	-128.162	1951.196	-0.89844	1	-2.707	57.2055	187.965	1235.79	-0.81836	0.86719	-1.5352
2.03	-81.929	-99.2961	1388.958	-0.71191	1.0234	-1.7656	39.5925	-75.68	989.389	-0.86377	1.0786	-1.1392	-76.761	-136.46571	1955.156	-0.88184	0.99367	-2.6866	-4.065	219.35	1184.219	-0.78398	0.83574	-1.4617
2.032	-94.6	-124.59	1389.4281	-0.73804	1.0638	-1.8123	54.4513	-115.246	972.4	-0.87695	1.0859	-1.127	-45.77494	-98.133	1929.681	-0.86719	1.0254	-2.6719	17.5265	261.605	1160.2234	-0.74219	0.79317	-1.3963
2.034	-81.403	-135.448	1386.389147	-0.76758	1.123	-1.8613	40.946	-115.733	973.408978	-0.90381	1.1255	-1.0854	-80.32	-100.7627	1866.3904	-0.86182	1.0923	-2.6694	-34.50123	278.909	1102.11	-0.69688	0.74004	-1.3291
2.036	-80.77	-146.391	1378.241	-0.80664	1.2266	-1.916	28.177	-114.549	988.354	-0.92041	1.1704	-1.0551	-78.9587	-32.2693	1812.203	-0.85889	1.1196	-2.6694	9.961	290.194	1078.2823	-0.64932	0.68975	-1.2544
2.038	-114.515	-128.744	1391.066	-0.82568	1.2817	-1.9331	34.472	-166.079	1032.2532	-0.92969	1.209	-1.0322	-80.4702	9.722	1765.298	-0.86279	1.1821	-2.6675	-33.037	266.843	1014.5219	-0.60303	0.64307	-1.1694
2.04	-94.622	-114.5622	1388.219	-0.84375	1.3789	-1.9668	-16.121	-139.148	1056.677	-0.91357	1.2544	-1.0337	-38.219	86.04	1725.581	-0.86963	1.2236	-2.6622	10.39	269.111	977.476	-0.55986	0.60459	-1.0756
2.042	-103.391	-99.24035	1370.222	-0.84082	1.4429	-1.9781	-35.484	-151.855	1051.041	-0.89844	1.2598	-1.0449	-25.776	89.7741	1687.51	-0.86963	1.2544	-2.6499	-36.927	253.509	958.4636	-0.50723	0.56309	-0.98281
2.044	-101.723	-83.0091	1367.3673	-0.83545	1.4868	-1.9878	-39.305	-182.546	1082.827	-0.87061	1.2798	-1.1108	18.971	111.4967	1681.743	-0.86279	1.2661	-2.6147	-25.907	262.441	929.814	-0.44473	0.5084	-0.88672
2.046	-100.796	-87.3074	1361.2842	-0.83643	1.5161	-1.9858	-52.595	-162.052	1113.384	-0.8667	1.2862	-1.1563	-19.847	88.591	1703.317	-0.85352	1.2617	-2.5859	-46.519	249.21	872.617	-0.37022	0.43525	-0.78799
2.048	-96.702	-60.91712	1354.0043	-0.8374	1.5181	-1.9819	-53.019	-208.3244	1168.147	-0.87354	1.2974	-1.2124	-3.125	108.968	1690.306	-0.83984	1.248	-2.5156	-45.978	213.148	813.492	-0.28955	0.35107	-0.69922
2.05	-102.761	-30.491	1356.221408	-0.83936	1.5083	-1.9507	-50.487	-222.467	1254.442	-0.9082	1.334	-1.2773	-10.553	107.355	1677.5892	-0.82348	1.2258	-2.4617	-91.792894	181.034	757.24	-0.20899	0.26778	-0.61094
2.052	-147.5116	-19.162	1337.0811	-0.83984	1.4902	-1.9238	-70.801	-216.503	1286.139	-0.92725	1.356	-1.3062	10.862	121.303	1644.3194	-0.80029	1.2017	-2.3999	-87.913	153.706	710.459	-0.13858	0.17539	-0.51445
2.054	-142.8354	-20.337	1330.92	-0.82959	1.4575	-1.8921	-33.234	-277.923	1310.323	-0.9707	1.4102	-1.3477	-8.274	84.633	1616.127	-0.75488	1.1543	-2.3105	-78.487	177.186	654.868	-0.066308	0.098437	-0.43437
2.056	-138.625	-47.643	1330.132	-0.80908	1.3892	-1.8413	-51.63	-242.346	1339.6398	-0.98217	1.4504	-1.3708	32.567	65.776	1590.449	-0.73047	1.123	-2.2656	-91.56	180.892	569.6707	-0.0063476	0.026758	-0.35459
2.058	-129.36	-46.3659	1322.8937	-0.79492	1.3555	-1.8242	-92.965	-201.066	1354.8269	-0.97656	1.4746	-1.3965	16.587	41.258	1585.6117	-0.68164	1.0527	-2.1699	-71.051	206.629	556.754	0.052246	-0.045898	-0.27441
2.06	-152.8432	-53.3583	1312.56597	-0.78711	1.3027	-1.7773	-74.824	-178.302	1375.125	-0.95117	1.4707	-1.4258	36.487	68.678	1584.015	-0.63599	1.0037	-2.0935	-82.422	178.314	484.56	0.089063	-0.1168	-0.19912
2.062	-153.12747	-52.1289	1297.89	-0.78638	1.2932	-1.7596	-109.519	-109.461	1377.8465	-0.9375	1.4609	-1.4512	40.008	70.956	1585.241	-0.59082	0.94922	-2.0234	-52.363	191.9038	409.7475	0.11484	-0.18613	-0.12754
2.064	-117.604	-63.0441	1295.601	-0.7832	1.29	-1.7441	-148.6515	-137.5597	1388.0857	-0.92334	1.4478	-1.5015	56.015	116.714	1524.872	-0.5332	0.875	-1.9395	-79.541	181.8486	336.822	0.14453	-0.24473	-0.065039
2.066	-140.563	-61.418	1291.6911	-0.77295	1.2896	-1.7222	-145.06322	-143.934	1427.9667	-0.93482	1.4338	-1.5554	7.492	136.2512	1455.3569	-0.5083	0.83643	-1.8882	-60.106	220.141	301.6761	0.18301	-0.29424	-0.0054692
2.068	-100.173	-74.118	1299.454	-0.76855	1.2852	-1.7148	-161.884	-106.416	1435.9362	-0.9585	1.4263	-1.6001	42.599	187.942	1401.523	-0.47217	0.77979	-1.8022	-100.405	206.538	239.034	0.23145	-0.33691	0.0625
2.07	-88.421	-66.52	1298.031	-0.75781	1.2734	-1.6914	-112.4574	-116.5011	1422.629	-1.0195	1.4297	-1.6709	9.984	226.044	1367.359	-0.44629	0.75098	-1.7271	-64.662	211.005	195.855	0.27295	-0.37383	0.12021
2.072	-53.45	-46.611	1288.227	-0.75146	1.2671	-1.6689	-101.213	-79.793	1445.2659	-1.0479	1.4414	-1.707	-21.031	271.47	1340.477	-0.42725	0.73779	-1.646	-102.28429	144.1446	109.533	0.30528	-0.40107	0.17051
2.074	-103.024	-27.374	1277.2224	-0.74561	1.2583	-1.6479	-117.327	-69.668	1453.3143	-1.103	1.4712	-1.7769	-98.05371	285.664	1301.825	-0.38672	0.72119	-1.5288	-55.77	94.662	95.056	0.333	-0.41201	0.21465
2.076	-91.335	-14.478	1268.965	-0.73291	1.2271	-1.6187	-81.68	-90.1371	1469.134	-1.1387	1.5	-1.8272	-108.4044	289.415	1252.419	-0.36475	0.71436	-1.4653	-96.834	59.9424	100.3555	0.35234	-0.42353	0.25069
2.078	-62.911	4.2941	1250.3778	-0.73242	1.2109	-1.6035	-74.191	-60.57949	1465.4016	-1.1694	1.5376	-1.8745	-113.82701	263.68	1189.5103	-0.30664	0.68848	-1.3379	-57.572	50.921	98.292	0.35791	-0.43848	0.27246
2.08	-42.248	25.247	1224.1462	-0.72266	1.1836	-1.5742	-47.687	-97.435	1507.63	-1.2031	1.5938	-1.9277	-119.952	256.813	1132.1028	-0.26098	0.65674	-1.2338	-79.086	51.07	67.6356	0.34961	-0.43389	0.28721
2.082	-49.373	35.47419	1213.8931	-0.71436	1.1597	-1.5513	-45.337	-133.392	1541.306	-1.2163	1.6235	-1.9526	-119.385	235.44	1092.2778	-0.20459	0.61182	-1.1304	-23.492	25.8965	57.919	0.3253	-0.42363	0.29091
2.084	-68.06	33.0411	1183.2902	-0.70947	1.1382	-1.5308	-82.115	-120.7	1538.598	-1.2212	1.688	-1.9878	-106.754	222.706	1047.395	-0.13721	0.52734	-1.0098	-24.91	-7.10869	48.208	0.2749	-0.40723	0.28115
2.086	-45.08	36.0462	1170.39076	-0.69531	1.1133	-1.5039	-85.707	-154.668	1540.302	-1.2263	1.7229	-2.0036	-128.6179	184.855	993.409	-0.10107	0.47656	-0.95117	-20.175	-33.9858	68.1065	0.2043	-0.36953	0.2583
2.088	-46.189	42.326	1144.3765	-0.69141	1.0977	-1.4883	-99.887	-129.063	1508.1111	-1.2261	1.7524	-2.0063	-153.24	165.381	948.15	-0.037598	0.37646	-0.84717	-7.56	-5.047	70.228	0.1167	-0.30713	0.22119
2.09	-40.843	29.692	1139.3241	-0.6792	1.0659	-1.4468	-97.409	-106.229	1508.5145	-1.2222	1.7642	-2.0093	-151.5668	136.007	895.644	0.0019532	0.30152	-0.76221	-21.044	12.816	51.7079	0.013086	-0.22373	0.17383
2.092	-38.624	11.051	1129.779815	-0.66992	1.045	-1.4189	-81.191	-120.341	1526.497	-1.2227	1.7637	-2	-132.15	155.97	868.76	0.03418	0.23535	-0.67676	-22.131	47.5357	26.7089	-0.10312	-0.13164	0.11279
2.094	-38.22	-2.173	1112.3651	-0.66602	1.0254	-1.3906	-105.572	-47.691	1519.27	-1.2207	1.7422	-1.9668	-128.745	187.158	791.226	0.07373	0.16846	-0.56787	-42.88	25.7354	10.6277	-0.23047	-0.026172	0.034668
2.096	-46.359	21.06	1091.4724	-0.63867	1	-1.3438	-70.501	-31.627	1514.636	-1.2288	1.7102	-1.9343	-153.558	215.479	733.3794	0.092773	0.13281	-0.51563	-34.601	47.27	-3.85343	-0.3502	0.093849	-0.041504
2.098	-57.915	26.9593	1087.065	-0.62451	0.98291	-1.3159	-61.076	-37.9265	1529.943	-1.2466	1.6743	-1.8979	-167.8984	221.077	660.32782	0.11328	0.066895	-0.4248	-28.25	41.872	-1.0676	-0.45117	0.21191	-0.12451
2.1	-55.207	23.45025	1077.824	-0.60205	0.94385	-1.2671	-95.923	1.79248	1499.51	-1.2598	1.623	-1.8496	-163.569	227.281	621.11	0.13916	0.024902	-0.35864	-11.6	90.144	19.5574	-0.52871	0.32129	-0.20352
2.102	-68.175	26.293541	1050.15	-0.58008	0.91455	-1.227	-78.869	-26.2388	1494.1139	-1.2681	1.5981	-1.8276	-121.171	216.282	540.647	0.16357	-0.011719	-0.29053	-58.535	73.823	13.1152	-0.58057	0.40898	-0.26934
2.104	-80.898	41.37925	1003.6286	-0.55859	0.88086	-1.1895	-78.877	4.0506	1484.4025	-1.271	1.5552	-1.8003	-79.53	234.571	475.4979	0.18799	-0.054199	-0.21533	-26.418	98.474	28.9007	-0.62509	0.48672	-0.32676
2.106	-103.0928	46.7485	961.8497	-0.53125	0.84082	-1.1484	-118.224	29.0008	1446.124	-1.2705	1.5351	-1.7842	-46.956	240.672	369.474	0.2002	-0.071777	-0.18066	-39.074	55.539	8.743	-0.6458	0.56025	-0.36983
2.108	-85.6053	55.0212	937.514	-0.51611	0.82373	-1.1147	-125.488	-19.1088	1476.0099372	-1.2637	1.5156	-1.7744	-64.105	236.143	318.102	0.21484	-0.098145	-0.12988	-8.76600000000001	60.2318	34.8919	-0.66357	0.63721	-0.40723
2.11	-89.279	71.439	912.7425	-0.48438	0.78125	-1.0684	-136.22544	16.1572	1478.9452	-1.248	1.502	-1.7637	-57.894	224.2579	252.005	0.21949	-0.1084	-0.083007	-54.225	22.093	36.9661	-0.67657	0.70781	-0.43262
2.112	-82.52	101.49639	885.2444	-0.46484	0.7566	-1.033	-149.2626	-12.22551	1460.4155	-1.2441	1.4922	-1.7617	-62.4	205.4901	215.765	0.22754	-0.11768	-0.04541	-19.074	25.936	77.178	-0.68623	0.77783	-0.45088
2.114	-73.016	85.2806	867.1816	-0.44238	0.7251	-0.99756	-129.427	-14.4169	1472.2706	-1.2261	1.4829	-1.7515	-41.979	191.457	177.23784	0.23779	-0.12109	0.0053711	-84.8689	-10.074	66.095	-0.68858	0.84346	-0.45791
2.116	-64.281	92.43487	845.1599	-0.40576	0.68262	-0.94287	-142.9015	18.2507	1458.862	-1.2195	1.4729	-1.7498	-50.201	158.7045	167.6591	0.2334	-0.12109	0.027832	-46.5468	-11.327	55.829	-0.68076	0.88838	-0.44775
2.118	-43.025	84.95768	833.3236	-0.37866	0.65162	-0.90356	-131.412	-25.3606	1461.0297	-1.2065	1.4731	-1.7378	-51.765	146.079	120.9502	0.23633	-0.12744	0.066406	-65.5	-37.764	51.29	-0.66211	0.90039	-0.43262
2.12	-72.094	101.5832	816.2383	-0.35107	0.61768	-0.86182	-110.059	7.7245	1456.6944	-1.1948	1.4595	-1.7261	-62.853	144.744	124.9305	0.22168	-0.14795	0.083984	-45.09	-38.1859	77.132	-0.63164	0.87226	-0.39267
2.122	-53.641	86.9988	794.9495	-0.3125	0.56543	-0.8125	-124.109	28.833	1436.7774	-1.1875	1.4551	-1.7207	-41.518	137.312	105.9512	0.20996	-0.1582	0.082031	-58.319	-19.3708	40.86	-0.58906	0.82597	-0.34629
2.124	-52.441	83.0423	764.2175	-0.29443	0.54443	-0.78467	-90.181	0.855	1454.625	-1.1816	1.4355	-1.6973	-77.156	87.649	114.088	0.17139	-0.16797	0.082031	-33.723	-2.338	54.1838	-0.53476	0.75371	-0.29746
2.126	-42.857	75.846	720.495	-0.24951	0.50586	-0.74414	-103.922	62.814	1448.6375	-1.1777	1.419	-1.6719	-40.668	38.124	95.263	0.13916	-0.1709	0.062012	-70.9	27.1921	8.59	-0.46777	0.67031	-0.23252
2.128	-60.825	70.2263	710.8265	-0.22168	0.4812	-0.71143	-90.757	76.494	1424.9304	-1.1738	1.4023	-1.6445	-47.189	6.7804	102.7535	0.087891	-0.15723	0.037109	-53.829	18.497	29.512146	-0.39404	0.58447	-0.16895
2.13	-39.104	57.3518	687.687	-0.18018	0.45947	-0.6792	-66.845	99.7358	1403.54929	-1.1621	1.375	-1.6055	-27.457	23.694	71.035	0.0073242	-0.11523	0.0029297	-40.683	25.5108	42.6835	-0.33154	0.50117	-0.11006
2.132	-10.685	68.186	675.414	-0.1333	0.42529	-0.64404	-80.907	157.702	1360.611	-1.1528	1.356	-1.5796	-42.578	32.623	69.7538	-0.037598	-0.083496	-0.021973	-57.476	9.356	46.573	-0.2666	0.41953	-0.053516
2.134	-21.783	75.071	641.82	-0.10938	0.40674	-0.62012	-45.03	121.595	1337.8246	-1.1309	1.3125	-1.5371	-34.942	55.337	30.874	-0.12793	-0.0092773	-0.078125	-53.013	47.712	30.7201	-0.20918	0.33398	-0.0019532
2.136	-15.129	76.479	628.5564	-0.068848	0.37012	-0.58008	-53.375	132.795	1322.9469	-1.1025	1.2827	-1.4965	-75.403	29.0724	21.2573	-0.19483	0.052002	-0.12842	-57.288	23.3161	19.0491	-0.15234	0.25479	0.045898
2.138	3.843	71.845	600.4702	-0.036132	0.34473	-0.55615	-67.017	135.833	1294.8618	-1.0737	1.2485	-1.4604	-74.809	38.269	1.8249	-0.25781	0.1123	-0.17676	-9.214	39.946	-4.7437	-0.10352	0.18604	0.07959
2.14	7.861	89.8816	565.7828	-0.01416	0.3208	-0.53076	-26.309	94.1048	1294.41	-1.0347	1.2056	-1.4019	-87.5705	16.2857	26.917	-0.32861	0.20508	-0.23389	-57.973	4.1005	-1.219	-0.0625	0.12734	0.10195
2.142	4.563	114.042	532.3882	0.021973	0.2876	-0.49414	-39.503	145.407	1257.0973	-1.0151	1.1782	-1.3784	-69.752	55.3273	36.94	-0.35449	0.25195	-0.26514	-7.926	14.413382	5.989	-0.024219	0.078125	0.11191
2.144	-3.76	121.741	506.3391	0.037598	0.27246	-0.47461	-35.271	119.721	1236.135	-0.97607	1.1274	-1.3218	-61.905	37.9452	76.066	-0.39063	0.34082	-0.31445	-36.242	-20.88489	3.683	0.010156	0.0375	0.12011
2.146	-23.596	109.701	469.527	0.068359	0.24658	-0.43701	-16.865	102.572	1234.523	-0.95166	1.0879	-1.2788	-55.506	60.986	57.105	-0.41748	0.39771	-0.3335	-1.023	3.0528	10.1765	0.033692	0.003125	0.12734
2.148	-48.609	114.7	440.6627	0.091797	0.22778	-0.40893	-29.479	134.595	1189.9426	-0.92139	1.0552	-1.2339	-88.032	41.5593	50.218	-0.43408	0.44971	-0.33838	-45.601	-29.473	4.573	0.053223	-0.022461	0.13623
2.15	-33.292	105.2125	420.4303	0.11865	0.20654	-0.38574	-6.908	84.224	1170.871	-0.875	1.0117	-1.1836	-64.093	47.492	29.368	-0.4624	0.50732	-0.34814	-33.557	12.107	20.9795	0.066894	-0.034082	0.14805
2.152	-54.913	95.5038	396.8844	0.14746	0.17676	-0.35156	-36.673	117.3903	1131.5682	-0.85107	0.98486	-1.1499	-57.73	2.32316	37.4366	-0.46924	0.53076	-0.34668	-44.628	8.1848	24.995	0.091503	-0.036621	0.14072
2.154	-40.938	90.5921	386.3577	0.1582	0.15625	-0.33154	-58.107	124.1911	1100.493	-0.79248	0.94189	-1.0874	-17.105	12.178	37.923	-0.47949	0.55176	-0.34326	-24.252	45.3447	52.526	0.11611	-0.036621	0.1501
2.156	-52.869	95.2536	354.9224	0.18555	0.12207	-0.29395	-26.081	105.4666	1081.167	-0.73438	0.89258	-1.0215	-9.654	-32.3506	46.428	-0.47681	0.55053	-0.32349	-22.555	31.0655	21.4943	0.15547	-0.045703	0.15918
2.158	-58.244	91.5393	328.4218	0.20336	0.10132	-0.27295	-61.528	150.0017	1029.0313	-0.70264	0.86963	-0.99463	-24.564	-0.0409999999999968	33.506	-0.46094	0.5332	-0.30029	-20.079	48.587	45.47	0.19287	-0.056641	0.1626
2.16	-55.407	80.59177	311.6899	0.21875	0.075195	-0.25049	-62.2177	118.784	981.9223	-0.63477	0.82422	-0.92383	-26.605	-44.2481	13.501	-0.43262	0.50049	-0.25	-39.441	63.788	10.922	0.23506	-0.077539	0.17275
2.162	-44.631	72.3106	297.65339	0.2417	0.055176	-0.22754	-36.98	112.1589	959.068	-0.58594	0.78321	-0.86963	-13.04	2.421	9.949	-0.4126	0.47705	-0.22412	-15.238	80.297	17.4809	0.27422	-0.1042	0.17901
2.164	-47.223	77.559	280.97305	0.24414	0.046387	-0.21631	-57.764	162.4354	906.7962	-0.52783	0.73682	-0.81787	-22.421	-16.843	34.4772	-0.37207	0.42188	-0.16943	-58.518	74.48	16.839	0.30625	-0.12842	0.1837
2.166	-74.3624	77.373	271.3775	0.25098	0.022461	-0.19385	-44.413	150.441	871.4862	-0.45654	0.67041	-0.74463	8.798	43.24	34.456	-0.33032	0.37231	-0.11401	-51.401	48.552	38.995	0.33467	-0.15889	0.18721
2.168	-74.563	64.432	267.307	0.25293	0.011963	-0.18481	-34.345	198.1142	819.7468	-0.41895	0.63281	-0.70703	-0.989000000000004	33.4236	54.2203	-0.28711	0.33008	-0.058105	-57.19	43.6103	15.806	0.35107	-0.18945	0.18311
2.17	-71.0511	79.6891	242.60125	0.25244	0.0019531	-0.17676	-28.628	181.1344	774.9961	-0.354	0.55664	-0.64648	-24.433	73.63	50.0701	-0.22168	0.2749	0.0092773	-58.001	15.912	49.915	0.36475	-0.22178	0.1834
2.172	-50.636	79.9359	230.557	0.24902	-0.0019531	-0.16406	-20.872	132.034	747.2754	-0.30078	0.49756	-0.59229	-46.075	21.8357	29.3602	-0.19482	0.24121	0.044434	-49.402	30.375	33.584	0.37207	-0.24834	0.17676
2.174	-55.971	81.69	215.999	0.24414	-0.0014648	-0.16016	-30.641	169.825	708.954	-0.24805	0.44531	-0.54004	-44.339	55.0485	28.5256	-0.13574	0.18359	0.10156	-73.267	0.768000000000001	74.177	0.37402	-0.26748	0.15801
2.176	-54.599	79.286	187.1651	0.23926	-0.0053711	-0.14648	-18.421	142.84	670.2276	-0.18359	0.37109	-0.46289	-46.866	16.983	16.161846	-0.094482	0.13892	0.13965	-59.731	19.382	64.217	0.36953	-0.27715	0.15029
2.178	-40.883	86.571	166.2143	0.2373	-0.0012208	-0.14282	-5.041	143.7691	644.963	-0.14941	0.33643	-0.4292	-25.288	63.54491	-1.483	-0.0625	0.09082	0.16309	-62.122	-29.1472	64.5936	0.35645	-0.28711	0.12695
2.18	-15.309	73.97	145.531	0.23633	-0.00097656	-0.13428	-22.2319	176.81	591.2764	-0.077637	0.25342	-0.3623	-20.607	7.0488	13.651	-0.018066	0.024414	0.17871	-26.793	3.407	51.5317	0.34922	-0.28301	0.10508
2.182	-14.684	53.99535	146.8847	0.2334	-0.0053711	-0.13086	-11.625	114.1178	528.174	-0.025635	0.18823	-0.31323	-59.371	39.2561	12.849	-0.003418	-0.0063477	0.18408	-45.069	-36.1447	39.9311	0.33887	-0.27402	0.081446
2.184	-7.62	41.9563	132.8339	0.23486	-0.0058594	-0.12256	-11.556	159.255	470.778	0.023438	0.11963	-0.26416	-61.884	6.4174	1.809	0.030273	-0.062012	0.1875	-31.896	-2.933	64.927	0.32051	-0.25879	0.060351
2.186	8.553	51.113	128.4159	0.23584	-0.019043	-0.12207	-10.02	144.6709	445.527	0.078613	0.037109	-0.19385	-49.531	43.848	25.37371	0.051758	-0.095461	0.18433	-79.0916	-37.72	57.2477	0.30352	-0.2376	0.037598
2.188	-5.241	54.9367	105.182	0.2334	-0.023926	-0.11718	2.24299999999999	105.4488	431.5237	0.10645	-0.0078125	-0.16797	-52.5	7.2913	36.323	0.072754	-0.12012	0.18213	-46.957	9.027	48.622	0.2915	-0.21826	0.016113
2.19	-14.731	46.2144	120.435	0.22949	-0.023926	-0.11279	4.871	152.721	397.8102	0.15039	-0.088867	-0.10742	-69.981	42.799	56.087	0.10059	-0.13623	0.16211	-56.695	-13.2391	16.8881	0.27793	-0.19766	-0.0038086
2.192	-8.913	44.844	115.944	0.21484	-0.029785	-0.11084	12.099	99.902	360.8118	0.17773	-0.1582	-0.068115	-77.039	12.5989	60.0204	0.12109	-0.13965	0.16553	-32.791	23.8949	20.6033	0.25742	-0.175	-0.024317
2.194	-10.39	45.5119	102.112	0.20947	-0.025879	-0.11426	24.039	103.8659	317.1437	0.2041	-0.21826	-0.029785	-81.106	51.265	60.262	0.16797	-0.13379	0.1543	-44.663	16.4898	-6.678	0.2418	-0.15586	-0.037598
2.196	-4.413	35.7617	93.999	0.19043	-0.022461	-0.11865	21.563	140.9477	266.484	0.22266	-0.28369	0.02002	-67	29.6818	45.28	0.20459	-0.12866	0.14453	-15.47	51.51	21.3979	0.21894	-0.13525	-0.048926
2.198	-25.373	30.4279	86.22884	0.17725	-0.011474	-0.11792	0.927999999999997	100.8556	234.963	0.22705	-0.31787	0.038574	-56.973	45.816	59.472	0.24512	-0.12305	0.13574	-31.848	23.9428	1.97	0.19873	-0.11963	-0.060059
2.2	-26.093	25.33017	72.1403	0.16943	-0.003418	-0.11963	-2.93	150.052	194.734	0.23291	-0.36426	0.070801	-64.534	9.3513	22.9355	0.29395	-0.10742	0.12061	-17.629	33.557	26.4895	0.1752	-0.098828	-0.072656
2.202	-32.544	41.2921	56.5287	0.15967	0.0048828	-0.12451	-24.272	136.258	165.424	0.23389	-0.39258	0.093995	-63.948	41.466	29.355	0.32324	-0.098145	0.11084	-3.901	8.495	-6.255	0.15147	-0.078516	-0.074511
2.204	-23.977	36.4862	62.1327	0.15527	0.0048828	-0.12549	-25.511	91.6463	175.8177	0.2334	-0.41748	0.11621	-26.402	27.4451	20.7008	0.36426	-0.09375	0.092773	-12.352	6.0279	16.2645	0.12647	-0.059375	-0.081543
2.206	-44.167	40.7849	49.0189	0.15088	0.010742	-0.13037	-32.5161	118.864	143.335	0.24023	-0.44824	0.14014	-30.061	43.891	27.9515	0.38721	-0.088868	0.078858	-20.454	23.7421	-6.382	0.10713	-0.041406	-0.08916
2.208	-46.87	33.772	48.0881	0.14502	0.0073242	-0.12158	-23.882	58.7636	139.4503	0.23877	-0.45898	0.14795	-25.917	24.2994	28.3817	0.4082	-0.080078	0.063965	-43.202	20.8114	28.1053	0.083984	-0.025879	-0.094238
2.21	-44.942	36.1572	45.2445	0.13867	0	-0.12158	-24.696	73.8286	125.1497	0.22803	-0.45313	0.14795	-49.586	21.9824	41.106	0.42627	-0.075195	0.041504	-45.64	42.222	8.4263	0.066797	-0.0083986	-0.096973
2.212	-66.731	37.5165	43.1044	0.13232	-0.0029297	-0.12109	-45.015	107.576	83.796	0.21142	-0.44165	0.14233	-32.92	22.138	32.843	0.43799	-0.069824	0.03125	-55.343	10.3692	29.6198	0.051562	0.010742	-0.098046
2.214	-64.301	44.689	51.5382	0.125	-0.0078125	-0.11963	-64.704	53.8881	77.6514	0.18701	-0.42432	0.13428	-21.801	20.09955	49.5853	0.43848	-0.0625	0.016113	-23.216	29.5453	24.0608	0.039062	0.029102	-0.10313
2.216	-55.591	42.7185	33.9376	0.12646	-0.010742	-0.12207	-43.869	85.87	66.78915	0.146	-0.3877	0.11963	-2.431	12.639	59.572	0.43676	-0.044922	0.0053711	-27.701	2.2517	30.067	0.025684	0.05127	-0.10049
2.218	-76.262	28.7572	29.2052	0.1228	-0.0063477	-0.11474	-44.338	55.824	54.9328	0.11914	-0.36914	0.10498	-19.081	8.9205	62.997	0.42578	-0.033691	-0.0024414	-41.539	51.258	39.9726	0.014648	0.074219	-0.099609
2.22	-91.5944	19.67086	40.9673	0.12207	-0.0063477	-0.11133	-57.477	11.346	81.468	0.062012	-0.31982	0.074707	-15.287	-1.225	31.684	0.41309	-0.018555	-0.0014648	-57.916	23.87	52.68	0.00097658	0.10342	-0.1043
2.222	-75.646	19.209492	44.747	0.12305	-0.0068359	-0.1123	-59.567	56.4668	76.5586	0.010986	-0.27222	0.053467	-40.948	-1.89352	31.673	0.40332	-0.0083008	-0.003418	-38.211	62.134	37.4554	-0.009961	0.12509	-0.10655
2.224	-53.709	27.9815	29.14704	0.12549	-0.0097656	-0.11328	-48.079	17.843	67.9357	-0.035156	-0.229	0.025391	6.554	4.774	19.8544	0.37695	0.0083008	-0.0058594	-58.207	33.8011	35.1115	-0.020117	0.15049	-0.10576
2.226	-45.8	30.9643	31.021	0.13086	-0.015625	-0.1084	-54.7866	37.7988	72.81	-0.098145	-0.15869	-0.003418	-30.711	-11.727	35.8078	0.35986	0.018311	-0.0053711	-47.5167	59.9537	34.079	-0.026758	0.16504	-0.10664
2.228	-50.902	18.569	32.9863	0.13404	-0.017578	-0.10717	-67.76108	57.9853	55.811	-0.12158	-0.12354	-0.02002	-12.19	15.202	40.8476	0.34033	0.023926	-0.0078125	-56.145	29.4251	43.712	-0.030273	0.17627	-0.11035
2.23	-43.319	14.431	33.39686	0.13379	-0.018555	-0.11621	-44.32	2.6725	45.721	-0.1709	-0.062012	-0.057617	-31.951	11.6087	27.007	0.30371	0.023926	-0.0087891	-62.748	56.6482	78.318	-0.03125	0.18652	-0.10303
2.232	-31.164	20.237	30.7479	0.1333	-0.015137	-0.11523	-16.589	34.029	42.201	-0.20239	-0.031494	-0.076172	-34.043	37.737	3.009	0.29102	0.029785	-0.010742	-86.8196	29.82387	34.3897	-0.030859	0.19228	-0.10595
2.234	-33.517	27.1045	22.3687	0.12793	-0.012695	-0.11377	-29.798	18.3033	20.105	-0.22607	0.0048828	-0.098145	-70.2356	13.5011	19.832	0.25342	0.026367	-0.0087891	-37.919	36.7729	69.567	-0.022656	0.19619	-0.10479
2.236	-13.997	22.80425	48.624	0.12402	-0.0053711	-0.12354	-25.39	-2.7228	33.8449	-0.25342	0.041504	-0.12012	-65.183	49.7736	21.6965	0.22779	0.020752	-0.016357	-65.984	-3.0621	33.795	-0.019434	0.20146	-0.10254
2.238	-8.703	18.4579	32.2971	0.1167	0.012695	-0.13159	-7.626	44.2395	32.89	-0.26563	0.0625	-0.13037	-62.497	25.341	29.9832	0.20264	0.016602	-0.023926	-24.035	-17.0111	70.135	-0.011719	0.20508	-0.097168
2.24	-4.943	30.1697	29.2915	0.11475	0.025879	-0.13574	-21.136	-5.689	34.734	-0.28662	0.095703	-0.14502	-37.306	63.856	36.9817	0.17725	0.0039063	-0.043457	-21.767	-23.8828	58.3948	-0.009082	0.21357	-0.092285
2.242	-27.925	35.55	19.5469	0.1084	0.047363	-0.14941	-15.036	-2.271	50.836	-0.29615	0.12158	-0.15528	-57.731	32.6729	22.691	0.16406	0.003418	-0.041992	-49.518	-23.6972	69.3	-0.0069336	0.21953	-0.087598
2.244	-13.334	35.184	31.5927	0.11084	0.057129	-0.1543	4.77500000000001	33.2223	37.4693	-0.29785	0.14209	-0.16797	-84.011	55.008	22.3751	0.13574	0.00048828	-0.053711	-62.717	-17.97697	28.3235	-0.003418	0.23164	-0.087207
2.246	-6.701	30.4155	32.13757	0.11084	0.073242	-0.1626	-21.423	-13.6611	36.667	-0.29297	0.15527	-0.16699	-90.867	15.8563	34.2549	0.11719	0.00073242	-0.067138	-33.222	-13.6787	41.516	0.003418	0.24375	-0.088769
2.248	-11.947	35.71582	14.2768	0.10986	0.085693	-0.16699	-6.089	28.042	34.5037	-0.28076	0.16162	-0.16748	-61.447	50.789046	9.1941	0.1001	0.0092773	-0.072754	-35.292	2.571	15.408	0.013672	0.25195	-0.092285
2.25	-10.303	21.0332	30.4398	0.11182	0.094238	-0.16943	-16.534	4.49966	25.393	-0.2417	0.15283	-0.15723	-56.22	12.2441	20.246	0.07666	0.027832	-0.081055	-31.212	-14.5276	30.7744	0.022657	0.25908	-0.093945
2.252	-3.826	15.7979	24.4471	0.11816	0.10449	-0.16699	-31.044	-21.2456	35.3957	-0.20874	0.13891	-0.14672	-36.776	42.5411	31.5544	0.064453	0.035645	-0.085938	-16.179	17.609	12.977	0.029493	0.26866	-0.091602
2.254	-11.592	23.3438	20.063	0.12012	0.10352	-0.16406	2.331	23.6633	15.041	-0.17578	0.11719	-0.13232	-59.882	-5.7783	41.7684	0.046387	0.056641	-0.083008	-47.824	-4.95939	25.289	0.036133	0.28701	-0.099807
2.256	-25.722	31.9384	18.1982	0.12842	0.10645	-0.15674	-24.075	-26.75006	7.628	-0.1333	0.078613	-0.10645	-58.529	44.4838	35.8747	0.035888	0.075928	-0.084472	-26.573	37.218	6.964	0.044238	0.29541	-0.104
2.258	-34.166	27.22462	21.9887	0.13867	0.10742	-0.14453	-30.309	-12.9303	40.46895	-0.11963	0.056641	-0.094727	-53.079	13.407171	46.21	0.026855	0.090332	-0.083984	-7.73	10.9665	8.919	0.047363	0.30664	-0.10938
2.26	-36.635	22.2548	33.4364	0.14063	0.10791	-0.13916	-22.737	30.64728	19.8361	-0.07959	0.023438	-0.065918	-37.552	56.625	44.202	0.019043	0.10156	-0.084961	-26.162	56.971	5.87332	0.045508	0.31436	-0.11865
2.262	-49.354	23.8615	41.0905	0.14551	0.099121	-0.12842	-55.385	2.449	31.076	-0.059814	0.0036621	-0.043945	-33.192	15.1322	61.009	0.018555	0.1128	-0.091309	-31.935	17.3219	2.6372	0.038184	0.32968	-0.1291
2.264	-69.477	18.3133	41.3939	0.15259	0.087646	-0.12255	-43.498	39.862595	34.059	-0.040039	-0.017578	-0.029785	-22.838	55.041	57.6326	0.017578	0.12061	-0.091797	-22.098	55.683	17.7333	0.027246	0.34258	-0.14824
2.266	-71.8989	26.7294	35.5566	0.14893	0.054199	-0.12256	-48.893	9.7202	-6.3634	-0.0087891	-0.030762	-0.0097656	-18.642	20.209	37.7549	0.01709	0.12646	-0.090332	-59.884	19.30362	-8.5179	0.014551	0.36299	-0.16455
2.268	-58.986	28.8991	23.92158	0.12793	0.043457	-0.10156	-56.455	-18.065	19.5121	0.0068359	-0.039551	-0.0068359	-14.002	59.739	29.0497	0.01416	0.13184	-0.090332	-44.235	48.5383	33.99077	0.0043945	0.38037	-0.17969
2.27	-61.903	47.4783	6.7314	0.14648	0.061523	-0.055176	-47.428	34.2932	12.386	0.027344	-0.036621	0.012695	-28.105	5.302	34.04	0.010742	0.146	-0.088867	-39.892	11.353	98.041	-0.0097654	0.4001	-0.21162
2.272	-73.511	35.538	17.42	0.17139	0.063965	-0.084961	-62.621	17.7105	3.649	0.040039	-0.034424	0.027588	-15.596	31.87138	46.614	0.00708	0.15015	-0.088379	-51.581	63.1836	163.15	-0.022461	0.40586	-0.25566
2.274	-64.404	27.23764	34.8709	0.17578	0.043701	-0.11304	-54.327	25.99024	42.4961	0.054199	-0.025391	0.039551	-18.761	-6.696	40.25	-0.0019531	0.15479	-0.086426	-69.525	85.12	211.34	-0.041993	0.39766	-0.3252
2.276	-43.513	21.4112	24.1294	0.18848	0.032715	-0.10547	-60.6656	41.1896	25.182	0.069824	-0.018066	0.05127	-10.782	26.3176	48.7103	-0.0039063	0.16797	-0.083008	-31.101	128.7233	295.289	-0.083008	0.40069	-0.40498
2.278	-45.598	23.665	40.2354	0.20654	0.0083008	-0.092285	-61.939	-11.494	19.9373	0.07373	-0.016602	0.058105	-3.695	11.8235	43.824	-0.0087891	0.16992	-0.081055	-119.812	142.018	376.224	-0.13916	0.40332	-0.49805
2.28	-49.258	31.6549	33.7034	0.21191	-0.00097656	-0.094727	-31.307	35.1801	31.5257	0.084473	-0.0058594	0.071777	-35.033	26.8433	60.114	-0.010742	0.17725	-0.071289	-114.365	182.215	558.851	-0.22432	0.42285	-0.59317
2.282	-37.893	22.2535	51.742	0.22803	-0.013672	-0.10449	-37.199	32.1508	19.1741	0.088135	-0.00048828	0.078858	-33.864	-2.188	51.871	-0.0061035	0.17529	-0.067382	-41.969	187.428	647.2	-0.32578	0.44834	-0.6957
2.284	-37.412	23.9569	37.41373	0.22705	-0.018799	-0.11646	-34.135	-7.9296	41.812	0.088867	0.0073242	0.080566	-47.504	2.955	27.1018	-0.0039063	0.17236	-0.064453	-68.943	166.6214	825.329	-0.43399	0.48115	-0.79883
2.286	-37.795	22.7278	29.3799	0.229	-0.021973	-0.11768	-29.771	33.4676	26.3454	0.088379	0.025391	0.084961	-41.775	-13.174	9.9918	0.0053711	0.16992	-0.053223	-62.255	178.173	979.8151	-0.53818	0.52139	-0.89893
2.288	-36.451	27.039	24.8796	0.23877	-0.022949	-0.12793	-45.662	-8.4921	14.204	0.077148	0.036621	0.085938	-53.144	7.1657	33.663	0.0097656	0.16797	-0.055664	-57.873	109.3753	1168.1695	-0.63037	0.56201	-1.0024
2.29	-9.874	17.7009	41.5537	0.24072	-0.027832	-0.13135	-0.887999999999998	3.625	36.3494	0.056641	0.064453	0.073242	-46.845	11.235	25.2811	0.022949	0.15771	-0.043945	-89.991	71.33	1265.902	-0.72031	0.59707	-1.1106
2.292	-24.174	16.9954	38.3692	0.25391	-0.03125	-0.13477	0.762	45.576	25.171	0.041992	0.088379	0.067627	-55.885	29.071631	30.77072	0.029052	0.15259	-0.04541	-49.574	-32.6338	1374.935	-0.79873	0.65127	-1.1987
2.294	-23.15	24.7881	23.6129	0.25439	-0.045654	-0.15381	-21.332	14.2475	30.445	0.023926	0.11865	0.057617	-72.556	23.94	11.2091	0.035156	0.15088	-0.047363	-29.737	-98.894	1458.7653	-0.88506	0.7251	-1.2811
2.296	4.147	27.777	34.4552	0.25879	-0.056152	-0.16504	-8.22	60.282	52.823	0.018066	0.14746	0.044922	-73.87	25.0206	15.5628	0.044434	0.15479	-0.049805	-69.59	-221.0626	1622.694	-0.97206	0.80527	-1.3525
2.298	8.135	18.83139	38.6075	0.26953	-0.066895	-0.16748	-12.551	45.306	32.9	0.018555	0.15967	0.043945	-64.205	31.535	26.6043	0.052246	0.15527	-0.049805	-91.517	-236.4032	1675.195	-1.0566	0.89648	-1.4043
2.3	3.339	21.1244	45.716	0.27539	-0.070801	-0.17139	-17.226	7.9045	37.977	0.025391	0.17676	0.035645	-72.93	36.873	54.146	0.058105	0.16943	-0.057129	-115.021	-296.659	1625.318	-1.1229	0.99375	-1.4537
2.302	-12.541	23.2271	50.1479	0.27539	-0.087891	-0.18359	7.292	35.058	34.3139	0.038086	0.1748	0.031738	-45.283	58.9196	11.762	0.064453	0.17944	-0.059327	-45.5383	-297.01	1547.738	-1.187	1.0925	-1.4936
2.304	-9.863	7.70837	70.669	0.28149	-0.10766	-0.20508	-20.588	-8.3665	19.4307	0.05127	0.16895	0.028809	-62.7594	40.1	17.979	0.070313	0.19434	-0.062012	-17.1299	-362.47	1523.592	-1.2206	1.2073	-1.528
2.306	-23.617	11.51726	61.8705	0.27881	-0.12842	-0.23145	-25.178	15.3286	33.4338	0.076172	0.15088	0.027344	-67.179	32.7442	7.551	0.073242	0.20313	-0.085938	51.7798	-320.27	1509.897	-1.2356	1.3065	-1.5681
2.308	-27.773	16.3381	63.0394	0.25586	-0.13428	-0.26855	-7.774	56.084	16.149	0.093994	0.12842	0.033203	-69.862	0.7704	20.5348	0.07959	0.21045	-0.099609	89.3543	-302.8	1436.742	-1.2305	1.3809	-1.6182
2.31	0.347000000000001	29.082	84.5118	0.24023	-0.1333	-0.2915	-38.793	0.7785	26.0103	0.10645	0.10596	0.036133	-39.232	29.027	22.1629	0.083984	0.23438	-0.1167	118.2286	-204.091	1369.475	-1.2336	1.4295	-1.6494
2.312	-28.462	30.2561	116.2479	0.19385	-0.10156	-0.33887	-33.466	25.6804	55.304	0.12061	0.064941	0.038574	-37.91	19.0145	43.5914	0.082031	0.24781	-0.13623	87.011	-202.53	1335.177	-1.235	1.486	-1.6827
2.314	-49.898	42.7907	142.666	0.15307	-0.081054	-0.38135	-33.752	9.2237	37.429	0.12012	0.05127	0.040527	-23.472	65.74	44.4016	0.07373	0.26563	-0.16797	80.091	-165.175	1341.4352	-1.2628	1.5489	-1.7136
2.316	-55.2508	51.5459	155.014	0.11719	-0.058594	-0.42529	-49.506	-20.4677	53.027	0.12061	0.022461	0.047363	-24.274	23.697	111.8631	0.053223	0.26953	-0.23242	112.9701	-186.473	1281.995	-1.3044	1.6157	-1.7227
2.318	-19.574	48.124	199.5402	0.068848	-0.02002	-0.49072	-34.726	29.3753	42.95429	0.12036	0.0065915	0.04541	-40.74	30.2588	101.434	0.033691	0.27002	-0.28467	156.764	-115.08	1330.3347	-1.355	1.6841	-1.7046
2.32	-4.512	56.639	244.71	0.043945	0.0048828	-0.52393	-75.269	-11.1363	33.562	0.12012	-0.014648	0.044434	-49.991	19.3571	148.5282	-0.023438	0.27295	-0.41016	67.1577	-101	1352.073	-1.3991	1.7494	-1.6608
2.322	-12.721	74.781	254.91	0	0.057129	-0.5835	-54.174	-5.088	50.924	0.12598	-0.038086	0.036133	3.807	88.399	191.8204	-0.075928	0.29858	-0.51343	7.161	-88.5	1406.773	-1.4129	1.7918	-1.6063
2.324	-24.277	93.3586	250.9337	-0.043701	0.089356	-0.62671	-50.875	21.7111	9.928	0.12793	-0.047852	0.032227	-42.681	66.609	285.0526	-0.14063	0.3374	-0.61768	-72.201	-167.42	1401.082	-1.386	1.8172	-1.5543
2.326	-34.4741	117.868	288.111	-0.09082	0.12305	-0.67383	-57.557	-11.814	16.2868	0.13867	-0.074219	0.030273	-49.974	127.641	374.28974	-0.24414	0.39014	-0.78467	-41.565	-223.145	1468.937	-1.3314	1.8108	-1.5217
2.328	-32.667	108.4119	369.0589	-0.15869	0.16602	-0.74316	-42.369	32.5272	43.9302	0.14551	-0.093507	0.027832	-52.427	85.765	470.5311	-0.29736	0.41699	-0.86572	-19.893	-332.172	1526.439	-1.2534	1.7896	-1.5015
2.33	-21.231	111.00704	425.2943	-0.1958	0.18848	-0.78662	-61.3299	19.79055	31.1785	0.15479	-0.11426	0.023926	-62.813	132.178	572.1268	-0.3877	0.46533	-1.0347	-21.414	-364.882	1647.551	-1.1806	1.7502	-1.4928
2.332	-11.273	108.9892	499.9004	-0.27979	0.24951	-0.85791	-45.966	-3.1954	45.62	0.15576	-0.13867	0.013184	-59.845	127.8994	772.911	-0.46728	0.49023	-1.1819	-53.713	-379.265	1709.115	-1.1242	1.6965	-1.4785
2.334	-27.201	93.9343	565.2187	-0.34278	0.28955	-0.93018	-16.934	40.2614	29.144	0.15625	-0.15088	0.0087891	-25.142	179.1887	947.4252	-0.55176	0.52588	-1.3247	-33.832	-361.49	1770.059	-1.0945	1.6231	-1.4847
2.336	-66.393	76.58	649.729	-0.41602	0.33984	-1	-53.699	-7.047	16.85529	0.15674	-0.1709	-0.0014648	-53.503	114.6038	1097.288	-0.67236	0.62939	-1.4624	-30.49	-335.368	1800.4463	-1.0843	1.5489	-1.5042
2.338	-45.741	62.812	703.907	-0.51563	0.45605	-1.0723	-23.565	-13.5928	42.5121	0.15918	-0.18579	-0.010742	-36.856	120.879	1186.224	-0.7373	0.69531	-1.5117	-53.653	-285.955	1839.045	-1.0854	1.4849	-1.5444
2.34	-28.483	58.005	739.198	-0.56006	0.51367	-1.1094	-17.378	13.9415	20.018	0.16162	-0.20215	-0.016113	-31.5864	3.737	1286.669	-0.84375	0.87891	-1.5625	-99.519	-227.745	1883.866	-1.1097	1.4413	-1.6208
2.342	-10.629	44.159	782.56	-0.64795	0.64307	-1.1606	-44.75	-12.3686	6.1761	0.16309	-0.20898	-0.037109	-45.188	-16.278	1404.612	-0.9148	1.0295	-1.5627	-127.738	-202.502	1887.444	-1.1547	1.4367	-1.7098
2.344	-13.919	-0.55851	801.3117	-0.6958	0.72314	-1.1997	-1.564	39.718	19.5444	0.16504	-0.21387	-0.045898	-109.6235	-108.2575	1509.843	-0.96436	1.1782	-1.5503	-200.6718	-125.589	1887.06	-1.2305	1.4742	-1.8176
2.346	-55.947	-39.4392	826.0609	-0.7207	0.77148	-1.2324	-21.702	14.796	23.5276	0.1665	-0.21045	-0.0625	-124.317	-88.4646	1444.534	-1.0068	1.3379	-1.5273	-288.639	-64.291	1884.294	-1.3141	1.5484	-1.9312
2.348	-63.744	-46.735	835.0651	-0.69141	0.80469	-1.2275	-16.526	-16.5357	40.29	0.16235	-0.20996	-0.081543	-101.022	-172.669	1374.694	-1.0195	1.3984	-1.5293	-217.607	33.738	1886.709	-1.3979	1.6431	-2.0444
2.35	-45.441	-47.486	861.62	-0.65186	0.79541	-1.2202	-0.0589999999999975	28.144	23.368	0.16113	-0.2002	-0.096191	-62.415	-167.019	1314.258	-1.0078	1.4609	-1.5605	-188.791	19.685	1854.561	-1.4759	1.7459	-2.1595
2.352	-36.963	-55.866	854.315	-0.55273	0.74902	-1.2129	-19.586	-0.537700000000001	12.8923	0.16162	-0.19043	-0.1167	-19.4116	-236.14	1275.901	-0.97193	1.4612	-1.6071	-188.697	49.596	1849.5257	-1.5421	1.8583	-2.2632
2.354	-59.387	-63.418	830.502	-0.47509	0.68701	-1.2114	5.309	1.1719	35.1966	0.15967	-0.18652	-0.12354	16.2551	-192.693	1226.898	-0.92334	1.4224	-1.6577	-198.515	6.058	1816.065	-1.6034	1.972	-2.3667
2.356	-91.365	-68.021	803.3608	-0.41895	0.60596	-1.2085	2.21	29.164	19.069	0.15771	-0.17334	-0.14551	60.235	-193.618	1155.366	-0.86279	1.3306	-1.7124	-190.6159	41.788	1849.818	-1.6614	2.0858	-2.4427
2.358	-80.366	-57.5556	796.3836	-0.38232	0.50928	-1.2007	-26.49	-4.785	13.1613	0.16088	-0.16651	-0.16186	36.2536	-129.757	1121.83	-0.84766	1.2871	-1.7266	-140.235	-22.3617	1862.325	-1.7363	2.2031	-2.5078
2.36	-73.371	-40.9139	813.208	-0.39453	0.48584	-1.2051	-18.798	44.731	14.329	0.16016	-0.16699	-0.18018	41.5356	-119.167	1119.544	-0.86279	1.2583	-1.769	-88.705	-51.676	1930.62	-1.783	2.3178	-2.574
2.362	-63.028	-35.639	790.3888	-0.43848	0.48047	-1.2314	-9.931	37.709	22.812	0.15869	-0.16943	-0.20947	74.303	-60.932	1138.8	-0.8855	1.2937	-1.7889	-76.861	-139.545	1910.012	-1.7976	2.402	-2.6125
2.364	-46.087	-49.783	780.323	-0.48389	0.52002	-1.25	-30.171	-14.2859	73.219	0.15039	-0.17529	-0.23145	108.509	-29.63	1161.748	-0.89795	1.3716	-1.7788	-82.284	-154.549	1916.02	-1.7777	2.4531	-2.627
2.366	-57.05	-68.541	778.42	-0.51563	0.58203	-1.2725	-38.587	16.3416	79.046	0.12158	-0.15381	-0.26221	101.325	4.87	1226.6864	-0.88525	1.4849	-1.7339	-114.691	-170.977	1849.144	-1.7384	2.442	-2.599
2.368	-59.5243	-85.2	802.541	-0.52881	0.67822	-1.2983	-43.387	3.6938	88.856	0.078369	-0.10449	-0.29615	33.3331	-5.82999999999998	1260.0512	-0.86621	1.5293	-1.7168	-146.6729	-134.069	1842.915	-1.7031	2.3848	-2.5371
2.37	-73.6987	-97.733	843.579	-0.521	0.71631	-1.3101	-4.702	23.4246	131.3596	0.0043945	-0.044922	-0.33545	-6.608	-60.88	1317.219	-0.82129	1.584	-1.707	-123.269	-103.735	1809.158	-1.6789	2.3094	-2.4527
2.372	-47.9979	-112.794	871.2683	-0.5	0.7666	-1.3223	-30.3468	64.011	167.1187	-0.1167	0.039063	-0.41895	-5.156	-134.395	1320.411	-0.78589	1.5842	-1.7131	-69.552	-71.07416	1796.145	-1.6684	2.2266	-2.3602
2.374	-36.502	-158.9642	897.5188	-0.47339	0.77344	-1.3165	-75.8036	18.471	206.9579	-0.16748	0.09082	-0.46777	30.621	-232.647	1370.386	-0.74756	1.5396	-1.728	-27.1	-22.925	1712.805	-1.6653	2.125	-2.2602
2.376	-23.503	-197.583	904.4524	-0.45361	0.76807	-1.3101	-25.311	52.2531	256.7372	-0.26172	0.20117	-0.54688	69.329	-299.298	1461.367	-0.69922	1.4395	-1.7598	-28.072	0.486999999999998	1678.752	-1.6508	2.0121	-2.17
2.378	-12.2	-206.077	934.9465	-0.45508	0.74414	-1.3066	-1.576	61.2099	296.716	-0.32886	0.29224	-0.61206	58.071	-358.49	1520.348	-0.68311	1.3853	-1.7749	-5.67299999999999	74.399	1620.568	-1.625	1.916	-2.0752
2.38	0.422999999999998	-204.45	973.1902	-0.45898	0.74023	-1.3145	-16.817	71.98	401.143	-0.40088	0.38135	-0.68506	37.839	-372.48	1532.562	-0.65234	1.2734	-1.7998	-18.379	108.659	1582.125	-1.5854	1.8348	-1.9885
2.382	10.038	-200.783	1013.3702	-0.48682	0.72852	-1.3145	2.655	119.95187	475.6828	-0.51025	0.50635	-0.78857	22.802	-367.377	1571.0408	-0.64869	1.2102	-1.8093	-45.725	204.622	1543.2379	-1.5418	1.7672	-1.9163
2.384	27.72	-199.003	1036.185	-0.51148	0.7356	-1.3318	-31.862	110.7982	504.6297	-0.57031	0.56445	-0.83594	2.967	-295.326	1619.777	-0.64941	1.1543	-1.8281	-57.041	202.237	1516.799	-1.4883	1.7052	-1.8439
2.386	24.1998	-182.965	1070.5805	-0.53271	0.75244	-1.3511	-26.973	102.5682	575.768	-0.68896	0.70264	-0.92725	-3.224	-221.251	1693.766	-0.66943	1.1235	-1.8726	-50.341	215.33	1502.78	-1.428	1.641	-1.7818
2.388	34.294	-165.7586	1100.6186	-0.55713	0.78369	-1.3999	-32.077	116.261	619.7325	-0.78076	0.80615	-0.99953	-34.197	-146.758	1750.758	-0.67529	1.1157	-1.9116	-110.475	163.62	1461.775	-1.3608	1.5728	-1.7144
2.39	39.5945	-133.7055	1137.5663	-0.56641	0.7998	-1.4277	-45.091	61.1038	697.233	-0.8667	0.90576	-1.0679	-98.314	-130.1376	1763.522	-0.69287	1.1099	-1.9897	-144.04	190.3	1469.3043	-1.2899	1.4986	-1.6353
2.392	64.1404	-108.744	1178.941	-0.58545	0.85205	-1.4878	-12.388	70.146	779.54	-0.96094	1.0371	-1.1533	-183.2	-58.99	1787.69	-0.70874	1.1077	-2.0745	-153.43702	167.3	1447.8313	-1.2255	1.4289	-1.5627
2.394	47.3325	-76.519	1192.715	-0.59912	0.90039	-1.5269	-51.217	47.467	797.6938	-0.9917	1.0933	-1.1851	-204.416	0.128	1769.818	-0.72607	1.127	-2.1738	-122.27327	181.363	1457.634	-1.1572	1.3567	-1.4943
2.396	69.77	-56.634	1214.0662	-0.61328	0.94922	-1.5645	-95.278	-11.3932	841.418	-1.0117	1.168	-1.2344	-181.107	76.344	1734.999	-0.72852	1.2109	-2.3125	-201.263	125.9351	1404.512	-1.0874	1.2779	-1.4218
2.398	49.1737	-65.348	1233.39	-0.63086	1.0098	-1.6055	-38.75	-13.883	844.9748	-0.98925	1.187	-1.2486	-191.302	75.823	1722.652	-0.75782	1.2881	-2.3848	-157.626	112.775	1400.7511	-1.0156	1.1953	-1.3574
2.4	57.575	-85.59	1240.814	-0.64258	1.0478	-1.624	-31.778	-85.634	835.638934	-0.93408	1.1685	-1.2476	-190.1813	60.234	1728.876	-0.81592	1.3892	-2.437	-159.865	84.44	1355.2439	-0.93952	1.1183	-1.2866
2.402	51.2034	-100.9131	1260.7095	-0.64502	1.0728	-1.6284	-29.208	-104.544	877.942	-0.81055	1.0645	-1.2324	-193.778	3.207	1716.698	-0.91357	1.5981	-2.5269	-103.64221	129.336	1370.198	-0.86757	1.0503	-1.2124
2.404	32.565	-108.793	1259.3817	-0.64209	1.0806	-1.6382	-38.282	-87.225	857.371	-0.73828	0.98047	-1.2168	-164.18269	-21.9697	1764.859	-0.93701	1.7212	-2.5679	-133.721	144.68	1307.668	-0.79408	0.98342	-1.1451
2.406	39.4	-118.4113	1281.237	-0.63867	1.0684	-1.6348	-106.71509	-138.511	841.087	-0.59766	0.7793	-1.1777	-141.1976	-88.534	1805.4921	-0.97266	1.957	-2.6465	-155.725	154.086	1280.12	-0.73168	0.92057	-1.077
2.408	3.947	-120.7765	1294.9246	-0.64551	1.0342	-1.6387	-62.069	-103.386	847.991	-0.52612	0.61206	-1.1394	-125.282	-115.838	1842.973	-0.99389	2.0852	-2.6726	-137.675	195.559	1184.917	-0.66162	0.86377	-1.0093
2.41	17.83931	-124.46	1317.751	-0.65503	0.99878	-1.6502	-95.871	-109.021	804.715	-0.47803	0.46338	-1.103	-129.977	-146.884	1837.06	-1.0244	2.1758	-2.6855	-98.16	219.6942	1115.84257	-0.59057	0.79994	-0.94116
2.412	-3.045	-142.337	1344.2872	-0.67188	0.9668	-1.6699	-94.648	-133.295	784.927	-0.45313	0.31885	-1.084	-134.099	-113.079	1818.2	-1.0737	2.2485	-2.6948	-55.69	275.444	1021.16	-0.50774	0.73786	-0.86459
2.414	17.8263	-137.795	1364.29	-0.71729	0.93604	-1.7046	-80.501	-87.317	746.701	-0.4502	0.27539	-1.0859	-137.2737	-97.299	1814.706	-1.0928	2.2676	-2.6953	-72.884	275.128	976.5804	-0.42789	0.67822	-0.78925
2.416	0.1816	-128.964	1372.345	-0.74414	0.92773	-1.7188	-121.909	-106.005	732.256	-0.45654	0.25684	-1.1035	-99.839	-64.328	1848.954	-1.1304	2.2446	-2.6558	-63.628	303.231	913.5327	-0.34975	0.61582	-0.71837
2.418	-8.5056	-100.2822	1350.628	-0.80811	0.94971	-1.7769	-121.259	-115.2739	779.3164	-0.46948	0.29517	-1.1287	-83.351	-39.307	1844.921	-1.1619	2.1761	-2.6238	-63.84	253.192	838.175	-0.2749	0.55127	-0.646
2.42	-2.9875	-90.7273	1370.268	-0.8479	0.99097	-1.8161	-114.117	-93.138	785.357	-0.48193	0.37451	-1.1616	-73.844	15.2183	1820.473	-1.1953	2.0801	-2.5684	-6.766	253.304	777.695	-0.199	0.48355	-0.565
2.422	0.715	-79.079	1350.3281	-0.87988	1.0322	-1.8555	-111.7334	-143.686	813.05527	-0.49658	0.50439	-1.2085	-16.342	43.754	1770.039	-1.2422	1.9141	-2.4824	27.166	195.1019	745.238	-0.11656	0.41683	-0.49033
2.424	27.293	-61.649	1360.448	-0.91553	1.0981	-1.8999	-56.157	-142.286	838.985	-0.5	0.57031	-1.2266	-0.974000000000004	106.539	1713.22	-1.2559	1.8359	-2.4473	83.3481	215.3815	702.7729	-0.03162	0.35186	-0.41533
2.426	30.487	-62.8141	1348.6637	-0.92188	1.1172	-1.918	-90.9028	-159.631	854.016	-0.50928	0.68115	-1.2612	16.505	141.062	1659.343	-1.2559	1.707	-2.3828	92.6194	182.941	642.458	0.047715	0.28053	-0.33505
2.428	24.3135	-62.3009	1341.8077	-0.92334	1.1567	-1.939	-104.659	-206.1076	915.18	-0.50903	0.73559	-1.2839	16.319	192.635	1616.931	-1.2409	1.635	-2.3474	77.8831	196.63	576.6639	0.12158	0.20996	-0.25684
2.43	37.706	-58.409	1353.048	-0.92627	1.1666	-1.9458	-63.1597	-178.814	973.313	-0.51563	0.76416	-1.314	30.843	219.884	1590.6736	-1.2188	1.5879	-2.3066	57.85694	142.818	508.9451	0.18662	0.14281	-0.18577
2.432	38.433	-39.713	1352.001	-0.93115	1.1763	-1.9526	-52.1261	-218.85	991.192	-0.5376	0.79346	-1.3608	-1.23	221.512	1571.141	-1.1792	1.5552	-2.2593	87.514	130.219	478.245	0.24995	0.0809	-0.12522
2.434	72.525	-40.2436	1369.0402	-0.94531	1.166	-1.9492	-20.503	-271.826	1047.025	-0.56055	0.82227	-1.3828	-51.591	197.772	1570.137	-1.1533	1.5488	-2.2285	87.59	122.075	410.9167	0.30498	0.015511	-0.073268
2.436	78.334	-41.8837	1390.26893	-0.94482	1.1626	-1.9448	-21.38	-261.029	1075.3214	-0.64453	0.91016	-1.4336	-74.628	177.193	1596.634	-1.0898	1.5313	-2.168	100.772	148.9168	357.70048	0.35307	-0.047711	-0.024664
2.438	113.307	-47.091	1415.07	-0.94092	1.145	-1.9253	-39.509	-289.906	1104.4269	-0.72168	0.9995	-1.4771	-34.088	180.508	1583.8805	-1.0337	1.5127	-2.1182	47.2123	160.287	262.386	0.39209	-0.11475	0.016602
2.44	71.241	-44.553	1435.8891	-0.93408	1.1172	-1.9053	-11.413	-226.462	1163.2447	-0.80371	1.0977	-1.5176	-71.693	185.707	1583.6326	-0.98193	1.4878	-2.064	18.637	183.3	235.2883	0.43146	-0.17642	0.057203
2.442	84.871	-50.031	1444.483	-0.92969	1.0908	-1.8848	-3.477	-176.6764	1176.6268	-0.88574	1.2168	-1.5703	-99.134	187.853	1571.8529	-0.92188	1.4492	-1.9766	-43.5869	206.539	171.7663	0.46868	-0.23378	0.093105
2.444	82.567	-62.2447	1438.467	-0.92578	1.0557	-1.8555	-1.40799999999999	-201.148	1239.324	-0.90527	1.2676	-1.5742	-156.849	155.359	1562.85356	-0.90039	1.4326	-1.9297	-12.908	200.495	155.878	0.50077	-0.28361	0.12517
2.446	105.515	-59.439	1421.317	-0.92725	1.0474	-1.8472	22.433	-140.651	1250.1737	-0.91016	1.3359	-1.5977	-130.16	150.623	1553.004	-0.84326	1.4087	-1.8315	-2.144	220.149	117.3023	0.52634	-0.32854	0.14759
2.448	94.26	-65.741	1397.839	-0.92041	1.0337	-1.8296	20.355	-149.508	1227.229	-0.86475	1.3423	-1.605	-128.5763	135.117	1552.956	-0.80737	1.3752	-1.7547	-16.079	183.917	112.5517	0.55078	-0.37305	0.17236
2.45	67.91	-60.56	1380.03218	-0.91235	1.0227	-1.8171	19.933	-130.606	1274.7501	-0.84082	1.3262	-1.5996	-92.422	174.003	1504.395	-0.76416	1.3345	-1.6733	-59.971	182.005	62.916	0.56998	-0.42674	0.18324
2.452	74.635	-54.002	1375.0071	-0.90869	1.0103	-1.8062	21.7653	-42.648	1274.461	-0.7959	1.2773	-1.6035	-118.9924	181.388	1461.706	-0.71338	1.272	-1.5581	-72.637	143.524	75.57	0.58124	-0.48069	0.17499
2.454	52.984	-42.262	1377.5834	-0.90186	0.99268	-1.7964	18.52	-81.475	1282.6411	-0.79029	1.2307	-1.6072	-143.487	235.764	1357.631	-0.68262	1.2485	-1.5034	-86.9304	139.948	33.64	0.57733	-0.53415	0.16596
2.456	66.221	-26.2971	1386.52	-0.9082	0.99121	-1.7813	21.174	-72.024	1309.537	-0.81104	1.1919	-1.6187	-168.744	244.9	1270.7237	-0.62305	1.1797	-1.3906	-102.828	75.9015	61.1541	0.56353	-0.57829	0.14399
2.458	44.068	-16.7542	1377.4673	-0.90771	0.98877	-1.7632	1.214	-92.363	1300.126	-0.86377	1.1587	-1.6362	-116.8799	303.3152	1237.8225	-0.56762	1.1252	-1.2995	-111.103	58.5532	45.4597	0.52734	-0.61084	0.10742
2.46	48.595	-3.216	1359.5714	-0.90552	0.99145	-1.7479	6.104	-151.776	1353.99	-0.89844	1.1563	-1.666	-113.30913	291.381	1224.79	-0.51611	1.0654	-1.208	-145.837	-11.397	79.609	0.45573	-0.61944	0.056295
2.462	24.01412	21.5746	1343.3517	-0.90039	0.99023	-1.7285	15.368	-111.1672	1388.661	-0.95752	1.1919	-1.7183	-69.003	333.792	1186.011	-0.44043	0.9668	-1.0918	-140.949	2.4678	84.726	0.35766	-0.59682	-0.0011023
2.464	-2.374	27.93835	1340.5983	-0.88672	0.9834	-1.7129	-26.597	-127.612	1382.362	-0.99291	1.2502	-1.7742	-68.6935	291.191	1142.6833	-0.39258	0.91602	-1.0293	-127.121	-37.3032	114.492	0.23497	-0.548	-0.070248
2.466	5.9185	26.1198	1349.446	-0.88428	0.97998	-1.7026	-29.031	-138.588	1419.432	-1.0269	1.3188	-1.8257	-68.9329	327.083	1058.584	-0.31885	0.83203	-0.9082	-87.8193	-32.422	107.03	0.097718	-0.46605	-0.14928
2.468	-0.6985	3.45101	1336.03	-0.87695	0.9751	-1.6875	-29.7443	-110.769	1424.4869	-1.0542	1.4048	-1.896	-42.879	284.288	1021.7122	-0.25684	0.77149	-0.81641	-70.638	-58.9521	82.719	-0.049805	-0.3584	-0.23291
2.47	-9.37786	-2.481	1304.7638	-0.86963	0.96436	-1.6724	-68.0121	-166.969	1437.2721	-1.0625	1.4316	-1.9199	4.42299999999999	301.6349	965.4021	-0.1958	0.71729	-0.72266	-15.838	-39.839	72.4704	-0.19544	-0.22995	-0.31936
2.472	-10.4559	-20.159	1287.125	-0.85889	0.95557	-1.6616	-40.856	-133.683	1503.564	-1.0854	1.4692	-1.9604	29.326	218.296	931.448	-0.13135	0.6333	-0.6001	-21.79	-31.489	40.22	-0.32025	-0.090976	-0.41283
2.474	8.8681	-14.738	1275.4	-0.84131	0.93115	-1.645	-44.43238	-86.0467	1512.718	-1.0984	1.4793	-1.9802	77.06216	233.206	875.103	-0.098145	0.58984	-0.54102	29.534	12.2859	60.0968	-0.42922	0.045344	-0.51086
2.476	19.6435	4.662	1264.3127	-0.8374	0.92041	-1.6401	-42.6427	-85.8116	1530.623	-1.1152	1.4863	-1.9922	86.605	152.254	843.496	-0.036133	0.49609	-0.43945	24.89	36.7393	32.7813	-0.50782	0.18683	-0.5879
2.478	12.9504	23.612	1267.8767	-0.82324	0.90039	-1.6211	-26.4673	-11.668	1527.847	-1.1377	1.4844	-1.9941	100.552	223.6	754.679	0.0061033	0.42749	-0.36889	15.768	40.739	49.221	-0.55957	0.31299	-0.65381
2.48	24.8867	26.0688	1261.964	-0.80566	0.89136	-1.6152	-45.3933	-20.1961	1492.7679	-1.1533	1.4766	-1.9922	104.327	174.781	702.992	0.04541	0.35352	-0.30469	-5.583	52.408	4.09077	-0.5791	0.42079	-0.69766
2.482	37.684	29.5408	1252.3493	-0.78516	0.87891	-1.6016	-27.079	-44.518	1515.2268	-1.1812	1.4546	-1.98	109.275	248.949	622.0763	0.10596	0.25781	-0.21484	-10.031	34.9199	6.0053	-0.58447	0.50966	-0.72373
2.484	51.618	45.1544	1243.561	-0.75537	0.85107	-1.5796	9.126	11.61	1502.078	-1.1941	1.426	-1.9675	95.203	181.743	558.295	0.13135	0.20166	-0.17236	-4.38	56.247	-36.7966	-0.59267	0.57724	-0.73584
2.486	37.4328	77.307	1219.9175	-0.74561	0.84229	-1.562	1.632	-28.952	1500.6689	-1.2017	1.3853	-1.9487	84.069	251.749	499.212	0.17871	0.099609	-0.083496	29.906	43.9845	27.3637	-0.60137	0.62305	-0.74414
2.488	49.612	91.129	1188.9601	-0.72217	0.8208	-1.5327	2.154	3.5547	1527.079	-1.2012	1.3379	-1.9316	59.01	214.241	460.382	0.21582	0.02417	-0.018555	23.766	45.5216	-14.16	-0.6084	0.66064	-0.73389
2.49	49.019	100.089	1145.057	-0.70288	0.80787	-1.5105	-8.7416	23.7117	1520.383	-1.207	1.3242	-1.9199	50.3513	315.023	425.799	0.24561	-0.069824	0.037109	23.159	-3.702	22.3305	-0.60254	0.67382	-0.70664
2.492	55.333	87.706	1109.462	-0.67773	0.79492	-1.4922	11.684	-13.57665	1538.0917	-1.2109	1.293	-1.9043	21.557	264.4	368.82	0.27051	-0.20166	0.1001	-4.575	5.885	-19.847	-0.58623	0.66768	-0.67568
2.494	54.3991	80.0759	1102.606	-0.64795	0.76221	-1.4497	32.0931	30.6251	1545.4066	-1.2297	1.283	-1.8986	-2.703	326.971	285.4821	0.28662	-0.26465	0.12451	-13.801	-44.024	17.1931	-0.56006	0.62744	-0.6292
2.496	72.923	66.6968	1112.4015	-0.62842	0.73682	-1.4312	11.16	3.781	1549.15	-1.2417	1.2817	-1.8921	-7.916	234.725	212.546	0.30762	-0.3877	0.1875	-1.459	-5.414	8.541406	-0.50947	0.5582	-0.56612
2.498	70.81	75.3212	1117.001	-0.60254	0.69629	-1.3828	37.43	-22.6464	1598.369	-1.2559	1.291	-1.8887	-19.228	269.398	175.165	0.31983	-0.46582	0.23388	-21.684	-21.623	48.792	-0.44287	0.46338	-0.50049
2.5	66.229	90.2523	1082.2147	-0.58203	0.66748	-1.3569	36.3036	30.9517	1573.7803	-1.2661	1.2935	-1.8882	-21.429	164.2842	181.125	0.31641	-0.53516	0.26953	-44.078	23.628	39.183	-0.35869	0.36026	-0.41865
2.502	51.6436	85.06872	1057.7751	-0.56445	0.63623	-1.3242	8.163	-18.9714	1548.0176	-1.269	1.2896	-1.8726	-54.342	208.3091	160.691	0.28467	-0.61523	0.28223	-83.5467	-7.737	31.8397	-0.26856	0.254	-0.34727
2.504	28.861	83.0066	1035.4031	-0.54102	0.59961	-1.2852	45.0515	2.989	1557.2593	-1.2676	1.2818	-1.856	-79.8988	107.924	134.1911	0.2666	-0.64844	0.2876	-103.9608	23.2859	35.577	-0.18848	0.154	-0.28203
2.506	20.363	87.488	1023.9441	-0.5249	0.58545	-1.2573	47.2145	28.2	1513.7661	-1.2534	1.2642	-1.8394	-114.169	126.1961	96.9225	0.2124	-0.70654	0.27344	-132.3934	25.2047	37.752	-0.11748	0.065039	-0.21963
2.508	6.515	94.1565	1028.637	-0.49609	0.55078	-1.2061	19.863	3.052	1519.8057	-1.23	1.2329	-1.812	-129.32	28.661	98.3291	0.17505	-0.72925	0.25122	-106.87628	78.206	26.2854	-0.063477	-0.013672	-0.16553
2.51	-14.305	92.5646	1011.132	-0.47437	0.5315	-1.1667	17.112	85.2516	1504.451	-1.2104	1.2173	-1.7866	-135.7269	86.5157	108.152	0.12793	-0.73877	0.22314	-91.2877	83.331	8.548	-0.024707	-0.074512	-0.11387
2.512	-14.812	90.2519	980.592	-0.44775	0.51172	-1.125	-16.947	94.744	1488.928	-1.1821	1.1841	-1.7515	-107.762	29.366	125.85	0.057617	-0.70752	0.16406	-108.937	96.657	33.244	0.0051758	-0.12353	-0.077637
2.514	-31.894	104.6667	927.907	-0.40576	0.48291	-1.0679	-13.98	84.515	1510.068	-1.1567	1.1655	-1.727	-111.5033	77.98509	118.858	-0.00048828	-0.67871	0.13037	-106.144	59.005	8.589	0.014941	-0.16299	-0.044825
2.516	-29.498	117.9905	882.039	-0.38428	0.46631	-1.0356	-5.707	136.448	1487.7875	-1.1309	1.1426	-1.709	-109.207	-9.239	125.18	-0.1377	-0.59375	0.022949	-107.6301	61.5273	58.564	0.0098633	-0.19014	-0.016797
2.518	-43.985	118.9018	857.3625	-0.34961	0.42578	-0.97168	-18.496	92.637	1456.3929	-1.1011	1.1216	-1.6792	-89.4855	15.7551	85.4494	-0.24585	-0.50366	-0.068358	-80.54	45.939	27.111	-0.0014648	-0.20654	0.0043945
2.52	-36.391	116.508	831.1798	-0.32764	0.39502	-0.92871	-15.611	127.573	1447.258	-1.0835	1.1206	-1.6616	-47.09	-33.8972	43.5874	-0.35254	-0.38916	-0.16699	-42.155	18.356	71.731	-0.018652	-0.20889	0.013477
2.522	-52.65	124.5299	801.2535	-0.30713	0.36816	-0.88623	-26.9088	156.01	1407.776	-1.0566	1.1133	-1.6367	-5.668	52.364	31.559	-0.47363	-0.22559	-0.28662	-50.656	18.51	38.6425	-0.042285	-0.1958	0.017773
2.524	-66.0255	129.61147	792.59439	-0.28857	0.33252	-0.8335	-58.8516	111.97	1403.2	-1.0351	1.1084	-1.6142	14.063	28.9875	15.12508	-0.51709	-0.14893	-0.34229	-44.418	-14.201	80.831	-0.067285	-0.17002	0.020508
2.526	-55.48	127.3665	772.3631	-0.27734	0.31885	-0.81006	-22.614	161.7061	1410.42202	-1.0156	1.1094	-1.5938	-11.79	72.127	10.5817	-0.60205	0.0014648	-0.44873	-24.077	1.291	43.399	-0.091309	-0.13926	0.02168
2.528	-63.6501	125.75966	738.3622	-0.26318	0.29688	-0.76807	-49.2694	130.552	1383.2998	-0.98193	1.0962	-1.5581	-3.02	19.615	-1.87617	-0.64941	0.10303	-0.51855	9.455	-42.26	88.944	-0.1084	-0.10059	0.023438
2.53	-52.979	122.842	722.2119	-0.24927	0.27979	-0.72901	-31.968	89.941	1384.35	-0.95947	1.0864	-1.5405	7.093	47.4358	6.1358	-0.67139	0.2124	-0.57568	-18.923	-32.2954	49.142	-0.10957	-0.071777	0.028809
2.532	-57.704	138.213	673.2821	-0.23975	0.2749	-0.69482	-13.105	133.045	1352.125	-0.91553	1.0591	-1.4995	41.932	16.966	35.764	-0.66455	0.3501	-0.62646	9.153	-59.891	68.395	-0.10146	-0.044922	0.035254
2.534	-40.758	117.1232	655.8151	-0.22705	0.26465	-0.66406	-56.257	92.067	1327.6031	-0.88452	1.0364	-1.4695	45.561	39.757	73.048	-0.65234	0.40674	-0.65039	-4.985	-10.58179	31.713	-0.076465	-0.033203	0.043067
2.536	-24.699	129.2475	624.706	-0.20996	0.26221	-0.63672	-15.011	133.2182	1329.9384	-0.8457	1.0156	-1.4336	20.891	24.8724	43.669	-0.60742	0.50781	-0.68262	24.078	-19.1957	51.4099	-0.040332	-0.038183	0.052637
2.538	-17.001	106.4216	611.032	-0.19238	0.25977	-0.60986	-18.009	162.786	1271.846	-0.79443	0.98291	-1.3862	14.292	41.1734	17.359	-0.55029	0.58447	-0.68311	11.935	28.437	28.107	0.0048828	-0.049805	0.063965
2.54	-21.948	101.8346	596.942	-0.16895	0.25635	-0.57666	-36.531	124.7336	1261.083	-0.77197	0.96924	-1.3628	17.962	1.4447	-9.3761	-0.50928	0.60596	-0.68115	21.814	7.734	30.99	0.047168	-0.076074	0.076856
2.542	-8.784	84.936	555.0726	-0.15771	0.25293	-0.56152	-15.682	185.685	1241.74794	-0.7251	0.93604	-1.3091	13.413	-20.2864	33.30116	-0.44873	0.59766	-0.64063	15.502	35.2047	-1.708	0.08496	-0.10498	0.087403
2.544	2.577	94.056	521.7283	-0.13281	0.24609	-0.52637	-16.956	187.156	1209.7773	-0.69287	0.9126	-1.2652	2.788	-30.9843	40.03	-0.40039	0.54956	-0.6062	37.138	17.4978	-19.746	0.11855	-0.12998	0.098342
2.546	-0.469999999999999	112.614	472.462	-0.11523	0.23804	-0.49585	-9.373	194.631	1194.73	-0.66016	0.88281	-1.2207	-15.511	-26.798	42.5941	-0.34863	0.48291	-0.56006	0.0810000000000031	62.062	-3.193	0.14092	-0.1498	0.10117
2.548	0.990000000000002	117.0245	468.88238	-0.094238	0.23291	-0.46973	-8.433	249.936	1157.2199	-0.61084	0.84424	-1.1636	-32.408	2.334	10.638	-0.26123	0.36377	-0.48047	-22.755	46.489	-11.8971	0.15381	-0.16455	0.10498
2.55	11.857	116.81173	440.7727	-0.067871	0.22119	-0.42725	-35.88	195.6959	1125.481	-0.57861	0.8208	-1.1353	-74.434	20.702	29.332	-0.20703	0.29785	-0.44336	-15.677	65.447	20.8745	0.17022	-0.16641	0.095215
2.552	8.147	128.595	423.697	-0.063965	0.2168	-0.40967	-2.91	196.5852	1095.469	-0.51807	0.77197	-1.0679	-70.552	50.264	26.919	-0.091309	0.16016	-0.35889	-78.1626	29.317	-12.27718	0.17646	-0.16416	0.088184
2.554	-6.844	128.176	402.833	-0.038086	0.20313	-0.37891	-1.534	207.1177	1032.7175	-0.46997	0.72656	-1.0249	-81.48	42.3195	34.2935	-0.010254	0.060547	-0.302	-85.3447	6.3138	10.5887	0.17568	-0.15518	0.074902
2.556	-11.67	128.673	387.853	-0.025147	0.1919	-0.35425	-21.675	175.577	1006.7383	-0.41943	0.6792	-0.97412	-82.295	64.205	14.5779	0.069824	-0.022461	-0.24512	-101.645	0.191599999999999	2.146	0.16895	-0.14131	0.054785
2.558	-12.782	123.251	356.4822	-0.01123	0.1709	-0.33789	-5.366	216.3493	999.5342	-0.35352	0.61523	-0.91602	-118.573	39.2423	36.989	0.16309	-0.125	-0.18945	-95.7726	8.1009	66.043	0.16748	-0.11572	0.032715
2.56	-23.307	132.873	331.00177	0.0048828	0.15479	-0.30566	-61.455	189.0715	958.8668	-0.32471	0.58594	-0.88818	-145.332	77.385	32.067	0.19678	-0.1665	-0.15918	-90.111	23.489	24.8008	0.16826	-0.089942	0.0099609
2.562	-35.826	124.96346	318.665002	0.010742	0.14404	-0.29688	-65.177	174.213	951.118	-0.26904	0.52979	-0.81885	-123.829	54.4	36.755	0.24951	-0.22998	-0.12012	-76.073	11.651	51.645	0.16084	-0.070215	-0.011719
2.564	-48.711	102.835	286.065368	0.026367	0.13037	-0.27295	-68.804	208.8254	903.8938	-0.23267	0.48413	-0.77514	-114.7938	85.055	13.766	0.27661	-0.26855	-0.098389	-111.4576	5.138	-3.083	0.15654	-0.052246	-0.033985
2.566	-52.21	83.322	263.0653	0.036377	0.12134	-0.26049	-117.572	162.64	862.11	-0.19629	0.45117	-0.73291	-108.5709	34.13	12.3207	0.29639	-0.30469	-0.079102	-97.0135	-3.082	39.5168	0.15401	-0.033984	-0.053809
2.568	-50.144	96.128	222.0143	0.047363	0.11523	-0.24561	-94.607	189.588	839.06	-0.15967	0.41553	-0.6748	-102.1162	46.3218	19.7609	0.29883	-0.33545	-0.061523	-65.023	36.86	41.2199	0.15186	-0.019043	-0.072266
2.57	-78.28535	90.1591	227.6364	0.0625	0.10742	-0.22607	-98.571	207.1568	767.045	-0.13721	0.39258	-0.64795	-77.3092	-8.973	58.60477	0.29346	-0.3457	-0.054688	-79.3541	31.1431	88.792	0.14346	-0.0016602	-0.087988
2.572	-63.193	98.3404	222.6836	0.070313	0.10498	-0.2251	-125.388	180.022	726.2677	-0.09668	0.37109	-0.59375	-40.91	30.1856	55.228	0.27979	-0.34521	-0.049316	-73.998	79.034	49.997	0.13672	0.0073243	-0.10283
2.574	-70.269	78.4873	202.3428	0.086426	0.10156	-0.20947	-89.2241	232.16505	684.7625	-0.059082	0.35352	-0.55078	-33.101	-14.415	50.304	0.25659	-0.33545	-0.046631	-60.535	46.38	53.554	0.12617	0.016699	-0.12119
2.576	-79.544	81.8492	183.9838	0.09717	0.091308	-0.20166	-105.199	198.309	629.8576	-0.023926	0.33643	-0.50928	-13.96	18.1153	56.592	0.2417	-0.32227	-0.037598	-74.1317	68.842	23.719	0.12071	0.027832	-0.12334
2.578	-92.9528	63.8273	192.3631	0.10449	0.087891	-0.18994	-101.648	188.695	598.875	0.029297	0.31006	-0.45605	-27.302	-35.387	58.917	0.20117	-0.29443	-0.045898	-27.531	29.6402	38.6736	0.11328	0.02832	-0.12598
2.58	-74.122	76.1852	179.46162	0.12305	0.082031	-0.18799	-98.204	227.2365	541.948	0.058105	0.29541	-0.42041	-13.084	24.069	44.9317	0.19287	-0.28027	-0.046875	-13.769	51.7465	50.549	0.11104	0.02168	-0.12549
2.582	-65.2526	71.387	145.1091	0.12891	0.072754	-0.18164	-134.3097	189.006	490.1066	0.10693	0.26172	-0.36719	7.735	-4.7255	48.3214	0.16113	-0.24561	-0.046875	-4.619	14.514	52.556	0.11298	0.0075194	-0.12178
2.584	-72.9	75.9412	131.8461	0.14014	0.052734	-0.17334	-108.725	206.1814	457.8961	0.14868	0.23022	-0.32251	11.02	61.794	51.422	0.14038	-0.21875	-0.047119	-9.54000000000001	26.5641	37.6372	0.11924	-0.019043	-0.11475
2.586	-67.524	75.8009	98.4043	0.14307	0.042969	-0.16992	-114.3838	199.4519	399.395	0.19238	0.19727	-0.27783	36.83	19.1759	50.424	0.12061	-0.18701	-0.04834	32.781	-21.0978	33.65	0.12373	-0.042676	-0.10351
2.588	-58.793	68.4378	89.3625	0.15137	0.035156	-0.16406	-116.041	168.9807	354.142	0.24414	0.14893	-0.22705	47.194	56.802	39.2585	0.095703	-0.14697	-0.050293	10.119	-13.8679	45.012	0.12451	-0.069336	-0.096191
2.59	-32.568	72.32	68.4091	0.14893	0.02832	-0.16016	-71.09	202.021	333.343	0.26709	0.12402	-0.19922	15.023	-2.569	6.8428	0.083008	-0.13184	-0.042969	44.701	-26.0183	43.1888	0.12002	-0.093457	-0.088769
2.592	-29.238	53.706	82.6554	0.14795	0.025879	-0.16211	-83.907	176.2951	285.6	0.31299	0.069824	-0.15234	22.809	50.285	5.7286	0.062012	-0.10254	-0.043945	18.892	-13.0011	79.238	0.10879	-0.11319	-0.077149
2.594	-16.963	38.9605	88.622	0.14502	0.021973	-0.16016	-74.633	159.131	275.867	0.34033	0.022461	-0.099121	20.802	1.3788	29.389	0.05127	-0.087646	-0.040039	10.728	-14.575	39.9622	0.097852	-0.12217	-0.070898
2.596	-10.12	38.6199	93.2781	0.14258	0.016357	-0.16333	-31.277	180.942	252.355	0.34473	-0.00097656	-0.082031	23.431	56.835	36.3201	0.040527	-0.081055	-0.036133	-18.582	-15.9382	45.698199	0.085157	-0.13603	-0.067481
2.598	-10.219	52.3516	72.6579	0.14209	0.010742	-0.16406	-47.215	126.551	230.5478	0.34424	-0.026855	-0.050293	-0.497999999999998	3.365	41.979	0.040527	-0.071289	-0.028809	-21.972	-21.8825	-1.864	0.073242	-0.14746	-0.060059
2.6	2.934	57.1184	49.0574	0.13965	0.0048828	-0.17383	-13.056	121.565	217.6526	0.33887	-0.02832	-0.029541	-40.218	26.6143	21.1069	0.036621	-0.070801	-0.024902	-11.851	-13.8559	30.829397	0.064356	-0.15088	-0.056348
2.602	7.986	51.6275	60.76642	0.13721	0.0078125	-0.1709	1.998	118.3046	177.48483	0.3291	-0.02832	-0.014648	-78.6025	-19.8258	26.3277	0.042969	-0.070801	-0.022949	-42.216	13.5817	-6.4266	0.054883	-0.15459	-0.057031
2.604	0.774000000000001	53.014	57.749	0.14355	0.0048828	-0.17139	-45.577	82.662	154.077	0.30713	-0.014648	-0.012207	-71.776	16.627	20.757	0.038086	-0.071778	-0.019287	-26.497	16.1818	31.0564	0.041211	-0.15029	-0.053515
2.606	-12.362	49.0927	49.7103	0.13989	0.0009766	-0.16797	5.968	116.17	129.0278	0.29297	0.003418	-0.012207	-71.759	-1.859	29.1867	0.037598	-0.06543	-0.017578	-80.9105	47.259	-15.942	0.029004	-0.14736	-0.054883
2.608	-9.416	46.6718	66.383	0.14111	-0.0083008	-0.16797	-30.842	102.501	95.913	0.271	0.037109	-0.022949	-101.838	26.539	24.2318	0.041016	-0.060547	-0.015137	-80.2789	31.7479	4.62	0.018555	-0.14941	-0.056641
2.61	-13.174	29.62145	54.09683	0.13574	-0.019043	-0.16064	-34.197	79.9662	97.30914	0.24756	0.053955	-0.035889	-110.361	-6.413	18.2955	0.035645	-0.061035	-0.016113	-76.73256	62.486	-9.573	0.011621	-0.15225	-0.054297
2.612	-25.633	33.6461	43.8074	0.14063	-0.022461	-0.16162	-2.793	77.638	74.352	0.21777	0.077637	-0.048828	-121.764	8.4679	28.1	0.030762	-0.056152	-0.026855	-62.55	45.67426	30.8898	0.0037109	-0.16201	-0.057812
2.614	-10.072	33.5745	31.4353	0.13965	-0.032227	-0.15234	-50.246	47.378	65.3749	0.16064	0.12207	-0.061523	-115.578	2.485	33.3094	0.029785	-0.056641	-0.033692	-89.2977	66.3176	13.7503	0.0041016	-0.17607	-0.057031
2.616	-33.85	35.8472	28.6686	0.14185	-0.039795	-0.14844	-9.748	69.329	83.302	0.13574	0.1416	-0.064941	-93.243	37.7577	35.2449	0.027832	-0.060547	-0.035156	-95.3169	30.8768	29.247	0.0082031	-0.19375	-0.064258
2.618	-23.688	48.4856	35.4736	0.14209	-0.04541	-0.14014	-20.672	81.426	56.4085	0.10986	0.16895	-0.079102	-104.2188	52.483	37.7525	0.021484	-0.065918	-0.032227	-123.869	31.6683	0.0765999999999991	0.01123	-0.21436	-0.067383
2.62	-58.352	45.5946	26.8214	0.13818	-0.055664	-0.13574	-51.864	39.6602	57.399	0.080567	0.18066	-0.0896	-90.301	76.195	27.354	0.019043	-0.071777	-0.035156	-87.9514	-2.948	29.9637	0.015332	-0.24111	-0.071289
2.622	-64.539	33.5411	37.4082	0.13965	-0.057617	-0.13379	1.797	39.7188	55.6836	0.046875	0.19189	-0.10205	-83.4307	71.801	18.559	0.018555	-0.079102	-0.03418	-72.516	26.5909	57.763	0.027344	-0.26631	-0.075488
2.624	-62.2238	32.9124	49.8032	0.13281	-0.066406	-0.12402	-56.34	34.4025	29.9621	0.00048828	0.21191	-0.12207	-60.871	46.1973	26.572	0.01709	-0.089599	-0.03418	-59.863	4.2327	61.84	0.035547	-0.29404	-0.080957
2.626	-60.541	29.8069	54.0527	0.12549	-0.065185	-0.12402	-45.221	25.731	53.0196	-0.019531	0.22119	-0.12646	-67.5788	32.0849	21.243	0.019043	-0.098145	-0.033691	-68.241	24.649	57.71	0.041895	-0.31426	-0.079199
2.628	-76.7728	34.8348	37.84477	0.11768	-0.062988	-0.11768	-27.258	39.2205	47.896	-0.07959	0.2417	-0.14893	-37.17	22.9693	24.179	0.015137	-0.11133	-0.033203	-51.898	15.4468	38.586	0.049805	-0.33496	-0.088867
2.63	-78.403	27.2849	29.8382	0.11133	-0.065918	-0.11328	-93.8129	11.8079	32.8361	-0.12378	0.26416	-0.16406	-20.339	43.153	42.14	0.01416	-0.11035	-0.033691	-42.628	35.58472	39.7321	0.055176	-0.35547	-0.09209
2.632	-70.5751	30.4388	35.90959	0.10986	-0.058105	-0.11035	-54.912	13.21683	53.299	-0.15967	0.29834	-0.17773	-6.029	30.512	40.467	0.0087891	-0.10303	-0.036133	-29.082	28.228	28.8508	0.060156	-0.37158	-0.10361
2.634	-60.934	21.599782	34.4025	0.10156	-0.052734	-0.10059	-67.1392	20.0867	25.3866	-0.20117	0.33984	-0.19189	1.431	46.063	39.6455	0.0080564	-0.097411	-0.040528	9.152	30.9808	66.54	0.058984	-0.38057	-0.11807
2.636	-55.537	18.20473	26.86405	0.099366	-0.047851	-0.096191	-79.658	-8.6207	45.329	-0.21045	0.35889	-0.19727	21.718	9.3228	46.977	0.0063477	-0.088867	-0.044922	2.89899999999999	33.657	44.9081	0.056738	-0.38721	-0.13164
2.638	-51.383	13.80829	25.7788	0.097656	-0.041992	-0.09082	-17.281	10.1232	59.107	-0.22412	0.38135	-0.2041	30.541	28.541	41.96	0.015137	-0.082031	-0.055176	2.239	30.3444	86.474	0.049805	-0.38037	-0.14551
2.64	-54.428	17.5191	29.5405	0.095215	-0.030273	-0.084473	-77.519	6.572	38.2853	-0.21777	0.38892	-0.19384	35.572	-3.863	64.476	0.016602	-0.084473	-0.057617	36.307	36.6888	112.7894	0.04336	-0.3711	-0.16475
2.642	-38.788	23.9534	25.6127	0.091309	-0.027832	-0.082031	-42.147	0.510999999999999	52.879	-0.2041	0.38281	-0.18604	31.399	31.0474	54.871	0.038574	-0.092285	-0.064453	19.524	20.1486	141.985	0.026075	-0.3666	-0.20048
2.644	-24.633	29.6418	28.24348	0.089355	-0.025879	-0.069824	-20.439	33.9417	25.2695	-0.17529	0.35596	-0.15967	21.243	-14.6552	49.9728	0.04834	-0.10401	-0.06958	18.33	61.966	154.524	-0.0016601	-0.36387	-0.24776
2.646	-39.271	26.9904	43.4034	0.083008	-0.02124	-0.0625	-45.789	21.106	21.72503	-0.15918	0.33301	-0.146	9.588	40.573	36.719	0.060547	-0.11377	-0.072754	72.4797	54.865	257.2335	-0.052442	-0.33857	-0.30127
2.648	-17.604	21.3829	55.611	0.08252	-0.023926	-0.05127	6.09800000000001	12.712	35.9624	-0.11768	0.2832	-0.11328	12.675	-11.2674	37.478	0.070313	-0.12207	-0.082031	33.1306	89.4464	289.925	-0.12695	-0.28613	-0.35254
2.65	-0.524999999999999	17.3509	40.5911	0.076172	-0.015625	-0.040039	-18.051	14.77573	21.0158	-0.095701	0.24756	-0.087158	-16.84	36.32268	21.7557	0.078125	-0.12549	-0.083496	-9.435	73.205	398.63	-0.2377	-0.20879	-0.44229
2.652	-16.84	22.7372	31.7633	0.07373	-0.013672	-0.033203	-27.622	-6.003	39.568	-0.076172	0.2124	-0.05957	-41.838	-9.3628	42.4636	0.077637	-0.12744	-0.096191	-14.591	76.066	451.797	-0.36396	-0.11689	-0.53955
2.654	-2.78100000000001	31.258	36.5156	0.069824	-0.00097656	-0.030762	20.706	2.5399	36.5641	-0.060059	0.16699	-0.026855	-52.551	49.989	23.8069	0.08252	-0.11889	-0.099609	18.934	56.371	590.552	-0.50224	0.0010746	-0.64893
2.656	1.825	22.408	29.3861	0.063232	-0.0024414	-0.020264	-29.464	6.5579	30.54086	-0.054688	0.14355	-0.013672	-72.594	13.6487	40.5942	0.088379	-0.10889	-0.10352	-15.906	121.703	708.703	-0.63516	0.1461	-0.77022
2.658	-10.163	23.5786	23.1646	0.061035	0.0078125	-0.015625	-26.306	-7.091	46.599	-0.038086	0.10547	0.012207	-54.665	67.387	17.418	0.10596	-0.096191	-0.10596	-23.326	114.8175	892.67565	-0.78076	0.31592	-0.8999
2.66	-2.262	13.2678	23.2919	0.057129	0.01709	-0.010254	9.331	26.807	9.893	-0.022949	0.074463	0.027832	-73.845	-3.289	28.2426	0.11621	-0.083984	-0.10791	-46.265	130.086	1008.89	-0.93847	0.48672	-1.05
2.662	-7.856	8.4718	37.7063	0.057617	0.023438	-0.0063477	-30.639	12.182	6.826	-0.003418	0.047363	0.037598	-113.6733	43.968	25.57103	0.13184	-0.067383	-0.104	-88.094	77.664	1128.111	-1.1157	0.67051	-1.2153
2.664	-4.023	8.03209	49.276	0.056152	0.032227	-0.0029297	3.631	5.4589	38.2383	0.02002	0.015137	0.057129	-122.789	-25.596	26.4015	0.15356	-0.058838	-0.10058	-99.004	38.3704	1213.456	-1.3	0.89082	-1.3918
2.666	-39.387	19.1078	30.7417	0.053955	0.039063	0.00073242	-12.532	4.0991	28.2325	0.036621	-0.0019531	0.057617	-108.606	38.378	39.7401	0.16943	-0.059082	-0.094727	-83.004	-41.706	1264.768	-1.495	1.1656	-1.5629
2.668	-35.267	33.2559	35.225	0.053711	0.04834	0.0014648	-45.823	-20.0863	45.165	0.06543	-0.030273	0.069336	-94.404	-17.545	51.0152	0.17871	-0.055176	-0.095215	-137.531	-91.011	1316.42	-1.6714	1.4907	-1.728
2.67	-46.685	22.3597	34.64616	0.05957	0.047852	0.0043945	6.606	-2.963	37.54132	0.08667	-0.052002	0.074463	-98.5975	30.026	32.4719	0.18311	-0.055664	-0.096191	-125.2011	-122.263	1324.23	-1.8049	1.8318	-1.8588
2.672	-45.061	16.01592	30.133	0.05957	0.053223	0.0053711	-40.518	8.1136	4.286	0.11035	-0.070801	0.074707	-85.8678	-23.1104	24.249	0.18848	-0.060547	-0.09375	-141.381	-154.7201	1265.056	-1.8344	2.1504	-1.9352
2.674	-54.107	17.0308	34.9265	0.067871	0.053223	0.0083008	-38.675	-1.359	35.5214	0.13965	-0.092285	0.078125	-113.30838	34.4704	6.068	0.19165	-0.068115	-0.096681	-153.257	-200.928	1181.531	-1.752	2.3719	-1.9715
2.676	-57.85	16.5482	32.6757	0.067383	0.054199	0.010742	-34.953	43.196	7.924	0.15967	-0.10156	0.077148	-80.9883	-0.1441	12.1088	0.18848	-0.074219	-0.10547	-157.9132	-246.22	1146.323	-1.5756	2.4428	-1.9939
2.678	-53.341	14.4272	35.7086	0.068359	0.058105	0.015137	-73.705	25.2149	10.496	0.18506	-0.11816	0.077148	-60.626	65.915	16.444	0.19434	-0.079102	-0.12354	-132.071	-251.43	1103.02	-1.3652	2.3516	-1.959
2.68	-83.935	24.4159	37.2121	0.071777	0.052734	0.022461	-33.461	32.2767	26.6518	0.20215	-0.12622	0.075683	-40.007	27.596	27.3003	0.19482	-0.085694	-0.14721	-158.366	-265.105	1083.73	-1.1963	2.0936	-1.8803
2.682	-67.285	24.9394	1.9021	0.07666	0.049805	0.014404	-64.4097	21.4928	10.544	0.21729	-0.13135	0.069336	-15.93	64.218	26.305	0.19482	-0.085938	-0.17822	-173.399	-214.62	992.83817	-1.0874	1.6833	-1.7577
2.684	-68.401	19.0294	23.68575	0.080566	0.04834	0.017578	-82.6015	1.6117	23.3279	0.22998	-0.12988	0.06543	-10.044	23.6307	41.549	0.19482	-0.075684	-0.22461	-150.579	-190.3583	1019.3755	-1.0464	1.2368	-1.6276
2.686	-65.345	17.2596	25.8684	0.081543	0.047852	0.015625	-29.833	22.3911	31.2856	0.23486	-0.12988	0.060059	-9.339	66.914	39.6574	0.19629	-0.067383	-0.25293	-127.81	-118.392	985.108	-1.0194	0.85908	-1.5046
2.688	-64.415	12.3879	19.7121	0.084961	0.048828	0.014648	-73.4487	23.9837	9.563	0.23975	-0.12451	0.049805	10.174	43.356	48.746	0.1875	-0.044922	-0.31787	-89.791	-142.498	1044.203	-1.0103	0.58057	-1.4331
2.69	-57.318	18.7718	26.2764	0.089844	0.04834	0.0083008	-54.89	16.453	32.6557	0.2478	-0.12159	0.042725	27.435	73.573	40.8092	0.18017	-0.015625	-0.37036	-113.295	-109.437	1018.372	-0.98985	0.44395	-1.3961
2.692	-44.071	16.0005	34.835058	0.093995	0.057129	0.0070801	-33.533	34.993	19.7361	0.25244	-0.11816	0.024902	30.263	28.3086	28.90695	0.17139	0.0068359	-0.43066	-72.5174	-156.06	1119.8081	-0.97031	0.38623	-1.3704
2.694	-51.345	29.85838	37.7174	0.098145	0.063477	0.0029297	-70.7429	20.34	7.9597	0.25684	-0.097168	0.015137	47.903	36.5634	78.485	0.13623	0.029297	-0.52979	-101.08	-148.21	1171.644	-0.96523	0.37881	-1.3832
2.696	-24.131	28.9381	20.57973	0.11035	0.074219	0.0014648	-15.479	30.975	34.4297	0.2583	-0.089355	0.0068359	33.746	-27.826	93.4779	0.11963	0.041016	-0.58936	-46.833	-251.208	1254.257	-0.96777	0.40918	-1.4033
2.698	-36.144	19.7145	24.1459	0.11279	0.071777	-0.0048828	-33.27	32.818	27.323	0.26074	-0.067383	-0.0043945	7.342	-16.2408	135.1644	0.05127	0.09375	-0.69531	-13.11	-256.677	1273.0749	-0.95166	0.50244	-1.4429
2.7	-13.01	27.05168	19.2284	0.12158	0.087402	-0.0053711	-35.1	7.4351	37.303	0.25928	-0.055664	-0.014893	29.15	-1.4193	175.127	-0.018311	0.16455	-0.78003	27.392	-372.406	1335.7261	-0.91309	0.67363	-1.4965
2.702	-3.688	17.22	28.0426	0.12866	0.094239	-0.012939	-1.52999999999999	11.8161	42.6991	0.25537	-0.046875	-0.021973	19.094	42.0022	222.9978	-0.097656	0.25244	-0.86426	41.674	-371.626	1339.272	-0.85899	0.85273	-1.5422
2.704	-13.882	23.2236	25.75727	0.13037	0.095215	-0.022461	-54.528	14.8434	22.5596	0.25732	-0.035645	-0.038574	-17.159	58.991	317.06328	-0.20557	0.37158	-0.99365	17.465	-461.29	1414.603	-0.78007	0.95664	-1.5414
2.706	-7.903	7.67644	51.3553	0.1333	0.096191	-0.039063	-18.009	2.3527	44.209	0.25293	-0.027832	-0.042969	-21.208	37.2162	399.056	-0.25537	0.43213	-1.0698	44.035	-430.67	1473.871	-0.67012	0.94199	-1.4986
2.708	-1.022	6.5109	52.0955	0.12891	0.099121	-0.048828	13.568	28.8191	28.5002	0.24951	-0.023438	-0.049805	5.95	27.873	503.146	-0.35596	0.5542	-1.2183	83.132	-434.07	1555.603	-0.54492	0.81445	-1.4492
2.71	0.306000000000004	-0.948	50.676	0.11963	0.095703	-0.090332	-39.007	31.618	38.522	0.24536	-0.015381	-0.056641	-3.246	77.204	702.138	-0.45605	0.64356	-1.3642	99.213	-330.643	1605.302	-0.45479	0.62139	-1.4261
2.712	-16.15	17.6745	60.6676	0.10498	0.11182	-0.11768	12.971	32.148	45.381	0.24072	-0.012695	-0.062988	-4.478	140.0807	923.82	-0.57764	0.74854	-1.5288	44.623	-301.516	1613.879	-0.40596	0.44659	-1.421
2.714	-24.51	35.4605	106.9271	0.084473	0.13428	-0.14746	-6.01499999999999	41.025	18.794	0.23096	-0.010742	-0.073242	-76.6423	103.2279	1099.208	-0.771	0.96631	-1.7222	33.4809	-198.704	1652.138	-0.42393	0.32705	-1.4288
2.716	-24.583	38.6641	132.743	0.061035	0.17676	-0.19824	-9.019	14.867	29.7518	0.22461	-0.013672	-0.071777	-110.5605	73.192	1229.955	-0.88281	1.1113	-1.8203	-7.165	-157.287	1635.7072	-0.52148	0.27217	-1.4727
2.718	-27.548	33.69824	141.53753	0.049316	0.19727	-0.22461	16.258	11.7212	41.618	0.21387	-0.0043945	-0.083008	-58.795	-47.641	1354.176	-1.1519	1.481	-1.9976	-10.221	-88.76	1685.147	-0.65771	0.3125	-1.5718
2.72	-58.953	30.4335	167.7784	0.020508	0.22754	-0.29102	-42.679	4.736	39.4854	0.20313	-0.0021973	-0.087402	-49.2102	-90.215	1489.94157	-1.3279	1.8284	-2.1043	13.739	-69.657	1672.9129	-0.82305	0.47207	-1.6957
2.722	-50.624	34.297	193.1454	-0.0026856	0.25806	-0.34033	-22.293	-11.309	65.388	0.19092	0.0039063	-0.09082	-77.0235	-165.956	1661.155	-1.4565	2.1626	-2.2085	50.3344	-38.715	1705.7427	-0.97628	0.68526	-1.838
2.724	-45.507	58.3192	247.547	-0.02002	0.28369	-0.38965	-19.623	16.6259	32.1339	0.17041	0.013672	-0.09668	-128.276	-172.719	1636.328	-1.4551	2.4492	-2.2715	39.745	-51.104	1642.913	-1.1142	0.91142	-2.0055
2.726	-70.893	91.1321	262.6725	-0.057617	0.30762	-0.46973	-65.9339	11.3972	18.279	0.1582	0.022949	-0.097656	-138.13	-262.833	1574.566	-1.3667	2.5063	-2.271	34.5816	-66.135	1659.777	-1.2145	1.1272	-2.174
2.728	-93.8259	116.5022	291.953	-0.079102	0.31934	-0.5127	-35.087	15.6785	45.162	0.13965	0.039063	-0.10352	-140.15	-311.718	1495.331	-1.1128	2.4263	-2.271	-26.0894	-59.2283	1660.504	-1.2788	1.3247	-2.3335
2.73	-82.842	99.1199	352.256	-0.13037	0.34961	-0.59912	-60.701	21.0123	23.1753	0.12354	0.058349	-0.11157	-153.334	-416.59	1477.017	-0.90064	2.2034	-2.2322	25.8113	-101.12	1734.654	-1.3203	1.493	-2.4594
2.732	-77.609	91.3282	430.3747	-0.16822	0.37061	-0.67749	-60.857	-0.0969999999999978	30.403361	0.11133	0.070801	-0.11377	-111.718	-398.77	1437.582	-0.73047	1.8848	-2.1621	7.57	-106.333	1763.733	-1.3472	1.63	-2.5515
2.734	-57.579	93.7098	513.3751	-0.21826	0.38916	-0.75293	-33.609	-0.356	40.1831	0.095703	0.09082	-0.12109	-91.967	-438.77	1402.112	-0.65625	1.4141	-2.0449	-9.973	-154.123	1837.638	-1.3823	1.7206	-2.6311
2.736	-63.464	98.1174	598.5882	-0.2915	0.41846	-0.86865	-78.5838	-16.22	24.9766	0.092773	0.10303	-0.12061	-118.157	-368.37	1329.5982	-0.63721	1.2095	-1.9741	-28.1716	-121.501	1829.248	-1.4137	1.7633	-2.684
2.738	-82.261	85.812	664.8618	-0.33496	0.4375	-0.92969	-36.646	-25.464	51.262	0.085938	0.12402	-0.12256	-116.04	-332.973	1320.257	-0.62012	0.90527	-1.8516	8.8434	-136.682	1857.635	-1.4351	1.7778	-2.7085
2.74	-74.5836	65.409	720.5784	-0.42139	0.49072	-1.0425	-28.742	8.877	23.9577	0.075684	0.14844	-0.13135	-75.052	-218.251	1299.023	-0.62671	0.79321	-1.8152	-35.3318	-81.959	1817.883	-1.4517	1.7597	-2.7079
2.742	-53.186	50.2662	749.624	-0.49218	0.54956	-1.1189	-67.589	23.4464	1.24036	0.074219	0.16211	-0.13037	-28.509	-177.939	1302.914	-0.63965	0.73438	-1.8086	-28.9772	-100.551	1819.957	-1.4511	1.7013	-2.6841
2.744	-72.185	32.481	827.5499	-0.55518	0.62549	-1.1812	-30.206	24.5692	24.642	0.075684	0.18311	-0.13281	-44.533	-127.97	1333.742	-0.67432	0.73633	-1.8262	-8.413	-52.214	1782.502	-1.4491	1.5946	-2.6329
2.746	-61.877	22.6216	866.5379	-0.63721	0.74463	-1.2397	-57.8274	31.451	14.026	0.078613	0.2002	-0.13208	-88.06457	-145.2	1380.2468	-0.69336	0.76318	-1.834	5.09	-49.905	1743.4201	-1.437	1.4848	-2.5589
2.748	-43.323	8.377	883.9537	-0.67334	0.80811	-1.2593	-68.314	3.82	26.7428	0.08252	0.21387	-0.13672	-137.233	-164.09	1434.888	-0.68555	0.88867	-1.8359	-9.1644	44.1769	1704.836	-1.4199	1.3887	-2.4883
2.75	-47.719	4.2049	884.9925	-0.70898	0.9209	-1.2813	-5.883	11.35532	34.5	0.093262	0.23291	-0.14111	-80.691	-204.61	1475.08792	-0.65527	0.99415	-1.8086	25.4557	58.8513	1694.196	-1.3965	1.3215	-2.4258
2.752	-20.531	-10.8923	900.073	-0.70728	0.98071	-1.2771	-50.856	5.7861	14.952	0.10352	0.23926	-0.14551	-29.161	-279.298	1484.949	-0.59375	1.0518	-1.7461	24.4104	113.7876	1680.1759	-1.3671	1.2714	-2.3788
2.754	19.284	-5.0523	907.082	-0.69092	1.0259	-1.269	-35.877	-7.9438	36.7917	0.12256	0.24902	-0.15869	22.281	-376.774	1496.3262	-0.46387	0.94531	-1.6289	50.1051	110.7823	1642.4868	-1.3343	1.223	-2.3366
2.756	42.8117	-4.655	895.856	-0.64014	1.0386	-1.2417	2.004	12.4598	45.543	0.12476	0.24878	-0.18042	32.904	-473.786	1530.355	-0.39355	0.83008	-1.5723	49.7525	145.565	1653.0633	-1.3153	1.1979	-2.3052
2.758	20.138	6.545	899.242	-0.61084	1.0337	-1.2222	-43.39	-25.6843	42.2054	0.12354	0.24609	-0.20801	33.56228	-502.01	1572.627	-0.29932	0.52148	-1.5273	34.7976	140.403	1640.683	-1.3022	1.2075	-2.2827
2.76	27.035	0.0734000000000004	901.886	-0.55664	1.0049	-1.1768	18.556	-29.7758	80.1914	0.10059	0.25732	-0.24463	42.9497	-514.91	1652.921	-0.26978	0.31909	-1.5213	73.831	144.432	1672.046	-1.3178	1.2451	-2.265
2.762	16.048	6.3569	924.269	-0.52807	0.97388	-1.1277	14.52	-4.257	97.04743	0.083496	0.27246	-0.25977	73.639	-472.02	1721.332	-0.29443	0.16406	-1.5288	68.564	139.885	1648.759	-1.3316	1.2884	-2.2409
2.764	30.314	11.1491	912.9305	-0.50928	0.93604	-1.0815	-24.945	-2.1132	144.1094	0.029785	0.30176	-0.30762	73.122	-425.023	1790.086	-0.48047	0.11963	-1.5762	87.176	121.341	1681.1913	-1.3436	1.3232	-2.2077
2.766	31.604	12.103	902.2473	-0.49658	0.89697	-1.0376	12.921	21.0693	188.974	-0.016357	0.30957	-0.34985	45.848	-344.648	1798.505	-0.61328	0.19824	-1.6426	70.564	96.191	1634.2101	-1.3321	1.3421	-2.17
2.768	-2.879	6.162	918.253	-0.4917	0.88525	-1.021	-51.31	15.9485	199.195	-0.056152	0.31592	-0.40967	19.0357	-295.993	1778.331	-0.93066	0.51563	-1.8359	86.197	65.235	1656.525	-1.2944	1.3462	-2.1323
2.77	-13.408	-8.89299999999999	923.252	-0.479	0.89111	-1.0103	-25.854	-10.9061	283.0366	-0.11133	0.3418	-0.49219	-17.54432	-188.985	1782.314	-1.1199	0.80884	-2.0193	30.365	65.706	1604.839	-1.2414	1.3078	-2.0805
2.772	-41.808	-27.337	932.2304	-0.46997	0.89941	-1.0191	-6.239	39.462	353.0932	-0.14502	0.35791	-0.54248	-36.428	-125.033	1786.214	-1.2441	1.0918	-2.2051	33.2116	60.412	1623.055	-1.1905	1.2462	-2.019
2.774	-35.485	-35.304	955.708	-0.46191	0.91992	-1.0254	-44.877	73.7719	438.768	-0.229	0.39014	-0.64795	15.8603	-43.796	1775.932	-1.2964	1.4399	-2.4194	75.702	112.559	1565.79	-1.1472	1.1763	-1.9632
2.776	-29.405	-77.2061	989.024	-0.44482	0.94775	-1.0444	-11.097	115.867	548.693	-0.30591	0.42237	-0.73023	84.817	-60.045	1757.5147	-1.3008	1.582	-2.5195	65.346	125.525	1527.759	-1.1093	1.1036	-1.9003
2.778	-44.613	-113.266	1024.86	-0.4375	0.95898	-1.0527	-38.924	150.378	585.381	-0.3916	0.46973	-0.81445	78.778	-48.516	1732.756	-1.2769	1.7876	-2.6538	8.158	174.314	1458.3414	-1.0796	1.0376	-1.8413
2.78	-74.418	-131.192	1033.7084	-0.41943	0.96729	-1.0757	-50.558	119.1293	679.6775	-0.51563	0.54883	-0.9248	68.829	-110.7557	1712.332	-1.2559	1.8467	-2.708	14.855	188.55754	1437.5784	-1.05	0.98478	-1.7882
2.782	-75.951	-120.776	1034.031	-0.40576	0.96118	-1.1106	31.3937	121.2011	761.547087	-0.58496	0.58984	-0.98145	64.842	-73.067	1721.217	-1.2417	1.8481	-2.73	-16.484	268.343	1381.45	-1.0215	0.94258	-1.7346
2.784	-62.747	-107.611	1049.508	-0.39648	0.94531	-1.1523	22.3743	112.0675	842.9164	-0.7124	0.68408	-1.0806	80.292	-115.615	1756.0687	-1.2339	1.77	-2.6948	-7.882	303.989	1374.58488	-0.97266	0.9125	-1.6693
2.786	-94.278	-106.668	1087.5059	-0.39648	0.93164	-1.2129	20.321	61.208	949.944	-0.80176	0.77002	-1.1279	68.167	-89.854	1812.552	-1.2246	1.6992	-2.667	-46.2085	359.541	1336.7818	-0.91934	0.88086	-1.6016
2.788	-100.645	-103.654	1113.7366	-0.40967	0.92627	-1.2397	-14.8482	47.861	989.5383	-0.87646	0.85693	-1.1616	57.518	-184.563	1850.424	-1.1821	1.5103	-2.5913	-34.745	350.93	1305.256	-0.86865	0.84131	-1.5288
2.79	-112.748	-87.1412	1132.5542	-0.44434	0.93945	-1.3105	-58.13	-17.4626	986.075	-0.93896	0.98193	-1.1831	55.547	-173.931	1881.198	-1.1289	1.3223	-2.5097	-60.8573	356.231	1238.9569	-0.80684	0.79434	-1.4631
2.792	-124.84873	-68.32307	1156.5751	-0.47657	0.96264	-1.3616	-21.545	-55.4708	1000.344	-0.95117	1.0361	-1.1758	28.8094	-239.499	1884.984	-1.0791	1.1279	-2.4238	-64.304	310.446	1184.8935	-0.74414	0.74316	-1.3886
2.794	-117.2774	-39.5212	1181.28742	-0.5083	0.99658	-1.4146	-53.953	-65.822	982.96	-0.91211	1.1191	-1.1523	25.35333	-159.887	1871.477	-1.0073	0.93311	-2.3413	-85.6986	293.145	1172.8472	-0.68515	0.69199	-1.3141
2.796	-105.549	-23.8994	1171.886	-0.53027	1.041	-1.4648	-72.408	-108.356	984.817	-0.83862	1.1536	-1.1111	17.3125	-175.176	1826.465	-0.98389	0.88525	-2.3218	-36.776	273.8668	1120.7187	-0.62529	0.6374	-1.2395
2.798	-105.81	-9.4971	1185.2192	-0.53418	1.0664	-1.4805	-21.254	-91.9118	967.348	-0.73633	1.1602	-1.0723	13.877	-56.5723	1773.355	-0.97705	0.87158	-2.314	-60.965	248.457	1107.1731	-0.57031	0.57373	-1.1719
2.8	-98.015	-15.24	1212.007	-0.53369	1.1001	-1.5034	-55.9931	-94.703	910.9085	-0.5791	1.0996	-1.0059	11.3709	-55.7695	1728.242	-0.99266	0.93164	-2.3291	-47.346	229.886	1025.927	-0.50938	0.50918	-1.0902
2.802	-73.662	-22.888	1223.6782	-0.52417	1.1111	-1.5203	-25.478	-115.042	885.474	-0.50977	1.0547	-0.97852	51.826	54.705	1685.112	-1.0156	1.0293	-2.3438	-70.813	211.009	1016.5906	-0.44082	0.43916	-1.0085
2.804	-69.01	-24.22	1249.9131	-0.52344	1.1138	-1.5366	35.41395	-82.188	837.249	-0.42285	0.94922	-0.92969	73.883	23.6365	1654.569	-1.0308	1.1509	-2.3628	-76.86	219.104	959.582	-0.38731	0.37002	-0.92608
2.806	-55.765	-24.655	1254.3453	-0.521	1.1035	-1.5469	-8.822	-71.508	794.225	-0.41186	0.88501	-0.8982	67.899	109.645	1645.337	-1.0288	1.1978	-2.3667	-74.1919	236.485	943.181	-0.32588	0.30947	-0.84014
2.808	-56.171	-47.7399	1276.936	-0.52637	1.0957	-1.5664	35.099	-36.0151	773.405	-0.42773	0.84766	-0.89697	35.0913	72.83747	1629.0058	-1.0117	1.248	-2.3613	-63.098	274.7403	856.486	-0.271	0.24902	-0.75781
2.81	-53.572	-57.743	1273.97867	-0.54346	1.0825	-1.5991	8.616	16.752	740.9529	-0.47168	0.85938	-0.93555	53.038	154.115	1578.805	-0.9773	1.2464	-2.3269	-52.144	285.6739	835.245	-0.20957	0.20401	-0.67383
2.812	-65.001	-63.055	1281.0992	-0.56348	1.0757	-1.6362	-15.355	7.498	765.3343	-0.49609	0.88867	-0.96533	31.1928	119.459	1560.572	-0.94727	1.2305	-2.2871	-75.455	301.372	741.9945	-0.15157	0.1669	-0.59815
2.814	-72.34	-55.029	1289.595	-0.59131	1.0786	-1.6772	37.543	13.77	805.2672	-0.53516	0.98242	-1.041	30.4983	179.631	1518.754	-0.89893	1.1802	-2.2163	-57.423	282.6185	690.042	-0.082422	0.13174	-0.51455
2.816	-49.69	-48.793	1305.906	-0.63525	1.1001	-1.7349	-15.575	-39.484	815.829	-0.54346	1.061	-1.1021	69.991	88.564	1521.724	-0.87085	1.1419	-2.158	-58.302	269.5025	565.777	-0.020703	0.092088	-0.43125
2.818	-47.858	-35.3559	1303.998	-0.66114	1.1279	-1.7881	-52.03	-108.137	872.18	-0.54541	1.145	-1.1675	49.202	99.623	1517.478	-0.84375	1.1025	-2.0938	-38.25	252.9507	522.0873	0.043457	0.05127	-0.34717
2.82	-60.876	-11.3086	1308.6459	-0.67627	1.1782	-1.8394	-54.616	-123.191	886.112	-0.54102	1.2324	-1.2754	16.3042	6.0876	1530.877	-0.81396	1.0669	-2.0073	-65.662	251.2297	442.695	0.10361	0.009082	-0.27119
2.822	-62.006	-11.2643	1328.73162	-0.70605	1.2368	-1.8843	-126.939	-171.78	927.885	-0.53662	1.27	-1.3237	8.7507	36.796	1532.231	-0.79297	1.0566	-1.9688	-40.757	231.1853	396.968	0.16591	-0.041211	-0.19678
2.824	-41.516	-9.37454	1329.8148	-0.73193	1.2681	-1.8999	-84.416	-183.4727	986.81625	-0.54736	1.3286	-1.4155	35.355	-13.526	1501.997	-0.74805	1.0234	-1.8887	-75.282	229.659	313.685	0.22763	-0.095506	-0.12959
2.826	-56.516	3.01582	1319.3761	-0.78662	1.3423	-1.9292	-78.955	-201.284	998.566	-0.56055	1.3633	-1.4707	46.395	59.478	1455.968	-0.69995	0.99341	-1.822	-80.526	196.674	247.811	0.27549	-0.15489	-0.064063
2.828	-87.397	24.8218	1303.3232	-0.8042	1.3975	-1.9541	-94.998	-269.954	1061.051	-0.57959	1.397	-1.5249	45.011	40.234	1418.938	-0.65283	0.95752	-1.7612	-101.186	159.636	212.467	0.31641	-0.21436	-0.00097656
2.83	-84.836	41.549	1300.6292	-0.81055	1.4375	-1.9609	-64.021	-272.164	1116.07	-0.60645	1.4414	-1.5859	48.022	109.907	1381.901	-0.59229	0.90088	-1.6714	-81.619	136.953	182.398	0.33652	-0.26875	0.049218
2.832	-109.455	37.657	1300.222	-0.81445	1.459	-1.959	-97.7658	-253.511	1141.2164	-0.61572	1.4634	-1.605	24.296	99.057	1345.8175	-0.56982	0.87354	-1.6284	-97.779	134.9487	191.2725	0.3501	-0.30859	0.088477
2.834	-129.467	35.7418	1303.8717	-0.82813	1.4629	-1.9473	-65.45	-236.413	1197.8823	-0.61719	1.5039	-1.6484	6.101	181.2084	1326.819	-0.53271	0.82861	-1.5405	-82.922	117.836	162.7383	0.34385	-0.3461	0.12871
2.836	-133.1294	28.3983	1310.7444	-0.86279	1.4653	-1.9331	-57.178	-143.197	1215.4432	-0.59961	1.52	-1.6734	-16.657	193.276	1301.188	-0.50317	0.80664	-1.4624	-86.545	72.0973	144.9089	0.32578	-0.36992	0.15605
2.838	-112.847	23.462	1323.2562	-0.8811	1.4758	-1.9285	-127.3953	-117.996	1220.6644	-0.56934	1.5195	-1.6973	-27.956	266.746	1234.066	-0.47461	0.77539	-1.3906	-82.65	35.685	116.3251	0.29248	-0.38135	0.18018
2.84	-130.7622	12.782	1348.262	-0.88623	1.4829	-1.9194	-112.187	-85.75599	1251.3052	-0.52637	1.4805	-1.7207	-30.037	255.414	1147.87	-0.43066	0.74219	-1.3008	-57.926	29.521	96.5872	0.24443	-0.37979	0.18516
2.842	-133.346	29.614	1334.859	-0.88086	1.4707	-1.9033	-132.531	-37.434	1246.979	-0.50439	1.4478	-1.73	-66.722	275.631	1085.905	-0.39648	0.71875	-1.2441	-50.831	45.261	43.2202	0.18037	-0.36797	0.17354
2.844	-139.34769	30.3181	1331.6532	-0.88428	1.4673	-1.894	-176.7518	-34.501	1290.01301	-0.4873	1.3716	-1.7603	-59.3813	225.638	1038.56	-0.34961	0.66406	-1.1484	-71.9366	55.955	62.782	0.10147	-0.3293	0.14658
2.846	-130.922	29.9874	1342.408	-0.89404	1.4692	-1.8745	-107.311	25.016	1321.3994	-0.49951	1.3205	-1.7781	-68.1407	225.5779	1007.6032	-0.30493	0.62915	-1.0701	-68.714	51.502	11.0742	0.014843	-0.26602	0.11084
2.848	-110.079	20.5664	1346.053	-0.89941	1.4825	-1.8711	-130.362	20.179	1306.833	-0.52539	1.2832	-1.7988	-53.539	176.84	964.3212	-0.25684	0.59814	-0.98584	-68.273	36.21	16.123	-0.077637	-0.18066	0.05957
2.85	-130.591	28.369	1336.338	-0.89258	1.502	-1.8691	-108.251	-37.308	1351.5519	-0.57959	1.2661	-1.8237	-58.349	164.885	927.4647	-0.18848	0.55127	-0.87256	-64.359	34.5871	-19.479	-0.1747	-0.080077	0.0046874
2.852	-119.395	38.424	1319.4435	-0.87891	1.4922	-1.8477	-81.194	-34.496	1343.327	-0.60693	1.2749	-1.8374	-51.914	150.319	889.6285	-0.1543	0.52148	-0.81641	-33.823	37.0829	7.6149	-0.2791	0.030469	-0.060156
2.854	-122.523	38.6947	1322.3113	-0.87109	1.4844	-1.8457	-113.182	-92.823	1357.2533	-0.66016	1.3066	-1.8672	-44.025	163.542	844.5897	-0.07666	0.46484	-0.70898	-66.777	56.303	8.104	-0.38028	0.14258	-0.13164
2.856	-97.905	53.688	1307.872	-0.86426	1.4551	-1.8164	-64.274	-102.398	1421.293	-0.69141	1.3457	-1.8877	-63.369	160.029	784.106	-0.011719	0.39795	-0.62451	-31.059	76.361	43.677	-0.46279	0.25801	-0.19326
2.858	-83.044	59.367	1291.8426	-0.8623	1.4316	-1.7988	-60.008	-94.909	1441.685	-0.72119	1.3853	-1.9019	-82.111	165.235	754.838	0.050293	0.33008	-0.55127	-35.606	82.1	28.7767	-0.52832	0.36133	-0.25488
2.86	-83.786	75.754	1280.9035	-0.86084	1.4087	-1.7827	-88.168	-153.568	1481.799	-0.77246	1.4424	-1.9082	-116.529801	158.731	706.887	0.13623	0.229	-0.45068	13.678	71.499	49.857	-0.56953	0.43965	-0.3127
2.862	-66.469	77.05	1293.7951	-0.8374	1.3755	-1.7554	-33.93	-137.085	1514.204	-0.80273	1.4668	-1.916	-119.7413	163.5994	665.8169	0.17236	0.17627	-0.40674	-23.86	43.969	46.426	-0.5999	0.5001	-0.36162
2.864	-64.916	91.861	1290.25265	-0.82959	1.3599	-1.7397	-79.001	-136.772	1501.3441	-0.87549	1.5259	-1.9116	-90.324	187.271	586.628	0.229	0.061523	-0.31934	26.922	27.893	66.068	-0.62373	0.55049	-0.3917
2.866	-43.886	103.164	1291.102	-0.8125	1.3203	-1.7109	-76.372	-148.283	1538.832	-0.93115	1.5747	-1.9058	-96.358	212.334	511.416	0.26025	-0.016357	-0.25977	-17.675	5.781	54.911	-0.64287	0.6001	-0.40605
2.868	-38.537	97.615	1288.924	-0.80347	1.3011	-1.6882	-65.19	-67.257	1527.904	-0.98633	1.6133	-1.8887	-70.808	259.481	442.985	0.28369	-0.087402	-0.2041	-4.679	-2.886	48.965	-0.66162	0.65088	-0.41553
2.87	-21.933	83.8399	1265.7031	-0.79541	1.2852	-1.6699	-119.818	-51.552	1512.179	-1.0444	1.6704	-1.8706	-77.855	245.9	396.922	0.30811	-0.16699	-0.1333	-46.7151	-25.469112	37.7339	-0.67168	0.69336	-0.42031
2.872	-41.299	81.808	1244.1958	-0.77197	1.2661	-1.6362	-95.725	2.714	1526.5796	-1.0698	1.6938	-1.8608	-80.055	245.605	323.282	0.30371	-0.19873	-0.097168	-15.737	-30.628	30.6998	-0.67705	0.71885	-0.42685
2.874	-69.142	76.775	1224.8922	-0.75732	1.2524	-1.6206	-93.799	46.1643	1500.907	-1.1167	1.7231	-1.8452	-58.075	199.4738	276.563	0.29346	-0.23779	-0.042969	-23.884	-26.2611	48.7287	-0.67198	0.73487	-0.42881
2.876	-38.708	75.0093	1225.764	-0.7373	1.2188	-1.5781	-94.042	18.5998	1517.6315	-1.153	1.7278	-1.8347	-12.072	194.772	234.022	0.29419	-0.25	0.002686	-16.897	-5.974	39.4149	-0.64991	0.72724	-0.41826
2.878	-54.547	76.5896	1213.77	-0.72168	1.1914	-1.5356	-58.574	65.816	1529.225	-1.1895	1.7344	-1.8262	-26.36	161.27885	214.8805	0.29932	-0.25732	0.058105	-37.054	19.6761	83.424	-0.625	0.71094	-0.39697
2.88	-57.403	82.7488	1188.231	-0.71338	1.1665	-1.4985	-98.587	72.377	1516.069	-1.2344	1.7402	-1.8203	-49.919	186.142	158.851	0.30176	-0.25732	0.11572	-55.8085	41.592	53.28	-0.59551	0.68965	-0.37168
2.882	-56.236	87.4295	1162.122	-0.69531	1.127	-1.4512	-120.123	37.1167	1544.9404	-1.2573	1.7505	-1.8159	-68.762	139.757	149.8276	0.2959	-0.25586	0.13965	-42.332	28.877	66.851	-0.56504	0.65879	-0.34062
2.884	-60.171	95.9669	1138.8442	-0.68262	1.1074	-1.4219	-88.845	68.814	1543.1132	-1.2793	1.7676	-1.8145	-93.736	149.712	118.3162	0.27734	-0.24854	0.1626	-43.075	19.974	27.85	-0.52715	0.63105	-0.30039
2.886	-80.548	108.1173	1122.0798	-0.66016	1.0723	-1.3682	-155.1722	16.9708	1536.3213	-1.2808	1.7856	-1.8101	-84.604	85.4821	149.908	0.26514	-0.24366	0.1626	-43.635	9.138	45.8538	-0.48233	0.59267	-0.25127
2.888	-82.73	135.82	1083.008	-0.6416	1.0337	-1.3208	-137.323	3.907	1561.138	-1.2695	1.7891	-1.8047	-55.627	84.999	152.397	0.24023	-0.22803	0.16406	-88.995	7.175	8.643	-0.43164	0.55078	-0.20313
2.89	-80.669	131.0565	1074.6414	-0.63428	1.0044	-1.2808	-129.734	24.6851	1544.7509	-1.2397	1.7876	-1.7866	-41.045	10.013	161.955	0.19824	-0.20557	0.13477	-73.633	18.4723	12.94885	-0.37939	0.50801	-0.15039
2.892	-81.8	138.8721	1054.7518	-0.61523	0.96289	-1.2227	-178.814	-24.382	1553.3241	-1.1982	1.7773	-1.7822	-60.732	41.101	117.466	0.17236	-0.18994	0.12109	-93.1542	17.951	-21.7977	-0.33037	0.46494	-0.10332
2.894	-88.0765	124.1476	1038.31894	-0.59961	0.94336	-1.1992	-130.27976	-4.303	1571.382	-1.1421	1.7563	-1.771	-73.96	-6.8598	109.729	0.10303	-0.15527	0.076172	-64.709	4.3705	-14.0102	-0.27217	0.41807	-0.061133
2.896	-87.769	127.2692	1021.7325	-0.58008	0.89844	-1.1465	-153.764	-17.556	1528.438	-1.0679	1.7036	-1.7476	-44.785	28.0907	62.298	0.043212	-0.1167	0.032959	-76.5149	-1.5302	-10.166	-0.21514	0.36943	-0.018652
2.898	-89.8167	123.0026	999.752	-0.56323	0.87012	-1.1006	-128.561	-45.8167	1538.908	-1.0366	1.6782	-1.7319	-20.287	-16.432	42.9573	-0.021973	-0.063965	-0.021484	-43.024	0.5351	32.3525	-0.16113	0.31494	0.019043
2.9	-83.776	116.3066	988.6009	-0.54688	0.83594	-1.0586	-75.952	23.764	1496.599	-0.97266	1.624	-1.7002	-20.491	24.912	2.7234	-0.11816	0.02002	-0.098633	-75.8697	3.0566	25.5452	-0.11582	0.26738	0.049707
2.902	-64.893	106.7239	940.9956	-0.5166	0.79492	-1.001	-143.445	17.447	1459.4234	-0.94263	1.5881	-1.6716	-32.743	-8.816	36.1557	-0.15967	0.067383	-0.12744	-27.616	12.0561	37.963	-0.07959	0.22246	0.079199
2.904	-73.091	97.3167	914.5371	-0.50195	0.77832	-0.9707	-109.243	66.837	1460.329	-0.92139	1.5591	-1.6479	-37.736	56.911	17.188	-0.24219	0.16406	-0.19434	-69.7557	13.03963	22.1166	-0.053809	0.19043	0.10811
2.906	-49.956	96.1316	892.43358	-0.47266	0.73633	-0.91895	-87.461	126.634	1419.925	-0.90283	1.5142	-1.6167	-74.639113	32.1073	38.7645	-0.29614	0.24341	-0.24096	-38.131	26.156	16.5553	-0.03418	0.15771	0.12559
2.908	-54.024	100.5248	870.359	-0.4458	0.70459	-0.87354	-104.187	115.90922	1414.391	-0.896	1.4907	-1.6011	-58.56	89.901	-2.3487	-0.33936	0.3208	-0.28564	-29.542	32.6742	30.1844	-0.011719	0.12988	0.13965
2.91	-25.753	116.843	841.907	-0.41846	0.67334	-0.82764	-34.857	161.033	1421.645	-0.87842	1.4614	-1.564	-65.788	40.721	14.3349	-0.37598	0.41406	-0.33105	-3.824	42.896	23.1175	0.013086	0.1043	0.1583
2.912	-17.816	118.897	832.525	-0.39014	0.62939	-0.76904	-85.927	152.716	1376.718	-0.86108	1.4358	-1.5369	-44.651	73.615	27.48501	-0.38428	0.4541	-0.33936	-41.419	48.435	20.9627	0.05166	0.073633	0.17344
2.914	-18.475	111.428	809.318	-0.37646	0.60742	-0.74414	-71.654	127.586	1364.31996	-0.8374	1.4185	-1.5034	-46.322	7.2716	58.56057	-0.3916	0.52588	-0.36475	-19.492	69.893	28.3267	0.087988	0.045117	0.18867
2.916	-11.078	109.874	785.3146	-0.34863	0.56348	-0.68262	-41.306	163.871	1348.3932	-0.80762	1.3716	-1.4565	-30.819	37.84	33.836	-0.38574	0.56299	-0.3833	-1.595	49.861	22.9379	0.12412	0.015625	0.20791
2.918	0.231000000000002	123.6284	747.6941	-0.32275	0.52173	-0.64136	-94.479	128.092	1320.9442	-0.79346	1.3535	-1.4287	-35.712	-15.5102	34.7622	-0.36719	0.58789	-0.39258	-14.018	44.531	21.308	0.15527	-0.01709	0.2207
2.92	2.258	141.472	707.6707	-0.30225	0.48682	-0.60205	-21.944	100.4435	1335.863	-0.76123	1.3052	-1.3726	-20.736	2.897	2.496	-0.34375	0.60059	-0.40137	-3.931	27.9312	43.794	0.18877	-0.050391	0.23389
2.922	3.193	143.614	677.3957	-0.27441	0.44189	-0.54639	-25.44	108.7532	1308.7186	-0.74073	1.2588	-1.3242	-31.978	-44.573	15.3377	-0.33594	0.59766	-0.39844	-23.744	29.5347	32.33962	0.2208	-0.078027	0.24609
2.924	-3.648	150.555	625.1841	-0.25732	0.41846	-0.521	-57.988	73.801	1278.6509	-0.70996	1.2168	-1.2773	-31.014	-3.905	-4.073	-0.30908	0.58008	-0.38477	-20.338	36.7182	45.445	0.25048	-0.10771	0.25625
2.926	-3.581	151.201	581.009	-0.22754	0.37598	-0.47559	-1.495	114.275	1270.2061	-0.66553	1.1548	-1.2065	-37.165	-22.6208	6.3015	-0.2937	0.55859	-0.36988	-29.304	29.584	37.388	0.26787	-0.13066	0.25596
2.928	-28.131	139.8679	561.602	-0.2063	0.34546	-0.43848	-47.42	133.291	1211.7862	-0.64502	1.1206	-1.1655	-28.77	44.4613	27.33455	-0.27881	0.53125	-0.3457	-14.716	11.346	66.896	0.28516	-0.15234	0.26221
2.93	-11.013	126.387	549.2017	-0.18213	0.31689	-0.396	-55.436	117.095	1186.964	-0.59668	1.0532	-1.0903	-25.042	26.446	64.345	-0.25537	0.4873	-0.30811	-50.202	-11.794	64.6903	0.29492	-0.16084	0.26035
2.932	-23.163	119.063	527.6215	-0.146	0.27295	-0.34619	-31.663	176.85	1137.9499	-0.56225	0.99342	-1.0368	-28.184	64.771	52.5209	-0.24463	0.46143	-0.28174	-16.412	-11.394	94.449	0.29834	-0.16377	0.25576
2.934	-16.56	124.213	479.7469	-0.12744	0.24707	-0.32324	-92.745	166.782	1094.437	-0.52441	0.93359	-0.98438	-60.574	41.9906	65.121	-0.21436	0.41406	-0.23145	-58.991	-0.199	56.6634	0.29561	-0.16533	0.24716
2.936	-36.893	116.075	462.2103	-0.093262	0.20557	-0.27051	-55.538	191.214	1083.6736	-0.47021	0.85596	-0.90381	-48.602	79.947	39.4674	-0.18481	0.38501	-0.19482	-39.185	5.3012	46.394	0.29229	-0.16397	0.23301
2.938	-35.194	122.89193	433.061	-0.066406	0.16626	-0.23291	-42.991	230.382	1054.8863	-0.44531	0.8125	-0.86475	-51.954	73.46	33.8123	-0.14893	0.34717	-0.16162	-76.3752	-8.8619	32.16152	0.28174	-0.1582	0.21924
2.94	-51.271	103.7376	404.84134	-0.039063	0.125	-0.19482	-90.2566	211.316	1027.472	-0.39355	0.73877	-0.79639	-36.965	97.687	20.693	-0.092773	0.30078	-0.12256	-61.139	-11.1495	29.8971	0.27461	-0.14375	0.20098
2.942	-51.974	111.0812	381.25559	-0.0063477	0.081055	-0.15283	-49.7774	244.56	986.1909	-0.35816	0.68603	-0.74267	-45.367	64.818	9.8543	-0.072266	0.27441	-0.1001	-101.8842	-20.9163	25.947	0.26992	-0.13086	0.18262
2.944	-69.3008	98.193	372.5264	0.0039063	0.0625	-0.13184	-71.38122	244.399	904.809	-0.32178	0.63623	-0.69238	-36.389	29.1119	12.1047	-0.026367	0.22559	-0.061523	-49.878	-5.085	42.0259	0.26368	-0.11993	0.16113
2.946	-82.8756	103.7185	347.5845	0.032715	0.010742	-0.088867	-62.324	210.6509	865.893	-0.27734	0.57617	-0.62793	-64.871	-5.012	19.0653	-0.00097655	0.1875	-0.040283	-94.6367	10.5166	9.631	0.25547	-0.11114	0.13819
2.948	-74.2808	99.2756	316.436	0.052734	-0.022217	-0.061767	-24.778	234.853	848.62	-0.25488	0.54248	-0.59814	-43.178	-2.98	34.46	0.020508	0.1499	-0.024902	-61.123	30.837	18.42	0.25098	-0.097656	0.1123
2.95	-94.6	102.522	283.566	0.069824	-0.054199	-0.038574	-60.4371	201.6865	810.396	-0.2041	0.48242	-0.5293	-28.298	8.8579	57.186	0.044922	0.09375	-0.010254	-66.26	29.979	3.755	0.25019	-0.090039	0.086621
2.952	-69.733	105.3654	256.6675	0.088379	-0.088379	-0.0053711	-12.155	168.764	797.961	-0.16675	0.43896	-0.48291	-28.397	11.694	70.261	0.052734	0.07666	-0.00048828	-55.247	31.9385	4.9186	0.24346	-0.08418	0.063379
2.954	-67.414	109.5376	240.664	0.10474	-0.10815	0.0048829	-27.8261	175.951	752.978	-0.12451	0.39551	-0.4375	-64.084	5.8491	54.309	0.063965	0.035645	0.018555	-65.43	22.81016	18.85999	0.23018	-0.075586	0.046973
2.956	-58.875	106.523	218.7083	0.12549	-0.1377	0.027344	-58.7275	135.518	730.073	-0.066895	0.33643	-0.37256	-62.164	-10.64756	68.204	0.080566	0.0048828	0.041016	-30.311	22.2169	11.0411	0.21035	-0.059375	0.024707
2.958	-56.002	111.1278	211.7212	0.15332	-0.17432	0.044434	16.257	148.74	702.782	-0.041016	0.30762	-0.3457	-57.035	1.92856	60.711	0.091797	-0.0039063	0.050293	-16.84	21.1289	13.2006	0.18945	-0.045898	0.010254
2.96	-32.33	102.7397	207.2955	0.16553	-0.1875	0.049805	-11.317	177.668	632.865	0.01416	0.24414	-0.27832	-52.103	-2.953	55.42	0.11084	-0.023438	0.069824	-34.26	33.71249	-0.1983	0.16113	-0.028125	-0.0084958
2.962	-11.516	93.10045	189.0323	0.18652	-0.20508	0.056641	-2.39	166.475	586.682	0.052979	0.19848	-0.23901	-46.081	28.4612	46.751	0.13501	-0.037597	0.080566	-21.731	20.7318	14.3995	0.14043	-0.0073243	-0.017969
2.964	-36.222	84.0745	171.6369	0.20191	-0.21875	0.058838	31.417	195.359	528.4056	0.084473	0.15674	-0.19824	-42.076	15.825	25.8318	0.15674	-0.052246	0.094727	-68.357	13.833	16.1665	0.12168	0.010645	-0.028125
2.966	-28.333	86.5943	163.5299	0.20996	-0.22168	0.057129	-25.04	171.544	472.1645	0.12646	0.089844	-0.14063	-33.327	48.722	14.183	0.19043	-0.066895	0.11719	3.854	18.448	32.6861	0.11289	0.032812	-0.037012
2.968	-19.868	70.8059	151.8925	0.21533	-0.21729	0.047852	15.885	160.2164	429.75	0.14209	0.062988	-0.11279	-27.52	18.935	21.845	0.20752	-0.082031	0.125	-31.421	17.0933	28.5595	0.10596	0.050781	-0.043457
2.97	-23.816	70.398	134.6829	0.21484	-0.2124	0.038574	19.763	185.632	379.5254	0.15869	-0.0029297	-0.067871	-37.677	35.9709	12.5052	0.23975	-0.11133	0.14209	3.868	31.207	42.142	0.10625	0.066797	-0.049414
2.972	-14.419	55.044	118.002	0.21924	-0.19385	0.019531	-7.296	164.233	339.4924	0.19141	-0.035157	-0.039551	-20.414	1.033	12.3797	0.25659	-0.13623	0.14672	-29.089	29.745	30.654	0.1085	0.081445	-0.05166
2.974	-20.028	52.139	118.288	0.22534	-0.17871	0.0041504	49.934	165.0861	308.21519	0.23633	-0.08252	-0.00048828	-33.196	38.312	6.5609	0.27295	-0.15479	0.15283	15.336	49.467	56.486	0.10224	0.089257	-0.056348
2.976	11.787	37.84894	113.84284	0.23096	-0.16162	-0.011719	-15.236	168.101	258.398	0.26074	-0.14404	0.044434	-32.673	27.8218	22.36	0.28369	-0.17432	0.15967	-33.168	32.916	37.2798	0.10029	0.096094	-0.059179
2.978	-5.614	42.3148	96.2709	0.22363	-0.13867	-0.036621	-19.841	139.996	222.2812	0.26807	-0.16943	0.055664	-30.771	50.781	24.757	0.2876	-0.18115	0.15918	-6.52200000000001	52.0622	49.576	0.09082	0.10352	-0.057129
2.98	0.878	38.673	76.437	0.22412	-0.11963	-0.05127	22.955	151.482	205.9694	0.2583	-0.20898	0.070313	-48.797	9.2932	31.3999	0.2915	-0.18408	0.16064	-19.175	38.16944	35.6431	0.086231	0.1084	-0.054102
2.982	-17.561	55.1781	84.07136	0.2168	-0.09082	-0.084473	-36.468	135.3848	171.0766	0.24268	-0.23023	0.081787	-47.276	25.8705	32.857	0.29199	-0.17871	0.16235	-17.599	46.86	51.4314	0.076172	0.10596	-0.048828
2.984	5.083	47.8174	84.879	0.20752	-0.063965	-0.10767	-18.882	94.1752	170.9298	0.22217	-0.23877	0.089355	-44.043	-28.3356	44.071	0.28174	-0.17627	0.16748	-61.594	24.5517	49.9565	0.071094	0.10791	-0.045703
2.986	-28.626	54.7177	64.7652	0.19531	-0.035645	-0.13135	-50.86	99.492	129.59	0.1958	-0.25342	0.096191	-41.913	14.788	31.5603	0.27832	-0.16846	0.16553	-41.431	18.857	69.162	0.066309	0.10293	-0.040722
2.988	-33.237	53.74	60.7921	0.17188	0.0039063	-0.16357	-81.9342	54.353	129.7155	0.17432	-0.26123	0.092773	-52.607	-3.3055	50.5339	0.27295	-0.16162	0.16406	-65.692	0.121	59.026	0.061035	0.1001	-0.040039
2.99	-61.561	53.632	71.4304	0.15967	0.026855	-0.17969	-25.97	25.993	137.3024	0.14209	-0.25732	0.07666	-29.776	43.4987	24.212	0.27197	-0.14941	0.15137	-57.693	7.741	51.957	0.061133	0.098047	-0.033593
2.992	-45.83	67.013	55.52994	0.13721	0.072754	-0.20459	-71.9154	44.475	106.793	0.10523	-0.24878	0.071533	-24.306	0.6086	21.275	0.26197	-0.14014	0.14307	-71.9639	-1.83168	29.775	0.063868	0.10009	-0.031446
2.994	-48.577	53.4117	49.9221	0.12158	0.10522	-0.21875	-66.138	24.998	97.407	0.068359	-0.24023	0.052246	-32.806	42.5397	6.4789	0.25439	-0.1333	0.1416	-58.588	1.074	28.0506	0.063086	0.10049	-0.026758
2.996	-80.006	38.7992	53.1312	0.10742	0.13477	-0.23242	-32.049	55.74932	61.1627	0.016113	-0.20508	0.018066	-58.568	18.7158	0.7668	0.24463	-0.12793	0.13184	-70.394	-16.0102	40.152	0.064356	0.099315	-0.026074
2.998	-63.444	19.5099	58.9215	0.099121	0.16895	-0.24121	-99.23077	72.5366	33.139	-0.01123	-0.18701	0.0024414	-43.273	77.284	25.9995	0.24023	-0.12695	0.125	-79.097	-20.978	51.1754	0.063965	0.1084	-0.033203
3	-67.903	15.6266	43.886	0.09375	0.18018	-0.24316	-48	38.4017	38.138	-0.074219	-0.13867	-0.036621	-63.8654	58.585	65.375	0.22314	-0.11865	0.11768	-72.112	-14.8881	41.5034	0.074903	0.11748	-0.030469
3.002	-68.3116	20.2625	25.0499	0.088379	0.20264	-0.23828	-44.085	53.0534	27.616	-0.12012	-0.099611	-0.064697	-41.614	93.091	54.2547	0.21557	-0.11547	0.11206	-58.584	-9.684	26.848	0.07998	0.12637	-0.032812
3.004	-72.326	25.6741	32.167	0.091553	0.20289	-0.22974	-67.93	31.488	43.0036	-0.17334	-0.05957	-0.099609	-51.761	39.937	63.499	0.2041	-0.11279	0.10352	-56.242	7.8921	12.9278	0.086231	0.14004	-0.036328
3.006	-49.373	23.829	28.9687	0.097168	0.20313	-0.20508	-18.563	26.1528	44.64456	-0.23877	-0.0058594	-0.14307	-31.346	43.511	28.8449	0.18555	-0.11035	0.086914	-63.68	18.2482	1.3751	0.096973	0.15908	-0.042383
3.008	-58.878	17.162	40.2644	0.10693	0.17871	-0.18848	-73.916	66.424	27.266	-0.26953	0.024902	-0.17139	-78.08	5.39186	23.3059	0.17627	-0.10742	0.078613	-67.161	31.5808	40.966	0.10449	0.17773	-0.051758
3.01	-80.501	13.199	47.0966	0.10889	0.16406	-0.17285	-45.789	46.265	44.275	-0.32373	0.092773	-0.21875	-35.858	50.4708	20.442	0.15283	-0.094238	0.061035	-44.519	21.0952	24.2777	0.1042	0.20303	-0.058984
3.012	-41.285	17.0866	50.2451	0.11572	0.13525	-0.1416	-2.548	60.953	19.0605	-0.36158	0.14014	-0.24731	-37.19	19.2905	41.8099	0.13867	-0.08374	0.04541	-7.373	25.1335	19.3387	0.10879	0.22217	-0.062011
3.014	-34.431	20.035	52.1319	0.10962	0.11279	-0.12182	-49.099	63.697	9.5675	-0.38965	0.18457	-0.27588	-16.479	26.093	40.3827	0.11914	-0.063965	0.043457	-60.3296	19.4363	-12.8531	0.11074	0.24326	-0.06748
3.016	-32.968	28.44	46.939	0.097656	0.094238	-0.10547	3.033	4.975	29.309	-0.40869	0.23975	-0.30811	-36.531	-16.3836	52.731	0.10303	-0.032715	0.022949	3.07	30.7606	4.143	0.10674	0.2542	-0.073437
3.018	-36.91	32.229	27.911	0.078613	0.089355	-0.086914	-1.699	14.0651	25.3355	-0.40771	0.26123	-0.31982	-43.579	-2.428	40.313	0.090332	-0.019531	0.01416	-28.113	26.62	-0.173000000000002	0.10352	0.26123	-0.083984
3.02	-27.233	29.064	22.5874	0.0625	0.094727	-0.082031	-20.218	-7.94	43.217	-0.39648	0.29297	-0.33594	-58.231	-11.3263	66.118	0.068359	0.0097656	0.003418	-0.316000000000003	40.69135	21.0062	0.10508	0.26728	-0.093652
3.022	-6.72799999999999	16.7783	19.587	0.039551	0.10352	-0.072266	36.564	-25.4914	58.088	-0.3706	0.30737	-0.33008	-33.118	25.653	53.803	0.055908	0.034423	-0.0048828	-30.44	19.7608	5.6938	0.099709	0.27549	-0.11299
3.024	-25.561	22.5993	13.0197	0.027344	0.11523	-0.072021	-2.04	11.3208	28.282	-0.33691	0.31836	-0.32617	-51.6	14.812	60.586	0.045898	0.059082	-0.012207	19.674	22.4374	84.401	0.090332	0.2794	-0.12666
3.026	4.014	10.021	29.2433	0.010254	0.12939	-0.069824	8.938	-14.62444	34.214	-0.28613	0.31152	-0.30127	-30.844	31.648563	34.5282	0.02832	0.081055	-0.019531	-17.75	-4.2044	102.95432	0.072949	0.28731	-0.15254
3.028	-0.0360000000000014	6.628	39.1789	0.0058594	0.14502	-0.069824	14.235	12.5747	20.0962	-0.24194	0.29175	-0.27417	-36.781	2.7641	26.0133	0.018555	0.09375	-0.026367	-30.82	29.9035	171.123	0.051758	0.29053	-0.2002
3.03	15.869	15.7552	43.9834	0.0053711	0.15381	-0.055176	-60.372	53.815	25.728	-0.19873	0.26367	-0.24414	-24.469	19.455	17.1295	0.0068359	0.1123	-0.03418	-30.976	66.085	193.7014	0.017578	0.28731	-0.26679
3.032	-17.236	29.4953	26.6268	0.0019531	0.15674	-0.054199	-15.225	26.779	56.451	-0.15381	0.21289	-0.19385	-52.071	14.1246	19.1312	0.0009766	0.125	-0.045166	-25.33	92.158	274.9033	-0.025195	0.29492	-0.34912
3.034	-7.82100000000001	25.3262	24.0313	0.0041504	0.1604	-0.043701	-14.778	54.714	38.7987	-0.13281	0.18799	-0.16943	-40.752	44.316	18.1673	-0.0024414	0.13623	-0.048828	-71.942	91.337	355.488	-0.077148	0.31719	-0.43467
3.036	-13.391	21.2768	35.307	0.0029297	0.15723	-0.032227	-41.092	33.0836	38.8789	-0.084473	0.13477	-0.12207	-45.789	46.555	21.9367	-0.0053711	0.1543	-0.063477	-82.432	86.0949	463.677	-0.15019	0.33945	-0.53027
3.038	-22.519	24.5535	33.861	0.0073242	0.14941	-0.019531	2.42100000000001	9.6827	34.5409	-0.054444	0.10376	-0.078125	-20.18	27.662	35.531	-0.0043945	0.16309	-0.067383	-69.535	71.565	590.496	-0.23047	0.36328	-0.64063
3.04	-33.846	15.0345	22.23473	0.0087891	0.1416	-0.0073242	-69.2949	44.6233	14.325	-0.020508	0.072754	-0.050781	-30.78	11.5085	33.471	0.0073242	0.18799	-0.074219	-96.993	99.156	780.2966	-0.30713	0.40371	-0.74727
3.042	-54.146	6.8078	24.0278	0.015137	0.12744	0.0087891	-48.929	19.8106	29.509	0.020996	0.026855	-0.01709	-26.341	-4.243	49.7511	0.019287	0.20068	-0.080322	-73.635	144.4693	1029.992	-0.39463	0.44912	-0.86123
3.044	-42.477	12.4677	36.38274	0.023194	0.11084	0.024414	-36.857	27.509	25.5293	0.036621	0.011719	-0.0039063	-53.624	6.912	20.0201	0.033203	0.21338	-0.083984	-120.0264	108.5615	1206.5321	-0.4837	0.49287	-0.98548
3.046	-44.227	24.6452	15.6128	0.030273	0.089844	0.03418	-90.7437	29.821	19.8945	0.05957	-0.0097656	0.026855	-60.569	9.006	34.1385	0.055664	0.22363	-0.083496	-77.4109	42.952	1302.128	-0.57803	0.53506	-1.1092
3.048	-49.412	32.5867	11.8687	0.04248	0.06543	0.049316	-40.751	-19.09536	42.112	0.073975	-0.025147	0.045654	-66.913	36.758	14.518	0.064453	0.23291	-0.083008	-82.946	-62.6864	1363.122	-0.67627	0.604	-1.2241
3.05	-64.638	27.4397	14.7179	0.048828	0.051758	0.059082	-74.9631	9.3748	29.8288	0.083984	-0.03418	0.057617	-34.807	24.5144	25.16	0.077637	0.24023	-0.076172	-60.2681	-122.038	1509.478	-0.79492	0.71289	-1.3094
3.052	-54.115	28.72525	21.3294	0.068359	0.025391	0.066406	-81.0205	-6.436	49.0805	0.10303	-0.038086	0.077148	-35.66	33.187	37.9483	0.095215	0.24096	-0.07129	-139.867	-185.8754	1641.475	-0.91787	0.85361	-1.3589
3.054	-63.841	29.1171	21.5746	0.08374	0.0061037	0.073974	-30.072	-24.419	58.7561	0.11035	-0.045898	0.07666	-30.833	9.6961	44.34	0.10986	0.24561	-0.066895	-146.6682	-170.9225	1605.286	-1.035	1.0161	-1.3761
3.056	-76.085	23.2826	23.2767	0.098145	-0.020508	0.080566	-83.584	7.061	39.24863	0.12744	-0.048828	0.087402	-47.071	34.3572	33.3837	0.12402	0.23584	-0.058105	-178.584	-221.031	1462.125	-1.128	1.1878	-1.3768
3.058	-41.91	27.7268	42.6266	0.11084	-0.05127	0.079102	-52.322	-19.7633	51.081	0.13697	-0.052978	0.093994	-62.741	34.2879	36.0621	0.13721	0.22754	-0.051758	-96.6812	-249.727	1381.332	-1.1948	1.3403	-1.3628
3.06	-56.228	32.1694	33.64896	0.12109	-0.064453	0.076172	-19.699	-19.1158	39.3011	0.14893	-0.055176	0.098145	-50.416	62.652	-3.308	0.15967	0.2168	-0.041016	-72.1086	-317.48	1340.367	-1.2162	1.4506	-1.3721
3.062	-65.013	24.3095	31.1267	0.12939	-0.089844	0.068848	-54.02	21.7392	22.9113	0.16016	-0.061035	0.10156	-39.032	49.729	26.222	0.17139	0.19873	-0.034424	25.8039	-281.87	1316.499	-1.1785	1.5227	-1.3981
3.064	-60.986	21.4904	20.2934	0.13599	-0.1001	0.062256	-6.011	-3.8147	32.402	0.15918	-0.05957	0.10645	-31.07	63.397	36.53146	0.16895	0.1792	-0.032227	69.667	-262.93	1244.464	-1.1176	1.5422	-1.4481
3.066	-37.596	24.0078	36.4694	0.14893	-0.10938	0.048828	-20.638	43.302	8.867	0.16016	-0.063477	0.10059	-15.67	33.1904	42.852	0.15625	0.15186	-0.024902	111.738	-199.043	1182.844	-1.0542	1.5188	-1.4976
3.068	-41.751	21.9961	31.4959	0.16602	-0.12451	0.030273	-31.968	34.928	19.3449	0.1604	-0.062744	0.092774	-41.714	48.878	34.006	0.14404	0.1499	-0.026367	48.2813	-189.0251	1175.703	-1.0288	1.4858	-1.5308
3.07	-47.561	31.493	21.8504	0.17139	-0.12939	0.020996	17.818	5.7706	16.36	0.16211	-0.062012	0.086914	-51.488	20.6838	44.912	0.11377	0.16162	-0.050293	84.104	-103.966	1159.064	-1.0732	1.4705	-1.5549
3.072	-17.567	17.64132	16.6414	0.18359	-0.14111	0.0058594	-26.167	28.414	11.24	0.1626	-0.068848	0.078613	-53.316	43.151	36.7107	0.094239	0.17212	-0.067138	91.52	-88.7	1145.685	-1.1592	1.4755	-1.5698
3.074	-23.955	28.2329	22.2304	0.19335	-0.14355	-0.010742	-4.38	1.11	31.47	0.16797	-0.073242	0.074219	-30.362	9.4967	72.852	0.077148	0.19287	-0.086426	86.584	-21.74	1194.151	-1.2421	1.5208	-1.5667
3.076	12.258	31.893	33.308967	0.20557	-0.146	-0.027344	28.002	21.60563	24.6626	0.17871	-0.074707	0.061035	-15.897	22.1365	40.8947	0.064941	0.22168	-0.11475	17.235	-62.91	1229.354	-1.3026	1.583	-1.5494
3.078	-9.524	33.193	43.8395	0.21924	-0.14746	-0.042969	-26.432	43.316	3.6508	0.18482	-0.084229	0.054931	-36.103	-18.6815	34.6535	0.061035	0.24121	-0.12451	-30.264	-106.13	1313.6719	-1.314	1.647	-1.5347
3.08	7.947	20.0101	58.5784	0.22998	-0.15039	-0.057129	8.686	-8.907	24.862	0.19336	-0.097656	0.04248	-53.086	6.652	22.23667	0.045898	0.26563	-0.16309	-40.935	-174.6	1359.16	-1.2744	1.7014	-1.5107
3.082	-13.663	7.6335	78.06723	0.229	-0.15625	-0.084473	-14.087	17.56208	8.691	0.1958	-0.10254	0.028809	-70.3757	-10.00434	89.809	0.035645	0.26416	-0.2041	18.134	-245.4179	1370.511	-1.2023	1.7403	-1.4793
3.084	-17.647	4.0296	69.6647	0.22363	-0.15552	-0.11743	-35.024	1.237	17.9729	0.19336	-0.1001	0.019531	-37.168	36.3757	118.734	0.01123	0.24951	-0.26514	31.921	-345.106	1437.0888	-1.1246	1.7367	-1.4594
3.086	-1.643	5.9911	55.07051	0.20605	-0.14307	-0.1543	10.96	-15.18503	26.757	0.17969	-0.096191	-0.0029297	-44.888	38.2496	174.0497	-0.043457	0.22949	-0.38037	-21.169	-369.74	1469.906	-1.0446	1.6919	-1.4394
3.088	1.90199999999999	5.3627	73.9101	0.17969	-0.11621	-0.19385	-47.725	19.6732	14.055	0.17382	-0.087158	-0.020996	-11.343	75.3068	206.1504	-0.081055	0.22266	-0.44189	-6.827	-428.51	1529.343	-0.97949	1.6074	-1.417
3.09	-10.44	15.6638	83.665	0.16895	-0.095703	-0.21387	-30.14	-4.514	33.9646	0.17041	-0.073242	-0.03125	-52.736	69.1339	277.5113	-0.18018	0.23389	-0.57178	0.753	-379.79	1574.925	-0.92706	1.5007	-1.3907
3.092	-33.923	7.797	82.745	0.13965	-0.054688	-0.25977	-31.738	11.6544	15.7291	0.17236	-0.058594	-0.057617	-89.527	99.604	350.6416	-0.26758	0.25171	-0.68189	-11.463	-351.6	1697.269	-0.89532	1.3883	-1.3813
3.094	-24.978	3.85197	116.982	0.11963	-0.016602	-0.30762	-77.0267	40.9121	8.4753	0.17871	-0.049316	-0.071289	-102.019	104.56577	435.3957	-0.34326	0.27246	-0.79248	-63.736	-266.441	1745.745	-0.87462	1.2926	-1.3988
3.096	-20.109	8.998	162.888	0.11523	0.0043945	-0.33447	-33.633	16.1122	32.952	0.18652	-0.038086	-0.085938	-53.519	135.547	514.236	-0.43701	0.31201	-0.94873	-83.808	-217.578	1799.144	-0.87949	1.2229	-1.4451
3.098	-3.034	18.712	213.534	0.10693	0.041016	-0.37842	-45.203	49.536	26.3696	0.18945	-0.033447	-0.10181	-89.647	129.376	645.458	-0.51636	0.35767	-1.071	-188.4267	-143.853	1750.187	-0.89551	1.1729	-1.5254
3.1	-11.32	36.639	210.8399	0.095459	0.063477	-0.41406	-78.56	46.1286	23.2678	0.19141	-0.03125	-0.10986	-56.066	174.0849	833.409	-0.60156	0.40332	-1.2051	-248.949	-73.348	1748.535	-0.93645	1.1534	-1.6376
3.102	-22.29	63.944	218.3793	0.082031	0.081055	-0.45117	-42.783	20.9125	19.5708	0.18799	-0.031738	-0.12354	-42.872	140.48	982.03	-0.72021	0.51025	-1.3608	-284.249	19.397	1742.9746	-0.97903	1.1779	-1.7598
3.104	-26.821	88.7505	264.559	0.047852	0.10254	-0.51416	-90.9379	54.029	15.169	0.18408	-0.030273	-0.13477	-56.901	114.6963	1104.317	-0.77783	0.58984	-1.418	-235.477	23.279	1769.7966	-1.0271	1.2369	-1.8867
3.106	-34.55	114.915	312.3098	0.029297	0.11279	-0.5498	-63.233	23.251	34.3591	0.17432	-0.026855	-0.1416	-73.9092	46.892	1226.437	-0.91699	0.79004	-1.4844	-229.454	16.69	1746.633	-1.0689	1.325	-2.0061
3.108	-15.477	122.2825	394.1267	-0.030273	0.13916	-0.62158	-39.585	19.5555	44.2959	0.16626	-0.019288	-0.1477	-19.617	-16.8621	1320.3271	-1.0149	0.98073	-1.5037	-194.858	-10.09	1744.878	-1.1113	1.4277	-2.1211
3.11	-28.482	114.73924	460.1262	-0.091795	0.17627	-0.69092	-70.3853	39.43044	26.64836	0.15674	-0.016113	-0.15479	-57.72	-90.445	1432.542	-1.1016	1.1914	-1.498	-209.953	-13.196	1701.375	-1.155	1.5555	-2.2319
3.112	-25.725	106.4519	524.3152	-0.16309	0.22363	-0.76953	-28.001	-4.2749	29.128	0.13965	-0.01416	-0.16748	-62.512	-114.5617	1451.27	-1.2012	1.498	-1.4746	-177.951	-19.6084	1717.508	-1.2056	1.6848	-2.3247
3.114	-56.1	82.3424	597.847	-0.27979	0.32568	-0.87158	-36.886	17.0384	36.9038	0.13281	-0.012207	-0.16602	-96.97	-140.487	1359.043	-1.2358	1.6333	-1.4604	-148.854	-54.653	1775.23	-1.2629	1.8249	-2.4078
3.116	-36.892	76.829	648.553	-0.33643	0.38672	-0.93018	-52.433	8.146	55.446	0.12646	-0.0058594	-0.18115	-72.092	-169.192	1301.007	-1.2598	1.834	-1.4658	-122.976	-108.115	1835.873	-1.3279	1.9785	-2.4833
3.118	-4.597	75.02	695.896	-0.44678	0.53564	-1.0269	1.334	-13.6384	53.214	0.12671	-0.0036621	-0.18164	-85.61143	-182.702	1247.026	-1.2427	1.8989	-1.4819	-101.968	-159.629	1861.366	-1.3789	2.127	-2.5488
3.12	-22.384	60.445	731.202	-0.5227	0.64868	-1.1027	-28.496	21.42653	32.9162	0.12305	-0.0043945	-0.18555	-37.536	-190.922	1179.504	-1.2012	1.8965	-1.4961	-133.5107	-174.082	1847.342	-1.4051	2.2618	-2.5923
3.122	-16.634	10.638	736.8654	-0.57959	0.76416	-1.1675	5.069	-4.0155	41.3744	0.12451	-0.0053711	-0.18896	12.2937	-173.323	1147.541	-1.1289	1.7871	-1.5313	-133.1406	-174.225	1829.786	-1.4192	2.3478	-2.6145
3.124	-62.859	-31.2855	749.6303	-0.62158	0.90283	-1.2202	-6.545	9.8196	48.4196	0.12598	-0.013184	-0.18896	52.036	-171.291	1122.9983	-1.105	1.7134	-1.5425	-161.4364	-138.766	1803.438	-1.4273	2.397	-2.6082
3.126	-24.012	-50.779	771.589	-0.62109	0.95898	-1.2324	-32.077	36.45595	40.5753	0.12939	-0.020508	-0.19238	46.575	-121.89	1091.8498	-1.0776	1.5845	-1.5522	-92.678	-89.1379	1783.805	-1.4367	2.4007	-2.5812
3.128	-30.276	-47.735	769.54	-0.58398	1.0078	-1.2402	17.865	5.1972	41.401	0.13623	-0.035645	-0.19165	33.253	-104.632	1099.6211	-1.07	1.51	-1.5652	-87.03	-26.77	1720.2119	-1.4507	2.3677	-2.5444
3.13	-21.214	-39.7344	758.286	-0.52465	0.9895	-1.2185	-10.767	26.7209	25.0577	0.14258	-0.057617	-0.19141	40.276	-28.08	1089.0892	-1.0483	1.4595	-1.5815	-6.116	12.934	1689.571	-1.4735	2.3022	-2.4958
3.132	-58.667	-40.9852	741.529	-0.4585	0.92822	-1.187	-19.133	18.5965	23.9765	0.14746	-0.085449	-0.20361	48.779	-10.32	1122.7847	-0.98535	1.4751	-1.562	23.38	42.0287	1639.135	-1.502	2.2117	-2.4314
3.134	-70.704	-45.484	738.938158	-0.37256	0.78369	-1.1343	16.906	-9.1156	49.56909	0.14502	-0.10352	-0.21631	6.379	10.56	1178.513	-0.95068	1.5083	-1.5425	33.037	69.525	1630.531	-1.529	2.1079	-2.3596
3.136	-41.222	-41.64	759.038	-0.3501	0.69922	-1.1133	-14.463	11.8506	53.057	0.13428	-0.13428	-0.24072	-47.641	-84.35	1256.626	-0.87256	1.5903	-1.521	-0.637	115.36	1594.2292	-1.5397	2.0088	-2.2971
3.138	-39.134	-14.6383	745.088	-0.33398	0.52832	-1.0723	-19.255	-20.2902	70.1636	0.10913	-0.12964	-0.26123	-67.284	-114.8	1298.853	-0.8103	1.6194	-1.5095	23.733	171.575	1600.262	-1.5386	1.9263	-2.2358
3.14	-18.438	9.879	743.962	-0.35132	0.42602	-1.0574	2.11	-32.3944	76.54053	0.064453	-0.10645	-0.28857	-52.03	-209.702	1354.681	-0.75244	1.6079	-1.5151	-20.279	186.467	1562.006	-1.5101	1.8645	-2.1794
3.142	-41.001	2.84200000000001	747.9282	-0.38281	0.35547	-1.0703	-45.6331	-32.86	98.4045	-0.025391	-0.047852	-0.34521	-64.358	-264.904	1384.6459	-0.68555	1.5117	-1.5391	-48.954	184.913	1551.832	-1.4862	1.8087	-2.1189
3.144	-42.757	-17.304	763.295	-0.44141	0.33594	-1.1191	-15.293	-85.868	144.8956	-0.070801	-0.015137	-0.37695	-83.941	-342.313	1418.25	-0.6543	1.4492	-1.5586	-119.268	152.339	1518.87	-1.4587	1.7605	-2.0597
3.146	-65.9167	-34.201	772.752	-0.47021	0.36621	-1.1538	-45.5221	-59.80165	165.427	-0.14697	0.054688	-0.43994	-79.064	-350.53	1458.39	-0.62451	1.2993	-1.5854	-111.992	163.802	1555.0922	-1.4212	1.7062	-1.998
3.148	-44.465	-63.675	800.8864	-0.50146	0.46924	-1.2202	-43.0986	-70.128	186.665	-0.20093	0.10645	-0.48951	-24.708	-386.91	1513.6252	-0.61914	1.1909	-1.6128	-155.033	152.326	1551.9248	-1.3726	1.6567	-1.9292
3.15	-35.071	-107.9344	836.62604	-0.51343	0.55957	-1.2703	7.276	-89.713	265.6949	-0.25146	0.1582	-0.53369	-16.55	-349.49	1592.632	-0.62256	1.0933	-1.6362	-153.535	153.76	1584.624	-1.3188	1.5935	-1.8715
3.152	-45.785	-155.5	855.2289	-0.51318	0.64697	-1.3188	-50.7898	-21.6745	313.77	-0.31836	0.22852	-0.60547	-40.4	-306.387	1677.483	-0.62695	0.98535	-1.6934	-186.398	119.8524	1548.03267	-1.2592	1.5304	-1.8013
3.154	-48.211	-174.856	865.8133	-0.47998	0.72607	-1.3608	-49.898	-15.692	386.588	-0.35645	0.25732	-0.64258	-82.514	-217.312	1701.393	-0.62891	0.95508	-1.7285	-139.8656	105.468	1531.077	-1.1931	1.4653	-1.7283
3.156	-47.3472	-178.967	882.5694	-0.45166	0.74268	-1.3745	-34.295	29.165	473.7	-0.44141	0.32031	-0.73047	-136.594	-168.211	1704.571	-0.62256	0.93213	-1.8159	-152.712	107.589	1505.621	-1.127	1.3944	-1.6529
3.158	-15.931	-179.078	936.1268	-0.39502	0.73486	-1.3872	-58.136	81.1439	579.724	-0.521	0.38428	-0.79785	-186.6795	-91.15484	1694.6376	-0.61402	0.93189	-1.9021	-147.357	125.23	1483.467	-1.0698	1.313	-1.5757
3.16	-8.432	-182.551	984.138	-0.35546	0.71069	-1.3933	-22.955	75.8426	701.18407	-0.60742	0.45313	-0.86621	-226.603	-41.991	1716.87206	-0.61279	0.93994	-1.9976	-160.604	134.78	1460.765	-1.0103	1.2341	-1.4971
3.162	-15.556	-173.486	1031.051	-0.32959	0.68408	-1.396	-38.927	108.612	780.9243	-0.75439	0.57129	-0.97217	-194.36408	15.59	1736.10372	-0.62695	0.97461	-2.1289	-156.685	155.707	1408.764	-0.95301	1.1594	-1.419
3.164	-11.52	-173.9	1087.74085	-0.33496	0.64404	-1.4233	-61.219	107.6971	868.2713	-0.82764	0.63525	-1.0317	-187.495	28.008	1715.3728	-0.63721	1.0083	-2.1831	-129.432	203.353	1329.4021	-0.89866	1.0805	-1.3426
3.166	-10.915	-126.277	1122.2085	-0.34326	0.62939	-1.4487	-18.25	64.161	934.9268	-0.9917	0.7915	-1.1323	-192.379	16.799	1701.797	-0.67236	1.1079	-2.2847	-105.6286	251.503	1258.322	-0.84022	1.0082	-1.2672
3.168	21.928	-87.8031	1162.91	-0.38623	0.62939	-1.5171	-85.3086	58.604	992.7204	-1.0984	0.92505	-1.199	-202.09	6.319	1684.958	-0.70215	1.2222	-2.3569	-82.16	284.15	1224.421	-0.77393	0.94385	-1.189
3.17	-8.053	-56.728	1181.017	-0.43408	0.66431	-1.5808	-57.441	-19.688	1024.199	-1.1895	1.0566	-1.2607	-157.633	-11.0843	1697.811	-0.73047	1.3506	-2.4355	-130.4561	284.104	1179.31	-0.70162	0.88236	-1.1094
3.172	7.07400000000001	-45.304	1185.217	-0.48193	0.72607	-1.644	0.446000000000005	-58.598	1007.7928	-1.25	1.1992	-1.3203	-139.12	-25.5941	1731.084	-0.7915	1.5337	-2.5015	-72.5846	306.832	1155.7152	-0.62758	0.81966	-1.0262
3.174	-1.057	-45.534	1197.743	-0.5293	0.83301	-1.7227	7.804	-83.5199	1013.44609	-1.238	1.2517	-1.3494	-90.632	-84.013	1786.256	-0.83838	1.6177	-2.5288	-72.259	251.039	1087.049	-0.54132	0.75763	-0.93599
3.176	20.518	-43.35	1211.229	-0.54346	0.8877	-1.7559	13.5332	-156.762	1039.72	-1.1963	1.2754	-1.3672	-88.2	-116.431	1827.041	-0.95703	1.7959	-2.584	27.7477	249.018	1046.0409	-0.45698	0.69433	-0.85269
3.178	16.426	-60.424	1243.7349	-0.55273	0.97266	-1.8066	-34.1713	-150.085	1001.399	-1.0874	1.2505	-1.3726	-87.664	-161.22	1877.88	-1.0481	1.9212	-2.6277	22.435	212.4856	983.344	-0.36865	0.63037	-0.76709
3.18	12.55	-91.73039	1268.6146	-0.54907	1.0283	-1.8301	-42.8422	-171.596	946.854	-1.0278	1.2183	-1.3608	-132.9672	-132.646	1880.379	-1.1523	2.0215	-2.6641	87.97104	224.633	942.2225	-0.28503	0.55681	-0.68318
3.182	31.268	-105.3195	1259.2528	-0.53857	1.061	-1.8354	11.323	-195.391	881.419	-0.91455	1.1099	-1.3315	-136.133	-116.762	1879.16	-1.2847	2.1177	-2.6968	68.6126	187.927	878.538	-0.20791	0.48465	-0.59549
3.184	-6.659	-116.22	1250.5108	-0.52148	1.0591	-1.812	-20.578	-161.169	817.618	-0.86646	0.99929	-1.3064	-143.671	-40.5475	1853.142	-1.3359	2.1582	-2.7051	129.996	176.341	839.572	-0.13326	0.41431	-0.52126
3.186	-5.029	-111.542	1264.7896	-0.51758	1.0469	-1.8008	-36.029	-151.198	785.867	-0.84082	0.87012	-1.2715	-88.433	-32.566	1819.24	-1.4248	2.2188	-2.7188	103.699	137.365	792.685	-0.066532	0.34925	-0.44417
3.188	-11.403	-116.135	1297.9766	-0.50293	0.99512	-1.7832	-27.872	-94.189	740.361	-0.82227	0.69922	-1.2227	-81.496	31.159	1780.265	-1.4614	2.2463	-2.7156	161.207	157.265	753.959	-0.010254	0.28076	-0.36475
3.19	2.55	-108.717	1336.142	-0.49316	0.93506	-1.7666	-62.893	-39.41	707.073	-0.80811	0.62354	-1.2085	-64.456	30.8527	1769.967	-1.4878	2.2505	-2.6909	116.355	187.2425	673.096	0.037119	0.22255	-0.29071
3.192	-22.461	-116.049	1350.761	-0.49902	0.86328	-1.748	-35.81	-50.044	728.8043	-0.7749	0.51025	-1.2104	-39.21	99.636	1749.556	-1.5132	2.2017	-2.6421	106.708	231.219	604.0338	0.081655	0.16122	-0.21756
3.194	-14.026	-106.193	1355.2	-0.53076	0.76611	-1.7505	-36.142	-28.31	732.925	-0.74463	0.48754	-1.2153	-32.759	85.418	1739.3062	-1.5171	2.1821	-2.6167	57.166	249.471	524.104	0.13361	0.10145	-0.15272
3.196	-3.954	-95.179	1366.1439	-0.55273	0.74023	-1.7637	-49.795	-64.722	757.648	-0.71436	0.50293	-1.2378	-53.511	146.437	1713.4683	-1.5151	2.106	-2.5483	18.096	266.087	462.174	0.17725	0.032804	-0.083098
3.198	-22.122	-84.9711	1369.08	-0.61133	0.74316	-1.8301	-9.982	-102.024	791.807	-0.67578	0.55176	-1.2754	-50.297	124.3618	1685.793	-1.5005	2.0347	-2.4878	8.257	270.094	398.211	0.2168	-0.039063	-0.021973
3.2	-5.985	-48.4483	1352.5132	-0.66992	0.79785	-1.8946	-46.92022	-140.136	809.871	-0.65234	0.58203	-1.291	-63.972	180.646	1640.976	-1.4761	1.9556	-2.4331	10.214	248.0599	360.783	0.2624	-0.10937	0.035934
3.202	-4.866	-37.432	1329.6187	-0.71875	0.87305	-1.9668	-40.866	-224.149	878.55	-0.59277	0.625	-1.3281	-110.542	138.7793	1638.773	-1.4292	1.8696	-2.3511	10.381	252.648	316.4835	0.30458	-0.1786	0.089253
3.204	-2.825	-38.9205	1336.964	-0.76953	0.99414	-2.0547	35.847	-269.075	952.0848	-0.53516	0.63965	-1.3506	-140.957	177.046	1641.7282	-1.4121	1.8398	-2.3125	3.206	216.5474	273.579	0.34248	-0.25478	0.13926
3.206	-8.712	-42.08489	1344.212	-0.78516	1.043	-2.0977	-29.564	-310.191	1002.856	-0.47998	0.63623	-1.3784	-161.9535	97.826	1672.801	-1.3613	1.793	-2.2383	2.371	233.608	229.058	0.37891	-0.3333	0.18476
3.208	-11.222	-31.3977	1361.201	-0.80664	1.1113	-2.1406	6.0511	-360.033	1073.7673	-0.43701	0.62158	-1.4253	-163.9297	108.074	1653.693	-1.3108	1.7522	-2.1745	-51.9006	187.167	175.78	0.41309	-0.4165	0.22559
3.21	26.7705	-22.3081	1386.668	-0.82226	1.1406	-2.164	-9.635	-357.29	1120.641	-0.43848	0.61133	-1.4492	-182.388	34.1955	1672.115	-1.2593	1.7075	-2.103	-56.2416	174.942	160.1949	0.43643	-0.49395	0.26143
3.212	24.8593	-10.151	1411.8346	-0.83252	1.1528	-2.1772	-66.276	-356.3	1185.9446	-0.48242	0.64648	-1.5156	-168.6733	82.715	1635.282016	-1.1855	1.6348	-2.002	-102.732	119.633	118.756	0.45977	-0.57461	0.29063
3.214	54.311	-18.977	1424.3619	-0.8418	1.166	-2.1875	20.338	-319.465	1243.806	-0.53906	0.71192	-1.5708	-153.6943	31.438	1618.072	-1.1504	1.5938	-1.9551	-140.82	92.867	134.105	0.475	-0.65235	0.31367
3.216	25.902	-20.43	1422.6008	-0.84912	1.1724	-2.189	22.252	-270.101	1280.945	-0.60791	0.79248	-1.6265	-149.265	122.387	1577.886	-1.0757	1.5103	-1.8452	-165.57	52.681	146.314	0.47627	-0.72725	0.32871
3.218	44.5688	-22.052	1455.361	-0.84082	1.1514	-2.1875	18.922	-255.565	1321.955	-0.66309	0.91406	-1.7012	-164.783	108.641	1536.514	-1.0163	1.4319	-1.7679	-100.2954	50.434	154.422	0.46826	-0.78857	0.34229
3.22	40.2135	-24.782	1464.379	-0.84204	1.1155	-2.1716	34.966	-208.2675	1331.974	-0.68311	0.97607	-1.7319	-131.0616	178.639	1477.6555	-0.95313	1.3516	-1.6855	-134.245	27.733	127.839	0.45605	-0.8418	0.34063
3.222	60.011	-28.759323	1455.289	-0.8374	1.0708	-2.1479	-7.756	-175.845	1327.5683	-0.69092	1.0806	-1.7749	-114.0939	164.151	1453.1524	-0.875	1.2324	-1.5645	-78.5531	19.829	106.57	0.43213	-0.87539	0.32149
3.224	58.592	-42.664	1447.49	-0.83203	1.0156	-2.127	27.7413	-147.643	1325.0302	-0.68359	1.1426	-1.8038	-88.977	256.512	1397.0282	-0.84131	1.1743	-1.5054	-80.2183	-12.194	84.1516	0.38408	-0.89453	0.29531
3.226	47.964	-44.632	1426.7062	-0.81592	0.99072	-2.1167	30.9927	-86.748	1300.839	-0.66504	1.1777	-1.8301	-99.723	253.888	1370.0101	-0.76611	1.0669	-1.3882	-27.453	6.229	102.8607	0.31172	-0.8875	0.25771
3.228	57.572	-36.527	1425.18497	-0.77295	0.93994	-2.105	18.984	-98.894	1302.764	-0.63623	1.1782	-1.8608	-70.185	343.466	1303.797	-0.70996	0.99803	-1.3028	-23.143	7.983	47.938	0.21484	-0.85547	0.19873
3.23	57.4795	-10.7622	1395.1981	-0.74292	0.90551	-2.0876	68.85108	-122.8	1313.549	-0.62695	1.1621	-1.8809	-119.9491	297.046	1277.737	-0.64844	0.93066	-1.2188	50.292	15.7882	47.159	0.10127	-0.79082	0.1335
3.232	50.0907	10.0112	1403.882	-0.70898	0.88477	-2.0625	27.105	-139.091	1345.592	-0.63818	1.1021	-1.9253	-98.9088	321.779	1224.4798	-0.56006	0.84424	-1.0972	-4.754	18.19019	3.3424	-0.034472	-0.69492	0.053515
3.234	46.8801	18.7339	1401.4992	-0.66553	0.86768	-2.0405	21.715	-186.9315	1400.5839	-0.68726	1.0837	-1.9558	-66.345	253.797	1202.665	-0.48803	0.7898	-0.99828	7.78599999999999	0.635999999999999	2.461	-0.18525	-0.56562	-0.045313
3.236	51.14	18.2569	1402.3527	-0.63379	0.84766	-2.0264	61.77	-191.0034	1440.759	-0.77148	1.082	-2.0039	-9.932	280.55	1134.153	-0.42676	0.72461	-0.91699	8.19900000000001	26.1365	-21.431	-0.34746	-0.40732	-0.15449
3.238	14.0137	26.2279	1402.8776	-0.60303	0.82275	-2.0093	18.9266	-222.373	1461.764	-0.9082	1.1367	-2.0645	3.407	230.447	1104.478	-0.32959	0.64404	-0.81006	7.544	34.588	2.873	-0.49805	-0.23584	-0.2666
3.24	20.96505	35.941	1393.263	-0.56982	0.79736	-1.98	37.5162	-262.962	1505.371	-0.9707	1.168	-2.0957	32.13	253.497	1051.939	-0.27783	0.60938	-0.75	35.516	57.02	12.048	-0.64062	-0.063768	-0.36856
3.242	22.476	38.988	1381.6861	-0.56494	0.77783	-1.9663	41.0966	-228.124	1502.305	-1.0625	1.252	-2.1523	16.698	188.323	1012.845	-0.18408	0.53711	-0.63672	60.226	21.64	40.111	-0.76045	0.10537	-0.45889
3.244	-9.283	45.158	1350.3764	-0.55811	0.76416	-1.9351	1.1843	-234.641	1523.5667	-1.1016	1.2871	-2.1856	44.447	220.819	940.307	-0.12109	0.48169	-0.55908	35.233	28.967	35.0748	-0.85927	0.2667	-0.54131
3.246	-13.805	42.43674	1323.4086	-0.56372	0.76685	-1.9158	54.941	-205.872	1570.764	-1.1289	1.3066	-2.207	64.4419	180.471	917.543	-0.060059	0.42041	-0.48096	3.78	-3.01	3.023	-0.92549	0.42383	-0.61455
3.248	-16.0742	29.407	1311.9076	-0.58105	0.76074	-1.916	38.4496	-181.684	1562.498	-1.1348	1.3008	-2.2207	85.554	232.589	864.4096	0.02002	0.32959	-0.38232	37.479	30.5535	1.8979	-0.97607	0.57959	-0.68115
3.25	0.34	9.797	1314.941	-0.59668	0.75	-1.8887	17.6113	-187.112	1568.639	-1.1328	1.293	-2.2168	47.568	222.478	856.664	0.064941	0.28516	-0.33789	-14.614	-8.2036	16.9346	-1.0058	0.71748	-0.73174
3.252	-0.8985	-5.378	1327.335	-0.59521	0.75244	-1.8647	52.879	-121.81026	1532.0241	-1.1235	1.2632	-2.1792	49.1701	294.6	764.6826	0.12549	0.18652	-0.24609	18.672	14.742	15.6617	-1.0194	0.85049	-0.7665
3.254	8.68	13.389	1302.7116	-0.60498	0.75244	-1.8413	18.3166	-95.5936	1493.344	-1.1207	1.2178	-2.1421	4.314	277.786	697.528	0.17041	0.11279	-0.17652	-42.542	-18.358	-2.862	-1.012	0.95322	-0.79112
3.256	8.772	17.429	1301.0513	-0.60864	0.76294	-1.8201	56.455	-63.17712	1519.91	-1.1162	1.1602	-2.1055	9.55	320.418	610.141	0.21826	0.050781	-0.10303	-41.663	14.197	15.2327	-0.97891	1.0311	-0.79863
3.258	0.988	48.0314	1270.5077	-0.61084	0.75635	-1.8062	64.556	-1.963	1495.307	-1.1216	1.0659	-2.0405	-19.048	276.998	566.481	0.26904	-0.027344	0.0014648	-110.815	-4.787	21.82287	-0.91553	1.0649	-0.78076
3.26	6.159	63.8881	1250.5228	-0.59961	0.75439	-1.7573	17.8989	-0.883000000000003	1506.54	-1.1323	1.0181	-2.0093	1.818	285.454	501.8335	0.30029	-0.072754	0.044922	-89.1751	51.3395	81.564	-0.829	1.0565	-0.75088
3.262	-15.922	96.923	1245.1451	-0.59473	0.75195	-1.7402	81.814	29.707	1535.996	-1.1577	0.94385	-1.9585	-15.0938	238.843	446.79	0.35352	-0.18213	0.12256	-126.429	54.891	47.643	-0.71875	0.9996	-0.70332
3.264	16.019	93.684	1236.931	-0.58984	0.74316	-1.7031	61.995	10.859	1541.525	-1.1848	0.92114	-1.9431	24.097	263.0198	366.877	0.40039	-0.27002	0.17725	-89.2701	88.966	35.372	-0.59687	0.88242	-0.63926
3.266	-12.0818	102.133	1226.2898	-0.58814	0.74048	-1.6736	49.125	-38.098	1564.2139	-1.2202	0.92041	-1.9272	-31.7705	212.7094	322.8	0.44678	-0.35889	0.22559	-138.444	68.519	19.073	-0.47998	0.72256	-0.5582
3.268	7.358	99.779	1181.6914	-0.59033	0.72705	-1.6421	91.424	-37.72	1562.966	-1.2573	0.96729	-1.937	-29.81	212.973	267.386	0.49219	-0.49414	0.29297	-124.693	56.299	44.5197	-0.36523	0.54395	-0.4707
3.27	4.925	102.3631	1150.4893	-0.57715	0.71094	-1.5957	51.35	-67.4333	1544.0388	-1.272	0.99854	-1.9429	-44.44	169.241	222.236	0.49561	-0.55664	0.31934	-134.777	32.8855	43.089	-0.26055	0.37276	-0.38164
3.272	26.588	105.3991	1109.0176	-0.57227	0.70117	-1.5713	72.874	-80.313	1573.954	-1.2832	1.0508	-1.957	-31.543	193.706	186.7863	0.49121	-0.67383	0.35449	-102.8631	28.483	64.917	-0.15869	0.21875	-0.31084
3.274	16.863	103.4788	1090.7684	-0.55469	0.67285	-1.5254	76.184	-86.841	1573.585	-1.2739	1.0801	-1.9648	-60.8163	147.4594	184.61259	0.46362	-0.74243	0.37158	-86.0608	19.486	31.96703	-0.076269	0.09375	-0.23936
3.276	31.197	98.1805	1062.473	-0.53467	0.65332	-1.4839	60.324	-118.835	1577.847	-1.2559	1.0957	-1.9629	-28.092	140.726	207.228	0.44336	-0.78906	0.37842	-70.2341	2.086	53.4511	-3.998e-07	-0.0079104	-0.19053
3.278	22.854	88.3545	1061.0359	-0.51367	0.63086	-1.4355	116.539	-100.349	1580.542	-1.2266	1.0879	-1.9434	-58.8643	74.0615	187.797	0.42676	-0.87109	0.39404	-55.597	3.801	35.5524	0.063477	-0.085449	-0.14893
3.28	10.87	84.1179	1051.8866	-0.48535	0.59717	-1.3789	92.677	-64.268	1532.063	-1.209	1.0781	-1.9316	-80.5229	66.99	152.864	0.41455	-0.90967	0.396	-35.664	-12.146	57.427	0.10401	-0.13955	-0.11807
3.282	15.694	93.7021	1055.884	-0.46729	0.58154	-1.3452	62.766	-48.13	1521.432	-1.1714	1.0474	-1.894	-63.9738	33.8683	106.026	0.35254	-0.9585	0.36279	-15.029	4.0316	45.879	0.1375	-0.17744	-0.099025
3.284	8.796	100.596	1026.6	-0.42969	0.54492	-1.2793	79.376	14.0011	1494.5481	-1.1353	1.0171	-1.8706	-30.732	54.064	65.5341	0.28248	-0.95508	0.30908	-16.174	-31.9712	76.924	0.14883	-0.19697	-0.086524
3.286	-25.208	101.1865	995.946	-0.40893	0.52246	-1.2324	41.652	54.854	1460.0802	-1.0938	0.98633	-1.8379	-51.868	41.082	44.1224	0.18896	-0.91113	0.25098	3.575	-9.536	54.4295	0.14355	-0.20508	-0.083301
3.288	-34.129	100.9474	960.5059	-0.38672	0.49609	-1.1885	73.806	83.446	1463.752	-1.043	0.95508	-1.7949	-1.326	60.597	30.1736	0.029297	-0.77881	0.12646	11.149	-36.0916	38.602	0.13135	-0.20068	-0.087402
3.29	-44.435	112.9386	921.3117	-0.35352	0.46631	-1.1348	89.52	115.336	1440.1609	-1.0195	0.9375	-1.7793	10.115	25.862	-3.962	-0.056641	-0.69482	0.060059	36.929	7.418	31.406	0.11358	-0.18174	-0.094532
3.292	-32.926	128.4479	900.4476	-0.33936	0.45313	-1.1108	23.4526	103.614	1429.954946	-0.97803	0.91455	-1.7397	-1.003	30.741	10.229	-0.23096	-0.48779	-0.09082	4.468	-7.537	19.9735	0.098535	-0.16211	-0.099904
3.294	-50.643	126.5809	867.4297	-0.31641	0.42383	-1.0498	67.375	122.738	1415.597349	-0.95313	0.90332	-1.7144	-5.117	-0.728999999999999	-1.566	-0.34912	-0.32031	-0.20606	25.503	36.8886	23.6121	0.093066	-0.1375	-0.099511
3.296	-34.893	122.7623	841.8693	-0.29638	0.40747	-1.0115	30.079	125.403	1372.008	-0.9292	0.89502	-1.687	16.512	27.393	16.7465	-0.45361	-0.15137	-0.31982	31.953	20.9134	9.0943	0.09746	-0.11768	-0.095215
3.298	-46.002	133.5435	797.627	-0.27441	0.396	-0.9707	23.8252	94.953	1360.013	-0.90186	0.89502	-1.6577	4.72	53.201	4.7235	-0.58789	0.082031	-0.45801	56.392	50.609	1.0051	0.11084	-0.10156	-0.09668
3.3	-44.189	147.7346	757.896	-0.24902	0.37695	-0.91602	72.044	80.159	1357.9618	-0.88672	0.89063	-1.6387	3.906	85.281	32.925	-0.64404	0.20557	-0.52295	15.143	13.04368	-6.6479	0.12881	-0.1044	-0.075782
3.302	-61.773	155.8697	741.2708	-0.23535	0.36865	-0.88623	14.8781	39.795	1333.021	-0.86279	0.8833	-1.6089	-22.808	68.988	27.1195	-0.72998	0.45264	-0.63916	36.636	33.786	20.6924	0.1543	-0.11787	-0.05791
3.304	-44.182	159.2121	712.2987	-0.20459	0.35303	-0.84326	35.465	12.793	1344.763	-0.84106	0.87329	-1.5744	-13.796	54.452	58.399	-0.77295	0.61572	-0.70801	-9.863	17.9207	1.226	0.17656	-0.14248	-0.036425
3.306	-46.449	144.9536	689.0478	-0.18579	0.3335	-0.80225	31.85	36.821	1319.0775	-0.82324	0.86133	-1.5469	-35.165	15.9261	36.696	-0.80273	0.75293	-0.75	-29.541	37.38	20.2238	0.19414	-0.17168	-0.016211
3.308	-85.2293	142.665	656.2091	-0.16943	0.32373	-0.76904	-9.16227	37.12	1286.246	-0.78906	0.84766	-1.4961	-39.689	11.778	44.918	-0.80078	0.875	-0.79688	-62.7241	29.005	-17.484	0.2041	-0.19775	0.010742
3.31	-72.734	128.044	635.4115	-0.14453	0.31055	-0.72266	40.756	49.688	1278.044	-0.77295	0.83447	-1.4741	-27.948	1.809	26.139	-0.78564	0.91846	-0.80225	-76.8389	21.70168	27.09189	0.20772	-0.22363	0.031055
3.312	-51.37	138.337	606.3413	-0.13379	0.30762	-0.69922	-5.189	83.665	1205.291	-0.73633	0.79883	-1.4199	-30.149	11.075	26.549	-0.71777	0.96875	-0.80957	-107.556	14.5967	13.81	0.1959	-0.2415	0.050195
3.314	-41.284	141.4485	552.5572	-0.11523	0.29248	-0.65234	-11.092	96.432	1155.942	-0.70313	0.76904	-1.3784	-38.027	5.771	18.574	-0.64722	0.96314	-0.77221	-88.559	8.453	64.209	0.17598	-0.24892	0.059571
3.316	-50.496	134.2318	524.24	-0.10156	0.28784	-0.61499	50.8127	134.352	1126.683	-0.67285	0.72656	-1.3262	-78.99	12.865	12.208	-0.56885	0.91846	-0.729	-113.054	22.528	29.79	0.14561	-0.24453	0.0625
3.318	-26.511	115.528	501.8543	-0.081055	0.28418	-0.57568	-2.997	177.359	1084.821	-0.62842	0.67822	-1.2632	-62.081	30.5545	23.1468	-0.45264	0.80811	-0.64746	-123.4965	9.186	46.148	0.11328	-0.2334	0.063477
3.32	-22.311	103.172	491.1386	-0.054688	0.27588	-0.52979	22.091	170.687	1075.8035	-0.59643	0.6438	-1.2155	-79.2939	47.873	68.415	-0.39795	0.73486	-0.60303	-108.755	45.5349	31.915	0.082226	-0.21172	0.055078
3.322	-20.589	105.114	444.7116	-0.04248	0.27393	-0.50537	48.3685	199.811	1025.0129	-0.56006	0.60791	-1.1675	-86.2582	61.422	66.288	-0.30371	0.55664	-0.50049	-114.316	24.674	30.562	0.055664	-0.1833	0.043652
3.324	-12.887	111.5679	416.366	-0.012207	0.26367	-0.45313	-13.936	190.22	957.647	-0.51563	0.5625	-1.0996	-92.7301	58.592	90.522	-0.24023	0.42529	-0.42529	-68.605	52.3994	33.2489	0.038476	-0.15908	0.032324
3.326	-3.896	116.26995	387.2267	0.011963	0.25	-0.41894	27.326	180.106	932.348	-0.49023	0.53516	-1.0645	-89.6811	60.996	60.5829	-0.18359	0.30029	-0.3501	-90.7065	23.371	66.866	0.024316	-0.12735	0.01709
3.328	-18.768	129.708	362.3492	0.031738	0.23926	-0.39209	-11.841	193.871	893.34	-0.44922	0.48828	-0.99805	-89.3636	36.113	53.7838	-0.10303	0.16992	-0.27344	-76.785	53.14004	54.0291	0.013672	-0.09375	1.2767e-13
3.33	-32.315	130.802	328.2478	0.058594	0.20801	-0.34766	-21.594	167.0392	865.055	-0.41016	0.45703	-0.94727	-65.667	26.2553	28.133	-0.066406	0.12354	-0.25	-100.234	23.2027	61.8432	-0.003125	-0.058789	-0.012109
3.332	-25.564	119.55	309.5258	0.064453	0.19434	-0.33545	16.823	176.135	839.9065	-0.37646	0.42627	-0.89209	-74.5539	-4.2826	34.979	0.0073242	0.050781	-0.20459	-49.488	52.4805	47.1446	-0.021973	-0.021387	-0.023144
3.334	-9.589	121.541	294.2188	0.078125	0.16748	-0.30127	-48.9281	159.6329	802.1138	-0.31982	0.38428	-0.82373	-61.162	6.287	25.6728	0.055908	0.0075683	-0.16773	-45.482	6.4199	29.4715	-0.036426	0.0079098	-0.034082
3.336	-13.028	121.113	272.677	0.084717	0.15601	-0.28149	-13.159	111.949	797.812	-0.29492	0.36328	-0.78906	-44.163	-2.22532	32.816	0.09668	-0.030762	-0.14111	-29.337	32.8539	54.404	-0.041895	0.027246	-0.036719
3.338	-31.926	113.474	244.7666	0.089844	0.15039	-0.25488	-15.264	133.2002	771.298	-0.24219	0.32422	-0.71875	-17.138	5.975	16.3603	0.146	-0.078125	-0.12061	-13.786	-11.84917	43.596	-0.046387	0.033691	-0.032715
3.34	-34.311	107.511	219.0434	0.098633	0.1377	-0.23047	-62.772	131.819	731.1	-0.19336	0.29199	-0.66626	-38.506	-13.242	41.9769	0.16553	-0.099121	-0.098145	30.924	6.6466	46.3405	-0.054688	0.029883	-0.028027
3.342	-19.442	86.9798	200.3367	0.10303	0.12891	-0.22168	5.232	126.844	698.241	-0.14648	0.25732	-0.60742	8.666	5.05	25.3851	0.19482	-0.13477	-0.066406	21.181	-20.2408	19.766	-0.057813	0.025098	-0.019531
3.344	-43.589	84.5729	164.285828	0.10938	0.11865	-0.20459	-47.396	159.7902	628.385	-0.085449	0.21436	-0.54053	-22.107	-15.0802	42.2638	0.21802	-0.16235	-0.049072	38.17	-5.59	46.80988	-0.060547	0.0067382	-0.01289
3.346	-32.685	68.825	161.1321	0.11939	0.1145	-0.19287	-74.2486	140.095	573.838	-0.057617	0.18896	-0.50098	-0.768999999999998	20.563	50.3231	0.23877	-0.1875	-0.023926	31.301	-9.7869	27.342	-0.053907	-0.0042969	-0.0013672
3.348	-47.829	60.379	165.074403	0.12598	0.11133	-0.18359	-24.27	153.2562	526.6482	-0.0014648	0.14063	-0.42969	-2.64100000000001	2.9165	47.7999	0.25342	-0.22314	0.0024414	37.385	6.723	61.305	-0.055176	-0.025879	0.0078125
3.35	-33.835	62.1669	142.907	0.13232	0.11182	-0.1792	-60.95	181.2803	474.2388	0.041504	0.10351	-0.38159	10.717	33.8942	41.427	0.26367	-0.23877	0.014648	17.434	-3.0217	14.1892	-0.052539	-0.039355	0.014258
3.352	-58.562	61.5709	135.1762	0.12891	0.11084	-0.17676	-44.148	163.9388	446.6691	0.078613	0.060059	-0.33203	-31.409	20.8331	19.4815	0.27441	-0.27393	0.036621	6.804	1.6728	36.3841	-0.060449	-0.047656	0.021387
3.354	-64.221	52.116	117.2	0.12695	0.11621	-0.16064	-51.837	185.653	397.416	0.12354	0.012207	-0.27246	-8.67299999999999	48.458	-5.33364	0.27392	-0.28833	0.047364	-10.815	5.7437	10.4844	-0.062012	-0.048438	0.027246
3.356	-44.682	49.3893	113.744	0.125	0.11572	-0.16797	-79.654	176.9676	352.117	0.14551	-0.0097656	-0.25049	-19.996	45.68	-0.097999999999999	0.27295	-0.30322	0.057129	-18.922	1.712	41.799	-0.063183	-0.04541	0.027441
3.358	-58.712	55.3963	101.8081	0.12256	0.12207	-0.16357	-21.606	150.12	332.8854	0.1748	-0.054199	-0.19482	-4.967	48.9342	13.506	0.25732	-0.31201	0.065918	-7.726	27.9732	-0.217699999999999	-0.069824	-0.041992	0.024414
3.36	-65.813	46.3456	81.39872	0.12305	0.12598	-0.15869	-64.122	178.776	296.5145	0.19531	-0.07666	-0.1582	-39.08	17.1577	19.198	0.24512	-0.31543	0.072266	-52.168	10.4738	26.4979	-0.071875	-0.039063	0.024024
3.362	-67.2035	36.849	88.4385	0.11865	0.12109	-0.15527	-46.25	133.5229	264.097	0.21045	-0.1001	-0.12842	-20.12	27.497	25.502	0.22266	-0.30127	0.072754	-59.896	36.364	-17.515	-0.072461	-0.036035	0.02002
3.364	-37.024	37.4144	81.3063	0.12158	0.11621	-0.16016	-26.037	115.849	239.9479	0.23145	-0.12061	-0.080078	-41.216	8.24	20.266	0.20288	-0.28394	0.066895	-62.278	18.1609	-1.041	-0.070508	-0.030176	0.015332
3.366	-24.91	49.7633	54.6818	0.12256	0.11523	-0.15869	-80.4156	133.199	203.981	0.24365	-0.12695	-0.066406	-36.228	39.2493	7.113	0.18945	-0.26758	0.056641	-86.142	71.4361	-12.9	-0.065528	-0.02959	0.011816
3.368	-27.842	44.813	29.494	0.12109	0.11133	-0.15869	-45.947	70.464	196.4524	0.26318	-0.14941	-0.041016	-84.522	33.954	33.08138	0.17188	-0.24463	0.04834	-83.6336	32.8717	24.6118	-0.063477	-0.035156	0.0068359
3.37	-18.632	36.1654	36.4438	0.11475	0.10742	-0.16064	-35.22	69.184	190.7551	0.26611	-0.15137	-0.024414	-76.869	59.311	41.386	0.16504	-0.23291	0.04248	-95.1362	54.48705	48.15	-0.056054	-0.04375	0.0040039
3.372	-28.77	33.7969	43.4035	0.10644	0.11011	-0.16284	-42.49	37.644	165.253	0.271	-0.15137	-0.013184	-78.2857	30.0492	53.985	0.15381	-0.2085	0.029297	-137.622	-1.327	47.686	-0.043164	-0.055273	-0.0010742
3.374	-21.528	34.147	51.4449	0.10107	0.10986	-0.16357	-3.119	-5.308	160.971	0.26221	-0.13477	-0.010254	-71.4671	41.8963	60.02	0.15527	-0.18945	0.014648	-110.5178	36.1545	39.734	-0.030273	-0.073242	-0.00029294
3.376	-23.059	35.435454	47.94	0.096191	0.10693	-0.17041	-38.338	40.627	123.12301	0.24951	-0.12939	-0.0092773	-97.2439	-3.12022	52.12264	0.1499	-0.18018	0.0024414	-97.5227	10.8774	23.5368	-0.015332	-0.095605	-0.0054688
3.378	-7.346	32.9562	66.342	0.097656	0.11084	-0.16992	-33.817	20.764	100.478	0.21826	-0.11572	-0.010254	-91.0765	25.5621	45.1762	0.14893	-0.16211	-0.013672	-74.6891	53.1772	56.171	0.0039063	-0.12012	-0.0092773
3.38	-24.248	23.2879	46.3515	0.10107	0.097168	-0.16016	-0.417000000000002	25.1982	91.848	0.18823	-0.093017	-0.022461	-91.7562	16.13658	38.183	0.14306	-0.146	-0.022949	-109.4823	23.07913	44.1951	0.030176	-0.14277	-0.011035
3.382	-28.408	25.3877	37.7435	0.10864	0.094239	-0.16065	-48.424	71.864	50.0661	0.14893	-0.056152	-0.038574	-63.819	44.2056	22.2174	0.13135	-0.13135	-0.033691	-61.907	24.66928	50.014	0.045117	-0.16152	-0.016016
3.384	-22.072	24.8168	23.7069	0.11328	0.085938	-0.15625	-10.44	20.4909	45.28654	0.09082	0.0087891	-0.05957	-48.948	28.41716	30.85154	0.11426	-0.10889	-0.053223	-67.417	-5.8874	11.869	0.065039	-0.17871	-0.01875
3.386	-9.145	28.37573	29.611	0.12207	0.076172	-0.14941	-17.429	43.4649	46.559	0.058594	0.044922	-0.067871	-55.509	40.006	36.487	0.10791	-0.092773	-0.064941	-46.741	29.66	57.322	0.083008	-0.19189	-0.028222
3.388	-11.608	23.929	27.9967	0.12207	0.071289	-0.14746	-44.2379	48.342	29.977	-0.00097656	0.12012	-0.098145	-57.181	24.9879	44.665	0.094238	-0.075195	-0.079102	-26.686	23.506	24.46766	0.099121	-0.2002	-0.038574
3.39	-33.274	9.1739	22.2091	0.12646	0.061523	-0.13965	-11.468	18.289	43.6137	-0.04419	0.16895	-0.12305	-35.709	46.542	53.473	0.078369	-0.057861	-0.084229	-0.978000000000002	35.7709	81.608	0.11211	-0.20293	-0.05625
3.392	-23.235	-1.252	29.80267	0.13379	0.050293	-0.12939	-34.11	77.564	34.6577	-0.083984	0.21777	-0.14844	-24.443	22.73094	57.049	0.0625	-0.040039	-0.098633	-0.463999999999999	34.0384	44.3278	0.12685	-0.20733	-0.072363
3.394	-22.043	14.357	30.8819	0.14014	0.037109	-0.12402	-39.012	41.3192	40.383	-0.12939	0.28125	-0.17334	-39.531	25.623	70.793	0.050293	-0.024414	-0.10889	16.458	16.3651	71.958	0.14287	-0.20303	-0.08877
3.396	-16.05	33.5432	33.4646	0.15137	0.020996	-0.11572	-12.461	21.1977	21.3609	-0.15039	0.30664	-0.18262	-9.634	13.8617	38.604	0.046387	-0.013672	-0.11084	24.262	28.694	31.4637	0.14668	-0.19736	-0.10957
3.398	-48.013	42.12212	19.193	0.1582	0.0083008	-0.10986	-53.332	46.119	4.1494	-0.18848	0.34863	-0.2085	-16.76	15.9096	31.6077	0.045898	-0.0014648	-0.1167	33.509	-5.616913	55.425	0.15088	-0.1875	-0.12061
3.4	-49.952	30.0876	30.22	0.16406	-0.0043945	-0.098145	-43.642	-30.853	28.391	-0.21069	0.37695	-0.2168	-7.125	8.1072	14.1612	0.058106	-0.0004883	-0.11694	33.175	22.736	23.786	0.1415	-0.16016	-0.14483
3.402	-57.175	30.7492	33.1052	0.17358	-0.023681	-0.090332	-31.826	-7.4071	28.572	-0.23145	0.40039	-0.23047	-1.488	1.2485	28.4993	0.069824	-0.0073242	-0.11719	10.733	-10.1168	96.291	0.1249	-0.13701	-0.17139
3.404	-69.2721	26.1466	16.2854	0.18604	-0.035156	-0.089355	-49.794	-5.956	30.536	-0.24658	0.41943	-0.23828	-4.748	-2.097	23.7018	0.093262	-0.0097656	-0.10596	13.82	-7.5082	87.292	0.10654	-0.11397	-0.20185
3.406	-68.615	30.4713	23.55846	0.19189	-0.052246	-0.076172	-31.713	-57.193	42.1708	-0.25293	0.42041	-0.23877	-7.71599999999999	11.0932	38.1181	0.10303	-0.014648	-0.10303	-22.195	-48.916	128.2306	0.075879	-0.1084	-0.24179
3.408	-65.284	28.8486	22.77978	0.19727	-0.064941	-0.073242	-57.636	5.16	12.293	-0.25146	0.42432	-0.23779	17.396	10.724	17.1767	0.12109	-0.031738	-0.10205	10.956	8.0053	144.344	0.040039	-0.093262	-0.28564
3.41	-40.352	23.4393	27.5003	0.20215	-0.076172	-0.06543	-59.597	-5.37	16.7095	-0.24341	0.41674	-0.22802	-14.49	22.2249	42.5507	0.12329	-0.047852	-0.098633	23.687	-11.9278	224.9176	-0.026758	-0.030859	-0.32119
3.412	-56.644	22.7251	15.898	0.20801	-0.084473	-0.065185	-29.521	12.90218	13.1	-0.23145	0.40576	-0.22314	-12.05	12.265	38.8311	0.12451	-0.056641	-0.096191	-13.216	74.927	338.2695	-0.12451	0.050195	-0.37246
3.414	-43.909	18.3638	9.968	0.21338	-0.089844	-0.0625	-48.398	80.746	-0.4408	-0.20605	0.37891	-0.20703	-41.924	4.3093	26.6194	0.11816	-0.061523	-0.095215	-55.2608	53.3439	408.657	-0.26201	0.15801	-0.45449
3.416	-48.488	19.291	21.1525	0.21826	-0.095703	-0.05957	-19.927	21.257	23.9208	-0.19482	0.36914	-0.1958	-38.208	19.027	18.8508	0.10938	-0.067383	-0.098633	-12.911	76.4785	490.013	-0.41836	0.28633	-0.55635
3.418	-34.145	27.2832	34.736	0.21875	-0.10156	-0.059082	-23.331	42.582	29.7683	-0.18018	0.33594	-0.16553	-57.378	28.2429	30.8236	0.09082	-0.063965	-0.104	0.696000000000002	71.3029	612.061	-0.56934	0.42969	-0.66797
3.42	-33.401	30.4519	21.6482	0.22705	-0.10449	-0.058105	-49.633	47.8445	29.565	-0.16821	0.3164	-0.14673	-53.185	48.8733	5.532	0.080811	-0.059326	-0.11133	-66.0563	128.3319	813.31142	-0.71709	0.59268	-0.77803
3.422	-50.417	33.06	14.0941	0.23071	-0.10449	-0.053955	-3.28100000000001	8.873755	31.2706	-0.15088	0.29541	-0.12354	-87.2871	44.554	30.9205	0.067383	-0.055664	-0.12012	-54.7577	101.8336	965.867	-0.87207	0.75781	-0.9082
3.424	-30.811	28.8127	39.43498	0.24121	-0.10547	-0.054199	-40.48	74.498	6.94	-0.12402	0.25586	-0.09668	-82.631	50.5336	-1.2423	0.055176	-0.046875	-0.13281	-100.693	92.014	1133.302	-1.0361	0.91016	-1.0676
3.426	-34.879	30.141	33.8907	0.25	-0.10742	-0.049805	-28.437	43.7306	6.31042	-0.11426	0.24121	-0.07959	-88.4998	30	20.736	0.05127	-0.04248	-0.13721	-154.2623	24.745	1229.95	-1.2042	1.0811	-1.2173
3.428	-26.933	29.3867	39.0589	0.25781	-0.10938	-0.038086	-19.038	23.423	18.7854	-0.086914	0.20703	-0.050293	-73.806	31.755	39.2539	0.053223	-0.046875	-0.15234	-66.201	-66.041	1329.387	-1.3799	1.2793	-1.3652
3.43	-27.523	33.2701	33.2511	0.26367	-0.10791	-0.040527	-51.822	63.824	15.2108	-0.062744	0.17822	-0.028809	-76.839	11.1278	50.7099	0.053467	-0.043457	-0.1582	-67.5283	-139.904	1379.817	-1.5491	1.4997	-1.5081
3.432	-18.355	27.438	33.3651	0.26953	-0.11011	-0.031738	-17.845	-20.8273	24.5021	-0.038574	0.1499	-0.010254	-59.834	39.878	53.8732	0.05957	-0.041016	-0.16699	-98.726	-181.921	1479.243	-1.6949	1.7251	-1.6464
3.434	-17.742	34.104	25.6356	0.27686	-0.11572	-0.023926	-18.047	-6.80107	58.774	-0.0024414	0.1123	0.016602	-71.8296	24.4976	50.327	0.064453	-0.04541	-0.17188	-121.725	-204.311	1421.445	-1.7792	1.9376	-1.737
3.436	-27.022	31.7108	12.5221	0.28125	-0.11182	-0.011719	-33.578	2.723	53.741	0.019043	0.089355	0.028809	-50.473	41.9907	26.821	0.072266	-0.041992	-0.18115	-111.607	-259.311	1417.914	-1.7766	2.0625	-1.8027
3.438	-9.123	26.82118	21.15145	0.2793	-0.11133	-0.0058594	-5.629	-41.161	54.6277	0.047852	0.047852	0.052246	-67.397	21.3415	32.0219	0.092773	-0.053711	-0.17773	-136.3035	-280.437	1314.813	-1.6714	2.0845	-1.8315
3.44	-1.67899999999999	33.4359	33.05844	0.28516	-0.11133	0.0024414	-34.398	30.5093	51.2508	0.069824	0.020264	0.070801	-52.523	43.7158	24.7387	0.11036	-0.063965	-0.18213	-93.295	-334.78	1282.978	-1.491	2.0019	-1.8305
3.442	-12.259	20.9632	38.7572	0.28076	-0.10839	0.011231	-14.817	6.495	38.2609	0.087402	-0.0097656	0.084473	-49.956	19.79491	37.5374	0.13086	-0.083984	-0.17578	-85.223	-312.55	1196.093	-1.2793	1.8301	-1.7824
3.444	-46.546	20.091	47.6603	0.2793	-0.10889	0.018555	-7.646	3.27689	37.615	0.11572	-0.043945	0.1001	-29.141	44.174	54.22	0.15576	-0.11475	-0.17676	-128.605	-323.38	1161.498	-1.084	1.552	-1.6918
3.446	-34.511	17.2774	47.1983	0.27539	-0.10596	0.030273	-59.6586	62.12	40.249	0.12305	-0.058105	0.1084	-45.43	17.21494	64.186	0.16504	-0.13184	-0.18359	-158.997	-200.77	1096.387	-0.95361	1.2216	-1.5829
3.448	-34.235	30.5	41.185	0.27148	-0.10303	0.033203	-30.146	7.57983	24.1348	0.14111	-0.088379	0.12451	-16.025	42.3558	38.6476	0.19043	-0.1626	-0.19141	-135.44	-176.842	1107.5664	-0.85645	0.88672	-1.4785
3.45	-38.532	35.794	42.944	0.26514	-0.10156	0.039551	-29.717	38.033	26.83022	0.15943	-0.10449	0.13819	-0.969000000000001	15.1405	25.941	0.20166	-0.17798	-0.19946	-98.693	-86.807	1091.7228	-0.80303	0.6126	-1.4304
3.452	-51.817	32.785	33.2257	0.25757	-0.095215	0.046875	-60.0318	46.8625	29.8142	0.16943	-0.12305	0.14844	7.138	43.3475	32.4753	0.21387	-0.1875	-0.21094	-91.672	-135.213	1064.63	-0.76572	0.45869	-1.4015
3.454	-58.681	14.8854	27.6555	0.25098	-0.090332	0.044434	-40.209	-11.6864	44.274	0.17578	-0.14453	0.14941	-3.726	27.029	51.479	0.23828	-0.18115	-0.22461	-61.593	-108.91	1087.274	-0.77119	0.43604	-1.3967
3.456	-42.225	20.9177	29.6049	0.2373	-0.07666	0.057129	-49.311	42.1985	31.112	0.18115	-0.15088	0.1543	18.47	45.9517	62.427	0.24268	-0.17041	-0.23828	-135.881	-202.05	1146.5	-0.81455	0.51553	-1.4321
3.458	-60.976	20.4455	26.972308	0.23145	-0.072754	0.056152	-21.16	5.75	21.9381	0.19092	-0.16846	0.16162	-1.274	2.9366	47.897	0.25928	-0.14453	-0.26611	-115.439	-170.33	1202.37	-0.88086	0.64063	-1.4844
3.46	-53.206	21.0221	52.8939	0.21729	-0.053711	0.047852	-31.914	-9.3601	26.8527	0.19433	-0.18237	0.1604	-19.514	9.0779	46.035	0.27124	-0.12256	-0.29297	-70.746	-264.827	1221.767	-0.91514	0.76504	-1.5419
3.462	-44.802	22.9998	41.0326	0.20996	-0.03955	0.051514	-71.1411	43.4669	19.8436	0.19434	-0.19238	0.16064	-29.666	-23.5621	16.5588	0.29053	-0.10107	-0.31104	-20.165	-290.377	1261.9652	-0.91475	0.88096	-1.6054
3.464	-46.524	21.583	27.042858	0.20215	-0.016602	0.046875	-20.107	-23.2941	35.179	0.19189	-0.19727	0.1499	-21.644	7.037	43.6993	0.30127	-0.081055	-0.35449	-28.683	-416.467	1261.061	-0.88506	0.97002	-1.6476
3.466	-58.682	32.4679	21.80331	0.19238	0.0029297	0.040039	-36.558	8.517	29.7733	0.19262	-0.19409	0.146	-28.309	0.881	56.649	0.29932	-0.076172	-0.38281	-47.897	-438.94	1336.01	-0.81699	0.97764	-1.6466
3.468	-65.456	21.1013	29.5997	0.1875	0.015137	0.044434	-50.085	-4.218	36.556	0.1875	-0.1875	0.13623	-36.317	3.1753	82.269	0.26758	-0.080566	-0.47412	-72.692	-528.53	1386.063	-0.70557	0.90869	-1.6069
3.47	-34.272	17.6976	52.512	0.17773	0.039063	0.033691	-33.188	-63.29	44.895	0.18506	-0.18066	0.12695	-61.763	-19.442	106.383	0.21435	-0.052002	-0.5398	-25.645	-483.41	1498.77	-0.58584	0.76533	-1.5597
3.472	-40.586	17.866	39.3923	0.17163	0.056152	0.030518	-56.5895	6.395	37.219	0.17969	-0.1748	0.11963	-43.492	22.5156	144.7948	0.13281	0.0087891	-0.60889	7.166	-455.46	1550.786	-0.4709	0.60781	-1.5055
3.474	-44.288	11.2936	20.245	0.16943	0.075684	0.025879	-21.146	-6.605	21.813	0.17627	-0.16162	0.11133	-31.499	42.4607	182.5724	-0.026855	0.1333	-0.7085	33.0188	-352.895	1604.74	-0.38652	0.46289	-1.457
3.476	-39.652	12.0298	16.681	0.15967	0.098145	0.018555	-8.357	7.2267	22.2346	0.17383	-0.14917	0.10059	-38.171	85.2366	281.5614	-0.12207	0.20166	-0.7749	15.8175	-298.72	1573.2684	-0.35068	0.37998	-1.4198
3.478	-29.945	8.7778	35.1868	0.15967	0.11279	0.01709	-33.635	56.519	9.99	0.17822	-0.1333	0.091309	-70.624	70.955	337.181	-0.29639	0.34912	-0.93701	0.876999999999999	-208.059	1613.644	-0.35791	0.36768	-1.4175
3.48	-18.032	4.8323	56.8026	0.15527	0.12598	0.0048828	-19.126	3.749	7.61	0.17969	-0.11865	0.077637	-75.2591	70.5479	423.589	-0.40527	0.47168	-1.06	-63.6514	-129.083	1617.1945	-0.43672	0.4419	-1.4796
3.482	-25.991	-7.665	71.557	0.14941	0.13306	-0.016357	-18.013	30.767	9.9975	0.18408	-0.10986	0.071777	-12.944	80.299	560.04	-0.52002	0.61768	-1.1812	-23.843	-60.77	1660.872	-0.5749	0.59307	-1.5882
3.484	-22.639	-13.12862	69.7295	0.13232	0.13281	-0.045898	-22.704	44.6031	4.193	0.18262	-0.10645	0.064941	-29.458	128.2504	691.5325	-0.69092	0.82861	-1.3726	3.227	-27.73	1659.159	-0.74756	0.8001	-1.7241
3.486	-11.972	-17.5672	73.4902	0.10889	0.15674	-0.08252	-12.256	4.0066	23.3381	0.18604	-0.098145	0.060303	-62.821	142.184	844.219	-0.79492	0.94141	-1.4785	38.67	-38.937	1645.609	-0.93447	1.0483	-1.9001
3.488	-17.455	-4.7091	78.0966	0.089355	0.17432	-0.104	-33.981	57.021	35.3413	0.1875	-0.09375	0.053711	-66.449	142.439	1003.904	-1.0063	1.1782	-1.7026	40.325	-40.509	1624.434	-1.1069	1.3179	-2.0933
3.49	-39.287	-7.7028	93.5236	0.056641	0.22314	-0.14697	-25.258	22.9164	28.1994	0.18262	-0.091309	0.047363	-98.949	104.392	1115.973	-1.1645	1.4019	-1.8247	32.242	-55.011	1649.551	-1.247	1.58	-2.2626
3.492	-36.481	-7.6747	117.81004	0.040284	0.25732	-0.17651	-13.274	1.4989	16.716	0.17725	-0.084473	0.037109	-80.984	58.13937	1264.199	-1.3027	1.6523	-1.9023	35.408	-17.0487	1682.149	-1.3707	1.8125	-2.4184
3.494	-36.836	-15.3558	133.9131	0.024414	0.28369	-0.21777	-39.292	41.7004	18.436	0.17188	-0.079102	0.023926	-37.229	-9.044	1343.363	-1.4648	1.9512	-2.0117	60.0998	-77.203	1743.462	-1.4625	1.9723	-2.5445
3.496	-44.818	-11.9193	160.5512	0.012695	0.31055	-0.26514	-9.89	-15.7482	25.184	0.16504	-0.068115	0.018311	-48.802	-73.127	1458.408	-1.4897	2.0532	-2.0464	31.7526	-100.498	1835.706	-1.515	2.0624	-2.6313
3.498	-50.472	-16.3854	199.6142	0.0048828	0.32227	-0.28613	-21.646	15.4292	34.1808	0.15674	-0.060547	0.0083008	-79.172	-113.774	1509.736	-1.418	2.0996	-2.0391	23.204	-177.45	1866.535	-1.5332	2.0938	-2.6953
3.5	-43.24	5.525	236.919	-0.018555	0.33594	-0.33936	-43.989	26.5674	32.5803	0.15234	-0.046875	-0.0029297	-122.3663	-163.374	1470.361	-1.3047	2.0053	-2.0131	17.78	-145.037	1896.781	-1.5308	2.0622	-2.7132
3.502	-64.456	48.2965	269.4516	-0.047364	0.33863	-0.39746	-29.669	-33.154	22.2821	0.14697	-0.040527	-0.0053711	-111.946	-194.446	1368.872	-1.1836	1.8125	-1.9727	-40.3249	-166.509	1891.022	-1.4984	1.9867	-2.6926
3.504	-56.505	79.2373	301.471	-0.078613	0.33301	-0.4668	-34.405	20.03069	30.9773	0.13965	-0.018555	-0.019043	-114.134	-234.08	1318.808	-1.0195	1.3926	-1.8457	-29.6766	-100.626	1885.729	-1.4547	1.8664	-2.6348
3.506	-67.191	93.6293	392.172	-0.15088	0.32764	-0.56885	-50.633	8.225	27.2721	0.13159	0.0019531	-0.026368	-62.867	-255.11	1271.054	-0.94922	1.1543	-1.7832	-57.648	-95.575	1810.306	-1.4106	1.7016	-2.5503
3.508	-75.323	99.4022	503.634	-0.19385	0.32471	-0.63721	-43.461	11.5548	38.439	0.11963	0.022461	-0.030762	-125.472	-298.25	1209.329	-0.80957	0.69141	-1.6758	-59.978	-57.324	1781.517	-1.3652	1.5039	-2.4512
3.51	-51.184	86.32017	605.4196	-0.30127	0.34131	-0.78564	-57.139	76.981	26.8205	0.10889	0.049316	-0.039063	-125.787	-278.8	1133.989	-0.70874	0.43579	-1.5979	-53.75834	-47.449	1714.202	-1.3181	1.3237	-2.3603
3.512	-76.426	84.5985	681.958	-0.42139	0.40576	-0.93701	-25.625	23.396	13.1515	0.10791	0.056152	-0.047363	-139.324	-270.798	1103.8994	-0.66016	0.2749	-1.5527	-32.202	24.027	1715.7944	-1.2749	1.202	-2.2944
3.514	-71.8646	60.6321	724.31252	-0.48389	0.44922	-1.019	-49.567	53.771	30.4011	0.10107	0.090332	-0.054199	-111.522	-196.392	1122.21272	-0.64551	0.22168	-1.5156	-46.639	57.905	1651.202	-1.2444	1.1443	-2.2492
3.516	-73.239	46.931	789.554	-0.60889	0.57227	-1.1577	-41.604	59.941	20.6409	0.096191	0.10596	-0.058838	-112.966	-130.685	1134.05	-0.70044	0.24732	-1.5202	-34.609	110.1526	1628.891	-1.2336	1.1258	-2.2176
3.518	-84.933	40.849	852.222	-0.68383	0.68896	-1.2348	-24.594	7.1639	37.722	0.095703	0.12939	-0.062012	-97.937	-91.938	1119.959	-0.78125	0.3125	-1.5527	-44.033	138.625	1568.125	-1.2378	1.145	-2.1929
3.52	-79.91	17.2794	865.0549	-0.74023	0.80273	-1.293	-39.842	49.773	26.5564	0.092285	0.15283	-0.069336	-116.429	-94.26	1152.507	-0.86475	0.46045	-1.6167	-34.06	133.002	1587.184	-1.2608	1.1954	-2.1859
3.522	-66.798	-12.4193	868.2224	-0.7793	0.95508	-1.3418	-54.849	6.478	26.029	0.092773	0.16553	-0.063965	-139.483	-141.13	1228.68	-0.89014	0.55615	-1.6499	-54.7451	144.727	1574.803	-1.2887	1.2652	-2.1746
3.524	-41.583	-51.216	880.525	-0.78223	1.02	-1.3452	-42.373	-10.4475	39.301	0.09668	0.19189	-0.06543	-135.316	-192.868	1286.0372	-0.9082	0.7583	-1.709	-46.883	120.87	1602.178	-1.3074	1.3309	-2.173
3.526	-60.992	-73.315	882.841	-0.73047	1.123	-1.3281	-53.29	33.6189	30.9088	0.098389	0.20655	-0.066651	-100.517	-246.768	1356.082	-0.87378	0.82935	-1.7175	-28.618	135.76	1583.306	-1.3062	1.3665	-2.1522
3.528	-42.023	-68.8963	871.927	-0.66358	1.1578	-1.29	-8.745	-21.2595	40.097	0.10498	0.21777	-0.066406	-38.113	-305.099	1348.31463	-0.79492	0.82129	-1.6875	-32.5053	105.251	1574.284	-1.271	1.3647	-2.1206
3.53	-22.631	-39.303	855.4831	-0.58594	1.1602	-1.2607	-24.753	3.7275	42.473	0.11523	0.23779	-0.06543	-4.559	-376.619	1382.241	-0.65088	0.67432	-1.6147	-2.1603	120.076	1558.927	-1.2135	1.3092	-2.0717
3.532	-13.541	-6.684	839.9871	-0.48438	1.1133	-1.2051	-31.265	6.36	28.243	0.11719	0.24219	-0.06543	-34.6754	-425.35	1422.216	-0.58594	0.57227	-1.5898	15.3045	65.548	1542.089211	-1.1433	1.2275	-2.0128
3.534	14.758	6.4138	849.7528	-0.44434	1.0649	-1.1812	-19.056	-29.452	40.629	0.12793	0.25488	-0.068848	-22.815	-467.94	1482.071	-0.49902	0.3584	-1.5898	42.295	81.703	1535.058	-1.0745	1.1383	-1.9487
3.536	-6.72	8.6593	864.749	-0.41602	0.96289	-1.125	-29.592	31.2388	41.3677	0.13672	0.26343	-0.072754	37.613	-424.31	1557.37737	-0.48706	0.23487	-1.6235	26.541	48.98	1531.171	-1.0136	1.0567	-1.8835
3.538	-2.059	6.8066	865.657	-0.42505	0.90234	-1.0908	-16.757	4.414	38.888	0.14307	0.2749	-0.082031	86.425	-381.09	1619.501	-0.50928	0.15967	-1.6675	68.0085	106.824	1506.091	-0.95898	0.98633	-1.8223
3.54	-28.045	7.481	882.0178	-0.45215	0.86426	-1.0645	-17.491	-6.9122	49.824	0.1499	0.27881	-0.091309	51.512	-294.746	1664.043	-0.60352	0.1875	-1.7832	56.5871	125.642	1443.637	-0.91367	0.91914	-1.7629
3.542	-35.163	9.06	892.4809	-0.49805	0.87109	-1.0625	-25.837	44.7137	31.8264	0.15283	0.28516	-0.096191	15.7299	-229.1516	1704.347	-0.67041	0.26416	-1.8667	30.232	193.135	1417.434	-0.87656	0.86953	-1.7031
3.544	-66.898	-10.055	892.158	-0.51709	0.88721	-1.0786	-11.684	-1.987	12.708	0.16309	0.27881	-0.11182	16.521	-158.315	1690.9965	-0.81396	0.50684	-2.064	15.431	211.0826	1350.89471	-0.83906	0.82422	-1.6515
3.546	-53.775	-43.684	902.317	-0.52979	0.95166	-1.1226	-12.504	32.8705	53.619	0.16357	0.26758	-0.14966	17.54	-93.352	1722.2568	-0.91455	0.72168	-2.2344	0.166000000000004	280.281	1338.149	-0.80029	0.78916	-1.5913
3.548	-43.364	-80.751	918.605	-0.52026	1.0066	-1.1536	-37.607	21.4461	84.204	0.15381	0.25	-0.20361	40.001	-20.088	1740.974	-0.97803	0.94287	-2.3862	-38.684	321.51	1272.618	-0.75732	0.76025	-1.5366
3.55	-76.828	-115.6416	939.225	-0.50977	1.0605	-1.1846	-38.501	-15.9391	112.4773	0.10938	0.25928	-0.27734	80.1456	-7.92	1755.5743	-1.0176	1.2285	-2.5566	-40.807	361.787	1247.7144	-0.71309	0.73301	-1.4785
3.552	-71.659	-165.093	992.2062	-0.4873	1.1309	-1.1992	-38.917	53.953	144.361	0.071777	0.27588	-0.3208	93.061	6.163	1735.051	-1.0273	1.3477	-2.6191	-64.2041	363.37	1192.5084	-0.66699	0.71328	-1.416
3.554	-86.912	-200.58	1033.5655	-0.47656	1.1436	-1.2129	-53.99	24.9732	186.7386	-0.033203	0.31006	-0.43164	81.145	-26.561	1743.925	-1.0366	1.5044	-2.7007	-63.476	337.02	1174.217	-0.61504	0.6957	-1.3524
3.556	-67.003	-197.919	1065.5341	-0.45459	1.1235	-1.2437	-60.052	25.331925	273.09366	-0.12256	0.34326	-0.5227	80.562	-31.928	1741.099	-1.045	1.562	-2.7495	-68.116	307.986	1100.8966	-0.55078	0.66934	-1.2845
3.558	-72.555	-186.045	1090.2029	-0.44605	1.0791	-1.2818	-78.387	84.1511	359.791	-0.21045	0.39844	-0.61914	76.102	-101.711	1750.5897	-1.0327	1.5942	-2.7886	-46.04	250.795	1111.227	-0.48193	0.63623	-1.2104
3.56	-79.555	-170.066	1123.46192	-0.44531	1.0298	-1.3257	-58.115	35.376	427.773	-0.3291	0.48926	-0.75146	73.607	-129.252	1779.728	-0.99756	1.5942	-2.8159	-82.5	247.764	1052.7728	-0.40899	0.58691	-1.1405
3.562	-102.123	-155.769	1166.3635	-0.4751	0.98633	-1.3867	-62.78	72.9968	487.158	-0.39014	0.53174	-0.82373	18.8452	-174.83	1811.966	-0.9751	1.5728	-2.8062	-103.386	201.083	1042.439	-0.33486	0.52617	-1.0699
3.564	-133.021	-135.6654	1190.277	-0.49756	0.98096	-1.4214	-56.299	98.827	585.1175	-0.51563	0.62598	-0.95117	10.463	-157.278	1842.401	-0.95068	1.4849	-2.7827	-85.688	219.876	975.5047	-0.26221	0.45586	-1.0016
3.566	-143.5258	-98.793	1212.944	-0.56104	0.99463	-1.4956	-35.772	61.635	665.7084	-0.60401	0.70313	-1.0337	-10.9374	-169.958	1860.5194	-0.96069	1.386	-2.7469	-136.891	178.827	956.257	-0.18818	0.38526	-0.93076
3.568	-165.469	-70.1	1220.7573	-0.6123	1.0225	-1.5537	-64.0033	108.099	721.355	-0.69727	0.7832	-1.1113	0.535	-136.865	1885.377	-0.97314	1.2915	-2.7163	-147.1313	201.917	884.82	-0.12061	0.30908	-0.85889
3.57	-136.9033	-46.472	1234.4292	-0.64014	1.0591	-1.5991	-42.1381	60.0983	785.393	-0.81445	0.88281	-1.1934	-39.555	-139.165	1893.071	-0.97461	1.2109	-2.6836	-157.356	174.433	853.35	-0.055761	0.23974	-0.79004
3.572	-147.0968	-47.304	1248.64	-0.64746	1.1074	-1.6426	13.7177	26.125	891.408	-0.86279	0.93604	-1.2251	-24.03714	-81.179	1841.387	-0.97607	1.1997	-2.6753	-162.144	219.7328	761.99634	0.0021484	0.17627	-0.71602
3.574	-142.1759	-42.794	1261.702	-0.64014	1.1196	-1.6558	-7.48355	54.067	1015.04	-0.93506	1.0513	-1.2847	-73.382	-49.0237	1797.064	-1.0171	1.2407	-2.6558	-157.46	213.038	705.8895	0.05293	0.11299	-0.65
3.576	-109.178	-52.701	1282.104	-0.62207	1.1294	-1.6694	-10.12	-21.5918	1089.959	-0.97632	1.1341	-1.3025	-36.8108	37.1979	1781.04	-1.0759	1.3176	-2.6364	-124.8936	274.465	643.2243	0.10596	0.051953	-0.58554
3.578	-102.572	-53.6644	1322.3516	-0.61792	1.1252	-1.6746	-2.288	-46.508	1102.9994	-0.98389	1.1997	-1.3169	-21.009	53.747	1759.918	-1.1382	1.4028	-2.6167	-145.589	268.2467	588.0639	0.15234	-0.0048828	-0.51807
3.58	-91.696	-65.6822	1335.79	-0.61328	1.1133	-1.6934	-8.49	-74.0236	1109.503	-0.95166	1.2563	-1.3394	25.3514	90.87234	1718.4657	-1.1851	1.4517	-2.5757	-114.38	280.605	492.26	0.19756	-0.051367	-0.45234
3.582	-108.247	-73.8007	1355.4946	-0.63477	1.082	-1.7188	-28.786	-159.0493	1193.005	-0.92725	1.2612	-1.3413	4.54822	79.5151	1684.482	-1.1958	1.4575	-2.5483	-99.013	250.4593	390.294	0.24736	-0.096582	-0.38282
3.584	-80.534	-88.495	1381.235	-0.64795	1.0669	-1.7388	-29.465	-125.16	1213.892	-0.86133	1.2305	-1.3457	28.83	98.073	1649.545	-1.2026	1.4146	-2.478	-59.325	248.9542	337.764	0.28955	-0.12978	-0.31406
3.586	-103.463	-101.583	1383.8924	-0.68115	1.0337	-1.7964	19.76	-153.4966	1210.052	-0.82422	1.186	-1.3476	7.0939	92.4461	1646.028	-1.2012	1.3691	-2.4228	-80.263	237.2669	271.866	0.3292	-0.15703	-0.23594
3.588	-84.378	-109.463	1396.744	-0.71924	1.0249	-1.8452	48.0121	-180.4937	1194.395	-0.80859	1.1523	-1.3418	23.6295	124.604	1622.7821	-1.1997	1.313	-2.3589	-43.999	223.31	274.2184	0.36133	-0.18262	-0.16504
3.59	-98.665	-115.644	1410.108	-0.75928	1.0356	-1.8989	33.916	-150.021	1195.488	-0.83057	1.145	-1.3413	47.5176	108.615	1609.202	-1.1792	1.2485	-2.2651	-89.392	188.817	195.893	0.38711	-0.20664	-0.093652
3.592	-99.816	-108.081	1413.062	-0.80908	1.0884	-1.9722	55.582	-212.507	1180.099	-0.84717	1.1509	-1.3433	86.979	109.94	1603.492	-1.1558	1.2114	-2.2222	-82.419	150.196	196.2002	0.40879	-0.22725	-0.025195
3.594	-86.372	-93.4675	1418.458	-0.82861	1.1274	-2.0073	70.475	-178.713	1155.021	-0.86914	1.2051	-1.3398	65.644	36.1196	1608.5212	-1.0952	1.145	-2.1226	-62.62	144.033	134.05	0.4252	-0.24639	0.037305
3.596	-89.649	-69.6017	1408.633	-0.84717	1.2207	-2.0684	82.238	-137.04	1115.454	-0.85522	1.26	-1.3308	59.989	32.029	1603.478	-1.0425	1.086	-2.0606	-53.225	118.339	158.568	0.42832	-0.26348	0.090235
3.598	-74.134	-49.8484	1404.8986	-0.86939	1.2883	-2.0974	91.188	-151.796351	1108.148	-0.83105	1.3262	-1.3145	36.512	8.668	1609.081	-0.98047	1.0283	-2.002	-34.017	129.577	131.348	0.41211	-0.28369	0.12891
3.6	-89.276	-47.3843	1404.0422	-0.90039	1.3555	-2.1172	55.4713	-103.328	1132.2952	-0.76563	1.4063	-1.2861	81.75	59.12	1589.827	-0.88867	0.9375	-1.9336	-39.339	58.162	158.747	0.38398	-0.31172	0.15811
3.602	-73.599	-37.9303	1401.4041	-0.93506	1.4438	-2.1421	47.38	-132.029	1139.951	-0.73193	1.4297	-1.2695	101.707	61.48	1544.441	-0.85254	0.90234	-1.8926	-40.859	42.061	112.902	0.3418	-0.32402	0.18017
3.604	-112.254	-6.581	1397.42	-0.95068	1.479	-2.144	56.5995	-162.642	1165.795	-0.65088	1.4419	-1.2573	97.928	115.625	1485.612	-0.78564	0.84912	-1.8101	-22.476	2.35	97.16	0.275	-0.32754	0.18955
3.606	-102.338	4.422	1402.5841	-0.97021	1.5259	-2.1284	-9.387	-165.592	1206.907	-0.60986	1.4096	-1.2759	58.3395	128.406	1428.362	-0.75391	0.81543	-1.7524	0.0619999999999976	34.342	41.93715	0.19385	-0.31299	0.18144
3.608	-121.933	1.327	1403.688	-0.98584	1.5459	-2.1084	-27.301	-212.434	1238.927	-0.58691	1.3613	-1.3164	52.229	203.4292	1383.3796	-0.73242	0.7832	-1.6934	-4.756	24.019	54.351	0.096191	-0.2749	0.16113
3.61	-142.691	-3.549	1397.665	-0.99609	1.5469	-2.0781	-23.349	-201.252	1267.054	-0.60352	1.3281	-1.3857	41.2988	219.136	1357.5429	-0.69922	0.74805	-1.6152	-26.62	61.2936	26.095	-0.012793	-0.21602	0.13154
3.612	-152.666	-8.2782	1406.0148	-1.0151	1.5317	-2.0298	-63.848	-198.482	1275.974	-0.65332	1.337	-1.4336	8.215	282.158	1350.077	-0.68506	0.72217	-1.5776	-59.252	48.5449	50.0548	-0.11709	-0.13731	0.089063
3.614	-177.9892	-21.4217	1403.3751	-1.0254	1.5234	-2.0078	-29.125	-248.947	1313.6318	-0.72559	1.375	-1.4805	-21.466	270.619	1314.531	-0.63086	0.67383	-1.4922	-61.0249	78.707	21.353	-0.22021	-0.042773	0.035938
3.616	-168.464	-22.3117	1439.4333	-1.0215	1.5029	-1.9688	-41.742	-262.26	1369.4893	-0.8042	1.4536	-1.5327	-16.184	292.717	1260.051	-0.57983	0.6416	-1.4216	-64.0663	52.7103	16.262	-0.32334	0.059473	-0.02959
3.618	-171.694	-34.246	1436.9853	-1.0063	1.4868	-1.9448	-41.0849	-324.881	1434.448	-0.82764	1.4937	-1.5522	-28.183	270.277	1196.46	-0.52197	0.60303	-1.3472	-66.9451	67.285	38.4613	-0.42383	0.16748	-0.104
3.62	-165.025	-35.229	1430.1768	-0.98779	1.4751	-1.9272	-32.802	-365.602	1480.591	-0.83594	1.5488	-1.5996	-68.646	295.994	1158.3888	-0.44238	0.54248	-1.2476	-73.261	64.249	28.547	-0.52305	0.27344	-0.17344
3.622	-154.373	-45.045	1430.6588	-0.98535	1.4785	-1.9131	-66.895	-310.361	1508.693	-0.81177	1.5569	-1.6345	-81.0462	251.618	1123.884	-0.396	0.5083	-1.1919	-98.338	65.6	58.882	-0.60351	0.38203	-0.23379
3.624	-156.9716	-32.9236	1426.0472	-0.99219	1.4824	-1.9102	-73.964	-279.678	1497.5684	-0.77881	1.5552	-1.6675	-84.9629	252.092	1081.0762	-0.31494	0.4292	-1.0854	-73.57	41.5256	25.9225	-0.66641	0.47617	-0.29433
3.626	-150.412	-13.6488	1421.313	-0.99414	1.5	-1.8984	-63.867	-221.256	1503.7958	-0.75586	1.5391	-1.7207	-99.904	195.47	1023.3395	-0.24854	0.36866	-1.0049	-72.462	5.602	58.269	-0.71514	0.55195	-0.3293
3.628	-176.7196	5.503	1395.002	-0.97583	1.509	-1.8913	-111.321	-162.6973	1518.0687	-0.76367	1.5254	-1.75	-111.4164	178.289	999.7986	-0.18213	0.30225	-0.92529	-41.461	-17.581	35.2928	-0.75	0.61914	-0.35498
3.63	-145.354	14.2631	1394.652	-0.94287	1.5005	-1.8784	-95.674	-161.651	1516.9631	-0.80225	1.5122	-1.8062	-74.225	141.074	964.472	-0.098633	0.2124	-0.82617	-18.95	-47.5099	74.442	-0.76826	0.67656	-0.36885
3.632	-141.211	35.4087	1380.164	-0.90625	1.4668	-1.8555	-99.9787	-134.237	1526.597	-0.86425	1.5053	-1.851	-122.692	184.681	909.152	-0.057617	0.17334	-0.77051	-45	-23.735	25.697	-0.78174	0.72344	-0.37402
3.634	-120.582	47.921	1350.9422	-0.89111	1.4478	-1.8413	-131.479	-128.257	1536.697	-0.92139	1.5083	-1.8979	-117.3645	187.034	813.334	0.030762	0.098145	-0.66211	-59.067	-38.44452	55.78064	-0.78838	0.75742	-0.38379
3.636	-136.619	56.138	1337.933	-0.86963	1.4146	-1.8062	-66.331	-137.458	1565.5139	-0.979	1.5278	-1.9585	-104.6724	228.6204	756.157	0.090576	0.05249	-0.58032	-61.499	-10.237	11.206	-0.76983	0.78252	-0.38428
3.638	-110.744	58.843	1339.1973	-0.85694	1.3984	-1.7929	-62.731	-91.253	1543.943	-0.99951	1.5493	-1.9858	-98.75142	223.7705	692.3713	0.15137	0.00048828	-0.50244	-45.07	-33.552	57.7538	-0.7417	0.78564	-0.37744
3.64	-100.923	57.579	1332.51984	-0.84375	1.3867	-1.7715	-44.663	-102.52	1511.6394	-1.0352	1.6055	-2.0352	-87.871	255.695	665.092	0.22461	-0.070313	-0.39844	-27.611	-7.7712	5.4118	-0.69697	0.76904	-0.35596
3.642	-97.816	59.77	1317.0682	-0.82471	1.3696	-1.7397	-27.39	-109.62	1514.9869	-1.0574	1.6546	-2.0652	-51.775	248.289	584.037	0.25684	-0.10791	-0.35449	-11.559	-7.746	67.827	-0.63955	0.7333	-0.32813
3.644	-71.446	46.7804	1314.2049	-0.81641	1.3555	-1.7227	-52.373	-107.6882	1527.879	-1.0815	1.7075	-2.0874	-71.731	266.823	527.141	0.31689	-0.17969	-0.26953	-53.593	53.7748	36.4602	-0.58213	0.67197	-0.28867
3.646	-61.723	46.9356	1302.6538	-0.80859	1.3281	-1.6875	1.816	-163.462	1585.542	-1.1172	1.7793	-2.1055	-67.204	263.746	429.4125	0.35425	-0.22339	-0.21655	-29.882	41.9718	44.0912	-0.52119	0.59688	-0.24746
3.648	-54.556	46.6491	1302.253	-0.8042	1.3139	-1.6562	-24.466	-172.068	1619.969	-1.1304	1.8149	-2.1069	-46.142	238.067	381.033	0.39063	-0.26221	-0.1709	-18.888	81.179	11.589	-0.4585	0.53174	-0.19775
3.65	-73.329	46.4	1276.6093	-0.79053	1.2954	-1.6226	-40.582	-190.657	1610.396	-1.146	1.8501	-2.0913	-23.566	211.1042	302.603	0.41455	-0.31348	-0.11914	14.338	40.621	-8.49792	-0.40176	0.46748	-0.14668
3.652	-71.371	44.423	1268.079	-0.76758	1.252	-1.5742	-5.927	-206.38	1600.9377	-1.1377	1.852	-2.0659	-14.171	181.324	278.217	0.41822	-0.34082	-0.077392	2.096	46.931	-9.9302	-0.34414	0.41259	-0.098239
3.654	-68.898	47.648	1247.2122	-0.73804	1.2146	-1.5251	-65.776	-154.638	1559.196	-1.123	1.832	-2.0293	8.405	155.8407	217.5221	0.41943	-0.34521	-0.034668	-6.161	12.646	3.2007	-0.28711	0.35791	-0.056836
3.656	-74.296	62.51198	1222.1367	-0.72021	1.1704	-1.4702	-68.299	-138.4583	1546.197	-1.105	1.772	-1.9702	-26.031	129.1599	182.9855	0.41211	-0.33447	0.0083008	-25.429	24.4974	15.9096	-0.23037	0.30117	-0.01416
3.658	-66.913	78.3758	1192.1101	-0.69775	1.1177	-1.4155	-54.027	-95.295	1552.838	-1.0933	1.7329	-1.9409	-36.868	127.225	138.472	0.40186	-0.32764	0.026367	-36.983	11.527	4.3503	-0.1748	0.24609	0.033691
3.66	-90.205	93.9984	1173.17134	-0.67676	1.0918	-1.3848	-65.964	-56.043	1544.4652	-1.0889	1.6387	-1.875	-67.905	110.0515	134.0495	0.36279	-0.31299	0.041016	-19.432	20.5036	23.5758	-0.12666	0.19326	0.069727
3.662	-76.594	101.097	1146.5199	-0.6499	1.0337	-1.3257	-19.876	-81.261	1556.7542	-1.0867	1.5676	-1.8318	-44.324	99.924	121.789	0.32471	-0.28711	0.038574	-34.718	-3.9026	19.2371	-0.081152	0.14004	0.10429
3.664	-102.999	115.557	1103.308	-0.62158	0.99416	-1.2764	-55.786	-68.082	1526.401	-1.0854	1.4966	-1.7925	-29.875	47.475	140.0894	0.26807	-0.25342	0.021973	-40.27	-2.9179	62.626	-0.041699	0.095118	0.12929
3.666	-107.3994	126.731	1080.555	-0.59668	0.95508	-1.2363	-88.213	-48.6795	1478.317	-1.0977	1.4336	-1.7559	-12.049	34.805	117.7986	0.17773	-0.18604	-0.01416	-65.666	6.4075	36.9935	-0.0092775	0.060254	0.15664
3.668	-98.502	123.526	1058.585	-0.56445	0.89453	-1.1768	-36.006	-29.8581	1458.107	-1.0933	1.4146	-1.7437	-67.145	7.29	106.4625	0.11963	-0.14355	-0.04248	-56.133	22.7	65.303	0.010742	0.027832	0.17432
3.67	-80.313	130.083	1047.3494	-0.54297	0.87109	-1.1445	-88.468	30.809	1421.946	-1.0913	1.3931	-1.7358	-66.57	43.1616	69.134	0.0048828	-0.037109	-0.11914	-64.9716	42.8859	21.2636	0.034571	0.004785	0.19053
3.672	-96.832	122.199	1017.0788	-0.5	0.81641	-1.0859	-102.138	0.3952	1433.56587	-1.0838	1.3899	-1.7302	-75.0328	33.388	45.1359	-0.078372	0.047119	-0.18213	-62.107	29.935	63.474	0.050781	-0.014453	0.20352
3.674	-111.08791	112.4989	985.0939	-0.45849	0.77636	-1.0415	-78.34	-25.244	1448.2555	-1.0757	1.3794	-1.7241	-60.875	69.903	2.093	-0.15771	0.12744	-0.23877	-52.216	39.602	9.956	0.067578	-0.026562	0.21289
3.676	-106.815	101.7036	980.0465	-0.42139	0.74268	-0.99512	-97.9267	-30.2224	1451.3793	-1.0752	1.377	-1.7148	-70.363	32.2948	-3.654	-0.26465	0.24414	-0.31445	-58.526	28.58	40.2214	0.085352	-0.041113	0.22178
3.678	-93.9665	100.5609	954.1163	-0.36914	0.69434	-0.93848	-94.0711	-52.487	1475.822	-1.0703	1.377	-1.7031	-64.993	67.523	-11.461	-0.30859	0.30371	-0.35352	-69.56	57.9266	25.2577	0.1123	-0.055176	0.2251
3.68	-76.336	84.2517	933.304	-0.34326	0.66846	-0.90576	-107.2582	-37.8561	1475.012	-1.043	1.375	-1.6855	-109.63	44.444	8.319	-0.37842	0.43213	-0.41553	-55.994	40.864898	56.175	0.12988	-0.066113	0.22275
3.682	-88.903	87.023	914.499	-0.29395	0.61621	-0.84961	-112.7177	-29.833	1444.2698	-1.0227	1.3625	-1.6618	-97.0147	84.77129	14.198	-0.41406	0.51831	-0.46875	-73.156	50.021	38.592	0.1543	-0.083691	0.22383
3.684	-69.702	79.324	879.291	-0.25928	0.57593	-0.80469	-90.017	-42.919	1428.6295	-0.99268	1.3442	-1.6343	-77.5532	36.1857	40.13991	-0.43848	0.60156	-0.50391	-51.994	8.1217	49.6061	0.17969	-0.10283	0.22383
3.686	-49.021	93.6451	839.2689	-0.22705	0.5332	-0.76025	-88.892	-0.646699999999999	1397.1348	-0.9707	1.3037	-1.5977	-69.215	78.949	39.669	-0.45703	0.70117	-0.52539	-55.335	19.6489	20.115	0.20381	-0.12012	0.21895
3.688	-56.375	101.2386	804.442	-0.19092	0.4751	-0.70068	-57.087	-14.757	1407.115	-0.95947	1.2876	-1.5874	-65.609	29.337	44.0034	-0.4668	0.74023	-0.5293	-58.162	-3.0211	46.4155	0.21631	-0.12842	0.21533
3.69	-42.15	104.2146	787.207	-0.1709	0.44727	-0.67188	-36.32	-2.989	1417.574	-0.95117	1.2578	-1.5371	-25.325	68.698	36.0811	-0.47852	0.81689	-0.51514	-60.346	13.4326	46.0348	0.22217	-0.13633	0.20518
3.692	-24.667	106.603	754.159	-0.13232	0.40088	-0.62451	-63.4126	46.266	1378.343	-0.94653	1.2473	-1.509	-40.401	11.79034	40.2491	-0.48511	0.84888	-0.49243	-25.146	-22.9048	41.3685	0.22724	-0.13545	0.19414
3.694	-1.64	121.477	713.94569	-0.1062	0.36279	-0.5791	-25.791	45.952	1352.54	-0.93311	1.2241	-1.4741	-49.877	36.0095	63.464	-0.48926	0.85938	-0.46973	-62.2273	-8.6184	31.437	0.22959	-0.12568	0.17968
3.696	-27.256	131.509	667.8358	-0.070801	0.32861	-0.54248	-19.205	83.6356	1303.0135	-0.91162	1.1938	-1.4233	-46.137	-41.12	62.234	-0.4707	0.83789	-0.41797	-18.292	-27.3261	41.1546	0.22578	-0.11338	0.16367
3.698	-13.83	141.028	642.3892	-0.033691	0.29248	-0.49219	-25.739	109.23	1264.9585	-0.89307	1.1704	-1.394	-30.147	-2.146	33.7591	-0.46094	0.80664	-0.38281	0.338999999999999	-15.1635	61.149	0.2251	-0.10059	0.1499
3.7	4.059	147.929	617.939	-0.015137	0.26904	-0.4668	18.385	93.94	1259.007	-0.85742	1.1309	-1.3438	-2.975	-35.4418	31.189	-0.43311	0.72705	-0.30762	5.212	-18.4511	37.222	0.22129	-0.083398	0.12197
3.702	-11.978	147.64	572.5473	0.022949	0.23047	-0.42773	-17.213	131.739	1201.855	-0.83081	1.0959	-1.3005	-0.170999999999999	27.64221	35.5605	-0.40967	0.65673	-0.25122	-26.175	6.97466	40.069	0.2209	-0.065235	0.10478
3.704	-21.805	131.577	528.8045	0.044189	0.19605	-0.39112	-7.107	103.033	1187.1469	-0.80078	1.0664	-1.2559	-6.481	-5.36755	54.02	-0.37842	0.58545	-0.19775	1.314	6.3537	-6.051	0.21973	-0.05	0.083692
3.706	-15.763	119.7608	506.6103	0.061523	0.16797	-0.35449	-1.507	94.857	1180.5012	-0.76123	1.02	-1.187	-10.56	64.544	51.247	-0.3291	0.49561	-0.12549	-12.675	9.244	42.5869	0.21015	-0.039844	0.06211
3.708	-19.004	113.50892	471.6903	0.088867	0.13525	-0.31299	-24.692	97.1115	1132.776	-0.73779	0.99268	-1.1577	8.849	23.8002	45.952	-0.30127	0.45703	-0.092773	-35.901	27.247	11.297	0.20166	-0.032227	0.046387
3.71	-26.864	112.9453	439.0147	0.10205	0.12207	-0.29346	35.636	58.011	1121.8992	-0.69287	0.93799	-1.0913	-5.358	64.494	49.18	-0.24658	0.38818	-0.03125	-18.215	32.1528	22.39	0.18682	-0.027637	0.023144
3.712	-41.281	95.1388	417.6407	0.12598	0.10205	-0.25635	4.669	76.937	1090.5193	-0.65869	0.89794	-1.0444	1.79600000000001	10.58504	54.478	-0.20532	0.34692	0.0063477	-41.991	69.885	-15.1222	0.17227	-0.019629	0.0093746
3.714	-37.073	93.6448	385.0368	0.15527	0.080322	-0.22925	-12.343	71.413	1054.5846	-0.62061	0.85742	-0.98828	2.20400000000001	64.891	53.4358	-0.16162	0.30713	0.042969	-37.087	47.469	8.67367	0.15352	-0.013769	-0.010157
3.716	-36.827	82.98	365.1984	0.17578	0.05127	-0.19824	0.522000000000006	45.345	1040.241	-0.56836	0.80371	-0.93359	-23.517	28.9073	26.5773	-0.10547	0.25146	0.085449	-41.934	55.732	-24.0971	0.1376	-0.0053711	-0.024707
3.718	-56.308	80.8755	330.1764	0.21045	0.011719	-0.15967	-25.768	98.856	982.4956	-0.5415	0.7749	-0.8999	-47.747	51.5875	8.112	-0.082031	0.22021	0.1001	-29.584	24.0001	38.937	0.12012	0.0068359	-0.037598
3.72	-82.7153	77.556	313.4477	0.2251	-0.0073242	-0.13965	-28.785	70.949	935.1339	-0.48877	0.72217	-0.83154	-70.4571	-16.6764	6.1294	-0.043457	0.15869	0.13477	-53.402	44.3524	27.5765	0.1043	0.020703	-0.057129
3.722	-57.125	89.9887	303.8839	0.24951	-0.048828	-0.10889	-12.644	99.8365	910.8067	-0.44971	0.68188	-0.78295	-94.883	3.8453	15.818	-0.020508	0.11352	0.1543	-4.065	7.203	58.734	0.088965	0.037793	-0.077832
3.724	-65.6059	94.3653	273.2141	0.25879	-0.073731	-0.087158	-50.9129	129.8085	866.36	-0.4043	0.63965	-0.73438	-52.876	-31.6283	17.6407	-0.0048828	0.066895	0.16943	-63.542	28.123	30.5247	0.072168	0.054981	-0.092285
3.726	-98.705	91.09038	243.4745	0.25244	-0.095703	-0.074219	-47.794	99.8661	830.3316	-0.35059	0.57861	-0.66553	-47.806	13.5288	27.8236	0.01416	0.016602	0.1875	-59.919	0.939000000000002	29.6356	0.057422	0.069238	-0.1
3.728	-88.2069	92.02103	215.0283	0.23975	-0.10986	-0.055664	-54.5064	155.16	774.387	-0.31885	0.55078	-0.63086	-57.913	-13.147	24.8587	0.024902	-0.0024414	0.19629	-78.4311	34.15594	19.5281	0.04248	0.088867	-0.10352
3.73	-70.61	86.86841	200.6707	0.22705	-0.11523	-0.054688	-62.1278	153.0876	744.8083	-0.25781	0.47852	-0.56641	-91.3443	11.2572	42.1718	0.041504	-0.041992	0.21631	-50.432	23.843	41.034	0.03291	0.1043	-0.10928
3.732	-63.052	99.1545	173.0403	0.20605	-0.11719	-0.043945	-36.998	134.9354	715.595	-0.21802	0.42822	-0.51928	-77.8873	-6.089	21.447	0.059326	-0.061524	0.22925	-94.4068	29.4235	60.546	0.024707	0.11885	-0.11484
3.734	-73.231	90.2201	156.7506	0.19726	-0.11279	-0.03833	-49.1476	187.473	651.713	-0.17627	0.37598	-0.47168	-88.9221	32.691	29.617	0.083008	-0.078125	0.23926	-54.427	4.871	53.313	0.023535	0.13252	-0.11133
3.736	-51.771	79.33113	148.1621	0.19092	-0.10889	-0.033203	-17.628	148.441	612.702	-0.12207	0.31152	-0.40625	-51.187	38.275	36.3416	0.11719	-0.088867	0.25293	-80.3917	7.603	49.947	0.027246	0.1376	-0.11026
3.738	-38.804	69.0143	131.7926	0.18848	-0.10449	-0.036621	-15.358	175.026	566.484	-0.093262	0.28223	-0.38281	-61.363	60.075	42.2561	0.13281	-0.1001	0.26123	-76.2014	0.561	35.203	0.033691	0.13867	-0.10596
3.74	-24.3	67.184	124.40113	0.18604	-0.1001	-0.034668	-24.775	182.8339	533.906	-0.055176	0.22314	-0.31982	-75.385	58.402	20.2087	0.17627	-0.1167	0.26514	-40.067	29.5766	73.974	0.038281	0.1375	-0.1085
3.742	-33.682	61.99677	115.3274	0.17578	-0.084961	-0.041016	-1.29	122.765	522.8282	-0.010742	0.16871	-0.28443	-75.148	63.56	6.912	0.2041	-0.13208	0.26685	-33.787	39.1156	41.268	0.04082	0.13545	-0.10274
3.744	-22.401	51.4603	126.652	0.16553	-0.074463	-0.045655	-30.171	150.5545	489.6799	0.022949	0.1167	-0.24219	-64.947	55.442	-13.1262	0.24072	-0.14551	0.26611	-19.613	43.145	44.6551	0.042383	0.13428	-0.098437
3.746	-7.601	59.9327	97.7271	0.15234	-0.060059	-0.050293	-8.202	121.1648	462.864	0.068848	0.049805	-0.19531	-56.368	45.647	-2.33	0.26855	-0.16357	0.25977	-25.55	35.1584	6.185	0.045117	0.13076	-0.094043
3.748	-19.173	49.8449	87.0667	0.12646	-0.043945	-0.0625	0.539999999999999	91.3598	443.449	0.092285	0.017578	-0.17578	-23.524	34.609	29.497	0.2876	-0.1709	0.25488	-36.441	15.385	45.0786	0.045898	0.12402	-0.092773
3.75	-28.496	40.6851	75.543	0.11279	-0.032227	-0.069336	-8.486	132.971	404.6607	0.12451	-0.043457	-0.13721	-15.199	28.9543	50.2095	0.31152	-0.18066	0.24268	-25.515	15.611	35.791	0.052637	0.12724	-0.098046
3.752	0.469000000000001	35.323	72.2472	0.084961	-0.0087891	-0.080078	-9.91399999999999	70.9891	379.391	0.14746	-0.083985	-0.11377	2.406	43.3473	44.6675	0.32276	-0.18286	0.22998	-7.572	-7.5693	77.552	0.051758	0.12871	-0.10254
3.754	1.595	43.9107	59.5781	0.061279	0.015137	-0.092285	-2.881	94.5926	346.222	0.16602	-0.1167	-0.095703	-13.722	18.24823	57.2862	0.33496	-0.18018	0.21436	-45.844	-11.5496	33.186	0.058398	0.13106	-0.10606
3.756	-2.191	49.5065	42.5735	0.04248	0.038086	-0.10254	3.515	103.8041	302.7271	0.18018	-0.15771	-0.077148	-1.884	29.272	55.233	0.34766	-0.1748	0.1958	-30.303	-33.008	39.8126	0.064062	0.13203	-0.10879
3.758	-13.778	40.7836	42.1284	0.019531	0.066406	-0.12207	14.118	48.146	278.92257	0.18628	-0.1836	-0.0625	-13.087	-5.015	63.285	0.35205	-0.1665	0.18848	-23.962	-8.43206	17.941	0.080078	0.13867	-0.1123
3.76	6.359	39.438	39.9805	0.012207	0.081055	-0.12256	14.444	109.394	242.948	0.19141	-0.20557	-0.055664	9.086	20.3886	52.59	0.36523	-0.15381	0.16943	-19.153	-14.6241	28.94998	0.095312	0.15029	-0.12256
3.762	-13.227	45.7039	33.2449	-0.0019531	0.10254	-0.13477	14.452	106.9143	212.9275	0.19727	-0.22412	-0.035645	-11.721	-2.9036	61.473	0.37182	-0.13745	0.15283	-22.227	13.064791	18.0051	0.11309	0.15791	-0.12451
3.764	-28.459	55.5666	34.5181	-0.0070801	0.1106	-0.1399	9.823	92.814	187.922	0.19775	-0.22705	-0.049316	3.862	34.468	47.8325	0.37256	-0.12256	0.14404	2.338	1.657	31.189	0.1248	0.16963	-0.12491
3.766	-35.735	44.8561	34.03867	-0.01416	0.12012	-0.14551	-17.612	136.016	160.4003	0.18652	-0.22705	-0.050293	-26.176	-10.6911	49.4748	0.37207	-0.10156	0.12061	-34.689	26.0749	6.652	0.14404	0.18047	-0.12344
3.768	-40.958	46.4184	26.881	-0.018555	0.12402	-0.1499	-30.742	70.1041	150.829	0.18335	-0.2229	-0.057129	-41.874	32.8822	34.563	0.37207	-0.092773	0.11133	-22.716	20.2975	3.208	0.1626	0.19141	-0.11865
3.77	-55.031	49.3509	31.1234	-0.022949	0.12598	-0.1543	-8.178	76.5102	143.376	0.18018	-0.21094	-0.066406	-51.464	-1.1615	31.7255	0.35791	-0.07373	0.092773	-27.994	43.0234	-6.238	0.17334	0.1958	-0.12178
3.772	-75.038	35.2505	27.8062	-0.023926	0.12695	-0.14893	-22.744	93.77564	115.2846	0.16943	-0.19824	-0.083008	-31.542	50.4012	33.7104	0.34449	-0.058106	0.076905	-38.396	33.2185	29.469	0.1834	0.204	-0.12871
3.774	-66.566	25.1824	29.7331	-0.022461	0.12525	-0.14624	-33.562	45.6933	102.3546	0.16504	-0.18994	-0.088379	-47.579	23.66401	51.2478	0.33008	-0.041016	0.06543	-66.031	49.603	36.697	0.18691	0.21495	-0.12754
3.776	-56.571	20.6977	43.815	-0.019531	0.12354	-0.14258	-53.56	90.741	81.474	0.15967	-0.17188	-0.104	-42.774	62.27	37.4056	0.30566	-0.018066	0.047852	-33.611	41.5388	37.243	0.1835	0.225	-0.13926
3.778	-80.2253	25.8442	26.5827	-0.0097656	0.11426	-0.13525	-58.598	43.34573	63.8732	0.13794	-0.15893	-0.1189	-51.508	0.434000000000001	43.4	0.29346	-0.0073242	0.044434	-77.5088	46.974	23.0489	0.16895	0.24023	-0.15527
3.78	-78.0303	16.6906	32.956	-0.00097656	0.10742	-0.13086	-66.663	10.8095	59.813	0.11572	-0.13867	-0.13721	-67.755	31.978	19.7846	0.26563	0.0073242	0.024414	-67.1996	47.662	-4.8486	0.15283	0.25742	-0.16895
3.782	-66.277	17.0827	23.9291	0.015625	0.091309	-0.10986	-64.8891	45.9662	58.1956	0.078125	-0.10986	-0.1626	-79.0634	-24.292	19.6401	0.24292	0.023682	0.014892	-78.90287	41.72	18.2143	0.13564	0.27676	-0.19111
3.784	-56.246	16.693	26.14498	0.025391	0.069092	-0.1001	-51.501	-20.243	58.5148	0.053711	-0.087402	-0.18213	-92.467	24.395	19.572	0.22314	0.037598	0.0083008	-52.793	34.1834	25.15863	0.11651	0.30137	-0.21416
3.786	-57.956	28.5924	27.8357	0.037598	0.049805	-0.083008	-53.48	-2.915	82.6627	0.0087891	-0.044922	-0.20947	-76.781	-9.443	29.171	0.1958	0.043457	0.0014648	-57.907	6.0488	98.2964	0.097069	0.32793	-0.2416
3.788	-53.277	13.5568	37.7466	0.043945	0.026855	-0.072754	-65.4567	17.823	64.6094	-0.024658	-0.0085448	-0.23364	-69.763	44.51	7.093	0.17627	0.046875	-0.0068359	-62.757	-14.509	112.797	0.08252	0.35254	-0.27734
3.79	-53.281	22.37806	50.2934	0.05249	0.005127	-0.065185	-57.884	-23.932	55.461	-0.056641	0.029297	-0.25146	-65.8331	-0.3368	33.535604	0.14795	0.06543	-0.01709	-81.95	-7.192	205.89	0.062891	0.35684	-0.33565
3.792	-47.366	40.2191	35.2314	0.049316	-0.0092773	-0.060059	-27.032	50.5261	37.56273	-0.099609	0.080566	-0.28369	-83.8029	28.791	17.9489	0.12402	0.07666	-0.027344	-60.554	54.643	229.0427	0.027246	0.34892	-0.42246
3.794	-34.988	41.073	32.4102	0.049805	-0.024902	-0.058105	-33.877	27.7592	32.33035	-0.12061	0.10693	-0.30371	-74.843	-20.85711	26.5989	0.11084	0.083984	-0.037109	-52.62	77.5788	351.474	-0.020801	0.34697	-0.52402
3.796	-17.022	38.276	34.1625	0.044922	-0.024414	-0.055176	-19.105	10.3856	22.969	-0.14941	0.14746	-0.32764	-67.041	36.5784	33.6629	0.088379	0.095703	-0.04834	-119.317	106.2777	442.679	-0.086524	0.36934	-0.63164
3.798	-25.109	27.419	46.4475	0.038574	-0.022461	-0.054688	-22.805	61.398	18.083	-0.16577	0.1709	-0.33814	-44.126	13.1532	28.9321	0.06958	0.10986	-0.052246	-78.865	96.746	574.6695	-0.17285	0.40283	-0.74072
3.8	-6.042	38.767	27.165	0.023682	-0.013672	-0.056396	-29.793	2.9954	21.5697	-0.17969	0.18994	-0.34863	-22.816	65.974	25.896	0.056152	0.12256	-0.054688	-76.558	91.231	663.837	-0.26485	0.43545	-0.8544
3.802	-0.758000000000003	28.659	17.4831	0.011719	0.0029297	-0.068359	-10.293	18.3696	32.37898	-0.17773	0.20117	-0.35547	-16.087	21.9517	31.369	0.038086	0.13721	-0.057617	-51.356	103.445	916.339	-0.36309	0.48047	-0.98047
3.804	-10.715	19.0817	27.0063	0.0058594	0.034668	-0.070313	-25.316	21.0322	24.1414	-0.17285	0.20068	-0.35303	-28.414	57.686	21.742	0.032227	0.14307	-0.058594	-55.36	127.927	1101.59	-0.46465	0.52852	-1.1106
3.806	13.599	15.3428	41.1807	0.0058594	0.041504	-0.070801	-25.615	-30.5786	16.5944	-0.16406	0.19043	-0.3418	-22.354	28.70673	17.1751	0.025879	0.15088	-0.059082	-52.71	70.674	1307.727	-0.5708	0.57217	-1.2546
3.808	-2.85299999999999	17.2099	29.03615	0.0083008	0.065918	-0.071289	-7.851	38.7013	14.404	-0.14526	0.17236	-0.32227	2.8	66.134	35.2584	0.025147	0.15113	-0.057861	-93.9321	12.6572	1391.957	-0.67822	0.62646	-1.3901
3.81	-3.472	10.7564	34.701	0.013916	0.077881	-0.071777	0.986000000000004	30.1788	-2.994	-0.125	0.14551	-0.30518	1.459	46.292	28.5412	0.026367	0.14453	-0.050781	-20.908	-98.211	1473.167	-0.78907	0.72188	-1.4961
3.812	-16.554	8.2855	42.6878	0.020508	0.084473	-0.069336	-2.423	11.818	19.0573	-0.10254	0.094238	-0.26904	-3.682	63.439	43.8315	0.026367	0.14453	-0.048828	-44.384	-165.674	1583.744	-0.89405	0.85714	-1.5691
3.814	-9.381	13.34078	37.255	0.027832	0.085449	-0.060059	-3.717	47.126	22.4162	-0.085938	0.075195	-0.25244	-3.716	22.8471	40.4066	0.033691	0.13867	-0.047363	-74.176	-197.1035	1663.163	-1.0081	1.0212	-1.5956
3.816	-26.862	22.6897	39.0695	0.033203	0.082031	-0.047363	-0.655000000000001	-23.045	31.555	-0.058105	0.021973	-0.20557	-30.045	27.421	56.979	0.033691	0.13184	-0.043945	-108.378	-201.49	1620.084	-1.1199	1.2035	-1.5718
3.818	-36.732	15.7837	37.453	0.044922	0.071777	-0.04248	-14.864	-2.6178	51.0597	-0.041748	-0.013428	-0.17823	-23.493	10.741	57.869	0.034912	0.13233	-0.03833	-83.081	-246.561	1508.298	-1.21	1.3945	-1.5332
3.82	-39.68	16.4201	28.68019	0.052735	0.059326	-0.031006	-20.304	18.4327	34.4875	-0.020996	-0.047852	-0.15332	-29.779	13.6014	55.719	0.029297	0.13086	-0.030762	-75.8576	-303.142	1438.462	-1.2527	1.5562	-1.4965
3.822	-47.873	18.034369	26.90081	0.060059	0.047363	-0.019531	-34.506	-30.732	44.2497	-0.00097656	-0.084961	-0.11084	-13.42	16.9872	50.608	0.022461	0.12939	-0.027832	0.1608	-342.14	1371.266	-1.2438	1.6597	-1.4801
3.824	-56.924	27.5017	9.4347	0.069824	0.028809	-0.0063477	-41.424	48.569	42.1699	0.0083008	-0.095215	-0.095703	-27.184	26.699	54.8209	0.016113	0.12793	-0.025879	86.0962	-334.46	1330.8893	-1.1844	1.6941	-1.4817
3.826	-54.322	24.4434	31.71183	0.074707	0.020996	-0.0073242	-50.463	41.443	-2.1723	0.028809	-0.10449	-0.060059	-32.156	23.6562	51.506	0.0083008	0.13574	-0.023438	140.92108	-255.85	1238.7846	-1.1014	1.6598	-1.5129
3.828	-58.603	26.98573	31.5323	0.075195	0.0039063	-0.0053711	-56.031	21.0588	3.1156	0.036866	-0.10962	-0.044678	-53.518	10.206	53.9454	0.00024415	0.13647	-0.025635	99.856	-177.121	1244.089	-1.043	1.5898	-1.5371
3.83	-67.945	27.0052	31.3076	0.081543	-0.0053711	-0.00097654	-54.7059	66.324	4.702	0.040039	-0.10645	-0.023926	-56.38	3.463	29.17	-0.0048828	0.1416	-0.025391	28.3701	-85.143	1229.657	-1.0681	1.5253	-1.5288
3.832	-80.229	29.0746	28.62145	0.089355	-0.01709	0.00048828	-58.973	3.1214	15.93211	0.044434	-0.097168	-0.00097656	-81.958	1.201	41.546	-0.010254	0.1499	-0.03125	45.4067	-85.92	1217.6107	-1.1642	1.4789	-1.5144
3.834	-61.402	10.8756	23.8506	0.099121	-0.034668	0.00097656	-45.139	30.7467	34.5186	0.039063	-0.094238	0.015137	-81.21	32.6685	27.722	-0.0029297	0.15234	-0.035645	67.55	-48.48	1173.27	-1.2837	1.4993	-1.5067
3.836	-60.066	10.9698	41.345	0.10303	-0.039063	0.0019531	-46.245	49.5668	30.385	0.040527	-0.081543	0.030762	-67.147	19.6787	40.84028	0.0043945	0.1626	-0.051758	84.46	-85.43	1263.775	-1.3771	1.5879	-1.488
3.838	-63.246	18.5745	35.598	0.11328	-0.048828	0	-62.955	-2.799	37.021	0.037842	-0.072998	0.035889	-70.362	56.7497	24.4301	0.017334	0.17309	-0.048095	27.589	-64.73	1320.169	-1.4272	1.6978	-1.4624
3.84	-65.523	14.82528	37.655	0.12232	-0.059571	-0.001709	-51.765	36.5153	63.941	0.036621	-0.05127	0.051758	-90.501	20.03772	38.265	0.032715	0.18311	-0.052734	-12.904	-132.31	1410.354	-1.4249	1.7879	-1.4456
3.842	-51.195	11.3085	28.8184	0.13086	-0.06543	-0.0014648	-60.737	16.8492	38.848	0.037598	-0.039063	0.063965	-98.31313	36.4159	18.6131	0.054199	0.19678	-0.05127	-18.791	-164.86	1391.098	-1.3755	1.8437	-1.4381
3.844	-41.955	4.3485	35.3452	0.14404	-0.080566	0	-39.592	9.0387	37.913	0.041504	-0.034668	0.068848	-73.02	-10.2827	46.6096	0.057617	0.1958	-0.058105	26.653	-310.89	1457.037	-1.31	1.8548	-1.4475
3.846	-37.131	21.0287	22.6406	0.15186	-0.087891	-0.0014648	-28.949	57.204	25.8605	0.039063	-0.013184	0.074219	-55.545	26.577	16.4383	0.069824	0.20166	-0.062988	11.771	-356.099	1477.53928	-1.2343	1.8354	-1.4593
3.848	-25.087	13.7531	24.7575	0.15918	-0.10059	-0.0024414	-51.308	-11.7199	29.4237	0.033691	-0.0024415	0.072998	-57.657	-9.3716	24.92	0.083252	0.20776	-0.066163	14.367	-453.37	1561.049	-1.1733	1.7954	-1.4487
3.85	-28.13	19.2133	25.64	0.16822	-0.11182	-0.0051269	-41.232	-8.8859	56.4308	0.029297	0.0092773	0.067383	-30.792	30.3229	26.915	0.09082	0.21338	-0.07373	4.485	-396.61	1617.612	-1.1251	1.7107	-1.4343
3.852	-1.95200000000001	27.0348	21.8838	0.17285	-0.125	-0.0048828	-29.528	10.351	32.0308	0.028809	0.032227	0.063477	-40.712	-23.1902	22.0836	0.099609	0.22461	-0.084473	18.314	-401.76	1717.35	-1.0746	1.5938	-1.4293
[truncated: 28,074 more rows]
