# Supplementary material for: Reliability and Validity of Running Cadence and Stance Time Derived from Instrumented Wireless Earbuds
Source: Sensors (Basel). 2021 Nov 30;21(23):7995. doi: 10.3390/s21237995 (PMC8659722; doi:10.3390/s21237995)
Supplement: Supplementary file 1 [file sensors-21-07995-s001.zip › Data_P05_HeadMovements.csv]

time	up_force_plate_1	up_force_plate_2	up_force_plate_3	up_earbuds_1	up_earbuds_2	up_earbuds_3	down_force_plate_1	down_force_plate_2	down_force_plate_3	down_earbuds_1	down_earbuds_2	down_earbuds_3	shake_force_plate_1	shake_force_plate_2	shake_force_plate_3	shake_earbuds_1	shake_earbuds_2	shake_earbuds_3	nod_force_plate_1	nod_force_plate_2	nod_force_plate_3	nod_earbuds_1	nod_earbuds_2	nod_earbuds_3	bird_L_force_plate_1	bird_L_force_plate_2	bird_L_force_plate_3	bird_L_earbuds_1	bird_L_earbuds_2	bird_L_earbuds_3	bird_R_force_plate_1	bird_R_force_plate_2	bird_R_force_plate_3	bird_R_earbuds_1	bird_R_earbuds_2	bird_R_earbuds_3	check_watch_force_plate_1	check_watch_force_plate_2	check_watch_force_plate_3	check_watch_earbuds_1	check_watch_earbuds_2	check_watch_earbuds_3
0	-31.5255	183.9423	1207.709	-1.0656	1.1373	0.27744	119.534	-230.196	651.002	-0.23037	0.25352	-0.12422	7.222	9.528	1809.444	-1.6059	1.5285	0.18935	-34.3009	-18.763	1893.643	-1.7734	1.6191	0.3585	-92.0243	-12.08528	128.1472	0.06385	0.065287	0.25392	57.5148	-248.533	1758.275	-1.3901	1.595	0.31514	17.1	-42.353	1839.762	-1.7169	1.6686	0.43271
0.002	2.869	166.552	1180.532	-1.023	1.1066	0.27022	106.544	-151.243	653.5936	-0.30263	0.2957	-0.094727	-11.867	2.448	1819.142	-1.6316	1.5121	0.17695	21.4132	19.5022	1889.636	-1.7884	1.6178	0.34922	-38.458	-67.8181	231.69	0.064453	0.085698	0.26005	26.203	-297.393	1817.09	-1.4164	1.6219	0.32412	-0.684999999999999	10.74186	1851.275	-1.7387	1.6688	0.43154
0.004	-30.841	228.656	1121.0447	-0.97617	1.0707	0.26435	102.245	-104.125	691.572	-0.38184	0.33594	-0.060547	-1.91	-30.525	1856.7842	-1.6523	1.498	0.1665	-20.879	-5.2545	1876.311	-1.7964	1.6108	0.33398	-67.308	-100.826	293.581	0.062881	0.10211	0.26517	46.0592	-198.4243	1837.44	-1.437	1.645	0.32324	21.76	-4.1417	1858.9375	-1.7504	1.6703	0.42959
0.006	-10.755	226.4845	1068.8407	-0.92744	1.037	0.25859	113.714	-45.175	726.158	-0.47695	0.38515	-0.027442	-23.1274	-13.985	1866.187	-1.6697	1.4824	0.16133	-36.376	-7.0602	1904.464	-1.7944	1.5963	0.32158	-89.885	-177.393	403.343	0.061619	0.12151	0.26973	28.698	-186.156	1815.898	-1.4623	1.6529	0.32597	15.409	22.6837	1878.111	-1.7509	1.6581	0.42725
0.008	29.9	211.709	1021.8275	-0.88867	1.0059	0.25537	81.726	2.642	778.085	-0.57783	0.44385	-5.5967e-07	-16.1898	-109.109	1881.9697	-1.6895	1.4715	0.15645	-45.644	25.8841	1883.811	-1.793	1.5805	0.31201	-102.05	-296.518	493.116	0.060547	0.1377	0.27197	32.1251	-140.072	1818.984	-1.4874	1.6544	0.32813	-34.0681	39.7833	1861.49	-1.7456	1.6489	0.42676
0.01	-1.224	247.34	960.154	-0.8461	0.96446	0.24483	135.463	22.201	885	-0.67197	0.50908	0.031249	-10.9875	-139.042	1914.5167	-1.7087	1.4634	0.15293	-90.49	-32.694	1901.994	-1.798	1.5661	0.30264	-163.335	-358.928	541.772	0.049815	0.15136	0.28281	28.7786	-53.914	1781.43	-1.514	1.6442	0.33477	-50.5529	-12.1108	1880.4423	-1.738	1.6382	0.42012
0.012	31.529	186.217	921.53565	-0.80274	0.93242	0.23935	107.467	61.5005	933.827	-0.76074	0.57715	0.066015	-25.3271	-122.832	1895.605	-1.7259	1.4569	0.15352	-55.918	-26.6907	1953.6646	-1.8061	1.5435	0.29658	-139.036	-375.2119	589.063	0.042111	0.16903	0.28018	15.285	-68.362	1777.594	-1.5516	1.6297	0.33545	-52.719981	20.3165	1902.141	-1.7324	1.6238	0.41982
0.014	28.446	219.51498	891.5284	-0.76133	0.8918	0.23467	70.2217	34.8359	992.74	-0.85742	0.64453	0.10107	-15.7782	-161.601	1891.872	-1.7441	1.4473	0.15967	-52.515	-46.1035	1972.652	-1.8145	1.5215	0.29346	-116.292	-284.615	659.2015	0.025306	0.18777	0.28018	45.27979	-27.506	1797.237	-1.582	1.6113	0.32861	-34.305	-24.2587	1917.678	-1.734	1.6114	0.42139
0.016	-15.006	249.176	850.4761	-0.72266	0.86055	0.22939	109.891	22.809	1015.79	-0.96035	0.72402	0.13477	15.4379	-65.662	1854.156	-1.7567	1.4496	0.16582	-56.165	-81.414	2001.155	-1.8231	1.4965	0.28584	-204.3728	-161.7484	746.1561	0.0016699	0.21434	0.2832	39.66893	-5.196	1785.87	-1.6027	1.5864	0.33008	-1.672	-38.0352	1972.088	-1.7363	1.591	0.42314
0.018	-28.67	213.7618	815.8248	-0.68359	0.82422	0.22314	52.091	8.01199999999999	1031.095	-1.0628	0.80869	0.17695	45.881	-28.853	1814.114	-1.7682	1.456	0.17285	-12.8344	-46.1473	1981.5742	-1.8382	1.4692	0.28545	-169.268	-105.14	801.093	-0.03125	0.2583	0.29102	44.706	-57.0007	1829.053	-1.6218	1.5517	0.31963	-21.3065	-3.5389	1967.0891	-1.7515	1.5728	0.42725
0.02	-36.265	246.478	782.6829	-0.63975	0.78955	0.21172	26.8623	-59.111	1107.649	-1.1616	0.9005	0.21992	90.719	9.614	1814.436	-1.7823	1.4575	0.18027	-56.3886	-66.555	1948.277	-1.8491	1.4411	0.28857	-119.658	-48.1608	812.6718	-0.078042	0.3131	0.317	36.7896	-9.40978	1860.196	-1.6327	1.5204	0.30947	-10.4048	-71.851	1933.5116	-1.7625	1.5492	0.4208
0.022	-50.972	204.5264	744.4383	-0.59912	0.75009	0.20147	5.2694	-96.215	1161.923	-1.262	0.9872	0.26524	71.061	101.964	1791.15	-1.7929	1.4689	0.1919	-11.672	-69.149	1952.37916	-1.859	1.4141	0.28525	-123.133	-31.136	863.9025	-0.15344	0.37404	0.34669	-23.5221	-55	1863.337556	-1.6393	1.481	0.29443	37.2426	-58.474	1925.2713	-1.7679	1.5259	0.42149
0.024	-44.45	181.312	709.772	-0.55264	0.71533	0.18623	-100.873	-144.859	1225.9091	-1.3628	1.0649	0.31055	66.8116	91.5909	1781.297	-1.8013	1.479	0.19824	61.7818	-26.76	1924.702	-1.8726	1.3872	0.29346	-67.427	-5.06	971.732	-0.25071	0.43498	0.38458	-47.8038	-62.649	1886.734	-1.646	1.4419	0.28027	22.592	-39.004	1901.24	-1.7741	1.5025	0.41992
0.026	-85.55406	214.228	648.77649	-0.50313	0.67832	0.17256	-87.32203	-210.8906	1292.2501	-1.4723	1.1354	0.35937	66.707	145.239	1793.0799	-1.8142	1.488	0.21524	43.4661	-24.553	1906.747	-1.8842	1.3631	0.30049	-103.1547	54.146	1083.947	-0.35245	0.50089	0.42794	-39.906	-3.6183	1877.4474	-1.6598	1.4078	0.26768	66.8108	-39.064	1903.681	-1.7748	1.4818	0.42138
0.028	-80.087	157.0135	605.8654	-0.45166	0.63574	0.15967	-106.1005	-232.641	1302.2132	-1.5784	1.1918	0.40936	39.762	184.007	1759	-1.8231	1.4969	0.22422	100.496	49.033	1911.224	-1.8977	1.3387	0.30948	-109.941	69.149	1169.185	-0.46045	0.55713	0.47559	-66.018	-44.1003	1866.1198	-1.6742	1.3746	0.25146	72.096	67.633	1883.1175	-1.7754	1.4629	0.41895
0.03	-83.335	184.923	582.0404	-0.40146	0.60283	0.13906	-141.926	-292.61	1353.9402	-1.6788	1.2352	0.44765	67.696	150.312	1757.292	-1.832	1.5019	0.24336	64.578	84.2782	1890.4217	-1.9101	1.3136	0.31963	-130.03	93.281	1204.813	-0.57587	0.61748	0.51231	-44.3517	-22.767	1897.732	-1.6883	1.3449	0.24209	57.554	102.3551	1846.468	-1.7788	1.4552	0.41924
0.032	-88.511	172.299	536.797	-0.35088	0.57276	0.13154	-88.999	-308.89	1401.5502	-1.762	1.2614	0.47362	41.449	185.955	1748.6732	-1.8312	1.5075	0.25283	58.0152	112.255	1871.2832	-1.9223	1.2949	0.32617	-214.208	50.324	1263.366	-0.69442	0.69033	0.55156	-61.059	-28.8996	1898.8285	-1.7079	1.3242	0.23379	67.293	147.668	1850.22	-1.7805	1.4496	0.41318
0.034	-47.133	104.675	513.40051	-0.30049	0.54307	0.11513	-120.12703	-298.03	1426.0658	-1.8223	1.2832	0.49561	39.9539	162.596	1722.617	-1.8364	1.5044	0.26709	100.343	175.748	1841.994	-1.9316	1.2773	0.33643	-190.389	-8.58000000000001	1357.408	-0.81239	0.7747	0.58711	-67.4411	-105.641	1908.4122	-1.7319	1.3052	0.229	67.482	203.894	1811.301	-1.7824	1.4508	0.4081
0.036	-68.175	150.488	461.588	-0.25097	0.51347	0.10039	-122.7427	-309.58	1479.622	-1.8519	1.2891	0.50508	38.9193	123.502	1754.9762	-1.8375	1.4963	0.28008	57.8742	164.96	1804.953	-1.9368	1.2589	0.34512	-230.9206	-39.1	1413.381	-0.92607	0.87861	0.62754	5.9345	-33.39697	1899.79956	-1.7604	1.2916	0.23047	79.451	158.079	1798.4806	-1.7805	1.4499	0.40547
0.038	-76.086	132.137	426.6218	-0.20605	0.4834	0.092285	-85.258	-245.806	1505.117	-1.8504	1.2973	0.50635	35.48	131.2603	1735.597	-1.8332	1.4856	0.2919	73.6985	141.673	1822.6335	-1.9411	1.2478	0.35391	-302.746	-129.061	1504.428	-1.0366	0.99463	0.68066	-1.0154	-32.424	1869.4115	-1.7961	1.2883	0.23574	41.35151	174.349	1804.209	-1.7813	1.4541	0.41064
0.04	-102.336	148.2771	398.9492	-0.17031	0.4543	0.085254	-138.4837	-187.7824	1544.5	-1.8156	1.2992	0.50829	34.508	42.911	1739.751	-1.8274	1.4711	0.29854	47.2056	122.042	1809.904	-1.9407	1.2357	0.36172	-273.322	-213.643	1586.884	-1.1628	1.112	0.74493	27.717	20.876	1881.7395	-1.8258	1.2867	0.24278	31.0463	170.603	1780.426	-1.7712	1.4546	0.41582
0.042	-114.7501	209	348.889	-0.13682	0.42705	0.081054	-115.797	-153.361	1596.012	-1.7601	1.3004	0.49695	45.9082	16.488	1754.837	-1.8187	1.458	0.3083	-9.4804	65.0151	1796.11	-1.9354	1.2271	0.36777	-272.171	-271.351	1615.384	-1.3055	1.2203	0.81572	50.8449	116.005	1852.2972	-1.8577	1.2884	0.24717	12.333	113.443	1782.0828	-1.7703	1.459	0.41455
0.044	-80.599	152.573	317.05314	-0.10635	0.4001	0.075586	-99.788	-106.672	1571.554	-1.6792	1.3071	0.48047	56.051	25.843	1717.911	-1.8047	1.4473	0.31396	51.821	66.6126	1817.815	-1.9253	1.2212	0.37402	-189.043	-348.58	1658.259	-1.4691	1.3192	0.87159	16.003	104.045	1834.92001	-1.8843	1.2925	0.25537	14.2645	136.884	1773.0231	-1.761	1.459	0.41807
0.046	-73.039	165.127	295.678	-0.077441	0.37266	0.070606	-134.473	-137.845	1563.551	-1.5839	1.3096	0.46692	33.0455	4.372	1710.573	-1.7888	1.4331	0.32188	30.0062	64.059	1777.8874	-1.907	1.2151	0.37988	-48.95	-343.89	1680.0259	-1.6379	1.3918	0.921	49.48217	144.009	1845.1356	-1.906	1.2942	0.25635	34.9908	84.072	1756.421	-1.7507	1.463	0.41406
0.048	-95.343	156.918	274.896	-0.056152	0.3418	0.064941	-96.3006	-138.46	1584.893	-1.4974	1.3118	0.43998	45.559	96.395	1672.079	-1.7661	1.4187	0.33183	11.753	34.365	1781.748	-1.8831	1.213	0.37735	-31.864	-319.58	1721.8132	-1.7847	1.4517	0.96094	48.6142	136.778	1829.5915	-1.9207	1.2988	0.26377	26.8497	67.173	1768.394	-1.7441	1.4531	0.41846
0.05	-71.556	97.3369	270.5502	-0.029883	0.31631	0.061133	-96.468	-123.786	1574.788	-1.4283	1.313	0.40247	4.1826	112.789	1619.594	-1.7387	1.4079	0.33926	30.372	59.046	1763.891	-1.8581	1.2083	0.38672	38.44	-266.96	1814.073	-1.9011	1.4825	0.98652	35.3054	84.889	1824.8061	-1.9289	1.2953	0.26221	12.3271	89.454	1739.167	-1.7328	1.4477	0.41689
0.052	-69.92	159.559	243.312	-0.012598	0.29004	0.056348	-71.1	-175.969	1629.493	-1.3719	1.3095	0.3685	-22.015	156.1092	1612.41	-1.7118	1.3935	0.34443	-33.512	51.659	1713.0754	-1.8281	1.2041	0.39013	41.534	-170.437	1860.688	-1.9656	1.4988	0.99815	44.717	129.295	1826.1765	-1.9341	1.2983	0.26231	7.293	44.833	1721.829	-1.7147	1.4403	0.41172
0.054	-64.267	121.6292	211.8006	0.0088863	0.25918	0.048536	13.902	-168.649	1676.8624	-1.3276	1.3091	0.33154	-23.0195	241.331	1562.092	-1.6763	1.3794	0.35156	-10.778	49.457	1723.631	-1.8022	1.1997	0.39697	3.443	-134.673	1877.498	-1.9672	1.5066	0.99189	24.515	93.71	1799.139	-1.9331	1.2983	0.26465	-16.899	105.907	1717.869	-1.6929	1.4325	0.40781
0.056	-36.031	94.278	187.75	0.026465	0.23447	0.042481	3.393	-199.6743	1698.7202	-1.2949	1.3081	0.30729	-26.2774	212.903	1535.7824	-1.639	1.3642	0.35156	4.78	98.578	1681.786	-1.7748	1.1924	0.39854	53.765	-112.672	1863.92	-1.9082	1.5147	0.97334	63.2425	88.0919	1792.148	-1.9308	1.2951	0.26923	-15.618	125.903	1674.602	-1.6669	1.4222	0.40645
0.058	-41.554	126.0986	152.4421	0.047363	0.21436	0.030762	64.624	-228.682	1759.291	-1.2868	1.3167	0.28724	-2.665	253.717	1495.2467	-1.6022	1.3477	0.35293	-70.865	109.42	1633.9184	-1.75	1.1902	0.404	1.279	-75.388	1822.542	-1.8008	1.5215	0.94971	66.542	120.4242	1769.6254	-1.9254	1.2934	0.27899	-24.99	116.902	1645.374	-1.6357	1.4102	0.40576
0.06	-18.462	56.573	123.712	0.063379	0.18857	0.030566	106.415	-192.593	1754.5016	-1.2929	1.3311	0.27311	-13.383	255.85	1446.337	-1.5589	1.3341	0.35488	-22.694	162.337	1603.363	-1.7187	1.184	0.40986	-43.078	-78.917	1853.229	-1.6709	1.5279	0.91592	40.9758	80.884	1780.215	-1.9188	1.2984	0.286	-39.980302	193.596	1606.228	-1.6047	1.3945	0.41543
0.062	-26.387	89.0097	133.86	0.074804	0.1709	0.024121	69.554	-236.945	1784.6434	-1.3142	1.3491	0.26342	-3.569	207.51	1395.1598	-1.5228	1.3119	0.3541	-79.317	219.573	1540.227	-1.6898	1.1758	0.41416	-32.687	-32.28	1882.71	-1.5315	1.5357	0.87812	53.804	84.414	1815.561	-1.9048	1.3006	0.30324	-63.5845	199.779	1559.0083	-1.5754	1.3808	0.41689
0.064	-47.196	97.302	150.08735	0.083399	0.15293	0.021777	78.4408	-228.257	1830.296	-1.3433	1.3735	0.25342	12.7155	218.2185	1369.095	-1.4863	1.2891	0.35498	-99.226	218.145	1523.7803	-1.6563	1.1631	0.41846	-98.8836	-50.79	1864.399	-1.3972	1.531	0.83594	32.752	77.071	1787.243	-1.8901	1.3052	0.30664	-44.4729	245.437	1532.9205	-1.5473	1.3668	0.42158
0.066	-30.863	33.735	157.82	0.083887	0.13486	0.016406	42.2337	-219.0914	1831.245	-1.3779	1.3966	0.24189	12.433	174.636	1344.588	-1.4424	1.2622	0.35137	-31.931	245.709	1503.4954	-1.6252	1.1502	0.42178	-95.046	-89.22	1886.47775	-1.2885	1.5108	0.78779	10.672	28.652	1765.377	-1.8689	1.3103	0.32562	-47.7116	302.419	1497.6681	-1.5177	1.3499	0.425
0.068	-33.773	86.6086	151.3121	0.083008	0.11768	0.024414	20.105	-255.117	1882.543	-1.4231	1.4196	0.22911	15.292	148.558	1325.7182	-1.4026	1.2372	0.34649	-83.912	220.54	1444.3718	-1.5882	1.1294	0.41758	-49.761	-69.68	1860.889	-1.1948	1.4829	0.74219	39.0744	91.701	1729.326	-1.8405	1.3169	0.3368	-41.719	248.258	1454.95261	-1.4844	1.3379	0.42334
0.07	-28.218	62.8044	111.775	0.078614	0.10371	0.023633	51.2712	-186.023	1881.906	-1.4656	1.4413	0.22656	28.32	182.835	1316.5367	-1.3545	1.2079	0.34296	-20.241	183.2316	1412.6221	-1.546	1.1154	0.41328	-2.65600000000001	-121.22695	1890.159	-1.1341	1.4452	0.7043	-13.908	95.323	1651.991	-1.8016	1.3197	0.34146	-11.494	244.165	1416.857	-1.4464	1.3232	0.43076
0.072	-41.243	67.915	98.796	0.073047	0.092188	0.025781	-7.3076	-172.56	1854.304	-1.5193	1.4667	0.22463	14.45	137.413	1286.9774	-1.3176	1.1806	0.32987	-0.423000000000002	185.482	1371.389	-1.5093	1.0973	0.40615	48.21	-132.592	1962.934	-1.0978	1.4169	0.67266	-21.64	134.642	1627.159	-1.762	1.3245	0.35084	6.354	190.2492	1374.161	-1.4129	1.3035	0.42598
0.074	-70.68	132.447	85.0839	0.062109	0.076172	0.023829	8.22	-133.826	1866.582	-1.5859	1.4941	0.22168	7.482	162.671	1280.858	-1.2769	1.147	0.32178	-24.624	150.182	1339.236	-1.4644	1.0757	0.40332	15.758	-151.37	2000.0212	-1.0876	1.3934	0.64453	-35.1269	209.687	1599.741	-1.7227	1.3291	0.3501	-7.475	147.532	1359.963	-1.3742	1.2867	0.42012
0.076	-55.604	66.383	71.757	0.056348	0.065234	0.025683	11.6255	-57.385	1823.455	-1.6479	1.5098	0.22953	4.047	155.0705	1230.823	-1.2304	1.1233	0.31107	38.766	148.211	1320.6746	-1.4163	1.0575	0.39043	-49.006	-238.57	2079.333	-1.091	1.3812	0.6333	-82.66	170.266	1599.1286	-1.6838	1.3303	0.35575	15.084	186.468	1352.187	-1.3377	1.2642	0.4126
0.078	-77.538	85.7127	71.9929	0.053711	0.053711	0.025391	-19.564	-71.8038	1818.841	-1.7196	1.5299	0.23754	-8.193	106.857	1188.035	-1.1848	1.0887	0.29967	-5.783	164.997	1283.5373	-1.3672	1.0367	0.38125	-58.287	-244.92	2103.083	-1.1084	1.3789	0.62939	-40.2872	175.895	1598.009	-1.6391	1.3322	0.35944	17.297	162.815	1315.9398	-1.2944	1.2466	0.40332
0.08	-62.946	63.384	58.958	0.057617	0.051758	0.028613	51.6794	-39.324	1832.217	-1.7776	1.5496	0.25231	23.694	173.8584	1150.5775	-1.1345	1.0633	0.28598	-9.047	141.545	1273.178	-1.3187	1.016	0.36758	-155.6512	-279.4	2087.851	-1.1379	1.3901	0.65166	-45.0201	171.6316	1538.5695	-1.5997	1.3301	0.36194	-3.608	169.001	1309.293	-1.2485	1.2223	0.39385
0.082	-49.846	-11.487	72.3327	0.057324	0.043847	0.030274	32.8371	-51.8751	1834.288	-1.8244	1.5615	0.267	-7.852	182.156	1090.0899	-1.0858	1.0375	0.27377	16.208	160.7821	1276.907	-1.2721	0.99677	0.35273	-203.4537	-231.662	2083.233	-1.1848	1.4109	0.68487	-52.7489	131.914	1491.02445	-1.5548	1.321	0.36833	2.392	197.85571	1276.035	-1.2035	1.1996	0.38066
0.084	-74.179	50.604	73.132	0.057324	0.041895	0.038867	2.643	-116.768	1886.906	-1.8672	1.5781	0.28125	12.928	226.4652	1061.1172	-1.0405	1.0142	0.25977	1.375	164.4428	1241.08	-1.2139	0.96875	0.34863	-232.0465	-97.636	2028.1258	-1.2641	1.4363	0.72354	1.023	174.494	1440.324	-1.5156	1.3105	0.37158	-11.809	138.655	1240.455	-1.1614	1.1761	0.36972
0.086	-68.51	40.404	46.9364	0.055762	0.037988	0.04541	-1.6988	-89.98	1894.058	-1.8985	1.5892	0.29218	19.259	299.377	992.458	-0.99355	0.99082	0.25159	30.777	149.587	1200.475	-1.1692	0.94288	0.33457	-275.89	-57.705	1995.688	-1.3561	1.4736	0.75098	-44.513	147.285	1380.745	-1.4692	1.3017	0.36914	-6.641	176.51662	1214.303	-1.1205	1.149	0.36054
0.088	-79.422	41.683	43.3987	0.049805	0.029785	0.050781	-51.987	-105.364	1863.445	-1.9185	1.5979	0.30457	-7.747	249.3672	960.5658	-0.94913	0.97199	0.24577	23.341	199.891	1127.666	-1.1234	0.91768	0.3211	-257.163	4.371	2005.308	-1.4468	1.5122	0.78516	-26.158	147.779	1361.435	-1.4192	1.2814	0.36832	0.265000000000001	182.4072	1152.785	-1.0762	1.125	0.35205
0.09	-92.945	84.447	41.4133	0.04707	0.023633	0.057812	-47.112	-100.108	1874.152	-1.9305	1.6	0.31333	28.959	284.414	920.3662	-0.90675	0.95088	0.2394	-26.132	204.5948	1050.1008	-1.0699	0.88682	0.31094	-291.618	-11.218	1993.718	-1.5448	1.5497	0.8207	15.496	165.76	1357.8405	-1.3663	1.256	0.36534	-2.177	172.564	1094.4453	-1.0385	1.0931	0.34395
0.092	-80.442	-11.4597	62.764	0.041407	0.014649	0.064942	-39.8745	-50.1734	1855.429	-1.9434	1.601	0.31649	6.901	271.07	849.179	-0.86766	0.92766	0.23661	37.972	207.1986	1003.803	-1.0194	0.85566	0.2999	-235.053	-75.9891	2008.5044	-1.6469	1.5879	0.85284	-25.7347	119.081	1347.621	-1.3182	1.2287	0.3513	2.57400000000001	237.1131	1039.071	-0.99853	1.0626	0.3332
0.094	-78.389	6.3285	62.7686	0.035156	0.0060546	0.072363	-64.5628	-81.9301	1863.0449	-1.9448	1.5981	0.32031	-17.94	232.3324	815.4153	-0.82568	0.90674	0.23145	-4.444	244.4486	948.803	-0.96631	0.82666	0.28857	-143.492	-21.4568	1991.585	-1.7559	1.6156	0.8876	-3.803	164.121	1340.168	-1.2603	1.1958	0.34082	-11.012	214.082	969.191	-0.95635	1.0282	0.32695
0.096	-74.52	13.55	65.6074	0.036133	0.0006836	0.082129	-28.3424	-62.5499	1897.29097	-1.9386	1.5898	0.30902	-35.001	257.618	776.528	-0.78686	0.88401	0.22399	-10.676	226.2377	924.51631	-0.91982	0.78936	0.28291	-178.092	7.974	1944.873	-1.8613	1.6488	0.91611	-0.0910000000000011	186.733	1281.2889	-1.2041	1.1608	0.3395	14.864	249.69682	938.5814	-0.91211	0.99358	0.31787
0.098	-77.709	-15.71	57.52731	0.030762	-0.0087891	0.09082	-31.5205	-72.6314	1879.0835	-1.926	1.5811	0.30679	-69.7964	223.795	742.379	-0.74555	0.86158	0.22037	30.648	251.301	898.4701	-0.86807	0.75224	0.25957	-137.053	57.63	1936.579	-1.9448	1.6743	0.9375	-8.956	175.3398	1231.898	-1.1535	1.1259	0.33048	-4.658	291.016	898.5176	-0.87256	0.95752	0.29883
0.1	-65.9	55.4238	58.273	0.028125	-0.0125	0.10127	-31.8381	-113.597	1881.987	-1.9057	1.5639	0.2945	-63.105	227.078	736.4164	-0.70449	0.83727	0.21242	-60.658	251.2298	825.955	-0.81807	0.7167	0.24746	-110.781	110.179	1928.687	-1.9962	1.6917	0.95723	35.229	206.142	1184.1861	-1.1017	1.0899	0.32826	-45.151	251.629	856.0781	-0.82119	0.91709	0.28692
0.102	-62.409	15.82	28.9814	0.029688	-0.02168	0.11211	46.746	-57.21	1859.756	-1.8852	1.5518	0.27896	-35.814	239.422	703.604	-0.65973	0.81492	0.20185	-48.535	219.7819	803.4748	-0.77109	0.6836	0.2334	-169.833	48.677	1968.8893	-2.0258	1.7113	0.96963	5.328	163.1737	1116.5784	-1.0559	1.0545	0.32309	-50.617	287.701	824.4868	-0.77402	0.87949	0.27686
0.104	-33.178	-9.3508	21.63653	0.026562	-0.024804	0.12305	50.6107	-33.539	1826.3868	-1.8569	1.5356	0.26953	-63.187	191.4778	665.2368	-0.60498	0.78662	0.19727	-76.339	233.519	763.6282	-0.72266	0.65039	0.21631	-139.9497	6.628	2049.213	-2.0332	1.7179	0.98017	20.095	163.0873	1094.8405	-1.0044	1.022	0.31445	-71.227	248.595	758.491	-0.72597	0.84472	0.26045
0.106	-12.523	43.869	21.078	0.028125	-0.03291	0.1251	76.4	31.287	1831.9188	-1.839	1.5249	0.26836	-80.037803	204.9908	652.496	-0.5507	0.75987	0.18565	-108.8901	212.5866	721.3063	-0.66826	0.61475	0.20176	-118.82	-50.3291	2061.025	-2.0296	1.7231	0.99375	49.387	225.594	1045.188	-0.95205	0.98101	0.31168	-73.866	212.1908	736.063	-0.67461	0.81191	0.24522
0.108	-20.358	-7.1481	26.3304	0.037598	-0.040039	0.12549	92.05	102.945	1810.734	-1.8218	1.5192	0.26485	-59.348	192.037	596.2524	-0.49879	0.7274	0.172	-61.149	188.0375	706.6168	-0.61093	0.57929	0.18789	-150.5779	-89.9484	2047.375	-2.0151	1.7192	1.001	12.558	227.0465	1015.691	-0.9023	0.93734	0.30561	-85.9574	235.336	702.842	-0.62598	0.77539	0.22607
0.11	-24.153	33.5594	54.0229	0.048047	-0.044922	0.13301	40.8971	96.403	1806.327	-1.8202	1.5114	0.26956	-72.557	159.133	562.223	-0.44699	0.69591	0.16149	-110.609	192.99873	662.538	-0.55821	0.54453	0.17227	-118.328	-27.719	2027.3667	-1.9978	1.7125	1.0114	40.516	260.499	979.288	-0.85522	0.88742	0.29735	-85.6155	176.025	655.07	-0.57412	0.7417	0.20723
0.112	-26.133	48.2762	41.4542	0.061817	-0.051465	0.13613	98.541	118.202	1837.3067	-1.8208	1.4999	0.27392	-52.13	175.218	525.1273	-0.39374	0.66132	0.15117	-106.5273	151.347	642.7725	-0.51055	0.51533	0.1667	-136.529	-14.728	1943.009	-1.9715	1.7058	1.0235	15.418	251.593	909.664	-0.80372	0.83433	0.28554	-98.0219	185.849	646.3916	-0.52217	0.7042	0.18828
0.114	-31.46	-5.5252	41.921	0.079004	-0.058496	0.1334	66.097	111.509	1808.999	-1.8223	1.4863	0.27295	-32.308	139.08	464.0947	-0.33887	0.63086	0.13916	-99.646	143.2705	620.1864	-0.46094	0.48535	0.16064	-90.925	-14.6763	1938.71	-1.9543	1.6934	1.0329	-26.28	213.646745	887.79969	-0.75586	0.78125	0.27393	-98.2796	198.5459	604.1837	-0.46943	0.67569	0.17227
0.116	-25.348	48.464	44.8527	0.094043	-0.067187	0.12666	39.549	82.081	1800.5874	-1.8217	1.4745	0.28154	-44.191	159.498	441.4399	-0.29638	0.5918	0.13035	-131.924	168.177	552.864	-0.41621	0.45176	0.15303	-28.52	20.489	1921.0346	-1.9399	1.6803	1.0529	0.613	223.169	856.201977	-0.70161	0.72641	0.25905	-99.3021	142.934	569.908	-0.41787	0.64131	0.15488
0.118	-8.97499999999999	16.2788	39.5089	0.11719	-0.071289	0.12109	95.391	100.413	1794.218	-1.8238	1.4649	0.29208	-24.921	226.508	405.039	-0.25782	0.56284	0.12519	-69.238	125.982	508.607	-0.37422	0.42012	0.15039	-38.831	-0.156999999999996	1932.388	-1.9409	1.6685	1.0625	-66.82	199.6112	805.428	-0.64697	0.67054	0.24947	-54.547	173.661	529.7225	-0.36719	0.60449	0.13965
0.12	-11.485	-2.6009	34.159	0.14219	-0.081153	0.11065	29.2166	73.069	1752.605	-1.8172	1.4528	0.29717	-75.208	209.494	389.486	-0.21689	0.53061	0.11825	-64.327	146.442	465.2171	-0.33125	0.39199	0.14414	22.575	71.358	1956.383	-1.9476	1.6512	1.0728	-37.969	206.425	789.68	-0.59425	0.61243	0.23461	-55.537	155.872	469.62412	-0.31387	0.57539	0.12734
0.122	-34.114	56.733	29.472	0.16592	-0.08457	0.098441	64.863	62.5145	1760.9469	-1.8061	1.4446	0.30459	-58.552	244.646	363.326	-0.17983	0.50229	0.1142	-102.33712	134.401	428.783	-0.29326	0.36377	0.1375	-0.263999999999996	147.395	1915.3585	-1.9542	1.6286	1.0856	-47.859	240.262	745.3055	-0.54336	0.56585	0.22703	-88.491	139.379	438.1886	-0.26514	0.54473	0.10352
0.124	-53.499	-3.29241	22.3058	0.18975	-0.09082	0.085156	79.255	78.8758	1760.8018	-1.7954	1.436	0.30859	-59.911	212.202	317.2197	-0.14746	0.47363	0.11963	-48.686	112.997	398.8313	-0.25635	0.33545	0.13086	-46.331	177.9537	1868.413903	-1.9635	1.6052	1.0933	-102.4453	204.6742	706.016	-0.49023	0.51953	0.21777	-73.477	188.24626	401.849	-0.21983	0.51269	0.088672
0.126	-38.302	20.85342	22.6081	0.21084	-0.094043	0.074707	20.8384	44.386	1765.373	-1.7787	1.424	0.31621	-70.967	151.822	265.3279	-0.11736	0.45015	0.10743	-79.1549	171.5507	362.472	-0.22412	0.30752	0.13056	-38.123	218.763	1801.591	-1.9782	1.5897	1.1057	-50.703	212.470772	699.8093	-0.43481	0.48333	0.20763	-66.981	162.1178	366.38	-0.17402	0.47959	0.069824
0.128	-25.196	20.996	20.7082	0.22656	-0.10205	0.066406	65.19	43.603	1784.295	-1.7592	1.4141	0.32304	-36.699	171.514	253.118	-0.090602	0.41563	0.10679	-53.886	153.9671	354.4885	-0.19492	0.27969	0.12978	-125.235	194.015	1736.072	-1.9878	1.5688	1.0996	-81.0352	207.7561	654.5062	-0.38296	0.44369	0.19659	-62.534	197.608	349.2249	-0.13037	0.44434	0.057129
0.13	-27.568	-27.46854	18.2386	0.23935	-0.10264	0.058594	43.611	70.793	1722.3325	-1.7377	1.4027	0.32735	-48.544	110.2686	228.824	-0.067833	0.38824	0.10611	-25.585	173.697	316.0681	-0.16602	0.25313	0.12666	-150.318	162.639	1763.6308	-1.9913	1.5493	1.0946	-79.4637	177.16	628.287	-0.33685	0.40775	0.18643	-53.62	220.196	313.3468	-0.091504	0.4166	0.045508
0.132	-51.127	45.4814	49.0223	0.246	-0.10683	0.057618	-1.71	73.653	1696.3508	-1.7118	1.3944	0.33379	-30.013	108.345	228.33053	-0.04417	0.36255	0.10609	-72.399	201.462	269.363	-0.14062	0.22705	0.1209	-173.409	164.025	1806.7082	-1.9835	1.5314	1.0867	-52.62	180.4408	588.823	-0.28938	0.37482	0.18096	-71.901	172.898	286.014	-0.052441	0.3877	0.030664
0.134	-54.015	38.83362	42.88754	0.24795	-0.10723	0.045898	60.093	127.8038	1663.077	-1.6851	1.3872	0.33936	-33.291	106.208	212.2905	-0.02002	0.33203	0.098145	-14.81	142.873	245.6844	-0.11426	0.19434	0.11621	-228.201	126.362	1806.5811	-1.9604	1.5122	1.0636	-111.3876	159.674	523.4412	-0.24805	0.34619	0.17285	-42.703	202.746	263.0823	-0.021972	0.35566	0.018164
0.136	-63.153	33.983	51.246	0.24668	-0.11064	0.039551	-16.1659	145.316	1609.8	-1.6554	1.3738	0.34268	-41.386	53.525	188.075	-0.0011071	0.30449	0.097168	-30.231	147.84	227.366	-0.087207	0.17051	0.11269	-161.845	119.402	1784.6601	-1.9242	1.4883	1.039	-88.033	155.337	497.6776	-0.20585	0.31386	0.15986	-45.723	175.073	226.828	0.0041017	0.33018	0.006836
0.138	-83.3214	73.543	46.8643	0.23242	-0.10938	0.037109	-53.2977	143.396	1599.2331	-1.6296	1.3607	0.34844	-3.113	84.0576	200.453	0.018146	0.2741	0.093665	-46.526	106.9397	220.3918	-0.065527	0.14492	0.1086	-207.16	102.929	1708.514	-1.8823	1.4731	1.0098	-63.617	179.232	454.496	-0.16854	0.28486	0.14463	-53.241	127.547	204.579	0.029785	0.30371	-0.0014648
0.14	-89.485	6.0499	9.3516	0.21972	-0.10703	0.031445	-29.5713	182.478	1591.7898	-1.5995	1.3423	0.3543	-48.455	70.1904	156.8631	0.038053	0.24562	0.096001	22.813	56.031	207.9256	-0.040137	0.125	0.10078	-209.5591	62.767	1673.7432	-1.8287	1.4561	0.98135	-109.9184	167.8021	428.4157	-0.13261	0.25791	0.13603	-18.635	129.9761	191.6105	0.056738	0.2834	-0.0038086
0.142	-65.259	30.6202	36.5091	0.20781	-0.10127	0.027832	-79.628	172.441	1560.34677	-1.569	1.3212	0.35293	-71.054	41.432	154.214	0.055194	0.21899	0.093648	-15.593	79.409	166.838	-0.019532	0.10313	0.096484	-134.133	70.96	1682.497	-1.7746	1.4434	0.95361	-52.002	182.67	416.6587	-0.099606	0.23163	0.12822	-22.32	64.408	159.1042	0.079199	0.25684	-0.0095704
0.144	-89.7038	59.165	26.977	0.1918	-0.094239	0.024317	-20.0101	179.719	1541.4152	-1.5293	1.2988	0.35303	-47.138	63.43	150.3435	0.070801	0.19287	0.097168	-11.803	46.849	157.058	-0.00097656	0.086426	0.091797	-182.6878	78.738	1637.174	-1.7156	1.4258	0.92588	-59.769	185.982	397.809	-0.072754	0.2041	0.12012	-28.6	73.96	159.42612	0.094824	0.23223	-0.008789
0.146	-73.619	15.2784	33.5627	0.17559	-0.083887	0.028516	-36.9182	196.792	1481.423	-1.4949	1.2765	0.35244	-88.1197	17.326	113.2204	0.082413	0.16994	0.094531	5.455	54.2999	154.8604	0.012501	0.070214	0.089453	-144.5898	83.571	1654.209	-1.6594	1.4099	0.89776	-79.2083	146.8757	386.3944	-0.044631	0.18125	0.11836	-34.316	82.384	164.1604	0.1085	0.21504	-0.01123
0.148	-80.9216	57.0853	52.3334	0.1543	-0.074707	0.030273	-38.839	159.5163	1441.335	-1.4612	1.2481	0.35176	-80.717	25.05	114.1035	0.08739	0.14582	0.098822	-38.303	83.1998	150.2262	0.030372	0.055761	0.089746	-118.9026	136.146	1644.313	-1.605	1.395	0.86719	-17.315	140.022	344.346	-0.023146	0.1581	0.11387	-63.463	57.235	155.346	0.11768	0.19336	-0.012207
0.15	-73.548	23.707	30.9353	0.14365	-0.06709	0.034278	32.732	174.5821	1405.1294	-1.4241	1.2212	0.34434	-66.318	54.6277	86.228	0.092871	0.12473	0.098833	-8.262	33.885	149.748	0.041309	0.040526	0.08662	-178.185	146.71	1562.1199	-1.5551	1.3719	0.8419	-65.561	110.6349	290.894	-0.002833	0.1331	0.10645	-34.329	95.2838	162.562	0.12334	0.17608	-0.010449
0.152	-43.458	2.127	48.2138	0.13213	-0.056738	0.039551	-29.563	159.909	1353.221	-1.383	1.1959	0.34268	-91.603	58.3424	83.5001	0.099313	0.1046	0.095312	-41.449	65.306	120.038	0.048144	0.026855	0.083692	-140.7261	192.627	1501.142	-1.509	1.3508	0.81142	-20.511	97.2603	268.049	0.0098629	0.11641	0.10557	-56.06	68.554191	137.237	0.12041	0.15742	-0.0054688
0.154	-36.827	57.97134	42.704	0.11846	-0.052051	0.041894	21.984	136.204	1366.496	-1.3374	1.1646	0.33203	-52.39	115.494	74.568	0.10352	0.081055	0.092285	-85.8457	39.39105	108.633	0.045898	0.015137	0.083496	-160.37985	251.208	1426.637	-1.4621	1.325	0.78799	1.065	109.4346	228.52	0.024414	0.095215	0.10205	-80.091	32.177	130.663	0.11338	0.14219	-0.0027344
0.156	-46.853	13.526	36.7168	0.11211	-0.039356	0.04248	20.038	159.5017	1352.43	-1.2958	1.1364	0.32754	-77.453	112.966	45.8705	0.10674	0.070797	0.089647	-47.822	4.1466	113.6741	0.044825	0.0057628	0.082324	-163.3949	248.927	1386.7742	-1.4087	1.2988	0.7584	-35.898	83.005	224.4248	0.03418	0.081835	0.10059	-57.188	61.469	114.8144	0.099513	0.12129	0.0067384
0.158	-43.99	40.055	49.5721	0.10889	-0.025391	0.043945	-16.382	155.601	1321.275	-1.2539	1.1049	0.32549	-100.394	61.5212	35.2497	0.10606	0.052827	0.089161	-89.109	76.4567	72.254	0.041698	-0.0021471	0.083986	-85.237	260.817	1365.1633	-1.3594	1.2754	0.7251	23.422	83.627	231.9556	0.039942	0.06709	0.099901	-96.7568	32.951	76.4391	0.081543	0.10986	0.01709
0.16	-43.215	51.7278	52.2328	0.10909	-0.016992	0.043164	39.2521	167.5353	1306.123	-1.2102	1.0721	0.32041	-55.677	58.1639	26.007	0.11152	0.041112	0.089941	-93.9115	68.054	58.665	0.043653	-0.0076156	0.08086	-115.9576	236.044	1322.406	-1.302	1.2465	0.69209	-12.606	83.669	203.878	0.043847	0.056934	0.096386	-69.432	61.8584	76.4976	0.06416	0.094239	0.025586
0.162	-42.664	-12.7854	43.713	0.11572	-0.0054687	0.046191	10.16	190.589	1250.5224	-1.1711	1.0393	0.31865	-75.925	-3.131	23.621	0.11494	0.030175	0.091308	-68.215	79.941	45.211	0.046387	-0.015038	0.080078	-49.189	181.2298	1306.0268	-1.2429	1.2136	0.66016	-12.425	59.734	198.5778	0.045117	0.048536	0.091211	-62.589	82.369	51.185	0.047851	0.07959	0.037793
0.164	-31.109	42.1048	58.1239	0.11924	0.0097658	0.047754	7.039	169.0034	1217.923	-1.1309	1.0098	0.31543	-72.201	-1.49	39.162	0.11279	0.02002	0.09082	-111.7343	102.613	32.702	0.050293	-0.020508	0.083496	15.135	190.0199	1270.746	-1.1831	1.1866	0.62344	13.089	71.2417	172.4508	0.046875	0.039063	0.092773	-114.4256	53.2429	40.283	0.033398	0.073731	0.044824
0.166	-25.126	15.1783	54.6482	0.12744	0.019727	0.054004	51.197	188.512	1177.976	-1.0912	0.97676	0.30791	-72.779	28.9688	34.263	0.10957	0.015723	0.094726	-82.391	49.4654	41.4206	0.053029	-0.024026	0.083501	-4.27300000000001	176.67	1230.541	-1.1273	1.1551	0.58681	-61.227	66.509	123.2045	0.04961	0.026465	0.095508	-66.633	78.1811	43.9925	0.019629	0.064258	0.057519
0.168	-37.295	21.8958	53.5484	0.13916	0.028809	0.051758	-15.205	202.06	1099.6373	-1.0546	0.94814	0.30156	-98.545	11.2106	33.79327	0.10879	0.015527	0.099904	-83.64	70.836	21.609	0.056549	-0.027442	0.084764	52.507	163.78	1196.0017	-1.0762	1.1201	0.55225	-43.311	59.538	127.957	0.044922	0.026464	0.09453	-86.569	54.2042	32.997	0.0048828	0.05957	0.061523
0.17	-8.907	77.316	44.435	0.14463	0.043164	0.057519	22.199	191.18563	1078.35376	-1.0132	0.9169	0.29766	-66.803	41.56	43.348	0.1002	0.011621	0.1003	-86.6957	51.7164	37.8905	0.058101	-0.031356	0.085159	25.605	184.221	1149.043	-1.019	1.0873	0.51582	-41.133	66.196	105.2765	0.039453	0.021387	0.10469	-81.373	31.774	56.5629	0.00078126	0.052051	0.074512
0.172	-8.401	14.1187	28.5669	0.15205	0.050196	0.060254	42.049	223.213	1044.84	-0.9667	0.88447	0.29326	-78.777	32.162	26.3266	0.09541	0.0125	0.10293	-44.352	0.0440000000000005	44.62605	0.059185	-0.034369	0.086024	22.63	148.326	1132.253	-0.96435	1.0559	0.48223	-93.156	45.578	98.8871	0.033985	0.023145	0.11367	-64.009	40.5096	47.538	-0.0077148	0.051172	0.08418
0.174	-12.228	20.9986	50.5789	0.15869	0.054883	0.061426	-10.248	204.06	1000.323	-0.91943	0.85596	0.28027	-66.096	2.9262	51.176	0.088867	0.0083008	0.10596	-105.33776	26.6955	43.261	0.064941	-0.036133	0.087402	38.356	146.7191	1102.001	-0.91435	1.02	0.45254	-32.18	40.745	110.1439	0.027344	0.027832	0.12256	-87.7939	6.4822	34.668	-0.012402	0.047266	0.090039
0.176	-25.493	20.7502	49.04293	0.1624	0.059472	0.059766	42.837	189.767	969.9402	-0.87793	0.82441	0.27568	-15.162	31.1272	45.5455	0.084082	0.0048828	0.1083	-76.012	-8.761	44.48684	0.06933	-0.040134	0.078315	-46.047	149.1767	1054.832	-0.86514	0.99053	0.42441	-71.5652	65.798	63.854	0.016308	0.033984	0.13174	-52.849	13.117	49.004	-0.014062	0.04834	0.099414
0.178	-22.981	-25.3675	47.791	0.16309	0.060059	0.057129	-1.011	222.2107	910.449	-0.8336	0.79453	0.26182	-57.777	2.971	36.397	0.085058	0.0050781	0.10948	-54.055	4.5823	40.956	0.075576	-0.041326	0.075804	-33.974	129.381	1016.497	-0.81836	0.95801	0.39893	-93.1178	53.561	70.372	0.0083007	0.03877	0.1418	-67.399	21.4459	39.124	-0.01709	0.049316	0.104
0.18	-35.377	44.2945	57.20783	0.15752	0.064649	0.059277	-38.527	198.871	878.69315	-0.78398	0.76289	0.24971	-35.78	13.56	32.496	0.081934	0.0039063	0.11494	-82.4376	47.30802	50.6224	0.077148	-0.042061	0.075365	-46.56	181.753	940.756	-0.77871	0.93086	0.37588	-43.722	68.1906	57.901	0.00048827	0.043848	0.15469	-84.822	-9.9106	53.321	-0.01289	0.045899	0.10889
0.182	-46.509	23.3395	43.77981	0.15498	0.070508	0.064063	-4.941	209.1709	854.3523	-0.73399	0.73281	0.23838	-14.352	47.3386	10.893	0.084766	0.0037109	0.1169	-22.43	-2.6188	62.494	0.081543	-0.04221	0.075954	-108.3277	207.77281	876.703	-0.73721	0.904	0.35175	-93.019	47.2408	28.149	-0.009082	0.045312	0.16309	-38.885	17.9723	59.6144	-0.0092773	0.046484	0.10948
0.184	-63.282	10.273	58.498	0.14248	0.075976	0.071875	-73.503	234.169	792.9939	-0.68359	0.70898	0.22949	-40.23	38.2981	19.23869	0.081543	0.0019531	0.11816	-17.817	27.08	41.8546	0.083984	-0.039063	0.078613	-56.159	218.448	851.341	-0.69971	0.86963	0.33457	-74.96	16.835	33.6334	-0.01123	0.048828	0.17188	-35.38	20.901	24.1367	-0.0030273	0.042578	0.11064
0.186	-60.598	45.9131	40.202	0.12871	0.075684	0.078613	-53.815	208.03257	766.7493	-0.62637	0.67861	0.21406	-11.411	75.398	45.195	0.088672	0.0037109	0.11504	-25.035	30.3962	26.26739	0.08471	-0.043183	0.081078	-64.455	260.159	803.55	-0.66357	0.83194	0.31504	-79.6128	19.1832	14.512	-0.0094725	0.05459	0.18057	-36.759	-1.445	37.931	0.0038086	0.037207	0.11182
0.188	-54.432	-14.5441	25.073	0.11377	0.080566	0.090332	-51.77	216.386	744.1011	-0.57529	0.65147	0.19775	-33.743	95.98	24.1387	0.09668	0.0037109	0.11338	18.844	-12.25889	27.6702	0.086974	-0.043337	0.08446	-68.508	230.6779	760.5201	-0.62598	0.79395	0.29541	-128.039	17.041	30.9113	-0.012109	0.055371	0.19073	-2.848	22.6769	37.308	0.016602	0.035156	0.10986
0.19	-65.254	13.4649	40.99827	0.09746	0.081152	0.10557	-104.1398	194.502	711.2593	-0.52608	0.6249	0.18526	-42.623	75.257	46.4053	0.10723	0.0072265	0.11103	-7.832	26.9129	43.066	0.088266	-0.045582	0.091111	-38.537	245.037	691.7989	-0.5878	0.75596	0.27344	-68.11	34.323668	66.312	-0.0089844	0.057715	0.1958	-32.669	5.131	28.405	0.028222	0.03125	0.1084
0.192	-80.8577	31.1473	39.2947	0.077735	0.082226	0.11807	-60.57	171.084	690.6779	-0.47383	0.59453	0.17744	-12.631	96.033	61.9762	0.1208	0.0070313	0.10664	31.14	11.286	51.5206	0.092615	-0.044889	0.097986	-122.874	250.0072	617.614	-0.5456	0.71533	0.25498	-100.9002	59.309	40.144	-0.0030274	0.053223	0.20273	-5.362	22.853	30.0851	0.047363	0.026269	0.10498
0.194	-84.215	-21.4995	38.3046	0.061328	0.08418	0.13018	-74.0843	199.31	624.428	-0.42285	0.57031	0.16797	-70.321	45.151	35.3892	0.13672	0.0043945	0.10107	32.307	21.6504	37.4585	0.095703	-0.045898	0.10205	-113.7571	190.067	597.371	-0.50498	0.6794	0.23311	-92.987	48.923	42.5413	0.0014648	0.045898	0.2041	-7.204	51.373	10.74	0.062598	0.02041	0.10029
0.196	-59.066	8.4057	65.556	0.042968	0.07998	0.14834	-71.7696	168.726	585.5407	-0.37754	0.54336	0.15478	-52.55	6.602	59.3526	0.15928	0.0063477	0.098731	-31.677	81.001	29.895	0.10668	-0.047597	0.099417	-120.978444	205.0587	579.568	-0.46406	0.63789	0.21504	-35.919	57.787	30.387	0.0001953	0.045117	0.20791	-55.843	39.779	32.12419	0.083594	0.018457	0.095019
0.198	-90.754	-58.4185	117.626	0.032227	0.081543	0.16553	-47.89	163.405	541.4753	-0.32617	0.51601	0.1459	-42.106	15.534	33.897	0.17988	0.0052734	0.091015	-4.016	53.05	35.3597	0.11557	-0.043692	0.10211	-152.87	191.462	560.158	-0.42285	0.60059	0.19775	-80.3976	41.0231	17.557	9.7656e-05	0.036328	0.21074	-7.663	85.48	60.0652	0.099609	0.0078125	0.088379
0.2	-77.812	-111.667	203.93	0.023828	0.07334	0.17637	-92.807	186.50685	476.542	-0.28281	0.49062	0.14043	-85.054	-5.108	44.09784	0.19785	0.0017578	0.08711	-10.531	80.568	35.4198	0.1256	-0.042339	0.10184	-97.1703	155.15237	554.445	-0.38389	0.56211	0.17373	-25.865	26.35	39.492	0.0020508	0.026953	0.21582	-36.462	73.134	29.9341	0.11592	-0.0024414	0.082324
0.202	-83.055	-91.149	319.242	0.019238	0.068359	0.18867	-62.296	152.638	459.131	-0.23916	0.46494	0.12812	-29.249	31.10185	67.413	0.21484	-0.0018554	0.075098	-38.399	63.299	41.3526	0.13702	-0.045729	0.096051	-140.849	168.437	510.6841	-0.34404	0.52119	0.16465	-17.793	32.749	25.0111	0.0039063	0.016016	0.22099	-48.062	44.692	42.436	0.13272	-0.01455	0.078027
0.204	-119.284	-184.774	413.193	0.017286	0.070313	0.19336	-54.72	187.024	436.47	-0.20068	0.44287	0.125	-70.051	36.8295	63.4102	0.23486	-0.003418	0.06543	-12.866	-12.3923	42.928	0.14746	-0.049805	0.09375	-120.038	127.0368	471.996	-0.3081	0.47862	0.14199	-25.882	30.0601	30.972	0.013184	0.0039063	0.2207	-23.296	56.626	43.3353	0.14834	-0.02041	0.068653
0.206	-154.106	-245.038	497.191	0.017578	0.072265	0.19219	-87.5881	185.6865	422.2391	-0.16797	0.41318	0.12304	-76.223	24.99	63.74	0.25274	-0.010058	0.057519	-65.14	5.0787	43.699	0.16058	-0.049978	0.086877	-79.529	131.633	436.297	-0.27891	0.446	0.12989	16.551	19.3862	56.4522	0.019922	-0.0038086	0.21934	-77.5431	0.443999999999999	31.933	0.16826	-0.031836	0.062012
0.208	-155.236	-298.949	501.47	0.021973	0.078125	0.18994	-19.185	151.6133	409.127	-0.13613	0.38389	0.1207	-27.608	38.5499	57.694	0.26748	-0.011231	0.054004	-46.733	-36.0713	63.222555	0.16998	-0.05258	0.076274	-89.8307	160.3268	381.19148	-0.25146	0.40723	0.11768	-20.36	41.8643	34.38	0.033301	-0.014551	0.21631	-56.229	1.601	58.4271	0.18994	-0.039551	0.051758
0.21	-155.557	-352.727	531.705	0.00058596	0.10273	0.16641	-61.898	173.036	354.688	-0.11035	0.35107	0.12032	-81.709	0.507000000000001	44.56306	0.28272	-0.024121	0.044238	-35.591	-28.8067	58.65678	0.17994	-0.057412	0.067332	-22.257	100.011	359.6806	-0.22109	0.36875	0.099709	-20.587	40.62071	55.8395	0.049316	-0.018457	0.21397	-49.883	19.147	32.991	0.20508	-0.05	0.0375
0.212	-133.987	-240.119	590.267	-0.02959	0.14502	0.15957	-74.851	142.231	323.36265	-0.086719	0.32519	0.11425	-86.27	9.339	67.7487	0.29121	-0.026856	0.03877	-78.3463	28.723	36.5908	0.194	-0.058377	0.064002	-0.356000000000002	109.243	331.332	-0.19482	0.33271	0.08457	9.821	71.07	56.36718	0.069043	-0.020996	0.21191	-80.158	-5.529	32.6546	0.22588	-0.060351	0.029199
0.214	-149.0399	-175.501	638.042	-0.075683	0.20478	0.167	-9.258	131.57	291.5688	-0.062988	0.29443	0.11279	-70.25	35.9094	57.976	0.29639	-0.025879	0.036621	-37.204	-1.359	14.3195	0.20215	-0.058594	0.05127	1.513	110.61	311.4642	-0.17021	0.29638	0.065429	-30.013	67.885	39.7664	0.089355	-0.02002	0.19873	-38.968	28.72372	52.199	0.24073	-0.070117	0.020606
0.216	-157.9604	-119.213	676.2545	-0.14502	0.26562	0.2082	-57.469	149.779	254.7731	-0.042578	0.26436	0.11133	-86.395	21.3956	53.4614	0.29111	-0.031347	0.03125	-74.049	31.7546	26.8476	0.21063	-0.057466	0.044227	48.133	103.58	303.663	-0.14551	0.25938	0.04834	-8.176	20.107	57.216	0.10996	-0.029297	0.2001	-71.439	30.4777	46.285	0.254	-0.076855	0.006836
0.218	-109.4976	-34.366	696.704	-0.23193	0.33057	0.26172	-11.239	95.40712	236.5706	-0.025976	0.23311	0.10811	-53.164	46.478	61.5626	0.28311	-0.036816	0.031739	-95.3215	29.792	33.2073	0.21771	-0.055742	0.04023	31.446	187.644	247.8138	-0.12012	0.229	0.028809	-5.44900000000001	12.2748	33.9753	0.13203	-0.028711	0.1958	-86.005	22.7918	59.446	0.2627	-0.083008	0.0019531
0.22	-34.659	-47.206	753.6414	-0.33838	0.38047	0.31729	1.499	106.561	210.779	-0.0060548	0.20927	0.10654	-87.301	45.049	37.9328	0.26944	-0.037988	0.029004	-75.727	-8.5889	61.657	0.22385	-0.055004	0.036259	23.154	188.507	229.998	-0.089552	0.18975	0.011719	-44.446	-2.841	45.7369	0.15117	-0.029102	0.18759	-43.722	50.357	61.2698	0.27022	-0.093262	-0.009375
0.222	-9.781	27.14	862.64	-0.44863	0.43437	0.36435	-44.552	94.191	203.337	0.0078126	0.18369	0.10166	-85.603	27.8491	46.544	0.25342	-0.042383	0.028027	-105.199	36.8203	41.2777	0.22323	-0.055069	0.038108	53.952	190.16	181.485	-0.060547	0.15654	-0.0025391	-9.838	11.7434	70.591	0.17002	-0.027539	0.18056	-102.3536	19.4489	42.6636	0.27344	-0.10069	-0.013867
0.224	0.562999999999995	141.05	957.68	-0.56465	0.48711	0.39287	23.511	61.92	213.03548	0.022461	0.16064	0.086914	-27.775	59.893	36.733	0.2417	-0.046875	0.022461	-80.2592	3.175	40.8777	0.22217	-0.050781	0.033203	-10.85	182.862	138.7123	-0.034765	0.13271	-0.01543	-38.418	47.4549	57.0015	0.18555	-0.025391	0.16357	-84.133	16.558	68.4682	0.27187	-0.10498	-0.021289
0.226	2.927	173.196	1026.856	-0.66377	0.54404	0.40937	-31.713	108.0512	190.44866	0.033398	0.14014	0.10039	-69.5295	24.8978	21.518	0.22763	-0.05459	0.032325	-79.483	6.21628	37.313	0.22127	-0.044288	0.035519	27.85	88.602	147.2622	-0.010645	0.11055	-0.029102	-55.064	35.126	63.766	0.20879	-0.016894	0.14941	-71.863	38.4612	35.602	0.26875	-0.11172	-0.023633
0.228	-41.503	229.71	1093.581	-0.74756	0.61768	0.41699	-44.63	81.4392	164.235	0.040625	0.11924	0.09668	-44.187	-5.31	60.457	0.20987	-0.05625	0.0292	-92.9131	61.58	19.53	0.21318	-0.037432	0.034008	26.077	81.277	157.4642	0.0087891	0.087402	-0.041016	-17.806	39.8549	51.2217	0.22666	-0.011914	0.13701	-78.804	26.6228	27.1765	0.2627	-0.11084	-0.026367
0.23	-90.26	171.875	1178.22	-0.81211	0.70644	0.43076	-24.245	61.663	149.37	0.045312	0.10205	0.094727	-23.068	-13.8231	50.6867	0.19931	-0.058593	0.035449	-40.931	29.566	13.9421	0.2031	-0.027498	0.036634	-5.12	53.773	154.8313	0.033399	0.055762	-0.060058	-88.3528	25.0761	26.638	0.24502	-0.0041015	0.12959	-36.087	66.35	30.114	0.2542	-0.11269	-0.025683
0.232	-99.471	69.522	1264.292	-0.87529	0.8083	0.44629	-97.2165	100.156	104.9835	0.05	0.082715	0.092871	-48.852	-52.3698	48.015	0.19297	-0.05791	0.044336	-44.493	71.371	8.983	0.19706	-0.015887	0.037979	33.612	11.697	153.466	0.057324	0.035351	-0.071778	-61.839	0.423999999999999	57.933	0.26025	0.0054687	0.11963	-71.5502	65.293	19.4185	0.24766	-0.10879	-0.024512
0.234	-135.238	8.31999999999999	1344.801	-0.94287	0.9251	0.46934	-58.048	52.391	119.213	0.056641	0.068359	0.089355	-18.797	-2.069	53.61	0.18701	-0.059082	0.05127	-49.719	63.0419	34.8441	0.18506	-0.0029297	0.039063	-25.637	64.9848	107.128	0.081543	0.0083984	-0.087403	-77.374	7.809	51.0875	0.26953	0.017578	0.11182	-37.226	33.59408	52.64	0.2414	-0.10996	-0.025293
0.236	-162.3455	-138.112	1419.293	-1.0199	1.0445	0.51143	-65.127	69.542	114.1284	0.061816	0.052344	0.091308	-42.539	24.5475	35.6644	0.18438	-0.056934	0.063184	2.947	-8.93114	39.1414	0.16761	0.0054986	0.04338	-32.825	47.371	88.882	0.10693	-0.010156	-0.097264	-109.2865	6.642	49.324	0.27588	0.028321	0.10508	-5.845	38.97485	50.1051	0.23105	-0.10244	-0.020996
0.238	-203.315	-222.638	1479.493	-1.1123	1.1563	0.56689	-92.6422	72.2859	102.0991	0.067676	0.040137	0.085254	-52.444	19.4413	49.3544	0.17617	-0.054981	0.069922	-20.92	12.356	33.3007	0.1542	0.015773	0.047883	-20.813	30.743	79.945	0.125	-0.030762	-0.11084	-62.806	-8.4	57.6831	0.28291	0.041308	0.10215	-71.666	-14.683	41.27091	0.22607	-0.09082	-0.01416
0.24	-184.924	-243.571	1514.879	-1.2287	1.2446	0.62852	-62.796	33.419	105.8582	0.070801	0.028027	0.084472	-14.992	44.824	36.042	0.16094	-0.051855	0.083203	-16.34	-26.8391	31.9279	0.13786	0.025904	0.053723	-82.78	56.56	69.434	0.14326	-0.041699	-0.12275	-103.3194	5.3149	36.823	0.28642	0.049121	0.095508	-27.766	-16.01	75.626	0.21709	-0.077832	-0.011035
0.242	-106.57894	-329.394	1499.558	-1.3636	1.3075	0.68711	-87.2025	80.2191	71.19	0.077734	0.018164	0.084766	-62.625	10.8256	18.624	0.14453	-0.051172	0.091406	-1.81	-18.3083	38.4474	0.12538	0.036836	0.05763	-79.921	-12.575	84.307	0.1542	-0.06211	-0.13223	-83.187	9.623	51.512	0.28652	0.063672	0.093652	-20.143	-1.062	51.6588	0.20791	-0.061231	-0.0046875
0.244	-7.021	-342.43	1529.816	-1.5069	1.3485	0.73515	-67.993	41.629	69.5725	0.07959	0.010742	0.08252	-35.916	0.9407	36.0152	0.12695	-0.048828	0.1001	-16.772	25.4125	49.5413	0.11572	0.043945	0.062012	-106.944	3.851	82.424	0.15889	-0.078907	-0.14199	-38.635	26.5978	54.8358	0.28564	0.072754	0.094727	-40.924	-17.4394	51.753	0.18994	-0.048339	0.0019531
0.246	7.199	-373.56	1590.1823	-1.6324	1.3722	0.77285	-65.694	29.1851	53.4331	0.085059	0.0029297	0.081348	-25.138	22.0688	18.8435	0.11807	-0.056641	0.10176	11.106	-2.21226	53.044	0.10391	0.049997	0.068054	-129.03	18.463	75.44	0.16934	-0.091602	-0.14677	-100.4294	41.50881	31.3842	0.28213	0.086426	0.095508	4.043	35.052	41.9714	0.17471	-0.035938	0.010547
0.248	12.778	-373.98	1681.218	-1.731	1.3901	0.80566	-104.3196	67.6701	25.281	0.087598	-0.00019532	0.081347	-55.233	5.517	9.9398	0.10879	-0.058886	0.10283	-0.491999999999997	43.928	26.8335	0.096777	0.057129	0.071083	-96.89425	6.001	61.389	0.16846	-0.10254	-0.15332	-43.975	5.099	36.31758	0.27871	0.096386	0.10059	-48.324	29.272	16.7946	0.15918	-0.021484	0.015137
0.25	26.464	-246.04	1760.562	-1.7762	1.4012	0.82471	-66.92	8.41	33.105	0.089551	-0.0064453	0.080567	-37.532	48.183	26.1936	0.1045	-0.061621	0.10557	-24.699	53.838	20.193	0.093268	0.062978	0.078512	-131.5082	80.789	42.535	0.16318	-0.1084	-0.15098	-45.055	1.1178	22.447	0.27246	0.10576	0.10293	-38.276	14.3744	49.934	0.14687	-0.007617	0.022852
0.252	12.188	-204.695	1747.783	-1.7682	1.4119	0.82969	-81.051	25.49172	36.67	0.090918	-0.013379	0.076855	-47.283	71.724	8.932	0.10254	-0.061426	0.11172	15.476	13.48518	40.062	0.091699	0.06582	0.082906	-137.205	82.082	31.79416	0.15274	-0.11807	-0.15156	-57.334	-16.361	23.377	0.26446	0.11406	0.10986	-8.662	33.0637	55.1595	0.14101	0.0079101	0.026562
0.254	-5.562	-121.724	1740.645	-1.7132	1.4231	0.82695	-120.73	43.505	50.3054	0.089844	-0.013184	0.080566	-54.974	51.17165	29.6264	0.10352	-0.057617	0.10791	-19.225	52.357	39.5202	0.088867	0.065918	0.091797	-122.0488	81.306	16.643	0.13711	-0.12315	-0.14922	-0.488999999999997	-25.1035	31.1928	0.25977	0.11963	0.11523	-50.484	2.388	34.5077	0.13828	0.020019	0.040234
0.256	-31.612	-50.456	1702.426	-1.6181	1.4405	0.80137	-57.011	13.164	65.3588	0.086328	-0.016894	0.076856	-36.986	63.827	43.16215	0.10068	-0.054297	0.10644	-22.194	33.6152	34.9279	0.091405	0.071876	0.094923	-135.582	100.3	-5.79	0.11973	-0.12656	-0.14111	-45.272	13.91229	21.5975	0.25488	0.12803	0.11983	-31.185	14.79	50.2018	0.13476	0.036914	0.044922
0.258	-56.173	-53.07	1668.468	-1.4937	1.4673	0.76758	-78.609	60.0408	63.956	0.090527	-0.022364	0.080371	-84.981	30.692	22.1489	0.10146	-0.043066	0.10586	-18.106	18.3532	30.7574	0.087109	0.078027	0.10167	-73.535	7.0161	15.989	0.099609	-0.1333	-0.1333	-49.026	23.5528	31.0964	0.24971	0.12754	0.12354	-18.365	36.557	25.031	0.13525	0.049805	0.053711
0.26	-85.298	0.00999999999999091	1705.136	-1.3514	1.485	0.7417	-54.374	36.958	54.1375	0.091699	-0.021582	0.081543	-70.179	22.4422	54.1	0.09912	-0.036426	0.10976	-53.8945	45.4368	24.019	0.087892	0.078028	0.10322	-68.937	8.2698	35.492	0.079297	-0.1372	-0.12617	23.253	38.4779	35.24846	0.24463	0.13222	0.12236	-52.756	24.9108	26.9656	0.13818	0.065234	0.060449
0.262	-127.308	-21.31	1740.564	-1.2254	1.4947	0.72197	-33.012	23.6871	37.5483	0.097656	-0.024317	0.081641	-63.954	8.2724	72.808	0.091211	-0.027246	0.11455	-33.231	3.296	47.0835	0.083983	0.082227	0.10791	-56.966	1.972	44.946	0.063379	-0.13838	-0.12051	-45.99	42.545	17.618	0.24082	0.13692	0.12402	-45.734	53.595	29.1704	0.13906	0.079297	0.06543
0.264	-106.55184	-98.31	1772.4357	-1.1387	1.4916	0.70557	-56.278	54.9497	15.8235	0.10156	-0.029785	0.083496	-105.7905	-53.1356	85.4132	0.083496	-0.013672	0.12158	-57.573	55.113	36.0183	0.077637	0.08252	0.11475	-8.816	-29.626	39.958	0.050098	-0.1376	-0.1166	5.262	17.62	34.5342	0.23486	0.13574	0.12695	-67.648	50.262	10.3728	0.13906	0.094922	0.073633
0.266	-76.067	-108.576	1752.114	-1.0897	1.4756	0.69677	-8.074	1.808	23.299	0.10791	-0.027246	0.083984	-81.421	-71.2349	131.285	0.073926	0.0016601	0.129	-90.8542	68.9858	24.0743	0.068848	0.083789	0.12227	-61.451	21.1911	37.344	0.03584	-0.13682	-0.11289	15.967	23.98	12.75	0.23067	0.1376	0.12129	-83.559	37.1877	36.915	0.13076	0.10293	0.077832
0.268	-22.175	-177.8398	1727.149	-1.0757	1.4556	0.68896	-12.33	14.1254	30.05306	0.11524	-0.024805	0.087402	-105.132	-99.056	185.445	0.065821	0.016699	0.13477	-64.427	18.9698	32.92353	0.055177	0.083106	0.12559	-36.183	14.33	56.552	0.024902	-0.13574	-0.10645	-25.819	8.479	18.5426	0.22841	0.13692	0.12051	-56.336	50.756	49.3914	0.12207	0.11865	0.092285
0.27	11.225	-180.349	1800.051	-1.0896	1.4383	0.68584	-21.663	22.709	31.342	0.12188	-0.027148	0.092481	-112.107	-168.6234	295.8903	0.056445	0.033105	0.14297	-104.8207	45.52	39.075	0.041895	0.083106	0.1377	11.562	8.095	64.865	0.017774	-0.13574	-0.10664	-2.298	5.1893	23.127	0.22646	0.1373	0.11777	-94.9318	1.0817	43.3099	0.11113	0.12529	0.10283
0.272	3.63	-152.59	1854.246	-1.1142	1.4216	0.68457	2.751	-12.931	52.4495	0.12276	-0.027734	0.093945	-105.991	-193.475	387.956	0.049512	0.052442	0.15215	-81.3892	-12.228	50.2614	0.028614	0.081836	0.14375	-11.946	50.346	55.484	0.014941	-0.13399	-0.10508	-33.422	30.7094	9.415	0.22246	0.13301	0.11914	-71.784	-1.555	47.2966	0.098141	0.12861	0.11973
0.274	-6.444	-225.86	1920.217	-1.1505	1.4079	0.68691	-27.178	51.1584	49.007	0.12842	-0.032715	0.091309	-155.079	-270.009	432.037	0.044434	0.072754	0.16602	-57.943	-33.023	58.916	0.016113	0.08252	0.14941	40.596	-9.5196	51.546	0.010645	-0.13789	-0.10586	-24.591	31.4099	33.482	0.21777	0.13916	0.11914	-63.359	10.6801	32.28	0.075488	0.13604	0.14082
0.276	-48.583	-253.02	1987.147	-1.198	1.4027	0.67842	-25.539	50.9831	55.77634	0.1378	-0.033496	0.085351	-122.582	-311.283	474.2106	0.038769	0.097655	0.1584	-99.929	17.415	53.2164	0.0047851	0.077344	0.15518	22.735	-2.224	38.213	0.0091795	-0.13857	-0.10722	-5.734	44.095	42.411	0.20733	0.13662	0.12432	-88.3594	-5.857	28.2381	0.062109	0.1377	0.15703
0.278	-96.1675	-293.91	2010.697	-1.2422	1.4004	0.67041	-3.48	37.7873	50.1577	0.14814	-0.036329	0.087988	-108.306	-312.725	488.7487	0.031641	0.13272	0.16153	-60.49	-23.256	50.939	-0.00039078	0.078711	0.15879	-12.649	11.7774	24.387	0.015137	-0.13672	-0.1084	-62.286	54.838	33.16971	0.19649	0.13838	0.12578	-55.867	11.648	61.7753	0.043457	0.13965	0.17334
0.28	-102.493	-302.105	2031.203	-1.2751	1.4042	0.66133	-32.479	76.188	39.2743	0.16065	-0.038281	0.084082	-168.09951	-303.9341	520.24	0.021875	0.16592	0.15293	-86.3863	34.3059	44.2135	-0.0039063	0.079102	0.16347	21.674	-4.7296	29.8644	0.014062	-0.14346	-0.10986	-53.852	43.2565	47.5371	0.18594	0.13799	0.13672	-71.856	-5.4091	62.387	0.027734	0.13555	0.1961
0.282	-151.591	-177.5342	1996.696	-1.3124	1.4114	0.67461	-15.848	5.424	33.5204	0.1749	-0.038574	0.079004	-126.447	-206.263	562.081	0.0090819	0.20742	0.14688	-74.875	43.082	45.876	-0.0055664	0.080078	0.16435	8.723	69.901	31.299	0.017285	-0.14785	-0.10801	-57.806	46.756	29.551	0.17207	0.13779	0.14336	-73.551	-41.437	111.7717	0.015625	0.13437	0.21836
0.284	-186.778	-106.21	1925.54067	-1.3417	1.4298	0.70703	-46.423	13.3471	26.8132	0.18408	-0.043457	0.072754	-132.5573	-119.038	552.4164	-0.016602	0.26123	0.1377	-24.421	-9.6126	81.993	-0.0048828	0.080078	0.16943	21.167	66.2086	32.9211	0.014551	-0.15098	-0.10723	-86.22295	30.624	11.931	0.1626	0.13672	0.15283	-44.912	-35.48	185.91	0.0023438	0.12656	0.23008
0.286	-182.35242	-65.065	1899.861	-1.3907	1.4515	0.75215	-67.718	20.96	45.2804	0.19082	-0.04502	0.069629	-117.642	-78.36	576.044	-0.049121	0.31826	0.14981	-45.513	-13.206	158.303	-0.0075195	0.080859	0.16524	3.834	56.288	37.9624	0.017774	-0.15752	-0.11162	-57.792	10.121	45.1466	0.1459	0.13486	0.16533	-86.109	-105.632	280.485	-0.0026367	0.11963	0.23701
0.288	-214.698	-20.953	1887.404	-1.4526	1.4751	0.80078	-28.037	-4.086	49.7608	0.19746	-0.046387	0.065039	-32.105	-9.696	614.153	-0.09951	0.37549	0.17285	-45.157	-104.9544	276.616	-0.005957	0.084961	0.16367	-60.53	106.948	24.43	0.019531	-0.16406	-0.11621	-85.503	29.8577	29.1773	0.13525	0.1335	0.17549	-60.987	-158.322	410.891	-0.01123	0.11475	0.23828
0.29	-175.738	-77.305	1894.657	-1.5324	1.5139	0.84014	-55.81	49.7688	39.784	0.20293	-0.052637	0.06543	-9.588	28.315	657.557	-0.1624	0.42236	0.20879	-47.292	-154.928	383.58	-0.010644	0.089649	0.15351	-42.481	48.558	36.623	0.021973	-0.16826	-0.11289	-86.414	27.9876	43.675	0.12783	0.13506	0.1751	-119.276	-219.704	473.354	-0.0019531	0.11036	0.24033
0.292	-116.412	-48.01601	1919.007	-1.6093	1.5579	0.86836	-54.798	34.705	41.526	0.20439	-0.058887	0.058008	42.561	82.705	748.822	-0.23916	0.45938	0.24678	-108.129	-171.866	475.309	-0.02334	0.11133	0.13574	-68.817	60.337	36.6694	0.03125	-0.17695	-0.11485	-58.295	50.087	49.1808	0.12529	0.13779	0.18115	-168.491	-300.783	514.516	0.0042969	0.12032	0.23526
0.294	-105.095	7.43	1882.002	-1.6843	1.6016	0.8918	-35.941	23.5484	38.7675	0.20068	-0.0625	0.058105	18.047	165.2022	784.9205	-0.3208	0.49072	0.28125	-125.727	-268.561	534.7984	-0.042969	0.14551	0.1123	-108.9994	40.80971	51.975	0.034765	-0.17695	-0.12109	-120.766	66.402	64.41737	0.125	0.13672	0.18164	-84.074	-296.849	570.091	-0.0015625	0.14024	0.22744
0.296	-107.155	23.277	1856.456	-1.7598	1.6438	0.92432	-96.271	57.558	31.386	0.19599	-0.065039	0.05498	-44.017	154.04	847.6001	-0.39668	0.51055	0.3123	-116.641	-262.444	564.3756	-0.067871	0.19873	0.089062	-87.555	-39.447	55.60684	0.04541	-0.17939	-0.12002	-64.848	10.690773	119.8556	0.1335	0.1458	0.18643	-111.377	-238.129	594.203	-0.018945	0.17832	0.22529
0.298	-124.696	109.053	1844.497	-1.8301	1.6855	0.95166	-60.289	3.1892	43.676	0.18994	-0.064648	0.053222	-42.413	147.847	939.62	-0.45986	0.54092	0.32969	-110.186	-214.882	614.929	-0.11055	0.26689	0.08086	-105.3168	-6.65	46.286	0.053711	-0.18213	-0.11914	-41.242	-39.3142	156.172	0.13633	0.15966	0.18516	-145.29	-166.6713	661.199	-0.047852	0.23145	0.21826
0.3	-128.856	73.067	1862.671	-1.8848	1.7168	0.98096	-91.4667	15.766	47.1848	0.17939	-0.068555	0.053222	-84.658	108.62	999.665	-0.5083	0.57686	0.34375	-107.89	-179.346	664.8808	-0.16523	0.33916	0.088672	-114.8138	-18.919	48.7814	0.061231	-0.179	-0.12041	-71.887	-92.105	213.122	0.14492	0.17646	0.18555	-120.685	-72.662	681.6807	-0.091991	0.29756	0.23555
0.302	-122.05	5.97514	1948.466	-1.9284	1.7462	0.99804	-100.33981	21.5989	48.5514	0.16768	-0.066406	0.056543	-130.014	18.104	1102.462	-0.55439	0.62861	0.35908	-142.2128	-61.3233	721.192	-0.24297	0.40791	0.1041	-122.2573	-3.796	58.055	0.065039	-0.17392	-0.11289	-41.872	-127.3949	323.858	0.14863	0.19336	0.18916	-142.6185	-64.5065	703.443	-0.15478	0.35478	0.25401
0.304	-121.6916	-4.127	2002.039	-1.9472	1.772	1.0074	-53.909	-19.2459	45.781	0.15332	-0.062988	0.058594	-142.859	-32.94	1195.287	-0.60938	0.69336	0.35498	-107.035	-66.1538	805.38211	-0.33008	0.48682	0.12305	-131.396	63.7489	44.987	0.061524	-0.16377	-0.10547	-109.528	-153.826	389.722	0.14307	0.21436	0.18994	-57.832	-56.277	776.6737	-0.23252	0.39893	0.28017
0.306	-126.2078	-81.8724	2037.486	-1.9467	1.7893	1.0187	-87.065	31.992	45.23	0.14882	-0.0625	0.059668	-205.551	-137.833	1264.5804	-0.67119	0.78467	0.3581	-38.937	-65.942	859.656	-0.43037	0.55928	0.15117	-94.193	20.474	35.75	0.057226	-0.1584	-0.10127	-147.95	-224.542	451.44	0.12656	0.24365	0.18965	-0.608000000000004	-18.05	869.475	-0.3206	0.43291	0.30469
0.308	-136.8381	-57.109	2027.08	-1.9331	1.8052	1.0137	-77.957	28.9219	48.5848	0.14531	-0.063281	0.060742	-184.2106	-233.9242	1349.562	-0.74092	0.87783	0.36563	-28.534	-22.53	953.942	-0.52842	0.64307	0.17529	-105.2763	27.0878	37.76834	0.046387	-0.14551	-0.095215	-104.387	-244.064	477.1343	0.097657	0.28593	0.19268	-32.141	10.54	975.987	-0.41357	0.45752	0.32471
0.31	-150.7472	-42.5128	1961.988	-1.9025	1.8143	1.0084	-37.695	21.0315	41.50605	0.14492	-0.055469	0.05918	-146.9244	-275.888	1373.7936	-0.82529	0.97861	0.38164	17.207	-16.73	1059.353	-0.62646	0.72314	0.19756	-106.14548	22.601	33.224	0.033984	-0.13682	-0.084961	-114.466	-208.607	508.84	0.051563	0.33008	0.21455	-23.044	105.787	1054.386	-0.49805	0.48086	0.33369
0.312	-118.761	-66.583	1931.4914	-1.8696	1.8165	1.0031	-69.4334	64.814	31.78572	0.14512	-0.049707	0.055469	-136.538	-373.38	1405.216	-0.91738	1.0564	0.4167	-26.569	91.032	1123.084	-0.73096	0.80908	0.23575	-60.112	-13.7136	57.4357	0.026172	-0.12461	-0.077344	-94.603	-179.0858	582.698	-0.014062	0.38203	0.24052	-83.655	150.368	1088.40409	-0.56552	0.50263	0.3332
0.314	-84.061	-5.348	1914.1061	-1.8271	1.8138	0.99883	-39.278	-3.6218	28.3661	0.15088	-0.047363	0.056641	-45.609	-369.98	1492.277	-1.0195	1.1191	0.46143	-86.043	146.827	1196.075	-0.8418	0.90625	0.27783	-89.5594	52.5717	65.84	0.016797	-0.11172	-0.071485	-116.808	-109.9326	625.9685	-0.1001	0.43799	0.28223	-133.126	100.667	1158.618	-0.61865	0.5417	0.33789
0.316	-54.872	-10.553	1911.603	-1.7887	1.8	0.99502	-26.765	7.2916	27.2755	0.1541	-0.038183	0.056641	-57.075	-322.26	1560.218	-1.1412	1.1623	0.51162	-82.605	103.762	1234.9107	-0.95615	1.0067	0.32676	-66.829	52.7642	49.6939	0.010449	-0.098631	-0.067383	-151.422	-72.8794	658.9208	-0.19326	0.49053	0.32461	-148.954	86.383	1233.387	-0.66602	0.60254	0.35205
0.318	-24.153	22.315	1950.54	-1.7617	1.7891	0.99268	-35.033	18.7423	26.7343	0.15908	-0.033887	0.056641	-75.515	-291.45	1648.001	-1.2616	1.1969	0.55977	-140.8331	83.733	1256.552	-1.0823	1.1028	0.39394	-45.071	49.603	33.6573	0.0058594	-0.085449	-0.065918	-56.337	-60.677	703.5487	-0.29541	0.54336	0.36982	-180.125	-23.68	1289.108	-0.71729	0.6875	0.37451
0.32	-49.405	115.534	1933.16563	-1.7474	1.7655	0.99551	-13.004	-14.1847	34.55	0.15713	-0.02334	0.057031	-43.329	-168.135	1693.767	-1.3811	1.2236	0.60195	-152.1646	-38.41	1313.266	-1.2182	1.1934	0.46035	-43.358	89.46	24.1276	0.0010742	-0.068848	-0.061231	-32.199	-30.023	759.158	-0.40322	0.59492	0.40889	-177.971	-116.277	1383.288	-0.78428	0.77549	0.42578
0.322	-31.72	121.153	1900.15414	-1.7441	1.7465	0.99678	-29.841	39.441	47.9401	0.15156	-0.019727	0.062402	-103.168	-121.889	1679.856	-1.4756	1.258	0.64053	-152.9745	-154.282	1385.48	-1.3632	1.2651	0.53476	15.458	32.749	26.1663	-0.00097656	-0.057031	-0.062011	-17.489	-24.513	886.341	-0.5127	0.65566	0.4333	-240.349	-171.134	1447.3269	-0.85976	0.86562	0.48955
0.324	-38.098	199.96	1860.855	-1.7504	1.7168	0.99991	-19.023	31.44874	46.411	0.14258	-0.016113	0.066895	-123.128	-104.729	1684.881	-1.5405	1.2915	0.66895	-215.448	-202.71	1447.453	-1.521	1.313	0.60156	13.051	36.568	34.257	-0.0021484	-0.042578	-0.063965	26.328	44.32	990.181	-0.60938	0.72461	0.45361	-258.657	-282.152	1522.538	-0.98008	0.95625	0.56142
0.326	-72.848	232.945	1807.249	-1.7615	1.6893	0.99775	-16.305	18.0546	39.0035	0.13867	-0.0076172	0.07539	-131.438	-38.565	1666.678	-1.5686	1.3291	0.69131	-169.373	-269.3	1510.473	-1.6684	1.3434	0.66143	-20.876	28.274	43.6861	0.00058594	-0.028027	-0.069922	-62.371	100.493	1077.8908	-0.71045	0.7917	0.47119	-155.4343	-305.428	1560.025	-1.134	1.0418	0.63779
0.328	-92.979	210.877	1806.852	-1.7729	1.6587	0.99023	-36.263	57.826	26.314	0.13203	-0.0068359	0.080859	-170.1274	-65.773	1660.26	-1.5789	1.3727	0.70664	-112.569	-264.79	1512.495	-1.7819	1.3564	0.71709	32.592	-39.6216	56.0337	0.0092773	-0.016602	-0.075684	-84.105	75.582	1192.64382	-0.80693	0.86729	0.4836	-100.572	-315.39	1549.181	-1.3008	1.1191	0.70557
0.33	-124.011	237.69	1812.59	-1.7745	1.6286	0.97149	-0.100000000000001	5.1646	41.297	0.12578	-0.00097656	0.086328	-163.3234	-38.11	1689.442	-1.57	1.4144	0.71054	-64.0948	-302.19	1509.6703	-1.8433	1.3591	0.77217	12.796	-3.687	54.149	0.013769	-0.002832	-0.078808	-122.846	36.17	1231.285	-0.90811	0.9497	0.50781	-39.936	-339.96	1609.429001	-1.4414	1.182	0.76338
0.332	-148.856	172.952	1814.5685	-1.7668	1.5965	0.96416	-17.016	21.7761	35.072	0.12344	-0.0026367	0.085254	-150.265	-23.59	1690.571	-1.5443	1.4631	0.70225	46.526	-360.76	1511.7198	-1.8592	1.3607	0.825	10.595	-23.688	52.04953	0.01875	0.0070313	-0.087891	-173.9393	-71.194	1315.306	-1.0158	1.0326	0.54053	20.248	-265.92	1693.439	-1.5521	1.2508	0.80596
0.334	-123.9976	106.633	1846.355	-1.7555	1.5672	0.94502	-34.75	26.404	24.01337	0.11963	2.2204e-14	0.092285	-115.0293	-86.164	1712.754	-1.4956	1.4985	0.69531	41.472	-305.06	1573.539	-1.8413	1.3618	0.86719	41.711	-17.3395	55.5922	0.030078	0.015625	-0.096094	-125.419	-181.173	1379.838	-1.1348	1.1064	0.57275	-46.52	-245.24	1772.22	-1.6353	1.3145	0.84541
0.336	-107.1102	100.909	1809.9257	-1.7377	1.5447	0.92119	-18.755	-16.4683	27.5288	0.12568	0.0013672	0.094043	-43.572	-64.944	1740.787	-1.4416	1.5258	0.68838	47.4807	-263.68	1679.796	-1.7854	1.3607	0.89102	-9.463	50.864	47.33451	0.038183	0.020703	-0.099024	-188.607	-233.088	1415	-1.26	1.1783	0.61045	-37.864	-180.888	1835.274	-1.676	1.3779	0.86514
0.338	-104.99	23.178	1766.8652	-1.7051	1.5176	0.89893	-53.279	26.2884	24.6213	0.12559	9.7656e-05	0.092969	-30.097	-99.8	1760.365	-1.3858	1.5427	0.67188	70.6012	-219.205	1715.994	-1.7011	1.3536	0.89492	-27.456	27.1035	47.184	0.047852	0.025391	-0.10742	-197.269	-282.634	1507.8369	-1.3835	1.2388	0.65195	-20.539	-111.666	1828.475	-1.6831	1.4478	0.86523
0.34	-101.46	47.153	1733.992	-1.6707	1.4945	0.87353	-38.483	22.51	39.4563	0.12285	0.005957	0.098828	-14.945	-130.038	1834.118	-1.3374	1.5552	0.65937	11.33	-174.7	1698.83	-1.5885	1.3482	0.88867	-40.956	47.976	41.6579	0.05293	0.031738	-0.11162	-127.194	-264.258	1565.598	-1.4816	1.2782	0.68906	-52.518	-144.8721	1803.4399	-1.6627	1.5232	0.85849
0.342	-100.031	68.561	1711.9621	-1.6238	1.4786	0.84785	-31.494	14.4202	64.622	0.12734	0.0094725	0.10098	-15.11	-117.669	1871.096	-1.297	1.5591	0.64072	13.06	-185.553	1683.5284	-1.4635	1.3375	0.87647	-60.941	39.464	35.8496	0.059472	0.038379	-0.11416	-105.43	-269.013	1587.242	-1.5669	1.3003	0.72559	-56.567	-87.847	1796.338	-1.6046	1.597	0.84062
0.344	-86.79	62.245	1723.066	-1.5742	1.4579	0.82793	-83.8297	66.98545	46.2821	0.12207	0.01709	0.104	-52.689	-223.25	1926.965	-1.2539	1.5566	0.62354	7.971	-129.953	1653.214	-1.3394	1.3208	0.85938	-31.972	-16.1128	33.2227	0.059864	0.039941	-0.11846	-2.491	-313.66	1625.099	-1.6226	1.3169	0.75195	-109.826	-33.87	1785.37	-1.5234	1.6611	0.81485
0.346	-71.606	130.6	1708.852	-1.5279	1.4382	0.80606	-60.777	21.533	31.88245	0.12031	0.020313	0.11113	-58.916	-246.22	1987.135	-1.2192	1.5519	0.60312	-53.796	-70.67	1660.824	-1.2503	1.2991	0.83457	-76.518	38.0533	25.354	0.060547	0.045215	-0.12168	32.55	-289.33	1670.482	-1.6462	1.3312	0.76777	-137.706667	-32.63	1818.284	-1.4474	1.7061	0.78271
0.348	-103.8756	120.393	1662.471	-1.4834	1.418	0.78857	-66.655	29.1644	36.192	0.11846	0.022852	0.11953	-70.708	-208.049	1996.225	-1.1843	1.5482	0.57988	-57.805	-46.51	1677.123	-1.1901	1.279	0.80977	-78.498	34.295	27.15	0.060059	0.050781	-0.12549	-25.665	-270.32	1737.165	-1.635	1.3427	0.77773	-88.8265	5.50999999999999	1836.975	-1.3882	1.729	0.75098
0.35	-105.1971	167.3185	1616.4177	-1.4367	1.3943	0.7667	-89.1976	40.6368	26.877	0.10947	0.024414	0.12656	-86.105	-192.39	2020.604	-1.162	1.5626	0.55918	-87.651	-42.2	1698.732	-1.1616	1.2599	0.78516	-100.7443	39.347	25.316	0.061816	0.052539	-0.11865	27.15	-214.1	1802.426	-1.5881	1.352	0.7793	-74.986	-60.61	1838.054	-1.3408	1.733	0.72334
0.352	-123.248	251.194	1551.929	-1.3936	1.3692	0.74775	-57.897	0.222	30.10733	0.10098	0.028809	0.14072	-88.218	-61.772	2013.376	-1.1596	1.5897	0.55225	-54.73	-115.939	1731.679	-1.1534	1.2475	0.7541	-130.542	88.94	25.75	0.056738	0.055664	-0.12285	-17.383	-145.7799	1783.859	-1.5109	1.3626	0.76797	-17.341	-126.1002	1868.963	-1.3083	1.722	0.69902
0.354	-120.815	248.057	1504.3909	-1.3507	1.3411	0.73018	-81.214	43.767	31.975	0.089844	0.030762	0.146	-138.657	-27.642	1963.8003	-1.1675	1.6235	0.54688	14.388	-181.99445	1728.168	-1.1543	1.2441	0.7251	-98.0059	31.7544	31.801	0.050879	0.062696	-0.11152	-16.486	-157.384	1790.8881	-1.4175	1.3774	0.76172	49.707	-123.535	1893.664	-1.2888	1.6954	0.67793
0.356	-103.678	289.182	1457.47684	-1.3098	1.3144	0.71973	-91.5257	30.021	33.0589	0.081641	0.034863	0.16055	-148.629	-34.07	1962.301	-1.2035	1.6597	0.55362	9.54799999999999	-203.302	1769.864	-1.1626	1.2389	0.69727	-109.7106	28.05	36.5543	0.043555	0.062695	-0.10938	36.659	-104.296	1755.931	-1.3297	1.3934	0.7583	15.006	-180.162	1947.25	-1.2792	1.661	0.6584
0.358	-69.415	253.687	1416.7305	-1.2705	1.293	0.69971	-75.123	21.0277	47.1603	0.068067	0.037305	0.17099	-121.391	10.357	1957.11	-1.2519	1.6992	0.57129	26.422	-213.046	1841.4154	-1.1703	1.25	0.67471	-109.0732	27.1188	55.643	0.034668	0.068848	-0.10889	-38.484	-78.87	1727.737	-1.2569	1.4056	0.76172	-13.796	-151.67	2023.936	-1.2808	1.6255	0.64258
0.36	-60.676	196.077	1382.837	-1.2315	1.267	0.67725	-93.9028	49.3481	79.041	0.062207	0.041602	0.18037	-118.464	-23.7054	1953.7	-1.3203	1.7246	0.60684	-24.16	-174.229	1876.662	-1.1844	1.2812	0.66885	-92.6612	-50.591	83.0315	0.018653	0.078809	-0.10537	-52.841	-71.61	1769.055	-1.2023	1.4118	0.76953	-40.372	-162.51	2067.243	-1.2868	1.5997	0.63887
0.362	-55.653	213.353	1328.078	-1.1894	1.2385	0.65713	-44.041	-33.542	119.8441	0.054883	0.051953	0.18828	-60.926	5.2716	1980.1041	-1.3951	1.7486	0.6585	-124.6858	-170.261	1927.443	-1.2087	1.3216	0.67187	-137.138	-41.6631	121.338	0.0054687	0.085938	-0.10078	-49.495	-34.79	1756.337	-1.175	1.4109	0.77783	-96.631	-231.857	2093.996	-1.3121	1.5836	0.63916
0.364	-17.012	182.265	1292.402	-1.1473	1.2103	0.63447	-44.003	-61.507	188.035	0.056641	0.056641	0.19678	-79.274	74.7499	1949.675	-1.4766	1.7676	0.70947	-132.9588	-204.514	1951.2	-1.2515	1.3677	0.69043	-81.7613	-110.475	179.344	-0.0097658	0.094922	-0.093359	-72.895	-99.61	1764.2518	-1.1689	1.3984	0.77783	-108.908	-177.478	2088.997	-1.35	1.5739	0.66377
0.366	-3.79599999999999	193.201	1283.625	-1.1043	1.1746	0.60557	-92.79	-82.2467	263.744	0.055469	0.070117	0.20293	-128.31	57.619	1941.252	-1.5735	1.7988	0.76524	-179.841	-207.057	1969.764	-1.309	1.4129	0.72978	-29.098	-153.5733	247.2147	-0.021191	0.1002	-0.085156	2.71599999999999	-155.358	1786.4156	-1.1761	1.3939	0.7832	-159.7494	-154.31058	2070.992	-1.3976	1.5732	0.7084
0.368	-12.236	211.745	1263.2129	-1.0581	1.1411	0.57422	-93.926	-172.718	365.418	0.050195	0.088477	0.21368	-135.033	119.814	1972.3991	-1.6781	1.834	0.80791	-210.45	-218.334	1996.095	-1.3805	1.4571	0.78174	-30.4519	-120.078	321.499	-0.04541	0.11035	-0.083984	38.538	-187.302	1797.794	-1.1906	1.3872	0.78105	-173.015	-90.853	2077.123	-1.459	1.5762	0.77002
0.37	0.0480000000000018	131.894	1245.926	-1.0124	1.1087	0.54883	-150.104	-207.949	435.645	0.042774	0.11153	0.21172	-163.61816	92.6018	1985.0375	-1.77	1.8594	0.84658	-200.43771	-171.978	1967.2679	-1.4645	1.5043	0.83603	44.214	-207.55	417.15	-0.05918	0.11738	-0.078809	42.104	-254.902	1879.2524	-1.201	1.3907	0.76699	-186.195	12.649	2024.554	-1.5486	1.5889	0.82627
0.372	-14.172	139.547	1231.942	-0.96513	1.0798	0.51953	-166.011	-291.681	467.2491	0.02041	0.14277	0.20166	-155.852	24.5435	2040.717	-1.8521	1.8693	0.8833	-260.318	-82.272	1916.154	-1.5661	1.5538	0.88008	66.955	-230.205	485.347	-0.071973	0.12657	-0.083106	55.73	-214.178	1916.0729	-1.2052	1.3917	0.75684	-220.127	-23.282	1995.516	-1.6535	1.6117	0.87393
0.374	-35.8	134.711	1193.298	-0.91787	1.045	0.49024	-139.066	-322.891	488.707	-0.010254	0.18896	0.19092	-140.9901	34.9046	2062.532	-1.9116	1.8677	0.91602	-251.139	-49.853	1891.461	-1.6714	1.6118	0.9209	36.3811	-240.959	551.685	-0.084863	0.13203	-0.089746	-43.329	-204.887	1927.277	-1.1929	1.3989	0.75488	-158.484	-2.166	2014.452	-1.7656	1.6434	0.91104
0.376	-34.832	139.915	1144.291	-0.87325	1.0119	0.46787	-132.823	-241.201	518.9493	-0.052539	0.24355	0.20556	-189.756	-49.6216	2037.077	-1.9566	1.8535	0.94463	-217.939	-26.713	1900.119	-1.7581	1.6501	0.96094	82.772	-280.416	607.99	-0.098535	0.14307	-0.10107	-82.647	-206.481	1957.476	-1.1826	1.4099	0.76944	-128.784	22.82705	2016.722	-1.8738	1.6688	0.93886
0.378	-25.294	223.251	1070.878	-0.82861	0.97705	0.44336	-116.341	-211.693	599.558	-0.11026	0.29619	0.22969	-172.9007	-54.2696	2035.558	-1.9906	1.8426	0.96103	-216.7508	-16.9231	1927.465	-1.8449	1.6802	0.9921	105.654	-214.7437	664.706	-0.11377	0.16406	-0.11426	-101.552	-169.2167	1929.116	-1.1757	1.4165	0.80352	-95.746	24.389	2029.8898	-1.9785	1.6895	0.96533
0.38	-61.542	217.95818	989.577	-0.78643	0.94463	0.42461	-155.4998	-117.736	634.5687	-0.18916	0.34189	0.26797	-171.974	-30.869	1987.5041	-2.0008	1.8293	0.97041	-108.449	-0.625	1956.7809	-1.9184	1.6959	1.0218	119.693	-183.051	716.381	-0.13887	0.19589	-0.12168	-168.473	-184.3322	1913.377	-1.1866	1.4305	0.84727	-79.48	130.2586	2030.9154	-2.0632	1.6981	0.98711
0.382	-50.741	232.4824	935.776	-0.75342	0.90713	0.40508	-148.3467	-46.609	667.439	-0.2874	0.38486	0.30918	-183.4965	-90.647	1971.097	-1.9825	1.8105	0.97012	-97.49	61.1852	1941.893	-1.9787	1.694	1.0448	130.028	-124.615	744.766	-0.16953	0.23692	-0.10976	-170.235	-138.386	1939.792	-1.2286	1.4475	0.88125	-136.579	150.0639	2008.116	-2.1359	1.6997	1.0082
0.384	-32.59	262.273	889.485	-0.71631	0.86689	0.38203	-57.668	-56.027	718.5816	-0.38623	0.42383	0.34619	-120.213	-11.528	1956.014	-1.9395	1.7949	0.97119	-150.7754	65.68	1948.3664	-2.0234	1.6855	1.0669	122.542	-25.4706	768.7782	-0.22813	0.28574	-0.080859	-200.567	-82.619	1906.035	-1.2964	1.481	0.90039	-132.984	128.1393	2024.2785	-2.1983	1.6997	1.0301
0.386	-34.172	220.34115	859.47889	-0.68379	0.82969	0.36709	-49.11	12.26	803.0762	-0.47588	0.46328	0.37139	-104.384	18.879	1923.9866	-1.888	1.7796	0.95957	-118.28	61.2526	1964.6747	-2.0516	1.6742	1.0794	143.647	-11.026	826.649	-0.3165	0.33565	-0.046973	-222.171	-100.108	1922.7922	-1.363	1.5265	0.91309	-131.087	116.077	2040.9762	-2.2427	1.6989	1.0517
0.388	-8.689	284.507	829.145	-0.65039	0.78906	0.34521	-24.009	68.349	937.827	-0.56289	0.50567	0.38457	-92.1	52.311	1949.486	-1.8336	1.7664	0.95127	-146.2612	39.4122	1964.774	-2.0656	1.6621	1.0907	122.737	24.108	900.831	-0.41797	0.39844	-0.0087891	-205.201	-47.839	1919.151	-1.4343	1.5634	0.93437	-170.5632	0.2696	2068.865	-2.2632	1.6958	1.0742
0.39	-19.718	277.671	774.1464	-0.61465	0.74687	0.32451	-11.841	157.9152	1051.248	-0.63906	0.57207	0.40176	-70.357	138.5678	1929.5814	-1.7868	1.7555	0.93955	-102.614	-27.304	1986.222	-2.0563	1.6449	1.097	94.318	32.296	975.281	-0.53476	0.45371	0.038965	-198.741	-43.788	1899.604	-1.5093	1.5947	0.95234	-119.224	-3.384	2098.202	-2.2568	1.6936	1.0784
0.392	-72.572	242.453	713.7754	-0.57481	0.70869	0.30273	-97.245	239.169	1127.23288	-0.71143	0.64854	0.41406	-87.399	118.9696	1883.2463	-1.7511	1.7407	0.93145	-75.637	-57.914	2001.296	-2.0333	1.6284	1.1057	116.469	-25.7274	1023.145	-0.65527	0.52305	0.091407	-150.792	-28.2842	1916.449	-1.5968	1.6262	0.96953	-129.5094	4.187	2063.5621	-2.2399	1.689	1.0841
0.394	-73.032	264	682.007	-0.5373	0.66807	0.28281	-114.559	172.847	1207.567	-0.78613	0.74023	0.43115	-63.634	159.722	1861.3274	-1.7319	1.729	0.93359	-133.5432	-54.241	2010.80404	-1.9995	1.606	1.1172	95.158	-6.18400000000001	1063.338	-0.78027	0.59961	0.14375	-99.19	51.725	1899.019	-1.6831	1.6489	0.98242	-165.1765	-24.0633	2056.4285	-2.2059	1.6824	1.0868
0.396	-66.465	215.4638	653.433	-0.49326	0.63369	0.26504	-122.174	115.282	1250.588	-0.86963	0.84209	0.45996	-81.419	203.641	1819.426	-1.7365	1.7193	0.93076	-80.157	-36.573	2005.363	-1.9686	1.5817	1.1227	76.746	-9.845	1118.764	-0.91064	0.66787	0.18574	-159.064	55.048	1914.329	-1.7575	1.6655	1.0032	-109.097	20.075	2044.1706	-2.1715	1.6715	1.0892
0.398	-68.337	215.6891	639.19297	-0.45117	0.59082	0.24268	-188.5868	16.445	1329.8	-0.97266	0.94923	0.50185	-111.182	159.301	1794.312	-1.7488	1.7051	0.92842	-71.773	16.1991	1980.0812	-1.9476	1.5547	1.1298	70.69	-50.32	1175.677	-1.042	0.74121	0.23096	-137.158	39.844	1973.77	-1.805	1.6802	1.0129	-82.574	0.0760000000000005	2005.521	-2.1304	1.6587	1.084
0.4	-65.5486	209.8955	614.6447	-0.41406	0.55703	0.21866	-167.846	-131.222	1421.298	-1.0969	1.0594	0.56436	-112.837	194.082	1796.9	-1.7531	1.6899	0.92413	-48.554	7.384	1956.526	-1.9364	1.5254	1.1356	3.6638	-54.7	1233.16	-1.1713	0.81836	0.28408	-156.311	-16.4114	1971.34	-1.8378	1.6942	1.0207	-34.941	2.71599999999999	2001.482	-2.1028	1.6398	1.0881
0.402	-79.792	139.723	585.748	-0.37148	0.51425	0.19873	-208.755	-195.309	1506.3002	-1.2397	1.1511	0.6164	-131.005	161.088	1767.881	-1.7526	1.6708	0.91914	25.135	-18.65	1947.56	-1.9364	1.497	1.1459	-53.002	-160.18	1268.5701	-1.2961	0.90566	0.33457	-196.004	-121.77	2003.157	-1.8544	1.7089	1.024	-4.245	85.701	1987.151	-2.0816	1.625	1.089
0.404	-79.6874	155.3888	557.793	-0.33477	0.47637	0.17568	-209.361	-264.347	1584.809	-1.4019	1.231	0.67969	-96.15	113.657	1754.6147	-1.752	1.6484	0.90967	2.101	18.106	1935.0562	-1.9473	1.4668	1.1606	-108.017	-233.5187	1288.5236	-1.4161	0.99508	0.40684	-139.8108	-115.425	1997.584	-1.8569	1.7231	1.0254	-22.179	91.204	1964.656	-2.0703	1.6066	1.0901
0.406	-41.899	122.462	506.072	-0.29736	0.43633	0.15137	-107.808	-306.725	1604.058	-1.566	1.2914	0.73643	-63.305	135.203	1723.2867	-1.7294	1.6339	0.89941	23.092	56.978	1921.4297	-1.9632	1.4391	1.1637	-145.629	-268.134	1334.62	-1.5428	1.0782	0.46895	-151.441	-106.178	1940.1093	-1.8501	1.7316	1.0246	-20.559	163.3975	1942.5273	-2.0587	1.5804	1.0912
0.408	-43.917	112.89	460.836	-0.25684	0.39844	0.12793	-77.5097	-307.86	1576.032	-1.718	1.3367	0.7919	-74.433	67.716	1690.5331	-1.7023	1.6149	0.87979	4.048	144.0751	1917.245	-1.973	1.4107	1.1601	-83.8775	-311.51	1398.56	-1.6719	1.1426	0.53174	-119.666	-63.06489	1931.0557	-1.8396	1.7395	1.0222	-41.898	204.06	1870.451	-2.0469	1.5547	1.0884
0.41	-24.934	155.682	415.1245	-0.21357	0.36182	0.11006	11.674	-355.99	1592.7606	-1.8461	1.3766	0.83877	-45.969	69.992	1692.5309	-1.6664	1.5914	0.85869	-46.149	203.738	1885.573	-1.9726	1.386	1.152	-94.9858	-304.69	1443.5244	-1.8059	1.1976	0.57588	-94.026	8.412	1907.524	-1.8256	1.7426	1.0276	-71.779	180.169	1834.9253	-2.0293	1.5281	1.0849
0.412	-13.556	111.952	393.0646	-0.17871	0.32881	0.094628	32.879	-315.33	1655.891	-1.931	1.4073	0.88535	-50.135	104.437	1673.648	-1.6235	1.5739	0.8377	-43.973	188.677	1852.7469	-1.9596	1.3627	1.1403	-101.6121	-345.93	1482.8357	-1.9254	1.2359	0.5997	-89.644	-15.10873	1926.556	-1.8097	1.7418	1.0274	-55.413	229.9	1808.273	-2.0101	1.504	1.0738
0.414	6.849	146.731	384.8298	-0.14316	0.29795	0.074315	6.37	-240.27	1745.496	-1.9668	1.4219	0.92285	-97.254	77.654	1653.235	-1.5781	1.5469	0.81348	-82.481	207.393	1818.915	-1.9277	1.3418	1.1235	-64.628	-354.4	1510.2077	-2.0004	1.2594	0.61416	4.4	-29.1712	1945.52	-1.8047	1.7422	1.0298	-108.104	212.847	1791.902	-1.9893	1.4794	1.0586
0.416	1.344	175.1099	337.652	-0.11807	0.26299	0.058789	29.125	-207.978	1804.82	-1.9509	1.4311	0.94043	-59.827	140.509	1648.532	-1.5256	1.5232	0.79013	-124.9068	184.754	1809.55	-1.8847	1.325	1.1079	-120.848	-280.927	1529.784	-2.0232	1.2775	0.61064	7.943	-11.121	1910.8049	-1.8065	1.7372	1.0342	-105.2325	202.486	1796.6044	-1.9609	1.4562	1.0466
0.418	-11.621	153.225	301.345	-0.096191	0.23193	0.049316	16.105	-148.856	1792.793	-1.8914	1.4519	0.93018	-129.113	186.1482	1584.0404	-1.4797	1.4989	0.76318	-112.849	169.108	1826.0213	-1.8329	1.3145	1.0897	-109.41233	-241.488	1566.108	-1.9995	1.2993	0.59375	-7.376	1.60400000000001	1896.0863	-1.8137	1.7328	1.0423	-98.4636	210.235	1761.221	-1.9312	1.4341	1.0273
0.42	33.855	214.33	272.888	-0.072853	0.2001	0.030275	9.97	-135.613	1778.156	-1.7867	1.4707	0.90986	-152.7562	204.143	1541.367	-1.4277	1.4719	0.73623	-173.435	166.869	1813.659	-1.7813	1.313	1.0756	-98.715	-153.445	1590.9885	-1.9426	1.325	0.56162	13.072	102.415	1858.379	-1.8215	1.7204	1.0439	-110.45761	119.638	1745.4458	-1.8846	1.4033	1.0097
0.422	-21.377	201.745	223.895	-0.048444	0.17129	0.01934	14.044	-85.206	1737.58	-1.6531	1.4883	0.88643	-123.049	293.898	1493.049	-1.379	1.4484	0.71152	-143.626	100.756	1810.4544	-1.7297	1.3184	1.0505	-148.11304	-102.31	1610.475	-1.8555	1.3468	0.52744	-47.068	159.288	1806.927	-1.8323	1.7001	1.0402	-47.818	96.273	1737.0871	-1.8419	1.3756	0.98795
0.424	-30.643	165.729	202.6259	-0.024225	0.14239	0.0041054	-71.436	-24.15	1706.018	-1.502	1.502	0.86084	-174.143	285.999	1456.0694	-1.3418	1.4219	0.68018	-124.677	71.067	1792.1005	-1.6855	1.3232	1.0278	-87.243	-133.821	1639.143	-1.7508	1.3719	0.48799	-74.645	161.529	1786.9036	-1.834	1.6816	1.0396	-82.479	84.341	1695.317	-1.7935	1.3513	0.96922
0.426	-9.596	158.059	189.659	-0.0021509	0.11846	-0.0082963	-81.359	-25.36	1718.787	-1.3656	1.4981	0.82422	-139.8946	287.743	1439.74	-1.3027	1.3976	0.65449	-141.789	56.19	1750.067	-1.64	1.3276	1.0022	-88.3433	-147.241	1618.308	-1.6408	1.3951	0.43828	-57.687	171.263	1775.809	-1.8268	1.6603	1.027	-96.267	75.24	1666.9983	-1.7436	1.3297	0.94597
0.428	-8.151	66.9496	166.208	0.019043	0.087891	-0.024902	-64.45	-23.94	1718.082	-1.2672	1.4883	0.80049	-125.7816	260.694	1373.522	-1.2612	1.37	0.63418	-72.7	55.198	1752.146	-1.6023	1.3328	0.97471	-101.147	-178.85	1639.325	-1.5332	1.4043	0.38135	-111.755	103.439	1788.2561	-1.8115	1.6314	1.0078	-41.491	142.118	1644.6716	-1.6909	1.3101	0.92383
0.43	20.535	56.122	186.5622	0.038195	0.067371	-0.028807	-85.936	-87.747	1740.493	-1.2012	1.4691	0.77197	-135.8327	193.236	1315.094	-1.2269	1.3434	0.61699	-102.388	122.7	1732.34	-1.5621	1.3309	0.94385	-40.276	-180.494	1680.377	-1.4271	1.3983	0.34043	-86.986	78.566	1804.9924	-1.7849	1.6071	0.99062	-114.1435	164.233	1601.337	-1.6414	1.2886	0.89949
0.432	18.602	58.033	149.614	0.057723	0.050558	-0.042586	18.654	-166.281	1793.656	-1.1629	1.4434	0.75547	-80.451	223.786	1290.528	-1.1945	1.3168	0.59404	-115.9241	157.625	1721.891	-1.5158	1.3264	0.90811	-51.592	-144.852	1689.8	-1.3405	1.3927	0.29316	-102.4742	92.653	1780.085	-1.7478	1.5785	0.97315	-105.81168	175.5949	1600.869	-1.5967	1.2637	0.87121
0.434	-15.709	32.499	116.193	0.071799	0.021653	-0.049615	28.626	-206.653	1841.624	-1.1504	1.416	0.74072	-93.712	238.354	1255.174	-1.1616	1.2915	0.57227	-80.0349	164.9677	1701.931	-1.4741	1.3208	0.88037	13.099	-146.114	1739.8326	-1.2671	1.3865	0.25644	-133.0469	51.08	1758.279	-1.7085	1.5571	0.95508	-72.866	215.617	1541.4855	-1.5489	1.2371	0.83664
0.436	-12.64	65.1796	110.0258	0.084187	0.0015512	-0.05772	12.178	-238.33	1899.086	-1.1597	1.3841	0.725	-69.995	239.18	1239.3461	-1.1358	1.2643	0.55215	-139.655	174.045	1631.0121	-1.4202	1.3091	0.83789	63.911	-141.15	1768.145	-1.2163	1.3888	0.23711	-70.713	65.939	1734.7321	-1.6588	1.5373	0.93857	-133.7924	194.113	1469.244	-1.4978	1.2058	0.80553
0.438	-45.026	43.263	82.622	0.09082	-0.015625	-0.064941	-0.109999999999999	-217.654	1929.475	-1.1761	1.3607	0.71094	-63.521	271.195	1213.80034	-1.1059	1.2332	0.53447	-101.36168	145.095	1587.4257	-1.3726	1.2973	0.80049	71.608	-190.549	1811.806	-1.1997	1.4009	0.23584	-138.361	51.946	1687.7389	-1.6093	1.5168	0.91846	-110.8293	233.824	1437.961	-1.4478	1.1782	0.76563
0.44	-64.52	13.356	101.548	0.10302	-0.032773	-0.080053	-103.998	-202.851	1937.321	-1.1894	1.3387	0.7	-92.4892	216.0685	1184.222	-1.0762	1.1988	0.51768	-83.988	180.328	1540.13	-1.3226	1.2785	0.76767	104.036	-241.854	1877.752	-1.2131	1.4229	0.23701	-124.282	49.746	1705.465	-1.5629	1.4929	0.89854	-96.031	262.797	1383.061	-1.3968	1.1413	0.72835
0.442	-41.492	40.975	98.3931	0.10791	-0.052493	-0.091594	-98.547	-200.604	1965.675	-1.2089	1.3294	0.70098	-70.189	194.385	1185.568	-1.047	1.1683	0.49805	-92.721	235.531	1480.948	-1.2805	1.2585	0.73379	42.861	-252.776	1900.199	-1.2566	1.4554	0.2498	-81.957	129.892	1703.745	-1.5196	1.4659	0.87168	-101.934	246.596	1329.478	-1.3451	1.1049	0.69378
0.444	-65.2554	-2.237	96.1932	0.11295	-0.066932	-0.096648	-112.958	-191.197	1990.554	-1.2397	1.3384	0.70508	-82.4662	204.9353	1158.571	-1.0112	1.1313	0.48047	-25.386	240.406	1450.08	-1.2324	1.2354	0.70166	-14.4158	-262.738	1947.27	-1.3176	1.4774	0.25762	-152.123	141.008	1693.195	-1.4761	1.436	0.84961	-35.219	274.929	1272.148	-1.2881	1.0684	0.66353
0.446	-90.3404	21.8625	86.8825	0.11815	-0.07837	-0.10915	-193.7148	-171.707	2009.338	-1.2947	1.3541	0.71065	-98.541	172.954	1109.847	-0.97607	1.095	0.46699	-36.639	260.441	1396.193	-1.1891	1.2062	0.67481	12.063	-216.5982	1943.442	-1.3874	1.4989	0.26582	-106.7218	179.8835	1671.302	-1.437	1.4056	0.82539	-41.412	245.4419	1205.363	-1.2238	1.0327	0.62597
0.448	-76.8963	66.192	51.967	0.12207	-0.089844	-0.12158	-176.2162	-139.747	2010.1473	-1.3633	1.3789	0.72509	-23.48	210.8695	1041.6686	-0.942	1.059	0.44775	5.664	227.26247	1362.36	-1.1472	1.1727	0.64737	-34.426	-149.027	1913.047	-1.459	1.5176	0.27588	-150.337	204.149	1599.066	-1.4019	1.3692	0.80743	-16.817	234.8412	1193.1847	-1.1616	0.99658	0.58594
0.45	-82.329	56.411	33.1066	0.12118	-0.097703	-0.1218	-224.478	-95.515	1958.801	-1.4336	1.4071	0.7376	-63.348	231.935	960.306	-0.90215	1.0223	0.43721	60.113	193.76271	1347.3738	-1.1067	1.143	0.6126	-7.574	-111.566	1923.553	-1.5331	1.5298	0.2833	-163.867	179.292	1536.073	-1.3745	1.3349	0.77774	6.496	273.123	1174.0679	-1.1009	0.9545	0.55116
0.452	-52.095	114.401	7.099	0.12117	-0.10268	-0.13052	-256.313	-73.476	1914.359	-1.5183	1.4344	0.7583	-31.993	220.207	921.0074	-0.86211	0.98652	0.41875	44.669	202.1584	1331.389	-1.0652	1.1125	0.58721	-8.376	-75.359	1918.2519	-1.6007	1.5481	0.29375	-96.663	208.102	1506.166	-1.3467	1.3013	0.7581	-26.534	246.6679	1144.648	-1.0387	0.91323	0.51241
0.454	-78.022	86.53	-12.422	0.11661	-0.10921	-0.12999	-222.069	-44.135	1914.216	-1.606	1.4692	0.78516	28.935	248.672	881.2635	-0.82422	0.94727	0.40088	64.587	170.233	1310.526	-1.0293	1.0859	0.56104	-61.178	-55.326	1932.3411	-1.6725	1.5661	0.29297	-148.2657	206.795	1461.566	-1.3164	1.2656	0.729	14.178	242.7761	1120.355	-0.98045	0.87421	0.48109
0.456	-93.0871	40.421	15.0957	0.10945	-0.10938	-0.13663	-207.434	-5.513	1901.335	-1.6937	1.5106	0.81719	-11.127	225.3092	841.465	-0.78311	0.91026	0.38691	49.064	174.8224	1271.2703	-0.98273	1.049	0.53457	-5.4812	-60.3035	1917.738	-1.7354	1.5827	0.29668	-110.5334	196.94	1465.88411	-1.2807	1.2273	0.70732	-29.075	208.0376	1079.0845	-0.92082	0.83579	0.44847
0.458	-48.153	60.097	22.566	0.094727	-0.1084	-0.13428	-133.008	23.591	1901.409	-1.7871	1.5516	0.85049	20.192	225.0048	805.169	-0.74834	0.87217	0.37363	-6.832	170.967	1216.3742	-0.9417	1.0142	0.50781	-12.2773	-49.7794	1887.662	-1.7847	1.5942	0.29785	-54.913	228.215	1441.414	-1.2437	1.1888	0.68203	-36.366	148.916	1037.825	-0.8667	0.79736	0.42188
0.46	-59.839	4.764	22.9996	0.081482	-0.11279	-0.13404	-86.85	59.667	1907.892	-1.8656	1.5824	0.88838	-3.542	220.8614	733.729	-0.70888	0.82881	0.35723	14.905	118.385	1169.8661	-0.89639	0.97666	0.48125	-22.579	-51.732	1874.974	-1.8257	1.6052	0.2914	-71.735	200.8452	1380.135	-1.2105	1.1548	0.66289	-1.993	180.22775	996.1954	-0.81753	0.76321	0.39913
0.462	-37.955	18.525	55.8603	0.065695	-0.11439	-0.13349	-155.0648	60.142	1933.629	-1.9266	1.6188	0.92021	-45.756	183.882	682.527	-0.67021	0.78858	0.34102	-25.056	161.7726	1125.933	-0.85645	0.93125	0.45479	13.453	-39.8915	1880.81552	-1.855	1.6161	0.29131	-2.24299999999999	171.394	1372.32324	-1.1748	1.1299	0.64639	-52.448	202.7812	919.4827	-0.77715	0.72599	0.37425
0.464	-52.734	16.444	37.1177	0.051375	-0.11662	-0.13234	-133.034	7.5957	1969.195	-1.9688	1.6406	0.94385	-24.49	209.3091	650.934	-0.62695	0.74609	0.31982	-29.318	164.3527	1084.029	-0.81299	0.88916	0.42578	-51.496	-17.18354	1884.5502	-1.8796	1.6181	0.2874	0.930999999999997	178.333	1330.898	-1.144	1.1021	0.61914	-25.604	224.9	891.205	-0.73254	0.69187	0.35248
0.466	-77.415	-9.194	35.3535	0.042668	-0.11573	-0.13704	-136.8245	-27.0701	1963.321	-1.9886	1.6657	0.96729	-50.343	219.7019	601.238	-0.5874	0.70391	0.3	-12.093	185.583	1046.8044	-0.76797	0.84492	0.39766	-88.15	-20.197	1917.81	-1.9056	1.6217	0.28535	-7.733	155.911	1309.458	-1.1036	1.0725	0.59981	-24.533	250.256	839.2142	-0.68949	0.6545	0.33644
0.468	-29.83	30.6035	48.9442	0.028809	-0.11523	-0.13525	-159.349	-66.526	1974.816	-1.9901	1.6844	0.98203	-50.073	194.9377	580.239	-0.54307	0.6626	0.27754	-60.1542	238.791	993.013	-0.72734	0.80156	0.36699	-67.672	-20.6009	1955.147	-1.9233	1.6177	0.28223	51.179	166.3215	1298.499	-1.0651	1.0509	0.58125	-61.791	205.5821	771.4735	-0.64697	0.61768	0.31201
0.47	-36.066	28.731	39.2737	0.017776	-0.11485	-0.13707	-119.164	-68.0959	1977.555	-1.9765	1.7028	0.99336	-34.707	200.377	557.6518	-0.49931	0.62041	0.25488	-34.599	206.8112	946.3286	-0.6832	0.75899	0.34082	-87.69	-17.5906	1949.797	-1.9411	1.6154	0.2793	-16.281	152.202517	1258.614	-1.0272	1.0216	0.56797	-2.78100000000001	215.5699	740.9179	-0.60419	0.58062	0.29368
0.472	-34.874	3.39426	66.914	0.0092247	-0.11369	-0.14127	-139.851	-51.626	1957.851	-1.9599	1.7124	0.99961	-85.1365	165.891	535.218	-0.45175	0.57734	0.23271	-27.061	209.5468	896.8944	-0.63281	0.71797	0.30225	-49.819	-17.8538	1965.015	-1.9523	1.6059	0.26797	-5.133	127.291	1242.034	-0.99511	0.99628	0.54483	-23.301	223.057	674.8884	-0.56223	0.54764	0.28031
0.474	5.791	21.2867	57.61	0.0080689	-0.11619	-0.14828	-142.238	-56.144	1978.798	-1.9331	1.7192	1.0029	-55.075	142.5996	499.425	-0.40723	0.5332	0.21387	-69.7255	218.776	824.683	-0.58789	0.6792	0.27783	-27.146	-9.9786	1941.257	-1.9523	1.5911	0.25821	5.509	163.205	1190.299	-0.95898	0.9668	0.52686	-36.496	206.042	634.5634	-0.52205	0.51421	0.2576
0.476	-34.826	-7.522	26.86178	0.0091414	-0.11662	-0.15492	-97.032	-41.428	1973.598	-1.9105	1.7164	1.0047	-36.689	134.54	432.6781	-0.35869	0.4917	0.19141	-52.541	196.652	771.994	-0.54141	0.63652	0.24971	-46.105	-27.4474	1920.914	-1.9442	1.5736	0.24648	-43.072	169.4057	1116.14075	-0.92061	0.94189	0.51133	-13.61	243.30935	578.228	-0.47984	0.4831	0.23568
0.478	-22.007	19.981	54.3295	0.016113	-0.11963	-0.16016	-76.416	-45.2217	1945.191	-1.8883	1.7164	1.0075	-56.257	95.191	390.5776	-0.31572	0.44971	0.16563	-80.1755	260.1261	715.429	-0.50117	0.59629	0.22119	-1.364	-34.42	1942.583	-1.9312	1.5571	0.22998	-9.791	197.9408	1066.93071	-0.88233	0.91338	0.49317	-88.4703	241.4372	520.185	-0.44092	0.44824	0.21826
0.48	-0.387	57.0418	38.554	0.017427	-0.11899	-0.16341	6.232	-59.884	1928.669	-1.8762	1.7113	1.0095	-30.75	104.361	354.119	-0.27393	0.41181	0.14609	-95.491	249.511	679.245	-0.46016	0.56152	0.19229	6.08	-14.087	1933.806	-1.9091	1.5464	0.22129	-40.398	236.61	996.606	-0.84482	0.87822	0.47402	-74.105	217.9638	499.2613	-0.40054	0.42012	0.19936
0.482	-35.043	46.8707	40.41358	0.027372	-0.12376	-0.16707	-0.647999999999996	-9.535	1878.7393	-1.8648	1.7025	1.0051	-75.8397	110.27	320.413	-0.22441	0.37481	0.12197	-91.2682	221.884	663.068	-0.42207	0.52227	0.16914	59.559	2.853	1939.957	-1.8883	1.527	0.2083	-33.006	198.4828	965.6195	-0.80332	0.8459	0.45342	-54.901	227.238	464.026	-0.36031	0.39099	0.18966
0.484	5.629	75.621	55.661	0.041154	-0.12676	-0.17058	-23.422	68.354	1852.213	-1.8535	1.6875	1.0044	-44.551	114.359	320.2832	-0.17139	0.33691	0.094238	-125.648	235.777	629.1558	-0.38281	0.48486	0.13965	99.112	51.603	1933.147	-1.8711	1.5145	0.20244	9.278	195.172	941.0004	-0.75977	0.8125	0.43408	-90.9098	189.1137	440.487	-0.32361	0.36016	0.17252
0.486	-22.68	65.092	19.2466	0.052099	-0.12969	-0.17412	16.883	142.509	1851.7075	-1.8481	1.6683	1.0027	-22.682	150.3378	278.7231	-0.12402	0.2916	0.066699	-85.43072	164.87739	602.423	-0.34502	0.44932	0.11992	44.5987	102.058	1884.664	-1.8574	1.507	0.19736	-52.844	203.3647	879.7893	-0.71318	0.78057	0.41309	-44.605	171.786	427.906	-0.2934	0.33121	0.15651
0.488	-57.857	44.206	40.226	0.063477	-0.13623	-0.18018	-59.457	194.167	1824.3332	-1.8421	1.6491	0.99727	-74.3478	150.001	260.106	-0.088086	0.2459	0.03623	-88.01458	159.7029	561.0567	-0.30967	0.41387	0.097946	85.7444	123.483	1861.971	-1.853	1.5024	0.19531	-40.693	185.741	839.2894	-0.66358	0.74619	0.38477	-80.7234	157.213	392.2093	-0.25928	0.30762	0.1377
0.49	-42.604	77.658	43.1862	0.075579	-0.13978	-0.18635	-88.072	173.209	1828.815	-1.8402	1.6198	0.98906	-21.732	149.071	246.765	-0.060742	0.19981	0.015918	-96.884	152.8483	512.3103	-0.27725	0.38184	0.076465	42.913	139.375	1814.083	-1.8594	1.4918	0.20059	-53.521	211.487	805.646	-0.61709	0.71377	0.36445	-97.3123	117.465	353.3073	-0.23011	0.27561	0.11526
0.492	-71.927	30.2906	32.9359	0.091586	-0.14333	-0.19392	-88.717	163.848	1813.799	-1.8324	1.5926	0.98017	-52.126	158.413	192.18	-0.027246	0.16582	-0.0055666	-48.99	103.54	500.812	-0.24561	0.34609	0.057715	17.93	122.943	1820.8808	-1.8699	1.4907	0.2083	-129.505	217.868	756.853	-0.56641	0.68203	0.34317	-24.895	115.356	319.7445	-0.19877	0.23898	0.091507
0.494	-39.163	18.149	62.0247	0.10701	-0.14758	-0.20079	-149.5754	151.738	1775.6	-1.8218	1.5649	0.96191	-67.3586	118.105	160.573	0.010254	0.13379	-0.025391	-29.724	162.411	446.8759	-0.21582	0.31152	0.036621	49.5084	88.509	1847.698	-1.878	1.4903	0.21807	-73.574	200.7166	738.141	-0.52441	0.64648	0.31396	-27.542	104.195	266.144	-0.16946	0.21906	0.083703
0.496	-60.889	0.932	53.942	0.11652	-0.14825	-0.20456	-119.376	125.489	1779.829	-1.8028	1.5362	0.94785	7.207	98.8243	149.97	0.041113	0.10908	-0.044531	3.834	133.458	406.3478	-0.18711	0.28711	0.020215	-7.888	89.578	1833.5667	-1.8922	1.493	0.22666	-87.3812	202.108	688.845	-0.47529	0.61435	0.28945	-12.347	99.326	261.456	-0.14386	0.19649	0.069343
0.498	-88.7225	-46.6312	61.3738	0.12549	-0.14502	-0.20898	-135.299	137.076	1745.452	-1.7706	1.5115	0.93164	-31.24	84.9621	122.629	0.07002	0.08877	-0.06416	34.692	118.617	391.173	-0.16104	0.25703	-0.0054688	41.5528	89.2233	1807.002	-1.8965	1.4902	0.2373	-118.383	150.9814	654.8235	-0.42861	0.58291	0.26494	-15.024	122.9365	236.3121	-0.12402	0.17236	0.056152
0.5	-61.406	-6.043	67.6536	0.12652	-0.14237	-0.21066	-158.98418	86.202	1722.721	-1.7421	1.486	0.91328	-0.996000000000002	66.453	121.8678	0.093066	0.069238	-0.08291	-9.769	165.5228	349.42144	-0.13252	0.22969	-0.020703	42.8439	112.07	1790.984	-1.8952	1.4872	0.24433	-92.7688	127.9046	620.637	-0.38213	0.54736	0.23487	-39.527	115.089	224.88817	-0.10556	0.15312	0.043941
0.502	-90.0691	6.135	42.3194	0.12428	-0.13382	-0.20419	-101.992	27.14	1721.95	-1.7096	1.46	0.8917	18.312	99.3976	96.234	0.11806	0.050196	-0.097462	36.699	121.48	351.71	-0.11093	0.20049	-0.038965	-16.235	140.865	1747.8	-1.8882	1.4817	0.25615	-143.808	135.3254	563.4209	-0.3374	0.51367	0.2085	5.85	118.9406	215.3103	-0.086419	0.13437	0.031151
0.504	-80.308	16.467	46.034	0.11098	-0.12293	-0.19753	-146.861	24.131	1685.17991	-1.6699	1.4316	0.87354	-43.507	105.5081	75.6209	0.13281	0.025879	-0.11523	29.802	173.249	314.4603	-0.086914	0.17627	-0.057129	13.94	109.699	1741.772	-1.8768	1.4743	0.26787	-110.5988	118.707	544.784	-0.29785	0.48438	0.18311	-24.714	125.192	168.7099	-0.070408	0.11406	0.023728
0.506	-55.801	38.1397	43.0769	0.091373	-0.10984	-0.18017	-129.4244	28.6	1700.913	-1.6368	1.4018	0.85449	7.908	89.933	95.605	0.15058	0.011719	-0.12842	18.636	177	259.9563	-0.066016	0.14991	-0.069433	1.702	110.47	1723.071	-1.8573	1.463	0.27568	-38.097	158.136	497.611	-0.25361	0.45205	0.15371	-23.1	92.4491	144.6312	-0.055956	0.093161	0.01953
0.508	-91.0466	-3.5684	29.769	0.066406	-0.094727	-0.16748	-90.265	107.848	1704.412	-1.6001	1.3704	0.83672	-14.013	90.368	84.4696	0.16836	-0.0047852	-0.14502	54.83	111.74	237.005	-0.046386	0.12744	-0.084082	-31.908	79.123	1719.057	-1.8398	1.4492	0.28906	-59.651	162.703	457.17	-0.20957	0.42246	0.12705	22.856	90.59	118.272	-0.045898	0.068359	0.013672
0.51	-50.845	-2.771	62.252	0.031473	-0.076969	-0.14797	-139.80192	163.266	1656.057	-1.5669	1.3341	0.81992	-31.504	56.259	90.118	0.18281	-0.016894	-0.15127	20.641	152.256	194.7408	-0.025293	0.10322	-0.097754	-0.82	67.057	1712.403	-1.8111	1.4351	0.29551	-5.085	149.84	445.001	-0.17129	0.3877	0.10634	-40.766	98.595	81.47	-0.036523	0.046974	0.0054692
0.512	-63.595	28.8849	53.783	-0.0027948	-0.057731	-0.12756	-113.268	163.957	1614.817	-1.5267	1.3018	0.79697	3.14599999999999	44.25801	88.2699	0.19317	-0.030957	-0.16123	17.13	129.022	171.814747	-0.011133	0.084082	-0.10215	-36.3495	119.6423	1656.667	-1.7875	1.4196	0.30498	-1.869	199.9874	397.881	-0.13457	0.36054	0.083203	-22.33	85.3591	87.2957	-0.027638	0.025197	-0.0071278
0.514	-75.2942	18.8253	62.397	-0.033278	-0.041714	-0.10685	-152.194	186.709	1550.408	-1.4839	1.272	0.78027	-54.984	49.413	69.668	0.20264	-0.043945	-0.16699	23.018	121.467	155.077	0.003418	0.063477	-0.11182	-65.8195	125.074	1607.426	-1.7613	1.3941	0.31552	-11.823	195.9788	368.93661	-0.099121	0.33105	0.058594	-12.578	95.955	77.388	-0.015919	0.0068368	-0.019238
0.516	-40.83	55.222	57.0385	-0.062781	-0.024907	-0.089557	-145.164	179.139	1518.9037	-1.4373	1.2447	0.75498	-43.345	47.5154	88.903	0.20674	-0.057226	-0.17608	10.573	142.945	153.168	0.016797	0.045215	-0.11875	-76.7395	185.592	1571.7	-1.7396	1.3714	0.32217	10.255	191.289	341.098	-0.067969	0.2998	0.033203	-49.073	75.1849	70.6906	-0.0016605	-0.0061519	-0.029785
0.518	-57.378	54.807	1.181	-0.085938	-0.0068359	-0.075684	-104.939	202.073	1504.7191	-1.3888	1.2195	0.729	-40.696	79.485	66.1472	0.21387	-0.070117	-0.18584	16.396	62.74	150.2019	0.027734	0.028027	-0.11836	-122.339	216.021	1526.547	-1.7148	1.3477	0.3335	-23.73	205.803	286.2669	-0.040332	0.27422	0.013281	26.621	63.4669	69.81236	0.011719	-0.022461	-0.039063
0.52	-59.899	24.7209	7.308	-0.099123	0.007914	-0.066795	-139.445	250.312	1456.439	-1.3404	1.1945	0.70713	-65.838	94.101	39.704	0.21816	-0.082226	-0.19561	-1.123	69.5121	138.0579	0.032422	0.012793	-0.12109	-99.8795	205.968	1508.6948	-1.691	1.323	0.3417	13.518	158.1	273.4635	-0.013769	0.24922	-0.012891	-32.176	60.544	45.348	0.024219	-0.04209	-0.051563
0.522	-6.171	57.736	5.609	-0.11162	0.024515	-0.054783	-71.1	234.56	1411.25	-1.2871	1.1723	0.67979	-42.101	72.466	42.7235	0.22627	-0.091992	-0.20166	-23.454	55.002	121.8014	0.044043	0.0020508	-0.12705	-86.4941	231.555	1484.56349	-1.6598	1.3012	0.34658	27.857	157.814	252.773	0.008789	0.22109	-0.036719	-55.475	33.796	62.3121	0.037988	-0.056739	-0.062207
0.524	-41.709	14.40242	22.0092	-0.11474	0.037406	-0.050097	-44.113	236.426	1357.554	-1.2363	1.1465	0.65479	-83.947	65.708	24.721	0.229	-0.10596	-0.2085	-33.717	3.178	113.566	0.050293	-0.0068359	-0.125	-66.81252	209.057	1451.2913	-1.6266	1.275	0.34502	-13.503	150.8236	245.113	0.034668	0.19531	-0.063477	-11.717	34.9451	63.9155	0.047363	-0.069629	-0.072364
0.526	-13.932	0.5669	68.654	-0.11494	0.053127	-0.040917	-55.36	221.2654	1300.045	-1.185	1.1282	0.63505	-78.932	20.281	55.1713	0.23242	-0.10127	-0.21416	-70.0711	54.7097	106.075	0.056738	-0.02207	-0.12461	-6.889	189.132	1420.0463	-1.5905	1.2489	0.34453	45.9457	110.7711	244.106	0.054102	0.1753	-0.08623	-76.6925	36.3237	49.5826	0.05791	-0.083594	-0.084473
0.528	2.097	12.8928	47.5483	-0.11328	0.06543	-0.037598	18.569	163.874	1314.5925	-1.139	1.1039	0.61338	-39.532	9.694	52.93662	0.22617	-0.10488	-0.21152	-95.5587	24.044	104.615	0.059278	-0.032422	-0.13017	-33.02	203.3275	1351.715	-1.5449	1.2256	0.34424	12.495	138.826	196.989	0.073437	0.15352	-0.10674	-59.59	16.264	63.298	0.06543	-0.09375	-0.097656
0.53	-32.929	-29.1637	47.6902	-0.10303	0.072753	-0.04336	25.125	180.6417	1288.0804	-1.0953	1.0781	0.5876	-94.8527	9.624	38.485	0.21797	-0.10449	-0.20527	-80.8	32.41064	86.6485	0.062402	-0.046094	-0.13565	-27.5	169.267	1314.107	-1.5049	1.1926	0.34678	8.419	119.7605	167.7545	0.093359	0.13164	-0.1247	-63.775	22.049	61.128	0.080176	-0.10557	-0.10986
0.532	3.38	7.783	57.0335	-0.094728	0.069922	-0.040233	18.24	152.513	1274.959	-1.0515	1.0558	0.56465	-79.086	5.444	55.6681	0.20097	-0.10645	-0.19775	-91.7146	79.2118	61.282	0.063281	-0.053907	-0.13564	-12.677	185.865	1296.5819	-1.4629	1.1672	0.34239	48.987	102.321	153.777	0.10801	0.11475	-0.14278	-108.3611	26.4858	48.8788	0.088574	-0.11729	-0.11367
0.534	-17.486	12.771	28.4912	-0.072072	0.064845	-0.052344	37.194	137.098	1264.011	-1.0093	1.0278	0.54297	-85.46	34.457	58.0666	0.17969	-0.10498	-0.19482	-104.8291	17.1501	60.2128	0.063965	-0.071289	-0.14014	-15.237	210.222	1268.6265	-1.4192	1.1437	0.33887	-12.55	125.4678	127.9807	0.12109	0.098145	-0.16211	-62.742	36.441	52.0621	0.095996	-0.12275	-0.11875
0.536	-30.888	12.9475	40.642	-0.052442	0.060547	-0.068554	-11.209	163.137	1219.628	-0.96992	1	0.52607	-108.3154	52.871	55.9086	0.16113	-0.10234	-0.18496	-109.0883	38.9421	59.2916	0.063281	-0.078028	-0.14277	13.375	197.4266	1261.746	-1.375	1.1193	0.33858	-15.559	56.772	155.974	0.13144	0.084277	-0.17402	-96.5531	68.324	27.0279	0.09785	-0.1332	-0.12021
0.538	-24.5	50.538	32.76358	-0.030273	0.051758	-0.084961	-3.429	127.198	1176.2146	-0.92803	0.96553	0.51123	-58.127	43.169	66.383	0.14209	-0.097265	-0.17461	-96.95407	47.5949	50.765	0.061621	-0.085157	-0.13721	-13.168	227.736	1243.685	-1.3252	1.0889	0.33496	-6.992	55.247	164.247	0.14161	0.070019	-0.19092	-97.0225	40.9874	34.1249	0.10059	-0.13623	-0.12207
0.54	-57.474	14.28656	14.9218	0.00039119	0.047754	-0.10508	25.31	169.1961	1122.9379	-0.89209	0.93428	0.48818	-92.6753	45.029	63.83	0.1253	-0.094922	-0.1668	-71.3358	18.9921	43.3537	0.052246	-0.091406	-0.13252	-16.775	195.801	1207.977	-1.2793	1.0621	0.33164	-75.4126	74.162	160.093	0.15254	0.055175	-0.20069	-48.726	25.3377	34.0197	0.099513	-0.14746	-0.12246
0.542	-33.744	15.0868	38.661	0.029395	0.039942	-0.12129	-40.774	199.443	1070.8312	-0.85918	0.8998	0.46631	-93.177	4.774	67.839	0.10586	-0.087109	-0.15791	-67.5936	68.9977	21.163	0.039844	-0.1041	-0.12646	21.949	169.577	1166.282	-1.2359	1.0326	0.32881	-35.714	59.535	148.0731	0.16406	0.04375	-0.2085	-90.9093	27.3511	22.7013	0.094238	-0.15635	-0.13086
0.544	-33.127	40.9722	18.107	0.056739	0.039551	-0.1373	-30.591	184.024	1031.072	-0.8208	0.8667	0.44482	-28.012	-18.9551	66.1611	0.087891	-0.074707	-0.15039	-50.795	18.0105	20.642	0.026855	-0.10938	-0.12354	-29.022	203.4929	1073.5661	-1.1859	1.0037	0.32451	-84.4217	118.498	112.64206	0.16846	0.033203	-0.21484	-54.851	12.162	47.2526	0.093457	-0.16377	-0.12305
0.546	-69.268	37.2326	17.1322	0.079785	0.041797	-0.15069	-36.033	237.337	991.5434	-0.77891	0.82852	0.42656	-80.191	-7.409	27.92	0.075586	-0.071094	-0.14161	-38.626	15.0999	28.5471	0.016015	-0.1166	-0.11875	-5.895	176.737	1033.0115	-1.1371	0.97422	0.31455	-117.6009	107.118	73.8088	0.16875	0.02539	-0.21972	-44.11	39.0327	36.7268	0.08711	-0.1708	-0.12666
0.548	-51.982	79.379	36.6535	0.097168	0.043945	-0.15869	-40.122	217.341	936.2287	-0.73946	0.79219	0.4001	-36.456	-10.991	37.11602	0.061914	-0.062109	-0.1376	-49.296	70.203	20.444	0.0082032	-0.12637	-0.11367	18.641	211.23902	1001.8771	-1.0869	0.94727	0.31104	-72.903	88.686	40.2136	0.16435	0.015137	-0.22305	-79.076	50.5491	55.7897	0.088867	-0.17969	-0.13086
0.55	-83.0601	69.031	32.8618	0.0999	0.053613	-0.1751	-21.63	201.202	892.7829	-0.69726	0.75625	0.37705	0.235999999999997	19.0996	36.8958	0.05332	-0.057422	-0.13681	-32.341	15.1073	17.3028	0.0046875	-0.13222	-0.11523	-24.926	240.3387	945.0056	-1.0355	0.91718	0.30127	-134.746	108.367	21.452	0.15693	0.007715	-0.22578	-32.295	45.1418	55.9766	0.09082	-0.19043	-0.13447
0.552	-73.033	34.9614	56.74	0.099997	0.06543	-0.18232	-61.002	227.1493	821.945	-0.65107	0.71943	0.35322	-43.266	41.4048	43.2365	0.053516	-0.055274	-0.12568	-14.328	30.726	43.4902	-0.00058594	-0.13301	-0.10967	24.801	211.38506	922.595	-0.97949	0.88359	0.28672	-90.93601	21.28	53.5592	0.14893	-0.00048832	-0.23008	-68.193	48.638	35.65277	0.093652	-0.19815	-0.13536
0.554	-43.376	45.1703	62.5444	0.088672	0.079492	-0.19014	-50.823	186.933	769.796	-0.61084	0.68213	0.33203	-8.882	21.3446	47.2819	0.051758	-0.055664	-0.12793	-29.592	16.8173	47.8043	0.0014648	-0.13281	-0.11328	-10.035	260.082	879.778	-0.92325	0.85625	0.28711	-78.6109	4.344	72.09663	0.14502	-0.0073242	-0.23096	-37.899	15.20538	55.224	0.10303	-0.20752	-0.14082
0.556	-73.765	-1.0058	62.27578	0.079394	0.092481	-0.18613	-65.058	217.49	736.523	-0.56104	0.64775	0.31064	-28.961	47.538	35.7846	0.06211	-0.057812	-0.12842	5.245	-47.252	57.8457	-0.00029296	-0.13408	-0.11211	-41.713	236.6288	827.744	-0.86875	0.82266	0.28369	-88.39315	13.862	82.4488	0.13496	-0.014746	-0.23096	-1.517	4.9755	60.316	0.11328	-0.21357	-0.14756
0.558	-76.226	-22.1389	103.45595	0.06543	0.104	-0.19531	-88.913	237.058	710.394	-0.51895	0.60977	0.28613	-59.003	28.9388	50.316	0.072949	-0.062207	-0.13487	14.881	10.2124	51.1481	0.0036133	-0.13594	-0.11201	-30.966	203.1262	789.0085	-0.81592	0.79346	0.27441	-42.461	-2.329	79.6951	0.13164	-0.023047	-0.23369	-49.878	6.324	47.5257	0.12012	-0.22217	-0.1543
0.56	-80.7235	-39.4062	129.642	0.049805	0.11582	-0.19639	-77.9591	180.41	702.192	-0.48028	0.57813	0.26347	4.432	9.4674	47.7584	0.090918	-0.069238	-0.14267	13.308	-19.7438	26.9875	0.0020508	-0.1336	-0.11553	-94.5031	243.7455	733.825	-0.76299	0.76201	0.26719	-71.118	53.4788	45.594	0.12813	-0.030078	-0.23564	-9.878	-16.5726	60.724	0.13467	-0.22656	-0.16709
0.562	-91.3155	-126.502	206.3534	0.029493	0.13115	-0.19873	-92.46098	203.111	670.03	-0.43867	0.54316	0.2417	-39.187	9.4092	30.908	0.10645	-0.070508	-0.15195	18.997	-22.8642	36.73	0.0088867	-0.13476	-0.1166	-80.264	198.26	696.39198	-0.71377	0.73545	0.25967	-55.869	45.171	54.983	0.11875	-0.039648	-0.23847	-14.99	1.1343	36.5118	0.15185	-0.22783	-0.1747
0.564	-14.933	-156.6088	298.031	0.0083985	0.14482	-0.20225	-102.4649	156.8616	623.205	-0.39941	0.50879	0.21729	-36.157	-17.6721	25.7994	0.12695	-0.071777	-0.15771	-4.477	47.055	25.5818	0.015137	-0.13135	-0.12012	-64.946	203.9139	656.7955	-0.66221	0.7003	0.24795	-38.804	4.30925	42.485	0.11865	-0.048828	-0.23682	-65.386	16.083	42.8903	0.16748	-0.2333	-0.18682
0.566	-5.6722	-217.005	382.282	-0.0045898	0.16055	-0.20137	-101.3347	121.94922	589.118	-0.36172	0.47676	0.19482	-27.707	-2.432	15.127	0.13574	-0.071191	-0.16856	9.784	13.0009	17.8514	0.015039	-0.13242	-0.12442	-105.3374	202.8181	611.9258	-0.6126	0.66983	0.23926	-65.871	21.4949	34.295	0.1166	-0.046973	-0.23604	15.353	25.0748	53.3655	0.18662	-0.2372	-0.19395
0.568	28.6206	-288.0106	474.883	-0.019531	0.18164	-0.20508	-127.808	151.406	543.20491	-0.32461	0.44453	0.17382	-68.69	23.6889	19.7064	0.13945	-0.064746	-0.16866	24.414	52.798	27.2756	0.020606	-0.1376	-0.12285	-113.38741	158.0841	581.539	-0.56055	0.63672	0.22803	-6.602	-46.106	58.214	0.10869	-0.048633	-0.23232	-10.91	48.3956	37.2937	0.19824	-0.24023	-0.19775
0.57	64.787	-278.195	541.154	-0.044825	0.21143	-0.21279	-79.9647	96.186	525.2033	-0.28906	0.41016	0.14297	-15.495	29.4806	44.279	0.12617	-0.060449	-0.16201	12.15	55.8082	28.5007	0.025683	-0.13955	-0.12793	-115.7665	207.555	548.536	-0.50957	0.60703	0.21885	-14.716	-30.7845	48.9663	0.10517	-0.050586	-0.22842	-39.503	32.762	50.314	0.21133	-0.23769	-0.20683
0.572	0.0945	-297.2389	581.66	-0.071875	0.25322	-0.21231	-30.13	117.242	487.0101	-0.25351	0.37793	0.11973	-44.848	53.19	16.965	0.10771	-0.053028	-0.15557	-17.332	-4.7364	46.67471	0.031445	-0.13789	-0.1333	-105.4505	179.0486	514.0111	-0.45927	0.57588	0.21367	-26.601	-10.0237	47.9131	0.096289	-0.051563	-0.22324	-15.72	25.6215	48.7102	0.2167	-0.23213	-0.20762
0.574	51.587	-255.7004	630.601	-0.1082	0.30557	-0.19434	-29.908	141.637	419.911	-0.21533	0.35303	0.096191	-64.104	35.8335	24.8808	0.07373	-0.044434	-0.14404	-43.392	57.45	53.0195	0.039063	-0.14551	-0.13818	-93.903	144.229	462.065	-0.41787	0.54424	0.20195	19.861	-33.144	36.997016	0.086914	-0.047852	-0.22461	-66.499	36.2938	35.674	0.21826	-0.22315	-0.20567
0.576	76.65	-198.2866	637.983	-0.15849	0.36846	-0.16465	22.905	104.888	395.1225	-0.17168	0.32383	0.060449	-28.594	10.1167	29.4756	0.037598	-0.038769	-0.13115	-49.559	39.5045	30.6447	0.042968	-0.14131	-0.14258	-99.8798	164.711	415.893	-0.37275	0.51211	0.19658	-8.751	40.656	13.325	0.080469	-0.049414	-0.21514	-45.294	10.414	51.973	0.21026	-0.21621	-0.20068
0.578	57.311	-180.796	689.676	-0.23193	0.43018	-0.12451	4.456	174.041	356.7763	-0.13027	0.29287	0.032032	-97.41695	16.275	21.726	-0.0042968	-0.03125	-0.11445	-64.22	33.187	24.121	0.053027	-0.1376	-0.14912	-72.496	90.853	384.695	-0.33496	0.47705	0.1958	6.677	34.3649	23.0234	0.073144	-0.055078	-0.20869	-36.477	22.8892	21.753	0.19727	-0.20703	-0.19189
0.58	109.987	-99.082	738.562	-0.32842	0.48886	-0.078027	-13.086	175.863	335.464	-0.087696	0.26123	0.0046874	-70.096	-4.751	53.474	-0.039062	-0.017969	-0.096094	-97.2415	81.009	28.6068	0.056933	-0.13799	-0.15108	-79.561	121.769	354.795	-0.29248	0.44219	0.17793	36.6	24.8735	32.391	0.071191	-0.055078	-0.19854	-88.688	18.976	18.1593	0.17188	-0.19424	-0.1789
0.582	72.65	-41.254	774.9111	-0.43359	0.55645	-0.017383	22.597	163.534	318.717	-0.052246	0.22715	-0.016992	-82.744	21.4821	28.672	-0.077051	-0.0068359	-0.079297	-88.66	12.7202	20.8287	0.057812	-0.13291	-0.15586	-80.499	166.6793	317.2429	-0.25312	0.41113	0.17676	-5.77	71.991	20.39	0.066406	-0.053125	-0.19336	-50.422	11.5944	29.165	0.1457	-0.179	-0.16358
0.584	70.3525	5.087	864.098	-0.54921	0.62207	0.04668	-0.969999999999999	198.296	291.0581	-0.021973	0.19434	-0.038086	-121.0933	50.9416	27.7011	-0.10547	0.011719	-0.063965	-78.257	26.3278	20.3864	0.056152	-0.12842	-0.15771	-51.696	133.353	311.482	-0.21601	0.38144	0.17285	17.16	8.4877	13.381	0.05957	-0.053711	-0.18408	-85.8884	37.6559	17.526	0.11406	-0.1669	-0.14951
0.586	107.895	60.205	912.968	-0.66533	0.69238	0.1085	28.595	112.5011	276.60191	0.0023437	0.16328	-0.055957	-61.937	48.004	33.733	-0.12724	0.028125	-0.054882	-103.281	29.133	23.573	0.051758	-0.125	-0.15713	-71.821	186.989	284.1877	-0.18174	0.34687	0.16661	6.361	13.3106	14.954	0.059375	-0.053125	-0.18115	-98.8438	27.409	32.8146	0.083007	-0.15332	-0.12744
0.588	84.3932	32.283	932.525	-0.7832	0.76367	0.15869	25.555	109.109	245.2	0.027148	0.1374	-0.074414	-88.105	82.932	20.593	-0.1418	0.048633	-0.054004	-89.5621	-32.4819	50.6235	0.044043	-0.11846	-0.15459	-61.007	152.384	248.8442	-0.15332	0.31738	0.16748	-57.044	26.483	32.9989	0.057129	-0.055274	-0.18272	-47.828	17.6092	40.3817	0.04834	-0.13672	-0.11035
0.59	90.5067	18.227	988.4192	-0.90234	0.84141	0.20283	0.0630000000000024	123.6403	212.156	0.044727	0.1081	-0.09082	-95.999	68.4323	36.2831	-0.15234	0.067774	-0.046972	-102.9359	15.361	57.0242	0.03623	-0.11221	-0.146	-40.068	112.81	229.0432	-0.12833	0.29083	0.16269	-21.29	0.3187	38.2269	0.057129	-0.056055	-0.17139	-95.6098	11.769	22.2528	0.02373	-0.12285	-0.091114
0.592	110.354	35.708	1023.253	-1.0059	0.91211	0.2335	14.32	88.4453	180.335	0.066699	0.091015	-0.097951	-41.351	47.566	39.44595	-0.14873	0.083008	-0.049902	-71.893	-8.553	52.5256	0.020899	-0.10029	-0.13565	-61.351	131.5107	192.705	-0.10265	0.25967	0.15938	-58.716	42.771	30.569	0.057715	-0.056152	-0.16904	-53.636	-14.37	41.5631	0.0012695	-0.10381	-0.078515
0.594	82.301	-5.97999999999999	1110.741	-1.1055	0.97422	0.28155	3.058	141.389	165.758	0.089355	0.072754	-0.10645	-75.0072	42.2632	36.49064	-0.13672	0.10547	-0.054199	-63.084	-11.267	49.133	0.0043945	-0.087402	-0.12549	-35.101	58.801	178.815	-0.078813	0.23429	0.14844	-82.26078	26.5923	25.6163	0.058105	-0.057129	-0.16797	-67.166	8.8706	39.167	-0.013965	-0.089355	-0.059375
0.596	55.494	-39.09	1222.099	-1.2131	1.0428	0.34053	9.428	90.0437	148.0416	0.10489	0.058789	-0.11816	-47.751	2.996	49.8586	-0.11885	0.11426	-0.058399	-65.506	53.416	39.9502	-0.016211	-0.070996	-0.11406	-19.36	72.95	157.073	-0.055278	0.20821	0.14346	-61.286	8.8659	24.12744	0.058887	-0.054297	-0.1668	-99.0312	27.9649	43.7691	-0.02627	-0.067969	-0.050098
0.598	-21.996	-114.155	1251.345	-1.3184	1.1055	0.40283	1.5	34.6109	138.7054	0.11553	0.045996	-0.12695	-36.844	15.35718	44.6645	-0.093066	0.12461	-0.070704	-58.499	9.6613	45.126	-0.030664	-0.057813	-0.09834	-13.931	94.3385	122.198	-0.028809	0.18994	0.14014	-108.56849	47.9682	14.4463	0.058496	-0.048047	-0.16299	-46.169	34.71	61.956	-0.035156	-0.047363	-0.044922
0.6	-51.3574	-256.5075	1303.3907	-1.4365	1.1632	0.4752	-14.964	61.142	150.4105	0.1292	0.031153	-0.13477	-75.446	38.412	40.3945	-0.064941	0.12812	-0.083594	-65.332	55.83	57.9	-0.047461	-0.045313	-0.089746	9.477	52.1866	117.6681	-0.008294	0.16669	0.13457	-86.517	5.99	10.74681	0.056152	-0.038281	-0.16065	-92.481	61.925	26.1152	-0.035059	-0.031055	-0.036816
0.602	-51.817	-285.364	1330.8227	-1.5742	1.2102	0.52783	-13.613	0.743000000000002	152.824	0.1375	0.017285	-0.14121	-23.75	37.98826	60.193	-0.038769	0.12724	-0.096191	-50.247	74.462	25.578	-0.057129	-0.029199	-0.075879	-9.50999999999999	105.987	113.05052	0.0079312	0.1414	0.13251	-87.313	17.0633	0.105	0.053027	-0.034278	-0.16191	-46.564	40.2156	23.4053	-0.035938	-0.011035	-0.031836
0.604	-87.793	-328.338	1356.411	-1.7242	1.2492	0.56845	-50.851	35.571	149.0884	0.14746	0.0068359	-0.1416	-58.276	69.136	44.1857	-0.011719	0.12305	-0.11621	-24.966	8.905	26.383	-0.0625	-0.012207	-0.069336	-38.713	90.153	120.072	0.024717	0.13046	0.12274	-99.4127	36.881	16.525	0.046875	-0.026855	-0.15674	-15.308	31.224	24.321	-0.033594	0.0014649	-0.029101
0.606	-51.489	-311.833	1423.172	-1.863	1.2776	0.58945	-63.4012	73.812	122.801	0.15078	-0.0024414	-0.14639	-52.687	57.33	57.966	0.020215	0.11406	-0.13369	-1.416	45.3783	33.72	-0.064648	0.0015625	-0.063086	-41.176	59.886	133.74	0.038684	0.10897	0.11933	-70.65	-1.237	54.4433	0.042676	-0.01914	-0.15342	-80.773	44.46	15.173	-0.027343	0.014063	-0.031055
0.608	-21.624	-265.82	1465.22	-1.9805	1.2949	0.59619	-76.131	34.1012	95.201	0.15576	-0.010156	-0.14941	-15.934	31.3168	58.2513	0.04873	0.10723	-0.15068	-11.004	9.904	25.705	-0.067383	0.017383	-0.056933	-50.431	93.486	117.1202	0.048828	0.094238	0.11084	-83.5167	43.7811	68.5022	0.035449	-0.0094727	-0.14638	-24.36	22.4536	42.16275	-0.02002	0.029297	-0.036621
0.61	-56.134	-335.23	1517.092	-2.0453	1.3047	0.59287	-107.1763	105.812	70.713	0.15615	-0.013281	-0.15059	-37.275	30.026	48.3119	0.076465	0.10449	-0.16123	13.704	5.5975	37.7207	-0.058789	0.026758	-0.054199	-64.967	15.984	98.5775	0.065208	0.07718	0.10401	-80.50797	56.5092	58.508	0.024903	-0.0024414	-0.14053	-6.236	38.229	29.082	-0.0097655	0.032031	-0.039942
0.612	-26.694	-328.1	1580.241	-2.066	1.3137	0.57959	-90.3652	80.821	62.5094	0.15069	-0.02002	-0.15303	-3.457	4.376	56.532	0.10059	0.10586	-0.17734	14.583	65.959	40.2301	-0.055078	0.042578	-0.051172	-74.059	36.3209	90.1663	0.07985	0.062538	0.096597	-72.165	46.68	52.544	0.0080077	0.0041992	-0.13369	-36.667	43.7259	42.433	-0.0012696	0.034375	-0.049121
0.614	-37.6064	-283.242	1592.995	-2.0324	1.3199	0.54912	-98.0685	63.824	58.5843	0.14697	-0.023926	-0.14893	-11.175	12.7201	50.1834	0.125	0.10889	-0.18799	17.767	16.2384	29.001	-0.04248	0.049316	-0.057617	-68.336	75.942	73.7541	0.090773	0.051604	0.092301	-101.9856	93.425	18.4605	-0.0053711	0.015625	-0.12256	10.472	20.6929	54.211	0.015918	0.032813	-0.056543
0.616	-93.9886	-255.309	1614.131	-1.9421	1.3314	0.51328	-131.932	110.668	62.0172	0.13545	-0.028027	-0.14922	-44.815	24.689	48.0181	0.14541	0.11553	-0.19267	19.373	33.57	54.842	-0.025195	0.057617	-0.063282	-84.609	39.2245	52.037	0.099585	0.035965	0.084473	-45.515	45.648	18.408	-0.012793	0.023926	-0.11611	-32.811	46.256	46.0756	0.034472	0.034473	-0.066113
0.618	-77.979	-104.159	1626.8481	-1.8145	1.3418	0.47217	-93.84068	28.4543	55.053	0.12188	-0.029981	-0.14873	-20.703	19.7398	49.3558	0.15947	0.12295	-0.196	3.322	23.94432	46.9625	-0.0035156	0.063183	-0.071484	-100.98227	103.661	38.9731	0.10693	0.027832	0.078125	-31.667	48.795	13.276	-0.027149	0.03418	-0.11064	-29.266	39.5797	57.718	0.050781	0.028809	-0.070313
0.62	-107.1702	-56.9	1604.227	-1.669	1.3536	0.41621	-65.586	35.5974	44.406	0.11524	-0.033887	-0.14834	-42.318	50.972	52.2588	0.16377	0.12959	-0.19716	-0.207000000000001	-27.7757	43.0343	0.020313	0.06709	-0.082422	-104.2817	64.414	49.9024	0.10883	0.01846	0.078721	-49.011	39.3993	25.481	-0.027149	0.044727	-0.11064	9.258	38.716	64.0316	0.066992	0.030078	-0.074512
0.622	-92.6204	-66.66	1617.835	-1.5268	1.356	0.36963	-65.954	43.004	34.084	0.10508	-0.035352	-0.14756	-43.557	37.6456	86.24	0.16269	0.13555	-0.20127	-6.415	15.3895	58.63	0.04502	0.066211	-0.095508	-94.796	21.1874	67.7318	0.10768	0.012982	0.075803	10.556	-18.94031	68.73	-0.02959	0.05498	-0.11036	-67.704	41.3925	41.5164	0.073535	0.03164	-0.074805
0.624	-54.8692	-53.43	1613.235	-1.4023	1.3556	0.32471	-47.515	-8.381	39.85979	0.104	-0.033691	-0.15039	-9.68	1.018	103.8667	0.1543	0.14502	-0.20801	-28.987	-11.223	50.8895	0.062988	0.064453	-0.10938	-77.568	62.1314	64.9949	0.10834	0.0063743	0.068729	-17.188	17.6855	68.05345	-0.029297	0.062012	-0.11084	-30.547	-11.5882	57.298	0.074317	0.032032	-0.073633
0.626	-59.588	-157.953	1621.9	-1.3099	1.3494	0.29394	-47.033	54.9551	49.7723	0.09834	-0.036524	-0.15088	-79.2865	-29.56	113.607	0.14756	0.15039	-0.20869	-45.133	-26.144	47.5203	0.081055	0.061719	-0.11973	-71.446	-10.189	45.5957	0.10979	-0.00081808	0.070075	-2.765	32.858	73.439	-0.019727	0.070313	-0.11738	-19.97	-6.7551	26.461	0.071387	0.032813	-0.072168
0.628	-34.992	-165.0369	1692.641	-1.2534	1.3384	0.27539	-51.281	28.8099	30.4294	0.099414	-0.030664	-0.15254	-50.841	-111.55	178.691	0.13799	0.16309	-0.21328	-42.032	28.434	34.3808	0.095508	0.06123	-0.12461	-80.255	14.28	45.676743	0.10596	-0.0029297	0.075684	26.015	29	75.177	-0.0070312	0.077051	-0.11963	-68.18	10.825	36.8656	0.069336	0.033691	-0.069336
0.63	-32.098	-141.1805	1709.4433	-1.2298	1.3424	0.26631	-41.325	-1.071	41.425	0.1002	-0.02832	-0.16035	-18.992	-161.458	255.031	0.12978	0.17402	-0.22187	-47.22	-3.69564	12.90271	0.10918	0.059277	-0.12969	-104.615	41.9235	37.4658	0.10322	-0.0033961	0.074197	-15.574	61.424	43.1199	0.0070313	0.0833	-0.12588	-43.615	18.1259	48.574	0.058399	0.035742	-0.063477
0.632	22.067	-180.377	1746.08	-1.2353	1.3406	0.26563	-36.649	40.61	57.0471	0.10352	-0.024316	-0.16758	-38.3237	-200.96296	360.437	0.12187	0.19443	-0.23467	-61.912	45.589	25.2388	0.1128	0.062305	-0.13789	-86.236	8.1265	27.816	0.096301	-0.0010397	0.075511	16.135	10.7912	56.202	0.019727	0.086133	-0.13564	-74.617	66.279	32.8797	0.042969	0.033008	-0.066407
0.634	79.881	-141.2138	1777.801	-1.2635	1.3453	0.26329	-22.521	-37.5959	66.512	0.11084	-0.020508	-0.1709	21.2466	-273.8623	485.05	0.11084	0.21631	-0.24121	-81.5271	66.988	35.6093	0.10938	0.063965	-0.13721	-87.5448	71.279	50.879	0.092016	-0.0014648	0.077637	25.607	5.82126	43.0219	0.039551	0.086914	-0.14648	-72.688	53.8626	56.099	0.029297	0.03418	-0.065625
0.636	101.268	-190.291	1771.3713	-1.3021	1.3574	0.26152	1.419	-13.9564	74.2183	0.11621	-0.016211	-0.17314	5.989	-301.019	564.447	0.10323	0.23594	-0.25078	-98.461	16.6	32.1848	0.10791	0.07373	-0.14658	-79.518	47.074	47.538	0.081543	-0.0032677	0.080698	-16.94	12.029	41.8067	0.057813	0.089356	-0.15693	-45.314	40.3886	66.2968	0.018555	0.030664	-0.064258
0.638	99.968	-240.373	1837.064	-1.3374	1.3696	0.26563	1.762	19.0052	49.6499	0.1166	-0.0042969	-0.17314	-18.452	-342.9006	665.6	0.095703	0.26728	-0.25371	-77.6065	60.4503	30.073	0.10351	0.083789	-0.15049	-47.19	5.9135	65.265	0.078125	-0.0019531	0.087402	-10.838	-26.362	54.3966	0.072851	0.089941	-0.16152	-82.047	11.342	81.8523	0.015137	0.035156	-0.062988
0.64	44.75402	-203.777	1861.16	-1.3759	1.3772	0.26699	-4.573	-26.334	37.872	0.11816	0.00039062	-0.17588	38.979	-338.469	754.28709	0.078906	0.29892	-0.25527	-91.4507	16.505	24.464	0.10156	0.090039	-0.15401	-59.01	52.1733	50.608	0.073224	-0.0015822	0.096853	-45.144	23.6373	55.071	0.089258	0.087988	-0.17324	-59.028	-57.567	116.6967	0.0012696	0.044239	-0.07168
0.642	-10.929	-243.72	1893.047	-1.4133	1.3942	0.26504	-3.968	45.785	32.0268	0.10576	0.00625	-0.17353	19.0028	-270.6879	806.473	0.053906	0.33525	-0.2582	-81.0864	-8.1493	43.5899	0.098633	0.10137	-0.15254	-20.716	-9.735	38.5602	0.070081	-0.0064249	0.10346	-34.431	20.4364	53.0214	0.098438	0.08789	-0.18564	-58.1	-65.9642	141.624	-0.0060547	0.054981	-0.084278
0.644	-13.583	-183.426	1904.239	-1.4508	1.4145	0.26035	6.359	41.3764	21.7529	0.096191	0.013184	-0.16895	64.653	-214.731	875.175	0.013672	0.37842	-0.25537	-84.1796	40.0366	43.1279	0.088379	0.11328	-0.15771	-7.49	9.282	47.2411	0.066972	-0.0098937	0.11048	-25.364	9.3984	34.40521	0.10596	0.086914	-0.18945	-88.387	-88.6091	186.466	-0.0083985	0.06123	-0.10146
0.646	-8.749	-122.679	1851.3649	-1.49	1.4302	0.25449	14.479	25.968	14.5601	0.086426	0.013379	-0.16768	96.279	-147.64	900.2658	-0.034375	0.43135	-0.2334	-96.54537	-5.70027	45.6283	0.076074	0.12383	-0.16602	-8.177	31.853	33.2732	0.073106	-0.016194	0.11576	-79.333	59.195	33.9162	0.10928	0.085156	-0.19434	-30.163	-160.729	283.669	-0.0080078	0.075488	-0.11738
0.648	14.436	-139.867	1827.7272	-1.5313	1.4473	0.25146	14.585	77.886	24.8821	0.070215	0.013183	-0.1627	50.19	-115.883	930.4154	-0.10586	0.48984	-0.19492	-83.019	6.193	85.7308	0.068164	0.13194	-0.15908	5.275	-24.44019	33.1054	0.083984	-0.019043	0.11865	-58.165	10.1341	42.49	0.10762	0.0875	-0.19707	-37.9551	-205.647	359.652	-0.0039063	0.084473	-0.13379
0.65	31.1	-52.106	1820.054	-1.5721	1.4622	0.24619	-1.305	5.6006	30.3325	0.060059	0.015137	-0.16035	97.551	-91.583	1009.007	-0.21132	0.56211	-0.13711	-78.0167	-32.603	127.757	0.060743	0.13623	-0.1708	-10.631	51.0014	33.888	0.0956	-0.025269	0.11978	-55.712	7.91404	42.6087	0.10293	0.091016	-0.19707	-10.1675	-299.2717	477.884	0.0041016	0.098537	-0.15371
0.652	17.5409	-34.597	1798.52	-1.6078	1.4723	0.23897	-42.773	24.5689	46.8486	0.049707	0.011816	-0.15488	96.682	-13.851	1076.12	-0.33604	0.63194	-0.071582	-39.805	-135.4233	216.4384	0.050879	0.14121	-0.17578	-25.771	47.8306	37.0519	0.11292	-0.029863	0.12101	-92.177771	16.295	51.6092	0.095606	0.094434	-0.2039	59.693	-361.0394	567.521	0.0064453	0.12207	-0.16123
0.654	34.3247	-39.659	1826.988	-1.6391	1.4847	0.2292	-58.0212	45.94	51.4103	0.041504	0.017578	-0.15186	101.4913	25.861	1163.673	-0.47852	0.71094	-0.0039063	-18.256	-134.174	306.807	0.039551	0.14648	-0.17725	-40.259	32.716	58.326	0.12541	-0.038053	0.12303	-81.881	-42.734	48.219	0.087891	0.099609	-0.19873	-11.4507	-360.324	638.689	-0.0044922	0.15449	-0.16982
0.656	42.8193	31.781	1822.099	-1.6688	1.493	0.22197	-46.56	-4.159	37.317	0.03623	0.0125	-0.14922	133.442	61.66	1166.947	-0.63418	0.79023	0.078909	37.269	-206.2441	397.593	0.019629	0.16006	-0.18926	-41.428	76.059	63.2582	0.14502	-0.039253	0.12457	-108.3927	-27.562	73.575	0.07998	0.10459	-0.19619	59.423	-340.54	703.014	-0.029882	0.19922	-0.16914
0.658	53.018	-32.74513	1793.914	-1.6909	1.5063	0.2251	-85.8396	42.956	40.9523	0.03418	0.016504	-0.13907	67.6259	60.923	1134.66	-0.7914	0.87617	0.15683	80.296	-272.9026	493.139	-0.0041992	0.17822	-0.19092	-25.389	-1.2589	43.8653	0.15869	-0.046387	0.11865	-97.9397	-67.427	110.933	0.07041	0.10928	-0.19521	67.746	-257.234	704.47	-0.070313	0.25342	-0.15039
0.66	44.232	-25.4147	1816.943	-1.7088	1.5095	0.22549	-86.707	16.0348	18.663	0.031446	0.017285	-0.13477	77.5382	-10.93	1184.483	-0.95078	0.9543	0.22793	91.97576	-252.679	562.512	-0.038574	0.21806	-0.19131	-13.142	3.7512	50.539	0.16983	-0.051302	0.12281	-56.083	-103.799068	157.0495	0.061035	0.12061	-0.19405	36.057	-181.214	717.487	-0.13916	0.30967	-0.11846
0.662	-2.93	-0.749400000000001	1800.139	-1.7238	1.5251	0.22744	-82.552	-4.7324	18.0942	0.023438	0.017969	-0.12852	55.8087	-66.77	1239.382	-1.1142	1.0237	0.2793	93.813	-287.5693	631.3588	-0.087986	0.27031	-0.17276	-33.026	15.9145	35.453	0.18003	-0.05414	0.12362	-76.397	-99.678	218.921	0.04834	0.13369	-0.18896	101.211	-140.989	756.121	-0.23164	0.36455	-0.080469
0.664	-26.862	-59.219	1819.024	-1.735	1.531	0.23174	-101.2724	51.1084	13.732	0.017578	0.018066	-0.11963	-48.5758	-138.53	1343.369	-1.2754	1.1016	0.32324	104.259	-222.28	702.256	-0.15869	0.33447	-0.14355	-56.918	-21.9482	31.24366	0.18354	-0.059583	0.12326	-29.9355	-200.0511	306.422	0.031738	0.14307	-0.19141	86.907	-55.494	780.547	-0.34023	0.41494	-0.029297
0.666	-12.0696	-20.847	1867.389	-1.7451	1.5401	0.23799	-87.5999	-14.531	24.8501	0.0059571	0.01582	-0.11036	-49.4006	-215.587	1423.4686	-1.4132	1.1806	0.35899	127.955	-133.471	728.327	-0.26123	0.39639	-0.10127	-70.839	56.016	36.84	0.18685	-0.057594	0.12153	3.9799	-256.515	379.546	0.0072266	0.16514	-0.18711	67.2562	-20.093	896.419	-0.46416	0.46895	0.024023
0.668	-26.6481	-50.8972	1857.935	-1.752	1.543	0.24072	-99.4066	-2.444	53.4637	-0.0081052	0.012793	-0.10479	-101.39	-255.329	1415.408	-1.532	1.2615	0.39062	113.844	-118.14	762.393	-0.38105	0.46318	-0.047071	-64.785	44.2837	22.6992	0.18799	-0.058594	0.12207	1.3768	-296.961	428.814	-0.024024	0.19023	-0.18086	125.658	47.362	959.673	-0.59814	0.53271	0.082031
0.67	-7.2099	-83.1688	1878.099	-1.7568	1.5513	0.24473	-88.8719	21.657	59.776	-0.026855	0.0073243	-0.091114	-124.55617	-330.596	1481.3553	-1.6436	1.3341	0.42461	103.688	-32.0755	801.916	-0.5084	0.52959	0.018164	-77.117	27.4856	33.72523	0.1871	-0.061999	0.12608	73.485	-349.8764	505.808	-0.066992	0.225	-0.16836	61.8692	77.0234	995.097	-0.73653	0.59531	0.14346
0.672	28.381	-16.6533	1852.396	-1.7606	1.5535	0.24648	-60.888	-17.138	43.819	-0.047558	0.0040041	-0.080371	-90.611	-342.196	1539.524	-1.7417	1.3981	0.46172	115.871	-26.321	832.131	-0.63887	0.59746	0.087501	-68.351	60.792	35.552	0.18564	-0.061237	0.12558	61.323	-285.828	584.763	-0.13184	0.26533	-0.14375	87.4376	46.808	1032.494	-0.87539	0.66621	0.1957
0.674	-4.365	-64.98	1817.398	-1.7672	1.5547	0.24609	-81.348	50.0329	41.0287	-0.065918	-0.0048828	-0.076172	-100.308	-347.66	1573.062	-1.834	1.4492	0.49365	130.074	-28.86	939.793	-0.78223	0.6582	0.15332	-65.567	-3.998	34.896	0.18212	-0.06437	0.12481	74.558	-239.296	644.5658	-0.21338	0.30908	-0.104	123.144	32.065	1015.437	-1.0133	0.7377	0.23672
0.676	21.783	-14.983	1843.1711	-1.7645	1.5546	0.2459	-86.8757	63.75	26.8284	-0.086622	-0.0087894	-0.056542	-73.983	-382.57	1641.274	-1.922	1.4936	0.51074	121.173	20.476	1021.711	-0.9416	0.73027	0.22041	-93.79961	9.724	63.6945	0.18076	-0.062893	0.12498	120.693	-176.702	673.2238	-0.31436	0.35909	-0.055958	79.565	-12.54	1084.903	-1.1332	0.81113	0.28369
0.678	57.565	24.433	1823.602	-1.7593	1.5591	0.24609	-76.23	39.477	36.9919	-0.10137	-0.01377	-0.049317	-82.871	-376.42	1648.867	-2.004	1.5111	0.51621	86.4694	-14.84	1043.994	-1.1018	0.80322	0.27237	-108.2025	30.86257	60.8372	0.18311	-0.060059	0.12012	94.108	-80.785	680.405	-0.425	0.4123	-0.00078235	68.516	-59.18	1181.369	-1.2397	0.88916	0.33301
0.68	54.138	-16.786	1838.658	-1.7591	1.5663	0.24707	-56.887	95.199	34.65	-0.11387	-0.017285	-0.044237	-166.71	-376.64	1682.509	-2.0528	1.5107	0.52715	52.7716	5.468	1061.9671	-1.2542	0.88135	0.32119	-100.936	-18.8464	38.3374	0.18242	-0.055963	0.12081	144.387	-69.9902	734.979	-0.54453	0.46933	0.059374	-30.748	-91.37	1253.118	-1.3427	0.96631	0.39756
0.682	113.005	70.722	1834.979	-1.7558	1.5728	0.25136	-49.721	19.50395	16.674	-0.11768	-0.01748	-0.038184	-155.6952	-331.814	1716.959	-2.0393	1.4977	0.53438	37.8115	18.26	1079.692	-1.3981	0.9627	0.35966	-81.779	41.695	30.2542	0.18779	-0.046505	0.11446	131.559	-7.035	787.75	-0.66406	0.53437	0.12188	-70.18	-191.652	1351.3029	-1.4461	1.0352	0.4751
0.684	101.479	79.3119	1784.181	-1.7573	1.5728	0.25566	-12.593	23.068	34.947	-0.12012	-0.021484	-0.031738	-164.264	-212.028	1701.6433	-1.9766	1.4863	0.52393	20.791	-40.67	1156.815	-1.5332	1.0449	0.40234	-90.07	38.47	19.67	0.19326	-0.03165	0.1164	100.6233	62.291	835.358	-0.7832	0.60156	0.18018	-44.049	-277.606	1361.8732	-1.5789	1.1117	0.54424
0.686	92.443	104.226	1749.925	-1.7549	1.5761	0.26094	-20.86	36.61889	45.663	-0.11523	-0.021191	-0.030176	-213.564	-175.634	1713.245	-1.8592	1.4826	0.49756	-32.742	-52.44	1249.845	-1.6573	1.1137	0.44161	-70.135	32.822	22.5768	0.19649	-0.018265	0.11953	121.5593	54.706	902.485	-0.88096	0.67061	0.21953	-86.762	-361.65	1376.134	-1.7278	1.1815	0.60176
0.688	72.082	186.134	1719.286	-1.7515	1.5767	0.26367	-19.535	-3.3132	50.9178	-0.10947	-0.020801	-0.032615	-194.685	-124.1	1705.92	-1.7221	1.4821	0.45186	-93.342	-153.776	1291.762	-1.7694	1.1693	0.47695	-49.849	86.685	32.475	0.19434	-0.003418	0.12354	109.17	110.124	935.0594	-0.97774	0.74024	0.254	-31.189	-393.99	1450.664	-1.8672	1.2305	0.65088
0.69	43.0578	128.068	1724.6917	-1.7464	1.5732	0.26943	0.070999999999998	55.064	51.0207185	-0.096976	-0.022753	-0.037694	-228.325	-120.1	1691.236	-1.5749	1.481	0.40733	-120.869	-285.8212	1315.652	-1.8632	1.2021	0.50078	-54.067	20.9314	45.4896	0.18603	0.018754	0.1293	117.49	85.706	977.621	-1.0867	0.81172	0.28408	-28.399	-350.91	1460.2689	-1.9859	1.2672	0.68096
0.692	58.194	103.738	1773.662	-1.7305	1.5691	0.27685	15.595	37.3575	37.8266	-0.081451	-0.023923	-0.040818	-212.559	-152.636	1701.807	-1.4378	1.4681	0.36221	-159.087	-336.674	1354.531	-1.9328	1.2231	0.50029	-41.523	11.5288	62.3524	0.16758	0.035942	0.13535	125.678	44.608	1029.757	-1.1849	0.89571	0.30713	-56.395	-357.3	1528.62	-2.0729	1.2899	0.70264
0.694	46.204	79.215	1760.6342	-1.7207	1.5617	0.28193	12.947	1.2859272	44.674	-0.061035	-0.030762	-0.04834	-137.11	-123.101	1730.41	-1.3218	1.4575	0.32031	-149.113	-409.8	1401.018	-1.9785	1.2344	0.49561	-34.797	19.963	34.8174	0.15547	0.050003	0.13652	52.514	34.819	1089.576	-1.2734	0.98047	0.33838	-31.495	-346.448	1595.332	-2.1167	1.3212	0.70498
0.696	46.431	11.345	1746.817	-1.6996	1.5511	0.28682	3.952	43.031	50.949	-0.039441	-0.033791	-0.059085	-117.172	-166.895	1767.904	-1.2426	1.4516	0.27656	-119.03	-384.74	1449.421	-1.9786	1.2405	0.48105	-26.876	-29.7616	36.0556	0.14258	0.054688	0.13711	27.861	-50.03	1154.952	-1.3583	1.0609	0.36992	-63.1782	-294.94	1613.539	-2.1214	1.3493	0.67939
0.698	70.464	79.547	1725.0543	-1.6792	1.5396	0.29688	4.858	-6.9974	43.0124	-0.019901	-0.036628	-0.069726	-28.799	-203.734	1840.2172	-1.1893	1.4512	0.24815	-100.209	-312.5	1472.567	-1.9483	1.2407	0.45859	-7.967	46.946	39.9772	0.13721	0.059082	0.13281	-42.0426	-98.76	1214.8834	-1.4436	1.1348	0.40742	-63.017	-257.041	1653.764	-2.0703	1.3691	0.63525
0.7	38.813	84.09	1662.23	-1.6582	1.5273	0.30362	-11.413	11.8653	53.1187	-0.0023319	-0.048748	-0.076774	30.374	-185.82	1845.554	-1.1642	1.459	0.22549	-91.444	-338.749	1483.79	-1.8753	1.2427	0.42383	-19.873	55.799	24.9734	0.13418	0.06455	0.13203	-108.446	-166.291	1261.941	-1.5343	1.1895	0.44999	-57.828	-143.988	1641.7679	-1.9658	1.3838	0.57529
0.702	38.2477	73.808	1659.42	-1.6418	1.5187	0.31192	-18.655	34.494	57.5195	0.017106	-0.053515	-0.086539	29.798	-241.295	1880.6183	-1.1637	1.473	0.22471	-101.55887	-300.329	1523.154	-1.775	1.2473	0.37881	-35.108	42.771	45.912	0.14365	0.065234	0.12784	-73.2345	-269.932	1323.978	-1.6376	1.2359	0.48515	-135.975	-76.44	1626.16	-1.8246	1.3939	0.5086
0.704	60.44	102.261	1660.735	-1.6211	1.5058	0.32285	-30.041	-17.2048	49.2198	0.034668	-0.05957	-0.10156	74.105	-235.765	1928.015	-1.1802	1.4907	0.22559	-117.219	-278.307	1544.222	-1.6538	1.2563	0.33789	-17.114	79.923	50.9199	0.15342	0.071875	0.12236	-89.6465	-303.377	1364.7924	-1.7358	1.2603	0.51563	-124.851	-52.64	1629.032	-1.6714	1.4016	0.43437
0.706	21.8674	34.508	1665.626	-1.6078	1.4922	0.33193	-45.864	39.404	50.6663	0.047744	-0.0625	-0.11053	29.729	-266.525	1956.361	-1.2157	1.5117	0.23545	-107.65596	-265.736	1577.929	-1.5346	1.275	0.29443	-25.051	11.1583	39.135	0.16787	0.072851	0.11982	-98.6031	-344.26	1419.5078	-1.8169	1.2714	0.53184	-84.5477	-31.91	1625.064	-1.5315	1.3963	0.36865
0.708	51.788	65.979	1681.136	-1.5898	1.4766	0.33936	-46.955	41.1	34.0307	0.053984	-0.063667	-0.11881	6.637	-325.359	1984.059	-1.2621	1.5347	0.24092	-139.7399	-189.118	1577.97	-1.4288	1.2896	0.25879	-16.908	9.3296	62.461	0.17822	0.074219	0.12158	-70.471	-330.7	1459.234	-1.8711	1.2801	0.53936	-91.671	-98.511	1661.492	-1.4175	1.3862	0.31592
0.71	33.305	130.9733	1607.3862	-1.577	1.4566	0.34346	-55.172	16.74628	30.8515	0.058291	-0.063679	-0.13014	25.89	-278.3419	1972.025	-1.307	1.561	0.23818	-140.5167	-189.385	1553.016	-1.3479	1.3016	0.22246	-36.852	30.0788	48.8107	0.18809	0.07998	0.11465	-127.474	-276.18	1491.392	-1.8898	1.2801	0.53504	-9.692	-142.125	1721.1423	-1.3413	1.3806	0.27656
0.712	-40.9008	139.986	1559.051	-1.5554	1.4388	0.35469	-81.3663	79.144	42.277	0.062385	-0.061831	-0.1397	6.623	-285.9546	1944.501	-1.3487	1.5878	0.23848	-122.904	-163.69	1557.689	-1.2949	1.3086	0.20088	-22.827	-16.273	44.8975	0.2002	0.082813	0.11143	-112.905	-265.241	1529.667	-1.8687	1.2779	0.52293	18.314	-148.08	1747.442	-1.3061	1.3802	0.25625
0.714	-12.163	235.621	1521.356	-1.5432	1.4197	0.35898	-91.3546	17.7552	37.1151	0.061523	-0.0625	-0.15039	31.68	-244.8978	1944.468	-1.3887	1.6113	0.24121	-91.0789	-114.98	1574.13	-1.2676	1.3271	0.18506	-42.233	35.0724	41.9677	0.20723	0.080078	0.10791	-85.119	-203.362	1527.443	-1.8066	1.2715	0.49951	21.417	-178.202	1797.0592	-1.303	1.3895	0.24687
0.716	-50.9543153	220.662	1456.896	-1.5241	1.3975	0.35869	-65.392	23.6132	41.3642	0.066704	-0.055236	-0.15895	22.642	-177.461	1913.9754	-1.4327	1.6398	0.24004	-19.194	-163.92	1617.9689	-1.2754	1.3438	0.17968	-52.144	25.921	24.3287	0.20284	0.074219	0.10576	-158.507	-180.594	1539.045	-1.7101	1.2771	0.46403	103.463	-139.541	1826.241	-1.334	1.4059	0.25166
0.718	-46.1208	198.345	1454.6262	-1.4961	1.373	0.36279	-90.1115	32.1954	40.958	0.067062	-0.044566	-0.16633	1.996	-172.4342	1893.1545	-1.4727	1.6625	0.23467	1.37	-165.125	1667.814	-1.2991	1.3626	0.18574	-48.788	7.606	52.875	0.19775	0.062988	0.098633	-112.028742	-172.351	1571.3008	-1.5924	1.2852	0.42798	100.337	-175.348	1843.3638	-1.3828	1.4336	0.26855
0.72	-3.4088	222.976	1448.949	-1.4665	1.3483	0.35957	-86.504	-45.253	73.3579	0.061089	-0.034061	-0.17332	63.1126	-84.921	1873.491	-1.509	1.6777	0.22139	18.212	-226.24734	1701.1178	-1.33	1.3801	0.19512	-49.775	74.862	55.0751	0.18652	0.052832	0.099901	-120.548	-138.658	1577.165	-1.4753	1.2931	0.3796	90.462	-258.802	1914.933	-1.4484	1.459	0.28086
0.722	-9.369	172.207	1433.5012	-1.434	1.3258	0.35263	-95.7969	-24.6399	110.761	0.05096	-0.01804	-0.17277	53.6317	-42.883	1850.914	-1.5349	1.6909	0.2166	78.823	-291.995	1733.7716	-1.3766	1.3957	0.21504	-69.555	38.6042	58.254	0.17256	0.036523	0.092578	-131.411	-144.704	1588.023	-1.3594	1.2991	0.33412	77.161	-276.203	1947.816	-1.5109	1.4871	0.29492
0.724	4.18	189.36732	1424.9537	-1.4012	1.3023	0.34365	-108.5841	-55.2003	118.2866	0.038086	0.00048828	-0.17188	52.569	-38.672	1855.345	-1.5625	1.707	0.21387	81.966	-268.288	1755.627	-1.4141	1.4258	0.2373	-83.55	40.7007	57.581	0.15928	0.022461	0.086719	-73.00449	-122.922	1587.672	-1.2632	1.2935	0.29395	5.8144	-318.889	1974.756	-1.5719	1.5215	0.30196
0.726	2.159	194.922	1365.28	-1.3652	1.2774	0.33193	-79.494	-102.5627	170.687	0.019321	0.015792	-0.17179	55.269	6.537	1858.03	-1.5849	1.7143	0.20108	109.685	-285.206	1771.974	-1.4497	1.4557	0.26104	-88.683	37.876	41.9918	0.14814	0.0078124	0.080078	-70.2925	-98.022	1575.901	-1.197	1.2972	0.27058	6.879	-271.547	1994.018	-1.6262	1.5511	0.30918
0.728	12.909	154.026	1308.5914	-1.3262	1.248	0.32422	-70.8066	-98.065	223.145	-0.0049669	0.036861	-0.16564	-30.546	-60.2864	1858.0048	-1.6069	1.7212	0.20245	98.058	-292.342	1824.37	-1.4894	1.5021	0.28711	-103.9058	-32.91542	47.0683	0.13281	-0.0068359	0.071777	-21.586	-122.553	1602.308	-1.16	1.3052	0.25657	27.0185	-176.064	1935.235	-1.6733	1.5767	0.31494
0.73	33.9	177.536	1303.5064	-1.2861	1.2201	0.31767	-53.095	-195.9107	309.243	-0.037924	0.057009	-0.16343	-75.2856	-97.193	1891.476	-1.6225	1.7227	0.1958	54.98	-263.353	1860.991	-1.5319	1.5454	0.31406	-96.1216	-11.012	81.481	0.1247	-0.021191	0.070703	40.483	-133.308	1632.684	-1.1575	1.3206	0.24868	8.139	-157.579	1903.245	-1.7161	1.6062	0.31621
0.732	9.827	167.433	1275.0154	-1.2549	1.1918	0.31065	-19.864	-230.2348	392.446	-0.076651	0.083703	-0.16192	-84.974	-86.137	1876.123	-1.636	1.7253	0.19082	25.1955	-289.726	1865.665	-1.5834	1.5861	0.33945	-94.7867	-54.645	101.345	0.11631	-0.03291	0.065625	44.048	-176.7449	1705.9636	-1.1778	1.3436	0.24968	56.279	-73.097	1854.118	-1.7511	1.6257	0.31856
0.734	7.25	169.651	1275.251	-1.2201	1.1625	0.29932	12.5538	-246.5915	433.205	-0.12305	0.11523	-0.15967	-139.691	-131.593	1866.6981	-1.6406	1.7227	0.18896	14.1655	-217.6377	1862.595	-1.6382	1.6216	0.3623	-94.15	-78.5717	163.236	0.10693	-0.047363	0.062109	114.198	-235.478	1763.123	-1.209	1.3652	0.2583	37.043	-57.27	1824.03	-1.782	1.6418	0.3166
0.736	20.6013	207.915	1280.421	-1.1801	1.1324	0.29053	2.7126	-309.639	505.74372	-0.17232	0.15976	-0.14987	-97.2068	-86.766	1875.2259	-1.6493	1.7175	0.18574	-2.283	-161.107	1839.516	-1.6969	1.6512	0.38272	-111.68	-31.229	252.359	0.098533	-0.059277	0.060449	121.849	-271.291	1780.4	-1.251	1.3949	0.26509	58.874	-37.5247	1874.465	-1.8118	1.6474	0.3125
0.738	-7.0461	168.0572	1233.961	-1.1426	1.1016	0.27979	28.2128	-244.7295	561.633	-0.24258	0.20943	-0.12657	-141.611	-78.346	1843.864	-1.6518	1.7118	0.18309	12.999	-156.366	1844.028	-1.7563	1.6711	0.39853	-147.905	-112.699	341.844	0.091797	-0.065918	0.063965	79.976	-315.18	1810.909	-1.2972	1.421	0.27699	81.145	34.5817	1877.641	-1.8359	1.6465	0.31787
0.74	-0.518999999999998	168.2527	1193.598	-1.0973	1.0646	0.27393	68.103	-214.166	570.919	-0.3359	0.26128	-0.091159	-160.406	-124.468	1869.3164	-1.6515	1.7012	0.17098	-2.48500000000001	-83.95	1832.928	-1.8043	1.6824	0.40596	-136.642	-170.62	446.821	0.083398	-0.068066	0.062305	84.565	-296.732	1819.774	-1.3526	1.4563	0.28407	27.9544	-3.0755	1876.3392	-1.8528	1.6437	0.31953
0.742	12.176	188.0952	1131.937	-1.0516	1.034	0.2667	61.182	-161.266	597.117	-0.45305	0.31502	-0.040763	-94.858	-115.068	1875.08065	-1.6474	1.6931	0.16269	-8.429	-81.31	1814.628	-1.8464	1.6876	0.40488	-158.291	-228.371	484.641	0.073731	-0.066992	0.060938	44.264	-225.314	1791.013	-1.4075	1.4951	0.29341	44.4632	10.3457	1879.3322	-1.8687	1.6403	0.32148
0.744	-4.04000000000001	176.487	1067.9452	-1.0114	1	0.2624	58.308	-59.089	631.1777	-0.58203	0.36621	0.016113	-100.293	-166.833	1854.1225	-1.6387	1.6816	0.1543	25.5491	-69.924	1808.894	-1.8765	1.6841	0.40039	-137.753	-316.6964	517.4609	0.061231	-0.057226	0.057813	47.1205	-175.966	1806.182	-1.4702	1.5317	0.30908	-6.94	23.669	1836.897	-1.8894	1.6337	0.32969
0.746	33.921	245.8	1034.723	-0.96494	0.96865	0.25303	83.889	-61.1727	660.748	-0.70884	0.4172	0.067739	-51.8298	-129.324	1852.034	-1.632	1.6684	0.14854	12.6669	-24.404399	1805.282	-1.8835	1.6749	0.39219	-109.554	-233.3905	586.904	0.045313	-0.036426	0.052637	73.647	-134.443	1802.113	-1.5428	1.5645	0.32113	-25.066	-20.313	1865.819	-1.9053	1.6295	0.33926
0.748	7.996	236.982	979.92	-0.91992	0.93555	0.24561	78.7938	-19.163	739.3	-0.82828	0.47251	0.12136	-6.417	-30.046	1824.7138	-1.6285	1.657	0.14687	-16.4416	-59.837	1822.972	-1.8863	1.668	0.37549	-145.9775	-164.804	628.3648	0.011719	-0.0092773	0.042969	14.3051	-127.961	1800.7868	-1.6125	1.5933	0.33003	2.764	13.1001	1906.2427	-1.9175	1.6157	0.34717
0.75	9.575	212.3835	962.2699	-0.87441	0.90215	0.23906	69.799	29.786	816.516	-0.92992	0.5233	0.18012	-39.588	16.149	1793.21	-1.6231	1.6516	0.14532	-35.403	-26.345	1842.8188	-1.8801	1.6539	0.36299	-155.65126	-90.239	656.879	-0.024609	0.040137	0.041016	31.742	-136.438	1805.415	-1.6708	1.6146	0.34357	-62.47	-12.726	1927.4338	-1.931	1.601	0.34892
0.752	39.0325	235.9516	929.3732	-0.82851	0.86875	0.23896	74.904	-3.996	888.4453	-1.0354	0.56989	0.23013	-12.103	100.657	1778.0035	-1.6215	1.6441	0.14435	-84.9116	-32.101	1837.9679	-1.8682	1.6353	0.34727	-113.389	10.603	672.213	-0.078028	0.090625	0.047461	31.767	-98.1523	1788.282	-1.7098	1.6284	0.34842	-33.004	-46.5599	1977.544	-1.9403	1.5828	0.35498
0.754	-24.405	185.734	872.8994	-0.78477	0.83203	0.23115	66.0518	44.241	949.815	-1.1455	0.62793	0.28271	-38.862	133.366	1744.536	-1.6187	1.6372	0.14551	-63.385	-91.974	1870.7786	-1.8555	1.6133	0.3291	-61.425	-14.284	702.91766	-0.14483	0.15	0.083008	8.403	-63.083	1752.714	-1.7241	1.6353	0.34277	0.9283	-48.1795	1973.893	-1.9469	1.5606	0.35927
0.756	-20.267	201.748	856.7712	-0.74101	0.80742	0.22588	71.4178	27.615	988.286	-1.2538	0.69664	0.33362	-21.47	119.502	1753.761	-1.6167	1.6184	0.14784	-74.227	-81.9342	1906.1639	-1.8364	1.5944	0.30703	3.743	10.031	801.187	-0.22509	0.20762	0.12666	58.7313	0.8651	1750.783	-1.7246	1.6348	0.34	-37.3901	-104.301	1943.438	-1.9479	1.5377	0.35654
0.758	-29.136	221.405	804.405	-0.70654	0.77197	0.22217	44.8996	-3.48999999999999	1051.991	-1.3487	0.77657	0.38925	17.2711	147.521	1762.172	-1.6128	1.6066	0.15668	-53.192	-126.0318	1913.48	-1.8257	1.5732	0.29248	18.473	89.93	899.6382	-0.31445	0.26172	0.16943	-2.061	53.924	1739.016	-1.7194	1.6338	0.34215	25.339	-79.532	1934.047	-1.9453	1.5156	0.35596
0.76	-76.0944	200.21131	767.6564	-0.66103	0.74248	0.21748	1.086	27.31	1140.351	-1.4383	0.853	0.4503	-24.902	89.614	1736.961	-1.6116	1.596	0.16183	-40.104	-135.399	1917.085	-1.8132	1.5481	0.27803	14.178	90.648	990.704	-0.40195	0.31856	0.21055	-16.7579	52.903	1797.266	-1.7129	1.6279	0.3469	76.561	-14.214	1892.5828	-1.9432	1.4932	0.35576
0.762	-35.8818	216.588	728.2072	-0.61768	0.70517	0.21592	-33.6901	-43.89	1199.478	-1.5335	0.93666	0.51387	17.895	57.374	1707.457	-1.6042	1.5804	0.16749	-58.927	-69.303	1894.816	-1.8055	1.525	0.26953	-17.538	141.968	1051.63534	-0.48974	0.37002	0.24414	4.347	34.1089	1844.7827	-1.7222	1.6129	0.35239	40.837	8.20399999999999	1870.7237	-1.943	1.4785	0.35605
0.764	-67.1487	172.8425	678.23999	-0.57275	0.67353	0.2085	-60.662	-115.434	1273.74652	-1.6279	1.0137	0.58643	32.986	47.066	1659.438	-1.5977	1.5664	0.16943	-19.517	-75.191	1871.90994	-1.8086	1.5039	0.2583	-65.761	102.4181	1090.348	-0.56826	0.42862	0.2707	-71.639	-6.1058	1855.908	-1.7305	1.6035	0.354	71.83	83.124	1894.4955	-1.9399	1.4629	0.3502
0.766	-69.2313	160.6164	663.798	-0.52695	0.64073	0.20215	-99.7	-190.436	1343.3301	-1.7313	1.08	0.65862	29.971	4.893	1636.9615	-1.5893	1.5572	0.18124	13.763	-35.5047	1870.45088	-1.8109	1.4852	0.25762	-83.651	29.572	1138.074	-0.64248	0.4999	0.29795	-40.515	-38.182	1881.984	-1.7482	1.5914	0.35733	61.422	101.58666	1874.043	-1.9398	1.45	0.34776
0.768	-38.495	192.7687	622.1476	-0.48242	0.60693	0.19336	-110.933	-297.57	1386.9822	-1.8362	1.1379	0.71226	87.6255	21.593	1657.072	-1.5805	1.5427	0.1907	52.3967	-0.217999999999996	1850.803	-1.8183	1.47	0.24834	-94.611	20.91	1208.359	-0.7085	0.57959	0.32959	-40.0404	-45.3523	1868.1661	-1.7653	1.5687	0.35636	70.688	116.458	1857.6654	-1.9375	1.4395	0.34863
0.77	-76.301	166.32	566.769	-0.44063	0.57178	0.18555	-74.921	-277.7	1434.001	-1.9295	1.1858	0.74541	51.793	26.985	1662.05	-1.5709	1.5306	0.19927	77.318	-18.029	1869.292	-1.828	1.4493	0.25029	-129.518	-88.32	1270.505	-0.77842	0.67539	0.35928	-64.732	-62.563	1848.045	-1.7779	1.5469	0.35329	91.577	188.454	1820.09222	-1.9313	1.4293	0.35068
0.772	-43.38	177.442	532.2267	-0.39091	0.54053	0.17949	-81.297	-273.3	1460.187	-1.9949	1.2201	0.76252	43.094	-0.413000000000011	1667.603	-1.5616	1.5202	0.21269	71.599	39.1838	1893.5023	-1.8307	1.4302	0.246	-161.0985	-164.193	1373.331	-0.86318	0.77608	0.40069	-24.9774	-56.2522	1868.618	-1.7914	1.5212	0.35433	29.3642	172.968	1791.1869	-1.9245	1.4192	0.35117
0.774	-41.799	169.353	487.999	-0.3456	0.5042	0.17051	-93.568	-287.79	1503.953	-2.0229	1.2485	0.75977	68.9364	27.771	1652.994	-1.5527	1.5098	0.22217	66.463	31.93233	1853.6895	-1.8413	1.4067	0.24121	-183.187	-208.039	1421.121	-0.9667	0.88662	0.45889	-40.9266	-35.6067	1879.7784	-1.8027	1.498	0.35205	72.69	179.054	1796.4	-1.9198	1.413	0.35234
0.776	-62.545	129.4	452.3903	-0.30137	0.46777	0.15694	-95.368	-220.922	1557.799	-1.9899	1.2617	0.75226	-3.556	27.051	1589.029	-1.5352	1.489	0.23302	70.7041	50.685	1809.9524	-1.8497	1.3886	0.24756	-119.417	-325.709	1432.27	-1.0753	0.99227	0.53086	28.157	-24.406	1888.483	-1.8151	1.4802	0.34841	45.2837	165.838	1775.218	-1.9093	1.4059	0.3543
0.778	-20.07	164.9312	425.3391	-0.25879	0.43555	0.146	-118.9391	-211.118	1577.914	-1.9184	1.2795	0.72428	-12.721	51.296	1540.183	-1.5142	1.4795	0.23941	68.435	123.835	1750.321	-1.8582	1.3688	0.24834	-41.862	-341.22	1430.004	-1.2046	1.0708	0.59375	69.018	8.649	1882.664	-1.8223	1.4593	0.34862	15.595	100.1	1779.3333	-1.9004	1.3984	0.35889
0.78	-73.6459	174.24	363.2223	-0.21621	0.39853	0.13897	-113.446	-172.7085	1630.701	-1.811	1.2979	0.66685	-48.978	123.363	1483.8841	-1.4807	1.4635	0.24622	70.98	95.523	1736.53	-1.8656	1.3504	0.2542	-0.325000000000003	-362.47	1438.114	-1.3479	1.1422	0.64873	32.924	52.461	1842.3333	-1.8301	1.4445	0.34707	93.835	92.5785	1792.418	-1.8881	1.3967	0.36738
0.782	-58.861	184.622	354.2106	-0.17403	0.36621	0.12061	-140.5532	-118.899	1659.23992	-1.679	1.3192	0.60383	-139.257	132.8	1439.7781	-1.4459	1.4435	0.25209	41.6479	107.663	1767.603	-1.8695	1.3298	0.25742	32.938	-348.56	1538.585	-1.4929	1.1954	0.69912	98.846	60.872	1836.23449	-1.8281	1.4289	0.34825	58.36	59.392	1769.3596	-1.8757	1.388	0.37647
0.784	-49.921	207.436	326.772	-0.13613	0.32754	0.12021	-139.7495	-137.745	1665.6674	-1.543	1.3301	0.55029	-89.5191	180.229	1429.4017	-1.4043	1.4297	0.25293	10.728	64.521	1794.6002	-1.8711	1.3105	0.26025	13.839	-208.1	1635.325	-1.6066	1.2349	0.74091	99.923	93.158	1786.655	-1.8262	1.4141	0.34814	57.214	63.242	1775.505	-1.8609	1.3833	0.3835
0.786	-89.721	157.979	291.922	-0.104	0.29463	0.11181	-138.9919	-97.706	1650.099	-1.4342	1.3291	0.50009	-104.501	201.706	1406.5949	-1.36	1.4138	0.24834	45.7678	-12.3885	1817.586	-1.8725	1.2943	0.26572	10.547	-177.546	1679.562	-1.6923	1.2659	0.77246	65.5414	106.408	1769.8734	-1.8186	1.4053	0.34133	51.559	93.286	1765.995	-1.8506	1.3775	0.38985
0.788	-26.733	143.771	280.5094	-0.071289	0.26172	0.1001	-138.7945	-84.743	1623.261	-1.3555	1.3141	0.4622	-119.055	178.82	1368.24592	-1.3151	1.3916	0.24455	38.194	6.91	1812.236	-1.8636	1.279	0.26933	13.633	-137.64	1702.465	-1.7476	1.2876	0.80078	94.826	115.382	1793.588	-1.8043	1.3944	0.34004	-1.921	63.387	1733.492	-1.8296	1.3735	0.3877
0.79	-38.803	124.8962	243.835	-0.039941	0.23174	0.09375	-99.481	-103.027	1651.477	-1.3078	1.2922	0.43486	-67.5692	199.415	1330.004	-1.2695	1.3734	0.24316	39.4084	-19.446	1763.584	-1.8573	1.2634	0.27051	-13.444	-92.539	1677.312	-1.7657	1.3069	0.8084	77.773	140.462	1781.3686	-1.7847	1.3867	0.33457	54.0718	69.042	1717.791	-1.8043	1.366	0.38994
0.792	-59.748	103.302	228.9764	-0.012598	0.20332	0.08877	-94.472	-73.183	1698.019	-1.2879	1.2715	0.42207	-113.943	168.024	1275.062	-1.2236	1.3523	0.23813	37.255	1.78700000000001	1722.958	-1.8441	1.2496	0.27285	-43.455	-113.085	1642.228	-1.7496	1.3133	0.80987	62.119	135.948	1780.5826	-1.7628	1.377	0.3293	13.345	105.592	1663.465	-1.7754	1.359	0.39034
0.794	3.379	123.2077	216.3086	0.0077148	0.17402	0.083301	-52.178	-115.853	1743.4393	-1.2891	1.252	0.42432	-79.999	126.122	1253.214	-1.1777	1.3301	0.23145	-1.83799999999999	68.383	1679.825	-1.8262	1.2383	0.2793	-65.778	-62.025	1659.309	-1.6945	1.3246	0.79697	68.906	155.506	1758.981	-1.7402	1.3691	0.3291	-53.166	124.419	1631.3143	-1.7387	1.3496	0.39775
0.796	-38.239	112.68188	162.9261	0.028614	0.15235	0.077051	-3.31	-152.1166	1803.654	-1.3104	1.2431	0.42861	-74.425	123.361	1217.925	-1.1331	1.3068	0.22881	9.842	44.516	1668.2186	-1.8049	1.2318	0.28681	-103.8286	-42.5	1669.759	-1.6177	1.3354	0.77871	37.82172	137.888	1731.246	-1.7133	1.359	0.32724	-11.236	196.72	1612.006	-1.71	1.3412	0.39863
0.798	-21.474	95.662	167.548	0.049805	0.1333	0.071289	1.64299999999999	-157.528	1814.733	-1.343	1.2355	0.43682	-102.4909	92.401	1188.2232	-1.0914	1.2822	0.22602	-10.061	99.1348	1670.4207	-1.7835	1.2231	0.28525	-89.8601	-76.61	1707.5025	-1.5293	1.3438	0.75635	91.552	84.847	1726.2969	-1.6922	1.3539	0.33242	-68.706	249.501	1548.396	-1.6738	1.332	0.39648
0.8	-22.546	105.2794	157.93619	0.060645	0.11279	0.070899	37.111	-234.548	1836.518	-1.382	1.234	0.44541	-54.1948	83.596	1183.575	-1.0497	1.2581	0.22879	-34.03	111.6107	1658.3906	-1.7569	1.2153	0.29307	-62.403	-81.167	1743.878	-1.4511	1.3434	0.74327	58.5473	66.091	1702.771	-1.6683	1.3465	0.33125	-49.6946	244.647	1524.8232	-1.6395	1.3234	0.39834
0.802	-65.565	75.129	149.649	0.074316	0.092286	0.067578	17.695	-240.281	1884.474	-1.4164	1.2391	0.44844	-105.789	113.544	1157.0562	-1.0033	1.2318	0.22173	-53.171	95.957	1637.551	-1.7295	1.2092	0.29649	-9.649	-154.379	1758.771	-1.3832	1.3317	0.71299	14.772	11.594	1725.037	-1.6424	1.3424	0.33603	-17.461	265.964	1497.94326	-1.6018	1.311	0.39961
0.804	-23.543	74.7129	163.1472	0.079395	0.079394	0.078906	-23.513	-227.419	1884.658	-1.4365	1.248	0.44287	-106.114	97.308	1139.872	-0.96289	1.207	0.22119	-88.729	164.074	1585.879	-1.6973	1.2051	0.30518	23.828	-181.472	1805.968	-1.3367	1.3093	0.69307	76.397	6.196	1746.863	-1.6128	1.3364	0.33203	-62.7008	232.278	1441.3829	-1.5659	1.2954	0.40195
0.806	-62.59	89.077	135.072	0.084961	0.064746	0.074023	-15.279	-231.072	1896.128	-1.4517	1.2558	0.4416	-55.819	116.9667	1088.1251	-0.92202	1.1792	0.21641	-93.9561	166.638	1522.341	-1.6668	1.1947	0.3083	21.635	-152.303	1871.653	-1.2991	1.2855	0.67597	22.3081	49.13	1699.749	-1.5788	1.331	0.33027	-9.531	213.20282	1428.3375	-1.5284	1.2736	0.39961
0.808	-81.853	72.8582	119.242	0.087402	0.050781	0.074707	-47.918	-163.79	1902.357	-1.4722	1.2638	0.44248	-65.743	128.54	1029.4461	-0.88061	1.1516	0.21484	-98.1522	185.883	1485.341	-1.6372	1.1868	0.31172	12.121	-191.305	1909.722	-1.269	1.2622	0.66406	-8.0033	78.039	1646.9143	-1.5437	1.3308	0.329	-20.5726	213.5679	1386.487	-1.4863	1.251	0.39502
0.81	-37.042	77.216	105.5069	0.086816	0.043066	0.082422	-46.526	-144.976	1907.582	-1.5085	1.2766	0.44717	14.514	118.107	998.734	-0.84078	1.1274	0.21366	-54.7663	208.613	1441.9	-1.606	1.1775	0.31328	-27.889	-199.95	1951.17	-1.2567	1.2402	0.65528	-12.671	136.58	1605.728	-1.5082	1.3188	0.33408	-33.59	179.463	1358.861	-1.4424	1.2248	0.39307
0.812	-75.011	77.306	79.07812	0.078515	0.035059	0.087402	-36.527	-125.052	1898.535	-1.5551	1.2887	0.45029	25.48	162.34	933.1259	-0.8059	1.104	0.21212	-33.668	143.3124	1421.659	-1.5793	1.1629	0.31533	-69.791	-228.52	1973.783	-1.2603	1.2392	0.65098	-81.603	173.7295	1560.08	-1.46	1.3099	0.3291	41.7612	176.945	1360.7978	-1.4004	1.2004	0.39502
0.814	-85.422	70.4142	82.211	0.070313	0.026465	0.094433	-67.1514	-77.115	1884.3197	-1.6069	1.2974	0.44824	10.86	161.6587	884.5683	-0.771	1.0747	0.2085	-11.349	158.2702	1436.247	-1.5425	1.147	0.31738	-65.725	-268.162	2018.703	-1.2779	1.2536	0.64903	-55.1737	169.775	1538.83655	-1.4175	1.2935	0.32764	-9.843	159.557	1302.5557	-1.3578	1.1789	0.38408
0.816	-71.816	81.142	76.06642	0.061133	0.022168	0.10176	-53.817	-99.192	1862.2116	-1.6751	1.2983	0.4585	77.7834	188.209	842.3416	-0.73353	1.0468	0.20821	10.67	147.512	1417.913	-1.5045	1.1352	0.31787	-111.431	-180.0508	2031.631	-1.3056	1.2981	0.65957	-93.003	184.98	1517.14638	-1.376	1.2854	0.325	-7.743	145.285	1303.907	-1.3158	1.1535	0.379
0.818	-99.6051	50.921	89.8074	0.04834	0.015137	0.11475	-16.398	-55.3296	1864.415	-1.7386	1.3009	0.46601	45.793	243.938	786.162	-0.70258	1.0158	0.20284	10.898	111.027	1398.2898	-1.4567	1.1234	0.31494	-146.5732	-113.999	1985.826	-1.3481	1.3462	0.67773	-93.984	167.588	1494.28	-1.3293	1.2648	0.31944	9.382	167.3422	1279.511	-1.271	1.1235	0.37598
0.82	-45.671	41.174	89.9975	0.033691	0.0125	0.12334	-21.593	-6.5049	1838.514	-1.803	1.3114	0.47734	46.374	228.7028	756.31788	-0.66742	0.98616	0.19776	-7.01	153.988	1349.5197	-1.4086	1.109	0.30986	-157.64582	-68.598	1951.157	-1.3993	1.3968	0.7169	-27.4223	152.986	1466.8945	-1.2805	1.2488	0.31475	-33.758	163.9492	1228.673	-1.2274	1.0898	0.37403
0.822	-64.956	40.3308	53.034	0.018848	0.010742	0.13535	3.223	-24.8512	1837.9142	-1.8607	1.3136	0.48242	61.445	230.416	721.6877	-0.62971	0.95236	0.19072	-1.481	115.433	1313.712	-1.3599	1.0952	0.3084	-190.943	0.635000000000005	1905.099	-1.4679	1.4454	0.76718	-57.741	192.025	1392.86	-1.2387	1.2304	0.3084	29.028	167.1202	1205.571	-1.1858	1.0611	0.37188
0.824	-80.262	22.152	41.651	0.0020508	0.009961	0.14512	-25.473	20.5403	1851.4332	-1.9043	1.3164	0.479	-15.524	221.665	674.834	-0.59131	0.92041	0.1792	-8.762	126.44	1297.985	-1.3101	1.0786	0.30518	-165.49327	-46.296	1899.968	-1.5519	1.4926	0.8168	-46.9054	175.836	1352.857	-1.1973	1.2051	0.29736	8.319	196.6373	1123.7874	-1.1472	1.0333	0.36601
0.826	-33.831	32.636508	38.8975	-0.01748	0.0060547	0.15391	-65.23627	-1.498	1851.6453	-1.9401	1.3178	0.4752	-6.04	179.941	657.2293	-0.54774	0.88252	0.17148	10.227	158.9794	1265.527	-1.2609	1.064	0.29492	-109.022	-35.526	1927.807	-1.646	1.5384	0.85196	6.833	191.562	1332.39	-1.1557	1.1838	0.29892	15.886	195.372	1070.9327	-1.1044	1.0042	0.36494
0.828	-108.0671	24.9611	33.4922	-0.03418	0.0068359	0.15674	-79.9743	-29.2871	1863.767	-1.9577	1.3141	0.46426	-20.058	189.254	615.5247	-0.50975	0.85234	0.16143	40.3	120.6737	1241.668	-1.2143	1.0454	0.28984	-103.141	-10.84984	1922.697	-1.7456	1.5825	0.89063	-18.541	201.735	1289.302	-1.1196	1.1631	0.29297	59.6037	227.7981	1026.097	-1.0566	0.97461	0.35986
0.83	-72.832	14.9522	70.526	-0.04668	0.003125	0.16797	-116.541	-1.272	1853.8782	-1.9624	1.3056	0.45371	-43.679	159.169	588.7149	-0.46483	0.82147	0.14971	24.5307	188.084	1199.3481	-1.1643	1.0282	0.2828	-56.439	-16.1997	1934.9265	-1.8445	1.629	0.92891	10.853	156.584	1287.3528	-1.0867	1.1365	0.28594	-10.176	274.0985	964.163	-1.012	0.94814	0.35528
0.832	-56.451	14.5835	73.8229	-0.053516	0.00068359	0.17568	-83.48839	-39.525	1859.3356	-1.9605	1.2911	0.43887	-40.137	123.803	568.7437	-0.41904	0.79131	0.13652	21.712	217.516	1141.295	-1.1183	1.0051	0.27568	-95.905	63.1013	1929.462	-1.9313	1.668	0.96025	7.429	178.975	1285.6286	-1.0511	1.1117	0.27901	33.801	278.2119	929.846064	-0.96631	0.91806	0.34375
0.834	-87.0637	5.733	65.1548	-0.062109	0.00068359	0.17568	-52.952	-37.5707	1880.4193	-1.9512	1.2773	0.4248	-95.141	143.858	525.677	-0.37891	0.75586	0.12256	42.138	214.317	1095.08	-1.0684	0.98242	0.26807	-147.3183	54.498	1926.109	-1.9989	1.6973	0.98877	2.612	151.2213	1263.292	-1.0195	1.082	0.27637	45.262	300.616	886.13	-0.91826	0.88486	0.33477
0.836	-22.237	8.2131	68.4994	-0.060547	-0.00078124	0.17822	-58.9746	-25.40428	1875.5806	-1.9445	1.2672	0.4043	-87.481	114.239	519.4793	-0.32891	0.72109	0.10606	27.994	253.845	1042.776	-1.0209	0.95833	0.25861	-120.526	20.992	1970.57443	-2.0429	1.7138	1.0043	43.6674	128.0474	1243.441	-0.98389	1.0521	0.27051	-16.038	280.145	821.9346	-0.86758	0.84678	0.32207
0.838	-54.953	32.071	24.028	-0.057129	-0.0014648	0.17578	-44.271	-67.204	1891.158	-1.93	1.2605	0.38349	-68.081	129.284	493.0086	-0.28486	0.68877	0.093165	21.686	206.8863	999.6534	-0.97046	0.93563	0.2474	-128.735	31.4868	1984.07313	-2.0684	1.7324	1.022	-14.533	160.8047	1174.04611	-0.95547	1.0219	0.26494	11.101	235.703	793.2547	-0.81396	0.80957	0.31006
0.84	-52.134	26.0864	20.2193	-0.046484	-0.0070312	0.17334	-32.1879	-19.332	1880.17814	-1.9176	1.2496	0.36475	-112.8853	160.021	460.26	-0.24541	0.65908	0.076759	27.986	211.454	969.424	-0.92557	0.91102	0.23725	-111.7	-51.608	2014.554	-2.0787	1.7432	1.0343	27.209	155.109	1122.6553	-0.92579	0.99218	0.25439	-36.419	241.039	750.965	-0.75498	0.7751	0.29834
0.842	4.504	26.7384	15.601	-0.034668	-0.009668	0.16709	5.005	-6.317	1846.2381	-1.9042	1.2399	0.34736	-102.9365	119.199	430.881	-0.20322	0.62881	0.066114	18.071	226.219	922.8688	-0.87642	0.88398	0.22844	-114.596	-47.481	2041.408	-2.0729	1.7501	1.0426	52.359	192.382	1080.6211	-0.88935	0.96221	0.25137	-80.84995	222.2567	713.1	-0.69785	0.74004	0.2794
0.844	-35.856	15.7019	10.57	-0.014746	-0.014355	0.16162	36.458	29.343	1836.3629	-1.8945	1.2305	0.33057	-108.9303	138.7948	374.3366	-0.16309	0.60156	0.056152	-28.374	187.32857	900.7008	-0.83203	0.85352	0.22119	-144.21	-28.162	2022.8481	-2.0557	1.7485	1.0473	11.234	247.502	1017.766	-0.8584	0.92627	0.24072	-31.538	217.734	703.7916	-0.63925	0.70254	0.26143
0.846	-14.072	-6.961	40.8052	0.0092775	-0.017969	0.1544	32.599	100.4455	1814.607	-1.8915	1.2237	0.3251	-156.281	133.987	343.9817	-0.12969	0.57363	0.046679	-47.513	230.791	877.983	-0.78009	0.82511	0.21373	-107.8288	-61.9343	1994.8472	-2.0249	1.743	1.0488	56.592	236.936	992.9961	-0.82598	0.89258	0.23154	-94.9725	225.1843	647.747	-0.58272	0.66611	0.24649
0.848	0.338000000000001	9.6194	39.4388	0.032227	-0.022949	0.14746	53.44	85.4236	1806.6433	-1.9022	1.2204	0.31543	-125.36072	127.0144	332.4742	-0.1002	0.54375	0.042772	-45.736	221.917	837.078	-0.73705	0.78988	0.20777	-86.684	-5.188	1959.5302	-1.9878	1.7329	1.043	32.336	267.505	960.5492	-0.79053	0.85908	0.22422	-88.957	171.437	625.0232	-0.52393	0.63135	0.23145
0.85	-54.815	26.0532	50.667	0.060449	-0.032227	0.13848	38.018	107.95	1790.75	-1.9038	1.2212	0.31895	-153.531	173.917	306.0201	-0.072851	0.5168	0.025195	-65.778	170.4844	809.8729	-0.6938	0.75848	0.19945	-59.454	1.737	1930.1153	-1.9499	1.7216	1.0368	22.24	241.6256	913.5627	-0.75459	0.82705	0.21797	-64.854	185.8967	587.51334	-0.46543	0.59971	0.21016
0.852	-31.932	42.799	49.953	0.085938	-0.042383	0.13096	4.418	131.225	1770.6904	-1.9049	1.2256	0.32392	-126.3157	156.551	284.2948	-0.045801	0.4874	0.026953	-72.272	205.3164	770.973	-0.64891	0.72526	0.19368	-14.53	31.499	1926.0579	-1.9094	1.7032	1.0347	34.517	196.82	872.6898	-0.71553	0.79502	0.21211	-97.0241	184.257	535.9052	-0.40918	0.56719	0.19638
0.854	-44.04	56.3	27.0637	0.11563	-0.050977	0.12119	28.2084	93.012	1786.665	-1.9063	1.2363	0.3335	-97.5219	158.137	254.1003	-0.020996	0.46094	0.022461	-87.6159	137.599	730.1898	-0.60791	0.69189	0.18164	-10.018	148.6122	1925.3924	-1.8828	1.6828	1.0347	-43.81	235.317	811.609	-0.67725	0.76025	0.20654	-44.505	163.223	503.162	-0.3541	0.53399	0.1835
0.856	-43.411	25.2969	29.9014	0.1458	-0.058105	0.1045	32.9022	151.255	1757.999	-1.908	1.2478	0.33545	-141.488	165.757	208.991	0.0062497	0.42627	0.02041	-83.7927	151.444	698.839	-0.56219	0.65662	0.1772	-13.662	152.455	1931.7532	-1.866	1.6613	1.0388	-37.88	210.839	777.6723	-0.63994	0.72217	0.1957	-68.602	186.657	460.1227	-0.30313	0.50381	0.16797
0.858	-1.965	12.0655	14.268	0.17334	-0.066895	0.091797	5.296	142.699	1717.183	-1.9129	1.2586	0.34736	-57.464	100.008	196.8398	0.029589	0.39873	0.013086	-90.967	171.6207	646.933	-0.51699	0.62202	0.16848	-23.024	189.885	1933.208	-1.8589	1.645	1.0391	-31.262	236.521	737.502	-0.59951	0.68408	0.19111	-98.8452	165.121	418.5979	-0.24951	0.47363	0.15283
0.86	-80.7781	6.1469	16.605	0.19824	-0.069727	0.077442	35.659	136.481	1714.218	-1.9028	1.2672	0.35205	-68.098	113.489	172.675	0.045605	0.37217	0.014649	-78.819	122.973	586.9705	-0.47265	0.58684	0.16176	-48.238	197.581	1881.1376	-1.8615	1.6135	1.0421	-82.1463	267.988	699.4185	-0.55537	0.64541	0.18525	-60.275	153.263	397.3594	-0.20351	0.44707	0.13828
0.862	-50.292	-0.093	47.437	0.22197	-0.07705	0.063086	30.3109	153.089	1694.702	-1.8882	1.2767	0.35977	-67.435	89	165.3402	0.063281	0.3416	0.016406	-72.285	170.227	557.5929	-0.43116	0.554	0.15689	-58.888	148.707	1865.165	-1.8625	1.5832	1.0462	-63.156	211.202	686.401	-0.51484	0.60655	0.17275	-99.799	197.2644	352.319	-0.15879	0.42148	0.12979
0.864	-35.465	23.3326	24.16294	0.24189	-0.080566	0.050976	39.1095	82.333	1709.495	-1.8667	1.2759	0.36426	2.503	40.476	176.006	0.073242	0.31396	0.013672	-63.3	162.801	523.945	-0.39111	0.51807	0.15234	-98.383	203.308	1831.863	-1.8621	1.5562	1.0435	-93.655	233.528	670.189	-0.46826	0.56494	0.16064	-72.598	182.0056	325.6512	-0.12012	0.39219	0.11924
0.866	-79.427	30.0619	23.77092	0.25547	-0.083301	0.036816	37.85785	88.693	1715.757	-1.8377	1.2834	0.36602	-19.741	71.026	169.94204	0.084571	0.28945	0.014356	-54.694	166.075	498.158	-0.34679	0.48542	0.14828	-118.164	184.034	1820.316	-1.8519	1.5259	1.0391	-127.296	183.503	614.9889	-0.42676	0.52637	0.15342	-68.097	215.737	297.4593	-0.083496	0.37051	0.10869
0.868	-32.089	35.9316	33.3979	0.26709	-0.084473	0.030273	4.431	89.195	1701.726	-1.8062	1.2816	0.36582	4.73	28.366	181.656	0.093457	0.26543	0.0098633	-65.1915	225.019	476.738	-0.30443	0.44873	0.14129	-95.639	158.269	1833.6696	-1.8438	1.5059	1.0337	-105.865	146.545	585.0005	-0.37969	0.48906	0.13994	-88.0526	227.169	244.476	-0.050293	0.33545	0.098145
0.87	-69.681	45.9632	16.887	0.2749	-0.091211	0.022461	10.545	67.68	1674.228	-1.7688	1.2777	0.36895	27.931	32.813	166.375	0.10127	0.24238	0.013379	-52.297	177.925	437.1096	-0.26316	0.4127	0.13245	-106.3172	158.003	1811.3518	-1.8309	1.4882	1.024	-125.706	177.269	539.323	-0.33633	0.45391	0.1251	-32.377	169.607	226.3981	-0.024414	0.30898	0.094043
0.872	-60.196	40.09	47.5528	0.28281	-0.091895	0.012793	-6.203	140.244	1611.5102	-1.7288	1.2739	0.3666	-3.32	77.717	147.0903	0.10879	0.21924	0.0091798	-40.824	186.034	400.6002	-0.22067	0.37638	0.12232	-91.9819	55.252	1817.941	-1.8102	1.4691	1.0147	-101.1456	118.671	493.7662	-0.29257	0.41914	0.11338	-73.068	168.555	188.387	0.00087888	0.28281	0.08418
0.874	-40.619	36.4512	60.6151	0.28438	-0.093066	0.0069337	-44.954	142.2473	1551.754	-1.689	1.2622	0.36768	18.202	28.73	138.983	0.1084	0.20361	0.015625	-35.37	187.668	337.303	-0.18115	0.34619	0.11963	-65.565	58.44	1799.328	-1.782	1.4488	1.0046	-74.722	142.55	468.2091	-0.24316	0.38232	0.10693	-65.535	111.433	193.5646	0.025098	0.2582	0.074023
0.876	-116.1462	34.5636	35.9793	0.28408	-0.09375	0.0058594	-49.263	162.936	1540.6856	-1.6442	1.2512	0.3707	-9.726	58.293	102.9206	0.1166	0.18496	0.016699	-37.371	128.163	309.2247	-0.1465	0.30979	0.10299	-86.721	73.551	1766.026	-1.7537	1.4268	0.99112	-96.53995	174.713	419.9632	-0.2045	0.35049	0.095215	11.15	74.323	195.068	0.046191	0.22734	0.064746
0.878	-68.155	11.2715	41.847	0.27979	-0.088867	0.0063477	-62.681571	208.301	1520.6655	-1.6043	1.2336	0.36718	-59.361	21.0941	91.0956	0.1167	0.16787	0.015137	-39.494	155.093	313.91	-0.11058	0.28054	0.089263	-70.401	76.583	1748.03	-1.7168	1.4082	0.97314	-55.662	133.3892	400.6	-0.16074	0.3207	0.093652	-47.049	107.807	174.5099	0.063477	0.19922	0.060059
0.88	-48.081	29.362	27.744	0.26758	-0.082812	0.0032226	-70.8824	169.346	1507.31	-1.5566	1.2227	0.36328	-16.463	-11.1624	74.8	0.1167	0.15264	0.016699	-23.158	129.89042	299.8484	-0.073389	0.25329	0.082048	-79.984	171.529	1706.254	-1.6715	1.3895	0.94521	-87.649	186.817	384.265	-0.12402	0.28984	0.085059	-18.134	62.008	170.752	0.08125	0.17285	0.049219
0.882	-92.1354	43.3735	19.9746	0.26221	-0.071679	0.0083008	-65.1001	192.748	1493.189	-1.5181	1.205	0.36162	-56.834	51.8909	55.843	0.11308	0.1415	0.021289	-12.66	90.279	292.7037	-0.039546	0.22399	0.067637	-98.17	182.453	1663.014	-1.6249	1.3654	0.9168	-90.322	165.466	348.35	-0.09365	0.26651	0.078906	10.753	80.385	163.219	0.092383	0.15157	0.041309
0.884	-43.5	43.0074	50.033	0.25088	-0.066992	0.013769	-56.12064	207.877	1441.593764	-1.4702	1.1821	0.35938	-43.125	31.392	55.7734	0.11035	0.12549	0.026855	30.445	123.501	256.712	-0.0058594	0.19482	0.064453	-84.914	198.1036	1637.801	-1.5784	1.343	0.88906	-56.627	127.494	310.61192	-0.066895	0.24219	0.079102	-49.493	87.153	138.1037	0.10019	0.12929	0.038184
0.886	-56.059	53.28	40.729	0.23731	-0.056934	0.017871	-41.917	175.9196	1400.28679	-1.4277	1.1693	0.35352	-49.44	56.5424	42.934	0.10615	0.11494	0.032324	14.625	79.289	217.4008	0.01938	0.17148	0.056165	-112.235	258.983	1595.82567	-1.5267	1.3236	0.85273	-56.013	144.5567	270.769	-0.042871	0.21885	0.080762	-8.468	46.586	121.357	0.10234	0.10889	0.031152
0.888	-72.369	22.378	63.254	0.21924	-0.044922	0.021484	-44.025	226.5077	1334.828	-1.3819	1.1447	0.34795	-96.86	91.0365	36.11	0.10303	0.10606	0.0375	20.302	96.535	202.6149	0.039829	0.14422	0.048775	-110.9474	236.804	1566.464	-1.4785	1.2969	0.81885	-39.194	64.89	255.7356	-0.024609	0.19287	0.074707	-46.852	70.295	101.0922	0.10205	0.09375	0.026855
0.89	-7.954	14.0547	58.737	0.2041	-0.029395	0.027148	-40.074	198.828	1296.0595	-1.3381	1.1243	0.33857	-53.645	27.867	34.97074	0.1042	0.10019	0.04375	6.811	106.1088	179.8112	0.052961	0.11801	0.043564	-101.9325	269.792	1521.18909	-1.4324	1.2676	0.78409	-21.305	85.8586	236.4568	-0.0050782	0.17764	0.072363	-93.881	32.611	98.264	0.099416	0.080371	0.033985
0.892	-44.039	25.995	39.6143	0.19043	-0.013477	0.036524	-27.496	194.982	1289.904	-1.2958	1.1042	0.3336	-109.3531	47.524	25.806	0.10068	0.093164	0.051074	-31.934	56.905	178.623	0.064466	0.092343	0.0393	-98.4747	274.009	1457.045	-1.3847	1.2344	0.74541	-24.798	126.051	196.429	0.0077147	0.1624	0.069824	-53.62	11.07538	104.289	0.092089	0.0625	0.032422
0.894	-23.755	19.131	47.2041	0.16817	-0.0013672	0.045117	-17.59	216.6416	1257.57716	-1.2534	1.0786	0.3252	-137.2922	35.4662	39.4114	0.094238	0.085449	0.05127	-18.253	94.987	182.249	0.072266	0.069336	0.02832	-76.234	210.39808	1415.484	-1.3407	1.2027	0.71143	18.63	80.1844	179.755	0.019043	0.14746	0.069336	-84.837	61.0868	70.125	0.083496	0.046094	0.03711
0.896	-7.202	46.191	30.505	0.14883	0.014453	0.056055	-16.548	161.956	1256.583	-1.2097	1.0549	0.31992	-108.2184	-8.3612	40.1131	0.09541	0.080469	0.060938	-44.531	58.8829	164.5086	0.080694	0.041326	0.030889	-37.956	221.699	1352.157	-1.2965	1.1764	0.67744	-8.35700000000001	122.347	161.683	0.024219	0.13613	0.067871	-48.902	31.657	70.0047	0.075879	0.037891	0.046875
0.898	-62.876	33.451785	43.3549	0.12354	0.03418	0.063477	-28.818	191.8504	1239.216	-1.1677	1.0261	0.31308	-159.524	33.3646	15.842	0.095313	0.077442	0.06543	-65.358	53.3011	162.5962	0.082217	0.018189	0.02891	-11.272	177.564	1323.513	-1.252	1.1426	0.64404	-22.29	75.9628	154.283267	0.031836	0.12891	0.067968	-51.463	79.132	47.961	0.06543	0.028809	0.056152
0.9	-24.183	23.9609	61.103	0.10791	0.044336	0.074023	-26.577	190.693	1193.563	-1.1251	1.0062	0.3041	-144.497	0.437999999999999	42.965	0.097265	0.078222	0.069336	-53.121	122.497	140.361	0.08302	0.00062824	0.034014	-15.484	184.681	1316.5357	-1.2036	1.1072	0.60996	18.042	25.992	149.35705	0.033008	0.11953	0.069532	-87.4502	96.2119	32.898	0.053418	0.019922	0.056055
0.902	-45.34	15.4584	60.3478	0.091992	0.060156	0.080371	-23.199	148.766	1161.079	-1.0804	0.97783	0.29385	-126.9392	-0.888999999999999	46.2864	0.098437	0.07041	0.079785	-86.123	110.359	80.799	0.081645	-0.014274	0.032918	-2.026	239.7967	1320.4904	-1.1616	1.0751	0.57871	-13.569	74.414	131.832	0.034961	0.11484	0.074219	-80.121	44.1144	29.4138	0.045019	0.015918	0.06123
0.904	-47.567	7.7018	61.3627	0.088086	0.073437	0.078027	-27.104	203.5523	1101.0436	-1.0371	0.9541	0.28955	-137.527	28.244	45.2171	0.095703	0.067383	0.083984	-87.622	132.368	61.7835	0.081543	-0.025879	0.036133	-4.24	201.51	1295.646	-1.1272	1.047	0.55293	-18.588	12.281	126.6711	0.031738	0.10889	0.079102	-108.714	69.926	11.688	0.030957	0.014355	0.063184
0.906	-10.41	27.89	57.1053	0.08916	0.083203	0.084765	-23.559	179.16	1060.6236	-1.0002	0.92754	0.27959	-78.76	-5.699	31.2239	0.10059	0.064746	0.086524	-78.4847	112.46	44.619	0.080666	-0.040421	0.041696	-9.993	208.600022	1260.507	-1.088	1.0167	0.52568	-42.971	30.077628	126.10782	0.025586	0.1081	0.086035	-85.674	24.157	28.92107	0.025293	0.012207	0.074609
0.908	-51.352	43.5977	21.586	0.094727	0.097656	0.088379	-4.13699999999999	210.0275	1037.6856	-0.95547	0.90352	0.27334	-92.1554	41.823	6.734	0.10244	0.061719	0.089746	-82.633	31.892	45.8217	0.077641	-0.050967	0.045309	-28.826	178.0213	1200.331	-1.0483	0.98877	0.5	-70.225	76.985	93.03477	0.011523	0.10323	0.088867	-55.832	-14.8083	34.4392	0.015625	0.0083008	0.080078
0.91	-16.047	22.26	35.2451	0.1085	0.1084	0.088769	-1.235	249.065	988.9749	-0.91875	0.88164	0.26592	-83.3005	49.3383	14.9477	0.10596	0.058594	0.099118	-69.068	44.657	84.0074	0.077633	-0.060734	0.050775	-32.471	138.139	1144.906	-1.0095	0.96084	0.47588	-55.365	39.132	66.429	0.0017578	0.10127	0.094336	-104.5238	27.8112	47.4907	0.010742	0.012793	0.090332
0.912	-31.638	16.4202	31.975	0.12334	0.1127	0.088477	-11.104	208.0831	937.582144	-0.87148	0.85469	0.25898	-2.666	12.02927	35.8337	0.10928	0.05498	0.1	-75.3342	24.905	75.9649	0.077442	-0.069333	0.054196	-25.251	209.0305	1095.7305	-0.96601	0.93554	0.44844	-83.586	96.943	58.5932	-0.011621	0.1001	0.09922	-77.4264	-14.5599	57.4265	0.0054688	0.017285	0.099023
0.914	-70.811	3.133	43.2803	0.13584	0.11738	0.085352	-9.46	235.2405	901.4085	-0.83545	0.82666	0.25244	-25.6	58.2973	32.846	0.11377	0.050781	0.10596	-96.1878	18.154	81.851	0.077637	-0.081055	0.053711	-40.273	212.2949	1021.91	-0.93008	0.90898	0.42852	-107.6544	73.646	62.23971	-0.025879	0.10107	0.099121	-81.2116	18.1705	43.4641	0.0027344	0.02002	0.1084
0.916	-11.889	-9.278	66.405	0.15293	0.12109	0.08916	-33.828	218.577	861.458	-0.79112	0.80049	0.23945	-10.719	36.834	44.1648	0.1164	0.044727	0.10605	-71.215	73.2115	81.7726	0.075	-0.081155	0.063674	-16.536	237.678	965.218	-0.89424	0.88447	0.41035	-90.758	31.4582	56.8421	-0.039551	0.10264	0.10391	-104.8321	34.171	58.1455	0.0045899	0.018555	0.11397
0.918	-70.831	22.7373	43.2702	0.16064	0.12451	0.087402	-54.054	183.803	831.471	-0.74571	0.77207	0.22529	-7.428	51.925	56.3967	0.11552	0.041211	0.10967	-117.92691	41.0108	48.389112	0.073632	-0.085546	0.06592	-35.841	282.609	922.469	-0.85693	0.86182	0.39258	-95.1662	75.1915	41.825	-0.054297	0.10108	0.11338	-35.693	-3.5485	45.524	0.0092773	0.02002	0.12695
0.92	-69.761	34.2226	62.809	0.15977	0.1207	0.083203	-51.151	235.4027	782.767	-0.69883	0.74394	0.21279	-33.263	102.962	61.422	0.11826	0.038867	0.11436	-79.646	32.6694	46.3825	0.070898	-0.089847	0.07295	-29.981	238.653	888.3946	-0.81885	0.83467	0.37695	-87.7272	11.985	27.388	-0.066407	0.099903	0.11377	-52.674	33.835	31.436	0.018457	0.014453	0.12676
0.922	-38.853	33.086	41.254	0.15732	0.11719	0.081347	-50.323	205.134	739.9715	-0.65273	0.71582	0.19873	11.832	73.245	57.607	0.11953	0.037402	0.11484	-60.746	40.978	33.4768	0.073926	-0.09375	0.082716	-6.53	276.133	850.2581	-0.78702	0.80889	0.36133	-96.999	12.392	41.935	-0.076074	0.099803	0.12168	-44.455	14.8353	16.799	0.029785	0.011816	0.12891
0.924	-100.9022	29.221	30.727	0.15498	0.11328	0.078613	-76.861	219.527	709.5457	-0.59766	0.69238	0.19287	1.432	87.571	27.7209	0.12158	0.033203	0.11279	-64.1	-10.09064	48.0888	0.071777	-0.090332	0.086426	-26.63	258.8095	788.608	-0.75459	0.77803	0.34063	-106.447	51.0551	32.977	-0.083496	0.094727	0.12451	3.56	-2.2987	33.3736	0.043457	0.0083008	0.12773
0.926	-63.815	-25.9602	65.7323	0.14551	0.10918	0.081055	-93.0295	253.356	675.252	-0.54599	0.66435	0.18066	-2.169	49.448	20.3805	0.12324	0.032324	0.11973	-25.251	22.44944	62.6466	0.073243	-0.088868	0.093163	-50.565	214.40264	745.8356	-0.72109	0.74785	0.32119	-93.317	18.5949	18.3281	-0.084473	0.089063	0.12881	-49.158	53.4502	27.151	0.062109	0.00048826	0.12168
0.928	-60.379	-61.6303	98.234	0.12842	0.10596	0.089355	-99.726	197.519	630.627	-0.50146	0.63408	0.16426	22.102	-20.0225	30.1689	0.12636	0.029199	0.12109	-44.098	8.707	41.492	0.075976	-0.089453	0.098631	-64.5183	251.721	703.08	-0.68506	0.71533	0.2998	-118.0597	88.284	27.9343	-0.080762	0.083398	0.12832	-7.885	17.654	40.0741	0.081543	-0.0078125	0.11279
0.93	-120.4203	-97.61	165.901	0.11621	0.10107	0.084961	-100.535	209.941	618.4004	-0.45303	0.61025	0.15449	-0.552999999999997	11.9694	54.22382	0.12793	0.030371	0.12071	-23.174	6.738	44.5413	0.080664	-0.084766	0.10567	-88.5452	213.849	665.595	-0.64521	0.68819	0.27812	-99.246	73.731	33.0788	-0.068262	0.075977	0.1291	2.492	39.413	38.9097	0.10205	-0.01709	0.1124
0.932	-65.496	-142.3709	269.197	0.10303	0.1043	0.093652	-104.9152	176.5118	595.509	-0.40645	0.58222	0.14307	8.517	-3.798	59.404	0.13086	0.028125	0.12061	17.385	55.672	42.7038	0.084668	-0.082227	0.10801	-73.987	212.767	632.861	-0.60518	0.65673	0.25459	-80.536	19.218	50.9842	-0.056836	0.072071	0.12529	-53.5	77.916	36.449	0.12793	-0.025098	0.10762
0.934	-110.386	-164.53	361.782	0.090527	0.10664	0.10107	-110.784	130.754	564.8089	-0.36475	0.55615	0.13623	1.335	3.758	69.158	0.13818	0.029297	0.12158	-12.085	26.39	31.4283	0.092773	-0.081055	0.10889	-69.454	229.874	598.323	-0.56182	0.62275	0.23701	-75.681	54.0363	52.146	-0.039063	0.066406	0.12305	0.859000000000009	61.513	47.908	0.15254	-0.034473	0.099024
0.936	-150.788	-246.252	459.881	0.077149	0.1125	0.10703	-97.0176	163.532	521.192	-0.31856	0.52949	0.12578	-26.209	50.386	73.1155	0.14092	0.030469	0.11875	23.945	47.616	45.1969	0.10039	-0.080859	0.11016	-91.9732	159.0645	587.652	-0.52207	0.59121	0.21816	-34.668	-8.802	41.6123	-0.017285	0.057129	0.11943	-18.422	99.573	43.1155	0.17265	-0.048632	0.094043
0.938	-118.351	-325.913	517.972	0.060547	0.12549	0.10986	-89.225	120.629	452.134	-0.28242	0.50029	0.12246	-23.136	13.41	63.99	0.14209	0.033007	0.11787	19.001	68.635	24.72	0.11172	-0.077735	0.10859	-72.2466	176.617	561.368	-0.47705	0.55762	0.1958	-34.932	9.535	49.5646	0.0032226	0.048047	0.11377	-32.85	65.214	30.974	0.19678	-0.059082	0.083984
0.94	-164.653	-356.399	527.623	0.038867	0.15264	0.1083	-94.923	145.7863	434.4704	-0.24922	0.47764	0.11621	-67.328	46.485	49.4431	0.14482	0.031055	0.11826	-30.113	17.8574	37.7779	0.12188	-0.080469	0.1125	-59.0168	159.0474	514.061	-0.44717	0.52148	0.16885	-17.373	55.3012	35.604	0.028613	0.039453	0.10908	-1.228	-1.131	25.6717	0.21982	-0.078711	0.080567
0.942	-137.236	-329.17	602.692	0.0080076	0.19746	0.1085	-93.435	180.063	396.166	-0.21846	0.4458	0.10918	-110.6935	54.95823	51.9951	0.14619	0.028808	0.11582	-3.628	36.076	50.31889	0.13144	-0.074512	0.11494	-48.44	119.465	462.344	-0.41114	0.48672	0.14716	6.72	12.00191	37.993	0.056446	0.029394	0.10244	-47.962	19.4042	29.841	0.24512	-0.089356	0.07627
0.944	-128.869	-230.474	646.744	-0.043945	0.25996	0.1167	-87.593	140.525	372.2543	-0.19238	0.41846	0.10889	-88.931	16.5819	54.664	0.1416	0.027344	0.11816	-11.83	-2.1278	36.343	0.13379	-0.075195	0.11426	-18.744	156.27	403.9645	-0.37324	0.44922	0.12685	17.185	67.375	46.645	0.076172	0.018555	0.095703	-35.337	-29.451	50.1612	0.26699	-0.10498	0.065723
0.946	-190.805	-146.45	649.799	-0.11084	0.33164	0.1458	-78.869	176.964	360.5229	-0.15996	0.39326	0.1043	-128.464	43.295	47.9617	0.14024	0.023633	0.11856	-33.842	-23.5393	46.3342	0.14385	-0.070508	0.11572	-15.694	110.912	369.3005	-0.34317	0.41807	0.10176	18.511	49.49	37.215	0.1045	0.0089845	0.089063	-39.135	-6.4114	57.8914	0.29102	-0.12148	0.055957
0.948	-132.802	-92.518	656.7033	-0.20313	0.39941	0.19434	-88.595	146.61	335.2591	-0.12978	0.3622	0.10068	-124.0315	-2.036	58.4252	0.13926	0.021093	0.11572	-14.459	23.53	44.5652	0.15137	-0.065332	0.1166	-16.501	139.567	352.636	-0.31641	0.38379	0.082031	16.486	13.1346	54.169	0.13145	-0.0006836	0.085352	-70.433	31.307	59.446	0.31592	-0.12988	0.044922
0.95	-94.798	-46.87	663.281	-0.30303	0.44717	0.25742	-83.863	100.3284	321.577	-0.10362	0.33681	0.091308	-106.9144	-1.1558	37.831	0.13887	0.01875	0.10479	-46.644	-1.05957	37.6805	0.15645	-0.061426	0.11816	-18.416	199.596	322.6004	-0.28974	0.35889	0.061524	-11.266	71.233	65.1474	0.1541	-0.0084961	0.077539	-50.143	-1.238	56.565	0.33369	-0.13555	0.033301
0.952	-21.059	-10.27	793.063	-0.41953	0.47891	0.31572	-67.739	131.909	289.3584	-0.077344	0.30703	0.091309	-148.965	54.4049	32.8465	0.14405	0.011621	0.10322	-44.465	14.198	72.003	0.15869	-0.057227	0.12217	-11.601	176.502	314.5215	-0.26552	0.32432	0.036328	-1.293	16.6021	45.2022	0.17803	-0.019922	0.067285	-74.2478	50.468	35.189	0.34775	-0.14131	0.025488
0.954	14.817	102.279	918.705	-0.53282	0.51015	0.36338	-50.252	91.5905	235.3238	-0.052734	0.2793	0.087891	-100.7191	23.223	49.9173	0.14893	0.0097656	0.095215	-38.277	33.9721	23.303	0.15967	-0.056641	0.12598	-8.904	208.289	296.246	-0.24404	0.29658	0.021484	-3.718	17.8327	55.4367	0.19922	-0.026367	0.059082	-68.3746	34.9668	36.2365	0.34658	-0.14561	0.019629
0.956	-17.546	199.332	988.775	-0.64141	0.53711	0.38828	-48.272	104.9137	215.39972	-0.030762	0.25215	0.084863	-107.5108	51.5322	35.722	0.15508	0.0052735	0.086816	-63.985	-12.794	18.8903	0.1624	-0.052539	0.12598	-23.092	181.999	254.3744	-0.22627	0.26592	0.0017579	-16.117	46.1571	47.1382	0.2209	-0.035254	0.052246	-67.073	6.9262	43.6825	0.34336	-0.15352	0.0125
0.958	-1.31699999999999	222.936	1068.687	-0.72803	0.56885	0.39746	-38.665	128.353	191.382	-0.0082032	0.2291	0.083496	-107.0344	27.064	38.8719	0.16221	0.0035157	0.082226	-45.202	18.989	19.3774	0.16182	-0.048535	0.12588	-27.545	133.42	211.549	-0.20898	0.23779	-0.015137	-13.069	-16.1441	47.975	0.24297	-0.046582	0.043848	-111.8672	58.792	53.57	0.33496	-0.15869	0.010254
0.96	-58.602	212.511	1096.115	-0.78779	0.61494	0.39062	-39.288	72.8499	177.8061	0.014062	0.20605	0.087012	-73.416	-35.549	34.6501	0.16689	0.0042969	0.074023	-80.54	9.074	18.804	0.16377	-0.052832	0.12627	-4.528	140.611	183.8206	-0.19014	0.20957	-0.033496	-20.29	33.824	49.985	0.26133	-0.052832	0.035645	-83.687	6.703	58.0411	0.31992	-0.16035	0.0094726
0.962	-134.613	161.0407	1175.016	-0.84121	0.67832	0.38174	-16.453	109.741	174.6561	0.029297	0.17949	0.083399	-80.362	0.465999999999998	34.109	0.17237	0.0014648	0.070313	-99.5608	13.8667	52.4694	0.16592	-0.051172	0.12617	-9.333	71.1869	154.8124	-0.171	0.18574	-0.050195	-28.59	43.143	38.233	0.27696	-0.057226	0.027344	-85.309	19.9171	50.5937	0.30235	-0.15488	0.0167
0.964	-86.198	90.22	1287.323	-0.88848	0.77011	0.37939	-23.107	78.161	152.8988	0.044434	0.15576	0.086914	-66.198	-27.12	47.0975	0.17676	-0.0024414	0.067383	-78.2721	69.158	50.1164	0.16846	-0.049316	0.12549	-9.993	60.6883	143.3403	-0.15108	0.15996	-0.07207	-53.578	11.5418	47.332	0.29248	-0.060059	0.020996	-104.2569	55.7395	37.702339	0.28399	-0.14942	0.022168
0.966	-144.889	3.87	1371.759	-0.94512	0.87988	0.39072	-55.865	43.241	149.6152	0.053223	0.12891	0.087695	-38.289	-18.092	65.63	0.17725	-0.0043945	0.067969	-100.072	22.1069	32.1031	0.16738	-0.048438	0.12452	8.978	76.5695	143.7242	-0.13096	0.13741	-0.086328	-62.8401	47.6145	54.9274	0.30186	-0.060547	0.010156	-52.257	18.4498	44.508	0.26152	-0.14414	0.027344
0.968	-219.862	-144.656	1483.2848	-1.0156	0.99805	0.42627	-21.429	77.773	149.6537	0.056543	0.11084	0.090039	-51.559	39.155	44.4925	0.18252	-0.0069336	0.064844	-76.0588	19.9168	44.365	0.16611	-0.045996	0.11651	-14.644	32.783	121.4391	-0.10742	0.11523	-0.10449	-58.065	-29.448	56.365	0.3045	-0.058691	0.00097654	-83.2808	74.763	26.208	0.23779	-0.13086	0.038574
0.97	-166.949	-255.943	1546.242	-1.1106	1.0984	0.48008	-52.557	28.843	123.9571	0.06084	0.087012	0.093946	-18.542	8.3822	45.402	0.18252	-0.006543	0.067968	-75.926	38.677	23.5896	0.16689	-0.047559	0.11455	5.556	61.302	131.9284	-0.082715	0.094043	-0.11689	-86.771	-37.2476	50.528	0.30176	-0.056739	-0.0044922	-58.372	56.5954	26.417	0.221	-0.11944	0.046289
0.972	-173.383	-330.929	1532.071	-1.2407	1.1813	0.554	-63.146	46.51051	122.825	0.061719	0.065723	0.092773	-15.242	40.0815	36.127	0.18184	-0.0090821	0.069238	-96.222	13.87407	7.775	0.16582	-0.043652	0.11025	-38.078	52.774	112.88	-0.062012	0.070508	-0.13584	-96.6919	9.921	39.659	0.29707	-0.050098	-0.0077149	-14.662	0.8843	37.812	0.20234	-0.1081	0.050782
0.974	-74.967	-381.23	1524.2727	-1.3926	1.2434	0.62588	-50.745	70.37	117.949	0.058105	0.050781	0.095215	3.813	39.9089	25.4316	0.18213	-0.014648	0.069336	-27.456	53.579	17.624	0.1665	-0.04541	0.1084	-75.488	25.073	112.269	-0.038184	0.04707	-0.15342	-101.5346	-21.53176	30.773063	0.2876	-0.044434	-0.0058594	-76.463	20.498	42.839	0.19023	-0.09287	0.055469
0.976	5.382	-368.31	1510.325	-1.5428	1.283	0.68506	-78.835	33.26121	97.554	0.052735	0.029785	0.098535	29.858	-0.8226	34.334	0.17754	-0.013086	0.073437	-54.581	26.49	6.761	0.16084	-0.040528	0.10176	-41.792	62.335	98.6152	-0.012012	0.024219	-0.16455	-102.1278	47.16	45.2427	0.27041	-0.038379	-0.0047851	-44.027	-41.9564	54.068	0.17529	-0.08291	0.060156
0.978	-24.476	-367.49	1579.589	-1.6694	1.3188	0.73828	-75.11	78.805	94.67	0.050684	0.0083984	0.097851	-2.33	48.015	-0.0910000000000011	0.17431	-0.014355	0.073926	-50.513	-11.304	42.145	0.15606	-0.035547	0.099707	-81.3212	13.938	62.9303	0.01123	0.0092773	-0.1875	-101.3075	40.313	17.95501	0.25625	-0.028027	-0.00087888	-21.374	-30.7581	56.4839	0.16553	-0.069824	0.066406
0.98	37.368	-312.56	1686.805	-1.7512	1.3395	0.77646	-82.845	65.0286	49.618	0.041699	-0.0029297	0.10332	20.029	10.22	9.8193	0.16963	-0.013965	0.079395	-0.0339999999999989	10.66	49.5069	0.14863	-0.030859	0.10127	-83.052	24.3026	63.2978	0.033984	-0.0053711	-0.19951	-93.284	2.953	26.6086	0.23477	-0.020215	0.0038086	-29.598	22.211	53.8426	0.15723	-0.05293	0.064062
0.982	30.5232	-241.969	1736.413	-1.7859	1.3539	0.8001	-95.559	29.998	59.04011	0.034765	-0.017383	0.10684	24.23	13.5054	23.8471	0.16153	-0.0095702	0.083789	-22.809	-7.867	39.778	0.14619	-0.028809	0.099704	-66.439	47.729	50.562	0.053809	-0.022949	-0.21601	-99.1773	44.4972	32.1404	0.21846	-0.0017578	0.01123	-8.363	-4.818	49.259	0.15615	-0.034375	0.068555
0.984	-7.246	-216.63	1751.736	-1.7621	1.3746	0.80361	-62.684	54.785	59.407	0.026367	-0.029785	0.10889	4.469	52.1878	39.24821	0.15869	-0.0083008	0.092285	-5.148	27.4524	63.368	0.13916	-0.022949	0.095215	-101.9739	35.5804	45.5823	0.069043	-0.033887	-0.22578	-74.3355	-21.003	31.106	0.20215	0.010254	0.022461	-39.559	60.984	42.0414	0.15147	-0.021094	0.066993
0.986	-6.555	-148.302	1716.274	-1.6869	1.3904	0.78721	-82.3	2.128	45.3044	0.016308	-0.037891	0.11123	0.470999999999997	27.2182	50.679	0.15127	-0.0036132	0.098146	-19.676	60.572	46.82612	0.13105	-0.024219	0.091504	-71.833	90.604	53.461	0.083496	-0.047168	-0.23701	-47.303	-11.221	50.3398	0.18828	0.024805	0.028418	-29.324	30.9299	39.7761	0.15195	-0.0057618	0.067187
0.988	-83.923	-70.663	1650.893	-1.5664	1.4121	0.75928	-80.55	9.646	55.8089	0.0088867	-0.045801	0.11074	-43.459	69.383	38.3292	0.14316	-0.0017578	0.10713	-25.892	24.3829	37.174	0.12978	-0.019531	0.087988	-77.8541	85.179	17.449	0.084961	-0.055664	-0.24854	-56.048	32.926	21.642	0.16621	0.038672	0.0375	-5.064	-1.7357	32.4369	0.15527	0.0073242	0.064941
0.99	-106.492	-22.58	1647.111	-1.4113	1.4375	0.73301	-75.3617	38.2172	37.9073	0.0057617	-0.053613	0.11309	-59.74	65.716	43.923	0.13652	0.003711	0.11455	21.63	37.88	31.3807	0.12705	-0.013281	0.086816	-88.639	46.3506	24.046	0.081543	-0.066406	-0.24619	-29.192	-9.085	7.937	0.14746	0.049219	0.050781	-28.919	46.7778	18.499	0.15615	0.020313	0.073242
0.992	-107.304	35.1	1643.053	-1.2518	1.4641	0.71035	-108.8841	22.1405	39.8066	0.0083007	-0.056348	0.10801	-47.752	14.7174	48.65662	0.12549	0.0049805	0.12588	-2.057	20.8612	3.636	0.12822	-0.0083984	0.081836	-65.114	46.8892	21.68	0.07666	-0.07666	-0.24492	-13.936	48.6589	19.633	0.13604	0.062988	0.058984	-21.386	3.766	22.222	0.15147	0.029883	0.071387
0.994	-157.938	-36.72	1673.091	-1.1316	1.4782	0.69551	-74.3	71.487	49.01513	0.016113	-0.05957	0.10889	-93.5789	50.043	15.133	0.1123	0.0068359	0.13623	-21.712	0.3373	31.912	0.12744	-0.0063477	0.075195	-67.734	-3.511	13.582	0.063379	-0.080176	-0.24297	-13.477	39.1426	11.18681	0.125	0.071289	0.070313	-2.367	27.0665	23.583	0.14521	0.044336	0.083887
0.996	-79.178	-112.38	1712.875	-1.0537	1.4791	0.67861	-80.008	73.008	23.552	0.021387	-0.060254	0.098537	-92.678	0.195	13.076	0.10508	0.0088867	0.14317	4.561	42.787	42.6382	0.12627	-0.00078126	0.081738	-48.235	3.104	32.9929	0.047851	-0.083594	-0.23545	-8.313	6.1831	32.494	0.11699	0.079492	0.078321	-31.045	65.2681	29.156	0.1374	0.055957	0.088183
0.998	-53.96	-163.96	1693.009	-1.0176	1.4707	0.66699	-74.247	32.5591	24.5559	0.030567	-0.059082	0.094824	-73.292	-0.862599999999999	23.8643	0.098633	0.0081055	0.14551	-31.678	40.2491	31.9894	0.12568	0.0041992	0.084082	-58.72	20.7688	23.9464	0.033203	-0.087891	-0.2373	-10.589	58.567	31.9161	0.11153	0.085352	0.089258	-25.895	22.1812	33.3446	0.12842	0.060059	0.092773
1	-46.443	-219.416	1734.316	-1.0021	1.4601	0.6541	-35.784	49.8302	41.973	0.039942	-0.05791	0.085449	-145.37	40.192	30.8301	0.092773	0.0092773	0.15566	-12.417	55.9438	45.30583	0.12452	0.011621	0.086816	-80.1	-7.0032	47.174	0.021289	-0.083692	-0.22392	-12.962	6.39716	32.6344	0.10723	0.091211	0.095899	-64.255	63.509	35.3106	0.11612	0.065821	0.10283
1.002	9.92	-185.465	1771.455	-1.0027	1.446	0.64434	-64.147	-12.527	42.853	0.050586	-0.056445	0.08916	-118.11368	11.966	77.4511	0.091016	0.010351	0.15518	-9.593	54.964	37.0345	0.12402	0.016406	0.091113	-59.152	36.447	71.9612	0.013184	-0.086719	-0.21699	16.541	7.10081	47.2474	0.10605	0.093555	0.10059	-59.083	44.3413	43.35	0.097949	0.075293	0.11738
1.004	-40.639	-199.671	1782.907	-1.0171	1.4362	0.63535	-31.879	2.302	64.0578	0.058594	-0.052246	0.086426	-118.7915	25.914	111.7017	0.09375	0.015137	0.15479	-36.143	-8.757	48.723	0.11816	0.020996	0.093262	-48.527	38.032	54.4486	0.0069335	-0.083985	-0.21738	15.627	30.18882	23.517	0.11475	0.096191	0.099609	-74.58	9.306	40.93406	0.085449	0.076855	0.12637
1.006	-66.071	-262.76	1863.327	-1.0474	1.4355	0.61426	-11.24	33.5516	38.4882	0.067481	-0.048144	0.088574	-134.35	-4.2796	163.53	0.089355	0.021875	0.16093	-38.732	23.524	68.279	0.11807	0.023926	0.097656	-34.731	3.23097	64.4456	0.0006836	-0.086719	-0.21289	1.826	-14.3281	13.5317	0.11211	0.093262	0.10088	-107.148	52.9481	32.042	0.073047	0.08086	0.13975
1.008	-73.262	-278.38	1917.388	-1.0845	1.4497	0.59277	-40.517	4.386	29.8146	0.077246	-0.045117	0.085547	-97.135	-75.1807	247.56	0.086718	0.033789	0.15918	-75.2212	16.0517	26.1997	0.11474	0.023243	0.10273	-6.127	23.4878	47.1048	0.00048828	-0.089355	-0.20508	1.005	57.428	15.225	0.1166	0.092773	0.10069	-64.309	-6.7113	38.0055	0.059082	0.083984	0.15527
1.01	-116.4	-342.593	1985.485	-1.1249	1.4744	0.57598	-2.136	45.0834	41.3419	0.082324	-0.043164	0.086329	-157.5505	-81.237	353.055	0.085547	0.052149	0.16113	-62.205	8.2717	38.4815	0.10772	0.021289	0.10586	-43.932	-11.3223	32.9052	0.0023437	-0.08584	-0.20137	-1.548	70.145	13.8376	0.12363	0.094336	0.099122	-77.603	-1.6389	29.264	0.040625	0.079004	0.16758
1.012	-117.788	-293.514	2031.114	-1.1652	1.4977	0.56992	-20.666	40.224	16.252	0.086816	-0.041211	0.088867	-178.861	-182.019	453.127	0.083496	0.070605	0.16904	-64.024	44.133	45.1728	0.10449	0.021192	0.1127	-13.173	6.3305	36.787	0.0074218	-0.08584	-0.19687	-15.768	41.258	42.185	0.12646	0.09541	0.099026	-102.2659	20.846	35.4657	0.029492	0.076269	0.18213
1.014	-177.393	-180.161	1980.539	-1.2155	1.5294	0.57813	-19.021	27.221	46.0162	0.085449	-0.039551	0.090332	-175.802	-277.134	510.119	0.084473	0.091309	0.17725	-106.362	4.1635	26.2262	0.09668	0.021484	0.11768	-4.093	47.251	11.9197	0.010937	-0.084278	-0.18594	-38.902	82.199	39.0492	0.12744	0.1001	0.10107	-60.894	-34.159	66.189	0.01543	0.069629	0.18447
1.016	-218.5896	-130.216	1910.1524	-1.2812	1.5591	0.59727	-9.203	62.455	60.878	0.085645	-0.036133	0.090234	-192.325	-295.28	529.6661	0.067773	0.11055	0.18418	-83.215	3.526	61.8053	0.091699	0.017578	0.12432	-32.288	27.243	12.9719	0.015332	-0.087695	-0.17666	-48.644	29.3015	36.264	0.12539	0.11016	0.099121	-92.219	-0.125	95.2123	0.011133	0.0625	0.20098
1.018	-200.2997	-49.48	1857.926	-1.3574	1.5898	0.63818	-21.616	13.3214	54.189	0.088769	-0.030274	0.094043	-144.784	-318.087	592.028	0.05293	0.13418	0.19512	-71.0525	19.9191	38.815	0.080078	0.015528	0.12998	-8.255	64.54	45.1544	0.010742	-0.090332	-0.16602	-36.093	19.61068	50.0958	0.12276	0.11866	0.094825	-99.2596	-28.0293	163.318	0.0087891	0.057617	0.20996
1.02	-233.9207	-38.903	1829.054	-1.4429	1.6134	0.70391	-23.775	3.2379	57.2904	0.089551	-0.029492	0.094434	-144.889	-224.087	678.069	0.033008	0.16074	0.19863	-95.28	1.543	31.78712	0.06836	0.0057616	0.13389	-18.878	66.809	43.9029	0.013184	-0.088769	-0.15107	-72.0432	45.7686	49.6849	0.11416	0.12842	0.094825	-76.864	-91.151	247.103	0.014746	0.046875	0.21895
1.022	-192.658	-55.771	1854.005	-1.5383	1.6375	0.771	-19.301	29.5618	35.933	0.088965	-0.025781	0.093652	-154.5994	-136.688	726.141	0.0064451	0.19492	0.19824	-59.9417	33.4409	54.86	0.05918	0.0061524	0.14971	-44.626	44.962	59.8241	0.011816	-0.090821	-0.13614	-91.374	-7.154	48.3673	0.1084	0.13701	0.10196	-124.938	-91.384	353.322	0.014258	0.044043	0.21806
1.024	-106.588	5.789	1878.016	-1.6367	1.6703	0.83271	-46.399	10.10273	33.116	0.094727	-0.020996	0.097168	-129.009	-115.14	742.4762	-0.027832	0.23828	0.19629	-73.225	19.6936	33.6154	0.051758	-2.2204e-14	0.16406	-25.829	78.179	64.8508	0.011035	-0.090821	-0.12519	-106.54793	48.8463	43.7574	0.10107	0.14697	0.10254	-133.367	-221.241	447.187	0.016602	0.04834	0.21768
1.026	-125.381	-26.556	1875.423	-1.7392	1.7062	0.89004	-36.612	51.672	49.0503	0.098535	-0.016797	0.096191	-98.327	-53.664	760.5774	-0.07832	0.296	0.21143	-61.007	9.7	26.3224	0.043457	-0.0016602	0.17666	-69.12	28.223	39.6665	0.011328	-0.092969	-0.10791	-91.5756	54.2255	24.985	0.093262	0.16084	0.104	-161.731	-290.547	519.694	0.017188	0.058789	0.21231
1.028	-117.198	18.099	1881.359	-1.8398	1.7441	0.94775	-46.519	59.307	29.1313	0.098339	-0.010938	0.091406	-3.134	-76.027	839.149	-0.14678	0.35635	0.23428	-16.781	49.9456	16.854	0.027832	-0.0013672	0.18603	-66.169	9.8827	45.411	0.010742	-0.090332	-0.09668	-85.289	25.5086	37.903	0.084766	0.17168	0.10118	-203.809	-285.817	558.1271	0.011719	0.078613	0.20361
1.03	-134.135	52.5773	1867.202	-1.9283	1.7596	0.99951	-45.243	26.803	39.402	0.09912	-0.0050781	0.094532	25.168	-30.777	972.431	-0.23232	0.41885	0.26592	-69.456	25.2092	24.1555	0.020801	-0.0025391	0.19775	-59.375	14.9172	27.1503	0.0074219	-0.088379	-0.086621	-112.5057	50.941	68.904	0.082031	0.18574	0.10586	-142.059	-288.416	597.985	-0.0033203	0.11348	0.19102
1.032	-171.471	2.653	1888.3361	-2.0018	1.7708	1.0465	-27.705	52.797	52.0214	0.098926	0.00058594	0.094824	-2.92700000000001	76.081	1081.993	-0.33457	0.47793	0.29756	-44.104	27.7498	89.693	0.012402	0.0023437	0.20762	-85.927	-24.6349	11.1483	0.005957	-0.082715	-0.07793	-97.3731	-37.473	102.2554	0.084277	0.20117	0.11025	-157.668	-181.972	654.66	-0.028516	0.16699	0.1833
1.034	-127.745	15.92857	1922.8346	-2.0565	1.763	1.0785	-77.0463	-0.552999999999999	30.398	0.09668	0.0014648	0.099609	11.837	114.355	1174.253	-0.44043	0.52832	0.33057	-3.88	11.612	116.4016	0.00097656	0.010742	0.21582	-77.002	15.388	51.948	0.010254	-0.081543	-0.075195	-90.151	-69.4145	170.6898	0.085938	0.21582	0.11475	-181.415	-127.76	701.501	-0.065625	0.23379	0.18838
1.036	-155.804	-24.781	1945.779	-2.0905	1.7571	1.1051	-58.094	-2.761	63.75068	0.090137	0.0061524	0.099612	-44.421	151.34	1232.892	-0.54658	0.59091	0.35097	-53.753	-73.5516	175.0083	-0.0075196	0.015723	0.2165	-84.0156	28.716	56.808	0.015527	-0.079101	-0.073731	-93.4798	-76.6191	245.773	0.091992	0.2294	0.11904	-132.497	-116.016	711.3883	-0.11758	0.30742	0.21514
1.038	-168.386	-87.984	2020.173	-2.1011	1.7407	1.1172	-76.546	15.4492	52.5097	0.087598	0.011231	0.10166	-106.635	99.998	1299.08	-0.64287	0.64795	0.36562	-14.713	-97.161	258.066	-0.016992	0.02207	0.21699	-92.026	7.76	70.039	0.02002	-0.07666	-0.072266	-115.627	-187.107	355.4993	0.094141	0.24668	0.11875	-109.426	-60.719	741.3594	-0.19385	0.37793	0.25195
1.04	-145.811	-72.859	2021.186	-2.0838	1.7203	1.1165	-109.5703	-23.7872	33.822	0.083301	0.018652	0.10049	-98.624	5.41	1369.84	-0.73467	0.71475	0.36719	-49.347	-152.1757	344.841	-0.026758	0.031445	0.21582	-54.754	45.43	51.0595	0.024121	-0.071777	-0.068945	-115.317	-196.063	458.947	0.089453	0.26621	0.1207	-39.005	-71.719	839.407	-0.28369	0.44326	0.29179
1.042	-175.688	-140.83	1985.053	-2.041	1.6953	1.1095	-73.646	23.534	51.685	0.082324	0.026074	0.096582	-149.118	-56.66	1421.516	-0.81738	0.78457	0.3666	-84.294	-228.1984	440.238	-0.036523	0.040821	0.21601	-77.664	11.393	27.0105	0.031933	-0.066211	-0.069531	-142.897	-244.514	503.48	0.070117	0.29814	0.11357	-22.476	-2.25999999999999	957.495	-0.38154	0.49971	0.32813
1.044	-128.117	-119.062	1943.224	-1.9774	1.673	1.0927	-73.7148	28.217	33.38	0.079102	0.032715	0.09668	-190.8561	-166.807	1508.91	-0.90186	0.86963	0.37354	-81.81	-252.611	481.698	-0.060547	0.068359	0.20654	-70.668	6.568	52.381	0.033105	-0.060352	-0.06875	-158.389	-295.076	546.07487	0.043945	0.34082	0.11621	-41.449	81.488	1051.75	-0.48115	0.55479	0.35703
1.046	-88.459	-78.9947	1885.9968	-1.9141	1.6485	1.072	-76.385	7.2245	43.668	0.078906	0.03916	0.098731	-206.708	-232.377	1586.6753	-0.98748	0.96114	0.39092	-132.475	-289.57	519.9469	-0.1041	0.10606	0.1959	-79.769	39.9325	47.6129	0.0375	-0.050488	-0.066699	-149.907	-218.873	594.226	0.0042969	0.39306	0.13057	-35.164	75.794	1118.821	-0.57901	0.61162	0.37734
1.048	-76.285	-52.241	1866.4418	-1.853	1.6265	1.0508	-35.172	43.677	44.29482	0.076563	0.045117	0.1001	-203.118	-258.076	1636.658	-1.0883	1.0547	0.42666	-96.992	-235.225	625.144	-0.14531	0.16445	0.19287	-90.158	20.08284	32.9105	0.040527	-0.041016	-0.066406	-155.902	-199.941	628.769	-0.055761	0.45293	0.16397	-115.971	91.831	1144.158	-0.6626	0.67041	0.39844
1.05	-33.125	67.29	1873.9031	-1.8063	1.6031	1.0271	-93.9485	7.0903	18.059	0.076172	0.049024	0.10088	-85.84396	-338.65	1657.6856	-1.2055	1.1532	0.4626	-95.787	-147.578	684.9866	-0.20664	0.23047	0.20303	-36.847	62.926	41.8999	0.04209	-0.034375	-0.06582	-156.717	-145.206	696.847	-0.13702	0.51348	0.19913	-171.967	47.735	1235.872	-0.72744	0.73955	0.41904
1.052	-59.16	109.024	1890.2412	-1.7684	1.5797	1.0101	-65.497	19.049	39.4396	0.07666	0.055957	0.098923	-18.232	-346.37	1682.545	-1.3389	1.2384	0.52324	-164.999	-121.983	753.459	-0.28955	0.29756	0.22881	-86.80868	52.621	19.724	0.046386	-0.024609	-0.063769	-144.242	-75.312	726.675	-0.24121	0.56504	0.24209	-165.184	-26.12	1304.147	-0.80107	0.82237	0.44297
1.054	-42.459	125.2028	1900.515	-1.7445	1.5613	0.99717	-11.105	34.1654	36.146	0.077637	0.058105	0.096191	-20.934	-333.75	1746.948	-1.4902	1.3145	0.57471	-129.608	-48.8933	797.74387	-0.37988	0.3623	0.26318	-76.259	23.7995	49.4999	0.04834	-0.017969	-0.05791	-111.814	-106.6852	772.8001	-0.354	0.61719	0.27197	-225.448	-80.03	1349.311	-0.87725	0.90947	0.4832
1.056	-26.427	182.449	1859.0776	-1.7298	1.5417	0.9791	-52.048	-5.283	35.0085	0.082227	0.057031	0.091699	17.667	-298.79	1827.259	-1.6471	1.3812	0.62217	-121.088	-34.002	832.5727	-0.4878	0.43525	0.30498	-12.582	59.0751	44.737	0.052832	-0.0072266	-0.060156	-44.416	-20.88	857.0864	-0.46181	0.6706	0.29785	-248.9815	-194.268	1423.6849	-0.96591	0.99304	0.53672
1.058	-124.977	176.066	1798.112	-1.7183	1.5278	0.96387	-21.784	23.15241	48.223	0.090918	0.056055	0.089551	-14.74	-179.627	1866.866	-1.7758	1.4429	0.66728	-90.995	-29.621	935.697	-0.61475	0.50782	0.33545	-51.898	20.763	16.533	0.058105	0.0014648	-0.061035	-24.48	35.22	957.811	-0.56172	0.72285	0.32304	-265.269	-268.716	1474.64	-1.0674	1.0723	0.59033
1.06	-120.074	205.074	1792.907	-1.7101	1.5173	0.95234	-28.567	33.601	18.8489	0.096777	0.053321	0.085254	-32.892	-144.645	1879.033	-1.8719	1.5008	0.71651	-59.989	44.885	1037.404	-0.74053	0.58672	0.36279	-14.588	19.568	44.8067	0.064551	0.00625	-0.058203	-20.49	74.684	1045.859	-0.66875	0.783	0.34609	-229.057	-308.997	1528.204	-1.2014	1.1233	0.64199
1.062	-154.571	216.22	1790.707	-1.7026	1.5036	0.93808	-24.84	21.1038	37.526	0.1043	0.053223	0.078808	-9.11	-132.383	1850.5432	-1.9302	1.5365	0.74853	-99.68	72.053	1134.604	-0.85762	0.6709	0.39053	-16.32	10.1159	49.6126	0.068164	0.014063	-0.055762	-48.736	161.192	1107.7195	-0.77676	0.85508	0.3626	-98.837	-376.96	1548.531	-1.3566	1.1692	0.68594
1.064	-178.3082	145.203	1781.898	-1.6839	1.4943	0.92715	-11.281	61.422	30.33765	0.11621	0.046387	0.074219	-70.5123	-115.676	1835.84	-1.9414	1.5605	0.76807	-101.588	99.089	1244.412	-0.97656	0.74805	0.41992	-37.706	-36.60087	44.755	0.074414	0.018359	-0.056934	-73.524	110.31163	1180.429	-0.88428	0.94971	0.3916	-50.869	-364.42	1570.648	-1.4944	1.1892	0.73477
1.066	-115.354	103.937	1798.661	-1.6663	1.4888	0.90547	-44.914	12.0221	16.4416	0.12471	0.041895	0.072754	-89.1039	-106.45	1835.356	-1.9015	1.5723	0.76416	-128.143	101.789	1307.796	-1.1106	0.8374	0.45273	22.425	4.507	54.9627	0.083105	0.01875	-0.054199	-124.882	39.01	1281.779	-0.98729	1.0549	0.42744	-27.966	-343.47	1653.118	-1.6143	1.2031	0.75977
1.068	-136.4285	48.535	1767.5441	-1.644	1.479	0.88477	-12.301	4.254	44.7685	0.1293	0.037793	0.070117	-94.40505	-32.52	1811.537	-1.8121	1.589	0.74814	-185.271	9.17	1368.174	-1.2565	0.93799	0.50703	-26.594	28.2096	33.3338	0.089355	0.016113	-0.055664	-163.1878	-11.16	1360.94	-1.0945	1.159	0.47139	-4.646	-309.44	1718.043	-1.6909	1.2095	0.78711
1.07	-121.3463	-3.926	1768.737	-1.6058	1.4708	0.86875	-5.883	17.013	24.756	0.13555	0.035449	0.070117	-125.856	6.39	1832.391	-1.6859	1.6027	0.73213	-161.1777	-49.92	1450.17	-1.4081	1.0435	0.56328	-59.724	23.0005	51.7918	0.10069	0.010156	-0.055664	-174.8149	-170.405	1418.704	-1.2149	1.2559	0.53076	-62.48	-215.98	1775.454	-1.726	1.2173	0.80429
1.072	-74.615	35.317	1751.0784	-1.5699	1.466	0.85284	-30.809	-20.784	28.403	0.13369	0.029004	0.074805	-61.599	-2.54000000000001	1827.86	-1.5449	1.6137	0.71494	-197.895	-137.421	1500.422	-1.5665	1.1452	0.62246	-16.89	68.319	65.3643	0.10849	0.0061523	-0.062793	-225.298	-232.042	1476.17	-1.3459	1.3319	0.5956	-55.82	-190.978	1809.502	-1.7092	1.2404	0.80205
1.074	-125.37	29.14	1721.0908	-1.5281	1.4609	0.84385	-15.536	24.371	44.0788	0.13477	0.019531	0.069824	-4.32700000000001	-36.583	1823.126	-1.4268	1.623	0.69775	-195.945	-241.5304	1565.218	-1.7202	1.2427	0.67969	-42.535	27.3937	35.713	0.11553	-0.0028321	-0.075293	-231.413	-275.915	1538.3924	-1.4863	1.3906	0.66162	-21.456	-160.28	1789.52	-1.6401	1.2752	0.79619
1.076	-88.366	46.633	1719.684	-1.4873	1.4611	0.83565	-29.486	38.6686	27.3179	0.12305	0.0097655	0.071387	57.135	-128.5679	1871.928	-1.3439	1.6238	0.69931	-153.118	-241.8161	1609.618	-1.8598	1.3229	0.73516	-39.006	10.9949	32.2394	0.12012	-0.0087891	-0.095312	-179.627	-324.371	1559.2632	-1.6266	1.4269	0.72139	-89.454	-132.059	1788.248	-1.5433	1.3278	0.7836
1.078	-87.642	98.415	1669.722	-1.4507	1.4595	0.82227	-43.373	23.2589	49.433	0.11406	0.0024414	0.070801	107.83	-169.313	1931.291	-1.2948	1.6146	0.7043	-129.929	-289.544	1613.881	-1.9738	1.3879	0.77784	-35.846	16.8372	26.303	0.1333	-0.0092773	-0.10449	-113.759	-288.29	1569.892	-1.7445	1.4434	0.77979	-112.9253	-113.361	1780.294	-1.4297	1.3867	0.77588
1.08	-156.586	102.332	1632.965	-1.4109	1.457	0.81534	-24.724	68.477	46.6544	0.10391	-0.0049805	0.073144	44.014	-174.595	2003.9409	-1.2773	1.5915	0.71914	-40.577	-304.94	1644.1717	-2.0422	1.439	0.80244	-62.214	-4.8768	25.3794	0.14853	-0.012988	-0.12442	-13.087	-321.27	1622.41	-1.8254	1.4485	0.82627	-128.5282	-44.7	1776.808	-1.3319	1.4369	0.77793
1.082	-108.8657	176.845	1612.3145	-1.3703	1.4422	0.80127	-68.905	24.0795	24.7909	0.095117	-0.013477	0.077441	22.386	-206.563	2044.387	-1.2806	1.5706	0.73496	39.4292	-272.73	1666.444	-2.0632	1.4762	0.81875	-36.107	55.192	31.986	0.15595	-0.0089843	-0.1376	48.0544	-321.47	1720.27	-1.8694	1.4427	0.86758	-149.99	-36.96	1794.157	-1.2574	1.4758	0.77393
1.084	-165.016	237.951	1557.517	-1.3309	1.4301	0.78057	-26.564	26.6255	56.810028	0.084961	-0.019531	0.079102	-25.308	-204.61	2048.174	-1.2998	1.5547	0.74268	63.5029	-308.62	1723.532	-2.0405	1.4927	0.82227	-63.18	74.748	15.288	0.15869	-0.0085938	-0.14619	41.441	-267.21	1801.707	-1.8726	1.4341	0.89063	-79.785	-56.772	1793.747	-1.2152	1.4961	0.76923
1.086	-155.465	260.288	1509.7212	-1.2942	1.4087	0.76387	-58.632	47.725	43.906	0.072851	-0.021777	0.083887	-106.131	-207.271	2053.284	-1.3217	1.5451	0.74912	79.7315	-253.627	1810.375	-1.9739	1.4929	0.81152	-89.981	47.374	34.957	0.16094	0.0012696	-0.15078	27.3013	-275.88	1853.731	-1.8321	1.4311	0.89219	-51.828	-86.252	1793.831	-1.1973	1.5038	0.76035
1.088	-100.975	295.263	1451.735	-1.2632	1.3794	0.74219	-95.2266	16.133	33.219	0.059277	-0.024024	0.08916	-75.096	-189.2432	2048.29	-1.3418	1.5453	0.74424	85.622	-195.519	1802.875	-1.8602	1.4789	0.79326	-49.963	67.404	52.548	0.1543	0.014648	-0.15332	20.659	-189.023	1855.712	-1.7489	1.443	0.87041	17.99	-169.695	1853.683	-1.1968	1.5005	0.75293
1.09	-135.787	244.066	1391.999	-1.2183	1.3527	0.72138	-47.42	32.0003	60.387	0.049903	-0.022461	0.098928	-130.408	-117.996	2024.2462	-1.3578	1.5496	0.74619	68.881	-191.0846	1809.574	-1.7258	1.4664	0.76201	-88.559	7.1308	49.361	0.13945	0.029492	-0.15166	8.315	-119.024	1820.2394	-1.6219	1.4566	0.84815	53.572	-183.348	1914.515	-1.2193	1.4881	0.74524
1.092	-53.112	200.5216	1371.747	-1.18	1.3188	0.69421	-88.8467	5.5236	54.93	0.043848	-0.021485	0.10488	-174.1886	-85.677	2035.247	-1.3677	1.5667	0.75234	75.51	-114.355	1810.345	-1.5759	1.451	0.72627	-79.094	-3.431	82.7923	0.12178	0.04336	-0.14863	8.494	-85.297	1806.765	-1.4826	1.4764	0.82139	-19.871	-195.076	1974.2775	-1.2506	1.488	0.72505
1.094	-58.102	193.0625	1324.063	-1.1359	1.2863	0.66726	-108.074	-48.698	110.79932	0.037598	-0.01123	0.10938	-182.875	-77.782	2015.1777	-1.3862	1.5806	0.75	23.035	-110.45	1794.521	-1.4414	1.4355	0.6958	-74.8133	0.84653	83.262	0.094042	0.063672	-0.14004	-37.206	9.06999999999999	1817.209	-1.3574	1.4902	0.79443	-26.905	-210.07	2034.036	-1.283	1.4884	0.71602
1.096	-52.378	158.634	1304.6799	-1.0928	1.2517	0.63991	-67.846	-43.476	178.185	0.029395	0.000293	0.11397	-220.094	-68.741	1981.643	-1.4053	1.5896	0.76397	-13.084	-97.38	1800.429	-1.3295	1.4244	0.67725	-111.1201	-76.131	104.102	0.066895	0.083106	-0.13067	-50.382	-6.11000000000001	1830.426	-1.2666	1.4978	0.77764	-75.531	-203.35	2037.458	-1.3187	1.5043	0.70166
1.098	3.439	172.121	1288.8519	-1.0493	1.2192	0.61133	-102.883	-112.593	268.648	0.033789	0.016308	0.11875	-170.4081	-54.959	1963.022	-1.4273	1.6016	0.78408	-38.223	-51.62	1777.392	-1.2528	1.4035	0.66943	-62.825	-82.3913	157.629	0.038086	0.10254	-0.12061	-40.9847	-60.72	1855.702	-1.2109	1.5106	0.76455	-148.548	-211.154	2054.138	-1.3535	1.5234	0.70068
1.1	-36.056	181.739	1247.822	-1.0055	1.1755	0.58842	-108.978	-151.491	397.675	0.030273	0.038964	0.12109	-97.877	15.7478	1941.44	-1.4539	1.611	0.80596	-71.685	-116.762	1799.692	-1.2105	1.3785	0.67373	-58.923	-122.442	202.145	0.012988	0.12568	-0.1125	-56.2681	-95.575	1872.016	-1.1922	1.5168	0.7583	-143.071	-169.924	2047.784	-1.4011	1.5469	0.7097
1.102	-32.801	139.118	1246.0921	-0.96574	1.1407	0.56346	-134.219	-199.108	479.443	0.024902	0.072558	0.121	-134.594	70.248	1922.654	-1.4851	1.6274	0.83047	-44.434	-120.807	1836.108	-1.2047	1.3571	0.68389	-30.932	-177.233	309.9471	-0.0086914	0.14346	-0.10341	2.645	-181.16772	1888.9381	-1.1991	1.5267	0.75352	-213.322	-117.52	2015.5506	-1.4534	1.5714	0.72733
1.104	-32.679	155.986	1222.752	-0.92673	1.1048	0.53616	-177.946	-288.7514	530.329	0.0083008	0.11523	0.11377	-136.52	105.1858	1932.1143	-1.5332	1.6621	0.85107	-4.45100000000001	-150.879	1828.576	-1.2183	1.3364	0.69141	20.6181	-181.811	444.606	-0.025097	0.16768	-0.097558	72.248	-197.717	1920.185	-1.2236	1.541	0.75244	-229.748	-99.891	2021.1252	-1.5158	1.5905	0.75728
1.106	-87.986	152.582	1192.629	-0.88812	1.0626	0.51864	-133.116	-255.474	587.8795	-0.011035	0.17539	0.10068	-183.089	122.202	1948.3618	-1.5914	1.6965	0.86748	27.829	-243.47	1900.4235	-1.2447	1.332	0.7041	-0.393600000000001	-266.305	506.711	-0.040332	0.19336	-0.098828	59.092	-189.355	1960.383	-1.2567	1.5595	0.74239	-197.789	-80.596	1982.4804	-1.5791	1.6067	0.80382
1.108	-36.752	148.97128	1171.145	-0.85254	1.0205	0.49561	-129.493	-189.998	621.236	-0.044922	0.24238	0.10088	-213.358	51.122	1992.211	-1.6527	1.7301	0.88525	15.256	-212.44	1948.3088	-1.271	1.3277	0.71992	21.9269	-299.803	579.951	-0.049316	0.2168	-0.10742	47.91	-214.701	2023.537	-1.2886	1.588	0.73457	-236.858	-80.809	1948.697	-1.6465	1.623	0.854
1.11	-51.218	203.312	1095.083	-0.81787	0.98134	0.47075	-187.613	-147.5669	689.307	-0.098439	0.31465	0.11416	-156.25	-30.1191	2026.169	-1.7195	1.7532	0.90127	-46.561	-238.76	1957.215	-1.2995	1.3421	0.73282	65.145	-296.4967	606.168	-0.053516	0.24385	-0.11973	-3.132	-181.076	2074.624	-1.3171	1.6188	0.73184	-156.769	-62.254	1949.25	-1.7161	1.6513	0.88561
1.112	-86.419	199.459	1024.6169	-0.7842	0.94023	0.44981	-178.4427	-39.8855	743.815	-0.16602	0.3832	0.13428	-197.5212	-62.356	2001.556	-1.7917	1.7669	0.91582	-113.646	-257.98	1999.444	-1.3339	1.3682	0.75332	37.214	-311.623	660.458	-0.054004	0.26748	-0.13467	-54.785	-209.784	2087.328	-1.3507	1.6513	0.72656	-119.556	0.3764	1926.65	-1.7848	1.6785	0.92016
1.114	-21.2	221.805	954.678	-0.74622	0.90069	0.42672	-156.335	-26.816	775.23778	-0.25195	0.45166	0.17041	-181.3411	-81.5033	1975.2986	-1.8574	1.7695	0.92432	-160.439	-179.972	1991.926	-1.374	1.3965	0.77588	68.694	-225.065	723.506	-0.061426	0.31006	-0.14404	-83.627	-235.648	2101.495	-1.3809	1.6816	0.74072	-129.28	46.73	1939.986	-1.8499	1.7068	0.94447
1.116	-60.45	254.248	897.389	-0.71068	0.8565	0.40553	-72.288	-16.189	868.032	-0.35059	0.51299	0.20664	-190.5222	-40.729	1951.332	-1.9022	1.7731	0.93086	-208.284	-188.233	1998.216	-1.4234	1.429	0.82734	61.131	-135.638	716.107	-0.080469	0.36045	-0.14248	-175.992	-182.03	2074.909	-1.4193	1.7108	0.75693	-104.836	70.9816	1949.1621	-1.9109	1.7256	0.9656
1.118	-43.987	245.077	864.4754	-0.67676	0.81055	0.37988	-38.497	39.856	933.2006	-0.45654	0.58095	0.23242	-199.457	-4.19	1945.8957	-1.9292	1.7696	0.93086	-220.20868	-128.093	2004.1794	-1.5015	1.4653	0.88252	40.6632	-91.914	757.077	-0.12012	0.42236	-0.12598	-171.985	-161.674	2024.203	-1.4611	1.7341	0.77207	-179.9743	76.0978	1943.6419	-1.9663	1.7271	0.98047
1.12	-19.951	275.7544	817.2546	-0.64057	0.76603	0.36169	-58.016	35.882	1023.707	-0.5499	0.64775	0.25976	-123.933	-39.919	1954.426	-1.928	1.7661	0.92656	-265.979	-74.489	1990.166	-1.5984	1.5059	0.93721	113.402	-4.769	852.096	-0.19356	0.48857	-0.095409	-180.692	-111.894	2010.425	-1.5075	1.7493	0.79512	-183.2388	21.186	1975.628	-2.0144	1.7239	0.99339
1.122	-86.6927	272.5703	761.744	-0.60472	0.72956	0.34035	-28.476	94.327	1101.428	-0.63819	0.71221	0.28799	-76.899	-51.516	1920.399	-1.9069	1.7642	0.91368	-308.39	-100.24	1990.281	-1.7104	1.5407	0.99531	91.963	-15.441	952.902	-0.29199	0.54814	-0.059961	-245.882	-69.848	2002.101	-1.5419	1.7569	0.82832	-156.1496	-26.1912	1977.469	-2.0363	1.707	1.0114
1.124	-48.36	241.2251	728.3583	-0.57389	0.68622	0.32085	-80.098	114.327	1141.1368	-0.73193	0.76807	0.31152	-24.671	-67.68	1909.12	-1.8672	1.7598	0.89307	-264.723	-42.967	1982.295	-1.8301	1.582	1.0396	116.479	-28.335	1044.732	-0.39239	0.60244	-0.0080078	-204.143	-96.259	2005.7838	-1.5835	1.7681	0.8623	-187.9904	-47.789	1984.05	-2.0403	1.6958	1.0251
1.126	-69.8281	257.112	690.867	-0.53837	0.64385	0.29695	-122.073	51.201	1225.5722	-0.82871	0.84785	0.35615	18.466	-20.225	1870.6983	-1.8149	1.7605	0.88066	-255.714	-54.9849	1959.179	-1.9474	1.6206	1.0787	120.297	-4.6954	1075.373	-0.51025	0.6586	0.048926	-185.122	-60.4109	2008.32	-1.6424	1.7846	0.88584	-169.3784	-63.565	1983.46	-2.026	1.6841	1.037
1.128	-99.6029	227.2597	664.3315	-0.50391	0.60742	0.2749	-118.877	24.94	1282.061	-0.92685	0.93291	0.40791	-21.322	72.802	1833.945	-1.7573	1.7521	0.86699	-197.8555	-56.146	1976.871	-2.0507	1.6512	1.1117	94.989	-57.044	1109.15	-0.64307	0.7251	0.11328	-155.503	-25.2774	1978.9	-1.7004	1.8016	0.89932	-168.5463	-44.3	1974.128	-2	1.6719	1.0532
1.13	-71.415	214.599	653.5636	-0.45631	0.57111	0.2558	-143.22	-82	1336.832	-1.0331	1.0118	0.46651	-19.894	124.3774	1800.4161	-1.7089	1.745	0.85137	-141.415	46.6656	1951.536	-2.1378	1.6688	1.1285	109.847	-22.18	1197.682	-0.79775	0.80224	0.1668	-122.697	8.162	1973.893	-1.7469	1.8152	0.90909	-173.8168	-42.0255	1957.6112	-1.961	1.6606	1.0638
1.132	-111.045	218.208	604.9907	-0.40588	0.53348	0.22751	-174.984	-185.826	1435.0065	-1.148	1.0886	0.54238	-10.168	178.999	1758.2039	-1.6669	1.7319	0.8334	-121.229	30.454	1934.211	-2.1915	1.6788	1.1381	79.338	-11.63	1248.868	-0.94776	0.87823	0.22246	-138.557	88.2722	1936.843	-1.7898	1.8114	0.91562	-111.464	-47.3446	1942.2273	-1.9377	1.649	1.0762
1.134	-86.5273	154.365	596.792	-0.35372	0.49286	0.1992	-202.414	-217.817	1484.5855	-1.2778	1.1509	0.61133	-71.947	177.683	1731.962	-1.6367	1.7168	0.81689	-107.919	59.0394	1964.3397	-2.2202	1.6782	1.1357	42.155	-90.8	1332.467	-1.1056	0.96259	0.27324	-116.437	39.7308	1970.114	-1.8198	1.8013	0.9209	-62.337	-28.038	1916.243	-1.9139	1.6347	1.0867
1.136	-70	141.6027	577.6254	-0.30764	0.45499	0.17359	-203.167	-317.215	1520.38	-1.4246	1.198	0.67901	-53.685	156.601	1738.9441	-1.6105	1.7008	0.80478	-115.45	52.3037	1994.5546	-2.2021	1.6746	1.1144	9.1493	-124.264	1389.445	-1.2543	1.0541	0.32393	-143.2853	-14.3546	2015.069	-1.847	1.787	0.91865	-24.02	-10.946	1898.815	-1.9015	1.6182	1.0993
1.138	-76.7929	134.987	519.7139	-0.25928	0.42627	0.14746	-106.963	-332.796	1537.659	-1.5617	1.2422	0.73975	-99.404	197.698	1717.092	-1.5873	1.6793	0.78565	-127.144	-63.138	2031.603	-2.1609	1.672	1.0875	-65.625	-245.4453	1420.01338	-1.4063	1.1377	0.37549	-160.595	-60.591	2062.555	-1.8628	1.7661	0.91602	6.318	42.489	1897.393	-1.8906	1.5977	1.1079
1.14	-13.916	108.646	465.737	-0.21712	0.38841	0.12034	-31.081	-333.34	1531.719	-1.6738	1.2692	0.78935	-122.665	185.57	1694.682	-1.5689	1.657	0.77197	-99.332	-62.789	2049.345	-2.0933	1.67	1.0559	-56.611	-319.788	1505.256	-1.5596	1.2182	0.43105	-125.456	-147.654	2078.8	-1.8659	1.7544	0.91679	-54.583	96.545	1859.4293	-1.887	1.5772	1.1141
1.142	-30.765	150.831	401.119	-0.17973	0.35691	0.097728	15.921	-355.9	1584.595	-1.7486	1.2916	0.83818	-92.776	145.895	1662.013	-1.5473	1.634	0.75225	-102.668	-80.142	2009.3	-2.0105	1.6712	1.0254	-49.4052	-299.44	1531.31851	-1.7156	1.2821	0.475	-147.839	-94.9395	2053.426	-1.8599	1.7452	0.91465	-41.726	110.79202	1848.7414	-1.8785	1.5539	1.1155
1.144	-44.727	131.703	384.0172	-0.14778	0.33025	0.076159	70.1868	-264.68	1681.738	-1.7964	1.3032	0.87695	-132.213	96.058	1609.305	-1.5293	1.6055	0.7334	-84.615	-78.293	1994.554	-1.937	1.6665	0.99609	-37.794	-354.93	1545.0862	-1.8604	1.3278	0.51289	-145.7693	-46.853	2008.04596	-1.8472	1.7349	0.91602	-57.172	148.008	1806.5296	-1.8753	1.532	1.118
1.146	4.82700000000001	129.179	373.259	-0.11234	0.29974	0.056532	30.8097	-216.677	1743.404	-1.8024	1.3128	0.90684	-84.176	21.133	1603.5441	-1.4951	1.5795	0.71201	-71.558	16.178	1947.302	-1.8778	1.6515	0.97246	-6.31999999999999	-340.96	1592.77129	-1.9801	1.3648	0.54853	-86.638	-37.722	1971.18	-1.8288	1.7255	0.91367	-120.091	167.831	1771.9279	-1.8637	1.511	1.1154
1.148	-49.415	174.33177	329.455	-0.082031	0.2749	0.034668	29.194	-185.096	1800.036	-1.7796	1.3196	0.91602	-75.669	23.593	1600.7	-1.459	1.5527	0.68818	-70.205	-4.238	1940.1617	-1.8363	1.6394	0.95635	-40.858	-302.047	1629.0943	-2.0684	1.3926	0.56787	-54.347	16.0655	1921.942	-1.8191	1.7125	0.90752	-99.336	180.971	1760.1432	-1.8535	1.4902	1.1099
1.15	16.474	154.4935	309.1299	-0.055656	0.24755	0.01959	39.67474	-120.0905	1777.922	-1.7253	1.3333	0.92032	-132.0851	76.766	1600.651	-1.4273	1.5172	0.66514	-9.59100000000001	34.8788	1960.697	-1.8145	1.6301	0.94541	-59.441	-304.09	1716.404	-2.1063	1.4152	0.58467	-28.279	-35.6383	1940.3332	-1.8145	1.6953	0.90283	-155.2451	205.123	1721.642	-1.8389	1.4633	1.0952
1.152	23.296	178.646	282.4449	-0.031546	0.22362	0.001616	1.384	-140.553	1746.19	-1.6428	1.3381	0.91435	-108.18	110.136	1598.178	-1.3875	1.4865	0.64444	24.661	51.8	1945.8873	-1.8087	1.614	0.9414	-59.0473	-186.9858	1779.797	-2.1033	1.4267	0.59736	23.769	-26.946	1972.233	-1.8131	1.6811	0.89629	-133.009	176.191	1715.883	-1.817	1.4364	1.0812
1.154	-46.095	191.885	246.92601	-0.012336	0.20178	-0.016746	-7.846	-84.625	1761.531	-1.5488	1.334	0.91455	-155.468	169.465	1545.3535	-1.353	1.4536	0.62207	27.218	21.66	1949.082	-1.8081	1.5942	0.93945	-87.576	-145.835	1768.723	-2.0705	1.4439	0.60674	26.724	19.264	1958.832	-1.811	1.6606	0.8916	-103.92	123.99	1708.064	-1.7873	1.4098	1.0648
1.156	-2.051	149.129	216.5195	0.006337	0.18227	-0.026153	-53.592	-36.24	1746.007	-1.464	1.3188	0.90625	-168.929	164.559	1482.0447	-1.3083	1.419	0.60254	28.791	110.57	1917.9849	-1.8111	1.5721	0.93857	-103.9298	-124.154	1767.9408	-2.0114	1.4581	0.59141	8.56	49.206	1941.192	-1.8092	1.6443	0.88076	-137.8051	70.441	1688.9559	-1.7502	1.3864	1.043
1.158	-15.683	162.475	155.602	0.021484	0.15967	-0.035645	-95.7771	-70.12	1776.832	-1.3964	1.2966	0.90235	-168.5401	160.166	1422.003	-1.2703	1.3879	0.58545	-38.82	133.6695	1863.892	-1.8074	1.547	0.93565	-103.2931	-58.49	1719.252	-1.9253	1.481	0.57373	-16.382	174.985	1858.291	-1.8046	1.6274	0.87539	-79.891	14.458	1689.168	-1.709	1.3682	1.022
1.16	-35.389	113.6976	142.536	0.033035	0.1437	-0.046334	-75.128	-43.85	1801.852	-1.3523	1.2735	0.90586	-205.521	219.11	1382.559	-1.2332	1.3563	0.56904	-56.262	141.349	1828.52621	-1.7996	1.5283	0.93017	-124.302	-114.368	1693.793	-1.8216	1.4909	0.54082	-46.683	205.874	1802.798	-1.7941	1.613	0.86094	-89.412	32.425	1665.612	-1.6587	1.3526	0.99318
1.162	26.528	59.0269	150.267	0.048419	0.12805	-0.057378	-41.417	-106.338	1817.165	-1.324	1.2496	0.91338	-172.347	218.932	1385.456	-1.2007	1.3243	0.55508	-93.39	179.543	1806.1818	-1.784	1.5098	0.91846	-119.47	-118.104	1736.653	-1.7081	1.4926	0.50742	-54.275	194.547	1786.936	-1.77	1.5974	0.84844	-128.504	77.998	1628.1923	-1.6086	1.3336	0.96498
1.164	-12.006	68.6785	137.273	0.065968	0.11403	-0.074186	23.501	-171.591	1852.941	-1.3125	1.2227	0.92236	-168.312	259.452	1354.9211	-1.1675	1.2935	0.54004	-152.746	110.745	1808.62114	-1.7651	1.4907	0.90527	-120.3685	-108.366	1779.4429	-1.5952	1.479	0.46953	-108.179	208.3	1785.645	-1.75	1.5801	0.83447	-105.325	111.921	1613.088	-1.5551	1.3153	0.93176
1.166	-2.325	12.171	142.8582	0.085778	0.098805	-0.086261	61.952	-152.01	1882.682	-1.3199	1.2131	0.92529	-196.437	272.881	1276.928	-1.1379	1.2626	0.53066	-141.3125	113.364	1824.434	-1.745	1.4729	0.89824	-56.409	-181.5903	1798.55	-1.4958	1.4515	0.43321	-97.1864	118.308	1820.0037	-1.72	1.5626	0.81524	-145.8604	183.573	1566.0943	-1.501	1.2926	0.89836
1.168	0.0769999999999982	28.763	100.6601	0.10791	0.086914	-0.099121	51.434	-204.634	1914.797	-1.3296	1.2079	0.9289	-107.485	231.10376	1221.932	-1.1058	1.2328	0.51767	-165.68	135.964	1803.501	-1.7245	1.4579	0.88828	4.823	-138.6291	1833.286	-1.4136	1.4204	0.40039	-100.9732	91.441	1826.0342	-1.6918	1.5461	0.79502	-149.664	165.797	1521.0127	-1.4434	1.2676	0.86865
1.17	-64.244	40.591	100.9156	0.12596	0.071299	-0.11249	15.744	-204.58	1996.505	-1.3484	1.2141	0.9375	-72.45	260.702	1185.694	-1.0684	1.2016	0.50518	-189.869	87.889	1793.516	-1.6983	1.4411	0.87852	28.219	-150.881	1822.581	-1.3665	1.3946	0.36582	-140.646	76.214	1777.128	-1.6625	1.527	0.78057	-123.44448	165.999	1488.6851	-1.388	1.2389	0.82646
1.172	-37.765	9.658	103.382	0.14237	0.062222	-0.12226	-54.61	-184.116	2012.655	-1.3786	1.2343	0.95371	-33.842	243.261	1162.446	-1.0331	1.1716	0.49395	-178.929	100.255	1764.4838	-1.6705	1.424	0.8667	47.755	-191.533	1849.269	-1.3429	1.3762	0.33653	-128.972	31.196	1737.7653	-1.6281	1.5109	0.76474	-182.245	189.308	1452.1991	-1.3331	1.2114	0.78817
1.174	-58.63	55.1765	72.001	0.15643	0.046597	-0.13476	-82.938	-243.557	2037.06	-1.4209	1.2617	0.98682	-6.742	239.2458	1141.5233	-1.002	1.1426	0.48096	-191.8968	43.807	1709.996	-1.6484	1.4082	0.85889	44.244	-153.356	1881.2236	-1.3433	1.3696	0.31777	-130.041	78.76	1692.779	-1.5918	1.4961	0.75049	-133.8128	183.676	1431.2732	-1.2788	1.1837	0.75341
1.176	-76.944	40.6396	67.7708	0.16699	0.031936	-0.14453	-101.839	-174.621	2060.972	-1.4831	1.2982	1.0067	-53.112	239.921	1121.462	-0.95996	1.1098	0.46728	-169.8561	20.068	1690.983	-1.6203	1.3892	0.84072	16.706	-229.632	1926.673	-1.3622	1.3661	0.30293	-121.646	88.447	1667.578	-1.5628	1.4778	0.73633	-107.88	231.857	1367.168	-1.2272	1.1544	0.72148
1.178	-60.931	10.6689	66.10013	0.1748	0.02002	-0.15723	-153.9854	-135.449	2022.509	-1.5613	1.3324	1.0415	-16.993	161.1185	1100.762	-0.92041	1.0761	0.45449	-130.4185	91.984	1688.283	-1.587	1.3669	0.82227	-12.088	-260.171	1995.378	-1.3999	1.3618	0.29297	-111.133	100.222	1680.097	-1.527	1.4578	0.72275	-108.6234	238.5329	1295.52	-1.1772	1.1284	0.68945
1.18	-103.24	64.402	62.407	0.17354	0.011423	-0.15381	-164.9558	-97.135	2011.8592	-1.6489	1.3699	1.0681	-38.984	151.4684	1089.52	-0.87823	1.044	0.4377	-144.2701	74.774	1677.943	-1.5523	1.3446	0.80235	-13.1763	-224.76	1985.912	-1.4532	1.3651	0.28614	-116.997	157.476	1682.901	-1.4961	1.4387	0.71221	-37.921	208.3415	1250.249	-1.1264	1.1036	0.65782
1.182	-75.49	44.0338	63.9544	0.16777	-0.0023469	-0.15859	-183.363	0.425000000000011	1960.798	-1.7425	1.4122	1.0883	-50.878	137.739	1049.63	-0.83213	1.0108	0.4168	-123.1646	132.477	1660.145	-1.5186	1.3189	0.78008	-10.555	-239.8561	1969.202	-1.5139	1.3708	0.2793	-109.547	139.842	1673.81	-1.4632	1.4185	0.69922	-38.657	239.97497	1210.248	-1.0834	1.0809	0.62949
1.184	-66.781	67.847	25.206	0.15097	-0.0097666	-0.15429	-209.265	-42.617	1946.445	-1.8369	1.4453	1.105	4.916	125.217	1012.684	-0.78857	0.97803	0.4043	-136.418	183.1911	1587.835	-1.478	1.2896	0.75098	6.183	-117.08	1944.458	-1.5695	1.3833	0.28008	-127.252	185.794	1615.94	-1.4253	1.3911	0.67871	1.047	224.365	1199.35625	-1.0432	1.0547	0.59785
1.186	-94.3775	85.037	3.421	0.13301	-0.016505	-0.15	-155.4171	-45.66	1972.91	-1.9185	1.4826	1.1183	-34.489	215.511	946.7286	-0.74512	0.94531	0.38916	-139.1619	166.369	1517.662	-1.4351	1.2664	0.7249	-3.178	-48.492	1867.3365	-1.6264	1.4006	0.28135	-136.485	216.309	1526.5	-1.3886	1.3567	0.65899	24.414	232.065	1197.202	-0.99757	1.0286	0.57071
1.188	-48.549	36.3053	2.112	0.1123	-0.023926	-0.15039	-127.0568	-10.953	1970.587	-1.984	1.5082	1.131	-36.807	215.512	900.13915	-0.70342	0.91495	0.37422	-90.046	217.208	1485.49	-1.3836	1.2379	0.69541	-3.089	-53.175	1868.454	-1.6777	1.4199	0.28809	-136.065	190.626	1474.124	-1.3475	1.3263	0.63828	-9.847	223.9622	1173.46	-0.95264	1.0024	0.53613
1.19	-71.744	61.819	-10.363	0.091798	-0.033203	-0.1501	-95.01	-38.18	1970.437	-2.0184	1.5286	1.1434	7.271	203.148	859.371	-0.66631	0.8833	0.36133	-113.402	203.321	1438.8494	-1.3382	1.2051	0.66728	22.0195	20.508	1869.683	-1.7212	1.4417	0.29355	-113.75	255.139	1417.311	-1.3034	1.2923	0.6168	6.762	153.857	1144.908	-0.9041	0.97559	0.50967
1.192	-66.067	37.314	15.131	0.076563	-0.038769	-0.15039	-66.122	52.5296	1956.799	-2.0368	1.5383	1.1532	-8.634	218.836	812.058	-0.63408	0.84853	0.34825	-85.071	189.873	1432.112	-1.2872	1.1725	0.63633	48.485	-62.002	1876.9	-1.7633	1.4547	0.29326	-86.5317	236.813	1383.5885	-1.2604	1.2467	0.5875	-37.498	150.4113	1092.539	-0.85703	0.94727	0.4875
1.194	-22.592	1.354	32.9782	0.065625	-0.048925	-0.14961	-85.979	61.247	1927.983	-2.0366	1.5571	1.1582	9.22699999999999	159.541	771.572	-0.60107	0.81592	0.33252	-24.846	201.653	1380.762	-1.2319	1.1392	0.61084	93.387	-69.114	1920.6854	-1.7945	1.4625	0.29365	-70.0752	209.854	1366.7624	-1.2168	1.21	0.56299	-38.084	142.354	1047.152	-0.8086	0.91914	0.45547
1.196	-78.3298	46.0296	33.1671	0.063477	-0.050879	-0.15518	-112.257	9.868	1964.236	-2.022	1.5631	1.164	-11.764	183.691	716.0089	-0.57422	0.78301	0.32187	-34.504	142.1606	1330.107	-1.1806	1.1013	0.58154	44.028	-36.455	1891.2676	-1.8133	1.4692	0.29033	-41.131	223.061	1340.891	-1.1728	1.1648	0.53886	1.503	142.9445	1016.972	-0.7625	0.89531	0.43144
1.198	-53.145	4.723	63.328	0.063965	-0.059082	-0.15625	-110.6361	16.83595	1982.277	-2.0088	1.5715	1.1665	-64.842	216.958	667.842	-0.54638	0.74814	0.31074	13.219	162.06	1307.5811	-1.1292	1.0618	0.55391	-1.803	-69.617	1866.1291	-1.832	1.4785	0.28906	15.277	167.771	1313.2216	-1.1222	1.1239	0.50977	-42.032	218.666	955.497	-0.72168	0.86914	0.40723
1.2	-37.27	9.5876	74.6221	0.071387	-0.05957	-0.16191	-108.356	-88.542	1984.211	-1.9857	1.5727	1.1677	-69.587	199.778	643.309	-0.51318	0.71299	0.29277	40.535	166.624	1248.916	-1.0733	1.0239	0.52578	0.25	18.3896	1849.83	-1.8388	1.4896	0.28955	31.541	179.4	1270.8757	-1.0702	1.079	0.48594	-27.611	189.896	911.898	-0.67676	0.83731	0.38408
1.202	-55.015	38.7151	53.6098	0.074707	-0.060742	-0.16455	-86.956	-95.879	2012.171	-1.9608	1.578	1.1652	-93.7779	253.7015	599.079	-0.48115	0.68193	0.28203	56.62	142.16	1224.725	-1.0253	0.98682	0.50254	-55.4443	15.7155	1858.8743	-1.8425	1.4962	0.28223	24.637	171.83	1217.9405	-1.0178	1.042	0.45957	-1.111	199.519	868.3476	-0.63536	0.80547	0.36231
1.204	0.957000000000001	-11.6125	54.415	0.081738	-0.063086	-0.17314	-112.3209	-57.648	2003.496	-1.9414	1.5762	1.1597	-107.9969	193.3704	586.776	-0.44873	0.64893	0.26953	79.828	184.639	1188.08896	-0.97461	0.9502	0.47705	-9.265	-38.587	1917.682	-1.8421	1.5044	0.27559	57.944	132.714	1186.9811	-0.96436	1.0005	0.43652	-38.257	225.1266	805.83	-0.5959	0.77188	0.34277
1.206	-36.009	20.955	39.1651	0.086523	-0.060254	-0.16426	-103.28	-95.0075	1974.609	-1.9224	1.5722	1.1522	-108.6267	168.248	544.167	-0.42471	0.61514	0.2584	29.707	162.3204	1156.4301	-0.92744	0.91241	0.45488	8.778	-24.852	1941.679	-1.842	1.5077	0.28057	44.081	175.382	1158.969	-0.91143	0.95596	0.40996	7.754	175.576	772.6954	-0.56152	0.74082	0.32168
1.208	-40.617	16.7874	39.5562	0.091309	-0.060547	-0.16699	-77.896	-16.5659	1931.0119	-1.9046	1.5638	1.142	-120.614	196.776	502.094	-0.39443	0.58243	0.24942	26.791	129.734	1137.459	-0.88457	0.88066	0.43408	-11.0911	-100.514	1915.6065	-1.8394	1.5044	0.27686	15.106	160.7815	1124.475	-0.86865	0.91768	0.38574	-18.762	209.789	709.963	-0.52344	0.70313	0.29688
1.21	21.608	3.3076	32.478	0.09043	-0.060254	-0.16533	-44.772	-11.854	1875.3382	-1.8858	1.5528	1.135	-121.208	125.319	483.78138	-0.36435	0.55156	0.23652	15.733	157.5202	1097.075	-0.84238	0.84551	0.41221	-11.9961	-99.758	1917.31	-1.8306	1.4968	0.27383	21.721	151.89	1103.952	-0.83037	0.87237	0.36308	-68.775	205.749	654.1465	-0.4835	0.67432	0.27891
1.212	-23.67	73.0705	24.58	0.084571	-0.061719	-0.16631	-4.31700000000001	-17.319	1882.702	-1.8722	1.5384	1.1273	-142.394	144.33	454.8855	-0.33818	0.51553	0.22168	-42.887	141.083	1045.243	-0.79863	0.81006	0.39327	-13.61145	-42.5496	1845.762	-1.8218	1.4927	0.27109	9.049	195.855	1036.681	-0.78887	0.82129	0.34404	-61.05	193.28	620.1919	-0.44395	0.6375	0.26074
1.214	0.868000000000002	39.49	36.01795	0.085351	-0.061719	-0.16514	22.292	73.037	1873.8153	-1.8594	1.5254	1.1235	-127.521	115.308	423.072	-0.30859	0.48486	0.21191	-35.288	182.1103	989.4138	-0.75732	0.77197	0.37451	19.145	-52.488	1825.775	-1.8156	1.4849	0.26797	-20.865	164.7572	971.8205	-0.74512	0.78125	0.31885	-91.356	245.695	577.131	-0.40137	0.60859	0.23379
1.216	2.889	44.6082	50.4413	0.089746	-0.061328	-0.16611	15.657	65.616	1870.677	-1.8546	1.5058	1.1082	-77.029	43.912	392.492	-0.27901	0.44824	0.19736	-61.129	234.044	923.781	-0.71279	0.73594	0.35137	56.7367	42.864	1826.0098	-1.8086	1.4803	0.26768	-27.675	208.4066	902.039	-0.6999	0.73701	0.29824	-94.8601	191.954	562.098	-0.36221	0.57471	0.21162
1.218	-41.329	73.7296	60.2838	0.09668	-0.06543	-0.16846	16.032	126.996	1866.674	-1.8508	1.4852	1.0999	-60.711	102.902	351.418	-0.2498	0.41309	0.18125	-99.997	223.046	874.965	-0.66709	0.69346	0.33282	69.549	71.838	1815.2909	-1.8042	1.4731	0.26758	-30.222	217.1038	842.134	-0.65254	0.69492	0.27813	-92.0082	195.495	533.4951	-0.32031	0.5459	0.18604
1.22	-27.066	37.366	61.625	0.10019	-0.067676	-0.16806	-24.54	166.185	1812.9842	-1.8395	1.4559	1.0855	-59	99.566	345.84914	-0.22402	0.38027	0.16289	-57.458	259.19	828.438	-0.6249	0.65908	0.31211	61.939	61.293	1856.574	-1.7931	1.4659	0.26787	-17.343	181.943	808.943	-0.60762	0.65625	0.25429	-119.607	201.93	488.673	-0.28067	0.51172	0.16475
1.222	-63.7315	71.978	29.9238	0.10517	-0.066211	-0.17149	-87.687	110.001	1770.3396	-1.8253	1.4313	1.0703	-36.246	140.35003	334.599	-0.19433	0.34258	0.14805	-85.8444	233.096	781.3037	-0.58066	0.61485	0.28545	62.2267	135.736	1820.148	-1.7906	1.4629	0.27226	-9.707	233.3249	748.478	-0.56348	0.61719	0.22969	-87.8556	132.6038	455.0994	-0.23994	0.47744	0.13965
1.224	-60.272	46.8302	45.9026	0.11221	-0.067773	-0.17031	-73.073	157.667	1751.7841	-1.8159	1.4067	1.0596	-49.037	210.477	289.0732	-0.17188	0.30762	0.12842	-86.295	212.697	750.7753	-0.53711	0.58301	0.26465	33.7211	111.291	1778.5221	-1.7922	1.4574	0.27695	-28.609	195.866	681.004	-0.51758	0.57422	0.20605	-100.9729	150.3626	416.705	-0.20596	0.44658	0.11894
1.226	-34.586	-8.14597	36.7561	0.11582	-0.064258	-0.16953	-124.956	148.227	1727.141	-1.7977	1.3815	1.0357	-25.131	146.042	258.74	-0.14736	0.27802	0.11289	-84.02694	224.8297	696.734	-0.49014	0.54951	0.24121	29.8475	135.409	1760.0606	-1.7921	1.4509	0.28125	-49.876	200.5748	652.9085	-0.47177	0.53965	0.18252	-83.76176	110.322	390.9732	-0.16904	0.41426	0.10039
1.228	-93.7123	20.3968	21.936	0.11963	-0.062988	-0.16846	-140.9351	120.693	1739.015	-1.7714	1.3544	1.0121	-23.552	152.5	218.2335	-0.12353	0.24736	0.10293	-146.93	184.49	663.813	-0.44922	0.51914	0.21631	44.4083	164.84	1699.646	-1.791	1.4414	0.28955	-83.6119	243.95	632.539	-0.42627	0.49677	0.15938	-38.798	71.234	365.599	-0.13184	0.38037	0.078613
1.23	-59.457	-17.863	43.6405	0.11094	-0.060937	-0.15811	-119.2078	145.673	1723.114	-1.7382	1.3298	0.98672	-21.566	118.138	190.933	-0.10517	0.21221	0.09082	-114.1449334	207.319	645.1863	-0.40196	0.48555	0.19678	25.695	84.847	1694.685	-1.7843	1.4419	0.3	-107.8828	191.8796	602.353	-0.38408	0.46162	0.13554	-24.386	128.689	314.144	-0.10205	0.3499	0.058985
1.232	-68.3517	-1.303	56.5329	0.10576	-0.057031	-0.15293	-142.9399	45.182	1700.4363	-1.6951	1.3018	0.95381	6.191	74.0586	186.976	-0.08457	0.19004	0.076758	-115.5525	213.82	615.242	-0.36172	0.45449	0.17373	47.992	118.654	1701.003	-1.7688	1.4367	0.3083	-90.7014	202.3499	568.453	-0.33926	0.42373	0.11367	-8.92	104.755	296.506	-0.070703	0.32246	0.041309
1.234	-90.4874	24.156	67.88	0.090137	-0.053515	-0.14668	-132.3832	22.076	1692.508	-1.6499	1.272	0.92188	13.031	148.513	173.273	-0.068848	0.1626	0.063965	-149.199	166.8764	599.235	-0.32324	0.4248	0.15527	43.519	77.7439	1698.891	-1.7516	1.4289	0.31494	-107.007	170.1002	522.495	-0.29883	0.38379	0.089355	-20.397	137.7144	285.6989	-0.044922	0.29238	0.025293
1.236	-47.818	-23.8426	70.269	0.07373	-0.047363	-0.13818	-118.6537	35.315	1646.9915	-1.5946	1.2436	0.88946	29.372	121.766	147.976	-0.052442	0.13105	0.052539	-121.586	177.533	548.275	-0.28877	0.39092	0.12959	59.568	54.738	1704.846	-1.73	1.4233	0.32657	-102.108	108.465	484.5724	-0.25655	0.35049	0.06709	-37.479	181.425	254.3023	-0.016504	0.27236	0.0094726
1.238	-77.832	14.2707	39.4827	0.052246	-0.041992	-0.12451	-120.025	27.36	1617.037	-1.5453	1.2176	0.85752	34.33	112.043	122.74	-0.037598	0.10195	0.037598	-130.75	154.5775	507.1929	-0.25273	0.36465	0.1122	68.54	100.655	1687.126	-1.7085	1.4165	0.33398	-99.777	154.1328	440.8938	-0.21923	0.31446	0.045606	-5.274	120.443	231.5033	0.0097656	0.24219	-0.0014648
1.24	-66.693	11.162	35.9795	0.03457	-0.035351	-0.11875	-86.515	123.64	1607.531	-1.4894	1.1945	0.82823	7.557	141.123	99.9199	-0.015722	0.074219	0.023535	-84.2725	149.8648	482.0622	-0.2207	0.33692	0.086816	33.5798	60.35	1633.577	-1.683	1.4068	0.34316	-75.9783	128.333	393.398	-0.18603	0.28047	0.028027	-1.146	156.264	188.958	0.030078	0.21865	-0.017676
1.242	-62.018	2.96379	46.7219	0.016993	-0.025977	-0.10742	-98.604	155.563	1564.6192	-1.4415	1.1652	0.80215	25.629	64.9263	88.3732	0.0088868	0.051074	0.0071292	-53.187	153.2568	451.1886	-0.18311	0.30986	0.067578	58.643	78.725	1616.266	-1.66	1.3966	0.35401	-60.818	147.4955	357.4956	-0.15225	0.25235	0.0078124	-3.443	117.935	158.6241	0.050586	0.19258	-0.029785
1.244	-104.6826	60.299	39.657	-0.00097656	-0.012305	-0.096876	-132.4817	163.884	1543.164	-1.396	1.1431	0.77344	29.037	86.7357	106.142	0.033691	0.021484	-0.012695	-55.261	124.065	411.124	-0.15137	0.28516	0.048828	45.61	120.7552	1562.8786	-1.6386	1.39	0.35947	-37.622	188.0786	329.623	-0.12305	0.22461	-0.0058594	14.367	84.244	141.6368	0.068555	0.16914	-0.03916
1.246	-56.646	21.5798	36.59	-0.015234	0.0017578	-0.087891	-110.5411	222.623	1487.52	-1.3552	1.1171	0.74863	-23.998	72.007	127.0278	0.060742	0.002832	-0.026758	37.407	125.115	392.5619	-0.12373	0.26221	0.033203	12.161	91.6311	1555.138	-1.6192	1.3823	0.36807	2.118	132.604	320.6944	-0.098046	0.19541	-0.023535	-10.236	136.624	113.217	0.091406	0.146	-0.049414
1.248	-38.505	28.114	41.597	-0.022949	0.015625	-0.079102	-143.378	193.917	1456.0054	-1.3085	1.0907	0.72305	-34.944	16.211	129.355	0.087207	-0.014355	-0.047851	25.045	137.666	355.8298	-0.10264	0.2375	0.015039	18.8702	140.514	1554.3172	-1.5972	1.3696	0.36621	18.408	159.07	302.5091	-0.072265	0.16934	-0.036719	-2.777	98.841	95.94	0.1084	0.12598	-0.060059
1.25	-70.452	43.0604	34.853	-0.032422	0.032324	-0.071386	-125.002897	225.289	1427.5447	-1.2683	1.063	0.69844	-57.156	67.2163	123.5839	0.11143	-0.034668	-0.066602	21.731	139.964	330.815	-0.082715	0.2168	-0.0013672	-18.6574	145.263	1492.533	-1.5679	1.3615	0.37813	25.134	158.556	271.0021	-0.051172	0.14785	-0.050781	25.416	107.296	106.8995	0.12051	0.10303	-0.069239
1.252	-25.465	13.0528	28.80619	-0.036718	0.043653	-0.066992	-97.6873	250.428	1356.58	-1.2282	1.0363	0.67676	-59.336	38.62	96.5066	0.13418	-0.051074	-0.083691	83.93175	187.355	311.365	-0.062207	0.19404	-0.016797	-50.22	162.824	1470.7822	-1.5346	1.3516	0.37872	3.634	135.6226	246.07	-0.030469	0.12539	-0.063672	-4.183	121.1696	85.2155	0.13193	0.080469	-0.07832
1.254	-42.07	58.894	22.68	-0.033203	0.056933	-0.065039	-102.692	199.339	1306.972	-1.186	1.0132	0.6543	-83.551	47.163	70.062	0.15186	-0.065918	-0.097656	19.688	185.205	254.8935	-0.045898	0.17285	-0.030273	-20.8148	238.42	1415.908	-1.5002	1.3406	0.37245	23.731	206.389	201.5884	-0.014648	0.10449	-0.075195	17.462	46.65	76.9711	0.14131	0.0625	-0.084571
1.256	-33.674	40.045	22.7231	-0.030762	0.061914	-0.059179	-46.816	217.67	1252.573	-1.1434	0.99033	0.62852	-111.1274	111.816	62.709	0.16807	-0.081836	-0.1208	31.449	168.33	230.1283	-0.026367	0.14463	-0.04248	-42.097	223.944	1344.149	-1.464	1.3242	0.371	23.853	168.426	159.0513	0.000293	0.083301	-0.084082	-1.475	75.1788	84.2431	0.14648	0.045215	-0.096777
1.258	-2.786	-0.00729999999999986	34.3873	-0.021973	0.070801	-0.061523	-35.212	179.1164	1212.612	-1.1109	0.96055	0.60752	-108.295207	68.683	49.819	0.17432	-0.098242	-0.1336	45.294	152.25	214.464	-0.016016	0.12392	-0.049511	-16.298	225.295	1320.3273	-1.4253	1.3071	0.36719	30.879	151.602	144.7537	0.016797	0.061914	-0.088477	-40.444	62.258	69.121	0.14941	0.024414	-0.10547
1.26	-30.757	21.353	28.869	-0.018359	0.074414	-0.068262	2.458	163.52	1210.9267	-1.0723	0.9375	0.58565	-127.059	84.018	55.4366	0.17901	-0.10918	-0.14922	5.594	102.4166	205.187	-0.0089844	0.10283	-0.058105	-1.761	227.493	1271.5001	-1.3853	1.2862	0.36357	24.706	159.163	138.9986	0.025	0.044336	-0.10019	-44.012	21.0417	88.826	0.15078	0.0084962	-0.10908
1.262	-5.549	-35.3161	49.9251	-0.014648	0.071973	-0.073535	39.738	207.1078	1206.0263	-1.0322	0.91348	0.56162	-111.641	53.8872	40.442	0.17822	-0.11934	-0.1622	50.9163	78.58	216.3061	0.0035156	0.083691	-0.069629	-32.832	141.566	1261.4183	-1.3452	1.2653	0.35332	18.25	78.496	149.4132	0.039551	0.025196	-0.10918	-70.9828	60.585	76.4379	0.15147	-0.0039062	-0.11367
1.264	-5.098	-9.089	43.7714	-0.0056641	0.067676	-0.085645	9.614	174.662	1181.2741	-0.99365	0.88135	0.53906	-99.869	-24.557	65.0222	0.16992	-0.12646	-0.17871	24.747	76.124	193.4385	0.014648	0.063477	-0.074707	18.429	171.269	1258.6687	-1.3002	1.243	0.34745	46.53	87.9689	158.5637	0.051758	0.0073242	-0.12451	-86.5393	7.6478	65.551	0.15224	-0.016406	-0.11836
1.266	-43.505	44.6909	43.5554	0.0043945	0.065137	-0.095312	29.813	181.6091	1158.248	-0.95136	0.8543	0.51816	-103.031	35.971	59.628	0.16162	-0.13438	-0.17871	-18.139	62.9069	165.8972	0.029102	0.045313	-0.079492	-6.694	174.216	1203.4298	-1.2607	1.2175	0.33826	15.462	69.577	126.2274	0.065918	-0.0033203	-0.13418	-86.669	17.2625	63.7092	0.14805	-0.024609	-0.11699
1.268	-14.967	22.6586	46.984	0.015625	0.060059	-0.10498	21.687	173.4854	1113.346	-0.90908	0.8251	0.49434	-96.7133	16.005	46.779	0.14844	-0.13828	-0.18555	21.837	65.9343	134.2962	0.03711	0.028808	-0.082324	-20.165	184.12	1196.1099	-1.2129	1.1914	0.32861	2.086	47.074	97.5996	0.079297	-0.018457	-0.14385	-99.7709	65.046	44.32	0.14209	-0.040039	-0.1167
1.27	-33.178	45.883	39.4965	0.026172	0.055469	-0.11367	-23.842	129.049	1075.936	-0.86416	0.79502	0.47246	-103.3844	38.6842	45.9327	0.13711	-0.1418	-0.18867	-36.863	58.0973	86.878	0.042187	0.015918	-0.090137	-9.783	245.629	1150.9389	-1.1681	1.1567	0.32414	2.483	84.7547	93.045	0.085547	-0.030567	-0.1497	-106.16326	25.1759	47.9873	0.13174	-0.043066	-0.11446
1.272	-34.967	24.2327	31.101	0.036621	0.052343	-0.12041	-5.369	168.6563	1021.074	-0.82207	0.76289	0.44522	-97.2394	87.789	45.0481	0.12871	-0.14326	-0.19707	-39.733	26.752	93.653	0.049121	0.00039066	-0.091504	-54.36	201.382	1110.5568	-1.12	1.1205	0.31505	-30.249	30.743	54.4909	0.09541	-0.041797	-0.15732	-108.0921	73.097	45.7503	0.11865	-0.050879	-0.11474
1.274	-22.158	-9.1484	27.9945	0.047558	0.051172	-0.12666	-48.342	181.743	963.8108	-0.77393	0.729	0.4248	-90.984	11.1213	50.554	0.11865	-0.14453	-0.19971	-47.602	35.137	84.4958	0.053711	-0.016602	-0.099121	-29.731	203.218	1087.695	-1.0735	1.0881	0.31077	-41.072	39.229	76.754	0.096191	-0.050293	-0.16357	-74.044	39.515	24.698	0.10341	-0.060254	-0.11279
1.276	-66.658	38.5924	15.883	0.053418	0.05332	-0.12881	-44.269	191.851	921.4394	-0.73076	0.70244	0.3961	-68.158	20.57521	61.255	0.10312	-0.13535	-0.20459	-107.1423	17.233	106.7456	0.058985	-0.028222	-0.10283	-18.4113	184.57	1056.98	-1.0336	1.0601	0.30118	-65.6755	71.1226	98.245	0.091504	-0.060058	-0.16934	-72.587	-15.8446	29.43332	0.09209	-0.065625	-0.11191
1.278	-43.763	33.4952	32.4079	0.054688	0.060547	-0.13818	-18.904	235.465	866.558	-0.68232	0.66963	0.37256	-69.107	3.788	57.5049	0.089062	-0.12822	-0.20274	-78.07186	23.859	113.5983	0.062012	-0.04707	-0.10928	-29.772	139.2788	1029.258	-0.98779	1.0259	0.29199	-95.182	27.724	97.875	0.091894	-0.071387	-0.16933	-76.629	41.6789	37.1987	0.088379	-0.069336	-0.11523
1.28	-41.828	67.225	37.211	0.057226	0.065821	-0.13525	-60.03	214.789	826.2634	-0.63662	0.63565	0.34561	-39.033	-61.408	64.9118	0.07539	-0.11768	-0.20586	-118.029	51.9317	70.042	0.06123	-0.057227	-0.11318	1.321	182.8182	980.9524	-0.94055	1.0008	0.28202	-97.2568	54.8491	119.944	0.086817	-0.077246	-0.16856	-63.69	12.978	38.5498	0.080957	-0.075976	-0.11474
1.282	-90.6493	86.029	18.904	0.056055	0.074609	-0.13252	-25.024	220.0041	799.50193	-0.59004	0.60879	0.31826	-24.976	2.517	65.349	0.058301	-0.10898	-0.20264	-141.754	53.048	74.963	0.055273	-0.068848	-0.11699	-26.925	195.998	899.003	-0.89533	0.97092	0.27257	-95.0443	55.576	77.9646	0.074707	-0.082031	-0.16894	-67.24	45.586	52.433	0.072461	-0.081933	-0.11601
1.284	-40.018	30.27834	34.70104	0.04668	0.087109	-0.1294	-23.49	230.241	727.987	-0.54736	0.57666	0.29688	-24.849	-25.0129	48.2977	0.038086	-0.093262	-0.19336	-102.9078	80.098	53.325	0.049316	-0.080566	-0.1123	-7.594	213.784	859.996	-0.84591	0.93956	0.2645	-118.5882	17.9382	46.8353	0.064941	-0.084961	-0.1665	-78.7463	77.815	47.59522	0.070118	-0.08584	-0.11758
1.286	-75.205	52.692	47.6721	0.04082	0.095605	-0.1251	-73.244	185.459	683.4153	-0.5044	0.55283	0.27071	21.504	-7.3774	36.7882	0.010742	-0.084668	-0.18359	-149.451	76.844	21.086	0.035157	-0.094629	-0.11582	15.773	250.8081	817.908	-0.80145	0.90393	0.25548	-105.5288	58.082	29.548	0.051367	-0.085742	-0.15723	-62.457	8.166249	48.895	0.067285	-0.087207	-0.11758
1.288	-90.6262	44.602	59.34	0.035156	0.10254	-0.12354	-43.241	203.235	651.7972	-0.45927	0.52197	0.24668	43.137	53.842	29.7257	-0.011816	-0.075293	-0.17168	-109.4819	61.057	26.0694	0.028906	-0.10781	-0.12139	-14.337	216.7451	773.9374	-0.75586	0.875	0.24707	-116.431	17.6246	8.408	0.037793	-0.082031	-0.15323	-49.402	34.799	56.2116	0.063965	-0.087891	-0.11963
1.29	-53.41	7.61	70.907	0.020313	0.11494	-0.11836	-90.5929	190.02832	618.1378	-0.41748	0.49775	0.22168	28.769	5.67607	30.7175	-0.040723	-0.070606	-0.15606	-96.1924	50.243	3.88	0.019531	-0.12071	-0.11827	5.807	216.118	760.56	-0.71396	0.84575	0.23998	-111.417	17.918	15.419	0.02334	-0.082813	-0.14151	-41.273	8.8215	48.3259	0.065918	-0.093457	-0.1208
1.292	-101.16	37.7377	64.2362	0.0095703	0.12373	-0.11758	-88.20595	176.3157	592.279	-0.38047	0.46758	0.1916	8.527	41.907	28.413	-0.058008	-0.065918	-0.14336	-94.0968	9.231	15.137	0.012793	-0.12705	-0.12636	-5.107	223.972	703.011	-0.67538	0.81541	0.22952	-82.4566	31.5111	23.303	0.0033203	-0.083594	-0.13164	-10.993	-33.824	51.9236	0.071094	-0.09336	-0.12119
1.294	-77.093	-40.358	81.3124	0.0072265	0.13115	-0.11211	-92.554	193.752	567.5213	-0.33643	0.43896	0.16699	2.967	44.906	24.3397	-0.07373	-0.06543	-0.13232	-18.322	-6.953	46.557	0.0083008	-0.13867	-0.1333	-67.732	189.1982	678.9494	-0.6396	0.78496	0.21899	-91.6782	-23.0986	51.582	-0.01416	-0.081543	-0.12402	-24.766	31.64251	32.752	0.075781	-0.096094	-0.12861
1.296	-38.248	-79.6	120.154	0.0030273	0.13633	-0.10625	-131.769	152.1115	542.62	-0.29814	0.40908	0.14072	2.819	2.67721	39.3008	-0.085938	-0.061426	-0.12139	-48.47	12.921	26.803	0.0085938	-0.1415	-0.13623	-38.716	222.1091	638.0725	-0.59799	0.75224	0.20515	-59.432	19.071	60.7875	-0.025977	-0.081933	-0.12012	-1.259	-8.784	32.964	0.08418	-0.10274	-0.13809
1.298	-58.622	-90.522	182.962	-4.4409e-14	0.13916	-0.10156	-85.0711	136.4691	513.838	-0.26104	0.38164	0.11934	-8.17	58.187	42.35	-0.089063	-0.0625	-0.1125	-39	10.912	29.55	0.013086	-0.14512	-0.14277	-67.254	204.353	585.168	-0.55273	0.71777	0.18896	-41.596	25.444	40.1814	-0.032422	-0.076074	-0.11153	2.763	4.572	44.96	0.098145	-0.11133	-0.14746
1.3	-3.283	-149.2519	263.824	0.00048826	0.14453	-0.097363	-88.44	130.8259	472.8762	-0.22549	0.35625	0.090429	-48.525	14.5022	31.5619	-0.084375	-0.062109	-0.10078	16.677	24.9641	43.196	0.011914	-0.14824	-0.14707	-61.562	181.877	559.3353	-0.50437	0.69069	0.17632	-50.416	-7.7017	45.233	-0.037891	-0.074121	-0.11153	7.41399999999999	40.3581	33.40195	0.11856	-0.11221	-0.1586
1.302	6.64739	-138.631	368.343	-0.0063477	0.14843	-0.1043	-75.4074	91.382	426.9863	-0.19023	0.33194	0.0625	-48.701	-10.3943	27.5859	-0.079394	-0.069531	-0.094336	-41.119	26.5838	44.961	0.0125	-0.14931	-0.14893	-46.279	197.351251	534.1136	-0.45353	0.66026	0.15885	-28.505	21.6768	60.7905	-0.035059	-0.070508	-0.104	8.167	-6.1027	40.361	0.13847	-0.11778	-0.18106
1.304	32.67408	-192.855	458.602	-0.012207	0.15625	-0.10781	-7.419	108.43	398.3331	-0.15137	0.30371	0.035645	-62.881	57.048	11.707	-0.083984	-0.078125	-0.088379	18.624	5.7314	70.782	0.011719	-0.15186	-0.15137	-88.9039	161.4369	503.22461	-0.40197	0.6256	0.14325	-25.9	-30.5437	54.6578	-0.033691	-0.063965	-0.094727	13.211	46.126	65.1442	0.16231	-0.12285	-0.19434
1.306	75.6304	-280.134	532.184	-0.027832	0.16699	-0.10254	-12.26	116.232	346.2585	-0.11836	0.27353	0.010351	-76.708	13.9662	7.8221	-0.080078	-0.08457	-0.087012	50.062	10.903	36.9723	0.0033203	-0.15039	-0.14961	-30.007	163.2663	474.184	-0.34803	0.59501	0.12494	3.157	-22.6906	51.462	-0.030566	-0.067285	-0.092676	-23.363	43.0237	44.0856	0.18848	-0.12705	-0.2085
1.308	63.436	-289.685	589.6007	-0.049316	0.18604	-0.10303	5.156	110.028	330.664	-0.08916	0.25264	-0.015234	-79.48	51.406	24.7305	-0.078711	-0.091016	-0.085938	4.429	2.3512	31.1576	-1.2e-08	-0.15117	-0.146	-44.687	167.1061	414.6281	-0.29834	0.56689	0.1123	40.619	10.2676	26.589	-0.02207	-0.068652	-0.091602	-42.38	7.595	48.1768	0.20752	-0.1333	-0.22461
1.31	81.116	-323.047	640	-0.092092	0.22119	-0.089453	19.896	152.3828	288.7401	-0.059863	0.22569	-0.039453	-88.136	48.9739	18.247	-0.083008	-0.096875	-0.079297	30.395	-3.2753	47.1652	-0.011719	-0.15391	-0.146	-95.344	122.127	372.1223	-0.25883	0.53899	0.10022	-5.232	-14.3066	0.137	-0.016211	-0.076074	-0.09082	-46.758	73.635	37.44	0.22578	-0.12803	-0.23574
1.312	80.548	-246.7601	697.444	-0.15351	0.26944	-0.066894	-5.706	146.9635	280.1863	-0.03418	0.20147	-0.059766	-98.7463	-25.942	31.2849	-0.088282	-0.1042	-0.070703	29.381	20.4527	21.381	-0.020508	-0.15645	-0.14102	-60.392	128.85	347.903	-0.2169	0.51443	0.088429	5.181	31.555	19.4367	0.0004883	-0.080371	-0.10195	-60.363	6.8196	16.348	0.23564	-0.12861	-0.24278
1.314	64.182	-128.9487	726.29	-0.23594	0.32373	-0.029004	39.114	162.633	275.675	-0.01123	0.17871	-0.083496	-112.0111	23.589	36.044	-0.10205	-0.10986	-0.063477	5.516	26.9696	30.2802	-0.026855	-0.15479	-0.1416	-94.604	116.728	319.349	-0.17456	0.48878	0.078158	14.581	50.18	9.296	0.021973	-0.091309	-0.10059	-52.582	6.3559	32.919	0.23759	-0.1251	-0.24668
1.316	105.826	-106.709	742.847	-0.3417	0.37246	0.011621	29.633	166.138	238.535	0.010351	0.15283	-0.1084	-109.382	-4.66	45.8762	-0.11611	-0.11279	-0.057324	52.401	60.439	31.232	-0.026758	-0.15898	-0.14306	-78.622	134.308	326.5103	-0.14062	0.46949	0.068252	9.88	21.9391	17.937	0.051269	-0.10322	-0.11865	-75.421	52.679	25.3056	0.23066	-0.12344	-0.24366
1.318	88.236	-34.316	758.789	-0.45459	0.43359	0.058105	1.207	134.29	204.3532	0.038281	0.13252	-0.13106	-104.8739	10.409	69.125	-0.12959	-0.11445	-0.056836	-8.932	68.799	25.1421	-0.023926	-0.16015	-0.14551	-61.0375	165.107	307.921	-0.104	0.44971	0.061523	48.079	44.239	41.4191	0.076757	-0.11504	-0.13252	-83.55	-0.0886	30.6693	0.21582	-0.11182	-0.229
1.32	116.198	-37.459	847.436	-0.57139	0.49522	0.10849	37.294	132.656	180.142	0.060547	0.11533	-0.1498	-132.177	89.344	48.7279	-0.13623	-0.11641	-0.054492	6.456	45.5515	47.228	-0.017286	-0.16094	-0.15254	-84.186	148.302	272.235	-0.069817	0.42171	0.057096	-3.496	-11.4402	25.211038	0.10489	-0.12246	-0.14424	-85.7342	51.8201	37.5773	0.1918	-0.10088	-0.21963
1.322	124.7	-39.152	924.266	-0.69219	0.56269	0.16358	-8.619	102.373	147.503	0.087793	0.097264	-0.16943	-118.3785	44.963	32.2395	-0.13594	-0.10615	-0.055566	-10.02	43.5	28.0581	-0.008789	-0.15683	-0.15	-67.091	155.848	246.199	-0.036086	0.39193	0.050352	-13.008	3.8945	34.5613	0.12617	-0.12773	-0.15557	-82.4403	24.945	34.199	0.15996	-0.08916	-0.19668
1.324	58.2556	41.678	977.23	-0.80664	0.63301	0.20537	7.677	62.761546	154.9742	0.11328	0.080078	-0.19531	-98.6898	78.69	16.112	-0.12988	-0.098145	-0.060547	-75.689	34.3175	21.804	-0.00048828	-0.15283	-0.15088	-88.523	160.875	175.787	-0.012216	0.36639	0.047959	-12.739	68.298	27.757	0.14746	-0.12793	-0.16846	-73.72	-18.554	44.4843	0.12246	-0.077051	-0.17168
1.326	93.096	36.831	1012.139	-0.91943	0.70479	0.23955	32.241	70.659	136.744	0.13282	0.065625	-0.21846	-100.465	78.831	4.362	-0.11387	-0.079492	-0.05791	-58.571	24.6121	45.1691	0.0038086	-0.14863	-0.15098	-102.416	109.3253	173.233	0.012387	0.34147	0.038264	-68.094	52.969	-5.0148	0.16026	-0.12949	-0.17588	-94.48233	20.721	35.177	0.083887	-0.060352	-0.15039
1.328	100.347	50.216	1012.304	-1.021	0.77002	0.26367	-16.286	44.284	120.871	0.15517	0.05	-0.23379	-70.764	22.4626	34.8677	-0.098929	-0.057813	-0.061816	-92.4832	30.0718	35.064	0.0025391	-0.1418	-0.14365	-37.524	101.62868	163.615	0.03125	0.3125	0.029297	-61.782	67.122	33.12483	0.1625	-0.12597	-0.18066	-80.511	-5.661	32.514	0.04834	-0.043945	-0.12598
1.33	44.3844	31.27	1053.657	-1.1057	0.83652	0.28565	13.957	51.171	127.292	0.17158	0.033984	-0.24941	-52.303	62.2113	57.9641	-0.084082	-0.038672	-0.061816	-98.8925	6.964	72.24801	-0.0048828	-0.13437	-0.13936	-56.813	60.71	151.06	0.057487	0.28458	0.023798	-81.9821	37.364	25.4133	0.16055	-0.1209	-0.17988	-92.1529	22.8961	49.2621	0.02041	-0.026074	-0.10391
1.332	60.133	-62.74	1115.491	-1.1945	0.88965	0.31142	-23.343	56.186	110.789	0.18447	0.023535	-0.26006	-38.144	31.5318	45.822	-0.071386	-0.017383	-0.069336	-76.3874	3.7507	43.8553	-0.011035	-0.12578	-0.13047	-38.667	46.007	159.3486	0.077026	0.26242	0.021755	-99.2647	-10.1068	39.5225	0.15313	-0.11602	-0.17852	-101.0988	77.357	51.02707	0.0032226	-0.0077148	-0.085156
1.334	-1.783	-100.68	1155.568	-1.284	0.95449	0.35244	-70.036	42.705	108.324	0.19092	0.010254	-0.26611	-14.586	22.3452	61.63528	-0.0625	0.0024414	-0.073242	-138.25	9.1931	32.8453	-0.03125	-0.11475	-0.11572	-18.305	72.2621	140.224	0.094587	0.24055	0.016684	-70.9293	27.1268	53.94704	0.14111	-0.10986	-0.16748	-77.587	15.5632	52.817	-0.0057617	0.011035	-0.070703
1.336	-109.679	-170.65	1217.332	-1.3718	1.0138	0.39658	-30.122	51.765	94.9562	0.19297	0.0053712	-0.27217	4.429	77.42	63.5822	-0.045801	0.013867	-0.082129	-111.6721	8.458	60.764	-0.053809	-0.10576	-0.10322	-61.946	86.4986	108.8557	0.10206	0.21637	0.013279	-124.88	-8.623	26.4885	0.11543	-0.10098	-0.16309	-65.831	52.982	41.6083	-0.012304	0.030957	-0.057812
1.338	-102.509	-252.0888	1250.0278	-1.4727	1.0625	0.44238	-83.6321	49.0782	76.0623	0.18818	-0.0010742	-0.27608	-6.659	24.4052	52.716	-0.034863	0.030371	-0.087793	-109.9058	17.7123	41.2123	-0.074903	-0.093946	-0.090039	-18.272	103.431	94.819	0.10938	0.20068	0.016113	-115.2085	8.929	37.4204	0.090429	-0.090625	-0.15263	-52.151	36.4876	20.9696	-0.012695	0.052246	-0.051758
1.34	-138.325	-287.204	1281.107	-1.584	1.1066	0.48155	-86.013	37.9197	89.0963	0.17803	-0.0065427	-0.27373	7.763	50.816	53.232	-0.018067	0.044824	-0.095215	-141.678	14.488	24.990546	-0.097946	-0.083789	-0.076758	-62.163	111.221	85.482	0.10899	0.17492	0.016309	-91.0319	48.8155	22.494	0.062305	-0.074609	-0.13311	-29.247	-4.009145	33.199	-0.013574	0.068262	-0.044824
1.342	-98.09	-359.84	1326.568	-1.6836	1.1325	0.51885	-71.861	63.219	73.8372	0.16611	-0.0067382	-0.27305	2.418	45.325	40.9227	0.00087892	0.058399	-0.10537	-72.254	-8.502	41.1697	-0.11406	-0.069629	-0.067481	-79.269	67.052	89.94	0.1087	0.15861	0.01738	-101.974	17.045	5.299	0.0375	-0.063574	-0.11944	-29.436	66.553	34.973	-0.0039062	0.078027	-0.048535
1.344	-47.999	-358.86	1354.203	-1.7597	1.1391	0.55049	-125.83	60.513	62.948	0.14404	-0.0087891	-0.2666	-6.58300000000001	-20.4357	61.6855	0.013184	0.072754	-0.1167	-80.79669	12.825	20.545	-0.125	-0.058105	-0.045898	-12.585	50.7219	105.9609	0.10713	0.14454	0.018945	-73.137	59.4018	41.2275	0.01709	-0.04541	-0.10547	-38.571	28.4991	27.152	0.003125	0.08584	-0.050098
1.346	-87.932	-349.29	1402.5425	-1.8245	1.1424	0.56231	-98.1247	66.179	73.609	0.12148	-0.01416	-0.25556	7.454	28.251	72.2175	0.036328	0.081543	-0.12588	-73.1576	15.78	52.57	-0.13008	-0.043066	-0.038282	-70.9403	15.9193	97.2806	0.1003	0.1295	0.025292	-85.31583	68.572	52.4246	-0.0033202	-0.033692	-0.093555	-2.905	21.82235	51.8943	0.0096681	0.088965	-0.060058
1.348	-70.982	-344.45	1466.449	-1.8594	1.1445	0.55713	-102.9024	71.984	33.128	0.10068	-0.017969	-0.24863	-4.067	-7.6949	60.15605	0.057617	0.094239	-0.13271	-15.293	36.3672	63.74846	-0.13643	-0.029297	-0.027832	-50.333	18.365	98.126	0.09375	0.1167	0.026855	-87.4904	41.209	76.212	-0.015528	-0.015723	-0.080566	4.395	61.6071	45.7684	0.021484	0.084961	-0.072754
1.35	-91.0881	-273.56	1516.777	-1.8429	1.1411	0.53057	-105.86881	51.1259	20.491	0.081932	-0.018749	-0.24317	2.758	-12.4892	63.646	0.075586	0.10283	-0.13427	-77.4959	63.863	21.2793	-0.13603	-0.014453	-0.021582	-47.176	58.83	75.7979	0.086328	0.10146	0.033006	-69.436	68.552	81.913	-0.022168	0.0041989	-0.073535	-1.646	2.765	42.277	0.038379	0.079687	-0.083496
1.352	-120.7881	-231.413	1549.055	-1.7812	1.1443	0.48662	-64.663	39.0284	19.119	0.065917	-0.020117	-0.24004	-11.784	50.9975	56.4155	0.091407	0.11025	-0.14092	-22.924	50.372	42.906	-0.13252	-0.00058592	-0.016504	-99.426	75.4278	32.9089	0.083106	0.089253	0.035257	-65.379	31.5156	27.124	-0.025879	0.014844	-0.06875	1.889	60.035	52.682	0.058887	0.079004	-0.094336
1.354	-86.427	-195.31	1535.067	-1.6702	1.152	0.43897	-96.85169	24.94631	10.913	0.055664	-0.021973	-0.23389	-44.149	9.7103	46.522	0.10303	0.11475	-0.146	5.307	47.2087	32.5698	-0.12695	0.013184	-0.014648	-49.664	79.984	23.6192	0.081933	0.077537	0.04424	-33.077	15.743	41.62637	-0.029297	0.033691	-0.062012	-19.428	48.532	54.286	0.074902	0.076269	-0.10488
1.356	-130.943	-141.734	1521.379	-1.5413	1.1681	0.38291	-52.882	7.516	44.6603	0.040041	-0.017675	-0.23135	-55.558	55.239	54.2508	0.11162	0.11699	-0.14268	-17.489	18.1408	26.9017	-0.1167	0.019434	-0.013672	-80.402	70.153	13.272	0.078808	0.070604	0.052052	-4.384	40.0071	33.393	-0.027637	0.042579	-0.06084	-19.864	1.6517	64.5829	0.097557	0.075684	-0.11865
1.358	-137.0669	-135.345	1551.435	-1.4199	1.1895	0.33691	-27.695	18.534	44.4788	0.029398	-0.013967	-0.22364	-62.178	58.6875	55.773	0.11768	0.1209	-0.14101	40.44	-6.6754	38.5277	-0.10693	0.023633	-0.01582	-86.565	16.8577	48.652	0.074219	0.059082	0.061035	-18.647	1.4409	33.4325	-0.026562	0.051661	-0.061036	-20.546	28.9173	59.151	0.11035	0.077148	-0.13477
1.36	-107.684	-105.45	1547.523	-1.3328	1.2043	0.29483	-73.808	2.3679	58.343	0.014165	-0.0092773	-0.22011	-48.046	-18.5846	74.6614	0.11885	0.12246	-0.13633	8.72799999999999	6.14794	16.471	-0.092872	0.027539	-0.016992	-29.015	0.395000000000003	59.653	0.067188	0.055665	0.067578	12.755	36.7407	54.523	-0.016796	0.058301	-0.074318	-29.562	-33.4261	41.7613	0.12861	0.079101	-0.14199
1.362	-120.061	-116.073	1585.206	-1.2714	1.2224	0.2584	-19.728	11.5096	58.108	0.0042992	-0.010353	-0.21543	-71.674	-18.24649	99.7286	0.11738	0.12276	-0.13555	10.698	-1.584	53.7875	-0.078516	0.022461	-0.023828	-62.75	-4.779	45.168	0.056153	0.04668	0.082617	18.879	42.837	47.8658	-0.0075191	0.061719	-0.076074	-33.034	-22.6461	42.5262	0.13594	0.081152	-0.1461
1.364	-55.112	-173.02	1625.7084	-1.2386	1.2396	0.23614	-29.833	26.1821	54.6741	-0.0058594	-0.0078125	-0.20947	-113.885	-89.496	126.297	0.1123	0.12598	-0.12988	64.347	5.4027	54.4253	-0.058594	0.016602	-0.033203	-72.826	3.255	63.718	0.0417	0.038087	0.089258	13.339	1.8873	76.328	0.0048828	0.064941	-0.083496	-44.376	50.4962	28.741	0.14571	0.084668	-0.15078
1.366	-21.212	-187.3619	1641.411	-1.2447	1.2623	0.22783	-41.041	4.56924	67.679	-0.018071	-0.0075175	-0.20165	-66.9665	-123.6081	184.01	0.10029	0.129	-0.11836	17.754	14.8858	27.451	-0.040527	0.010058	-0.038183	-69.598	29.88998	52.2136	0.026953	0.032422	0.093359	36.649	27.8136	78.844	0.021873	0.061816	-0.096386	-59.129	27.8922	50.575	0.14629	0.088086	-0.14902
1.368	3.598	-208.641	1688.855	-1.271	1.2935	0.23193	34.33	10.07815	64.647	-0.031844	-0.0046963	-0.19687	-65.1	-93.533	246.101	0.089356	0.13487	-0.11045	39.158	-3.113	44.307	-0.022852	0.0049805	-0.050293	-106.1389	37.96496	43.285	0.019043	0.024414	0.10889	14.911	-8.4485	54.2614	0.04023	0.062891	-0.10546	-65.404	53.348	79.1522	0.14502	0.087402	-0.15332
1.37	82.246	-190.394	1706.537	-1.3245	1.329	0.24609	-13.633	-5.8232	37.58015	-0.039265	-0.01094	-0.18983	-75.979	-186.9693	332.84	0.072949	0.13838	-0.10107	17.209	19.272	34.3049	-0.008789	0.0010742	-0.059278	-55.959	51.81	43.56	0.010547	0.021973	0.11103	7.387	-10.7825	60.0248	0.058979	0.06211	-0.11367	-72.248	-5.5928	96.2072	0.13564	0.090625	-0.13349
1.372	54.204	-185.725	1750.8256	-1.3918	1.3672	0.26182	1.717	-22.6124	38.897	-0.050792	-0.009284	-0.18418	-46.2852	-229.486	417.94	0.051953	0.14531	-0.090039	-34.988	14.10762	48.651	0.0044922	-0.00039062	-0.059863	-62.938	59.922	18.5702	0.0060547	0.017968	0.12041	11.732	17.69953	53.5901	0.0707	0.063964	-0.11953	-63.715	-88.432	151.6354	0.11582	0.094434	-0.12432
1.374	65.1973	-217.626	1827.419	-1.4574	1.4063	0.28018	24.298	7.02812	15.4499	-0.058105	-0.021484	-0.18701	-44.099	-289.392	463.143	0.019531	0.1499	-0.078125	-9.75	5.674	42.724	0.017578	-0.0048828	-0.074707	-62.351	20.9451	40.0368	0.0037109	0.017968	0.12315	-45.295	-22.4885	39.3858	0.08252	0.066895	-0.12354	-60.366	-94.789	201.73	0.094727	0.1042	-0.11885
1.376	59.087	-246.758	1856.722	-1.5137	1.4481	0.29805	-15.589	31.8534	12.7594	-0.064738	-0.023419	-0.18105	-26.0739	-374.8	527.3063	-0.009375	0.1624	-0.075293	-59.085	24.607	17.4611	0.022656	-0.0041016	-0.080957	-29.428	7.989	55.2442	0.0069336	0.020019	0.12695	-22.585	17.3825	44.887	0.084084	0.067873	-0.12471	-52.1925	-181.931	275.86	0.071094	0.10977	-0.11347
1.378	-22.5985	-288.033	1902.676	-1.5625	1.4883	0.31104	30.494	49.833	28.564	-0.063572	-0.031345	-0.18018	2.3991	-301.6104	586.2832	-0.042285	0.17051	-0.074317	-65.17	13.8751	25.5169	0.030078	-0.0022461	-0.088672	-77.639	-2.989	23.327	0.01416	0.02002	0.12695	-26.3	34.918	14.263	0.079386	0.072469	-0.12588	-60.1377	-227.3275	373.618	0.041016	0.12305	-0.10938
1.38	-2.158	-273.726	1920.58	-1.6021	1.5271	0.31923	-13.691	55.898	23.5123	-0.067064	-0.03755	-0.17862	16.7964	-263.176	629.573	-0.07744	0.18496	-0.074707	-35.879	30.6672	22.826	0.028906	0.0016601	-0.09375	-24.94	-3.845	34.533	0.026562	0.017676	0.12627	-51.602	24.3818	15.4503	0.07001	0.07754	-0.12313	-40.304	-250.87	421.834	0.007715	0.14013	-0.1127
1.382	-20.091	-179.024	1890.893	-1.6387	1.5621	0.32139	-25.296	32.5705	40.798	-0.068655	-0.035041	-0.18457	41.274	-202.418	683.8776	-0.11152	0.20293	-0.068652	-117.799	61.0613	11.946	0.025977	0.0084961	-0.1044	-24.968	13.7869	26.772	0.044726	0.015234	0.12207	-51.849	63.628	43.65	0.05956	0.084284	-0.12343	0.0126999999999997	-363.591	511.956	-0.025098	0.16533	-0.11534
1.384	-51.602	-118.876	1874.714	-1.6699	1.5903	0.32334	-5.891	29.2238	55.842	-0.067383	-0.035156	-0.18311	60.668	-94.102	696.481	-0.15283	0.23584	-0.054199	-98.2539	50.7733	37.76135	0.027832	0.016113	-0.10693	-67.279	30.8123	40.0201	0.066211	0.010547	0.11387	-88.0354	15.1778	41.73	0.04248	0.090332	-0.11475	14.5544	-352.27	587.981	-0.06416	0.20049	-0.1169
1.386	-2.07	-75.722	1847.501	-1.6981	1.6221	0.32481	-66.883	25.2549	31.6056	-0.068597	-0.036788	-0.17985	84.19	-106.154	729.284	-0.20674	0.27197	-0.02373	-99.1228	58.993	20.7076	0.028906	0.027051	-0.10986	-29.787	50.423	70.984	0.090431	0.0067383	0.10645	-88.5385	-9.352	60.9288	0.028345	0.099509	-0.11289	-2.678	-333.43477	651.569	-0.10742	0.23985	-0.10508
1.388	-6.594	-75.132	1834.491	-1.7266	1.6426	0.31787	-59.729	11.762	49.8016	-0.07117	-0.03743	-0.17916	112.55	-30.275	827.977	-0.28282	0.30743	0.0096704	-127.352	33.2417	31.843	0.024805	0.039453	-0.11953	-23.713	70.243	37.21724	0.11523	0.0039063	0.097168	-72.5035	2.853	40.7154	0.012721	0.11517	-0.11635	14.5885	-311.75	689.939	-0.1626	0.29199	-0.086426
1.39	6.72744	-108.37	1851.747	-1.7535	1.6594	0.30537	-53.673	30.128	24.606	-0.080256	-0.038977	-0.17141	132.96	52.662	906.811	-0.37657	0.35235	0.047171	-76.805	5.7139	48.562	0.018555	0.04961	-0.11485	-50.1	49.719	43.139	0.14082	0.00097656	0.088281	-115.421	-36.657	25.8199	0.0087891	0.13275	-0.11549	21.9826	-197.196	709.8154	-0.2416	0.35156	-0.053321
1.392	63.157	-85.586	1884.051	-1.7676	1.6705	0.2919	-103.15699	9.11	18.26207	-0.091889	-0.042105	-0.16594	145.002	68.1076	964.489	-0.48487	0.39424	0.08809	-105.6998	6.8201	34.0348	0.0089845	0.062597	-0.12343	-22.471	33.2967	43.2943	0.16728	-0.0033203	0.079687	-92.079	10.359	33.9573	0.0036232	0.15489	-0.12	49.532	-176.115	704.6531	-0.34179	0.41504	-0.010449
1.394	7.227	-60.063	1888.3049	-1.7754	1.6767	0.27862	-77.999	2.044	30.0877	-0.10791	-0.041016	-0.16797	136.004	121.697	1015.7781	-0.59668	0.43848	0.13232	-112.8779	-20.92	76.56548	-0.00097656	0.080078	-0.12891	-56.209	8.666	28.65	0.19112	-0.0076172	0.071875	-103.8583	27.8374	29.095	-0.00048828	0.17676	-0.125	94.653	-118.07	746.538	-0.45625	0.4748	0.038379
1.396	-13.611	-29.912	1891.337	-1.7753	1.6798	0.27051	-115.958	16.847	27.156	-0.11795	-0.033374	-0.15633	165.93	73.165	1046.992	-0.712	0.4872	0.1747	-74.0616	-46.973	112.175	-0.0087892	0.093848	-0.13028	-34.834	-17.691	36.69	0.21367	-0.0098633	0.060743	-119.6473	-7.1929	41.537	-0.0015719	0.20014	-0.13536	111.892	-16.936	818.804	-0.5833	0.53213	0.084862
1.398	-20.334	9.407	1876.3001	-1.7734	1.6797	0.26709	-120.6404	2.588	40.3702	-0.13046	-0.027264	-0.15483	184.572	-12.13	1117.406	-0.82459	0.541	0.20722	-111.429	-64.554	166.116	-0.019629	0.10782	-0.13672	-22.03	0.9645	24.611	0.23242	-0.01416	0.054688	-79.1179	-19.581	92.76	0.00059538	0.2228	-0.14164	98.02	-1.812	884.971	-0.72266	0.59766	0.13086
1.4	-82.3325	-26.3079	1871.5486	-1.7681	1.6796	0.26943	-59.518	12.753	41.4735	-0.14498	-0.022398	-0.14839	128.873	-33.21	1190.05	-0.93473	0.60194	0.2205	-45.23	-126.0219	261.482	-0.028613	0.1168	-0.14492	-65.812	18.9198	42.2015	0.25176	-0.022754	0.045801	-94.3072	-90.0405	136.885	0.0066111	0.23415	-0.15301	95.043	92.5905	936.613	-0.85254	0.65567	0.17002
1.402	-34.5167	-61.1665	1901.899	-1.7741	1.6833	0.26973	-117.192	16.057	28.085	-0.15831	-0.016141	-0.14129	72.096	-131.738	1256.155	-1.0276	0.66697	0.24463	23.177	-142.887	328.866	-0.035059	0.12979	-0.15576	-24.265	33.4844	58.642	0.26446	-0.033496	0.039746	-26.156	-144.912	229.26693	0.007608	0.25083	-0.16022	78.2919	129.268	967.5418	-0.96934	0.71875	0.19385
1.404	-54.88	-89.2268	1921.7441	-1.7854	1.686	0.26894	-69.748	11.315	34.9863	-0.16699	-0.0092773	-0.13916	27.41683	-161.858	1337.815	-1.1128	0.73193	0.26318	31.257	-183.497	410.382	-0.040527	0.14502	-0.17139	-47.693	55.847	30.6751	0.27461	-0.038965	0.032324	27.4588	-153.678	297.856	0.0087891	0.26172	-0.1709	83.77	83.233	1002.577	-1.0596	0.77851	0.20595
1.406	-66.115	-105.661	1937.2544	-1.8001	1.6776	0.27099	-56.622	36.2525	29.694	-0.16748	0.0022006	-0.13475	-15.24735	-199.024	1356.276	-1.2024	0.80101	0.2924	106.955	-229.437	491.4134	-0.048438	0.16787	-0.18604	-65.559	37.39966	22.6175	0.27793	-0.043359	0.023828	-10.5564	-230.083	372.622	4.3695e-05	0.27104	-0.18334	92.454	73.279	1041.746	-1.1474	0.84053	0.21563
1.408	-36.7682	-90.0903	1933.7423	-1.8184	1.666	0.27197	-101.7916	39.6081	34.541	-0.16879	0.0069396	-0.12677	-8.3	-300.151	1385.646	-1.2973	0.87887	0.33364	73.93578	-255.386	532.768	-0.053906	0.20332	-0.19423	-34.147	42.738	21.769	0.27881	-0.047363	0.014648	73.408	-247.648	453.043	-0.011125	0.2834	-0.20006	74.244	-38.01	1108.56	-1.2441	0.91992	0.23291
1.41	-70.8657	-102.648	1900.343	-1.8379	1.6481	0.2626	-42.484	61.37	48.3741	-0.16265	0.012797	-0.12502	-7.903	-317.139	1440.9212	-1.4098	0.95233	0.37857	85.844	-261.4294	600.908	-0.072266	0.24785	-0.18487	-107.8014	33.864	39.415	0.27705	-0.055762	0.011426	82.108	-270.091	506.909	-0.037605	0.30929	-0.21314	4.3207	-120.03	1205.246	-1.3177	1.0119	0.26475
1.412	-14.156	-106.863	1891.602	-1.8481	1.6235	0.25771	-66.407	70.004	41.095	-0.15908	0.017695	-0.11977	-13.874	-362.11	1512.3524	-1.535	1.0245	0.413	146.551	-228.904	666.301	-0.11689	0.29971	-0.1667	-63.242	6.54	72.2058	0.26924	-0.058594	0.0040039	62.146	-316.194	605.172	-0.068209	0.34066	-0.22467	-58.978	-152.828	1265.616	-1.3824	1.1031	0.31045
1.414	19.285	-73.251	1877.919	-1.8593	1.5972	0.25029	-60.599	52.312	42.0428	-0.15186	0.018555	-0.12109	-40.443	-398.12	1586.334	-1.6597	1.0845	0.43262	112.289	-154.038	704.4471	-0.1875	0.35352	-0.13672	-47.352	8.36	51.3371	0.26104	-0.059375	-0.0030273	105.364	-255.349	687.067	-0.11719	0.38672	-0.20313	-67.079	-276.3449	1319.811	-1.4645	1.1907	0.36319
1.416	36.493	-38.733	1875.874	-1.8715	1.5707	0.24326	-9.74299999999999	41.724	33.448	-0.13862	0.019052	-0.12042	-89.9828	-316.79	1642.793	-1.7692	1.1441	0.44295	167.928	-99.06	754.205	-0.28359	0.41016	-0.095509	-99.2762	6.9872	40.9646	0.24814	-0.062109	-0.0051758	98.921	-213.4289	694.0422	-0.2055	0.43915	-0.17143	-77.0852	-316.648	1372.368	-1.5741	1.2589	0.41797
1.418	67.177	21.438	1883.499	-1.8804	1.5435	0.23389	-34.885	35.633	24.38	-0.12642	0.016163	-0.12368	-112.2098	-284.519	1666.06	-1.8629	1.196	0.44961	173.083	-36.7367	750.63	-0.39062	0.47402	-0.046973	-46.581	25.375	53.444	0.24072	-0.06543	-0.0048828	117.471	-159.587	740.116	-0.32436	0.50086	-0.12636	-54.662	-328.68	1420.49	-1.6812	1.3169	0.47168
1.42	22.094	86.3681	1869.625	-1.882	1.5117	0.23194	-6.951	16.424	38.5492	-0.11234	0.010995	-0.1253	-97.68	-201.2614	1674.523	-1.922	1.244	0.44805	117.806	-5.625	811.6336	-0.50234	0.53574	0.0034179	-70.484	69.281	25.4306	0.23125	-0.063183	-0.0056641	155.22	-78.29	751.1821	-0.46542	0.57023	-0.069779	-16.176	-365.15	1476.549	-1.794	1.3533	0.51729
1.422	25.8381	104.334	1852.14	-1.88	1.4818	0.22373	24.312	19.422	44.424	-0.099606	0.010657	-0.12982	-127.7575	-97.005	1675.1304	-1.9434	1.2928	0.43967	158.61	17.694	927.523	-0.6293	0.59668	0.065234	-73.922	63.2917	30.268	0.2207	-0.064453	-0.0023437	131.337	-81.9063	814.609	-0.60483	0.64281	-0.009513	-57.377	-326.74	1518.8954	-1.8816	1.3781	0.55576
1.424	59.484	116.493	1820.614	-1.8773	1.4563	0.21748	-5.593	14.8746	36.3904	-0.08252	0.0039063	-0.12891	-135.7508	-79.914	1681.952	-1.9316	1.3418	0.42041	120.953	19.396	998.599	-0.76904	0.67236	0.13184	-25.834	50.699	30.3653	0.21562	-0.062109	-0.0023437	145.817	-26.887	920.683	-0.74609	0.71191	0.05127	-79.17354	-344.38	1581.103	-1.9312	1.3941	0.58037
1.426	1.07100000000001	127.084	1797.037	-1.8667	1.4368	0.20976	23.464	9.14047	64.092	-0.064116	0.0027252	-0.13818	-149.853	-44.78	1690.944	-1.8762	1.3854	0.40191	96.109	-29.2182	1066.236	-0.90937	0.74961	0.1916	-83.1087	24.8788	17.9411	0.20235	-0.061523	0.0084961	128.096	12.866	976.124	-0.88432	0.77697	0.10808	-113.533	-321.284	1631.981	-1.9435	1.4022	0.5876
1.428	15.602	115.135	1820.113	-1.8516	1.418	0.20117	12.379	33.679	48.1934	-0.04605	0.0023556	-0.1437	-183.441	-76.905	1722.338	-1.7882	1.4172	0.37863	143.807	-44.089	1083.9437	-1.053	0.83643	0.24824	-46.794	-11.351	53.925	0.2002	-0.05957	0.015137	119.167	14.254	1057.682	-1.0211	0.8547	0.16178	-142.174	-234.463	1641.509	-1.9082	1.4063	0.57373
1.43	26.9452	131.651	1826.6552	-1.8372	1.4031	0.19648	-12.617	18.30897	70.119	-0.027687	0.0023343	-0.1459	-178.268	-151.41	1738.916	-1.6771	1.4481	0.3525	84.128	-33.95	1095.508	-1.1944	0.93017	0.30761	-31.398	-16.2805	53.1516	0.19405	-0.054492	0.017285	133.078	74.2899	1111.94579	-1.1406	0.94043	0.21484	-134.992	-218.2883	1625.207	-1.8224	1.4104	0.54922
1.432	-2.5581	114.951	1813.9514	-1.8163	1.3934	0.1959	13.837	30.382	63.552	-0.014231	0.0025485	-0.14504	-134.988	-138.6152	1766.641	-1.5657	1.4673	0.33015	60.985	-60.65	1189.11	-1.3367	1.0168	0.37471	-70.645	14.404	50.34923	0.18916	-0.047852	0.02207	132.345	75.831	1141.66	-1.2586	1.0353	0.27342	-162.426	-125.677	1633.18	-1.6971	1.4122	0.51836
1.434	41.469	82.7429	1808.0344	-1.8054	1.3857	0.19746	-46.569	26.896	34.866	-0.003418	0.0078125	-0.14014	-55.572	-174.229	1780.7	-1.4702	1.4771	0.30469	-1.1885	-61.27	1214.733	-1.4839	1.106	0.44824	-27.606	37.391	48.411	0.18291	-0.040039	0.022461	132.881	34.835	1203.222	-1.3716	1.1323	0.33301	-183.118	-45.76	1635.282	-1.5487	1.4231	0.47305
1.436	29.4255	77.131	1778.3098	-1.7945	1.3818	0.20176	-34.047	1.9254	64.5857	0.0039312	0.010652	-0.13689	-11.506	-177.5534	1809.619	-1.3965	1.4733	0.28662	-109.102	-161.213	1243.99	-1.6323	1.1749	0.51074	-61.079	62.458	34.28455	0.17861	-0.035937	0.031152	52.5421	-11.42	1242.726	-1.4816	1.2155	0.40451	-149.312	-44.97	1639.172	-1.4145	1.4358	0.42598
1.438	20.849	38.508	1770.6194	-1.7832	1.375	0.20801	-24.105	17.8498	37.091	0.0071067	0.012324	-0.13164	-0.886000000000003	-136.8931	1864.647	-1.3531	1.4699	0.27226	-78.32	-252.084	1297.4153	-1.769	1.2306	0.56133	-65.339	53.8907	48.512	0.17383	-0.028809	0.041992	-58.3722	-151.86	1277.557	-1.6074	1.301	0.49074	-134.348	-27.952	1658.006	-1.3057	1.4336	0.37646
1.44	35.126	51.66	1761.9096	-1.7735	1.3799	0.21699	-77.812	19.98526	31.9698	0.005574	0.01858	-0.1285	39.6616	-200.341	1913.611	-1.3297	1.4555	0.26758	-130.208	-303.442	1321.4482	-1.8765	1.2544	0.5961	-14.717	32.41	44.826	0.1668	-0.020508	0.048535	-57.733	-231.669	1368.06	-1.7379	1.3618	0.56638	-114.1411	-99.888	1689.394	-1.23	1.4321	0.34199
1.442	-25.977	70.254	1765.845	-1.7648	1.3832	0.22422	-30.601	28.692	35.0727	0.0088842	0.022474	-0.12852	47.341	-238.149	1960.882	-1.3354	1.4449	0.27635	-123.7447	-357	1428.652	-1.9447	1.258	0.61435	-44.154	27.7382	29.1661	0.15937	-0.009375	0.05791	-72.429	-274.113	1399.861	-1.8693	1.4091	0.62329	-64.644	-183.2407	1730.0355	-1.1888	1.4356	0.31191
1.444	19.594	67.686	1777.562	-1.7582	1.3852	0.23008	-77.254	59.92	27.6966	0.013184	0.029785	-0.12891	34.63	-292.635	1978.942	-1.3535	1.4375	0.28564	-62.83	-316.678	1485.759	-1.9741	1.2563	0.61133	-31.398	2.513	53.944	0.14922	-0.0046875	0.068457	-69.9149	-345.022	1451.884	-1.9883	1.4336	0.67236	-21.015	-168.3714	1757.838	-1.1778	1.4356	0.30566
1.446	3.558	112.537	1733.487	-1.7387	1.3836	0.23291	-99.648	43.139	49.6202	0.013765	0.032804	-0.12852	40.3642	-349.145	1978.197	-1.3787	1.4357	0.30455	-109.7138	-290.769	1481.2425	-1.9662	1.2447	0.60302	-19.787	13.1706	44.199	0.13867	0.002832	0.078614	-31.887	-320.769	1498.5314	-2.0755	1.4475	0.7121	12.255	-201.144	1797.8559	-1.1955	1.4463	0.30566
1.448	-52.832	138.3164	1676.7519	-1.7183	1.3774	0.23828	-56.629	17.8493	97.7854	0.014847	0.040418	-0.12743	41.37	-262.473	1965.129	-1.4176	1.4391	0.31494	-99.6515	-293.234	1516.011	-1.9296	1.2337	0.56484	-48.314	18.96	36.912	0.12402	0.016602	0.089355	-32.469	-355.16	1488.666	-2.1199	1.4489	0.73087	37.454	-192.014	1860.0479	-1.2441	1.459	0.31592
1.45	-27.6121	169.402	1642.2061	-1.6911	1.3686	0.24414	-116.458	-31.2651	100.948	0.011722	0.045898	-0.12744	63.2073	-213.5157	1940.172	-1.461	1.4489	0.31748	-71.3228	-236.488	1494.1427	-1.8593	1.2243	0.51797	-26.471	19.124	44.5268	0.10411	0.020898	0.10537	-38.101	-378.37	1545.5638	-2.117	1.4344	0.72889	25.168	-203.598	1894.78	-1.3121	1.4727	0.32441
1.452	-81.8322	228.924	1608.799	-1.6636	1.3591	0.24951	-84.0006	-100.856	171.6195	-0.0027313	0.053702	-0.12939	87.696	-154.273	1932.5163	-1.5073	1.4618	0.32518	-110.7315	-221.048	1540.994	-1.7614	1.2159	0.46543	-56.568	39.43454	31.9343	0.090723	0.022265	0.11241	-37.2059	-312.71	1596.766	-2.0648	1.4163	0.70601	8.891	-290.814	1916.68	-1.3852	1.4906	0.33584
1.454	-79.924	224.811	1580.177	-1.6292	1.345	0.25029	-44.261	-121.98808	211.494	-0.012695	0.067383	-0.13135	38.362	-86.131	1920.7544	-1.5503	1.4771	0.32568	-78.735	-167.317	1598.053	-1.6484	1.2041	0.40283	-62.055	28.154	57.189	0.077441	0.025391	0.12803	-66.67833	-322.478	1636.143	-1.9707	1.4023	0.6792	-18.187	-273.932	1947.93	-1.4617	1.5094	0.33974
1.456	-41.642	215.473	1562.2356	-1.5918	1.3301	0.25195	-90.791	-157.9633	283.01	-0.028228	0.077154	-0.13603	89.031	-123.751	1899.819	-1.5995	1.4913	0.33318	-116.3343	-121.506	1598.5909	-1.5356	1.1944	0.34971	-25.024	38.132	54.329	0.06416	0.030664	0.14551	-63.7	-269.6619	1692.567	-1.8361	1.391	0.63822	-26.204	-267.63	1945.746	-1.5265	1.5316	0.34697
1.458	-52.9085	203.9711	1511.563	-1.5425	1.3169	0.25146	-18.4625	-194.821	365.767	-0.043267	0.093757	-0.14512	99.407	-83.401	1892.615	-1.6461	1.5069	0.33902	-116.2733	-170.203	1617.871	-1.437	1.1864	0.29219	-80.4382	43.716	29.93099	0.04248	0.035156	0.1626	-84.88	-169.983	1673.484	-1.6869	1.3793	0.60093	-2.296	-237.0149	1934.447	-1.5854	1.5571	0.34961
1.46	9.769	157.924	1488.8796	-1.4985	1.2988	0.25488	8.1964	-222.986	415.047	-0.067487	0.1172	-0.15215	62.801	-43.6477	1881.982	-1.6952	1.5207	0.34392	-52.5865	-150.94	1581.086	-1.3636	1.1731	0.24883	-57.692	13.8348	55.1059	0.030371	0.037012	0.17363	-97.7887	-149.579	1667.189	-1.5532	1.3731	0.55561	-41.944	-145.277	1911.426	-1.6386	1.5731	0.34775
1.462	-14.553	181.994	1452.153	-1.4573	1.2806	0.2582	-10.8797	-290.8179	508.97946	-0.094147	0.15313	-0.15371	112.417	-36.077	1875.1	-1.7453	1.536	0.34795	-41.5335	-156.261	1551.648	-1.3143	1.1674	0.22011	-55.849	-26.7252	82.242	0.019043	0.035157	0.18447	-64.011	-75.054	1673.721	-1.4378	1.3571	0.51837	-27.12	-160.671	1885.8473	-1.6801	1.593	0.33965
1.464	-33.78	195.901	1413.322	-1.4167	1.2602	0.26446	48.951	-312.8805	599.473	-0.13428	0.1958	-0.14063	56.38542	7.244	1874.238	-1.7925	1.5493	0.35059	-6.91999999999999	-162.82	1615.698	-1.2866	1.1685	0.20752	-104.609	-71.801	137.884	0.0053711	0.029688	0.20127	-85.502	-69.516	1646.029	-1.3579	1.3423	0.49316	-0.363	-122.663	1851.957	-1.718	1.5973	0.33848
1.466	10.969	199.559	1402.4605	-1.3807	1.2387	0.26338	27.728	-268.151	641.639	-0.19599	0.24394	-0.11221	24.0487	-49.7919	1886.1223	-1.8366	1.5625	0.35396	38.112	-106.833	1641.77	-1.2946	1.1796	0.2039	-56.29	-122.531	223.902	-0.0035156	0.022461	0.20469	-69.621	-119.054	1675.47	-1.3181	1.3403	0.48203	10.979	-59.6269	1852.436	-1.7469	1.6011	0.33389
1.468	-26.121	228.501451	1377.72746	-1.3418	1.2148	0.26709	78.628	-206.863	704.723	-0.27646	0.29462	-0.073636	7.4387	-102.202	1916.415	-1.8748	1.5712	0.35679	39.582	-151.737	1685.7144	-1.3136	1.1962	0.21592	-110.444	-143.2184	313.897	-0.0073242	0.015625	0.21533	-19.656	-107.928	1704.363	-1.3159	1.3474	0.47569	34.924	-37.3016	1841.037	-1.7695	1.5957	0.33008
1.47	-16.477	176.943	1371.134	-1.3046	1.1921	0.26738	112.777	-109.273	691.462	-0.37685	0.34345	-0.032229	-32.641	-96.564	1937.2374	-1.9047	1.5761	0.35954	126.249	-172.2069	1744.056	-1.3526	1.2181	0.22451	-147.183	-190.02	436.2	-0.0077149	0.015234	0.21885	13.062	-183.3786	1748.293	-1.3366	1.3634	0.47764	-15.755	46.93	1831.039	-1.7902	1.5973	0.32187
1.472	8.628	163.3449	1375.871	-1.2664	1.1668	0.27002	72.439	-78.625	713.7975	-0.48271	0.39297	0.010545	-19.665	-116.155	1940.705	-1.9369	1.5808	0.36496	130.971	-197.066	1753.8921	-1.4001	1.2522	0.24971	-127.169	-252.393	534.894	-0.0056641	0.016113	0.21514	62.818	-211.807	1841.3226	-1.3774	1.3839	0.47832	-19.49	63.115	1829.291	-1.8034	1.5942	0.31172
1.474	-45.294	176.0568	1334.204	-1.2289	1.1418	0.27393	131.346	-49.128	774.935	-0.59131	0.44678	0.060059	-66.948	-70.114	1924.751	-1.9604	1.5923	0.3584	122.039	-264.472	1793.61	-1.459	1.291	0.26123	-187.812	-305.32	550.227	-0.002539	0.028613	0.21279	80.1529	-195.685	1857.4337	-1.4292	1.4048	0.47461	-40.778	12.007	1844.7793	-1.805	1.5942	0.31094
1.476	2.04	148.6583	1282.344	-1.1941	1.1144	0.27119	138.624	13.264	833.771	-0.6999	0.51123	0.10166	-72.9	-53.102	1911.593	-1.9793	1.5911	0.3539	123.357	-238.389	1814.298	-1.5135	1.3283	0.27627	-166.79	-336.97	593.738	0.0018554	0.041113	0.19961	88.821	-262.367	1893.967	-1.4832	1.4281	0.45587	-96.3378	-5.225	1852.397	-1.8133	1.5918	0.3126
1.478	-10.907	196.83	1232.375637	-1.1504	1.0898	0.28027	112.725	40.195	961.387	-0.8043	0.57969	0.14453	-53.0833	-129.859	1917.4642	-1.9886	1.5903	0.34165	44.78	-227.139	1804.319	-1.5523	1.3665	0.29327	-151.535	-277.489	649.1654	-0.0048828	0.074707	0.18018	56.27	-239.045	1946.361	-1.521	1.452	0.43789	-76.6535	-96.368	1869.134	-1.8257	1.5923	0.31152
1.48	-41.272	207.525	1159.1065	-1.1134	1.0628	0.27568	136.036	82.718	1015.152	-0.90195	0.64844	0.18203	-61.287	-120.805	1920.417	-1.985	1.5892	0.32877	26.06	-210.868	1837.606	-1.5964	1.4075	0.31084	-224.626	-192.996	734.10587	-0.020312	0.12656	0.1584	-6.24279	-233	1935.287	-1.5535	1.4728	0.42071	-80.4178	-112.966	1902.939	-1.84	1.5814	0.31787
1.482	14.694	199.635	1128.1108	-1.0658	1.0379	0.28096	97.227	83.0699	1022.7611	-1.0042	0.71436	0.21982	-22.71	-129.195	1928.134	-1.9801	1.5836	0.31531	44.1786	-120.778	1811.658	-1.6437	1.4448	0.32305	-190.0796	-124.51	790.26906	-0.052149	0.19092	0.15215	-15.048	-252.89	1976.067	-1.5762	1.4938	0.39932	-108.446	-54.152	1887.3013	-1.8562	1.5699	0.31797
1.484	-11.653	238.6399	1081.103	-1.0334	1.0125	0.27861	114.205	29.548	1053.811	-1.1191	0.78516	0.26221	-11.9951	-87.43	1913.761	-1.9688	1.5801	0.29736	12.574	-124.092	1803.73	-1.6851	1.4731	0.33203	-141.3661	-57.204	777.305	-0.10606	0.26592	0.16621	-16.489	-166.0503	1965.484	-1.5996	1.5176	0.3833	-111.429	-80.574	1882.537	-1.8667	1.5523	0.31445
1.486	-2.376	214.0997	1047.9218	-0.99046	0.98574	0.27871	91.262	-16.96	1076.015	-1.2299	0.86543	0.30693	-7.6032	36.172	1876.9756	-1.9482	1.5715	0.28751	37.40187	-87.225	1828.9615	-1.7225	1.4963	0.33721	-102.07	-35.073	863.0582	-0.18379	0.33467	0.20274	-13.618	-170.019	1948.288	-1.6239	1.5386	0.35205	-111.7036	-38.292	1868.78	-1.8759	1.5307	0.3164
1.488	9.612	234.637	1017.5926	-0.94971	0.95557	0.28223	0.706999999999997	-128.801	1136.774	-1.3417	0.94229	0.3626	3.227	66.00274	1842.049	-1.93	1.5641	0.27579	45.353	-51.053	1797.469	-1.7526	1.506	0.33809	-16.656	33.502	961.239	-0.28369	0.39453	0.24854	-11.165	-153.145	1967.731	-1.6414	1.5535	0.32637	-82.3906	-60.538	1872.026	-1.8711	1.5117	0.31006
1.49	-36.711	256.506	970.5413	-0.91006	0.92276	0.2751	-10.442	-186.503	1237.6459	-1.4577	1.02	0.41611	22.407	127.989	1795.198	-1.9132	1.5575	0.26408	19.1872	-79.703	1812.433	-1.7761	1.5107	0.33457	-50.854	121.851	1038.923	-0.39492	0.45078	0.28975	-26.8863	-93.451	1927.688	-1.6613	1.5632	0.29629	-14.671	-94.525	1885.511	-1.8572	1.4924	0.30137
1.492	-22.362	210.1807	933.8644	-0.86534	0.89102	0.26943	-91.364	-212.224	1268.261	-1.578	1.0774	0.46758	34.1832	134.729	1790.233	-1.9019	1.5516	0.25742	48.63	-16.5012	1824.266	-1.7962	1.5187	0.32696	-50.938	151.266	1131.937	-0.50859	0.50625	0.32471	5.0079	-98.716	1908.288	-1.6748	1.5689	0.26709	-0.451000000000001	-28.503	1878.573	-1.8468	1.4746	0.29893
1.494	-62.653	229.233	874.397	-0.81806	0.85313	0.26514	-117.447	-266.008	1331.414	-1.7046	1.1255	0.50781	55.712	80.953	1825.484	-1.894	1.5435	0.24951	30.812	-0.645999999999999	1800.511	-1.812	1.5161	0.31543	-65.089	157.608	1183.95	-0.62148	0.55859	0.34541	16.666	-10.7484	1903.719	-1.689	1.563	0.24023	-7.955	-13.807	1863.327	-1.8363	1.4625	0.29698
1.496	-83.9838	227.9812	820.223	-0.77187	0.82188	0.25283	-65.271	-291.075	1382.5587	-1.8078	1.1707	0.53174	38.0048	100.86	1845.516	-1.8918	1.5402	0.24678	10.745	-25.8527	1832.721	-1.8114	1.5128	0.30693	-147.944	82.191	1267.825	-0.72275	0.61787	0.37452	7.037	54.286	1861.528	-1.7043	1.5602	0.2126	13.125	71.6572	1829.747	-1.825	1.4461	0.29697
1.498	-45.915	197.9904	796.5735	-0.72168	0.78906	0.24219	-113.7239	-317.05	1390.944	-1.8726	1.198	0.5376	53.764	46.7611	1820.8584	-1.8957	1.5308	0.24297	-0.667399999999999	23.7406	1836.637	-1.814	1.5016	0.30066	-108.232	-1.39000000000001	1348.928	-0.81982	0.69189	0.4043	21.815	51.113	1878.369	-1.7129	1.5574	0.19697	-3.066	154.157	1775.195	-1.814	1.4341	0.29639
1.5	-94.589	251.411	758.4455	-0.66641	0.75752	0.23418	-100.152	-327.48	1469.108	-1.8867	1.22	0.53682	66.087	37.0532	1779.3934	-1.8945	1.5273	0.23946	-60.099	-20.4584	1849.192	-1.8089	1.4887	0.28505	-147.321	-65.45	1386.73	-0.9041	0.77656	0.43935	-7.418	108.327	1887.511	-1.7164	1.5516	0.1876	7.981	144.265	1739.725	-1.8022	1.4193	0.30137
1.502	-81.02283	213.978	737.944	-0.61338	0.72705	0.22871	-95.375	-277.52	1501.456	-1.8572	1.2387	0.51963	57.867	59.1982	1727.212	-1.8898	1.5187	0.23701	-19.849	-19.4667	1892.377	-1.804	1.4624	0.27216	-202.6842	-173.951	1470.75	-0.99014	0.87315	0.48028	-55.872	30.428	1891.6515	-1.7265	1.5532	0.18516	17.414	197.016	1726.233	-1.7887	1.4105	0.30351
1.504	-58.981	191.559	696.2742	-0.5626	0.69502	0.21074	-176.374	-266.399	1541.776	-1.7949	1.2529	0.49658	104.603	6.378	1710.4449	-1.8828	1.5117	0.23291	-26.474	-33.3196	1858.078	-1.7925	1.438	0.25781	-190.768	-223.407	1523.585	-1.0917	0.98174	0.5334	-40.6123	-18.95375	1961.094	-1.7402	1.5547	0.18604	13.859	176.543	1744.487	-1.784	1.3981	0.31054
1.506	-94.381	189.055	636.334	-0.51055	0.66729	0.20322	-132.3854	-242.293	1589.381	-1.7021	1.2667	0.46309	90.033	21.058	1723.799	-1.8666	1.5096	0.22764	-35.383	-98.777	1870.85	-1.7885	1.4128	0.24611	-220.928	-274.4834	1544.796	-1.207	1.0847	0.59814	-31.041	-8.6366	1961.313	-1.7551	1.5558	0.1833	9.632	135.263	1775.9476	-1.7763	1.3826	0.31416
1.508	-56.844	127.139	588.93313	-0.46094	0.63867	0.18896	-153.831	-174.391	1589.3858	-1.5914	1.2797	0.43145	89.889	25.258	1735.715	-1.8465	1.5066	0.22412	17.907	-75.522	1869.6368	-1.7812	1.3888	0.23458	-112.872	-348.626	1586.76	-1.3457	1.1719	0.66064	-50.663	-68.384	1960.427	-1.7668	1.5551	0.18692	2.274	134.925	1753.762	-1.7656	1.3711	0.3208
1.51	-72.824	175.985	547.0538	-0.41026	0.61142	0.17979	-195.24	-161.522	1598.126	-1.4836	1.2906	0.40019	107.297	-10.923	1769.259	-1.8203	1.5024	0.22256	-10.213	-87.972	1842.201	-1.7812	1.3631	0.23223	0.308999999999997	-385.2	1574.5088	-1.4947	1.2311	0.71435	-11.502	-12.626	1970.02323	-1.7789	1.5469	0.18692	47.6978	69.9951	1718.85108	-1.7541	1.3584	0.32627
1.512	-78.184	182.545	519.8244	-0.36006	0.58194	0.17246	-155.7845	-109.013	1601.343	-1.3885	1.3	0.36982	82.449	37.269	1742.125	-1.7914	1.4972	0.22481	36.5903	-81.711	1861.362	-1.7908	1.3436	0.22384	19.04	-433.3	1634.501	-1.6398	1.2633	0.75322	-9.153	1.268	1924.338	-1.7934	1.5402	0.18398	51.325	54.797	1696.3039	-1.7411	1.3523	0.33144
1.514	-43.94	160.2351	495.477	-0.31475	0.5503	0.15879	-179.073	-95.223	1590.424	-1.3164	1.3047	0.33936	83.327	45.982	1661.737	-1.7632	1.4927	0.22266	83.315	-13.056	1852.259	-1.7983	1.3286	0.22461	66.6415	-387.15	1738.421	-1.7566	1.2777	0.77197	-0.474	-44.747	1957.378	-1.7964	1.5396	0.19287	24.697	69.795	1661.8987	-1.7258	1.341	0.33575
1.516	-88.8178	213.345	447.4351	-0.26953	0.52285	0.1459	-173.998	-120.882	1627.253	-1.2703	1.305	0.31367	60.1418	88.328	1605.7163	-1.7364	1.4894	0.23526	81.936	-12.476	1854.671	-1.8135	1.3123	0.22493	49.3338	-264.5	1778.748	-1.8302	1.287	0.78731	50.289	-0.448	1954.796	-1.7993	1.5343	0.19385	34.686	38.491	1667.972	-1.7141	1.334	0.34502
1.518	-66.061	169.746	411.9713	-0.22656	0.49951	0.13916	-106.548	-111.514	1641.911	-1.2461	1.2988	0.29385	8.894	177.418	1529.366	-1.7086	1.4797	0.24346	129.595	28.233	1853.104	-1.8326	1.297	0.2247	20.139	-193.864	1783.174	-1.855	1.2954	0.78223	51.142	-47.184	1943.586	-1.7979	1.5266	0.19883	5.772	96.237	1694.376	-1.7012	1.3203	0.35303
1.52	-50.033	180.311	381.1989	-0.18603	0.46827	0.12988	-79.222	-194.064	1670.119	-1.2453	1.2957	0.27822	-23.46	175.787	1526.0121	-1.6808	1.4715	0.25322	104.141	64.229	1811.438	-1.8545	1.2894	0.23656	42.25	-110.687	1756.55	-1.8108	1.304	0.77617	73.723	-12.765	1948.455	-1.7937	1.5247	0.19883	0.628	90.523	1693.472	-1.6802	1.3119	0.35986
1.522	-97.6239	213.04	333.937	-0.15381	0.44268	0.12588	-7.33199999999999	-235.0148	1734.989	-1.2601	1.3042	0.26817	-25.5555	221.543	1537.0113	-1.65	1.4609	0.26181	84.8	50.344	1782.656	-1.8757	1.2855	0.23417	-50.455	-77.845	1724.258	-1.7304	1.3187	0.75557	64.188	63.969	1885.0405	-1.7895	1.5173	0.20918	10.637	82.607	1649.413	-1.6637	1.2992	0.36894
1.524	-50.548	144.759	309.3577	-0.11358	0.41104	0.12783	25.22	-214.935	1767.5614	-1.2886	1.313	0.27002	-26.7777	204.74	1518.9467	-1.6226	1.4478	0.27734	129.591	94.625	1754.587	-1.8921	1.2876	0.23779	-58.009	-72.88	1738.947	-1.6129	1.3395	0.72393	59.0207	75.332	1832.134	-1.7832	1.5098	0.2168	-46.2626	138.8133	1577.8703	-1.6433	1.2868	0.3709
1.526	-65.622	157.362	278.831	-0.082813	0.38887	0.12256	45.792	-254.491	1805.624	-1.3274	1.3281	0.27842	-24.20596	144.1462	1484.4317	-1.5916	1.4357	0.28857	89.184	103.89	1729.617	-1.9031	1.2871	0.23735	-70.523	-42.62	1730.057	-1.4826	1.3625	0.69267	69.6785	155.608	1815.045	-1.7872	1.5085	0.22725	-77.0589	135.0717	1527.896	-1.6147	1.2725	0.379
1.528	-58.59	132.284	244.878	-0.056641	0.36572	0.11523	78.7474	-218.892	1822.024	-1.3694	1.356	0.28828	-45.004	166.165	1399.76	-1.5581	1.4204	0.29629	63.023	87.673	1750.9224	-1.9101	1.2894	0.23946	-144.607	-93.67	1748.375	-1.3457	1.3809	0.64502	39.4028	166.045	1794.3819	-1.7914	1.5008	0.23252	-71.739	203.14	1475.012	-1.5854	1.2622	0.38086
1.53	-10.906	89.945	215.1385	-0.028027	0.34336	0.11777	51.217	-227.214	1823.994	-1.4218	1.3919	0.30195	-52.409	129.844	1362.1	-1.5237	1.3985	0.30684	96.069	120.348	1750.9731	-1.9073	1.2898	0.24518	-116.2053	-124.319	1782.177	-1.2195	1.3903	0.61094	32.1442	141.193	1828.295	-1.7914	1.4899	0.2419	-98.682	261.172	1446.8205	-1.5516	1.2485	0.38682
1.532	-27.03	148.2795	193.568	0.00048828	0.32031	0.1127	61.1581	-280.939	1874.464	-1.4751	1.4351	0.31348	-36.747	138.359	1327.108	-1.4883	1.3779	0.3167	56.836	71.277	1725.9279	-1.8997	1.2872	0.24838	-54.619	-131.846	1743.657	-1.1295	1.3863	0.579	14.1572	169.476	1822.35882	-1.7899	1.4785	0.25342	-84.9256	231.718	1432.607	-1.5112	1.2423	0.3877
1.534	-30.823	106.966	197.037	0.029785	0.29765	0.10879	58.3041	-224.13684	1878.517	-1.5249	1.4829	0.32422	-40.47054	155.106	1305.805	-1.4507	1.3521	0.32227	80.357	71.541	1733.416	-1.8862	1.2837	0.24805	-22.621	-201.884	1777.768	-1.0686	1.3817	0.55556	1.9623	101.413	1778.971	-1.7939	1.4648	0.25439	-48.977	263.623	1397.2617	-1.4738	1.2251	0.38965
1.536	-45.605	116.709	191.6108	0.055762	0.27598	0.11211	16.024	-239.0341	1879.446	-1.5731	1.5229	0.33428	-21.103	94.11	1312.856	-1.4177	1.3216	0.32715	51.03	87.553	1698.4289	-1.8589	1.2743	0.25039	51.225	-179.885	1843.542	-1.0444	1.3808	0.53594	30.505	79.65617	1757.364	-1.7869	1.4518	0.2749	-58.3594	219.0526	1360.455	-1.4293	1.2101	0.39482
1.538	-54.587	135.5148	182.1152	0.072266	0.25195	0.10889	48.658	-198.838	1886.503	-1.6163	1.5606	0.33985	-36.757	117.495	1320.169	-1.3757	1.2892	0.33662	20.707	50.073	1692.4116	-1.8278	1.2653	0.25049	22.884	-184.801	1878.968	-1.0391	1.3809	0.52783	22.147	88.482	1699.779	-1.7811	1.4348	0.28399	-57.909	200.57	1341.81	-1.3867	1.1875	0.39307
1.54	-33.838	61.487	155.412	0.084863	0.22842	0.10645	26.778	-132.473	1843.8422	-1.6667	1.5892	0.35234	-35.103	114.486	1285.9059	-1.3382	1.2579	0.33584	58.636	74.749	1694.389	-1.7837	1.2576	0.25061	-29.876	-244.92	1948.479	-1.0579	1.3809	0.53291	0.342999999999996	20.518	1681.8472	-1.7706	1.4228	0.29766	-59.643	221.978	1312.185	-1.3425	1.1722	0.38535
1.542	-55.52	92.5263	142.5649	0.092773	0.20039	0.11055	-7.224	-153.021	1837.43	-1.714	1.612	0.36211	-34.0624	111.898	1244.166	-1.3008	1.2211	0.33545	0.125999999999998	45.817	1669.2805	-1.7437	1.2509	0.25391	-45.682	-247.66	1996.097	-1.0991	1.3895	0.54561	37.508	43.819	1707.368	-1.7586	1.409	0.31523	-50.59	172.54	1271.4906	-1.3016	1.1469	0.38496
1.544	-71.398	61.9435	144.0125	0.098242	0.17578	0.10899	52.0076	-82.005	1843.986	-1.752	1.6348	0.36475	-49.1056	172.924	1175.3442	-1.2554	1.186	0.33643	-2.3425	34.982	1670.393	-1.7109	1.2461	0.25049	-109.9611	-318.26	2032.917	-1.1585	1.4051	0.56201	3.7741	41.466	1697.094	-1.7397	1.395	0.33301	-51.064	169.813	1251.9437	-1.2516	1.1227	0.37637
1.546	-64.631	38.25951	137.7381	0.10791	0.15996	0.11015	42.7137	-51.379	1800.542	-1.7828	1.6496	0.36904	-0.386000000000003	152.773	1121.6604	-1.2153	1.1469	0.33418	40.354	108.892	1618.9015	-1.6773	1.2379	0.25833	-124.331	-289.746	2064.685	-1.227	1.4294	0.58516	-23.1228	24.844	1706.176	-1.7274	1.3754	0.35381	-47.288	161.871	1214.88	-1.2091	1.0966	0.36933
1.548	-73.883	105.162	108.527	0.10938	0.14453	0.10986	27.369	-55.1674	1833.2565	-1.8062	1.654	0.36543	24.302	176.1228	1066.028	-1.1788	1.1071	0.32666	-49.416	126.42333	1573.973	-1.6465	1.2287	0.26377	-145.248	-185.1775	2019.219	-1.2969	1.4629	0.62354	3.594	102.534	1668.467	-1.7078	1.3614	0.36406	-54.995	122.293	1208.855	-1.1621	1.0703	0.36182
1.55	-64.164	57.7935	96.6718	0.1085	0.1293	0.10791	19.432	6.884	1842.1885	-1.8202	1.6478	0.3541	34.8823	217.228	1015.563	-1.1355	1.0638	0.32158	-47.442	169.704	1574.6193	-1.6216	1.2228	0.2697	-203.3486	-140.113	1980.8683	-1.3638	1.5017	0.67431	-38.8115	90.939	1586.6979	-1.6781	1.341	0.36797	-51.3257	172.78554	1192.524	-1.1179	1.043	0.35039
1.552	-65.007	49.996	92.7312	0.10664	0.10967	0.10655	-63.99533	-72.748	1859.1723	-1.8326	1.6361	0.34101	53.9174	188.527	998.436	-1.0948	1.0243	0.31465	-71.433	201.486	1535.572	-1.5925	1.2087	0.27998	-193.907	-35.73	1960.012	-1.4405	1.547	0.7293	-46.102	134.7134	1542.183	-1.6408	1.3205	0.36895	-36.421	160.807	1136.153	-1.0734	1.019	0.34053
1.554	-80.361	69.3465	74.4459	0.10742	0.095996	0.10498	-54.31046	-104.289	1899.757	-1.8374	1.6235	0.32715	48.0906	262.648	958.0442	-1.0522	0.98291	0.30566	-92.499	165.866	1501.1033	-1.564	1.1997	0.28906	-229.122	-21.481	1923.184	-1.5374	1.5938	0.78399	-63.4432	184.844	1473.562	-1.5996	1.2969	0.37354	-22.432	170.018	1107.728	-1.032	0.99863	0.33115
1.556	-47.293	17.394	68.2095	0.10898	0.086719	0.11436	-51.193	-109.659	1893.365	-1.841	1.6016	0.31162	48.2091	270.459	900.592	-0.99953	0.946	0.2958	-6.91	182.957	1469.1435	-1.5332	1.1891	0.30004	-181.0348	-48.24	1940.784	-1.6555	1.6387	0.82705	-85.857	154.425	1445.023	-1.5507	1.269	0.36777	-4.758	216.5988	1037.67	-0.98789	0.97539	0.32002
1.558	-65.479	66.86683	65.192	0.10791	0.080566	0.1167	-103.885	-163.32	1893.619	-1.8448	1.5766	0.29756	40.368	241.3705	845.039	-0.95019	0.90625	0.28594	-33.9721	168.184	1422.002	-1.5013	1.1792	0.30643	-83.449	-2.11	1937.599	-1.769	1.6782	0.86328	-32.41445	213.89	1445.6496	-1.5043	1.2426	0.36416	10.306	180.041	993.5731	-0.94336	0.94531	0.31201
1.56	-75.4856	48.744	60.5922	0.10459	0.071387	0.11924	-88.341	-98.597	1893.5667	-1.8479	1.5548	0.28428	53.554	265.159	809.314	-0.89707	0.86953	0.27109	1.745	155.48	1412.3425	-1.461	1.1694	0.31539	-77.705	-26.4261	1915.891	-1.876	1.7139	0.8833	-23.11121	205.995	1393.3165	-1.461	1.2109	0.36143	15.037	231.165	944.8565	-0.89971	0.92393	0.30478
1.562	-60.021	1.876	61.0792	0.096875	0.064648	0.12217	-105.318	-60.348	1847.921	-1.8556	1.5357	0.27549	20.687	196.0557	792.2795	-0.84707	0.83477	0.25811	43.132	200.4434	1382.555	-1.4215	1.1483	0.32228	-45.398	7.484	1923.125	-1.9616	1.7434	0.90781	-19.407	188.2471	1366.813	-1.4119	1.1842	0.35595	29.5	255.478	874.11001	-0.85849	0.89775	0.29571
1.564	-78.19	55.5332	48.766	0.09375	0.058398	0.12412	-122.943	-73.9254	1852.183	-1.873	1.5156	0.26709	12.763	205.816	773.1696	-0.7915	0.79932	0.24316	-3.409	183.953	1337.658	-1.3789	1.1377	0.32861	-95.551	57.1797	1910.983	-2.0273	1.7669	0.93047	24.401	233.189	1308.048	-1.3594	1.1523	0.35205	8.172	248.143	841.509	-0.81943	0.87119	0.28437
1.566	-75.642	18.6187	43.5463	0.08711	0.057422	0.12578	-58.8347	-40.4984	1867.3232	-1.8793	1.5049	0.2623	-4.798	224.952	732.755	-0.73867	0.76074	0.23106	49.2931	178.487	1327.2033	-1.3403	1.1197	0.32585	-153.5861	8.38	1943.5726	-2.0774	1.7848	0.94385	-3.703	197.4151	1259.466	-1.3155	1.1188	0.33896	-10.626	311.571	808.1656	-0.77627	0.84853	0.28203
1.568	-65.755	39.699	59.6278	0.081055	0.054688	0.12451	-57.2415	-108.554	1868.473	-1.8874	1.4876	0.25567	-29.854	185.906	712.524	-0.68779	0.72471	0.21484	43.4332	184.9349	1292.0765	-1.2986	1.0984	0.32315	-91.851	7.2344	1984.823	-2.1128	1.7993	0.95313	14.458	210.4808	1231.8358	-1.2666	1.0828	0.32442	-39.248	252.366	763.794	-0.73389	0.81689	0.271
1.57	-65.0701	68.976	63.9696	0.078711	0.057324	0.12207	-10.952	-86.04	1880.066	-1.8932	1.4771	0.25488	-31.003	225.846	710.295	-0.63857	0.69111	0.19804	17.066	159.1364	1294.634	-1.2549	1.0796	0.32471	-126.4022	-40.544	1979.281	-2.1265	1.8016	0.95859	9.541	200.5384	1200.692	-1.2186	1.0465	0.31231	-26.812	230.166	737.693	-0.69131	0.78623	0.25781
1.572	-46.958	-6.5378	46.1589	0.079004	0.058984	0.1252	18.0052	4.176	1838.4203	-1.891	1.4672	0.2499	-67.134	181.89792	672.13501	-0.58623	0.66338	0.18516	65.804	182.621	1284.881	-1.2138	1.054	0.3159	-138.9121	-98.129	2017.676	-2.1168	1.8047	0.95771	-17.384	135.5852	1198.4289	-1.1701	1.0061	0.29189	-54.708	235.734	701.53	-0.64268	0.7542	0.24844
1.574	-35.984	27.841	37.2633	0.079395	0.061718	0.1248	-12.703	23.414	1812.5021	-1.8926	1.4551	0.24756	-56.525	150.682	631.7723	-0.53076	0.62939	0.17578	14.678	167.953	1220.1517	-1.1738	1.0283	0.30615	-107.091	-68.343	2005.7236	-2.0867	1.8051	0.94951	8.851	161.8657	1207.6792	-1.1177	0.97314	0.27539	-57.62	170.50355	670.7711	-0.59463	0.71905	0.23711
1.576	-33.709	2.605	22.457	0.08291	0.064843	0.12822	45.826	100.182	1799.146	-1.8926	1.4485	0.23545	-58.367	171.293	591.6468	-0.48173	0.59951	0.15664	43.15889	145.4148	1178.8761	-1.1328	1.0032	0.29708	-133.1445	-101.488	1955.365	-2.0449	1.8055	0.94893	9.234	158.0035	1160.3751	-1.0627	0.93476	0.254	-57.204	193.714	643.531	-0.54727	0.68828	0.22686
1.578	-12.524	-37.353	35.3075	0.085449	0.069824	0.12305	25.394	127.534	1753.932	-1.8811	1.4415	0.21973	-83.1665	131.61	545.2225	-0.43584	0.56992	0.14355	76.711	167.779	1131.7233	-1.0905	0.97621	0.29152	-101.439	-102.098	1947.2038	-2.0015	1.8032	0.94336	-8.8	152.7158	1128.488	-1.0047	0.89804	0.23564	-90.50427	182.0352	586.7658	-0.50195	0.6582	0.21191
1.58	-27.554	42.3425	33.124	0.086914	0.078125	0.12715	36.443	98.999	1762.227	-1.8687	1.4384	0.20332	-99.5893	161.453	524.952	-0.39678	0.53789	0.13575	5.178	170.993	1075.091	-1.0518	0.94377	0.28058	-59.917	-76.881	1912.9708	-1.9607	1.7976	0.94043	-3.675	214.427	1082.765	-0.9457	0.86172	0.21572	-103.9838	145.6006	556.6684	-0.45137	0.62676	0.19854
1.582	-27.51	4.093	24.5474	0.098536	0.078613	0.12578	72.149	135.726	1774.446	-1.8492	1.4344	0.19297	-100.435	178.807	459.7333	-0.3583	0.5126	0.12686	51.157	198.634	1064.5746	-1.0121	0.91252	0.27667	-22.518	-94.8208	1893.214	-1.9386	1.7884	0.9502	-25.273	189.9749	1018.089	-0.88652	0.82636	0.19824	-88.114	172.8863	544.8502	-0.39844	0.59375	0.18467
1.584	-18.694	23.457	35.6124	0.1083	0.080566	0.12852	13.6422	68.538	1775.192	-1.8242	1.4336	0.18213	-104.742	164.4348	430.6325	-0.31787	0.48486	0.11523	40.461	237.218	1013.8368	-0.97021	0.87549	0.26709	26.091	13.351	1889.396	-1.9245	1.7806	0.95957	0.00300000000000011	198.4372	968.754	-0.82813	0.79395	0.17773	-100.791	131.48	510.8024	-0.34531	0.56172	0.17451
1.586	-28.855	61.299	37.5557	0.12119	0.075	0.12588	50.8321	60.229	1793.087	-1.7948	1.4356	0.1666	-105.807	218.226	405.053	-0.28213	0.4626	0.11357	11.463	210.928	982.046	-0.92704	0.83837	0.25019	-13.385	106.848	1875.95838	-1.9281	1.7641	0.97939	24.277	216.0586	914.2224	-0.77207	0.76172	0.16074	-106.676	138.654	486.76	-0.29961	0.53437	0.16611
1.588	-27.289	7.43216	49.173	0.13818	0.072266	0.12256	55.027	73.999	1749.0441	-1.7641	1.4316	0.16153	-114.30575	199.8	391.7071	-0.24971	0.43798	0.11006	40.113	216.665	955.047	-0.88339	0.79647	0.24151	-4.17100000000001	155.416	1862.2855	-1.9395	1.75	0.99854	-2.493	190.6301	877.0216	-0.71748	0.729	0.15371	-89.5266	168.635	438.94614	-0.25195	0.50098	0.15137
1.59	-51.974	49.13	42.2915	0.15596	0.072363	0.11768	46.0767	19.707	1711.5408	-1.7332	1.4328	0.15723	-117.1492	180.253	383.3209	-0.21728	0.40791	0.11084	-34.574	211.9187	876.5829	-0.833	0.76171	0.23135	6.33900000000001	217.866	1824.3354	-1.9541	1.7301	1.011	6.746	245.7961	851.7186	-0.66474	0.69541	0.14434	-122.233	131.431	390.3798	-0.20625	0.47734	0.14268
1.592	-30.555	45.469	28.865	0.17754	0.06914	0.11133	106.347	44.735	1714.668	-1.706	1.4318	0.16133	-113.467	202.648	351.9215	-0.1917	0.38408	0.11104	-21.744	192.443	835.2071	-0.78378	0.71934	0.21689	-77.716	183.176	1784.9103	-1.9554	1.7099	1.0164	-41.334	252.2832	784.732	-0.61816	0.66074	0.1334	-107.4504	179.741	361.5028	-0.16572	0.45254	0.13018
1.594	-34.129	2.0505	31.4697	0.19629	0.064453	0.10547	54.9399	51.856	1699.4938	-1.6792	1.4331	0.16309	-98.2019	127.5771	303.2382	-0.16895	0.35693	0.11133	-21.638	207.2952	800.615	-0.73389	0.67822	0.20215	-90.858	157.87	1790.0523	-1.9569	1.6848	1.0164	-51.307	246.2012	743.644	-0.56738	0.62891	0.12744	-87.298	184.849	321.5919	-0.12861	0.42324	0.12354
1.596	-67.3679	57.484	29.501	0.21397	0.058301	0.096094	41.5596	43.364	1728.859	-1.664	1.4251	0.1709	-65.603	121.3874	258.7	-0.14492	0.33447	0.11836	-98.8202	203.261	764.872	-0.68643	0.64443	0.18242	-94.7029	156.825	1772.946	-1.9462	1.6526	1.0095	-28.345	273.715	723.9998	-0.52822	0.59483	0.11396	-102.276	152.107	293.592	-0.09297	0.39863	0.11582
1.598	-49.226	8.636	24.0481	0.22998	0.045898	0.085449	66.689	101.465	1719.56	-1.6438	1.4168	0.17198	-58.022	122.8616	230.604	-0.12256	0.30762	0.11553	-73.8446	191.5048	758.573	-0.63311	0.60987	0.16748	-149.518	103.477	1766.606	-1.9253	1.6216	0.99805	-82.8083	222.005	683.6431	-0.48409	0.55947	0.10371	-82.003	195.909	269.8475	-0.055176	0.38184	0.10547
1.6	-45.801	11.5863	29.7523	0.24785	0.040332	0.080371	7.2953	88.032	1656.771	-1.616	1.4094	0.17822	-50.54	73.408	225.3508	-0.099512	0.28652	0.12061	-70.5478	210.823	708.356	-0.58389	0.56924	0.1499	-108.093	117.45	1778.2897	-1.8984	1.5872	0.97734	-62.323	225.226	664.182	-0.44345	0.5251	0.091993	-101.093	145.177	257.0326	-0.027734	0.35693	0.097557
1.602	-54.378	65.4935	17.283	0.26172	0.02793	0.073145	14.438	92.8101	1624.2269	-1.5919	1.3979	0.18164	-28.679	112.4438	226.4844	-0.077637	0.26465	0.12051	-107.379	179.58	670.619	-0.53194	0.53584	0.1377	-121.571	90.379	1724.2833	-1.8589	1.5528	0.95117	-56.499	217.331	609.92135	-0.39922	0.49805	0.075683	-79.232	130.051	252.3047	-0.0020508	0.33291	0.089551
1.604	-49.235	19.462	28.855	0.28164	0.01543	0.065332	-17.604	133.829	1552.323	-1.5659	1.3872	0.17725	-43.592	75.239	237.828	-0.05957	0.2417	0.11621	-79.2128	172.258	656.8468	-0.47949	0.5	0.12354	-85.898	41.276	1697.498	-1.8203	1.5196	0.92812	-120.496	172.213	569.876	-0.35547	0.46777	0.061035	-42.778	141.9722	224.065	0.022168	0.31142	0.08291
1.606	-72.322	56.659	47.2455	0.2914	0.0011719	0.062011	-86.0552	133.518	1517.1728	-1.5318	1.3664	0.17861	-11.935	40.153	232.929	-0.038281	0.21963	0.11103	-120.482	173.3415	590.2196	-0.42812	0.4707	0.10801	-45.713	49.306	1698.843	-1.7762	1.4871	0.90205	-79.602	174.0329	554.1425	-0.3166	0.44365	0.049121	-30.373	86.797	169.4857	0.040039	0.28965	0.076563
1.608	-59.453	38.9522	38.91636	0.29395	-0.0092773	0.053223	-53.3685	179.805	1523.8	-1.4996	1.3477	0.17822	12.362	69.376	200.354953	-0.01416	0.19239	0.10967	-74.723	139.692	546.032	-0.37705	0.44004	0.094726	-91.98	28.47	1692.951	-1.728	1.4614	0.875	-86.1509	135.637	489.18	-0.27041	0.42373	0.037109	-26.744	102.1552	153.0831	0.054688	0.26904	0.069824
1.61	-60.206	-19.3175	49.7148	0.29404	-0.019629	0.046582	-95.219	195.971	1480.7711	-1.4621	1.3195	0.17509	-4.369	25.752	160.6314	0.0081055	0.17207	0.10927	-40.029	155.498	508.672	-0.32666	0.40996	0.083007	-41.409	41.06	1706.955	-1.6834	1.4326	0.84913	-66.849	105.128	462.0855	-0.229	0.40655	0.030859	-32.113	80.075	129.3952	0.072949	0.24776	0.063769
1.612	-82.0002	47.5904	52.1372	0.28262	-0.025293	0.037597	-95.644	154.015	1462.4554	-1.4225	1.2959	0.16748	-10.529	61.2172	139.015	0.024121	0.15303	0.10654	-97.5819	132.777	490.35	-0.27783	0.38711	0.078223	-49.583	103.002	1661.959	-1.6363	1.4043	0.81963	-29.337	127.202	449.536	-0.19189	0.38809	0.019532	-42.2	44.283	166.776	0.08125	0.22686	0.061328
1.614	-69.033	13.924	49.1217	0.26699	-0.03623	0.033301	-42.7513	169.663	1418.173	-1.3843	1.2622	0.16699	-17.88	70.203	113.7306	0.043945	0.12891	0.10352	-35.401	123.023	475.6828	-0.24121	0.3584	0.070801	-118.9566	117.506	1605.03	-1.5828	1.368	0.79424	-65.461	104.35	426.0287	-0.15332	0.36963	0.023438	-11.821	91.26941	175.431	0.096875	0.2124	0.05625
1.616	-52.067	28.324	55.1747	0.24853	-0.044824	0.030567	-64.4131	149.116	1368.032	-1.3371	1.2355	0.171	-56.783	33.6906	96.758	0.057617	0.11026	0.1085	-35.847	171.341	442.246	-0.19941	0.33135	0.073438	-78.141	184.181	1559.7545	-1.527	1.3352	0.76572	-43.212	132.147	397.484	-0.11992	0.35547	0.021679	-23.584	38.936	162.325	0.10449	0.19522	0.049902
1.618	-77.377	77.845	37.7274	0.22705	-0.049316	0.025879	-19.677	152.863	1347.017	-1.294	1.2083	0.1792	-29.468	78.374	95.9919	0.070313	0.088672	0.10899	-68.529	177.004	400.051	-0.16601	0.30352	0.075782	-126.4453	240.578	1487.047	-1.4722	1.3071	0.74121	-50.467	150.715	333.135	-0.091797	0.33594	0.02207	-7.313	42.302	163.987	0.10986	0.17871	0.049805
1.62	-71.719	21.73045	32.6191	0.20537	-0.050879	0.021875	-36.953	175.294	1318.3037	-1.2581	1.1833	0.18623	-33.784	60.6531	73.139	0.082031	0.067578	0.10938	-13.523	169.275	377.973	-0.14375	0.2707	0.068359	-133.653	274.744	1453.9099	-1.4186	1.282	0.71787	-75.729	119.5936	292.775	-0.069922	0.32383	0.02168	-14.88	73.7852	132.9015	0.11406	0.16777	0.044727
1.622	-32.443	44.3951	43.09822	0.18174	-0.051367	0.021582	-55.893	123.862	1292.431	-1.2332	1.1631	0.19863	-63.653	56.92177	95.467	0.086523	0.047266	0.10967	-57.687	170.811	337.138	-0.12363	0.23984	0.073633	-68.477	310.691	1432.4961	-1.3664	1.2543	0.69229	-35.304	139.566	273.8432	-0.05166	0.3084	0.021582	-60.81	39.9664	83.8985	0.11504	0.15537	0.043457
1.624	-34.277	32.988	35.676	0.16806	-0.045117	0.018848	-3.736	129.533	1290.262	-1.2026	1.145	0.2041	-35.927	117.655	63.573	0.095703	0.033691	0.11182	-15.586	118.0506	318.6404	-0.10791	0.21436	0.068359	-111.4748	275.627	1379.68	-1.3129	1.2328	0.68252	-69.144	135.371	243.551	-0.030762	0.29004	0.020996	-59.295	75.794	77.2225	0.11347	0.14444	0.043847
1.626	-43.775	-6.373	39.8284	0.15557	-0.037305	0.01709	-35.157	143.716	1252.352	-1.1796	1.1149	0.20723	-79.321	67.2334	21.312	0.097168	0.020898	0.11436	4.419	114.52117	285.003	-0.089355	0.18779	0.073437	-43.508	206.2868	1352.694	-1.2641	1.2003	0.66328	-45.626	114.9117	240.922	-0.025098	0.27382	0.021289	-59.91	77.696	46.60797	0.1083	0.13633	0.041992
1.628	-39.421	52.07385	50.7429	0.14746	-0.033203	0.020508	-11.29	134.718	1223.722	-1.1543	1.0911	0.21631	-91.059	71.64226	38.18358	0.10127	0.0061523	0.11348	-32.441	110.51	253.069	-0.070508	0.16396	0.077637	-12.653	189.778	1276.793	-1.2163	1.1714	0.64453	-9.297	135.786	217.621	-0.019824	0.25742	0.026172	-77.655	23.9576	45.1446	0.10352	0.125	0.038574
1.63	-38.784	12.473	46.2934	0.13555	-0.018359	0.020704	32.485	174.137	1191.3413	-1.1305	1.0664	0.22373	-91.41	42.2436	21.119	0.104	-0.0040039	0.11035	41.603	89.97	250.4619	-0.060742	0.13896	0.075683	-29.91	154.373	1234.995	-1.1691	1.1395	0.62432	-62.088	96.5533	182.054	-0.015136	0.24336	0.031641	-46.546	70.5817	58.173	0.098535	0.11397	0.042383
1.632	-20.739	18.85959	60.208	0.12588	-0.0079102	0.022949	-38.867	183.674	1119.852	-1.1018	1.0385	0.22969	-104.324	-11.384	35.4347	0.10586	-0.016211	0.10781	10.045	129.849	206.3316	-0.048145	0.11865	0.078515	29.686	177.182	1234.5999	-1.1222	1.1044	0.60664	-6.022	88.6211	157.59007	-0.011816	0.22353	0.036425	-87.817	40.1807	39.82	0.091309	0.10459	0.043555
1.634	-37.243	60.008	43.7738	0.11689	0.0038086	0.022949	16.38	182.0348	1071.7988	-1.0649	1.0161	0.23047	-90.157	32.4714	56.2128	0.10791	-0.027344	0.10693	-16.924	126.557	204.93	-0.044434	0.092285	0.080566	6.639	198.026	1202.671	-1.0742	1.0751	0.58789	-20.159	97.047	109.917	-0.016113	0.21191	0.041992	-92.674	57.264	67.0665	0.087012	0.099122	0.044727
1.636	-38.002	5.80859	34.2584	0.1085	0.012305	0.021582	38.086	199.476	1026.359	-1.0261	0.99385	0.23535	-139.704	27.9959	48.918	0.11015	-0.040625	0.10987	20.355	113.674	203.885	-0.038867	0.081152	0.083008	-1.669	182.238	1198.1911	-1.0313	1.0477	0.56533	-50.162	67.42249	86.5883	-0.018848	0.19502	0.055078	-67.645	86.8564	50.486	0.07959	0.09541	0.04834
1.638	-29.683	41.458	48.0761	0.099121	0.020508	0.024902	18.508	177.5955	990.0583	-0.99023	0.96543	0.23183	-139.5216	31.4553	68.4192	0.1125	-0.051367	0.1124	-42.897	126.864	177.446	-0.034863	0.061035	0.083008	-1.669	181.2501	1191.703	-0.98047	1.0156	0.54834	1.226	81.331	101.1756	-0.027832	0.18486	0.069824	-114.19	26.5353	34.4869	0.069336	0.090332	0.049316
1.64	-31.717	34.7038	41.2516	0.09707	0.030469	0.023535	70.164	199.056	973.8803	-0.94492	0.93887	0.22676	-107.4548	72.369	40.108	0.11641	-0.059571	0.11123	-24.708	58.674	189.9	-0.032519	0.050098	0.086914	-71.99	161.1162	1150.928	-0.93018	0.98291	0.52344	-47.719	55.5589	108.0709	-0.043847	0.16885	0.085449	-102.4537	35.882	32.5946	0.066797	0.084766	0.05625
1.642	-38.044	-16.8216	64.529	0.097754	0.040625	0.024707	32.849	236.701	918.09	-0.89951	0.91104	0.22519	-114.881	16.6642	15.7018	0.12256	-0.069727	0.10518	-35.819	56.9562	170.3518	-0.028027	0.03916	0.092188	-27.253	146.5356	1115.323	-0.87754	0.95312	0.50107	-55.891	23.01	146.766	-0.057031	0.15527	0.1	-85.241	13.738	15.801	0.056543	0.081543	0.06123
1.644	-30.845	29.1906	54.8121	0.097363	0.048047	0.025879	16.764	220.0826	893.4588	-0.85205	0.8833	0.21777	-87.441	31.63666	30.9387	0.12842	-0.078125	0.10254	-89.3216	71.664	148.95	-0.031738	0.030273	0.091797	-41.334	190.879	1026.8551	-0.83183	0.91992	0.48428	-22.641	41.246	125.05	-0.072754	0.146	0.11328	-116.2673	-13.8679	41.63784	0.045606	0.076074	0.070996
1.646	-28.365	-6.225	33.2156	0.097168	0.05752	0.021875	43.009	233.7769	866	-0.80537	0.85654	0.21875	-89.69722	34.5292	26.3195	0.13574	-0.082813	0.10137	-42.626	43.5118	133.5803	-0.031348	0.02168	0.10498	-73.641	185.69224	950.324	-0.78389	0.88975	0.46191	-83.761	28.53	98.0547	-0.092383	0.13262	0.13252	-82.9362	29.7262	52.914532	0.029688	0.072266	0.074609
1.648	-36.87	-3.355	41.6956	0.099609	0.0625	0.024902	-32.125	208.0522	825.3552	-0.75938	0.82558	0.2082	-76.99	13.083	33.87189	0.14043	-0.084375	0.10615	-87.34	89.576	102.261	-0.036914	0.013672	0.108	-16.781	209.934	889.146	-0.7373	0.86328	0.43994	-63.147	54.4996	89.9618	-0.11133	0.12392	0.14756	-96.6422	-2.666	48.9209	0.020996	0.0625	0.086426
1.65	-52.64	57.5838	40.1528	0.099708	0.065625	0.021289	-9.83	171.179	791.9461	-0.7125	0.80058	0.20196	-19.541	63.6448	42.1402	0.1455	-0.091016	0.10498	-108.6774	83.8209	93.182	-0.037696	0.0097656	0.1166	-43.886	245.32	842.46	-0.69502	0.83174	0.425	-72.828	91.586	42.579	-0.12812	0.11924	0.16436	-84.284	3.445	54.4835	0.010058	0.057324	0.093359
1.652	-39.878	3.15006	45.356	0.096972	0.068164	0.023633	-38.965	188.906	737.012	-0.66601	0.77305	0.19648	-45.182	50.8442	32.4766	0.14873	-0.092773	0.10332	-64.11	58.351	99.611	-0.039453	0.010449	0.12237	-26.573	235.9632	817.6755	-0.65215	0.79961	0.4	-97.5712	72.324	36.8035	-0.14307	0.12032	0.17637	-47.722	35.1528	26.999	0.008789	0.053613	0.10098
1.654	-43.93	44.225	44.2463	0.092285	0.070899	0.027148	-98.2727	181.0576	699.0407	-0.61768	0.75049	0.18848	-36.146	41.61749	57.139	0.14648	-0.089355	0.10352	-126.17	79.9675	95.7489	-0.042969	0.0097656	0.12939	-2.611	258.733	771.6648	-0.6084	0.7668	0.38984	-59.185	61.546	33.357	-0.15625	0.11865	0.18994	-56.335	13.398	30.416	0.0091797	0.049317	0.10918
1.656	-56.621	37.2627	27.276	0.088379	0.069336	0.024512	-54.31	187.192	679.2112	-0.57402	0.71797	0.18262	2.169	97.785	57.8544	0.15332	-0.091992	0.10576	-86.4225	22.66	94.11143	-0.042676	0.0095702	0.13457	-55.347	262.2357	700.172	-0.56778	0.73144	0.37021	-86.1413	29.4122	30.974	-0.16533	0.11406	0.20303	-6.624	50.165	55.7865	0.017871	0.042187	0.11299
1.658	-55.713	-16.6458	45.5549	0.081055	0.071777	0.02002	-107.6613	189.23	636.137	-0.5209	0.68633	0.17842	-23.409	70.564	42.1651	0.15459	-0.091601	0.10771	-63.114	30.782	86.416	-0.040918	0.0094726	0.13877	-40.175	232.4959	667.66	-0.52881	0.69189	0.34863	-84.417	14.284	50.8782	-0.17451	0.11289	0.21377	-12.379	39.597	21.2713	0.026367	0.039551	0.11816
1.66	-73.5368	35.423	38.189	0.072168	0.070996	0.017871	-87.854	155.672	607.71425	-0.47949	0.65821	0.17217	4.486	71.172	64.86	0.15654	-0.090039	0.10655	-111.6776	42.381	64.64	-0.032715	0.0079102	0.1419	-65.432	256.424	631.863	-0.48623	0.65693	0.33193	-48.008	52.497	39.693	-0.18311	0.10586	0.21924	-31.143	11.7384	24.6005	0.040332	0.032324	0.11914
1.662	-88.0202	-0.0960000000000001	24.4927	0.0625	0.066601	0.015528	-65.536	160.523	582.0972	-0.43672	0.62695	0.16299	-14.334	51.079	42.8075	0.16133	-0.086816	0.10645	-71.278	15.801	53.2577	-0.026172	0.011523	0.14853	-89.0173	218.557	603.2313	-0.44492	0.62305	0.31142	-93.91	66.3992	22.598	-0.18633	0.10176	0.22217	-5.03	64.727	31.2819	0.056738	0.027637	0.12412
1.664	-67.89	19.4444	39.17855	0.054687	0.056445	0.015918	-113.4341	167.627	540.648	-0.3916	0.59473	0.15527	-35.02	-20.5998	48.898	0.16602	-0.085938	0.10938	-91.436	70.309	29.648	-0.015625	0.0087891	0.15234	-47.766	187.741	580.7599	-0.40312	0.58789	0.2876	-57.039	85.207	32.1463	-0.18359	0.094238	0.22021	-35.669	43.952	13.35	0.075097	0.019434	0.12256
1.666	-69.112	60.6286	31.8463	0.048633	0.049903	0.014551	-73.987	157.056	518.0617	-0.34453	0.56211	0.15225	8.448	9.2179	39.1964	0.17051	-0.08418	0.11133	-92.038	59.375	41.2052	-0.0066406	0.011719	0.15586	-104.613	180.714	532.7	-0.36191	0.55469	0.2664	-65.52	76.595	18.1013	-0.16904	0.088379	0.21651	0.879000000000005	48.396	72.8	0.091505	0.012988	0.12354
1.668	-65.513	-0.2933	23.7616	0.044434	0.042969	0.01709	-110.3964	191.397	452.062	-0.30039	0.53135	0.14902	-2.08199999999999	7.918	34.3077	0.17363	-0.083496	0.11064	-56.441	37.822	58.589	0.0042969	0.0083984	0.16142	-102.97	142.6089	530.305	-0.31934	0.51855	0.24707	-77.167	34.6	27.2009	-0.15098	0.078809	0.20937	-0.361000000000004	80.711	51.832	0.10889	-1.3323e-13	0.125
1.67	-53.654	37.983	24.111	0.039941	0.044629	0.020312	-118.638	187.0067	403.5011	-0.26211	0.49737	0.14433	-24.288	6.39	77.902	0.18027	-0.081933	0.11064	-85.0993	62.941	64.6695	0.0125	0.0068359	0.16533	-61.4146	146.83	513.004	-0.27989	0.48633	0.22832	-27.523	28.6376	54.336	-0.12442	0.077246	0.20742	-41.546	33.306	42.01	0.12862	-0.0067383	0.11396
1.672	-48.856	28.4039	45.881	0.04375	0.045215	0.017871	-65.675	160.747	386.3999	-0.22441	0.46553	0.14258	-1.816	59.4963	76.266	0.18916	-0.079101	0.10244	-24.095	6.683	69.561	0.021582	0.0055664	0.16787	-71.7702	150.1786	468.069	-0.24668	0.45752	0.20772	-77.081	19.75	42.1625	-0.094822	0.07207	0.20274	-5.009	42.48	58.973	0.15088	-0.015918	0.10664
1.674	-49.491	-35.504	85.113129	0.046093	0.051465	0.019825	-115.0302	174.739	348.421	-0.19092	0.43213	0.12988	-35.849	23.9579	55.5279	0.18945	-0.078125	0.10059	-5.177	-2.02	53.723	0.033691	0.0039063	0.16992	-3.273	114.833	415.4063	-0.20918	0.43213	0.18623	-50.498	1.411	73.134	-0.057129	0.066895	0.19531	-9.453	14.9223	24.7974	0.18174	-0.029981	0.098046
1.676	-58.282	-31.5053	139.574	0.055078	0.060839	0.021484	-94.7297	146.515	353.2812	-0.15332	0.39551	0.1292	-27.988	25.6286	74.27	0.19902	-0.071484	0.1002	-37.782	8.822	40.022	0.036621	0.0047852	0.17256	10.17	133.45	347.378	-0.17871	0.4001	0.17022	-20.902	15.679	64.03	-0.02666	0.059472	0.18662	-42.517	-18.9304	40.123	0.20928	-0.043457	0.084375
1.678	-62.085	-118.3168	212.28	0.063477	0.067383	0.023438	-55.414	152.504	336.106	-0.11865	0.35986	0.12774	-49.223	17.6358	54.1328	0.20078	-0.066992	0.097461	8.053	-30.1958	40.3137	0.043066	0.00039062	0.17168	-27.429	107.905	311.38788	-0.14746	0.37646	0.14844	-44.077	16.913	39.972	0.011328	0.050976	0.17959	-0.695	12.4384	41.9797	0.23877	-0.056641	0.070313
1.68	-81.626	-160.122	314.4432	0.069532	0.080957	0.032129	-86.44452	152.292	309.0442	-0.090528	0.32588	0.12383	-95.327	-18.26236	46.487	0.20274	-0.06582	0.092773	5.325	28.0989	16.091	0.054394	-0.0015625	0.17364	15.161	99.736	328.284	-0.11573	0.34463	0.12529	4.17599999999999	17.754	52.6054	0.045313	0.036523	0.17334	-47.487	-1.043	24.9386	0.26504	-0.064356	0.058985
1.682	-104.708	-162.222	402.416	0.074805	0.097852	0.03584	-21.27	97.6898	275.8	-0.063672	0.29609	0.11689	-76.223	34.5656	44.58297	0.20078	-0.058203	0.090918	11.31	16.5483	27.172	0.062403	-0.0029297	0.16992	-16.001	156.4698	278.3629	-0.085742	0.32031	0.10429	-0.682000000000002	41.7259	35.72872	0.076562	0.024512	0.16494	-53.859	9.63	49.7817	0.28857	-0.075293	0.043067
1.684	-130.82	-272.192	478.264	0.070118	0.11778	0.033887	-21.422	109.838	228.0663	-0.038574	0.26563	0.11572	-106.24357	27.82047	23.699	0.19775	-0.048828	0.084961	30.271	16.9617	30.2569	0.070801	-0.0029297	0.16162	8.111	165.9698	261.86	-0.062304	0.29102	0.084375	-14.233	27.2633	40.571	0.11279	0.010742	0.15234	-55.857	41.44202	64.1219	0.30772	-0.083105	0.033692
1.686	-131.333	-280.577	508.9305	0.055859	0.14453	0.033008	-36.136	84.577	199.918	-0.012891	0.23399	0.11142	-106.4441	21.2091	48.0632	0.19101	-0.047656	0.083692	-20.148	50.498	33.9542	0.081054	-0.0040039	0.15928	11.135	193.758	222.2291	-0.034863	0.26377	0.063379	19.754	34.911	52.397	0.14414	-0.0044922	0.14541	-108.1217	13.6728	59.147	0.31836	-0.090527	0.018066
1.688	-109.865	-290.882	522.4086	0.035645	0.18213	0.025391	26.959	68.352	190.821	0.0075195	0.20361	0.1124	-108.738	48.023	52.143	0.18359	-0.033301	0.081543	0.880000000000003	7.2424	61.707	0.093262	-0.003125	0.15479	-23.657	209.831	185.5278	-0.012695	0.23926	0.044434	-50.51	28.772	51.6903	0.17891	-0.020899	0.14072	-84.917	49.6939	75.099	0.32813	-0.097656	0.0087891
1.69	-111.997	-283.6786	580.787	-0.0021484	0.22363	0.03291	-9.278	88.714	194.6923	0.023144	0.1751	0.1124	-136.911	4.691	42.705691	0.17656	-0.025879	0.08545	14.023	14.8466	57.5266	0.10576	-0.0039062	0.14697	18.122	159.744	186.4719	0.0094726	0.21562	0.023828	-38.523	16.6623	65.417	0.21133	-0.036133	0.12627	-88.5954	41.992	30.4832	0.32354	-0.10576	0.003125
1.692	-141.99131	-166.522	646.737	-0.0625	0.27402	0.063867	-2.99	45.002	197.29	0.032617	0.14394	0.11191	-88.048	25.5683	60.1214	0.16641	-0.014551	0.091308	-39.296	26.8723	46.5554	0.11621	-0.0069336	0.13731	-12.225	151.127	132.775	0.027344	0.1958	0.0018555	-5.925	33.121	59.566	0.24512	-0.055274	0.11953	-100.979	14.1004	34.656	0.31709	-0.11592	0.0008789
1.694	-146.7483	-119.995	666.4879	-0.15313	0.32832	0.11426	26.633	51.4528	185.4432	0.040039	0.12012	0.10449	-85.641	29.9395	26.97	0.15674	-0.0043945	0.091309	-7.655	-14.2962	38.0761	0.13184	-0.003418	0.13184	-31.122	83.461	120.7347	0.046094	0.17471	-0.0075196	-59.548	37.9254	47.6186	0.27441	-0.072266	0.10742	-92.207	45.771	31.374	0.30068	-0.11826	0.0024414
1.696	-103.762	-75.801	694.0003	-0.26367	0.38223	0.18301	-21.958	73.659	149.9367	0.049316	0.098436	0.10616	-110.841	-6.119	32.6919	0.1458	0.0058594	0.10078	-51.841	27.524	13.684	0.14609	-0.010449	0.1248	30.235	27.615	124.0867	0.063477	0.1499	-0.025	-24.807	28.679	55.496	0.30117	-0.085351	0.097852	-94.4996	24.0325	20.52	0.27773	-0.12207	0.003418
1.698	-71.67	-1.23999999999999	741.27721	-0.39209	0.43457	0.24951	-1.29	52.383	137.564	0.066601	0.074023	0.10459	-65.79	8.995	37.6825	0.13506	0.018848	0.10644	-74.989	38.6718	13.159	0.15762	-0.01377	0.11475	-22.419	54.835	89.261	0.076172	0.13184	-0.04248	-43.37	44.972	33.345	0.32998	-0.10147	0.086035	-78.081	21.131	39.1948	0.25244	-0.12354	0.0073242
1.7	-26.158	11.41	855.42	-0.52168	0.4917	0.30879	-33.126	91.781	101.62155	0.078711	0.052539	0.10263	-75.89	-19.74	16.121	0.12959	0.024707	0.11308	-34.728	35.882	8.0561	0.16308	-0.017675	0.10498	-4.25	41.114	79.0681	0.09248	0.11123	-0.055567	-63.744	20.9884	34.076	0.34912	-0.11435	0.072363	-55.627	52.9299	50.0464	0.22812	-0.12129	0.012012
1.702	-24.61	137.088	966.57	-0.63779	0.54385	0.36006	-54.393	86.706	87.032	0.091895	0.035156	0.10235	-70.935	-24.359	45.2451	0.12724	0.035742	0.11797	-80.9831	61.301	5.464	0.17217	-0.020019	0.098045	4.642	54.763	70.8719	0.10595	0.089551	-0.070215	-19.298	2.585	34.841	0.3669	-0.12422	0.062403	-75.317	18.4945	37.43107	0.20918	-0.11651	0.01582
1.704	-45.746	198.551	1045.666	-0.7331	0.60088	0.39052	-29.857	57.748	83.1419	0.1001	0.01709	0.10303	-33.989	28.11175	44.443	0.12305	0.04248	0.12305	-63.705	15.689	35.406	0.18018	-0.023926	0.086426	-79.796	67.885	77.977	0.11963	0.069629	-0.091309	-69.324	-20.4083	22.6947	0.38232	-0.13281	0.050781	-53.834	34.9527	64.6919	0.19355	-0.10869	0.020117
1.706	-74.564	170.295	1103.748	-0.79726	0.66426	0.41484	-88.73126	63.0924	71.987	0.10859	0.0082032	0.10381	-67.314	15.5855	38.7234	0.12148	0.05166	0.1293	-68.401	8.5966	47.7384	0.18643	-0.025782	0.074805	-37.874	17.258	107.981	0.13389	0.05498	-0.10801	-63.67	-38.4621	46.1164	0.39277	-0.14151	0.040723	-65.199	24.3016	31.2083	0.17861	-0.10078	0.026562
1.708	-129.999	155.447	1173.479	-0.85303	0.73096	0.42969	-60.823	20.311	90.3598	0.11729	-0.0072265	0.10429	-32.22	40.48	45.2461	0.12138	0.052246	0.13203	-102.0814	22.216	51.3298	0.18565	-0.031739	0.067481	-61.528	37.263	87.7439	0.14746	0.041016	-0.12061	-47.683	-14.5315	42.304	0.39883	-0.15235	0.037988	-54.54	-17.1915	55.381	0.16846	-0.094727	0.035156
1.71	-133.131	51.934	1246.675	-0.90801	0.82129	0.45654	-46.6	32.946	79.944	0.12314	-0.017383	0.10625	-5.462	57.68	17.963	0.12022	0.059668	0.13438	-66.506	-25.2896	56.8206	0.18174	-0.031347	0.054199	-89.7764	21.826	77.9914	0.15313	0.030957	-0.13174	-86.35203	1.773	48.7275	0.39649	-0.1625	0.023926	-8.035	10.1428	48.1868	0.16084	-0.085742	0.039942
1.712	-134.583	-65.47	1349.964	-0.97461	0.92382	0.4917	-98.8889	60.501	62.0528	0.13223	-0.024023	0.10849	-16.767	12.5008	19.58572	0.1166	0.061133	0.12988	-104.2419	23.94571	38.6545	0.18066	-0.031153	0.04668	-57.114	0.06387	73.87067	0.15713	0.019629	-0.14199	-56.895	8.401	63.8359	0.39385	-0.16436	0.025391	-45.613	-19.83771	18.0837	0.15323	-0.078907	0.038574
1.714	-189.136	-126.601	1425.077	-1.0461	1.0285	0.55029	-76.172	31.936	60.2856	0.13135	-0.032227	0.11084	19.157	38.679	17.1911	0.11768	0.062988	0.12939	-101.143	30.3003	34.5016	0.17285	-0.032227	0.041016	-112.5034	51.407	48.988	0.15674	0.0079102	-0.15097	-83.9737	30.003	35.2385	0.3877	-0.16797	0.019043	-17.909	-8.9313	50.8527	0.14502	-0.067579	0.043262
1.716	-191.054	-251.509	1503.826	-1.1458	1.1214	0.62227	-107.2511	53.2881	33.305	0.13682	-0.039356	0.11074	-6.513	22.9884	4.301	0.12109	0.061035	0.12226	-49.411	23.8685	17.3208	0.16221	-0.033789	0.0375	-86.1	44.2944	37.2238	0.15693	-0.0014648	-0.15703	-89.942	16.1717	19.0465	0.37842	-0.16982	0.018848	10.372	43.025	24.535	0.14248	-0.054883	0.048145
1.718	-163.949	-274.749	1534.152	-1.2754	1.1973	0.69775	-123.3789	24.765	29.38917	0.1415	-0.043359	0.10821	-11.742	21.223	32.2294	0.125	0.059765	0.11924	-86.0847	69.993	6.274	0.15361	-0.034375	0.032519	-72.929	64.917	7.172	0.15137	-0.013672	-0.15967	-44.118	25.804	19.8073	0.37363	-0.16914	0.017871	-42.155	23.14	38.331	0.14111	-0.041992	0.043457
1.72	-101.755	-297.256	1533.4562	-1.4343	1.2436	0.76895	-72.446	-12.19301	42.2987	0.14658	-0.042578	0.10742	5.641	73.133	39.9424	0.12227	0.059765	0.11142	-68.055	27.1915	26.3774	0.14072	-0.026172	0.030567	-99.56544	92.938	4.571	0.14463	-0.018262	-0.16318	-98.1583	30.38	4.414	0.36777	-0.16094	0.019043	10.097	53.937	55.463	0.1418	-0.030664	0.044043
1.722	-30.015	-360.55	1534.744	-1.5944	1.2773	0.82871	-139.592	22.7553	34.382	0.15117	-0.044238	0.10293	-20.383	51.802	33.84291	0.12431	0.051465	0.11065	-47.196	26.6082	50.5119	0.13223	-0.02666	0.031055	-64.718	25.2621	29.3419	0.13496	-0.020606	-0.16396	-48.892	15.0036	31.2637	0.3581	-0.15234	0.024512	-3.114	42.553	26.1428	0.1416	-0.01543	0.045508
1.724	30.051	-347.23	1581.24	-1.7347	1.2893	0.87363	-99.0305	5.963	54.0427	0.15527	-0.038574	0.1001	-6.39400000000001	56.968	50.419	0.12793	0.054199	0.10449	-57.403	30.824	68.1002	0.12012	-0.020996	0.03125	-73.581	50.1077	29.649	0.12676	-0.021386	-0.16631	-20.935	22.6827	22.297	0.354	-0.1416	0.024902	-27.775	12.513	29.6038	0.14512	-0.0013675	0.050977
1.726	46.1778	-335.25	1671.805	-1.8284	1.2954	0.91406	-78.923	26.4081	49.724	0.15781	-0.039356	0.10527	-24.388	49.12	27.2506	0.12725	0.050879	0.1085	4.476	-20.4107	53.7963	0.1084	-0.015332	0.029492	-60.2	39.047	38.8028	0.10772	-0.022949	-0.16289	-66.6848	18.957	5.645	0.33906	-0.12578	0.033203	6.383	40.1872	35.223	0.14238	0.013379	0.059667
1.728	59.5481	-281.54	1744.389	-1.8828	1.3066	0.94678	-117.8111	54.85	42.992	0.16309	-0.029492	0.11084	-57.971	15.1225	32.7896	0.11582	0.050391	0.10615	-28.156	26.2194	25.5508	0.10107	-0.015821	0.033301	-33.005	-3.785	30.6942	0.086914	-0.025879	-0.15527	-12.558	21.5759	39.2546	0.32871	-0.11035	0.03916	-11.155	22.3811	16.67	0.13965	0.029297	0.068848
1.73	48.61819	-181.992	1791.613	-1.8717	1.306	0.95274	-37.406	29.4021	47.1568	0.16504	-0.023242	0.11162	-45.947	42.713	55.9398	0.10371	0.050781	0.10655	-8.18	42.41366	29.6777	0.094433	-0.0099608	0.035254	-77.376	29.46685	35.256	0.067969	-0.023437	-0.15332	-18.482	56.091	15.379	0.30918	-0.095898	0.050879	-43.915	25.908489	42.0301	0.13115	0.042579	0.074317
1.732	54.9403	-165.4592	1778.193	-1.8148	1.302	0.94141	-41.872	62.249	21.9584	0.16455	-0.019238	0.11719	-93.11957	28.7184	36.1094	0.087793	0.050781	0.10772	20.77	36.338	27.5972	0.089648	-0.0037109	0.029785	-54.549	-4.8435	59.592	0.046582	-0.023047	-0.14931	-43.47	45.1948	19.5347	0.29102	-0.082812	0.058204	-27.713	66.237	24.3892	0.12031	0.05918	0.089747
1.734	7.13500000000001	-93.321	1746.8822	-1.71	1.2982	0.91641	-45.908	58.8288	27.10148	0.16504	-0.013672	0.12305	-79.196	3.563	51.585	0.075195	0.05127	0.10352	-25.963	82.562	20.6535	0.093262	0.00097656	0.029785	-32.467	11.141	53.768	0.030957	-0.021875	-0.14659	-2.752	45.382	28.2967	0.27002	-0.070313	0.072266	-86.631	31.256	22.7998	0.1039	0.068165	0.0999
1.736	-27.179	-29.13	1713.412	-1.5762	1.3011	0.88105	13.264	32.612	20.3681	0.16748	-0.011816	0.12539	-73.104	39.6858	43.5686	0.066406	0.055469	0.10498	25.111	30.5457	34.013	0.095703	0.0035156	0.031738	-49.359	46.776	63.974	0.022558	-0.020312	-0.14834	-35.452	22.1624	17.6762	0.25429	-0.057031	0.073633	-57.83	37.072	51.591533	0.082128	0.076953	0.11367
1.738	-28.705	-45.73	1698.106	-1.4331	1.3032	0.85352	-34.434	48.9783	19.977	0.16983	-0.0046875	0.13174	-132.5899	25.9533	35.2584	0.054492	0.059668	0.10948	3.043	8.6436	52.7393	0.099024	0.010156	0.029492	-14.168	7.5603	68.535	0.017578	-0.023438	-0.15381	-18.872	-15.4152	47.27	0.23701	-0.044531	0.089941	-68.628	27.1751	47.5811	0.062988	0.085938	0.12207
1.74	-89.79638	-12.28	1715.335	-1.3099	1.2995	0.83613	-10.821	17.774	39.1227	0.171	-0.0027344	0.13604	-93.664	35.8118	99.9299	0.046289	0.068262	0.10987	-28.213	17.4486	59.71	0.10684	0.017578	0.030664	-38.588	28.8324	40.641978	0.022461	-0.022949	-0.15488	-0.167000000000002	6.1974	35.12856	0.22334	-0.034375	0.093847	-92.6683	-3.709	53.0308	0.048341	0.091502	0.13505
1.742	-84.3264	-72.56	1734.912	-1.2199	1.2911	0.82315	26.008	15.1467	47.962	0.1708	0.0040039	0.14023	-97.7987	13.7957	130.235	0.041797	0.076269	0.10889	6.098	-22.2431	67.9038	0.11748	0.019141	0.03164	-32.991	3.219	35.1298	0.035547	-0.022265	-0.15889	-50.729	13.4149	47.4078	0.21504	-0.024707	0.10137	-68.982	25.6805	64.72967	0.037797	0.097363	0.14521
1.744	-6.339	-164.845	1766.063	-1.1766	1.275	0.8126	-1.541	50.3546	57.514	0.17041	0.011719	0.14746	-135.6645	-62.3083	194.7691	0.040039	0.089844	0.10986	-18.647	17.7792	45.1067	0.12402	0.024414	0.038574	25.265	-11.87341	24.976	0.05039	-0.023828	-0.16904	-11.319	35.8218	46.1982	0.21289	-0.019531	0.11328	-103.1635	-19.4085	49.533	0.023734	0.10127	0.16201
1.746	-5.374	-187.2293	1786.235	-1.165	1.2674	0.81592	15.566	19.6738	66.966	0.16924	0.013379	0.14736	-104.517	-78.0214	280.241	0.044824	0.097169	0.10801	-23.09	23.576	32.4142	0.13057	0.026269	0.036914	-33.676	47.7895	23.298	0.07041	-0.025	-0.17578	-33.783	61.859	32.9051	0.19502	-0.01289	0.11846	-96.409	-53.934	88.048	0.019141	0.10654	0.17431
1.748	31.126	-240.984	1843.878	-1.1719	1.2656	0.8208	-16.351	57.257	30.8709	0.17617	0.020605	0.14678	-146.216	-145.9819	348.507	0.046484	0.11084	0.10469	-11.282	8.775	39.644	0.1331	0.031641	0.033692	-10.955	30.3614	37.6301	0.090332	-0.026367	-0.18066	-49.845	62.7094	28.2658	0.1831	-0.0079102	0.12403	-105.9309	-47.306	136.133	0.022949	0.10889	0.18311
1.75	31.803	-210.173	1894.681	-1.1945	1.2673	0.82305	-20.218	38.835	43.927	0.17695	0.018652	0.14951	-163.349	-229.0876	458.5069	0.048828	0.12686	0.1039	-63.189	56.1759	26.536	0.1335	0.036328	0.034472	9.87200000000001	35.76	43.4443	0.10693	-0.032129	-0.18867	-1.91	55.711	24.324	0.17256	-0.0024414	0.13028	-134.6337	-105.5485	205.764	0.025294	0.1128	0.1877
1.752	-33.046	-179.395	1924.107	-1.2191	1.2825	0.81953	5.35599999999999	-2.309	42.287	0.17979	0.022266	0.14824	-166.165	-235.458	487.358	0.054297	0.14463	0.10274	-38.341	18.025	38.6798	0.12959	0.041601	0.032617	-51.86	74.587	45.389	0.12236	-0.039355	-0.19541	-56.5251	40.7419	34.998	0.1624	0.0038086	0.13438	-83.967	-122.304	356.474	0.034194	0.11249	0.19112
1.754	-58.087	-222.65	1959.56	-1.2452	1.3056	0.80899	-40.287	19.7883	34.4122	0.19043	0.023926	0.14502	-192.61	-292.048	514.9545	0.058105	0.16211	0.10059	-35.981	21.4568	46.2041	0.12451	0.051758	0.037109	-33.523	51.974	51.296	0.13447	-0.044434	-0.19502	-43.24	21.899	63.404	0.15576	0.0092773	0.14453	-153.489	-202.962	463.402	0.047473	0.11094	0.1958
1.756	-89.75	-210.256	1982.885	-1.2632	1.3342	0.79805	-11.002	-6.875	49.6766	0.19229	0.022949	0.14258	-133.392	-237.737	579.438	0.055762	0.18857	0.094336	-97.9707	40.0314	46.0412	0.11504	0.056836	0.046387	-66.423	79.567	38.9997	0.14697	-0.055762	-0.20352	-32.348	38.1142	44.147	0.14219	0.013086	0.16485	-179.886	-317.952	557.058	0.05967	0.11173	0.1958
1.758	-131.37809	-218.703	2001.016	-1.2793	1.3691	0.7915	-17.1	13.04136	43.064	0.20069	0.022656	0.14023	-118.656	-184	628.28	0.041016	0.21777	0.086328	-57.974	-12.6594	53.6739	0.10264	0.066211	0.060645	-79.354	59.625	37.1748	0.15967	-0.066406	-0.20557	-83.949	39.6729	42.65278	0.12754	0.019922	0.17695	-135.488	-340.353	586.319	0.066406	0.12256	0.19092
1.76	-158.0566	-206.71304	2007.008	-1.3076	1.4057	0.77861	-72.9132	55.721	51.665	0.20537	0.020313	0.13282	-160.8672	-167.457	665.91	0.01836	0.2623	0.077734	-85.359	12.8331	50.371	0.088183	0.073633	0.072754	-47.336	-3.1835	41.78513	0.16601	-0.078125	-0.21026	-67.682	41.0692	59.229	0.10606	0.024219	0.1875	-171.94	-334.342	582.5108	0.059088	0.14632	0.18458
1.762	-203.922	-110.105	1977.502	-1.3405	1.4376	0.78126	-38.799	18.9802	58.1775	0.21396	0.022851	0.12774	-111.473	-103.982	690.5196	-0.02168	0.31572	0.079101	-99.3211	-13.6308	60.8749	0.069141	0.080566	0.085645	-87.2389	12.237	36.0647	0.17764	-0.087988	-0.21641	-87.6966	48.091	46.8501	0.094238	0.036133	0.19306	-152.539	-269.3869	652.572	0.041795	0.18819	0.18398
1.764	-243.13	-89.159	1934.768	-1.3793	1.463	0.79181	-86.0133	53.313	41.4008	0.22021	0.023926	0.12695	-83.833	-81.207	709.6184	-0.080566	0.37402	0.09668	-76.417	-61.5899	109.6019	0.047363	0.088867	0.097656	-99.4389	-38.9662	54.08	0.18506	-0.10049	-0.21875	-92.5445	26.8066	47.797	0.083984	0.04541	0.20313	-151.016	-141.448952	681.206	0.0051577	0.24518	0.19134
1.766	-235.808	-43.364	1912.048	-1.4189	1.4804	0.81468	-98.1636	39.2952	37.309	0.2208	0.024316	0.12412	-37.714	-57.486	811.033	-0.16318	0.42822	0.12666	-108.8644	-44.275	155.439	0.029493	0.099513	0.10996	-68.306	-19.4779	45.8908	0.19375	-0.10351	-0.22442	-40.948	23.155	57.3642	0.077539	0.053809	0.21797	-190.5968	-98.743	692.2476	-0.059321	0.31617	0.21608
1.768	-219.158	7.204	1890.584	-1.4761	1.5005	0.83789	-65.507	13.4994	42.713	0.21904	0.02168	0.11582	1.71	48.864	911.403	-0.2583	0.47666	0.16846	-86.019	-106.2081	241.556	0.016504	0.11162	0.11983	-90.4813	26.883	44.564	0.19531	-0.10645	-0.22803	-80.1557	24.8165	55.193	0.073535	0.060742	0.23115	-76.127	-57.028	753.7341	-0.14404	0.38477	0.25439
1.77	-138.881	-18.571	1889.529	-1.5331	1.5351	0.86022	-113.839	38.841	35.858	0.21436	0.020508	0.11035	-24.162	84.18	996.865	-0.36963	0.51533	0.21299	-84.803	-141.05	311.641	0.002832	0.12568	0.13584	-70.477	11.504	41.709	0.19287	-0.1041	-0.22471	-63.16	-32.9731	95.0456	0.065332	0.074804	0.246	-15.54	-22.573	817.8248	-0.25342	0.4435	0.31194
1.772	-106.361	26.3496	1889.026	-1.6006	1.5737	0.88267	-95.2344	4.568	38.97007	0.2084	0.024902	0.10576	-24.75	136.622	1079.6194	-0.48409	0.55479	0.25674	-149.214	-193.066	412.852	-0.015137	0.14805	0.13965	-74.374	47.7923	36.98271	0.18388	-0.10176	-0.21484	-55.847	-65.016	115.5855	0.060743	0.085742	0.25938	1.704	-0.29000000000002	962.887	-0.36431	0.49266	0.37279
1.774	-96.848	35.6033	1897.051	-1.6645	1.6003	0.89982	-84.0662	1.993	46.5398	0.20459	0.024414	0.092773	-78.688	147.868	1110.731	-0.59814	0.59277	0.28271	-143.521	-302.36178	494.5036	-0.043457	0.18164	0.14209	-89.2955	42.677	38.9754	0.16748	-0.093164	-0.20938	-104.103	-93.12	164.3	0.052734	0.10107	0.27686	36.568	89.297	1053.851	-0.48104	0.53385	0.4225
1.776	-109.942	-0.925999999999998	1910.8372	-1.7177	1.6215	0.91946	-130.815	15.713	42.7183	0.1956	0.027344	0.096973	-120.115	64.648	1172.169	-0.69443	0.64736	0.32627	-137.168	-287.592	524.4143	-0.082129	0.229	0.14961	-50.034	-0.77	53.7543	0.14658	-0.088965	-0.19492	-46.12	-118.3898	271.7979	0.048242	0.11621	0.28184	-15.515	128.7622	1080.822	-0.58613	0.58132	0.4565
1.778	-149.8046	16.621	1932.9597	-1.7729	1.6313	0.93848	-78.842	-13.899	51.507	0.18281	0.029785	0.095215	-117.791	1.95999999999999	1250.564	-0.78935	0.7001	0.35703	-116.44	-248.961	544.988	-0.13008	0.27598	0.15899	-104.64487	28.1804	54.7443	0.12109	-0.081055	-0.18701	-89.859	-145.475	390.303	0.040625	0.12978	0.29024	-79.252	111.656	1153.4953	-0.6792	0.63135	0.47656
1.78	-109.527	-41.4096	1944.425	-1.8205	1.6289	0.94822	-72.333	28.2707	38.25867	0.17695	0.030957	0.099514	-182.5852	-102.182	1295.877	-0.8835	0.75908	0.38906	-112.951	-186.3685	579.031	-0.19336	0.32519	0.19414	-64.631	13.006	64.448	0.093556	-0.067383	-0.17363	-147.115	-218.322	520.415	0.032031	0.14893	0.29844	-115.696	112.036	1209.078	-0.74604	0.69399	0.48907
1.782	-112.426	-68.215	1948.048	-1.8557	1.6221	0.958	-65.956	29.2816	38.827	0.16514	0.030468	0.10322	-219.082	-209.877	1395.5448	-0.97724	0.83154	0.43027	-177.552	-56.2648	602.718	-0.27392	0.36582	0.22773	-47.334	33.087	47.1968	0.0625	-0.058008	-0.16162	-108.898	-272.113	559.073	0.0095706	0.17588	0.30312	-143.044	3.03999999999999	1297.403	-0.80142	0.76768	0.50056
1.784	-126.233	-53.04	1958.535	-1.8701	1.6091	0.95981	-23.05	-0.8519	51.813	0.15332	0.033203	0.10742	-193.587	-222.1621	1459.38651	-1.0742	0.9082	0.47705	-113.921	-28.338	630.899	-0.36572	0.40527	0.25781	-70.777	71.144	19.674	0.042578	-0.043164	-0.15303	-138.292	-298.958	553.698	-0.018066	0.21484	0.31055	-158.998	-80.55	1408.992	-0.86012	0.86057	0.5315
1.786	-119.017	-78.325	1954.958	-1.8574	1.5985	0.96252	-59.255	28.4421	33.8393	0.14648	0.030078	0.11172	-184.516	-289.406	1502.833	-1.1896	0.98308	0.52822	-30.609	17.194	644.153	-0.45615	0.43603	0.29609	-19.971	46.169	17.6403	0.026269	-0.026562	-0.1461	-119.792	-270.029	597.642	-0.060547	0.26533	0.33125	-226.502	-154.04	1458.259	-0.93298	0.96702	0.58353
1.788	-127.9633	-26.028	1948.9284	-1.8379	1.5918	0.95947	-30.73	-16.334	33.0492	0.13926	0.030957	0.11436	-92.033	-313.58	1533.6511	-1.31	1.0555	0.58008	-19.116	60.094	732.3647	-0.54805	0.46836	0.31963	-43.146	56.472	24.672	0.0078125	-0.01123	-0.14014	-135.52	-189.801	645.059	-0.11407	0.32422	0.36211	-264.491	-287.4989	1517.693	-1.0244	1.0801	0.65479
1.79	-93.198	-35.7915	1917.034	-1.7981	1.5868	0.96336	-4.177	-7.7589	24.5838	0.13887	0.033301	0.12256	-41.234	-290.31	1550.009	-1.4378	1.1091	0.62695	61.0534	67.698	840.994	-0.62695	0.5043	0.34502	-50.239	49.1382	28.4512	-0.0025391	0.0061524	-0.13858	-204.1313	-125.619	693.627	-0.20039	0.37734	0.40039	-201.435	-313.33	1562.5234	-1.1583	1.1916	0.73027
1.792	-37.655	-81.455	1895.055	-1.7662	1.5837	0.96533	-40.497	34.63725	31.6919	0.13574	0.030469	0.13037	-62.995	-314.06	1614.826	-1.5624	1.147	0.66445	26.3664	158.13	904.831	-0.69766	0.53925	0.36103	0.173999999999999	-7.7997	50.687	-0.0092774	0.028125	-0.13662	-137.86	-84.628	740.9268	-0.29698	0.42852	0.43877	-143.0819	-366.42	1545.0446	-1.3241	1.2774	0.80241
1.794	-32.322	-31.436	1854.0087	-1.7344	1.5779	0.96533	-0.431999999999995	18.1988	39.152	0.1333	0.03418	0.13818	-29.535	-250.93	1697.651	-1.6621	1.1758	0.69385	-15.908	189.763	965.589	-0.771	0.58643	0.37305	-27.534	16.719	43.822	-0.019824	0.046094	-0.13701	-96.919	-41.868	795.466	-0.40723	0.47363	0.46875	-31.074	-417.55	1590.69	-1.496	1.3318	0.86503
1.796	-5.71900000000001	-11.132	1838.5034	-1.7208	1.5788	0.97279	-2.523	61.129	27.6754	0.12637	0.028613	0.13896	-47.739	-200.963	1732.701	-1.7251	1.1893	0.72363	-42.086	165.218	1002.53	-0.83701	0.66182	0.39531	-14.083	-26.716	52.16974	-0.021875	0.067188	-0.14063	-72.381	-32.431	917.744	-0.504	0.52099	0.50039	27.132	-366.26	1639.808	-1.6382	1.3684	0.90474
1.798	7.66800000000001	75.498	1844.853	-1.7144	1.5757	0.98242	-2.786	51.27	27.65693	0.12051	0.025781	0.146	-64.941	-194.321	1771.776	-1.7519	1.1942	0.73906	-118.704	170.545	1048.018	-0.9042	0.74267	0.42286	-11.252	-16.58507	63.1596	-0.022949	0.082031	-0.1416	-31.478	28.31	1038.582	-0.60391	0.56875	0.51729	-6.84399999999999	-359.16	1727.327	-1.7402	1.3945	0.93604
1.8	-38.552	165.301	1822.636	-1.7218	1.5742	0.99198	22.601	17.9245	31.9556	0.11387	0.021875	0.14248	-51.528	-109.754	1756.007	-1.7428	1.1931	0.73477	-108.254	81.814	1120.121	-0.98701	0.82314	0.45254	-35.767	29.702	43.756	-0.023047	0.096679	-0.14541	-58.747	104.218	1105.017	-0.7043	0.62774	0.53095	7.72	-266.675	1832.702	-1.7745	1.4167	0.93766
1.802	-35.716	151.978	1811.617	-1.7344	1.5728	0.99795	-25.133	42.4813	19.3522	0.11592	0.015137	0.14102	-85.1248	-80.622	1709.089	-1.6982	1.187	0.72168	-104.412	11.52	1188.909	-1.0814	0.90655	0.49219	-5.602	15.2567	45.2179	-0.027148	0.10195	-0.14004	-102.971	115.754	1179.49125	-0.79209	0.70986	0.54551	-31.313	-166.4	1814.165	-1.7529	1.432	0.92735
1.804	-70.092	181.891	1791.0789	-1.7405	1.5675	0.99609	13.312	2.988	38.4197	0.1167	0.01416	0.14111	-100.2744	-33.34	1719.422	-1.6206	1.1899	0.70313	-202.61	-80.83	1266.774	-1.1836	0.97461	0.53369	-46.276	55.458	46.84297	-0.027148	0.10977	-0.1416	-133.192	110.377	1227.104	-0.8667	0.81494	0.57227	-62.105	-155.213	1770.264	-1.6717	1.4465	0.90468
1.806	-115.702	150.983	1763.995	-1.7387	1.5539	0.99057	12.324	10.6533	30.0606	0.11787	0.0084962	0.14063	-117.403	32.55	1712.815	-1.513	1.2011	0.67832	-164.257	-217.1251	1347.58	-1.294	1.0217	0.57979	-65.064	47.184	56.838	-0.031152	0.10938	-0.14981	-207.393	29.67	1313.083	-0.93584	0.93174	0.60547	-60.826	-86.589	1743.069	-1.5486	1.4679	0.87374
1.808	-112.158	113.835	1765.686	-1.7324	1.543	0.97607	-48.91	35.2582	32.047	0.11689	0.0041016	0.14492	-113.7285	-21.23	1734.577	-1.3961	1.2106	0.65967	-128.866	-263.205	1368.42313	-1.4018	1.0544	0.62578	-34.627	6.759	39.8577	-0.033203	0.10938	-0.15723	-165.769	-61.32	1429.828	-1.0203	1.0566	0.64815	-117.9744	-73.62	1712.942	-1.4063	1.498	0.83838
1.81	-161.8197	146.66	1747.811	-1.7144	1.5322	0.95449	-19.965	8.0138	50.7117	0.12041	0.0080078	0.14063	-57.556	-35.564	1761.008	-1.2906	1.2121	0.64209	-88.0374	-308.4	1360.6011	-1.4897	1.0775	0.6668	-59.35	43.073	15.573	-0.02832	0.11201	-0.16699	-200.287	-127.22	1489.041	-1.1246	1.1757	0.7083	-151.8604	-94.26	1769.544	-1.2646	1.5153	0.80389
1.812	-150.48777	83.895	1738.1694	-1.6891	1.5236	0.92654	-59.542	42.03	35.841	0.11924	0.013867	0.14092	-0.681000000000004	-89.659	1775.613	-1.2172	1.2043	0.62823	-16.457	-310.51	1371.8078	-1.5569	1.0954	0.70743	-46.46	14.6554	34.5279	-0.022364	0.11192	-0.17549	-286.625	-228.122	1549.2498	-1.2579	1.2815	0.77754	-147.82	-48.23	1788.547	-1.1538	1.5227	0.76573
1.814	-133.8937	51.721	1715.9265	-1.6536	1.5057	0.90344	-69.913	44.0918	37.987	0.12305	0.020996	0.13818	45.736	-193.172	1867.184	-1.1597	1.1899	0.61426	-32.361	-250.42	1403.735	-1.5977	1.1113	0.7417	-61.275	28.3888	38.336	-0.014941	0.11192	-0.18564	-232.057	-264.857	1594.422	-1.4009	1.3892	0.8457	-120.81	-102.25	1780.8624	-1.0715	1.5154	0.73074
1.816	-138.00189	40.653	1676.0946	-1.6157	1.4904	0.88154	-56.617	15.5252	38.7525	0.12578	0.035156	0.13701	48.022	-169.199	1918.4827	-1.1268	1.1728	0.61094	-22.814	-203.882	1494.715	-1.5983	1.14	0.75869	-84.01	57.3499	40.744	-0.0045899	0.11367	-0.1914	-206.727	-278.088	1589.3608	-1.539	1.4621	0.90811	-45.483	-134.984	1798.241	-1.0119	1.4969	0.69669
1.818	-104.993	4.997	1677.551	-1.5776	1.4771	0.84961	-108.912	49.5081	39.031	0.12539	0.043652	0.1374	14.463	-189.99	1944.864	-1.1077	1.1594	0.61348	-8.958	-127.136	1556.349	-1.5625	1.1731	0.76065	-53.058	34.133033	33.1938	0.0063477	0.11475	-0.19092	-105.224	-318.2	1612.2995	-1.6723	1.5277	0.9626	16.428	-130.8357	1787.874	-0.97803	1.4771	0.67676
1.82	-108.6982	84.361	1668.5595	-1.5368	1.4611	0.82206	-75.44	15.757	36.5587	0.12578	0.056934	0.14014	1.679	-203.552	1984.687	-1.1003	1.1513	0.617	-42.7574	-89.277	1578.199	-1.4942	1.214	0.7626	-82.555	61.655	35.0825	0.011328	0.11318	-0.19482	18.208	-309.22	1641.59	-1.7801	1.5777	1.0173	44.86	-187.973	1837.02	-0.95406	1.454	0.64844
1.822	-97.553	117.291	1656.858	-1.4954	1.4407	0.79448	-83.997	21.222561	33.553	0.12227	0.070606	0.14707	-51.803	-160.847	1976.353	-1.1036	1.1589	0.62539	10.854	-102.213	1573.421	-1.4027	1.2547	0.75283	-93.601	48.5067	70.614	0.010644	0.10693	-0.19414	7.76199999999999	-327.47	1729.358	-1.8481	1.618	1.047	48.198	-162.475	1888.496	-0.94692	1.4406	0.62386
1.824	-104.8033	118.686	1635.693	-1.4521	1.4122	0.76681	-121.355	32.8023	53.2299	0.11816	0.07959	0.15576	-84.393	-218.449	2005.35	-1.1162	1.1738	0.64307	-50.14	-62.412	1521.593	-1.2964	1.2876	0.73242	-70.628	-4.9169	99.153	0.0067383	0.10342	-0.19492	44.424	-290.12	1867.314	-1.8647	1.6411	1.0664	-8.039	-194.376	1962.256	-0.9547	1.4359	0.60314
1.826	-129.454	166.6772	1575.7885	-1.4094	1.3871	0.73724	-71.89	-21.5633	89.4172	0.11084	0.095215	0.15469	-81.433	-188.6096	2039.616	-1.1422	1.1989	0.66201	-104.457	-35.653	1517.879	-1.1938	1.3183	0.71816	-100.6199	-17.479	87.067	0.0045899	0.099704	-0.20029	25.6973	-193.274	1891.593	-1.8223	1.6631	1.0573	-59.428	-289.34	2061.785	-0.97309	1.4352	0.5864
1.828	-118.635	142.2897	1525.815	-1.3633	1.3574	0.70752	-98.8357	-7.934	150.361	0.10703	0.11065	0.16484	-123.972	-143.835	2027.136	-1.1793	1.2266	0.69267	-86.327	-3.63000000000001	1531.201	-1.1015	1.336	0.70361	-84.1508	-106.03	114.562	-0.0019531	0.097168	-0.19336	-23.548	-166.139	1878.613	-1.7365	1.6712	1.0457	-96.326	-271.623	2082.45	-1.0044	1.4438	0.57813
1.83	-119.961	195.222	1494.198	-1.3264	1.3218	0.68262	-103.792	-32.8808	219.162	0.096874	0.12509	0.17578	-131.65	-167.152	2031.017	-1.2289	1.2598	0.74151	-113.322	5.53	1539.338	-1.0391	1.3437	0.69268	-52.412	-144.191	194.371	-0.0068359	0.092383	-0.19306	10.343	-78.251	1853.839	-1.6056	1.6708	1.0133	-124.872	-271.279	2061.374	-1.0518	1.4581	0.57675
1.832	-124.703	257.734	1448.563	-1.2857	1.2949	0.65494	-86.604	-101.79	325.865	0.086328	0.1418	0.18242	-154.653	-87.695	1996.399	-1.295	1.2841	0.80625	-71.769	-57.844	1581.9224	-0.99894	1.3409	0.68692	-47.7833	-157.3686	278.418	-0.010644	0.089453	-0.19502	-26.818	-23.14	1784.157	-1.4591	1.6616	0.96309	-166.523	-183.522	2038.802	-1.1104	1.4764	0.59548
1.834	-110.5025	242.305	1425.3426	-1.2446	1.2641	0.62452	-130.652	-124.79	423.219	0.071777	0.16064	0.1875	-165.8557	-75.0033	1946.664	-1.3804	1.313	0.87695	-2.871	-101.459	1616.108	-0.97656	1.3359	0.68701	10.188	-237.1546	384.093	-0.015332	0.086329	-0.19854	-80.26	-49.34	1816.724	-1.3154	1.6406	0.9165	-215.6659	-45.521	1955.308	-1.1932	1.4936	0.62985
1.836	-84.1961	265.724	1377.189	-1.2025	1.2333	0.59673	-152.043	-238.599	484.5111	0.047754	0.1831	0.18799	-140.216	-31.4365	1948.933	-1.4874	1.3368	0.93711	-17.291	-139.0293	1668.173	-0.98643	1.3288	0.6877	13.7506	-238.411	445.194	-0.014649	0.091895	-0.20156	-65.882	-28.28	1845.132	-1.1968	1.6115	0.85313	-215.4417	-66.161	1929.001	-1.2977	1.5171	0.65838
1.838	-61.93	198.331	1331.543	-1.1616	1.1978	0.57373	-147.35	-285.284	507.7356	0.010938	0.21172	0.1876	-109.755	79.77	1926.652	-1.6011	1.3552	0.98868	23.484	-164.233	1715.696	-1.0079	1.3314	0.6832	14.196	-276.934	517.635	-0.018555	0.097656	-0.2124	-72.6229	-106.57	1855.27	-1.0971	1.5685	0.80156	-224.959	-32.695	1931.299	-1.4038	1.5474	0.68945
1.84	-19.168	153.905	1306.9878	-1.1173	1.1679	0.54963	-159.619	-246.618	544.276	-0.032031	0.25508	0.19073	-117.169	59.434	1935.201	-1.7175	1.3771	1.034	-2.49799999999999	-166.88	1741.71	-1.0469	1.3407	0.67422	51.344	-322.611	599.556	-0.013184	0.11074	-0.21855	-5.712	-159.493	1891.3116	-1.0268	1.5216	0.76406	-190.261	-47.353	1915.53	-1.4912	1.5682	0.73126
1.842	-0.137	175.018	1278.4545	-1.0774	1.1353	0.52386	-114.39	-222.352	609.297	-0.091603	0.30176	0.21455	-131.931	70.798	1964.615	-1.8311	1.4017	1.0761	-61.991	-202.716	1781.832	-1.0873	1.3584	0.65908	33.812	-272.653	652.553	-0.021875	0.13272	-0.21943	27.594	-164.46611	1875.41	-0.98438	1.4824	0.72979	-99.528	-95.99	1944.9132	-1.5782	1.5933	0.76397
1.844	25.166	153.41	1246.251	-1.0384	1.1071	0.50002	-143.332	-126.324	664.888	-0.16211	0.3501	0.25244	-168.586	40.8145	1978.663	-1.9355	1.4229	1.1099	-21.778	-227.86	1813.425	-1.1265	1.3774	0.65234	78.526	-271.886	679.399	-0.037891	0.171	-0.21513	29.184	-205.061	1901.182	-0.9624	1.4595	0.70313	-100.228	-4.518	1933.938	-1.6594	1.6152	0.79835
1.846	27.827	187.676	1225.032	-1.0053	1.0762	0.47696	-139.432	-70.581	718.7769	-0.25684	0.39102	0.29697	-180.892	-77.747	1996.0869	-2.0203	1.4285	1.1329	-89.973	-202.822	1833.749	-1.1618	1.4023	0.63653	100.304	-204.268	695.143	-0.073535	0.21465	-0.19649	67.584	-147.445	1940.904	-0.94912	1.4482	0.69551	-133.478	14.518	1903.322	-1.7528	1.6313	0.83702
1.848	-0.388999999999996	205.065	1179.6339	-0.96973	1.0479	0.45264	-70.127	-64.554	742.742	-0.36719	0.43047	0.34375	-157.9344	-62.546	2007.097	-2.0832	1.432	1.1603	-122.177	-161.903	1895.912	-1.1991	1.4298	0.64131	46.85	-108.599	727.8644	-0.13525	0.27051	-0.15869	18.95	-143.353	1984.957	-0.95889	1.4536	0.69414	-144.417	51.135	1897.9053	-1.834	1.6426	0.87354
1.85	-1.031	152.673	1176.779	-0.92977	1.0116	0.43828	-49.505	0.88000000000001	812.1476	-0.47891	0.475	0.38867	-169.9623	-92.035	1993.372	-2.1258	1.4309	1.1723	-112.805	-80.942	1907.578	-1.2421	1.4673	0.64599	90.77	-59.138	764.0674	-0.23008	0.32578	-0.10742	-35.064	-217.05	2072.312	-0.99326	1.4755	0.71055	-180.6836	106.8297	1889.291	-1.8981	1.6476	0.90088
1.852	1.936	181.5963	1164.974	-0.89608	0.97538	0.41865	-12.689	28.69	926.873	-0.58916	0.51826	0.41494	-183.5682	-96.6197	1997.596	-2.1385	1.4236	1.1794	-179.9536	-12.827	1872.2981	-1.2881	1.499	0.67529	99.708	29.378	815.8542	-0.34326	0.37861	-0.03916	-53.642	-211.657	2116.915	-1.0459	1.5115	0.74033	-192.4148	-0.437999999999999	1963.957	-1.9386	1.6509	0.9246
1.854	-30.198	170.2893	1114.187	-0.86406	0.93632	0.39364	-2.024	100.001	1000.843	-0.68652	0.56055	0.43701	-156.01043	-27.37	1967.0991	-2.1309	1.416	1.1821	-172.5642	-7.413	1834.377	-1.3354	1.5239	0.70898	90.2777	55.719	913.381	-0.47138	0.43057	0.019434	-125.3332	-270.294	2118.399	-1.1289	1.5547	0.78174	-145.8108	-12.247	2004.899	-1.9554	1.6513	0.93828
1.856	-40.186	195.385	1073.631	-0.83388	0.89912	0.38076	-52.484	162.916	1091.114	-0.78018	0.61904	0.45664	-148.7969	-89.1213	1968.8202	-2.1072	1.4162	1.1788	-180.9294	10.342	1806.16	-1.3962	1.5548	0.75996	113.195	63.795	987.807	-0.60459	0.48447	0.080274	-155.0085	-228.066	2094.026	-1.2295	1.5951	0.84229	-164.517	-50.731	2013.183	-1.9608	1.6564	0.95391
1.858	-57.88	250.819	992.8932	-0.80225	0.85986	0.3623	-36.531	132.657	1169.0947	-0.87061	0.6915	0.46524	-89.677	-83.83	1973.845	-2.0694	1.4173	1.1754	-181.8658	5.99372	1807.794	-1.471	1.5919	0.80508	90.738	91.756	1010.246416	-0.72461	0.54199	0.13525	-181.8006	-104.646	2031.742	-1.3465	1.6399	0.90557	-178.9425	-109.672	1991.554	-1.9609	1.6602	0.96826
1.86	-75.69	225.339	940.9	-0.7667	0.82237	0.34102	-98.061	116.752	1237.102	-0.95811	0.77901	0.48086	-57.919	-73.2995	1925.7466	-2.0292	1.4294	1.175	-106.707	25.236	1847.75	-1.5538	1.6435	0.85039	116.801	51.364	1070.089	-0.83447	0.59033	0.16631	-246.069	-89.707	1979.635	-1.4855	1.6868	0.954	-149.7917	-47.181	1945.778	-1.9663	1.6606	0.98399
1.862	-63.347	237.578	894.8138	-0.7332	0.78086	0.32412	-137.4878	56.647	1328.811	-1.0438	0.88311	0.50322	-27.216	-98.073	1910.219	-1.995	1.4397	1.1724	-144.628	74.485	1853.485	-1.6408	1.6924	0.8917	91.992	29.09	1134.76	-0.94326	0.64775	0.19033	-218.215	-39.224	1968.807	-1.6183	1.7394	0.99599	-159.711	-84.585	1910.9798	-1.9741	1.6673	1
1.864	-36.418	238.8581	834.74	-0.69883	0.74415	0.3003	-90.697	-67.882	1393.728	-1.1445	0.98926	0.54346	-21.345	22.903	1860.254	-1.9683	1.4438	1.1758	-136.138	80.20042	1885.284	-1.7285	1.7354	0.93018	24.0232	-26.75	1217.897	-1.0398	0.7169	0.2122	-201.589	-37.844	1951.744	-1.7319	1.7876	1.0156	-88.157	-78.4574	1884.871	-1.985	1.6673	1.0203
1.866	-33.63	197.409	811.5866	-0.6666	0.70303	0.2833	-178.812	-131.646	1430.597	-1.2583	1.0915	0.59454	-38.165	66.722	1827.27	-1.952	1.4414	1.1693	-119.159	95.592	1899.2055	-1.8156	1.7648	0.9665	5.48805	-133.771	1275.291	-1.1246	0.80762	0.24189	-163.332	-76.231	1969.4002	-1.8416	1.808	1.0327	-34.787	-8.068	1873.4348	-2.001	1.6631	1.039
1.868	-59.0042	252.168	768.476	-0.63623	0.66455	0.2627	-178.605	-222.5721	1504.434	-1.3858	1.1743	0.64922	-18.325	114.949	1824.267	-1.9441	1.4402	1.1684	-202.355	66.386	1911.6153	-1.8917	1.7802	1.0016	-81.088	-204.697	1309.944	-1.1992	0.89844	0.28516	-80.506	-26.4925	1980.973	-1.9467	1.8263	1.0481	-16.148	-13.937	1881.355	-2.0215	1.6582	1.0552
1.87	-87.401	227.499	734.605	-0.60528	0.62304	0.24541	-123.836	-281.193	1514.984	-1.5214	1.2309	0.70898	-19.561	197.45	1802.487	-1.9364	1.4324	1.1615	-148.562	28.347	1965.236	-1.962	1.7895	1.0289	-101.194	-279.089	1355.9148	-1.2822	1.0011	0.33066	-115.616	-45.277	1935.661	-2.023	1.8345	1.0539	-4.14699999999999	90.082	1889.8469	-2.0343	1.6489	1.067
1.872	-71.906	212.2155	717.62983	-0.56904	0.58213	0.22695	-94.302	-305.179	1530.6835	-1.6606	1.2611	0.75459	-42.93	154.26	1803.5705	-1.9231	1.4276	1.1553	-126.691	21.9948	1968.25	-2.0208	1.787	1.0568	-63.41501	-337.734	1394.524	-1.3876	1.0987	0.37998	-122.986	-6.617	1938.203	-2.0435	1.8319	1.0506	-6.033	144.832	1872.5877	-2.0418	1.6383	1.0716
1.874	-78.4711	225.0228	670.99473	-0.53272	0.54268	0.20937	0.317	-344.88	1576.887	-1.7729	1.2817	0.78711	-49.672	176.106	1791.82	-1.9058	1.4185	1.1523	-140.6814	-0.0899999999999999	1969.44	-2.0625	1.7852	1.0796	-96.98031	-325.05	1429.4912	-1.5173	1.1799	0.43389	-110.803	49.827	1916.919	-2.021	1.8188	1.0332	-21.428	137.122	1824.0514	-2.034	1.6242	1.0747
1.876	-82.332	158.988	639.481	-0.49668	0.50273	0.19306	37.8647	-320.71	1616.005	-1.8402	1.291	0.81494	-83.092	184.239	1752.447	-1.8824	1.411	1.1249	-102.3846	-20.464	1987.332	-2.0776	1.7817	1.0899	-57.089	-365.25	1481.4322	-1.671	1.2423	0.48437	-158.3885	-27.7704	1934.1015	-1.9687	1.7992	1.0161	-55.882	198.15	1766.019	-2.0173	1.6089	1.0689
1.878	-82.2924	179.3996	603.879	-0.46143	0.45898	0.17334	14.5779	-289.84	1688.63	-1.85	1.2887	0.8333	-90.335	106.613	1723.438	-1.8508	1.407	1.1099	-147.472	-15.71	1970.426	-2.0699	1.7761	1.104	-28.529	-384.89	1520.2441	-1.8179	1.2856	0.51709	-135.2098	-21.014	2010.804	-1.902	1.7875	0.99619	-86.92	163.039	1740.24	-1.9902	1.5898	1.0552
1.88	-120.275	177.811	574.50364	-0.42607	0.42822	0.15703	43.0066	-246.68	1713.42	-1.8109	1.2856	0.83486	-65.556	108.632	1704.223	-1.8152	1.4012	1.079	-97.433	-20.004	1964.828	-2.0496	1.7699	1.113	-78.982	-354.57	1579.583	-1.9309	1.3027	0.53858	-121.1155	-38.476	2017.038	-1.8425	1.7735	0.98369	-108.119	158.139	1761.895	-1.9567	1.5776	1.0373
1.882	-95.1447	144.459	555.1689	-0.38789	0.3875	0.13877	21.193	-158.95	1700.273	-1.7238	1.2889	0.82256	-82.161	38.703	1692.24346	-1.7701	1.4025	1.0483	-48.718	31.299	1938.391	-2.0248	1.7588	1.1147	-69.63	-327.02	1642.282	-2.0027	1.3055	0.55205	-120.0197	-67.937	2017.013	-1.7976	1.7626	0.96992	-123.35047	192.13	1760.682	-1.9241	1.5661	1.0164
1.884	-49.2277	176.3735	509.917	-0.35664	0.35078	0.11767	16.611	-132.217	1695.1	-1.603	1.2954	0.79492	-58.278	1.68700000000001	1693.216	-1.7207	1.3984	1.0171	-61.837	102.828	1912.1237	-2.0039	1.7422	1.1157	-74.389	-202.7303	1679.01	-2.0156	1.3051	0.55635	-85.085	-15.613	1989.4895	-1.7695	1.7461	0.96533	-123.964	115.16	1750.6185	-1.8824	1.547	0.99414
1.886	-32.349	124.312	469.991	-0.32549	0.30986	0.10049	33.197	-85.651	1675.117	-1.4506	1.3109	0.75537	-60.395	69.246	1700.267	-1.6694	1.3958	0.98359	-9.128	143.797	1922.881	-1.9882	1.7134	1.1105	-127.8615	-113.779	1704.8	-1.9836	1.3211	0.54189	-121.511	-42.2755	1917.087	-1.7598	1.7313	0.95049	-89.495	115.0708	1729.0505	-1.8413	1.5306	0.96992
1.888	11.007	116.561	414.2104	-0.29297	0.27246	0.084961	-38.625	-56.61	1674.065	-1.2941	1.3371	0.71885	-123.3098	61.436	1684.006	-1.616	1.3929	0.94932	-2.479	201.384	1905.103	-1.9831	1.6841	1.1078	-113.957	-68.84	1677.274	-1.8979	1.3413	0.51563	-48.365	-45.1013	1898.5005	-1.7687	1.7157	0.94218	-89.277	65.683	1693.2424	-1.7964	1.5122	0.94629
1.89	12.764	160.507	374.347	-0.25986	0.23799	0.064258	-17.289	-69.15	1701.813	-1.157	1.3531	0.69346	-101.431	131.89	1665.106	-1.5617	1.3894	0.91377	-16.647	214.52	1886.1099	-1.9765	1.6486	1.0934	-138.55408	-30.33	1665.09	-1.7709	1.3736	0.49228	5.956	-2.09	1873.555	-1.7823	1.7052	0.94336	-73.965	12.02	1690.6202	-1.757	1.5005	0.92149
1.892	-5.185	127.65	365.7268	-0.23389	0.20488	0.043164	-68.2305	-49.88	1698.807	-1.0507	1.3595	0.66914	-95.228	171.281	1611.3317	-1.5053	1.3806	0.87803	-4.83599999999999	208.217	1890.2026	-1.9615	1.6115	1.0769	-156.719	-69.19	1669.068	-1.6352	1.4204	0.45557	-12.817	0.384999999999991	1874.2609	-1.8085	1.6933	0.94531	-57.008	76.608	1672.7454	-1.7223	1.486	0.89356
1.894	12.721	182.788	343.326	-0.20342	0.17286	0.023633	-85.4456	-84.465	1711.788	-0.98193	1.3657	0.65234	-141.708	129.8779	1571.1734	-1.4487	1.3755	0.84766	-45.43	217.807	1869.0808	-1.9468	1.5728	1.0605	-105.0307	-95.841	1694.909	-1.5023	1.4609	0.42353	49.341	77.153	1901.931	-1.8335	1.688	0.94727	-97.589	64.574	1669.431	-1.6812	1.466	0.86035
1.896	31.463	178.685	307.5408	-0.17636	0.14297	0.0067383	-0.406999999999996	-111.577	1717.954	-0.94883	1.3652	0.64795	-135.119	187.542	1517.5948	-1.3993	1.3714	0.81465	-76.499	187.956	1845.393	-1.9115	1.5365	1.0257	-106.7493	-136.163	1732.655	-1.3933	1.4981	0.38223	19.924	133.0562	1861.3576	-1.8558	1.681	0.93984	-92.878	100.556	1672.145	-1.6404	1.4439	0.83154
1.898	18.985	125.249	276.7988	-0.15625	0.1167	-0.012207	12.949	-133.597	1717.259	-0.9456	1.3587	0.66602	-159.933	187.917	1473.361	-1.3479	1.3552	0.78985	-71.491	201.542	1834.542	-1.8641	1.5004	0.99818	-57.932	-196.9037	1771.0589	-1.3086	1.5195	0.35693	-19.028	148.097	1827.0496	-1.8643	1.6762	0.93438	-116.252	151.0079	1626.151	-1.5977	1.4238	0.80371
1.9	40.775	160.428	246.646	-0.13008	0.095119	-0.02793	32.744	-179.491	1802.287	-0.97178	1.3536	0.67109	-163.68	223.868	1457.3641	-1.3042	1.3443	0.76094	-107.5978	190.204	1820.897	-1.8156	1.4676	0.96377	2.83900000000001	-172.3094	1791.764	-1.2648	1.5328	0.34697	-31.526	203.075	1788.4851	-1.8577	1.6642	0.93008	-185.273	138.407	1573.2297	-1.555	1.4028	0.77324
1.902	12.724	125.101	221.756	-0.11054	0.076465	-0.045801	58.885	-186.502	1852.3915	-1.0121	1.35	0.6751	-140.702	283.811	1416.0279	-1.2655	1.322	0.73965	-57.108	135.61396	1841.627	-1.771	1.4372	0.93672	19.264	-194.741	1817.766	-1.2531	1.5482	0.34443	-105.258	181.721	1751.8964	-1.8492	1.6531	0.92198	-139.7858	217.337	1538.9299	-1.516	1.3782	0.74619
1.904	-2.762	124.606	214.4379	-0.092578	0.052637	-0.055957	-15.2	-239.41	1912.777	-1.0581	1.3501	0.67676	-128.6913	234.161	1361.5842	-1.2344	1.3008	0.72363	-61.003	112.409	1831.376	-1.7261	1.4136	0.91211	68.378	-205.159	1834.9714	-1.28	1.5524	0.35576	-104.793	156.074	1771.934	-1.8315	1.6372	0.91309	-153.049	252.52	1484.979	-1.4723	1.3562	0.71573
1.906	5.933	142.914	179.0762	-0.078809	0.041113	-0.06875	-49.159	-287.61	1963.468	-1.1027	1.3525	0.68184	-75.084	243.8459	1310.492	-1.2033	1.2759	0.70224	-96.4036	71.751	1818.17	-1.6874	1.3919	0.89024	22.897	-197.246	1882.001	-1.3395	1.5574	0.37041	-123.2496	171.11	1752.452	-1.8116	1.6188	0.89922	-148.9644	247.669	1456.8957	-1.4296	1.328	0.6915
1.908	0.878	61.0416	154.5426	-0.062012	0.02832	-0.08252	-100.921	-255.911	1945.643	-1.1451	1.3606	0.68603	-63.183	232.364473	1265.668	-1.1734	1.2529	0.68232	-53.826	61.029	1811.026	-1.6554	1.3782	0.87676	-21.26	-249.067	1935.995	-1.4141	1.5605	0.38818	-177.54	106.863	1729.012	-1.7796	1.5947	0.88594	-95.7679	260.229	1419.857	-1.3843	1.2993	0.66309
1.91	14.05	69.53886	144.65285	-0.056641	0.014063	-0.093652	-162.66	-234.579	1957.976	-1.1912	1.3746	0.70166	-41.811	195.964	1256.8938	-1.146	1.2247	0.66826	-91.434	103.443	1771.7925	-1.6288	1.3673	0.86035	-12.409	-246.565	1961.655	-1.4877	1.5668	0.39648	-97.3032	108.2354	1725.4689	-1.7468	1.5712	0.87031	-92.6965	195.09196	1360.971	-1.3394	1.2679	0.63223
1.912	11.91	56.981	117.57	-0.043359	-0.00039064	-0.10879	-165.181	-148.402	1924.621	-1.2335	1.3942	0.7293	0.736000000000004	216.3324	1250.796	-1.1118	1.1943	0.64785	-87.397	116.348	1751.4833	-1.602	1.3545	0.84756	-55.2197	-225.2703	1960.483	-1.5461	1.5774	0.4041	-129.0961	105.683	1675.016	-1.7004	1.5391	0.84815	-46.707	178.829	1326.189	-1.2922	1.2359	0.60791
1.914	-19.33	31.71	123.1897	-0.028125	-0.010156	-0.12246	-215.2389	-73.573	1903.193	-1.2827	1.4048	0.77246	-27.653	170.373	1212.102	-1.0742	1.168	0.62842	-60.194	166.436	1708.9441	-1.5742	1.3457	0.83447	-19.366	-179.979	1942.975	-1.5851	1.5914	0.40879	-164.52006	71.313	1650.152	-1.6523	1.5059	0.8208	1.308	198.185	1298.893	-1.2453	1.2047	0.58057
1.916	-31.835	97.624	124.7159	-0.012207	-0.01875	-0.13916	-241.879	-66.874	1903.558	-1.3394	1.4169	0.82148	-11.884	134.555	1197.576	-1.0354	1.1367	0.61221	-108.1259	216.30972	1641.145	-1.543	1.3284	0.82305	-19.977	-92.985	1893.651	-1.6145	1.6089	0.4083	-90.043	123.011	1641.923	-1.6053	1.472	0.79834	0.140000000000001	178.271	1289.2403	-1.2024	1.1728	0.55879
1.918	-65.9	70.474	104.7979	0.00097656	-0.026367	-0.15186	-189.603	-52.668	1898.818	-1.4124	1.4337	0.86328	0.533999999999999	142.796	1153.3734	-0.99652	1.1117	0.59414	-85.3422	229.316	1615.2369	-1.5085	1.3137	0.80352	-94.478	-57.241	1864.787	-1.6265	1.6313	0.40039	-133.765	115.168	1629.179	-1.5539	1.4398	0.77431	21.966	234.9695	1270.5896	-1.1641	1.1426	0.53662
1.92	-82.171	60.137	111.579	0.014844	-0.03623	-0.16865	-214.589	-72.9726	1895.944	-1.5007	1.454	0.89688	-35.42	116.062	1126.507	-0.9543	1.0836	0.58008	-123.178	279.416	1570.90284	-1.4683	1.2993	0.78672	-15.789	-14.361	1857.379	-1.6388	1.6478	0.38467	-105.6189	119.5	1629.687	-1.5059	1.4035	0.75127	-8.739	217.3219	1250.4	-1.1232	1.1085	0.5123
1.922	-75.3862	83.3489	67.962	0.027344	-0.044531	-0.17989	-168.3732	-55.088	1909.7057	-1.594	1.4935	0.92774	3.691	172.6245	1091.713	-0.91934	1.0573	0.56064	-135.24	275.857	1560.569	-1.423	1.2805	0.76338	-8.056	7.109	1828.729	-1.6418	1.6656	0.36924	-117.3141	152.3215	1603.534	-1.4514	1.3709	0.73643	-34.995	158.5359	1221.292	-1.0875	1.0738	0.48867
1.924	-95.6205	29.1323	52.9492	0.033203	-0.057031	-0.1916	-121.231	8.9464	1887.679	-1.6846	1.5234	0.95752	-0.559000000000005	206.579	1025.191	-0.87988	1.0293	0.5376	-54.8	266.659	1534.8713	-1.375	1.2578	0.74316	24.856	-19.1628	1856.912	-1.65	1.6808	0.34503	-174.8	152.893	1537.48701	-1.4023	1.3379	0.71729	-15.099	161.227	1186.698	-1.0457	1.0352	0.47344
1.926	-106.48862	77.518	65.907	0.036523	-0.064062	-0.20498	-157.03	41.7211	1874.59	-1.7632	1.5474	0.99261	-22.24	186.66	959.201	-0.84102	1.0012	0.52705	-82.1676	272.532	1452.622	-1.3206	1.2309	0.71494	68.8993	-5.208724	1860.2004	-1.6571	1.6933	0.32413	-122.0343	207.036	1478.362	-1.3535	1.3024	0.69248	-35.696	133.0628	1156.433	-1.0103	0.99405	0.44825
1.928	-103.542	87.72	46.7829	0.032227	-0.06543	-0.2124	-146.086	54.705	1895.2933	-1.8398	1.5601	1.0247	36.073	200.807	901.4219	-0.80088	0.97041	0.51133	-62.062	208.29	1403.554	-1.2727	1.1969	0.68642	3.674	-14.23812	1856.042	-1.6655	1.7036	0.30615	-160.364	257.379	1421.028	-1.3034	1.2665	0.67188	-17.083	155.6991	1096.95	-0.97021	0.95752	0.43164
1.93	-101.6172	50.6262	45.812112	0.026953	-0.073145	-0.21914	-164.4882	29.852	1914.6122	-1.9105	1.5785	1.061	11.369	183.6914	850.2226	-0.76572	0.93604	0.49414	7.484	186.161	1372.236	-1.2179	1.161	0.66298	-19.286	-18.6327	1856.2595	-1.67	1.7093	0.28994	-138.1613	232.517	1380.3095	-1.2467	1.2263	0.65273	-22.767	204.467	1025.469	-0.9289	0.91601	0.41026
1.932	-71.0501	78.7958	40.039	0.020215	-0.080469	-0.22158	-170.151	-51.507	1962.506	-1.9723	1.5867	1.0954	14.876	187.917	807.507	-0.72715	0.90156	0.48037	-43.365	199.65	1347.25	-1.1697	1.126	0.63818	-45.1352	-10.462	1861.0747	-1.6753	1.7105	0.2789	-77.385	233.02	1357.0834	-1.1953	1.1914	0.62988	-45.786	190.9719	976.276	-0.88653	0.87617	0.38916
1.934	-89.9424	18.825	27.018	0.0061524	-0.082422	-0.22041	-129.8368	-90.8627	1983.025	-2.021	1.6001	1.1211	23.861	226.6262	760.035	-0.69092	0.86768	0.46289	7.769	190.424	1337.249	-1.1167	1.0884	0.60938	-75.612	-42.003	1893.672	-1.6898	1.7116	0.27657	-81.304	198.752	1302.5884	-1.1426	1.1523	0.61572	18.705	232.356	945.9085	-0.85215	0.83633	0.36416
1.936	-61.769	12.577	40.1959	-0.0089846	-0.084571	-0.20938	-157.711	-134.211	1956.971	-2.0521	1.6021	1.14	-26.183	204.729	716.047	-0.65537	0.83486	0.44639	12.309	224.42	1318.851	-1.0639	1.0477	0.5836	-29.8507	-55.86477	1913.252	-1.7049	1.7115	0.27128	-14.798	159.337	1274.2486	-1.0859	1.1199	0.59053	-1.005	216.1651	901.037	-0.80938	0.79277	0.34697
1.938	-28.822	61.7467	37.059	-0.035156	-0.086914	-0.20508	-135.202	-141.232	1946.519	-2.0569	1.6052	1.1508	-25.367	226.8656	690.42339	-0.61719	0.80176	0.42334	-30.978	181.9819	1297.904	-1.0109	1.0015	0.55576	-35.7241	-49.022	1900.554	-1.7227	1.707	0.27588	6.776	171.352	1230.482	-1.0347	1.0817	0.56797	-6.38	188.965	853.508	-0.76758	0.75488	0.32471
1.94	-60.369	22.126	22.0343	-0.056836	-0.087891	-0.19825	-99.496	-90.4276	1911.29677	-2.0386	1.6001	1.1558	-62.118	221.712	655.0266	-0.57383	0.76387	0.40108	5.782	149.313	1276.92	-0.96211	0.96055	0.52841	-60.2389	-60.127	1886.3332	-1.7423	1.7019	0.28398	3.58000000000001	165.181	1192.6977	-0.98155	1.0474	0.55157	-6.744	220.9949	800.6836	-0.72842	0.71064	0.30352
1.942	-45.287	43.2285	40.871	-0.074023	-0.087207	-0.19063	-111.489	-71.087	1893.628	-2.002	1.603	1.1517	-76.0075	191.328	608.5904	-0.53291	0.73271	0.37969	-45.68	183.283	1202.2289	-0.91836	0.91875	0.50185	-20.938	-55.225	1872.3625	-1.7616	1.697	0.29264	58.282	180.042	1168.4329	-0.93018	1.0108	0.53018	-73.309	202.629	739.452	-0.69258	0.67109	0.28848
1.944	-44.865	22.4287	37.851	-0.093946	-0.083691	-0.18828	-17.699	-48.413	1895.656	-1.9624	1.5962	1.1504	-47.497	202.155	569.0745	-0.49463	0.69531	0.35547	-14.925	174.776	1160.081	-0.87158	0.8833	0.47754	-19.642	-58.2515	1837.4732	-1.7768	1.6888	0.30126	16.594	204.494	1120.3305	-0.87988	0.97266	0.50928	-69.208	218.13873	712.027	-0.64532	0.62461	0.26309
1.946	-24.1	-22.4209	62.842	-0.10215	-0.080273	-0.18261	-3.073	-19.488	1878.423	-1.9188	1.589	1.1397	-113.529	175.158	517.309	-0.45088	0.66123	0.33262	16.008	223.9077	1094.4276	-0.82548	0.83994	0.45098	21.205	-69.196	1831.59	-1.7838	1.676	0.30946	10.841	162.811	1110.775	-0.83457	0.93476	0.48857	-70.807	225.829	662.407	-0.60176	0.58164	0.24268
1.948	9.591	30.7019	85.4664	-0.11035	-0.07373	-0.18213	-5.03	7.08600000000001	1873.331	-1.8831	1.5794	1.1344	-98.9091	136.70594	506.0863	-0.41523	0.62422	0.31289	-34.355	261.768	1022.038	-0.78232	0.79775	0.42832	65.6122	-16.574	1813.071	-1.7847	1.6587	0.31641	36.543	173.611	1088.456	-0.78633	0.89541	0.46504	-127.207	180.9053	636.0621	-0.55908	0.54297	0.21924
1.95	-14.407	13.8791	65.4345	-0.11621	-0.067285	-0.18291	22.799	80.669	1862.8783	-1.8687	1.5673	1.1293	-88.4437	123.366	480.317	-0.37813	0.5832	0.28789	4.492	244.171	955.601	-0.74092	0.75634	0.40566	42.398	39.292	1802.7315	-1.7815	1.6415	0.31915	-38.228	160.772	1020.947	-0.7375	0.86142	0.44942	-86.0236	181.433	619.04549	-0.51504	0.50459	0.19873
1.952	-23.978	22.81707	63.751	-0.11787	-0.062207	-0.18604	-43.433	133.734	1819.127	-1.854	1.5519	1.1221	-108.297	80.379	455.869	-0.34599	0.55303	0.26855	-1.218	286.582	923.7143	-0.70283	0.71416	0.38242	64.225	110.09159	1791.866	-1.7645	1.6223	0.32362	-18.934	147.935	980.848	-0.69052	0.82412	0.42734	-111.943	161.068	576.0061	-0.47031	0.46679	0.1793
1.954	-3.898	57.486	36.84	-0.11787	-0.058301	-0.18057	-17.517	162.821	1778.949	-1.8491	1.5317	1.1113	-31.688	97.165	427.128	-0.31299	0.51563	0.24463	-25.464	279.89	893.8297	-0.65771	0.67432	0.35742	1.814	182.962	1751.583	-1.7442	1.6019	0.32646	-15.958	187.212	915.51414	-0.64697	0.78467	0.40381	-108.2636	140.8388	557.5861	-0.42774	0.43125	0.16015
1.956	-11.816	9.61938	18.64909	-0.11816	-0.053223	-0.18438	-62.144	177.345	1746.792	-1.8292	1.5036	1.0945	-33.331	120.965	376.9432	-0.28213	0.48193	0.22334	-6.611	250.6561	858.2464	-0.62129	0.63164	0.33486	4.441	189.465	1735.582	-1.7179	1.5856	0.32792	-70.635	165.4378	836.204	-0.60186	0.74912	0.38067	-53.631	166.759	508.52144	-0.38623	0.39561	0.13759
1.958	5.555	32.5674	37.139	-0.10498	-0.053711	-0.1875	-141.375	147.641	1742.861	-1.8071	1.4754	1.0802	-47.613	138.405	353.839	-0.24765	0.44463	0.19912	-77.3674	263.16683	800.308	-0.575	0.59111	0.31299	38.8161	181.624	1730.9184	-1.6895	1.5684	0.32715	-6.248	172.7735	800.345	-0.55391	0.71543	0.36094	-81.732	132.589	438.405	-0.34912	0.36182	0.11914
1.96	15.274	33.7527	20.1895	-0.088379	-0.05332	-0.1915	-99.078	116.001	1772.76674	-1.7805	1.4472	1.0551	-25.297	181.023	323.5666	-0.22032	0.41455	0.17802	-64.2834	223.319	753.426	-0.53789	0.54502	0.28681	-24.217	147.366	1732.929	-1.669	1.5522	0.33536	-47.696	205.9039	750.275	-0.50938	0.67558	0.33828	-42.891	107.506	406.983	-0.30752	0.32509	0.10088
1.962	-18.915	-4.934	42.2895	-0.071679	-0.05664	-0.19053	-145.7182	119.254	1777.104	-1.7434	1.4174	1.0337	-60.3026	174.005	279.8605	-0.1872	0.3833	0.15205	-57.88	230.7608	718.235	-0.49473	0.50332	0.26523	-14.42	98.437	1750.2575	-1.6502	1.5321	0.33626	-34.055	196.904	704.304	-0.45986	0.6374	0.3127	-30.99	111.419	368.069	-0.267	0.29199	0.08164
1.964	-26.571	50.7335	66.328	-0.055274	-0.060156	-0.19482	-144.282	84.2744	1753.8414	-1.7085	1.395	1.002	-9.234	145.49	270.2992	-0.1543	0.35303	0.13037	-93.8351	259.877	669.766	-0.45508	0.45898	0.24365	12.129	92.379	1738.262	-1.6332	1.516	0.34254	-5.036	214.42096	672.467	-0.41455	0.604	0.29004	-54.633	106.164	361.8909	-0.2377	0.26855	0.064063
1.966	-51.285	30.4338	47.3199	-0.032227	-0.061621	-0.19356	-111.963	56.458	1723.6996	-1.6718	1.3747	0.97617	10.874	138.402	243.072	-0.12315	0.31934	0.10791	-58.374	208.281	658.553	-0.41416	0.4208	0.21826	0.032	86.8025	1687.643	-1.6257	1.4991	0.34421	-76.83848	208.0042	617.395	-0.37519	0.56582	0.26377	5.087	150.12065	366.233	-0.20293	0.2335	0.043945
1.968	-57.135	19.2726	63.3031	-0.01123	-0.066895	-0.19824	-150.074	44.981	1676.01	-1.6437	1.3528	0.94854	-30.483	123.00004	220.638	-0.088574	0.2918	0.086719	-78.7145	226.653	621.854	-0.36914	0.37715	0.1959	54.0809	85.162	1675.8041	-1.6187	1.4849	0.35205	-78.129	177.9685	605.611	-0.32842	0.5293	0.24043	-42.084	169.71	313.2891	-0.16846	0.20752	0.024414
1.97	-52.484	55.165	48.9933	0.0054689	-0.068164	-0.20176	-129.865	16.64	1670.32798	-1.6067	1.3344	0.92471	41.505	147.859	209.326	-0.059277	0.26328	0.066797	-110.15	175.0688	596.268	-0.32773	0.33144	0.1748	14.662	82.816	1665.2735	-1.6117	1.4618	0.36335	-84.4079	200.672	553.741	-0.28975	0.49492	0.21504	-16.251	160.889	289.876	-0.1333	0.1793	0.0074219
1.972	-86.588	5.67913	29.2489	0.027734	-0.069824	-0.20469	-104.457	48.126	1682.0672	-1.5761	1.32	0.9	10.131	162.877	149.076	-0.033008	0.23398	0.043359	-71.3327	130.524	580.081	-0.28916	0.29219	0.1459	14.939	62.477	1660.104	-1.609	1.4416	0.37876	-135.305	184.0858	522.5347	-0.25176	0.45947	0.18809	14.146	168.354	241.5731	-0.10703	0.15127	-0.0053711
1.974	-68.028	19.6519	49.02431	0.039062	-0.074121	-0.20156	-154.478	71.657	1679.775	-1.543	1.3105	0.88721	-10.139	133.033	140.118	-0.0068359	0.20605	0.024414	-62.6566	158.555	513.4564	-0.24854	0.25391	0.125	38.939	65.545	1660.492	-1.6036	1.4201	0.39063	-92.0942	168.3615	501.9874	-0.21191	0.42334	0.16895	-26.584	136.297	188.959	-0.076172	0.13135	-0.022949
1.976	-101.6804	11.2598	15.416	0.042773	-0.066406	-0.19932	-123.72692	96.914	1670.512	-1.5063	1.2953	0.86026	50.709	116.706	132.842	0.019043	0.18066	0.0038086	-29.137	118.686	473.3465	-0.21348	0.2166	0.10195	-29.399	113.223	1618.796	-1.5882	1.3946	0.39518	-117.513	176.127	450.208	-0.17705	0.39385	0.1456	6.304	117.875	180.556	-0.052539	0.10469	-0.034668
1.978	-120.4997	-30.9064	30.9134	0.042969	-0.066895	-0.19824	-153.216	182.65492	1599.6779	-1.4664	1.2871	0.83916	29.021	84.743	110.4604	0.040723	0.15605	-0.016797	-24.004	148.473	432.9944	-0.17841	0.17891	0.08125	-17.048	112.344	1619.395	-1.564	1.3755	0.40039	-99.265	138.099	439.5615	-0.14629	0.35927	0.12812	8.002	115.22	158.438	-0.03125	0.083496	-0.049805
1.98	-79.944	13.555	56.8976	0.04082	-0.059766	-0.18623	-183.937	206.043	1543.206	-1.4262	1.275	0.81689	24.481	59.009	122.938	0.066504	0.13496	-0.040235	-53.696	188.889	378.847	-0.14521	0.14493	0.062891	-5.299	169.387	1554.9538	-1.5329	1.3595	0.40399	-41.577	149.7247	386.058	-0.11894	0.32647	0.1082	15.477	80.545	161.622	-0.009375	0.064356	-0.057617
1.982	-97.8668	-16.344	26.483	0.030078	-0.051367	-0.17539	-133.7643	245.213	1498.152	-1.3796	1.2669	0.78789	11.009	58.7308	126.0266	0.090039	0.10986	-0.059082	-11.854	170.3646	354.7586	-0.11797	0.11455	0.043164	-71.9665	197.774	1492.129	-1.4959	1.3464	0.40487	-52.577	158.92293	342.61	-0.094824	0.29453	0.090332	65.1209	83.471	152.897	0.0058594	0.042676	-0.066894
1.984	-81.243	-0.462	33.8815	0.016797	-0.046289	-0.15976	-154.2108	268.184	1454.249	-1.3315	1.2524	0.75391	-44.775	43.923	136.0737	0.11279	0.085449	-0.080566	-17.714	220.155	332.4105	-0.094727	0.081055	0.021973	-32.576	206.096	1484.6967	-1.4634	1.3299	0.40837	-3.057	122.232	331.8176	-0.069824	0.26563	0.067871	6.491	86.6975	103.577	0.020313	0.026269	-0.079004
1.986	-68.363	58.697	25.446	0.0035156	-0.039258	-0.13779	-101.714	234.114	1453.3965	-1.2786	1.2325	0.72617	-15.217	47.313	134.703	0.13399	0.064648	-0.10527	-41.969	206.817	317.8054	-0.071191	0.051074	0.005371	-59.86761	257.903	1452.197	-1.4251	1.3132	0.40631	7.663	141.501	288.2675	-0.043652	0.23408	0.045898	0.527000000000001	72.632	108.759	0.03877	0.007129	-0.09043
1.988	-96.259306	28.08	30.73433	-0.01416	-0.034668	-0.11816	-93.5287	231.598	1405.653	-1.2238	1.2095	0.69453	-33.923	58.351	91.8047	0.15118	0.043457	-0.12246	5.548	165.908	316.003	-0.048438	0.02002	-0.0072265	-55.39483	248.673	1428.5687	-1.3926	1.2969	0.40479	-20.376	116.735	288.5468	-0.024316	0.19677	0.032227	29.538	101.099	93.0167	0.054688	-0.0058594	-0.104
1.99	-60.983	49.049	56.89	-0.031445	-0.029004	-0.10098	-80.9687	202.6251	1357.963	-1.1753	1.1813	0.66406	-66.526	44.7094	86.213	0.16914	0.027441	-0.13848	-4.148	178.633	266.632	-0.034375	-0.0026367	-0.022461	-1.435	235.05	1388.2364	-1.3541	1.2786	0.40141	58.6367	108.388	281.89	-0.0063476	0.16748	0.018945	-56.507	94.2494	78.539	0.066797	-0.019922	-0.10879
1.992	-44.576	46.353	31.0463	-0.04375	-0.021484	-0.087695	9.879	166.814	1339.425	-1.1231	1.1545	0.63233	-59.964	69.459	75.567	0.19102	0.010059	-0.1585	3.105	101.645	231.066	-0.016211	-0.029297	-0.033887	-59.4977	219.0717	1327.788	-1.3212	1.2533	0.39683	11.746	149.7258	239.9492	0.011133	0.13935	0.0059571	-41.643	70.764	96.7811	0.082617	-0.035058	-0.12168
1.994	-60.806	-4.409	23.6325	-0.045703	-0.012109	-0.078711	-20.78	187.821	1298.406	-1.0776	1.1206	0.60352	-109.4999	66.494	69.12	0.19922	-0.0024414	-0.17969	2.305	92.3544	215.8848	-0.0024414	-0.04834	-0.041504	7.475	154.394	1312.093	-1.2799	1.2286	0.38703	33.818	139.2034	233.87	0.029297	0.10547	-0.0063477	-48.292	52.161	78.1649	0.094727	-0.040137	-0.13028
1.996	-20.579	36.228	29.227	-0.044336	-0.0014648	-0.070118	8.44199999999999	170.944	1278.555	-1.0348	1.0902	0.57256	-96.34353	51.874	64.618	0.20332	-0.008789	-0.19238	3.045	109.321807	178.847	0.0072264	-0.069532	-0.055469	18.51	159.822	1275.9237	-1.241	1.2036	0.38169	55.8108	160.945	197.2412	0.042188	0.078418	-0.021386	-85.5469	14.751	101.572	0.10215	-0.048926	-0.13994
1.998	-40.806	23.7139	25.248	-0.037109	0.0083008	-0.062988	63.625	167.1582	1273.916	-0.98995	1.0587	0.54024	-100.2638	50.9845	43.935	0.20312	-0.016406	-0.20205	44.341	56.2408	176.738	0.019433	-0.07959	-0.063086	-29.234	160.125	1244.3916	-1.1963	1.1738	0.37061	-5.048	176.689	154.862	0.059668	0.055469	-0.035156	-49.128	35.47978	93.6419	0.10986	-0.055664	-0.14404
2	-28.259	24.2589	36.157	-0.021973	0.02207	-0.062891	-7.991	172.5473	1246.289	-0.94659	1.0294	0.52032	-115.2653	23.812	42.026	0.19766	-0.027734	-0.20869	16.283	101.852	144.12	0.034277	-0.09209	-0.066992	5.924	167.935	1256.715	-1.1544	1.1425	0.37063	50.887	118.738	147.2096	0.074902	0.026563	-0.04961	-104.6283	55.8492	42.028	0.11885	-0.061328	-0.15615
2.002	4.637	68.18	31.7447	-0.0083984	0.032715	-0.065234	16.161	111.6634	1257.871	-0.9126	0.99987	0.49805	-60.835	15.118	56.07	0.18154	-0.032617	-0.21065	-0.496000000000002	65.183	150.9818	0.042871	-0.10322	-0.072656	-46.677	212.25151	1241.823	-1.1182	1.1183	0.3694	31.219	90.553	133.065	0.092675	0.0042971	-0.063965	-102.41071	70.4743	45.7301	0.12148	-0.063769	-0.16387
2.004	-23.927	14.9027	24.024	0.0052734	0.044434	-0.057813	11.479	128.0568	1217.064	-0.87842	0.9751	0.48145	-116.6909	36.221	36.745	0.16797	-0.038574	-0.21387	-2.562	14.402	154.489	0.050781	-0.11426	-0.077637	-25.003	200.5888	1205.733	-1.0804	1.0968	0.35964	3.512	51.985	133.345	0.10938	-0.021484	-0.078125	-64.651	73.688	27.577	0.12344	-0.064551	-0.16817
2.006	8.441	23.5161	43.53	0.020703	0.057227	-0.065625	-20.284	144.634	1152.341	-0.84492	0.94414	0.46377	-122.2949	44.378	42.9618	0.14629	-0.04502	-0.2168	-34.58	53.332	141.9229	0.061817	-0.12265	-0.079004	-11.662	181.002	1191.952	-1.0423	1.0726	0.35088	48.192	23.375	130.9107	0.12441	-0.04502	-0.090527	-115.4359	32.4727	13.763	0.1207	-0.071387	-0.16826
2.008	18.163	31.3526	28.4089	0.040527	0.065918	-0.071777	14.976	142.4092	1091.0265	-0.81669	0.91729	0.44824	-73.118	49.994	43.451	0.13184	-0.048047	-0.21641	-38.598	0.164000000000001	127.4972	0.064355	-0.13799	-0.088965	-52.428	208.098	1117.0971	-1.0034	1.0464	0.3457	8.894	58.276	98.843	0.14287	-0.061914	-0.10517	-67.451	2.078	45.147	0.11572	-0.069824	-0.16797
2.01	-4.48	-8.3693	43.855	0.058007	0.078809	-0.077149	-37.852	219.116	1016.149	-0.79209	0.88486	0.42832	-134.35	26.8836	37.736	0.11425	-0.046093	-0.21641	-39.855	22.395	108.7328	0.066699	-0.15908	-0.088965	-10.208	178.5267	1092.744	-0.96166	1.0224	0.33243	-7.242	50.088	95.4402	0.15224	-0.079883	-0.1208	-61.989	3.075	19.679	0.11065	-0.071094	-0.16856
2.012	4.262	49.098	54.4269	0.075391	0.088867	-0.083203	-45.103	218.846	971.0402	-0.7623	0.85098	0.40908	-77.264	-16.1134	56.687	0.10137	-0.043164	-0.21357	-62.964	65.5684	88.65314	0.063672	-0.15986	-0.092481	-36.388	216.575	1034.8655	-0.92641	0.99808	0.32423	-4.584	63.5942	81.8939	0.16084	-0.099903	-0.13545	-87.4292	-1.405	38.23723	0.10009	-0.078223	-0.16777
2.014	-36.305	15.137	40.4305	0.10235	0.091992	-0.091406	-9.898	235.558	940.8742	-0.73096	0.81689	0.38867	-47.555	-16.9873	45.966	0.087891	-0.042969	-0.21436	-56.507	36.958	69.2517	0.063477	-0.16406	-0.096191	-51.5103	230.4241	977.4323	-0.88383	0.97736	0.31758	-72.14	81.5543	72.8671	0.16455	-0.11182	-0.14893	-69.434	26.089	63.6711	0.093848	-0.084082	-0.17754
2.016	-30.059	11.1208	58.766	0.11778	0.10605	-0.098437	-39.487	266.161	904.1877	-0.69961	0.77774	0.3708	-90.28	-24.335	51.348	0.07334	-0.032715	-0.21826	-76.728	115.961	41.487	0.066699	-0.16855	-0.097265	-1.763	197.896	950.52028	-0.84787	0.95157	0.30363	-51.249	37.536	75.408	0.16846	-0.12607	-0.14854	-96.7803	49.339	52.1996	0.090918	-0.079394	-0.17715
2.018	-28.095	52.785	48.8364	0.12695	0.1123	-0.104	-30.361	204.21109	875.638	-0.66398	0.74171	0.34805	-23.298	-15.0438	72.3851	0.062793	-0.027637	-0.21699	-85.5148	104.01	27.871	0.066016	-0.17021	-0.092089	-20.794	252.7816	895.627	-0.81006	0.92236	0.28906	-77.2577	46.839	70.85491	0.16621	-0.13272	-0.15752	-61.642	27.9132	71.851	0.083984	-0.078613	-0.17773
2.02	-69.799	19.3216	30.6139	0.13623	0.12275	-0.11338	-62.2	210.6381	814.647	-0.62999	0.70382	0.32657	-38.087	7.1466	37.37	0.056152	-0.026075	-0.2166	-68.205	54.104	36.8467	0.059375	-0.17178	-0.08584	-11.959	227.11	860.805	-0.76835	0.89863	0.28428	-107.051	20.4473	80.615	0.16191	-0.13897	-0.16182	-25.348	35.088	54.472	0.083008	-0.084668	-0.17715
2.022	-56.809	61.474	45.6373	0.14443	0.13037	-0.11621	-94.0947	208.125	767.298	-0.58848	0.66232	0.30791	-35.796	-0.667000000000002	52.859	0.050586	-0.02041	-0.2208	-94.8863	74.5841	36.206	0.053516	-0.17647	-0.079883	-10.156	225.2724	827.7559	-0.73348	0.87626	0.27275	-82.7981	-12.2015	87.406	0.15323	-0.14727	-0.16738	-74.206	19.1646	35.987	0.078418	-0.085645	-0.17588
2.024	-75.007	70.363	33.445	0.14951	0.13936	-0.11739	-87.6231	175.638	739.492	-0.55762	0.63184	0.28369	36.436	11.18687	25.1427	0.04248	-0.01709	-0.21045	-62.655	-4.703	31.1047	0.043945	-0.17969	-0.078125	-78.8953	260.021	803.2911	-0.69247	0.84775	0.2583	-126.924	34.9933	64.3094	0.14502	-0.1499	-0.16602	-11.764	-1.6397	55.835	0.075683	-0.086816	-0.17588
2.026	-90.707	25.094	37.4204	0.14776	0.15186	-0.11758	-118.177	219.8404	712.996	-0.52635	0.59276	0.26777	-9.542	33.4	-0.1315	0.03584	-0.01543	-0.20781	-47.299	-1.083	36.089	0.039551	-0.17969	-0.078418	-61.747	201.8875	773.0211	-0.65117	0.8249	0.24374	-112.2329	22.69	31.8891	0.13301	-0.15381	-0.16728	-16.198	12.7517	27.363	0.074512	-0.086621	-0.17441
2.028	-60.776	39.5776	41.706	0.14063	0.16504	-0.12061	-108.398	167.7492	694.325	-0.49929	0.5609	0.2495	13.664	34.0684	33.852	0.029101	-0.020703	-0.20235	-62.3718	26.111	24.017	0.032715	-0.18086	-0.08125	-58.677	210.633	738.00166	-0.61133	0.79492	0.22607	-79.135	17.4367	19.885	0.1248	-0.15381	-0.17285	-29.558	2.868	31.7108	0.070801	-0.092285	-0.17969
2.03	-99.6697	0.840999999999998	37.53079	0.13652	0.17314	-0.12246	-98.3655	140.836	657.584	-0.46999	0.52223	0.23622	22.389	45.12	26.333	0.025195	-0.022266	-0.1957	-56.814	-19.5324	24.065	0.025293	-0.17969	-0.085547	-102.5475	197.411	688.256	-0.56221	0.76846	0.2126	-121.0831	37.4723	8.82	0.11777	-0.15263	-0.1709	35.721	18.612	42.6385	0.07041	-0.10078	-0.1835
2.032	-85.172	-4.014	73.089	0.13174	0.18155	-0.12627	-137.41	155.2987	606.989	-0.44275	0.48552	0.21786	-18.824	28.8372	37.8234	0.025879	-0.025879	-0.19111	-84.092	47.312	29.9818	0.015625	-0.18105	-0.087988	-59.17	149.701	672.119	-0.51788	0.74229	0.19834	-73.563	-1.879	15.5667	0.10713	-0.15108	-0.17256	-14.869	18.311	24.398	0.076563	-0.10498	-0.18457
2.034	-62.312	38.356	86.5857	0.13057	0.18857	-0.13174	-99.8905	86.487	597.572	-0.41162	0.44971	0.19922	10.368	29.7974	46.2895	0.024414	-0.031738	-0.18604	-61.867	40.1107	27.097	0.01123	-0.17871	-0.086426	-108.2475	204.77489	625.178	-0.47529	0.71651	0.1874	-64.79	30.6995	19.515	0.10156	-0.14697	-0.17383	8.57400000000001	9.195	56.198	0.075391	-0.1124	-0.18731
2.036	-105.2592	-11.5166	91.1677	0.13105	0.19775	-0.12998	-95.4306	129.578	549.7785	-0.38276	0.41119	0.18234	-27.533	38.778	22.91	0.026269	-0.036914	-0.18388	-34.008	-3.1077	54.993	0.0011719	-0.17402	-0.091699	-86.367	182.186	587.6021	-0.43428	0.68496	0.1708	-65.903	15.77	27.5589	0.096583	-0.13946	-0.17647	20.712	40.033	43.4275	0.082324	-0.11963	-0.19209
2.038	-95.408	-31.9679	121.2287	0.12402	0.20264	-0.13477	-72.291	132.846	497.0268	-0.35215	0.37978	0.16325	-37.943	37.4093	31.6707	0.026953	-0.041895	-0.17842	-42.592	35.481	59.3644	-0.015332	-0.16953	-0.093164	-57.05	180.9295	563.6829	-0.39795	0.65674	0.15527	-20.789	-25.8852	36.1615	0.090822	-0.13701	-0.17373	-64.06	56.533	35.697	0.093262	-0.12305	-0.19824
2.04	-70.88	-67.609	153.947	0.1207	0.20967	-0.1459	2.927	97.91	463.604	-0.31666	0.34934	0.14567	-20.158	54.667	20.0682	0.032032	-0.044629	-0.17412	-26.668	-28.7031	54.8403	-0.027051	-0.16719	-0.093164	-77.702	183.767	517.0198	-0.36045	0.62705	0.14707	-67.888	4.8046	29.762	0.088477	-0.13272	-0.17451	-15.927	51.461	65.666	0.10508	-0.12011	-0.20195
2.042	-67.343	-155.0855	237.956	0.12099	0.21983	-0.158	-14.513	160.812	414.196	-0.28105	0.31952	0.12555	-85.311	53.636	-4.6059	0.037402	-0.05293	-0.16983	-1.16699999999999	-17.6632	40.1727	-0.041309	-0.16582	-0.089551	-37.095	110.731	500.214	-0.3211	0.60156	0.13076	-30.895	-3.092	50.589	0.08252	-0.12607	-0.17138	-23.892	38.3	26.131	0.11738	-0.12675	-0.19795
2.044	-18.938	-178.3349	333.305	0.12373	0.22763	-0.16426	11.686	142.398	406.68989	-0.24951	0.29248	0.10596	-65.552	22.3229	36.0205	0.038086	-0.049805	-0.16748	-12.639	33.7507	15.257	-0.05127	-0.16113	-0.089844	-54.96	154.122	438.463	-0.28438	0.57422	0.11943	12.441	9.2695	54.8797	0.078125	-0.12109	-0.17188	-69.498	-7.038	19.0186	0.12481	-0.12988	-0.19795
2.046	-13.341	-248.088	405.482	0.12471	0.23301	-0.17686	30.411	182.185	380.4532	-0.22349	0.26963	0.088308	-74.276	17.6372	16.944	0.033496	-0.053711	-0.16269	1.247	0.7124	13.923	-0.06416	-0.15577	-0.09209	-68.992	170.384	391.091	-0.25654	0.54541	0.10645	-27.247	48.016	36.34071	0.073924	-0.11807	-0.17149	-33.906	-17.2514	28.318	0.12998	-0.12998	-0.19453
2.048	5.1531	-315.3	500.665	0.11328	0.24609	-0.18262	-4.483	240.691	336.1858	-0.19736	0.24311	0.066183	-98.7218	-7.558	38.4962	0.022559	-0.053418	-0.15049	-9.633	81.342	22.1644	-0.063965	-0.15195	-0.090527	-63.57	156.609	391.0155	-0.22119	0.52002	0.10498	14.086	9.4637	38.254	0.067186	-0.11494	-0.17237	-85.767	4.507	20.381	0.13428	-0.12744	-0.19287
2.05	63.428	-299.838	581.633	0.091213	0.26553	-0.17842	19.991	185.058	311.832	-0.17146	0.21371	0.044368	-61.044	-13.794	74.0873	0.015526	-0.050683	-0.14853	3.964	82.906	26.3254	-0.063183	-0.14531	-0.09248	-85.665	212.662	362.766	-0.18877	0.49248	0.085938	15.212	31.1396	-5.737	0.065624	-0.11377	-0.16884	-81.373	24.555	60.9622	0.13467	-0.13203	-0.19053
2.052	51.571	-325.6294	650.2053	0.054688	0.28994	-0.16396	17.476	178.368	277.7688	-0.14922	0.19159	0.024831	-115.8587	23.25	47.7421	-0.00019607	-0.049804	-0.13564	13.75	50.13	38.3245	-0.056543	-0.13711	-0.096582	-67.4	167.314	333.48458	-0.15899	0.46387	0.079785	-4.279	28.3979	-3.4316	0.064357	-0.11279	-0.16797	-55.9	59.784	32.59	0.13916	-0.13154	-0.18408
2.054	89.894	-247.918267	724.135	-0.015625	0.32744	-0.13232	-7.883	144.691	254.446	-0.125	0.16895	0.0019531	-109.3228	48.0373	50.339	-0.019531	-0.041504	-0.125	-23.861	87.883	59.1561	-0.041992	-0.13037	-0.096191	-53.851	154.006	302.7714	-0.13125	0.44043	0.07666	44.46	-2.0553	20.95922	0.064941	-0.11279	-0.16211	-88.6308	43.6295	10.6742	0.13838	-0.12646	-0.17822
2.056	104.274	-161.448	740.0761	-0.10557	0.36982	-0.092772	46.373	83.7454	240.642	-0.098913	0.15097	-0.023074	-83.243	68.366	47.3519	-0.037205	-0.034865	-0.11309	-15.686	23.5226	47.0355	-0.03418	-0.12432	-0.10274	-89.4893	175.723	282.695	-0.10479	0.4166	0.070703	-3.82700000000001	29.1108	20.558	0.073426	-0.11503	-0.16669	-66.064	17.681	30.5488	0.13516	-0.12246	-0.17412
2.058	83.758	-139.824	781.714	-0.22363	0.41113	-0.047852	25.987	118.0097	221.496	-0.066747	0.12769	-0.044437	-141.536	73.891	29.5472	-0.057711	-0.02803	-0.10011	-21.992	11.2141	51.4114	-0.025098	-0.11006	-0.10957	-42.499	106.102	264.135	-0.07959	0.39453	0.07373	10.54	5.948	43.5727	0.083471	-0.11738	-0.16802	-85.6689	16.393	18.774	0.12451	-0.12109	-0.1626
2.06	114.592	-67.3033	833.285	-0.35654	0.45859	0.0071288	29.131	81.781	212.905	-0.033365	0.10893	-0.069407	-102.4249	51.748	43.1251	-0.075678	-0.018265	-0.082523	-54.674	31.2565	31.2621	-0.019629	-0.10263	-0.11387	-45.885	130.077	233.6599	-0.061426	0.37061	0.07666	18.746	11.2052	34.42689	0.088564	-0.11855	-0.17433	-114.13115	12.94	57.47	0.11123	-0.11582	-0.15156
2.062	116.866	-36.105	867.052	-0.49248	0.51279	0.072559	32.119	77.3893	195.9497	-0.0020938	0.091881	-0.096588	-91.2813	48.365	26.514	-0.088573	-0.010745	-0.073146	-38.474	-39.002	21.7201	-0.009961	-0.094238	-0.11914	-61.371	104.166	199.2321	-0.042871	0.34795	0.076269	-38.56	63.072	34.0067	0.098505	-0.11886	-0.17411	-71.03	30.388	64.1889	0.094141	-0.10371	-0.13535
2.064	132.295	-8.768	979.082	-0.62529	0.57373	0.13545	9.479	101.3183	175.765	0.03418	0.071777	-0.11768	-112.9581	32.639	37.089122	-0.095215	-0.0024414	-0.063965	-50.535	4.6111	46.1266	-0.0083008	-0.083496	-0.12305	-10.586	47.401	183.3518	-0.026074	0.32373	0.074316	-23.123	48.059	47.744	0.11182	-0.1167	-0.17041	-116.4223	34.8553	44.113	0.078906	-0.095118	-0.1334
2.066	146.982	64.58	1016.922	-0.76484	0.64473	0.19385	9.108	47.671	158.678	0.067432	0.051782	-0.13484	-47.153	35.54559	54.1744	-0.10127	0.010942	-0.053903	-70.686	21.9596	45.7146	-0.012793	-0.078027	-0.11739	-40.23	91.25	173.749	-0.0087891	0.30156	0.073731	-54.424	83.38	24.0056	0.11694	-0.11266	-0.17207	-75.11	22.9690535	49.4509	0.062989	-0.080274	-0.12197
2.068	97.075	49.8983	1040.952	-0.88428	0.73291	0.24805	-30.199	71.3071	169.717	0.093496	0.036979	-0.15612	-74.534	52.5193	48.2452	-0.097066	0.018073	-0.052046	-56.597	7.4233	46.442	-0.024512	-0.067188	-0.12109	-36.439	59.948	182.9341	0.0024414	0.27881	0.074219	-80.803	76.881	18.2984	0.1192	-0.10917	-0.16693	-46.322	45.729	24.77	0.046875	-0.066406	-0.1084
2.07	87.661	60.448	1074.661	-0.99577	0.81709	0.29863	-61.5046	63.525	172.303	0.1203	0.021151	-0.1663	-65.323	44.2383	55.075	-0.088463	0.025496	-0.046576	-80.2267	61.8102	53.539	-0.036621	-0.065625	-0.10937	-30.721	78.8861	175.012	0.017676	0.26006	0.074805	-56.353	14.8025	26.7312	0.11526	-0.10015	-0.16645	-84.0171	49.7961	5.078	0.03877	-0.053321	-0.10166
2.072	72.211	57.789	1064.151	-1.105	0.91202	0.34844	-64.7178	11.149	156.9581	0.13258	0.0075715	-0.18824	19.426	55.813	63.885	-0.078019	0.028716	-0.048536	-67.024	2.31	56.08777	-0.056348	-0.051563	-0.096973	-75.8365	134.348	156.529	0.031347	0.24697	0.07666	-117.837	22.1117	36.211	0.10461	-0.094067	-0.15444	-31.433	48.654	39.7132	0.035352	-0.034473	-0.09834
2.074	39.2991	-30.95	1154.949	-1.2222	1.0182	0.40703	-94.6537	70.9448	139.919	0.13867	-0.0097656	-0.19434	-35.4	43.2638	48.238	-0.064941	0.031738	-0.044922	-59.3	-13.693	59.46854	-0.072266	-0.040527	-0.088379	-68.025	63.739	146.047	0.039551	0.22548	0.080957	-88.5141	-8.315	53.9779	0.088867	-0.083984	-0.14502	-60.673	49.695	32.4924	0.031445	-0.017676	-0.09209
2.076	3.38	-66.95	1244.902	-1.3313	1.1296	0.46817	-103.7151	56.0106	105.064	0.14063	-0.022996	-0.20415	-9.555	20.9761	73.668	-0.056171	0.029981	-0.046102	-73.6635	22.083	45.8488	-0.096288	-0.029492	-0.079297	-76.652	76.004	130.1437	0.045312	0.21299	0.086035	-84.9573	-0.323999999999998	49.1588	0.076089	-0.07509	-0.13528	-56.561	10.216	42.018	0.029395	0.0011719	-0.091504
2.078	-80.407	-133.429	1300.618	-1.4448	1.229	0.53711	-101.8315	77.493	79.485	0.1362	-0.036508	-0.21299	12.064	13.3618	54.2723	-0.046006	0.029024	-0.04716	-77.0787	-20.73	35.7733	-0.11396	-0.012988	-0.067676	-76.324	62.8788	101.1045	0.047852	0.19775	0.089844	-122.709	52.397	41.1266	0.058716	-0.067475	-0.12596	33.917	5.869	54.9696	0.030762	0.015625	-0.088867
2.08	-99.144	-240.676	1371.1785	-1.5621	1.3092	0.59404	-124.598	134.138	49.445	0.12539	-0.043141	-0.2168	-28.318	-4.16	46.4227	-0.040172	0.022392	-0.054152	-86.7414	48.882	30.7232	-0.1292	0.0030273	-0.062207	-68.621	30.15594	95.729	0.046484	0.17783	0.099316	-86.571	26.2057	39.491	0.043612	-0.057709	-0.11735	-26.333	6.931	46.656186	0.029102	0.027832	-0.091407
2.082	-98.14	-266.305	1393.564	-1.6854	1.379	0.65078	-109.2023	78.084	39.19598	0.11221	-0.051418	-0.21771	23.788	-10.7517	84.287	-0.03427	0.014878	-0.053596	-74.919	54.878	29.6368	-0.13946	0.018262	-0.052735	-80.64	104.127	84.8477	0.043653	0.16201	0.10234	-95.1696	60.337	29.9448	0.029024	-0.042039	-0.10649	-5.299	12.168	62.8132	0.030566	0.034375	-0.093946
2.084	-133.706	-352.52	1441.908	-1.812	1.4243	0.70859	-113.1775	95.871	40.63	0.094727	-0.059082	-0.21436	-15.418	-7.1841	46.8434	-0.03125	0.0097656	-0.063477	-71.46	31.484	22.4203	-0.14502	0.031738	-0.044922	-79.858	71.9547	70.26697	0.044433	0.14873	0.10625	-96.8629	50.4628	46.7311	0.016602	-0.033203	-0.099121	14.976	52.638	55.2601	0.033691	0.04375	-0.098242
2.086	-96.372	-357.32	1492.139	-1.9285	1.4493	0.74609	-109.011	57.7826	49.075	0.07664	-0.062784	-0.21039	-10.004	-4.985	57.5702	-0.022926	0.0053711	-0.064952	-67.666	77.988	24.566	-0.1458	0.04668	-0.044629	-65.508	65.1186	60.9952	0.045605	0.13535	0.11104	-59.362	5.7778	60.51	0.0012546	-0.013363	-0.090449	-55.42	67.197	33.62914	0.038184	0.043457	-0.104
2.088	-77.563	-317.22	1519.869	-2.019	1.4517	0.76172	-55.366	-11.938	67.6547	0.058171	-0.065027	-0.20115	9.169	28.062	44.858	-0.017424	0.0028352	-0.080494	-34.574	21.3095	24.415	-0.14013	0.058886	-0.044531	-74.449	92.44743	36.516	0.04541	0.12207	0.11572	-93.694	37.7504	66.86086	-0.0055257	-7.5376e-05	-0.085295	-1.48699999999999	43.659	57.068	0.041016	0.046875	-0.11133
2.09	-100.511	-349.5	1566.579	-2.0523	1.4411	0.76719	-63.82	34.87	69.617	0.04093	-0.066192	-0.19454	-54.798	47.695	34.8409	-0.0099047	-0.0041963	-0.087059	-19.522	11.346	52.7148	-0.13115	0.072558	-0.045313	-59.168	5.104	58.277	0.043164	0.11084	0.12051	-74.0648	7.191	61.9111	-0.01511	0.013851	-0.081287	-14.602	19.4438	42.22396	0.045899	0.049414	-0.11904
2.092	-105.0239	-299.654	1629.459	-2.034	1.4262	0.74853	-63.044	2.372	53.5571	0.017827	-0.067025	-0.19515	-26.077	41.6256	67.387	0.0029886	-0.0049289	-0.099056	-28.94	25.857	45.368	-0.1167	0.080761	-0.049317	-67.505	46.6387	47.89394	0.040723	0.1001	0.12412	-21.201	6.46453	56.3437	-0.019296	0.023203	-0.079219	-46.812	-14.8649	37.141	0.047364	0.051953	-0.12168
2.094	-108.6143	-261.169	1631.475	-1.9644	1.4121	0.70791	-48.934	11.85998	43.9281	-0.003418	-0.062988	-0.19141	-31.459	36.64	29.306	0.017578	-0.0039063	-0.10889	-3.371	-41.828	46.773	-0.098145	0.083496	-0.058105	-79.697	35.385	46.9746	0.034863	0.087207	0.12803	-54.758	48.3994	41.5523	-0.019043	0.029297	-0.08252	-2.61799999999999	-7.2239	37.5502	0.05166	0.051563	-0.13067
2.096	-99.7668	-254.168	1657.735	-1.8387	1.398	0.66416	-79.4721	60.87	46.5676	-0.018141	-0.061498	-0.18301	-72.883	13.89	22.0455	0.029338	0.0041385	-0.11508	-11.972	-7.4737	36.6342	-0.071973	0.08291	-0.067676	-71.579	-4.188	51.074	0.031153	0.074023	0.13516	-1.784	21.7981	41.582	-0.011719	0.035954	-0.085975	-51.646	25.7001	31.232	0.05	0.058594	-0.13779
2.098	-130.783	-166.258	1659.205	-1.6704	1.3872	0.62695	-19.121	-6.8036	52.631	-0.03894	-0.059353	-0.178	-33.091	0.162000000000001	43.1089	0.041348	0.01254	-0.1228	3.94	-3.8722	32.001	-0.050293	0.075098	-0.07666	-96.7983	46.3754	43.962	0.025879	0.067383	0.13672	-4.267	43.876	34.3616	-0.0024414	0.044419	-0.090835	-62.199	31.72	56.7995	0.048828	0.060547	-0.14258
2.1	-147.891	-166.925	1637.415	-1.5074	1.3871	0.58389	-11.172	-0.765999999999998	53.826	-0.062791	-0.055069	-0.17136	-98.9694	8.3557	33.341	0.05277	0.021881	-0.12595	0.252000000000002	-14.6327	35.663	-0.026855	0.067285	-0.093848	-78.686	11.051	59.655	0.018359	0.052734	0.14385	-21.526	38.6827	45.045	0.00010947	0.045819	-0.097088	-32.847	49.8302	45.885	0.043359	0.064063	-0.15078
2.102	-129.763	-139.461	1651.24	-1.3667	1.3888	0.53828	-7.561	-9.4536	53.358	-0.080984	-0.052531	-0.1662	-105.0591	5.539	54.057	0.068172	0.030856	-0.12875	-27.057	61.774	33.965	0.00097657	0.058203	-0.11133	-51.26	16.31305	58.591	0.0097657	0.045215	0.14746	43.496	-1.6835	54.035	0.004204	0.048149	-0.10336	-76.196	37.1773	42.5743	0.041308	0.064844	-0.15205
2.104	-112.487	-67.88	1647.757	-1.2683	1.3872	0.50391	17.339	-64.6	61.463	-0.10547	-0.049316	-0.16309	-86.2651	28.2202	39.8313	0.075195	0.043457	-0.13232	-16.156	28.7438	34.0604	0.023438	0.04834	-0.13086	-42.41	56.6491	52.94963	0.011719	0.034668	0.14629	10.365	15.8829	35.462	0.015625	0.047363	-0.10791	-57.283	15.2461	69.032	0.035059	0.067968	-0.15713
2.106	-50.967	-114.136	1682.375	-1.1979	1.3728	0.47686	2.55399999999999	6.7249	50.9638	-0.12304	-0.050004	-0.15186	-140.957	23.996	36.92	0.07666	0.055991	-0.13051	-16.526	19.3105	37.6057	0.043457	0.041504	-0.15069	-40.957	9.2852	39.6809	0.011523	0.028418	0.146	21.269	-14.171	58.9235	0.018099	0.051791	-0.11152	-80.1842	10.23824	75.2285	0.034961	0.076465	-0.15694
2.108	-2.569	-115.394	1724.257	-1.1699	1.3613	0.46338	21.615	2.704	32.3471	-0.13934	-0.05039	-0.14434	-102.2954	-16.7807	84.3922	0.073755	0.070931	-0.13616	-9.775	35.8046	32.331	0.064062	0.036328	-0.17061	-63.525	43.9016	40.6066	0.014648	0.022461	0.146	32.05	-11.9331	47.3884	0.022837	0.053474	-0.11599	-120.3311	-34.9591	93.5954	0.024902	0.087891	-0.15723
2.11	22.491	-150.16726	1750.401	-1.1813	1.3524	0.45508	15.825	19.9696	26.9508	-0.15223	-0.048442	-0.13965	-87.291	-53.9846	107.637	0.069259	0.088531	-0.14476	-13.081	-25.517	27.5034	0.078125	0.03711	-0.18584	-40.18	30.196	25.898	0.024316	0.018848	0.14971	-17.325	22.543	35.6463	0.020401	0.061905	-0.11721	-85.449	-64.0927	127.1285	0.01543	0.099803	-0.15938
2.112	72.351	-229.225	1797.6838	-1.2256	1.3445	0.44785	18.668	80.409	4.465	-0.16162	-0.052441	-0.13633	-97.4032	-91.601	150.682	0.06742	0.10784	-0.1534	-29.857	32.5	27.8654	0.095312	0.038184	-0.20244	-3.04	-17.237	26.16	0.033008	0.012793	0.14893	-8.119	-3.5127	54.362	0.020424	0.06655	-0.1199	-91.149	-99.9637	143.026	0.0041992	0.12168	-0.1582
2.114	101.032	-197.052	1833.9234	-1.2873	1.3367	0.44238	25.185	26.51	23.8665	-0.16846	-0.055664	-0.13428	-18.915	-122.7536	236.306	0.067871	0.12646	-0.15479	-32.768	53.4181	12.2553	0.10449	0.044434	-0.2207	-20.259	31.075	23.21	0.047461	0.0022461	0.1458	-29.574	21.5015	31.8021	0.018066	0.074707	-0.12402	-52.122	-173.853	249.561	-0.0055664	0.13887	-0.15547
2.116	102.126	-248.042	1839.936	-1.3421	1.3411	0.42607	-2.395	62.395	31.388	-0.17129	-0.05957	-0.13389	-49.403	-131.834	317.907	0.058049	0.14821	-0.15919	-37.25	28.161	35.5953	0.10244	0.053028	-0.23086	-37.912	11.775	29.0633	0.0625	-0.0046875	0.14776	-46.55	28.032	30.285	0.011013	0.079807	-0.12352	-25.51	-205.9815	340.913	-0.022657	0.1624	-0.15019
2.118	94.473	-276.446	1901.797	-1.3901	1.3481	0.40625	-19.146	62.001	29.4875	-0.16787	-0.058301	-0.13692	-34.8748	-175.3718	418.752	0.044045	0.17179	-0.16206	-62.872	68.093	59.8538	0.10176	0.066504	-0.24072	-30.807	35.963	49.1883	0.083984	-0.013184	0.14355	-11.166	-12.330967	40.0483	0.0039912	0.086054	-0.12525	-50.751	-266.4639	418.533	-0.038086	0.18555	-0.14307
2.12	56.379	-246.251	1911.693	-1.4198	1.3648	0.38769	-38.194	3.588	36.7453	-0.16592	-0.0583	-0.13457	36.937	-209.532	477.558	0.028607	0.1905	-0.1668	-72.057	-15.3879	83.6954409	0.094728	0.081738	-0.254	-48.988	101.253	58.7435	0.10391	-0.01875	0.13575	-70.867	31.7779	17.222	-0.0022763	0.092703	-0.12218	32.872	-312.989	532.638	-0.061231	0.20566	-0.13985
2.122	38.8264	-297.199	1918.833	-1.443	1.3949	0.36797	-72.136	43.4599	38.543	-0.15889	-0.061035	-0.14473	7.4291	-240.714	535.421	0.018321	0.21517	-0.17387	-59.797	-50.8497	129.2251	0.086817	0.095799	-0.26631	-44.82	42.037	55.438	0.12588	-0.02168	0.13418	-67.609	9.515	19.48	-0.010361	0.099224	-0.1205	11.257	-305.938	569.081	-0.09541	0.23174	-0.13428
2.124	45.1036	-232.875641	1918.889	-1.4664	1.4293	0.34922	-68.808	-12.485	36.5606	-0.15283	-0.062012	-0.1499	33.4184	-236.4332	622.572	0.0039063	0.23682	-0.1748	-57.4786	-64.6937	172.588	0.078125	0.11914	-0.27539	-44.875	39.84	54.6375	0.14971	-0.026367	0.13535	-48.914	7.5332	21.66	-0.01123	0.10645	-0.11719	30.9719	-307.3539	627.339	-0.13759	0.26728	-0.12021
2.126	14.9268	-177.4849	1894.6169	-1.4936	1.4653	0.3375	-78.456	-21.5405	28.4296	-0.14726	-0.059962	-0.15732	63.209	-167.873	665.09	-0.012544	0.26559	-0.17997	-53.992	-178.353	243.97	0.071093	0.14853	-0.28516	-48.774	19.9731	36.674	0.1707	-0.035059	0.12285	-107.4744	26.663	34.2404	-0.018744	0.11493	-0.11123	96.519	-260.749	657.621	-0.19189	0.30859	-0.10283
2.128	33.7007	-185.6146	1892.581	-1.5215	1.5039	0.32666	-106.5626	35.982	22.481	-0.14141	-0.059082	-0.16191	74.213	-98.5856	703.292	-0.04008	0.3028	-0.17533	-51.408	-207.621	333.206	0.054688	0.18281	-0.28809	-48.155	-31.558	23.936	0.18945	-0.040527	0.1167	-53.855	-16.83783	61.627	-0.016109	0.12451	-0.10918	47.722	-210.916	656.714	-0.26318	0.35352	-0.068359
2.13	27.3703	-102.21	1872.809	-1.5544	1.5308	0.31524	-93.8423	-3.667	21.4579	-0.13282	-0.059082	-0.16894	99.926	-44.8951	733.7923	-0.076128	0.34584	-0.1606	-19.3934	-297.49417	413.378	0.028907	0.22969	-0.29863	-63.948	31.7561	34.641	0.21006	-0.046289	0.10645	-87.2597	-5.644	68.9266	-0.018066	0.13037	-0.10333	54.091	-154.128	700.293	-0.35645	0.40352	-0.029883
2.132	29.5131	-83.974	1858.586	-1.5878	1.5598	0.30557	-100.0183	41.1498	31.80062	-0.12334	-0.060059	-0.16992	90.347	-27.318	760.074	-0.13534	0.3926	-0.13058	28.7079	-384.513	513.9612	-0.0048825	0.28115	-0.29522	-49.905	10.25	40.4722	0.22939	-0.053711	0.098734	-126.781	-18.1571	83.656	-0.018068	0.13926	-0.098731	100.832	-74.087	750.959	-0.46592	0.45713	0.016504
2.134	52.0686	-59.336	1876.26	-1.6237	1.5755	0.29502	-108.9602	30.582	30.3291	-0.11816	-0.061523	-0.17139	126.303	-33.21	872.74877	-0.21777	0.43701	-0.097656	34.981	-340.784	610.808	-0.047852	0.34277	-0.28418	-48.961	8.8069	43.818	0.24736	-0.058008	0.085449	-71.4133	-77.476	138.959	-0.020508	0.14453	-0.10596	72.5525	-12.119	808.907	-0.58233	0.51494	0.066894
2.136	56.952	18.9306	1856.717	-1.6576	1.5912	0.2876	-96.5399	-24.6896	36.0674	-0.10909	-0.061719	-0.17471	176.774	25.058	984.521	-0.3141	0.48405	-0.059651	56.6774	-333.8678	682.341	-0.10684	0.4127	-0.24492	-53.806	59.1292	31.2214	0.25781	-0.064356	0.07666	-86.758	-85.039	202.343	-0.028616	0.13916	-0.1084	120.547	25.473	881.691	-0.69961	0.57343	0.11826
2.138	41.2328	-26.3329	1862.5036	-1.689	1.604	0.28271	-103.40402	28.576	49.877	-0.1042	-0.058789	-0.17588	123.855	92.356	1050.701	-0.41651	0.53314	-0.016544	59.33092	-249.2488	717.935	-0.18799	0.48682	-0.18554	-51.486	11.348	25.94552	0.26904	-0.072266	0.058594	-49.3306	-171.6917	306.118	-0.033694	0.14033	-0.11416	118.0586	91.1648	899.016	-0.82031	0.64063	0.16455
2.14	-13.2861	-15.0957	1859.716	-1.7184	1.6086	0.27774	-98.0364	14.052	44.384	-0.097949	-0.062695	-0.17549	138.036	133.602	1108.244	-0.51958	0.59013	0.022098	68.7055	-135.539	717.316	-0.29073	0.56261	-0.12226	-69.778	46.457	52.1814	0.27871	-0.078613	0.046582	7.6009	-241.923	393.229	-0.045805	0.14932	-0.12393	76.849	81.219	921.096	-0.94434	0.70254	0.19365
2.142	-36.63	-11.3157	1842.404	-1.7445	1.6176	0.27647	-70.886	29.60415	60.424	-0.090039	-0.061133	-0.17539	126.769	160.757	1105.6088	-0.62811	0.65559	0.059722	113.29	-133.05	731.0646	-0.4169	0.63702	-0.049214	-86.1126	60.963	63.115	0.28418	-0.08291	0.03584	3.18	-266.347	470.834	-0.065238	0.16885	-0.12685	123.054	83.28	955.149	-1.0502	0.76368	0.20976
2.144	-51.87979	-84.9983	1877.8808	-1.7649	1.616	0.27724	-81.3822	98.892	50.5617	-0.081543	-0.05957	-0.17139	61.168	106.535	1133.234	-0.73682	0.73096	0.091797	113.701	-80.4097	796.458	-0.55273	0.70215	0.026367	-72.534	3.7239	65.234	0.28731	-0.086816	0.02998	64.9774	-328.7838	548.1831	-0.10303	0.19971	-0.12695	80.149	61.224	1016.575	-1.1186	0.81484	0.22578
2.146	-48.574	-62.246	1897.6875	-1.7833	1.6147	0.27851	-59.146	53.866	18.1356	-0.070996	-0.053418	-0.16992	79.5843	21.01	1212.749	-0.84317	0.80629	0.12253	113.247	-46.02	852.843	-0.70184	0.76962	0.10409	-79.601	39.772	51.4087	0.28564	-0.089551	0.022266	47.2496	-295.39	609.9829	-0.16054	0.23418	-0.10547	41.7442	-4.87	1135.466	-1.189	0.86846	0.23594
2.148	-57.074	-109.3034	1889.036	-1.8013	1.6099	0.28076	-43.753	79.613	11.531	-0.066113	-0.044141	-0.16367	-5.669	-77.032	1246.494	-0.95564	0.88555	0.16557	121.9694	-16.277	912.981	-0.85866	0.83817	0.16366	-61.602	-3.5655	29.3638	0.27588	-0.089355	0.021484	70.493	-237.6592	660.446	-0.23788	0.27265	-0.075198	30.0669	-43.52	1220.561	-1.2788	0.93018	0.25244
2.15	-57.228	-147.4906	1915.4542	-1.816	1.6032	0.28037	-43.553	76.363	8.303	-0.067285	-0.040235	-0.15742	-80.377	-186.641	1334.6669	-1.0721	0.97463	0.21519	103.4271	101.0462	969.485	-1.0106	0.90184	0.21015	-56.418	1.7881	38.7637	0.27246	-0.085742	0.014649	127.001	-195.2725	684.527	-0.33789	0.3207	-0.041995	-52.397	-134.84	1261.159	-1.3653	0.99226	0.28418
2.152	-44.936	-86.7152	1895.8352	-1.8277	1.5931	0.28339	-13.581	8.20674	30.0408	-0.072851	-0.030273	-0.14648	-92.433	-220.723	1359.1918	-1.1995	1.0653	0.2696	116.2938	108.833	990.5376	-1.1558	0.96805	0.24023	-76.485	72.636	30.503	0.26318	-0.074609	0.014746	103.727	-98.484	706.6548	-0.45644	0.3707	-0.0025403	-44.442	-212.888	1317.463	-1.4465	1.0515	0.31348
2.154	-27.4931	-146.603	1892.397	-1.837	1.5821	0.27168	-2.20500000000001	47.405	47.155	-0.07666	-0.027344	-0.13721	-166.562	-272.095	1348.8852	-1.3301	1.1543	0.33643	106.939	87.34	1010.693	-1.2866	1.0435	0.25879	-49.94	40.503	31.907	0.25264	-0.060937	0.018262	139.9	-98.297	776.116	-0.5835	0.42725	0.041504	-66.897	-251.216	1325.932	-1.5399	1.1035	0.33887
2.156	31.2209	-89.852	1875.403	-1.8382	1.5665	0.27793	-3.58	-2.608	60.2786	-0.077832	-0.021191	-0.12842	-115.9	-295.17	1413.344	-1.4669	1.2273	0.40451	79.967	45.703	1032.392	-1.4041	1.1155	0.28664	-42.765	54.951	43.038	0.24414	-0.050879	0.022168	164.454	-61.276	857.729	-0.70957	0.49268	0.10264	-101.887	-316.61	1376.092	-1.6272	1.1504	0.36318
2.158	57.681	-49.03851	1834.912	-1.8335	1.5532	0.27539	30.663	-18.8173	65.3684	-0.080371	-0.019238	-0.12158	-102.147	-264.01	1417.6155	-1.6121	1.2849	0.47131	96.623	-82	1089.922	-1.5058	1.1986	0.3225	-52.823	37.7057	31.0784	0.23145	-0.040039	0.033691	114.443	15.699	953.062	-0.83282	0.56582	0.1583	-32.197	-326.39	1416.8453	-1.707	1.1758	0.38672
2.16	77.465	-65.582	1837.468	-1.8285	1.5344	0.28115	26.13	29.84319	57.2935	-0.081153	-0.0083008	-0.12002	-173.2343	-278.77	1469.653	-1.7636	1.3239	0.53224	18.9582	-122.92	1206.352	-1.6012	1.2705	0.37056	-38.854	-38.8047	49.264	0.20938	-0.030859	0.039453	160.652	20.423	1040.596	-0.95508	0.64629	0.21533	-63.319	-351.93	1448.073	-1.7643	1.1967	0.40888
2.162	70.775	35.702	1834.6531	-1.8258	1.5196	0.2877	32.945	2.53533	52.701	-0.076368	-0.0043945	-0.1125	-135.589	-260.426	1549.225	-1.905	1.3439	0.57793	-66.193	-168.513	1303.18047	-1.7017	1.3375	0.40862	-35.429	25.861	53.95007	0.19482	-0.019531	0.050391	170.088	47.96	1050.056	-1.0757	0.71943	0.27852	-68.544	-381.61	1538.372	-1.8038	1.2097	0.41523
2.164	59.671	48.3048	1800.7698	-1.8258	1.507	0.28847	9.759	51.078	51.61	-0.065918	-0.0058594	-0.11133	-176.021	-239.134	1608.694	-2.0176	1.3418	0.60791	-60.7076	-252.385	1335.984	-1.812	1.3931	0.44092	-31.115	5.138	40.2691	0.17569	-0.010938	0.053125	120.381	40.421	1061.9039	-1.2168	0.79492	0.34424	-54.4108	-299.298	1573.477	-1.8046	1.2222	0.41836
2.166	87.802	91.112	1783.3144	-1.8246	1.4883	0.29024	-10.13	58.964	41.2318	-0.060059	0.00058594	-0.11094	-204.183	-242.556	1665.145	-2.0698	1.3291	0.6208	-73.279	-275.679	1361.456	-1.9212	1.427	0.46405	-29.751	14.8235	60.698	0.16064	0.0019531	0.061035	141.923	-4.56	1096.857	-1.3517	0.89483	0.41894	-113.337	-233.732	1575.846	-1.7697	1.2404	0.40849
2.168	74.709	178.642	1737.101	-1.8198	1.4771	0.29492	3.241	-11.239	52.039	-0.044239	0.0064453	-0.11289	-157.5506	-166.0041	1664.726	-2.0601	1.309	0.61729	-76.21	-346.04	1394.555	-2.0164	1.4403	0.47871	-55.75	73.473	47.5876	0.15234	0.0097656	0.060547	93.002	-13.16	1144.844	-1.4913	0.99463	0.49649	-92.076	-146.881	1606.266	-1.6997	1.2603	0.39551
2.17	64.155	144.322	1729.6256	-1.8161	1.4651	0.29727	-30.49	17.9703	46.9004	-0.027442	0.0068359	-0.12422	-207.9278	-136.13	1615.6109	-1.9929	1.2918	0.59697	-61.573	-358.69	1465.9136	-2.084	1.44	0.48298	-57.056	15.3476	27.9475	0.14278	0.011914	0.066895	26.559	-98.61	1261.499	-1.6476	1.09	0.57617	-137.4162	-51.799	1561.771	-1.6031	1.2801	0.38232
2.172	75.394	157.488	1731.253	-1.8136	1.4505	0.30293	-34.869	-18.9346	45.05989	-0.013574	0.0080078	-0.12178	-210.458	-112.534	1613.159	-1.8822	1.2878	0.55665	-88.5773	-304.91	1538.8219	-2.1022	1.4366	0.47437	-30.317	45.911	30.4929	0.1375	0.016113	0.074902	-33.132	-177.927	1330.08	-1.8079	1.1737	0.64082	-157.973	-62.315	1557.051	-1.5066	1.3121	0.36455
2.174	46.483	125.639	1727.859	-1.8085	1.4392	0.30918	-34.606	-5.48611	48.6191	0.0024414	0.0053711	-0.12793	-228.678	-54.41	1597.998	-1.7476	1.2915	0.52002	-84.188	-320.06	1585.306	-2.0815	1.4263	0.45313	-51.446	42.1898	37.3214	0.13633	0.022754	0.07373	-96.64	-270.638	1374.9601	-1.9668	1.25	0.68213	-80.742	-40.24	1599.795	-1.4289	1.3367	0.34736
2.176	59.476	46.0967	1747.95	-1.7993	1.4327	0.31513	-68.7196	69.162	33.621	0.018164	0.01084	-0.13447	-240.225	-86.149	1632.962	-1.6076	1.292	0.47744	-101.799	-284.162	1615.731	-2.0131	1.4231	0.41979	-36.541	-2.448	48.0462	0.14121	0.027735	0.077149	-72.554	-371.957	1416.337	-2.1086	1.3031	0.69658	-99.339	-55.516	1614.859	-1.3721	1.3588	0.32148
2.178	93.139	65.9827	1754.2404	-1.7988	1.4238	0.32568	-68.71	28.9778	32.8922	0.033789	0.013086	-0.13809	-159.5139	-122.689	1707.1302	-1.4922	1.2902	0.42022	-132.24784	-249.592	1614.685	-1.9082	1.4275	0.37275	-34.344	47.7385	46.5336	0.14209	0.030762	0.073242	-88.076	-368.03	1445.854	-2.2101	1.3433	0.69541	-68.083	-120.709	1684.2769	-1.3423	1.3755	0.30518
2.18	98.079	32.321	1724.945	-1.7892	1.4167	0.33789	-81.147	57.907	29.3804	0.039258	0.017773	-0.1416	-109.523	-179.8454	1718.024	-1.4027	1.2875	0.36358	-143.1541	-217.92	1615.291	-1.7745	1.4437	0.32417	-44.218	9.613	31.669	0.14844	0.033887	0.069531	-126.231	-355.14	1511.43	-2.2493	1.3652	0.67939	3.136	-131.228	1703.6566	-1.3314	1.3835	0.29756
2.182	75.129	31.532	1714.188	-1.7835	1.4114	0.34551	-84.8254	52.158	43.4164	0.050293	0.024707	-0.14834	-59.452	-267.42	1761.147	-1.3414	1.283	0.31846	-173.863	-110.597	1638.105	-1.6367	1.4589	0.27472	-47.146	-7.351	45.1409	0.15898	0.033594	0.067676	-69.686	-354.12	1563.447	-2.2239	1.3749	0.64902	-20.04	-170.8792	1704.179	-1.3428	1.3907	0.28945
2.184	64.456	76.061	1678.5803	-1.7741	1.4052	0.35801	-77.65	-35.065	78.031	0.054688	0.030273	-0.146	-4.626	-229.675	1785.376	-1.3022	1.2876	0.28857	-186.157	-80.956	1669.382	-1.521	1.4712	0.22412	-52.522	39.967	46.78424	0.16016	0.033594	0.063379	-110.2763	-335.199	1588.363	-2.1479	1.3794	0.59912	48.324	-172.376	1747.5821	-1.3706	1.4036	0.2914
2.186	28.0256	28.696	1656.296	-1.7597	1.4012	0.36679	-108.28	-22.1856	101.6393	0.062012	0.036719	-0.14287	-10.564	-202.317	1792.644	-1.2894	1.2975	0.27481	-167.19	-69.03	1684.194	-1.4143	1.4818	0.17358	-57.345	8.401	49.054	0.16064	0.035254	0.061035	-147.101	-346.167	1646.979	-2.0269	1.3745	0.53613	95.4535	-150.449	1765.957	-1.406	1.4193	0.30185
2.188	8.4836	74.532	1659.793	-1.7383	1.3936	0.37939	-106.3176	-101.046	137.2082	0.060254	0.04043	-0.14258	6.49300000000001	-193.695	1850.637	-1.303	1.3165	0.27578	-159.55	-74.503	1684.536	-1.3255	1.4848	0.14053	-67.686	52.668	51.7794	0.16455	0.036133	0.060547	-105.027	-306.888	1668.756	-1.8753	1.3731	0.4623	58.863	-225.639	1833.026	-1.4551	1.4355	0.30957
2.19	5.5845	91.075	1632.009	-1.7106	1.3832	0.38623	-73.6099	-138.231	201.471	0.050098	0.044727	-0.13984	22.544	-166.658	1891.003	-1.3424	1.3544	0.28008	-88.2725	-140.514	1688.891	-1.2571	1.4833	0.12671	-73.3268	71.784	26.947	0.16377	0.035645	0.061035	-163.623	-251.066	1675.0197	-1.719	1.37	0.38886	50.8122	-257.347	1904.404	-1.4983	1.4572	0.32227
2.192	-29.5409	70.3046	1611.946	-1.6828	1.375	0.39278	-60.5743	-132.3128	266.232	0.038281	0.04541	-0.13252	-15.755	-243.127	1924.777	-1.3929	1.3936	0.28789	-45.695	-160.236	1709.437	-1.2245	1.4852	0.12076	-76.482	-1.33035	45.758	0.15713	0.037012	0.059278	-157.1313	-217.149	1682.2879	-1.5733	1.3646	0.31914	11.6641	-289.527	1914.496	-1.5409	1.4841	0.32461
2.194	-36.128	151.064	1561.2893	-1.6438	1.3656	0.39355	-51.711	-224.8522	336.116	0.024414	0.046387	-0.13184	5.564	-235.759	1945.949	-1.4429	1.436	0.29053	-23.272	-166.4614	1747.536	-1.2222	1.4985	0.11133	-76.4798	29.4736	43.42	0.15049	0.036231	0.063574	-168.48	-148.754	1636.534	-1.4492	1.3496	0.24951	7.58	-308.128	1943.344	-1.5842	1.5087	0.31797
2.196	-69.622	151.077	1501.36	-1.6022	1.3544	0.39961	-0.4664	-241.41	402.457	-0.00068358	0.054102	-0.13154	-10.884	-170.9867	1900.9061	-1.4764	1.4779	0.28701	39.349	-190.355	1810.1763	-1.2499	1.5145	0.11939	-80.7829	-13.948	39.523	0.14472	0.031055	0.059375	-172.659	-141.084	1637.33	-1.3527	1.3346	0.20019	29.992	-205.9504	1931.639	-1.6233	1.5353	0.31289
2.198	-44.935	187.557	1461.964	-1.5522	1.3364	0.39941	13.2424	-264.869	463.52	-0.032324	0.075977	-0.1206	-48.243	-154.9339	1890.765	-1.507	1.5145	0.27774	62.337	-176.143	1857.4779	-1.2997	1.5339	0.13248	-58.011	-19.2018	64.6228	0.14355	0.030762	0.061523	-99.296	-138.077	1637.19	-1.2765	1.3211	0.17197	-17.597	-154.149	1880.841	-1.6602	1.5547	0.30615
2.2	-45.3419	238.071	1411.653	-1.5027	1.3144	0.40088	26.4748	-316.083	516.019	-0.064356	0.10528	-0.10381	-15.125	-59.782	1871.067	-1.5352	1.5566	0.2625	55.189	-223.417	1888.986	-1.3605	1.5529	0.15581	-67.438	18.4468	91.228	0.14355	0.026563	0.067481	-72.6779	-140.647	1676.528	-1.2433	1.3129	0.16533	-8.298	-88.296	1869.1639	-1.6882	1.5676	0.30078
2.202	-43.1934	195.5493	1374.598	-1.4535	1.2957	0.39424	44.08	-226.10691	564.6497	-0.1126	0.14599	-0.064648	-47.561	-60.418	1833.454	-1.5585	1.595	0.24424	63.254	-274.551	1910.984	-1.4296	1.5698	0.17993	-80.234	-61.4209	144.121	0.14258	0.02998	0.06709	-31.869	-204.231	1738.974	-1.24	1.3211	0.167	3.268	-5.221	1836.26	-1.7231	1.5773	0.29736
2.204	1.674	213.4	1374.789	-1.4082	1.266	0.39776	90.291	-198.706	601.4876	-0.18652	0.18555	-0.028809	-33.981	-70.726	1845.603	-1.5825	1.6216	0.22656	17.703	-260.124	1913.603	-1.5073	1.5913	0.20117	-86.535	-52.142	237.781	0.14375	0.032715	0.07334	52.839	-208.1724	1757.768	-1.2578	1.3398	0.17773	-9.721	-29.25	1840.519	-1.7512	1.5797	0.28877
2.206	-9.706	181.3768	1345.493	-1.3616	1.2396	0.39375	96.346	-151.609	644.7122	-0.28496	0.23555	0.02002	33.494	-17.298	1870	-1.5974	1.6421	0.2125	20.96	-238.971	1903.061	-1.5776	1.6037	0.22501	-104.547	-79.643	333.681	0.14717	0.043261	0.081348	45.983	-236.999	1773.733	-1.2819	1.3713	0.18945	39.521	-0.213000000000001	1867.603	-1.7814	1.5775	0.28144
2.208	0.815999999999999	131.488	1331.94	-1.3174	1.209	0.39014	87.811	-68.819	666.466	-0.3917	0.28974	0.063086	-6.017	-34.60655	1876.806	-1.6109	1.6505	0.21202	18.646	-180.241	1905.915	-1.6383	1.6097	0.24308	-107.503	-205.103	453.377	0.14941	0.051758	0.091797	105.912	-261.333	1794.0246	-1.3116	1.404	0.19776	17.7167	1.60981	1826.542	-1.8003	1.5747	0.26758
2.21	18.687	156.612	1303.3564	-1.2734	1.1785	0.38985	123.62	-65.869	716.094	-0.50498	0.34521	0.11387	-18.136	8.6265	1904.8543	-1.6233	1.6505	0.22138	-6.631	-120.253	1880.234	-1.6902	1.6082	0.26264	-152.981	-255.357	526.991	0.15029	0.069922	0.099416	137.427	-253.362	1807.845	-1.3456	1.4466	0.2122	-0.551000000000002	-29.1693	1832.123	-1.8131	1.5709	0.2623
2.212	-14.466	112.353	1257.296	-1.2308	1.1484	0.38565	120.743	19.521	790.256	-0.61797	0.41387	0.16103	-68.771	34.288	1889.8245	-1.6432	1.6643	0.23086	32.426	-131.26	1883.2627	-1.74	1.6037	0.27212	-192.883	-350.63	552.66	0.14854	0.085742	0.10283	81.03	-285.091	1863.168	-1.3789	1.4922	0.21826	-2.386	35.105	1827.593	-1.8265	1.5767	0.25547
2.214	-4.467	122.064	1232.6247	-1.1871	1.1141	0.37783	130.181	97.129	859.927	-0.73145	0.48828	0.2041	-118.0931	-30.717	1896.8261	-1.6753	1.686	0.24268	24.8417	-94.655	1876.028	-1.7827	1.6001	0.28613	-150.458	-335.138	602.5451	0.13408	0.11309	0.10557	107.134	-293.015	1896.169	-1.4106	1.5415	0.23242	-96.1703	-1.255	1818.497	-1.839	1.5798	0.26055
2.216	11.473	157.8896	1191.556	-1.1391	1.0804	0.36875	119.282	93.587	916.745	-0.8292	0.5708	0.23418	-88.483	-30.3252	1914.1999	-1.7068	1.7085	0.254	32.2553	-66.5861	1847.815	-1.8281	1.5934	0.29924	-168.81	-205.818	671.3734	0.10996	0.1542	0.10186	71.245	-269.8114	1885.877	-1.4401	1.5801	0.24951	-58.3631	-16.941	1889.2439	-1.8517	1.5807	0.26113
2.218	-11.631	122.9896	1178.797	-1.0957	1.0449	0.36572	109.884	116.222	928.377	-0.93086	0.64688	0.26748	-117.4454	-79.330029	1923.96	-1.7362	1.7271	0.26855	60.3221	-25.4969	1842.116	-1.8617	1.5814	0.31013	-203.4463	-172.395	715.123	0.070801	0.21143	0.10107	77.107	-275.0842	1889.987	-1.4735	1.6207	0.26279	-39.95892	0.866000000000003	1900.291	-1.8745	1.5884	0.26904
2.22	32.344	158.784	1171.03	-1.0499	1.0107	0.36406	113.088	51.079	971.959	-1.034	0.72968	0.30888	-133.049	-84.7677	1957.769	-1.757	1.7423	0.28535	9.74	58.544	1812.169	-1.8902	1.5671	0.317	-172.271	-88.481	725.0455	0.01084	0.29043	0.11103	116.012	-208.667	1860.3337	-1.5113	1.6461	0.2753	-90.707	-56.5406	1940.522	-1.905	1.5872	0.2794
2.222	36.655	159.8467	1115.6227	-1.0059	0.97236	0.35674	95.493	-27.46	1055.845	-1.1374	0.81729	0.34785	-112.665	-27.72	1940.637	-1.7836	1.7504	0.29521	3.988	45.412	1819.6911	-1.9107	1.5499	0.31733	-124.33	-48.148	742.303	-0.066212	0.37461	0.1457	68.085	-186.587	1826.043	-1.5507	1.6688	0.28633	-45.628	-39.7439	1969.58	-1.9268	1.5805	0.27764
2.224	14.526	139.226	1067.972	-0.96065	0.93017	0.34697	45.972	-60.911	1141.633	-1.2383	0.90234	0.40283	-166.607	-59.971	1902.4868	-1.8081	1.7563	0.31055	-8.606	6.636	1849.776	-1.916	1.5234	0.31494	-69.702	-63.809	843.439	-0.15918	0.44805	0.1957	73.52	-153.58	1835.059	-1.5996	1.6885	0.29199	-65.284	-55.456	1929.7989	-1.9425	1.5665	0.27686
2.226	38.773	197.393	1016.128	-0.91885	0.88721	0.34043	9.3692	-161.715	1221.2596	-1.3439	0.99825	0.45556	-118.952	-56.826	1880.1687	-1.8258	1.7621	0.31377	-70.361	-39.817	1890.7351	-1.9092	1.4921	0.31309	-57.042	29.964	997.326	-0.27334	0.52402	0.25527	99.765	-83.271	1828.824	-1.6387	1.6928	0.29238	-45.1509	-77.583	1928.153	-1.9419	1.5425	0.27481
2.228	23.279	178.9076	950.7255	-0.87012	0.84082	0.32666	-48.6238	-192.636	1265.8522	-1.4517	1.0836	0.50283	-80.044	-46.0252	1854.963	-1.8387	1.7641	0.32109	-56.47	-113.399	1922.541	-1.8929	1.4569	0.30514	-36.73	67.76	1111.924	-0.40381	0.59131	0.31445	72.418	-61.789	1845.638	-1.671	1.693	0.28301	36.346	-16.325	1899.4144	-1.9253	1.52	0.26514
2.23	34.742	205.5698	910.09769	-0.81953	0.79668	0.31738	-93.8	-209.734597	1281.3243	-1.5705	1.1508	0.54541	-39.763	-59.5183	1871.898	-1.8449	1.7672	0.31757	-68.92	-82.098	1921.1496	-1.8702	1.4257	0.2938	-52.225	77.16	1162.047	-0.53897	0.65303	0.35244	95.879	-28.774	1855.4149	-1.698	1.6849	0.26816	34.778	-6.542	1879.1384	-1.9104	1.4968	0.25605
2.232	41.2967	235.621	855.181	-0.76748	0.7502	0.31308	-75.607	-274.843	1320.6322	-1.6885	1.2069	0.57041	-2.539	21.12	1888.765	-1.8438	1.7667	0.31563	-100.993	-52.193	1895.891	-1.842	1.3955	0.27812	-126.984	92.638	1197.639	-0.66983	0.7042	0.37383	54.401	-9.66	1827.132418	-1.7207	1.668	0.26133	54.5681	43.689	1893.901	-1.8887	1.4745	0.24619
2.234	-2.762	193.1671	828.0804	-0.72568	0.70293	0.30293	-85.396	-247.815	1368.596	-1.7847	1.2524	0.58887	-75.4281	57.54059	1878.174	-1.8398	1.7676	0.31152	-70.346	-36.881	1880.648	-1.8164	1.3711	0.26807	-156.81	17.24	1274.298	-0.79443	0.76709	0.39883	-2.8048	-57.683	1836.7902	-1.7339	1.6509	0.24365	69.693	122.0714	1876.348	-1.8621	1.4557	0.23447
2.236	-10.001	227.093	801.026	-0.67744	0.65381	0.29346	-102.6668	-284.04	1458.2106	-1.8386	1.2814	0.5873	-39.288	81.7048	1890.723	-1.8253	1.7689	0.30254	-71.089	-9.941	1873.572	-1.7851	1.3458	0.26026	-178.99	-21.82	1359.405	-0.89707	0.84902	0.41865	-5.456	-50.342	1831.8687	-1.7522	1.6263	0.23789	37.1132	136.417	1853.272	-1.8343	1.4399	0.22685
2.238	-46.257	218.545	759.5	-0.63672	0.6084	0.28369	-101.0556	-324.77	1533.363	-1.8492	1.2953	0.57724	-16.25	139.156	1836.7788	-1.8082	1.7691	0.30273	-25.819	-61.22	1891.016	-1.7614	1.3262	0.25479	-212.7013	-76.95	1459.346	-0.99268	0.94189	0.44092	-65.267	-102.8822	1833.787	-1.7702	1.5978	0.23838	64.419	189.258	1838.44874	-1.814	1.4253	0.22656
2.24	-52.946	197.999	752.1378	-0.60283	0.56865	0.27217	-130.792	-281.929	1571.025	-1.8184	1.3066	0.55811	-50.617	112.368	1796.4471	-1.7946	1.7703	0.29493	-2.082	-85.257	1916.303	-1.7504	1.3106	0.254	-219.399	-214.007	1538.947	-1.085	1.0442	0.47666	-41.849	-120.519	1874.258	-1.7913	1.5774	0.24346	54.5557	205.516	1796.955	-1.8	1.4129	0.23388
2.242	-33.173	212.4	725.5207	-0.56631	0.53193	0.25889	-117.2585	-266.838	1593.868	-1.752	1.3136	0.52725	-3.935	122.5	1805.2617	-1.7797	1.7687	0.29277	13.4761	-51.074	1893.771	-1.7492	1.298	0.24736	-254.319	-281.393	1582.627	-1.1904	1.1474	0.51504	-17.37498	-111.029	1894.78	-1.8212	1.556	0.2417	36.137	165.105	1790.2217	-1.7991	1.404	0.23154
[truncated: 11,878 more rows]
