# Supplementary material for: Reliability and Validity of Running Cadence and Stance Time Derived from Instrumented Wireless Earbuds
Source: Sensors (Basel). 2021 Nov 30;21(23):7995. doi: 10.3390/s21237995 (PMC8659722; doi:10.3390/s21237995)
Supplement: Supplementary file 1 [file sensors-21-07995-s001.zip › Data_P05_speeds_1.csv]

time	S7kmh_force_plate_1	S7kmh_force_plate_2	S7kmh_force_plate_3	S7kmh_earbuds_1	S7kmh_earbuds_2	S7kmh_earbuds_3	S10kmh_force_plate_1	S10kmh_force_plate_2	S10kmh_force_plate_3	S10kmh_earbuds_1	S10kmh_earbuds_2	S10kmh_earbuds_3	S13kmh_force_plate_1	S13kmh_force_plate_2	S13kmh_force_plate_3	S13kmh_earbuds_1	S13kmh_earbuds_2	S13kmh_earbuds_3	max_force_plate_1	max_force_plate_2	max_force_plate_3	max_earbuds_1	max_earbuds_2	max_earbuds_3
0	-39.133	89.0028	344.9018	-0.15479	0.14722	0.11231	-65.837	2.674	32.953	0.085938	0.075684	0.098145	-48.79	183.401	358.832	-0.18623	0.33994	-0.0026367	-57.737	17.114	54.33	-0.2167	0.050781	-0.063281
0.002	-40.271	79.4173	333.72131	-0.13379	0.13574	0.10986	-93.4168	54.5036	48.178	0.087647	0.08545	0.098631	-80.6279	143.124	357.642	-0.1418	0.3082	-0.021289	-41.934	51.9255	46.362	-0.23535	0.056152	-0.053027
0.004	-37.656	99.411	315.4123	-0.10889	0.12256	0.11133	-83.1532	-1.829	41.4211	0.087891	0.090332	0.098145	-74.093	179.83	315.1547	-0.097656	0.26758	-0.042969	-48.304	44.7957	37.6278	-0.24902	0.060839	-0.044043
0.006	-68.063	98.611	295.5799	-0.098145	0.11621	0.11279	-45.994	13.086	73.3916	0.097168	0.098633	0.095703	-84.427	112.8014	309.5949	-0.055664	0.23916	-0.063281	-82.415	65.598	45.2792	-0.2624	0.066601	-0.040039
0.008	-101.135	88.979	288.6265	-0.084961	0.096191	0.1123	-69.345	43.8907	64.803	0.09668	0.10254	0.104	-77.7206	203.847	260.6794	-0.017285	0.20049	-0.08125	-27.108	85.246	36.662	-0.27002	0.07373	-0.041504
0.01	-76.7678	78.1399	257.7124	-0.068603	0.085693	0.104	-52.887	-17.3548	48.8341	0.11621	0.10449	0.088379	-40.615	147.24	245.3009	0.016699	0.16729	-0.097266	20.806	78.198	19.3076	-0.26709	0.074902	-0.043457
0.012	-87.9379	87.88784	251.6241	-0.050293	0.072266	0.10352	-52.988	50.417	45.4198	0.1272	0.10962	0.085449	-31.304	185.691	206.822	0.046094	0.1377	-0.11416	78.017	80.763	4.59504	-0.25674	0.074805	-0.043457
0.014	-67.818	91.729	224.555	-0.030273	0.0625	0.095215	-51.476	31.6634	30.275	0.14111	0.11133	0.081055	54.4675	75.298	180.132	0.07373	0.10889	-0.12598	36.707	48.71	3.844	-0.2501	0.074414	-0.045019
0.016	-69.001	74.489	240.058	-0.016113	0.057129	0.095703	-20.035	-2.50316	30.867	0.15771	0.11084	0.070801	45.305	57.593	162.353	0.10322	0.070801	-0.14004	15.304	56.132	18.939	-0.24707	0.075781	-0.05332
0.018	-68.257	69.173	237.7818	0.010742	0.046387	0.088379	-32.839	48.134	29.686	0.16211	0.10645	0.070313	61.6069	33.067	152.3903	0.13027	0.037012	-0.15596	53.923	60.3529	72.0798	-0.23828	0.079102	-0.058105
0.02	-79.9603	72.0194	216.2796	0.030274	0.039551	0.083496	-22.201	-11.0474	36.01	0.1748	0.10303	0.067383	35.458	45.845	150.8972	0.15332	0.01084	-0.17197	61.557	74.2414	96.766	-0.2251	0.080274	-0.063379
0.022	-76.051	75.7766	204.7103	0.046875	0.038574	0.077148	6.33	-6.25769	52.5295	0.17822	0.098389	0.060791	51.783	141.8407	134.1779	0.16865	-0.016016	-0.18555	66.884	45.353	110.324	-0.21494	0.0875	-0.067773
0.024	-64.772	67.6612	204.57678	0.064453	0.026367	0.075195	-11.508	51.464	55.36745	0.17676	0.096191	0.059082	-10.918	118.729	131.8053	0.18066	-0.040527	-0.19482	27.246	20.402	80.5	-0.20752	0.090235	-0.076367
0.026	-82.006	64.178	195.1615	0.071777	0.024902	0.071289	10.833	9.06491	34.5019	0.17041	0.095703	0.056641	-38.422	194.744	81.7553	0.196	-0.056152	-0.20156	-15.337	21.6604	68.6059	-0.2	0.097265	-0.086426
0.028	-84	75.529	181.3964	0.075684	0.02002	0.070313	22.647	48.004	39.5904	0.1626	0.089844	0.057129	-14.706	107.729	88.487	0.20635	-0.073731	-0.2082	-80.265	-1.1561	122.0018	-0.19043	0.10986	-0.10596
0.03	-80.8748	70.014	160.5897	0.080078	0.017822	0.067871	-9.055	43.202	26.3983	0.15039	0.090332	0.061523	-50.177	143.165	80.8194	0.21299	-0.086621	-0.21132	-74.864	-43.7024	161.1527	-0.1832	0.12383	-0.11104
0.032	-56.245	71.1994	163.5502	0.081543	0.018066	0.06543	-5.501	-3.832446	34.9534	0.1377	0.089111	0.068847	-36.5308	53.829	100.5599	0.20703	-0.095213	-0.21006	-68.9	-133.434	227.684	-0.17685	0.13642	-0.12304
0.034	-40.525	54.4038	160.9118	0.078125	0.01416	0.070801	-7.876	59.347	34.8966	0.11719	0.092285	0.071289	-67.1138	65.482	96.6003	0.20508	-0.10303	-0.20459	-67.715	-204.553	302.429	-0.16631	0.15009	-0.1414
0.036	-35.657	51.794	145.6769	0.074219	0.015625	0.068848	-20.303	25.3651	22.713	0.10205	0.09082	0.088379	-16.237	34.462	58.194	0.20313	-0.10498	-0.20361	-57.794	-292.432	443.098	-0.15342	0.17481	-0.16084
0.038	-16.204	48.369	137.0541	0.065918	0.01123	0.07373	-47.182	6.9909	34.2548	0.091797	0.097168	0.095215	-58.786	24.981	54.903	0.19707	-0.10742	-0.20332	-95.818	-356.079	630.481	-0.14648	0.20166	-0.18311
0.04	-14.101	62.8259	136.6898	0.05835	0.0097658	0.073975	-69.174	62.455	43.3503	0.072754	0.104	0.10352	-21.393	54.582	43.639	0.19004	-0.10781	-0.19512	-74.498	-407.114	737.941	-0.14131	0.2292	-0.20107
0.042	2.962	74.7999	128.18888	0.054199	0.01123	0.07959	-49.894	8.3204	49.45	0.0625	0.10645	0.11475	-52.542	8.111	80.5152	0.17422	-0.10596	-0.19033	-60.586	-468.105	810.757	-0.13437	0.26836	-0.2207
0.044	-27.466	76.4796	123.1703	0.045898	0.013672	0.083008	-30.534	37.6898	52.821	0.05957	0.11035	0.12012	-78.4546	69.998172	76.833	0.15869	-0.099609	-0.18066	5.38	-448.0212	848.114	-0.14726	0.31406	-0.2457
0.046	-21.056	60.5693	112.4622	0.046387	0.017578	0.084473	-70.4653	53.6642	35.3593	0.053711	0.11963	0.12695	-74.3085	-17.8146	82.557	0.13505	-0.1	-0.16914	-22.376	-418.644	914.362	-0.17695	0.3792	-0.26641
0.048	-32.136	58.53	119.4677	0.043945	0.016602	0.088867	-86.135	-3.867	36.4366	0.051269	0.12305	0.13282	-143.84	34.47	86.997	0.11113	-0.092578	-0.15937	-44.7109	-279.437	1015.1125	-0.22266	0.46045	-0.26758
0.05	-34.452	70.781	119.7768	0.038086	0.026612	0.089844	-80.6873	44.3319	71.7888	0.04834	0.13086	0.12988	-93.6481	-33.31	82.5005	0.088086	-0.088281	-0.14844	25.691	-166.281	1090.4634	-0.30401	0.56035	-0.2499
0.052	-51.252	58.717	109.7442	0.030273	0.030273	0.089355	-78.272	-3.0232	107.865	0.041992	0.14795	0.12354	-124.086	8.244	85.0819	0.062988	-0.081445	-0.13633	61.6638	-104.18	1136.879	-0.41632	0.67003	-0.21142
0.054	-62.144	53.37	112.1242	0.02832	0.035645	0.10059	-80.569	-91.824	200.088	0.026367	0.1665	0.11475	-78.723	-7.1624	71.5206	0.041016	-0.075684	-0.12256	110.453	-103.468	1235.138	-0.57218	0.77823	-0.14111
0.056	-46.479	52.5019	95.43179	0.024414	0.038086	0.10107	-122.947	-80.1265	311.803	-0.016602	0.22656	0.091797	-115.6432	24.9994	82.6883	0.029394	-0.069336	-0.11816	127.504	-90.764	1368.026	-0.74933	0.89659	-0.06484
0.058	-60.208	51.4427	85.69	0.018555	0.040039	0.10596	-120.234	-167.8123	407.923	-0.060547	0.29029	0.10278	-68.8719	49.4947	60.981	0.019629	-0.061426	-0.099807	145.879	-87.532	1491.298	-0.94678	1.0288	0.011719
0.06	-35.612	42.653	86.915	0.012207	0.044922	0.11377	-128.568	-196.959	528.55018	-0.13037	0.34863	0.12012	-57.405	27.4486	59.5506	0.015723	-0.058692	-0.092383	184.201	-47.337	1564.747	-1.1476	1.1627	0.090323
0.062	-58.308	29.517	104.8125	0.0053711	0.045898	0.11426	-210.693	-210.538	576.437	-0.26465	0.42822	0.17627	-33.53	50.2947	21.8245	0.017383	-0.058008	-0.091113	218.902	6.24000000000001	1592.8095	-1.3733	1.2747	0.166
0.064	-50.21	40.7564	108.769	-0.0019531	0.045898	0.11768	-180.472	-275.003	613.077	-0.34082	0.45898	0.19727	7.064	-18.258	27.748	0.027832	-0.051758	-0.089844	225.971	0.979999999999961	1617.205	-1.6166	1.3751	0.22498
0.066	-55.888	46.8093	86.046	-0.00097657	0.049805	0.1189	-169.709	-180.037	689.783	-0.50195	0.52344	0.25195	0.0799999999999983	35.516	13.339	0.041601	-0.048828	-0.087891	177.031	-9.66000000000003	1658.941	-1.8367	1.468	0.28232
0.068	-89.3571	42.7752	81.34592	-0.0024414	0.043945	0.11621	-199.415	-108.422	741.682	-0.63282	0.57227	0.27636	11.707	-32.601	23.179	0.062012	-0.045214	-0.0875	119.386	-137.17	1731.131	-2.0332	1.5508	0.32227
0.07	-71.1454	39.04957	88.2062	0.00097656	0.049316	0.11426	-197.968	-95.998	804.2501	-0.75146	0.63135	0.29395	-34.574	25.0278	47.60656	0.076855	-0.045606	-0.091016	-4.71076	-246.046	1828.0718	-2.2199	1.6261	0.37267
0.072	-91.2838	29.0279	79.5814	0.0048828	0.050781	0.11035	-137.441	7.81400000000001	850.305	-0.90479	0.73486	0.31689	-0.0459999999999994	-7.206	47.888	0.090039	-0.048145	-0.093847	-58.188	-355.288	1911.571	-2.399	1.7012	0.4101
0.074	-90.1465	36.7597	83.6122	0.018555	0.050781	0.10498	-54.381	-1.68000000000001	943.2901	-0.97656	0.79248	0.33105	-35.888	37.8637	61.5899	0.10547	-0.04834	-0.095215	-60.675	-379.05	1943.05	-2.5494	1.7524	0.45855
0.076	-86.26987	44.6313	75.6902	0.023438	0.051758	0.10157	6.714	28.09	1063.939	-1.1035	0.93164	0.36084	-10.184	46.907	49.1568	0.12197	-0.05625	-0.1001	3.7	-393.69	1937.017	-2.6724	1.7758	0.50325
0.078	-55.1802	47.5178	85.2632	0.030273	0.054688	0.098145	4.8343	127.22	1183.929	-1.2073	1.0276	0.39673	-41.603	46.455	48.8044	0.13994	-0.062793	-0.10791	26.348	-401.07	1963.543	-2.7358	1.7896	0.53223
0.08	-48.516	45.561	79.2625	0.046387	0.054199	0.094238	6.382	135.083	1238.885	-1.3237	1.1196	0.43848	-8.709	59.602	12.527	0.16103	-0.070215	-0.12159	30.591	-391.69	1993.722	-2.7151	1.7686	0.52335
0.082	-53.069	37.6594	74.2196	0.048828	0.053223	0.089844	39.099	182.687	1279.5036	-1.4897	1.2231	0.51318	-16.513	-1.844	33.629	0.18125	-0.083887	-0.12881	-42.311	-389.88	2066.465	-2.6078	1.7478	0.49432
0.084	-36.441	22.6097	69.3663	0.056641	0.052246	0.085449	-38.752	135.8035	1313.427	-1.5698	1.2622	0.53516	-33.096	29.82	27.90316	0.20215	-0.091309	-0.13818	-114.8965	-328.64	2128.241	-2.416	1.7104	0.42378
0.086	-15.388	31.4686	68.0498	0.064942	0.054444	0.080322	-69.496	7.52	1346.752	-1.7144	1.3052	0.59521	-1.753	-18.402	53.9745	0.22168	-0.092774	-0.14873	-177.193	-285.951	2155.385	-2.1623	1.6731	0.33424
0.088	3.535	23.8806	70.1893	0.070313	0.052246	0.077148	-63.273	-18.19	1385.69	-1.8003	1.3052	0.63232	-30.729	68.7713	39.668	0.24073	-0.097656	-0.15351	-264.968	-172.958	2144.655	-1.9004	1.6387	0.25439
0.09	-33.214	14.8533	74.8001	0.083984	0.049805	0.074219	-67.876	-132.968	1415.567	-1.8438	1.2969	0.65869	-26.266	43.88	42.516	0.24385	-0.10039	-0.16172	-291.993	-123.833	2093.924	-1.6961	1.6151	0.17984
0.092	-24.055	10.3238	74.8279	0.089355	0.050781	0.075195	-69.0346	-226.439	1455.573	-1.8335	1.2563	0.67578	-79.3549	113.928	67.9963	0.24707	-0.095215	-0.15996	-306.384	-94.52	2070.294	-1.536	1.597	0.12377
0.094	-24.097	12.0214	71.93	0.097168	0.052246	0.076172	-120.212	-234.679	1454.38	-1.7969	1.2383	0.67236	-51.317	75.408	64.6286	0.23975	-0.09668	-0.15576	-299.166	-110.425	2013.68	-1.4327	1.5787	0.095004
0.096	-2.459	31.653	58.9976	0.10401	0.053955	0.073486	-57.409	-292.616	1447.266	-1.6387	1.2246	0.64502	-121.417	89.215	86.7146	0.22803	-0.090332	-0.15498	-262.62	-152.29	2006.131	-1.3858	1.5745	0.075011
0.098	-33.769	18.812	67.5404	0.10498	0.050781	0.074219	43.52	-293.62	1426.185	-1.4744	1.222	0.62182	-94.896	66.913	59.1806	0.20879	-0.08545	-0.14736	-223.84	-155.856	2024.89	-1.3848	1.5781	0.049805
0.1	-29.378	18.2313	77.453	0.11328	0.055176	0.077637	53.478	-311.85	1454.3618	-1.3003	1.2192	0.5918	-106.157	24.2312	79.5496	0.18652	-0.078809	-0.14111	-140.914	-182.449	2061.625	-1.4259	1.5976	0.028832
0.102	-13.128	19.07856	81.215	0.1167	0.051758	0.08252	86.2798	-356.15	1562.417	-1.1011	1.2153	0.54883	-111.8487	29.20448	55.7039	0.16231	-0.075391	-0.13408	-38.129	-181.121	2107.005	-1.4864	1.6108	0.013087
0.104	-23.998	26.3214	55.2486	0.12109	0.055664	0.087402	72.2549	-266.887	1612.848	-1.0269	1.2153	0.5293	-108.8313	-5.612	72.3589	0.13623	-0.067383	-0.12744	80.039	-186.611	2134.209	-1.5678	1.6314	0.0096735
0.106	-13.118	13.7945	61.7133	0.12232	0.05542	0.092041	44.62945	-198.435	1610.174	-0.92578	1.2266	0.51025	-79.895	56.7878	43.2191	0.1208	-0.058594	-0.12178	77.1263	-163.218	2156.705	-1.6609	1.6498	0.0088078
0.108	-35.945	7.361	66.8085	0.11572	0.053223	0.097656	40.065	-162.232	1603.4619	-0.89551	1.2353	0.51074	-59.214	20.723	76.6853	0.10205	-0.050976	-0.12256	93.158	-151.858	2183.126	-1.7612	1.6704	0.0058594
0.11	-30.653	16.89	58.7311	0.11523	0.050293	0.11133	-70.974	-91.385	1556.649	-0.89795	1.2505	0.51123	-76.5142	69.348	75.295	0.088769	-0.044336	-0.1167	29.848	-131.138	2217.288	-1.8453	1.6919	0.0095308
0.112	-45.001	18.9204	72.226	0.1084	0.050293	0.11035	-114.453	-109.437	1544.15	-0.94141	1.2832	0.51025	-30.587	8.366	84.179	0.079883	-0.033593	-0.11484	-0.3447	-122.969	2234.508	-1.9328	1.7102	0.014496
0.114	-53.225	-8.1115	119.573	0.097656	0.050293	0.11328	-96.624	-76.47	1561.7443	-0.979	1.3091	0.51074	-52.964	46.597	90.622	0.067871	-0.023438	-0.11182	49.038	-98.8876	2227.017	-2.0167	1.7301	0.024852
0.116	-47.51	-48.411	201.311	0.085206	0.052978	0.10913	-180.88	-58.71	1548.2	-1.0444	1.354	0.50928	-18.35	-6.12	70.5965	0.058594	-0.01582	-0.1085	105.3391	-42.591	2184.857	-2.0959	1.7421	0.026213
0.118	-60.524	-62.716	256.9757	0.066406	0.061523	0.10596	-144.4763	-146.209	1596.975	-1.0962	1.3862	0.5083	-52.619	9.6581	92.856	0.051172	-0.010547	-0.10742	143.007	-35.785	2142.462	-2.1543	1.7461	0.034668
0.12	-83.9569	-79.177	326.79071	0.03418	0.094238	0.089844	-92.092	-175.766	1636.513	-1.1382	1.4224	0.50781	-30.641	-0.2976	68.662	0.046094	-0.0050781	-0.10586	145.887	21.517	2118.701	-2.2038	1.7338	0.034847
0.122	-147.0475	-107.846	370.5384	0.013184	0.1167	0.085938	-104.182	-203.9889	1635.008	-1.1812	1.481	0.50781	-51.581	5.069	92.254	0.04873	-0.0042969	-0.10537	201.242	59.2494	2129.7661	-2.2302	1.7128	0.037753
0.124	-142.01	-136.912	395.389	-0.040039	0.16797	0.087402	-36.056	-241.784	1689.322	-1.2065	1.5161	0.51367	4.575	41.04	58.434	0.04834	-0.00097656	-0.10742	222.35	112.875	2130.7161	-2.2322	1.69	0.040953
0.126	-139.65	-113.726	430.0393	-0.096189	0.20801	0.097412	-64.029	-189.756	1714.913	-1.2554	1.6021	0.53027	-7.106	9.5778	45.29902	0.048828	0.0001953	-0.1082	250.2	171.135	2133.004	-2.2139	1.6634	0.040845
0.128	-131.912	-74.3227	484.5789	-0.16455	0.25049	0.11523	-133.104	-199.832	1772.784	-1.2893	1.6594	0.56983	-15.421	44.4955	29.6883	0.05039	0.0018555	-0.10606	205.711	180.08	2111.9456	-2.1772	1.6431	0.044922
0.13	-125.64	-51.985	523.20594	-0.26953	0.31201	0.14209	-152.292	-203.425	1824.023	-1.3394	1.7075	0.61523	6.383	-13.9276	37.407	0.051562	0.0096678	-0.10918	104.769	206.0767	2068.0103	-2.1252	1.6262	0.040857
0.132	-108.259	-24.055	566.1008	-0.33105	0.34229	0.15869	-221.843	-164.571	1830.147	-1.4434	1.7695	0.66455	-13.328	27.946	25.875	0.053027	0.017969	-0.10137	28.367	182.209	2059.922	-2.0679	1.6051	0.040178
0.134	-80.889	1.986	608.13351	-0.45557	0.40869	0.18994	-209.683	-198.425	1856.57	-1.5093	1.7935	0.68164	33.598	-18.065	32.9285	0.047363	0.023438	-0.095215	-59.3012	159.152	2104.344	-2.0131	1.5809	0.043123
0.136	-72.7771	36.534	670.2253	-0.55567	0.46045	0.2146	-202.9643	-162.83726	1850.321	-1.6289	1.8477	0.7085	-30.31	21.3152	57.661	0.040918	0.035645	-0.091797	-92.028	119.561	2114.296	-1.9787	1.5601	0.046018
0.138	-29.198	57.309	749.372	-0.66064	0.51904	0.23633	-254.223	-117.43	1824.7195	-1.7114	1.8784	0.72754	-10.815	-2.702	53.106	0.02793	0.041797	-0.085547	-96.862	83.857	2096.963	-1.9609	1.5391	0.053223
0.14	-49.726	88.871	821.4621	-0.79102	0.60059	0.26221	-242.446	-98.706	1790.516	-1.7847	1.8989	0.74609	-52.923	39.697	65.7843	0.01582	0.053516	-0.076953	-91.42	87.7228	2059.3475	-1.9573	1.5228	0.065647
0.142	-22.475	133.111	880.06818	-0.85693	0.64404	0.28076	-229.083	-21.487	1776.496	-1.8647	1.9087	0.76563	-42.457	37.469	35.7864	0.0019531	0.061328	-0.07002	-166.062	106.273	1997.529	-1.959	1.5109	0.082397
0.144	-36.505	125.275	956.958	-0.98828	0.73193	0.31787	-202.6057	-4.033	1791.674	-1.8984	1.9121	0.78369	-93.2934	53.844	48.4202	-0.01123	0.07373	-0.06543	-177.65	142.166	1970.143	-1.9605	1.5078	0.10311
0.146	-60.41	106.902	1033.14	-1.0878	0.79297	0.34766	-118.345	-21.8043	1826.077	-1.9438	1.9067	0.81641	-84.3849	44.15077	27.88	-0.021387	0.077246	-0.064063	-184.687	130.895	1946.268	-1.9591	1.5057	0.12045
0.148	-63.6337	79.7362	1101.921	-1.189	0.85596	0.37109	-120.612	12.97332	1836.475	-1.9653	1.8994	0.8291	-108.47024	1.74233	54.784	-0.029101	0.083301	-0.06084	-175.145	134.516	1919.757	-1.9546	1.5122	0.14258
0.15	-53.274	43.6989	1161.267	-1.3257	0.92627	0.41504	-102.717	-8.472	1852.2975	-1.9727	1.8887	0.84033	-94.695	21.651	34.513	-0.032227	0.091504	-0.06123	-111.054	128.9	1908.008	-1.9545	1.5181	0.16239
0.152	-27.839	-17.425	1219.99046	-1.3843	0.96143	0.43115	-103.622	17.713	1872.429	-1.9531	1.8613	0.85303	-63.69	-42.96	80.163	-0.037403	0.10098	-0.068457	-91.82	178.337	1846.1426	-1.9441	1.5251	0.18572
0.154	-59.4632	-81.845	1254.877	-1.4858	1.0103	0.4668	-160.7113	31.914	1879.3722	-1.9336	1.8477	0.854	-80.9506	-26.34054	132.578	-0.037598	0.11328	-0.07373	-79.102	245.123	1780.076	-1.9194	1.5341	0.19395
0.156	-18.442	-119.614	1286.954	-1.5498	1.0283	0.49316	-139.683	-54.435	1926.901	-1.8848	1.8047	0.85596	-46.778	-92.84202	219.091	-0.037989	0.12324	-0.086035	-100.373	322.963	1705.589	-1.8839	1.5333	0.20624
0.158	-1.093	-129.121	1312.553503	-1.603	1.0454	0.51172	-154.516	-57.4261	1898.068	-1.8523	1.7698	0.85767	-46.2131	-98.311	327.594	-0.042578	0.13995	-0.095802	-77.0741	363.321	1628.793	-1.8374	1.522	0.21289
0.16	31.905	-136.942	1336.549	-1.6479	1.0571	0.53809	-137.56	-50.015	1888.5397	-1.8184	1.7305	0.85205	22.8189	-217.227	454.838	-0.053516	0.15595	-0.10986	-74.8318	367.067	1580.143	-1.775	1.515	0.21533
0.162	41.721	-150.486	1379.37	-1.6543	1.0586	0.54639	-65.53	-55.463	1894.9564	-1.79	1.6797	0.84814	3.512	-294.328	596.485	-0.068066	0.18584	-0.12695	-28.223	365.64	1570.795	-1.7018	1.497	0.21299
0.164	18.418	-139.373	1405.122	-1.623	1.0508	0.54736	-105.379	0.181999999999999	1892.911	-1.7808	1.6587	0.8457	46.182	-407.793	668.473	-0.090332	0.22656	-0.13818	51.1087	319.67	1553.393	-1.6335	1.47	0.21064
0.166	6.087	-117.983	1429.004	-1.5661	1.0393	0.53442	-128.414	-24.0716	1904.4045	-1.7705	1.6074	0.83447	4.446	-413.818	756.581	-0.13467	0.28916	-0.14443	84.2834	294.848	1512.114	-1.5598	1.4447	0.20889
0.168	-7.592	-98.067	1440.446	-1.4937	1.0239	0.5166	-68.63	-25.031	1892.7668	-1.7617	1.5743	0.82471	84.1354	-366.1627	773.6676	-0.20332	0.35928	-0.13096	105.413	287.248	1454.303	-1.4902	1.416	0.20801
0.17	-5.186	-74.1468	1455.0317	-1.3687	0.99854	0.48535	-65.722	26.766	1856.9652	-1.7612	1.5513	0.81445	58.3958	-291.663	830.87	-0.29825	0.43506	-0.10283	60.24	292.4709	1393.3905	-1.4213	1.3861	0.20937
0.172	-22.906	-48.566	1440.9866	-1.3105	0.99414	0.46338	-47.611	13.154	1866.9617	-1.75	1.5156	0.80225	78.116	-171.782	838.69	-0.42324	0.51729	-0.066992	118.4039	292.552	1335.207	-1.3633	1.3508	0.20713
0.174	-60.455	-20.168	1428.4623	-1.2007	0.979	0.43262	-69.019	86.679	1875.9554	-1.7437	1.5063	0.78906	114.371	-152.678	879.96	-0.55859	0.60156	-0.02002	121.5799	287.183	1292.634	-1.2992	1.3164	0.19932
0.176	-63.581	-11.635	1406.945	-1.1375	0.96656	0.41724	-125.012	172.501	1840.7849	-1.7231	1.4829	0.77734	132.071	-76.804	935.034	-0.71231	0.68867	0.031836	126.6364	296.762	1268.747	-1.239	1.2762	0.19844
0.178	-99.1363	-29.579	1422.828	-1.0908	0.96094	0.4126	-94.561	147.004	1834.5034	-1.7058	1.469	0.7649	166.83	-69.29	1030.842	-0.87129	0.77382	0.080369	109.33361	289.791	1237.211	-1.1812	1.2388	0.19971
0.18	-77.145	-42.156	1447.338	-1.0703	0.9668	0.40967	-130.5034	187.047	1796.911	-1.6855	1.4609	0.75244	138.822	3.57499999999999	1129.459	-1.0361	0.85351	0.12607	74.049	330.9064	1187.855	-1.1171	1.1962	0.19863
0.182	-81.096	-78.77	1483.0743	-1.0664	0.97461	0.41553	-149.7159	118.978	1793.844	-1.6558	1.4536	0.73438	171.996	21.229	1142.374	-1.1913	0.94033	0.15332	3.172	353.116	1101.149	-1.0535	1.1547	0.20039
0.184	-48.057	-93.361	1500.249	-1.0781	1.0039	0.42041	-126.721	75.569	1829.038	-1.6326	1.4456	0.73023	134.878	31.001	1135.753	-1.3359	1.0195	0.18896	-64.305	375.641	992.323	-0.98475	1.1063	0.2
0.186	-58.833	-124.586	1528.445	-1.0954	1.0315	0.43042	-168.6965	123.763	1799.406	-1.6074	1.4375	0.71729	151.007	-3.06999999999999	1127.35	-1.4533	1.1111	0.22198	-72.265	361.124	917.773	-0.91524	1.0594	0.19795
0.188	-81.735	-134.902	1556.2215	-1.1138	1.0571	0.43896	-154.2189	71.7404	1791.6999	-1.5742	1.4297	0.69873	71.313	-41.93	1244.987	-1.5749	1.1923	0.2625	-153.2139	344.552	860.9868	-0.84717	1.0142	0.19922
0.19	-94.577	-156.121	1566.653	-1.146	1.0884	0.44482	-129.5139	76.049	1774.75969	-1.5522	1.4282	0.69141	19.9049	-69.06	1304.728	-1.7077	1.2618	0.31211	-163.2841	332.654	804.557	-0.77754	0.96211	0.19336
0.192	-113.698	-169.277	1602.871	-1.1589	1.113	0.45874	-130.414	73.081	1749.4186	-1.5156	1.4199	0.67627	-55.268	-157.72	1382.032	-1.8551	1.3222	0.35352	-179.436	306.4476	747.795	-0.71133	0.9	0.18545
0.194	-125.8325	-165.538	1609.961	-1.1675	1.1372	0.4707	-80.34	21.298	1760.573	-1.4792	1.4084	0.66137	-100.904	-252.326	1382.821	-1.9922	1.3672	0.39502	-214.263	312.247	686.197	-0.63515	0.84336	0.18272
0.196	-165.1605	-146.421	1606.717	-1.1831	1.1685	0.48193	-88.52	107.392	1753.443	-1.4414	1.4004	0.64307	-133.663	-383.684	1419.9265	-2.1007	1.3837	0.42207	-211.586	282.929	596.713	-0.56084	0.78818	0.17803
0.198	-164.9131	-132.43171	1598.222	-1.1914	1.1855	0.48877	-89.3625	128.522	1735.571	-1.3901	1.3833	0.62207	-86.4247	-431.67	1459.7943	-2.175	1.3816	0.42998	-215.652	253.675	508.296	-0.48682	0.72705	0.16553
0.2	-173.363	-114.482	1596.196	-1.2144	1.2153	0.50977	-46.754	134.7802	1722.566	-1.3647	1.3696	0.61035	-51.018	-471.2	1519.333	-2.2093	1.3723	0.42412	-207.687	241.914	437.017	-0.40684	0.66914	0.15537
0.202	-156.754	-82.131	1587.465	-1.2459	1.2434	0.52491	-109.992	197.904	1668.1812	-1.3125	1.3457	0.58447	-61.238	-433.7	1585.741	-2.1804	1.3579	0.3961	-227.494	221.887	399.312	-0.3293	0.61172	0.14697
0.204	-149.6936	-58.114	1599.455	-1.2866	1.2632	0.52734	-101.075	166.571	1619.8981	-1.2754	1.3208	0.55957	-43.491	-408.49	1646.099	-2.0957	1.3418	0.34814	-206.951	208.4324	395.9067	-0.24883	0.55508	0.1419
0.206	-149.098	-36.304	1601.116	-1.3569	1.3013	0.53418	-73.976	206.983	1584.33799	-1.2397	1.2964	0.54102	-83.889	-354.12	1705.632	-1.9531	1.3283	0.27457	-243.071	157.9903	354.737	-0.17246	0.49873	0.1336
0.208	-136.024	-20.085	1617.529	-1.3979	1.3208	0.53662	-101.036	253.498	1540.783	-1.1899	1.2563	0.51953	-75.8953	-279.874	1704.77	-1.7892	1.3258	0.19896	-201.963	129.735	310.3023	-0.098145	0.44092	0.12354
0.21	-121.895	-15.916	1633.1698	-1.48	1.3521	0.55469	-79.387	194.816	1542.9815	-1.1694	1.2388	0.50684	-109.128	-202.474	1735.035	-1.6228	1.3086	0.12472	-175.49	125.581	277.403	-0.03086	0.39424	0.11562
0.212	-120.564	-3.766	1640.1765	-1.5444	1.3735	0.56641	-84.063	232.476	1515.9242	-1.1299	1.1914	0.4834	-133.15	-140.393	1705.7879	-1.4867	1.2987	0.060686	-138.82006	117.475	219.52	0.035156	0.34199	0.10381
0.214	-126.344	-10.24413	1669.434	-1.6074	1.3965	0.58838	-36.549	206.472	1459.398	-1.0945	1.1589	0.47241	-193.751	-121.17	1705.662	-1.3789	1.2949	0.0063477	-69.48	133.28951	177.541	0.092188	0.28926	0.094824
0.216	-126.083	-24.7903	1674.6352	-1.6836	1.4141	0.61475	9.466	155.614	1442.9497	-1.0669	1.1235	0.4585	-172.793	-92.1	1662.475	-1.3037	1.3123	-0.012011	-39.593	170.217	143.565	0.14385	0.24258	0.085254
0.218	-150.3712	-54.6732	1685.98321	-1.7227	1.416	0.62744	-14.39	197.4	1409.875	-1.0308	1.0806	0.43945	-139.417	-104.083	1667.643	-1.2601	1.3426	-0.017819	23.013	167.49	111.96	0.19385	0.20752	0.067871
0.22	-157.0137	-68.3135	1694.3622	-1.7866	1.4263	0.6543	-0.361000000000004	141.057	1404.536	-1.0132	1.0571	0.42969	-91.042	-97.87	1672.864	-1.2631	1.3831	-0.0053178	57.536	153.91	101.5864	0.23272	0.16787	0.057813
0.222	-121.501	-78.7582	1705.10015	-1.8169	1.4282	0.67041	-16.079	170.09	1385.287	-0.97412	1.0122	0.40625	18.867	-102.06	1705.954	-1.3008	1.4335	0.01672	87.667	126.734	95.781	0.2625	0.13652	0.043359
0.224	-125.904	-76.9008	1711.4245	-1.8413	1.4302	0.68359	-48.698	232.7129	1352.258	-0.948	0.97778	0.39063	55.9075895	-82.73	1764.578	-1.3613	1.4863	0.039063	85.894	115.155	66.83	0.27813	0.098242	0.038672
0.226	-122.349	-83.118	1716.24	-1.8457	1.4277	0.6958	-58.984	156.198	1335.249	-0.91943	0.93994	0.37402	127.336	-95.5435	1804.301	-1.4369	1.5319	0.067381	106.54	119.26	54.8575	0.28594	0.070313	0.036426
0.228	-139.225	-72.714	1726.478	-1.8418	1.418	0.69287	-62.99	182.4651	1304.301	-0.87891	0.89844	0.35107	164.906	-112.1398	1880.8836	-1.5212	1.5724	0.098215	91.858	122.753	69.85709	0.28174	0.04834	0.040039
0.23	-109.174	-41.314	1720.912	-1.8281	1.4082	0.6958	-101.341	176.8988	1240.8456	-0.86035	0.88086	0.34082	196.334	-171.158	1902.833	-1.6033	1.6086	0.12337	50.556	108.938	65.7417	0.26289	0.023242	0.046192
0.232	-117.101	-18.1693	1724.6011	-1.8115	1.3945	0.68896	-87.143	167.179	1213.0845	-0.82227	0.83984	0.32666	138.093	-229.792	1976.303	-1.6846	1.6415	0.13555	44.523	97.341	72.785	0.23838	0.005957	0.0625
0.234	-90.265	18.38	1717.7545	-1.7969	1.3828	0.69189	-86.0808	263.557	1154.665	-0.79516	0.81176	0.30786	118.016	-263.268	1986.271	-1.7539	1.6699	0.14941	18.561	60.903	78.685	0.19932	-0.01084	0.080469
0.236	-108.705	34.412	1704.6612	-1.7827	1.3677	0.69531	-71.684	212.56208	1106.293	-0.76709	0.78076	0.28906	51.419	-247.836	2036.266	-1.801	1.6907	0.14995	16.606	41.288	77.107	0.15107	-0.022168	0.10391
0.238	-115.116	53.6959	1687.533	-1.7769	1.354	0.69727	-64.287	213.72034	1096.427	-0.72852	0.73828	0.27051	55.731	-180.5564	1998.85	-1.8341	1.7059	0.15281	-1.146	24.5291	69.959	0.092773	-0.024902	0.13135
0.24	-114.293	64.12	1666.083	-1.7715	1.3359	0.70557	-78.833	252.0412	1013.985	-0.7041	0.71533	0.25977	68.725	-125.165	1982.139	-1.8506	1.7125	0.1456	-38.207	25.654	72.9617	0.032812	-0.017969	0.15176
0.242	-138.246	70.435	1674.917	-1.7683	1.3225	0.71216	-36.419	204.938	974.852	-0.66504	0.66602	0.24707	78.946	-83.189	1952.315	-1.8502	1.7137	0.13642	-113.114	15.467	68.473	-0.030859	-0.01084	0.17959
0.244	-119.418	62.852	1686.6464	-1.7656	1.3047	0.71631	-62.552	255.7974	945.425	-0.6294	0.63038	0.22681	79.529	-87.889	1922.625	-1.8438	1.7129	0.12939	-108.3607	-28.8	77.3784	-0.1	0.0090822	0.20811
0.246	-134.61	46.499	1702.509	-1.7632	1.2798	0.71484	-75.235	249.0272	894.769	-0.5918	0.59766	0.21143	97.555	-68.569	1908.304	-1.8409	1.7054	0.12437	-123.7075	-40.293	87.0981	-0.16328	0.023731	0.23223
0.248	-129.365	23.8051	1688.58335	-1.752	1.2695	0.71924	-71.246	189.2539	895.7402	-0.54346	0.55127	0.18848	92.734	-41.496	1894.754	-1.8489	1.7031	0.12585	-168.144	-20.066	67.7681	-0.23145	0.051758	0.25684
0.25	-153.7892	8.10109	1669.993	-1.7441	1.2441	0.7124	-93.4325	248.285	853.5437	-0.51416	0.53369	0.17383	77.852	16.9691	1914.9459	-1.866	1.6959	0.13062	-168.847	31.174	55.822	-0.28184	0.073047	0.28164
0.252	-132.545	-4.062	1658.8832	-1.7268	1.2273	0.71412	-68.7398	178.9674	804.3277	-0.46729	0.49414	0.15674	104.53	16.745	1891.731	-1.8895	1.6813	0.13447	-208.315	64.786	55.609	-0.33037	0.097754	0.3039
0.254	-112.468	0.584000000000003	1652.887862	-1.7085	1.2095	0.70703	-39.877	164.2025	769.3313	-0.43408	0.45801	0.14087	17.0426	32.4757	1933.8109	-1.9121	1.6582	0.13818	-220.556	80.727	45.652	-0.36474	0.11924	0.32657
0.256	-113.535	-1.699	1660.1127	-1.6812	1.1958	0.69873	-68.9355	208.4122	735.40061	-0.39404	0.42676	0.12402	-27.9178	24.5811	1897.028	-1.9301	1.6295	0.13589	-215.898	47.009	38.023	-0.39082	0.1378	0.34287
0.258	-94.338	16.017	1646.2567	-1.6655	1.1841	0.68555	-57.522	148.44	683.6823	-0.34717	0.38818	0.11084	-63.377	24.394	1943.014	-1.939	1.5961	0.13644	-178.067	22.706577	35.0596	-0.40576	0.14795	0.35742
0.26	-99.266	16.782	1633.7187	-1.6255	1.1685	0.67578	1.427	193.9033	656.8125	-0.32178	0.37207	0.097656	-86.603	24.2387	1914.977	-1.9373	1.5614	0.13447	-173.887	-21.4578	24.571	-0.408	0.15215	0.36768
0.262	-76.146	50.689	1627.01	-1.5964	1.1574	0.66431	-1.518	196.6647	588.083	-0.27881	0.32764	0.074219	-128.059	8.647	1932.633	-1.9325	1.5252	0.13196	-159.254	-28.1843	46.571	-0.4002	0.14971	0.36826
0.264	-93.924	74.3284	1601.569	-1.563	1.145	0.65234	7.442	121.242	561.9276	-0.24389	0.30078	0.057617	-95.058	-18.2622	1920.1818	-1.9238	1.4902	0.13086	-112.2922	3.292	32.95	-0.37246	0.14151	0.36514
0.266	-99.937	116.905	1574.776	-1.5239	1.1294	0.62988	14.933	180.28881	540.7396	-0.21191	0.271	0.044922	-81.339	-76.679	1924.824	-1.9084	1.4605	0.12785	-82.362	11.5791	-13.469	-0.33467	0.12598	0.35635
0.268	-82.11	126.07	1545.26584	-1.5029	1.1211	0.61768	-16.672	147.8918	483.4777	-0.16992	0.23486	0.018555	-27.334	-85.2738	1903.4896	-1.8905	1.4328	0.12449	-4.788	43.8323	-19.992703	-0.2876	0.10889	0.33496
0.27	-104.288	129.766	1527.415	-1.4668	1.1133	0.60107	-5.047	171.6883	466.051	-0.15137	0.22314	0.0058594	33.13	-91.191	1908.13791	-1.8718	1.4047	0.12284	-2.182	39.2316	-11.3348	-0.22412	0.090039	0.31153
0.272	-86.976	122.792	1513.847	-1.4402	1.1086	0.5852	-12.388	237.109	422.171	-0.1123	0.18359	-0.0092773	37.647	9.17800000000001	1890.345	-1.8497	1.3787	0.1266	11.879	41.2	18.3475	-0.16016	0.070703	0.29072
0.274	-108.941	121.09	1507.705	-1.4082	1.0957	0.5708	-21.582	146.621	397.52509	-0.083984	0.15747	-0.027344	73.983	80.08	1857.3464	-1.8315	1.3579	0.12891	44.298	58.415	61.144	-0.098438	0.049609	0.2626
0.276	-69.458	113.2235	1500.7737	-1.3687	1.0845	0.54785	-21.218	164.396	372.4171	-0.059082	0.13135	-0.043457	51.343	177.4278	1879.4491	-1.8176	1.3406	0.12864	68.3704	50.622	78.08	-0.039258	0.022949	0.2332
0.278	-76.021	103.9741	1479.095	-1.3481	1.0747	0.54492	-8.157	187.357	327.628	-0.027344	0.10254	-0.063477	95.647	184.783	1835.665	-1.8081	1.3285	0.13288	74.679	41.542	74.681	0.022949	0.0053711	0.20898
0.28	-54.195	91.191	1457.314	-1.3047	1.0605	0.521	-30.587	114.545	303.2825	-0.013184	0.091309	-0.066895	72.983	194.712	1840.5419	-1.7973	1.3128	0.14102	92.51	34.2769	67.784	0.076172	-0.020508	0.18984
0.282	-67.399	73.785	1443.2458	-1.2722	1.051	0.50537	-21.211	163.902	292.1116	0.010742	0.065918	-0.088867	103.138	203.494	1770.147	-1.7869	1.3096	0.14181	85.39	42.182	41.6817	0.12734	-0.041602	0.16806
0.284	-56.335	70.634	1437.617	-1.2441	1.042	0.48975	-33.079	103.6312	255.303	0.024903	0.049805	-0.092041	34.285	213.69	1781.8752	-1.7793	1.3066	0.15771	48.393	72.852	18.0747	0.17461	-0.066602	0.14854
0.286	-51.793	82.27	1415.03	-1.2026	1.0239	0.47559	-38.553	68.124	237.9882	0.038086	0.032715	-0.10547	41.687	240.461	1724.953	-1.7687	1.3032	0.1621	56.191	91.863	24.50718	0.21768	-0.086816	0.13418
0.288	-69.447	85.253	1397.038	-1.1855	1.0137	0.46338	-37.641	128.107	213.2355	0.050293	0.0073242	-0.1167	62.048	199.269	1713.969	-1.7579	1.3019	0.17371	16.998	76.013	42.083	0.2583	-0.10547	0.11377
0.29	-90.144	73.821	1379.4094	-1.1479	0.99854	0.44482	-29.019	62.352	179.4289	0.060059	-0.003418	-0.12549	88.989	221.77	1664.549	-1.7375	1.2988	0.18388	20.439	73.121	39.9358	0.29092	-0.12344	0.097949
0.292	-99.723	81.164	1360.603	-1.1248	0.98218	0.43676	-58.094	92.604	209.772	0.05957	-0.026855	-0.13379	117.095	170.853	1688.311	-1.7152	1.3008	0.19726	-2.871	43.613	45.9116	0.32392	-0.1374	0.084277
0.294	-74.344	112.8583	1317.276	-1.1016	0.96777	0.42627	-73.4462	132.3261	181.8475	0.069824	-0.042236	-0.14502	139.616	200.318	1696.1359	-1.6895	1.2988	0.21143	-75.462	20.54	58.6693	0.35479	-0.14951	0.073731
0.296	-88.538	140.25	1295.18	-1.0708	0.9458	0.40723	-76.2339	65.54381	164.414	0.079102	-0.057617	-0.1543	122.772	155.212	1713.422	-1.6639	1.2916	0.22217	-109.088	20.327	76.105	0.37597	-0.16641	0.061328
0.298	-82.556	148.392	1282.716	-1.0552	0.93213	0.40234	-60.903	131.353	149.4496	0.089844	-0.072266	-0.16895	51.704	194.895	1712.558	-1.6281	1.2836	0.23506	-136.2996	6.089	99.635	0.39648	-0.17773	0.052734
0.3	-80.664	149.753	1255.4153	-1.0234	0.91016	0.38721	-43.58	87.097	117.886	0.095215	-0.080078	-0.16748	57.4901	158.694	1693.598	-1.5926	1.2692	0.23819	-142.632	31.19	79.0423	0.41309	-0.19502	0.045117
0.302	-95.9175	169.091	1206.696	-0.99635	0.89136	0.3772	-60.756	34.8955	128.483	0.1001	-0.092285	-0.17139	6.454	192.7233	1666.715	-1.5509	1.2549	0.24239	-177.271	21.816	56.4705	0.42148	-0.1997	0.040136
0.304	-83.0446	179.046	1162.4041	-0.97217	0.87158	0.37354	-77.123	114.322	115.243	0.10254	-0.09668	-0.17236	-3.889	202.92917	1574.8185	-1.5078	1.2344	0.24951	-178.114	3.75	77.8632	0.4336	-0.21299	0.034277
0.306	-74.949	169.22311	1135.708	-0.9292	0.84912	0.34961	-60.425	53.704	73.9841	0.10352	-0.099121	-0.17236	-71.8758	255.774	1564.336	-1.4535	1.2109	0.25147	-218.153	6.718	76.444	0.44258	-0.22402	0.029395
0.308	-49.316	154.7781	1121.681	-0.91016	0.83398	0.34424	-37.371	63.42	88.6609	0.093262	-0.10889	-0.17627	-93.83	303.724	1508.061	-1.3992	1.1884	0.24902	-208.716	-1.297	40.171	0.44727	-0.22998	0.029297
0.31	-80.433	152.5316	1101.742	-0.87256	0.80127	0.32373	-29.74	92.436	71.826	0.087402	-0.10986	-0.1748	-144.85	296.875	1501.1575	-1.3432	1.1661	0.24941	-180.528	3.801	14.152	0.44951	-0.23457	0.030273
0.312	-84.359	141.748	1076.629	-0.84472	0.78369	0.31054	-31.791	2.717	50.6369	0.07373	-0.11377	-0.17383	-113.489	313.699	1418.355	-1.2845	1.1401	0.24316	-183.468	-8.806	14.268	0.45156	-0.23135	0.031055
0.314	-62.247	126.952	1061.883	-0.81299	0.76611	0.29785	-9.626	69.9229	68.6629	0.065429	-0.11572	-0.17017	-88.321	252.2834	1384.0163	-1.2358	1.1235	0.23633	-154.696	-25.094	40.704	0.44844	-0.22588	0.033399
0.316	-58.639	125.9964	1058.84	-0.78271	0.73096	0.27734	-14.405	76.02	44.0076	0.058105	-0.11963	-0.16748	-55.4271	275.066	1321.251	-1.1817	1.1009	0.23076	-127.9997	-27.9319	57.962	0.44278	-0.21446	0.032129
0.318	-69.13	118.2303	1050.736	-0.76709	0.71924	0.26953	-14.75	18.2342	59.2095	0.04541	-0.11084	-0.16455	-19.268	230.739	1299.883	-1.1309	1.0775	0.22647	-83.9522	14.6288	23.532	0.43164	-0.2041	0.035156
0.32	-79.813	115.227	1024.64	-0.73779	0.69385	0.25391	-2.104	60.76	102.992	0.039063	-0.11279	-0.16211	-56.3323	288.978	1274.0617	-1.0857	1.0524	0.22022	-34.371	43.719	16.1292	0.41582	-0.1875	0.039648
0.322	-53.794	113.7902	975.206	-0.70898	0.66211	0.23877	-26.508	-21.203	66.54	0.021484	-0.10352	-0.15723	-21.855	249.937	1245.571	-1.0406	1.0229	0.21651	-8.48	82.098	25.6578	0.39219	-0.17451	0.045508
0.324	-55.973	137.6199	936.737	-0.69482	0.64551	0.23389	-18.686	-12.974	75.867	0.013672	-0.09375	-0.15039	-48.7422	285.8017	1222.514	-0.99561	0.99072	0.21777	-7.07099999999999	90.398	28.7801	0.36133	-0.1585	0.050977
0.326	-42.91	137.2369	914.75875	-0.66748	0.61816	0.22021	0.991	68.5326	57.229	0.0068359	-0.091309	-0.14844	-25.653	242.567	1160.692	-0.9543	0.96289	0.21299	19.77	80.853	23.8527	0.32842	-0.14326	0.059375
0.328	-58.324	135.106	880.3581	-0.6455	0.59668	0.20092	-27.332	-1.809	33.567	-0.0068359	-0.080078	-0.13818	-81.18	252.428	1127.969	-0.91055	0.93203	0.20928	52.269	61.033	29.2708	0.29736	-0.12256	0.059082
0.33	-33.964	153.2618	842.4114	-0.62207	0.57715	0.18848	-30.807	43.5823	48.9773	-0.012207	-0.075928	-0.13404	-18.109	241.0938	1065.0933	-0.86797	0.89336	0.20029	64.668	7.3338	35.1597	0.25957	-0.10576	0.071289
0.332	-37.121	178.4208	807.309	-0.59277	0.5415	0.17725	-41.016	48.581	6.8562	-0.021484	-0.072754	-0.1377	-43.667	216.548	1022.8916	-0.81406	0.85859	0.19599	83.386	15.3355	32.204	0.22334	-0.090332	0.072754
0.334	-36.264	188.633	786.3287	-0.58008	0.51855	0.17041	-40.784	-10.6179	22.9634	-0.032715	-0.075684	-0.12646	-0.823	225.4863	940.39073	-0.76416	0.8208	0.18701	72.021	37.004	41.221	0.19326	-0.06455	0.075488
0.336	-34.967	163.413	787.6492	-0.55225	0.47314	0.15381	-9.732	56.0349	53.116	-0.030762	-0.075195	-0.12549	12.531	179.758	910.323	-0.71182	0.7876	0.17901	69.978	56.641	25.96106	0.15947	-0.035058	0.080469
0.338	-28.185	146.7134	765.682	-0.53711	0.45068	0.13745	-36.631	-5.512	60.3416	-0.035645	-0.074219	-0.125	40.992	245.519	828.452	-0.66767	0.75459	0.17256	69.151	82.913	34.2501	0.12451	-0.01123	0.084473
0.34	-36.044	143.3	730.9006	-0.51514	0.43408	0.12646	-64.416	-14.921	79.331	-0.027832	-0.078613	-0.1206	80.74	235.317	791.8749	-0.62939	0.72334	0.17177	56.058	59.498	47.2225	0.096874	0.013867	0.093164
0.342	-58.524	145.506	681.856	-0.48828	0.40527	0.12305	-66.593	69.573	59.8028	-0.02002	-0.081543	-0.12646	60.4376	341.041	717.579	-0.59317	0.69336	0.16846	51.804	63.0858	59.505	0.063769	0.039258	0.099122
0.344	-43.143	140.785	657.689	-0.47607	0.39111	0.12402	-71.1495	12.423	40.8749	0.0029297	-0.080566	-0.12744	76.707	324.1638	674.906	-0.54639	0.66162	0.15918	-1.53	45.5244	76.887	0.039161	0.061914	0.1124
0.346	-58.954	140.318	630.561	-0.4624	0.36475	0.11523	-53.052	48.3774	60.6007	0.011719	-0.085938	-0.13037	26.055	348.154	623.417	-0.49424	0.62344	0.15625	-58.669	41.484	95.484	0.010937	0.075977	0.12383
0.348	-55.331	148.241	595.2397	-0.45606	0.34912	0.10718	-67.924	50.752	25.7217	0.027832	-0.07959	-0.13623	26.677	265.297	585.0986	-0.44248	0.58164	0.14258	-91.246	29.0099	97.768	-0.010742	0.097656	0.13086
0.35	-57.083	132.2873	570.6678	-0.44971	0.34033	0.097656	-72.19	-33.2119	13.0764	0.036133	-0.078613	-0.13599	-52.311	272.499	562.9004	-0.37412	0.53203	0.13203	-103.518	22.978	81.8044	-0.033105	0.11748	0.14355
0.352	-49.918	113.95	570.83617	-0.42969	0.32324	0.089844	-68.6713	42.1712	27.0458	0.042969	-0.078125	-0.13574	-51.884	232.648	517.7198	-0.29707	0.48066	0.12139	-142.4239	19.5	58.0451	-0.054199	0.13164	0.15508
0.354	-51.6055	101.254	561.1945	-0.41406	0.31152	0.081055	-67.038	13.928	18.312	0.040527	-0.072266	-0.13574	-105.7188	259.29	497.606	-0.22656	0.43945	0.1084	-151.636	20.742	18.911	-0.074121	0.14414	0.16485
0.356	-62.098	115.333	540.504	-0.37598	0.28857	0.08252	-59.614	-28.16588	60.8725	0.037109	-0.069336	-0.13379	-80.555	265.06	436.041	-0.15664	0.39746	0.088868	-176.145	39.181	43.811	-0.084863	0.15205	0.17491
0.358	-27.018	122.505	516.759	-0.34936	0.27392	0.068603	-60.974	50.641	50.96155	0.027344	-0.05957	-0.12012	-120.3911	227.112	400.965	-0.10097	0.35352	0.081543	-219.069	34.7542	64.71	-0.097168	0.1543	0.18408
0.36	-37.929	139.3526	474.6355	-0.3252	0.25293	0.060059	-45.033	-8.5448	24.1991	0.0068357	-0.053955	-0.10986	-106.8728	220.5449	350.075	-0.055273	0.31992	0.069433	-192.789	24.372	65.031	-0.10273	0.15547	0.1917
0.362	-33.994	142.111	442.3032	-0.30127	0.22217	0.04541	-18.871	31.2899	55.1683	-0.013184	-0.04541	-0.098145	-108.748	129.817	329.406	-0.019922	0.28721	0.06416	-174.09	-5.144	47.857	-0.10557	0.15771	0.19825
0.364	-57.758	138.483	415.613	-0.29004	0.20459	0.043945	-30.162	86.926	45.5297	-0.036621	-0.033691	-0.083496	-141.146	167.493	294.8453	0.0043945	0.26221	0.05957	-165.077	-3.614	41.457	-0.1001	0.15771	0.20371
0.366	-61.5707	123.753	404.1114	-0.26807	0.17334	0.027344	-53.439	9.6631	39.158	-0.047363	-0.027344	-0.072754	-107.235	109.546	289.8894	0.018262	0.23271	0.056836	-151.411	-15.857	44.844	-0.090918	0.1583	0.20313
0.368	-50.452	125.783	401.7087	-0.25293	0.1543	0.02002	-35.976	60.708	41.931	-0.068848	-0.020996	-0.055176	-118.662	184.792	257.8794	0.029785	0.20684	0.054004	-141.2593	-28.2028	65.423	-0.080566	0.15576	0.20166
0.37	-46.5682	123.7799	377.839	-0.23047	0.14258	0.0078125	-21.475	36.911	19.5225	-0.081299	-0.010254	-0.048584	-108.9482	135.664	257.8901	0.035254	0.18457	0.058301	-132.458	4.991	62.093	-0.062597	0.15244	0.20117
0.372	-50.908	103.6602	371.0806	-0.20264	0.11914	-0.0039063	-12.425	-18.9879	28.324	-0.088867	-0.003418	-0.042969	-157.419	183.477	241.432	0.043847	0.16552	0.057031	-90.6754	-17.92839	66.771	-0.045313	0.1459	0.20567
0.374	-47.567	92.5092	352.7002	-0.18555	0.11133	-0.0083008	4.072	63.349	48.8972	-0.086426	0.0078125	-0.033691	-111.955	146.664	220.194	0.046875	0.14307	0.057617	-53.688	-49.872	121.53	-0.023047	0.13691	0.20918
0.376	-26.461	93.4363	320.4482	-0.16797	0.089844	-0.018555	-48.259	0.954700000000001	30.4316	-0.07959	0.010742	-0.036621	-153.49	174.389	218.335	0.060938	0.12188	0.059668	-57.715	-104.506	235.02	-0.0083008	0.13018	0.21543
0.378	-19.777	119.4217	288.5012	-0.15503	0.074952	-0.022705	-17.054	15.20542	50.955	-0.066406	0.022461	-0.035156	-117.34	160.323	187.698	0.06289	0.10918	0.064063	-65.545	-143.088	394.788	0.0014648	0.12354	0.22021
0.38	-5.897	111.626	295.1137	-0.14209	0.0625	-0.03418	-5.195	88.283	25.4411	-0.052001	0.023193	-0.03711	-90.843	126.728	162.366	0.059375	0.092382	0.064453	-63.203	-233.447	600.501	0.0082031	0.11943	0.23047
0.382	-22.573	89.6506	298.4575	-0.12158	0.044434	-0.037598	-21.431	11.801	32.0854	-0.033203	0.026367	-0.038574	-58.695	104.829	119.141	0.052344	0.069726	0.069726	-84.19	-368.657	741.657	0.009375	0.11738	0.23945
0.384	-24.439	77.466	280.5915	-0.11426	0.036621	-0.040039	-8.82100000000001	54.6744	62.789	-0.010742	0.026367	-0.033203	-23.603	12.147	94.414	0.042969	0.051758	0.070313	-86.42	-475.572	807.766	0.0066406	0.12012	0.24375
0.386	-22.394	77.324	263.319	-0.094238	0.020996	-0.049805	-31.261	42.1728	24.2189	-0.0029297	0.019043	-0.042969	-13.077	38.452	69.9636	0.026269	0.033887	0.076367	-74.36	-476.597	888.282	-0.002832	0.13301	0.2333
0.388	-27.595	67.116	251.2001	-0.077393	0.012939	-0.053223	-50.04	-9.84	52.6993	0.013672	0.012695	-0.04248	-0.779000000000003	-13.798	100.382	0.0071289	0.02207	0.081347	-105.449	-365.106	983.535	-0.020996	0.16895	0.21094
0.39	-27.831	67.185	261.5579	-0.059082	0	-0.062012	-31.853	79.019	60.2957	0.026856	0.0021973	-0.049561	3.996	57.369	104.059	-0.0088866	0.010351	0.085254	-200.888	-219.723	1077.699	-0.051661	0.2377	0.20009
0.392	-46.329	78.975	232.561	-0.037598	-0.013672	-0.067383	-51.973	17.779	55.8232	0.035645	-0.00048828	-0.050293	57.537	7.399	113.313	-0.026367	0.0026367	0.084473	-209.17	-77.843	1122.723	-0.092286	0.32548	0.20733
0.394	-38.115	97.199	208.2239	-0.032715	-0.020508	-0.067383	-74.185	-3.65	71.928	0.047363	-0.0043945	-0.058105	20.671	72.739	102.055	-0.03418	-0.0097656	0.090332	-159.954	-79.216	1195.132723	-0.16338	0.41884	0.23389
0.396	-45.633	99.117	174.9756	-0.025391	-0.030762	-0.068359	-68.763	69.021	39.2438	0.049316	-0.0097656	-0.062012	29.317	11.2359	81.235	-0.037695	-0.014551	0.088086	-84.442	-80.516	1312.391	-0.26621	0.51035	0.28155
0.398	-27.101	90.365	175.2028	-0.017578	-0.036621	-0.072266	-75.8735	10.0067	13.63	0.055176	-0.0083008	-0.071289	0.372999999999998	31.5905	63.3209	-0.036133	-0.019629	0.085645	-52.361	-125.385	1532.107	-0.38721	0.59619	0.34326
0.4	-34.588	83.534	169.442	-0.0097656	-0.041504	-0.077637	-44.307	54.9336	40.479	0.054688	-0.0046386	-0.07666	-11.375	-5.5585	52.7171	-0.034961	-0.021972	0.080566	-59.132	-101.21	1696.092	-0.52793	0.67754	0.40205
0.402	-32.675	82.824	173.1646	-0.00097656	-0.044922	-0.083008	-61.069	67.9477	38.246	0.051758	-0.0029297	-0.080078	-66.784	-9.809	40.4796	-0.030371	-0.024219	0.077246	-88.535	-60.079	1782.05	-0.675	0.76973	0.45498
0.404	-23.872	67.695	167.763	0.0024414	-0.050293	-0.082031	-95.2643	-23.7344	62.866	0.04834	0	-0.082031	-28.755	21.5167	52.686	-0.028809	-0.026855	0.080566	-177.142	-28.08	1821.1251	-0.82852	0.86777	0.49366
0.406	-26.788	60.53	163.6115	0.0097656	-0.059082	-0.083984	-40.657	50.1956	68.5787	0.038574	0.0024414	-0.088867	-44.614	6.05891	37.145	-0.027441	-0.026856	0.077148	-248.9194	-76.13	1820.153	-0.99247	0.99676	0.53457
0.408	-30.226	51.301	155.3307	0.011475	-0.055908	-0.089843	-47.638	10.497	48.015	0.030273	0.013184	-0.096191	-36.275	74.5993	19.391	-0.029102	-0.031152	0.077832	-280.015	-124.6	1838.35	-1.1699	1.166	0.59521
0.41	-51.635	46.07056	152.842	0.015137	-0.056152	-0.09082	-48.354	-18.078	84.105	0.026856	0.013183	-0.088379	-32.994	24.871	13.229	-0.04043	-0.03584	0.084472	-338.927	-197.89	1916.832	-1.3498	1.3631	0.68066
0.412	-55.567	57.941	141.275	0.010742	-0.053711	-0.088379	-54.453	70.182	68.673	0.025391	0.016602	-0.092285	-83.8257	89.3801	2.23	-0.054492	-0.040527	0.094043	-384.9	-290.82	1978.446	-1.5593	1.5602	0.78164
0.414	-58.885	70.385	114.8191	0.0058594	-0.050293	-0.091797	-62.834	2.569594	43.5524	0.02002	0.020996	-0.092285	-77.313	19.246	8.449	-0.073242	-0.047852	0.095703	-361.15	-391.357	2022.799	-1.8077	1.7415	0.89336
0.416	-58.8295	67.92	105.408	0.00048828	-0.04834	-0.088867	-37.06	34.797	43.3241	0.021484	0.022461	-0.097168	-92.2253	68.5545	24.784	-0.087891	-0.052539	0.10927	-282.34	-473.08	2036.258	-2.0898	1.8844	0.99503
0.418	-51.576	57.5618	104.016	-0.016845	-0.043946	-0.080323	-24.675	53.534	10.433	0.021973	0.027344	-0.10449	-78.225	-2.528	39.685	-0.095215	-0.055273	0.11621	-131.106	-469.05	1996.4591	-2.3711	1.9844	1.0806
0.42	-44.363	39.351	114.2498	-0.027832	-0.039551	-0.078125	-40.717	-47.791	45.9963	0.023193	0.034912	-0.10767	-135.877	40.0059	52.798	-0.09873	-0.056836	0.1252	24.293	-461.57	2000.9068	-2.6128	2.043	1.1652
0.422	-16.659	36.656	123.0594	-0.055664	-0.033691	-0.068848	-24.002	29.7034	79.6705	0.021484	0.041504	-0.11279	-106.487	37.035	56.36166	-0.094238	-0.058008	0.12373	104.7147	-426.58	2056.1411	-2.7856	2.0645	1.2304
0.424	-20.799	53.263	109.8476	-0.071777	-0.033691	-0.062988	-1.585	3.01517	77.028	0.014648	0.050781	-0.12061	-174.48	88.704	62.614	-0.078613	-0.05957	0.12988	97.5365	-375.94	2145.592	-2.8715	2.0723	1.2679
0.426	-26.678	47.7681	114.042	-0.096191	-0.026367	-0.058105	-13.361	-64.1834	136.171	0.0039063	0.060547	-0.13086	-144.006	94.105	71.037	-0.054785	-0.057422	0.13379	146.569	-308.977	2223.05	-2.8514	2.0639	1.289
0.428	-30.768	53.5679	102.912	-0.12329	-0.018798	-0.045654	6.757	-34.627	205.879	-0.024902	0.092773	-0.13574	-116.5956	43.628	64.912	-0.028027	-0.056738	0.13633	202.183	-231.648	2244.834	-2.709	2.0586	1.2837
0.43	-3.017	54.578	88.361	-0.14551	-0.0092773	-0.035156	19.439	-153.287	271.2444	-0.069092	0.13476	-0.13331	-79.5545	55.4703	51.9726	0.0016601	-0.05752	0.13086	147.111	-203.92	2222.617	-2.4733	2.033	1.2304
0.432	-22.364	68.249	75.91164	-0.16553	0.003418	-0.022949	58.7972	-187.914	373.2252	-0.12646	0.18018	-0.13086	-76.235	-18.8774	33.902	0.027344	-0.060058	0.13193	96.585	-124.88	2164.847	-2.2042	1.9872	1.1539
0.434	-31.953	57.948	76.1918	-0.17725	0.0058594	-0.024414	70.228	-177.848	452.479	-0.22949	0.2417	-0.091309	-4.699	51.8733	52.3843	0.052734	-0.064941	0.12939	6.204	-89.33	2096.669	-1.9476	1.9048	1.066
0.436	-29.58	29.7128	86.836	-0.18506	0.016602	-0.01709	74.62071	-293.786	511.707	-0.30078	0.27783	-0.069824	2.467	-9.319	69.1133	0.086621	-0.072363	0.12617	-43.686	-63.32	2043.86	-1.7517	1.7954	0.98948
0.438	-40.459	30.2382	64.353	-0.18872	0.022705	-0.015869	86.8954	-248.653	610.214	-0.45166	0.3501	-0.015137	-40.139	79.6814	72.681	0.11719	-0.084766	0.12539	-54.201	-106.29	2031.244	-1.603	1.6782	0.93359
0.44	-25.574	35.0958	77.8589	-0.18164	0.027832	-0.01709	83.7194	-231.9347	660.84	-0.57813	0.40869	0.034424	29.59	33.701	84.741	0.15	-0.096484	0.12305	-27.16	-156.928	2078.0353	-1.5142	1.5612	0.88975
0.442	-35.097	28.93471	77.8023	-0.17822	0.030762	-0.018555	79.797	-223.451	736.522	-0.7085	0.479	0.087891	-2.68	90.428	91.549	0.18457	-0.1041	0.11563	99.349	-200.185	2104.063	-1.4508	1.4684	0.85361
0.444	-8.759	25.7563	95.3	-0.17725	0.032227	-0.022461	111.086	-68.594	758.7255	-0.89258	0.56738	0.15283	16.749	47.308	108.748	0.22363	-0.11377	0.11084	176.528	-187.8714	2162.283	-1.4285	1.4289	0.81416
0.446	-28.731	30.609844	67.1166	-0.16699	0.026367	-0.024414	97.419	-95.399	754.1861	-0.98291	0.61865	0.18457	2.926	66.028	115.831	0.26308	-0.12187	0.10469	171.5778	-144.081	2190.648	-1.4211	1.4301	0.77471
0.448	-34.514	36.8754	61.195	-0.16089	0.027099	-0.028564	66.807	-64.971	824.86	-1.1641	0.72461	0.24072	4.663	35.288	88.609	0.2915	-0.12636	0.097363	65.501	-119.921	2220.86826	-1.418	1.459	0.75488
0.45	-34.911	36.364751	68.5945	-0.14795	0.023438	-0.035156	78.9571	57.424	869.664	-1.2803	0.81006	0.2649	-28.107	-0.179	57.8145	0.32119	-0.12559	0.084082	-26.473	-87.3311	2262.954	-1.4312	1.5098	0.77041
0.452	-28.209	33.2994	61.1972	-0.12695	0.017578	-0.04248	56.359	31.514	923.213	-1.3906	0.88672	0.29053	27.712	-9.1115	42.3407	0.34776	-0.12539	0.074804	-136.2112	-122.018	2296.373	-1.4722	1.582	0.79805
0.454	-31.348	29.8688	57.1474	-0.11303	0.020264	-0.052978	77.3293	99.6788	988.858	-1.5347	0.99463	0.32227	-4.23099999999999	-59.239	33.703	0.36719	-0.12109	0.062012	-260.358	-151.809	2316.78	-1.5601	1.6644	0.83672
0.456	-53.462	22.088	53.179	-0.096191	0.018066	-0.061035	58.2631	110.143	971.293	-1.6089	1.0454	0.33691	-25.041	11.343	47.2421	0.37627	-0.11699	0.057129	-303.44	-152.568	2314.957	-1.6827	1.7596	0.86406
0.458	-42.346	15.2138	53.626	-0.07373	0.012207	-0.067871	11.785	0.703000000000003	1000.783	-1.7319	1.145	0.36914	28.03	-17.855	59.2487	0.37852	-0.10957	0.050586	-386.22	-110.918	2239.568	-1.8022	1.8462	0.88672
0.46	-35.526	25.705	64.9401	-0.062988	0.014648	-0.07373	19.659	47.587	1074.061	-1.8281	1.2227	0.39844	-32.486	64.87156	73.926	0.37539	-0.10449	0.043945	-387.81	-31.171	2151.527	-1.8985	1.8992	0.91846
0.462	-46.475	41.874	65.5689	-0.039551	0.014648	-0.081543	-5.306	-18.5	1130.542	-1.8672	1.2568	0.40186	-53.672	-8.547	71.566	0.36455	-0.10059	0.037012	-374.72	11.26	2101.629	-1.9871	1.9301	0.95244
0.464	-48.815	30.086	65.24	-0.021485	0.021972	-0.090576	-35.5922	-118.547	1240.2073	-1.9136	1.2974	0.4043	-80.723	21.909	56.8513	0.35352	-0.094238	0.033203	-345.934	24.287	2090.407	-2.0691	1.9441	0.98681
0.466	-60.916	24.9728	57.348	-0.0068359	0.024414	-0.092285	-105.362	-129.713	1295.0456	-1.9167	1.3118	0.4065	-76.447	-26.146	45.1636	0.3376	-0.089453	0.024219	-278.579	21.099	2120.121	-2.1298	1.946	1.0029
0.468	-41.082	26.2372	47.14121	0.0097656	0.026855	-0.1084	-131.5028	-259.744	1325.258	-1.8867	1.3213	0.39502	-136.433	18.4478	32.341	0.32032	-0.081348	0.022949	-190.017	49.173	2119.051	-2.1577	1.936	1.0166
0.47	-45.448	30.42229	38.609	0.020996	0.027832	-0.10791	-90.559	-268.161	1395.249	-1.8027	1.3066	0.36279	-82.8472	17.1597	37.1639	0.30273	-0.069629	0.02334	-138.749	76.976	2099.44	-2.1497	1.9163	1.0248
0.472	-33.068	22.0025	56.1099	0.03418	0.033203	-0.11572	-68.407	-243.62	1415.104	-1.7324	1.2988	0.33643	-153.37	31.749	27.456	0.28877	-0.05625	0.021582	-121.162	132.33	2061.188	-2.1215	1.8942	1.0275
0.474	-34.539	12.499	51.423	0.044434	0.036133	-0.11988	-61.173	-342.55	1486.199	-1.5684	1.2754	0.27393	-138.978	52.263	21.8017	0.26611	-0.043945	0.021973	-135.9644	165.499	2058.151	-2.0762	1.8707	1.0267
0.476	-31.56	9.085	48.159	0.053223	0.044434	-0.12598	-72.186	-293.85	1544.568	-1.4343	1.2571	0.21582	-114.3134	24.3704	35.17	0.24717	-0.026368	0.023145	-177.14	164.876	2044.652	-2.0297	1.8473	1.0236
0.478	-49.466	17.436	45.962	0.068848	0.055176	-0.12891	-85.294	-288.881	1539.921	-1.3179	1.2388	0.16455	-90.837	75.86352	25.477	0.21992	-0.0070313	0.025684	-158.779	122.576	2047.018	-1.9937	1.8247	1.0234
0.48	-39.14	17.7922	65.086	0.067871	0.052246	-0.13428	-71.186	-296.326	1567.41	-1.1841	1.2192	0.099609	-89.221	16.001	35.071	0.19727	0.0097654	0.031152	-119.922	82.374	2060.049	-1.9599	1.7955	1.0096
0.482	-27.138	23.229	60.282	0.075195	0.063965	-0.14258	-82.356	-171.4327	1597.498	-1.1387	1.2168	0.071777	-71.1352	64.9577	32.937	0.16816	0.024023	0.036133	-80.825	77.1205	2034.871	-1.9359	1.7669	0.99531
0.484	-39.805	39.11	58.754	0.079834	0.073242	-0.14233	-106.741	-182.601	1585.924	-1.0918	1.2168	0.037109	-64.204	-1.754	39.389	0.13232	0.041992	0.033691	9.506	104.35184	1981.702	-1.9159	1.7469	0.97539
0.486	-30.548	24.69	87.5141	0.079102	0.077148	-0.14258	-100.1827	-150.749	1587.66	-1.082	1.2305	0.015869	-62.6952	64.32354	42.4665	0.10312	0.061523	0.037012	62.696	120.66	1923.956	-1.9045	1.7315	0.95108
0.488	-33.506	-9.952	99.725	0.072266	0.086914	-0.14063	-115.858	-66.787	1571.372	-1.0908	1.25	0.012695	2.50700000000001	6.228	55.9558	0.067871	0.084082	0.04209	55.216	129.158	1866.406	-1.894	1.7192	0.9248
0.49	-20.635	-51.13521	156.575	0.061035	0.09082	-0.1377	-64.285	-116.541	1563.169	-1.1543	1.2988	0.040039	-58.7687	76.057	73.0324	0.041308	0.10596	0.052637	104.222	110.024	1816.2	-1.8731	1.7015	0.89278
0.492	-29.128	-69.9626	198.817	0.033203	0.10645	-0.1333	-33.8447	-77.698	1618.733	-1.1968	1.3306	0.058105	-27.475	62.113	70.851	0.0043948	0.12646	0.060547	168.7414	140.315	1795.416	-1.8515	1.6892	0.86016
0.494	-1.955	-81.2952	255.275	0.0034179	0.11841	-0.12745	-33.102	-84.248	1634.429	-1.3042	1.3931	0.095703	-10.631	79.963	70.368	-0.024902	0.14209	0.075684	135.4016	195.167	1790.248	-1.8237	1.6684	0.83008
0.496	19.9673	-109.4846	313.843	-0.035156	0.14014	-0.12109	22.274	-158.813	1671.22	-1.3894	1.4387	0.12842	13.378	70.941	60.525	-0.051465	0.15801	0.096193	102.966	277.942	1789.027	-1.7878	1.6515	0.79473
0.498	52.1267	-134.547	347.009	-0.10352	0.16797	-0.096191	47.23	-111.548	1715.736	-1.4688	1.4883	0.1499	-5.74299999999999	34.697	62.5742	-0.07041	0.16739	0.11133	47.291	335.232	1746.901	-1.7441	1.627	0.76025
0.5	44.83784	-134.066	396.1508	-0.15088	0.18408	-0.08252	90.629	-179.538	1732.7467	-1.5586	1.541	0.16943	39.848	41.202	65.061	-0.087207	0.17715	0.12774	-20.973	357.696	1645.788	-1.6889	1.5998	0.72959
0.502	35.385	-122.61436	451.528	-0.26074	0.21094	-0.056641	108.84	-245.327	1789.88	-1.5972	1.5649	0.17383	32.168	-0.546000000000001	59.86	-0.10146	0.1834	0.13897	-44.732	367.81	1591.96577	-1.6265	1.5661	0.70078
0.504	50.5	-101.546	521.058	-0.35108	0.2417	-0.01831	60.132	-212.829	1814.46	-1.6523	1.6055	0.17236	13.774	69.02	50.9404	-0.10205	0.18799	0.146	-73.679	372.84	1564.129	-1.5573	1.5275	0.66289
0.506	50.497	-62.763	547.961	-0.44873	0.27637	0.0048828	49.533	-291.702	1810.869	-1.6841	1.6353	0.16529	25.499	29.51514	65.5818	-0.10429	0.19229	0.15547	-140.935	342.51	1544.396	-1.4924	1.4912	0.63076
0.508	55.846	-32.872	550.7489	-0.58008	0.31934	0.044434	61.509	-255.26	1844.097	-1.7007	1.6548	0.14893	-12.442	99.504	89.659	-0.096387	0.19101	0.16328	-196.755	304.313	1512.306	-1.4194	1.4478	0.5957
0.51	44.299	-28.422	588.794	-0.64893	0.34717	0.069824	35.4409	-184.931	1825.6479	-1.709	1.6699	0.13818	-4.881	15.8236	110.408	-0.086621	0.18711	0.17539	-207.501	255.9768	1449.184	-1.3487	1.4048	0.5668
0.512	57.64	18.398	644.6765	-0.77783	0.40967	0.10547	43.14	-236.8779	1820.814	-1.7075	1.6724	0.12891	-46.115	32.049049	152.386	-0.081543	0.18535	0.1793	-235.536	189.86	1373.26	-1.2742	1.3578	0.53584
0.514	73.047	71.101	715.942	-0.87158	0.45825	0.12817	52.01	-143.642	1818.18	-1.707	1.6758	0.10547	-50.317	-89.7939	216.5735	-0.081543	0.18311	0.17773	-206.411	161.16	1318.436	-1.2047	1.3078	0.50654
0.516	77.027	114.153	752.66	-0.96387	0.50879	0.1582	34.905	-128.8564	1775.487	-1.7	1.6722	0.081299	-128.4332	-150.045	289.467	-0.070801	0.18047	0.18027	-187.815	195.15	1273.428	-1.1355	1.2614	0.47158
0.518	68.446	99.939	798.45735	-1.0728	0.59229	0.18311	70.179	-129.9978	1796.818	-1.6987	1.6626	0.06543	-128.7294	-249.569183	438.762	-0.064355	0.18457	0.17207	-211.024	231.67	1243.04	-1.064	1.2036	0.43848
0.52	35.543	74.569	837.258	-1.1323	0.63232	0.19336	73.223	-4.396	1785.258	-1.7007	1.647	0.044434	-197.961	-363.7957	575.527	-0.051465	0.19786	0.16113	-169.981	279.674	1202.82	-0.99404	1.1525	0.40244
0.522	67.445	52.163	899.567	-1.2339	0.71533	0.21875	78.56	-30.6929	1772.521	-1.7026	1.6372	0.041504	-235.099	-431.532	690.879	-0.052734	0.23399	0.13633	-155.544	273.735	1130.1594	-0.92295	1.0953	0.36367
0.524	46.83	19.805	967.802	-1.3117	0.76538	0.24219	85.918	15.982	1812.1579	-1.7144	1.6157	0.035645	-252.489	-523.13	775.094	-0.068359	0.30029	0.11084	-155.101	276.966	1049.3497	-0.84209	1.0386	0.32344
0.526	31.7501	-27.33	1028.9134	-1.3789	0.82031	0.25977	46.239	68.631	1780.962	-1.7292	1.6048	0.029785	-274.92093	-427.909	856.712	-0.10605	0.40605	0.089258	-133.437	276.309	977.195	-0.76163	0.98546	0.28574
0.528	4.93681	-91.313	1099.655	-1.4648	0.88184	0.28564	34.75	-38.8693	1805.3669	-1.7456	1.5894	0.025879	-299.845	-351.152	941.2783	-0.16992	0.52109	0.083887	-118.4588	291.06	913.193	-0.69238	0.92578	0.25146
0.53	-22.01613	-142.6961	1132.866	-1.4961	0.91016	0.30029	-22.3387	-17.042	1829.937	-1.7651	1.5669	0.018555	-321.077	-137.6727	1016.452	-0.26914	0.62656	0.10655	-127.812	308.353	818.672	-0.61152	0.86992	0.21377
0.532	-46.958	-165.925	1209.727	-1.5542	0.95166	0.31445	-43.692	-43.8952	1807.43655	-1.7734	1.5566	0.022461	-306.014	-131.498	1037.776	-0.38867	0.71172	0.14112	-65.091	304.228	714.048	-0.54209	0.80361	0.18466
0.534	-31.286	-175.73	1251.5361	-1.5847	0.97974	0.32641	15.7916	-104.077	1836.4952	-1.7988	1.5391	0.023926	-264.63	-55.048	1077.4889	-0.52637	0.7832	0.17383	-23.782	293.335	631.657	-0.47295	0.73838	0.15771
0.536	-7.618	-178.718	1320.097	-1.603	1.0005	0.33594	-3.7163	-36.6908	1841.521	-1.8169	1.5336	0.028564	-116.096	-77.59	1207.493	-0.67109	0.85801	0.20263	25.932	273.207	575.318	-0.40625	0.67656	0.12832
0.538	-42.904	-164.576	1377.641	-1.6069	1.0181	0.34717	-26.84035	-107.859	1861.62671	-1.8379	1.5195	0.032227	-68.4247	32.03	1353.765	-0.81602	0.93242	0.22617	115.5868	256.864	536.363	-0.3418	0.61523	0.10498
0.54	-56.609	-151.631	1414.659	-1.6035	1.0215	0.34619	-6.4366	-127.675	1887.287	-1.8691	1.5039	0.041992	-7.442	102.921	1460.212	-0.94648	1.016	0.24766	162.488	254.827	496.214	-0.28291	0.55127	0.083008
0.542	-59.169	-145.271	1442.003	-1.5742	1.0293	0.33447	4.0699	-30.575	1872.188	-1.8862	1.4956	0.045898	-38.872	135.447	1519.995	-1.0566	1.1223	0.26397	176.15	246.7813	420.186	-0.22657	0.48867	0.058301
0.544	-66.5197	-109.816	1472.271	-1.541	1.0322	0.31689	40.283	-53.122	1858.865	-1.9077	1.481	0.061523	-11.896	168.69	1523.387	-1.168	1.2461	0.29932	184.616	239.594	375.074	-0.16836	0.43008	0.035644
0.546	-51.939	-97.0989	1496.321	-1.4956	1.0317	0.29395	77.551	46.802	1867.716	-1.9192	1.4661	0.067383	-70.375	28.61	1555.61	-1.2911	1.3796	0.35	171.827	227.423	368.077	-0.1209	0.36924	0.015332
0.548	-92.1694	-76.916	1478.364	-1.4448	1.02	0.2583	74.203	108.6156	1814.68	-1.9277	1.4512	0.075684	-90.92	-6.89000000000001	1620.182	-1.4399	1.5055	0.41807	97.6804	213.469	335.233	-0.07666	0.31396	-0.0014648
0.55	-79.5989	-66.153	1470.545	-1.4224	1.0142	0.24023	63.2316	66.2811	1800.272	-1.9316	1.4336	0.083984	-102.778	-154.81	1660.302	-1.6199	1.5972	0.49111	64.35	179.004	306.248	-0.03789	0.24306	-0.022461
0.552	-90.501	-69.493	1473.2	-1.3867	0.99805	0.2041	46.584	172.739	1800.095	-1.9351	1.4233	0.084961	-137.7	-172.32	1720.348	-1.8107	1.6639	0.55849	13.339	174.455	277.101	0.0032228	0.18037	-0.038476
0.554	-67.635	-57.266	1481.737	-1.3655	0.99145	0.18189	48.982	118.045	1770.371	-1.918	1.4043	0.093262	-94.676	-324.883	1776.848	-1.9878	1.686	0.61914	-35.0383	166.482	241.178	0.043067	0.11396	-0.057227
0.556	-65.6254	-73.672	1509.639	-1.3511	0.98682	0.15967	68.7	89.115	1818.243	-1.9024	1.3916	0.093506	-75.258	-333.56	1799.87	-2.1269	1.6876	0.68965	-9.528	194.979	224.079	0.076269	0.054785	-0.078711
0.558	-52.876	-86.521	1526.5891	-1.3306	0.9917	0.13281	38.179	168.203	1780.9368	-1.8828	1.3789	0.10205	56.93	-401.14	1762.6881	-2.2261	1.6669	0.74531	-25.773	206.324	185.39361	0.11279	0.0024414	-0.092285
0.56	-14.891	-113.187	1558.5617	-1.3218	0.99268	0.125	36.0792	84.183	1752.91	-1.8535	1.3672	0.092285	153.043	-391.77	1798.1074	-2.2335	1.6407	0.7789	-64.547	156.7445	144.9182	0.14004	-0.050391	-0.11202
0.562	-21.599	-138.317	1580.209	-1.3042	1.0142	0.10156	77.826	125.113	1748.671	-1.834	1.3574	0.09668	213.923	-376.23	1860.595	-2.1474	1.6225	0.78926	-85.388	121.752	117.3427	0.16123	-0.096388	-0.1288
0.564	33.608	-160.423	1616.925	-1.2937	1.0334	0.090576	67.258	107.6588	1726.111	-1.7964	1.3501	0.09668	146.203	-346.21	1969.465	-1.978	1.606	0.77344	-98.974	82.883	94.187	0.18116	-0.13819	-0.14444
0.566	19.0381	-196.578	1644.026	-1.2798	1.0552	0.080566	70.9341	-1.769	1760.889	-1.7646	1.3437	0.10449	177.747	-248.826	2009.4	-1.7656	1.6066	0.73974	-130.148	76.323	61.332	0.19121	-0.17168	-0.16055
0.568	52.6159	-206.543	1642.501	-1.2676	1.084	0.061035	50.64	48.93	1771.34	-1.7339	1.3325	0.10938	134.41	-232.394	2021.191	-1.5586	1.6035	0.70654	-170.948	69.589	64.663	0.19775	-0.19922	-0.1748
0.57	29.1082	-205.722	1635.336	-1.2642	1.1011	0.053711	36.512	5.324	1757.394	-1.7031	1.3242	0.11768	42.8831	-128.36	1990.9153	-1.4074	1.5836	0.68076	-218.429	55.195	96.9893	0.1876	-0.22285	-0.18408
0.572	17.5118	-187.3159	1599.10026	-1.2607	1.125	0.041504	64.661	9.057	1771.706	-1.6831	1.3188	0.12549	-18.823	-139.5	1961.253	-1.3304	1.5524	0.65234	-247.75	55.9473	97.0736	0.17216	-0.24541	-0.1873
0.574	20.65361	-168.287	1605.0346	-1.2615	1.1448	0.036377	22.17964	116.157	1719.11	-1.6504	1.3086	0.12939	-123.19	-30.68	1931.275	-1.3066	1.5254	0.64209	-230.538	36.0664	82.7651	0.15224	-0.25478	-0.1877
0.576	36.7016	-143.203	1588.15845	-1.269	1.1646	0.03418	4.007	75.648	1657.115	-1.6218	1.2912	0.13135	-190.257	-70.73	1927.231	-1.3249	1.5075	0.63535	-206.532	40.7724	67.589	0.12803	-0.26484	-0.18916
0.578	35.2271	-112.335	1591.0411	-1.2905	1.186	0.026855	-7.55	159.247	1619.6586	-1.5938	1.2734	0.1377	-265.276	-71.86	1930.056	-1.3683	1.5023	0.62988	-187.282	13.2183	53.455	0.099121	-0.26221	-0.18311
0.58	32.155	-108.7464	1574.466	-1.3066	1.1934	0.029297	-36.8918	221.338	1565.745	-1.5469	1.2539	0.14307	-205.3869	-156.738	1919.559	-1.4222	1.5116	0.62285	-155.439	-8.53165	78.7087	0.059082	-0.25918	-0.17744
0.582	52.706	-99.8603	1576.542	-1.3457	1.2148	0.033203	-23.746	154.946	1575.343	-1.5249	1.2466	0.13672	-160.486	-185.923	1956.884	-1.4775	1.5322	0.61768	-94.014	-50.1	66.7368	0.01836	-0.24824	-0.16182
0.584	67.713	-73.9597	1574.134	-1.3862	1.2368	0.034668	-36.6715	226.462	1564.518	-1.4761	1.2153	0.14746	-23.964	-206.368	1979.896	-1.5405	1.5708	0.62109	-51.042	-45.5584	17.61	-0.026563	-0.22871	-0.14658
0.586	74.677	-30.643	1597.9036	-1.4063	1.248	0.037598	-36.14239	190.546	1500.32	-1.4402	1.1995	0.14869	-33.861	-196.541	2048.152	-1.6077	1.6165	0.63086	15.51	-44.7237	14.202	-0.076172	-0.20645	-0.12881
0.588	91.184	-17.969	1602.306	-1.4487	1.2681	0.04834	-26.761	168.5375	1472.63	-1.3965	1.1768	0.14697	-104.133	-160.297	2105.2324	-1.6918	1.6578	0.65928	44.948	-21.32	17.87851	-0.125	-0.17822	-0.10596
0.59	64.849	-35.073	1624.3928	-1.4822	1.2825	0.050782	-13.369	255.02	1431.667	-1.3496	1.1523	0.15283	-174.311	-224.205	2183.492	-1.7902	1.6984	0.69443	35.83	34.29925	30.6318	-0.17149	-0.1498	-0.081152
0.592	62.207	-61.416	1650.9603	-1.5112	1.2935	0.062012	-15.076	165.5824	1403.106	-1.3296	1.1421	0.15234	-198.895	-197.403	2194.23	-1.8995	1.738	0.73115	53.239	58.94	51.0526	-0.21885	-0.11856	-0.055761
0.594	12.594	-99.1716	1659.7177	-1.5527	1.3066	0.07666	-22.413	182.003	1419.79168	-1.2793	1.1094	0.15039	-263.106	-278.337	2207.874	-2.0132	1.7778	0.75586	72.5488	97.7	36.932	-0.26143	-0.088477	-0.024121
0.596	22.3411	-112.7592	1672.214	-1.5762	1.3115	0.077637	-0.902000000000001	204.394	1398.458	-1.2432	1.0879	0.15113	-294.996	-193.958	2182.52	-2.112	1.8216	0.77422	88.92434	84.009	32.7486	-0.30957	-0.065527	0.00058596
0.598	13.023	-128.414	1655.5548	-1.605	1.3208	0.087402	-11.28	107.075	1388.655	-1.1987	1.0669	0.14844	-231.899	-193.583	2122.7073	-2.1875	1.8606	0.79073	79.8792	86.189	28.57	-0.34229	-0.044434	0.024902
0.6	22.1102	-121.766	1647.1532	-1.6328	1.3243	0.08789	-3.982	158.66	1374.7555	-1.1479	1.0317	0.15186	-291.432	-86.328	2065.879	-2.2394	1.8914	0.78877	75.348	69.6852	21.8857	-0.36651	-0.028614	0.039062
0.602	-0.666899999999998	-139.754	1642.264	-1.6519	1.3267	0.085449	-29.544	105.125	1322.11916	-1.1094	1.0118	0.15113	-254.65	-98.431	2020.68	-2.2621	1.9031	0.79365	32.974	42.051	17.6336	-0.38213	-0.017383	0.043555
0.604	4.6385	-142.814	1637.4641	-1.666	1.3203	0.083984	-32.49	81.785	1294.732	-1.0664	0.98242	0.14648	-210.747	-44.04	2022.398	-2.2676	1.9043	0.79639	38.507	52.0336	9.7758	-0.37276	-0.020117	0.055274
0.606	36.913	-115.526	1641.8288	-1.6733	1.3208	0.086914	7.964	184.563	1243.184	-1.0156	0.94824	0.14502	-90.75	-37.145	1989.597	-2.2537	1.8881	0.80263	31.572	36.143	15.5675	-0.3583	-0.02041	0.052149
0.608	55.2483	-74.253	1653.6175	-1.6846	1.3145	0.08252	10.523	138.173	1183.5757	-0.98584	0.92822	0.13965	-34.011	19.359	1983.54	-2.2179	1.8657	0.79687	13.465	58.3529	31.2113	-0.32617	-0.027344	0.050781
0.61	71.654	-30.798	1653.409	-1.6892	1.3166	0.08252	16.76	191.9569	1178.43	-0.93066	0.88574	0.12939	49.825	91.639	1948.882	-2.1612	1.8333	0.79375	7.15	51.069	55.556	-0.28408	-0.03584	0.045996
0.612	40.207	-4.063	1656.36232	-1.6968	1.3169	0.082031	5.893	253.896	1114.5105	-0.88232	0.85889	0.12597	11.403	108.5442	1968.37	-2.1014	1.7982	0.78389	-59.838	48.711	69.675	-0.23574	-0.04541	0.038574
0.614	63.091	29.7435	1616.5615	-1.7104	1.313	0.083984	16.494	204.5895	1072.8578	-0.8374	0.82861	0.12012	-5.84	141.7977	1953.799	-2.0405	1.7603	0.76563	-106.423	21.85	71.861	-0.19472	-0.061426	0.027246
0.616	53.214	53.2967	1597.98	-1.7227	1.3105	0.081055	34.059	307.523	1043.3053	-0.77148	0.78516	0.11035	-31.659	49.544	1995.193	-1.9836	1.7242	0.75518	-132.563	25.488	71.7168	-0.14668	-0.081152	0.013477
0.618	47.626	50.968	1582.7963	-1.7363	1.3066	0.083984	28.816	286.03	983.024	-0.74365	0.76465	0.10498	-81.856	52.8123	1990.489	-1.9425	1.6868	0.74902	-164.797	25.717	73.3688	-0.10693	-0.10205	-0.0063477
0.62	36.002	18.636	1596.4581	-1.7459	1.303	0.086182	16.869	225.8522	967.361	-0.67822	0.72217	0.094238	-82.342	-39.021	1990.6468	-1.9335	1.6458	0.74473	-177.264	27.296	77.44	-0.063281	-0.13135	-0.023144
0.622	27.5351	-1.278	1586.7108	-1.7549	1.2988	0.082031	-18.491	276.461	908.307	-0.63355	0.69458	0.083252	-59.387	55.049	1977.3126	-1.9367	1.6122	0.7416	-217.793	23.94623	79.821	-0.015235	-0.15312	-0.050586
0.624	59.35	-20.7446	1562.042	-1.7515	1.2935	0.084473	-43.931	196.1271	868.02179	-0.58789	0.66504	0.074707	-81.595	43.933	1937.885	-1.9429	1.5825	0.74219	-226.85	5.4424	79.4186	0.03086	-0.17656	-0.075586
0.626	50.859	-25.072	1549.441	-1.7495	1.2935	0.088867	-34.831	213.81	866.2789	-0.52393	0.62549	0.063965	-109.41	107.173	1926.399	-1.9504	1.559	0.73799	-232.113	42.5484	76.609	0.080272	-0.19668	-0.10937
0.628	87.753	-22.3571	1582.4668	-1.73	1.2817	0.077148	-39.178	247.217	819.27998	-0.49463	0.60254	0.057617	-44.627	42.4061	1900.742	-1.9452	1.5403	0.72539	-188.544	44.24	56.755	0.14307	-0.21875	-0.13574
0.63	76.275	-25.6094	1577.538	-1.7075	1.2729	0.074219	-45.617	148.01	771.934	-0.43359	0.56348	0.05127	-74.974	41.176	1868.66708	-1.9229	1.5282	0.70937	-158.538	48.406	29.575	0.2	-0.23359	-0.16064
0.632	89.197	-18.724	1575.5013	-1.6816	1.2598	0.071289	-60.299	212.5347	751.9695	-0.39624	0.531	0.049805	-52.131	38.38	1856.408	-1.8935	1.5144	0.68515	-127.92961	27.069	22.853	0.25019	-0.24541	-0.18565
0.634	84.153	-32.96	1569.9959	-1.646	1.2427	0.06543	-65.6495	188.634	700.394	-0.35303	0.50586	0.05127	-23.901	93.43	1881.706	-1.8594	1.4951	0.66113	-114.0611	-0.0839999999999961	15.983	0.29551	-0.25635	-0.21065
0.636	68.265	-20.383	1575.683	-1.6265	1.2349	0.064453	-57.743	138.81	697.175	-0.30518	0.46924	0.044434	-53.951	186.439	1850.021	-1.805	1.4782	0.63379	-84.862	-15.14	31.411	0.33301	-0.26592	-0.22891
0.638	73.441	7.246	1559.659	-1.5796	1.2134	0.061035	-52.684	212.42	661.998	-0.2749	0.45313	0.041016	-150.953	223.794	1813.9647	-1.753	1.4634	0.60742	-31.612	-17.779	31.379	0.35889	-0.27295	-0.24756
0.64	32.744	46.1302	1525.369	-1.5559	1.1956	0.060059	-66.886	128.184	600.621	-0.23291	0.41504	0.04248	-162.824	299.645	1755.919	-1.6987	1.4442	0.58047	-20.873	4.3699	41.871	0.38545	-0.28125	-0.26387
0.642	24.9086	71.781	1484.6699	-1.5249	1.1792	0.063477	-60.294	185.933	570.795	-0.19653	0.38769	0.041992	-201.184	263.09	1733.797272	-1.6516	1.4262	0.56123	7.913	17.527	55.911	0.40713	-0.28711	-0.27813
0.644	4.5483	89.162	1447.258	-1.4883	1.1602	0.061523	-66.646	248.49	517.74	-0.16357	0.36377	0.05127	-230.473	308.34	1717.53406	-1.5996	1.4043	0.54297	27.49	44.6044	66.4082	0.41807	-0.29375	-0.2918
0.646	20.1992	85.349	1444.643	-1.4741	1.1519	0.061523	-58.648	185.0773	483.8049	-0.12061	0.32666	0.045898	-210.523	210.95	1709.494	-1.5602	1.3895	0.53369	28.26	30.513	50.112	0.41963	-0.30117	-0.2959
0.648	4.73119	92.334	1432.3209	-1.4473	1.1309	0.065918	-54.245	258.464	462.5236	-0.10645	0.30566	0.04541	-247.053	221.933	1652.41	-1.5165	1.3716	0.52168	73.0499	38.0164	29.58	0.41602	-0.3042	-0.30811
0.65	21.1718	87.093	1416.92856	-1.4266	1.1218	0.073974	-73.947	204.6	405.8419	-0.072266	0.28076	0.043945	-217.226	104.815	1605.741	-1.4786	1.3423	0.51036	89.7527	25.4137	12.6481	0.41123	-0.30108	-0.31192
0.652	22.9639	85.1331	1391.725	-1.4116	1.1079	0.078125	-74.4374	152.7293	374.679	-0.045166	0.25317	0.041748	-177.155	108.055	1558.646	-1.4361	1.3119	0.49854	55.322	18.1157	14.216757	0.3956	-0.30078	-0.31406
0.654	6.2282	76.014	1365.084	-1.3965	1.0938	0.080566	-45.055	206.056	335.081	-0.024902	0.23486	0.041016	-124.7244	66.57	1518.454	-1.395	1.2798	0.48242	83.298	28.547	7.3696	0.38427	-0.28867	-0.3125
0.656	8.835	60.3	1367.879	-1.3833	1.0884	0.084961	-49.984	126.2762	303.588	-0.0019531	0.20703	0.04248	-95.478	105.4	1508.188	-1.3529	1.2432	0.46983	84.087	41.998	3.786	0.36446	-0.27334	-0.30811
0.658	19.1025	53.902	1369.6787	-1.3672	1.0664	0.094727	-47.666	146.173	296.454	0.01123	0.19043	0.039063	-5.043	153.616	1508.568	-1.3124	1.1931	0.45371	47.131	72.163	15.4196	0.33447	-0.25244	-0.30176
0.66	29.9364	55.942	1370.23	-1.3503	1.0559	0.099856	-15.354	164.314	273.8363	0.028809	0.16064	0.037598	-24.666	179.429	1488.726	-1.2635	1.1419	0.43457	26.438	70.234	36.7306	0.29873	-0.22491	-0.28271
0.662	16.0485	47.3396	1370.325	-1.332	1.0391	0.10205	-33.024	93.529	256.279	0.039551	0.14453	0.036377	-31.314	212.297	1443.85	-1.2104	1.1119	0.40849	22.563	86.11	75.232	0.2543	-0.19873	-0.26396
0.664	5.1714	40.9707	1344.442	-1.3125	1.0195	0.11279	10.543	135.2169	264.6529	0.047363	0.12646	0.037598	-7.64999999999999	174.5027	1376.544	-1.1577	1.0942	0.37988	-54.567	86.896	91.177	0.19414	-0.16983	-0.24092
0.666	-3.3273	43.485	1320.1459	-1.2964	1.0063	0.10889	-15.543	82.504	271.2	0.057617	0.10498	0.04248	-45.32	234.265	1283.5345	-1.1051	1.0742	0.35869	-91.9259	84.297	63.229	0.12276	-0.13984	-0.21269
0.668	-4.236	70.218	1261.4763	-1.2656	0.98242	0.1084	-31.735	48.02	255.747	0.059082	0.087891	0.041016	-63.169	198.344	1208.8	-1.0531	1.0426	0.33828	-107.2489	73.154	72.7842	0.050293	-0.11475	-0.19092
0.67	15.9582	83.1482	1209.362	-1.2363	0.96582	0.10986	-9.165	116.885	213.1937	0.061035	0.073242	0.042969	-27.668	297.55	1147.529	-1.0098	1.0047	0.32226	-170.816	36.4079	53.229	-0.021094	-0.086621	-0.16231
0.672	0.828999999999997	91.4421	1179.01	-1.2085	0.94775	0.11084	-44.603	59.4214	162.146	0.070801	0.062745	0.046143	-20.102	256.252	1117.121	-0.96426	0.96738	0.29404	-182.837	20.596	29.04982	-0.092382	-0.061231	-0.13359
0.674	28.62833	87.55	1175.189	-1.1641	0.91992	0.10645	-30.194	71.353	153.3999	0.066895	0.05127	0.04541	-24.129	312.047	1058.081	-0.90625	0.92969	0.26514	-165.322	-7.197	36.16894	-0.15371	-0.036621	-0.1082
0.676	19.8166	110.4317	1154.6174	-1.1406	0.90625	0.1084	-49.445	84.582	118.503	0.07959	0.039063	0.047363	65.599	250.2455	1025.389	-0.83223	0.8914	0.23955	-222.619	6.985	45.38223	-0.20684	-0.013574	-0.081836
0.678	45.694	129.5671	1137.5975	-1.0972	0.88916	0.10596	-65.347	28.3758	111.1047	0.078613	0.034668	0.048828	29.817	261.974	974.987	-0.74873	0.84521	0.21153	-202.551	-0.902000000000001	78.447	-0.25	0.010742	-0.064941
0.68	57.0392	152.704	1105.2266	-1.0674	0.86621	0.10254	-24.816	116.345	112.4919	0.080566	0.031738	0.056152	53.391	228.153	920.873	-0.67646	0.79092	0.1877	-164.903	9.356	99.9042	-0.27627	0.02959	-0.048242
0.682	68.757	146.454	1095.1015	-1.0332	0.84375	0.098633	-36.938	97.5052	86.485	0.074463	0.029541	0.060303	70.423	234.789	865.029	-0.61084	0.73408	0.16973	-158.635	12.666	78.32	-0.29287	0.05	-0.038574
0.684	31.492	155.475	1061.89349	-0.98779	0.8208	0.097656	-60.072	71.9721	101.3625	0.070801	0.025391	0.061035	37.3358	252.778	833.714	-0.55811	0.68896	0.14941	-115.2241	6.723	61.7464	-0.29131	0.064063	-0.037793
0.686	2.466	130.419	1046.1706	-0.96973	0.80664	0.097168	-54.231	111.841	74.3398	0.070313	0.024414	0.076172	-9	217.559	799.75	-0.52344	0.64883	0.13662	-124.977	16.408	57.752	-0.27315	0.077148	-0.041308
0.688	3.636	110.718	1032.37571	-0.92188	0.77832	0.087891	-69.924	57.8325	50.6775	0.06543	0.022461	0.07959	-63.4237	239.654	794.138	-0.49629	0.6125	0.12862	-148.11	-8.671	54.408	-0.24414	0.089355	-0.046875
0.69	-3.5597	92.4336	996.6235	-0.89258	0.76074	0.082519	-55.779	71.794	58.8905	0.05957	0.019043	0.087891	-125.4743	189.85	766.32	-0.47324	0.57539	0.1247	-93.039	18.4697	35.733	-0.20615	0.096974	-0.053516
0.692	-10.58	80.9593	986.7693	-0.85889	0.74561	0.077148	-43.419	78.939	52.149	0.053466	0.019531	0.093994	-168.126	255.873	704.944	-0.45693	0.54101	0.11885	-60.152	9.6687	28.266	-0.16924	0.10059	-0.060254
0.694	-30.6991	70.05	949.5727	-0.81494	0.71729	0.072266	-99.489003	1.1786	68.678999	0.050293	0.019043	0.10156	-113.694	215.396	660.7777	-0.43408	0.50879	0.10938	-36.139	23.1858	25.6309	-0.13369	0.10371	-0.069629
0.696	-21.123	77.316	904.807	-0.79248	0.70557	0.070313	-70.138	50.6218	59.7135	0.049316	0.016602	0.11182	-136.014	294.501	598.697	-0.40147	0.48096	0.10137	18.173	22.4008	12.925	-0.10596	0.10195	-0.077734
0.698	-12.443	101.401	862.706	-0.75977	0.68066	0.072266	-86.36581	15.8996	44.636	0.048828	0.0087891	0.11475	-87.2649	223.3633	547.896	-0.36211	0.44531	0.090723	28.862	29.6258	29.298	-0.083496	0.1001	-0.074707
0.7	-4.563	119.573	865.1883	-0.73828	0.66308	0.079102	-72.297	-12.744	51.3592	0.050293	0.0087891	0.11719	-68.3701	241.3537	502.238	-0.31836	0.41055	0.068847	54.724	62.653	15.681	-0.07168	0.099608	-0.068555
0.702	0.547999999999995	115.337	871.403	-0.71484	0.63867	0.073242	-38.643	38.3192	60.01	0.055176	0.0041504	0.11792	-45.205	178.358	454.2532	-0.27021	0.38057	0.05332	106.719	56.936	18.7703	-0.071191	0.09834	-0.064551
0.704	-10.247	116.6772	856.823	-0.68066	0.62012	0.07373	-60.711	-5.204	38.973	0.061035	-0.00097656	0.12207	-69.3218	179.329	394.532	-0.2207	0.34912	0.030762	94.889	63.354	63.4	-0.08291	0.10029	-0.052442
0.706	-21.855	143.281	827.5962	-0.66162	0.60303	0.070313	-37.436	26.419	42.369	0.064941	-0.0083008	0.13086	-26.617	194.632	375.2662	-0.16924	0.30772	0.0086915	103.3861	9.8501	73.243	-0.092675	0.096973	-0.045117
0.708	-33.0498	146.824	787.6639	-0.61035	0.56689	0.075684	-27.891	63.3033	40.867	0.067871	-0.0087891	0.12939	-52.137	210.8416	345.197	-0.11523	0.2707	-0.0088867	82.942	-26.8496	85.028	-0.1123	0.098145	-0.038574
0.71	-41.462	142.521	767.156	-0.57495	0.53882	0.071289	-25.845	14.65	50.5827	0.074707	-0.023438	0.12744	-56.457	240.309	320.2082	-0.06875	0.23008	-0.028808	45.384	-85.773	160.981	-0.1335	0.10518	-0.041894
0.712	-67.347	147.285	730.8904	-0.55029	0.52588	0.071289	-6.559	56.649	56.6825	0.087403	-0.029541	0.12597	-52.766	192.01	311.8881	-0.028516	0.19102	-0.04541	40.087	-108.635	270.855	-0.15527	0.12099	-0.048536
0.714	-63.091	154.062	685.813	-0.54297	0.51758	0.080566	-42.26	37.5889	35.113113	0.093262	-0.036621	0.12109	-75.353	205.755	284.413	0.0087891	0.1499	-0.062988	49.28193	-164.475	418.3825	-0.17715	0.1413	-0.058692
0.716	-48.4824	139.354	650.024	-0.54492	0.50684	0.10083	-34.912	48.296	36.681966	0.11475	-0.047852	0.11523	-27.593	106.273	251.416	0.045898	0.10264	-0.077832	50.727	-247.616	579.325	-0.19824	0.16904	-0.06875
0.718	-38.498	117.5948	637.616	-0.54834	0.49854	0.1123	-0.976999999999997	104.904	42.568	0.11523	-0.057617	0.11084	-3.955	123.895	242.503	0.076367	0.067676	-0.094824	37.2573	-333.388	654.678	-0.21777	0.19092	-0.081543
0.72	-39.838	110.3373	635.5086	-0.53857	0.48682	0.12402	-27.932	42.944	49.4964	0.12939	-0.062012	0.10889	22.125	39.575	216.772	0.098245	0.029785	-0.11709	-1.251	-424.654	745.189	-0.2374	0.22402	-0.10527
0.722	-20.76	125.3067	611.196	-0.5249	0.47705	0.12451	-24.587	42.512	53.592	0.13965	-0.067871	0.10132	39.1274	76.7413	184.57689	0.11904	-0.0033203	-0.13515	-21.193	-390.738	847.0411	-0.26611	0.26035	-0.13955
0.724	19.403	117.92	598.9871	-0.48633	0.46533	0.11963	-30.547	37.8445	29.5285	0.14844	-0.069824	0.097656	117.894	22.216	145.128	0.14111	-0.032715	-0.14746	-39.632	-352.3213	923.916	-0.29502	0.31308	-0.18369
0.726	3.013	115.586	569.548	-0.45118	0.4419	0.12158	-40.176	-12.201	37.187	0.16016	-0.075195	0.088867	68.1512	54.363	103.818	0.15547	-0.05498	-0.16543	-33.43	-221.361	991.005	-0.33594	0.3919	-0.21768
0.728	-6.683	94.31	591.2461	-0.42236	0.41553	0.12598	-8.864	37.159	67.419	0.16846	-0.077148	0.083984	53.4928	32.95	100.572	0.17783	-0.072168	-0.1792	-33.6602	-145.721	1049.172	-0.39307	0.48682	-0.22803
0.73	-15.591	102.341	579.525	-0.3877	0.38672	0.12891	-33.72	14.545	62.465	0.17725	-0.083008	0.078613	38.847	47.335	96.188	0.19737	-0.084278	-0.19052	-40.4273	-135.0089	1098.888	-0.4875	0.5958	-0.21094
0.732	-14.93	112.2648	546.7338	-0.37549	0.37549	0.125	-47.029	-10.513	76.556	0.18457	-0.080078	0.073974	4.978	66.077	83.455	0.20771	-0.099804	-0.19648	-41.78	-125.862	1220.8525	-0.61914	0.71211	-0.17119
0.734	-23.535	127.521	517.05628	-0.35547	0.34033	0.125	-14.312	38.26624	55.9518	0.1875	-0.075684	0.071777	-36.017	46.90952	48.84	0.21387	-0.11328	-0.20068	-16.562	-139.527	1384.601	-0.7875	0.83203	-0.11768
0.736	-39.0211	130.496	479.0504	-0.34155	0.32006	0.12573	-40.894	-7.07	39.6171	0.19043	-0.074219	0.066406	-17.938	87.313	53.8831	0.22187	-0.12343	-0.2043	-8.283	-124.2206	1486.704	-0.97889	0.95547	-0.061035
0.738	-50.319	127.982	458.52319	-0.3252	0.30469	0.12646	-63.457	20.1939	67.4778	0.19043	-0.073242	0.063477	-33.965	47.73	56.249	0.22588	-0.13477	-0.20528	17.727	-110.02	1539.698	-1.187	1.0728	-0.00048828
0.74	-38.757	111.041	425.7397	-0.30664	0.27295	0.12842	-60.102	38.607	51.9002	0.18896	-0.067871	0.060547	-77.339	88.344	46.1451	0.21963	-0.1418	-0.20059	17.251	-76.5	1538.585	-1.4178	1.192	0.053613
0.742	-27.469	118.679	412.5974	-0.29541	0.25977	0.12744	-95.711	15.327	54.82738	0.18652	-0.063965	0.055176	-65.632	28.066	27.57	0.20733	-0.15039	-0.19678	10.915	-85.61	1539.809	-1.6406	1.3164	0.10508
0.744	-19.269	123.0685	399.2288	-0.27832	0.23047	0.12549	-43.645	74.381	54.884	0.18457	-0.06543	0.049805	-92.1905	78.5	17.471	0.19092	-0.15479	-0.19336	35.57535	-105.42	1607.386	-1.8359	1.4461	0.14805
0.746	-33.78	110.714	391.068	-0.26392	0.21337	0.12232	-58.833	37.2892	29.529	0.18311	-0.056152	0.045898	-93.6215	18.823	18.838	0.1625	-0.14834	-0.18623	-1.355	-196.57	1698.038	-2.0183	1.5849	0.18535
0.748	-41.098	89.856	381.021	-0.24219	0.19531	0.12158	-71.35	7.2892	43.4459	0.18335	-0.050781	0.043701	-81.38078	52.086	18.582	0.13398	-0.1376	-0.17412	-50.2666	-296.174	1766.252	-2.1895	1.7305	0.22656
0.75	-48.564	105.533	372.153	-0.2207	0.18018	0.11084	-57.842	46.315	42.84479	0.18066	-0.04541	0.043945	-77.2337	8.926	22.507	0.09961	-0.12588	-0.16084	-90.743	-375.8623	1836.3189	-2.3507	1.8697	0.28828
0.752	-31.898	122.0635	340.291	-0.20703	0.16797	0.10791	-86.4561	13.4308	21.9827	0.18359	-0.035645	0.042969	-117.5993	13.709	11.226	0.062402	-0.1084	-0.14571	-72.207	-427.311	1890.962	-2.5144	1.9884	0.33497
0.754	-50.661	118.3862	343.68906	-0.16895	0.15479	0.10547	-29.633	45.6121	49.7359	0.18066	-0.033691	0.04834	-108.573	13.601	60.249	0.024414	-0.086914	-0.13428	-7.34899999999999	-415.43	1911.692	-2.6711	2.0567	0.3877
0.756	-69.926	103.895	353.727	-0.14063	0.14136	0.1001	-29.648	34.896	51.4627	0.17773	-0.025391	0.051758	-136.69196	18.973	63.2686	-0.012793	-0.060156	-0.11152	87.995	-396.39	1937.545	-2.7658	2.0894	0.42247
0.758	-103.8448	102.464	324.4552	-0.11426	0.12793	0.092773	-75.905	-20.1981	42.1993	0.1748	-0.019531	0.047608	-139.793	84.962	74.4221	-0.04502	-0.039941	-0.097754	81.944	-360.87	1957.631	-2.7788	2.0884	0.43848
0.76	-82.7585	95.957	313.7584	-0.077637	0.10986	0.082031	-19.787	17.278314	56.7245	0.17529	-0.019531	0.055664	-80.903	44.324	72.898	-0.067285	-0.025097	-0.085254	30.144	-347.711	1990.087	-2.675	2.0683	0.42412
0.762	-75.0577	77.5975	293.5272	-0.062012	0.094727	0.079102	-34.092	14.2998	34.218	0.16895	-0.01416	0.058594	-78.223	93.642	91.624	-0.081933	-0.011133	-0.073926	-15.347	-303.009	2056.332	-2.4676	2.0411	0.38312
0.764	-70.1931	66.6217	271.870793	-0.023438	0.078613	0.071289	-38.575	13.1506	48.9733	0.16504	-0.0087891	0.063477	-98.4449	29.2774	87.0098	-0.086914	-0.0058594	-0.068848	-83.859	-264.1419	2127.69	-2.1816	2.0177	0.31828
0.766	-69.703	77.58	241.463	-0.0026856	0.064453	0.066894	-16.031	42.157	59.5303	0.16748	-0.0014648	0.063965	-73.873	91.161	81.526	-0.077734	-0.0023437	-0.063184	-112.478	-191.959	2129.097	-1.8841	1.9959	0.26378
0.768	-59.116	82.299	233.373	0.022949	0.049316	0.062988	-52.694	-11.9315	36.959	0.16577	0.005127	0.064453	-20.746	42.47784	46.685	-0.058789	-0.00097656	-0.063379	-162.828	-143.48	2091.9199	-1.6362	1.9712	0.22754
0.77	-47.292	78.215	237.771	0.049805	0.038574	0.058105	-16.354	7.5461	42.0281	0.16309	0.012695	0.068848	-28.927	92.067	48.8386	-0.03418	-0.0025391	-0.069239	-188.5321	-104.88	2055.385	-1.4789	1.9363	0.22422
0.772	-21.1	82.023	227.739	0.066895	0.032227	0.053223	4.683	34.6434	21.991	0.15967	0.024414	0.074707	19.691	22.956	67.3502	-9.768e-05	-0.0084962	-0.073731	-259.412	-58.79	2038.636	-1.3828	1.8949	0.22666
0.774	-43.19	81.388	242.102	0.097168	0.024414	0.052246	-29.749	11.903	28.19579	0.15674	0.034668	0.075195	36.045	47.768	53.955	0.028809	-0.012207	-0.082031	-216.798	-54.954	2068.601	-1.3519	1.8539	0.22627
0.776	-30.042	84.8229	231.556	0.11865	0.016357	0.044922	3.142	62.982	57.9517	0.146	0.051758	0.086914	36.474	21.9525	84.741	0.061914	-0.019825	-0.085547	-215.451	-76.424	2093.8855	-1.3663	1.8267	0.21875
0.778	-49.312	81.836	213.9274	0.13525	0.0063477	0.041992	-27.594	56.294	28.7743	0.13623	0.063476	0.092285	19.241	7.5209	70.7251	0.088769	-0.028125	-0.089746	-138.711	-149.471	2095.038	-1.4082	1.8164	0.19971
0.78	-46.259	96.932	200.49577	0.15234	-0.0019531	0.037598	-40.771	45.5752	30.27493	0.12207	0.076172	0.1084	29.4754	17.455	103.631	0.11611	-0.044531	-0.095996	-70.295	-178.516	2136.11	-1.4673	1.8155	0.18896
0.782	-49.139	86.948	183.1194	0.15918	-0.003418	0.040039	6.195	68.632	32.636	0.1001	0.088867	0.11816	-4.33199999999999	-7.342	73.59	0.14863	-0.057813	-0.10821	-55.405	-180.002	2143.195	-1.5418	1.8211	0.18302
0.784	-50.208	59.902	187.05393	0.15625	-0.0078125	0.041504	-55.1	7.6519	37.053	0.086914	0.099121	0.12207	0.814	31.9204	85.346	0.18213	-0.077637	-0.11865	-32.199	-154.472	2183.147	-1.6199	1.8321	0.17989
0.786	-29.311	45.943	166.325	0.15235	-0.012939	0.04126	-51.428	27.66525	62.309	0.0625	0.11621	0.14648	1.976	-6.4056	48.681	0.21377	-0.09805	-0.13125	-65.9087	-142.536	2236.254	-1.6977	1.8403	0.17578
0.788	-41.536	43.5622	159.541	0.14453	-0.0092773	0.047852	-55.482	44.196	35.905	0.048096	0.12378	0.15918	-41.7782	30.865	71.7439	0.25273	-0.11572	-0.14941	-123.76	-181.941	2253.915	-1.771	1.8403	0.17822
0.79	-29.269	40.492	151.991	0.12549	-0.01123	0.056641	-69.154	8.084	31.437	0.032715	0.13232	0.17041	-33.252	-42.84079	70.0631	0.29375	-0.12939	-0.16621	-128.077	-209.37	2255.926	-1.8314	1.8346	0.18026
0.792	-23.412	40.922	159.13	0.11475	-0.0073242	0.05957	-36.927	47.089	52.4003	0.0097656	0.14111	0.17773	-32.037	19.155	67.793	0.33008	-0.13701	-0.18203	-112.655	-175.828	2241.649	-1.8992	1.8258	0.18163
0.794	-27.536	40.356	148.322	0.091309	-0.0063477	0.071289	-70.712	12.136	40.9121	0.0014648	0.13965	0.18066	-45.873	-9.204	47.568	0.36035	-0.14014	-0.19482	-82.856	-89.295	2209.044	-1.9651	1.8162	0.18587
0.796	-27.299	42.835	142.485	0.06665	0.0026855	0.082763	-75.137	7.045	57.984	-0.0073242	0.14355	0.18457	-63.411	33.933	23.006	0.38369	-0.13721	-0.20342	-12.73	-21.34	2143.539	-2.03	1.8084	0.19566
0.798	-24.044	46.3963	128.018	0.047363	0.0083008	0.086914	-47.953	51.7827	54.7975	-0.001709	0.13769	0.19043	-43.956	9.06	27.961	0.39248	-0.13291	-0.20606	24.676	21.307	2100.49	-2.0938	1.793	0.21094
0.8	-59.949	40.63871	136.6656	0.023926	0.018555	0.10205	-74.6105	7.609	55.6855	-0.0039063	0.13428	0.19482	-87.168	19.967	21.672	0.38545	-0.12353	-0.20567	34.7231	21.5159	2061.919	-2.1463	1.7716	0.23061
0.802	-73.6296	37.8925	138.949	0.012695	0.027344	0.10352	-51.619	-15.9832	130.8085	-0.0029297	0.14063	0.18799	-112.559	30.566	41.7764	0.36748	-0.11485	-0.19463	142.977	18.945	2060.805	-2.1826	1.7427	0.24058
0.804	-79.242	50.3022	119.4817	-0.0043945	0.039551	0.11475	-58.631	-64.0604	185.527	-0.01123	0.15234	0.1792	-115.8263	15.152	43.532	0.33691	-0.099609	-0.18408	187.279	81.75676	2101.502	-2.1837	1.7159	0.23876
0.806	-61.007	55.799	115.336	-0.016846	0.046387	0.11914	-74.563	-133.711	245.879	-0.034668	0.18213	0.16895	-146.879	57.328	69.3159	0.30039	-0.089649	-0.16748	184.542	132.576	2113.016	-2.1495	1.6777	0.22646
0.808	-77.4515	64.235	96.051	-0.024414	0.051758	0.125	-49.781	-112.612	349.698	-0.074463	0.22364	0.18311	-149.245	21.117	42.625	0.2457	-0.075684	-0.14541	167.892	205.401	2074.282	-2.0854	1.647	0.21143
0.81	-75.3569	49.432	95.7696	-0.034668	0.069824	0.12988	-115.552	-174.888	435.759	-0.13672	0.26318	0.19141	-104.975	70.621	48.7475	0.19101	-0.06084	-0.12822	119.036	211.512	2011.0532	-1.9896	1.6172	0.19057
0.812	-72.912	50.651	87.60132	-0.037109	0.069824	0.13428	-169.651	-241.5	528.8806	-0.24805	0.32031	0.21826	-97.7	9.602	6.474	0.14356	-0.04668	-0.11426	34.6132	187.867	1973.846	-1.9006	1.5917	0.17452
0.814	-58.898	40.9213	78.0775	-0.038086	0.07959	0.13379	-154.068	-238.724	571.2296	-0.31592	0.34521	0.23633	-108.978	47.36566	15.603	0.098145	-0.029297	-0.095703	9.023	162.476	1986.9562	-1.8354	1.5703	0.16725
0.816	-62.785	37.5961	90.1315	-0.038086	0.081543	0.13989	-168.671	-245.814	571.27	-0.46045	0.38916	0.27832	-56.417	-0.331999999999997	37.155	0.060254	-0.010352	-0.08291	18.083	88.036	2036.606	-1.8095	1.5573	0.16989
0.818	-49.924	30.343	81.9138	-0.032715	0.085449	0.13574	-117.73	-182.212	647.2586	-0.57568	0.41944	0.30224	-70.7726	42.328	55.0827	0.027539	0.01123	-0.073828	-0.451000000000001	77.574	2014.359	-1.8066	1.5449	0.18408
0.82	-55.741	29.179	80.7754	-0.01709	0.090332	0.13867	-134.676	-120.358	701.3516	-0.69141	0.45508	0.31738	-17.505	23.093	58.3373	0.0044921	0.030761	-0.069531	-4.366	83.70391	1971.3204	-1.8341	1.5365	0.19912
0.822	-45.572	23.441	93.2519	-0.011719	0.092773	0.13672	-155.677	-110.098	738.3386	-0.83594	0.52734	0.32666	10.679	57.5769	50.791	-0.01875	0.049707	-0.06416	-49.1511	137.6758	1946.0681	-1.8626	1.532	0.22719
0.824	-50.243	30.7057	80.511	0.0039063	0.095215	0.12646	-59.434	-23.635	794.5985	-0.90088	0.56787	0.33252	-0.664000000000001	75.923	63.9126	-0.031738	0.067383	-0.063477	-71.3213	193.33	1901.3525	-1.8867	1.5227	0.25571
0.826	-40.255	46.88601	75.1814	0.01416	0.095947	0.12109	-9.837	14.464	849.8769	-1.019	0.67725	0.34082	-31.886	71.186	46.953	-0.045801	0.083106	-0.061914	-54.775	221.475	1893.797	-1.9063	1.5162	0.28762
0.828	-46.827	42.589	85.33	0.027832	0.094727	0.11768	21.8775	45.249	950.887	-1.0991	0.76758	0.35767	-4.039	91.431	80.853	-0.051856	0.093164	-0.062891	-36.6292	243.006	1882.093	-1.9077	1.5083	0.30664
0.83	-45.844	27.4768	78.688	0.049316	0.094238	0.10742	50.9812	136.1	1039.626	-1.1895	0.85547	0.38232	-4.814	38.87	74.1035	-0.053418	0.09668	-0.065234	-69.0662	245.359	1854.553	-1.8973	1.5018	0.32218
0.832	-51.915	20.8135	62.6663	0.055176	0.089844	0.104	-38.319	138.606	1076.283	-1.3232	0.97461	0.44189	-8.3989	60.908	69.289	-0.049805	0.097949	-0.074707	-80.803	277.109	1797.5475	-1.8709	1.4893	0.32985
0.834	-32.564	23.8247	66.2044	0.071777	0.089844	0.093262	-46.435	146.83	1131.005	-1.3984	1.0293	0.47119	53.421	-1.48085	56.1974	-0.040039	0.095703	-0.07959	-101.4907	299.7259	1720.15	-1.8262	1.4754	0.33448
0.836	-21.377	31.2189	52.1491	0.079834	0.083984	0.085449	-73.55	116.636	1162.036	-1.5293	1.1055	0.53564	11.983	56.039	49.5428	-0.021973	0.093945	-0.08916	-163.605	329.547	1650.6961	-1.7749	1.4498	0.33759
0.838	-16.963	28.412	69.44	0.091309	0.080566	0.080078	-90.315	-9.09	1223.093	-1.6206	1.1489	0.56909	-10.927	34.7875	34.656	0.00029252	0.091406	-0.099902	-132.0432	308.907	1590.139	-1.7148	1.4355	0.34033
0.84	-12.178	23.331	56.881	0.10645	0.075684	0.072266	-73.761	-66.637	1301.831	-1.6797	1.1797	0.59814	7.78	95.075	79.228	0.024121	0.095313	-0.11084	-129.063	315.115	1556.827	-1.6578	1.4075	0.33955
0.842	-16.687	29.23	60.073	0.11328	0.072266	0.067871	-126.618	-154.177	1327.105	-1.6948	1.2095	0.62305	1.252	44.7881	92.821	0.046581	0.097754	-0.12149	-111.861	289.313	1512.02	-1.5974	1.3831	0.34072
0.844	-7.786	38.6029	68.6227	0.12061	0.071777	0.063477	-114.103	-233.92574	1380.525	-1.6758	1.2207	0.62646	-34.434	39.8034	106.88	0.060547	0.099609	-0.13086	-62.6611	287.094	1503.218	-1.5346	1.3522	0.33915
0.846	-27.315	27.8869	72.4555	0.13037	0.06543	0.055176	-54.2437	-220.11	1416.1341	-1.5894	1.2407	0.61816	-16.243	-10.94872	112.1	0.078321	0.10068	-0.13848	-30.216	290.59	1468.6492	-1.4692	1.3205	0.3373
0.848	-34.466	36.396	66.336	0.13135	0.064453	0.053223	-40.2118	-288.863	1433.3757	-1.4712	1.2592	0.59644	-72.099	-13.355	72.0041	0.080957	0.10059	-0.14463	-30.561	258.005	1408.317	-1.4082	1.2813	0.33447
0.85	-45.974	29.8675	61.464	0.13574	0.063965	0.051758	15.062	-317.28	1474.475	-1.3354	1.2778	0.57031	-115.313	6.47822	66.471	0.082129	0.10332	-0.14736	-3.67	263.133	1332.0314	-1.349	1.2443	0.32481
0.852	-57.054	29.799	60.5996	0.13696	0.059327	0.055176	54.564	-307.05	1482.273	-1.146	1.3052	0.51953	-86.323	-3.135	52.7072	0.088086	0.099023	-0.15108	30.636	233.98	1266.4526	-1.2841	1.2055	0.32131
0.854	-46.546	14.62607	64.324	0.13184	0.059082	0.054688	46.118	-308.07	1548.019	-1.0625	1.3203	0.50244	-133.256	21.5983	61.6847	0.083496	0.10156	-0.15381	37.5	234.86	1218.9764	-1.2192	1.1555	0.31386
0.856	-60.8743	9.069	57.844	0.13037	0.061035	0.056152	54.4248	-215.144	1633.265	-0.94092	1.3579	0.47559	-121.5132	-21.4548	47.129	0.083593	0.10195	-0.15225	62.992	244.8	1184.354	-1.1494	1.1091	0.30352
0.858	-70.19652	20.612	50.743	0.13184	0.060059	0.061035	9.31	-172.7045	1618.6	-0.89844	1.3813	0.47607	-96.387	20.675	76.8252	0.076075	0.10557	-0.14688	52.115	279.4938	1142.151	-1.0757	1.0591	0.29248
0.86	-36.643	23.321	52.858	0.12451	0.0625	0.060059	-14.321	-167.47	1607.653	-0.90234	1.4004	0.48389	-96.417	-27.75828	78.9596	0.064361	0.12041	-0.1418	26.261	311.569	1055.6179	-0.99841	1.0109	0.27519
0.862	-42.72	29.568	50.344	0.12378	0.065185	0.059326	-21.087	-69.644	1582.732	-0.95313	1.4277	0.50244	-106.979	12.1456	108.864	0.051471	0.13915	-0.1416	-29.299	319.464	950.003	-0.91677	0.96249	0.26191
0.864	-52.397	41.6715	61.9791	0.12354	0.067383	0.060059	-81.47	-68.826	1570.97	-0.99414	1.4355	0.50635	-62.476	-71.734	148.755	0.032227	0.16064	-0.14014	-66.507	357.21	839	-0.83631	0.91483	0.24629
0.866	-60.454	44.8449	69.521	0.11816	0.07373	0.062012	-104.902	-54.041	1619.01	-1.082	1.4453	0.53418	-72.479	-108.8494	232.484	0.0065293	0.188	-0.1373	-51.406	358.856	772.052	-0.75752	0.86493	0.22519
0.868	-44.215	22.7159	80.593	0.12256	0.074219	0.062988	-123.66	-34.88	1606.743	-1.1443	1.4612	0.54664	-14.46	-227.801	347.058	-0.02161	0.21897	-0.13799	-34.134	365.952	735.7356	-0.67432	0.81299	0.21045
0.87	-57.38	-5.3598	124.293	0.11865	0.078125	0.064941	-117.978	-96.35	1634.532	-1.2017	1.4771	0.55762	87.552	-301.9671	507.105	-0.057172	0.24945	-0.14386	-42.064	315.74	696.9997	-0.59278	0.75781	0.19775
0.872	-65.051	-20.51714	175.419	0.11328	0.085693	0.063233	-49.158	-88.47	1665.477	-1.2598	1.5059	0.56934	66.136	-378.033	674.832	-0.096327	0.29457	-0.16271	-98.111	292.248	626.089	-0.51524	0.70625	0.18223
0.874	-101.0384	-28.68	241.402	0.10449	0.10107	0.0625	-32.893	-130.848	1688.138	-1.2871	1.5254	0.57764	58.515	-426.509	747.347	-0.1416	0.34912	-0.1748	-95.08	294.748	565.948	-0.44063	0.6543	0.167
0.876	-69.22	-47.347	302.417	0.073242	0.12598	0.061035	-52.787	-201.614	1775.7319	-1.3276	1.5747	0.60547	101.451	-408.574	824.3	-0.20352	0.42642	-0.17755	-129.727	314.3158	527.951	-0.36738	0.60157	0.15039
0.878	-103.497	-88.601	331.785	0.058105	0.14941	0.061523	-68.104	-156.966	1825.3247	-1.3692	1.6104	0.64209	136.155	-393.824	878.475	-0.28785	0.5197	-0.14945	-137.18	340.377	463.72	-0.29346	0.54688	0.1377
0.88	-116.659	-117.71	370.442	-0.0058594	0.19385	0.069824	-113.567	-179.221	1849.428	-1.4214	1.6353	0.68652	138.7069	-278.297	956.275	-0.4122	0.61418	-0.10266	-145.904	309.948	429.818	-0.2211	0.49531	0.11201
0.882	-107.279	-120.57	424.2743	-0.066651	0.22949	0.084961	-142.748	-190.886	1902.688	-1.5308	1.6665	0.72168	186.098	-215.806	1011.7354	-0.58214	0.72453	-0.054116	-171.0579	278.511	398.8667	-0.14844	0.44316	0.091894
0.884	-92.414	-97.536	474.291	-0.13818	0.26367	0.10791	-174.6696	-174.726	1911.597	-1.6304	1.6831	0.74024	174.585	-108.37	1045.892	-0.77539	0.8418	0.016113	-214.022	207.0476	348.5832	-0.080466	0.39668	0.074707
0.886	-103.585	-60.80688	517.243	-0.25977	0.32227	0.13818	-235.323	-225.003	1917.837	-1.7227	1.6953	0.76074	184.031	-129.949	1085.911	-0.99139	0.94945	0.088589	-212.501	159.996	329.8723	-0.014941	0.34814	0.05205
0.888	-121.719	-43.166	556.857	-0.31982	0.35059	0.15039	-197.761	-147.6323	1912.685	-1.8418	1.6953	0.78662	168.732	-39.182	1214.491	-1.2175	1.0463	0.14839	-186.513	130.753	302.636	0.043945	0.3042	0.032227
0.89	-84.758	-26.948	593.2396	-0.43896	0.4165	0.18213	-201.295	-92.903	1863.779	-1.8901	1.6899	0.79492	151.212	-17.298	1323.607	-1.4329	1.1294	0.19444	-209.798	118.404	261.344	0.1041	0.26133	0.01211
0.892	-50.482	-4.32899999999999	641.558	-0.52271	0.47144	0.21021	-206.6423	-96.1509	1886.301	-1.9863	1.6719	0.8208	174.242	42.8916	1363.201	-1.629	1.1975	0.22798	-167.289	140.544	225.8738	0.15879	0.21631	-0.0049803
0.894	-59.093	32.132	695.795	-0.6084	0.5293	0.22998	-197.148	-18.759	1882.979	-2.0366	1.6587	0.83594	178.396	53.662	1384.7093	-1.7905	1.2671	0.25439	-138.622	126.675	174.192	0.20879	0.17842	-0.026465
0.896	-50.83	78.887	751.4377	-0.71875	0.6123	0.26221	-189.4971	-26.7308	1870.881	-2.0718	1.6372	0.85449	68.993	1.66	1415.055	-1.9443	1.3361	0.27422	-110.747	159.4675	163.355	0.25557	0.14443	-0.044629
0.898	-42.399	110.672	814.1303	-0.77832	0.6543	0.27588	-127.844	11.2082	1888.915	-2.0947	1.6133	0.86377	-9.7687	1.48000000000002	1501.191	-2.0698	1.4109	0.28841	-47.247	146.4933	155.126	0.28809	0.11084	-0.055664
0.9	-37.231	121.228	880.4919	-0.88037	0.74756	0.29883	-105.336	91.1838	1883.447	-2.0977	1.6035	0.87158	-44.543	-142.37	1564.098	-2.1685	1.4818	0.30267	-49.196	120.8603	154.521	0.31943	0.083496	-0.064844
0.902	-66.459	102.597	943.074	-0.95776	0.81713	0.32666	-99.475	76.91363	1911.18421	-2.0776	1.5786	0.87207	-155.025	-174.51	1601.56	-2.2492	1.5319	0.31768	-10.646	84.437	127.888	0.33603	0.055664	-0.0625
0.904	-73.11421	72.8509	1032.99	-1.0371	0.88086	0.34619	-114.38	102.045	1933.377	-2.0542	1.5698	0.875	-225.683	-369.782	1641.356	-2.3184	1.5703	0.33154	-6.431	61.179	87.062	0.33995	0.033789	-0.06289
0.906	-58.9587	17.354	1118.092	-1.1558	0.97119	0.38086	-148.459	67.971	1946.5495	-2.0293	1.5605	0.86768	-222.646	-372.799	1723.667	-2.3485	1.5909	0.33105	3.37299999999999	61.46825	48.021	0.32744	0.016894	-0.060352
0.908	-60.415	-38.024	1184.122	-1.2148	1.0078	0.39307	-138.185	-26.104	1987.315	-1.9956	1.5513	0.86719	-214.516	-456.94	1758.082	-2.3185	1.5883	0.31833	-2.605	41.0122	53.2985	0.29785	0.0043945	-0.049316
0.91	-86.519	-97.0933	1241.638	-1.3237	1.0747	0.41992	-95.686	-13.543	1997.7848	-1.9902	1.541	0.87158	-218.9925	-404.08	1788.326	-2.2181	1.562	0.29428	8.82000000000001	63.526	53.6654	0.25283	-0.0043945	-0.028711
0.912	-72.726	-132.581	1272.628	-1.3955	1.1035	0.43555	-118.946	-52.6576	1982.4465	-1.9839	1.5337	0.87109	-118.559	-457.13	1815.232	-2.0456	1.5368	0.25805	-6.666	32.5867	57.654	0.20645	-0.0081055	-0.010547
0.914	-13.3216	-152.887	1296.633	-1.4604	1.1294	0.45361	-131.188	-57.087	1992.0441	-1.9812	1.5178	0.87622	-169.442	-437.71	1849.374	-1.8379	1.5039	0.21338	10.279	22.239	43.3457	0.14941	-0.0057617	0.0054687
0.916	7.882	-168.744	1332.4943	-1.5474	1.1411	0.47852	-113.047	7.5216	1968.389	-1.9858	1.5063	0.87793	-154.126	-411.22	1872.958	-1.6495	1.4701	0.1655	38.802	0.516000000000002	40.7208	0.086232	-0.00058594	0.027735
0.918	28.2442	-175.487	1374.978	-1.5762	1.1426	0.48486	-93.808	-29.9235	1956.9019	-1.9844	1.4902	0.87451	-169.72	-376.745	1903.386	-1.4852	1.4457	0.11841	27.349	9.138	31.1961	0.019531	0.0058594	0.056152
0.92	55.14	-168.511	1445.364	-1.5933	1.1392	0.49902	-42.71	6.708	1991.41	-1.9844	1.4785	0.86963	-202.928	-292.9653	1892.847	-1.3551	1.4343	0.084919	49.475	21.3959	24.063	-0.046386	0.025683	0.078027
0.922	51.951	-164.127	1488.606	-1.5735	1.132	0.49975	-51.406	18.057	1975.779	-1.9766	1.4668	0.87158	-237.491	-280.781	1890.95	-1.2657	1.4394	0.064536	17.165	15.811	20.491	-0.11075	0.044043	0.1084
0.924	41.099	-155.124	1523.034	-1.5293	1.125	0.49756	-47.659	20.669	1973.936	-1.9571	1.4502	0.86573	-213.835	-176.69	1853.868	-1.2202	1.4595	0.055176	-28.505	29.246	25.72	-0.17168	0.063965	0.13653
0.926	43.9126	-152.666	1525.902	-1.4473	1.1094	0.479	-35.006	147.7526	1948.375473	-1.9414	1.4355	0.85986	-182.744	-211.944	1797.141	-1.223	1.4994	0.053665	-59.469	22.496	33.2911	-0.22822	0.088574	0.15947
0.928	60.7152	-119.4881	1491.0385	-1.3965	1.1094	0.45947	-96.736	168.797	1903.067	-1.9077	1.4243	0.84961	-166.817	-115.82	1762.805	-1.2594	1.5383	0.059195	-84.1862	50.6978	51.623	-0.28662	0.1084	0.19629
0.93	37.391	-85.154	1473.337	-1.2988	1.1055	0.42822	-100.161	192.098	1881.1104	-1.894	1.4146	0.8418	-48.2664	-140.435	1797.319	-1.3224	1.5797	0.066205	-91.576	78.814	49.134	-0.33389	0.1292	0.22139
0.932	-7.884	-54.544	1457.525	-1.2295	1.1079	0.41358	-118.368	236.483	1839.578	-1.8555	1.3887	0.82666	-19.239	-81.233	1849.785	-1.4057	1.6206	0.070396	-127.3951	122.285	51.194	-0.3789	0.1459	0.24668
0.934	-15.828	-56.615	1480.076	-1.1733	1.105	0.40625	-135.062	173.704	1847.8377	-1.825	1.3811	0.8064	100.4747	-179.1391	1874.283	-1.4922	1.6504	0.075195	-129.7863	105.827	66.7087	-0.41446	0.15879	0.2709
0.936	-21.651	-78.238	1507.255	-1.1387	1.1172	0.39209	-116.8209	191.775	1861.777	-1.7871	1.3672	0.79541	205.655	-211.725	1916.553	-1.5774	1.6812	0.079024	-165.813	82.054	52.003	-0.44268	0.17109	0.29414
0.938	-8.288	-116.262	1551.9321	-1.127	1.125	0.39111	-153.225	161.276	1838.831	-1.748	1.3613	0.77393	273.84	-281.785	1908.06225	-1.656	1.7029	0.083008	-144.01	52.9764	38.4092	-0.46191	0.17725	0.31836
0.94	-11.65	-137.4139	1572.468	-1.1309	1.1406	0.39697	-149.3328	98.331	1848.7428	-1.728	1.3521	0.76172	226.87	-287.269	1950.176	-1.722	1.7244	0.081828	-129.28	1.748	31.9552	-0.47325	0.1709	0.33526
0.942	-7.661	-146.576	1586.6324	-1.1406	1.1602	0.39991	-90.836	122.711	1842.591	-1.6831	1.3394	0.73633	207.992	-255.137	1974.841	-1.7716	1.737	0.080649	-128.6659	4.463	38.307	-0.46787	0.16182	0.34609
0.944	-4.686	-154.778	1601.7354	-1.1553	1.1797	0.40576	-113.997	87.748	1810.299	-1.6433	1.3254	0.71801	134.512	-261.389	2003.585	-1.8022	1.7485	0.071777	-136.86026	-6.248	54.71	-0.4542	0.14971	0.34648
0.946	-53.598	-162.324	1604.714	-1.1753	1.1968	0.41211	-89.313	87.942	1805.968	-1.605	1.312	0.69434	82.947	-226.4254	1994.396	-1.8132	1.7603	0.064267	-140.1509	29.693	56.531	-0.42187	0.1293	0.33565
0.948	-47.868	-181.948	1625.896	-1.1831	1.2056	0.4209	-64.598	125.615	1786.9397	-1.5498	1.2832	0.65674	93.698	-272.02	1994.977	-1.8097	1.7707	0.049919	-104.996	30.913	40.2874	-0.37842	0.10645	0.32031
0.95	-73.161	-198.1	1646.618	-1.1968	1.231	0.43848	-114.4901	110.378	1785.05	-1.5195	1.2695	0.64502	69.04	-217.0918	1953.446	-1.7985	1.7773	0.038971	-77.7	32.072	65.432	-0.32363	0.086621	0.3039
0.952	-96.3767	-203.321	1673.5343	-1.208	1.2471	0.44409	-79.039	173.6856	1766.824	-1.457	1.2344	0.6084	58.8207	-214.9965	1927.1044	-1.7889	1.7834	0.028127	-68.1525	15.526	86.802	-0.26299	0.065429	0.27871
0.954	-139.3799	-200.451	1682.47424	-1.2266	1.2578	0.4541	-72.7334	197.5854	1710.50884	-1.4094	1.2073	0.58081	36.2	-101.169	1921.388	-1.7769	1.7856	0.018555	-66.8627	-9.3815	97.3281	-0.19893	0.035742	0.25332
0.956	-154.9858	-166.7764	1670.5411	-1.2451	1.2715	0.46631	-96.779	181.4698	1671.4889	-1.3672	1.1797	0.55518	56.6317	-63.285	1900.986	-1.7865	1.7787	0.01084	-16.107	15.4426	92.948	-0.13506	0.012891	0.23018
0.958	-165.7601	-128.411	1664.7881	-1.2593	1.2778	0.47363	-64.943	238.9	1623.846	-1.3081	1.1313	0.52344	43.346	51.6128099	1907.048	-1.8004	1.7703	0.010643	-6.564	10.5883	68.994	-0.076172	-0.010742	0.20264
0.96	-176.938	-73.596	1649.2197	-1.3013	1.2935	0.49023	-91.486	235.448	1558.879	-1.2808	1.1089	0.50586	104.215	26.1575	1889.78	-1.8192	1.7657	0.0055651	0.661000000000001	30.529	46.1675	-0.019238	-0.02998	0.18027
0.962	-162.661	-55.232	1664.4201	-1.3428	1.3028	0.50684	-60.155	257.935	1550.428	-1.23	1.0591	0.47217	18.337	58.519	1904.028	-1.841	1.7516	0.0045899	25.261	11.1508	15.5951	0.035059	-0.051953	0.16221
0.964	-137.246	-52.078	1670.161	-1.3887	1.3145	0.52197	-10.207	294.711	1505.319	-1.1972	1.0206	0.4541	-59.7722	28.4369	1902.62843	-1.8535	1.7266	0.0029297	6.837	15.0881	-3.067	0.083105	-0.076953	0.14463
0.966	-126.4605	-49.1581	1689.964	-1.4702	1.3442	0.53906	-39.936	229.6362	1465.592	-1.1616	0.98486	0.42969	-149.109	37.4853	1923.8595	-1.8488	1.6915	-0.0011719	18.268	14.0109	2.995	0.12734	-0.099901	0.13662
0.968	-116.38	-38.3982	1689.468	-1.5117	1.3613	0.54932	4.93	228.905	1434.294	-1.1172	0.93555	0.41064	-153.691	28.906	1882.053	-1.8374	1.6552	-0.005468	25.684	32.9599	41.1269	0.16455	-0.125	0.13086
0.97	-101.295	-27.404	1691.933	-1.5996	1.3926	0.56396	-5.204	213.53	1397.365	-1.0996	0.91406	0.39893	-176.222	-4.715	1884.4218	-1.8171	1.6192	-0.0070316	35.43	39.783	51.703	0.20322	-0.14541	0.12226
0.972	-80.279	-43.643	1696.3444	-1.6558	1.4155	0.58301	-10.143	196.183	1392.4304	-1.0581	0.86768	0.37988	-152.113	-66.4606	1884.0069	-1.803	1.5845	-0.0081055	37.377	35.814	29.3567	0.23877	-0.16474	0.11455
0.974	-86.455	-63.4185	1700.771	-1.708	1.4297	0.604	18.579	227.4788	1390.5919	-1.0274	0.83008	0.36182	-116.878	-111.8972	1900.292	-1.7886	1.5513	-0.0048828	23.896	40.294	5.49	0.27393	-0.19053	0.10517
0.976	-98.635	-91.1382	1733.832	-1.772	1.4341	0.61719	-51.396	180.7495	1333.996	-0.99414	0.79883	0.3501	-138.541	-102.312	1901.6703	-1.7713	1.5259	-0.0003906	-34.809	25.826	13.738	0.30605	-0.21035	0.098045
0.978	-89.755	-113.6582	1738.214	-1.8139	1.4335	0.63232	-59.312	175.0317	1293.718	-0.95947	0.75342	0.33008	-83.323	-104.645	1897.969	-1.7611	1.5039	0.015235	-61.755	55.899	24.2742	0.34082	-0.22266	0.078125
0.98	-69.508	-122.9332	1772.073	-1.8394	1.4341	0.64648	-58.1071	196.005	1245.8472	-0.93359	0.72754	0.31494	-17.3603	-43.861	1871.199	-1.7534	1.4789	0.029297	-51.365	49.88	50.959	0.37793	-0.25039	0.061817
0.982	-86.187	-123.369	1768.24	-1.8555	1.4277	0.65088	-83.1165	169.281	1196.7606	-0.88086	0.68164	0.29932	31.902	-37.449	1842.234	-1.7403	1.4628	0.039649	-70.597	63.365	48.94	0.4125	-0.26934	0.03916
0.984	-93.566	-114.638	1742.7218	-1.8516	1.4277	0.65576	-18.852	204.51	1175.74709	-0.84985	0.64843	0.28637	59.601	46.597	1813.751	-1.7261	1.4497	0.052734	-93.826	48.7746	37.542	0.44375	-0.2873	0.016504
0.986	-61.849	-91.237	1718.841	-1.8301	1.418	0.65576	-56.052	219.365	1101.648	-0.8125	0.61816	0.27148	124.448	51.775	1803.2953	-1.7163	1.4417	0.065039	-130.3255	23.308	45.303	0.46944	-0.3042	-0.0083009
0.988	-38.532	-48.424	1685.889	-1.8101	1.419	0.65479	-63.015	206.207	1065.7043	-0.75586	0.57031	0.25488	86.364	133.488	1795.925	-1.7015	1.4363	0.079688	-140.3618	37.915	53.469	0.49219	-0.31641	-0.028809
0.99	-37.26	-6.0664	1717.1614	-1.7886	1.4106	0.65234	-32.12	257.0516	1014.136	-0.72803	0.54639	0.24219	94.341	118.421	1758.548	-1.6922	1.4316	0.096094	-128.5432	52.717	48.525	0.50733	-0.32451	-0.054004
0.992	-29.704	8.9483	1717.78	-1.7695	1.4082	0.65381	-56.198	243.00153	938.292	-0.67578	0.49805	0.22412	69.486	200.264	1722.7891	-1.682	1.43	0.11357	-126.342	79.1958	47.5208	0.51602	-0.32764	-0.072754
0.994	-26.376	13.2952	1722.767	-1.7637	1.3965	0.65479	-35.659	264.4037	893.6739	-0.64014	0.46436	0.20801	101.492	177.252	1674.4579	-1.6772	1.4263	0.12695	-107.9221	47.316	47.55	0.5164	-0.3253	-0.086035
0.996	-62.942	24.9116	1708.781	-1.7495	1.3853	0.65527	-48.463	288.717	849.6891	-0.59863	0.43164	0.19189	98.467	192.936	1630.667	-1.6684	1.4215	0.14795	-130.21	45.465	59.215	0.50625	-0.3251	-0.094238
0.998	-82.693	36.243	1683.279	-1.7461	1.3691	0.65625	-90.0499	250.588	800.006	-0.54297	0.38184	0.1748	154.613	126.705	1600.78	-1.6524	1.4148	0.1584	-141.1575	22.211	80.0617	0.49414	-0.31348	-0.094727
1	-92.485	34.308	1683.835	-1.7441	1.3594	0.65137	-55.915	263.056	758.558	-0.51563	0.35645	0.16455	118.286	112.154	1586.238	-1.6211	1.4055	0.16855	-134.1321	20.571	70.348	0.46709	-0.30303	-0.094336
1.002	-96.258	44.897	1673.019	-1.7339	1.3364	0.6543	-70.19432	235.083	717.21	-0.46289	0.32129	0.14355	132.382	76.792	1570.0331	-1.5844	1.392	0.17637	-105.3658	36.315	67.458	0.4334	-0.28867	-0.084961
1.004	-128.587	32.525	1677.479	-1.7241	1.3306	0.65723	-79.64	188.5499	691.7139	-0.42529	0.29297	0.13037	127.877	84.874	1580.236	-1.5371	1.3809	0.17676	-81.785	38.9002	63.988	0.39278	-0.26797	-0.075195
1.006	-147.151	14.883	1679.105	-1.7046	1.3052	0.6543	-31.868	206.489	662.2192	-0.3877	0.26465	0.11084	79.556	75.546	1564.791	-1.4897	1.3557	0.18604	-59.333	39.4153	67.446	0.35	-0.24629	-0.063672
1.008	-143.214	-23.902	1685.5737	-1.6938	1.291	0.65088	-54.416	176.5228	615.5596	-0.34229	0.22607	0.10156	55.306	77.723	1539.382	-1.4402	1.3349	0.1873	-38.274	-1.6404	64.472	0.30469	-0.21387	-0.04541
1.01	-130.6189	-34.647	1688.1581	-1.6758	1.2715	0.6499	-28.603	185.98873	583.949	-0.31982	0.2124	0.089355	52.8324	107.798	1524.181	-1.385	1.3102	0.18418	-13.199	4.2712	73.76272	0.25439	-0.17978	-0.027344
1.012	-117.3252	-37.3964	1688.37	-1.6465	1.25	0.64355	-20.229	179.592	540.7408	-0.28418	0.17529	0.073242	1.519	139.532	1476.233	-1.3285	1.286	0.18213	-4.56	-10.776	42.927	0.20322	-0.14473	-0.0023437
1.014	-108.446	-34.403	1663.021	-1.6382	1.2368	0.64063	-27.403	138.944	506.8	-0.25244	0.15332	0.062256	-97.939	191.765	1446.0136	-1.2749	1.2622	0.1748	12.97	2.578	44.4746	0.15674	-0.1084	0.021875
1.016	-108.308	-12.303	1630.7168	-1.6055	1.2129	0.62939	28.079	153.459	479.451	-0.22314	0.13428	0.04834	-107.941	197.952	1391.0464	-1.2198	1.229	0.17529	1.528	9.5316	18.634	0.11104	-0.074219	0.050977
1.018	-94.945	7.669	1612.1105	-1.5794	1.199	0.61719	7.01300000000001	154.008	428.008	-0.19189	0.10742	0.03125	-194.138	262.238	1362.1035	-1.171	1.1986	0.17129	3.855	3.7036	20.883	0.067871	-0.04248	0.077637
1.02	-108.2289	24.791	1611.5933	-1.5522	1.1782	0.60938	-14.185	142.158	413.2569	-0.17041	0.090576	0.021484	-147.514	242.782	1288.302	-1.1261	1.17	0.16777	30.412	27.2471	40.48393	0.028418	-0.0079104	0.10303
1.022	-84.172	31.6638	1616.6489	-1.5171	1.1548	0.5957	5.87	183.08	370.7544	-0.14502	0.071777	0.01123	-149.781	315.106	1243.296	-1.0751	1.1423	0.16426	34.086	3.28	59.093	-0.0046874	0.021386	0.12949
1.024	-87.07055	59.79	1578.3354	-1.502	1.1426	0.58643	-37.444	181.065	321.3512	-0.12158	0.054688	-0.0014648	-148.958	287.0134	1167.528	-1.0249	1.1118	0.16553	20.562	27.6591	53.896	-0.035938	0.047558	0.1498
1.026	-73.902	92.759	1550.389	-1.4688	1.1289	0.56299	-13.231	196.883	294.955	-0.10693	0.051758	-0.0043945	-150.31	317.927	1136.747	-0.97969	1.0795	0.16562	3.42	33.2444	22.94	-0.055273	0.069434	0.16865
1.028	-75.6022	96.889	1522.311	-1.4329	1.1141	0.55396	11.382	211.735	254.4966	-0.095215	0.033691	-0.016602	-86.742	253.65	1129.339	-0.93203	1.0483	0.16465	-31.843	77.924	24.912	-0.078613	0.088379	0.18994
1.03	-68.057	99.9	1514.7994	-1.4053	1.0996	0.54199	-35.406	172.243	241.0859	-0.084228	0.022705	-0.02417	-110.230626	287.844	1115.493	-0.89024	1.0182	0.1666	-27.723	68.4	15.837	-0.083789	0.096582	0.20713
1.032	-71.582	92.376	1498.314	-1.3647	1.0835	0.5249	1.532	151.602	233.2154	-0.073242	0.01123	-0.032227	-59.20978	235.687	1084.806	-0.84873	0.98584	0.16201	-42.29	55.37	26.8872	-0.092187	0.10273	0.22715
1.034	-34.043	86.53	1454.3221	-1.3413	1.0747	0.51758	-19.869	132.2227	197.422	-0.060547	0	-0.04541	-10.066	260.999	1071.523	-0.80615	0.95166	0.16162	-46.416	41.5396	12.8646	-0.094141	0.10976	0.24082
1.036	-0.805000000000007	65.291	1440.8553	-1.3066	1.0625	0.50049	-34.375	111.918	173.069	-0.0625	-0.0053711	-0.049316	-65.863	222.78475	1043.963	-0.76338	0.91553	0.16084	-85.596	18.312	7.7539	-0.10274	0.11338	0.25303
1.038	3.148	50.168	1426.849	-1.2744	1.0532	0.4834	14.796	114.296	165.3435	-0.049316	-0.021484	-0.063477	-59.632	228.467	1019.1993	-0.7207	0.8791	0.15332	-115.8585	57.3483	38.03	-0.10889	0.11621	0.26172
1.04	12.48	45.407	1422.4491	-1.2485	1.0376	0.46777	-67.27	86.086	130.741	-0.034668	-0.029296	-0.068604	-20.4639	192.23	993.92	-0.67852	0.84629	0.14981	-135.782	59.6861	80.115	-0.11143	0.11289	0.2752
1.042	8.936	64.311	1403.68046	-1.2051	1.0195	0.45166	-45.602	77.842	130.4345	-0.02832	-0.039063	-0.07373	-10.374	176.805	940.595	-0.63554	0.80977	0.14366	-105.5151	85.728	83.968	-0.11866	0.11729	0.2836
1.044	17.32	49.232	1389.6649	-1.1807	1.0117	0.43506	-48.388	84.3662	124.7141	-0.0073242	-0.050781	-0.083984	-5.587	158.825	868.466	-0.59131	0.77686	0.13428	-86.415	69.72634	64.605	-0.12686	0.11963	0.29063
1.046	-3.507	44.496	1372.714	-1.1396	0.99805	0.4209	-94.0546	70.823	137.9748	-0.0019531	-0.054688	-0.089844	77.355	147.439	786.906	-0.54687	0.74082	0.12734	-124.8769	40.13	46.2704	-0.12822	0.12432	0.29453
1.048	-26.145	33.09723	1364.372	-1.1136	0.98462	0.40747	-41.28	56.939	156.921	0.012695	-0.066895	-0.098633	44.617	189.094	735.8721	-0.49941	0.70234	0.11943	-127.29	23.109	60.72	-0.12695	0.12695	0.29688
1.05	-58.692	64.852	1340.515	-1.0957	0.97461	0.39502	-83.2359	53.7633	124.9904	0.022461	-0.071289	-0.10401	55.175	191.475	674.4749	-0.44941	0.66016	0.10967	-159.23	-27.58401	123.0965	-0.12432	0.12979	0.29668
1.052	-64.6209	89.847	1300.0227	-1.0625	0.9541	0.38672	-92.36	34.099	93.4817	0.028809	-0.075195	-0.10596	107.923	228.9388	655.5209	-0.39766	0.6209	0.10107	-142.5003	-70.896	219.7169	-0.1165	0.1374	0.29912
1.054	-69.938	112.799	1261.8054	-1.041	0.94922	0.38037	-47.027	54.8015	57.801	0.03418	-0.088379	-0.10742	98.2557	194.677	602.0481	-0.34473	0.58203	0.088867	-144.514	-154.82	331.824	-0.10869	0.14131	0.29951
1.056	-75.22062	130.777	1204.643	-1	0.92773	0.36426	-80.2638	69.490544	34.957	0.035156	-0.083984	-0.10693	48.952	234.5513	560.7903	-0.28252	0.53974	0.083008	-134.133	-194.076	505.782	-0.096878	0.15713	0.30117
1.058	-82.508	129.7545	1168.548	-0.97022	0.90918	0.3545	-29.951	54.3607	59.54761	0.02832	-0.097168	-0.11426	53.295	207.677	510.031	-0.22441	0.49883	0.075097	-148.101	-317.9787	692.446	-0.084473	0.17334	0.30273
1.06	-57.46	121.563	1145.205	-0.94092	0.88721	0.34668	-22.686	55.8068	37.376	0.023925	-0.10156	-0.11573	-45.321	251.417	468.67651	-0.16543	0.45821	0.061817	-220.115	-421.786	835.44	-0.078027	0.18974	0.30928
1.062	-58.706	123.835	1121.706	-0.90039	0.8584	0.33105	-69.4389	43.7207	37.1583	0.02002	-0.10352	-0.11816	-83.51	208.853	421.877418	-0.11045	0.421	0.054297	-195.019	-479.222	927.7536	-0.078613	0.20937	0.31152
1.064	-60.681	128.823	1117.872321	-0.87842	0.84619	0.32275	2.208	50.41955	65.6436	0.0053711	-0.11182	-0.11621	-71.098	214.125	386.1845	-0.066895	0.38721	0.047852	-192.428	-438.153	1030.985	-0.091895	0.24297	0.30332
1.066	-63.94318	117.957	1114.346	-0.8374	0.81494	0.30762	-26.698	59.8104	55.411	0.0024414	-0.11572	-0.11768	-112.368	127.8894	347.688	-0.026855	0.35537	0.043164	-189.869	-323.097	1134.3969	-0.125	0.29238	0.27813
1.068	-71.7923	108.0104	1073.9767	-0.81225	0.79126	0.30102	-36.951	29.8017	68.585	-0.0053711	-0.11865	-0.11816	-158.182	119.4105	290.797	0.0026368	0.3212	0.039649	-248.327	-231.231	1230.603	-0.17139	0.37158	0.24365
1.07	-92.995	114.8317	1025.9738	-0.78613	0.76758	0.28418	-4.418	29.6747	51.9704	-0.0080566	-0.12012	-0.11988	-144.511	63.517	285.775	0.022558	0.28838	0.041602	-266.267	-120.116	1285.528	-0.23408	0.47002	0.24649
1.072	-88.9537	118.9395	1009.9168	-0.75293	0.73535	0.27295	-55.93	21.1569	26.792	-0.0083008	-0.12646	-0.12158	-146.3133	100.394	258.551	0.041211	0.25733	0.040528	-158.524	-138.889	1358.434	-0.32051	0.57979	0.26465
1.074	-85.7538	104.4588	993.5503	-0.73877	0.72217	0.26416	-4.763	-6.701	57.0472	-0.0087891	-0.12646	-0.12305	-178.169	87.406	216.55	0.066406	0.23096	0.036621	-67.538	-108.367	1525.308	-0.43105	0.6958	0.30879
1.076	-83.6192	100.2124	968.4664	-0.71045	0.69482	0.24414	-15.362	10.2343	42.206	-0.003418	-0.12354	-0.12549	-99.054	121.656	205.379	0.092087	0.19697	0.028809	-37.426	-153.525	1743.268	-0.5628	0.80801	0.35654
1.078	-70.0368	111.9012	931.5229	-0.69751	0.67114	0.24487	-45.938	-6.3707	55.5846	0.0063477	-0.12744	-0.12891	-157.844	109.9	176.767	0.12246	0.16904	0.020605	-38.017	-113.436	1880.054	-0.70557	0.90869	0.41211
1.08	-38.468	119.2428	896.93	-0.67871	0.65723	0.23975	5.126	-7.5078	56.4437	0.016113	-0.12818	-0.13379	-135.6708	127.751	143.326	0.15488	0.1331	0.010059	-22.26	-67.966	1939.447	-0.86963	1.0157	0.45351
1.082	-25.858	119.844	892.4248	-0.65332	0.625	0.23291	-23.682	14.887	32.531	0.030762	-0.12939	-0.13232	-127.325	123.7496	179.4145	0.18027	0.10459	-0.002832	-65.003	-66.21	1935.806	-1.0371	1.1379	0.49277
1.084	-2.445	123.326	866.974	-0.63818	0.60791	0.22461	-18.441	-1.006	57.8596	0.041992	-0.12988	-0.14111	-161.235	150.61	159.8102	0.19629	0.077637	-0.011719	-131.698	-105.42	1928.848	-1.2086	1.2821	0.54785
1.086	3.281	143.411	835.623	-0.60938	0.57764	0.20605	0.835000000000001	22.156	49.2178	0.048828	-0.13232	-0.14502	-142.942	155.341	145.5704	0.20254	0.056934	-0.011133	-168.3775	-166.95	1949.549	-1.3837	1.4526	0.61191
1.088	30.333	156.1491	793.2127	-0.58593	0.55322	0.19604	-46.92	35.704	33.061	0.064941	-0.14209	-0.14795	-85.5039	150.613	146.298	0.18984	0.043164	-0.010742	-253.759	-248.36	1959.802	-1.5698	1.6372	0.69141
1.09	27.695	164.6322	775.9089	-0.55908	0.53027	0.18359	-25.664	32.544	39.003	0.076904	-0.14086	-0.156	-81.3753	155.384	99.084	0.15899	0.039258	-0.0052734	-258.696	-356.01	2010.647	-1.7787	1.8193	0.76865
1.092	21.988	170.548	738.4196	-0.51953	0.49805	0.16455	-39.419	56.821	32.486	0.092773	-0.14453	-0.15771	-59.926	123.436	81.857	0.11123	0.038281	0.012988	-267.59	-401.426	2077.12	-2.016	1.9691	0.85049
1.094	-3.383	153.085	718.488	-0.50049	0.48242	0.15869	-84.3106	50.097	38.801	0.11084	-0.15039	-0.16455	21.847	108.255	77.9531	0.064453	0.03418	0.029297	-181.844	-465.02	2101.188	-2.2629	2.0816	0.91611
1.096	-12.614	149.877	695.0772	-0.46484	0.44727	0.13916	-48.823	40.927	43.5349	0.11865	-0.15283	-0.16943	13.791	64.0691	60.7166	0.032519	0.035645	0.042578	-22.457	-419.49	2057.442	-2.4742	2.1445	0.97237
1.098	-21.976	132.078	662.493	-0.43921	0.42603	0.12427	-92.2566	56.693	18.626	0.12646	-0.14795	-0.17188	49.84	77.3658	68.3736	0.011524	0.034277	0.057715	88.9426	-411.89	2036.842	-2.623	2.1563	1.0044
1.1	-19.299	129.317	649.163	-0.41699	0.40527	0.11768	-72.33	32.0153	47.4745	0.12842	-0.14062	-0.17334	84.3606	18.931	83.54	-0.0056641	0.033887	0.066309	71.294	-384.21	2082.465	-2.6937	2.1356	1.0125
1.102	-16.549	120.602	640.972	-0.39258	0.38232	0.099121	-22.898	21.6986	45.1924	0.12695	-0.13281	-0.16895	90.638	35.013	102.086	-0.011816	0.032226	0.076758	74.8586	-354.05	2172.747	-2.6449	2.1039	0.99932
1.104	-23.324	115.1198	619.9062	-0.38379	0.36523	0.09668	-93.91088	9.73	25.6486	0.11279	-0.12012	-0.15527	46.458	-7.48	124.92	-0.024414	0.030762	0.099121	86.0526	-322.954	2258.057	-2.4696	2.0746	0.95205
1.106	-11.789	107.113	582.6319	-0.37061	0.34375	0.088867	-68.692	-3.833	42.261	0.094727	-0.1123	-0.15137	63.271	26.5716	135.713	-0.029102	0.036133	0.10381	56.136	-254.256	2227.539	-2.2007	2.0297	0.88643
1.108	-27.256	123.122	546.62927	-0.354	0.32373	0.083496	-49.61	16.982	27.1981	0.053711	-0.089844	-0.13574	13.882	7.81634	110.377	-0.032422	0.036425	0.10762	12.967	-232.078	2184.217	-1.8979	1.9673	0.82422
1.11	-28.759	120.033	507.3176	-0.34717	0.31543	0.080566	-67.398	16.881	31.5925	0.016846	-0.077149	-0.10913	-2.77999999999999	47.4725	104.339	-0.035547	0.039551	0.12168	-97.681	-163.23	2139.123	-1.6434	1.8847	0.7876
1.112	-43.407	115.548	525.9568	-0.33496	0.29834	0.074219	-19.825	16.999	62.6343	-0.017578	-0.06543	-0.097168	-1.807	-8.249	95.685	-0.043555	0.036231	0.12715	-204.201	-148.19	2081.847	-1.4807	1.7732	0.76738
1.114	-39.095	111.215	508.4294	-0.32178	0.28857	0.072265	-64.049	26.78147	42.9415	-0.059082	-0.04834	-0.067871	-25.836	23.694	78.036	-0.052734	0.036133	0.13086	-214.655	-138.79	2047.529	-1.387	1.6481	0.75566
1.116	-63.9735	117.265	490.1692	-0.30371	0.27734	0.066895	-54.613	22.494	61.7133	-0.072266	-0.038574	-0.062012	-40.138	-13.2069	46.3494	-0.062891	0.036035	0.14228	-171.87	-176.231	2038.216	-1.3384	1.5339	0.76465
1.118	-64.4255	114.22956	472.4226	-0.27979	0.2666	0.060059	-0.508000000000003	46.75	62.8072	-0.097168	-0.021484	-0.04248	-57.824	15.8122	31.628	-0.076367	0.034961	0.15439	-102.105	-208.80793	2069.785	-1.3257	1.4536	0.76953
1.12	-70.4027	102.429	468.6472	-0.26855	0.25537	0.053223	-58.431	56.895	30.10232	-0.10474	-0.008301	-0.033936	-91.9216	-0.704999999999998	32.08	-0.095117	0.031836	0.1669	15.279	-239.12	2087.101	-1.3475	1.4298	0.78594
1.122	-91.377	110.112	438.0309	-0.24414	0.23779	0.044922	-13.088	42.5501	42.325	-0.10205	0.0063477	-0.028809	-108.7759	21.19	15.188	-0.1045	0.025683	0.17656	75.315	-257.72	2143.224	-1.3972	1.4469	0.81933
1.124	-81.318	137.475	380.6841	-0.22632	0.22534	0.037353	-23.031	43.507	21.0776	-0.089844	0.020996	-0.023926	-96.251	22.013	32.492	-0.10742	0.021484	0.18896	5.47000000000001	-215.713	2171.704	-1.4976	1.5122	0.85645
1.126	-55.219	135.617	349.645	-0.20508	0.21533	0.025391	-50.896	47.8099	25.2009	-0.083984	0.027344	-0.021973	-117.57	43.4952	48.132	-0.10293	0.014551	0.19014	-44.569	-192.15	2195.4846	-1.6509	1.6157	0.88145
1.128	-55.926	121.281	347.858	-0.17578	0.19238	0.01709	22.695	39.1693	40.268	-0.061523	0.038086	-0.027832	-134.679	30.591	41.1468	-0.088672	0.011133	0.19795	-146.41	-142.492	2224.478	-1.812	1.7212	0.90039
1.13	-34.033	97.0685	328.499	-0.16064	0.18359	0.012207	-5.572	49.7495	34.93	-0.043457	0.042724	-0.038575	-154.367	20.904	45.567	-0.066016	0.003711	0.19326	-232.526	-160.473	2221.457	-1.9567	1.8003	0.93574
1.132	-21.524	89.056	316.192	-0.13525	0.16357	0.00097656	-24.494	36.2079	54.1992	-0.024414	0.043457	-0.040527	-174.5	19.1866	28.59014	-0.037695	-0.00097658	0.18847	-300.59	-161.176	2231.508	-2.0961	1.8773	0.96416
1.134	4.523	88.235	325.0039	-0.11816	0.15015	-0.0051269	4.64700000000001	42.3907	56.5132	0.0029297	0.042969	-0.05957	-195.424	21.1405	9.329	-0.0083008	-0.0058594	0.18555	-332.107	-131.688	2209.062	-2.2332	1.9356	0.99502
1.136	1.072	83.476	328.0747	-0.10303	0.13184	-0.015625	-41.081	34.7543	40.148	0.017578	0.041992	-0.065918	-126.986	21.4822	39.768	0.02207	-0.0051758	0.17812	-360.832	-100.38	2149.62967	-2.3472	1.9772	1.0035
1.138	13.385	76.94	310.32	-0.080566	0.10742	-0.021973	-16.433	14.005	63.2721	0.04541	0.037109	-0.07959	-115.17336	-8.0385	52.229	0.054101	-0.012109	0.16807	-334.903	-34.168	2065.554	-2.418	1.9922	1.0112
1.14	-1.774	85.853	302.098	-0.071777	0.097168	-0.029297	-42.436	6.41334	55.6724	0.059815	0.041016	-0.088623	-90.2376	7.848	48.4922	0.085742	-0.01875	0.16064	-286.304	-13.496	2012.621	-2.4286	1.9878	1.0037
1.142	10.331	75.481	276.7155	-0.057617	0.075195	-0.041016	-68.278	-5.328	69.547	0.077148	0.043945	-0.09668	-50.181	-0.843	34.744	0.11748	-0.023437	0.15323	-275.117	27.8556	2022.536	-2.3898	1.9746	0.97705
1.144	19.076	61.882	259.9843	-0.043213	0.063476	-0.046631	-18.602	-0.8703	68.5194	0.091797	0.049805	-0.10693	-13.579	63.1521	23.4071	0.14893	-0.035156	0.14502	-158	60.3273	2046.835	-2.3305	1.9543	0.94892
1.146	5.493	65.132	240.9156	-0.024414	0.053711	-0.053223	-56.304	26.5194	29.578	0.09668	0.056641	-0.11084	-19.748	66.65508	13.398	0.1833	-0.050781	0.13935	-113.513	103.652	2087.264	-2.2403	1.9442	0.91592
1.148	-6.252	57.94	226.6682	-0.0058594	0.037598	-0.060547	-57.275	21.6838	39.818	0.1001	0.071777	-0.11621	30.593	95.569	43.2938	0.2169	-0.061621	0.12773	-97.817	123.839	2087.157	-2.1484	1.9355	0.88525
1.15	-6.323	61.583	231.7859	0.0043945	0.032227	-0.055664	-29.18	29.087	41.607	0.098389	0.083252	-0.12354	45.052	62.069	47.5141	0.24775	-0.076855	0.1125	-119.026	146.923	2051.881	-2.0482	1.9256	0.8542
1.152	-1.483	52.6144	207.847	0.026855	0.016602	-0.063965	-87.4821	41.716332	34.922	0.09668	0.094727	-0.12549	37.066	91.001	67.04623	0.27256	-0.091309	0.1043	-173.87308	187.6052	2024.961	-1.9707	1.9141	0.8335
1.154	0.204000000000001	58.67	193.175	0.035645	0.0075683	-0.077881	-43.273	36.9567	59.3368	0.094238	0.11963	-0.12646	43.534	48.789	78.4625	0.29688	-0.099609	0.083496	-206.3	167.6678	1989.343	-1.9141	1.891	0.81826
1.156	19.061	61.639	197.2124	0.050781	-0.0019531	-0.08252	-57.546	35.364	46.4266	0.090332	0.12939	-0.13721	47.778	94.562	84.976	0.3166	-0.10537	0.071289	-200.9735	140.483	1993.135	-1.8898	1.8707	0.80596
1.158	-8.998	54.4426	201.381	0.058594	-0.016113	-0.09082	-89.0858	21.0801	53.4496	0.086426	0.146	-0.13135	13.174	71.032	94.272	0.3334	-0.10664	0.058203	-130.566	88.562	1996.884	-1.875	1.8574	0.79541
1.16	-9.603	55.7061	189.042	0.064941	-0.021484	-0.091797	-33.413	23.0565	57.1994	0.090332	0.1582	-0.13135	30.669	92.704	72.692	0.34355	-0.10664	0.042578	-128.53	72.212	1972.65413	-1.8762	1.8462	0.77773
1.162	-39.898	63.033	164.6739	0.066895	-0.030273	-0.092285	-74.9605	45.435	26.037	0.088379	0.16553	-0.1333	43.372	31.97	72.495	0.34824	-0.10957	0.033301	-75.195	67.433	1923.006	-1.8761	1.8333	0.75898
1.164	-37.73	59.048	152.2218	0.067139	-0.036377	-0.091553	-62.674	33.5238	33.5344	0.094727	0.17041	-0.13818	12.803	40.247	62.0218	0.34863	-0.10693	0.022949	-57.438	72.614	1879.961	-1.8726	1.8102	0.74218
1.166	-59.267	33.9986	151.051	0.058594	-0.045898	-0.09375	-23.576	18.196	31.884	0.093262	0.17187	-0.14819	22.158	-18.423	77.7372	0.34209	-0.10605	0.016406	-42.223	121.634	1827.309	-1.8628	1.7845	0.72549
1.168	-83.384	26.09302	134.279	0.04834	-0.044434	-0.087891	-85.2133	13.61976	25.054	0.09668	0.17188	-0.15088	-12.912	6.668	82.0669	0.33984	-0.10606	0.018652	9.36	114.55	1803.7086	-1.8452	1.7544	0.70703
1.17	-87.1458	51.04759	123.5398	0.036621	-0.04541	-0.085449	-31.573	-3.9	50.5692	0.098145	0.1709	-0.16113	-63.6481	-6.623	76.406	0.32696	-0.10332	0.014356	28.984	166.118	1787.876	-1.8241	1.7333	0.69141
1.172	-104.735	43.6792	117.8585	0.015137	-0.043457	-0.074707	-12.609	3.2129	61.8153	0.094238	0.17041	-0.16211	-85.2222	1.072	71.51509	0.31465	-0.096094	0.021778	19.182	196.714	1742.441	-1.7976	1.6992	0.66885
1.174	-71.6594	35.6909	122.4052	-0.0031738	-0.041016	-0.073243	-34.33	-16.09424	92.0373	0.075195	0.18018	-0.17773	-70.804	0.0579999999999998	86.245	0.29883	-0.092773	0.027832	-40.447	247.158	1709.246	-1.7606	1.6598	0.64463
1.176	-68.7359	29.28	112.0666	-0.027832	-0.035156	-0.06543	6.102	-58.5749	156.1671	0.047363	0.19849	-0.18335	-118.8444	13.4041	92.5449	0.28428	-0.082031	0.029297	-61.549	273.197	1641.7536	-1.7054	1.6177	0.62275
1.178	-43.95	49.529	101.358	-0.04834	-0.03125	-0.050781	-23.135	-83.884	182.479	0.0083008	0.22705	-0.18896	-129.229	16.1578	89.749	0.2667	-0.072754	0.033106	-137.5088	288.24	1563.24	-1.6455	1.5684	0.604
1.18	-30.98	49.5586	105.92919	-0.066406	-0.022949	-0.049805	10.98	-126.4726	289.5027	-0.069824	0.2793	-0.18311	-148.222	36.315	88.4954	0.24638	-0.066113	0.039355	-137.57545	305.58	1505.114	-1.5784	1.5228	0.56797
1.182	-36.215	60.2291	96.8556	-0.091309	-0.012695	-0.035156	101.593	-147.517	386.608	-0.12109	0.31494	-0.16943	-184.863	34.622	63.932	0.22783	-0.060156	0.049414	-155.879	299.12	1466.67	-1.5053	1.4783	0.54327
1.184	-25.613	55.0795	76.406	-0.11353	8.6736e-15	-0.023926	70.337	-188.759	481.946	-0.25586	0.38525	-0.12012	-184.424	9.6289	28.46	0.20605	-0.057617	0.053711	-190.553	275.929	1422.176	-1.4323	1.4255	0.51865
1.186	-44.661	58.6535	83.8707	-0.12451	0.0048828	-0.01416	95.208	-253.334	576.285	-0.38599	0.44312	-0.086182	-124.245	18.629	26.256	0.18721	-0.048438	0.065723	-185.056	231.845	1368.279	-1.3511	1.3703	0.49287
1.188	-12.028	53.746	77.60107	-0.146	0.018555	-0.0053711	75.7501	-257.279	631.172	-0.52734	0.50488	-0.044922	-121.8705	4.136	10.663	0.16514	-0.043457	0.074414	-192.215	223.6671	1326.598	-1.2798	1.3247	0.4668
1.19	-20.861	49.512	85.1514	-0.15234	0.023926	0	69.5985	-228.6426	704.3744	-0.72021	0.5874	0.022949	-90.9378	33.834	17.739	0.14756	-0.033692	0.08457	-157.151	201.781	1271.318	-1.2087	1.2679	0.43691
1.192	-23.472	49.888	73.9522	-0.16895	0.041992	0.0024414	124.769	-151.103	792.62	-0.82178	0.63428	0.05957	-81.8598	-2.735	25.638	0.13037	-0.023925	0.091504	-125.1381	208.122	1235.312	-1.1436	1.2146	0.40801
1.194	-41.984	45.34	77.8444	-0.17627	0.048828	0.0061035	94.643	-80.312	829.677	-1.0313	0.73242	0.12549	-79.8243	22.648	40.4177	0.11621	-0.013672	0.099609	-93.505	220.485	1180.864	-1.073	1.1555	0.37871
1.196	-22.057	48.619	78.6556	-0.17773	0.058594	0.0068359	90.084	-82.636	856.215	-1.1914	0.81739	0.17334	-62.083	-17.7231	37.5928	0.099024	-0.0056641	0.104	-120.885	239.127	1124.245	-1.0062	1.0987	0.35
1.198	8.801	34.2372	65.4273	-0.18457	0.063965	0.0068359	111.326	-67.1997	894.21	-1.3394	0.90869	0.21387	-5.898	31.7796	62.422	0.082031	0.002539	0.11074	-100.998	295.15	1084.204	-0.94336	1.0391	0.31885
1.2	9.58000000000001	40.7127	57.877	-0.17871	0.064453	0.0063477	56.6481	-26.744	986.542	-1.5352	1.0117	0.26807	2.934	5.8577	48.9207	0.060938	0.011524	0.11738	-121.6387	295.0204	1029.22	-0.86865	0.97979	0.29414
1.202	20.489	33.399	63.2365	-0.1748	0.064453	-1.0408e-14	116.712	-14.072	1121.487	-1.6348	1.0664	0.30518	18.738	58.418	45.3004	0.041797	0.016601	0.12051	-134.591	329.954	965.797	-0.80068	0.92237	0.26446
1.204	17.222	19.012	74.3153	-0.16675	0.064697	-0.0012207	102.23	15.0925	1137.168	-1.8281	1.1777	0.37354	19.552	28.4363	39.2756	0.022461	0.021484	0.12793	-120.5624	318.611	889.782	-0.73194	0.8708	0.23789
1.206	0.259	32.9841	61.07289	-0.15283	0.06543	-0.003418	29.561	-24.698	1135.2683	-1.9607	1.2503	0.42017	0.0800000000000054	73.651	32.1546	-0.0012695	0.024707	0.13486	-110.3942	317.283	825.123	-0.66748	0.82041	0.21348
1.208	-27.926	49.0305	61.5542	-0.13477	0.060547	-0.013672	62.8052	-53.551	1175.419	-2.0757	1.3013	0.46436	29.045	22.81534	29.733	-0.020703	0.030566	0.14531	-51	299.297	756.0301	-0.61133	0.77002	0.19043
1.21	-29.37	40.249	66.8903	-0.12305	0.056641	-0.014648	22.481	-77.14	1226.476	-2.1836	1.334	0.479	75.159	67.728	53.1097	-0.035938	0.037597	0.15117	-65.034	283.78	687.1607	-0.55391	0.71699	0.16806
1.212	-44.162	28.7778	84.9944	-0.095703	0.054199	-0.026855	-19.912	-141.52	1352.972	-2.2163	1.3481	0.48047	61.815	34.45742	51.5531	-0.045703	0.038867	0.15517	0.848000000000006	271.4764	629.823	-0.50254	0.66104	0.14571
1.214	-52.907	33.471	77.1392	-0.079346	0.045654	-0.033203	-39.1014	-170.283	1421.7207	-2.2285	1.3652	0.4751	37.139	88.141	43.576	-0.05127	0.04248	0.16943	16.05	230.244	568.364	-0.44394	0.60322	0.1293
1.216	-64.14914	50.702	60.7045	-0.062988	0.044434	-0.035645	-124.474	-228.393	1429.9283	-2.1826	1.3662	0.45361	50.417	69.093	67.72942	-0.041992	0.049414	0.17784	41.046	217.932	527.4864	-0.39033	0.54785	0.10909
1.218	-76.1233	56.477	55.7231	-0.044922	0.042969	-0.045898	-111.3573	-298.778	1480.2812	-2.1113	1.3555	0.41846	-3.816	97.051	50.6226	-0.035352	0.05957	0.18427	73.836	188.366	476.2269	-0.32227	0.49951	0.088379
1.22	-57.9681	40.2027	59.3098	-0.03418	0.043457	-0.054199	-96.602	-300.626	1508.121	-1.9722	1.3423	0.35303	-25.187	48.4838	76.472	-0.02168	0.07207	0.18584	57.723	196.074	449.2994	-0.26435	0.45605	0.066113
1.222	-77.345	33.2242	49.218	-0.022949	0.037598	-0.060547	-93.3	-330.33	1571.947	-1.8882	1.3364	0.31543	-25.107	41.812	100.5824	-0.00097656	0.085352	0.19014	66.941	202.171	427.9931	-0.2083	0.41905	0.03955
1.224	-63.979	36.359	50.7465	-0.0080565	0.039062	-0.061523	-35.198	-325.33	1640.251	-1.7261	1.3188	0.23926	-72.933	-19.4841	170.086	0.017578	0.10596	0.18896	-16.356	182.988	404.384	-0.15635	0.37685	0.017285
1.226	-51.408	23.865	60.0033	0.0039063	0.039063	-0.072266	-56.304	-310.839	1666.627	-1.6189	1.3011	0.18311	-113.2398	-59.076	236.816	0.0375	0.12431	0.19023	-52.207	157.063	346.5816	-0.11221	0.33623	-0.0070314
1.228	-47.199	22.753	66.637	0.016602	0.036133	-0.07373	-73.4611	-343.391	1721.821	-1.5352	1.2832	0.13232	-129.334	-113.083	373.056	0.052246	0.14629	0.18936	-61.566	113.671	288.47	-0.071289	0.30078	-0.019531
1.23	-56.57	28.436	62.6881	0.02002	0.032227	-0.077637	-56.0748	-279.19	1735.77	-1.4492	1.2598	0.08252	-176.0379	-173.935	506.276	0.052246	0.17988	0.19795	-52.293	108.1	262.523	-0.041797	0.25625	-0.048438
1.232	-87.3631	22.533	71.9571	0.028809	0.034668	-0.081055	-108.418	-240.052	1713.747	-1.4224	1.2583	0.0625	-233.887	-285.7963	620.8623	0.04082	0.2167	0.18877	-81.7346	94.9019	236.004	-0.015235	0.20996	-0.06084
1.234	-61.9809	23.6151	81.2687	0.034912	0.036132	-0.085938	-122.094	-219.248	1725.1847	-1.3867	1.2637	0.044922	-259.9609	-395.042	684.157	0.012695	0.26807	0.17285	-85.82169	110.9358	204.996	0.0046875	0.16699	-0.070996
1.236	-66.8055	31.002	67.3496	0.041016	0.038574	-0.088867	-120.036	-141.316	1692.351	-1.3772	1.2785	0.03418	-260.9804	-386.4324	736.7534	-0.038379	0.34033	0.16338	-70.812	114.9097	138.904	0.022363	0.12295	-0.082715
1.238	-39.058	34.171	51.1082	0.043945	0.041992	-0.089355	-128.412	-160.139	1671.581	-1.3809	1.3066	0.025391	-249.26919	-310.221	809.2733	-0.094434	0.41845	0.17041	-80.5	114.9317	101.67	0.04541	0.08252	-0.088867
1.24	-42.888	27.519	52.7221	0.04248	0.051514	-0.088623	-81.272	-161.237	1706.331	-1.4004	1.3633	0.026855	-256.966	-147.6973	926.784	-0.18623	0.49814	0.18564	-69.495	100.604	80.884	0.06582	0.045703	-0.10137
1.242	-18.918	31.729	62.0465	0.03125	0.060547	-0.09375	-49.154	-150.348	1723.538	-1.4214	1.3872	0.022949	-293.068	-111.061	957.656	-0.30449	0.57871	0.21611	-94.018	96.131	76.4	0.09336	0.011328	-0.11416
1.244	-10.969	32.3948	61.1641	0.019531	0.074219	-0.089844	-22.223	-215.9329	1769.398	-1.459	1.4453	0.026855	-235.398	-62.353	974.102	-0.43555	0.64453	0.25293	-80.191	109.93087	68.925	0.11602	-0.016015	-0.12666
1.246	-15.025	35.0648	49.8601	0.010742	0.081055	-0.088867	39.769	-184.142437	1789.0961	-1.4976	1.4888	0.03418	-119.6956	-103.393	1066.2382	-0.57764	0.70713	0.28759	-105.751	92.763	56.034	0.14121	-0.039063	-0.13262
1.248	9.023	18.445	80.1296	-0.0019531	0.085449	-0.08252	57.152	-200.69	1784.76753	-1.5469	1.5273	0.043457	-57.55247	-39.86	1237.573	-0.72724	0.76533	0.31191	-154.465	82.757	47.5469	0.17285	-0.061035	-0.14355
1.25	15.824	5.4784	105.3536	-0.017334	0.097899	-0.083008	74.676	-231.327	1800.0812	-1.6108	1.5669	0.053711	-26.8795	7.06999999999999	1378.46	-0.87099	0.82939	0.33066	-142.19	60.065	62.771	0.18877	-0.079882	-0.15176
1.252	-11.865	-9.3894	113.4558	-0.033691	0.10107	-0.075195	102.341	-189.302	1810.7471	-1.6465	1.5918	0.063477	13.95	86.991	1472.257	-1.0104	0.90918	0.35137	-158.3	72.813	56.638	0.1919	-0.09629	-0.15762
1.254	-4.37	-14.474	152.854	-0.04541	0.1123	-0.081543	57.687	-259.18	1851.164	-1.709	1.6152	0.081055	-7.858	57.211	1470.3973	-1.1421	1.0063	0.37598	-110.2847	66.684	61.032	0.19463	-0.11035	-0.16152
1.256	10.801	-33.55	199.421	-0.053711	0.12451	-0.08252	73.667	-266.626	1897.512	-1.7476	1.6304	0.088623	-10.919	1.42000000000002	1502.524	-1.2867	1.109	0.42139	-98.145	51.747	57.089	0.19306	-0.12627	-0.16602
1.258	-4.077	-66.45	264.232	-0.072266	0.14014	-0.088867	51.8196	-244.475	1872.926	-1.7827	1.6294	0.093262	-14.725	-91.48	1568.074	-1.4469	1.2157	0.47344	-69.166	40.7412	52.3989	0.18701	-0.13818	-0.1709
1.26	5.836	-90.205	308.842	-0.087159	0.15894	-0.095459	-6.4731	-288.492	1871.134	-1.8101	1.6313	0.083496	-37.504	-130.8	1613.174	-1.6234	1.3242	0.53477	-13.932	6.69	49.9062	0.17148	-0.15205	-0.17617
1.262	20.67513	-121.684	346.126	-0.11328	0.18408	-0.095215	35.8057	-179.463	1850.284	-1.8179	1.6313	0.085449	-23.973	-193.065	1667.56	-1.8033	1.4088	0.60283	42.342	18.571	45.53406	0.15899	-0.16269	-0.17256
1.264	20.5223	-129.00755	402.2416	-0.16309	0.21924	-0.089844	49.0031	-142.58	1820.4766	-1.8184	1.6328	0.075684	-19.485	-264.536	1731.9859	-1.9897	1.4653	0.6626	28.641	0.872999999999998	52.503	0.13125	-0.17207	-0.16397
1.266	25.64485	-117.76	457.651	-0.19189	0.23486	-0.084473	61.2627	-134.69	1843.4733	-1.8191	1.6301	0.07251	-22.95	-346.294	1774.364	-2.135	1.5061	0.71123	31.856	14.541	62.869	0.099514	-0.16983	-0.15586
1.268	2.2814	-88.016	492.86	-0.27295	0.27539	-0.069824	90.24	-69.913	1833.272	-1.8149	1.6255	0.06543	18.469	-386.37	1760.123	-2.2226	1.5192	0.75039	30.11	22.836	61.9973	0.057617	-0.16943	-0.14258
1.27	21.078	-50.541	521.644	-0.34034	0.30566	-0.060547	72.48	-107.3659	1824.34	-1.8086	1.6035	0.055664	140.192	-389.39	1769.885	-2.2479	1.515	0.77188	-9.999	49.7273	48.64023	0.015625	-0.16299	-0.12998
1.272	22.0202	-39.7815	546.0195	-0.41553	0.34131	-0.04248	85.893	-66.551	1838.1811	-1.8042	1.5962	0.052734	176.442	-362.12	1785.5266	-2.1827	1.504	0.76953	-12.228	71.994	54.9545	-0.026465	-0.15918	-0.11397
1.274	26.781	-27.444	569.07	-0.52295	0.39893	-0.018555	75.935	-10.5774	1806.856	-1.8003	1.5688	0.04834	145.508	-287.31	1886.154	-2.0352	1.5	0.74854	-19.294	67.448	91.96	-0.069043	-0.15137	-0.095996
1.276	23.848	-9.398	627.2567	-0.58154	0.42627	-0.014648	24.018	-67.474	1819.04089	-1.792	1.5527	0.049317	136.144	-201.76	1949.811	-1.821	1.5142	0.70195	-11.637	61.831	115.619	-0.10186	-0.14531	-0.088574
1.278	23.5134	28.29	728.021	-0.68799	0.49609	0.0087891	-13.804	-41.023	1821.5636	-1.7969	1.5313	0.046387	116.547	-137.1797	1976.719	-1.6026	1.5361	0.65722	-23.88	27.6041	43.7771	-0.12744	-0.14551	-0.07959
1.28	37.9936	62.136	788.168	-0.7727	0.552	0.02832	-28.6803	-82.659	1811.3089	-1.8066	1.5098	0.054199	50.8499	-123.491	1942.805	-1.4105	1.5431	0.61309	-23.577	14.5329	8.973	-0.13896	-0.14365	-0.072852
1.282	2.3633	66.203	834.6097	-0.85742	0.61328	0.054688	-22.1773	-126.9491	1846.479	-1.8081	1.5024	0.049805	-0.782	-106.964	1944.471	-1.2717	1.541	0.57265	-25.382	0.519	-6.852	-0.13242	-0.14453	-0.069922
1.284	27.988	56.6959	863.43	-0.96826	0.69775	0.10254	-11.7956	-86.45	1855.1443	-1.8198	1.481	0.056152	-91.11	-61.13	1921.781	-1.187	1.5278	0.54492	-41.294	7.449	26.599	-0.11875	-0.14336	-0.074219
1.286	22.1045	27.023	922.715	-1.0273	0.7334	0.12549	-33.856	-129.688	1847.765	-1.8277	1.4663	0.067383	-181.239	-28.98	1921.9186	-1.1508	1.5162	0.52998	-39.451	-8.35	51.674	-0.087207	-0.14033	-0.077539
1.288	34.05	7.514	1001.5157	-1.1499	0.81689	0.17822	-14.8412	-109.758	1843.9099	-1.8315	1.4517	0.069336	-236.998	-40.04	1888.365	-1.1461	1.5102	0.5208	-81.459	-23.54	43.9651	-0.055176	-0.13623	-0.083496
1.29	19.7491	-41.034	1060.3481	-1.2507	0.86694	0.2102	-17.604	-55.004	1804.748	-1.8335	1.4399	0.080566	-218.181	-79.684	1921.014	-1.1711	1.5039	0.52119	-92.0614	-5.106	28.0794	-0.026465	-0.1291	-0.090137
1.292	-5.574	-84.693	1105.2643	-1.3477	0.91211	0.24072	-6.912	-84.977	1803.116	-1.8335	1.4302	0.084961	-154.123	-142.776	1923.23	-1.2134	1.515	0.52109	-115.0649	7.3833	46.4431	0.0027344	-0.12852	-0.093261
1.294	3.604	-135.268	1160.343	-1.46	0.96973	0.27588	90.189	-4.78599999999999	1825.511	-1.8296	1.4185	0.091309	-70.025	-163.473	1987.462	-1.271	1.5474	0.53027	-124.368	61.344	61.1506	0.025782	-0.12695	-0.09873
1.296	-5.17599999999999	-176.717	1204.665	-1.5088	0.99414	0.29053	58.491	10.659	1826.054	-1.8211	1.4065	0.093261	-50.359	-173.75	2009.948	-1.3358	1.5962	0.55	-145.657	66.58	63.5438	0.038086	-0.12939	-0.10147
1.298	4.36	-193.036	1266.8873	-1.5854	1.0356	0.31592	60.565	28.313	1825.862	-1.8125	1.3906	0.098145	-81.413	-143.263	2083.392	-1.4249	1.6501	0.58125	-131.374	51.7423	47.1213	0.050293	-0.13818	-0.10352
1.3	-15.928	-178.007	1343.8412	-1.6277	1.055	0.33057	76.802	104.333	1787.3081	-1.7925	1.3755	0.10938	-126.7741	-161.654	2118.435	-1.5323	1.7114	0.61758	-123.7582	12.747	27.1085	0.05957	-0.1499	-0.1084
1.302	-19.189	-148.868	1409.206	-1.668	1.0684	0.35059	40.691	84.632	1736.871	-1.781	1.3664	0.11622	-161.666	-192.018	2162.056	-1.6606	1.7729	0.64434	-117.9062	-0.2801	20.5177	0.07295	-0.16328	-0.11201
1.304	-70.36	-142.118	1455.724	-1.6914	1.0938	0.35889	57.881	101.036	1724.427	-1.7734	1.3574	0.12354	-201.816	-217.949	2156.155	-1.7925	1.8286	0.68262	-116.1015	42.4547	40.7265	0.081543	-0.1793	-0.11787
1.306	-98.634	-129.115	1481.827	-1.6948	1.0962	0.36035	38.6087	113.2	1708.371	-1.7612	1.3442	0.13574	-187.6727	-201.424	2156.077	-1.9112	1.8825	0.70352	-103.332	75.3496	34.8149	0.1001	-0.19278	-0.12666
1.308	-78.543	-92.91233	1522.991	-1.689	1.1118	0.36426	19.494	47.8294	1718.798	-1.7559	1.3379	0.14893	-190.278	-131.298	2107.104	-2.0186	1.9188	0.72344	-59.928	82.4883	10.91002	0.12354	-0.20508	-0.13965
1.31	-83.019	-59.874	1532.651	-1.6704	1.1231	0.35498	79.776	74.252	1717.8	-1.7383	1.3184	0.15967	-241.326	-57.52	2053.954	-2.1042	1.9404	0.74414	-49.761	61.57576	18.4288	0.14795	-0.21611	-0.15488
1.312	-91.323	-51.769	1532.5025	-1.6523	1.125	0.34814	71.423	37.5529	1703.654	-1.7161	1.3074	0.16822	-208.267	-16.718	1993.401	-2.1624	1.9536	0.76015	-24.856	56.674	20.3454	0.17344	-0.22695	-0.16748
1.314	-130.95	-55.09	1520.889	-1.6309	1.123	0.32568	62.179	7.58000000000001	1678.828571	-1.6934	1.291	0.18213	-164.5242	-13.631	1955.18	-2.1934	1.9609	0.77197	5.11300000000001	38.4493	40.629	0.20117	-0.23321	-0.17764
1.316	-136.346	-51.775	1519.088	-1.6211	1.1211	0.31787	88.808	53.871	1674.275	-1.6543	1.2793	0.18896	-82.928	-28.0507	1968.422	-2.1921	1.9575	0.77968	-13.023	54.969	70.57	0.22598	-0.24326	-0.19209
1.318	-113.9209	-47.972	1531.217	-1.5991	1.1138	0.29639	53.7439	49.098	1643.452	-1.6304	1.27	0.19141	-1.77999999999999	-19.309788	1973.607	-2.1757	1.9524	0.7834	-6.732	45.146	96.39	0.24756	-0.24609	-0.2041
1.32	-107.4708	-59.166	1564.891	-1.5737	1.1094	0.2771	73.962	68.884	1645.792	-1.5859	1.25	0.19873	48.422	41.355	1993.8936	-2.1444	1.9431	0.78965	-2.957	37.552	80.6	0.26523	-0.24687	-0.21377
1.322	-101.331	-72.6264	1594.583	-1.5503	1.104	0.26074	66.938	74.721	1640.197	-1.5434	1.2358	0.20215	3.86099999999999	100.2553	1972.0463	-2.1103	1.9339	0.7959	0.243000000000002	30.7801	68.0186	0.27588	-0.24629	-0.21446
1.324	-118.9777	-94.9466	1628.09484	-1.5117	1.1035	0.23779	5.647	27.816	1620.432	-1.5039	1.2207	0.19971	-15.272	158.753	1971.943	-2.0679	1.9185	0.79297	-13.766	18.633	47.7368	0.28291	-0.24629	-0.21523
1.326	-104.19631	-107.542	1645.65675	-1.4917	1.1021	0.22412	63.166	93.791	1587.047	-1.4492	1.1973	0.20557	-45.483	133.1391	1980.0686	-2.0354	1.8943	0.79404	5.962	26.58	63.7184	0.28047	-0.24248	-0.21484
1.328	-107.982	-133.224	1657.3183	-1.4507	1.1099	0.20459	-9.0838	132.061	1493.949	-1.4194	1.187	0.20654	-49.651	109.661	1998.237	-2.0011	1.8669	0.79824	-7.768	4.084	74.41	0.27295	-0.22803	-0.21289
1.33	-86.7	-156.476	1674.592	-1.424	1.1209	0.19091	-49.2882	143.727	1452.975	-1.3691	1.168	0.20117	-80.538	29.9059	1981.2458	-1.9729	1.831	0.79043	-18.162	5.171	66.2087	0.25527	-0.21719	-0.20293
1.332	-72.1667	-178.657	1682.154	-1.3945	1.1348	0.18018	-43.1353	197.804	1418.925	-1.3315	1.1489	0.20312	-92.285	69.43	2000.9069	-1.9571	1.7911	0.78868	3.736	9.585	40.061	0.2331	-0.20156	-0.1915
1.334	-66.063	-173.997	1652.6028	-1.3711	1.1523	0.16211	-85.6654	155.532	1381.567	-1.2866	1.1294	0.19385	-126.6558	78.741	1961.345	-1.9531	1.752	0.77783	-1.553	9.278	29.259	0.19522	-0.1832	-0.1751
1.336	-51.3198	-151.201	1624.923	-1.355	1.1606	0.15625	-19.893	156.017	1382.4351	-1.23	1.1079	0.18506	-123.472	123.541	1977.488	-1.9552	1.7128	0.77363	-30.316	20.011	39.812	0.14932	-0.16455	-0.16006
1.338	-36.202	-129.0177	1626.5739	-1.3325	1.1841	0.13428	-5.815	162.116	1354.646	-1.2026	1.0903	0.18164	-108.066	67.9886	1941.133	-1.9551	1.6711	0.76377	-73.452	16.2343	61.17	0.10156	-0.14258	-0.14746
1.34	13.347	-114.1964	1627.8508	-1.3161	1.2	0.12744	-33.822	131.066	1347.8629	-1.1426	1.0625	0.17529	-105.2924	86.428	1911.2457	-1.952	1.6336	0.74893	-88.98	35.9758	75.7821	0.056543	-0.11924	-0.13418
1.342	5.982	-107.54534	1636.9939	-1.3101	1.2114	0.12061	16.433	169.0103	1325.512	-1.0947	1.0352	0.16968	-86.04	73.594	1891.03245	-1.9409	1.5977	0.73125	-119.2309	26.238	58.6756	0.013672	-0.094141	-0.12149
1.344	24.888	-102.15635	1617.9504	-1.3081	1.2349	0.11035	-34.414	182.869	1251.1094	-1.0483	1.0103	0.16553	-75.489	202.926	1902.359	-1.9199	1.5586	0.71338	-127.492	59.427	46.513	-0.021875	-0.075391	-0.11328
1.346	37.88038	-79.427	1604.917	-1.3081	1.2485	0.10938	-19.833	172.632	1223.3869	-0.98975	0.97119	0.15967	-114.494	251.027	1888.009	-1.8897	1.5217	0.68936	-121.4329	37.696	28.9928	-0.052246	-0.047949	-0.10205
1.348	53.5429	-49.116	1619.499	-1.3242	1.2715	0.10986	22.201	184.0044	1210.3155	-0.95898	0.95508	0.15869	-114.65	335.817	1851.337	-1.8543	1.4902	0.66944	-127.2678	29.67535	27.5465	-0.070801	-0.025391	-0.090332
1.35	50.946188	-25.734	1632.3404	-1.3411	1.2854	0.10961	-56.1672	142.614	1189.212	-0.89941	0.91406	0.15039	-124.2291	274.089	1791.3968	-1.8102	1.457	0.64912	-127.11031	16.2986	7.628	-0.09209	9.762e-05	-0.08125
1.352	55.3593	-27.556	1634.9316	-1.3594	1.3027	0.10986	-16.153	142.9296	1178.984	-0.85547	0.88574	0.14453	-139.4438	286.134	1758.841	-1.7643	1.4279	0.62646	-129.877	5.4076	1.649	-0.10312	0.026465	-0.074316
1.354	52.6738	-29.414	1633.6084	-1.394	1.3247	0.12256	-15.454	168.754	1137.74082	-0.81201	0.85205	0.1377	-168.771	240.501	1769.5879	-1.7129	1.4004	0.60986	-90.3235	25.873	5.196	-0.11407	0.038574	-0.06416
1.356	52.339	-64.213	1629.156	-1.4077	1.3325	0.12354	-29.5009	150.011	1082.452	-0.75146	0.81299	0.12842	-157.7334	289.989	1777.5237	-1.6667	1.3806	0.58867	-71.076	24.129	44.4121	-0.12383	0.056934	-0.053321
1.358	42.565	-87.4063	1649.1381	-1.4434	1.3438	0.12891	31.231	169.0519	1061.9939	-0.72852	0.78906	0.13721	-188.472	258.732	1758.697	-1.623	1.3594	0.57276	-85.509	41.165	49.3141	-0.12744	0.063477	-0.050293
1.36	36.3491	-103.077	1659.331	-1.4646	1.3518	0.1377	-13.016	191.8566	991.7061	-0.67188	0.74805	0.1167	-178.05	253.488	1690.185	-1.5746	1.3406	0.55596	-80.23	39.6621	49.3	-0.13642	0.06709	-0.042676
1.362	38.5992	-99.527	1658.831	-1.4883	1.3555	0.1416	-2.173	196.9416	949.3142	-0.62891	0.71533	0.11523	-107.862	157.297	1633.9176	-1.5246	1.3153	0.5336	-64.744	57.676	52.514	-0.14365	0.063867	-0.039453
1.364	37.8192	-106.502	1641.4484	-1.5112	1.3579	0.14453	49.9315	247.995	925.542	-0.58789	0.68164	0.10742	-78.487	141.004	1595.1485	-1.4648	1.2852	0.51025	-63.02	74.992	49.343	-0.15224	0.060351	-0.034375
1.366	6.011	-115.738	1637.366	-1.5195	1.3613	0.14893	19.485	229.3947	888.5	-0.53662	0.63965	0.098633	-3.721	108.02	1584.646	-1.4068	1.2451	0.47793	-54.422	64.01	56.504	-0.15674	0.045508	-0.037305
1.368	8.5641	-112.512	1635.70179	-1.5425	1.3638	0.15723	41.4037	207.6926	882.1461	-0.50977	0.61914	0.099609	-0.512	156.964	1558.358	-1.3457	1.2008	0.44854	-16.67	67.044	57.833	-0.16357	0.036133	-0.037598
1.37	-7.7665	-92.129	1643.4567	-1.562	1.3657	0.16113	3.624	208.276	834.37126	-0.46143	0.58252	0.09375	-1.106	193.946	1552.717	-1.2946	1.1636	0.42549	-9.801	32.6075	52.3177	-0.16768	0.021191	-0.041992
1.372	-6.0148	-38.25904	1649.2745	-1.5718	1.3667	0.16504	-30.504	181.362	778.8301	-0.42212	0.55786	0.088867	6.98699999999999	223.757	1477.6355	-1.2536	1.132	0.40957	15.646	28.0671	34.939	-0.1708	0.011914	-0.050293
1.374	-33.181	-15.281	1632.412	-1.5859	1.3711	0.17432	1.85100000000001	197.9319	760.9776	-0.39111	0.53271	0.084961	36.0932	216.57	1413.7427	-1.2324	1.1025	0.39795	17.897	28.033	45.2814	-0.16885	0.011133	-0.063965
1.376	-16.997999	10.125	1607.969	-1.5991	1.3677	0.18017	-59.985	202.3118	711.0579	-0.34717	0.49561	0.078613	20.63	229.923	1349.4538	-1.2039	1.0785	0.38916	3.422	46.8	45.4076	-0.17168	0.016406	-0.086328
1.378	-47.6379	14.003	1603.37811	-1.6108	1.3677	0.18262	-50.56	175.24759	682.18	-0.32422	0.47607	0.075684	-8.376	260.891	1304.468	-1.1663	1.0606	0.36953	11.154	33.969	78.245	-0.16309	0.024414	-0.10303
1.38	-34.1	32.4615	1589.9743	-1.6289	1.3652	0.18848	-23.893	187.307	641.1741	-0.28076	0.44385	0.07959	-12.718	297.982	1256.0277	-1.105	1.0259	0.35625	-0.100000000000001	-9.7646	132.1955	-0.13798	0.030274	-0.12793
1.382	-15.1297	30.7756	1582.855	-1.6343	1.3638	0.19141	-60.8681	167.8071	598.964	-0.24902	0.41138	0.067383	-41.4847	336.383	1175.1993	-1.0276	0.98691	0.32979	-3.309	-85.393	223.5834	-0.11172	0.041894	-0.15381
1.384	-6.1612	29.8041	1569.26794	-1.6421	1.356	0.19385	-24.796	149.071	594.011	-0.22021	0.3877	0.068359	-31.229	275.414	1098.821	-0.95264	0.93994	0.30566	34.251	-163.1793	308.084	-0.086328	0.056738	-0.17763
1.386	10.48507	-1.176	1572.561	-1.6443	1.341	0.19018	-52.347	159.375	549.004	-0.18262	0.35303	0.070313	22.032	260.0033	1043.091	-0.88193	0.88389	0.27969	60.525	-198.664	408.783	-0.056934	0.073926	-0.20156
1.388	7.564	-24.187	1576.4	-1.6343	1.3306	0.1875	-83.685	148.631	506.9136	-0.16943	0.33496	0.067871	25.107	199.911	981.216	-0.81631	0.82119	0.26484	27.1149	-270.483	546.345	-0.034668	0.089844	-0.22266
1.39	29.1793	-39.512	1546.295	-1.6147	1.2974	0.18506	-33.26	161.157	478.1435	-0.14453	0.2998	0.074219	37.3441	246.826	942.075	-0.76201	0.76299	0.24766	22.414	-333.096	649.979	-0.017969	0.10976	-0.24219
1.392	33.8313	-32.4784	1545.8296	-1.5991	1.2837	0.18359	-87.5435	178.5352	428.185	-0.12305	0.27539	0.07251	45.323	234.003	927.681	-0.71143	0.71357	0.23105	-0.649999999999999	-431.002	736.02	-0.012402	0.13457	-0.25908
1.394	47.913	-40.171	1554.086	-1.5664	1.25	0.17334	-73.861	140.2236	423.3055	-0.10156	0.24805	0.075684	-19.204	295.7657	888.9205	-0.65332	0.6709	0.21045	-13.5398	-448.9861	795.619	-0.018653	0.16269	-0.26455
1.396	45.352	-35.742	1565.014	-1.5369	1.2219	0.16406	-41.053	152.749	389.4977	-0.079102	0.21631	0.073242	-37.952	247.7989	841.707	-0.60058	0.62891	0.19737	44.368	-364.732	836.0902	-0.045606	0.20468	-0.26329
1.398	38.129	-27.2589	1544.809	-1.5078	1.1895	0.1582	-107.6811	164.344	339.119	-0.068359	0.20068	0.074219	-28.542	275.148	792.084	-0.54951	0.58564	0.18359	28.457	-239.306	920.061	-0.096191	0.25732	-0.24121
1.4	53.374	-9.97011	1511.976	-1.4727	1.1621	0.14453	-53.438	149.118	317.137	-0.044434	0.17236	0.068848	-85.8166	203.631	752.285	-0.5124	0.54736	0.16875	19.221	-104.961	950.421	-0.18213	0.31963	-0.20127
1.402	67.83	6.913	1511.361	-1.4609	1.1426	0.13916	-61.498	159.512	297.891	-0.031006	0.15063	0.063964	-113.336	251.187	709.3707	-0.47168	0.51113	0.15635	11.7914	-85.0183	979.515	-0.29737	0.39737	-0.1461
1.404	66.894	31.3823	1475.366	-1.4297	1.1055	0.12793	-69.713	102.056	265.707	-0.017578	0.13135	0.059082	-116.905	212.9623	670.7145	-0.43359	0.46826	0.13232	63.1136	-63.636	1070.1036	-0.44385	0.47666	-0.075
1.406	54.4195	55.8944	1444.8465	-1.417	1.086	0.12744	-16.328	73.7212	242.7507	-0.0019531	0.10498	0.048828	-113.901	286.42	599.3892	-0.37959	0.42989	0.11465	53.562	-87.204	1208.426	-0.60957	0.56758	0.004492
1.408	61.912	94.596	1416.586	-1.4023	1.0684	0.11963	-53.914	96.1506	207.396	0.013184	0.089355	0.05127	-95.338	234.3974	558.7555	-0.32959	0.38614	0.098245	90.577	-50.548	1301.796	-0.78857	0.67236	0.093262
1.41	65.173	86.495	1401.828	-1.3823	1.0493	0.12109	-19.988	73.375	198.4027	0.033691	0.067871	0.046387	-20.608	261.255	501.7557	-0.2749	0.34942	0.078711	67.008	-54.079	1340.934	-0.99648	0.78574	0.19053
1.412	60.017	87.176	1404.519	-1.375	1.0352	0.12207	11.937	104.979	198.27947	0.042969	0.055908	0.038819	-37.557	184.722	479.2678	-0.22021	0.31357	0.063867	10.849	-31.69	1301.369	-1.2255	0.90049	0.2709
1.414	38.1016	65.433	1398.3524	-1.356	1.0181	0.12744	-50.288	101.739	173.9818	0.058105	0.041504	0.038086	-33.877	225.943	427.592	-0.17139	0.27588	0.04541	25.9374	-40.04	1319.113	-1.4614	1.0098	0.32871
1.416	3.991	69.0347	1382.2415	-1.3494	1.0066	0.13111	-3.106	70.6448	176.12	0.07373	0.024414	0.028809	-12.279	200.006	399.85	-0.13398	0.24238	0.032617	33.4519	-67.88	1397.323	-1.6728	1.1108	0.37148
1.418	-2.0915	59.4908	1364.6076	-1.3438	1	0.1377	-21.299	89.4883	140.3243	0.083496	0.020508	0.027832	-23.815	224.5311	361.665	-0.10175	0.20469	0.021972	-0.673	-139.9	1445.153	-1.8765	1.1899	0.41357
1.42	-34.743	58.16092	1340.274	-1.3354	0.99463	0.14746	-21.82	56.192	142.2102	0.10547	0.0073242	0.024414	-19.3064	164.061	361.757	-0.081836	0.16953	0.015723	-38.2101	-264.779	1510.104	-2.0597	1.2625	0.45508
1.422	-31.6421	55.249	1321.231	-1.3296	0.98975	0.15039	9.662	48.71	142.81732	0.11572	0.0012207	0.02417	-10.498	162.269	306.3332	-0.067383	0.13447	0.0087892	-74.277	-356.927	1584.374	-2.2148	1.3337	0.49336
1.424	-43.7053	47.689	1328.4724	-1.3042	0.97021	0.15771	-66.02	81.54	101.4654	0.12354	-0.00048828	0.021484	-33.1969	133.75615	278.21	-0.052734	0.099121	0.0019531	-114.5684	-451.25	1668.043	-2.3581	1.3904	0.52344
1.426	-21.369	44.905	1312.596	-1.2813	0.96289	0.16285	-31.681	55.971	92.365	0.1377	-0.010254	0.023926	-28.324	155.387	238.5438	-0.035743	0.066309	-0.0054687	-40.659	-437.51	1712.917	-2.4857	1.4428	0.54717
1.428	-54.5619	52.228	1284.814452	-1.2617	0.95117	0.15723	-17.021	82.453	65.7114	0.14063	-0.01416	0.023438	9.029	138.854	255.718	-0.015039	0.04043	-0.0088867	50.808	-423.12	1746.421	-2.5757	1.4712	0.54492
1.43	-54.811	56.891	1267.1229	-1.2383	0.92773	0.15869	-67.864	83.3967	56.8421	0.14648	-0.021973	0.02832	0.932000000000002	111.048	254.491	0.0072265	0.005664	-0.026856	41.912	-388.43	1744.78	-2.6123	1.4877	0.51826
1.432	-38.7861	69.144	1256.0881	-1.2227	0.91211	0.16553	-33.638	42.21	77.419	0.14428	-0.026367	0.031006	15.579	52.7164	213.517	0.036328	-0.023926	-0.038183	-2.842	-364.83	1777.562	-2.5682	1.4954	0.47305
1.434	-28.288	81.6007	1234.2845	-1.1968	0.89111	0.16406	-65.217	70.984	69.498	0.14258	-0.03125	0.03125	49.946	12.126	148.147	0.071289	-0.044922	-0.053223	-83.7175	-312.738	1866.14	-2.4374	1.4974	0.41484
1.436	-25.014	100.7089	1193.8183	-1.1814	0.87622	0.17017	-72.4987	54.48	81.6542	0.13574	-0.035645	0.032715	50.8039	13.856	111.182	0.10967	-0.065918	-0.066602	-144.577	-246.429	1913.919	-2.243	1.4978	0.34932
1.438	-36.761	119.6461	1170.604	-1.1655	0.86377	0.17188	-21.762	34.7414	78.3093	0.13232	-0.039063	0.037598	26.129	1.237	91.092	0.13896	-0.083496	-0.079004	-147.3039	-203.233	1945.815	-2.0176	1.4941	0.26807
1.44	-31.023	129.104	1151.0287	-1.1328	0.8457	0.17285	-80.623	64.122	48.5345	0.12891	-0.041992	0.042969	15.596	60.471	87.5193	0.16045	-0.10185	-0.085254	-171.665	-158.69	1898.5703	-1.7938	1.496	0.18281
1.442	-38.229	124.411	1113.676	-1.1177	0.83447	0.16992	-63.367	18.532	40.2509	0.1333	-0.044922	0.048828	-33.861	52.907	74.837	0.17324	-0.12129	-0.091602	-200.217	-186.864	1840.283	-1.6042	1.4919	0.11328
1.444	-36.1944	142.205	1086.286	-1.0815	0.81885	0.16797	-76.565	37.545	28.9313	0.13184	-0.043457	0.046387	-51.1228	92.657	36.9702	0.1792	-0.1333	-0.098145	-210.544	-143.771	1811.439	-1.4542	1.4888	0.065626
1.446	-3.956	152.48	1061.503	-1.053	0.80005	0.16504	-103.7436	61.5898	35.777	0.13086	-0.043945	0.058594	-54.324	38.501	56.155	0.17236	-0.14492	-0.1	-178.022	-133.181	1831.692	-1.356	1.4936	0.030664
1.448	15.902	145.751	1040.542	-1.0215	0.78125	0.15625	-50.432	24.8828	69.338	0.13428	-0.04541	0.064942	-62.388	68.362	58.1822	0.15849	-0.15293	-0.10225	-145.831	-109.582	1882.824	-1.3101	1.5142	0.0083008
1.45	19.611	132.552	1029.7714	-0.97803	0.76025	0.15283	-90.6007	35.0958	65.485	0.1377	-0.04834	0.067383	-83.6726	27.3976	73.49141	0.1456	-0.15879	-0.10342	-92.5208	-141.4997	1911.006	-1.2994	1.5486	-0.010352
1.452	-6.567	128.6944	1012.6998	-0.95703	0.74609	0.14697	-77.11	16.445	59.8948	0.14404	-0.048828	0.07373	-71.239	91.516	50.444	0.12187	-0.16064	-0.10254	-40.255	-187.732	1942.892	-1.3136	1.5969	-0.027639
1.454	31.7755	119.9517	1003.475	-0.91553	0.729	0.14258	-37.646	8.783	42.6218	0.14746	-0.049316	0.074707	-99.845	19.5779	33.049	0.10107	-0.15576	-0.092773	-0.181999999999995	-184.986	1949.418	-1.3538	1.6568	-0.051075
1.456	44.14	113.301	995.494	-0.88256	0.71264	0.13501	-55.429	59.2788	24.151	0.15674	-0.047852	0.072754	-93.199	53.4342	-10.889	0.076172	-0.15528	-0.09209	17.766	-175.528	1995.374	-1.4027	1.7148	-0.064551
1.458	28.582	96.945	963.939	-0.85352	0.69238	0.1333	-19.287	31.308	43.9045	0.16723	-0.04248	0.070801	-86.10933	-24.293	8.136	0.049121	-0.14775	-0.0833	-3.002	-118.651	2063.752	-1.4551	1.7695	-0.069824
1.46	10.936	101.462	940.4201	-0.8125	0.66895	0.12158	-28.465	41.068	33.894	0.17139	-0.040039	0.073242	-79.225	44.531	-17.5498	0.02334	-0.1376	-0.077832	-38.6795	-143.653	2095.698	-1.5084	1.8201	-0.067578
1.462	13.339	108.2282	925.6017	-0.79297	0.66016	0.11963	-39.092	54.77667	47.9312	0.1748	-0.033203	0.070801	-80.35598	16.75	35.769	-0.0046874	-0.12226	-0.063867	-55.943	-167.435	2118.255	-1.5699	1.8629	-0.053129
1.464	1.505	117.2616	885.34	-0.76074	0.6377	0.10889	6.791	8.9997	71.4756	0.17529	-0.030762	0.071777	-71.241	80.3442	47.46234	-0.035156	-0.10889	-0.058105	-27.584	-183.15	2118.745	-1.6476	1.9031	-0.033601
1.466	-18.667	134.251	868.9706	-0.73511	0.62378	0.10327	-21.953	43.926	72.8408	0.17773	-0.024902	0.071289	-104.743	34.485	82.083	-0.063574	-0.097266	-0.044238	-28.824	-130.4254	2103.7264	-1.7289	1.9336	-0.0063547
1.468	-26.92	137.204	850.902	-0.7085	0.60596	0.097168	-33.023	36.50157	71.954	0.17652	-0.021484	0.071289	-100.3674	63.943	70.566	-0.090527	-0.085742	-0.03291	46.348	-29.357	2105.5286	-1.8164	1.959	0.022461
1.47	-47.155	145.712	843.177	-0.67676	0.58789	0.093262	-4.82	28.74	50.7691	0.17578	-0.019531	0.075684	-52.1357	34.3638	88.818	-0.1081	-0.077929	-0.02627	55.9789	45.862	2099.409	-1.8947	1.9682	0.0463
1.472	-30.034	146.065	815.6823	-0.66162	0.57471	0.094727	-44.316	65.438	32.857	0.16992	-0.0087891	0.07666	-47.584	68.542	67.7276	-0.12539	-0.072363	-0.023242	70.713	103.434	2056.381	-1.9778	1.9675	0.073165
1.474	-62.3403	152.3592	778.792	-0.63232	0.55518	0.097656	-14.651	-0.101699999999999	37.8651	0.17285	-0.0039063	0.071289	-38.47	57.104	97.118	-0.12891	-0.064453	-0.018066	103.497	96.032	2030.834	-2.0482	1.9535	0.098172
1.476	-49.049	154.7738	752.4351	-0.60767	0.54077	0.10181	-1.673	-2.77574	53.4981	0.16162	0.0029297	0.075195	-37.109	72.804	71.4684	-0.12774	-0.062793	-0.021973	133.471	121.647	2040.983	-2.1059	1.9324	0.10645
1.478	-55.3511	144.155	735.436	-0.5874	0.5293	0.10107	-37.834	14.352	53.9091	0.15454	0.012939	0.078369	-36.417	80.871	68.237	-0.11523	-0.062402	-0.028516	141.058	136.761	2069.082	-2.1367	1.9023	0.11279
1.48	-55.093	126.689	709.142	-0.55859	0.5083	0.104	-10.026	-7.6282	51.7019	0.14404	0.026855	0.08252	-15.506	70.187	43.0887	-0.10547	-0.06709	-0.035937	87.356	172.583	2085.436	-2.1377	1.8694	0.10888
1.482	-69.5622	129.1775	682.797	-0.54248	0.49854	0.099609	-38.672	49.448	50.989	0.13428	0.028809	0.080566	13.933	36.625	59.131	-0.087793	-0.06416	-0.041699	39.969	182.377	2061.771	-2.1232	1.8306	0.10374
1.484	-75.093	123.15401	669.326	-0.51807	0.4751	0.1123	-31.527	40.7585	51.7945	0.13184	0.035645	0.080566	-3.06	10.583	83.644	-0.063965	-0.065918	-0.049316	-56.3522	150.11	2040.6146	-2.0831	1.7896	0.094371
1.486	-60.1009	121.895	675.6742	-0.50122	0.46313	0.11572	-10.456	12.8869	52.5289	0.12207	0.04248	0.081543	0.656999999999996	19.875	78.8727	-0.047656	-0.075293	-0.053711	-45.207	130.7	2052.713	-2.0336	1.7475	0.088404
1.488	-90.3191	123.501	653.906	-0.48633	0.44727	0.11963	-79.8227	42.245	39.875	0.11817	0.050049	0.085449	4.242	3.516	91.3552	-0.03252	-0.085058	-0.058203	-39.192	95.9017	2083.128	-1.9902	1.7031	0.078613
1.49	-92.0638	129.061	621.594	-0.46094	0.42383	0.12354	-51.336	-1.1721	55.676	0.11182	0.054199	0.084473	6.196	39.932	92.8935	-0.01377	-0.095215	-0.063282	-37.087	101.46	2084.93	-1.9573	1.6716	0.072539
1.492	-77.6551	113.3874	600.4648	-0.4502	0.41211	0.12305	-68.4601	16.6261	51.7322	0.11621	0.062988	0.082031	-20.915	-11.4326	94.992	0.0035154	-0.10957	-0.067969	-67.9586	116.3456	2053.4591	-1.9345	1.6353	0.069169
1.494	-61.49	100.698	596.3906	-0.4292	0.39307	0.13037	-97.8381	44.6376	35.4512	0.12256	0.063477	0.081055	-37.922	15.7026	65.69	0.021484	-0.12061	-0.078613	-111.941	119.485	2025.147	-1.9202	1.6058	0.072727
1.496	-48.022	104.651	565.3134	-0.41822	0.3772	0.1311	-55.225	2.65925	24.5498	0.13379	0.066895	0.078125	-29.745	-18.9303	49.2211	0.049317	-0.13848	-0.089063	-116.36	124.305	1975.544	-1.9191	1.583	0.078831
1.498	-27.905	128.704	527.766	-0.39941	0.35986	0.13477	-81.112	40.655	14.51	0.14551	0.066894	0.07544	-58.037	29.4498	48.869	0.077053	-0.15107	-0.10254	-115.2295	122.715	1963.4248	-1.9258	1.5615	0.091309
1.5	-9.775	130.2919	515.0461	-0.37256	0.33447	0.13818	-69.507	29.1873	35.7165	0.16016	0.069336	0.072754	-58.9509	-16.133	82.15734	0.11104	-0.16631	-0.11387	-54.72	151.309	1966.77	-1.9344	1.5553	0.10158
1.502	-4.009	126.3975	506.57888	-0.3562	0.31861	0.13965	-32.526	5.1054	45.0554	0.17969	0.068848	0.070313	-71.519	10.388	61.69014	0.1504	-0.18067	-0.12725	-58.934	179.304	1915.332	-1.943	1.5544	0.11686
1.504	-1.224	118.9631	486.227	-0.33496	0.29688	0.14111	-68.2323	44.23126	44.80188	0.18994	0.066895	0.070313	-63.5845	-40.8914	55.5473	0.18555	-0.1875	-0.13379	-84.9346	237.558	1876.132	-1.9462	1.5543	0.12937
1.506	-17.265	121.816	462.293	-0.31152	0.27832	0.14111	-36.889	-2.929	45.35	0.20801	0.066406	0.068848	-76.253	28.287	16.613	0.21494	-0.19541	-0.15195	-89.5307	284.829	1811.019	-1.9372	1.555	0.1459
1.508	-10.145	116.028	463.907	-0.29785	0.271	0.13623	-43.714	15.7322	42.5237	0.21655	0.062255	0.067627	-65.3209	-5.36	18.874	0.2456	-0.19931	-0.16543	-99.375	321.456	1764.32	-1.9199	1.5479	0.16016
1.51	-15.555	112.481	439.3443	-0.271	0.24854	0.13623	-60.819	44.343	28.2873	0.21875	0.05957	0.067383	-90.315	65.514	8.59	0.26279	-0.20479	-0.17363	-37.029	313.076	1734.358	-1.89	1.5493	0.18173
1.512	-25.357	105.621	411.154	-0.24976	0.23169	0.13404	-14.645	6.03	26.151	0.22266	0.062988	0.063965	-96.8371	21.6624	47.558	0.27598	-0.20801	-0.17744	-61.336	271.914	1684.215	-1.8585	1.551	0.19801
1.514	-38.78	98.5785	396.862	-0.23291	0.21631	0.13184	-48.904	49.41	24.08	0.22021	0.061523	0.063477	-83.664	72.509	24.9151	0.28223	-0.20996	-0.18115	-59.304	260.418	1631.862	-1.8228	1.5474	0.20526
1.516	-42.248	98.9754	378.083	-0.21094	0.20166	0.13086	-55.048	36.3625	36.006	0.20947	0.06543	0.069824	-94.191	17.0572	53.0117	0.27685	-0.21231	-0.18008	-35.891	252.681	1605.582	-1.7765	1.5392	0.21814
1.518	-21.932	101.6639	352.927	-0.19922	0.19238	0.12988	-15.596	26.2591	47.233	0.19726	0.067383	0.077393	-103.4089	42.3623	38.759	0.26678	-0.21171	-0.18028	-26.017	295.387	1570.503	-1.7319	1.5259	0.2168
1.52	-43.708	104.3489	347.1849	-0.18213	0.17676	0.12744	-26.265	60.702	49.1471	0.18115	0.067383	0.085938	-82.2561	2.233	52.6664	0.25038	-0.20546	-0.17675	-24.324	299.6534	1540.008	-1.6828	1.5091	0.22086
1.522	-32.983	93.0576	352.978	-0.16968	0.15991	0.12647	-1.925	16.1677	45.4682	0.1543	0.065918	0.098145	-74.588	41.27386	29.483	0.22947	-0.19491	-0.1703	8.15499999999999	289.848	1514.62	-1.6259	1.4821	0.2255
1.524	-44.875	72.229	355.244	-0.15674	0.1499	0.12402	-9.342	30.036	44.58664	0.14209	0.069824	0.10303	-57.217	44.3325	40.8451	0.20654	-0.17969	-0.15771	38.388	267.198	1458.526	-1.5621	1.4576	0.22157
1.526	-55.417	69.378	330.944	-0.13867	0.13037	0.13135	-36.725	51.3582	41.0977	0.11768	0.072754	0.11426	-44.765	74.086	20.912	0.17339	-0.16125	-0.14954	28.983	265.611	1422.793	-1.4948	1.4253	0.21105
1.528	-69.6691	74.42	308.77809	-0.11963	0.12451	0.12695	3.393	13.457	44.7239	0.10303	0.072266	0.12329	-27.596	57.6384	42.9978	0.14105	-0.14315	-0.13832	55.094	302.681	1395.563	-1.4194	1.394	0.20215
1.53	-78.228	72.907	295.3841	-0.096191	0.10645	0.12061	-17.113	53.51247	44.9296	0.092285	0.077637	0.12549	-20.754	40.1737	38.8003	0.1086	-0.12244	-0.1239	15.257	329.573	1356.39	-1.352	1.3532	0.18436
1.532	-92.272	72.3737	286.379	-0.072021	0.093262	0.11255	-36.378	32.312	39.5846	0.076172	0.080078	0.1377	-3.381	42.7059	42.117	0.074511	-0.097437	-0.1182	13.224	330.46	1276.9815	-1.285	1.3116	0.17381
1.534	-119.7601	85.172	260.985	-0.048828	0.087891	0.10547	-18.315	6.0906	49.541	0.071289	0.086426	0.15332	-18.021	48.5986	76.596	0.04248	-0.075684	-0.10498	-37.102	300.012	1172.166	-1.2199	1.2677	0.17215
1.536	-97.6279	97.897	238.481	-0.016113	0.070313	0.099121	-67.249	60.615	50.9107	0.058594	0.091797	0.16162	-10.809	76.152	75.57	0.013841	-0.053593	-0.095108	-78.993	310.162	1102.3344	-1.144	1.2252	0.17378
1.538	-97.6693	98.994	226.047	0.00048828	0.067383	0.092773	-39.927	29.5311	45.4061	0.05542	0.10059	0.17285	6.497	53.011	106.0239	-0.015039	-0.031455	-0.084485	-87.128	333.232	1050.189	-1.0669	1.1821	0.17432
1.54	-79.858	85.7005	249.8755	0.024902	0.057617	0.087402	-45.653	33.2981	43.533	0.053711	0.10205	0.18359	-26.577	73.693	90.6434	-0.040137	-0.0099579	-0.076225	-124.3168	373.136	1017.2	-0.98049	1.1386	0.17776
1.542	-81.215	80.21886	228.891	0.041015	0.051758	0.079346	-78.1583	39.3572	50.4594	0.04834	0.1123	0.19189	-22.741	21.9796	79.545	-0.057313	0.0094617	-0.075446	-97.6047	376.7785	952.0564	-0.90204	1.0998	0.17696
1.544	-72.998	82.6801	209.6218	0.055176	0.047852	0.074219	-49.265	-7.6267	64.8812	0.055176	0.11084	0.19775	-5.969	64.752	60.3558	-0.068848	0.027832	-0.07666	-98.4524	346.659	872.982	-0.82906	1.0526	0.17931
1.546	-61.25	79.0571	205.3656	0.066895	0.039551	0.067871	-61.194	37.0851	66.983	0.058594	0.12354	0.20459	-18.724	14.421	70.1038	-0.07615	0.043604	-0.075725	-91.0512	303.664	818.588	-0.76171	0.99905	0.17949
1.548	-40.242	81.7363	191.0878	0.074219	0.037598	0.062988	-68.656	16.032	93.0752	0.064698	0.13526	0.19873	-36.906	69.224	46.4282	-0.081589	0.060172	-0.08345	-88.355	266.784	762.165	-0.6875	0.93848	0.17432
1.55	-39.872	67.6812	181.153	0.080078	0.036133	0.060547	-56.958	-45.4782	142.859	0.061035	0.15674	0.19141	-45.958	23.9265	76.7071	-0.077573	0.076696	-0.0892	-104.296	270.701	730.7292	-0.61704	0.87018	0.1632
1.552	-44.323	68.9708	167.639	0.078125	0.038574	0.063965	-119.96645	-63.366	218.68	0.035156	0.21826	0.17188	-53.894	50.816	65.39674	-0.071637	0.089468	-0.10119	-118.265	277.05247	685.3476	-0.54646	0.80095	0.15842
1.554	-30.656	68.8175	173.9451	0.075195	0.037598	0.061035	-93.036	-150.7555	353.099	0.0097656	0.26074	0.17041	-46.3083	-28.616	95.007	-0.060547	0.10742	-0.11133	-133.74	262.181	617.2444	-0.47028	0.73609	0.14552
1.556	-36.494	70.065	175.149	0.071777	0.042969	0.063965	-79.493	-192.296	461.266	-0.062012	0.35596	0.18994	-46.649	4.319	89.636	-0.04342	0.11547	-0.11917	-139.832	226.195	546.737	-0.39573	0.66761	0.13721
1.558	-34.365	61.874	157.2242	0.064941	0.04541	0.062012	-162.043	-247.007	557.729	-0.14868	0.42798	0.20825	-95.0911	-56.8141	121.115	-0.026442	0.12634	-0.12945	-148.631	194.9368	476.607	-0.32324	0.60107	0.12451
1.56	-30.484	53.4519	162.416	0.055664	0.050293	0.0625	-186.275	-340.572	627.6022	-0.25391	0.49854	0.2417	-97.653	2.6851	114.5892	-0.0060929	0.13495	-0.13309	-125.1616	194.625	429.612	-0.25535	0.53241	0.11474
1.562	-21.715	53.302	162.933	0.049316	0.055664	0.066651	-203.661	-296.034	674.0874	-0.41357	0.57666	0.29102	-78.9734	-57.3361	132.668	0.010316	0.14031	-0.12453	-116.321	202.6642	392.0509	-0.19832	0.46902	0.1041
1.564	-9.262	49.6256	142.39347	0.040527	0.061523	0.072266	-189.195	-216.353	724.4645	-0.48975	0.61572	0.31445	-84.1197	-54.504	135.969	0.012207	0.15234	-0.12354	-89.297	192.2235	347.4602	-0.13622	0.40496	0.091599
1.566	-27.035	58.2288	143.5181	0.02832	0.072266	0.074707	-160.65	-147.5285	798.352	-0.6499	0.69336	0.36475	-60.6339	-161.2866	196.27	0.0043383	0.1628	-0.11521	-50.936	183.941	285.427	-0.083002	0.34296	0.08457
1.568	-18.122	51.742	136.192	0.024902	0.072266	0.074219	-192.4504	-53.844	856.773	-0.76684	0.75366	0.39599	-45.301	-213.3483	266.36	-0.016657	0.1724	-0.11098	-1.93899999999999	177.564	245.61	-0.037109	0.2832	0.078613
1.57	-29.731	56.475	122.413	0.013184	0.08252	0.082031	-101.941	-58.913	932.7358	-0.875	0.82813	0.41846	-52.784	-294.1577	401.138	-0.044648	0.18904	-0.11217	26.44	172.179	228.3738	0.0042943	0.2254	0.072559
1.572	-20.622	65.7861	112.983	-0.0026856	0.085449	0.087891	-40.801	-26.55	1012.25755	-1.0249	0.94971	0.4541	-17.7697	-310.397	497.502	-0.083671	0.21646	-0.1109	28.421	177.538	199.8741	0.043552	0.17335	0.062011
1.574	-54.311	61.4065	107.264	-0.0097656	0.091797	0.094727	-17.70637	30.98	1144.653	-1.0991	1.0161	0.47461	58.4378	-359.126	614.376	-0.13135	0.25732	-0.10889	35.26	184.093	171.5792	0.075194	0.12451	0.061621
1.576	-51.133	55.3284	128.7947	-0.011719	0.092773	0.092773	51.4051	54.767	1262.653	-1.2637	1.1523	0.52197	17.2268	-345.834	655.64	-0.19705	0.31495	-0.097886	3.012	174.904	137.5463	0.10137	0.073048	0.058886
1.578	-54.543	48.838	121.2785	-0.0087891	0.099121	0.095215	2.73800000000001	133.666	1332.176	-1.4375	1.2754	0.5835	47.7924	-305.2593	691.624	-0.27497	0.3812	-0.071961	-12.851	162.672	115.0113	0.12646	0.031738	0.057617
1.58	-93.4011	58.486	108.624	-0.010742	0.1001	0.099121	-16.729	115.062	1397.134	-1.5386	1.313	0.61133	80.93	-228.172	688.451	-0.37829	0.45526	-0.041548	-12.203	135.53	137.237	0.1417	-0.01045	0.057031
1.582	-81.1021	59.158	111.6511	-0.0061035	0.099611	0.096924	-9.752	50.81	1425.461	-1.7358	1.3481	0.67578	68.092	-134.151	709.953	-0.49933	0.52902	-0.0013192	-17.438	116.174	135.984	0.15342	-0.045508	0.048437
1.584	-81.174	44.1973	112.374	-0.0014648	0.10156	0.094238	-83.07304	10.03	1483.273	-1.864	1.3469	0.72339	43.114	-90.931	749.655	-0.63281	0.60742	0.044922	-11.66	85.662	106.016	0.16162	-0.081837	0.041797
1.586	-76.7142	38.5134	117.9388	0.0043945	0.10254	0.096191	-72.921	-110.56	1556.177	-1.9434	1.3281	0.75635	81.413	-31.147	773.467	-0.78076	0.68167	0.073843	-21.443	53.175	68.3828	0.17177	-0.11338	0.035937
1.588	-95.149	41.703	80.866	0.01123	0.099121	0.098145	-68.581	-200.691	1583.578737	-1.9722	1.2925	0.78223	94.669	-34.926	870.23	-0.93098	0.75784	0.092147	-18.634	60.3350584	64.8968	0.1792	-0.14111	0.032715
1.59	-69.2556	35.687	73.448	0.018555	0.10156	0.097168	-119.731	-274.1657	1605.52	-1.9434	1.2715	0.77979	89.003	59.648	939.602	-1.0762	0.83275	0.10699	-37.96	53.6692	67.9988	0.17588	-0.16172	0.032422
1.592	-67.855	43.2795	86.9513	0.025146	0.10035	0.09668	-81.744	-340.363	1606.834	-1.7988	1.248	0.73975	101.624	53.524	999.271	-1.2077	0.91567	0.11858	-22.414	39.008	81.3312	0.16719	-0.175	0.02832
1.594	-53.697	33.4784	87.0767	0.032227	0.10156	0.092285	-12.8702	-344.46	1582.001	-1.6128	1.2427	0.6875	47.557	121.273	1006.61	-1.3276	1.0083	0.13232	-60.097	25.638	77.11976	0.15391	-0.18203	0.026758
1.596	-67.5	29.47699	82.0399	0.04248	0.098633	0.087891	57.0919	-396.35	1615.2599	-1.4004	1.2539	0.62354	61.2096	69.552	1073.643	-1.4566	1.0873	0.15193	-93.896	5.855	75.3734	0.1331	-0.18399	0.03877
1.598	-66.205	34.7379	85.581	0.049316	0.098633	0.09082	111.405	-412.75	1678.667	-1.1147	1.2798	0.55029	56.0262	101.44	1152.079	-1.5919	1.1709	0.17946	-109.4951	15.738	80.5066	0.10303	-0.17676	0.046875
1.6	-45.797	39.083	87.5748	0.055664	0.10205	0.08252	95.501	-348.72	1733.032	-1.0039	1.292	0.51221	15.9385	-7.54000000000002	1292.027	-1.7423	1.2425	0.20642	-145.329	35.753	74.6115	0.060449	-0.16279	0.063282
1.602	-39.987	42.823	87.183	0.061768	0.10156	0.080322	105.522	-285.583	1764.787	-0.84961	1.3223	0.45996	-42.827	-77.86	1358.687	-1.8924	1.304	0.22704	-139.6983	55.06	60.52	0.0088867	-0.14492	0.089063
1.604	-33.948	39.8503	93.1798	0.066406	0.098145	0.074219	71.8528	-189.153	1753.658	-0.79273	1.342	0.43823	-91.359	-235.966	1422.815	-2.0269	1.3442	0.24121	-137.503	48.202	45.9972	-0.050488	-0.12109	0.11993
1.606	-45.782	30.5665	77.5861	0.07373	0.095215	0.074219	-22.968	-134.516	1731.023	-0.76709	1.3716	0.43115	-134.549	-284.447	1469.455	-2.1322	1.3736	0.26153	-134.9463	32.323	35.604	-0.11514	-0.091697	0.1501
1.608	-14.209	33.6403	78.0883	0.075684	0.095215	0.071777	-25.078	-112.98	1723.068	-0.80078	1.416	0.43408	-125.338	-362.9	1522.152	-2.2055	1.3949	0.27598	-122.7128	6.0394	25.98	-0.18506	-0.061523	0.18506
1.61	-9.617	25.6822	67.3074	0.081543	0.087891	0.065918	-64.747	-61.28	1681.914	-0.83154	1.4458	0.43359	-73.15	-326.39	1577.8792	-2.2414	1.4121	0.28261	-131.125	5.2168	29.006	-0.24346	-0.030957	0.21113
1.612	-20.793	21.63745	61.1828	0.084228	0.083985	0.068115	-135.63582	-91.167	1724.716	-0.92969	1.5137	0.45947	-62.982	-367.24	1634.774	-2.2125	1.4254	0.27861	-113.469	7.85	40.835	-0.29062	0.0020507	0.23731
1.614	7.19900000000001	10.1658	86.236	0.089355	0.077148	0.062012	-142.302	-124.266	1767.031	-1.0183	1.5735	0.47143	-71.28	-376.71	1691.535	-2.1309	1.4375	0.26025	-96.6412	20.041	45.606	-0.3207	0.029785	0.25801
1.616	-1.72	8.62825	68.6628	0.091797	0.075195	0.056641	-168.95	-143.788	1761.726	-1.1074	1.6348	0.49072	-55.6812	-382.11	1756.755	-1.9815	1.4497	0.22578	-70.298	31.341	31.346	-0.33721	0.051758	0.27842
1.618	-4.907	17.359	67.6658	0.095215	0.072754	0.05127	-108.439	-172.34	1786.836	-1.2144	1.7261	0.51758	-125.598	-307.372	1787.788	-1.8035	1.468	0.18096	-45.857	21.528	18.468	-0.33984	0.074707	0.28906
1.62	-19.393	18.0495	66.8664	0.10059	0.064453	0.045898	-18.625	-167.3755	1781.45	-1.2632	1.7759	0.54688	-126.285	-210.643	1799.088	-1.6305	1.4754	0.1376	-29.271	40.9114	8.6529	-0.32744	0.089746	0.29443
1.622	-4.059	11.4093	86.8285	0.10498	0.060791	0.048095	-57.839	-206.258	1818.28	-1.3774	1.8735	0.59375	-136.8811	-138.235	1797.7882	-1.4908	1.483	0.099513	-27.119	42.608	50.286	-0.30654	0.10352	0.28985
1.624	-24.963	-1.18263	107.2659	0.10889	0.054688	0.047363	-75.094	-239.25	1899.481	-1.4844	1.9307	0.62354	-149.315	-56.717	1779.792	-1.3804	1.4907	0.073242	-18.765	50.121	66.919	-0.2749	0.11133	0.2793
1.626	-44.057	-17.4331	117.4	0.10889	0.056152	0.047363	-138.831	-238.5	1935.62	-1.5898	1.9805	0.64795	-136.682	-44.04	1758.4	-1.3213	1.5131	0.066309	-10.248	40.3353	55.0001	-0.22812	0.11064	0.26856
1.628	-59.146	-41.908	170.429	0.10596	0.055664	0.051758	-204.568	-265.7	2006.42	-1.7153	2.022	0.66797	-86.664	-20.3	1773.298	-1.2976	1.5262	0.063281	16.636	21.4571	32.357	-0.18408	0.10547	0.25537
1.63	-46.59	-49.85	230.996	0.098145	0.070801	0.043457	-178.5081	-260.385	2037.842	-1.7695	2.0371	0.68262	-93.021	-67.013	1814.595	-1.3098	1.5539	0.072266	17.329	27.1401	39.0672	-0.13359	0.10381	0.23877
1.632	-62.162	-59.924	290.5926	0.081055	0.094727	0.039063	-241.556	-221.557	2013.984	-1.855	2.0298	0.70313	-71.5732	-48.839	1841.3138	-1.3506	1.5897	0.077148	8.047	50.279	43.797	-0.090625	0.091211	0.2248
1.634	-123.7689	-82.762	326.28028	0.064453	0.11377	0.035156	-255.37	-185.3982	1978.484	-1.9043	2.0176	0.71973	0.290999999999997	-108.262	1863.287	-1.4116	1.6274	0.083984	1.69900000000001	68.701	42.725	-0.051953	0.076758	0.20762
1.636	-142.677	-122.6598	375.5518	0.0068359	0.1582	0.043945	-240.271	-103.978	1908.821	-1.9375	2.0039	0.74072	83.355	-93.9816	1867.479	-1.4883	1.6551	0.089062	2.961	63.747	36.26	-0.010547	0.061035	0.20176
1.638	-138.224	-115.3113	401.865	-0.04834	0.19214	0.057862	-265.098	-59.238	1876.996	-1.9629	1.9785	0.76611	110.9657	-174.806	1904.113	-1.5598	1.6914	0.088965	-3.604	54.4245	21.019	0.029297	0.044434	0.19189
1.64	-123.887	-76.1348	443.5615	-0.11621	0.21973	0.081055	-199.3121	-48.861	1913.655	-1.9609	1.9648	0.78369	112.604	-190.168	1958.416	-1.634	1.7195	0.088965	4.162	32.9072	50.785	0.064648	0.024805	0.18203
1.642	-149.189	-43.338	470.2709	-0.2207	0.26563	0.11475	-146.702	-42.759	1931.098	-1.9683	1.936	0.80664	76.348	-264.24	2034.182	-1.7038	1.7456	0.087403	5.034	38.92	56.5276	0.10234	0.0058594	0.17061
1.644	-150.7568	-34.3688	492.3907	-0.27637	0.28809	0.13037	-126.281	-56.115	1932.521	-1.9666	1.9202	0.82007	25.8483	-212.709	2072.956	-1.7593	1.7622	0.078125	-7.546	39.936	55.0648	0.14063	-0.016407	0.1624
1.646	-122.268	-14.077	536.99128	-0.38525	0.34033	0.16016	-50.418	-23.5696	1921.056	-1.9648	1.8926	0.83447	26.276	-227.752	2089.949	-1.8182	1.7666	0.069727	-66.374	37.088	54.9416	0.17812	-0.044141	0.15459
1.648	-106.0712	28.182	578.8049	-0.46485	0.38208	0.18653	-85.763	21.8951	1903.873	-1.9604	1.8589	0.85547	3.989	-133.153	2049.47	-1.859	1.768	0.061816	-115.0431	26.411	67.2536	0.2124	-0.068848	0.14111
1.65	-74.9545	53.965	650.3227	-0.55029	0.42725	0.2124	-115.223	16.636	1922.112	-1.957	1.8359	0.86377	7.27	-118.8174	2000.938	-1.8871	1.7601	0.050488	-104.933	15.432	66.0323	0.24619	-0.089746	0.12812
1.652	-87.667	77.91	740.761	-0.65137	0.48438	0.24463	-112.891	21.1644	1934.321	-1.9604	1.7944	0.88281	19.934	-13.331	1982.714	-1.9143	1.7635	0.045898	-119.4922	39.628	68.691524	0.28076	-0.11553	0.11728
1.654	-39.1	124.684	785.01	-0.69873	0.52002	0.25586	-145.727	-30.47	1954.554	-1.969	1.7659	0.89331	-2.407	-7.63	1964.807	-1.9336	1.7559	0.04248	-139.057	36.8603	51.3828	0.31084	-0.13545	0.10517
1.656	-28.764	138.711	834.852	-0.79688	0.59473	0.28076	-88.08	-85.874	1990.361	-1.9766	1.7402	0.91455	-1.544	76.941	1989.409	-1.9434	1.7516	0.041699	-130.699	24.101	35.106	0.33906	-0.15566	0.092969
1.658	-53.1148	139.803	894.465	-0.87475	0.65796	0.30029	-78.229	-103.323	1976.6463	-1.9844	1.7129	0.92236	8.4671	80.4132	2009.391	-1.9656	1.7399	0.050098	-152.88	4.931	40.746	0.36572	-0.17383	0.07959
1.66	-25.987	104.879	957.148	-0.95459	0.71729	0.32227	-120.429	-118.3291	1966.9634	-1.9878	1.7036	0.92969	19.469	153.829	2015.343	-1.9922	1.7195	0.062207	-130.0421	0.528999999999996	35.638	0.38691	-0.18887	0.06748
1.662	-19.777	68.391	1027.679	-1.0649	0.78955	0.35938	-70.895	-87.655	1945.13281	-1.9902	1.6797	0.93799	38.389	167.033	1989.706	-2.0298	1.6921	0.073437	-104.4513	9.762	47.7839	0.39697	-0.20264	0.058203
1.664	-2.729	16.196	1100.8565	-1.125	0.8291	0.37646	-96.044	-33.2164	1889.307	-1.987	1.6633	0.94116	-14.376	206.663	1978.117	-2.0586	1.6621	0.077637	-97.7763	3.067	55.8203	0.40986	-0.2128	0.05039
1.666	-28.382	-38.425	1139.4908	-1.2358	0.89307	0.41602	-80.131	-25.598	1880.086	-1.9785	1.6504	0.93506	-63.2223	179.987	2006.452	-2.0811	1.6243	0.084571	-91.569	10.087	59.345	0.41836	-0.22051	0.048047
1.668	-5.101	-85.22371	1191.4927	-1.321	0.92651	0.44677	-36.831	0.280999999999999	1882.568	-1.9473	1.6309	0.92822	-96.118	147.685	2033.8882	-2.0879	1.5863	0.088086	-84.343	32.467	50.772	0.42725	-0.22559	0.041992
1.67	12.859	-111.84	1208.3694	-1.3926	0.94824	0.47559	-68.393	38.682	1887.824	-1.9277	1.6172	0.92041	-75.507	102.507	2073.874	-2.0879	1.5504	0.089648	-73.49	46.897	43.884	0.42812	-0.22695	0.046094
1.672	23.762	-118.648	1223.222	-1.4624	0.96631	0.49805	-52.099	90.903	1894.651	-1.8745	1.5942	0.88867	-67.801	61.9333	2072.983	-2.0787	1.5154	0.095215	-71.147	45.7894	30.8453	0.42314	-0.22197	0.043945
1.674	57.5045	-125.928	1246.245	-1.4819	0.96533	0.51123	-95.346	149.506	1847.484	-1.8257	1.5737	0.86084	-55.629	42.189	2094.422	-2.0659	1.4888	0.099609	-48.676	50.149	34.916	0.4165	-0.21495	0.045507
1.676	45.5665	-123.809	1268.602	-1.4883	0.95508	0.52881	-147.9891	159.09	1815.005	-1.7749	1.5532	0.83203	-49.8413	4.39100000000001	2082.0516	-2.0539	1.4617	0.10498	-36.958	25.7982	26.5418	0.39776	-0.21689	0.045312
1.678	48.454	-110.061	1300.791	-1.4648	0.94921	0.52148	-127.026	154.224	1785.263	-1.7051	1.5254	0.7915	-51.4637	33.882	2083.76	-2.0414	1.4465	0.11241	-1.491	23.1224	18.592	0.37646	-0.2085	0.047852
1.68	23.0736	-105.79	1304.6287	-1.4219	0.93945	0.51221	-184.8294	163.802	1759.088	-1.6719	1.5098	0.771	-20.204	28.864	2073.299	-2.0286	1.4352	0.11826	26.414	33.089	22.4066	0.34707	-0.2041	0.055469
1.682	31.852	-101.184	1348.361	-1.3164	0.93359	0.48291	-185.2273	131.52	1757.58	-1.5977	1.4824	0.72314	56.893	83.59	2043.549	-2.0188	1.421	0.12656	10.892	29.9	47.2	0.31211	-0.18818	0.05664
1.684	20.643	-71.6352	1352.2066	-1.2539	0.9248	0.46924	-142.3867	114.876	1772.33	-1.5455	1.4605	0.69385	71.725	69.734	2026.095	-2.0117	1.4199	0.13232	15.576	56.9917	50.314	0.26914	-0.17412	0.0625
1.686	-3.143	-39.26	1354.0486	-1.1265	0.91455	0.4375	-191.206	76.9478	1755.5495	-1.4961	1.4395	0.66064	65.953	154.26	1987.1527	-2.0036	1.4079	0.14375	26.125	50.921	42.333	0.22979	-0.15732	0.074316
1.688	-39.594	-18.325	1329.3016	-1.0501	0.90259	0.4148	-148.832	22.926	1754.335	-1.4375	1.4102	0.62012	50.8689	165.69	1955.73	-1.9992	1.3977	0.15577	24.038	58.697	43.768	0.18359	-0.13916	0.082031
1.69	-103.0396	-17.787	1329.258	-0.99365	0.89795	0.40283	-130.9621	30.351	1729.071	-1.4116	1.395	0.59961	70.704	282.896	1897.031	-1.9847	1.3935	0.16709	7.375	52.685	47.9983	0.13496	-0.12197	0.09785
1.692	-96.1756	-23.085	1341.764	-0.95313	0.90234	0.39307	-123.755	32.58	1714.902	-1.3589	1.3696	0.56055	38.1485	274.021	1845.9933	-1.9717	1.3892	0.18057	20.787	49.641	61.213	0.090039	-0.10283	0.11065
1.694	-107.5355	-46.638	1359.114	-0.94678	0.90674	0.39844	-38.862	52.132	1712.2	-1.3169	1.3418	0.53271	13.324	338.62	1809.7484	-1.9492	1.3828	0.18994	-31.429	43.8203	67.254	0.04668	-0.080176	0.12627
1.696	-93.451	-75.9018	1377.928	-0.95654	0.92627	0.40234	-84.193	107.862	1669.0469	-1.2793	1.3164	0.50244	34.4026	273.551	1804.5511	-1.9227	1.3727	0.20166	-38.614	24.704	46.814	0.010742	-0.057422	0.14053
1.698	-109.6107	-115.728	1410.922	-0.98218	0.95142	0.41626	-89.496	128.353	1640.379	-1.2266	1.2754	0.46729	33.715	302.32	1774.28	-1.8921	1.3692	0.2128	-48.424	22.846	32.6941	-0.022461	-0.031738	0.15381
1.7	-96.247	-135.02	1451.4767	-1.0151	0.9751	0.42432	-42.78	176.865	1600.2197	-1.2007	1.2563	0.44775	49.93	208.7668	1772.235	-1.8531	1.3615	0.22178	-100.7931	23.695	53.9262	-0.047461	-0.010547	0.1708
1.702	-99.573	-152.917	1467.3261	-1.0659	1.0142	0.44531	-99.0672	206.96	1547.528	-1.1499	1.2153	0.41016	56.8686	226.0767	1735.324	-1.8109	1.3524	0.23057	-88.79	39.298	64.4321	-0.066016	0.0093749	0.17832
1.704	-112.5678	-162.44	1495.771	-1.0894	1.0317	0.45898	-66.02	201.662	1525.4735	-1.1152	1.1841	0.39184	30.7982	145.987	1734.9456	-1.7671	1.3364	0.23242	-91.382	44.43	76.7759	-0.078906	0.028906	0.19004
1.706	-92.978	-173.662	1530.481	-1.1362	1.0718	0.46875	-66.002	218.972	1491.851	-1.0718	1.1509	0.36133	27.868	199.691	1693.22757	-1.7231	1.319	0.23711	-126.9912	49.038	57.01704	-0.09082	0.048633	0.19385
1.708	-141.8097	-175.197	1534.801	-1.1638	1.0979	0.47192	-66.245	213.216	1439.1113	-1.0254	1.1035	0.34814	8.339	154.212	1689.68	-1.6729	1.2989	0.23906	-130.333	25.387	47.305	-0.098633	0.064453	0.20264
1.71	-150.3155	-159.1527	1529.8251	-1.1792	1.1255	0.47168	-17.878	199.812	1399.3279	-0.99951	1.0806	0.33301	-5.879	202.767	1647.804	-1.6202	1.2688	0.24023	-118.5325	9.975	43.82	-0.095117	0.077148	0.20791
1.712	-175.767	-126.835	1518.631	-1.1895	1.1621	0.46924	-21.238	213.995	1338.031	-0.95703	1.0313	0.31152	-45.6475	167.923	1635.771	-1.5675	1.2404	0.24023	-140.8874	14.851	73.911	-0.094043	0.087207	0.20644
1.714	-156.0492	-98.017	1514.241	-1.1968	1.1782	0.46631	9.364	166.186	1316.423	-0.93237	0.9956	0.30127	-63.697	247.1194	1566.7438	-1.5137	1.2129	0.23633	-112.237	-18.1379	99.769	-0.087402	0.10205	0.20254
1.716	-160.1191	-79.295	1534.511	-1.2109	1.209	0.47119	36.264	159.236	1307.952	-0.90576	0.9585	0.29053	-90.836	264.7724	1518.7357	-1.4627	1.1818	0.23203	-100.594	-41.182	120.666	-0.071289	0.11211	0.20049
1.718	-140.811	-69.38	1526.354	-1.2259	1.2346	0.4729	-1.84500000000001	163.88	1277.86	-0.87158	0.9165	0.27588	-114.009	341.327	1441.824	-1.4085	1.1513	0.23301	-154.287	-98.6811	174.106	-0.055176	0.12793	0.20654
1.72	-115.605	-48.6411	1532.38	-1.25	1.2559	0.47803	14.131	119.452	1279.1271	-0.84717	0.87745	0.26563	-116.283	349.12	1411.9249	-1.3554	1.1216	0.22715	-134.9338	-135.1903	278.681	-0.040332	0.13066	0.20068
1.722	-102.135	-32.474	1541.5169	-1.291	1.291	0.49854	-15.7	144.7174	1250.519	-0.82568	0.84229	0.26025	-100.8538	379.684	1343.624	-1.3063	1.0879	0.22236	-149.061	-200.309	449.711	-0.031836	0.13721	0.19824
1.724	-59.002	-10.374	1586.274	-1.314	1.3091	0.50391	-69.858	119.22	1220.35	-0.79297	0.79688	0.25049	-97.903	392.331	1295.8685	-1.248	1.0547	0.22559	-176.112	-302.416	626.544	-0.02207	0.1419	0.20606
1.726	-85.034	-5.111	1603.4827	-1.3921	1.3521	0.51074	-50.862	102.5327	1189.836	-0.7749	0.77197	0.24805	-76.9486	416.011	1237.736	-1.1966	1.0241	0.21797	-182.577	-386.191	695.95	-0.022754	0.14531	0.2041
1.728	-58.502	-13.2202	1615.2173	-1.4509	1.385	0.51929	-94.8607	154.3538	1100.5333	-0.74219	0.73047	0.23682	-71.0645	394.662	1217.664	-1.1422	0.99258	0.21514	-142.541	-449.943	747.729	-0.021973	0.15527	0.19629
1.73	-71.296	-45.8185	1617.309	-1.5073	1.4146	0.53125	-92.6818	148.6813	1044.3768	-0.71533	0.69385	0.23071	-63.966	352.0771	1159.244	-1.084	0.95	0.21358	-152.439	-392.348	798.1089	-0.032715	0.17305	0.1875
1.732	-97.125	-60.4311	1629.9227	-1.5757	1.4478	0.5498	-60.576	197.064	988.559	-0.68652	0.66113	0.21338	-65.177	335.2224	1116.6413	-1.0229	0.91387	0.21211	-174.206	-278.739	877.69	-0.053027	0.20791	0.17656
1.734	-107.807	-89.253	1659.1444	-1.6074	1.4561	0.55518	-104.9919	227.0999	944.533	-0.64844	0.61719	0.2041	-60.925	295.735	1074.1125	-0.95801	0.87305	0.20557	-180.875	-146.6009	955.706	-0.087793	0.2708	0.17266
1.736	-128.516	-75.80277	1676.9831	-1.6602	1.4727	0.57275	-57.426	205.8033	915.1355	-0.62451	0.59326	0.20068	-37.326	296.7136	1037.9149	-0.89004	0.83105	0.20517	-170.625	-78.753	994.194	-0.14668	0.34531	0.18232
1.738	-112.485	-84.0384	1689.313	-1.686	1.4809	0.5874	-54.332	241.856	850.484	-0.57129	0.54883	0.18066	-58.185	250.9798	1037.798	-0.82539	0.78789	0.20059	-111.581	-49.177	1043.586	-0.229	0.43359	0.21631
1.74	-144.1159	-82.8048	1681.708	-1.6987	1.479	0.59912	-66.2293	210.519	803.072	-0.53564	0.51709	0.17138	-69.497	257.17	1001.021	-0.75156	0.74219	0.19199	-16.962	-34.48	1162.3	-0.34121	0.51973	0.25772
1.742	-116.605	-84.4738	1680.108	-1.7026	1.478	0.61523	-43.988	189.2449	775.1769	-0.50098	0.48633	0.1582	-29.874	195.713	949.654	-0.67646	0.6917	0.18428	53.9533	6.47999999999999	1305.546	-0.46367	0.60274	0.30293
1.744	-118.55	-59.985	1683.307	-1.7007	1.479	0.61426	-82.8576	236.846	733.6913	-0.4541	0.44824	0.14502	-23.286	236.7369	871.905	-0.61133	0.64111	0.1792	68.264	56.365	1425.051	-0.59648	0.68711	0.34825
1.746	-91.657	-17.0801	1693.3555	-1.689	1.4712	0.62305	-69.7579	203.332	701.4762	-0.4292	0.43213	0.13379	-27.732	204.013	803.165	-0.54385	0.58897	0.17041	20.701	87.013	1474.535	-0.72871	0.7709	0.38711
1.748	-94.235	13.91	1672.436	-1.6718	1.4648	0.63135	-56.959	206.613	667.711	-0.38086	0.39355	0.11426	-19.982	258.066	709.3179	-0.47852	0.53926	0.16348	-80.378	53.412	1497.064	-0.84766	0.86328	0.4165
1.75	-109.699	30.804	1667.03	-1.666	1.457	0.64307	-90.4765	197.787	620.154	-0.34668	0.36694	0.10522	-8.792	218.604	672.426	-0.41601	0.49902	0.14902	-93.06	-51.04	1529.24	-0.95146	0.98528	0.44521
1.752	-116.219	51.24623	1659.273	-1.6616	1.4458	0.64746	-60.638	119.821	610.14708	-0.31885	0.34033	0.088867	-8.176	284.78	581.6257	-0.34903	0.45606	0.13193	-111.117	-111.27	1595.17	-1.0526	1.1204	0.4832
1.754	-129.58	48.333	1667.767	-1.6655	1.4419	0.65723	-28.567	143.5105	590.7918	-0.27881	0.30664	0.072754	6.566	224.039	536.1025	-0.27246	0.38672	0.11768	-186.2317	-167.17	1689.996	-1.1589	1.272	0.52774
1.756	-133.792	61.401	1671.1599	-1.6772	1.4243	0.6748	-30.253	125.04	550.973	-0.25684	0.29297	0.066406	2.709	266.579	473.645	-0.17803	0.32217	0.095119	-218.128	-237.864	1745.384	-1.2942	1.4192	0.58535
1.758	-156.2	58.07	1673.8732	-1.6851	1.4121	0.68799	34.053	107.595	515.3	-0.21729	0.2583	0.053223	-53.432	208.0718	441.8738	-0.090527	0.28086	0.067481	-227.405	-324.157	1784.1291	-1.457	1.5488	0.65283
1.76	-142.047787	39.2465	1690.697	-1.6909	1.3989	0.69727	4.889	153.6565	449.176	-0.18627	0.2439	0.038819	-75.413	263.554	377.404	-0.030762	0.26797	0.051855	-141.908	-402.19	1795.1242	-1.6394	1.6531	0.71319
1.762	-162.128	12.253	1679.9967	-1.6929	1.3813	0.70996	16.399	113.574	414.007	-0.16064	0.22266	0.02832	-79.473	218.663	371.88	-0.000293	0.26016	0.056641	-15.2462	-447.47	1802.9009	-1.8081	1.7298	0.77334
1.764	-145.6108	5.2717	1661.759	-1.6843	1.3645	0.71412	47.514	138.017	391.1807	-0.12549	0.20117	0.016602	-99.096	243.072	297.476	0.0019531	0.24805	0.07666	78.751	-434.73	1867.1098	-1.9628	1.7704	0.82959
1.766	-102.589	0.779	1652.163	-1.6738	1.3486	0.71338	25.071	175.248	357.795	-0.10938	0.18164	0.0068359	-105.3726	165.674	262.161	-0.014551	0.23193	0.086231	88.274	-377.45	1937.695	-2.0798	1.81	0.86543
1.768	-81.074	-5.479	1656.4808	-1.6602	1.3242	0.71729	37.743	140.1321	345.882	-0.079102	0.15576	-0.0097656	-91.951	167.375	215.346	-0.022657	0.21904	0.087988	89.296	-314.37	1980.784	-2.1406	1.8457	0.88135
1.77	-52.904	-2.38399999999999	1657.4287	-1.646	1.3091	0.71289	3.534	198.845	317.4483	-0.052246	0.13696	-0.02417	-136.197	117.0362	203.7453	-0.0046874	0.20654	0.082911	103.984	-234.646	2032.363	-2.1075	1.8773	0.86504
1.772	-66.219	11.712	1642.3228	-1.6167	1.2856	0.69922	-14.088	196.074	274.569	-0.024902	0.11572	-0.039063	-134.7187	145.534	193.3141	0.031738	0.18574	0.079883	96.75	-184.527	2029.672	-2.0089	1.9075	0.84317
1.774	-34.817	27.976	1651.679	-1.5964	1.2669	0.69214	-3.435	161.365	242.4736	0.0063477	0.094727	-0.056152	-111.2212	116.243	208.8158	0.07373	0.15771	0.078125	121.151	-121.185	2008.0109	-1.8573	1.9263	0.8123
1.776	-38.574	37.196	1657.684	-1.5679	1.2485	0.68457	-41.429	188.047	218.6144	0.025391	0.085938	-0.064941	-103.882	117.804	170.2725	0.1085	0.13408	0.08125	60.339	-95.16	1987.457	-1.7097	1.9113	0.76768
1.778	-26.344	62.1259	1636.909	-1.5371	1.2285	0.67041	-29.113	107.1005	201.172	0.052734	0.0625	-0.080078	-91.982	85.95	154.65681	0.13144	0.10528	0.082715	-16.5172	-52.19	1936.111	-1.5859	1.877	0.73291
1.78	-52.068	87.051	1614.176	-1.521	1.2095	0.66602	-31.067	87.957	199.3462	0.071289	0.051758	-0.087403	-80.97	108.757	138.0912	0.13613	0.077929	0.082325	-83.324	-48.18	1904.966	-1.4953	1.8199	0.71143
1.782	-65.105	110.927	1583.33997	-1.4897	1.189	0.64453	-49.1489	97.035	189.143	0.089355	0.040527	-0.1001	-107.892	110.6719	118.4315	0.13232	0.055957	0.078906	-50.7387	-67.01	1908.197	-1.4351	1.7473	0.71074
1.784	-49.772	120.666	1558.771	-1.4646	1.1751	0.63403	-9.056	36.69	169.558	0.10596	0.014648	-0.11475	-97.5483	124.782	97.6443	0.12695	0.031738	0.081055	32.706	-85.222	1935.098	-1.4132	1.6817	0.71425
1.786	-74.06	127.713	1539.837	-1.4375	1.1543	0.61963	-48.386	85.412	155.965	0.11816	0.0078125	-0.12158	-99.243	153.218	77.0451	0.11348	0.0083009	0.082812	118.901	-117.751	2001.367	-1.4225	1.6338	0.70889
1.788	-43.831	110.196	1530.175	-1.4019	1.1431	0.59961	-65.982	50.669	126.2332	0.13525	-0.0014648	-0.13281	-83.739	129.781	83.6935	0.10371	-0.013476	0.088867	222.07	-128.204	2078.626	-1.4473	1.6094	0.70947
1.79	-43.757	89.2642	1506.026	-1.3848	1.1367	0.5835	-68.822	10.071	124.312	0.13892	-0.01001	-0.13965	-64.376	124.082	58.561	0.088086	-0.033789	0.09082	155.784	-122.259	2130.734	-1.4893	1.6143	0.72041
1.792	-33.615	77.864	1498.5938	-1.3472	1.1245	0.57031	-115.816	76.867	112.0154	0.14111	-0.018066	-0.14258	-28.82	73.179	87.6404	0.068847	-0.048242	0.093066	106.205	-76.201	2225.102	-1.5465	1.6367	0.74053
1.794	-53.895	74.983	1480.8546	-1.3198	1.1147	0.55664	-74.9084	31.297	113.8635	0.1377	-0.029785	-0.14941	-63.276	86.625	81.2496	0.049316	-0.05957	0.094238	35.98	-55.752	2273.596	-1.623	1.6742	0.77568
1.796	-39.186	71.51	1474.013	-1.2925	1.103	0.54736	-77.2484	45.579	129.6217	0.13672	-0.033691	-0.15381	-23.998	54.414	89.896	0.029004	-0.054687	0.096582	-20.848	-65.0809	2314.16	-1.7223	1.7098	0.81768
1.798	-37.23	69.344	1479.059	-1.2607	1.0859	0.52637	-97.4986	78.649	112.5419	0.13232	-0.04834	-0.15674	12.038	66.822	89.3856	0.0086913	-0.049804	0.1001	-86.784	-65.191	2300.166	-1.8374	1.7466	0.86328
1.8	-55.035	73.159	1470.724	-1.2373	1.0801	0.51855	-63.325	26.207	83.1122	0.13355	-0.051269	-0.15454	24.774	11.128	96.219	-0.0096679	-0.04043	0.10479	-122.5614	-54.4082	2284.38	-1.9653	1.7921	0.90391
1.802	-77.347	76.3652	1447.3015	-1.2012	1.0664	0.50635	-69.472	94.823	50.973	0.12842	-0.056641	-0.15479	14.005	14.6444	59.3475	-0.032325	-0.025098	0.10849	-132.024	4.683	2216.444	-2.0952	1.8427	0.94024
1.804	-107.05	72.8094	1425.804	-1.1736	1.0491	0.48999	-61.827	80.1672	21.192	0.12549	-0.059082	-0.16797	15.253	-23.3299	88.122	-0.05957	-0.0097656	0.12549	-149.817	41.732	2190.408	-2.1983	1.8786	0.96524
1.806	-106.83164	84.7542	1405.7817	-1.1484	1.0371	0.47412	-35.51	47.4864	22.753	0.12402	-0.064453	-0.16211	-24.224	9.202	73.765	-0.091895	0.0045898	0.14023	-156.732	78.01	2189.3447	-2.2637	1.9039	0.97197
1.808	-128.492	107.999	1361.215	-1.1113	1.0156	0.45557	-23.497	83.853	32.19	0.12354	-0.070801	-0.17041	-21.793	-29.1619	95.569	-0.12412	0.014258	0.15146	-127.61	83.0545	2163.733	-2.2949	1.9199	0.97217
1.81	-106.7165	133.184	1313.3165	-1.0913	1.0112	0.45117	-0.129000000000005	0.0790000000000006	43.6952	0.11914	-0.072265	-0.17115	-33.491	12.4205	95.2521	-0.15381	0.026367	0.16123	-64.844	100.123	2127.728	-2.327	1.9266	0.96455
1.812	-101.7644	144.211	1272.266	-1.0483	0.99463	0.42969	-1.936	10.79296	43.3189	0.11475	-0.078125	-0.16797	-36.88	-29.948	114.059	-0.17549	0.029199	0.17324	-20.141	155.18	2087.99	-2.3324	1.9336	0.95674
1.814	-71.282	154.3099	1252.4541	-1.0237	0.98169	0.41431	-15.506	31.1669	53.4942	0.10498	-0.077148	-0.16846	-45.276	5.17134	82.00747	-0.18945	0.025879	0.17529	-25.07	220.174	2089.655	-2.3102	1.9371	0.94385
1.816	-65.518	152.09385	1237.7725	-1.0015	0.96533	0.40137	-0.374000000000002	-30.05	58.251	0.098145	-0.077637	-0.16309	-34.183	-5.087	82.8002	-0.18926	0.022949	0.18233	2.602	280.563	2109.009	-2.2555	1.9414	0.93428
1.818	-65.793	166.3367	1208.125	-0.96875	0.94727	0.38379	-10.763	24.7818	61.2919	0.09375	-0.084961	-0.16553	-69.274	44.2209	20.7569	-0.18008	0.017969	0.1835	-58.395	266.24	2123.366	-2.1948	1.9399	0.92188
1.82	-23.914	160.525	1208.4564	-0.95508	0.93652	0.38184	-10.6	23.115	47.80783	0.085205	-0.083985	-0.16553	-75.9751	43.5841	21.3166	-0.16094	0.011328	0.1835	-113.15	207.614	2111.612	-2.1398	1.931	0.90937
1.822	-31.37	149.218	1187.434	-0.92432	0.9165	0.36621	-1.514	-10.565	44.6649	0.081543	-0.089355	-0.16455	-84.158	52.3331	17.5108	-0.13613	-0.0017578	0.17968	-89.9526	155.872	2095.1924	-2.089	1.9091	0.88808
1.824	-34.285	136.81605	1160.374	-0.90625	0.89746	0.35888	-16.439	27.982	42.302	0.077148	-0.093262	-0.16309	-80.305	31.2803	23.721	-0.10645	-0.010742	0.17188	-37.973	133.696	2065.5147	-2.0402	1.8829	0.86426
1.826	-55.837	129.2798	1117.374	-0.88086	0.88086	0.34229	-13.424	-33.188	38.046	0.076172	-0.098145	-0.16016	-65.335	31.494	19.737	-0.075683	-0.021387	0.16504	-14.279	152.977	2042.5465	-1.9968	1.8419	0.82968
1.828	-41.015	127.909	1112.6436	-0.84717	0.854	0.33105	-17.204	-5.656	35.7296	0.076172	-0.097168	-0.16162	-80.0975	15.4125	39.692	-0.043945	-0.02832	0.15918	9.626	145.819	2024.881	-1.9512	1.7969	0.79736
1.83	-41.429	124.306	1097.9383	-0.83203	0.83984	0.32568	-17.063	53.7331	29.0709	0.077637	-0.10401	-0.16064	-113.391	18.666	16.76	-0.010742	-0.035742	0.14863	30.026	117.109	1980.954	-1.912	1.7607	0.7625
1.832	-61.3545	110.945	1068.721	-0.80273	0.81445	0.30762	-28.378	19.578	33.3511	0.07373	-0.104	-0.15625	-120.553	29.811	36.2551	0.020019	-0.049121	0.13955	49.493	69.738	1930.507	-1.8724	1.7306	0.72383
1.834	-42.16	104.74879	1033.898	-0.77319	0.7893	0.2959	-36.16	71.067	34.805	0.075195	-0.099609	-0.15234	-113.961	20.0858	51.3851	0.057129	-0.067871	0.12793	98.274	96.376	1900.672	-1.8314	1.7013	0.68594
1.836	-32.345	116.303	998.6693	-0.75	0.76953	0.28467	-57.27	50.5249	43.8651	0.070801	-0.099121	-0.15283	-76.9845	26.9056	44.5083	0.087988	-0.080468	0.12207	132.176	180.463	1852.755	-1.7891	1.6715	0.6501
1.838	1.563	133.384	969.0311	-0.71484	0.73828	0.26953	-63.226	34.384	34.086	0.064453	-0.099121	-0.146	-49.443	-3.866	42.8159	0.12471	-0.097851	0.11631	139.723	279.236	1817.631	-1.7476	1.647	0.61523
1.84	9.125	151.317	932.8096	-0.70166	0.7251	0.26221	-67.5211	96.09	32.2206	0.052979	-0.097412	-0.14258	-49.355	17.0638	31.4527	0.15986	-0.10996	0.1042	119.998	340.7532	1752.1378	-1.7104	1.6197	0.58779
1.842	9.293	144.326	921.04399	-0.67285	0.68945	0.24414	-92.3405	35.6564	28.035	0.040527	-0.094238	-0.13281	-55.443	17.56	54.7997	0.19726	-0.12236	0.097559	85.8896	322.889	1701.2601	-1.6721	1.5911	0.55996
1.844	-1.092	146.3774	900.2915	-0.65576	0.66553	0.23242	-93.7556	25.2777	45.4749	0.019043	-0.090332	-0.125	-40.986	69.667	31.572	0.23145	-0.12939	0.085938	63.1881	339.897	1672.348	-1.6284	1.5567	0.53652
1.846	-23.552	156.6257	866.79224	-0.63623	0.63916	0.22021	-106.620214	41.1429	31.968	0.0039063	-0.088379	-0.12109	-22.546	54.337	57.6214	0.26387	-0.13691	0.076465	47.37	343.375	1634.802	-1.5855	1.5187	0.51827
1.848	-29.463	171.21	837.488	-0.60303	0.60596	0.20898	-62.194	-27.7783	32.2303	-0.010742	-0.082031	-0.10449	-10.789	77.33	40.78	0.28955	-0.14101	0.063574	22.3655	378.87	1602.447	-1.5503	1.481	0.49951
1.85	-54.463	162.242	811.097	-0.59424	0.58545	0.19922	-81.1172	20.264	58.4682	-0.022705	-0.077636	-0.096436	9.572	45.4033	66.1194	0.31533	-0.14024	0.052637	-48.0717	387.77	1523.663	-1.5051	1.4399	0.48955
1.852	-70.446	158.811	786.786	-0.56787	0.55273	0.18311	-76.3326	12.262	63.44	-0.034668	-0.073242	-0.085449	1.863	90.794	52.7631	0.33964	-0.13789	0.040528	-68.2637	356.33	1445.523	-1.4687	1.4032	0.47568
1.854	-90.90849	162.258	735.4819	-0.54444	0.53076	0.17627	-56.945	-6.242	51.91	-0.045898	-0.063965	-0.072754	-13.477	77.519	79.621	0.35791	-0.13428	0.038574	-51.398	312.402	1379.942	-1.425	1.3563	0.46319
1.856	-78.7627	162.266	675.948	-0.521	0.5083	0.1626	-57.375	64.3411	38.085	-0.052246	-0.053223	-0.068848	-24.571	114.172	65.387	0.36904	-0.12666	0.024414	-38.683	254.855	1358.356	-1.3819	1.313	0.44405
1.858	-70.2563	149.769	663.975	-0.48975	0.47705	0.15088	-23.03	24.981	21.215	-0.055176	-0.051758	-0.058594	-34.006	71.923	82.47	0.37461	-0.11826	0.021973	-34.905	234.46	1337.716	-1.3379	1.2617	0.42822
1.86	-45.367	133.3747	660.3073	-0.47021	0.46338	0.14307	-25.99	26.8577	48.746	-0.049316	-0.04541	-0.053223	-13.399	66.062	65.9045	0.37929	-0.10654	0.02002	-59.2495	223.98	1313.591	-1.2779	1.2061	0.40928
1.862	-57.355	120.191	625.2081	-0.44434	0.43457	0.13428	-32.859	56.3801	60.6722	-0.044434	-0.043945	-0.055176	12.48	4.0576	78.5047	0.37705	-0.097754	0.023731	-76.509	259.25	1248.388	-1.2121	1.1473	0.3875
1.864	-53.225	117.528	608.1737	-0.42431	0.41381	0.12475	-21.977	6.8528	56.5119	-0.03125	-0.036133	-0.053711	-9.58000000000001	19.9108	80.296	0.37305	-0.093262	0.019531	-77.25338	296.39	1200.156	-1.1426	1.0894	0.36328
1.866	-24.519	118.349	604.24942	-0.40625	0.39063	0.11523	-21.814	72.092	57.7212	-0.019532	-0.03125	-0.056397	-42.5959	-2.989	102.419	0.36465	-0.077539	0.028125	-84.6535	332.652	1137.635	-1.0656	1.041	0.33203
1.868	-21.13	133.718	578.4593	-0.3833	0.37012	0.10498	-7.408	61.737	40.6016	-0.0043945	-0.028809	-0.05957	-72.7396	9.207	89.555	0.35283	-0.071582	0.031738	-58.596	340.3939	1073.8848	-0.98438	0.98828	0.30322
1.87	-43.076	123.9446	571.891	-0.37354	0.35547	0.1001	1.559	31.387	44.0532	0.014648	-0.026855	-0.065918	-59.497	-20.332	88.195	0.33955	-0.060644	0.043066	-95.1971	325.204	986.583	-0.91201	0.93564	0.27471
1.872	-57.357	134.8152	529.13	-0.35449	0.33008	0.087891	-9.16399999999999	79.259	28.895	0.022949	-0.025879	-0.074707	-56.181	-14.725	50.6882	0.32051	-0.049707	0.050293	-132.93	324.496	900.011	-0.83428	0.88252	0.24492
1.874	-35.799	129.713	508.5452	-0.34327	0.30982	0.080567	-9.925	18.7866	8.447	0.042969	-0.030762	-0.080078	-68.172	-10.14096	65.5789	0.3042	-0.038086	0.055176	-122.327	317.918	839.325	-0.76357	0.83604	0.22578
1.876	-35.849	137.495	472.5039	-0.33154	0.2876	0.061035	-2.63500000000001	22.4671	39.697	0.055176	-0.03247	-0.088135	-72.275	14.08536	76.30071	0.28037	-0.02666	0.059765	-77.16662	335.369	757.077	-0.69805	0.78438	0.19521
1.878	-61.782	133.524	431.922	-0.31299	0.26074	0.059082	-6.395	37.0712	57.257	0.063965	-0.036133	-0.094238	-95.4749	30.7318	73.6718	0.25586	-0.017773	0.062109	-45.422	315.057	661.17	-0.63623	0.72607	0.17383
1.88	-37.351	123.687	419.6951	-0.3042	0.24756	0.056641	1.125	-32.9367	71.095	0.076172	-0.030273	-0.10938	-123.952	32.08855	75.7237	0.22656	-0.0048828	0.06914	-13.824	277.668	579.379	-0.57109	0.6625	0.14785
1.882	-3.73500000000001	113.6004	402.258	-0.27881	0.21924	0.046387	-8.79499999999999	19.3118	79.8741	0.084473	-0.026855	-0.1084	-93.7906	16.9781	64.8361	0.20176	0.0075195	0.072461	3.593	257.186	527.229	-0.51397	0.60693	0.1208
1.884	19.276	114.8355	387.621	-0.26416	0.20093	0.032959	-20.165	19.004	51.1215	0.089355	-0.027344	-0.11328	-92.2842	-3.407	37.883	0.16406	0.017578	0.07373	19.619	242.153	512.46	-0.45302	0.54912	0.090333
1.886	16.364	110.103	360.559	-0.24316	0.18359	0.025879	-45.122	-4.1978	50.4783	0.094482	-0.022461	-0.11109	-95.2934	29.9262	22.747	0.1334	0.033887	0.081543	81.5378	271.5337	491.8166	-0.38809	0.48359	0.059668
1.888	29.927	103.918	365.6544	-0.21289	0.15869	0.011719	-75.347	40.062	65.4773	0.092773	-0.019531	-0.11426	-72.677	27.15	36.065	0.097262	0.047754	0.086719	81.8239	267.645	454.316	-0.32178	0.4209	0.039063
1.89	25.254	100.3396	346.461	-0.19922	0.14795	0.00048828	-64.553	0.4342	52.119	0.085938	-0.0083008	-0.11182	-52.18	51.001	-0.443999999999999	0.066797	0.062207	0.091016	41.5	245.15	400.076	-0.26279	0.36758	0.019238
1.892	14.724	118.2514	321.711	-0.17529	0.12646	-0.0083008	-71.77	11.7296	38.1343	0.078613	-0.0073242	-0.11475	-66.3923	27.865	26.51823	0.033203	0.078613	0.096777	5.247	186.309	327.435	-0.21025	0.31396	-0.0040039
1.894	-5.564	118.7453	309.7923	-0.15576	0.10352	-0.018555	-69.9896	47.3381	31.255	0.067871	0.0014648	-0.11133	-66.059	25.0033	14.3349	0.0039063	0.091797	0.10498	8.834	173.6	281.148	-0.16338	0.26201	-0.024707
1.896	-17.135	98.375	315.9478	-0.146	0.095703	-0.021484	-72.654	-4.4336	25.194	0.057861	0.0092771	-0.10962	-32.927	-13.342	46.9686	-0.027637	0.10508	0.11143	6.507	170.123	278.813	-0.11103	0.22168	-0.047071
1.898	-30.091	75.439	292.9385	-0.13477	0.080078	-0.022461	-86.4621	46.145	34.92	0.050781	0.01416	-0.10449	-17.836	25.6198	44.333	-0.055274	0.12305	0.11816	-6.638	159.299	274.263	-0.0625	0.17725	-0.067871
1.9	-38.691	72.3286	264.703	-0.12598	0.063965	-0.030273	-85.1214	51.9774	27.83	0.037109	0.02002	-0.098633	-6.33499999999999	17.3908	68.2754	-0.081836	0.13633	0.12363	14.105	158.349	245.978	-0.016992	0.1417	-0.090918
1.902	-35.317	74.4176	254.476	-0.12012	0.053711	-0.030273	-74.408	25.29686	38.1	0.032715	0.023438	-0.097656	-35.43	65.291	42.108	-0.10283	0.15312	0.1414	-28.097	135.9082	176.0969	0.022852	0.1043	-0.10303
1.904	-41.237	86.1784	247.1596	-0.10938	0.040527	-0.03418	-64.821	65.73	49.767	0.01709	0.035645	-0.084473	-12.176	26.08098	70.358	-0.11816	0.15918	0.1499	-17.528	141.3488	122.395	0.045898	0.075	-0.12451
1.906	-39.209	89.1978	237.806	-0.10107	0.029785	-0.037109	-53.125	-1.4017	52.741	0.0095213	0.033936	-0.093506	-22.672	52	34.9444	-0.13184	0.16748	0.16259	-13.108	125.367	108.8045	0.068945	0.044043	-0.13662
1.908	-36.386	92.0376	185.0655	-0.083984	0.015137	-0.045898	-59.341	-2.6197	66.646	0.0078125	0.040039	-0.099609	-1.675	23.37677	54.654	-0.13936	0.171	0.16875	-32.482	155.668	98.166	0.07959	0.016113	-0.15186
1.91	-41.504	92.439	173.7301	-0.068115	0.0085447	-0.047119	-71.3703	44.6962	30.3596	0.0039063	0.040039	-0.098145	0.602000000000004	78.14	22.7352	-0.13896	0.17061	0.1793	-45.164	129.82	71.978	0.088184	-0.016602	-0.16094
1.912	-23.072	85.57	185.066	-0.053711	0.0014648	-0.053711	-34.214	-1.137	28.2092	0.0063477	0.041016	-0.104	-5.28	64.447	47.3162	-0.13164	0.16533	0.18418	-94.8294	79.931	66.98	0.095702	-0.037695	-0.1749
1.914	-22.004	84.865	188.6867	-0.025391	-0.0092773	-0.063477	-28.331	20.83126	43.584	-0.0019531	0.043945	-0.1084	-16.088	102.757	46.159	-0.11719	0.16992	0.18066	-118.177	68.977	68.65	0.10469	-0.055273	-0.18271
1.916	-51.074	81.4159	187.661	-0.0078125	-0.018066	-0.067383	-34.551	3.47	33.193	0.00048827	0.040771	-0.11767	-25.436	64.285	67.34824	-0.10352	0.16719	0.17783	-125.661	37.525	110.7506	0.10537	-0.071582	-0.18955
1.918	-69.7151	75.2613	172.404	0.011719	-0.027832	-0.079102	-18.868	-20.6246	38.8593	-0.00048828	0.040527	-0.12207	-26.401	48.397	84.6349	-0.080469	0.1667	0.17354	-128.752	85.028	101.702	0.10791	-0.087402	-0.2002
1.92	-58.9379	67.048	170.1925	0.033936	-0.036133	-0.082032	-2.39	39.157	65.0908	-0.0083008	0.040527	-0.13721	-39.493	-13.8596	170.889	-0.06211	0.17139	0.17236	-140.1202	76.0746	90.848	0.10996	-0.10117	-0.20645
1.922	-51.2776	65.414	136.7863	0.050781	-0.044434	-0.086426	7.599	-16.8531	96.9622	-0.014648	0.050293	-0.14795	-65.601	-48.9171	218.1021	-0.042676	0.18203	0.17285	-159.433	60.9679	48.4937	0.11191	-0.11143	-0.2083
1.924	-69.6822	74.974	137.9649	0.065918	-0.055664	-0.098145	18.696	-40.6783	180.7429	-0.033691	0.07373	-0.16992	-108.3995	-101.43	329.726	-0.029297	0.19824	0.17432	-145.348	-0.326499999999999	40.513	0.10566	-0.11612	-0.20518
1.926	-46.431	67.371	132.855	0.065918	-0.060547	-0.088379	23.507	-40.128	229.414	-0.057861	0.10718	-0.18433	-123.884	-146.821	462.823	-0.025683	0.21953	0.17119	-113.2211	-41.1909	40.535	0.088672	-0.125	-0.19912
1.928	-42.351	58.577	113.3504	0.074707	-0.064941	-0.098145	40.9249	-110.95	301.159	-0.096191	0.1543	-0.18506	-196.5249	-253.521	612.944	-0.026367	0.24825	0.16846	-39.84	-47.2121	48.6276	0.068848	-0.12646	-0.19922
1.93	-26.377	53.1313	108.434	0.072266	-0.070801	-0.094971	83.98	-109.861	419.468	-0.16797	0.23096	-0.17139	-246.46	-393.749	732.085	-0.040039	0.29473	0.16885	-17.028	-31.934	49.1827	0.04668	-0.12451	-0.18311
1.932	-21.979	44.5	101.263	0.070801	-0.072754	-0.09668	76.874	-159.83	484.492	-0.22119	0.26807	-0.15771	-255.227	-470.243	793.924	-0.074316	0.36856	0.15908	-32.142	-8.605	28.402	0.018066	-0.12139	-0.17237
1.934	5.181	32.71	121.3063	0.057617	-0.075195	-0.089844	63.2963	-236.84	549.9105	-0.34277	0.34863	-0.12549	-233.182	-410.0802	867.3922	-0.12842	0.45947	0.15137	-86.232	9.486	35.767	-0.02295	-0.11279	-0.15401
1.936	19.119	35.843	124.0942	0.05127	-0.077148	-0.09082	56.4797	-175.379	611.1019	-0.45117	0.41992	-0.089113	-265.2288	-264.215	973.0761	-0.19688	0.56211	0.17051	-60.188	58.887	43.492	-0.070996	-0.10703	-0.13135
1.938	10.178	59.6944	110.4462	0.03125	-0.075684	-0.081055	54.4973	-168.231	644.374	-0.56396	0.49268	-0.049316	-294.274	-166.111	1055.9859	-0.29336	0.66328	0.20479	-12.298	65.832	75.467	-0.11865	-0.097168	-0.10645
1.94	-4.847	75.8637	87.9708	0.013184	-0.07251	-0.072998	65.894	-125.578	706.8132	-0.73438	0.60156	0.011719	-298.583	-96.414	1077.248	-0.4125	0.75157	0.24541	9.854	87.88	78.772	-0.16348	-0.09209	-0.088379
1.942	-5.207	66.258	105.344	-0.0053711	-0.071289	-0.063965	71.983	-69.553	742.5431	-0.82617	0.65918	0.041992	-199.0572	-106.105	1150.265	-0.56054	0.83867	0.28213	12.688	65.8	56.539	-0.19707	-0.088965	-0.073243
1.944	-16.534	63.038	93.657	-0.03125	-0.060547	-0.053711	48.8197	-104.81	777.559	-1.0039	0.78516	0.10205	-102.146	-49.35	1244.738	-0.71387	0.91846	0.31836	-30.798	37.161	7.252	-0.21973	-0.092089	-0.061133
1.946	-34.078	69.572	75.2	-0.044434	-0.059082	-0.046875	44.9133	-23.255	850.378	-1.1353	0.86865	0.13794	-70.4354	-44.45	1421.251	-0.86015	0.98984	0.35039	-23.772	39.182	-4.91	-0.22647	-0.094239	-0.052832
1.948	-39.424	49.383	85.26379	-0.071777	-0.049805	-0.045898	62.2407	23.137	935.687	-1.2695	0.94336	0.17432	-80.2891	44.303	1502.318	-1.0012	1.073	0.38467	1.178	11.214	-0.901000000000003	-0.21826	-0.099609	-0.05127
1.95	-20.635	43.28	71.785	-0.095216	-0.039795	-0.025635	64.7825	14.748	1006.575	-1.4438	1.0513	0.22656	-35.942	22.865	1572.272	-1.1394	1.173	0.41904	35.373	40.3749	12.50575	-0.19453	-0.10508	-0.058594
1.952	-35.067	44.316	82.053	-0.11426	-0.029785	-0.019043	10.316	74.856	1033.8481	-1.5234	1.0996	0.25439	-112.042	31.22	1564.67	-1.2801	1.2849	0.45518	21.765	22.965	24.431	-0.15752	-0.10869	-0.059473
1.954	-37.258	44.329	65.047	-0.12793	-0.021484	-0.010742	17.109	29.436	1026.204	-1.6738	1.1855	0.30957	-125.333	-78.18	1627.698	-1.4331	1.3931	0.50977	-18.986	25.338	20.2368	-0.12119	-0.11064	-0.065723
1.956	-19.071	24.805	64.4526	-0.13525	-0.015625	-0.0068359	38.489	12.53	1057.388	-1.7781	1.2273	0.32495	-127.674	-122.33	1652.196	-1.6049	1.4806	0.57305	-45.932	29.0558	49.3468	-0.079199	-0.11416	-0.068945
1.958	-27.514	23.338	73.1424	-0.14795	-0.0019531	-0.0024414	-12.031	2.2	1130.468	-1.8555	1.2559	0.33936	-150.9643	-237.83	1728.55	-1.7804	1.5419	0.63633	-50.686	43.9793	84.867	-0.042969	-0.12109	-0.077637
1.96	-39.307	26.819	63.025	-0.14697	0.0019531	0.0007324	-50.929	-106.95	1220.377	-1.9136	1.272	0.35303	-171.284	-248.79	1768.977	-1.9534	1.572	0.69688	-40.164	55.2342	90.912	-0.016797	-0.13389	-0.080957
1.962	-63.011	39.8965	72.338	-0.14941	0.0039063	-0.0019531	-89.0372	-158.59	1288.046	-1.9272	1.2837	0.35059	-106.371	-331.6666	1848.335	-2.1117	1.5781	0.76142	-72.141	32.752	58.406	0.0083009	-0.14365	-0.0958
1.964	-56.3891	36.2809	69.9009	-0.14502	0.0092773	0	-111.848	-220.105	1315.349	-1.9102	1.3008	0.34619	-73.867	-369.715	1849.454	-2.2065	1.5786	0.8125	-88.895	8.7974	38.3643	0.036817	-0.15693	-0.10713
1.966	-64.3156	38.659	79.6174	-0.13965	0.0087891	-0.0014648	-93.068	-297.112	1356.7299	-1.8704	1.3098	0.33374	59.944	-441.82	1835.543	-2.2475	1.542	0.84522	-122.3931	6.306266	51.367	0.066309	-0.16748	-0.125
1.968	-64.95308	34.5642	65.7458	-0.12305	0.012695	-0.0058594	-94.508	-279.095	1428.52959	-1.8218	1.3091	0.31592	128.2196	-427.22	1830.4343	-2.214	1.5122	0.85586	-136.591	57.472	70.8576	0.099121	-0.18311	-0.14111
1.97	-94.0137	16.8722	63.6098	-0.11353	0.0083008	-0.0080566	-72.108	-313.66	1476.961	-1.7271	1.3169	0.2793	121.915	-375.14	1906.613	-2.0968	1.4966	0.84961	-102.1008	67.67186	72.024	0.13379	-0.19346	-0.16094
1.972	-80.4069	17.7694	62.1708	-0.095703	0.0053711	-0.013672	-60.319	-304.01	1523.501	-1.6738	1.3232	0.26563	129.24	-276.45	1983.316	-1.9215	1.493	0.82822	-86.0747	74.534	52.629	0.16973	-0.20557	-0.18252
1.974	-58.4885	29.8038	58.757	-0.07666	-0.0014648	-0.01709	-108.123	-267.128	1557.113	-1.5781	1.3203	0.22705	127.232	-178.722	2033.39	-1.7202	1.4907	0.78711	-128.2813	42.014	18.037	0.20762	-0.20986	-0.20205
1.976	-38.545	46.2146	38.9356	-0.065918	-0.0048828	-0.025879	-79.844	-294.163	1600.869	-1.5164	1.3137	0.19385	67.7867	-153.245	2035.678	-1.5319	1.4795	0.75303	-146.6053	14.782	17.614	0.24209	-0.21807	-0.21943
1.978	-42.78	37.74571	38.8043	-0.04248	-0.0078125	-0.034668	-83.129	-255.472	1658.992	-1.4712	1.313	0.16602	35.083	-132.093	1991.111	-1.3866	1.4513	0.71738	-104.885	25.792	32.192	0.27197	-0.22607	-0.23682
1.98	-18.641	24.1256	51.7012	-0.02417	-0.010742	-0.039551	-125.923	-203.529	1669.385	-1.4297	1.3145	0.14355	-44.897	-121.05	1993.892	-1.3022	1.406	0.69082	-66.049	25.113	57.774	0.30078	-0.22705	-0.24912
1.982	-16.714	21.847	52.2957	-0.0068359	-0.016602	-0.042969	-141.381	-186.561	1645.337	-1.4146	1.3208	0.13525	-154.265	-59.03	1961.618	-1.2773	1.3637	0.66729	-65.882	36.06	66.3	0.31923	-0.23105	-0.26035
1.984	-26.307	25.4434	55.1094	0.012695	-0.017578	-0.050781	-142.3296	-125.962	1632.066	-1.4023	1.3574	0.13281	-212.063	-75.02	1960.541	-1.2866	1.3462	0.64063	-52.879	-3.6112	48.942	0.33564	-0.23653	-0.27324
1.986	-25.703	19.9412	60.8828	0.02002	-0.018066	-0.054199	-142.2291	-109.884	1610.472	-1.4031	1.3928	0.1438	-215.629	-84.44	1937.931	-1.3104	1.3474	0.62158	-75.905	3.79375	35.851	0.34785	-0.2414	-0.28037
1.988	-20.04	13.8443	74.0716	0.03418	-0.021484	-0.062988	-106.3157	-111.672	1625.154	-1.4233	1.436	0.15723	-188.36298	-159.649	1969.346	-1.321	1.3548	0.6084	-66.878	19.7857	52.736	0.35596	-0.2417	-0.2876
1.99	-29.334	15.0546	60.3113	0.045898	-0.019287	-0.065918	-113.7452	-85.091	1667.042	-1.4551	1.4844	0.16699	-80.118	-164.4349	1976.264	-1.3503	1.3864	0.60098	-49.902	43.09	81.286	0.35918	-0.24141	-0.29101
1.992	-26.536	33.806	36.746	0.053223	-0.01709	-0.071777	-48.627	-138.911	1699.164	-1.4761	1.5063	0.16748	-3.849	-218.358	2040.069	-1.4012	1.4332	0.60283	-23.477	46.076	70.085	0.35576	-0.2373	-0.28887
1.994	-22.37	24.2144	36.8507	0.061523	-0.018555	-0.077637	-19.921	-162.72375	1757.683	-1.5234	1.5527	0.1792	-74.873	-154.583	2095.991	-1.4741	1.4966	0.62109	-17.637	10.3571	34.473	0.34053	-0.22871	-0.283
1.996	-13.514	26.506	38.1234	0.063965	-0.015625	-0.077148	-35.519	-182.242	1797.688167	-1.584	1.5879	0.18701	-133.238	-184.023	2146.21	-1.5719	1.5602	0.66904	-17.754	-18.4582	-4.918	0.31739	-0.2208	-0.27676
1.998	-21.699	30.167	49.81	0.067383	-0.0039063	-0.08252	-1.081	-207.778	1830.311	-1.6108	1.6021	0.18604	-197.2404	-153.536	2168.435	-1.6863	1.616	0.7169	-2.412	-14.0663	3.074	0.29834	-0.20801	-0.26416
2	-24.385	33.6423	48.4446	0.066406	0.0009766	-0.089111	-9.455	-171.719	1836.519	-1.668	1.6328	0.17627	-241.072	-235.46	2185.734	-1.8043	1.6723	0.75283	10.889	37.952	32.0617	0.26904	-0.19287	-0.26504
2.002	-5.675	19.8288	66.15967	0.067383	0.0092773	-0.092285	-23.739	-181.795	1846.076	-1.7056	1.6548	0.17212	-258.049	-213.465	2172.518	-1.9149	1.7204	0.77422	57.887	62.932	46.499	0.23203	-0.17373	-0.25098
2.004	-6.504	15.273	91.324	0.066406	0.02002	-0.10107	-10.555	-218.484	1881.401	-1.728	1.6743	0.16504	-268.463	-239.236	2165.307	-2.0112	1.77	0.79492	28.3	80.819	37.416	0.1957	-0.14561	-0.23848
2.006	-20.716	-10.4597	116.9364	0.062012	0.029297	-0.10254	-47.8353	-204.9726	1888.952	-1.7539	1.6855	0.1582	-317.09	-113.106	2095.3952	-2.0778	1.8108	0.80605	-29.799	60.145	23.0815	0.14453	-0.12207	-0.22041
2.008	-40.773	-39.977	146.738	0.054688	0.046387	-0.10986	-6.33	-221.645	1881.137	-1.7554	1.687	0.15186	-307.682	-93.482	2047.989	-2.1133	1.8364	0.81259	-61.758	37.965	60.0537	0.09082	-0.095703	-0.19336
2.01	-35.249	-64.284	179.32	0.046875	0.064942	-0.11475	11.623	-196.0086	1861.768	-1.7617	1.6855	0.14746	-260.058	-2.875	2011.54	-2.1281	1.8426	0.81807	-51.834	76.124	73.115	0.028711	-0.066699	-0.16875
2.012	-31.683	-71.122	249.936	0.025879	0.086914	-0.11816	-26.027	-134.5945	1840.525	-1.7625	1.6819	0.14428	-218.703	-69.592	1997.454	-2.1391	1.841	0.82314	-44.251	64.136	72.715	-0.03418	-0.037402	-0.13819
2.014	-11.3714	-104.04	295.965	-0.0097656	0.12451	-0.11572	24.276	-123.5819	1837.669	-1.7676	1.6738	0.14209	-118.395	-3.0927	1981.38	-2.1445	1.8418	0.82764	-62.698	59.4016	37.885	-0.095901	-0.0096679	-0.10498
2.016	-9.1853	-149.668	358.8802	-0.036133	0.15137	-0.11328	20.358	-31.04	1818.148	-1.7695	1.6582	0.14014	-16.85	-32.3246	1979.521	-2.1449	1.848	0.83702	-77.156	6.569	0.952999999999999	-0.15508	0.017773	-0.071387
2.018	-3.875	-161.169	404.2212	-0.10498	0.20068	-0.089355	45.55146	15.64548	1824.564	-1.771	1.647	0.14063	-21.125	78.665	1961.998	-2.1344	1.8543	0.83838	-132.8221	-4.758	13.772	-0.21045	0.04834	-0.046387
2.02	12.925	-142.2574	447.3777	-0.17286	0.2395	-0.066162	92.934	30.7553	1852.4001	-1.7871	1.627	0.13721	-46.032	73.535	1969.878	-2.1172	1.859	0.84151	-99.777	17.48	44.942	-0.25293	0.065332	-0.024609
2.022	30.741	-107.828	496.9072	-0.25342	0.28027	-0.040039	28.9375	61.26	1871.4576	-1.8003	1.606	0.13648	-84.659	133.5345	1988.517	-2.0927	1.8558	0.83945	-66.995	48.388	83.193	-0.27891	0.089063	-0.0082031
2.024	24.2719	-71.591	539.728	-0.36914	0.33203	-0.0014648	19.028	25.867	1887.286	-1.8125	1.5879	0.13379	-86.969	39.842	1978.777	-2.0698	1.8462	0.83789	-85.2615	55.995	76.371	-0.29219	0.11015	-0.0023437
2.026	29.2753	-60.0193	551.526	-0.45899	0.37915	0.032471	-13.16	9.6493	1879.9133	-1.8296	1.5591	0.12744	-92.025	54.014	1978.5531	-2.0489	1.8257	0.83731	-117.078	26.844	46.6711	-0.2959	0.1248	0.00068362
2.028	44.238	-35.396	538.9086	-0.54932	0.4248	0.061035	-42.67203	13.146	1868.039	-1.834	1.541	0.12549	-80.801	-11.055	1993.87657	-2.03	1.7997	0.82539	-116.1173	10.03	52.98	-0.28809	0.13965	0.0029297
2.03	58.5836	13.47	579.1155	-0.65918	0.48535	0.10498	-3.716	-44.661	1889.1414	-1.8535	1.5176	0.12354	-99.601	64.71	1981.35	-2.0081	1.7716	0.80976	-131.5723	9.468	73.729	-0.275	0.14483	-0.0013672
2.032	43.7318	69.83	655.468	-0.7085	0.52002	0.12207	-23.695	-50.668	1924.8503	-1.8659	1.5022	0.1228	-106.428	46	1978.2208	-1.9814	1.7486	0.79326	-117.7829	56.8172	87.199	-0.25781	0.14961	-0.009082
2.034	43.054	92.947	728.247	-0.80957	0.58789	0.1582	-26.8264	-67.952	1915.2655	-1.8843	1.4849	0.12988	-96.947	90.994	1918	-1.9512	1.7227	0.77588	-71.95	33.821	68.406	-0.24102	0.15235	-0.018066
2.036	41.863	115.283	748.7536	-0.88427	0.63599	0.17968	-23.725	-94.459	1930.8662	-1.9092	1.4551	0.12939	-74.706	11.22	1893.4153	-1.9187	1.6938	0.75586	-92.3901	27.7993	22.234	-0.2207	0.14619	-0.031934
2.038	32.01	101.916	753.928	-0.9502	0.67969	0.20166	-38.6806	-38.3568	1914.9565	-1.9194	1.4458	0.1333	-28.535	56.494	1858.4605	-1.8871	1.6637	0.73057	-92.5995	13.5954	-6.744	-0.19678	0.13818	-0.052246
2.04	41.8076	78.6862	813.666	-1.0327	0.74365	0.23242	-6.285	-51.113	1901.8706	-1.9395	1.4199	0.1377	-45.242	64.13	1857.848	-1.8605	1.6433	0.70869	-62.511	13.7422	29.331	-0.17627	0.13115	-0.069824
2.042	45.126	38.834	885.984	-1.0776	0.77197	0.24561	30.081	-15.81	1902.1093	-1.9497	1.4018	0.13746	-67.725	205.317	1837.3702	-1.8308	1.6185	0.68515	-41.625	48.67	60.2833	-0.15576	0.12597	-0.09043
2.044	37.5662	0.899000000000001	944.0819	-1.1602	0.81738	0.26563	3.594	39.252	1883.3773	-1.959	1.3828	0.14307	-98.646	237.442	1826.126	-1.7983	1.5962	0.66211	-3.73	26.0394	88.675	-0.13154	0.12129	-0.11153
2.046	1.985	-46.48	1003.9354	-1.2233	0.84936	0.27783	14.502	36.829	1892.366	-1.9585	1.3638	0.14111	-145.396	296.031	1775.9746	-1.7574	1.5695	0.64307	0.792000000000002	-10.3737	96.6351	-0.10557	0.1209	-0.13008
2.048	0.117000000000001	-100.3033	1062.4122	-1.2886	0.87354	0.28613	13.6719	106.946	1875.8842	-1.9551	1.3535	0.14453	-185.975	254.561	1749.1045	-1.7109	1.5383	0.62598	-16.133	-94.2772	120.23	-0.087891	0.13672	-0.15137
2.05	-21.888	-151.303	1104.665	-1.3589	0.89795	0.2915	-13.61086	126.002	1827.9233	-1.9331	1.3403	0.14941	-175.289	269.597	1715.0588	-1.6707	1.5058	0.61153	2.67599999999999	-128.789	221.21	-0.078222	0.15088	-0.16563
2.052	-13.212	-188.539	1152.524	-1.3882	0.90771	0.29297	18.996	137.751	1806.7279	-1.9177	1.3294	0.15601	-204.914	245.527	1717.186	-1.6345	1.4816	0.59668	70.8302	-175.243	357.775	-0.074414	0.17383	-0.17764
2.054	-25.749	-197.817	1221.301	-1.4395	0.93164	0.29688	0.207000000000001	179.697	1783.344	-1.896	1.3228	0.16211	-221.327	274.276	1690.009	-1.6011	1.4458	0.57813	81.219	-241.445	522.6817	-0.08418	0.19961	-0.18506
2.056	-44.579	-178.886	1277.765	-1.4473	0.9502	0.29859	7.979	119.42	1771.838	-1.8633	1.3105	0.16846	-248.423	210.519	1643.8923	-1.5608	1.4212	0.56436	97.207	-336.63	632.748	-0.10596	0.22627	-0.19716
2.058	-78.9254	-158.332	1317.847	-1.4531	0.97266	0.30078	1.84399999999999	93.885	1775.279	-1.8438	1.3027	0.17285	-218.244	182.74	1580.649	-1.5109	1.3898	0.55059	85.818	-455.582	694.475	-0.13525	0.25293	-0.20654
2.06	-101.504	-142.719	1346.897	-1.4521	1.0098	0.29736	-2.831	68.303	1769.488	-1.8086	1.291	0.18604	-182.113	103.018	1537.1724	-1.4562	1.3531	0.53887	24.058	-504.716	773.176	-0.17403	0.29082	-0.23086
2.062	-117.343	-123.804	1376.248	-1.437	1.0259	0.28711	52.2212	16.878	1772.192	-1.781	1.2834	0.19262	-113.842	98.79	1496.8337	-1.4024	1.3159	0.52519	87.579	-453.219	859.184	-0.21699	0.34444	-0.24609
2.064	-107.5285	-98.608	1401.401	-1.418	1.0547	0.27344	27.85073	52.706	1767.194	-1.7559	1.2773	0.19775	-61.223	118.835	1493.116	-1.3491	1.27	0.5	116.754	-304.221	933.45	-0.27324	0.41748	-0.25195
2.066	-92.0975	-75.854	1414.44	-1.3941	1.0733	0.25586	28.9503	51.749	1753.713	-1.7202	1.2739	0.2085	-55.839	172.228	1472.983	-1.2881	1.2309	0.48496	91.5253	-187.811	957.05	-0.34961	0.51475	-0.23096
2.068	-106.1401	-61.165	1415.466	-1.3706	1.0864	0.24316	50.967	60.32	1739.243	-1.6968	1.2681	0.21387	-62.676	201.631	1438.708	-1.2297	1.1863	0.46016	66.0708	-89.628	962.5828	-0.45508	0.63086	-0.18604
2.07	-105.629	-51.678	1422.9	-1.3491	1.1099	0.21826	16.775	110.534	1711.0507	-1.6577	1.2603	0.22168	-49.822	207.993	1365.403	-1.1606	1.1438	0.43672	75.37	-81.97	1024.009	-0.60918	0.75156	-0.11953
2.072	-83.9828	-57.136	1441.629	-1.3418	1.1172	0.20947	28.772	85.455	1690.793	-1.6221	1.2504	0.22657	-53.872	208.5359	1306.31007	-1.0894	1.0993	0.41485	75.8203	-79.832	1181.906	-0.79297	0.86445	-0.047363
2.074	-69.4182	-62.325	1461.6994	-1.334	1.1426	0.19141	-6.339	118.959	1672.515	-1.5894	1.2427	0.23047	-22.35	233.724	1234.9643	-1.0205	1.0469	0.38916	82.683	-57.437	1324.24	-0.99802	0.96328	0.025683
2.076	-46.798	-72.492	1479.1453	-1.3262	1.1548	0.18188	-18.9485	152.388	1636.7179	-1.5347	1.231	0.23193	-34.815	281.617	1166.2071	-0.95586	1.0051	0.36406	116.302	-58.561	1379	-1.2087	1.0403	0.075586
2.078	-49.314	-100.002	1502.519	-1.3203	1.1699	0.17236	5.227	140.423	1585.8685	-1.5112	1.2251	0.23633	-21.375	310.644	1096.7	-0.89424	0.95322	0.33555	78.711	-34.213	1370.094	-1.416	1.0977	0.11963
2.08	-26.323	-131.8808	1541.685	-1.3208	1.186	0.16553	-36.6995	203.211	1531.972	-1.4663	1.2056	0.22754	-44.221	326.525	1026.326	-0.82705	0.90322	0.3125	49.4679	-45.82	1367.416	-1.595	1.166	0.14913
2.082	-22.115	-160.885	1568.152	-1.3262	1.1934	0.16162	-32.567	216.454	1484.128	-1.4187	1.1907	0.23242	-0.93	276.461	970.331	-0.76367	0.8584	0.28408	33.7158	-18.43	1433.773	-1.7449	1.2437	0.17861
2.084	-12.485	-164.302	1588.826	-1.3257	1.2192	0.15186	-9.084	214.18	1458.66	-1.3789	1.1699	0.22314	48.047	257.2793	900.27	-0.69482	0.81299	0.25928	18.6539	-93.9	1520.016	-1.8605	1.3328	0.20166
2.086	1.895	-187.967	1609.852	-1.3227	1.2422	0.14429	-24.886	263.7004	1432.82	-1.3276	1.145	0.22021	66.499	214.054	873.8857	-0.62852	0.7625	0.2335	-18.2456	-195.71	1570.926	-1.9722	1.4267	0.2209
2.088	21.231	-191.263	1609.015	-1.3223	1.2656	0.14111	-28.987	208.5872	1420.494	-1.3022	1.1333	0.21777	67.5922	262.234	806.134	-0.56211	0.71757	0.2042	-106.489	-363.5817	1629.383	-2.0894	1.5083	0.24463
2.09	43.8277	-180.773	1618.11	-1.3179	1.2974	0.13574	-28.331	208.718	1426.6417	-1.2485	1.104	0.21484	58.3797	249.06	778.144	-0.49648	0.67383	0.17569	-150.372	-441.434	1664.061	-2.21	1.5666	0.26689
2.092	29.2357	-151.418	1604.416	-1.3193	1.3086	0.12988	-35.3951	196.8703	1397.6551	-1.2136	1.0774	0.21436	24.511	285.83	744.942	-0.42646	0.63369	0.14258	-132.534	-451.91	1710.0338	-2.309	1.593	0.28076
2.094	66.847	-121.2418	1609.133	-1.3257	1.3403	0.12207	-16.151	152.493	1361.346	-1.1758	1.0449	0.2124	-23.998	228.57	697.827	-0.35791	0.58936	0.11816	14.762	-412.3	1759.514	-2.3805	1.5887	0.2874
2.096	62.041	-108.7933	1600.4923	-1.3389	1.357	0.12378	-35.724	189.6073	1336.7133	-1.127	1.0156	0.20703	-43.351	234.001	634.259	-0.29414	0.55264	0.086523	75.424	-390.87	1801.838	-2.404	1.5823	0.27578
2.098	49.956	-105.8658	1602.0576	-1.3516	1.3711	0.12109	-60.8942	159.156	1282.0843	-1.0967	0.99512	0.20654	-108.811	196.7578	609.089	-0.24287	0.51494	0.062305	73.806	-410.67	1833.699	-2.3569	1.5649	0.25098
2.1	41.6076	-93.2572	1583.172	-1.3765	1.3872	0.11133	-48.779	151.53	1261.4217	-1.041	0.9541	0.19824	-127.134	248.697	551.8635	-0.19795	0.47549	0.036914	-1.28	-364.433	1894.378	-2.228	1.5399	0.21728
2.102	61.47	-55.743	1599.019	-1.3906	1.3945	0.11426	-54.6504	184.617	1238.8523	-0.99001	0.92847	0.1919	-120.26	235.922	543.9727	-0.15605	0.43789	0.0068358	-39.76	-303.828	1961.734	-2.0609	1.5177	0.16777
2.104	68.82	-25.185	1600.4	-1.4155	1.4067	0.11133	-14.982	147.145	1203.721	-0.94727	0.89453	0.17773	-110.862	282.135	482.8749	-0.11279	0.40186	-0.0078125	-60.453	-193.823	1993.951	-1.8698	1.5071	0.10879
2.106	36.5807	-18.716	1609.1877	-1.4297	1.4101	0.11084	-11.577	189.854	1181.97	-0.88086	0.8584	0.17529	-102.63	214.1141	440.459	-0.070117	0.36064	-0.029883	-61.481	-136.65	1966.151	-1.6772	1.5122	0.060059
2.108	34.553	-38.801	1639.9986	-1.4395	1.418	0.1084	-15.196	219.6946	1121.8345	-0.85059	0.83203	0.17334	-67.774	231.2166	384.5	-0.031836	0.31993	-0.051953	-72.396	-110.08	1867.969	-1.4956	1.522	0.026367
2.11	9.2353	-64.13	1647.1347	-1.4609	1.4219	0.11182	-12.706	210.43153	1058.7418	-0.78906	0.79102	0.16455	-91.8119	164.288	360.1189	0.003711	0.28125	-0.069531	-111.2858	-117.15	1789.854	-1.3627	1.5518	0.026562
2.112	16.9193	-90.326	1664.1549	-1.4688	1.4238	0.11035	-11.779	278.283	1021.569	-0.74292	0.75756	0.1521	-85.255	217.2224	284.789	0.04336	0.24424	-0.087207	-91.421	-131.7	1812.202	-1.2882	1.5896	0.039355
2.114	14.828	-98.713	1671.5169	-1.4917	1.4302	0.11572	-4.587	273.3	950.0932	-0.69238	0.7207	0.14697	-75.147	178.1246	272.7694	0.084473	0.20654	-0.10742	-112.535	-121.508	1878.541	-1.2761	1.6368	0.058106
2.116	21.439	-112.017	1666.339	-1.5119	1.4299	0.11889	-4.846	262.337	924.6923	-0.62646	0.67432	0.13379	-79.551	215.173	222.0043	0.1164	0.17373	-0.12295	-25.976	-117.49	1953.46	-1.3167	1.6767	0.084863
2.118	7.628	-106.874	1678.6913	-1.5308	1.4302	0.12549	-20.481	288.918	876.212	-0.59521	0.65186	0.12891	-85.071	129.0525	235.1342	0.13955	0.14062	-0.14082	41.342	-107.57	1963.12515	-1.3892	1.7095	0.11377
2.12	-4.811	-99.371	1680.6004	-1.5625	1.4238	0.13086	-43.228	230.226	855.33	-0.5293	0.60596	0.11768	-66.702	137.6193	215.3178	0.16299	0.10742	-0.1541	109.0988	-139.703	1995.712	-1.4874	1.7337	0.13427
2.122	8.3932	-90.012	1681.0875	-1.5757	1.4146	0.13232	-31.9	251.237	838.937	-0.47852	0.56885	0.10839	-96.045	75.4916	225.513	0.18037	0.075098	-0.17158	130.965	-101.767	2030.393	-1.5804	1.7485	0.15616
2.124	-3.1139	-87.622	1690.816	-1.603	1.4048	0.12939	-36.405	230.96	782.315	-0.4375	0.53955	0.10498	-40.881	119.28	189.806	0.19189	0.044922	-0.18506	85.867	-98.106	2115.051	-1.6678	1.7532	0.15967
2.126	11.3906	-61.5971	1701.602	-1.6216	1.394	0.13159	-49.272	165.25439	745.2066	-0.38086	0.49219	0.10352	-7.792	62.024	183.776	0.2044	0.016504	-0.19814	62.25	-107.246	2186.517	-1.7336	1.7555	0.16504
2.128	13.1947	-20.592	1684.5786	-1.6343	1.3862	0.12598	-56.326	195.511	708.8	-0.35107	0.46924	0.10059	6.99	88.4975	136.6761	0.20928	-0.015234	-0.20069	-6.096	-141.121	2214.023	-1.7808	1.7622	0.15088
2.13	15.0597	23.6977	1661.06	-1.6538	1.3774	0.125	-56.548	151.07	669.6038	-0.30322	0.42676	0.098145	25.972	-3.625	100.836	0.21202	-0.033985	-0.20967	-58.662	-185.766	2244.308	-1.8085	1.7677	0.14248
2.132	14.2263	47.22	1645.776	-1.6577	1.3735	0.12402	-47.304	151.3752	635.729	-0.27124	0.39526	0.094239	59.829	17.37	56.875	0.20723	-0.044629	-0.20635	-72.33	-132.368	2210.77	-1.842	1.7668	0.13174
2.134	18.6209	55.408	1639.896	-1.6641	1.3633	0.11719	-70.449	192.2783	596.4267	-0.24072	0.36523	0.093262	40.331	-29.902	54.8965	0.19287	-0.046875	-0.20361	3.59	-49.423	2169.6414	-1.8729	1.761	0.11807
2.136	52.172	54.692	1645.7281	-1.67	1.3603	0.11743	-66.46	130.077	571.946	-0.2041	0.32666	0.088379	54.5	13.921	59.3435	0.17637	-0.047461	-0.19903	39.3443	47.9674	2135.489	-1.9107	1.7435	0.12168
2.138	45.992	55.744	1629.751	-1.6753	1.3501	0.12549	-54.477	159.187	544.6024	-0.1748	0.29566	0.08667	44.948	0.578000000000003	77.022	0.15752	-0.052246	-0.18926	27.5207	71.984	2111.348	-1.9507	1.7212	0.12402
2.14	73.833	47.864	1661.5806	-1.689	1.3423	0.12744	-75.52	167.512	489.3205	-0.14893	0.271	0.086426	19.851	55.5363	51.1989	0.13564	-0.056152	-0.18574	79.847	44.432	2096.713	-2.0048	1.696	0.13164
2.142	78.435	31.689	1663.375	-1.6948	1.3345	0.13232	-78.81	140.1109	460.80212	-0.1167	0.23682	0.078613	-24.284	34.0645	30.2289	0.11826	-0.059277	-0.17901	87.081	47.395	2101.685	-2.0518	1.6677	0.14014
2.144	90.087	11.5882	1669.6924	-1.7051	1.3223	0.13477	-84.394	196.2	431.8502	-0.098633	0.21924	0.079102	1.094	74.096	29.705	0.098633	-0.061035	-0.17725	86.364	82.235	2101.26	-2.0964	1.6333	0.14561
2.146	77.101	-4.2105	1657.511	-1.7117	1.3083	0.1355	-91.2637	167.68	379.951	-0.062988	0.1875	0.072754	-46.349	39.497	41.9605	0.084864	-0.062109	-0.17158	115.367	158.28	2082.02	-2.1178	1.5974	0.14336
2.148	76.51	-24.0475	1638.75	-1.7109	1.2949	0.1377	-70.591	170.131	338.9609	-0.044677	0.1665	0.062744	-39.076	67.925	14.916	0.068457	-0.05752	-0.16347	67.0338	207.31	2079.632	-2.1226	1.5591	0.14209
2.15	62.329	-26.493	1649.7324	-1.6948	1.2739	0.13086	-66.93	194.819	287.349	-0.020996	0.14844	0.055664	-58.502	26.2162	18.983	0.054785	-0.061816	-0.15762	-15.1326	226.283	2068.095	-2.0995	1.5108	0.14102
2.152	51.424	-17.073	1634.50006	-1.6914	1.2559	0.13379	-88.849	122.3637	267.514	-0.00097656	0.11719	0.053223	-78.629	43.76553	0.0820000000000007	0.038184	-0.054981	-0.15303	-55.83	175.471	2097.2102	-2.0667	1.4763	0.13584
2.154	49.613	-4.696	1623.6576	-1.6641	1.2334	0.12842	-68.197	140.843	272.742	0.0029297	0.10303	0.039551	-81.56	20.05	19.882	0.024902	-0.056152	-0.14014	-37.057	146.498	2120.9	-2.0382	1.4423	0.12842
2.156	50.052	22.761	1606.46555	-1.626	1.209	0.12256	-56.451	133.9006	234.017	0.01709	0.078613	0.057617	-75.843	46.79	52.2121	0.008105	-0.053809	-0.13535	-23.4401	117.376	2117.938	-2.0117	1.4152	0.13183
2.158	55.95	49.6508	1575.1424	-1.6089	1.2017	0.1167	-49.189	97.994	224.5806	0.015869	0.056396	0.046386	-118.598	37.842	43.4945	-0.0069339	-0.05957	-0.13145	18.872	114.235	2074.2508	-1.9956	1.3872	0.14355
2.16	32.5627	69.3292	1554.722	-1.5698	1.1782	0.1084	-38.911	149.2005	211.8163	0.018555	0.037598	0.043945	-102.1049	52.065	47.485	-0.015138	-0.064258	-0.12832	-7.983	125.663	1999.773	-1.9929	1.3622	0.15225
2.162	36.3252	86.173	1557.5471	-1.5411	1.1607	0.10596	-53.29	86.601	201.313	0.010742	0.016113	0.046387	-111.046	39.82583	71.5114	-0.013867	-0.070996	-0.12383	0.210000000000001	84.785	1969.76	-2.0008	1.3515	0.16887
2.164	31.23123	100.988	1549.8265	-1.5151	1.145	0.10303	-39.043	71.3919	204.778	0.0063477	0.0063477	0.053223	-138.344	39.802	84.9819	-0.011719	-0.07666	-0.11914	6.312	109.508	1962.8789	-2.0114	1.3403	0.188
2.166	26.339	117.401	1520.3796	-1.4878	1.1255	0.10156	-36.521	103.4795	188.443	-0.0024414	-0.0078125	0.05957	-140.514	44.04	69.9859	-0.0035168	-0.083202	-0.11739	35.484	105.207	1992.282	-2.0237	1.3392	0.21662
2.168	22.2931	119.772	1488.5122	-1.4785	1.1162	0.095703	-30.315	51.4222	171.204	-0.0021973	-0.019776	0.064209	-83.04	49.267	66.379	0.0078107	-0.084568	-0.11807	32.8495	155.302	1985.64	-2.0405	1.3345	0.23828
2.17	-22.6482	100.207	1462.256	-1.4512	1.1035	0.10547	-30.116	79.8222	163.2429	-0.012207	-0.027832	0.069336	-126.166	50.019	52.3056	0.017965	-0.089257	-0.12276	11.8484	238.211	1937.876	-2.046	1.3407	0.25935
2.172	-16.221	86.1352	1461.075	-1.4372	1.094	0.10523	-38.321	63.67737	131.34	-0.01123	-0.035645	0.076172	-98.3781	56.233	70.381	0.032712	-0.090232	-0.12002	-35.074	306.167	1869.306	-2.0465	1.3438	0.27983
2.174	-34.5734	80.0178	1441.201	-1.4199	1.084	0.098145	-67.642	33.988	109.995	-0.0097656	-0.042969	0.08252	-66.8221	66.697	74.0557	0.042969	-0.098633	-0.11865	-47.007	376.549	1790.7612	-2.0274	1.3457	0.28692
2.176	-27.8804	79.631	1430.888	-1.3979	1.0767	0.11621	-24.477	101.0534	81.822	-0.0043945	-0.047852	0.080078	-51.692	62.407	89.583	0.056154	-0.10254	-0.11611	-33.266	352.219	1755.846	-1.9984	1.3518	0.30626
2.178	-19.12122	64.166	1444.9676	-1.3794	1.0708	0.11914	-24.281	71.996	67.501	0.0007324	-0.046387	0.084229	-15.349	65.5288	75.585	0.065725	-0.11017	-0.11289	-39.5335	330.094	1707.4351	-1.9624	1.356	0.3125
2.18	5.4535	47.735	1436.828	-1.3574	1.0625	0.12793	-48.385	72.7772	79.5571	0.0043945	-0.047363	0.080566	8.64299999999999	25.467	98.209	0.071592	-0.12032	-0.1031	-16.042	256.941	1685.646	-1.9152	1.3541	0.31424
2.182	7.3756	47.729	1418.55	-1.3364	1.0572	0.1355	-34.615	111.936	75.164183	0.010742	-0.045898	0.091797	-1.048	38.2906	69.59476	0.076375	-0.13488	-0.099217	-21.343	253.4438	1643.655	-1.8684	1.3506	0.31428
2.184	-1.7282	69.592	1375.032	-1.3159	1.0493	0.14209	-50.885	67.7065	74.1073	0.013672	-0.046387	0.09082	33.228	0.112000000000002	73.5812	0.086914	-0.15186	-0.097168	-29.558	269.822	1600.268	-1.8179	1.3407	0.30818
2.186	18.2345	82.344	1350.773	-1.2886	1.0317	0.15039	-46.961	94.772	86.5725	0.019531	-0.038574	0.09668	31.318	8.09461	59.6849	0.10368	-0.16209	-0.099712	-26.856	317.269	1554.68962	-1.7646	1.3232	0.30581
2.188	35.9901	116.17222	1325.397	-1.2734	1.0195	0.15283	-57.361	79.6379	64.960413	0.023926	-0.035644	0.10108	13.475	-13.864853	68.6568	0.1259	-0.17719	-0.10682	7.65300000000001	324.412	1501.096	-1.709	1.3047	0.29541
2.19	19.154	127.871	1294.8499	-1.2383	0.99609	0.15332	-76.413	27.9676	56.8992	0.030762	-0.02832	0.10547	11.29	-1.672	68.2182	0.15126	-0.19087	-0.11306	-23.395	280.015	1464.948	-1.6518	1.2779	0.29316
2.192	9.53	140.569	1259.177	-1.2195	0.98413	0.15747	-61.297	71.7	52.479	0.034668	-0.023926	0.10693	4.182	-13.5287	85.5366	0.17765	-0.20164	-0.12427	-24.128	271.872	1440.469	-1.5906	1.2541	0.28198
2.194	24.5905	132.854	1250.281	-1.207	0.96973	0.16357	-73.6767	26.3819	47.33	0.038574	-0.019043	0.11035	-16.237	12.1039	51.1625	0.20654	-0.20898	-0.13867	-26.558	253.516	1451.436	-1.5244	1.2286	0.27472
2.196	27.7185	134.646	1229.5817	-1.1851	0.94775	0.16406	-72.206	11.427	67.424	0.044922	-0.013184	0.11035	-20.61	-13.54802	57.9142	0.23169	-0.21674	-0.1501	-32.8655	289.6012	1406.092	-1.4506	1.1989	0.26483
2.198	21.6876	151.458	1208.188	-1.1768	0.94141	0.15869	-60.356	12.105	64.1489	0.05127	-0.0083008	0.11328	3.839	11.553	57.0925	0.24926	-0.21854	-0.16047	-12.02	304.2146	1305.592	-1.3711	1.1641	0.25635
2.2	13.19	154.834	1182.809	-1.1436	0.91797	0.17334	-73.119	-35.046	48.024	0.057617	-0.003418	0.11621	-29.55	-15.847	45.295	0.26362	-0.21858	-0.16705	-30.462	314.364	1187.971	-1.2818	1.1237	0.25049
2.202	29.5317	140.227	1136.4202	-1.1081	0.91284	0.16845	-51.577	15.8405	57.754	0.072754	-0.00097656	0.11377	-16.744	27.323	13.257	0.27512	-0.21792	-0.17594	-66.324	337.578	1101.789	-1.1851	1.0832	0.2399
2.204	33.868	129.8874	1112.639	-1.0762	0.90332	0.16455	-46.416	33.7703	44.4528	0.077148	0.0024414	0.11328	-47.625	9.0021	34.5782	0.2749	-0.20947	-0.17871	-105.15	335.46	1055.405	-1.0934	1.0367	0.2326
2.206	28.1928	127.0041	1074.164	-1.0332	0.87305	0.16895	-42.874	10.7829	53.2017	0.088379	-0.00097656	0.11035	-70.563	56.0301	12.665	0.27159	-0.20238	-0.17789	-63.85	375.761	1009.563	-1.0024	0.98778	0.2231
2.208	12.841	119.61	1080.5913	-1.0117	0.85742	0.16748	-14.791	54.158	67.9017	0.095459	0.00048828	0.10938	-94.2629	35.784	46.7438	0.26343	-0.19284	-0.16803	-62.0486	367.437	950.927	-0.9248	0.94141	0.20947
2.21	25.61	112.683	1075.475	-0.97461	0.82227	0.16748	-44.849	16.694	33.409	0.11084	0.00097656	0.10498	-90.6842	65.091	48.572	0.2464	-0.18326	-0.16673	-33.185	338.656	888.85	-0.85081	0.89354	0.20444
2.212	0.0830000000000002	114.084	1040.1908	-0.94019	0.80298	0.15796	-24.606	19.7459	59.7861	0.12598	0.00048828	0.1001	-148.222	33.299	36.541	0.22293	-0.16512	-0.15823	0.472999999999999	286.4212	831.148	-0.78003	0.84803	0.19321
2.214	-10.1	118.0899	1011.4004	-0.90039	0.78516	0.15283	-18.917	64.913	51.54	0.13135	-0.0014648	0.097656	-135.479	64.623	27.745	0.19336	-0.14502	-0.15039	-50.314	283.562	758.992	-0.71252	0.79758	0.18745
2.216	-30.944	110.7792	997.0798	-0.84766	0.74219	0.14404	-50.601	31.013	38.2461	0.14355	-0.0068359	0.094238	-136.131	33.592	44.825	0.15837	-0.13336	-0.14108	-46.818	301.5335	708.8794	-0.64452	0.74944	0.18423
2.218	-22.684	119.67431	972.628	-0.82568	0.72119	0.14502	-27.802	61.302	49.343	0.1543	-0.0095215	0.084961	-107.1739	52.2414	12.256	0.12721	-0.11382	-0.13032	-54.895	309.839	647.7621	-0.57275	0.70068	0.18066
2.22	-37.2965	139.0051	931.583	-0.78174	0.68799	0.13672	-25.023	61.403	21.6931	0.16113	-0.0083008	0.080078	-102.4256	16.095	34.5886	0.09342	-0.090539	-0.11911	-59.385	314.596	597.715	-0.50779	0.65647	0.17937
2.222	-48.76491	155.0387	893.2888	-0.75244	0.66406	0.1311	-34.396	1.4675	17.5562	0.16357	-0.013184	0.070801	-79.226	43.4358	25.316	0.067766	-0.063842	-0.11079	-85.3395	275.484	548.339	-0.43822	0.61089	0.16909
2.224	-51.271	157.284	871.9554	-0.72217	0.64697	0.12305	-6.635	27.5593	40.314	0.16455	-0.016602	0.068848	-100.7759	28.4156	49.627	0.036621	-0.040039	-0.099609	-68.5067	261.329	506.943	-0.36227	0.56001	0.15757
2.226	-39.6475	159.042	831.035	-0.68457	0.61133	0.12207	-38.746	-21.5678	45.8178	0.16113	-0.017578	0.062988	-50.53	69.233	68.8667	0.0081789	-0.014236	-0.088792	-75.076	210.74	465.684	-0.28888	0.51563	0.14797
2.228	-44.407	166.65304	793.696	-0.66797	0.59961	0.12598	-36.775	-22.8325	66.7925	0.1582	-0.01709	0.061523	-53.227	50.5334	91.6	-0.016672	0.0050167	-0.072945	-109.9172	214.147	403.353	-0.2124	0.46533	0.14551
2.23	-24.132	172.9005	761.998	-0.63086	0.56348	0.12402	3.662	30.1965	44.316	0.1543	-0.025879	0.058105	-18.295	78.7929	87.063	-0.039863	0.026317	-0.066423	-57.635	194.643	344.987	-0.14461	0.42499	0.13785
2.232	-34.842	154.0229	759.734	-0.60278	0.54566	0.11988	-23.928	-8.1967	33.49716	0.14063	-0.021484	0.055664	-22.72	41.897	95.593	-0.063266	0.047641	-0.058933	-62.535	162.447	290.2213	-0.081087	0.3852	0.12987
2.234	-30.4548	148.2535	740.3134	-0.57813	0.52246	0.12109	-31.656	16.6628	52.431	0.13525	-0.020508	0.053223	-21.433	51.8386	87.281	-0.07666	0.061035	-0.055664	-41.917	183.626	283.0894	-0.022976	0.34656	0.12675
2.236	-54.1508	138.1993	726.921	-0.54834	0.50049	0.11963	-46.25	31.598	45.405	0.1333	-0.020996	0.054199	-17.316	40.673	69.00792	-0.089923	0.07441	-0.056107	-35.163	168.5667	262.31969	0.031927	0.31127	0.11934
2.238	-41.423	145.5433	698.8372	-0.53613	0.49023	0.12256	-66.51	6.9176	42.916	0.13159	-0.019531	0.05249	21.095	47.768	58.4023	-0.09501	0.08576	-0.056984	-17.738	186.4198	218.2128	0.076172	0.27588	0.11572
2.24	-19.504	137.447	696.1463	-0.50781	0.46582	0.12305	-39.659	55.842	41.85941	0.12549	-0.019043	0.054199	-0.766999999999996	36.8662	63.218	-0.096346	0.095227	-0.059738	-28.153	167.42328	158.1042	0.12087	0.24934	0.10938
2.242	-14.863	143.662	656.9937	-0.49487	0.44507	0.12232	-64.863	19.8998	23.4698	0.12451	-0.013672	0.059082	25.197	43.8482	54.5995	-0.091523	0.10211	-0.065764	-77.035	159.7412	127.2542	0.15261	0.22064	0.10303
2.244	-25.864	130.9835	614.761	-0.4751	0.43213	0.125	-57.872	21.9973	45.24188	0.12305	-0.012695	0.056641	5.673	19.4785	70.4576	-0.083496	0.10693	-0.075195	-87.328	144.46321	136.9704	0.17372	0.18782	0.099513
2.246	-34.161	123.553	600.577	-0.44727	0.41211	0.12549	-60.324	61.2411	18.285	0.13379	-0.0078125	0.055176	37.393	25.715	84.0821	-0.074194	0.10996	-0.080103	-107.544	114.9111	147.5059	0.19023	0.15939	0.098046
2.248	-11.645	108.313	577.7467	-0.43164	0.40186	0.12695	-57.632	26.4272	2.062	0.14038	-0.01294	0.051514	-11.06	12.9326	83.7403	-0.061158	0.11435	-0.088023	-73.631	98.119	146.9663	0.19824	0.13477	0.09375
2.25	0.689	127.525	565.7019	-0.40039	0.3833	0.12939	-44.626	66.219	32.7867	0.14453	-0.0083008	0.049316	13.227	14.032	108.952	-0.049887	0.11358	-0.097396	-66.599	53.538	97.28	0.20097	0.10556	0.094332
2.252	-0.699999999999996	123.6988	540.307	-0.37597	0.36914	0.12867	-67.7195	61.976	24.6326	0.15674	-0.0063477	0.044434	-26.35	8.0498	96.408	-0.040223	0.11592	-0.10568	-59.85	50.21	61.367	0.20371	0.083	0.091405
2.254	-2.705	121.617932	526.383	-0.34961	0.34521	0.12695	-67.734	17.212	62.796	0.16406	-0.0068359	0.039551	-31.793	-2.505	59.5123	-0.033203	0.11377	-0.11768	-67.862	40.6369	51.797	0.20019	0.061129	0.090625
2.256	3.651	133.8398	495.8779	-0.32178	0.32275	0.13037	-36.824	57.6039	60.0929	0.1748	-0.0039063	0.038086	-73.55841	-6.06081	35.419	-0.026959	0.11855	-0.13017	-60.285	64.095	52.422	0.19023	0.044529	0.08584
2.258	-12.66	156.574	469.741	-0.30615	0.30664	0.125	-57.855	15.617	29.8536	0.18018	0.0021973	0.036377	-75.388	-10.4478	50.0703	-0.020903	0.12255	-0.14227	-45.718	39.0712	48.468	0.18311	0.029297	0.088379
2.26	-17.893	150.368	444.8386	-0.28174	0.27637	0.12598	-50.61	7.3	48.00778	0.18701	0.0058594	0.034668	-105.3268	3.6138	37.6188	-0.011926	0.13192	-0.15399	-47.295	22.7606	40.965	0.16582	0.019434	0.089551
2.262	-27.032	142.191	433.0584	-0.26294	0.25537	0.12524	-40.767	27.248	54.8588	0.1875	0.015137	0.036621	-104.6491	-8.2602	69.5974	-0.009274	0.14325	-0.15908	-46.463	3.165	33.719	0.14355	0.0099613	0.092968
2.264	-30.622	131.548	406.902	-0.25146	0.23682	0.12402	-59.384	-14.891	40.97555	0.18799	0.02002	0.035645	-94.3368	-21.96447	81.448	-0.01416	0.16064	-0.16309	-90.426	-22.9507	56.8395	0.11387	0.0091794	0.10117
2.266	-54.603	132.963	374.293	-0.22949	0.21289	0.11865	-8.37	37.74749	44.9212	0.17969	0.035156	0.046875	-99.4551	-90.611	116.784	-0.02051	0.18555	-0.16348	-76.357	30.083	79.403	0.08047	0.0075195	0.10957
2.268	-52.013	120.9401	368.867	-0.21826	0.2041	0.11719	-19.04	42.967	39.3346	0.17236	0.046875	0.050537	-106.407	-125.8838	226.8	-0.030376	0.20704	-0.1667	-105.271	35.361	70.388	0.044922	0.0068359	0.12109
2.27	-51.768	121.628	362.1089	-0.19531	0.1792	0.11035	-44.095	8.3229	55.639	0.1626	0.059082	0.0625	-49.681164	-173.3544	354.736	-0.04639	0.22461	-0.17569	-75.135	79.536	43.1401	0.0013664	0.013965	0.13808
2.272	-60.784	115.4481	350.073	-0.17285	0.16309	0.10596	-7.86	66.39	67.573	0.14502	0.075684	0.069824	3.44341	-212.924	474.595	-0.062209	0.24873	-0.19043	-37.006	62.332	7.26	-0.04922	0.024023	0.15498
2.274	-71.7756	117.7154	329.3235	-0.1543	0.15088	0.096191	-33.316	41.3889	32.2255	0.13379	0.083984	0.082031	21.494	-326.321	636.989	-0.090332	0.2876	-0.21143	-54.237	47.3109	6.696	-0.096877	0.032227	0.16983
2.276	-73.2904	94.784	316.098	-0.12598	0.12988	0.097656	-18.785	40.8716	52.2221	0.11279	0.10449	0.093262	19.874	-396.709	734.794	-0.12783	0.34746	-0.23291	-49.67	35.624	31.4348	-0.146	0.04209	0.19189
2.278	-53.425	97.299	309.977	-0.11621	0.12354	0.091309	-11.605	59.7013	56.729	0.10107	0.12402	0.10303	42.164	-446.748	847.391	-0.18994	0.43056	-0.22773	-51.795	20.7277	39.4905	-0.19629	0.054688	0.21045
2.28	-59.842	87.085	283.8852	-0.087891	0.10693	0.085938	-41.905	8.919	51.3716	0.094727	0.13086	0.10986	97.6518	-374.305	940.0072	-0.28447	0.529	-0.20117	-35.299	35.417	50.419	-0.23437	0.059375	0.22852
2.282	-78.148	94.3009	276.0565	-0.068847	0.090088	0.079834	-17.137	42.7616	51.1911	0.084961	0.14648	0.12305	86.3645	-291.1784	1042.557	-0.42265	0.63066	-0.16182	-40.644	25.358	33.993	-0.26768	0.064648	0.24473
2.284	-57.597	83.92532	256.9631	-0.049805	0.075684	0.071289	-16.355	57.973	17.291	0.084717	0.15918	0.12964	119.6437	-149.334	1075.693	-0.59766	0.73145	-0.10547	-34.704	35.042	27.4441	-0.28603	0.063476	0.25489
2.286	-64.638	90.89	256.6995	-0.018066	0.05957	0.060547	-41.314	21.7496	28.8502	0.080566	0.1626	0.13574	151.196	-149.498	1096.556	-0.79259	0.83848	-0.03828	-55.642	40.1993	47.1958	-0.29521	0.056055	0.26426
2.288	-52.515	88.001	256.8901	0.0004883	0.050781	0.058105	-37.129	42.549	61.5133	0.083984	0.1748	0.13818	196.407	-118.023	1129.009	-1.0168	0.94531	0.031545	-73.942	66.2948	66.169	-0.29248	0.050781	0.27393
2.29	-78.1598	88.729	246.435	0.019531	0.042969	0.051758	-47.425	2.3399	60.6008	0.085938	0.17627	0.14502	205.09	-109.86	1270.089	-1.2547	1.0566	0.09951	-32.422	44.4177	67.887	-0.27295	0.041699	0.27109
2.292	-59.225	82.585	240.867	0.051758	0.026855	0.04248	-52.333	-9.1473	70.382	0.098633	0.18604	0.14941	236.119	-47.581	1393.76	-1.4964	1.1559	0.15244	-59.172	28.3665	53.6152	-0.2416	0.029004	0.26543
2.294	-43.358	81.97456	221.5406	0.064941	0.019531	0.041504	-41.656	6.7622	83.6449	0.10132	0.19629	0.1543	223.068	-51.242	1462.98	-1.7324	1.2461	0.20264	-52.2135	15.112	38.9029	-0.19355	0.016113	0.25293
2.296	-35.041	82.71153	183.427	0.091309	0.01123	0.030762	-74.405	-79.422	120.4859	0.09375	0.20703	0.15967	218.106	-30.173	1447.27732	-1.9485	1.3448	0.25528	-47.323	-4.854	53.265	-0.14141	0.008789	0.24238
2.298	-31.925	69.76783	171.284	0.10401	0.0058594	0.027588	-55.15	-84.155	178.531	0.063965	0.24316	0.1626	167.748	-62.87	1469.233	-2.1515	1.4481	0.30761	-30.869	36.4296	60.739	-0.087402	0.003418	0.23193
2.3	-16.349	57.6512	159.6939	0.11963	0	0.023438	-74.417	-93.909	231.826	0.041992	0.26807	0.15918	131.14	-78.28	1550.005	-2.3484	1.5419	0.34512	-68.335	44.498	56.955	-0.03291	-0.0064452	0.22002
2.302	2.492	58.3657	153.7662	0.13916	-0.0053711	0.016602	-80.709	-152.83	327.869	-0.035645	0.3291	0.17871	50.234	-103.57	1641.086	-2.5253	1.6251	0.38193	-65.501	72.962	35.2892	0.013184	-0.016406	0.20273
2.304	-0.0249999999999986	67.1767	156.3015	0.14844	-0.0083008	0.013184	-94.194	-151.172	435.145	-0.11841	0.38038	0.20532	-61.1596	-197.3	1730.686	-2.6484	1.6943	0.42236	-46.985	31.731	38.1452	0.063184	-0.03125	0.18633
2.306	-19.631	43.681594	168.1647	0.16064	-0.0063477	0.012207	-179.687	-235.268	490.56	-0.21973	0.43164	0.24268	-155.706	-287.058	1772.1463	-2.7263	1.7363	0.44551	-89.9583	16.968	45.729	0.10811	-0.042871	0.16973
2.308	-30.426	28.00117	187.817	0.16943	-0.0051269	0.0083008	-169.396	-261.538	550.766	-0.37207	0.49609	0.30322	-155.34	-389.661	1822.1032	-2.7413	1.7575	0.45918	-53.698	15.6119	61.106	0.1543	-0.058105	0.15234
2.31	-32.772	43.2141	171.564	0.16602	-0.0029297	0.0068359	-142.357	-195.09	551.9578	-0.45654	0.52979	0.3252	-148.4073	-431.44	1868.491	-2.6776	1.7572	0.44668	-45.135	23.547	54.505	0.19424	-0.070215	0.13291
2.312	-37.73	49.7425	134.9366	0.16992	-0.0024414	0.0092773	-175.705	-167.5485	577.657	-0.61279	0.59424	0.37305	-104.429	-492.88	1901.49	-2.526	1.7401	0.40733	-69.511	37.214	30.483	0.23535	-0.084766	0.11142
2.314	-35.464	53.4802	116.5211	0.16504	0	0.012695	-161.873	-84.112	645.56	-0.70655	0.6377	0.39942	-76.73	-461.49	1935.045	-2.3164	1.7109	0.34912	-82.961	26.157	22.352	0.27246	-0.099606	0.093456
2.316	-35.28	51.8459	106.048	0.15039	0.0058594	0.019531	-139.253	-38.101	650.532	-0.78906	0.68359	0.43018	-94.575	-439.49	1972.496	-2.0856	1.6714	0.28145	-102.80559	32.9693	29.845	0.30908	-0.11523	0.073535
2.318	-59.316	42.9054	80.832	0.13696	0.011719	0.028565	-107.519	-31.055	707.6652	-0.87891	0.7666	0.45459	-149.614	-345.72	2011.548	-1.8668	1.632	0.20488	-97.3568	26.947	45.8498	0.34814	-0.12793	0.053223
2.32	-56.076	46.9136	84.4079	0.12549	0.019531	0.03418	-39.938	48.867	795.61209	-0.92236	0.81494	0.4668	-157.843	-327.921	2052.708	-1.6879	1.5914	0.14434	-80.6056	43.656	57.1918	0.38262	-0.14336	0.035254
2.322	-48.305	37.7053	89.8611	0.10352	0.026367	0.047363	-29.521	65.096	871.57	-1.0112	0.91846	0.49219	-214.248	-260.856	2068.329	-1.5448	1.5619	0.094143	-40.994	38.1076	48.5177	0.41641	-0.15528	0.016309
2.324	-44.493	39.774	112.8998	0.092773	0.032227	0.047852	-6.159	107.367	982.452	-1.0882	0.9983	0.5166	-244.364	-273.319	2042.381	-1.437	1.5435	0.063477	-43.798	20.0163	45.8273	0.44649	-0.16426	-0.0040039
2.326	-57.518	40.4934	107.6121	0.079102	0.038086	0.063965	-4.113	170.913	1038.025	-1.1807	1.0625	0.53564	-254.622	-188.03	1984.994	-1.3849	1.5394	0.042187	-37.783	16.0656	4.828	0.46367	-0.16709	-0.021582
2.328	-73.325	45.6778	101.4884	0.064453	0.048828	0.070557	-72.683	122.611	1069.2	-1.3164	1.124	0.5708	-264.748	-183.72	1949.466	-1.3726	1.552	0.015625	-53.592	7.33624	36.8388	0.47705	-0.16895	-0.035156
2.33	-68.5299	34.7783	88.11082	0.056152	0.054688	0.07666	-79.462	96.607	1143.411	-1.3862	1.1499	0.59521	-235.2	-101.16	1915.643	-1.4026	1.572	-0.00078124	-64.393	35	35.82837	0.4877	-0.1622	-0.055468
2.332	-75.7484	47.9535	72.0848	0.05127	0.064453	0.083008	-91.668	37.991	1199.499	-1.5137	1.1797	0.61768	-150.31	-134.416	1955.875	-1.4554	1.6044	-0.0073243	-42.139	27.634	42.8853	0.49219	-0.15722	-0.068164
2.334	-75.0337	39.9688	48.8827	0.04834	0.068359	0.082031	-116.464	-85.566	1270.236	-1.575	1.1868	0.62964	-65.653	-123.939	1967.968	-1.5269	1.6372	-0.0039063	-22.252	69.327	63.341	0.48867	-0.1459	-0.074804
2.336	-103.5698	33.1007	61.8862	0.042969	0.080566	0.089355	-135.102	-118.976	1338.4536	-1.6133	1.1836	0.63135	54.2276	-207.112	1997.439	-1.6159	1.6685	0.0057617	-42.523	59.313	50.512	0.4835	-0.13096	-0.075586
2.338	-79.1756	23.31071	52.265	0.040283	0.08667	0.090576	-128.861	-189.2762	1364.7658	-1.6069	1.1743	0.62842	150.766	-188.012	2036.961	-1.7172	1.698	0.020313	-75.425	66.951	64.256	0.46875	-0.12061	-0.075684
2.34	-55.351	20.0838	62.985	0.035645	0.090332	0.097656	-68.1	-230.003	1402.2414	-1.5815	1.1655	0.61328	184.442	-196.196	2068.8998	-1.8114	1.7266	0.039844	-72.391	56.271	69.736	0.44727	-0.1043	-0.071875
2.342	-32.928	32.7541	72.4044	0.030273	0.097168	0.098633	5.192	-224.966	1428.636	-1.4746	1.1504	0.58057	192.393	-121.9	2085.876	-1.9012	1.7519	0.052637	-67.388	40.143	44.5454	0.42607	-0.084278	-0.066114
2.344	-44.79	18.196	81.332	0.030762	0.096191	0.10059	27.491	-296.44	1458.0248	-1.3581	1.134	0.54101	222.751	-169.775	2132.329	-1.9683	1.7661	0.060547	-22.515	22.558	21.69783	0.39951	-0.064746	-0.061035
2.346	-46.157	16.4286	86.737	0.029785	0.1001	0.10205	80.26	-279.78	1520.166	-1.2344	1.125	0.49463	179.367	-193.341	2151.188	-2.02	1.7831	0.072363	-16.794	7.565	36.556	0.36533	-0.03916	-0.050391
2.348	-26.521	24.5488	54.2232	0.027832	0.099365	0.10669	79.64	-223.294	1579.356	-1.0781	1.1211	0.42822	123.157	-282.92	2150.273	-2.0511	1.7954	0.079687	-39.397	18.66	37.557	0.32666	-0.016113	-0.038574
2.35	-30.971	37.3994	37.9539	0.028809	0.10107	0.10547	12.011	-217.942	1626.672	-1.0132	1.1284	0.40674	113.483	-226.6613	2128.848	-2.0663	1.8068	0.084766	-47.655	19.387	56.4785	0.2752	0.0072267	-0.015918
2.352	-18.151	31.6241	45.8044	0.039551	0.09668	0.098145	16.252	-127.0451	1670.94	-0.93164	1.1426	0.36768	91.718	-190.891	2104.088	-2.0698	1.8083	0.077051	-69.482	55.8891	58.709111	0.22207	0.038769	-0.0010742
2.354	-31.475	23.5466	50.473	0.044922	0.092773	0.090332	-13.046	-107.457	1637.3954	-0.91358	1.1524	0.34741	111.253	-74.133	2083.81	-2.064	1.8052	0.087402	-53.465	48.417	61.268	0.16074	0.070801	0.021191
2.356	-21.595	37.1907	44.0988	0.055176	0.096191	0.088379	-16.605	-97.378	1625.002	-0.92139	1.1665	0.33643	133.652	-74.991	2070.080685	-2.0576	1.7893	0.084277	-61.002	52.6056	41.408372	0.098338	0.10557	0.042285
2.358	-21.279	36.8961	51.141	0.063965	0.092041	0.083496	-52.1433	-34.297	1629.024	-0.96631	1.2056	0.33154	137.534	-36.186	2024.209	-2.0488	1.7617	0.074219	-64.48	35.3981	56.718	0.043945	0.13232	0.064941
2.36	-25.853	28.8548	53.6839	0.072266	0.097656	0.077637	-100.8685	-79.667	1626.145	-0.99756	1.2251	0.3335	160.788	-50.7403	1984.41	-2.025	1.7293	0.058984	-104.51914	8.0967	60.463	-0.0070314	0.16338	0.09551
2.362	-21.969	23.6943	84.991	0.084961	0.097656	0.069824	-97.511	-83.085	1685.181	-1.0757	1.2603	0.33984	165.636	17.568	1963.398	-1.9894	1.6957	0.041699	-83.8071	14.8813	51.878	-0.05166	0.18965	0.12539
2.364	-26.064	31.5659	65.148	0.095215	0.09375	0.067871	-88.868	-78.701	1689.288	-1.1286	1.2834	0.34668	70.553	55.081	1974.755	-1.9512	1.6641	0.032227	-72.207	-14.77987	63.9707	-0.091113	0.21895	0.15078
2.366	-11.27	37.3541	50.4964	0.10498	0.092773	0.064941	-60.031	-155.379	1721.9276	-1.1758	1.3066	0.35303	-18.018	117.474	1958.16624	-1.9011	1.6329	0.019141	-68.887	23.07701	38.8746	-0.12129	0.24023	0.17959
2.368	-20.583	36.9532	39.4307	0.11499	0.093506	0.056397	-10.021	-129.97	1781.962	-1.2339	1.3481	0.36523	-87.39	86.7731	1962.17025	-1.8597	1.6059	0.014453	-55.417	39.51	16.858	-0.14355	0.25635	0.20557
2.37	-30.572	36.6257	34.834	0.12207	0.091309	0.053711	-9.126	-157.447	1775.441	-1.2617	1.3691	0.37646	-113.782	53.179	1941.443	-1.8219	1.5797	0.012109	-84.385	65.582	28.344	-0.15625	0.26728	0.23076
2.372	-53.352	35.1731	36.607	0.13135	0.085938	0.053711	-41.438	-181.773	1832.3316	-1.3242	1.416	0.43213	-127.204	-9.2561	1942.9893	-1.7936	1.5521	0.019043	-81.449	60.673	23.002	-0.1627	0.27158	0.24756
2.374	-45.518	25.922	49.23	0.13916	0.083984	0.052246	-85.895	-131.567	1866.9919	-1.3863	1.4478	0.50684	-139.613	-12.1817	1972.045	-1.7793	1.5313	0.024414	-71.629	39.037	46.7416	-0.16075	0.26612	0.2663
2.376	-38.745	19.405	52.4613	0.14844	0.077637	0.044922	-117.886	-184.898	1871.211	-1.4722	1.4741	0.5752	-188.309	3.648	1977.495	-1.771	1.51	0.031543	-45.239	29.978	65.591	-0.15401	0.25439	0.27266
2.378	-56.745	26.9303	62.37855	0.15552	0.073242	0.047119	-129.89	-191.648	1930.102	-1.6304	1.5063	0.63672	-194.304	22.444	1938.873	-1.7672	1.4918	0.044336	-51.932	1.5353	62.468	-0.146	0.25049	0.28906
2.38	-71.2003	36.384	66.38	0.15576	0.064941	0.043457	-169.8406	-153.8034	1933.543	-1.7046	1.5259	0.66211	-143.496	-15.84955	1904.165	-1.7536	1.4867	0.054492	-62.316	1.98721	45.6394	-0.13467	0.23877	0.29297
2.382	-88.69084	33.932	60.6184	0.16162	0.057129	0.043945	-175.278	-168.695	1925.228	-1.8477	1.5469	0.71924	-67.769	-53.35	1857.649	-1.7418	1.4758	0.063281	-52.364	18.1858	48.471	-0.1248	0.22109	0.29278
2.384	-46.825	47.181	43.29724	0.15918	0.056641	0.049316	-160.6496	-73.327	1926.0281	-1.9478	1.563	0.74903	2.1183	-72.518	1837.2218	-1.7202	1.4731	0.073242	-47.527	29.06	79.2162	-0.11231	0.20196	0.28652
2.386	-67.215	45.3612	48.347	0.16162	0.053223	0.050781	-190.589	-43.252	1872.488	-2.043	1.5752	0.78369	51.262	-2.25	1832.452	-1.705	1.4661	0.085157	-32.486	-21.934	140.3862	-0.094924	0.18086	0.2791
2.388	-57.134	47.1666	51.09	0.16724	0.049804	0.052735	-193.916	-44.13	1874.619	-2.1484	1.5859	0.82666	8.01	98.408	1801.3964	-1.6852	1.4629	0.098145	-70.28	-81.777	253.47	-0.069336	0.15918	0.27588
2.39	-75.0873	12.381	95.894	0.1665	0.055176	0.054199	-137.14	19.4659	1870.227	-2.1953	1.5898	0.854	36.314	186.876	1766.0206	-1.6641	1.4598	0.10908	-95.043	-155.786	391.6094	-0.046094	0.14424	0.26221
2.392	-59.8	-28.078	139.549	0.16113	0.064453	0.050293	-110.886	-9.01216	1869.343	-2.2568	1.5977	0.88721	52.044	206.595	1709.265	-1.6444	1.4528	0.12168	-118.567	-275.886	574.902	-0.023242	0.1288	0.25234
2.394	-50.389	-62.1284	200.144	0.15967	0.07373	0.049805	-64.416	19.6561	1934.1165	-2.281	1.595	0.90576	91.678	215.825	1640.4167	-1.6211	1.4473	0.13232	-150.762	-362.693	732.099	0.00019536	0.12451	0.24414
2.396	-76.823	-76.198	288.442	0.14355	0.09668	0.046387	-75.233	80.502	1940.6205	-2.2808	1.5942	0.92383	111.662	236.16	1617.17	-1.5944	1.4394	0.14258	-175.508	-474.623	798.463	0.02041	0.12558	0.23418
2.398	-79.034	-121.805	365.32341	0.1206	0.1333	0.040527	-96.187	21.13	1949.387	-2.2632	1.5864	0.93945	138.076	250.74	1613.753	-1.5667	1.4302	0.1544	-151.313	-446.229	822.984	0.031738	0.14307	0.22803
2.4	-117.817	-189.298	434.4386	0.077637	0.17529	0.03125	-117.361	47.2196	1968.974	-2.2476	1.5845	0.94531	106.815	247.4	1572.295	-1.537	1.4138	0.16455	-175.011	-364.083	900.687	0.021778	0.18584	0.1959
2.402	-143.907	-198.569	450.2536	-0.0039063	0.23828	0.049316	-133.968	14.232	1953.971	-2.2144	1.5708	0.94336	115.277	204.017	1541.543	-1.5038	1.3947	0.17529	-300.828	-220.1888	982.065	-0.0033202	0.26465	0.18389
2.404	-150.527	-167.05	479.45498	-0.04834	0.27148	0.0625	-103.875	-25.7275	1963.966	-2.1934	1.5596	0.93409	149.027	174.675	1501.421	-1.4683	1.3706	0.17773	-306.879	-111.128	1047.90973	-0.063477	0.36621	0.18037
2.406	-138.209	-121.416	527.6769	-0.17139	0.33154	0.11035	-73.033	26.5549	1963.534	-2.1694	1.5493	0.93262	176.398	145.539	1472.3396	-1.4249	1.3434	0.18213	-216.27	-66.107	1128.3186	-0.15137	0.46435	0.19463
2.408	-131.237	-81.019	574.0487	-0.27807	0.38256	0.14648	-101.329	-16.861	1960.5585	-2.1523	1.5215	0.9292	175.796	161.908	1436.05874	-1.3731	1.3144	0.18399	-132.951	-48.35	1221.887	-0.25537	0.54932	0.2334
2.41	-132.896	-46.9013	606.513	-0.39014	0.43604	0.18359	-86.099	-19.6832	1984.4928	-2.1421	1.5083	0.91406	132.681	181.52	1445.845	-1.3191	1.2832	0.18008	-85.581	-65	1348.33	-0.37803	0.6169	0.28105
2.412	-72.847	-11.109	646.393	-0.54004	0.51074	0.23193	-78.963	12.515	1968.03758	-2.1255	1.479	0.9043	53.8181	223.224	1402.829	-1.2568	1.2485	0.17285	-71.1665	-38.12	1456.44	-0.50694	0.68916	0.33096
2.414	-34.865	13.621	712.9075	-0.60986	0.5542	0.25195	-77.376	-12.157	1959.916	-2.1123	1.458	0.89502	33.651183	230.325	1396.153	-1.1987	1.2173	0.16553	-102.9538	-25.101	1531.2432	-0.64404	0.76338	0.3665
2.416	-15.046	47.555	811.891	-0.74561	0.64307	0.29639	-31.245	73.64	1953.059	-2.0972	1.436	0.88477	14.271	240.0073	1350.48	-1.1372	1.1849	0.15742	-139.08	35.891	1591.74	-0.77822	0.8583	0.40156
2.418	-30.939	100.481	871.366	-0.87061	0.73682	0.33154	-38.791	118.89	1913.314	-2.0698	1.4136	0.87305	-46.695	210.6801	1309.962	-1.083	1.1512	0.15508	-129.985	-20.43	1637.1	-0.90527	0.9707	0.43896
2.42	-44.899	137.309	934.981	-0.93311	0.7915	0.34766	-42.158	142.98688	1899.42746	-2.0515	1.3947	0.85962	-96.5399	242.733	1232.179	-1.0315	1.1121	0.15586	-196.785	-53.99	1672.788	-1.0479	1.1174	0.48955
2.422	-43.472	140.324	989.92	-1.0527	0.89453	0.3833	-51.125	211.75	1896.171	-2.0332	1.3789	0.854	-156.124	264.397	1200.3188	-0.98291	1.0784	0.15391	-230.5834	-157.49	1712.961	-1.21	1.2739	0.56211
2.424	-75.388	112.8215	1045.785	-1.1374	0.97143	0.41309	-91.462	165.485	1888.9605	-2.0073	1.3657	0.84375	-200.425	337.879	1118.6363	-0.93359	1.041	0.14893	-286.495	-259.54	1743.851	-1.4011	1.4283	0.64336
2.426	-101.936	61.858	1102.592	-1.2241	1.0415	0.43555	-83.872	146.712	1909.8496	-1.9961	1.3613	0.84131	-189.326	313.457	1084.3801	-0.88877	0.9956	0.15556	-289.097	-351.829	1813.5656	-1.6109	1.565	0.72969
2.428	-129.903	-18.219	1187.433	-1.3311	1.1172	0.45557	-113.2496	158.922	1880.806	-1.9683	1.3579	0.83398	-164.744	283.4245	1029.4224	-0.83955	0.95556	0.15108	-224.463	-457.434	1857.401	-1.8296	1.6665	0.82617
2.43	-93.4204	-79.414	1242.8975	-1.3789	1.1465	0.46777	-128.366	120.58	1836.055	-1.9502	1.3492	0.82422	-167.153	215.237	977.918	-0.78916	0.90674	0.14951	-89.1982	-482	1826.116	-2.0713	1.7185	0.91514
2.432	-108.799	-136.5225	1284.5771	-1.4805	1.168	0.4917	-107.23	170.623	1821.623	-1.9277	1.3438	0.80811	-137.926	228.355	910.014	-0.7458	0.85576	0.14746	25.613	-515.6	1775.81551	-2.2792	1.7427	0.98281
2.434	-86.656	-173.915	1311.433	-1.5418	1.1795	0.5066	-124.3856	160.2017	1789.574	-1.8848	1.3359	0.78564	-132.371	233.199	876.679	-0.70215	0.79883	0.13965	72.111	-432.85	1800.96	-2.4171	1.7392	1.0332
2.436	-42.7929	-202.156	1323.3592	-1.5854	1.1851	0.51953	-105.941	116.406	1812.758	-1.8569	1.3267	0.77148	-122.432	288.743	805.269	-0.65703	0.75977	0.13105	104.095	-367.3	1910.17	-2.4543	1.7258	1.0645
2.438	14.51	-216.585	1348.1053	-1.5913	1.1802	0.52246	-73.117	130.97	1822.946	-1.7988	1.2959	0.7251	-138.537	244.957	797.05	-0.61446	0.72071	0.12451	87.694	-280.448	2007.505	-2.3984	1.709	1.0669
2.44	55.6978	-215.158	1384.237	-1.5718	1.1704	0.51953	-83.382	80.749	1810.461	-1.7454	1.2717	0.69116	-104.4596	219.071	749.473	-0.56797	0.68164	0.12139	111.8871	-222.7914	2047.48	-2.2336	1.7093	1.0388
2.442	48.792	-189.323	1449.021	-1.4922	1.1504	0.50439	-52.086	108.708	1807.962	-1.6855	1.2402	0.65088	-107.4616	152.126	704.355	-0.52598	0.64355	0.11787	68.879	-181.586	2037.418	-2.012	1.7122	0.99043
2.444	40.8388	-169.633	1472.986	-1.4004	1.1289	0.48584	-52.196	166.856	1762.6354	-1.605	1.1997	0.60547	-40.48	187.6741	659.8784	-0.479	0.60742	0.11133	6.963	-156.69	1971.374	-1.7686	1.7087	0.93145
2.446	19.484	-156.315	1472.136	-1.2969	1.1074	0.45508	-90.542	156.535	1713.864	-1.5605	1.1738	0.58545	-29.363	179.606	645.823	-0.42119	0.57295	0.10674	-94.624	-123.68	1941.272	-1.5707	1.6789	0.87158
2.448	0.110999999999997	-126.8421	1443.0821	-1.1465	1.0859	0.40527	-60.959	217.731	1679.224	-1.4761	1.1333	0.54053	-17.543	214.823	553.4929	-0.35449	0.53818	0.09336	-196.782	-71.34	1915.9091	-1.4355	1.6367	0.8208
2.45	-23.25	-75.256	1416.898	-1.0796	1.0757	0.38965	-82.2899	218.156	1621.406	-1.4204	1.0996	0.51171	-6.504	182.818	511.3861	-0.27793	0.49834	0.082032	-223.5077	-99.39	1885.3583	-1.3676	1.5803	0.76943
2.452	-36.541	-28.528	1402.045	-0.97217	1.063	0.35889	-93.0147	180.164	1615.6867	-1.3687	1.0659	0.48633	61.683	169.832	421.304	-0.20019	0.4582	0.066797	-176.9491	-132.058	1851.404	-1.3241	1.5181	0.74258
2.454	-61.559	-16.34	1412.792	-0.92066	1.0589	0.34497	-60.743	225.836	1598.5514	-1.3086	1.0195	0.46143	91.829	119.036	373.015	-0.12598	0.41602	0.054199	-110.723	-198.3494	1857.325	-1.3101	1.4634	0.7207
2.456	-87.207	-43.923	1427.748	-0.89404	1.0591	0.33887	-63.277	195.609	1554.9842	-1.2832	0.99316	0.44287	127.8136	154.428	342.98	-0.061328	0.37705	0.036719	-48.325	-221.369	1915.034	-1.3217	1.4491	0.70097
2.458	-77.469	-67.359	1439.435	-0.89893	1.0747	0.35156	-33.175	213.092	1507.581	-1.2285	0.94922	0.42041	83.019	160.04	317.434973	-0.0013672	0.33779	0.029297	-2.19	-215.814	1983.597	-1.3613	1.4688	0.67627
2.46	-42.365	-115.8937	1458.336	-0.91113	1.082	0.35254	-5.514	232.9117	1433.658	-1.1962	0.90234	0.40259	55.363	215.9276	268.6553	0.050977	0.30146	0.020703	-47.922	-191.429	2069.7956	-1.4097	1.5214	0.667
2.462	-12.897	-142.153	1502.102	-0.96045	1.1157	0.37695	-18.828	163.468	1400.437	-1.1597	0.8667	0.38379	12.314	174.528	256.7553	0.097557	0.26728	0.013867	-141.336	-155.069	2106.164	-1.4652	1.5789	0.67627
2.464	-19.851	-161.415	1546.016	-0.99949	1.1328	0.40185	2.788	183.752	1382.6362	-1.1133	0.81445	0.36182	24.798	174.5579	209.7802	0.1333	0.23828	0.0048828	-193.4556	-186.067	2147.122	-1.5305	1.6403	0.7001
2.466	-58.38	-177.773	1565.208	-1.0469	1.1523	0.42432	17.715	199.3401	1361.702	-1.0859	0.78711	0.35205	-29.55	144.921	198.0277	0.15869	0.21182	0.002832	-294.589	-188.386	2158.838	-1.608	1.6869	0.74697
2.468	-86.435	-186.348	1573.354	-1.103	1.1899	0.45068	-3.38	193.5407	1371.047	-1.0366	0.73682	0.33154	-23.278	183.623	180.3099	0.18096	0.19062	0.0025391	-332.789	-176.966	2183.422	-1.6934	1.7266	0.7876
2.47	-137.86367	-204.307	1609.689	-1.1309	1.2012	0.46143	-8.147	241.444	1330.83	-0.99682	0.70044	0.31665	-94.602	161.858	182.3969	0.19424	0.17344	0.00097656	-351.969	-77.812	2189.241	-1.7935	1.7823	0.81474
2.472	-169.3683	-207.316	1642.972	-1.165	1.2266	0.47314	-50.042	183.3831	1278.0207	-0.95752	0.66504	0.30273	-100.8318	177.779	149.696	0.20459	0.15761	0.0056641	-374.657	-13.817	2128.2646	-1.8925	1.8341	0.83692
2.474	-216.176	-193.803	1653.435	-1.1892	1.2444	0.48902	-52.248	180.56466	1224.3233	-0.90576	0.61963	0.28516	-149.903	100.001	148.001	0.20361	0.14307	0.012207	-369.424	32.626	2019.082	-1.9725	1.8712	0.8498
2.476	-213.4061	-161.007	1619.143	-1.2148	1.2598	0.50732	-50.017	209.78953	1161.887	-0.87695	0.59766	0.2749	-143.8529	73.098	125.26	0.19678	0.13311	0.01709	-338.394	39.241	1952.975	-2.0227	1.8856	0.8501
2.478	-224.047	-126.949	1574.556	-1.2515	1.2876	0.5293	-56.557	175.239	1114.3491	-0.82813	0.54785	0.25488	-153.988	39.519	96.983	0.18496	0.12031	0.020605	-254.522	14.2795	1964.627	-2.0586	1.877	0.85205
2.48	-206.066	-91.63	1564.421	-1.2769	1.3013	0.54688	-21.568	219.663	1071.3608	-0.78809	0.51465	0.24292	-124.469716	80.326	97.5014	0.16582	0.10312	0.036621	-131.949	61.152	1997.418	-2.0659	1.8571	0.84805
2.482	-196.329	-78.09	1588.685	-1.3398	1.3301	0.56982	-39.941	227.679	1012.5505	-0.74805	0.48438	0.23779	-192.879	86.17	115.1014	0.15137	0.094043	0.041601	-66.06	74.736	2034.475	-2.0617	1.8328	0.85205
2.484	-171.083	-74.4541	1604.792	-1.3921	1.354	0.58105	-39.464	217.5388	976.7619	-0.70068	0.44385	0.22803	-182.627	117.732	96.4161	0.13477	0.078613	0.048828	-88.669	129.825	2018.116	-2.0461	1.8172	0.85283
2.486	-112.53	-53.2378	1603.576	-1.4492	1.3828	0.60303	-9.866	266.845	921.551	-0.6792	0.42627	0.22266	-189.828	75.346	105.6731	0.1168	0.072461	0.059472	-90.17	150.738	1977.5185	-2.0221	1.8131	0.85811
2.488	-132.834	-23.2155	1626.356	-1.5308	1.4194	0.62305	-50.92	221.498	886.1638	-0.63379	0.38672	0.20947	-154.675	75.3905	93.488	0.099314	0.066211	0.070801	-129.059	164.8687	1985.337	-1.999	1.8066	0.85986
2.49	-136.763	6.2162	1645.5601	-1.5713	1.4336	0.63135	-36.317	232.094	868.42	-0.59692	0.35644	0.19702	-141.227	45.97	90.1897	0.077442	0.063086	0.08252	-119.341	178.793	2017.501	-1.9723	1.7961	0.85967
2.492	-131.025	-0.0609999999999999	1660.779	-1.6411	1.4673	0.65527	-52.726	254.3757	810.0409	-0.56055	0.33057	0.18896	-114.3457	74.307	97.3685	0.057226	0.062695	0.091699	-139.707	130.001	2044.376	-1.9519	1.7787	0.85976
2.494	-136.053	-18.923	1664.8207	-1.6945	1.4846	0.66919	-84.2467	224.9037	763.489	-0.50537	0.29443	0.17188	-114.814	43.145	95.58	0.03418	0.064941	0.10254	-99.861	123.158	2024.751	-1.9331	1.7583	0.85976
2.496	-158.341	-57.2691	1666.243	-1.7383	1.4961	0.68213	-41.577	264.589	719.153	-0.4834	0.27539	0.16309	-67.928	49.8991	68.2453	0.015039	0.064258	0.11279	-107.513	79.335	1958.8	-1.9217	1.7392	0.85391
2.498	-146.969	-110.45	1681.5321	-1.769	1.5083	0.68945	-63.7169	237.796	661.3233	-0.42969	0.24023	0.146	-33.28	-3.5907	75.721	-0.006543	0.063574	0.12275	-102.735	79.128	1919.199	-1.9199	1.7266	0.84814
2.5	-124.676	-122.8237	1699.0556	-1.7793	1.5137	0.68799	-66.864	198.51674	634.668	-0.39233	0.21753	0.13134	19.038	-1.707	58.101	-0.028418	0.062012	0.12783	-40.002	75.537	1913.811	-1.9121	1.7174	0.83115
2.502	-112.659	-121.28816	1693.8927	-1.7656	1.5156	0.68506	-36.063	223.0014	600.0919	-0.35107	0.18945	0.11523	42.165	-18.0833	60.9466	-0.052246	0.060352	0.13194	-34.198	93.885	1884.123	-1.8922	1.6989	0.80635
2.504	-109.823	-106.927	1695.0776	-1.7475	1.5112	0.67968	-49.166	175.902	570.7481	-0.29492	0.15918	0.093262	62.468	12.2037	65.0951	-0.074707	0.061523	0.14844	15.138	116.03	1826.872	-1.8652	1.6836	0.78095
2.506	-63.922	-97.095	1692.0838	-1.7285	1.5059	0.67285	-7.992	179.494	558.0935	-0.27148	0.14746	0.088867	62.166	3.4177	61.4325	-0.10166	0.060644	0.15557	10.846	163.53	1782.1657	-1.8318	1.6635	0.75341
2.508	-70.151	-74.852	1695.7308	-1.7031	1.5	0.6626	-9.863	182.717	520.5674	-0.22363	0.125	0.071289	91.7671	23.9533	64.1532	-0.12266	0.062695	0.16641	-4.92	236.137	1754.6044	-1.7988	1.6426	0.72998
2.51	-53.696	-33.8901	1700.368	-1.6914	1.4941	0.66357	-27.168	145.496	464.9309	-0.19116	0.10303	0.059327	93.6943	-25.8048	66.2023	-0.13789	0.062305	0.17617	-46.551	265.406	1738.42	-1.7567	1.6159	0.69903
2.512	-59.475	5.383	1688.678	-1.6772	1.4741	0.66016	8.122	187.5782	417.729	-0.15918	0.087891	0.046875	56.573	-21.913	56.098	-0.14668	0.06543	0.18428	-78.61	316.047	1719.943	-1.7092	1.5872	0.66953
2.514	-68.36	31.2492	1689.2052	-1.6753	1.4634	0.66308	-17.285	192.7984	372.111	-0.12549	0.067383	0.030762	71.283	-20.0404	38.7976	-0.15723	0.063965	0.18994	-134.7678	317.447	1648.738	-1.6648	1.5497	0.6457
2.516	-102.285	50.848	1692.3106	-1.6777	1.4473	0.66357	-35.52	178.5327	362.0079	-0.11279	0.061523	0.022461	18.911	26.6324	49.8787	-0.15606	0.061914	0.19013	-199.83	327.425	1588.498	-1.6106	1.5108	0.61894
2.518	-122.63	57.453	1652.771	-1.6733	1.4321	0.66797	-15.862	199.32	359.8173	-0.08252	0.044434	0.0092773	-2.495	56.751	32.15	-0.14551	0.05752	0.19297	-208.575	339.99	1542.877	-1.5586	1.4629	0.59814
2.52	-161.5584	51.8623	1645.568	-1.6733	1.4243	0.66992	-40.805	162.722	337.10548	-0.06543	0.032226	-0.0004883	-21.221	73.253	45.590424	-0.13262	0.049707	0.19414	-251.999	323.855	1517.631	-1.5029	1.4072	0.57255
2.522	-149.2879	54.692786	1629.182	-1.668	1.4121	0.67529	3.14299999999999	167.328	314.3722	-0.049805	0.020996	-0.0097656	-32.95	43.1052	24.823	-0.10518	0.040039	0.18438	-210.17	314.683	1489.709	-1.4473	1.3567	0.54131
2.524	-170.8347	55.4494	1657.195	-1.657	1.3982	0.67603	-8.232	151.465	269.507	-0.029297	0.0087891	-0.019531	-74.603	26.7765	17.947	-0.072754	0.032227	0.17969	-204.301	215.792	1424.036	-1.3879	1.3051	0.51826
2.526	-158.8837	39.1287	1665.46	-1.6382	1.3872	0.67432	-41.114	111.2432	232.044	-0.022461	0.003418	-0.026855	-68.996	38.13	-4.38	-0.033008	0.02168	0.16562	-175.563	173.695	1357.816	-1.3333	1.2542	0.49825
2.528	-167.5365	-9.01746	1680.875	-1.6191	1.3691	0.67041	-5.159	131.2345	196.7904	-0.0024414	-0.0058594	-0.043945	-115.368	47.5137	27.38	0.0076171	0.0086914	0.14893	-137.9406	149.34	1322.622	-1.2798	1.1997	0.47412
2.53	-144.0973	-35.908	1668.923	-1.603	1.3638	0.66992	-22.238	118.0355	154.42	0.0095214	-0.018555	-0.05835	-115.611	58.3184	30.161	0.049805	-0.00029294	0.13604	-81.789	207.34	1303.8474	-1.2262	1.1492	0.44366
2.532	-144.2263	-47.788	1643.7545	-1.5737	1.3481	0.65869	-9.429	98.8742	162.376	0.022949	-0.027344	-0.066406	-145.057	46.2129	46.1637	0.091407	-0.0077147	0.12392	-70.506	268.788	1284.78	-1.1738	1.0935	0.4166
2.534	-130.336	-41.602	1643.6988	-1.5508	1.3291	0.65284	-8.663	90.6071	164.744	0.044434	-0.039551	-0.078613	-171.096	32.595	37.841	0.13037	-0.018066	0.11475	-103.273	293.265	1237.119	-1.1129	1.042	0.38847
2.536	-128.1151	-26.35	1645.8271	-1.5225	1.3105	0.64307	-59.613	47.009	155.6348	0.052246	-0.040039	-0.086914	-196.003	41.5545	46.1335	0.16084	-0.030567	0.099024	-92.261	299.795	1143.287	-1.0538	0.99034	0.36689
2.538	-132.969	1.907	1637.8955	-1.4917	1.2856	0.62891	-43.773	60.006	152.6888	0.071777	-0.047363	-0.104	-161.01	57.544	51.7563	0.19521	-0.042383	0.089551	-134.5901	294.997	1049.6575	-0.99414	0.94531	0.34326
2.54	-124.0633	38.2489	1611.2282	-1.478	1.2769	0.61914	-60.77	83.5184	119.132	0.084473	-0.058594	-0.11353	-179.346	70.632	93.3819	0.22295	-0.051367	0.083301	-124.9715	346.72	977.6878	-0.93252	0.90088	0.31797
2.542	-136.3306	53.695	1601.1368	-1.4409	1.2524	0.60547	-89.4536	72.0589	117.0877	0.096191	-0.063477	-0.12109	-144.674	68.6634	64.4873	0.24766	-0.063575	0.072851	-108.182	362.17	944.878	-0.87227	0.85547	0.304
2.544	-132.6005	76.547	1567.6174	-1.4101	1.2382	0.5918	-42.479	74.213	114.7157	0.10059	-0.067871	-0.13232	-128.29	34.8585	72.9877	0.27051	-0.077637	0.066895	-85.876	373.12	863.7021	-0.81875	0.81055	0.28408
2.546	-117.8779	103.361	1549.78222	-1.3809	1.2207	0.57715	-71.133	53.277	67.7816	0.104	-0.070801	-0.13574	-90.4457	14.75	58.2612	0.30078	-0.085449	0.055567	-50.903	308.374	775.209	-0.76514	0.76807	0.26738
2.548	-107.574	137.102	1522.8133	-1.3359	1.1973	0.56006	-78.244	27.9387	65.0486	0.1001	-0.07666	-0.14746	-74.328	-2.297	62.47672	0.33067	-0.097461	0.046387	-16.159	258.7947	677.732	-0.71484	0.72266	0.25732
2.55	-75.477	133.495	1486.52	-1.3061	1.1826	0.54248	-38.205	50.3416	58.38	0.09375	-0.080078	-0.14941	-24.819	36.035	63.985	0.35293	-0.10605	0.037793	49.856	249.158	639.714	-0.65722	0.67891	0.23584
2.552	-57.455	111.792	1475.688	-1.2808	1.1665	0.5293	-72.1364	24.778	53.8843	0.086426	-0.082031	-0.15479	-23.749	51.038	89.3759	0.37627	-0.1126	0.027148	46.13	256.524	623.856	-0.59844	0.63281	0.22217
2.554	-35.309	95.1738	1469.424	-1.252	1.1416	0.51416	-31.842	36.095	63.0486	0.071289	-0.086426	-0.14697	30.764	86.622	75.2813	0.39893	-0.12207	0.015625	80.353	291.121	604.196	-0.54062	0.58594	0.2042
2.556	-28.635	79.427	1465.0798	-1.2422	1.1309	0.51025	-41.827	47.95	18.869	0.066163	-0.079589	-0.15259	32.108	57.651	98.1324	0.41221	-0.13321	0.0030273	29.305	268.1302	514.945	-0.47754	0.5374	0.18623
2.558	-16.872	75.914	1445.3604	-1.2129	1.1113	0.49756	-57.663	22.146	32.5035	0.058105	-0.07959	-0.15723	48.746	37.3154	98.451	0.42061	-0.13584	-0.0078125	-6.16799999999999	245.0647	462.5837	-0.41016	0.49707	0.16602
2.56	-23.12	63.086	1439.8557	-1.1892	1.1008	0.48706	6.668	27.392	46.4894	0.044922	-0.079102	-0.15283	41.085	-5.297	82.127	0.43115	-0.13936	-0.010546	-48.797	194.78	423.265	-0.34531	0.45469	0.14092
2.562	-30.86	73.9372	1437.343	-1.1655	1.0894	0.47949	-40.558	24.6146	42.464	0.041992	-0.07666	-0.15186	83.2761	29.6681	69.294	0.43077	-0.14307	-0.018945	-113.623	171.7759	416.949	-0.2793	0.41553	0.11797
2.564	-41.14	55.675496	1415.814	-1.1309	1.0664	0.4668	-36.692	17.4199	53.286	0.029785	-0.077148	-0.15088	51.161	-0.0919999999999987	75.26154	0.42334	-0.14648	-0.021484	-114.0171	176.4492	394.825	-0.20742	0.37569	0.086328
2.566	-71.958	36.544	1393.827	-1.1157	1.0532	0.46094	-16.981	37.366	41.28725	0.026855	-0.073486	-0.15259	62.356	13.8781	62.0937	0.4084	-0.14238	-0.019433	-128.315	183.864	333.3492	-0.13994	0.34062	0.061133
2.568	-74.881	34.763	1356.167	-1.082	1.0342	0.4458	-47.663	28.2754	35.3974	0.024902	-0.072754	-0.15332	42.591	-27.1982	58.135	0.38701	-0.13858	-0.02207	-111.116	197.5722	282.804	-0.080078	0.30322	0.036621
2.57	-92.9	57.027	1341.2736	-1.0593	1.0158	0.43677	-19.243	21.16817	44.42516	0.024902	-0.072754	-0.15674	35.118	-5.153	35.7781	0.36787	-0.13154	-0.019726	-120.3398	189.3719	236.441	-0.023828	0.26797	0.011328
2.572	-74.049	85.967	1311.32835	-1.0327	0.99951	0.42578	-32.268	25.1494	26.264	0.019531	-0.074219	-0.15723	-1.462	-15.6594	44.5825	0.34258	-0.12305	-0.01377	-91.585	179.707	200.0262	0.02373	0.22754	-0.012695
2.574	-95.983	101.588	1268.369	-1.002	0.97852	0.4126	-38.37	11.135	39.007	0.021973	-0.075684	-0.15527	-3.725	23.245	52.1245	0.31201	-0.11182	-0.0087891	-99.755	142.884	162.08883	0.071778	0.19238	-0.026758
2.576	-80.19	134.2484	1226.962	-0.98438	0.95898	0.40869	1.61	23.3719	47.1532	0.020996	-0.079102	-0.15455	-63.963	9.8714	55.379	0.28603	-0.092773	-0.0018555	-124.0096	129.859	121.84	0.11211	0.15869	-0.054981
2.578	-77.618	157.279	1198.935	-0.95117	0.93164	0.39746	-41.908	32.1513	27.9552	0.022461	-0.079102	-0.1582	-84.667	37.0576	49.477	0.24922	-0.08125	0.0058594	-108.6204	106.572	95.213	0.13672	0.12402	-0.071289
2.58	-77.401	161.978	1179.791	-0.92822	0.90967	0.38965	-34.802	18.38	43.941	0.032227	-0.094238	-0.1626	-90.3161	7.7403	37.718	0.21953	-0.061719	0.015235	-107.5941	92.722	81.31	0.15801	0.091601	-0.086523
2.582	-98.46	165.051	1161.7167	-0.90625	0.88086	0.37939	7.747	43.9424	40.152	0.035645	-0.094727	-0.15771	-113.6038	23.93	33.9039	0.18379	-0.046582	0.026562	-100.29117	104.3407	80.01	0.17325	0.061621	-0.10254
2.584	-111.5052	153.434	1146.256	-0.875	0.85156	0.36572	-45.136	43.3947	44.8929	0.049805	-0.099121	-0.1543	-153.62	-0.753	23.6	0.15674	-0.030762	0.036133	-131.973	80.734	107.536	0.18261	0.021777	-0.11465
2.586	-111.1094	152.053	1105.0515	-0.85791	0.83643	0.35547	-30.761	44.10783	66.248	0.058593	-0.10156	-0.15991	-146.422	43.1235	21.572	0.12373	-0.017968	0.04668	-139.728	104.783	85.8323	0.19434	-0.0092774	-0.12441
2.588	-120.3377	129.0849	1060.229	-0.82031	0.80566	0.34229	-51.096	51.966	46.6387	0.069824	-0.10498	-0.15918	-194.527	44.271	24.071	0.094043	-0.006836	0.057715	-132.243	79.997	70.3682	0.2002	-0.039551	-0.13379
2.59	-122.6559	126.7274	1045.935	-0.79248	0.77734	0.32959	-69.938	32.5023	49.6192	0.07666	-0.10059	-0.16064	-157.243	92.728	26.215	0.070215	0.0080078	0.06709	-90.9122	65.39675	51.2822	0.20703	-0.065918	-0.1415
2.592	-118.4975	123.7307	1021.683	-0.76563	0.75098	0.3208	-44.776	40.6377	49.2328	0.077637	-0.10352	-0.15576	-135.008	65.56	24.919	0.050879	0.020508	0.078418	-68.822	40.712	66.364	0.20782	-0.092871	-0.15039
2.594	-98.9978	124.6484	1007.7041	-0.73438	0.71875	0.3042	-88.712	35.4566	31.791	0.077637	-0.099121	-0.16016	-141.964	70.51972	35.855	0.030762	0.033203	0.089844	-45.304	-7.456	79.738	0.20586	-0.12022	-0.15899
2.596	-78.08456	101.633	986.0122	-0.71875	0.7041	0.29736	-56.341	19.845	53.4602	0.069824	-0.091309	-0.15333	-141.859	25.725	29.0953	0.011426	0.050977	0.093847	46.112	-38.5794	39.178	0.20401	-0.13555	-0.16328
2.598	-66.295	102.502	974.222	-0.69092	0.67236	0.28174	-39.889	36.5311	33.085	0.059082	-0.083496	-0.14551	-103.59203	44.695	52.2192	-0.0053712	0.067285	0.10205	40.045	-56.8514	0.0960000000000001	0.1958	-0.14941	-0.16357
2.6	-32.34	106.358	958.931	-0.66968	0.64526	0.27026	-85.2195	31.777	25.376	0.039063	-0.075195	-0.13379	-89.3325	26.857	70.8198	-0.021778	0.086426	0.11338	59.257	-23.338	6.1891	0.18155	-0.16318	-0.1665
2.602	-28.741	122.573	930.138	-0.64893	0.62061	0.25684	-36.521	30.8614	64.6659	0.028809	-0.061035	-0.12744	-48.337	50.7753	77.6036	-0.039649	0.096777	0.11826	64.593	19.997	45.715	0.16094	-0.16484	-0.1627
2.604	-12.559	141.9623	903.3984	-0.61914	0.58691	0.23975	-43.161	40.4929	63.7679	0.003418	-0.052246	-0.11523	-1.378	32.8615	89.648	-0.056152	0.104	0.12646	40.192	77.504	64.878	0.13359	-0.16836	-0.15839
2.606	-19.225	148.37938	857.2738	-0.60352	0.57227	0.23389	-51.456	17.513	59.088	-0.023193	-0.035644	-0.096678	-16.417	57.186	79.045	-0.069824	0.10782	0.13428	28.128	95.448	67.522	0.096682	-0.16728	-0.14824
2.608	-12.633	155.295	823.61	-0.57031	0.54102	0.21338	-22.437	16.2918	73.81	-0.041504	-0.026855	-0.084961	-3.923	52.785	59.7183	-0.08457	0.11319	0.14541	-11.244	89.858	48.385	0.057129	-0.15674	-0.13721
2.61	-39.573	172.976	793.17	-0.54712	0.5188	0.20264	-82.8875	15.4054	44.26	-0.062012	-0.0058594	-0.069336	36.93	76.556	68.2912	-0.091992	0.1167	0.1501	-13.661	57.33	57.564	0.0087889	-0.14941	-0.12393
2.612	-32.947	179.705	763.2043	-0.52734	0.49805	0.18848	-44.188	22.9425	61.9837	-0.071777	0.00048828	-0.066406	39.273	36.9085	81.896	-0.097363	0.11807	0.15869	-53.484	37.2317	50.922	-0.035449	-0.13701	-0.1083
2.614	-5.41699999999999	187.689	732.7578	-0.50195	0.47119	0.17578	-13.034	37.695	52.708	-0.075684	0.011719	-0.053223	41.676	38.217	91.339	-0.096191	0.11914	0.16943	-45.557	37.588	40.1329	-0.080762	-0.12373	-0.097753
2.616	-19.489	190.695	701.4377	-0.48828	0.45898	0.16797	-62.048	29.1544	44.0161	-0.076416	0.020997	-0.049316	89.83168	22.3923	81.7939	-0.093164	0.12344	0.18057	-55.041	28.5119	33.92	-0.11631	-0.11152	-0.08877
2.618	-25.519	152.274	679.1959	-0.46387	0.43652	0.14941	-13.846	16.8159	51.703555	-0.070801	0.029785	-0.050293	64.449	30.7954	88.3424	-0.084765	0.12617	0.19062	-34.159	41.983	29.3	-0.13818	-0.10156	-0.078125
2.62	-31.193	130.9477	680.3127	-0.44458	0.41699	0.13916	-20.905	32.544	30.998	-0.061035	0.040039	-0.056152	51.47	15.093	70.113	-0.080859	0.12929	0.19922	-57.499	26.067	21.926	-0.14824	-0.088183	-0.076562
2.622	8.885	120.513	644.0468	-0.42334	0.40479	0.13086	-41.443	17.2775	51.6598	-0.052734	0.044922	-0.060059	17.947	23.6272	85.451	-0.073633	0.1291	0.20947	-52.524	44.783	21.0172	-0.14639	-0.079883	-0.072168
2.624	-35.622	130.9758	635.457	-0.40234	0.37695	0.11133	7.48200000000001	31.355	47.7273	-0.035645	0.050781	-0.069824	18.622	20.8263	76.564	-0.064453	0.13086	0.21143	-84.997	37.093	38.341	-0.13545	-0.069336	-0.075683
2.626	-34.202	127.0489	610.9572	-0.3877	0.37158	0.10986	-26.371	32.871	53.8801	-0.023193	0.054688	-0.074463	-12.844	7.302	121.646	-0.052149	0.12529	0.2207	-148.001	2.511	66.345	-0.12207	-0.057325	-0.074414
2.628	-38.445	100.964	583.6806	-0.36719	0.3501	0.093262	-18.884	6.3614	65.395	-0.010742	0.054199	-0.083984	-21.396	-61.7757	200.889	-0.041699	0.12842	0.22207	-158.696	-3.421	73.0196	-0.10254	-0.050293	-0.078125
2.63	-86.039	112.225	562.597	-0.34717	0.3396	0.089355	4.317	13.4626	34.889	-0.00097656	0.05957	-0.083496	-112.6122	-145.508	312.593	-0.032715	0.13232	0.22207	-170.966	-15.1086	69.914	-0.076563	-0.05166	-0.079883
2.632	-88.508	131.658	546.9593	-0.32666	0.32129	0.081543	-57.321	13.944	31.959	0.0053711	0.061035	-0.086426	-158.915	-191.436	442.762	-0.026855	0.14277	0.22392	-134.7871	7.3563	57.702	-0.050684	-0.055371	-0.090527
2.634	-93.1658	119.4736	528.354	-0.31006	0.30518	0.077148	-27.326	19.57548	49.1533	0.01416	0.059082	-0.097656	-191.2304	-270.3358	584.424	-0.03125	0.16113	0.2207	-146.492	14.7964	75.0575	-0.019043	-0.062793	-0.10615
2.636	-64.1226	115.8814	515.736	-0.29688	0.29688	0.074707	-42.07	34.713	33.7772	0.017334	0.06543	-0.1001	-257.865	-367.14646	671.745	-0.046777	0.19932	0.19902	-168.935	37.7651	71.35	0.0125	-0.068359	-0.12285
2.638	-102.7556	120.0867	469.9463	-0.27783	0.27979	0.068848	-59.154	17.0322	38.87	0.015625	0.068848	-0.10156	-321.2204	-434.552	762.287	-0.078712	0.2582	0.17979	-154.195	71.143	40.469	0.047852	-0.076172	-0.13672
2.64	-93.41047	139.257	453.1061	-0.26343	0.26611	0.060547	-15.276	18.9041	29.0212	0.012207	0.071289	-0.10645	-286.86	-355.338	851.1487	-0.12754	0.34062	0.16025	-97.4194	77.022	18.758	0.086719	-0.085644	-0.15029
2.642	-61.9889	131.657	427.3328	-0.24854	0.25049	0.053223	-55.976	12.71001	23.417	0.01123	0.076172	-0.10645	-334.81	-238.708	971.5852	-0.19951	0.43164	0.16094	-51.46	68.6931	18.738	0.13008	-0.1002	-0.16631
2.644	-53.9971	127.1751	404.8405	-0.22754	0.23145	0.047363	-57.704	2.503	58.442	-0.00048828	0.07666	-0.11084	-364.702	-81.5064	1052.483	-0.28955	0.5249	0.18311	-43.765	30.4324	33.631	0.17578	-0.11504	-0.18232
2.646	-54.588	121.8936	380.886	-0.21533	0.21875	0.040039	-35.293	27.3854	44.9186	-0.0031738	0.077148	-0.11743	-374.161	-73.316	1109.233	-0.40996	0.6125	0.22451	-16.761	17.48	36.7868	0.22617	-0.13486	-0.20625
2.648	-58.786	117.0536	359.938	-0.18896	0.20557	0.029785	-73.4198	29.018	29.6464	-0.0058594	0.077148	-0.12158	-270.596	-71.22	1170.212	-0.54267	0.6958	0.26582	-12.073	-2.995	22.0137	0.27832	-0.15234	-0.229
2.65	-43.84	98.79834	364.512	-0.16724	0.18824	0.019532	-35.708	29.7547	53.4459	-0.0053711	0.071289	-0.12451	-184.372	-94.037	1318.33	-0.69541	0.779	0.30684	12.517	20.4483	5.345	0.33799	-0.16807	-0.24239
2.652	-32.145	110.4735	346.18	-0.146	0.17773	0.011719	-63.007	51.335	22.062	-0.0043945	0.07666	-0.12891	-112.5703	-56.19	1464.412	-0.84746	0.8795	0.3333	27.021	28.9604	44.0027	0.39101	-0.18496	-0.25928
2.654	-34.263	114.018	334.492	-0.12695	0.15771	0.00097656	-71.794	34.0076	41.396	-0.0087891	0.069336	-0.14258	-81.3679	-31.64	1599.401	-1.0073	0.98389	0.36816	25.935	56.1422	72.138	0.43242	-0.19941	-0.27412
2.656	-41.901	101.433	324.302	-0.11816	0.14893	-0.00048828	-40.362	38.6682	40.927	-0.015869	0.07373	-0.14136	-50.01	5.104	1658.294	-1.1633	1.0949	0.40898	28.814	64.5023	66.855	0.47276	-0.20625	-0.28379
2.658	-14.919	83.996	319.909	-0.10596	0.13135	-0.0073242	-84.6408	34.7528	35.3788	-0.01709	0.079102	-0.16162	-55.371	-17.91	1664.3868	-1.3214	1.2055	0.46728	0.563000000000002	51.9563	50.64	0.50586	-0.21387	-0.29053
2.66	-13.153	76.4982	300.735	-0.095214	0.11499	-0.018799	-53.846	9.466	73.59258	-0.019531	0.086426	-0.18115	-94.842	-36.43	1694.577	-1.4917	1.3275	0.53916	-11.366	22.5995	45.519	0.52471	-0.22217	-0.29942
2.662	1.68	78.2501	276.7187	-0.08252	0.097168	-0.022461	-31.041	-8.2693	97.146	-0.025391	0.095703	-0.19727	-79.618	-89.1	1741.394	-1.6864	1.4359	0.61572	-10.689	-3.096	47.743	0.53721	-0.23096	-0.29951
2.664	19.939	53.5639	284.3668	-0.064453	0.081055	-0.038574	-60.737	-53.2402	142.936	-0.041992	0.13184	-0.23584	-61.117	-157.9	1817.916	-1.9004	1.5352	0.70361	20.394	-2.333	49.0412	0.53291	-0.23096	-0.29092
2.666	12.037	23.16	263.5483	-0.050781	0.070801	-0.04248	5.96299999999999	-89.9744	218.5116	-0.070556	0.17602	-0.25439	-53.046	-229.03	1890.8184	-2.121	1.6095	0.78359	-0.265000000000001	0.185000000000002	35.705	0.51875	-0.23242	-0.2794
2.668	21.42	39.846	224.339	-0.035156	0.055664	-0.052734	18.706	-101.067	281.343	-0.11182	0.23535	-0.2627	-61.457	-323.2743	1945.486	-2.3266	1.6492	0.85556	-9.56	17.437	16.176	0.48877	-0.22949	-0.27051
2.67	-12.207	68.4479	218.71	-0.01294	0.046386	-0.060303	25.1105	-154.6608	384.957	-0.20459	0.32178	-0.25732	23.7649	-365.512	1926.181	-2.491	1.6567	0.92471	-12.552	36.473	39.432	0.44111	-0.22168	-0.25605
2.672	-2.278	86.334	209.5748	0	0.036133	-0.071777	99.245	-206.085	492.163	-0.26172	0.36865	-0.25049	147.169	-375.07	1929.001	-2.5734	1.6493	0.9668	-49.084	61.896	47.115	0.3835	-0.20479	-0.23867
2.674	-21.254	76.349	226.383	0.022461	0.022461	-0.07373	56.134	-259.266	559.251	-0.41699	0.45117	-0.21338	247.19	-355.74	1928.7203	-2.5737	1.6372	0.99902	-62.062	74.743	65.778	0.32412	-0.17939	-0.22578
2.676	-27.294	87.254	203.494	0.033691	0.015137	-0.086426	99.093	-293.55	646.5955	-0.5459	0.51465	-0.1792	252.53	-345.94	2004.388	-2.4501	1.6384	0.98848	-108.064	73.1662	72.286	0.25928	-0.15762	-0.1999
2.678	-34.449	85.851	179.9005	0.049316	0.0014648	-0.091309	137.167	-234.6595	696.7588	-0.67334	0.58447	-0.13916	239.39	-302.508	2077.348	-2.2418	1.6485	0.95576	-149.557	58.2816	50.8407	0.19238	-0.12646	-0.18262
2.68	-52.224	76.671	180.9407	0.062012	-0.010742	-0.10059	92.192	-158.627	740.48	-0.84961	0.66211	-0.085938	207.97	-257.603	2107.478	-1.9871	1.6609	0.9081	-181.187	33.09799	34.57	0.12588	-0.099513	-0.16543
2.682	-54.5019	58.3861	173.3093	0.063965	-0.015137	-0.104	125.279	-81.808	767.199	-0.93604	0.70557	-0.05957	160.328	-215.5059	2113.676	-1.7444	1.6669	0.85938	-160.104	25.2842	46.336	0.063769	-0.070605	-0.14844
2.684	-83.5243	60.0229	159.8178	0.077148	-0.030273	-0.10986	117.374	-21.559	759.9273	-1.084	0.79102	-0.016602	71.162	-186.333	2106.881	-1.5586	1.6465	0.79346	-166.8267	12.06	51.3306	0.0043945	-0.039356	-0.12813
2.686	-45.367	65.8066	131.187	0.079101	-0.036621	-0.11865	95.471	-14.396	811.522	-1.1809	0.86352	0.014404	-21.823	-123.201	2054.667	-1.4298	1.616	0.73457	-140.3774	9.075	43.852	-0.056836	-0.0062501	-0.11162
2.688	-51.782	47.124	110.414	0.078125	-0.042969	-0.12256	147.263	30.315	880.373	-1.2642	0.93799	0.041016	-123.2	-100.56	2020.165	-1.3461	1.5773	0.68526	-112.3348	7.154	39.894	-0.11377	0.029785	-0.094238
2.69	-67.6929	40.718	117.532	0.080078	-0.052734	-0.12207	124.296	62.942	940.151	-1.3589	1.0376	0.072266	-157.647	-104.82	2002.177	-1.2902	1.5441	0.64541	-133.276	24.1028	26.67	-0.1628	0.060352	-0.082617
2.692	-94.4127	40.174	120.0949	0.082031	-0.052734	-0.11914	93.004	58.778	983.659	-1.3979	1.0786	0.086426	-228.152	-165.161	2012.325	-1.2614	1.5339	0.60664	-86.6969	32.752	30.29	-0.20029	0.089648	-0.072656
2.694	-79.5005	45.115	129.383	0.081543	-0.055664	-0.11914	101.466	92.34	952.564	-1.4844	1.1641	0.1167	-161.9439	-185.6308	2048.832	-1.252	1.5527	0.57666	-50.761	38.8195	55.262	-0.23154	0.12129	-0.073047
2.696	-67.347	32.83	116.4996	0.07373	-0.055908	-0.11938	47.7847	72.442	942.834	-1.5645	1.2266	0.13232	-121.009	-195.843	2085.465	-1.2681	1.5983	0.55449	-46.949	25.4776	68.395	-0.2461	0.14873	-0.073731
2.698	-75.9242	40.167	114.3908	0.067383	-0.052246	-0.11719	64.622	19.1	1013.065	-1.6074	1.2441	0.14209	-49.403	-173.84	2094.383	-1.2969	1.6547	0.55869	-70.295	11.83531	58.993	-0.24658	0.17236	-0.09082
2.7	-53.255	48.9714	119.4798	0.052246	-0.052246	-0.11182	51.963	-14.99	1058.291	-1.6826	1.2715	0.16553	-65.646	-155.192	2130.041	-1.3426	1.7184	0.59502	-65.028	3.2658	55.6243	-0.23594	0.1957	-0.098829
2.702	-59.22	34.9578	107.1124	0.040039	-0.046875	-0.10693	-27.6513	-144.202	1155.908	-1.7163	1.3003	0.17261	-126.0368	-158.097	2163.352	-1.4302	1.7723	0.63428	-43.218	23.5891	57.2281	-0.20849	0.21377	-0.12168
2.704	-42.341	57.6512	83.2579	0.013672	-0.043457	-0.097656	-39.152	-206.297	1234.2926	-1.7358	1.3208	0.18262	-211.233	-184.509	2205.889	-1.5547	1.832	0.6665	6.285	61.9304	53.0037	-0.1749	0.23057	-0.14473
2.706	-37.947	77.742	74.3203	-0.01001	-0.036621	-0.084716	-97.365	-271.099	1244.426	-1.7183	1.3481	0.17773	-235.114	-203.308	2212.805	-1.6976	1.899	0.69072	40.189	75.563	56.141	-0.13574	0.24795	-0.16113
2.708	-23.227	87.198	77.3676	-0.03418	-0.029785	-0.07373	-71.513	-331.313	1309.288	-1.6973	1.3496	0.17871	-264.672	-216.434	2213.761	-1.8338	1.9641	0.70957	41.188	50.73941	29.7456	-0.091797	0.26123	-0.17627
2.71	-10.501	58.454	82.8605	-0.072754	-0.019531	-0.053223	-30.967	-310.908	1341.303	-1.6211	1.3496	0.16553	-270.313	-172.389	2188.264	-1.9491	2.0091	0.72246	18.424	34.018	-1.604	-0.055274	0.2749	-0.18535
2.712	-5.975	39.8072	75.0038	-0.094238	-0.013672	-0.044434	-60.764	-349.91	1357.7891	-1.5493	1.3511	0.15356	-284.062	-107.023	2125.428	-2.0436	2.0326	0.74307	6.094	8.32555	22.545	-0.021484	0.2794	-0.18682
2.714	12.708	43.0132	66.2827	-0.12939	0	-0.024902	-26.93	-355.13	1454.023	-1.4668	1.3516	0.13477	-209.989	-27.182	2049.869	-2.1147	2.0474	0.76758	49.178	8.4955	88.691	0.0054687	0.28252	-0.18447
2.716	-9.544	40.7493	67.2325	-0.15503	0.0080567	-0.010986	-59.3305	-304.59	1492.262	-1.3706	1.3442	0.10352	-191.918	14.668	2028.244	-2.1544	2.0378	0.78398	25.721	-40.839	155.177	0.013965	0.28438	-0.18418
2.718	4.70200000000001	34.4945	74.7155	-0.17725	0.018066	0.0019531	-97.788	-300.206	1547.716	-1.3379	1.3438	0.09082	-115.608	20.16	2060.291	-2.1797	2.0277	0.79307	37.884	-96.4982	243.605	0.010742	0.29053	-0.18115
2.72	-14.348	38.8646	76.435	-0.19727	0.027832	0.013672	-46.202	-219.975	1589.09	-1.2964	1.3599	0.060547	-35.991	25.1745	2085.6011	-2.186	2.0089	0.79229	29.135	-182.9557	318.488	0.0043945	0.30723	-0.1749
2.722	1.46	44.7038	55.821	-0.20654	0.035156	0.020996	-76.583	-153.932	1524.3207	-1.2922	1.3684	0.050537	34.18	65.343	2095.70595	-2.1623	1.9901	0.78975	-6.759	-276.9734	490.875	-0.020996	0.33408	-0.16446
2.724	5.233	39.4721	68.4892	-0.21436	0.042969	0.020996	-95.348	-147.84	1502.679	-1.2988	1.3809	0.055176	67.935	102.3419	2068.5648	-2.1245	1.9731	0.79785	26.466	-357.956	702.707	-0.062012	0.36377	-0.15274
2.726	-20.698	37.8991	72.6448	-0.21509	0.046386	0.021485	-64.8189	-77.745	1500.374	-1.3452	1.4009	0.062988	69.609	127.03	2064.1853	-2.0707	1.949	0.79658	25.5702	-458.546	833.402	-0.11221	0.39004	-0.14326
2.728	-20.148	40.7943	78.142	-0.20996	0.049316	0.020996	-89.499	-98.476	1537.618	-1.3828	1.4121	0.073242	44.247	118.5408	2073.56	-2.0252	1.927	0.79834	12.843	-500.432	900.8528	-0.17432	0.42383	-0.14648
2.73	-46.968	52.299	64.06	-0.19824	0.046387	0.014648	-22.035	-111.913	1636.43116	-1.457	1.4238	0.092773	-12.168	78.88	2078.762	-1.9892	1.8973	0.79912	21.075	-492.48	935.663	-0.24522	0.46485	-0.15869
2.732	-39.588	30.19164	69.115	-0.18945	0.04541	0.0058594	13.7186	-91.431	1673.7727	-1.5076	1.4426	0.10058	-35.638	47.12	2085.102	-1.9675	1.8669	0.80166	0.677999999999997	-383.05	993.611	-0.31709	0.52705	-0.17129
2.734	-56.765	21.498	54.311	-0.16992	0.041016	-0.003418	23.525	-178.9354	1691.2421	-1.5586	1.4619	0.11133	-42.71	52.6884	2076.184	-1.9585	1.8364	0.80469	-17.936	-218.442	1094.753	-0.39873	0.61651	-0.16739
2.736	-40.695	24.992	56.867	-0.1477	0.034424	-0.016113	72.2111	-161.0346	1711.943	-1.625	1.4883	0.11816	-26.789	61.189	2054.5326	-1.9636	1.7934	0.8041	8.678	-99.61368	1174.5392	-0.50381	0.73525	-0.14746
2.738	-58.939	42.069	46.743	-0.12842	0.032715	-0.030273	84.1166	-152.136	1710.542	-1.6538	1.5005	0.1167	-22.754	76.2558	2042.263	-1.973	1.7544	0.80039	48.5397	-76.394	1248.769	-0.64648	0.87109	-0.10205
2.74	-65.6659	55.9913	49.967	-0.092285	0.027832	-0.043945	80.3479	-190.848	1770.106	-1.7129	1.5313	0.12891	-37.985	52.283	2002.624	-1.9823	1.7153	0.79492	61.692	-86.33	1378.434	-0.83174	1.0159	-0.03252
2.742	-71.316	63.678	64.0406	-0.080566	0.029297	-0.053711	105.017	-174.663	1824.646	-1.7592	1.5454	0.13623	-65.628	32.84	1985.404	-1.9973	1.6828	0.7872	107.272	-91.359	1502.578	-1.0464	1.1512	0.051953
2.744	-74.838	61.223	55.4655	-0.045898	0.027832	-0.062988	69.438	-267.849	1872.968	-1.8027	1.5586	0.14453	-27.124	42.21	1976.633	-2.0078	1.6543	0.771	90.208	-123.561	1611.159	-1.2929	1.2634	0.13398
2.746	-78.597	36.324	68.32	-0.026124	0.026855	-0.071533	42.041	-308.567	1904.391	-1.855	1.5571	0.15674	-83.355	91.49	1973.677	-1.9967	1.6275	0.75732	137.19	-49.53	1647.08	-1.5678	1.3478	0.20137
2.748	-72.9527	17.6145	71.169	-0.0097656	0.02832	-0.086426	41.408	-235.183	1892.081	-1.8809	1.5566	0.15869	-93.542	175.402	1948.654	-1.9835	1.5988	0.74375	96.705	-54.74	1652.667	-1.8433	1.4185	0.25879
2.75	-73.285	13.4635	79.8337	0.0048828	0.029297	-0.090332	36.3809	-210.714	1854.464	-1.918	1.5371	0.15869	-105.137	227.348	1911.9236	-1.955	1.5772	0.73242	67.303	-33.73	1648.175	-2.0707	1.4883	0.30635
2.752	-72.4361	20.838	59.669	0.012207	0.03125	-0.089355	57.788	-94.82	1834.9388	-1.9263	1.519	0.15479	-139.2096	242.385	1825.451	-1.9196	1.5468	0.71602	34.651	-98.85	1671.017	-2.2718	1.5669	0.36172
2.754	-58.8131	20.7431	59.772	0.025391	0.033691	-0.097656	45.171	-33.185	1810.38	-1.9292	1.4995	0.14502	-194.724	231.256	1797.691	-1.873	1.5254	0.69775	-31.7725	-183.02	1745.446	-2.4405	1.6481	0.39922
2.756	-49.29	14.451	47.455	0.034668	0.035645	-0.10206	34.288	-53.1309	1822.021	-1.9253	1.4673	0.13672	-200.218	223.96	1759.045	-1.8207	1.4953	0.68057	-92.659	-312.985	1833.571	-2.5924	1.7365	0.44014
2.758	-42.852	24.814	40.57	0.036133	0.041504	-0.10645	74.023	8.789	1858.938	-1.9238	1.457	0.1333	-240.55	227.427	1752.0081	-1.7612	1.4638	0.658	-122.9773	-406.672	1914.513	-2.7397	1.8149	0.48535
2.76	-4.176	32.2904	47.041	0.040039	0.042969	-0.10791	68.502	-9.39901	1843.817	-1.918	1.4258	0.12354	-221	210.139	1702.902	-1.6999	1.4353	0.63574	-60.646	-472.66	1952.918	-2.8462	1.855	0.52978
2.762	-12.538	35.765	49.4634	0.044434	0.042969	-0.10742	64.004	16.9003	1876.4776	-1.9109	1.4045	0.12012	-205.564	169.552	1663.815	-1.6375	1.3949	0.60839	13.546	-466.39	1941.696	-2.8956	1.8653	0.55273
2.764	-10.096	37.772	92.109	0.04248	0.047852	-0.10889	42.087	91.964	1844.739	-1.9121	1.3828	0.11914	-157.119	147.544	1590.975	-1.5737	1.3638	0.57813	92.143	-420.87	1969.185	-2.8577	1.8579	0.55547
2.766	-18.729	19.5291	103.351	0.042968	0.050049	-0.10693	-6.4745	33.277	1819.761	-1.9175	1.3579	0.11426	-146.11	128.094	1572.849	-1.5127	1.3185	0.55068	60.032	-376.47	2047.848	-2.7029	1.8314	0.52842
2.768	8.773	-2.431	116.6426	0.040527	0.052734	-0.10986	8.1615	45.061	1865.942	-1.9199	1.3418	0.11133	-64.123	165.926	1544.757	-1.4495	1.2727	0.52031	7.773	-307.091	2108.761	-2.4644	1.8091	0.47607
2.77	-10.904	-38.682	159.778	0.033691	0.059082	-0.10742	7.4938	1.326	1873.693	-1.9238	1.3223	0.11035	-69.06	200.66	1550.867	-1.3851	1.2255	0.49024	-73.311	-261.282	2162.856	-2.1805	1.7918	0.40732
2.772	-7.086	-78.5861	204.515	0.027832	0.060547	-0.11035	-10.4246	-79.165	1941.276	-1.9295	1.3078	0.11084	-10.726	234.249	1520.817	-1.3221	1.1853	0.45479	-139.463	-216.508	2150.744	-1.9066	1.7754	0.33154
2.774	5.327	-95.918	250.209	0.0029297	0.074707	-0.11328	23.44021	-43.968	1961.827	-1.9312	1.2974	0.11279	20.757	219.1084	1489.4802	-1.2554	1.145	0.42383	-199.964	-184.402	2107.671	-1.6774	1.7539	0.27021
2.776	30.2792	-94.825	290.344	-0.016114	0.093262	-0.11597	-18.5449	-95.387	1908.558	-1.9331	1.2817	0.11572	56.003	231.4386	1411.5341	-1.1926	1.1035	0.39561	-238.079	-162.046	2071.44	-1.4979	1.7226	0.21807
2.778	63.738	-120.163	338.354	-0.047363	0.11865	-0.11572	13.5884	-97.292	1919.635	-1.9292	1.2817	0.11279	15.184	235.752	1349.7415	-1.1293	1.0594	0.3627	-253.254	-129.134	2015.978	-1.3691	1.6836	0.16699
2.78	45.2375	-153.613	397.3068	-0.11914	0.15723	-0.095703	49.771	-46.215	1883.1121	-1.9238	1.2793	0.11768	46.769	283.503	1267.1864	-1.073	1.0195	0.33418	-256.707	-148.907	1967.495	-1.2845	1.6599	0.11924
2.782	48.777	-181.068	454.068	-0.15869	0.17773	-0.077637	62.2939	-64.6512	1887.255	-1.9139	1.2766	0.12573	-8.754	297.044	1209.2271	-1.0211	0.98418	0.3124	-205.272	-123.454	1955.695	-1.2418	1.6535	0.070996
2.784	27.5221	-171.443	501.283	-0.26758	0.22168	-0.055664	117.763	28.976	1915.613	-1.9038	1.2739	0.1333	8.349	329.755	1122.091	-0.96777	0.94824	0.28662	-156.992	-152.772	1980.419	-1.2309	1.6589	0.025293
2.786	36.037	-123.869	557.077	-0.35474	0.25635	-0.032959	84.626	81.3277	1880.7654	-1.896	1.2778	0.14697	24.581	297.79	1103.331	-0.92295	0.91026	0.26895	-69.93516	-133.851	2035.939	-1.2456	1.6825	0.0036133
2.788	28.016	-76.658	572.4154	-0.43945	0.29785	-0.0087891	67.266	74.037	1855.9627	-1.8901	1.2778	0.15723	88.51187	311.8276	1056.3818	-0.87578	0.87031	0.25322	26.868	-131.662	2107.285	-1.2871	1.709	-0.0039063
2.79	13.7205	-44.7704	593.0638	-0.56055	0.35547	0.027832	102.469	142.376	1824.059	-1.8804	1.2778	0.17383	85.54746	282.756	1024.9583	-0.8336	0.82656	0.23682	47.633	-105.88	2117.3	-1.3645	1.7454	0.0048828
2.792	19.626	-6.131	639.2749	-0.62109	0.38672	0.041016	68.781	129.509	1777.689	-1.8708	1.2766	0.1875	106.722	319.904	977.6699	-0.78174	0.77823	0.2168	29.208	-99.74	2129.6664	-1.4675	1.7786	0.017089
2.794	-3.278	31.132	684.6526	-0.73682	0.45654	0.07373	88.985	136.661	1773.658	-1.8608	1.2729	0.19873	39.7067	278.0895	936.8088	-0.72412	0.73486	0.19873	-19.873	-109.738	2163.724	-1.5803	1.7931	0.039746
2.796	30.8	68.0509	755.0069	-0.82422	0.51611	0.093751	78.74	170.363	1767.446	-1.8452	1.27	0.21826	40.633	283.729	889.704	-0.65908	0.68193	0.18369	-83.867	-130.27	2186.142	-1.6889	1.8018	0.063965
2.798	-3.026	85.313	804.609	-0.90918	0.58398	0.11377	26.51148	95.459	1752.68	-1.8374	1.2661	0.22168	1.06	232.997	872.79	-0.59639	0.63115	0.1624	-86.742	-161.115	2224.125	-1.793	1.8164	0.088867
2.8	1.782	66.7606	869.9766	-1.0132	0.6665	0.14551	58.412	87.804	1766.6804	-1.8164	1.2637	0.23291	-19.596	241.7921	816.265	-0.52842	0.58037	0.15381	-49.05721	-112.6443	2207.894	-1.8979	1.8272	0.10283
2.802	12.726	33.397	938.524	-1.0698	0.71631	0.16016	71.327	70.942	1754.6659	-1.7998	1.2549	0.24365	-104.458	196.508	753.7149	-0.46924	0.5208	0.12617	14.145	-72.883	2160.1519	-1.9856	1.8328	0.11592
2.804	6.981	3.065	1012.8041	-1.1836	0.80371	0.20361	53.928	9.145	1753.691	-1.7773	1.2441	0.25049	-139.526	231.18356	685.277	-0.41846	0.46924	0.10498	88.397	2.94799999999999	2101.654	-2.0559	1.8219	0.13232
2.806	0.396000000000001	-37.512	1087.726	-1.2703	0.86597	0.23413	97.571	47.465	1748.035	-1.7417	1.2231	0.25439	-195.812	185.4295	634.7268	-0.36738	0.41738	0.085742	123.252	63.284	2071.247	-2.1022	1.8056	0.14023
2.808	-45.9473	-84.237	1144.531	-1.3574	0.92578	0.27002	30.4729	22.552	1705.364	-1.7266	1.2129	0.26074	-164.393	229.931	587.053	-0.31933	0.37187	0.070898	115.404	88.787	2063.321	-2.1206	1.7856	0.14063
2.81	-51.2024	-135.226	1193.12	-1.4644	0.99463	0.30859	2.321	46.863	1710.052	-1.6895	1.1934	0.26953	-129.426	168.444	551.9361	-0.2791	0.33164	0.056053	195.159	97.912	2040.325	-2.1011	1.7579	0.13272
2.812	-94.49598	-186.617	1217.138	-1.5371	1.0303	0.33618	32.704	122.658	1678.167	-1.6591	1.1797	0.27564	-76.8753	197.078	474.481	-0.2457	0.29512	0.049316	195.585	82.6954	2034.888	-2.0601	1.7302	0.12295
2.814	-52.935	-203.977	1285.6969	-1.6069	1.0591	0.3623	-11.0063	96.418	1633.513	-1.6289	1.1621	0.28271	-96.5514	141.464	435.09	-0.21582	0.26367	0.032715	171.183	127.67	2023.7025	-1.996	1.6973	0.11826
2.816	-42.39	-219.77	1343.672	-1.7046	1.0864	0.39551	12.9711	145.5166	1618.857	-1.582	1.1377	0.29053	-73.3451	204.696	384.031	-0.18702	0.23174	0.020606	113.817	163.82	1999.915	-1.932	1.6676	0.11699
2.818	-56.092	-207.053	1398.637	-1.748	1.0918	0.41064	-19.43879	178.382	1551.435	-1.5586	1.123	0.28955	-74.16792	172.876	344.505	-0.15665	0.20733	0.0052772	42.924	215.2	1990.688	-1.8711	1.6367	0.11475
2.82	-68.275	-185.283	1434.878	-1.7886	1.1108	0.42969	-39.0969	184.334	1517.663	-1.5112	1.1001	0.2959	-66.1267	219.9997	302.136	-0.11954	0.17726	-0.0041009	-18.715	219.785	1978.874	-1.8212	1.6046	0.11601
2.822	-78.275	-154.278	1453.179	-1.782	1.1062	0.43042	4.458	271.624	1496.7802	-1.478	1.0757	0.30591	-56.536	134.3891	279.4225	-0.076964	0.14268	-0.026559	-59.614	173.663	1959.908	-1.7799	1.577	0.12168
2.824	-64.258	-131.17	1490.62	-1.7515	1.1138	0.42334	-36.4902	244.422	1460.714	-1.4453	1.0527	0.30713	-44.389	159.712	256.944	-0.033691	0.104	-0.046387	-4.385	117.078	1937.759	-1.758	1.5535	0.12793
2.826	-93.215	-118.7731	1497.2528	-1.6772	1.1294	0.39941	-3.615	219.093	1439.812	-1.3955	1.0234	0.31152	-31.546	114.669	234.372	0.0084142	0.063558	-0.056549	-26.355	89.653	1922.7886	-1.7509	1.5292	0.13721
2.828	-76.342	-99.09	1508.846	-1.6421	1.1313	0.38086	1.902	213.338	1397.434	-1.3706	1.0063	0.30176	-24.177	172.157	193.6933	0.037811	0.018131	-0.072076	-76.037	104.542559	1886.4582	-1.7559	1.5098	0.15039
2.83	-86.73	-77.577	1496.782	-1.5625	1.1387	0.33838	-17.3721	174.897	1351.808	-1.3237	0.96924	0.30322	-0.027000000000001	98.759	165.727	0.060476	-0.018985	-0.086548	-91.054	100.493	1863.12	-1.7548	1.4936	0.17129
2.832	-114.42649	-67.215	1479.512	-1.508	1.1242	0.30493	39.8764	204.6931	1355.633	-1.2807	0.94287	0.2998	16.929	102.098	129.776	0.077072	-0.052658	-0.10373	-107.231	117.563	1808.187	-1.7581	1.4833	0.1919
2.834	-102.0311	-70.215	1490.278	-1.4565	1.1157	0.27734	20.96	211.5862	1322.786	-1.2397	0.91455	0.29785	58.425	8.934	109.4189	0.094727	-0.078613	-0.12158	-79.948	129.86	1772.492	-1.7628	1.4771	0.21572
2.836	-119.605	-84.65	1526.793	-1.4082	1.0947	0.23779	0.838999999999999	164.184	1316.814	-1.1875	0.87695	0.29053	112.7463	51.912	97.772	0.12174	-0.10113	-0.14051	-54.897	177.12	1766.825	-1.7655	1.4763	0.23985
2.838	-87.207	-108.964	1538.1682	-1.3882	1.0884	0.22119	35.6792	178.1859	1305.287	-1.1433	0.84839	0.28051	119.336	24.54	68.785	0.1362	-0.12678	-0.15484	-48.5223	255.042	1731.7	-1.7651	1.4731	0.26318
2.84	-85.209	-153.2571	1564.8381	-1.3511	1.0864	0.18555	-13.5486	141.48	1267.243	-1.1011	0.81885	0.27148	99.1151	99.5789	82.8406	0.14635	-0.14671	-0.16966	-87.532	298.565	1698.242	-1.7648	1.463	0.2748
2.842	-42.09	-178.381	1577.4301	-1.3269	1.0949	0.1648	13.947	132.979	1261.886	-1.0449	0.77344	0.25977	58.142	54.171	78.915	0.15105	-0.15612	-0.17792	-105.208	337.445	1631.3138	-1.7495	1.4509	0.29492
2.844	-50.649	-192.766	1617.5935	-1.312	1.1089	0.14844	61.098	183.4989	1233.689	-1.0117	0.75391	0.26025	25.362	105.0854	72.157	0.15381	-0.16211	-0.18311	-107.267	287.042	1543.958	-1.7296	1.4317	0.30703
2.846	-29.462	-187.192	1639.531	-1.2871	1.1309	0.12988	-2.115	179.906	1149.569	-0.95313	0.71094	0.24365	8.61	64.286	57.0724	0.15207	-0.16674	-0.18867	-57.8485	265.815	1487.328	-1.6968	1.4079	0.31484
2.848	-30.022	-219.871	1641.409	-1.2852	1.1484	0.12549	38.907	219.96118	1091.392	-0.90747	0.67846	0.23389	-25.236	113.394	45.4197	0.14309	-0.18033	-0.18575	-25.817	247.278	1446.849	-1.6538	1.3813	0.31787
2.85	-27.22	-233.292	1635.5246	-1.2793	1.1631	0.11133	25.737	251.405	1012.57	-0.85498	0.64697	0.21875	-39.734	79.31	69.553	0.1318	-0.18222	-0.19357	-46.002	251.481	1422.367	-1.6015	1.3509	0.31905
2.852	-14.273	-221.547	1642.6321	-1.2763	1.1758	0.10205	8.691	229.7774	974.835	-0.79639	0.604	0.2041	-65.331	115.06	74.1176	0.11626	-0.1816	-0.18862	-31.497	266.752	1372.521	-1.5397	1.3188	0.31309
2.854	-25.985	-184.9554	1637.9335	-1.2793	1.1934	0.093262	60.0887	274.277	962.72708	-0.76074	0.58203	0.19287	-88.8691	54.16	50.9158	0.090332	-0.1709	-0.18115	-37.376	283.553	1311.988	-1.4725	1.2782	0.30645
2.856	-15.807	-138.977	1641.141	-1.291	1.2148	0.086426	-5.434	260.226	924.0531	-0.69287	0.54639	0.17529	-112.4551	63.997	25.319	0.0538	-0.16826	-0.16271	13.756	304.9322	1259.8954	-1.4032	1.2405	0.30156
2.858	-38.566	-109.67	1639.38587	-1.2949	1.2246	0.085449	-11.909	257.508	892.454	-0.6438	0.51685	0.15967	-114.738	-2.614	38.178	0.017553	-0.15378	-0.14707	57.038	272.967	1236.908	-1.3335	1.1997	0.29639
2.86	-4.924	-89.556	1616.6994	-1.3096	1.2383	0.07959	-9.507	259.221	839.219	-0.58984	0.49414	0.14502	-120.64325	18.269	57.95	-0.029545	-0.1435	-0.13487	80.748	257.226	1205.611	-1.2681	1.1612	0.28769
2.862	8.4562	-86.538	1610.892	-1.3247	1.251	0.078857	-62.007	217.6757	793.689	-0.52539	0.45508	0.12451	-101.5062	20.522	90.8676	-0.075844	-0.12602	-0.11858	63.095	237.079	1151.577	-1.1977	1.1164	0.27929
2.864	12.052	-71.894	1588.456	-1.3452	1.2622	0.07959	-20.993	212.7906	762.6897	-0.49072	0.43604	0.1167	-128.988	63.911	73.9673	-0.11816	-0.11719	-0.10156	50.73	252.9738	1087.7379	-1.1285	1.0699	0.26796
2.866	60.016	-46.418	1593.957	-1.3784	1.2778	0.077148	-36.488	223.612	712.423	-0.42334	0.39941	0.097168	-147.865	29.448	81.965	-0.14785	-0.10979	-0.093305	55.072	274.22	1015.0561	-1.0585	1.0222	0.26123
2.868	50.284	-33.355	1603.284	-1.3984	1.2832	0.078613	-56.2883	183.6962	693.2175	-0.37475	0.37182	0.082763	-159.246	11.542	102.457	-0.15756	-0.11007	-0.081696	10.005	275.277	955.865	-0.98779	0.97314	0.25244
2.87	49.2592	-35.302	1646.8898	-1.4331	1.2935	0.088379	-39.621	172.3876	664.789	-0.32764	0.34814	0.069824	-156.397	-19.08	92.316	-0.15594	-0.10637	-0.077098	-11.962	286.697	875.719	-0.91789	0.92605	0.24856
2.872	20.2092	-84.5178	1669.1771	-1.4653	1.3042	0.093262	-95.319	143.923	622.2668	-0.26465	0.31885	0.046387	-130.551	13.1023	102.7747	-0.13953	-0.10305	-0.081679	-65.014	283.671	804.6963	-0.84486	0.87273	0.23676
2.874	35.379	-122.5947	1688.669	-1.4995	1.3032	0.093262	-60.719	118.037	588.404	-0.23291	0.29736	0.041504	-71.7547	24.7052	90.0959	-0.11426	-0.10205	-0.09082	-110.2676	303.851	741.3892	-0.7715	0.81656	0.22621
2.876	28.7984	-150.618	1687.903	-1.5352	1.3096	0.093262	-32.692	146.789	538.666	-0.17773	0.27051	0.02832	-93.6502	22.4711	87.403	-0.079618	-0.10384	-0.080914	-103.2958	297.359	683.0839	-0.69008	0.7631	0.21835
2.878	-11.977	-144.724	1695.826	-1.5503	1.311	0.095703	-78.153	142.342	487.1487	-0.14453	0.24731	0.015136	-81.5611	22.639	64.231	-0.050131	-0.10681	-0.090269	-84.882	282.4855	647.572	-0.60938	0.70703	0.19873
2.88	-17.0292	-149.375	1702.095	-1.582	1.3184	0.098633	-30.077	154.926	472.8146	-0.11084	0.22607	0.013672	-30.543	11.0215	40.21	-0.0193	-0.11569	-0.093434	-85.249	251.536	576.508	-0.5326	0.6555	0.17673
2.882	-43.7525	-143.1049	1684.64258	-1.6023	1.3206	0.09863	-63.59	191.9432	427.314	-0.069824	0.20313	0.0097656	8.496	27.594	12.2857	0.0068599	-0.12315	-0.096064	-114.131	205.326	527.1661	-0.44748	0.60638	0.15227
2.884	-12.433	-135.793	1665.6683	-1.623	1.3232	0.095703	-46.513	173.61218	398.4868	-0.052734	0.18896	0.010254	26.052	8.454	41.47911	0.026367	-0.13525	-0.097168	-105.371	206.981	465.437	-0.36495	0.5511	0.13476
2.886	-23.633	-131.445	1654.229	-1.6406	1.3262	0.10107	-1.755	194.733	371.572	-0.023438	0.17041	0.010254	51.518	23.585	43.001	0.042626	-0.15065	-0.10115	-143.5695	230.907	418.586	-0.28691	0.50156	0.11444
2.888	3.74	-113.115	1660.4938	-1.6465	1.3242	0.099609	-60.595	184.205	316.9133	-0.0070802	0.15136	0.010986	31.731	10.5637	55.9024	0.062349	-0.16408	-0.10518	-129.3577	259.17139	394.367	-0.20996	0.45557	0.09375
2.89	3.387	-67.262	1664.7082	-1.6621	1.3262	0.098633	-21.156	153.759	298.8595	0.0063477	0.13672	0.016602	67.182	31.2907	25.686	0.082236	-0.1802	-0.11373	-136.0726	252.52	375.599	-0.13845	0.4088	0.073585
2.892	1.673	-22.7051	1658.0063	-1.6697	1.3254	0.1001	-35.697	165.404	254.133	0.02002	0.11377	0.01416	49.858	-2.1259	34.097	0.10991	-0.1883	-0.12202	-179.192	192.2678	326.6049	-0.071908	0.36671	0.054999
2.894	-9.05	1.312	1625.6608	-1.6733	1.3267	0.10254	-69.056	141.303	222.729	0.029297	0.10156	0.020508	26.167	27.6219	38.76339	0.13965	-0.20215	-0.13135	-186.131	130.901	266.737	-0.0040252	0.3278	0.03701
2.896	-14.139	2.342	1606.1671	-1.6875	1.3242	0.10107	6.88200000000001	120.07836	232.48946	0.036133	0.081055	0.021484	13.247	4.018	67.0594	0.1766	-0.20919	-0.14407	-168.903	90.715	233.622	0.056416	0.29245	0.017315
2.898	-4.759	2.469	1603.072	-1.6914	1.3164	0.099609	-9.192	118.1277	219.3909	0.04126	0.063965	0.026367	15.444	66.349	47.6451	0.20962	-0.21407	-0.15711	-131.3629	113.963	219.1425	0.11914	0.25586	0.0014648
2.9	-14.755	0.976999999999997	1618.4961	-1.6953	1.3008	0.10693	-31.364	79.757	205.4469	0.046875	0.050293	0.032715	-3.006	31.8098	40.9424	0.24553	-0.2231	-0.17388	-106.331	144.32	208.708	0.17606	0.22294	-0.010915
2.902	-24.583	-11.637	1618.1586	-1.6989	1.2913	0.10572	1.219	88.0407	186.1051	0.045898	0.039063	0.030273	-9.431	54.59	24.37677	0.28022	-0.22589	-0.18664	-64.763	158.4358	178.603	0.22901	0.19533	-0.022668
2.904	-36.6969	-28.114	1610.853	-1.6934	1.2793	0.10059	-44.734	106.41098	175.1618	0.043945	0.028809	0.041504	-52.824	-14.492	43.982	0.31201	-0.23047	-0.20166	-46.127	150.78	135.532	0.27878	0.16985	-0.036003
2.906	-8.966	-39.4918	1597.777	-1.6855	1.2598	0.10107	-13.016	75.307	189.817	0.047363	0.012695	0.050781	-58.982	31.808	13.2594	0.33738	-0.22647	-0.20898	-12.71	138.556	115.294	0.31356	0.1431	-0.041405
2.908	-4.302	-52.624	1592.3463	-1.6777	1.2539	0.098145	-7.47	85.4239	172.666	0.042724	0.0043946	0.057862	-68.512	20.084	15.37	0.35321	-0.22432	-0.21025	11.925	128.759	116.7326	0.33691	0.12451	-0.043457
2.91	10.767	-56.705	1579.735	-1.6519	1.2329	0.09082	-70.732	57.689	144.5108	0.036621	-0.0029297	0.067383	-74.3475	97.7917	43.28	0.35791	-0.21574	-0.21299	27.406	118.531	112.246	0.34684	0.11144	-0.042283
2.912	20.163	-60.43	1576.887	-1.6372	1.2193	0.086182	-31.09	31.485	126.47202	0.028809	-0.01123	0.07373	-112.194	55.8077	77.5152	0.34962	-0.20674	-0.21044	10.156	101.666	99.6968	0.34471	0.097989	-0.032828
2.914	25.832	-46.2312	1579.154	-1.6182	1.2031	0.083496	-59.994	82.99825	117.703	0.018066	-0.013184	0.080078	-111.627	101.844	66.6111	0.33154	-0.19336	-0.20996	-24.082	48.935	79.071	0.33336	0.089688	-0.021093
2.916	41.797	-40.8447	1577.834	-1.5894	1.186	0.074219	-71.042	81.458	109.76381	0.0073242	-0.019531	0.089355	-141.707	50.9335	83.451	0.30312	-0.17754	-0.20137	-2.353	27.5057	57.837	0.30609	0.078401	-0.0080227
2.918	23.5119	-28.271	1558.9731	-1.5737	1.1763	0.069824	-41.123	113.715	70.4069	-0.00073245	-0.020996	0.095215	-163.597	99.921	68.748	0.2658	-0.15868	-0.19482	-8.76300000000001	25.0538	43.6938	0.27051	0.076172	0.0083008
2.92	40.7914	-1.325	1542.6168	-1.5508	1.1543	0.063965	-94.7279	120.316	49.846	-0.0073242	-0.022949	0.10254	-165.118	45.915	92.732	0.22049	-0.14345	-0.17646	28.78	48.362	49.404	0.22439	0.077478	0.028737
2.922	10.626	39.7626	1502.344	-1.5347	1.1479	0.063476	-58.55	75.8724	50.859	-0.021484	-0.027832	0.1167	-154.823	82.931	88.175	0.1626	-0.1251	-0.16182	19.598	52.18705	54.313	0.17595	0.074219	0.046316
2.924	19.557	75.315	1484.875	-1.522	1.1372	0.066895	-67.899	82.907	59.822	-0.027344	-0.027344	0.11816	-131.119	5.765	59.0026	0.11035	-0.10498	-0.14258	-41.936	35.8785	52.2227	0.11307	0.076887	0.077259
2.926	-10.263	95.7	1468.2997	-1.4995	1.1245	0.06543	-90.963	61.4538	62.478	-0.036133	-0.02832	0.12549	-95.5241	30.471	49.275	0.060647	-0.079982	-0.12666	-29.424	13.2123	44.813	0.045346	0.081115	0.1084
2.928	-13.5473	106.65	1446.45583	-1.4917	1.1157	0.0625	-24.478	25.7058	78.8087	-0.041015	-0.034423	0.12695	-75.5007	-34.24	62.9208	0.015628	-0.054103	-0.1127	-3.73299999999999	-10.7866	35.529	-0.022461	0.093262	0.13916
2.93	-6.914	87.842	1436.0654	-1.4688	1.0996	0.068359	-95.7245	61.748	66.822	-0.041016	-0.041992	0.12695	-62.13	17.187	69.4043	-0.01953	-0.030275	-0.099807	-26.769	7.102	51.414	-0.089926	0.10923	0.16364
2.932	-26.7742	61.291	1417.8596	-1.4516	1.0962	0.072266	-80.507	26.044	66.552	-0.030273	-0.042969	0.13232	-49.617	1.945	89.212	-0.056542	-0.001661	-0.086426	-63.579	10.96	62.624	-0.15199	0.12273	0.19001
2.934	1.335	42.443	1404.467	-1.4404	1.0879	0.079102	-56.639	16.7287	66.1036	-0.02832	-0.043457	0.13574	8.82	62.918	82.2417	-0.087891	0.020508	-0.070801	-106.8765	34.733	51.492	-0.20465	0.13754	0.20955
2.936	-8.345	44.028	1379.378	-1.418	1.0781	0.088379	-90.4574	41.0229	49.1811	-0.014648	-0.051758	0.13721	18.29	15.5347	86.408	-0.12022	0.043652	-0.060351	-151.333	52.3632	46.9946	-0.2486	0.15382	0.23051
2.938	-0.712	49.718	1362.7987	-1.4063	1.0781	0.092285	-26.594	-2.869	56.882	-0.0026855	-0.056152	0.1333	30.751	30.5763	100.809	-0.14307	0.063086	-0.050586	-140.297	78.105	39.62061	-0.28418	0.1626	0.24805
2.94	-10.593	36.32	1355.25	-1.3848	1.0684	0.10059	-49.416	14.0489	48.415	0.010254	-0.061035	0.12744	-3.009	-20.8569	92.014	-0.1583	0.073243	-0.041211	-108.2542	82.521	58.343	-0.31618	0.17032	0.26746
2.942	-4.232	32.296	1345.078	-1.3667	1.0532	0.11182	-46.58	1.873	59.6561	0.034668	-0.065918	0.12451	5.47799999999999	21.92452	56.622876	-0.16348	0.080664	-0.039356	-105.589	42.6091	65.631	-0.33875	0.17061	0.28514
2.944	2.113	31.101	1352.382	-1.354	1.0493	0.11719	12.998	-29.5863	64.85279	0.043457	-0.070801	0.12354	24.832	8.06009	42.2	-0.1582	0.08252	-0.038574	-135.868	29.198	24.309	-0.35087	0.16787	0.29803
2.946	-42.1479	29.8878	1340.536	-1.3281	1.0439	0.12256	-33.959	20.0148	40.943	0.066895	-0.083008	0.11914	38.459	34.2456	48.618	-0.14756	0.077637	-0.043652	-162.972	0.445	6.16	-0.35371	0.16309	0.31005
2.948	-41.2414	37.3132	1307.039	-1.3008	1.0288	0.12427	-2.722	10.242	62.83	0.084473	-0.088379	0.11182	58.123	6.0898	34.25	-0.13428	0.074707	-0.047851	-134.497	-6.802	17.381	-0.34277	0.14453	0.32275
2.95	-66.1356	62.9389	1243.1996	-1.2734	1.0098	0.12646	17.332	38.115	46.0196	0.10449	-0.092773	0.1084	36.433	12.3516	23.285	-0.11514	0.068067	-0.052539	-105.687	14.207	40.8466	-0.32372	0.13447	0.31826
2.952	-46.4797	107.297	1203.731	-1.228	0.98975	0.12256	-41.598	80.293	37.6068	0.12598	-0.09375	0.095215	14.595	10.569	2.878	-0.096875	0.065137	-0.050391	-66.689	34.102	56.952	-0.28661	0.11552	0.30859
2.954	-51.7864	133.4057	1176.036	-1.207	0.97266	0.12354	-1.693	53.093	46.5067	0.13818	-0.099121	0.089355	0.753999999999998	32.9766	20.384	-0.081543	0.057129	-0.060547	-55.181	48.567	38.3291	-0.23661	0.094427	0.29687
2.956	-19.045	140.0574	1153.8223	-1.1602	0.94727	0.11523	-31.904	67.359	35.3964	0.15723	-0.098633	0.085938	-18.439	26.9828	51.432	-0.067578	0.053028	-0.065137	-94.1714	43.7719	27.593	-0.17753	0.073143	0.27802
2.958	-6.001	143.0889	1111.764	-1.1311	0.9314	0.11352	-48.682	47.6952	36.985	0.17261	-0.10181	0.085205	-41.189	21.7427	87.005	-0.053907	0.047656	-0.066406	-77.3401	60.749	65.769	-0.10986	0.05957	0.25195
2.96	12.27	154.573	1096.527	-1.0996	0.91211	0.10889	18.859	-1.7521	35.7256	0.18262	-0.098145	0.080566	-64.689	16.3335	41.2986	-0.048047	0.041016	-0.063281	-19.527	54.771	79.9781	-0.040141	0.038087	0.22491
2.962	13.292	142.6148	1105.4418	-1.0571	0.88721	0.10449	-51.345	22.48824	34.216	0.18555	-0.095703	0.071777	-89.287	12.8161	33.514	-0.048047	0.032813	-0.056641	14.895	47.673	91.415	0.028315	0.016603	0.19805
2.964	9.004	136.03782	1082.3274	-1.0391	0.87598	0.10742	-45.682	-15.1068	49.734	0.18555	-0.089355	0.077637	-100.9325	40.4662	30.498	-0.053223	0.032715	-0.053711	32.396	14.438	65.7979	0.093941	0.0013679	0.17539
2.966	9.22	115.71126	1060.508	-0.99365	0.8501	0.10498	-19.664	-13.65578	47.5796	0.18848	-0.09082	0.075195	-150.47	40.311	38.256	-0.063184	0.028418	-0.047265	-0.808999999999997	-13.227	40.592	0.14609	-0.016015	0.15107
2.968	-16.727	118.027	1023.9499	-0.96289	0.83056	0.099608	-56.833	32.0988	45.5194	0.18238	-0.080322	0.077393	-152.47	66.586	45.4964	-0.077149	0.030078	-0.044434	-21.61	6.657	21.653	0.19482	-0.033203	0.12598
2.97	-14.618	99.733	996.4251	-0.92334	0.80713	0.099609	-31.082	5.153	37.337	0.17725	-0.07373	0.079102	-138.653	44.117	74.347	-0.098245	0.038282	-0.04873	7.70700000000001	51.291	37.35505	0.23838	-0.052344	0.11406
2.972	-36.68	100.806	980.23	-0.89063	0.77637	0.089355	-55.313	21.42	19.862	0.16113	-0.062988	0.083496	-121.808	12.3722	77.418	-0.11289	0.051172	-0.049902	26.361	94.454	32.1242	0.27354	-0.067383	0.1041
2.974	-34.606	107.1571	974.69141	-0.87158	0.76367	0.086426	-81.2135	24.593	39.9658	0.15381	-0.056641	0.082031	-122.707	-62.4636	149.5638	-0.13086	0.072266	-0.050781	23.674	45.511	36.3309	0.30283	-0.084961	0.090821
2.976	-37.384	109.0656	943.6165	-0.8335	0.73584	0.089355	-61.09	-3.963	49.95001	0.13818	-0.044922	0.087402	-104.251	-53.9273	201.5282	-0.15195	0.089063	-0.050879	-7.391	15.3899	35.7877	0.33028	-0.10117	0.081446
2.978	-29.187	98.794	909.8215	-0.80371	0.71728	0.087158	-86.39512	38.1142	47.1004	0.12354	-0.03125	0.085449	-80.3142	-125.11266	302.975	-0.17519	0.11025	-0.058301	-11.199	-18.44498	34.787	0.3584	-0.12061	0.071289
2.98	-0.744	92.214	889.5579	-0.77246	0.69629	0.083008	-71.179	26.345	43.489	0.12158	-0.022949	0.089844	-42.5729	-141.662	431.959	-0.19668	0.13604	-0.068066	-8.544	9.1895	54.589	0.38486	-0.1333	0.063379
2.982	-6.932	106.119	865.41441	-0.73584	0.67236	0.083008	-45.783	26.8257	32.4086	0.10889	-0.0097656	0.088867	11.1613	-274.928	563.32	-0.22002	0.17031	-0.085352	-29.624	50.975	81.495	0.41484	-0.14375	0.05
2.984	-4.584	127.885	861.894	-0.71094	0.65527	0.078613	-88.0092	74.437	23.4223	0.10229	0.0029297	0.093262	39.7989	-311.966	653.088	-0.24902	0.22021	-0.10254	-61.594	60.319	71.542	0.44219	-0.1543	0.041797
2.986	-6.069	145.7428	828.551	-0.6665	0.63135	0.074707	-53.357	49.656	34.409	0.097168	0.01416	0.092285	40.374	-385.957	740.4526	-0.29434	0.28311	-0.11201	-100.738123	51.9036	36.762	0.46719	-0.16611	0.030078
2.988	-15.314	156.097	793.3351	-0.63086	0.60767	0.070068	-54.974	81.261	15.971	0.091797	0.027344	0.090332	57.0554	-287.126	783.453	-0.35117	0.35615	-0.10498	-101.658	22.5919	14.281	0.49414	-0.17627	0.016602
2.99	-59.7826	163.304	758.6632	-0.59912	0.58057	0.064941	-57.337	75.1134	28.3	0.088379	0.033203	0.091309	72.6244	-266.0966	821.042	-0.44063	0.4331	-0.087402	-133.1934	39.9323	28.699	0.50743	-0.18516	0.0050781
2.992	-68.6785	151.45	732.834	-0.54834	0.54932	0.057617	-21.861	16.195	48.2937	0.086426	0.039063	0.086914	106.834	-142.2727	850.13	-0.55479	0.5124	-0.05459	-112.5508	40.098	54.458	0.52452	-0.19121	-0.0044922
2.994	-67.3737	147.582	712.583	-0.52881	0.53564	0.054688	-49.605	23.189	43.785	0.08667	0.046143	0.088867	110.879	-174.42	883.375	-0.69141	0.5957	-0.023438	-94.702	34.369	64.388	0.53388	-0.19668	-0.012305
2.996	-67.8673	145.869	678.273	-0.48779	0.50244	0.052246	-33.45	-2.442	53.7735	0.090332	0.049805	0.088379	155.131	-104.9842	924.4349	-0.84258	0.68125	0.017871	-129.834	2.001	30.8128	0.54268	-0.20098	-0.01875
2.998	-66.9416	139.901	659.795	-0.46508	0.48437	0.052246	0.638999999999996	-2.261	52.81956	0.085938	0.051758	0.085938	209.486	-111.405	1046.963	-1.0059	0.76562	0.051953	-172.244	-13.402	3.646	0.54883	-0.20361	-0.03125
3	-73.964	110.2039	641.3922	-0.44189	0.4624	0.048828	-43.634	40.064	44.1272	0.090332	0.04834	0.083984	162.252	-31.933	1154.268	-1.1692	0.85234	0.077344	-114.5525	3.593	26.077	0.54072	-0.20576	-0.021973
3.002	-54.385	92.42988	637.1177	-0.42139	0.44141	0.050293	-1.049	20.627	59.848	0.09668	0.049316	0.087891	163.197	-26.067	1231.281	-1.3229	0.92832	0.094336	-78.118	45.876	83.770692	0.52129	-0.20098	-0.022168
3.004	-62.387	114.4151	602.564	-0.41211	0.43359	0.053223	-22.671	46.571	52.6166	0.10425	0.050293	0.086426	164.484	28.844	1230.1485	-1.4551	1.0059	0.10938	-84.754	101.1168	89.822	0.49707	-0.1955	-0.012402
3.006	-25.464	120.5986	590.596	-0.3916	0.41064	0.0625	-37.463	43.5093	52.4809	0.10645	0.047363	0.090332	151.259	0.390000000000015	1236.943	-1.5839	1.0899	0.13682	-65.965	71.213	57.604	0.4583	-0.18554	-0.0067383
3.008	-22.971	110.543	585.6125	-0.38012	0.39526	0.064698	11.283	8.33755	51.7543	0.10645	0.046875	0.094727	109.539	-0.730000000000018	1303.498	-1.7262	1.1722	0.16709	-120.557	42.7626	29.43	0.41699	-0.16943	0.0019531
3.01	-31.38	100.803	551.0838	-0.37305	0.37988	0.072754	-30.364	33.6513	46.721	0.10449	0.049805	0.094238	29.407	-87.11	1399.93	-1.8695	1.2594	0.20694	-112.7842	27.599	35.523	0.36094	-0.14893	0.011133
3.012	-53.763	98.273	538.5524	-0.35693	0.35938	0.081055	-22.807	32.245	60.6867	0.097656	0.048828	0.09668	-61.897	-155.31	1442.601	-2.0112	1.3368	0.25235	-20.844	14.9392	56.458	0.3043	-0.12392	0.02207
3.014	-38.889	97.642	510.348	-0.35107	0.34814	0.081543	-6.678	32.6688	55.4396	0.091309	0.044189	0.098633	-130.761	-262.09	1460.462	-2.1616	1.3931	0.29053	1.855	18.33488	57.7204	0.24336	-0.094238	0.045117
3.016	-31.797	91.6707	501.0312	-0.32959	0.3335	0.084961	-61.958	70.514	33.96	0.082031	0.045898	0.093262	-156.408	-345.511	1502.062	-2.28	1.4242	0.31436	1.059	14.656	37.2102	0.17959	-0.075	0.069141
3.018	-60.633	109.12	469.957	-0.30884	0.31445	0.090088	-26.278	24.9761	41.3741	0.072266	0.050293	0.094238	-129.8	-420.26	1561.9405	-2.3649	1.4402	0.33096	-15.249	31.0045	24.354	0.11523	-0.049316	0.091309
3.02	-55.985	109.332	444.8	-0.28906	0.29785	0.092773	-36.796	38.975	38.7199	0.067383	0.050781	0.097656	-103.258	-428.46	1594.7542	-2.3856	1.4461	0.32901	-26.43	21.0993	33.934	0.058496	-0.020508	0.11357
3.022	-43.254	121.972	418.1463	-0.25635	0.27002	0.099121	-62.085	48.0601	51.8742	0.0625	0.063965	0.094238	-61.218	-394.64	1635.145	-2.3256	1.4525	0.30645	9.398	62.072	62.2407	0.005176	0.0094727	0.12724
3.024	-49.361	118.442	389.947	-0.24365	0.25928	0.092773	-23.304	18.1422	53.4164	0.061279	0.069336	0.093262	-121.3008	-366.67	1682.3355	-2.1968	1.4517	0.27148	51.569	68.169	70.899	-0.037402	0.037207	0.14834
3.026	-22.778	123.2757	363.801	-0.21045	0.23682	0.091309	-71.5579	39.867	41.052	0.058594	0.077148	0.091309	-126.795	-315.29	1728.12	-2.0005	1.4531	0.20742	21.359	52.987	55.945	-0.065723	0.071192	0.16875
3.028	-20.362	99.055	359.976	-0.18433	0.22192	0.086426	-83.0996	-4.331	58.1158	0.066895	0.09082	0.092285	-146.136	-270.562	1780.644	-1.7929	1.456	0.14649	-1.616	8.57	28.3029	-0.086426	0.10352	0.18359
3.03	-17.027	83.8	359.444	-0.15674	0.20117	0.083496	-66.082	-20.579	50.5673	0.069824	0.085449	0.095703	-183.351	-186.009	1783.051	-1.6023	1.4653	0.091016	-37.964	-11.5251	42.533	-0.10049	0.13818	0.19453
3.032	-35.969	80.758	327.337	-0.12842	0.17529	0.079102	-91.8607	17.622	57.1241	0.080078	0.09082	0.090332	-195.758	-144.296	1787.7194	-1.4595	1.4715	0.050293	-49.601	-0.3552	56.1102	-0.10742	0.16905	0.2044
3.034	-20.05	83.839	323.5616	-0.11475	0.16602	0.076172	-39.721	-15.1662	57.635	0.084961	0.094482	0.08667	-208.555	-79.57	1757.125	-1.3608	1.4731	0.035645	-6.619	25.0211	70.115	-0.10781	0.19521	0.21025
3.036	-46.977	78.73648	321.206	-0.087402	0.14453	0.078613	-71.58	-6.606	79.2228	0.088867	0.1001	0.080566	-210.535	-81.72	1761.154	-1.3283	1.4869	0.046679	-24.697	53.375	49.639	-0.10605	0.21719	0.21651
3.038	-55.079	72.346	329.187	-0.073486	0.12939	0.073242	-91.4176	-44.49458	143.953	0.085938	0.125	0.067383	-182.66	-28.32	1773.834	-1.3364	1.511	0.068262	-63.419	43.6449	16.2298	-0.104	0.23584	0.21387
3.04	-66.535	67.197	304.788	-0.063477	0.11426	0.071289	-55.804	-121.2867	215.868	0.073242	0.14453	0.054199	-116.834	-58.441	1805.682	-1.3822	1.5497	0.10029	-108.6308	56.745	3.414	-0.099414	0.24219	0.21465
3.042	-80.36	82.623	273.4424	-0.032227	0.091797	0.070313	-83.406	-126.754	302.118	0.022949	0.21436	0.040039	-45.063	-56.908	1833.35904	-1.4494	1.5885	0.12627	-120.5801	45.7728	34.6186	-0.095507	0.2499	0.21661
3.044	-80.2334	76.9452	261.891	-0.025391	0.084961	0.069824	-81.911	-211.7145	435.82	-0.038574	0.28052	0.047363	13.716	-130.397	1874.549	-1.5229	1.6255	0.14795	-109.9191	40.249	65.771	-0.088476	0.25498	0.21153
3.046	-73.24	67.98724	246.726	-0.0014648	0.068359	0.066406	-133.377	-300.369	531.94	-0.10889	0.33984	0.068359	62.572	-132.9585	1926.15	-1.5957	1.6571	0.16006	-84.142	16.852	67.573	-0.075	0.25742	0.2125
3.048	-65.049	68.29	227.599	0.016357	0.052978	0.063477	-212.018	-321.605	574.721	-0.23682	0.40576	0.11719	114.545	-192.876	1956.592	-1.6547	1.6867	0.17568	-96.4464	-3.32	52.849	-0.058105	0.26025	0.21387
3.05	-67.643	80.809	205.1311	0.036621	0.041992	0.060547	-168.463	-324.521	616.1583	-0.30859	0.43164	0.14404	130.317	-178.86	1985.236	-1.7078	1.7133	0.17451	-146.467	9.271	26.309	-0.036426	0.25586	0.21367
3.052	-42.411	77.319	194.1283	0.060059	0.033691	0.055176	-168.05	-218.655	660.1344	-0.45752	0.48779	0.19043	116.185	-242.942	2047.354	-1.7605	1.7344	0.18535	-142.8931	34.485	32.798	-0.013965	0.25088	0.2209
3.054	-57.589	75.387	201.44826	0.071289	0.025391	0.056641	-200.8169	-125.582	720.746	-0.55957	0.52637	0.20655	74.7	-219.098	2083.082	-1.8047	1.748	0.18408	-122.0195	77.4048	68.69288	0.0083004	0.24893	0.2209
3.056	-60.88	68.0551	209.686	0.087402	0.015625	0.052246	-166.426	-98.059	758.295	-0.65234	0.57813	0.22412	25.9716	-242.112	2089.354	-1.8446	1.7558	0.1835	-82.719	60.5362	110.359	0.028613	0.24404	0.22285
3.058	-59.923	83.0349	193.3075	0.097412	0.011231	0.050293	-155.767	-30.931	775.748	-0.74707	0.66602	0.24365	8.905	-161.0411	2065.479	-1.8765	1.7641	0.17998	-89.688	-17.0482	133.318	0.05127	0.23633	0.23389
3.06	-49.746	87.795	184.3885	0.104	0.010254	0.053223	-55.511	-16.13	868.252	-0.79688	0.7168	0.2583	20.742	-133.738	2034.062	-1.9	1.761	0.17373	-127.466	-122.572	211.187	0.058984	0.23418	0.23847
3.062	-49.758	84.062	176.394	0.10889	0.0083008	0.054199	27.8054	30.52	991.589	-0.89404	0.84424	0.27588	21.945	-63.649	2032.26	-1.9233	1.7506	0.16436	-162.274	-160.8556	379.58	0.063379	0.2336	0.25156
3.064	-68.4205	65.881	137.95	0.10889	0.0087891	0.053223	0.581799999999999	108.582	1094.519	-0.98022	0.94458	0.29907	1.931	-72.352	2004.9156	-1.9395	1.7383	0.15918	-122.111	-206.737	613.029	0.060254	0.23633	0.26289
3.066	-61.597	61.269	137.392	0.10791	0.0068359	0.060059	23.721	133.744	1152.499	-1.0757	1.0532	0.32715	1.78	-13.244	1991.807	-1.9586	1.7187	0.15401	-127.716	-344.558	758.85	0.047168	0.23437	0.26905
3.068	-48.717	52.8283	142.0612	0.10376	0.011963	0.063233	-19.051	166.71	1158.6196	-1.2163	1.1899	0.38086	33.3305	-5.1189	1964.349	-1.9719	1.6961	0.14659	-187.522	-445.942	792.45	0.030762	0.23682	0.27295
3.07	-53.911	46.6994	147.7856	0.098145	0.018066	0.071777	-117.1932	133.89954	1200.299	-1.2925	1.2319	0.40918	29.54766	63.682	1968.639	-1.984	1.6691	0.14619	-170.94	-469.616	836.134	0.012598	0.24346	0.27071
3.072	-32.198	45.819	148.42948	0.086426	0.02002	0.070313	-116.672	48.6	1271.66	-1.4663	1.2876	0.47852	17.008	64.302	1964.864	-1.9877	1.6371	0.14209	-187.962	-355.276	956.2925	-0.013769	0.27236	0.26426
3.074	-37.726	36.541	149.3675	0.080322	0.032227	0.083008	-162.4996	-5.54000000000002	1333.931	-1.5987	1.3106	0.53027	-53.658	99.8223	1981.226	-1.9858	1.6021	0.14307	-241.255	-216.952	1133.734	-0.054004	0.33135	0.24707
3.076	-13.137	36.812	156.005	0.070801	0.040527	0.091309	-151.519	-125.524	1409.44	-1.707	1.3223	0.57471	-88.8416	66.532	1986.9026	-1.9736	1.5685	0.13115	-238.072	-101.7012	1198.6648	-0.12256	0.4208	0.24453
3.078	-20.761	50.6553	127.7515	0.059082	0.050781	0.094238	-151.899	-225.913	1443.2368	-1.7886	1.3403	0.62109	-134.601	78.5923	1969.0219	-1.9522	1.531	0.12364	-164.496	-108.217	1205.757	-0.20313	0.52344	0.26318
3.08	-12.605	59.95098	102.5012	0.050293	0.059082	0.099121	-187.696	-292.994	1479.31672	-1.7988	1.3457	0.63428	-151.205	37.1549	2009.242	-1.9175	1.4954	0.11972	-90.75	-165.232	1292.6301	-0.30908	0.60049	0.3081
3.082	-32.233	54.9458	109.5552	0.036133	0.070801	0.10498	-68.7944	-360.29	1511.397	-1.7573	1.3638	0.66406	-147.865	51.493	2016.3431	-1.8882	1.4637	0.11631	-57.374	-202.6198	1478.112	-0.43819	0.66983	0.36201
3.084	-46.495	43.825	120.4919	0.024414	0.079102	0.10864	-0.467999999999996	-364.62	1490.9821	-1.6875	1.3736	0.66699	-87.424	12.7633	2011.1921	-1.8633	1.4336	0.11328	-42.23	-168.375	1737.28	-0.59248	0.73311	0.4124
3.086	-49.954	46.667	104.5539	0.012207	0.08252	0.11475	16.037	-358.42	1547.967	-1.5938	1.3867	0.65479	-92.105	17.67726	1986.267	-1.8413	1.4137	0.11465	-47.566	-77.473	1879.234	-0.75068	0.80351	0.44405
3.088	-56.455	61.148	96.0371	-0.00097656	0.09668	0.1167	72.072	-335.6	1621.349	-1.4341	1.4067	0.63672	-93.649	-7.613	1961.252	-1.8247	1.3982	0.12285	-43.576	-23.83	1897.897	-0.89795	0.89893	0.4668
3.09	-60.688	61.748	107.6849	-0.0058594	0.1001	0.12354	55.483	-261.181	1664.87	-1.3633	1.418	0.63135	-56.475	26.493	1958.2791	-1.82	1.3888	0.13262	-108.788	-55.08	1884.026	-1.0521	1.0222	0.50313
3.092	-59.517	57.091	113.2722	-0.01416	0.10352	0.12598	14.089	-224.266	1720.682	-1.2559	1.4277	0.62158	18.243	73.53	1944.969	-1.8184	1.3856	0.14912	-208.444	-148.46	1890.685	-1.2094	1.1754	0.55684
3.094	-66.055	55.1834	104.431	-0.018799	0.10938	0.12744	20.605	-176.7477	1683.753	-1.2233	1.4202	0.60767	17.249	152.519	1933.541	-1.832	1.3887	0.16602	-266.32	-206.44	1955.316	-1.3836	1.3536	0.62246
3.096	-51.907	58.81568	81.5515	-0.015625	0.11182	0.13135	-52.278	-132.294	1657.721	-1.2026	1.4126	0.61133	33.8735	205.811	1929.355	-1.8499	1.3884	0.18789	-302.107	-303.962	2015.4292	-1.5805	1.536	0.69658
3.098	-36.892	40.7075	77.8737	-0.0063477	0.11035	0.11719	-71.284	-108.163	1655.248	-1.1973	1.3867	0.61279	39.9922	239.748	1903.5407	-1.8679	1.3872	0.20449	-308.662	-407.58	2062.675	-1.8042	1.6978	0.77539
3.1	-39.163	31.013	68.3735	-0.003418	0.11328	0.12549	-113.19	-54.34	1641.462	-1.1982	1.3828	0.61475	61.9082	265.099	1838.7851	-1.8753	1.3853	0.22129	-236.609	-502.24	2078.164	-2.0606	1.8311	0.84863
3.102	-58.303	18.721	85.3811	0.0092773	0.11475	0.12354	-175.2613	-67.88	1678.749	-1.207	1.3711	0.60889	28.007	301.693	1791.9902	-1.8768	1.3822	0.23174	-71.971	-518.94	2071.438	-2.3035	1.9226	0.91572
3.104	-63.712	35.285	85.7609	0.018798	0.11206	0.12085	-127.298	-106.77	1701.068	-1.2085	1.3843	0.61181	48.619	323.726	1779.253264	-1.8691	1.375	0.24316	39.8023	-465.93	2042.571	-2.5304	1.9723	0.98486
3.106	-51.854	38.5098	78.343	0.032227	0.10938	0.11279	-81.475	-123.403	1701.217	-1.2148	1.4043	0.61182	31.732	305.903	1778.245	-1.8509	1.3655	0.25908	109.83	-414.34	2089.2603	-2.6868	1.9969	1.0294
3.108	-57.281	32.0192	96.5394	0.050293	0.10693	0.11084	-58.393	-173.6343	1740.507	-1.2319	1.4517	0.6377	33.4708	277.726	1761.877	-1.821	1.3563	0.27129	100.1759	-371.91	2157.911	-2.7476	2.0024	1.0576
3.11	-68.4139	33.8727	82.5193	0.055664	0.10352	0.10254	-24.681	-175.282	1776.801	-1.2534	1.4771	0.66406	50.565	217.153	1759.718	-1.7847	1.3466	0.27988	57.066	-340.933	2220.583	-2.6801	2.0063	1.0497
3.112	-65.243	36.021	96.059	0.071777	0.10205	0.092285	-94.008	-190.133	1821.608	-1.3325	1.5278	0.71191	52.4274	198.901	1732.5627	-1.7428	1.3308	0.28623	80.8716	-282.872	2246.351	-2.5018	2.02	1.011
3.114	-53.807	31.786	83.7267	0.087647	0.10058	0.089843	-108.951	-212.06	1890.711	-1.4541	1.5762	0.74854	40.348	177.351	1746.498	-1.6948	1.3091	0.28906	46.515	-244.596	2233.858	-2.2444	2.0274	0.95352
3.116	-50	39.055	61.316	0.10205	0.097168	0.082031	-133.74	-214.883	1928.611	-1.5195	1.6055	0.76611	7.662	202.118	1699.88	-1.6432	1.2872	0.28828	-9.86899999999999	-180.96	2216.497	-1.9741	2.0111	0.88828
3.118	-41.809	39.4509	47.667	0.11719	0.097168	0.071777	-201.281	-257.079	1980.566	-1.6523	1.6523	0.80029	-17.414	179.84	1665.341	-1.5891	1.268	0.29014	-104.974	-128.78	2177.633	-1.7446	1.9712	0.83203
3.12	-30.452	31.508	66.0152	0.12451	0.09668	0.071289	-194.0335	-247.916	2000.664	-1.7524	1.6919	0.81982	-8.867	192.246	1631.198	-1.5332	1.2348	0.28857	-166.958	-95.94	2103.092	-1.5874	1.8993	0.78672
3.122	0.235999999999997	28.0306	76.2003	0.1333	0.091797	0.066895	-235.624	-186.937	1955.293	-1.8457	1.7363	0.83838	-45.621	155.463	1598.405	-1.4798	1.2099	0.28769	-208.715	-130.55	2022.907	-1.4871	1.8117	0.75479
3.124	-25.457	20.467	67.22	0.14477	0.089356	0.061279	-274.884	-157.87	1920.1245	-1.9429	1.7817	0.86328	-60.59	208.274	1538.701	-1.4238	1.1807	0.28467	-136.403	-165.44	2048.92	-1.4191	1.7179	0.73213
3.126	-15.977	23.005	72.84227	0.15137	0.086426	0.056641	-213.9929	-97.863	1882.506	-1.9897	1.7993	0.87598	-110.954	203.551	1495.0612	-1.3669	1.1405	0.27695	-32.67	-194.684	2105.744	-1.3745	1.6509	0.71406
3.128	-27.944	15.70673	93.945	0.15869	0.078125	0.051758	-248.718	-88.338	1877.082	-2.0659	1.8247	0.90918	-165.152	310.198	1406.187	-1.3062	1.1056	0.26367	73.808	-230.1312	2164.662	-1.3467	1.6133	0.70068
3.13	-28.483	17.751	87.985	0.15918	0.07666	0.049316	-206.4777	-74.9078	1888.992	-2.0943	1.8262	0.9253	-168.274	314.524	1359.699	-1.2448	1.0708	0.25195	122.314	-234.119	2183.591	-1.3391	1.6196	0.69883
3.132	-39.742	22.7471	57.1006	0.16797	0.074707	0.047363	-114.05	-25.4438	1896.566	-2.1074	1.8262	0.93799	-162.013	370.112	1285.5021	-1.1862	1.0346	0.24795	3.55499999999999	-223.724	2184.732	-1.3573	1.6466	0.71738
3.134	-29.73	24.417	50.5926	0.17236	0.069092	0.042969	-144.714	-3.938	1888.817	-2.0757	1.8149	0.94141	-148.359	318.645	1259.3257	-1.125	1	0.23633	-99.332	-182.496	2212.985	-1.4077	1.6899	0.75527
3.136	-41.47	9.93725	53.9128	0.17285	0.064453	0.041992	-99.941	37.956	1901.1299	-2.0542	1.8071	0.9375	-106.1501	362.681	1173.623	-1.068	0.95947	0.22686	-178.7649	-151.498	2262.856	-1.5132	1.7585	0.79219
3.138	-37.545	7.2655	62.632	0.17334	0.0625	0.037109	-104.966	85.51628	1887.5173	-1.9863	1.7852	0.93213	-96.3444	280.296	1125.123	-1.0093	0.92529	0.22012	-247.7296	-139.528	2316.41	-1.6479	1.8306	0.81543
3.14	-34.415	11.6276	65.572	0.17627	0.060547	0.041992	-138.171	57.925	1900.0028	-1.9382	1.7688	0.92407	-112.1266	339.1495	1068.871	-0.94717	0.88662	0.20918	-291.721	-110.654	2300.157	-1.7857	1.8943	0.84092
3.142	-32.313	22.739	77.1373	0.17871	0.06543	0.037109	-95.798	36.474	1938.832	-1.9004	1.752	0.9165	-96.09237	272.913	1026.972	-0.8873	0.84395	0.2	-303.295	-86.159	2254.403	-1.9148	1.943	0.86651
3.144	-20.807	-3.476	113.2225	0.17407	0.060791	0.039062	-137.598	-24.33	1963.7032	-1.8813	1.7192	0.91016	-60.263	332.023	982.992	-0.82813	0.80176	0.19238	-334.907	-43.511	2174.198	-2.0367	1.9758	0.89151
3.146	-31.167	-36.469	144.0188	0.17529	0.062988	0.041992	-99.933	-46.987	2011.492	-1.8765	1.6978	0.91016	-34.683	259.42	951.9552	-0.77129	0.75879	0.18389	-335.896	-13.887	2138.485	-2.1439	1.9982	0.90752
3.148	-38.076	-51.692	177.9961	0.16895	0.07666	0.046387	-79.31	-32.538	2000.5177	-1.8921	1.6665	0.90625	-73.859	304.878	896.3808	-0.71152	0.71406	0.1748	-267.689	14.109	2121.38	-2.2207	2.0039	0.92041
3.15	-44.647	-33.374	239.3583	0.16406	0.083496	0.041992	-135.696	-30.70816	1972.098	-1.9106	1.6372	0.91162	-41.426	232.6071	883.363	-0.65918	0.675	0.16973	-229.6157	20.431	2113.0119	-2.2481	1.9866	0.92989
3.152	-65.144	-59.149	290.821	0.13721	0.11377	0.041504	-92.429	-30.39565	1945.9628	-1.9233	1.6157	0.91016	-36.241	293.585	832.156	-0.60791	0.6292	0.16182	-145.431	55.736	2093.748	-2.2378	1.9735	0.92852
3.154	-119.127	-100.295	314.104	0.10888	0.14673	0.049316	-80.306	-14.042	1916.843	-1.9355	1.5879	0.90283	-45.914	237.263	764.994	-0.55615	0.58643	0.15186	-126.917	101.78	2084.98	-2.2019	1.9595	0.91758
3.156	-134.1163	-133.285	336.0498	0.070313	0.18848	0.052734	-70.561	-5.59399999999999	1919.423	-1.9355	1.5703	0.89697	9.80399999999999	309.903	693.753	-0.50293	0.54854	0.1458	-124.262	154.055	2063.5105	-2.1469	1.9527	0.90166
3.158	-95.89	-126.261	365.0604	-0.0039063	0.23828	0.075684	-20.602	39.399	1946.053	-1.9233	1.5513	0.88086	28.594	231.928	641.6582	-0.44815	0.50596	0.13613	-155.9508	184.139	2067.172	-2.0737	1.9497	0.88086
3.16	-89.9444	-98.1444	390.1211	-0.043945	0.26221	0.09375	-56.759	81.538	1942.1248	-1.8963	1.5374	0.87232	26.665	295.425	577.658	-0.39736	0.46377	0.13066	-184.107	154.871	2062.357	-2.011	1.9339	0.86289
3.162	-109.5628	-65.706	437.4531	-0.13916	0.31396	0.13037	-54.461	103.312	1950.205	-1.8726	1.5259	0.86133	29.945	260.7954	536.2725	-0.34443	0.42354	0.12519	-193.6989	112.283	2056.57	-1.9581	1.9075	0.8293
3.164	-101.632	-47.4099	455.6686	-0.22436	0.34814	0.15748	-81.702	163.45	1889.572	-1.834	1.5156	0.84814	28.476	353.485	489.9929	-0.29053	0.38281	0.1167	-190.741	83.0659	2049.6748	-1.9163	1.872	0.80391
3.166	-68.852	-18.555	493.1406	-0.30078	0.3877	0.17969	-146.304	198.424	1833.158	-1.8159	1.5083	0.83984	-9.788	284.401	475.123	-0.24063	0.34336	0.10439	-114.258	83.551	2028.965	-1.8826	1.8354	0.77197
3.168	-20.777	6.75899999999999	533.27789	-0.39502	0.44287	0.21143	-115.046	223.783	1831.689	-1.771	1.4985	0.82422	-27.691	323.655	430.9049	-0.18261	0.31026	0.092578	-80.682	129.199	1991.084	-1.8569	1.8071	0.74414
3.17	-27.381	41.961	576.5729	-0.43848	0.47119	0.22363	-175.3944	246.035	1816.667	-1.7334	1.4912	0.80981	-62.625	235.244	392.0933	-0.13028	0.279	0.078125	-82.836	125.715	1944.961	-1.8416	1.7818	0.72432
3.172	-17.564	87.73	647.8839	-0.52686	0.5415	0.24707	-190.226	177.978	1829.112	-1.6948	1.481	0.79443	-81.818	270.793	326.198	-0.086914	0.24541	0.070996	-29.75	129.69624	1899.014	-1.8323	1.7653	0.69883
3.174	-28.872	132.457	731.5282	-0.59301	0.59765	0.26782	-150.058	129.163	1826.2891	-1.6445	1.4707	0.77881	-78.901	203.191	311.8961	-0.049316	0.2207	0.062012	-7.581	97.707	1859.307	-1.821	1.7469	0.67617
3.176	-39.363	156.468	810.635	-0.66309	0.6499	0.28955	-189.206	84.362	1806.5945	-1.6245	1.4673	0.77148	-132.1533	232.022	279.941	-0.022168	0.18906	0.054687	14.829	131.873	1825.9282	-1.8151	1.7373	0.65146
3.178	-64.4419	153.828	860.733	-0.76123	0.73291	0.31152	-135.4995	49.898	1810.73	-1.5781	1.4512	0.75244	-133.168	145.99745	280.6389	0.0027344	0.171	0.042383	37.096	190.681	1798.815	-1.7944	1.7212	0.63379
3.18	-57.867	97.711	939.216	-0.81445	0.77344	0.33057	-99.429	75.412	1781.3961	-1.5434	1.437	0.7295	-121.1711	151.168	242.2004	0.021875	0.15108	0.038086	35.397	261.925	1744.455	-1.7697	1.7049	0.61885
3.182	-61.173	28.687	1021.903	-0.93359	0.84766	0.36377	-126.847	90.228	1745.136	-1.5059	1.4199	0.71338	-135.603	68.124	231.0552	0.025098	0.13105	0.03457	-42.68	293.65608	1697.207	-1.746	1.6864	0.60273
3.184	-80.36	-32.546	1093.7337	-1.0352	0.89844	0.39063	-74.155	115.763	1745.337	-1.4507	1.3872	0.68945	-133.7674	92.541	212.3546	0.019531	0.11475	0.034668	-82.2	287.343	1640.776	-1.7151	1.661	0.58633
3.186	-77.51	-64.1155	1150.4079	-1.1382	0.94189	0.41992	-95.4	156.135	1725.4689	-1.4253	1.3735	0.67383	-137.2149	40.443	205.323	0.010156	0.099022	0.041894	-106.61588	291.939	1580.8642	-1.6716	1.6284	0.56484
3.188	-36.5253	-76.17556	1190.0198	-1.2813	0.99219	0.45459	-115.4312	137.901	1708.248	-1.3745	1.3384	0.65039	-150.9195	101.51	173.7597	0.0014649	0.090234	0.047754	-106.297	302.52	1577.345	-1.6152	1.5918	0.54443
3.19	-1.663	-104.747	1231.17	-1.3472	1.0103	0.4707	-75.428	159.891	1680.635	-1.3415	1.3147	0.63111	-145.523	65.78	136.733	-0.01416	0.070313	0.057519	-144.2582	325.56	1560.252	-1.5535	1.5559	0.51885
3.192	9.573	-132.241	1257.833	-1.4585	1.0337	0.50195	-126.6542	187.505	1619.8482	-1.3105	1.2832	0.60791	-115.5887	92.8588	109.588	-0.030567	0.057129	0.070605	-171.5405	296.04	1476.469	-1.4875	1.5211	0.49365
3.194	22.035	-154.665	1310.0922	-1.5298	1.0464	0.52246	-111.458	184.522	1563.9311	-1.2598	1.2441	0.58301	-108.9089	43.1849	108.9601	-0.049805	0.043945	0.083984	-179.698	241.836	1379.82	-1.4149	1.4727	0.46318
3.196	7.083	-131.36	1359.987	-1.5796	1.0532	0.53516	-67.089	221.824	1509.106	-1.2412	1.2227	0.57471	-95.538	61.7707	76.0589	-0.065625	0.031933	0.092481	-185.359	208.39	1296.755	-1.3406	1.4242	0.43213
3.198	-1.396	-106.43	1414.68	-1.5913	1.063	0.5415	-76.931	235.823	1448.499	-1.1909	1.1753	0.54883	-84.742	65.136	68.2891	-0.081055	0.021875	0.096093	-162.813	175.827	1277.488	-1.2656	1.3691	0.40283
3.2	-19.386	-97.377	1450.287	-1.5762	1.0664	0.53955	-4.78599999999999	222.438	1430.7067	-1.1572	1.1377	0.53125	-60.477	88.124	65.5	-0.098629	0.016016	0.10781	-79.322	199.67	1276.696	-1.1935	1.3108	0.3708
3.202	-3.835	-79.4186	1440.242	-1.5098	1.0654	0.52783	6.402	240.703	1392.902	-1.1284	1.1001	0.51123	-51.07	62.089	43.631	-0.12031	0.016211	0.11768	-83.593	225.44	1237.717	-1.1226	1.252	0.33829
3.204	7.445	-53.609	1431.2834	-1.4019	1.0571	0.50195	2.673	206.3543	1370.2631	-1.0728	1.0532	0.49268	-13.844	40.3684	41.972	-0.15039	0.020508	0.12988	-109.269	275.174	1175.072	-1.0527	1.1945	0.30898
3.206	-10.496	-20.141	1398.137	-1.3379	1.0488	0.48584	39.999	193.2271	1371.121	-1.0503	1.0298	0.48047	1.353	13.452	22.1434	-0.18516	0.032227	0.14687	-133.44	289.121	1100.3578	-0.98738	1.1443	0.28076
3.208	-41.72	-16.901	1394.043	-1.2065	1.0239	0.44727	0.781999999999996	195.901	1337.4869	-0.99756	0.98096	0.4541	26.309	6.804	22.265	-0.21397	0.044238	0.1625	-118.284	298.1441	1035.834	-0.92432	1.0962	0.25586
3.21	-83.9985	-24.591	1400.329	-1.1294	1.0069	0.42188	2.632	152.911	1324.85	-0.95679	0.93579	0.43774	26.876	29.4271	30.6177	-0.23545	0.058301	0.17266	-120.9962	314.577	958.619	-0.86553	1.0448	0.2331
3.212	-48.946	-44.998	1408.185	-1.0645	0.98828	0.39893	-24.301	155.809	1270.12	-0.92188	0.89453	0.4126	31.94	24.0365	42.6536	-0.2497	0.070508	0.18018	-113.928	296.8	884.59279	-0.80732	0.98916	0.21533
3.214	-31.864	-74.663	1429.852	-1.0156	0.98047	0.38135	-92.0674	140.44	1198.333	-0.86719	0.83203	0.38672	31.087	33.138	38.235	-0.25977	0.083984	0.19092	-94.8704	294.598	820.108	-0.75537	0.93174	0.19112
3.216	-19.693	-99.73897	1460.384	-1.0029	0.97656	0.37305	-53.761	140.5484	1179.391	-0.83545	0.80322	0.37549	32.315	10.553	62.4112	-0.26631	0.088574	0.19854	-99.6418	283.509	748.634	-0.70274	0.87051	0.16983
3.218	-27.223	-124.892	1512.8178	-0.99951	0.98486	0.37402	-81.742	207.881	1124.0999	-0.78076	0.74268	0.34277	28.884	33.36	56.187	-0.26152	0.088672	0.20401	-59.718	295.154	686.49	-0.6499	0.81104	0.15332
3.22	-46.774	-132.891	1552.882	-1.0122	1.0005	0.37768	-83.0609	206.6991	1082.7246	-0.73999	0.69703	0.323	10.912	3.606	77.324	-0.25214	0.083204	0.20869	-1.982	285.737	616.128	-0.59121	0.75059	0.13203
3.222	-51.111	-151.087	1577.633	-1.0386	1.02	0.37988	-31.905	215.946	1051.3765	-0.69727	0.65137	0.30322	-20.741	45.829	68.4	-0.23584	0.075489	0.21406	27.285	278.201	554.091	-0.52774	0.69922	0.11973
3.224	-68.373	-170.893	1574.913	-1.0693	1.0488	0.38232	-86.4433	231.5598	983.171	-0.646	0.59619	0.27539	-43.35	41.0907	69.211	-0.22021	0.064453	0.21924	36.736	243.064	499.803	-0.46758	0.63828	0.093554
3.226	-64.047	-176.627	1593.252	-1.0835	1.0649	0.38574	-61.734	202.717	947.4029	-0.62061	0.56689	0.2666	-57.902	96.362	36.106	-0.20869	0.049609	0.22744	63.559	207.288	454.556	-0.40488	0.58438	0.078516
3.228	-91.73	-181.473	1588.7958	-1.1172	1.1055	0.39307	-51.129	237.526	887.3312	-0.56299	0.50049	0.23828	-56.332	63.8923	38.074	-0.19346	0.033203	0.23096	71.877	222.7184	432.9884	-0.33594	0.53125	0.059082
3.23	-95.288	-154.6604	1576.1303	-1.1365	1.136	0.39893	-84.0975	251.953	824.1691	-0.52661	0.4563	0.21802	-73.187	89.208	27.066	-0.17041	0.016015	0.22588	48.611	199.672	419.01	-0.27744	0.475	0.040625
3.232	-124.844	-127.7643	1557.037	-1.1597	1.1685	0.40137	-44.82	239.6421	781.9008	-0.4917	0.4165	0.19678	-101.8587	49.477	45.7163	-0.14082	0.0025391	0.2167	26.489	198.386	367.1453	-0.21875	0.42627	0.025195
3.234	-133.8634	-94.1621	1546.818	-1.1895	1.2109	0.41797	-97.0406	274.541	732.125	-0.43408	0.35889	0.17188	-124.7003	88.795	54.8682	-0.10449	-0.0048828	0.20801	-48.746	163.089	313.968	-0.16797	0.37744	0.00097652
3.236	-118.5238	-83.5316	1581.6574	-1.2031	1.2285	0.42627	-107.33972	257.757	702.488	-0.40625	0.3335	0.16211	-117.703	49.7971	77.48193	-0.069824	-0.014356	0.20342	-79.388	170.018	279.434	-0.12129	0.32715	-0.010156
3.238	-127.0408	-77.1659	1590.612	-1.2456	1.2583	0.43896	-70.459	239.837	677.968	-0.35059	0.28369	0.13672	-105.001	72.864	77.13898	-0.042676	-0.025879	0.19345	-69.3098	179.813	259.6335	-0.078613	0.28125	-0.032227
3.24	-99.117	-55.851	1606.8971	-1.2763	1.2773	0.44873	-91.1322	245.594	646.2544	-0.31225	0.24853	0.1184	-120.395	-1.234	106.015	-0.0086914	-0.036035	0.18447	-64.3574	165.564	250.748	-0.037304	0.23672	-0.05
3.242	-100.309	-13.702	1610.658	-1.3184	1.2949	0.46338	-54.331	167.1707	632.149	-0.27344	0.22266	0.10205	-122.366	38.71133	94.058	0.030957	-0.052637	0.1708	-39.033	159.507	211.506	-0.0024413	0.19209	-0.063769
3.244	-93.821	2.95999999999999	1633.6625	-1.3818	1.3203	0.49268	-42.551	171.011	598.0489	-0.22607	0.18213	0.081543	-123.967	-5.257	85.9628	0.078613	-0.070313	0.14844	-51.936	112.0124	138.9209	0.033496	0.15342	-0.07666
3.246	-125.076	-15.182	1637.738	-1.4141	1.3379	0.50244	-54.659	155.84	543.915	-0.20313	0.16602	0.064453	-109.073	30.878	62.291	0.13525	-0.085449	0.13193	-69.691	78.718	102.7102	0.063477	0.10908	-0.095312
3.248	-132.892	-51.5259	1653.8693	-1.4961	1.3691	0.54443	14.312	122.436	505.8611	-0.16602	0.12842	0.050293	-102.47	-22.04	73.3873	0.19189	-0.11211	0.11298	-74.834	66.903	77.0336	0.091797	0.07373	-0.12158
3.25	-133.282	-86.4166	1691.5737	-1.5542	1.3999	0.56054	-6.814	172.7385	460.5579	-0.13916	0.10327	0.035645	-86.839	-6.395	58.0137	0.25322	-0.13633	0.093066	-79.087	94.121	57.9134	0.12002	0.039648	-0.13193
3.252	-134.5498	-108.457	1685.548	-1.6147	1.4165	0.58203	5.589	145.637	433.6261	-0.11328	0.078125	0.019531	-54.713	-48.299	78.43809	0.30723	-0.15967	0.069336	-63.929	97.2429	60.59925	0.14365	0.0060546	-0.15059
3.254	-128.3948	-115.079	1704.731	-1.689	1.4321	0.61035	33.3	139.335	419.0762	-0.088867	0.047852	-0.0029297	-7.553	4.833	53.658	0.36328	-0.17773	0.044922	-107.746	81.5858	85.27025	0.16514	-0.024805	-0.16895
3.256	-149.7517	-104.834	1696.701	-1.728	1.4409	0.62695	-12.358	177.1072	391.021	-0.067871	0.029297	-0.012207	-18.095	-11.4489	59.467	0.40596	-0.18838	0.023926	-149.036	68.5	106.1694	0.18594	-0.054297	-0.18242
3.258	-132.894	-100.282	1702.065	-1.7871	1.4473	0.65283	4.27099999999999	132.4131	367.3107	-0.048828	0.01123	-0.022461	-12.183	51.149	61.828	0.43897	-0.20215	0.0019531	-161.828	51.527	100.24	0.19824	-0.081055	-0.19922
3.26	-117.844	-98.498	1696.9385	-1.8203	1.4468	0.66846	18.344	169.742	323.86857	-0.022949	-0.013672	-0.033691	-3.79600000000001	31.562	52.7877	0.46514	-0.21504	-0.01914	-142.272	66.099	74.792	0.20605	-0.09697	-0.2043
3.262	-99.759	-89.659	1691.9946	-1.8408	1.4434	0.67432	-13.614	176.973	271.9624	-0.015137	-0.020508	-0.040039	36.948	76.639	29.848	0.48594	-0.22637	-0.032813	-108.92	22.2736	34.8943	0.20762	-0.11396	-0.2122
3.264	-74.069	-70.233	1709.1678	-1.8418	1.4336	0.67822	4.118	133.594	247.8348	0.00097656	-0.037598	-0.055176	29.648	34.434	51.6884	0.49756	-0.23975	-0.047852	-100.662	19.301	23.272	0.20332	-0.12725	-0.21416
3.266	-81.214	-39.0627	1716.25919	-1.834	1.4277	0.67676	-24.116	163.98	213.603	0.016601	-0.052002	-0.063965	28.254	44.395	38.7348	0.50674	-0.25147	-0.062695	-59.752	-10.762	29.842	0.19355	-0.13926	-0.20918
3.268	-88.26	5.9698	1700.996	-1.8003	1.4146	0.6709	-29.027	121.2977	193.883	0.032227	-0.060059	-0.074219	1.916	17.614073	41.1813	0.50869	-0.25654	-0.070996	-15.495	-13.515	33.993	0.17432	-0.14307	-0.2002
3.27	-113.729	53.208	1676.164	-1.7693	1.4016	0.66333	-2.779	94.0109	188.09	0.051758	-0.075684	-0.084961	12.017	36.937	30.2366	0.50635	-0.26475	-0.077246	11.318	8.603	43.7265	0.14268	-0.14707	-0.19854
3.272	-100.557	72.997	1673.8916	-1.7432	1.3945	0.65723	-27.557	113.6187	178.443	0.063477	-0.078613	-0.093262	4.997	5.894	14.6844	0.49932	-0.26455	-0.081836	29.053	6.051	48.7073	0.10401	-0.14854	-0.19034
3.274	-103.62	70.112	1682.4152	-1.7109	1.3789	0.65088	-21.553	44.756	165.5677	0.083496	-0.088379	-0.10986	5.852	14.8664	23.522	0.49219	-0.26367	-0.07666	19.392	45.254	43.2854	0.061035	-0.1419	-0.17822
3.276	-110.339	63.082	1665.8983	-1.7031	1.3691	0.65186	-43.704	66.8924	134.3522	0.10132	-0.096436	-0.1167	-21.907	1.395	47.3004	0.47744	-0.25429	-0.080957	-23.253	48.161	43.537	0.014844	-0.14248	-0.16162
3.278	-111.2007	51.915	1668.0764	-1.6831	1.356	0.65039	-90.5286	61.569	111.9573	0.11768	-0.10352	-0.12744	-25.039	30.4381	45.203	0.46133	-0.24375	-0.076953	-30.56	86.621	38.279	-0.026855	-0.13574	-0.14697
3.28	-91.414	39.637	1678.775	-1.6784	1.3401	0.65698	-70.642	15.0161	117.355	0.13281	-0.10059	-0.1416	-43	42.2997	51.7634	0.43398	-0.22812	-0.06875	-24.522	70.402	42.3982	-0.074414	-0.12959	-0.12773
3.282	-97.964	6.29	1689.9036	-1.6738	1.3301	0.65674	-81.2714	58.5457	115.8329	0.13184	-0.10352	-0.14746	-75.0942	48.1811	50.8978	0.40361	-0.21377	-0.058984	-7.438	59.531	74.267	-0.1207	-0.1168	-0.11309
3.284	-96.466	-29.903	1672.485	-1.6694	1.3169	0.66699	-80.4363	17.523	110.6876	0.14111	-0.10352	-0.16113	-117.572	45.3478	52.3345	0.36719	-0.19336	-0.044434	12.282	24.864	56.1541	-0.15976	-0.10664	-0.10176
3.286	-75.927	-44.7602	1667.9448	-1.668	1.3115	0.66455	-81.448	6.0251	105.851	0.14575	-0.10425	-0.16431	-98.7833	43.6538	57.911	0.31826	-0.16904	-0.039063	-34.883	20.492	36.366	-0.1791	-0.095508	-0.088184
3.288	-80.598	-23.283	1659.791	-1.6543	1.2969	0.66357	-109.809	53.7367	81.092	0.14697	-0.10449	-0.16602	-117.033	58.9971	52.9946	0.26904	-0.1457	-0.023145	-45.932	58.757	26.133	-0.18701	-0.088867	-0.081543
3.29	-77.823	4.064	1676.9315	-1.6392	1.2906	0.65918	-63.12	21.735	55.7052	0.14209	-0.10645	-0.16504	-96.6099	62.4531	64.4277	0.21396	-0.11914	-0.005957	-22.497	48.006	37.489	-0.17959	-0.089941	-0.078516
3.292	-99.268	24.887	1691.157	-1.6265	1.2817	0.66016	-59.277	71.153	36.45	0.13184	-0.10205	-0.16357	-127.263	68.94	76.396	0.16172	-0.090137	0.0045899	-31.458	67.0809	34.71	-0.15547	-0.08877	-0.081348
3.294	-93.0125	41.239	1676.402	-1.5996	1.2656	0.64307	-61.594	73.123	15.397	0.1123	-0.10107	-0.15967	-139.465	47.3923	87.304	0.11084	-0.058105	0.027832	-34.649	11.13	32.7021	-0.12109	-0.093066	-0.086817
3.296	-100.565	53.5148	1641.236	-1.5874	1.2603	0.64063	-13.763	15.90495	27.9415	0.1023	-0.097901	-0.15747	-131.12	75.528	55.82246	0.061328	-0.027734	0.046875	-64.322	-2.785	34.4749	-0.082617	-0.094728	-0.093359
3.298	-93.5212	75.0627	1598.8336	-1.5581	1.2456	0.6167	-44.348	64.937	27.763	0.090332	-0.098145	-0.14893	-77.521	48.768	36.642	0.01582	0.0063477	0.067383	-100.3868	-26.66353	55.404	-0.043945	-0.09668	-0.10889
3.3	-89.836	102.604	1582.135	-1.5337	1.2324	0.60595	-24.513	30.236	28.6251	0.072266	-0.10547	-0.14111	-85.60096	64.4131	43.227	-0.028711	0.041895	0.07832	-133.1455	-5.06048	95.095	-0.0064453	-0.1041	-0.10029
3.302	-80.649	129.824	1556.743	-1.5112	1.2212	0.5918	-1.115	11.5554	50.9497	0.06543	-0.10205	-0.14502	-71.988	23.976	71.495	-0.069629	0.079394	0.10684	-96.77471	41.954	81.149	0.022266	-0.11836	-0.10723
3.304	-70.108	133.189	1558.638	-1.478	1.2075	0.57324	-29.352	69.1438	38.8845	0.051758	-0.11572	-0.13672	-70.0272	39.48415	73.9058	-0.10498	0.11621	0.13086	-92.14	50.342	53.703	0.047656	-0.13828	-0.11425
3.306	-59.714	119.207	1541.242	-1.4663	1.1958	0.56055	-14.221	12.90994	37.2742	0.048584	-0.11792	-0.13452	-55.981	-6.194	109.289	-0.13769	0.14395	0.15244	-115.2363	67.565	41.9074	0.067578	-0.1582	-0.11846
3.308	-61.758	115.804	1519.389	-1.4331	1.1899	0.54688	-15.863	45.82	35.768	0.04834	-0.12549	-0.13574	-39.917	17.2066	86.758	-0.16621	0.1708	0.16846	-142.727	22.4329	50.9233	0.089355	-0.18359	-0.12695
3.31	-57.821	110.9072	1511.1493	-1.4063	1.1841	0.53442	-17.766	44.654	32.9019	0.050781	-0.13623	-0.13086	-12.024	-31.2863	105.786	-0.18262	0.19228	0.1833	-150.552	32.0536	64.0689	0.11182	-0.20752	-0.13808
3.312	-74.399	96.2401	1514.6115	-1.3848	1.1836	0.521	8.034	-23.5725	48.276	0.055664	-0.14404	-0.13379	-15.56	27.306	93.278	-0.19424	0.21104	0.19668	-100.8762	23.907	37.281	0.13877	-0.22559	-0.15118
3.314	-54.205	88.1966	1508.0405	-1.3462	1.1743	0.50684	-16.444	24.8626	54.155	0.061523	-0.146	-0.13135	17.466	5.5591	71.3092	-0.19482	0.22314	0.20264	-78.464	25.011	16.5105	0.17002	-0.2416	-0.16367
3.316	-68.054	83.0934	1488.887	-1.3257	1.1743	0.49316	-19.389	-0.228999999999999	47.0639	0.066407	-0.14746	-0.1294	16.932	57.148	49.974	-0.1872	0.22989	0.21524	-54.444	17.925	10.981	0.20342	-0.25283	-0.18096
3.318	-49.318	67.794	1463.801	-1.2832	1.1631	0.479	-3.245	-3.905	38.8322	0.067383	-0.14893	-0.13135	32.709	-19.8956	62.3501	-0.17217	0.23662	0.21797	-65.71	18.899	19.437	0.23682	-0.25928	-0.19434
3.32	-60.915	60.165	1439.014	-1.2505	1.1528	0.46362	-18.558	62.4698	45.072	0.062988	-0.1499	-0.12988	16.194	-3.6281	34.8191	-0.16006	0.24131	0.21797	-26.324	43.615	22.108	0.26387	-0.26982	-0.21055
3.322	-60.286	68.561	1421.614	-1.2183	1.147	0.45361	-19.396	20.186	46.9899	0.061035	-0.15186	-0.12598	19.211	-42.242	44.1025	-0.14316	0.24561	0.2166	-30.192	34.66	44.4611	0.28623	-0.27402	-0.22852
3.324	-56.713	102.2745	1390.8766	-1.1855	1.1191	0.43848	-19.498	59.504	43.5919	0.055176	-0.15381	-0.12549	30.771	35.2631	25.863	-0.12891	0.24854	0.20947	-7.688	63.8956	70.28	0.30498	-0.2791	-0.2289
3.326	-51.915	125.19551	1374.758	-1.165	1.1113	0.43311	-48.533	74.9322	47.0132	0.046875	-0.15698	-0.12378	11.655	16.8527	47.159	-0.10449	0.25273	0.2081	-1.266	37.3907	80.124	0.31709	-0.27744	-0.24668
3.328	-40.707	134.4377	1347.208	-1.1323	1.0923	0.41504	-45.757	21.4603	57.515	0.040527	-0.15771	-0.11963	-11.369	53.756	97.1285	-0.082324	0.2545	0.20205	-38.294	46.056	56.295	0.3208	-0.27441	-0.25586
3.33	-41.737	134.0689	1306.879	-1.1013	1.072	0.40503	-102.3251	76.811	49.509	0.024902	-0.15381	-0.10645	-67.731	-43.49	159.7925	-0.065527	0.25645	0.19893	-23.343	35.61	41.647	0.32832	-0.26709	-0.25967
3.332	-49.705	139.797	1287.3611	-1.0732	1.0508	0.39307	-87.3891	54.9826	48.3538	0.019043	-0.15527	-0.10645	-61.884	-70.821	212.642	-0.047852	0.24932	0.20352	-37.439	18.1886	38.797	0.32324	-0.25644	-0.25576
3.334	-59.056	160.404	1261.9431	-1.0308	1.0239	0.375	-73.049	30.1147	38.61	0.0063477	-0.14844	-0.097168	-115.352	-186.375	368.796	-0.03125	0.24805	0.20166	-18.294	25.93	33.1948	0.31582	-0.24707	-0.25264
3.336	-56.346	175.764	1232.6537	-1.0071	0.99636	0.36401	-81.771	64.6923	36.877	-0.0019531	-0.14526	-0.09375	-140.845	-227.235	520.205	-0.017285	0.24932	0.20586	5.332	1.322	34.6506	0.29765	-0.23652	-0.24658
3.338	-66.79	176.544	1187.04	-0.97998	0.97412	0.35547	-74.463	-10.0319	44.78214	-0.0058594	-0.13477	-0.091309	-204.187	-377.204	676.264	-0.017773	0.2583	0.20479	-13.822	27.8745	18.088	0.27393	-0.22754	-0.23828
3.34	-65.9006	165.457	1155.719	-0.94482	0.94775	0.34229	-89.2756	14.8954	45.436	-0.010742	-0.12305	-0.087402	-246.556	-417.978	749.49	-0.036914	0.28447	0.19854	-12.718	35.547	59.342	0.24248	-0.21338	-0.22109
3.342	-73.83	156.741	1160.292	-0.92578	0.93262	0.3374	-76.4598	29.44	48.0316	-0.015625	-0.11426	-0.083008	-267.8481	-454.175	808.848	-0.076758	0.34004	0.19218	-14.536	60.231	68.757	0.20664	-0.20508	-0.20733
3.344	-54.085	147.7104	1135.777	-0.88818	0.90576	0.32422	-38.801	-19.415	58.534	-0.017578	-0.095215	-0.076172	-266.17752	-322.356	905.335	-0.13672	0.41504	0.19678	3.293	50.617	53.3888	0.16563	-0.19297	-0.19443
3.346	-56.824	131.8499	1121.1521	-0.87231	0.87964	0.31738	-50.08	37.8641	60.6854	-0.024903	-0.083008	-0.072754	-334.798	-232.453	1020.204	-0.22881	0.49932	0.2207	-50.871	54.8535	46.7467	0.1206	-0.1751	-0.18115
3.348	-70.8052	117.399	1096.939	-0.84766	0.85352	0.31104	-45.968	-3.515	58.6289	-0.029785	-0.069824	-0.069336	-354.189	-86.189	1055.5998	-0.34297	0.575	0.25518	-75.828	35.693	47.967	0.075684	-0.15723	-0.1665
3.35	-67.074	105.477	1087.988	-0.81738	0.81836	0.29248	-26.924	-11.53788	60.746335	-0.034668	-0.051758	-0.061035	-285.165	-33.276	1106.007	-0.475	0.6418	0.28252	-140.776	27.7884	65.0336	0.033204	-0.13681	-0.14912
3.352	-51.505	99.751	1051.974	-0.80225	0.80322	0.28271	-66.8307	59.95	67.0186	-0.038574	-0.044922	-0.063965	-154.438113	1.29000000000002	1206.30839	-0.61435	0.70703	0.31241	-133.559	53.38	72.35891	-0.01123	-0.11211	-0.13526
3.354	-57.167	108.19	1016.594	-0.76904	0.76855	0.27441	-32.614	9.7914	61.441	-0.037598	-0.029297	-0.055176	-101.924	-10.05	1379.417	-0.75977	0.78418	0.33105	-89.708	30.4232	69.022	-0.052246	-0.088673	-0.12275
3.356	-63.638	117.17	989.7604	-0.74853	0.74609	0.26074	-8.645	35.7336	60.238	-0.035644	-0.017822	-0.053222	-74.105	-10.31	1521.876	-0.89268	0.88291	0.33946	-97.982	29.964	27.4357	-0.089552	-0.059863	-0.10528
3.358	-54.832	129.7847	970.675	-0.72607	0.71826	0.24609	-27.198	39.497	33.6896	-0.032227	-0.012695	-0.050293	-70.658	13.239	1584.374	-1.0172	0.99765	0.35527	-90.325	-2.39769	17.7613	-0.12402	-0.035645	-0.09375
3.36	-52.251	143.3996	927.237	-0.69238	0.68164	0.23291	-8.825	-7.38101	16.621	-0.031738	-0.0029297	-0.045898	-74.957	24.166	1622.7558	-1.1465	1.1316	0.38652	-122.4579	21.9462	23.966	-0.15263	-0.013574	-0.07666
3.362	-69.8497	176.371	885.0038	-0.67725	0.66748	0.229	-8.192	54.712	24.02	-0.026855	0.00097656	-0.04541	-119.713	30.42	1678.061	-1.2809	1.2885	0.44512	-103.8295	29.64	49.04836	-0.17979	0.0042969	-0.073047
3.364	-36.581	184.796	856.9063	-0.64648	0.63086	0.20996	3.28	27.0988	29.768	-0.021484	0.0097656	-0.047852	-120.527	-54.6	1725.946	-1.4277	1.4531	0.51709	-75.583	18.943	65.733	-0.20049	0.021094	-0.065625
3.366	-47.522	172.728	840.3165	-0.62867	0.6084	0.20288	12.215	14.8442	48.976	-0.013184	0.011475	-0.044434	-143.93	-124.89	1750.946	-1.6136	1.5969	0.59531	-64.747	15.745	69.893	-0.21465	0.032617	-0.062793
3.368	-46.514	159.005	807.3701	-0.60352	0.58398	0.19336	-8.426	59.829	46.493	-0.0014648	0.015137	-0.047363	-127.5718	-267.848	1792.867	-1.8115	1.7043	0.65401	-65.529	-8.492	52.509	-0.22217	0.047363	-0.064453
3.37	-46.273	177.0088	760.3705	-0.57715	0.55469	0.18115	2.175	-1.6819	40.696	0.0073242	0.019043	-0.047363	-145.459	-328.89	1831.078	-1.997	1.7703	0.71299	-74.986	25.883	49.468	-0.22129	0.052051	-0.067578
3.372	-22.49	162.0159	743.3243	-0.56201	0.53467	0.17725	-12.009	19.1808	43.97135	0.011719	0.017578	-0.050781	-85.796	-418.753	1888.093	-2.1386	1.8087	0.76152	-82.285	50.173	62.2771	-0.21465	0.057324	-0.069238
3.374	-20.691	155.43076	719.0829	-0.53809	0.50244	0.15967	-47.412	33.195091	57.1336	0.022949	0.016113	-0.053223	15.4556	-393.42	1883.506	-2.2202	1.8208	0.80029	-87.0857	75.391	53.63776	-0.2084	0.065137	-0.075098
3.376	-28.817	141.7771	670.344	-0.51318	0.48364	0.1477	-48.836	-14.04119	43.39	0.029785	0.013184	-0.057373	159.146	-440.09	1870.8436	-2.2093	1.8091	0.81328	-2.491	54.072	39.9984	-0.19365	0.07461	-0.085254
3.378	-43.666	137.812	657.989	-0.48682	0.46338	0.13672	-63.3841	30.370896	41.395	0.030273	0.013672	-0.058594	218.698	-376.21	1897.441	-2.1219	1.8011	0.81104	-12.549	28.6029	16.699	-0.18018	0.079102	-0.09082
3.38	-24.348	128.7089	644.046	-0.45605	0.43164	0.12598	-55.731	-1.414	33.123	0.037109	0.013184	-0.060059	199.757	-380.27	2001.044	-1.9668	1.7891	0.79307	6.33300000000001	6.783	14.992	-0.16455	0.079394	-0.095898
3.382	-20.222	120.120233	640.8471	-0.43896	0.41504	0.11133	-62.243	-19.222	30.5842	0.032227	0.0097656	-0.06543	157.28	-259.577	2059.765	-1.7837	1.78	0.76191	-19.967	13.904	44.423	-0.14414	0.081054	-0.099707
3.384	-34.548	114.9519	616.833	-0.40967	0.38574	0.099121	-82.277	49.7209	30.9953	0.029785	0.010742	-0.069824	114.14	-218.0771	2070.025	-1.6128	1.772	0.74414	-32.153	55.943	43.742	-0.12227	0.08418	-0.10088
3.386	-54.126	108.5607	603.836	-0.39209	0.36084	0.090332	-59.411	22.5313	36.675	0.023682	0.012451	-0.07129	64.096	-139.253	2030.4521	-1.483	1.7525	0.73506	-14.674	47.848	44.084	-0.10439	0.087988	-0.099318
3.388	-40.903	103.3857	582.929	-0.37109	0.33447	0.07666	-76.339	70.048	31.2617	0.020508	0.012695	-0.071777	-4.338	-151.34	1998.745	-1.4155	1.7133	0.72578	11.195	58.4597	70.2083	-0.089355	0.093262	-0.10449
3.39	-38.438	116.5416	536.5517	-0.34766	0.30371	0.062012	-83.3309	82.9056	33.0591	0.0063477	0.013184	-0.072266	-92.379	-97.31	1961.037	-1.3889	1.6649	0.72422	16.896	-18.6522	108.2406	-0.0875	0.099314	-0.10713
3.392	-38.844	128.445	486.1004	-0.33057	0.29395	0.058594	-58.338	2.462	55.7242	0.00097656	0.014648	-0.072266	-154.695	-138.61	1931.028	-1.3857	1.6182	0.72334	-45.635	-68.985	176.731	-0.084375	0.1123	-0.11768
3.394	-52.8853	123.7454	465.8637	-0.30713	0.26709	0.048828	-76.2449	43.16	46.908	-0.0097656	0.015625	-0.077148	-226.812	-113.51	1901.549	-1.4014	1.5801	0.71338	-13.989	-107.361	269.36	-0.087891	0.12285	-0.12784
3.396	-28.979	125.9824	451.0652	-0.28736	0.24658	0.040039	-61.224	27.406	41.7378	-0.015137	0.021484	-0.08252	-209.856	-163.93	1927.906	-1.4262	1.5598	0.70595	11.4456	-157.315	376.518	-0.090722	0.13447	-0.13955
3.398	-34.347	126.0475	417.349	-0.27051	0.22559	0.027344	-57.485	29.2083	36.9616	-0.017578	0.022461	-0.086426	-142.3545	-138.23	1961.649	-1.4523	1.5571	0.70215	9.5183	-215.222	499.262	-0.095703	0.15137	-0.14844
3.4	-40.885	131.14248	411.56	-0.25098	0.19971	0.027344	-75.129	80.524	37.998	-0.012695	0.026367	-0.095215	-47.605	-170.636	2031.959	-1.4893	1.5739	0.71035	10.2007	-324.435	637.82	-0.10098	0.16309	-0.16016
3.402	-31.772	124.2696	399.2151	-0.2417	0.18896	0.021973	-46.735	27.6618	23.8153	-0.010254	0.032471	-0.10107	-40.675	-148.275	2049.543	-1.5449	1.6106	0.7333	-9.962	-409.895	715.871	-0.1122	0.18096	-0.17783
3.404	-40.627	107.615	399.052	-0.22119	0.16553	0.0092773	-44.118	41.716	41.6431	-0.0078125	0.040527	-0.10889	-93.366	-173.356	2093.865	-1.6289	1.6465	0.75635	3.277	-442.528	798.563	-0.12979	0.21025	-0.19502
3.406	-53.186	113.3148	364.9557	-0.2063	0.14844	0.0046387	-37.936	33.7591	69.953	-0.0029297	0.058105	-0.12891	-150.865	-153.364	2151.081	-1.7439	1.6952	0.77227	45.545	-358.757	884.447	-0.15117	0.25039	-0.21191
3.408	-53.0512	128.1683	335.8832	-0.18799	0.12988	-0.00048828	6.361	-53.269	122.2783	-0.00097656	0.068848	-0.13525	-215.732	-176.822	2179.374	-1.8659	1.7411	0.78828	82.8327	-238.4435	956.97	-0.18359	0.31543	-0.21875
3.41	-33.643	126.0302	315.0051	-0.17432	0.11035	-0.0053711	-12.272	-50.494	181.163	-0.0087891	0.094727	-0.15723	-270.32	-161.988	2199.873	-1.9815	1.7817	0.8	28.726	-98.07	1004.113	-0.23652	0.40176	-0.19785
3.412	-46.7283	106.4366	296.1446	-0.16357	0.1001	-0.014648	-15.208	-103.67	216.735	-0.021972	0.13257	-0.16846	-299.85	-165.2966	2178.32	-2.0828	1.8156	0.80928	59.8527	-66.6863	1027.968	-0.3249	0.49434	-0.15986
3.414	-47.864	98.9636	276.7693	-0.14746	0.080566	-0.025879	56.0572	-149.411	317.556	-0.055664	0.18457	-0.16992	-300.231	-119.777	2134.6641	-2.1543	1.8418	0.81299	69.021	-91.963	1076.0848	-0.45537	0.59746	-0.10322
3.416	-38.159	101.8644	263.166	-0.13086	0.065673	-0.032959	89.168	-142.786	433.196	-0.14014	0.26611	-0.14844	-269.525	-71.505	2093.2559	-2.1903	1.857	0.80596	77.2211	-76.758	1228.232	-0.61778	0.69277	-0.033008
3.418	-25.049	86.331	273.3715	-0.11816	0.046875	-0.040039	115.032	-256.489	544.898	-0.20264	0.30908	-0.12939	-271.083	-18.91	2049.635	-2.2086	1.8547	0.79873	119.712	-60.587	1383.53	-0.80322	0.79541	0.044434
3.42	-2.495	67.357	278.3014	-0.091309	0.029785	-0.053223	106.712	-272.58	618.086	-0.35742	0.39453	-0.079102	-217.308	27.398	2015.778	-2.198	1.8559	0.796	89.4987	8.605	1437	-1.0037	0.90098	0.11787
3.422	-31.418	58.871	262.2286	-0.080078	0.015137	-0.054199	82.874	-246.307	696.456	-0.49805	0.47094	-0.023437	-129.097	41.468	2030.706	-2.1629	1.8539	0.78174	71.7949	-27.922	1421.603	-1.2109	1.018	0.17539
3.424	-37.933	75.361787	243.8693	-0.057617	0.0014648	-0.064453	100.574	-248.2853	776.112	-0.64648	0.54297	0.033691	-25.845	63.529	2029.053	-2.1108	1.8462	0.76074	50.979	-33.72	1401.67	-1.4171	1.1337	0.21836
3.426	-17.301	78.461	229.3628	-0.037353	-0.0078127	-0.074463	108.034	-136.381	841.423	-0.85938	0.63965	0.11279	27.502	74.374	2037.393	-2.0674	1.8408	0.75459	60.4383	-110.27	1431.529	-1.6217	1.2375	0.26348
3.428	-22.993	98.619	204.6446	-0.019043	-0.01709	-0.079102	116.591	-108.194	845.724	-0.97461	0.69727	0.15283	32.929	122.143	2052.085	-2.0278	1.8324	0.74394	68.93	-165.44	1504.863	-1.8232	1.3438	0.2959
3.43	-33.273	94.589	177.5184	0	-0.026367	-0.089355	103.727	-111.936	823.5831	-1.1909	0.80127	0.22266	7.791	120.812	2058.108	-2.0062	1.8227	0.7459	0.152999999999999	-261.357	1577.299	-1.9978	1.4459	0.33096
3.432	-55.238	82.976	180.7439	0.0078125	-0.034668	-0.091309	74.101	-47.97	879.0099	-1.3462	0.88526	0.27173	-63.654	132.3406	2075.854	-1.9911	1.8128	0.74434	-83.724	-340.7459	1647.0362	-2.1672	1.5524	0.358
3.434	-39.52	73.8794	169.594	0.020508	-0.045898	-0.097656	91.2578	-41.411	991.779	-1.5054	0.96338	0.31348	-96.439	63.725	2066.646	-1.9839	1.7964	0.74414	-144.893	-425.788	1720.3159	-2.334	1.6566	0.36777
3.436	-27.081	72.74832	166.137	0.033203	-0.054687	-0.099611	77.884	15.599	1096.053	-1.6816	1.0605	0.3623	-100.512	41.373	2056.913	-1.988	1.7804	0.7461	-67.829	-478.07	1776.722	-2.4632	1.729	0.3873
3.438	-27.999	75.8768	161.2978	0.043457	-0.059082	-0.10547	45.182	48.93	1121.434	-1.7632	1.103	0.38477	-67.29	-10.419	2040.234	-1.9863	1.7559	0.74502	-21.121	-449.54	1797.304	-2.5698	1.7661	0.40723
3.44	-32.711	68.9968	178.247	0.044434	-0.069824	-0.10645	38.967	-15.611	1101.087	-1.9058	1.1685	0.42529	-57.319	15.756	1991.117	-1.9848	1.7308	0.74189	33.58	-422.44	1809.793	-2.6181	1.7834	0.40146
3.442	-18.665	54.7066	165.71	0.047852	-0.074707	-0.10693	11.965	-31.93	1115.486	-1.9969	1.2005	0.44019	-86.942	-13.263	1955.397	-1.9762	1.7086	0.7292	-9.702	-347.48	1848.503	-2.591	1.7863	0.37783
3.444	-19.201	51.22586	120.1495	0.048828	-0.075195	-0.10449	-4.819	-86.15	1195.923	-2.062	1.2241	0.44482	-94.57	25.989	1918.446	-1.9609	1.6816	0.71729	-89.817	-300.879	1918.128	-2.4644	1.7848	0.32666
3.446	-28.318	52.3966	107.676	0.04541	-0.079346	-0.10937	-52.9383	-142.41	1276.353	-2.0957	1.2461	0.43896	-63.196	1.52499999999999	1886.9324	-1.9414	1.6512	0.69404	-165.668	-256.743	1970.197	-2.2487	1.7798	0.26211
3.448	-46.589	50.3951	112.332	0.041016	-0.086426	-0.10693	-137.848	-153.24	1326.247	-2.084	1.248	0.42871	-44.454	81.404	1844.1418	-1.9172	1.6226	0.67158	-162.606	-231.093	2004.1779	-1.9917	1.7896	0.18701
3.45	-55.987	51.04791	121.7814	0.033691	-0.074707	-0.10303	-137.586	-257.953	1373.49503	-2.0234	1.25	0.40479	-44.953	93.45	1868.22	-1.8957	1.5863	0.64932	-154.93	-219.572	1983.833	-1.7549	1.81	0.11943
3.452	-57.534	52.873	107.276	0.026367	-0.069824	-0.098145	-151.918	-322.006	1411.1709	-1.9451	1.2444	0.37989	-59.347	217.204	1848.528	-1.8692	1.5566	0.6334	-202.673	-155.8	1944.243	-1.5499	1.8259	0.062402
3.454	-57.6689	48.4586	97.083	0.013672	-0.067383	-0.092773	-163.06228	-329.896	1468.703	-1.8413	1.2437	0.33545	-103.979	222.433	1810.4045	-1.8423	1.5298	0.61621	-216.086	-109.61	1924.092	-1.3937	1.8228	0.033887
3.456	-38.85	46.89801	112.1375	0.0004883	-0.062012	-0.086181	-93.04	-364.29	1526.761	-1.6797	1.2344	0.28564	-180.029	298.155	1731.219	-1.8122	1.503	0.60254	-248.176	-53.68	1884.033	-1.2889	1.8244	0.016602
3.458	-56.8577	42.6362	125.873	-0.018066	-0.059082	-0.079102	-74.507	-324.23	1537.016	-1.5996	1.2305	0.25635	-220.646	252.542	1703.4715	-1.7698	1.473	0.58476	-184.366	-75.325	1908.173	-1.2305	1.8164	0.015625
3.46	-47.945	68.054	102.644	-0.044434	-0.052246	-0.066406	-99.868	-329.11	1594.965	-1.4565	1.2153	0.18555	-235.41	300.42	1661.109	-1.721	1.4429	0.57187	-74.2904	-119.871	1954.153	-1.2203	1.818	0.01084
3.462	-29.083	76.205	90.8812	-0.056641	-0.04541	-0.061035	-100.362	-352.649	1616.325	-1.3784	1.2133	0.14477	-217.393	223.873	1645.019	-1.6689	1.4075	0.55742	4.757	-228.193	1992.27285	-1.2366	1.8169	0.0035156
3.464	-19.759	55.1092	67.5169	-0.081055	-0.039551	-0.052246	-111.0894	-304.996	1629.189	-1.3184	1.2168	0.10449	-204.511	250.802	1580.941	-1.6191	1.374	0.5415	32.595	-252.395	2032.3321	-1.2757	1.8247	-0.0015625
3.466	-27.76	44.6527	64.9288	-0.10742	-0.021973	-0.043457	-102.668	-268.8676	1647.949	-1.271	1.2329	0.078125	-194.482	146.5475	1549.706	-1.5706	1.3431	0.52979	42.041	-229.365	2069.4596	-1.3246	1.8379	-0.0019531
3.468	-47.615	38.2301	59.753	-0.11768	-0.01709	-0.039063	-114.771	-202.736	1650.504	-1.2632	1.2485	0.071289	-185.786	176.376	1517.7712	-1.5183	1.305	0.51123	17.68	-172.508	2112.791	-1.3843	1.854	0.010742
3.47	-36.763	42.0892	66.878	-0.14307	-0.003418	-0.038574	-170.438	-151.177	1657.716	-1.2793	1.2891	0.08252	-135.018	117.19	1506.827	-1.4604	1.2675	0.49326	3.558	-137.355	2161.239	-1.4722	1.869	0.023047
3.472	-18.445	40.98978	79.2312	-0.15625	0.0029297	-0.027832	-135.92	-155.731	1638.805	-1.3218	1.3213	0.093507	-75.223	208.43	1460.118	-1.3972	1.2313	0.47305	6.863	-169.033	2197.203	-1.5651	1.8689	0.042578
3.474	-36.573	47.1095	78.40356	-0.16846	0.0078125	-0.020508	-105.072	-129.958	1636.309	-1.377	1.3633	0.10693	-26.406	180.1	1460.631	-1.3315	1.188	0.44727	-3.7626	-181.734	2168.056	-1.6605	1.8766	0.054688
3.476	-44.41	39.7397	76.42	-0.18164	0.020508	-0.016113	-86.203	-142.639	1666.502	-1.4526	1.4087	0.11426	11.934	261.711	1431.5	-1.2621	1.1461	0.42159	6.356	-155.346	2180.307	-1.756	1.8714	0.064746
3.478	-52.059	20.3599	84.708	-0.19092	0.020996	-0.01709	15.756	-181.52	1699.8953	-1.4844	1.4336	0.11816	7.68	220.125	1426.134	-1.1941	1.0887	0.39932	18.689	-66.075	2159.2356	-1.8535	1.875	0.078125
3.48	-18.046	20.3644	75.134	-0.20557	0.028809	-0.013184	29.657	-190.34267	1763.704	-1.5464	1.4771	0.11914	0.120000000000005	304.863	1347.199	-1.1281	1.0336	0.3712	35.956	-2.926	2145.96707	-1.9334	1.8701	0.098146
3.482	-32.792	27.9577	65.1101	-0.20654	0.03125	-0.0073243	61.614	-226.32	1799.1882	-1.5898	1.5078	0.12158	-30.114	274.968	1283.802	-1.0662	0.97306	0.34893	94.848	24.0791	2105.4276	-2.0192	1.8664	0.12022
3.484	-29.586	30.31521	43.0617	-0.2085	0.034668	-0.0063477	92.3455	-225.804	1804.6574	-1.6362	1.5415	0.11328	-27.428	333.98	1171.4098	-1.0137	0.92383	0.32568	131.061	40.06	2049.59	-2.0856	1.8555	0.14014
3.486	-24.851	20.7141	52.978	-0.20459	0.036133	-0.0063477	74.917	-218.949	1826.0972	-1.6929	1.5767	0.097656	-54.1292	282.78	1118.6402	-0.96785	0.87527	0.30253	148.675	49.311	2041.114	-2.1338	1.8319	0.14765
3.488	-14.139	29.8527	52.899	-0.19824	0.037598	-0.010742	65.4529	-261.629	1858.603	-1.7227	1.5938	0.095215	-18.405	330.159	1056.833	-0.91549	0.82662	0.28475	136.514	133.1095	2054.726	-2.1519	1.8071	0.14844
3.49	-24.95	28.765	46.986	-0.18457	0.034668	-0.013672	31.463	-247.711	1886.616	-1.769	1.6177	0.080566	27.089	269.745	1016.066	-0.8596	0.78169	0.26444	81.555	184.8377	2094.258	-2.134	1.7697	0.14844
3.492	-36.57	30.1942	57.1183	-0.17163	0.030762	-0.015869	-14.4456	-226.00833	1880.215	-1.8003	1.6294	0.080811	48.274	302.212	957.852	-0.80044	0.73716	0.24158	-1.315	216.004	2087.4495	-2.0882	1.7361	0.15283
3.494	-35.77	30.1526	81.301	-0.15527	0.03125	-0.024414	16.328	-216.447	1880.389	-1.8281	1.6309	0.071777	60.1741	232.72	914.969	-0.73438	0.68652	0.22314	-53.5753	163.80776	2053.7301	-2.0307	1.7106	0.15401
3.496	-43.9	38.704	76.336	-0.12598	0.023438	-0.033203	-9.7247	-184.137	1892.7659	-1.855	1.6206	0.063965	67.271	258.205	850.4386	-0.66232	0.63866	0.20638	-83.5122	100.007	2029.376	-1.9685	1.6847	0.15352
3.498	-36.661	38.597	42.54741	-0.11377	0.027344	-0.024414	-3.0307	-184.5852	1885.4069	-1.8628	1.6196	0.057617	61.9354	222.364	818.278	-0.5919	0.59252	0.1855	-84.3664	77.1933	2022.125	-1.9077	1.6606	0.15625
3.5	-35.773	26.682	43.2309	-0.085449	0.023438	-0.043945	36.6724	-164.04319	1859.864	-1.8687	1.604	0.050781	70.187	268.067	770.426	-0.52519	0.54456	0.16911	-82.3714	81.909	2036.73	-1.8676	1.6369	0.16299
3.502	-39.996	23.7679	50.7274	-0.065673	0.024414	-0.047851	9.043	-97.8953	1830.529	-1.8691	1.5903	0.04541	6.676	214.08021	745.152	-0.45961	0.49798	0.14283	-109.272	139.366	2057.5096	-1.8445	1.616	0.17119
3.504	-45.945	15.0635	45.653	-0.050293	0.025391	-0.049805	75.55	-51.3373	1820.682	-1.8633	1.5723	0.031738	-52.02	205.3879	701.093	-0.39404	0.4541	0.12793	-125.075	147.368	2031.1247	-1.8379	1.5906	0.18409
3.506	-52.964	23.94	39.263	-0.029297	0.025879	-0.056641	59.679	3.226	1823.55	-1.8608	1.5454	0.023438	-150.687	137.326	658.491	-0.3419	0.40414	0.10768	-133.385	135.747	1998.92965	-1.8496	1.5727	0.20225
3.508	-41.638	27.785	43.179	-0.017578	0.024414	-0.062988	27.857845	7.8478	1853.4135	-1.8628	1.5337	0.018066	-158.087	182.442	567.3216	-0.29631	0.3594	0.084785	-87.7074	111.223	1965.4058	-1.8574	1.5566	0.22021
3.51	-32.954	28.2537	61.6998	-0.003418	0.025391	-0.072266	26.4226	-52.0704	1882.102	-1.8608	1.5122	0.01416	-166.166	167.236	528.776	-0.2501	0.3188	0.066889	-90.739	130.7	1931.2377	-1.8675	1.5477	0.23779
3.512	-33.111	14.1974	64.323	0.010254	0.029053	-0.071045	-66.989	-94.2581	1876.4961	-1.864	1.4885	0.0053711	-128.1	217.8911	459.397	-0.20995	0.27728	0.045464	-70.215	190.278	1908.727	-1.8656	1.5379	0.25146
3.514	-51.52	12.574	46.3009	0.021484	0.03125	-0.07373	-76.423	-137.728	1874.457	-1.8667	1.4731	0.0073242	-109.024	184.8514	417.171	-0.17529	0.23486	0.023438	-61.29	230.5473	1871.136	-1.8567	1.5329	0.26826
3.516	-40.706	28.2347	47.1573	0.035156	0.036133	-0.07959	-54.7575	-141.01872	1865.9654	-1.8804	1.4438	0.013184	-75.15	197.261	353.354	-0.14655	0.19939	0.0072844	-86.286	271.784	1808.2388	-1.8391	1.5336	0.28076
3.518	-44.328	37.151	48.357	0.038574	0.037109	-0.084961	-66.7669	-96.85	1833.375	-1.8882	1.438	0.016602	-74.1455	157.16	309.715	-0.11222	0.16349	-0.010793	-78.0638	238.137	1753.075	-1.8184	1.5313	0.29443
3.52	-58.156	40.1695	47.9835	0.050781	0.03418	-0.096191	-25.828	-101.124	1827.026	-1.8965	1.416	0.023438	-58.358	169.281	278.4446	-0.077183	0.13365	-0.030012	-44.049	256.658	1708.0919	-1.791	1.5313	0.30644
3.522	-44.789	37.2529	48.0878	0.058106	0.041504	-0.095948	-36.374	-90.283	1850.039	-1.9082	1.4072	0.029785	-57.8031	162.274	249.0951	-0.039372	0.10395	-0.047457	-27.207	275.027	1663.89927	-1.755	1.531	0.31465
3.524	-34.676	28.6809	65.9703	0.064941	0.043945	-0.10205	-28.0121	-92.931	1861.1019	-1.9155	1.397	0.03418	-31.779	200.5591	213.24593	-0.0024414	0.076172	-0.06543	-42.755	323.756	1643.7043	-1.7171	1.5251	0.32988
3.526	-17.769	14.8829	85.977	0.069824	0.050781	-0.10693	43.7291	-122.511	1878.942	-1.9253	1.3882	0.054199	-41.326	210.818	171.743	0.024013	0.044909	-0.082983	-32.072	320.106	1580.858	-1.676	1.5154	0.33379
3.528	-48.023	-5.875	117.046	0.066895	0.055176	-0.11426	39.3878	-55.5676	1860.161	-1.9316	1.3848	0.039551	-62.6044	209.252	186.5	0.052301	0.016059	-0.097246	-18.301	278.632	1532.9714	-1.627	1.4932	0.33887
3.53	-29.147	-35.5819	169.5932	0.062988	0.065918	-0.11914	54.05707	-1.324	1840.937	-1.9292	1.3774	0.057617	-86.669	168.969	189.3498	0.080565	-0.018295	-0.11397	4.857	242.633	1486.334	-1.5766	1.4656	0.3376
3.532	-23.009	-61.448	228.2565	0.050293	0.080567	-0.12329	81.4193	55.944	1822.4247	-1.9155	1.3716	0.066406	-41.907	140.269	182.743	0.1012	-0.04651	-0.12715	19.94	180.227	1463.138	-1.5238	1.4345	0.32988
3.534	18.924	-88.031	278.7946	0.03418	0.10156	-0.12402	43.2815	113.964	1757.453	-1.9077	1.3657	0.068359	-1.73	109.613	149.3108	0.11865	-0.073242	-0.13818	45.688	193.063	1443.604	-1.4636	1.3954	0.32168
3.536	45.571	-114.7492	318.395	-0.01123	0.14453	-0.12012	53.3993	89.609	1744.117	-1.8862	1.3657	0.080078	25.72	86.9793	134.6376	0.13203	-0.08975	-0.15011	39.098	219.933	1392.245	-1.3964	1.3528	0.30244
3.538	42.0078	-146.5665	350.226	-0.043945	0.16455	-0.10986	39.396	104.487	1746.796	-1.8692	1.3584	0.085693	61.3137	69.287	95.532	0.14224	-0.10529	-0.15737	6.281	288.487	1313.2284	-1.3218	1.3052	0.28516
3.54	37.299	-158.50095	412.667	-0.12939	0.21484	-0.084961	0.7422	93.439	1750.1022	-1.8472	1.3521	0.092773	78.735	39.781	90.2808	0.14714	-0.11382	-0.16452	15.8	309.6638	1248.891	-1.2502	1.2598	0.26826
3.542	43.708	-136.6711	481.0244	-0.20874	0.24732	-0.071777	34.5364	62.1936	1765.64	-1.8179	1.3423	0.10303	57.521	38.489	61.3127	0.15481	-0.12413	-0.16484	-37.333	313.251	1185.918	-1.1706	1.2161	0.24961
3.544	61.063	-92.705	514.771	-0.29248	0.28564	-0.05127	15.118	79.228	1730.21	-1.8027	1.3359	0.10596	72.91	35.473	73.915	0.15088	-0.1333	-0.16846	-71.19	327.814	1116.273	-1.0913	1.1688	0.23672
3.546	54.046	-63.022	565.854	-0.41064	0.33984	-0.02832	47.2277	40.67192	1691.566	-1.7695	1.3301	0.11426	60.707	56.662	95.233	0.14694	-0.13598	-0.16239	-108.214	304.997	1063.0841	-1.007	1.1328	0.23125
3.548	60.613	-37.4128	585.2434	-0.47412	0.36572	-0.0053711	83.9303	17.165	1670.2785	-1.7407	1.3178	0.11841	33.268	63.198	117.701	0.13402	-0.14258	-0.16545	-139.4414	349.331	986.4504	-0.92773	1.0859	0.23096
3.55	58.946	-21.35	589.8972	-0.5835	0.42871	0.022949	37.7657	39.828	1672.698	-1.7046	1.3071	0.12012	4.625	90.251	94.9073	0.12141	-0.14181	-0.15782	-162.727	343.269	923.474	-0.85431	1.0414	0.21933
3.552	63.662	28.519	641.6297	-0.66992	0.48095	0.041748	46.256	19.124	1697.451	-1.6597	1.2935	0.12646	-34.293	88.584	90.1518	0.10974	-0.14082	-0.15112	-148.972	352.29	853.506	-0.78117	0.99663	0.21494
3.554	79.672	97.332	711.089	-0.75146	0.53174	0.061523	40.634	57.427	1702.181	-1.6343	1.2827	0.12939	-52.685	88.288	54.5838	0.10059	-0.13916	-0.14307	-141.3665	315.7477	811.603	-0.71165	0.94348	0.20635
3.556	80.758	124.664	766.2936	-0.85547	0.6001	0.07666	20.9352	84.021	1660.988	-1.5859	1.2617	0.1377	-95.99222	40.4417	69.286	0.084821	-0.13482	-0.13708	-158.4027	305.801	752.871	-0.64181	0.89298	0.19825
3.558	79.231	129.256	795.977	-0.90625	0.63672	0.09082	12.308	73.365	1609.894	-1.5486	1.2473	0.14258	-95.617	18.517	53.8795	0.073279	-0.12213	-0.13219	-139.7999	313.6797	672.31	-0.57129	0.83643	0.18848
3.56	67.366	118.663	828.495	-0.99658	0.70264	0.11035	-18.895	139.893	1549.132	-1.5195	1.2305	0.1416	-116.734	-12.2369	60.3258	0.058841	-0.11041	-0.12557	-134.1302	300.225	622.256	-0.50983	0.7907	0.17412
3.562	77.791	90.577	900.43	-1.0728	0.7544	0.1333	-19.665	150.249	1509.4388	-1.4727	1.209	0.14746	-83.9621	20.743	45.713	0.040794	-0.10566	-0.11532	-159.765	312.39	564.6312	-0.43783	0.73824	0.16386
3.564	84.004	41.522	982.7779	-1.1484	0.79883	0.15527	-69.8297	170.77	1497.5077	-1.4458	1.1938	0.1499	-91.7145	-3.90300000000001	74.646	0.026855	-0.10107	-0.10596	-184.72	266.893	542.4477	-0.36516	0.69136	0.14978
3.566	38.1392	-27.087	1066.225	-1.2583	0.84619	0.19092	-91.19	190.397	1480.511	-1.3979	1.1704	0.1499	-104.6898	15.503	49.922	0.013782	-0.09561	-0.098548	-160.588	222.875	490.7227	-0.2973	0.64009	0.13348
3.568	6.5662	-79.856	1105.346	-1.3149	0.86865	0.20313	-53.1586	148.74	1460.1301	-1.3601	1.1555	0.15039	-117.541	-16.755	48.4548	0.00059354	-0.09463	-0.094243	-156.8802	166.088	413.1099	-0.23096	0.58252	0.12402
3.57	-37.9729	-143.8013	1142.093	-1.4136	0.896	0.22607	-40.8884	186.84	1399.116	-1.3262	1.1348	0.15039	-115.08437	-3.14400000000001	46.9739	-0.0017598	-0.095018	-0.086826	-149.3012	157.1	367.3064	-0.17002	0.53542	0.11565
3.572	-0.0700000000000003	-177.628	1152.273	-1.4695	0.90552	0.23877	-27.343	198.075	1343.793	-1.2769	1.1128	0.15576	-128.212	-23.101	77.2478	0	-0.098633	-0.081839	-104.993	155.261	354.124	-0.11113	0.48535	0.099073
3.574	-22.351	-191.54	1199.577	-1.5195	0.92188	0.24658	-2.80099999999999	179.19	1328.168	-1.2534	1.0923	0.15967	-105.4555	6.9746	78.2	0.0092773	-0.10498	-0.077637	-114.382	163.8124	327.321	-0.052181	0.43183	0.086558
3.576	-3.421	-176.786	1262.2886	-1.5488	0.93359	0.25098	-33.169	209.9644	1311.784	-1.2036	1.0649	0.16406	-124.442	-11.112	88.714	0.023734	-0.10742	-0.077444	-42.519	184.4	282.291	0.005377	0.38443	0.067921
3.578	-10.654	-182.746	1323.36	-1.5527	0.94141	0.25439	-5.661	162.928	1300.901	-1.1679	1.0439	0.15918	-110.313	31.1604	46.3912	0.0418	-0.10879	-0.081346	-10.052	160.876	218.947	0.065918	0.3374	0.051758
3.58	-37.108	-177.567	1365.011	-1.5366	0.95654	0.24854	14.612	149.1286	1309.827	-1.1279	1.0117	0.1543	-113.815	18.789	38.598	0.057036	-0.10879	-0.078613	11.834	154.4336	162.8984	0.12075	0.29539	0.037634
3.582	-48.1881	-169.005	1408.751	-1.5005	0.96875	0.24121	-35.93637	156.745	1299.435	-1.0723	0.98633	0.15576	-58.621	73.617	20.916	0.07588	-0.11425	-0.076075	22.281	133.135	144.4217	0.1701	0.25983	0.026166
3.584	-41.22	-146.703	1460.303	-1.4609	0.98047	0.23242	10.855	119.941	1257.849	-1.0483	0.96729	0.15479	-50.148	46.016	50.716	0.091797	-0.11816	-0.070313	-2.544	145.868	142.7666	0.2163	0.22296	0.017143
3.586	-26.482	-113.947	1475.156	-1.4023	0.99414	0.2124	-35.062	167.6653	1193.073	-0.98438	0.92676	0.14795	27.626	67.7408	6.87	0.11201	-0.12578	-0.073633	-9.935	143.259	130.928	0.25766	0.19132	0.006368
3.588	-64.643	-80.28	1455.6436	-1.3711	1.0068	0.20068	-47.408	181.203	1127.344	-0.93969	0.8977	0.14282	17.823	26.9905	28.7108	0.12861	-0.14111	-0.074511	-1.557	96.507	124.5107	0.2876	0.15918	-0.0024414
3.59	-61.9512	-56	1429.247	-1.3276	1.0259	0.17334	4.312	162.9222	1097.5944	-0.89795	0.86182	0.14063	44.426	41.144	9.8895	0.15166	-0.15244	-0.083886	-1.96199999999999	94.6984	99.841	0.29987	0.13299	-0.01176
3.592	-66.284	-48.431	1436.793	-1.3032	1.0366	0.15332	-3.492	195.3708	1053.443	-0.83838	0.81885	0.13916	38.315	12.0702	35.5907	0.17549	-0.16904	-0.095899	-14.605	67.8696	76.3968	0.31661	0.11493	-0.013672
3.594	-58.8597	-61.127	1450.116	-1.2866	1.0474	0.14063	4.21	150.29	1026.3516	-0.81201	0.80029	0.13281	57.987	43.91	34.075	0.20508	-0.18213	-0.10596	-10.534	99.882	58.7269	0.32059	0.096786	-0.015406
3.596	-53.0271	-81.175	1491.441	-1.2881	1.0703	0.12939	17.809	178.985	1013.8887	-0.75439	0.75342	0.13672	31.581	46.176	49.152	0.23515	-0.18926	-0.12099	-45.877	88.413	73.7302	0.31583	0.081392	-0.014038
3.598	-28.929	-113.5429	1513.225	-1.2971	1.0881	0.12354	23.671	227.899	963.5005	-0.71753	0.72119	0.13331	28.619	79.485	52.6739	0.26807	-0.19853	-0.13906	-65.214	64.932	60.198	0.29688	0.063965	0.00048828
3.6	6.457	-130.13	1541.888	-1.3086	1.1074	0.11621	33.832	205.0092	923.7305	-0.67773	0.68359	0.13037	-2.074	58.929	84.527	0.29541	-0.19853	-0.14726	-37.091	6.761	55.929	0.26063	0.057914	0.010272
3.602	11.78	-150.592	1594.9524	-1.3198	1.1431	0.11523	1.393	247.4	863.982	-0.62842	0.63916	0.13232	-12.377	58.912	74.0322	0.31777	-0.20254	-0.15791	-81.928	-0.975999999999999	53.831	0.20952	0.045897	0.02845
3.604	12.375	-171.019	1628.085	-1.3276	1.1606	0.11914	-22.305	222.58	821.3548	-0.59912	0.61572	0.12402	-44.918	31.4954	72.541	0.33398	-0.19678	-0.16504	-77.045	11.037	44.326	0.14773	0.04243	0.05119
3.606	48.797	-191.792	1658.168	-1.3472	1.2036	0.12354	-20.681	178.933	802.1784	-0.54834	0.57178	0.12305	-26.159	33.3451	56.804	0.33633	-0.19385	-0.16152	-119.102	12.746	67.1776	0.079319	0.044396	0.074008
3.608	45.027	-205.03	1684.41	-1.3572	1.2307	0.12354	-43.183	209.734	767.937	-0.50782	0.53711	0.12012	-45.223	17.637312	53.7711	0.3291	-0.19024	-0.16055	-134.5552	51.006	68.53427	0.010254	0.047852	0.097656
3.61	33.193	-197.435	1669.028	-1.3726	1.2603	0.12402	-61.4135	154.717	736.514	-0.47412	0.51025	0.11475	-43.733	30.843	54.66075	0.31465	-0.18047	-0.15352	-152.382	47.144	47.6473	-0.050837	0.05866	0.11823
3.612	4.0494	-195.748	1667.569	-1.3906	1.2852	0.125	-70.718	161.085	691.8162	-0.4165	0.47607	0.11133	-72.398	28.24	67.5828	0.2877	-0.17813	-0.14111	-122.847	74.742	34.614	-0.10876	0.067553	0.13846
3.614	34.887	-161.7756	1644.0911	-1.4023	1.3018	0.12598	-72.4827	169.9643	638.0044	-0.396	0.4541	0.10791	-70.567	52.149	63.8276	0.25732	-0.1665	-0.13428	-109.5969	47.786	45.915	-0.16325	0.079131	0.15798
3.616	38.875	-140.83159	1622.0324	-1.4258	1.3281	0.12646	-47.074	114.121	606.573	-0.34277	0.42139	0.1084	-95.7932	56.0841	79.9562	0.22158	-0.15313	-0.11738	-146.345	57.75	69.178	-0.20973	0.08717	0.17914
3.618	32.4177	-121.6864	1617.113	-1.445	1.3411	0.12622	-72.242	163.345	565.3749	-0.30273	0.39087	0.10743	-91.3682	56.298	104.694	0.1833	-0.14014	-0.1041	-125.834	51.54	65.931	-0.24365	0.09375	0.19336
3.62	42.357	-123.2379	1627.495	-1.4624	1.3599	0.125	-50.45	144.789	557.4377	-0.26758	0.36279	0.10693	-146.423	41.1685	94.4676	0.14502	-0.12607	-0.094727	-130.028	27.591	40.418	-0.27247	0.10418	0.20913
3.622	50.673	-103.9763	1640.0785	-1.4883	1.3691	0.11572	-37.584	134.479	534.066	-0.21826	0.32861	0.099121	-139.608	45.092	78.6731	0.11065	-0.11289	-0.083789	-83.725	39.24013	23.1261	-0.29006	0.10688	0.21886
3.624	82.142	-67.104	1653.405	-1.4976	1.3716	0.11572	-64.782	193.4742	477.3964	-0.20166	0.30908	0.098145	-154.772	25.4931	66.616	0.07666	-0.088379	-0.074707	-75.077	9.1991	28.2447	-0.29325	0.10699	0.23233
3.626	88.905	-38.689	1641.5196	-1.519	1.3794	0.11328	-56.084	157.7087	436.8604	-0.15576	0.271	0.104	-141.65	9.1494	70.08301	0.046582	-0.072559	-0.064453	-48.966	26.271	52.828	-0.28452	0.10513	0.23204
3.628	85.929	-29.97	1632.837	-1.5376	1.3813	0.10962	-78.159	172.779	410.2261	-0.12255	0.24512	0.094726	-129.676	-19.0069	59.8158	0.01709	-0.051074	-0.059375	-28.572	24.267	63.357	-0.26416	0.097168	0.22949
3.63	71.799	-42.941	1644.646	-1.5508	1.3828	0.11182	-101.2281	187.316	368.964	-0.096191	0.22168	0.094238	-106.97196	-25.5882	48.26069	-0.010254	-0.034278	-0.05625	-26.373	29.5148	47.524	-0.2285	0.080685	0.22006
3.632	38.674	-60.629	1648.001	-1.5698	1.3872	0.104	-81.724	141.321	340.1281	-0.05957	0.1875	0.092285	-80.697	-6.6577	40.315	-0.029297	-0.014063	-0.049121	17.604	19.3325	48.467	-0.18103	0.068397	0.20705
3.634	35.53837	-86.9768	1681.7913	-1.5762	1.3848	0.095703	-61.73	186.857	318.4412	-0.048828	0.17139	0.091797	-32.451	7.897	53.822	-0.047363	-8.3267e-14	-0.047852	-7.15600000000001	13.9741	50.872	-0.12206	0.055531	0.1891
3.636	45.268	-120.654	1687.576	-1.5913	1.3794	0.087891	-55.7745	150.871	290.016	-0.028809	0.13525	0.094727	-11.756	29.955	57.5435	-0.061035	0.013477	-0.05166	24.292	17.2979	66.906	-0.056927	0.039234	0.1691
3.638	38.572	-131.872	1715.512	-1.6033	1.3767	0.078857	-54.558	110.454	271.4131	-0.0092773	0.11353	0.092285	-3.647	13.572	72.0485	-0.062402	0.024121	-0.058399	11.98	5.7096	64.868	0.010254	0.02832	0.14844
3.64	29.29	-131.471	1715.474	-1.6011	1.3696	0.070313	-57.53	147.945	238.785	0.0019531	0.092773	0.09375	8.719	17.83	42.8581	-0.054199	0.032324	-0.064258	6.373	28.8531	39.7246	0.07202	0.010563	0.12571
3.642	14.2476	-118.309	1696.283	-1.6074	1.3633	0.060059	-25.831	95.309	204.829	0.016113	0.060547	0.091309	10.94	5.5954	49.4033	-0.041699	0.033203	-0.077442	21.503	16.2965	43.843	0.12349	-0.006537	0.10207
3.644	51.323	-95.773	1672.4083	-1.6113	1.3574	0.051758	6.05	118.386	203.3736	0.018555	0.04834	0.095215	4.60599999999999	16.9429	44.8483	-0.022949	0.038086	-0.087891	14.397	35.7789	36.892	0.16959	-0.019806	0.086833
3.646	70.066	-56.793	1662.58	-1.6211	1.3555	0.035645	-25.308	123.405	197.337	0.027344	0.030273	0.095703	13.405	16.442	53.023	-0.0054688	0.046484	-0.095996	2.23999999999999	35.19	22.017	0.20419	-0.033393	0.065927
3.648	76.117	-44.443	1703.1014	-1.6265	1.3481	0.0354	-22.682	41.511	200.4679	0.03833	0.017334	0.099855	12.412	56.4073	24.1771	0.0051758	0.058203	-0.10068	-24.665	41.324	34.5226	0.23145	-0.050781	0.050781
3.65	80.041	-23.553	1694.5247	-1.6426	1.3477	0.031738	-24.921	95.679	205.1318	0.055176	0.0024414	0.10449	20.265	62.063	10.206	0.0094727	0.066797	-0.11826	-15.937	53.426	27.302	0.24922	-0.069534	0.047262
3.652	76.881	-4.48439	1683.568	-1.6597	1.3481	0.026855	-34.342	81.805	184.4999	0.062988	-0.018555	0.11182	14.15	74.76	-11.569	0.010156	0.083789	-0.11533	-50.368	50.5271	33.107	0.26466	-0.090631	0.041208
3.654	46.04	32.95	1669.837	-1.6655	1.3403	0.02832	-45.587	76.614	164.187	0.0625	-0.030273	0.10547	11.726	45.713	36.459	0.0053711	0.093262	-0.11523	-48.332	66.4342	30.774	0.28145	-0.11289	0.031834
3.656	41.113	55.465	1654.5714	-1.688	1.3423	0.024414	-49.407	124.614	146.80737	0.06543	-0.041016	0.10645	14.072	51.0786	30.4385	-0.0042969	0.096875	-0.11269	-98.018	37.798	38.7914	0.2957	-0.13525	0.024999
3.658	43.257	61.472	1653.2108	-1.7009	1.3327	0.026611	-59.884	72.756	115.04376	0.072022	-0.054199	0.1145	7.733	37.5439	62.1565	-0.019043	0.10508	-0.10908	-123.99218	47.9037	49.251	0.31152	-0.15527	0.011719
3.66	60.9483	50.5565	1647.3117	-1.7168	1.3262	0.031738	-57.895	85.403	95.712	0.077637	-0.061035	0.10889	-2.95399999999999	58.133	74.622	-0.033496	0.11133	-0.11065	-131.556	36.0709	52.684	0.32558	-0.17392	0.0029304
3.662	45.614	23.804	1670.0701	-1.73	1.3188	0.03418	-42.289	85.418	88.522	0.086426	-0.074219	0.10889	-53.423	34.5496	74.604	-0.045313	0.12002	-0.11035	-146.475	36.5311	34.381	0.34072	-0.1956	-0.012402
3.664	67.239	-0.879	1658.0161	-1.7378	1.3169	0.036621	-45.562	26.735	94.4679	0.090332	-0.078125	0.11377	-65.762	43.967	73.008	-0.055176	0.1333	-0.10889	-120.0017	33.5868	37.175	0.35479	-0.21436	-0.018261
3.666	73.238	-28.4337	1643.463	-1.7344	1.3027	0.039063	-55.16	79.308	86.416	0.094238	-0.086914	0.11084	-106.3519	28.6145	70.6149	-0.066407	0.14961	-0.1167	-134.947	38.6622	50.696	0.36855	-0.22735	-0.030566
3.668	84.476	-27.074	1624.556	-1.728	1.2915	0.040528	-60.102	57.009	76.0133	0.10083	-0.090332	0.10962	-110.94927	29.9195	86.749	-0.078614	0.16787	-0.11875	-127.1587	34.6563	67.999	0.37549	-0.23877	-0.041016
3.67	87.862	-25.12	1623.9222	-1.7222	1.2798	0.040039	-67.2	44.4303	74.9883	0.10645	-0.094238	0.10596	-129.688	-29.126	153.285	-0.091894	0.18896	-0.12148	-147.504	10.3108	64.7453	0.3792	-0.24287	-0.042578
3.672	88.153	-31.988	1633.03694	-1.7104	1.2642	0.041992	-64.564	88.031	63.4083	0.11816	-0.10059	0.10059	-110.121	-74.8319	229.293	-0.10937	0.20723	-0.12403	-124.3218	26.3823	45.184	0.37862	-0.24609	-0.05
3.674	67.3	-25.9714	1636.734	-1.7012	1.2549	0.038574	-66.494	27.45	75.03	0.12549	-0.10278	0.099609	-124.402	-159.745	318.542	-0.12695	0.2207	-0.13086	-96.991	20.7971	54.9108	0.37119	-0.24492	-0.044922
3.676	64.958	-9.9219	1635.655	-1.6753	1.2388	0.033203	-80.067	34.584	83.772	0.13623	-0.10986	0.09375	-64.085	-210.7015	425.533	-0.15	0.23877	-0.14307	-75.949	53.16	48.14389	0.35927	-0.23603	-0.041699
3.678	56.28	19.1886	1628.464	-1.6572	1.2275	0.029052	-79.415	36.46	64.636	0.15186	-0.11475	0.080078	-38.689	-307.401	564.107	-0.17442	0.26504	-0.16406	-38.049	26.6683	61.77	0.34668	-0.22998	-0.035645
3.68	54.467	55.747	1584.054	-1.6348	1.2148	0.029785	-77.431	-22.7338	53.366	0.15967	-0.10889	0.086914	1.984	-363.0328	669.005	-0.20371	0.31152	-0.18945	-66.188	22.1421	59.231	0.3209	-0.21504	-0.031836
3.682	13.4393	81.09	1539.342	-1.6055	1.2031	0.023926	-66.164	13.1578	53.825	0.17822	-0.10791	0.077148	-21.342	-417.157	772.4657	-0.24737	0.37393	-0.204	-17.685	17.2335	58.639	0.29121	-0.20146	-0.026269
3.684	34.7525	98.991	1508.635	-1.5874	1.1978	0.021484	-67.646	-6.017	46.4064	0.19018	-0.10791	0.069092	35.3198	-382.5552	821.0384	-0.3125	0.44629	-0.19922	-21.721	14.2803	52.56	0.26191	-0.18154	-0.019238
3.686	41.353	100.107	1481.745	-1.5586	1.1836	0.016602	-49.069	-14.9276	43.526	0.20068	-0.10547	0.065918	59.4415	-335.7378	882.416	-0.41592	0.53301	-0.17666	2.356	63.128	38.226	0.22959	-0.1544	-0.010254
3.688	48.269	93.796	1485.148	-1.5372	1.1767	0.020996	-15.045	48.7857	42.944	0.21484	-0.10693	0.056152	82.0256	-226.439	930.128	-0.54492	0.62285	-0.13779	17.289	61.421	48.8878	0.19385	-0.13281	0.00048828
3.69	39.874	93.7774	1472.029	-1.5176	1.1699	0.023926	-36.17	18.6019	30.768	0.22412	-0.10645	0.056641	78.898147	-171.234	960.22	-0.70859	0.71621	-0.086232	20.153	42.955	53.201	0.15049	-0.1127	0.014453
3.692	38.7766	87.5115	1460.6932	-1.4976	1.1636	0.036133	-28.425	40.034	56.494	0.23975	-0.10693	0.047852	144.501	-123.6764	991.589	-0.88682	0.81182	-0.030371	1.46000000000001	5.081	42.7246	0.10693	-0.090918	0.032226
3.694	37.249	78.0781	1451.9467	-1.4897	1.1606	0.043945	-8.107	46.7294	45.051	0.24463	-0.10229	0.045654	129.486	-109.1166	1074.253	-1.082	0.91309	0.021484	9.27700000000001	-6.112	32.6215	0.065137	-0.077637	0.047461
3.696	26.9285	70.3086	1433.2814	-1.4746	1.1543	0.061035	-14.247	-6.67	44.7984	0.24902	-0.10059	0.039551	171.031	-82.651	1199.756	-1.2812	1.0008	0.058691	34.562	11.766	29.6303	0.023242	-0.060059	0.06377
3.698	13.756	54.993	1420.932	-1.4646	1.1438	0.072998	-4.54	43.6343	47.721	0.25244	-0.098145	0.031738	180.893	-74.636	1291.618	-1.4671	1.0938	0.095899	-3.34399999999999	24.859	50.03	-0.0092773	-0.041504	0.085449
3.7	24.4354	49.112	1415.0276	-1.4565	1.1392	0.086914	-28.271	24.8913	27.956	0.25391	-0.09668	0.030273	206.475	-74.859	1320.123	-1.6269	1.1826	0.1334	16.496	30.263	48.9619	-0.038184	-0.016113	0.10283
3.702	23.8386	24.9311	1406.4818	-1.4409	1.1235	0.10498	-39.282	18.0587	36.5714	0.26221	-0.089844	0.019531	202.487	-49.49	1297.863	-1.7796	1.2669	0.17851	-25.655	23.958	39.222	-0.069043	0.0074218	0.12198
3.704	9.5293	34.8647	1371.7004	-1.4331	1.1157	0.10693	-21.319	76.385	42.9253	0.26098	-0.082275	0.028076	169.872	-52.47	1333.064	-1.9429	1.3501	0.22559	-55.221	39.176	30.81	-0.098733	0.032813	0.12783
3.706	11.4445	48.975	1337.5915	-1.4097	1.0923	0.12354	-38.292	21.5773	23.7072	0.25928	-0.078613	0.028809	125.403	-44.68	1402.241	-2.1044	1.4296	0.27481	-48.925	37.8621	47.7279	-0.12109	0.055469	0.13838
3.708	18.4086	70.8837	1328.7971	-1.3806	1.074	0.12476	-11.978	18.7693	35.192	0.25439	-0.066895	0.029297	54.566	-141.33	1505.185	-2.2602	1.4972	0.32861	-101.2644	61.6545	66.319	-0.13379	0.077148	0.15186
3.71	31.8472	82.9785	1284.5673	-1.353	1.0513	0.13184	-26.481	28.0641	26.416	0.24854	-0.064453	0.029785	-21.4282	-221.346	1558.665	-2.3843	1.5441	0.37041	-103.3321	51.4018	49.1226	-0.14287	0.099316	0.15352
3.712	18.186	100.5109	1256.9656	-1.3125	1.0273	0.1377	-56.898	-25.762	43.5596	0.23779	-0.056152	0.036133	-48.532	-355.678	1640.711	-2.4703	1.5713	0.39258	-129.1578	49.9385	33.875	-0.15713	0.11748	0.15605
3.714	26.3438	120.6359	1219.3275	-1.2964	1.0103	0.13965	-25.098	39.702	56.815	0.22803	-0.04541	0.036133	-100.567	-399.312	1683.767	-2.4976	1.5786	0.40039	-122.6459	35.0541	17.288	-0.16338	0.12842	0.15489
3.716	38.162	134.6218	1211.1843	-1.2578	0.97852	0.14404	-26.054	27.613	37.4939	0.21191	-0.036133	0.04248	-64.515	-441.65	1720.7	-2.4293	1.5734	0.39541	-133.8176	17.0398	26.049	-0.16231	0.13799	0.1542
3.718	54.723	140.09	1179.8545	-1.2204	0.94897	0.14477	-33.496	2.978	43.0746	0.18848	-0.025879	0.047363	-45.923	-383.61	1735.929	-2.2969	1.5605	0.37178	-115.0071	57.922	40.5469	-0.15674	0.14209	0.14502
3.72	34.3339	148.497	1150.6786	-1.1875	0.92188	0.14404	-41.544	60.876	34.4485	0.17969	-0.015625	0.054688	-47.479	-366.94	1759.1714	-2.109	1.55	0.31396	-138.25	57.402	62.897	-0.14873	0.14678	0.13506
3.722	37.8728	136.69	1107.195	-1.1465	0.88477	0.15088	-86.582	30.8125	34.7714	0.15332	-0.0024414	0.063477	-89.018	-309.78	1790.1055	-1.8992	1.5414	0.24219	-136.4	58.924	56.1493	-0.13389	0.14736	0.12441
3.724	27.7834	127.742	1094.382	-1.123	0.86523	0.14844	-71.18	68.551	50.4548	0.13501	0.0046387	0.067871	-110.091	-306.31	1869.821	-1.6934	1.5371	0.17969	-112.9114	45.016	75.093	-0.12021	0.14268	0.11738
3.726	9.774	124.05	1067.835	-1.0742	0.83008	0.15234	-74.6016	75.451	45.7091	0.12061	0.0097656	0.079102	-150.057	-224.247	1921.108	-1.5207	1.5338	0.14073	-132.003	17.9518	88.407	-0.097852	0.14297	0.11553
3.728	-16.6617	125.805	1049.3274	-1.0288	0.7876	0.14648	-92.195	12.9853	50.0601	0.10205	0.023926	0.093262	-222.334	-166.79	1951.789	-1.3985	1.5398	0.10537	-71.834	-30.244	118.995	-0.08252	0.13965	0.11279
3.73	14.814	116.86535	1050.352	-0.99805	0.76172	0.14551	-61.705	40.2793	59.163	0.089844	0.025391	0.09668	-226.661	-76.974	1907.6736	-1.3297	1.557	0.090527	-80.946	-85.1119	188.8611	-0.071191	0.14326	0.11397
3.732	11.1812	103.7571	1025.014	-0.93896	0.72217	0.13184	-61.261	15.622	30.459	0.084961	0.034668	0.10059	-239.985	-60.09	1864.554	-1.3202	1.5835	0.080664	-84.419	-135.626	296.017	-0.061719	0.14375	0.1166
3.734	-6.5728	96.936	977.561	-0.89721	0.69898	0.12915	-43.467	7.625	29.997	0.086914	0.03833	0.10156	-201.664	-53.5	1847.039	-1.3535	1.6113	0.080566	-92.325	-198.083	452.527	-0.057812	0.14375	0.11348
3.736	-0.665000000000001	117.643	934.72264	-0.86328	0.68359	0.12988	-59.949	73.866	29.122	0.090332	0.046387	0.104	-171.17	-85.562	1856.888	-1.4223	1.6331	0.07666	-78.292	-290.049	633.674	-0.051953	0.14238	0.12441
3.738	20.935	113.11	921.578	-0.83301	0.66797	0.12939	-55.094	34.798	39.764	0.09375	0.050293	0.10449	-109.156	-99.567	1893.011	-1.5109	1.6527	0.070019	-119.83	-409.377	731.786	-0.053223	0.14502	0.13184
3.74	18.413	128.659	903.7572	-0.81641	0.6543	0.13574	-34.341	35.50119	61.7146	0.099121	0.053223	0.10547	-32.78145	-121.1199	1946.524	-1.6055	1.6699	0.061426	-115.226	-444.986	755.99	-0.062109	0.1543	0.13301
3.742	4.027	128.847	881.7138	-0.78467	0.62354	0.13916	-24.988	48.618748	52.4816	0.11133	0.057617	0.10693	65.74067	-161.777	1976.495	-1.6881	1.6826	0.058496	-90.107	-441.379	831.747	-0.085254	0.17735	0.12334
3.744	-8.294	140.2255	858.28288	-0.7522	0.60474	0.13623	-35.333	-6.638	71.585	0.1145	0.056397	0.10376	102.754	-175.909	2002.046	-1.7593	1.6958	0.061035	-169.718	-330.969	922.505	-0.11455	0.23907	0.10381
3.746	3.2947	140.605	830.1933	-0.71631	0.58643	0.13721	-29.944	28.4394	90.6254	0.11816	0.056152	0.10303	163.995	-179.099	2032.6142	-1.8223	1.7127	0.06416	-204.079	-214.957	987.8324	-0.15684	0.3248	0.087305
3.748	-16.022	158.42	819.8638	-0.66797	0.55957	0.13135	-32.96	25.5797	54.6811	0.12012	0.057617	0.10352	149.7	-177.245	2076.381	-1.8788	1.7212	0.067969	-182.217	-160.28	1027.1262	-0.20996	0.43945	0.10938
3.75	-29.0491	171.085	777.9639	-0.64209	0.54443	0.13135	-29.495	15.9835	46.2322	0.12207	0.053223	0.1001	145.854	-207.368	2129.854	-1.9225	1.7227	0.067969	-105.287	-102.647	1076.234	-0.30312	0.53857	0.14473
3.752	-51.2112	163.568	738.5756	-0.60596	0.50635	0.13672	-13.699	64.895	40.272	0.12207	0.048828	0.10303	70.921	-231.713	2138.138	-1.9489	1.7221	0.062012	-55.313	-111.886	1209.848	-0.41787	0.63623	0.19131
3.754	-27.372	149.791	707.563	-0.57617	0.48437	0.13281	-32.682	2.7491	28.608	0.1228	0.053467	0.099363	79.592	-235.158	2116.201	-1.9609	1.7168	0.057129	-23.617	-43.25	1371.834	-0.54912	0.71435	0.24053
3.756	-24.815	137.1614	676.978	-0.54834	0.4624	0.12598	-11.56	19.1261	54.0989	0.12451	0.05127	0.09668	101.811	-170.247	2059.403	-1.9588	1.7088	0.050879	-38.211	-11.504	1516.614	-0.67998	0.77724	0.28164
3.758	-28.167	135.359	654.44	-0.51123	0.43896	0.12988	-16.732	53.265	42.9561	0.11279	0.054688	0.09375	131.495	-127.552	2015.3252	-1.9504	1.7031	0.049316	-87.905	60.003	1592.3843	-0.79053	0.83643	0.31836
3.76	-5.505	123.146	644.5524	-0.48877	0.42236	0.13037	-19.564	9.367	47.8933	0.10498	0.060059	0.09082	126.078	-60.414	1993.504	-1.936	1.6957	0.050879	-77.727	28.81	1667.773	-0.88183	0.9209	0.34893
3.762	5.442	135.0851	636.3789	-0.45557	0.396	0.13281	-9.257	39.6282	75.2724	0.09668	0.058105	0.094238	123.396	-47.8239	1980.547	-1.9312	1.6849	0.048633	-134.686	-37.48	1715.165	-0.95968	1.0337	0.39092
3.764	3.134	136.0202	610.0659	-0.42724	0.37109	0.13477	-39.11	15.409	59.96638	0.083252	0.059326	0.096679	138.37	19.2213	1952.695	-1.9331	1.6724	0.052734	-217.0811	-143.2	1736.75	-1.0456	1.1853	0.44482
3.766	-20.002	122.18	601.52009	-0.40625	0.34912	0.13232	-49.884	-13.4873	58.9904	0.072754	0.063965	0.098145	138.939	54.0992	1965.966	-1.9406	1.6515	0.053223	-313.921	-213.09	1807.87	-1.1692	1.3585	0.50577
3.768	-5.901	109.826	599.45	-0.37402	0.31885	0.12939	-15.978	38.175	44.1292	0.06543	0.064941	0.10254	94.653	122.912	1977.8153	-1.9504	1.6328	0.053809	-335.521	-279.618	1849.729	-1.3335	1.5415	0.57617
3.77	-20.714	109.7233	582.165	-0.35449	0.29785	0.12744	-60.657	7.6229	26.33408	0.051758	0.068848	0.10205	66.549	119.7327	1974.4921	-1.9613	1.6078	0.054199	-328.72	-378.1288	1918.0409	-1.5444	1.6915	0.64903
3.772	-27.626	129.0631	539.86	-0.32227	0.27734	0.12549	-69.589	28.535	48.4617	0.048828	0.073242	0.10742	5.3	149.429	1937.975	-1.9662	1.5809	0.056641	-216.459	-402.252	1960.715	-1.7578	1.8121	0.73272
3.774	-33.5684	142.9781	499.6623	-0.30005	0.25635	0.12524	-61.9637	46.343	36.603	0.043946	0.082031	0.11133	-49.4866	105.483	1928.596	-1.9663	1.5513	0.061523	-67.907	-450.01	1932.77823	-1.9735	1.8825	0.80693
3.776	-36.988	142.35	473.032	-0.27637	0.23877	0.12598	-73.663	-14.7867	35.5415	0.042969	0.088867	0.11475	-86.884	117.69	1957.398	-1.9642	1.5276	0.064453	40.1728	-413.13	1948.8	-2.1681	1.9268	0.87685
3.778	-24.54	140.86	451.053	-0.24609	0.21484	0.12158	-44.245	20.2974	35.4243	0.041992	0.097168	0.125	-109.987	53.954	2007.641	-1.9645	1.508	0.065332	80.18	-372.57	2011.93668	-2.3198	1.9458	0.94141
3.78	-37.836	147.877	411.7172	-0.2334	0.20605	0.11963	-65.486	7.464	38.7825	0.038574	0.1001	0.12793	-109.115	70.171	1994.416	-1.9602	1.492	0.073145	54.0707	-308.34	2114.102	-2.3909	1.9751	0.97539
3.782	-3.909	141.3295	410.3554	-0.20166	0.18115	0.12012	-70.664	-25.8647	83.843	0.031738	0.11865	0.12207	-129.836	24.8681	1993.2818	-1.9529	1.4707	0.080957	105.498	-252.754	2168.59	-2.3852	2.0094	0.96982
3.784	-12.14	124.9584	419.8287	-0.18604	0.16797	0.12036	-58.719	0.7142	132.761	0.022949	0.13501	0.12036	-93.955	39.961	1958.395	-1.939	1.4556	0.091309	130.723	-230.4414	2172.421	-2.2973	2.0348	0.93896
3.786	-26.009	118.0339	425.4128	-0.17188	0.15234	0.12305	-85.386	-80.19579	192.804	0.0014648	0.16016	0.11279	-82.277	7.88	1920.454	-1.9247	1.4402	0.10439	110.723	-186.224	2121.654	-2.1497	2.0436	0.88379
3.788	-46.848	116.9873	384.9069	-0.15479	0.13818	0.12451	-65.381	-108.317	300.992	-0.041992	0.22266	0.1167	-54.409	77.173	1888.692	-1.9038	1.4266	0.11396	38.769	-157.11	2082.554	-1.9702	2.0259	0.81836
3.79	-26.231	126.0645	355.0829	-0.14502	0.13281	0.12598	-84.951	-120.903	411.117	-0.083984	0.25879	0.11865	-23.4709	87.17	1882.108	-1.8808	1.4154	0.12412	2.667	-64.75	2031.266	-1.8077	1.9736	0.75234
3.792	-32.479	123.908	339.6811	-0.125	0.11963	0.12354	-149.916	-244.026	503.856	-0.18701	0.32861	0.14844	10.222	182.953	1855.0132	-1.8546	1.4008	0.13399	-45.8311	-46.92	1995.11038	-1.6699	1.8973	0.70478
3.794	-58.89	125	333.8563	-0.11084	0.1123	0.1272	-151.37	-263.483	546.574	-0.28784	0.38378	0.17724	13.498	199.373	1859.1971	-1.8301	1.3926	0.14795	-50.6973	-73.4	1955.841	-1.5695	1.8117	0.67471
3.796	-81.4376	108.282	314.232	-0.10156	0.099609	0.13086	-172.094	-285.523	566.9152	-0.40186	0.43604	0.2085	33.19042	285.098	1814.4898	-1.8104	1.3833	0.15938	12.055	-187.388	1953.043	-1.4989	1.7342	0.65547
3.798	-74.8905	91.8226	316.6455	-0.08252	0.090332	0.13379	-160.381	-260.122	649.072	-0.54883	0.50488	0.24658	45.4795	308.162	1801.938	-1.7946	1.3758	0.17129	60.571	-237.484	1982.008	-1.4526	1.6646	0.6377
3.8	-55.0265	86.0305	306.5052	-0.069336	0.085449	0.13086	-162.755	-154.3595	712.573	-0.62549	0.53955	0.26172	74.183	367.38	1752.312	-1.7786	1.3684	0.18574	132.157	-224.204	2056.253	-1.4155	1.6317	0.63672
3.802	-45.135	68.895	294.7474	-0.060059	0.073242	0.14063	-172.774	-132.203	755.2599	-0.76758	0.62695	0.29639	29.563	324.01	1739.4603	-1.7628	1.3608	0.20068	175.606	-175.396	2127.12383	-1.3996	1.6246	0.63389
3.804	-51.622	58.969	281.3029	-0.04541	0.060059	0.14453	-114.721	-61.984	817.02	-0.86792	0.7063	0.32056	55.2817	289.39	1697.889	-1.7358	1.3521	0.21338	120.778	-98.4024	2178.249	-1.411	1.6438	0.63506
3.806	-42.006	66.784	267.8759	-0.033203	0.05127	0.14014	-78.928	11.16	858.969	-0.96826	0.79541	0.34375	51.834	188.288	1672.044	-1.7042	1.3341	0.22461	38.47	-119.4177	2214.007	-1.4519	1.6754	0.65635
3.808	-29.575	86.7166	252.5474	-0.012695	0.033691	0.14111	-55.394	6.65000000000001	982.404	-1.1177	0.94189	0.37207	119.249	172.3132	1606.121	-1.6659	1.3173	0.23028	-64.238	-119.577	2253.3	-1.5269	1.7153	0.70508
3.81	-26.698	100.141	216.4954	0	0.029785	0.13574	-7.3	88.088	1109.437	-1.1924	1.0156	0.38721	111.732	130.979	1598.1489	-1.6171	1.2997	0.22364	-131.4963	-122.468	2282.141	-1.6232	1.7491	0.78232
3.812	-57.88	96.3212	215.8017	0.021973	0.019531	0.13623	-25.543	133.0281	1191.683	-1.3569	1.145	0.42969	112.396	156.993	1566.6248	-1.5625	1.2754	0.21982	-219.69	-51.206	2272.537	-1.7539	1.7742	0.85127
3.814	-45.086	79.0898	225.9654	0.041748	0.011963	0.13208	-31.403	119.018	1287.654	-1.5586	1.2402	0.48291	76.9637	143.707	1561.798	-1.5	1.2441	0.21045	-256.446	25.649	2196.387	-1.8926	1.7996	0.90557
3.816	-46.349	74.2631	218.3765	0.062012	0.0068359	0.12988	-83.555	115.441	1339.452	-1.668	1.2715	0.51221	85.7257	185.727	1508.675	-1.436	1.219	0.19414	-270.612	39.795	2101.217	-2.0225	1.8248	0.94131
3.818	-41.352	83.01	198.326	0.086914	-0.0039063	0.125	-113.2052	27.73	1386.857	-1.8804	1.3149	0.57031	42.6983	164.915	1519.147	-1.3742	1.1881	0.18125	-271.75	43.9822	2013.853	-2.1328	1.8398	0.96338
3.82	-61.0756	82.779	200.61042	0.099121	-0.0078125	0.12354	-123.696	-59.36	1441.952	-2.0264	1.3301	0.60498	52.8213	205.945	1461.003	-1.3156	1.1553	0.16914	-249.036	17.148	2040.028	-2.2142	1.8314	0.96885
3.822	-37.286	74.865	190.0381	0.125	-0.010254	0.12012	-150.5333	-118.854	1500.446	-2.1245	1.3413	0.6377	-21.815	205.325	1420.77	-1.2526	1.1271	0.16035	-178.682	47.985	2066.151	-2.259	1.8039	0.96612
3.824	-37.78	56.9195	184.8629	0.14234	-0.021973	0.1167	-171.858	-249.8585	1556.381	-2.1836	1.3291	0.67236	-69.4169	277.833	1314.2737	-1.2012	1.1016	0.15869	-70.104	102.029	2064.465	-2.2765	1.7738	0.96025
3.826	-40.229	58.89651	143.378	0.15625	-0.022949	0.11572	-123.823	-294.918	1594.873	-2.1694	1.3169	0.67578	-148.987	284.064	1234.35	-1.151	1.0685	0.1498	-50.269	190.779	2049.953	-2.2645	1.7401	0.95107
3.828	-21.095	57.2527	133.1434	0.17383	-0.031738	0.10498	-58.74	-333.286	1603.1683	-2.0625	1.2891	0.69385	-147.899	327.368	1144.958	-1.096	1.0333	0.1459	-71.218	236.76745	2026.249	-2.2319	1.7173	0.94336
3.83	-29.043	46.9323	136.6083	0.18213	-0.03418	0.10303	2.252	-401.26	1617.1351	-1.917	1.2813	0.67871	-167.26	307.948	1111.216	-1.0433	0.99228	0.1373	-77.5682	243.784	2049.3328	-2.1898	1.71	0.93389
3.832	-20.36	45.5211	134.5645	0.19482	-0.043945	0.097168	80.622	-365.74	1658.1392	-1.7373	1.2773	0.65576	-139.956	337.0663	1046.019	-0.9874	0.95108	0.12988	-92.05555	214.157	2074.532	-2.1262	1.707	0.92002
3.834	-55.449	47.247	125.162	0.19507	-0.04248	0.093506	75.312	-368.84	1728.173	-1.4897	1.2817	0.62695	-138.659	310.513	1005.895	-0.93311	0.90869	0.12402	-111.1603	149.551	2077.072	-2.0465	1.7008	0.89814
3.836	-28.86	47.247	129.4777	0.1958	-0.043945	0.091309	52.3287	-305.941	1781.918	-1.3882	1.2778	0.6123	-110.15527	322	954.262	-0.8709	0.86465	0.11309	-86.3579	136.186	2053.085	-1.974	1.6955	0.87373
3.838	-45.705	32.2413	138.5951	0.1958	-0.04248	0.09082	59.75891	-186.41	1777.578	-1.2461	1.2666	0.59424	-150.896	286.0351	913.837	-0.81084	0.81885	0.10986	-67.8391	108.914	1999.5865	-1.9092	1.6797	0.8501
3.84	-57.672	37.1713	140.578	0.18945	-0.039551	0.088379	37.415	-172.888	1752.2035	-1.1895	1.2534	0.59033	-116.7812	303.92	858.0102	-0.74405	0.77549	0.10127	-35.426	111.646	1947.083	-1.8589	1.6662	0.82461
3.842	-60.288	49.85	123.952	0.17627	-0.03418	0.091797	13.851	-107.878	1750.223	-1.1699	1.2461	0.59424	-104.2245	279.1216	819.687	-0.68115	0.73056	0.088281	3.188	85.859	1919.6902	-1.8145	1.659	0.80205
3.844	-62.701	64.194	109.7406	0.16944	-0.025391	0.096924	-20.098	-67.69	1737.959	-1.1929	1.2603	0.604	-86.708	297.651	778.2737	-0.61865	0.68701	0.07959	81.031	45.944	1873.742	-1.7797	1.65	0.77978
3.846	-37.968	63.313	85.43139	0.15723	-0.019531	0.10254	-60.266	-114.79	1729.838	-1.2246	1.2754	0.59961	-113.2182	255.225	755.198	-0.55439	0.64326	0.074121	160.781	64.759	1830.784	-1.7497	1.6444	0.7541
3.848	-65.572	53.926	67.287	0.14014	-0.0083008	0.11377	-102.389	-95.24	1742.87	-1.3047	1.3223	0.58691	-102.8247	263.6676	731.1531	-0.49961	0.59805	0.07041	155.213	107.08	1794.949	-1.7046	1.6333	0.72461
3.85	-74.124	35.0282	66.185	0.12939	0.0043945	0.1167	-110.444	-145.238	1744.376	-1.3562	1.3626	0.56518	-89.35754	239.869	699.898	-0.44453	0.55469	0.063379	152.778	199.327	1771.259	-1.6673	1.6179	0.69551
3.852	-63.287	20.404	88.075	0.11133	0.016602	0.12793	-65.632	-174.856	1771.084	-1.3999	1.4028	0.54102	-25.716	262.8594	639.188	-0.38867	0.51152	0.063281	128.067	247.486	1753.471	-1.6214	1.5978	0.66172
3.854	-36.715	37.897	82.56	0.096925	0.02832	0.13501	-12.798	-144.667	1781.382	-1.4507	1.4673	0.52148	-23.933	234.605	574.2652	-0.3374	0.47168	0.057129	80.9426	296.9498	1682.162	-1.5777	1.5689	0.63047
3.856	-39.569	34.951	88.1529	0.084473	0.041016	0.14111	13.422	-215.735	1812.178	-1.4688	1.4961	0.50635	9.912	245.941	520.325	-0.28467	0.42832	0.053027	31.249	296.419	1598.825	-1.5311	1.5474	0.59756
3.858	-75.5087	30.3813	90.1428	0.067871	0.056641	0.14844	-19.956	-223.88	1875.214	-1.519	1.5679	0.49609	19.573	216.981	468.979	-0.23633	0.38623	0.051074	-17.229	319.092	1515.8041	-1.4902	1.5176	0.56982
3.86	-40.784	25.3199	100.141	0.056153	0.062988	0.15649	-77.456	-239.63	1904.555	-1.56	1.6177	0.49194	45.585	241.96657	431.082	-0.19141	0.34326	0.040527	-35.648	344.85	1492.7005	-1.4367	1.4867	0.5413
3.862	-50.648	42.22	82.5941	0.044922	0.071289	0.16309	-113.577	-309.96	1951.057	-1.6074	1.666	0.49658	58.431	226.59367	366.722	-0.14121	0.30351	0.031836	-109.467	347.33	1486.232	-1.3874	1.4563	0.51426
3.864	-43.508	50.978	55.01368	0.036133	0.084473	0.16943	-157.221	-264.343	1994.168	-1.6636	1.7173	0.51953	62.225	238.45	326.9555	-0.074707	0.25439	0.025391	-98.3824	319.193	1429.959	-1.3327	1.4157	0.48457
3.866	-69.5517	45.1104	70.9223	0.032227	0.086914	0.16846	-180.9353	-261.938	1979.812	-1.6895	1.7402	0.54443	11.682	196.4482	298.04	-0.019043	0.21592	0.0094726	-96.5816	233.249	1372.605	-1.2769	1.3677	0.46133
3.868	-58.234	22.542	66.483	0.026855	0.096191	0.17334	-187.93	-237.3762	1974.767	-1.7397	1.7759	0.6084	-13.394	212.8662	293.2088	0.031055	0.1916	-0.0065429	-107.031	213.746	1290.125	-1.2241	1.3208	0.43164
3.87	-48.774	10.244	61.286	0.028565	0.098144	0.17041	-243.178	-120.687	1923.511	-1.7947	1.8059	0.66088	-10.57	197.613	259.7326	0.055273	0.16504	-0.0026367	-87.78	186.61	1230.533	-1.1753	1.2647	0.41045
[truncated: 28,065 more rows]
