# Supplementary material for: Reliability and Validity of Running Cadence and Stance Time Derived from Instrumented Wireless Earbuds
Source: Sensors (Basel). 2021 Nov 30;21(23):7995. doi: 10.3390/s21237995 (PMC8659722; doi:10.3390/s21237995)
Supplement: Supplementary file 1 [file sensors-21-07995-s001.zip › Data_P05_speeds_2.csv]

time	S7kmh_force_plate_1	S7kmh_force_plate_2	S7kmh_force_plate_3	S7kmh_earbuds_1	S7kmh_earbuds_2	S7kmh_earbuds_3	S10kmh_force_plate_1	S10kmh_force_plate_2	S10kmh_force_plate_3	S10kmh_earbuds_1	S10kmh_earbuds_2	S10kmh_earbuds_3	S13kmh_force_plate_1	S13kmh_force_plate_2	S13kmh_force_plate_3	S13kmh_earbuds_1	S13kmh_earbuds_2	S13kmh_earbuds_3	max_force_plate_1	max_force_plate_2	max_force_plate_3	max_earbuds_1	max_earbuds_2	max_earbuds_3
0	-122.953	-74.9089	1304.853	-1.4165	0.90088	0.34033	-62.386	198.9191	706.7648	-0.44922	0.92188	0.0625	-92.455	182.274	157.45	0.070801	0.070801	-0.17188	-123.26017	183.809	359.09	0.15918	0.099121	0.025391
0.002	-99.273	-79.53096	1303.619	-1.3276	0.89307	0.2998	-73.07	177.9749	664.715	-0.42871	0.9043	0.067383	-125.11	211.853	172.558	0.077148	0.053711	-0.18945	-133.3896	219.195	309.2668	0.19727	0.050293	0.013672
0.004	-98.141	-61.81	1298.174	-1.2537	0.87817	0.26831	-108.3535	195.1431	608.0434	-0.38477	0.85645	0.064453	-130.209	146.9408	167.4059	0.097168	0.019043	-0.20459	-86.848	231.1484	291.85529	0.20605	0.026367	0.0063477
0.006	-70.366	-56.355	1322.104	-1.1836	0.86328	0.23926	-67.845	136.326	578.2973	-0.35401	0.82666	0.063721	-139.151	157.686	164.269	0.10376	0.003418	-0.21558	-67.658	244.581	250.9844	0.21875	-0.01123	0.0019531
0.008	-69.808	-58.276	1316.592	-1.1094	0.84375	0.21338	-86.557	176.3538	544.563	-0.32178	0.7915	0.063477	-116.9874	113.6732	116.0029	0.11279	-0.015625	-0.2251	-44.106	233.863	236.864	0.21753	-0.03125	0.0053711
0.01	-51.569	-69.355	1325.4539	-1.0879	0.8291	0.2002	-96.315	161.325	518.37	-0.28271	0.75049	0.063965	-97.83514	136.613	95.027	0.11475	-0.029297	-0.229	-9.053	210.776	217.416	0.2085	-0.047363	0.0097656
0.012	-37.61	-86.642	1347.32929	-1.0562	0.81689	0.17627	-59.428	125.482	490.9128	-0.26563	0.73242	0.059082	-42.569	90.668	95.7824	0.11328	-0.035156	-0.22949	-22.585	170.368	191.849	0.17773	-0.061523	0.023438
0.014	-11.36	-122.7885	1365.1406	-1.0532	0.81494	0.17065	-97.781	170.196	452.1486	-0.22754	0.69287	0.068359	-55.839	82.917	100.8526	0.104	-0.046875	-0.22266	-25.746	137.2104	161.7796	0.14673	-0.067138	0.039551
0.016	2.487	-148.1714	1380.637548	-1.063	0.82275	0.16846	-93.564	132.978	430.4913	-0.20361	0.65845	0.066162	-23.723	20.93	73.7636	0.086425	-0.052979	-0.22168	-23.518	124.78	140.2822	0.11084	-0.073242	0.058105
0.018	-8.224	-162.315	1394.7916	-1.0972	0.83838	0.16602	-81.124	153.6346	406.4835	-0.18848	0.62939	0.067871	24.571	0.421000000000003	66.6081	0.068359	-0.057129	-0.21533	-14.784	97.0028	129.293	0.053223	-0.068359	0.078613
0.02	25.874	-162.756	1420.609	-1.1187	0.85205	0.18164	-107.609	198.571	364.6218	-0.1626	0.58447	0.069336	43.456	-31.617	55.593	0.043945	-0.063965	-0.21143	-43.564	60.2491	108.867	0.024414	-0.064453	0.089355
0.022	14.753	-191.578	1434.369	-1.1714	0.8833	0.20801	-73.139	161.146	324.6678	-0.15283	0.55762	0.069336	49.442	-16.102	66.97	0.032227	-0.065918	-0.20459	-37.718	44.3167	95.825	-0.029785	-0.052246	0.11719
0.024	35.004	-210.861	1422.505	-1.209	0.91894	0.22998	-82.235	201.882	296.1548	-0.14355	0.51611	0.065918	53.401	18.5861	66.768	0.012207	-0.062988	-0.19482	-61.36	18.671	84.2326	-0.068848	-0.028809	0.14062
0.026	9.108	-203.972	1402.2498	-1.2441	0.95898	0.25146	-79.565	175.792	265.012	-0.13404	0.49121	0.065918	24.717	67.945	58.8536	-0.01123	-0.061523	-0.18848	-43.607	-0.7636	86.1901	-0.11377	-0.0073242	0.16895
0.028	18.237	-155.3273	1416.8188	-1.2773	1.0176	0.27686	-86.826	123.1772	257.941	-0.11963	0.45166	0.065918	40.046	87.256	46.498	-0.033203	-0.056641	-0.17236	-44.756	-11.85	86.749	-0.17432	0.031738	0.19629
0.03	31.5442	-118.4489	1440.2524	-1.2949	1.0498	0.29346	-99.03	160.9931	228.727	-0.10156	0.4165	0.069824	22.173	61.3612	47.8576	-0.066406	-0.04541	-0.15283	-44.424	-34.9414	49.324	-0.20117	0.047852	0.21924
0.032	-9.2	-104.9411	1442.5715	-1.312	1.1089	0.31445	-45.141	114.394	227.4718	-0.094238	0.39453	0.069336	4.792	50.415	46.12	-0.089111	-0.040039	-0.14014	-63.616	-49.0118	23.861	-0.2627	0.081543	0.25195
0.034	7.045	-113.0804	1459.7279	-1.3269	1.1477	0.32788	-49.849	110.071	223.79002	-0.08252	0.36084	0.065918	-17.18	26.5726	44.09904	-0.11035	-0.036133	-0.12891	-92.562	-51.1363	26.645	-0.30004	0.10327	0.27368
0.036	-17.4633	-109.7303	1439.276	-1.3452	1.187	0.34277	-73.575	124.9308	194.51614	-0.075195	0.33764	0.066162	-17.619	42.929	24.606	-0.12939	-0.033203	-0.11816	-103.228	-5.423	21.1458	-0.33398	0.12256	0.29346
0.038	6.028	-91.621	1432.516	-1.3687	1.2368	0.35742	-56.441	60.64	179.343	-0.071777	0.31543	0.0625	-50.053	17.4412	39.136	-0.1333	-0.038086	-0.11182	-133.0095	53.1062	32.5317	-0.3623	0.146	0.31152
0.04	-15.441	-58.064	1434.34	-1.3862	1.2515	0.36523	-71.981	107.659	168.9306	-0.060547	0.28711	0.067383	-59.626	32.882	25.6996	-0.13281	-0.04834	-0.10889	-123.7122	98.461	32.954	-0.37598	0.15039	0.3208
0.042	-19.089	-39.046	1441.685	-1.4043	1.2813	0.36572	-63.601	95.8081	160.8099	-0.055176	0.26855	0.06543	-74.95	3.641	37.8758	-0.11719	-0.058838	-0.11108	-132.3769	112.45	18.825	-0.38037	0.15381	0.33105
0.044	-14.3089	-46.523	1462.101	-1.4192	1.2951	0.35864	-49.206	59.2732	174.1467	-0.04541	0.24951	0.065918	-92.628	34.156	27.7684	-0.096191	-0.074707	-0.11377	-140.3232	82.71	15.007	-0.36792	0.14942	0.33081
0.046	-22.107	-82.81149	1464.9394	-1.4302	1.3032	0.36523	-69.323	101.0668	165.509	-0.040283	0.22754	0.063232	-127.038	0.884	44.2387	-0.055664	-0.092285	-0.12109	-116.546	73.583	2.158	-0.3501	0.14111	0.32275
0.048	7.3595	-109.711	1498.4008	-1.4375	1.3125	0.35645	-62.745	42.412	144.1151	-0.033691	0.20703	0.065918	-132.073	25.426	60.143	-0.035156	-0.10059	-0.12012	-125.414	69.682	1.251	-0.29492	0.12109	0.2959
0.05	-2.136	-122.657	1509.5542	-1.4434	1.3154	0.33887	-53.617	64.6805	127.6978	-0.03125	0.18994	0.075684	-156.113	-9.9878	62.301	-0.00048828	-0.11133	-0.12744	-109.1821	69.6471	-5.5682	-0.26172	0.10791	0.28271
0.052	14.7911	-115.44	1539.693	-1.439	1.314	0.32813	-82.337	103.877	100.11507	-0.02002	0.17822	0.074219	-169.248	25.275	42.3041	0.029053	-0.12476	-0.13281	-106.6309	49.9804	2.429	-0.1792	0.081055	0.25488
0.054	-13.507	-103.771	1533.7284	-1.4348	1.3147	0.32422	-68.73	48.9094	81.889	-0.012207	0.15576	0.080078	-162.471	-28.2753	40.626	0.054199	-0.13916	-0.13428	-78.918	51.99	17.91	-0.12183	0.065186	0.22657
0.056	12.6759	-91.2951	1540.232	-1.4414	1.3105	0.31299	-65.777	104.222	73.6525	-0.0063476	0.14136	0.085938	-146.355	27.4635	34.0767	0.082031	-0.16211	-0.14209	-82.26	73.965	36.8754	-0.062012	0.043945	0.20361
0.058	26.3462	-94.5445	1533.0475	-1.4551	1.3066	0.31104	-90.791	84.9519	61.671	-0.00097656	0.12158	0.086426	-153.749	0.715999999999999	62.6146	0.10107	-0.17383	-0.13916	-63.966	82.557	73.924	0.0058594	0.013672	0.1748
0.06	25.7953	-80.0015	1541.23162	-1.4644	1.3032	0.30957	-70.739	47.43822	74.4931	0.0097656	0.10547	0.096191	-127.306	87.293	40.146	0.13428	-0.19678	-0.15771	-48.948	99.55	96.879	0.039551	-0.00097656	0.15723
0.062	32.5708	-75.1674	1558.91319	-1.4902	1.3027	0.30908	-79.013	89.2253	85.1	0.015137	0.095703	0.098145	-119.148	51.2683	13.389	0.16773	-0.21191	-0.17309	-62.59	65.8524	100.423	0.099121	-0.035645	0.12598
0.064	45.88	-32.826	1555.6964	-1.513	1.2937	0.31518	-81.803	28.606	69.23973	0.02832	0.074707	0.10156	-60.89	99.128	2.735	0.20068	-0.22607	-0.18848	-55.128	39.1259	96.533	0.1355	-0.051513	0.10425
0.066	49.649	2.636	1538.8683	-1.5391	1.2891	0.3208	-84.207	32.51182	72.1626	0.039795	0.062744	0.10767	-35.236	25.0323	17.665	0.24854	-0.24219	-0.21338	-29.452	5.0129	100.4625	0.16748	-0.074219	0.091309
0.068	42.0804	27.4512	1516.729	-1.5781	1.2871	0.31543	-98.862	68.798	53.397	0.047852	0.052246	0.10889	-33.706	62.5964	22.7378	0.27148	-0.25146	-0.22998	3.28	11.24706	102.944	0.20117	-0.099609	0.076172
0.07	72.1633	27.6918	1519.1583	-1.5913	1.2837	0.31836	-72.038	3.867	52.6453	0.064453	0.036621	0.11475	-12.774	12.3925	33.2008	0.32031	-0.25635	-0.25586	-6.024	28.7182	100.521	0.21191	-0.11182	0.067383
0.072	71.953	23.998	1527.0146	-1.6245	1.2769	0.31982	-74.443	32.7838	52.28165	0.081543	0.025879	0.11451	21.847	64.882	40.8024	0.35279	-0.26099	-0.27051	5.83900000000001	21.622	51.744	0.23926	-0.14209	0.061035
0.074	71.34	27.652	1539.565	-1.6438	1.2653	0.31372	-78.957	9.208	51.483	0.09668	0.015137	0.11523	12.146	17.2455	66.74	0.38281	-0.26074	-0.29053	-42.418	29.5907	35.31488	0.25073	-0.16137	0.058105
0.076	47.977	7.8474	1560.8112	-1.6563	1.2539	0.30518	-76.194	-25.7327	66.743	0.11768	0.00097656	0.1167	10.325	64.419	71.481	0.40332	-0.2627	-0.2959	-57.761	23.4119	51.067	0.26465	-0.18555	0.058105
0.078	55.059	-11.6609	1573.8953	-1.6597	1.2329	0.28711	-80.122	42.2195	47.4075	0.1333	-0.0029297	0.11279	21.715	11.60875	69.484	0.40625	-0.25879	-0.29834	-27.281	8.819	53.6069	0.2876	-0.21484	0.055176
0.08	51.9294	-16.5433	1561.4049	-1.6543	1.2266	0.28174	-56.048	6.55	40.1417	0.16064	-0.011719	0.11377	34.763	55.855	49.5715	0.39941	-0.24756	-0.30078	-34.606	8.065	71.467	0.29443	-0.23047	0.052734
0.082	15.0749	-14.1431	1551.4727	-1.6328	1.1992	0.25195	-58.96	22.6841	42.416	0.1775	-0.018555	0.11255	31.397	-4.9706	44.0175	0.38599	-0.23779	-0.29297	-50.103	3.319	46.5187	0.30615	-0.25684	0.050781
0.084	29.266	-13.829	1553.2644	-1.6072	1.1819	0.2351	-48.063	66.0277	44.13	0.18896	-0.022461	0.10986	28.805	17.0907	39.4549	0.35986	-0.22949	-0.28613	-76.919	-24.6451	18.556	0.31103	-0.2788	0.051758
0.086	4.895	-18.5807	1558.0696	-1.5776	1.1626	0.2168	-25.931	0.0111000000000008	32.3052	0.2085	-0.028809	0.10547	11.592	-31.7395	54.217	0.31396	-0.21143	-0.26758	-108.352	-18.398	21.498	0.32129	-0.29736	0.045898
0.088	-6.263	-0.849	1548.256	-1.543	1.1387	0.19189	-50.012	54.85	34.8325	0.21338	-0.032227	0.104	-1.241	25.51406	44.8932	0.28613	-0.19824	-0.2583	-110.051	29.1592	37.5083	0.32422	-0.31494	0.04248
0.09	-36.841	7.258	1547.064	-1.521	1.1274	0.17871	-62.443	40.706	45.016	0.22949	-0.034668	0.091797	-18.966	10.086	61.1267	0.22998	-0.17383	-0.22998	-80.231	39.026	39.815	0.33301	-0.32471	0.036133
0.092	-7.002	24.788	1543.199	-1.4917	1.1099	0.16455	-42.035	9.9668	49.696	0.24317	-0.039063	0.081299	-31.704	61.651	48.194	0.19239	-0.1521	-0.21021	-96.8446	52.6746	16.304	0.33398	-0.33887	0.032227
0.094	11.5888	41.977	1526.034	-1.4734	1.094	0.15699	-42.85	80.848	38.2827	0.25488	-0.038086	0.071289	-67.914	44.6303	57.319	0.14941	-0.12842	-0.19287	-132.1581	23.5434	-7.689	0.33691	-0.34302	0.031739
0.096	-30.4	67.341	1487.262	-1.457	1.0781	0.1499	-27.782	28.9793	13.28	0.26953	-0.040039	0.05957	-103.897	86.007	65.8754	0.10303	-0.10254	-0.16699	-138.9627	16.374	-5.608	0.3374	-0.3374	0.035645
0.098	-25.678	79.3884	1485.67	-1.4458	1.0669	0.14551	-47.284	34.0592	31.7494	0.27148	-0.035156	0.057129	-141.252	58.68	65.871	0.07666	-0.086914	-0.15479	-150.0733	25.384	21.485	0.32324	-0.33398	0.035645
0.1	-28.565	86.865	1478.868	-1.4483	1.0606	0.14551	-70.618	52.9115	32.111	0.27344	-0.035156	0.045898	-140.632	57.603	49.9034	0.039551	-0.063477	-0.13525	-120.646	32.234	30.936	0.31689	-0.32568	0.044434
0.102	-12.0546	94.895	1486.8175	-1.4429	1.061	0.15137	-56.931	-19.8809	28.9157	0.27539	-0.026611	0.032959	-146.72	4.91	36.898913	0.0058592	-0.040527	-0.12036	-100.141	71.6857	21.8636	0.2915	-0.31152	0.053711
0.104	-31.6014	94.772	1468.1717	-1.4448	1.0513	0.16553	-52.823	35.0073	43.8166	0.27393	-0.02002	0.029297	-147.7191	-11.183	15.488	-0.019531	-0.023926	-0.10693	-87.909	75.001	1.262	0.27027	-0.29639	0.053955
0.106	-32.0881	73.135	1453.8008	-1.4434	1.0488	0.17432	-49.296	30.891	37.7085	0.26807	-0.0097656	0.025391	-147.389	-17.684	11.6832	-0.060547	0.0043945	-0.091309	-82.382	104.729	0.824000000000005	0.24316	-0.27881	0.067871
0.108	-30.693	61.5565	1441.223	-1.4434	1.0479	0.19629	-53.594	-3.0773	41.6595	0.26611	-0.0053711	0.025391	-154.683	9.063	33.502	-0.074707	0.013672	-0.084961	-78.796	115.893	54.7779	0.20508	-0.24561	0.083496
0.11	-21.063	71.73	1419.305	-1.4493	1.0498	0.21045	-70.294	59.6676	49.8023	0.25391	0.0078125	0.029297	-124.125	24.278	33.5792	-0.10645	0.03125	-0.075195	-81.806	113.308	90.143	0.18555	-0.229	0.089355
0.112	-8.879	70.81	1418.7078	-1.4556	1.0503	0.22266	-72.148	29.5856	39.9653	0.2478	0.012939	0.034668	-115.9195	12.824	48.8911	-0.12009	0.042722	-0.071047	-54.056	95.745	93.088	0.14209	-0.19629	0.11475
0.114	-7.076	51.354	1423.612	-1.457	1.0566	0.24268	-85.245	45.5744	50.437	0.24121	0.021973	0.038086	-116.63243	19.817	47.386	-0.12808	0.046907	-0.066863	-54.336	68.7747	55.318	0.10767	-0.16187	0.13086
0.116	25.988	37.854	1425.246	-1.4551	1.0527	0.25342	-80.575	81.8279	41.8557	0.23193	0.034668	0.041504	-89.659	7.753	37.5282	-0.13121	0.049448	-0.066982	-51.045	39.8724	52.3184	0.069336	-0.12891	0.14063
0.118	30.241	48.36	1399.875	-1.4492	1.0449	0.26611	-71.002	9.3913	31.6144	0.23145	0.038086	0.04541	-59.659	37.4629	42.2121	-0.1327	0.052311	-0.068764	-31.14	35.8113	69.898	0.031738	-0.083496	0.15869
0.12	31.039	65.423	1379.744	-1.4397	1.0335	0.27466	-81.831	60.353	40.893	0.23389	0.043457	0.062012	-50.838	24.7197	60.0759	-0.13379	0.056641	-0.071289	-25.107	52.3198	96.621	0.013672	-0.069336	0.17383
0.122	20.955	70.0649	1367.3216	-1.4331	1.0239	0.28027	-76.174	60.296	27.305	0.22803	0.047119	0.074463	-53.762	49.96	48.9329	-0.1364	0.061423	-0.066072	-13.532	26.0289	92.922	-0.019043	-0.027344	0.19873
0.124	39.297	84.5594	1347.6109	-1.4136	1.0044	0.28809	-70.577	25.6194	35.5756	0.22021	0.055176	0.083496	-17.974	27.1778	39.5018	-0.13146	0.066798	-0.071651	-0.144999999999996	18.598	63.82	-0.038818	-0.0021971	0.21631
0.126	36.45	99.9565	1317.8899	-1.4038	0.99658	0.29102	-81.997	83.899	43.4975	0.20898	0.062012	0.08252	8.233	54.443	21.507	-0.12272	0.07071	-0.07326	-28.202	-8.2393	68.9911	-0.060547	0.023438	0.23291
0.128	-11.658	110.75	1283.9663	-1.3804	0.97217	0.29541	-73.893	31.8164	42.598	0.20947	0.066895	0.094238	31.729	36.772	27.2079	-0.10616	0.076532	-0.07697	-28.545	-3.8204	76.4612	-0.077637	0.05127	0.25195
0.13	4.102	124.438	1251.4986	-1.362	0.95727	0.29273	-57.458	29.24018	55.8562	0.20166	0.069824	0.091797	26.155	76.293	28.7487	-0.07959	0.08252	-0.083008	-26.834	9.8257	87.956	-0.083008	0.063965	0.25391
0.132	-1.383	129.307	1227.2787	-1.3364	0.93408	0.28809	-72.218	60.3628	65.9988	0.20117	0.075195	0.09961	33.54	35.784	32.726	-0.065023	0.085408	-0.083537	-43.361	-6.1212	89.294	-0.092285	0.083008	0.27295
0.134	-1.672	142.09	1210.9545	-1.3027	0.91016	0.2832	-53.008	6.4959	55.66902	0.19824	0.074219	0.10596	35.898	72.576	23.94	-0.050952	0.089622	-0.086341	-67.623	7.51	59.42	-0.098388	0.096924	0.28516
0.136	-30.303	137.541	1201.45434	-1.2847	0.89697	0.28076	-54.349	48.5996	60.0598	0.19629	0.078125	0.11426	36.402	17.7527	44.0277	-0.041324	0.092006	-0.088469	-90.646	-21.7015	34.3482	-0.098633	0.10986	0.29688
0.138	-6.712	127.8416	1173.824	-1.2446	0.86963	0.26953	-59.812	29.0713	37.1111	0.19678	0.077148	0.11719	21.682	37.4271	50.062	-0.039601	0.095215	-0.090871	-97.094	-3.907	18.206	-0.10059	0.11914	0.31348
0.14	2.676	115.799	1171.171	-1.2136	0.84643	0.26391	-49.451	-11.1327	37.0477	0.19678	0.076172	0.12158	-9.25	-4.918	65.205	-0.041504	0.10303	-0.091309	-89.411	26.3634	35.5478	-0.10303	0.12451	0.31934
0.142	-32.719	112.465	1146.763	-1.1812	0.82275	0.25635	-55.443	42.8989	49.6366	0.19922	0.076904	0.12695	-37.483	50.723	60.6591	-0.044502	0.1084	-0.10184	-84.137	41.4401	30.8456	-0.10547	0.13232	0.33154
0.144	-37.264	100.053	1129.8218	-1.1362	0.79541	0.2334	-52.051	17.4063	55.354	0.19727	0.07666	0.12598	-60.372	18.1837	81.5374	-0.050768	0.11802	-0.11118	-85.127	45.413	11.445	-0.11157	0.13354	0.34179
0.146	-38.255	102.228	1113.7279	-1.1172	0.78516	0.22656	-39.081	25.186	69.829	0.19971	0.078613	0.12891	-57.274	59.996	111.178	-0.055292	0.12949	-0.11938	-113.8626	28.4347	-23.674	-0.11084	0.13525	0.34961
0.148	-41.2007	106.8341	1085.0557	-1.0698	0.75537	0.20898	-49.584	76.908	42.8271	0.19873	0.074219	0.13037	-78.0785	-48.388208	124.6073	-0.056036	0.14806	-0.12558	-133.9415	24.63	-24.585	-0.10596	0.13379	0.35107
0.15	-64.5067	120.6043	1058.65182	-1.0379	0.73364	0.19825	-55.497	24.393	45.777	0.19824	0.078125	0.1333	-110.043	-65.3347	140.442	-0.0625	0.16406	-0.13672	-140.49389	13.1381	33.954	-0.10205	0.13135	0.34814
0.152	-67.485	100.8619	1051.2924	-1.0029	0.70898	0.19238	-34.919	60.543	49.398	0.19165	0.078125	0.13453	-68.504	-170.705	203.718	-0.070607	0.18313	-0.13579	-117.068	22.4292	99.88	-0.092285	0.13525	0.3335
0.154	-67.0151	95.5359	1035.918932	-0.95117	0.6875	0.18457	-40.909	31.1762	42.346	0.18652	0.080078	0.12646	-75.5454	-164.313	309.94	-0.082789	0.19971	-0.13473	-122.351	0.587	148.804	-0.078613	0.13232	0.32275
0.156	-43.323	118.3199	1001.7613	-0.93311	0.67627	0.18457	-61.767	-7.0606	50.9433	0.18652	0.083008	0.13037	-70.471	-253.0425	478.095	-0.09227	0.20935	-0.13828	-139.468	-28.82	187.34	-0.072266	0.13867	0.31006
0.158	-49.682	129.0436	971.6662	-0.89404	0.65186	0.18555	-54.49	52.7617	48.55954	0.18701	0.083008	0.1333	-40.5737	-273.292	579.939	-0.1072	0.22613	-0.15307	-150.075	-91.729	289.788	-0.083496	0.1792	0.29932
0.16	-50.4293	140.8195	936.105	-0.8623	0.63721	0.18896	-48.021	6.4606	48.6442	0.18701	0.085449	0.12891	-70.584	-410.551	660.278	-0.13623	0.24902	-0.17432	-178.304	-173.897	483.89	-0.097656	0.21094	0.2959
0.162	-14.674	149.1395	919.1045	-0.83447	0.62354	0.19385	-74.961	-10.1873	99.3299	0.18921	0.088623	0.12647	-64.437	-402.744	710.0389	-0.16802	0.30098	-0.18739	-190.182	-277.01	656.212	-0.15625	0.28662	0.31787
0.164	-8.366	170.373	866.0549	-0.8042	0.60205	0.20264	-85.424	-20.538	138.725	0.19141	0.091309	0.13135	-24.5411	-427.308	773.007	-0.22058	0.37861	-0.18444	-200.347	-405.29	757.048	-0.22094	0.34033	0.35059
0.166	-13.196	172.305	865.7023	-0.78857	0.5874	0.20898	-74.996	-124.8303	217.469	0.19678	0.09375	0.12891	-17.7051	-295.3446	818.436	-0.30891	0.47264	-0.15596	-191.847	-413.862	787.0132	-0.30664	0.39355	0.39258
0.168	-8.992	159.5019	842.7028	-0.76367	0.5752	0.21631	-80.597	-115.3598	316.235	0.19531	0.095703	0.12939	-15.1954	-212.267	858.151	-0.4268	0.57193	-0.10788	-195.975	-345.149	862.0334	-0.44482	0.46436	0.4502
0.17	2.418	148.9959	826.5496	-0.74365	0.55664	0.22217	-108.281	-172.5678	411.616	0.19434	0.10107	0.12207	20.5728	-111.133	848.415	-0.56152	0.66455	-0.045898	-264.6314	-207.484	971.301	-0.55468	0.51464	0.4895
0.172	-4.819	143.5126	804.1242	-0.72412	0.54395	0.2251	-148.205	-276.0783	494.793	0.19824	0.11011	0.11475	84.86	-121.28	886.554	-0.70839	0.72932	0.020869	-283.3687	-87.573	1051.839	-0.66504	0.58105	0.53125
0.174	-17.933	133.201	783.961681	-0.69678	0.52295	0.22949	-185.652	-259.337	525.0572	0.19092	0.11865	0.10645	107.659	-84.903	1004.008	-0.86912	0.79425	0.085122	-209.445	-35.334	1101.875	-0.81445	0.71875	0.57275
0.176	-2.768	140.42	766.2959	-0.68164	0.50977	0.22803	-173.515	-254.748	540.177	0.17334	0.14893	0.095703	111.2545	-62.609	1104.391	-1.0244	0.86187	0.14133	-143.858	-59.633	1171.624	-0.88818	0.80322	0.60059
0.178	-16.155	140.422	734.2933	-0.65332	0.48828	0.23096	-169.925	-163.68	622.453	0.1499	0.17529	0.084961	142.472	-5.389	1188.469	-1.1776	0.9358	0.19483	-39.606	-58.54	1291.189	-1.0405	1.0103	0.66211
0.18	-6.23	139.973	707.27264	-0.62671	0.47095	0.22876	-195.604	-41.4322	680.02326	0.094727	0.23633	0.077148	176.665	56.576	1220.86	-1.3276	1.0161	0.25098	-26.229	-37.6	1451.123	-1.1611	1.1641	0.73047
0.182	-30.899	135.716	690.7754	-0.60547	0.45313	0.22852	-194.663	-49.9185	713.5446	0.03418	0.29175	0.096679	192.669	97.41	1262.87	-1.4654	1.103	0.32345	-21.299	17.365	1541.394	-1.3047	1.3203	0.79932
0.184	-14.66	125.3164	674.8045	-0.5708	0.43262	0.22852	-135.886	6.123	758.4429	-0.037598	0.34619	0.12891	188.228	91.82	1300.654	-1.6181	1.1978	0.39415	-86.45	31.848	1597.2	-1.5425	1.5083	0.89453
0.186	-24.174	128.323	647.3476	-0.55273	0.42236	0.23047	-91.662	26.75	833.0164	-0.16504	0.41553	0.18652	139.739	-35.4	1377.369	-1.7976	1.2937	0.46994	-149.716	-25.5	1619.006	-1.6636	1.5884	0.93555
0.188	-27.953	130.185	625.054455	-0.52148	0.39844	0.22705	-62.99	24.08	933.663	-0.23438	0.44922	0.22217	39.838	-160.67	1439.387	-1.9824	1.3774	0.53587	-188.662	-107.06	1643.217	-1.8896	1.7227	1.0044
0.19	-32.625	130.741	598.10379	-0.4978	0.38013	0.22998	-38.73	126.336	1019.6039	-0.37061	0.51807	0.29492	-25.97	-304.752	1551.6869	-2.1602	1.4336	0.6001	-214.814	-192.02	1705.232	-2.0234	1.792	1.0532
0.192	-33.444	142.4119	580.5796	-0.4751	0.3667	0.22461	-65.883	142.018	1089.725	-0.47705	0.58935	0.34301	-51.187	-358.731	1594.214	-2.3193	1.4692	0.63926	-247.152	-247.57	1781.707	-2.1284	1.8462	1.0859
0.194	-52.955	148.887	565.345	-0.43799	0.34521	0.21973	-97.082	133.737	1158.517	-0.57959	0.66553	0.38232	-22.016	-394.713	1628.749	-2.4457	1.4805	0.65595	-286.157	-327.197	1816.6421	-2.1641	1.8984	1.0923
0.196	-62.742	153.451	537.408	-0.4209	0.33789	0.21631	-133.517	122.595	1245.655	-0.71338	0.77393	0.43457	23.055	-391.35	1617.756	-2.5142	1.4774	0.64968	-227.647	-422.104	1841.808	-2.1421	1.9185	1.0811
0.198	-71.588	134.892	534.3005	-0.38818	0.31348	0.21191	-143.848	3.98999999999999	1315.554	-0.77832	0.83984	0.46826	52.057	-455.82	1621.231	-2.4908	1.4587	0.62355	-164.381	-481.3	1821.161	-1.998	1.9287	1.0278
0.2	-86.602	140.49	511.2147	-0.36645	0.30078	0.21387	-155.797	-50.485	1392.048	-0.90967	0.98096	0.55078	0.696000000000005	-429.71	1679.7496	-2.3901	1.4478	0.56934	-61.3953	-474.51	1813.309	-1.8138	1.9158	0.99683
0.202	-90.1316	134.521	475.528	-0.34766	0.28711	0.20801	-178.19	-129.441	1444.4534	-1.013	1.0886	0.62281	-56.9951	-414.01	1768.023	-2.2159	1.4429	0.49305	56.763	-421.26	1889.9755	-1.6182	1.8789	0.96729
0.204	-82.897	131.0963	453.583	-0.3125	0.27246	0.20361	-188.097	-231.8626	1495.068	-1.1289	1.1934	0.70215	-109.413	-293.906	1835.281	-1.9995	1.4394	0.41446	79.562	-342.93	1992.608	-1.3906	1.8164	0.95166
0.206	-82.1869	118.7429	429.5161	-0.29932	0.26123	0.2002	-153.315	-214.873	1529.0104	-1.2959	1.3145	0.81787	-134.839	-223.852	1897.129	-1.7904	1.4375	0.33278	70.57	-246.259	2078.671	-1.3086	1.7852	0.95166
0.208	-72.746	113.571	413.1124	-0.26514	0.24365	0.19678	-73.379	-266.131	1537.9821	-1.3789	1.3672	0.87256	-145.745	-97.908	1865.275	-1.6091	1.4397	0.25882	74.2271	-182.38598	2093.202	-1.2031	1.7168	0.98486
0.21	-62.977	110.726	402.3493	-0.24512	0.23706	0.1958	-2.016	-306.36	1570.5645	-1.5488	1.4434	0.96533	-155.151	-89.85	1807.689	-1.478	1.4399	0.19678	63.6857	-128.862	2061.39	-1.1924	1.6699	1.0151
0.212	-51.345	112.2622	414.043	-0.23242	0.22461	0.19043	15.512	-269.58	1629.629	-1.655	1.4846	1.0188	-193.384	-52.09	1775.53	-1.3922	1.4343	0.14589	-3.917	-93.33	2035.487	-1.2222	1.6372	1.0293
0.214	-47.526	99.698	396.669	-0.20508	0.20947	0.18408	24.645	-262.44	1700.224	-1.7358	1.5063	1.0469	-217.969	-77.132	1769.581	-1.3476	1.4367	0.10722	-50.471	-49.13	2032.231	-1.3301	1.6309	1.0396
0.216	-34.806	94.1741	385.69769	-0.19336	0.20361	0.17676	19.906	-157.931	1755.676	-1.7944	1.5161	1.0645	-221.183	-71.647	1808.537	-1.3461	1.4429	0.077924	-135.678	-49.68	2026.628	-1.4023	1.6387	1.0454
0.218	-57.523	87.8524	370.7211	-0.17139	0.18652	0.18408	-4.081	-99.032	1750.128	-1.7969	1.5195	1.064	-145.512	-132.976	1854.9191	-1.3625	1.4609	0.056542	-180.98	-66.44	2008.088	-1.564	1.6626	1.0586
0.22	-38.122	88.1613	344.287	-0.1543	0.17529	0.17749	-10.604	-109.257	1734.0421	-1.7363	1.5078	1.0376	-76.135	-168.55	1866.903	-1.396	1.4868	0.038086	-179.74865	-71.43	2007.315	-1.6963	1.6875	1.0864
0.222	-30.223	89.724	320.85526	-0.1377	0.16455	0.17676	-39.174	-50.804	1723.792	-1.6592	1.4844	1.0054	64.228	-216.884	1884.093	-1.4354	1.5174	0.030665	-95.121	-86.043	2028.259	-1.8184	1.7051	1.1196
0.224	-46.817	95.897	287.57225	-0.11621	0.15332	0.17334	-69.544	-65.454	1726.984	-1.5508	1.4541	0.9624	94.0295	-199.246	1927.223	-1.486	1.5473	0.034473	22.139	-81.916	2078.4211	-1.9766	1.7402	1.1626
0.226	-43.342	100.826	275.7787	-0.10449	0.14404	0.16895	-92.272	-70.99	1744.205	-1.3945	1.4141	0.9126	94.485	-189.681	1961.4637	-1.5312	1.5832	0.042284	68.355	-105.888	2133.407	-2.0547	1.7578	1.1938
0.228	-49.078	95.633	274.9798	-0.075684	0.12939	0.16699	-165.559	-47.81	1761.143	-1.3218	1.3911	0.89258	57.324	-165.359	2045.787	-1.5823	1.6193	0.060741	28.255	-130.399	2166.244	-2.1816	1.7949	1.2388
0.23	-22.703	87.2444	269.7548	-0.05664	0.11767	0.16626	-119.085	-101.716	1754.6008	-1.2031	1.3594	0.87158	27.432	-215.649	2102.759	-1.6465	1.6563	0.083496	-44.514	-175.746	2200.533	-2.2409	1.8283	1.261
0.232	-22.997	87.905	251.8184	-0.034668	0.10693	0.16309	-57.639	-110.835	1775.113	-1.1304	1.3228	0.8457	-1.714	-247.948	2158.227	-1.7125	1.6918	0.1082	-103.93	-194.037	2255.483	-2.2729	1.8677	1.2715
0.234	-13.163	70.236	248.9613	-0.010254	0.096191	0.15625	-47.092	-128.019	1793.692	-1.1064	1.3057	0.83838	66.8443	-239.013	2127.596	-1.7807	1.7212	0.13515	-167.75	-212.437	2290.62	-2.2593	1.8892	1.2715
0.236	-21.888	74.135	232.571	0.011963	0.085693	0.15112	-0.587000000000003	-184.81	1837.224	-1.0742	1.292	0.83057	112.353	-160.808	2071.359	-1.8433	1.7384	0.1582	-240.8842	-181.86	2256.432	-2.2305	1.8945	1.27
0.238	-24.484	68.4508	216.878	0.036621	0.07666	0.14404	-36.86	-170.797	1905.0503	-1.0798	1.2898	0.82202	105.314	-72.025	2003.6984	-1.9126	1.7542	0.17764	-276.202	-107.823	2202.065	-2.1758	1.9082	1.2524
0.24	-32.781	79.2754	194.2254	0.059082	0.069336	0.13525	-91.668	-202.782	1937.518	-1.0894	1.2993	0.81055	81.769	-14.081	1967.739	-1.9727	1.7715	0.20264	-318.511	-31.453	2148.066	-2.1385	1.9124	1.2473
0.242	-60.592	63.565	190.2451	0.072266	0.064453	0.14209	-114.898	-240.97	1976.586	-1.1245	1.3169	0.80176	87.899	12.067	1951.813	-2.0346	1.7849	0.22773	-331.439	24.606	2097.525	-2.1113	1.9121	1.2349
0.244	-82.784	51.009	198.473	0.085938	0.059082	0.125	-149.738	-188.69	1981.485	-1.147	1.3403	0.79492	109.863	6.519	1974.517	-2.0929	1.7949	0.25459	-301.763	15.441	2097.6609	-2.0776	1.8989	1.2002
0.246	-81.769	50.87016	172.30052	0.098875	0.053711	0.12305	-152.625	-181.347	1965.387	-1.2012	1.3691	0.80127	176.025	47.7955	1976.418	-2.1394	1.8	0.27529	-228.195	11.8228	2056.541	-2.0547	1.8848	1.1802
0.248	-107.3587	50.6962	185.4848	0.10742	0.047852	0.12109	-183.309	-100.3	1956.8658	-1.2527	1.3953	0.81225	130.941	78.6655	1968.565	-2.1737	1.7989	0.28418	-160.852	15.372	2031.843	-1.9937	1.8481	1.1348
0.25	-87.05	43.074	186.0153	0.10791	0.043457	0.11719	-225.381	-28.934	1932.926	-1.313	1.4263	0.8291	45.6754	150.7433	1945.9137	-2.1846	1.7852	0.28613	-96.823	63.291	1995.521	-1.9305	1.8128	1.0857
0.252	-94.2044	36.586	178.0313	0.11475	0.041016	0.11963	-225.909	-40.872	1925.738	-1.396	1.4634	0.8457	-23.7195	162.964	1932.042	-2.1656	1.7629	0.28174	-99.811	143.425	1972.418	-1.8672	1.7793	1.0386
0.254	-78.088	38.986	141.4479	0.10352	0.039551	0.11914	-203.484	-4.588	1946.232	-1.4429	1.4868	0.85156	-57.854	158.5641	1978.65691	-2.1212	1.7399	0.27256	-106.166	206.785	1980.477	-1.7925	1.7388	0.96875
0.256	-76.099	38.5012	124.0265	0.093261	0.040039	0.12525	-169.7407	-12.1718	1937.478	-1.5254	1.5273	0.86963	-49.7618	82.4755	2027.5829	-2.0587	1.7071	0.25459	-117.358	235.799	2006.066	-1.7573	1.7173	0.94336
0.258	-66.341	46.10928	121.6207	0.081543	0.043457	0.12842	-118.359	-21.4383	1939.8326	-1.5752	1.5596	0.87647	-5.372	74.6744	2052.776	-1.9914	1.6781	0.24687	-183.3178	209.415	2014.636	-1.6953	1.6816	0.8833
0.26	-82.146	54.7893	115.3742	0.067383	0.046387	0.13867	-106.482	63.406	1912.043	-1.6206	1.5884	0.88672	-66.054	39.733	2057.7863	-1.9336	1.6563	0.24561	-195.2364	159.469	2013.757	-1.6538	1.6558	0.84083
0.262	-72.936	51.0389	109.4129	0.055664	0.051758	0.14453	-92.236	55.903	1891.221	-1.6621	1.6055	0.90283	-99.923	95.64	2011.6977	-1.8928	1.6377	0.24346	-180.04	147.636	1995.905	-1.6187	1.6274	0.80371
0.264	-83.774	45.5628	113.9632	0.033203	0.056152	0.1499	-101.092	65.7336	1920.207	-1.6816	1.6113	0.90283	-127.488	54.9764	1965.138	-1.8694	1.6235	0.24922	-136.9	160.096	1936.0584	-1.584	1.6016	0.76611
0.266	-74.466	39.3002	132.84913	0.021485	0.063232	0.15625	-137.1384	53.735	1958.61288	-1.6968	1.6235	0.91016	-86.149	60.651	1929.606	-1.8554	1.6111	0.26328	-98.057	172.595	1888.44	-1.5684	1.582	0.74854
0.268	-80.038	36.2292	116.8992	0.0078125	0.070801	0.17139	-114.147	-50.751	2018.624	-1.6975	1.6252	0.91333	-49.2845	-7.95100000000001	1924.553	-1.8564	1.599	0.28018	-42.76	160.763	1844.675	-1.5391	1.5566	0.7251
0.27	-60.239	54.4933	105.8124	-0.017578	0.079102	0.18018	-122.033	-48.5225	2023.525	-1.6934	1.627	0.9126	3.089	52.7	1920.4	-1.8667	1.5942	0.29883	-41.498	134.132	1835.946	-1.533	1.5335	0.70655
0.272	-69.356	48.703	94.8799	-0.023926	0.081055	0.18945	-145.2258	-45.173	1988.3864	-1.6719	1.6309	0.91064	-10.17	82.193	1896.0744	-1.8718	1.5892	0.32148	-23.961	172.696	1835.284	-1.5171	1.4995	0.68555
0.274	-46.792	48.088	82.2685	-0.044434	0.089355	0.20068	-130.317	-31.254	1968.31822	-1.6602	1.6348	0.90869	-46.3903	226.026	1830.18	-1.8664	1.5838	0.34092	16.702	259.237	1831.913	-1.4844	1.4551	0.66455
0.276	-30.939	40.81	72.9281	-0.053955	0.090332	0.20923	-146.737	33.8488	1933.868	-1.6406	1.6445	0.90869	-35.204	266.081	1794.4653	-1.8519	1.5795	0.35263	13.725	346.113	1803.568	-1.4683	1.4282	0.6543
0.278	-35.433	44.67156	64.967	-0.0625	0.094727	0.21143	-113.925	4.757	1916.8728	-1.6391	1.6451	0.91113	-7.794	357.337	1754.955	-1.8243	1.5812	0.36211	0.0749999999999886	386.1517	1743.662	-1.4082	1.3701	0.63184
0.28	-23.935	30.2973	74.9639	-0.067383	0.10303	0.21484	-53.604	8.813	1923.076	-1.6387	1.6523	0.91064	35.59	296.27	1737.186	-1.7852	1.5762	0.37158	-64.446	367.155	1672.6398	-1.3589	1.3247	0.60718
0.282	-21.978	28.472	82.1958	-0.066895	0.099121	0.21729	-61.821	40.768	1926.057	-1.6499	1.6528	0.92578	49.6134	325.53	1703.023	-1.7378	1.57	0.375	-94.853	328.113	1609.37282	-1.3008	1.2715	0.58252
0.284	-25.55	28.712	79.0237	-0.062012	0.10059	0.21729	-34.346	41.492	1932.055	-1.6655	1.6509	0.93066	33.536	224.62	1699.372	-1.6886	1.5603	0.37793	-160.4151	311.891	1599.367	-1.2124	1.1958	0.54492
0.286	-38.942	49.57006	76.68971	-0.054932	0.10108	0.21485	-28.54	135.733	1911.053	-1.6875	1.6504	0.94385	37.584	270.342	1658.935	-1.6366	1.5451	0.38262	-167.5129	310.11	1572.787	-1.1738	1.1602	0.52588
0.288	-27.019	40.1651	73.02216	-0.044922	0.1001	0.21094	-71.665	183.754	1850.721	-1.7009	1.6477	0.95239	16.139	191.818	1629.109	-1.5859	1.5234	0.38721	-169.486	320.098	1507.53	-1.0874	1.0835	0.48828
0.29	-45.991	29.68	76.3076	-0.02832	0.094238	0.21143	-81.753	174.4	1825.8456	-1.7148	1.6426	0.96631	43.7	227.666	1567.99	-1.5347	1.5083	0.38672	-183.633	299.424	1420.525	-1.023	1.0269	0.45533
0.292	-48.057	45.49	56.76225	-0.022949	0.098145	0.20313	-113.161	209.882	1811.318	-1.7202	1.6294	0.98047	74.639	131.105	1536.9452	-1.4788	1.4915	0.38594	-182.396	251.277	1347.295	-0.95703	0.96875	0.42139
0.294	-70.913	46.688	58.7127	-0.0087891	0.088379	0.20117	-131.938	153.651	1807.8144	-1.7246	1.6279	0.98877	83.953	187.836	1511.7723	-1.4296	1.4697	0.38476	-173.9814	230.045	1317.2628	-0.87354	0.89502	0.38135
0.296	-66.818	40.718	64.879849	0.0012207	0.082764	0.19409	-157.8911	142.701	1834.2954	-1.7183	1.6118	0.99023	67.847	142.901	1517.357	-1.3761	1.4481	0.38008	-137.567	194.32	1292.659	-0.82861	0.854	0.36523
0.298	-67.599	29.349	73.3766	0.0097656	0.07959	0.19092	-165.091	141.165	1811.83	-1.7146	1.5989	0.99633	40.349	257.072	1482.308	-1.3228	1.4233	0.37031	-107.218	202.25	1236.786	-0.74219	0.78125	0.32275
0.3	-67.959	30.1205	53.019	0.018555	0.063477	0.18457	-137.7704	66.786	1795.7827	-1.707	1.5859	0.99072	17.847	210.751	1447.985	-1.2617	1.3906	0.36182	-110.626	200.98	1178.534	-0.67969	0.73584	0.29004
0.302	-68.997	26.6831	54.387	0.021973	0.063477	0.18408	-143.207	89.722	1764.4814	-1.6816	1.5664	0.98291	-35.077	272.0646	1362.219	-1.1954	1.353	0.34961	-102.282	232.46	1103.822	-0.61719	0.6875	0.25293
0.304	-60.457	26.1442	70.17562	0.025391	0.055664	0.18311	-127.263	55.693	1735.0036	-1.6636	1.5552	0.97656	-65.205	207.851	1286.6396	-1.1245	1.3141	0.33477	-105.01	269.83832	1043.029	-0.53174	0.63135	0.21875
0.306	-75.716	25.953	52.68938	0.032959	0.050293	0.18042	-92.177	48.359	1718.175	-1.6274	1.5356	0.95508	-76.249	330.552	1220.144	-1.055	1.2736	0.32539	-115.286	305.556	941.617	-0.49219	0.59766	0.19531
0.308	-85.433	30.7845	54.0856	0.040039	0.046387	0.17432	-84.715	119.912	1701.233	-1.5938	1.5215	0.93213	-82.4621	326.717	1179.5225	-0.9834	1.2275	0.31182	-115.129	339.72	842.664	-0.41211	0.53809	0.16211
0.31	-88.469	22.8221	53.5614	0.046875	0.043945	0.17139	-74.049	114.79	1697.023	-1.5562	1.5015	0.90234	-112.4268	426.688	1113.579	-0.91406	1.1836	0.29688	-130.7822	338.7	770.228	-0.35645	0.48902	0.13306
0.312	-76.878	22.7617	71.3463	0.050293	0.041992	0.16309	-97.198	159.617	1665.797	-1.4956	1.4673	0.86133	-122.815	352.195	1063.5985	-0.84941	1.1316	0.28291	-151.19	345.702	705.677	-0.30371	0.44434	0.10547
0.314	-70.856	26.82	80.99103	0.06543	0.047363	0.15723	-106.9256	194.0928	1606.268	-1.4609	1.457	0.84131	-144.138	367.6869	992.94	-0.77998	1.0775	0.26885	-91.975	323.822	652.179	-0.23535	0.38281	0.070801
0.316	-65.373	-3.4468	104.7588	0.077637	0.046875	0.15063	-107.317	171.907	1561.4471	-1.3921	1.4204	0.80469	-124.552	263.018	936.121	-0.7124	1.0239	0.25595	-39.771	300.538	595.776	-0.19971	0.35254	0.052734
0.318	-84.055	-43.594	156.9734	0.090332	0.053223	0.14746	-113.025	230.632	1512.0908	-1.3413	1.397	0.77637	-96.613	315.0106	862.267	-0.64766	0.97032	0.24043	16.839	274.144	523.245	-0.14502	0.29102	0.019043
0.32	-65.344	-68.838	199.302	0.099609	0.062012	0.14014	-109.03	217.616	1466.9021	-1.2935	1.3735	0.75195	-95.963	255.128	832.175	-0.57471	0.91455	0.22217	51.422	251.518	469.051	-0.10205	0.24903	-0.0046385
0.322	-50.271	-80.0141	233.355	0.097656	0.065918	0.12695	-86.827	199.193	1439.3787	-1.2437	1.3364	0.7207	-116.71	324.688	798.697	-0.50869	0.85498	0.20293	62.842	280.55	424.111	-0.056152	0.20801	-0.029297
0.324	-56.157	-83.3755	278.2406	0.10059	0.086914	0.11523	-83.902	237.822	1390.709	-1.2168	1.3223	0.70557	-128.549	264.4685	753.7119	-0.44014	0.80195	0.18272	58.092	284.5822	420.90563	-0.0063477	0.15332	-0.059082
0.326	-82.252	-127.609	322.1082	0.090088	0.10766	0.11231	-43.2	180.1292	1349.7	-1.1694	1.2856	0.67773	-140.585	302.224	692.2146	-0.37178	0.75391	0.16436	48.093	298.259	419.127	0.017578	0.13281	-0.080566
0.328	-96.937	-153.5774	331.0289	0.070801	0.12988	0.10986	-29.433	174.791	1323.599	-1.1365	1.259	0.6604	-103.5711	222.421	658.712	-0.30928	0.70361	0.15049	28.544	249.067	383.652	0.067383	0.094238	-0.10693
0.33	-77.094	-130.4612	357.6948	0.026855	0.16846	0.13037	-11.733	191.106	1275.225	-1.1035	1.2246	0.63721	-81.191	251.374	630.172	-0.24609	0.65234	0.13574	-30.419	206.769	325.373	0.098633	0.054688	-0.12988
0.332	-71.106	-71.8994	396.182	-0.0078125	0.19092	0.14063	-1.60799999999999	147.623	1266.924	-1.0605	1.1777	0.61377	-58.549	224.3513	591.023	-0.18779	0.60869	0.12636	-62.836	167.796	290.118	0.11279	0.034668	-0.13477
0.334	-69.09	-53.283	441.375	-0.073242	0.22412	0.16846	-6.727	193.466	1238.0439	-1.0371	1.1543	0.59619	-32.154	269.149	502.5966	-0.13174	0.56104	0.12002	-100.5946	151.2052	281.401	0.12793	-0.00097656	-0.14404
0.336	-84.36	-34.834	476.496	-0.13696	0.25048	0.19532	-29.055	165.433	1200.068	-0.98438	1.1133	0.57178	-34.087	221.412	435.0887	-0.083692	0.51494	0.11221	-97.2234	144.771	271.571	0.13525	-0.02124	-0.14819
0.338	-57.144	-5.905	481.3045	-0.20166	0.27686	0.22461	-44.85	146.139	1168.523	-0.94629	1.0796	0.54883	-10.63	215.4277	379.7041	-0.038867	0.46846	0.10146	-64.835	129.9032	225.304	0.13477	-0.04541	-0.15723
0.34	-33.122	26.29	518.36771	-0.29297	0.31934	0.26465	-55.173	201.4585	1119.701	-0.9082	1.0449	0.5249	6.96900000000001	164.89704	336.384	0.0019531	0.42041	0.088379	-37.228	113.325	164.388	0.12988	-0.067383	-0.1582
0.342	-23.901	64.162	561.2129	-0.34033	0.34424	0.27637	-74.775	169.4176	1060.1336	-0.85107	0.99463	0.49365	-0.441000000000003	198.4259	284.8552	0.044238	0.37568	0.073242	-20.343	100.936	125.864	0.12891	-0.07666	-0.16113
0.344	-36.965	108.6567	626.438	-0.43164	0.39209	0.30908	-73.218	228.254	1009.356	-0.81885	0.97119	0.47852	2.858	201.198	239.2643	0.086036	0.33506	0.062402	-71.194	112.499	112.154	0.11328	-0.091797	-0.1582
0.346	-40.226	144.23	661.4769	-0.49512	0.43457	0.33472	-64.626	257.668	946.268	-0.76367	0.92285	0.44385	-20.376	227.277	208.546	0.12354	0.29756	0.046387	-88.949	89.772	105.611	0.097414	-0.10254	-0.16113
0.348	-56.573	144.905	708.783	-0.56592	0.48584	0.36182	-71.747	221.289	912.018914	-0.72265	0.88696	0.41626	-42.463	186.016	216.243	0.15791	0.26123	0.034765	-108.5678	61.16	67.4838	0.080078	-0.1123	-0.1626
0.35	-83.708	118.447	769.881	-0.64844	0.55859	0.39844	-67.763	260.486	868.0056	-0.67773	0.84766	0.39893	-47.919	159.149	203.9361	0.18994	0.23389	0.024902	-126.96213	13.906	67.3335	0.059082	-0.11914	-0.16162
0.352	-108.9864	76.689	847.013	-0.69482	0.5835	0.41699	-52.983	220.7118	802.6938	-0.62158	0.80518	0.37109	-52.645	134.3461	160.986	0.21387	0.204	0.01709	-139.8071	-7.319	82.649	0.050781	-0.12256	-0.16699
0.354	-98.525	30.0271	915.35	-0.80859	0.63867	0.46338	-56.505	207.932	755.7688	-0.58984	0.78125	0.34814	-36.667	116.12246	141.5916	0.22988	0.17793	0.014258	-142.4075	29.522	91.379	0.026855	-0.12744	-0.15234
0.356	-126.1175	-27.127	987.9545	-0.89111	0.68995	0.50342	-85.44	251.2908	708.593	-0.53564	0.73584	0.31104	-91.9703	100.15	130.1788	0.23222	0.15019	0.01543	-156.254	13.7964	70.7255	0.0097657	-0.13184	-0.14844
0.358	-135.3173	-80.2831	1047.2842	-0.97607	0.73193	0.55078	-80.018	208.866	677.756	-0.49414	0.70117	0.28956	-97.304	82.7462	137.8972	0.23281	0.12548	0.018652	-154.627	36.8284	21.4729	-0.0097656	-0.12549	-0.14111
0.36	-115.0547	-119.113	1087.4604	-1.083	0.78711	0.604	-91.07	225.2625	662.666	-0.45215	0.66846	0.26758	-105.097	75.8061	113.5274	0.22607	0.10498	0.022949	-124.371	8.332	-5.063	-0.040527	-0.12305	-0.13086
0.362	-89.0378	-128.929	1120.437	-1.1387	0.80859	0.62939	-104.8295	229.138	623.799	-0.40576	0.62109	0.23584	-94.525	49.534	70.258	0.20947	0.081152	0.035351	-90.701	-12.5527	-2.364	-0.053711	-0.12158	-0.12646
0.364	-93.0661	-136.572	1152.1887	-1.2344	0.85547	0.67334	-105.0942	177.9425	597.606	-0.38037	0.59863	0.22314	-103.753	31.517	53.404	0.18183	0.064942	0.046582	-33.164	-7.6287	2.41	-0.087402	-0.11377	-0.11621
0.366	-54.35	-128.364	1176.966	-1.3125	0.89648	0.70752	-100.24301	194.703	566.5811	-0.33545	0.5498	0.19287	-132.6205	1.086	65.419	0.14473	0.050098	0.055176	-12.528	-2.017	26.8083	-0.11304	-0.11328	-0.10743
0.368	-32.148	-108.176	1213.492	-1.3394	0.91846	0.71973	-99.7769	154.7804	523.535	-0.29931	0.51587	0.17065	-147.698	41.585	60.369	0.10625	0.037207	0.069824	-8.38500000000001	19.814	36.351	-0.13184	-0.10889	-0.095703
0.37	-47.921	-75.002	1251.893	-1.3745	0.95068	0.73633	-83.224	149.6322	489.531	-0.26953	0.47852	0.15088	-144.494	48.486	65.87829	0.070801	0.030273	0.083008	0.853999999999999	32.213	23.5076	-0.15283	-0.11035	-0.084473
0.372	-31.33	-63.229	1291.945	-1.3787	0.96802	0.73706	-52.649	184.3884	442.0519	-0.22119	0.43604	0.11523	-140.28	85.721	46.5067	0.032032	0.020117	0.098047	-22.771	83.29264	13.1099	-0.15869	-0.11084	-0.078613
0.374	-25.933	-59.077	1317.661	-1.3613	0.98145	0.7373	-50.903	112.031	392.9321	-0.1958	0.41162	0.098633	-141.5754	39.5311	70.209	-0.010352	0.017188	0.11133	-23.072	125.668	27.4708	-0.16211	-0.11719	-0.073242
0.376	-13.808	-42.36315	1319.4165	-1.3145	0.98535	0.72314	-26.808	140.47	370.6529	-0.14355	0.37256	0.070801	-131.2269	64.741	53.1967	-0.043945	0.015234	0.12617	-1.01	151.809	39.5194	-0.14917	-0.11768	-0.065674
0.378	-42.023	-4.339	1327.6551	-1.2788	0.98096	0.71289	-14.177	153.52	343.1212	-0.11206	0.34399	0.040772	-110.6403	34.9254	44.1793	-0.076172	0.010254	0.13828	9.298	127.032	52.892	-0.14063	-0.12402	-0.062012
0.38	-52.119	11.872	1323.85	-1.2031	0.97656	0.68701	-20.554	137.787	330.3883	-0.077637	0.31885	0.028809	-74.623	90.963	9.757	-0.11133	0.012207	0.15918	-32.308	100.718	39.6335	-0.11621	-0.12793	-0.05957
0.382	-73.793	-2.678	1321.834	-1.1433	0.969	0.67163	-10.035	211.134	294.57798	-0.033203	0.28271	0.0014648	-38.523	51.51021	27.911	-0.1334	0.014746	0.17012	-36.884	68.138	30.21832	-0.1084	-0.13037	-0.057617
0.384	-64.727	-12.185	1331.808	-1.0889	0.96094	0.65283	-37.199	181.191	251.4234	-0.012207	0.26465	-0.0058594	-41.526	55.3124	31.515	-0.15176	0.011719	0.18496	-55.489	34.4353	50.18188	-0.084473	-0.13379	-0.061523
0.386	-49.074	-27.835	1360.345	-1.0283	0.95508	0.63135	-38.002	158.018	235.8225	0.018066	0.23193	-0.033691	-25.971	-2.686	44.8581	-0.16153	0.012109	0.19355	-63.948	48.903	67.758	-0.065186	-0.14038	-0.064697
0.388	-47.219	-68.676	1390.1755	-1.0039	0.95215	0.62549	-36.701	163.02	210.058	0.041016	0.20752	-0.047363	-11.861	31.5182	17.4893	-0.1709	0.011914	0.20127	-50.996	27.188	78.227	-0.040039	-0.15234	-0.071289
0.39	-51.185	-103.039	1423.4967	-0.96289	0.94922	0.62402	-22.65	83.0499	198.5155	0.063965	0.18213	-0.0625	-1.531	-0.683999999999999	49.665	-0.17139	0.0087891	0.20703	-30.341	50.863	73.817	-0.0024414	-0.16846	-0.087891
0.392	-62.382	-124.242	1453.7385	-0.94751	0.95191	0.6167	-31.872	97.545	197.3646	0.089355	0.15332	-0.078125	9.35599999999999	49.598	63.216	-0.16758	0.006836	0.21436	-49.238	22.943	67.563	0.018555	-0.17529	-0.098145
0.394	-60.996	-128.318	1481.575	-0.94385	0.96143	0.61719	-25.158	79.983648	159.114	0.10913	0.13452	-0.082032	8.713	11.7438	93.336	-0.15215	0.0020508	0.21729	-92.183	19.845	78.038	0.071777	-0.19531	-0.12549
0.396	-62.581	-146.305	1511.846	-0.94531	0.97852	0.62158	-28.52	44.418	152.8489	0.12354	0.11475	-0.089355	4.522	52.166	57.6187	-0.12754	-0.0077149	0.21494	-126.2356	6.584	105.094	0.11377	-0.20629	-0.14502
0.398	-75.552	-152.149	1514.562	-0.95068	0.99268	0.61719	-32.024	88.54607	124.9	0.12842	0.090332	-0.099609	-4.516	3.3837	47.261	-0.099218	-0.015723	0.21435	-118.11962	-5.429	89.613	0.16113	-0.21875	-0.16943
0.4	-97.271	-126.656	1505.836	-0.96484	1.0176	0.62158	-35.513	52.228	100.0971	0.12988	0.082031	-0.097168	4.703	45.455	38.736	-0.0625	-0.026367	0.20508	-129.2468	-7.9448	83.935	0.22461	-0.23242	-0.19873
0.402	-160.1759	-101.449	1503.6283	-0.97534	1.0359	0.61938	-56.829	33.834	105.52	0.13818	0.063965	-0.11035	-9.694	-2.53857	75.3195	-0.020996	-0.035547	0.19492	-164.388	-15.4492	74.6709	0.25293	-0.23828	-0.21045
0.404	-164.9893	-71.203	1508.224	-0.99219	1.0605	0.61963	-60.187	56.81	97.8345	0.13526	0.042725	-0.12109	-18.93	48.6	64.612	0.02793	-0.049317	0.17266	-152.807	5.3118	70.081	0.30469	-0.25195	-0.24414
0.406	-187.0593	-46.338	1496.96	-1.0127	1.0996	0.62354	-87.971	3.851	95.4395	0.13574	0.028809	-0.12842	-38.015	21.4584	44.49	0.075586	-0.05791	0.15938	-148.2281	19.8992	72.4863	0.33716	-0.25561	-0.26074
0.408	-194.556	-26.282	1505.317	-1.0244	1.1211	0.61768	-77.346	45.12	105.32653	0.13721	0.011719	-0.13623	-46.107	61.7683	8.685	0.11954	-0.068262	0.14258	-151.88	57.7695	49.8707	0.36426	-0.25732	-0.27686
0.41	-197.09074	-15.418	1501.075	-1.0464	1.1528	0.61914	-77.761	59.81272	75.4344	0.14258	0.010254	-0.14746	-68.491	19.7334	37.2264	0.16406	-0.077637	0.12695	-104.552	28.128	7.508	0.39453	-0.26758	-0.30029
0.412	-182.3593	4.011	1506.495	-1.0642	1.179	0.61987	-99.646	36.6251	68.728	0.14014	0.003418	-0.14307	-64.947	51.2901	29.7459	0.20595	-0.089257	0.11387	-78.102	13.341	-29.3026	0.40332	-0.26855	-0.31494
0.414	-153.248	14.7595	1515.104	-1.0801	1.207	0.62061	-78.246	91.048	51.0957	0.1416	0	-0.14258	-109.33231	15.3498	27.0087	0.23887	-0.10137	0.099416	-67.036	-6.807	-24.452	0.41016	-0.27344	-0.3208
0.416	-157.408	44.452	1530.3422	-1.1055	1.2461	0.62842	-111.1773	70.848	23.3315	0.13965	-0.003418	-0.1377	-105.9767	50.7937	14.754	0.27129	-0.11425	0.092774	-55.011	-9.457	-8.582	0.40479	-0.26636	-0.3335
0.418	-136.884	33.767	1553.3124	-1.1226	1.2593	0.63086	-90.112	74.478	24.6268	0.12744	-0.0087891	-0.13574	-123.658	8.0562	47.3822	0.30322	-0.12803	0.081738	-46.52	36.96586	28.0898	0.3916	-0.25928	-0.33398
0.42	-155.226	-1.442277	1581.7875	-1.1563	1.3008	0.64941	-58.059	78.515	14.514	0.11914	-0.010254	-0.12744	-139.8619	20.1635	58.246	0.33545	-0.13721	0.076172	-41.266	30.164	35.7941	0.35352	-0.24805	-0.32764
0.422	-145.912	-27.2712	1597.1567	-1.1914	1.3262	0.67554	-86.718	3.402	25.2009	0.10596	-0.016113	-0.12549	-141.595	1.382	63.9568	0.36309	-0.14932	0.057129	-41.738	59.154	32.9529	0.33447	-0.24121	-0.32617
0.424	-173.33	-45.562	1614.5259	-1.23	1.3481	0.69141	-61.885	20.148	47.5683	0.097412	-0.019775	-0.12696	-108.6216	29.625	43.2818	0.38682	-0.15801	0.045606	-36.735	63.81	20.5219	0.2832	-0.22314	-0.31348
0.426	-170.62	-52.11813	1636.45	-1.2949	1.377	0.71826	-50.95	14.973	19.876	0.092773	-0.020508	-0.12158	-115.895	13.91	38.4709	0.41221	-0.16465	0.03584	-32.624	87.201	36.7578	0.24121	-0.19776	-0.29639
0.428	-170.121	-66.036	1642.57	-1.3271	1.3828	0.72705	-81.31	0.718	28.9417	0.087402	-0.021973	-0.12158	-114.261	15.497	51.9043	0.4292	-0.16728	0.015918	-24.45	85.934	50.5297	0.19775	-0.17041	-0.28711
0.43	-160.975	-50.579	1624.437	-1.3867	1.3945	0.75439	-36.331	50.8311	49.2116	0.085938	-0.021484	-0.11816	-121.3725	-6.218	48.9937	0.43652	-0.16602	0.0068359	-7.555	74.465	42.6555	0.13818	-0.12988	-0.25049
0.432	-152.065	-30.5805	1622.451	-1.4304	1.4026	0.7727	-59.559	32.212	52.329	0.078613	-0.022949	-0.11377	-81.217	19.352	19.5104	0.44336	-0.16943	-0.0050781	2.63500000000001	50.135	10.05955	0.104	-0.10791	-0.23486
0.434	-135.834	-16.491	1608.8039	-1.4722	1.3989	0.79492	-51.07	35.536	65.978	0.077637	-0.023682	-0.11328	-67.65	33.6205	10.262	0.44336	-0.17539	-0.012305	-10.27	16.075	6.3971	0.036621	-0.05957	-0.19971
0.436	-105.643	-0.341000000000001	1611.2657	-1.5195	1.3926	0.81299	-25.483	51.646	47.7679	0.078125	-0.025391	-0.10645	-25.847	50.3675	18.825	0.44179	-0.17891	-0.013867	-16.136	56.0385	47.3851	-0.020996	-0.025635	-0.16944
0.438	-87.128	28.524	1610.0783	-1.5327	1.3872	0.81836	-48.705	-9.1739	37.7443	0.070801	-0.023926	-0.10303	-54.425	47.628	39.154	0.43545	-0.179	-0.013867	-9.50399999999999	82.025	74.4334	-0.082031	0.0068359	-0.13867
0.44	-72.978	46.8188	1606.286	-1.5547	1.373	0.84033	-33.846	22.617	47.6876	0.070313	-0.023438	-0.10107	-32.998	52.065	63.2471	0.42822	-0.17529	-0.01123	-38.389	126.025	96.772	-0.15771	0.05127	-0.097168
0.442	-76.518	65.6313	1606.23	-1.5567	1.3608	0.84326	-38.056	41.5144	19.3	0.057129	-0.019531	-0.094238	-32.871	63.458	56.1504	0.4123	-0.16885	-0.0071289	-36.563	95.095	96.772	-0.19482	0.06543	-0.071289
0.444	-87.672	74.084	1587.94	-1.5522	1.3423	0.85352	-39.121	31.8334	38.952	0.053955	-0.026612	-0.09082	5.724	63.984	62.024	0.3956	-0.16875	-0.0033203	-85.249	68.0385	77.779	-0.25977	0.097656	-0.032227
0.446	-120.093	94.973	1589.0907	-1.5454	1.313	0.85547	-19.924	85.412	39.9512	0.050781	-0.030273	-0.085938	7.878	60.185	67.649	0.38116	-0.15937	0.0029297	-124.8756	35.6046	90.611	-0.29834	0.12011	-0.014649
0.448	-146.184	93.966	1585.6326	-1.5366	1.2993	0.86133	-39.279	61.818	16.183	0.041016	-0.036133	-0.081543	18.354	26.5862	45.58	0.36543	-0.14785	0.0069336	-129.1707	8.304	101.259	-0.32227	0.13525	0.00097656
0.45	-149.3	81.653	1611.795	-1.5234	1.2695	0.86084	-42.644	57.965	54.2356	0.041504	-0.036133	-0.085449	-5.26	33.909	4.945	0.34912	-0.13623	0.015137	-114.9623	17.8536	81.2933	-0.33203	0.15332	0.016113
0.452	-167.29137	64.858	1592.5779	-1.5105	1.2444	0.86157	-52.498	85.693	47.7809	0.032227	-0.045898	-0.07959	3.15799999999999	6.08	14.647	0.33613	-0.12353	0.024121	-135.1575	-23.4636	58.481	-0.3291	0.16504	0.012207
0.454	-159.7671	41.1978	1573.7848	-1.498	1.2148	0.85791	-72.182	42.2025	52.329	0.038574	-0.045166	-0.081787	5.806	21.695	37.3472	0.31358	-0.10557	0.026562	-126.3944	-4.398	47.8265	-0.31152	0.17773	0.022949
0.456	-159.8866	17.167	1576.4254	-1.478	1.1841	0.85352	-59.427	59.466	67.795	0.041504	-0.044434	-0.086914	-10.24	-1.115	67.2496	0.28974	-0.087207	0.041406	-134.73101	-9.561	47.3716	-0.28736	0.18188	0.017578
0.458	-135.611	14.955	1566.4844	-1.4746	1.1719	0.854	-99.17	34.8909	44.478	0.049316	-0.043945	-0.086914	-23.06	30.2927	67.547	0.26386	-0.064942	0.056348	-154.24	-0.103999999999999	68.7094	-0.25977	0.18262	0.0097656
0.46	-132.497	15.49	1555.8261	-1.4609	1.1406	0.84619	-98.125	-6.0746	54.1345	0.050781	-0.041992	-0.089844	-50.026	21.4311	61.4201	0.23438	-0.047363	0.07373	-114.924	8.616	77.7018	-0.22168	0.17627	-0.0092773
0.462	-131.334	36.303	1537.4273	-1.4543	1.1223	0.84644	-59.907	23.98465	58.049	0.044922	-0.041504	-0.089844	-66.722	63.724	45.4708	0.20137	-0.028516	0.085351	-105.156	-18.541	54.6522	-0.19678	0.17139	-0.016602
0.464	-125.496	33.84	1548.324	-1.4409	1.105	0.84375	-110.8863	11.101	42.3233	0.036133	-0.037842	-0.091309	-76.897	21.9769	84.53	0.17002	-0.0098633	0.097559	-86.478	-7.818	10.533	-0.1626	0.15674	-0.04248
0.466	-132.973	49.464	1532.6436	-1.4312	1.0776	0.83398	-100.523	17.049	57.748	0.027832	-0.035156	-0.09082	-87.74	55.473	58.061	0.13799	0.0061523	0.11006	-68.258	-13.7275	12.092	-0.13745	0.1499	-0.05542
0.468	-122.61	71.19	1544.856	-1.4258	1.0684	0.83447	-80.059	46.4027	45.655	0.01416	-0.027832	-0.086914	-121.7489	4.397	53.542	0.11104	0.024219	0.12491	-88.207	14.7307	10.205	-0.12207	0.14453	-0.069336
0.47	-149.711	103.348	1519.8861	-1.4058	1.0513	0.81934	-98.577	11.445	40.426	0.00097656	-0.017578	-0.086914	-118.112	42.8249	23.503	0.083496	0.039551	0.14209	-93.777	23.9512	28.919	-0.11279	0.15088	-0.091309
0.472	-141.0452	124.431	1489.5425	-1.3887	1.0381	0.81299	-71.809	34.4503	63.81368	-0.017578	-0.0097656	-0.077637	-112.4117	8.57	46.31	0.053906	0.053027	0.15859	-62.909	70.807	22.888	-0.11133	0.15918	-0.10547
0.474	-158.5629	141.664	1449.851	-1.3716	1.0337	0.79883	-52.63	35.6141	50.78456	-0.031494	-0.0021973	-0.071777	-120.2521	50.5288	28.6	0.026563	0.066601	0.17412	-50.232	75.04	13.0066	-0.11572	0.1875	-0.13086
0.476	-141.9046	140.012	1423.234	-1.3364	1.0181	0.78027	-86.227	12.5351	72.169	-0.043945	0.0058594	-0.069336	-121.125	15.479	52.1386	-0.003125	0.080664	0.19287	-32.763	80.4	-3.44	-0.12085	0.20923	-0.15014
0.478	-126.475	145.589	1405.91	-1.3237	1.0142	0.77148	-66.105	59.085	63.4861	-0.057617	0.015137	-0.05957	-104.9077	57.7167	23.2633	-0.032324	0.094239	0.20498	-4.12	83.702	17.3061	-0.12891	0.2334	-0.16406
0.48	-101.236	133.316	1395.7586	-1.2856	1.0093	0.74805	-83.88	51.406	36.1075	-0.059082	0.024902	-0.058105	-112.3572	9.3684	39.9334	-0.056641	0.10693	0.22168	-40.495	48.97	32.483	-0.14453	0.27637	-0.19141
0.482	-77.135	121.0558	1386.6206	-1.2588	1.0029	0.729	-65.304	44.16	42.3647	-0.061523	0.038086	-0.048828	-120.078	41.277	47.205	-0.082324	0.11651	0.23467	13.429	33.765	63.65	-0.16309	0.30273	-0.2002
0.484	-60.828	100.368	1365.6861	-1.2275	0.99902	0.71338	-33.389	61.121	30.4044	-0.058105	0.04834	-0.045654	-106.2817	-12.6607	51.058	-0.1042	0.12422	0.24668	40.827	-58.6073	112.598	-0.20508	0.36084	-0.22266
0.486	-56.743	84.868	1368.2128	-1.1909	0.98877	0.68555	-61.697	4.3232	33.66011	-0.052246	0.058105	-0.040039	-65.577	28.5823	24.5098	-0.12998	0.12578	0.25567	33.741	-84.979	216.8823	-0.23852	0.41455	-0.2373
0.488	-28.035	69.859	1355.1261	-1.1675	0.98584	0.66992	-37.251	26.6015	40.4266	-0.041992	0.069824	-0.037598	-61.851	-8.7997	53.8544	-0.13721	0.13183	0.26113	44.724	-138.375	356.277	-0.28369	0.48291	-0.24609
0.49	-31.127	68.615	1332.484	-1.1289	0.97266	0.64502	-22.244	26.61156	21.838	-0.034668	0.073242	-0.033203	-36.081	41.5884	53.205	-0.14258	0.13086	0.2666	29.5774	-190.799	549.151	-0.36133	0.59277	-0.21777
0.492	-48.38	78.234	1323.463	-1.0952	0.96338	0.63038	-32.265	-8.4582	56.6729	-0.032227	0.076172	-0.041016	-49.083	-8.8135	86.479	-0.14219	0.13027	0.2707	16.2106	-278.269	726.506	-0.45386	0.68774	-0.15747
0.494	-82.965	89.3053	1307.309	-1.0664	0.95703	0.61084	-7.686	23.2493	65.511	-0.023194	0.075683	-0.041259	-20.743	-7.5058	104.521	-0.13769	0.13125	0.26513	6.2132	-431.315	815.936	-0.57178	0.78564	-0.082031
0.496	-59.286	92.627	1280.3234	-1.0283	0.94531	0.58545	-50.293	4.161	33.87	-0.01123	0.07373	-0.047852	-30.48	-88.82	167.1333	-0.12715	0.13867	0.25733	25.5046	-512.754	887.576	-0.7915	0.89697	0.029297
0.498	-79.71	117.582	1226.244	-1.0034	0.93994	0.57617	-32.701	2.552	53.844	0.00097656	0.060547	-0.052246	-17.965	-104.564	262.4542	-0.10811	0.14658	0.24922	42.2302	-532.937	954.372	-0.92188	0.94922	0.083496
0.5	-83.883	141.291	1183.6208	-0.96875	0.92383	0.54932	-28.358	45.6851	35.9874	0.0092773	0.060059	-0.059082	-41.867	-219.452	432.226	-0.087891	0.15723	0.23975	40.959	-419.9845	1036.389	-1.2031	1.0508	0.18994
0.502	-94.517	156.12	1146.775	-0.92773	0.90918	0.5249	-78.124	16.7288	27.42768	0.022949	0.050781	-0.063477	-77.892	-287.937	546.468	-0.072363	0.17666	0.2292	21.345	-265.421	1143.181	-1.4165	1.125	0.25342
0.504	-68.995	170.475	1124.046	-0.90625	0.89844	0.51123	-47.798	50.71	52.627	0.035401	0.049805	-0.069092	-149.233	-388.391	641.41	-0.064648	0.2041	0.21152	21.612	-116.073	1179.969	-1.6172	1.1973	0.31787
0.506	-65.221	180.8626	1084.985	-0.87256	0.87939	0.48438	-59.954	49.39	12.46	0.047852	0.039551	-0.071777	-101.729	-409.58	688.579	-0.067773	0.25566	0.18379	96.169	-114.42	1208.706	-1.8691	1.2891	0.37207
0.508	-56.589	186.0698	1067.123	-0.84277	0.86377	0.46728	-80.48	19.363	23.5065	0.055176	0.036621	-0.072266	-126.416	-385.944	746.648	-0.083984	0.3253	0.17168	94.957	-113.66	1364.095	-1.9902	1.3418	0.40283
0.51	-49.374	166.109	1068.67175	-0.81396	0.84619	0.45068	-51.103	62.399	34.586	0.052246	0.03125	-0.077637	-162.189	-266.183	826.077	-0.11523	0.40771	0.17285	104.479	-113.787	1523.84	-2.2085	1.4458	0.46729
0.512	-62.573	153.889	1042.7161	-0.77881	0.81885	0.42578	-100.895	48.9687	22.0359	0.046875	0.029297	-0.07373	-220.947	-180.44565	874.544	-0.1751	0.48916	0.19043	111.691	-91.9268	1645.06	-2.3454	1.5305	0.53296
0.514	-76.32	150.237	1024.5442	-0.7583	0.80518	0.41211	-79.966	41.3361	48.106	0.037353	0.027832	-0.075683	-202.384	-101.78	878.669	-0.25518	0.56582	0.21905	121.84	-36.896	1675.399	-2.4741	1.604	0.59375
0.516	-105.3354	153.0003	990.988	-0.72852	0.77148	0.38574	-60.267	80.623	39.3787	0.027344	0.02832	-0.074707	-147.539	-89.012	944.078	-0.34932	0.6334	0.25537	120.659	-33.7	1634.684	-2.6206	1.688	0.6543
0.518	-112.09236	148.121	978.736	-0.7063	0.75513	0.36523	-98.114	28.0565	31.3458	0.0083008	0.030273	-0.07666	-73.37642	-72.14	1050.463	-0.44902	0.68964	0.29131	73.847	-34.91	1618.023	-2.668	1.7129	0.68701
0.52	-104.524	143.109	940.2763	-0.68555	0.73438	0.354	-75.137	33.7388	66.31749	-0.0014648	0.033203	-0.079102	-42.1038	-8.28	1191.083	-0.54297	0.74902	0.32227	51.616	-114.77	1660.14	-2.7012	1.7441	0.71436
0.522	-111.9075	121.501	917.3867	-0.6543	0.70801	0.32617	-87.883	17.7683	71.869	-0.01416	0.040039	-0.092285	-30.179	37.96	1282.297	-0.64229	0.81474	0.35772	-52.71	-205.09	1718.115	-2.6621	1.7393	0.68701
0.524	-111.0671	123.5913	905.3977	-0.64063	0.69482	0.31299	-114.823	-37.898	101.17662	-0.014892	0.047363	-0.09741	-111.5984	100.415	1338.0236	-0.74414	0.90176	0.39522	-109.406	-328.448	1800.654	-2.564	1.7251	0.63818
0.526	-96.535	111.153	877.251	-0.6123	0.66406	0.2915	-73.824	-28.0403	137.781	-0.012207	0.056152	-0.104	-144.025	70.148	1430.892	-0.84571	1.0143	0.44951	-139.066	-396.228	1882.95	-2.3262	1.6816	0.53174
0.528	-69.415	127.77	851.9209	-0.59204	0.64209	0.27368	-74.795	-92.2512	190.498	-0.0083008	0.074219	-0.11475	-172.5	44.3	1494.683	-0.96241	1.1329	0.50557	-101.038	-439.6	1891.973	-2.1792	1.6587	0.47266
0.53	-39.194	146.649	807.8301	-0.56982	0.62549	0.2583	-45.982	-138.5003	300.3918	-0.0087891	0.087891	-0.12451	-176.049	-59.67	1577.969	-1.1021	1.2544	0.58301	7.42999999999999	-426.98	1902.306	-1.8862	1.6138	0.34766
0.532	-24.895	171.412	799.6252	-0.54199	0.59863	0.24268	-13.395	-141.596	355.073	-0.0029297	0.10791	-0.14307	-239.19	-136.56	1635.669	-1.2748	1.3545	0.67021	41.76	-436.89	1912.2741	-1.7	1.5989	0.27759
0.534	8.98299999999999	169.1514	782.62004	-0.52637	0.58594	0.229	-6.296	-230.786	427.547	-0.0043945	0.12476	-0.15088	-281.914	-283.411	1710.7264	-1.4803	1.4293	0.75635	33.23	-411.36	1974.2064	-1.5586	1.5957	0.21631
0.536	-16.925	180.132	741.6699	-0.49658	0.55615	0.20898	32.941	-237.313	484.95	-0.0087891	0.14111	-0.16895	-276.366	-350.5	1758.908	-1.6939	1.4625	0.83174	-25.416	-332.53	2067.369	-1.4336	1.6074	0.16162
0.538	-25.528	198.047	713.0758	-0.47266	0.53369	0.19775	13.7134	-257.434	522.9743	-0.024902	0.17773	-0.18066	-192.83	-443.71	1808.166	-1.8883	1.4739	0.89776	-66.069	-258.937	2156.829	-1.4043	1.6133	0.14014
0.54	-45.816	195.035	698.129	-0.4502	0.51367	0.18311	32.2999	-259.422	588.903	-0.045898	0.19727	-0.18115	-44.055	-432.56	1765.9119	-2.0269	1.4771	0.94238	-117.999	-154.053	2182.241	-1.3823	1.6313	0.11719
0.542	-35.841	177.107	669.1473	-0.4165	0.49072	0.15967	82.159	-162.6343	618.206	-0.095703	0.25342	-0.15771	78.9601	-479.24	1794.3132	-2.0925	1.4791	0.96963	-175.9804	-101.8	2136.3	-1.415	1.6494	0.11206
0.544	-49.448	170.108	633.1534	-0.40576	0.47998	0.15186	55.779	-117.549	618.3452	-0.16601	0.29736	-0.12818	112.175	-397.31	1839.042	-2.0871	1.4931	0.97344	-212.1201	-68.79	2069.677	-1.4683	1.6763	0.11768
0.546	-54.474	155.245	599.447	-0.37695	0.45557	0.13672	47.2767	-85.45	677.223	-0.25391	0.34521	-0.087891	138.189	-355.55	1951.759	-2.0132	1.527	0.95898	-255.276	-66.2	2008.333	-1.5835	1.7095	0.14209
0.548	-33.577	150.1482	574.396	-0.35718	0.43872	0.12183	69.4009	-19.958	711.0552	-0.39404	0.40527	-0.023926	132.248	-219.314	2015.727	-1.8953	1.5715	0.92939	-255.973	-106.675	1999.424	-1.6484	1.7236	0.15576
0.55	-17.513	133.0916	555.552	-0.33936	0.41943	0.11084	54.069	-19.057	793.471	-0.50586	0.46533	0.024658	122.115	-192.661	2071.178	-1.7539	1.6113	0.88916	-234.577	-110.55	2025.42	-1.7822	1.7598	0.18115
0.552	-16.984	150.5618	538.8524	-0.31494	0.39795	0.099609	82.296	38.388	887.053	-0.61865	0.521	0.074219	99.0851	-126.563	2026.762	-1.6209	1.6404	0.84287	-156.903	-147.701	2066.541	-1.8698	1.7873	0.19555
0.554	-14.663	133.797	525.104	-0.30713	0.38916	0.088379	56.13	73.4396	923.632	-0.76172	0.60156	0.13477	41.047	-131.053	1998.212	-1.516	1.6516	0.80166	-80.7173	-160.324	2117.575	-1.9531	1.8105	0.21436
0.556	-1.498	127.215	525.447	-0.28809	0.36719	0.078613	52.001	34.05687	971.814	-0.82813	0.6416	0.15869	-50.719	-70.32	1945.657	-1.4332	1.6531	0.75244	23.241	-173.531	2171.378	-2.0547	1.8457	0.24316
0.558	-14.463	115.115	514.09	-0.27392	0.35205	0.072266	90.203	63.766	1026.214	-0.95459	0.75049	0.19727	-115.3962	-46.63	1926.899	-1.3684	1.6367	0.72481	65.064	-148.758	2212.035	-2.1089	1.8599	0.25195
0.56	-53.42	122.94	489.028	-0.26367	0.33984	0.06543	22.975	42.037	1058.546	-1.0362	0.83545	0.23145	-132.0302	-20.24	1911.94	-1.3276	1.6118	0.70703	50.914	-130.445	2237.952	-2.2031	1.875	0.28662
0.562	-71.7416	130.6646	480.3392	-0.25342	0.3208	0.054688	9.7175	-27.53	1162.612	-1.1108	0.93018	0.26758	-94.16068	-78.61	1916.481	-1.3169	1.5976	0.7039	9.32	-125.888	2273.95	-2.271	1.8716	0.30175
0.564	-84.937	131.566	465.3573	-0.24707	0.31006	0.056152	2.0473	-60.805	1220.4046	-1.2188	1.0605	0.32373	-18.057	-142.081	1928.989	-1.3273	1.6121	0.70713	-78.776	-173.447	2287.852	-2.3301	1.8613	0.31885
0.566	-88.1255	137.438	419.0594	-0.23438	0.29297	0.048828	-89.211	-189.731	1250.325	-1.2734	1.1309	0.34814	41.242	-204.833	1995.644	-1.357	1.6402	0.71182	-100.269	-235.105	2283.945	-2.355	1.8306	0.32422
0.568	-106.4889	143.547	390.9785	-0.2207	0.27783	0.038574	-82.877143	-248.169	1306.37	-1.4102	1.2441	0.4043	41.943	-216.213	2076.32	-1.407	1.6824	0.72431	-85.242	-236.453	2246.978	-2.3472	1.8149	0.31641
0.57	-100.24965	136.989	375.92687	-0.21094	0.26221	0.029785	-77.8513	-266.416	1316.3826	-1.5124	1.3117	0.44506	-6.873	-184.066	2145.147	-1.4707	1.7266	0.74854	-4.938	-191.442	2166.432	-2.2808	1.7778	0.29932
0.572	-85.437	126.451	349.826	-0.18799	0.24756	0.018066	-71.619	-334.15	1384.3186	-1.6187	1.354	0.47363	-89.174	-161.182	2173.042	-1.5384	1.7655	0.79306	15.482	-95.509	2071.585	-2.1968	1.7515	0.27734
0.574	-73.108	123.5114	327.148	-0.17676	0.23438	0.0078125	-34.564	-292.47	1441.4044	-1.7344	1.377	0.50244	-159.053	-177.524	2191.581	-1.6172	1.8094	0.83955	64.7228	-26.427	2023.864	-2.0977	1.7266	0.25635
0.576	-58.826	107.711	324.2017	-0.15088	0.22021	-0.0053711	-70.854	-306.5	1475.91512	-1.7773	1.3809	0.50537	-207.807	-183.361	2188.994	-1.7191	1.8465	0.88603	85.72	27.047	2006.58	-1.9668	1.6895	0.23193
0.578	-43.077	101.663	325.5727	-0.13135	0.20752	-0.018067	-78.506	-290.893	1545.482	-1.8276	1.3989	0.50391	-262.432	-147.0921	2166.498	-1.8322	1.901	0.91963	123.083	67.12	2015.099	-1.9019	1.6685	0.22119
0.58	-36.13	86.71	314.4722	-0.10693	0.1958	-0.026367	-81.0059	-190.51	1573.53	-1.8181	1.4025	0.49585	-260.652	-107.049	2147.828	-1.9292	1.9429	0.94336	175.424	93.9357	2023.611	-1.8105	1.6211	0.21289
0.582	-45.179	97.943	306.9039	-0.081543	0.17773	-0.038574	-90.181	-178.8461	1607.393	-1.7827	1.4009	0.47559	-287	-33.621	2093.5117	-2.0049	1.9713	0.96045	160.982	150.83	2012.31361	-1.7671	1.5947	0.21338
0.584	-42.405	96.4034	277.4585	-0.070313	0.17041	-0.046875	-100.586	-133.722	1642.555	-1.6895	1.4004	0.44092	-306.729	-24.679	2038.296	-2.06	1.9888	0.96562	89.80823	187.9049	1985.1832	-1.73	1.5708	0.22461
0.586	-60.353	91.0269	287.778	-0.050781	0.15137	-0.0625	-107.326	-75.583	1600.912	-1.6304	1.4048	0.41797	-263.662	5.585	1991.966	-2.0819	1.9934	0.96562	-8.053	229.638	1972.325	-1.7051	1.5449	0.24658
0.588	-61.65	96.862	260.502	-0.034912	0.14112	-0.073242	-96.009	-120.166	1600.242	-1.4956	1.4185	0.37012	-151.1489	-9.348	1984.609	-2.086	1.9891	0.96074	-34.26	237.966	1972.1182	-1.7065	1.5376	0.26025
0.59	-53.505	86.478	239.648	-0.018555	0.13086	-0.083008	-84.0303	-85.176	1611.041	-1.3992	1.4222	0.33594	-60.556	60.5837	1984.84	-2.0781	1.9844	0.96143	-46.5306	204.201	1986.665	-1.7007	1.5161	0.28711
0.592	-32.08	68.253	234.0256	0.0048828	0.11523	-0.10742	-92.40202	-113.178	1629.962	-1.3159	1.4282	0.2998	1.705	70.168	1986.683	-2.0488	1.9758	0.95283	-10.757	143.212	1968.771	-1.6895	1.5054	0.30396
0.594	-25.904	58.632	220.5344	0.017578	0.10352	-0.11523	-49.572	-154.23	1681.8261	-1.2432	1.4336	0.26221	-35.139	153.544	1991.03	-2.0144	1.9672	0.95244	-34.521	95.44	1933.1856	-1.6836	1.4922	0.32324
0.596	-25.502	65.84534	196.08176	0.039551	0.088867	-0.12891	-12.545	-112.005	1691.964	-1.2202	1.4282	0.25391	-73.21	142.854	2000.811	-1.9707	1.9484	0.9501	-91.185	95.969	1883.258	-1.6577	1.481	0.3418
0.598	-15.077	89.1176	176.13112	0.057862	0.082031	-0.14527	15.169	-148.6124	1727.3328	-1.2109	1.4297	0.24951	-92.8827	176.1859	2011.807	-1.9226	1.9264	0.94443	-100.024	101.416	1852.759	-1.6519	1.4731	0.35352
0.6	-8.124	84.564	171.7607	0.072266	0.071777	-0.16211	46.151	-163.097	1792.79521	-1.2309	1.4322	0.25684	-59.417	86.7928	2051.851	-1.8823	1.897	0.93555	-98.334	148.064	1852.8466	-1.6323	1.4536	0.37207
0.602	-1.627	86.887	162.4719	0.094238	0.066406	-0.18115	43.652	-161.505	1816.2818	-1.2734	1.4336	0.26074	-54.813	69.974	2037.798	-1.8438	1.8569	0.92832	-42.353	139.37	1853.109	-1.6065	1.4375	0.38696
0.604	-10.258	76.207	148.9448	0.10986	0.065918	-0.1875	18.706	-239.986	1858.792	-1.3438	1.4395	0.2793	-39.282	1.104	2039.565	-1.8179	1.8255	0.91387	-46.348	169.47	1828.013	-1.5781	1.4199	0.39355
0.606	-23.258	77.5213	152.6048	0.12939	0.056152	-0.20508	10.03	-206.936	1889.821	-1.3809	1.4414	0.28564	-48.279	48.893	1997.9217	-1.7999	1.7896	0.90449	-31.586	239.701	1784.885	-1.5229	1.3872	0.3877
0.608	-36.375	70.9774	142.9215	0.13941	0.058838	-0.21558	-1.659	-191.75	1876.177	-1.4351	1.4546	0.28857	-70.556	9.473	1964.831	-1.7889	1.754	0.89024	-92.0534	329.201	1757.632	-1.4917	1.3696	0.38818
0.61	-60.362	77.754	142.2903	0.14258	0.058594	-0.22314	-13.525	-180.951	1884.086	-1.4656	1.4671	0.28515	-16.212	53.699	1924.8918	-1.7773	1.7148	0.87598	-123.215	406.936	1714.896	-1.4102	1.3301	0.37354
0.612	-69.687	64.414	126.1996	0.14111	0.06543	-0.22998	-6.171	-68.118	1881.8872	-1.4956	1.4878	0.27832	25.745	6.18199999999999	1897.3761	-1.7748	1.6834	0.86064	-101.5993	376.655	1647.433	-1.3477	1.2945	0.36109
0.614	-88.291	55.989	115.95171	0.1333	0.067383	-0.22363	-20.021	-61.574	1842.1183	-1.5308	1.5122	0.26904	36.596	83.981	1848.4823	-1.7703	1.6551	0.84736	-87.1036	335.877	1568.9254	-1.2798	1.2544	0.3418
0.616	-80.084	52.641	106.1476	0.11377	0.084473	-0.2207	-11.893	-54.555	1879.8372	-1.5464	1.5278	0.26221	45.129	102.628	1835.4401	-1.7614	1.6297	0.83213	-52.514	253.892	1505.912	-1.1816	1.2012	0.31689
0.618	-84.4644	55.0129	101.5414	0.089356	0.089599	-0.20533	-1.766	-5.897	1875.921	-1.5854	1.563	0.25928	13.247	256.296	1809.9871	-1.7544	1.6081	0.81309	-53.319	220.284	1476.66	-1.1294	1.1782	0.30273
0.62	-76.369	51.262	88.486	0.057617	0.098145	-0.19189	-16.772	-57.226	1877.913	-1.615	1.5842	0.25977	-63.097	268.7773	1802.137	-1.7422	1.5859	0.79736	-35.91	233.225	1445.703	-1.0156	1.123	0.28174
0.622	-76.265	44.708	90.541	0.0078125	0.11328	-0.17139	22.772	9.8996	1888.707	-1.6538	1.6021	0.25977	-79.982	354.946	1741.771	-1.72	1.5624	0.77929	-42.355	246.1584	1385.5538	-0.94019	1.0813	0.26856
0.624	-61.411	42.428	90.4624	-0.015625	0.12158	-0.16211	10.329	35.934	1857.783	-1.7104	1.6294	0.26807	-128.662	296.637	1710.7276	-1.6862	1.5392	0.75781	3.674	242.563	1300.4936	-0.875	1.041	0.25439
0.626	-54.341	43.537	70.4666	-0.066406	0.13965	-0.13818	-15.246	16.0534	1889.9746	-1.7363	1.623	0.26416	-154.028	348.08	1672.863	-1.6464	1.5126	0.73907	26.394	211.214	1244.806	-0.78711	0.9873	0.24268
0.628	-60.011	50.108	74.4265	-0.096922	0.1499	-0.12182	-20.32	77.816	1895.319	-1.7832	1.6328	0.2749	-172.45	271.904	1654.615	-1.6035	1.4785	0.72119	55.221	214.042	1212.422	-0.74756	0.9585	0.24414
0.63	-50.449	63.3946	77.51413	-0.12939	0.16699	-0.10889	-47.8229	4.404	1913.6229	-1.8123	1.638	0.2771	-183.1765	297.766	1609.501	-1.5566	1.4453	0.69385	54.953	209.296	1212.114	-0.67334	0.90186	0.22852
0.632	-83.7878	69.92	83.7252	-0.15381	0.18604	-0.088867	-21.0372	-9.2617	1971.04	-1.8403	1.6392	0.28662	-216.563	199.501	1586.938	-1.5064	1.4093	0.66895	25.046	269.451	1179.262	-0.61694	0.85865	0.22266
0.634	-78.86	77.645	80.6517	-0.17505	0.19605	-0.075928	-25.6904	5.9851	1965.296	-1.8647	1.6353	0.29297	-189.034	209.383	1525.397	-1.4623	1.3727	0.64424	16.291	293.1942	1077.739	-0.56055	0.81445	0.21387
0.636	-64.731	71.159	68.6933	-0.18408	0.20557	-0.067871	-26.377	-61.686	1964.545	-1.8687	1.6313	0.29492	-140.471	109.297	1511.229	-1.4103	1.3309	0.61768	-20.923	319.662	960.985	-0.48389	0.75439	0.19531
0.638	-53.073	59.69	58.5754	-0.18945	0.21875	-0.061523	7.319	-27.81277	1952.9673	-1.8789	1.6211	0.28711	-92.3596	140.71	1480.8659	-1.358	1.292	0.59433	-36.192	342.008	843.767	-0.44385	0.72217	0.18555
0.64	-58.051	50.4507	71.1572	-0.1875	0.22363	-0.05957	-30.506	-36.07	1906.125	-1.8706	1.6109	0.28101	-91.817	117.74	1498.669	-1.3066	1.252	0.57373	-93.56	361.565	789.719	-0.35889	0.6665	0.16797
0.642	-51.551	54.1633	46.812	-0.18066	0.22412	-0.0625	-5.259	-58.924	1907.023	-1.8652	1.5957	0.27197	-78.251	238.47	1463.537	-1.2632	1.2067	0.54649	-107.127	398.207	754.0955	-0.29565	0.62061	0.15063
0.644	-21.933	51.5865	44.8302	-0.16578	0.22046	-0.058106	27.531	18.314	1906.7627	-1.8413	1.5786	0.25391	-72.2102	245.029	1407.163	-1.2105	1.1644	0.52276	-111.977	359.949	682.012	-0.22852	0.57227	0.13574
0.646	-18.43	39.3337	55.0052	-0.14844	0.21289	-0.06543	45.468	22.447	1889.256	-1.8394	1.5708	0.25488	-62.725	317.893	1307.6521	-1.1589	1.1223	0.49424	-125.7057	347.097	599.729	-0.14355	0.51367	0.11377
0.648	-13.128	32.7784	58.59	-0.11768	0.19971	-0.07373	38.404	64.168	1895.1333	-1.8223	1.5508	0.25049	-71.573	283.904	1250.5283	-1.108	1.0795	0.46865	-117.214	290.112	542.166	-0.08325	0.46705	0.096194
0.65	1.125	27.1081	52.2777	-0.10352	0.19385	-0.081055	46.6189	134.551	1839.35	-1.8181	1.5383	0.24683	-41.185	336.433	1164.5568	-1.0508	1.0361	0.4458	-138.951	261.468	498.774	-0.025879	0.42236	0.083984
0.652	-11.927	35.1997	51.3523	-0.074707	0.17725	-0.094238	21.789	93.396	1816.5375	-1.8164	1.5254	0.24463	-25.014	323.317	1116.0426	-1.0027	0.99648	0.42139	-116.303	283.832	458.819	0.044434	0.36621	0.059082
0.654	-22.36	40.4292	59.0879	-0.055175	0.16357	-0.10376	35.843	137.985	1818.2375	-1.8179	1.5083	0.24854	-10.16	384.621	1050.9641	-0.946	0.95674	0.39961	-147.414	305.344	417.6106	0.078125	0.3374	0.057617
0.656	-38.026	56.067	65.09853	-0.033203	0.15332	-0.11035	19.482	137.027	1786.0207	-1.8164	1.4961	0.24951	-22.507	324.646	1004.3783	-0.89131	0.91065	0.38242	-156.66408	314.475	373.1447	0.13916	0.28418	0.044434
0.658	-49.533	40.637	47.64827	-0.013184	0.13574	-0.12207	0.408000000000001	84.327	1797.73	-1.8179	1.479	0.25342	40.747	324.5876	950.0816	-0.83857	0.8667	0.35977	-193.176	270.628	349.516	0.17553	0.24781	0.03418
0.66	-62.132	32.164	54.61192	-0.0048828	0.13135	-0.13037	32.9727	147.175	1766.809	-1.8182	1.4593	0.25634	54.524	250.838	876.7458	-0.78076	0.82275	0.33398	-213.962	218.129	345.328	0.21338	0.21094	0.023926
0.662	-48.07	35.872	42.8114	0.010254	0.12207	-0.13281	-8.965	99.73459	1741.298	-1.814	1.4478	0.25586	112.7908	271.117	801.85	-0.72529	0.78174	0.30859	-207.743	139.763	328.783	0.24951	0.16748	0.017578
0.664	-63.467	35.526	44.2017	0.017822	0.11743	-0.13794	13.77	103.937	1739.7156	-1.7998	1.4248	0.2583	120.488	236.31	777.271	-0.66396	0.74189	0.29092	-195.174	99.691	297.843	0.26367	0.14551	0.014648
0.666	-49.961	49.8209	38.6744	0.023926	0.11035	-0.13428	6.444	125.942	1715.5542	-1.7905	1.4146	0.25732	84.167	268.139	749.7313	-0.6042	0.704	0.26514	-143.781	66.361	245.7774	0.27979	0.10986	0.015137
0.668	-62.228	46.1543	38.9227	0.027344	0.1123	-0.14404	-26.519	60.403	1723.297	-1.7617	1.3984	0.25928	5.707	230.4828	717.539	-0.54571	0.66953	0.23652	-147.0089	71.241	173.449	0.27954	0.083496	0.012451
0.67	-54.699	37.7146	53.6615	0.031738	0.11377	-0.14258	1.993	95.064	1730.655	-1.741	1.3816	0.2605	-0.933	230.0149	649.16	-0.48193	0.6333	0.20898	-93.384	88.944	150.457	0.27344	0.059082	0.014648
0.672	-49.286	8.473	75.194	0.029785	0.12256	-0.14502	-17.161	90.663	1683.743	-1.7163	1.3677	0.26074	-44.6157	190.638	619.689	-0.42432	0.59561	0.18623	-67.195	89.6498	138.904	0.25146	0.030273	0.015137
0.674	-58.763	-33.993	119.9956	0.027344	0.12403	-0.14429	-10.649	86.347	1662.667	-1.6812	1.3521	0.26025	-61.492	202.72	576.686	-0.36904	0.55469	0.16016	-28.397	119.751	121.522	0.23682	0.015625	0.020508
0.676	-72.353	-70.5395	167.1538	0.022949	0.13525	-0.146	-20.324	165.577	1616.316	-1.6636	1.3442	0.24756	-78.8799	187.7126	531.109	-0.31826	0.51367	0.1375	-7.39	83.3334	81.004	0.19775	-0.0029297	0.025391
0.678	-77.2	-98.169	204.3892	0.010742	0.146	-0.14893	-53.375	168.4221	1557.916	-1.625	1.3281	0.24951	-86.086	241.1718	462.0378	-0.26611	0.47392	0.11387	-7.291	71.0578	57.513	0.16724	-0.011475	0.037109
0.68	-49.771	-119.37	237.7929	-0.0029297	0.15771	-0.13916	-60.639	198.789	1554.41	-1.5918	1.3111	0.24707	-90.1634	238.973	383.915	-0.22314	0.43018	0.09375	-17.142	46.298	56.106	0.13232	-0.019043	0.043945
0.682	-63.4139	-153.588	299.5523	-0.044434	0.19189	-0.1333	-73.1708	231.423	1518.936	-1.5645	1.2949	0.24609	-90.7887	237.16	337.74	-0.17627	0.39395	0.072656	-38.277	35.0273	83.3276	0.085449	-0.022461	0.064941
0.684	-41.69988	-189.835	354.0411	-0.08081	0.22021	-0.11792	-74.744	197.475	1486.13594	-1.5215	1.2715	0.24561	-93.4943	189.034	293.396	-0.13301	0.35234	0.050586	-0.609999999999999	42.2751	86.2024	0.058105	-0.018555	0.079102
0.686	-21.0623	-213.877	406.781	-0.1377	0.25293	-0.089844	-30.133	234.248	1480.91172	-1.5034	1.2622	0.24658	-72.285	185.773	239.937	-0.085742	0.31055	0.029883	-17.712	34.439	45.44703	-0.0048828	-0.011719	0.097656
0.688	-0.9745	-199.7993	422.4507	-0.23047	0.29297	-0.045898	-31.1352	225.758	1409.568	-1.4546	1.2407	0.24707	-75.1917	187.962	197.85	-0.052246	0.2748	0.0082032	-7.51300000000001	61.55	12.59515	-0.050781	0.0031738	0.11596
0.69	27.529	-168.631	480.114	-0.27783	0.31592	-0.024902	-37.269	185.9749	1389.8636	-1.4234	1.2251	0.24927	-108.109	216.1528	196.182	-0.016113	0.24365	-0.0083008	-21.749	55.5909	-2.411	-0.094727	0.01416	0.13525
0.692	24.4231	-126.105	520.132	-0.39258	0.35889	0.035156	9.96	218.105	1350.029	-1.3862	1.2056	0.25	-121.322	206.495	192.255	0.011719	0.20312	-0.02793	-24.96	73.725	7.96	-0.14795	0.032715	0.1626
0.694	39.49583	-86.871	508.156	-0.47412	0.39551	0.068848	-32.016	183.851	1284.248	-1.3418	1.1777	0.25684	-115.3047	193.446	199.175	0.036133	0.16924	-0.041895	-30.001	49.16	20.137	-0.17236	0.041992	0.17627
0.696	22.554	-57.7048	517.4026	-0.55273	0.42969	0.10547	-24.772	203.294	1298.2102	-1.3228	1.1665	0.26074	-108.7536	161.204	144.5688	0.060351	0.13408	-0.061036	-40.067	25.0304	22.109	-0.20557	0.0625	0.2041
0.698	46.464	-13.896	569.275	-0.65039	0.47754	0.14551	8.671	235.371	1275.1472	-1.2852	1.1367	0.26367	-91.1762	137.713	127.377	0.079883	0.10019	-0.074121	-28.443	-11.368	16.5903	-0.23047	0.074707	0.21948
0.7	48.342	38.11	631.682	-0.69775	0.50049	0.16211	-33.49	195.64476	1256.6491	-1.2558	1.1138	0.27124	-64.2335	104.079	122.9289	0.10254	0.069336	-0.09375	-56.716	-0.868000000000002	18.7435	-0.24561	0.087891	0.2373
0.702	33.466	98.557	667.033	-0.77246	0.56055	0.18555	-14.574	226.908	1231.923	-1.2246	1.0879	0.271	-43.536	77.1892	127.53307	0.11465	0.044433	-0.10713	-88.971	59.072	55.94	-0.25586	0.098633	0.25781
0.704	16.727	122.075	698.6414	-0.82983	0.60181	0.19873	-41.056	204.971	1170.0216	-1.1792	1.0513	0.26758	-21.365	39.6038	93.61	0.13047	0.012012	-0.12442	-135.9436	110.386	71.3	-0.25684	0.104	0.25342
0.706	-24.178	103.818	718.929	-0.8877	0.64844	0.21436	-25.658	179.9417	1142.049	-1.1563	1.0352	0.25635	11.92	19.143	80.2714	0.14727	-0.009082	-0.13887	-136.3247	160.51	88.673	-0.25244	0.1084	0.2627
0.708	-10.781	81.9001	781.834	-0.96289	0.72461	0.24316	-11.778	233.6898	1089.1101	-1.103	0.99756	0.24902	59.97	1.21	53.141	0.1582	-0.032227	-0.1501	-145.911361	130.85	61.077	-0.24194	0.10742	0.2666
0.71	-31.762	34.799	850.23	-1.0039	0.76172	0.25732	-40.602	215.2838	1026.75863	-1.0454	0.95508	0.23682	54.037	-16.871	80.126	0.16406	-0.054199	-0.16699	-150.767	108.953	45.559	-0.22266	0.099609	0.26953
0.712	-23.406	6.93	898.1744	-1.0801	0.83496	0.28906	-25.386	226.0578	1000.0577	-1.0171	0.93408	0.23535	44.728	18.8009	72.748	0.16924	-0.069336	-0.17402	-139.2762	71.484	51.34585	-0.19141	0.091309	0.26074
0.714	-45.5636	-42.977	980.5443	-1.134	0.87817	0.30957	-12.563	250.77	929.138	-0.95703	0.89063	0.22803	-0.786999999999999	57.441	73.377	0.16866	-0.085742	-0.1878	-161.337	24.5397	77.127	-0.18262	0.086914	0.25586
0.716	-60.6908	-110.1404	1021.2092	-1.1934	0.92188	0.33691	-46.686	221.3861	900.8265	-0.91284	0.86084	0.21558	21.279	90.639	30.762	0.17061	-0.10449	-0.19716	-146.3401	0.392000000000003	68.854	-0.14404	0.072754	0.23975
0.718	-87.0464	-178.662	1042.2002	-1.269	0.96338	0.35938	-21.13	241.3638	873.7154	-0.8667	0.83057	0.2041	-4.023	66.407	40.057	0.17334	-0.11582	-0.20059	-128.6643	-20.298	48.618	-0.11133	0.058106	0.23193
0.72	-101.66	-216.877	1074.96024	-1.3022	0.97998	0.37207	-55.551	225.6601	810.3913	-0.80273	0.78516	0.19385	-1.832	47.601	40.3861	0.16846	-0.12451	-0.20361	-97.797	-4.432	44.5275	-0.07373	0.041504	0.21973
0.722	-70.264	-233.573	1110.721	-1.3594	1.0059	0.38818	-95.802	215.7831	786.213	-0.77393	0.76318	0.1875	-27.948	15.3101	53.2225	0.16396	-0.13145	-0.2083	-74.382	4.062	54.2322	-0.020996	0.024902	0.19727
0.724	-84.058	-214.336	1157.339	-1.3845	1.0237	0.39575	-70.701	246.872	740.8803	-0.71094	0.7207	0.17236	-34.592	34.314	39.8294	0.15381	-0.13828	-0.20879	-85.042	42.583	91.374	0.0087891	0.011719	0.18408
0.726	-113.6517	-179.636	1181.183	-1.3984	1.0254	0.39307	-103.6523	213.1721	681.366	-0.66308	0.68408	0.16382	-48.507	41.492	58.4523	0.14443	-0.14571	-0.20606	-79.534	34.5738	95.054	0.064941	-0.0029297	0.17041
0.728	-130.889	-150.581	1204.139	-1.3887	1.0313	0.38135	-81.221	210.4137	677.857	-0.61133	0.65625	0.1499	-48.809	51.9188	30.4321	0.12862	-0.15527	-0.20127	-50.461	19.9853	82.5248	0.10791	-0.01294	0.14795
0.73	-115.5051	-130.788	1227.173	-1.3633	1.0332	0.36719	-90.391	213.276	631.0016	-0.54834	0.61572	0.1377	-89.433	20.578	50.4771	0.1167	-0.16406	-0.19482	-20.483	-18.4803	63.6626	0.14502	-0.023438	0.13428
0.732	-97.3494	-124.521	1240.205	-1.3022	1.0269	0.3374	-115.016	167.2693	587.2003	-0.51563	0.59082	0.12891	-91.483	20.386	6.5985	0.10098	-0.17295	-0.19405	-26.143	-36.715	52.9586	0.19824	-0.035156	0.11621
0.734	-120.3278	-89.5402	1220.6681	-1.2373	1.0259	0.30493	-70.551	179.9743	571.187	-0.45557	0.55518	0.11719	-102.1767	-14.33	20.7477	0.098342	-0.17998	-0.19423	-7.96299999999999	-30.149	56.0588	0.22461	-0.040039	0.10498
0.736	-99.7437	-52.229	1234.195	-1.1758	1.0195	0.27344	-102.794	161.197	520.209	-0.41381	0.51953	0.11059	-108.1086	-3.524	32.302	0.092871	-0.18818	-0.19267	-9.042	-15.174	42.176	0.26611	-0.056152	0.089355
0.738	-76.983	-45.72	1246.89	-1.0957	1.0156	0.23096	-78.657	131.305	481.9401	-0.37256	0.49268	0.10107	-174.333	-13.5215	74.8859	0.095996	-0.19297	-0.19287	-21.512	46.968	6.952	0.29541	-0.062988	0.073243
0.74	-45.441	-33.488	1261.204	-1.0674	1.0166	0.20752	-55.767	158.004	446.0053	-0.3252	0.45313	0.09375	-146.298	15.791	58.2452	0.10254	-0.19531	-0.19238	-12.685	41.3125	-17.1696	0.32031	-0.071777	0.055664
0.742	-32.356	-55.119	1283.364	-1.0288	1.0103	0.16602	-98.281	135.125	397.4708	-0.30518	0.43408	0.084473	-142.758	12.0396	53.9681	0.11426	-0.1957	-0.18808	2.245	79.963	-3.0002	0.35107	-0.085449	0.037598
0.744	-8.001	-89.282	1309.5506	-1.0105	1.01	0.14209	-63.47	151.4442	388.18357	-0.25293	0.40039	0.07959	-129.3282	40.7059	19.6676	0.12393	-0.19336	-0.18291	-3.836	75.65	7.03177	0.36328	-0.092773	0.029297
0.746	11.94	-128.3551	1334.546	-1.0098	1.0117	0.12207	-69.532	179.567	362.928	-0.2229	0.37353	0.075195	-146.274	27.6467	59.7561	0.13057	-0.19531	-0.18096	-33.745	60.461	7.443	0.38721	-0.11035	0.01123
0.748	-7.825	-154.321	1373.735	-1.0156	1.0254	0.095703	-102.099	155.3864	328.2455	-0.19482	0.3418	0.070313	-125.0104	62.2995	47.1451	0.13681	-0.19287	-0.17607	-21.359	49.273	7.984	0.39965	-0.11914	-0.0009766
0.75	16.097	-162.729	1413.9623	-1.0229	1.0376	0.088867	-43.013	170.558	312.3462	-0.16064	0.31299	0.07666	-116.0727	61.849	46.3357	0.14453	-0.19238	-0.17383	-58.71	18.19441	14.483	0.40918	-0.12744	-0.014648
0.752	32.382	-185.317	1458.756	-1.0464	1.064	0.080078	-66.004	154.281	268.493	-0.15039	0.29102	0.078613	-53.477	70.76	5.99	0.14912	-0.19551	-0.17188	-60.563	57.1582	40.2822	0.42041	-0.13525	-0.024414
0.754	49.116	-210.696	1476.348	-1.0699	1.0953	0.080078	-69.473	119.5985	261.9251	-0.12354	0.25928	0.079102	-46.519	31.8226	10.255	0.16143	-0.19062	-0.16651	-84.246	61.353	61.77	0.42432	-0.14258	-0.037109
0.756	36.488	-233.946	1478.929	-1.0977	1.125	0.077148	-24.681	137.6883	223.749	-0.10547	0.22998	0.078125	-11.783	29.873	5.36	0.17705	-0.19961	-0.17276	-101.141	94.175	51.5407	0.42139	-0.14063	-0.04248
0.758	33.204	-217.06	1481.021	-1.1289	1.1689	0.087402	-64.761	113.0369	189.295	-0.091309	0.20361	0.081543	-31.665	24.0596	25.206	0.19619	-0.20156	-0.17305	-134.2605	92.117	48.2881	0.41651	-0.14111	-0.047363
0.76	31.38976	-173.576	1490.908	-1.1455	1.1953	0.092773	-37.834	111.4444	188.6701	-0.067383	0.1709	0.082031	0.0660000000000025	60.4587	41.279	0.20996	-0.20361	-0.17236	-130.159	93.706	44.1036	0.40527	-0.14111	-0.049805
0.762	23.991	-120.57	1504.027	-1.187	1.2485	0.10547	-35.211	122.0959	167.716	-0.057129	0.15479	0.081543	0.390999999999998	54.199	58.35	0.23799	-0.20469	-0.175	-130.5752	59.6816	43.071	0.38428	-0.1377	-0.045898
0.764	15.063	-91.769	1500.2922	-1.2241	1.3071	0.12109	-76.33	81.059	170.8557	-0.041992	0.12061	0.075195	11.209	44.285	76.966	0.25879	-0.20772	-0.17217	-146.6861	47.375	55.107	0.36523	-0.14014	-0.038086
0.766	6.359	-74.778	1489.182	-1.2397	1.3286	0.13818	-28.633	91.67004	151.6595	-0.027344	0.10523	0.071045	2.859	17.435	83.366	0.27285	-0.20303	-0.17529	-135.90853	24.76	69.584	0.32959	-0.12842	-0.026855
0.768	-1.122	-67.314	1483.915	-1.2813	1.377	0.15283	-79.757	90.4899	124.2389	-0.01123	0.084473	0.065918	27.989	15.257	49.802	0.28066	-0.19385	-0.17647	-139.2201	-2.632	68.467	0.2876	-0.12158	-0.013428
0.77	-14.681	-53.423	1499.318	-1.3111	1.4087	0.16357	-80.598	75.1672	139.99	0.0078125	0.061523	0.061035	18.54	9.4376	47.5117	0.28857	-0.18311	-0.18164	-123.2264	36.511	76.5117	0.24756	-0.10693	-0.0043945
0.772	-16.291	-24.292	1504.299	-1.3359	1.4336	0.1748	-49.015	89.991	136.8534	0.019531	0.052734	0.055664	7.906	13.523	60.483	0.28985	-0.17344	-0.18623	-112.069	49.552	97.869	0.18652	-0.086914	0.0063477
0.774	-28.452	-13.76	1517.5264	-1.3672	1.4668	0.18018	-104.056	66.67988	122.004	0.034668	0.032227	0.057617	-15.811	-2.5742	48.11304	0.29238	-0.15771	-0.18906	-87.479	69.4352	108.008	0.15479	-0.081055	0.01709
0.776	-27.347	-26.249	1517.999	-1.375	1.4824	0.18701	-69.394	73.7796	121.708	0.042968	0.017578	0.05542	-6.46899999999999	19.602	47.6552	0.29278	-0.1456	-0.18828	-94.479	63.975	91.427	0.095703	-0.057129	0.041016
0.778	-37.87377	-50.7371	1546.199	-1.3848	1.5059	0.18799	-90.268	85.754	95.50651	0.049316	0.0039063	0.058105	-30.959	21.1775	29.9587	0.28428	-0.13291	-0.18476	-101.05	33.2271	71.65705	0.05835	-0.044922	0.056396
0.78	-43.7818	-87.231	1568.1926	-1.3877	1.5146	0.18677	-124.1256	72.6431	85.4072	0.051758	-0.0092773	0.061035	-34.847	51.0687	42.8534	0.271	-0.12842	-0.18652	-64.814	15.457	49.111	0.018066	-0.032715	0.06543
0.782	-32.1416	-89.594	1586.0534	-1.3921	1.5278	0.18701	-67.361	79.3103	83.7163	0.056152	-0.019531	0.05957	-67.49	48.443	52.73814	0.26338	-0.12325	-0.1918	-53.295	-32.6658	42.538	-0.021973	-0.013184	0.082031
0.784	-31.4324	-101.908	1625.857	-1.3921	1.5376	0.18555	-118.7797	69.1272	48.688	0.057617	-0.029297	0.064941	-104.0011	62.915	76.936	0.25937	-0.11406	-0.19717	-8.708	-28.6127	53.657	-0.038086	-0.0024414	0.088379
0.786	-30.6892	-98.33	1637.482	-1.396	1.5454	0.17773	-95.552	37.627	61.0922	0.055664	-0.039307	0.066162	-131.245	64.198	51.6745	0.25508	-0.10508	-0.20146	-12.083	-58.805	43.38904	-0.055176	0.0087891	0.1001
0.788	-34.38332	-107.9	1623.6319	-1.4063	1.5488	0.17041	-57.592	45.04869	47.644	0.054199	-0.050781	0.073242	-122.687	53.6937	42.2662	0.24971	-0.093655	-0.20586	-30.821	-19.95411	26.12	-0.062988	0.017334	0.10132
0.79	-25.563	-100.793	1616.3903	-1.4146	1.5468	0.16089	-107.569	31.233	42.089	0.047363	-0.057129	0.080566	-129.1396	22.0511	35.881	0.24023	-0.083984	-0.20459	-4.023	8.7511	27.564	-0.064941	0.026855	0.099609
0.792	-1.152	-84.628	1614.839	-1.4199	1.543	0.14697	-70.047	27.766	68.3088	0.045898	-0.060547	0.086914	-138.409	-3.831	40.1504	0.22138	-0.065126	-0.20166	-10.176	48.477	28.315	-0.059082	0.04248	0.092773
0.794	2.901	-47.3837	1623.828	-1.4312	1.5356	0.14258	-91.105	54.584	56.9816	0.036133	-0.066895	0.094238	-135.2874	-8.2446	26.3935	0.20251	-0.052619	-0.19814	17.47	59.207	34.9807	-0.056152	0.053223	0.092285
0.796	31.6608	-5.5098	1622.356	-1.437	1.5298	0.13916	-117.544	45.4191	68.528	0.032959	-0.071534	0.1023	-144.59	6.014	26.8626	0.17086	-0.031519	-0.19032	0.927000000000007	51.367	35.322	-0.044922	0.068848	0.081055
0.798	15.492	25.866	1625.118	-1.4468	1.5181	0.12842	-35.337	44.491	71.71	0.030762	-0.075684	0.10986	-113.703	24.119	25.9113	0.13835	-0.016685	-0.1832	-43.978	42.592	2.694	-0.037353	0.082275	0.085205
0.8	46.507	55.035	1595.1129	-1.4543	1.509	0.12622	-58.017	42.196	40.8371	0.031738	-0.080566	0.10693	-126.1541	10.812	45.547	0.10059	0.0019531	-0.16699	-63.28	12.4163	1.66	-0.036133	0.09668	0.09082
0.802	51.8769	61.685	1578.738	-1.4565	1.4966	0.11865	-62.212	10.544	53.2994	0.032715	-0.083008	0.1167	-96.114	4.83	46.00665	0.067737	0.016868	-0.16066	-50.594	46.476	8.685	-0.037598	0.11377	0.10254
0.804	58.4397	72.228	1555.283	-1.4629	1.4863	0.11816	-29.197	24.7049	38.81	0.035156	-0.088867	0.12744	-71.759	0.123000000000001	40.56705	0.040222	0.029842	-0.14084	-60.041	55.605	28.2369	-0.041992	0.11865	0.11426
0.806	48.9681	69.901	1573.4284	-1.4629	1.4785	0.11621	-60.052	10.464	32.357	0.039306	-0.093995	0.13159	-58.027	28.809	25.2656	0.016781	0.043494	-0.12917	-55.154	99.018	38.866	-0.051758	0.12354	0.13086
0.808	46.6394	51.026	1577.40486	-1.4648	1.4609	0.11768	-11.375	9.25	51.086	0.041992	-0.099121	0.13525	-64.285	38.536	74.6619	0.0017324	0.058146	-0.11518	-63.68	97.331	25.985	-0.062988	0.13232	0.15332
0.81	42.8678	14.644	1591.6951	-1.4663	1.4536	0.11792	-32.714	21.24623	22.3451	0.050781	-0.10205	0.1377	-30.836	62.285	65.63	-0.015137	0.07373	-0.09668	-131.5018	94.316	7.663	-0.069336	0.13477	0.1709
0.812	36.1242	-7.51	1607.752	-1.4683	1.4419	0.1167	-50.351	7.7363	44.036	0.050781	-0.10498	0.1416	-33.801	45.371	52.9657	-0.035167	0.087258	-0.082533	-123.7184	95.411	23.193	-0.074219	0.14014	0.20557
0.814	40.8584	-29.59	1614.707	-1.4609	1.415	0.11572	6.562	33.976	59.531	0.057617	-0.11328	0.14355	2.86	53.128	25.527	-0.055305	0.10073	-0.071362	-134.3762	61.3082	63.311	-0.079834	0.14722	0.23803
0.816	22.114	-28.709825	1608.001	-1.4531	1.4121	0.10742	-57.611	59.197	38.31547	0.06543	-0.11255	0.1477	6.889	31.875	19.4636	-0.073307	0.11127	-0.059564	-124.5756	71.2671	80.713	-0.088379	0.1543	0.26953
0.818	9.818	-16.703	1559.111	-1.4414	1.3926	0.11621	-46.654	39.141	60.433	0.075195	-0.11523	0.14746	26.227	44.3328	30.889	-0.089632	0.12184	-0.04776	-135.4956	29.561	93.178	-0.10693	0.16797	0.31055
0.82	-15.339	-7.23	1556.1155	-1.428	1.3772	0.11866	-46.216	37.196	30.696	0.09375	-0.12061	0.14697	3.821	45.49	42.951	-0.10742	0.12451	-0.043945	-144.3034	9.738	109.3518	-0.11963	0.17432	0.32617
0.822	-27.13	3.287	1545.651	-1.4097	1.3638	0.12012	-85.396	16.228	20.365	0.099609	-0.125	0.14746	31.049	61.2613	9.017	-0.11914	0.13069	-0.038511	-143.782	-38.536	167.41	-0.15137	0.19385	0.33594
0.824	-12.191	21.07	1548.605	-1.3867	1.3438	0.12695	-45.247	8.089	42.3435	0.11523	-0.13086	0.14404	12.254	35.726	40.5518	-0.1287	0.13691	-0.032054	-162.632	-66.35925	271.52123	-0.19263	0.21606	0.32105
0.826	-15.475	43.973	1528.901	-1.375	1.335	0.13232	-62.135	27.8525	16.975	0.1311	-0.1355	0.14355	19.32	34.743	47.6172	-0.13756	0.13922	-0.03522	-154.117	-119.7042	426.073	-0.23535	0.25391	0.29346
0.828	-27.3235	70.1811	1502.4179	-1.3569	1.313	0.14209	-90.408	32.0511	33.2469	0.15088	-0.1416	0.12402	-15.157	4.5721	59.77774	-0.14273	0.14179	-0.032227	-174.721	-224.089	584.107	-0.2998	0.33496	0.25879
0.83	-46.906	91.231	1480.923	-1.3455	1.2952	0.14966	-43.904	46.659	46.6359	0.18262	-0.14697	0.10938	-28.62	36.0977	84.342	-0.14795	0.13916	-0.041992	-208.693	-367.211	701.946	-0.33496	0.38232	0.25146
0.832	-31.9148	123.67	1458.541	-1.3354	1.2837	0.16016	-79.427	56.9011	19.652	0.19629	-0.15234	0.1001	-74.601	-9.829	122.874	-0.15078	0.14542	-0.05648	-246.341	-522.305	787.616	-0.41748	0.49658	0.26709
0.834	-48.2804	138.863	1442.763	-1.3286	1.2563	0.1748	-77.139	30.93	44.7438	0.22363	-0.14746	0.086914	-66.992	-24.311	145.989	-0.1443	0.15669	-0.074787	-219.042	-527.699	859.629	-0.50366	0.57153	0.2937
0.836	-51.0785	142.871	1414.2434	-1.3237	1.2466	0.18262	-59.94	29.7631	35.024	0.23975	-0.14795	0.074218	-85.1978	-99.667	200.974	-0.13574	0.17432	-0.09069	-203.241	-441.358	999.591	-0.60205	0.63916	0.33643
0.838	-46.4084	119.012	1414.2406	-1.3164	1.2188	0.19043	-116.1954	15.072	33.8866	0.25293	-0.14502	0.063477	-51.882	-141.6834	240.6	-0.12817	0.19735	-0.10416	-238.607	-279.249	1119.444	-0.7583	0.73096	0.38525
0.84	-37.402	86.1548	1402.678	-1.3083	1.2004	0.19898	-84.561	16.627	54.4769	0.26074	-0.13867	0.060059	-76.734	-224.13	350.547	-0.13086	0.22559	-0.11914	-284.2916	-146.546	1150.574	-0.83789	0.78125	0.40771
0.842	-24.3084	59.922	1383.306	-1.2979	1.1777	0.20557	-90.133	43.078	26.04	0.25781	-0.1333	0.057129	-69.426	-250.3859	477.582	-0.14345	0.26253	-0.13763	-255.389	-101.1019	1186.608	-0.98193	0.91162	0.45508
0.844	-22.569	58.896	1392.81678	-1.2793	1.1543	0.21143	-92.987	41.9601	29.0652	0.25049	-0.12549	0.052246	-63.523	-325.9	596.909	-0.16721	0.31368	-0.15427	-128.126	-73.483	1256.4139	-1.0876	1.0344	0.50366
0.846	8.911	49.338	1372.9756	-1.2754	1.1426	0.21338	-46.32	49.359	42.8833	0.23999	-0.12403	0.051757	-25.4388	-358.0408	671.856	-0.20392	0.37093	-0.16058	-33.815	-93.5	1437.51	-1.2026	1.1704	0.57227
0.848	10.416	56.132	1351.137	-1.25	1.1172	0.22119	-90.457	57.033	23.878	0.22656	-0.11963	0.055176	-61.222	-396.248	734.668	-0.25341	0.4467	-0.14474	19.196	-43.22	1590.72	-1.3804	1.3745	0.69629
0.85	21.121	61.416	1324.04	-1.2331	1.096	0.22363	-80.953	45.2613	53.7568	0.2085	-0.11084	0.052246	-36.95	-355.559	762.632	-0.3374	0.53369	-0.10254	11.762	-13.521	1658.041	-1.4858	1.4751	0.77344
0.852	18.073	74.2207	1311.151	-1.2173	1.0767	0.22754	-32.146	59.8643	45.69	0.20166	-0.10303	0.052246	-24.49	-287.332	818.983	-0.4523	0.62747	-0.04719	-58.607	44.073	1652.792	-1.7358	1.6431	0.92188
0.854	47.064	89.367	1307.799	-1.188	1.0474	0.229	-67.047	42.1986	35.273	0.1875	-0.081055	0.058594	-25.7777	-160.278	857.453	-0.60034	0.71707	0.012408	-91.776	-25.26	1711.568	-1.9373	1.7483	1.0217
0.856	40.861	113.95	1285.621	-1.1753	1.0356	0.22754	-30.713	30.1524	51.5298	0.17895	-0.066162	0.060791	-15.8677	-104.82	889.097	-0.7655	0.80342	0.067137	-126.392	-74.58	1761.615	-2.1309	1.8193	1.1138
0.858	25.024	129.778	1255.2234	-1.1382	1.0044	0.22217	-45.396	32.4168	31.1327	0.17188	-0.052734	0.067383	49.7863	-74.094	970.1712	-0.93088	0.87278	0.11443	-171.357	-158.26	1822.454	-2.3237	1.8657	1.2188
0.86	21.515	140.761	1218.067	-1.1071	0.97924	0.21777	-43.833	32.0862	34.3187	0.16602	-0.029297	0.071289	95.11	-78.371	1058.235	-1.105	0.93408	0.1543	-211.924	-197.03	1839.386	-2.3843	1.8677	1.2539
0.862	12.43	145.018	1175.741	-1.0776	0.95459	0.21045	-13.125	50	47.7216	0.17139	-0.018555	0.069336	98.4632	-81.761	1159.486	-1.2579	0.98848	0.17634	-237.184	-301.749	1839.088	-2.4097	1.8774	1.2813
0.864	15.885	177.989	1132.568	-1.0347	0.92627	0.20264	-69.959	67.792	48.6546	0.16797	-0.00048828	0.074707	140.799	-52.058	1214.218	-1.4008	1.0519	0.1934	-224.87	-405.638	1910.577	-2.3311	1.8813	1.2651
0.866	-3.324	180.038	1113.7414	-1.0137	0.91016	0.19385	-49.982	37.1961	78.311	0.16553	0.018066	0.080078	150.785	-14.66	1290.50313	-1.521	1.1199	0.21573	-126.909	-427.92	1920.117	-2.1851	1.8794	1.2207
0.868	14.385	182.368	1090.8183	-0.96436	0.88135	0.17383	-12.627	38.782	53.1232	0.1626	0.026367	0.083984	154.687	38.79	1335.023	-1.6268	1.1965	0.25017	53.075	-460.94	1919.235	-1.9038	1.8462	1.1406
0.87	3.254	163.912	1072.0413	-0.92969	0.86328	0.16357	-72.923	27.7996	44.9515	0.16064	0.043945	0.087891	157.353	10.91	1401.81	-1.7339	1.2876	0.30273	124.117	-417.23	1962.196	-1.7598	1.8164	1.0962
0.872	-13.387	162.3434	1060.404	-0.89502	0.84424	0.15332	-22.141	13.9192	58.3896	0.15576	0.057373	0.091553	122.956	-68.48	1457.726	-1.8567	1.37	0.36176	106.202	-393.13	2038.607	-1.5176	1.7461	0.99951
0.874	-21.868	135.915	1054.65	-0.85498	0.81885	0.14307	-38.342	27.0434	31.455	0.15039	0.072754	0.092773	66.3607	-191.547	1570.541	-1.9928	1.4571	0.42093	102.853	-286.3	2125.346	-1.3877	1.6866	0.93506
0.876	-36.229	124.621	1053.14731	-0.83252	0.81006	0.13818	-75.617	26.769	47.3524	0.14063	0.091309	0.10596	9.69018	-273.863	1646.083	-2.1225	1.5289	0.48461	125.754	-201.6492	2198.77	-1.293	1.6211	0.88721
0.878	-29.313	111.257	1033.6067	-0.79004	0.78711	0.13232	-37.124	39.676	44.8375	0.13623	0.099609	0.1084	-28.1132	-337.177	1719.269	-2.2258	1.5745	0.53846	110.35	-162.042	2175.495	-1.2202	1.5415	0.86426
0.88	-73.0526	113.549	1005.0154	-0.7605	0.76929	0.13501	-89.707	50.5186	36.601	0.12793	0.12207	0.11572	17.161	-335.2	1714.679	-2.2871	1.6211	0.57666	59.173	-158.662	2101.7302	-1.2065	1.5142	0.8457
0.882	-76.99	112.881261	986.4038	-0.73438	0.75391	0.13916	-73.386	27.122	80.568	0.11694	0.1333	0.12377	68.171	-369.77	1734.8029	-2.2927	1.6622	0.59746	-67.599	-177.29	2033.88	-1.2104	1.4878	0.82031
0.884	-86.7992	126.247	961.4566	-0.70703	0.73828	0.14648	-50.554	34.4735	64.2319	0.10791	0.14258	0.12695	72.63	-365.95	1752.6352	-2.2289	1.6953	0.59658	-176.025	-141.42	1993.066	-1.2373	1.5029	0.82275
0.886	-67.26	138.181	921.6329	-0.68945	0.73047	0.15283	-112.039	29.4972	42.109	0.093262	0.15967	0.13818	5.076	-388.26	1839.891	-2.1073	1.7184	0.57431	-209.847	-148.91	2003.92	-1.2793	1.5391	0.84619
0.888	-83.16737	149.36145	892.4018	-0.66748	0.71631	0.16016	-69.104	24.1191	47.0169	0.081543	0.16943	0.13965	-22.402	-328.3	1900.446	-1.9433	1.7337	0.52861	-177.8824	-113.698	2014.1873	-1.4004	1.6191	0.87549
0.89	-74.314	147.062	874.215	-0.65356	0.70337	0.16431	-79.946	29.39	30.014	0.067871	0.18359	0.14795	-111.98	-265.832	1962.112	-1.7617	1.752	0.47021	-57.618	-181.492	2009.608	-1.4863	1.6699	0.89111
0.892	-52.199	143.019	848.096	-0.63916	0.69385	0.16992	-114.846	12.871	29.9287	0.062988	0.19776	0.15283	-152.114	-147.371	1952.483	-1.5908	1.751	0.41026	55.823	-206.198	2026.171	-1.6636	1.772	0.92578
0.894	-45.395	153.832	813.639	-0.62109	0.67773	0.17725	-60.514	0.943	59.7056	0.058105	0.20801	0.16357	-173.461	-72.779	1942.741	-1.4484	1.7355	0.3546	104.477	-224.457	2055.492	-1.783	1.8166	0.94018
0.896	-24.531	169.4342	786.1202	-0.60889	0.6665	0.18018	-97.307	-5.255	62.023	0.051758	0.2251	0.16992	-161.902	-31.44	1899.493	-1.3582	1.7227	0.30576	29.262	-197.275	2153.214	-1.8906	1.8457	0.96338
0.898	-17.491	175.155	770.3576802	-0.58789	0.64844	0.18213	-81.325	-54.788	141.7309	0.045898	0.22949	0.17578	-197.98	-43.6	1890.148	-1.3161	1.7143	0.26846	-24.729	-151.766	2231.828	-2.0156	1.8672	0.99854
0.9	-10.079	173.189	735.1091	-0.56543	0.63281	0.18213	-68.418	-87.033	216.613	0.041992	0.23145	0.18945	-214.061	-68.204	1907.264	-1.3145	1.7129	0.23779	-103.226	-194.228	2262.522	-2.0684	1.877	1.0103
0.902	-36.147	169.885	710.0868	-0.5542	0.62158	0.18311	-134.228	-134.568	319.379	0.045655	0.23559	0.19507	-217.601	-94.921	1960.1963	-1.3689	1.7093	0.22978	-188.8679	-203.888	2241.487	-2.1602	1.8789	1.0396
0.904	-40.669	152.238	701.2287	-0.52344	0.60156	0.18408	-110.293	-214.895	455.2627	0.04248	0.2373	0.21143	-162.554	-135.7385	1994.22149	-1.4438	1.7113	0.22216	-241.204	-199.147	2181.36	-2.198	1.8723	1.0529
0.906	-29.994	132.8151	692.5786	-0.50489	0.58667	0.1792	-165.108	-289.848	523.308	0.032715	0.24023	0.21289	-82.845	-149.22913	2013.689	-1.5262	1.7117	0.22178	-280.188	-107.614	2145.976	-2.2065	1.8716	1.0645
0.908	-16.355	133.6929	667.738	-0.48193	0.56738	0.17578	-206.882	-359.24	583.072	0.020508	0.24756	0.20996	-16.274	-158.902	2043.094	-1.606	1.7162	0.23389	-272.837	-8.16	2104.67842	-2.189	1.8638	1.0781
0.91	-10.566	132.038	635.5167	-0.45313	0.54883	0.1748	-160.067	-337.945	608.940287	-0.0092773	0.2627	0.19629	29.247	-164.203	2037.481	-1.6797	1.7285	0.25	-321.915	30.533	2058.75	-2.1675	1.8599	1.0801
0.912	-15.244	118.5906	604.9435	-0.43701	0.53955	0.17285	-205.473	-242.889	627.4388	-0.046387	0.29468	0.17919	14.676	-172.75	2084.918	-1.7479	1.7399	0.26807	-293.763	8.283	1995.254	-2.1245	1.8423	1.0977
0.914	10.852	112.2412	586.3318	-0.40527	0.52246	0.1665	-216.086	-141.7129	696.659	-0.090332	0.33447	0.17725	-57.699	-160.024	2135.646	-1.8159	1.7564	0.28555	-208.203	-7.0716	1974.52	-2.0928	1.8272	1.105
0.916	-26.441	109.433	566.864	-0.38476	0.50292	0.16456	-167.996	-52.287	725.1354	-0.17188	0.40039	0.2085	-64.706	-188.519	2173.474	-1.8839	1.7626	0.29414	-88.039	18.662	1963.519	-2.0601	1.8071	1.1084
0.918	-18.773	118.602	553.7	-0.36328	0.48389	0.15723	-182.0691	-22.381	747.3751	-0.23242	0.44092	0.22363	-40.474	-175.461	2183.259	-1.9427	1.762	0.30009	-14.81	68.538	2031.514	-2.0171	1.7642	1.1074
0.92	-20.538	106.11	543.2379	-0.33496	0.45996	0.1499	-81.338	-11.47	832.856	-0.37109	0.50195	0.26855	33.117	-176.838	2162.876	-1.9868	1.7505	0.30225	-20.892	183.138	2057.2119	-1.9937	1.7446	1.0977
0.922	-32.695	114.585	514.74427	-0.3208	0.44971	0.15039	-59.428	50.37	912.905	-0.47998	0.53906	0.30957	25.513	-96.761	2083.28	-2.0241	1.7365	0.2999	-52.035	238.8291	2045.212	-1.9492	1.709	1.0786
0.924	-59.444	116.8857	491.261	-0.29688	0.43262	0.14893	-53.31	103.009	1003.083	-0.59082	0.56055	0.33936	60.915	-40.598	2042.5968	-2.0578	1.7215	0.30147	-106.5093	259.848	2039.689	-1.9156	1.6909	1.0528
0.926	-76.603	138.208	459.6105	-0.28125	0.4148	0.1438	-4.90599999999999	177.7236	1077.108	-0.72998	0.59814	0.37402	61.3699	52.628	1993.421	-2.0809	1.7062	0.30498	-128.6832	224.103	2033.315	-1.8887	1.6738	1.0181
0.928	-75.298	131.64	436.0645	-0.26416	0.39795	0.14844	-103.405	201.291	1081.742	-0.79199	0.6123	0.37305	64.618	82.26	1997.204	-2.0947	1.6893	0.30459	-136.226	147.836	2067.182	-1.8418	1.6563	0.97705
0.93	-99.246	139.115	415.71532	-0.24805	0.37305	0.15234	-155.653	141.0984	1168.071	-0.89844	0.67969	0.37402	113.538	134.417	2020.686	-2.1055	1.6719	0.31055	-102.58	117.223	2053.802	-1.8198	1.6509	0.95703
0.932	-117.3566	123.737	393.4752	-0.23486	0.36475	0.15479	-134.735	92.181	1242.966	-0.9646	0.74927	0.37647	117.691	112.533	2030.3	-2.1032	1.6531	0.31807	-74.767	55.5322	1996.5826	-1.7788	1.6235	0.91016
0.934	-114.0153	109.1252	381.959	-0.22314	0.34473	0.15283	-192.6784	-32.56	1314.074	-1.0288	0.83545	0.38281	112.656	141.811	1994.105	-2.0957	1.6364	0.32431	-53.61	52.284	1958.294	-1.7429	1.6018	0.8728
0.936	-102.7719	86.16	384.0737	-0.21411	0.32178	0.1582	-209.33609	-157.789	1426.3591	-1.1094	0.96484	0.42822	15.191	128.12277	1986.132	-2.0754	1.6129	0.33174	-27.738	26.342	1938.259	-1.7065	1.5806	0.8418
0.938	-81.34	89.771	360.269	-0.20313	0.31055	0.16455	-229.152	-243.584	1453.742	-1.1641	1.0273	0.4624	-45.727	153.943	1983.5147	-2.0552	1.5972	0.33672	5.758	44.861	1920.732	-1.6523	1.541	0.80518
0.94	-90.701	76.945	327.3236	-0.19043	0.29004	0.16064	-233.434	-333.836	1487.458	-1.2866	1.1304	0.54883	-58.127	109.735	2017.471	-2.0327	1.5806	0.34375	61.608	106.31	1899.225	-1.625	1.5234	0.7915
0.942	-88.885	70.216	316.47193	-0.18018	0.2832	0.16797	-112.4035	-355.453	1493.423	-1.4111	1.1797	0.62012	-26.785	123.665	2028.438	-2.0089	1.5696	0.3461	32.845	167.75	1862.234	-1.5605	1.4727	0.75244
0.944	-101.9305	74.34	302.9843	-0.16064	0.26465	0.16748	-55.574	-377.95	1480.688	-1.543	1.2227	0.68213	-30.281	78.351	2036.4216	-1.9862	1.5645	0.35938	42.656	247.078	1824.8943	-1.5096	1.4378	0.72974
0.946	-78.467	78.9447	294.418	-0.1438	0.2544	0.17114	7.548	-397.1	1546.075	-1.707	1.2598	0.75439	-22.568	74.0376	2009.127	-1.9749	1.5579	0.36914	-27.872	272.413	1773.0948	-1.4551	1.3984	0.70361
0.948	-87.837	66.1618	280.7664	-0.12891	0.24121	0.17236	60.395	-326.75	1599.453	-1.771	1.2759	0.78223	-88.172	45.992	1987.5636	-1.9691	1.5532	0.37959	-50.403	292.0015	1723.125	-1.3809	1.3418	0.67432
0.95	-66.762	60.6717	295.746	-0.10107	0.22217	0.16602	11.428	-268.76	1671.233	-1.8491	1.2954	0.83203	-138.491	93.922	1937.8156	-1.959	1.5547	0.3916	-70.245	265.872	1655.2355	-1.3413	1.311	0.65625
0.952	-73.404	52.8406	278.3804	-0.087402	0.2124	0.16162	24.926	-211.068	1730.405	-1.8633	1.3091	0.84766	-113.832	94.98	1931.921	-1.9461	1.5523	0.41533	-136.5645	284.199	1594.719	-1.2632	1.2456	0.62695
0.954	-57.84	70.0011	249.029	-0.052734	0.19287	0.14941	0.593000000000004	-150.0449	1675.072	-1.8354	1.3149	0.84766	-45.3138	126.484	1880.105	-1.9278	1.551	0.43652	-157.705	304.43	1559.989	-1.2027	1.1948	0.59961
0.956	-49.173	68.6654	229.629	-0.024414	0.18262	0.14062	-51.532	-143.905	1642.5967	-1.7437	1.3267	0.81836	-52.3453	115.632	1872.964	-1.9031	1.549	0.45215	-192.407	337.93	1509.84	-1.1396	1.1465	0.57275
0.958	-37.759	72.584	217.6332	0.0019531	0.16797	0.1333	-56.892	-79.09	1649.77	-1.6714	1.3442	0.79004	-48.653	185.616	1825.8171	-1.8692	1.5508	0.47021	-152.746	333.587	1460.308	-1.0664	1.0859	0.53369
0.96	-22.137	74.772	205.0167	0.038086	0.15283	0.12012	-124.64	-30.02	1647.844	-1.4941	1.377	0.71533	-77.1869	233.859	1810.10621	-1.8296	1.5571	0.48828	-165.179	268.4624	1406.398	-1.0254	1.0547	0.51025
0.962	-33.557	91.719	176.1519	0.057617	0.14258	0.11328	-152.0684	-69.27	1686.522	-1.3501	1.3892	0.66162	-52.4567	350.447	1748.0354	-1.7857	1.5537	0.49854	-128.312	211.388	1365.278	-0.94727	0.98828	0.46729
0.964	-19.325	88.2613	162.1933	0.085449	0.13086	0.10352	-128.812	-76.04	1687.75	-1.2222	1.395	0.60742	-83.5047	355.294	1712.005	-1.7308	1.5515	0.50439	-115.092	157.42	1346.528	-0.87109	0.92578	0.42627
0.966	-34.084	71.9295	171.4709	0.10522	0.11694	0.095217	-132.325	-150.396	1668.853	-1.0913	1.395	0.54883	-27.262	356.642	1665.551	-1.6824	1.5438	0.51026	-84.249	194.82	1294.676	-0.82861	0.90088	0.40332
0.968	-23.387	59.5465	183.24247	0.12109	0.10986	0.093262	-43.536	-206.858	1702.847	-1.0444	1.3931	0.521	-8.952	269.47	1651.526	-1.6255	1.5315	0.50937	-69.729	264.929	1247.934	-0.75635	0.84033	0.36719
0.97	-28.325	49.08	159.711	0.13916	0.094238	0.086914	0.670000000000002	-182.471	1725.911	-0.9917	1.3911	0.48828	26.978	257.818	1599.215	-1.564	1.5142	0.50537	-79.661	326.833	1218.532	-0.69556	0.79908	0.34693
0.972	-30.095	40.756	160.5283	0.14844	0.086914	0.080078	-60.586	-245.43	1809.91386	-0.97754	1.3862	0.46631	-2.04799999999999	211.359	1603.332	-1.5106	1.4941	0.49668	-83.586	361.374	1161.566	-0.64014	0.75635	0.32178
0.974	-39.313	34.2585	147.2265	0.16064	0.078125	0.078125	-78.412	-248.67	1874.057	-0.98193	1.3794	0.44531	28.298	225.53	1573.6	-1.4551	1.4731	0.49033	-99.4821	361.605	1078.8086	-0.56201	0.69775	0.28857
0.976	-80.416	40.282	135.5768	0.167	0.071533	0.077149	-129.034	-266.48	1898.892	-1	1.3691	0.44531	0.893999999999998	178.06	1546.52	-1.3929	1.443	0.47861	-64.4221	378.668	1003.472	-0.52686	0.6626	0.26611
0.978	-78.697	49.05	117.7783	0.16895	0.064941	0.07959	-197.8595	-320.51	1949.215	-1.0166	1.3672	0.44873	43.241	198.168	1482.537	-1.3311	1.4101	0.47168	-62.6398	402.87	950.9857	-0.44482	0.60596	0.23584
0.98	-95.846	58.566	116.422	0.17188	0.062988	0.083008	-193.8461	-244.576	1952.524	-1.0649	1.3677	0.47852	35.179	170.039	1462.717989	-1.2788	1.3716	0.45898	-32.274	392.362	903.385	-0.38233	0.55273	0.20899
0.982	-87.7313	59.1516	109.5727	0.17139	0.062988	0.083984	-250.8738	-208.48182	1909.64	-1.1231	1.3804	0.52637	91.1442	220.414	1439.1539	-1.2199	1.3356	0.45235	-34.049	330.985	814.678	-0.31738	0.50684	0.17627
0.984	-86.867	51.7461	114.205	0.16455	0.057129	0.091309	-271.8962	-150.229	1874.9954	-1.1909	1.3833	0.58594	63.944	211.9748	1416.35	-1.1625	1.298	0.44072	-23.626	284.713	702.651	-0.23047	0.44727	0.1333
0.986	-99.757	39.618	99.366	0.15674	0.060058	0.098387	-267.466	-51.518	1831.529	-1.3022	1.3931	0.68164	7.893	257.235	1319.887	-1.1074	1.2578	0.43096	44.772	253.926	641.154	-0.18896	0.4126	0.10938
0.988	-97.094	38.387	112.279	0.14502	0.062012	0.10205	-285.483	-106.947	1837.141	-1.373	1.4023	0.71729	-61.3449	263.599	1249.65	-1.0526	1.2134	0.41992	66.688	262.844	619.2533	-0.10498	0.35449	0.074707
0.99	-91.394	52.31	108.72849	0.12842	0.069336	0.11572	-214.5222	-89.637	1857.627	-1.5244	1.4297	0.7749	-61.739	311.375	1162.7861	-0.99951	1.1665	0.40723	109.3288	294.479	604.938	-0.042236	0.31299	0.039307
0.992	-71.068	65.3283	96.2797	0.11865	0.068848	0.11475	-190.125	-60.146	1838.024	-1.6374	1.4544	0.81324	-67.652	306.513	1099.7931	-0.93818	1.111	0.39697	89.8514	285.38131	546.033	0.018555	0.271	0.013672
0.994	-102.3479	61.009	72.67642	0.092285	0.072266	0.11914	-164.331	-46.0276	1837.92	-1.7422	1.4727	0.84424	-62.081	357.468	1045.32956	-0.88105	1.0582	0.38184	60.4549	276.907	487.084	0.082031	0.21924	-0.023438
0.996	-92.126	51.073	75.80746	0.076416	0.078369	0.12451	-119.383	66.6794	1814.978	-1.875	1.4844	0.88916	-105.8079	357.966	1002.4041	-0.82129	0.99922	0.36504	5.285	197.4894	440.06868	0.11182	0.18945	-0.046387
0.998	-92.879	55.078	71.3272	0.057617	0.083496	0.12988	-157.19	71.785	1820.448	-1.9331	1.4907	0.91113	-92.3515	395.445	940.847	-0.75586	0.94238	0.34932	-44.451	145.494	389.235	0.17041	0.13818	-0.077148
1	-79.499	58.117	70.1214	0.037109	0.088867	0.13184	-145.109	41.871	1873.0626	-2.0313	1.4941	0.95166	-135.436	335.7677	891.673	-0.69043	0.88086	0.33057	-58.81	113.463	360.294	0.19531	0.095462	-0.10107
1.002	-83.681	48.7649	79.0295	0.025391	0.091797	0.12891	-138.654	16.78048	1914.0998	-2.0821	1.4844	0.9751	-128.4893	320.772	827.771	-0.62032	0.83047	0.30635	-89.4349	112.3986	304.2461	0.22559	0.055176	-0.12256
1.004	-75.941	32.059	93.6138	0.02002	0.091797	0.13281	-155.781	-101.7967	1966.036	-2.1133	1.4707	0.99463	-117.303	258.3121	779.323	-0.54922	0.78047	0.28896	-75.40871	138.3577	255.187	0.24707	0.0039063	-0.14209
1.006	-48.493	18.417	79.9078	0.016846	0.091797	0.12866	-126.374	-97.61	1986.908	-2.1265	1.4595	1.0117	-81.623	277.4558	742.449	-0.4789	0.73047	0.26943	-91.51734	150.8867	212.122	0.25488	-0.020508	-0.15283
1.008	-38.404	22.399	58.79	0.018066	0.090332	0.12305	-171.511	-72.047	1968.2067	-2.125	1.4551	1.02	-138.8043	235.786	690.388	-0.41093	0.68164	0.25264	-70.881	169.5673	175.684	0.26367	-0.069336	-0.17627
1.01	-9.203	33.9804	64.669	0.028809	0.085449	0.1123	-161.756	-74.4197	1945.9882	-2.0972	1.4536	1.0244	-162.277	262.2157	652.9767	-0.34668	0.63867	0.23291	-59.393	156.8511	136.3442	0.271	-0.095949	-0.1897
1.012	-8.326	46.2707	70.804	0.036621	0.079102	0.11035	-104.988	-14.069	1909.8709	-2.0739	1.4524	1.0305	-177.399	207.7199	621.724	-0.28428	0.59932	0.2126	-71.122	142.802	98.205	0.26807	-0.12256	-0.19727
1.014	1.07	44.673	78.676	0.057129	0.07666	0.092285	-97.416	-32.786	1886.976	-2.0464	1.4497	1.0352	-159.325	223.595	573.66	-0.22314	0.56152	0.19541	-93.2351	125.162	48.255	0.24951	-0.15332	-0.20947
1.016	-30.069	43.268	50.87133	0.066651	0.070556	0.086426	-41.43	-48.477	1902.82	-2.0195	1.4443	1.0396	-108.9731	198.939	508.576	-0.16806	0.51894	0.17471	-113.8495	102.4893	27.05	0.23682	-0.1665	-0.20654
1.018	-27.326	29.3655	65.2773	0.078613	0.064453	0.078613	-34.133	13.839	1910.7405	-2.0039	1.4375	1.0376	-54.291	221.513	458.7561	-0.11504	0.4789	0.15781	-133.1714	93.2381	33.972	0.19678	-0.18311	-0.21094
1.02	-28.121	27.9585	73.1224	0.098145	0.054199	0.069336	-77.841	31.02	1903.576	-1.9922	1.4199	1.0317	-57.746	194.0814	424.575	-0.067383	0.44238	0.13428	-148.4634	89.1	60.044	0.15821	-0.19385	-0.20801
1.022	-33.309	26.4418	82.6051	0.10352	0.048828	0.063477	-51.399	120.2537	1898.497	-1.9853	1.4052	1.0239	-71.212	237.292	384.2032	-0.013867	0.41279	0.11718	-151.86127	110.459	64.088	0.12158	-0.19873	-0.20459
1.024	-31.715	30.8472	48.1919	0.11035	0.035156	0.052734	-86.112	187.35	1847.854	-1.9844	1.3867	1.0181	-30.393	199.578	321.677	0.03877	0.3792	0.10078	-158.168	121.925	49.7706	0.062012	-0.2002	-0.19141
1.026	-64.442	30.0375	50.686	0.1211	0.029541	0.045898	-140.332	172.456	1806.586	-1.9766	1.3672	1.0161	-2.94200000000001	207.36	287.339	0.088379	0.34482	0.092578	-129.4787	118.456	37.5716	0.032227	-0.19336	-0.18848
1.028	-46.015	31.046	44.8937	0.12793	0.02002	0.037598	-145.385	214.684	1806.558	-1.9724	1.3499	1.0061	-12.775	143.5954	244.956	0.13418	0.31592	0.069824	-102.1685	98.846	48.6345	-0.041992	-0.17773	-0.16211
1.03	-52.52	27.7268	49.6652	0.13867	0.012207	0.037598	-205.684	180.256	1821.968	-1.9644	1.3364	1.002	-38.372	163.149	223.92127	0.17041	0.28711	0.0625	-46.293	59.111	90.096	-0.096922	-0.15259	-0.13989
1.032	-57.881	26.2513	57.006	0.1416	0.0029297	0.030518	-200.615	140.848	1867.9142	-1.9429	1.3247	0.98047	-27.721	157.398	188.822	0.19932	0.26113	0.0583	-9.68	17.612	67.059	-0.15479	-0.13281	-0.11182
1.034	-55.584	18.3145	65.058	0.14551	0.00048828	0.025391	-176.28	129.111	1847.4639	-1.9312	1.3159	0.97852	-37.021	194.894	171.111	0.2165	0.2332	0.049902	-8.404	-23.16	43.269	-0.22461	-0.10303	-0.084961
1.036	-65.515	21.5467	68.6939	0.1499	-0.0053711	0.016113	-217.732	30.203	1814.73	-1.8926	1.3105	0.95654	-45.229	144.667	149.7505	0.22276	0.2039	0.050684	15.926	-15.088	33.4837	-0.25439	-0.089355	-0.070801
1.038	-77.898	13.436	74.6528	0.15479	-0.0073242	0.01709	-144.542	10.512	1794.7695	-1.8545	1.3125	0.94092	-60.131	122.653	137.396	0.22325	0.17285	0.049609	-1.48899999999999	8.16	66.824	-0.2959	-0.061523	-0.046875
1.04	-116.0475	0.835999999999999	70.0979	0.15674	-0.01123	0.0043945	-141.13	11.57	1738.348	-1.8164	1.3086	0.92529	-45.366	53.665	105.9758	0.21436	0.14502	0.054199	-5.438	63.368	104.737	-0.3186	-0.041993	-0.035889
1.042	-85.504	-3.404	55.64009	0.16382	-0.010498	0.0036621	-140.126	6.92	1737.069	-1.7559	1.3027	0.90088	-40.255	72.726	115.1153	0.19834	0.11768	0.053906	-6.36499999999999	88.702	115.382	-0.32764	-0.026367	-0.027832
1.044	-99.9844	-2.316	62.59388	0.16602	-0.011719	0	-91.113	77.793	1767.256	-1.7319	1.3013	0.88672	-34.517	49.704	106.8871	0.18242	0.097653	0.059082	-28.308	80.531	82.557	-0.32324	-0.011719	-0.028809
1.046	-105.4128	-18.0754	89.8878	0.16309	-0.010254	-0.00048828	-124.6182	111.752	1758.252	-1.6855	1.2891	0.86182	-62.855	58.6832	119.16	0.16054	0.073828	0.06455	-25.544	51.664	72.4406	-0.3125	-0.003418	-0.032227
1.048	-111.384	-47.789	122.627	0.15967	-0.010254	-0.0087891	-114.254	115.265	1733.184	-1.6518	1.2846	0.85205	-58.817	17.306	95.455	0.13321	0.05918	0.066504	-36.794	22.268	69.2864	-0.2749	-0.00097656	-0.036133
1.05	-98.384	-78.632	193.52	0.15576	0.00048828	-0.013672	-122.4655	170.228	1667.365	-1.623	1.2744	0.83643	-121.7053	11.254	60.4073	0.10791	0.047363	0.07373	-37.636	15.9977	59.0586	-0.23975	-0.00097656	-0.043701
1.052	-82.095	-102.817	254.6576	0.13989	0.010498	-0.017334	-163.6397	171.636	1619.7087	-1.5947	1.2588	0.81299	-100.226	6.38	16.966	0.077246	0.034668	0.07832	-52.916	-5.7397	43.0059	-0.20508	-0.0068359	-0.062012
1.054	-107.661	-141.429	325.9326	0.12109	0.028809	-0.017578	-101.217	215.762	1569.8605	-1.5742	1.2539	0.80518	-138.599	37.9021	42.324	0.045117	0.029102	0.085938	-55.436	-20.355	13.535	-0.16406	-0.022461	-0.06543
1.056	-127.381	-206.1915	402.7193	0.077637	0.075195	-0.0073242	-120.197	248.383	1504.1	-1.5352	1.2314	0.77881	-130.6797	51.5047	48.4635	0.014258	0.027148	0.092187	-91.616	-25.524	16.02	-0.14551	-0.029297	-0.068848
1.058	-139.293	-223.90923	416.035	0.046387	0.098633	0.0029297	-112.415	204.517	1485.3672	-1.5039	1.2192	0.76123	-155.066	83.777	49.3945	-0.013281	0.025586	0.10215	-71.909	12.277	21.824	-0.11084	-0.052246	-0.07959
1.06	-126.532	-204.86688	450.4311	-0.039063	0.1582	0.03418	-23.874	204.962	1473.402	-1.4702	1.2056	0.74023	-119.3019	69.126	28.6914	-0.047363	0.027832	0.1167	-55.187	26.098	37.731	-0.081787	-0.068603	-0.089111
1.062	-131.319	-153.8414	471.4425	-0.11182	0.19873	0.063964	-32.262	173.1387	1431.504	-1.4272	1.1724	0.71484	-133.573	45.479	30.831	-0.072461	0.03125	0.12256	-89.135	29.745	48.659	-0.055176	-0.084961	-0.1001
1.064	-123.757	-114.334	518.538	-0.18945	0.24023	0.10254	-0.0769999999999982	146.682	1421.8302	-1.3984	1.1543	0.70166	-98.9322	16.394	25.9697	-0.1001	0.040332	0.1291	-122.1337	8.083	40.5877	-0.0087891	-0.10889	-0.11719
1.066	-103.542	-76.37	552.218	-0.29297	0.30029	0.14111	28.362	178.93	1388.9711	-1.3535	1.123	0.67822	-92.056	25.3666	56.5037	-0.11963	0.042676	0.1416	-162.671	-4.66755	20.82	0.015625	-0.12061	-0.12305
1.068	-76.266	-28.765	565.7443	-0.34766	0.33252	0.16699	-15.651	148.87	1342.5667	-1.3149	1.0962	0.65381	-52.928	50.991	37.0022	-0.1373	0.049805	0.14727	-142.362	16.681	21.56	0.074707	-0.13818	-0.13818
1.07	-45.565	5.203	619.2415	-0.4502	0.40674	0.2085	18.017	148.281	1328.489	-1.2773	1.0684	0.63721	-62.674	64.8007	39.772	-0.1499	0.060059	0.15332	-149.7844	23.4258	15.0976	0.11865	-0.15137	-0.15454
1.072	-21.987	41.376	691.3481	-0.52515	0.46802	0.24072	-37.178	140.542	1287.017	-1.2305	1.0293	0.60693	-24.842	46.957	19.303	-0.14854	0.068847	0.15957	-139.7947	57.364	57.766	0.1626	-0.16162	-0.16846
1.074	-4.161	90.68	764.299	-0.59375	0.53516	0.27588	-72.865	106.613	1276.546	-1.2012	1.0039	0.59814	-45.92	9.369	37.8775	-0.14961	0.069824	0.16397	-163.9255	77.393	41.958	0.21582	-0.17969	-0.18506
1.076	-22.242	120.857	797.1018	-0.68555	0.6416	0.31348	-37.551	154.5527	1252.985	-1.1606	0.96143	0.57227	-20.116	21.139	36.176	-0.14179	0.070996	0.16709	-130.9392	102.722	-4.099	0.24463	-0.18311	-0.19336
1.078	-44.237	123.817	849.724	-0.73389	0.69189	0.33643	-116.52871	190.7908	1172.2621	-1.1238	0.93676	0.55102	-44.087	9.59	66.284	-0.12627	0.07002	0.17412	-99.69	108.127	-9.619	0.29443	-0.20264	-0.20947
1.08	-89.506	95.779	931.15	-0.84961	0.79297	0.39209	-102.524	209.2146	1125.4011	-1.0933	0.90088	0.53418	-8.999	47.779	75.769	-0.104	0.063477	0.17188	-58.705	96.758	5.013	0.3208	-0.21191	-0.2207
1.082	-117.165	70.961	1011.512	-0.9353	0.87427	0.44189	-84.988	265.851	1058.643	-1.0469	0.85938	0.51221	-5.149	11.584	79.3217	-0.076367	0.056152	0.16738	-29.144	74.0624	47.831	0.34375	-0.21777	-0.22949
1.084	-101.675	4.98	1089.234	-1.0332	0.94922	0.48877	-104.54	256.426	1008.396	-1.0269	0.83252	0.50146	-6.62499999999999	23.1621	63.312	-0.044922	0.044629	0.16446	-21.118	49.8299	56.03	0.36426	-0.23242	-0.2417
1.086	-136.3996	-69.01	1157.1542	-1.166	1.043	0.54932	-45.401	265.952	976.6404	-0.98193	0.7876	0.47461	-18.884	5.732	47.4255	-0.0058594	0.040332	0.15351	-26.889	46	39.7558	0.36768	-0.2373	-0.24561
1.088	-133.5	-125.916	1214.6992	-1.2363	1.082	0.58252	-88.929	264.146	903.92	-0.94458	0.75122	0.45435	14.349	55.24887	25.1574	0.031836	0.029297	0.14482	-31.514	39.8637	55.1376	0.36865	-0.24219	-0.25244
1.09	-135.925	-161.702	1244.43079	-1.3672	1.1504	0.63037	-96.524	230.422	868.178	-0.89795	0.71338	0.43457	-11.525	33.8579	47.3024	0.070801	0.02002	0.13135	-21.882	78.864	90.59	0.36646	-0.2478	-0.25366
1.092	-85.18	-176.974	1258.4515	-1.4426	1.1867	0.66968	-86.573	239.3236	831.547	-0.83789	0.66992	0.40674	-9.929	69.7979	39.7229	0.10937	0.0076174	0.11924	-20.467	85.03	108.368	0.35596	-0.24609	-0.25635
1.094	-59.253	-187.658	1270.8979	-1.5117	1.2168	0.69775	-160.717	243.1364	796.938	-0.80908	0.64209	0.39111	-34.623	32.8701	41.1737	0.14834	-0.0021484	0.11045	-15.741	72.053	100.662	0.32861	-0.24316	-0.24902
1.096	-20.694	-188.332	1317.156	-1.5811	1.2422	0.72607	-110.07	226.0036	784.2821	-0.74756	0.59424	0.35791	-22.779	65.7181	30.06236	0.18662	-0.018164	0.095214	-32.562	31.3969	77.0558	0.31689	-0.23486	-0.24512
1.098	1.24	-175.033	1393.768	-1.6016	1.2559	0.729	-110.833	239.611	748.0829	-0.6958	0.56152	0.3313	-51.327	6.9169	38.9569	0.23311	-0.035352	0.08291	-39.703	-26.875	66.763	0.27588	-0.23193	-0.24121
1.1	-13.195	-142.104	1428.902	-1.6089	1.2612	0.73633	-150.58	207.0428	708.1511	-0.64648	0.53125	0.30225	-73.394	26.2851	27.657	0.28125	-0.05127	0.064453	-4.95800000000001	-35.7118	65.0135	0.24243	-0.21338	-0.23047
1.102	1.087	-108.713	1454.98	-1.5742	1.2578	0.72656	-94.831	173.915	684.991	-0.56738	0.48047	0.26855	-105.992	-14.2998	49.1673	0.33135	-0.077051	0.045996	-4.14400000000001	-31.23	85.099	0.20996	-0.19141	-0.2207
1.104	-30.161	-79.031	1459.018	-1.519	1.2515	0.71387	-126.5562	186.244	648.319	-0.53467	0.4585	0.24805	-132.2	42.27	42.1639	0.38438	-0.09961	0.026269	0.700999999999993	2.072	70.236	0.14453	-0.16748	-0.19727
1.106	-15.315	-39.524	1429.3807	-1.4155	1.2329	0.68555	-83.443	154.627	609.82	-0.46484	0.41602	0.21826	-126.735	27.78	50.792	0.43359	-0.11602	0.0051757	-40.578	14.326	39.228	0.1084	-0.15137	-0.18311
1.108	-50.495	-2.893	1392.55	-1.3569	1.2251	0.66797	-24.103	158.496	554.4335	-0.42309	0.3833	0.19506	-96.9499	50.378	56.247	0.47119	-0.13594	-0.010742	-79.093	22.011	32.132	0.036621	-0.11768	-0.15869
1.11	-77.023	11.79	1392.304	-1.2437	1.1997	0.64551	-61.246	162.628	505.913	-0.38184	0.35596	0.17676	-104.3837	-12.904	40.9161	0.49756	-0.15283	-0.02832	-79.688	32.6591	34.595	-0.01416	-0.093997	-0.13892
1.112	-76.957	-14.45	1414.789	-1.1731	1.178	0.62378	-7.874	147.043	483.5072	-0.33105	0.31445	0.14844	-123.63152	13.217	40.47	0.51816	-0.17256	-0.046582	-89.795	37.987	63.427	-0.066406	-0.069336	-0.11768
1.114	-77.301	-42.632	1448.734	-1.1133	1.1504	0.60303	9.53699999999999	184.4788	451.8465	-0.30566	0.29785	0.13281	-129.8027	-18.783	37.414	0.53388	-0.18955	-0.066894	-113.4778	38.571	72.875	-0.12891	-0.024902	-0.093262
1.116	-46.521	-79.027	1457.1365	-1.0508	1.1133	0.59229	-26.888	204.4355	424.312	-0.26172	0.26416	0.10352	-85.612	43.389	33.3661	0.5374	-0.20283	-0.072363	-128.797	24.2316	36.306	-0.15723	-0.0048828	-0.080078
1.118	-29.851	-119.977	1482.181	-1.0332	1.1074	0.58838	8.477	206.432	401.789	-0.23462	0.23633	0.086425	-78.035	8.712	43.4466	0.53623	-0.21797	-0.076563	-159.336	13.0693	-8.36300000000001	-0.21582	0.030762	-0.057617
1.12	12.88	-131.584	1503.308	-1.0112	1.0923	0.57813	-30.946	233.749	344.1628	-0.20068	0.21289	0.062012	-66.258	50.3227	28.2342	0.53369	-0.22705	-0.079102	-158.536	-1.3293	-6.254	-0.24243	0.054931	-0.040772
1.122	-22.401	-156.872	1537.8115	-1.0117	1.0904	0.57471	-57.105	186.451	313.5489	-0.16064	0.18213	0.035156	-81.087	12.823	15.824	0.51582	-0.22734	-0.074121	-141.5957	31.442	3.746	-0.26514	0.074707	-0.035156
1.124	-33.617	-158.868	1570.815	-1.0132	1.0903	0.57129	-17.033	162.993	277.283	-0.14063	0.16602	0.024902	-70.128	66.186	26.439	0.49922	-0.23018	-0.06377	-114.681	53.11959	21.8374	-0.27002	0.094238	-0.03418
1.126	-42.535	-184.177	1604.61	-1.0229	1.1079	0.56348	-56.328	155.258	253.686	-0.10156	0.13574	-0.0029297	-56.882	45.846	50.1843	0.47734	-0.2251	-0.052832	-104.496	63.892	16.90133	-0.26172	0.10059	-0.039795
1.128	-85.436	-191.041	1627.729	-1.0288	1.1157	0.5625	-27.15	99.947	267.0334	-0.071778	0.11597	-0.011719	-49.006	98.541	66.4154	0.45273	-0.22598	-0.046485	-118.7537	58.2412	-0.176000000000002	-0.24512	0.10059	-0.035645
1.13	-109.622	-181.574	1636.965	-1.0483	1.145	0.5625	-26.454	104.1189	239.286	-0.047852	0.09668	-0.026855	-8.006	63.202	59.623	0.43018	-0.21973	-0.038086	-129.309	42.5074	16.339	-0.21143	0.1001	-0.043457
1.132	-158.41359	-151.8927	1619.145	-1.0664	1.1734	0.5625	-50.125	97.634	210.7427	-0.018555	0.07666	-0.044434	-15.771	62.471	43.4391	0.40361	-0.21094	-0.021973	-54.949	63.93125	36.25	-0.19824	0.098145	-0.04541
1.134	-167.095	-103.241	1589.404	-1.0879	1.209	0.56006	-2.74100000000001	78.181	189.7014	-0.0092773	0.066895	-0.053223	1.619	3.342	30.2025	0.37959	-0.19892	-0.0087887	-42.428	52.9399	63.494	-0.17188	0.09668	-0.049805
1.136	-187.815	-68.655	1554.852	-1.1113	1.252	0.55615	-72.845	99.6228	156.681	0.015137	0.040039	-0.063965	-3.682	2.7845	24.5615	0.35381	-0.18643	0.011523	-55.747	70.2292	68.224	-0.15796	0.087891	-0.042236
1.138	-190.96	-45.413	1546.207	-1.1206	1.2739	0.55078	-95.67	59.6	158.005	0.024902	0.023925	-0.076661	-15.052	-15.985	37.1947	0.31865	-0.17178	0.025195	-71.37	73.32	73.3574	-0.1499	0.07959	-0.039063
1.14	-186.635	-33.038	1547.105	-1.146	1.3149	0.54297	-67.214	52.718	145.1789	0.043945	0.0058594	-0.088867	-12.148	31.6567	61.67826	0.27246	-0.16211	0.043457	-73.672	86.874	57.045	-0.1499	0.067871	-0.040039
1.142	-145.948	-25.267	1562.754	-1.1695	1.3545	0.54541	-121.1928	64.371	125.212	0.059082	-0.019531	-0.099609	25.484	34.973	38.4493	0.23233	-0.14287	0.053613	-20.618	108.836	64.293	-0.1543	0.064453	-0.039063
1.144	-110.039	-12.47036	1594.1452	-1.1895	1.3906	0.54834	-96.4073	31.548	134.089	0.067871	-0.029785	-0.10059	2.187	46.464	48.284	0.19101	-0.12403	0.062207	5.80800000000001	91.339	75.617	-0.15967	0.063477	-0.043945
1.146	-117.028	-0.347000000000001	1586.383	-1.2168	1.4336	0.5708	-111.61381	65.361	118.6919	0.07959	-0.048828	-0.11523	-23.174	27.9154	45.2558	0.15781	-0.10293	0.074316	7.069	56.56786	53.162	-0.16259	0.067871	-0.055908
1.148	-110.499	-2.826	1595.7426	-1.2319	1.4536	0.58447	-146.141	89.417	87.9929	0.090577	-0.056641	-0.12549	-64.111	29.9624	53.741	0.12597	-0.079199	0.088672	-30.689	6.878	33.262	-0.16309	0.084961	-0.065918
1.15	-138.716	-33.8755	1606.9966	-1.2764	1.4922	0.61426	-76.905	86.845	57.1715	0.10303	-0.062988	-0.13086	-73.748	33.0996	67.4	0.1001	-0.057617	0.099609	-22.055	-1.186	42.857	-0.1543	0.11377	-0.09375
1.152	-138.573	-59.644	1627.208	-1.3161	1.5144	0.64331	-118.4021	138.052	10.96	0.1084	-0.076172	-0.13428	-86.597	33.2025	70.186	0.070996	-0.02373	0.11084	-19.166	7.882	94.3036	-0.15332	0.13135	-0.11133
1.154	-165.806	-88.5019	1644.899	-1.3525	1.5313	0.66309	-120.401	89.0443	17.647	0.11084	-0.078613	-0.1377	-86.18	35.4956	61.0169	0.039355	0.0019532	0.1208	10.633	26.204	126.656	-0.15381	0.17627	-0.1416
1.156	-153.0125	-100.629	1670.853	-1.4058	1.5454	0.68896	-51.136	43.36383	33.499	0.11133	-0.085938	-0.1416	-98.6469	23.269	61.364	0.011621	0.030859	0.12666	-15.575	22.798	132.66	-0.15088	0.2185	-0.17016
1.158	-144.3708	-118.707	1669.392	-1.4258	1.5488	0.70166	-73.662	57.784	40.225	0.11109	-0.086914	-0.14161	-103.8564	35.267	19.228	-0.017188	0.058789	0.13017	-53.397	-23.797	106.8421	-0.15137	0.2627	-0.19482
1.16	-153.5691	-115.3115	1648.3182	-1.4629	1.5527	0.7251	-10.73	14.967	64.7947	0.10693	-0.097168	-0.14209	-100.2008	37.6492	12.393	-0.035645	0.084473	0.13086	-94.867	-73.5195	132.91	-0.16064	0.3291	-0.23389
1.162	-120.708	-106.996	1616.2414	-1.4793	1.551	0.73658	-30.518	35.099	44.722	0.10254	-0.10352	-0.14893	-104.5714	58.952	30.0804	-0.051954	0.099318	0.1416	-85.658	-130.348	236.052	-0.1792	0.37158	-0.25195
1.164	-115.762	-90.314	1592.6372	-1.4961	1.5449	0.74658	-68.071	33.002	50.4986	0.10303	-0.10742	-0.14697	-107.5911	37.6809	45.548	-0.061719	0.11944	0.14619	-20.018	-188.679	359.319	-0.21875	0.48535	-0.27588
1.166	-56.404	-58.444	1597.8338	-1.4937	1.5435	0.75488	-17.999	13.4859	36.072	0.10596	-0.10889	-0.15088	-97.29	41.1282	56.973	-0.073828	0.13623	0.15244	-16.7694	-288.7788	486.227	-0.27685	0.59008	-0.2544
1.168	-60.921	-30.7105	1609.59164	-1.488	1.5354	0.75805	-35.195	67.115	21.2826	0.10572	-0.11084	-0.14893	-110.67713	-14.6174	50.4379	-0.07793	0.15654	0.15566	-5.12001	-402.2409	631.146	-0.35889	0.70947	-0.20947
1.17	-36.864	10.436	1607.6334	-1.478	1.5278	0.76123	-28.672	33.3556	49.324	0.10303	-0.11426	-0.15283	-90.109	6.658	42.786	-0.080566	0.17285	0.1543	-32.641	-504.4446	705.3	-0.52783	0.86768	-0.10938
1.172	-44.978	28.71698	1607.758	-1.458	1.5098	0.75732	-9.772	-0.00750000000000028	59.662	0.099121	-0.11133	-0.15186	-94.7018	-22.26561	51.790333	-0.073633	0.19014	0.15849	-55.405	-528.416	821.051	-0.63623	0.9458	-0.045898
1.174	-62.645	51.417	1583.6511	-1.4487	1.4927	0.75537	-40.07	12.448	50.9561	0.098145	-0.1167	-0.15918	-101.25	22.697	53.0898	-0.064062	0.20322	0.15898	-12.8655	-441.92	930.843	-0.89453	1.0957	0.066895
1.176	-93.941	61.064	1583.4216	-1.4355	1.4648	0.7583	-9.37899999999999	-13.755	43.8926	0.092773	-0.12061	-0.14502	-96.7589	-13.7069	83.248	-0.051953	0.20869	0.15508	33.7933	-354.028	1035.925	-1.1071	1.1995	0.14697
1.178	-128.382	62.3566	1561.609	-1.4235	1.4397	0.75122	-26.478	43.9659	37.953	0.089111	-0.11841	-0.14917	-54.676	-2.004	130.945	-0.033203	0.22207	0.14609	34.6785	-216.6975	1107.313	-1.3262	1.2871	0.2251
1.18	-139.366	50.163	1557.735	-1.4199	1.4082	0.74854	-48.976	83.4402	38.3377	0.079102	-0.11816	-0.146	-68.375	-104.645	227.425	-0.01123	0.22949	0.1377	27.651	-146.013	1145.213	-1.6108	1.3872	0.29883
1.182	-159.2991	31.661	1562.008	-1.4063	1.377	0.73682	6.78700000000001	63.253	39.9354	0.067871	-0.11914	-0.14941	-76.464	-127.284	366.36	0.010351	0.24228	0.12734	91.345	-106.73	1173.582	-1.7378	1.4341	0.33301
1.184	-145.323	4.423	1549.6068	-1.3965	1.3555	0.72998	-49.28	102.689	12.352	0.059326	-0.11694	-0.14136	-81.173	-264.264	528.608	0.027148	0.25869	0.12012	120.118	-114.51	1315.848	-1.9766	1.5293	0.40479
1.186	-157.8745	-27.2368	1562.0068	-1.375	1.3242	0.71143	-62.214	59.241	44.21	0.048828	-0.11328	-0.13721	-129.99	-335.617	638.32	0.033789	0.28799	0.10723	164.218	-65.33	1486.06	-2.1396	1.6064	0.44385
1.188	-124.698	-51.813	1553.5241	-1.3594	1.3056	0.69995	-57.847	39.38	66.163	0.035645	-0.11133	-0.13281	-163.357	-451.655	695.302	0.023242	0.33115	0.099998	184.001	-59.578	1584.22	-2.2974	1.6743	0.4834
1.19	-111.234	-45.847	1535.6426	-1.3433	1.2896	0.68457	-109.96293	76.72	57.6	0.029297	-0.10693	-0.12744	-136.925	-401.88	740.4831	-0.012207	0.39844	0.096191	184.029	-7.19	1620.057	-2.4863	1.7305	0.53174
1.192	-104.261	-22.653	1523.6852	-1.3198	1.2661	0.67285	-75.128	27.0709	65.3106	0.012695	-0.10498	-0.11816	-147.542	-360.085	814.046	-0.079981	0.48281	0.1043	163.712	30.64	1619.276	-2.564	1.7427	0.55664
1.194	-95.163	-7.802	1529.1803	-1.3081	1.2583	0.66113	-111.4168	35.5614	39.379	0.006836	-0.10351	-0.11279	-202.211	-189.981	884.968	-0.17431	0.57315	0.13613	143.705	29.76	1632.535	-2.6758	1.7559	0.57275
1.196	-105.423	23.482	1520.219	-1.2827	1.2339	0.64648	-132.6161	25.327	40.851	-0.0014648	-0.10059	-0.11523	-242.99082	-142.986	910.6543	-0.2958	0.64775	0.1916	124.453	-31.32	1694.835	-2.6853	1.762	0.56373
1.198	-104.008	48.7913	1514.64	-1.2612	1.2261	0.63525	-80.175	-17.9553	51.205	-0.01123	-0.092773	-0.10889	-195.2397	-62.342	954.8073	-0.42774	0.69414	0.24306	25.5442	-177.92	1764.473	-2.6348	1.7617	0.53662
1.2	-159.6998	83.271	1472.941298	-1.2378	1.2134	0.62207	-123.4242	31.9307	51.3069	-0.013184	-0.09082	-0.10986	-122.2311	-74.087	1053.551	-0.56836	0.72266	0.28564	-41.3329	-324.539	1824.571	-2.457	1.7578	0.4624
1.202	-157.391	107.266	1447.129	-1.2109	1.1953	0.60498	-115.9318	7.201	53.686	-0.027344	-0.083008	-0.10352	-48.273	-36.05	1208.868	-0.70117	0.7457	0.32412	-122.501	-435.795	1922.183	-2.3276	1.7505	0.41406
1.204	-159.9716	123.463	1418.431	-1.1948	1.188	0.59277	-86.202	1.7421	59.3587	-0.033691	-0.073731	-0.096436	-22.177	-16.71	1367.702	-0.81319	0.78486	0.36192	-103.089	-453.63	1984.271	-2.0352	1.7422	0.31494
1.206	-131.0412	147.165	1386.331	-1.1641	1.1777	0.57666	-115.18167	41.889	41.74	-0.044922	-0.068359	-0.092285	-52.612	44.932	1449.404	-0.89951	0.84541	0.39238	-51.73	-433.63	2005.546	-1.8284	1.7366	0.24365
1.208	-115.494	128.637	1362.495	-1.1362	1.1704	0.56128	-68.916	2.437	51.3605	-0.055176	-0.064453	-0.086426	-114.579	58.435	1474.036	-0.98973	0.93311	0.42363	-1.01000000000001	-382.18	1999.331	-1.644	1.7329	0.18408
1.21	-91.5	110.1344	1356.764	-1.1113	1.1621	0.54932	-55.474	34.0293	58.7409	-0.062988	-0.063477	-0.083008	-172.662	22.53	1538.14	-1.0776	1.0396	0.47217	-39.716	-382.06	1991.705	-1.4688	1.7285	0.11279
1.212	-45.631	99.1099	1347.4748	-1.0757	1.1548	0.5332	-80.38	52.4786	56.8496	-0.07373	-0.060059	-0.077148	-243.175	-35.57	1588.593	-1.1876	1.1597	0.54824	-116.755	-366.55	2065.035	-1.4141	1.7266	0.083496
1.214	-37.598	78.535	1335.03425	-1.0601	1.1489	0.52686	-33.775	32.037	65.721	-0.073487	-0.057373	-0.0708	-267.9293	-105.39	1680.561	-1.3328	1.2707	0.63271	-158.1952	-333.15	2139.974	-1.3711	1.7305	0.036621
1.216	-9.76799999999999	73.2	1329.3154	-1.0254	1.1357	0.50684	-76.956	79.084	34.9909	-0.07666	-0.052246	-0.072266	-273.583	-216.32	1743.122	-1.5219	1.3629	0.72686	-231.009	-320.932	2192.899	-1.3742	1.7425	0.013428
1.218	-12.018	72.116	1314.458	-1	1.1269	0.49023	-43.618	38.88	32.5907	-0.071777	-0.043945	-0.071777	-305.829	-337.391	1795.1803	-1.7331	1.4165	0.81797	-240.5192	-225.225	2137.8534	-1.3979	1.7446	-0.0063477
1.22	-3.46299999999999	74.281	1304.831	-0.97217	1.1147	0.47705	-13.034	17.2761	17.3762	-0.066895	-0.037598	-0.070801	-258.595	-424.465	1825.255	-1.9453	1.4355	0.89697	-319.179	-199.996	2063.429	-1.4727	1.7559	-0.020996
1.222	-36.159	62.032	1279.8725	-0.93896	1.0981	0.45898	-43.504	43.8974	1.969	-0.057617	-0.033203	-0.076172	-155.633	-502.25	1822.308	-2.1211	1.4457	0.97275	-335.38	-130.61	2003.823	-1.5176	1.7637	-0.025391
1.224	-80.387	55.83708	1257.736	-0.91797	1.085	0.45166	-0.317000000000007	3.488	32.5242	-0.052002	-0.026123	-0.084716	10.15	-485.49	1800.737	-2.2413	1.4563	1.0398	-354.494	-96.6	1999.864	-1.6245	1.7798	-0.022949
1.226	-65.173	69.22	1246.041	-0.87451	1.0591	0.43311	-7.07	12.3985	34.485	-0.041016	-0.022949	-0.086914	81.605	-440.02	1865.1738	-2.3058	1.4747	1.0801	-309.867	-71.617	2014.891	-1.7058	1.7951	-0.012451
1.228	-70.023	103.107	1211.7568	-0.84888	1.0393	0.41431	-26.64	24.851	56.6422	-0.024414	-0.018555	-0.09668	101.4502	-378.17	1949.588	-2.3067	1.5016	1.0942	-235.268	-73.404	2034.917	-1.7891	1.8154	-0.0043945
1.23	-60.09	139.017	1171.6389	-0.81592	1.02	0.40137	15.737	-2.6926	64.995	-0.018555	-0.016113	-0.10156	96.0197	-326.852	2016.552	-2.2441	1.5352	1.0903	-151.985	-136.0314	2054.304	-1.894	1.8521	0.024902
1.232	-77.816	150.575	1131.1078	-0.77783	0.98877	0.38086	-33.225	45.2859	44.654	0.00048828	-0.010254	-0.10986	100.3453	-230.348	2047.93	-2.1188	1.5806	1.0712	-40.839	-180.689	2096.05	-1.9492	1.874	0.038574
1.234	-47.103	158.734	1098.1899	-0.76367	0.97754	0.37158	-38.308	22.342	52.579	0.011963	-0.010986	-0.1145	96.1948	-171.452	2049.234	-1.9649	1.6097	1.0403	1.176	-180.429	2140.773	-2.0586	1.9121	0.084473
1.236	-47.52	164.64245	1069.049	-0.73193	0.9458	0.35156	-27.95	14.6485	39.6772	0.026367	-0.01123	-0.11865	51.732	-115.941	2012.7902	-1.8082	1.6203	1.0001	56.66	-141.084	2190.8733	-2.1377	1.9316	0.12134
1.238	-51.815	171.265	1021.418	-0.71045	0.91797	0.34253	-94.9126	51.0753	16.052	0.041504	-0.010254	-0.12988	-41.786	-103.42	1990.672	-1.6571	1.6032	0.95078	48.485	-115.609	2227.74	-2.2163	1.9341	0.16113
1.24	-43.804	157.257	1010.3506	-0.69141	0.89453	0.32227	-59.851	11.0267	35.0123	0.048828	-0.0083008	-0.13184	-100.5037	-87.01	1961.062	-1.5234	1.5703	0.90283	-8.039	-105.648	2262.811	-2.2964	1.9302	0.20117
1.242	-52.02	150.1745	1000.199	-0.66748	0.85986	0.31152	-64.007	30.4366	31.227	0.0625	-0.0048828	-0.14746	-134.629	-101.86	1937.121	-1.4228	1.5381	0.86182	-24.8379	-132.7485	2272.784	-2.3198	1.9224	0.21729
1.244	-76.919	140.251	983.245	-0.6543	0.83594	0.30615	-88.523	46.159	27.672	0.070801	-0.0019532	-0.15234	-105.567	-123.16	1919.775	-1.3578	1.5195	0.82491	-21.176	-118.515	2265.83	-2.3276	1.8989	0.23438
1.246	-112.2036	149.094	974.2119	-0.63818	0.80225	0.28711	-68.049	31.78106	33.5948	0.07959	0.0014648	-0.15918	-50.803	-168.165	1935.879	-1.3321	1.5289	0.79522	44.314	-77.021	2214.865	-2.2876	1.8765	0.24121
1.248	-114.8036	125.189	960.5689	-0.61719	0.77198	0.27661	-132.67023	91.589	16.961	0.091797	0.01416	-0.16357	13.33	-190.4808	1986.043	-1.3395	1.569	0.77481	63.373	-66.473	2141.676	-2.2344	1.8477	0.24072
1.25	-125.02428	125.823	941.5538	-0.59717	0.74902	0.26855	-109.942	69.87825	32.56552	0.096191	0.019531	-0.17188	54.676	-208.785	2042.196	-1.3726	1.6294	0.76563	84.436	-38.863	2076.0833	-2.1362	1.8228	0.24707
1.252	-115.863	107.184	919.205	-0.5752	0.71094	0.25244	-73.04	55.0985	31.8327	0.10059	0.02832	-0.17188	39.517	-176.47	2124.258	-1.4468	1.6973	0.77324	64.3258	-41.3411	2035.337	-2.0918	1.8086	0.25635
1.254	-122.5315	97.50616	877.1724	-0.55762	0.7002	0.24512	-112.6424	57.4847	45.3087	0.099854	0.038818	-0.17724	-28.163	-191.759	2183.94	-1.528	1.7583	0.80898	99.90383	21.9416	2035.384	-2.019	1.7583	0.25391
1.256	-89.0435	97.091	848.2546	-0.53564	0.67139	0.2334	-86.135	2.022	59.064	0.098633	0.05127	-0.17725	-121.725	-220.438	2250.318	-1.6257	1.8224	0.86055	164.057	102.242	2083.722334	-1.9773	1.7249	0.26709
1.258	-53.884	117.781	803.4255	-0.51782	0.64575	0.22363	-100.753	15.5575	48.488	0.087891	0.064941	-0.17334	-204.591	-241.908	2264.6	-1.7359	1.8844	0.91025	135.529	177.6122	2089.158	-1.9448	1.6958	0.27686
1.26	-43.95	134.05	770.4533	-0.49854	0.62646	0.21436	-98.457	39.128	47.6291	0.086914	0.074219	-0.1748	-278.054	-200.179	2249.579	-1.8438	1.9492	0.95361	86.818	211.4971	2056.004	-1.9116	1.6567	0.2959
1.262	-35.655	132.916	771.7243	-0.48242	0.59473	0.19971	-77.825	21.0825	45.416	0.07666	0.093262	-0.1709	-316.56	-125.695	2175.124	-1.9362	2.013	0.99375	-38.292	191.109	2019.12831	-1.9023	1.6445	0.31494
1.264	-26.607	137.918	749.1367	-0.47168	0.58936	0.19629	-102.929	62.386	46.9443	0.063965	0.10425	-0.1665	-322.657	-60.903	2134.533	-2.003	2.0626	1.0207	-109.8692	141.6844	2023.3003	-1.8809	1.6055	0.33838
1.266	1.331	161.53304	726.90733	-0.45117	0.55273	0.18701	-60.701	29.676	59.4282	0.048828	0.11768	-0.15918	-312.476	-36.121	2071.366	-2.0374	2.0876	1.0339	-135.078	91.412	2046.288	-1.8709	1.5862	0.36133
1.268	-25.32	161.503	700.65732	-0.43945	0.53174	0.18042	-22.468	-3.7599	87.324	0.032227	0.1333	-0.15576	-296.774	-40.077	2043.79	-2.0462	2.1003	1.0477	-126.789	56.821	2049.595	-1.853	1.5688	0.38281
1.27	-34.578	168.242	682.192	-0.42822	0.51172	0.17188	-43.029	-16.8184	143.134	0.024414	0.14258	-0.15186	-213.814	-41.70181	2032.869	-2.0347	2.106	1.0547	-147.863	26.5311	1983.1372	-1.8198	1.5474	0.40625
1.272	-29.826	169.388	642.75	-0.41406	0.4873	0.1626	-4.872	-90.0306	221.7719	0.012207	0.15869	-0.14551	-158.4707	-21.0694	2020.659	-2.0149	2.0976	1.056	-183.304	20.651	1915.927	-1.812	1.5435	0.4209
1.274	-44.424	165.712	588.4693	-0.4082	0.47559	0.15869	1.945	-85.004	302.28	-0.00097655	0.16602	-0.14111	-85.781	30.688	2003.172	-1.9895	2.0871	1.0571	-232.227	51.448	1871.715	-1.7803	1.5293	0.43994
1.276	-40.848	137.703	556.184	-0.39453	0.44922	0.15234	20.544	-95.326	397.121	-0.011719	0.1748	-0.14404	-95.885	62.353	1990.359	-1.9613	2.0684	1.0602	-218.678	85.675	1864.933	-1.7566	1.5091	0.45972
1.278	-45.293	111.5761	552.356	-0.37989	0.43042	0.14698	86.657	-179.677	498.6222	-0.024902	0.18945	-0.15479	-92.418	107.812	1993.9557	-1.923	2.0391	1.0575	-149.614	124.294	1843.537	-1.7305	1.4863	0.47217
1.28	-2.279	94.282	550.7008	-0.36768	0.41211	0.13184	57.515	-191.507	564.308	-0.041992	0.19336	-0.16113	-131.087	98.7856	1996.035	-1.8828	2.0039	1.0552	-104.990823	129.22	1804.923	-1.6812	1.4517	0.48828
1.282	-6.90000000000001	105.881	515.6783	-0.34863	0.38281	0.12256	66.286	-232.759	644.4452	-0.063965	0.2207	-0.1748	-115.799	91.357	2024.166	-1.8402	1.9578	1.0497	-92.8614	162.936	1752.232	-1.6343	1.4292	0.48584
1.284	1.965	104.056	500.8855	-0.33643	0.37109	0.12061	97.969	-203.13	710.336	-0.093017	0.2522	-0.1814	-135.18	44.5379	2058.112	-1.8105	1.9095	1.0445	-107.4876	216.199	1709.617	-1.5815	1.4028	0.48438
1.286	-21.491	108.186	484.8039	-0.30859	0.34766	0.10596	62.13	-121.9602	750.479	-0.13916	0.29199	-0.17188	-97.245	39.954	2022.742	-1.7886	1.8642	1.0391	-98.386	297.957	1686.71717	-1.4902	1.3594	0.47803
1.288	-18.549	97.913	469.532	-0.28662	0.32861	0.098877	95.102	-126.443	788.41	-0.22949	0.35645	-0.13379	-63.434	23.223	2012.941	-1.7667	1.827	1.0336	-82.657	376.71	1625.428	-1.439	1.3384	0.47266
1.29	-36.69	107.759	457.042	-0.26416	0.31006	0.084961	64.367	-117.893	802.6794	-0.29199	0.38965	-0.11328	-17.184	27.76	1951.362	-1.7573	1.7856	1.0234	-69.071	412.86	1565.4438	-1.3354	1.2876	0.45752
1.292	-55.687	106.3875	431.5028	-0.23486	0.28857	0.068359	39.31	-100.894	862.4973	-0.44287	0.45996	-0.056152	-41.267	-24.629	1919.06	-1.7459	1.7498	1.0069	-31.596	421.94	1524.272	-1.2618	1.2432	0.44385
1.294	-59.488	100.063	433.7351	-0.22168	0.2793	0.0625	113.427	-65.462	952.548	-0.56811	0.51538	-0.006592	21.417	-5.379	1876.098	-1.7291	1.7117	0.9958	-32.924	383.49	1476.368	-1.1855	1.2002	0.4292
1.296	-100.3235	113.914	398.073	-0.19824	0.26367	0.051758	83.7	40.354	1025.572	-0.69873	0.58252	0.046875	22.676	-2.20099999999999	1849.687	-1.7146	1.6746	0.97979	21.288	334.4	1458.761	-1.0825	1.1333	0.40918
1.298	-109.027	115.141	371.2982	-0.17432	0.24316	0.044922	60.6037	59.883	1090.021	-0.87109	0.68164	0.11816	48.171	95.88	1822.442	-1.7007	1.6431	0.95469	42.252	295.61	1424.334	-1.0313	1.0996	0.38965
1.3	-103.2589	112.239	337.132	-0.16504	0.24072	0.034668	40.0586	58.0843	1076.03067	-0.95459	0.7251	0.15137	22.886	145.059	1804.4008	-1.6831	1.6099	0.93164	68.902	250.794	1371.01	-0.93164	1.0234	0.36475
1.302	-83.1055	110.9628	311.725	-0.14648	0.22217	0.03418	-11.221	36.086	1065.982	-1.1382	0.81689	0.21094	5.309	231.119	1759.0213	-1.6578	1.5762	0.904	112.456	228.493	1317.081	-0.85254	0.9751	0.33594
1.304	-65.884	105.9372	295.567	-0.13794	0.20386	0.027344	18.017	-45.28	1127.598	-1.2713	0.88013	0.24537	-67.24	242.732	1722.9594	-1.628	1.5353	0.87187	103.2729	212.689	1288.667	-0.77295	0.92041	0.31738
1.306	-68.227	94.501	274.273	-0.12842	0.18994	0.023438	-39.53	-79.2	1201.73	-1.3882	0.94775	0.28125	-92.693	306.65	1664.0233	-1.578	1.4993	0.83594	104.1709	258.551	1274.008	-0.67871	0.85742	0.28662
1.308	-40.247	68.857	282.1983	-0.1123	0.16455	0.010254	-87.9319	-130.406	1291.6791	-1.5269	1.0239	0.31934	-137.9247	294.91	1631.8954	-1.527	1.4547	0.79932	110.996	295.431	1271.925	-0.63281	0.82813	0.26807
1.31	-38.351	72.206	268.7831	-0.10205	0.15576	0.0058594	-80.2679	-207.687	1311.0895	-1.582	1.0605	0.33789	-188.641	311.87	1604.7961	-1.4648	1.4102	0.76025	71.009	328.583	1211.196	-0.54688	0.76563	0.23682
1.312	-13.862	81.394	264.2281	-0.074707	0.13379	-0.0087891	-134.726	-252.689	1315.733	-1.6797	1.125	0.36182	-223.514	240.092	1601.029	-1.4092	1.3646	0.72305	-11.281	328.612	1121.784	-0.47754	0.73413	0.21705
1.314	-43.757	76.911	254.4964	-0.054199	0.11987	-0.015869	-119.1962	-310.4	1361.9328	-1.7354	1.1572	0.37353	-205.884	239.65	1531.3	-1.3449	1.3153	0.67774	-84.406	325.851	1015.9348	-0.41748	0.70068	0.19434
1.316	-49.53	74.2251	254.4655	-0.034668	0.10693	-0.025879	-55.8	-317.57	1395.197	-1.7729	1.1821	0.37207	-199.11	146.623	1482.12	-1.2866	1.272	0.64297	-138.2877	330.688	922.8757	-0.33545	0.6416	0.17383
1.318	-45.933	83.507	239.1201	-0.0024414	0.08252	-0.04248	-84	-288.55	1449.494	-1.7837	1.2036	0.37109	-164.66	171.163	1425.193	-1.2299	1.2268	0.60537	-135.32	304.895	853.8503	-0.2959	0.61621	0.16357
1.32	-35.29	80.821	222.3933	0.010254	0.074219	-0.051758	-66.086	-306.062	1512.615	-1.7729	1.2104	0.36523	-182.68	111.31	1425.3715	-1.1733	1.1841	0.57129	-144.6005	301.5889	788.2701	-0.22412	0.57031	0.14404
1.322	-32.635	67.431	207.9004	0.037109	0.055176	-0.0625	-62.18	-286.871	1528.57	-1.7339	1.229	0.34473	-139.0425	184.07	1390.826	-1.1242	1.1411	0.53643	-183.066	285.867	722.292	-0.16406	0.53467	0.12989
1.324	-30.251	47.3709	201.0039	0.055908	0.041993	-0.072022	-81.1903	-285.111	1576.93	-1.6894	1.2334	0.33447	-127.7814	166.209	1372.88	-1.0729	1.1019	0.50986	-189.95	283.569	640.352	-0.10889	0.49365	0.11279
1.326	-9.416	57.1355	168.9965	0.066895	0.030762	-0.07959	-39.312	-263.111	1599.217	-1.6431	1.2378	0.32178	-107.338	238.496	1341.077	-1.0256	1.0547	0.47666	-213.489	270.976	575.572	-0.03125	0.44189	0.088867
1.328	-11.63	71.8456	138.257	0.080566	0.0087891	-0.089355	-97.261	-183.351	1578.6138	-1.5645	1.248	0.30078	-104.9092	191.3505	1308.955	-0.97832	1.0068	0.44834	-186.5811	262.166	528.991	0.0063477	0.42236	0.080566
1.33	3.482	75.1058	147.074	0.081543	0.0024414	-0.089844	-141.0557	-148.284	1567.694	-1.5391	1.25	0.28955	-115.2619	267.34	1226.824	-0.93115	0.96533	0.42627	-162.023	260.376	463.317	0.072266	0.37061	0.063965
1.332	9.507	79.503	138.744	0.081543	-0.012207	-0.092285	-102.229	-97.3	1541.211	-1.4648	1.2461	0.26807	-144.698	272.23	1131.3317	-0.88438	0.91406	0.39756	-177.7258	225.3166	404.785	0.12329	0.33276	0.050537
1.334	18.64	78.546	139.905992	0.080078	-0.025147	-0.092041	-111.4913	-60.95	1553.312	-1.4197	1.2356	0.24682	-101.1855	366.83	1042.309	-0.8376	0.85947	0.36738	-206.114	191.0773	355.933	0.17188	0.30029	0.037598
1.336	-9.745	80.8584	138.1987	0.069336	-0.03418	-0.090332	-46.687	-101.864	1607.108	-1.3809	1.2236	0.23389	-65.138	310.15	996.823	-0.78916	0.80791	0.34161	-231.283	169.0657	333.308	0.22705	0.25879	0.023438
1.338	-34.89	73.231	137.3961	0.055664	-0.045898	-0.093262	24.275	-140.024	1628.918	-1.355	1.2095	0.21143	-20.73	350.326	947.0248	-0.73711	0.76035	0.32236	-224.931	159.7278	328.4261	0.25391	0.23535	0.016602
1.34	-57.717	64.132	138.4215	0.050293	-0.04248	-0.083008	-0.527000000000001	-205.331	1659.42	-1.3442	1.2017	0.20313	24.338	260.7874	874.7675	-0.69189	0.71143	0.29883	-153.7837	157.71221	307.551	0.29199	0.20557	0.0048828
1.342	-67.306	70.471	123.33521	0.021484	-0.054688	-0.074219	39.152	-229.422	1718.8376	-1.3354	1.188	0.19922	76.28	315.6797	819.5954	-0.64873	0.66397	0.27676	-109.439	165.0227	244.4861	0.31225	0.18726	-0.0021973
1.344	-84.222	64.358	110.0165	0.0048829	-0.053467	-0.071045	41.558	-192.153	1726.812	-1.3418	1.1924	0.19824	109.734	250.04	764.9458	-0.60078	0.61367	0.25566	-93.695	173.372	196.922	0.32324	0.16797	-0.0087891
1.346	-80.499	44.8283	98.278	-0.010254	-0.05127	-0.065918	37.164	-194.363	1782.701	-1.3457	1.1992	0.20557	108.2569	288.104	722.9485	-0.55273	0.56719	0.23691	-57.21	169.78	159.292	0.32861	0.15381	-0.0068359
1.348	-82.395	31.6256	97.198	-0.037109	-0.047852	-0.056152	77.7034	-181.114	1814.975	-1.3691	1.2305	0.22119	110.121	213.707	675.4419	-0.49854	0.52744	0.2209	-14.586	190.969	148.3988	0.33496	0.14355	-0.0048828
1.35	-80.1063	45.4286	79.975	-0.049316	-0.047363	-0.05127	29.453	-209.928	1844.882	-1.3969	1.2642	0.23193	95.2464	266.533	617.70036	-0.45264	0.48291	0.20459	50.518	169.905	130.165	0.31006	0.13086	0.0058594
1.352	-75.723	42.421	91.6529	-0.069824	-0.04248	-0.040527	11.4202	-245.845	1881.617	-1.4375	1.3027	0.25244	61.962	191.6715	594.4043	-0.40694	0.45244	0.18262	86.159	143.805	102.282	0.28296	0.1228	0.0078124
1.354	-51.031	46.919	88.9907	-0.089844	-0.03833	-0.031494	6.5487	-212.0996	1851.901	-1.4961	1.3574	0.26904	18.28	229.98	566.438	-0.36172	0.42451	0.16436	82.704	120.8354	86.586	0.24609	0.11377	0.023926
1.356	-56.249	52.318	91.5918	-0.10449	-0.033203	-0.019043	-32.9544	-195.3442	1847.5	-1.5327	1.3892	0.27051	-55.8734	155.5659	519.9	-0.3168	0.3917	0.14677	66.57	129.987	89.555	0.1875	0.11133	0.044922
1.358	-52.877	54.148	88.2223	-0.12695	-0.023438	-0.014648	16.985	-160.3279	1834.92	-1.605	1.4399	0.27734	-69.7429	233.613	468.223	-0.27353	0.36279	0.12735	24.926	155.165	104.441	0.15723	0.1123	0.058594
1.36	-81.156	45.5887	82.78801	-0.13428	-0.01709	-0.010742	22.853	-114.467	1807.297	-1.6499	1.4751	0.27832	-37.2537	189.06223	412.1673	-0.23535	0.33301	0.10693	27.169	150.774	114.544	0.096191	0.11426	0.084473
1.362	-70.132	46.7502	98.3528	-0.15479	-0.0063477	0	18.555	-93.1818	1821.274	-1.6948	1.5054	0.27344	-39.897	252.924	369.0308	-0.19492	0.29961	0.086719	15.549	129.196	98.615	0.052002	0.1189	0.10913
1.364	-84.4434	69.179	89.5598	-0.16064	-0.001709	0.0073242	59.729	-35.165	1813.403	-1.7422	1.5391	0.27979	-32.886	190.064	332.8583	-0.15459	0.27373	0.072754	-21.731	57.564	82.867	0.010742	0.12305	0.12988
1.366	-66.8413	75.924	76.8404	-0.16748	0.0039063	0.013184	57.02	10.6684	1810.963	-1.7534	1.5493	0.27734	-53.044	222.758	279.3033	-0.11201	0.24951	0.059082	-14.797	16.8017	88.9088	-0.04248	0.13086	0.15967
1.368	-66.639	52.835	52.7884	-0.17285	0.0068359	0.017578	64.135	30.98939	1841.156	-1.7788	1.5708	0.27148	-71.5061	165.978	214.038	-0.081348	0.22236	0.046875	-45.652	-16.9292	103.585	-0.06543	0.13916	0.16992
1.37	-59.327	41.597	46.8584	-0.17188	0.0097656	0.013184	20.6914	45.107	1848.4143	-1.7944	1.5825	0.26367	-96.2723	203.843	171.568	-0.04834	0.19873	0.035156	-75.404	-12.177	95.79	-0.11523	0.15186	0.19824
1.372	-43.34	35.4748	45.7201	-0.1626	0.010742	0.013184	-34.372	1.678	1857.69095	-1.8008	1.5918	0.26025	-94.427	143.693	156.056	-0.02793	0.17851	0.015332	-80.963	-1.403	77.8401	-0.14502	0.15698	0.21826
1.374	-26.298	34.2102	49.88083	-0.15087	0.011963	0.0065918	12.887	-48.785	1865.6784	-1.8042	1.604	0.25439	-134.212	180.943	155.093	-0.0050781	0.15517	0.0016602	-124.1308	-24.626	55.768	-0.17578	0.16357	0.23535
1.376	-14.294	17.189	80.215	-0.13477	0.0063477	0.0039063	-14.227	-64.005	1877.6561	-1.8027	1.5996	0.24854	-143.623	140.16	143.731	0.017578	0.13056	-0.010449	-166.233	-20.779	45.844	-0.20361	0.1665	0.25781
1.378	5.175	21.082	73.5971	-0.11279	6.0716e-15	-0.0092773	-32.9931	-96.4651	1904.135	-1.8003	1.6021	0.23828	-151.94	186.922	128.096	0.030469	0.11094	-0.016992	-166.225	-24.831	66.0914	-0.21924	0.1665	0.26953
1.38	4.632	23.723	69.6303	-0.104	0.003418	-0.012207	31.832	-91.779	1921.289	-1.7947	1.5979	0.23315	-148.724	131.229	119.9375	0.043457	0.085449	-0.033691	-174.567	12.175	72.615	-0.23828	0.15332	0.28955
1.382	-16.381	33.1623	63.4286	-0.077637	0.00048828	-0.027344	-18.2312	-86.088	1892.053	-1.7905	1.5864	0.22852	-133.718	126.664	103.0938	0.053125	0.065723	-0.050977	-185.585	19.832	59.416	-0.24707	0.14063	0.2998
1.384	-7.354	28.5069	64.602	-0.060058	0.0019531	-0.041748	-15.0029	-93.811	1890.376	-1.7773	1.5762	0.22021	-111.3823	46.6811	101.236	0.058691	0.043848	-0.061133	-213.61	37.5361	22.29	-0.24219	0.12402	0.31201
1.386	-35.475	36.4514	66.293	-0.043457	0.0024414	-0.052734	47.1652	-75.503	1868.1812	-1.7793	1.5664	0.21875	-66.89	38.8518	82.225	0.065723	0.0208	-0.072852	-205.435	35.5956	0.469999999999999	-0.229	0.10059	0.32031
1.388	-46.731	34.192	46.4436	-0.019043	-0.00097656	-0.062988	22.38	-58.642	1848.2124	-1.7813	1.5449	0.21191	17.592	0.711000000000006	69.009	0.068262	0.00097656	-0.082813	-197.518	38.809	7.432	-0.21436	0.085938	0.32373
1.39	-68.441	26.219	52.1118	-0.01416	-0.00048828	-0.074707	70.5542	-13.688	1871.378	-1.7807	1.5356	0.20508	41.642	9.271	63.202	0.065918	-0.02002	-0.09668	-156.349	57.904	10.766	-0.17578	0.061035	0.31641
1.392	-49.88	16.1949	52.2845	0.0073242	0.0048828	-0.082031	64.317	39.965	1855.077	-1.7832	1.5215	0.20557	38.328	-1.512	51.29	0.059472	-0.043945	-0.10928	-113.305	47.775	11.101	-0.13452	0.045899	0.30787
1.394	-46.079	17.1235	64.399	0.010742	0.006836	-0.086182	32.7296	51.423	1840.2278	-1.8022	1.5044	0.19629	26.372	18.438	58.773	0.058594	-0.062598	-0.12178	-112.7923	65.315	-4.31	-0.091309	0.026367	0.29736
1.396	-52.437	28.448	41.9122	0.019043	0.0092773	-0.094238	62.961	97.497	1808.7513	-1.8047	1.4961	0.19775	37.218	40.0468	62.522	0.05664	-0.085254	-0.13388	-86.226	49.688	8.201	-0.030762	0.0073242	0.27246
1.398	-63.172	32.9462	42.2912	0.020508	0.022461	-0.099121	14.212	141.411	1769.033	-1.8101	1.4731	0.20117	25.731	55.366	61.2141	0.052149	-0.097365	-0.14453	-70.721	49.9097	-0.92	0.00048828	-0.00097656	0.25781
1.4	-68.33	31.2662	40.6748	0.02832	0.027344	-0.1001	35.967	159.212	1752.254	-1.814	1.4624	0.1958	19.968	69.813	65.585	0.044434	-0.10791	-0.15625	-16.365	41.5371	8.9924	0.058105	-0.016113	0.2373
1.402	-66.32	21.171	59.8369	0.023926	0.037598	-0.10156	17.079	158.156	1739.808	-1.8159	1.4478	0.19824	3.438	51.9554	59.627	0.039063	-0.10986	-0.16221	33.198	42.9007	26.8133	0.091799	-0.037353	0.22071
1.404	-61.047	-5.254	77.398	0.020752	0.052246	-0.097168	-32.231	118.26	1744.674	-1.8022	1.4399	0.19678	-18.91	55.0397	31.6276	0.030274	-0.11562	-0.16914	54.248	53.318	44.859	0.12109	-0.054688	0.20459
1.406	-73.465	-44.205	113.7966	0.013672	0.066895	-0.092285	32.0972	60.793	1762.4015	-1.7969	1.4336	0.19873	-9.83200000000001	26.81793	16.866	0.018555	-0.1125	-0.175	41.821	60.403	60.575	0.16016	-0.072266	0.18896
1.408	-68.885	-75.6503	140.4173	0.00048828	0.081055	-0.087402	26.8097	48.745	1738.629	-1.7749	1.4263	0.20508	-5.076	35.459	8.145	0.011328	-0.11387	-0.17354	37.042	77.577	96.1654	0.17773	-0.085938	0.18262
1.41	-85.4136	-86.9285	179.737	-0.0097656	0.093262	-0.086426	28.2112	35.059	1731.343	-1.7579	1.418	0.20483	-20.617	10.581	47.42	0.0068359	-0.11084	-0.17432	54.04	81.086	108.511	0.21143	-0.1123	0.1626
1.412	-52.2085	-101.447	228.737	-0.044922	0.12012	-0.080566	51.438	48.077	1740.352	-1.7363	1.416	0.20898	-1.15	50.9793	41.493	0.0023437	-0.10664	-0.17764	51.047	78.183	83.755	0.23584	-0.12964	0.14966
1.414	-27.3208	-137.188	290.909	-0.076172	0.14575	-0.071777	-6.90900000000001	80.319	1708.8504	-1.7168	1.4043	0.21143	-27.251	26.727	45.2853	0.0017578	-0.1042	-0.18203	62.836	47.5467	59.23	0.26025	-0.14551	0.13818
1.416	-15.8005	-177.013	351.846	-0.11816	0.17334	-0.054199	9.035	82.507	1702.807	-1.6992	1.3984	0.21289	-77.197	51.358	38.117	0.0083984	-0.10185	-0.18398	-7.86799999999999	45.9439	33.7507	0.29297	-0.17334	0.11426
1.418	9.102056	-195.3223	384.625	-0.18848	0.2168	-0.024902	21.492	110.246	1676.978	-1.6758	1.3945	0.21826	-116.0521	-19.496	55.046	0.026855	-0.097168	-0.19023	-35.967	38.2784	39.237	0.30664	-0.18506	0.10645
1.42	17.20971	-192.5713	433.6245	-0.23291	0.2373	-0.0053711	-27.007	116.2828	1659.683	-1.6565	1.383	0.22534	-149.285	5.898	59.005	0.052734	-0.097656	-0.19189	-32.965	42.8743	66.2323	0.34375	-0.20703	0.079102
1.422	43.917	-166.407	476.759	-0.33643	0.28613	0.035645	8.657	129.766	1643.057	-1.6367	1.3789	0.229	-161.735	-19.4398	47.5021	0.08291	-0.10381	-0.19697	-37.786	46.509	78.72	0.3623	-0.22192	0.059326
1.424	61.707	-123.105	518.14	-0.42066	0.32691	0.06128	-44.4105	189.565	1581.487	-1.6089	1.3687	0.23828	-141.791	41.422	39.057	0.11485	-0.10547	-0.19072	-49.363	27.068	77.119	0.38281	-0.23438	0.041992
1.426	73.682	-80.838	541.8579	-0.50195	0.36768	0.094727	-74.8295	198.464	1523.909	-1.5913	1.3638	0.23584	-159.913	-11.011	59.941	0.13985	-0.10508	-0.18955	-90.54	19.546	57.545	0.4082	-0.24414	0.027832
1.428	74.646	-47.3566	565.782	-0.61475	0.4292	0.14258	-13.96	219.826	1491.567	-1.5586	1.3467	0.24512	-178.952	40.686	49.8456	0.16768	-0.11504	-0.18789	-145.562	12.9258	52.017	0.41699	-0.24854	0.025391
1.43	82.333	-27.367	635.2494	-0.66895	0.45898	0.16309	-44.545	231.154	1445.475	-1.5288	1.3393	0.24707	-169.149	2.2622	45.017	0.19092	-0.12793	-0.19629	-195.118	34.6553	72.874	0.42578	-0.25049	-0.0039063
1.432	75.3598	13.13	710.85	-0.77295	0.52979	0.20703	-10.314	214.4693	1430.1763	-1.5005	1.3306	0.25098	-129.7374	83.7082	20.8331	0.21894	-0.14287	-0.2042	-194.474	16.782	76.9589	0.4314	-0.25562	-0.016113
1.434	64.59013	62.3587	761.57	-0.87012	0.5918	0.24072	10.173	216.878	1425.8522	-1.4526	1.311	0.25098	-104.65503	32.502	41.683	0.2539	-0.16494	-0.21309	-170.965	-16.457	55.1901	0.42871	-0.25	-0.027832
1.436	68.5732	85.967	799.456	-0.92041	0.63037	0.25586	-19.259	204.2024	1407.239	-1.4258	1.2988	0.24951	-66.847	72.8719	26.3006	0.29297	-0.18448	-0.22637	-199.388	-47.8712	29.1822	0.41992	-0.24023	-0.034668
1.438	49.1512	64.3113	814.752	-1.0186	0.70117	0.28564	32.852	181.1324	1388.2501	-1.3789	1.2773	0.24512	-65.59	6.632	30.9351	0.32939	-0.21084	-0.23779	-212.498	-46.3603	20.293	0.41406	-0.23291	-0.038086
1.44	64.9768	35.299	876.349	-1.0903	0.76075	0.32569	-2.06	182.5807	1340.6817	-1.3374	1.2583	0.24292	-38.159	61.326	2.36	0.37012	-0.22998	-0.25488	-204.623	-5.008	27.69	0.39404	-0.20459	-0.043457
1.442	27.803	10.564	963.706	-1.1597	0.82471	0.35889	-18.418	160.271	1304.1661	-1.2983	1.2349	0.24365	-26.236	6.804	14.687	0.39854	-0.24775	-0.26973	-164.577	46.458	28.965	0.37061	-0.17529	-0.048828
1.444	13.899	-22.069	1063.845	-1.2539	0.90527	0.40869	15.967	155.754	1296.395	-1.248	1.207	0.23584	-14.231	59.728	35.0669	0.42861	-0.25547	-0.28184	-133.01787	73.515	16.815	0.35303	-0.15283	-0.037109
1.446	-10.006	-80.734	1134.1747	-1.2969	0.9375	0.42822	-40.132	178.9619	1251.1005	-1.2173	1.1899	0.23047	-7.775	20.2196	72.644	0.44932	-0.25938	-0.27989	-89.601	37.2801	-9.046	0.30713	-0.104	-0.013672
1.448	-46.505	-144.46629	1180.5456	-1.3828	1	0.47119	-13.619	150.6303	1232.447	-1.1602	1.1621	0.22363	0.271999999999998	84.446	63.4871	0.4585	-0.26182	-0.28242	-79.735	17.73147	5.63500000000001	0.2627	-0.073487	0.0041504
1.45	-73.517	-184.63	1223.8369	-1.4475	1.0383	0.48999	4.978	165.657	1200.333	-1.1204	1.133	0.21948	24.422	34.1283	69.698	0.45068	-0.25342	-0.28467	-73.486	24.404	32.102	0.21582	-0.044434	0.032715
1.452	-90.747	-207.002	1245.4257	-1.4956	1.0669	0.50781	-9.413	181.597	1135.809	-1.0796	1.106	0.21094	20.609	45.253	45.5936	0.42988	-0.23965	-0.26328	-39.088	60.985	47.761	0.15479	-0.012695	0.070801
1.454	-64.678	-208.948	1297.24	-1.5425	1.0962	0.52295	25.478	164.707	1089.1152	-1.0249	1.0728	0.2124	15.164	-23.5401	60.674	0.39298	-0.22804	-0.24707	-28.931	122.606	38.5305	0.12012	0.0048828	0.084473
1.456	-91.277	-204.029	1330.656	-1.5503	1.106	0.52344	-28.037	216.6074	1008.832	-0.99805	1.0547	0.20801	26.901	-0.352999999999998	33.4193	0.35079	-0.20772	-0.2295	21.625	122.221	18.9256	0.065918	0.039551	0.12256
1.458	-120.7231	-187.228	1377.026	-1.5503	1.1118	0.50977	-30.897	220.32	966.845	-0.94287	1.0171	0.20166	13.284	-24.088	26.0429	0.29581	-0.18213	-0.20538	28.105	104.419	21.715	0.025879	0.062988	0.14844
1.46	-131.872	-184.579	1390.809	-1.5239	1.1138	0.48902	29.608	240.812	933.249287	-0.8999	0.99269	0.1958	26.918	50.2438	37.508	0.23633	-0.16211	-0.18018	31.772	69.828	46.485	-0.0073242	0.08252	0.16846
1.462	-123.106	-179.364	1417.233	-1.4766	1.1055	0.46143	-23.875	281.722	867.164	-0.85303	0.96143	0.19141	21.842	25.078	40.164	0.18211	-0.13866	-0.15761	49.53	51.037	65.244	-0.039551	0.10938	0.19287
1.464	-108.2397	-138.831	1420.668	-1.3823	1.104	0.40771	-3.884	238.674	850.4611	-0.79639	0.91846	0.18701	-14.395	65.5177	45.9537	0.13092	-0.11639	-0.13279	77.045	44.505	65.788	-0.050781	0.11719	0.20361
1.466	-102.5263	-98.281	1421.013	-1.3345	1.103	0.3833	-26.961	243.395	816.9523	-0.76514	0.89697	0.18359	-64.942	34.348	66.7	0.085205	-0.091376	-0.11209	59.662	42.2771	58.624	-0.063965	0.13232	0.22021
1.468	-74.696	-83.349	1415.076	-1.2402	1.0898	0.32959	-88.3822	240.067	775.2522	-0.71094	0.85352	0.17432	-97.291	67.832	66.567	0.042055	-0.063945	-0.090704	36.352	31.0869	49.8117	-0.065674	0.14136	0.22412
1.47	-84.9452	-81.308	1404.787	-1.1792	1.0854	0.2915	-43.108	193.1417	757.623	-0.66504	0.81982	0.17236	-136.762	51.829	84.637	0.00097656	-0.043945	-0.070801	-0.152999999999992	16.188	57.777372	-0.066406	0.146	0.22852
1.472	-56.3773	-76.527	1425.763	-1.1309	1.0781	0.25195	-71.247	213.426	695.7813	-0.62402	0.78711	0.16846	-129.0422	61.691	73.9582	-0.032272	-0.016633	-0.062918	-37.031	25.415	79.468	-0.061035	0.14551	0.23291
1.474	-40.9009	-94.985	1447.899	-1.0874	1.0708	0.21729	-59.477	161.614	647.9058	-0.57129	0.74316	0.15479	-147.642	20.2658	35.9225	-0.062006	0.0077495	-0.048042	-29.288	25.261	94.166	-0.059082	0.13916	0.23389
1.476	-13.911	-122.211	1468.73	-1.0742	1.0664	0.19922	-40.767	124.768	627.7318	-0.54297	0.7168	0.15332	-140.2196	12.115	1.586	-0.087811	0.030364	-0.048054	-72.364	65.6518	109.211	-0.054199	0.12744	0.24023
1.478	3.931	-150.3684	1482.186	-1.064	1.0688	0.16846	-80.372	171.239	564.208	-0.48193	0.68018	0.14844	-154.238	-12.139	0.759	-0.11039	0.045077	-0.036391	-106.812	52.5559	95.186	-0.052491	0.1167	0.24096
1.48	18.245	-158.896	1488.726	-1.0642	1.0755	0.1499	-58.687	142.256	542.3785	-0.43872	0.65014	0.14184	-150.717	0.0449999999999946	18.259	-0.12158	0.057129	-0.039551	-141.255	41.1178	84.1304	-0.048828	0.11035	0.24902
1.482	57.63868	-175.188	1511.59	-1.0684	1.0879	0.13916	-39.965	174.2928	517.9992	-0.39355	0.61572	0.13525	-141.278	18.579	54.8367	-0.12459	0.057701	-0.048089	-162.6901	1.65	51.953	-0.044922	0.099121	0.26025
1.484	62.7775	-194.612	1534.912	-1.0762	1.1133	0.12402	-73.802	181.911	486.183	-0.34131	0.5791	0.12939	-108.4876	20.741	57.8495	-0.11905	0.064286	-0.061832	-153.82747	-13.383	41.275	-0.042969	0.096191	0.25586
1.486	87.335	-225.508	1573.947	-1.0879	1.127	0.12158	-61.472	130.246	453.76	-0.31738	0.55713	0.12842	-99.89704	25.274	57.172	-0.10678	0.069857	-0.071638	-156.1506	-9.75	26.725	-0.03125	0.091797	0.26563
1.488	74.153	-253.362	1577.011	-1.105	1.1704	0.12109	-69.24	173.3153	410.361	-0.27197	0.521	0.12109	-82.668	-1.19	68.337	-0.084038	0.077478	-0.087587	-179.816	-7.107	21.3	-0.023438	0.087158	0.26587
1.49	92.487	-237.192	1556.348	-1.1177	1.1983	0.11792	-57.044	163.0688	377.8292	-0.24633	0.49218	0.11279	-89.175	14.2678	46.96	-0.062988	0.087891	-0.098633	-221.914	30.4306	29.677	-0.012695	0.083496	0.2749
1.492	100.555	-211.225	1533.3856	-1.1382	1.231	0.12549	-45.241	180.95	357.6621	-0.21436	0.4585	0.11133	-93.232	9.727	61.8994	-0.04675	0.096889	-0.10766	-204.9	26.5379	44.018	-0.003418	0.092285	0.2749
1.494	77.364	-163.2462	1532.9504	-1.166	1.2656	0.13086	-72.954	235.829	294.6561	-0.18115	0.41797	0.098633	-73.46	51.956	37.7241	-0.033877	0.10615	-0.11702	-169.935	26.6055	43.4382	-0.0019531	0.085449	0.28027
1.496	71.479	-129.65	1548.9446	-1.1841	1.2847	0.13281	-48.636	171.811	261.299	-0.16602	0.39844	0.091309	-32.9	36.011	32.005	-0.012957	0.1095	-0.124	-136.7023	8.048	19.576	0.0039063	0.088379	0.29053
1.498	32.4844	-122.347	1549.0117	-1.2104	1.313	0.13281	-56.842	177.75	256.126	-0.12793	0.3584	0.083008	-0.765000000000001	64.725	28.758	0.00089216	0.11294	-0.12774	-116.9974	15.057	13.795	0.011475	0.091552	0.29981
1.5	48.801	-108.547	1554.29009	-1.2342	1.3294	0.14136	-77.441	165.004	230.198	-0.1023	0.33033	0.075439	8.111	24.081	25.2975	0.018066	0.12012	-0.13574	-109.8137	6.24826	59.311	0.01123	0.095215	0.30322
1.502	39.775	-88.29	1559.1584	-1.2593	1.3481	0.14844	-10.998	104.2714	223.3711	-0.07666	0.30371	0.068848	8.644	53.829	19.70098	0.026794	0.12436	-0.13767	-100.284	-37.236	132.279	0.0024414	0.10107	0.30225
1.504	51.554	-59.762	1547.37877	-1.2886	1.3716	0.14844	-51.893	141.7785	200.6047	-0.051758	0.27393	0.058594	24.991	29.367	25.21326	0.037187	0.1304	-0.1342	-108.59	-68.54	231.128	-0.0053711	0.11475	0.30127
1.506	28.774	-54.495	1543.2591	-1.3042	1.3853	0.15234	-53.154	107.449	185.2009	-0.037842	0.24976	0.05835	34.708	68.86	35.301	0.042891	0.13788	-0.12852	-59.898	-114.897	362.9	-0.036621	0.1709	0.29883
1.508	8.077	-59.4877	1528.373	-1.3354	1.4067	0.16357	-33.988	78.349	189.0925	-0.024414	0.22803	0.053711	60.304	25.5919	66.211	0.041349	0.1468	-0.12139	-43.17	-141.654	518.799	-0.079589	0.24829	0.31201
1.51	12.3225	-89.775	1547.916	-1.3562	1.4192	0.1748	-72.032	116.0527	167.8213	-0.013672	0.19971	0.050293	46.344	57.8717	59.24143	0.038086	0.15674	-0.11572	-86	-263.88	662.142	-0.13721	0.33643	0.33789
1.512	-10.1958	-118.033	1569.8671	-1.3789	1.4355	0.18311	-47.681	63.853	174.443	-0.0068359	0.1875	0.047852	25.712	-2.325	63.2656	0.021748	0.16816	-0.1167	-158.406	-354.05	736.083	-0.25244	0.45557	0.3999
1.514	13.5014	-138.075	1603.9135	-1.4097	1.4497	0.19141	-48.983	97.948	173.789	0.0078125	0.16309	0.047852	-18.661	30.4739	77.7659	0.0021162	0.1837	-0.10872	-138.322	-400.46	787.005	-0.32715	0.5083	0.4375
1.516	-11.8143	-156.254	1621.6529	-1.4292	1.4517	0.19678	-95.507	113.953	165.3337	0.0070801	0.15015	0.048096	-60.765	-53.977	115.59595	-0.019464	0.19759	-0.09969	-89.699	-364.502	899.222	-0.47412	0.6001	0.51367
1.518	3.1438	-153.888	1632.869	-1.4604	1.4595	0.20605	-75.986	50.7612	159.288	0.010254	0.1377	0.046875	-54.791	-42.745	180.391	-0.055605	0.20619	-0.081668	-137.401	-262.36	1008.582	-0.59814	0.66162	0.5581
1.52	-26.086	-148.516	1617.0874	-1.4827	1.4641	0.20776	-83.583	91.958	118.092	0.01709	0.12207	0.047852	-40.452	-149.637	278.2826	-0.097168	0.2168	-0.064453	-176.572	-167.389	1093.891	-0.72754	0.72998	0.59619
1.522	-9.5858	-134.487	1602.573	-1.5	1.4648	0.21191	-94.956	55.288	88.5349	0.019531	0.11572	0.044922	-41.328	-177.046	367.076	-0.14211	0.2298	-0.05831	-184.669	-71.681	1120.6648	-0.90039	0.86621	0.65283
1.524	11.1539	-123.809	1591.6506	-1.5171	1.4692	0.21582	-64.175	43.544	75.6178	0.03125	0.10596	0.05127	-33.644	-296.898	523.863	-0.18346	0.24646	-0.061615	-129.254	-54.363	1206.2999	-0.98584	0.94775	0.68359
1.526	29.4989	-87.0753	1598.4086	-1.521	1.4731	0.21924	-86.043	109.51684	58.755	0.040039	0.09375	0.050049	-31.7111	-320.592	621.609	-0.22745	0.2699	-0.064705	-110.017	-22.72	1402.683	-1.1543	1.1426	0.75635
1.528	56.697	-71.3287	1601.9	-1.5288	1.4829	0.22705	-91.786	63.19	62.9933	0.047852	0.083984	0.05127	-80.625	-417.5881	686.3	-0.274	0.31645	-0.072051	-86.744	-29.6	1593.15	-1.311	1.3008	0.82764
1.53	67.256	-48.9611	1581.1235	-1.5361	1.4834	0.22925	-98.063	97.275	62.6293	0.0625	0.076172	0.049805	-66.657	-371.071	729.0679	-0.32666	0.38184	-0.068359	-84.652	-1.946	1709.509	-1.4961	1.4678	0.90674
1.532	80.056	-31.43128	1560.1177	-1.5366	1.4849	0.23047	-103.078	95.859	82.0661	0.063477	0.077637	0.048828	-40.042	-393.432	783.898	-0.41338	0.45434	-0.041277	-153.393	-38.437	1764.91	-1.7769	1.6587	1.0098
1.534	87.953	-5.93	1512.487	-1.5449	1.4805	0.23389	-60.084	29.1409	82.497	0.079102	0.067383	0.050781	-31.2417	-267.608	838.686	-0.52075	0.52894	0.0011291	-236.17684	-67.69	1761.655	-1.9272	1.7349	1.0586
1.536	97.467	-0.0730000000000004	1508.4979	-1.543	1.4805	0.23486	-74.328	71.616	71.3346	0.091064	0.063965	0.051514	-45.515	-199.867	908.061	-0.65425	0.60462	0.061224	-302.488	-121.11	1800.909	-2.2129	1.8262	1.1431
1.538	100.245	-3.439	1515.1885	-1.5405	1.4653	0.23633	-70.96	30.632038	56.068	0.10449	0.057129	0.055176	-15.366	-96.104	920.2467	-0.81406	0.6746	0.11943	-302.053	-163.54	1860.991	-2.3786	1.8616	1.1828
1.54	98.554	-19.32	1523.9216	-1.532	1.4543	0.22534	-99.481	-0.7128	59.5959	0.12256	0.045898	0.046387	-17.54625	-106.019	972.885	-0.99365	0.73682	0.17578	-366.572	-232.247	1898.766	-2.478	1.8657	1.21
1.542	93.613	-35.413	1538.1944	-1.5171	1.4419	0.21484	-115.0628	38.5316	54.922	0.12744	0.041504	0.053711	16.969	-71.424	1070.465	-1.1709	0.80268	0.21901	-372.29	-360.419	1945.0303	-2.4707	1.8613	1.1987
1.544	71.927	-58.748	1529.7734	-1.4897	1.4165	0.20264	-57.64	-29.5022	46.734	0.14014	0.030273	0.052246	62.4664	-84.671	1146.878	-1.3251	0.87219	0.24382	-354.68	-442.603	1976.522	-2.4077	1.8618	1.1758
1.546	77.309	-69.6591	1531.688	-1.4746	1.4082	0.19434	-59.603	-6.586	43.621	0.1482	0.026123	0.053467	118.512	-46.842	1215.326	-1.4517	0.93784	0.26219	-235.263	-471.97	1978.1008	-2.2026	1.856	1.0957
1.548	60.141	-64.543	1510.1245	-1.4355	1.3809	0.17627	-61.295	18.073	40.5455	0.15479	0.023438	0.049805	132.024	11.336	1272.673	-1.5511	1.0122	0.27373	-76.186	-443.28	1974.6294	-2.0066	1.844	1.0173
1.55	51.3677	-44.541	1483.0181	-1.4023	1.3554	0.16699	-38.566	-2.8899	44.4665	0.16455	0.010742	0.045898	140.578	34.12	1293.928	-1.6406	1.0957	0.29541	43.182	-422.75	1988.8197	-1.7988	1.8066	0.94971
1.552	38.1553	-43.87	1473.9717	-1.3652	1.3398	0.15186	-46.533	71.742	46.008	0.17773	0.0083008	0.048828	112.236	13.31	1331.744	-1.7238	1.1812	0.3293	81.9902	-406.25	2049.954	-1.5625	1.7324	0.87744
1.554	53.7488	-37.5235	1480.06	-1.3198	1.313	0.13281	-35.907	42.412	32.7486	0.17871	0	0.046875	81.165	-98.17	1420.374	-1.8117	1.2622	0.37423	80.8181	-343.321	2145.589	-1.4663	1.6802	0.85938
1.556	41.265	-27.2771	1470.157	-1.3022	1.3013	0.12793	-20.732	5.1079	47.203	0.18701	0.00073242	0.050537	13.3844	-203.063	1493.9895	-1.9117	1.3356	0.42462	105.5409	-260.286	2194.812	-1.3315	1.5864	0.82227
1.558	8.2618	2.161	1449.129	-1.2651	1.2739	0.11963	-39.658	52.4134	35.7646	0.19189	0.00097656	0.049805	-21.1166	-320.1354	1608.824	-2.0272	1.3978	0.47745	90.4857	-167.105	2203.081	-1.2666	1.5254	0.81739
1.56	-3.8479	24.4109	1430.1201	-1.2439	1.2542	0.11157	-39.086	3.7033	22.1671	0.19629	-0.0058594	0.047852	-41.91	-361.191	1643.956	-2.1479	1.4438	0.52539	67.642	-102.98	2180.3349	-1.2163	1.4751	0.82031
1.562	-28.9007	63.299	1410.759	-1.2246	1.2402	0.1084	-55.638	66.008	32.187	0.19336	-0.010254	0.049316	-23.845	-419.86	1648.375	-2.2433	1.4669	0.56084	-19.139	-56.29	2126.7477	-1.1855	1.4434	0.84814
1.564	-14.5552	89.408	1387.81	-1.207	1.2227	0.10547	-71.723	110.116	33.63562	0.19971	-0.0058594	0.05127	33.613	-398.83	1638.61907	-2.3003	1.4739	0.56679	-59.32	-78.75	2072.5616	-1.1914	1.4609	0.86182
1.566	-48.8914	109.82	1363.75	-1.1961	1.2054	0.11157	-51.205	49.986	29.893	0.2024	-0.0048828	0.051025	42.875	-444.85	1681.2451	-2.2788	1.4728	0.56055	-90.397	-74.07	2036.572	-1.2876	1.5415	0.88672
1.568	-53.49	88.844	1359.312	-1.1875	1.1953	0.11279	-49.326	69.4922	19.239	0.20654	-0.0029297	0.05127	11.508	-393.44	1726.2536	-2.1902	1.4645	0.53399	-84.398	-108.173	2043.674	-1.4155	1.6289	0.91113
1.57	-53.8514	77.598	1359.7409	-1.1777	1.1797	0.12061	-61.124	8.679	16.594	0.20996	0.0078125	0.052246	-31.093	-384.98	1807.458	-2.0498	1.4707	0.48975	26.298	-133.877	2083.257	-1.5586	1.7129	0.94189
1.572	-59.638	66.164	1337.114	-1.1743	1.1763	0.12842	-61.666	-30.3104	41.755	0.21436	0.010742	0.055664	-92.8608	-268.885	1867.931	-1.8725	1.492	0.43409	76.249	-175.563	2138.963	-1.7417	1.7856	0.99805
1.574	-46.58326	48.744	1332.61656	-1.168	1.1582	0.13477	-63.42	33.914	59.2617	0.21973	0.01709	0.047363	-157.384	-206.809	1897.7	-1.6953	1.5078	0.38252	135.107	-187.923	2213.0637	-1.8281	1.8145	1.0239
1.576	-12.62	43.478	1305.60089	-1.16	1.1482	0.14478	-60.727	2.492	50.874	0.21851	0.027832	0.053711	-197.781	-84.545	1867.5796	-1.5465	1.5137	0.33799	79.469	-162.137	2242.05298	-1.9961	1.8613	1.0864
1.578	24.686	40.614	1299.1901	-1.1543	1.1387	0.15283	-61.068	32.19225	38.538	0.21436	0.038574	0.05127	-203.537	-66.37	1830.568	-1.4412	1.5131	0.30449	-11.664	-125.981	2277.209	-2.1216	1.894	1.124
1.58	19.252	43.215	1269.975	-1.1431	1.1274	0.16602	-72.982	49.83726	18.5631	0.20898	0.052734	0.049316	-224.776	-12.35	1792.958	-1.3906	1.5176	0.28223	-119.007	-110.767	2311.341	-2.2207	1.9219	1.1577
1.582	20.82	36.635	1267.161	-1.1387	1.1172	0.17285	-78.744	13.179	44.4743	0.2041	0.058105	0.054688	-242.063	-76.88	1805.342	-1.4025	1.5201	0.26846	-243.185	-141.815	2316.49	-2.3047	1.9414	1.1899
1.584	37.8799	27.403	1267.531	-1.1226	1.1021	0.18604	-104.803	87.038	57.513	0.19385	0.074707	0.055664	-235.41	-78.821	1819.911	-1.4528	1.525	0.25664	-307.386	-164.819	2317.652	-2.314	1.9458	1.1934
1.586	36.72321	36.1151	1251.914	-1.1128	1.0889	0.19141	-88.429	69.4554	53.32443	0.1853	0.084717	0.058593	-186.162	-152.95252	1855.14	-1.5289	1.5254	0.25078	-381.349	-141.5692	2269.588	-2.2905	1.9497	1.1934
1.588	51.98564	61.0143	1217.4899	-1.0977	1.0762	0.19385	-77.22	34.491	64.578	0.17432	0.094727	0.058594	-103.395	-149.11	1894.299	-1.608	1.5168	0.24531	-387.546	-87.796	2206.636	-2.2471	1.9439	1.1944
1.59	35.6455	80.522	1188.5507	-1.0703	1.043	0.19922	-96.153	69.139	38.367	0.15918	0.10791	0.061523	-30.956	-215.917	1937.256	-1.6821	1.5142	0.24316	-410.8	-15.345	2139.198	-2.2026	1.938	1.1914
1.592	57.4263	97.637	1149.4308	-1.0581	1.0337	0.20605	-72.12	10.4383	27.9318	0.1543	0.11377	0.061523	-11.517	-195.384	1974.0344	-1.7379	1.5129	0.23438	-391.979	27.3952	2108.379	-2.1484	1.9277	1.1821
1.594	38.3358	125.095	1114.484	-1.0151	1.0063	0.20117	-61.03	42.758	24.476	0.1416	0.12549	0.063477	-37.96	-209.931	1999.831	-1.7815	1.5169	0.22344	-331.396	56.1021	2075.364	-2.1226	1.9243	1.1797
1.596	44.96	138.076	1083.956	-0.98608	0.98217	0.20215	-59.779	84.391	23.1126	0.13989	0.12939	0.06665	-67.363	-174.918	2065.13	-1.8124	1.5266	0.2168	-233.663	48.643	2063.657	-2.0742	1.9102	1.1606
1.598	33.807	138.699	1065.652	-0.95166	0.95947	0.19873	-56.233	35.15	47.0389	0.13867	0.13574	0.073242	-65.647	-209.144	2113.048	-1.837	1.5345	0.20547	-170.676	61.136	2074.065	-2.0215	1.8858	1.1309
1.6	73.78757	122.139	1060.505	-0.90918	0.92773	0.19775	-68.86	88.062	60.4762	0.14844	0.14063	0.060059	-74.8125	-200.817	2141.468	-1.8652	1.5313	0.18994	-168.41	85.312	2065.074	-1.9609	1.8535	1.0942
1.602	48.831	113.3566	1017.619	-0.88623	0.91455	0.19531	-52.22	30.454	64.127	0.15283	0.14502	0.054688	-8.37800000000001	-199.721	2115.931	-1.8826	1.5354	0.17617	-157.218	125.862	2066.7938	-1.8711	1.8271	1.0435
1.604	26.922	102.666	993.927	-0.84961	0.88477	0.19043	-41.736	-18.6558	68.6716	0.16895	0.13867	0.051758	28.29	-125.691	2053.826	-1.9006	1.5356	0.16797	-211.056	174.8778	2047.774	-1.8086	1.8066	1
1.606	13.539	91.485	982.285	-0.8169	0.86474	0.1875	-56.15	38.4792	69.2304	0.17969	0.14454	0.043212	41.42	-72.711	1998.08723	-1.9245	1.543	0.15937	-201.6398	185.798	2026.314	-1.7559	1.791	0.95752
1.608	-0.687999999999999	93.815	966.8087	-0.7832	0.83984	0.18262	-58.798	-9.6094	48.858	0.19873	0.14355	0.037109	43.388	-13.811	1977.776	-1.9451	1.5482	0.16289	-185.2347	175.796	2018.3309	-1.6968	1.7622	0.91211
1.61	-24.831	98.3781	954.184	-0.75	0.80859	0.17871	-34.555	19.9604	61.5323	0.21289	0.14453	0.03418	68.7409	-3.468	1974.826	-1.9746	1.5586	0.17139	-138.007	148.935	1997.2497	-1.6763	1.7427	0.89063
1.612	-59.8266	88.3734	928.123	-0.72803	0.79248	0.18066	-56.613	48.531	33.715	0.22021	0.14551	0.028809	130.094	20.146	1980.3761	-2.0112	1.5674	0.18603	-87.564	147.651	1971.7043	-1.6362	1.7075	0.84766
1.614	-55.8937	73.6991	931.47	-0.68848	0.77002	0.16309	-58.116	-6.604999	44.556	0.23633	0.14307	0.030762	153.857	47.628	1964.0905	-2.0442	1.5684	0.20127	-35.736	152.205	1920.71003	-1.6104	1.6787	0.81738
1.616	-77.3531	86.3381	902.8506	-0.65747	0.7439	0.16455	-49.943	47.878	57.70287	0.24439	0.13916	0.027099	91.257	86.726	1913.987	-2.0754	1.5653	0.22432	-13.347	132.742	1877.4116	-1.5864	1.6353	0.79297
1.618	-83.6803	101.91448	876.442	-0.63184	0.72266	0.16406	-34.792	32.4764	47.8591	0.24756	0.13086	0.024414	14.504	117.123	1896.947	-2.1048	1.5499	0.24063	50.647	133.363	1815.816	-1.5474	1.5786	0.75977
1.62	-80.4192	111.112	842.0271	-0.58936	0.69482	0.1582	-34.238	30.8933	54.1169	0.24805	0.12695	0.032227	-57.946	82.936	1893.969	-2.1191	1.5332	0.25635	86.896	130.034	1779.5362	-1.5244	1.5527	0.74756
1.622	-57.437863	97.406	801.3306	-0.57178	0.67676	0.15479	-58.309	84.072	28.826	0.24561	0.12549	0.033691	-72.2467	52.2258	1940.137305	-2.1244	1.51	0.26777	117.775	214.818	1778.577	-1.4702	1.4868	0.71436
1.624	-55.907	106.583	769.451	-0.54004	0.65186	0.15039	-59.898	12.189	37.32726	0.22656	0.12256	0.038574	-65.506	-0.00999999999999979	1989.651	-2.1149	1.4926	0.27509	104.012	287.905	1760.34	-1.4246	1.43	0.68652
1.626	-64.97651	116.447	740.2	-0.51318	0.63672	0.14673	-71.522	17.4369	38.378	0.21363	0.11718	0.039063	-56.093	5.95182	2015.97	-2.0898	1.4707	0.28838	34.682	368.296	1728.29	-1.3706	1.3755	0.6543
1.628	-38.277	128.5014	730.4704	-0.48779	0.61621	0.14697	-61.248	33.489	37.0947	0.19385	0.11865	0.044434	-78.956	-0.0549999999999997	2002.094	-2.0544	1.4624	0.29609	-24.164	396.013	1659.151	-1.2754	1.2988	0.6167
1.63	-18.441	131.4911	716.4391	-0.46338	0.59619	0.1416	-76.227	-6.1065	32.876	0.16748	0.12305	0.056641	-136.543	57.1386	1956.93	-2.0215	1.4531	0.30957	-84.543	383.395	1585.5373	-1.2246	1.2598	0.59619
1.632	-36.641	145.956	697.3073	-0.44775	0.5835	0.14063	-80.134	60.565	38.3754	0.1543	0.12646	0.058105	-161.512	62.167	1916.87611	-1.9824	1.445	0.32139	-128.63009	371.262	1545.9191	-1.1206	1.188	0.54834
1.634	-44.156	137.594	669.2663	-0.41797	0.55859	0.13721	-87.884	44.9039	27.6795	0.12451	0.13721	0.074219	-109.504	73.463	1875.21187	-1.9523	1.4398	0.33369	-173.86426	320.839	1522.0619	-1.042	1.1299	0.51392
1.636	-39.239	113.318	650.3691	-0.3999	0.54321	0.13697	-70.067	15.4068	44.0922	0.10791	0.14697	0.083741	-85.1689	24.58	1864.1786	-1.9242	1.4352	0.3501	-206.001	312.609	1484.648	-0.9668	1.0762	0.479
1.638	-12.71	106.6523	627.6894	-0.38281	0.52637	0.14502	-77.781	49.4481	53.2045	0.097168	0.1626	0.094238	-91.3241	62.749	1842.0792	-1.899	1.428	0.36182	-216.493	259.1742	1420.091	-0.87646	1.0024	0.43652
1.64	-15.637	114.3805	604.6177	-0.36426	0.50781	0.14404	-79.95	-50.134	91.0609	0.087891	0.17969	0.11377	-103.1359	74.214	1827.602	-1.8765	1.4302	0.37695	-242.774	232.508	1339.729	-0.84033	0.96338	0.41406
1.642	0.890000000000001	105.9847	601.8991	-0.35352	0.49512	0.14111	-82.747	-84.691	164.5585	0.088379	0.18457	0.11914	-109.098	208.0486	1799.6345	-1.8571	1.428	0.3918	-216.146	197.139	1299.3312	-0.76953	0.88574	0.37549
1.644	7.91	104.114464	576.09249	-0.33008	0.48047	0.1416	-119.234	-84.983	239.18	0.088867	0.2002	0.12891	-129.735	233.53	1755.19883	-1.8436	1.4263	0.4039	-189.552	202.49	1263.026	-0.71362	0.82935	0.34497
1.646	22.887	95.387	546.7205	-0.31738	0.46655	0.1455	-101.827	-132.1384	347.205	0.089844	0.20996	0.13672	-110.704	317.118	1717.6141	-1.8312	1.4247	0.41641	-167.0587	224.37	1190.091	-0.65479	0.7749	0.31885
1.648	16.799	105.797	529.74631	-0.30713	0.45117	0.14795	-111.994	-114.697	418.027	0.092285	0.22656	0.13916	-67.927	267.126	1701.4721	-1.8074	1.4133	0.42803	-181.157	225.23	1142.4293	-0.57959	0.70361	0.2793
1.65	36.837	90.589	523.0209	-0.29297	0.43652	0.14893	-165.316	-209.998	453.858	0.091797	0.24707	0.14746	-47.253	299.357	1667.797	-1.7847	1.4028	0.43359	-186.758	257.843	1070.766	-0.53809	0.66602	0.25928
1.652	18.285	89.048	520.978	-0.28467	0.43115	0.14941	-165.491	-279.629	502.0556	0.092285	0.25879	0.14746	-29.195	236.593	1661.706	-1.7423	1.3932	0.4334	-211.318	253.377	1009.067	-0.46338	0.59814	0.22266
1.654	7.216	98.758	492.06939	-0.27148	0.41797	0.15283	-154.169	-206.45	535.93947	0.076172	0.29736	0.15918	-27.213	272.925	1618.122	-1.696	1.3817	0.43252	-205.286	276.154	941.4451	-0.40869	0.54639	0.19898
1.656	-18.58	108.291	466.4354	-0.26513	0.40527	0.15332	-166.919	-187.157	602.766	0.05542	0.33716	0.16528	-5.499	187.353	1595.7888	-1.6409	1.368	0.42822	-156.3449	300.24	861.3886	-0.35547	0.49609	0.17285
1.658	-47.164	103.14	443.6696	-0.25293	0.39551	0.15283	-186.136	-111.2493	682.394	0.019043	0.39795	0.18262	26.467	205.666	1555.495	-1.5815	1.351	0.42588	-134.571	332.349	775.4806	-0.27734	0.42285	0.12939
1.66	-64.004	113.024	438.7768	-0.24023	0.37939	0.15088	-191.0344	-42.3516	688.9167	-0.0625	0.48291	0.22607	62.263	108.647	1548.588	-1.5195	1.3301	0.42139	-65.183	342.44	689.935	-0.23877	0.38232	0.10693
1.662	-77.91	121.135	410.8982	-0.23291	0.37646	0.15039	-104.416	-71.475	701.9396	-0.14844	0.54273	0.26733	80.293	179.733	1526.004	-1.4617	1.3091	0.41553	-55.881	332.822	614.059	-0.16455	0.31104	0.0625
1.664	-83.527	129.004	399.523	-0.21631	0.35986	0.15186	-54.505	-0.320000000000007	765.359	-0.24902	0.60352	0.31104	69.851	159.342	1544.107	-1.4032	1.2864	0.41103	5.03	313.308	551.499	-0.11157	0.26343	0.029297
1.666	-94.8136	119.433	379.376	-0.20654	0.34692	0.15649	-65.494	49.143	887.4928	-0.38965	0.67383	0.34424	55.885	273.189	1487.807	-1.3468	1.2629	0.40088	78.461	257.084	514.757	-0.051758	0.21924	-0.00097656
1.668	-91.1637	94.7408	367.828	-0.19238	0.3418	0.14893	-57.134	110.221	1013.109	-0.4585	0.70752	0.35254	15.854	231.581	1439.601	-1.2885	1.2357	0.39463	102.075	240.513	461.0402	0.015137	0.16504	-0.04248
1.67	-74.167	92.271	349.4459	-0.17383	0.32422	0.14746	-64.981	202.066	1093.801	-0.57373	0.77197	0.33691	-26.453	300.74	1337.931	-1.2339	1.2085	0.38428	134.2183	227.472	396.3562	0.047852	0.1377	-0.065918
1.672	-87.2563	74.639	329.4016	-0.16553	0.31592	0.14697	-89.166	128.139	1146.4076921	-0.63965	0.82325	0.32569	-52.665	243.737	1277.508	-1.1762	1.1761	0.3749	138.428	257.3704	363.132	0.10205	0.092285	-0.10742
1.674	-97.683	75.486	325.033	-0.14746	0.30127	0.14258	-147.098	57.657	1217.677	-0.69482	0.87744	0.32031	-67.78	320.95	1216.546	-1.1172	1.1461	0.36328	113.315	277.803	354.3581	0.13696	0.057129	-0.12841
1.676	-98.4951	86.241	298.3394	-0.13476	0.29395	0.1438	-189.467	18.448	1256.796	-0.76855	0.97461	0.32617	-74.92	292.403	1184.44691	-1.057	1.1109	0.35625	68.763	267.56	339.818	0.16504	0.027832	-0.16699
1.678	-101.7136	92.5165	306.2211	-0.12305	0.2832	0.14209	-184.794	-88.209	1342.748	-0.80811	1.0298	0.33643	-85.609	387.606	1130.7724	-1.0012	1.0776	0.34238	49.866	250.116	306.008	0.19824	-0.0058594	-0.18701
1.68	-90.727	77.9959	298.0633	-0.10352	0.26807	0.14258	-233.8938	-108.638	1407.044	-0.91016	1.1426	0.375	-93.518	314.656	1096.9857	-0.94434	1.041	0.32959	19.004	174.856	284.061	0.20947	-0.024414	-0.19873
1.682	-92.3336	72.87403	307.9309	-0.094727	0.26123	0.14453	-230.265	-181.134	1468.407	-1.0049	1.2217	0.41211	-110.6957	360.362	1025.6851	-0.88125	0.99921	0.31338	-14.76	157.621	255.8084	0.22412	-0.054688	-0.22217
1.684	-82.573	72.3413	291.7793	-0.070313	0.24316	0.13916	-166.392	-261.978	1505.721	-1.1113	1.2813	0.46143	-123.4351	274.577	994.3243	-0.82177	0.95801	0.30049	-39.041	138.0206	242.8681	0.2312	-0.067383	-0.22949
1.686	-80.0716	91.538	265.7173	-0.055909	0.22925	0.13452	-115.2715	-248.949	1483.197	-1.2734	1.334	0.5249	-109.134	341.456	931.787	-0.76397	0.91426	0.28408	-68.106	148.5207	224.937	0.23535	-0.077148	-0.23828
1.688	-63.004	95.187	238.3679	-0.036133	0.21729	0.13281	-49.988	-322.69	1504.647	-1.3511	1.3462	0.55273	-134.2675	275.447	888	-0.71045	0.871	0.26699	-79.925	141.355	173.655	0.2334	-0.08252	-0.24707
1.69	-49.707	101.615	228.6123	-0.0053711	0.19775	0.12305	-28.866	-316.26	1578.772	-1.498	1.3555	0.604	-157.816441	323.969	833.628	-0.6499	0.82861	0.25391	-102.366	121.145	112.9166	0.229	-0.084961	-0.24365
1.692	-18.428	106.465	201.715495	0.0087891	0.19141	0.11963	-33.247	-240.57	1659.452	-1.5798	1.3625	0.6355	-205.471	219.5677	795.178	-0.59395	0.78223	0.2374	-115.04	107.247	86.8709	0.20361	-0.07959	-0.24072
1.694	-1.675	95.2861	206.0662	0.038086	0.17969	0.11182	-7.807	-225.408	1709.962	-1.6201	1.3652	0.65967	-208.233	246.2061	758.8167	-0.52969	0.73887	0.22783	-169.0285	83.052	71.591	0.17041	-0.070557	-0.23194
1.696	-8.287	73.932	206.2465	0.06128	0.16968	0.1018	-27.9	-146.126	1718.07	-1.6133	1.3828	0.67627	-188.653	196.8	724.112	-0.46718	0.69668	0.2126	-183.433	80.342	74.246	0.13477	-0.062012	-0.22363
1.698	-3.43	76.984	211.35552	0.079102	0.15918	0.09082	-61.46	-122.953	1701.4903	-1.5737	1.397	0.66699	-158.0392	267.573	659.553	-0.41367	0.66016	0.19941	-198.627	43.35	82.68	0.089844	-0.046875	-0.21289
1.7	3.431	74.0701	201.27047	0.10938	0.14307	0.081543	-61.375	-104.332	1692.658	-1.4507	1.4399	0.67578	-119.2035	235.9692	629.075	-0.35352	0.62109	0.18359	-229.156	39.285	95.9997	0.063477	-0.033691	-0.2041
1.702	-14.37	80.8558	181.746	0.12378	0.13867	0.072021	-124.358	-42.95	1682.065	-1.3381	1.4729	0.65747	-103.248	298.642	556.28202	-0.28555	0.58008	0.1709	-218.822	-4.7503	90.0285	0.0043945	-0.0087891	-0.17529
1.704	-21.417	62.38	180.8343	0.13867	0.12842	0.065918	-163.063	-66.95	1683.955	-1.2231	1.5083	0.6416	-72.999	252.039	509.6023	-0.21885	0.54004	0.15605	-251.096	-10.3046	74.636	-0.039795	0.011719	-0.15674
1.706	-20.045	64.842	165.1067	0.15332	0.11572	0.061035	-131.74	-93.05	1696.419	-1.0884	1.5454	0.62305	-6.486	276.05051	449.336	-0.1583	0.50449	0.1459	-221.369	12.2239	52.8851	-0.09082	0.037109	-0.13232
1.708	-52.219	63.188	144.83338	0.15723	0.11279	0.054688	-124.984	-105.533	1708.033	-1.0386	1.5571	0.61914	6.02900000000001	209.34	408.1748	-0.10195	0.46778	0.13272	-158.2266	16.4871	39.8278	-0.15674	0.066895	-0.098145
1.71	-67.324	61.738	161.6141	0.16455	0.098633	0.049316	-63.836	-162.627	1741.016	-0.97314	1.5767	0.61035	-0.792000000000002	218.379	357.4395	-0.048828	0.43066	0.12061	-111.5538	34.0917	34.4249	-0.18994	0.07959	-0.081055
1.712	-59.573	49.2789	166.3989	0.16626	0.099852	0.047363	-35.745	-155.878	1766.624	-0.95191	1.5862	0.6084	-18.066	181.045	301.1131	-0.0034179	0.39805	0.11153	-80.443	-0.659000000000001	0.856000000000002	-0.24756	0.10254	-0.055176
1.714	-65.179	53.132	169.8946	0.1665	0.088379	0.042969	-27.835	-152.741	1803.557	-0.94727	1.5957	0.60449	-26.278	216.692	279.959	0.037402	0.36406	0.10088	-33.777	-7.025	7.405	-0.27856	0.11206	-0.037598
1.716	-60.455	49.709	148.2753	0.16406	0.087891	0.041016	-35.752	-177.289	1844.133	-0.9585	1.6079	0.60156	-57.33	184.595	267.538	0.069043	0.33125	0.093457	22.804	-23.456	15.511	-0.29736	0.10938	-0.026855
1.718	-78.308	46.327	134.4459	0.16162	0.084961	0.043457	-96.484	-154.156	1865.206	-0.9707	1.6172	0.59424	-31.225	189.765	268.2	0.093261	0.30284	0.085352	33.606	-6.586	28.96984	-0.29834	0.09375	-0.023926
1.72	-83.568	46.482	124.0493292	0.15283	0.085938	0.046875	-127.304	-196.133	1896.065	-0.99951	1.6372	0.58984	-41.539	142.792	235.523	0.1084	0.27393	0.077637	50.814	39.026	34.514	-0.28613	0.08252	-0.026855
1.722	-86.206	57.9086	118.1506	0.1438	0.087402	0.047363	-129.677	-218.376	1939.411	-1.0225	1.6582	0.58398	-23.968	137.963	195.903	0.11699	0.24433	0.074805	46.787	93.862	24.41517	-0.22754	0.055176	-0.043457
1.724	-105.1065	60.799	111.19	0.13965	0.084961	0.054688	-186.576	-156.10439	1961.758	-1.0503	1.6743	0.58887	-48.529	112.279	159.944	0.12315	0.21982	0.076464	56.933	141.213	26.587	-0.16651	0.030274	-0.068603
1.726	-115.8607	51.6303	118.1197	0.12695	0.09082	0.05957	-205.705	-133.607	1947.364	-1.0996	1.6982	0.60986	-25.23	105.424	151.617	0.12119	0.19561	0.078808	45.695	126.909	39.395	-0.10205	0.0058594	-0.086426
1.728	-115.2112	42.1211	114.93359	0.12256	0.087891	0.060547	-239.369	-69.044	1913.254	-1.127	1.707	0.62549	-60.145	72.118	151.90477	0.11602	0.17832	0.083691	47.532	115.063	44.271	-0.025391	-0.025391	-0.11572
1.73	-109.50759	55.7486	98.404	0.11182	0.09668	0.062988	-258.876	-21.903	1882.726	-1.1914	1.7246	0.67334	-43.994	65.646	130.286	0.10547	0.1582	0.085938	55.023	65.97	30.11	0.0068359	-0.035645	-0.12549
1.732	-103.8625	55.3675	103.2279	0.10718	0.10132	0.067871	-213.5659	-30.984	1878.356	-1.264	1.7356	0.71411	-70.151	50.613	105.63	0.088477	0.13906	0.092285	37.371	52.273	15.55585	0.06543	-0.061523	-0.15137
1.734	-101.662	50.47957	102.4312	0.096191	0.10742	0.072266	-213.242	28.1776	1878.083	-1.3535	1.7461	0.74854	-99.9525	33.464	94.961	0.074805	0.11982	0.098048	34.676	34.6726	23.1166	0.093507	-0.086181	-0.16699
1.736	-81.35	43.6216	99.8864	0.092285	0.11279	0.078613	-152.513	19.208	1881.89	-1.4727	1.7598	0.77393	-159.621	61.7822	81.4791	0.062305	0.10186	0.10703	-24.942	38.435	55.794	0.1167	-0.11182	-0.17969
1.738	-71.284	40.9355	83.2855	0.089844	0.11572	0.080078	-117.619	20.489	1902.049	-1.5308	1.7642	0.78516	-174.11	73.0508	76.3437	0.046582	0.092481	0.11436	-23.202	38.747	69.0312	0.14404	-0.1416	-0.19629
1.74	-44.574	32.117	73.3611	0.089844	0.12646	0.088379	-179.414	62.07	1898.766	-1.6406	1.7578	0.81885	-167.272	99.422	51.616	0.028809	0.081055	0.11621	-40.697	23.701	69.835	0.15283	-0.16064	-0.2041
1.742	-34.766	28.946	88.712	0.090576	0.13184	0.092774	-153.117	30.245	1920.4022	-1.7212	1.7495	0.83837	-163.2751	72.798	50.838	0.01084	0.070996	0.12959	-81.127	49.838	73.527	0.18115	-0.18945	-0.22168
1.744	-22.427	37.212	80.1748	0.09375	0.13672	0.094238	-154.839	53.214	1948.3128	-1.7891	1.7305	0.86377	-154.7355	60.911	30.378	-0.0066406	0.062402	0.13389	-147.4169	32.696	84.335	0.19995	-0.21313	-0.23364
1.746	-20.697	41.7483	64.5412	0.095703	0.13574	0.096191	-187.4947	45.5927	1963.96	-1.8652	1.6914	0.89893	-165.514	8.677	26.403	-0.028125	0.058886	0.14209	-196.768	50.66601	104.472	0.22266	-0.23193	-0.24609
1.748	-30.509	39.266	71.2032	0.098145	0.13232	0.094727	-166.79	1.209	1967.833	-1.8921	1.6821	0.91992	-139.58	27.6457	22.867	-0.05	0.053711	0.14717	-201.538	33.7759	92.25349	0.25	-0.24609	-0.26123
1.75	-16.989	26.7515	68.0277	0.10791	0.13232	0.091797	-178.598	34.006	1957.4355	-1.9375	1.6484	0.94971	-89.1752	17.024	39.2445	-0.068359	0.050293	0.146	-219.497	6.358	76.6625	0.26514	-0.24707	-0.26709
1.752	-8.349	15.3152	87.7442	0.11011	0.13233	0.084717	-178.273	8.147	1962.1957	-1.9566	1.6245	0.96143	-61.951	45.787	44.2986	-0.087207	0.051563	0.15127	-210.23	-11.719	58.26	0.27979	-0.25244	-0.27441
1.754	-13.341	25.1853	66.0987	0.11572	0.13037	0.084961	-147.844	-15.87	1981.897	-1.9609	1.6074	0.97607	-46.496	22.728	53.8633	-0.10029	0.04834	0.15888	-221.679	-9.085	62.581	0.2898	-0.24927	-0.27515
1.756	-41.433	29.207	62.7508	0.12451	0.12451	0.074219	-146.118	5.096	1962.8145	-1.957	1.5898	0.98389	-44.824	56.4707	32.6713	-0.10928	0.045996	0.16319	-204.959	25.499	55.706	0.29102	-0.24707	-0.26904
1.758	-17.719	33.616	50.2535	0.12695	0.12207	0.074219	-80.573	-23.757	1925.209	-1.9507	1.5854	0.98828	-39.022	19.085	42.622	-0.11416	0.048438	0.16806	-191.504	37.21	27.784	0.28516	-0.24365	-0.25977
1.76	-32.568	32.7618	51.9883	0.13623	0.11816	0.074707	-69.538	34.019	1903.6612	-1.9355	1.5742	0.99951	-26.207	44.9851	41.67433	-0.11719	0.045898	0.17236	-169.0436	49.2926	22.235	0.2688	-0.23755	-0.25049
1.762	-35.645	34.70361	51.8643	0.13965	0.11524	0.067139	-79.74	103.803	1895.0339	-1.9306	1.5595	1.0073	-7.635	8.5978	65.4698	-0.11582	0.043555	0.17998	-112.799	18.271	7.729	0.25098	-0.22998	-0.23926
1.764	-41.563	20.1857	60.7436	0.14111	0.11377	0.063965	-38.699	132.3735	1885.531	-1.9258	1.543	1.0122	4.233	41.7735	56.0985	-0.10976	0.035449	0.17969	-88.875	20.692	-3.382	0.21826	-0.22656	-0.21436
1.766	-29.339	13.391	58.6797	0.14795	0.10938	0.064453	-60.638	202.086	1871.774	-1.9194	1.5181	1.0195	9.61	7.156	67.8339	-0.10468	0.028028	0.18711	-50.54	-15.4344	10.754	0.19824	-0.22314	-0.20654
1.768	-62.643	11.348	54.051	0.15137	0.10791	0.0625	-86.705	181.296	1873.898	-1.9199	1.5078	1.0239	36.317	45.3035	38.613	-0.089746	0.019336	0.18672	-46.534	-4.04393	37.363	0.15674	-0.2041	-0.18408
1.77	-84.867	22.4865	51.4	0.15479	0.10205	0.064941	-108.869	162.277	1863.8819	-1.9063	1.4824	1.02	-2.792	14.9008	63.794	-0.074219	0.0097656	0.18457	-35.648	16.3359	50.0718	0.12378	-0.18921	-0.16748
1.772	-89.36	16.18864	57.0175	0.1626	0.098144	0.067627	-141.6365	181.221	1845.121	-1.8891	1.4663	1.0146	1.389	58.822	49.709	-0.042969	-0.0020508	0.18105	6.48	42.2503	54.1456	0.09375	-0.16895	-0.15381
1.774	-100.171	8.14559	52.7357	0.16309	0.091309	0.068848	-140.457	137.883	1820.1878	-1.8706	1.4458	1.002	-13.019	24.1387	51.796	-0.010742	-0.014063	0.17402	28.267	86.986	31.4047	0.056641	-0.1377	-0.13525
1.776	-96.455	21.9378	32.2115	0.16699	0.090332	0.069824	-167.851	152.45	1801.973	-1.8335	1.4282	0.97852	9.697	66.7313	23.71	0.020508	-0.019922	0.16465	39.798	68.621	26.154	0.039551	-0.12891	-0.12842
1.778	-111.4848	17.4948	53.116	0.17236	0.086914	0.069336	-157.718	141.7987	1753.486	-1.8101	1.4243	0.9668	1.324	34.8312	40.269	0.061817	-0.031152	0.15557	36.949	78.383	23.715	0.0029297	-0.097168	-0.1084
1.78	-118.2073	8.4403	75.4952	0.17871	0.085938	0.073242	-116.786	90.347	1746.839	-1.7632	1.4146	0.94141	2.111	54.4141	25.536	0.1001	-0.038574	0.14648	57.275	45.536	20.4421	-0.029052	-0.07837	-0.093995
1.782	-98.2125	-20.9782	127.71	0.18213	0.087647	0.080811	-129.756	123.071	1749.4498	-1.7332	1.4104	0.91724	-56.547	9.8241	42.3518	0.13476	-0.046778	0.13916	74.12	43.765	27.304	-0.061523	-0.056641	-0.078125
1.784	-90.356	-42.9724	157.961	0.1792	0.088867	0.083008	-111.02	92.62	1758.638	-1.6987	1.4077	0.89355	-78.424	28.5042	29.517	0.16787	-0.058984	0.1292	91.725	50.4396	19.1523	-0.097656	-0.028809	-0.06543
1.786	-98.079	-61.664	221.164	0.16992	0.10205	0.081055	-78.664	98.166	1756.659	-1.6499	1.4028	0.86621	-121.002	8.3813	47.942	0.196	-0.069922	0.12412	56.115	50.799	30.9818	-0.11572	-0.020996	-0.056641
1.788	-88.324	-75.318	296.187	0.1582	0.10938	0.068848	-104.196	138.565	1711.31	-1.6309	1.3965	0.85205	-113.94657	34.564	57.2842	0.22793	-0.085058	0.11475	29.314	73.0941	47.0027	-0.14063	-0.00048828	-0.044922
1.79	-94.707	-106.836	362.005	0.12207	0.15576	0.056152	-110.176	116.551	1662.747	-1.5776	1.3911	0.82813	-137.816	13.2122	79.282	0.25537	-0.10059	0.10449	-19.278	78.404	74.639	-0.15747	0.012451	-0.041748
1.792	-168.062	-138.525	423.507	0.082764	0.20434	0.054199	-139.974	183.1074	1604.608	-1.5447	1.3806	0.81054	-139.7399	38.49	65.0177	0.28555	-0.11328	0.091992	-74.153	100.253	86.683	-0.16748	0.026855	-0.04248
1.794	-156.113	-130.673	480.9655	0.03418	0.25879	0.075195	-161.5012	216.366	1549.091	-1.5098	1.376	0.79541	-144.851	12.13	49.135	0.31221	-0.12812	0.078711	-91.299	89.476	97.052	-0.16943	0.045898	-0.045898
1.796	-122.428	-92.272	530.3927	-0.073242	0.33203	0.11475	-136.192	213.064	1541.2665	-1.4644	1.3638	0.77539	-132.96187	22.058	15.729	0.33799	-0.14258	0.06543	-148.543	92.622	92.452	-0.16895	0.057617	-0.049316
1.798	-124.378	-34.312	577.923	-0.14111	0.36768	0.13525	-142.3622	267.196	1523.7943	-1.4429	1.3599	0.7627	-143.89	-10.554	18.038	0.3667	-0.15693	0.050977	-156.229	36.0147	81.868	-0.15967	0.075684	-0.056641
1.8	-154.289	-9.5618	633.165	-0.28906	0.43604	0.19092	-113.9391	226.964	1499.791	-1.3979	1.3345	0.73828	-112.825	10.566	15.758	0.38037	-0.16943	0.030762	-185.003	-6.61	56.7679	-0.1521	0.098145	-0.064942
1.802	-131.344	7.661	692.263	-0.3999	0.4956	0.23901	-85.044	211.057	1445.238	-1.3579	1.3159	0.71728	-99.1107	16.3167	40.7201	0.39844	-0.18379	0.018554	-182.555	-25.903	46.022	-0.14648	0.10254	-0.071289
1.804	-56.771	43.349	748.607	-0.5127	0.5625	0.28174	-81.131	230.97	1372.422	-1.3164	1.2949	0.69873	-52.546	39.3528	42.14	0.41132	-0.19317	0.003711	-196.399	-24.591	46.208	-0.1377	0.12256	-0.080566
1.806	-38.045	70.769	830.0051	-0.65283	0.65479	0.33154	-47.374	195.683	1333.424	-1.2632	1.2622	0.66553	-81.9158	31.109	56.279	0.41797	-0.20879	-0.011523	-195.587	22.524	53.644	-0.12598	0.12158	-0.083496
1.808	-32.511	102.608	904.065	-0.71826	0.70654	0.35156	-19.35	217.774	1290.102	-1.2314	1.2451	0.64893	-73.852	40.3298	57.805	0.42519	-0.21436	-0.027051	-182.042	10.934	81.7911	-0.11133	0.12598	-0.088379
1.81	-24.6	121.2005	1008.332	-0.84326	0.80518	0.38086	-3.43899999999999	214.613	1262.7602	-1.1694	1.2075	0.61328	-84.036	49.21	45.311	0.43164	-0.21875	-0.038574	-191.194	17.422	66.5002	-0.096437	0.12549	-0.095703
1.812	1.691	146.271	1072.7369	-0.94068	0.88696	0.41114	-15.008	182.85	1263.513	-1.1189	1.173	0.5874	-51.829	76.028	48.8385	0.43457	-0.2248	-0.051172	-168.75	-14.835	53.876	-0.081543	0.12598	-0.097168
1.814	-25.824	142.535	1140.282	-1.0322	0.97656	0.44678	-43.967	237.0067	1247.6266	-1.0737	1.1372	0.55859	-11.123	75.842	42.866	0.4333	-0.22236	-0.059863	-147.9288	2.684	41.388	-0.064941	0.13037	-0.10303
1.816	-67.75685	108.525	1207.795	-1.1582	1.0957	0.49854	-43.562	205.3455	1231.614	-1.0137	1.0918	0.52881	13.422	47.1014	31.244	0.43526	-0.22275	-0.066113	-136.31565	13.547	40.7446	-0.058105	0.13525	-0.10303
1.818	-67.2669	39.885	1261.9877	-1.2163	1.1528	0.52686	-59.591	212.988	1179.373	-0.97998	1.0708	0.50635	1.57	6.3077	30.2192	0.42568	-0.21855	-0.067773	-121.4781	24.72	41.3293	-0.044434	0.14453	-0.11133
1.82	-77.847	-41.438	1309.700439	-1.334	1.2393	0.59033	-85.712	250.173	1105.9071	-0.91406	1.0195	0.4751	5.722	-15.5422	31.7455	0.41455	-0.20898	-0.066895	-73.644	30.7091	15.666	-0.041992	0.15552	-0.10913
1.822	-99.077	-98.143	1320.8352	-1.4136	1.2837	0.63453	-57.545	207.5957	1052.4901774	-0.85693	0.9751	0.44824	17.159	6.6419	23.7042	0.40322	-0.19756	-0.063867	-56.122	19.248	8.912	-0.049805	0.16406	-0.10547
1.824	-103.689	-132.829	1330.1219	-1.4917	1.313	0.67773	-61.294	244.843	988.112	-0.82959	0.94971	0.43896	36.46	14.374	54.877	0.38408	-0.18027	-0.054199	-9.35599999999999	45.487	11.841	-0.078125	0.18799	-0.11572
1.826	-53.5277	-155.587	1347.8115	-1.5601	1.3228	0.72363	-58.035	237.032	940.563	-0.77539	0.89844	0.40186	22.716	50.259	58.7955	0.35987	-0.15645	-0.049121	47.94	50.408	26.5326	-0.094238	0.19287	-0.11426
1.828	-13.884	-170.42	1353.5243	-1.5757	1.3179	0.74023	-61.612	225.1939	923.5815	-0.74072	0.86426	0.38623	20.392	49.1644	67.1685	0.32471	-0.13496	-0.040625	35.259	92.448	32.313	-0.13037	0.21387	-0.11328
1.83	13.536	-191.751	1351.338	-1.5601	1.2896	0.75781	-69.052	287.532	881.524	-0.70264	0.82861	0.36816	-9.986	63.896	43.094	0.28271	-0.11035	-0.021484	51.949	58.865	47.9898	-0.156	0.229	-0.11938
1.832	47.1962	-192.145	1385.058	-1.4839	1.2485	0.74805	-58.336	245.173	826.801	-0.64502	0.78174	0.33398	-33.023	21.3043	59.852	0.23769	-0.079395	-0.0080078	55.206	-3.319	88.277	-0.18604	0.25146	-0.13184
1.834	37.778	-182.494	1420.1	-1.4199	1.2266	0.73389	-56.95	252.545	781.662	-0.61914	0.75684	0.32275	-80.704	43.934	48.642	0.19414	-0.049219	0.0095703	91.303	-71.49	157.606	-0.22119	0.29639	-0.146
1.836	29.097	-146.547	1434.152	-1.2534	1.186	0.69531	-94.429	268.2613	740.941	-0.56348	0.69629	0.2876	-89.198	12.3013	66.031	0.1461	-0.015625	0.033398	113.0609	-136.091	270.4999	-0.24609	0.31934	-0.1543
1.838	15.477	-126.163907	1407.244	-1.1074	1.1533	0.66797	-98.72	216.9777	718.473	-0.52197	0.65772	0.26831	-92.9	39.268	34.001	0.096775	0.016699	0.05918	130.343	-148.865	398.53675	-0.30176	0.40088	-0.16406
1.84	-12.125	-91.118	1393.0397	-0.96973	1.1211	0.63916	-118.9688	258.368	687.019	-0.47852	0.6167	0.24854	-92.6562	21.0473	41.873	0.052246	0.047363	0.081543	90.64	-218.736	561.27505	-0.36792	0.47363	-0.14038
1.842	-19.044	-62.187	1365.512	-0.82227	1.0762	0.60986	-130.068	235.644	614.27056	-0.4248	0.56055	0.21777	-103.0766	45.7754	21.261	0.010645	0.082422	0.11162	53.988	-284.656	672.535	-0.46484	0.55762	-0.099121
1.844	-53.296	-55.399	1353.39	-0.76514	1.0581	0.59766	-129.18174	186.045	607.818	-0.39941	0.5332	0.20801	-123.954	26.097	52.722	-0.028516	0.11426	0.13789	43.778	-399.229	736.739	-0.64453	0.67139	-0.03125
1.846	-83.225	-57.92	1340.112	-0.68896	1.0317	0.58008	-116.3535	213.52	580.5913	-0.35107	0.48682	0.18457	-135.5488	52.613	39.9224	-0.066406	0.14082	0.16524	30.807	-438.89	804.433	-0.74951	0.73291	0.0097656
1.848	-100.921	-76.455	1350.242	-0.65674	1.0127	0.57325	-101.713	153.83	543.6086	-0.31909	0.44922	0.16748	-149.481	21.739	56.174	-0.095607	0.16338	0.19023	44.797	-407.7885	883.692	-0.96973	0.85938	0.095703
1.85	-69.474	-113.082	1366.26311	-0.64502	1.0024	0.57129	-72.451	171.924	500.596	-0.28906	0.41016	0.14551	-101.122	54.281	40.1187	-0.12207	0.18115	0.20801	4.28	-295.493	978.267	-1.1355	0.95239	0.13721
1.852	-49.992	-137.7126	1383.8402	-0.65479	1	0.57861	-46.416	193.307	466.9174	-0.25244	0.36035	0.12207	-107.5427	10.8739	47.3994	-0.1374	0.19346	0.23389	-29.452	-147.872	997.179	-1.3262	1.0273	0.19141
1.854	-46.186	-162.99	1412.1688	-0.66797	1.0054	0.57861	-46.509	128.642	440.186	-0.229	0.33887	0.11279	-111.8784	23.1728	52.2721	-0.14883	0.2042	0.24971	-36.2937	-117.036	1027.024	-1.5879	1.127	0.23291
1.856	-45.865	-199.679	1439.1097	-0.71484	1.0371	0.59521	-41.497	168.677	400.841	-0.18652	0.29346	0.088867	-114.221	-42.953	90.351	-0.15196	0.21084	0.26338	3.4108	-98.013	1102.182	-1.6997	1.1782	0.24902
1.858	-71.399	-229.119	1454.4622	-0.75757	1.0647	0.61304	-36.073	146.9073	367.278	-0.15674	0.26196	0.072998	-110.8623	-54.262	100.6021	-0.14902	0.21807	0.27452	9.838	-126.469	1259.542	-1.8613	1.2754	0.28125
1.86	-118.928	-229.258	1473.57	-0.80078	1.0957	0.62842	-37.818	140.896	341.045	-0.12695	0.23193	0.054199	-132.7636	-109.7267	175.1951	-0.14941	0.22363	0.28369	10.321	-57.149	1382.53	-1.9565	1.3491	0.31543
1.862	-158.266	-224.433	1485.515	-0.86133	1.1406	0.65967	-30.606	196.63	314.8344	-0.092773	0.19873	0.033691	-81.415	-115.455	252.877	-0.13897	0.23418	0.28642	27.863	-41.122	1436.286	-2.0347	1.438	0.35889
1.864	-193.0105	-207.716	1484.132	-0.89648	1.166	0.66602	-43.636	145.269	295.9514	-0.076172	0.17822	0.021973	-90.305	-213.342	403.734	-0.12841	0.24366	0.28984	-16.668	4.33	1433.274	-2.127	1.5488	0.43408
1.866	-230.6669	-199.2185	1477.8741	-0.95654	1.2134	0.66309	-25.675	156.242	282.6672	-0.04834	0.14893	0.0058594	-87.998	-277.856	540.137	-0.12021	0.25264	0.29101	-15.3704	-15.54	1415.427	-2.1753	1.5942	0.47168
1.868	-240.119	-172.343	1447.501	-1.0005	1.25	0.66894	-33.785	159.397	236.306	-0.02832	0.12475	-0.0063474	-127.24	-418.85	656.427	-0.12422	0.26933	0.28818	-2.67	-71.32	1469.422	-2.2852	1.6709	0.5249
1.87	-238.08	-140.429	1465.7378	-1.0386	1.2876	0.67383	-19.378	91.8227	213.6509	-0.01123	0.10303	-0.013184	-120.955	-469.964	682.812	-0.14258	0.30029	0.27979	-8.9365	-138.13	1537.767	-2.3408	1.7031	0.53833
1.872	-232.604	-122.235	1460.625	-1.0913	1.3296	0.67969	-15.614	108.776	192.3329	0.0024414	0.077637	-0.029297	-155.005	-486.419	765.817	-0.18389	0.34922	0.26123	-53.98	-256.773	1600.561	-2.3594	1.7266	0.53857
1.874	-206.929	-105.2	1468.2815	-1.1167	1.3521	0.67969	-24.588	83.8368	144.7352	0.0092773	0.070801	-0.035156	-135.678	-356.451	808.722	-0.23994	0.41426	0.26035	-107.468	-334.809	1652.846	-2.291	1.7344	0.50049
1.876	-172.611	-92.695	1465.839	-1.1719	1.3887	0.68408	-19.551	62.4901	141.7431	0.020996	0.04248	-0.04248	-165.041	-230.284	856.193	-0.31299	0.47637	0.27129	-105.4646	-412.865	1708.8392	-2.2266	1.7324	0.46191
1.878	-163	-70.51	1465.141	-1.2019	1.4133	0.67896	-25.415	104.9733	128.5967	0.029052	0.022705	-0.051757	-137.593	-101.348	872.4728	-0.39492	0.53799	0.29824	-32.868	-394.15	1756.756	-2.0034	1.7271	0.36719
1.88	-144.161	-54.0823	1499.817	-1.2241	1.438	0.67773	-43.612	42.289	122.16716	0.03418	0.0053711	-0.056152	-130.1003	-77.795	908.9997	-0.49219	0.57813	0.33447	97.541	-394.11	1785.151	-1.8052	1.728	0.29712
1.882	-146.035	-38.1758	1522.2897	-1.2397	1.4692	0.67285	-45.296	51.146	141.9661	0.04541	-0.02002	-0.066406	-33.282	-44.78	1017.443	-0.59639	0.60361	0.3668	122.453	-389.35	1813.037	-1.6167	1.731	0.23877
1.884	-146.747	-61.442	1547.4528	-1.2422	1.4805	0.66846	-72.08	84.887	115.4177	0.050781	-0.027832	-0.07373	-6.90586	10.28	1160.536	-0.69922	0.62988	0.3915	75.48	-360.28	1856.414	-1.4092	1.7344	0.17725
1.886	-167.228	-93.8506	1569.73	-1.2524	1.5103	0.67773	-103.348	47.0155	84.7704	0.064941	-0.047363	-0.08252	35.17305	90.71	1264.323	-0.78437	0.66348	0.41181	22.609	-293.999	1921.968	-1.332	1.7383	0.1582
1.888	-172.1666	-150.1447	1580.701	-1.2613	1.523	0.67676	-81.944	98.18	81.972	0.072998	-0.059815	-0.096437	-8.112	158.646	1325.5864	-0.85137	0.72266	0.42939	-36.249	-202.819	1984.735	-1.2417	1.7505	0.12988
1.89	-169.285	-162.5593	1584.1299	-1.271	1.5298	0.67871	-104.907	77.686	61.6322	0.084961	-0.076172	-0.10596	-65.161	96.256	1386.452	-0.90576	0.81104	0.44287	-56.09	-137.106	2026.273	-1.2202	1.7622	0.11963
1.892	-131.752	-145.7483	1588.5243	-1.2871	1.541	0.68457	-112.712	35.588	56.918	0.10303	-0.087402	-0.11621	-151.695	40.36	1442.222	-0.97012	0.92988	0.47685	-100.369	-59.41	1991.893	-1.2319	1.7788	0.11426
1.894	-143.132	-136.9806	1578.6558	-1.2866	1.5513	0.68457	-95.708	82.179	39.7949	0.11328	-0.091797	-0.12012	-196.637	-33.85	1531.583	-1.0426	1.0594	0.53291	-97.745	-81.29	1948.825	-1.3125	1.8008	0.13379
1.896	-110.347	-131.655	1567.546289	-1.2949	1.5508	0.68506	-96.4986	39.33	31.672	0.12646	-0.10449	-0.12891	-252.106	-67.36	1594.419	-1.1453	1.1864	0.61221	-164.6584	-40.42	1898.091	-1.3691	1.8125	0.14893
1.898	-76.051	-125.551	1577.887	-1.3054	1.5491	0.68823	-75.99	55.023	50.243	0.13354	-0.11279	-0.1272	-276.649	-189.82	1670.101	-1.2894	1.298	0.7001	-199.679	-63.788	1935.172	-1.5254	1.832	0.1709
1.9	-58.257	-103.268	1562.4673	-1.312	1.5532	0.69141	-77.356	74.5231	39.331	0.13525	-0.12061	-0.12354	-326.67	-261.76	1738.3591	-1.4619	1.3789	0.79053	-187.662	-54.034	1983.819	-1.6394	1.8459	0.19824
1.902	-64.025	-78.621	1589.1015	-1.3076	1.5371	0.70459	-91.463	31.515	36.203	0.13623	-0.12598	-0.13721	-263.549	-390.098	1772.104	-1.644	1.4462	0.8668	-144.136	-91.9203	2027.8228	-1.7358	1.8462	0.21533
1.904	-42.19	-43.372	1588.924068	-1.3159	1.5415	0.70508	-67.017	64.14127	22.544	0.13428	-0.13135	-0.14063	-132.862	-428.29	1750.467	-1.812	1.4911	0.93672	-54.264	-140.806	2071.153	-1.8433	1.8403	0.22461
1.906	-70.209	-1.4674	1564.5175	-1.3145	1.5254	0.72217	-53.051	36.8934	11.759	0.13623	-0.13428	-0.14453	-3.82	-502.4	1779.065	-1.9323	1.5364	0.99529	-44.12	-133.976	2086.995	-1.8809	1.8359	0.22705
1.908	-120.001	31.044	1552.433	-1.3194	1.5147	0.73145	-72.065	9.0009	43.858	0.13208	-0.1355	-0.14355	33.32	-444.16	1849.327	-1.9938	1.5769	1.0443	-42.646	-146.488	2122.099	-1.9429	1.8306	0.23438
1.91	-161.7464	19.193	1548.4962	-1.3203	1.5	0.74072	-64.081	60.762	52.5817	0.13135	-0.13965	-0.14355	60.65934	-408.17	1954.21	-2.0039	1.625	1.0669	-83.062	-116.842	2158.982	-1.9824	1.8243	0.22998
1.912	-161.611	11.036	1549.663	-1.3198	1.4741	0.75781	-54.208	24.6849	62.192	0.12598	-0.14014	-0.14551	111.295	-272.009	1992.756	-1.9533	1.6808	1.0555	-134.513	-158.656	2203.631	-2.0098	1.8105	0.23682
1.914	-173.54275	7.631	1559.2	-1.3242	1.4551	0.76025	-49.566	45.946	72.37817	0.12305	-0.14209	-0.146	102.173	-207.992	2025.293	-1.8577	1.7391	1.043	-156.786	-199.656	2220.172	-2.0347	1.7915	0.24756
1.916	-185.622	-5.323	1553.5368	-1.3262	1.4219	0.77197	-41.658	58.4058	44.697	0.12061	-0.13916	-0.14746	75.3441	-111.69	1994.1715	-1.7327	1.7845	1.0226	-136.243	-225.69	2185.832	-2.0464	1.7778	0.24658
1.918	-186.346	-37.6575	1536.511	-1.3247	1.398	0.77539	-43.7	-2.284	44.2151	0.10962	-0.13843	-0.14356	12.462	-130.834	1982.944	-1.6129	1.799	0.9874	-128.3017	-180.506	2163.9657	-2.0625	1.7559	0.25244
1.92	-164.6046	-54.956	1525.682	-1.3203	1.373	0.77588	-23.97	45.4481	53.20902	0.099609	-0.13867	-0.14307	-72.55	-70.49	1920.947	-1.5098	1.791	0.93408	-85.53	-74.8635	2113.859	-2.0659	1.7446	0.25586
1.922	-161.815	-58.3888	1518.7206	-1.3081	1.3442	0.77734	-22.02	48.6854	27.4141	0.089355	-0.12646	-0.13818	-142.127	-73.78	1906.087	-1.4066	1.7524	0.88828	-66.264	3.076	2093.448	-2.0527	1.7383	0.26416
1.924	-139.958	-61.28	1541.71	-1.3003	1.3306	0.77148	-20.47	31.4925	55.2148	0.084961	-0.12939	-0.14453	-131.334	-34.48	1892.404	-1.3241	1.7056	0.84824	-13.534	75.001	2072.017	-2.0215	1.7207	0.26318
1.926	-132.721	-77.0061	1566.726	-1.2842	1.3071	0.75977	-3.697	69.484	45.0198	0.069336	-0.12451	-0.13818	-60.029	-91.22	1883.266	-1.2538	1.6477	0.80918	49.9989	76.151	2049.875	-1.9771	1.7036	0.26343
1.928	-123.549	-52.97214	1554.493	-1.2651	1.2895	0.75732	-56.065	9.2742	49.4191	0.059815	-0.12085	-0.13184	27.299	-128.665	1878.528	-1.2184	1.6082	0.78135	112.3	116.119	2060.117	-1.9292	1.6821	0.25586
1.93	-144.269	-18.4939	1540.818	-1.2495	1.2739	0.74805	-41.606	36.8412	82.204	0.049316	-0.11572	-0.12842	92.847	-194.107	1914.879	-1.2075	1.5864	0.75586	158.93	147.133	2040.064	-1.8804	1.6528	0.25635
1.932	-167.7634	11.2348	1509.23272	-1.2285	1.2578	0.73682	-40.684	66.733	59.168	0.035645	-0.10742	-0.12256	91.773	-175.677	1981.736	-1.2313	1.5973	0.74815	126.322	193.135	2038.83	-1.8608	1.6411	0.25684
1.934	-163.1	27.5841	1496.5295	-1.2168	1.252	0.73291	-80.774	31.502	56.1871	0.019531	-0.10498	-0.11719	60.58	-166.19	2082.9912	-1.2733	1.6251	0.76094	118.263	223.691	2025.76058	-1.8301	1.623	0.26123
1.936	-153.384	63.6328	1465.9875	-1.1934	1.2363	0.71729	-61.051	65.697	65.31821	0.0063477	-0.097168	-0.1123	3.342	-152.52	2164.85	-1.3456	1.6606	0.80664	61.18	183.977	2013.61734	-1.814	1.6114	0.27661
1.938	-145.3842	75.2178	1431.7831	-1.1797	1.2251	0.70507	-95.3847	23.1526	30.581	-0.0048829	-0.08667	-0.10449	-78.109	-188.423	2202.285	-1.4506	1.6971	0.8624	43.4953	164.787	2007.4474	-1.8066	1.6055	0.28955
1.94	-130.093	74.304	1426.851	-1.1655	1.2134	0.69922	-94.593	-11.3825	31.4022	-0.018066	-0.079102	-0.095703	-132.634	-207.576	2201.421	-1.5879	1.7402	0.90869	41.593	119.79	2034.028	-1.7964	1.5962	0.31396
1.942	-88.578	59.179	1418.867	-1.1401	1.1958	0.68555	-59.26	29.6662	36.8744	-0.037598	-0.067871	-0.086426	-211.15	-198.381	2169.516	-1.7297	1.7801	0.94483	40.818	127.786	2030.254	-1.7944	1.5903	0.32959
1.944	-67.611	64.0541	1414.9856	-1.1289	1.1855	0.67627	-110.487	1.173	39.9781	-0.044434	-0.060059	-0.082031	-266.647	-136.97	2155.502	-1.8647	1.8137	0.98769	39.601	135.661	2003.227	-1.7988	1.5801	0.36279
1.946	-34.993	63.93	1389.903	-1.1069	1.1704	0.6582	-100.379	25.173	68.194	-0.059082	-0.058594	-0.071289	-335.715	-66.751	2109.048	-1.9741	1.8357	1.0096	-26.124	147.76	1965.4268	-1.7893	1.5755	0.38257
1.948	-40.111	40.215	1374.8496	-1.0899	1.1543	0.64063	-90.911	48.23029	52.7594	-0.064697	-0.047364	-0.068848	-313.171	-22.3	2060.457	-2.0516	1.8562	1.0256	-25.482	151.623	1947.999	-1.7793	1.5684	0.40625
1.95	-13.097	25.69	1353.202	-1.0659	1.147	0.62012	-83.122	1.956	42.4009	-0.074219	-0.045898	-0.05957	-290.451	2.258	2029.544	-2.0957	1.8652	1.0259	-44.517	139.419	1937.532	-1.7559	1.5586	0.43213
1.952	-24.066	30.959	1350.3729	-1.0327	1.1274	0.59668	-66.661	35.8053	65.6537	-0.077148	-0.037598	-0.061523	-186.0741	-2.4696	1992.118	-2.0948	1.8719	1.016	-28.329	179.404	1934.087	-1.7378	1.5532	0.44092
1.954	-39.142	31.09051	1356.022	-1.019	1.1118	0.58496	-98.2895	18.4671	46.9413	-0.07373	-0.03125	-0.052246	-101.955	32.885	1982.455	-2.073	1.8742	1.0085	-41.962	229.003	1932.85	-1.7007	1.5396	0.46094
1.956	-61.817	15.3826	1359.022	-0.98193	1.0884	0.5625	-92.277	-3.689	47.2274	-0.067871	-0.030762	-0.050293	-77.312	54.391	1961.205	-2.0246	1.882	0.98584	-74.5804	337.466	1900.19	-1.6653	1.5169	0.46728
1.958	-74.58	13.9242	1337.748	-0.95508	1.0708	0.54785	-73.974	56.751	20.999	-0.060058	-0.023437	-0.053466	-98.821	134.062	1949.749	-1.9655	1.8905	0.96748	-111.4558	369.651	1828.064	-1.6284	1.4946	0.47363
1.96	-116.4776	34.849	1296.139	-0.9292	1.061	0.5293	-77.566	23.6434	17.546	-0.052734	-0.015137	-0.056641	-131.0442	147.405	1956.8957	-1.9023	1.8867	0.94971	-161.455	382.858	1752.3318	-1.561	1.4517	0.47168
1.962	-131.8409	50.7299	1255.6131	-0.89648	1.0391	0.50537	-61.687	24.6934	48.249	-0.037109	-0.0058594	-0.063477	-159.766	157.7404	1979.509	-1.842	1.8721	0.93076	-158.342	348.507	1695.4685	-1.5293	1.4316	0.46729
1.964	-102.135	75.4206	1214.0608	-0.87451	1.0356	0.50342	-46.686	46.5916	25.479	-0.029785	-0.00048828	-0.063965	-167.524	75.52262	2004.548	-1.7975	1.8435	0.91602	-173.203	288.456	1673.126	-1.4634	1.3813	0.45752
1.966	-92.954	102.3883	1188.623	-0.84863	1.0117	0.48193	-52.142	16.1002	29.9	-0.014648	0.0083008	-0.07666	-139.506	62.373	2034.998	-1.7628	1.811	0.9	-146.573	267.685	1631.906	-1.4063	1.3409	0.44409
1.968	-89.52	128.3729	1161.645	-0.81982	0.99463	0.46973	-30.335	70.491	36.619	0.0029297	0.013672	-0.078613	-111.935	21.99	2026.476	-1.7437	1.7818	0.89102	-136.932	232.5747	1583.019	-1.3438	1.2988	0.43018
1.97	-89.21	110.6589	1154.3862	-0.81104	0.98486	0.46484	-34.329	44.4972	24.672	0.013672	0.016602	-0.086914	-111.99	68.627	1980.133	-1.7363	1.752	0.88721	-120.685	266.338	1539.131	-1.2534	1.2368	0.41113
1.972	-89.005	105.027	1135.1307	-0.79199	0.9668	0.45068	-20.901	10.947	53.5968	0.027344	0.025391	-0.094727	-84.041	31.357	1948.5774	-1.7443	1.7326	0.88545	-89.8712	250.475	1504.175	-1.2065	1.2036	0.39941
1.974	-93.722	98.573	1108.2646	-0.78027	0.94873	0.44336	3.92099999999999	49.1008	40.8027	0.034668	0.030273	-0.096191	-39.728	46.0821	1887.73	-1.7562	1.7083	0.87422	-69.195	256.632	1463.266	-1.1069	1.1431	0.3833
1.976	-123.343	106.6091	1088.7777	-0.76563	0.93066	0.43799	-31.322	1.035	15.8611	0.045898	0.031738	-0.10156	28.051	-19.921	1861.8537	-1.7612	1.6813	0.86445	-30.938	260.985	1425.595	-1.0328	1.0928	0.36499
1.978	-136.9299	97.206	1082.9524	-0.74707	0.91406	0.42334	-36.898	23.67456	51.159	0.053711	0.038086	-0.11426	79.416	38.37	1835.129	-1.7544	1.6515	0.85	-23.579	281.504	1389.534	-0.95117	1.041	0.33789
1.98	-169.0293	95.839	1064.79345	-0.73438	0.90234	0.42041	-46.986	61.294	40.39787	0.052734	0.039063	-0.11621	76.938	41.91	1832.907	-1.7397	1.6216	0.83008	20.681	287.58	1344.068	-0.84326	0.97314	0.31641
1.982	-150.617	90.755	1020.4957	-0.71875	0.87695	0.40332	-73.209	31.4893	38.7646	0.062988	0.046875	-0.12012	40.53	172.612	1803.698	-1.7062	1.5949	0.80752	12.982	267.5618	1283.1947	-0.79297	0.93555	0.30713
1.984	-158.198	76.72	995.4729	-0.70434	0.86059	0.39575	-46.364	62.069	55.03435	0.068603	0.051025	-0.12207	4.44	209.105	1759.58	-1.6721	1.5732	0.78242	18.619	283.994	1174.5	-0.69824	0.86719	0.27393
1.986	-138.8493	59.8135	987.746	-0.68311	0.84424	0.38672	-58.639	39.7281	14.563	0.072266	0.060059	-0.12061	-22.734	320.425	1700.2926	-1.63	1.5497	0.75586	19.958	288.119	1081.794	-0.62574	0.81568	0.26026
1.988	-104.572	47.563	962.0225	-0.66406	0.81836	0.37061	-69.082	16.278	30.4686	0.073242	0.067871	-0.12158	-60.234	310.96	1662.187	-1.5785	1.5293	0.73271	0.196000000000012	351.737	998.209	-0.5542	0.75684	0.23828
1.99	-73.986	64.399	937.8744	-0.64697	0.80273	0.35791	-59.553	53.593	42.881	0.070313	0.070313	-0.12061	-81.611	349.07	1629.221	-1.5269	1.5044	0.70508	-29.723	381.798	930.32	-0.46045	0.68408	0.2124
1.992	-42.076	83.738	911.9383	-0.62256	0.77686	0.34033	-85.889	26.673	35.884	0.060547	0.084473	-0.12354	-162.214	282.84	1608.765	-1.4697	1.4717	0.67725	-63.991	420.642	878.9432	-0.41602	0.64453	0.20117
1.994	-31.422	86.416	901.537735	-0.60328	0.75659	0.33106	-76.692	45.8821	58.3478	0.058106	0.091308	-0.12475	-193.838	295.17	1560.813	-1.414	1.436	0.64687	-37.22	415.961	822.17595	-0.33398	0.57031	0.17139
1.996	-0.215000000000003	102.136	872.7958	-0.58154	0.73682	0.31738	-74.511	70.386	42.2724	0.054199	0.098633	-0.12793	-192.467	210.614	1526.432	-1.3558	1.4044	0.61992	-17.96	375.146	764.4215	-0.2793	0.52271	0.14869
1.998	-11.193	120.0375	859.536	-0.55908	0.70703	0.30029	-100.048	33.2977	54.103	0.051758	0.11035	-0.13232	-163.144	206.472	1462.923	-1.2948	1.3647	0.59316	-5.699	354.636	699.446	-0.22266	0.47217	0.12793
2	-27.712	131.689	828.293	-0.54639	0.69482	0.29004	-91.144	72.494	73.8298	0.048828	0.11523	-0.12988	-161.873	112.03	1455.0509	-1.2378	1.3306	0.56543	-43.021	305.153	650.2941	-0.14209	0.39941	0.1084
2.002	-45.411	138.524	802.693	-0.52148	0.66797	0.271	-106.5148	42.032	61.5567	0.04248	0.12646	-0.13623	-98.742	154.93	1397.6546	-1.1837	1.2888	0.533	-62.09	316.8292	628.5105	-0.10938	0.37402	0.10205
2.004	-45.74	145.65	761.681	-0.50366	0.64966	0.25756	-105.6444	-7.9534	100.8991	0.03418	0.13159	-0.13477	-107.147	146.02	1390.8692	-1.1276	1.2492	0.4958	-86.521	312.8076	591.099	-0.044434	0.31055	0.070313
2.006	-49.958	144.931	729.761	-0.48486	0.62939	0.24658	-60.927	-26.235	160.01	0.02832	0.13672	-0.13574	-106.582	233.782	1351.227	-1.0717	1.2067	0.46885	-120.2731	310.336	559.447	-0.003174	0.27344	0.052002
2.008	-48.93	129.514	709.249	-0.45361	0.60156	0.23047	-86.9985	-138.8986	214.651	0.021484	0.14453	-0.1377	-145.808	219.692	1352.928	-1.0142	1.1677	0.43506	-135.80835	281.101	512.22	0.041992	0.22852	0.037109
2.01	-32.312	115.095	686.884	-0.43994	0.58936	0.22217	-15.667	-180.07913	319.459	0.020508	0.14941	-0.13525	-156.522	279.7476	1285.035	-0.9585	1.1255	0.40625	-194.203	233.45394	464.129	0.092773	0.17041	0.016113
2.012	-27.347	109.7761	669.302	-0.41406	0.56445	0.20264	3.442	-190.676	405.664	0.015625	0.15625	-0.14063	-159.675	255.347	1227.7987	-0.90244	1.0823	0.37774	-213.08	198.688	408.961	0.11768	0.14551	0.0068359
2.014	-5.444	111.688	655.1142	-0.39721	0.54541	0.18677	18.8425	-260.79	511.7847	0.0080566	0.15894	-0.1438	-128.007	325.183	1128.88	-0.84688	1.041	0.34659	-225.763	158.961	362.776	0.14844	0.098145	-0.015137
2.016	-24.821	102.298	650.8662	-0.37305	0.53125	0.17871	63.366	-267.643	593.4426	-0.0014648	0.16357	-0.1499	-141.702	312.833	1082.612	-0.79375	0.99648	0.31924	-186.336	165.287	296.111	0.16308	0.068115	-0.026611
2.018	-18.381	103.037	639.114	-0.34619	0.50146	0.16016	42.1747	-295.681	626.384	-0.025879	0.17627	-0.14893	-118.7192	359.943	1000.6996	-0.74043	0.95117	0.29052	-170.2165	128.453	270.3751	0.17627	0.040527	-0.038574
2.02	-40.228	97.177	616.5632	-0.33496	0.49023	0.14893	77.467	-292.673	701.697	-0.041504	0.19189	-0.14941	-100.559	320.496	951.1509	-0.69043	0.89844	0.2627	-151.596	133.115	243.083	0.18506	0.0024414	-0.050781
2.022	-63.963	105.416	595.4169	-0.30664	0.47266	0.13037	116.287	-203.841	738.569	-0.10156	0.23535	-0.12695	-24.463	333.3717	859.898	-0.63789	0.85547	0.2374	-83.314	124.891	208.382	0.18311	-0.012207	-0.050781
2.024	-97.8321	88.278	594.7012	-0.28785	0.45752	0.11792	78.683	-163.65	739.868	-0.16773	0.28003	-0.093751	45.986	265.903	817.714	-0.59444	0.81084	0.20664	-86.549	146.3435	178.631	0.17041	-0.043457	-0.048828
2.026	-112.0561	100.9908	572.64128	-0.271	0.44189	0.10205	73.957	-101.255	766.352	-0.25586	0.3291	-0.057129	120.16	289.87	775.66	-0.54678	0.75693	0.18633	-74.236	176.8891	158.109	0.14893	-0.05835	-0.038819
2.028	-95.715	119.719	535.6985	-0.24902	0.42041	0.091309	94.684	-26.048	772.5756	-0.4043	0.39014	0.015625	123.838	260.032	729.1313	-0.50381	0.70966	0.16494	-83.241	148.12	136.173	0.12354	-0.074707	-0.029297
2.03	-111.2699	132.203	508.1967	-0.23779	0.4126	0.081055	84.741	-22.25	866.012	-0.47852	0.41992	0.056152	123.2506	287.738	667.319	-0.4624	0.65479	0.14258	-60.745	139.945	108.419	0.075684	-0.081543	-0.0078125
2.032	-110.6309	121.695	490.88194	-0.2124	0.39502	0.06543	112.4779	46.457	966.683	-0.63672	0.50098	0.13721	63.3194	232.8398	658.359	-0.42569	0.60234	0.12617	-67.236	80.9968	97.2406	0.046387	-0.080566	0.00048828
2.034	-99.931	117.058	474.4323	-0.20019	0.37915	0.060791	105.469	77.1494	974.626	-0.76416	0.57422	0.18946	33.068	219.72403	627.566	-0.38633	0.54931	0.10684	-54.019	50.703	73.8715	-0.010742	-0.072754	0.026367
2.036	-69.9825	116.7414	451.5043	-0.18506	0.3667	0.04834	76.29188	47.5377	989.4354	-0.88281	0.64063	0.23633	-6.196	157.075	608.234	-0.34414	0.49697	0.088477	-39.439	26.748	57.5581	-0.055176	-0.066162	0.051758
2.038	-53.979	106.982	436.095	-0.16699	0.34521	0.040039	73.104	70.374	999.051	-1.0098	0.72461	0.27002	15.15	182.762	547.352	-0.30312	0.44531	0.068262	-17.057	25.9065	48.6474	-0.10693	-0.053711	0.075684
2.04	-33.965	97.091	429.883	-0.1582	0.3418	0.029297	19.873	17.51	1022.111	-1.0679	0.76611	0.27832	-25.786	179.898	488.301	-0.26172	0.39795	0.047852	31.972	54.008	29.375	-0.17383	-0.024902	0.11572
2.042	-6.39	95.776	408.319	-0.13818	0.32471	0.021484	-0.922000000000001	-46.39	1130.483	-1.1753	0.83057	0.28857	-37.795	241.608	420.845	-0.22598	0.35195	0.02832	27.79	46.138	35.462	-0.21191	-0.01123	0.12744
2.044	-29.878	102.534	394.7617	-0.1206	0.31347	0.014404	-50.53967	-81.62	1168.507	-1.2451	0.88379	0.29736	-40.17	219.843	372.88	-0.1835	0.30801	0.00625	38.946	39.464	43.906	-0.2832	0.017578	0.15479
2.046	-23.185	112.989	389.768	-0.104	0.29736	0.0092773	-99.137	-225.106	1213.928	-1.3125	0.94336	0.30908	-36.257	231.416	319.76006	-0.14483	0.26387	-0.012109	21.935	10.594	42.867	-0.32788	0.041504	0.17456
2.048	-38.734	103.4	383.003	-0.09082	0.27979	0	-107.055	-267.43	1289.3564	-1.4038	1.0181	0.32813	-2.355	179.952	276.0865	-0.10957	0.22432	-0.027344	11.746	13.563	43.1048	-0.36816	0.061035	0.19678
2.05	-19.562	102.68	370.625	-0.077637	0.27051	-0.0029297	-111.82	-293.196	1301.2741	-1.457	1.0566	0.33301	25.935	165.735	244.2723	-0.076172	0.18604	-0.040527	-10.957	26.606	38.536	-0.4082	0.085938	0.229
2.052	-28.985	88.706	370.6769	-0.06543	0.25098	-0.012207	-96.76	-354.6	1364.911	-1.564	1.1099	0.34375	-38.662	151.034	196.773	-0.052539	0.15635	-0.058496	-63.119	72.596	43.837	-0.42139	0.098633	0.23145
2.054	-15.8	83.542	364.774	-0.051758	0.24122	-0.015137	-60.887	-319.4	1382.9438	-1.6287	1.1448	0.34644	-82.0135	173.303	174.159	-0.029297	0.12129	-0.073926	-65.805	102.664	37.5613	-0.44043	0.1167	0.25684
2.056	17.817	69.0573	322.905	-0.035645	0.22314	-0.023926	-91.315	-353.49	1394.7674	-1.6772	1.1685	0.354	-132.995	157.201	142.476	-0.015234	0.092774	-0.079394	-112.4738	109.022	35.2129	-0.44336	0.12158	0.27587
2.058	4.601	75.6969	294.8351	-0.019531	0.20459	-0.031738	-87.521	-328.457	1467.212	-1.7188	1.2031	0.34521	-149.747	175.944	141.136	-0.0012696	0.066406	-0.095607	-81.498	119.394	32.546	-0.43701	0.12305	0.28857
2.06	11.924	86.7462	272.79395	-0.012695	0.19873	-0.038086	-99.634	-231.823	1495.244	-1.7148	1.2139	0.33252	-161.279	144.049	129.196	0.0083008	0.045898	-0.11035	-108.503	76.559	51.72937	-0.40674	0.11621	0.3042
2.062	9.305	87.2169	265.3365	0.0053711	0.17969	-0.052734	-118.6574	-224.147	1513.807	-1.6655	1.231	0.29639	-150.518	146.332	121.315	0.011426	0.027832	-0.11904	-141.5721	85.539	76.552	-0.39063	0.11279	0.29932
2.064	27.302	96.1701	269.1116	0.015381	0.16699	-0.058349	-113.266	-140.195	1542.8145	-1.6018	1.2453	0.25488	-156.681	107.264	106.821	0.020606	0.0060547	-0.12861	-136.34305	42.344	73.04	-0.3418	0.092285	0.29346
2.066	-2.108	101.2991	267.36	0.027344	0.1543	-0.064941	-170.628	-86.738	1497.354	-1.521	1.2661	0.21924	-140.102	97.4	107.9411	0.025683	-0.0083985	-0.13759	-149.912	23.361	59.4845	-0.29663	0.076172	0.28711
2.068	-3.861	92.9237	265.0106	0.040527	0.14258	-0.077637	-136.9584	-94.655	1492.975	-1.4023	1.3008	0.16504	-108.1649	43.414	86.239	0.031933	-0.028321	-0.14795	-155.4798	6.788	44.771	-0.25342	0.062988	0.27246
2.07	-33.351	75.8704	268.5049	0.047852	0.1377	-0.082031	-85.549	-28.21	1506.088	-1.3545	1.3184	0.1416	-39.916	15.865	69.77	0.039063	-0.038574	-0.15771	-139.9301	9.423	45.398	-0.18945	0.040527	0.25732
2.072	-56.016	76.6905	262.231	0.056152	0.12549	-0.084961	-88.435	-76.096	1528.609	-1.2739	1.3442	0.11377	10.715	-33.741	31.7912	0.049023	-0.049512	-0.16338	-119.049	26.399	46.74	-0.1582	0.027344	0.25244
2.074	-67.6446	85.884	227.0617	0.061035	0.11792	-0.090332	-34.938	-127.001	1628.408	-1.2407	1.3618	0.10816	42.185	-20.709	51.1315	0.05664	-0.053222	-0.1709	-157.4141	23.134	79.519	-0.095215	0.0024414	0.23291
2.076	-94.6526	82.204	223.0026	0.062012	0.11279	-0.094238	22.645	-142.631	1663.031	-1.2339	1.3813	0.1123	22.345	10.002	47.048	0.062109	-0.058691	-0.17363	-138.3569	20.398	83.731	-0.028809	-0.026855	0.22266
2.078	-85.006481	66.149	201.3309	0.060547	0.10742	-0.091797	56.593	-226.06	1693.40363	-1.2573	1.4146	0.12646	20.552	69.1965	63.6031	0.060156	-0.061719	-0.17539	-129.771	1.969	97.2754	-2.047e-13	-0.044922	0.2124
2.08	-81.152	62.01695	184.672	0.055176	0.10352	-0.085938	70.489	-200.491	1731.9735	-1.2827	1.4341	0.13574	9.95	89.345	62.5528	0.054199	-0.063477	-0.17139	-93.295	2.4393	81.201	0.060547	-0.077637	0.18652
2.082	-76.9194	56.303	179.2476	0.046387	0.1084	-0.08252	55.43	-178.335	1736.0518	-1.3374	1.4712	0.15527	-18.6	88.544	58.757	0.048047	-0.065918	-0.17187	-35.232	-9.0242	65.823	0.11352	-0.10059	0.17359
2.084	-81.5231	43.018	188.9496	0.030517	0.10913	-0.078613	58.642	-218.079	1784.346	-1.3757	1.4993	0.1814	-2.866	47.731	46.144	0.034473	-0.064551	-0.16523	-45.497	7.511	42.381	0.16602	-0.12354	0.15576
2.086	-74.616	38.718	184.08389	0.014648	0.11377	-0.070801	15.807	-193.545	1837.856	-1.4102	1.5352	0.20166	-6.908	31.267	55.9279	0.016894	-0.061426	-0.15469	-49.742	17.8699	26.3182	0.229	-0.14893	0.13086
2.088	-46.234	52.748	175.37907	-0.0073242	0.1167	-0.058105	-1.142	-242.307	1860.618	-1.4399	1.5806	0.22266	5.407	32.746	37.1149	-0.0014649	-0.063184	-0.14404	-46.128	25.158	10.887	0.25488	-0.16406	0.11963
2.09	-69.641	54.929	169.7421	-0.019531	0.13135	-0.057617	4.483	-260.43	1904.047	-1.4609	1.6094	0.23291	-21.908	36.7311	48.90279	-0.019043	-0.055664	-0.12646	5.724	46.109	-0.501000000000001	0.30127	-0.18799	0.086914
2.092	-48.833	57.7112	174.0243	-0.045898	0.13672	-0.039551	5.804	-176.031904	1884.125	-1.5117	1.6602	0.24756	-9.992	40.2847	7.243	-0.038379	-0.059668	-0.11406	17.766	36.253	7.0264	0.33618	-0.20117	0.06836
2.094	-60.162	63.3502	157.5271	-0.071533	0.14111	-0.028564	-7.597	-143.87965	1859.297	-1.5476	1.7044	0.25928	-23.703	31.122	22.493	-0.053028	-0.05791	-0.1041	42.183	68.895	18.1042	0.36279	-0.21777	0.041016
2.096	-60.964	80.154	147.9194	-0.089355	0.14844	-0.018066	-3.218	-51.998	1848.0722	-1.5874	1.7407	0.26953	17.45	20.071	18.879	-0.062012	-0.064551	-0.095117	28.547	50.408	26.8566	0.39746	-0.23145	0.023926
2.098	-66.256	75.477	137.20679	-0.11621	0.16211	-0.0058594	-1.712	22.743	1794.792	-1.6465	1.7773	0.28174	-20.016	7.043	57.406	-0.053809	-0.070605	-0.093457	-9.93000000000001	42.627	27.141	0.40771	-0.2373	0.013672
2.1	-55.486	69.818	131.7813	-0.12842	0.16748	0.0021973	12.914	1.784	1803.896	-1.666	1.7871	0.27734	-40.517	31.385	64.982	-0.041504	-0.074707	-0.098633	-17.394	34.032	29.805	0.43408	-0.24805	-0.0029297
2.102	-29.133	61.549	115.511	-0.1416	0.1748	0.012207	23.385	56.767	1839.918	-1.7148	1.8066	0.27588	-89.1392	24.0873	86.181	-0.018065	-0.086426	-0.10322	-28.388	39.6447	34.275	0.44067	-0.25049	-0.0058594
2.104	-12.845	60.82394	105.912	-0.1499	0.18115	0.015137	0.634	36.3968	1842.823	-1.7363	1.8086	0.27491	-117.675	13.567	51.7694	0.0093771	-0.093652	-0.10987	-17.769	60.64	43.316	0.44434	-0.25098	-0.013672
2.106	-0.448999999999998	38.462	112.0997	-0.15039	0.18359	0.018555	-16.183	18.3593	1899.192	-1.7578	1.8086	0.26318	-172.467	-20.4136	65.0849	0.037893	-0.098731	-0.11963	-32.87	66.075	44.058	0.44336	-0.24414	-0.021973
2.108	-4.40300000000001	40.862	109.275853	-0.14795	0.18604	0.02002	-77.177	48.374	1871.822	-1.7676	1.7969	0.25244	-157.21	-23.733	55.1704	0.065334	-0.10479	-0.12471	-69.912	63.756	36.4103	0.44189	-0.23926	-0.026367
2.11	21.165	40.706	101.1573	-0.14087	0.18433	0.020996	-86.8924	-26.454	1868.084	-1.771	1.7856	0.24707	-192.952	-5.941	60.23036	0.085449	-0.1167	-0.12695	-110.4109	55.8107	33.2776	0.43555	-0.22656	-0.019531
2.112	-3.693	58.647	94.934	-0.1333	0.18408	0.016113	-43.686	-30.4944	1903.8302	-1.7676	1.7676	0.2373	-151.123	69.259	29.11	0.10117	-0.12578	-0.12988	-105.679	54.451	32.8575	0.41993	-0.21314	-0.016113
2.114	5.978	52.7681	110.1775	-0.1167	0.17725	0.011719	-45.9519	-22.9645	1898.7531	-1.7742	1.7551	0.23023	-148.509	79.362	21.781	0.11347	-0.14092	-0.13437	-113.42	42.552	68.038	0.39893	-0.19189	-0.013672
2.116	-7.825	38.93055	104.3372	-0.10596	0.17676	0.0039063	-42.1847	-78.4151	1949.841	-1.7764	1.7383	0.22021	-119.2754	78.7633	14.25	0.12792	-0.15536	-0.14414	-119.4635	53.027	68.553	0.36572	-0.16699	-0.012207
2.118	-20.929	49.9379	100.1025	-0.085449	0.16406	0	-22.8249	-37.2916	1967.8726	-1.7754	1.7148	0.20264	-122.993	26.8955	22.3736	0.14579	-0.17216	-0.1542	-115.4422	43.5	65.5912	0.35059	-0.1499	-0.0087891
2.12	-51.824	60.474	86.2793	-0.074219	0.15503	-0.00073241	-30.2281	-67.694	1940.2333	-1.771	1.6958	0.19238	-57.441	16.963	20.6786	0.17725	-0.1875	-0.1709	-155.817	42.927	80.2057	0.30957	-0.12109	-0.0043945
2.122	-64.859	44.107	87.3563	-0.063965	0.1499	-0.0039063	3.559	-87.044	1943.961	-1.77	1.6724	0.18115	-38.507	1.226	36.2834	0.2049	-0.20635	-0.18555	-157.1754	69.953	73.21	0.27588	-0.099124	0.0021973
2.124	-69.69	36.55	104.9014	-0.050781	0.13623	-0.010254	42.9236	-18.416	1904.366	-1.7693	1.6506	0.16919	-18.591	24.851	28.3973	0.24486	-0.21827	-0.20587	-159.9003	52.845	80.258	0.23877	-0.074707	0.0068359
2.126	-82.706	40.857	76.37431	-0.041504	0.13379	-0.013184	55.11	-9.78000000000001	1870.155	-1.7676	1.6309	0.15869	-58.246	22.238	44.6554	0.28392	-0.22804	-0.22073	-148.6778	78.142	79.027	0.18408	-0.049316	0.032227
2.128	-65.107	46.5164	56.7317	-0.023926	0.12451	-0.021973	61.3423	69.686	1864.7764	-1.7749	1.604	0.15186	-38.175	53.978	55.688	0.3222	-0.23584	-0.24797	-148.51403	31.2547	61.1218	0.15381	-0.034668	0.050781
2.13	-61.693	38.8777	69.732	-0.021241	0.11768	-0.025147	47.38429	148.572	1824.371	-1.7866	1.5903	0.14941	-42.195	46.0456	51.246	0.35693	-0.24365	-0.26953	-120.0363	1.864	48.252	0.085449	-0.010742	0.072754
2.132	-75.359	42.495	70.238	-0.012695	0.11426	-0.029785	37.155	130.72	1827.4109	-1.8008	1.5664	0.14404	10.041	53.174	50.5861	0.38434	-0.24443	-0.28434	-93.9	-21.744	55.157	0.034668	0.0085448	0.085449
2.134	-67.026	46.023	84.255	-0.00097656	0.1084	-0.035645	73.366	200.102	1818.723	-1.8051	1.5503	0.14868	-0.937000000000005	26.663	52.6784	0.40229	-0.24316	-0.29666	-92.354	-21.535	56.0539	-0.012695	0.02832	0.098145
2.136	-83.356	40.387	78.038	0.00048828	0.10693	-0.036621	55.4224	180.339	1798.8818	-1.8135	1.5332	0.15332	1.724	31.607	43.3431	0.41442	-0.24086	-0.30523	-49.687	-4.898	51.9087	-0.058105	0.054688	0.10889
2.138	-77.449	18.612	81.6901	0.0078125	0.10352	-0.04248	39.645	141.487	1813.3792	-1.8228	1.5142	0.15869	-1.517	7.2469	49.5555	0.41991	-0.23155	-0.30878	-49.077	11.218	48.8045	-0.07666	0.066895	0.11133
2.14	-100.2751	32.0154	85.5462	0.015869	0.099608	-0.043945	33.3216	176.419	1785.619	-1.8257	1.5034	0.16162	35.649	14.415	32.066889	0.4082	-0.22266	-0.30518	-41.028	21.86797	26.013	-0.1084	0.088867	0.12061
2.142	-89.039	27.5967	78.1895	0.019043	0.099609	-0.049316	5.692	110.925	1774.548	-1.8262	1.4922	0.16553	30.844	-15.7007	38.0098	0.38672	-0.21095	-0.29493	-5.965	21.68301	43.361	-0.12231	0.10571	0.12671
2.144	-108.1918	39.172	70.5907	0.024902	0.097168	-0.053711	26.312	115.2771	1786.8014	-1.8159	1.4771	0.16406	32.933	13.991	42.978	0.35283	-0.19241	-0.27613	11.021	37.88245	38.82651	-0.1333	0.12305	0.12744
2.146	-77.359	48.98	69.807	0.030762	0.092773	-0.056641	34.3773	102.198	1769.309	-1.8022	1.4731	0.16406	19.937	34.8338	33.1417	0.30967	-0.17549	-0.25815	13.694	29.9256	45.663	-0.13574	0.14404	0.12842
2.148	-77.1719	46.508	58.9341	0.03418	0.091797	-0.062012	13.571	32.526	1782.422	-1.7827	1.4575	0.1709	-9.36799999999999	90.871	45.428	0.26312	-0.15357	-0.23641	7.626	36.368	21.5796	-0.13574	0.14844	0.1333
2.15	-55.266	37.3464	49.384	0.03833	0.09375	-0.062988	28.105	89.126	1779.106	-1.7666	1.4472	0.17285	-64.524	94.341	76.7654	0.21826	-0.12842	-0.22461	-2.176	17.9283	24.736	-0.13086	0.17188	0.13428
2.152	-28.265	21.699	71.9417	0.039063	0.09375	-0.066895	-30.456	77.924	1748.329	-1.7456	1.4399	0.17725	-100.86909	90.305	88.838	0.18111	-0.10702	-0.19571	-33.177	25.3203	15.379	-0.12598	0.17749	0.13818
2.154	-18.545	14.3227	80.8044	0.046387	0.096191	-0.068359	-22.769	95.088	1739.909	-1.7148	1.4258	0.18457	-115.8199	32.9619	77.39	0.14273	-0.075978	-0.17976	-9.661	57.991	8.144	-0.12207	0.18701	0.14111
2.156	-1.331	9.2277	97.9192	0.042969	0.097168	-0.069824	-31.555	161.0601	1693.7572	-1.6987	1.4185	0.1875	-114.628	6.883	41.2395	0.10738	-0.04904	-0.16174	-14.046	86.281	31.811	-0.11133	0.19092	0.14014
2.158	-23.474	-2.1091	122.8378	0.041504	0.10352	-0.082031	-66.9023	145.2654	1644.4082	-1.6636	1.4067	0.19629	-138.712	-20.5198	29.99515	0.069645	-0.020141	-0.14318	-22.822	112.611	11.6085	-0.10791	0.19629	0.13623
2.16	-7.307	-26.8619	170.9766	0.039795	0.104	-0.07959	-48.707	205.728	1620.6395	-1.6382	1.399	0.20556	-143.748	6.2592	26.492	0.029297	0.0087891	-0.12549	-50.068	77.305	13.888	-0.091797	0.20801	0.146
2.162	-6.994	-52.024	206.4778	0.035645	0.11426	-0.07959	-87.075	247.431	1576.778	-1.6133	1.3926	0.21191	-142.291	16.375	32.084	-0.013542	0.037826	-0.10817	-74.585	62.159	48.3782	-0.088623	0.21753	0.14429
2.164	-2.722	-58.187	256.36512	0.018555	0.13477	-0.085938	-92.7049	246.203	1558.161	-1.5752	1.3848	0.22998	-147.568	34.415	34.9019	-0.054203	0.068209	-0.092489	-79.718	45.18457	65.585	-0.08252	0.23438	0.14355
2.166	0.271999999999998	-70.496	299.2311	0.012207	0.14502	-0.092285	-57.3349	306.707	1535.3754	-1.5581	1.3774	0.23975	-103.7269	17.487	16.504	-0.08267	0.097628	-0.081724	-82.903	23.8752	107.184	-0.069824	0.25	0.14795
2.168	9.1813	-87.705	333.976	-0.019043	0.17773	-0.08252	-46.556	269.701	1482.818	-1.519	1.3618	0.25391	-90.25	6.03400000000001	38.6647	-0.10416	0.11673	-0.073867	-99.432	-12.566	148.545	-0.060547	0.25781	0.15283
2.17	11.379	-106.739	379.215	-0.055664	0.20215	-0.072265	-20.76	220.3257	1461.4892	-1.4965	1.3491	0.26123	-103.9318	4.698	58.2832	-0.11865	0.13623	-0.066895	-163.9994	-68.444	212.3262	-0.064453	0.28516	0.14502
2.172	0.576999999999998	-100.0897	401.8081	-0.10449	0.22998	-0.056641	14.64	225.7065	1431.64	-1.4741	1.3384	0.26465	-113.8879	27.7193	93.937	-0.11828	0.1508	-0.073946	-196.942	-110.817	315.306	-0.079834	0.31762	0.13843
2.174	22.046	-77.966	464.22	-0.18408	0.2749	-0.033203	-13.582	169.307	1391.5603	-1.4341	1.3169	0.26953	-89.886	35.1511	63.095	-0.11333	0.15647	-0.07613	-261.167	-185.5772	507.803	-0.10254	0.37793	0.13525
2.176	37.8316	-64.393	521.733	-0.23096	0.29736	-0.019531	4.114	196.4555	1386.4472	-1.4121	1.3008	0.27393	-98.05023	33.4875	66.175	-0.10391	0.16671	-0.077776	-256.772	-285.721	668.045	-0.16943	0.47021	0.13623
2.178	24.51675	-28.9804	553.221	-0.32031	0.34375	0.019043	17.34	208.7831	1356.9112	-1.3745	1.2759	0.27881	-62.094	13.0308	22.59393	-0.090012	0.17607	-0.086555	-269.214	-427.17	774.174	-0.22363	0.52246	0.15771
2.18	12.276	0.734999999999999	577.0864	-0.3894	0.38354	0.044189	-24.052	157.794	1341.183	-1.3398	1.25	0.2793	-51.649	12.983	19.577	-0.07373	0.18896	-0.091309	-281.194	-496.113	814.004	-0.34326	0.61768	0.2168
2.182	3.503	27.137	629.588	-0.46143	0.42236	0.077148	10.085	196.857	1319.838	-1.3086	1.2305	0.27734	-30.309	44.9517	-1.947	-0.065931	0.19818	-0.095169	-278.11	-450.081	873.372	-0.45483	0.67114	0.27246
2.184	15.042	55.9762	710.205	-0.56934	0.48633	0.1123	7.873	167.143	1264.784	-1.2593	1.1938	0.27686	-18.318	67.001	23.021	-0.05472	0.20438	-0.094786	-305.095	-316.5782	970.0206	-0.57373	0.7251	0.33545
2.186	-11.42	86.8743	750.88322	-0.62256	0.51904	0.13037	21.491	173.772	1240.628	-1.2363	1.1719	0.27881	16.764	70.9743	27.384	-0.04953	0.21411	-0.092011	-320.886	-160.224	1056.009	-0.73682	0.77979	0.40625
2.188	-17.381	95.714	780.401	-0.72168	0.5957	0.15625	30.646	230.062	1174.484	-1.1772	1.1372	0.27295	32.098	41.3817	45.9116	-0.048888	0.21588	-0.089105	-291.7482	-110.5135	1097.4864	-0.81201	0.81787	0.42969
2.19	-57.593	86.457	832.69	-0.79297	0.6377	0.18604	-2.42	208.9717	1107.2267	-1.1384	1.1077	0.2705	56.109	12.537	42.846	-0.051758	0.22021	-0.081543	-168.958	-56.16	1131.3075	-0.96094	0.91602	0.48096
2.192	-43.934	63.1094	891.9273	-0.86963	0.6875	0.21045	26.222	253.877	1058.6423	-1.0952	1.0757	0.27197	25.386	-4.7556	68.197	-0.062435	0.22462	-0.08162	-92.215	-48.34	1255.028	-1.0673	1.022	0.5293
2.194	-54.406	18.047	971.6357	-0.96826	0.76025	0.24902	33.368	260.622	987.19	-1.0352	1.0332	0.26953	31.958	3.462	98.467	-0.070515	0.23131	-0.084186	-56.509	19.21	1407.642	-1.1772	1.1411	0.58154
2.196	-54.956	-0.0440000000000005	1034.2785	-1.0142	0.79639	0.26514	14.714	242.602	959.3407	-1.0078	1.0137	0.26611	-1.699	-29.174	131.2201	-0.070503	0.243	-0.086533	-7.941	37.499	1518.008	-1.3452	1.2974	0.68506
2.198	-62.156	-38.347	1101.3478	-1.1035	0.86523	0.30078	10.695	299.725	924.8329	-0.94629	0.96289	0.25928	-11.556	-54.656	178.142	-0.074814	0.26711	-0.086616	-23.001	56.3983	1524.551	-1.4365	1.3691	0.729
2.2	-73.911	-81.1277	1139.452	-1.1667	0.90796	0.32788	-38.191	267.1422	854.116	-0.90014	0.9226	0.25757	-17.094	-130.455	256.414	-0.080078	0.28271	-0.090332	-66.179	35.74	1515.14	-1.6465	1.4932	0.83936
2.202	-65.697	-119.741	1165.292	-1.2241	0.9458	0.34766	-59.771	254.844	821.6139	-0.84961	0.88477	0.25049	30.163	-210.471	346.434	-0.091009	0.30877	-0.097656	-75.649	-27.18	1555.03	-1.812	1.5464	0.90771
2.204	-85.169	-135.69	1216.4486	-1.2832	0.98047	0.37256	-63.647	263.083	785.971	-0.78662	0.82861	0.24219	8.77145	-312.679	513.404	-0.10974	0.33551	-0.10214	-87.568	-92.13	1627.68	-1.9531	1.5811	0.98291
2.206	-54.579	-146.985	1258.431	-1.3047	1.0068	0.38232	-91.681	205.4166	750.0928	-0.75781	0.79883	0.23584	16.1364	-367.165	623.203	-0.13397	0.36911	-0.10449	-167.2	-163.36	1706.708	-2.0933	1.6177	1.0566
2.208	-85.752	-155.005	1277.503	-1.3262	1.0332	0.3916	-60.727	210.1331	723.9872	-0.68994	0.74658	0.22021	-30.90754	-450.564	698.023	-0.17117	0.41521	-0.10508	-177.256	-216.51	1740.4472	-2.1309	1.6309	1.0845
2.21	-104.72	-132.804	1294.516	-1.3243	1.0581	0.39672	-88.4047	203.0654	670.754	-0.64087	0.70264	0.21094	-27.465	-435.279	751.187	-0.22803	0.47803	-0.091309	-156.767	-337.674	1791.217	-2.1426	1.668	1.104
2.212	-117.31	-102.041	1317.44	-1.3062	1.0757	0.39453	-125.6572	170.552	639.7023	-0.58838	0.66455	0.19824	-18.4399	-436.4788	784.586	-0.30911	0.55276	-0.063175	-98.203	-386.208	1796.76	-2.0894	1.6958	1.0977
2.214	-103.949	-87.8811	1335.698	-1.2632	1.0962	0.38086	-74.6453	197.961	608.255	-0.51172	0.61279	0.18359	-10.3026	-324.733	847.271	-0.41556	0.63333	-0.018541	13.933	-439.54	1784.532	-1.9956	1.7231	1.0703
2.216	-89.216	-80.4363	1350.487	-1.2363	1.0986	0.36865	-103.0645	159.971	565.61156	-0.47607	0.5918	0.17627	-17.5832	-232.562	889.867	-0.54564	0.70793	0.038492	91.966359	-428.37	1833.031	-1.8276	1.7349	1.0195
2.218	-109.45	-87.8127	1341.3297	-1.1611	1.1172	0.34033	-70.614	152.454	526.863	-0.40479	0.54492	0.1582	-13.614831	-119.0069	895.72958	-0.70549	0.78243	0.10274	134.8299	-379.58	1919.938	-1.7344	1.7246	0.99268
2.22	-94.234	-77.499	1338.573	-1.0993	1.1214	0.31079	-49.446	180.913	470.8779	-0.34961	0.51416	0.14722	15.1049	-79.958	964.41	-0.88232	0.85205	0.16553	119.928	-316.74	2006.248	-1.5718	1.6841	0.95508
2.222	-99.473	-80.945	1329.117	-1.0391	1.127	0.28418	-106.914	161.775	431.326237	-0.29688	0.48145	0.12988	40.6589	-59.94	1089.559	-1.0536	0.92021	0.21211	114.73	-205.166	2067.57	-1.4825	1.6358	0.92823
2.224	-90.714	-65.635	1321.168	-0.97705	1.1372	0.24805	-77.377	201.6317	409.1182	-0.23291	0.43262	0.1123	31.364	-68.415	1179.719	-1.2244	0.98631	0.24443	66.5428	-145.1789	2075.958	-1.4233	1.5786	0.90137
2.226	-96.057	-60.645	1346.738	-0.95508	1.1426	0.23145	-83.657	206.28	355.618	-0.20068	0.41455	0.10938	84.497	-65.305	1273.736	-1.3869	1.0582	0.26319	28.705	-70.414	2064.326	-1.373	1.5313	0.87451
2.228	-85.48	-75.987	1382.9707	-0.92139	1.1626	0.20703	-85.333	186.2597	350.156	-0.14502	0.37354	0.097656	76.735	-36.02	1301.6975	-1.5239	1.1425	0.28691	-74.59	-65.22	2027.12	-1.3594	1.5195	0.85791
2.23	-58.644	-125.4593	1411.2996	-0.91162	1.1836	0.19238	-36.226	205.535	318.8802	-0.10278	0.34863	0.081543	104.466	9.38	1330.379	-1.6577	1.229	0.30664	-177.537	-43.26	1993.6	-1.3496	1.5371	0.8501
2.232	-70.67	-152.22	1427.8428	-0.91113	1.2021	0.18018	-58.12	178.641	274.618	-0.064941	0.32471	0.075195	106.674	10.88	1377.738	-1.7826	1.3154	0.32675	-205.124	-85.39	1973.7	-1.3708	1.5754	0.87719
2.234	-42.134	-161.351	1450.858	-0.91797	1.2344	0.17432	-44.667	181.206	263.316	-0.021484	0.28906	0.063477	67.2872	-87.14	1462.192	-1.8969	1.4047	0.34775	-219.196	-105.03	1981.02	-1.4214	1.6235	0.90967
2.236	-57.117	-164.038	1456.385	-0.93067	1.2651	0.1753	-33.483	190.803	220.72	-0.0014648	0.27344	0.063477	16.239	-209.364	1519.739	-2.0109	1.4656	0.37002	-144.6746	-145.856	1997.304	-1.5601	1.6997	0.96387
2.238	-47.684	-165.739	1452.58	-0.94531	1.293	0.17041	-52.259	136.146	186.0619	0.028809	0.24414	0.059082	4.0837	-358.418	1636.375	-2.1258	1.509	0.38184	-47.72	-173.2248	2042.501	-1.6843	1.7502	1.0037
2.24	-42.112	-179.332	1434.8295	-0.96484	1.332	0.18408	-10.949	120.0506	198.8465	0.048096	0.22339	0.056884	-34.241	-424.59	1698.546	-2.2261	1.5278	0.38281	49.591	-147.637	2068.347	-1.7944	1.7954	1.0352
2.242	-26.326	-179.868	1425.3	-0.97021	1.354	0.18848	-27.971	94.314	176.698	0.063965	0.19971	0.054199	25.548	-447.99	1720.077	-2.284	1.5324	0.37197	46.007	-164.132	2115.517	-1.9214	1.8423	1.0703
2.244	-23.335	-165.226	1450.578	-0.99023	1.3926	0.19824	-40.138	60.512	193.4962	0.07666	0.17676	0.056641	102.526	-412.23	1713.366	-2.2839	1.5294	0.34512	-18.686	-130.203	2154.695	-1.9766	1.8555	1.0923
2.246	-19.517	-145.4704	1464.166	-1.0044	1.4219	0.20703	-3.04700000000001	88.6	195.0581	0.082031	0.16309	0.052246	120.154	-415.26	1764.041	-2.2089	1.5278	0.30566	-90.47	-166.199	2213.871	-2.0859	1.8828	1.1216
2.248	-0.532999999999998	-101.5304	1474.2502	-1.0132	1.4497	0.21631	-61.822	79.8858	173.928	0.090332	0.1377	0.053711	73.026	-392.15	1837.907	-2.0791	1.5299	0.24834	-143.152	-183.876	2241.564	-2.1521	1.8909	1.1374
2.25	-12.126	-78.568	1465.7482	-1.0313	1.4863	0.22021	-55.091	75.3364	186.066	0.091309	0.12354	0.057861	32.237	-403.14	1915.46	-1.9141	1.5488	0.18848	-191.016	-202.678	2216.586	-2.1909	1.8853	1.1357
2.252	-3.393	-51.388	1460.2412	-1.0391	1.502	0.22754	-44.631	91.171	137.282	0.09375	0.10889	0.064453	-21.018	-325.222	1938.377	-1.7377	1.5858	0.146	-224.803	-183.589	2194.225	-2.1973	1.8848	1.1509
2.254	2.802	-51.372	1461.061	-1.0581	1.5298	0.23779	-105.567	49.5967	105.643	0.094727	0.090332	0.066895	-108.18	-217.151	1953.73	-1.5726	1.618	0.11387	-197.173	-76.232	2126.16	-2.1914	1.8857	1.147
2.256	15.984	-37.438	1474.9859	-1.0793	1.5549	0.23901	-76.308	62.5041	106.6672	0.088379	0.080078	0.074707	-128.291	-88.29	1927.5238	-1.4477	1.6422	0.093164	-202.009	2.994	2087.481	-2.1602	1.8809	1.145
2.258	26.222	-43.59	1497.819527	-1.0996	1.5762	0.23877	-95.009	77.593	82.817	0.074707	0.063965	0.084961	-159.838	-26.94	1896.806	-1.3639	1.6592	0.084473	-183.755	58.698	2060.324	-2.1297	1.8821	1.1389
2.26	11.045	-61.411	1509.9143	-1.1216	1.6021	0.23828	-116.067	63.942	90.66786	0.065918	0.052002	0.087647	-163.426	-13.65	1878.735	-1.3281	1.6738	0.083496	-143.1975	54.681	2066.933	-2.0918	1.8828	1.1294
2.262	26.9191	-87.7604	1513.033	-1.1328	1.6094	0.24072	-79.292	82.6827	79.2102	0.060547	0.038574	0.095703	-181.008	-83.41	1890.088	-1.3346	1.6824	0.091113	-56.698	82.186	2055.375	-2.0366	1.8716	1.1113
2.264	9.967	-102.719	1525.9397	-1.1602	1.6348	0.24561	-131.882	65.763	44.488	0.050293	0.019531	0.099121	-188.316	-116.754	1900.7615	-1.3715	1.693	0.098926	21.162	108.4938	2030.23	-2.0098	1.8574	1.0981
2.266	26.9214	-110.402	1526.7842	-1.178	1.6506	0.24658	-99.946	67.081	54.8798	0.04541	0.011719	0.10547	-147.714	-155.8541	1929.21853	-1.4262	1.6992	0.10713	12.447	175.0753	2008.689	-1.9448	1.8247	1.0605
2.268	5.818	-120.716	1545.2761	-1.1992	1.6631	0.24951	-88.752	75.938	45.09	0.043945	0.0068359	0.11426	-85.471	-151.643	1959.353	-1.4877	1.7076	0.11689	6.2	219.4482	2009.5416	-1.8994	1.7993	1.0342
2.27	16.021	-112.487	1555.759	-1.2344	1.6777	0.25537	-122.043	48.5226	40.2056	0.045655	0.0036621	0.11231	-26.442	-169.852	1985.989	-1.5425	1.7173	0.12939	-83.29	219.0241	2034.17	-1.8579	1.7778	1.002
2.272	3.766	-108.835	1571.901	-1.2495	1.6841	0.26074	-83.776	45.435	63.9455	0.046875	0.0043945	0.11523	24.636	-204.035	2000.929	-1.6004	1.7293	0.14541	-101.045	204.85	2042.509	-1.8022	1.7505	0.95508
2.274	-11.9566	-97.7224	1571.785	-1.2866	1.686	0.26123	-96.376	24.1346	41.018	0.050781	-0.0024414	0.125	2.756	-234.512	2059.7395	-1.6523	1.7446	0.17393	-118.292	153.7632	2062.098	-1.7754	1.7363	0.93213
2.276	7.548	-83.925	1569.3099	-1.3086	1.6885	0.27247	-118.4665	-17.557	66.9223	0.055664	0.00097656	0.12354	-54.435	-248.42	2134.114	-1.7153	1.7614	0.19385	-117.283	163.652	2057.808	-1.7339	1.7095	0.88867
2.278	13.866	-44.817	1540.5313	-1.332	1.6836	0.27539	-73.339	-5.584	61.2332	0.063965	-0.0058594	0.12402	-130.712	-234.348	2177.166	-1.7828	1.7731	0.21006	-78.203	150.311	2044.837	-1.708	1.6914	0.85596
2.28	17.942	-5.083	1515.6534	-1.3589	1.6743	0.27686	-81.309	-3.969	41.4188	0.067383	-0.0039063	0.12207	-111.357	-206.835	2205.697	-1.8457	1.7754	0.22705	-78.532	144.453	2009.8057	-1.6831	1.6743	0.82813
2.282	-17.986	14.719	1516.783	-1.3711	1.6719	0.28564	-56.005	7.841	68.522	0.076172	-0.0058594	0.11963	-103.1569	-174.864	2171.459	-1.9059	1.7695	0.23398	-70.553	123.7114	1968.558	-1.6499	1.6353	0.78809
2.284	-11.911	27.996	1506.651	-1.3848	1.6543	0.28271	-31.76	33.471	28.6199	0.086426	-0.0039063	0.11914	-18.775	-136.002	2103.396	-1.9586	1.7621	0.24043	-71.228	74.253	1945.5731	-1.6309	1.6172	0.76807
2.286	6.54	19.2632	1521.0475	-1.3972	1.6408	0.27807	-55.299	18.07	19.30734	0.092285	-0.0087891	0.12354	41.073	-92.936	2022.422	-1.9988	1.7516	0.24199	-28.951	99.18	1930.489	-1.5898	1.5684	0.73486
2.288	18.137	20.7336	1515.7664	-1.4058	1.6255	0.26953	4.47999999999999	25.524184	36.7824	0.10107	-0.0053711	0.12842	56.429	-70.8411	2001.525	-2.0255	1.7444	0.24551	-43.289	164.02	1900.998	-1.5537	1.5293	0.7085
2.29	12.9288	10.1074	1520.9723	-1.4082	1.5957	0.25488	-10.367	27.916	15.909	0.10571	-0.005127	0.13135	59.765	-8.251	1983.618	-2.041	1.7285	0.24121	-36.512	266.861	1857.741	-1.5142	1.4927	0.68359
2.292	3.579	-7.4621	1518.1366	-1.4043	1.5781	0.24707	-25.258	18.837	43.1647	0.1084	-0.0039063	0.13477	117.405	25.3137	2019.077	-2.0421	1.7079	0.24209	-30.834	328.613	1783.123	-1.4473	1.4395	0.65186
2.294	20.9162	-4.8982	1513.719	-1.4019	1.5454	0.23047	14.442	56.596	45.9119	0.11523	-0.0024414	0.13672	160.487	78.335	2004.547	-2.0352	1.6852	0.23486	-73.225	344.02	1727.609	-1.4116	1.4126	0.62891
2.296	-3.845	-2.7334	1507.7503	-1.3902	1.5205	0.21802	-41.353	63.637	28.549	0.12012	-0.0063476	0.14453	153.862	89.019	1973.143	-2.007	1.6586	0.22979	-87.932	341.426	1680.452	-1.3433	1.356	0.59766
2.298	1.342	-16.46948	1525.4492	-1.3784	1.4966	0.20557	-35.314	69.654	53.2236	0.12744	-0.013672	0.13623	106.713	99.316	1944.1372	-1.9701	1.6279	0.22275	-108.473	311.463	1659.388	-1.2847	1.3096	0.56983
2.3	-0.52	-38.1352	1530.621	-1.3589	1.4653	0.1875	-29.041	80.821	21.5286	0.1416	-0.015625	0.1377	36.433	52.597	1929.63	-1.9253	1.604	0.21582	-104.6452	296.298	1624.76	-1.23	1.2563	0.53662
2.302	23.3581	-41.122	1529.738	-1.3501	1.4536	0.18359	-71.404	47.928	21.8112	0.1499	-0.02002	0.13965	-28.7844	38.098	1951.461	-1.8868	1.578	0.21094	-161.325	285.951	1571.758	-1.1519	1.1938	0.49609
2.304	6.603	-23.2442	1516.09	-1.3281	1.418	0.16553	-23.731	38.0727	44.7	0.16309	-0.023926	0.12793	-32.16	-3.552	1997.178	-1.8512	1.5547	0.21084	-141.6154	282.153	1485.647	-1.1206	1.1528	0.47559
2.306	-1.04	-7.359	1508.4	-1.3113	1.3987	0.15625	-72.54	26.2437	9.149	0.18067	-0.03003	0.125	-4.341	-24.477	1990.605	-1.823	1.5407	0.2128	-111.663	252.581	1407.594	-1.0381	1.084	0.43848
2.308	22.433	12.154	1491.612	-1.2964	1.3794	0.15039	-81.264	0.0760000000000005	36.342	0.19678	-0.029785	0.12207	-0.490000000000002	-55.418	1972.08	-1.8132	1.5313	0.21875	-88.493	253.925	1355.619	-0.97876	1.0393	0.40454
2.31	23.342	33.436	1458.3461	-1.2793	1.3516	0.14697	-39.888	18.11	52.865	0.21289	-0.035645	0.10986	-27.07	-13.3812	1947.334	-1.8101	1.5239	0.23242	-54.581	240.687	1339.528	-0.91602	0.98438	0.37549
2.312	31.203	46.1842	1458.4687	-1.269	1.3423	0.13965	-80.835	22.66	41.2766	0.22119	-0.039063	0.10742	-83.6166	12.433	1918.13292	-1.8094	1.5268	0.24756	-36.487	238.176	1319.282	-0.83154	0.92041	0.33203
2.314	14.646	55.144	1447.3832	-1.2534	1.3208	0.14453	-73.14	22.316	58.488	0.23438	-0.041504	0.096191	-46.7102	77.421	1891.21	-1.8206	1.5326	0.26514	-10.082	253.443	1274.83	-0.78906	0.88672	0.31104
2.316	34.0144	68.456	1426.3863	-1.238	1.3137	0.14819	-88.471	42.0277	42.0795	0.25147	-0.040771	0.089355	-55.558	81.442	1898.819	-1.8312	1.5376	0.28467	-28.924	271.575	1229.479	-0.70654	0.81689	0.26855
2.318	9.4	87.057	1416.0917	-1.2246	1.3008	0.15576	-127.4138	52.5115	42.0146	0.26123	-0.039063	0.075684	-24.6254	112.516	1858.363	-1.8367	1.5418	0.30498	-18.077	321.3603	1156.791	-0.64575	0.76197	0.24341
2.32	-10.683	90.518	1388.4892	-1.2109	1.291	0.16064	-89.633	64.631	60.7819	0.27393	-0.039551	0.066406	-37.6058	101.424	1848.726	-1.834	1.5449	0.32471	-15.132	321.943	1078.725	-0.58984	0.70703	0.21338
2.322	-6.792	68.104	1390.5332	-1.2017	1.2837	0.16553	-120.0165	67.078	36.014	0.27783	-0.043457	0.061523	-20.111	162.819	1769.95	-1.816	1.5488	0.33779	-44.405	351.886	986.9129	-0.5166	0.63721	0.17773
2.324	-12.777	56.4899	1387.796	-1.1831	1.2759	0.16943	-114.452	35.8099	52.838	0.29199	-0.037598	0.051758	-104.3567	220.247	1726.639	-1.7888	1.5501	0.34766	-80.807	368.109	900.3805	-0.47363	0.60986	0.16016
2.326	-12.994	47.25	1365.16933	-1.1677	1.2678	0.17456	-68.413	49.887	39.407	0.29517	-0.039551	0.045166	-106.133	295.492	1686.62	-1.74	1.5536	0.35977	-97.3189	372.81	840.2503	-0.38965	0.53174	0.12207
2.328	-44.365	41.435	1369.992	-1.1479	1.2583	0.18213	-113.4137	52.9624	28.624	0.30127	-0.041504	0.033203	-113.79	292.48	1665.879	-1.687	1.5497	0.37129	-52.061	381.451	792.1	-0.33326	0.4834	0.10107
2.33	5.651	38.594	1358.684	-1.1323	1.2485	0.18701	-69.925	48.6099	62.4206	0.30469	-0.044922	0.025391	-45.732	281.254	1648.854	-1.6265	1.5493	0.37891	-66.104	340.571	711.452	-0.27637	0.43164	0.075684
2.332	-4.174	40.371	1345.996	-1.1226	1.2388	0.19434	-54.431	65.707	43.6971	0.30615	-0.04248	0.018555	-45.5285	221.973	1647.903	-1.5672	1.5395	0.37939	-7.943	303.797	637.692	-0.20654	0.37354	0.038574
2.334	-12.201	53.99	1321.4031	-1.1128	1.2271	0.20508	-73.1	45.30537	45.118	0.30664	-0.040039	0.01123	24.023	200.21	1618.751	-1.5086	1.5246	0.38233	-17.101	263.881	595.336	-0.17188	0.34229	0.020996
2.336	-8.35	35.623	1294.7929	-1.1042	1.217	0.2168	-12.142	39.0930069	66.803	0.30444	-0.036132	0.0095212	-5.55	165.0873	1594.369	-1.4523	1.5105	0.3835	-20.56	264.646	551.674	-0.10156	0.2832	-0.017578
2.338	2.148	46.202	1279.5361	-1.0957	1.2012	0.22607	-43.876	25.5511	39.8168	0.3042	-0.026367	0.003418	-4.362	190.054	1509.005	-1.4035	1.4899	0.38037	-12.556	262.466	509.8636	-0.053467	0.24268	-0.043213
2.34	-6.183	64.7524	1269.5948	-1.0854	1.186	0.2334	-53.408	3.157	66.668	0.29834	-0.021973	0.0014648	-1.467	158.704	1483.061	-1.3491	1.4653	0.37988	-6.747	271.1097	486.185	-0.0063477	0.20264	-0.069824
2.342	-41.101	97.73	1245.9702	-1.0815	1.1714	0.2373	-4.499	13.5316	72.601	0.29346	-0.011719	0.0048828	92.5509	175.37	1456.685	-1.2994	1.4279	0.37519	-31.589	233.4635	453.346	0.048828	0.15918	-0.10156
2.344	-32.0617	114.893	1238.6994	-1.0723	1.1484	0.24805	-53.473	18.5816	49.80461	0.27979	0.00048828	0.010742	107.587	160.813	1474.749	-1.2499	1.388	0.37373	-85.99	175.2291	404.0781	0.066406	0.13965	-0.11768
2.346	-41.367	122.341	1198.8709	-1.0583	1.1311	0.25122	-21.506	11.6491	64.624	0.26563	0.0051269	0.015136	120.505	225.05	1441.855	-1.1949	1.3493	0.36787	-107.2995	146.35	337.022	0.10596	0.092773	-0.1543
2.348	-23.968	130.125	1164.8743	-1.0444	1.1099	0.25391	0.414999999999999	25.2387	51.1835	0.25293	0.014648	0.019043	75.99112	257.981	1402.717	-1.1402	1.3082	0.35215	-136.146	130.209	299.124	0.1311	0.057862	-0.17236
2.35	-19.321	139.394	1153.117	-1.019	1.0806	0.25342	-56.789	27.6735	41.2144	0.229	0.031738	0.021484	38.697	322.553	1302.292	-1.0776	1.272	0.34766	-110.3929	141.951	279.9391	0.15234	0.029785	-0.19873
2.352	-0.375999999999998	125.6391	1137.0871	-1.0034	1.0786	0.25293	-7.40899999999999	30.437	58.679	0.2207	0.042969	0.02832	-68.0024	306.099	1235.2183	-1.019	1.2218	0.34101	-97.8082	129.633	233.63151	0.17578	-0.010254	-0.22461
2.354	-5.11	108.85	1116.45	-0.96826	1.0474	0.25098	-26.986	42.67	29.0917	0.19873	0.058105	0.036133	-31.051	316.586	1137.5788	-0.96397	1.1778	0.33281	-107.13	113.32	185.163	0.18652	-0.03418	-0.2373
2.356	-7.706	99.658	1093	-0.94385	1.0273	0.24218	-57.675	27.725	31.8392	0.18188	0.065918	0.039795	-29.303	270.132	1111.4307	-0.8999	1.1341	0.32383	-63.319	116.0407	128.664	0.20557	-0.066406	-0.2627
2.358	-7.91	85.118	1088.2813	-0.91797	1.0068	0.23486	-15.868	38.1821	46.131	0.1665	0.080566	0.044922	4.02099999999999	301.1364	1063.205	-0.8458	1.0874	0.31162	-56.964	111.9791	95.297	0.21899	-0.08667	-0.27344
2.36	-15.158	81.298	1076.3289	-0.87842	0.98096	0.22754	-75.532	30.5993	26.29	0.14795	0.094727	0.055176	-30.527	278.0487	1008.952	-0.78662	1.0396	0.29688	-50.153	136.6089	79.2997	0.23047	-0.10205	-0.2832
2.362	5.005	79.9684	1057.486	-0.85889	0.96826	0.22705	-65.756	17.297	50.7339	0.13965	0.10156	0.061035	-66.8888	320.808	951.04	-0.72656	0.99161	0.27725	-56.997	120.737	60.2205	0.22363	-0.11572	-0.28809
2.364	-28.296	89.475	1030.5222	-0.81445	0.93945	0.21143	-61.092	46.767	33.1362	0.12695	0.11621	0.066895	-86.41328	282.402	910.7962	-0.66758	0.94463	0.25898	-40.335	92.6209	34.711	0.21484	-0.12354	-0.29102
2.366	-42.983	106.458	1029.1677	-0.77979	0.9126	0.20313	-107.8448	37.2357	42.5463	0.1167	0.12793	0.077881	-65.148	310.047	854.151	-0.60079	0.89268	0.24414	-69.091	61.144	47.529	0.18604	-0.13135	-0.28809
2.368	-38.699	98.6957	1004.5884	-0.76221	0.90088	0.19678	-83.845	32.6545	52.9128	0.10742	0.13525	0.083008	-72.832	269.961	822.4735	-0.5416	0.84492	0.22471	-96.782	40.267	59.433	0.1587	-0.12915	-0.27783
2.37	-31.14	103.54673	971.2999	-0.72363	0.875	0.18945	-111.1398	30.7839	18.595	0.094727	0.14648	0.10156	-85.195	280.318	777.7121	-0.47998	0.79492	0.20947	-95.001	62.915	68.969	0.12305	-0.12891	-0.27148
2.372	-40.172	115.038	952.5399	-0.6958	0.85596	0.18067	-120.1517	7.446	34.8526	0.095703	0.15039	0.10596	-136.463	218.793	753.0774	-0.42705	0.74737	0.18858	-84.847	82.012	56.885	0.0625	-0.12891	-0.25244
2.374	-40.443	129.1644	921.7109	-0.66943	0.83936	0.17383	-90.772	17.698	57.2319	0.084961	0.14648	0.12158	-185.679	238.0593	695.4782	-0.37539	0.70664	0.16943	-73.634	82.304	37.2715	0.029785	-0.12793	-0.24854
2.376	-5.301	149.7347	898.4266	-0.63672	0.81934	0.1626	-124.8952	-7.174	63.217	0.077881	0.14038	0.13184	-215.967	181.098	629.8367	-0.32032	0.66602	0.15068	-66.87	53.725	26.8441	-0.033691	-0.12207	-0.21631
2.378	-38.524	169.3257	860.5568	-0.62061	0.80713	0.15576	-79.684	-59.944	129.7523	0.072266	0.1333	0.1416	-184.7	217.218	569.5325	-0.26787	0.62344	0.13095	-29.337	31.184	23.038	-0.085205	-0.11548	-0.2063
2.38	-21.09	170.655	847.0276	-0.58789	0.78125	0.146	-89.995	-77.74908	172.877	0.066895	0.12549	0.1499	-153.9228	195.627	531.7179	-0.22119	0.58398	0.11719	3.87299999999999	-0.175999999999998	21.854	-0.13574	-0.10938	-0.18555
2.382	-43.372	143.5282	837.7057	-0.56372	0.76098	0.14453	-141.757	-110.8835	289.769	0.068359	0.11914	0.15625	-124.154	259.7651	460.739	-0.17617	0.54698	0.10098	19.256	13.72	48.085	-0.19629	-0.10596	-0.16699
2.384	-32.637	129.8669	810.2237	-0.54297	0.74609	0.1377	-83.839	-143.827	414.741	0.068359	0.10352	0.17188	-94.303	245.735	406.802	-0.13252	0.5124	0.081152	-2.582	27.883	64.23	-0.22217	-0.10059	-0.1626
2.386	-54.431	132.25852	790.846	-0.51367	0.72266	0.14014	-148.32	-200.348	486.454	0.064453	0.090332	0.18042	-76.594	276.72	373.88106	-0.087598	0.47412	0.065528	-53.596	44.982	82.812	-0.2583	-0.10449	-0.14697
2.388	-55.081	131.547	759.786	-0.49951	0.71631	0.13428	-195.527	-280.409	556.8383	0.061035	0.083984	0.1875	-58.068	199.1419	333.8051	-0.044727	0.4375	0.050879	-52.252	82.095	80.2281	-0.27319	-0.10498	-0.14014
2.39	-62.599	116.286	754.668	-0.47656	0.69336	0.14014	-153.552	-288.559	594.7762	0.038086	0.091309	0.18506	-36.629	193.261	292.134	-0.00048828	0.40479	0.037109	-97.217	89.049	66.966	-0.27393	-0.11133	-0.13184
2.392	-79.361	122.87	732.9859	-0.45972	0.67822	0.14453	-198.093	-228.652	650.7193	0.022461	0.11084	0.17822	-21.491	129.398	233.965	0.044629	0.37373	0.020215	-74.883	113.099	77.147	-0.2583	-0.12158	-0.12793
2.394	-58.547	118.9586	727.2026	-0.45215	0.66504	0.15283	-167.388	-151.0983	752.419	-0.028809	0.17383	0.18262	-33.512	179.1576	195.541	0.084374	0.34746	0.0038086	-78.885	88.005	76.15	-0.23633	-0.12475	-0.12597
2.396	-53.037	118.42269	707.7207	-0.44092	0.64697	0.15625	-172.319	-48.528	769.314	-0.092772	0.2378	0.19654	-37.895	162.79	185.919	0.12578	0.32246	-0.0086915	-96.694	44.306	56.358	-0.20703	-0.13477	-0.12695
2.398	-46.468	114.8548	693.783	-0.43506	0.63721	0.16309	-175.569	-30.353	801.36444	-0.17578	0.31104	0.2251	-69.737	209.609	200.4988	0.16221	0.30508	-0.02041	-120.9162	10.564	29.698	-0.17139	-0.14307	-0.12988
2.4	-51.744	123.318	667.894	-0.4292	0.61963	0.16992	-48.586	-14.594	871.1095	-0.31689	0.41016	0.27686	-58.239	148.937	169.357	0.1958	0.28418	-0.02832	-106.125	-24.8157	24.797	-0.1499	-0.15283	-0.13037
2.402	-40.154	119.413	634.8149	-0.4248	0.60694	0.17163	-19.835	19.76	976.193	-0.39502	0.45654	0.30469	-39.122	142.574	145.553	0.21865	0.26533	-0.029785	-81.751	-24.391	53.5966	-0.11621	-0.16846	-0.12939
2.404	-29.488	121.354	621.6971	-0.41797	0.58691	0.17578	-32.946	65.768	1101.217	-0.55469	0.5459	0.3623	-31.008	54.74	142.052	0.23301	0.25039	-0.029102	-68.925	1.44600000000001	61.265	-0.094484	-0.18432	-0.13061
2.406	-51.266	120.1128	603.7371	-0.4043	0.56641	0.18506	1.508	142.7229	1188.55	-0.66919	0.6228	0.38916	-42.13	71.377	153.035	0.24277	0.2375	-0.030664	-68.402	25.843	53.8615	-0.071289	-0.19727	-0.13232
2.408	-29.591	122.1982	570.1689	-0.40186	0.55713	0.18457	-45.743	138.203	1212.0387	-0.7749	0.70361	0.40771	-8.505	22.635	135.8877	0.24043	0.22373	-0.022656	-113.13	14.055	63.939	-0.037109	-0.22412	-0.14453
2.41	-48.923	123.68	555.1436	-0.38672	0.53662	0.18555	-94.507	66.467	1291.562	-0.87988	0.81055	0.42139	-22.447	63.819	95.9321	0.23486	0.21191	-0.018555	-118.9804	18.031	50.8835	-0.018066	-0.23779	-0.15039
2.412	-52.822	131.428	549.818	-0.37403	0.51709	0.18433	-116.872	35.06	1344.774	-0.91992	0.87305	0.42822	-45.171	9.94400000000001	52.2116	0.22451	0.20185	-0.0071288	-96.484	7.17956	67.105	0.017578	-0.25342	-0.1709
2.414	-74.963	139.936	526.3971	-0.35547	0.50293	0.18945	-159.8304	-65.08	1394.147	-1.0015	0.98682	0.44922	-69.883	23.736	55.981	0.20341	0.19424	0.0084961	-73.029	12.8967	47.4795	0.053711	-0.2666	-0.18896
2.416	-54.897	147.439	499.56249	-0.33594	0.47705	0.18311	-137.686	-117.679	1452.206	-1.0715	1.09	0.48462	-91.961	11.254	61.0936	0.17959	0.1915	0.020606	-72.701	1.431	25.763	0.092285	-0.28271	-0.20996
2.418	-65.809	136.04	475.7542	-0.31787	0.46289	0.18018	-200.493	-163.558	1463.46938	-1.1543	1.1953	0.53369	-110.653	74.382	55.0862	0.14746	0.19033	0.039063	-106.513	1.731	17.64	0.14258	-0.29688	-0.23584
2.42	-61.99	118.3732	462.692	-0.29248	0.43896	0.17529	-199.849	-257.842	1518.69	-1.3022	1.3325	0.61426	-121.41246	77.037	49.643	0.10742	0.19238	0.057617	-98.205	48.5788	19.824	0.16504	-0.29834	-0.24805
2.422	-38.892	105.4066	444.5337	-0.26953	0.41699	0.16723	-108.035	-293.009	1532.777	-1.4004	1.3828	0.64893	-158.159	98.541	70.8091	0.075684	0.19297	0.072363	-79.53	75.217	28.00401	0.21533	-0.30957	-0.27637
2.424	-50.278	109.889	427.4045	-0.24707	0.39697	0.16406	-73.202	-362.99	1520.5915	-1.5874	1.4517	0.71387	-133.8256	33.93	55.481	0.037305	0.19668	0.089258	-29.731	104.099	18.50225	0.25	-0.30664	-0.29297
2.426	-42.57	97.228	426.7957	-0.21436	0.37256	0.15479	9.56100000000001	-405.11	1581.864	-1.7046	1.4781	0.75391	-147.1745	18.5679	45.2129	0.0052734	0.20332	0.10332	-35.256	92.69	17.07984	0.27979	-0.30518	-0.30566
2.428	-58.718	93.712	416.9541	-0.20117	0.35791	0.14941	64.888	-341.85	1648.636	-1.791	1.4922	0.78174	-109.49714	0.153000000000002	8.753	-0.027051	0.20723	0.11416	-32.517	54.9544	18.6505	0.31201	-0.30127	-0.31445
2.43	-47.619	87.048	398.4965	-0.17041	0.33594	0.13965	26.118	-295.144	1714.125	-1.8081	1.4966	0.80469	-114.882	24.1465	27.36	-0.047363	0.21289	0.12549	-34.407	53.7696	22.165	0.31982	-0.29492	-0.31738
2.432	-57.037	100.9067	378.3625	-0.14795	0.31958	0.13037	43.469	-198.651	1731.992	-1.7827	1.4966	0.80371	-84.1672	32.135	23.231	-0.078125	0.22002	0.13975	-15.319	44.61979	29.4439	0.3335	-0.28711	-0.31201
2.434	-59.08	90.1274	374.2517	-0.12793	0.30273	0.12646	-8.105	-141.093	1667.3445	-1.6641	1.4863	0.78467	-83.147	39.567	46.421	-0.10156	0.22813	0.15781	-22.171	43.3296	53.281	0.32373	-0.27466	-0.302
2.436	-81.397	89.662	371.2897	-0.095215	0.27734	0.12939	-74.38	-164.614	1665.117	-1.5193	1.4642	0.74951	-64.375	25.96	13.4446	-0.12305	0.23398	0.16836	-8.02000000000001	33.8148	42.199	0.30371	-0.25977	-0.29199
2.438	-94.8883	87.175	337.0762	-0.080078	0.26758	0.11865	-67.018	-128.741	1680.562	-1.356	1.4438	0.70508	-59.038	11.204	32.987	-0.14472	0.23369	0.18184	-46.509	49.1938	68.288	0.26758	-0.23926	-0.26416
2.44	-86.754	92.964	317.8297	-0.057617	0.23926	0.12158	-136.512	-121.65	1655.745	-1.1421	1.4263	0.65234	-47.935	5.986	58.87	-0.16211	0.22949	0.19531	-79.073	66.797	71.4225	0.24072	-0.22705	-0.24951
2.442	-80.464	83.62564	301.9732	-0.034668	0.23242	0.11573	-157.926	-139.617	1709.2257	-1.0518	1.4141	0.62451	-50.664	6.478	80.886	-0.16914	0.22197	0.20889	-78.546	81.459	84.175	0.18262	-0.2124	-0.22021
2.444	-75.263	86.8246	295.9815	-0.014648	0.21729	0.11035	-125.747	-107.8	1710.588	-0.92188	1.3828	0.6001	-7.489	35.676	73.6032	-0.16973	0.20488	0.21768	-69.385	62.3307	91.909	0.13477	-0.19483	-0.19873
2.446	-58.727	88.88	261.238	0.018066	0.19824	0.10938	-116.297	-167.068	1700.104	-0.86792	1.3636	0.58228	-34.383	33.396	58.77	-0.16074	0.18457	0.21924	-70.93	32.233	77.454	0.08252	-0.17725	-0.17676
2.448	-63.302	83.29	258.794	0.035645	0.19727	0.10693	-39.664	-178.2307	1732.468	-0.84912	1.3462	0.58984	-29.07	47.415	42.814	-0.14268	0.15791	0.21728	-77.613	-9.007	44.4774	0.01123	-0.15381	-0.15479
2.45	-55.183	76.7454	258.4694	0.063965	0.17578	0.10352	-3.13	-159.521	1727.879	-0.87256	1.3267	0.59375	-20.688	28.9515	46.3332	-0.10938	0.13477	0.2085	-91.908	-14.545	41.797	-0.022461	-0.14209	-0.13867
2.452	-58.731	79.39157	243.867	0.083984	0.16479	0.10254	-26.666	-208.525	1803.143	-0.90039	1.332	0.60596	12.86	62.946	17.8371	-0.073731	0.10869	0.18965	-99.976	9.708	52.773	-0.089355	-0.11182	-0.11328
2.454	-41.496	83.7354	236.5748	0.098145	0.15723	0.098633	-63.459	-189.387	1871.585	-0.98291	1.3423	0.625	-10.742	50.214	22.7643	-0.027148	0.079297	0.17491	-71.666	31.522	61.2582	-0.13623	-0.089112	-0.095213
2.456	-56.825	71.9201	220.47702	0.12109	0.146	0.093262	-154.6068	-232.204	1907.258	-1.0737	1.3735	0.6543	16.562	82.777	30.7292	0.023632	0.054688	0.15615	-58.566	58.67	77.5815	-0.18555	-0.060547	-0.077148
2.458	-64.242	56.233	223.2417	0.12744	0.13965	0.091309	-175.882	-290.339	1974.473	-1.1113	1.3906	0.67822	-2.854	33.6011	57.4438	0.067188	0.02959	0.13642	-105.7991	57.1975	69.72223	-0.23779	-0.022949	-0.059082
2.46	-72.703	58.3483	207.8395	0.13818	0.13281	0.088379	-179.645	-221.237	1959.883	-1.1992	1.4434	0.73291	5.284	45.829	57.68	0.11035	0.003418	0.11426	-123.7352	38.605	53.448	-0.26025	-0.0073242	-0.053223
2.462	-61.973	60.83034	201.8154	0.14453	0.12573	0.086914	-246.7407	-206.2893	1913.647	-1.2771	1.4939	0.76294	-9.238	-13.6643	43.3206	0.15615	-0.02373	0.097557	-150.343	32.503	70.587	-0.2915	0.01709	-0.046387
2.464	-73.929	63.4064104	192.4008	0.14111	0.11914	0.092285	-264.6675	-120.336	1894.006	-1.3691	1.5488	0.79932	-52.377	30.8721	22.2503	0.19814	-0.046582	0.088086	-127.6285	23.1237	41.6865	-0.30176	0.040771	-0.048584
2.466	-55.723	63.59545	190.6413	0.1333	0.11035	0.087891	-293.213	-29.473	1846.645	-1.4995	1.6235	0.83008	-80.253	14.4943	37.739	0.23642	-0.074707	0.073633	-92.483	3.8489	26.581	-0.30127	0.060059	-0.057617
2.468	-43.631	54.4009	159.8837	0.13037	0.10986	0.098145	-279.34	-63.899	1849.561	-1.5664	1.6563	0.85205	-74.806	67.145	52.4825	0.27314	-0.10391	0.05791	-75.709	-26.9144	16.125	-0.27686	0.07666	-0.069824
2.47	-43.967	63.9605	133.8486	0.11768	0.10254	0.1001	-214.2849	-30.01	1896.175	-1.6831	1.7056	0.88477	-99.9232	18.3023	64.6766	0.31055	-0.12402	0.039063	-96.013	-21.3598	4.929	-0.26172	0.088379	-0.07666
2.472	-46.593	66.5257	145.93269	0.1062	0.1018	0.10522	-182.309	-53.308	1879.528	-1.7761	1.7395	0.91528	-94.8726	40.093	45.263	0.34951	-0.14815	0.021387	-76.836	10.2353	24.016	-0.21777	0.10205	-0.083984
2.474	-46.992	61.9602	154.49994	0.1001	0.097168	0.10986	-111.996	-68.6955	1900.6983	-1.8623	1.7695	0.93213	-130.2156	-28.8084	53.318	0.3833	-0.16943	0.0074219	-38.062	45.899	35.843	-0.19165	0.11377	-0.086181
2.476	-37.232	54.4517	146.56714	0.087402	0.099121	0.11719	-113.083	35.52	1865.023	-1.9453	1.8086	0.97314	-139.9453	24.99	58.149	0.41103	-0.18506	-0.0097654	-38.928	79.749	38.77	-0.17578	0.12305	-0.084961
2.478	-64.948	58.5842	129.9923	0.084961	0.098633	0.12012	-188.142	48.841	1859.411	-1.9727	1.8223	0.99072	-126.437	-9.389	52.8274	0.43682	-0.20039	-0.027442	-23.552	78.468	16.4532	-0.16504	0.13574	-0.075684
2.48	-58.392	57.4872	131.9966	0.075684	0.10547	0.12744	-169.164	84.18239	1910.499	-1.9956	1.8462	1.0137	-109.1743	53.2395	46.5238	0.45215	-0.21289	-0.036621	-51.727	58.004	24.7064	-0.16553	0.14258	-0.069336
2.482	-73.371	63.793	129.0529	0.068604	0.10913	0.1333	-162.23	70.911	1919.696	-1.9848	1.855	1.024	-107.649	14.332	31.0704	0.46133	-0.22178	-0.047461	-54.438	32.504	44.8273	-0.17334	0.14453	-0.056152
2.484	-82.579	72.42	111.7791	0.062988	0.11035	0.14063	-165.208	-41.7457	1956.709	-1.9629	1.8613	1.0317	-92.9676	50.4428	15.709	0.4665	-0.23017	-0.055078	-38.168	43.726	49.01	-0.17969	0.14307	-0.050293
2.486	-85.121	69.918	103.2957	0.055664	0.1167	0.14307	-126.343	-32.054	1967.599	-1.9219	1.8574	1.0347	-60.025	4.388	27.991	0.47393	-0.23525	-0.060547	-32.036	55.555	49.706	-0.18408	0.14355	-0.043457
2.488	-83.065	54.932	93.2616	0.054199	0.12549	0.1543	-144.359	-38.115	1947.216	-1.8921	1.8462	1.0381	-72.279	51.5225	38.92123	0.47559	-0.23789	-0.065137	-13.882	75.341	42.019	-0.19775	0.14551	-0.046875
2.49	-67.164	33.5227	104.7271	0.046387	0.12939	0.15332	-152.468	-41.478	1950.1733	-1.8262	1.8242	1.0347	-104.7635	23.1608	44.066	0.47461	-0.23633	-0.062988	-32.868	88.843	25.314	-0.20361	0.146	-0.054688
2.492	-55.304	32.583	90.8451	0.044433	0.13575	0.15406	-115.766	13.9934	1933.4442	-1.7763	1.8017	1.0347	-78.198	74.427	57.117	0.46709	-0.22588	-0.061523	-60.782	64.334	66.794	-0.19824	0.1543	-0.055664
2.494	-55.003	34.154	110.42328	0.041504	0.13721	0.15625	-114.953	-28.06	1890.7146	-1.7261	1.7739	1.0313	-42.359	24.5928	65.343	0.4581	-0.20957	-0.056738	-68.03	26.085	120.174	-0.20044	0.16894	-0.067139
2.496	-62.72	41.923	97.0682	0.046387	0.13965	0.15918	-53.418	-16.846	1881.79	-1.6841	1.7427	1.0371	-28.806	46.618	36.6771	0.44365	-0.19472	-0.042285	-24.526	-42.9314	172.9332	-0.20898	0.18799	-0.081543
2.498	-55.199	43.508	92.5695	0.04248	0.13818	0.15479	-19.773	44.012	1879.7741	-1.6714	1.7114	1.0322	-34.921	-10.6921	41.4037	0.42627	-0.17686	-0.036719	-17.958	-115.209	262.41	-0.23828	0.23438	-0.11084
2.5	-61.264	49.7869	75.0896	0.045898	0.14209	0.15576	-66.409	61.07	1906.164	-1.6538	1.6704	1.043	-32.781	30.3858	21.45	0.40332	-0.15869	-0.013672	-11.239	-213.345	363.6027	-0.2627	0.26855	-0.11865
2.502	-89.1915	44.0371	90.4409	0.055176	0.14111	0.15039	-38.026	155.3449	1904.762	-1.6511	1.633	1.0442	-0.39500000000001	7.396	24.854	0.37725	-0.14306	-0.008789	-33.6727	-294.504	505.719	-0.32715	0.35889	-0.11279
2.504	-54.852	44.119	104.3716	0.059082	0.13525	0.14551	-79.879	169.503	1837.8206	-1.6523	1.5977	1.0474	15.407	50.371	28.4	0.34736	-0.12177	0.0061522	-22.9737	-385.832	659.845	-0.40893	0.45068	-0.086915
2.506	-71.076	40.236	84.43544	0.064453	0.13574	0.1377	-127.248	132.87	1810.6251	-1.6577	1.5493	1.041	12.299	16.65	36.48825	0.30987	-0.10029	0.019824	4.5615	-479.6447	751.131	-0.52002	0.53711	-0.053711
2.508	-64.142	50.727	75.80954	0.072021	0.13232	0.1377	-127.303	164.234	1778.827	-1.6558	1.522	1.0391	10.18	37.0196	46.35307	0.27324	-0.078516	0.034082	19.1807	-523.032	817.1925	-0.7041	0.65234	0.010254
2.51	-76.142	52.379	76.7826	0.083496	0.13037	0.13135	-189.036	128.573	1767.898	-1.6523	1.4863	1.0317	6.609	9.089	57.759	0.23633	-0.053711	0.043457	19.1823	-480.687	882.848	-0.80566	0.69824	0.030273
2.512	-51.467	45.856	73.7339	0.09375	0.12354	0.12891	-170.002	151.139	1797.7584	-1.6462	1.4573	1.0139	-21.746	40.632	59.62	0.19746	-0.028809	0.058691	-1.269	-395.39949	937.629	-1.0269	0.77783	0.078613
2.514	-48.002	40.8393	66.2386	0.094727	0.12012	0.125	-187.694	162.365	1763.5136	-1.6289	1.4316	0.99854	-42.639	49.713	64.359	0.16758	-0.0013673	0.067676	-25.8047	-273.253	991.9743	-1.1792	0.84033	0.097658
2.516	-41.322	40.3836	57.38377	0.10986	0.11621	0.11816	-194.15	90.315	1741.6681	-1.5952	1.4106	0.96484	-53.812	63.958	59.5706	0.13945	0.024414	0.083692	17.09369	-160.884	995.4676	-1.3135	0.91211	0.1123
2.518	-28.348	33.5029	68.4811	0.11768	0.11694	0.11255	-118.626	80.468	1724.0851	-1.5698	1.3989	0.94336	-67.563	50.569	28.51	0.11562	0.054981	0.094336	64.366	-150.249	1017.0518	-1.4707	1.0313	0.12891
2.52	-35.083	30.2566	71.6278	0.125	0.11426	0.10742	-142.94	49.675	1683.6183	-1.5176	1.3711	0.90869	-74.994	42.946	21.835	0.095215	0.086426	0.10596	113.931	-104.854	1107.544	-1.5347	1.103	0.14893
2.522	-42.252	27.0324	64.37563	0.13818	0.11035	0.10449	-122.204	42.99	1689.744	-1.4709	1.3567	0.88525	-75.428	20.3217	17.276	0.073633	0.11787	0.12012	93.7768	-50.407	1234.108	-1.6582	1.2695	0.22461
2.524	-61.335	40.15309	58.4401	0.14453	0.11328	0.099609	-76.052	106.711	1686.964	-1.4312	1.3345	0.85352	-110.8284	23.8943	45.0004	0.051856	0.1458	0.1334	96.393	40.611	1320.267	-1.7725	1.4014	0.29175
2.526	-45.738	28.0968	76.373	0.15527	0.10791	0.092773	-155.621	109.069	1637.359	-1.3823	1.3228	0.83203	-106.8403	48.43083	46.644	0.033496	0.16455	0.13574	104.9498	75.795	1350.109	-1.9077	1.5317	0.36621
2.528	-45.313	23.9354	71.4244	0.16211	0.11157	0.087891	-117.431	131.6589	1621.356	-1.3623	1.3125	0.82275	-102.2924	43.7261	65.5883	0.021192	0.18174	0.14629	146.204	82.48	1360.495	-2.123	1.668	0.46191
2.53	-60.387	23.3859	64.8517	0.17627	0.11182	0.08252	-130.0998	164.095	1558.139	-1.3257	1.2974	0.7998	-96.7396	47.3724	79.982	0.0063477	0.19531	0.15625	96.044	27.68	1374.416	-2.23	1.7192	0.49902
2.532	-68.017	27.4809	72.2342	0.18213	0.10742	0.083008	-167.9034	162.688	1508.1379	-1.3003	1.2818	0.78662	-119.4779	3.384	77.64	-0.0010742	0.20478	0.171	51.434	-38.19	1433.551	-2.4121	1.7656	0.54541
2.534	-51.807	26.3905	62.0478	0.1875	0.11035	0.077148	-94.87	224.524	1492.4957	-1.2769	1.2661	0.77344	-115.6892	18.363	46.941	-0.014453	0.21153	0.18193	-54.562	-141.69	1518.044	-2.4736	1.7783	0.54688
2.536	-54.619	16.61776	95.07791	0.19629	0.10986	0.079102	-112.873	245.301	1428.931	-1.2495	1.2446	0.75586	-110.8226	-0.641000000000002	38.207	-0.024219	0.21582	0.18936	-91.516	-265.28	1603.405	-2.4565	1.7739	0.5293
2.538	-63.938	-11.3527	100.3876	0.20093	0.10742	0.077393	-96.811	209.513	1405.37263	-1.2305	1.2324	0.74951	-107.6453	30.6291	21.421	-0.03457	0.21592	0.19863	-89.768	-361.7358	1669.146	-2.3223	1.7676	0.44775
2.54	-48.709	-57.3405	155.8328	0.20264	0.10498	0.072754	-40.648	220.504	1350.023	-1.189	1.2075	0.72754	-109.2353	-20.5122	73.218	-0.039063	0.21289	0.20654	-98.4145	-432.56	1706.488	-2.207	1.7695	0.38721
2.542	-42.961	-81.6063	198.811	0.20361	0.104	0.06543	-41.009	178.666	1288.695	-1.156	1.1877	0.7102	-91.928	-28.3373	112.3918	-0.038477	0.20859	0.21709	-25.389	-433.22	1710.251	-1.9312	1.7681	0.27539
2.544	-67.076	-75.5095	263.2309	0.20166	0.10596	0.060547	23.733	177.083	1291.2881	-1.1172	1.1641	0.68994	-95.844	-111.5409	183.4385	-0.035156	0.2044	0.22686	13.326	-433.75	1743.056	-1.7234	1.7756	0.20948
2.546	-79.954	-100.131	311.5757	0.18213	0.12061	0.059082	32.335	205.382	1251.608	-1.064	1.1372	0.66016	-79.305	-111.979	283.5806	-0.035938	0.19619	0.24092	7.035	-406.64	1843.659	-1.5459	1.7832	0.15674
2.548	-131.85	-143.801	352.9656	0.16431	0.14624	0.060302	-10.036	195.899	1225.3906	-1.0361	1.1191	0.64404	-91.135	-201.547	435.821	-0.032031	0.18906	0.25567	-33.673	-343.51	1941.939	-1.3843	1.7915	0.13037
2.55	-125.084	-161.531	371.8424	0.12988	0.17432	0.07666	8.276	220.9297	1196.8391	-0.98047	1.0781	0.60791	-120.497	-238.71	564.171	-0.032227	0.19336	0.26611	-52.418	-308.16	1996.884	-1.3389	1.7988	0.12061
2.552	-120.973	-129.7328	383.1445	0.062012	0.21631	0.10693	-53.231	200.704	1164.2271	-0.9331	1.0493	0.57812	-154.82	-383.543	661.132	-0.044433	0.20635	0.26992	-115.8804	-246.826	2012.582	-1.313	1.8149	0.10693
2.554	-114.994	-84.462	433.5992	0.018066	0.23828	0.12891	-56.308	149.7588	1151.818	-0.88623	1.0181	0.55469	-134.262	-416.102	678.218	-0.075488	0.23555	0.27012	-188.302	-193.765	1989.376	-1.3535	1.834	0.10107
2.556	-132.8702	-49.705	474.9149	-0.081543	0.28662	0.16846	-41.062	178.52	1099.623	-0.82813	0.98047	0.51221	-124.469	-441.902	744.9949	-0.1169	0.28828	0.27051	-208.0549	-110.97	1964.571	-1.3848	1.8457	0.10986
2.558	-97.328	-24.206	511.194	-0.16162	0.32471	0.19897	-94.8789	176.62	1038.561	-0.80078	0.95898	0.49268	-165.239	-294.236	816.578	-0.17354	0.36601	0.28994	-248.859	-75.35	1941.407	-1.4746	1.8633	0.11523
2.56	-63.079	14.757	523.808	-0.23975	0.3623	0.22852	-70.426	200.298	988.398846	-0.74023	0.91211	0.45947	-200.8272	-212.824	856.767	-0.25635	0.44678	0.3252	-225.049	-61.76	1895.524	-1.5517	1.8779	0.12988
2.562	-40.059	45.781	574.3558	-0.3335	0.43213	0.27393	-70.412	238.697	922.669	-0.68775	0.88013	0.42554	-180.0493	-56.3625	856.755	-0.35605	0.52793	0.36709	-210.397	-105.832	1891.066	-1.6289	1.8906	0.14551
2.564	-31.989	90.992	641.3211	-0.38135	0.47021	0.28467	-100.601	215.282	895.2268	-0.64258	0.84961	0.3999	-114.5624	-59.533	908.7608	-0.46651	0.59502	0.40547	-157.988	-137.008	1928.66	-1.7207	1.9082	0.16553
2.566	-40.477	141.9969	691.812	-0.46729	0.55127	0.33789	-36.367	229.1658	869.2241	-0.58887	0.81055	0.35889	-47.138	-18.32	1048.796	-0.58487	0.6458	0.43281	-80.909	-187.335	1977.073	-1.7637	1.916	0.16895
2.568	-48.392	168.765	752.8458	-0.52832	0.62305	0.36865	-69.039	233.283	794.049	-0.56787	0.7876	0.34082	-8.419	-22.64	1211.029	-0.70889	0.69131	0.44873	37.77	-176.837	2035.7	-1.8301	1.9297	0.17822
2.57	-73.767	169.877	807.314	-0.5957	0.68555	0.40479	-74.572	206.862	751.7783	-0.50977	0.74414	0.30811	-20.353	67.243	1294.533	-0.82373	0.74756	0.45313	44.234	-151.927	2087.098	-1.8811	1.9397	0.18945
2.572	-78.24	122.281	880.512	-0.69336	0.77344	0.45654	-72.539	237.152	706.926	-0.47754	0.71069	0.27929	-69.758	72.615	1329.078	-0.91103	0.82686	0.45703	63.5501	-156.045	2111.0156	-1.9331	1.9399	0.20361
2.574	-111.8187	75.476	943.022	-0.74805	0.82031	0.48975	-143.674	230.672	668.8821	-0.44336	0.67383	0.26025	-163.758	72.285	1391.473	-0.9788	0.92861	0.47803	47.9875	-148.159	2144.259	-2.0059	1.9316	0.23633
2.576	-95.032	17.114	997.861	-0.85498	0.90869	0.54395	-117.414	214.5455	651.523	-0.39844	0.62695	0.2251	-182.883	12.33	1473.1	-1.0405	1.045	0.52334	-20.7632	-197.183	2201.288	-2.0366	1.9224	0.25391
2.578	-114.323	-27.474	1076.4146	-0.93945	0.96191	0.58471	-119.5027	219.697	595.7093	-0.37646	0.60889	0.2085	-208.804	-52.8	1554.613	-1.1237	1.1692	0.59492	-31.5465	-225.616	2211.903	-2.1147	1.8911	0.28613
2.58	-105.657	-56.717	1113.8571	-1.0298	1.0112	0.61816	-160.763	183.2502	556.5287	-0.3335	0.56885	0.17773	-238.742	-148.49	1627.942	-1.2344	1.2832	0.67822	-16.301	-203.4025	2198.043	-2.164	1.8672	0.30176
2.582	-85.0424	-96.611	1156.91764	-1.1431	1.063	0.66016	-85.0581	178.697	541.21643	-0.30151	0.53442	0.1582	-311.382	-252.38	1698.1541	-1.3846	1.372	0.76748	7.275	-143.38	2132.363	-2.1934	1.8379	0.30908
2.584	-42.437	-126.072	1160.94	-1.1968	1.0786	0.67969	-104.4292	183.56	511.0606	-0.271	0.50586	0.13281	-356.53	-340.1969	1735.995	-1.5472	1.4332	0.85205	0.819000000000003	-76.648	2055.444	-2.1914	1.7891	0.30762
2.586	-9.826	-149.835	1197.3144	-1.2808	1.103	0.70117	-71.118	148.9853	485.0797	-0.23535	0.46094	0.10498	-276.61	-392.33	1756.822	-1.7	1.4727	0.92666	21.757	-22.306	2023.338	-2.1699	1.7598	0.30518
2.588	-11.428	-153.649	1231.64	-1.3247	1.1128	0.71972	-14.768	157.61431	440.0183	-0.21777	0.44336	0.093262	-154.4546	-423.85	1748.2483	-1.8144	1.4997	0.99044	50.673	48.54	2016.581	-2.0869	1.7012	0.2959
2.59	-13.342	-120.286	1283.695	-1.3418	1.1211	0.72803	-44.324	125.444	375.264	-0.17529	0.40088	0.062988	-5.46599999999999	-447.36	1783.6162	-1.8809	1.5254	1.0396	102.435	108.458	2030.579	-2.0113	1.6529	0.28907
2.592	-25.758	-84.428	1303.754	-1.3315	1.1235	0.72461	3.97699999999999	90.916	369.772	-0.1521	0.36499	0.041504	64.314	-428.95	1849.105	-1.8937	1.5625	1.0743	167.18	174.8912	2028.3931	-1.937	1.604	0.27881
2.594	-34.343	-61.069	1314.384	-1.3101	1.1255	0.7168	-15.539	122.851	333.5812	-0.12256	0.33691	0.016602	56.637	-375.8	1975.654	-1.8594	1.6103	1.086	111.85	204.863	2016.7079	-1.855	1.5454	0.27148
2.596	-32.981	-48.9876	1325.77	-1.2437	1.1216	0.69824	-20.274	132.205	322.528	-0.093262	0.29346	-0.0092773	56.114	-243.212	2046.14	-1.7891	1.6603	1.0845	65.2578	240.089	2007.397	-1.8237	1.5181	0.26514
2.598	-45.194	-27.112	1299.0689	-1.1692	1.1097	0.67603	22.925	149.174	303.252	-0.071777	0.27686	-0.02832	31.045	-166.4678	2061.285	-1.6991	1.7056	1.0745	4.482	238.957	2019.571	-1.7773	1.4727	0.26221
2.6	-55.63	-3.125	1287.119	-1.0913	1.0972	0.64648	-42.01	167.275	244.6097	-0.041504	0.24316	-0.062988	-4.797	-87.424	2015.25	-1.603	1.7231	1.0488	-26.401	219.495	2045.93	-1.753	1.4468	0.27612
2.602	-102.8085	11.49	1291.117	-0.98877	1.0825	0.60938	-17.138	126.87	219.85446	-0.014893	0.22022	-0.079834	-55.039	-83.65	1978.49	-1.5175	1.7181	1.0133	-33.1081	165.224	2050.144	-1.7383	1.4248	0.29346
2.604	-91.802	16.533	1311.271	-0.94922	1.0762	0.58887	3.352	136.425	182.473	0.0073242	0.19482	-0.097656	-104.537	-63.26	1921.438	-1.4366	1.6923	0.96641	-60.866	116.166	2062.063	-1.7441	1.4072	0.31201
2.606	-74.71	-8.681	1313.843	-0.875	1.0723	0.55713	-41.617	128.093	150.389	0.027832	0.1582	-0.12354	-154.622	-94.15	1903.053	-1.3694	1.6517	0.91484	-100.275	107.722	2036.277	-1.7495	1.4009	0.32422
2.608	-53.383	-30.274	1340.768	-0.83252	1.0703	0.54663	-1.062	82.1948	160.0105	0.038086	0.14355	-0.13086	-175.327	-82.63	1906.741	-1.3003	1.6048	0.86797	-111.251	114.6148	1999.5789	-1.752	1.3945	0.35303
2.61	-47.649	-69.335	1383.4677	-0.80273	1.0723	0.53564	-17.834	87.6329	133.705	0.046875	0.11475	-0.15137	-110.206	-129.936	1906.989	-1.2495	1.5708	0.82617	-87.5857	109.862	1968.1432	-1.7515	1.3882	0.37573
2.612	-57.204	-104.106	1432.62325	-0.79248	1.0747	0.5332	-40.896	62.268	126.022	0.059326	0.095459	-0.16138	-11.077	-151.3935	1911.15	-1.2176	1.5668	0.78525	-84.85036	107.09	1937.0722	-1.7495	1.3872	0.39258
2.614	-49.287	-119.496	1471.071	-0.79492	1.0762	0.53662	3.795	55.374	103.228	0.06543	0.071777	-0.16895	68.933	-201.833	1961.097	-1.2029	1.5859	0.75674	-36.143	92.88	1912.01	-1.7397	1.3813	0.42383
2.616	-95.666	-116	1492.626	-0.81006	1.0903	0.54883	-70.743	94.391	83.8913	0.077637	0.049316	-0.17725	69.136	-170.42	2056.051	-1.2091	1.625	0.73877	0.987000000000002	123.32	1889.365	-1.7285	1.3809	0.43115
2.618	-94.124	-126.198	1509.494	-0.84058	1.1013	0.56567	-67.349	67.229	95.584	0.080322	0.028564	-0.18384	28.85	-164.272	2133.3321	-1.2404	1.6762	0.73057	-33.218	198.69	1894.584	-1.6948	1.3794	0.44531
2.62	-113.944	-150.528	1509.514	-0.87451	1.1177	0.57959	-82.067	79.261	77.26681	0.081543	0.01709	-0.18799	-32.729	-151.27	2208.052	-1.2813	1.7227	0.74707	-47.864	284.157	1881.288	-1.6609	1.3743	0.45484
2.622	-135.538	-140.7403	1501.7125	-0.91602	1.1367	0.59033	-145.2206	78.98232	62.588	0.07959	0.00048828	-0.19629	-148.76514	-205.058	2229.06	-1.3349	1.7702	0.78965	-33.429	359.212	1832.39381	-1.6089	1.3677	0.45215
2.624	-174.5783	-116.88	1500.652	-0.93652	1.1563	0.60205	-94.478	34.51	79.8751	0.080078	-0.0068359	-0.20557	-227.29	-196.331	2226.192	-1.4065	1.8064	0.84355	-37.536	396.07	1727.1526	-1.5273	1.3418	0.44727
2.626	-174.4849	-66.198	1493.764	-0.97217	1.1938	0.61328	-124.6122	43.929	63.007	0.073242	-0.021484	-0.2085	-256.325	-180.877	2169.728	-1.5081	1.8501	0.88575	-70.5517	395.13	1657.579	-1.4897	1.3267	0.4375
2.628	-165.9307	-41.817	1498.395	-0.99389	1.2287	0.62646	-119.8426	32.095	76.0412	0.072266	-0.026367	-0.21216	-291.577	-85.325	2144.4363	-1.6178	1.8992	0.9208	-45.703	371.78	1604.198	-1.396	1.2896	0.42383
2.63	-162.313	-24.534	1503.764	-1.0181	1.2583	0.64063	-83.136	41.2051	58.6563	0.070313	-0.026855	-0.21436	-321.064	-26.648	2095.914	-1.7188	1.9473	0.9458	-46.422	312.567	1561.23	-1.3289	1.2571	0.41406
2.632	-142.404	-18.40954	1516.2404	-1.0503	1.2954	0.66211	-126.4446	92.897	26.094	0.064453	-0.032715	-0.2124	-320.11	15.375	2069.041	-1.7988	1.9732	0.96221	-28.29	257.239	1528.356	-1.2598	1.2207	0.39697
2.634	-127.197	-5.52339	1528.734	-1.0776	1.3169	0.67432	-90.122	69.3097	29.1837	0.060547	-0.038574	-0.21436	-279.234	-3.032	2034.526	-1.8566	1.986	0.96484	-5.999	245.551	1479.821	-1.168	1.1738	0.37549
2.636	-120.103	8.1255	1537.11941	-1.1021	1.3384	0.69141	-69.209	61.306	14.426	0.046387	-0.041992	-0.21191	-230.297	13.4094	2025.664	-1.8956	1.9829	0.96797	13.864	214.954	1436.188	-1.1206	1.1509	0.36914
2.638	-131.73	24.823	1555.8975	-1.1406	1.373	0.71533	-83.504	59.0883	24.3925	0.035889	-0.043701	-0.21045	-125.019	39.748	2003.051	-1.9177	1.9718	0.9709	54.868	237.398	1396.434	-1.0269	1.0942	0.35107
2.64	-146.569	25.7946	1574.9735	-1.1611	1.3848	0.72607	-28.268	18.795	41.36081	0.024902	-0.046387	-0.21191	-80.209	93.955	1987.677	-1.9194	1.9673	0.97461	50.729	286.149	1390.483	-0.95459	1.0582	0.33277
2.642	-147.309	-9.423	1596.0194	-1.1992	1.4141	0.74463	-55.875	47.4559	37.813	0.012207	-0.046387	-0.21289	-100.199	121.145	1977.389	-1.91	1.9572	0.98545	49.705	296.794	1392.375	-0.88623	1.02	0.31738
2.644	-154.513	-47.4095	1597.5364	-1.23	1.4405	0.75879	-60.734	38.499	55.3554	0.0053711	-0.043457	-0.20508	-160.103	148.825	2001.575	-1.8906	1.9582	0.99521	40.67	323.72151	1347.48	-0.79053	0.96338	0.30273
2.646	-161.511	-68.4944	1607.6749	-1.2637	1.4609	0.76416	-31.666	34.993	55.7655	0.00097656	-0.048828	-0.20654	-177.393	126.476	2031.702	-1.866	1.9516	1.0018	0.668999999999997	313.202	1257.46	-0.75	0.9375	0.29443
2.648	-177.5752	-59.6707	1611.923	-1.3066	1.4805	0.77197	-69.323	69.627	48.10968	-0.0065918	-0.049316	-0.19897	-184.607	95.548	2062.813	-1.8423	1.9366	1.0072	-57.197	332.858	1144.1739	-0.66406	0.88086	0.26953
2.65	-151.255	-54.39	1635.444	-1.3242	1.4883	0.77881	-31.528	47.497	58.121	-0.0073242	-0.050781	-0.19531	-163.02201	64.387	2076.218	-1.8101	1.9087	1.0039	-88.873	337.614	1052.892	-0.60132	0.83716	0.25708
2.652	-150.851	-47.384	1622.527	-1.3574	1.4961	0.79346	-2.569	45.091	48.5842	-0.0063477	-0.054688	-0.1958	-164.526	58.691	2063.043	-1.782	1.8691	1.0032	-108.336	359.359	992.9389	-0.53076	0.78467	0.23584
2.654	-127.033	-45.3144	1625.148	-1.3738	1.4992	0.79273	-39.089	43.8517	52.528	-0.0043945	-0.054199	-0.19971	-120.253	49.561	1998.4161	-1.7586	1.8418	0.99893	-148.969	393.172	931.823	-0.43506	0.72314	0.2124
2.656	-102.375	-47.9886	1636.47	-1.3862	1.4985	0.79492	6.601	-2.98	62.112	0.0024414	-0.057617	-0.19678	-113.999	40.021	1953.612	-1.7355	1.807	0.99463	-141.848	399.194	859.926	-0.38379	0.68945	0.19727
2.658	-79.901	-27.381	1635.9866	-1.3926	1.4961	0.79639	-17.553	19.0077	42.481	0.0097656	-0.060059	-0.198	-82.321	26.02	1916.82605	-1.7182	1.7805	0.98486	-136.9574	387.96	794.0959	-0.28809	0.62744	0.17578
2.66	-77.764	21.558	1643.587	-1.3823	1.4946	0.79688	-22.921	25.717	51.28	0.016602	-0.064941	-0.19775	-22.489	4.361	1881.7143	-1.7007	1.7544	0.97461	-123.562	372.9793	738.976	-0.21411	0.57886	0.15625
2.662	-110.618	72.9444	1629.260579	-1.3745	1.4897	0.79395	2.241	23.253	52.709	0.02832	-0.069336	-0.19824	52.069	47.97	1853.67	-1.681	1.7304	0.95762	-118.13	352.189	689.789	-0.14502	0.53467	0.13867
2.664	-118.265	91.413	1616.5225	-1.3601	1.4836	0.79858	-52.313	57.6518	45.5959	0.03125	-0.071777	-0.19775	27.537	117.369	1838.8121	-1.6567	1.7098	0.93096	-106.262	317.21	643.896	-0.053711	0.4751	0.11768
2.666	-129.023	81.708	1593.631	-1.3496	1.4746	0.80322	-41.139	35.4878	61.482	0.036133	-0.078125	-0.19873	30.934	224.544	1817.7473	-1.6332	1.6863	0.91064	-131.87	277.019	591.188	-0.011719	0.44727	0.10205
2.668	-148.478	84.131	1591.418	-1.334	1.4668	0.81006	-56.558	47.486	53.484	0.040528	-0.083252	-0.19385	-8.42399999999999	277.531	1798.6847	-1.6088	1.6643	0.88408	-174.3219	244.471	534.701	0.072266	0.39111	0.083496
2.67	-155.448	76.189	1602.8262	-1.3301	1.4531	0.81201	-116.0547	72.053	46.7727	0.041504	-0.085938	-0.19141	-53.853	329.403	1741.891	-1.5762	1.6445	0.85791	-176.3935	227.941	482.5916	0.13525	0.35718	0.065674
2.672	-139.233	58.773	1608.5488	-1.3228	1.4321	0.82422	-63.496	29.4007	57.386	0.036133	-0.085938	-0.18115	-142.203	312.92	1696.311	-1.5311	1.6167	0.82422	-195.843	227.8944	445.6433	0.19189	0.31738	0.051758
2.674	-150.044	41.6489	1605.8827	-1.3211	1.4094	0.83471	-99.576	37.705	33.955	0.032227	-0.087891	-0.17725	-136.605	304.03	1669.8579	-1.4828	1.5895	0.79053	-199.649	204.81001	416.174	0.25439	0.27148	0.027344
2.676	-158.7179	32.25	1602.2028	-1.3198	1.3872	0.84375	-127.1875	9.542	44.6332	0.018555	-0.087402	-0.1709	-196.621	260.26	1628.57	-1.423	1.5539	0.75889	-170.22	181.167	367.611	0.28369	0.25537	0.016113
2.678	-121.71	5.404	1603.93513	-1.3276	1.3501	0.85254	-80.183	-15.78	38.0067	0.0097655	-0.088623	-0.15796	-195.434	261.457	1579.64	-1.3656	1.521	0.72754	-154.6176	140.812	301.13238	0.33447	0.2207	0.003418
2.68	-93.375	2.518	1603.5221	-1.3296	1.3325	0.85645	-111.4953	32.397	39.41	-0.0039063	-0.083984	-0.15137	-209.234	188.864	1549.102	-1.3101	1.4829	0.69141	-126.842	127.45	231.844	0.36547	0.19507	0.00024412
2.682	-105.62	7.341	1591.1876	-1.3315	1.3052	0.86426	-90.904	17.951	53.735	-0.022461	-0.083984	-0.13477	-184.698	180.72	1504.178	-1.2543	1.4387	0.66338	-82.902	126.303	199.178	0.38135	0.17285	0.0024414
2.684	-123.583	26.594	1590.0554	-1.3318	1.282	0.86304	-101.5352	30.1451	39.07679	-0.028809	-0.080566	-0.12842	-174.98	121.19	1469.656	-1.2039	1.398	0.62939	-54.746	116.36	178.539	0.37061	0.14209	0.0063477
2.686	-135.9244	36.082	1595.528	-1.3237	1.2563	0.85449	-113.9088	43.7112	32.1029	-0.045898	-0.078613	-0.11621	-131.6411	169.6	1417.357	-1.1492	1.352	0.59659	-11.571	147.751	147.016	0.35156	0.12646	0.013184
2.688	-136.947	53.9906	1569.9391	-1.3047	1.2305	0.85205	-60.336	-3.398	46.398	-0.052735	-0.07544	-0.10083	-123.99	153.95	1434.468	-1.093	1.3062	0.56885	-2.038	146.054	103.035	0.30322	0.10059	0.029297
2.69	-152.6035	81.4939	1530.84944	-1.293	1.2188	0.84424	-94.827	19.8382	40.8487	-0.061035	-0.074707	-0.092773	-112.499	240.714	1405.766	-1.0386	1.2583	0.53857	-27.172	169.887	76.1995	0.25318	0.089111	0.041748
2.692	-138.564	102.913	1511.47151	-1.2695	1.2012	0.83057	-94.462	10.827	61.5509	-0.071289	-0.068359	-0.072754	-122.9021	222.656	1378.992	-0.98516	1.216	0.51221	-51.088	171.169	75.133	0.19824	0.075195	0.061035
2.694	-151.5228	126.652	1484.7267	-1.2517	1.1941	0.81567	-52.754	7.6548	62.7689	-0.072754	-0.062988	-0.068848	-148.076	301.277	1280.8058	-0.93643	1.1719	0.48105	-72.78	180.317	97.6417	0.11523	0.05957	0.083984
2.696	-118.162	145.646	1468.425	-1.2222	1.1821	0.80273	-77.734	53.134	34.826	-0.078125	-0.053223	-0.057129	-192.282	269.191	1207.553	-0.88447	1.1286	0.45254	-54.849	158.973	98.723	0.071777	0.058105	0.10107
2.698	-121.634	148.967	1447.36	-1.187	1.1606	0.79102	-32.449	38.026	29.1857	-0.078125	-0.047608	-0.048096	-173.088	349.2	1136.561	-0.83662	1.0876	0.42959	-73.672	92.852	59.295	-0.0083008	0.05127	0.13232
2.7	-88.736	152.306	1442.161	-1.1719	1.1563	0.78369	-27.305	43.368	16.2792	-0.07666	-0.040039	-0.042969	-150.021	323.585	1077.604	-0.7832	1.0391	0.39893	-57.703	39.219	52.854	-0.06665	0.061767	0.16601
2.702	-84.631	133.54706	1449.4409	-1.1367	1.1396	0.76416	-53.416	65.0463	8.129	-0.072754	-0.030762	-0.037109	-105.822118	393.63	1018.0044	-0.73721	0.99794	0.37617	-36.798	4.60907	46.6217	-0.12158	0.067871	0.18896
2.704	-67.833	113.031	1428.4937	-1.126	1.1333	0.75147	4.875	27.71041	34.3561	-0.067383	-0.026367	-0.036133	-75.2482	305.455	962.764	-0.69072	0.95557	0.35313	-40.809	21.9571	46.51863	-0.19336	0.085938	0.22314
2.706	-71.244	91.27	1419.4002	-1.105	1.1255	0.74023	-23.03	52.337	27.82	-0.056641	-0.013672	-0.036621	-29.211	323.549	896.239	-0.64189	0.91143	0.32774	-47.416	33.407	52.5902	-0.22852	0.09668	0.23535
2.708	-87.746	98.522	1404.2912	-1.0835	1.1118	0.72461	-24.461	39.894	38.3858	-0.042969	-0.0063476	-0.040283	21.916	232.106	841.3231	-0.60195	0.86231	0.29776	-58.823	41.808	57.617	-0.28174	0.12207	0.26514
2.71	-84.524	89.414	1415.024	-1.0728	1.1069	0.7207	15.757	17.1279	61.9333	-0.029785	0.00048828	-0.042969	52.238	299.99	774.823	-0.55225	0.81299	0.26904	-56.967	18.371	56.644	-0.32373	0.13818	0.2876
2.712	-92.153	86.0497	1390.535	-1.0483	1.0962	0.69922	-31.537	45.48106	43.8805	-0.0083008	0.0078125	-0.055664	103.7785	254.263	715.7818	-0.50498	0.76728	0.23994	-75.435	24.407	65.08	-0.33594	0.14795	0.29541
2.714	-99.841	74.3644	1368.734	-1.0283	1.0888	0.68798	-26.204	28.8956	45.7169	0.0024414	0.011719	-0.062012	99.3575	318.6367	669.815	-0.45488	0.71856	0.21201	-119.9694	41.142	84.254	-0.354	0.15527	0.31689
2.716	-109.782	86.9236	1336.1947	-1.002	1.082	0.67041	-37.115	49.221	27.4085	0.029785	0.027832	-0.074219	52.978	226.1663	665.8659	-0.40528	0.67285	0.18545	-145.5867	46.338	96.271	-0.35962	0.15527	0.32471
2.718	-94.458	100.1446	1306.8724	-0.97412	1.0669	0.65039	-86.589	70.038	34.6054	0.049804	0.037597	-0.082031	11.942	255.252	636.005	-0.35293	0.62832	0.16504	-154.697	75.777	96.424	-0.35107	0.15234	0.32568
2.72	-94.483	124.2866	1274.908	-0.95703	1.0625	0.63916	-59.162	26.7559	50.545	0.06543	0.046875	-0.094238	-12.441	161.3536	618.103	-0.30566	0.58008	0.14502	-133.8537	66.993	59.6921	-0.32471	0.13428	0.32178
2.722	-95.964	150.7879	1238.727	-0.92188	1.0449	0.61768	-76.631	35.765	37.7095	0.088379	0.060547	-0.10498	-29.25	224.798	566.798	-0.26543	0.53496	0.10996	-129.0104	77.411	40.176	-0.31104	0.12207	0.31934
2.724	-71.109	157.4537	1233.8549	-0.89429	1.0359	0.59936	-75.194	23.818	39.4104	0.1001	0.068848	-0.1167	-47.257	170.833	504.358	-0.22529	0.48828	0.085058	-108.231	47.438	32.03	-0.26465	0.093262	0.29785
2.726	-67.859	153.6707	1205.2692	-0.85986	1.022	0.58398	-52.237	10.736	43.1345	0.11963	0.080566	-0.12158	-63.906	258.525	410.01	-0.18623	0.43828	0.057715	-121.567	41.5633	46.381	-0.21436	0.075928	0.27881
2.728	-79.339	171.2348	1180.1321	-0.82422	1.0039	0.56152	-114.2907	63.5588	44.571	0.12671	0.091553	-0.13159	-42.829	213.419	355.562	-0.14297	0.39599	0.031152	-114.421	22.753	44.325	-0.16797	0.054199	0.26074
2.73	-89.076	184.103	1151.1623	-0.80273	0.99609	0.54834	-91.914	53.541	66.2836	0.12842	0.099609	-0.13477	-32.54	259.6092	291.809	-0.10596	0.35303	0.0083008	-100.248	6.786	23.779	-0.1001	0.03125	0.229
2.732	-92.703	186.567	1140.3992	-0.76318	0.97803	0.5293	-84.541	65.47	43.58099	0.12939	0.11133	-0.1377	-12.94	170.634	272.813	-0.072168	0.3126	-0.020117	-87.489	3.33	24.915	-0.067383	0.01709	0.21289
2.734	-98.623	174.513	1126.2646	-0.73974	0.96338	0.51904	-123.670712	76.6169	49.6064	0.12695	0.11719	-0.1377	-41.886	194.876	234.1595	-0.047168	0.27578	-0.04248	-53.543	-19.726	26.607	0.0029297	-0.0087891	0.18604
2.736	-131.55483	174.554	1093.236	-0.71436	0.94971	0.50635	-77.175	24.9184	81.842	0.12109	0.12354	-0.13965	-70.37	134.652	196.998	-0.026465	0.23945	-0.06084	-46.531	-0.555	40.7208	0.056152	-0.023681	0.16382
2.738	-105.214	142.2934	1072.355	-0.68359	0.92969	0.48975	-104.0599	15.04241	83.685	0.10571	0.13037	-0.1399	-87.2441	200.071	166.995	-0.010352	0.2043	-0.073438	-42.369	-2.87291	58.652	0.10254	-0.041016	0.14258
2.74	-107.5807	125.91607	1044.97	-0.67041	0.91797	0.48584	-104.6067	-23.7008	130.929	0.097168	0.13818	-0.14209	-100.612	148.6608	158.827	0.00097656	0.17432	-0.083984	-48.264	31.0216	71.54	0.1626	-0.061035	0.12061
2.742	-94.215	120.1066	1025.4169	-0.64746	0.89453	0.47119	-71.543	-84.848	184.63	0.088379	0.14404	-0.14551	-137.835	194.638	156.1005	0.0072266	0.14052	-0.10069	-45.954	42.0506	44.9846	0.18848	-0.071777	0.11084
2.744	-101.9838	126.756	1003.7555	-0.62989	0.88013	0.4607	-83.879	-102.201	260.164	0.079102	0.14453	-0.15381	-147.553	124.867	154.435	0.016894	0.1085	-0.11123	-6.253	39.4314	50.6272	0.24414	-0.09082	0.091309
2.746	-72.684	121.464	993.735	-0.61572	0.86133	0.45068	-8.716	-183.2786	373.258	0.074219	0.15137	-0.16162	-150.19	158.157	134.3891	0.021582	0.079981	-0.12373	-5.46499999999999	42.4951	32.507	0.27417	-0.10327	0.07666
2.748	-81.921	137.094	968.242	-0.59082	0.83789	0.43701	16.738	-225.905	458.611	0.06665	0.15381	-0.15942	-148.62	90.088	104.7329	0.029199	0.054297	-0.13223	-14.196	26.6	36.5048	0.30713	-0.11377	0.067871
2.75	-57.253	143.288	924.9886	-0.57764	0.82275	0.43164	17.4312	-245.8848	532.513	0.062012	0.15967	-0.16602	-119.5521	92.485	86.704	0.029297	0.035645	-0.14063	-18.671	67.153	21.6321	0.3501	-0.12646	0.05127
2.752	-42.88	153.982	913.8119	-0.55371	0.79492	0.41846	79.434	-298.6729	611.42687	0.04248	0.17578	-0.16162	-88.113	11.661	77.767	0.041699	0.016016	-0.14248	-30.735	60.8158	-6.0148	0.36475	-0.13867	0.041992
2.754	-59.917	170.6149	891.6775	-0.53808	0.77441	0.40185	64.197	-250.239	663.3235	0.023926	0.19141	-0.15918	-34.45	24.726	50.612	0.045215	0.0037109	-0.14698	-37.103	73.7706	-6.3514	0.38916	-0.15088	0.029785
2.756	-65.719	188.306	874.5333	-0.52197	0.75391	0.39209	70.952	-197.394	711.566	-0.026367	0.24023	-0.14453	10.473	-22.106	38.94159	0.049511	-0.010352	-0.15322	-27.575	67.6435	21.337	0.40576	-0.16357	0.019287
2.758	-67.424	197.477	831.32527	-0.48975	0.72412	0.37598	126.031	-157.47	751.193	-0.089113	0.28882	-0.11621	10.749	2.60599999999999	41.9768	0.053125	-0.024512	-0.16231	-41.288	77.344	50.927	0.41846	-0.17822	0.011719
2.76	-78.705	185.821	800.6336	-0.48389	0.70752	0.36426	69.331	-94.969	777.729	-0.17139	0.34229	-0.076172	8.835	0.457999999999998	61.059	0.053223	-0.037109	-0.16504	-48.815	76.915	49.411	0.42383	-0.19141	-0.0014648
2.762	-78.926	183.524	756.58251	-0.45313	0.67773	0.34326	82.084	-96.0613	826.065	-0.31543	0.41016	-0.0092773	8.579	68.709	69.1368	0.050293	-0.041699	-0.16875	-53.928	63.241	48.367	0.43262	-0.19678	-0.0092773
2.764	-49.809	169.289	738.6791	-0.43408	0.65259	0.33667	108.883	-28.47	867.755	-0.39258	0.44629	0.029297	23.219	97.259	59.0094	0.048242	-0.048438	-0.17071	-97.3987	65.708	59.682	0.43115	-0.20264	-0.021484
2.766	-42.598	159.449	707.1864	-0.41357	0.6333	0.31836	77.306	44.412	944.543	-0.55371	0.52686	0.11426	26.602	108.41	38.011	0.041602	-0.050782	-0.16836	-125.0944	48.92412	70.174	0.4353	-0.19971	-0.025879
2.768	-53.734	148.7308	692.0564	-0.38574	0.59766	0.30176	105.1499	63.816	1005.658	-0.66992	0.60302	0.17871	0.829999999999998	79.591	41.3611	0.03086	-0.050391	-0.16621	-133.2688	52.3183	92.461	0.43115	-0.2002	-0.03125
2.77	-47.682	137.786	677.8652	-0.36645	0.573	0.28564	76.4675	87.278	989.618	-0.79053	0.68213	0.23242	-25.444	38.2223	58.0799	0.022461	-0.054199	-0.16211	-114.5774	10.706	89.479	0.42383	-0.19629	-0.032715
2.772	-32.638	120.026	641.9595	-0.34375	0.54688	0.271	34.39	32.406	999.181	-0.94678	0.77979	0.29053	-28.04	16.918	38.3382	0.01289	-0.055371	-0.15566	-128.4773	7.24299999999999	66.53945	0.42285	-0.18799	-0.039551
2.774	-37.261	126.003	627.4848	-0.31885	0.51563	0.25439	57.073	-15.96	1063.305	-1.0385	0.8457	0.32276	-12.456	13.7555	39.28238	0.001757	-0.055957	-0.14394	-126.385	-8.022	50.97537	0.40137	-0.16992	-0.049805
2.776	-52.594	127.185	619.176	-0.2998	0.50146	0.2417	-21.675	-36.64	1160.196	-1.1147	0.90088	0.34424	-9.445	38.835	29.4777	-0.010743	-0.059082	-0.14043	-141.06596	6.718	40.2752	0.38477	-0.15454	-0.050781
2.778	-55.377	130.00044	622.49	-0.27344	0.4668	0.21924	-62.568	-93.267	1269.068	-1.2207	0.97754	0.37158	-16.402	25.4	37.9109	-0.019238	-0.06211	-0.1375	-121.2183	45.276	45.4266	0.36279	-0.14014	-0.044434
2.78	-66.01	135.4642	598.121	-0.25415	0.44507	0.20191	-93.864	-134.31	1284.2286	-1.2788	1.0181	0.39355	-30.081	36.726	38.0145	-0.023438	-0.069336	-0.13428	-87.861	17.607	64.442	0.33154	-0.11914	-0.039551
2.782	-78.266	144.4911	557.1079	-0.2334	0.4209	0.18652	-160.106	-212.7841	1300.9346	-1.3877	1.0996	0.43896	-41.764	7.347	36.9078	-0.020411	-0.074121	-0.13789	-77.967	28.2043	58.788	0.30566	-0.1123	-0.028809
2.784	-86.672	133.4646	521.2708	-0.20068	0.39063	0.16455	-140.60093	-292.398	1361.3633	-1.4695	1.1555	0.47022	-69.775	39.293	30.2478	-0.013868	-0.086034	-0.14687	-83.197	2.065	51.75	0.25977	-0.085449	-0.013184
2.786	-81.9505	131.106	499.2299	-0.19141	0.37891	0.16016	-155.1915	-297.08	1385.2177	-1.5547	1.207	0.49658	-82.0855	1.672	86.631	-0.0048873	-0.093845	-0.1539	-87.743	39.853	57.84	0.21851	-0.06543	-0.0036621
2.788	-85.121	139.8825	458.5979	-0.16162	0.34424	0.13281	-147.37	-324.09	1450.711	-1.666	1.25	0.52295	-120.196	16.9236	86.894	0.0098594	-0.10781	-0.1584	-91.535	64.297	59.9025	0.17285	-0.037109	0.0097656
2.79	-64.02	152.2239	422.401	-0.14966	0.32935	0.125	-81.433	-330.17	1508.902	-1.7109	1.2734	0.53174	-121.543	-26.0935	72.89319	0.028809	-0.11475	-0.16895	-97.775	76.694	71.92	0.11426	-0.0087891	0.032227
2.792	-56.63	138.7901	422.891	-0.13477	0.31299	0.11523	-137.66271	-325.315	1535.671	-1.7734	1.3125	0.53662	-158.375	22.295	51.677	0.04522	-0.12891	-0.17305	-52.151	55.512	41.13392	0.083008	0.003418	0.046387
2.794	-48.82	136.0629	407.176	-0.12256	0.28955	0.097656	-134.4665	-321.01	1568.512	-1.7856	1.3364	0.52588	-182.133	-7.8095	51.876	0.059587	-0.14054	-0.18048	-17.007	2.275	11.488	0.026855	0.037598	0.058105
2.796	-36.979	111.929	390.022	-0.11621	0.27637	0.088867	-100.73	-238.036	1559.905	-1.771	1.356	0.50195	-166.921	71.489	47.5901	0.079123	-0.155	-0.19572	-15.994	1.6446	-6.856	-0.0063477	0.059082	0.079834
2.798	-64.445	110.04	397.90967	-0.10547	0.25488	0.08252	-153.679	-157.541	1566.51754	-1.6797	1.3672	0.44873	-141.023	43.433	42.2468	0.1011	-0.17003	-0.20665	0.0459999999999994	-6.4577821	8.772	-0.036133	0.083496	0.097656
2.8	-64.737	100.0643	386.6858	-0.098142	0.23803	0.069092	-140.849	-106.209	1569.354	-1.6089	1.3735	0.41992	-103.1116	88.256	-5.336	0.12598	-0.18604	-0.2207	-17.03	31.7367	39.658	-0.068848	0.10986	0.11426
2.802	-58.12	112.6214	366.50816	-0.087402	0.22461	0.0625	-162.8176	-62.04	1542.62	-1.4487	1.3853	0.35254	-84.5815	22.572	5.411	0.15669	-0.20124	-0.23366	-27.986	32.9288	38.5488	-0.084473	0.12305	0.12744
2.804	-53.983	115.525	323.5454	-0.07666	0.20117	0.051758	-164.992	-73.406	1564.42	-1.3288	1.3977	0.30859	-65.99	38.314	8.733	0.19142	-0.21986	-0.25141	-12.543	51.9155	32.8541	-0.11084	0.14648	0.14209
2.806	-62.48	107.585	317.5086	-0.071289	0.19189	0.043457	-61.425	-85.721	1605.187	-1.2324	1.4121	0.26758	-63.86	-36.073	33.3143	0.22455	-0.23317	-0.26896	6.026	40.729	21.31011	-0.12451	0.16528	0.1477
2.808	-60.761	91.6443	309.7447	-0.056641	0.17578	0.03125	-47.629	-113.188	1636.373	-1.144	1.4321	0.22168	-26.056	23.675	19.2545	0.26406	-0.24869	-0.28538	-30.599	56.58	51.085	-0.1377	0.18066	0.15381
2.81	-54.599	81.7525	307.12616	-0.046143	0.16333	0.020508	-24.976	-165.549	1684.4794	-1.1221	1.4395	0.21289	-27.527	-2.86	43.582	0.2959	-0.26367	-0.30518	-70.875	74.727	72.609	-0.15137	0.19971	0.16211
2.812	-32.358	71.776	281.9705	-0.035645	0.1499	0.0087891	60.206	-162.239	1708.68301	-1.106	1.4595	0.20996	-28.819	73.09	64.967	0.3281	-0.26697	-0.31444	-82.483	57.898	72.547	-0.16113	0.20801	0.16943
2.814	-31.283	62.078	268.8252	-0.012695	0.13525	-0.010742	41.787	-164.5003	1712.544	-1.1325	1.4729	0.21264	-21.558	32.4679	92.301	0.35044	-0.27962	-0.32687	-69.246	82.227	43.6999	-0.18066	0.21777	0.17822
2.816	-10.907	68.829	259.05759	-0.00048828	0.12842	-0.018555	92.15878	-182.086	1760.762	-1.1812	1.4868	0.22266	-6.55200000000001	79.473	64.333	0.36679	-0.27956	-0.33568	-66.919	45.3812	22.2894	-0.18774	0.22851	0.18945
2.818	-21.197	79.3454	237.1951	0.019043	0.11475	-0.044922	79.5242	-199.913	1796.572	-1.2651	1.5044	0.23389	-11.292	9.5676	36.5037	0.37627	-0.27889	-0.3414	-91.727	52.031	22.393	-0.19336	0.2373	0.20703
2.82	-17.964	97.093	218.3434	0.037597	0.10327	-0.05835	35.239	-263.451	1843.274	-1.3101	1.5161	0.2373	-8.273	39.65	-0.419999999999998	0.37305	-0.27246	-0.34961	-80.507	52.165	48.9306	-0.19971	0.23926	0.24023
2.822	-39.113	102.026	197.549	0.051758	0.094238	-0.076172	52.679	-280.913	1860.513	-1.3779	1.5361	0.24512	-3.291	-26.5996	27.239	0.36655	-0.26913	-0.34897	-117.492	72.204	65.7262	-0.19824	0.23682	0.25781
2.824	-53.543	98.795	200.44312	0.075684	0.080078	-0.095703	3.483	-247.446	1830.564	-1.4187	1.553	0.24219	35.836	23.6383	30.101	0.35397	-0.26025	-0.34477	-126.7938	82.994	70.229	-0.2002	0.23096	0.28906
2.826	-42.587	97.003	187.4051	0.084961	0.077637	-0.10303	-3.232	-221.822	1848.82	-1.4604	1.5786	0.24414	36.299	-2.26	27.4252	0.33157	-0.24464	-0.33902	-123.9324	51.61	72.922	-0.19532	0.23218	0.31005
2.828	-65.928	95.102	183.5416	0.10498	0.063965	-0.12451	38.162	-141.595	1828.844	-1.5127	1.6133	0.24658	14.775	55.8489	32.4961	0.30204	-0.22697	-0.32782	-116.865	22.987	70.443	-0.18066	0.24219	0.33301
2.83	-66.634	96.063	182.1678	0.11744	0.054199	-0.13867	-5.354	-106.317	1797.1267	-1.5405	1.6294	0.24707	-16.049	35.0721	60.274	0.26904	-0.20557	-0.31543	-118.733	-18.029	84.631	-0.15381	0.25049	0.34473
2.832	-51.554	77.189	173.214	0.12793	0.045898	-0.14795	13.246	-73.465	1825.2052	-1.5957	1.6563	0.25439	-30.916	89.005	68.033	0.23556	-0.17708	-0.29345	-119.819	-27.3047	110.113	-0.13818	0.25635	0.35156
2.834	-44.643	71.1519	150.7737	0.13818	0.029297	-0.16504	22.6055	-19.664	1799.342	-1.6402	1.6724	0.26954	-80.7859	78.852	87.778	0.19618	-0.14517	-0.2667	-124.595	-81.434	167.433	-0.1123	0.27344	0.33936
2.836	-54.736	63.2172	139.2409	0.14404	0.019043	-0.17529	-6.939	-21.754	1792.256	-1.6812	1.686	0.27588	-79.801	106.17	45.222	0.15623	-0.11133	-0.23641	-155.6891	-111.3684	258.656	-0.10059	0.30786	0.31201
2.838	-44.013	42.684	126.9845	0.14844	0.018555	-0.18701	32.937	15.18842	1787.037	-1.728	1.6938	0.28516	-114.382	49.099	52.953	0.10313	-0.078311	-0.20355	-161.796	-180.5192	386.563	-0.10254	0.3667	0.28418
2.84	-44.087	43.677	123.9413	0.15161	0.010987	-0.1941	-46.424	13.33	1767.526	-1.7441	1.6934	0.28418	-116.781	17.53001	63.47	0.04541	-0.042969	-0.1709	-157.441	-291.211	558.889	-0.11426	0.47949	0.26855
2.842	-69.968	61.475	119.4484	0.14941	0.0073242	-0.19775	-61.037	-27.7674	1787.5769	-1.7637	1.6816	0.28271	-129.7051	-39.979	37.7413	-0.0086385	-0.0081696	-0.13887	-182.226	-398.874	696.519	-0.13965	0.5498	0.27588
2.844	-59.774	71.5163	113.6372	0.1499	0.0073242	-0.20703	-42.3649	-33.124	1802.4073	-1.7744	1.6772	0.27905	-139.2857	-19.3904	8.782	-0.063398	0.027068	-0.10762	-194.358	-506.101	754.091	-0.22949	0.68945	0.3208
2.846	-60.913	59.1935	123.6135	0.14551	0.0083008	-0.20752	-114.718	-71.95	1808.8158	-1.7754	1.6699	0.27441	-146.933	5.172	29.6969	-0.11654	0.053581	-0.080996	-196.804	-509.82	787.848	-0.31543	0.76977	0.37964
2.848	-64.888	64.38989	119.2544	0.12939	0.01416	-0.21191	-58.576	-77.731	1859.092	-1.7637	1.6621	0.26611	-116.4388	29.206	43.2044	-0.15801	0.082522	-0.048272	-188.525	-448.563	855.5266	-0.43213	0.83252	0.43359
2.85	-65.763	62.3741	108.9119	0.11669	0.020996	-0.20142	-34.26308	-62.353	1860.41421	-1.7617	1.6621	0.25781	-111.9255	41.444	73.212	-0.19189	0.1084	-0.030273	-254.64	-313.692	958.168	-0.60303	0.89209	0.48828
2.852	-68.343	69.131	114.5095	0.097168	0.02832	-0.19629	-73.9774	-75.664	1855.4806	-1.7515	1.6587	0.25244	-95.705	30.185	58.113	-0.21499	0.1295	-0.020917	-256.077	-204.532	1039.111	-0.68164	0.93164	0.52002
2.854	-59.546	74.378	96.8895	0.067871	0.043457	-0.1792	-36.913	-66.824	1866.39521	-1.7461	1.6479	0.24902	-106.0831	20.634	41.11	-0.22206	0.14863	-0.011891	-209.457	-116.976	1064.778	-0.82373	1.0122	0.5625
2.856	-56.411	87.61	87.6754	0.050293	0.047363	-0.17188	-16.725	-62.996	1827.37	-1.7461	1.6426	0.24805	-103.22314	11.855	48.8993	-0.21428	0.16479	-0.012695	-134.483	-82.627	1126.4696	-0.91089	1.1018	0.59594
2.858	-40.819	77.081	58.9262	0.010254	0.06543	-0.15381	-0.993000000000002	-73.63653	1828.918	-1.7456	1.6333	0.25342	-95.9102	21.5281	63.96224	-0.19722	0.17679	-0.023093	-51.09	-37.48	1293.382	-1.0029	1.2148	0.63623
2.86	-43.089	60.19051	66.295	-0.022949	0.07959	-0.14014	55.12131	-5.917	1836.831	-1.7515	1.6333	0.25	-61.458	15.6904	61.0176	-0.17139	0.18848	-0.029785	-36.756	32.19	1474.01	-1.1479	1.3892	0.71484
2.862	-30.703	51.0676	67.1947	-0.053223	0.099121	-0.12646	25.457	36.438	1824.961	-1.7559	1.627	0.25146	-33.848	43.14	32.6984	-0.14257	0.19525	-0.039654	-11.668	80.674	1594.046	-1.2383	1.4707	0.77197
2.864	-39.727	48.288	75.6394	-0.10059	0.11719	-0.10254	51.66358	81.051	1812.9473	-1.7547	1.6184	0.24951	-39.817	21.6293	29.3877	-0.11164	0.19828	-0.047799	-90.092	93.521	1628.476	-1.4595	1.6274	0.88623
2.866	-33.916	42.523	88.46847	-0.11865	0.12549	-0.090332	65.807	138.512	1761.726	-1.7515	1.6118	0.25195	-31.369	51.572	20.0273	-0.091733	0.20451	-0.058333	-117.249	-15.29	1700.968	-1.6579	1.7073	0.95239
2.868	-24.204	38.5151	84.4294	-0.15674	0.14258	-0.074219	21.519	153.516	1717.946	-1.7515	1.6021	0.25244	-4.95799999999999	25.7491	41.3987	-0.083097	0.21173	-0.063204	-179.881	-75.45	1766.233	-1.8594	1.7637	1.0132
2.87	-42.694	43.5465	83.055	-0.17676	0.15381	-0.062744	94.959	173.485	1734.076	-1.7476	1.6021	0.25195	-1.176	62.817	11.2481	-0.072266	0.21924	-0.069336	-254.6959	-142.32	1848.728	-2.1133	1.8027	1.0825
2.872	-37.241	45.417	57.0043	-0.19141	0.16357	-0.050781	51.6911	163.697	1729.322	-1.7441	1.5918	0.25732	24.772	24.5867	26.259	-0.066609	0.22079	-0.080955	-274.153	-182.79	1923.721	-2.2387	1.8252	1.1157
2.874	-47.52	41.427	62.439	-0.20313	0.1709	-0.046875	31.336	119.954	1748.897	-1.7358	1.5864	0.26196	42.307	44.317	61.21	-0.056262	0.22206	-0.087886	-304.511	-288.963	1970.117	-2.3223	1.8379	1.1382
2.876	-57.06	43.258	77.923	-0.20605	0.17871	-0.04248	54.79493	99.368	1756.8807	-1.728	1.5767	0.26416	37.526	-49.184	102.182	-0.043762	0.22949	-0.096863	-273.612	-420.309	2021.241	-2.3296	1.8481	1.1133
2.878	-47.086	51.885	70.0316	-0.20361	0.18213	-0.04248	8.752	71.432	1727.354	-1.7202	1.5669	0.271	1.927	-51.6173	115.4145	-0.028034	0.23672	-0.10253	-140.583	-498.5	1996.405	-2.271	1.8442	1.0898
2.88	-23.9	47.7508	61.0234	-0.19825	0.18262	-0.046143	71.729	66.32	1723.332	-1.7104	1.5591	0.27197	-5.685	-114.2183	184.6096	-0.015137	0.25	-0.10986	-0.111000000000001	-508.18	1975.1905	-2.0938	1.8438	1.0396
2.882	-52.867	37.904	59.1371	-0.18604	0.18115	-0.053223	20.821	83.756	1709.0279	-1.6904	1.5371	0.27734	10.646	-103.559	254.3081	-0.0097656	0.26026	-0.11533	34.343	-462	2044.781	-1.9383	1.8274	1.008
2.884	-52.892	36.749	62.94029	-0.16699	0.17578	-0.062012	-17.212	78.439	1708.863	-1.6704	1.522	0.28051	25.686	-208.222	409.579	-0.0077192	0.28047	-0.1168	68.8246	-428.85	2113.315	-1.7925	1.8013	0.98242
2.886	-35.235	40.042	44.60503	-0.1582	0.17188	-0.068848	38.558	66.659	1717.947	-1.6543	1.5039	0.28369	32.237	-250.303	522.82	-0.021389	0.30743	-0.12773	58.334	-340.81	2185.607	-1.6621	1.7363	0.95557
2.888	-61.518	51.6603	44.2138	-0.13379	0.16846	-0.083008	-31.723	87.91	1662.266	-1.6226	1.4829	0.2876	33.341	-399.555	614.484	-0.044925	0.34395	-0.13867	104.7673	-267.488	2225.448	-1.6191	1.6953	0.94775
2.89	-54.48	50.5249	48.5655	-0.11694	0.1582	-0.089111	-49.3026	82.188	1659.425	-1.6074	1.4746	0.29004	-7.4364	-432.132	641.935	-0.076172	0.38916	-0.13525	100.7953	-187.628	2200.089	-1.5718	1.6099	0.93555
2.892	-42.752	28.2451	63.8177	-0.1001	0.14893	-0.095215	-19.815	133.053	1638.705	-1.5781	1.457	0.30029	-22.4362	-488.125	714.7184	-0.13633	0.46054	-0.11719	45.767	-123.702	2158.874	-1.5422	1.552	0.92798
2.894	-52.725	30.4356	62.5196	-0.084961	0.14111	-0.10303	-91.4247	197.293	1558.485	-1.5537	1.4404	0.30909	-0.976098	-390.6706	755.064	-0.22695	0.54374	-0.078715	-71.905	-68.66	2126.824	-1.5117	1.5078	0.92236
2.896	-70.407	29.4785	47.55992	-0.078613	0.13428	-0.1123	-90.0412	214.139	1547.092	-1.5269	1.4302	0.31445	-13.32	-343.401	809.259	-0.35585	0.63046	-0.022855	-149.848	-26.16	2087.83	-1.4888	1.4946	0.92188
2.898	-70.111	17.8592	60.6309	-0.068359	0.12354	-0.1167	-75.5552	261.454	1513.06	-1.4932	1.4102	0.31934	-10.968	-181.714	838.206	-0.504	0.7124	0.031541	-151.931	-58.97	2041.587	-1.4819	1.5024	0.92383
2.9	-63.902	18.3421	66.2426	-0.054688	0.11523	-0.12549	-117.611	247.623	1480.04	-1.4766	1.4004	0.3252	11.9296	-151.264	857.6583	-0.66113	0.78613	0.09082	-173.566	-98.71	2016.104	-1.521	1.5532	0.93457
2.902	-75.718	23.2092	57.2183	-0.05127	0.10938	-0.13281	-47.467	226.77	1471.424	-1.4312	1.3755	0.32617	30.6055	-91.684	931.478	-0.83311	0.84502	0.14707	-80.384	-171.656	2007.323	-1.5864	1.6167	0.9414
2.904	-51.742	21.1696	36.2579	-0.046875	0.10742	-0.14209	-78.9204	235.905	1434.697	-1.3948	1.3577	0.32935	18.316	-87.889	1047.164	-1.0192	0.90694	0.18555	39.705	-182.2233	2037.981	-1.6655	1.6763	0.94922
2.906	-41.655	9.001	47.3583	-0.041504	0.10717	-0.15161	-60.433	186.1797	1418.9592	-1.3569	1.3384	0.3335	16.915	-29.473	1123.325	-1.1931	0.96826	0.21407	102.273	-171.85	2107.757	-1.7793	1.7305	0.95947
2.908	-46.626	11.968	55.7798	-0.033203	0.10791	-0.15723	4.396	194.1105	1401.8076	-1.312	1.3159	0.33203	66.491	-9.73341	1153.672	-1.3466	1.0378	0.23135	67.122	-117.69	2170.07	-1.8257	1.7485	0.96582
2.91	-52.757	15.578	62.1147	-0.030273	0.10889	-0.16504	-50.318	180.703	1344.654	-1.2871	1.2969	0.3335	128.559	34.066	1205.48	-1.478	1.1177	0.25391	5.15400000000001	-107.382	2219.317	-1.916	1.7754	0.97705
2.912	-34.331	-4.1262	94.8517	-0.029297	0.11475	-0.16797	-3.09500000000001	144.295	1343.668	-1.2461	1.2734	0.33154	116.438	42.15	1278.563	-1.595	1.2132	0.28848	-48.361	-148.364	2250.261	-1.9695	1.7893	0.97974
2.914	-35.301	-44.567	135.179	-0.030762	0.12256	-0.17236	-22.195	163.025	1321.2131	-1.2136	1.2473	0.33081	110.71	17.51	1344.742	-1.7253	1.3091	0.32861	-168.3578	-209.676	2251.738	-2.0059	1.8008	0.98486
2.916	-29.747	-73.288	186.711	-0.036622	0.13111	-0.17749	-37.406	148.466	1315.4	-1.1812	1.2251	0.33154	63.73	-49.9	1397.088	-1.8522	1.4009	0.3751	-209.809	-204.947	2247.673	-2.0112	1.7935	0.97656
2.918	4.417	-94.904	244.463	-0.046875	0.14404	-0.18018	7.27200000000001	146.0219	1280.04	-1.1426	1.1914	0.33008	16.917	-191.27	1479.389	-1.9881	1.4697	0.41396	-274.62	-114.072	2199.148	-1.9956	1.7856	0.97852
2.92	25.367	-137.883	310.058	-0.078125	0.18066	-0.17578	-12.953	178.517	1232.472	-1.1265	1.1743	0.3291	-22.297	-315.7149	1582.749	-2.1279	1.5215	0.45361	-284.798	-21.322	2143.42	-1.9512	1.7734	0.96729
2.922	19.459	-177.747	383.104	-0.098145	0.20313	-0.16992	6.62	166.7252	1197.713	-1.0859	1.1328	0.32178	10.2187	-407.689	1668.033	-2.2477	1.5522	0.47461	-303.928	35.909	2063.711	-1.9058	1.7691	0.95752
2.924	21.478	-184.281	414.691	-0.15674	0.24854	-0.14404	29.598	189.583	1150.0026	-1.0649	1.105	0.32177	72.7398	-398.92	1668.578	-2.3254	1.5641	0.48311	-331.557	29.965	2014.137	-1.8711	1.7559	0.95166
2.926	56.0279	-170.8381	462.756	-0.22485	0.29053	-0.11133	-17.324	229.0194	1062.848	-1.0352	1.0723	0.31494	137.901	-423.92	1668.77977	-2.3407	1.5598	0.47568	-227.146	35.4677	1984.943	-1.832	1.7383	0.94092
2.928	74.038	-159.455	540.904	-0.30713	0.33057	-0.077637	13.296	221.47845	1024.764	-0.99219	1.0352	0.30957	118.006	-407.78	1723.4529	-2.2613	1.5485	0.43818	-111.883	80.325	1984.118	-1.814	1.731	0.93164
2.93	94.847	-114.693	588.472	-0.4248	0.38916	-0.032227	21.647	275.405	989.399	-0.9707	1.0137	0.30664	58.7565	-424.09	1789.04	-2.1128	1.5376	0.38672	-57.421	124.053	1999.636	-1.7813	1.7031	0.90674
2.932	107.507	-75.567	572.891	-0.48438	0.42334	-0.0048828	-7.084	272.138	934.7935	-0.92334	0.9751	0.29883	25.684	-347.47	1871.007	-1.9077	1.5376	0.32637	-73.769	187.495	2002.766	-1.7559	1.6807	0.88233
2.934	88.831	-48.1652	573.9858	-0.60303	0.48291	0.044434	13.29	254.228	913.774	-0.875	0.92773	0.29346	11.985	-311.183	1950.459	-1.6917	1.5505	0.27676	-90.32	197.744	1969.26085	-1.7319	1.6626	0.85742
2.936	63.829	-16.408	614.3572	-0.68384	0.53662	0.081787	-57.5	268.71	845.728	-0.85303	0.90283	0.28662	-16.259	-169.048	1943.183	-1.4913	1.5689	0.2373	-122.071	199.136	1954.16	-1.6992	1.6387	0.82275
2.938	73.4213	19.963	674.464	-0.75879	0.59375	0.10889	-71.575	217.8532	831.4896	-0.79834	0.85107	0.27344	-47.658	-123.636	1924.6731	-1.3391	1.5887	0.22021	-158.857	174.201	1975.612	-1.6836	1.6289	0.80127
2.94	68.517	49.247	748.427	-0.85205	0.66455	0.14453	-61.426	215.339	802.4514	-0.75757	0.80933	0.26001	-117.2418	-10.48	1873.378	-1.2319	1.6138	0.21777	-147.249	141.2202	2011.765	-1.646	1.6001	0.77148
2.942	40.595	81.252	770.6976	-0.9043	0.70117	0.1626	-119.3495	228.9115	762.6917	-0.71484	0.77148	0.24854	-165.507	-29.73	1853.805	-1.1918	1.6375	0.23946	-140.02	120.126	2019.835	-1.6189	1.5774	0.75318
2.944	6.879	104.827	807.468	-1.0059	0.78906	0.19043	-70.842	170.963	737.76172	-0.65039	0.71875	0.22314	-181.919	3.46300000000001	1869.081	-1.1957	1.6727	0.25869	-133.637	88.9746	1944.155	-1.5889	1.5508	0.73193
2.946	3.116	97.329	850.72	-1.0691	0.85864	0.20362	-104.651	193.4022	687.938	-0.61475	0.69189	0.2168	-137.896	-101.72	1921.345	-1.2364	1.7055	0.27627	-102.34	80.222	1879.029	-1.5566	1.5254	0.71045
2.948	-28.709	71.411	928.267	-1.1309	0.92285	0.21729	-143.5121	180.877	658.696	-0.55225	0.64111	0.19287	-119.7523	-100.694	1946.856	-1.3055	1.7408	0.30254	-57.945	50.921	1829.372	-1.5391	1.5098	0.69971
2.95	-34.541	49.717	1007.257	-1.209	0.99805	0.23145	-86.764	159.847	635.493	-0.50219	0.60132	0.16845	-48.883	-164.8936	1966.46	-1.377	1.7773	0.31787	-14.95	54.059	1783.5989	-1.5112	1.479	0.68945
2.952	-31.67	-23.956	1109.9603	-1.2476	1.0298	0.2417	-119.2544	198.5963	580.28413	-0.45801	0.56592	0.1543	-3.227	-134.4129	1982.061	-1.4468	1.8035	0.31836	33.683	77.14	1760.425	-1.49	1.4524	0.67993
2.954	-58.8629	-92.513	1171.8088	-1.3315	1.0806	0.25391	-100.39	165.279	549.797	-0.39502	0.52051	0.13818	-0.573	-184.762	2012.412	-1.5157	1.8274	0.32422	27.19	146.12	1716.487	-1.4604	1.4185	0.67676
2.956	-113.4374	-139.756	1231.7535	-1.3933	1.1077	0.26783	-88.957	162.852	513.8755	-0.36572	0.49707	0.12744	-35.6993	-165.248	2065.89	-1.572	1.8493	0.31953	19.878	231.81	1680.9183	-1.4258	1.3711	0.66113
2.958	-93.258	-166.617	1261.0978	-1.4512	1.127	0.27588	-120.10576	193.358	466.171	-0.31348	0.45947	0.11816	-76.507	-243.65	2128.786	-1.6268	1.8712	0.31836	10.309	296.039	1663.4992	-1.4004	1.3438	0.64941
2.96	-77.249	-189.891	1302.0444	-1.5093	1.147	0.29199	-78.536	161.131	447.6665	-0.28076	0.42871	0.10694	-97.373	-221.723	2159.217	-1.6797	1.8867	0.31152	-18.964	358.476	1600.514	-1.3359	1.2754	0.62744
2.962	-81.47	-188.362	1331.427	-1.5347	1.1528	0.29639	-103.431	224.053	401.127	-0.25146	0.40332	0.099609	-113.969	-225.034	2181.723	-1.7292	1.9005	0.30938	-34.195	360.32	1529.963	-1.2752	1.2278	0.59839
2.964	-112.1503	-184.649	1354.635	-1.5542	1.1626	0.29883	-83.138	234.664	365.9527	-0.21631	0.36475	0.095703	-62.552	-127.165	2169.879	-1.7789	1.8996	0.30918	-98.297	388.44	1466.1584	-1.2109	1.1738	0.5708
2.966	-122.9732	-166.659	1389.255	-1.5505	1.1609	0.292	-37.756	198.748	345.2215	-0.2041	0.34717	0.092773	-12.993	-103.299	2122.401	-1.8226	1.8918	0.31114	-166.181	362.38	1429.443	-1.1206	1.1079	0.51758
2.968	-141.158	-137.436	1412.364	-1.5332	1.1563	0.28564	-92.395	216.364	304.884	-0.17969	0.31055	0.092285	12.924	-36.808	2066.226	-1.8758	1.8746	0.30889	-198.174	351.05	1395.772	-1.0757	1.0728	0.48926
2.97	-127.59007	-91.5169	1432.087	-1.478	1.1548	0.2583	-65.05	151.619	296.4277	-0.15649	0.28491	0.090577	26.517	-49.486	2011.632	-1.9214	1.8521	0.3125	-159.6375	323.948	1337.164	-0.98047	1.0137	0.43799
2.972	-114.611	-59.786	1421.02	-1.4443	1.1523	0.2417	-31.552	141.85	275.363	-0.13428	0.25244	0.089355	56.233	-11.312	1987.402	-1.9517	1.8171	0.3085	-169.665	247.564	1282.993	-0.91163	0.96924	0.40918
2.974	-102.7955	-52.128	1425.443	-1.3711	1.1514	0.2124	-52.13	151.0146	255.289	-0.10596	0.22266	0.081055	121.015	7.2092	2005.417	-1.9785	1.7855	0.31103	-161.316	207.732	1234.7404	-0.85254	0.92969	0.37744
2.976	-85.272	-43.92	1426.255	-1.3164	1.1504	0.19068	-11.936	86.419	248.173	-0.09082	0.20605	0.074219	148.622	80.772	2016.411	-1.9828	1.7469	0.30595	-130.651	185.96	1194.239	-0.78076	0.87158	0.3457
2.978	-48.291	-25.652	1436.642	-1.2656	1.1543	0.17627	-25.102	120.9199	233.90117	-0.052246	0.17334	0.069824	147.373	109.78	1971.0561	-1.9705	1.712	0.30234	-99.157	230.88	1156.762	-0.74951	0.8374	0.32324
2.98	-50.901	-22.042	1464.468	-1.2324	1.1611	0.1665	-41.076	103.56	213.6499	-0.030273	0.15283	0.065673	98.307	130.697	1902.853	-1.9487	1.6802	0.29443	-63.047	266.48	1129.773	-0.67578	0.77344	0.28613
2.982	-32.955	-31.916	1486.4441	-1.2202	1.1685	0.16602	6.232	67.69	209.181	-0.010742	0.13281	0.056641	48.7471	76.132	1902.271	-1.9196	1.6445	0.28692	-74.16	292.461	1105.474	-0.61915	0.72608	0.25977
2.984	-16.861	-75.217	1500.798	-1.2339	1.1802	0.16406	-53.692	116.709	204.922	0.01416	0.11377	0.057129	15.8	43.3197	1942.6922	-1.8922	1.6098	0.279	-90.155	274.805	1059.833	-0.55811	0.6792	0.22754
2.986	-5.781	-131.331	1503.034	-1.2461	1.1866	0.16089	-65.077	69.4436	191.609	0.023438	0.104	0.057129	17.563	-5.88159	2005.634	-1.864	1.5801	0.27236	-135.76	275.2222	955.3614	-0.4834	0.61133	0.18799
2.988	19.061	-165.714	1521.0124	-1.2612	1.1997	0.16895	-52.894	62.44	178.882	0.037109	0.086426	0.054688	50.0894	-15.7852	2016.485	-1.843	1.5524	0.26846	-150.26	328.447	881.463	-0.44287	0.58252	0.16992
2.99	38.46	-187.636	1566.402	-1.2808	1.2173	0.1792	-87.355	82.2179	140.065	0.042237	0.078369	0.058594	27.008	-23.381	1985.341	-1.8223	1.5313	0.26465	-132.6492	353.028	811.3194	-0.35889	0.51953	0.13721
2.992	38.214	-208.388	1592.585	-1.2866	1.2231	0.18164	-70.784	35.708	123.2593	0.04248	0.065918	0.064453	-8.76	-11.255	1945.351	-1.8084	1.5217	0.26407	-126.6711	373.016	737.1418	-0.29834	0.47412	0.11865
2.994	16.271	-233.868	1605.571	-1.3027	1.252	0.1958	-84.068	97.5526	102.686	0.037109	0.054199	0.07666	-22.7815	25.139	1906.655	-1.8003	1.5161	0.2667	-93.786	324.992	649.0544	-0.24316	0.42383	0.091797
2.996	18.911	-219.811	1583.39	-1.3052	1.2803	0.20239	-101.392	99.8162	89.9232	0.035645	0.047363	0.081055	-12.008	60.554	1895.7498	-1.7952	1.5064	0.28115	-60.7	285.894	557.729	-0.17529	0.36768	0.057129
2.998	26.737	-196.382	1583.483	-1.3145	1.3066	0.21191	-109.65	76.414	77.4032	0.025391	0.043457	0.10107	12.2478246	110.766	1899.254	-1.7897	1.5045	0.28897	2.794	237.917	495.658	-0.14063	0.3418	0.041016
3	38.602	-152.958	1586.5433	-1.3286	1.3345	0.21533	-133.9712	120.385	57.932	0.01709	0.03418	0.10522	-5.331	110.976	1893.5	-1.7793	1.4961	0.30127	60.424	217.501	476.939	-0.07959	0.27588	0.015137
3.002	15.936	-103.277	1588.563	-1.3315	1.3462	0.22461	-103.984	59.2357	62.5698	0.012207	0.032227	0.11377	-38.643	144.705	1823.6048	-1.7637	1.4945	0.30791	92.958	227.904	452.275	-0.030762	0.23291	-0.0080565
3.004	7.817	-65.931	1573.3345	-1.3452	1.3755	0.23486	-90.208	44.2907	65.7285	0.012207	0.025391	0.12158	-67.4078	157.708	1775.865	-1.7413	1.488	0.31777	74.369	200.559	414.0722	0.0087891	0.1958	-0.030762
3.006	-3.7209	-56.195	1577.525	-1.3657	1.3921	0.24341	-101.825	66.8562	60.917	0.01416	0.032227	0.12061	-72.954	227.671	1714.446	-1.7058	1.4806	0.32676	42.835	202.8007	372.214	0.060059	0.13672	-0.056152
3.008	9.608	-42.091	1568.27	-1.3784	1.4048	0.25244	-103.403	0.544	53.2763	0.019043	0.028809	0.12354	-57.61578	243.339	1690.692	-1.6668	1.4676	0.33086	11.101	155.0629	334.2119	0.07959	0.11084	-0.062012
3.01	9.087	-21.998	1564.898	-1.4141	1.4219	0.26807	-111.4814	34.467	50.003	0.026856	0.027343	0.12402	-71.106	300.292	1687.851	-1.6284	1.4517	0.33936	-26.453	155.025	293.7282	0.11719	0.063965	-0.085938
3.012	3.807	-2.913	1567.9739	-1.4272	1.4282	0.25879	-135.797	25.169	55.47315	0.033203	0.022949	0.12305	-57.736	264.826	1665.665	-1.58	1.4329	0.34658	-61.127	154.983	263.186	0.13916	0.022949	-0.10766
3.014	-0.562000000000001	-0.239999999999998	1561.569	-1.4487	1.4341	0.26367	-90.148	-18.6908	62.713	0.044922	0.022949	0.12402	-28.1101	279.951	1635.223	-1.5405	1.4141	0.3584	-67.226	151.044	254.486	0.14746	-0.0053711	-0.12061
3.016	-26.8312	-10.893	1595.783	-1.4566	1.4399	0.26661	-81.707	41.8233	55.809	0.052246	0.017578	0.12354	-12.213	217.786	1617.203	-1.5011	1.3927	0.36465	-68.9774	134.111	207.13	0.16016	-0.045898	-0.14063
3.018	-40.08	-58.6668	1600.073	-1.4648	1.4355	0.26221	-45.952	6.71	39.1618	0.059082	0.013672	0.11865	1.7	232.9179	1589.86	-1.473	1.3688	0.36885	-84.5204	124.885	153.743	0.16504	-0.063965	-0.14697
3.02	-18.52	-92.961	1650.009	-1.4702	1.4438	0.25391	-47.419	16.6634	35.701	0.067627	0.008789	0.11328	-0.440000000000001	152.218	1563.582	-1.4409	1.3442	0.38086	-53.105	144.675	117.63	0.16846	-0.10254	-0.16895
3.022	-11.657	-115.549	1672.811	-1.4702	1.4478	0.24902	-69.558	58.4607	23.104	0.072266	0.0024414	0.1123	13.235	166.681	1519.441	-1.3971	1.3096	0.37978	-26.764	140.8774	100.6173	0.16016	-0.12305	-0.17309
3.024	-17.4129	-109.698	1665.917	-1.4609	1.4551	0.23193	-12.594	-2.354	33.718	0.086426	-0.0053711	0.11035	41.9391	117.751	1505.633	-1.3635	1.2778	0.38086	-39.944	161.105	101.882	0.15137	-0.14551	-0.17773
3.026	-23.218	-102.193	1657.0209	-1.4545	1.4546	0.21655	-2.691	34.5216	35.588	0.09082	-0.0083008	0.11035	68.446	190.165	1489.042	-1.3147	1.247	0.38516	-72.948	124.312	70.8858	0.13086	-0.16162	-0.18066
3.028	-33.912	-87.008	1651.52683	-1.4453	1.457	0.19482	-17.895	41.707	26.5182	0.10498	-0.016602	0.104	80.2951	182.28	1472.355	-1.2682	1.2123	0.38115	-107.0189	101.568	32.89	0.1167	-0.1709	-0.18555
3.03	-8.595	-83.27	1663.039	-1.4351	1.4595	0.1626	-3.339	25.081	40.4329	0.11963	-0.03125	0.097412	54.958	289.399	1381.373	-1.2202	1.1743	0.38184	-112.5161	77.913	25.669	0.093262	-0.18311	-0.18945
3.032	22.2933	-59.361	1665.723	-1.4316	1.4512	0.14551	-30.576	110.678	47.1581	0.13086	-0.039063	0.093262	18.295	276.535	1319.4648	-1.1732	1.1367	0.3753	-132.2944	66.9301	67.408	0.065918	-0.18457	-0.18115
3.034	56.675	-29.085	1642.601	-1.4199	1.4521	0.11084	-27.441	87.539	28.139	0.15186	-0.049316	0.081055	0.159000000000006	347.296	1245.754	-1.1258	1.1019	0.36856	-149.647	94.014	91.971	0.053223	-0.18262	-0.17529
3.036	43.4725	12.7239	1621.7963	-1.4038	1.4517	0.078125	-22.985	60.32	32.2308	0.16455	-0.053711	0.075195	-18.437	283.225	1215.48832	-1.073	1.0617	0.35801	-177.725	84.638	84.737	0.025879	-0.1665	-0.15967
3.038	50.826	48.239	1599.64	-1.394	1.4478	0.054688	-48.081	68.0132	30.9543	0.18896	-0.066895	0.060547	16.438	332.302	1160.9855	-1.021	1.0267	0.35176	-172.176	78.171	62.8124	0.0009766	-0.14869	-0.14551
3.04	38.363	64.918	1570.713	-1.3809	1.4453	0.03125	-36.981	-29.2827	39.0849	0.20679	-0.076661	0.057373	7.529	262.3408	1121.899	-0.96533	0.98291	0.34961	-164.028	32.0155	65.9763	-0.035156	-0.12646	-0.13037
3.042	54.0635	78.848	1551.932	-1.3699	1.4485	0.012696	-54.519	12.1185	40.871	0.21924	-0.083984	0.049316	-17.977	303.649	1048.088	-0.90937	0.94141	0.34326	-98.488	14.63	86.503	-0.087402	-0.10059	-0.10742
3.044	52.4268	68.118	1568.6685	-1.3613	1.4453	-0.0024414	-74.418	30.71	44.181	0.23828	-0.091309	0.036133	-71.3203	239.487	1004.616	-0.85781	0.89922	0.33662	-38.011	-10.593	89.535	-0.11523	-0.084961	-0.089844
3.046	63.754	33.39611	1576.9141	-1.3491	1.4438	-0.013184	-58.563	10.3237	51.6	0.24609	-0.09668	0.032715	-65.916	310.041	953.36	-0.80743	0.85586	0.33427	-35.502	-29.372	64.4552	-0.16553	-0.053223	-0.072266
3.048	53.81	12.225	1589.102	-1.3398	1.4434	-0.015137	-71.343	81.501	42.4139	0.25732	-0.10059	0.024414	-45.382	270.9048	908.157	-0.75693	0.81728	0.329	-18.964	-26.402	44.471	-0.19775	-0.041992	-0.058106
3.05	29.26591	5.8481	1587.9945	-1.332	1.4395	-0.016602	-62.883	33.257	29.564	0.26392	-0.10474	0.015137	-37.719	332.256	856.50254	-0.70605	0.7793	0.32178	-13.265	-30.776	47.255	-0.21826	-0.031738	-0.046387
3.052	39.9035	6.2738	1588.7696	-1.3274	1.4363	-0.014648	-91.717	25.8264	41.5121	0.27148	-0.10596	0.0083008	-95.092	250.5369	832.928	-0.64932	0.73779	0.31523	-4.093	25.254	48.888	-0.2251	-0.020996	-0.037598
3.054	56.31416	-9.397	1580.4508	-1.3184	1.4297	-0.0053711	-132.5486	69.53069	62.6	0.27539	-0.10303	0.0053711	-154.825	262.12947	758.81416	-0.59443	0.68955	0.30468	-5.488	56.5022	55.67052	-0.2251	-0.023926	-0.043457
3.056	22.438	-28.355	1559.866	-1.3105	1.4199	0.0053711	-93.808	23.0681	71.444	0.28174	-0.10449	0.0029297	-171.227	169.369	709.7888	-0.53897	0.6458	0.29219	-27.311	103.496	56.093	-0.19238	-0.016602	-0.044434
3.058	8.274	-32.164	1553.315	-1.3062	1.4146	0.012207	-122.542	65.917	65.5631	0.27588	-0.097656	0.0024414	-177.72	219.539	656.19535	-0.48242	0.60244	0.2793	-59.667	79.5616	58.517	-0.16382	-0.016357	-0.051269
3.06	5.132	-21.204	1534.3031	-1.2988	1.4082	0.026367	-111.3073	51.7881	40.2608	0.27466	-0.093994	0.0014648	-166.637	165.833	636.053	-0.4209	0.56445	0.25879	-52.788	69.523	53.79	-0.12695	-0.011719	-0.057617
3.062	10.849	12.623	1523.021	-1.2934	1.4028	0.047364	-80.438	11.0545	27.2736	0.26709	-0.083496	0.00097656	-105.317	246.252	581.1585	-0.35459	0.52676	0.23692	-37.697	37.953	20.736	-0.082031	-0.013672	-0.06543
3.064	-20.9372	53.953	1485.2799	-1.293	1.3965	0.060059	-102.6192	70.734	27.06	0.25537	-0.071289	0.0092773	-122.921	224.2915	540.5292	-0.279	0.49473	0.21396	-36.282	15.867	23.102	-0.06543	-0.016113	-0.068848
3.066	-44.6235	68.0315	1474.156	-1.2881	1.3867	0.083984	-80.367	48.0506	35.5918	0.24512	-0.0625	0.010742	-102.056	304.853	440.183	-0.20049	0.46152	0.19365	-11.093	18.2743	12.257	-0.03125	-0.024414	-0.079102
3.068	-45.798	84.469	1443.347	-1.2881	1.3828	0.095215	-70.643	50.922	41.7386	0.23584	-0.043457	0.020508	-107.6491	260.283	423.593	-0.1292	0.43574	0.17383	-35.871	-9.7456	13.457	-0.01001	-0.033203	-0.08667
3.07	-35.7694	100.938	1423.841	-1.293	1.3691	0.11816	-78.779	79.868	62.35	0.22314	-0.025635	0.027587	-82.44	266.002	374.7402	-0.054199	0.41064	0.15576	-28.399	33.211	3.415	0.012207	-0.042969	-0.095703
3.072	-48.13	134.083	1418.369	-1.2934	1.3559	0.13256	-44.458	-13.528	69.338	0.20898	-0.0078125	0.036133	-75.028	179.1026	321.4206	0.008301	0.38047	0.13985	-41.724	27.323	9.4195	0.041016	-0.064453	-0.12012
3.074	-43.2639	153.574	1413.591	-1.2964	1.3403	0.14844	-35.734	5.778	58.2046	0.19629	0.0097656	0.038574	-46.274	194.3919	262.76	0.064844	0.35889	0.13242	-59.985	49.872	46.9684	0.057617	-0.073242	-0.11963
3.076	-32.922	139.367	1413.0379	-1.2944	1.3228	0.16797	-42.211	4.309	46.93326	0.1875	0.015625	0.041992	-68.59	133.2164	246.9	0.10899	0.33115	0.11445	-68.742	35.4291	59.42	0.10156	-0.09375	-0.15137
3.078	-40.56808	114.716	1364.399	-1.2905	1.313	0.17676	-9.163	-13.67138	59.364	0.18066	0.036133	0.047852	-87.197	172.569	226.095	0.14228	0.30069	0.1042	-123.137	34.0389	60.799	0.14257	-0.11059	-0.16699
3.08	-43.331	82.096	1345.844	-1.2847	1.2896	0.19092	-31.98	65.436	65.8849	0.17407	0.048584	0.052002	-77.963	162.752	226.8696	0.16797	0.27344	0.095215	-138.8914	35.72	56.9228	0.18213	-0.12744	-0.18945
3.082	-18.963	70.513	1338.9954	-1.2769	1.274	0.20166	-34.839	27.2528	43.706	0.16992	0.060059	0.055664	-30.563	202.526	185.3061	0.18379	0.25059	0.094531	-145.4043	23.3814	56.9613	0.23682	-0.14941	-0.21533
3.084	-9.303	63.509	1347.687	-1.2715	1.25	0.20459	-17.4	12.413	37.5431	0.16895	0.074707	0.058105	-18.077	162.287	152.6285	0.19385	0.22929	0.092969	-154.836	58.115	62.506	0.26563	-0.1582	-0.22412
3.086	-11.29	63.218	1350.09	-1.2417	1.2212	0.21875	-32.341	42.333	34.2651	0.17139	0.082031	0.0625	-18.258	155.088	159.3949	0.19268	0.20937	0.10196	-139.6383	58.037	62.215	0.31445	-0.17529	-0.24414
3.088	1.212	55.808	1318.956	-1.2339	1.2075	0.22021	-21.426	-7.2623	45.058	0.17871	0.09668	0.06543	-38.176	78.229	174.2818	0.18418	0.19267	0.1041	-127.957	100.169	46.2854	0.34302	-0.19434	-0.25317
3.09	11.037	54.962	1310.269	-1.2085	1.1782	0.21484	-15.434	44.2665	40.5255	0.18311	0.10059	0.07373	-23.439	67.759	153.6056	0.17529	0.17041	0.10938	-121.1524	82.1183	27.654	0.35742	-0.20947	-0.2627
3.092	25.12	63.0335	1284.3438	-1.1894	1.1518	0.22192	-37.914	55.9717	22.081	0.18408	0.10107	0.07666	-26.86	35.565	138.424	0.16709	0.15967	0.11787	-110.4585	81.481	25.154	0.37744	-0.22998	-0.26465
3.094	20.841	90.8137	1264.575	-1.1675	1.1255	0.22021	-41.113	7.622	36.621723	0.18506	0.095215	0.08252	-29.561	39.493	95.746	0.15674	0.14756	0.12119	-66.664	70.282	33.16115	0.375	-0.24121	-0.27002
3.096	21.114	122.569	1235.933	-1.1343	1.0923	0.2168	-60.269	52.1456	43.6865	0.17896	0.092285	0.087402	-77.0049	22.784	82.3445	0.14814	0.14014	0.12627	-67.573	36.111	53.431	0.36816	-0.25732	-0.2749
3.098	12.743	148.6	1200.89297	-1.1191	1.0723	0.21338	-62.09	12.607	30.6942	0.17139	0.090332	0.083496	-100.805	54.164	59.2016	0.13193	0.1334	0.13525	-49.024	17.321	49.9183	0.35864	-0.26831	-0.27661
3.1	6.221	162.944	1149.8843	-1.085	1.041	0.20752	-74.926	24.4132	39.1152	0.16016	0.07666	0.094238	-128.5795	74.23	58.8029	0.11328	0.12695	0.14014	-69.22	-32.934	63.657	0.34082	-0.27734	-0.27539
3.102	4.209	170.486	1115.6805	-1.0542	1.0127	0.19775	-96.3218	83.811	21.852	0.15283	0.078125	0.098145	-102.555	102.202	45.3139	0.096191	0.11924	0.1501	-66.557	8.6604	74.59	0.30957	-0.2749	-0.26367
3.104	-1.312	168.906	1093.6758	-1.0229	0.98486	0.1875	-99.5309	25.4484	32.8618	0.13672	0.071289	0.10596	-109.2478	75.083	52.2978	0.071582	0.11309	0.15381	-40.364	27.103	82.1945	0.28711	-0.27148	-0.26318
3.106	11.126	166.2643	1073.8348	-0.98193	0.94775	0.17969	-115.6467	36.9479	38.296	0.12573	0.073242	0.11255	-132.7581	32.74398	60.9998	0.050489	0.11074	0.16357	-38.488	62.157	85.983	0.24072	-0.25977	-0.24756
3.108	-0.186999999999998	166.4022	1053.6204	-0.96045	0.93115	0.17529	-102.088	16.35	25.965	0.10986	0.072754	0.12207	-119.5223	4.16357	35.184	0.027637	0.10869	0.17207	-39.432	41.895	63.525	0.20508	-0.24536	-0.23902
3.11	-25.802	161.05238	1026.59	-0.92188	0.89941	0.16113	-87.431	-51.88	61.2841	0.092773	0.085449	0.13867	-92.454	-6.397	39.9445	0.0014648	0.10352	0.18213	-65.611	5.4369	52.018	0.1709	-0.22607	-0.22656
3.112	-20.516	133.3112	1031.3303	-0.89258	0.86841	0.15869	-123.2628	-11.5064	108.308	0.080078	0.086914	0.14697	-102.023	21.456	32.6885	-0.021972	0.10967	0.18603	-32.093	-9.296	37.263	0.11865	-0.19092	-0.20605
3.114	-19.636	120.2398	1011.29221	-0.86523	0.83691	0.1582	-108.063	-82.067	178.664	0.0625	0.098633	0.16895	-101.082	18.223	59.512	-0.046094	0.11201	0.1916	-12.316	-24.8387	36.737	0.086426	-0.17627	-0.20264
3.116	-32.632	103.5468	986.0674	-0.8335	0.80127	0.15479	-127.498	-98.572	283.882	0.051758	0.10254	0.17945	-98.6816	45.9803	40.8965	-0.064062	0.11592	0.19434	-5.744	6.832	36.3819	0.02832	-0.13672	-0.18066
3.118	-63.941	113.4011	964.118	-0.81738	0.78125	0.15527	-120.817	-84.366	375.819	0.041016	0.10938	0.19775	-87.7965	23.559	38.4976	-0.07539	0.12012	0.20215	9.23400000000001	13.2158	23.5681	-0.018066	-0.104	-0.16162
3.12	-81.3497	99.5759	946.737	-0.78369	0.74463	0.15039	-120.124	-203.529	486.567	0.031738	0.11426	0.21387	-72.165	35.0421	15.062	-0.087891	0.125	0.20996	-17.127	48.905	8.222	-0.063477	-0.072266	-0.14941
3.122	-92.4639	105.123	924.0311	-0.76123	0.71777	0.15112	-172.842	-261.564	564.158	0.030762	0.12012	0.2207	-70.22	8.835	63.1697	-0.094043	0.12451	0.21914	-29.09	60.991	20.577	-0.1167	-0.030273	-0.13281
3.124	-81.3731	110.204	888.936	-0.73438	0.69434	0.15137	-195.121	-278.806	598.6267	0.016602	0.13428	0.21777	-56.128	13.0153	48.7308	-0.098145	0.12705	0.22539	-59.057	81.931	41.6472	-0.14453	-0.0073242	-0.11768
3.126	-63.717	123.053	860.9208	-0.70898	0.66699	0.146	-164.262	-260.899	668.019	-0.0019531	0.16114	0.21753	-48.516	-4.9581	40.3088	-0.090332	0.11924	0.22812	-75.393	107.228	52	-0.18506	0.032227	-0.10596
3.128	-48.199	128.63	833.97326	-0.69092	0.65186	0.14551	-172.79	-102.031	743.2168	-0.026367	0.20313	0.21924	-24.811	32.061	24.692	-0.075391	0.11406	0.22471	-101.288	81.448	55.668	-0.20215	0.067627	-0.10523
3.13	-50.339	138.8053	799.0707	-0.66016	0.625	0.146	-200.769	-74.051	801.425	-0.10498	0.29736	0.2583	-30.189	15.9238	60.5381	-0.05127	0.10889	0.21826	-134.1637	70.08	34.3416	-0.2041	0.09375	-0.10498
3.132	-57.995	160.8069	779.0677	-0.64038	0.60474	0.15088	-146.037	-38.23	830.3382	-0.16064	0.34375	0.28955	-23.928	55.941	52.3158	-0.01875	0.097365	0.20957	-133.5	-2.8714	31.987	-0.19922	0.12891	-0.10791
3.134	-32.019	169.115	746.5263	-0.62451	0.59424	0.14795	-68.791	9.20299999999999	881.355	-0.32959	0.43799	0.36816	-6.00300000000001	48.8095	68.827	0.016309	0.086133	0.19668	-122.2083	2.3878	24.5892	-0.18506	0.14063	-0.11426
3.136	-29.442	167.638	728.4359	-0.60059	0.5708	0.14307	-16.782	-0.390000000000001	997.382	-0.47339	0.49146	0.43189	3.85599999999999	94.619	8.0667	0.058106	0.07793	0.18027	-128.8081	11.658	30.433	-0.15967	0.16162	-0.12354
3.138	-31.166	161.262	687.0015	-0.59277	0.56445	0.15039	-41.261	94.134	1146.223	-0.63086	0.53418	0.49268	11.324	72.72	22.241	0.091506	0.066016	0.16436	-87.452	50.454	29.073	-0.14478	0.17553	-0.13061
3.14	-47.016	147.556	651.879	-0.56885	0.54541	0.14844	-34.426	150.284	1259.946	-0.83154	0.58447	0.54492	2.931	73.627	32.249	0.12598	0.057617	0.14941	-83.745	59.088	38.565	-0.12744	0.17871	-0.14063
3.142	-33.471	134.9965	641.628	-0.552	0.53344	0.14868	-17.449	120.39	1296.313	-0.91504	0.60742	0.55811	-43.299	15.8799	48.8929	0.15479	0.045703	0.13115	-126.6276	47.292	62.882	-0.11279	0.19092	-0.15088
3.144	-43.738	131.349	627.9322	-0.53125	0.52246	0.15381	-71.353	101.695	1333.151	-1.0332	0.68359	0.57471	0.0359999999999872	20.0278	43.8037	0.18105	0.032324	0.11855	-90.171	59.984	60.7266	-0.10352	0.18994	-0.15527
3.146	-31.747	139.198	602.6588	-0.50439	0.50439	0.15234	-137.221	15.42	1392.162	-1.0966	0.75195	0.58326	-20.795	-9.2213	45.28	0.20801	0.017871	0.10059	-85.766	42.725	80.142	-0.095703	0.18701	-0.14502
3.148	-15.69	121.67797	587.781	-0.49219	0.49609	0.15039	-143.861	-44.13	1424.779	-1.1543	0.83398	0.59229	-62.854	29.7975	39.839	0.2373	0.0029297	0.08291	-93.193	49.461	87.344	-0.099855	0.1875	-0.13989
3.15	-17.642	106.8856	568.9675	-0.46875	0.48242	0.14209	-175.7784	-66.18	1490.951	-1.2329	0.96924	0.61914	-93.942	22.2678	54.8132	0.2666	-0.013184	0.067383	-89.644	29.959	83.085	-0.10693	0.1875	-0.14111
3.152	-8.299	100.649	553.1977	-0.45337	0.46705	0.13208	-166.128	-177.572	1539.631	-1.2827	1.0356	0.64453	-77.722	58.22	39.314	0.29815	-0.031348	0.050782	-120.714	43.461	59.439	-0.13086	0.20068	-0.12109
3.154	2.187	112.046	505.1726	-0.42676	0.44824	0.12988	-180.894	-243.4405	1567.557	-1.4063	1.1738	0.70947	-94.003	28.706	58.5245	0.3295	-0.044629	0.032617	-74.636	35.99	51.239	-0.14307	0.20996	-0.11475
3.156	-3.13	103.582	496.9933	-0.39014	0.42529	0.12012	-133.133	-301.61	1562.3989	-1.5178	1.2581	0.75317	-71.493	31.676	47.4468	0.36191	-0.059472	0.012695	-41.095	36.649	48.373	-0.1748	0.23389	-0.10986
3.158	-29.672	106.608	485.117	-0.37793	0.41357	0.11523	-36.796	-380.72	1536.9972	-1.623	1.3203	0.79541	-121.5754	-16.5789	71.623	0.38935	-0.066309	-0.0031249	-16.431	45.3656	46.27034	-0.19189	0.25073	-0.10181
3.16	-24.359	104.1505	455.6016	-0.34961	0.39355	0.1084	-23.448	-352.36	1575.1945	-1.7266	1.377	0.84033	-115.206	13.428	52.089	0.41211	-0.074707	-0.021973	-48.449	29.8504	51.2273	-0.20166	0.2666	-0.10107
3.162	-54.148	106.62542	438.774	-0.32373	0.3772	0.099855	-0.787000000000006	-345.21	1647.795	-1.75	1.3887	0.85205	-128.487	19.4251	39.2336	0.43438	-0.084375	-0.045019	-6.739	8.2813	69.198	-0.21094	0.29834	-0.1084
3.164	-69.264	120.1115	419.8056	-0.30176	0.36182	0.089355	30.856	-277.069	1706.546	-1.7168	1.4043	0.86377	-90.2821	66.0951	39.7964	0.45166	-0.093066	-0.066602	-28.888	-83.336	131.064	-0.21484	0.31445	-0.11475
3.166	-77.291	127.863	410.0056	-0.27002	0.33838	0.075684	-16.198	-169.383	1712.961	-1.6304	1.4087	0.85401	-99.2025	35.738	47.47891	0.46299	-0.10049	-0.077149	0.945999999999998	-125.066	221.979	-0.23047	0.3667	-0.13965
3.168	-78.896	144.135	377.14777	-0.24536	0.32349	0.07251	-16.866	-170.3646	1699.285	-1.5044	1.4126	0.82422	-75.527	29.32	53.5287	0.47031	-0.10664	-0.087793	59.099	-213.0722	342.15533	-0.24682	0.41968	-0.15283
3.17	-97.7882	123.334	340.86	-0.21582	0.30664	0.067871	-52.219	-138.426	1681.352	-1.291	1.4102	0.77197	-101.692	8.1591	53.6273	0.47314	-0.10986	-0.094727	35.113	-285.447	475.3	-0.28516	0.48438	-0.146
3.172	-94.695	109.8865	320.488	-0.18945	0.29248	0.066406	-126.355	-106.721	1669.346	-1.1772	1.3989	0.73145	-86.102	34.056	26.0854	0.47022	-0.11709	-0.089258	55.264	-379.408	635.473	-0.38867	0.5918	-0.09668
3.174	-75.297	92.34046	316.866	-0.17334	0.28125	0.06543	-130.534	-112.332	1661.938	-0.96289	1.3965	0.68213	-99.8484	40.9321	37.8424	0.45996	-0.11387	-0.085058	26.734	-470.913	761.192	-0.46582	0.6582	-0.056641
3.176	-81.445	93.6846	297.629	-0.14844	0.25879	0.063477	-171.8116	-80.87	1662.767	-0.83667	1.3997	0.6438	-56.21	48.174	48.9456	0.45098	-0.11504	-0.080371	24.291	-513.795	844.213	-0.67383	0.76855	0.040527
3.178	-82.051	83.944	282.6865	-0.12915	0.24292	0.061035	-186.9359	-136.252	1664.606	-0.74414	1.4004	0.62012	-43.491	16.952	32.183	0.43506	-0.11103	-0.067383	52.4374	-524.903	919.433	-0.86426	0.85791	0.12109
3.18	-76.834	84.091	278.6866	-0.10791	0.22607	0.062012	-104.88	-180.53	1678.649	-0.68994	1.4048	0.60645	-7.87299999999999	11.653	26.9992	0.41602	-0.11084	-0.051758	63.223	-447.732	985.135	-1.0776	0.94385	0.18896
3.182	-96.3286	86.3491	274.40175	-0.077637	0.20215	0.055176	-64.664	-166.142	1700.913	-0.69287	1.4106	0.60547	-29.479	8.417	29.864	0.39326	-0.099804	-0.0375	16.9448	-313.391	1071.677	-1.3574	1.0488	0.27002
3.184	-85.0828	87.6209	272.0425	-0.060059	0.19434	0.053711	-5.393	-186.996	1737.66	-0.74023	1.4355	0.59424	-10.514	13.616	44.896	0.36768	-0.091309	-0.022754	10.458	-145.187	1101.76492	-1.4883	1.0986	0.29932
3.186	-87.369	71.7659	264.9057	-0.02832	0.17041	0.04834	-7.90300000000001	-186.338	1777.471	-0.79907	1.4451	0.58399	-16.41	20.0103	64.472	0.33994	-0.078418	-0.0032226	102.08	-90.085	1127.887	-1.7163	1.1997	0.34082
3.188	-60.724	63.304	254.1645	-0.0019533	0.15161	0.042236	-98.71	-195.088	1822.7886	-0.86328	1.458	0.57471	-10.269	30.1486	48.6038	0.30566	-0.070801	0.0094727	86.032	-70.86	1233.077	-1.8945	1.3086	0.36279
3.19	-61.617	59.07	233.0247	0.023438	0.14063	0.039063	-122.392	-240.53	1866.713	-0.93506	1.4771	0.56396	-12.782	42.599	11.597	0.26904	-0.059082	0.032715	101.88889	-75.03	1368.9	-1.9604	1.3677	0.37158
3.192	-51.794	77.82	206.9081	0.062012	0.11816	0.027832	-173.523	-232.885	1895.739	-0.9585	1.4946	0.55664	8.228	35.9868	25.541	0.23164	-0.042969	0.050097	117.98391	-62.769	1480.7	-2.0757	1.5005	0.38672
3.194	-65.223	73.087	179.151	0.072266	0.10693	0.028809	-204.399	-232.256	1931.138	-1.0078	1.5391	0.54932	-14.778	34.619	36.1097	0.19151	-0.025391	0.063281	101.1963	-7.93	1514.765	-2.1606	1.5923	0.4082
3.196	-36.414	82.242	183.5141	0.10156	0.086914	0.020996	-214.335	-183.748	1918.212	-1.0449	1.5869	0.55786	-38.089	32.5657	54.397	0.15049	-0.0078125	0.077735	46.3201	0.969999999999999	1537.3559	-2.2344	1.666	0.43604
3.198	-19.161	83.2	173.78764	0.12231	0.075684	0.013428	-285.594	-101.074	1875.34	-1.0918	1.6348	0.56299	-49.768	63.952	44.9148	0.11015	0.01709	0.088574	43.6158	1.84999999999999	1548.646	-2.3105	1.7148	0.46533
3.2	-18.781	92.8952	156.60232	0.14307	0.0625	0.013184	-282.708	-79.367	1834.261	-1.1582	1.7051	0.59131	-43.481	50.001	47.5537	0.077148	0.038086	0.10303	-9.0663	-92.37	1575.384	-2.332	1.7305	0.46387
3.202	-21.941	66.833	160.0482	0.1543	0.052246	0.0087891	-270.614	-56.287	1808.115	-1.1963	1.7344	0.61182	-59.085	44.456	29.732	0.042969	0.060742	0.12139	-80.512	-169.46	1608.082	-2.3281	1.7324	0.45947
3.204	-23.402	64.254	153.3635	0.15674	0.041992	0.0073242	-258.5311	-36.625	1819.953	-1.2715	1.7773	0.67432	-57.642	17.5821	45.331	0.010059	0.085645	0.13545	-146.59	-298.207	1685.191	-2.2703	1.721	0.43774
3.206	-19.46	63.9699	142.75309	0.16113	0.036621	0.01123	-148.897	-48.8225	1831.954	-1.3418	1.8057	0.73218	-70.907	41.2455	23.483	-0.014161	0.10909	0.15303	-200.761	-380.637	1782.9057	-2.1597	1.7046	0.39893
3.208	-39.145	68.434	125.2003	0.15942	0.030029	0.015381	-136.007	-13.6904	1833.138	-1.4268	1.8398	0.77393	-95.2055	43.727	45.9445	-0.037988	0.13291	0.16953	-186.0748	-433.73	1845.894	-1.9531	1.6895	0.32568
3.21	-33.101	50.172	119.2141	0.15479	0.02832	0.020996	-154.729	12.738	1844.615	-1.5464	1.8774	0.81152	-111.8832	66.5855	50.9241	-0.056152	0.14697	0.19482	-67.685	-432.27	1851.141	-1.8315	1.6958	0.29004
3.212	-41.541	49.512	116.645	0.13867	0.025879	0.029785	-126.376	16.132	1857.9669	-1.5991	1.8892	0.83398	-124.3164	24.3225	78.923	-0.06377	0.15849	0.21582	-23.06	-425.98	1860.191	-1.6016	1.7012	0.23633
3.214	-44.819	45.004	117.2841	0.13379	0.018555	0.03125	-188.585	52.248	1870.083	-1.6953	1.9004	0.87354	-103.264	29.78369	64.4473	-0.07207	0.16719	0.23125	-26.85	-444.2	1922.5025	-1.4658	1.708	0.21411
3.216	-70.388	49.1157	120.73311	0.11914	0.013672	0.041016	-200.785	14.501	1878.824	-1.7607	1.8911	0.89795	-111.44857	8.0516	62.6574	-0.074024	0.18008	0.24414	-43.365	-375.28	2003.727	-1.3706	1.7173	0.20215
3.218	-67.406	45.6472	127.181	0.10962	0.0092773	0.049561	-185.255	-14.776	1895.505	-1.8203	1.875	0.92041	-86.319	35.1173	49.2228	-0.068555	0.18946	0.25088	-90.382	-329.041	2100.14	-1.3242	1.7266	0.20752
3.22	-65.818	45.662	111.4629	0.094727	0.0073242	0.058594	-194.542	-12.889	1884.4572	-1.8804	1.8501	0.95313	-126.1	1.8325	56.3513	-0.063965	0.19531	0.25	-141.665	-217.1854	2117.109	-1.332	1.7344	0.22119
3.222	-81.253	33.388	102.7408	0.079102	0.0073242	0.068848	-170.573	-51.435	1901.522	-1.9077	1.8364	0.95703	-109.3079	3.704	57.9487	-0.051269	0.20762	0.25537	-170.088	-182.284	2060.791	-1.4004	1.7266	0.23682
3.224	-81.419	29.863	76.9472	0.073242	0.0024414	0.071289	-162.961	-30.401	1907.9339	-1.9321	1.8032	0.96973	-98.7087	-42.7725	84.827	-0.039355	0.21875	0.24766	-230.3738	-151.5	1985.572	-1.4927	1.7188	0.25366
3.226	-83.935	25.569	82.2494	0.057129	0.00097656	0.083008	-145.344	-54.598	1894.6089	-1.9204	1.7778	0.96582	-73.696	-44.1541	119.981	-0.016699	0.23789	0.24648	-263.704	-122.28	1908.073	-1.5933	1.7056	0.25879
3.228	-70.116	39.45147	86.9119	0.05127	0.0026856	0.087891	-102.597	-63.5502	1852.7311	-1.8926	1.7578	0.96729	-78.644	-101.3253	258.99	0.00097654	0.26201	0.24199	-262.25	-108.44	1889.205	-1.7285	1.6797	0.25586
3.23	-83.246	46.3474	76.5564	0.042969	0.0029297	0.09082	-100.672	-4.54299999999999	1810.5158	-1.8438	1.7266	0.96533	-78.423	-122.505	406.53	0.019043	0.29004	0.24316	-214.579	-63.054	1892.687	-1.7793	1.6699	0.25488
3.232	-99.9043	50.5035	74.6768	0.029297	-0.0024414	0.097656	-67.958	23.73	1815.075	-1.8218	1.7075	0.96289	-139.708	-241.399	575.631	0.033398	0.31797	0.24434	-170.594	-100.895	1939.154	-1.8574	1.6563	0.23682
3.234	-89.7703	38.0253	86.1954	0.029297	0	0.097168	-45.06	94.543	1820.0047	-1.7905	1.6685	0.96582	-149.777	-325.847	646.629	0.042089	0.35058	0.2373	-91.004	-126.399	2002.83	-1.9057	1.6616	0.22217
3.236	-89.5662	41.7107	75.6195	0.024414	-0.003418	0.11084	-76.763	150.17789	1814.425	-1.79	1.6387	0.97119	-172.977	-450.684	692.1229	0.038184	0.3916	0.23535	21.414	-153.849	2056.195	-1.9453	1.6719	0.21436
3.238	-58.993	42.2511	70.0224	0.022461	-0.0043946	0.10742	-71.773	117.762	1820.012	-1.793	1.6016	0.97217	-116.535	-462.983	741.466	0.013477	0.45508	0.23428	62.847	-116.482	2102.7728	-2.0015	1.6899	0.20166
3.24	-80.354	34.0055	70.0848	0.024414	-0.010254	0.11084	-127.816	131.487	1773.0001	-1.8105	1.5586	0.979	-160.901	-410.037	843.404	-0.033203	0.5415	0.24365	109.864	-69.42	2157.387	-2.0249	1.6997	0.20215
3.242	-50.775	33.91906	61.2241	0.029297	-0.012695	0.11426	-153.8324	128.944	1744.665	-1.8184	1.5313	0.97705	-188.164	-262.979	892.7053	-0.11328	0.63525	0.26768	23.323	-53.2278	2174.097	-2.0854	1.7153	0.2207
3.244	-55.394	27.1294	63.0622	0.035645	-0.01416	0.11523	-164.875	132.445	1737.59	-1.8223	1.4902	0.97314	-228.862	-161.529	921.926	-0.21767	0.71377	0.29844	-59.537	-109.648	2185.439	-2.1303	1.727	0.2373
3.246	-41.191	26.9883	45.4195	0.04541	-0.021484	0.11035	-220.0955	183.899	1701.03	-1.8176	1.4612	0.9729	-159.2954	-86.699	938.175	-0.33877	0.77158	0.33555	-110.507	-181.644	2201.572	-2.1777	1.7344	0.25244
3.248	-39.696	19.274	49.1986	0.054688	-0.025147	0.1084	-168.824	137.423	1688.23	-1.8047	1.4336	0.95557	-98.68	-90.968	1070.91	-0.46797	0.80293	0.37139	-119.251	-187.763	2201.823	-2.2109	1.7422	0.26416
3.25	-11.63	22.415	59.612	0.069336	-0.030762	0.1084	-159.725	99.7639	1670.1258	-1.7886	1.4146	0.93848	-40.411	-58.84	1243.061	-0.59717	0.83154	0.40137	-46.523	-170.461	2163.635	-2.2148	1.7402	0.27588
3.252	-1.354	26.2268	65.58331	0.078613	-0.041992	0.099609	-188.174	73.026	1651.9615	-1.7617	1.3906	0.92089	-41.793	11.08	1413.722	-0.72109	0.88242	0.43018	-42.818	-78.2381	2097.63	-2.1851	1.7271	0.27734
3.254	-38.292	33.8902	62.82028	0.083984	-0.043457	0.098145	-117.51	11.59	1685.451	-1.7402	1.3691	0.90283	-44.435	68.3297	1493.067	-0.8331	0.95284	0.46865	-38.917	-31.806	2031.108	-2.1331	1.7117	0.271
3.256	-16.924	18.1001	69.3787	0.098633	-0.054199	0.095703	-91.477	61.332	1676.183	-1.6914	1.3477	0.87158	-121.361	78.059	1530.409	-0.94561	1.052	0.51983	-31.699	27.987	1982.084	-2.0605	1.6914	0.26611
3.258	-30.19	13.704	53.4964	0.10839	-0.055908	0.087647	-100.44	80.67	1637.378	-1.6597	1.3364	0.85352	-184.515	4.27000000000001	1602.729	-1.0802	1.1698	0.59043	65.202	69.6677	2002.606	-1.9624	1.6646	0.25977
3.26	-27.637	19.4238	48.125	0.11621	-0.059082	0.081055	-114.79	95.784	1596.2695	-1.6074	1.3184	0.81982	-229.1669	-45.45	1669.64	-1.2363	1.2949	0.66943	91.499	91.448	2036.22943	-1.9136	1.6528	0.2583
3.262	-55.684	24.4202	38.0614	0.12842	-0.066406	0.08252	-152.366	160.84854	1535.601	-1.5632	1.3059	0.78735	-248.2764	-144.36	1768.724	-1.4323	1.4138	0.76192	96.28	137.581	2046.9696	-1.8428	1.6348	0.26465
3.264	-36.298	24.0304	43.6179	0.13525	-0.06543	0.077637	-149.397	150.612	1492.331	-1.5205	1.2891	0.75635	-312.57	-203.04	1839.352	-1.6465	1.5129	0.8544	29.866	162.585	2016.7046	-1.8086	1.625	0.27588
3.266	-28.214	27.5896	42.774	0.14404	-0.070313	0.080566	-154.28461	206.331	1472.5594	-1.4546	1.27	0.71777	-339.778	-342.215	1914.641	-1.8789	1.5687	0.94541	-94.5658	207.129	1980.034	-1.7886	1.6118	0.29199
3.268	-48.151	24.9541	34.9444	0.14453	-0.069824	0.080323	-164.992	236.437	1459.8169	-1.4277	1.2559	0.70166	-279.568	-393.604	1940.24	-2.083	1.6008	1.0238	-137.5927	212.112	1978.229	-1.7925	1.5884	0.31982
3.27	-46.058	23.6963	43.9656	0.14648	-0.069824	0.081055	-112.43	196.64	1445.275	-1.3687	1.2329	0.66016	-155.274	-488.66	1913.201	-2.2383	1.6152	1.0894	-139.937	179.147	1991.009	-1.7988	1.582	0.33154
3.272	-48.32	11.144	57.7579	0.15088	-0.070801	0.086426	-101.348	217.59	1383.754	-1.3269	1.217	0.63476	-35.817	-487.78	1890.5103	-2.3195	1.6312	1.1219	-108.063	119.908	1975.579	-1.8164	1.5605	0.36768
3.274	-50.358	17.8221	47.61671	0.15088	-0.068359	0.090332	-82.041	192.1343	1319.647	-1.2788	1.1958	0.61279	65.8467	-492.64	1969.434	-2.3195	1.6585	1.1334	-111.125	67.95	1942.135	-1.8278	1.5433	0.39428
3.276	-84.837	23.7145	42.8388	0.15039	-0.063965	0.094238	-32.035	171.812	1283.899	-1.2222	1.1665	0.58008	65.516	-393.1	2068.38	-2.244	1.6971	1.1268	-126.223	74.042	1907.189	-1.8413	1.5317	0.41211
3.278	-92.211	23.8335	35.8656	0.14868	-0.061279	0.10181	-12.665	215.155	1238.569	-1.1948	1.1567	0.56738	69.1653	-318.37	2180.757	-2.1128	1.7407	1.1086	-132.271	57.464	1887.873	-1.834	1.5234	0.43018
3.28	-74.509	14.3658	31.1303	0.14355	-0.058594	0.10693	14.805	185.089	1217.5833	-1.1367	1.1289	0.54346	76.5282	-174.404	2199.656	-1.9507	1.7778	1.0742	-108.66963	82.761	1882.729	-1.8237	1.5132	0.44043
3.282	-90.244	31.3126	33.8486	0.13965	-0.050781	0.11328	-5.38500000000001	208.6453	1195.202	-1.0935	1.1038	0.52173	71.5641	-162.158	2186.334	-1.7852	1.7805	1.0263	-22.169	65.68	1860.191	-1.7832	1.4902	0.45264
3.284	-80.65	26.8201	27.8456	0.13232	-0.049316	0.11816	-23.825	217.9092	1183.016	-1.0522	1.0796	0.50098	-0.754999999999995	-108.69	2120.4693	-1.6417	1.754	0.96211	-12.504	107.41	1831.715	-1.7459	1.4788	0.45629
3.286	-100.0682	20.0922	36.5986	0.12891	-0.050293	0.12256	-15.129	169.7983	1186.957	-1.0034	1.0454	0.47168	-82.98	-109.92	2084.8415	-1.5175	1.7087	0.89765	-33.852	185.691	1815.698	-1.707	1.4668	0.4585
3.288	-71.89	19.2003	36.4511	0.13086	-0.040039	0.12598	-85.021	184.6307	1141.895	-0.97559	1.0215	0.46338	-131.79556	-57.77	2028.137	-1.4101	1.6563	0.85059	-72.087	302.891448	1794.113	-1.6343	1.4419	0.46094
3.29	-72.99	24.2855	81.661	0.13477	-0.030762	0.13184	-76.271	159.84634	1088.964	-0.91846	0.98096	0.43359	-129.78	-82.04	1984.061	-1.3345	1.6099	0.80566	-83.71	403.602	1759.839	-1.603	1.4204	0.4624
3.292	-50.064	-16.5893	125.557	0.13232	-0.022461	0.1377	-75.79	160.493	1043.621	-0.87915	0.95044	0.41235	-102.279	-124.445	1981.956	-1.3016	1.5824	0.7708	-95.694	410.62	1681.545	-1.5293	1.3887	0.45557
3.294	-58.197	-81.51896	192.548	0.12939	-0.012207	0.14014	-81.55	233.793	976.533	-0.83789	0.91211	0.39111	-35.8	-230.108	1980.15	-1.288	1.574	0.74102	-53.759	374.42	1601.2503	-1.47	1.3528	0.44946
3.296	-46.718	-94.9395	255.173	0.12305	0.0058594	0.14502	-55.628	203.169	929.4776	-0.78516	0.8623	0.36768	49.025	-252.971	1998.269	-1.2985	1.5915	0.7125	-36.125	306.945	1555.693	-1.4082	1.3164	0.44385
3.298	-71.052	-104.337	339.339	0.10962	0.0354	0.14893	-51.224	239.152	903.7959	-0.75781	0.84375	0.35156	90.6	-243.351	2077.951	-1.3223	1.6227	0.70283	-44.302	288.077	1538.596	-1.3242	1.2637	0.43018
3.3	-128.095	-156.145	409.445	0.084473	0.077148	0.16113	-82.697	255.2404	862.225	-0.7041	0.79492	0.32471	65.66	-157.425	2134.1331	-1.3496	1.666	0.71338	-19.711	298.356	1529.117	-1.2734	1.2363	0.42725
3.302	-153.087	-202.25	480.6979	0.016602	0.15088	0.1792	-56.894	195.35	832.0271	-0.66845	0.75659	0.30835	-24.884	-145.729	2197.076	-1.4006	1.7092	0.75264	-17.821	313.552	1480.6242	-1.1948	1.1812	0.41357
3.304	-141.248	-189.285	512.858	-0.05957	0.20411	0.20727	-61.626	226.814	770.632	-0.63086	0.72461	0.29199	-88.099	-186.68	2231.966	-1.4762	1.7617	0.79287	22.714	294.432	1432.066	-1.1285	1.1431	0.40137
3.306	-112.831	-145.532	569.774	-0.146	0.25732	0.23926	-93.952	191.077	718.363	-0.58545	0.67432	0.26855	-201.0747	-251.339	2235.766	-1.5715	1.8023	0.8335	25.691	255.455	1386.934	-1.0586	1.1074	0.38525
3.308	-145.284	-104.7002	631.9229	-0.28076	0.33594	0.30371	-78.069	192.3749	691.685	-0.56348	0.64648	0.25537	-245.5814	-250.152	2211.912	-1.6686	1.8442	0.86172	29.662	263.473	1372.459	-0.96436	1.0513	0.35547
3.31	-126.495	-68.055	688.7206	-0.35742	0.3833	0.33594	-115.7269	236.381	653.0228	-0.51758	0.59717	0.23145	-297.01	-175.536	2163.667	-1.7476	1.8794	0.88477	-1.501	273.978	1359.755	-0.91553	1.019	0.3418
3.312	-95.508	-25.254	741.5378	-0.51758	0.47461	0.3877	-122.516	187.015	603.514	-0.48194	0.56103	0.21338	-319.313	-73.903	2111.8152	-1.8095	1.896	0.89629	-10.725	315.592	1350.11	-0.81299	0.95752	0.3125
3.314	-37.641	17.071	803.9541	-0.6289	0.55322	0.42602	-129.4101	211.789	576.2905	-0.44434	0.52539	0.1958	-338.768	12.72	2041.644	-1.8438	1.8879	0.9044	-23.401	304.171	1274.993	-0.73242	0.91553	0.28955
3.316	-8.431	36.218	904.1901	-0.74609	0.62012	0.46436	-131.493	196.692	552.0167	-0.39844	0.48145	0.1709	-307.766	5.441	1998.949	-1.8574	1.8727	0.90948	-64.702	288.2775	1162.998	-0.65234	0.86914	0.27051
3.318	-25.28	76.596	990.9905	-0.90576	0.72119	0.51904	-88.475	136.0666	540.93	-0.37549	0.4585	0.1543	-245.281	-1.954	1970.879	-1.8639	1.8565	0.91651	-79.036	289.2776	1060.083	-0.5542	0.81494	0.24902
3.32	6.454	125.505	1084.274	-0.99121	0.77441	0.54541	-63.649	172.95817	503.926	-0.32959	0.41992	0.13379	-153.785	-25.571	1964.874	-1.8687	1.8442	0.92383	-116.903	309.211	993.523	-0.50391	0.78711	0.2373
3.322	-28.006	142.054	1127.6091	-1.1401	0.89404	0.60059	-38.212	130.787	450.6512	-0.30004	0.38159	0.10888	-116.727	31.338	1964.639	-1.8671	1.838	0.9375	-118.824	359.429	962.66256	-0.41602	0.73047	0.21533
3.324	-81.0526	112.824	1203.624	-1.25	0.96875	0.64111	-33.802	116.629	406.3869	-0.26172	0.35303	0.089355	-114.62	70.639	1943.716	-1.8759	1.8329	0.94844	-151.7108	360.902	889.2468	-0.35938	0.6875	0.20166
3.326	-94.6662	55.808	1273.557	-1.3574	1.04	0.68604	-26.288	152.692	359.9163	-0.21729	0.30859	0.061523	-167.1557	126.893	1938.3367	-1.8817	1.8224	0.96992	-147.4849	349.326	817.183	-0.30566	0.646	0.18164
3.328	-92.0956	4.468	1317.734	-1.4858	1.1099	0.73242	-18.475	94.666	341.895	-0.19189	0.29541	0.049805	-183.19455	101.459	1967.1455	-1.8836	1.8066	0.98096	-129.0335	312.575	725.556	-0.23535	0.58594	0.16357
3.33	-67.625	-53.04	1362.1125	-1.5425	1.1353	0.75293	-22.362	139.0538	322.793	-0.15186	0.23779	0.022461	-189.6445	91.8183	1971.59	-1.8823	1.7837	0.98926	-103.606	281.201	682.781	-0.20166	0.55908	0.14795
3.332	-106.589	-117.411	1394.547	-1.6323	1.1587	0.77881	-31.167	167.464	297.5217	-0.10132	0.20777	0.049316	-158.1	21.6412	1990.827	-1.8793	1.7511	0.99502	-106.908	255.876	624.521	-0.14551	0.5	0.13428
3.334	-85.009	-155.127	1402.676	-1.6612	1.1592	0.79199	-26.062	124.718	284.9218	-0.13086	0.19629	-0.021484	-144.766	55.357	1985.433	-1.87	1.7231	0.98955	-126.638	271.89277	573.82	-0.10058	0.45752	0.11573
3.336	-47.2194	-179.826	1401.0337	-1.6563	1.1426	0.79541	-37.113	172.262	255.884	-0.086914	0.15625	-0.035156	-150.4731	33.049	1948.881	-1.85	1.6945	0.98525	-111.206	286.28	520.937	-0.057617	0.41504	0.099121
3.338	11.611	-210.48	1419.3787	-1.5898	1.1152	0.78564	-27.995	119.816	219.52577	-0.050293	0.13232	-0.026855	-128.4868	47.797	1894.808	-1.8138	1.6682	0.97022	-147.3629	261.805	479.1195	-0.00097656	0.36768	0.070313
3.34	37.863	-234	1452.833	-1.5415	1.0972	0.77539	-15.453	99.249	193.1076	-0.027832	0.11914	-0.057617	-68.45	-30.0925	1852.937	-1.7729	1.647	0.94824	-149.3138	231.431	452.593	0.027344	0.33936	0.057129
3.342	39.685	-210.604	1504.279	-1.4058	1.0503	0.75391	-33.171	119.83	149.466	-0.0095213	0.10962	-0.065918	-7.87	-40.298	1794.36209	-1.7277	1.6246	0.92901	-118.745	177.865	409.531	0.083008	0.2876	0.033691
3.344	64.6742	-153.587	1542.229	-1.2879	1.0149	0.72876	-24.874	52.201	132.726	0.0097656	0.088867	-0.074707	42.404	-67.11	1750.925	-1.6819	1.6048	0.90157	-118.713	171.832	363.623	0.13281	0.25317	0.015625
3.346	26.999	-115.2422	1551.623	-1.1714	0.98682	0.70605	-28.414	96.7771	130.706	0.024414	0.068848	-0.09375	50.75	70.25	1712.921	-1.6367	1.5829	0.875	-93.76	152.869	311.538	0.16846	0.21631	0.0029297
3.348	5.274	-95.818	1550.034	-1.0317	0.94971	0.66992	-36.313	99.896	122.083	0.035645	0.056152	-0.097656	13.4	162.82	1720.026	-1.5863	1.5621	0.83877	-83.264	145.217	269.7785	0.21143	0.17578	-0.013672
3.35	-22.118	-72.089	1518.80884	-0.96875	0.92969	0.6626	-39.069	53.786	120.689	0.055176	0.037598	-0.11426	-23.762	293.5296	1681.94126	-1.5366	1.5396	0.80859	-56.069	149.57	236.1005	0.23877	0.14941	-0.019531
3.352	-15.571	-46.315	1480.824	-0.88281	0.90039	0.64014	-59.708	100.052	111.6279	0.07373	0.022217	-0.12817	-33.426	274.795	1635.732	-1.4813	1.5143	0.775	-23.646	140.3288	224.763	0.25146	0.12402	-0.024902
3.354	-44.818	-40.224	1446.536	-0.84912	0.89014	0.63477	-86.077	62.59	85.1919	0.087402	0.0073242	-0.14209	-48.464	289.726	1557.6204	-1.4235	1.4891	0.73994	31.885	163.4059	189.659	0.26025	0.092285	-0.022949
3.356	-102.795	-53.683	1458.892	-0.8374	0.88721	0.63086	-106.737	64.9833	84.4747	0.10059	-0.012695	-0.15771	-123.212	230.832	1555.473	-1.3609	1.4625	0.70791	8.36	164.7519	172.313	0.25635	0.077637	-0.015137
3.358	-81.213	-78.039	1476.048	-0.84766	0.88867	0.6333	-103.1082	106.938	80.234	0.104	-0.01416	-0.16064	-163.4952	265.2	1516.716	-1.3079	1.4284	0.67675	-0.344000000000001	181.496	142.53885	0.24658	0.04541	-0.0073242
3.36	-68.094	-107.804	1500.093	-0.85742	0.89258	0.63525	-122.0182	39.584	60.063	0.11572	-0.027344	-0.16797	-226.846	216.591	1494.8239	-1.2593	1.397	0.64355	-35.805	179.327	129.1801	0.2251	0.026368	-0.00024415
3.362	-18.686	-135.629	1514.116	-0.88281	0.91406	0.62744	-103.817	58.276	64.69447	0.11573	-0.036621	-0.16895	-232.193	221.019	1423.125	-1.2115	1.3631	0.61651	-57.929	158.71	136.171	0.20117	0.0097656	0.0097656
3.364	-34.25	-170.812	1552.89	-0.90674	0.9375	0.64356	-115.445	54.5592	55.2204	0.1123	-0.039551	-0.16943	-201.094	125.19	1381.268	-1.1641	1.3251	0.5875	-35.29	113.0219	126.361	0.15674	-0.0083008	0.025879
3.366	-30.761	-184.383	1590.6561	-0.93311	0.96924	0.65039	-118.0998	29.441	48.6626	0.104	-0.044434	-0.16504	-146.917	116.1	1305.844	-1.1185	1.2833	0.56133	-46.366	63.497	107.1436	0.13721	-0.013184	0.033203
3.368	-104.723	-177.699	1611.594	-0.9751	1.0215	0.65674	-88.868	100.9433	45.086	0.097168	-0.050781	-0.16699	-146.2744	82.12	1292.6822	-1.0775	1.2439	0.53262	-50.046	48.278	71.462	0.088867	-0.019531	0.053711
3.37	-156.4533	-172.837	1635.816	-0.99561	1.0532	0.66406	-69.151	64.1363	21.392	0.086426	-0.062988	-0.15869	-150.5588	161.24	1259.8662	-1.0317	1.2031	0.50732	-81.451	45.8869	68.535	0.05127	-0.02002	0.068848
3.372	-177.52	-196.95	1646.744	-1.0386	1.1157	0.67773	-68.873	51.5841	33.7997	0.082275	-0.062012	-0.15893	-171.677	169.944	1269.72	-0.98057	1.1645	0.47461	-92.063	54.4359	77.9459	0.0097656	-0.016602	0.088379
3.374	-207.6168	-195.751	1644.145	-1.0737	1.1631	0.69189	-51.92	63.0292	38.8366	0.077148	-0.064941	-0.16113	-137.4191	239.562	1218.164	-0.9332	1.125	0.44951	-72.772	26.257	73.4118	-0.042969	-0.0083008	0.11035
3.376	-227.493	-174.3629	1621.8824	-1.1191	1.207	0.7085	-55.835	-0.850000000000001	32.26446	0.077148	-0.070313	-0.15967	-171.699	195.864	1182.134	-0.88438	1.084	0.42491	-82.214	11.63	57.734	-0.074707	-0.0039063	0.12158
3.378	-243.413	-137.4117	1593.45	-1.188	1.272	0.74414	-41.481	38.8954	49.841	0.081543	-0.071289	-0.16357	-153.7525	243.652	1090.5174	-0.82617	1.0394	0.39385	-79.861	-10.085	42.542	-0.13184	0.0063477	0.14795
3.38	-223.096	-84.532	1583.399	-1.2324	1.3027	0.75537	-61.465	50.561	44.9236	0.086426	-0.065918	-0.17188	-168.652	235.927	1044.285	-0.7793	0.99219	0.3667	-122.862	-7.134	65.094	-0.17505	0.020019	0.16967
3.382	-218.973	-53.621	1587.486	-1.3203	1.3652	0.77393	-66.249	32.861	66.264	0.088623	-0.070069	-0.17163	-150.4532	340.017	973.857	-0.72881	0.94912	0.34258	-141.5799	32.922	68.0311	-0.20996	0.032227	0.18701
3.384	-187.719	-43.62	1575.17	-1.3711	1.4072	0.77929	-35.333	86.075	80.1758	0.095703	-0.070801	-0.17529	-158.27	354.51	937.1596	-0.68115	0.9042	0.32021	-145.47	41.0955	60.0792	-0.24561	0.05127	0.21582
3.386	-147.695	-44.8581	1579.516	-1.4077	1.4419	0.78516	-35.719	33.9318	46.3628	0.10107	-0.070313	-0.17627	-85.363	363.844	859.2642	-0.63467	0.85381	0.296	-138.2708	62.367	48.369	-0.26221	0.056641	0.22754
3.388	-111.421	-41.3388	1580.263	-1.4355	1.4648	0.79736	-21.769	9.4754	49.4966	0.097656	-0.070313	-0.17871	-44.563	265.719	802.205	-0.58652	0.80332	0.27422	-141.9205	39.6572	48.041	-0.28564	0.08252	0.25
3.39	-106.067	-17.7092	1608.988	-1.4492	1.4824	0.79736	-30.724	32.95501	47.0087	0.093262	-0.072266	-0.17725	40.501	234.903	730.649	-0.53955	0.75391	0.25	-104.423	44.0927	38.78	-0.29492	0.095947	0.26342
3.392	-137.035	-14.3331	1641.1494	-1.4565	1.4946	0.79688	-17.877	-12.4167	45.814	0.088623	-0.066894	-0.17382	49.372	171.645	699.642	-0.49316	0.70293	0.225	-102.412	49.31	27.633	-0.29395	0.10352	0.27588
3.394	-140.866	-30.0728	1656.169	-1.4666	1.5042	0.80029	-0.396999999999998	38.932	62.7128	0.080078	-0.069824	-0.16553	106.614	230.709	660.7019	-0.44883	0.65195	0.20225	-88.32	50.145	22.4472	-0.28027	0.11621	0.28174
3.396	-155.939	-79.0024	1647.4702	-1.4741	1.5122	0.80371	-21.633	56.8054	34.614	0.067871	-0.069824	-0.16406	88.3925	224.103	645.406	-0.39883	0.60859	0.18115	-82.359	38.4721	8.107	-0.26172	0.11426	0.28564
3.398	-143.128	-101.2276	1640.741	-1.4766	1.5215	0.80518	-39.03	1.254	45.1663	0.060547	-0.070313	-0.15381	69.566	251.1805	582.882	-0.35127	0.55684	0.15693	-82.91	21.676	2.952	-0.229	0.11377	0.27832
3.4	-136.366	-116.42	1631.1407	-1.4746	1.5254	0.81201	-35.811	52.1588	63.9326	0.047852	-0.069824	-0.1582	17.188	180.344	549.5165	-0.30957	0.51172	0.13086	-40.309	23.195	3.748	-0.1936	0.11451	0.2644
3.402	-120.187	-110.265	1642.5203	-1.4663	1.5298	0.81396	-62.386	34.7163	63.069	0.045899	-0.06836	-0.15332	22.618	184.4572	519.234	-0.25947	0.46572	0.10879	-30.455	23.5552	21.2643	-0.15332	0.10205	0.24902
3.404	-102.942	-108.6363	1642.2628	-1.4606	1.5305	0.82203	-86.812	37.723	66.602	0.049316	-0.069336	-0.14795	-2.081	156.584	501.959	-0.2126	0.42119	0.089551	-43.783	57.04	62.029	-0.095215	0.085938	0.229
3.406	-94.384	-87.595	1607.5322	-1.459	1.5293	0.83154	-88.7514	78.959	48.827	0.047852	-0.067383	-0.13867	-2.76600000000001	211.291	466.26	-0.17119	0.37861	0.064941	-27.102	59.716	70.697	-0.070313	0.07666	0.21777
3.408	-66.765	-78.95	1589.5668	-1.457	1.5186	0.84424	-99.911	-6.1815	36.193	0.041015	-0.064209	-0.1333	-42.189	191.798	421.177	-0.12969	0.34014	0.04375	-12.683	86.642	70.673	-0.022461	0.05127	0.19043
3.41	-52.266	-76.916	1594.312	-1.4546	1.5181	0.84766	-91.943	9.706	36.4693	0.035156	-0.060059	-0.125	-35.699	213.056	357.8298	-0.092773	0.2998	0.017578	-17.651	59.572	75.123	0.013916	0.032959	0.17261
3.412	-37.346	-39.5403	1611.21382	-1.4512	1.498	0.86377	-90.893	7.69	26.6012	0.021484	-0.058594	-0.11426	-44.943	157.595	298.579	-0.054785	0.26035	-0.0064454	-19.532	26.592	67.523	0.045898	0.015625	0.15527
3.414	-79.524	26.7031	1614.523	-1.4456	1.4865	0.87134	-102.241	-15.689	24.01572	0.01709	-0.057129	-0.10645	-18.655	159.632	236.432	-0.018359	0.22559	-0.026172	-8.143	25.573	68.826	0.086426	-0.010742	0.1377
3.416	-104.954	74.628	1597.543	-1.4453	1.4688	0.88135	-90.646	52.5017	48.5766	0.003418	-0.052734	-0.097168	-29.593	139.761	192.532	0.0125	0.19121	-0.044922	-22.98	22.275	53.4718	0.10742	-0.021484	0.12793
3.418	-123.936	89.265	1574.8939	-1.4414	1.4375	0.88916	-104.7023	32.143	41.0609	-0.0048828	-0.049561	-0.090088	-66.229	183.082	164.463	0.038965	0.16162	-0.06211	-11.436	57.315	34.3607	0.14209	-0.051758	0.12109
3.42	-156.1195	78.086	1559.0649	-1.4409	1.4282	0.89063	-90.393	18.305	57.1491	-0.013184	-0.049805	-0.081543	-119.866	145.139	140.361	0.05957	0.13281	-0.077148	-45.392	59.858	41.6453	0.16406	-0.073974	0.11401
3.422	-174.60997	60.4695	1543.451	-1.4316	1.3945	0.89111	-65.394	42.1514	33.714	-0.024902	-0.043945	-0.069824	-131.926	150.085	140.867	0.075977	0.10234	-0.088086	-67.039	61.6604	54.923	0.18652	-0.089355	0.11816
3.424	-192.3796	39.7566	1540.854	-1.4273	1.3755	0.8877	-79.141	-16.359	30.7139	-0.025391	-0.043457	-0.06543	-143.345	78.7301	127.047	0.083105	0.077734	-0.097948	-70.839	39.718	49.80625	0.21582	-0.12061	0.10303
3.426	-155.61	25.0486	1537.855	-1.4194	1.3579	0.88867	-90.694	23.9233	51.6927	-0.029785	-0.041504	-0.057129	-137.831	97.5323	133.108	0.088574	0.05625	-0.11201	-54.919	32.153	42.164	0.22656	-0.13086	0.095215
3.428	-188.51	17.2253	1525.164	-1.4053	1.3262	0.87256	-91.214	43.2553	34.125	-0.029785	-0.036622	-0.05249	-128.259	93.017	119.428	0.095898	0.0375	-0.12734	-89.261	31.351	51.775	0.25342	-0.15332	0.082031
3.43	-166.14155	-5.09999999999999	1504.7649	-1.3984	1.3184	0.86963	-70.414	19.3155	37.6808	-0.028809	-0.032227	-0.047363	-151.754	117.872	111.911	0.10596	0.015625	-0.13818	-126.27861	29.0348	73.397	0.27222	-0.16772	0.068848
3.432	-146.4115	-36.438	1517.0811	-1.3804	1.2935	0.85547	-36.856	69.598	33.3203	-0.021484	-0.027344	-0.046875	-163.328	78.244	100.5808	0.11211	0.00068371	-0.14854	-123.2703	28.7444	69.072	0.2876	-0.18115	0.057617
3.434	-110.443	-29.399	1523.511	-1.3555	1.2754	0.83838	-33.903	35.6868	13.041	-0.018066	-0.026855	-0.046875	-112.23838	49.6249	71.7847	0.12012	-0.018066	-0.15342	-153.2847	21.7722	62.5874	0.31543	-0.19434	0.04248
3.436	-109.812	-10.366	1534.464	-1.3423	1.2642	0.82373	-31.098	15.6391	30.5452	-0.013672	-0.025879	-0.046387	-49.856	-27.635	41.831	0.12481	-0.035644	-0.16162	-134.95	29.5133	30.061	0.32715	-0.20215	0.03125
3.438	-127.629	25.87	1519.097	-1.3154	1.2363	0.80908	-19.342	67.243	19.754	-0.0065918	-0.023437	-0.041016	8.605	-10.714	36.381	0.12344	-0.045898	-0.17022	-114.4609	17.602	24.288	0.35107	-0.20459	0.022461
3.44	-121.8955	32.0683	1512.406	-1.29	1.2168	0.7915	-31.187	28.56481	20.0351	0.0024414	-0.022461	-0.044922	28.213	-19.32	32.755	0.12109	-0.053711	-0.1792	-143.0519	25.0807	37.2	0.36108	-0.20923	0.016113
3.442	-144.7788	58.947	1483.87967	-1.2593	1.1987	0.76953	-16.406	59.9119	47.77895	0.015137	-0.019531	-0.047363	-10.884	38.44	38.8439	0.12109	-0.068555	-0.18525	-117.146	18.238	42.4	0.37109	-0.20703	0.01416
3.444	-127.3884	83.293	1432.6144	-1.2124	1.1724	0.74414	-16.73	48.0685	46.3699	0.023926	-0.022949	-0.055664	-2.381	54.568	35.6247	0.1166	-0.078125	-0.18584	-110.897	7.5462	40.8698	0.37402	-0.20654	0.010742
3.446	-121.374	96.553	1397.2664	-1.1953	1.1602	0.73291	-24.501	-1.808	41.888	0.039063	-0.022461	-0.063477	-12.339	93.992	42.5624	0.10605	-0.083985	-0.18974	-92.792	12.2331	32.3631	0.37549	-0.2002	0.01123
3.448	-93.307	114.621	1375.2795	-1.1543	1.1406	0.70752	-12.183	57.028	41.7288	0.055908	-0.026123	-0.07666	21.288	66.125	50.177	0.097168	-0.08838	-0.19356	-84.453	6.7417	16.0049	0.36084	-0.19043	0.022461
3.45	-93.356	126.764	1355.972	-1.1258	1.1292	0.68531	-62.419	55.87	30.758	0.068359	-0.028809	-0.079102	47.234	64.1354	60.475	0.081543	-0.087891	-0.18555	-59.353	49.13	30.774	0.34399	-0.18359	0.022461
3.452	-59.106	131.678	1335.77	-1.0991	1.1177	0.66406	-68.75	49.735	65.531	0.083008	-0.026367	-0.09375	21.55	50.538	40.4475	0.058792	-0.087793	-0.1793	-54.644	74.44	55.6203	0.31738	-0.17139	0.038086
3.454	-20.551	99.3344	1333.9975	-1.064	1.0981	0.64063	-51.633	75.827	56.9477	0.091797	-0.023926	-0.099609	-24.285	67.25	53.179	0.031158	-0.084179	-0.16582	-58.683	98.538	60.732	0.28027	-0.15479	0.058594
3.456	-6.524	71.965	1324.484	-1.0532	1.0864	0.625	-72.525	-2.022	42.6941	0.099609	-0.020508	-0.10791	-10.057	45.919	24.752	0.0014751	-0.081447	-0.15684	-41.028	87.185	65.6	0.25586	-0.14648	0.072266
3.458	5.947	52.321	1308.513	-1.0273	1.0674	0.60303	-58.436	18.4796	36.7937	0.10596	-0.019043	-0.11646	-5.392	34.9927	31.793	-0.028511	-0.081836	-0.14522	-37.273	58.265	44.712	0.19922	-0.13525	0.098633
3.46	-12.294	43.063	1277.7542	-1.0046	1.0534	0.58569	-85.275	34.9982	31.807	0.10889	-0.015625	-0.12061	2.70500000000001	3.696	20.048	-0.047363	-0.079102	-0.13135	-17.545	40.2429	38.128	0.1521	-0.12354	0.10937
3.462	-16.338	59.677	1268.5037	-0.97754	1.0371	0.56104	-91.376	20.503	50.6012	0.10889	-0.010254	-0.12744	-18.277	11.428	46.7968	-0.060355	-0.076172	-0.12461	-7.08500000000001	25.6361	36.774	0.11035	-0.11572	0.12598
3.464	-40.213	71.0689	1257.6745	-0.94092	1.0122	0.53711	-90.775	92.026	57.8553	0.10889	-0.00097656	-0.13281	-31.11	21.405	60.387	-0.061225	-0.078027	-0.12109	0.287999999999997	37.2136	26.3122	0.058594	-0.09668	0.14111
3.466	-58.633	71.392	1241.538	-0.92578	1.002	0.52783	-103.036	66.1968	45.5807	0.1084	0.0087891	-0.13867	-85.5547	33.0145	88.26	-0.054582	-0.078812	-0.12188	-3.073	30.4892	33.9197	0.038086	-0.088379	0.14795
3.468	-82.737	50.4328	1211.747	-0.88623	0.97705	0.50195	-97.931	23.60907	76.994	0.10889	0.023193	-0.1416	-89.558	28.7499	61.914	-0.040212	-0.081646	-0.12452	0.302	47.414	42.0555	-0.003418	-0.0625	0.16309
3.47	-99.264	50.229	1179.071	-0.85937	0.96289	0.48291	-77.096	27.3076	115.5476	0.10254	0.034668	-0.15137	-134.869	11.9217	61.745	-0.015137	-0.082031	-0.13281	-9.796	38.591	52.7287	-0.026611	-0.042725	0.17822
3.472	-73.29	80.1103	1139.4149	-0.82861	0.94189	0.46387	-103.486	-54.0803	147.00417	0.09375	0.061523	-0.15332	-118.4532	-3.329	30.029	0.013222	-0.083217	-0.14325	-53.812	51.7757	65.3062	-0.045898	-0.020508	0.19092
3.474	-92.066	115.0337	1097.9063	-0.78711	0.91797	0.44385	-78.288	-59.681	194.03	0.09375	0.075684	-0.15186	-146.688	-6.4298	54.805	0.044726	-0.080078	-0.15058	-49.212	62.5392	94.713	-0.062012	0.010254	0.2041
3.476	-88.095	141.5468	1066.428	-0.76855	0.90039	0.42969	-71.5978	-91.381	231.816	0.083008	0.10156	-0.15723	-142.044	14.7577	49.164	0.069357	-0.085115	-0.15563	-71.19	52.7456	86.479	-0.070313	0.025391	0.20898
3.478	-87.613	131.1777	1058.2861	-0.7251	0.87549	0.41016	-43.354	-173.046	332.793	0.070557	0.11914	-0.1582	-190.592	47.103	74.963	0.096218	-0.088945	-0.1654	-85.235	36.111	65.31922	-0.077148	0.05957	0.21924
3.48	-59.439	124.302	1028.8058	-0.70312	0.85839	0.396	12.8555	-179.439	417.043	0.061035	0.13379	-0.16064	-160.245	77.642	60.524	0.11426	-0.099121	-0.17383	-104.349	8.826	49.4439	-0.073243	0.07959	0.21972
3.482	-90.7012	119.265	999.177	-0.68262	0.83838	0.38037	11.4932	-260.7862	478.515	0.044922	0.15723	-0.16943	-134.031	60.54	37.0401	0.14342	-0.11156	-0.18526	-108.7525	11.556	42.135	-0.063965	0.099609	0.22559
3.484	-102.7002	124.5229	974.17	-0.65186	0.81006	0.35547	27.4419	-298.7296	572.9047	0.041016	0.17285	-0.1748	-83.395	31.815	-12.807111	0.17262	-0.12708	-0.2006	-119.891	6.297	55.717	-0.04834	0.12402	0.23047
3.486	-116.6738	125.8892	959.081	-0.64355	0.79297	0.34326	44.898	-236.9285	628.7843	0.0092773	0.21338	-0.18115	-95.725	6.0142	4.23	0.21064	-0.14549	-0.21421	-113.23	30.3606	50.957	-0.043945	0.13477	0.23145
3.488	-128.73978	134.003	925.443	-0.61523	0.7627	0.32861	43.81	-234.125	684.261	-0.023193	0.25391	-0.17773	-56.014	25.454	10.325	0.25441	-0.15708	-0.23077	-131.3476	54.4233	33.88	-0.032715	0.15771	0.22852
3.49	-131.7111	134.486	894.1933	-0.58936	0.74683	0.31177	93.351	-138.082	741.658	-0.067871	0.30273	-0.16797	-66.583	6.227	44.539	0.29492	-0.16943	-0.24756	-129.94031	49.5924	14.902	-0.02002	0.17138	0.23217
3.492	-124.47284	107.3667	875.9295	-0.57178	0.729	0.29492	97.521	-90.155	737.8141	-0.15283	0.38135	-0.12744	-15.268	13.057	44.1658	0.33182	-0.172	-0.25609	-114.288	44.7647	34.585	-0.0053711	0.18359	0.23242
3.494	-96.1115	78.8099	864.564	-0.5415	0.70361	0.27441	83.221	-112.504	777.858	-0.21143	0.42334	-0.10449	-44.906	-17.1402	48.5881	0.36201	-0.1731	-0.26766	-156.8567	16.6603	64.2679	0.016113	0.19922	0.24463
3.496	-93.016	80.912	851.655	-0.5293	0.6875	0.2583	102.436	-37.105	860.172	-0.3457	0.50781	-0.054199	-17.985	28.1757	46.018	0.38409	-0.17723	-0.27287	-122.327	6.1802	68.1841	0.027832	0.20801	0.25342
3.498	-71.838	86.03	835.8202	-0.50293	0.66309	0.24316	87.839533	1.422	933.532	-0.46045	0.58643	0.0058594	-8.259	45.885	70.152	0.40086	-0.17364	-0.27263	-99.469	-5.519	77.9994	0.037598	0.22363	0.27197
3.5	-29.461	86.851	810.8962	-0.47852	0.64429	0.22559	90.6924	27.591	1019.064	-0.57861	0.67529	0.05957	23.119	86.216	58.72	0.40186	-0.17529	-0.27148	-97.108	-23.6949	90.1928	0.036622	0.24341	0.27881
3.502	-9.463	92.13	769.213	-0.45654	0.62354	0.20703	103.728	59.2672	1025.26314	-0.75488	0.79736	0.12988	3.88500000000001	37.1348	46.3216	0.38602	-0.17186	-0.26069	-107.084	-63.238	160.99	0.030762	0.26416	0.28662
3.504	3.264	104.45	739.399	-0.43457	0.60205	0.19043	89.803	-11.464	1020.456	-0.8457	0.84766	0.1665	0.445	11.7481	25.8822	0.36156	-0.16476	-0.2521	-107.381	-99.699	280.703	-0.0019531	0.30078	0.26514
3.506	-4.946	109.6701	701.88193	-0.41846	0.59033	0.18018	97.262	-45.91	1075.548	-1.019	0.95361	0.22266	-0.938000000000002	-35.544	12.425	0.32939	-0.15078	-0.23327	-138.777	-164.581	447.923	-0.038574	0.35205	0.25073
3.508	-2.785	127.148	692.8371	-0.39746	0.56641	0.16943	38.925	-63.8	1134.82	-1.1333	1.0181	0.25903	52.874	9.401	18.839	0.28846	-0.13595	-0.21333	-148.334	-291.857	627.9	-0.082031	0.41699	0.24658
3.51	-33.807	144.222	673.85	-0.38647	0.54907	0.15576	-21.1	-151.985	1217.467	-1.2241	1.0825	0.29297	42.023	22.3954	35.407	0.24268	-0.11865	-0.19922	-134.4	-412.273	744.316	-0.1748	0.51465	0.27344
3.512	-19.449	168.197	636.5299	-0.37256	0.52686	0.14453	-45.2235	-177.467	1286.5685	-1.3579	1.1626	0.35059	24.862	94.519	39.7189	0.20689	-0.098387	-0.18728	-185.595	-508.368	825.33	-0.23389	0.56689	0.30029
3.514	-39.95	151.913	612.7355	-0.36182	0.50879	0.14014	-79.181	-263.4449	1323.0255	-1.4331	1.1997	0.38086	-45.338	82.955	52.9588	0.17842	-0.076951	-0.17577	-181.405	-456.464	914.529	-0.38232	0.65869	0.37305
3.516	-34.834	137.053	593.5501	-0.35156	0.49658	0.13379	-86.2007	-328.1	1385.952	-1.5703	1.2656	0.44287	-64.299	102.587	63.103	0.15222	-0.056691	-0.17036	-217.375	-333.074	1037.546	-0.51196	0.7063	0.43725
3.518	-11.874	128.5652	557.861	-0.33936	0.47168	0.12402	-61.403	-294.426	1423.6388	-1.6883	1.3045	0.47681	-86.0761	51.956	71.702	0.12279	-0.031842	-0.16098	-286.254	-193.9053	1136.131	-0.65771	0.74463	0.50293
3.52	-25.715	126.0875	525.92	-0.333	0.4541	0.11865	-49.826	-326.87	1453.2945	-1.7944	1.3325	0.50488	-89.8668	54.545	63.781	0.095703	-0.0063477	-0.15625	-276.662	-96.566	1152.848	-0.854	0.80322	0.5791
3.522	-18.994	104.2234	521.988	-0.32617	0.43506	0.11279	-75.192	-315.52	1514.427	-1.8789	1.3398	0.53271	-122.0293	3.5014	61.822	0.061608	0.01292	-0.15029	-182.062	-62.573	1204.707	-0.95117	0.84375	0.60986
3.524	-34.905	99.839	515.6934	-0.31055	0.41357	0.10498	-104.1033	-296.131	1547.138	-1.9038	1.3521	0.53516	-126.8379	17.3039	35.844	0.026326	0.038509	-0.1392	-128.845	-23.58	1329.232	-1.1401	0.95557	0.67188
3.526	-7.517	92.629	494.4668	-0.29736	0.40137	0.098145	-83.1172	-320.979	1574.628	-1.8828	1.3613	0.54541	-135.3475	-7.281	20.654	-0.010103	0.055368	-0.13095	-101.069	-17.79	1495.84	-1.2773	1.0634	0.72607
3.528	-58.355	106.905	466.7225	-0.28369	0.38037	0.086914	-69.384	-242.0054	1625.395	-1.8457	1.378	0.53394	-141.3781	18.932	27.093	-0.045937	0.07665	-0.12532	-54.918	5.18000000000001	1598.659	-1.4253	1.186	0.78613
3.53	-70.042	89.624	458.669	-0.27221	0.36548	0.081543	-93.721	-170.094	1627.0963	-1.7788	1.4028	0.50928	-139.7703	1.455	39.5592	-0.084473	0.099121	-0.12061	-90.714	-5.428	1635.765	-1.6616	1.3403	0.87305
3.532	-92.7351	91.25	466.7713	-0.25635	0.34863	0.071777	-86.287	-146.735	1639.244	-1.644	1.4282	0.46875	-120.2097	37.058	64.206	-0.10554	0.11597	-0.11377	-150.819	-2.321	1628.975	-1.7949	1.4043	0.91846
3.534	-102.9173	91.1871	447.1384	-0.24414	0.33203	0.069824	-99.9036	-69.755	1641.246	-1.5679	1.4399	0.44922	-110.8868	28.09	67.288	-0.11692	0.1317	-0.11182	-179.573	-84.34	1685.456	-2.0483	1.5103	1.0029
3.536	-109.563	100.8411	431.9195	-0.23047	0.31641	0.063477	-109.65	-90.989	1605.286	-1.4219	1.4609	0.40479	-112.878	52.55	75.273	-0.12631	0.1485	-0.10946	-236.7054	-119.51	1738.407	-2.2051	1.5634	1.06
3.538	-106.9373	103.785	399.7071	-0.21191	0.29541	0.052246	-74.6152	-104.32	1638.068	-1.335	1.4698	0.37232	-113.651	18.0291	62.226	-0.11855	0.16164	-0.10899	-318.528	-209.9	1802.276	-2.3359	1.6094	1.1118
3.54	-90.9881	104.916	373.2948	-0.19775	0.2815	0.047852	-55.161	-103.014	1670.751	-1.2671	1.4634	0.35107	-107.836	19.3346	64.1134	-0.10596	0.1748	-0.10596	-297.954	-271.91	1860.085	-2.4111	1.6641	1.1548
3.542	-77.99	113.547	344.1524	-0.18018	0.26074	0.039063	0.771999999999998	-178.431	1723.6008	-1.2119	1.4551	0.34033	-87.355	-3.609	36.33354	-0.090053	0.1793	-0.1081	-287.88	-365.061	1885.3782	-2.4043	1.707	1.1646
3.544	-94.1556	122.769	326.0946	-0.15576	0.23535	0.023926	41.38	-167.296	1790.5811	-1.2056	1.4517	0.33398	-65.027	12.8506	24.707	-0.073554	0.18633	-0.10858	-232.4	-423.027	1899.273	-2.2773	1.7891	1.1587
3.546	-72	114.48257	322.1468	-0.14307	0.22656	0.017578	62.754	-179.644	1788.469	-1.2285	1.4531	0.32764	-21.147	20.0393	15.235	-0.059482	0.19296	-0.11134	-74.548	-439.7	1887.843	-2.1202	1.835	1.1372
3.548	-39.678	101.7078	311.47	-0.11816	0.20215	0	91.111	-235.887	1826.221	-1.2578	1.4629	0.33228	-15.234	48.398	38.994	-0.04483	0.19492	-0.10576	17.215	-470.45	1890.1659	-1.9409	1.856	1.1055
3.55	-26.568	92.294	303.7386	-0.09448	0.1897	-0.011475	78.13	-193.28	1858.02	-1.2939	1.4668	0.3335	-9.416	59.033	41.2145	-0.041016	0.19824	-0.10791	57.675	-440.87	1973.826	-1.7046	1.8423	1.0547
3.552	-40.485	89.5526	300.12444	-0.072266	0.17334	-0.022461	54.1368	-236.469	1859.769	-1.3398	1.4746	0.31885	3.43300000000001	58.633	47.978	-0.031933	0.19609	-0.099901	88.607	-399.34	2061.889	-1.6011	1.8188	1.0322
3.554	-15.533	81.2299	296.6395	-0.046387	0.15283	-0.032227	42.456	-245.488	1901.956	-1.3672	1.4785	0.31104	33.673	26.038	16.72789	-0.029101	0.19131	-0.095603	154.301	-298.332	2130.547	-1.4414	1.7539	0.98291
3.556	-37.041	92.9582	268.541	-0.036133	0.14355	-0.039551	19.653	-202.689	1897.681	-1.4043	1.498	0.28369	11.724	0.1706	35.2845	-0.032228	0.19014	-0.090136	180.771	-224.86	2140	-1.3665	1.7044	0.95874
3.558	-32.962	101.53	258.5756	-0.018066	0.12695	-0.050293	38.338	-232.6499	1899.025	-1.4255	1.51	0.25879	30.204	-13.059	50.8303	-0.034961	0.19112	-0.089551	114.095	-167.06	2107.247	-1.3169	1.6509	0.94238
3.56	-30.573	78.464	255.31	-0.0031738	0.1167	-0.053955	37.0528	-173.7907	1889.7154	-1.4507	1.5239	0.2417	4.823	0.8452	66.019	-0.037109	0.19336	-0.091309	18.673	-112.84	2049.992	-1.2944	1.6235	0.93359
3.562	-15.333	65.205	255.032	0.012207	0.10596	-0.059082	16.4538	-133.78316	1867.5481	-1.4878	1.5493	0.22217	31.797	17.6326	91.626	-0.047363	0.19844	-0.089551	-82.937	-110.93	2007.38	-1.2983	1.6255	0.94238
3.564	-3.553	71.1202	231.506	0.019043	0.089844	-0.066406	33.6737	-123.8271	1858.9933	-1.5049	1.5586	0.21533	-15.713	-22.513	107.918	-0.056152	0.20791	-0.082032	-138.678	-96.23	1993.657	-1.3608	1.6519	0.97656
3.566	3.388	69.3435	214.3187	0.022461	0.080078	-0.076172	14.5574	-18.842	1835.727	-1.5503	1.5747	0.21484	-24.259	-61.0595	142.4471	-0.065527	0.22783	-0.080469	-180.3167	-126.93	1974.8988	-1.4687	1.6977	1.001
3.568	-2.293	61.901	207.3681	0.02832	0.06543	-0.077148	34.1702	-4.054	1821.887	-1.6074	1.5918	0.21729	-32.846	-125.363	219.674	-0.084472	0.24814	-0.081836	-103.265	-117.535	1988.6733	-1.6055	1.7441	1.0269
3.57	-17.319	64.19	189.9403	0.032227	0.052734	-0.083984	53.2557	4.319	1848.973	-1.6406	1.5957	0.21777	5.302	-175.481	344.885	-0.1123	0.27881	-0.086426	-11.448	-142.302	2001.752	-1.7769	1.7915	1.0645
3.572	9.299	74.515	179.0968	0.032715	0.048828	-0.083008	10.189	13.9814	1857.4406	-1.689	1.604	0.22266	-20.7235	-266.527	510.914	-0.14238	0.30918	-0.08916	57.957	-122.972	2076.496	-1.8613	1.8066	1.0767
3.574	-14.636	82.0814	176.1623	0.029785	0.044922	-0.081055	-3.152	-80.536	1859.462	-1.7237	1.6113	0.22534	10.1786	-335.98	618.337	-0.18594	0.34874	-0.10127	51.433	-114.473	2122.307	-2.0103	1.8345	1.1289
3.576	-21.836	71.7555	183.1799	0.025879	0.041016	-0.080567	-40.3691	-83.971	1882.0152	-1.7534	1.6177	0.22656	-35.5118	-443.885	684.912	-0.24375	0.40538	-0.1122	4.79900000000001	-102.4935	2186.384	-2.1008	1.8518	1.1501
3.578	-46.894	74.537	188.4095	0.023926	0.041504	-0.081543	-55.143	-77.81	1864.7059	-1.7813	1.6191	0.2251	-38.664	-437.3299	719.159	-0.31504	0.47851	-0.108	-68.596	-106.115	2242.326	-2.1719	1.8721	1.1665
3.58	-70.3124	80.473	169.7854	0.0039063	0.041992	-0.077637	-40.1512	-114.646	1870.5928	-1.7905	1.6177	0.22656	-46.36	-418.393	780.245	-0.40381	0.56689	-0.085938	-197.4878	-166.385	2270.266	-2.2104	1.8931	1.1758
3.582	-96.8113	82.366	164.3484	-0.0029297	0.041992	-0.070313	-25.68	-39.697	1879.869	-1.7969	1.6133	0.23193	-18.3919	-302.446	857.641	-0.51621	0.66425	-0.038086	-264.0331	-191.866	2276.153	-2.2007	1.9009	1.1748
3.584	-102.5997	69.183	150.0927	-0.02002	0.04541	-0.069336	-30.634	-65.2644	1871.519225	-1.8013	1.6118	0.23096	-35.983	-210.308	934.393	-0.6544	0.76064	0.017871	-343.573	-191.847	2242.378	-2.1445	1.9043	1.1704
3.586	-83.6955	56.6109	138.2398	-0.040772	0.046875	-0.052978	-16.458	-79.073	1906.3226	-1.8101	1.6079	0.23438	-20.5511	-120.865	955.3683	-0.82979	0.84775	0.083496	-379.62	-110.143	2178.054	-2.0942	1.9068	1.1641
3.588	-93.5691	49.8466	114.187	-0.060547	0.050293	-0.045898	-11.6196	-32.642	1893.5988	-1.8223	1.6055	0.23486	4.0582	-142.362	1034.6635	-1.0169	0.93056	0.14043	-365.238	-39.312	2087.833	-2.0425	1.897	1.1504
3.59	-91.733	36.019	127.7335	-0.089844	0.058594	-0.033203	10.3801	-68.1561	1887.194	-1.8237	1.6001	0.24023	48.4309	-130.912	1147.978	-1.2065	1.0112	0.19189	-409.02	-3.007	2028.036	-1.9917	1.8833	1.1445
3.592	-76.324	27.12	113.0297	-0.10547	0.058594	-0.025879	59.268	6.98699999999999	1877.375	-1.8354	1.5962	0.24756	79.487	-138.47716	1251.085	-1.3862	1.085	0.21983	-363.171	14.162	2016.628	-1.9692	1.8696	1.1387
3.594	-76.876	28.088	121.5717	-0.13037	0.066406	-0.016113	58.3937	40.621	1822.422	-1.8418	1.5879	0.2566	120.135	-83.691	1344.496	-1.5507	1.1681	0.23672	-256.118	19.898	2029.974	-1.9258	1.8359	1.1177
3.596	-82.87	46.992	124.1147	-0.14454	0.070557	-0.0090329	68.496	37.81	1818.4715	-1.8555	1.5938	0.26025	142.109	-30.821	1391.567	-1.6835	1.2618	0.24844	-147.555	55.322	2023.87	-1.8855	1.8059	1.0926
3.598	-79.2356	45.329	111.0884	-0.15576	0.077148	-0.0014648	57.0194	128.689	1798.381	-1.8608	1.5728	0.27344	148.98	33.92	1447.138	-1.795	1.3495	0.27744	-75.36	76.939	2025.597	-1.8379	1.7695	1.0688
3.6	-49.552	50.7531	116.6349	-0.16504	0.085938	0.0043945	50.137	131.528	1776.362	-1.8613	1.5664	0.2749	164.337	40.25	1507.999	-1.8906	1.4375	0.30615	-57.681	145.262	2011.327	-1.7866	1.7466	1.0215
3.602	-53.477	66.758	98.706	-0.16992	0.089355	0.0039063	66.056	143.484	1791.07346	-1.8633	1.5527	0.28076	135.469	-49.55	1616.28	-1.9827	1.5145	0.33985	-125.149	174.596	2016.1427	-1.7617	1.7324	0.99756
3.604	-62.055	63.823	101.9153	-0.16748	0.088379	0.0043945	52.881	175.749	1782.554	-1.8638	1.5439	0.28833	62.3199	-182.6	1701.1638	-2.0852	1.5766	0.37959	-147.147	195.469	2012.588	-1.7227	1.7148	0.9458
3.606	-68.989	51.777	100.73668	-0.16431	0.093505	0.0021972	44.1726	104.174	1770.764	-1.8555	1.5352	0.29492	16.3803	-306.7695	1802.801	-2.2008	1.6187	0.41592	-144.954	170.048	2007.294	-1.69	1.6939	0.90479
3.608	-35.11	45.0928	90.0056	-0.15771	0.09375	0	60.7186	97.189	1760.979	-1.8379	1.5176	0.29883	6.783	-390.317	1840.581	-2.3061	1.6494	0.4499	-145.229	125.212	1986.981	-1.6577	1.6763	0.86426
3.61	-35.538	58.3255	66.522	-0.14502	0.091797	0.00097656	51.2825	81.0474	1722.141	-1.8296	1.5103	0.30664	39.211	-413.96	1870.632	-2.3809	1.6719	0.47607	-97.856	98.637	1958.551	-1.6152	1.6445	0.81885
3.612	-6.435	60.04385	67.922	-0.13672	0.090332	-0.012207	43.075	34.32	1744.181	-1.8027	1.4961	0.30566	118.2177	-407.29	1867.8519	-2.403	1.6833	0.48701	-77.983	73.244	1893.316	-1.5894	1.6235	0.79102
3.614	-2.44900000000001	36.0264	73.5332	-0.12744	0.080566	-0.016113	36.2232	88.63	1755.406	-1.7859	1.4827	0.30786	127.0256	-407.17	1876.989	-2.3613	1.6899	0.48428	-44.132	76.445	1871.031	-1.5522	1.5864	0.74609
3.616	3.955	38.812	71.75513	-0.11597	0.076416	-0.023682	44.2324	56.624	1732.199	-1.7637	1.4707	0.31152	84.865	-381.82	1935.764	-2.2469	1.6902	0.46592	-22.337	64.692	1853.2548	-1.523	1.564	0.72144
3.618	3.232	49.4028	55.2512	-0.10156	0.071777	-0.035645	43.0892	58.56	1736.424	-1.7358	1.4517	0.31641	10.529	-363.52	2022.6	-2.0765	1.6974	0.43223	56.633	64.215	1830.556	-1.4956	1.5396	0.69727
3.62	-5.41699999999999	38.6266	60.84357	-0.084473	0.057617	-0.042969	0.646000000000001	108.089	1676.4146	-1.7207	1.4375	0.32471	-51.041	-278.378	2084.526	-1.8784	1.7036	0.40332	91.847	107.51	1796.103	-1.4595	1.5015	0.66992
3.622	-6.39100000000001	26.1477	95.278	-0.080078	0.055176	-0.050781	-2.46899999999999	85.131	1635.1197	-1.6914	1.4258	0.33203	-93.5416	-182.351	2123.767	-1.6907	1.7134	0.37793	55.104	190.24	1777.379	-1.4443	1.4805	0.65869
3.624	-33.423	22.3228	86.7245	-0.061523	0.047852	-0.060547	-26.844	153.844	1604.74983	-1.6687	1.4114	0.32959	-94.17	-63.72	2089.991	-1.5402	1.7058	0.35879	33.25	287.289	1774.674	-1.3926	1.4375	0.61768
3.626	-25.599	25.5649	71.785	-0.048095	0.043457	-0.069824	-56.6186	182.618	1570.5539	-1.6406	1.3984	0.33398	-139.803	-22.44	2048.399	-1.4438	1.693	0.34512	-36.058	330.01	1732.01	-1.3425	1.3919	0.60279
3.628	-47.237	28.0333	58.84	-0.034668	0.037109	-0.078125	-56.732	162.974	1558.5575	-1.603	1.3853	0.33594	-173.732	-23.95	2000.471	-1.3939	1.6796	0.34414	-83.726	351.289	1658.805	-1.2905	1.354	0.57227
3.63	-62.343	28.709017	66.7121	-0.015137	0.03418	-0.09082	-48.3927	222.603	1533.5216	-1.583	1.3789	0.33838	-226.574	-67.331	1990.872	-1.394	1.6685	0.34229	-135.3103	331.814	1580.89	-1.2148	1.2949	0.53369
3.632	-59.501	38.6744	71.5825	-0.010742	0.031738	-0.09375	-43.468	206.073	1473.9225	-1.5386	1.354	0.34277	-224.055	-84.684	1996.545	-1.4325	1.6558	0.33828	-198.703	324.036	1549.4696	-1.1777	1.2656	0.51807
3.634	-71.405	40.182	47.6704	0.0092773	0.028809	-0.11035	-44.905	242.275	1444.3104	-1.5044	1.3394	0.34473	-186.861	-126.499	2026.591	-1.4902	1.6384	0.34219	-239.064	333.379	1515.939	-1.0977	1.207	0.479
3.636	-59.892	34.6883	49.2791	0.021728	0.034424	-0.10694	-36.699	278.878	1399.388	-1.4683	1.3228	0.34912	-77.35	-150.471	2049.902	-1.5651	1.6275	0.34532	-272.926	332.432	1478.732	-1.042	1.1621	0.45166
3.638	-63.928	30.6915	37.521	0.029297	0.032227	-0.1123	-45.293	209.9361	1377.2257	-1.418	1.3027	0.34424	-16.97	-176.189	2052.191	-1.6456	1.6212	0.34687	-264.867	293.8714	1411.186	-0.98633	1.1113	0.42236
3.64	-78.641	36.0467	58.0197	0.034668	0.036621	-0.11865	-26.596	203.1448	1377.61059	-1.395	1.2915	0.34473	5.303	-180.396	2073.83	-1.7144	1.6255	0.34912	-234.957	219.557	1352.47	-0.91943	1.0474	0.38428
3.642	-90.085	36.9929	67.4901	0.04248	0.037598	-0.12061	4.243	161.0779	1346.3847	-1.3413	1.2642	0.33789	-20.9796	-185.21	2111.3529	-1.7755	1.632	0.34639	-201.63	176.57	1327.882	-0.88818	1.0112	0.36328
3.644	-90.309	29.4706	69.1353	0.05127	0.044434	-0.12256	1.343	121.745	1336.704	-1.3052	1.2417	0.32861	-52.148	-185.448	2174.211	-1.8258	1.6422	0.3501	-172.2765	175.88	1306.1322	-0.82568	0.94385	0.32568
3.646	-78.717	25.9003	72.859	0.055664	0.048828	-0.125	-1.819	183.9	1309.249	-1.2656	1.2188	0.32178	-108.82	-202.641	2234.181	-1.8668	1.6496	0.3501	-162.316	209.94	1294.16	-0.77515	0.88892	0.30054
3.648	-94.4365	28.6872	71.6977	0.056641	0.053711	-0.12451	-26.104	163.613	1257.6953	-1.2129	1.1855	0.30322	-55.2559	-193.287	2251.446	-1.9046	1.6493	0.34688	-143.6091	268.774	1237.187	-0.72412	0.83936	0.27637
3.65	-77.493	2.9569	84.6268	0.054199	0.063965	-0.12109	-40.597	172.362	1240.4487	-1.1777	1.166	0.2915	-7.955	-170.331	2218.579	-1.9351	1.645	0.34619	-160.843	281.662	1145.256	-0.66162	0.77393	0.24658
3.652	-84.9842	-16.2037	111.6007	0.050293	0.066406	-0.12109	-0.0429999999999993	200.8852	1181.4924	-1.1187	1.1255	0.27734	51.838	-117.192	2150.384	-1.9577	1.6364	0.3332	-154.914	289.0087	1058.987	-0.63281	0.73682	0.23633
3.654	-70.918	-49.869	141.6787	0.040527	0.076172	-0.12207	10.101	153.201	1152.138	-1.0784	1.0974	0.27149	66.0226	-65.338	2093.8285	-1.9766	1.6254	0.32187	-158.523	291.139	992.05	-0.56445	0.6709	0.20557
3.656	-60.726	-70.302	161.671	0.027832	0.091553	-0.12061	34.886	206.0437	1126.569	-1.0391	1.0645	0.26221	84.376	-31.387	2024.734	-1.9766	1.6129	0.30664	-152.3181	313.142	935.76	-0.51514	0.62012	0.19239
3.658	-15.637	-101.645	224.377	0.011719	0.10645	-0.12305	29.058	212.623	1076.815	-0.98779	1.0317	0.25195	89.206	-6.684	1994.956	-1.9624	1.5934	0.29102	-95.628	336.12	870.37826	-0.46191	0.56836	0.17578
3.66	26.021	-135.4601	283.314	-0.018066	0.13721	-0.10986	-1.548	218.114	1033.5228	-0.96289	1.0117	0.24658	139.623	-1.671	2019.463	-1.9434	1.5771	0.28174	-73.678	339.63	780.3627	-0.3916	0.50586	0.14648
3.662	44.665	-154.23964	325.475	-0.041992	0.15527	-0.1123	19.932	276.12	975.4372	-0.90967	0.97217	0.23926	195.863	22.2719	2012.7329	-1.9077	1.5552	0.26211	-38.235	297.827	690.254	-0.36426	0.47461	0.13184
3.664	40.435	-147.0541	370.065	-0.098633	0.19873	-0.081055	4.633	234.519	911.869	-0.86987	0.94605	0.23511	183.205	50.5264646	1977.0464	-1.871	1.5274	0.24893	36.926	267.486	613.781	-0.30273	0.40234	0.10547
3.666	56.826	-142.4145	408.3331	-0.15943	0.2334	-0.060791	13.889	249.242	876.913	-0.83008	0.91602	0.229	126.672	91.068	1912.627	-1.837	1.4958	0.23643	87.381	247.401	578.34	-0.24707	0.33398	0.077637
3.668	75.611	-124.2564	472.504	-0.22266	0.271	-0.038086	-9.25	264.789	823.964	-0.78857	0.87939	0.2207	30.8069	90.6485	1900.4556	-1.8045	1.4732	0.22539	123.882	252.464	561.139	-0.21729	0.30566	0.057617
3.67	77.481	-73.8094	509.635	-0.3125	0.32715	0.0019531	-42.823	222.6326	799.858	-0.75977	0.85645	0.21777	-0.9818	71.6035	1921.8841	-1.7788	1.4497	0.22168	132.946	266.645	513.417	-0.15625	0.23633	0.021484
3.672	87.172	-31.9462	522.526	-0.3584	0.35791	0.019531	-43.999	255.754	786.1086	-0.70947	0.81396	0.21191	17.97822	28.114	1984.216	-1.7599	1.437	0.22002	119.2113	257.814	455.853	-0.11426	0.18677	-0.0053711
3.674	77.533	-28.801	542.025	-0.45557	0.42041	0.055664	-67.847	227.027	733.3088	-0.66455	0.78076	0.19971	34.84	4.691	2005.809	-1.7573	1.4294	0.22422	68.544	244.572	406.595	-0.070801	0.14355	-0.025391
3.676	71.406	-11.008	587.116	-0.52368	0.47046	0.082519	-73.591	185.0969	715.08	-0.625	0.75	0.19287	27.769	-7.26598	1995.92	-1.762	1.4294	0.23985	8.982	214.877	378.62	-0.018555	0.086426	-0.056641
3.678	61.2583	22.319	644.192	-0.59375	0.52539	0.10547	-59.025	205.7723	665.153	-0.56689	0.70557	0.1792	-33.8473	23.45078	1937.5042	-1.7783	1.4307	0.25927	-35.358	184.453	357.818	0.0063477	0.057617	-0.075195
3.68	69.2665	55.5022	691.097	-0.67383	0.60059	0.13086	-84.218	164.256	626.7595	-0.53857	0.68604	0.17578	-90.445	66.9105	1895.8665	-1.8008	1.4414	0.28418	-65.623	171.337	313.038	0.055176	0.0053711	-0.1084
3.682	43.262	74.941	728.7252	-0.71582	0.63867	0.14746	-89.999	184.063	605.483	-0.47949	0.6416	0.1582	-96.259	89.38	1841.8307	-1.8221	1.447	0.30586	-75.4754	146.073	271.1306	0.090576	-0.035644	-0.13037
3.684	26.096	83.895	750.601	-0.79639	0.71436	0.17773	-77.17	207.336	555.708	-0.43799	0.60694	0.15357	-56.466	77.747	1812.106	-1.8407	1.452	0.33095	-83.55043	162.6528	240.419	0.12451	-0.066406	-0.15137
3.686	12.79	66.875	818.145	-0.86157	0.77368	0.19848	-102.108	160.769	523.065	-0.39404	0.57178	0.146	-15.179	67.022	1789.0592	-1.8488	1.4516	0.35127	-92.6092	170.1893	229.8508	0.16602	-0.10547	-0.17529
3.688	-18.012	41.964	886.807	-0.92773	0.83789	0.22266	-53.928	195.5012	484.8243	-0.34131	0.52393	0.13574	-73.091	76.204	1776.46	-1.8397	1.4532	0.37177	-73.785	173.738	205.7842	0.18896	-0.12354	-0.19141
3.69	-51.42	-3.932	992.5055	-1.0054	0.91846	0.26123	-64.506	174.24455	441.234491	-0.31689	0.50098	0.12988	-63.9844	143.811	1717.068	-1.8179	1.4556	0.38672	-101.655	173.097	165.504	0.21875	-0.15234	-0.2124
3.692	-60.9357	-52.609	1060.8555	-1.0537	0.95215	0.28174	-103.921	169.8079	409.9126	-0.271	0.45752	0.125	-110.1	236.37	1672.1884	-1.7819	1.4536	0.3961	-120.0046	140.186	92.257	0.23193	-0.17309	-0.23193
3.694	-89.285	-96.857	1109.338	-1.1543	1.0176	0.31982	-77.569	218.097	386.648	-0.24365	0.42749	0.12476	-85.239	306.997	1620.9605	-1.7395	1.4516	0.41016	-144.2316	106.65	46.348	0.24072	-0.18994	-0.24854
3.696	-104.5089	-119.8403	1157.5011	-1.2217	1.0547	0.34253	-84.909	181.455	359.2091	-0.21484	0.39844	0.12061	-74.259	322.393	1618.78	-1.6907	1.4489	0.41719	-182.064	100.235	68.508	0.24512	-0.21289	-0.26807
3.698	-130.699	-143.616	1176.89878	-1.2925	1.0845	0.36523	-67.123	198.75	340.9805	-0.17627	0.36133	0.11377	4.493	291.515	1584.437	-1.6368	1.4431	0.43096	-189.576	87.508	110.912	0.24316	-0.2168	-0.26709
3.7	-101.324	-151.521	1213.4719	-1.3691	1.1152	0.38818	-58.828	191.789	290.3437	-0.15674	0.34229	0.1084	-2.494	256.926	1570.925	-1.5835	1.438	0.4375	-191.743	65.471	118.8411	0.22998	-0.23145	-0.27881
3.702	-117.4169	-151.403	1238.881	-1.4168	1.1321	0.40186	-71.232	141.128	255.8303	-0.12158	0.30518	0.10547	12.594	244.739	1535.936	-1.5376	1.4241	0.44463	-212.477	57.916	77.5677	0.2168	-0.23071	-0.28125
3.704	-115.5483	-158.558	1287.273	-1.4507	1.146	0.41309	-44.439	182.921	236.929	-0.089599	0.27758	0.10229	-19.045	225.341	1505.5537	-1.4839	1.4031	0.44736	-195.901	45.363	44.44	0.19727	-0.23047	-0.27539
3.706	-118.0205	-173.837	1334.022	-1.4702	1.1548	0.42578	-55.431	163.232	209.779	-0.0625	0.24902	0.091797	25.063	209.794	1444.795	-1.4375	1.373	0.45557	-167.989	51.208	48.614	0.15625	-0.21875	-0.26318
3.708	-92.933	-150.575	1356.919	-1.4644	1.1587	0.42578	-37.49	132.7607	217.3263	-0.022949	0.22314	0.084961	46.1433	167.357	1417.495	-1.386	1.3358	0.45469	-122.717	63.307	78.259	0.12891	-0.21045	-0.25342
3.71	-79.423	-119.332	1379.302	-1.4482	1.1543	0.41553	-27.93	121.4517	225.1848	-0.0078125	0.20752	0.075684	127.295	149.902	1391.4853	-1.3315	1.2954	0.45313	-64.554	2.2314	70.609	0.07373	-0.18555	-0.22998
3.712	-87.891	-91.829	1370.3148	-1.4174	1.1547	0.40185	-51.843	52.284	205.584	0.028809	0.18115	0.06543	116.8479	162.407	1399.944	-1.2783	1.2516	0.4457	-9.432	-30.9871	36.7109	0.022461	-0.16797	-0.20825
3.714	-69.519	-94.096	1371.546	-1.3784	1.1499	0.38086	-26.387	67.724	219.962	0.054688	0.16406	0.059814	110.587	228.247	1361.079	-1.2231	1.2078	0.43604	13.442	-65.603	12.8112	-0.029297	-0.14893	-0.18213
3.716	-65.507	-87.294	1343.787	-1.3125	1.1396	0.3501	-17.112	105.5736	176.945	0.073242	0.15234	0.052734	55.7089	270.539	1325.555	-1.1695	1.1676	0.42627	41.546	-43.578	26.2287	-0.094727	-0.12744	-0.15332
3.718	-39.938	-66.269	1373.175	-1.2769	1.1382	0.32959	-55.22	84.0619	161.146	0.091797	0.12988	0.05127	32.9364	301.449	1220.879	-1.1064	1.1312	0.4126	38.864	32.6278	58.4386	-0.12012	-0.11475	-0.13721
3.72	-49.6114	-66.408	1386.59	-1.2168	1.123	0.29541	-54.764	107.991	141.884	0.095703	0.12158	0.047363	-12.128	273.148	1141.095	-1.0425	1.0903	0.396	52.461	87.667	58.482	-0.17188	-0.09668	-0.11035
3.722	-1.588	-90.99	1409.9657	-1.1863	1.1223	0.2727	-91.985	68.862	114.9931	0.099121	0.10156	0.042969	20.102	280.121	1068.773	-0.97775	1.0459	0.3831	50.452	109.921	41.206	-0.19336	-0.084473	-0.094729
3.724	21.575	-127.9468	1437.9607	-1.1577	1.1196	0.24805	-88.836	37.343	119.1876	0.10571	0.084717	0.047607	-5.15300000000001	264.127	1048.427	-0.91006	0.99972	0.36777	35.698	90.3445	27.9428	-0.2041	-0.068848	-0.085938
3.726	31.294	-145.747	1444.1312	-1.1401	1.1265	0.22705	-38.857	58.121	106.368	0.10986	0.064941	0.04834	-17.438	311.5041	1005.0368	-0.84912	0.95518	0.35058	26.228	73.7192	25.8154	-0.20215	-0.060059	-0.074219
3.728	71.8109	-177.622	1465.9832	-1.1323	1.1343	0.2207	-101.9476	47.392	98.94751	0.11279	0.043945	0.044434	-91.3718	298.9733	974.678	-0.78438	0.90742	0.33369	8.876	66.936	48.837	-0.19141	-0.059082	-0.072754
3.73	74.385	-201.472	1476.3493	-1.123	1.1504	0.20947	-72.013	79.2036	95.1621	0.11108	0.024658	0.047852	-96.7755	320.825	905.728	-0.71289	0.86133	0.31201	-2.806	55.782	42.234	-0.16602	-0.052246	-0.068359
3.732	89.1	-212.816	1516.094	-1.1272	1.1653	0.2041	-76.89	98.2236	68.448	0.11182	0.01416	0.051758	-119.361	263.7409	847.457	-0.64561	0.81416	0.28642	-3.81700000000001	32.589	26.007	-0.13867	-0.055175	-0.070557
3.734	54.8454	-213.234	1513.353	-1.1274	1.1841	0.20361	-117.667	64.0574	47.93325	0.11963	-0.0019531	0.051758	-69.272	274.645	787.7778	-0.57774	0.76719	0.26192	-19.468	22.861	3.017	-0.11279	-0.058105	-0.072754
3.736	56.2535	-204.6313	1508.4864	-1.1426	1.2148	0.19873	-77.248	72.7311	48.2427	0.12061	-0.0078125	0.048828	-113.614	245.3999	717.697	-0.50938	0.72188	0.23887	-27.422	26.327	16.267	-0.07373	-0.075195	-0.075195
3.738	47.0188	-188.1334	1511.8833	-1.144	1.231	0.20557	-110.149	37.4964	38.32215	0.11865	-0.022949	0.056641	-145.5321	265.7825	661.711	-0.43711	0.6752	0.2083	-61.406	43.75	53.1157	-0.058105	-0.090332	-0.078125
3.74	17.91249	-155.3722	1504.9684	-1.1621	1.2656	0.2168	-100.841	22.7523	60.6047	0.11768	-0.030762	0.062745	-205.531	204.6016	627.485	-0.36816	0.63135	0.18408	-102.387	61.772	82.902	-0.025879	-0.12109	-0.088379
3.742	3.156	-134.0043	1509.5107	-1.1763	1.292	0.22852	-79.105	46.5353	53.093	0.11475	-0.041016	0.063477	-229.57	207.041	585.5934	-0.29814	0.58467	0.15948	-125.2753	45.892	83.742	-0.0024413	-0.14673	-0.098875
3.744	-33.4776	-123.0008	1507.041	-1.1934	1.3164	0.23877	-113.38409	14.767	41.132	0.10986	-0.054688	0.067871	-218.734	142.642	562.456	-0.23487	0.53496	0.1375	-149.9112	42.261	64.478	0.029785	-0.17334	-0.11133
3.746	6.436	-98.981	1517.8066	-1.2148	1.3477	0.25293	-83.544	10.238	68.9928	0.10693	-0.056641	0.066895	-159.5406	199.424	516.473	-0.1708	0.49277	0.11953	-180.449	12.155	46.949	0.073242	-0.20654	-0.12695
3.748	7.9727	-74.954	1515.06	-1.2305	1.3652	0.25879	-77.709	8.736	39.5092	0.10352	-0.063965	0.071289	-125.062	197.6656	487.533	-0.11055	0.45312	0.10088	-204.643	0.254999999999999	58.734	0.098633	-0.21777	-0.13916
3.75	28.2027	-47.452	1524.691	-1.2632	1.4009	0.27295	-88.818	-1.886	36.684	0.10571	-0.06958	0.072266	-130.582	285.14	438.632	-0.052734	0.41113	0.082031	-218.793	7.7757	80.728	0.14795	-0.24316	-0.16846
3.752	27.37853	-62.5767	1556.991	-1.2934	1.4209	0.28003	-35.67	42.2919	50.054	0.11572	-0.074707	0.069336	-117.229	256.025	391.344	-0.002832	0.37588	0.065332	-220.882	24.992	90.75725	0.18335	-0.26001	-0.18554
3.754	18.8293	-58.0912	1557.593	-1.3223	1.4395	0.28369	-57.7	48.825	18.8026	0.12207	-0.079102	0.067383	-81.633	263.488	334.0279	0.042285	0.33936	0.046777	-206.224	56.0105	62.765	0.20898	-0.27051	-0.20264
3.756	12.2096	-68.47484	1578.409	-1.3652	1.4688	0.28955	-40.395	25.129087	48.2995	0.13281	-0.078125	0.063965	-62.288	147.101	291.7822	0.086816	0.30264	0.030761	-159.946	70.2899	23.246	0.23926	-0.28174	-0.22607
3.758	-17.7061	-77.251	1587.27	-1.3784	1.4751	0.29297	-12.091	34.4144	28.344	0.15088	-0.077637	0.062012	-37.659	142.18	245.777	0.12109	0.26924	0.017871	-145.8332	67.7768	6.871	0.24707	-0.28467	-0.23682
3.76	4.4396	-97.0409	1625.1254	-1.4102	1.4902	0.30859	-47.367	6.218	9.786	0.16773	-0.078125	0.059814	-23.137	96.127	213.477	0.1543	0.24316	0.0068359	-99.077	54.2896	28.343	0.26416	-0.28906	-0.25195
3.762	-30.5133	-113.7201	1625.8337	-1.4348	1.4983	0.30957	-7.91199999999999	23.947	44.7691	0.18115	-0.081543	0.058105	-31.198	192.796	189.202	0.17168	0.21377	-0.0041015	-74.664	42.9371	39.8499	0.26709	-0.29053	-0.25708
3.764	-14.303	-115.4623	1618.959	-1.4604	1.5044	0.31543	-43.659	67.081	29.773	0.19336	-0.081543	0.058105	-41.35	180.382	171.63	0.19033	0.19053	-0.010547	-43.453	10.597	34.74	0.26855	-0.28223	-0.25684
3.766	-9.5394	-124.578	1626.9266	-1.4937	1.4985	0.31689	-72.801	66.929	52.166	0.2002	-0.080566	0.053711	-36.047	223.014	168.78	0.20166	0.17607	-0.0066407	-24.475	-2.418	35.3094	0.25635	-0.27148	-0.25928
3.768	15.4735	-122.971	1630.9954	-1.501	1.5029	0.31885	-11.092	98.784	43.7109	0.21875	-0.081055	0.05127	-29.682	130.958	162.599	0.20527	0.16025	-0.012695	-16.258	3.3626	40.6344	0.24658	-0.27002	-0.25879
3.77	47.021	-111.578	1636.3197	-1.5234	1.501	0.31787	-41.303	73.055	4.819	0.22412	-0.076904	0.04541	13.677	138.361	148.799	0.20459	0.14648	-0.017578	-6.422	21.3	70.4343	0.22559	-0.25977	-0.24414
3.772	69.096	-75.406	1615.3651	-1.5337	1.4995	0.31128	-44.969	29.5811	36.132	0.23438	-0.080078	0.044922	12.786	64.1876	139.5973	0.19121	0.13906	-0.0067383	2.212	66.8503	66.491	0.19483	-0.24903	-0.2439
3.774	112.96	-50.376	1615.2572	-1.541	1.502	0.31104	-47.901	28.1957	36.448	0.24902	-0.07666	0.041504	-25.912	115.79	124.923	0.17822	0.13526	-0.00048824	23.004	58.3448	55.481	0.16162	-0.23535	-0.21777
3.776	102.765	-22.8194	1617.3294	-1.5498	1.4902	0.30713	-83.152	5.724	44.239	0.25488	-0.075684	0.041016	-16.706	61.0559	120.89165	0.15752	0.13955	0.013184	34.116	62.199	37.936	0.10449	-0.20947	-0.20215
3.778	110.027	4.038	1622.906	-1.5547	1.4902	0.30566	-38.023	25.844	58.5932	0.26172	-0.078125	0.039063	-40.75	84.8497	93.63326	0.129	0.14355	0.025293	45.983	11.7571	18.2195	0.077637	-0.19727	-0.18652
3.78	80.443	31.6217	1597.0163	-1.5684	1.4805	0.30127	-56.447	36.0923	43.034	0.27051	-0.070556	0.035889	-45.857	-1.027	77.866	0.09668	0.146	0.04541	42.338	-1.0752	41.457	0.01416	-0.16553	-0.15332
3.782	88.905	37.4397	1587.8788	-1.5689	1.4633	0.29639	-100.914	21.9858	57.135	0.27588	-0.065918	0.033203	-78.96	22.829	67.9852	0.062305	0.15313	0.060059	38.761	-0.257	40.429	-0.03955	-0.14112	-0.13257
3.784	92.011	32.463	1585.9811	-1.5757	1.4497	0.29395	-61.734	55.261	56.484	0.27734	-0.058594	0.028809	-111.20576	8.966	74.945	0.023242	0.15898	0.081152	51.969	23.196	36.6298	-0.086426	-0.11816	-0.10791
3.786	51.426	20.231	1575.5342	-1.5874	1.4204	0.2832	-99.1773	57.634	26.0185	0.27393	-0.055176	0.029785	-153.362	85.534	80.484	-0.015039	0.16875	0.10146	19.493	63.6837	29.14417	-0.1543	-0.083496	-0.080078
3.788	50.604	2.239	1571.148	-1.5879	1.4043	0.27148	-116.2949	55.6023	52.654	0.26318	-0.047852	0.030762	-140.2349	73.921	54.823	-0.052637	0.18125	0.12491	-27.275	78.2164	35.1419	-0.18164	-0.067871	-0.069336
3.79	49.031	-27.259	1572.0571	-1.5815	1.3755	0.25781	-93.235	59.062	55.2476	0.24878	-0.041503	0.029541	-158.823	84.664	36.226	-0.090332	0.18896	0.14063	-65.747	90.933	59.773	-0.22559	-0.036133	-0.046875
3.792	78.689	-28.746	1570.94175	-1.5728	1.3511	0.24292	-109.033	23.9005	61.8982	0.23242	-0.038574	0.029297	-133.7318	-11.594	27.354	-0.12177	0.20215	0.15801	-100.435	92.442	82.79	-0.24682	-0.012696	-0.037842
3.794	54.374	-30.341	1589.5317	-1.5581	1.3306	0.22852	-63.85	17.954	72.5208	0.21045	-0.03125	0.033691	-138.6859	-17.659	33.959	-0.14834	0.21094	0.17627	-139.749	79.154	84.961	-0.2583	0.0083008	-0.036133
3.796	66.825	-26.2852	1596.448	-1.5386	1.3052	0.20996	-78.726	39.3707	31.07	0.19922	-0.024414	0.041504	-117.8484	-24.021	44.47059	-0.16826	0.21992	0.18955	-151.275	53.0279	66.4799	-0.2627	0.034668	-0.036133
3.798	51.076	-35.6316	1597.676	-1.5332	1.2852	0.20166	-105.041	37.6446	44.7372	0.18018	-0.012695	0.044922	-119.0103	47.6759	47.601	-0.18115	0.22969	0.20615	-168.368	38.606	42.045	-0.25781	0.050293	-0.040527
3.8	49.997	-15.034	1579.543	-1.5132	1.2642	0.18457	-46.523	75.009	56.6355	0.16578	-0.00048827	0.046875	-108.92	63.3764	42.0911	-0.2002	0.24219	0.21582	-196.489	8.489	27.114	-0.23828	0.064453	-0.044922
3.802	9.2645	0.751000000000005	1553.348	-1.4978	1.2439	0.17774	-82.198	67.477	28.341	0.16064	0.0083008	0.051758	-118.9803	61.087	54.9431	-0.21191	0.25156	0.22724	-204.987	-5.592	30.847	-0.21729	0.075195	-0.056641
3.804	-18.30838	22.745	1528.953	-1.4868	1.2271	0.17139	-72.119	31.5061	55.158	0.15381	0.025391	0.057617	-64.335	13.823	18.463	-0.22061	0.24805	0.24179	-193.787	9.127	41.686	-0.20068	0.081543	-0.069824
3.806	-28.8766	34.185	1522.7591	-1.4722	1.2036	0.16895	-24.801	29.58742	50.76968	0.15234	0.033691	0.057129	-60.441	-1.724	17.2599	-0.22412	0.2414	0.24922	-158.31452	12.67	68.281	-0.16553	0.087402	-0.085938
3.808	-28.25398	67.971	1491.386	-1.4663	1.1919	0.16895	-79.166	-18.383	61.675	0.15039	0.046387	0.061523	-39.592	8.254	20.5246	-0.21807	0.23125	0.25459	-155.723	45.953	67.4077	-0.15576	0.088867	-0.097168
3.81	-34.1237	76.883	1485.9903	-1.4585	1.1743	0.16797	-34.302	-3.402	81.154	0.15039	0.057373	0.062744	-36.097	29.6867	49.954	-0.20264	0.21045	0.25781	-126.9005	38.049	50.557	-0.13037	0.089355	-0.11865
3.812	-28.77312	80.288	1465.7373	-1.4504	1.1643	0.17334	-38.537	19.73419	43.9574	0.15381	0.067871	0.067383	-23.504	37.283	54.122	-0.17226	0.19522	0.25254	-132.033	32.376	51.999	-0.11597	0.093505	-0.13086
3.814	-0.4331	65.255	1443.9213	-1.4468	1.1509	0.17334	-60.231	16.3823	35.514	0.15869	0.078125	0.066895	-13.685	17.5025	47.8751	-0.13428	0.17237	0.24463	-149.333	24.1795	63.065	-0.10303	0.094238	-0.14404
3.816	-2.9449	68.438	1427.129	-1.4375	1.1348	0.17822	-4.196	40.069	63.2592	0.15527	0.088379	0.067383	12.564	21.9301	34.4598	-0.08545	0.15361	0.22627	-85.368	9.1094	83.4419	-0.084473	0.097656	-0.14209
3.818	13.7246	63.63	1407.8806	-1.4292	1.1294	0.18457	-49.423	28.347	31.6004	0.16211	0.10156	0.070313	16.595	19.7391	47.8163	-0.030664	0.13144	0.20244	-81.14	24.357	64.4905	-0.081543	0.099121	-0.14355
3.82	26.274	56.358	1427.0232	-1.4116	1.1138	0.19141	-33.882	19.7462	52.69	0.15893	0.11132	0.070069	13.847	68.759	51.627	0.024414	0.11279	0.18457	-52.366	29.1671	37.977	-0.088379	0.10596	-0.13232
3.822	35.6825	41.344	1404.944	-1.4031	1.1038	0.19629	-9.89299999999999	38.3319	36.115	0.1582	0.12207	0.078125	7.186	72.518	48.7943	0.076856	0.0875	0.14765	-0.843000000000004	52.6543	33.644	-0.12012	0.11377	-0.12256
3.824	50.4527	30.398	1401.826	-1.3906	1.0938	0.20068	-58.903	20.673	28.0725	0.1499	0.13232	0.085449	13.319	87.1	24.263	0.12852	0.067286	0.12041	2.81999999999999	51.2382	28.357	-0.13818	0.11816	-0.11865
3.826	37.2597	21.479	1381.344	-1.3687	1.0806	0.21094	-41.855	27.7567	52.6579	0.14355	0.13477	0.090332	1.334	32.8697	27.153	0.17539	0.045019	0.086816	19.073	59.852	32.469	-0.18652	0.125	-0.092285
3.828	29.2732	23.249	1376.049	-1.353	1.0728	0.21436	-55.519	33.2815	26.502	0.13135	0.14502	0.097656	14.205	26.034	27.2545	0.21807	0.020996	0.057324	79.088	13.751	49.568	-0.229	0.13135	-0.082764
3.83	47.138	43.7534	1352.5749	-1.3301	1.0566	0.22705	-61.797	17.938	30.692	0.12109	0.14746	0.1045	-18.274	-30.478	37.0804	0.26123	-0.00097656	0.035645	57.323	-42.8912	96.1672	-0.27002	0.14893	-0.07666
3.832	48.5794	71.567	1318.499	-1.3127	1.0461	0.23095	-41.322	46.8191	37.7834	0.1084	0.1499	0.11279	-52.166	42.896	30.7374	0.29795	-0.022168	0.011426	55.113	-102.398	187.313	-0.32422	0.1875	-0.076172
3.834	47.7793	83.591	1290.8673	-1.2891	1.0332	0.22656	-100.7084	44.4144	25.57534	0.091797	0.15039	0.12305	-85.7888	43.851	59.3618	0.33125	-0.037207	-0.011426	109.721	-158.004	299.6403	-0.35547	0.21777	-0.07666
3.836	52.6669	88.553	1262.9824	-1.2593	1.0122	0.23193	-89.649	31.9582	46.575	0.082031	0.15137	0.12842	-115.93	97.493	55.1898	0.36836	-0.052832	-0.030176	90.509	-194.445	430.2798	-0.42627	0.29883	-0.076172
3.838	77.482	94.31903	1224.31665	-1.2317	0.99439	0.23218	-76.407	53.804	25.553	0.066406	0.1543	0.13525	-109.562	23.1054	76.5177	0.39434	-0.066602	-0.047559	77.438	-285.639	567.099	-0.50464	0.37963	-0.057617
3.84	36.0742	117.66737	1209.67482	-1.2021	0.97461	0.22754	-117.3876	28.2372	19.739	0.060791	0.15503	0.13818	-98.444	31.2546	54.2626	0.42139	-0.07666	-0.067383	80.522	-365.174	681.758	-0.60352	0.47461	-0.020508
3.842	44.4718	131.5515	1201.0868	-1.1543	0.94531	0.22314	-63.941	4.793	71.8025	0.051758	0.15674	0.14551	-121.4272	-18.946	49.4621	0.44287	-0.089843	-0.075391	37.6457	-478.454	774.87	-0.7832	0.60645	0.04248
3.844	46.0896	129.6614	1162.1879	-1.1323	0.93213	0.22363	-92.143	-29.196	89.158	0.052246	0.15967	0.15137	-141.0721	41.378	40.7235	0.45928	-0.10176	-0.083203	34.956	-478.246	834.226	-0.88037	0.67236	0.077148
3.846	50.459506	130.5044	1134.0753	-1.0884	0.90674	0.21631	-117.835	-80.919	156.041	0.049805	0.16162	0.15283	-154.891	9.146	56.8754	0.46826	-0.10957	-0.089453	45.7586	-424.1389	911.042	-1.1099	0.78955	0.14697
3.848	7.512	130.7878	1105.529	-1.0508	0.88379	0.20898	-94.409	-78.71742	241.749	0.056641	0.16211	0.16064	-140.321	59.3762	48.9802	0.47168	-0.12549	-0.081347	29.354	-317.958	1004.152	-1.3054	0.86059	0.19165
3.85	-11.096	112.026	1091.031	-1.0112	0.86377	0.20313	-135.913	-103.809	335.808	0.061279	0.16773	0.16578	-105.973	-3.089	49.2152	0.47656	-0.1333	-0.084961	-17.026	-182.879	1042.208	-1.4995	0.92822	0.22461
3.852	-28.084	100.664	1100.7286	-0.96484	0.83594	0.1958	-139.623	-165.373	453.877	0.066895	0.17188	0.17334	-87.985	26.1063	25.4688	0.46797	-0.13633	-0.081738	2.51257	-128.689	1058.5988	-1.7188	1.0332	0.26514
3.854	-39.868573	109.827	1074.007	-0.93457	0.82031	0.1958	-150.225	-211.287	505.262	0.072266	0.18359	0.17578	-89.788	-27.7223	64.9258	0.46221	-0.13799	-0.073242	19.6682	-105.436	1120.677	-1.8027	1.0957	0.27979
3.856	-50.9656	100.41281	1052.2695	-0.89014	0.79443	0.19043	-194.723	-266.554	524.6208	0.071289	0.18701	0.17334	-101.899	47.4479	60.537	0.45127	-0.13877	-0.064649	20.355	-88.867	1260.103	-1.9453	1.2324	0.30859
3.858	-50.4407	80.836	1018.6712	-0.86133	0.77441	0.19214	-155.041	-236.987	603.74	0.055176	0.21484	0.17529	-99.7492	28.4454	54.121	0.43692	-0.1374	-0.054004	39.949	-45.487	1392.801	-2.0339	1.3366	0.32592
3.86	-56.6126	79.735	993.1836	-0.82764	0.76025	0.18359	-180.454	-156.948	671.605	0.031494	0.25293	0.17774	-82.723	86.093	39.5391	0.41895	-0.13477	-0.041016	57.88	-37.8648	1472.86	-2.1128	1.4351	0.35547
3.862	-59.8242	109.399	962.76887	-0.7876	0.73291	0.19043	-224.8342	-101.915	732.02	-0.010254	0.30566	0.19043	-38.2	9.573	24.939	0.40146	-0.12734	-0.032422	30.3938	-7.94	1454.736	-2.1987	1.5337	0.4082
3.864	-55.5712	127.606	939.483	-0.7666	0.7207	0.19092	-154.718	-37.16	756.7622	-0.10254	0.38623	0.21826	1.421	20.7379	22.209	0.37685	-0.11943	-0.018555	24.868	-11.97	1454.422	-2.2476	1.5688	0.42578
3.866	-33.479	133.15	924.2548	-0.72852	0.69727	0.19189	-111.554	-12.749	756.202	-0.16748	0.42969	0.23926	8.325	-23.6694	33.2903	0.35147	-0.10967	-0.0052734	16.158	-37.32	1469.36	-2.2988	1.6055	0.43994
3.868	-17.957	137.1283	901.5351	-0.70313	0.67895	0.18604	-56.341	7.48	865.189	-0.32422	0.50586	0.27002	0.396999999999998	34.4373	30.525305	0.31875	-0.094922	0.012207	-21.4547	-120	1540.386	-2.2969	1.6201	0.4253
3.87	1.256	143.2663	890.49	-0.67334	0.66064	0.18164	4.769	93.295	987.931	-0.42822	0.54199	0.29785	-6.524	22.66606	57.965	0.28906	-0.083496	0.02002	-52.5257	-205.61	1616.716	-2.2441	1.627	0.38965
3.872	-22.003	146.768	880.3791	-0.63281	0.63477	0.18799	-35.43	136	1092.759	-0.5249	0.56787	0.30273	28.896	59.849	43.15501	0.25527	-0.067481	0.030274	-90.066	-321.488	1668.272	-2.0796	1.6294	0.31787
3.874	-22.92	153.648	853.3619	-0.61328	0.62402	0.18604	-47.755	164.069	1185.21	-0.64404	0.61426	0.31738	14.428	10.408	34.3609	0.22363	-0.04707	0.045508	-66.01417	-412.533	1717.906	-1.9761	1.6235	0.2793
3.876	-22.292	153.306	797.4741	-0.5752	0.59766	0.18066	-71.68	147.282	1219.276	-0.69336	0.64453	0.32178	19.46	36.067	30.3835	0.19863	-0.027539	0.060352	-23.148	-436.58	1728.318	-1.7383	1.625	0.18799
3.878	-26.367	160.198	760.7552	-0.54566	0.58228	0.1831	-111.094	39.34	1279.083	-0.77295	0.73486	0.33594	10.246	15.7864	31.5163	0.17305	-0.0094726	0.072754	88.65	-435.43	1762.525	-1.5652	1.6311	0.14209
[truncated: 28,061 more rows]
