# Supplementary material for: Reliability and Validity of Running Cadence and Stance Time Derived from Instrumented Wireless Earbuds
Source: Sensors (Basel). 2021 Nov 30;21(23):7995. doi: 10.3390/s21237995 (PMC8659722; doi:10.3390/s21237995)
Supplement: Supplementary file 1 [file sensors-21-07995-s001.zip › Data_P06_HeadMovements.csv]

time	up_force_plate_1	up_force_plate_2	up_force_plate_3	up_earbuds_1	up_earbuds_2	up_earbuds_3	down_force_plate_1	down_force_plate_2	down_force_plate_3	down_earbuds_1	down_earbuds_2	down_earbuds_3	shake_force_plate_1	shake_force_plate_2	shake_force_plate_3	shake_earbuds_1	shake_earbuds_2	shake_earbuds_3	nod_force_plate_1	nod_force_plate_2	nod_force_plate_3	nod_earbuds_1	nod_earbuds_2	nod_earbuds_3	bird_L_force_plate_1	bird_L_force_plate_2	bird_L_force_plate_3	bird_L_earbuds_1	bird_L_earbuds_2	bird_L_earbuds_3	bird_R_force_plate_1	bird_R_force_plate_2	bird_R_force_plate_3	bird_R_earbuds_1	bird_R_earbuds_2	bird_R_earbuds_3	check_watch_force_plate_1	check_watch_force_plate_2	check_watch_force_plate_3	check_watch_earbuds_1	check_watch_earbuds_2	check_watch_earbuds_3
0	-18.319	20.4659	701.646	-0.60498	0.18506	-0.085449	-223.886	-91.9776	2209.75	-1.9566	1.0289	0.18935	-45.581	-43.947	275.6677	-0.15723	0.091797	-0.063477	-22.049	69.571	476.462	-0.30566	0.146	-0.13037	-85.412	-86.363	2012.271	-1.4175	0.5376	-0.12988	22.044	8.042	2041.908	-1.6035	0.89063	-0.21289	-93.165	106.878	220.382	-0.073242	0.30225	0.1792
0.002	-33.418	35.95	794.034	-0.76563	0.20264	-0.085938	-231.7322	-77.522	2197.653	-1.952	1.0149	0.19209	-59.407	-22.415	316.6876	-0.18652	0.089355	-0.061035	-27.075	106.087	564.85368	-0.44873	0.15967	-0.12695	-85.809	-74.054	1986.0831	-1.4401	0.55753	-0.13838	42.437	13.852	2041.5786	-1.6065	0.88232	-0.21289	-72.312	99.486	208.983	-0.074219	0.31641	0.17725
0.004	11.98	33.188	896.3976	-0.90893	0.22314	-0.084961	-246.69689	-67.9076	2169.647	-1.946	1.0059	0.18487	-67.979	-10.388	387.3696	-0.26904	0.094238	-0.054688	-54.702	137.256	650.2663	-0.57276	0.18579	-0.12109	-105.515	-77.104	1970.6231	-1.4505	0.58428	-0.15693	4.35000000000001	10.157	2029.1739	-1.6104	0.87891	-0.20703	-59.27	91.538	215.82505	-0.072266	0.32275	0.17578
0.006	-7.416	29.6605	1002.21	-1.0737	0.2373	-0.080566	-228.901	-77.9809	2147.041	-1.9399	0.99268	0.18701	-54.802	18.86	450.1082	-0.34204	0.096924	-0.052247	-38.833	161.98	721.1909	-0.70166	0.20898	-0.10889	-124.49	-96.0661	1960.894	-1.4626	0.60967	-0.16866	11.183	7.845	2022.7316	-1.6055	0.86133	-0.2041	-26.729	85.012	218.23	-0.069336	0.33496	0.17627
0.008	-12.368	22.252	1106.404	-1.3003	0.27686	-0.064941	-191.477	-86.784	2132	-1.931	0.98233	0.19043	-60.672	54.619	533.962	-0.42725	0.11084	-0.049316	-56.451	182.484	800.4789	-0.87646	0.25049	-0.090332	-95.649	-106.3913	1979.7788	-1.4701	0.63311	-0.18291	24.796	14.7782	2025.344	-1.6074	0.84766	-0.20459	-18.099	75.58	210.28	-0.063721	0.34619	0.16773
0.01	-23.413	22.957	1201.464	-1.4155	0.30322	-0.056641	-175.735	-89.097	2128.58	-1.9214	0.97588	0.19385	-76.339	93.781	641.192	-0.54932	0.12207	-0.05127	-44.564	175.173	872.149	-0.95557	0.27588	-0.079102	-67.214	-96.557	2001.4571	-1.4741	0.65283	-0.2041	21.701	16.8268	2022.757	-1.6074	0.8291	-0.20508	5.247	70.745	200.709	-0.053223	0.35107	0.16504
0.012	22.725	28.974	1226.036	-1.6387	0.37305	-0.023926	-182.58	-92.523	2112	-1.9128	0.96885	0.19267	-90.519	117.262	769.5111	-0.62256	0.12939	-0.050781	-64.787	142.186	937.146	-1.0898	0.32861	-0.058594	-23.215	-97.934	2034.8844	-1.4952	0.67314	-0.21631	3.34999999999999	20.5969	2015.618	-1.5955	0.81762	-0.20264	-8.135	80.998	186.3251	-0.040527	0.354	0.15723
0.014	2.551	18.6159	1232.5884	-1.7761	0.43946	-0.016358	-146.593	-107.505	2105.61	-1.9013	0.95967	0.20224	-71.499	141.873	869.77405	-0.7832	0.14941	-0.04541	-41.865	116.199	956.26	-1.157	0.37768	-0.047607	2.84	-108.391	2041.22128	-1.5242	0.68965	-0.23555	32.413	28.393	1999.2742	-1.5913	0.80518	-0.20654	28.884	87.45	161.414	-0.033691	0.35547	0.15039
0.016	-22.239	13.9752	1246.9457	-1.8828	0.51953	-0.0029297	-145.252	-96.855	2074.14	-1.8828	0.95313	0.19873	-56.909	147.713	940.93948	-0.91919	0.18164	-0.033691	-48.865	79.367	962.702	-1.1899	0.42236	-0.042969	55.801	-107.031	2043.5215	-1.5539	0.70176	-0.24961	48.795	30.7234	1983.425	-1.5815	0.79346	-0.2085	16.946	83.146	152.145	-0.016602	0.3501	0.14258
0.018	-25.5278	-4.076	1294.619	-1.9336	0.64209	0.015625	-156.606	-81.054	2048.3	-1.8696	0.946	0.20352	-50.677	137.747	991.0175	-1.0562	0.2124	-0.014648	-28.751	44.8866	985.3733	-1.1772	0.48975	-0.036621	80.445	-96.808	2042.4432	-1.5819	0.71904	-0.26289	29.067	17.3651	1966.9939	-1.5776	0.78369	-0.21143	26.618	63.353	145.375	-0.0056153	0.34912	0.14136
0.02	7.1749	-21.1494	1350.843	-1.9238	0.70703	0.013184	-125.822	-49.7306	2016.916	-1.8605	0.93945	0.20616	-28.4	105.066	1058.817	-1.2505	0.27197	0.010254	-30.268	12.7192	1013.0185	-1.1421	0.51514	-0.039551	105.253	-92.4495	2055.8805	-1.6069	0.73389	-0.2749	44.303	28.17	1965.0149	-1.564	0.77393	-0.2124	25.421	64.847	148.7717	0.0078125	0.34082	0.13184
0.022	-17.9579	-48.902	1368.059	-1.8374	0.82275	0.013672	-105.582	-20.2507	2010.472	-1.8425	0.92773	0.20772	-4.014	71.721	1127.916	-1.3335	0.31104	0.027832	-9.225	-11.68	1023.015	-1.0542	0.55322	-0.054199	150.019	-91.015	2062.9164	-1.6292	0.74307	-0.27842	78.363	57.512	1955.056	-1.5591	0.76587	-0.21435	38.816	52.8991	149.051	0.027344	0.3335	0.12988
0.024	-29.4758	-77.115	1375.664	-1.7204	0.8855	0.0041504	-127.881	-5.272	1992.859	-1.8222	0.92315	0.20605	23.069	28.0993	1157.99	-1.478	0.39697	0.053711	-38.092	-31.972	1027.3911	-0.9668	0.56592	-0.067871	189.656	-80.939	2050.1024	-1.6467	0.74854	-0.28389	81.54	81.983	1937.5854	-1.5488	0.75781	-0.21045	9.438	44.055	157.739	0.035645	0.32666	0.125
0.026	-57.7158	-80.993	1394.617	-1.5718	0.92236	-0.011719	-152.286	-11.847	1972.127	-1.793	0.91602	0.20361	35.309	-8.33	1157.9292	-1.5522	0.4685	0.072754	-30.913	-36.515	1060.823	-0.87646	0.56104	-0.084961	191.204	-82.671	2041.9619	-1.6624	0.74854	-0.28584	75.879	80.847	1928.19126	-1.5386	0.75244	-0.21631	13.581	59.663	157.321	0.045898	0.3125	0.12012
0.028	-77.326	-84.043	1419.085	-1.3706	0.91553	-0.037109	-141.318	-17.515	1943.972	-1.7642	0.90849	0.20166	21.612	-37.5073	1158.4797	-1.5938	0.54688	0.086914	-31.377	-29.982	1106.359	-0.77295	0.52588	-0.10938	201.6762	-75.171	2034.11487	-1.6733	0.7462	-0.28681	94.039	82.551	1902.644	-1.5288	0.74268	-0.21484	14.979	61.001	141.929	0.054687	0.29859	0.11938
0.03	-103.911	-92.333	1417.7779	-1.2734	0.88867	-0.05127	-146.043	-4.59212	1915.57	-1.7269	0.89707	0.19736	12.011	-59.67	1185.8638	-1.5718	0.64795	0.087891	-23.15	-15.014	1141.7	-0.73438	0.50195	-0.12061	219.1819	-36.963	2028.4331	-1.6792	0.73975	-0.28857	95.89	90.342	1879.7712	-1.5137	0.73438	-0.21387	-25.954	50.198	108.9617	0.061523	0.28613	0.11768
0.032	-86.02225	-73.783	1419.878	-1.1211	0.79395	-0.091797	-167.317	6.1473	1867.987	-1.6868	0.88496	0.19229	-1.062	-64.611	1197.9984	-1.5313	0.69238	0.084961	-42.829	-8.395	1122.3446	-0.68506	0.44629	-0.13623	236.431	6.072	2010.886	-1.6814	0.72842	-0.29111	92.381	81.386	1876.7401	-1.4995	0.73047	-0.22193	-26.518	33.1271	122.0403	0.073242	0.271	0.12061
0.034	-53.769	-69.353	1440.744	-1.0232	0.7024	-0.11719	-169.997	5.68064	1835.349	-1.6443	0.86797	0.18565	20.4875	-48.358	1210.033	-1.4019	0.75537	0.067871	-55.056	5.283	1132.0528	-0.6665	0.40673	-0.14673	229.212	15.726	2008.84	-1.6772	0.71396	-0.29805	87.792	66.62	1872.039	-1.4824	0.72656	-0.21875	-33.278	47.61	105.16	0.074219	0.26221	0.12256
0.036	-65.815	-92.313	1462.584	-0.94482	0.60986	-0.13428	-176.027	6.7613	1822.991	-1.5933	0.85596	0.17969	24.793	-38.787	1225.179	-1.2718	0.76978	0.036866	-60.66	27.384	1141.6202	-0.65723	0.36914	-0.14502	219.321	20.904	2018.843	-1.6714	0.70264	-0.30391	105.441	62.911	1856.255	-1.4531	0.7207	-0.22266	-51.377	39.533	112.05576	0.083984	0.24219	0.12256
0.038	-98.696037	-136.223	1488.658	-0.86865	0.49365	-0.15283	-202.11	11.458	1816.027	-1.5513	0.83311	0.17363	-8.189	-35.865	1235.264	-1.1328	0.75977	-0.00048828	-42.731	19.154	1171.52	-0.65137	0.33398	-0.14893	198.148	11.1479	2032.7432	-1.6649	0.69091	-0.31045	94.599	50.3691	1830.415	-1.437	0.71533	-0.22021	-87.1341	28.2543	118.204	0.089843	0.22852	0.12134
0.04	-116.8602	-173.943	1510.8	-0.84521	0.44482	-0.14795	-189.536	-10.927	1781.615	-1.5034	0.81885	0.16758	-45.99	-26.5869	1241.812	-0.96484	0.71777	-0.037598	-30.073	5.689	1143.4576	-0.65381	0.32324	-0.146	174.837	2.08	2034.311	-1.6543	0.68359	-0.31445	80.489	45.58812	1787.8413	-1.4097	0.70752	-0.22559	-86.056	12.8176	123.872	0.096191	0.21826	0.12207
0.042	-125.45	-182.059	1519.13	-0.81641	0.38379	-0.14746	-188.689	-41.7255	1765.08	-1.4663	0.80283	0.16445	-56.049	-1.272	1247.924	-0.896	0.68408	-0.061035	-22.364	-4.89899999999999	1152.718	-0.66016	0.31982	-0.15039	137.056	3.89	2027.919	-1.6487	0.675	-0.32041	54.926	57.1993	1765.6569	-1.3823	0.6997	-0.22583	-99.141	10.6342	135.944	0.097656	0.19873	0.12061
0.044	-142.288	-198.721	1560.3048	-0.80542	0.35864	-0.14624	-200.15	-35.665	1736.7	-1.425	0.78262	0.15859	-53.63	34.002	1244.73182	-0.79199	0.60547	-0.095703	-14.519	-21.188	1160.6365	-0.66138	0.32813	-0.14697	112.591	13.4552	2013.3282	-1.6432	0.66924	-0.32637	66.465	84.891	1756.1592	-1.3628	0.69287	-0.22705	-100.416	-3.933	140.547	0.1001	0.19385	0.11523
0.046	-129.855	-205.2225	1585.2346	-0.79834	0.354	-0.13916	-228.238	-4.507	1695.82	-1.3882	0.76416	0.15332	-52.5	28.365	1266.5446	-0.74243	0.53711	-0.11377	-43.505	-56.213	1184.296	-0.66992	0.34521	-0.14111	63.51	21.1857	1989.7811	-1.637	0.66299	-0.33339	40.595	98.029	1736.531	-1.3315	0.68018	-0.23193	-95.89	-15.3361	135.703	0.094238	0.17432	0.11621
0.048	-108.419	-196.6498	1619.60433	-0.81543	0.37012	-0.12891	-219.788	26.9771	1650.191	-1.3493	0.74619	0.1502	-59.612	-0.859000000000009	1257.291	-0.71045	0.47119	-0.12354	-35.334	-77.854	1193.3519	-0.69678	0.3833	-0.13916	-3.55	7.6343	1963.2265	-1.6359	0.65664	-0.33643	37.759	98.757	1713.3895	-1.312	0.67432	-0.23486	-74.509	-4.7837	129.5	0.087647	0.16553	0.11181
0.05	-96.882	-191.433	1641.3823	-0.84229	0.38916	-0.12207	-208.718	40.0361	1615.11	-1.3093	0.72764	0.14258	-52.076	-48.021	1280.90346	-0.68115	0.40527	-0.12549	-30.336	-90.6995	1212.927	-0.71436	0.40332	-0.14111	-32.83	7.9344	1954.25217	-1.6323	0.65186	-0.33984	19.763	102.105	1700.649	-1.2788	0.66748	-0.23584	-82.3599	-17.5486	139.475	0.07959	0.1582	0.11133
0.052	-72.799	-185.3832	1693.738	-0.92529	0.43896	-0.10352	-222.6	50.1106	1597.78	-1.2718	0.70888	0.14141	-75.472	-83.623	1301.4462	-0.66748	0.37646	-0.12988	-10.718	-104.7961	1247.635	-0.7627	0.44971	-0.13086	-38.99	20.1573	1948.5526	-1.6282	0.64677	-0.33662	18.659	102.747	1677.243	-1.2573	0.65918	-0.2334	-90.164	-31.225	141.455	0.057617	0.1499	0.1123
0.054	-27.894	-174.227	1737.6614	-1.0142	0.47778	-0.083984	-205.8447	47.8827	1578.14	-1.2317	0.69043	0.13496	-87.414	-115.444	1346.71985	-0.65088	0.34766	-0.12598	-23.575	-115.1377	1289.5164	-0.80298	0.48559	-0.12817	-54.394	24.1343	1938.8394	-1.6219	0.64179	-0.33565	-8.58300000000001	109.779	1663.347	-1.2344	0.6582	-0.22949	-94.899	-54.022	162.806	0.04834	0.14795	0.11182
0.056	-7.926	-167.91	1778.5243	-1.1108	0.52051	-0.067383	-171.914	54.83	1547.76	-1.189	0.67139	0.12744	-86.944	-131.976	1368.2539	-0.63843	0.34399	-0.12353	-21.886	-97.463	1316.7546	-0.85742	0.52051	-0.13086	-69.15	13.999	1907.8906	-1.6097	0.64141	-0.33565	0.36099999999999	126.59	1630.0009	-1.2031	0.65527	-0.22412	-43.233	-51.3167	184.711	0.022461	0.14355	0.1167
0.058	30.01	-182.638	1805.499	-1.2222	0.5708	-0.045898	-152.535	85.031	1509.802	-1.147	0.65244	0.11797	-89.881	-153.699	1413.4196	-0.63623	0.34863	-0.12402	1.145	-88.824	1350.0328	-0.9375	0.56934	-0.12305	-64.243	24.1057	1880.1758	-1.6006	0.63809	-0.33242	-2.38600000000001	153.907	1588.627	-1.1909	0.65479	-0.22217	-58.107	-54.136	219.922	-0.0051271	0.14502	0.11621
0.06	69.557	-201.761	1838.458	-1.271	0.59814	-0.037109	-163.141	103.9672	1475.995	-1.1101	0.63009	0.11397	-99.934	-187.618	1432.3757	-0.64404	0.36572	-0.12646	17.487	-81.283	1396.1151	-0.98047	0.59277	-0.11865	-52.249	38.3031	1853.791	-1.5835	0.6333	-0.32959	-13.413	152.6	1564.7433	-1.1602	0.65234	-0.21338	-29.953	-41.6659	252.26	-0.031738	0.14697	0.11621
0.062	114.328	-197.704	1855.588	-1.3359	0.65039	-0.024414	-134.061	101.699	1438.84	-1.0723	0.60939	0.10615	-100.546	-210.119	1458.02	-0.66357	0.37646	-0.12695	39.082	-81.198	1431.80556	-1.0801	0.62695	-0.11328	-33.961	48.71935	1843.4876	-1.57	0.63408	-0.32314	-19.964	149.283	1543.864	-1.1377	0.64868	-0.20849	-14.263	-20.5807	274.5	-0.077637	0.15918	0.11621
0.064	129.322	-186.961	1857.3156	-1.3574	0.68261	-0.016113	-121.974	98.5693	1401.859	-1.0459	0.58399	0.10293	-70.783	-183.813	1476.455	-0.74561	0.39893	-0.10938	44.438	-77.076	1466.133	-1.1511	0.65552	-0.10302	-16.8	56.546	1830.0526	-1.5597	0.62998	-0.32432	-1.61999999999999	150.351	1525.6863	-1.1172	0.65039	-0.19727	-7.045	2.7226	305.57	-0.10156	0.16064	0.11816
0.066	112.075	-204.912	1855.004	-1.3569	0.71338	-0.018555	-105.371	93.5189	1382.578	-1.0205	0.5625	0.10059	-38.763	-153.6281	1516.77	-0.8374	0.41675	-0.10352	55.51	-83.354	1497.096	-1.2222	0.68311	-0.094727	14.05	63.661	1803.9798	-1.5362	0.62842	-0.31885	-7.547	151.53	1498.88695	-1.0879	0.65039	-0.19043	-21.557	11.9356	369.43	-0.16064	0.16943	0.11816
0.068	112.048	-210.4711	1887.685	-1.3237	0.71533	-0.025391	-105.481	72.589	1371.166	-0.99822	0.54061	0.097266	-13.701	-132.472	1561.434	-0.93945	0.43945	-0.092285	35.348	-95.2109	1525.978	-1.3022	0.71924	-0.080078	10.78	53.467	1775.5044	-1.5236	0.62451	-0.32119	-5.623	144.014	1477.9916	-1.0639	0.65014	-0.1809	11.107	54.039	452.56	-0.21289	0.18042	0.11767
0.07	74.905	-220.1764	1923.4233	-1.3022	0.69971	-0.035156	-74.251	62.7176	1352.12	-0.97615	0.52186	0.094432	7.80499999999999	-120.566	1584.19	-1.0688	0.48096	-0.073242	35.119	-94.386	1543.2615	-1.3413	0.73682	-0.068848	31.767	48.566	1774.9109	-1.4985	0.62744	-0.31592	4.03399999999999	144.7337	1455.3325	-1.041	0.64941	-0.17188	40.087	99.905	538.42	-0.2832	0.18457	0.11133
0.072	112.081	-226.975	1947.7212	-1.2671	0.63916	-0.062988	-92.513	75.34722	1324.77	-0.95271	0.50388	0.091304	35.868	-104.953	1583.3863	-1.125	0.5	-0.061035	54.483	-87.36	1576.4927	-1.3901	0.76807	-0.063477	66.129	48.754	1761.6281	-1.4733	0.61582	-0.31123	28.515	154.243	1434.303	-1.0112	0.64795	-0.15723	6.00399999999999	138.938	622.73	-0.4082	0.19629	0.104
0.074	128.124	-235.194	1976.615	-1.2625	0.58813	-0.087403	-71.933	95.9128	1281.43	-0.92634	0.48983	0.084662	46.349	-107.1	1603.8853	-1.2129	0.5625	-0.039063	54.246	-86.834	1596.428	-1.4156	0.78955	-0.058594	132.393	58.551	1751.2127	-1.4453	0.60899	-0.31133	17.314	155.742	1410.946	-0.99561	0.64502	-0.15186	-11.764	157.811	723.38	-0.47852	0.20264	0.098633
0.076	142.532	-210.775	1995.813	-1.2769	0.54346	-0.096191	-73.403	91.8082	1235.427	-0.896	0.47705	0.081543	94.314	-102.637	1639.891	-1.2554	0.60694	-0.028076	39.249	-95.6972	1628.5112	-1.4272	0.80371	-0.062988	115.971	46.871	1722.8279	-1.4203	0.60586	-0.30586	23.408	150.47	1388.947	-0.96582	0.63574	-0.14111	8.511	176.628	827.74	-0.63867	0.22363	0.095703
0.078	103.189	-190.6057	2006.057	-1.334	0.49902	-0.089355	-62.982	83.979	1207.568	-0.86821	0.46389	0.070528	108.413	-88.541	1657.156	-1.2754	0.6543	-0.017578	46.448	-92.0772	1659.5827	-1.4316	0.81934	-0.074707	153.316	41.039	1706.5475	-1.3967	0.59746	-0.30371	52.422	157.795	1358.1984	-0.93896	0.63623	-0.12866	21.612	169.49	908.12	-0.77564	0.24121	0.10278
0.08	84.005	-182.3191	2018.2775	-1.375	0.4873	-0.080566	-78.701	66.498	1197.67	-0.83546	0.4528	0.068575	124.139	-81.432	1660.0029	-1.271	0.69873	-0.02002	39.82	-100.7874	1695.635	-1.4272	0.82471	-0.077148	174.099	58.4304	1682.9919	-1.3765	0.58643	-0.30176	35.264	159.845	1329.6396	-0.91846	0.6333	-0.11768	-12.277	136.606	982.03	-0.91406	0.26953	0.11768
0.082	66.472	-187.965	2043.1416	-1.4624	0.48779	-0.050293	-50.568	62.179	1184.52	-0.80266	0.43561	0.061168	93.739	-112.7793	1667.8193	-1.2539	0.71094	-0.02832	60.928	-93.1131	1722.993	-1.4219	0.82227	-0.094727	189.1933	59.7503	1671.8833	-1.3623	0.5791	-0.29336	39.413	158.635	1296.7382	-0.88281	0.6123	-0.10986	-15.805	99.908	1031.8	-1.0898	0.3208	0.13623
0.084	62.18	-181.308	2067.5666	-1.5469	0.51953	-0.034668	-51.92	73.411	1155.45	-0.76729	0.42429	0.054302	103.441	-129.9	1693.21305	-1.2222	0.71631	-0.05127	51.88	-100.447	1736.456	-1.4257	0.81494	-0.10523	192.56511	56.0699	1659.9122	-1.3437	0.5709	-0.29141	40.888	160.885	1277.25733	-0.86865	0.61182	-0.10107	-22.699	60.793	1088.27	-1.1655	0.354	0.1543
0.086	33.968	-174.366	2094.673	-1.5815	0.54541	-0.029785	-60.187	99.225	1120.4	-0.73242	0.4082	0.049805	109.303	-134.806	1720.9544	-1.2022	0.70459	-0.072266	47.673	-96.614	1752.2313	-1.4326	0.80566	-0.11377	203.3989	60.3652	1632.895	-1.334	0.5666	-0.28008	63.564	162.38	1256.698	-0.83984	0.59766	-0.089355	-32.622	12.2149	1118.87	-1.293	0.43359	0.18555
0.088	19.12	-154.422	2089.7653	-1.6367	0.60156	-0.01123	-82.728	105.483	1088.78	-0.69849	0.39004	0.041052	102.053	-135.928	1755.9391	-1.1948	0.68408	-0.090332	22.434	-104.489	1773.55	-1.4551	0.78906	-0.12695	172.181	81.156	1601.28	-1.3243	0.56035	-0.26924	30.147	154.5612	1219.1238	-0.8186	0.58423	-0.078125	-40.49	-45.708	1140.7	-1.3464	0.49927	0.22387
0.09	-32.453	-128.827	2085.3885	-1.6591	0.64746	-0.011719	-80.632	114.87889	1034.479	-0.66542	0.37525	0.036621	93.363	-133.433	1781.2411	-1.2183	0.65479	-0.11621	34.738	-111.208	1799.071	-1.4683	0.77783	-0.13428	140.407	85.8	1566.7141	-1.3101	0.56104	-0.26318	32.147	153.054	1187.8328	-0.80078	0.57227	-0.069824	-16.546	-82.829	1157.96	-1.373	0.57813	0.25244
0.092	-52.262	-119.435	2091.2958	-1.666	0.69629	-0.015625	-103.366	122.5781	995.251	-0.63331	0.35486	0.028974	89.997	-128.615	1803.117	-1.2358	0.64111	-0.12305	22.133	-106.207	1801.9289	-1.502	0.76367	-0.12402	106.776	94.415	1550.33621	-1.3001	0.56475	-0.2541	25.131	170.793	1152.6946	-0.77295	0.55713	-0.052246	-20.192	-108.63	1193.89	-1.3472	0.67041	0.27734
0.094	-73.34	-147.0249	2096.4112	-1.6636	0.75244	-0.024902	-109.435	145.8554	975.471	-0.60502	0.33653	0.023233	78.808	-133.8168	1833.422	-1.2769	0.6333	-0.13037	20.534	-100.85	1822.4958	-1.5332	0.75928	-0.13403	95.989	101.973	1533.4637	-1.2871	0.56973	-0.24502	17.681	191.354	1131.6472	-0.76172	0.54785	-0.051758	-59.213	-120.616	1213.64	-1.3184	0.7085	0.29395
0.096	-45.004	-158.8512	2107.971	-1.6543	0.77539	-0.039063	-100.591	133.5143	962.45	-0.57764	0.32373	0.021973	57.102	-134.5235	1846.971	-1.3262	0.63086	-0.125	14.046	-105.6404	1829.559964	-1.562	0.76025	-0.13428	50.777	112.183	1499.2629	-1.2727	0.57715	-0.23642	-25.336	198.877	1113.586	-0.74219	0.53027	-0.039551	-89.69	-95.712	1238.68	-1.2437	0.77295	0.30322
0.098	-46.203	-163.9372	2121.9903	-1.6411	0.81299	-0.060059	-101.3446	124.1425	948.217	-0.5534	0.30603	0.013715	57.92	-131.118	1868.138	-1.3516	0.64258	-0.11523	3.31700000000001	-97.9045	1848.989	-1.5879	0.77051	-0.14941	11.727	109.957	1473.4629	-1.2552	0.58096	-0.2293	-0.784999999999997	191.799	1081.2757	-0.7251	0.51441	-0.029541	-60.525	-61.9135	1257.37	-1.1846	0.78906	0.29956
0.1	-40.372	-153.9717	2126.8837	-1.6374	0.83374	-0.078125	-117.5199	125.0103	912.337	-0.5324	0.28693	0.010283	32.664	-112.102	1874.3558	-1.3862	0.66455	-0.11377	0.461000000000013	-88.547	1860.2868	-1.603	0.77979	-0.15332	-26.539	116.0878	1456.0184	-1.2397	0.58447	-0.21826	-3.17600000000001	190.233	1050.2256	-0.70605	0.50244	-0.02002	-70.681	-54.055	1282.22	-1.1304	0.78955	0.29785
0.102	-41.295	-146.172	2147.587	-1.6279	0.8418	-0.1001	-115.26	123.164	884.121	-0.5105	0.2686	0.0021724	-2.84100000000001	-110.272	1882.9506	-1.4087	0.68823	-0.11353	15.12	-85.998	1875.1521	-1.6187	0.79932	-0.16455	-52.68	138.029	1436.707	-1.2275	0.58593	-0.21162	-26.383	188.651	1032.4688	-0.68555	0.48242	-0.012695	-94.714	-53.663	1310.23	-1.0938	0.75781	0.29932
0.104	-13.47	-121.746	2140.46516	-1.6206	0.8501	-0.12549	-73.691	115.992	852.141	-0.48997	0.25509	0.0013146	-36.59	-94.1395	1887.745	-1.4194	0.72119	-0.11768	30.873	-81.672	1883.8088	-1.6187	0.81592	-0.18286	-82.966	149.033	1419.015	-1.2101	0.58584	-0.20694	-67.116	174.782	997.1261	-0.67432	0.47314	-0.010254	-93.003	-28.357	1331.07	-1.084	0.73438	0.30029
0.106	14.28	-121.71	2140.963	-1.6128	0.84424	-0.13428	-62.385	116.969	833.559	-0.47266	0.24023	-0.0024414	-34.907	-73.907	1898.6952	-1.4233	0.76416	-0.12646	29.009	-79.123	1903.5925	-1.6123	0.83398	-0.19727	-92.733	129.198	1392.0606	-1.1929	0.58974	-0.19834	-32.174	170.958	984.983	-0.65186	0.45166	0.0024414	-49.009	9.944	1349.94	-1.0835	0.68799	0.30322
0.108	58.412	-124.371	2136.349	-1.6074	0.83203	-0.16113	-68.559	111.438	836.07	-0.45131	0.22405	-0.01201	-41.977	-53.757	1881.154	-1.4219	0.78516	-0.13477	12.162	-81.979	1920.40743	-1.5977	0.8457	-0.22656	-84.731	121.54	1355.8673	-1.177	0.59287	-0.19424	-49.439	183.473	951.556	-0.63355	0.43482	0.0046387	-45.79	14.218	1344.04	-1.0786	0.64746	0.30567
0.11	79.613	-139.002	2155.2635	-1.6025	0.82422	-0.17847	-67.481	89.229	823.57	-0.42981	0.20724	-0.017503	-42.614	-54.353	1893.977	-1.418	0.82031	-0.14551	38.995	-68.657	1949.383	-1.5854	0.85205	-0.23633	-120.437	110.795	1332.994	-1.1621	0.58594	-0.18555	-54.914	180.398	927.7865	-0.61572	0.4165	0.016113	-33.248	15.83	1336.06	-1.0601	0.604	0.30859
0.112	90.574	-116.641	2174.916	-1.5874	0.81104	-0.18311	-40.772	77.712	778.819	-0.40816	0.19622	-0.023771	-52.978	-56.414	1908.173	-1.4209	0.84961	-0.15772	48.428	-45.452	1953.79724	-1.5581	0.854	-0.27295	-118.349	104.996	1313.9638	-1.1451	0.58379	-0.17949	-69.978	177.386	889.2084	-0.58936	0.39404	0.02002	-3.925	-3.5936	1320.28	-1.0098	0.55273	0.30322
0.114	92.523	-111.4579	2170.048	-1.5679	0.79346	-0.21484	-55.35	97.139	753.936	-0.38451	0.18525	-0.029124	-24.807	-55.372	1933.1677	-1.4297	0.87305	-0.16357	64.036	-26.294	1971.57916	-1.5366	0.84229	-0.31006	-113.362	101.808	1275.9162	-1.123	0.57627	-0.17598	-56.394	183.849	875.2254	-0.57373	0.3833	0.027344	-11.596	-43.16	1319.83	-0.97217	0.53369	0.29688
0.116	130.717	-98.597	2157.6757	-1.562	0.78564	-0.22168	-37.043	104.468	739.19	-0.36084	0.17432	-0.041504	-20.133	-57.689	1952.527061	-1.4507	0.90283	-0.18408	65.734	-38.209	1982.5398	-1.5239	0.83252	-0.32568	-95.141	107.528	1254.6782	-1.0968	0.57041	-0.16582	-61.124	186.034	859.7363	-0.54785	0.35791	0.038574	-7.81399999999999	-92.067	1310.54	-0.87891	0.51172	0.29053
0.118	142.004	-91.158	2143.7622	-1.5444	0.77393	-0.23096	-28.853	91.539	707.92	-0.34546	0.16388	-0.044791	16.127	-59.783	1975.7222	-1.457	0.91797	-0.18945	79.879	-53.7159	1995.52	-1.4976	0.80713	-0.34619	-89.39	100.66	1232.9272	-1.0724	0.56591	-0.15986	-67.9	179.779	834.2157	-0.53198	0.34302	0.044434	4.952	-131.206	1337.64	-0.80664	0.50342	0.27759
0.12	156.802	-70.9821	2134.8928	-1.5318	0.77002	-0.2395	-27.088	114.2616	676.144	-0.33309	0.15218	-0.053789	39.088	-51.643	1988.977438	-1.4785	0.94531	-0.20508	77.983	-63.1186	2010.107	-1.4819	0.78565	-0.36866	-60.32	94.0249	1211.433	-1.0425	0.56006	-0.15039	-47.712	168.625	822.768	-0.5127	0.32471	0.05127	20.282	-129.139	1363.11	-0.73926	0.49219	0.25537
0.122	176.018	-53.4558	2141.9041	-1.5215	0.76563	-0.24951	-18.122	117.5997	662.827	-0.31863	0.13847	-0.060702	61.173	-42.745	1993.1083	-1.4905	0.95825	-0.21118	90.882	-58.1038	2012.7805	-1.4722	0.76025	-0.3833	-46.155	105.8344	1197.15	-1.0115	0.55215	-0.14776	-34.59	171.091	790.755	-0.48145	0.30225	0.051758	14.391	-153.278	1392.64	-0.67725	0.48486	0.21777
0.124	187.349	-42.485	2150.803	-1.5215	0.76758	-0.24902	22.004	111.8101	643.444	-0.30694	0.13156	-0.062861	58.673	-50.548	2010.1508	-1.502	0.96875	-0.21387	88.051	-60.862	2033.0338	-1.4604	0.72705	-0.39795	-11.802	135.394	1174.416	-0.9833	0.54815	-0.13877	-31.626	161.176	767.7328	-0.47021	0.2915	0.057129	-3.00200000000001	-178.839	1403.45	-0.66455	0.48144	0.19141
0.126	174.544	-29.984	2156.2046	-1.5156	0.77148	-0.25195	23.45	106.2172	627.76	-0.30176	0.12744	-0.075684	89.789	-57.4074	2021.933	-1.5132	0.97705	-0.21436	110.799	-44.1272	2021.8355	-1.4565	0.71533	-0.40332	8.33199999999999	127.984	1155.0203	-0.95401	0.53994	-0.13213	-24.127	160.063	741.6636	-0.44141	0.27148	0.058594	-25.279	-190.967	1426.25	-0.6792	0.48682	0.16211
0.128	190.7505	-32.914	2155.2767	-1.5215	0.77344	-0.25781	19.869	118.2506	599.03	-0.29278	0.11326	-0.071949	106.548	-51.25858	2020.35	-1.5137	0.98047	-0.21973	89.857	-32.6235	2016.8436	-1.4521	0.69336	-0.41797	60.612	128.606	1124.2709	-0.92607	0.52881	-0.12344	-10.843	175.819	721.6698	-0.42358	0.25439	0.063721	-40.643	-181.214	1455.02	-0.74121	0.51367	0.13721
0.13	168.808	-41.26	2133.0708	-1.5234	0.77246	-0.25293	6.899	123.2537	567.823	-0.28772	0.10602	-0.071573	132.172	-59.093	2033.501	-1.5137	0.98242	-0.22949	87.109	-10.919	2019.0153	-1.4493	0.68457	-0.41797	57.286	131.661	1088.977	-0.90186	0.52002	-0.11475	-10.16	178.414	691.0534	-0.3999	0.24512	0.069336	-43.924	-159.013	1474.91	-0.78955	0.53271	0.12744
0.132	156.429	-34.603	2124.099	-1.521	0.77588	-0.25244	29.724	131.5164	553.14	-0.27648	0.099429	-0.078245	120.026	-72.273	2031.5544	-1.5108	0.98144	-0.23535	90.479	-15.444	2043.579	-1.4526	0.67334	-0.42432	84.773	130.778	1052.024	-0.88027	0.51055	-0.10645	-5.005	164.719	671.6027	-0.36572	0.2168	0.075684	-68.379	-124.129	1488.27	-0.89355	0.58594	0.12695
0.134	141.191	-16.267	2116.8327	-1.5269	0.77588	-0.24268	3.838	127.30512	537.346	-0.26419	0.096406	-0.079734	136.158	-49.222	2014.6556	-1.5029	0.97852	-0.24316	109.27	-12.302	2045.273	-1.4556	0.67236	-0.41943	100.593	126.1689	1035.465	-0.86269	0.50078	-0.099222	0.705999999999996	163.78	661.094	-0.34521	0.2085	0.071289	-84.918	-111.902	1500.33	-0.96436	0.63575	0.13623
0.136	117.352	-4.8547	2105.823	-1.5313	0.77148	-0.24805	-13.6	128.3799	531.46	-0.25244	0.096191	-0.083496	129.376	-11.266	2002.971	-1.4863	0.9668	-0.26123	83.693	-14.323	2046.698	-1.4609	0.67188	-0.41602	117.119	142.209	1025.3864	-0.84395	0.48359	-0.091016	19.312	169.093	638.962	-0.30859	0.19141	0.072754	-108.207	-113.962	1513.22	-1.0366	0.68408	0.1499
0.138	70.52	0.4418	2101.56	-1.5313	0.76172	-0.23242	-13.336	109.2765	501.43	-0.23815	0.095034	-0.08419	142.59	20.48	2005.85	-1.4785	0.9707	-0.26953	96.136	-8.056	2023.1069	-1.4707	0.67578	-0.41211	102.058	151.292	993.6145	-0.82822	0.4751	-0.079297	-15.903	155.288	615.3292	-0.28247	0.1836	0.070801	-103.528	-142.534	1534.05	-1.1074	0.73438	0.17725
0.14	46.689	-7.4838	2089.883	-1.5325	0.7522	-0.23144	-21.222	109.78	479.239	-0.22339	0.09237	-0.088581	150.301	24.7106	2045.3908	-1.4644	0.96924	-0.2876	78.837	-3.0653	2012.8703	-1.4844	0.68286	-0.40332	89.699	130.90964	971.403	-0.80859	0.46191	-0.070801	-9.519	144.5995	602.8703	-0.25586	0.17285	0.068848	-120.28	-144.255	1577.32	-1.1323	0.7583	0.19189
0.142	13.372	-15.2252	2066.0478	-1.5278	0.73877	-0.22998	-54.035	123.3599	462.182	-0.20933	0.089248	-0.092894	167.679	26.5524	2053.164	-1.4502	0.9751	-0.29834	67.618	24.1946	1992.0304	-1.4956	0.69385	-0.39941	68.609	131.8654	948.9337	-0.78965	0.44961	-0.0625	-11.541	142.6255	570.5752	-0.22021	0.1582	0.068848	-99.171	-145.759	1602.31	-1.1621	0.78223	0.2251
0.144	-7.83	-5.9252	2039.2007	-1.5132	0.72119	-0.22803	-60.192	112.0895	469.083	-0.19197	0.088474	-0.093864	121.547	20.211	2042.5985	-1.439	0.9751	-0.30859	46.801	24.6405	1992.1467	-1.5024	0.70166	-0.39209	51.956	144.2072	932.7598	-0.77246	0.43769	-0.053418	0.686	149.306	555.206	-0.2041	0.15137	0.071289	-138.566	-160.26	1621.61	-1.1726	0.79224	0.23804
0.146	-6.94	21.063	2024.1766	-1.5078	0.71289	-0.22656	-45.128	110.1646	446.84	-0.17432	0.088379	-0.095703	101.545	9.2234	2039.3106	-1.4312	0.97803	-0.32471	66.88	15.5584	1974.8157	-1.5078	0.70703	-0.39014	15.36	145.791	923.023	-0.75293	0.42207	-0.043261	-30.325	140.987	529.43331	-0.1748	0.13379	0.071289	-151.837	-173.249	1648.68	-1.1753	0.78955	0.25
0.148	-9.04000000000001	43.3772	1998.8714	-1.4941	0.69336	-0.23047	-41.466	106.415	441.045	-0.16348	0.086914	-0.10097	76.854	12.8953	2043.3805	-1.4282	0.98584	-0.33252	51.658	13.5369	1973.8738	-1.5151	0.72119	-0.38623	-7.163	133.632	891.5316	-0.74053	0.40732	-0.037597	-11.178	139.46	509.4919	-0.16186	0.1206	0.06665	-166.1855	-164.186	1681.1	-1.1582	0.7793	0.25244
0.15	0.269999999999996	52.2202	1981.5908	-1.4825	0.68164	-0.22901	-50.438	103.977	430.287	-0.14806	0.084771	-0.10194	75.182	28.4322	2030.4876	-1.4233	0.98682	-0.34619	32.053	9.0966	1972.196	-1.5205	0.72852	-0.3789	-22.555	120.0995	867.0244	-0.7168	0.39258	-0.027344	-37.148	142.698	501.59	-0.14258	0.10938	0.069824	-157.05	-169.225	1715.22	-1.1479	0.76807	0.24219
0.152	-7.28	28.7024	1962.0383	-1.4697	0.66797	-0.23047	-49.762	82.684	434.453	-0.13556	0.085931	-0.10352	35.251	17.4665	2018.8094	-1.4194	0.9956	-0.35205	25.036	9.5962	1969.908	-1.519	0.73096	-0.38086	-59.631	118.17	836.686	-0.70137	0.37832	-0.019531	-50.93	132.788	479.2491	-0.13086	0.09668	0.068848	-164.7433	-174.057	1757.27	-1.1289	0.75488	0.2251
0.154	4.626	16.925	1945.761	-1.4565	0.65137	-0.22754	-54.619	91.199	411.075	-0.12755	0.085449	-0.10312	25.355	11.8476	2014.0643	-1.4175	0.99463	-0.35791	47.549	18.1139	1955.306	-1.5151	0.72998	-0.37598	-90.664	114.405	828.3733	-0.68438	0.36602	-0.0084961	-68.8031	120.43	452.3877	-0.12695	0.094238	0.066406	-172.718	-178.46	1788.33	-1.1265	0.73438	0.21143
0.156	17.88	20.01524	1918.258	-1.4482	0.64844	-0.22754	-65.757	106.2628	382.352	-0.11768	0.084961	-0.10449	3.84400000000001	4.010325	2015.769	-1.4121	1.0029	-0.36133	58.604	33.5364	1919.838	-1.5112	0.72705	-0.37402	-110.26	129.902	802.6609	-0.66797	0.3543	-0.0006836	-43.051	124.484	423.7613	-0.12207	0.081543	0.062012	-184.519	-181.092	1818.58	-1.1279	0.72266	0.19678
0.158	23.977	21.6734	1905.6	-1.437	0.63721	-0.22754	-80.1049	123.6787	362.149	-0.10732	0.088282	-0.10674	-19.281	12.62987	2012.161	-1.4102	1.0068	-0.36426	42.176	39.374	1906.525	-1.5059	0.71875	-0.36914	-110.3498	148.555	789.1768	-0.64893	0.33897	0.010058	-67.518	118.694	415.2974	-0.11743	0.079102	0.072754	-172.483	-188.833	1855.86	-1.1514	0.70117	0.1792
0.16	29.27	45.317	1880.6791	-1.4265	0.62964	-0.23608	-49.251	110.7816	347.115	-0.097264	0.085057	-0.10723	-36.481	27.1949	1996.5634	-1.4019	1.0044	-0.36475	42.652	35.553	1904.4117	-1.4996	0.71631	-0.36767	-151.065	148.35	770.049	-0.62842	0.32568	0.025391	-85.8169	109.022	400.3979	-0.11816	0.077148	0.070313	-144.952	-182.208	1855.2	-1.1694	0.69287	0.16504
0.162	47.153	64.102	1846.6639	-1.4155	0.62549	-0.23193	-54.092	100.629	337.619	-0.090624	0.086232	-0.11113	-19.18	49.063	1968.7002	-1.3914	1.012	-0.36914	58.665	38.409	1904.531	-1.4878	0.70947	-0.36621	-156.729	141.778	750.086	-0.60986	0.31572	0.031934	-91.1619	104.244	392.0476	-0.10986	0.076172	0.071777	-102.918	-164.484	1866.34	-1.2046	0.68701	0.14795
0.164	55.511	52.7003	1824.672871	-1.4028	0.61182	-0.23535	-47.601	86.935	333.198	-0.086229	0.084181	-0.11211	-6.92	70.047	1959.423	-1.3901	1.0132	-0.36279	72.068	56.413	1900.604	-1.4746	0.70117	-0.36523	-174.342	143.268	723.306	-0.59131	0.30596	0.034278	-78.85	113.652	365.2549	-0.10693	0.080078	0.070801	-107.784	-169.083	1867.19	-1.2305	0.69287	0.13794
0.166	86.915	39.3632	1817.91377	-1.3984	0.60547	-0.23535	-49.577	85.7189	327.28	-0.081055	0.084473	-0.1167	-14.99	69.586	1939.281	-1.3867	1.0156	-0.36035	62.735	57.431	1886.4974	-1.458	0.69922	-0.36328	-139.498	152.529	695.2674	-0.56904	0.29463	0.037793	-97.3318	106.702	353.563	-0.10693	0.085449	0.07373	-106.064	-169.261	1877.66	-1.2568	0.71191	0.12109
0.168	101.845	36.4784	1811.5683	-1.3804	0.59717	-0.23193	-5.113	91.227	312.727	-0.073047	0.083985	-0.11778	22.893	68.343	1923.6963	-1.3867	1.0137	-0.36133	81.555	65.222	1861.7606	-1.4355	0.69141	-0.36133	-158.275	138.533	675.9181	-0.54844	0.28067	0.044433	-91.29195	99.74	341.0534	-0.11133	0.08374	0.067871	-72.227	-161.939	1901.8	-1.2847	0.74268	0.12061
0.17	145.535	53.8842	1791.1327	-1.3657	0.58838	-0.23608	-1.103	110.336	314.453	-0.070019	0.085644	-0.11953	31.128	79.93	1910.0817	-1.3765	1.0161	-0.35645	59.844	77.847	1832.48616	-1.4197	0.68579	-0.35987	-135.5149	131.947	662.4336	-0.52686	0.26807	0.050293	-69.566	95.405	329.8813	-0.11621	0.083496	0.069336	-53.438	-149.826	1936.04	-1.3022	0.76221	0.11426
0.172	148.961	78.57823	1772.015	-1.3491	0.58447	-0.23486	-1.442	93.2378	301.37	-0.071973	0.084082	-0.11875	24.685	92.59	1898.3121	-1.3765	1.0176	-0.34887	77.161	86.041	1811.2504	-1.3994	0.67578	-0.35986	-118.46787	146.468	641.3223	-0.50879	0.25625	0.050488	-64.366	104.495	308.4178	-0.12061	0.087891	0.069824	-48.803	-145.935	1961.95	-1.3398	0.7959	0.11279
0.174	153.83	100.472	1741.7807	-1.3281	0.57813	-0.23486	12.131	80.6572	287.91	-0.07373	0.086035	-0.11826	25.648	90.017	1878.01498	-1.3687	1.02	-0.34717	91.371	85.87	1804.4889	-1.3726	0.67041	-0.35889	-66.68	152.244	631.6964	-0.48741	0.24424	0.053418	-70.596	91.991	296.8537	-0.12549	0.085938	0.064453	-63.467	-155.669	1978.83	-1.3837	0.81592	0.11792
0.176	159.142	114.006	1712.7767	-1.3125	0.57031	-0.23633	19.171	85.454663	265.152	-0.081543	0.086426	-0.12305	62.04	102.352	1853.3657	-1.3569	1.02	-0.33838	115.416	84.885	1790.5698	-1.3608	0.67041	-0.35791	-59.905	144.687	626.5803	-0.46397	0.23682	0.055761	-59.892	82.89	278.4482	-0.12549	0.090332	0.064453	-77.915	-137.466	1971.98	-1.437	0.83643	0.12402
0.178	162.401	109.683	1679.8569	-1.2852	0.56641	-0.23682	24.19	90.179	264.792	-0.091211	0.089648	-0.12012	77.968	118.79	1847.2493	-1.3535	1.0156	-0.33594	92.33	72.0459	1765.2118	-1.3315	0.65869	-0.35254	-4.211	141.671	621.1347	-0.44033	0.22764	0.054101	-28.913	85.258	281.4607	-0.12207	0.095215	0.064698	-104.909	-125.954	1988.8	-1.502	0.87109	0.14893
0.18	146.435	90.9172	1667.0497	-1.2634	0.55981	-0.23852	17.638	74.332	267.23	-0.10244	0.09668	-0.11504	98.428	108.169	1826.66325	-1.3315	1.0142	-0.32764	110.563	73.2598	1738.36441	-1.3115	0.65722	-0.35571	3.287	142.752	599.333	-0.41699	0.21436	0.057617	-40.939	84.521	273.9583	-0.12158	0.10107	0.058594	-110.12	-110.877	1999.89	-1.5371	0.88086	0.15723
0.182	137.652	98.3395	1646.6766	-1.2446	0.54932	-0.23828	6.192	70.014	252.29	-0.1126	0.10019	-0.11582	94.712	78.22323	1825.1192	-1.3262	1.0083	-0.3208	106.724	83.7764	1721.563	-1.2886	0.65674	-0.35205	24.325	129.859	580.0508	-0.39082	0.21407	0.058398	-33.445	84.148	258.3152	-0.11816	0.1123	0.058105	-106.306	-113.459	2030.03	-1.6016	0.91992	0.17871
0.184	111.041	109.58	1617.906	-1.2129	0.5459	-0.23242	-3.654	77.8449	229.123	-0.12539	0.11104	-0.11475	124.158	64.9795	1816.402	-1.3184	1.002	-0.31055	105.779	108.819	1712.73	-1.2559	0.6543	-0.34961	41.232	132.103	565.2096	-0.367	0.20576	0.054004	-17.585	81.934	244.5415	-0.11719	0.11426	0.062012	-89.22	-132.965	2051.3	-1.6431	0.94287	0.19653
0.186	90.786	110.5467	1578.413121	-1.2007	0.53955	-0.23486	1.42	78.29433	221.152	-0.13281	0.11816	-0.11084	120.856	59.0304	1790.134	-1.3066	0.99219	-0.31055	91.821	120.948	1697.48685	-1.2378	0.65234	-0.35205	85.286	126.4469	536.7905	-0.33692	0.20068	0.053223	-5.32599999999999	83.578	239.4848	-0.1123	0.1167	0.058594	-125.715	-161.976	2062.8	-1.6797	0.9668	0.21045
0.188	48.872	106.0656	1554.7071	-1.166	0.53125	-0.22705	2.888	75.4597	220.15	-0.14053	0.1293	-0.10879	125.723	64.6289	1771.928	-1.3027	0.99023	-0.30078	85.628	118.583	1672.0917	-1.2124	0.65283	-0.35303	63.419	110.1672	544.497	-0.31025	0.19443	0.053418	-20.186	72.624	227.723	-0.10888	0.11841	0.058594	-130.618	-174.133	2072.6	-1.7188	0.98633	0.229
0.19	40.289	112.261	1514.9392	-1.1484	0.52392	-0.22583	5.91	73.0381	224.4	-0.14765	0.1417	-0.10674	133.465	73.4234	1753.445	-1.2944	0.97314	-0.2876	77.573	111.068	1655.636	-1.186	0.65234	-0.35498	64.428	94.7616	521.3179	-0.27881	0.19043	0.049805	1.795	72.469	208.492	-0.11377	0.12012	0.054688	-128.86997	-162.35	2081.5	-1.7344	0.99414	0.23486
0.192	13.845	107.4755	1489.0067	-1.1245	0.51416	-0.22119	-27.731	70.8641	212.34	-0.15703	0.15342	-0.10049	146.507	101.7603	1719.5778	-1.2886	0.96924	-0.28296	64.746	119.592	1634.983	-1.165	0.64844	-0.34912	66.42	108.0156	503.2681	-0.25781	0.18565	0.048633	3.062	64.842	191.7549	-0.11719	0.12256	0.055176	-134.93763	-125.166	2087.1	-1.7593	0.99854	0.24658
0.194	-6.527	101.3148	1462.0478	-1.0933	0.51221	-0.21777	-35.276	55.2497	200.804	-0.16602	0.16318	-0.10274	107.306	109.328	1691.4211	-1.2773	0.9624	-0.27783	45.725	119.6379	1618.8301	-1.1465	0.65039	-0.35449	44.537	129.0474	483.2336	-0.23564	0.1792	0.04795	-8.246	73.422	187.6132	-0.12012	0.11963	0.056152	-156.773	-108.332	2077.1	-1.7732	0.99439	0.25733
0.196	-15.406	116.393	1461.518	-1.0762	0.50977	-0.2168	-40.448	52.128	198.253	-0.17383	0.17041	-0.099121	78.477	99.441	1662.6299	-1.2578	0.95898	-0.26221	51.806	140.719	1599.719	-1.1304	0.64893	-0.34619	31.593	119.984	481.3467	-0.21612	0.17412	0.047168	-22.562	59.839	195.6429	-0.11816	0.12109	0.051758	-180.192	-107.304	2080.6	-1.7856	0.98291	0.26172
0.198	-32.32	132.372	1423.3	-1.0439	0.50391	-0.21484	-35.455	60.682	195.32	-0.18496	0.18027	-0.092773	68.215	99.792	1646.814	-1.2461	0.95313	-0.25928	48.593	151.69	1570.9091	-1.1099	0.64697	-0.34619	19.553	116.5816	452.1393	-0.19951	0.16845	0.04541	-5.043	60.491	181.5398	-0.1189	0.12329	0.049805	-190.393	-99.82	2088.4	-1.793	0.9707	0.26904
0.2	-50.269	127.362	1398.687	-1.0229	0.49854	-0.20898	-71.371	56.606	184.452	-0.19385	0.1918	-0.090039	52.165	107.538	1629.285	-1.2134	0.94092	-0.25537	42.553	156.029	1537.41722	-1.0933	0.64697	-0.34521	18.776	113.25	434.2386	-0.18506	0.1626	0.047852	-10.503	56.413	173.7012	-0.11816	0.12061	0.053223	-208.439	-96.992	2107	-1.7983	0.96338	0.27246
0.202	-64.118	116.076	1349.5627	-0.99805	0.49414	-0.20508	-67.599	53.468	167.688	-0.20596	0.19688	-0.088477	27.955	104.1496	1591.96	-1.186	0.93018	-0.25097	8.66199999999999	146.917	1518.9172	-1.0693	0.64844	-0.33984	-34.066	111.719	409.2658	-0.17471	0.15625	0.045606	-33.351	53.913	171.9581	-0.11865	0.11963	0.054199	-197.703	-72.506	2098.9	-1.8027	0.94922	0.27979
0.204	-66.416	129.403	1314.696	-0.96826	0.49072	-0.19629	-79.758	54.3221	163.333	-0.21338	0.19912	-0.083398	30.135	119.081	1556.3897	-1.1587	0.91846	-0.25098	18.978	139.317	1500.507	-1.0503	0.65186	-0.33154	-58.937	108.039	395.4487	-0.16074	0.15401	0.04541	-48.598	31.46	176.1188	-0.11035	0.12622	0.050537	-197.402	-58.323	2112	-1.8015	0.94653	0.2815
0.206	-63.874	125.228	1282.9268	-0.95068	0.48682	-0.19238	-69.69	52.5057	170.272	-0.22217	0.20654	-0.081543	-8.218	133.239	1507.804	-1.1226	0.90283	-0.2417	25.246	144.967	1490.3454	-1.0366	0.65088	-0.3252	-87.6373	101.043	389.2749	-0.15489	0.15088	0.046972	-30.951	53.886	168.704	-0.104	0.12354	0.053223	-205.806	-47.137	2101.1	-1.8008	0.94141	0.28418
0.208	-68.307	126.559	1264.5495	-0.91797	0.47852	-0.18701	-88.139	36.0266	179.165	-0.22578	0.2128	-0.07666	-38.842	135.537	1484.4417	-1.1035	0.88965	-0.2417	15.485	147.542	1456.8895	-1.0117	0.6543	-0.31445	-95.2857	108.482	376.4137	-0.15	0.14805	0.049024	-59.731	47.096	145.1634	-0.086426	0.12012	0.058105	-182.973	-54.896	2089.9	-1.7988	0.93555	0.29248
0.21	-51.928	124.385	1262.952	-0.89844	0.4751	-0.18115	-54.377	27.5121	172.992	-0.23174	0.21767	-0.070996	-49.511	132.886	1462.1194	-1.0703	0.86719	-0.23242	0.686999999999998	153.776	1421.2239	-0.99097	0.65259	-0.30786	-142.15	105.142	352.5306	-0.14551	0.14307	0.044922	-58.711	42.214	130.756	-0.07959	0.11914	0.057617	-152.961	-56.713	2081.6	-1.7886	0.93701	0.2959
0.212	-24.993	128.509	1216.5088	-0.87695	0.4707	-0.17432	-51.271	32.6406	146.05	-0.23525	0.22159	-0.069825	-36.465	122.5	1459	-1.0488	0.85352	-0.23047	3.637	153.405	1380.6493	-0.96533	0.64795	-0.29932	-135.591	99.479	343.6614	-0.14433	0.1499	0.049707	-66.415	23.984	137.9224	-0.062012	0.10547	0.060059	-141.514	-49.215	2102.2	-1.791	0.9375	0.30518
0.214	-25.276	125.0718	1188.0368	-0.84619	0.46533	-0.16895	-59.493	35.825	147.576	-0.23428	0.22881	-0.07041	-44.097	125.2981	1440.669	-1.0293	0.83203	-0.21875	5.285	156.265	1364.3888	-0.93848	0.64453	-0.29492	-160.377	96.394	330.4527	-0.14024	0.14765	0.049512	-71.472	27.8409	143.849	-0.044678	0.1084	0.060791	-129.9401	-40.435	2102.6	-1.7881	0.93652	0.31567
0.216	-13.076	127.239	1159.8118	-0.83008	0.46094	-0.16309	-63.183	26.337	147.933	-0.22852	0.23828	-0.071777	-65.968	121.3419	1420.356	-1.0059	0.81641	-0.20996	-0.391999999999996	153.622	1348.9554	-0.92285	0.63916	-0.28467	-150.864	105.997	318.432	-0.13985	0.15	0.045215	-80.693	23.8666	140.566	-0.028809	0.10449	0.061035	-111.85744	-51.204	2115.6	-1.7827	0.93799	0.32227
0.218	11.17	147.143	1139.4225	-0.80273	0.45313	-0.15137	-46.52	21.3	148.194	-0.21914	0.23965	-0.072266	-60.377	125.4847	1386.9132	-0.99561	0.80908	-0.20264	22.186	150.369	1350.46	-0.89258	0.63477	-0.27734	-179.197	95.638	297.468	-0.13731	0.15361	0.041992	-64.806	24.77496	127.9251	-0.018555	0.095703	0.058594	-108.6331	-51.319	2093.6	-1.7715	0.94336	0.3335
0.22	43.824	175.528	1115.521	-0.7749	0.44482	-0.14551	-43.224	24.62	141.486	-0.21084	0.24707	-0.070899	-46.797	137.6813	1367.753	-0.97266	0.78906	-0.19336	19.888	150.666	1314.687	-0.87158	0.62426	-0.271	-148.783	80.641	287.4806	-0.13574	0.15576	0.040527	-62.876	29.48627	124.791	-0.012207	0.089844	0.062012	-110.804	-50.4566	2083.06	-1.7578	0.94727	0.32764
0.222	40.43	160.334	1086.4123	-0.76172	0.43652	-0.13867	-29.985	22.639	125.823	-0.19912	0.24785	-0.072851	-45.93	149.635	1337.6145	-0.95484	0.77857	-0.1836	10.339	141.898	1291.294	-0.85352	0.61328	-0.2627	-148.079	75.789	275.27	-0.13506	0.15518	0.03877	-59.087	30.40052	134.978	-0.0053711	0.081543	0.0625	-110.2052	-33.0448	2067.03	-1.7417	0.95947	0.33984
0.224	75.081	133.551	1062.6525	-0.73828	0.42773	-0.12695	-4.675	21.477	126.015	-0.18496	0.24873	-0.072266	-49.687	138.4868	1310.05896	-0.93701	0.76514	-0.16748	17.48	140.4622	1254.777	-0.83252	0.6001	-0.24805	-110.6878	85.429	265.914	-0.13779	0.158	0.031055	-66.366	14.33223	137.761	-0.001709	0.073975	0.062744	-83.7872	-25.3756	2049.14	-1.7209	0.96753	0.34302
0.226	87.588	132.85	1044.4064	-0.71777	0.42187	-0.12256	1.947	33.78638	138.355	-0.16943	0.25439	-0.080566	-5.00399999999999	136.1644	1294.776	-0.91895	0.75195	-0.15723	28.851	149.798	1235.2387	-0.81738	0.59424	-0.24951	-95.512	84.368	268.9421	-0.13545	0.16035	0.031445	-54.576	1.5448	140.109	-0.0053711	0.064941	0.066406	-103.4044	-3.0668	2027.24	-1.7031	0.9707	0.34619
0.228	89.727	132.998	1012.1358	-0.69922	0.41504	-0.11328	-17.299	17.7298	142.06	-0.15332	0.25098	-0.074121	8.82900000000001	139.7837	1266.379	-0.9043	0.74219	-0.15137	30.916	159.02	1208.0723	-0.79883	0.58398	-0.2334	-45.11	101.256	257.744	-0.13164	0.16123	0.031152	-61.938	-6.9355	137.649	-0.025879	0.050781	0.063477	-103.2689	-2.6259	2012.87	-1.6758	0.97852	0.34424
0.23	61.096	135.76	997.14789	-0.67139	0.41064	-0.10498	-5.337	6.317	139.833	-0.13642	0.24893	-0.081348	16.826	143.611	1245.562	-0.87891	0.72461	-0.13281	25.525	159.0341	1178.6279	-0.78516	0.5708	-0.22559	-32.549	96.836	254.33379	-0.12744	0.16309	0.026855	-27.733	-18.4155	139.474	-0.038574	0.046387	0.065918	-98.3257	7.3221	1997.1	-1.6592	0.97949	0.34131
0.232	70.086	152.133	959.4496	-0.65869	0.40674	-0.099121	16.395	2.179	143.893	-0.11845	0.2501	-0.084472	26.358	147.285	1192.9332	-0.85156	0.71289	-0.12207	16.208	159.4707	1157.4373	-0.76563	0.56152	-0.21484	-26.881	84.247	241.9866	-0.11924	0.16631	0.026269	-29.129	-26.38712	165.894	-0.074219	0.029297	0.073242	-60.726	13.3344	1992.79	-1.6289	0.97656	0.34277
0.234	68.519	157.51	951.2911	-0.63037	0.39697	-0.090332	19.451	-11.804	156.176	-0.1	0.25068	-0.088183	49.507	158.149	1166.8032	-0.83691	0.70117	-0.11377	16.911	171.158	1139.136	-0.74854	0.54492	-0.20605	0.036999999999999	60.0467	243.211	-0.11533	0.16699	0.016309	-16.956	-37.8374	180.514	-0.10278	0.021485	0.072266	-66.686	23.0748	1981.56	-1.6072	0.97632	0.3396
0.236	44.766	141.9517	921.9373	-0.60767	0.39258	-0.083985	-5.351	-25.007	162.646	-0.079102	0.24902	-0.098633	61.112	152.445	1129.545	-0.80859	0.68652	-0.10156	4.15199999999999	179.772	1121.023	-0.73779	0.53174	-0.19727	47.029	63.2695	224.7161	-0.10713	0.16738	0.016309	-22.38	-46.172	181.337	-0.12402	0.021973	0.078125	-86.3627	24.24036	1956.41	-1.5811	0.97461	0.33545
0.238	29.127	129.101	894.137	-0.58594	0.38086	-0.087891	-10.741	-28.612	167.819	-0.071094	0.24541	-0.097754	49.033	149.04	1120.618	-0.78662	0.66748	-0.092286	24.902	182.725	1099.534	-0.70654	0.51611	-0.18701	33.848	61.834	218.0746	-0.10244	0.16748	0.017481	-12.228	-62.559	199.703	-0.15283	0.029297	0.082031	-98.554	24.29	1932.22	-1.5527	0.9668	0.33643
0.24	24.918	148.964	861.8392	-0.5542	0.37598	-0.067871	6.199	-17.564	162.479	-0.065235	0.24326	-0.10107	80.816	160.77	1088.2049	-0.76318	0.64893	-0.081055	13.985	168.953	1071.533	-0.68506	0.50293	-0.17139	54.762	57.8459	201.343	-0.098633	0.16602	0.015137	-14.85	-63.452	223.73	-0.17578	0.035156	0.083984	-114.961	38.995	1907.88	-1.5308	0.96338	0.32617
0.242	-14.408	152.742	849.8934	-0.53125	0.36865	-0.067383	-5.235	-36.345	164.9604	-0.066015	0.23584	-0.10264	69.063	180.952	1062.8646	-0.73779	0.62744	-0.066406	3.647	173.391	1036.3928	-0.66699	0.49023	-0.17383	68.589	54.0275	188.9603	-0.091992	0.16865	0.011328	16.022	-41.557	256.173	-0.20264	0.037598	0.082031	-138.466	45.654	1878.46	-1.4917	0.94971	0.31445
0.244	-37.622	144.661	828.647	-0.50342	0.36279	-0.060547	-21.97	-71.581	188.3261	-0.075488	0.23477	-0.10518	52.733	175.353	1039.1279	-0.72266	0.61426	-0.063477	-1.673	166.134	1004.8418	-0.64307	0.47119	-0.15479	65.622	59.1332	183.07874	-0.09082	0.16357	0.010742	1.29499999999999	-14.2503	285.528	-0.23316	0.041749	0.08545	-158.684	46.104	1845.63	-1.452	0.93725	0.3059
0.246	-45.58	146.555	801.2136	-0.47901	0.35254	-0.049805	-25.686	-95.6445	238.558	-0.09082	0.22852	-0.10352	36.761	168.837	1017.9471	-0.70117	0.58984	-0.053223	0.794999999999995	161.01	975.3874	-0.62891	0.46143	-0.14893	55.386	56.325	187.8844	-0.087305	0.1581	0.011132	-20.373	2.532	324.7	-0.27051	0.044434	0.084473	-160.449	34.6843	1842.8	-1.4175	0.92627	0.29395
0.248	-61.953	156.087	778.2478	-0.45654	0.34424	-0.046875	-27.887	-92.719	272.909	-0.10146	0.22842	-0.10264	21.951	180.518	984.0702	-0.67945	0.57153	-0.044678	-25.314	168.112	963.3328	-0.60156	0.44238	-0.13867	63.21	57.071	195.6774	-0.087207	0.15059	0.011816	-10.74	34.3642	392.99	-0.33838	0.055176	0.083984	-177.264	31.698	1831.17	-1.3687	0.90283	0.2832
0.25	-83.739	154.476	753.992	-0.43115	0.33838	-0.040039	-31.323	-81.888	315.2484	-0.11386	0.23096	-0.10634	25.026	180.41	959.1294	-0.65771	0.55518	-0.035645	-35.533	170.572	933.33	-0.58447	0.41992	-0.12915	45.654	68.225	174.2837	-0.086914	0.14746	0.016113	-23.025	56.2157	446.34	-0.38428	0.061035	0.081543	-183.206	17.875	1819.05	-1.3433	0.88916	0.27539
0.252	-87.504	142.044	741.016	-0.41064	0.33203	-0.034668	-15.392	-67.749	351.3282	-0.13027	0.23682	-0.11221	-5.42	160.328	940.9597	-0.62842	0.52783	-0.028809	-35.031	176.376	909.0616	-0.56641	0.40234	-0.12207	10.629	60.302	161.93861	-0.08125	0.14238	0.017285	-32.326	89.0854	518.23	-0.50146	0.066895	0.076172	-180.497	15.701	1794.74	-1.3008	0.86523	0.26807
0.254	-101.266	161.538	707.1031	-0.38281	0.32227	-0.026367	-24.195	-50.473	405.174	-0.15566	0.24043	-0.10996	-4.384	149.558	917.047	-0.61865	0.51611	-0.016602	-35.119	179.086	878.33664	-0.54004	0.37939	-0.11328	-7.797	55.006	159.3419	-0.074707	0.13476	0.016602	-15.922	126.176	590.48	-0.61743	0.067383	0.071045	-159.149	34.933	1779.64	-1.2685	0.84326	0.26269
0.256	-124.3643	166.784	684.3126	-0.36035	0.31201	-0.017822	-43.192	-23.941	509.197	-0.19531	0.24561	-0.10889	-35.822	156.2	883.1506	-0.5957	0.49463	-0.0048828	-51.579	177.206	872.9523	-0.52222	0.36548	-0.10302	-33.164	44.3832	146.1252	-0.071582	0.12891	0.02168	-39.347	144.972	690.51	-0.75098	0.074219	0.066406	-151.626	57.82	1738.33	-1.2407	0.82568	0.25977
0.258	-118.396	160.209	653.4611	-0.33691	0.30176	-0.0078125	-42.985	7.904	610.034	-0.25185	0.24776	-0.10947	-63.194	158.574	850.7921	-0.57154	0.47144	-0.001709	-50.728	178.285	867.859	-0.50098	0.35352	-0.09668	-53.92	54.494	135.7534	-0.064356	0.1248	0.0208	-72.874	160.385	780.47	-0.95947	0.089355	0.080566	-144.55	59.505	1707.18	-1.2007	0.80029	0.25342
0.26	-116.3256	145.646	642.2855	-0.31396	0.3042	0.0024414	8.959	57.966	724.53	-0.32158	0.24658	-0.10713	-81.627	161.797	826.1908	-0.55566	0.45605	0.0087891	-38.499	175.584	851.278	-0.4751	0.33154	-0.081543	-91.659	46.987	131.4794	-0.057617	0.12256	0.017578	-53.984	154.752	865.62	-1.0659	0.10059	0.087402	-141.01	76.825	1678.24	-1.1851	0.78955	0.25098
0.262	-90.81	137.772	629.857	-0.30029	0.28955	0.0014648	14.96	91.816	836.535	-0.4122	0.25284	-0.10596	-81.142	163.579	804.9342	-0.53418	0.43359	0.023438	-36.313	179.995	801.2131	-0.4585	0.31934	-0.074707	-103.5705	40.652	132.7016	-0.049707	0.11573	0.023438	-42.856	128.489	922.72	-1.27	0.15381	0.10596	-138.766	80.572	1649.85	-1.1484	0.76172	0.24365
0.264	-92.2637	117.643	618.385	-0.27686	0.27979	0.010742	10.13	86.936	944.7648	-0.51562	0.25527	-0.10156	-96.784	168.601	800.369	-0.52344	0.42285	0.025879	-53.231	179.18	774.389	-0.4292	0.30518	-0.065918	-130.5061	31.999	139.654	-0.043262	0.11289	0.021875	-45.744	93.327	1000.1	-1.3882	0.21069	0.12622	-140.334	83.148	1630.83	-1.1094	0.73828	0.24121
0.266	-72.483	122.723	605.094	-0.26368	0.27002	0.022949	42.04	70.817	1038.7676	-0.63623	0.26172	-0.10059	-102.5619	160.649	776.413	-0.49658	0.40576	0.038086	-52.878	176.457	755.9432	-0.41308	0.28881	-0.055664	-155.773	25.7634	137.71	-0.035059	0.10703	0.023828	-67.737	36.118	1063.45	-1.4702	0.2749	0.15088	-113.942	73.789	1614.25	-1.0874	0.72607	0.2417
0.268	-50.049	147.289	588.4008	-0.25684	0.26074	0.02832	43.07	58.124	1140.097	-0.78008	0.27617	-0.095898	-108.3638	161.878	757.888	-0.47705	0.38794	0.045898	-39.267	175.669	739.76152	-0.39844	0.27637	-0.051758	-150.337	3.44766	127.075	-0.022656	0.10694	0.026074	-68.689	-16.5541	1126.27	-1.5054	0.38037	0.16992	-130.645	72.785	1584.48	-1.0562	0.70166	0.23633
0.27	-25.819	161.167	561.21433	-0.24512	0.24805	0.037109	51.622	55.9539	1220.19	-0.9417	0.29151	-0.086816	-103.4665	172.551	728.44	-0.46094	0.37305	0.050293	-41.064	179.325	718.187	-0.38037	0.26172	-0.039063	-123.642195	5.9843	122.164	-0.014648	0.10547	0.025391	-53.449	-51.615	1159.63	-1.4941	0.43115	0.17725	-111.747	77.599	1566.09	-1.0303	0.68653	0.23657
0.272	-13.98	143.184	541.0944	-0.24023	0.24414	0.040039	58.787	26.478	1277.162	-1.121	0.31455	-0.074316	-111.0208	167.311	701.0451	-0.43652	0.35156	0.055176	-26.215	175.54	700.32987	-0.37012	0.24902	-0.031738	-121.2193	9.21638	127.641	-0.0067383	0.1043	0.027344	-12.008	-80.024	1174.22	-1.416	0.50977	0.18848	-107.923	88.708	1519.87	-1.0083	0.66699	0.22852
0.274	11.097	133.331	527.076	-0.23193	0.23193	0.046875	61.382	12.508	1313.9863	-1.3106	0.34394	-0.047363	-85.84	163.486	667.4603	-0.42383	0.33984	0.058594	-33.582	170.584	686.459	-0.35547	0.23633	-0.022949	-125.2402	7.892968	134.2	0.0022461	0.10186	0.025781	-30.648	-104.932	1198.25	-1.3364	0.53907	0.19531	-71.8471	94.439	1497.66	-0.97705	0.646	0.22607
0.276	34.161	129.6041	510.2087	-0.22705	0.22631	0.056641	40.377	2.3467	1342.7129	-1.502	0.39209	-0.010742	-80.281	156.602	659.2692	-0.39404	0.32373	0.0625	-20.896	169.827	670.829	-0.34399	0.23096	-0.015869	-124.9416	-15.3773	139.813	0.0069336	0.096386	0.021485	12.224	-108.413	1229.87	-1.2573	0.54541	0.20313	-71.5974	105.668	1480.67	-0.9668	0.63086	0.22412
0.278	26.516	115.0652	493.3188	-0.22021	0.21924	0.060547	23.559	-2.5733	1343.4153	-1.6723	0.45557	0.011231	-55.062	155.084	627.4077	-0.37476	0.3103	0.070313	-24.732	179.469	649.3616	-0.33008	0.2207	-0.0083008	-87.2055	-18.797	149.548	0.0077148	0.091895	0.01709	2.755	-88.705	1248.6	-1.1816	0.52344	0.21191	-60.069	101.803	1457.81	-0.93896	0.60596	0.22559
0.28	24.297	96.0616	491.776	-0.2124	0.21338	0.071777	12.986	-20.544	1392.811	-1.8046	0.53799	0.045215	-49.724	140.992	628.716	-0.35156	0.30078	0.072266	-1.119	191.259	617.516	-0.31396	0.21436	0.0019531	-61.396	-32.867	145.576	0.0043945	0.089844	0.01416	19.108	-64.738	1291	-1.1582	0.5127	0.22266	-41.845	88.511	1434.31	-0.92505	0.58765	0.22681
0.282	37.611	114.4526	477.817	-0.2041	0.21533	0.071289	13.8037	-22.165	1445.818	-1.8546	0.64502	0.067871	-31.082	138.272	612.3471	-0.32227	0.28369	0.077637	-16.506	190.044	614.6387	-0.30225	0.2124	0.0039063	-44.422	-35.508	166.302	-0.0011719	0.085937	0.014941	-9.19799999999999	-49.961	1342.38	-1.1538	0.4751	0.22363	-50.015	81.301	1414.98	-0.90967	0.57666	0.21826
0.284	54.397	114.3258	458.1517	-0.19336	0.20508	0.080078	8.74	-36.9768	1479.368	-1.8269	0.75742	0.076855	-7.57100000000001	147.878	592.7882	-0.30713	0.27539	0.080078	-13.73	170.763	596.8622	-0.28223	0.20703	0.013672	-18.363	-33.525	182.627	-0.010254	0.081153	0.0096679	50.292	-35.286	1371.43	-1.1706	0.44971	0.23218	-59.049	88.208	1383.97	-0.88086	0.5625	0.20557
0.286	22.21	114.7323	429.5144	-0.18286	0.2024	0.07959	-28.382	-44.702	1485.072	-1.731	0.86572	0.06543	1.879	153.806	569.8401	-0.28076	0.25537	0.085938	-14.184	153.3857	581.6124	-0.25806	0.20142	0.018555	11.052	-13.9531	192.162	-0.021582	0.075293	0.006543	50.116	-28.5885	1395.33	-1.1875	0.43164	0.23584	-51.437	99.521	1353.92	-0.86035	0.55664	0.19971
0.288	33.928	114.532	411.975	-0.16992	0.19775	0.089844	-66.19527	-37.6099	1502.67	-1.5708	0.94599	0.047949	13.623	143.6106	554.0776	-0.26001	0.24414	0.082764	-3.26900000000001	152.786	559.0067	-0.23584	0.19727	0.021484	10.622	-0.1462	197.227	-0.033105	0.075195	0.009668	24.37	-19.858	1409.75	-1.1855	0.42676	0.2373	-70.1546	97.924	1317.12	-0.82178	0.54639	0.18701
0.29	22.649	125.33	399.5812	-0.15674	0.19043	0.094238	-77.1244	-22.342	1526.971	-1.3824	0.99502	0.027246	22.257	142.9573	532.3057	-0.23584	0.2373	0.084473	-10.905	155.231	548.1216	-0.20996	0.1958	0.024902	42.504	3.24168	236.529	-0.046387	0.072754	0.012695	-0.515000000000001	-23.253	1433.97	-1.1655	0.43213	0.23828	-106.474	108.944	1280.16	-0.79566	0.53735	0.17945
0.292	0.108000000000004	110.032	389.4249	-0.14453	0.19385	0.092773	-72.6153	-10.2	1532.652	-1.198	0.99424	-0.00048824	33.433	142.444	521.431	-0.21387	0.22607	0.087891	-14.881	161.566	533.7084	-0.1958	0.19141	0.020996	64.349	17.8872	270.23	-0.061133	0.076074	0.01416	31.296	-18.29	1405.93	-1.0972	0.44775	0.22705	-108.0601	110.368	1253.17	-0.76807	0.52734	0.16797
0.294	-24.769	90.643	382.5249	-0.13086	0.19043	0.099609	-92.24955	5.255	1525.597	-1.0516	0.9374	-0.036425	22.212	127.679	513.634	-0.19824	0.21777	0.083496	-28.81	157.203	517.093	-0.17236	0.18945	0.026367	69.121	45.140415	322.92	-0.080664	0.076758	0.015918	27.726	-41.595	1371.09	-1.0166	0.45556	0.21411	-101.5404	116.932	1224.74	-0.72852	0.50781	0.15186
0.296	-17.663	87.012	370.9652	-0.11988	0.18653	0.098388	-73.493	-5.456	1544.875	-0.94531	0.84375	-0.072266	32.447	117.7539	481.9568	-0.17041	0.21045	0.08252	-26.001	154.572	483.3519	-0.156	0.18457	0.0271	63.391	73.5642	389.37	-0.10683	0.078711	0.016308	36.791	-64.732	1355.81	-0.92578	0.46973	0.20361	-84.9029	114.028	1207.82	-0.71143	0.50244	0.15527
0.298	-56.717	100.653	352.382	-0.11035	0.18506	0.097168	-61.855	-37.888	1585.351	-0.88154	0.72959	-0.10439	15.041	123.6229	464.8717	-0.15649	0.19824	0.084961	-32.216	152.916	464.9854	-0.14258	0.17969	0.03418	85.734	109.463	463.73	-0.13652	0.082519	0.019531	51.641	-113.039	1366.15	-0.80029	0.48291	0.18066	-94.79453	120.263	1175.85	-0.68555	0.48047	0.14502
0.3	-68.664	99.447	341.465	-0.098633	0.18799	0.10449	-81.885	-91.784	1629.335	-0.84492	0.61269	-0.12246	11.849	131.537	453.9426	-0.13721	0.19287	0.084473	-30.293	148.847	455.192	-0.12695	0.17725	0.032227	49.139	141.945	544.46	-0.16895	0.087891	0.018066	48.719	-146.529	1346.86	-0.73828	0.48633	0.16699	-94.8032	115.196	1144.67	-0.6626	0.46289	0.14136
0.302	-90.3257	107.294	319.3772	-0.091309	0.18311	0.098633	-105.0679	-143.7595	1662.317	-0.82578	0.50605	-0.13028	-2.07	131.562	441.0128	-0.12305	0.18408	0.083496	-40.349	133.7732	465.625	-0.12012	0.17578	0.034668	44.023	171.794	610.99	-0.22149	0.088867	0.013086	-1.894	-193.186	1343.6	-0.64844	0.48779	0.14014	-106.237	114.234	1121.39	-0.64502	0.44971	0.1333
0.304	-101.0981	108.412	303.386	-0.083008	0.17871	0.099609	-106.6229	-169.8723	1663.371	-0.82393	0.43057	-0.12725	1.308	138.892	407.65616	-0.10938	0.18018	0.083496	-49.885	133.964	439.8	-0.11328	0.17432	0.039551	27.681	182.71	685.78	-0.28301	0.094434	0.012304	-7.663	-213.675	1339.92	-0.62012	0.47412	0.12133	-101.2006	121.656	1090.21	-0.625	0.42676	0.12744
0.306	-128.508	94.386	292.9881	-0.076171	0.17994	0.10156	-136.9457	-173.0242	1668.7227	-0.82666	0.39111	-0.12646	-35.522	132.245	392.88232	-0.097656	0.17432	0.086426	-54.261	134.081	414.4138	-0.10986	0.17017	0.046143	28.415	164.093	759.86	-0.36113	0.096387	0.0076171	3.341	-220.721	1366.21	-0.63037	0.45996	0.10254	-110.566	129.746	1065.62	-0.61914	0.4209	0.12158
0.308	-116.1071	86.773	289.50086	-0.074707	0.17822	0.098633	-158.693	-173.1216	1701.4567	-0.83076	0.38096	-0.11475	-47.88	116.011	376.12207	-0.083252	0.17066	0.084472	-80.8538	145.495	386.2259	-0.10645	0.17236	0.048828	-20.366	161.376	825.62	-0.45664	0.10391	0.0089844	-24.832	-213.152	1381.03	-0.71045	0.43604	0.083496	-121.398	131.803	1035.14	-0.59619	0.4082	0.11719
0.31	-106.0308	88.988	281.4494	-0.076172	0.17871	0.104	-137.3577	-159.337	1719.3811	-0.83603	0.38545	-0.10762	-68.345	101.8253	384.944	-0.072266	0.16602	0.088867	-68.906	138.937	387.767	-0.10303	0.17334	0.054688	-27.731	128.68	889.23	-0.56836	0.1001	0.0083008	-85.796	-204.056	1383.93	-0.76709	0.43213	0.08252	-114.6794	139.99	1012.64	-0.5857	0.39624	0.11109
0.312	-108.262	85.808	263.0632	-0.074219	0.17725	0.10205	-89.082	-150.203	1736.881	-0.85283	0.4081	-0.092383	-73.814	107.601	349.3097	-0.058594	0.16846	0.094238	-57.546	128.774	392.651	-0.104	0.16797	0.053223	-56.494	98.257	927.61	-0.69346	0.11514	0.0080078	-101.872	-169.742	1410.82	-0.89209	0.43408	0.088379	-104.0496	146.26	994.57	-0.57178	0.38525	0.10986
0.314	-102.038448	87.776	260.371	-0.072754	0.18262	0.092773	-51.588	-158.993	1777.9407	-0.89619	0.43857	-0.075195	-105.8227	104.762	334.79642	-0.054199	0.16504	0.092773	-60.658	112.2578	370.147	-0.11572	0.17188	0.057617	-49.949	63.746	960.52	-0.82071	0.12373	0.012891	-110.3693	-130.452	1437.45	-0.98682	0.45215	0.095704	-101.5424	133.247	971.46	-0.55615	0.37451	0.10254
0.316	-105.4676	78.887	241.6735	-0.071533	0.18408	0.093506	-15.521	-158.136	1824.8054	-0.96533	0.48486	-0.051758	-107.6078	92.222	316.185	-0.04248	0.16357	0.086914	-74.1971	110.7302	352.362	-0.12696	0.17456	0.052491	-79.429	38.363	1017.5	-0.94102	0.14404	0.024609	-134.463	-101.304	1438.54	-1.0703	0.48828	0.11377	-81.20522	124.775	956.11	-0.54443	0.3667	0.10059
0.318	-68.461	86.82	244.5833	-0.070801	0.1875	0.090332	16.027	-148.204	1866.723	-1.0562	0.53223	-0.028516	-123.6755	93.323	315.6716	-0.038086	0.16577	0.086914	-34.783	115.9079	343.942	-0.1333	0.17529	0.055664	-99.3352	6.635	1067.23	-1.0471	0.175	0.037695	-172.186	-114.331	1464.76	-1.144	0.5415	0.13574	-54.567	121.761	932.3	-0.51855	0.35938	0.09375
0.32	-52.515	87.064	235.758	-0.072754	0.18945	0.088379	47.141	-121.892	1880.364	-1.1441	0.58369	-0.0081051	-123.0708	107.242	292.2387	-0.041016	0.16406	0.085449	-55.226	117.185	336.564	-0.14844	0.18164	0.055176	-101.307	-4.341	1119.37	-1.1406	0.21289	0.048828	-143.0107	-143.329	1493.62	-1.1597	0.56689	0.146	-45.31	111.265	910.05	-0.50318	0.35669	0.089355
0.322	-44.328	78.18	241.2755	-0.071777	0.19336	0.086426	78.314	-124.928	1889.851	-1.219	0.63525	0.015723	-121.853	109.413	288.672	-0.036133	0.16504	0.08252	-50.961	101.3047	333.917	-0.15381	0.18164	0.056641	-86.746	-5.866	1134.84	-1.2079	0.25772	0.057227	-135.1613	-162.573	1513.64	-1.168	0.62109	0.16748	-30.03	111.635	875.53	-0.48779	0.34375	0.078125
0.324	-26.238	86.402	219.6763	-0.07666	0.19775	0.083008	129.794	-124.768	1875.5843	-1.2823	0.68682	0.023535	-113.7946	96.846	278.4494	-0.04248	0.16699	0.081055	-42.663	81.154	312.647	-0.16357	0.19043	0.061035	-110.992	-16.701	1191.61	-1.253	0.31103	0.069727	-128.7505	-193.665	1544.63	-1.1441	0.6499	0.17456	-23.378	130.115	852.69	-0.46045	0.33691	0.070801
0.326	2.203	89.905	206.4268	-0.073974	0.20117	0.081299	147.615	-115.093	1868.652	-1.3281	0.73828	0.038086	-95.3863	88.787	274.5833	-0.044922	0.17041	0.083008	-29.372	80.942	305.11	-0.15625	0.19947	0.063477	-88.531	-16.694	1245.08	-1.2729	0.3669	0.077148	-98.3048	-198.139	1565.1	-1.1206	0.6665	0.1792	-8.57	146.122	831.69	-0.45703	0.32715	0.06543
0.328	-21.993	75.218	199.4593	-0.067871	0.20605	0.078613	127.644	-129.5114	1886.088	-1.3578	0.77735	0.044531	-90.8046	83.708	256.907	-0.048828	0.17188	0.080322	-47.317	88.7646	305.997	-0.15088	0.20459	0.0625	-70.489	-15.9248	1265.86	-1.2728	0.41348	0.083887	-77.102	-209.602	1598.33	-1.1064	0.67578	0.17725	-9.968	154.864	813.53	-0.44434	0.31543	0.057129
0.33	21.437	57.4928	202.8732	-0.068359	0.2085	0.071289	105.819	-149.8338	1914.076	-1.3707	0.79746	0.042871	-72.429	78.331	252.7651	-0.056641	0.18115	0.083008	-23.821	89.29094	298.049	-0.14355	0.21338	0.064453	-68.777	-12.286	1264.86	-1.2578	0.45117	0.088379	-109.4969	-223.391	1639.55	-1.1147	0.68213	0.17188	-3.34	150.753	780.96	-0.43335	0.30786	0.052979
0.332	37.847	58.702	192.6144	-0.062012	0.21094	0.06543	105.347	-159.406	1961.5581	-1.3641	0.79395	0.035449	-64.868	80.061	233.8899	-0.060059	0.18506	0.085938	-15.448	85.8774467	287.746	-0.14014	0.21338	0.063477	-29.289	-22.5046	1274.78	-1.2391	0.48457	0.087988	-114.6635	-252.185	1681.96	-1.1621	0.67383	0.15869	-18.96	151.548	773.85	-0.42529	0.29688	0.050293
0.334	38.55	62.485	184.5019	-0.053711	0.21436	0.062988	130.158	-158.723	1991.193	-1.3578	0.78047	0.018457	-40.905	78.957	235.2613	-0.05957	0.18945	0.085938	-28.876	95.7126	259.11	-0.12793	0.21582	0.060059	13.974	-18.5081	1266.48	-1.2168	0.50234	0.084179	-86.946	-247.955	1732.77	-1.2097	0.68433	0.15356	-10.405	149.088	758.77	-0.4165	0.28857	0.044922
0.336	34.648	62.542	175.1498	-0.04834	0.21704	0.061767	140.482	-169.301	2019.234	-1.3589	0.7583	0.0083008	-34.597	82.85	226.76356	-0.054199	0.20264	0.081055	-11.666	71.911	252.602	-0.12304	0.21118	0.055908	19.662	-13.299	1249.35	-1.2047	0.50899	0.077539	-74.891	-227.363	1762.84	-1.2651	0.69971	0.15137	3.515	148.754	734.57	-0.41309	0.28564	0.044922
0.338	61.074	68.481	172.7004	-0.041016	0.21631	0.055176	133.903	-164.74	2033.009	-1.38	0.7374	0.0014648	-11.813	79.661	202.874	-0.052246	0.20117	0.086182	-7.234	68.198	245.351	-0.12451	0.2085	0.054199	11.631	-26.4085	1202.52	-1.1911	0.50127	0.076758	-93.651	-219.306	1798.52	-1.3223	0.73926	0.146	-6.672	160.468	706.17	-0.40234	0.28076	0.039551
0.34	21.838	87.246	153.549	-0.03418	0.21289	0.050293	146.336	-141.476	2045.349	-1.4163	0.72217	-0.00048824	-2.718	82.223	197.3207	-0.048828	0.20508	0.088867	7.476	59.164	257.248	-0.12158	0.20654	0.050293	49.641	-45.617	1194	-1.1763	0.4917	0.074219	-74.922	-213.571	1814.6	-1.3438	0.76465	0.14648	2.987	157.896	685.55	-0.39893	0.27758	0.038331
0.342	5.782	75.96	147.042	-0.035156	0.20947	0.04541	114.925	-126.7936	2054.3053	-1.4683	0.72099	0.0073242	14.391	88.883	191.3438	-0.043457	0.20703	0.090332	-1.583	72.605	247.396	-0.12109	0.20459	0.043945	66.728	-48.472	1193.47	-1.1487	0.47607	0.073926	-74.164	-200.388	1850.25	-1.3643	0.83008	0.13135	-3.773	140.151	667.93	-0.39307	0.27295	0.037109
0.344	6.212	71.376	137.3966	-0.03418	0.20264	0.044922	101.06	-121.351	2083.3305	-1.5193	0.72773	0.010156	0.132000000000005	81.266	186.3415	-0.040039	0.20752	0.089844	-18.419	62.3835	230.524	-0.11963	0.19922	0.04834	91.192	-52.298	1198.1	-1.1086	0.45957	0.062988	-67.929	-187.2	1856.51	-1.3394	0.89697	0.10498	-20.844	131.198	666.19	-0.37988	0.27295	0.039063
0.346	19.556	70.026	157.3168	-0.034423	0.19849	0.044434	74.26	-125.973	2111.6043	-1.5605	0.73926	0.0097656	44.423	77.688	161.964	-0.040039	0.20898	0.089844	-34.21	50.673	232.832	-0.11231	0.19946	0.045655	92.25	-68.792	1219.85	-1.0469	0.44394	0.053613	-33.648	-196.637	1890.29	-1.3203	0.93164	0.09082	-41.48	133.288	654.96	-0.37354	0.27686	0.036133
0.348	-31.485	51.979	168.56	-0.034668	0.19385	0.048828	66.266	-123.35	2119.328	-1.5913	0.7669	0.00097658	31.277	64.7754	163.0965	-0.039062	0.20679	0.092285	-22.522	52.9577	210.889	-0.10791	0.19629	0.04248	86.888	-93.355	1273.44	-0.97656	0.43047	0.03623	3.507	-189.532	1901.72	-1.2847	0.97705	0.068359	-27.876	132.206	632.63	-0.35693	0.27637	0.038574
0.35	-59.542	23.1152	169.805	-0.032715	0.18896	0.046875	10.83	-120.016	2110.3098	-1.6097	0.79619	-0.01084	29.272	58.2208	157.0321	-0.041504	0.20215	0.098145	-32.694	51.0434	200.74	-0.099121	0.19482	0.039551	34.966	-105.331	1326.57	-0.8999	0.4126	0.017578	-9.493	-179.639	1904.33	-1.2758	1.0044	0.061279	-50.056	128.867	617.41	-0.34204	0.27759	0.040283
0.352	-81.761	32.5483	159.33	-0.036621	0.18506	0.047852	9.66999999999999	-98.979	2106.645	-1.6174	0.82198	-0.027246	15.417	56.4796	170.7501	-0.041504	0.19971	0.10303	-27.201	40.706	205.091	-0.092285	0.19189	0.036621	14.787	-104.136	1375.04	-0.83047	0.39297	-0.0027344	-43.462	-184.763	1896.8	-1.2832	1.0332	0.054199	-72.369	119.6	593.84	-0.32666	0.27734	0.044434
0.354	-64.504	42.362	137.205	-0.043457	0.17822	0.052246	-16.24	-70.639	2106.8216	-1.6131	0.84346	-0.047168	27.472	61.261	159.2213	-0.046875	0.1958	0.10498	-48.091	25.248	200.391	-0.081055	0.18652	0.033691	-21.123	-109.144	1418.42	-0.77773	0.37949	-0.025488	-42.508	-204.462	1917.42	-1.3159	1.0747	0.056152	-85.8312	134.065	561.84	-0.30566	0.27588	0.039063
0.356	-91.3888	26.4003	136.343	-0.046143	0.17188	0.052246	-18.31	-56.483	2104.405	-1.6055	0.86328	-0.066406	-12.857	60.749	152.7878	-0.046387	0.18945	0.10498	-44.868	13.602	200.655	-0.072998	0.17969	0.029541	-35.107	-107.684	1454.14	-0.73868	0.36856	-0.055957	-48.114	-197.812	1925.89	-1.3335	1.0903	0.060059	-67.529	130.448	548.4	-0.30127	0.27979	0.039551
0.358	-121.4914	4.815	160.84	-0.054199	0.16992	0.053711	-35.846	-62.2367	2090.483	-1.5967	0.86465	-0.091016	-27.403	48.742	150.7448	-0.044434	0.1853	0.10669	-58.586	-6.639	198.361	-0.063477	0.17822	0.029785	-51.705	-116.939	1494.71	-0.7209	0.35938	-0.074805	-63.996	-191.277	1947.73	-1.375	1.126	0.053711	-69.05	131.492	545.41	-0.28662	0.27588	0.041992
0.36	-100.7733	-0.911	154.246	-0.061035	0.16553	0.063477	-16.1	-73.0207	2103.3572	-1.5887	0.87187	-0.11426	-33.989	24.9479	152.433	-0.046387	0.18408	0.10791	-38.181	-11.261	197.325	-0.05127	0.17041	0.025391	-75.023	-120.624	1511.07	-0.71924	0.35889	-0.10156	-118.01356	-191.078	1962.85	-1.3995	1.1509	0.060303	-58.81	138.197	540.19	-0.27612	0.27466	0.03711
0.362	-101.028	-3.5025	152.813	-0.064698	0.16089	0.064209	-9.06999999999999	-69.596	2120.5617	-1.5797	0.87305	-0.13692	-47.794	24.0564	145.057	-0.049316	0.1748	0.10791	-46.496	7.784	188.902	-0.047852	0.17334	0.024902	-109.23	-142.403	1550.34	-0.74961	0.3666	-0.11836	-105.6224	-182.15	1997.98	-1.4214	1.1763	0.057617	-58.316	127.538	523.91	-0.26904	0.27539	0.035645
0.364	-120.6479	-12.5274	163.056	-0.067871	0.16162	0.070801	17.8	-73.294	2133.5165	-1.5681	0.87158	-0.1668	-57.238	11.2628	157.404	-0.054688	0.1665	0.10498	-59.585	10.526	179.243	-0.035645	0.16797	0.013672	-106.7581	-166.364	1577.95	-0.79873	0.38017	-0.12871	-136.0267	-173.948	2030.86	-1.4526	1.186	0.049805	-56.182	126.89	506.77	-0.25342	0.27002	0.03125
0.366	-108.8943	-22.6948	180.594	-0.062988	0.1626	0.079102	16.65	-66.7	2136.3017	-1.5566	0.87109	-0.18945	-75.655	5.355	152.806	-0.062988	0.17236	0.1084	-59.424	-4.22	187.926	-0.03247	0.16529	0.015381	-149.533	-193.404	1602.61	-0.86436	0.40205	-0.13301	-141.237	-169.9994	2060.8	-1.4727	1.1816	0.051758	-51.236	120.289	488.33	-0.24951	0.27344	0.032227
0.368	-74.739	-18.8471	178.813	-0.0625	0.16113	0.077637	62.501	-47.549	2135.6152	-1.5433	0.8751	-0.21123	-79.538	-1.047	150.992	-0.071045	0.16748	0.10792	-52.058	-19.043	197.054	-0.03125	0.16455	0.0097656	-186.427	-182.13567	1630.64	-0.94648	0.42813	-0.12637	-142.288	-184.6675	2075.76	-1.5	1.168	0.059082	-23.616	124.293	466.76	-0.23975	0.27002	0.023926
0.37	-92.5461	-27.5294	171.557	-0.054199	0.1582	0.084961	84.753	-49.182	2138.7689	-1.5294	0.87334	-0.23663	-95.8679	-5.7733	137.72	-0.07373	0.16357	0.10547	-60.116	-28.334	200.026	-0.029785	0.16211	0.010742	-188.418	-174.6137	1672.16	-1.0327	0.46045	-0.12012	-103.879	-173.701	2072.16	-1.5297	1.1509	0.067382	-35.081	123.925	451.21	-0.23755	0.27075	0.020019
0.372	-67.957	-44.833	173.294	-0.054443	0.15723	0.087647	110.42	-60.667	2130.57014	-1.5196	0.87217	-0.25303	-102.2832	-15.4523	150.531	-0.077148	0.16455	0.10498	-56.318	-45.861	199.398	-0.037109	0.15918	0.0092773	-184.548	-139.01	1691.5	-1.1065	0.48701	-0.10234	-129.172	-165.794	2076.32	-1.5625	1.1309	0.078613	-30.648	122.044	416.79	-0.229	0.26465	0.016113
0.374	-42.448	-46.47	202.451	-0.054199	0.14941	0.086914	108.759	-69.5223	2138.09818	-1.5128	0.87002	-0.27236	-105.8444	-12.6282	164.051	-0.069824	0.16773	0.10693	-29.128	-61.387	199.016	-0.047363	0.1626	0.0092773	-209.103	-125.084	1726.7	-1.1745	0.51533	-0.075293	-151.854	-160.415	2075.31	-1.6089	1.1021	0.098633	-22.039	114.069	397.9	-0.21875	0.26758	0.0092773
0.376	-37.479	-51.299	209.45	-0.067871	0.13965	0.093262	149.946	-65.216	2137.6545	-1.4995	0.86572	-0.29102	-86.965	-18.6628	157.201	-0.064453	0.16797	0.10596	-43.201	-66.483	215.04	-0.061768	0.16577	0.0078125	-218.59	-113.04	1772.71	-1.2339	0.54814	-0.053418	-152.42	-160.921	2085.62	-1.6304	1.0825	0.11377	-18.458	117.768	394.42	-0.21338	0.26221	0.0039063
0.378	-36.658	-75.201	207.026	-0.079102	0.1333	0.097168	142.711	-52.207	2133.7206	-1.5022	0.86114	-0.30019	-98.3793	-18.4165	164.156	-0.051758	0.17432	0.10742	-36.12	-63.479	224.18	-0.07959	0.16504	0.0058594	-203.088	-95.19	1789.61	-1.2748	0.5748	-0.027148	-127.4016	-137.712	2070.35	-1.6777	1.0547	0.14063	1.973	108.146	394.82	-0.20068	0.25928	0.003418
0.38	-3.28	-87.579	228.36	-0.10889	0.12695	0.095703	153.125	-40.322	2124.14496	-1.499	0.85869	-0.31065	-74.961	-32.3138	159.626	-0.044922	0.17725	0.10938	-28.014	-68.422	232.416	-0.10889	0.17725	0.0073242	-190.103	-77.399	1826.63	-1.312	0.60303	-0.0019531	-150.164	-152.61	2071.64	-1.7149	1.0322	0.16773	13.458	106.763	375.1	-0.19043	0.25659	-0.0019531
0.382	3.786	-85.627	262.658	-0.13745	0.12744	0.09253	165.707	-9.5026	2108.3256	-1.5021	0.854	-0.31807	-61.033	-50.8733	170.093	-0.039063	0.17822	0.10742	-11.639	-78.156	256.008	-0.12891	0.18164	0.0053711	-182.97	-95.428	1874.83	-1.3315	0.62119	0.017676	-140.152	-144.463	2082.35	-1.7495	1.0103	0.17969	31.425	106.554	375.46	-0.18115	0.25586	-0.003418
0.384	6.295	-85.65	337.182	-0.17627	0.12646	0.091797	187.297	14.5953	2105.8438	-1.5055	0.85118	-0.32578	-50.493	-42.35504	180.852	-0.038086	0.17554	0.10889	-13.363	-70.68178	311.48	-0.18115	0.19775	0.0048828	-141.0881	-106.5025	1911.36	-1.3566	0.64228	0.022168	-152.365	-121.168	2103.34	-1.7905	0.98291	0.20703	29.69	106.113	357.25	-0.1748	0.25098	-0.012695
0.386	32.414	-70.6209	407.511	-0.25195	0.12402	0.086426	185.222	23.02435	2128.4861	-1.5146	0.84766	-0.33008	-47.55	-48.59864	204.069	-0.041504	0.17578	0.1123	-14.4	-44.491	375.07	-0.23877	0.20556	-0.0070802	-115.526	-97.987	1924.38	-1.3757	0.64815	0.02998	-122.6079	-90.548	2098.75	-1.8047	0.96777	0.21875	31.874	91.194	354.64	-0.17041	0.24756	-0.015137
0.388	29.684	-20.9119	498.444	-0.30078	0.12598	0.083496	198.27	25.8365	2128.991	-1.5194	0.84736	-0.33487	-1.558	-34.2081	231.348	-0.066406	0.16748	0.11279	-40.522	-5.8352	457.22	-0.31494	0.2168	-0.024414	-83.727	-89.441	1930.93	-1.4045	0.64707	0.026172	-125.3433	-111.517	2097.51	-1.8198	0.94775	0.23242	25.996	91.946	337.25	-0.16211	0.23926	-0.019531
0.39	13.089	39.5452	586.009	-0.42139	0.12939	0.067871	179.946	28.932	2128.9723	-1.5222	0.83721	-0.33877	7.53700000000001	-8.7431	259.127	-0.07666	0.16113	0.11377	-25.538	52.835	521.71	-0.44238	0.23438	-0.038574	-73.779	-98.777	1959.72	-1.4409	0.64111	0.023438	-98.3003	-117.584	2090.47	-1.8239	0.93579	0.23218	24.711	89.142	308.7	-0.15601	0.2378	-0.02417
0.392	-15.635	60.8197	691.184	-0.53296	0.13574	0.062988	165.993	25.7081	2107.9429	-1.526	0.8294	-0.34033	-13.952	15.8402	307.16	-0.11914	0.15967	0.11328	-10.206	90.727	613.75	-0.55542	0.24854	-0.036377	-25.077	-114.588	2011.39	-1.4814	0.63418	0.014551	-66.223	-109.382	2101.04	-1.8154	0.91602	0.22705	10.027	85.92	288.5	-0.15039	0.23242	-0.022949
0.394	-23.155	77.2054	803.471	-0.66553	0.13965	0.063965	146.549	29.196	2090.5557	-1.5321	0.81875	-0.34121	-5.895	34.41177	377.5	-0.15942	0.15943	0.11279	-20.034	112.836	717.74	-0.67773	0.2749	-0.044922	-24.782	-109.968	2039.79	-1.5234	0.63242	-5.5511e-14	-58.763	-105.189	2094.28	-1.7974	0.89307	0.21973	7.506	81.54	287.29	-0.15283	0.22803	-0.027832
0.396	-26.26	106.7863	895.333	-0.86084	0.15674	0.06543	133.293	54.937	2073.4359	-1.5371	0.80176	-0.34375	29.776	56.5975	457.08	-0.21045	0.16699	0.10596	-18.103	121.432	807.75	-0.84229	0.30566	-0.046875	-16.24	-120.158	2081.69	-1.5559	0.63281	-0.01836	-54.912	-113.329	2110.1	-1.7886	0.88428	0.21777	-20.827	86.342	274.18	-0.14941	0.22852	-0.033691
0.398	-30.143	112.181	976.153	-0.96094	0.16895	0.070801	107.596	60.925	2058.889	-1.5365	0.78623	-0.34619	34.367	94.873	537.06	-0.30273	0.17188	0.098145	-17.862	139.781	873.33	-0.92188	0.32861	-0.048828	8.98	-127.881	2110	-1.5781	0.64531	-0.033203	-37.874	-112.598	2104.32	-1.7671	0.85205	0.20898	-19.623	90.556	275.93	-0.15088	0.22168	-0.030762
0.4	-67.092	104.8	1067.99	-1.168	0.19775	0.086426	72.974	40.7437	2030.6058	-1.5339	0.77393	-0.34746	41.085	125.723	642.24	-0.36426	0.17969	0.094238	-24.964	138.987	934.59	-1.0659	0.37891	-0.056152	29.684	-118.247	2130.79	-1.5933	0.66064	-0.042969	-46.129	-103.043	2076.34	-1.7566	0.82739	0.2063	-27.366	77.39	260.7	-0.15479	0.21289	-0.032715
0.402	-89.863	76.859	1159.17	-1.3179	0.22705	0.098878	37.949	18.1083	2023.354	-1.5276	0.7583	-0.35371	49.275	138.798	744.91	-0.50195	0.19873	0.081543	-30.245	113.564	988.64	-1.1518	0.42212	-0.044922	-17.932	-105.364	2143.45	-1.6043	0.67422	-0.054102	-55.261	-97.854	2055.18	-1.7441	0.79883	0.20215	-25.207	65.104	253.52	-0.16406	0.21436	-0.030762
0.404	-109.524	42.4477	1203.56	-1.4551	0.26904	0.1167	12.67	12.4271	2009.538	-1.5153	0.74834	-0.35635	34.475	155.968	834.98	-0.62305	0.21509	0.072021	-30.896	79.257	1024.43	-1.2261	0.46338	-0.035156	-15.402	-110.285	2158.11	-1.6214	0.68994	-0.0583	-79.195	-86.797	2048.89	-1.7285	0.76855	0.2041	-37.809	72.97	246.86	-0.17432	0.20557	-0.032715
0.406	-155.488	-12.9612	1236.433	-1.6113	0.34521	0.14404	5.73999999999999	31.3681	1993.29	-1.502	0.73242	-0.35742	27.167	150.953	905.25	-0.75586	0.24414	0.072266	-39.603	29.352	1058.7	-1.2925	0.51807	-0.022949	-5.848	-88.971	2179.84	-1.6448	0.69307	-0.052832	-63.967	-61.842	2055.75	-1.7227	0.75195	0.19971	-51.121	71.747	226.44	-0.18652	0.20093	-0.028076
0.408	-154.566	-67.491	1277.979	-1.6714	0.39502	0.15234	-7.34999999999999	59.417	1964.695	-1.4842	0.72324	-0.35957	16.818	132.233	973.63	-0.91943	0.28955	0.086914	-39.319	-19.4365	1078.12	-1.3115	0.54883	-0.014648	-22.252	-58.786	2173.69	-1.6822	0.70215	-0.038964	-81.59	-47.705	2042.34	-1.7114	0.73291	0.19971	-49.907	68.673	210.724	-0.19678	0.19922	-0.022949
0.41	-142.0761	-104.012	1331.77	-1.7422	0.49805	0.17041	10.7	80.572	1924.34332	-1.4709	0.71289	-0.36055	11.823	94.159	1020.63	-1.0054	0.32373	0.097656	-63.067	-52.71	1107.87	-1.3159	0.59717	-0.0039063	-84.805	-50.995	2190.08	-1.7363	0.70898	-0.023438	-107.72458	-54.49	2050.54	-1.6963	0.71973	0.20068	-47.213	81.269	199.367	-0.20703	0.19531	-0.015625
0.412	-180.601	-124.449	1382.657	-1.7578	0.57666	0.18091	5.31999999999999	87.707	1900.7754	-1.4549	0.69922	-0.35703	-12.296	50.676	1093.06	-1.1401	0.396	0.12695	-59.965	-51.85	1139.37	-1.2907	0.62915	0.01831	-90.474	-44.443	2191.1	-1.8023	0.7125	0.0084963	-85.09927	-40.542	2052.5	-1.6836	0.71094	0.20459	-51.488	66.372	192.003	-0.21875	0.19092	-0.01416
0.414	-202.122	-138.84	1404.71	-1.7441	0.64844	0.18994	20.79	82.968	1881.05384	-1.442	0.69199	-0.35371	-19.363	1.95	1123.71	-1.2124	0.46337	0.14502	-43.1	-49.542	1158.63	-1.2695	0.64844	0.037109	-114.661	-48.81	2212.01	-1.8771	0.72549	0.037305	-87.709	-35.795	2025.39	-1.6621	0.69922	0.20752	-52.198	55.227	183.925	-0.22363	0.18799	-0.01123
0.416	-154.8812	-126.159	1413.708	-1.6968	0.73291	0.19238	16.81	75.027	1868.911	-1.4253	0.68311	-0.3501	-47.705	-39.2153	1154.2	-1.2622	0.53369	0.16943	-47.646	-39.538	1162.75	-1.2461	0.64844	0.038574	-143.0154	-44.68	2213.21	-1.952	0.74815	0.072461	-121.207	-23.608	2001.48	-1.6563	0.69922	0.21191	-63.814	46.9055	182.099	-0.22705	0.18872	-0.010254
0.418	-115.91271	-104.655	1413.755	-1.6538	0.76318	0.19043	48.57	91.164	1853.301	-1.4139	0.67481	-0.34218	-40.37	-72.0792	1193.64	-1.2769	0.62744	0.18701	-73.394	-32.54	1215.23	-1.2344	0.64502	0.032227	-173.075	-59.98	2233.18	-2.0315	0.77168	0.10469	-104.9747	-22.519	1985.86	-1.6328	0.70117	0.20947	-60.296	60.21	173.633	-0.22412	0.19043	-0.0073242
0.42	-102.9226	-85.733	1417.77	-1.5488	0.79297	0.18994	39.151	98.722	1836.531	-1.4023	0.66953	-0.3332	-39.311	-97.053	1225.93	-1.2715	0.6709	0.19287	-41.771	-18.3353	1239.62	-1.2222	0.62939	0.031738	-185.119	-53.32	2255.65	-2.0991	0.79736	0.13867	-90.575	-11.334	1960.92	-1.6091	0.71069	0.21094	-47.997	57.237	177.194	-0.22021	0.18994	-0.011719
0.422	-91.0493	-65.132	1435.01	-1.4531	0.78955	0.19214	51.813	105.991	1795.32245	-1.3875	0.66406	-0.32656	-73.033	-103.553	1282.93	-1.229	0.74658	0.19727	-33.949	-17.7062	1277.14	-1.2126	0.60864	0.030762	-197.582	-38.69	2283.61	-2.1602	0.8247	0.16426	-110.831	-19.838	1942.37	-1.5815	0.71729	0.21094	-28.504	53.963	164.668	-0.2168	0.19141	-0.0083008
0.424	-48.471	-36.2786	1418	-1.3574	0.76758	0.19287	49.808	98.711	1758.4879	-1.3731	0.66231	-0.31758	-66.495	-89.226	1331.8	-1.1851	0.78125	0.18677	-43.634	4.3995	1273.76	-1.2109	0.58789	0.035645	-215.688	-34.62	2274.38	-2.2058	0.84795	0.18516	-145.849	-41.574	1922.42	-1.5508	0.72266	0.21143	-16.117	47.9409	153.718	-0.20654	0.18555	-0.0053711
0.426	-70.2973	-21.3664	1393.538	-1.2266	0.70898	0.18213	81.087	100.507	1732.0384	-1.3608	0.65869	-0.30127	-50.256	-63.953	1358.37	-1.145	0.79541	0.17871	-21.88	4.192	1275.16	-1.1875	0.56641	0.042969	-231.099	-35.66	2289.26	-2.2413	0.86709	0.2039	-153.086	-52.282	1923.99	-1.5347	0.72314	0.21143	-17.835	52.675	132.463	-0.19311	0.18677	-0.010254
0.428	-37.832	-47.0996	1381.32	-1.1641	0.66211	0.17432	97.408	77.9251	1725.1176	-1.3447	0.65957	-0.29219	-44.736	-35.5134	1389.02	-1.0972	0.79443	0.16064	-8.525	2.699	1251.07	-1.1719	0.55664	0.047363	-233.644	-13.47	2303.8	-2.265	0.8834	0.21856	-147.393	-49.563	1919.48	-1.5078	0.72266	0.21289	-8.487	37.7522	138.302	-0.1792	0.18701	-0.0083008
0.43	-5.813	-64.043	1355.52	-1.0508	0.56543	0.14941	119.925	69.5263	1724.1592	-1.3328	0.65781	-0.27676	-35.75	-33.6919	1405.7	-1.0835	0.78369	0.1543	-38.031	-22.091	1245.62	-1.123	0.54102	0.051758	-205.825	-4.02000000000001	2316.56	-2.2813	0.89258	0.23096	-163.428	-41.295	1883.52	-1.4853	0.7251	0.21045	4.60599999999999	39.713	144.355	-0.16406	0.17969	-0.012695
0.432	30.664	-83.147	1331.386	-0.98658	0.50293	0.12964	135.677	71.6416	1684.8886	-1.3235	0.65312	-0.26348	-4.568	-34.6809	1392.48	-1.0605	0.75391	0.14014	-38.599	-39.197	1229.99	-1.0806	0.53687	0.04834	-213.335	-8.41	2301.44	-2.2844	0.89726	0.23769	-158.535	-17.92	1853.58	-1.4604	0.72021	0.2124	11.628	37.02546	143.86	-0.14697	0.1792	-0.016602
0.434	10.26	-96.486	1304.667	-0.93896	0.44775	0.11523	158.306	78.1503	1653.1647	-1.313	0.65401	-0.24903	-39.879	-25.705	1382.55	-1.0366	0.73633	0.14209	-12.123	-59.284	1226.6	-1.0317	0.53369	0.046387	-197.028	-18.68	2306.61	-2.2815	0.89482	0.24502	-127.561	2.358	1837.24	-1.4316	0.7207	0.21582	5.798	34.2096	130.485	-0.12305	0.17529	-0.016113
0.436	3.21199999999999	-128.827	1296.659	-0.89648	0.39648	0.090332	153.115	79.2792	1619.5498	-1.3027	0.6543	-0.23438	-46.727	-24.855	1345.05	-1.0034	0.72021	0.14502	-26.66	-80.296	1246.17	-0.98242	0.5332	0.03418	-178.476	-7.49000000000001	2294.63	-2.2737	0.89717	0.24892	-94.845115	19.068	1823.25	-1.4141	0.72461	0.20996	6.6	27.046	125.303	-0.094728	0.17407	-0.020508
0.438	-9.334	-153.861	1318.717	-0.88135	0.38916	0.079102	147.448	90.2035	1610.0199	-1.292	0.6545	-0.21963	-13.087	-54.532	1331.53	-0.93945	0.68555	0.13184	-23.684	-125.729	1283.55	-0.95898	0.53271	0.025879	-145.752	7.97	2295.56	-2.2609	0.89102	0.2457	-118.029	10.343	1804.87	-1.3726	0.72607	0.20996	5.076	36.60903	111.414	-0.070313	0.16602	-0.026367
0.44	35.35	-182.747	1321.028	-0.86035	0.38477	0.074219	144.125	108.946	1587.3167	-1.2801	0.65879	-0.20195	41.411	-69.52	1294.3	-0.89307	0.66943	0.12695	-22.393	-151.339	1329.86	-0.92578	0.54297	0.0097656	-136.493	16.65	2299.99	-2.2378	0.88721	0.24219	-84.5131	12.58	1778.68	-1.3386	0.72486	0.20727	7.421	40.7715	114.649	-0.033691	0.15723	-0.023926
0.442	11.933	-232.051	1334.607	-0.86133	0.39892	0.067383	118.077	108.024	1565.676	-1.2695	0.6584	-0.18672	34.051	-91.995	1286.49	-0.80273	0.64063	0.10107	-25.575	-170.63	1367.21	-0.92188	0.5542	-0.0087893	-88.965	46.97	2284.55	-2.2115	0.87949	0.2376	-66.059	29.433	1754.3	-1.3081	0.7251	0.20654	13.934	39.259	99.021	-0.01709	0.15137	-0.032715
0.444	-2.456	-242.508	1379.65	-0.86133	0.4248	0.055664	94.97	114.505	1527.02763	-1.2543	0.66211	-0.17246	46.284	-117.43	1275.76	-0.73194	0.61817	0.081299	-64.588	-163.132	1383.46	-0.93164	0.57227	-0.017578	-63.468	64.74	2282.64	-2.1917	0.86846	0.23272	-65.142	39.177	1727.56	-1.2622	0.71729	0.19629	2.455	35.338	112.182	0.011719	0.14111	-0.036133
0.446	-13.338	-223.383	1431.29	-0.88818	0.46729	0.039551	78.963	126.603	1507.1006	-1.2344	0.66699	-0.15723	30.075	-144.579	1304.06	-0.66992	0.59668	0.061523	-40.987	-143.831	1396.42	-0.96338	0.60303	-0.024902	-46.848	80.855	2275.27	-2.1671	0.85557	0.22529	-92.9242	38.786	1697.58	-1.2417	0.71533	0.19141	5.503	25.8824	120.36	0.026611	0.12451	-0.043945
0.448	-12.623	-190.854	1441.33	-0.91406	0.49072	0.03418	78.657	126.0519	1461.9692	-1.2199	0.66875	-0.14736	15.608	-148.305	1345.08	-0.60791	0.57666	0.03125	-90.67	-130.005	1421.18	-0.98828	0.62061	-0.02832	-34.103	75.118	2262.44	-2.1417	0.84639	0.21592	-47.631	39.736	1667.44	-1.2012	0.70313	0.17871	-24.121	3.498	135.869	0.037109	0.1123	-0.052734
0.45	-63.521	-207.283	1486.75	-0.97559	0.53027	0.040527	29.409	120.4417	1436.0002	-1.1985	0.66953	-0.13213	-3.201	-159.131	1375.39	-0.58936	0.56592	0.021484	-109.948	-133.805	1456.05	-1.0449	0.65479	-0.024414	0.613	89.265	2225.4	-2.1152	0.83203	0.20605	-56.608	37.868	1640.2	-1.1726	0.69799	0.17627	-17.932	-11.689	128.686	0.037109	0.092773	-0.057129
0.452	-72.294	-211.086	1498.44	-1.0293	0.55127	0.048829	9.59100000000001	125.4515	1403.4138	-1.1797	0.66875	-0.12393	-20.569	-170.578	1408.55	-0.57617	0.55762	-0.0053711	-114.43	-153.218	1479.01	-1.0945	0.6814	-0.017334	-16.05	65.345	2200.65	-2.086	0.83193	0.19522	-71.4551	33.46	1629.42	-1.1479	0.68994	0.17236	-38.94	-5.352	134.303	0.03418	0.084961	-0.057129
0.454	-86.142	-215.968	1518.787	-1.0889	0.57129	0.062012	-5.21499999999999	141.874	1365.9694	-1.1587	0.66436	-0.11045	-24.074	-176.111	1444.16	-0.60278	0.55664	-0.021972	-92.325	-157.018	1501.1	-1.1445	0.70313	-0.003418	-17.192	37.83	2181.85	-2.0558	0.82852	0.18877	-74.1266	36.336	1611.13	-1.1152	0.68701	0.16504	-32.042	-10.004	152.888	0.015137	0.068359	-0.05957
0.456	-153.317	-202.9997	1543.465	-1.1597	0.59814	0.088379	-32.482	147.869	1337.8854	-1.1382	0.66455	-0.10156	-41.653	-168.485	1450.3	-0.64648	0.5625	-0.031738	-115.0705	-156.476	1543.68	-1.2026	0.73096	0.01416	-28.734	29.21	2162.95	-2.0168	0.83633	0.17939	-32.129	50.338	1596.94	-1.0957	0.68311	0.15674	-51.543	-17.341	142.2084	-0.0080569	0.058838	-0.062012
0.458	-178.288	-193.575	1577.6	-1.1851	0.61377	0.10205	-49.148	132.607	1317.7499	-1.1167	0.65615	-0.09082	-56.46	-166.324	1463.04	-0.7417	0.58643	-0.037598	-109.837	-160.353	1551.04	-1.2266	0.73926	0.022461	-20.526	35.42	2144.61	-1.9806	0.8455	0.16973	-53.306	51.993	1571.63	-1.062	0.67822	0.15234	-51.756	-32.138	151.474	-0.032227	0.053223	-0.0625
0.46	-209.676986	-160.038	1596.881	-1.2188	0.63086	0.12402	-31.05	132.502	1297.507	-1.0934	0.65391	-0.08086	-62.656	-161.542	1505.08	-0.79248	0.60498	-0.035156	-130.979	-158.128	1563.95	-1.271	0.75049	0.050781	-58.43	27.58	2120.03	-1.939	0.8501	0.16357	-58.769	50.051	1558.69	-1.0381	0.6709	0.14795	-59.51	-40.789	163.3396	-0.06543	0.057129	-0.056641
0.462	-230.218	-139.414	1618.603	-1.2322	0.63208	0.13745	-51.033	137.004	1260.4456	-1.0656	0.64961	-0.066016	-62.524	-169.474	1517.37	-0.91406	0.64648	-0.020996	-130.867	-147.172	1576.62	-1.2971	0.75073	0.065674	-68.206	36.23	2089.4	-1.9035	0.85293	0.15088	-34.753	48.809	1539.87	-1.0156	0.66113	0.14355	-72.844	-58.372	197.2538	-0.086914	0.056152	-0.056152
0.464	-248.653	-150.0165	1627.412	-1.2476	0.6333	0.13818	-76.199	139.506	1231.6797	-1.0375	0.64551	-0.061133	-82.406	-186.493	1538.55	-0.98802	0.67895	-0.0041503	-134.851	-161.903	1611.54	-1.3223	0.75195	0.070801	-75.9535	51.63	2065.39	-1.8648	0.85439	0.14482	-48.935	61.932	1499.58	-0.98584	0.65332	0.13379	-50.955	-62.097	243.44601	-0.12793	0.066406	-0.053711
0.466	-222.665	-167.232	1665.583	-1.2593	0.62744	0.13037	-69.589	139.496	1192.418	-1.0039	0.63672	-0.051758	-124.6836	-207.043	1559.44	-1.0522	0.71826	0.01709	-132.199	-169.208	1662.24	-1.334	0.7373	0.064453	-99.3131	69.478	2037.02	-1.8323	0.85244	0.1374	-86.0452	68.339	1478.38	-0.9707	0.64648	0.13135	-57.5	-54.496	288.5895	-0.17016	0.074462	-0.052735
0.468	-226.778	-152.843	1726.197	-1.269	0.62646	0.11719	-46.052	147.491	1165.711	-0.97217	0.62646	-0.048242	-129.3449	-194.392	1589.33	-1.1128	0.7583	0.036621	-133.0268	-177.677	1685.25	-1.3418	0.73828	0.062988	-127.497	81.197	2006.41	-1.8033	0.84766	0.13652	-88.0201	62.4533	1446.82	-0.94873	0.63232	0.12207	-51.342	-42.61	328.9303	-0.21582	0.086426	-0.053711
0.47	-213.9702	-143.625	1768.313	-1.293	0.62109	0.086914	-72.992	130.947	1157.9039	-0.94101	0.61719	-0.042578	-146.4346	-170.3357	1617.63	-1.1309	0.77881	0.049316	-149.3868	-170.368	1707.13	-1.3491	0.73486	0.048828	-116.5137	86.761	1979.14	-1.7734	0.83984	0.13135	-83.8343	81.09241	1418.85	-0.92773	0.62597	0.11474	-48.835	-29.646	397.308	-0.29736	0.099121	-0.047852
0.472	-196.3288	-151.298	1797.969	-1.3054	0.62964	0.060059	-57.297	115.1042	1147.562	-0.9086	0.60273	-0.036328	-179.137	-151.264	1655.21	-1.1465	0.81055	0.05957	-159.5617	-164.796	1734.77	-1.3586	0.7229	0.035645	-148.852	97.526	1951.66	-1.7439	0.83067	0.13545	-126.504	82.841	1393.62	-0.90234	0.61914	0.1084	-30.902	0.732000000000003	491.1091	-0.3418	0.10596	-0.048828
0.474	-169.539	-171.012	1809.648	-1.314	0.64307	0.038086	-19.317	115.672	1111.387	-0.8792	0.58623	-0.029981	-184.742	-146.342	1689.29	-1.145	0.81641	0.068603	-161.26408	-164.848	1776.74	-1.3672	0.71484	0.024902	-181.284	98.707	1928.28	-1.7113	0.82012	0.13057	-123.481	74.28	1357.02	-0.86914	0.61523	0.10059	-27.5	44.658	580.823	-0.44727	0.12012	-0.04834
0.476	-148.262	-209.198	1835.29	-1.3105	0.66992	0.01123	-13.034	127.432	1080.174	-0.84961	0.57617	-0.022461	-193.188	-144.018	1719.64	-1.1421	0.81689	0.064453	-117.446	-152.962	1775.41	-1.3809	0.70215	0.0014648	-207.282	95.089	1896.05	-1.6754	0.81074	0.12783	-108.179	80.64657	1336.26	-0.85645	0.60938	0.09375	13.728	77.367	655.845	-0.5498	0.13867	-0.045898
0.478	-129.301	-231.232	1855.292	-1.3013	0.68994	-0.0014648	-8.67399999999999	124.667	1050.5829	-0.82207	0.56328	-0.018261	-196.135	-145.3313	1765.05	-1.1406	0.80469	0.056152	-112.654	-158.647	1782.04	-1.3828	0.70068	-0.0053711	-195.701	110.514	1865.58	-1.6444	0.79873	0.12246	-95.8371	101.885	1311.38	-0.81738	0.59961	0.07959	21.83	88.487	713.424	-0.66309	0.15234	-0.04248
0.48	-131.582	-231.919	1872.96	-1.2729	0.73291	-0.027344	21.187	130.234	1024.9383	-0.79268	0.54727	-0.010547	-210.73	-147.283	1794.7	-1.1465	0.79199	0.052246	-101.626	-173.573	1794.93	-1.3843	0.70459	-0.022949	-201.462	117.263	1841.51	-1.6055	0.78662	0.11816	-119.754	101.09	1277.11	-0.78662	0.59033	0.071533	41.115	81.771	800.9652	-0.82617	0.18945	-0.02832
0.482	-86.657	-195.8888	1875.58	-1.2319	0.76221	-0.045899	46.214	152.003	996.0767	-0.76416	0.53359	-0.0015625	-164.97794	-139.5423	1833.45	-1.1816	0.77051	0.039063	-100.747	-185.719	1843.54	-1.3803	0.71363	-0.039307	-202.386	109.395	1815.5	-1.5672	0.77207	0.11602	-95.122	111.804	1250.89	-0.75098	0.58789	0.071289	44.717	53.881	912	-0.91748	0.20508	-0.023926
0.484	-82.774	-193.3039	1873.68	-1.1953	0.78516	-0.075195	45.503	149.078	965.202	-0.73984	0.51914	0.0053711	-152.738	-139.819	1840.36	-1.2165	0.75562	0.024414	-86.521	-174.33874	1851.26	-1.3726	0.72119	-0.050293	-168.904	107.178	1778.12	-1.5296	0.75557	0.11855	-91.942	116.341	1223.91	-0.71094	0.56641	0.052246	85.835	30.8316	994.85	-1.0894	0.2583	-0.0063477
0.486	-72.429	-205.2696	1890.63	-1.1602	0.80469	-0.092285	41.879	144.618	924.814	-0.71143	0.50439	0.01123	-146.7202	-167.9949	1856.48	-1.2539	0.74805	0.011719	-93.637	-180.9976	1865.07	-1.3594	0.7334	-0.060547	-138.7	97.041	1750.2	-1.4921	0.73838	0.11582	-75.218	120.334	1198.36	-0.67603	0.55982	0.041504	98.53	8.316	1047.38	-1.2215	0.30591	0.0063478
0.488	-49.223	-220.1642	1896.73	-1.1616	0.80518	-0.10547	71.807	150.944	919.9827	-0.68174	0.49229	0.01875	-138.181	-181.5831	1852.8	-1.2993	0.74463	-0.0058594	-79.528	-180.4921	1861.66	-1.3516	0.73633	-0.064941	-127.142	89.582	1733.3	-1.4549	0.72246	0.11592	-100.399	100.321	1177.9	-0.64355	0.54688	0.033203	101.549	4.889	1071.31	-1.3491	0.36377	0.021484
0.49	-5.79899999999999	-206.9769	1898.95	-1.187	0.81299	-0.097168	69.393	163.551	908.8626	-0.66103	0.47618	0.02666	-112.166	-181.074	1887.86	-1.3164	0.75	-0.013672	-82.137	-173.3383	1884.55	-1.3477	0.74219	-0.074707	-110.175	82.861	1722.02	-1.4194	0.70557	0.11719	-67.3495	100.72	1162.33	-0.60889	0.52588	0.020996	49.838	-1.22	1087.1428	-1.4917	0.4541	0.047363
0.492	-5.68299999999999	-189.4491	1920.949	-1.24	0.81323	-0.084473	46.262	159.665	892.262	-0.64033	0.45938	0.031348	-84.35	-172.001	1890.51	-1.3438	0.76855	-0.029785	-98.086	-150.1777	1893.34	-1.3493	0.74731	-0.078857	-69.262	90.47	1705.13	-1.3788	0.68672	0.11943	-64.983	113.977	1137.67	-0.59668	0.51514	0.018066	26.112	-18.9265	1119.5484	-1.5449	0.50977	0.061523
0.494	-2.13200000000001	-175.8204	1941.54	-1.3125	0.81445	-0.064453	57.803	152.284	866.389	-0.62051	0.44395	0.041797	-85.623	-182.179	1925.01	-1.3552	0.78833	-0.039795	-104.193	-136.4975	1907.6	-1.3555	0.74805	-0.082031	-69.076	110.533	1660.93	-1.3421	0.67119	0.11826	-51.5546	103.744	1105.85	-0.57471	0.49561	0.0058594	-4.8545	-30.45059	1132.7207	-1.5977	0.625	0.091797
0.496	0.120000000000005	-164.752	1950.741	-1.4199	0.82227	-0.033203	33.694	153.386	824.3512	-0.59717	0.42676	0.04834	-66.089	-182.305	1954.25	-1.3647	0.81104	-0.042969	-96.243	-125.7442	1936.99	-1.3711	0.75391	-0.071289	-57.7711	119.516	1620.74	-1.3046	0.65166	0.11826	-57.7127	94.747	1069.3	-0.55444	0.48242	-0.0043945	6.103	-10.076	1163.68167	-1.5809	0.70434	0.10327
0.498	-37.409	-152.021	1957.007	-1.4741	0.83447	-0.019043	19.012	146.7659	803.6405	-0.57676	0.41328	0.056543	-48.165	-166.504	1976.78	-1.3901	0.8335	-0.039551	-108.233	-117.3435	1955.71	-1.3799	0.75684	-0.073242	-38.339	119.551	1592.42	-1.2625	0.63144	0.11983	-25.498	108.933	1036.86	-0.53809	0.4668	-0.01123	-26.7144	-25.2642	1197.172	-1.5259	0.7832	0.10107
0.5	-63.721	-151.678	1973.924	-1.582	0.87305	0.013672	7.616	139.6063	758.983	-0.55254	0.4	0.064844	-44.193	-157.49	1990.56	-1.4058	0.84717	-0.036133	-114.501	-115.207	1982.22	-1.4199	0.76172	-0.053223	-11.862	139.456	1568.01	-1.2231	0.61182	0.11865	-22.092	106.591	1014.77	-0.50391	0.45703	-0.017578	-48.8025	-46.0927	1249.278	-1.4141	0.86328	0.090332
0.502	-49.16	-150.847	1996.431	-1.6655	0.91846	0.046387	-4.216	143.2397	744.169	-0.52832	0.38984	0.07539	-48.06	-147.3228	2019.77	-1.4521	0.86914	-0.019043	-124.806	-115.058	1976.38	-1.4537	0.76441	-0.042969	-9.684	137.773	1529.24	-1.1883	0.58945	0.11904	-21.049	101.834	999.88	-0.49023	0.45117	-0.026367	-91.978	-55.051	1261.326	-1.3457	0.88281	0.077637
0.504	-99.606	-144.5122	2010.163	-1.7026	0.94385	0.061035	-38.162	150.202	733.0645	-0.50528	0.37598	0.080762	-37.267	-118.367	2020.35	-1.5097	0.88281	0.0012207	-129.118	-110.974	1991.7	-1.4897	0.77393	-0.029297	11.68	135.796	1496.59	-1.1546	0.56807	0.12246	-8.608	97.654	993.71	-0.45459	0.44189	-0.036133	-107.627	-50.526	1274.146	-1.2109	0.88184	0.043945
0.506	-153.897	-149.455317	2018.025	-1.7671	0.98291	0.080078	-55.884	144.247	720.653	-0.48584	0.3667	0.089844	-50.333	-98.894	2022.72	-1.5742	0.90234	0.026367	-140.563	-115.914	2004.53	-1.5483	0.78369	-0.0087891	20.518	142.86637	1467.58	-1.1222	0.54541	0.12403	2.96	109.756	979.01	-0.42969	0.43383	-0.045899	-141.528	-52.485	1292.0795	-1.1216	0.84179	0.018066
0.508	-188.123	-167.297	2015.233	-1.8015	1.0071	0.09082	-66.296	131.655	700.129	-0.46162	0.35156	0.10293	-95.054	-97.495	2019.98	-1.6709	0.93945	0.05957	-165.8056	-124.023	2029.34	-1.5776	0.7876	0.0043945	25.013	139.6231	1433.96	-1.0925	0.52471	0.12695	-7.481	108.916	939.82	-0.40625	0.4209	-0.052246	-130.763	-50.266	1300.516	-1.0581	0.78564	-0.0019531
0.51	-177.582	-175.917	2037.108	-1.8257	1.022	0.10498	-69.704	134.626	684.917	-0.44219	0.34209	0.1169	-93.74	-100.695	2027.11	-1.7422	0.9668	0.084229	-150.7014	-117.711	2026.47	-1.6304	0.80322	0.032227	12.793	130.1115	1397.43	-1.0591	0.50537	0.11963	-25.895	124.5	905.73	-0.37744	0.40186	-0.061035	-140.039	-58.683	1305.807	-1.0039	0.68164	-0.022949
0.512	-216.784	-174.262	2050.379	-1.8647	1.0337	0.10352	-88.368	137.541	657.5058	-0.41992	0.32763	0.12275	-102.794	-97.717	2058.85	-1.8105	1	0.10352	-148.5467	-113.318	2047.95	-1.6729	0.81006	0.047119	17.923	132.9346365	1367.95	-1.0271	0.49004	0.12021	-15.597	149.003	870.5	-0.36426	0.39502	-0.069336	-146.941	-80.441	1340.129	-0.98486	0.63721	-0.030273
0.514	-233.8375	-169.621	2059.48	-1.8765	1.0337	0.11182	-111.3162	138.006	645.905	-0.40039	0.31465	0.13037	-118.157	-95.95	2078	-1.8926	1.0449	0.13916	-166.2745	-101.79	2063.95	-1.7046	0.82275	0.068359	-20.983	140.0092	1329.77	-0.99326	0.47119	0.11739	-27.735	153.862	846.89	-0.34229	0.37842	-0.078613	-122.874	-120.989	1383.5643	-0.96484	0.53906	-0.043945
0.516	-243.8559	-141.449	2073.084	-1.8979	1.0278	0.11963	-102.8056	135.919	613.3017	-0.38037	0.30713	0.13672	-128.7472	-109.597	2108.55	-1.9238	1.0645	0.1543	-185.964	-106.438	2099.39	-1.7461	0.8252	0.085449	-51.403	146.7412	1289.21	-0.95694	0.45478	0.11699	-35.505	141.329	822.03	-0.32349	0.36743	-0.08374	-110.49	-136.542	1417.4822	-0.9497	0.48706	-0.046143
0.518	-227.8588	-106.468	2090.578	-1.907	1.0178	0.11695	-91.791	149.895	586.2559	-0.35966	0.29795	0.14404	-120.55541	-104.717	2104.94	-1.9839	1.0962	0.18652	-172.5405	-88.586	2093.86	-1.7651	0.83057	0.10059	-89.812	158.663	1261.27	-0.92363	0.4332	0.11162	-49.0062	136.052	801.79	-0.31055	0.35645	-0.087891	-142.06219	-168.374	1464.0636	-0.93311	0.45166	-0.04834
0.52	-260.952	-84.469	2107.326	-1.9063	1.0039	0.11572	-115.9708	135.481	552.14	-0.33975	0.28877	0.14385	-157.795	-97.717	2140.61	-2.01	1.1184	0.19702	-177.35	-67.727	2087.79	-1.7949	0.83203	0.11572	-76.1533	166.609	1226.9	-0.89209	0.41748	0.11182	-22.147	134.588	794.47	-0.28516	0.34814	-0.09668	-168.107	-195.9167	1491.829	-0.91943	0.42236	-0.049316
0.522	-258.251	-96.51	2121.58	-1.9063	0.98535	0.11621	-112.6852	120.334	549.2302	-0.31787	0.28369	0.15049	-172.601	-82.696	2145.28	-2.0293	1.127	0.21191	-185.956	-63.788	2086.04	-1.8106	0.8291	0.12183	-101.457	166.262	1197.76	-0.85088	0.39697	0.10518	-43.237	115.133	786.99	-0.27637	0.33789	-0.097168	-198.841	-201.86	1530.166	-0.91406	0.42383	-0.044434
0.524	-243.1013	-111.789	2116.29	-1.8979	0.97314	0.10791	-87.166	127.904	536.961	-0.29903	0.2752	0.15205	-181.494	-80.317	2159.28	-2.0391	1.1328	0.22607	-172.6879	-67.949	2095.78	-1.8223	0.82422	0.125	-119.768	138.1242	1186.82	-0.82031	0.37754	0.098144	-48.1331	98.893	781.52	-0.25342	0.33154	-0.10156	-176.522	-198.437	1559.865	-0.89844	0.43408	-0.046387
0.526	-208.202	-92.6205	2078.292	-1.8804	0.94873	0.097656	-65.387	130.847	526.136	-0.28027	0.28125	0.15967	-192.319	-72.069	2149.76	-2.0352	1.1309	0.22168	-169.241258	-57.68	2103.25	-1.8296	0.81201	0.13428	-120.329	129.7359	1153.6	-0.79063	0.35996	0.091504	-64.4351	117.125	738.38	-0.24366	0.323	-0.10546	-132.181	-198.01	1580.2196	-0.88867	0.4497	-0.046875
0.528	-241.7896	-79.5337	2066.138	-1.8609	0.93408	0.09375	-59.132	116.817	512.785	-0.26338	0.26123	0.15498	-226.457	-88.408	2141.14	-2.0166	1.123	0.23682	-153.8575	-49.23	2100.23	-1.832	0.80859	0.13721	-102.458	134.34	1125.78	-0.75908	0.3415	0.085254	-58.6199	144.108	705.3	-0.22949	0.31348	-0.10791	-67.049	-163.569	1594.021	-0.89209	0.47314	-0.04834
0.53	-205.8674	-71.935	2065.491	-1.8433	0.91064	0.084473	-30.933	116.7119	503.373	-0.24482	0.26064	0.16211	-238.637	-86.86	2143.26	-1.9981	1.1133	0.23487	-131.417	-42.96	2095.98	-1.8354	0.7915	0.14063	-128.442	127.31283	1093.51	-0.73438	0.32568	0.081543	-73.4366	147.293	681.78	-0.21631	0.29883	-0.11816	-45.856	-132.6034	1622.855	-0.91602	0.50488	-0.042969
0.532	-164.525	-81.091	2094.741	-1.8223	0.88379	0.081543	-6.386	130.226	477.9662	-0.23037	0.25518	0.1625	-222.959	-80.09	2155.49	-1.9731	1.0972	0.23047	-105.25	-42.26	2093.35	-1.8223	0.77051	0.14404	-122.829	113.9998	1055.99	-0.70283	0.30918	0.07666	-71.8957	148.073	661.94	-0.20898	0.30078	-0.11328	-22.923	-125.913	1651.847	-0.94873	0.52588	-0.040527
0.534	-145.015	-85.7088	2072.093	-1.8101	0.87842	0.078125	-2.386	136.639	451.109	-0.21094	0.25185	0.16621	-193.545	-60.96	2134.55	-1.937	1.0688	0.22607	-136.5993	-38.45	2096.39	-1.8159	0.75928	0.14893	-116.268	123.097	1018.36	-0.67568	0.29678	0.074316	-73.6259	145.327	659.44	-0.2002	0.29102	-0.11426	-9.928	-136.235	1699.2405	-1.0342	0.56445	-0.025879
0.536	-135.355	-106.697	2065.238	-1.7964	0.86377	0.075684	0.0569999999999951	122.096	452.8107	-0.19336	0.24756	0.17188	-172.364	-61.08	2135.97	-1.916	1.0645	0.21973	-101.013	-36.648	2086.77	-1.8042	0.74072	0.14746	-120.806	131.853	988.13	-0.64834	0.27959	0.071191	-59.163	134.878	631.23	-0.19726	0.28003	-0.11622	43.181	-146.913	1741.788	-1.0974	0.59595	-0.018066
0.538	-71.896	-93.32	2061.024	-1.7963	0.85888	0.073487	31.341	124.96	429.2487	-0.17432	0.24863	0.17286	-161.691	-52.29	2112.59	-1.8843	1.0366	0.2124	-85.986	-27.088	2090.07	-1.7886	0.72803	0.14795	-111.82	133.431	954.96	-0.62539	0.26299	0.067969	-57.7742	111.684	625.75	-0.19336	0.27637	-0.11719	96.6341	-154.619	1772.472	-1.1563	0.62891	-0.0073242
0.54	-51.494	-64.7868	2077.03	-1.7866	0.85986	0.074219	23.678	116.2915	437.368	-0.15713	0.24385	0.1708	-138.7635	-44.53	2129.18	-1.8572	1.0169	0.20361	-76.017	-8.155	2092.03	-1.7788	0.71533	0.14648	-96.548	138.027	935.24	-0.59961	0.24805	0.063965	-41.94	117.607	630.2	-0.19238	0.27148	-0.12305	115.7282	-156.839	1781.7567	-1.2026	0.67041	0.0014648
0.542	-62.942	-48.546	2061.34	-1.7827	0.8667	0.077637	35.289	100.1994	413.224	-0.14072	0.24229	0.17354	-117.0182	-23.19	2120.4	-1.8281	1	0.2041	-111.354	1.39999999999999	2080.88	-1.7617	0.70508	0.15332	-72.9775	157.538	920.2	-0.57314	0.23799	0.061328	-23.773	124.33	607.41	-0.19629	0.26953	-0.12061	90.155	-148.204	1778.0363	-1.2195	0.70044	0.0063476
0.544	-39.815	-67.3432	2039.24	-1.7734	0.87109	0.080078	43.961	102.1629	397.9318	-0.12061	0.23721	0.17773	-107.784	-26.7	2124.74	-1.7949	0.98047	0.20166	-102.953	5.22	2066.27	-1.7578	0.70313	0.15137	-58.9906	160.348	886.31	-0.54766	0.22705	0.060644	-21.777	125.979	588.25	-0.19531	0.26367	-0.12012	84.496	-134.87171	1778.912	-1.2202	0.72314	-0.0029297
0.546	-18.23	-68.2455	2021	-1.7573	0.87744	0.083008	34.703	112.726	380.8883	-0.10449	0.23926	0.18115	-90.944	-16.11	2118.61	-1.7773	0.97266	0.19971	-95.981	-0.870000000000005	2065.68	-1.7437	0.69971	0.15625	-14.791	143.612	861.39	-0.52266	0.21533	0.057129	-22.627	123.798	560.59	-0.1914	0.26099	-0.11938	51.762	-124.714	1785.597	-1.2104	0.72412	-0.011719
0.548	-40.677	-71.9082	2010.48	-1.7488	0.88306	0.085693	3.66699999999999	103.9969	376.17284	-0.085254	0.23653	0.18487	-85.707	-16.67	2098.09	-1.7515	0.95752	0.19873	-98.857	2.38	2058.31	-1.7342	0.70239	0.16259	-10.719	140.541	828.66	-0.4959	0.2041	0.054785	-9.353	121.352	532.22	-0.18896	0.25537	-0.11816	62.738	-152.3157	1824.23	-1.2021	0.7207	-0.023438
0.55	-72.495	-67.638	1982.69	-1.7378	0.88525	0.092285	15.43	102.5077	341.242	-0.07334	0.23555	0.18731	-96.0492	-4.98999999999999	2076.82	-1.7329	0.95068	0.20288	-102.623	-8.47	2050.98	-1.7261	0.70947	0.16895	42.482	152.552	805.59	-0.47412	0.19189	0.047852	1.712	120.378	518.75	-0.18799	0.25342	-0.11768	65.234	-185.972	1860.382	-1.1875	0.69141	-0.054688
0.552	-61.573	-42.30363	1962.011	-1.7222	0.88232	0.09668	8.034	109.904	340.2877	-0.063965	0.23399	0.18379	-90.6834	3.38	2065.75	-1.7266	0.94629	0.20605	-97.354	-2.89000000000001	2023.6	-1.709	0.71484	0.17529	39.312	135.183	794.45	-0.45625	0.18154	0.048828	-18.003	113.296	514.66	-0.18896	0.25342	-0.11865	80.51	-205.015	1902.345	-1.1902	0.65405	-0.071289
0.554	-101.82	-2.57	1921.148	-1.7109	0.87891	0.095703	-7.307	102.446	335.0471	-0.056055	0.22803	0.18555	-62.508	14.59	2057.34	-1.7065	0.93994	0.20996	-91.425	5.64000000000001	2016.26	-1.6982	0.7207	0.17627	59.497	130.944	777.14	-0.44316	0.16738	0.048047	-7.428	119.589	494.7	-0.18604	0.24902	-0.12061	47.742	-214.628	1928.361	-1.2109	0.61523	-0.086426
0.556	-113.434	2.111	1911.894	-1.6909	0.88135	0.093262	-33.303	84.009	333.2513	-0.047363	0.22803	0.19189	-59.302	15.45	2047.04	-1.6973	0.93945	0.21533	-104.377	24.58	2003.39	-1.6772	0.7251	0.17969	51.6425	135.645	740.84	-0.42676	0.16113	0.045312	20.147	122.095	483.45	-0.18872	0.24658	-0.10864	25.342	-195.3119	1960.581	-1.2549	0.57227	-0.10059
0.558	-129.027	-14.3818	1904.867	-1.6641	0.88183	0.088623	-45.404	73.5664	317.8639	-0.033496	0.22959	0.18769	-69.036	-0.449999999999989	2039.53	-1.6758	0.93164	0.21777	-132.64	27.38	1981.38	-1.6619	0.72681	0.18653	56.702	130.378	707.54	-0.41621	0.14717	0.042188	-2.534	93.573	478.12	-0.19189	0.24268	-0.11328	15.108	-158.858	1964.097	-1.2813	0.55859	-0.10254
0.56	-126.369	-29.8072	1901.432	-1.6362	0.88525	0.088379	-77.145	90.553	303.1466	-0.026464	0.23164	0.18828	-34.839	-12.37	2017.37	-1.6628	0.9314	0.21777	-136.6514	38.448	1965.41	-1.6387	0.72949	0.18994	26.911	123.192	682.96	-0.40723	0.13232	0.041504	13.564	93.922	460.57	-0.19482	0.24219	-0.11035	-7.626	-137.292	1964.0198	-1.3394	0.54736	-0.10742
0.562	-174.979	-14.3061	1887.112	-1.6011	0.88135	0.089844	-73.815	97.428	282.32136	-0.017871	0.23516	0.19024	-53.675	1.39000000000001	1995.22	-1.644	0.92334	0.2207	-124.2608	37.644	1944.96	-1.6094	0.72852	0.18506	38.213	141.896	654.65	-0.39873	0.12705	0.039551	29.203	105.677	435.38	-0.20215	0.23975	-0.10791	-61.104	-142.363	1972.633	-1.3794	0.55518	-0.11303
0.564	-196.313	-1.2139	1876.99	-1.5835	0.87842	0.082031	-88.601	82.451	274.9066	-0.015918	0.24072	0.18828	-70.183	11.39	1970.4	-1.6128	0.91455	0.22559	-148.1311	48.776	1940.9	-1.5938	0.72266	0.18311	20.009	147.196	640.46	-0.39131	0.12149	0.035352	23.865	119.549	430.38	-0.20459	0.23975	-0.10303	-82.497	-141.925	1998.41868	-1.4175	0.57275	-0.11865
0.566	-223.8205	12.7576	1884.854	-1.5396	0.87744	0.086914	-102.0606	78.594	271.4568	-0.011719	0.24463	0.18994	-115.321	14.68	1952.3	-1.5996	0.91211	0.2251	-161.4131	55.004	1917.86	-1.5522	0.73096	0.18164	26.032	140.185	637.44	-0.37646	0.11289	0.031836	3.097	122.001	415.88	-0.21753	0.23584	-0.10156	-103.7563	-105.132	2024.161	-1.4512	0.60547	-0.13086
0.568	-219.147	19.0007	1860.766	-1.5098	0.86279	0.080322	-105.2752	84.912	253.00939	-0.0084961	0.2501	0.1916	-110.57297	40.927	1921.83	-1.5679	0.89697	0.22852	-172.425	51.683	1896.47	-1.5156	0.72168	0.17627	-2.497	119.429	617.14	-0.3583	0.10821	0.027832	4.411	102.896	399.08	-0.2251	0.23584	-0.099609	-125.783	-81.396	2044.384	-1.4692	0.62744	-0.1416
0.57	-253.0447	5.819	1820.911	-1.48	0.85205	0.074219	-117.0177	79.677	237.677	-0.00087888	0.2543	0.19267	-136.334	50.677	1894.48	-1.54	0.88281	0.23047	-171.311	50.638	1875.85	-1.4805	0.7168	0.16846	6.983	126.074	596.15	-0.33643	0.10986	0.021484	2.575	101.77	374.09	-0.2373	0.23633	-0.092773	-136.378	-86.217	2055.7548	-1.4902	0.65625	-0.15479
0.572	-237.0378	-13.778	1798.106	-1.4419	0.84424	0.066406	-106.88374	86.849	233.249	0.010059	0.25664	0.19502	-165.139	54.95	1873.37	-1.5093	0.87158	0.23193	-173.664	57.875	1859.57	-1.4312	0.70947	0.16406	-18.616	130.562	582.54	-0.31182	0.10322	0.015723	-29.591	93.275	352.51	-0.24512	0.23828	-0.087402	-124.005	-88.409	2055.6275	-1.5005	0.6792	-0.17334
0.574	-254.136	-13.393	1786.236	-1.4194	0.83643	0.068848	-105.1499	91.135	228.1036	0.01543	0.26153	0.19541	-183.71	49.77	1862.24	-1.4746	0.85938	0.23096	-142.17847	64.075	1838.25	-1.4038	0.70752	0.1582	-29.206	131.048	565.25	-0.2877	0.09795	0.0058594	-31.789	89.081	357.84	-0.25439	0.23389	-0.083496	-123.2473	-85.849	2033.4443	-1.5078	0.69531	-0.19287
0.576	-242.314	9.078	1763.352	-1.3843	0.81885	0.0625	-81.508	88.428	214.7761	0.019531	0.27002	0.20068	-173.442	55.882	1835.75	-1.4512	0.85059	0.23096	-131.398	80.398	1819.54	-1.3574	0.69434	0.15088	-56.525	136.5	533.21	-0.25996	0.088965	0.00078122	-31.812	96.15	351.16	-0.26587	0.23389	-0.083252	-109.123	-86.862	2055.106	-1.521	0.7251	-0.2124
0.578	-246.024	5.391	1736.502	-1.3562	0.80786	0.061035	-99.5934	70.994	212.2286	0.027735	0.27168	0.19649	-185.68	39.91	1803.59	-1.4053	0.83398	0.23096	-131.102	78.616	1801.17	-1.321	0.69067	0.13989	-91.4711	141.301	506.51	-0.23506	0.087011	-0.010645	-50.6849	92.593	335.64	-0.27393	0.23291	-0.077637	-65.624	-84.341	2083.512	-1.5313	0.73535	-0.22461
0.58	-209.2317	3.576	1705.605	-1.3257	0.78955	0.055664	-53.568	84.437	200.6915	0.033008	0.27148	0.19971	-192.521	27.3	1778.4	-1.3692	0.8291	0.22705	-118.7201	81.395	1779.94	-1.2871	0.68164	0.13672	-100.6823	124.242	477.62	-0.21533	0.07666	-0.015625	-52.518	88.449	306.47	-0.28467	0.229	-0.078125	-30.709	-90.573	2081.9934	-1.5469	0.75977	-0.24219
0.582	-170.45	21.854	1700.578	-1.2891	0.76758	0.04834	-50.385	88.644	203.2995	0.038086	0.27266	0.2044	-170.317	9.44	1755.38	-1.3315	0.81982	0.22266	-114.1295	92.06	1750.8	-1.2461	0.66992	0.12939	-103.7225	112.415	465.71	-0.19473	0.066407	-0.020996	-49.313	94.186	292.87	-0.29346	0.22559	-0.069336	-18.847	-106.525	2088.3324	-1.5664	0.77343	-0.25048
0.584	-158.626	39.9924	1674.037	-1.2725	0.76172	0.041992	-26.263	78.672	191.4343	0.03623	0.26787	0.20215	-150.165	28.762	1729.76	-1.2793	0.80664	0.21924	-110.292	98.9	1716.27	-1.2261	0.67041	0.12988	-113.8864	104.4425	459.08	-0.18359	0.056153	-0.025586	-27.6	102.652	283.27	-0.30273	0.23193	-0.066406	2.697	-124.035	2080.6356	-1.584	0.78711	-0.25977
0.586	-140.526	50.8416	1672.379	-1.2319	0.73779	0.032227	-16.598	66.088	190.472	0.029297	0.26758	0.2085	-150.847	45.266	1697.38	-1.2476	0.79541	0.21582	-109.38	106.2902	1683.09	-1.1885	0.66211	0.12402	-121.384	104.854	442.97	-0.17383	0.046777	-0.027148	-35.23	91.223	281.77	-0.30932	0.22461	-0.065186	30.786	-136.059	2101.468	-1.603	0.80127	-0.25928
0.588	-95.298	82.202	1647.695	-1.2115	0.71924	0.032959	11.402	78.853	170.5467	0.025195	0.26299	0.20957	-134.142	60.622	1675.19	-1.1948	0.78174	0.21436	-96.85	109.3519	1655.38	-1.1629	0.65405	0.11792	-107.716	98.323	430.35	-0.16914	0.037891	-0.026465	-52.682	75.653	270.44	-0.31738	0.2251	-0.06543	58.785	-118.7277	2102.603	-1.6167	0.80713	-0.27002
0.59	-76.945	101.663	1615.601	-1.1914	0.70313	0.032715	0.171999999999997	78.559	165.929	0.016211	0.25703	0.21192	-128.838	72.362	1647.6	-1.1538	0.76367	0.20703	-97.761	112.694	1647.6	-1.1348	0.64941	0.11523	-92.0544	106.151	421.95	-0.1626	0.030762	-0.023926	-36.798	79.963	263.2	-0.32129	0.22559	-0.064453	71.244	-111.23301	2117.858	-1.6377	0.81445	-0.27539
0.592	-68.321	103.587	1587.607	-1.1641	0.68262	0.023926	29.598	61.356	178.128	0.0091796	0.2543	0.21426	-137.524	78.848	1628.12	-1.1152	0.75293	0.20361	-92.86	116.161	1611.09	-1.0986	0.63281	0.11035	-48.515	124.229	417.39	-0.16387	0.024414	-0.025683	-46.623	79.69	254.898	-0.31982	0.2251	-0.058105	100.638	-106.407	2111.912	-1.6489	0.81689	-0.27905
0.594	-40.066	83.633753	1561.01	-1.1543	0.66797	0.020508	35.591	50.3347	187.757	0.0046875	0.24766	0.21523	-113.7063	76.285	1603.12	-1.0645	0.73438	0.19678	-78.243	115.198	1585.23	-1.0815	0.62842	0.11182	-49.337	113.719	402.15	-0.16436	0.020606	-0.025586	-43.367	63.8197	267.4	-0.31494	0.22363	-0.0625	103.546	-99.671	2121.556	-1.6616	0.82275	-0.28857
0.596	-23.86	81.7813	1527.552	-1.1235	0.64697	0.017578	22.065	56.936	158.4922	0.0029297	0.24805	0.22021	-79.3415	82.997	1577.01	-1.043	0.72656	0.19434	-44.837	117.434	1546.22	-1.0454	0.61768	0.10547	-38.692	99.078	383.06	-0.16318	0.018652	-0.022461	-30.861	56.8288	247.35	-0.30469	0.22266	-0.062255	97.251	-88.741	2110.851	-1.6812	0.8208	-0.28662
0.598	-28.249	70.36731	1498.027	-1.1032	0.63257	0.019043	18.829	51.343	149.7112	0.0047852	0.24453	0.21729	-69.539	87.511	1554.62	-0.99951	0.70361	0.18555	-47.48	117.109	1531.98	-1.0151	0.60986	0.10302	-15.023	97.448	358.5	-0.16777	0.018164	-0.019922	-19.455	67.0186	221.043	-0.29346	0.21973	-0.0625	109.977	-78.976	2104.8078	-1.6855	0.82422	-0.29004
0.6	-40.058	63.3112	1466.862	-1.0815	0.61865	0.013672	30.463	46.115	157.2788	0.0094727	0.24365	0.21553	-73.9999	83.739	1526.49	-0.96752	0.68384	0.18066	-53.496	111.103	1500.11	-0.98438	0.59766	0.095703	13.94	104.938	335.322	-0.1665	0.016113	-0.017578	-40.354	66.6294	214.624	-0.26953	0.2168	-0.064453	143.727	-50.8711	2107.462	-1.7065	0.82471	-0.29443
0.602	-16.703	69.0214	1451.99	-1.0513	0.60059	0.0097656	10.861	57.29	172.603	0.016113	0.23975	0.21319	-38.168	73.347	1492.49	-0.94141	0.66602	0.17822	-45.536	106.53643	1470.33	-0.95068	0.58154	0.09082	-12.189	83.2343	338.7	-0.16963	0.018457	-0.017383	-0.872	62.935	197.632	-0.25537	0.21289	-0.066895	139.629	-28.862	2092.192	-1.7212	0.82862	-0.29981
0.604	-15.242	68.8755	1422.151	-1.0308	0.58838	0.0058594	10.271	65.856	147.925	0.022656	0.2373	0.21377	-7.928	89.638	1464.13	-0.90332	0.64355	0.16699	-52.16	108.68256	1432.33	-0.93506	0.5708	0.086914	23.524	84.1975	333.09	-0.16992	0.023729	-0.012012	4.742	65.026	203.82	-0.22656	0.20654	-0.068848	102.618	-24.132	2090.8141	-1.7354	0.83496	-0.30322
0.606	-35.089	61.38139	1397.81	-0.99219	0.57129	0.0014648	-23.857	52.816	144.3059	0.03125	0.2334	0.21045	4.53899999999999	107.272	1451.94	-0.88818	0.63135	0.16797	-82.155	110.18154	1408.17	-0.90771	0.55908	0.083984	49.169	91.588	309.334	-0.17227	0.029198	-0.010059	17.811	48.8539	201.384	-0.20459	0.19654	-0.068359	82.573	-39.551	2110.5118	-1.7515	0.84619	-0.30225
0.608	-64.335	61.0463	1379.695	-0.96094	0.55957	-0.0019531	-28.405	31.9734	155.287	0.039063	0.23105	0.20948	-11.334	102.009	1418.69	-0.85205	0.61279	0.16162	-87.375	121.3503	1375.57	-0.87939	0.54004	0.081787	34.598	90.469	302.759	-0.17158	0.031639	-0.012405	-1.514	35.7496	191.885	-0.17822	0.1958	-0.069824	69.058	-38.72	2117.369	-1.7593	0.84424	-0.30615
0.61	-75.717	83.2576	1355.89	-0.92676	0.54492	-0.0068359	-29.52	17.3385	159.541	0.046386	0.22559	0.21143	-8.307	102.263	1391.07	-0.83277	0.59571	0.15722	-95.0285	122.0328	1354.42	-0.85645	0.52734	0.07666	41.149	84.991	293.038	-0.17188	0.036621	-0.016602	24.985	32.269	186.821	-0.1416	0.18164	-0.08252	59.733	-32.444	2113.579	-1.7749	0.84424	-0.30908
0.612	-84.078	99.1618	1325.167	-0.88428	0.52588	-0.0092773	-59.898	5.9965	165.179	0.051465	0.2209	0.21455	-19.787	107.728	1349.98	-0.80957	0.58203	0.14453	-95.3192	136.225	1323.3	-0.82764	0.51318	0.070313	72.798	91.923	281.38	-0.17246	0.038382	-0.012989	-7.44	53.3565	179.849	-0.12207	0.18018	-0.081543	12.556	-23.1003	2104.8261	-1.7791	0.84497	-0.31518
0.614	-107.229	92.908	1295.12	-0.86475	0.51807	-0.015137	-80.658	-1.124	157.335	0.051367	0.21875	0.21474	-42.386	105.68	1330.2	-0.78223	0.56055	0.13867	-97.9231	141.546	1294.8	-0.80859	0.49902	0.075195	54.814	90.223	263.95	-0.1664	0.043162	-0.015625	16.328	56.6495	170.096	-0.083984	0.16553	-0.087402	-14.761	-3.99979	2096.106	-1.7813	0.84766	-0.31836
0.616	-131.765	85.401	1259.775	-0.83154	0.49658	-0.022461	-80.051	4.3393	145.453	0.050293	0.21094	0.21191	-53.914	97.2227	1307.8	-0.76416	0.55029	0.13525	-88.693	145.639	1265.32	-0.77783	0.479	0.068848	38.409	75.7458	257.804	-0.16446	0.046298	-0.016408	0.550000000000004	55.8563	157.233	-0.056397	0.1604	-0.092041	-38.646	23.0773	2074.781	-1.7769	0.84033	-0.3208
0.618	-135.629	92.097	1234.169	-0.80737	0.47876	-0.027832	-84.607	7.61546	152.813	0.040332	0.20459	0.21377	-64.83	106.19686	1289.95	-0.73633	0.53711	0.12842	-73.589	147.673	1243.35	-0.75415	0.46558	0.061524	47.067	57.0148	244.216	-0.15673	0.049509	-0.018654	9.211	46.9523	158.814	-0.033203	0.14844	-0.096191	-72.259	17.3698	2065.4595	-1.769	0.84229	-0.32178
0.62	-157.4296	97.044	1191.059	-0.78662	0.46436	-0.026855	-133.013	-26.6447	167.61	0.024218	0.20302	0.21367	-85.13715	110.6665	1258.88	-0.70849	0.52392	0.12012	-86.4243	146.525	1209.75	-0.72803	0.45313	0.056641	22.293	55.524	238.653	-0.15283	0.05127	-0.017578	-10.98	43.9968	153.828	-0.0078125	0.13916	-0.104	-86.012	5.0267	2070.8776	-1.7573	0.83643	-0.32568
0.622	-172.59	106.197	1163.365	-0.76172	0.44482	-0.030273	-85.312	-45.7654	168.352	0.014844	0.20225	0.21132	-92.7259	107.013	1235.85	-0.68652	0.51025	0.11475	-83.593	140.547	1167.94	-0.69141	0.43311	0.050781	-24.897	54.774	227.71	-0.15322	0.053127	-0.020889	-14.564	21.55	155.778	0.0029296	0.1311	-0.10596	-66.954	-6.8884	2063.2656	-1.7437	0.83008	-0.33081
0.624	-150.693	116.2831	1138.423	-0.75	0.42969	-0.033691	-99.847	-32.36789	153.839	0.0069336	0.20771	0.2125	-87.1841	117.2071	1202.94	-0.66016	0.49219	0.10938	-80.094	137.966	1149.68	-0.67822	0.42627	0.044922	-22.573	61.515	218.864	-0.15506	0.053019	-0.02009	-34.863	20.251	157.361	0.010254	0.12451	-0.10791	-74.414	-0.669999999999998	2048.085	-1.7246	0.82617	-0.33301
0.626	-160.57388	115.2976	1121.436	-0.72168	0.41113	-0.033203	-99.583	-40.2049	176.659	0.00097656	0.21924	0.21875	-88.0343	121.5409	1167.64	-0.64014	0.48877	0.10596	-71.587	155.808	1122.51	-0.64648	0.4082	0.041016	-47.773	70.031	202.683	-0.15781	0.054199	-0.022477	-29.121	24.179	163.257	0.0048828	0.11719	-0.11426	-67.952	6.131	2033.132	-1.7007	0.82666	-0.33789
0.628	-163.9178	97.2492	1101.862	-0.70092	0.40014	-0.031495	-88.083	-55.9557	188.857	0.0076172	0.23047	0.221	-103.532	112.1033	1131.6	-0.6123	0.46777	0.097168	-96.69366	171.031	1098.44	-0.62207	0.39111	0.036621	-57.268	71.9549	198.523	-0.16483	0.050666	-0.021562	-49.497	13.286	169.232	0.0024414	0.1123	-0.11377	-49.025	37.502	2011.445	-1.689	0.82471	-0.33838
0.63	-138.3866	104.2049	1077.017	-0.67822	0.38672	-0.02832	-60.16	-76.0162	204.953	0.018457	0.24179	0.22158	-110.694	100.1348	1097.78	-0.5896	0.45825	0.091797	-79.7577	172.009	1060.07	-0.60156	0.37793	0.02832	-84.966	47.7934	188.616	-0.17041	0.056641	-0.023438	-55.052	-15.749	178.375	-0.01123	0.11279	-0.11523	-20.771	66.248	1989.2597	-1.6621	0.82227	-0.33984
0.632	-113.779	129.2339	1045.493	-0.65039	0.36816	-0.03418	-86.203	-80.0523	226.948	0.036035	0.25039	0.21885	-99.405	107.46828	1062.41	-0.57275	0.4458	0.086914	-72.3735	178.589	1040.6	-0.56982	0.36279	0.024414	-90.546	34.9046	174.683	-0.18003	0.056105	-0.022568	-37.761	-21.661	165.684	-0.016357	0.11475	-0.11353	-28.931	57.038	1961.92	-1.6364	0.82837	-0.34058
0.634	-106.822	129.966	1023.479	-0.63721	0.36182	-0.035156	-52.438	-76.6567	252.925	0.047265	0.25556	0.21172	-109.837	117.0026	1039.3	-0.54736	0.43018	0.081055	-70.9187	171.011	1023.66	-0.55615	0.35791	0.025879	-88.714	43.01	166.254	-0.18616	0.053865	-0.02706	-53.301	-13.4	178.865	-0.025879	0.12402	-0.11475	-18.967	57.698	1938.022	-1.6089	0.83057	-0.34375
0.636	-85.415	128.194	996.049	-0.60889	0.34326	-0.035156	-21.075	-57.8402	316.186	0.047852	0.25781	0.20947	-126.821	118.1292	1018.37	-0.53662	0.42041	0.084473	-54.13	150.702	1003.85	-0.52051	0.34375	0.016113	-101.284	39.715	162.256	-0.19693	0.058567	-0.018845	-83.5894	-14.078	191.0082	-0.046875	0.12793	-0.11572	6.005	55.06907	1931.6275	-1.5796	0.83545	-0.34521
0.638	-55.029	147.29	963.521	-0.58984	0.31934	-0.035645	-20.098	-17.8607	390.83	0.036133	0.25771	0.20508	-102.299	124.702	996.82	-0.51904	0.40381	0.078613	-14.607	151.168	970.24	-0.49707	0.32934	0.010986	-111.7471	26.917	173.35	-0.20822	0.064657	-0.017941	-79.754	-20.506	212.119	-0.05957	0.13867	-0.12012	23.599	67.5063	1930.8856	-1.5659	0.82861	-0.34521
0.64	-46.705	144.012	957.683	-0.57764	0.31201	-0.038086	-45.66	4.1266	467.167	0.0029296	0.25889	0.19795	-97.521	150.168	976.62	-0.50684	0.39527	0.073731	-17.354	152.69	951.04	-0.47949	0.32227	0.0073242	-97.529	26.658	149.772	-0.21631	0.067871	-0.016602	-53.746	-9.524	230.409	-0.09082	0.14209	-0.10986	36.313	72.8122	1923.0085	-1.5366	0.82666	-0.3374
0.642	2.06799999999999	121.455	933.437	-0.55762	0.29492	-0.040527	-29.469	47.1952	574.131	-0.047852	0.26123	0.1956	-91.475	152.436	948.71	-0.49414	0.38281	0.072754	-27.537	148.448	930.26	-0.45117	0.30859	-0.0024414	-98.9022	43.998	140.958	-0.22559	0.073093	-0.013948	-60.177	-17.416	261.0642	-0.12842	0.15039	-0.10717	58.768	71.1834	1903.2352	-1.5235	0.82422	-0.33521
0.644	4.573	111.4144	919.31	-0.54834	0.28443	-0.039551	-6.533	100.5272	691.383	-0.11914	0.2627	0.19013	-66.6068	151.406	920.27	-0.47461	0.36963	0.067871	-9.241	140.584	904.39	-0.44141	0.29688	-0.0043945	-78.193	57.597	126.763	-0.23571	0.075511	-0.0093868	-54.57	-20.903	314.102	-0.1792	0.15625	-0.10498	86.133	76.053	1868.5675	-1.5054	0.8208	-0.33203
0.646	48.507	132.8023	898.844	-0.53418	0.27539	-0.041992	14.978	127.541	807.79	-0.20557	0.26953	0.19287	-26.115	142.413	893.64	-0.4624	0.36426	0.064453	-9.762	150.873	869.38	-0.42139	0.28174	-0.011719	-74.283	56.5506	125.78	-0.24879	0.079024	-0.0099565	-38.96	9.1009	370.2501	-0.26709	0.16797	-0.09668	88.175	63.1404	1844.4936	-1.4941	0.82422	-0.31445
0.648	35.917	130.275	879	-0.51221	0.26318	-0.044922	-20.592	126.285	916.741	-0.32002	0.28173	0.1835	-24.222	133.807	875.74	-0.43604	0.3501	0.055664	-20.17	156.096	840.66	-0.40381	0.27246	-0.014892	-57.35	57.2534	123.735	-0.25828	0.084276	-0.0070049	-31.505	57.026	399.50803	-0.31934	0.17773	-0.094238	102.685	55.169	1824.6278	-1.4839	0.82568	-0.31348
0.65	56.603	123.596	852.788	-0.50195	0.26172	-0.048828	-24.725	139.4275	1022.38	-0.45009	0.29922	0.17842	-5.259	109.2223	850.59	-0.41992	0.34082	0.052734	-21.653	159.888	811.09	-0.38867	0.26221	-0.019043	-62.595	44.7905	116.893	-0.26465	0.087891	-0.0073242	-43.531	79.682	446.3226	-0.44092	0.19336	-0.086426	128.724	71.6611	1807.3209	-1.4683	0.8208	-0.29834
0.652	38.648	129.42	833.96	-0.48047	0.25293	-0.050781	-21.753	162.586	1112.34	-0.59229	0.32265	0.16905	11.164	102.712	832.74	-0.40967	0.33398	0.04834	-8.973	159.956	799.17	-0.37109	0.25	-0.029785	-25.477	26.7809	114.27	-0.26463	0.097261	-0.0038319	-33.578	97.182	521.8601	-0.53589	0.21338	-0.077637	139.9086	87.4109	1790.60843	-1.45	0.82593	-0.28955
0.654	44.609	137.072	800.102	-0.46191	0.24561	-0.053467	-14.009	165.633	1207.31	-0.74463	0.35615	0.17529	23.523	111.552	805.45	-0.38867	0.31738	0.041016	-33.661	165.272	778.86	-0.36475	0.24561	-0.030762	8.351	20.2562	124.016	-0.26421	0.10138	-0.00084834	-15.341	110.099	610.2585	-0.64063	0.23926	-0.066406	107.778	86.3391	1759.1392	-1.4355	0.82617	-0.27832
0.656	36.075	135.9039	774.759	-0.44287	0.24023	-0.058105	-60.104	121.083	1266.31	-0.88623	0.39893	0.16895	22.373	121.815	784.84	-0.37916	0.30591	0.034668	-34.585	162.018	746.7	-0.34717	0.23438	-0.034668	20.802	26.8896	122.965	-0.26134	0.10899	-0.0025187	8.197	130.873	696.21966	-0.79297	0.2793	-0.048828	71.711	88.1003	1731.987	-1.4082	0.82422	-0.27051
0.658	19.663	135.754	760.536	-0.41455	0.23096	-0.060059	-89.973	70.9087	1314.75	-1.014	0.44941	0.1792	30.916	130.046	761.17	-0.37061	0.2959	0.030762	-27.07	143.764	722.74	-0.33277	0.23121	-0.044922	24.479	14.7219	136.449	-0.24826	0.11053	-0.0093576	-2.07299999999999	137.999	779.342	-0.87451	0.30127	-0.040039	47.016	104.715	1708.6642	-1.3906	0.82617	-0.26172
0.66	10.594	133.804	744.214	-0.40283	0.22412	-0.070801	-69.587	6.894	1337.063	-1.1254	0.50996	0.18877	28.261	146.511	743.2	-0.3584	0.27734	0.020508	-16.052	143.825	709.33	-0.31885	0.22168	-0.04834	27.213	-1.286	136.977	-0.22998	0.11084	-0.0024414	-5.401	150.222	892.2287	-1.041	0.34277	-0.01709	34.194	115.21	1697.9888	-1.3613	0.81934	-0.25195
0.662	-19.52	130.6194	733.134	-0.37939	0.21631	-0.061035	-112.439	-39.3724	1372.489	-1.2086	0.57754	0.19385	24.985	147.398	711.7	-0.35303	0.27686	0.020508	-38.38	158.334	687.29	-0.29541	0.21582	-0.053711	38.785	4.518	117.571	-0.21494	0.11164	-0.0088173	-9.605	138.901	960.07389	-1.1638	0.38183	0.0036621	9.217	118.756	1677.5424	-1.333	0.81348	-0.24317
0.664	-26.197	123.9525	708.823	-0.35473	0.20898	-0.068848	-134.297	-71.415	1431.21	-1.2692	0.64551	0.20078	16.411	132.542	695.24	-0.34131	0.26807	0.02002	-21.992	158.72	660.78	-0.28613	0.21387	-0.061523	37.242	8.661	108.0966	-0.19737	0.11078	-0.0088528	-29.786	118.103	1020.8522	-1.2749	0.42432	0.023926	-6.53700000000001	127.769	1656.519	-1.312	0.80713	-0.23193
0.666	-20.825	146.7916	688.791	-0.33203	0.2041	-0.070313	-106.543	-86.437	1436.49	-1.3101	0.7085	0.20996	19.843	125.667	680.14	-0.33081	0.25928	0.011963	-46.356	160.572	628.71	-0.26074	0.20801	-0.058594	21.39	-9.534	119.0431	-0.18363	0.10459	-0.0095131	-30.266	89.115	1064.6674	-1.3862	0.49463	0.053711	-38.859	135.604	1619.66	-1.2754	0.79883	-0.22412
0.668	-36.079	145.2166	679.775	-0.30322	0.19531	-0.076172	-115.255	-101.605	1412.52	-1.326	0.76573	0.21123	17.051	128.834	673.82	-0.3252	0.25391	0.0078125	-39.182	166.551	608.78	-0.23779	0.20068	-0.067871	30.252	-16.788	131.6785	-0.16784	0.10523	-0.015434	-1.84	57.287	1125.028	-1.4219	0.53223	0.066895	-65.578	128.813	1590.178063	-1.2554	0.78955	-0.22314
0.67	-84.455	127.4656	662.706	-0.29199	0.19092	-0.071777	-121.94629	-89.69	1380.7	-1.3438	0.8164	0.21953	2.449	125.301	636.78	-0.30811	0.24658	0.0078125	-74.47728	150.985	587.86	-0.21973	0.19531	-0.066406	28.122	-13.531	123.9871	-0.1582	0.10107	-0.020508	-6.885	24.1325	1167.363	-1.4468	0.6167	0.080566	-77.464	125.718	1550.11	-1.2222	0.77979	-0.20068
0.672	-114.4011	124.67737	636.884	-0.26074	0.18555	-0.07666	-86.98063	-60.669	1394.86	-1.3391	0.84844	0.23086	-8.133	118.044	625.5	-0.29932	0.23926	0.0063477	-59.147	138.433	565.44	-0.19434	0.18945	-0.076172	9.588	-26.271	135.159	-0.14708	0.093229	-0.021188	-49.699	-11.242	1190.156	-1.4275	0.67358	0.086914	-80.258	138.609	1530.6965	-1.2	0.76734	-0.19312
0.674	-109.81088	139.3321	605.516	-0.23877	0.18017	-0.079834	-79.6742	-8.815	1398.91	-1.3335	0.87139	0.24453	-32.403	136.025	596.31	-0.2793	0.23096	0.00048828	-45.815	140.409	554.34	-0.1748	0.18921	-0.077881	-0.545999999999999	-44.949	151.8895	-0.13749	0.091803	-0.025015	-42.875	-37.609	1200.922	-1.3833	0.72363	0.081543	-99.079	143.872	1505.713	-1.1777	0.75781	-0.18604
0.676	-118.295	136.596	587.12	-0.22559	0.17334	-0.079102	-102.701	12.739	1401.06	-1.3145	0.87695	0.26172	-26.833	137.885	577.28	-0.26025	0.22485	-0.0046387	-59.476	142.725	538	-0.15088	0.18018	-0.07959	-18.207	-47.704	184.154	-0.12894	0.080768	-0.030119	-45.98	-58.1531	1219.042	-1.29	0.76758	0.071289	-112.0946	136.989	1501.449	-1.1426	0.73926	-0.17285
0.678	-136.876	130.156	558.548	-0.20508	0.16797	-0.076172	-83.905	7.584	1368.34	-1.2819	0.86348	0.26162	-64.62	137.849	552.15	-0.23779	0.22021	-0.0053711	-53.7879	133.81	533.76	-0.12891	0.1748	-0.081543	-25.044	-37.345	203.118	-0.12454	0.078065	-0.032929	-74.1075	-70.8932	1229.5035	-1.2383	0.77539	0.060547	-101.732	141.775	1478.444	-1.123	0.72949	-0.16797
0.68	-118.1009	127.033	543.839	-0.19531	0.16406	-0.07666	-61.624	7.779	1352.23	-1.2366	0.82861	0.25283	-54.443	140.572	526.58	-0.21533	0.2124	-0.012207	-44.612	133.035	503.24	-0.11816	0.17285	-0.085938	-66.112	-46.351	212.68699	-0.11279	0.072754	-0.037109	-87.613	-87.993	1250.5626	-1.1406	0.78125	0.055176	-102.233	152.251	1450.935	-1.0874	0.72021	-0.15479
0.682	-140.115	145.3227	526.628	-0.18115	0.15625	-0.082031	-46.531	6.0836	1334.816	-1.1706	0.77041	0.23447	-85.7326	142.048	519.9	-0.20215	0.2041	-0.016602	-38.785	137.317	480.46	-0.10205	0.16455	-0.088867	-65.154	-52.929	231.582	-0.11005	0.071637	-0.039962	-65.9443	-73.569	1270.405	-1.0815	0.76123	0.038086	-105.01	149.71	1415.21527	-1.0566	0.70117	-0.14648
0.684	-84.154	142.6798	527.856	-0.17016	0.15357	-0.080811	-41.011	-12.465	1334.143	-1.0951	0.69453	0.21094	-82.9912	129.512	505.67	-0.1748	0.19385	-0.022949	-25.755	132.856	461.2	-0.090332	0.15967	-0.093261	-72.771	-53.93	263.872	-0.10941	0.064739	-0.048054	-80.135	-46.56	1284.797	-1.0386	0.73291	0.030762	-99.106	142.284	1397.0063	-1.0444	0.69385	-0.13721
0.686	-59.489	139.2831	513.065	-0.15723	0.15137	-0.073242	-14.681	-58.293	1354.39	-1.0146	0.61523	0.1875	-105.893	118.732	504.36	-0.1587	0.18946	-0.023437	-15.251	112.984	465.79	-0.077148	0.1582	-0.09375	-81.611	-56.023	336.234	-0.11996	0.058461	-0.047256	-103.731	-32.517	1303.612	-0.98486	0.66064	0.020508	-64.421	160.31	1351.1731	-1.0137	0.67773	-0.12891
0.688	-43.207	141.8227	512.216	-0.14893	0.14893	-0.072266	-20.533	-87.997	1361.02	-0.94375	0.54102	0.15967	-67.3169	113.108	489.59	-0.14404	0.17773	-0.030273	-20.755	122.046	456.6	-0.063965	0.15527	-0.09375	-94.913	-43.969	422.677	-0.14185	0.052329	-0.051371	-126.142	-21.502	1303.918	-0.96289	0.62012	0.01416	-54.71	163.111	1334.1636	-0.98853	0.66822	-0.11841
0.69	-48.764	122.8655	487.071	-0.14063	0.15283	-0.071289	-4.005	-128.9108	1375.65	-0.88857	0.4835	0.13271	-68.926	127.379	474.229	-0.13037	0.15869	-0.034668	-15.939	119.006	423.55	-0.062988	0.15918	-0.093262	-44.94	-12.488	512.492	-0.18164	0.04834	-0.052734	-125.5349	2.306	1306.4457	-0.90234	0.53516	0.0024414	-34.36	164.188	1310.048	-0.9668	0.65527	-0.10938
0.692	-17.022	111.525	463.672	-0.12891	0.14795	-0.069336	-2.907	-170.4	1405.8	-0.84287	0.44014	0.11006	-58.204	125.328	466.66	-0.12402	0.15479	-0.040527	-6.601	105.839	390.81	-0.053223	0.1626	-0.10059	-44.471	25.319	621.58704	-0.23462	0.04248	-0.052542	-124.637	6.26600000000001	1311.32481	-0.85937	0.49072	-0.01001	-3.759	156.415	1281.118	-0.9375	0.64648	-0.095215
0.694	-4.706	116.2226	449.953	-0.12476	0.14868	-0.067139	27.579	-212.861	1457.73	-0.80156	0.41406	0.091504	-56.103	110.76	456.56	-0.11572	0.14307	-0.049805	3.673	104.304	384.74	-0.046875	0.1648	-0.1062	-36.97	27.3101	732.0581	-0.29943	0.04288	-0.04874	-114.083	-6.76600000000001	1323.645229	-0.81055	0.45703	-0.023438	16.686	160.416	1252.055	-0.91943	0.63916	-0.086914
0.696	7.872	112.4424	435.488	-0.12256	0.14941	-0.063965	21.235	-210.703	1478.72	-0.77686	0.40186	0.068359	-21.551	115.704	420.702	-0.10766	0.13501	-0.051514	-10.335	107.69	372.73	-0.043457	0.16797	-0.10254	-5.47	42.752	810.7185	-0.38498	0.038965	-0.047943	-77.4792	-34.57	1340.0971	-0.73633	0.42383	-0.032715	11.002	157.461	1213.1192	-0.88965	0.62012	-0.078613
0.698	24.671	95.8951	418.129	-0.11816	0.14746	-0.059082	1.38800000000001	-211.904	1502.86	-0.76534	0.40186	0.048633	-36.917	108.0844	404.003	-0.10449	0.12744	-0.053711	-1.376	104.601	352.41	-0.042969	0.17432	-0.10938	19.47	51.615	910.4656	-0.47964	0.039549	-0.045313	-58.354	-64.767	1352.1536	-0.69727	0.41602	-0.040527	31.454	153.734	1180.1278	-0.86719	0.60645	-0.072998
0.7	26.622	98.371	408.224	-0.11768	0.15381	-0.060059	8.506	-204.229	1533.06	-0.78203	0.41777	0.037891	-14.231	97.27774	383.97	-0.097168	0.12109	-0.058105	0.097999999999999	113.973	336.47	-0.047363	0.1792	-0.10986	2.97000000000001	48.207	983.7896	-0.59375	0.047852	-0.043457	-56.972	-116.8339	1374.0671	-0.64258	0.40137	-0.050293	52.665	162.625	1159.42531	-0.84082	0.59521	-0.061523
0.702	40.807	99.7267	383.522	-0.11865	0.14844	-0.053711	12.066	-200.762	1587.79	-0.82344	0.44433	0.020312	-11.479	91.6345	383.906	-0.092285	0.12061	-0.058105	15.149	111.75	325.263	-0.046875	0.18213	-0.10303	7.13200000000001	43.559	1076.841	-0.72386	0.057328	-0.030662	-44.109	-151.6797	1402.7921	-0.62427	0.40064	-0.052246	40.797	160.341	1134.9572	-0.81055	0.57617	-0.052734
0.704	64.613	98.7835	375.437	-0.11914	0.1477	-0.052002	-13.708	-200.995	1643.9	-0.88857	0.47998	0.013965	14.022	100.096	370.58	-0.084961	0.11572	-0.068848	13.077	110.523	326.903	-0.058838	0.18872	-0.104	26.056	47.255	1134.7418	-0.8688	0.070121	-0.0165	-23.2	-160.3513	1426.9254	-0.63965	0.40332	-0.046875	39.205	149.3284	1114.75195	-0.79297	0.56934	-0.046387
0.706	64.345	82.4557	363.297	-0.12695	0.15137	-0.048828	-54.97	-194.587	1684.38	-0.9707	0.51758	0.014648	1.981	86.3762	360.173	-0.07959	0.1123	-0.071289	10.386	94.514	326.8	-0.070313	0.19482	-0.10645	34.633	50.161	1167.4302	-1.0254	0.089263	-0.0004838	-10.057	-171.1354	1444.9506	-0.70898	0.42578	-0.025391	38.402	152.2516	1088.7418	-0.76563	0.55469	-0.032715
0.708	70.945	86.7801	352.33	-0.13281	0.15186	-0.045898	-49.783	-163.27	1719.17	-1.0626	0.56036	0.024511	24.705	90.219	345.739	-0.074219	0.10986	-0.07959	6.34699999999999	82.9311	292.627	-0.080078	0.20703	-0.10205	20.335	32.678	1188.497	-1.1828	0.11387	0.013575	-10.977	-188.227	1459.967	-0.76074	0.44824	-0.01416	14.117	164.665	1057.4133	-0.74536	0.53785	-0.023194
0.71	72.989	96.6615	337.773	-0.13574	0.15283	-0.043945	-81.001	-122.367	1745.62	-1.1503	0.60166	0.037402	44.054	99.923	340.104	-0.072266	0.10791	-0.087402	7.69499999999999	91.787	270.149	-0.084961	0.2124	-0.097656	25.614	18.332	1235.522	-1.3413	0.15576	0.023926	11.775	-174.451	1494.8265	-0.88135	0.48779	0.015137	-10.288	163.218	1046.358	-0.72363	0.52344	-0.014648
0.712	42.659	101.9744	316.672	-0.146	0.14697	-0.03125	-146.4446	-115.926	1773.91	-1.2342	0.63916	0.054981	40.216	98.079	327.982	-0.067871	0.10645	-0.086426	-23.471	95.1936	263.926	-0.10059	0.2207	-0.099121	24.8854	19.773	1285.426	-1.4855	0.21298	0.04453	39.272	-147.1582	1529.9333	-0.96802	0.52784	0.039307	-11.893	154.777	1012.097	-0.69336	0.50781	-0.0019531
0.714	15.945	99.7271	310.345	-0.15015	0.14844	-0.038086	-146.5058	-121.566	1791.91	-1.2967	0.67324	0.076465	37.441	85.3341	318.842	-0.071777	0.10693	-0.089355	-19.693	91.718	252.771	-0.11523	0.22754	-0.093994	35.2644	11.424	1315.915	-1.611	0.28231	0.060156	28.669	-132.2603	1550.2128	-1.043	0.56689	0.061523	-12.883	150.3023	986.899	-0.6792	0.49707	0.00048828
0.716	-5.264	108.53605	297.359	-0.15771	0.15137	-0.038086	-147.117	-142.04	1808.64	-1.3428	0.70117	0.095215	39.849	89.378	292.649	-0.076904	0.1023	-0.094482	-14.121	84.3421	241.135	-0.12354	0.23291	-0.10059	21.582	-11.364	1315.737	-1.7011	0.36826	0.070703	40.629	-123.6745	1595.7011	-1.1113	0.62109	0.087891	-50.491	147.013	942.31	-0.65088	0.4873	0.0073242
0.718	-33.502	99.9785	282.719	-0.16699	0.15137	-0.029785	-168.766	-146.034	1837.92	-1.3751	0.71826	0.10537	45.914	94.1958	279.796	-0.076172	0.10303	-0.091309	-37.22	90.9704	217.442	-0.1377	0.24512	-0.091797	-1.556	-22.7724	1330.082	-1.7373	0.46445	0.073829	54.729	-106.811	1624.8711	-1.1284	0.64697	0.09668	-83.14745	126.29589	926.8795	-0.62964	0.47388	0.011719
0.72	-40.396	98.5306	265.731	-0.17236	0.1499	-0.027344	-175.243	-177.396	1884.32	-1.3925	0.7333	0.11797	15.011	84.2557	272.497	-0.084961	0.10449	-0.097168	-48.455	71.174	220.325	-0.14502	0.24463	-0.092773	-22.288	-27.797	1344.8878	-1.731	0.56982	0.072754	59.085	-89.05	1648.428	-1.1406	0.67676	0.10205	-91.7756	133.4603	887.266	-0.61328	0.45996	0.022949
0.722	-60.788	88.6789	260.051	-0.18262	0.14893	-0.027832	-183.588	-191.453	1910	-1.4077	0.73682	0.12539	9.375	69.728	265.836	-0.086914	0.11182	-0.095215	-34.155	74.5861	217.512	-0.16016	0.25391	-0.088379	-64.8154	-38.035	1351.2401	-1.6726	0.66611	0.067187	58.363	-98.334	1644.411	-1.1201	0.68409	0.092773	-114.7517	151.481	868.4008	-0.58398	0.44531	0.030762
0.724	-85.1898	85.7856	240.685	-0.19091	0.15112	-0.025391	-176.214	-196.491	1924.32	-1.4266	0.73193	0.12461	-13.781	69.643	251.351	-0.094238	0.1123	-0.09668	-37.386	76.284	215.891	-0.17212	0.25415	-0.087646	-79.5035	-34.124	1358.986	-1.5809	0.74805	0.060742	70.893	-106.967	1675.6614	-1.0952	0.68213	0.083008	-143.906	165.717	836.203	-0.56982	0.43994	0.033203
0.726	-97.3814	63.7078	239.129	-0.19678	0.14746	-0.02002	-171.485	-206.308	1924.59	-1.4526	0.7251	0.11475	-24.906	74.8768	232.809	-0.10425	0.11865	-0.097656	-40.419	79.3499	203.528	-0.17773	0.2583	-0.084961	-59.211	-27.345	1368.966	-1.4715	0.79492	0.048632	65.784	-103.711	1686.6061	-1.0542	0.65479	0.064941	-144.827	160.108	821.697	-0.54346	0.42627	0.041992
0.728	-81.021	51.758	218.468	-0.21045	0.14941	-0.016602	-157.8151	-212.399	1965.15	-1.4947	0.72129	0.11845	-55.758	71.5321	236.787	-0.11182	0.12256	-0.094238	-38.305	60.9812	185.279	-0.18848	0.26123	-0.084961	-46.115	-34.932	1401.129	-1.3551	0.81094	0.031348	30.631	-112.127	1702.168	-1.043	0.63477	0.050781	-129.652	173.42	800.018	-0.51807	0.41919	0.049804
0.73	-79.215	65.82	217.68	-0.21826	0.14404	-0.016113	-142.0455	-219.31	2004.59	-1.5383	0.71797	0.10909	-41.727	69.0288	225.312	-0.13477	0.12793	-0.09668	-39.657	57.7953	184.882	-0.1875	0.26123	-0.083496	-80.689	-66.352	1425.078	-1.2373	0.79297	0.015625	11.264	-122.187	1712.143	-1.0342	0.59766	0.037109	-146.826	169.655	781.474	-0.5	0.40918	0.056152
0.732	-97.0743	68.765	209.625	-0.2251	0.14355	-0.016113	-132.511	-209.49	2012.68	-1.5746	0.72696	0.1044	-56.967	70.9316	216.16	-0.14453	0.13184	-0.095703	-51.389	57.4483	174.588	-0.19043	0.26025	-0.083008	-95.108	-96.087	1446.985	-1.138	0.7417	-0.0088869	-1.23099999999999	-118.417	1747.235	-1.0469	0.56885	0.025635	-150.62	157.937	744.4297	-0.46338	0.39795	0.06543
0.734	-105.141	57.184	211.496	-0.22803	0.14136	-0.0083006	-127.9785	-198.264	2027.49	-1.5948	0.74561	0.096191	-74.212	64.4201	200.088	-0.1665	0.13867	-0.089844	-42.644	61.6629	152.337	-0.18873	0.25683	-0.083008	-112.0744	-112.078	1454.776	-1.0608	0.66689	-0.019922	-17.226	-130.4826	1791.3777	-1.0723	0.54688	0.024902	-138.723	152.602	709.9797	-0.4502	0.39404	0.065918
0.736	-100.8	67.351	203.159	-0.23145	0.13623	-0.0097656	-131.56	-187.176	2045.87	-1.6035	0.77734	0.086914	-92.0944	47.8801	195.63	-0.1836	0.14844	-0.085694	-42.985	69.5359	150.165	-0.18018	0.25928	-0.082031	-145.558	-127.931	1463.0037	-0.99482	0.57861	-0.034766	-20.247	-133.2664	1824.608	-1.1304	0.5376	0.028809	-128.642	164.04	686.6123	-0.41992	0.37793	0.077148
0.738	-89.3391	74.52	203.062	-0.23145	0.13525	-0.0078125	-76.016	-180.769	2072.27	-1.5985	0.81162	0.076563	-68.324	60.0744	189.804	-0.20215	0.15674	-0.086426	-29.661	71.32284	156.01	-0.17676	0.24805	-0.080566	-157.864	-149.6696	1491.1089	-0.94141	0.4918	-0.048633	-26.622	-133.4667	1850.659	-1.1655	0.53174	0.041016	-107.211	161.529	665.9037	-0.39795	0.36621	0.082764
0.74	-56.374	62.53	190.783	-0.22998	0.13379	-0.0048828	-72.317	-164.35	2083.12	-1.5886	0.84688	0.071875	-78.005	57.572	181.326	-0.22266	0.16553	-0.080078	-27.04	57.6722	152.911	-0.16699	0.24902	-0.078613	-147.8778	-150.9689	1502.6013	-0.89844	0.41406	-0.057129	-19.003	-111.388	1890.197	-1.2539	0.54688	0.05957	-92.6264	152.159	652.63941	-0.375	0.35449	0.089355
0.742	-64.201	46.623	188.587	-0.22021	0.13037	-0.00097656	-75.106	-166.587	2096.77	-1.5805	0.87383	0.063281	-76.583	54.38	169.592	-0.229	0.16943	-0.07959	-20.503	41.3908	146.271	-0.15576	0.2417	-0.081543	-118.155	-154.09026	1527.0792	-0.86953	0.36211	-0.060449	-33.163	-100.257	1907.703	-1.3161	0.57422	0.068603	-50.598	148.87	630.0877	-0.35352	0.33594	0.092285
0.744	-38.497	55.0439	174.415	-0.21264	0.12402	0.0021973	-39.526	-131.926	2108.59	-1.5897	0.89346	0.060449	-80.403	43.027	149.03	-0.23877	0.18359	-0.077637	-15.678	41.07295	130.624	-0.14355	0.23437	-0.082764	-111.979	-165.4157	1541.09043	-0.84336	0.3291	-0.060449	-37.461	-93.527	1910.9413	-1.3647	0.60596	0.072754	-41.841	153.005	616.1758	-0.33936	0.3335	0.092773
0.746	-15.097	51.304	161.057	-0.19971	0.12109	0.0024414	-1.464	-111.57	2134.24	-1.6211	0.90234	0.064453	-80.723	53.05	147.358	-0.23877	0.19336	-0.077881	4.647	51.6424	126.748	-0.13281	0.22998	-0.083496	-69.213	-165.867	1571.5788	-0.82773	0.31621	-0.056543	-41.265	-94.289	1927.954	-1.4219	0.64453	0.080078	-37.078	143.754	589.4266	-0.32227	0.31445	0.10596
0.748	13.187	49.897	162.305	-0.18457	0.11865	0.0048828	-26.415	-103.149	2158.09	-1.6614	0.91006	0.072071	-73.91	50.5261	138.315	-0.24023	0.20215	-0.077148	-18.657	45.9223	137.379	-0.11182	0.22412	-0.087891	-46.462	-148.812	1612.1822	-0.81475	0.32021	-0.053321	-12.352	-75.422	1928.2114	-1.4468	0.67041	0.079102	-18.706	143.632	584.879	-0.30908	0.30517	0.10718
0.75	16.974	48.6717	165.512	-0.17188	0.1167	0.0039063	-19.254	-132.298	2186.77	-1.7058	0.91914	0.088868	-44.5	42.9918	142.626	-0.22998	0.21143	-0.075195	2.014	35.5017	128.632	-0.10449	0.22363	-0.085449	2.12	-144.28	1637.7683	-0.81445	0.33203	-0.046875	-28.715	-84.271	1943.0231	-1.478	0.72119	0.061523	1.734	139.9736	557.9119	-0.29834	0.29541	0.11426
0.752	45.026	36.7748	149.797	-0.15186	0.10791	0.0019531	-25.243	-142.682	2191.07	-1.7602	0.92813	0.10606	-22.016	46.4383	143.405	-0.21973	0.21582	-0.074707	-3.735	27.9702	120.104	-0.094238	0.22168	-0.088867	32.491	-141.341	1653.4165	-0.83565	0.35185	-0.035644	-16.064	-79.667	1941.927	-1.4966	0.75537	0.046387	11.722	143.689	541.7592	-0.28076	0.2876	0.12061
0.754	44.634	21.7413	155.437	-0.13233	0.10376	0.0051269	-39.14	-140.105	2198.91	-1.8033	0.94629	0.1292	-17.625	58.51	136.326	-0.2085	0.22119	-0.075684	7.726	26.226	121.968	-0.083496	0.21899	-0.093017	96.832	-128.752	1662.3709	-0.88799	0.37978	-0.01875	-17.31	-79.473	1963.3232	-1.5015	0.79736	0.03125	22.57	138.1205	515.8945	-0.26807	0.28662	0.12598
0.756	38.545	22.192	153.613	-0.12012	0.10254	0.0043945	-102.42	-134.746	2206.19	-1.8438	0.96289	0.1499	-18.516	31.5624	141.459	-0.19434	0.22314	-0.082032	-19.727	14.702	130.697	-0.080078	0.2168	-0.094727	132.387	-119.193	1678.5638	-0.95556	0.40674	-0.00039066	18.723	-72.378	1970.2127	-1.5132	0.82959	0.012207	33.061	127.70602	506.9846	-0.24414	0.27588	0.13037
0.758	49.994	30.927	159.846	-0.087402	0.096191	0	-93.52	-136.191	2237.29	-1.8852	0.98233	0.17021	1.715	17.924	145.463	-0.17725	0.21973	-0.081543	6.854	16.964	135.289	-0.074219	0.21387	-0.093262	135.202	-125.927	1708.1334	-1.0326	0.43496	0.018262	10.867	-77.187	1992.71268	-1.519	0.84424	-6.245e-14	6.78100000000001	132.788	480.8717	-0.22022	0.27368	0.13159
0.76	56.418	35.364	155.868	-0.07373	0.094727	-0.00048828	-121.254	-134.8544	2256.52	-1.9141	1.0004	0.18642	9.693	14.063	134.121	-0.16211	0.2168	-0.081543	-11.492	19.456	130.562	-0.072266	0.21484	-0.09668	125.743	-134.3094	1714.504	-1.1055	0.45508	0.040527	42.124	-52.53	2004.671	-1.5249	0.86768	-0.021484	5.125	130.647	464.9781	-0.19727	0.27002	0.1333
0.762	40.19	14.628	142.414	-0.050293	0.083496	-0.0048828	-133.6698	-140.52	2273.68	-1.9422	1.016	0.20049	16.173	11.564	126.111	-0.15723	0.22021	-0.076172	-28.013	6.345	126.606	-0.069824	0.21436	-0.10205	142.52	-136.9448	1739.983	-1.1638	0.48311	0.053516	53.585	-52.674	2014.5358	-1.5229	0.88135	-0.04541	-2.994	136.25	432.351	-0.16113	0.26367	0.13379
0.764	11.729	7.311	145.142	-0.030517	0.075928	-0.0051269	-162.1322	-143.9112	2271.25	-1.961	1.0249	0.20957	27.04	-0.225000000000001	127.546	-0.13867	0.21045	-0.082031	-13.012	-13.58	138.108	-0.067139	0.21558	-0.098389	140.611	-154.485	1773.74	-1.1995	0.51064	0.061035	74.635	-50.846	2018.1104	-1.519	0.87939	-0.057129	4.208	141.077	426.1411	-0.14502	0.26318	0.13623
0.766	17.433	7.385	148.227	-0.020996	0.067383	-0.0078125	-138.73905	-113.072	2276.97	-1.9727	1.0332	0.22021	31.743	-1.288	131.535	-0.12989	0.20288	-0.079346	-12.318	-22.213	143.8243	-0.066406	0.21875	-0.1001	166.424	-168.042	1792.9545	-1.2217	0.53447	0.061035	73.454	-63.736	2032.1155	-1.5132	0.87549	-0.074219	-22.635	132.217	398.8068	-0.11475	0.25635	0.13477
0.768	-6.665	10.661	156.793	-0.012207	0.054199	-0.011719	-152.7621	-89.724	2287.01	-1.9806	1.0396	0.22188	16.146	10.984	131.174	-0.12354	0.19678	-0.08252	-20.349	-32.491	149.1891	-0.063965	0.22021	-0.10791	170.888	-161.177	1821.094	-1.2217	0.54551	0.05332	101.403	-59.153	2031.1537	-1.5051	0.87036	-0.093262	-44.449	121.026	379.503	-0.093263	0.25073	0.14111
0.77	-10.095	11.508	163.213	-0.0083008	0.048828	-0.016602	-194.978	-75.902	2283.7	-1.9828	1.0457	0.23214	0.392999999999994	2.442	121.407	-0.11133	0.19385	-0.083008	-41.538	-46.129	153.4722	-0.065918	0.2207	-0.10645	192.362	-141.376	1830.0549	-1.2104	0.54541	0.04248	97.542	-79.624	2038.3077	-1.4961	0.86523	-0.1084	-74.3957	113.268	363.8522	-0.074219	0.24902	0.12744
0.772	-38.219	-3.158	169.709	-0.0097656	0.037109	-0.016602	-209.305	-72.991	2273.32	-1.9781	1.0488	0.23721	11.005	-1.009	126.61092	-0.10498	0.19043	-0.086914	-48.6	-53.682	179.405	-0.075195	0.22461	-0.11572	156.993	-129.3095	1837.2585	-1.2011	0.53154	0.026758	100.412	-94.10816	2045.5146	-1.4883	0.85742	-0.12207	-73.84	115.295	357.6041	-0.055176	0.23877	0.13672
0.774	-46.811	-17.192	167.917	-0.0063477	0.033935	-0.019043	-196.418	-57.386	2261.67	-1.9694	1.0517	0.23584	15.097	-5.468	141.206	-0.086914	0.18066	-0.084961	-52.721	-61.914	200.295	-0.088379	0.2268	-0.11816	134.532	-124.0043	1860.29002	-1.2042	0.50615	0.0096676	83.399	-100.70919	2046.1963	-1.4902	0.85742	-0.12549	-114.953	111.566	341.893	-0.050781	0.2334	0.13721
0.776	-87.9585	-39.878	178.037	-0.0087891	0.028809	-0.018555	-203.314	-54.049	2249.7	-1.9609	1.0508	0.2417	-24.266	-15.142	155.637	-0.077149	0.18287	-0.082275	-43.641	-81.666	207.9554	-0.1123	0.22949	-0.12109	104.809	-130.2231	1888.7661	-1.223	0.47178	-0.002832	96.91	-78.953	2047.77	-1.5	0.85938	-0.13379	-111.8051	105.472	324.6754	-0.037109	0.22363	0.13574
0.778	-84.184	-53.286	193.9807	-0.025391	0.025879	-0.024902	-209.681	-46.142	2249.95	-1.9497	1.0495	0.23261	-31.224	-37.088	168.877	-0.074219	0.18164	-0.085938	-38.424	-99.114	228.5798	-0.15479	0.23291	-0.11963	97.516	-121.063	1920.707	-1.2603	0.44405	-0.013086	65.529	-72.3114	2046.365	-1.513	0.86255	-0.1377	-127.961	112.289	309.644	-0.026856	0.22046	0.1377
0.78	-93.362	-35.02	233.3123	-0.042969	0.021485	-0.025147	-187.552	-23.999	2249.11	-1.9336	1.0434	0.22724	-34.472	-38.69	175.376	-0.067383	0.17627	-0.087891	-32.084	-101.776	275.8812	-0.18506	0.24072	-0.12109	70.116	-115.653	1916.9086	-1.3062	0.43018	-0.021484	78.013	-61.4157	2050.217	-1.5288	0.86572	-0.13818	-123.7137	118.436	290.0203	-0.017578	0.21631	0.13965
0.782	-86.648	-26.338	268.6231	-0.071777	0.020996	-0.02832	-174.342	7.13200000000001	2249.7	-1.918	1.0309	0.22415	-38.673	-44.588	170.8446	-0.066406	0.17822	-0.088867	-41.199	-97.563	327.4784	-0.26514	0.25439	-0.1167	32.18	-94.45	1924.7328	-1.3609	0.4293	-0.018066	64.302	-48.1631	2052.8133	-1.5527	0.87305	-0.1416	-160.975	106.278	273.8306	-0.01123	0.21094	0.13428
0.784	-110.704	-29.064	309.854	-0.13086	0.025879	-0.022949	-164.524	-5.083	2257.63	-1.9029	1.0167	0.21272	-70.59	-64.318	202.4564	-0.079102	0.17676	-0.095703	-33.101	-81.372	392.0818	-0.33863	0.26392	-0.12109	-12.88	-69.232	1935.9832	-1.4051	0.42676	-0.011328	58.056	-31.075	2064.3685	-1.5742	0.875	-0.14063	-124.9431	108.252	257.319	-0.0053711	0.21045	0.13672
0.786	-90.906	3.097	347.36211	-0.16895	0.023926	-0.022461	-122.3921	-35.251	2257.4	-1.8926	1.0078	0.20703	-63.489	-78.599	228.443	-0.094972	0.17651	-0.092774	-19.917	-46.6627	457.148	-0.42334	0.27588	-0.125	-46.66	-66.603	1930.516	-1.4399	0.44668	-0.021094	38.926	-18.341	2050.117	-1.5942	0.8833	-0.1333	-136.024	99.885	262.4213	-0.0024414	0.20264	0.13379
0.788	-71.09	14.0596	418.2039	-0.26611	0.035645	-0.020996	-88.354	-38.556	2266.27	-1.8766	0.98768	0.20102	-66.412	-65.5	268.6953	-0.12354	0.1748	-0.10205	7.587	9.717	530.462	-0.56396	0.29932	-0.12939	-45.28	-73.107	1937.191	-1.4645	0.46904	-0.030664	25.629	-10.073	2061.5525	-1.6103	0.88281	-0.13256	-104.5845	85.01	251.452	-0.0024414	0.20117	0.13062
0.79	-65.016	44.425	482.7541	-0.34912	0.046142	-0.017822	-77.753	-19.19	2256.52	-1.8672	0.97271	0.19586	-68.313	-38.443	316.69005	-0.18701	0.18262	-0.10254	-12.082	55.642	643.7471	-0.64404	0.31299	-0.13037	-36.887	-68.525	1948.5171	-1.4849	0.48975	-0.045898	12.615	9.499	2063.961	-1.6226	0.88721	-0.12842	-108.7862	79.436	254.493	-0.0043945	0.19873	0.12842
0.792	-52.27	72.539	593.7683	-0.44043	0.061035	-0.015137	-60.853	-5.94199999999999	2233.47	-1.853	0.96475	0.18951	-66.392	-20.193	387.8559	-0.2478	0.18847	-0.097656	-9.099	93.235	785.6286	-0.84277	0.34277	-0.13379	-39.05	-77.3	1971.0486	-1.486	0.51748	-0.061035	20.083	13.095	2064.726	-1.6343	0.87549	-0.12549	-67.642	82.594	238.82	-0.0087891	0.19824	0.12207
0.794	-42.84	115.502	710.1287	-0.58887	0.074707	-0.0063477	-34.156	3.047	2204.54	-1.8428	0.95279	0.19071	-43.433	1.477	474.8281	-0.31982	0.19482	-0.096191	-20.636	128.96	895.67446	-1.0056	0.375	-0.125	-9.03000000000002	-77.125	1971.6626	-1.4839	0.5415	-0.084473	-1.818	18.932	2045.6106	-1.6382	0.87158	-0.125	-50.816	87.816	237.838	-0.01123	0.19434	0.12598
0.796	-8.837	133.006	800.3133	-0.66992	0.088379	-0.0053711	-38.181	3.86500000000001	2174.81	-1.8301	0.94727	0.19238	-46.267	33.536	562.8452	-0.43506	0.20898	-0.09375	4.33200000000001	155.791	999.1181	-1.1797	0.40479	-0.10889	-32.3	-80.953	1971.0434	-1.4823	0.56025	-0.11142	5.16499999999999	16.057	2052.943	-1.6362	0.85596	-0.12549	-48.353	85.166	208.2358	-0.020996	0.19434	0.11963
0.798	0.366	135.945	880.9306	-0.85645	0.11719	0.010742	-38.078	-2.97	2142.1	-1.8202	0.94555	0.19446	-58.348	70.558	678.08	-0.50293	0.21973	-0.097168	-41.792	160.639	1109.4871	-1.4238	0.4668	-0.084473	-4.94999999999999	-69.794	1975.20407	-1.4775	0.57949	-0.13554	10.79	15.6207	2051.448	-1.6299	0.84033	-0.12891	-23.907	70.837	210.01588	-0.026368	0.19263	0.11743
0.8	-6.843	125.376	943.3745	-1.001	0.1438	0.031495	-24.138	-3.425	2119.16	-1.8113	0.94073	0.20196	-48.929	104.448	807.8099	-0.65039	0.24609	-0.10107	-13.029	151.129	1231.903	-1.5356	0.50146	-0.067383	13.25	-88.647	1985.998	-1.4805	0.59766	-0.15771	-7.379	3.20863	2045.605	-1.6172	0.82422	-0.13379	-11.705	64.3418	191.4564	-0.032227	0.19043	0.11816
0.802	21.284	126.804	1026.3311	-1.1499	0.18018	0.049805	-11.202	25.566	2092.98	-1.7997	0.93807	0.20276	-25.667	152.562	910.42348	-0.78467	0.26734	-0.10156	-5.89	111.939	1319.07	-1.7378	0.58545	-0.03125	59.694	-99.684	1985.514	-1.4833	0.61475	-0.18389	-3.58	5.0436	2025.9058	-1.6035	0.80273	-0.13721	8.343	51.3664	198.0542	-0.036133	0.19385	0.12354
0.804	41.011	90.135	1110.347	-1.3311	0.24414	0.076172	-43.254	52.123	2066.22	-1.7833	0.94074	0.2111	-9.643	171.37	979.2091	-0.92578	0.29297	-0.090332	10.148	56.106	1353.059	-1.8435	0.65844	-0.014649	65.842	-91.787	1987.6372	-1.4846	0.6249	-0.20713	20.306	15.6781	2003.391	-1.5938	0.79492	-0.14648	21.482	49.577	192.2613	-0.037598	0.19189	0.12158
0.806	63.416	55.345	1156.437	-1.4102	0.2793	0.086426	-45.729	43.434	2041.21	-1.7632	0.93994	0.21777	-30.51	154.873	1043.3829	-1.1187	0.34375	-0.065918	32.136	-15.818	1383.052	-1.8999	0.73486	0.0014648	118.62	-72.8561	1997.2824	-1.4858	0.63545	-0.23369	23.274	13.0505	2003.4135	-1.5776	0.78174	-0.15332	44.415	55.468	181.6216	-0.041504	0.19385	0.125
0.808	76.928	34.262	1181.448	-1.5327	0.37158	0.11523	-33.591	44.134	2008.52	-1.746	0.93797	0.22123	16.548	108.98	1128.495	-1.2202	0.37451	-0.051758	61.921	-88.026	1420.05	-1.8784	0.83643	0.010742	112.531	-59.8593	1999.724	-1.4877	0.64258	-0.25137	18.412	17.6371	1980.6451	-1.5656	0.76587	-0.16065	28.982	55.787	170.085	-0.042969	0.1897	0.12719
0.81	66.776	-2.736259	1208.697	-1.5884	0.45069	0.13135	-42.415	56.686	1977.88	-1.718	0.93614	0.21932	30.446	75.939	1187.131	-1.4121	0.44727	-0.0087891	19.151	-152.5027	1462.265	-1.7935	0.89013	0.010498	136.437	-42.89157	1995.2093633	-1.4922	0.64648	-0.27197	38.554	34.976	1985.348	-1.5522	0.76025	-0.16602	29.327	52.197	152.00363	-0.038086	0.18359	0.12305
0.812	40.869	-27.81	1227.169	-1.6089	0.53271	0.1416	-81.975	55.771	1948.4	-1.6827	0.931	0.22466	54.299	23.244	1224.246	-1.5288	0.5205	0.01709	-6.142	-187.5858	1485.653	-1.6699	0.91211	-0.010742	172.135	-27.3646	1994.1079	-1.497	0.64981	-0.28418	62.248	53.723	1971.265	-1.5386	0.75244	-0.17969	33.978	50.3998	166.736	-0.035645	0.18408	0.125
0.814	12.422	-42.2	1245.6033	-1.5684	0.63867	0.14697	-103.41878	50.94	1924.98	-1.6409	0.92818	0.22008	46.219	-16.223	1225.5536	-1.6206	0.60303	0.04248	-7.155	-196.601	1478.307	-1.4238	0.89551	-0.043457	198.146	-28.2722	2001.1493	-1.5055	0.65059	-0.30254	69.476	60.462	1964.624	-1.5303	0.74902	-0.18018	52.008	55.495	148.7494	-0.030273	0.1792	0.12793
0.816	6.525	-36.121	1258.2559	-1.5293	0.68066	0.14404	-116.0665	66.852	1896.86	-1.6035	0.91992	0.21826	55.845	-40.8008	1237.3967	-1.668	0.71094	0.07373	-10.911	-170.65	1462.299	-1.3018	0.86523	-0.044922	212.2776	-29.41808	2010.0412	-1.5117	0.65059	-0.3166	87.312	62.7	1935.7506	-1.5195	0.74414	-0.19287	17.268	51.035	145.3189	-0.025391	0.17529	0.12744
0.818	-28.096	-50.425	1276.831	-1.415	0.74414	0.13623	-122.569	70.762	1860.32	-1.561	0.91532	0.21972	15.832	-49.678	1257.474	-1.6616	0.76025	0.081055	-65.9087	-150.023	1476.6913	-1.1089	0.76611	-0.074707	214.482	-16.6554	2014.7119	-1.5188	0.64902	-0.32793	89.284	75.176	1901.0342	-1.5056	0.74267	-0.19776	6.47199999999999	50.136	133.4496	-0.021973	0.16602	0.11963
0.82	-46.4123	-56.944	1300.426	-1.3135	0.76367	0.12354	-153.68	51.285	1835.46	-1.5214	0.90573	0.21541	-3.996	-58.715	1260.811	-1.5859	0.84961	0.091309	-84.05	-109.405	1499.783	-1.0002	0.67798	-0.10693	206.597	3.517	2018.4392	-1.5254	0.64844	-0.33984	86.257	79.025	1874.5448	-1.4917	0.73975	-0.20264	-39.747	42.8773	128.5325	-0.020996	0.16016	0.12305
0.822	-86.419	-41.6438	1302.271	-1.2104	0.75146	0.11279	-151.816	37.802	1819.88	-1.4813	0.89408	0.2134	-2.7732	-57.154	1274.224	-1.4763	0.89184	0.084473	-94.246	-57.63	1532.497	-0.90967	0.59033	-0.13232	208.588	14.712	2017.9117	-1.5284	0.65635	-0.35	89.664	70.5018	1853.3364	-1.4688	0.72949	-0.20703	-42.476	49.314	123.5159	-0.012695	0.16064	0.125
0.824	-111.899	-8.056	1315.903	-1.0903	0.69775	0.089355	-169.473	36.804	1795.23	-1.4368	0.88249	0.21198	-5.48	-40.7051	1282.983	-1.3413	0.90088	0.062988	-90.6	4.93	1524.88	-0.80908	0.47607	-0.146	196.177	23.2298	2004.271	-1.5374	0.66494	-0.35811	75.431	70.15	1844.0735	-1.4585	0.73096	-0.21143	-69.468	36.43	126.642	-0.0058594	0.15235	0.1272
0.826	-120.9528	-1.143	1294.264	-1.0469	0.65625	0.075684	-180.3	38.325	1767.03	-1.3965	0.87109	0.2002	-69.82	-28.799	1293.661	-1.1426	0.86523	0.030273	-120.261	31.02	1520.583	-0.76123	0.42627	-0.14746	156.017	27.9165	2017.95794	-1.5401	0.67315	-0.36592	91.205	64.0106	1828.7683	-1.4297	0.72607	-0.21924	-57.845	22.3477	117.0933	-0.0019531	0.14795	0.12646
0.828	-133.474	7.377	1305.21253	-0.9707	0.56348	0.068848	-172.802	47.584	1735.54	-1.3499	0.84536	0.20106	-95.6632	-18.4726	1307.459	-1.0454	0.82861	0.01123	-130.258	39.828	1516.016	-0.70361	0.35986	-0.15869	148.168	24.48	2017.911	-1.5416	0.68047	-0.37285	76.319	58.26676	1803.6402	-1.4099	0.71557	-0.22364	-78.505	24.5872	116.737	0.0039063	0.13965	0.12158
0.83	-121.765	10.853	1304.3326	-0.92846	0.48413	0.056641	-140.084	69.548	1700.5	-1.3017	0.83399	0.19664	-119.839	2.171	1303.068	-0.89941	0.73145	-0.018066	-111.82	28.404	1502.308	-0.6626	0.34033	-0.16089	131.537	14.9739	2018.684	-1.5415	0.68604	-0.37744	68.748	65.3273	1795.3166	-1.3921	0.70557	-0.23389	-91.073	22.533	112.118	0.0019531	0.13721	0.12256
0.832	-125.377	-18.091	1323.4314	-0.89209	0.41064	0.05127	-125.348	82.152	1674.53	-1.2575	0.81307	0.19026	-97.8878	16.554	1307.6076	-0.82837	0.64331	-0.036865	-81.624	-18.05	1464.347	-0.62061	0.33643	-0.15381	100.105	12.4046	2020.49	-1.5445	0.68848	-0.38399	51.068	89.71	1778.6973	-1.3574	0.69336	-0.23193	-107.14042	13.4587	106.0797	0.012207	0.12695	0.12256
0.834	-126.062	-61.059	1330.5189	-0.85352	0.33301	0.046387	-125.663	69.93	1650.12	-1.2138	0.79084	0.18636	-105.6116	6.512	1305.1519	-0.77734	0.5498	-0.048828	-82.141	-85.927	1454.509	-0.58008	0.35547	-0.16309	48.017	4.2703	1994.832	-1.5445	0.68945	-0.39024	52.697	113.045	1760.1466	-1.3452	0.68018	-0.23291	-106.641	21.6725	95.4884	0.0090332	0.11866	0.12524
0.836	-146.865	-88.723	1342.7505	-0.83594	0.30273	0.041992	-85.1584	81.782	1625.66	-1.1689	0.76953	0.18115	-83.632	-19.905	1315.278	-0.74316	0.43115	-0.047363	-57.797	-151.226	1472.665	-0.57568	0.37744	-0.16602	21.13	8.7315	1972.8014	-1.5465	0.68594	-0.39297	39.745	112.244	1735.5104	-1.3179	0.67041	-0.23145	-118.0964	19.4755	82.761	0.016602	0.11475	0.12451
0.838	-128.0564	-110.508	1372.0391	-0.80811	0.27002	0.040039	-90.3663	118.1624	1586.06	-1.1311	0.75013	0.17663	-87.413	-35.582	1341.271289	-0.73779	0.37842	-0.054199	-18.992	-191.584	1495.5786	-0.60742	0.42285	-0.16797	-7.16000000000003	19.7242	1942.4109	-1.5524	0.68037	-0.39443	29.936	97.298	1702.3364	-1.3025	0.65942	-0.23535	-104.4083	11.551	82.8356	0.017578	0.10645	0.12256
0.84	-126.08068	-131.697	1402.4775	-0.79566	0.26099	0.04126	-62.716	132.4702	1540.8	-1.0904	0.72971	0.16788	-95.191	-78.931	1371.1622	-0.74609	0.30371	-0.05127	-37.112	-246.0515	1506.9037	-0.67945	0.47241	-0.16382	-10.15	46.208	1926.1807	-1.5527	0.67578	-0.40186	9.10900000000001	91.599	1691.0512	-1.2891	0.64941	-0.23242	-91.0259	9.053	86.0086	0.025391	0.10254	0.12695
0.842	-128.3205	-165.0307	1427.1317	-0.78271	0.26465	0.044434	-60.4805	127.2656	1503.08	-1.0545	0.70704	0.16354	-112.0737	-127.77	1399.3902	-0.7561	0.27173	-0.048584	-65.214	-286.205	1531.1516	-0.78076	0.52588	-0.16406	-9.48	74.948	1925.954	-1.5522	0.66806	-0.40615	4.711	81.898	1668.268	-1.2676	0.64355	-0.22852	-95.016	11.7136	95.142	0.02832	0.10156	0.12939
0.844	-102.778	-180.537	1452.8305	-0.78955	0.27979	0.042969	-35.149	122.1014	1480.93	-1.0199	0.68845	0.16026	-106.21	-170.5637	1426.6631	-0.77441	0.25684	-0.040039	-13.909	-292.131	1575.502	-0.93848	0.60254	-0.1416	-1.73	76.851	1923.631	-1.5471	0.66552	-0.41162	-16.904	85.234	1650.947	-1.2515	0.64111	-0.22412	-83.741	17.4155	85.7969	0.039062	0.093995	0.1228
0.846	-58.124	-183.942	1486.346	-0.80225	0.29346	0.042969	-18.685	115.6123	1439.99	-0.98779	0.6665	0.15039	-103.7	-193.1195	1459.2881	-0.79248	0.26709	-0.038086	-1.58800000000001	-264.349	1614.9006	-1.0137	0.63867	-0.13623	-18.15	74.543	1899.287	-1.5398	0.65888	-0.41514	-17.002	108.328	1615.1024	-1.2305	0.63477	-0.22656	-51.358	19.8102	92.78109	0.054199	0.087891	0.12012
0.848	-19.371	-168.58	1519.1332	-0.854	0.32275	0.041504	1.335	105.2697	1422.19	-0.9593	0.6503	0.14961	-109.919	-208.318	1483.56505	-0.80811	0.28076	-0.032715	2.06699999999999	-241.636	1644.4196	-1.144	0.71533	-0.12402	-3.94	73.038	1875.595	-1.5295	0.65312	-0.42031	-37.622	121.897	1581.4145	-1.2089	0.62891	-0.21875	-23.644	17.8908	88.128	0.077637	0.085449	0.12207
0.85	28.758	-144.83202	1544.6571	-0.90894	0.35376	0.045655	15.38	104.482	1397.49	-0.93352	0.63528	0.14884	-111.7393	-203.958	1530.4551	-0.85693	0.32813	-0.024414	32.768	-200.883	1662.6606	-1.2224	0.77514	-0.11231	-11.4	74.476	1843.94582	-1.5176	0.65039	-0.42383	-48.304	117.705	1538.899	-1.1914	0.62793	-0.21338	-19.582	15.48231	108.9454	0.083008	0.084473	0.11816
0.852	61.455	-127.6523	1578.5295	-0.97852	0.38086	0.048828	37.656	121.865	1374.33	-0.90618	0.61379	0.134	-76.186	-171.516	1574.053	-0.91675	0.37427	-0.016602	69.539	-165.652	1692.528	-1.2808	0.82959	-0.10693	13.74	79.541	1835.6158	-1.5062	0.64434	-0.43223	-43.51	116.837	1529.16478	-1.1655	0.62207	-0.20703	9.514	-2.1848	104.863	0.10059	0.085449	0.1123
0.854	91.483	-115.027	1598.4313	-1.0684	0.4248	0.059082	25.695	118.321	1334.47	-0.88029	0.59952	0.13008	-23.769	-136.4163	1613.512	-0.98828	0.42383	-0.0078125	63.309	-143.279	1707.926	-1.3154	0.88965	-0.10352	24.88	79.692	1816.3451	-1.4882	0.63916	-0.43564	-23.924	137.213	1512.8673	-1.1499	0.62646	-0.21094	21.481	-18.6872	111.66	0.10401	0.081787	0.10766
0.856	117.596	-104.762	1619.3869	-1.1147	0.44336	0.062988	13.882	107.28	1290.4	-0.84912	0.58838	0.12598	-1.218	-122.9652	1638.914	-1.0913	0.4917	0.010742	86.8	-139.43	1731.403	-1.3159	0.90479	-0.099121	59.846	77.969	1793.6114	-1.4738	0.63799	-0.44228	-16.835	135.987	1488.58805	-1.1284	0.61768	-0.19873	56.455	-19.42	122.076	0.092285	0.080566	0.10303
0.858	133.103	-89.49	1641.9061	-1.187	0.48291	0.077637	4.678	105.543	1245.28	-0.81708	0.5707	0.12324	35.225	-103.102	1661.0601	-1.1421	0.52832	0.019043	133.237	-122.133	1734.86397	-1.2993	0.90088	-0.11035	63.003	75.7996	1789.9814	-1.4594	0.63867	-0.44297	-32.626	140.686	1470.536	-1.116	0.61157	-0.19556	37.667	-25.584	151.0062	0.076172	0.078125	0.10059
0.86	155.4465	-85.478	1672.4539	-1.2146	0.51245	0.080322	-7.887	121.2	1222.38	-0.78398	0.55937	0.12148	61.876	-82.258	1687.6656	-1.2261	0.59473	0.027344	163.4062	-123.003	1746.7762	-1.2942	0.88403	-0.12451	89.774	67.3848	1768.3576	-1.4478	0.63525	-0.45068	-8.77799999999999	144.882	1448.86888	-1.0981	0.60791	-0.19287	49.438	-44.069	182.9226	0.062012	0.077637	0.098145
0.862	156.3516	-92.825	1695.1558	-1.2305	0.53906	0.081055	-22.373	106.976	1198.4	-0.74569	0.54531	0.11445	87.719	-75.213	1695.6947	-1.2686	0.65186	0.043701	124.574	-150.701	1754.882	-1.293	0.85352	-0.14258	104.969	89.319	1752.54807	-1.439	0.63818	-0.44521	-6.627	148.896	1422.7771	-1.0796	0.60889	-0.18457	42.696	-37.4737	197.7417	0.024414	0.087402	0.096191
0.864	155.2456	-97.468	1713.8274	-1.2324	0.55615	0.071777	-28.441	112.045	1164.73	-0.71211	0.52441	0.11103	105.815	-89.582	1712.5651	-1.2891	0.69824	0.046875	115.299	-172.74383	1769.911	-1.3145	0.82178	-0.15723	144.196	86.5641	1734.2284	-1.4273	0.63945	-0.44668	3.57900000000001	156.676	1407.2884	-1.0698	0.60791	-0.18066	59.491	-12.0143	216.159	-0.0024415	0.098879	0.098145
0.866	121.113	-114.3754	1734.1357	-1.2246	0.55859	0.064453	-50.3209	129.939	1125.97	-0.68018	0.51123	0.10596	130.847	-92.537	1730.094	-1.2734	0.74609	0.044434	125.083	-172.4578	1801.619	-1.3374	0.80713	-0.14941	156.887	91.2674	1707.17507	-1.4231	0.64297	-0.4416	6.70100000000001	151.248	1377.19008	-1.0547	0.59961	-0.16797	41.185	8.3494	254.832	-0.035156	0.11426	0.097656
0.868	128.214	-119.3644	1768.4674	-1.2134	0.55322	0.054199	-64.9835906	131.6801	1082.7	-0.64903	0.4918	0.10459	122.972	-109.167	1736.575	-1.2539	0.76172	0.038086	101.468	-186.7395	1827.087	-1.3901	0.79932	-0.15332	177.551	81.92835	1694.601	-1.4146	0.64834	-0.43252	39.434	162.62	1348.659	-1.0388	0.59985	-0.15966	26.089	32.6064	304.805	-0.080078	0.13623	0.092285
0.87	106.99	-132.009	1782.8966	-1.2156	0.53833	0.040039	-64.6184	121.923	1056.27	-0.62188	0.47539	0.095899	82.349	-131.2418	1753.088	-1.2026	0.76514	0.0078125	46.416	-213.9665	1861.9133	-1.4304	0.79907	-0.14722	165.704	80.1411	1672.3345	-1.4121	0.65234	-0.42969	18.361	155.362	1322.8858	-1.022	0.59619	-0.15088	-4.41699999999999	60.3841	368.271	-0.11035	0.14697	0.094727
0.872	94.365	-130.4747	1799.3747	-1.2305	0.52051	0.032227	-74.1787	130.404	1034.81	-0.59258	0.45587	0.091602	70.131	-135.534	1791.0468	-1.1677	0.75122	-0.015625	38.856	-230.858	1906.981	-1.4683	0.80811	-0.146	156.896	76.6676	1648.95962	-1.4052	0.66084	-0.41729	27.168	147.5238	1289.2593	-1.0059	0.58496	-0.13525	-16.618	104.324	429.2638	-0.17139	0.16357	0.094727
0.874	58.37	-136.9674	1835.2093	-1.2637	0.50098	0.033203	-76.8569	147.7	991.58	-0.57021	0.43838	0.087892	71.349	-125.2703	1819.1174	-1.1421	0.73096	-0.034668	53.722	-229.612	1938.688	-1.4976	0.82764	-0.14404	159.841	91.893	1631.5828	-1.3965	0.66523	-0.40566	29.419	142.021	1269.2873	-0.99414	0.57813	-0.13232	-44.5	134.161	502.362	-0.23291	0.17627	0.0896
0.876	49.85	-139.019	1875.007	-1.2886	0.49268	0.030762	-100.233	141.386	958.01	-0.55371	0.41797	0.081055	82.569	-120.1234	1843.299	-1.1411	0.6958	-0.052734	42.917	-213.205	1975.307	-1.5068	0.83984	-0.15479	143.079	119.117	1592.087	-1.3805	0.67422	-0.39746	54.19	149.2344	1247.108	-0.97021	0.57471	-0.12305	-45.897	173.344	620.36717	-0.3042	0.18604	0.081543
0.878	23.982	-125.814	1893.028	-1.3379	0.49219	0.035645	-97.841	135.39	932.22	-0.52725	0.40732	0.080469	58.136	-131.405	1850.2201	-1.1523	0.68555	-0.055664	23.876	-194.994	1982.913	-1.5112	0.86963	-0.16699	120.173	134.776	1570.5734	-1.3686	0.68223	-0.38613	16.897	154.359	1224.5888	-0.95141	0.56762	-0.11352	-58.953	210.853	712.8593	-0.43701	0.19824	0.075195
0.88	-4.492	-119	1912.874	-1.3748	0.49854	0.036133	-101.99	135.531	910.08	-0.50352	0.39297	0.07832	51.46	-130.0282	1887.782	-1.1929	0.66357	-0.062988	38.972	-160.714	1989.182	-1.5066	0.88892	-0.18482	87.261	121.9625	1537.6612	-1.3535	0.69043	-0.375	18.404	167.012	1199.749	-0.9375	0.55469	-0.10645	-60.358	220.19	821.6632	-0.51123	0.21191	0.075195
0.882	-35.924	-125.205	1939.32	-1.4019	0.5083	0.029785	-99.6066	132.643	878.07	-0.47969	0.37617	0.075195	32.32	-136.2031	1916.225	-1.2251	0.65966	-0.061768	7.884	-140.503	1995.802	-1.498	0.89844	-0.20508	76.722	119.8015	1518.6077	-1.3315	0.69326	-0.36299	11.659	172.668	1175.101	-0.90869	0.54248	-0.087402	-58.754	200.953	915.502	-0.69141	0.23047	0.07666
0.884	-51.57	-113.835	1939.803	-1.4375	0.5293	0.0087891	-106.098	128.797	839.51	-0.45508	0.36065	0.066797	16.063	-144.008	1939.322	-1.2612	0.65674	-0.064941	-19.771	-148.477	2004.237	-1.4883	0.91016	-0.23145	56.306	126.182	1501.5277	-1.3136	0.69853	-0.35196	2.763	181.178	1151.47	-0.89648	0.53613	-0.08252	-65.606	167.093	1008.85235	-0.83276	0.25342	0.089356
0.886	-72.176	-92.821	1943.876	-1.4492	0.53613	-0.0058594	-72.9872	136.562	822.25	-0.43115	0.34424	0.061035	-12.384	-133.397	1951.909	-1.2983	0.67041	-0.081543	0.352000000000004	-158.451	2005.195	-1.4805	0.91113	-0.24023	17.956	112.193	1476.2152	-1.2968	0.70517	-0.3375	-14.295	160.714	1124.2339	-0.86914	0.52051	-0.072266	-78.06	136.511	1070.34591	-0.97998	0.28613	0.10742
0.888	-74.592	-72.631	1935.1239	-1.4683	0.56299	-0.025391	-51.426	134.326	810.27	-0.40996	0.32539	0.054395	-13.091	-110.183	1954.857	-1.3164	0.68555	-0.081543	14.65	-151.354	1994.0898	-1.4683	0.9165	-0.26318	-16.559	110.032	1446.6408	-1.2766	0.7084	-0.325	1.322	162.552	1095.0728	-0.85132	0.51001	-0.065186	-81.167	82.607	1156.604	-1.1548	0.34717	0.14404
0.89	-79.051	-65.263	1935.102	-1.4731	0.5835	-0.046143	-36.946	124.8472	794.66	-0.38633	0.30821	0.045606	-47.614	-97.717	1967.744	-1.3315	0.71924	-0.10742	-10.785	-155.047	1987.809	-1.4631	0.92407	-0.28613	-12.044	124.265	1429.9495	-1.2554	0.71143	-0.31396	-24.571	175.804	1058.6826	-0.83594	0.49854	-0.057617	-57.435	48.287	1190.663	-1.23	0.38184	0.16357
0.892	-62.389	-62.897	1946.9241	-1.4819	0.60303	-0.065918	-20.209	115.46	751.59	-0.3707	0.29102	0.039355	-61.55	-76.221	1950.9076	-1.3387	0.74976	-0.12427	-14.282	-134.9894	1980.622	-1.457	0.92383	-0.30566	-42.765	147.384	1397.9716	-1.2403	0.71416	-0.30029	-45.894	170.511	1022.597	-0.80664	0.48584	-0.046387	-35.063	7.028	1227.991	-1.3374	0.47119	0.21387
0.894	-63.199	-61.299	1952.262	-1.4937	0.62354	-0.09668	15.948	138.513	722.18	-0.35235	0.27607	0.034375	-83.606	-69.095	1946.026	-1.3428	0.7832	-0.14453	-2.95	-107.2496	1977.254	-1.4468	0.92041	-0.3335	-48.051	168.985	1379.3596	-1.2203	0.7127	-0.28945	-60.288	148.8379	1006.9379	-0.79297	0.47803	-0.044434	-24.944	-34.5461	1268.279	-1.3772	0.54077	0.24194
0.896	-45.405	-63.908	1975.8265	-1.498	0.63672	-0.11084	28.662	132.305	699.52	-0.33691	0.2583	0.024414	-66.189	-47.282	1951.983	-1.3501	0.81689	-0.16748	10.01	-78.291	1976.436	-1.4468	0.91455	-0.33545	-66.397	164.6	1346.24	-1.2011	0.70996	-0.27656	-68.709	154.326	997.179	-0.76416	0.46045	-0.039063	-13.008	-86.666	1319.348	-1.3926	0.61719	0.26221
0.898	-5.32599999999999	-54.223	2001.9594	-1.5151	0.65869	-0.13867	22.828	125.334	695.43	-0.32285	0.24844	0.02207	-76.435	-51.6167	1976.936	-1.355	0.82959	-0.18066	9.468	-93.264	1996.116	-1.439	0.90381	-0.354	-58.943	154.841	1321.4582	-1.1837	0.70752	-0.26387	-81.91	157.376	974.694	-0.74292	0.44946	-0.033692	34.633	-102.948	1354.024	-1.3545	0.70508	0.28369
0.9	30.635	-45.857	2030.612	-1.5295	0.67505	-0.15991	33.339	123.626	663.17	-0.3082	0.23789	0.015821	-48.096	-44.849	1997.18	-1.3823	0.85596	-0.19287	63.126	-113.455	2047.5709	-1.4407	0.88843	-0.35816	-84.099	136.139	1290.9367	-1.166	0.70703	-0.25195	-78.021	155.965	942.961	-0.72461	0.43555	-0.021484	43.625	-93.536	1378.743	-1.3296	0.73877	0.29102
0.902	46.696	-30.95	2041.1602	-1.5464	0.68604	-0.17871	53.245	145.691	628.43	-0.29219	0.22539	0.010351	-33.829	-41.145	2028.841	-1.4048	0.87402	-0.20654	80.279	-115.711	2072.688	-1.4414	0.87305	-0.36719	-70.551	125.375	1278.757	-1.1426	0.70332	-0.23926	-79.568	163.83	909.6414	-0.69531	0.42188	-0.017578	14.555	-73.2453	1429.354	-1.2656	0.77539	0.28613
0.904	88.199	-37.527	2045.9649	-1.5659	0.69775	-0.20166	48.824	147.66	600.04	-0.27861	0.21699	0.0043945	-6.955	-28.845	2048.426	-1.4307	0.88867	-0.2207	106.861	-119.721	2076.035	-1.4395	0.85059	-0.36963	-54.223	134.185	1239.6062	-1.1191	0.70098	-0.23115	-96.63327	177.687	896.412	-0.67847	0.41089	-0.012451	44.12	-68.054	1489.9459	-1.2241	0.78369	0.28248
0.906	124.285	-35.76	2066.216	-1.5737	0.70068	-0.21045	46.066	147.274	585.99	-0.26807	0.2041	-0.00048828	14.053	-33.642	2068.136	-1.459	0.9043	-0.23193	108.689	-124.671	2077.03	-1.438	0.83643	-0.3667	-18.642	141.305	1212.92201	-1.0901	0.69082	-0.21787	-80.266	182.46	864.46285	-0.65332	0.40137	-0.0053711	61.722	-44.5599	1530.1641	-1.189	0.77002	0.27295
0.908	129.96	-51.225	2079.7188	-1.5952	0.71338	-0.22803	50.053	158.984	563.82	-0.25781	0.19414	-0.0084962	48.863	-29.697	2064.4279	-1.4712	0.9126	-0.23828	136.439	-109.914	2067.3787	-1.4395	0.80859	-0.37109	-19.587	138.976	1177.1532	-1.0639	0.68692	-0.21289	-88.1937	158.364	843.1461	-0.62598	0.38574	0.0024414	100.282	-9.773	1540.304	-1.1733	0.73877	0.27002
0.91	137.8	-69.0224	2089.9833	-1.605	0.71533	-0.2417	38.332	163.13	540.82	-0.2458	0.18779	-0.012696	67.907	-35.38	2068.8973924	-1.4956	0.92627	-0.25537	151.492	-105.68	2056.45	-1.4356	0.78662	-0.37256	-2.16499999999999	143.384	1158.3075	-1.0425	0.67627	-0.19971	-55.111	157.86	821.3779	-0.60693	0.37939	0.0097656	99.963	0.885000000000005	1558.66545	-1.1753	0.71924	0.26514
0.912	177.864	-71.502	2103.914	-1.6128	0.71338	-0.24951	36.955	149.313	517.41	-0.23174	0.18154	-0.013867	102.553	-47.993	2069.9447	-1.5083	0.92823	-0.2666	149.474	-112.52101	2050.61393	-1.4355	0.76758	-0.36963	27.226	166.008	1136.7257	-1.0165	0.66572	-0.1915	-67.056	164.73	802.446	-0.57568	0.36621	0.011719	125.69	0.259999999999998	1582.371	-1.1714	0.67432	0.26221
0.914	181.0903	-54.303	2089.1354	-1.627	0.7168	-0.25879	34.286	141.5737	504.1	-0.22129	0.17832	-0.020312	90.271	-74.0067	2080.9733	-1.5132	0.92627	-0.271	124.657	-126.772	2052.4623	-1.437	0.75049	-0.37061	43.915	171.761	1118.34055	-0.98985	0.65117	-0.1833	-49.858	168.251	789.023	-0.55078	0.35791	0.017822	100.199	-5.438	1593.021	-1.136	0.6311	0.2605
0.916	172.565	-42.1352	2088.3273	-1.625	0.71875	-0.26538	9.066	134.2292	501.7	-0.19385	0.17529	-0.023438	120.859	-77.836	2085.7945	-1.5151	0.92041	-0.29053	140.106	-107.941	2060.069	-1.4355	0.7373	-0.36816	54.268	168.208	1115.377	-0.96797	0.63711	-0.17471	-46.458	172.586	768.469	-0.52686	0.34619	0.021973	102.016	-31.492	1539.43	-1.0859	0.5918	0.25684
0.918	159.438	-30.8085	2086.33	-1.6265	0.72314	-0.27441	-5.201	119.5925	485.846	-0.16953	0.1752	-0.026661	125.327	-73.633	2079.4525	-1.5137	0.91797	-0.2998	124.269	-82.863	2060.053	-1.4453	0.72656	-0.36914	80.971	156.535	1088.393	-0.94463	0.62217	-0.16319	-26.431	192.765	739.1692	-0.50146	0.3335	0.023438	114.364	-73.914	1495.17131	-0.98047	0.54199	0.24561
0.92	173.218	-16.9274	2077.3325	-1.625	0.7207	-0.28613	-29.735	113.139	469.924	-0.14033	0.17139	-0.034863	123.284	-57.749	2070.0522	-1.5054	0.90674	-0.32178	114.253	-62.5426	2039.9165	-1.4548	0.71899	-0.3711	91.171	138.9211	1050.2649	-0.92139	0.60645	-0.15088	-34.257	177.148	712.1705	-0.48828	0.3252	0.022461	102.795	-128.7887	1471.9018	-0.92529	0.52588	0.23047
0.922	143.936	-3.67	2074.0231	-1.625	0.72266	-0.29004	-37.191	127.342	446.096	-0.11651	0.16748	-0.036035	115.416	-40.9344	2074.6949	-1.5059	0.8999	-0.33863	109.814	-30.887	2022.0631	-1.4624	0.71436	-0.36377	86.384	130.3205	1016.6084	-0.90254	0.59395	-0.14453	-18.273	153.3267	695.6257	-0.46484	0.3125	0.031738	74.887	-162.984	1459.6135	-0.81885	0.50244	0.2085
0.924	133.521	-2.388	2080.9828	-1.623	0.70801	-0.29932	-57.639	123.006	432.337	-0.092676	0.16055	-0.045117	132.666	-5.227	2082.763	-1.4956	0.89111	-0.35498	117.354	-1.914	2005.205	-1.4741	0.71094	-0.36182	83.175	127.4849	1004.305	-0.88027	0.57734	-0.13213	-11.632	154.3809	681.08711	-0.44776	0.302	0.035156	41.695	-200.034	1445.231	-0.74976	0.48023	0.17847
0.926	117.111	-10.1478	2083.912	-1.6248	0.70532	-0.30103	-62.364	108.542	419.13	-0.076172	0.14893	-0.050293	128.815	8.2799	2093.919	-1.4937	0.88525	-0.37256	75.417	-3.511	2007.8887	-1.4785	0.71289	-0.3623	99.723	140.9745	988.3206	-0.86387	0.5625	-0.1208	-1.129	167.6981	656.2228	-0.42725	0.29053	0.038086	3.218	-221.248	1454.2962	-0.69092	0.46143	0.15283
0.928	91.771	5.963	2073.6719	-1.6245	0.69189	-0.30762	-96.855	113.0582	405.51	-0.064551	0.13838	-0.055274	128.428	14.087	2076.6527	-1.4949	0.87915	-0.37915	67.626	-10.555	2014.0024	-1.4761	0.71045	-0.36279	80.967	149.1279	963.836	-0.84346	0.54326	-0.10869	-19.585	172.787	637.7611	-0.40381	0.28369	0.048828	-19.681	-220.8396	1476.1907	-0.64014	0.44287	0.13086
0.93	56.641	15.972	2057.5964	-1.6309	0.67969	-0.31152	-71.349	123.8047	376.308	-0.060742	0.12949	-0.057226	105.572	22.058	2078.3138	-1.5054	0.86768	-0.38916	64.969	-15.107	2019.386	-1.4712	0.70898	-0.36182	60.92	135.9325	924.8791	-0.83008	0.52734	-0.092285	-16.211	165.649	634.5956	-0.38818	0.27979	0.054688	-81.242	-221.093	1498.69	-0.63232	0.43896	0.12305
0.932	28.54	21.1308	2048.562	-1.6406	0.66992	-0.30859	-90.0263	114.4042	377.801	-0.059961	0.11621	-0.061914	78.291	38.1475	2069.8569	-1.5195	0.85742	-0.39453	53.9	-23.411	2011.319	-1.4668	0.71289	-0.36328	43.959	135.9964	906.3105	-0.81192	0.51328	-0.08457	-4.12	159.11	610.3341	-0.35938	0.27637	0.055176	-107.6498	-213.139	1524.038	-0.64893	0.43604	0.10938
0.934	7.86999999999999	13.5576	2067.538	-1.6577	0.65479	-0.31396	-75.6787	86.614	372.05	-0.056348	0.11006	-0.061621	42.447	34.40605	2059.1257	-1.5269	0.84814	-0.3999	21.7	-34.754	1988.518	-1.4512	0.70703	-0.35645	17.318	139.587	889.924	-0.79414	0.49375	-0.077441	-6.788	154.367	585.3347	-0.33154	0.26855	0.057373	-127.93	-185.11	1530.19236	-0.69629	0.44604	0.10986
0.936	-20.93	22.142	2042.3373	-1.6645	0.64648	-0.31299	-74.036	88.339	361.5	-0.057129	0.10449	-0.063965	37.068	30.3777	2058.69	-1.5488	0.83594	-0.4043	17.44	-28.729	1949.4724	-1.4448	0.70068	-0.35889	14.295	135.187	873.426	-0.77578	0.47227	-0.055957	-27.686	131.5977	575.802	-0.30371	0.26074	0.062012	-124.188	-150.779	1549.4416	-0.75977	0.46484	0.11621
0.938	-43.64	2.3787	2036.3255	-1.6699	0.63672	-0.31494	-56.129	97.927	327.907	-0.053809	0.10313	-0.068555	27.505	24.4329	2050.137	-1.5601	0.82129	-0.40576	20.16	-14.026	1931.268	-1.4336	0.69922	-0.36035	-32.957	139.445	841.2668	-0.75469	0.45508	-0.043652	-23.784	146.962	559.5213	-0.26807	0.24902	0.064453	-137.766	-135.54	1558.5478	-0.87109	0.5	0.14014
0.94	-46.166	2.87918	2028.4748	-1.6772	0.62744	-0.31689	-58.981	100.8951	326.371	-0.053515	0.1043	-0.069336	-1.66800000000001	16.1869	2055.185	-1.5742	0.81445	-0.40674	-9.13	-26.7318	1915.8995	-1.4267	0.69433	-0.35547	-31.068	156.163	810.7148	-0.73779	0.43408	-0.03125	-39.497	158	543.7846	-0.25439	0.24609	0.064941	-134.312	-132.736	1596.361	-0.9292	0.51611	0.15576
0.942	-47.99	15.2608	2024.995	-1.6816	0.62012	-0.31934	-35.61	105.2201	307.094	-0.049219	0.09961	-0.07168	-25.816	11.458	2042.796	-1.5894	0.80322	-0.40088	-27.815	-42.3407	1921.6897	-1.4233	0.68604	-0.35059	-74.05	154.877	785.965	-0.71738	0.41924	-0.017188	-63.5463	144.396	521.31802	-0.22266	0.22559	0.061523	-118.478	-132.017	1605.6439	-1.0347	0.55029	0.18164
0.944	-56.049	31.279	1992.2445	-1.6797	0.61426	-0.31689	-17.288	104.36904	293.35	-0.043652	0.098047	-0.075781	-57.21	19.873	2027.4619	-1.5962	0.79248	-0.39795	7.259	-38.3227	1906.3275	-1.416	0.68164	-0.34766	-89.084	154.041	762.463	-0.69639	0.40283	-0.0055664	-66.311	135.297	483.317	-0.20166	0.21557	0.059815	-134.546	-156.636	1633.4299	-1.0997	0.57177	0.20777
0.946	-47.549	37.842	1984.466	-1.6753	0.6084	-0.31812	-13.95	96.8975	274.46	-0.038086	0.097656	-0.078613	-69.31	46.486	2009.9794	-1.6035	0.78418	-0.39844	16.9	-25.6115	1902.586	-1.4155	0.6792	-0.34131	-106.362	163.791	742.0869	-0.6749	0.38643	0.0053711	-71.354	145.05	472.312	-0.18457	0.2002	0.061035	-153.374	-194.487	1659.7929	-1.1479	0.59033	0.22168
0.948	-11.51	49.244	1978.295	-1.6753	0.60352	-0.31494	-11.7	78.20023	256.63	-0.032617	0.091797	-0.076953	-62.302	53.427	1995.51838	-1.5984	0.77759	-0.3938	19.166	-0.41	1865.6501	-1.4155	0.67822	-0.33057	-86.041	171.648	714.932	-0.65371	0.37266	0.016797	-84.3019	143.387	471.9406	-0.16504	0.18555	0.060547	-152.864	-210.488	1694.7092	-1.187	0.60986	0.22705
0.95	11.87	60.402	1984.015	-1.6636	0.6001	-0.31689	18.039	100.7031	253.785	-0.032031	0.09541	-0.084375	-47.446	59.944	1989.5341	-1.5996	0.76953	-0.39111	40.809	48.1881	1841.3978	-1.4058	0.67822	-0.32471	-116.332	162.972	701.029	-0.63232	0.35645	0.023926	-93.1673	138.386	457.678	-0.15771	0.1748	0.055176	-115.856	-207.072	1718.0716	-1.1987	0.61768	0.22998
0.952	13.523	72.057	1966.606	-1.6577	0.60107	-0.31006	31.529	90.3413	253.74	-0.027343	0.091113	-0.084765	-18.416	67.672	1976.6989	-1.5952	0.76221	-0.38525	67.674	91.791	1822.8671	-1.4058	0.67822	-0.31543	-121.2244	143.964	676.734	-0.61181	0.34629	0.03125	-84.5201	143.585	446.239	-0.14014	0.16357	0.054688	-117.049	-212.0658	1752.073	-1.2241	0.62646	0.21289
0.954	44.753	71.578	1950.7902	-1.6504	0.5957	-0.30664	31.442	66.0879	241.81	-0.029395	0.08457	-0.089941	1.605	76.862	1963.14	-1.5923	0.7583	-0.38184	73.752	92.959	1810.0811	-1.3887	0.6748	-0.31055	-121.8547	145.425	649.9358	-0.58388	0.33056	0.034864	-97.962	141.772	411.5713	-0.13037	0.15649	0.052979	-99.592	-212.28	1786.212	-1.2475	0.625	0.1941
0.956	75.041	91.216	1917.4864	-1.6362	0.6001	-0.30273	47.645	54.9526	220.418	-0.034668	0.082031	-0.091797	6.30600000000001	76.551	1943.819	-1.584	0.75293	-0.37012	85.774	70.193	1787.884	-1.3809	0.67383	-0.30273	-97.869	146.822	640.4353	-0.5542	0.32002	0.041895	-102.1571	127.321	388.3994	-0.12256	0.14307	0.047852	-81.8746	-186.2086	1826.3471	-1.269	0.62744	0.16992
0.958	84.306	93.904	1895.799	-1.627	0.59766	-0.29492	44.716	74.03317	214.381	-0.033789	0.080469	-0.093555	7.96000000000001	91.508	1928.5056	-1.5752	0.74707	-0.36035	111.839	56.3839	1775.874	-1.3628	0.67041	-0.28955	-90.347	129.83	620.79161	-0.52461	0.30869	0.035449	-111.5333	123.77	378.292771	-0.10596	0.1333	0.045898	-65.4597	-170.5257	1871.7832	-1.3042	0.63037	0.13867
0.96	96.656	89.7737	1881.519	-1.6074	0.60156	-0.28711	55.388	70.0862	218.007	-0.04082	0.079102	-0.095313	31.719	110.59	1893.8127	-1.5684	0.74219	-0.34961	117.698	46.173	1758.34589	-1.3418	0.66797	-0.28125	-67.342	133.941	602.97974	-0.48633	0.29248	0.041504	-84.935	144.5	363.827	-0.098633	0.12695	0.043457	-46.7315	-159.88582	1913.137	-1.3196	0.6438	0.11866
0.962	133.877	96.1674	1862.41	-1.5996	0.59961	-0.28613	30.257	58.89804	213.74	-0.04668	0.076367	-0.098047	50.438	115.578	1866.251	-1.562	0.73682	-0.34131	107.362	55.9539	1727.8837	-1.3286	0.66846	-0.28223	-53.65	132.613	594.5557	-0.45459	0.2876	0.036426	-82.0171	140.854	352.0658	-0.088379	0.12354	0.044434	-17.228	-151.4646	1950.922	-1.3389	0.66309	0.097656
0.964	159.694	83.482	1847.8681	-1.5737	0.6001	-0.27881	23.542	51.56348	193.517	-0.056641	0.072168	-0.094238	63.399	105.8546	1845.928	-1.5552	0.73682	-0.32666	113.552	63.9621	1703.37996	-1.3047	0.66113	-0.27832	-26.848	133.999	568.093	-0.42324	0.26855	0.031836	-90.3889	135.095	345.583	-0.083252	0.11328	0.037842	15.024	-141.447	1971.348	-1.3472	0.70166	0.080078
0.966	148.547	69.9073	1841.2752	-1.5581	0.60083	-0.27417	-6.14100000000001	58.36882	178.737	-0.064453	0.069824	-0.092285	75.451	102.32409	1843.2735	-1.5391	0.72852	-0.31494	133.729	80.391	1684.8508	-1.2928	0.65747	-0.26441	-11.366	132.068	566.6043	-0.38848	0.25957	0.029102	-75.3535	118.503	339.3024	-0.07959	0.10498	0.035156	-2.73	-154.568	1973.51	-1.355	0.71729	0.073242
0.968	144.166	75.6706	1842.047	-1.543	0.60156	-0.26563	10.185	53.9372	172.934	-0.075976	0.071191	-0.097266	79.504	93.5064	1823.8837	-1.53	0.72241	-0.30957	110.223	60.0817	1674.5701	-1.2744	0.6543	-0.25879	25.461	128.648	547.9835	-0.36026	0.24854	0.027442	-50.493	123.039	328.6942	-0.080566	0.10303	0.033691	14.222	-174.3311	1959.0504	-1.3633	0.75195	0.057129
0.97	170.5602	78.96994	1817.136	-1.5215	0.60352	-0.25684	-30.336	38.726	181.813	-0.083105	0.069434	-0.095996	89.072	83.6161	1812.3202	-1.5117	0.71875	-0.30273	112.236	34.0496	1671.4529	-1.2529	0.64844	-0.25391	33.689	121.5453	542.066	-0.33545	0.23389	0.021484	-46.997	100.229	326.207	-0.080078	0.097168	0.027344	-5.20999999999999	-166.885	1937.112	-1.3784	0.77246	0.066162
0.972	158.3423	88.422	1780.4745	-1.5073	0.60498	-0.24951	-32.295	44.822	177.9	-0.094433	0.072949	-0.096387	99.132	76.4803	1792.2032	-1.4956	0.71338	-0.29248	126.86	27.325	1667.319	-1.2412	0.64746	-0.25098	29.475	111.0556	511.7538	-0.30928	0.22217	0.020899	-51.827	101.385	316.6436	-0.086914	0.09082	0.028809	-2.656	-149.921	1927.026	-1.4023	0.78906	0.071289
0.974	127.852	99.227	1754.813	-1.4863	0.61523	-0.23975	-60.174	32.6748	162.318	-0.10098	0.074902	-0.097461	118.9	88.881	1771.1444	-1.4761	0.71533	-0.28857	127.066	51.6712	1649.012	-1.2134	0.64893	-0.24365	32.194	109.4077	487.2514	-0.28809	0.21221	0.018261	-16.704	106.796	298.7846	-0.086181	0.087647	0.02295	-48.109	-160.6	1931.277	-1.4487	0.79932	0.078125
0.976	106.145	106.388	1730.27287	-1.4675	0.61646	-0.23047	-70.22	40.1801	146.223	-0.10645	0.074707	-0.09668	111.838	87.8913	1738.9468	-1.4463	0.70605	-0.2793	69.037	66.7229	1606.6128	-1.1941	0.64624	-0.23902	43.629	131.357	471.6284	-0.26465	0.20362	0.020605	-18.679	104.937	286.5722	-0.082031	0.083008	0.021973	-36.821	-154.6603	1960.08	-1.4766	0.80908	0.084961
0.978	84.013	107.859	1713.046	-1.4468	0.62158	-0.22363	-79.4706	42.093	147.891	-0.11308	0.082617	-0.095215	110.49	88.118	1717.4887	-1.4207	0.70679	-0.27319	73.3	95.807	1575.634	-1.1704	0.64697	-0.23291	55.138	137.892	465.1742	-0.24512	0.19317	0.02168	-22.936	93.59	273.311	-0.084961	0.077637	0.025391	-51.6918	-153.394	2014.3279	-1.5371	0.82617	0.092285
0.98	50.973	105.951	1695.7607	-1.4189	0.62646	-0.20898	-66.013	40.5065	145.655	-0.11758	0.081348	-0.096777	96.091	103.042	1699.3005	-1.3965	0.70508	-0.27051	70.737	109.714	1553.027	-1.1401	0.63818	-0.2334	42.635	125.3966	444.89856	-0.22363	0.18994	0.021973	-7.234	90.353	273.4421	-0.077637	0.072754	0.021484	-52.4295	-144.3386	2028.9803	-1.5903	0.84717	0.09912
0.982	31.736	104.8594	1670.2852	-1.4102	0.63184	-0.20215	-104.8209	20.182	138.358	-0.12461	0.085645	-0.094043	70.323	115.093	1668.881	-1.3628	0.70166	-0.26416	38.972	96.65	1521.8504	-1.125	0.63965	-0.23145	41.848	132.363	418.8036	-0.19971	0.18154	0.022559	1.108	89.292	263.7883	-0.07373	0.066406	0.020996	-92.77	-145.0607	2067.469	-1.6367	0.87305	0.10303
0.984	-2.66600000000001	122.636	1646.818	-1.3784	0.63916	-0.18896	-105.284	19.513	130.271	-0.1251	0.086035	-0.094238	36.558	119.323	1649.3351	-1.3452	0.70068	-0.26025	-0.557000000000002	75.239	1512.508	-1.0938	0.62988	-0.23584	10.688	126.055	396.5213	-0.18652	0.17861	0.020313	-15.189	92.238	262.756	-0.069336	0.059814	0.016113	-89.204	-121.103	2083.988	-1.6929	0.91455	0.10547
0.986	-24.083	138.299	1626.142	-1.3565	0.64062	-0.18482	-85.504	30.725	125.382	-0.12891	0.088867	-0.094727	13.418	128.663	1616.5051	-1.3145	0.69824	-0.25293	-1.476	88.72	1469.6401	-1.0623	0.62524	-0.22583	6.417	125.378	395.2296	-0.16152	0.17627	0.023438	-18.644	82.379	245.53	-0.072266	0.051758	0.013672	-131.448	-103.644	2100.818	-1.7163	0.93408	0.10254
0.988	-62.852	149.41	1587.8055	-1.3359	0.64648	-0.17773	-94.032	37.305	124.535	-0.13183	0.09209	-0.09502	-1.265	141.584	1590.7231	-1.2969	0.69776	-0.24707	-14.159	96.908	1443.9748	-1.0391	0.61328	-0.22461	-21.821	115.432	392.7334	-0.14365	0.1708	0.018457	-7.498	84.222	237.469	-0.071777	0.04541	0.01709	-138.805	-106.854	2100.9967	-1.7593	0.979	0.11035
0.99	-73.089	151.671	1565.4213	-1.3081	0.65088	-0.16309	-105.0715	13.701	118.049	-0.12803	0.091211	-0.091993	-23.033	154.422	1559.5102	-1.2749	0.68701	-0.23877	-45.334	109.4	1400.48273	-1.0132	0.6123	-0.2207	-18.713	118.269	378.3314	-0.12158	0.1665	0.02002	-22.306	80.004	229.609	-0.071289	0.043457	0.012695	-154.846	-127.269	2112.58	-1.7822	1.0058	0.10644
0.992	-82.316	154.858	1533.8118	-1.2949	0.64844	-0.1582	-78.37	18.53	122.647	-0.12256	0.091992	-0.095898	-56.274	155.564	1549.311	-1.2441	0.68652	-0.23096	-53.584	119.876	1357.838	-0.99365	0.60791	-0.21436	-62.541	110.742	359.3269	-0.10703	0.16465	0.020801	-27.073	71.013	212.6075	-0.071289	0.035156	0.013672	-137.829	-120.224	2117.2345	-1.8066	1.0283	0.10791
0.994	-79.768	155.17	1511.8348	-1.2617	0.65039	-0.146	-57.979	26.7037	105.21	-0.11709	0.093848	-0.094238	-67.77	162.186	1501.6564	-1.23	0.68799	-0.22998	-32.634	139.079	1324.708	-0.9668	0.5957	-0.20654	-77.34	107.447	337.9073	-0.092871	0.16123	0.021191	-39.886	71.004	203.5773	-0.068604	0.032226	0.016845	-151.875	-120.649	2127.7547	-1.8262	1.0527	0.10449
0.996	-89.781	148.723	1490.5598	-1.2402	0.64599	-0.14087	-50.05	29.5339	111.495	-0.10986	0.096191	-0.091797	-81.832	158.857	1479.4919	-1.2012	0.68506	-0.22314	-37.001	123.336	1316.4489	-0.93921	0.5857	-0.20313	-97.7901	104.375	328.12783	-0.079199	0.16162	0.020411	-31.983	87.5	193.93972	-0.062012	0.029297	0.017578	-152.358	-110.526	2119.8932	-1.8335	1.062	0.10693
0.998	-81.868	142.31	1461.2665	-1.2163	0.64355	-0.13818	-21.043	18.8847	112.352	-0.10371	0.091895	-0.09502	-80.508	151.27	1443.9316	-1.1748	0.67919	-0.2207	-50.411	98.582	1304.1633	-0.9248	0.57422	-0.19336	-106.4451	100.83	319.7043	-0.074707	0.15694	0.019727	-59.18	76.751	176.8206	-0.051758	0.023438	0.02002	-163.898	-101.821	2129.3485	-1.8374	1.0728	0.10742
1	-65.694	149.542	1439.867	-1.1831	0.64014	-0.12598	-17.939	22.20391	117.4218	-0.099417	0.091992	-0.09629	-81.078	145.063	1429.6465	-1.1484	0.67969	-0.21436	-15.722	94.919	1304.655	-0.90039	0.55957	-0.18555	-136.4983	82.766	313.439	-0.066406	0.16162	0.021973	-72.332	68.491	189.675	-0.047363	0.021484	0.024902	-133.651	-86.681	2132.617	-1.8357	1.0755	0.10303
1.002	-66.722	155.236	1414.65023	-1.1597	0.63721	-0.12207	-13.437	19.6976	105.1575	-0.090821	0.088086	-0.098634	-71.006	164.158	1402.49619	-1.1074	0.67383	-0.20605	-2.536	110.601	1274.136	-0.88672	0.55566	-0.18213	-123.6978	83.067	297.2198	-0.060058	0.16094	0.026465	-78.102	62.145	190.8	-0.034668	0.016113	0.028809	-133.826	-95.7947	2145.038	-1.8271	1.0713	0.10107
1.004	-32.658	150.136	1399.7337	-1.123	0.62695	-0.11426	5.712	5.9635	104.1632	-0.079786	0.087403	-0.093848	-66.654	165.663	1378.3123	-1.0879	0.66992	-0.20557	-9.265	114.815	1250.9637	-0.84912	0.53955	-0.17188	-126.213	84.182	285.667	-0.055078	0.16494	0.026953	-54.373	45.832	171.607	-0.027588	0.0097657	0.028077	-111.186	-88.725	2147.2447	-1.8203	1.0615	0.093262
1.006	-16.374	156.338	1370.9633	-1.094	0.62134	-0.10595	29.107	-2.21	120.59528	-0.075195	0.084961	-0.10059	-74.41	156.216	1337.5996	-1.0503	0.6665	-0.19824	-11.802	126.517	1208.7862	-0.82861	0.53027	-0.16748	-124.0007	86.079	276.7631	-0.048828	0.17314	0.028516	-85.0725	27.197	171.532	-0.020996	0.0029297	0.030762	-79.4144	-60.28	2152.0217	-1.8125	1.0527	0.087402
1.008	-2.524	140.618	1346.0455	-1.0645	0.60938	-0.1001	20.464	-3.287	129.8619	-0.056836	0.086719	-0.097266	-57.279	145.23	1323.3147	-1.0173	0.66528	-0.18946	15.743	144.204	1179.6229	-0.80371	0.51855	-0.15918	-116.79476	75.18	267.92765	-0.044824	0.17578	0.032715	-81.465	30.775	155.7773	-0.014648	-0.0058594	0.030273	-68.4289	-38.502	2164.646	-1.7964	1.0415	0.083984
1.01	8.97999999999999	143.7824	1323.1748	-1.021	0.59912	-0.085449	23.764	-10.098	123.1196	-0.04375	0.088965	-0.095508	-48.083	140.857	1297.5219	-0.98438	0.66016	-0.1875	25.112	143.505	1152.2288	-0.7749	0.50439	-0.15137	-95.07	96.547	265.0488	-0.041992	0.17969	0.033203	-71.038	48.468	155.2303	-0.010742	-0.016113	0.031738	-64.8607	-36.65	2163.528	-1.7876	1.0278	0.081054
1.012	49.521	138.5939	1313.488	-1.0034	0.59424	-0.086914	3.063	-13.313	111.4717	-0.026563	0.088965	-0.093164	-27.248	131.44	1280.441	-0.94629	0.65234	-0.17676	29.26	131.091	1138.2373	-0.76025	0.49561	-0.14404	-79.489	98.234	253.6617	-0.039355	0.18682	0.031445	-76.366	47.794	151.636	-0.0048828	-0.024414	0.035645	-45.417	-39.745	2168.635	-1.7749	1.0122	0.072266
1.014	67.431	149.468	1265.4494	-0.96143	0.57666	-0.083496	12.026	-2.106	128.5747	-0.015039	0.088672	-0.098927	-17.317	130.7866	1257.221	-0.92578	0.64746	-0.17139	53.944	126.0254	1141.943	-0.73193	0.47998	-0.13965	-82.188	87.502	245.79	-0.036718	0.19238	0.031836	-78.644	16.3533	164.824	0.0019531	-0.027832	0.030762	4.623	-32.94	2158.59	-1.7573	1.0044	0.074707
1.016	73.933	154.202	1239.7733	-0.93433	0.57032	-0.080322	19.879	-19.1297	143.2256	-0.0097656	0.086426	-0.095703	13.902	156.668	1215.1398	-0.88281	0.63965	-0.15869	72.642	139.702	1112.406	-0.71582	0.46558	-0.1311	-45.941	78.595	241.6816	-0.032422	0.19941	0.031055	-57.193	4.57	156.31	-0.0019531	-0.03125	0.02832	9.652	-62.514	2149.228	-1.7515	0.99658	0.074219
1.018	88.226	161.6522	1214.2518	-0.90674	0.55713	-0.073242	-1.67	-35.85711	148.047	-0.013574	0.082422	-0.095508	29.895	172.623	1183.25587	-0.85498	0.62647	-0.15308	67.128	138.584	1081.855	-0.6958	0.45166	-0.12451	-18.521	89.122	224.7292	-0.033594	0.20528	0.033008	-46.971	-9.6778	171.741	-0.018066	-0.035645	0.03418	1.267	-78.66153	2148.843	-1.7461	0.99414	0.074219
1.02	93.45	156.6192	1195.552	-0.8667	0.54346	-0.06543	-5.741	-42.8915	161.617	-0.026953	0.079883	-0.096191	35.554	172.989	1151.966	-0.83105	0.62207	-0.14258	64.279	147.692	1031.047	-0.67188	0.4375	-0.11768	-8.017	79.848	221.4276	-0.032715	0.21289	0.03125	-26.556	-16.9438	172.541	-0.02832	-0.038086	0.03418	6.129	-82.618	2140.579	-1.7371	0.98559	0.078125
1.022	80.389	164.831	1171.201	-0.8457	0.54297	-0.062988	-2.505	-32.626	180.0839	-0.047656	0.080273	-0.090722	43.518	169.744	1124.324	-0.79736	0.60352	-0.12939	76.402	163.695	1007.125	-0.65771	0.43066	-0.11133	-11.16	73.1241	214.024	-0.031445	0.21924	0.033594	-26.479	-14.6851	189.731	-0.050781	-0.042969	0.037598	15.528	-86.146	2112.1723	-1.7344	0.98633	0.07959
1.024	90.023	166.2817	1142.6192	-0.80664	0.5293	-0.057617	-45.059	-43.381	200.478	-0.07041	0.083984	-0.089649	66.638	175.382	1101.08516	-0.77441	0.59766	-0.12109	73.518	171.211	991.967	-0.63428	0.41064	-0.10303	16.738	60.2951	208.3934	-0.032129	0.22402	0.030566	-15.196	-5.404	184.958	-0.067627	-0.037597	0.042237	-5.975	-89.224	2105.582	-1.7324	0.98633	0.087402
1.026	71.505	179.225	1101.5844	-0.77906	0.51782	-0.052002	-75.493	-55.898	240.135	-0.10059	0.092285	-0.084961	60.695	175.69	1084.465	-0.74609	0.58398	-0.1084	44.935	162.427	991.1649	-0.61865	0.3999	-0.095703	28.833	64.8686	203.026	-0.034864	0.2291	0.029004	-9.249	-31.386	188.36	-0.084961	-0.026855	0.049805	3.531	-67.9962	2105.044	-1.7305	0.98438	0.086426
1.028	49.069	180.584	1085.9684	-0.75	0.50879	-0.044922	-59.715	-51.809	262.1579	-0.12891	0.10185	-0.076367	51.908	169.313	1055.294	-0.72192	0.57642	-0.098391	40.46	162.46	970.7978	-0.59912	0.38721	-0.094238	39.797	46.2769	188.969889	-0.041894	0.2332	0.030957	-11.586	-50.9264	182.618	-0.10645	-0.0073242	0.049316	-17.486	-31.06	2102.7824	-1.7305	0.99023	0.091309
1.03	11.018	174.323	1055.6912	-0.71582	0.49512	-0.040039	-57.951	-29.975	298.214	-0.15644	0.11582	-0.070899	58.813	171.448	1024.6657	-0.69531	0.56152	-0.087891	38.626	156.074	944.745	-0.57813	0.37305	-0.084473	48.276	41.3137	193.8816	-0.04541	0.23633	0.031738	17.408	-44.581	207.32	-0.11816	-0.0014648	0.052246	-27.415	-8.44	2098.249	-1.7309	0.98828	0.095947
1.032	8.734	161.08	1031.6746	-0.69434	0.4873	-0.036133	-82.331	-10.259	341.494	-0.18496	0.12793	-0.067383	37.599	166.253	987.6453	-0.66504	0.54785	-0.068848	-3.989	142.116	921.0911	-0.56592	0.3667	-0.07959	65.309	64.097	183.8488	-0.04707	0.23994	0.028613	12.073	-16.605	226.03	-0.15039	0.018066	0.056152	-53.532	-7.95	2080.8996	-1.7314	0.98242	0.10498
1.034	-4.042	166.763	1014.158	-0.66064	0.47217	-0.03125	-80.876	17.4321	430.753	-0.22217	0.14326	-0.068262	3.802	164.761	962.7912	-0.64844	0.53906	-0.06543	-18.012	140.476	899.8277	-0.54053	0.354	-0.068848	38.23	48.0906	181.96	-0.049316	0.24609	0.02793	5.063	-9.736	258.874	-0.1792	0.028564	0.053711	-45.404	8.065	2082.316	-1.7241	0.98486	0.10791
1.036	-56.534	171.018	994.7796	-0.63769	0.46118	-0.025635	-93.377	60.696	516.465	-0.25928	0.15674	-0.064941	5.982	162.8531	938.68918	-0.61426	0.51953	-0.051758	-30.232	155.621	868.7046	-0.52124	0.34619	-0.062744	12.807	28.7563	188.836	-0.047754	0.24961	0.033007	6.906	-5.3452	303.882	-0.21338	0.041016	0.053711	-76.64583	6.605	2063.335	-1.7217	0.98242	0.1084
1.038	-76.181	167.519	970.808	-0.61768	0.44922	-0.01709	-108.5361	94.597	630.4143	-0.31416	0.16816	-0.062793	-21.586	175.113	924.204	-0.59595	0.50513	-0.041749	-25.519	153.072	850.064	-0.50146	0.34229	-0.05957	16.129	27.6231	180.532	-0.045703	0.25351	0.032422	7.09399999999999	17.8927	342.67	-0.28027	0.051758	0.047363	-77.5822	2.411	2032.388	-1.7051	0.97656	0.11133
1.04	-88.81	157.729	939.122	-0.58691	0.43408	-0.015137	-87.921	121.765	727.3179	-0.38906	0.18262	-0.058594	-29	168.371	903.044	-0.5708	0.4917	-0.03418	-63.377	135.847	826.2054	-0.47949	0.32764	-0.049316	2.73399999999999	41.2153	180.064	-0.041504	0.25635	0.02832	-11.663	48.7387	385.66	-0.34693	0.064209	0.046875	-91.1668	9.06	1999.1764	-1.6915	0.97217	0.10913
1.042	-105.1877	167.031	909.931	-0.57129	0.42188	-0.012695	-75.802	146.353	839.28961	-0.48633	0.19512	-0.057422	-59.015	156.932	876.246	-0.5459	0.4668	-0.021973	-52.861	129.821	810.9867	-0.47119	0.3208	-0.04541	-22.236	29.5126	182.523	-0.037988	0.25606	0.029687	1.715	73.9601	453.25	-0.42236	0.075195	0.045898	-112.0272	19.746958	1983.2041	-1.6797	0.96289	0.10938
1.044	-116.774	166.699	888.1326	-0.54102	0.4082	-0.0078125	-94.5261	164.785	960.4	-0.60058	0.20889	-0.05166	-71.37	154.111	848.066	-0.53418	0.45508	-0.015625	-60.673	147.81	798.492	-0.44629	0.31152	-0.033203	-52.3	22.449	181.196	-0.033789	0.2543	0.030078	-2.15799999999999	119.029	536.5	-0.54443	0.096191	0.036133	-142.97	9.3149	1957.356	-1.6543	0.95703	0.099121
1.046	-115.34049	153.027	865.6533	-0.52319	0.39819	-0.0014649	-116.97	153.86	1079.35	-0.74561	0.22607	-0.049316	-102.4894	149.668	822.591	-0.50684	0.43311	-0.0014648	-66.044	156.418	760.8271	-0.42969	0.30713	-0.023437	-61.733	23.5507	160.894	-0.032226	0.25195	0.030468	-4.722	174.356	613.46	-0.61719	0.11182	0.036133	-136.736	6.1988	1951.6909	-1.6382	0.95361	0.10205
1.048	-121.51085	159.94	839.8637	-0.49951	0.37939	-0.00097656	-81.15283	131.591	1147.4591	-0.90371	0.24961	-0.030762	-98.9026	132.584	791.7968	-0.49194	0.41675	0.0073244	-94.893	169.72	743.1726	-0.41406	0.29883	-0.01709	-90.4191	13.8485	153.67	-0.031738	0.24863	0.03291	-60.0326	203.865	699.25	-0.76855	0.14355	0.022949	-117.256	-1.193	1938.7483	-1.6035	0.9375	0.092285
1.05	-128.7927	157.449	826.8676	-0.47461	0.36475	0.0039063	-32.97	112.14	1217.6057	-1.0859	0.2874	-0.0097654	-109.42322	142.739	768.5479	-0.47363	0.40332	0.017578	-73.841	181.064	719.1213	-0.39258	0.28906	-0.0053711	-101.051	-9.40213	156.47	-0.034668	0.24951	0.035645	-29.488	203.121	793.74	-0.8894	0.17212	0.022461	-114.932	0.865	1926.892	-1.5728	0.92969	0.090332
1.052	-140.997	157.112	790.9569	-0.46484	0.3584	0.0087891	-31.857	69.212	1275.289	-1.275	0.33858	0.0097658	-101.679	156.033	740.8793	-0.4502	0.38623	0.033203	-60.693	172.544	703.175	-0.37988	0.28564	0.0019531	-88.476	-18.9879	174.182	-0.03164	0.24004	0.039941	-34.165	174.944	892.86	-1.0063	0.20264	0.021973	-132.99	0.0909999999999993	1916.123	-1.5449	0.92578	0.084473
1.054	-99.464	158.663	786.265	-0.4375	0.33496	0.013184	-14.283	-2.6673	1337.411	-1.4684	0.40957	0.044824	-105.7279	169.297	726.9907	-0.43457	0.375	0.041016	-62.243	162.475	687.5714	-0.3623	0.26953	0.0087891	-100.609	-23.967	177.557	-0.032715	0.24072	0.044336	-46.579	136.179	959.09	-1.1543	0.25977	0.035645	-99.1939	4.89359	1899.313	-1.5054	0.90869	0.078125
1.056	-86.599	173.092	751.3164	-0.41992	0.31445	0.016113	-21.38	-49.2578	1394.295	-1.6519	0.50049	0.077637	-115.319	160.982	699.0231	-0.4082	0.36133	0.049805	-61.392	151.863	675.2135	-0.35108	0.26367	0.016113	-108.5688	-28.1618	175.275	-0.035059	0.23838	0.049804	-77.32	76.948	1021.15	-1.2192	0.28662	0.04541	-77.57	26.868	1872.632	-1.4858	0.90088	0.077637
1.058	-62.964	172.905	730.3081	-0.4043	0.30811	0.021484	24.135	-67.1185	1401.3314	-1.8054	0.61201	0.10957	-107.0059	170.023	676.093	-0.38647	0.34521	0.055908	-26.663	171.618	644.2779	-0.33789	0.25391	0.020508	-108.738	-39.79419	163.852	-0.038672	0.23184	0.047266	-63.746	47.679	1059.66	-1.3218	0.35205	0.083008	-60.689	41.914	1844.251	-1.4487	0.8833	0.076172
1.06	-52.853	166.049	705.5499	-0.38428	0.29248	0.031738	22.188	-87.6274	1416.37	-1.916	0.7418	0.129	-86.747	167.581	647.7367	-0.36719	0.33887	0.062988	-20.277	165.118	639.374	-0.32422	0.24707	0.02832	-91.1162	-26.5307	172.442	-0.041504	0.22754	0.055176	-57.335	17.27838	1088.38	-1.3677	0.39991	0.11695	-48.647	33.4931	1810.866499	-1.4192	0.87281	0.075683
1.062	-18.338	151.8444	693.3684	-0.36816	0.2688	0.039794	1.957	-118.382	1440.445	-1.9617	0.87422	0.15166	-71.055	152.066	621.57746	-0.3457	0.31543	0.07373	-24.379	158.314	612.0535	-0.31348	0.24268	0.033691	-98.3722	-32.997	175.014	-0.048145	0.22695	0.05752	-50.662	-12.992	1094.05	-1.3931	0.44775	0.14746	-25.3	44.3751	1781.59913	-1.3887	0.85938	0.074707
1.064	-23.027	162.364	673.5351	-0.354	0.25488	0.04541	-26.66	-130.128	1468.018	-1.9396	1.0045	0.15537	-56.34	137.4679	614.186	-0.33105	0.31152	0.074219	12.546	153.631	602.0074	-0.30273	0.23242	0.043457	-86.623	-58.4764	189.828	-0.052929	0.22344	0.060645	-50.99	-61.6963	1109.85	-1.3828	0.50488	0.17334	-7.01	55.808	1753.4025	-1.3496	0.84961	0.074707
1.066	22.409	159.609	658.025	-0.33203	0.23389	0.054199	-30.9774	-108.868	1461.278	-1.8589	1.1118	0.14453	-40.981	150.257	587.2617	-0.30811	0.29834	0.084473	24.369	151.529	581.67403	-0.2871	0.229	0.041748	-78.374	-79.38951	207.712	-0.056445	0.22032	0.063379	-15.344	-68.9664	1127.43	-1.3633	0.52295	0.18457	-10.718	58.017	1716.5833	-1.3301	0.83789	0.077148
1.068	43.058	162.059	629.03	-0.32813	0.22705	0.057129	-47.5561	-70.139	1455.534	-1.7073	1.1787	0.13174	-26.435	141.8347	566.26622	-0.28564	0.28857	0.098145	15.028	121.097	583.602	-0.2749	0.22314	0.053223	-51.417	-81.9552	217.618	-0.059277	0.21787	0.062695	-5.531	-68.0061	1164.96	-1.3271	0.54785	0.2041	7.968	40.5595	1707.663	-1.2944	0.83057	0.07373
1.07	59.547	159.95	614.7627	-0.30322	0.20947	0.062012	-39.498	-27.48016	1450.706	-1.5188	1.2043	0.11357	-10.713	150.033	539.934	-0.27002	0.28369	0.097656	14.277	112.7941	572.4943	-0.26172	0.21582	0.053223	-32.872	-84.9911	248.691	-0.057129	0.21826	0.061523	-13.787	-62.1315	1223.26	-1.2964	0.55078	0.2107	14.644	52.052	1664.486	-1.2674	0.81421	0.078857
1.072	29.575	159.682	604.5383	-0.28784	0.19409	0.067627	-59.1693	1.314	1438.656	-1.3344	1.1778	0.088575	3.39400000000001	156.992	529.972	-0.24414	0.27441	0.098145	42.867	126.9274	554.3601	-0.25488	0.21484	0.056641	-9.206	-68.1872	292.971	-0.062305	0.21152	0.062598	2.517	-45.6541	1262.48	-1.2744	0.54297	0.21924	17.921	49.9665	1636.949	-1.2378	0.80225	0.084473
1.074	56.013	150.4617	579.9	-0.27051	0.18604	0.073242	-95.2878	1.016	1409.5908	-1.1674	1.1014	0.038867	26.542	169.545	507.052	-0.22241	0.26831	0.10303	21.035	142.27	545.339	-0.23682	0.20898	0.063965	18.486	-32.1016	351.973	-0.062207	0.20986	0.06123	10.911	-11.867	1281.03	-1.2632	0.53076	0.2334	15.559	54.8894	1609.25	-1.2065	0.78564	0.080566
1.076	42.459	135.1633	564.8264	-0.24707	0.17236	0.07666	-124.419	-0.835000000000001	1380.4527	-1.0195	0.98633	-0.010254	16.012	148.001	507.6198	-0.20166	0.26074	0.10498	22.584	142.654	521.4228	-0.22436	0.2041	0.069825	33.211	16.9103	400.904	-0.072363	0.20557	0.06084	24.442	-5.7617	1278.28	-1.2642	0.52686	0.23584	19.816	75.4997	1592.6304	-1.189	0.77588	0.085449
1.078	46.918	132.201	541.1865	-0.23682	0.16748	0.078613	-92.4754	-6.97500000000001	1371.368	-0.87803	0.85068	-0.049902	35.612	120.2905	495.0201	-0.17627	0.25	0.1084	13.992	142.082	525.617	-0.21094	0.20068	0.069336	16.922	56.33	499.98	-0.082129	0.20381	0.057519	0.442	5.923	1306.51	-1.2749	0.5127	0.2334	27.251	106.831	1566.5045	-1.1646	0.75732	0.085938
1.08	12.036	127.7802	524.8675	-0.21582	0.15332	0.079102	-83.3349	-32.961	1380.5474	-0.74648	0.71914	-0.086035	40.395	121.2669	472.978	-0.1665	0.25244	0.11035	24.146	140.519	500.573	-0.18799	0.19043	0.07373	48.672	91.7621	602.682	-0.10449	0.20117	0.049805	-11.407	27.357	1333.18	-1.2725	0.50879	0.24194	15.411	102.146	1539.9056	-1.1453	0.74488	0.091797
1.082	-0.850000000000001	127.20964	504.0141	-0.19971	0.14941	0.078369	-86.232	-78.012	1396.5029	-0.63399	0.60117	-0.11182	34.268	115.0531	442.3839	-0.14063	0.24072	0.10889	-23.484	124.8714	483.9606	-0.18018	0.18945	0.074707	32.657	109.76192	704.595	-0.14014	0.19453	0.043262	2.035	42.334	1325.99	-1.2578	0.50586	0.23584	-18.368	83.098	1527.2127	-1.127	0.73047	0.092773
1.084	-18.543	137.816	485.0434	-0.18896	0.13916	0.075195	-83.925	-126.973	1387.68	-0.53623	0.51104	-0.1292	-1.344	96.0589	431.716	-0.12622	0.23852	0.11011	-2.319	124.7874	458.9298	-0.16064	0.18799	0.07959	23.413	116.4596	783.115	-0.18818	0.1961	0.040625	-11.019	29.922	1303.59	-1.2046	0.49561	0.23242	-3.299	91.905	1505.7181	-1.0938	0.71484	0.092285
1.086	-31.784	145.951	456.917	-0.16992	0.13916	0.070801	-85.394	-166.063	1418.452	-0.4502	0.44287	-0.14111	4.256	111.1163	407.2394	-0.10889	0.23047	0.10938	-18.768	135.522	443.7875	-0.14307	0.18359	0.083984	3.69	106.5358	874.653	-0.26279	0.19102	0.028125	9.98399999999999	4.597	1286.65	-1.166	0.49023	0.22803	-40.499	91.546	1478.4487	-1.085	0.70703	0.091797
1.088	-58.743	139.392	457.1852	-0.16113	0.13184	0.069336	-91.677	-192.6284	1456.7054	-0.36982	0.404	-0.15371	-12.313	128.357	393.8459	-0.092773	0.22705	0.11035	-43.782	139.543	434.0551	-0.13574	0.17676	0.086426	33.835	113.8238	926.333	-0.35332	0.19844	0.020215	29.724	-30.5086	1278.19	-1.0649	0.48877	0.20801	-58.845	89.494	1444.7478	-1.0522	0.68994	0.093262
1.09	-79.7167	115.798	435.099	-0.14746	0.13086	0.068848	-81.631	-209.45	1486.22711	-0.29209	0.38418	-0.16103	-35.488	133.427	368.8761	-0.09082	0.22559	0.10938	-66.398	125.174	411.8085	-0.11865	0.17529	0.088379	8.175	99.987	1008.292	-0.46045	0.20752	0.0097656	18.188	-86.207	1267.2	-0.98706	0.48902	0.19459	-65.604	89.463	1408.4666	-1.0264	0.67481	0.091553
1.092	-95.391507	109.592	422.61	-0.13794	0.13086	0.067871	-79.445	-210.5438	1517.4878	-0.23702	0.37636	-0.16885	-37.768	118.037	374.0529	-0.078613	0.21826	0.11279	-59.699	126.055	394.2409	-0.10766	0.17188	0.089844	-35.311	84.936	1033.063	-0.57149	0.2252	0.008789	6.598	-123.691	1256.92	-0.90576	0.49023	0.17334	-68.073	105.07	1370.2024	-1.0044	0.6626	0.090332
1.094	-129.214	112.29	390.7766	-0.13379	0.13135	0.065918	-59.694	-216.105	1556.6075	-0.21182	0.37822	-0.17305	-52.258	117.382	348.63185	-0.070312	0.21801	0.11255	-85.4683	132.121	383.831	-0.097168	0.16846	0.091309	-67.797	37.771	1087.7	-0.68848	0.24766	0.012598	17.072	-130.225	1258.37	-0.81836	0.48926	0.14258	-93.8522	105.406	1352.80169	-0.97217	0.63916	0.087402
1.096	-130.513	120.571	375.7464	-0.125	0.13086	0.062012	-45.798	-222.36	1579.282	-0.23438	0.38965	-0.16699	-78.5966	104.679	344.0992	-0.063965	0.22217	0.11133	-97.6629	118.543	380.404	-0.087891	0.16797	0.088379	-59.452	1.5288	1104.06	-0.80332	0.27071	0.015723	0.555999999999997	-129.287	1275.68	-0.78516	0.49072	0.12305	-100.2595	108.213	1314.5723	-0.95264	0.63037	0.086914
1.098	-147.066	127.533	361.095	-0.11572	0.13623	0.057129	-25.802	-205.132	1616.246	-0.32529	0.41553	-0.14873	-94.9206	89.46	329.0361	-0.056152	0.22119	0.10938	-92.02236	119.617	365.1955	-0.081543	0.16357	0.090332	-89.083	-56.971	1149.326	-0.90948	0.30449	0.021484	-50.182	-140.636	1283.53	-0.75244	0.49561	0.088867	-102.9797	121.936	1285.10909	-0.91357	0.61377	0.082031
1.1	-140.911	121.842	338.0562	-0.11328	0.13818	0.050781	23.611	-167.2035	1642.4104	-0.46757	0.45195	-0.12666	-94.68	90.771	297.4502	-0.056641	0.22217	0.10986	-82.541	125.736	343.4894	-0.071777	0.16455	0.084961	-119.7854	-98.029	1191.999	-1.0093	0.34424	0.035645	-87.526	-157.133	1311	-0.7544	0.50391	0.067383	-106.4245	134.311	1261.8624	-0.87842	0.59521	0.073242
1.102	-161.788	103.577	313.664	-0.11011	0.14038	0.049073	51.768	-139.76	1667.6081	-0.64609	0.5125	-0.099707	-118.0923	104.911	282.8629	-0.053711	0.23047	0.10938	-94.9097	122.503	330.8635	-0.068115	0.15967	0.083496	-129.21	-115.908	1218.383	-1.09	0.39111	0.041309	-85.181	-149.514	1310.97	-0.77344	0.50879	0.048828	-99.0568	124.382	1242.382	-0.86279	0.58838	0.07373
1.104	-132.831	104.973	301.8927	-0.10889	0.14551	0.044434	64.145	-111.13	1682.985	-0.81894	0.58242	-0.067383	-125.8715	104.381	269.187	-0.053222	0.23267	0.11279	-95.5705	115.253	323.6187	-0.068359	0.15625	0.07666	-117.309	-103.377	1202.105	-1.159	0.43897	0.051758	-127.1853	-129.756	1343.83	-0.82764	0.5249	0.046387	-83.628	132.261	1212.8923	-0.82031	0.56836	0.06543
1.106	-132.309	108.347	315.207	-0.11426	0.14648	0.040039	86.903	-95.366	1708.9996	-0.96338	0.65283	-0.034668	-116.932	99.809	256.4738	-0.055664	0.23926	0.11475	-74.7292	106.784	317.688	-0.071289	0.1582	0.077148	-112.2857	-91.747	1207.198	-1.2066	0.49521	0.066211	-161.699	-112.392	1351.61	-0.86426	0.53516	0.035645	-69.018	136.678	1187.9991	-0.78589	0.55786	0.062744
1.108	-103.2061	108.774	309.738	-0.11621	0.1499	0.04248	103.95	-85.265	1730.9929	-1.0838	0.71817	-0.0045898	-112.089	99.878	242.599	-0.057129	0.24658	0.11279	-65.777	113.838	314.582	-0.072266	0.15674	0.078125	-114.729	-74.462	1212.313	-1.2329	0.53975	0.072657	-184.578	-108.99	1383.76	-0.93115	0.56299	0.038574	-59	133.241	1154.8263	-0.75342	0.54443	0.058105
1.11	-99.1231	99.96	292.9522	-0.12598	0.15479	0.042969	123.385	-95.88	1775.2916	-1.1738	0.78711	0.0125	-140.567	98.105	246.7783	-0.057129	0.25098	0.12207	-58.01	98.211	298.8455	-0.079102	0.16113	0.068359	-76.122	-44.907	1223.94	-1.2441	0.58203	0.081055	-164.618	-105.032	1390.67	-0.9773	0.5857	0.040039	-57.919	123.978	1128.3686	-0.70752	0.52588	0.04541
1.112	-56.476	94.078	266.9258	-0.1272	0.1626	0.044678	137.485	-99.552	1796.32	-1.2258	0.84453	0.016797	-100.7948	85.807	241.6728	-0.055176	0.26416	0.11377	-59.056	96.35	304.827	-0.083496	0.1604	0.069092	-78.899	-14.04812	1223.92	-1.2329	0.61416	0.088086	-164.0301	-130.579	1405.8	-1.0151	0.60596	0.044434	-35.13	131.208	1104.0874	-0.68506	0.51416	0.040039
1.114	-52.657	97.167	257.1949	-0.12744	0.16992	0.04248	143.732	-92.695	1822.832	-1.2454	0.8792	0.016797	-77.843	86.294	232.4539	-0.056397	0.27173	0.11474	-3.052	110.658	286.272	-0.092285	0.1626	0.067871	-78.12857	-3.7459	1209.013	-1.2141	0.64023	0.090723	-149.33906	-143.997	1422.8	-1.0483	0.62744	0.049316	-19.761	132.339	1066.8571	-0.64404	0.49854	0.029785
1.116	-12.168	92.878	253.9789	-0.12695	0.17578	0.041992	113.499	-111.6163	1865.6013	-1.2422	0.89209	0.0053711	-56.923	87.038	216.7209	-0.052246	0.28174	0.11572	-25.348	111.107	263.8443	-0.095703	0.16748	0.067383	-67.176	-4.0111	1227.539	-1.1832	0.64531	0.09541	-123.063	-147.612	1460.3	-1.0562	0.63428	0.044922	-5.006	122.437	1041.0687	-0.61596	0.48413	0.020752
1.118	-15.13	81.973	257.4	-0.12061	0.18018	0.041016	94.755	-135.539	1880.5063	-1.2251	0.87686	-0.017774	-63.344	67.451	211.9248	-0.041016	0.28906	0.11963	-2.711	98.522	249.339	-0.097168	0.16797	0.070313	-44.111	-21.4084	1226.59	-1.1578	0.64736	0.10293	-110.521	-167.083	1504.29	-1.043	0.64844	0.036621	10.795	111.93376	1026.7676	-0.58789	0.46875	0.0073242
1.12	27.699	87.0287	242.3717	-0.11523	0.18848	0.040527	82.378	-145.188	1925.561	-1.212	0.84385	-0.046387	-36.951	50.0731	206.8567	-0.034668	0.29395	0.11719	-4.512	91.6954	251.2137	-0.091309	0.16992	0.071289	-43.702	-61.79059	1209.901	-1.1289	0.6377	0.11133	-126.906	-188.417	1546.72	-1.0308	0.66015	0.022705	24.159	121.1656	1001.603	-0.55127	0.44385	0.0043945
1.122	22.898	78.7279	229.5593	-0.10839	0.19116	0.03833	95.721	-135.6517	1964.082	-1.2143	0.79306	-0.075293	-13.045	74.803	205.492	-0.024902	0.29785	0.11523	17.696	90.8102	245.9725	-0.090332	0.1709	0.065186	-14.742	-95.7796	1211.804	-1.0995	0.62939	0.11348	-131.231	-199.342	1575.62	-1.0112	0.67041	0.00048828	42.785	128.3758	973.195	-0.53809	0.43555	0.0029297
1.124	32.746	69.5447	222.6103	-0.10059	0.19482	0.044434	73.996	-139.8667	1988.91	-1.2425	0.74307	-0.091308	2.407	77.46	190.4696	-0.019531	0.30396	0.11206	-9.905	90.168	255.286	-0.083984	0.17139	0.062012	0.857999999999997	-104.54	1240.451	-1.0686	0.61885	0.11406	-104.91	-196.033	1605.2	-0.99707	0.67676	-0.030762	38.066	137.385	948.0363	-0.5083	0.4165	-0.0053711
1.126	27.69	51.2009	211.5174	-0.09082	0.1958	0.043457	64.941	-147.70193	1998.739	-1.2925	0.71436	-0.10254	9.302	73.965	177.183	-0.018066	0.30176	0.10791	22.717	74.14031	246.028	-0.085449	0.16748	0.060547	13.737	-112.673	1282.194	-1.0265	0.60634	0.10977	-116.302	-182.432	1628.44	-0.99219	0.68115	-0.044434	52.207	149.422	926.3427	-0.48584	0.40478	-0.01001
1.128	53.97	62.123	202.2301	-0.088867	0.19678	0.041504	16.702	-147.2063	2028.438	-1.3578	0.7125	-0.10342	12.635	70.992	168.3065	-0.011719	0.30029	0.10205	17.309	87.382	224.114	-0.088867	0.16602	0.061523	-11.642	-149.629	1322.912	-0.98575	0.58672	0.10156	-111.211	-165.688	1660.14	-1.0039	0.68359	-0.070313	57.046	145.714	897.0013	-0.46436	0.39307	-0.016602
1.13	40.661	60.764	198.40647	-0.07959	0.1958	0.039551	24.694	-133.376	2044.235	-1.4121	0.73672	-0.091699	22.661	57.213	164.5853	-0.013672	0.29785	0.10742	17.407	92.427	216.007	-0.09375	0.1582	0.064453	1.16900000000001	-183.2959	1360.945	-0.94287	0.57373	0.083008	-118.0708	-151.022	1705.92	-1.0261	0.6853	-0.088623	48.545	136.176	869.448	-0.43896	0.37695	-0.020996
1.132	29.718	63.573	187.7501	-0.073731	0.19629	0.040039	14.133	-125.227	2059.958	-1.4449	0.76953	-0.09209	25.47	48.315	154.5997	-0.012695	0.2959	0.10107	-13.343	87.616	213.46	-0.10034	0.15649	0.062988	20.824	-198.002	1399.282	-0.90644	0.56797	0.059766	-93.551	-140.365	1743.34	-1.0547	0.69727	-0.1001	26.33	138.656	842.229	-0.42578	0.36719	-0.024414
1.134	22.685	64.762	184.094	-0.064941	0.19775	0.046875	11.094	-103.209	2057.86	-1.4567	0.78857	-0.09746	25.072	34.699	158.2627	-0.01709	0.29322	0.097413	6.294	76.2503	212.127	-0.10107	0.15186	0.064941	3.34800000000001	-213.29	1448.92	-0.88066	0.56797	0.023828	-92.0071	-154.032	1782.88	-1.0913	0.72021	-0.12402	33.783	145.604	815.8843	-0.39648	0.35742	-0.030273
1.136	8.253	63.001	183.7296	-0.055664	0.19189	0.05127	-38.606	-86.434	2054.7583	-1.4541	0.80176	-0.11035	35.529	39.989	163.693	-0.013184	0.2915	0.094727	-11.427	72.5162	197.597	-0.10498	0.14502	0.068848	5.184	-225.466	1474.3	-0.85449	0.58555	-0.0039062	-50.363	-159.225	1804.3	-1.1069	0.73975	-0.13428	26.337	137.492	796.1682	-0.38111	0.34571	-0.037842
1.138	-21.017	54.116	167.0853	-0.052246	0.1875	0.043945	-41.86	-62.32	2043.0576	-1.44	0.80175	-0.12578	24.559	48.334	156.06	-0.010742	0.28857	0.09375	-18.867	44.4202	207.661	-0.10645	0.14795	0.066406	-15.667	-208.901	1523.71	-0.84101	0.60098	-0.035058	-32.355	-163.65	1823.1	-1.1362	0.76221	-0.15039	-2.815	136.916	784.6653	-0.36279	0.33643	-0.043457
1.14	-37.469	42.4512	162.6604	-0.035156	0.18652	0.045898	-49.911	-44.308	2054.5081	-1.425	0.79532	-0.1457	-9.639	48.317	147.195	-0.0048828	0.2876	0.092773	-38.872	33.007	194.674	-0.098633	0.146	0.075684	-23.461	-184.897	1542.42	-0.83398	0.61914	-0.0625	-17.217	-152.307	1812.99	-1.1555	0.78785	-0.15918	-15.084	128.891	746.2005	-0.33887	0.32617	-0.047852
1.142	-56.519	46.608	153.7809	-0.022461	0.18188	0.047607	-35.461	-19.526	2061.553	-1.4161	0.78632	-0.17266	2.878	45.114	139.4093	0.0039063	0.28271	0.092285	-47.354	41.69	197.264	-0.093261	0.14209	0.077393	-59.646	-186.867	1570.63	-0.85478	0.64678	-0.089746	-52.354	-153.308	1812.14	-1.1699	0.8125	-0.16602	-20.036	143.886	719.4065	-0.32471	0.32275	-0.057129
1.144	-81.681	34.776	149	-0.012695	0.17773	0.047363	-43.425	-14.775	2092.1675	-1.4087	0.77647	-0.19981	-19.91	58.887	122.9312	0.013672	0.27857	0.088379	-64.66	52.879	177.142	-0.083984	0.14209	0.078125	-58.017	-191.472	1600.48	-0.88008	0.67071	-0.1083	-43.703	-143.969	1831.99	-1.187	0.84814	-0.16797	-43.214	128.417	708.935	-0.29492	0.32031	-0.055176
1.146	-101.7669	25.7991	140.137	0.003418	0.17285	0.050293	-14.233	-26.425	2114.22233	-1.4043	0.76953	-0.21777	-38.004	38.291	128.3521	0.023438	0.27686	0.085938	-81.3425	39.09838	175.946	-0.074707	0.13623	0.080566	-94.36	-189.699	1644.75	-0.93008	0.69102	-0.11924	-56.585	-157.359	1861.46	-1.1929	0.86475	-0.1709	-61.095	135.104	690.942	-0.27588	0.30908	-0.058838
1.148	-108.0853	24.7939	132.6157	0.0092773	0.16797	0.053711	-22.987	-35.858	2122.58045	-1.4228	0.76582	-0.23027	-61.754	15.5775	121.6027	0.038574	0.26807	0.083984	-85.4152	31.0712	175.546	-0.070801	0.13965	0.080566	-117.11	-190.65	1660.55	-0.98769	0.71172	-0.12451	-70.297	-166.997	1884.57	-1.2207	0.89844	-0.16943	-51.045	132.89	674.6789	-0.25342	0.30713	-0.060547
1.15	-107.4435	21.4063	131.7246	0.021484	0.16748	0.051758	3.38	-30.881	2141.236	-1.4574	0.76953	-0.23789	-55.316	8.6167	121.027	0.046387	0.26367	0.080078	-83.67229	19.534	181.805	-0.068359	0.13525	0.078613	-155.661	-186.553	1691.19	-1.0566	0.72998	-0.11914	-105.0192	-180.484	1911.96	-1.2439	0.91236	-0.16333	-73.337	126.822	651.4096	-0.22852	0.29834	-0.063965
1.152	-121.9677	20.02384	115.405	0.033936	0.15869	0.057373	34.135	-34.286	2167.266	-1.5094	0.78321	-0.24336	-93.3745	23.2641	112.967	0.064941	0.25684	0.084473	-81.6072	9.217	170.674	-0.070068	0.13623	0.079589	-146.299	-186.289	1695.03	-1.1181	0.75186	-0.10967	-117.792	-160.996	1933.29	-1.2656	0.92773	-0.1582	-77.698	106.6232	638.669	-0.21484	0.29834	-0.063477
1.154	-121.9848	22.7798	114.6166	0.039063	0.15771	0.058594	71.482	-56.915	2181.839	-1.5582	0.79961	-0.23818	-103.022	12.5823	105.093	0.079346	0.25586	0.082763	-89.0722	1.058	182.753	-0.069824	0.13623	0.078125	-179.512	-183.129	1707.17	-1.1774	0.77305	-0.091894	-132.1134	-144.178	1962.55	-1.3027	0.94531	-0.14746	-66.626	118.956	615.96	-0.19482	0.28809	-0.068848
1.156	-124.002	8.2993	131.111	0.04834	0.15234	0.057617	83.34	-69.7982	2179.3571	-1.6094	0.8125	-0.24121	-114.4839	17.7316	101.4709	0.093262	0.25098	0.078125	-77.701	-0.411000000000001	180.32	-0.083984	0.14014	0.07959	-200.529	-191.737	1725.61	-1.2238	0.78828	-0.070801	-155.953	-135.916	1981.24	-1.3276	0.95361	-0.14014	-54.427	128.536	587.629	-0.18213	0.27979	-0.068604
1.158	-117.5763	-3.5993	137.666	0.051758	0.14893	0.05957	90.16	-75.7784	2181.4815	-1.6611	0.83848	-0.23789	-88.045	19.877	110.268	0.1123	0.24756	0.079102	-76.117	-8.561	176.599	-0.088379	0.1416	0.081055	-225.47	-199.07	1762.48	-1.2651	0.80478	-0.047656	-135.8044	-140.204	1985.29	-1.3765	0.96533	-0.12891	-61.499	135.535	572.458	-0.16992	0.27246	-0.069336
1.16	-103.697	-17.75703	141.493	0.049316	0.14893	0.060059	94.698	-76.307	2186.3046	-1.702	0.86016	-0.23438	-100.4893	3.1	106.971	0.12305	0.24219	0.078125	-67.381	-22.385	169.623	-0.10352	0.1543	0.081543	-187.1106	-185.371	1813.98	-1.3008	0.81445	-0.03125	-111.502	-140.008	2012.14	-1.4128	0.96997	-0.12085	-51.451	119.609	553.5057	-0.15723	0.26514	-0.066406
1.162	-61.662	-19.105	141.137	0.036866	0.14087	0.056641	113.755	-59.126	2197.662	-1.7313	0.87539	-0.23477	-107.835	-17.7464	125.551	0.13184	0.22754	0.071289	-42.997	-27.968	182.596	-0.1128	0.16504	0.08667	-179.4798	-186.122	1847.8	-1.324	0.8209	-0.014258	-141.079	-140.109	2035.31	-1.4531	0.97266	-0.11084	-37.955	119.817	523.67	-0.146	0.26123	-0.065918
1.164	-52.51	-20.2802	143.571	0.024902	0.13721	0.062012	118.325	-28.2181	2194.9434	-1.7438	0.88984	-0.23662	-81.149	-17.9755	131.414	0.13159	0.22315	0.067383	-29.507	-32.742	190.002	-0.125	0.1748	0.084473	-189.651	-214.893	1894.86	-1.3457	0.82168	-0.0073242	-150.421	-131.249	2044.47	-1.5098	0.9707	-0.089844	-18.81	121.087	505.17188	-0.13672	0.25488	-0.072266
1.166	-42.816	-15.0319	172.558	-0.0048828	0.14111	0.063477	109.234	-6.838	2189.5701	-1.75	0.89453	-0.24609	-49.941	-6.6835	133.45	0.12451	0.21484	0.064941	-42.906	-52.989	204.443	-0.14063	0.19141	0.080078	-147.6369	-225.406	1911.56	-1.3597	0.81934	-0.0061523	-148.784	-107.63354	2053.31	-1.5425	0.96924	-0.077148	-6.634	115.2019	489.5713	-0.12793	0.25317	-0.067871
1.168	-35.449	-19.3411	165.801	-0.019531	0.1416	0.063965	128.05	23.1451	2187.9444	-1.7394	0.88789	-0.24883	-59.139	-21.622	131.844	0.10547	0.20557	0.062988	-34.143	-63.293	225.17	-0.14941	0.20117	0.08252	-114.077	-220.48	1914.96	-1.3775	0.81631	-0.010937	-148.263	-86.41	2065.14	-1.6069	0.96143	-0.059082	17.381	121.2994	477.2009	-0.11963	0.25049	-0.066406
1.17	-3.58300000000001	-20.18791	190.105	-0.045898	0.15137	0.066406	109.13	45.045	2190.056	-1.7245	0.87861	-0.25849	-68.203	-42.551	149.321	0.090332	0.20068	0.060547	-2.04	-72.744	218.408	-0.16797	0.21875	0.081543	-112.107	-207.377	1924.16	-1.3926	0.81641	-0.021484	-170.131	-98.0752	2050.11	-1.6531	0.95679	-0.045166	13.79	129.394	460.8837	-0.11523	0.23926	-0.067871
1.172	18.576	-32.1218	215.2	-0.065674	0.16333	0.066162	101.008	63.731	2189.7301	-1.7058	0.86455	-0.26631	-32.125	-48.647	152.666	0.060059	0.19922	0.062988	2.002	-86.641	244.806	-0.18945	0.23047	0.073486	-115.938	-216.715	1956.33	-1.4091	0.81435	-0.034668	-159.359	-104.394	2057.89	-1.7026	0.94971	-0.026855	21.695	115.466	446.4991	-0.11133	0.24023	-0.070313
1.174	25.94	-22.9443	251.37	-0.088867	0.17285	0.067871	92.651	65.529	2180.18862	-1.6811	0.84356	-0.27656	-13.138	-50.89	175.927	0.031983	0.20141	0.063232	-2.013	-106.218	265.537	-0.21387	0.24316	0.063965	-81.235	-218.853	1979.53	-1.4296	0.81631	-0.047266	-158.298	-80.4192	2083.9	-1.7559	0.94336	-0.01123	41.884	107.268	424.1599	-0.1084	0.23242	-0.074707
1.176	40.485	-0.9655	282.455	-0.13037	0.19092	0.0625	97.848	77.452	2169.75105	-1.6616	0.8208	-0.28857	6.79900000000001	-55.624	205.972	0.0039063	0.20703	0.067871	4.14700000000001	-101.756	322.755	-0.27197	0.25781	0.046387	-60.655	-203.938	1998.51	-1.4484	0.821	-0.061328	-152.68	-67.6638	2116.3	-1.7793	0.94141	-0.0019531	59.885	119.628	412.3934	-0.10889	0.23023	-0.075439
1.178	37.347	34.0174	313.386	-0.14844	0.20117	0.056641	62.928	80.711	2149.6094	-1.6498	0.80761	-0.29326	17.293	-46.666	237.72	-0.033203	0.22607	0.074707	24.891	-59.9556	376.529	-0.31641	0.26367	0.036621	-64.128	-197.805	2001.17	-1.4657	0.83076	-0.070898	-134.117	-65.553	2125	-1.8184	0.92969	0.015625	63.095	123.443	391.6769	-0.10645	0.2251	-0.07373
1.18	25.742	59.2857	367.49	-0.20557	0.21973	0.054688	36.774	69.474	2142.9213	-1.6406	0.7918	-0.30058	27.36	-26.82	257.49	-0.048828	0.23486	0.076172	7.493	0.00900000000000034	455.54	-0.42285	0.27637	0.020996	-33.125	-194.117	2026.46	-1.4785	0.8457	-0.07373	-99.777	-62.424	2139.4	-1.8457	0.92188	0.030762	51.807	112.349	383.1442	-0.10791	0.21924	-0.073242
1.182	34.176	80.9265	452.59	-0.26246	0.23926	0.049804	11.481	58.436	2130.178	-1.6402	0.78593	-0.30215	2.386	-22.099	299.69	-0.09375	0.25439	0.077148	-13.266	42.4609	565.46	-0.53564	0.28564	0.013184	-14.233	-182.365	2042.15	-1.4972	0.86299	-0.073633	-87.759	-49.142	2141.3	-1.8569	0.9165	0.031738	52.666	103.43	360.547	-0.11426	0.21289	-0.07373
1.184	33.377	119.376	522.77	-0.32959	0.25391	0.047363	10.174	48.578	2134.942	-1.6418	0.78574	-0.30107	22.09	-1.0046	368.85	-0.13037	0.26953	0.073242	6.437	95.356	692.37	-0.65869	0.30029	-0.0019531	-22.315	-170.135	2053.61	-1.5229	0.87979	-0.058301	-75.204	-57.338	2141.5	-1.8774	0.90674	0.043457	52.444	102.676	345.1694	-0.11572	0.20752	-0.074219
1.186	30.993	157.187	601.33	-0.44141	0.26855	0.026367	-21.199	34.3915	2128.851	-1.6445	0.79199	-0.30273	52.786	48.647	451.55	-0.17334	0.28369	0.077148	6.902	135.998	782.72	-0.84619	0.32324	-0.025391	-28.487	-158.428	2058.58	-1.5523	0.89502	-0.045801	-58.157	-63.9451	2146.7	-1.8875	0.89087	0.056641	37.548	86.756	335.9405	-0.12183	0.20411	-0.075195
1.188	5.776	177.122	686.51	-0.50586	0.28271	0.029785	-30.565	28.4917	2112.054	-1.6455	0.79834	-0.30059	47.801	95.938	538.13	-0.25342	0.29688	0.066406	-16.41	149.651	891.93	-0.93652	0.34424	-0.025879	0.962000000000003	-155.27	2093.13	-1.5985	0.90254	-0.025098	-39.736	-58.3948	2132.6	-1.896	0.87549	0.065918	21.305	79.874	338.6034	-0.12451	0.20215	-0.074219
1.19	0.0229999999999961	184.459	795.23	-0.66211	0.31104	0.032715	-39.669	32.656	2090.905	-1.6436	0.81025	-0.29248	15.815	135.45	631.89	-0.30762	0.30566	0.059082	-23.884	145.028	995.3	-1.1206	0.38428	-0.018555	-15.253	-160.409	2132.99	-1.6543	0.90918	0.0024414	-65.371	-57.3899	2121.7	-1.9019	0.85303	0.074219	22.472	83.536	316.3492	-0.13281	0.19482	-0.073242
1.192	-31.892	189.845	886.42	-0.78784	0.33715	0.040527	-43.164	63.7568	2066.2107	-1.639	0.81807	-0.28896	14.562	164.415	742.39	-0.43115	0.33057	0.053223	-38.233	129.564	1095.53	-1.254	0.42237	-0.012695	-59.707	-175.991	2148.52	-1.728	0.92354	0.034277	-69.935	-61.7546	2117.2	-1.9097	0.84033	0.083984	0.525999999999996	100.529	295.2753	-0.1377	0.19336	-0.075684
1.194	-37.158	145.652	950.33	-0.91797	0.36914	0.055664	-62.004	82.059	2054.76686	-1.6353	0.8292	-0.28223	-0.239999999999995	195.149	844.37	-0.54858	0.35083	0.045898	-62.134	97.927	1150.1	-1.3706	0.46875	-0.0014648	-80.588	-183.526	2154.56	-1.8062	0.9292	0.071875	-69.2	-65.0739	2134.3	-1.9141	0.82031	0.094238	-41.173	101.158	280.105	-0.14502	0.18896	-0.071777
1.196	-57.493	106.98	994.3	-1.0737	0.42432	0.084961	-42.219	101.002	2020.9949	-1.6348	0.83789	-0.27637	-11.244	185.807	928.96	-0.67578	0.37207	0.040039	-90.037	46.4637	1182	-1.4902	0.54883	0.014648	-82.4	-164.956	2155.05	-1.8863	0.94521	0.11172	-66.828	-50.2345	2128.41	-1.9196	0.80297	0.10327	-34.556	95.979	272.9615	-0.15234	0.18433	-0.070801
1.198	-67.953	60.1394	1063.23	-1.1765	0.47681	0.11133	-30.86	100.849	1995.0858	-1.6301	0.84492	-0.26953	-17.603	159.637	1017.72	-0.86084	0.41943	0.053223	-90.614	5.285	1222.92	-1.5254	0.58984	0.02832	-131.366	-144.296	2167.14	-1.9582	0.96406	0.14356	-80.44	-39.4726	2127.51	-1.9219	0.78906	0.11523	-31.317	101.781	250.27056	-0.16309	0.18066	-0.072754
1.2	-96.493	18.41	1129.82	-1.2676	0.53076	0.14551	-4.681	102.882	1977.701	-1.6214	0.85557	-0.26504	-12.582	117.436	1109.31	-0.9585	0.44873	0.056641	-70.305	-38.04	1256.19	-1.5586	0.66992	0.053711	-170.922	-145.796	2173.28	-2.0195	0.98438	0.17578	-65.984	-30.6354	2109.14	-1.9194	0.77783	0.125	-60.123	88.792	241.1328	-0.1748	0.17773	-0.067871
1.202	-76.713	-21.932	1153.71	-1.3457	0.61523	0.18848	9.55200000000001	94.109	1948.2181	-1.6105	0.85869	-0.25176	-31.595	58.403	1159.71	-1.1367	0.51514	0.087891	-122.302	-85.388	1305.79	-1.5525	0.71997	0.062988	-177.965	-145.36	2182.78	-2.0658	1.0022	0.20576	-79.259	-6.968	2113.18	-1.916	0.77344	0.13477	-67.06	77.238	236.1976	-0.17676	0.17383	-0.067383
1.204	-77.381	-36.898	1173.56	-1.3716	0.65332	0.20801	28.439	101.291	1918.5044	-1.5975	0.86582	-0.24238	-57.877	1.098	1185.7	-1.2634	0.57373	0.10767	-82.976	-90.78	1352.59	-1.5332	0.75098	0.067871	-176.163	-149.146	2196.57	-2.1004	1.0147	0.22822	-97.9756	16.376	2081.91	-1.9043	0.76563	0.15234	-57.797	81.237	221.1907	-0.18604	0.16943	-0.063965
1.206	-39.034	-58.563	1215.05	-1.3965	0.71875	0.23926	20.113	128.864	1882.801	-1.5854	0.86768	-0.23389	-35.664	-41.712	1221.9	-1.3589	0.64209	0.13037	-103.12	-89.965	1404.48	-1.4805	0.7832	0.072754	-220.894	-140.089	2211.07	-2.1195	1.022	0.24073	-99.6307	6.3721	2064.25	-1.8923	0.75806	0.15601	-75.61	89.677	210.1718	-0.19506	0.16626	-0.06372
1.208	-45.088	-79.23726	1279.74	-1.3879	0.76245	0.25904	39.37	132.542	1852.487	-1.5646	0.8709	-0.22324	-6.72499999999999	-68.453	1256.69	-1.4316	0.73242	0.15723	-100.76	-81.458	1414.76	-1.4512	0.78223	0.075195	-206.814	-139.182	2220.27	-2.1264	1.0224	0.24336	-104.7654	5.211	2063.91	-1.873	0.75977	0.16846	-76.902	88.086	203.1252	-0.20605	0.16553	-0.060059
1.21	-60.672	-71.3264	1320.02	-1.3687	0.78564	0.26953	43.75	114.64	1828.997	-1.539	0.86787	-0.21904	-20.016	-91.756	1290.34	-1.4368	0.80053	0.17212	-110.912	-98.858	1449.9	-1.4053	0.76563	0.072754	-203.403	-119.598	2222.03	-2.127	1.0215	0.25146	-108.661	8.852	2059.27	-1.8457	0.76172	0.17236	-64.425	85.282	186.9548	-0.21875	0.16016	-0.060547
1.212	-50.183	-54.901	1364.8	-1.3379	0.78711	0.26904	64.149	98.4131	1818.128	-1.5124	0.86709	-0.21279	-73.837	-112.402	1309.03	-1.4141	0.8623	0.18506	-56.102	-82.51	1468.59	-1.364	0.74243	0.068115	-208.4842	-92.5539	2219.33	-2.1153	1.0144	0.24961	-126.214	9.309	2036.41	-1.8257	0.76025	0.17285	-52.528	89.11	180.89223	-0.22021	0.15869	-0.061523
1.214	-17.611	-36.585	1424.24	-1.3301	0.77344	0.26855	79.896	96.0362	1808.851	-1.4818	0.85879	-0.21269	-44.318	-111.488	1340.18	-1.3394	0.91357	0.18457	-56.692	-50.772	1508.61	-1.3203	0.70508	0.072754	-217.9617	-79.3469	2216.3	-2.0996	1.0027	0.25166	-137.705	7.373	2028.15	-1.7905	0.76025	0.17871	-74.042	81.997	179.8119	-0.23096	0.15479	-0.056641
1.216	-29.929	-29.3251	1495.83	-1.3188	0.74268	0.26221	88.377	100.9727	1800.955	-1.4512	0.85547	-0.20752	-44.431	-101.333	1408.88	-1.2969	0.93164	0.18311	-37.569	-26.756	1504.07	-1.2339	0.66064	0.069336	-191.2644	-83.4646	2203.23	-2.0777	0.98945	0.24971	-161.178	15.659	2023.18	-1.761	0.76489	0.18018	-52.089	62.408	174.217	-0.23217	0.15356	-0.059814
1.218	1.084	-16.7954	1524.01	-1.323	0.71216	0.2649	100.046	94.6876	1777.103	-1.4173	0.84756	-0.20605	-46.667	-81.556	1470.34	-1.2017	0.93311	0.16699	-56.66	-29.4758	1472.04	-1.1772	0.63135	0.066406	-175.1558	-87.7506	2193.57	-2.0596	0.9791	0.24873	-153.609	17.782	1991.82	-1.7324	0.76563	0.17871	-33.582	60.721	176.423	-0.2334	0.14893	-0.064453
1.22	29.995	-7.167	1505.7	-1.3198	0.68213	0.27344	78.653	106.903	1739.9321	-1.3836	0.84433	-0.19961	-18.24	-51.6671	1495.63	-1.1394	0.90845	0.15625	-29.469	-45.035	1434.82	-1.0542	0.58447	0.071777	-179.9497	-92.778	2187.9	-2.0371	0.97168	0.24365	-168.058	7.1064	1976.74	-1.6875	0.75977	0.18506	-11.923	58.738	172.439	-0.22607	0.14697	-0.053711
1.222	53.581	-9.113	1491.53	-1.292	0.65234	0.28369	71.69	101.8859	1712.9068	-1.343	0.83574	-0.19649	16.035	-15.537	1480.7	-1.0898	0.87207	0.14307	-41.846	-48.709	1385.43	-0.96655	0.55396	0.063477	-148.4537	-100.596	2186.86	-2.0093	0.96465	0.24101	-141.353	9.54952	1964.01	-1.6655	0.76221	0.18457	-2.877	42.499	158.302	-0.22607	0.1499	-0.054688
1.224	72.717	-25.396	1485.17	-1.2642	0.6333	0.29053	76.852	106.3056	1666.9153	-1.3066	0.83135	-0.19668	17.804	5.299	1475.79	-1.0483	0.80908	0.13232	-20.012	-63.194	1342.15	-0.88281	0.52441	0.048828	-139.64	-93.6273	2189.09	-1.9805	0.95839	0.23701	-137.417	26.3973	1966.77	-1.627	0.76172	0.18408	15.146	37.513	155.3961	-0.21484	0.14893	-0.053223
1.226	101.02	-37.7731	1449.36	-1.1792	0.59424	0.29346	69.994	123.302	1644.19384	-1.2671	0.82666	-0.19434	25.104	-0.324999999999996	1481.58	-1.0254	0.77051	0.12793	-31.084	-87.354	1320.27	-0.78418	0.50293	0.035645	-111.503	-74.8825	2184.68	-1.9504	0.95254	0.23897	-113.4744	27.127	1949.67	-1.5913	0.76269	0.17993	23.344	51.138	157.53	-0.20069	0.15014	-0.053467
1.228	112.501	-62.879	1408.08	-1.0913	0.57813	0.29102	59.828	140.589	1620.0749	-1.2329	0.81787	-0.18799	48.834	-7.276	1465.09	-0.96045	0.69775	0.11426	7.76900000000001	-116.246	1313	-0.73511	0.4939	0.023438	-95.697	-70.5775	2164.09	-1.9253	0.94932	0.23379	-121.164	21.4831	1933.63	-1.5566	0.75391	0.17529	23.272	57.381	134.1616	-0.18945	0.15137	-0.053223
1.23	98.217	-103.717	1364.48	-0.99414	0.55469	0.28662	26.718	142.087	1594.3087	-1.1991	0.81182	-0.18496	69.873	-21.0125	1426.55	-0.89428	0.65258	0.097167	-6.449	-147.041	1321.75	-0.7124	0.49268	0.0043945	-51.577	-79.593	2158.44	-1.894	0.95166	0.22949	-96.1323	41.673	1891.58	-1.5054	0.75439	0.16846	14.22	48.931	137.4422	-0.1665	0.1499	-0.054688
1.232	114.33	-140.606	1345.46	-0.87549	0.53076	0.26758	1.14999999999999	149.21	1567.1599	-1.1648	0.80557	-0.17988	68.263	-79.221	1381.87	-0.82031	0.61328	0.080566	-15.177	-168.88	1375.28	-0.7207	0.5	-0.022949	-36.884	-63.946	2166.86	-1.8712	0.94873	0.22519	-90.5063	42.319	1866.31	-1.4849	0.75049	0.16553	36.553	36.984	128.2042	-0.15381	0.14648	-0.055176
1.234	98.04	-147.625	1356.3	-0.82813	0.52051	0.25439	-8.96000000000001	163.147	1544.3243	-1.1353	0.79893	-0.17686	68.973	-127.196	1369.88	-0.71875	0.58496	0.058105	-0.109999999999999	-165.921	1424.37	-0.74219	0.50586	-0.027344	-19.575	-49.3327	2146.91	-1.8434	0.94551	0.21924	-88.2595	51.09	1820.82	-1.4316	0.73828	0.15576	35.986	35.659	123.6	-0.12695	0.14453	-0.052246
1.236	88.024	-137.441	1360.27	-0.74365	0.49072	0.22412	-26.519	166.462	1519.887	-1.1094	0.79395	-0.16943	74.515	-144.361	1382.52	-0.67041	0.57471	0.042969	-14.29	-159.158	1466.04	-0.82422	0.52832	-0.02832	-26.906	-52.574	2136.73	-1.8293	0.94395	0.22002	-90.605	58.363	1807.91	-1.3916	0.73389	0.15039	-1.18	28.519	129.142	-0.10742	0.13672	-0.052246
1.238	58.745	-146.191	1378.42	-0.70678	0.47094	0.2063	-52.152	163.9831	1489.527	-1.0832	0.78594	-0.16738	67.572	-159.93	1400.75	-0.59326	0.56104	0.0053711	-76.76	-151.208	1494.14	-0.90625	0.55078	-0.026367	-3.67999999999999	-46.393	2112.34	-1.8082	0.94414	0.21807	-70.77	66.386	1785.61	-1.3569	0.729	0.1416	10.947	22.053	135.6668	-0.094238	0.13477	-0.052246
1.24	21.32	-141.414	1401.9	-0.69336	0.4502	0.18115	-62.504	162.7376	1448.217	-1.0625	0.78027	-0.158	41.209	-184.38	1432.75	-0.55469	0.54639	-0.022949	-125.802	-160.522	1532.78	-0.99805	0.5752	-0.0078125	-44.332	-20.284	2076.47	-1.7891	0.94238	0.22021	-58.75	54.4256	1775.91	-1.2983	0.71533	0.13037	14.245	25.4923	124.0965	-0.071289	0.12891	-0.059082
1.242	-38.311	-129.549	1414.2	-0.71436	0.43896	0.15869	-60.973	169.99	1417.916	-1.0359	0.77246	-0.15293	3.559	-202.452	1466.33	-0.53516	0.53516	-0.047363	-121.919	-163.252	1544.63	-1.1187	0.60791	0.023926	-44.836	-7.778	2041.22	-1.7649	0.94365	0.21719	-62.807	47.758647	1746.84	-1.271	0.70947	0.12939	4.32700000000001	13.9306	120.1054	-0.057861	0.12158	-0.060302
1.244	-57.7	-108.645	1429.43	-0.73584	0.43604	0.15381	-66.012	154.975	1392.6771	-1.0102	0.76485	-0.14414	-32.216	-206.202	1496.18	-0.5708	0.52588	-0.077637	-141.085	-181.853	1539.64	-1.1753	0.62451	0.042969	-64.993	-7.911	2013.8	-1.7444	0.94229	0.21367	-37.223	53.415	1723.35	-1.2241	0.6958	0.1167	-42.01	1.311	106.551	-0.044434	0.11377	-0.061035
1.246	-83.181	-107.948	1440.64	-0.81006	0.44531	0.14063	-63.907	139.369	1365.471	-0.98193	0.7583	-0.1377	-68.433	-186.629	1534.45	-0.60498	0.52393	-0.090332	-190.716	-219.484	1547.06	-1.2734	0.65332	0.07373	-71.826	7.751	2006.33	-1.7147	0.94619	0.21484	-36.132	76.519	1703.69	-1.1885	0.68994	0.1106	-27.583	4.325	120.3792	-0.039063	0.10498	-0.063477
1.248	-94.239	-108.744	1452.33	-0.88183	0.46216	0.14673	-62.738	117.4533	1347.452	-0.95664	0.74766	-0.12822	-73.077	-171.624	1561.32	-0.71094	0.53711	-0.099609	-177.614	-250.08	1564.78	-1.3308	0.66284	0.086914	-115.203	5.137	1992.74	-1.6826	0.93613	0.21123	-28.716	77.6554	1682.2	-1.1499	0.67725	0.10645	-41.762	13.894	124.4215	-0.037109	0.098145	-0.067383
1.25	-138.4724	-125.979	1478.19	-0.95654	0.48779	0.15332	-56.963	114.8412	1324.499	-0.93028	0.7375	-0.12598	-73.24	-145.138	1575.21	-0.80444	0.55542	-0.090088	-177.213	-247.523	1581.02	-1.3784	0.67041	0.091309	-116.082	-8.523	1978.53	-1.6504	0.92969	0.21045	-51.021	92.0624	1655.68	-1.1055	0.66406	0.097168	-67.702	-3.997	124.9733	-0.035156	0.085938	-0.064453
1.252	-136.1878	-144.038	1491.88	-1.0366	0.52002	0.16357	-45.626	117.954	1307.977	-0.90332	0.72226	-0.1084	-94.014	-150.751	1586.46	-0.90967	0.58057	-0.080078	-195.877	-239.12	1608.02	-1.4219	0.68359	0.085938	-126.4784	-11.007	1947.85	-1.6225	0.91777	0.20918	-44.838	105.426	1631.18	-1.0864	0.65967	0.09375	-72.7	-26.919	139.2557	-0.037109	0.083496	-0.064453
1.254	-152.111	-183.949	1521.28	-1.0698	0.54248	0.16797	-38.493	122.6088	1271.822	-0.87529	0.704	-0.1043	-133.1601	-179.21	1596.98	-1.0352	0.625	-0.041992	-204.903	-236.488	1657.38	-1.4409	0.68408	0.086426	-135.602	4.135	1942.94	-1.5948	0.90713	0.20888	-67.5682	95.767	1599.75	-1.0566	0.64063	0.092285	-81.735	-34.893	142.473	-0.034668	0.080566	-0.065918
1.256	-142.4049	-194.753	1542.69	-1.105	0.58057	0.1792	-37.354	124.8305	1240.955	-0.85352	0.68457	-0.093262	-129.1065	-202.495	1637.81	-1.0913	0.65283	-0.025879	-186.451	-223.219	1694.42	-1.4785	0.67871	0.07373	-170.9704	4.706	1918.57	-1.5702	0.8958	0.20381	-63.437	88.169	1573.1	-1.0275	0.63794	0.082031	-103.534	-49.151	153.955	-0.036133	0.075195	-0.073242
1.258	-169.877	-226.971	1562.34	-1.1135	0.60352	0.18139	-23.429	130.1867	1214.321	-0.82529	0.66435	-0.08457	-133.1909	-211.137	1654.87	-1.1792	0.68994	0.0029297	-176.618	-189.975	1731.56	-1.5	0.67773	0.056397	-180.9754	1.945	1908.46	-1.5444	0.88057	0.21211	-84.946	99.014	1558.78	-1.0073	0.62939	0.080078	-89.198	-51.1583	165.0028	-0.039063	0.077148	-0.070801
1.26	-169.041	-226.358	1594.04	-1.1055	0.625	0.17139	-10.217	130.857	1177.4	-0.80498	0.64463	-0.076074	-143.059	-218.009	1681.42	-1.2134	0.71045	0.016601	-218.956677	-175.355	1761.57	-1.5156	0.67285	0.032227	-173.359	16.045	1866.83	-1.5234	0.86719	0.21338	-77.709	111.144	1527.34	-0.97656	0.61719	0.074707	-88.924	-44.9	194.3441	-0.054688	0.074707	-0.073242
1.262	-165.229	-212.186	1622.5	-1.082	0.63867	0.1665	-3.876	147.1777	1144.67	-0.78389	0.62236	-0.066699	-149.6097	-229.87	1696.97	-1.2305	0.72461	0.023926	-231.47067	-150.931	1818.74	-1.5313	0.68359	0.010742	-187.483	16.745	1832.37	-1.5013	0.85967	0.21875	-95.5519	117.597	1497.45	-0.9624	0.60986	0.068848	-68.782	-10.576	205.7729	-0.076172	0.075684	-0.075928
1.264	-153.123	-196.149	1659.17	-1.0703	0.64648	0.15527	21.558	165.725	1108.7086	-0.7627	0.60215	-0.055859	-148.3519	-227.403	1742.44	-1.2324	0.74219	0.02002	-214.509	-132.396	1837.06	-1.5288	0.68994	-0.0039063	-193.771	7.564	1806.28	-1.4761	0.84912	0.22168	-87.6543	122.928	1464.9	-0.92529	0.60303	0.0625	-73.355	-10.867	243.2161	-0.10742	0.074219	-0.07959
1.266	-143.5833	-196.065	1704.42	-1.0542	0.65088	0.13623	23.897	174.935	1066.7953	-0.7417	0.58057	-0.041016	-164.5167	-211.62	1769.9	-1.2305	0.74707	0.012207	-224.5163	-126.082	1851.18	-1.5229	0.71143	-0.021973	-198.02	-3.964	1792.64	-1.4491	0.83936	0.22637	-97.344	122.662	1445.57	-0.89917	0.59692	0.061035	-63.883	-5.861	282.571	-0.16504	0.072754	-0.084473
1.268	-118.5	-179.372	1726.12	-1.0532	0.65088	0.11865	34.37	180.134	1048.4565	-0.72754	0.56191	-0.029688	-171.939	-197.92	1810.39	-1.228	0.75244	-0.0029297	-223.1492	-149.596	1856.88	-1.5144	0.72534	-0.041504	-184.433	19.924	1737.44	-1.4253	0.829	0.22891	-85.53535	127.3	1416.42	-0.87207	0.58643	0.053711	-49.333	8.2105	335.5419	-0.20313	0.079102	-0.080078
1.27	-124.3078	-169.345	1754.61	-1.0684	0.65039	0.10254	34.858	182.857	1011.2149	-0.70986	0.54336	-0.020117	-133.23	-187.626	1848.64	-1.2319	0.75	-0.018799	-189.166	-177.058	1889.12	-1.5137	0.74219	-0.055176	-178.997	27.864	1726.51	-1.394	0.81641	0.22656	-109.668	119.861	1384.8	-0.8374	0.57764	0.043945	-24.235	53.066	390.7958	-0.2998	0.089844	-0.072754
1.272	-109.238	-152.268	1786.25	-1.0933	0.6626	0.083984	48.003	183.59	979.4575	-0.69268	0.52227	-0.0080078	-137.2967	-169.958	1895.65	-1.2515	0.74854	-0.032715	-144.342	-190.496	1895.26	-1.5142	0.75049	-0.066895	-139.6438	32.997	1697.48	-1.3608	0.80635	0.22656	-98.3649	130.235	1359.49	-0.81982	0.56787	0.041992	-8.949	68.784	471.352	-0.38477	0.096925	-0.069092
1.274	-72.761	-145.69	1803.55	-1.1128	0.66797	0.077148	44.493	179.264	958.214	-0.67471	0.50732	-9.7656e-05	-129.498	-167.082	1926.49	-1.2969	0.74805	-0.051758	-117.752	-193.955	1901.58	-1.5171	0.74854	-0.07373	-108.5623	38.626	1692.08	-1.3254	0.79746	0.2294	-95.0741	143.03	1330.7	-0.79297	0.55762	0.034668	10.773	103.352	536.2473	-0.47656	0.10742	-0.063477
1.276	-31.761	-134.2164	1815.32	-1.1519	0.69482	0.05957	20.286	182.068	931.1088	-0.65381	0.49365	0.010742	-113.816	-172.561	1931.41	-1.3213	0.75391	-0.058105	-102.095	-202.629	1924.8	-1.5327	0.75049	-0.075195	-78.721	52.769	1658.83	-1.2914	0.77988	0.22666	-96.2337	143.577	1300.04	-0.76978	0.54468	0.029053	24.77	126.538	618.448	-0.60742	0.12695	-0.058105
1.278	-11.817	-130.76	1825.19	-1.1814	0.71508	0.055665	11.494	177.734	906.5287	-0.63545	0.47842	0.01748	-68.442	-175.687	1948.85	-1.3628	0.78467	-0.070801	-55.625	-198.9	1957.55	-1.5596	0.75098	-0.068847	-71.124	47.72117	1618.34	-1.2527	0.7666	0.22549	-95.0743	124.198	1282.96	-0.75098	0.53271	0.030762	15.639	136.2302	721.644	-0.67773	0.13623	-0.059082
1.28	12.233	-148.9025	1851.66	-1.2178	0.74219	0.056152	2.442	167.951	884.8655	-0.61914	0.46738	0.026855	-38.66	-174.134	1968.24	-1.3864	0.81128	-0.078857	-70.309	-201.076	1967.68	-1.5894	0.75244	-0.060547	-43.41	67.7139	1589.78	-1.2129	0.75391	0.22119	-70.3718	138.577	1253.5	-0.72656	0.51953	0.016113	14.136	131.9661	800.624	-0.83203	0.16797	-0.051758
1.282	20.622	-153.9622	1857.54	-1.2671	0.78467	0.060547	-26.244	138.85873	860.4171	-0.59649	0.45098	0.03584	-22.149	-191.464	1977.67	-1.4102	0.84375	-0.077148	-89.287	-201.84	1977.28	-1.6309	0.7666	-0.04248	-28.756	84.1182	1557.65	-1.1694	0.73799	0.21543	-56.388	139.735	1227.01	-0.71338	0.50928	0.01416	50.594	147.065	869.505	-0.96096	0.19263	-0.041748
1.284	27.033	-158.9082	1882.89	-1.293	0.80664	0.065918	-37.999	134.2785	846.5205	-0.57773	0.43848	0.042969	-7.827	-190.245	1984.03	-1.4512	0.87891	-0.068359	-94.72	-197.156	2004.01	-1.6479	0.77393	-0.037109	-16.122	88.7359	1527.17	-1.1257	0.72412	0.19853	-49.607	135.691	1195.89	-0.68115	0.49463	0.0068359	28.289	129.469	931.0798	-1.0835	0.22998	-0.020508
1.286	13.741	-169.004	1908.33	-1.3647	0.84033	0.083496	-41.35	129.62454	825.6517	-0.55859	0.42773	0.046875	-12.498	-189.579	2009.3	-1.4741	0.89893	-0.064941	-89.165	-174.256	2023.37	-1.6943	0.78711	-0.017578	9.12	65.9963	1497.22	-1.0831	0.7042	0.19971	-31.036	131.431	1174.33	-0.65649	0.4768	0.00073245	23.83	86.123	995.868	-1.2402	0.28662	0.0043945
1.288	19.626	-177.65	1948.6	-1.4097	0.86767	0.09546	-70.348	141.529	797.6872	-0.53721	0.4208	0.05	-7.94499999999999	-175.542	2025.79	-1.5308	0.93115	-0.04248	-124.106	-148.6382	2026.62	-1.7241	0.80762	-0.0048826	17.592	71.412	1471.85	-1.0459	0.68457	0.19551	-38.018	136.078	1153.75	-0.62939	0.46729	-0.0073242	50.978	28.9494	1057.309	-1.3066	0.31787	0.020996
1.29	4.929	-173.236	1959.51	-1.4624	0.90381	0.10938	-88.067	136.84	779.122	-0.51816	0.40576	0.057813	-6.39100000000001	-180.445	2067.19	-1.5845	0.95215	-0.024903	-134.789	-127.5858	2015.98	-1.748	0.82031	0.003418	19.796	86.4688	1457.06	-1.0117	0.66504	0.18848	-18.798	128.372	1115.8	-0.59961	0.44873	-0.016113	52.199	13.8556	1081.958	-1.4121	0.39258	0.051758
1.292	-16.487	-167.681	1964.72	-1.5327	0.94873	0.13184	-101.79	142.715	751.0926	-0.49434	0.39951	0.063672	-14.635	-170.727	2077.88	-1.6392	0.97412	-0.0039063	-141.25	-116.6842	2033.15	-1.7788	0.83643	0.018066	17.855	91.25	1431.63	-0.97803	0.64268	0.18135	-19.372	122.785	1092.5	-0.5835	0.43994	-0.021973	29.721	-3.934	1104.0786	-1.4524	0.46655	0.067139
1.294	-63.109	-162.94	1983.16	-1.5605	0.97461	0.14404	-87.452	131.613	732.1546	-0.47588	0.38984	0.069922	-31.407	-144.985	2084.08	-1.7114	1.0103	0.023926	-137.739	-110.583	2035.68	-1.7969	0.84082	0.02002	8.562	96.6537	1400.66	-0.95322	0.61806	0.17422	2.856	126.776	1073.55	-0.55713	0.4165	-0.031738	1.808	-23.3313	1109.82995	-1.4629	0.5293	0.083496
1.296	-73.392	-147.536	2001.63	-1.6167	1.0239	0.16553	-83.3487	123.739	694.5101	-0.45264	0.38232	0.072754	-51.025	-143.363	2080.09	-1.7422	1.0371	0.037109	-193.6842	-125.475	2052.05	-1.8105	0.85254	0.034668	3.679	111.444	1382.46	-0.9333	0.59619	0.1707	-6.144	143.844	1036.64	-0.53784	0.40112	-0.039063	-8.663	-38.344	1125.8822	-1.416	0.62256	0.088379
1.298	-90.274	-138.663	2030.4	-1.6475	1.0601	0.17798	-87.7593	135.352	666.1319	-0.42803	0.3708	0.076758	-74.458	-148.323	2104.85	-1.8008	1.0898	0.059082	-170.52	-134.244	2050.33	-1.8203	0.854	0.041748	-4.238	100.767	1343.49	-0.91298	0.57461	0.16299	-1.39	167.335	991.94	-0.52246	0.38574	-0.046387	-42.743	-40.11	1144.486	-1.3784	0.66455	0.086914
1.3	-102.739	-118.693	2031.93	-1.6772	1.0903	0.18164	-104.17664	155.886	653.2235	-0.40537	0.36065	0.082812	-87.798	-134.148	2128.56	-1.833	1.1211	0.077393	-173.715	-127.346	2069.6	-1.8179	0.85205	0.050293	-25.419	86.0604	1319.69	-0.88916	0.55713	0.15771	-1.207	180.544	965.21	-0.50391	0.36426	-0.053223	-73.6223	-44.094	1167.094	-1.2651	0.71533	0.071777
1.302	-128.3492	-133.767	2052.98	-1.7012	1.1152	0.19678	-89.518	161.493	624.2054	-0.3831	0.35205	0.081641	-91.977	-135.857	2151.2	-1.8628	1.1528	0.088867	-175.012	-115.77	2064.91	-1.814	0.83936	0.060059	-47.107	88.10612	1286.56	-0.86514	0.54336	0.15508	5.642	184.631	936.66	-0.4917	0.35986	-0.054688	-71.5326	-43.235	1191.37	-1.1697	0.7312	0.052002
1.304	-119.7894	-120.861	2055.23	-1.7148	1.126	0.19727	-100.531	160.654	600.95866	-0.36836	0.34453	0.086816	-98.468	-135.522	2144.2	-1.8999	1.1763	0.11084	-244.123	-124.134	2081.27	-1.8101	0.83447	0.065918	-58.967	86.4873	1252.8	-0.83672	0.52676	0.14737	-3.563	162.695	920.95	-0.47949	0.33887	-0.066406	-103.178	-29.662	1202.395	-1.0693	0.71777	0.029785
1.306	-133.2589	-117.962	2051.54	-1.73	1.1353	0.20703	-81.055	148.905	589.31149	-0.34424	0.33643	0.088867	-118.5296	-132.167	2160.3	-1.9116	1.1821	0.11816	-217.7991	-115.271	2085.79	-1.8027	0.81055	0.074707	-73.237	100.0931	1200.1	-0.80821	0.51231	0.14268	-2.065	146.109	908.68	-0.4585	0.32886	-0.068115	-120.012	-12.558	1203.64	-0.95654	0.67432	-0.003418
1.308	-147.9205	-100.464	2046.21	-1.7363	1.1338	0.21094	-59.963	148.749	550.526	-0.32353	0.32236	0.093555	-128.6358	-114.029	2167.3	-1.9312	1.1841	0.12842	-245.575	-98.263	2081.76	-1.8061	0.7876	0.081055	-108.1404	102.7932	1178.783	-0.77706	0.50215	0.1375	-4.53400000000001	143.758	874.68	-0.44482	0.31738	-0.07373	-147.768	8.108	1192.3696	-0.90967	0.63916	-0.022461
1.31	-166.694	-87.861	2058.24	-1.7388	1.1226	0.20215	-53.914	140.898	551.0681	-0.30469	0.31289	0.095996	-146.1196	-112.763	2172.7	-1.9411	1.1809	0.13721	-273.681	-97.344	2102.9	-1.8066	0.77148	0.084473	-102.1726	122.7995	1149.025	-0.74658	0.48975	0.12695	-11.028	152.113	855.92	-0.42822	0.30029	-0.075684	-133.339	24.272	1205.2351	-0.83105	0.55273	-0.043457
1.312	-169.721	-80.565	2068.62	-1.7422	1.1016	0.21631	-40.343	136.149	537.1966	-0.2832	0.30195	0.10498	-157.7066	-117.141	2167.3	-1.9414	1.1729	0.14893	-293.481	-89.528	2131.1	-1.8022	0.73291	0.093262	-111.1769	111.0225	1131.63	-0.71512	0.47411	0.1208	-24.956	145.272	831.77	-0.41895	0.29346	-0.079102	-118.0733	36.327	1221.7568	-0.7959	0.48975	-0.051757
1.314	-181.68	-79.236	2085.12	-1.7368	1.0884	0.2168	-25.532	137.108	507.562	-0.25947	0.29228	0.11084	-164.576	-116.462	2162	-1.9395	1.1602	0.15625	-244.583	-76.495	2133.72	-1.8027	0.71973	0.104	-127.854	103.8961	1098.906	-0.68406	0.46023	0.11356	-35.322	142.85	813.37	-0.40088	0.2793	-0.080078	-103.0711	4.523	1223.3	-0.76563	0.42822	-0.061035
1.316	-185.158	-67.718	2103.31	-1.73	1.063	0.21484	-7.515	129.821	489.947	-0.24219	0.2832	0.11475	-176.471	-105.979	2182.4	-1.9277	1.1484	0.15723	-252.283	-57.951	2110.95	-1.8062	0.69043	0.10693	-108.38836	103.727	1072.395	-0.65866	0.43953	0.1038	-41.195	147.355	771.29	-0.39331	0.2666	-0.082032	-114.068	-42.277	1234.122	-0.73975	0.36475	-0.067871
1.318	-143.5682	-69.492	2121.36	-1.7244	1.0466	0.21264	10.428	116.535	480.4994	-0.22568	0.26983	0.11758	-187.983	-95.354	2190.6	-1.9097	1.1274	0.16016	-231.2098	-59.063	2098.91	-1.8083	0.67651	0.11158	-114.8844	120.13581	1040.378	-0.62987	0.41824	0.098521	-49.547	146.911	741.8	-0.37891	0.25732	-0.083008	-87.039	-84.895	1270.7024	-0.73096	0.34033	-0.070801
1.32	-136.3619	-60.823	2126.89	-1.7207	1.0293	0.21191	19.765	112.919	463.1531	-0.20752	0.26416	0.12032	-181.849	-76.57	2209	-1.8901	1.1118	0.15918	-204.2292	-61.39	2085.76	-1.8062	0.66357	0.1167	-98.3431	109.4739	1030.856	-0.6123	0.40234	0.085938	-67.4893	130.102	722.09	-0.36523	0.24805	-0.085449	-80.84	-111.552	1303.621	-0.72168	0.31836	-0.071289
1.322	-128.0929	-62.938	2141.95	-1.7129	1.0107	0.20361	13.431	106.828	467.69	-0.18759	0.25205	0.11797	-160.748	-46.4004	2206.2	-1.873	1.0977	0.15674	-169.369	-51.16	2088.02	-1.8042	0.65186	0.12109	-88.736	109.8341	985.24	-0.59241	0.38566	0.082139	-61.55	133.693	732.6	-0.3518	0.2395	-0.085938	-69.967	-151.5584	1330.071	-0.71875	0.31592	-0.065918
1.324	-96.309	-66.881	2131.6	-1.7109	1.0039	0.20508	5.924	100.226	460.022	-0.17305	0.24258	0.11944	-159.918	-33.647	2216.1	-1.8394	1.0864	0.15039	-174.1479	-52.92	2065.24	-1.7969	0.64453	0.12695	-61.765	113.682	964.48	-0.57322	0.37056	0.073363	-67.122	131.738	710.28	-0.33936	0.23145	-0.086914	-41.968	-174.43	1358.861	-0.71826	0.32422	-0.060059
1.326	-34.923	-61.637	2134.62	-1.7031	0.99219	0.2085	16.04	105.898	435.617	-0.15967	0.23486	0.12256	-118.951	-44.8621	2207	-1.8237	1.0737	0.15381	-139.677	-60.823	2072.69	-1.7871	0.6377	0.1333	-61.113	129.958	934.448	-0.55445	0.35727	0.063237	-46.994	128.006	674.33	-0.32324	0.2207	-0.087891	-13.257	-187.722	1358.88876	-0.74316	0.35156	-0.049805
1.328	-13.244	-61.033	2129.61	-1.7016	0.98974	0.21509	13.26	102.075	411.16968	-0.14277	0.22373	0.1248	-96.294	-45.24	2196.1	-1.8003	1.063	0.15039	-102.973	-37.01	2068.42	-1.7793	0.63135	0.14111	-30.265	129.776	894.928	-0.53317	0.34086	0.058131	-33.654	121.621	650.13	-0.31689	0.21387	-0.084473	-20.114	-189.29	1373.4881	-0.76318	0.37549	-0.04541
1.33	0.213000000000001	-67.911	2141.35	-1.7012	0.98438	0.21729	-9.927	88.42008	383.825	-0.1334	0.21758	0.12988	-54.197	-41.0106	2194.2	-1.7832	1.0576	0.14795	-109.153	-26.503	2048.4	-1.77	0.62939	0.14941	-27.485	145.885	880.708	-0.51123	0.32764	0.050293	-37.355	125.6	636.12	-0.30371	0.20654	-0.086426	20.325	-177.55	1390.013	-0.81885	0.43213	-0.029297
1.332	9.232	-60.831	2130.66	-1.6968	0.98096	0.22461	-24.925	89.258	360.811	-0.12403	0.21485	0.12793	-44.62	-46.871	2189.4	-1.7637	1.0488	0.14355	-119.2	-15.478	2016.56	-1.7617	0.62695	0.15674	2.951	137.564	858.066	-0.48958	0.32051	0.051818	-46.649	129.99	617.23	-0.29419	0.19946	-0.091309	57.753	-137.32819	1440.4106	-0.87085	0.47095	-0.016846
1.334	23.96	-48.505	2120.44	-1.6904	0.97266	0.22974	-34.389	109.857	346.743	-0.11123	0.20762	0.13057	-38.564	-50.634	2178.5	-1.7285	1.0469	0.14893	-110.653	-13.327	2007.54	-1.7495	0.62744	0.16113	24.389	123.779	838.692	-0.46216	0.30706	0.035083	-29.362	135.265	594.95	-0.28662	0.19092	-0.094238	77.988	-98.495	1492.766	-0.93213	0.51074	-0.0024414
1.336	-7.072	-28.343	2105.09	-1.687	0.96533	0.24072	-45.254	124.66	332.1578	-0.10449	0.20313	0.13037	-28.306	-45.763	2152.9	-1.7124	1.0425	0.14844	-90.23	-5.13499999999999	2000.47	-1.728	0.63135	0.1665	48.624	119.7326	808.674	-0.44217	0.29035	0.0336	-20.304	144.516	559.7	-0.27393	0.18066	-0.09668	81.973	-94.486	1523.187	-1.019	0.56885	0.019531
1.338	10.629	-7.242	2100.11	-1.6812	0.9585	0.24219	-52.466	122.457	326.8128	-0.098244	0.20088	0.13379	-32.702	-33.7018	2143.8	-1.6758	1.0361	0.14502	-115.495	-24.021	1992.9	-1.708	0.62598	0.16797	50.588	135.758	801.014	-0.42784	0.27807	0.025345	-13.73	135.948	541.02	-0.26953	0.17676	-0.095215	99.543	-102.891	1531.105	-1.0586	0.5957	0.038086
1.34	4.963	-8.001	2088.33	-1.6777	0.94922	0.24512	-64.564	100.987	322.4326	-0.095898	0.20098	0.13291	-41.639	-26.3443	2133.5	-1.658	1.0286	0.14477	-105.556	-31.61	1976.92	-1.6875	0.63086	0.16846	71.033	137.172	779.472	-0.41357	0.26904	0.02002	-19.447	118.623	531.43	-0.25977	0.17627	-0.095703	116.422	-83.862	1550.9078	-1.1304	0.64209	0.06543
1.342	-4.92100000000001	0.573999999999998	2060.79	-1.6699	0.93945	0.24756	-75.964	94.185	310.1434	-0.093164	0.19863	0.13721	-36.868	-16.8554	2135.7	-1.6348	1.0215	0.14355	-85.025	-30.338	1958.52	-1.6558	0.63525	0.1748	53.692	125.829	765.902	-0.39759	0.25731	0.0099998	-7.864	113.616	512.49	-0.2539	0.16626	-0.095459	119.893	-87.966	1576.0425	-1.1682	0.677	0.081787
1.344	-30.539	-6.531	2060.3	-1.658	0.93481	0.2539	-94.845	90.03	287.2898	-0.089453	0.19912	0.13759	-25.091	4.546	2110.2	-1.6084	1.0117	0.14307	-83.536	-19.43	1929.37	-1.6396	0.63037	0.17969	56.16	141.983	741.837	-0.38405	0.24818	0.00087979	2.518	129.882	492.38	-0.25	0.16553	-0.098145	122.599	-75.193	1603.1971	-1.1875	0.7002	0.095703
1.346	-1.555	-8.45500000000001	2052.75	-1.6504	0.92969	0.25537	-85.838	88.531	281.1991	-0.08252	0.19922	0.13916	-30.262	5.7471	2086.34	-1.5903	1.0014	0.13965	-130.988	-20.148	1893.18	-1.6089	0.63135	0.17676	47.566	147.0893	716.413	-0.36766	0.23718	-0.0060009	28.492	125.468	470.89	-0.24365	0.16064	-0.096191	101.779	-77.666	1609.137	-1.1885	0.71973	0.1001
1.348	-18.592	-8.128	2047.96	-1.6445	0.91797	0.26074	-104.1609	97.668	269.4954	-0.079199	0.20586	0.14063	-40.005	-20.07733	2068.92	-1.5742	0.99023	0.14404	-116.479	-5.819	1874.21	-1.582	0.62891	0.17505	48.265	135.3687	671.746	-0.35195	0.22629	-0.014263	7.806	121.339	464.45	-0.23975	0.15625	-0.099609	76.945	-89.202	1627.8466	-1.1797	0.73047	0.104
1.35	-34.741	-6.497	2027.46	-1.6343	0.9165	0.26514	-112.73164	89.227	249.6094	-0.074414	0.20909	0.14082	-30.448	-14.5536	2059.22	-1.5601	0.98291	0.14502	-124.935	19.77	1854.03	-1.5552	0.62842	0.16895	25.086	121.3138	669.043	-0.33789	0.2168	-0.023926	31.513	112.897	441.19	-0.23291	0.14941	-0.1001	49.488	-123.0428	1642.0994	-1.1558	0.72705	0.091309
1.352	-52.76	-8.104	1996.51	-1.6265	0.91064	0.26758	-106.7424	72.783	231.3279	-0.07168	0.21143	0.14238	-35.838	-8.0577	2029.18	-1.5527	0.97461	0.1499	-160.6924	36.723	1848.46	-1.519	0.62354	0.1665	20.577	128.267	651.594	-0.32844	0.20548	-0.032752	27.705	115.844	418.04	-0.22852	0.146	-0.10181	41.594	-151.226	1684.7379	-1.135	0.71411	0.081054
1.354	-72.752	-4.178	1975.8	-1.6208	0.91626	0.2754	-108.6329	63.372	229.5372	-0.066504	0.21895	0.13916	-59.944	5.004	2001.65	-1.5308	0.96533	0.15332	-208.466	24.436	1823.04	-1.5039	0.62402	0.16553	-3.877	115.162	636.512	-0.32167	0.19662	-0.043099	31.193	105.103	396.28	-0.22803	0.14307	-0.096191	22.877	-150.5499	1720.837	-1.1284	0.69482	0.064941
1.356	-115.5608	-1.639	1963.05	-1.6069	0.9165	0.27734	-104.7984	74.903	241.857	-0.064453	0.21875	0.14063	-74.078	14.5956	1982.57	-1.5163	0.96167	0.15137	-204.998	33.196	1816.29	-1.4629	0.62305	0.16064	-1.439	108.718	620.463	-0.31119	0.18555	-0.049237	22.878	100.109	398.67	-0.22217	0.14014	-0.10107	31.495	-139.8609	1754.116	-1.127	0.66211	0.050781
1.358	-145.426	1.671	1937.43	-1.5874	0.92822	0.27441	-87.34	75.248	236.828	-0.059863	0.22149	0.14111	-102.405	33.2179	1956.43	-1.4995	0.95752	0.15186	-223.08	43.313	1785.56	-1.4346	0.61792	0.15576	-25.099	106.75	610.694	-0.30136	0.17492	-0.057265	25.888	100.008	385.92	-0.22314	0.13818	-0.10547	10.396	-144.6141	1777.717	-1.1323	0.646	0.040527
1.36	-138.453	16.076	1920.8	-1.5776	0.92236	0.27344	-80.448	80.98	222.818	-0.061133	0.22314	0.13916	-129.90167	33.3434	1923.68	-1.4766	0.95117	0.15625	-242.489	48.206	1778.2	-1.4053	0.61719	0.15332	-53.015	119.543	597.675	-0.27783	0.17285	-0.063965	17.51	92.86	382	-0.22461	0.13232	-0.10352	-10.199	-132.0773	1789.324	-1.1558	0.61377	0.022949
1.362	-153.871	18.352	1915.91	-1.5527	0.92383	0.27588	-44.999	77.963	203.8945	-0.056836	0.22432	0.13955	-160.121	28.8563	1899.2	-1.4644	0.9458	0.14893	-231.674	51.969	1754.8	-1.3589	0.61377	0.1543	-59.443	124.2216	580.423	-0.25608	0.16911	-0.07081	-4.972	81.936	342.51	-0.22192	0.12915	-0.10352	-34.996	-118.051	1805.809	-1.1882	0.59204	0.015137
1.364	-181.201	26.214	1909.01	-1.5301	0.92554	0.27784	-36.078	72.331	199.4739	-0.051953	0.22158	0.14053	-156.7809	28.469	1891.54	-1.437	0.93799	0.15234	-214.409	62.054	1742.74	-1.3345	0.6123	0.14697	-77.088	137.6511	550.584	-0.23033	0.17026	-0.077587	-13.61	93.171	343.5	-0.22119	0.12598	-0.104	-32.861	-106.16	1811.0234	-1.2222	0.58252	0.0039063
1.366	-151.257	20.028	1879.68	-1.5034	0.92627	0.28027	-17.862	56.535	199.154	-0.047363	0.2207	0.13916	-172.368	36.643	1881.78	-1.4148	0.92798	0.1521	-215.235	55.51	1708.5	-1.2905	0.60107	0.1377	-78.182	135.3125	511.651	-0.20521	0.16791	-0.087432	-16.409	90.225	331.75	-0.22412	0.12402	-0.10205	-43.35	-111.905	1845.894	-1.269	0.59424	-0.023438
1.368	-132.465	31.444	1844.68	-1.4565	0.92627	0.27051	-23.479	43.0165	199.479	-0.041699	0.22109	0.13838	-165.924	34.04786	1856.08	-1.396	0.91846	0.15234	-213.227	31.697	1692.11	-1.248	0.58789	0.12939	-101.6476	118.881	505.853	-0.18614	0.16389	-0.091669	-17.971	95.385	312.36	-0.22461	0.12402	-0.10742	-44.228	-101.656	1851.052	-1.2949	0.59961	-0.03418
1.37	-105.268	56.676	1827.72	-1.4321	0.92041	0.26758	8.785	58.024	183.1466	-0.041211	0.21611	0.13682	-151.592	42.198476	1819.15	-1.3687	0.90381	0.15576	-177.2802	31.385	1669.37	-1.2266	0.58789	0.12891	-87.291	103.933	488.066	-0.16602	0.16016	-0.098145	-41.694	93.694	291.21	-0.23535	0.12549	-0.10938	-50.175	-93.205	1852.531	-1.3247	0.62939	-0.043945
1.372	-97.7158	52.442	1807.31	-1.3687	0.92041	0.25781	4.233	64.817	178.681	-0.041601	0.21416	0.13838	-122.7734	58.052	1807.24	-1.3496	0.89453	0.15674	-170.0357	58.664	1653.96	-1.188	0.57178	0.12061	-100.6047	115.283	463.728	-0.15382	0.15444	-0.10051	-32.363	100.958	275.21	-0.24048	0.11841	-0.1084	-32.238	-82.9818	1844.00174	-1.3464	0.65258	-0.058106
1.374	-66.85	50.154	1779.62	-1.3191	0.91333	0.24854	3.812	41.43531	170.719	-0.044531	0.21738	0.13926	-113.9195	55.04116	1770.34	-1.3223	0.87598	0.16016	-165.8685	67.943	1616.34	-1.1585	0.56665	0.12061	-72.507	120.092	457.913	-0.14151	0.14927	-0.10323	-40.928	89.308	273.64	-0.25	0.1123	-0.1123	-33.848	-80.3939	1858.9742	-1.3633	0.67969	-0.071777
1.376	-59.422	48.486	1747.8	-1.2715	0.90234	0.24365	5.645	28.5739	183.954	-0.043457	0.21436	0.13672	-107.867	47.025	1748.98	-1.2923	0.86548	0.16089	-151.9647	64.708	1599.01	-1.1382	0.55713	0.11475	-61.96	113.977	449.796	-0.1373	0.14023	-0.10607	-30.633	74.502	279.64	-0.25781	0.1123	-0.11572	-4.86	-58.172	1865.09215	-1.3813	0.71533	-0.088867
1.378	-55.799	39.328	1714.95	-1.2104	0.88721	0.23242	13.053	25.4943	174.277	-0.044824	0.20986	0.13779	-85.917	57.6482	1711.27	-1.2656	0.85156	0.15869	-128.576	76.301	1579.06	-1.1069	0.54297	0.11035	-41.233	102.209	437.654	-0.13447	0.13509	-0.1049	-50.152	70.816	256.41	-0.26318	0.1084	-0.12256	10.392	-55.053	1861.136	-1.3908	0.74096	-0.10742
1.38	-54.347	41.9973	1703.45	-1.1748	0.87891	0.22314	25.472	15.3535	175.109	-0.051856	0.21045	0.13955	-84.671	59.617	1684.57	-1.2266	0.83203	0.15527	-123.179	79.613	1554.76	-1.0918	0.5332	0.10645	-36.849	107.8807	424.567	-0.13477	0.12695	-0.10254	-28.753	85.294	246.12	-0.27148	0.10742	-0.10498	32.837	-57.3156	1865.893	-1.3979	0.76611	-0.12451
1.382	-30.418	47.2276	1683.9	-1.1226	0.85889	0.21045	8.04799999999999	10.23	165.036	-0.050684	0.20693	0.13916	-80.156	59.445	1674.71	-1.2075	0.82471	0.14941	-117.324	88.655	1538.37	-1.0645	0.52344	0.10352	-8.252	110.8743	396.372	-0.13409	0.13067	-0.094111	-61.147	91.215	228.39	-0.27637	0.11133	-0.11255	48.76	-61.525	1898.1238	-1.4038	0.80127	-0.15479
1.384	-13.322	60.372	1646.16	-1.084	0.84521	0.20312	6.594	11.983	176.543	-0.05293	0.20723	0.13389	-66.443	55.142	1646.02	-1.1714	0.79932	0.14648	-75.087	98.6466	1500.32	-1.04	0.5166	0.10474	9.532	94.21	391.674	-0.13534	0.12523	-0.09488	-33.819	87.552	221.2	-0.27783	0.11084	-0.10938	98.642	-66.734	1924.5224	-1.4043	0.81738	-0.1665
1.386	-11.528	53.942	1627.89	-1.0488	0.82617	0.20459	-15.043	5.971	170.392	-0.053711	0.20654	0.13379	-54.493	60.59	1608.18	-1.1367	0.78564	0.14136	-60.534	120.178	1471.94	-1.02	0.50635	0.10156	13.091	86.00876	390.022	-0.13654	0.12831	-0.09063	-52.154	91.026	214.003	-0.27832	0.11523	-0.10742	115.565	-76.3218	1940.202	-1.4058	0.83936	-0.19287
1.388	14.143	51.596	1608.31	-1.0034	0.80908	0.1875	-10.63	-10.638	175.492	-0.049902	0.21006	0.13408	-42.61	71.97	1577.56	-1.1113	0.7627	0.13965	-63.424	105.298	1443.3	-0.98779	0.49902	0.099609	4.91	78.2108	385.045	-0.13741	0.13048	-0.086807	-22.108	68.166	199.52	-0.27881	0.11133	-0.11279	123.653	-84.0286	1934.36832	-1.4085	0.84937	-0.20801
1.39	29.496	64.409	1579.19	-0.98633	0.79883	0.18896	-14.35	-13.95776	174.928	-0.044239	0.21025	0.1372	-20.716	73.952	1544.38	-1.0713	0.73828	0.12598	-48.878	98.64	1406.56	-0.9751	0.49268	0.09668	34.792	68.3073	360.693	-0.13818	0.13428	-0.083496	-34.317	65.454	185.534	-0.27051	0.11475	-0.10791	118.924	-77.368	1937.5174	-1.4146	0.85498	-0.22705
1.392	35.257	72.767	1553.85	-0.94629	0.7793	0.18115	-37.296	-20.6283	166.186	-0.034082	0.21416	0.13643	0.268000000000001	107.3744	1532.82	-1.0508	0.73047	0.12207	-17.163	97.7444	1368.68	-0.9375	0.48047	0.10059	38.808	62.694	342.77	-0.14404	0.13398	-0.082327	-3.218	66.145	190.124	-0.26074	0.11377	-0.10693	136.376	-88.0079	1947.004	-1.4175	0.86182	-0.24609
1.394	30.406	69.608	1525.43	-0.92236	0.76465	0.17505	-63.728	-27.3647	167.486	-0.02041	0.21269	0.13682	15.404	118.7332	1494.02	-1.0034	0.70947	0.11035	-46.654	96.149	1341.6	-0.91601	0.46923	0.092041	57.704	70.629	341.06	-0.14314	0.1376	-0.083984	-15.798	64.907	198.724	-0.25244	0.11719	-0.10742	138.76	-83.484	1953.727	-1.4155	0.86377	-0.25342
1.396	25.331	72.115	1504.41	-0.896	0.75244	0.17285	-66.998	-28.0662	167.703	-0.011719	0.2085	0.13818	22.177	89.939	1455.35	-0.97242	0.69165	0.099367	-62.224	91.6188	1307.12	-0.8999	0.45947	0.086914	46.418	69.2987	317.383	-0.15059	0.14423	-0.080085	6.623	57.629	187.348	-0.23438	0.11182	-0.10303	140.495	-74.512	1954.733	-1.4312	0.85596	-0.2749
1.398	1.808	85.604	1475.16	-0.86328	0.72852	0.16553	-80.104	-19.977	165.071	-0.0054688	0.20918	0.1376	22.18	82.183	1424.14	-0.93848	0.67432	0.09082	-62.085	101.896	1292.31	-0.86035	0.44727	0.081055	49.039	67.6468	308.799	-0.14736	0.14443	-0.081641	-2.292	45.51	187.952	-0.2251	0.10547	-0.104	139.086	-62.167	1946.732	-1.4441	0.85376	-0.28784
1.4	-16.509	96.543	1434.32	-0.85303	0.71729	0.1582	-76.421	-35.8256	167.061	-0.0042969	0.20283	0.13701	2.405	80.131	1408.84	-0.89648	0.65234	0.081543	-78.696	122.23	1254.61	-0.8457	0.4375	0.077637	37.847	83.015	272.943	-0.14844	0.14551	-0.083008	26.161	48.9761	166.956	-0.2085	0.10693	-0.10791	128.868	-55.997	1950.4486	-1.4541	0.85156	-0.30322
1.402	-29.638	107.233	1385.11	-0.82422	0.69824	0.15381	-90.9713	-62.04847	175.991	0.00039058	0.20323	0.13779	-16.733	90.4898	1364.63	-0.87842	0.63916	0.072754	-101.842	125.174	1235.53	-0.81299	0.42139	0.076172	40.555	83.0976	268.689	-0.14961	0.1501	-0.079592	19.12	44.3909	171.506	-0.18896	0.1045	-0.10205	98.444	-28.9536	1953.2229	-1.4746	0.84863	-0.31738
1.404	-51.758	120.562	1356.1	-0.80469	0.68213	0.14648	-77.645	-70.2537	179.842	-0.0011719	0.1999	0.1417	-42.942	100.5667	1326.89	-0.83936	0.61963	0.062012	-100.553	113.355	1226.33	-0.78614	0.40894	0.074463	10.414	62.4135	275.812	-0.14864	0.15224	-0.084279	7.301	42.663	148.044	-0.17529	0.1001	-0.10693	101.841	5.607	1953.021844	-1.4839	0.8501	-0.32568
1.406	-94.1702	119.596	1341.84	-0.77979	0.66846	0.13867	-74.168	-73.4433	188.529	-0.0058594	0.19824	0.14551	-48.717	119.027	1293.3	-0.81372	0.6023	0.054443	-108.39	115.897	1215.24	-0.7583	0.39453	0.07373	-7.142	52.4515	275.639	-0.14824	0.15498	-0.084276	-9.151	33.9281	149.412	-0.15332	0.095215	-0.10596	77.939	23.125	1971.2787	-1.5054	0.8501	-0.34131
1.408	-101.4125	112.981	1321.76	-0.75195	0.64648	0.12646	-76.595	-71.1794	205.089	-0.0069336	0.19473	0.14844	-72.426	134.963	1259.15	-0.79053	0.58301	0.044434	-122.9023	120.844	1179.6	-0.73193	0.37158	0.068359	-17.395	66.423	246.946	-0.14677	0.15566	-0.085839	9.485	49.694	139.606	-0.1416	0.096191	-0.10693	71.234	22.914	1977.0101	-1.5232	0.85425	-0.35083
1.41	-113.25	120.875	1293.14	-0.73145	0.63477	0.12354	-73.917	-88.036	254.518	-0.012598	0.19102	0.15176	-71.625	124.0131	1236.52	-0.76611	0.56006	0.040527	-141.6044	99.846	1148.42	-0.71484	0.36621	0.063477	-40.865	76.105	236.409	-0.14502	0.16064	-0.085449	1.238	35.4443	147.922	-0.11719	0.085449	-0.10938	53.179	19.97	1974.3135	-1.5332	0.85742	-0.36035
1.412	-92.8891	122.967	1276.68	-0.70264	0.62451	0.1167	-36.837	-75.284	288.461	-0.019629	0.19141	0.15449	-92.288	120.1731	1199.73	-0.75195	0.54785	0.038086	-128.194	115.296	1119.31	-0.67773	0.3457	0.058105	-70.442	74.9713	215.409	-0.14932	0.16514	-0.082324	-6.522	24.7997	144.962	-0.10083	0.082763	-0.11377	40.063	30.7414	1951.052	-1.5547	0.86328	-0.37549
1.414	-109.202	117.094	1256.56	-0.677	0.60888	0.11108	-42.154	-61.745	347.289	-0.03125	0.1916	0.1584	-87.3892	125.0428	1202.15	-0.72217	0.53076	0.028809	-118.791	122.794	1094.28	-0.65308	0.32789	0.053955	-77.472	65.7511	212.408	-0.15156	0.16182	-0.082324	-9.379	21.0384	153.681	-0.085938	0.081543	-0.11475	15.728	35.3809	1935.1669	-1.562	0.86377	-0.38037
1.416	-107.54	102.795	1221.27	-0.65137	0.5918	0.10693	-43.729	-18.269	406.111	-0.04541	0.19678	0.15723	-83.573	124.0865	1163.23	-0.69897	0.51587	0.02295	-147.3807	113.307	1051.08	-0.62549	0.31152	0.04834	-91.73	71.6078	182.723	-0.1543	0.16416	-0.082715	-28.027	18.339	145.883	-0.073242	0.074219	-0.12158	7.11	37.7001	1941.6593	-1.582	0.86328	-0.39258
1.418	-112.717	112.037	1179.96	-0.61963	0.57471	0.097168	-25.702	26.513	503.898	-0.065137	0.19668	0.15615	-104.33693	114.78026	1140.35	-0.6792	0.49561	0.02002	-145.5152	113.524	1011.1	-0.59912	0.28955	0.043945	-92.566	53.4436	176.188	-0.1583	0.1626	-0.081348	-27.516	11.648	147.265	-0.067871	0.076172	-0.11914	1.84999999999999	30.9559	1932.6816	-1.5881	0.86255	-0.39673
1.42	-97.1835	123.282	1143.28	-0.60596	0.56104	0.09082	-6.043	93.9269	615.467	-0.095508	0.20019	0.15323	-102.9223	122.073	1104.81	-0.64795	0.47803	0.01416	-135.5397	132.684	998.43	-0.5835	0.27881	0.043945	-102.7913	56.185	153.678	-0.16162	0.15918	-0.080566	-31.715	9.751	142.66	-0.066895	0.073242	-0.125	-19.619	25.4282	1933.7167	-1.5938	0.8623	-0.40039
1.422	-103.056	129.66	1130.79	-0.58008	0.54004	0.08252	-4.232	113.56774	712.96	-0.13847	0.20996	0.1458	-109.7412	129.582	1071.1	-0.63623	0.46533	0.010254	-114.9899	142.94	992.99	-0.55078	0.25781	0.039063	-114.0149	35.168	178.084	-0.1669	0.16259	-0.079199	-37.064	6.215	151.861	-0.070801	0.076172	-0.12598	-14.677	11.1665	1927.2192	-1.5957	0.85352	-0.40137
1.424	-88.847	122.882	1107.97	-0.56103	0.52539	0.078857	19.931	127.747	796.641	-0.21006	0.21308	0.1377	-94.839	132.065	1024.4	-0.61279	0.44385	0.0063477	-132.1402	136.683	972.6	-0.52905	0.24365	0.030518	-113.1168	42.991	174.761	-0.175	0.15986	-0.075879	-58.817	-10.118	154.952	-0.076172	0.08252	-0.125	-15.268	14.6324	1928.101	-1.5957	0.85156	-0.40527
1.426	-74.3214	119.585	1089.62	-0.54004	0.50879	0.074219	30.193	136.5407	901.658	-0.29736	0.22119	0.13232	-105.4736	124.42695	1004.54	-0.59375	0.42505	0.00097654	-90.419	134.303	946.27	-0.50732	0.23096	0.026855	-98.508	30.732	161.911	-0.18515	0.16221	-0.074707	-50.934	-25.15	148.821	-0.087402	0.092285	-0.12793	1.98200000000001	35.712	1937.196	-1.5991	0.83838	-0.39697
1.428	-78.7363	113.002	1076.09	-0.52246	0.48486	0.068359	25.012	147.764	1009.93	-0.42129	0.23789	0.1248	-97.7072	139.7861	978.17	-0.56982	0.41064	-0.0029297	-82.936	146.048	916.56	-0.47852	0.21289	0.024902	-92.216	41.375	158.649	-0.1956	0.15889	-0.073828	-61.24	-29.237	167.011	-0.09668	0.098145	-0.12744	17.02	66.965	1915.6202	-1.5984	0.83667	-0.39673
1.43	-53.2195	114.311	1052.28	-0.51172	0.47754	0.0625	13.894	119.655	1085.78	-0.5585	0.25273	0.12022	-90.406	137.7008	972.83	-0.54492	0.38867	-0.0068359	-60.508	140.151	896.82	-0.46484	0.20215	0.019531	-76.178	51.778	146.549	-0.20801	0.15723	-0.068359	-57.179	-38.484	187.587	-0.10498	0.11133	-0.12305	43.157	81.037	1900.894	-1.5972	0.83057	-0.39111
1.432	-15.037	125.392	1026.12	-0.48779	0.45557	0.058594	-11.325	96.7	1124.13	-0.70029	0.28281	0.12725	-49.557	122.6358	937.47	-0.5293	0.37939	-0.0053711	-73.011	135.891	878.97	-0.43701	0.18701	0.016602	-76.979	46.8855	138.331	-0.21504	0.16074	-0.069531	-65.34	-54.602	210.02	-0.1211	0.12402	-0.12842	57.964	96.535	1887.6204	-1.5854	0.82861	-0.38428
1.434	19.651	132.188	994.76	-0.47925	0.43676	0.058838	10.465	47.0398	1132.76	-0.84179	0.32031	0.14267	-36.354	119.6961	918.81	-0.49902	0.36133	-0.01709	-18.544	144.99	847.5	-0.41992	0.17798	0.0092771	-61.207	44.05	126.405	-0.22881	0.15772	-0.060156	-65.614	-68.021	220.944	-0.13379	0.13623	-0.12988	65.314	90.201	1867.0502	-1.5874	0.82178	-0.38135
1.436	3.411	132.526	969.5	-0.47119	0.42188	0.054688	13.121	-15.2823	1168.07	-0.98389	0.36279	0.15918	-16.342	129.109	893.66	-0.47925	0.34399	-0.021973	-4.481	144.978	826.08	-0.40137	0.16406	0.0039063	-45.313	42.30909	122.597	-0.23584	0.16045	-0.057031	-52.636	-63.215	241.311	-0.1582	0.15332	-0.1333	81.572	77.871	1852.98528	-1.5762	0.82227	-0.37109
1.438	42.539	133.555	936.54	-0.46289	0.39746	0.05127	-28.64	-64.035	1225.61	-1.1065	0.41807	0.18174	13.844	127.0029	878.55	-0.45557	0.33252	-0.02002	-4.947	128.109	796.59	-0.37842	0.14795	-0.0029297	-5.18	37.5795	121.903	-0.23945	0.16524	-0.049219	-27.109	-59.581	260.0253	-0.17578	0.1582	-0.13525	96.46	73.322	1848.6986	-1.5672	0.81714	-0.36377
1.44	44.104	134.305	899.79	-0.45605	0.39111	0.052734	-73.632	-81.634	1259.79	-1.212	0.48448	0.20049	18.088	129.2912	845.23	-0.42773	0.31104	-0.03125	-16.572	125.154	771.36	-0.36719	0.14941	0.0024414	-3.275	25.3673	143.626	-0.24365	0.1665	-0.046875	-38.338	-53.1944	315.3478	-0.22656	0.1748	-0.13818	106.965	86.183	1819.1533	-1.564	0.81592	-0.35547
1.442	62.333	137.5	887.05	-0.44482	0.36865	0.046875	-58.786	-87.473	1241.99	-1.287	0.55714	0.2208	16.406	148.2292	815.23	-0.42139	0.30029	-0.034668	7.59700000000001	146.37	748	-0.34668	0.13867	-0.0063477	-0.600999999999999	10.135	130.869	-0.23428	0.16885	-0.044824	-31.414	-22.682	379.293	-0.28296	0.18457	-0.14136	117.518	85.9365	1813.929	-1.5527	0.81445	-0.34277
1.444	42.502	134.312	856.59	-0.43799	0.35302	0.046142	-46.658	-99.713	1234.909	-1.3371	0.63311	0.23565	31.841	148.701	784.63	-0.39941	0.28369	-0.037598	9.21299999999999	147.342	725.04	-0.33374	0.12793	-0.014404	22.849	21.0512	123.966	-0.22627	0.17383	-0.043555	-19.884	7.106	422.2791	-0.34961	0.19727	-0.1416	116.984	90.807	1784.8586	-1.5527	0.81836	-0.33789
1.446	49.536	137.467	845.9	-0.42969	0.33984	0.040039	-41.443	-105.263	1254.26	-1.353	0.70361	0.24902	34.877	137.6296	755.27	-0.38378	0.27002	-0.045655	-2.056	142.421	709.4	-0.31494	0.11914	-0.023438	14.647	27.60275	111.843	-0.21455	0.17461	-0.039258	11.569	38.744	493.477	-0.45898	0.21826	-0.14111	126.818	84.61	1775.96609	-1.5464	0.81689	-0.31494
1.448	30.854	144.291	818.48	-0.41895	0.32568	0.036133	-31.632	-83.671	1269.86	-1.3366	0.76923	0.25479	14.693	128.8612	749.04	-0.36816	0.25586	-0.05127	5.751	133.362	703.12	-0.29736	0.11182	-0.026855	35.588	29.0147	108.876	-0.19873	0.17295	-0.042383	-0.825000000000003	56.208	567.457	-0.51221	0.23242	-0.14209	116.553	86.911	1750.9316	-1.5437	0.82056	-0.3064
1.45	12.273	135.887	799.93	-0.41602	0.31641	0.039551	-35.1647	-42.402	1267.64	-1.3003	0.81435	0.25976	43.121	139.334	721.26	-0.34814	0.2417	-0.055176	3.256	134.819	676.2	-0.28906	0.10889	-0.026855	27.205	23.16927	111.239	-0.18408	0.16797	-0.040527	25.997	84.647	638.621	-0.64258	0.25781	-0.13867	112.725	66.9433	1744.264	-1.5386	0.82471	-0.28857
1.452	8.827	143.109	774.45	-0.39893	0.30713	0.032227	-53.366	-16.8344	1269.779	-1.2362	0.84794	0.26172	8.434	139.118	711.73	-0.33838	0.23291	-0.058594	-14.661	125.55	668.5	-0.26367	0.10693	-0.036621	40.783	15.4622	101.9763	-0.1665	0.16504	-0.041992	27.099	107.878	738.4776	-0.74365	0.28491	-0.14306	103.743	63.1541	1730.947	-1.5308	0.81787	-0.26807
1.454	17.947	143.948	758.33	-0.38623	0.29102	0.028077	-55.897	-0.726000000000001	1265.2	-1.1692	0.85879	0.25576	17.592	139.841	692.09	-0.31592	0.22559	-0.063965	-31.634	133.125	652.42	-0.24316	0.10424	-0.042969	0.884999999999998	14.1137	99.9731	-0.14521	0.15977	-0.037988	20.088	119.62	841.921	-0.85693	0.30811	-0.13672	87.611	76.4189	1711.219	-1.5229	0.81689	-0.25879
1.456	-24.196	139.624	733.05	-0.36865	0.28369	0.027344	-44.208	7.545	1244.96	-1.0874	0.854	0.25195	3.824	136.038	672.6	-0.30151	0.21851	-0.07251	-29.507	148.678	618.8	-0.22021	0.099609	-0.045898	14.554	18.0003	111.71	-0.12685	0.15859	-0.033692	35.964	122.327	919.043	-1.0273	0.36035	-0.13379	72.373	96.018	1678.382	-1.5073	0.81885	-0.24365
1.458	-18	120.327	719.86	-0.34229	0.27295	0.027832	-52.907	-12.066	1218.597	-1.0069	0.82352	0.24824	16.773	137.341	636.94	-0.28906	0.20898	-0.076172	-60.205	146.848	588.42	-0.18652	0.096191	-0.054199	-24.153	21.543	124.46	-0.097462	0.15274	-0.046387	46.86	114.13	978.197	-1.1519	0.40454	-0.12989	64.408	95.885	1654.372	-1.4903	0.81445	-0.22876
1.46	-48.513	117.54	692.29	-0.33154	0.26611	0.01709	-50.646	-33.006	1214.805	-0.93744	0.78551	0.23916	-27.987	123.174	622.75	-0.27002	0.20557	-0.084473	-74.575	134.384	557.64	-0.17383	0.094727	-0.055664	-22.142	8.455	139.213	-0.068848	0.15039	-0.049316	18.077	92.663	1029.983	-1.2808	0.45557	-0.11426	35.142	106.47	1639.533	-1.4746	0.81348	-0.2168
1.462	-52.539	120.166	683.03	-0.29834	0.24756	0.01123	-53.534	-56.896	1237.113	-0.86907	0.73431	0.22938	-14.694	126.722	602.58	-0.25684	0.19824	-0.087891	-87.2562	135.438	542.17	-0.14746	0.089355	-0.060059	-31.674	-2.569	113.865	-0.041309	0.14258	-0.050977	24.494	54.885	1113.08	-1.4312	0.53369	-0.091309	20.09	106.677	1611.222	-1.4526	0.80908	-0.2041
1.464	-74.6357	120.918	646.26	-0.27637	0.23852	0.0063476	-60.043	-82.262	1255.155	-0.81168	0.66596	0.21298	-55.652	131.569	588.77	-0.23438	0.18799	-0.09082	-69.681	132.516	533.59	-0.12378	0.085693	-0.065918	-49.101	-7.195	110.7295	-0.015625	0.13526	-0.054395	30.477	17.207	1167.449	-1.4883	0.57227	-0.073242	-3.70700000000001	97.9316	1586.023	-1.4395	0.80469	-0.19238
1.466	-67.967	120.644	625	-0.25879	0.22705	0.0019531	-65.227	-123.8339	1285.953	-0.76318	0.604	0.19531	-54.338	129.23	566.85	-0.21167	0.1858	-0.094238	-107.873	114.375	524.15	-0.11035	0.085449	-0.065918	-88.4202	-0.779000000000003	128.8867	0.0050781	0.12041	-0.06416	26.113	-19.086	1201.869	-1.5527	0.65918	-0.049805	-5.074	111.058	1564.2491	-1.4116	0.79639	-0.18164
1.468	-88.5526	129.297	598.05	-0.24023	0.2041	-0.0068359	-39.842	-159.905	1303.608	-0.73139	0.54785	0.17922	-78.1163	108.539	553.95	-0.18213	0.18164	-0.098145	-102.266	113.034	504.08	-0.093262	0.07666	-0.071289	-88.7439	-13.37	136.9372	0.020215	0.10996	-0.072949	11.396	-48.504	1198.586	-1.5432	0.71802	-0.026612	-31.345	135.623	1544.7337	-1.3916	0.78564	-0.17334
1.47	-97.2601	116.046	589.03	-0.22559	0.19531	-0.013672	-48.821	-194.668	1357.059	-0.71059	0.50312	0.16208	-82.164	113.42	538.52	-0.14697	0.18115	-0.10498	-96.0981	128.272	496.73	-0.083984	0.07666	-0.071289	-94.259	-37.942	145.13558	0.023438	0.095215	-0.079102	14.132	-80.8199	1193.795	-1.4976	0.76807	-0.012695	-30.867	132.264	1504.9374	-1.3696	0.77783	-0.16504
1.472	-87.45349	115.248	575.46	-0.21533	0.17627	-0.020508	-42.144	-207.108	1396.58	-0.69692	0.48161	0.14411	-93.5428	111.6	523.23	-0.12646	0.17871	-0.11133	-76.122	137.508	491.11	-0.073242	0.067383	-0.071777	-83.386	-41.737	144.908	0.023047	0.084765	-0.07793	-36.369	-92.909	1203.4865	-1.3745	0.80518	-0.01416	-48.785	127.714	1483.156	-1.3335	0.76416	-0.15234
1.474	-70.8057	113.641	554.91	-0.20801	0.16211	-0.024414	-40.996	-219.414	1462.18	-0.69862	0.47475	0.12505	-87.6122	116.689	487.31	-0.091309	0.17041	-0.11621	-96.19718	129.045	482.47	-0.069336	0.067627	-0.075195	-89.905	-59.722	174.9449	0.0099613	0.074316	-0.079102	-45.122	-97.184	1217.9087	-1.2949	0.81348	-0.019531	-57.819	130.741	1466.71265	-1.3184	0.75684	-0.15186
1.476	-54.257	118.43	544.48	-0.20264	0.15283	-0.035156	-27.282	-194.062	1491.94	-0.70264	0.49658	0.11133	-86.7	111.038	475.32	-0.067627	0.16285	-0.1267	-73.298	129.743	453.13	-0.069336	0.068359	-0.072266	-85.946	-57.32	200.054	-0.0095699	0.068457	-0.081445	-56.46091	-76.047	1195.8724	-1.1255	0.80322	-0.03418	-29.26	151.279	1459.176	-1.2847	0.74072	-0.14404
1.478	-71.1495	113.794	535.05	-0.20117	0.13867	-0.035156	-36.435	-196.936	1504.07	-0.72337	0.53134	0.092773	-70.819	120.906	461.52	-0.048828	0.15137	-0.13086	-51.69	127.663	430.24	-0.064941	0.069336	-0.074707	-97.42	-53.433	233.051	-0.031738	0.0625	-0.078223	-67.161	-55.51	1204.4376	-1.0183	0.77246	-0.0542	-20.82	148.422	1429.389	-1.2612	0.729	-0.14112
1.48	-32.75	106.771	519.54	-0.19922	0.13721	-0.040039	-69.965	-182.461	1523.803	-0.75308	0.58745	0.090272	-57.197	103.36	456.03	-0.03125	0.13818	-0.13965	-67.112	122.189	420.01	-0.068359	0.071289	-0.076172	-85.099	-21.233	257.958	-0.054199	0.066406	-0.082031	-106.253	-34.899	1234.659	-0.92725	0.72119	-0.062988	-19.522	142.736	1423.386	-1.2305	0.7168	-0.14355
1.482	-13.996	113.39	489.02	-0.20166	0.13232	-0.037109	-77.165	-187.104	1563.53	-0.79193	0.65039	0.091797	-52.579	95.439	443.83	-0.017578	0.13428	-0.1377	-58.485	111.432	402.93	-0.07373	0.072754	-0.072754	-79.031	-14.318	290.8664	-0.078711	0.067774	-0.080664	-119.19	-26.834	1248.977	-0.85791	0.63818	-0.08252	-4.17	150.773	1386.0824	-1.1987	0.69971	-0.14063
1.484	1.182	122.159	474	-0.19922	0.12402	-0.034668	-68.725	-165.516	1589.2	-0.83588	0.71929	0.089844	-25.948	93.661	420.56	-0.0048828	0.12646	-0.14209	-24.081	119.161	387.78	-0.08081	0.07666	-0.071289	-62.313	-16.015	336.5813	-0.10107	0.07959	-0.079687	-121.8699	-1.657	1248.597	-0.83203	0.59375	-0.088379	7.863	138.909	1354.0202	-1.1792	0.69189	-0.14014
1.486	11.904	105.384	452.92	-0.19775	0.12549	-0.039551	-91.308	-158.8648	1620.97	-0.88037	0.77783	0.089844	-31.218	111.184	412.12	-0.00048828	0.11426	-0.1416	-17.376	104.857	369.87	-0.091797	0.081055	-0.065918	-51.39	13.68522	402.818	-0.12451	0.091308	-0.078907	-79.505	4.01599999999999	1256.133	-0.80273	0.50195	-0.09082	13.734	130.7422	1313.324	-1.1436	0.67969	-0.13574
1.488	41.874	105.617	441.83	-0.19824	0.12451	-0.031738	-115.568	-151.552	1636.778	-0.92066	0.83094	0.097698	-18.696	110.479	391.72	0.0024414	0.11133	-0.14697	-7.526	96.362	353.33	-0.11133	0.092285	-0.060547	-33.074	54.671	485.986	-0.15293	0.10566	-0.08125	-69.583	-18.781	1272.037	-0.78613	0.4458	-0.087402	28.406	134.776	1304.005	-1.1142	0.6665	-0.13159
1.49	37.82	105.004	421.6	-0.19238	0.11963	-0.034424	-123.035	-163.715	1664.284	-0.95898	0.88022	0.10537	-18.738	108.874	377.75	0.012207	0.10938	-0.14258	22.697	96.829	352.355	-0.12451	0.088867	-0.061035	-10.613	99.94	584.893	-0.19189	0.11572	-0.083496	-73.578	-41.056	1291.731	-0.77783	0.40674	-0.090332	51.826	140.5519	1283.7359	-1.0889	0.65332	-0.12744
1.492	37.319	95.158	412.17	-0.19141	0.12012	-0.033203	-129.29	-171.11	1693.912	-0.99753	0.91661	0.12	2.528	107.211	354.15	0.012207	0.10816	-0.14453	31.237	121.375	339.449	-0.146	0.10059	-0.056641	10.462	132.361	696.69248	-0.24395	0.1252	-0.084766	-52.424	-78.232	1304.61	-0.7749	0.36768	-0.096191	57.127	136.687	1264.502	-1.0537	0.63672	-0.12744
1.494	60.308	91.414	399.1	-0.18994	0.11572	-0.032715	-146.372	-187.302	1718.321	-1.0281	0.94425	0.13554	15.94	96.273	334.43	0.016602	0.10596	-0.14209	23.439	115.28	332.819	-0.15747	0.11206	-0.056641	24.015	149.71	799.53469	-0.31357	0.13135	-0.090723	-29.319	-120.372	1340.1985	-0.77002	0.35645	-0.096191	54.457	140.8111	1237.969	-1.0386	0.63135	-0.11963
1.496	64.529	97.191	398.06	-0.19189	0.11572	-0.032227	-170.406	-194.6344	1762.06	-1.0586	0.96289	0.15332	44.569	86.775	329.09	0.02002	0.10938	-0.14014	23.341	110.765	325.972	-0.17041	0.11572	-0.050293	11.22	134.02	878.1317	-0.40576	0.13409	-0.09541	-52.435	-176.2165	1375.1711	-0.77588	0.35596	-0.10498	80.901	153.91	1205.5474	-1	0.61279	-0.11816
1.498	57.879	97.498	375.07	-0.19385	0.11475	-0.033203	-152.626	-176.6399	1781.05	-1.0841	0.97172	0.17404	30.251	84.658	329.34	0.019043	0.11035	-0.14063	35.798	105.131	304.368	-0.19043	0.12793	-0.047363	1.658	126.047	998.0731	-0.52119	0.13935	-0.095606	-33.614	-213.5246	1401.2676	-0.79297	0.36377	-0.10864	64.393	158.45	1181.184	-0.97217	0.59668	-0.1167
1.5	46.926	94.084	366.77	-0.19849	0.11328	-0.029786	-174.735	-179.332	1821.5	-1.107	0.96811	0.19141	44.677	94.45	313.51	0.015137	0.11523	-0.13428	15.327	95.558	299.014	-0.19873	0.13232	-0.044922	4.474	120.422	1095.0301	-0.65967	0.14453	-0.087402	-15.121	-232.48	1444.6327	-0.83154	0.38721	-0.10986	74.559	163.94	1144.2532	-0.94727	0.58008	-0.1123
1.502	55.627	92.16	352.93	-0.19873	0.1123	-0.029785	-189.3912	-197.178	1850.93	-1.1263	0.96042	0.20916	38.582	94.281	302.54	0.006836	0.11719	-0.12793	8.123	79.4138	276.529	-0.21289	0.14209	-0.037598	23.652	117.862	1154.9994	-0.81826	0.15752	-0.083594	-6.81099999999999	-238.933	1493.5753	-0.91016	0.44043	-0.10596	38.962	167.861	1115.4252	-0.91357	0.56299	-0.10645
1.504	26.766	101.556	333.93	-0.19678	0.11182	-0.030273	-169.3421	-222.911	1899.45	-1.1424	0.94982	0.22807	26.593	81.084	302.78	-0.0029297	0.11572	-0.12598	-12.869	80.98697	267.25	-0.22412	0.1499	-0.033203	22.763	85.419	1208.7358	-0.98673	0.17695	-0.072754	2.648	-241.006	1524.8178	-0.97021	0.46533	-0.098633	72.622	175.388	1089.835	-0.89844	0.54688	-0.10059
1.506	16.336	96.275	318.53	-0.1958	0.11279	-0.031738	-148.288	-219.112	1908.87	-1.1753	0.93408	0.23828	19.831	84.537	290.11	-0.016113	0.12109	-0.11768	-5.055	91.2031	253.121	-0.23145	0.15479	-0.03125	-1.667	36.839	1261.06149	-1.1621	0.20859	-0.057519	38.505	-203.361	1556.8337	-1.0801	0.5293	-0.081055	42.327	169.7	1068.8098	-0.86523	0.5293	-0.091797
1.508	-1.562	81.718	304.68	-0.19385	0.10645	-0.03125	-140.907	-214.076	1932.44	-1.2045	0.91534	0.24168	29.459	79.947	266.82	-0.024902	0.12646	-0.11865	-28.271	84.9405	246.014	-0.2417	0.15918	-0.025879	-6.541	-24.1697	1337.264	-1.3333	0.25459	-0.037988	68.612	-158.3334	1587.639	-1.1655	0.58301	-0.065429	27.173	163.854	1038.2724	-0.84815	0.5083	-0.085693
1.51	-20.055	76.388	291.34	-0.18774	0.11353	-0.038818	-165.979	-219.26	1959.19	-1.2366	0.90274	0.23328	-5.498	64.917	250.92	-0.044434	0.13477	-0.099609	-39.228	77.249	228.55	-0.25367	0.16358	-0.023193	-8.505	-63.0979	1391.697	-1.4897	0.31543	-0.015137	72.073	-129.935	1629.1591	-1.2397	0.63135	-0.052246	13.183	169.599	1013.0497	-0.83203	0.48828	-0.075684
1.512	-42.554	75.185	292.36	-0.18213	0.1123	-0.04541	-127.352	-205.0253	1978.96	-1.2689	0.8985	0.22163	-29.577	78.373	247.29	-0.061279	0.13892	-0.10278	-38.56	80.91298	220.167	-0.26221	0.16406	-0.018066	-24.614	-81.7412	1415.387	-1.6182	0.38662	0.00019532	101.503	-122.694	1676.496	-1.293	0.69434	-0.030273	-1.149	172.698	990.5317	-0.80273	0.46484	-0.066406
1.514	-40.84	66.825	274.92	-0.18018	0.11182	-0.052734	-140.796	-198.609	2000.29	-1.2998	0.89453	0.20085	-44.473	70.843	237.32	-0.078125	0.14502	-0.091797	-55.037	80.3055	215.956	-0.27832	0.16992	-0.014648	-57.002	-91.3941	1430.796	-1.712	0.47901	0.017383	104.05	-106.913	1698.876	-1.3081	0.72705	-0.029297	-43.059	174.446	980.623	-0.78101	0.44629	-0.057373
1.516	-41.45	70.534	270.37	-0.17432	0.1084	-0.056152	-111.911	-190.3794	2008.479	-1.3232	0.90234	0.17285	-51.266	64.149	232.42	-0.11035	0.15674	-0.083496	-71.289	67.0707	213.276	-0.2832	0.16895	-0.01709	-86.944	-112.3982	1447.239	-1.7491	0.57627	0.030664	103.356	-101.397	1728.899	-1.3062	0.75928	-0.031738	-49.45	169.463	947.0904	-0.75684	0.4292	-0.053223
1.518	-67.806	79.453	250.4	-0.17432	0.10254	-0.065918	-101.607	-202.0191	2038.298	-1.3338	0.92335	0.14259	-53.646	53.863	206.123	-0.12354	0.15723	-0.074707	-74.391	54.371	211.186	-0.29785	0.16992	-0.01123	-130.873	-120.664	1453.492	-1.7425	0.67783	0.04668	128.422	-111.074	1751.82	-1.2866	0.77393	-0.048096	-58.337	174.053	928.6648	-0.72607	0.39893	-0.036621
1.52	-96.6951	73.082	245.22	-0.17627	0.095215	-0.070313	-63.429	-173.7974	2048.147	-1.3374	0.95184	0.11338	-62.856	59.29	209.591	-0.15088	0.17285	-0.064941	-62.746	64.997	191.751	-0.30664	0.16895	-0.011474	-150.143	-96.221	1430.476	-1.6978	0.76611	0.053711	103.23	-122.305	1747.4724	-1.2534	0.77197	-0.069336	-53.95	170.046	888.9539	-0.70703	0.39453	-0.041016
1.522	-91.5488	67.916	238.83	-0.18164	0.092773	-0.07666	-107.164	-165.7922	2045.009	-1.3308	0.98743	0.099309	-61.977	69	204.917	-0.16748	0.17822	-0.056152	-101.4161	66.212	176.382	-0.30469	0.17139	-0.010742	-133.163	-63.634	1409.552705	-1.6094	0.83466	0.049707	74.133	-136.947	1765.925	-1.2109	0.74805	-0.097656	-84.316	158.9	857.57	-0.66748	0.37158	-0.030762
1.524	-80.6734	67.418	226.772	-0.18896	0.088867	-0.084473	-95.154	-135.0246	2049.141	-1.3291	1.0191	0.08682	-99.7365	65.531	208.78	-0.18896	0.18262	-0.051758	-94.9772	64.689	163.74	-0.30957	0.17383	-0.0063477	-162.851	-31.211	1428.5736	-1.4992	0.86191	0.038477	45.726	-171.2555	1772.494	-1.1929	0.73096	-0.11084	-95.148	166.476	841.36	-0.63697	0.35742	-0.029297
1.526	-69.154	75.7838	220.85	-0.19385	0.083496	-0.08252	-88.82	-135.6659	2084.3	-1.3374	1.0493	0.092285	-81.1	64.71	179.679	-0.21191	0.19043	-0.036621	-84.946	77.25327	165.469	-0.30469	0.17236	-0.0078125	-191.99	-5.198	1428.1263	-1.3711	0.84551	0.025586	36.083	-189.121	1808.2553	-1.1753	0.68994	-0.13721	-79.896	174.432	829.9725	-0.61377	0.34033	-0.023926
1.528	-79.487	62.7615	217.75	-0.20703	0.081543	-0.087402	-48.558	-149.19	2121.69	-1.3702	1.071	0.10778	-78.096	62.889	171.531	-0.22656	0.19531	-0.034668	-64.798	70.5675	156.683	-0.29883	0.17773	-0.0078125	-205.31	5.396	1406.9502	-1.2516	0.80107	0.0095702	26.263	-198.2389	1842.5596	-1.1848	0.66431	-0.15479	-83.666	172.54	814.617	-0.57373	0.31738	-0.013184
1.53	-63.869	71.4086	203.462	-0.21021	0.081054	-0.088134	-76.562	-170.7324	2143.68	-1.4119	1.0838	0.12244	-90.275	52.0299	154.385	-0.24512	0.20703	-0.024414	-71.971	51.2749	162.292	-0.29273	0.17603	-0.0073243	-184.593	-4.68300000000001	1415.18661	-1.1616	0.72705	-0.0083008	37.364	-208.4538	1883.35	-1.1987	0.64404	-0.15332	-70.752	169.791	801.492	-0.55811	0.31006	-0.0092773
1.532	-41.266	79.1242	185.977	-0.21484	0.084473	-0.088379	-71.585	-177.125	2165.08	-1.4693	1.0997	0.14157	-78.612	48.93775	156.029	-0.25488	0.21655	-0.016846	-35.336	44.936	155.986	-0.28271	0.16895	-0.010254	-149.122	-33.382	1427.658	-1.0839	0.63496	-0.016992	13.079	-226.3538	1910.409	-1.2402	0.63867	-0.15186	-48.269	166.528	768.8477	-0.521	0.29102	-0.0073242
1.534	-44.977	70.47013	178.672	-0.22168	0.083008	-0.08252	-90.65	-172.5375	2181.6	-1.5312	1.1114	0.15413	-73.512	53.262	144.747	-0.26465	0.22168	-0.01123	-32.791	35.94	176.212	-0.27344	0.16553	-0.012695	-121.451	-62.091	1459.2717	-1.014	0.53437	-0.030273	-2.44	-223.8352	1936.199	-1.2632	0.64014	-0.14746	-57.07	171.222	734.0325	-0.49756	0.27393	-0.0014649
1.536	-19.04	70.5539	184.081	-0.22266	0.086914	-0.087891	-95.155	-150.5982	2191.64	-1.5977	1.125	0.17529	-63.299	64.3815	144.314	-0.27148	0.2251	-0.0097656	-18.018	23.826	167.107	-0.26465	0.16357	-0.016602	-88.02	-93.499	1468.361	-0.94883	0.44453	-0.043164	-10.586	-213.421	1948.617	-1.3184	0.66602	-0.14795	-70.684	167.347	723.354	-0.47559	0.2583	0.0029297
1.538	-5.95	66.231	182.309	-0.21143	0.095215	-0.085449	-145.361	-153.6238	2210.94	-1.6519	1.139	0.19042	-46.705	61.843	145.326	-0.27539	0.23047	-0.003418	-19.427	-1.408	177.427	-0.25098	0.15967	-0.012207	-76.931	-137.834	1489.834	-0.89258	0.36865	-0.048242	-6.88500000000001	-193.18	1963.351	-1.354	0.68994	-0.15063	-27.932	179.422	696.5834	-0.44873	0.23779	0.0087891
1.54	20.202	61.5173	170.041	-0.20459	0.1001	-0.083252	-115.342	-156.22	2201.83	-1.7085	1.1554	0.20067	-13.242	53.7432	146.27	-0.27637	0.23535	0.0029297	4.512	10.32	155.473	-0.23706	0.16113	-0.016357	-51.248	-170.6229	1525.1027	-0.8418	0.31348	-0.055176	-15.867	-182.119	1964.38	-1.3809	0.71875	-0.1582	-25.165	192.652	664.8278	-0.4375	0.23193	0.0083008
1.542	4.447	52.5881	170.103	-0.19531	0.104	-0.081055	-149.58	-163.498	2212.26	-1.7535	1.173	0.21395	-7.98500000000001	45.7739	151.607	-0.2749	0.23926	0.0085449	23.646	6.308	166.052	-0.23242	0.1543	-0.017578	-36.898	-193.6561	1549.662	-0.80137	0.28183	-0.059766	-4.727	-169.224	1977.218	-1.4058	0.7583	-0.16162	-6.505	180.321	665.1949	-0.41699	0.21973	0.014648
1.544	32.445	34.9762	169.248	-0.18115	0.10742	-0.084473	-166.874	-148.42	2218.29	-1.7871	1.1813	0.22363	8.709	27.33901	136.199	-0.27051	0.23926	0.01123	17.88	-8.23500000000001	162.927	-0.21484	0.15381	-0.019531	-12.803	-201.8108	1587.55	-0.76757	0.26231	-0.062793	-34.374	-179.118	1979.505	-1.418	0.77734	-0.16895	-12.651	160.97	655.611	-0.40234	0.20484	0.018798
1.546	31.509	40.0326	158.083	-0.17236	0.1084	-0.084961	-175.549	-131.438	2234.28	-1.8086	1.1895	0.23047	-3.265	18.5994	138.641	-0.26758	0.2417	0.01416	21.544	-20.165	171.748	-0.20752	0.14941	-0.020996	6.365	-218.143	1627.6791	-0.74726	0.26231	-0.064355	-31.07	-174.363	1986.942	-1.4277	0.81641	-0.18359	26.932	161.923	627.1751	-0.38428	0.19385	0.030762
1.548	39.354	37.9893	161.341	-0.14844	0.1167	-0.081055	-161.5	-98.489	2247.17	-1.8235	1.1862	0.22842	0.766999999999996	19.37	134.954	-0.26221	0.23779	0.01416	24.511	-9.274	178.016	-0.19971	0.14941	-0.024902	29.295	-219.294	1656.3028	-0.74727	0.27363	-0.067773	-23.811	-158.991	1980.1364	-1.4297	0.8418	-0.19727	10.363	164.876	608.549	-0.35938	0.18115	0.036621
1.55	38.647	37.49087	153.708	-0.13134	0.11768	-0.088867	-196.395	-70.31	2237.68	-1.832	1.1809	0.23339	13.309	11.106	142.299	-0.25195	0.23535	0.015625	40.23	-19.656	180.869	-0.19409	0.14355	-0.028564	57.719	-197.786	1687.791	-0.77832	0.29102	-0.0625	1.057	-128.651	1972.381	-1.4312	0.86572	-0.22021	32.317	169.508	585.9465	-0.34814	0.17871	0.040527
1.552	45.409	40.7692	151.146	-0.11719	0.12061	-0.091309	-181.719	-50.24677	2231.699	-1.8371	1.1743	0.22559	26.499	2.228	126.009	-0.24292	0.23218	0.019287	22.617	-41.339	193.932	-0.1958	0.14404	-0.03125	70.866	-162.74	1729.6388	-0.85263	0.32588	-0.054394	3.277	-135.2485	1982.721	-1.4336	0.89063	-0.25	32.304	165.113	562.3482	-0.31836	0.17041	0.04834
1.554	22.853	32.2693	162.079	-0.084473	0.12061	-0.094238	-174.388	-48.6416	2226.958	-1.8368	1.1638	0.21767	4.968	-1.695	139.759	-0.229	0.229	0.016602	37.24	-50.741	205.86	-0.20508	0.13867	-0.032227	90.462	-141.1742	1770.94208	-0.95538	0.37022	-0.03711	43.745	-132.7391	2003.0849	-1.4316	0.90234	-0.25781	44.627	163.717	553.2642	-0.29199	0.16944	0.056152
1.556	8.998	18.477	151.596	-0.078125	0.12109	-0.094238	-180.87	-36.739	2241.269	-1.8374	1.1509	0.21045	33.951	5.881	132.212	-0.20801	0.22412	0.016602	26.816	-59.87	214.243	-0.21777	0.13623	-0.036621	104.376	-123.691	1775.613	-1.0742	0.41787	-0.019531	53.842	-120.526	2014.8648	-1.4355	0.90234	-0.27734	3.97	149.613	528.3889	-0.26904	0.16504	0.053711
1.558	5.768	12.163	148.957	-0.059082	0.12256	-0.095703	-178.381	-30.0988	2236.971	-1.8333	1.1401	0.20332	9.731	6.71	147.538	-0.18994	0.22021	0.015137	23.093	-73.415	237.239	-0.24121	0.13623	-0.037109	105.678	-104.022	1794.61	-1.186	0.46289	0.0001953	90.485	-129.242	2040.0047	-1.4434	0.90136	-0.29565	10.868	128.5812	507.3223	-0.2334	0.15967	0.055176
1.56	-6.826	15.475	155.343	-0.053955	0.12573	-0.10302	-181.8521	-49.94296	2224.553	-1.8222	1.1296	0.19649	3.877	2.767	141.517	-0.1626	0.20947	0.0078125	3.8	-81.44	264.176	-0.27099	0.1333	-0.034668	94.804	-79.971	1811.635	-1.2773	0.51074	0.016602	90.197	-152.785	2073.8113	-1.4507	0.89404	-0.31006	-17.436	133.019	499.1435	-0.2124	0.15771	0.056152
1.562	-42.711	-0.869999999999997	165.096	-0.047363	0.12354	-0.10791	-175.492	-75.058	2210.07	-1.8187	1.1206	0.19336	3.02500000000001	-8.82	154.789	-0.13745	0.2063	0.0061035	22.023	-79.383	292.7078	-0.31055	0.14307	-0.032227	104.436	-81.378	1850.4316	-1.3453	0.56035	0.025098	129.09	-144.836	2093.0656	-1.4585	0.88525	-0.32373	-13.922	135.935	488.956	-0.18213	0.15088	0.058105
1.564	-56.394	-8.558	170.127	-0.048828	0.12402	-0.10986	-178.417	-67.744	2191.66	-1.8086	1.1152	0.18838	-18.13	-23.326	155.356	-0.12012	0.20117	-0.00097656	-10.224	-69.446	344.5342	-0.3833	0.14209	-0.028809	108.442	-82.703	1871.3146	-1.3757	0.6042	0.027246	143.738	-128.457	2082.427555	-1.4663	0.87451	-0.33105	-38.787	121.585	464.759	-0.16675	0.14673	0.059082
1.566	-50.159	-13.867	171.056	-0.052246	0.13086	-0.10986	-149.701	-63.121	2168.52	-1.7988	1.1094	0.18652	-34.225	-38.878	174.157	-0.098145	0.19092	-0.0043945	-30.286	-54.555	399.25	-0.42822	0.14307	-0.035156	73.728	-105.959	1891.0369	-1.3773	0.63779	0.021777	156.221	-110.46	2084.3333	-1.4741	0.85986	-0.34521	-48.218	127.755	443.7395	-0.14795	0.14209	0.062012
1.568	-72.249	-12.824	152.912	-0.057617	0.13672	-0.11133	-120.81	-58.521	2184.47	-1.7805	1.1024	0.18428	-44.477	-50.921	171.852	-0.094727	0.18701	-0.0078125	-22.634	-19.456	483.1582	-0.55127	0.146	-0.043457	33.412	-131.541	1905.2264	-1.3552	0.64834	0.012891	126.789	-115.2386	2090.6709	-1.4834	0.8457	-0.35132	-67.019	137.615	422.429	-0.13184	0.13574	0.067383
1.57	-84.5	-25.173	163.088	-0.061768	0.15063	-0.11279	-102.616	-50.401	2172.96	-1.7652	1.0942	0.18516	-57.826	-47.958	184.3496	-0.080566	0.17676	-0.013672	-10.944	39.624	570.4999	-0.67237	0.14844	-0.039795	9.864	-146.5298	1941.3665	-1.3218	0.64502	-0.0024414	147.086	-112.885	2106.6785	-1.4937	0.83887	-0.35303	-73.72	121.658	408.027	-0.12549	0.13379	0.068848
1.572	-121.927	-41.454	182.99	-0.068359	0.16309	-0.11182	-104.791	-48.714	2164.73	-1.7536	1.0942	0.18398	-84.304	-48.285	202.3124	-0.082031	0.17163	-0.019776	-39.963	64.7265	679.3461	-0.81006	0.146	-0.032715	-15.229	-149.0168	1970.7197	-1.3036	0.62178	-0.022949	127.085	-124.878	2106.1303	-1.498	0.83398	-0.35498	-81.518	118.879	389.6875	-0.11523	0.13721	0.072754
1.574	-98.076	-52.911	194.479	-0.088867	0.17969	-0.11182	-100.432	-53.644	2144.88	-1.748	1.0867	0.18603	-69.193	-74.824	236.261	-0.089844	0.16846	-0.027344	-34.046	95.576	770.5628	-1.0332	0.14795	-0.020996	-18.722	-141.5899	1994.843	-1.3014	0.59278	-0.039844	123.586	-134.735	2098.7863	-1.5015	0.83447	-0.35596	-106.731	125.644	372.97054	-0.1062	0.13794	0.074707
1.576	-99.2331	-45.247	214.918	-0.10059	0.19287	-0.11133	-80.498	-47.156	2126.3	-1.7363	1.082	0.18994	-80.347	-88.662	277.235	-0.10986	0.16504	-0.032227	-49.089	120.559	868.7581	-1.1519	0.15186	-0.0073242	-15.832	-141.8201	2017.672	-1.3174	0.56191	-0.052344	101.835	-114.284	2110.689	-1.5054	0.83252	-0.354	-92.9642	124.267	353.8023	-0.10156	0.13867	0.077637
1.578	-86.915	-52.2	257.5436	-0.1416	0.20557	-0.11084	-82.43	-9.1169	2099.43	-1.7386	1.0859	0.19756	-69.697	-99.123	305.8052	-0.13184	0.1665	-0.037109	-48.897	140.972	956.163	-1.3867	0.16748	0.03418	-43.526	-136.409	2037.142	-1.3463	0.53926	-0.05957	124.376	-68.914	2097.118	-1.5151	0.83545	-0.35009	-114.144	96.765	347.711	-0.095703	0.14795	0.080078
1.58	-93.6458	-36.605	297.80906	-0.18946	0.21729	-0.11451	-85.227	7.5436	2060.27	-1.7382	1.0849	0.20156	-69.813	-93.3169	357.032	-0.19482	0.17188	-0.035156	-54.855	119.508	1044.792	-1.5564	0.19776	0.059327	-60.206	-136.287	2055.495	-1.3853	0.521	-0.064941	96.112	-40.571	2083.7085	-1.5254	0.84375	-0.3457	-106.21141	96.126	341.406	-0.091797	0.14648	0.08252
1.582	-70.914	-16.993	343.564	-0.25293	0.229	-0.1167	-79.258	12.206	2040.62	-1.7378	1.0876	0.20899	-52.208	-68.6751	442.256	-0.26001	0.18018	-0.036377	-36.058	103.43	1118.718	-1.7026	0.2417	0.068359	-62.788	-143.342	2077.185	-1.4143	0.5127	-0.073438	84.489	-8.67	2058.388	-1.5293	0.85059	-0.33203	-112.9378	111.765	313.0857	-0.086426	0.15283	0.087402
1.584	-87.783	16.4161	386.0511	-0.35303	0.24463	-0.11377	-82.346	16.024	2019.311	-1.7301	1.0914	0.21084	-57.516	-7.735	543.4451	-0.33252	0.19092	-0.034668	-8.15899999999999	68.571	1157.084	-1.814	0.34131	0.074219	-39.07	-123.514	2081.941	-1.4394	0.51895	-0.082422	73.716	-13.105	2055.853	-1.5352	0.85254	-0.32617	-77.073	106.841	292.8688	-0.084228	0.15893	0.086181
1.586	-46.573	45.288	465.3803	-0.41406	0.24805	-0.10742	-111.119	24.5229	1997.956	-1.709	1.0957	0.2124	-48.669	43.181	674.614	-0.44092	0.20654	-0.052246	23.234	12.273	1194.722	-1.8218	0.3999	0.095703	-39.926	-99.706	2076.927	-1.4554	0.52715	-0.10234	55.337	-34.499	2065.6315	-1.5449	0.85742	-0.31445	-102.8444	92.381	279.416	-0.081543	0.16455	0.084961
1.588	-12.59	80.477	556.72105	-0.54639	0.26563	-0.10645	-124.992	28.1637	1965.473	-1.6845	1.0948	0.21475	-62.856	81.108	798.402	-0.50879	0.21387	-0.052734	20.287	-48.702	1215.172	-1.7925	0.52783	0.11816	-49.063	-105.519	2080.665	-1.4593	0.54561	-0.12891	15.028	-62.042	2080.108	-1.5488	0.86084	-0.31103	-75.283	99.939	278.153	-0.083008	0.17432	0.086914
1.59	-19.057	105.899	683.11514	-0.66186	0.28686	-0.10718	-108.828	24.515	1950.51	-1.6555	1.0894	0.21709	-13.036	111.102	888.12	-0.67773	0.23828	-0.064941	36.821	-91.6157	1236.8794	-1.7022	0.6167	0.10938	-15.459	-94.428	2062.5859	-1.459	0.56348	-0.16064	18.585	-57.1389	2066.33	-1.5449	0.85938	-0.30225	-63.67	93.355	274.458	-0.085938	0.18018	0.087402
1.592	-19.025	123.1006	782.805	-0.78857	0.31104	-0.10449	-113.008	43.4371	1924.764	-1.6195	1.0801	0.21279	-29.681	139.008	966.893	-0.8291	0.26074	-0.067627	36.328	-119.242	1257.992	-1.5781	0.68945	0.098633	-12.185	-69.049	2065.821	-1.4565	0.57949	-0.18974	33.127	-33.657	2036.385	-1.5425	0.85596	-0.29248	-30.826	82.3367	258.5431	-0.087402	0.18457	0.081543
1.594	0.845999999999997	132.7219	856.393	-0.98389	0.35791	-0.085449	-143.027	32.5793	1921.852	-1.5771	1.0667	0.20722	-11.988	140.412	1056.337	-0.99023	0.28613	-0.059082	31.458	-125.288	1270.9271	-1.3633	0.74219	0.073242	11.949	-44.766	2075.619	-1.4589	0.59385	-0.2209	-4.49000000000001	-35.599	2011.0443	-1.541	0.85547	-0.29004	-26.93	81.401	243.8382	-0.08667	0.18921	0.088623
1.596	-3.536	157.55	912.5218	-1.084	0.38965	-0.069824	-147.23	23.0473	1886.044	-1.5352	1.0479	0.19629	-27.83	91.837	1175.521	-1.2144	0.34814	-0.039063	11.179	-120.648	1297.6969	-1.2495	0.74658	0.052246	27.845	-48.748	2105.6593	-1.4589	0.60947	-0.24746	-26.57	-39.714	1998.002	-1.5347	0.84229	-0.28955	4.742	90.846	236.3765	-0.089844	0.19531	0.085449
1.598	-27.13	139.455	996.671	-1.2944	0.46729	-0.035156	-137.05	12.012	1871.69	-1.4882	1.0309	0.18506	33.363	49.283	1234.781	-1.3218	0.38721	-0.022461	34.039	-96.844	1327.466	-1.062	0.69385	0.0078125	65.718	-50.8013	2123.0224	-1.4691	0.62432	-0.27285	0.819999999999993	-44.9614	1978.7821	-1.5313	0.83008	-0.28906	-12.731	84.281	227.9889	-0.091309	0.20557	0.089355
1.6	-7.969	107.677	1073.174	-1.4324	0.54077	-0.0012205	-172.721	20.515	1846.34	-1.4393	1.0072	0.17187	34.5	-5.68	1259.303	-1.5103	0.48389	0.0024414	13.362	-77.759	1337.292	-0.96167	0.63452	-0.024658	65.36	-44.734	2128.6203	-1.4878	0.64502	-0.29443	15.03	-45.9966	1985.1335	-1.5332	0.8252	-0.28467	-2.557	72.3014	227.343	-0.094727	0.2041	0.088379
1.602	24.3214	68.554	1127.152	-1.5444	0.62646	0.029297	-175.1374	3.957	1827.32	-1.3893	0.9876	0.16015	48.398	-51.65	1250.4643	-1.6111	0.57934	0.025635	6.018	-47.132	1347.452	-0.88281	0.55469	-0.053223	82.187	-63.548	2144.52	-1.5112	0.6669	-0.31446	10.301	-42.8213	1998.6319	-1.5288	0.8208	-0.28076	14.313	70.1644	203.4899	-0.097168	0.20947	0.083008
1.604	19.472	30.753	1129.24	-1.6284	0.76025	0.063965	-176.934	19.693	1785.31	-1.3424	0.96817	0.14678	25.918	-84.5633	1260.4257	-1.6636	0.68896	0.047363	-8.486	-5.971	1339.615	-0.81006	0.44189	-0.087891	119.604	-86.2254	2161.342	-1.5339	0.68486	-0.33037	49.419	-15.3882	1991.887	-1.5311	0.81079	-0.27758	37.089	77.002	186.315	-0.1001	0.2124	0.08374
1.606	1.887	1.68	1144.7199	-1.6245	0.82666	0.075684	-178.559	40.255	1753.64	-1.2944	0.94775	0.13281	21.713	-87.87	1273.3046	-1.6426	0.83496	0.07373	5.352	15.872	1353.734	-0.77393	0.39307	-0.091309	141.995	-87.2212	2171.6098	-1.5636	0.70674	-0.33662	53.375	21.3879	1967.638	-1.5288	0.80127	-0.27344	6.507	60.4104	182.2231	-0.10547	0.21631	0.077148
1.608	-33.627	-26.25835	1169.144	-1.5469	0.9502	0.088379	-194.312	72.72907	1706.519	-1.25	0.92344	0.11943	-10.5271	-96.12	1285.274	-1.603	0.90674	0.083496	-19.214	16.469	1353.254	-0.73291	0.30713	-0.10889	136.479	-83.7354	2162.5523	-1.592	0.72363	-0.35303	69.738	51.5624	1942.0232	-1.5288	0.7915	-0.26709	13.331	56.1827	192.2068	-0.10205	0.2168	0.077148
1.61	-59.0806	-44.242	1176.7714	-1.427	1.0208	0.10523	-149.392	67.0579	1678.416	-1.2035	0.90039	0.10869	-7.8179	-97.749	1305.9749	-1.4526	1.022	0.082031	-20.89	-10.873	1324.3393	-0.71826	0.271	-0.11548	140.548	-83.34	2167.43026	-1.623	0.73779	-0.35693	68.782	59.806	1916.04	-1.5293	0.78906	-0.26563	9.445	74.006	168.6247	-0.099121	0.21826	0.074219
1.612	-72.767	-53.845	1170.2828	-1.2813	1.0527	0.10742	-146.72	69.228	1654.28	-1.1645	0.87852	0.10322	-29.1728	-100.357	1333.012	-1.3159	1.0591	0.067627	-5.85299999999999	-21.737	1302.772	-0.70068	0.25244	-0.12061	137.223	-71.323	2180.8636	-1.6462	0.75283	-0.35732	111.14	70.327	1916.807	-1.5176	0.78125	-0.25879	-2.629	76.305	153.5952	-0.091797	0.22021	0.080566
1.614	-94.458	-67.014	1177.8672	-1.0669	1.022	0.086426	-144.834	61.636	1634.27	-1.1258	0.85254	0.094922	-58.6934	-90.644	1361.674	-1.1655	1.0649	0.04248	-4.747	-62.074	1297.04	-0.67627	0.25635	-0.12695	132.417	-45.3174	2189.304	-1.6659	0.76533	-0.36201	111.316	62.795	1909.505	-1.5037	0.77857	-0.25513	-20.05	63.031	148.5476	-0.085205	0.21899	0.076904
1.616	-98.38	-60.305	1219.691	-0.92139	0.95312	0.058105	-130.13	67.7	1599.727	-1.0957	0.83203	0.087402	-118.28	-69.3535	1365.641	-0.98242	1.0117	0.0019531	-29.147	-111.599	1319.462	-0.65381	0.26855	-0.11963	97.422	-47.8845	2177.0565	-1.6827	0.77823	-0.36435	117.753	56.7923	1880.2141	-1.4878	0.77197	-0.25244	-16.09	56.177	156.768474	-0.074219	0.21924	0.075195
1.618	-124.827	-34.1572	1233.581	-0.80127	0.86377	0.026855	-94.634	82.7678	1565.304	-1.0678	0.8124	0.083496	-116.9	-22.474	1366.96	-0.90771	0.97607	-0.016602	-12.662	-144.4646	1346.0467	-0.64014	0.30566	-0.12354	95.176	-33.9734	2176.6849	-1.6911	0.7875	-0.36816	111.198	52.785036	1849.0421	-1.457	0.76563	-0.24707	-28.723	58.444	151.5927	-0.058594	0.21338	0.064453
1.62	-173.019	-16.446	1236.33	-0.71387	0.72363	0	-98.788	111.316	1532.804	-1.043	0.79102	0.081836	-117.952	9.32300000000001	1354.9649	-0.8042	0.87158	-0.037598	-40.164	-169.5721	1385.0085	-0.64576	0.33936	-0.12915	79.085	-6.057	2177.867	-1.6963	0.79492	-0.36914	138.439	62.2559	1820.924	-1.4355	0.7627	-0.24805	-67.156	50.662	136.2395	-0.046875	0.21777	0.063477
1.622	-180.339	21.264	1211.839	-0.69531	0.65625	-0.0043945	-84.678	105.5354	1488.088	-1.0183	0.77266	0.081445	-110.534	8.16099999999999	1361.872	-0.75659	0.78442	-0.045898	-38.106	-205.5235	1416.8921	-0.68506	0.37451	-0.13086	62.463	21.2355	2177.742	-1.6956	0.80166	-0.36826	121.227	64.39	1789.846	-1.4023	0.76367	-0.24414	-68.027	42.74	138.2485	-0.027344	0.21191	0.062012
1.624	-183.486	48.207	1225.4018	-0.67529	0.52588	-0.011719	-73.495	85.1826	1444.805	-0.99404	0.75928	0.08125	-95.2573	-27.557	1347.078	-0.72021	0.70068	-0.053711	-42.376	-220.153	1457.997	-0.79102	0.4209	-0.13379	21.307	37.242	2158.1326	-1.6956	0.80283	-0.37002	120.486	62.771	1782.7635	-1.3759	0.75855	-0.24389	-70.722	46.26	142.831	-0.015381	0.20972	0.055176
1.626	-164.997	44.016	1240.7861	-0.67968	0.4458	-0.003418	-67.413	79.6267	1413.59	-0.96924	0.73926	0.080078	-98.0677	-70.688	1362.393	-0.68604	0.61035	-0.046387	-28.126	-199.2248	1476.7372	-0.85938	0.44043	-0.13086	29.19	47.7	2140.2867	-1.6917	0.80752	-0.36534	150.274	51.738	1784.3879	-1.3433	0.76025	-0.24365	-75.817	31.755	139.368	-0.0029297	0.20605	0.055176
1.628	-157.713	9.655	1254.5313	-0.68896	0.38916	0.00048828	-56.893	79.1416	1394.33	-0.94404	0.72647	0.079688	-91.75	-119.109	1378.761	-0.66602	0.56104	-0.040772	-34.101	-185.9595	1504.7792	-0.99365	0.47607	-0.10889	6.15700000000001	57.297	2121.147	-1.6882	0.80635	-0.37139	135.879	59.37107	1778.687	-1.3105	0.75586	-0.24121	-97.2288	15.4271	126.499	0.0048828	0.19629	0.046387
1.63	-122.917	-30.66	1264.4708	-0.69336	0.3457	0.0019531	-46.922	75.9451	1360.084	-0.9125	0.70938	0.077246	-106.528	-155.585	1406.7028	-0.65234	0.53125	-0.030762	-3.605	-178.2083	1534.24967	-1.0869	0.50489	-0.091309	-14.093	54.8515	2122.8361	-1.687	0.79932	-0.36865	91.513	66.4922	1778.035	-1.2925	0.7583	-0.24023	-90.596	13.3084	121.5668	0.0053711	0.19434	0.044434
1.632	-127.683	-65.95	1299.595	-0.69092	0.33545	0.003418	-41.634	73.307	1329.59	-0.8832	0.69414	0.078418	-111.6822	-175.019	1436.819478	-0.63232	0.50439	-0.028809	13.885	-171.7936	1582.4265	-1.1797	0.54102	-0.077148	-40.295	42.436	2124.382	-1.6865	0.79121	-0.37383	86.461	79.7779	1745.701	-1.2632	0.75635	-0.229	-84.402	12.0192	126.528	0.0063477	0.18213	0.041504
1.634	-111.9718	-95.076	1315.1618	-0.68262	0.34766	-0.0019531	-49.662	88.176	1284.621	-0.85918	0.6752	0.071289	-121.34549	-203.5561	1463.9386	-0.63379	0.49609	-0.020996	67.707	-147.255	1608.201	-1.2754	0.59277	-0.054688	-12.89	42.379	2122.062	-1.6891	0.78359	-0.37324	80.112	111.328	1697.862	-1.24	0.7561	-0.22925	-91.5082	14.3939	135.311	-0.00097655	0.17553	0.043213
1.636	-117.0106	-125.214	1348.9035	-0.66797	0.3645	-0.0070801	-38.709	90.901	1264.099	-0.82764	0.65869	0.068359	-116.573012	-234.364	1508.003	-0.66455	0.48486	-0.015137	64.502	-137.651	1628.074	-1.3086	0.61914	-0.040039	-16.109	25.0047	2114.406	-1.6891	0.76641	-0.37636	42.551	128.504	1663.6248	-1.2148	0.76172	-0.22217	-76.676	3.8974	125.032	-0.0053711	0.16699	0.044922
1.638	-75.681	-138.636	1372.7132	-0.66016	0.39844	-0.016113	-33.218	87.905	1227.97	-0.8001	0.63799	0.067969	-88.12	-238.196	1533.775	-0.7312	0.49243	-0.0053711	83.417	-135.649	1646.564	-1.3457	0.6543	-0.033691	-28.774	5.7461	2096.7992	-1.6913	0.75401	-0.37842	5.998	127.232	1629.5962	-1.1812	0.76416	-0.21631	-59.523	5.08034754	129.972	-0.015625	0.16211	0.049805
1.64	-71.024	-164.6348	1401.537	-0.67188	0.4502	-0.015625	-26.792	93.466	1210.58	-0.7753	0.61875	0.05957	-57.373	-199.527	1580.043	-0.8208	0.51416	0.0053711	99.247	-124.368	1666.4903	-1.3477	0.66895	-0.031495	-41.695	0.9789	2075.45619	-1.6851	0.74268	-0.38672	13.546	118.24	1621.501	-1.1621	0.76367	-0.21094	-61.466	-3.51002	126.92	-0.01709	0.15723	0.05127
1.642	-45.032	-179.192	1435.575	-0.69043	0.48145	-0.013184	-49.68	110.399	1188.17	-0.74912	0.59571	0.056445	-5.953	-153.6662	1621.3312	-0.98193	0.55908	0.029785	104.138	-127.707	1682.0062	-1.3315	0.67529	-0.038574	-23.67	12.69868	2043.836	-1.676	0.73144	-0.38907	22.647	117.576	1603.959	-1.1245	0.76416	-0.21094	-66.172	-21.7427	155.453	-0.019531	0.16211	0.05957
1.644	-11.167	-164.981	1480.8259	-0.75781	0.53711	-0.0097656	-52.45	114.3829	1142.221	-0.7249	0.57783	0.054102	4.521	-145.539	1666.063	-1.0669	0.58838	0.047363	93.97	-150.636	1695.345	-1.2959	0.66602	-0.056641	-18.505	23.6421	2037.7437	-1.6641	0.71953	-0.39531	-14.714	107.999	1568.4129	-1.0984	0.76245	-0.20142	-22.431	-18.0011	154.76	-0.018799	0.15844	0.068359
1.646	57.078	-125.5822	1524.6699	-0.82496	0.57959	0.0056153	-53.743	119.08817	1103.799	-0.70068	0.55908	0.049805	45.112	-136.627	1679.278	-1.209	0.66113	0.080566	109.857	-178.7561	1715.094	-1.2712	0.64087	-0.068604	-0.890000000000001	40.996	2015.362	-1.6469	0.71406	-0.40078	-23.266	116.953	1536.44261	-1.0718	0.76025	-0.19873	1.49299999999999	-8.2669	157.598	-0.015625	0.15625	0.061523
1.648	47.605	-107.13	1560.039	-0.89746	0.62451	0.017578	-61.281	128.8964	1066.532	-0.67647	0.53721	0.047656	65.993	-122.56	1696.1328	-1.2849	0.72974	0.1062	114.922	-186.387	1754.1169	-1.2651	0.61377	-0.07959	28.238	57.006	2006.7522	-1.6294	0.70107	-0.40674	-27.566	131.975	1487.5272	-1.0337	0.75635	-0.19189	-1.652	-25.2778	158.169	-0.020508	0.1582	0.066406
1.65	71.817	-97.013	1609.226	-0.98193	0.68262	0.043457	-94.667	125.237	1031.486	-0.65224	0.51728	0.043359	124.73	-124.339	1705.1698	-1.3423	0.79639	0.125	88.091	-188.473	1780.2943	-1.2793	0.58887	-0.081543	61.109	64.593	1962.0257	-1.6089	0.69189	-0.41357	-42.327	146.852	1459.353	-1.019	0.75439	-0.1875	2.072	-34.84	193.351	-0.026367	0.1543	0.066406
1.652	82.387	-94.237	1618.511	-1.0142	0.7124	0.055176	-81.827	119.5919	1006.672	-0.62686	0.50049	0.040625	130.8601	-134.341	1748.499	-1.3647	0.88135	0.14258	93.423	-183.3204	1790.5664	-1.291	0.58301	-0.08252	61.182	61.032	1947.1833	-1.5942	0.68535	-0.41445	-34.162	143.981	1439.789122	-0.9917	0.74756	-0.17627	22.896	-28.793	206.903	-0.04248	0.15137	0.06543
1.654	114.7412	-89.337	1634.278	-1.0449	0.75488	0.05957	-82.243	127.9452	977.311	-0.60586	0.47812	0.036817	140.282	-120.39	1747.2228	-1.3589	0.9165	0.14893	96.717	-175.7962	1826.843	-1.3281	0.57666	-0.069336	80.459	63.159	1924.9658	-1.58	0.67032	-0.41718	-14.434	135.362	1442.333	-0.96656	0.73511	-0.17798	27.027	-4.849	233.19	-0.066895	0.15576	0.0625
1.656	93.0812	-98.996	1649.6575	-1.0432	0.77563	0.054199	-79.374	132.6201	966.213	-0.58887	0.45508	0.026367	120.782	-125.178	1746.73	-1.3237	0.94385	0.14111	102.036	-180.059	1849.065	-1.3482	0.58106	-0.062988	110.962	78.962	1894.0022	-1.5707	0.66484	-0.41562	-5.751	124.794	1416.227	-0.94971	0.729	-0.16504	9.32700000000001	6.44	274.08	-0.083496	0.15723	0.061035
1.658	90.88	-92.145	1674.7364	-1.0283	0.77734	0.038574	-86.3	130.6039	936.682	-0.56592	0.43838	0.02832	106.99	-128.024	1751.828	-1.2896	0.93701	0.12451	98.8	-192.8886	1870.237	-1.3652	0.58789	-0.054199	109.144	90.836	1853.77	-1.5603	0.65479	-0.40947	-9.008	111.262	1392.833	-0.91992	0.7168	-0.15869	31.69	20.3841	345.76	-0.13477	0.15723	0.054688
1.66	73.637	-74.34	1687.55847	-0.9834	0.75293	-0.0024414	-84.364	121.458	906.048	-0.54737	0.42002	0.022558	93.672	-157.176	1785.829	-1.2588	0.90625	0.10547	94.695	-191.958	1886.928	-1.3828	0.60742	-0.049805	98.086	90.555	1837.314	-1.5483	0.64795	-0.40869	8.09399999999999	103.086	1350.125	-0.90186	0.70752	-0.15186	29.825	60.389	415.07	-0.18164	0.16431	0.050782
1.662	53.914	-81.573	1709.4808	-0.97217	0.73291	-0.026855	-82.61	131.656	875.668	-0.52901	0.4044	0.016309	95.215	-162.0039	1817.984	-1.2334	0.85547	0.073242	82.4	-186.77	1904.911	-1.3872	0.61572	-0.054688	95.934	93.059	1807.03	-1.5397	0.63848	-0.39912	16.144	122.059	1315.7049	-0.89014	0.68994	-0.14502	15.558	102.139	497.31	-0.24658	0.16846	0.039063
1.664	6.268	-104.6803	1724.862	-0.9707	0.67773	-0.064453	-54.907	128.364	870.331	-0.50517	0.38477	0.01123	84.365	-169.799	1855.59376	-1.228	0.83252	0.061035	49.142	-180.907	1912.33	-1.3901	0.64307	-0.05957	99.101	94.049	1794.9096	-1.5273	0.6336	-0.38984	21.639	128.146	1293.538	-0.86694	0.66479	-0.11255	5.299	132.954	577.08	-0.35352	0.18213	0.024414
1.666	1.797	-117.144	1769.6583	-1.0002	0.64111	-0.072754	-53.446	118.115	841.94	-0.48389	0.37451	0.0068359	68.066	-160.361	1891.378	-1.2329	0.78271	0.036621	10.754	-175.04	1907.938	-1.3935	0.65528	-0.06543	68.698	76.5422	1788.8325	-1.5164	0.62812	-0.37773	42.133	118.5802	1275.2505	-0.85498	0.62549	-0.14697	22.572	173.628	673.7	-0.41797	0.18994	0.029297
1.668	-0.826000000000001	-114.3149	1807.664	-1.0527	0.6123	-0.070313	-59.621	123.335	829.17	-0.4583	0.35889	-0.0019532	57.603	-151.7565	1921.584	-1.2485	0.75196	0.025635	7.35000000000001	-169.517	1895.8347	-1.3921	0.67432	-0.072266	70.179	73.7373	1764.0172	-1.5123	0.62315	-0.36543	56.973	105.687	1231.53197	-0.81006	0.62549	-0.12012	-7.106	187.475	764.38	-0.55859	0.20117	0.016602
1.67	-14.766	-120.5317	1841.895	-1.1382	0.59619	-0.060059	-53.441	137.873	805.23	-0.43379	0.34287	-0.0063477	43.368	-135.324	1943.493	-1.2617	0.7207	0.01123	-3.42	-151.539	1894.7447	-1.4136	0.69189	-0.092773	70.919	68.9765	1746.553	-1.5059	0.61719	-0.35107	62.361	110.7096	1207.5107	-0.78662	0.61475	-0.10645	-12.014	178.757	827.35	-0.67334	0.21777	0.016601
1.672	-47.874	-114.38391	1874.691	-1.1851	0.59619	-0.055176	-39.088	134.2892	764.157	-0.40918	0.32607	-0.010254	4.44199999999999	-136.595	1944.119	-1.2871	0.69678	0.0014648	0.189000000000007	-147.4309	1913.482	-1.4199	0.70508	-0.098145	61.136	78.561	1716.8597	-1.4963	0.61367	-0.33652	53.815	112.4039	1185.7904	-0.75244	0.60791	-0.10303	-27.831	157.73	913.02	-0.7832	0.24072	0.024902
1.674	-57.019	-93.663	1895.346	-1.2554	0.60596	-0.045898	-25.593	140.2313	723.988	-0.37959	0.3082	-0.017187	9.04700000000001	-142.922	1950.4849	-1.2964	0.69189	0.00048828	5.16	-137.7862	1925.0841	-1.4453	0.72998	-0.11523	23.828	85.696	1685.53976	-1.4851	0.61094	-0.32159	60.545	136.7531	1163.2727	-0.72608	0.60156	-0.09668	-15.446	134.235	969.7	-0.93311	0.28076	0.04248
1.676	-85.661	-85.636	1901.338	-1.3003	0.62403	-0.043457	-29.378	142.4761	709.39	-0.35645	0.2959	-0.015137	-11.125	-145.972	1956.2363	-1.3145	0.70313	0.00048828	15.586	-112.858	1920.7647	-1.4704	0.74682	-0.12695	30.452	94.257	1654.4403	-1.4758	0.60938	-0.31455	77.452	166.492	1124.7806	-0.70654	0.58252	-0.086426	-53.992	98.833	1022.59	-1.002	0.30273	0.054688
1.678	-109.607	-86.363	1909.2065	-1.3296	0.65283	-0.049805	-16.049	138.9306	692.423	-0.33691	0.28193	-0.032422	-44.14	-136.72	1965.502	-1.3257	0.72608	-0.003418	17.09	-108.579	1942.5392	-1.4956	0.76416	-0.14307	-1.087	92.704	1629.0902	-1.4576	0.61015	-0.30322	70.135	177.906	1085.385	-0.68506	0.55713	-0.07666	-52.714	45.482	1052.74	-1.1172	0.36475	0.076172
1.68	-114.361	-87.064	1935.899	-1.3477	0.6875	-0.06543	9.367	131.7958	669.519	-0.32071	0.26679	-0.038379	-58.485	-134.819	1964.819	-1.3301	0.75781	-0.0087891	22.524	-110.699	1939.4562	-1.5132	0.77783	-0.15527	-31.307	96.978	1603.746	-1.4429	0.61182	-0.29053	45.175	160.496	1064.32	-0.67139	0.54053	-0.064453	-51.898	23.8981	1090.44	-1.1787	0.41162	0.092041
1.682	-103.5332	-84.129	1950.09	-1.3496	0.70508	-0.078125	22.421	139.8135	651.772	-0.30938	0.25235	-0.041895	-58.785	-126.587	1960.612	-1.3315	0.80518	-0.014648	40.64	-108.817	1956.9599	-1.5273	0.78516	-0.16113	-47.574	99.339	1583.047	-1.4233	0.60703	-0.28223	44.696	153.368	1042.9176	-0.65625	0.51074	-0.061523	-46.188	-13.6194	1098.95	-1.2188	0.46436	0.1167
1.684	-117.8834	-82.865	1974.308	-1.3486	0.73145	-0.095215	19.777	142.69543	634.47	-0.29805	0.2375	-0.051953	-77.321	-131.0704	1952.8252	-1.3267	0.83057	-0.018555	68.444	-111.031	1974.7978	-1.5356	0.7915	-0.16748	-47.446	118.554	1547.683	-1.3987	0.60323	-0.2706	37.766	156.329	1024.7953	-0.64014	0.49463	-0.05249	-71.564	-61.176	1108.9	-1.2378	0.53369	0.13379
1.686	-93.36	-84.1799	1975.6392	-1.3474	0.74878	-0.125	10.418	127.9037	620.41	-0.28711	0.2251	-0.056641	-82.108	-131.3248	1956.9352	-1.3257	0.87158	-0.033691	90.956	-122.761	1983.0182	-1.5357	0.79394	-0.1748	-70.455	125.611	1523.757	-1.3702	0.60361	-0.2624	25.7	154.453	993.177	-0.62402	0.48145	-0.046387	-39.46	-91.849	1125.84	-1.2339	0.56689	0.1416
1.688	-78.822	-70.075	1974.0955	-1.3496	0.75781	-0.13477	5.55800000000001	131.8704	590.009	-0.27871	0.2166	-0.060254	-42.922	-125.95934	1964.1242	-1.3216	0.89673	-0.057861	96.083	-124.836	2003.263	-1.5288	0.78564	-0.19287	-65.661	124.188	1476.6112	-1.3444	0.59912	-0.25293	5.31100000000001	151.816	961.5626	-0.60059	0.46094	-0.038086	-39.159	-73.594	1172.62	-1.2129	0.61133	0.15723
1.69	-58.519	-60.634	1967.168	-1.3667	0.77002	-0.15283	-5.461	148.4837	572.273	-0.26923	0.21436	-0.06416	-19.641	-103.085	1978.236	-1.3262	0.92383	-0.071289	105.261	-121.2005	2000.604	-1.5249	0.77588	-0.1958	-70.62	122.134	1452.805	-1.3159	0.59814	-0.24756	-26.603	151.6427	932.0668	-0.58447	0.45264	-0.033203	-38.959	-56.9298	1211.37	-1.1865	0.63183	0.16211
1.692	-55.861	-67.3651	1980.644	-1.3765	0.77783	-0.1543	4.964	144.1503	548.628	-0.25322	0.20537	-0.066894	-3.21100000000001	-92.7	2002.588	-1.334	0.95508	-0.093262	112.331	-124.4901	2004.401	-1.5137	0.76563	-0.20215	-66.558	139.549	1416.7052	-1.285	0.59151	-0.23682	-43.683	151.113	906.7874	-0.56006	0.43311	-0.020996	-66.225	-34.178	1222.76	-1.1641	0.63672	0.16162
1.694	-8.206	-50.436	2005.2337	-1.4077	0.78369	-0.16748	-12.458	129.9073	545.12	-0.2375	0.2001	-0.069434	37.4	-99.031	2025.047	-1.3335	0.97119	-0.099609	119.825	-120.127	1987.862	-1.5039	0.75293	-0.20752	-64.704	138.922	1407.8616	-1.2541	0.58575	-0.23301	-52.648	134.4467	879.0605	-0.54516	0.41675	-0.018066	-30.262	-6.007	1227.02	-1.146	0.62256	0.15918
1.696	37.067	-42.548	2043.329	-1.4353	0.78394	-0.17017	-20.851	124.3788	520.374	-0.21338	0.19922	-0.072266	70.466	-107.886	2017.49906	-1.3481	0.98291	-0.11572	141.931	-113.058	1985.9589	-1.4968	0.73852	-0.21558	-42.072	140.85	1391.679	-1.2256	0.57911	-0.21777	-66.31	139.516	869.5	-0.52393	0.40234	-0.016602	-5.53100000000001	21.078	1240.22	-1.1382	0.60986	0.1709
1.698	63.751	-47.658	2061.476	-1.4644	0.77979	-0.17334	-47.955	112.757	503.984	-0.19238	0.19951	-0.077246	90.847	-101.898	2014.3	-1.3689	0.98413	-0.12109	146.56	-78.6825	1985.3512	-1.4961	0.72461	-0.21924	-12.307	134.797	1362.939	-1.1993	0.57412	-0.21494	-59.438	143.595	856.4122	-0.49756	0.38672	-0.0078125	18.719	23.509	1245.75	-1.1289	0.58301	0.17383
1.7	65.058	-50.367	2075.837	-1.5063	0.77588	-0.17041	-25.394	104.17	481.163	-0.16758	0.19541	-0.082325	96.756	-115.138	2024.5089	-1.3867	0.97852	-0.12744	153.113	-58.064	1994.5042	-1.4941	0.7168	-0.2251	-11.895	134.474	1327.0603	-1.1733	0.56885	-0.2085	-86.396	141.968	843.848	-0.48193	0.37451	-0.0019531	17.761	24.0286	1224.52	-1.115	0.5603	0.1748
1.702	90.76	-44.645	2077.8197	-1.5254	0.77148	-0.1748	-38.413	105.9344	456.308	-0.15117	0.1876	-0.083887	133.267	-106.92123	2054.711	-1.4155	0.97314	-0.13135	162.949	-51.092	1998.8873	-1.5	0.71289	-0.2251	-12.832	119.667	1298.53402	-1.1467	0.56416	-0.20283	-75.603	150.487	800.7397	-0.44824	0.35645	-0.0029297	26.067	30.16663	1211.49	-1.0923	0.53271	0.17676
1.704	92.01	-41.271	2073.93733	-1.5645	0.75684	-0.16699	-42.03	107.251	457.28	-0.13047	0.18086	-0.091308	157.581	-87.416	2056.155	-1.4238	0.96582	-0.1377	175.256	-40.809	2009.2965	-1.5039	0.70898	-0.23145	10.215	114.2845	1270.7581	-1.1181	0.56065	-0.19267	-64.409	159.734	782.2394	-0.4248	0.35107	0.0007324	35.738	10.539	1193.92	-1.0327	0.49854	0.16699
1.706	104.307	-39.3204	2083.445	-1.5899	0.75146	-0.1709	-48.336	109.488	452.9	-0.11328	0.17334	-0.094727	153.55	-88.562	2037.47	-1.4355	0.9541	-0.14648	153.978	-32.595	2006.3256	-1.5059	0.71045	-0.2295	25.257	128.643	1248.6742	-1.0946	0.55596	-0.18408	-49.314	160.261	763.145	-0.39795	0.33936	0.0063477	36.324	-15.512	1190.07	-1.001	0.48242	0.15918
1.708	120.685	-44.133	2089.875	-1.6113	0.74805	-0.1748	-42.297	106.5315	423.615	-0.104	0.16289	-0.098728	144.287	-95.741	2045.7368	-1.4429	0.93897	-0.15771	145.091	-28.848	2000.942	-1.5098	0.71484	-0.22705	25.342	124.69	1230.046	-1.0686	0.55108	-0.17871	-69.381	157.177	745.74665	-0.36816	0.32471	0.01416	54.069	-32.6067	1188.94	-0.92383	0.4502	0.13916
1.71	124.23	-42.725	2100.6425	-1.6377	0.74512	-0.17725	-57.964	103.284	413.903	-0.097364	0.15518	-0.10156	169.682	-75.069	2032.8804	-1.4448	0.93018	-0.16113	119.36	-18.491	1990.819	-1.5132	0.71436	-0.23438	52.602	123.2602	1178.47475	-1.0405	0.54736	-0.1748	-52.103	156.398	707.4228	-0.354	0.31885	0.01123	63.397	-73.3759	1210.94	-0.86817	0.43067	0.12305
1.712	105.97	-45.475	2108.7515	-1.6523	0.75195	-0.18457	-57.381	95.22	404.475	-0.091895	0.1458	-0.1043	146.229	-40.7722	2034.7482	-1.4492	0.91016	-0.17676	109.942	-5.305	1973.5523	-1.5093	0.72119	-0.22754	48.212	135.6031	1157.048	-1.0071	0.54229	-0.16875	-39.425	158.19	685.0601	-0.33594	0.30273	0.019531	28.823	-107.846	1233.31	-0.81641	0.41602	0.10596
1.714	74.265	-50.727	2117.043	-1.668	0.75293	-0.18555	-59.083	85.274	375.4	-0.08711	0.13809	-0.10733	144.723	-14.5483	2031.338	-1.4512	0.90234	-0.18359	88.312	-13.987	1960.93259	-1.5132	0.71924	-0.21924	43.512	140.928	1129.4475	-0.97608	0.53975	-0.16299	-37.307	155.863	671.48969	-0.32251	0.29444	0.023926	-27.193	-146.322	1278.26	-0.76367	0.4082	0.070801
1.716	74.511	-22.0401	2113.9376	-1.6794	0.75953	-0.19434	-63.726	105.1397	353.8	-0.08252	0.13135	-0.11377	151.35	-7.7912	2046.7235	-1.4404	0.88867	-0.20313	67.879	-37.101033	1948.1667	-1.5075	0.71216	-0.22876	42.085	135.5514	1099.8937	-0.93975	0.53154	-0.154	-36.108	152.53	651.6285	-0.31396	0.2876	0.027344	-29.39	-142.177	1307.76	-0.74609	0.4043	0.052246
1.718	54.919	8.526	2113.5706	-1.689	0.76221	-0.20459	-60.352	123.1045	329.811	-0.076074	0.12871	-0.11162	150.977	16.358	2063.7323	-1.4385	0.88086	-0.21485	51.546	-61.5064	1948.6626	-1.5015	0.70557	-0.2251	46.001	140.0143	1075.9597	-0.90684	0.52725	-0.1458	-1.584	160.455	631.853	-0.29883	0.2793	0.033203	-56.483	-154.971	1319.76	-0.73047	0.41699	0.017578
1.72	44.999	14.438	2121.3198	-1.6968	0.76611	-0.21631	-39.287	104.4419	319.4	-0.068359	0.12636	-0.11406	113.772	17.117	2063.153	-1.4355	0.87695	-0.23242	52.45	-66.6208	1942.916	-1.4863	0.70117	-0.22998	30.592	147.977	1036.3089	-0.87744	0.51807	-0.13916	4.685	163.615	612.4105	-0.28955	0.27637	0.041504	-96.799	-163.1	1334.05	-0.74341	0.43334	0.0024415
1.722	4.81999999999999	20.4928	2128.9553	-1.7085	0.77002	-0.22412	-37.731	81.5643	309.117	-0.058984	0.12285	-0.11641	90.432	6.795	2042.332	-1.4302	0.86768	-0.24561	21.97	-54.87082	1928.964	-1.4824	0.69434	-0.23535	16.948	150.305	1011.1786	-0.83809	0.50811	-0.1336	18.736	153.199	591.0106	-0.2793	0.27051	0.051758	-123.989	-157.583	1359.63	-0.76025	0.46045	-0.013184
1.724	4.88200000000001	37.5297	2118.35607	-1.7148	0.76563	-0.23682	-34.276	78.534	300.366	-0.050586	0.12237	-0.12305	74.044	2.352	2039.255	-1.4316	0.85938	-0.25049	27.69	-35.067	1914.1385	-1.4624	0.68213	-0.23047	-5.646	147.941	991.4293	-0.80517	0.49561	-0.12481	22.211	140.158	579.9156	-0.26465	0.26904	0.057373	-94.498	-136.284	1391.86	-0.81201	0.49658	-0.017578
1.726	-36.505	41.987	2108.8572	-1.7208	0.75781	-0.24097	-11.232	86.492	289.152	-0.037598	0.11719	-0.12109	32.913	10.2722	2014.8633	-1.4194	0.84424	-0.26123	25.73	-22.869	1906.083	-1.4545	0.66894	-0.23267	-4.10300000000001	151.644	952.7241	-0.77979	0.48389	-0.11894	44.213	137.011	582.523	-0.25146	0.26807	0.062012	-115.7433	-132.169	1425.15	-0.84326	0.51807	-0.015625
1.728	-53.984	40.466	2115.3066	-1.7222	0.74951	-0.25049	-3.876	81.358	295.906	-0.033106	0.1127	-0.12373	2.95	4.39186	1992.50654	-1.4139	0.82862	-0.26977	29.2	-26.717	1894.191	-1.4448	0.65967	-0.23096	-44.47	162.434	921.6302	-0.74951	0.47041	-0.11064	41.095	144.641	549.0709	-0.23486	0.26855	0.067383	-141.347	-142.729	1459.1	-0.92188	0.56152	-0.0053711
1.73	-73.288	43.803	2111.8281	-1.7261	0.73096	-0.25391	8.056	70.788	280.686	-0.026269	0.11045	-0.12627	-12.348	-1.4617	1962.6198	-1.3989	0.81885	-0.27393	28.214	-35.568	1871.5013	-1.4375	0.63965	-0.23145	-53.972	156.16	908.00476	-0.71973	0.4624	-0.09375	32.555	149.269	539.039	-0.22266	0.2666	0.070313	-144.829	-153.647	1480.74	-0.9812	0.59302	0.005615
1.732	-67.237	53.475	2109.264	-1.7246	0.72266	-0.25781	3.036	66.3764	265.23	-0.024707	0.1042	-0.12744	-28.831	-12.1727	1941.213	-1.3901	0.80029	-0.28857	41.182	-23.018	1852.1504	-1.4312	0.63037	-0.23047	-64.964	135.342	897.712	-0.69521	0.44971	-0.088867	29.82	145.599	510.5389	-0.20068	0.26563	0.075684	-141.2641	-144.28	1500.49	-1.0381	0.62109	0.018555
1.734	-83.068	41.285	2084.045	-1.7188	0.70117	-0.26514	15.36	55.2449	242.58	-0.021191	0.099807	-0.12354	-67.658	-20.6674	1927.135	-1.3804	0.79834	-0.29199	51.702	-3.649	1832.0549	-1.4253	0.61865	-0.23193	-77.539	129.8378	865.088	-0.67383	0.4375	-0.075489	-2.018	142.288	501.842	-0.18237	0.26098	0.075927	-180.984	-142.617	1515.28	-1.103	0.65381	0.041992
1.736	-80.826	33.842	2085.814	-1.7156	0.69116	-0.26489	3.76	56.113	229.58	-0.022461	0.097168	-0.12451	-59.852	-28.283	1933.3578	-1.3672	0.77637	-0.29395	52.941	9.6104	1815.12342	-1.42	0.61377	-0.22485	-90.82	115.9768	839.5427	-0.64843	0.42422	-0.066504	-6.759	125.078	490.98	-0.16162	0.25928	0.075684	-178.281	-125.288	1543.84	-1.1323	0.66455	0.048828
1.738	-81.436	45.936	2077.474	-1.709	0.67969	-0.27832	14.528	58.7499	222.855	-0.029102	0.09248	-0.12588	-34.486	-9.605	1929.185	-1.3621	0.76977	-0.29834	67.269	12.7333	1788.6986	-1.4175	0.60205	-0.22559	-100.002	122.5758	811.8487	-0.62187	0.4127	-0.057031	-7.419	108.6906	483.396	-0.13965	0.25977	0.07666	-174.859	-115.951	1580.4	-1.1753	0.68799	0.063965
1.74	-54.406	38.541	2055.5956	-1.6968	0.66943	-0.28467	-16.988	53.8705	218.51	-0.033496	0.09209	-0.12442	-6.3	18.043	1913.961	-1.3569	0.76514	-0.30615	84.649	23.9269	1763.215	-1.4082	0.60352	-0.22168	-90.821	125.764	784.002	-0.59619	0.40039	-0.054199	-18.884	113.061	454.64	-0.12256	0.25781	0.07788	-167.723	-119.861	1622.75	-1.1968	0.69775	0.073242
1.742	-50.177	42.634	2020.678	-1.6855	0.66016	-0.28711	-10.657	44.9957	211.79	-0.043261	0.091309	-0.12207	0.439999999999998	25.77	1888.072	-1.3491	0.76025	-0.30615	93.452	14.08137	1759.2248	-1.4077	0.60205	-0.21631	-120.97122	133.502	758.356	-0.57246	0.38613	-0.044922	-50.993	120.949	443.0995	-0.10352	0.25488	0.079102	-195.439	-136.445	1650.73	-1.2026	0.70752	0.063477
1.744	-15.508	60.067	2031.4622	-1.6714	0.65283	-0.29053	-6.34799999999999	39.644	198.488	-0.047754	0.089258	-0.12295	32.465	34.4101	1862.5858	-1.3545	0.76172	-0.31055	111.941	8.8576	1755.8896	-1.3945	0.60156	-0.21777	-107.3694	139.827	734.0361	-0.54687	0.37383	-0.040429	-64.256	117.174	408.3108	-0.083984	0.25391	0.08252	-158.156	-138.898	1709.99	-1.2129	0.7168	0.061523
1.746	3.64	86.985	2020.729	-1.6602	0.65088	-0.29151	2.76100000000001	55.409	192.392	-0.05957	0.091797	-0.11572	40.478	44.713	1832.947	-1.3511	0.76416	-0.30615	124.489	10.19218	1757.8279	-1.3855	0.59985	-0.21216	-102.2499	142.169	722.7554	-0.52226	0.36094	-0.032617	-55.053	123.703	393.4573	-0.075195	0.25342	0.078125	-136.3565	-128.666	1760.85	-1.2104	0.72314	0.057129
1.748	24.406	85.963	2030.608	-1.6484	0.64746	-0.29688	-22.42	48.457	190.014	-0.063574	0.094531	-0.11221	42.409	56.926	1800.686	-1.3491	0.76514	-0.30957	151.144	20.7991	1734.47763	-1.3726	0.604	-0.21143	-71.171	150.517	699.1508	-0.49814	0.34599	-0.031348	-70.009	122.785	372.0011	-0.055664	0.25098	0.077637	-127.381	-125.384	1787.67	-1.2251	0.7251	0.044434
1.75	54.579	92.441	2005.4689	-1.6343	0.64502	-0.30029	-18.205	39.5606	174.073	-0.067773	0.10068	-0.11318	45.96	57.668	1804.753	-1.3491	0.76807	-0.30908	141.72	16.0353	1722.9651	-1.3613	0.60059	-0.21045	-70.274	142.664	689.14	-0.47266	0.32813	-0.023438	-92.2352	113.266	382.0456	-0.042236	0.24878	0.078858	-99.653	-138.274	1817.71	-1.2407	0.73096	0.03418
1.752	72.869	99.001	1977.8026856	-1.624	0.64844	-0.29712	-40.996	44.0115	158.372	-0.079492	0.099904	-0.1124	79.781	68.2839	1809.3712	-1.3452	0.77295	-0.30518	156.226	12.6756	1701.0632	-1.3516	0.60352	-0.2124	-55.285	137.969	646.02	-0.44004	0.3167	-0.02002	-76.0843	105.816	362.493	-0.040039	0.24561	0.074219	-73.535	-137.063	1822.58	-1.2573	0.73682	0.026855
1.754	74.924	113.213	1960.4484	-1.6152	0.65039	-0.29688	-43.376	61.9629	152.08	-0.08711	0.10547	-0.1124	95.905	85.65	1799.015	-1.3398	0.77148	-0.30176	167.844	13.9863	1682.85647	-1.332	0.59961	-0.21094	-49.471	143.206	622.8813	-0.41367	0.30557	-0.022558	-78.864	97.755	366.95	-0.029785	0.24365	0.07666	-79.141	-145.338	1838.06	-1.293	0.74121	0.018066
1.756	83.869	107.4962	1937.6976	-1.6035	0.65234	-0.29492	-51.151	58.143	133.992	-0.092285	0.11084	-0.10889	112.799	81.42	1772.5689	-1.3374	0.77881	-0.29932	154.316	26.8517	1664.82432	-1.3188	0.60083	-0.21191	-19.083	156.019	609.3558	-0.38438	0.28916	-0.017481	-102.4018	100.892	339.1428	-0.023926	0.24316	0.072754	-63.463	-151.445	1845.49	-1.3164	0.74219	0.011719
1.758	106.918	118.981	1916.9748	-1.5938	0.65527	-0.29346	-48.153	55.1866	145.262	-0.10254	0.11748	-0.11016	116.431	69.1812	1748.7811	-1.3291	0.78027	-0.29028	133.997	31.03459	1654.0193	-1.3003	0.6001	-0.2124	-27.215	148.824	585.3676	-0.35351	0.27627	-0.015625	-111.5859	103.604	320.1275	-0.023438	0.23828	0.078613	-58.16	-152.248	1880.64	-1.3491	0.7583	0.00097656
1.76	115.61	116.467	1898.492	-1.5859	0.6543	-0.28906	-85.885	49.343	137.468	-0.11514	0.1249	-0.10332	143.103	71.368	1731.89641	-1.3198	0.77979	-0.28076	114.506	42.613	1638.133	-1.2773	0.60352	-0.21484	5.993	145.255	581.0222	-0.32129	0.26025	-0.01416	-87.414	108.739	304.3966	-0.030274	0.24096	0.075439	-35.451	-135.191	1903.52	-1.3755	0.76416	-0.0019531
1.762	107.543	96.9901	1881.374	-1.573	0.65698	-0.28296	-79.618	40.385	142.087	-0.13037	0.12764	-0.10527	147.575	71.4	1708.9299	-1.3101	0.77588	-0.27295	120.49	52.5134	1617.5948	-1.271	0.6001	-0.21533	5.00899999999999	135.6943	546.733	-0.29482	0.24971	-0.010254	-61.536	101.027	294.939	-0.033203	0.23682	0.075195	-60.763	-136.953	1941.25	-1.4063	0.78027	0.0014648
1.764	99.148	75.9321	1869.9734	-1.5625	0.6582	-0.27832	-62.424	38.329	130.78	-0.14326	0.13808	-0.10068	161.918	67.305	1682.487	-1.3018	0.77002	-0.26001	83.305	67.9231	1588.9178	-1.2441	0.59766	-0.21289	12.696	135.827	537.7312	-0.27217	0.23301	-0.010938	-68.619	91.114	289.8183	-0.046875	0.23535	0.063965	-40.32	-122.076	1940.5	-1.4487	0.78955	0.003418
1.766	101.047	91.7357	1868.856	-1.543	0.65625	-0.27148	-63.216	36.2025	132.083	-0.15771	0.14404	-0.099609	159.422	71.8696	1670.1854	-1.2866	0.77002	-0.25439	67.493	82.284	1559.9279	-1.2212	0.60107	-0.21143	-3.6	125.09	537.172	-0.25537	0.21582	-0.003125	-40.269	79.6472	278.0079	-0.050293	0.24023	0.066895	-51.398	-120.224	1965.74	-1.4722	0.80713	0.012695
1.768	82.094	115.577	1856.185	-1.5288	0.65674	-0.27197	-60.802	32.8616	136.104	-0.16963	0.15527	-0.1	144.937	79.2331	1648.9353	-1.2729	0.76318	-0.24072	53.924	93.178	1530.6792	-1.1973	0.60107	-0.21289	7.175	119.915	520.4867	-0.23877	0.20323	0.0011719	-39.34	79.8289	287.875	-0.058594	0.24365	0.068359	-49.214	-97.843	1988.67	-1.5337	0.82178	0.020996
1.77	61.884	125.401	1840.601	-1.5039	0.6543	-0.26611	-69.371	23.9496	128.809	-0.17685	0.16299	-0.097266	93.614	82.367	1627.4009	-1.2651	0.76221	-0.23584	53.209	105.777	1514.1454	-1.1738	0.60156	-0.20801	16.691	109.868	484.3291	-0.22949	0.19189	0.011719	-18.215	91.547	275.653	-0.063232	0.24707	0.072021	-78.346	-87.14388	1998.27	-1.5864	0.83593	0.042968
1.772	36.584	131.69	1810.871	-1.4763	0.64966	-0.26392	-49.966	33.233	114.663	-0.18272	0.17236	-0.094532	72.04	91.717	1602.7878	-1.252	0.75586	-0.22461	20.422	99.492	1497.219	-1.1563	0.59863	-0.21045	19.815	103.052	472.1907	-0.21924	0.17686	0.021094	-8.94799999999999	81.498	261.4479	-0.069824	0.25244	0.066895	-68.98	-85.2366	2009.77	-1.6406	0.84961	0.063477
1.774	23.19	122.239	1779.181	-1.4536	0.6499	-0.2627	-49.943	40.7631	105.9	-0.18652	0.18018	-0.10098	64.555	105.913	1592.608	-1.2373	0.75634	-0.21729	9.556	91.708	1468.1648	-1.1187	0.60205	-0.19873	0.748000000000005	101.6377	458.1505	-0.2124	0.16084	0.029688	5.01299999999999	75.727	236.7656	-0.074219	0.25342	0.069336	-104.9203	-76.626	2027.14	-1.7222	0.87354	0.10303
1.776	-20.968	105.971	1743.9513	-1.418	0.63867	-0.2583	-46.444	32.072	114.0547	-0.18506	0.18896	-0.087402	31.277	114.743	1574.246	-1.2261	0.75635	-0.2085	12.081	93.408	1450.6549	-1.0966	0.59864	-0.19726	-14.905	113.519	452.6011	-0.21045	0.15264	0.035157	-5.459	77.857	232.4063	-0.077637	0.25488	0.068848	-142.2616	-85.483	2050.06	-1.7578	0.88477	0.11328
1.778	-46.132	94.5822	1725.926	-1.3965	0.63672	-0.25879	-39.712	12.926	118.203	-0.17988	0.19258	-0.090039	0.521000000000001	116.138	1549.498	-1.2129	0.75195	-0.19727	10.305	85.64	1427.1063	-1.0723	0.59961	-0.20068	-30.733	119.585	424.0252	-0.20898	0.14297	0.045801	27.733	87.924	213.2963	-0.077148	0.25195	0.074707	-155.0367	-100.986	2079.2	-1.8257	0.91064	0.15283
1.78	-62.194	121.878	1704.4404	-1.3633	0.62695	-0.25195	-10.616	22.493	120.366	-0.1748	0.20127	-0.089257	-14.187	123.04	1508.428	-1.2012	0.74902	-0.19141	-17.978	82.267	1393.10449	-1.0352	0.5957	-0.19092	-62.847	122.171	410.62431	-0.20215	0.14209	0.04541	10.729	83.315	219.8744	-0.075196	0.25097	0.065186	-148.7081	-93.65	2101.4	-1.8745	0.92724	0.1709
1.782	-59.97	135.079	1678.038	-1.3388	0.61865	-0.24854	-14.357	35.9208	103.047	-0.16738	0.20869	-0.087695	-40.782	129.217	1466.7213	-1.1821	0.75439	-0.1792	-23.981	97.609	1368.7631	-1.0171	0.59717	-0.18994	-66.843	114.703	382.1811	-0.19756	0.12929	0.05586	21.991	72.3235	211.8578	-0.074707	0.24854	0.066406	-167.674	-80.129	2108	-1.9175	0.94385	0.18652
1.784	-90.656	134.692	1631.18608	-1.3164	0.60938	-0.24951	-8.413	29.57484	112.8421	-0.15264	0.21201	-0.086816	-52.533	127.182	1432.61	-1.1665	0.74951	-0.17236	-12.929	99.062	1353.829	-0.98438	0.58984	-0.17871	-78.9014	103.861	381.315	-0.1916	0.13271	0.058789	4.198	69.7289	202.8002	-0.07373	0.24268	0.065918	-172.891	-92.275	2119.9	-1.9585	0.95947	0.20313
1.786	-90.563	129.628	1618.1339	-1.2847	0.6001	-0.23975	-0.290999999999997	23.886	106.8355	-0.13818	0.21631	-0.084961	-76.276	124.969	1406.808	-1.1523	0.74609	-0.1709	-21.684	90.282	1342.408	-0.95117	0.58398	-0.16699	-90.128	98.698	363.0776	-0.18379	0.12998	0.061132	6.095	68.5986	185.2906	-0.080078	0.23828	0.063477	-178.323	-97.277	2140	-1.9766	0.96289	0.21191
1.788	-88.557	158.286	1596.487	-1.2749	0.59521	-0.23975	-2.844	32.5606	104.2132	-0.12285	0.21719	-0.082422	-59.078	127.291	1412.171	-1.123	0.73633	-0.15967	-14.594	82.3	1319.0814	-0.94824	0.57813	-0.16602	-115.5811	96.628	343.684	-0.17217	0.13076	0.061523	2.068	65.2169	176.2288	-0.07959	0.22852	0.061035	-179.271	-84.649	2158.3	-2.002	0.9668	0.229
1.79	-74.173	156.732	1587.92	-1.2529	0.59229	-0.229	7.566	30.5844	93.182	-0.10791	0.21758	-0.08291	-59.435	132.861	1393.877	-1.1128	0.73682	-0.15088	-7.23099999999999	92.295	1295.2043	-0.92188	0.56543	-0.16016	-100.2208	103.488	326.61327	-0.16406	0.13135	0.0625	-5.122	65.389	173.1995	-0.080811	0.22095	0.061523	-182.798	-71.794	2169.6	-2.018	0.96533	0.23828
1.792	-75.501	163.777	1548.28761	-1.2322	0.58667	-0.2185	8.338	20.4073	97.5839	-0.088379	0.21758	-0.084863	-76.127	125.578	1369.427	-1.082	0.72363	-0.14111	26.336	98.232	1275.9452	-0.90015	0.55835	-0.14917	-119.0477	119.063	302.467	-0.1541	0.13057	0.064453	-20.925	54.493	182.241	-0.078125	0.2124	0.05957	-186.034	-78.047	2178.2	-2.0234	0.95508	0.24854
1.794	-48.071	166.421	1522.8432	-1.2144	0.58545	-0.21045	-1.219	10.5503	112.071	-0.077148	0.2167	-0.088769	-71.729	124.767	1330.7532	-1.0567	0.71094	-0.13599	33.591	111.446	1258.847	-0.8833	0.55322	-0.1416	-110.37926	105.582	294.066	-0.15068	0.13008	0.064062	-39.867	53.178	163.2505	-0.077637	0.20752	0.056641	-181.333	-67.609	2179	-2.0269	0.93799	0.24707
1.796	-53.259	177.312	1500.1232	-1.1836	0.58594	-0.20508	-15.122	18.1749	119.017	-0.060547	0.21387	-0.087891	-56.655	127.084	1288.3857	-1.0308	0.69775	-0.125	52.853	122.329	1224.404	-0.86279	0.5415	-0.12646	-108.2419	96.112	281.3387	-0.14326	0.12929	0.058594	-46.318	50.154	149.4383	-0.070801	0.19824	0.053711	-176.217	-45.448	2173.9	-2.0232	0.927	0.25171
1.798	-48.822	176.93	1482.8698	-1.1743	0.58154	-0.19775	-17.547	13.625	120.24388	-0.047071	0.21318	-0.09043	-53.544	127.591	1254.237	-0.99609	0.68164	-0.11523	61.213	132.481	1196.76277	-0.85254	0.54053	-0.12061	-101.2468	95.655	282.027	-0.13887	0.12793	0.057227	-60.291	47.982	146.6305	-0.062988	0.18359	0.04834	-156.935	-31.371	2168.2	-2.0151	0.9126	0.25098
1.8	-24.199	179.218	1462.72615	-1.1367	0.58398	-0.19043	-21.753	4.279	134.87428	-0.033789	0.21064	-0.091309	-60.217	117.2985	1240.7331	-0.97852	0.66504	-0.1123	76.232	127.227	1169.6993	-0.82764	0.52393	-0.10791	-94.4486	95.367	271.448	-0.13574	0.12549	0.054688	-74.87	36.9117	161.476	-0.061768	0.17749	0.049316	-153.808	-24.792	2160.4	-1.9956	0.8999	0.25
1.802	9.278	183.935	1437.9678	-1.1172	0.58496	-0.18067	-20.301	-16.78	129.9092	-0.02207	0.21338	-0.095606	-7.12700000000001	122.94952	1229.86	-0.93701	0.64795	-0.1001	59.217	120.611	1153.2465	-0.80737	0.51782	-0.096681	-90.03	85.334	273.037	-0.13418	0.12666	0.055762	-92.532	33.5383	165.593	-0.060059	0.16895	0.046875	-124.5262	-12.0989	2167.8	-1.9878	0.88721	0.24561
1.804	22.98	173.951	1420.612	-1.0942	0.58252	-0.17432	-35.126	-29.278	137.4175	-0.015136	0.21358	-0.097949	22.188	124.7293	1214.091	-0.91211	0.62695	-0.089112	76.389	133.881	1125.019	-0.79053	0.5083	-0.09082	-68.629	77.226	253.883	-0.1331	0.12568	0.052246	-77.932	35.8353	155.404	-0.064453	0.15186	0.044922	-114.577	-10.3652	2176.8	-1.9561	0.87305	0.23584
1.806	37.404	152.70171	1395.7601	-1.062	0.58057	-0.16064	-60.087	-28.45	158.1382	-0.0063477	0.21289	-0.1001	23.871	120.57	1195.632	-0.88428	0.61182	-0.081543	65.48	151.51	1101.4147	-0.76123	0.49414	-0.077148	-62.502	74.374	235.16451	-0.13428	0.121	0.050293	-81.015	34.441	153.052	-0.062988	0.14844	0.047363	-82.79	-10.035	2169.9	-1.9314	0.85864	0.22974
1.808	58.029	159.797939	1380.61	-1.0513	0.57373	-0.15381	-33.565	-19.877	188.192	-0.0064453	0.21407	-0.10391	40.658	115.0255	1156.256	-0.85498	0.58838	-0.072266	84.363	146.4921	1072.6631	-0.75	0.48633	-0.07373	-55.031	72.184	233.5024	-0.1336	0.11943	0.05332	-97.0269	-2.846	153.742	-0.069336	0.13623	0.054199	-78.409	-6.948	2172.1	-1.9126	0.84229	0.22754
1.81	68.476	163.9958	1343.0038	-1.0151	0.57666	-0.14014	-46.523	-26.14	199.1692	-0.017285	0.21689	-0.10537	54.382	127.219	1110.9611	-0.8374	0.57373	-0.070313	46.93	151.897	1049.43633	-0.72021	0.47217	-0.05957	-28.776	66.4696	236.963	-0.13232	0.12256	0.057129	-103.5433	-10.354	164.489	-0.074707	0.13159	0.057129	-45.527	-0.372	2176.4	-1.8789	0.82617	0.21533
1.812	51.75	169.36699	1310.429	-0.99364	0.56933	-0.12597	-61.682	-46.077	229.4031	-0.036426	0.22276	-0.10498	63.855	143.183	1086.5404	-0.80566	0.55371	-0.057617	64.935	146.073	1030.6713	-0.70288	0.45923	-0.053955	3.361	73.753	213.8985	-0.13115	0.11914	0.058301	-73.341	-5.245	146.764	-0.079102	0.12402	0.063477	-56.955	-5.713	2156.5	-1.8589	0.82471	0.2085
1.814	62.898	171.545609	1282.467	-0.96436	0.56494	-0.11475	-70.612	-68.475	251.597	-0.065136	0.22774	-0.10605	70.47	139.548	1062.063	-0.78589	0.53833	-0.050049	45.354	140.702	1010.5094	-0.68213	0.44482	-0.050293	-0.238	71.091	225.372	-0.1249	0.1206	0.062012	-74.143	5.9873	137.596	-0.080566	0.12012	0.07373	-46.807	0.828000000000003	2142.8	-1.8262	0.82031	0.20215
1.816	55.762	184.164	1262.5518	-0.93359	0.5498	-0.10205	-41.105	-66.565	307.155	-0.099121	0.23633	-0.1001	81.568	136.103	1030.583	-0.76611	0.52197	-0.043945	36.956	140.864	996.621	-0.65771	0.42822	-0.040039	15.561	47.7834	196.47115	-0.11866	0.11748	0.060059	-54.148	11.903	141.75	-0.083496	0.12061	0.075195	-61.647	11.538	2115.9	-1.793	0.81787	0.19165
1.818	41.197	187.663	1243.385	-0.91406	0.54688	-0.09082	-73.281	-40.325	380.968	-0.14365	0.24199	-0.095996	72.41	134.1469	1006.4597	-0.73438	0.50098	-0.027832	18.931	150.388	978.3267	-0.64355	0.41992	-0.037109	19.462	37.30543	192.0641	-0.11611	0.11914	0.064649	-54.549	-10.903	162.704	-0.079102	0.11426	0.081055	-58.458	18.257	2101.1	-1.7637	0.81055	0.1875
1.82	20.731	181.967	1227.853	-0.87451	0.53564	-0.079102	-31.78	-13.56	431.6574	-0.18457	0.25312	-0.098144	42.451	129.2798	994.3844	-0.72119	0.49561	-0.024902	28.984	156.832	945.792	-0.61963	0.39893	-0.023926	15.095	38.294	190.994	-0.11279	0.11865	0.068848	-37.845	-28.0471	169.529	-0.07373	0.11303	0.085693	-66.589	15.319	2083.5	-1.7148	0.81836	0.1792
1.822	10.303	178.992	1201.134	-0.8457	0.52099	-0.071777	-23.745	11.3018	495.9607	-0.23262	0.26563	-0.096192	27.687	137.5505	983.1681	-0.69092	0.47998	-0.014648	-10.218	151.51	919.598	-0.60328	0.38257	-0.019531	5.721	41.513	175.5732	-0.10908	0.11768	0.074805	-38.087	-34.0542	178.228	-0.07373	0.1123	0.086426	-70.264	22.7543	2090.8	-1.6929	0.81787	0.17676
1.824	10.326	188.614	1167.7565	-0.81641	0.50879	-0.062988	-6.01599999999999	38.409	558.204	-0.28486	0.27822	-0.094824	16.087	152.569	957.525	-0.67066	0.46656	-0.0065918	-24.738	146.199	897.8292	-0.58594	0.37012	-0.012207	30.404	57.553	165.6869	-0.10791	0.1125	0.078808	-9.67	-52.5424	193.57	-0.069824	0.11279	0.088379	-85.739	22.8427	2073.4	-1.6563	0.81836	0.16943
1.826	-38.821	184.598	1119.61	-0.77734	0.49316	-0.048828	-27.733	69.695	659.013	-0.34619	0.29346	-0.098145	-0.347000000000001	156.576	924.33	-0.65186	0.45508	0.0014648	-42.476	154.512	884.548	-0.56201	0.34863	-0.0039063	3.173	56.908	164.2409	-0.10674	0.10743	0.084668	11.349	-49.7811	213.569	-0.070801	0.11133	0.084961	-91.6739	23.164	2058.9	-1.6243	0.81909	0.16187
1.828	-48.72	183.4016	1088.748	-0.76074	0.48877	-0.043945	0.170999999999992	97.152	825.066	-0.43008	0.31035	-0.1002	-9.639	144.814	896.9073	-0.62744	0.43799	0.0048828	-49.416	156.364	866.885	-0.55469	0.3457	0.0029297	-12.682	52.49	149.4572	-0.1085	0.1041	0.084375	6.419	-58.957	227.18	-0.077637	0.11035	0.088379	-104.57405	28.076	2013.79	-1.5952	0.81689	0.15625
1.83	-74.706	192.27	1071.4399	-0.72266	0.46777	-0.030762	-5.64700000000001	127.849	998.5151	-0.51826	0.32256	-0.10342	-29.964	129.1638	863.5978	-0.61084	0.43359	0.0092773	-65.238	148.681	845.966	-0.5376	0.32617	0.012207	-23.758	42.754	156.7785	-0.11035	0.104	0.089844	-1.102	-50.614	228.179	-0.099855	0.11133	0.081787	-108.0128	50.651	1998.76	-1.5645	0.81836	0.14893
1.832	-69.93	192.395	1046.4912	-0.69873	0.45459	-0.023438	43.327	134.634	1125.927	-0.62295	0.34248	-0.10577	-67.28	125.2061	839.71514	-0.59375	0.41992	0.019043	-63.09	156.875	828.95	-0.52319	0.31469	0.018067	-22.61	35.6089	154.67	-0.10732	0.092285	0.094238	4.547	-41.062	253.868	-0.12695	0.11133	0.078125	-115.5147	72.57	1968.05	-1.5449	0.81543	0.14111
1.834	-124.434	184.22	1025.8394	-0.67139	0.43994	-0.015625	55.494	106.903	1206.1768	-0.74385	0.35849	-0.10888	-94.764	123.968	800.392	-0.57495	0.41309	0.027588	-62.228	156.849	792.6185	-0.51074	0.30273	0.026855	-43.807	37.719	145.7519	-0.1041	0.094141	0.097167	11.478	-22.4904	306.94	-0.18115	0.11963	0.068848	-128.82	68.109	1939.76	-1.5137	0.81055	0.13281
1.836	-120.604	187.967	997.9805	-0.64355	0.41699	-0.0014648	30.392	68.854	1273.257	-0.88867	0.37891	-0.11133	-94.465	136.468	778.342	-0.56152	0.4043	0.030762	-74.137	153.596	774.7083	-0.48535	0.28906	0.032715	-50.734	27.6694	148.834	-0.1002	0.093359	0.09912	-16.587	-2.97665	391.38	-0.21436	0.12939	0.065918	-148.744	56.563	1920.37	-1.4864	0.81445	0.13257
1.838	-135.446	195.192	970.746	-0.62842	0.41162	-0.00097656	5.23	16.696	1396.132	-1.0599	0.41065	-0.10381	-102.9196	146.736	772.6729	-0.53857	0.39404	0.037598	-50.8	158.364	751.09276	-0.48242	0.28516	0.032227	-62.255	11.3294	129.9461	-0.094141	0.090039	0.10567	19.579	20.2371	454.54	-0.30322	0.15039	0.058594	-167.552	65.184	1909.63	-1.4639	0.81055	0.13135
1.84	-133.6886	198.996	950.439	-0.59717	0.3833	0.0063477	42.795	-42.824	1475.714	-1.2504	0.45625	-0.077929	-112.652	155.282	752.1483	-0.52295	0.39014	0.04834	-44.631	158.544	738.0272	-0.46094	0.27441	0.043457	-76.581	13.3382	130.681	-0.085449	0.088867	0.10645	-0.183999999999997	68.5372	532.26	-0.39624	0.16723	0.048828	-166.562	69.218	1890.19	-1.4351	0.80322	0.11719
1.842	-153.534	196.187	929.7649	-0.57617	0.37158	0.020264	69.69	-91.938	1507.1215	-1.4633	0.52617	-0.040821	-123.4672	155.515	740.301	-0.4917	0.37646	0.053711	-25.96	150.449	725.4262	-0.448	0.26416	0.044922	-91.295	11.7263	125.981	-0.07998	0.08457	0.11143	-18.492	115.556	642.14	-0.50195	0.19043	0.044922	-166.382	71.647	1871.2	-1.4175	0.80518	0.13232
1.844	-108.2119	202.312	899.146	-0.55908	0.35156	0.027344	65.854	-115.1877	1505.2977	-1.6712	0.6124	0.0041017	-112.7751	150.716	724.665	-0.47388	0.36938	0.060058	-44.851	137.0444	697.7775	-0.43359	0.25781	0.047852	-95.1084	-5.44971	137.878	-0.072265	0.084375	0.11015	-32.736	143.845	747.57	-0.6582	0.22559	0.04541	-169.836	80.152	1845.95	-1.3809	0.79688	0.11865
1.846	-112.616	192.503	869.5059	-0.53516	0.33496	0.039551	16.236	-153.051	1537.038	-1.855	0.72119	0.046387	-112.0298	154.347	694.7248	-0.44775	0.36084	0.062012	-3.45	150.232	678.3423	-0.41113	0.25195	0.056152	-86.046	-3.8512	124.034	-0.061328	0.078516	0.10899	-28.203	149.622	820.05	-0.74268	0.24658	0.050781	-153.383	75.771	1816.63	-1.3547	0.79224	0.11718
1.848	-105.6345	183.058	847.7252	-0.5249	0.32227	0.043457	7.463	-177.438	1589.445	-1.9757	0.84736	0.086035	-116.0813	145.662	669.3253	-0.41748	0.35107	0.066406	-12.619	166.852	658.13869	-0.39697	0.24658	0.059082	-91.602	-4.1112	130.603	-0.045605	0.076465	0.11201	-66.634	154.345	883.32	-0.91357	0.2915	0.063477	-145.151	75.867	1786.25	-1.3242	0.78418	0.11475
1.85	-97.33715	188.645	829.9075	-0.50732	0.30664	0.052246	-18.718	-175.295	1588.13	-2.0214	0.97549	0.10615	-101.5154	141.938	636.57	-0.40723	0.34668	0.069336	10.68	161.042	630.8283	-0.37109	0.24023	0.064941	-92.631	-9.8434	143.537	-0.032715	0.072266	0.11523	-74.441	142.734	949.65	-1.0317	0.33594	0.076172	-122.2588	70.538	1767.19	-1.2847	0.77295	0.11133
1.852	-47.594	203.359	809.172	-0.49756	0.29102	0.05957	-30.9315	-151.56	1576.9853	-1.9773	1.0837	0.11474	-57.56	143.54	609.5049	-0.38184	0.33154	0.071777	-2.70800000000001	146.9605	622.0123	-0.34815	0.23852	0.062989	-97.6033	-24.75572	168.06	-0.023828	0.069531	0.11182	-89.9	107.096	1019.78	-1.1382	0.38037	0.098145	-96.3713	92.097	1744.17	-1.2695	0.76953	0.11426
1.854	-54.552	190.223	795.56	-0.48828	0.27734	0.066406	-79.353	-139.282	1579.322	-1.8452	1.1564	0.10156	-50.083	143.916	600.6968	-0.36499	0.32129	0.075928	26.67	150.3973	605.71608	-0.32764	0.23096	0.067871	-65.803	-36.46	157.523	-0.02002	0.064453	0.10908	-98.083	73.33	1073.02	-1.2397	0.45752	0.12061	-91.7854	97.746	1718.47	-1.2339	0.75635	0.11572
1.856	-34.82	180.127	771.0017	-0.48291	0.26758	0.074707	-137.304	-113.751	1611.323	-1.6543	1.1719	0.064453	-40.81	136.22	585.541	-0.34717	0.31201	0.07666	11.801	148.9658	597.2687	-0.2959	0.22656	0.067383	-74.426	-44.432	162.943	-0.027442	0.05625	0.1083	-121.1277	29.5672	1087.76	-1.2788	0.49658	0.13232	-86.56794	94.3187	1705.52	-1.2117	0.74243	0.1167
1.858	-18.185	177.04	749.3005	-0.47656	0.2666	0.080566	-153.276	-68.316	1608.047	-1.414	1.1255	0.029297	-15.699	137.965	578.6854	-0.32129	0.29541	0.084473	42.299	148.6645	587.285	-0.28125	0.22363	0.070801	-37.322	-39.311	175.573	-0.040527	0.052344	0.10811	-94.376	-22.338	1096.44	-1.3125	0.57227	0.1499	-72.287	106.373	1667.62	-1.186	0.72803	0.1167
1.86	6.723	179.962	718.0752	-0.46875	0.25586	0.085449	-145.546	-16.307	1567.2154	-1.1909	1.0426	-0.0094726	11.172	139.973	561.3962	-0.30664	0.2915	0.081543	26.49	145.871	559.20559	-0.25146	0.22119	0.072754	-28.331	-23.6797	202.67	-0.054199	0.044434	0.10596	-94.3669	-53.484	1142.58	-1.302	0.6145	0.15992	-59.908	132.866	1642.87	-1.1499	0.70459	0.11914
1.862	-5.509	175.646	708.1005	-0.44898	0.25146	0.098145	-117.36158	2.399	1540.046	-1.0287	0.92578	-0.052832	17.802	135.378	558.6107	-0.28418	0.28125	0.088379	31.582	144.658	547.9898	-0.23096	0.21485	0.070801	-34.643	17.0757	222.644	-0.069043	0.041894	0.10586	-90.824	-72.4142	1186.39	-1.2749	0.6499	0.16797	-46.265	138.981	1603.87	-1.1362	0.69971	0.12061
1.864	11.072	179.7775	685.7125	-0.43311	0.24854	0.10303	-124.29102	-7.492	1564.086	-0.92314	0.7956	-0.093068	23.175	130.213	540.798	-0.26782	0.2727	0.087891	11.152	135.87	511.7682	-0.20752	0.20557	0.070313	-22.171	43.7543	245.426	-0.082226	0.042383	0.10459	-100.313	-72.36832	1191.2	-1.2109	0.67773	0.16895	-41.472	138.094	1595.1	-1.1055	0.67578	0.13232
1.866	30.985	189.597	670.79842	-0.40918	0.24512	0.11133	-114.951	-28.483	1582.24	-0.85107	0.66846	-0.11963	47.637	125.2491	523.6516	-0.25146	0.26807	0.088379	20.485	130.23	500.4359	-0.18213	0.20654	0.07373	-12.765	43.5814	283.918	-0.086523	0.052539	0.097558	-72.371	-60.366	1209.3	-1.1777	0.68164	0.16992	-38.291	135.663	1552.35	-1.0932	0.66308	0.12989
1.868	16.779	184.241	649.2344	-0.39404	0.24463	0.11426	-113.5308	-90.297	1595.8569	-0.79697	0.54063	-0.12754	44.722	126.666	492.3508	-0.23047	0.25537	0.09668	1.202	144.675	492.47943	-0.17627	0.20605	0.071289	11.415	63.437	352.628	-0.095021	0.065429	0.094238	-38.866	-40.9121	1233.62	-1.1152	0.66992	0.1665	-43.426	126.563	1531.24	-1.0718	0.65479	0.12793
1.87	17.508	169.311	626.7132	-0.35889	0.24072	0.12354	-98.852	-161.587	1630.6094	-0.75957	0.43848	-0.12617	40.163	113.3002	477.643	-0.21777	0.24902	0.097168	-17.432	140.674	484.98	-0.15381	0.20166	0.07959	6.81	92.022	421.841	-0.10889	0.075195	0.092773	-70.554	-19.3047	1276.46	-1.086	0.65259	0.16333	-32.93	130.254	1486.26	-1.0386	0.64014	0.125
1.872	-5.104	161.398	616.548	-0.33691	0.23559	0.12695	-82.266	-217.438	1658.3459	-0.74043	0.36856	-0.11719	5.081	118.5745	457.7859	-0.20215	0.24268	0.1001	-24.295	134.582	463.735	-0.14258	0.19922	0.075439	4.36799999999999	114.8838	501.233	-0.13311	0.085449	0.087402	-57.908	-14.1045	1305.36	-1.0649	0.63135	0.16016	-10.509	127.292	1462.92	-1.0161	0.6333	0.12598
1.874	-5.183	165.913	598.441	-0.31348	0.22998	0.12988	-66.865	-241.3815	1674.4601	-0.72656	0.32793	-0.11191	12.228	124.168	449.93327	-0.19214	0.23803	0.099365	-42.144	128.065	440.8298	-0.13135	0.2041	0.074219	2.255	151.877	585.087	-0.16689	0.094042	0.081836	-44.056	-14.9235	1292.05	-1.0532	0.60498	0.16357	-25.538	134.766	1447.76	-0.97852	0.61914	0.11621
1.876	-43.099	152.675	573.534	-0.28027	0.21777	0.13184	-85.796	-252.004	1684.492	-0.70215	0.32373	-0.11328	-1.579	126.459	441.3198	-0.17871	0.23438	0.10205	-66.691	133.928	422.8524	-0.11865	0.20264	0.07373	-2.76899999999999	180.807	649.124	-0.21494	0.10459	0.078711	-17.467	-2.1318	1278.25	-1.0341	0.57861	0.1643	-36.633	127.39	1418.8	-0.94482	0.60742	0.11645
1.878	-44.105	155.359	540.7213	-0.26367	0.20947	0.13525	-107.243	-267.112	1713.437	-0.66572	0.33242	-0.11875	10.535	120.082	421.8379	-0.1582	0.229	0.10791	-80.955	119.0278	420.266	-0.11377	0.20654	0.071289	-8.59500000000001	176.384	722.861	-0.28076	0.10869	0.073438	-6.713	6.7975	1264.33	-1.0117	0.55469	0.16602	-53.848	118.005	1376.9	-0.91553	0.59717	0.11377
1.88	-64.7753	158.265	520.4472	-0.23584	0.20264	0.13428	-73.901	-260.989	1752.556	-0.63848	0.35117	-0.12539	-30.967	116.824	404.4918	-0.146	0.22168	0.10742	-76.943	112.891	408.351	-0.10742	0.20605	0.075684	-25.551	158.685	787.767	-0.36133	0.11279	0.0625	-1.863	-5.283	1229.15	-0.96875	0.52148	0.16553	-68.764	133.229	1350.45	-0.87451	0.5708	0.10938
1.882	-76.4958	161.814	497.927	-0.21509	0.19214	0.12841	-20.78	-245.044	1801.239	-0.63222	0.38437	-0.13203	-40.819	113.853	388.39	-0.12842	0.21582	0.11182	-82.3657	119.527	385.15565	-0.10766	0.21215	0.07373	-32.566	135.756	863.671	-0.45948	0.12129	0.053906	13.561	-14.765	1200.76	-0.93555	0.50586	0.15967	-92.0934	135.885	1314.16	-0.854	0.5625	0.10303
1.884	-123.896	143.265	493.2393	-0.19141	0.18506	0.12549	38.179	-230.692	1852.781	-0.67695	0.42969	-0.13164	-79.9061	112.573	370.1258	-0.11817	0.20801	0.11524	-89.6506	119.901	362.3148	-0.10449	0.21631	0.071777	-42.298	118.4995	944.602	-0.5708	0.13223	0.059668	-1.26100000000001	-45.1563	1177.71	-0.87109	0.48438	0.14404	-90.6969	136.569	1281.86	-0.81104	0.5376	0.094727
1.886	-108.7568	148.094	470.1803	-0.16943	0.17578	0.12744	86.896	-214.75363	1896.187	-0.77686	0.49365	-0.11475	-72.34	108.994	357.15087	-0.10498	0.20313	0.10742	-106.4232	104.743	349.1756	-0.10254	0.22021	0.067383	-67.974	77.93076	1027.337	-0.69892	0.14629	0.062011	4.721	-85.635	1187.68	-0.8186	0.47631	0.1333	-102.2265	137.873	1262.77	-0.78711	0.51904	0.085938
1.888	-143.327	140.43	448.706	-0.15283	0.17529	0.125	110.111	-170.191	1896.164	-0.91133	0.5584	-0.092481	-104.56093	111.552	345.958	-0.097656	0.19336	0.11475	-87.19	109.388	348.5095	-0.11035	0.22217	0.075684	-46.462	44.08	1078.445	-0.82685	0.1668	0.068457	31.803	-110.043	1206.05	-0.77246	0.46777	0.12109	-109.1331	143.24	1225.55	-0.76221	0.50244	0.084473
1.89	-137.164	123.388	444.312	-0.12988	0.16113	0.11914	92.76	-139.329	1899.2949	-1.0504	0.62949	-0.064942	-121.9043	113.551	331.4114	-0.089355	0.18945	0.11328	-85.699	119.411	339.198	-0.11572	0.22754	0.070313	-94.8758	9.14	1092.828	-0.95801	0.19434	0.078613	26.955	-118.49	1232.1	-0.71729	0.46826	0.09668	-121.864	147.864	1198.58	-0.73047	0.47461	0.071777
1.892	-157.482	112.106	426.537	-0.1084	0.15771	0.11865	131.426	-99.813	1901.351	-1.1691	0.69668	-0.03916	-131.039	111.304	316.4853	-0.077148	0.18701	0.11279	-68.755	118.107	316.9769	-0.12158	0.23389	0.072998	-90.34	-15.798	1117.797	-1.0728	0.23105	0.093066	2.036	-129.486	1264.99	-0.69727	0.4707	0.086426	-103.8039	141.933	1167.45	-0.71191	0.46436	0.061035
1.894	-135.737	127.985	393.5086	-0.097168	0.15967	0.11377	173.609	-95.329	1918.181	-1.2524	0.77041	-0.016309	-136.957	99.667	298.512	-0.075684	0.18335	0.11279	-88.2373	111.16	311.0244	-0.12695	0.23584	0.07373	-93.825	-45.1775	1136.079	-1.1766	0.28193	0.1041	-41.265	-145.114	1278.56	-0.67773	0.48633	0.061523	-112.8838	147.753	1142.89	-0.67529	0.43848	0.054688
1.896	-154.846	133.3	367.3358	-0.074707	0.15527	0.11084	176.94022	-104.245	1931.493	-1.3062	0.84033	-0.0024414	-141.021	94.171	302.868	-0.072266	0.18018	0.11182	-52.143	109.203	301.8725	-0.13086	0.24414	0.071289	-92.166	-55.566	1204.89	-1.2477	0.34522	0.11269	-84.366	-143.149	1311.82	-0.68628	0.50537	0.044678	-87.091	153.172	1103.91	-0.65258	0.42066	0.040772
1.898	-142.92	129.774	359.753	-0.059082	0.15357	0.10596	116.837	-142.29	1952.735	-1.3159	0.8917	-0.0081054	-133.197	89.773	298.019	-0.068848	0.17676	0.11377	-50.575	98.735	284.8009	-0.13086	0.24658	0.066406	-124.7595	-54.518	1242.027	-1.2878	0.41299	0.12481	-108.601	-121.798	1329.52	-0.71484	0.52734	0.032227	-88.1997	146.294	1072.97	-0.62891	0.40039	0.029785
1.9	-115.551	112.963	352.6531	-0.050781	0.15479	0.097656	126.038	-161.8406	2003.1086	-1.2987	0.91904	-0.016308	-113.2059	83.96	284.896	-0.069336	0.17725	0.1167	-39.722	98.219	284.4072	-0.12646	0.24902	0.060547	-116.173	-67.693	1259.812	-1.3008	0.49512	0.14307	-139.193	-131.576	1369.79	-0.78662	0.56592	0.024414	-87.815	148.059	1047.3	-0.59521	0.38379	0.019531
1.902	-112.105	115.101	343.3124	-0.032715	0.15771	0.092773	97.596	-171.0583	2038.707	-1.2675	0.92217	-0.033887	-99.0697	86.407	265.004	-0.066406	0.17285	0.12256	-31.255	98.984	266.1854	-0.11963	0.24781	0.062988	-88.476	-80.249	1272.648	-1.2887	0.5707	0.15283	-149.5526	-138.192	1389.59	-0.82959	0.59131	0.025391	-76.0631	153.172	1026.07	-0.57959	0.36963	0.013184
1.904	-100.998	90.837	340.549	-0.023438	0.15869	0.090332	84.459	-176.0807	2063.5877	-1.2532	0.89678	-0.055567	-78.9234	83.71	251.6411	-0.06543	0.17188	0.12158	-9.337	107.97	248.1119	-0.11621	0.24902	0.061523	-63.708	-81.865	1292.003	-1.2593	0.63877	0.15791	-166.652	-145.423	1417.73	-0.91846	0.6333	0.040039	-57.959	147.615	993.71	-0.55225	0.34912	0
1.906	-54.662	82.7189	333.95	-0.016113	0.16016	0.07959	78.87	-202.384	2083.9248	-1.2612	0.86182	-0.076172	-77.018	76.168	245.4099	-0.06543	0.1709	0.12061	-21.377	102.069	245.6389	-0.10498	0.24902	0.051758	-35.33	-55.476	1294.491	-1.2296	0.69033	0.15908	-155.522	-156.183	1438.81	-0.98535	0.66895	0.04834	-63.18	142.94	975.88	-0.52881	0.33301	-0.0080564
1.908	-38.604	93.294	328.219	-0.012695	0.16674	0.07373	77.657	-206.813	2102.384	-1.3026	0.8209	-0.082813	-37.127	63.22072	249.3666	-0.063477	0.16943	0.13721	14.402	88.987	239.9886	-0.095703	0.24512	0.053711	-28.231	-22.6226	1286.17	-1.191	0.71699	0.1626	-170.556	-174.941	1466.15	-1.0386	0.70166	0.062012	-42.684	152.684	946.07	-0.50732	0.31689	-0.011719
1.91	-35.978	91.077	309.3881	-0.014648	0.16455	0.073242	46.205	-204.482	2133.354	-1.3593	0.80283	-0.093262	-36.162	73.299	229.3248	-0.064941	0.17041	0.13135	14.321	86.645	224.0757	-0.085938	0.24121	0.053223	-3.266	-12.155	1260.127	-1.1616	0.729	0.15918	-159.333	-170.082	1500.98	-1.084	0.75	0.071289	-33.873	155.376	924.73	-0.48438	0.29688	-0.022461
1.912	-13.868	79.2683	276.5306	-0.016602	0.17334	0.066406	22.011	-188.7946	2163.261	-1.4113	0.79698	-0.096777	-15.491	70.791	238.501	-0.06543	0.16943	0.13037	13.117	86.304	228.858	-0.080078	0.23877	0.055664	3.30500000000001	-17.38	1245.225	-1.144	0.71553	0.15488	-167.476	-165.258	1528.16	-1.0986	0.76953	0.08252	-7.585	148.598	896.8	-0.46875	0.29199	-0.024414
1.914	1.163	85.2815	267.8839	-0.019043	0.17822	0.066895	2.81099999999999	-168.091	2163.1261	-1.4496	0.8082	-0.10498	0.909000000000006	63.244	221.899	-0.063965	0.16309	0.13477	14.672	74.664	211.9545	-0.071777	0.23584	0.046875	-3.861	-56.5537	1247.59	-1.127	0.68398	0.14863	-185.803	-162.612	1566.58	-1.1138	0.80127	0.095703	10.089	140.041	869.96	-0.44775	0.27197	-0.026855
1.916	-2.7	99.229	254.2844	-0.031738	0.18311	0.064941	1.00700000000001	-147.633	2174.686	-1.4668	0.83789	-0.11328	19.996	55.7325	217.722	-0.061035	0.16211	0.12939	10.206	81.776	199.7877	-0.059082	0.22168	0.050293	13.665	-87.9868	1248.16	-1.1047	0.64609	0.14941	-195.743	-159.709	1596.84	-1.1194	0.81811	0.104	22.743	142.128	851.89	-0.43238	0.26416	-0.0354
1.918	14.822	84.8922	257.3577	-0.040771	0.18189	0.06543	-32.206	-148.531	2177.92	-1.4683	0.86084	-0.1293	4.282	72.187	197.7019	-0.058105	0.16406	0.12695	2.472	86.747	188.8174	-0.050293	0.2207	0.053223	53.719	-112.4647	1229.238	-1.0836	0.6084	0.15166	-188.67	-150.153	1647.12	-1.126	0.82422	0.10889	25.466	131.373	817.1	-0.4209	0.25439	-0.037109
1.92	23.069	74.8926	250.217	-0.054199	0.1875	0.066406	-42.056	-149.471	2177.803	-1.4566	0.88545	-0.14463	41.746	69.57	186.6716	-0.048828	0.15918	0.12622	-8.922	75.841	187.3362	-0.033203	0.20654	0.051758	38.931	-128.2805	1245.412	-1.0391	0.56836	0.15479	-170.361	-155.7844	1677.23	-1.146	0.81982	0.10645	23.604	124.363	800.19	-0.41016	0.23633	-0.04541
1.922	13.188	74.0922	228.611	-0.069824	0.19287	0.064941	-42.802	-124.841	2178.855	-1.441	0.9042	-0.16846	32.99	72.4292	173.494	-0.045898	0.15527	0.12695	-18.59	60.4379	184.4374	-0.024414	0.19629	0.047363	33.108	-141.0051	1269.132	-0.98056	0.53311	0.14834	-194.466	-169.315	1718.75	-1.1602	0.81445	0.104	44.183	137.993	773.31	-0.4043	0.23291	-0.04248
1.924	7.052	81.928	215.8822	-0.076172	0.19238	0.060059	-25.64	-78.917	2156.1436	-1.4275	0.91543	-0.19316	40.137	65.6084	182.429	-0.043457	0.15283	0.12451	-28.679	67.674	180.8501	-0.016602	0.19287	0.052246	10.076	-159.96499	1294	-0.91015	0.49804	0.13369	-168.501	-167.477	1730.75	-1.1973	0.80664	0.095703	22.3	155.971	751.14	-0.39014	0.22217	-0.044434
1.926	1.235	65.3703	215.1522	-0.083984	0.19922	0.065918	-44.294	-88.01	2149.275	-1.4175	0.92041	-0.21826	30.817	68.372	164.5774	-0.041504	0.15283	0.12695	-27.838	68.481	174.851	-0.0019531	0.18115	0.05127	21.974	-175.4226	1306.302	-0.83007	0.47109	0.12275	-131.1167	-162.563	1759.22	-1.2236	0.80811	0.094482	23.193	157.921	714.51	-0.39014	0.21387	-0.046386
1.928	5.678	65.495	207.7194	-0.093506	0.20142	0.06543	-30.31	-104.8327	2148.685	-1.4106	0.93379	-0.24316	25.224	53.3651	151.7975	-0.039551	0.15332	0.12598	-62.84	53.682	170.8087	0.0068359	0.17065	0.049072	-11.651	-182.342	1322.132	-0.76006	0.44834	0.10362	-114.067	-167.466	1776.91	-1.2515	0.81543	0.076172	-19.607	156.781	694.57	-0.38428	0.2085	-0.05127
1.93	-21.974	76.718	185.1138	-0.095215	0.2041	0.064453	-6.64999999999999	-98.5659	2139.046	-1.4059	0.94219	-0.26641	0.606000000000002	51.778	161.8829	-0.035645	0.14942	0.12818	-77.33	38.556	178.8252	0.0092773	0.16162	0.049316	-26.763	-181.806	1387.36	-0.70605	0.4248	0.092285	-98.808	-168.652	1812	-1.269	0.82666	0.051758	-16.846	162.183	678.11	-0.37744	0.20557	-0.056152
1.932	-45.298	69.76	173.1763	-0.098145	0.20947	0.068848	18.08	-98.599	2136.906	-1.4055	0.95195	-0.28281	-11.679	48.141	159.152	-0.024414	0.14795	0.13428	-62.531	34.7547	160.4927	0.0029297	0.15039	0.05127	-38.142	-172.8438	1414.612	-0.68027	0.40469	0.07666	-54.661	-173.584	1827.08	-1.2754	0.8418	0.041016	-39.09	148.259	665.21	-0.37402	0.20556	-0.058349
1.934	-71.384	63.637	163.025	-0.098145	0.2124	0.071289	38.776	-105.082	2174.7873	-1.4179	0.96338	-0.29619	-46.65	35.348	147.9805	-0.016113	0.14404	0.1333	-75.215	28.1439	146.9761	0.00097656	0.14307	0.053711	-55.261	-165.6444	1446.265	-0.67764	0.38858	0.057617	-34.776	-171.089	1838.84	-1.2734	0.8623	0.0058594	-16.188	141.715	639.42	-0.36377	0.20752	-0.060059
1.936	-71.575	71.933	172.8711	-0.10645	0.21143	0.070313	83	-96.714	2213.054	-1.4409	0.97705	-0.30811	-58.352	38.947	138.1787	-0.0083008	0.146	0.13574	-76.072	10.5785	163.5128	-0.015625	0.13379	0.061523	-83.595	-168.022	1462.858	-0.70693	0.37647	0.044336	-46.476	-166.337	1850.73	-1.2595	0.88013	-0.016357	-41.329	147.26	614.98	-0.34619	0.20947	-0.065918
1.938	-77.635	55.97	159.3038	-0.10279	0.20971	0.067627	110.897	-94.623	2221.756	-1.4592	0.9918	-0.31065	-59.182	38.48	124.6773	0.00097656	0.14697	0.14258	-84.7683	15.2833	172.904	-0.023682	0.12695	0.072021	-91.214	-188.665	1489.226	-0.77285	0.37021	0.042187	-59.85	-164.7259	1878.67	-1.248	0.89453	-0.037598	-38.318	148.115	594.01	-0.33447	0.21338	-0.064941
1.94	-117.396	39.749	164.667	-0.10938	0.20508	0.071777	134.365	-119.551	2214.72	-1.4866	1.0033	-0.3083	-79.032	36.451	134.5294	0.014405	0.14258	0.14331	-71.723	11.936	162.8574	-0.029785	0.12646	0.075195	-101.959	-196.781	1508.355	-0.86328	0.37305	0.040527	-49.31	-141.08	1907.38	-1.2363	0.91016	-0.05957	-59.474	137.622	572.85	-0.3125	0.22021	-0.07373
1.942	-107.4576	29.8886	154.948	-0.11035	0.20508	0.071289	140.614	-137.1153	2231.0034	-1.5159	1.013	-0.30713	-97.17	30.447	140.9407	0.02832	0.13965	0.14307	-100.256998	3.084	174.711	-0.035645	0.12646	0.088867	-126.703	-183.556	1537.833	-0.97326	0.38516	0.058789	-77.521	-127.042	1936.73	-1.2358	0.91846	-0.062012	-59.575	130.202	561.09	-0.29492	0.21997	-0.077148
1.944	-107.1359	34.089	147.02	-0.11133	0.20264	0.07373	189.646	-128.417	2242.812	-1.5388	1.0171	-0.30166	-100.0113	16.5534	127.22	0.047363	0.1333	0.14893	-83.575	-9.375	172.583	-0.039063	0.12939	0.091309	-166.304	-173.3097	1554.909	-1.0749	0.41035	0.079981	-68.905	-135.017	1956.14	-1.2549	0.92383	-0.067383	-63.933	140.248	533.03	-0.27686	0.22217	-0.077637
1.946	-120.0451	29.672	137.3111	-0.10645	0.19385	0.072266	193.683	-116.146	2233.1781	-1.5645	1.0234	-0.29883	-109.40056	-2.6727	128.156	0.05957	0.13037	0.15039	-62.578	-11.919	193.1766	-0.042969	0.12793	0.10059	-157.383	-150.1511	1593.701	-1.1624	0.44082	0.10498	-83.785	-127.1759	1973.94	-1.2839	0.93579	-0.066162	-62.003	149.521	516.17	-0.25586	0.22412	-0.083008
1.948	-130.067	32.874	130.9316	-0.10083	0.18799	0.07129	181.067	-88.01	2191.261	-1.5851	1.0246	-0.29844	-127.982	-11.3024	136.309	0.060547	0.12354	0.14404	-61.257	-34.668	185.9125	-0.049805	0.12793	0.10889	-184.455	-153.6153	1629.361	-1.2316	0.47412	0.13115	-101.134	-123.1559	2009.24	-1.3203	0.94336	-0.064453	-75.009	141.658	505.96	-0.24561	0.2251	-0.086426
1.95	-103.399	40.276	117.267	-0.092773	0.18262	0.068848	163.453	-60.716	2194.7581	-1.5942	1.0172	-0.29727	-91.211	-16.0022	144.661	0.054932	0.11304	0.1438	-57.784	-45.4223	190.1779	-0.061035	0.12793	0.11426	-187.2195	-166.363	1659.086	-1.2739	0.50928	0.15332	-116.2236	-109.521	2012.07	-1.3818	0.9668	-0.052246	-78.754	135.184	496.77	-0.22412	0.2251	-0.087891
1.952	-89.561	42.789	123.6805	-0.07959	0.16797	0.06543	161.822	-36.7392	2191.7976	-1.5992	1.0121	-0.30039	-83.761	-4.26	136.687	0.046387	0.10498	0.14307	-23.629	-44.541	193.3967	-0.085449	0.12256	0.125	-196.2404	-196.389	1695.816	-1.2832	0.54649	0.1708	-118.3506	-114.063	2035.43	-1.4121	0.97461	-0.052246	-72.158	134.097	471.07	-0.21729	0.22339	-0.091308
1.954	-96.40466533	19.5875	119.5738	-0.075195	0.16602	0.062988	145.376	-26.3819	2207.167	-1.5959	1.0025	-0.30654	-87.348	-3.0976	140.107	0.035156	0.10791	0.14014	-26.761	-42.45	223.0144	-0.104	0.12012	0.12402	-187.5711	-197.909	1729.692	-1.2757	0.57353	0.17207	-127.18642	-122.764	2036.86	-1.4648	0.99316	-0.04541	-77.549	133.105	455.05	-0.21045	0.22314	-0.096191
1.956	-71.809	6.7069	136.677	-0.063965	0.1499	0.0625	137.981	-16.366	2183.7351	-1.5933	0.9917	-0.31543	-89.2194	-9.4873	142.694	0.029297	0.10889	0.14014	-34.263	-52.025	244.166	-0.15625	0.11816	0.13184	-174.128	-187.328	1768.672	-1.2503	0.59502	0.16543	-168.77	-132.666	2047.79	-1.5005	1.0059	-0.040772	-39.947	124.942	437.12	-0.1958	0.22217	-0.10107
1.958	-49.139	14.54984	141.208	-0.057861	0.14258	0.055664	153.995	8.347	2178.7012	-1.5876	0.98193	-0.32432	-60.072	-27.9571	144.697	0.024414	0.12061	0.13623	-6.719	-47.716	274.4594	-0.20435	0.11817	0.13769	-161.671	-174.2194	1796.63	-1.2252	0.60528	0.15537	-195.605	-148.989	2057.29	-1.5352	1.0107	-0.031738	-14.84	132.624	438.69	-0.19189	0.22314	-0.10059
1.96	-14.371	10.2834	144.312	-0.052246	0.13232	0.052246	121.311	30.0027	2164.4697	-1.582	0.96367	-0.33731	-45.377	-32.2531	164.877	0.02002	0.13745	0.14209	7.876	-24.893	320.941	-0.26318	0.12158	0.14551	-142.593	-181.18	1820.03	-1.2026	0.60596	0.13428	-196.715	-139.434	2086.92	-1.5811	1.0176	-0.026367	-8.548	128.581	420.22	-0.1792	0.22314	-0.1123
1.962	-14.233	3.6792	148.241	-0.044922	0.11816	0.047852	82.919	24.0703	2149.5326	-1.5727	0.94649	-0.35059	-10.347	-44.43836	185.703	0.018066	0.15234	0.14795	19.676	10.741	387.298	-0.36719	0.13037	0.15771	-103.198	-193.7884	1825.797	-1.1962	0.60185	0.11465	-213.686	-112.432	2089.11	-1.6011	1.02	-0.020996	-12.712	120.414	402.26	-0.17578	0.22339	-0.11231
1.964	17.566	-6.207	135.227	-0.04248	0.11719	0.041504	65.889	19.309	2120.388	-1.5637	0.92979	-0.3583	-2.736	-58.4613	190.507	0.0019531	0.17041	0.14453	9.749	37.871	455.046	-0.43164	0.13574	0.16211	-96.185	-200.104	1841	-1.2034	0.59112	0.095899	-237.288	-113.176	2112.33	-1.6445	1.0205	-0.003418	20.456	124.195	375.21	-0.16943	0.2251	-0.11475
1.966	8.185	-18.168	145.557	-0.034668	0.11133	0.041504	61.59	3.97	2111.6695	-1.5527	0.91504	-0.36914	3.263	-52.6896	217.465	-0.0087891	0.17676	0.14453	23.104	82.569	542.577	-0.58789	0.146	0.17432	-81.156	-198.024	1846.77	-1.2218	0.58604	0.078711	-229.163	-116.713	2115	-1.6775	1.0159	0.0068359	9.219	126.266	365.33	-0.15771	0.22998	-0.11816
1.968	29.45	-27.7793	155.259	-0.031495	0.10986	0.041748	30.68	-26.078	2104.682	-1.542	0.89746	-0.37715	14.645	-37.9537	235.394	-0.041992	0.19775	0.14697	-7.647	124.998	623.171	-0.72632	0.1582	0.18091	-83.833	-194.866	1873.711	-1.2451	0.58145	0.060449	-223.264	-98.534	2137.99	-1.707	1.0117	0.02002	36.525	116.904	357.85	-0.14795	0.22607	-0.12354
1.97	27.099	-41.1481	169.331	-0.025391	0.10742	0.038086	-10.11	-49.7051	2107.941	-1.5332	0.88477	-0.38711	38.33	-20.4632	268.36	-0.07788	0.21264	0.14331	14.888	156.237	729.948	-0.86963	0.1792	0.18994	-62.873	-189.064	1898.61	-1.2598	0.5918	0.04834	-214.314	-75.814	2135.11	-1.7437	1.0024	0.036621	28.364	99.983	354.78	-0.13428	0.22656	-0.125
1.972	69.373	-52.20163	177.559	-0.024902	0.10693	0.040527	-21.01	-53.767	2096.737	-1.5156	0.87344	-0.3918	30.846	2.0895	328.01	-0.12012	0.22656	0.14307	-18.956	174.883	831.678	-1.064	0.21582	0.20166	-47.737	-180.153	1914.15	-1.2737	0.6001	0.028125	-222.802	-64.145	2148.93	-1.7593	0.99658	0.041992	18.657	109.332	336.4	-0.12573	0.22559	-0.12573
1.974	40.922	-64.6722	195.239	-0.024902	0.10791	0.037598	-17.949	-38.3958	2055.655	-1.4981	0.85625	-0.39414	33.763	25.463	395.66	-0.18066	0.25195	0.14307	-4.117	189.344	920.92	-1.1543	0.24121	0.21191	-36.773	-189.2954	1929.05	-1.2801	0.61797	0.009668	-189.18	-50.596	2143.49	-1.7827	0.98779	0.048828	10.692	110.778	325.19	-0.11816	0.22803	-0.13037
1.976	16.306	-83.2704	210.448	-0.031738	0.10742	0.03418	-46.71	-23.7787	2040.44326	-1.4863	0.83984	-0.39551	40.775	53.6437	478.09	-0.2124	0.26221	0.14502	-8.765	175.378	996.38	-1.3301	0.29883	0.23145	-34.919	-179.6968	1953.781	-1.2906	0.63516	-9.7391e-05	-178.791	-56.202	2130.61	-1.7986	0.97778	0.047607	25.018	109.229	319.8	-0.10498	0.22217	-0.13623
1.978	16.937	-69.3932	248.91	-0.05542	0.10962	0.034424	-28.01	3.236	2017.353	-1.4728	0.83232	-0.39912	30.89	93.194	574.93	-0.31152	0.28711	0.14014	-8.523	124.372	1068.03	-1.4392	0.36352	0.25586	-30.98	-173.276	1983.2	-1.3027	0.65078	-0.006543	-168.266	-60.367	2122.58	-1.8086	0.96582	0.051758	19.349	105.978	298.16	-0.1001	0.21924	-0.13525
1.98	35.105	-34.8105	255.845	-0.079102	0.11377	0.038086	-17.72	19.8524	1991.8543	-1.4625	0.82071	-0.3957	27.071	137.223	688.22	-0.40796	0.30127	0.13916	-21.635	69.447	1134.21	-1.5308	0.42627	0.26758	-51.845	-151.752	1992.73	-1.3262	0.66797	-0.0068359	-159.849	-66.622	2127.79	-1.8203	0.95313	0.047852	7.291	99.701	281.02	-0.099609	0.21875	-0.1416
1.982	-8.631	-5.47888	300.701	-0.12402	0.12695	0.03418	8.51000000000001	31.1025	1968.1094	-1.4574	0.81015	-0.3918	36.395	185	796.34	-0.52148	0.31934	0.13721	9.926	21.8697	1162.43	-1.5977	0.5293	0.2749	-61.757	-148.537	2004.421	-1.3637	0.67666	-0.0054682	-124.90049	-63.12	2152.02	-1.8223	0.94287	0.046875	0.140000000000001	94.276	264.64	-0.09839	0.21485	-0.13941
1.984	-24.889	10.7535	360.03	-0.1582	0.13721	0.036621	30.562	34.884	1960.685	-1.4529	0.80215	-0.38545	-5.697	185.106	905.87	-0.69092	0.35791	0.13477	-25.838	-17.135	1202.21	-1.603	0.58252	0.27734	-79.614	-145.834	2006.593	-1.4092	0.69073	0.0099621	-117.62	-45.786	2146.68	-1.8296	0.92432	0.04541	2.854	90.152	263.61	-0.10254	0.2124	-0.13916
1.986	-48.217	49.589	431.72	-0.23291	0.14355	0.027344	72.084	72.203	1949.0585	-1.4521	0.79883	-0.38086	-24.318	175.515	986.28	-0.77979	0.38721	0.13867	1.783	-31.1222	1241.6	-1.584	0.66602	0.26807	-76.148	-151.6438	2013.772	-1.4671	0.71104	0.025978	-114.6386	-54.359	2149.03	-1.8269	0.91529	0.047363	2.968	87.34	264.52	-0.1084	0.20898	-0.13672
1.988	-61.677	92.232	510.53	-0.31128	0.16065	0.026855	81.714	89.306	1924.4451	-1.4523	0.79932	-0.36826	-21.443	152.497	1073.94	-0.94336	0.44922	0.14502	-30.504	-26.494	1283.57	-1.5495	0.71021	0.26758	-122.222	-168.116	2021.232	-1.5273	0.74023	0.049807	-87.123	-34.235	2130.7	-1.8252	0.90234	0.049316	-27.586	84.281	251.12	-0.11621	0.20801	-0.1377
1.99	-91.998	115.569	615.28	-0.40381	0.17139	0.013672	87.4	90.145	1875.548	-1.4499	0.80244	-0.36504	-44.336	113.057	1170.96	-1.0515	0.50317	0.15259	-14.9	-38.433	1306.52	-1.5059	0.73828	0.26221	-120.968	-172.243	2038.085	-1.5894	0.76611	0.072266	-70.905	-22.42	2145.69	-1.8125	0.89258	0.049316	-55.898	70.801	210.329	-0.12744	0.20361	-0.13428
1.992	-75.171	137.707	717.56	-0.55127	0.19189	0.0024414	79.169	89.613	1841.734	-1.4452	0.804	-0.35644	-53.54	67.287	1226.84	-1.1323	0.56104	0.16846	-46.511	-69.392	1341.99	-1.4429	0.75732	0.26074	-133.494	-171.031	2055.247	-1.6481	0.79921	0.092478	-59.458	-26.757	2136.11	-1.8066	0.88672	0.047363	-60.028	74.558	209.256	-0.13672	0.20288	-0.13061
1.994	-85.8474	153.682	828.73	-0.63867	0.20654	-0.0048828	111.446	93.131	1824.194	-1.4413	0.80596	-0.34512	-61.594	8.5058	1222.08	-1.2012	0.63281	0.19189	-20.038	-76.506	1400.22	-1.4082	0.75391	0.25537	-161.806	-165.365	2079.236	-1.6988	0.82968	0.11406	-75.427	-33.088	2130.53	-1.7959	0.87793	0.056641	-66.268	82.852	196.745	-0.14697	0.20703	-0.12451
1.996	-121.042	147.72	896.69	-0.80811	0.24316	-0.012207	122.105	87.806	1818.1265	-1.4331	0.80713	-0.33936	-63.83	-37.0879	1236.81	-1.2124	0.66943	0.19824	-50.402	-40.301	1448.38	-1.3535	0.72754	0.23633	-170.35	-155.98	2095.466	-1.7445	0.86366	0.12461	-71.444	-21.641	2112.3	-1.7918	0.87427	0.060547	-79.424	76.496	206.575	-0.16895	0.20361	-0.11914
1.998	-109.716	126.622	979.34	-0.94018	0.27905	-0.011475	128.48	71.7451	1794.875	-1.42	0.81162	-0.33281	-33.181	-84.579	1270.58	-1.1968	0.72314	0.21875	-39.663	-6.816	1470.22	-1.3028	0.68554	0.21118	-184.359	-141.6584	2106.894	-1.7866	0.88134	0.13545	-83.482	-19.786	2104.59	-1.7866	0.87158	0.063477	-75.698	73.425	177.841	-0.17529	0.20557	-0.11426
2	-102.72	106.429	1060.02	-1.0659	0.32471	0.00048828	152.474	57.045	1781.4216	-1.407	0.8126	-0.32549	-68.875	-108.448	1291.06	-1.1594	0.74243	0.2312	-38.565	-1.124	1470.75	-1.2383	0.63086	0.18799	-192.152	-126.3855	2123.374	-1.8198	0.89502	0.1499	-99.274	-13.171	2086.83	-1.7788	0.86572	0.077637	-68.77	73.594	171.244	-0.19189	0.20703	-0.10596
2.002	-96.326	67.734	1104.7	-1.2188	0.40234	0.023438	150.328	58.201	1752.3671	-1.3913	0.8126	-0.31845	-71.752	-101.731	1318.36	-1.1187	0.75244	0.23828	-14.326	-4.65	1477.42	-1.1343	0.54932	0.15283	-222.6994	-111.1673	2135.393	-1.8524	0.90127	0.15019	-108.805	-14.757	2068.13	-1.7773	0.86523	0.083008	-68.143	73.788	163.748	-0.20288	0.20801	-0.10303
2.004	-109.856	11.2235	1147.36	-1.2827	0.44287	0.041016	128.588	68.876	1734.4929	-1.3739	0.81533	-0.31377	-48.37	-82.916	1329.57	-1.0859	0.73535	0.24121	-22.95	-13.458	1482.34	-1.0776	0.51758	0.13379	-198.7358	-102.9345	2154.617	-1.88	0.90597	0.15275	-122.336	0.781999999999996	2035.49	-1.7651	0.86572	0.088867	-69.691	48.018	178.753	-0.21582	0.20947	-0.097168
2.006	-59.251	-29.9621	1179.68	-1.3823	0.5415	0.080566	128.545	77.1595	1722.7998	-1.3491	0.81689	-0.30762	-37.319	-82.431	1394.53	-1.0801	0.72266	0.24316	-26.187	-41.3074	1470.99	-0.9502	0.46484	0.099121	-204.2152	-90.413	2163.49	-1.8937	0.90712	0.15781	-143.796	5.36199999999999	2029.08	-1.7512	0.87036	0.099119	-58.471	46.7909	170.253	-0.23145	0.20703	-0.091797
2.008	-69.292	-62.05	1199.54	-1.4243	0.6167	0.10938	142.202	93.011	1706.974	-1.3281	0.81621	-0.30234	-73.475	-50.979	1446.81	-1.0894	0.69385	0.25879	-8.19999999999999	-72.822	1441.24	-0.83276	0.44581	0.077881	-187.75642	-90.787	2159.99	-1.9069	0.9044	0.15927	-169.643	10.345	2016.74	-1.7378	0.87158	0.10742	-47.2	49.954	154.283	-0.23975	0.20703	-0.083496
2.01	-24.949	-83.5656	1231.21	-1.4409	0.69189	0.13037	121.782	90.72	1683.387	-1.3054	0.81338	-0.29326	-37.222	-14.776	1464.01	-1.1106	0.67602	0.26441	6.14	-106.087	1420.07	-0.71777	0.44189	0.054688	-180.4766	-89.52	2139.881	-1.9121	0.90625	0.15527	-166.811	14.914	1999.69	-1.7148	0.86719	0.12061	-29.01	50.9121	139.123	-0.24609	0.20898	-0.07666
2.012	-20.57	-127.168	1276.01	-1.4238	0.77734	0.15918	61.133	91.588	1652.681	-1.2772	0.81182	-0.29131	-5.127	17.765	1444.44	-1.1343	0.65479	0.27295	-1.34	-137.896	1401.34	-0.58496	0.44727	0.015137	-134.71	-77.53	2146.347	-1.921	0.90479	0.14952	-187.751	24.267	1982.47	-1.7012	0.86719	0.11865	-23.557	32.2282	142.09	-0.24829	0.20777	-0.071045
2.014	26.374	-123.383	1312.95	-1.4141	0.8125	0.1665	46.54	87.79	1628.427	-1.252	0.80723	-0.28691	9.65600000000001	17.328	1452.27	-1.1382	0.63721	0.26953	-4.57199999999999	-167.452	1381.26	-0.52295	0.45166	0.0039063	-143.829	-62.023	2139.708	-1.9261	0.90283	0.15263	-202.941	19.038	1961.53	-1.6714	0.86963	0.11963	-31.056	33.1448	138.748	-0.24609	0.20654	-0.067383
2.016	12.511	-92.923	1346.96	-1.3647	0.85596	0.17432	29.617	114.091	1581.3923	-1.2285	0.80371	-0.28076	13.194	17.846	1452.3	-1.125	0.63477	0.26807	-16.042	-182.288	1355.42	-0.43311	0.46973	-0.022949	-108.975	-59.214	2159.78	-1.9311	0.90089	0.15381	-210.631	25.386	1950.63	-1.6304	0.87158	0.12451	-14.129	32.8464	120.961	-0.23975	0.20654	-0.064941
2.018	40.407	-55.4523	1376.06	-1.3229	0.86108	0.1726	-1.047	127.965	1545.837	-1.2027	0.79981	-0.27422	22.467	3.18	1420.99	-1.0625	0.62793	0.25439	-3.32000000000001	-187.081	1357.7	-0.40478	0.47583	-0.039551	-86.861	-66.0128	2162.409	-1.9371	0.89844	0.15597	-195.829	35.756	1915.94	-1.6133	0.86816	0.12158	-12.057	34.746	113.746	-0.23242	0.2002	-0.063965
2.02	56.815	-31.216	1430.91	-1.2891	0.84277	0.16455	-19.03	143.102	1519.8537	-1.1762	0.79941	-0.2669	14.803	-19.428	1393.23	-0.98558	0.61841	0.24561	-39.171	-184.767	1385.17	-0.40283	0.48242	-0.047852	-64.722	-66.8374	2163.212	-1.9375	0.89648	0.15723	-227.122	37.105	1884.13	-1.5703	0.86328	0.12402	3.825	32.226	117.467	-0.21484	0.19531	-0.058594
2.022	92.943	-5.46	1453.79	-1.2441	0.7998	0.15625	-40.98	149.144	1480.5864	-1.1527	0.79004	-0.25947	47.086	-67.83	1374.34	-0.90234	0.61719	0.22803	-45.379	-166.99	1412.04	-0.46826	0.47705	-0.061523	-76.956	-62.25439	2145.31	-1.942	0.89548	0.16536	-218.201	33.291	1872.93	-1.541	0.86621	0.1228	8.546	32.081	130.397	-0.19677	0.1914	-0.056397
2.024	87.561	-5.325	1453.26	-1.2168	0.7793	0.15137	-69.035	134.878	1459.637	-1.1261	0.78389	-0.25615	56.62	-117.421	1387.27	-0.80322	0.604	0.20801	-52.659	-143.736	1438.38	-0.51953	0.47363	-0.061523	-59.368	-56.0646	2133.09	-1.9456	0.89507	0.17007	-207.265	41.579	1854.5	-1.5059	0.85938	0.1167	16.611	14.2218	133.213	-0.17822	0.18896	-0.053711
2.026	83.401	-20.3906	1441.8	-1.1528	0.72314	0.15039	-80.83	120.529	1437.781	-1.1055	0.77734	-0.2373	65.078	-166.116	1417.33	-0.76416	0.6001	0.19531	-70.362	-127.812	1465.64	-0.65723	0.46826	-0.047363	-68.366	-41.2027	2122.427	-1.944	0.89818	0.17357	-174.926	50.031	1830.31	-1.457	0.85156	0.10986	15.308	1.4142	120.068	-0.15723	0.18115	-0.053223
2.028	81.197	-42.772	1415.74	-1.0877	0.67652	0.15185	-58.249	120.792	1410.011	-1.0844	0.77422	-0.23086	42.056	-206.154	1428.49	-0.70801	0.58398	0.17529	-97.894	-127.419	1489.59	-0.77173	0.47388	-0.025879	-55.842	-30.894	2115.33	-1.9407	0.9006	0.18234	-199.421	47.535	1808.51	-1.4351	0.8501	0.10498	35.358	3.61	107.2968	-0.15332	0.1748	-0.053223
2.03	79.226	-64.244	1377.45	-1.0083	0.63232	0.14648	-43.815	129.4	1381.625	-1.0633	0.76485	-0.22617	29.289	-225.484	1434.02	-0.69531	0.57911	0.16382	-103.952	-113.119	1501.85	-0.88232	0.48682	-0.0073242	-56.388	-36.8157	2099.77	-1.9326	0.9043	0.18457	-157.757	44.337	1788.59	-1.3789	0.8457	0.10205	26.283	15.235	123.158	-0.13184	0.16113	-0.053223
2.032	49.652	-111.018	1354.66	-0.8999	0.58447	0.13818	-58.362	126.704	1341.1057	-1.0406	0.7625	-0.21289	-35.917	-230.033	1472.74	-0.71094	0.57227	0.14746	-111.878	-108.195	1527.51	-1.0015	0.51221	0.028809	-29.448	-40.4803	2076.124	-1.9189	0.90152	0.19291	-136.439	56.325	1778.36	-1.3387	0.84302	0.096436	9.299	4.838	109.9459	-0.12159	0.15503	-0.053467
2.034	66.892	-136.758	1340.25	-0.82715	0.55372	0.12158	-64.72	115.389	1308.8171	-1.0236	0.75723	-0.20332	-71.153	-217.019	1508.22	-0.7749	0.57666	0.13965	-118.336	-119.176	1554.08	-1.0449	0.52539	0.037598	-43.131	-47.74	2062.77	-1.9068	0.90069	0.19569	-115.7987	82.466	1753.82	-1.3047	0.83789	0.088867	-21.858	-8.146	118.5075	-0.11572	0.1499	-0.053223
2.036	54.486	-157.09	1328.73	-0.76465	0.52979	0.10498	-37.894	126.527	1282.0203	-0.99707	0.75	-0.19336	-84.689	-185.681	1525.89	-0.82031	0.58789	0.13672	-134.071	-147.357	1566.36	-1.1128	0.55811	0.053223	-60.379	-41.997	2038.31	-1.8931	0.89629	0.19894	-124.041	93.8856	1727.21	-1.2534	0.82471	0.077637	-19.674	-7.404	109.5248	-0.10254	0.14551	-0.056152
2.038	21.049	-181.156	1345.2	-0.70459	0.50928	0.063965	-23.994	126.549	1245.6275	-0.975	0.74023	-0.18125	-117.743	-152.264	1544.96	-0.91797	0.59863	0.1543	-135.959	-166.37	1580.79	-1.1482	0.57153	0.056153	-81.582	-37.366	2017.442	-1.8774	0.89099	0.20457	-81.347	89.6889	1703.58	-1.2324	0.82227	0.081055	-28.248	-25.883	128.3456	-0.096191	0.13867	-0.053711
2.04	-56.804	-216.602	1379.4	-0.69092	0.49854	0.048828	-16.056	104.3871	1233.8731	-0.9501	0.73643	-0.16982	-125.5415	-136.965	1587.72	-1.0288	0.62744	0.17578	-122.299	-189.23	1615.66	-1.1772	0.57959	0.05957	-95.184	-12.99109	2000.437	-1.8633	0.88086	0.21094	-72.537	89.4778	1687.02	-1.189	0.81104	0.069824	-33.443	-38.618	145.561	-0.088867	0.13428	-0.050293
2.042	-74.746	-213.68	1427.68	-0.6875	0.49219	-0.00097656	5.122	95.4285	1213.461	-0.92549	0.72354	-0.16006	-127.1275	-134.946	1620.65	-1.0796	0.63477	0.18652	-100.006	-198.427	1642.25	-1.2026	0.58643	0.053223	-117.517	1.2252	1989.195	-1.8429	0.87594	0.2123	-83.569	99.294	1661.07	-1.1626	0.80029	0.067139	-42.617	-57.8189	158.163	-0.08667	0.13232	-0.048828
2.044	-105.78	-177.881	1444.6	-0.71582	0.49756	-0.02539	17.597	104.703	1187.167	-0.90459	0.71377	-0.15029	-135.2144	-153.152	1656.66	-1.168	0.65625	0.21143	-116.062	-197.325	1680.67	-1.2207	0.58887	0.046875	-127.405	4.0864	1976.03	-1.8231	0.86819	0.21844	-71.178	114.175	1629.56	-1.1304	0.79346	0.063965	-57.1	-55.256	156.779298	-0.078125	0.13477	-0.047363
2.046	-138.75756	-176.183	1464.17	-0.7666	0.50977	-0.036133	32.287	118.1818	1161.565	-0.87646	0.69775	-0.13965	-158.527	-161.715	1666.2	-1.2188	0.66895	0.23145	-131.855	-180.729	1719.34	-1.2534	0.5791	0.037109	-133.398	8.0955	1961.571	-1.8051	0.86236	0.22566	-55.57	114.645	1610.84	-1.1016	0.77832	0.060059	-70.532	-64.648	181.7261	-0.083496	0.13525	-0.047852
2.048	-183.264	-167.342	1493.78	-0.86279	0.55908	-0.032715	51.48	126.3254	1126.3127	-0.85879	0.68418	-0.12832	-159.176	-187.628	1681.66	-1.2515	0.68018	0.24414	-154.839	-176.403	1754.52	-1.281	0.57251	0.01709	-167.57402	0.431000000000001	1928.385	-1.7819	0.85791	0.23084	-60.924	101.29601	1577.66	-1.0801	0.76855	0.056152	-76.777	-78.32	212.7596	-0.088379	0.1333	-0.051758
2.05	-166.4341	-151.969	1522.93	-0.9165	0.59033	-0.026367	73.412	136.9656	1089.433	-0.84082	0.67071	-0.12051	-171.596	-189.041	1693.47	-1.271	0.68506	0.25781	-149.19	-151.714	1799.83	-1.3091	0.56982	0.003418	-179.3253	6.224	1902.647	-1.7554	0.85205	0.23193	-86.6513	92.78681	1546.73	-1.0469	0.75781	0.059082	-62.523	-87.266	243.298	-0.12012	0.13574	-0.049805
2.052	-163.563	-137.176	1557.48	-1.0234	0.66504	0.0024414	65.932	139.475	1048.777	-0.81895	0.65664	-0.11035	-170.919	-186.995	1729.58	-1.2754	0.68945	0.26416	-145.866	-139.67	1822.03	-1.3477	0.5752	-0.015137	-181.0016	15.698	1878.357	-1.7212	0.85156	0.23487	-61.837	90.5325	1510.01	-1.0164	0.75073	0.051514	-74.402	-88.69	286.685	-0.15966	0.14429	-0.046387
2.054	-163.161	-150.928	1584.46	-1.0799	0.72095	0.024658	47.925	130.419	1021.283	-0.79795	0.63799	-0.097461	-179.381	-181.687	1764.54	-1.2729	0.68994	0.26221	-131.429	-133.099	1830.14	-1.3574	0.58496	-0.024902	-179.81	24.85	1864.138	-1.6864	0.84367	0.23361	-62.489	113.25	1487.22	-0.98828	0.74316	0.04834	-58.727	-90.205	337.151	-0.21826	0.1499	-0.04541
2.056	-166.632	-179.05	1621.39	-1.1221	0.7793	0.054199	74.912	129.187	993.7132	-0.77783	0.62158	-0.083496	-175.825	-181.698	1817.63	-1.2829	0.68188	0.25171	-125.938	-127.525	1839.27	-1.375	0.61328	-0.044434	-180.111	41.234	1841.363	-1.6536	0.84781	0.23801	-83.3352	119.703	1468.54	-0.94482	0.7251	0.040527	-60.266	-64.436	408.7068	-0.31641	0.16406	-0.036133
2.058	-130.205341	-201.663	1634.89	-1.1499	0.84033	0.092285	74.732	146.488	972.0768	-0.75761	0.6041	-0.071582	-175.337	-181.166	1868.44	-1.3022	0.68408	0.24658	-115.657	-118.478	1858.98	-1.3787	0.63208	-0.05835	-158.682	30.103	1830.702	-1.6174	0.84309	0.23764	-108.399	117.537	1441.54	-0.92529	0.72119	0.037109	-25.321	-32.956	496.8591	-0.37158	0.16895	-0.028809
2.06	-170.92	-214.038	1656.36	-1.1577	0.86572	0.10742	64.559	137.437	956.1616	-0.73672	0.58731	-0.062012	-178.099	-182.276	1904.9	-1.3438	0.67188	0.23486	-84.29	-118.415	1861.22	-1.3833	0.64502	-0.063965	-131.81	21.075	1805.421	-1.5796	0.83447	0.23438	-97.84789	116.763	1415.88	-0.88135	0.70654	0.033691	-33.213	6.281	610.1544	-0.49561	0.18408	-0.021973
2.062	-155.4828	-215.493	1668.29	-1.1602	0.89258	0.11963	43.153	130.677	938.4824	-0.7125	0.57403	-0.052637	-188.31	-179.715	1934.75	-1.3633	0.6748	0.22998	-77.239	-127.009	1857.85	-1.4063	0.65625	-0.072266	-126.441	32.306	1785.365	-1.536	0.82606	0.23507	-119.736	132.305	1381.41	-0.84913	0.6958	0.024658	-10.691	53.336	735.688	-0.60327	0.19604	-0.01709
2.064	-145.6259	-196.336	1717.93	-1.1638	0.90259	0.11866	18.12	129.019	906.5951	-0.68799	0.56025	-0.04209	-156.5335	-174.46	1962.39	-1.4082	0.68164	0.21875	-66.925	-150.486	1863.05	-1.4385	0.65723	-0.073486	-123.097	43.786	1762.67	-1.4951	0.81705	0.23004	-127.287	134.233	1353.88	-0.82129	0.68164	0.022949	12.519	95.789	857.483	-0.72803	0.21191	-0.012695
2.066	-110.397	-178.041	1750.71	-1.167	0.9043	0.11816	-12.232	133.7614	882.5978	-0.66211	0.54004	-0.035156	-108.009	-165.856	1974.01	-1.4417	0.69653	0.21093	-67.87	-160.568	1889.29	-1.4741	0.65869	-0.062988	-119.936	55.2923	1734.097	-1.4533	0.80402	0.23032	-140.042	145.121	1328.11	-0.78271	0.66455	0.024414	21.711	124.423	939.148	-0.92578	0.23926	0.003418
2.068	-139.0378	-187.529	1796.76	-1.1831	0.88916	0.10352	-37.084	121.6934	851.8788	-0.63916	0.52451	-0.026269	-93.058	-155.643	1976.43	-1.4624	0.71826	0.20117	-62.631	-166.02	1909.91	-1.5386	0.67041	-0.049805	-93.362	61.299	1694.168	-1.4097	0.79489	0.22423	-143.718	155.133	1295.44	-0.76318	0.65088	0.03418	14.865	127.166	1028.7641	-1.043	0.25781	0.012207
2.07	-97.415	-192.16	1834.6	-1.1934	0.88867	0.094727	-43.459	121.1549	840.8298	-0.61241	0.50713	-0.015528	-90.585	-172.975	1985.83	-1.4858	0.75049	0.18945	-69.724	-144.01	1921.84	-1.5698	0.67529	-0.039551	-93.821	73.602	1669.835	-1.3643	0.77637	0.22168	-174.059	149.826	1254.85	-0.74268	0.62256	-0.0053711	12.648	93.144	1148.594	-1.2886	0.31055	0.046387
2.072	-68.396	-188.946	1892.16	-1.2246	0.88281	0.078613	-55.428	131.133	801.16	-0.58936	0.49033	-0.0073242	-41.156	-181.763	1985.47	-1.5	0.76563	0.19043	-65.885	-129.219	1941.12	-1.644	0.70166	-0.027832	-87.384	66.5043	1644.19	-1.325	0.76823	0.22012	-149.316	144.1	1223.98	-0.70386	0.61108	0.0012207	7.364	65.845	1234.928	-1.5288	0.38135	0.091797
2.074	-44.639	-157.86	1909.62	-1.2402	0.88868	0.062988	-90.945	125.626	765.8501	-0.56758	0.47481	-0.0025391	-25.41	-171.359	1994.5	-1.5249	0.79639	0.18896	-91.454	-116.095	1963.3	-1.6926	0.72437	-0.018066	-45.079	64.39148	1621.63	-1.2814	0.75159	0.21678	-134.211	134.811	1201.68	-0.67578	0.59766	0.0039063	10.844	30.64	1278.346	-1.6426	0.43115	0.1123
2.076	-36.911	-159.446	1921.65	-1.248	0.90332	0.052246	-118.5818	110.272	741.2751	-0.5459	0.46045	0.0043945	-18.039	-162.753	2007.5	-1.5586	0.81934	0.19727	-107.94	-121.973	1981.6	-1.7358	0.75244	-0.0039063	-33.963	66.217	1598.227	-1.2393	0.73521	0.21523	-119.966	135.606	1191.74	-0.64746	0.58594	-0.0068359	21.398	-0.662999999999997	1271.343	-1.8145	0.55273	0.14355
2.078	5.369	-163.954	1913.16	-1.25	0.91992	0.031738	-118.8098	114.155	736.0572	-0.52373	0.44112	0.016699	-42.53	-163.024	2026.9	-1.5977	0.83203	0.21143	-126.492	-113.646	1988.87	-1.7808	0.7915	0.0068359	-22.894	71.175	1572.945	-1.202	0.71704	0.21534	-122.515	125.896	1170.13	-0.62793	0.5791	-0.00097656	25.767	-30.181	1281.784	-1.8647	0.66186	0.15454
2.08	-5.537	-170.646	1936.82	-1.2456	0.93408	0.022461	-94.335	130.756	716.7744	-0.5	0.42402	0.025391	-36.498	-155.929	2042.7	-1.6631	0.85938	0.24121	-110.467	-100.243	2010.47	-1.8027	0.80078	0.012695	-23.463	74.788	1540.497	-1.168	0.70117	0.21045	-106.186	129.582	1151.35	-0.60107	0.55322	-0.0073242	-3.743	-51.5321	1299.275	-1.8569	0.78076	0.15332
2.082	-0.766999999999996	-175.493	1935.71	-1.2476	0.95068	0.0087891	-92.129	136.207	689.2537	-0.47539	0.40996	0.038672	-59.548	-135.566	2046	-1.6953	0.875	0.25439	-118.561	-89.405	2028.49	-1.834	0.8252	0.025391	5.636	78.159	1497.143	-1.1286	0.68526	0.20724	-81.3274	149.162	1102.86	-0.58447	0.53418	-0.0092774	-33.523	-69.547	1321.701	-1.748	0.91406	0.13672
2.084	0.908000000000001	-172.03	1932.84	-1.2563	0.96045	0.0029297	-100.4263	144.99	665.1962	-0.4457	0.39297	0.041895	-76.056	-128	2076.3	-1.7671	0.89893	0.2793	-108.637	-92.435	2045.53	-1.8464	0.83862	0.029053	-13.677	80.0556	1470.378	-1.0947	0.66691	0.20185	-80.8073	143.928	1093.56	-0.57568	0.51611	-0.013184	-39.3966	-83.682	1317.94721	-1.6479	0.97119	0.12207
2.086	-16.283	-165.139	1976.51	-1.2734	0.97266	-0.0019531	-91.685	158.052	631.77092	-0.41797	0.37793	0.05127	-95.653	-109.707	2110	-1.8161	0.92358	0.30078	-114.365	-102.788	2023.49	-1.8535	0.8501	0.02832	-35.071	73.70255	1449.44	-1.0618	0.65129	0.19952	-61.5833	138.987	1052.77	-0.56006	0.49463	-0.015625	-64.867	-88.603	1334.77	-1.4106	1.0415	0.086426
2.088	-56.873	-161.5859	1999.57	-1.3159	0.98779	0.0097656	-99.735	151.258	611.7826	-0.38545	0.36387	0.058106	-104.727	-94.072	2146.7	-1.8574	0.94531	0.31934	-123.048	-90.967	2018.61	-1.8569	0.854	0.040039	-55.091	73.714	1433.86	-1.0355	0.63682	0.19414	-57.9785	133.343	1030.13	-0.54785	0.48633	-0.018066	-124.675	-92.464	1367.935	-1.2185	1.0413	0.050537
2.09	-68.727	-171.483	2011.36	-1.3403	0.99268	0.01123	-87.797	140.225	603.219	-0.35918	0.34512	0.063281	-136.5983	-80.153	2164.7	-1.9053	0.97949	0.34229	-143.462	-85.425	2024.98	-1.8545	0.85352	0.044434	-57.894	88.00686	1402.645	-1.0083	0.62549	0.18848	-42.3	140.934	986.83	-0.52686	0.46143	-0.015137	-170.92	-78.4015	1398.362	-1.0508	0.99707	0.0068359
2.092	-79.966	-161.3832	2025.28	-1.4155	1.0122	0.035156	-58.125	139.725	578.878	-0.33379	0.3291	0.070703	-142.2197	-88.083	2166.8	-1.9214	0.98877	0.34961	-152.7441	-83.874	2058.95	-1.8457	0.85352	0.046387	-88.399	110.7655	1371.879	-0.97499	0.61543	0.18379	-43.8163	139.98	975.44	-0.51001	0.45117	-0.019776	-171.83	-37.635	1401.793	-0.88184	0.88867	-0.050293
2.094	-97.392	-133.2339	2065.92	-1.4797	1.0315	0.051758	-37.807	138.378	554.1255	-0.30576	0.31397	0.070605	-146.38209	-93.339	2160.4	-1.9468	1.0024	0.36523	-151.7271	-73.971	2051.05	-1.8387	0.84302	0.051026	-92.688	120.83	1337.3	-0.9454	0.60556	0.18047	-9.493	135.781	957.44	-0.48926	0.43799	-0.024414	-171.482	4.544	1404.2066	-0.81201	0.81689	-0.079102
2.096	-96.089	-114.2633	2083.92	-1.5405	1.0591	0.067871	-44.402	116.38	555.327	-0.27979	0.29541	0.072266	-145.4104	-109.59	2161	-1.9551	1.0049	0.37011	-160.0228	-66.7198	2052.71	-1.8359	0.83789	0.053223	-87.864	123.44	1298.889	-0.91063	0.59423	0.17343	-1.03599999999999	136.375	933.66	-0.45703	0.41797	-0.025391	-156.583	7.748	1406.3039	-0.72119	0.66748	-0.11816
2.098	-137.2749	-122.9768	2111.62	-1.6187	1.0981	0.084961	-21.214	111.768	526.4097	-0.25908	0.28008	0.075586	-165.792	-119.7199	2162.6	-1.9644	1.0044	0.37305	-147.3574	-54.2334	2057.18	-1.8335	0.82471	0.054199	-89.714	124.669	1265.448	-0.88066	0.58389	0.1669	-1.208	138.609	888.35	-0.44092	0.40479	-0.031738	-165.862	-26.19	1428.258	-0.67114	0.55737	-0.13843
2.1	-146.4	-115.0873	2113.92	-1.6538	1.1177	0.09375	16.156	127.822	514.4822	-0.23994	0.2665	0.079395	-173.188	-117.709	2175.9	-1.9683	1.0044	0.37988	-158.0397	-58.7899	2073.77	-1.8379	0.81934	0.061523	-125.0861	113.546	1247.359	-0.85156	0.57715	0.15771	-0.0970000000000013	139.683	861.36	-0.41211	0.37891	-0.03418	-156.782	-61.362	1436.8469	-0.64258	0.46875	-0.14746
2.102	-175.111	-119.48	2106.57	-1.7109	1.1523	0.10791	29.146	136.302	490.948	-0.22275	0.25556	0.07666	-186.836	-102.2604	2181	-1.9702	1.0024	0.38086	-166.4097	-39.6037	2068.65	-1.8398	0.79688	0.064941	-104.479	98.253	1215.219	-0.82129	0.56758	0.15361	7.651	155.306	845.82	-0.39356	0.36157	-0.033935	-150.291	-113.688	1460.3021	-0.63867	0.396	-0.15381
2.104	-190.569	-130.956	2111.22	-1.742	1.1731	0.10229	33.985	120.795	482.9763	-0.2041	0.24433	0.077637	-209.73	-102.7032	2193.9	-1.957	0.99609	0.38525	-149.472	-33.0589	2069.41	-1.8465	0.79516	0.06958	-105.639	103.4645	1186.353	-0.79102	0.55195	0.14395	-9.104	161.565	820.13	-0.37402	0.33789	-0.040039	-122.882	-154.938	1474.6846	-0.63867	0.375	-0.14648
2.106	-206.985	-128.062	2135.23	-1.7656	1.1855	0.10547	48.63	114.45	463.55394	-0.18066	0.23389	0.078125	-229.719	-85.7281	2191.6	-1.9441	0.99194	0.3855	-135.108	-32.9175	2058.5	-1.8477	0.78711	0.073242	-114.415	108.506	1164.773	-0.7625	0.53906	0.14082	-23.953	159.148	787.74	-0.35254	0.31787	-0.043945	-144.499	-176.784	1498.5134	-0.63184	0.37598	-0.14648
2.108	-184.935	-108.342	2124.23	-1.7847	1.1958	0.1001	51.429	111.0672	452.8968	-0.16387	0.22822	0.082227	-217.711	-65.409	2189.7	-1.9253	0.98486	0.38281	-110.17	-42.2527	2061.41	-1.8545	0.77344	0.078125	-141.9671	106.605	1137.236	-0.7333	0.52783	0.13428	-47.725	145.102	753.4	-0.34863	0.30469	-0.04248	-156.472	-200.3305	1522.6031	-0.6355	0.39478	-0.14039
2.11	-212.456	-125.711	2114.18	-1.7949	1.1914	0.09668	38.885	104.043	436.31019	-0.14883	0.22207	0.085742	-220.202	-39.721	2189.5	-1.9121	0.97461	0.39014	-101.722	-40.9224	2051.93	-1.8535	0.76855	0.080566	-111.607	115.648	1096.938	-0.70313	0.51758	0.12793	-58.8362	149.747	724.56	-0.3252	0.28418	-0.051758	-150.893	-241.065	1551.10918	-0.65186	0.4292	-0.13428
2.112	-226.594	-127.599	2135.45	-1.7964	1.188	0.080078	22.528	94.5627	431.417	-0.12813	0.2209	0.085352	-202.712	-28.669	2195.8	-1.9023	0.9668	0.38965	-96.317	-32.835	2040.95	-1.8452	0.76904	0.083496	-118.975	125.9442	1074.273	-0.67354	0.50107	0.11865	-65.052	150.451	714.28	-0.30932	0.27026	-0.054444	-126.6193	-251.937	1581.5898	-0.71191	0.48633	-0.10547
2.114	-198.801	-114.059	2151.88	-1.7937	1.1673	0.080567	11.617	99.591	412.392	-0.11113	0.21133	0.089551	-168.942	-25.752	2187.7	-1.8901	0.95361	0.39258	-79.599	-23.539	2041.67	-1.8361	0.76099	0.077149	-122.546	137.1169	1057.06	-0.64414	0.48945	0.11113	-90.1798	146.421	705.7	-0.29785	0.25488	-0.05127	-101.3534	-227.401	1620.2108	-0.76172	0.52148	-0.09375
2.116	-154.666	-84.295	2165.96	-1.7905	1.1489	0.070313	-19.506	117.724	386.3254	-0.09375	0.2085	0.089355	-127.0579	-28.664	2171.5	-1.8757	0.94458	0.39331	-78.994	-15.83	2020.43	-1.8218	0.75732	0.078125	-80.889	125.8109	1047.79	-0.61601	0.47773	0.10723	-74.1756	146.178	676.93	-0.28027	0.24121	-0.061523	-57.693	-191.859	1668.735	-0.89404	0.59814	-0.052246
2.118	-153.366	-79.504	2173.63	-1.7769	1.1255	0.066895	-35.757	119.601	361.5453	-0.072949	0.20625	0.086133	-110.743	-47.713	2161.1	-1.8647	0.93408	0.39551	-93.936	-9.526	2005.84	-1.7964	0.75244	0.078125	-52.18	123.0246	1014.983	-0.58359	0.45899	0.096974	-73.5894	154.343	653.3	-0.27051	0.23193	-0.060059	0.783999999999999	-160.76969	1707.882	-0.99953	0.63916	-0.02417
2.12	-138.3084	-77.078	2174.12	-1.7637	1.1133	0.061523	-40.964	120.356	350.8915	-0.051855	0.20381	0.087109	-86.913	-57.655	2168	-1.8374	0.93213	0.396	-92.677	-1.886	1990.54	-1.7788	0.74658	0.078613	-56.826	113.738	984.506	-0.55176	0.44434	0.090332	-79.4411	134.327	643.66	-0.25293	0.22119	-0.0625	24.733	-138.179	1725.981	-1.103	0.69092	0.0029297
2.122	-126.57968	-55.932	2158.19	-1.7383	1.0947	0.051758	-44.856	132.557	341.783	-0.032324	0.19639	0.088281	-65.97	-58.797	2168.9	-1.8262	0.92578	0.39551	-78.4	10.759	1991.87	-1.751	0.73047	0.07373	-46.162	110.51	963.505	-0.52402	0.43027	0.083691	-105.19	116.58	622.78	-0.23608	0.208	-0.065674	75.678	-123.968	1733.9563	-1.2168	0.75977	0.036621
2.124	-98.224	-48.699	2143.29	-1.7217	1.0737	0.044678	-53.274	115.844	335.198	-0.014062	0.19219	0.083496	-55.793	-50.535	2134.3	-1.793	0.91992	0.39502	-82.36	28.736	1976.6	-1.7292	0.71704	0.075928	5.82000000000001	114.817	946.84	-0.49922	0.41191	0.078809	-81.452	122.785	587.99	-0.21777	0.19824	-0.067383	90.082	-139.761	1770.88	-1.2637	0.79395	0.049316
2.126	-99.177	-55.245	2135.06	-1.7051	1.0547	0.036133	-79.1372	95.174	319.1433	0.00048828	0.18799	0.087891	-60.46	-45.3544	2108.6	-1.7671	0.91358	0.38916	-93.662	32.695	1972.21	-1.7065	0.70557	0.075195	8.09999999999999	132.7777	915.441	-0.47734	0.3955	0.074121	-97.57246	127.773	571.76	-0.19336	0.19092	-0.071777	133.3746	-138.523	1787.127	-1.3145	0.85059	0.060547
2.128	-43.05	-56.407	2150.46	-1.6831	1.0435	0.03125	-85.206	87.946	305.8245	0.016504	0.18682	0.08291	-71.613	-26.1167	2096.1	-1.7422	0.9082	0.38525	-75.993	24.761	1940.73	-1.6792	0.68701	0.069824	6.86399999999999	132.8879	893.657	-0.45967	0.37705	0.061914	-97.6192	130.75	549.67	-0.18164	0.18213	-0.075684	120.66856	-143.842	1797.176	-1.3155	0.87647	0.058349
2.13	-43.393	-58.109	2134.05	-1.6733	1.0337	0.026367	-124.4567	93.13	294.5442	0.027539	0.18223	0.078027	-61.138	-16.5208	2092.7	-1.7065	0.89502	0.375	-81.7	15.45	1933.63	-1.6636	0.68213	0.068359	18.227	125.0514	872.189	-0.4458	0.36377	0.054199	-98.2066	134.1	545.4	-0.15381	0.16943	-0.083496	102.4841	-154.494	1783.579	-1.2949	0.88867	0.053711
2.132	-56.182	-67.269	2142.55	-1.6538	1.0249	0.017578	-127.59683	91.911	290.8208	0.036132	0.17871	0.075293	-81.478	-6.666	2075.91	-1.6899	0.88916	0.37207	-80.08	22.911	1916.73	-1.627	0.67188	0.068848	27.202	120.4466	840.334	-0.42647	0.34346	0.047754	-81.318	132.429	515.64	-0.13354	0.16137	-0.081787	65.473	-184.2646	1800.721	-1.249	0.85938	0.030762
2.134	-51.77	-59.547	2146.81	-1.6423	1.0217	0.016846	-104.942	87.624	284.624	0.038477	0.17647	0.076367	-61.425	-15.807	2067.97	-1.6504	0.875	0.36035	-80.625	17.163	1901.51	-1.5993	0.66284	0.070557	1.299	132.4193	819.343	-0.40781	0.32813	0.047363	-83.44589	123.558	499.04	-0.1167	0.14941	-0.086426	68.817	-202.172	1810.044	-1.2183	0.83838	0.016113
2.136	-25.071	-48.854	2126.78	-1.6304	1.022	0.018555	-112.74228	90.967	254.5296	0.039551	0.17188	0.07373	-50.262	-16.6	2055.94	-1.6267	0.86938	0.36255	-80.057	25.165	1875.11	-1.5776	0.65576	0.069824	-4.869	130.851	794.05	-0.39531	0.31485	0.037207	-48.984	125.629	483.89	-0.092773	0.13477	-0.087402	44.797	-218.937	1831.023	-1.1816	0.77539	-0.01709
2.138	-33.255	-34.879	2111.01	-1.625	1.0283	0.019043	-131.35	81.352	259.9831	0.034375	0.16943	0.067871	-35.9	1.861	2046.05	-1.5996	0.85938	0.35254	-101.489	33.451	1849.83	-1.5405	0.65088	0.071777	10.379	141.1101	767.776	-0.38516	0.30185	0.03291	-17.605	135.183	485.69	-0.084961	0.13184	-0.091797	42.836	-212.412	1856.383	-1.1834	0.73511	-0.026856
2.14	-60.061	-42.44	2094.77	-1.6187	1.0259	0.023926	-113.35081	72.391	238.1331	0.027832	0.16582	0.065918	-65.552	18.334	2003.11	-1.5645	0.84961	0.34033	-116.247	27.29	1829.96	-1.5269	0.65088	0.065918	8.41799999999999	148.69769	752.8	-0.375	0.28711	0.023438	-17.568	137.043	463.2	-0.069824	0.12012	-0.099121	22.177	-214.45	1892.25	-1.1948	0.69971	-0.026855
2.142	-70.813	-24.829	2089.9	-1.6147	1.0337	0.030273	-88.839	67.395	245.193	0.018456	0.16425	0.06123	-88.665	12.287	1968.31	-1.5508	0.84375	0.34229	-137.0245	23.778	1819.17	-1.4863	0.65137	0.06543	-24.697	146.1487	728.819	-0.36299	0.27891	0.021094	-8.937	120.209	441.47	-0.065918	0.10962	-0.10132	12.261	-196.538	1927.079	-1.2578	0.6709	-0.017578
2.144	-61.924	-4.985	2081.02	-1.6082	1.0305	0.038086	-60.672	82.397	235.765	0.0072259	0.1626	0.057715	-94.506	19.1701	1940.07	-1.5156	0.83203	0.32666	-155.91463	40.276	1810.11	-1.4565	0.64746	0.064941	-1.741	133.3424	715.96	-0.34795	0.26806	0.0091797	7.399	112.743	425.03	-0.061035	0.10156	-0.104	-27.245	-195.7766	1958.549	-1.2871	0.66309	-0.00048828
2.146	-106.1146	-2.058	2058.26	-1.604	1.0356	0.045898	-41.55	58.315	230.3126	-0.0024414	0.16846	0.061035	-120.4729	15.8625	1921.75	-1.4893	0.82666	0.31934	-147.1279	42.314	1801.39	-1.4336	0.64648	0.064941	-7.21700000000001	139.2454	685.312	-0.33389	0.25674	0.0052734	25.369	121.617	404.29	-0.060547	0.095215	-0.10742	-27.852	-189.286	1966.137	-1.3511	0.6665	0.0097656
2.148	-110.9576	-13.846	2040	-1.5933	1.0376	0.052246	-29.14	57.692	218.58168	-0.017381	0.17139	0.055665	-162.626	14.1158	1889.78	-1.4624	0.8208	0.30811	-152.2786	49.936	1764.34	-1.3882	0.64502	0.064941	-36.805	148.3662	673.165	-0.3167	0.24971	-0.0032226	3.147	123.525	394.96	-0.060059	0.092285	-0.10986	-36.782	-164.665	1962.8305	-1.3894	0.67944	0.012695
2.15	-120.7363	-10.618	2033.65	-1.5864	1.0376	0.057617	-6.702	52.446	214.14	-0.028905	0.17793	0.061718	-172.6	18.3086	1878.09	-1.4272	0.80908	0.29883	-144.1004	48.699	1737.23	-1.3691	0.64453	0.06543	-62.84	135.3031	657.55	-0.30273	0.23975	-0.012207	7.922	112.528	381.6	-0.063477	0.086914	-0.11084	-68.608	-144.433	1970.014	-1.4141	0.71094	0.011719
2.152	-138.6673	-7.48899999999999	1996.64	-1.5742	1.0371	0.070313	-2.346	59.86	198.60867	-0.033593	0.18144	0.059767	-188.197	15.598	1869.08	-1.4092	0.80664	0.29395	-132.2723	65.0191	1720.07	-1.3262	0.64844	0.061035	-59.237	115.845	651.723	-0.28388	0.23125	-0.014551	3.59399999999999	114.629	370.03	-0.064453	0.084961	-0.10498	-113.467	-139.931	1964.2106	-1.4375	0.75781	0.0058594
2.154	-182.256	4.682	1966.75	-1.5594	1.0315	0.074707	14.574	60.952	201.9798	-0.031642	0.18808	0.061132	-201.089	15.424	1856.06	-1.377	0.80273	0.28516	-115.696	64.018	1687.83	-1.2876	0.64257	0.057617	-89.057	109.292	629.095	-0.26885	0.21982	-0.024805	12.332	119.211	355.5	-0.067383	0.087402	-0.11133	-124.01	-130.211	1974.8327	-1.4453	0.78125	0.0029297
2.156	-170.528	6.829	1948.44	-1.5469	1.0273	0.078613	18.459	68.362	187.9446	-0.029297	0.19434	0.062012	-210.902	11.054	1814.23	-1.3535	0.79737	0.28149	-113.555	65.205	1664.24	-1.2617	0.6416	0.058594	-98.484	109.613	611.914	-0.254	0.20889	-0.027539	-12.33	105.91	352.67	-0.078125	0.083496	-0.11279	-132.492	-114.705	1956.697	-1.4414	0.82227	-0.0063477
2.158	-169.772	19.703	1945.06	-1.5254	1.0273	0.083008	25.953	57.7299	173.6912	-0.024704	0.2	0.059669	-185.066	24.2109	1775.65	-1.3257	0.7915	0.27734	-95.523	69.799	1640.59	-1.2212	0.63428	0.054688	-91.281	92.593	579.369	-0.23896	0.20527	-0.033008	21.246	100.133	323.84	-0.091065	0.088379	-0.11035	-125.5428	-121.071	1957.584	-1.4409	0.84033	-0.013916
2.16	-187.421	12.775	1926.99	-1.5098	1.0176	0.081055	9.728	49.7187	167.1242	-0.01884	0.20284	0.057908	-165.476	38.572	1745.13	-1.2969	0.7793	0.27588	-106.549	74.237	1625.64	-1.2031	0.62793	0.05957	-101.7187	117.5436	556.634	-0.22559	0.19678	-0.037598	-7.053	98.51	318.95	-0.097656	0.091797	-0.11621	-125.463	-137.5173	1978.408	-1.4429	0.8501	-0.022949
2.162	-199.476	-1.649	1910.02	-1.4761	1.0161	0.082031	37.497	37.3593	159.466	-0.012203	0.20635	0.059086	-159.138	40.762	1738.78	-1.2813	0.77539	0.27734	-89.367	71.91	1610.9	-1.1719	0.61523	0.063965	-108.59843	127.4257	544.586	-0.21455	0.18272	-0.036816	-10.014	104.045	307.26	-0.10889	0.097656	-0.11475	-94.882	-133.7833	1987.3433	-1.459	0.86816	-0.036621
2.164	-187.938	14.415	1893.65	-1.4524	1.0071	0.078858	28.43	50.6778	158.03872	-0.0094701	0.20371	0.056734	-137.307	29.9821	1719.85	-1.2495	0.76025	0.27344	-106.326	76.2225	1586.72	-1.149	0.61133	0.057373	-88.224	127.5771	536.754	-0.2123	0.16963	-0.036719	-44.636	89.64	300.33	-0.12061	0.099121	-0.12012	-64.922	-104.552	1995.4042	-1.4692	0.87744	-0.044922
2.166	-165.179	41.309	1877.65	-1.4253	1.0044	0.081055	22.267	46.0923	158.5399	-0.0063477	0.20313	0.055664	-123.4845	32.907	1677.81	-1.2168	0.75	0.27221	-90.606	83.5326	1557.72	-1.127	0.60156	0.056641	-61.869	114.3892	522.955	-0.20527	0.15869	-0.0375	-11.812	101.024	295.37	-0.1333	0.10547	-0.11475	-26.981	-90.339	2028.5566	-1.4897	0.88525	-0.050781
2.168	-165.625	51.166	1827.65	-1.394	0.99463	0.084473	2.94	40.1906	160.7488	-0.0079139	0.2003	0.049811	-121.2569	41.5972	1641.59	-1.1909	0.74072	0.26904	-92.831	92.0445	1544.99	-1.0972	0.58936	0.054688	-48.412	111.183	519.646	-0.20508	0.15098	-0.03584	-58.587	94.481	294.24	-0.14184	0.11109	-0.11474	-6.93300000000001	-95.326	2047.72042	-1.5061	0.89184	-0.060302
2.17	-142.76	45.428	1810.72	-1.3686	0.98388	0.078125	11.618	47.272	142.5621	-0.017173	0.1968	0.050388	-110.32513	50.057	1615.21	-1.1494	0.72852	0.26221	-74.433	93.61051	1519.62	-1.0835	0.58643	0.053223	-49.908	95.426	512.352	-0.20801	0.14502	-0.033203	-79.274	83.38973	273.03	-0.14795	0.11475	-0.11572	44.61	-115.845	2066.1775	-1.5195	0.89648	-0.064941
2.172	-127.2002	42.963	1782.46	-1.3379	0.97656	0.075195	-24.833	49.452	138.8231	-0.025343	0.18745	0.052331	-81.824	66.178	1582.02	-1.1294	0.71924	0.26123	-66.039	96.1238	1500.4	-1.0601	0.57666	0.049805	-27.952	87.213	499.886	-0.21094	0.13711	-0.031934	-83.6067	72.7575	260.18	-0.16406	0.12695	-0.11719	51.298	-133.026	2050.7931	-1.5293	0.8999	-0.074707
2.174	-111.1748	31.181	1759.22	-1.2983	0.95752	0.074707	-49.256	36.349	142.461	-0.033449	0.18173	0.056025	-79.068	87.645	1542.23	-1.0972	0.69775	0.25	-53.958	110.429	1476.18	-1.0298	0.57568	0.050781	-21.463	106.933	462.007	-0.21055	0.1332	-0.029102	-84.4767	90.746	241.435	-0.16553	0.12744	-0.11426	77.308	-129.165	2067.402	-1.5332	0.90039	-0.074219
2.176	-107.8069	23.126	1745.25	-1.2832	0.95117	0.07959	-67.488	24.3091	140.1153	-0.039551	0.18213	0.057129	-68.529	87.234	1519.31	-1.0722	0.68725	0.24561	-33.512	108.579	1459.69	-1.0049	0.57031	0.049316	-10.113	132.9768	428.782	-0.21211	0.1332	-0.027148	-103.5601	81.79	230.341	-0.17236	0.13916	-0.11328	105.549	-102.2984	2082.8245	-1.5405	0.89307	-0.077637
2.178	-60.348	36.036	1733.13	-1.2441	0.93359	0.074707	-72.119	32.284	120.9289	-0.045708	0.18378	0.06125	-37.485	88.7904	1487.97	-1.0469	0.67578	0.24072	-40.69	102.29	1439.91	-0.9668	0.56445	0.043945	-7.09199999999999	117.9679	417.24	-0.21103	0.13662	-0.024219	-83.236	72.366	223	-0.18335	0.14307	-0.11499	126.152	-78.9462	2090.843	-1.5417	0.88599	-0.080566
2.18	-43.861	60.1811	1712.02	-1.2124	0.92041	0.072998	-96.7186	26.0998	111.48897	-0.04559	0.18311	0.058641	-14.618	96.834	1488.64	-1.0054	0.66064	0.22852	-47.33	98.703	1418.87	-0.95215	0.5625	0.043457	13.302	106.804	395.96	-0.20801	0.13477	-0.022949	-64.686	67.42	219.827	-0.19189	0.15186	-0.1123	112.523	-78.609	2084.591	-1.5425	0.87451	-0.081543
2.182	-48.215	70.3738	1677.49	-1.1812	0.90088	0.071289	-109.7167	8.7159	124.6518	-0.038199	0.18271	0.060949	-18.272	100.299	1473.11	-0.98023	0.64721	0.21485	-63.969	108.336	1380.13	-0.91748	0.55713	0.04248	5.801	110.301	384.836	-0.20713	0.13877	-0.026074	-63.307	70.2216	211.381	-0.20361	0.16064	-0.10498	133.734	-86.695	2067.58657	-1.5522	0.86377	-0.087402
2.184	-56.223	72.806	1639.52	-1.1436	0.88281	0.066895	-92.393	-0.5461	141.493	-0.029488	0.18185	0.060514	-18.059	88.676	1453.33	-0.95264	0.63721	0.20654	-55.535	117.383	1351.18	-0.89331	0.54395	0.033936	15.19	117.4631	377.619	-0.20703	0.14375	-0.024414	-68.594	55.6718	215.376	-0.2124	0.16699	-0.10596	122.195	-81.089	2077.6188	-1.5522	0.86182	-0.090332
2.186	-2.209	88.612	1603.59	-1.1206	0.86865	0.06543	-122.4635	-1.2594	122.002	-0.02002	0.18262	0.060059	9.038	97.214	1414.19	-0.91748	0.6167	0.19189	-73.194	120.413	1325.38	-0.87256	0.53564	0.030762	22.059	94.8982	385.377	-0.20078	0.15039	-0.026367	-56.662	65.0864	219.652	-0.22461	0.17773	-0.097168	111.599	-59.050173	2093.5232	-1.5566	0.85156	-0.098633
2.188	-25.248	103.431	1591.14	-1.0879	0.8418	0.057129	-115.8756	4.2831	118.692	-0.0074313	0.17998	0.061184	3.011	106.104	1378.13	-0.90186	0.60986	0.18359	-82.974	118.137	1290.3	-0.84033	0.52002	0.026855	49.854	92.451	368.511	-0.19463	0.14951	-0.029199	-39.286	74.639	196.172	-0.23316	0.18018	-0.096191	96.874	-32.723	2091.8667	-1.5581	0.85108	-0.10034
2.19	-35.419	93.588	1569.78	-1.059	0.83057	0.060058	-98.2497	-2.52413	117.9038	0.0033884	0.17748	0.0625	-31.656	105.489	1338.01	-0.86768	0.59229	0.16992	-111.442	112.03	1263	-0.82715	0.51367	0.026367	22.476	85.525	353.31	-0.18604	0.14697	-0.03125	-36.767	65.499	185.027	-0.23926	0.1875	-0.094727	123.095	-8.002	2074.0162	-1.5562	0.8501	-0.10254
2.192	-39.505	82.427	1557.96	-1.0371	0.80859	0.055176	-78.998	-1.2768	139.239	0.017741	0.17197	0.059032	-40.76	96.5587	1309.79	-0.84351	0.5752	0.16285	-82.171	122.671	1225.8	-0.79346	0.49951	0.02832	29.95	80.311	323.384	-0.18135	0.14492	-0.034277	-22.876	52.094	176.137	-0.24316	0.20166	-0.088867	86.606	14.317	2066.5124	-1.5522	0.84619	-0.10889
2.194	-41.658	86.306	1521.54	-1.002	0.78418	0.053711	-82.694	-8.0921	141	0.024875	0.17241	0.059082	-59.18	95.1473	1277.79	-0.82275	0.56055	0.15088	-94.272	134.904	1219.22	-0.76587	0.48462	0.021972	11.707	88.8324	326.4	-0.17675	0.14111	-0.037012	-23.176	48.4684	168.872	-0.23877	0.2002	-0.088379	44.904	6.718	2062.0261	-1.5444	0.84814	-0.11279
2.196	-82.866	69.611	1504.54	-0.98926	0.76953	0.05127	-62.545	-25.196	127.336	0.027832	0.16406	0.055664	-87.979	87.7286	1259.75	-0.79639	0.54346	0.14014	-88.94	141.112	1198.94	-0.73975	0.47607	0.023438	2.89300000000001	113.211	306.101	-0.17011	0.13565	-0.04248	-5.113	50.3876	170.518	-0.23535	0.20361	-0.085938	20.96	-13.113	2075.616	-1.5313	0.84375	-0.12207
2.198	-61.816	69.195	1474.77	-0.96387	0.74512	0.04834	-48.176	-25.8288	143.112	0.027616	0.16256	0.059509	-109.8225	86.924	1245.99	-0.77539	0.52979	0.13037	-95.967	130.86	1181.21	-0.69873	0.4585	0.015625	-32.155	104.8207	308.26	-0.17012	0.13427	-0.045215	5.251	36.467	163.806	-0.23218	0.20776	-0.085205	18.703	-26.594	2071.568	-1.5181	0.84033	-0.12792
2.2	-59.361	84.808	1439.54	-0.93945	0.72705	0.045898	-28.87	-24.4932	154.767	0.023206	0.1607	0.056588	-94.7496	100.15	1231.78	-0.74951	0.51514	0.11865	-71.74	132.851	1152.86	-0.68115	0.45166	0.0078125	-30.44	79.7315	285.482	-0.17041	0.12695	-0.047852	22.887	32.7652	159.135	-0.23193	0.2085	-0.083496	-21.03	-25.079	2052.592	-1.5063	0.83643	-0.13379
2.202	-89.6996	104.299	1402.76	-0.91553	0.71143	0.043945	-31.052	-48.6064	174.124	0.012182	0.15812	0.057796	-95.1984	111.715	1196.95	-0.72632	0.50122	0.10718	-81.791	142.243	1111.55	-0.646	0.43408	0.0068359	-49.681	67.521	287.321	-0.17314	0.12217	-0.051367	30.211	29.0539	173.471	-0.23291	0.20947	-0.086426	-67.317	-33.201	2040.827	-1.481	0.82471	-0.1377
2.204	-112.07	95.008	1373.68	-0.88672	0.68555	0.036621	4.763	-52.2154	175.97	0.0025774	0.15709	0.061252	-120.1912	114.026	1166.75	-0.70117	0.49121	0.097656	-81.091	140.659	1091.53	-0.61084	0.41162	-0.0014648	-62.605	73.928	274.165	-0.17715	0.12325	-0.051367	16.072	23.985	173.025	-0.22852	0.21045	-0.089844	-91.975	-33.9151	2030.937	-1.4766	0.81836	-0.14453
2.206	-110.0677	96.486	1349.5	-0.87305	0.6748	0.031738	10.897	-49.6073	183.8	-0.0048828	0.1582	0.062012	-130.077	127.215	1128.23	-0.66748	0.47412	0.087891	-90.852	142.503	1071.25	-0.59766	0.39844	-0.0063477	-83.973	60.629	257.155	-0.18418	0.1166	-0.050977	20.754	-1.097	166.276	-0.21973	0.20117	-0.094238	-104.3	-28.11	1989.9286	-1.4565	0.80908	-0.14307
2.208	-116.57	104.649	1331.16	-0.84131	0.65674	0.029785	38.642	-38.1233	211.46	-0.015334	0.16509	0.064116	-114.523	140.561	1090.71	-0.64941	0.46631	0.081055	-81.266	143.619	1043.07	-0.56885	0.37744	-0.011719	-66.767	61.569	241.474	-0.1876	0.11172	-0.052441	20.419	8.333	167.322	-0.21241	0.20313	-0.099611	-116.843	-31.563	1969.58	-1.4461	0.80249	-0.14722
2.21	-148.527	109.091	1299.05	-0.81909	0.63843	0.029053	18.791	-27.053	251.445	-0.026077	0.17593	0.063809	-116.5278	142.82	1062.82	-0.62256	0.44824	0.079102	-81.581	145.457	1015.52	-0.54834	0.36402	-0.013916	-72.686	78.978	229.106	-0.19238	0.10938	-0.057129	9.04	12.339	155.717	-0.2002	0.20068	-0.10059	-105.374	-29.213	1967.232	-1.4395	0.79102	-0.14355
2.212	-133.435	112.461	1269.27	-0.79639	0.62354	0.020996	42.02	-10.1508	291.29	-0.042085	0.18339	0.059759	-131.835	129.639	1035.02	-0.60132	0.43286	0.062989	-75.102	136.883	998.6	-0.53223	0.34229	-0.022949	-80.215	74.202	219.796	-0.20342	0.10898	-0.055273	-6.603	6.606	149.332	-0.18213	0.19922	-0.10498	-91.763	-12.034	1979.8888	-1.4409	0.78369	-0.14209
2.214	-157.782	134.371	1245.62	-0.76807	0.59229	0.020508	33.374	23.5085	330.237	-0.062948	0.19682	0.056067	-121.94	123.632	1007.43	-0.58447	0.41846	0.055664	-52.736	125.845	979.98	-0.50195	0.33008	-0.028809	-77.007	60.73	222.47	-0.21093	0.10537	-0.053711	-23.164	-18.866	165.707	-0.16943	0.20264	-0.10986	-73.537	7.687	1972.191	-1.4448	0.78222	-0.1355
2.216	-143.654	139.133	1220.61	-0.75049	0.58154	0.012695	11.89	60.4854	402.09	-0.09375	0.20703	0.053711	-109.3958	122.077	992.55	-0.56543	0.40381	0.04541	-37.316	140.329	964.26	-0.49365	0.31494	-0.028809	-81.939	66.898	209.054	-0.22188	0.10381	-0.051758	-19.538	-16.207	179.026	-0.14893	0.19678	-0.12012	-58.582	14.048	1961.442	-1.4468	0.78174	-0.13623
[truncated: 11,891 more rows]
