# Supplementary material for: Reliability and Validity of Running Cadence and Stance Time Derived from Instrumented Wireless Earbuds
Source: Sensors (Basel). 2021 Nov 30;21(23):7995. doi: 10.3390/s21237995 (PMC8659722; doi:10.3390/s21237995)
Supplement: Supplementary file 1 [file sensors-21-07995-s001.zip › Data_P06_speeds_1.csv]

time	S7kmh_force_plate_1	S7kmh_force_plate_2	S7kmh_force_plate_3	S7kmh_earbuds_1	S7kmh_earbuds_2	S7kmh_earbuds_3	S10kmh_force_plate_1	S10kmh_force_plate_2	S10kmh_force_plate_3	S10kmh_earbuds_1	S10kmh_earbuds_2	S10kmh_earbuds_3	S13kmh_force_plate_1	S13kmh_force_plate_2	S13kmh_force_plate_3	S13kmh_earbuds_1	S13kmh_earbuds_2	S13kmh_earbuds_3	max_force_plate_1	max_force_plate_2	max_force_plate_3	max_earbuds_1	max_earbuds_2	max_earbuds_3
0	-48.266	-24.7658	1090.156	-0.58104	1.1297	0.26552	-102.974	160.878	377.4685	0.0030274	0.39472	0.063281	-36.723	251.3276	671.72	0.047363	0.47656	-0.16309	NaN	NaN	NaN	NaN	NaN	NaN
0.002	-19.511	-8.8071	1129.489	-0.528	1.1198	0.24951	-90.8695	165.376	369.154	0.022558	0.37949	0.068359	-39.697	293.6297	623.9	0.066895	0.4541	-0.13721	NaN	NaN	NaN	NaN	NaN	NaN
0.004	2.33	-15.988	1158.152	-0.49557	1.0999	0.24208	-60.4414	190.411	378.6492	0.039258	0.36728	0.069824	-25.383	256.752	595.88	0.072021	0.44751	-0.21069	NaN	NaN	NaN	NaN	NaN	NaN
0.006	-79.776	-25.16	1208.798	-0.48036	1.0667	0.23359	-94.5587	152.832	332.0366	0.052734	0.35498	0.071777	-13.051	281.78	560.82	0.10352	0.4458	-0.22754	NaN	NaN	NaN	NaN	NaN	NaN
0.008	-49.081	-27.641	1255.79	-0.48291	1.0371	0.23096	-73.165	157.04	334.827	0.069434	0.34395	0.074024	-38.1049	217.179	523.59	0.12793	0.41016	-0.21826	NaN	NaN	NaN	NaN	NaN	NaN
0.01	-73.428	-44.39	1264.112	-0.50055	1.0137	0.23134	-63.31964	144.805	292.492	0.083985	0.33233	0.067285	0.779999999999994	226.396	447.949	0.12744	0.39893	-0.22168	NaN	NaN	NaN	NaN	NaN	NaN
0.012	-54.435	-48.393	1264.804	-0.52506	1.002	0.23873	-65.4554	108.976	278.386	0.094922	0.32256	0.062207	-11.52	167.435	418.852	0.12061	0.38037	-0.23584	NaN	NaN	NaN	NaN	NaN	NaN
0.014	-80.9086	-75.121	1274.462	-0.5329	0.99569	0.25083	-32.542	122.109	290.1237	0.1081	0.31504	0.063867	-20.367	192.628	386.35	0.11768	0.37158	-0.24048	NaN	NaN	NaN	NaN	NaN	NaN
0.016	-32.617	-95.2245	1268.899	-0.51231	0.99356	0.25772	-41.498	90.49464	251.4626	0.11572	0.31055	0.0625	-10.725	134.703	369.18	0.12256	0.36182	-0.24756	NaN	NaN	NaN	NaN	NaN	NaN
0.018	-41.4026	-118.966	1264.085	-0.46631	0.99072	0.25635	-32.804	86.0899	240.1902	0.12442	0.30527	0.064063	-7.205	180.238	336.94	0.12402	0.34863	-0.24902	NaN	NaN	NaN	NaN	NaN	NaN
0.02	-64.4549	-125.044	1237.998	-0.38596	0.97964	0.23768	-2.744	114.912	229.2924	0.13242	0.30517	0.065137	-3.975	141.678	315.22	0.12451	0.34131	-0.25244	NaN	NaN	NaN	NaN	NaN	NaN
0.022	-51.403	-143.447	1250.548	-0.29331	0.96699	0.20786	-17.233	82.817	200.1716	0.13711	0.30244	0.064355	29.662	184.00835	299.223	0.11865	0.32813	-0.24658	NaN	NaN	NaN	NaN	NaN	NaN
0.024	-42.053	-150.198	1272.572	-0.19705	0.94812	0.17264	17.162	89.296	225.867	0.14062	0.29893	0.066113	40.276	145.403	287.42	0.10938	0.31519	-0.24389	NaN	NaN	NaN	NaN	NaN	NaN
0.026	-19.133	-141.073	1274.41	-0.11565	0.92786	0.13397	27.659	77.6546	199.22	0.14355	0.29883	0.069824	14.329	175.4164	259.61	0.094727	0.30371	-0.24463	NaN	NaN	NaN	NaN	NaN	NaN
0.028	-39.442	-142.753	1278.844	-0.055176	0.90039	0.10449	-3.92	47.16	180.206	0.15176	0.29912	0.069922	9.655	122.651	215.66	0.076172	0.29297	-0.23926	NaN	NaN	NaN	NaN	NaN	NaN
0.03	-50.432	-132.9145	1281.534	-0.023249	0.87341	0.06934	32.987	68.145	189.46	0.15918	0.29688	0.072266	-1.9	134.0302	185.465	0.057862	0.2898	-0.2356	NaN	NaN	NaN	NaN	NaN	NaN
0.032	-54.959	-114.992	1313.857	-0.021661	0.8527	0.045124	2.64	48.9421	143.7967	0.16699	0.2957	0.071875	-10.417	91.149	165.919	0.040527	0.28906	-0.22998	NaN	NaN	NaN	NaN	NaN	NaN
0.034	-77.687	-82.326	1326.978	-0.047972	0.84196	0.031766	-5.702	46.7828	142.9564	0.17822	0.29385	0.069922	14.536	104.56	169.906	0.026855	0.28418	-0.21729	NaN	NaN	NaN	NaN	NaN	NaN
0.036	-74.586	-67.09	1346.772	-0.090464	0.85036	0.026349	1.71400000000001	71.9	129.083	0.19189	0.29053	0.069824	15.123	70.1354	130.443	0.016602	0.28662	-0.21729	NaN	NaN	NaN	NaN	NaN	NaN
0.038	-114.612	-90.136	1378.289	-0.14795	0.87158	0.033203	-41.491	46.8971	97.196	0.20488	0.28018	0.072461	-35.98	83.155	132.247	0.0063477	0.29102	-0.20898	NaN	NaN	NaN	NaN	NaN	NaN
0.04	-71.228	-102.949	1417.67	-0.20926	0.91774	0.043884	-28.816	59.678	125.2504	0.21601	0.2667	0.069433	-30.7	45.1478	100.664	-0.0014648	0.28906	-0.20092	NaN	NaN	NaN	NaN	NaN	NaN
0.042	-95.231	-124.5182	1440.332	-0.24871	0.96955	0.049933	-33.462	48.888	114.908	0.22696	0.25225	0.065137	-43.164	51.609	115.449	-0.0043945	0.29199	-0.1958	NaN	NaN	NaN	NaN	NaN	NaN
0.044	-81.465	-134.7065	1468.194	-0.25928	1.0265	0.044281	-59.674	7.2922	114.079	0.23389	0.23691	0.0625	-26.543	32.6816	104.027	-0.010742	0.29102	-0.19629	NaN	NaN	NaN	NaN	NaN	NaN
0.046	-80.212	-165.855	1494.21	-0.24582	1.075	0.031732	-28.719	21.6786	132.592	0.2373	0.22021	0.060059	-31.817	45.301	120.742	-0.0097656	0.28906	-0.20117	NaN	NaN	NaN	NaN	NaN	NaN
0.048	-62.798	-177.155	1505.214	-0.22803	1.1079	0.011719	-71.6924	-6.5524	93.175	0.23759	0.2041	0.055762	-14.691	40.0845	92.5758	-0.015625	0.28809	-0.18945	NaN	NaN	NaN	NaN	NaN	NaN
0.05	-78.122	-189.07	1533.523	-0.2199	1.1334	-0.011803	-75.3564	-15.0207	103.5014	0.2294	0.18828	0.047754	-53.086	46.171	135.428	-0.021484	0.29029	-0.18433	NaN	NaN	NaN	NaN	NaN	NaN
0.052	-122.911	-191.581	1543.41	-0.22214	1.1406	-0.018505	-71.5195	18.4294	98.28841	0.21689	0.17735	0.043066	-54.566	36.289	116.618	-0.024902	0.28613	-0.17383	NaN	NaN	NaN	NaN	NaN	NaN
0.054	-90.434	-186.918	1587.048	-0.24673	1.1509	-0.034727	-90.2791	-1.6669	53.948	0.1999	0.16699	0.042773	-89.989	32.4004	147.982	-0.037109	0.28906	-0.17383	NaN	NaN	NaN	NaN	NaN	NaN
0.056	-132.235	-173.895	1621.658	-0.27943	1.1658	-0.05127	-62.825	23.9575	93.256	0.17773	0.16016	0.041992	-70.877	40.1051	121.6267	-0.039551	0.28564	-0.16846	NaN	NaN	NaN	NaN	NaN	NaN
0.058	-136.5542	-159.646	1635.598	-0.32227	1.1797	-0.041016	-64.585	18.0557	82.8109	0.15654	0.16211	0.041504	-55.965	23.3299	145.47	-0.04541	0.28662	-0.16748	NaN	NaN	NaN	NaN	NaN	NaN
0.06	-165.734	-156.4522	1652.227	-0.37329	1.203	-0.03443	-76.123	-20.1534	99.3711	0.13027	0.16924	0.050879	-37.524	25.70384	131.24	-0.052246	0.28394	-0.16089	NaN	NaN	NaN	NaN	NaN	NaN
0.062	-150.367	-147.3301	1676.265	-0.43647	1.2301	-0.022499	-45.886	10.6335	126.473	0.10957	0.17588	0.06377	-54.302	7.053	148.183	-0.050781	0.2793	-0.15625	NaN	NaN	NaN	NaN	NaN	NaN
0.064	-121.536	-138.903	1699.257	-0.4938	1.2645	-0.0093245	-55.6547	-0.284700000000001	86.0077	0.093848	0.18496	0.073535	-56.031	9.8	110.1706	-0.04248	0.27051	-0.15283	NaN	NaN	NaN	NaN	NaN	NaN
0.066	-143.068	-122.217	1703.621	-0.5347	1.2943	0.0056217	-39.408	6.6548	103.5787	0.07959	0.19238	0.088379	-28.212	7.2891	130.908	-0.037598	0.26514	-0.15088	NaN	NaN	NaN	NaN	NaN	NaN
0.068	-117.923	-116.022	1713.618	-0.56445	1.3203	0.0087891	-1.376	40.974	106.5802	0.074316	0.19766	0.10196	-13.82	15.713	114.6632	-0.018066	0.24805	-0.14746	NaN	NaN	NaN	NaN	NaN	NaN
0.07	-115.565	-133.135	1740.253	-0.57777	1.3489	0.0058345	-38.987	8.4042	77.131	0.072363	0.19951	0.11298	-32.742	-14.7639	153.108	0	0.22973	-0.15113	NaN	NaN	NaN	NaN	NaN	NaN
0.072	-107.358	-120.283	1743.177	-0.56973	1.3775	-0.0035822	-2.745	37.794	101.367	0.081738	0.19522	0.11963	-11.451	1.28	127.125	0.01709	0.2085	-0.15527	NaN	NaN	NaN	NaN	NaN	NaN
0.074	-139.756	-137.716	1756.055	-0.54907	1.3958	-0.021548	7.20200000000001	39.354	88.4084	0.086132	0.1876	0.12285	-3.454	-28.009	134.441	0.029297	0.1709	-0.16162	NaN	NaN	NaN	NaN	NaN	NaN
0.076	-129.919	-144.724	1766.055	-0.52037	1.4194	-0.041129	-8.416	11.7996	93.8398	0.098633	0.17773	0.12695	-27.786	-5.367	122.5452	0.035156	0.15332	-0.16846	NaN	NaN	NaN	NaN	NaN	NaN
0.078	-116.601	-149.071	1797.025	-0.49805	1.4277	-0.057129	30.014	23.61478	139.739	0.10713	0.16211	0.12363	-19.747	-25.6917	121.6685	0.019043	0.12744	-0.17236	NaN	NaN	NaN	NaN	NaN	NaN
0.08	-136.708	-150.239	1815.056	-0.48849	1.439	-0.076644	21.14	-17.2127	118.029	0.11621	0.14981	0.12685	-2.167	1.7558	100.938	0.00024415	0.11328	-0.17066	NaN	NaN	NaN	NaN	NaN	NaN
0.082	-136.203	-150.42766	1838.132	-0.48584	1.4493	-0.085357	30.345	-28.6574	122.495	0.12129	0.13652	0.12412	-27.867	-2.012	103.1192	-0.025879	0.10303	-0.16504	NaN	NaN	NaN	NaN	NaN	NaN
0.084	-143.224	-162.7085	1856.527	-0.49715	1.4598	-0.081058	21.574	-5.11186	113.457	0.12715	0.12129	0.13115	-1.699	24.3335	87.8924	-0.068359	0.11035	-0.15674	NaN	NaN	NaN	NaN	NaN	NaN
0.086	-112.248	-153.4462	1886.05	-0.51864	1.4702	-0.070024	-3.75	-14.2105	82.723	0.13281	0.10889	0.1333	0.721000000000004	3.2616	95.1264	-0.085938	0.12109	-0.14648	NaN	NaN	NaN	NaN	NaN	NaN
0.088	-111.342	-151.9898	1894.345	-0.54834	1.4849	-0.056152	3.181	17.3044	110.8475	0.14082	0.10205	0.14053	-21.55	8.037	120.72079	-0.11377	0.14404	-0.13281	NaN	NaN	NaN	NaN	NaN	NaN
0.09	-115.462	-144.2964	1880.777	-0.57716	1.4986	-0.039546	-11.226	16.185	102.0548	0.1455	0.092871	0.14658	-26.589	-22.881	105.4219	-0.12109	0.16113	-0.12402	NaN	NaN	NaN	NaN	NaN	NaN
0.092	-120.155	-135.7791	1889.326	-0.60733	1.5118	-0.026655	-24.18	-6.462	89.8644	0.15566	0.087793	0.15673	-18.14	-1.944	78.455	-0.11768	0.17383	-0.11768	NaN	NaN	NaN	NaN	NaN	NaN
0.094	-128.842	-132.9993	1892.223	-0.62999	1.5306	-0.011814	-18.751	5.983	135.926	0.16572	0.087793	0.16054	-27.499	1.263	94.1626	-0.087402	0.18896	-0.1084	NaN	NaN	NaN	NaN	NaN	NaN
0.096	-122.468	-126.464	1874.017	-0.65039	1.5486	0.0025411	-38.276	-28.18063	147.899	0.18164	0.080078	0.17236	-8.961	43.384	96.2148	-0.068359	0.19385	-0.11865	NaN	NaN	NaN	NaN	NaN	NaN
0.098	-153.393	-132.147	1873.072	-0.67139	1.5688	0.0073242	-51.372	-52.772	163.18	0.192	0.07793	0.16963	-26.874	39.9072	93.3182	-0.012695	0.19043	-0.11572	NaN	NaN	NaN	NaN	NaN	NaN
0.1	-125.515	-124.424	1867.063	-0.69121	1.5811	0.011426	-50.318	-25.70266	169.403	0.19756	0.065137	0.16074	-63.844	55.528	99.5556	0.033447	0.18189	-0.12133	NaN	NaN	NaN	NaN	NaN	NaN
0.102	-154.681	-117.7283	1885.776	-0.71523	1.5973	0.023243	-82.17738	-55.6608	134.443	0.19678	0.060059	0.1459	-54.894	37.7685	75.3436	0.080078	0.17041	-0.13037	NaN	NaN	NaN	NaN	NaN	NaN
0.104	-170.647	-94.671	1894.595	-0.73672	1.607	0.031444	-59.86	-42.7628	181.868	0.18262	0.053125	0.12451	-64.311	47.796	99.592	0.14453	0.13916	-0.14209	NaN	NaN	NaN	NaN	NaN	NaN
0.106	-167.748	-76.013	1899.737	-0.75879	1.6214	0.045703	-88.579	-53.479	208.971	0.15918	0.057617	0.10791	-65.6181	37.1696	114.784	0.17871	0.12451	-0.15039	NaN	NaN	NaN	NaN	NaN	NaN
0.108	-142.74	-76.809	1924.485	-0.78027	1.627	0.058105	-121.7448	-92.828	221.77	0.12558	0.072656	0.098535	-51.784	47.876	141.468	0.2373	0.083496	-0.16943	NaN	NaN	NaN	NaN	NaN	NaN
0.11	-150.742	-88.677	1938.281	-0.79473	1.6385	0.065137	-83.056	-92.102	274.308	0.087891	0.10508	0.10341	-44.596	39.97011	104.303	0.2727	0.05835	-0.18213	NaN	NaN	NaN	NaN	NaN	NaN
0.112	-180.381	-103.4462	1926.835	-0.80576	1.6423	0.07041	-113.72081	-119.092	302.499	0.053125	0.13516	0.10185	-81.162	42.6546	122.466	0.30371	0.035156	-0.19531	NaN	NaN	NaN	NaN	NaN	NaN
0.114	-169.6008	-108.032	1918.848	-0.8167	1.6376	0.074316	-86.872	-118.133	384.604	0.012891	0.17353	0.10742	-48.199	28.191	104.26952	0.33643	0.0039063	-0.20703	NaN	NaN	NaN	NaN	NaN	NaN
0.116	-178.526	-105.804	1927.87	-0.81953	1.6308	0.082129	-40.084	-57.289	443.79	-0.029297	0.21191	0.10986	-31.798	29.5691	133.842	0.34229	-0.0087891	-0.21191	NaN	NaN	NaN	NaN	NaN	NaN
0.118	-159.497	-91.963	1912.94	-0.82227	1.6191	0.080078	-88.012	-32.167	475.896	-0.074121	0.25606	0.10654	-31.846	32.8049	118.9238	0.35156	-0.016602	-0.2207	NaN	NaN	NaN	NaN	NaN	NaN
0.12	-157.565	-89.686	1894.393	-0.81943	1.6052	0.086426	-74.836	25.542	577.368	-0.12861	0.296	0.094922	-16.394	40.082	154.656	0.34961	-0.019287	-0.21924	NaN	NaN	NaN	NaN	NaN	NaN
0.122	-166.615	-96.973	1886.658	-0.81211	1.5895	0.089355	-56.367	85.91	680.199	-0.18565	0.33779	0.085156	-2.643	21.04715	160.356	0.34229	-0.011719	-0.21338	NaN	NaN	NaN	NaN	NaN	NaN
0.124	-151.439	-89.697	1888.13	-0.79766	1.5711	0.093262	-69.651	119.9313	831.75	-0.25508	0.38027	0.058887	-57.379	-20.8895	237.061	0.32764	0.0097656	-0.22217	NaN	NaN	NaN	NaN	NaN	NaN
0.126	-146.627	-66.4204	1889.336	-0.78496	1.5551	0.094336	0.0229999999999961	175.601	1006.01	-0.33789	0.42529	0.023438	-7.699	-44.256	211.9443	0.31787	0.028809	-0.22168	NaN	NaN	NaN	NaN	NaN	NaN
0.128	-147.781	-46.2706	1872.613	-0.76904	1.5415	0.090332	-43.879	149.686	1093.015	-0.44267	0.47998	-0.016211	-17.031	-60.2629	244.4188	0.28662	0.070313	-0.2168	NaN	NaN	NaN	NaN	NaN	NaN
0.13	-160.666	-36.7858	1879.619	-0.754	1.5292	0.097461	-59.62	114.742	1204.558	-0.5625	0.54511	-0.051855	-22.007	-48.984	285.2859	0.26367	0.10669	-0.21289	NaN	NaN	NaN	NaN	NaN	NaN
0.132	-125.817	-17.868	1863.699	-0.7374	1.5227	0.10361	-30.787	107.252	1274.89	-0.69023	0.62519	-0.065137	-4.248	-74.9198	392.748	0.2373	0.15039	-0.21387	NaN	NaN	NaN	NaN	NaN	NaN
0.134	-143.499	-21.761	1855.107	-0.72334	1.5165	0.11065	-19.463	50.817	1282.126	-0.81426	0.72598	-0.043359	40.51	-66.065	433.2279	0.18799	0.20654	-0.22021	NaN	NaN	NaN	NaN	NaN	NaN
0.136	-151.52	-15.95	1834.284	-0.70537	1.5097	0.11475	-8.067	2.921	1338.95	-0.92969	0.84863	0.003418	4.332	-96.7108	519.0477	0.16016	0.23096	-0.23096	NaN	NaN	NaN	NaN	NaN	NaN
0.138	-145.338	-26.1499	1839.27	-0.69189	1.5024	0.12207	-41.427	-57.891	1318.81	-1.0235	0.97754	0.070996	54.471	-100.16	530.355	0.082031	0.27637	-0.25098	NaN	NaN	NaN	NaN	NaN	NaN
0.14	-126.451	-27.1626	1827.729	-0.6752	1.494	0.12861	-52.96	-154.767	1320.97	-1.0767	1.1055	0.14443	28.778	-106.39	668.185	0.00293	0.31616	-0.26489	NaN	NaN	NaN	NaN	NaN	NaN
0.142	-119.893	-41.7966	1797.592	-0.66133	1.4877	0.13291	-14.831	-167.836	1362.41	-1.0877	1.2117	0.21279	-0.814000000000007	-45.289	821.3592	-0.091797	0.36768	-0.26123	NaN	NaN	NaN	NaN	NaN	NaN
0.144	-148.662	-49.55	1766.885	-0.64297	1.4815	0.13291	-27.218	-187.682	1349.17	-1.0568	1.2818	0.26074	5.983	-19.952	956.2322	-0.22656	0.46143	-0.24316	NaN	NaN	NaN	NaN	NaN	NaN
0.146	-119.831	-49.203	1758.611	-0.62422	1.4762	0.13545	-41.327	-193.829	1347.37	-0.98828	1.3184	0.29102	83.729	43.152	1018.574	-0.29004	0.51123	-0.23096	NaN	NaN	NaN	NaN	NaN	NaN
0.148	-125.092	-47.792	1755.936	-0.60596	1.4692	0.13672	-31.0714	-150.871	1333.85	-0.91201	1.324	0.29189	6.658	43.42	1150.945	-0.40039	0.62109	-0.2168	NaN	NaN	NaN	NaN	NaN	NaN
0.15	-128.317	-32.094	1739.799	-0.58545	1.4546	0.13389	-60.8061	-169.959	1283.922	-0.83496	1.3176	0.27471	-8.086	88.141	1252.016	-0.47314	0.70654	-0.20605	NaN	NaN	NaN	NaN	NaN	NaN
0.152	-157.259	-29.099	1738.293	-0.56416	1.4407	0.13838	-32.499	-134.73	1324.67	-0.77363	1.2914	0.24307	-25.439	54.946	1371.552	-0.54834	0.7876	-0.20459	NaN	NaN	NaN	NaN	NaN	NaN
0.154	-140.699	-22.34	1721.163	-0.54697	1.4247	0.13526	-45.928	-55.146	1332.77	-0.71982	1.2559	0.19502	-9.43300000000001	53.733	1434.6402	-0.66162	0.88916	-0.22314	NaN	NaN	NaN	NaN	NaN	NaN
0.156	-132.384	-5.0394	1712.582	-0.52373	1.4065	0.1335	-85.227	-17.391	1324.83	-0.66748	1.1997	0.14697	-11.471	-28.787	1473.678	-0.72021	0.93799	-0.23193	NaN	NaN	NaN	NaN	NaN	NaN
0.158	-161.9	13.5859	1674.42	-0.49805	1.3867	0.13135	-41.531	47.632	1330.041	-0.60888	1.1294	0.12207	-1.633	-77.147	1505.55	-0.86865	1.0415	-0.24219	NaN	NaN	NaN	NaN	NaN	NaN
0.16	-147.446	29.888	1655.478	-0.47354	1.3685	0.12666	-76.3662	20.963	1298.712	-0.54414	1.0586	0.11289	-44.4982	-182.5799	1512.191	-0.99487	1.1272	-0.23193	NaN	NaN	NaN	NaN	NaN	NaN
0.162	-138.509	28.133	1627.432	-0.4502	1.3434	0.12139	-97.0787	-51.884	1330.119	-0.47227	0.99921	0.10469	-59.109	-184.812	1534.827	-1.1152	1.2285	-0.19922	NaN	NaN	NaN	NaN	NaN	NaN
0.164	-139.516	27.4825	1603.073	-0.4252	1.323	0.11865	-62.583	-90.9491	1350.172	-0.40176	0.94756	0.091895	-67.502	-230.731	1535.465	-1.2573	1.3696	-0.15137	NaN	NaN	NaN	NaN	NaN	NaN
0.166	-157.444	26.3765	1569.303	-0.39951	1.2964	0.11348	-91.241	-191.161	1343.804	-0.3335	0.90283	0.057617	-56.999	-150.951	1537.201	-1.3105	1.4473	-0.12598	NaN	NaN	NaN	NaN	NaN	NaN
0.168	-138.365	22.78	1560.469	-0.38232	1.2739	0.104	-106.105	-261.652	1429.27	-0.27168	0.8668	-0.000586	-67.9007	-170.25	1541.566	-1.3276	1.5825	-0.067871	NaN	NaN	NaN	NaN	NaN	NaN
0.17	-110.08	22.898	1554.93	-0.36368	1.2518	0.10127	-99.242	-279.553	1473.38	-0.22774	0.84345	-0.066698	-54.076	-114.9238	1588.927	-1.2827	1.6841	-0.039551	NaN	NaN	NaN	NaN	NaN	NaN
0.172	-129.079	45.7749	1527.751	-0.34336	1.2282	0.095703	-102.862	-333.919	1515.88	-0.20469	0.82861	-0.13818	-96.5904	-169.8792	1602.256	-1.2324	1.7188	-0.029785	NaN	NaN	NaN	NaN	NaN	NaN
0.174	-133.513	46.2243	1514.547	-0.33047	1.2062	0.088672	-75.547	-319.141	1593.32	-0.21133	0.83213	-0.18819	-94.1651	-115.373	1608.461	-1.0879	1.7363	-0.043945	NaN	NaN	NaN	NaN	NaN	NaN
0.176	-141.687	42.7389	1507.09	-0.31406	1.1891	0.093457	-100.564	-334.334	1631.47	-0.24072	0.85547	-0.22314	-88.3334	-122.975	1548.998	-0.96071	1.677	-0.089109	NaN	NaN	NaN	NaN	NaN	NaN
0.178	-105.917	49.6286	1498.056	-0.30664	1.1699	0.089355	-125.224	-349.976	1713.96	-0.29883	0.90508	-0.23222	-94.5598	-38.952	1533.016	-0.81445	1.5586	-0.14453	NaN	NaN	NaN	NaN	NaN	NaN
0.18	-115.678	62.855	1471.472	-0.28818	1.1603	0.074512	-121.584	-283.554	1747.31	-0.37236	0.97666	-0.22471	-53.0173	-64.903	1483.531	-0.61865	1.3423	-0.20557	NaN	NaN	NaN	NaN	NaN	NaN
0.182	-114.621	56.037	1457.611	-0.26748	1.1439	0.078125	-161.9882	-266.083	1729.47	-0.45244	1.0638	-0.19697	-41.396	-51.126	1491.556	-0.53271	1.2231	-0.2251	NaN	NaN	NaN	NaN	NaN	NaN
0.184	-95.726	49.3436	1444.889	-0.25967	1.1271	0.078516	-150.065	-220.449	1770.5	-0.51552	1.1462	-0.15068	-17.068	-108.441	1458.604	-0.40039	1.0195	-0.24512	NaN	NaN	NaN	NaN	NaN	NaN
0.186	-90.158	63.0106	1409.22	-0.24961	1.1127	0.074121	-127.583	-177.558	1779.9	-0.5625	1.2148	-0.11133	20.22	-140.029	1515.198	-0.32764	0.89111	-0.25146	NaN	NaN	NaN	NaN	NaN	NaN
0.188	-97.338	68.7337	1368.313	-0.24414	1.0977	0.070801	-128.047	-210.7671	1783.47	-0.58848	1.2557	-0.063769	28.469	-241.36	1555.091	-0.26221	0.7832	-0.25684	NaN	NaN	NaN	NaN	NaN	NaN
0.19	-98.632	74.2502	1344.677	-0.2295	1.0795	0.073144	-119.702	-183.434	1837.389	-0.61045	1.277	-0.032813	-16.719	-279.364	1641.4379	-0.18604	0.66357	-0.27686	NaN	NaN	NaN	NaN	NaN	NaN
0.192	-77.461	67.2002	1314.587	-0.22178	1.0643	0.07334	-135.1562	-193.724	1829.336	-0.63702	1.2739	-0.03125	3.217	-337.2865	1682.6606	-0.15381	0.6123	-0.28809	NaN	NaN	NaN	NaN	NaN	NaN
0.194	-86.092	74.7246	1293.726	-0.21552	1.0499	0.072168	-122.179	-229.0843	1869.079	-0.68164	1.2603	-0.058203	45.059	-339.18	1764.943	-0.10352	0.54004	-0.32861	NaN	NaN	NaN	NaN	NaN	NaN
0.196	-73.383	70.8578	1282.382	-0.21201	1.0301	0.071094	-117.285	-182.946	1912.555	-0.72559	1.2539	-0.087891	104.727	-328.8483	1821.014	-0.096924	0.50611	-0.36352	NaN	NaN	NaN	NaN	NaN	NaN
0.198	-83.981	65.82294	1266.256	-0.2041	1.0156	0.070801	-162.652	-220.2855	1906.505	-0.78652	1.251	-0.11123	124.711	-300.451	1861.2633	-0.10693	0.51172	-0.37793	NaN	NaN	NaN	NaN	NaN	NaN
0.2	-60.437	73.7153	1249.261	-0.20108	0.99758	0.067578	-157.689	-259.8575	1977.27	-0.84678	1.2704	-0.1209	134.112	-275.543	1870.955	-0.17334	0.58447	-0.37744	NaN	NaN	NaN	NaN	NaN	NaN
0.202	-80.936	91.484	1226.005	-0.19697	0.97862	0.071191	-178.799669	-260.7425	2027.35	-0.90928	1.3017	-0.11738	95.382	-281.732	1937.424	-0.22754	0.64258	-0.37109	NaN	NaN	NaN	NaN	NaN	NaN
0.204	-85.768	88.881	1194.074	-0.18994	0.96299	0.062988	-201.172	-318.203	2084.34	-0.96865	1.3481	-0.10791	107.034	-273.561	1993.306	-0.34863	0.81641	-0.3374	NaN	NaN	NaN	NaN	NaN	NaN
0.206	-84.487	84.192	1180.37	-0.1874	0.94892	0.060156	-162.6705	-299.57	2158.26	-1.0215	1.4063	-0.10547	100.724	-290.595	2067.036	-0.44458	0.95775	-0.30274	NaN	NaN	NaN	NaN	NaN	NaN
0.208	-77.219	77.0232	1152.592	-0.18066	0.93604	0.057129	-160.914	-287.75	2143.93	-1.0638	1.4654	-0.11289	154.9981	-273.3185	2064.327	-0.52881	1.0884	-0.27734	NaN	NaN	NaN	NaN	NaN	NaN
0.21	-69.793	86.08	1128.936	-0.17217	0.91943	0.053418	-167.827	-310.502	2171.09	-1.1055	1.525	-0.10967	135.1	-299.966	2066.8883	-0.60742	1.2363	-0.25293	NaN	NaN	NaN	NaN	NaN	NaN
0.212	-87.076	79.716	1100.996	-0.15928	0.90401	0.049609	-142.811	-225.5656	2205.03	-1.1402	1.5824	-0.11513	95.249	-263.336	2054.264	-0.62939	1.291	-0.24609	NaN	NaN	NaN	NaN	NaN	NaN
0.214	-65.527	80.268	1095.526	-0.15186	0.88409	0.042969	-135.897	-222.8483	2202.463	-1.1764	1.6267	-0.11562	65.891	-261.897	2079.63	-0.65283	1.3657	-0.23975	NaN	NaN	NaN	NaN	NaN	NaN
0.216	-55.227	85.44	1067.147	-0.13672	0.86582	0.03623	-109.566	-229.74688	2273.15	-1.2183	1.6606	-0.10596	94.019	-184.372	2109.933	-0.6626	1.3994	-0.25538	NaN	NaN	NaN	NaN	NaN	NaN
0.218	-53.381	102.711	1041.934	-0.13184	0.84375	0.026367	-117.461	-184.323	2283.74	-1.2676	1.6891	-0.089257	51.41	-193.731	2194.443	-0.67383	1.4219	-0.26758	NaN	NaN	NaN	NaN	NaN	NaN
0.22	-65.228	104.5281	1029.052	-0.12031	0.8294	0.020703	-155.033	-225.384	2254.87	-1.3214	1.7161	-0.060742	72.674	-155.244	2245.5603	-0.69287	1.4507	-0.28076	NaN	NaN	NaN	NaN	NaN	NaN
0.222	-34.585	108.7447	1019.026	-0.11396	0.81416	0.012207	-159.681	-172.60657	2238.987	-1.3788	1.7384	-0.029883	56.315	-228.9001	2283.413	-0.70947	1.4614	-0.28467	NaN	NaN	NaN	NaN	NaN	NaN
0.224	-42.216	109.859	1001.308	-0.10068	0.78994	0.0075195	-191.197	-114.438	2219.086	-1.431	1.7547	-0.0020508	63.443	-170.379	2299.699	-0.74609	1.4961	-0.27197	NaN	NaN	NaN	NaN	NaN	NaN
0.226	-57.242	122.332	969.793	-0.093653	0.77197	-0.0014648	-187.228	-126.513	2252.557	-1.4741	1.7759	0.015137	26.012	-216.3092	2308.745	-0.78296	1.5266	-0.26001	NaN	NaN	NaN	NaN	NaN	NaN
0.228	-55.191	104.06	957.574	-0.089844	0.75293	-0.0029297	-170.722	-77.835	2319.919	-1.5163	1.7903	0.027344	32.541	-145.354	2329.9925	-0.82959	1.561	-0.25586	NaN	NaN	NaN	NaN	NaN	NaN
0.23	-44.049	99.3436	948.225	-0.082324	0.73525	-0.010059	-170.251	-131.353	2335.289	-1.5495	1.8064	0.038477	1.858	-220.905	2369.092	-0.89014	1.6118	-0.26025	NaN	NaN	NaN	NaN	NaN	NaN
0.232	-35.758	103.1338	916.922	-0.075	0.71758	-0.014746	-141.241	-176.5061	2408.19	-1.573	1.8157	0.043945	-22.477	-174.591	2377.149	-0.91797	1.6328	-0.27441	NaN	NaN	NaN	NaN	NaN	NaN
0.234	-52.14	102.027	887.291	-0.072266	0.70196	-0.01748	-149.156	-149.6784	2422.86	-1.5993	1.8269	0.062012	-15.449	-233.72932	2400.626	-0.95703	1.668	-0.2998	NaN	NaN	NaN	NaN	NaN	NaN
0.236	-38.094	99.812	872.694	-0.067383	0.68321	-0.021778	-178.3	-178.982	2400.11	-1.6245	1.8345	0.078125	-16.754	-155.454	2408.7723	-0.96851	1.6926	-0.32934	NaN	NaN	NaN	NaN	NaN	NaN
0.238	-25.237	98.57	861.705	-0.062988	0.66699	-0.021973	-151.909	-126.388	2411.78	-1.6383	1.8461	0.090234	-3.14700000000001	-172.452	2422.1008	-0.97217	1.7192	-0.35889	NaN	NaN	NaN	NaN	NaN	NaN
0.24	-26.495	115.922	834.572	-0.056152	0.65068	-0.025098	-197.182	-96.858	2398.22	-1.6429	1.8531	0.10117	21.545	-81.589	2411.4665	-0.9624	1.7505	-0.40186	NaN	NaN	NaN	NaN	NaN	NaN
0.242	-8.399	105.0647	820.257	-0.047754	0.63594	-0.02959	-192.456	-163.721	2440.75	-1.6371	1.8543	0.10821	31.928	-113.9522	2390.049	-0.95459	1.7661	-0.41943	NaN	NaN	NaN	NaN	NaN	NaN
0.244	-19.036	97.7915	817.439	-0.034473	0.62344	-0.035449	-162.275	-138.519	2481.57	-1.6185	1.8571	0.1083	57.004	-54.759	2432.973	-0.91406	1.7813	-0.46289	NaN	NaN	NaN	NaN	NaN	NaN
0.246	-16.466	106.4346	813.641	-0.024121	0.60713	-0.036621	-198.705	-155.325	2451.84	-1.5913	1.8442	0.10059	71.809	-93.4422	2443.814	-0.88061	1.7815	-0.49976	NaN	NaN	NaN	NaN	NaN	NaN
0.248	-25.104	108.8776	798.07	-0.010254	0.59033	-0.040527	-198.9964	-139.813	2449.12	-1.5588	1.833	0.088574	74.217	-33.809	2452.4094	-0.85352	1.7578	-0.53906	NaN	NaN	NaN	NaN	NaN	NaN
0.25	-30.539	107.1049	773.567	0.0046875	0.57705	-0.048828	-192.675	-29.1944	2425.98	-1.525	1.8137	0.080567	75.864	-53.422	2438.6096	-0.81641	1.7324	-0.50537	NaN	NaN	NaN	NaN	NaN	NaN
0.252	-45.476	104.399	761.208	0.015918	0.55996	-0.049707	-211.523	-10.867	2401.291	-1.4902	1.7922	0.074707	76.853	3.65	2443.5954	-0.81201	1.729	-0.51318	NaN	NaN	NaN	NaN	NaN	NaN
0.254	-29.818	114.2831	726.561	0.028808	0.5416	-0.061426	-189.881	44.6341	2426.302	-1.4583	1.7644	0.071484	77.468	-26.373	2444.7047	-0.82813	1.709	-0.66602	NaN	NaN	NaN	NaN	NaN	NaN
0.256	-29.705	120.9085	698.8	0.03789	0.52861	-0.067773	-173.492	65.654	2411.399	-1.4326	1.7422	0.069336	101.651	18.9093	2467.198	-0.80347	1.7044	-0.65894	NaN	NaN	NaN	NaN	NaN	NaN
0.258	-53.88	121.5348	687.791	0.044922	0.5127	-0.072266	-160.591	-2.3636	2447.48	-1.4086	1.7235	0.070898	173.215	-30.1531	2457.915	-0.8125	1.6973	-0.625	NaN	NaN	NaN	NaN	NaN	NaN
0.26	-31.755	119.877	674.061	0.048536	0.49765	-0.075488	-140.5542	28.693	2463.52	-1.3879	1.7058	0.056445	153.801	-16.6309	2464.21	-0.90283	1.7056	-0.61865	NaN	NaN	NaN	NaN	NaN	NaN
0.262	-18.241	116.287	659.049	0.046875	0.48291	-0.083008	-190.8972	10.02	2394.54	-1.3695	1.6898	0.058399	134.818	-68.697	2446.7221	-0.94873	1.7271	-0.61084	NaN	NaN	NaN	NaN	NaN	NaN
0.264	-17.588	115.057	647.566	0.045703	0.47354	-0.086133	-188.709	-1.922	2383.98	-1.3552	1.6772	0.052637	89.467	-41.8441	2440.983	-1.0156	1.7598	-0.58984	NaN	NaN	NaN	NaN	NaN	NaN
0.266	-41.453	114.928	638.623	0.042871	0.46299	-0.087793	-166.488	58.0863	2349.03	-1.3413	1.6724	0.050781	130.062	-26.6257	2419.867	-1.0534	1.7883	-0.57056	NaN	NaN	NaN	NaN	NaN	NaN
0.268	-15.217	122.596	629.989	0.040039	0.45557	-0.089844	-166.886	1.438	2319.38	-1.324	1.6614	0.053125	127.46	28.498	2426.349	-1.085	1.8164	-0.56348	NaN	NaN	NaN	NaN	NaN	NaN
0.27	-34.572	136.405	612.033	0.038965	0.45215	-0.096094	-136.953	5.1784	2341.67	-1.305	1.6578	0.059961	113.825	57.32	2349.722	-1.103	1.8403	-0.54639	NaN	NaN	NaN	NaN	NaN	NaN
0.272	-41.648	140.755	589.697	0.033886	0.44853	-0.09873	-174.6072	6.309	2301.46	-1.2906	1.652	0.056836	80.627	96.69	2352.10207	-1.1011	1.8462	-0.53662	NaN	NaN	NaN	NaN	NaN	NaN
0.274	-37.56	130.923	575.458	0.034278	0.44971	-0.10185	-163.41399	-43.3808	2282.884	-1.273	1.6448	0.059863	73.602	102.932	2290.061	-1.0762	1.8262	-0.54395	NaN	NaN	NaN	NaN	NaN	NaN
0.276	-38.043	121.1385	572.136	0.032129	0.44853	-0.1085	-157.7987	24.159	2238.77	-1.252	1.6338	0.069336	19.868	120.451	2289.7733	-1.0478	1.7959	-0.55127	NaN	NaN	NaN	NaN	NaN	NaN
0.278	-28.413	108.379	551.854	0.026855	0.45361	-0.10986	-183.452	24.927	2160.41	-1.2358	1.6177	0.089062	26.261	149.746	2261.6606	-1.019	1.7563	-0.55615	NaN	NaN	NaN	NaN	NaN	NaN
0.28	-38.611	100.7359	536.396	0.021484	0.45127	-0.11445	-138.685	37.868	2123.16	-1.22	1.6039	0.098242	36.008	157.85	2266.04	-0.99561	1.7017	-0.55615	NaN	NaN	NaN	NaN	NaN	NaN
0.282	-22.609	106.921	520.113	0.018066	0.45166	-0.11367	-155.362	92.182	2089.017	-1.1906	1.5918	0.09668	59.327	175.641	2207.9369	-0.9917	1.6763	-0.55225	NaN	NaN	NaN	NaN	NaN	NaN
0.284	-19.185	110.617	508.851	0.009082	0.45049	-0.11601	-173.438	59.2682	2055.273	-1.1376	1.5796	0.082227	-24.57	154.27	2165.42654	-0.99756	1.6294	-0.53467	NaN	NaN	NaN	NaN	NaN	NaN
0.286	-15.741	126.344	484.227	0.0016602	0.45303	-0.11465	-156.498	78.3481	2048.5	-1.0874	1.5532	0.077148	-26.149	178.257	2089.638	-1.0044	1.6021	-0.52344	NaN	NaN	NaN	NaN	NaN	NaN
0.288	-4.523	109.9726	466.847	-0.0058594	0.45361	-0.11475	-155.16	96.4585	1998.106	-1.0368	1.5169	0.075	-37.608	169.957	2114.154	-1.0137	1.5762	-0.50586	NaN	NaN	NaN	NaN	NaN	NaN
0.29	-10.511	115.0989	467.995	-0.016602	0.44961	-0.1125	-162.9743	57.786	1939.893	-0.99346	1.4782	0.064355	-16.933	200.569	2055.47	-1.0132	1.5513	-0.48975	NaN	NaN	NaN	NaN	NaN	NaN
0.292	-0.938000000000002	123.9273	473.611	-0.024512	0.44746	-0.11309	-160.346	132.693	1911.207	-0.95323	1.4419	0.056543	5.408	163.352	2062.192	-1.0103	1.5356	-0.479	NaN	NaN	NaN	NaN	NaN	NaN
0.294	-18.179	126.7358	448.958	-0.04209	0.44707	-0.10566	-198.491	124.756	1849.127	-0.91172	1.4012	0.045606	37.777	196.436	2008.2691	-0.99854	1.5122	-0.46631	NaN	NaN	NaN	NaN	NaN	NaN
0.296	-12.098	119.18	440.076	-0.048926	0.44854	-0.10518	-189.853	98.017	1850.997	-0.87256	1.3657	0.041992	27.28	186.2266	2003.037	-0.97827	1.4992	-0.45752	NaN	NaN	NaN	NaN	NaN	NaN
0.298	-25.943	115.368	420.269	-0.060059	0.44482	-0.10254	-145.275	117.059	1847.18	-0.83701	1.3359	0.041113	8.5	273.654	1951.2751	-0.94727	1.4863	-0.45313	NaN	NaN	NaN	NaN	NaN	NaN
0.3	-13.077	111.0849	403.789	-0.073633	0.44522	-0.096973	-187.838	45.163	1824.09	-0.80166	1.2997	0.035059	22.011	266.749	1915.2693	-0.9043	1.459	-0.44238	NaN	NaN	NaN	NaN	NaN	NaN
0.302	-25.632	113.643	391.285	-0.085644	0.4458	-0.091308	-157.204	67.516	1819.38	-0.76963	1.2731	0.039356	45.667	310.562	1887.0106	-0.88086	1.4473	-0.44336	NaN	NaN	NaN	NaN	NaN	NaN
0.304	-25.175	109.8978	373.662	-0.10088	0.44424	-0.087793	-155.8462	101.24	1749.72	-0.73603	1.2425	0.035645	65.355	253.7653	1871.806	-0.83154	1.4146	-0.43506	NaN	NaN	NaN	NaN	NaN	NaN
0.306	-13.974	120.7574	370.015	-0.10947	0.44336	-0.083496	-181.125	100.835	1704.534	-0.70117	1.209	0.030762	60.922	287.115	1818.674	-0.79736	1.3926	-0.42383	NaN	NaN	NaN	NaN	NaN	NaN
0.308	-18.978	112.8493	334.691	-0.12012	0.44043	-0.078613	-144.363	196.267	1678.39	-0.67529	1.1736	0.026563	53.368	256.197	1755.254	-0.76758	1.3652	-0.41406	NaN	NaN	NaN	NaN	NaN	NaN
0.31	-11.139	92.1748	334.117	-0.12412	0.43955	-0.074316	-164.475	176.975	1624.37	-0.64678	1.1462	0.018164	51.866	313.449	1683.095	-0.72852	1.3301	-0.39697	NaN	NaN	NaN	NaN	NaN	NaN
0.312	-19.125	84.641	340.778	-0.13047	0.43838	-0.069238	-125.069	158.4072	1618.49	-0.62217	1.1208	0.016602	39.733	269.246	1637.027	-0.70947	1.311	-0.38232	NaN	NaN	NaN	NaN	NaN	NaN
0.314	-2.526	85.8566	333.909	-0.12929	0.43291	-0.066113	-113.7353	170.4966	1600.49	-0.60059	1.0955	0.014062	31.135	318.034	1586.659	-0.6792	1.2778	-0.35889	NaN	NaN	NaN	NaN	NaN	NaN
0.316	-11.129	97.8749	319.126	-0.1289	0.42842	-0.060547	-156.7	121.391	1533.794	-0.57471	1.0688	0.0043945	73.62	265.9817	1542.203	-0.65771	1.2388	-0.3335	NaN	NaN	NaN	NaN	NaN	NaN
0.318	-39.6048	94.669	314.508	-0.12402	0.41992	-0.064453	-119.414	175.879	1496.48	-0.54658	1.0464	0.0040039	71.946	318.338	1509.411	-0.64014	1.2163	-0.31592	NaN	NaN	NaN	NaN	NaN	NaN
0.32	-36.262	83.817	320.876	-0.11289	0.40723	-0.061816	-134.658	228.24122	1426.994	-0.51944	1.0275	-0.003418	53.759	272.6535	1494.513	-0.60938	1.1816	-0.29932	NaN	NaN	NaN	NaN	NaN	NaN
0.322	-21.895	75.5513	311.23	-0.1001	0.39365	-0.061133	-128.317	230.4304	1371.706	-0.49092	1.0028	-0.010449	-0.445	315.932	1445.224	-0.58691	1.1533	-0.27442	NaN	NaN	NaN	NaN	NaN	NaN
0.324	-26.409	69.7755	283.855	-0.091504	0.38037	-0.064258	-82.971	252.488	1353.58	-0.46484	0.97949	-0.016309	-28.37	264.767	1366.273	-0.56152	1.1235	-0.25635	NaN	NaN	NaN	NaN	NaN	NaN
0.326	-47.913	67.549	270.443	-0.074902	0.3622	-0.064551	-112.759	187.527	1318.624	-0.43506	0.9541	-0.020508	-60.577	309.077	1324.9166	-0.52734	1.0859	-0.2334	NaN	NaN	NaN	NaN	NaN	NaN
0.328	-10.084	44.201	280.98	-0.065918	0.34375	-0.07666	-86.8541	146.04869	1322.3	-0.40664	0.92969	-0.02793	-50.694	262.294	1273.389	-0.50781	1.0645	-0.22119	NaN	NaN	NaN	NaN	NaN	NaN
0.33	-18.347	35.174	282.96	-0.054004	0.32734	-0.078418	-67.6911	163.1626	1300.98	-0.37402	0.90049	-0.035254	-48.259	304.1976	1241.639	-0.47021	1.0293	-0.20117	NaN	NaN	NaN	NaN	NaN	NaN
0.332	-14.007	30.991	269.96	-0.043555	0.31426	-0.080957	-109.575	135.407	1233.5	-0.34512	0.87236	-0.044629	-79.5738	268.69229	1155.62093	-0.43872	1.0017	-0.1836	NaN	NaN	NaN	NaN	NaN	NaN
0.334	-7.672	17.529	259.1	-0.031445	0.30293	-0.083301	-70.945	159.533	1181.73	-0.31445	0.84473	-0.049024	-77.555418	312.379	1086.801	-0.41162	0.97314	-0.1626	NaN	NaN	NaN	NaN	NaN	NaN
0.336	2.583	9.162	266.58	-0.02207	0.28711	-0.087305	-90.496	183.919	1109.392	-0.28418	0.8125	-0.058594	-101.696	277.412	1024.537	-0.3667	0.93408	-0.14307	NaN	NaN	NaN	NaN	NaN	NaN
0.338	8.939	13.374	272.29	-0.0053711	0.27539	-0.092285	-102.454	154.793	1079.25	-0.26035	0.78281	-0.066309	-121.765	321.164	990.036	-0.34326	0.9165	-0.13477	NaN	NaN	NaN	NaN	NaN	NaN
0.34	-24.421	18.076	265.55	0.0095701	0.26748	-0.09414	-51.928	187.2785	1084.02	-0.23448	0.75342	-0.075195	-78.6496	281.19	928.8622	-0.30762	0.87061	-0.11377	NaN	NaN	NaN	NaN	NaN	NaN
0.342	-13.714	4.57	265.35	0.023828	0.25498	-0.10469	-58.8366	167.744	1056.67	-0.21572	0.72646	-0.083789	-65.459	338.629	891.6339	-0.28491	0.84107	-0.10278	NaN	NaN	NaN	NaN	NaN	NaN
0.344	-15.85	-5.174	279.41	0.034375	0.24873	-0.11407	-48.6224	157.017	1039.62	-0.20351	0.69648	-0.090918	-55.00516	324.051	824.7	-0.26367	0.80762	-0.086426	NaN	NaN	NaN	NaN	NaN	NaN
0.346	5.299	-20.071	286.4	0.042187	0.24014	-0.12227	-42.4206	195.75981	982.94	-0.18896	0.67529	-0.096191	-94.3743	369.376	811.4331	-0.23926	0.76904	-0.060059	NaN	NaN	NaN	NaN	NaN	NaN
0.348	-15.402	-38.181	288.656	0.044922	0.23389	-0.13135	-69.824	184.141	900.046	-0.17715	0.65215	-0.104	-119.776	354.973	757.226	-0.229	0.75049	-0.052246	NaN	NaN	NaN	NaN	NaN	NaN
0.35	-3.767	-48.475	303.094	0.039063	0.23047	-0.1377	-34.29	226.927	855.959	-0.16533	0.63203	-0.10957	-116.614	385.112	728.909	-0.21387	0.70654	-0.03125	NaN	NaN	NaN	NaN	NaN	NaN
0.352	15.882	-28.331	322.723	0.023438	0.2292	-0.14463	-40.97	224.2509	807.401	-0.14892	0.61719	-0.11348	-57.4223	349.138	682.1495	-0.20337	0.67896	-0.0092773	NaN	NaN	NaN	NaN	NaN	NaN
0.354	13.842	-2.916	345.485	0.0039062	0.23779	-0.15244	-52.988	187.09	767.036	-0.13349	0.60478	-0.11679	-33.215	330.762	662.25166	-0.20117	0.65234	0.0043945	NaN	NaN	NaN	NaN	NaN	NaN
0.356	20.33	16.771	403.778	-0.029785	0.25068	-0.16094	-16.45	203.106	776.25	-0.11133	0.58936	-0.12305	-38.008	278.181	615.3874	-0.18896	0.61865	0.021484	NaN	NaN	NaN	NaN	NaN	NaN
0.358	22.699	32.27985	436.107	-0.068359	0.26563	-0.1709	-37.9596	182.791	738.257	-0.091211	0.57402	-0.12783	-39.359	294.587	585.179	-0.18701	0.60791	0.031738	NaN	NaN	NaN	NaN	NaN	NaN
0.36	29.35	60.136	491.707	-0.12344	0.29922	-0.17363	-11.527	190.4335	711.396	-0.070606	0.55644	-0.1332	-19.442	278.051	522.769	-0.17334	0.58643	0.046875	NaN	NaN	NaN	NaN	NaN	NaN
0.362	10.402	97.531	553.064	-0.1914	0.33506	-0.18311	-15.992	223.092	684.893	-0.05459	0.53418	-0.14883	-32.896	281.86	531.982	-0.15844	0.57299	0.051026	NaN	NaN	NaN	NaN	NaN	NaN
0.364	-0.554000000000002	118.176	634.586	-0.27304	0.38389	-0.1878	-53.598	191.841	616.579	-0.038964	0.51074	-0.15771	-0.798999999999999	248.966	505.5421	-0.14453	0.55859	0.058594	NaN	NaN	NaN	NaN	NaN	NaN
0.366	18.704	146.638	725.136	-0.36026	0.43847	-0.19785	-8.441	184.272	600.473	-0.023438	0.49414	-0.16504	-26.363	256.946	500.781	-0.12012	0.54297	0.061035	NaN	NaN	NaN	NaN	NaN	NaN
0.368	32.259	158.45	788.307	-0.46143	0.50635	-0.20068	-17.527	164.9456	583.526	-0.010938	0.47529	-0.16866	-2.394	281.755	449.079	-0.1123	0.54004	0.066406	NaN	NaN	NaN	NaN	NaN	NaN
0.37	24.788	156.316	843.511	-0.56553	0.58525	-0.19287	-16.762	129.721	564.489	-0.00097658	0.45703	-0.17012	-28.5488	287.294	428.94	-0.087891	0.53174	0.073242	NaN	NaN	NaN	NaN	NaN	NaN
0.372	-1.754	138.526	896.891	-0.6668	0.67929	-0.17637	36.7956	146.3217	577.61	0.013477	0.44063	-0.16777	-59.0224	266.489	388.4837	-0.068603	0.5166	0.085205	NaN	NaN	NaN	NaN	NaN	NaN
0.374	0.969999999999999	109.118	969.695	-0.76406	0.78516	-0.15176	-25.094	149.0359	520.39	0.021778	0.42636	-0.17119	-81.3404	229.730692	381.324	-0.045898	0.50391	0.083008	NaN	NaN	NaN	NaN	NaN	NaN
0.376	3.114	81.423	1017.855	-0.84326	0.9001	-0.11992	-24.619	160.2204	478.22	0.032227	0.41748	-0.17236	-45.001	207.0995	325.8018	-0.026367	0.48828	0.087402	NaN	NaN	NaN	NaN	NaN	NaN
0.378	15.226	60.287	1050.177	-0.8999	1.0122	-0.078125	0.263999999999996	178.241	455.268	0.041114	0.39883	-0.17441	-42.87	191.545	302.729	-0.01123	0.48047	0.086426	NaN	NaN	NaN	NaN	NaN	NaN
0.38	33.498	16.0334	1080.719	-0.91524	1.1164	-0.057129	-46.378	161.3625	422.998	0.052149	0.38799	-0.17256	-64.728	202.373	282.943	0.013184	0.46924	0.079102	NaN	NaN	NaN	NaN	NaN	NaN
0.382	20.68	-16.3973	1121.071	-0.90196	1.1929	-0.042774	7.154	149.6727	438.18	0.057617	0.37197	-0.17724	-77.03575	182.9309	276.796	0.029297	0.45801	0.076904	NaN	NaN	NaN	NaN	NaN	NaN
0.384	24.593	-42.283	1149.628	-0.85234	1.2418	-0.054492	-0.518000000000001	134.8278	398.66	0.066407	0.36074	-0.17461	-101.203	183.055	243.3574	0.036133	0.45117	0.075195	NaN	NaN	NaN	NaN	NaN	NaN
0.386	-21.311	-58.514	1180.053	-0.7832	1.2527	-0.072363	-33.4385	122.954	362.6	0.079102	0.34229	-0.18066	-107.215	147.67	206.1692	0.044434	0.44141	0.07666	NaN	NaN	NaN	NaN	NaN	NaN
0.388	-11.199	-67.038	1203.309	-0.69727	1.2334	-0.09375	-5.598	143.284	347.82	0.088282	0.33037	-0.18144	-91.717	126.023	155.54	0.044434	0.43945	0.073242	NaN	NaN	NaN	NaN	NaN	NaN
0.39	-15.62	-56.6023	1235.427	-0.61191	1.1832	-0.12002	-55.7	160.975	303.437	0.092481	0.31621	-0.18154	-99.951	60.936	186.3893	0.039551	0.44141	0.07666	NaN	NaN	NaN	NaN	NaN	NaN
0.392	-11.171	-48.9445	1242.196	-0.53125	1.1203	-0.14434	-22.114	158.6376	295.94	0.09873	0.30137	-0.18154	-96.0482	55.545	183.2012	0.036377	0.4436	0.079834	NaN	NaN	NaN	NaN	NaN	NaN
0.394	-54.5927	-36.0584	1238.596	-0.46055	1.05	-0.16386	-13.699	147.916	291.11	0.10508	0.29141	-0.18691	-90.5628	23.398	161.649	0.030273	0.4502	0.083984	NaN	NaN	NaN	NaN	NaN	NaN
0.396	-51.0051	-26.5713	1228.6172	-0.40195	0.98457	-0.17529	-28.444	111.486	266.164	0.11133	0.27588	-0.18604	-118.177	71.582	139.6047	0.025391	0.45215	0.089355	NaN	NaN	NaN	NaN	NaN	NaN
0.398	-40.2731	-7.124	1240.5837	-0.35889	0.92041	-0.18018	3.533	83.997	285.63	0.11416	0.2706	-0.18604	-108.789	30.4259	123.1089	0.019043	0.45654	0.097168	NaN	NaN	NaN	NaN	NaN	NaN
0.4	-33.933	14.197	1247.701	-0.32813	0.86455	-0.1835	-23.692	85.9905	251.82	0.1166	0.25976	-0.18203	-69.9741	48.684	128.0454	0.013672	0.45361	0.10107	NaN	NaN	NaN	NaN	NaN	NaN
0.402	-42.17	10.752	1246.0487	-0.29951	0.80479	-0.18682	-47.758	76.495	207.836	0.12012	0.24883	-0.18437	-50.364	2.3174	119.1966	0.010254	0.45117	0.10864	NaN	NaN	NaN	NaN	NaN	NaN
0.404	-38.672	2.48	1235.479	-0.2706	0.75283	-0.18408	-8.092	80.737	213.682	0.12929	0.23965	-0.18447	-55.808	57.496	84.139	0.0092773	0.44775	0.12012	NaN	NaN	NaN	NaN	NaN	NaN
0.406	-32.234	-14.137	1234.374	-0.24736	0.72266	-0.18574	-50.986	76.8615	171.293	0.1333	0.23193	-0.18506	-14.571	22.826	81.7169	0.01416	0.43799	0.12793	NaN	NaN	NaN	NaN	NaN	NaN
0.408	-44.528	-32.461	1231.5126	-0.21631	0.69824	-0.19141	-20.357	42.563	200.833	0.13867	0.22041	-0.17783	-14.932	45.3984	91.1405	0.02002	0.42725	0.12891	NaN	NaN	NaN	NaN	NaN	NaN
0.41	-22.049	-59.136	1258.198	-0.17529	0.68496	-0.20166	-9.45	38.695	194.945	0.14287	0.21103	-0.18623	-30.279	-20.712	83.327	0.035645	0.41357	0.1377	NaN	NaN	NaN	NaN	NaN	NaN
0.412	-8.514	-85.892	1273.5713	-0.13282	0.67793	-0.21738	-44.2069	35.184	166.855	0.15146	0.20323	-0.18389	1.782	16.639	72.387	0.050048	0.39404	0.13965	NaN	NaN	NaN	NaN	NaN	NaN
0.414	9.133	-113.9212	1287.373	-0.097656	0.68261	-0.23731	17.791	27.881	175.676	0.15401	0.19512	-0.18027	36.875	-8.149	67.953	0.066406	0.37402	0.14404	NaN	NaN	NaN	NaN	NaN	NaN
0.416	-3.207	-147.899	1318.511	-0.076367	0.69892	-0.24873	-19.278	39.5184	134.518	0.15381	0.18408	-0.17773	29.522	79.351	107.6547	0.097168	0.3501	0.14258	NaN	NaN	NaN	NaN	NaN	NaN
0.418	1.008	-167.854	1345.921	-0.077148	0.72314	-0.25146	-20.953	36.174	106.9513	0.1502	0.17705	-0.179	21.553	52.547	130.14	0.11084	0.33691	0.14307	NaN	NaN	NaN	NaN	NaN	NaN
0.42	35.449	-156.218	1374.211	-0.098926	0.76025	-0.24756	13.236	32.0338	113.9097	0.14941	0.16943	-0.18037	-22.846	99.33	117.178	0.14697	0.30273	0.13379	NaN	NaN	NaN	NaN	NaN	NaN
0.422	47.591	-134.66	1384.392	-0.14278	0.81035	-0.22695	-44.232	31.6035	101.5816	0.14082	0.16397	-0.17841	9.296	43.736	80.4859	0.17749	0.27954	0.12548	NaN	NaN	NaN	NaN	NaN	NaN
0.424	40.803	-118.718	1405.5015	-0.18926	0.86348	-0.20937	-0.663000000000004	5.603	136.55	0.13184	0.15615	-0.17461	7.029	66.962	99.7028	0.20361	0.25391	0.11328	NaN	NaN	NaN	NaN	NaN	NaN
0.426	48.983	-116.4467	1423.775	-0.23477	0.92148	-0.18828	-6.445	1.163	135.269	0.12305	0.15088	-0.17334	-7.922	3.3578	128.995	0.24658	0.21582	0.10596	NaN	NaN	NaN	NaN	NaN	NaN
0.428	85.031	-117.3689	1448.772	-0.27881	0.97217	-0.16895	-48.005	-2.078	107.4323	0.11201	0.14492	-0.16865	-19.02	21.5075	164.078	0.26367	0.20264	0.10254	NaN	NaN	NaN	NaN	NaN	NaN
0.43	101.99	-103.7009	1473.8914	-0.31934	1.0233	-0.15928	-6.202	-7.8309	113.6538	0.095801	0.14658	-0.16406	3.849	-6.8649	129.78	0.30029	0.17139	0.097656	NaN	NaN	NaN	NaN	NaN	NaN
0.432	77.408	-92.637	1507.7805	-0.35566	1.0727	-0.15049	-32.683	14.1418	96.14475	0.081738	0.14502	-0.16485	-24.348	47.3639	126.769	0.323	0.14526	0.089844	NaN	NaN	NaN	NaN	NaN	NaN
0.434	87.43	-87.431	1513.0346	-0.37793	1.1219	-0.14307	-21.846	7.3167	96.2722	0.06914	0.14151	-0.16035	-28.23	4.155	116.431	0.34033	0.11523	0.084961	NaN	NaN	NaN	NaN	NaN	NaN
0.436	80.501	-81.8	1530.664	-0.39668	1.1611	-0.14151	-4.332	-5.6105	113.2775	0.054199	0.13867	-0.15186	-48.676	23.8702	124.2744	0.35254	0.081543	0.077148	NaN	NaN	NaN	NaN	NaN	NaN
0.438	84.432	-76.511	1549.3107	-0.40771	1.1899	-0.14355	-59.5227	-11.2888	103.1275	0.039648	0.13701	-0.15352	-56.945	-10.8784	116.0729	0.35742	0.066895	0.070313	NaN	NaN	NaN	NaN	NaN	NaN
0.44	75.397	-89.987	1581.574	-0.41182	1.2104	-0.14375	-27.638	-35.8159	137.994	0.018359	0.13525	-0.15069	-64.518	24.345	100.3045	0.3584	0.043457	0.065918	NaN	NaN	NaN	NaN	NaN	NaN
0.442	98.493	-98.224	1612.6025	-0.41445	1.2258	-0.15342	-17.377	-18.6414	130.105	-0.0042968	0.14189	-0.14756	-60.3282	2.2965	93.276	0.3584	0.029297	0.064697	NaN	NaN	NaN	NaN	NaN	NaN
0.444	79.549	-110.9679	1634.7177	-0.41524	1.2367	-0.15811	-43.127	-0.0439999999999969	116.284	-0.021484	0.13809	-0.14805	-108.6914	8.3672	147.225	0.35303	0.017578	0.05957	NaN	NaN	NaN	NaN	NaN	NaN
0.446	55.564	-111.115	1646.7088	-0.41006	1.2415	-0.16406	-9.533	15.1559	118.242	-0.04248	0.14307	-0.14795	-77.639	-22.5489	120.728	0.34473	0.018066	0.048828	NaN	NaN	NaN	NaN	NaN	NaN
0.448	53.328	-128.46071	1681.006	-0.40625	1.2441	-0.17041	-62.3034	41.347	84.0874	-0.064062	0.14687	-0.1417	-82.395	-14.7869	105.3574	0.33447	0.020508	0.052246	NaN	NaN	NaN	NaN	NaN	NaN
0.45	53.626	-132.5403	1709.254	-0.40088	1.2419	-0.17978	-46.1734	30.0178	95.1508	-0.083789	0.15254	-0.14043	-75.8453	-1.357	79.982	0.31982	0.025879	0.04834	NaN	NaN	NaN	NaN	NaN	NaN
0.452	58.49	-136.6757	1731.676	-0.39609	1.2465	-0.19033	-3.335	2.547	111.1163	-0.10411	0.15957	-0.133	-74.226	22.6339	103.69417	0.30542	0.031738	0.044678	NaN	NaN	NaN	NaN	NaN	NaN
0.454	44.171	-135.4413	1751.282	-0.39024	1.2562	-0.19385	-71.4692	7.8395	96.6154	-0.11679	0.16973	-0.12969	-41.018	26.0193	111.5868	0.28271	0.041504	0.044922	NaN	NaN	NaN	NaN	NaN	NaN
0.456	44.322	-151.2026	1754.081	-0.39102	1.2695	-0.19863	-30.307	-5.2269	115.0138	-0.11816	0.18018	-0.12549	-46.461	9.69957	111.0916	0.25293	0.059082	0.044922	NaN	NaN	NaN	NaN	NaN	NaN
0.458	19.982	-138.2475	1762.174	-0.38818	1.2837	-0.19873	-35.161	21.8055	104.097	-0.11338	0.18965	-0.11924	-19.955	-10.273	57.417	0.22876	0.075684	0.045166	NaN	NaN	NaN	NaN	NaN	NaN
0.46	20.389	-128.7963	1764.099	-0.39492	1.2957	-0.1998	-56.637	31.9958	106.301	-0.10059	0.19365	-0.10478	-15.99	-45.548	89.0149	0.19971	0.1001	0.053223	NaN	NaN	NaN	NaN	NaN	NaN
0.462	15.297	-120.6354	1765.6981	-0.40606	1.3137	-0.2082	-9.88999999999999	9.3073	120.5912	-0.072461	0.2003	-0.11182	-6.904	-30.126	81.302	0.17041	0.13965	0.070313	NaN	NaN	NaN	NaN	NaN	NaN
0.464	35.489	-120.1226	1778.0315	-0.42168	1.3281	-0.21406	-38.338	4.1678	97.49817	-0.037012	0.19727	-0.10996	-3.214	-28.2913	98.055	0.15723	0.15869	0.075684	NaN	NaN	NaN	NaN	NaN	NaN
0.466	26.376	-106.6743	1787.8767	-0.43838	1.3512	-0.22373	-15.715	-8.3242	99.738	0.00097656	0.18799	-0.11377	11.31	35.2349	86.8224	0.14551	0.18408	0.088379	NaN	NaN	NaN	NaN	NaN	NaN
0.468	35.157	-90.05	1779.0578	-0.46191	1.375	-0.23047	11.545	-16.04573	115.5001	0.043164	0.16905	-0.121	-21.024	35.768	96.4689	0.14209	0.19995	0.095947	NaN	NaN	NaN	NaN	NaN	NaN
0.47	40.297	-67.571	1817.1628	-0.47197	1.3927	-0.23486	-57.329	23.383	101.7907	0.085351	0.1544	-0.12558	7.899	62.449	95.679	0.14404	0.21729	0.10156	NaN	NaN	NaN	NaN	NaN	NaN
0.472	64.502	-59.116	1825.63261	-0.4832	1.4114	-0.2456	-22.836	8.349	122.5442	0.12403	0.13369	-0.13535	14.152	14.3423	94.8206	0.14795	0.22998	0.11279	NaN	NaN	NaN	NaN	NaN	NaN
0.474	71.617	-65.322	1839.7428	-0.48477	1.4317	-0.26123	-22.061	21.534	102.53312	0.15947	0.11338	-0.14414	3.292	48.343	87.811	0.1499	0.23291	0.11035	NaN	NaN	NaN	NaN	NaN	NaN
0.476	76.793	-66.576	1845.30368	-0.48672	1.4452	-0.28457	-43.973	22.8684	92.1202	0.19189	0.094727	-0.15527	18.335	32.387	89.8463	0.17139	0.24219	0.11328	NaN	NaN	NaN	NaN	NaN	NaN
0.478	82.815	-80.0051	1857.8783	-0.48584	1.4536	-0.30469	12.745	-11.04457	131.271	0.2208	0.074121	-0.16719	6.174	74.717	105.731	0.17969	0.2439	0.10839	NaN	NaN	NaN	NaN	NaN	NaN
0.48	89.411	-76.3619	1870.9171	-0.48594	1.4652	-0.32735	-28.767	8.337084	116.812	0.24316	0.057618	-0.18105	0.460999999999999	23.16573	117.92	0.18994	0.24316	0.10547	NaN	NaN	NaN	NaN	NaN	NaN
0.482	108.511	-78.1131	1879.7674	-0.48213	1.4716	-0.3497	-22.973	8.741	120.6806	0.2541	0.039258	-0.18965	3.395	45.70295	97.0725	0.19727	0.23779	0.10352	NaN	NaN	NaN	NaN	NaN	NaN
0.484	108.486	-81.788	1884.0424	-0.47666	1.4731	-0.36611	-10.784	13.8259	138.5618	0.25977	0.029395	-0.19609	-24.314	-5.8755	79.3748	0.19482	0.23975	0.10254	NaN	NaN	NaN	NaN	NaN	NaN
0.486	103.579	-85.44029	1909.272	-0.47832	1.4709	-0.38389	-52.745	18.174	130.511	0.26172	0.021973	-0.20801	-47.58	62.217	92.0237	0.19092	0.24707	0.094238	NaN	NaN	NaN	NaN	NaN	NaN
0.488	117.456	-98.117	1910.8306	-0.47656	1.4668	-0.40137	15.178	-29.409	154.2645	0.25449	0.022461	-0.21504	-45.896	24.843	143.069	0.18262	0.26075	0.096924	NaN	NaN	NaN	NaN	NaN	NaN
0.49	108.453	-85.907	1912.1416	-0.48555	1.4682	-0.41201	-40.571	-26.927	148.86999	0.24404	0.028516	-0.22022	-41.815	46.024	203.935	0.17725	0.27734	0.099121	NaN	NaN	NaN	NaN	NaN	NaN
0.492	106.878	-56.7515	1918.7946	-0.49443	1.4684	-0.42217	-58.2795	-41.513	176.513	0.21865	0.040234	-0.22881	-93.9189	-48.0947	214.502	0.16895	0.29834	0.10889	NaN	NaN	NaN	NaN	NaN	NaN
0.494	115.479	-37.484	1919.5467	-0.50537	1.4638	-0.43076	-10.371	-66.7651	235.645	0.18076	0.064648	-0.23321	-91.715	-33.388	223.155	0.16211	0.30908	0.10645	NaN	NaN	NaN	NaN	NaN	NaN
0.496	98.234	-28.725	1921.18248	-0.52139	1.4651	-0.4378	-49.8474	-61.389	251.339	0.13086	0.10596	-0.23096	-59.607	-107.267	262.429	0.16016	0.32959	0.1123	NaN	NaN	NaN	NaN	NaN	NaN
0.498	90.86	-25.117	1912.7541	-0.54102	1.4653	-0.4458	-22.745	-84.199	267.9809	0.071776	0.14658	-0.22871	-91.2151	-69.7783	350.29	0.15723	0.34521	0.11865	NaN	NaN	NaN	NaN	NaN	NaN
0.5	80.807	-21.99	1923.559	-0.55556	1.4694	-0.45166	-8.80100000000001	-102.5254	298.8421	0.012692	0.20137	-0.2207	-99.7358	-111.1644	405.321	0.16162	0.3623	0.1123	NaN	NaN	NaN	NaN	NaN	NaN
0.502	87.183	-19.686	1924.538	-0.56787	1.4708	-0.45498	-54.198	-70.3	334.7724	-0.043169	0.25254	-0.2125	-117.7742	-73.283	465.658	0.1582	0.36963	0.083984	NaN	NaN	NaN	NaN	NaN	NaN
0.504	61.038	-17.637	1916.874	-0.5831	1.4697	-0.45889	-22.094	-60.6224	430.9904	-0.10088	0.3086	-0.20684	-94.57	-124.5568	526.574	0.14844	0.37451	0.0625	NaN	NaN	NaN	NaN	NaN	NaN
0.506	49.303	-12.908	1900.3033	-0.5958	1.4708	-0.46631	-26.392	-2.3164	511.874	-0.15479	0.36084	-0.20605	-78.506	-64.099	651.14	0.086426	0.39648	0.0068359	NaN	NaN	NaN	NaN	NaN	NaN
0.508	34.465	-16.354	1897.1847	-0.6001	1.4731	-0.47412	-27.099	34.0606	579.2924	-0.21991	0.40547	-0.20742	-80.818	-65.008	810.68	0.019531	0.44287	-0.0097658	NaN	NaN	NaN	NaN	NaN	NaN
0.51	49.371	-28.1131	1896.6231	-0.60537	1.4726	-0.48233	19.405	35.9577	680.9147	-0.29324	0.45829	-0.22187	-105.877	31.525	990.17	-0.058105	0.49951	-0.0053711	NaN	NaN	NaN	NaN	NaN	NaN
0.512	26.15	-38.647	1889.1979	-0.60625	1.4738	-0.49063	-30.536	86.214	781.69867	-0.38464	0.50165	-0.23672	-96.9009	45.259	1156.41	-0.16162	0.58594	0.01709	NaN	NaN	NaN	NaN	NaN	NaN
0.514	38.493	-18.563	1875.2216	-0.60352	1.4672	-0.49961	-19.192	100.96	917.148	-0.49255	0.55721	-0.2458	-97.129	110.923	1366.26	-0.20654	0.63135	0.039551	NaN	NaN	NaN	NaN	NaN	NaN
0.516	28.851	-30.318	1898.17	-0.59649	1.4607	-0.50566	21.857	129.956	1041.449	-0.6167	0.61719	-0.25195	-22.017	98.7995	1521.68	-0.28564	0.72705	0.05957	NaN	NaN	NaN	NaN	NaN	NaN
0.518	30.048	-19.5408	1888.866	-0.58984	1.4531	-0.51367	12.562	155.171	1136.893	-0.761	0.69456	-0.24696	35.951	91.49539	1656.9	-0.34643	0.78833	0.061524	NaN	NaN	NaN	NaN	NaN	NaN
0.52	33.359	-19.1876	1875.043	-0.5833	1.4386	-0.51494	6.02	105.555	1265.2853	-0.92163	0.78408	-0.23318	27.41	35.011	1696.41	-0.40723	0.83789	0.043945	NaN	NaN	NaN	NaN	NaN	NaN
0.522	38.926	-6.03	1859.212	-0.58408	1.4264	-0.5206	-40.036	76.581	1337.7462	-1.0932	0.90013	-0.20192	0.290999999999997	-10.741	1704.39	-0.52832	0.88867	0.003418	NaN	NaN	NaN	NaN	NaN	NaN
0.524	55.336	9.695	1849.4117	-0.58525	1.4144	-0.52022	-45.98955	26.5064	1379.969	-1.2605	1.0513	-0.14838	47.98	-104.187	1691.82	-0.61133	0.91992	-0.033203	NaN	NaN	NaN	NaN	NaN	NaN
0.526	45.578	22.14138	1835.4868	-0.59092	1.4071	-0.51914	1	-36.4893	1410.903	-1.4058	1.2114	-0.083008	66.818	-183.781	1702.13	-0.80615	1.0103	-0.07373	NaN	NaN	NaN	NaN	NaN	NaN
0.528	67.143	24.9435	1815.5965	-0.59863	1.4043	-0.51367	-18.502	-42.411	1431.24	-1.493	1.3739	-0.014058	120.5547	-254.557	1672.57	-0.97119	1.122	-0.06543	NaN	NaN	NaN	NaN	NaN	NaN
0.53	66.917	28.837	1805.8046	-0.60879	1.3944	-0.50742	-4.46	-136.76081	1457.926	-1.5141	1.5076	0.028175	142.8059	-290.17	1648.62	-1.1265	1.2642	-0.018555	NaN	NaN	NaN	NaN	NaN	NaN
0.532	69.437	30.167	1813.3877	-0.62364	1.3898	-0.49804	26.523	-211.008	1459.532	-1.4421	1.5932	0.044169	105.717	-262.85	1580.07	-1.2808	1.479	0.095703	NaN	NaN	NaN	NaN	NaN	NaN
0.534	93.306	27.686	1803.0608	-0.62793	1.3887	-0.4914	-21.195	-230.752	1422.753	-1.3175	1.6259	0.03905	32.62	-222.93	1582.58	-1.3301	1.5781	0.16064	NaN	NaN	NaN	NaN	NaN	NaN
0.536	99.434	38.143	1781.3613	-0.63584	1.3881	-0.48437	1.028	-238.565	1383.5289	-1.1714	1.6353	0.040039	65.7581	-138.935	1550.37	-1.3281	1.7305	0.28564	NaN	NaN	NaN	NaN	NaN	NaN
0.538	93.339	43.303	1777.1748	-0.64453	1.3867	-0.47461	-13.128	-176.081	1393.66659	-1.0269	1.6087	0.0057436	67.006	-100.488	1593.83	-1.2458	1.7766	0.34742	NaN	NaN	NaN	NaN	NaN	NaN
0.54	72.828	50.294	1764.346	-0.64502	1.3841	-0.4666	-77.57	-104.4099	1388.44606	-0.88285	1.5315	-0.058943	71.009	0.84	1597.72	-1.1157	1.77	0.37646	NaN	NaN	NaN	NaN	NaN	NaN
0.542	90.282	38.706	1749.544	-0.64649	1.3781	-0.45576	-40.2319	-78.265	1377.61785	-0.74305	1.4046	-0.13049	30.353	33.326	1605.66	-0.87891	1.6602	0.34473	NaN	NaN	NaN	NaN	NaN	NaN
0.544	98.406	27.4573	1736.559	-0.64531	1.3676	-0.44756	-72.5711	-18.627	1380.1076	-0.59625	1.2457	-0.17802	-15.679	124.805	1573.47	-0.75098	1.5645	0.30908	NaN	NaN	NaN	NaN	NaN	NaN
0.546	97.705	25.0617	1723.1717	-0.64268	1.3575	-0.44023	-73.77155	-22.079	1388.404	-0.47314	1.0801	-0.20996	-19.828	96.155	1531.07	-0.51074	1.3496	0.23633	NaN	NaN	NaN	NaN	NaN	NaN
0.548	78.963	15.2141	1704.7535	-0.63477	1.3477	-0.43359	-42.131	-43.6	1443.907	-0.39061	0.92998	-0.22429	-12.45	99.541	1523.79	-0.37085	1.1949	0.19068	NaN	NaN	NaN	NaN	NaN	NaN
0.55	73.394	28.7467	1685.956	-0.62734	1.332	-0.42656	-71.339	-15.67	1453.52102	-0.33229	0.80396	-0.2328	-13.371	-84.362	1526.11	-0.26074	1.0654	0.16113	NaN	NaN	NaN	NaN	NaN	NaN
0.552	61.743	47.2982	1661.099	-0.61524	1.318	-0.41485	-20.938	-74.272	1457.988	-0.29613	0.696	-0.23535	-31.773	-193.071	1549.96	-0.146	0.94189	0.1333	NaN	NaN	NaN	NaN	NaN	NaN
0.554	40.975	57.311	1645.513	-0.60391	1.3106	-0.41446	0.635999999999996	-111.369	1501.564	-0.26555	0.6132	-0.24146	-62.025	-382.76	1612.74	-0.09668	0.89551	0.12549	NaN	NaN	NaN	NaN	NaN	NaN
0.556	36.76	48.0549	1630.462	-0.59541	1.2929	-0.40918	-4.8	-157.504	1524.731	-0.24658	0.55713	-0.25439	-126.9254	-400.99	1663.22	0.0087891	0.82422	0.10791	NaN	NaN	NaN	NaN	NaN	NaN
0.558	37.644	42.45944	1604.493	-0.58252	1.2837	-0.40479	57.702	-285.491	1593.794	-0.25865	0.54677	-0.27627	-168.097	-443.07	1704.89	0.081056	0.78467	0.090576	NaN	NaN	NaN	NaN	NaN	NaN
0.56	31.302	62.713	1575.3998	-0.57432	1.2677	-0.40488	74.654	-305.07	1649.463	-0.31598	0.56443	-0.29354	-179.748	-343.67	1759.32	0.15088	0.75781	0.064453	NaN	NaN	NaN	NaN	NaN	NaN
0.562	2.846	79.04	1568.877	-0.56514	1.2571	-0.39834	56.385	-353.539	1677.4145	-0.43584	0.64231	-0.2773	-187.829	-359.15	1826.07	0.22168	0.73828	0.003418	NaN	NaN	NaN	NaN	NaN	NaN
0.564	14.739	95.583	1537.13244	-0.55381	1.2497	-0.39405	83.362	-377.328	1748.911	-0.5954	0.77637	-0.22626	-185.184	-272.489	1939.72	0.24365	0.74463	-0.03125	NaN	NaN	NaN	NaN	NaN	NaN
0.566	2.223	88.308	1518.91101	-0.54346	1.2409	-0.39619	34.01	-312.077	1797.124	-0.74463	0.93408	-0.16748	-187.232	-302.796	2033.24	0.25635	0.78516	-0.077148	NaN	NaN	NaN	NaN	NaN	NaN
0.568	2.363	90.419	1495.0311	-0.53369	1.2329	-0.39404	76.585	-327.749	1827.191	-0.84276	1.0721	-0.1119	-178.933	-214.206	2091.08	0.22681	0.85278	-0.092041	NaN	NaN	NaN	NaN	NaN	NaN
0.57	-0.697000000000003	79.155	1491.927	-0.51621	1.2243	-0.38672	91.606	-281.547	1880.3357	-0.90556	1.1874	-0.066796	-193.623	-223.003	2090.52	0.1665	0.93945	-0.087891	NaN	NaN	NaN	NaN	NaN	NaN
0.572	2.497	84.603	1485.348	-0.5042	1.213	-0.38379	68.496	-207.8776	1890.004	-0.92708	1.2681	-0.043002	-199.074	-150.974	2081.19	0.03418	1.0708	-0.058105	NaN	NaN	NaN	NaN	NaN	NaN
0.574	13.727	89.398	1457.271	-0.49443	1.2044	-0.38027	110.704	-211.281	1952.4031	-0.91786	1.3067	-0.050358	-209.109	-200.6321	2048.54	-0.038574	1.1313	-0.04541	NaN	NaN	NaN	NaN	NaN	NaN
0.576	5.63200000000001	90.711	1427.23329	-0.47666	1.1925	-0.37988	110.135	-112.331	2016.896	-0.88672	1.3076	-0.076172	-196.555	-200.973	2067.12	-0.20898	1.229	-0.035645	NaN	NaN	NaN	NaN	NaN	NaN
0.578	6.395	79.9251	1408.0362	-0.46387	1.1816	-0.37891	133.338	-90.677	2021.145	-0.84787	1.2735	-0.11396	-105.139	-265.899	2071.8	-0.33276	1.2912	-0.049072	NaN	NaN	NaN	NaN	NaN	NaN
0.58	15.061	68.7683	1389.99572	-0.44512	1.1676	-0.37305	177.2665	-136.98	2035.075	-0.81352	1.2278	-0.15853	-99.2832	-247.435	2142.45	-0.43896	1.3462	-0.061035	NaN	NaN	NaN	NaN	NaN	NaN
0.582	30.742	76.6624	1356.991	-0.429	1.1585	-0.36631	141.046	-119.849	2043.638	-0.79729	1.1758	-0.19667	-115.608	-272.289	2171.47	-0.54834	1.4341	-0.059082	NaN	NaN	NaN	NaN	NaN	NaN
0.584	31.101	87.0867	1349.1233	-0.41767	1.1441	-0.36513	132.62	-213.563	2050.521	-0.79121	1.1324	-0.23942	-166.577	-264.719	2214.84	-0.59277	1.4746	-0.05957	NaN	NaN	NaN	NaN	NaN	NaN
0.586	28.82	106.453	1343.132	-0.40567	1.1252	-0.3585	101.83	-231.19	2098.52	-0.80225	1.106	-0.2583	-133.533	-288.443	2246.8	-0.64258	1.5801	-0.083984	NaN	NaN	NaN	NaN	NaN	NaN
0.588	53.393	109.149	1316.354	-0.39258	1.1104	-0.35059	55.541	-198.217	2123.448	-0.83372	1.102	-0.26484	-126.687	-284.653	2332	-0.65527	1.6621	-0.1167	NaN	NaN	NaN	NaN	NaN	NaN
0.59	48.419	109.927	1282.9866	-0.37939	1.0884	-0.34483	68.991	-256.872	2160.0776	-0.89057	1.1229	-0.2615	-63.3008	-301.135	2383.5	-0.65234	1.7344	-0.16309	NaN	NaN	NaN	NaN	NaN	NaN
0.592	50.715	106.647	1255.5784	-0.36934	1.0735	-0.33809	47.738	-222.443	2222.514	-0.95344	1.1717	-0.24935	-52.6408	-280.203	2438.99	-0.63672	1.8027	-0.21582	NaN	NaN	NaN	NaN	NaN	NaN
0.594	51.311	97.7113	1240.2335	-0.35371	1.0551	-0.33106	11.083	-242.606	2235.97	-1.0185	1.2422	-0.24248	-59.475	-248.2953	2449.34	-0.63428	1.8188	-0.23779	NaN	NaN	NaN	NaN	NaN	NaN
0.596	51.472	101.693	1219.876	-0.34287	1.0457	-0.32646	47.538	-292.241	2285.291	-1.0566	1.3125	-0.24854	-97.343	-211.39	2507.55	-0.6499	1.8228	-0.25684	NaN	NaN	NaN	NaN	NaN	NaN
0.598	39.84	114.1156	1187.9438	-0.33057	1.0313	-0.3208	5.693	-199.6444	2325.464	-1.0679	1.3649	-0.262	-68.825	-153.91	2528.01	-0.73779	1.7778	-0.22998	NaN	NaN	NaN	NaN	NaN	NaN
0.6	21.287	122.2474	1160.0121	-0.32344	1.0202	-0.30889	20.482	-208.7072	2318.254	-1.0689	1.4129	-0.27068	-62.107	-139.637	2544.2	-0.79883	1.7617	-0.2168	NaN	NaN	NaN	NaN	NaN	NaN
0.602	10.316	116.2551	1154.7034	-0.31377	1.0037	-0.30303	47.035	-179.5355	2343.588	-1.0581	1.4535	-0.29295	-39.883	-94.141	2525.74	-0.90381	1.8091	-0.26172	NaN	NaN	NaN	NaN	NaN	NaN
0.604	8.188	110.0772	1122.6496	-0.30674	0.9916	-0.29444	23.401	-107.99	2304.6169	-1.049	1.4912	-0.31669	-100.523	-107.133	2553.55	-0.9441	1.842	-0.26636	NaN	NaN	NaN	NaN	NaN	NaN
0.606	12.286	125.523	1107.3725	-0.30264	0.97764	-0.28584	51.538	-150.535	2265.992	-1.0337	1.5181	-0.34033	-119.523	-59.21	2519.01	-0.98633	1.8691	-0.2124	NaN	NaN	NaN	NaN	NaN	NaN
0.608	6.11799999999999	131.246	1096.479	-0.29346	0.96533	-0.27344	40.401	-77.652	2293.892	-1.03	1.5414	-0.37188	-192.631	-45.46	2540.16	-1.1094	1.9063	-0.15234	NaN	NaN	NaN	NaN	NaN	NaN
0.61	-3.234	126.137	1076.59	-0.28858	0.94912	-0.26328	16.666	-57.177	2285.826	-1.0254	1.5554	-0.40079	-168.422	31.21	2516.7	-1.1758	1.9199	-0.14404	NaN	NaN	NaN	NaN	NaN	NaN
0.612	-25.187	124.2688	1045.8377	-0.28232	0.93808	-0.25596	61.35	-92.3395	2306.0162	-1.0316	1.5695	-0.42149	-134.96	10.13	2564.35	-1.2891	1.9482	-0.13672	NaN	NaN	NaN	NaN	NaN	NaN
0.614	-19.057	131.992	1010.038	-0.27295	0.92403	-0.24346	31.096	-22.695	2319.995	-1.0416	1.578	-0.43281	-114.891	53.78	2591.96	-1.3613	1.9629	-0.13013	NaN	NaN	NaN	NaN	NaN	NaN
0.616	-29.772	134.919	997.58397	-0.26562	0.9081	-0.23447	61.27	-72.4677	2297.486	-1.0591	1.5845	-0.44092	-158.897	27.91	2610.7	-1.4272	1.9849	-0.12744	NaN	NaN	NaN	NaN	NaN	NaN
0.618	-36.735	139.693	983.8013	-0.25439	0.89014	-0.22412	88.069	-78.314	2344.7718	-1.077	1.5885	-0.44756	-159.89	105	2634.59	-1.5112	2.0298	-0.11182	NaN	NaN	NaN	NaN	NaN	NaN
0.62	-45.5326	142.509	968.823	-0.24219	0.8749	-0.21104	78.793	-28.509	2356.1278	-1.0842	1.593	-0.4625	-170.001	52.98	2642.27	-1.5601	2.0591	-0.10107	NaN	NaN	NaN	NaN	NaN	NaN
0.622	-36.039	149.498	943.327	-0.22617	0.8543	-0.20254	134.166	-109.037	2355.2795	-1.0861	1.6059	-0.47773	-139.132	60	2627.28	-1.6328	2.1094	-0.064941	NaN	NaN	NaN	NaN	NaN	NaN
0.624	-38.843	141.035	933.562	-0.20937	0.83555	-0.19395	154.368	-56.564	2406.748	-1.0856	1.6137	-0.49531	-172.567	-60.37	2612.15	-1.6707	2.1468	-0.043213	NaN	NaN	NaN	NaN	NaN	NaN
0.626	-40.4	140.54	913.498	-0.19121	0.81426	-0.18809	124.541	-60.522	2382.4045	-1.0815	1.6235	-0.5083	-161.339	-44.84	2588.65	-1.689	2.1704	-0.0083008	NaN	NaN	NaN	NaN	NaN	NaN
0.628	-27.343	150.319	875.524	-0.17285	0.78857	-0.17822	170.9259	-122.347	2405.352	-1.083	1.6303	-0.51738	-148.553	-87.02	2574.79	-1.6948	2.1685	0.019531	NaN	NaN	NaN	NaN	NaN	NaN
0.63	-14.898	154.435	858.2146	-0.1585	0.7711	-0.17187	164.713	-38.859	2412.901	-1.0816	1.6328	-0.52452	-144.395	27.71	2536.14	-1.6836	2.1504	0.029297	NaN	NaN	NaN	NaN	NaN	NaN
0.632	-17.232	157.118	843.90949	-0.14287	0.74912	-0.16533	153.285	-62.831	2360.5037	-1.0809	1.6297	-0.53428	-142.06	24.56	2512.16	-1.646	2.1001	0.044922	NaN	NaN	NaN	NaN	NaN	NaN
0.634	-3.958	162.437	823.1688	-0.12686	0.72881	-0.1583	155.548	-35.209	2372.5709	-1.0778	1.6245	-0.5292	-136.535	107.58	2475.07	-1.6089	2.0479	0.051026	NaN	NaN	NaN	NaN	NaN	NaN
0.636	3.221	159.794	820.033	-0.10938	0.70645	-0.15136	84.362	50.834	2354.02437	-1.0762	1.6133	-0.52344	-94.076	71.31	2457.1	-1.5645	2	0.046875	NaN	NaN	NaN	NaN	NaN	NaN
0.638	12.237	152.046	811.799	-0.095215	0.68799	-0.14063	113.699	7.067	2327.4655	-1.0709	1.5994	-0.52207	-67.254	156.648	2444.01	-1.4956	1.938	0.04541	NaN	NaN	NaN	NaN	NaN	NaN
0.64	5.122	138.229	796.359	-0.073535	0.67139	-0.13369	116.386	97.348	2350.03993	-1.0723	1.5797	-0.51709	-63.804	127.75	2419.21	-1.4644	1.9087	0.041016	NaN	NaN	NaN	NaN	NaN	NaN
0.642	17.552	143.938	766.316	-0.051072	0.65244	-0.12666	78.083	119.557	2306.885	-1.0761	1.5593	-0.51592	-68.303	211.558	2390.59	-1.3921	1.8521	0.038086	NaN	NaN	NaN	NaN	NaN	NaN
0.644	18.901	153.522	741.6552	-0.026073	0.6372	-0.11924	95.009	88.933	2301.7596	-1.0806	1.5368	-0.51162	-59.557	159.69	2332.65	-1.3384	1.8179	0.030273	NaN	NaN	NaN	NaN	NaN	NaN
0.646	5.72799999999999	154.798	718.06457	-0.0022443	0.61836	-0.11514	68.139	172.063	2310.212	-1.0952	1.5122	-0.50781	-60.12	199.014	2274.5	-1.2788	1.7876	0.017578	NaN	NaN	NaN	NaN	NaN	NaN
0.648	24.717	142.65194	708.6929	0.022461	0.59717	-0.11084	64.486	114.054	2264.3491	-1.1093	1.4974	-0.50107	-74.127	129.76	2229.51	-1.1987	1.7563	0.0014648	NaN	NaN	NaN	NaN	NaN	NaN
0.65	21.057	137.26452	693.272	0.042673	0.57911	-0.11387	50.246	90.671	2282.88	-1.1269	1.4794	-0.49141	-69.524	166.44	2199.67	-1.1621	1.75	-0.0043945	NaN	NaN	NaN	NaN	NaN	NaN
0.652	20.633	148.5183	664.2028	0.067475	0.56201	-0.11504	24.717	111.732	2266.778	-1.1401	1.4701	-0.48438	-29.8841	131.246	2148.59	-1.0854	1.729	-0.020996	NaN	NaN	NaN	NaN	NaN	NaN
0.654	1.338	158.433	654.059	0.084274	0.54366	-0.10879	43.288	3.295	2226.081	-1.1579	1.4604	-0.47744	-75.903	181.862	2115.44	-1.03	1.7269	-0.026856	NaN	NaN	NaN	NaN	NaN	NaN
0.656	-10.146	153.15	652.35	0.10244	0.52706	-0.11172	41.76	35.914	2217.756	-1.1646	1.4536	-0.46045	-87.21	123.937	2049.42	-0.98047	1.7129	-0.035156	NaN	NaN	NaN	NaN	NaN	NaN
0.658	-11.16	153.032	627.546	0.11426	0.51123	-0.11328	-2.434	50.8568	2164.3221	-1.1736	1.4514	-0.45762	-141.143	170.017	2017.68	-0.91943	1.6997	-0.036133	NaN	NaN	NaN	NaN	NaN	NaN
0.66	-24.39	148.482	603.87	0.1294	0.49638	-0.11035	8.485	25.138	2145.4512	-1.1711	1.4492	-0.44639	-126.043	152.72	1975.66	-0.89209	1.689	-0.033203	NaN	NaN	NaN	NaN	NaN	NaN
0.662	-27.129	145.73	580.9961	0.13867	0.48407	-0.10664	7.15299999999999	125.4667	2147.4074	-1.1613	1.4442	-0.43545	-109.955	253.63	1965.6	-0.83984	1.6738	-0.026855	NaN	NaN	NaN	NaN	NaN	NaN
0.664	-29.751	143.416	565.9396	0.14454	0.47118	-0.10547	30.016	95.0496	2075.5859	-1.144	1.4374	-0.42549	-88.366	263.595	1932.64	-0.79883	1.6514	-0.028076	NaN	NaN	NaN	NaN	NaN	NaN
0.666	-42.2236	163.542	534.3574	0.14571	0.46191	-0.10038	37.991	112.2766	2084.098	-1.125	1.4219	-0.41406	-127.652	336.166	1883.06	-0.75732	1.6294	-0.026367	NaN	NaN	NaN	NaN	NaN	NaN
0.668	-53.506	155.85	520.18111	0.14648	0.45215	-0.094238	45.722	180.882	2050.971	-1.0944	1.4005	-0.40849	-154.797	334.8527	1802.38	-0.71094	1.5957	-0.02832	NaN	NaN	NaN	NaN	NaN	NaN
0.67	-66.3265	148.721	504.55753	0.14473	0.44845	-0.088493	78.535	137.211	2011.349	-1.0679	1.3802	-0.39873	-120.709	374.772	1744.52	-0.68555	1.5723	-0.023926	NaN	NaN	NaN	NaN	NaN	NaN
0.672	-61.675	132.827	505.014	0.13871	0.44461	-0.082425	94.434	218.125	2000.258	-1.0331	1.3556	-0.39014	-97.705	327.684	1698.01	-0.64209	1.5376	-0.028809	NaN	NaN	NaN	NaN	NaN	NaN
0.674	-55.2571	136.885	481.6203	0.13049	0.44272	-0.067695	87.768	219.055	1897.334	-0.9998	1.333	-0.38301	-122.891	308.7	1661.15	-0.61328	1.5034	-0.033936	NaN	NaN	NaN	NaN	NaN	NaN
0.676	-55.697	120.1456	474.93	0.12375	0.43763	-0.067756	101.672	184.3156	1856.234	-0.96875	1.3066	-0.37305	-100.773	254.84	1575.93	-0.5835	1.4712	-0.032715	NaN	NaN	NaN	NaN	NaN	NaN
0.678	-49.7419	117.0065	466.182	0.12598	0.43799	-0.061035	98.722	238.434	1850.596	-0.93828	1.2832	-0.36728	-123.242	270.387	1523.32	-0.54639	1.4321	-0.029785	NaN	NaN	NaN	NaN	NaN	NaN
0.68	-62.5164	115.4902	446.7692	0.13394	0.44417	-0.065168	83.171	181.41268	1796.649	-0.90879	1.2598	-0.3625	-129.153	281.201	1456.79	-0.52832	1.4121	-0.032227	NaN	NaN	NaN	NaN	NaN	NaN
0.682	-47.7054	130.156	418.46998	0.14398	0.44878	-0.053878	83.393	177.231	1816.6767	-0.88848	1.2442	-0.35156	-92.322	301.726	1438.65	-0.48926	1.3682	-0.033203	NaN	NaN	NaN	NaN	NaN	NaN
0.684	-50.3961	116.695	405.1846	0.1447	0.44747	-0.052332	70.728	196.489	1795.185	-0.87344	1.2238	-0.3376	-42.718	300.633	1390.4	-0.45679	1.3362	-0.034913	NaN	NaN	NaN	NaN	NaN	NaN
0.686	-39.797	117.417	402.8784	0.14181	0.44787	-0.05387	63.59	125.983	1759.419	-0.85156	1.2109	-0.33105	-34.081	304.867	1368.76	-0.42529	1.3071	-0.04248	NaN	NaN	NaN	NaN	NaN	NaN
0.688	-19.713	117.017	387.9908	0.14502	0.44043	-0.047852	55.217	181.3695	1751.776	-0.83369	1.2015	-0.31934	-22.198	317.204	1314.39	-0.38379	1.2637	-0.050293	NaN	NaN	NaN	NaN	NaN	NaN
0.69	-8.866	118.51	378.725	0.14621	0.43587	-0.047087	37.57	184.2064	1671.12	-0.81553	1.1903	-0.30742	13.661	300.709	1294.85	-0.36035	1.2446	-0.056152	NaN	NaN	NaN	NaN	NaN	NaN
0.692	-1.831	106.0307	372.43	0.14098	0.42697	-0.040039	60.64	165.801	1639.0249	-0.78662	1.1762	-0.2914	22.621	301.24	1235.86	-0.30615	1.2075	-0.065918	NaN	NaN	NaN	NaN	NaN	NaN
0.694	-10.207	98.7193	367.03	0.13633	0.41806	-0.038652	32.951	236.316	1616.63	-0.75654	1.163	-0.27412	22.505	276.704	1168.42	-0.28125	1.17	-0.066162	NaN	NaN	NaN	NaN	NaN	NaN
0.696	2.776	98.286	338.138	0.12988	0.41116	-0.033052	-3.462	195.397	1537.2239	-0.72168	1.1426	-0.26221	32.917	255.685	1076.16	-0.25439	1.1313	-0.064941	NaN	NaN	NaN	NaN	NaN	NaN
0.698	2.862	104.7442	319.3084	0.12451	0.40674	-0.027344	10.26	195.7244	1522.5623	-0.68819	1.1169	-0.25889	33.955	226.687	1010.65	-0.22852	1.0786	-0.076172	NaN	NaN	NaN	NaN	NaN	NaN
0.7	-3.978	106.2308	310.3703	0.12354	0.39893	-0.028672	-34.039	235.236	1460.767	-0.65488	1.0859	-0.24971	18.549	257.49	957.82	-0.21436	1.0532	-0.083008	NaN	NaN	NaN	NaN	NaN	NaN
0.702	-0.326000000000001	105.072	303.5575	0.12035	0.38865	-0.021021	-31.658	189.7693	1419.2053	-0.62832	1.0516	-0.24307	-5.599	258.07	917.23	-0.18359	1.0044	-0.093262	NaN	NaN	NaN	NaN	NaN	NaN
0.704	0.187999999999995	100.36	295.0804	0.12228	0.37703	-0.012207	-47.606	263.147	1394.158	-0.60215	1.0179	-0.23564	-3.701	295.7	839.83	-0.16797	0.96948	-0.10572	NaN	NaN	NaN	NaN	NaN	NaN
0.706	-15.394	98.545	285.8333	0.12305	0.36496	-0.0078125	-65.488	255.491	1303.4454	-0.57617	0.98926	-0.21973	-15.27	255.794	793.79	-0.14844	0.94141	-0.11133	NaN	NaN	NaN	NaN	NaN	NaN
0.708	-8.873	83.2493	280.406	0.12598	0.35254	-0.0014648	-50.537	233.2147	1275.6891	-0.5582	0.95537	-0.21191	8.687	272.524	755.4	-0.12061	0.9082	-0.11914	NaN	NaN	NaN	NaN	NaN	NaN
0.71	-18.851	84.79	280.135	0.13333	0.33882	-0.00098591	-86.1764	289.08	1227.898	-0.54023	0.92657	-0.20078	15.271	237.007	724.41	-0.10596	0.89551	-0.125	NaN	NaN	NaN	NaN	NaN	NaN
0.712	-15.38	85.308	258.4824	0.14086	0.32587	0.0053215	-72.363	242.8516	1173.949	-0.52539	0.89883	-0.19023	8.65499999999999	304.73	687.95	-0.080566	0.8623	-0.1377	NaN	NaN	NaN	NaN	NaN	NaN
0.714	-34.053	78.957	247.6717	0.15055	0.31723	0.0070885	-62.351	266.469	1159.418	-0.50674	0.87607	-0.17705	-2.139	284.21	654.2	-0.060547	0.84204	-0.14722	NaN	NaN	NaN	NaN	NaN	NaN
0.716	-38.67	66.7065	237.4098	0.16432	0.30053	0.0051587	-70.5917	279.601	1123.7491	-0.48828	0.84961	-0.16797	-21.004	326.08	610.53	-0.048828	0.8208	-0.15674	NaN	NaN	NaN	NaN	NaN	NaN
0.718	-45.856	72.0879	227.05292	0.17432	0.2876	0.0083008	-33.488	211.847	1106.671	-0.46807	0.82744	-0.15342	-43.134	260.612	562.82	-0.030273	0.79785	-0.16602	NaN	NaN	NaN	NaN	NaN	NaN
0.72	-58.4016	84.168	215.9606	0.18724	0.27393	0.0058594	-40.095	239.554	1104.261	-0.4458	0.80625	-0.14511	-58.239	272.443	530.02	-0.020508	0.78955	-0.17725	NaN	NaN	NaN	NaN	NaN	NaN
0.722	-60.5961	74.621	204.5866	0.1987	0.26015	0.011778	-24.443	220.571	1026.542	-0.42588	0.7832	-0.13262	-45.62	195.117	493.56	-0.0068359	0.77588	-0.17773	NaN	NaN	NaN	NaN	NaN	NaN
0.724	-66.25408	67.86	195.5964	0.20846	0.24668	0.010909	1.547	198.65477	1001.7391	-0.40674	0.76064	-0.12109	-44.515	231.97	483.45	0.0012207	0.76709	-0.18261	NaN	NaN	NaN	NaN	NaN	NaN
0.726	-70.712925	62.024	204.0377	0.21418	0.23358	0.011909	-22.073	238.315	942.7148	-0.3877	0.73877	-0.10938	-53.838	185.57	464.5	0.012207	0.75684	-0.18652	NaN	NaN	NaN	NaN	NaN	NaN
0.728	-49.753	63.71	190.9221	0.22803	0.22314	0.010742	-8.182	200.525	886.973	-0.36611	0.71806	-0.10068	-70.805	245.032	437.86	0.019043	0.74219	-0.18604	NaN	NaN	NaN	NaN	NaN	NaN
0.73	-60.773	52.609	187.392	0.23675	0.20933	0.014623	-30.514	213.51	879.0371	-0.34394	0.69736	-0.090136	-84.2777	194.722	373.53	0.022949	0.73242	-0.18262	NaN	NaN	NaN	NaN	NaN	NaN
0.732	-55.587	51.301	191.576	0.24495	0.19944	0.012223	-18.082	246.628	818.0178	-0.31973	0.67549	-0.076465	-32.808	259.739	359.75	0.027344	0.7168	-0.18555	NaN	NaN	NaN	NaN	NaN	NaN
0.734	-43.0445	58.853	173.53427	0.24766	0.18777	0.01298	3.323	215.3426	806.152	-0.30732	0.65088	-0.064844	15.434	206.18	350.62	0.033204	0.70117	-0.18018	NaN	NaN	NaN	NaN	NaN	NaN
0.736	-39.02	49.9903	182.529	0.25107	0.17615	0.010444	-9.004	255.416	795.044	-0.28955	0.63281	-0.056641	-2.276	262.831	358.06	0.038086	0.6875	-0.17773	NaN	NaN	NaN	NaN	NaN	NaN
0.738	-44.7235	31.8521	199.702	0.25098	0.16602	0.00097656	-21.475	240.01	741.428	-0.26855	0.60918	-0.041895	4.587	189.781	320.06	0.037598	0.66455	-0.17822	NaN	NaN	NaN	NaN	NaN	NaN
0.74	-54.033	21.957	207.434	0.23781	0.16055	-0.0070185	-2.478	234.9	717.458	-0.25147	0.58633	-0.02666	10.129	234.307	281.08	0.039063	0.6499	-0.17725	NaN	NaN	NaN	NaN	NaN	NaN
0.742	-3.92	22.5168	197.684	0.2178	0.16473	-0.0050807	-25.382	273.152	662.08018	-0.23427	0.56524	-0.016114	-6.535	155.615	248.77	0.036133	0.62939	-0.17627	NaN	NaN	NaN	NaN	NaN	NaN
0.744	0.888000000000002	12.269	212.524	0.19474	0.17294	-0.0042962	-9.794	229.393	608.471	-0.21797	0.54531	-0.0061524	20.418	175.767	227.44	0.041504	0.6084	-0.17578	NaN	NaN	NaN	NaN	NaN	NaN
0.746	-11.734	10.889	248.36	0.16661	0.19276	0.0041962	-33.639	225.2145	606.365	-0.19434	0.52344	0.0019531	5.907	84.179	213.73	0.04248	0.59131	-0.18701	NaN	NaN	NaN	NaN	NaN	NaN
0.748	-17.115	2.868	266.64	0.14258	0.22021	0.017578	-74.2146	214.618	559.303	-0.17256	0.50654	0.010644	14.947	136.005	196.962	0.037598	0.56494	-0.17529	NaN	NaN	NaN	NaN	NaN	NaN
0.75	4.999	12.1353	267.38	0.12275	0.24942	0.029497	-54.3994	160.7608	539.8059	-0.14707	0.48867	0.022071	21.611	55.744	193.171	0.03711	0.53906	-0.17431	NaN	NaN	NaN	NaN	NaN	NaN
0.752	-8.836	24.8627	291.79	0.0997	0.2795	0.039159	-74.368	174.7235	528.001	-0.12207	0.46797	0.022461	14.702	85.723	175.709	0.033691	0.52344	-0.17529	NaN	NaN	NaN	NaN	NaN	NaN
0.754	-1.75700000000001	51.106	330.69	0.08564	0.30645	0.040724	-95.868	148.751	496.415	-0.097659	0.44883	0.030566	37.235	-2.916	181.712	0.035156	0.49707	-0.16797	NaN	NaN	NaN	NaN	NaN	NaN
0.756	-10.355	74.989	389.47	0.065915	0.32871	0.037792	-83.655	140.4327	500.759	-0.070313	0.43604	0.024414	36.214	17.38	154.576	0.033691	0.48486	-0.16846	NaN	NaN	NaN	NaN	NaN	NaN
0.758	-2.473	108.432	426.07	0.039551	0.34766	0.027344	-95.479	165.097	443.195	-0.043066	0.41611	0.026367	26.245	-44.346	144.795	0.043457	0.46289	-0.16895	NaN	NaN	NaN	NaN	NaN	NaN
0.76	-26.219	121.839	485.15	-0.0088838	0.36543	0.013477	-92.111	153.6133	387.8266	-0.015039	0.39893	0.025	-7.66	-1.87	124.172	0.051025	0.44214	-0.17261	NaN	NaN	NaN	NaN	NaN	NaN
0.762	-5.693	135.246	553.54	-0.067084	0.38691	0.0012703	-99.752	160.4056	382.472	0.0072264	0.38291	0.022266	-7.939	-33.786	133.572	0.062988	0.42725	-0.17432	NaN	NaN	NaN	NaN	NaN	NaN
0.764	-2.872	158.415	634.69	-0.14794	0.42011	-0.0096668	-100.725	158.708	359.4528	0.029297	0.36699	0.02041	-34.187	18.4151	116.5269	0.084961	0.40137	-0.17578	NaN	NaN	NaN	NaN	NaN	NaN
0.766	1.519	191.083	696.93	-0.24375	0.46611	-0.012012	-68.3583	127.10527	351.4006	0.045898	0.35156	0.019531	-39.83	-9.0247	99.097	0.09668	0.3916	-0.17676	NaN	NaN	NaN	NaN	NaN	NaN
0.768	-19.034	187.785	778.48	-0.35156	0.51953	-0.0083008	-81.695	156.721	322.3982	0.065137	0.33945	0.012305	-49.399	13.7407	84.466	0.12158	0.36426	-0.17676	NaN	NaN	NaN	NaN	NaN	NaN
0.77	-28.659	152.907	859.21	-0.46641	0.60157	0.0055668	-73.323	140.999	282.077	0.079102	0.32315	0.0091797	-91.5984	-11.7392	106.1995	0.13941	0.34008	-0.17675	NaN	NaN	NaN	NaN	NaN	NaN
0.772	-25.252	101.833	929.61	-0.59131	0.69815	0.030665	-51.3961	135.204	295.925	0.085352	0.31377	0.006836	-74.457	14.8424	84.4944	0.15967	0.3208	-0.18066	NaN	NaN	NaN	NaN	NaN	NaN
0.774	-27.955	64.67	987.41	-0.70538	0.81299	0.072462	-67.302	153.094	271.689	0.096971	0.30605	0.010547	-65.3536	-2.672	88.3792	0.18018	0.28809	-0.17871	NaN	NaN	NaN	NaN	NaN	NaN
0.776	-13.875	13.5531	1043.74	-0.80508	0.93945	0.11807	-30.273	125.396	220.847	0.10547	0.29541	0.012207	-63.618	19.078	90.6591	0.19238	0.27002	-0.18018	NaN	NaN	NaN	NaN	NaN	NaN
0.778	-4.114	-23.3096	1090.32	-0.88184	1.0684	0.15723	-24.689	133.1105	212.077	0.11016	0.28828	0.014453	-63.5798	0.227	104.148	0.21338	0.23828	-0.18359	NaN	NaN	NaN	NaN	NaN	NaN
0.78	-13.27	-47.976	1125.25	-0.91845	1.1827	0.19414	-38.347	128.586	184.564	0.11992	0.28291	0.020117	-53.983	2.407	84.5723	0.22827	0.21021	-0.17994	NaN	NaN	NaN	NaN	NaN	NaN
0.782	11.197	-67.658	1159.64	-0.92666	1.2728	0.21533	-7.695	83.269	206.3359	0.12774	0.27705	0.018164	-66.331	25.9963	83.61	0.24561	0.18799	-0.17676	NaN	NaN	NaN	NaN	NaN	NaN
0.784	35.138	-81.353	1198.6	-0.90596	1.3333	0.22119	-8.388	101.392	196.7117	0.13653	0.26933	0.022559	-54.4	51.1981	80.41615	0.27002	0.15332	-0.17627	NaN	NaN	NaN	NaN	NaN	NaN
0.786	37.231	-86.498	1245.93	-0.85498	1.3716	0.22109	-11.481	67.311	169.3221	0.14307	0.25928	0.022461	-52.302	75.156	102.6101	0.2876	0.13818	-0.17676	NaN	NaN	NaN	NaN	NaN	NaN
0.788	50.9388	-82.302	1284.99	-0.78516	1.3828	0.21436	18.085	56.2499	191.793	0.15293	0.24981	0.016992	-47.2	47.123	106.4466	0.31299	0.104	-0.18799	NaN	NaN	NaN	NaN	NaN	NaN
0.79	57.3718	-62.59	1348.5	-0.70654	1.3657	0.20381	-12.333	63.793	181.042	0.16181	0.24053	0.017383	-72.875	37.1961	103.3286	0.33105	0.077881	-0.19531	NaN	NaN	NaN	NaN	NaN	NaN
0.792	43.542	-38.528	1401.08	-0.64131	1.3294	0.18603	20.449	39.9569	166.707	0.16963	0.23037	0.014649	-39.339	-5.6015	108.47	0.34766	0.055664	-0.20264	NaN	NaN	NaN	NaN	NaN	NaN
0.794	38.487	-18.6872	1456.86	-0.59795	1.272	0.16142	-1.078	68.1026	156.4582	0.17227	0.21758	0.014453	-25.484	26.0595	124.982	0.3623	0.024414	-0.22412	NaN	NaN	NaN	NaN	NaN	NaN
0.796	55.588	-25.5682	1498.29	-0.58233	1.201	0.1373	-32.902	60.931	105.609	0.17236	0.21289	0.016113	-5.265	24.008	141.086	0.3584	0.0019531	-0.22461	NaN	NaN	NaN	NaN	NaN	NaN
0.798	28.762	-49.3205	1540.95	-0.59473	1.1367	0.12012	-9.959	36.4887	125.517	0.17275	0.19795	0.011426	2.435	72.471	141.75	0.354	-0.016602	-0.22266	NaN	NaN	NaN	NaN	NaN	NaN
0.8	21.764	-62.5677	1572.32	-0.60576	1.0909	0.11973	-34.744	41.0578	133.709	0.16748	0.18741	0.015625	0.0319999999999965	42.791	125.647	0.33496	-0.027099	-0.22461	NaN	NaN	NaN	NaN	NaN	NaN
0.802	40.717	-66.4901	1572.05	-0.61289	1.0598	0.13486	-44.705	18.663	116.2476	0.16123	0.17959	0.01914	9.456	66.127	109.527	0.30908	-0.038086	-0.22266	NaN	NaN	NaN	NaN	NaN	NaN
0.804	49.567	-74.1332	1560.73	-0.58867	1.0426	0.14072	-32.768	21.1079	120.77472	0.15312	0.17646	0.020801	14.593	-1.031	116.078	0.2666	-0.038574	-0.21094	NaN	NaN	NaN	NaN	NaN	NaN
0.806	35.377	-99.854	1543.7	-0.5209	1.0334	0.14346	-65.1481	38.405	111.913	0.14746	0.16943	0.027832	15.498	27.7167	114.6214	0.24268	-0.034668	-0.20068	NaN	NaN	NaN	NaN	NaN	NaN
0.808	50.488	-150.111	1518	-0.41357	1.0298	0.12939	-48.894	21.5384	112.702	0.13672	0.16553	0.02959	8.529	-9.7172	117.51	0.19287	-0.020508	-0.18652	NaN	NaN	NaN	NaN	NaN	NaN
0.81	51.914	-184.786	1488.05	-0.28271	1.022	0.10332	-68.083	31.4355	118.0252	0.12803	0.16289	0.033789	-2.167	43.437	121.912	0.15625	-0.0041505	-0.17285	NaN	NaN	NaN	NaN	NaN	NaN
0.812	24.627	-184.078	1453.3	-0.14629	0.99777	0.058692	-77.029	21.965	83.1435	0.12256	0.15859	0.036523	9.604	-0.46406	130.657	0.12256	0.01416	-0.15527	NaN	NaN	NaN	NaN	NaN	NaN
0.814	6.435	-181.881	1431.91	-0.025195	0.9626	0.0043945	-55.331	-11.398	93.1135	0.10449	0.15517	0.035742	-30.846	37.931	123.4797	0.085938	0.040039	-0.13965	NaN	NaN	NaN	NaN	NaN	NaN
0.816	-9.553	-177.073	1426.62	0.066113	0.91367	-0.04043	-75.3012	12.242	105.8966	0.094238	0.14844	0.039063	-34.261	-4.1104	117.263788	0.068359	0.053711	-0.13135	NaN	NaN	NaN	NaN	NaN	NaN
0.818	-26.783	-168.597	1403.47	0.12256	0.87158	-0.083984	-47.677	-13.762	95.5826	0.081934	0.14815	0.04209	-29.669	43.192	116.8154	0.051758	0.076172	-0.12109	NaN	NaN	NaN	NaN	NaN	NaN
0.82	-45.988	-141.119	1393.86	0.12764	0.8294	-0.10537	-49.557	-23.8267	129.004	0.070019	0.14834	0.043945	-35.116	-7.17628	129.46	0.050293	0.092774	-0.10474	NaN	NaN	NaN	NaN	NaN	NaN
0.822	-46.847	-112.479	1407.04	0.10547	0.80439	-0.11894	-80.3435	-11.8146	101.294	0.062598	0.14873	0.044727	-61.127	17.8847	130.107	0.060547	0.10156	-0.098145	NaN	NaN	NaN	NaN	NaN	NaN
0.824	-66.822	-95.743	1445.34	0.048828	0.79346	-0.11152	-40.268	-29.0404	103.81	0.050977	0.15342	0.049023	-69.5249	-47.068	119.505	0.092285	0.1084	-0.09668	NaN	NaN	NaN	NaN	NaN	NaN
0.826	-87.7225	-80.52	1445.54	-0.022559	0.79434	-0.098438	-42.551	1.3271	122.9477	0.044922	0.1582	0.049805	-52.248	-30.9206	88.1258	0.10498	0.104	-0.097656	NaN	NaN	NaN	NaN	NaN	NaN
0.828	-110.474	-80.107	1461.7	-0.091309	0.82422	-0.077148	-45.225	7.719	97.9648	0.039648	0.16055	0.051172	-53.499	-67.9338	100.541	0.15283	0.088379	-0.099121	NaN	NaN	NaN	NaN	NaN	NaN
0.83	-97.10847	-98.303	1463.98	-0.14873	0.87647	-0.057519	-7.031	3.5887	104.7534	0.040429	0.1622	0.051953	-66.204	-2.86	128.705	0.18213	0.071289	-0.11108	NaN	NaN	NaN	NaN	NaN	NaN
0.832	-89.2022	-132.592	1492.43	-0.18633	0.9375	-0.049707	-28.809	32.394	95.82	0.041211	0.16689	0.057812	-63.7402	-49.7927	150.5064	0.20752	0.046875	-0.11768	NaN	NaN	NaN	NaN	NaN	NaN
0.834	-75.053	-166.303	1510.48	-0.20938	1.0086	-0.054395	-4.883	9.905	86.5962	0.03125	0.16729	0.055566	-67.342	3.002	150.1553	0.2334	0.013184	-0.12695	NaN	NaN	NaN	NaN	NaN	NaN
0.836	-64.93	-195.178	1536.63	-0.22275	1.0648	-0.060839	31.991	-4.27366	128.6915	0.034668	0.17334	0.057129	-84.35864	-27.543	168.7335	0.23877	-0.0014648	-0.12695	NaN	NaN	NaN	NaN	NaN	NaN
0.838	-67.586	-221.411	1571.57	-0.24561	1.1138	-0.071777	7.515	11.0554	100.1587	0.03877	0.17558	0.057422	-60.268	-6.57	172.684	0.23975	-0.032715	-0.14063	NaN	NaN	NaN	NaN	NaN	NaN
0.84	-64.9385	-247.754	1606.05	-0.27392	1.1485	-0.07793	16.561	-14.2497	99.1724	0.040235	0.17881	0.063379	-60.3271	-79.0532	233.589	0.23047	-0.05249	-0.14185	NaN	NaN	NaN	NaN	NaN	NaN
0.842	-70.7491	-257.005	1623.07	-0.31299	1.1765	-0.074902	6.696	17.5003	117.6732	0.051953	0.18037	0.066504	-60.27	-74.983	240.136	0.21094	-0.06543	-0.14307	NaN	NaN	NaN	NaN	NaN	NaN
0.844	-63.6786	-256.205	1659.29	-0.36181	1.2027	-0.060058	5.943	13.4917	94.26	0.067676	0.17979	0.065527	-41.875	-134.8566	278.1861	0.16309	-0.069824	-0.13037	NaN	NaN	NaN	NaN	NaN	NaN
0.846	-71.465	-241.59	1688.63	-0.421	1.2284	-0.045117	17.458	-3.632817	106.535	0.08252	0.17871	0.061523	1.07300000000001	-111.589	317.4992	0.12939	-0.06543	-0.125	NaN	NaN	NaN	NaN	NaN	NaN
0.848	-84.285	-193.978	1706.09	-0.48096	1.2603	-0.022949	-21.873	9.1331	102.6824	0.099218	0.17266	0.061426	-2.171	-149.656	405.0064	0.04248	-0.041992	-0.10693	NaN	NaN	NaN	NaN	NaN	NaN
0.85	-66.514	-133.457	1727.73	-0.53711	1.2947	0.0050779	-21.905	-18.9743	74.1012	0.11846	0.16739	0.061621	4.40299999999999	-142.984	456.477	-0.032226	-0.0090331	-0.094483	NaN	NaN	NaN	NaN	NaN	NaN
0.852	-87.9842	-104.031	1725.89	-0.58203	1.3371	0.026172	-3.299	-15.2088	121.746	0.13799	0.16152	0.062012	16.422	-160.925	550.828	-0.11084	0.031738	-0.066406	NaN	NaN	NaN	NaN	NaN	NaN
0.854	-72.5737	-93.156	1750.65	-0.61406	1.3715	0.044141	-45.58	9.2511	104.648	0.16113	0.15508	0.062793	44.222	-127.64	628.813	-0.20898	0.089355	-0.038574	NaN	NaN	NaN	NaN	NaN	NaN
0.856	-67.826	-100.66656	1770.76	-0.62832	1.4012	0.051465	-30.61	-20.4025	100.7829	0.18311	0.14746	0.061035	35.418	-91.257	789.555	-0.25439	0.12305	-0.022949	NaN	NaN	NaN	NaN	NaN	NaN
0.858	-55.702	-100.191	1775.11	-0.62305	1.4336	0.039551	-39.469	3.3545	118.073	0.20937	0.13731	0.061035	63.444	-36.253	985.985	-0.34082	0.19482	-0.0068359	NaN	NaN	NaN	NaN	NaN	NaN
0.86	-66.282	-108.039	1777.11	-0.59228	1.4572	0.01709	-51.538	9.855	79.089	0.23242	0.13135	0.055957	34.575	17.98762	1158.423	-0.4021	0.24292	0.0024414	NaN	NaN	NaN	NaN	NaN	NaN
0.862	-69.1379	-123.8751	1788.28	-0.54443	1.4728	-0.015039	-33.939	-1.1468	129.239	0.25547	0.12432	0.052051	55.937	79.878	1299.525021	-0.47461	0.29199	0.01416	NaN	NaN	NaN	NaN	NaN	NaN
0.864	-58.778	-142.599	1789.52	-0.49443	1.4852	-0.040039	-61.3723	12.7191	129.159	0.27578	0.11543	0.047949	28.305	130.911	1462.5577	-0.57227	0.35254	0.01709	NaN	NaN	NaN	NaN	NaN	NaN
0.866	-98.402	-171.388	1810.02	-0.44297	1.4918	-0.060254	-93.35228	-27.7157	120.641	0.29053	0.10498	0.041504	16.007	125.572	1589.549	-0.62988	0.38086	0.018066	NaN	NaN	NaN	NaN	NaN	NaN
0.868	-100.5516	-202.755	1830.81	-0.40771	1.5005	-0.074707	-52.242	-24.155	147.893	0.30313	0.094824	0.028613	-43.74	99.966	1694.701	-0.76367	0.43262	0.0097656	NaN	NaN	NaN	NaN	NaN	NaN
0.87	-120.961	-211.587	1852.57	-0.39063	1.5055	-0.083594	-60.387	-23.5685	145.743	0.30039	0.086914	0.016406	-32.535	3.636	1694.634	-0.88598	0.4729	0.0068359	NaN	NaN	NaN	NaN	NaN	NaN
0.872	-114.646	-196.838	1877.24	-0.38487	1.5119	-0.086524	-59.714	-72.522	182.498	0.27891	0.079883	0.010547	-36.024	-62.37	1695.309	-1.0352	0.51855	0.0039063	NaN	NaN	NaN	NaN	NaN	NaN
0.874	-133.171	-191.029	1901.02	-0.39111	1.5196	-0.083399	-68.744	-64.1773	223.47	0.24834	0.083789	0.0084961	-26.7415	-186.525	1698.345	-1.2749	0.60645	0.015137	NaN	NaN	NaN	NaN	NaN	NaN
0.876	-135.831	-172.664	1912.24	-0.4087	1.5336	-0.078516	-70.4928	-96.153	218.52	0.20459	0.10107	0.011719	-42.5454	-252.267	1654.865	-1.3965	0.66602	0.032227	NaN	NaN	NaN	NaN	NaN	NaN
0.878	-118.943	-157.243	1917.98	-0.43311	1.5532	-0.063477	-33.706	-119.546	266.88	0.15625	0.12598	0.014941	-4.899	-340.794	1586.349	-1.6406	0.82422	0.10693	NaN	NaN	NaN	NaN	NaN	NaN
0.88	-115.267	-133.721	1907.61	-0.46133	1.5701	-0.057813	-39.744	-90.0188	314.05	0.11533	0.16485	0.016406	-22.656	-322.243	1519.289	-1.8008	0.96825	0.19629	NaN	NaN	NaN	NaN	NaN	NaN
0.882	-115.86	-114.831	1925.5	-0.49151	1.5934	-0.041699	-34.638	-102.025	348.706	0.071191	0.20429	0.019531	-27.305	-336.795	1517.8068	-1.916	1.1367	0.30176	NaN	NaN	NaN	NaN	NaN	NaN
0.884	-108.2476	-89.469	1922.39	-0.52939	1.6204	-0.030762	-26.226	-88.4626	434.74	0.02539	0.24951	0.02002	-76.457	-258.75	1518.27	-1.9551	1.3535	0.42432	NaN	NaN	NaN	NaN	NaN	NaN
0.886	-103.04	-76.699	1920.8	-0.56035	1.6434	-0.015625	-46.786	-42.5341	459.191	-0.02002	0.29492	0.018066	-73.193	-234.421	1488.81	-1.8787	1.4935	0.46167	NaN	NaN	NaN	NaN	NaN	NaN
0.888	-98.4907	-68.038	1913.19	-0.5918	1.6621	-0.0019531	-7.078	-37.328	565.59	-0.075683	0.34013	0.01543	-81.824	-158.516	1457.976	-1.7456	1.6079	0.47266	NaN	NaN	NaN	NaN	NaN	NaN
0.89	-105.571	-77.869	1916.09	-0.6251	1.6839	0.016894	-9.393	29.1044	721.84	-0.13936	0.38174	0.015918	-83.278	-122.752	1421.188	-1.4897	1.6743	0.43115	NaN	NaN	NaN	NaN	NaN	NaN
0.892	-91.3527	-88.712	1923.29	-0.65732	1.7017	0.035742	-19.737	82.1729	841.03	-0.21162	0.42236	0.0038085	-95.395	-48.192	1402.395	-1.3496	1.6582	0.39209	NaN	NaN	NaN	NaN	NaN	NaN
0.894	-102.82	-87.49076	1925.53	-0.69131	1.7153	0.056445	-3.56	93.674	989.72	-0.30469	0.46504	-0.014453	-75.382	-56.514	1404.583	-1.0562	1.5142	0.29785	NaN	NaN	NaN	NaN	NaN	NaN
0.896	-99.8474	-81.4303	1931.23	-0.72178	1.7226	0.074317	-50.787	145.829	1103.38	-0.42529	0.51416	-0.033691	-6.977	-53.467	1370.318	-0.83863	1.3352	0.23731	NaN	NaN	NaN	NaN	NaN	NaN
0.898	-95.0465	-72.914	1935.39	-0.75195	1.7246	0.1001	-33.151	132.086	1200.04	-0.57226	0.57363	-0.052735	35.078	-154.354	1386.73	-0.62988	1.1484	0.20654	NaN	NaN	NaN	NaN	NaN	NaN
0.9	-89.6882	-90.6453	1969.86	-0.77764	1.7196	0.1207	11.812	112.736	1332.81	-0.74375	0.64981	-0.058789	38.967	-223.284	1411.641	-0.375	0.89502	0.17334	NaN	NaN	NaN	NaN	NaN	NaN
0.902	-78.1576	-91.697	1988.62	-0.79492	1.7066	0.13525	2.805	63.2583	1388.79	-0.92539	0.75566	-0.032617	76.461	-320.258	1466.438	-0.26367	0.77148	0.1499	NaN	NaN	NaN	NaN	NaN	NaN
0.904	-58.919	-104.43	1997.67	-0.80781	1.6937	0.14776	17.657	-38.00397	1421.49	-1.1047	0.88282	0.012988	126.43	-353.36	1497.34	-0.060059	0.5332	0.089844	NaN	NaN	NaN	NaN	NaN	NaN
0.906	-53.471	-108.53	1988.5	-0.80772	1.6732	0.14766	9.933	-105.617	1480.81	-1.2612	1.0352	0.079102	186.977	-386.0143	1578.724	0.051025	0.36426	0.026367	NaN	NaN	NaN	NaN	NaN	NaN
0.908	-61.09926	-108.408	1980.21	-0.79346	1.6489	0.146	-7.255	-167.469	1477.82	-1.3717	1.1869	0.1585	203.174	-377.5409	1611.04	0.13672	0.19775	-0.044922	NaN	NaN	NaN	NaN	NaN	NaN
0.91	-48.721	-88.769	1974.05	-0.77324	1.6273	0.14063	9.997	-230.543	1487.07	-1.4062	1.3141	0.21875	224.84	-370.594	1723.652	0.19385	0.035645	-0.11523	NaN	NaN	NaN	NaN	NaN	NaN
0.912	-62.527	-67.078	1934.63	-0.74218	1.6063	0.1333	-12.421	-227.475	1471.81	-1.3703	1.3984	0.25625	214.789	-345.541	1797.6982	0.18799	-0.01709	-0.12646	NaN	NaN	NaN	NaN	NaN	NaN
0.914	-71.1842	-63.769	1923.71	-0.70625	1.5812	0.12275	-7.187	-250.529	1435.05	-1.2783	1.4373	0.26475	187.049	-317.599	1884.009	0.1001	-0.05957	-0.11377	NaN	NaN	NaN	NaN	NaN	NaN
0.916	-98.6293	-56.451	1905.19	-0.66865	1.5622	0.1127	12.39	-245.58	1483.88	-1.1675	1.4517	0.25879	194.6	-247.9903	1935.734	-0.037353	-0.022949	-0.077637	NaN	NaN	NaN	NaN	NaN	NaN
0.918	-95.962	-41.377	1896.19	-0.63184	1.541	0.10791	-34.462	-203.769	1498.1	-1.0637	1.4468	0.23145	202.252	-200.844	1997.407	-0.21777	0.067383	-0.028809	NaN	NaN	NaN	NaN	NaN	NaN
0.92	-119.376	-23.175	1898.62	-0.59326	1.5228	0.09668	2.617	-187.963	1506.41	-0.96914	1.4195	0.18222	203.9272	-141.828	1990.486	-0.4873	0.27734	0.051758	NaN	NaN	NaN	NaN	NaN	NaN
0.922	-104.056	-23.613	1885.01	-0.55879	1.5066	0.095703	-9.25	-109.933	1549.41	-0.87969	1.3559	0.12871	218.0229	-156.892	1994.039	-0.60938	0.40186	0.094238	NaN	NaN	NaN	NaN	NaN	NaN
0.924	-103.146	-23.176	1873.34	-0.5334	1.4906	0.09375	2.16	-23.2768	1506.21	-0.79375	1.2531	0.081934	216.839	-206.951	1950.652	-0.81445	0.64453	0.16504	NaN	NaN	NaN	NaN	NaN	NaN
0.926	-99.15	-25.293	1851.9	-0.5041	1.4857	0.091895	53.192	14.2897	1506.26	-0.72266	1.1406	0.052246	210.798	-238.4	1988.727	-0.93872	0.81128	0.20727	NaN	NaN	NaN	NaN	NaN	NaN
0.928	-111.185	-36.207	1842.67	-0.48047	1.4805	0.084473	32.088	43.949	1499.09	-0.66279	1.0519	0.036328	184.639	-257.968	2006.909	-1.0347	0.96924	0.24658	NaN	NaN	NaN	NaN	NaN	NaN
0.93	-85.4607	-35.645	1835.21	-0.46211	1.4737	0.075391	-10.523	-15.7784	1467.74	-0.60401	0.97822	0.032813	168.92	-255.018	2060.576	-1.1353	1.1489	0.27002	NaN	NaN	NaN	NaN	NaN	NaN
0.932	-84.039	-45.757	1836.78	-0.43848	1.4676	0.071387	11.074	-102.879	1509.06	-0.5376	0.9208	0.029688	149.572	-251.191	2105.804	-1.1694	1.2212	0.27441	NaN	NaN	NaN	NaN	NaN	NaN
0.934	-76.82173	-59.701	1820.12	-0.41972	1.4582	0.070996	-17.705	-182.026	1533.72	-0.46817	0.87051	0.010938	91.409	-249.8393	2173.066	-1.2305	1.332	0.29736	NaN	NaN	NaN	NaN	NaN	NaN
0.936	-108.801	-68.568	1814.49	-0.40547	1.4517	0.067383	2.506	-295.69	1561.97	-0.39502	0.83252	-0.020996	51.938	-246.931	2211.599	-1.2747	1.3781	0.32837	NaN	NaN	NaN	NaN	NaN	NaN
0.938	-103.323	-74.748	1778.86	-0.39502	1.4419	0.0625	-24.428	-351.37	1633.81	-0.33848	0.80313	-0.080274	45.229	-259.94	2297.53	-1.3164	1.4141	0.36182	NaN	NaN	NaN	NaN	NaN	NaN
0.94	-110.587	-54.6099	1754.16	-0.38252	1.4378	0.059375	-63.673	-379.85	1642.9	-0.30821	0.79297	-0.13779	45.229	-249.43	2312.999	-1.3804	1.4399	0.3916	NaN	NaN	NaN	NaN	NaN	NaN
0.942	-96.2057	-26.543	1728.92	-0.36914	1.4293	0.057422	-49.468	-408.16	1692.23	-0.325	0.79922	-0.18819	-19.27	-237.836	2360.36	-1.4063	1.4551	0.39502	NaN	NaN	NaN	NaN	NaN	NaN
0.944	-105.768	-2.903	1701.53	-0.36016	1.4246	0.05586	-62.211	-357.06	1758.15	-0.38741	0.82549	-0.2083	-9.90000000000001	-210.2913	2374.807	-1.4707	1.5	0.38525	NaN	NaN	NaN	NaN	NaN	NaN
0.946	-83.6826	12.934	1691.18	-0.34668	1.415	0.049805	-95.616	-332.92	1797.27	-0.49609	0.87549	-0.19336	-18.29	-214.97	2382.473	-1.5171	1.5454	0.37134	NaN	NaN	NaN	NaN	NaN	NaN
0.948	-78.003	15.968	1675.31	-0.33447	1.4043	0.043945	-83.2637	-337.26	1885.51	-0.63818	0.954	-0.14346	-6.12	-204.465	2358.965	-1.5601	1.5903	0.35889	NaN	NaN	NaN	NaN	NaN	NaN
0.95	-65.3633	34.117	1658.63	-0.32246	1.3889	0.04209	-141.087	-293.129	1920.9	-0.76943	1.0368	-0.072558	8.19	-215.427	2314.299	-1.5811	1.6289	0.33154	NaN	NaN	NaN	NaN	NaN	NaN
0.952	-55.233	38.344	1657.48	-0.31006	1.3747	0.045507	-148.511	-260.295	1937.66	-0.87099	1.1212	-0.0006836	48.361	-198.009	2312.028	-1.5664	1.6406	0.31494	NaN	NaN	NaN	NaN	NaN	NaN
0.954	-28.597	38.101	1623.84	-0.29717	1.3591	0.04043	-126.309	-202.2309	1974.53	-0.92813	1.1855	0.064551	40.441	-181.40332	2316.6698	-1.5	1.6309	0.26758	NaN	NaN	NaN	NaN	NaN	NaN
0.956	-37.015	28.317	1593.91	-0.28828	1.3378	0.034864	-138.854	-160.692	1926.26	-0.96338	1.231	0.099121	79.887	-140.6769	2311.944	-1.4072	1.6045	0.22266	NaN	NaN	NaN	NaN	NaN	NaN
0.958	-59.3197	20.381	1557.83	-0.27734	1.3208	0.02832	-122.633	-196.716	1936.96	-0.96846	1.2417	0.090819	101.28	-120.0644	2279.829	-1.3066	1.5664	0.17432	NaN	NaN	NaN	NaN	NaN	NaN
0.96	-70.6509	0.125	1544.01	-0.2628	1.3001	0.029199	-129.289	-196.108	1961.28	-0.95781	1.2386	0.042969	109.511	-70.434	2299.958	-1.1694	1.5044	0.094727	NaN	NaN	NaN	NaN	NaN	NaN
0.962	-62.4652	-5.0863	1540.95	-0.25205	1.2806	0.022851	-143.891	-218.744	1986.79	-0.93281	1.2254	-0.026563	95.509	-52.183	2285.949	-1.1074	1.4707	0.053223	NaN	NaN	NaN	NaN	NaN	NaN
0.964	-66.5827	-11.9404	1521.29	-0.24659	1.2571	0.020117	-109.9256	-236.398	2087.93	-0.89658	1.2163	-0.093945	81.549	-8.708	2328.136	-0.99951	1.4302	-0.020996	NaN	NaN	NaN	NaN	NaN	NaN
0.966	-103.302	-7.6102	1503.83	-0.23936	1.2353	0.020508	-154.948	-230.163	2103.33	-0.86475	1.2153	-0.14893	134.048	30.179	2358.6086	-0.94336	1.415	-0.06958	NaN	NaN	NaN	NaN	NaN	NaN
0.968	-96.508	1.416	1483.07	-0.23828	1.2153	0.019043	-185.873	-272.761	2127.41	-0.83955	1.2341	-0.17754	188.883	42.2452	2394.894	-0.90967	1.4165	-0.10645	NaN	NaN	NaN	NaN	NaN	NaN
0.97	-75.5455	15.605	1469.32	-0.23398	1.1961	0.021094	-149.904	-289.879	2190.06	-0.8293	1.2653	-0.20489	211.1388	15.7934	2385.885	-0.91553	1.4478	-0.13281	NaN	NaN	NaN	NaN	NaN	NaN
0.972	-70.136	32.989	1436.83	-0.23906	1.1821	0.019922	-156.225	-280.73	2196.31	-0.83867	1.3074	-0.22207	219.0492	-18.9493	2359.027	-0.93164	1.4609	-0.13184	NaN	NaN	NaN	NaN	NaN	NaN
0.974	-71.7071	46.8857	1421.98	-0.24024	1.1661	0.026172	-108.2463	-293.77	2249.84	-0.85732	1.3564	-0.22549	214.709	-25.4388	2323.982	-1.0005	1.5122	-0.11865	NaN	NaN	NaN	NaN	NaN	NaN
0.976	-59.7722	52.08924	1381.45	-0.23965	1.1498	0.026758	-72.665	-261.339	2298.06	-0.87842	1.4067	-0.22803	205.594	-14.8236	2343.7412	-1.062	1.5572	-0.10816	NaN	NaN	NaN	NaN	NaN	NaN
0.978	-53.9368	60.56	1363.46	-0.23926	1.1372	0.024902	-63.792	-250.008	2321.52	-0.89199	1.4422	-0.23603	186.832	-2.586	2319.6011	-1.1177	1.5962	-0.087402	NaN	NaN	NaN	NaN	NaN	NaN
0.98	-82.2716	75.222	1349.05	-0.2335	1.1182	0.024511	-22.958	-275.012	2371.42	-0.9044	1.4745	-0.23985	176.613	23.2306	2340.485	-1.1733	1.6392	-0.068359	NaN	NaN	NaN	NaN	NaN	NaN
0.982	-89.862	73.936	1328.14	-0.23076	1.102	0.018653	-73.746	-249.263	2369.16	-0.92666	1.4983	-0.23321	182.029	59.965	2318.686	-1.1831	1.6548	-0.055176	NaN	NaN	NaN	NaN	NaN	NaN
0.984	-70.9836	74.541	1300.07	-0.23037	1.0828	0.013574	-50.313	-244.182	2367.1	-0.96982	1.5259	-0.22285	113.567	96.765	2302.361	-1.1948	1.6704	-0.049805	NaN	NaN	NaN	NaN	NaN	NaN
0.986	-74.935	79.475	1257.43	-0.23027	1.065	0.0087891	-12.101	-216.456	2396.74	-1.0352	1.5605	-0.20996	95.121	155.287	2250.527	-1.1853	1.6624	-0.051269	NaN	NaN	NaN	NaN	NaN	NaN
0.988	-94.627	84.737	1229.32	-0.23242	1.0552	0.0058594	-77.597	-155.071	2361.93	-1.1056	1.5983	-0.19053	37.098	197.074	2260.065	-1.1675	1.6392	-0.063965	NaN	NaN	NaN	NaN	NaN	NaN
0.99	-99.248	88.385	1220.74	-0.23281	1.0395	0.005664	-98.28679	-127.945	2379.16	-1.1788	1.6388	-0.16357	53.442	228.84	2226.269	-1.1533	1.5938	-0.079102	NaN	NaN	NaN	NaN	NaN	NaN
0.992	-72.3124	78.363	1201.3	-0.22784	1.0204	0.0039063	-98.6786	-80.086	2404.15	-1.2511	1.679	-0.14014	41.481	204.267	2229.738	-1.1558	1.5688	-0.086426	NaN	NaN	NaN	NaN	NaN	NaN
0.994	-59.2257	85.121	1188.16	-0.21963	0.99892	0.0054688	-107.719	-66.238	2408.18	-1.3208	1.7175	-0.11592	50.626	176.624	2180.552	-1.1616	1.52	-0.094727	NaN	NaN	NaN	NaN	NaN	NaN
0.996	-42.072	75.823	1187.46	-0.20586	0.98047	0.003418	-65.2237	-106.058	2465.26	-1.3887	1.75	-0.092773	2.41	152.245	2167.981	-1.1827	1.4834	-0.087647	NaN	NaN	NaN	NaN	NaN	NaN
0.998	-20.31	74.616	1173.09	-0.19336	0.95508	-0.003418	-107.825	-108.655	2496.4	-1.454	1.7913	-0.069043	-5.902	145.621	2099.775	-1.2031	1.4609	-0.084473	NaN	NaN	NaN	NaN	NaN	NaN
1	-19.088	75.189	1164.48	-0.18731	0.93067	-0.0091795	-90.588	-133.602	2479.68	-1.5125	1.8215	-0.044922	-24.27	141.182	2050.02006	-1.2373	1.4414	-0.072266	NaN	NaN	NaN	NaN	NaN	NaN
1.002	-11.716	80.131	1140.44	-0.17529	0.90791	-0.012402	-85.357	-132.934	2489.78	-1.5551	1.8453	-0.01875	16.2	149.914	1989.3213	-1.248	1.4355	-0.06543	NaN	NaN	NaN	NaN	NaN	NaN
1.004	-23.3702	75.652	1102.51	-0.17022	0.88955	-0.015137	-125.782	-107.85	2461	-1.5867	1.8572	0.0080079	30.68	134.943	2003.007	-1.2622	1.4302	-0.051758	NaN	NaN	NaN	NaN	NaN	NaN
1.006	-31.7598	68.632	1085.64	-0.16367	0.86221	-0.02041	-118.721	-150.314	2465.9	-1.6089	1.8579	0.029785	24.82	145.3896	1943.8304	-1.2605	1.4318	-0.04004	NaN	NaN	NaN	NaN	NaN	NaN
1.008	-9.753	73.94	1053.58	-0.16113	0.84131	-0.026367	-121.976	-163.955	2493.22	-1.6113	1.8418	0.041016	19.494	147.635	1968.88	-1.25	1.4297	-0.034668	NaN	NaN	NaN	NaN	NaN	NaN
1.01	-43.1076	77.93	1020.23	-0.1541	0.82344	-0.030078	-159.318	-167.835	2479.54	-1.6093	1.8216	0.050489	51.506	196.6825	1881.1677	-1.2222	1.436	-0.021484	NaN	NaN	NaN	NaN	NaN	NaN
1.012	-50.8444	101.469	1005.43	-0.14931	0.80693	-0.036231	-137.609	-181.5	2505.25	-1.6097	1.7931	0.054785	52.025	216.139	1899.491	-1.2065	1.4341	-0.017578	NaN	NaN	NaN	NaN	NaN	NaN
1.014	-51.7831	102.649	995.29	-0.14658	0.78975	-0.041699	-156.59	-116.012	2490.32	-1.6091	1.7698	0.061816	72.837	260.366	1835.5908	-1.1675	1.4302	-0.016113	NaN	NaN	NaN	NaN	NaN	NaN
1.016	-24.035	113.802	983.89	-0.13535	0.77432	-0.047265	-147.469	-66.99	2439.4	-1.6133	1.7461	0.062012	117.553	263.1687	1804.404	-1.1326	1.4153	-0.014648	NaN	NaN	NaN	NaN	NaN	NaN
1.018	-30.004	112.385	966.68	-0.125	0.7583	-0.050293	-108.848	-27.21	2427.35	-1.6076	1.7303	0.073926	143.71	279.303	1730.3528	-1.0957	1.4043	-0.0092773	NaN	NaN	NaN	NaN	NaN	NaN
1.02	-23.677	111.33	950.31	-0.11192	0.74092	-0.057227	-130.379	30.07	2399.87	-1.5992	1.7149	0.084961	126.896	261.5272	1678.064	-1.0405	1.3931	-0.0014648	NaN	NaN	NaN	NaN	NaN	NaN
1.022	-4.113	102.298	932.7	-0.10283	0.72188	-0.065235	-100.112	30.03	2405.82	-1.58	1.6981	0.086914	122.869	258.634	1580.846	-1.0132	1.3813	0.0043945	NaN	NaN	NaN	NaN	NaN	NaN
1.024	-21.923	113.743	904.97	-0.087207	0.70469	-0.069141	-78.485	63.96	2438.55	-1.5666	1.6838	0.091113	130.508	241.224	1544.863	-0.96533	1.3638	0.010742	NaN	NaN	NaN	NaN	NaN	NaN
1.026	-18.682	115.993	867.33	-0.073926	0.68398	-0.073242	-89.981	83.89	2411.46	-1.5449	1.6699	0.087891	144.7956	229.585	1472.04	-0.91504	1.3418	0.027832	NaN	NaN	NaN	NaN	NaN	NaN
1.028	-28.033	104.528	860.42	-0.059082	0.6665	-0.079102	-38.37	54.26	2421.25	-1.5221	1.6618	0.079883	122.947	237.399	1470.823	-0.88818	1.3306	0.036621	NaN	NaN	NaN	NaN	NaN	NaN
1.03	-48.0746461	94.39	851.31	-0.049805	0.64199	-0.084766	-74.813	64.68	2374.48	-1.4922	1.6511	0.077149	122.932	289.719	1445.1421	-0.84131	1.3032	0.046875	NaN	NaN	NaN	NaN	NaN	NaN
1.032	-55.325	90.801	847.7	-0.038867	0.62197	-0.084961	-59.965	34.37	2309.49	-1.4617	1.6418	0.073633	95.197	330.319	1410.0842	-0.80639	1.2756	0.058838	NaN	NaN	NaN	NaN	NaN	NaN
1.034	-63.9567	91.244	826.61	-0.029883	0.60127	-0.090039	-49.2947	13.92	2302.15	-1.4341	1.6297	0.076856	55.989	358.542	1354.5138	-0.77539	1.25	0.072266	NaN	NaN	NaN	NaN	NaN	NaN
1.036	-51.6629	98.894	817.11	-0.022071	0.57793	-0.092871	-56.766	39.29	2272.41	-1.4097	1.6216	0.081055	17.808	347.529	1316.70251	-0.72998	1.2056	0.087891	NaN	NaN	NaN	NaN	NaN	NaN
1.038	-47.2598	108.707	784.85	-0.020508	0.55518	-0.095703	-44.627	1.80000000000001	2281.99	-1.3891	1.602	0.088086	-13.523	321.062	1296.17	-0.70752	1.1821	0.094727	NaN	NaN	NaN	NaN	NaN	NaN
1.04	-38.2192	116.858	760.55	-0.017285	0.53965	-0.095605	-56.771	11.94	2264	-1.3613	1.5867	0.093067	21.503	316.376	1274.129	-0.66748	1.145	0.11182	NaN	NaN	NaN	NaN	NaN	NaN
1.042	-27.672	113.27	741.99	-0.016797	0.52598	-0.099707	-90.674	25.88	2209.8	-1.3363	1.5695	0.10049	-12.743	307.042	1222.321	-0.63941	1.1145	0.11865	NaN	NaN	NaN	NaN	NaN	NaN
1.044	-13.477	110.679	733.56	-0.017968	0.51309	-0.10088	-62.388	11.69	2192.88	-1.3051	1.5485	0.10342	-44.984	320.185	1128.853	-0.6084	1.0786	0.13672	NaN	NaN	NaN	NaN	NaN	NaN
1.046	-3.686	112.685	718.69	-0.018164	0.49932	-0.10283	-83.81	65.56	2133.49	-1.2671	1.5259	0.104	-69.352	307.491	1081.189	-0.56592	1.0337	0.14111	NaN	NaN	NaN	NaN	NaN	NaN
1.048	0.00600000000000023	122.015	712.6	-0.01123	0.49023	-0.10205	-85.239	79.91	2068.13	-1.228	1.5005	0.10498	-89.8	318.283	1000.935	-0.54541	1.0117	0.14551	NaN	NaN	NaN	NaN	NaN	NaN
1.05	-8.166	111.019	702.3	-0.013184	0.48144	-0.10157	-77.87	103.939	2045.36	-1.1803	1.4732	0.10341	-87.232	312.462	972.6438	-0.50195	0.97266	0.1626	NaN	NaN	NaN	NaN	NaN	NaN
1.052	-7.071	109.041	674.64	-0.010938	0.47471	-0.10527	-113.561	127.673	1979.27	-1.1331	1.4446	0.10225	-74.999	328.605	924.35	-0.46997	0.93775	0.16845	NaN	NaN	NaN	NaN	NaN	NaN
1.054	-5.527	110.23	649.59	-0.00625	0.46924	-0.1084	-97.354	89.85	1942.5	-1.0785	1.4117	0.095703	-75.812	315.7241	900.603	-0.43652	0.90479	0.17285	NaN	NaN	NaN	NaN	NaN	NaN
1.056	-21.882	111.405	633.91	-0.0064453	0.46289	-0.11015	-102.902	100.31	1923.09	-1.0254	1.377	0.08252	-89.572	336.581	862.639	-0.39111	0.85938	0.17773	NaN	NaN	NaN	NaN	NaN	NaN
1.058	-2.77	106.53	617.75	-0.0048828	0.45508	-0.11377	-139.147	109.13	1867.91	-0.96875	1.351	0.080567	-104.2849	327.239	834.444	-0.37061	0.83447	0.18359	NaN	NaN	NaN	NaN	NaN	NaN
1.06	-16.235	101.977	616.11	-0.0058593	0.45127	-0.11445	-119.717	92.903	1838.44	-0.91358	1.32	0.068945	-74.696	348.481	747.48177	-0.3335	0.7832	0.18506	NaN	NaN	NaN	NaN	NaN	NaN
1.062	-5.269	98.533	588.95	-0.0076172	0.44424	-0.1167	-147.763	120.854	1793.28	-0.85342	1.2872	0.060742	-91.38854	334.641	739.333	-0.31055	0.7439	0.18335	NaN	NaN	NaN	NaN	NaN	NaN
1.064	-3.822	96.782	579.32	-0.015821	0.43799	-0.11552	-147.615	103.889	1749.9	-0.80176	1.2531	0.049805	-43.02	344.878	671.6402	-0.28418	0.70703	0.18115	NaN	NaN	NaN	NaN	NaN	NaN
1.066	10.578	100.454	571.3	-0.023536	0.43125	-0.11484	-126.74	88.089	1751.39	-0.75146	1.2231	0.041504	-25.079	294.7735	685.459	-0.25537	0.65967	0.18359	NaN	NaN	NaN	NaN	NaN	NaN
1.068	18.7721	105.588	558.9	-0.03125	0.4248	-0.10352	-129.747	109.086	1703.34	-0.70938	1.1945	0.031738	21.57	303.5	599.0170434	-0.24414	0.63867	0.18555	NaN	NaN	NaN	NaN	NaN	NaN
1.07	13.45	111.262	541.27	-0.050391	0.41192	-0.11172	-93.022	87.377	1682.11	-0.6707	1.1668	0.021875	-2.053	236.186	559.421	-0.21436	0.59229	0.18652	NaN	NaN	NaN	NaN	NaN	NaN
1.072	10.7416	114.245	515.63	-0.056055	0.40977	-0.12441	-89.666	113.331	1682.25	-0.63555	1.1387	0.018359	19.257	228.1178	500.726	-0.198	0.56885	0.1897	NaN	NaN	NaN	NaN	NaN	NaN
1.074	-7.358	109.535	508.66	-0.054492	0.41093	-0.11152	-92.031	136.62	1626	-0.60625	1.11	0.012207	22.548	168.991	509.4527	-0.17969	0.5415	0.19385	NaN	NaN	NaN	NaN	NaN	NaN
1.076	1.153	110.278	489.14	-0.061523	0.41767	-0.10898	-29.7254	114.66	1594.31	-0.57959	1.0864	0.0043945	49.429	178.5752	450.514	-0.16162	0.51611	0.19873	NaN	NaN	NaN	NaN	NaN	NaN
1.078	-20.173	116.865	473.54	-0.071777	0.4165	-0.10986	-29.84143	158.65	1531.93	-0.5502	1.0646	0.00019534	34.9849	166.743	454.385	-0.15088	0.50098	0.19727	NaN	NaN	NaN	NaN	NaN	NaN
1.08	-39.497	122.214	456.03	-0.087403	0.42012	-0.10527	-28.8883	155.353	1454.42	-0.529	1.0427	-0.0069336	42.081	217.5727	404.837845	-0.12744	0.48438	0.20361	NaN	NaN	NaN	NaN	NaN	NaN
1.082	-28.6991	118.245	438.61	-0.097656	0.41924	-0.10235	-12.4687	151.281	1431.96	-0.5083	1.0212	-0.014746	-8.911	217.564	405.004	-0.10913	0.46753	0.20874	NaN	NaN	NaN	NaN	NaN	NaN
1.084	-28.07	114.511	424.95	-0.10586	0.41806	-0.098047	-48.089	196.556	1357.66	-0.48506	1.0041	-0.010059	15.604	256.386	345.6685	-0.091797	0.45703	0.21387	NaN	NaN	NaN	NaN	NaN	NaN
1.086	-24.1807	119.903	408.48	-0.11816	0.42286	-0.092578	-29.1861	163.8167	1336.21	-0.45654	0.98291	-0.019043	-37.604	217.0334	315.182	-0.062012	0.44971	0.22363	NaN	NaN	NaN	NaN	NaN	NaN
1.088	-12.956	107.617	398.82	-0.12256	0.42041	-0.088379	-17.1765	178.2459	1298.58	-0.4292	0.96055	-0.023438	-24.376	237.229	253.183	-0.050781	0.44727	0.21729	NaN	NaN	NaN	NaN	NaN	NaN
1.09	0.451999999999998	106.736	393.49	-0.13281	0.41885	-0.084473	-18.4964	179.52	1257.49	-0.39736	0.93545	-0.028711	-40.105	199.7167	260.0458	-0.023926	0.44287	0.22217	NaN	NaN	NaN	NaN	NaN	NaN
1.092	-12.791	107.048	371.64	-0.13984	0.41758	-0.080273	12.674	172.587	1231.01	-0.37041	0.91045	-0.039649	-32.708	225.966	234.0251	-0.0065918	0.43775	0.21704	NaN	NaN	NaN	NaN	NaN	NaN
1.094	-0.405999999999999	110.04	358.49	-0.14453	0.41094	-0.074414	10.00072	219.507	1162.91	-0.33886	0.88613	-0.04961	-58.36504	178.419	253.041	0.0092773	0.43408	0.21631	NaN	NaN	NaN	NaN	NaN	NaN
1.096	-11.094	102.107	361.85	-0.14727	0.4043	-0.070703	-1.03298	209.111	1113.3	-0.31494	0.86084	-0.060547	-61.745	175.694	188.3322	0.027344	0.42725	0.19824	NaN	NaN	NaN	NaN	NaN	NaN
1.098	-13.868	95.354	362.38	-0.14551	0.39648	-0.068359	-18.0707	194.693	1104.13	-0.28848	0.83438	-0.063965	-133.729	138.707	174.855	0.033203	0.42627	0.19922	NaN	NaN	NaN	NaN	NaN	NaN
1.1	-6.705	95.339	332.75	-0.14248	0.39034	-0.066113	-40.3294	216.625	1051.04	-0.26445	0.80801	-0.067383	-119.6799	162.699	146.177	0.04541	0.41797	0.18701	NaN	NaN	NaN	NaN	NaN	NaN
1.102	-19.282	94.451	331.58	-0.14024	0.38232	-0.062207	-20.805	156.5834	1033.49	-0.24532	0.77988	-0.075195	-121.506	135.706	159.0438	0.047608	0.41748	0.18628	NaN	NaN	NaN	NaN	NaN	NaN
1.104	-24.0441	88.021	326.94	-0.13203	0.36865	-0.062989	-44.6804	153.193	1013.71	-0.2292	0.7583	-0.083301	-84.9819	136.317	143.5188	0.04834	0.42041	0.18115	NaN	NaN	NaN	NaN	NaN	NaN
1.106	-18.463	78.837	314.11	-0.12217	0.3542	-0.05664	-69.689	153.247	954.27	-0.20947	0.73389	-0.090332	-143.838	86.3562	155.711	0.052246	0.4165	0.18115	NaN	NaN	NaN	NaN	NaN	NaN
1.108	8.287	86.258	285.4	-0.10547	0.33887	-0.057129	-51.029	142.8517	938.55	-0.1998	0.71055	-0.089941	-123.757	58.104	125.266	0.044434	0.41602	0.17725	NaN	NaN	NaN	NaN	NaN	NaN
1.11	-1.751	77.957	278.74	-0.091895	0.32158	-0.063965	-60.416	211.702	872.26	-0.18769	0.68809	-0.10059	-112.831	31.5166	152.02	0.042969	0.41357	0.18066	NaN	NaN	NaN	NaN	NaN	NaN
1.112	24.741	72.774	275.81	-0.069238	0.30547	-0.067871	-50.944	203.134	824.45	-0.1791	0.66778	-0.10723	-93.1486	51.4279	141.694	0.035156	0.41186	0.17749	NaN	NaN	NaN	NaN	NaN	NaN
1.114	18.6518	66.263	277.04	-0.049707	0.28945	-0.072168	-40.757	201.89	814.02	-0.16934	0.64902	-0.11602	-67.599	59.447	145.342	0.033691	0.40869	0.17383	NaN	NaN	NaN	NaN	NaN	NaN
1.116	10.541	72.372	265.11	-0.027149	0.26924	-0.076367	-65.8259	229.759	752	-0.15869	0.63135	-0.12061	-45.65	77.195	133.437	0.029297	0.41064	0.16455	NaN	NaN	NaN	NaN	NaN	NaN
1.118	14.14	79.54	249.38	-0.0029297	0.24609	-0.083984	-40.845	193.814	740.39	-0.15332	0.61621	-0.12451	-27.616	59.233	121.607	0.03418	0.40527	0.16113	NaN	NaN	NaN	NaN	NaN	NaN
1.12	-0.617999999999995	73.295	264.7	0.018652	0.23145	-0.087891	-23.1157	226.872	728.73	-0.14141	0.6003	-0.12686	-7.972	28.5517	108.742	0.027344	0.40234	0.15479	NaN	NaN	NaN	NaN	NaN	NaN
1.122	-1.678	55.128	263.9	0.037988	0.21084	-0.094629	-42.8052	219.267	685.72	-0.13281	0.5831	-0.13115	-4.124	-1.7214	103.8337	0.026123	0.39722	0.16162	NaN	NaN	NaN	NaN	NaN	NaN
1.124	-16.089	45.5252	246.47	0.050098	0.19365	-0.10127	-5.94	184.091	669.82	-0.12217	0.56806	-0.13809	7.998	-36.5167	87.03	0.02832	0.39404	0.16748	NaN	NaN	NaN	NaN	NaN	NaN
1.126	-23.461	43.87414	234.92	0.064453	0.17256	-0.11055	-22.078	217.951	611.84	-0.10938	0.55078	-0.14697	19.381	-7.2476	108.1781	0.038086	0.38281	0.18018	NaN	NaN	NaN	NaN	NaN	NaN
1.128	-22.9599	30.297	236.94	0.070801	0.15869	-0.11816	4.921	195.91	568.43	-0.097363	0.53467	-0.15576	57.131	-2.87352	118.192	0.04541	0.37256	0.18066	NaN	NaN	NaN	NaN	NaN	NaN
1.13	-9.288	27.042	240.13	0.075879	0.14453	-0.1207	17.184	208.051	565.64	-0.089648	0.52149	-0.16045	46.549	18.0059	109.467	0.069336	0.36182	0.18213	NaN	NaN	NaN	NaN	NaN	NaN
1.132	-13.582	12.828	242.366	0.074902	0.13974	-0.12539	7.239	214.318	528	-0.081445	0.50859	-0.16279	51.937	12.3103	120.381	0.090088	0.34497	0.18066	NaN	NaN	NaN	NaN	NaN	NaN
1.134	-14.683	-0.283999999999999	231.314	0.074512	0.13428	-0.12734	25.904	141.902	528.86	-0.068164	0.4873	-0.16572	20.305	19.9506	90.751	0.11621	0.3291	0.17969	NaN	NaN	NaN	NaN	NaN	NaN
1.136	3.896	-21.894	242.706	0.077344	0.13154	-0.1294	21.951	144.965	517.06	-0.060059	0.47119	-0.17041	8.146	5.80088	116.75036	0.1499	0.29541	0.17676	NaN	NaN	NaN	NaN	NaN	NaN
1.138	-13.115	-23.089	251.521	0.075195	0.12939	-0.13281	37.8042	126.829	496.72	-0.05	0.45537	-0.17149	34.02	24.509	125.098	0.1665	0.28076	0.17871	NaN	NaN	NaN	NaN	NaN	NaN
1.14	-20.398	-17.388	288.511	0.067383	0.13711	-0.14004	54.483	97.516	490.93	-0.037305	0.44297	-0.17774	-1.165	-4.4845	136.172	0.19775	0.2373	0.1792	NaN	NaN	NaN	NaN	NaN	NaN
1.142	-11.684	-18.728	311.091	0.060938	0.14287	-0.14873	35.289	150.009	434.73	-0.02793	0.42734	-0.1793	-0.938000000000002	-10.6669	115.647	0.22339	0.20532	0.18018	NaN	NaN	NaN	NaN	NaN	NaN
1.144	-6.768	-13.556	341.421	0.04375	0.15303	-0.15576	28.886	133.049	384.16	-0.019239	0.41103	-0.18037	-14.673	-39.1621	107.5944	0.24854	0.1709	0.17773	NaN	NaN	NaN	NaN	NaN	NaN
1.146	-13.324	6.731	355.741	0.014941	0.16523	-0.16328	4.906	151.559	375.2	-0.011719	0.3999	-0.18555	-35.483	-16.279	72.158	0.27441	0.125	0.17236	NaN	NaN	NaN	NaN	NaN	NaN
1.148	-23.729	39.281	403.644	-0.023438	0.18213	-0.17236	5.066	171.07	334.46	-0.0032227	0.38194	-0.18271	-61.88984	-15.322	96.981	0.28662	0.09668	0.17139	NaN	NaN	NaN	NaN	NaN	NaN
1.15	-5.33	71.057	460.687	-0.078711	0.20762	-0.17188	21.546	114.8652	347.22	0.0044921	0.36982	-0.18369	-69.296	8.561	72.245	0.30615	0.05127	0.16406	NaN	NaN	NaN	NaN	NaN	NaN
1.152	0.93	94.587	521.617	-0.15	0.23789	-0.17598	-5.951	142.9528	326.54	0.0091796	0.35459	-0.18838	-82.8914	7.2468	93.9297	0.31811	0.013916	0.16358	NaN	NaN	NaN	NaN	NaN	NaN
1.154	22.284	120.614	595.282	-0.23047	0.27187	-0.18496	-15.346	121.479	298.103	0.013281	0.33867	-0.19219	-80.491	35.2878	77.8719	0.32275	-0.020508	0.15381	NaN	NaN	NaN	NaN	NaN	NaN
1.156	28.622	125.364	679.843	-0.31494	0.31855	-0.1917	-32.868	106.264	286.12	0.020508	0.32959	-0.1875	-97.146	13.2785	93.6303	0.32666	-0.0625	0.14307	NaN	NaN	NaN	NaN	NaN	NaN
1.158	38.086	135.773	758.04	-0.41309	0.37158	-0.19434	-42.5727	135.844	249.695	0.02793	0.31328	-0.19795	-105.2925	32.43	53.684	0.31934	-0.08252	0.13672	NaN	NaN	NaN	NaN	NaN	NaN
1.16	25.042	133.069	850.908	-0.521	0.4374	-0.2	-29.416	87.219	215.05	0.036817	0.29941	-0.19746	-128.619	19.3072	88.4505	0.30176	-0.11182	0.12891	NaN	NaN	NaN	NaN	NaN	NaN
1.162	20.527	135.874	912.638	-0.63115	0.51611	-0.1959	-43.133	90.82785	204.578	0.046583	0.28574	-0.20645	-93.037	56.6805	68.6699	0.2793	-0.12573	0.12622	NaN	NaN	NaN	NaN	NaN	NaN
1.164	8.082	121.831	974.905	-0.74053	0.61533	-0.18027	-50.674	109.8249	182.12	0.057423	0.27452	-0.20596	-101.53	54.321	116.994	0.25293	-0.13477	0.12061	NaN	NaN	NaN	NaN	NaN	NaN
1.166	8.934	86.051	1017.459	-0.84336	0.7291	-0.15098	-33.042	59.755	177.753	0.063477	0.26074	-0.2124	-50.434	81.564	89.654	0.20947	-0.14404	0.12207	NaN	NaN	NaN	NaN	NaN	NaN
1.168	25.906	42.4535	1077.59	-0.93115	0.85205	-0.11279	-71.8394117	78.7618	189.259	0.071191	0.24707	-0.21201	-43.126	44.315	114.36	0.18457	-0.14209	0.11963	NaN	NaN	NaN	NaN	NaN	NaN
1.17	16.466	10.297	1127.624	-0.98437	0.97986	-0.081445	-84.2273	41.959	168.877	0.081931	0.23272	-0.21553	-55.733	47.5235	81.45417	0.13428	-0.12891	0.11523	NaN	NaN	NaN	NaN	NaN	NaN
1.172	6.873	-27.9649	1159.64	-1.0084	1.0914	-0.057422	-59.199	4.989	164.433	0.088963	0.22178	-0.21592	-44.186	2.2597	93.1744	0.077637	-0.097168	0.12598	NaN	NaN	NaN	NaN	NaN	NaN
1.174	-7.614	-52.268	1187.49	-0.99825	1.1804	-0.04375	-44.066	41.183	156.994	0.0916	0.21016	-0.21416	-18.131	20.337	78.38524	0.053223	-0.077637	0.13721	NaN	NaN	NaN	NaN	NaN	NaN
1.176	-26.274	-61.437	1189.5297	-0.95508	1.2366	-0.059961	-32.327	8.65	132.643	0.09668	0.19727	-0.21582	18.639	5.6368	109.877	0.019531	-0.036621	0.16553	NaN	NaN	NaN	NaN	NaN	NaN
1.178	-37.4364	-70.898	1221.776	-0.88428	1.2603	-0.080078	-30.055	23.8428	137.364	0.10244	0.18886	-0.21504	47.039	6.7624	104.283	0.00048825	-0.010986	0.17944	NaN	NaN	NaN	NaN	NaN	NaN
1.18	-55.721	-61.417	1246.158	-0.79492	1.2465	-0.11299	-46.136	44.1128	103.729	0.10235	0.17646	-0.20868	26.439	-0.408999999999999	141.931	-0.0043945	0.013672	0.19434	NaN	NaN	NaN	NaN	NaN	NaN
1.182	-63.85	-48.989	1251.16	-0.69375	1.2105	-0.14063	-24.733	-1.9694	97.979	0.10234	0.17138	-0.20674	27.745	34.0953	113.474	-0.0029297	0.047363	0.20117	NaN	NaN	NaN	NaN	NaN	NaN
1.184	-74.306	-35.74	1259.255	-0.60156	1.1527	-0.16679	9.52999999999999	35.6317	107.4665	0.10205	0.15517	-0.20596	-0.867999999999995	37.9627	123.2273	-0.00048828	0.060547	0.20313	NaN	NaN	NaN	NaN	NaN	NaN
1.186	-100.492	-15.723	1264.783	-0.52344	1.0887	-0.19316	14.193	3.918	108.7673	0.1001	0.14746	-0.20898	41.816	58.713	130.786	0.014648	0.083008	0.21045	NaN	NaN	NaN	NaN	NaN	NaN
1.188	-100.433	-10.281	1253.1854	-0.46289	1.0293	-0.21289	12.002	-17.400622	111.4697	0.098734	0.14073	-0.20411	17.641	25.6665	146.841	0.033447	0.094238	0.21119	NaN	NaN	NaN	NaN	NaN	NaN
1.19	-108.324	2.19	1245.4614	-0.41894	0.96123	-0.2249	6.872	36.418	104.857	0.098728	0.13735	-0.20606	37.088	19.5477	137.681	0.052246	0.095215	0.21387	NaN	NaN	NaN	NaN	NaN	NaN
1.192	-91.727	-1.056	1237.248	-0.38262	0.88926	-0.23174	-13.122	19.4443	81.6209	0.097184	0.13105	-0.20604	33.052	0.927	127.959	0.072754	0.094727	0.22559	NaN	NaN	NaN	NaN	NaN	NaN
1.194	-91.924	-18.036	1247.021	-0.35566	0.81738	-0.23252	0.870999999999995	32.707	94.726	0.096782	0.12569	-0.20049	6.701	-0.607000000000003	85.176	0.082031	0.087891	0.23242	NaN	NaN	NaN	NaN	NaN	NaN
1.196	-72.6734	-39.921	1234.6883	-0.3374	0.75879	-0.23184	-12.807	35.993	93.8	0.095703	0.12354	-0.19971	-26.437	-22.5624	102.2477	0.081055	0.075195	0.22266	NaN	NaN	NaN	NaN	NaN	NaN
1.198	-74.232	-69.812	1234.2541	-0.31348	0.71191	-0.23242	-2.82100000000001	-19.4712	104.079	0.099121	0.11912	-0.20299	-40.918	-15.645	97.6537	0.072754	0.062256	0.22632	NaN	NaN	NaN	NaN	NaN	NaN
1.2	-74.32126	-100.441	1237.714	-0.27812	0.67774	-0.23759	-6.682	19.8068	128.802	0.099824	0.11259	-0.20431	-60.215	-11.6196	82.967	0.05957	0.057129	0.21973	NaN	NaN	NaN	NaN	NaN	NaN
1.202	-57.623	-137.4333	1287.263	-0.23554	0.66523	-0.24844	3.09	11.2793	115.7	0.10019	0.10477	-0.20307	-27.09	0.411999999999999	116.575	0.033691	0.05127	0.22705	NaN	NaN	NaN	NaN	NaN	NaN
1.204	-26.493	-150.6375	1309.399	-0.18984	0.65625	-0.26172	-6.201	-13.2131	127.9675	0.097564	0.10057	-0.20421	-51.62	-31.55	167.672	0.020996	0.055176	0.23535	NaN	NaN	NaN	NaN	NaN	NaN
1.206	-9.682	-173.568194	1304.0893	-0.14863	0.65664	-0.28027	-43.8323	25.0988	118.3005	0.092285	0.09082	-0.20654	-100.3727	-67.337	208.056	-0.003418	0.061035	0.25586	NaN	NaN	NaN	NaN	NaN	NaN
1.208	-21.806	-174.3894	1324.3794	-0.1167	0.66455	-0.29639	-40.503	-12.9847	90.4	0.083667	0.088401	-0.20557	-161.7568	-77.443	219.323	-0.01416	0.066406	0.27173	NaN	NaN	NaN	NaN	NaN	NaN
1.21	3.791	-177.0371	1363.1943	-0.11357	0.68106	-0.3042	-49.792	-7.1822	109.06086	0.071601	0.085007	-0.20401	-109.881	-71.823	227.586	-0.020996	0.071777	0.28076	NaN	NaN	NaN	NaN	NaN	NaN
1.212	24.612	-160.6516	1389.9222	-0.12783	0.71377	-0.30127	-36.452	31.7772	104.516	0.052571	0.082725	-0.20788	-112.5369	-63.1528	279.494	-0.021973	0.085449	0.2793	NaN	NaN	NaN	NaN	NaN	NaN
1.214	65.981	-135.8012	1408.396	-0.16573	0.76104	-0.28916	-51.42	-15.546	110.9433	0.029081	0.080754	-0.20767	-138.79128	-80.5	412.142	-0.015625	0.09375	0.27539	NaN	NaN	NaN	NaN	NaN	NaN
1.216	59.483	-120.2061	1428.5825	-0.21387	0.82246	-0.26738	-71.5171	34.6859	132.149	0.0097656	0.084961	-0.20459	-138.5153	-85.615	470.514	-0.015137	0.10156	0.25244	NaN	NaN	NaN	NaN	NaN	NaN
1.218	93.754	-110.697	1447.3209	-0.26709	0.88232	-0.24561	-60.81469	29.2458	105.873	-0.011929	0.095252	-0.20307	-113.289	-100.8622	551.413	-0.037842	0.10815	0.2063	NaN	NaN	NaN	NaN	NaN	NaN
1.22	90.497	-105.935	1490.085	-0.30703	0.94532	-0.22764	-58.656	-5.9687	111.0149	-0.034336	0.10845	-0.19701	-124.524	-60.883	642.93	-0.075195	0.11572	0.16064	NaN	NaN	NaN	NaN	NaN	NaN
1.222	98.354	-98.27	1488.253	-0.34316	1.0064	-0.21152	-75.4558	37.3035	115.8168	-0.045846	0.12561	-0.18842	-147.5437	-21.195	853.47	-0.15723	0.15723	0.11133	NaN	NaN	NaN	NaN	NaN	NaN
1.224	101.3068	-99.217	1514.0024	-0.36895	1.0651	-0.19707	-65.281	-12.5001	124.324	-0.046739	0.14405	-0.18424	-84.503	53.191	1058.16	-0.20654	0.18848	0.10205	NaN	NaN	NaN	NaN	NaN	NaN
1.226	93.932	-111.629	1536.7459	-0.38223	1.1174	-0.1957	-48.57	2.2636	127.043	-0.043945	0.16406	-0.17578	-88.33	73.866	1260.84	-0.31006	0.25146	0.11084	NaN	NaN	NaN	NaN	NaN	NaN
1.228	93.772	-127.5887	1558.8019	-0.38672	1.1602	-0.19043	-43.476	37.3135	113.734	-0.028912	0.17585	-0.17414	-96.683	118.1325	1397.76	-0.38794	0.3103	0.125	NaN	NaN	NaN	NaN	NaN	NaN
1.23	61.811	-127.611	1574.1744	-0.39268	1.1896	-0.19717	-33.971	-23.5305	102.6897	-0.0090799	0.18797	-0.17046	-26.455	104.1448	1584.79	-0.46484	0.36914	0.14502	NaN	NaN	NaN	NaN	NaN	NaN
1.232	58.787	-136.2149	1608.8245	-0.40596	1.2082	-0.20176	-31.257	-6.778	125.642	0.016282	0.18949	-0.16444	14.206	89.825	1709.16	-0.56201	0.45654	0.15039	NaN	NaN	NaN	NaN	NaN	NaN
1.234	54.666	-141.9832	1651.581	-0.42041	1.2227	-0.20996	-40.184	-21.816	102.6184	0.043291	0.19312	-0.16533	-22.956	11.778	1836.87	-0.61523	0.49707	0.1377	NaN	NaN	NaN	NaN	NaN	NaN
1.236	44.214	-148.8978	1685.191	-0.4418	1.2375	-0.22012	-3.607	-36.0382	105.4017	0.074219	0.18506	-0.16699	36.291	-42.371	1808.65	-0.75	0.58105	0.075684	NaN	NaN	NaN	NaN	NaN	NaN
1.238	33.188	-161.51161	1695.425	-0.45898	1.252	-0.22461	0.872	22.0694	119.802	0.10044	0.17924	-0.1626	51.474	-165.928	1860.75	-0.86719	0.64697	0.02124	NaN	NaN	NaN	NaN	NaN	NaN
1.24	0.416999999999994	-169.45925	1719.947	-0.47481	1.2595	-0.22676	2.414	-7.151	110.63441	0.12749	0.16499	-0.16633	74.922	-236.67	1835.47	-1.0034	0.72656	-0.023438	NaN	NaN	NaN	NaN	NaN	NaN
1.242	10.342	-162.41215	1757.584	-0.48896	1.2716	-0.22832	-18.877	-6.8667	137.049	0.15174	0.15406	-0.16553	87.802	-343.64	1844.16	-1.2041	0.84668	-0.020996	NaN	NaN	NaN	NaN	NaN	NaN
1.244	-15.368	-154.2569	1761.39	-0.49912	1.2888	-0.22871	9.358	18.3812	111.391	0.17159	0.14053	-0.16721	118.022	-351.35	1819.25	-1.3086	0.91992	0.01416	NaN	NaN	NaN	NaN	NaN	NaN
1.246	-14.843	-136.984	1756.415	-0.50879	1.3087	-0.22939	0.689999999999998	-15.1131	94.749	0.18652	0.12598	-0.17188	76.504	-329.19	1834.03	-1.4858	1.0776	0.13574	NaN	NaN	NaN	NaN	NaN	NaN
1.248	-21.759	-137.782	1774.893	-0.51758	1.3301	-0.2251	16.422	29.1685	121.2368	0.20031	0.11332	-0.17297	47.424	-244.77	1814.11	-1.5847	1.1917	0.24267	NaN	NaN	NaN	NaN	NaN	NaN
1.25	-23.058	-120.981	1783.103	-0.53213	1.3601	-0.22832	-7.868	9.008	135.635	0.20323	0.10204	-0.17872	65.222	-215.046	1864.76	-1.6426	1.2949	0.34424	NaN	NaN	NaN	NaN	NaN	NaN
1.252	-11.834	-114.702	1775.0973	-0.54209	1.3813	-0.22481	-16.339	-40.449	142.4757	0.20204	0.097739	-0.18066	61.192	-161.358	1881.95	-1.6504	1.415	0.4458	NaN	NaN	NaN	NaN	NaN	NaN
1.254	-36.264	-103.59	1787.9844	-0.55811	1.3997	-0.22441	-5.454	-3.865	139.8519	0.18971	0.093369	-0.18927	17.548	-106.0755	1930.58	-1.6226	1.4575	0.47852	NaN	NaN	NaN	NaN	NaN	NaN
1.256	2.14100000000001	-94.806	1801.7343	-0.57441	1.4158	-0.22266	-41.383	-55.2654	126.631	0.16553	0.093262	-0.19238	29.853	-42.7155	1863.71	-1.5234	1.4863	0.49561	NaN	NaN	NaN	NaN	NaN	NaN
1.258	4.99000000000001	-83.544	1822.4564	-0.58545	1.4399	-0.23047	-30.568	-56.1636	188.0498	0.12709	0.10565	-0.19277	-38.894	-19.895	1810.59	-1.4121	1.4541	0.47851	NaN	NaN	NaN	NaN	NaN	NaN
1.26	28.334	-70.691	1814.8721	-0.58984	1.4555	-0.24082	-36.963	-41.595	210.955	0.075848	0.12623	-0.19561	-30.961	-27.9099	1716.23	-1.2827	1.3657	0.44336	NaN	NaN	NaN	NaN	NaN	NaN
1.262	11.344	-77.326	1826.526	-0.57939	1.4728	-0.25439	-39.155	-87.842	212.0179	0.016456	0.15906	-0.18976	-35.151	-105.62	1684.09	-1.0981	1.1646	0.39453	NaN	NaN	NaN	NaN	NaN	NaN
1.264	56.252	-72.812	1864.762	-0.56338	1.4833	-0.27822	-26.492	-75.323	237.9128	-0.037379	0.19802	-0.18321	-16.85	-205.598	1629.44	-1.0137	1.0508	0.37939	NaN	NaN	NaN	NaN	NaN	NaN
1.266	93.062	-82.712	1889.585	-0.54453	1.4935	-0.30029	-68.058	-104.0716	274.9325	-0.089844	0.23975	-0.16992	-61.869	-307.6	1634.23	-0.87256	0.83252	0.37207	NaN	NaN	NaN	NaN	NaN	NaN
1.268	80.524	-85.329	1895.9842	-0.53125	1.498	-0.3252	-69.853	-142.232	358.964	-0.14377	0.28448	-0.15888	-101.056	-421.88	1671.85	-0.78223	0.68897	0.36328	NaN	NaN	NaN	NaN	NaN	NaN
1.27	100.93	-87.2173	1904.7999	-0.51787	1.5016	-0.34521	-60.021	-89.581	430.0904	-0.19874	0.32706	-0.15615	-154.101	-504.04	1712.54	-0.70654	0.56592	0.34473	NaN	NaN	NaN	NaN	NaN	NaN
1.272	110.425	-101.447	1913.304	-0.51045	1.5032	-0.35986	-35.73	-87.7238	470.698	-0.25734	0.36612	-0.15771	-173.7096	-516.27	1767.4	-0.60742	0.43945	0.31104	NaN	NaN	NaN	NaN	NaN	NaN
1.274	112.24	-106.593	1932.101	-0.50615	1.5052	-0.38213	-18.874	-40.9156	565.177	-0.33526	0.40557	-0.16426	-161.8827	-445.91	1819.84	-0.55615	0.38818	0.2959	NaN	NaN	NaN	NaN	NaN	NaN
1.276	98.845	-95.162	1915.60433	-0.50899	1.5117	-0.39882	-42.088	47.9955	674.3545	-0.43555	0.44141	-0.17139	-125.9846	-368.63	1903.22	-0.46875	0.31836	0.24658	NaN	NaN	NaN	NaN	NaN	NaN
1.278	120.6383	-95.396	1920.4145	-0.51367	1.5156	-0.40527	-20.429	44.0723	787.3505	-0.5499	0.48428	-0.18262	-179.738	-312.83	2028.43	-0.4148	0.29273	0.21289	NaN	NaN	NaN	NaN	NaN	NaN
1.28	106.013	-82.8915	1933.447	-0.51592	1.5231	-0.40967	2.17699999999999	113.732	939.557	-0.68475	0.53339	-0.17695	-206.589	-291.78	2113.12	-0.38281	0.28711	0.17578	NaN	NaN	NaN	NaN	NaN	NaN
1.282	97.605	-75.3677	1928.9694	-0.52285	1.5305	-0.41602	-32.363	163.08	1112.975	-0.84178	0.58418	-0.17812	-210.095	-254.228	2111.27	-0.375	0.33496	0.13965	NaN	NaN	NaN	NaN	NaN	NaN
1.284	84.551	-55.2069	1924.681	-0.53066	1.5367	-0.42539	23.438	146.71888	1289.98	-1.0151	0.65244	-0.17441	-201.682	-244.156	2129.73	-0.38818	0.37549	0.1333	NaN	NaN	NaN	NaN	NaN	NaN
1.286	81.088	-33.913	1921.1428	-0.53603	1.5405	-0.42802	68.439	181.004	1383.427	-1.2173	0.73682	-0.15283	-173.2645	-217.19	2111.02	-0.46338	0.49072	0.146	NaN	NaN	NaN	NaN	NaN	NaN
1.288	76.56	-35.059	1924.4739	-0.54443	1.5415	-0.43115	-7.788	108.657	1411.219	-1.4272	0.86055	-0.13144	-172.2123	-243.687	2131.92	-0.54248	0.58618	0.16431	NaN	NaN	NaN	NaN	NaN	NaN
1.29	60.246	-32.494	1906.55813	-0.55566	1.5381	-0.43691	-7.759	38.171	1487.186	-1.6347	1.0137	-0.092089	-152.032	-262.762	2106.87	-0.63428	0.68164	0.17822	NaN	NaN	NaN	NaN	NaN	NaN
1.292	37.887	-38.53	1899.1304	-0.56904	1.5415	-0.43682	6.218	5.07100000000001	1537.415	-1.7973	1.1965	-0.045995	-157.6322	-332.51	2138.17	-0.74756	0.8208	0.19141	NaN	NaN	NaN	NaN	NaN	NaN
1.294	23.824	-38.203	1903.9069	-0.58506	1.5365	-0.43955	58.0093	-118.727	1537.315	-1.8638	1.3721	0.01377	-146.138	-312.097	2151.13	-0.80762	0.89648	0.19482	NaN	NaN	NaN	NaN	NaN	NaN
1.296	15.353	-27.321	1914.853	-0.59707	1.5326	-0.44102	85.0795	-149.45	1495.421	-1.8262	1.5107	0.05957	-131.076	-312.41	2242.76	-0.89648	1.0508	0.19775	NaN	NaN	NaN	NaN	NaN	NaN
1.298	3.006	-29.601	1893.60337	-0.60693	1.5298	-0.44482	55.394	-184.814	1414.326	-1.6685	1.5861	0.084277	-123.349	-258.487	2300.15	-0.95581	1.1731	0.19653	NaN	NaN	NaN	NaN	NaN	NaN
1.3	-25.747	-30.669	1893.1809	-0.61592	1.5278	-0.4458	14.049	-247.56	1409.006	-1.443	1.6137	0.089063	-126.7027	-255.971	2361.43	-0.9917	1.2964	0.19385	NaN	NaN	NaN	NaN	NaN	NaN
1.302	-0.596999999999994	-37.4591	1908.437	-0.621	1.5196	-0.44639	-12.5767	-183.787	1404.754	-1.1793	1.5914	0.073438	-114.622	-255.856	2396.58	-1.0098	1.459	0.1709	NaN	NaN	NaN	NaN	NaN	NaN
1.304	-17.889	-36.1154	1908.945	-0.62412	1.5181	-0.44912	2.3206	-179.56	1358.602	-0.92539	1.515	0.0028324	-136.0323	-299.82	2474.76	-1.0015	1.5435	0.15918	NaN	NaN	NaN	NaN	NaN	NaN
1.306	3.31700000000001	-29.8162	1886.9923	-0.62685	1.5079	-0.4542	-17.043	-158.678	1373.8563	-0.69678	1.3813	-0.11182	-103.676	-285.349	2482.44	-0.97266	1.6895	0.1333	NaN	NaN	NaN	NaN	NaN	NaN
1.308	-3.699	-19.8506	1873.608	-0.62305	1.5	-0.45508	-67.8332	-91.5591	1417.375	-0.51543	1.2104	-0.21035	-107.566	-306.545	2518.77	-0.95459	1.7827	0.12476	NaN	NaN	NaN	NaN	NaN	NaN
1.31	21.588	0.102	1883.9272	-0.62041	1.487	-0.45733	-97.9165	-84.789	1434.052	-0.37324	1.0259	-0.27236	-124.587	-290.929	2522.91	-0.94531	1.8574	0.12939	NaN	NaN	NaN	NaN	NaN	NaN
1.312	28.896	5.104	1872.06	-0.6169	1.4751	-0.46045	-91.506	9.79900000000001	1452.378	-0.28379	0.85214	-0.29971	-161.2386	-301.9	2548.95	-0.97656	1.9219	0.146	NaN	NaN	NaN	NaN	NaN	NaN
1.314	38.128	12.1954	1836.6205	-0.61299	1.4642	-0.46045	-64.7	55.085	1447.7469	-0.24726	0.69804	-0.30284	-113.399	-267.221	2523.2	-1.0261	1.9554	0.17602	NaN	NaN	NaN	NaN	NaN	NaN
1.316	52.101	18.74558	1821.0146	-0.60996	1.4522	-0.46016	-29.097	-25.02	1443.01	-0.24463	0.56885	-0.29395	-110.4261	-255.109	2519	-1.0952	1.9771	0.20557	NaN	NaN	NaN	NaN	NaN	NaN
1.318	65.026	28.3379	1823.06031	-0.60693	1.438	-0.4624	1.023	-80.23	1512.005	-0.25996	0.47393	-0.28672	-114.266	-241.66	2482.9	-1.1929	1.9927	0.25098	NaN	NaN	NaN	NaN	NaN	NaN
1.32	84.311	26.0678	1816.696	-0.604	1.4306	-0.45791	-1.345	-218.266	1546.151	-0.28164	0.40938	-0.29297	-171.335	-231.424	2491.29	-1.2417	1.9966	0.26611	NaN	NaN	NaN	NaN	NaN	NaN
1.322	73.316	39.846	1783.6517	-0.60742	1.416	-0.45585	17.788	-334.901	1599.778	-0.31758	0.39297	-0.30391	-203.419	-205.867	2453.35	-1.3262	2.0293	0.32568	NaN	NaN	NaN	NaN	NaN	NaN
1.324	87.866	37.773	1763.52531	-0.60507	1.4098	-0.45195	14.396	-332.4116	1676.388	-0.3917	0.41396	-0.31982	-236.725	-180.771	2480.68	-1.3962	2.0051	0.33521	NaN	NaN	NaN	NaN	NaN	NaN
1.326	89.996	28.5795	1751.3338	-0.60351	1.3951	-0.44824	7.25999999999999	-394.591	1697.301	-0.51367	0.48242	-0.32764	-174.9138	-149.633	2466.97	-1.4531	1.9883	0.30859	NaN	NaN	NaN	NaN	NaN	NaN
1.328	97.603	23.8223	1740.2481	-0.604	1.3872	-0.44482	8.482	-370.286	1761.5483	-0.67842	0.61846	-0.30146	-170.208	-144.601	2503.56	-1.4741	2.0161	0.33789	NaN	NaN	NaN	NaN	NaN	NaN
1.33	95.776	20.8128	1727.8426	-0.60372	1.3819	-0.44044	8.116	-334.146	1804.2645	-0.84805	0.76875	-0.26055	-153.3004	-133.859	2488.95	-1.4922	2.0195	0.3374	NaN	NaN	NaN	NaN	NaN	NaN
1.332	103.7504	26.1114	1715.5828	-0.60107	1.3727	-0.43157	9.548	-388.51	1859.064	-0.99411	0.92969	-0.22422	-180.455	-102.114	2514.39	-1.4902	2.0664	0.34521	NaN	NaN	NaN	NaN	NaN	NaN
1.334	94.457	30.0747	1716.285	-0.59875	1.37	-0.42569	47.337	-299.313	1965.743	-1.0976	1.0832	-0.17139	-163.089	-68.578	2496.2	-1.4666	2.0871	0.35351	NaN	NaN	NaN	NaN	NaN	NaN
1.336	66.872	31.3481	1683.4994	-0.59356	1.36	-0.41711	95.474	-227.021	2041.447	-1.1636	1.2153	-0.13037	-157.87	-74.975	2513.09	-1.439	2.1001	0.354	NaN	NaN	NaN	NaN	NaN	NaN
1.338	72.268	34.2662	1652.6655	-0.59082	1.355	-0.40967	134.737	-198.032	2088.603	-1.1785	1.3062	-0.11309	-145.11	-114.769	2491.19	-1.3779	2.1074	0.33008	NaN	NaN	NaN	NaN	NaN	NaN
1.34	38.292	40.35	1637.051	-0.58415	1.343	-0.40172	156.223	-105.661	2102.364	-1.152	1.3594	-0.11406	-150.124	-138.407	2472.46	-1.3369	2.1055	0.32275	NaN	NaN	NaN	NaN	NaN	NaN
1.342	48.481	44.661	1623.764	-0.57722	1.3311	-0.39401	153.052	-131.992	2059.441	-1.0929	1.3551	-0.13125	-161.248	-145.844	2445.17	-1.2456	2.0923	0.29297	NaN	NaN	NaN	NaN	NaN	NaN
1.344	16.182	43.8834	1591.0845	-0.56582	1.3181	-0.38747	217.6616	-119.714	2062.29471	-1.0332	1.3102	-0.18545	-176.189	-94.962	2439.73	-1.1784	2.0745	0.27685	NaN	NaN	NaN	NaN	NaN	NaN
1.346	-2.281	50.9622	1571.634	-0.55426	1.3077	-0.38239	239.143	-91.974	2079.631	-0.97998	1.2368	-0.24365	-142.078	-26.095	2427.55	-1.1147	2.0454	0.25391	NaN	NaN	NaN	NaN	NaN	NaN
1.348	5.908	68.381	1555.858	-0.54834	1.2896	-0.37402	180.929	-190.357	2076.327	-0.96426	1.1625	-0.29844	-119.049	44.275	2428.55	-1.043	2.0098	0.23926	NaN	NaN	NaN	NaN	NaN	NaN
1.35	-19.273	78.76	1539.3295	-0.53834	1.279	-0.37006	161.938	-197.6478	2109.422	-0.97032	1.1027	-0.33262	-79.923	67.413	2418.67	-1.0107	1.9941	0.23682	NaN	NaN	NaN	NaN	NaN	NaN
1.352	-19.318	96.145	1507.6545	-0.53082	1.2645	-0.35948	99.401	-243.855	2122.881	-1.0031	1.0699	-0.35176	-66.403	114.932	2425.58	-0.95996	1.9551	0.22803	NaN	NaN	NaN	NaN	NaN	NaN
1.354	-41.948	88.696	1488.7014	-0.52778	1.2526	-0.35589	71.527	-311.004	2149.631	-1.0504	1.0637	-0.36347	-98.063	121.769	2394.94	-0.93189	1.926	0.2251	NaN	NaN	NaN	NaN	NaN	NaN
1.356	-17	88.551	1481.946	-0.5176	1.2393	-0.34899	104.269	-250.704	2246.014	-1.1162	1.0869	-0.37012	-96.794	149.894	2349.06	-0.91016	1.8965	0.22021	NaN	NaN	NaN	NaN	NaN	NaN
1.358	-24.317	78.433	1471.182	-0.51563	1.2295	-0.3418	86.755	-276.118	2260.852	-1.1823	1.1544	-0.37666	-89.266	125.921	2311.86	-0.8833	1.8599	0.2168	NaN	NaN	NaN	NaN	NaN	NaN
1.36	-22.042	82.621	1435.5485	-0.50645	1.2194	-0.33369	85.856	-281.38	2302.023	-1.2276	1.2298	-0.38935	-70.793	120.274	2269.83	-0.8667	1.8501	0.21191	NaN	NaN	NaN	NaN	NaN	NaN
1.362	-11.336	77.996	1429.589	-0.49252	1.2056	-0.32589	50.887	-218.2174	2352.294	-1.2436	1.2935	-0.40459	-112.45	62.2	2260.89	-0.84619	1.8228	0.21289	NaN	NaN	NaN	NaN	NaN	NaN
1.364	-13.25	81.309	1404.7425	-0.47782	1.1945	-0.3189	20.032	-262.141	2350.078	-1.2349	1.3292	-0.4251	-92.071	52.669	2177.36	-0.83106	1.8057	0.20948	NaN	NaN	NaN	NaN	NaN	NaN
1.366	7.35	82.5568	1371.9926	-0.46349	1.1783	-0.31447	53.844	-178.355	2380.645	-1.2197	1.3545	-0.43945	-103.092	29.718	2134.34	-0.80811	1.7915	0.20703	NaN	NaN	NaN	NaN	NaN	NaN
1.368	-1.72799999999999	92.1989	1351.35088	-0.44678	1.1665	-0.31006	48.762	-110.252	2327.942	-1.2129	1.376	-0.46709	-109.181	63.527	2091.85	-0.77588	1.7739	0.2002	NaN	NaN	NaN	NaN	NaN	NaN
1.37	23.547	84.2122	1349.029	-0.43939	1.1477	-0.30598	24.65	-137.005	2290.306	-1.2171	1.4028	-0.49297	-120.2441	49.632	2074.29	-0.76465	1.7617	0.19873	NaN	NaN	NaN	NaN	NaN	NaN
1.372	45.063	83.4638	1335.855	-0.42448	1.1332	-0.30043	9.5	-74.331	2337.1205	-1.2272	1.4341	-0.5125	-133.4885	98.743	2030.7	-0.72607	1.7368	0.19531	NaN	NaN	NaN	NaN	NaN	NaN
1.374	51.531	88.1999	1315.522	-0.40927	1.1204	-0.29568	-43.952	-106.724	2317.3976	-1.2417	1.4637	-0.52744	-138.9077	80.712	2035.51	-0.6997	1.7085	0.18701	NaN	NaN	NaN	NaN	NaN	NaN
1.376	50.661	95.9659	1288.231	-0.39986	1.0987	-0.28826	-1.28999999999999	-121.4477	2332.0976	-1.2617	1.4863	-0.5332	-135.159	120.973	1999.29	-0.66895	1.6738	0.17578	NaN	NaN	NaN	NaN	NaN	NaN
1.378	60.492	104.265	1261.2168	-0.39209	1.0825	-0.28076	27.391	-53.306	2360.93	-1.2833	1.4991	-0.53369	-143.7725	124.304	1991.96	-0.61377	1.6157	0.16113	NaN	NaN	NaN	NaN	NaN	NaN
1.38	62.957	110.8621	1238.006	-0.38383	1.0682	-0.27312	8.25	-98.531	2311.812	-1.3161	1.5029	-0.53115	-128.851	194.554	1901.78	-0.58984	1.5801	0.15186	NaN	NaN	NaN	NaN	NaN	NaN
1.382	44.713	117.954	1207.25159	-0.37348	1.0511	-0.26249	54.659	-37.161	2347.261	-1.3427	1.5075	-0.53271	-189.081	198.0623	1840.06	-0.53613	1.5059	0.13477	NaN	NaN	NaN	NaN	NaN	NaN
1.384	70.973	120.594	1186.88209	-0.36675	1.035	-0.25738	52.988	8.734	2349.592	-1.3654	1.5119	-0.53692	-130.277	228.028	1763.22	-0.4956	1.4512	0.11816	NaN	NaN	NaN	NaN	NaN	NaN
1.386	49.666	115.2734	1166.2497	-0.35894	1.0217	-0.24748	88.692	-63.87	2360.9459	-1.377	1.5098	-0.53906	-135.0297	166.294	1742.44	-0.45166	1.3931	0.10645	NaN	NaN	NaN	NaN	NaN	NaN
1.388	41.387	121.5545	1149.4225	-0.35449	1.0039	-0.2373	157.108	-46.138	2459.683	-1.3778	1.514	-0.54434	-118.016	168.4245	1657.01	-0.40771	1.3169	0.085938	NaN	NaN	NaN	NaN	NaN	NaN
1.39	7.847	110.9988	1133.0755	-0.34364	0.98805	-0.23228	152.936	-113.89	2449.641	-1.3718	1.5137	-0.55117	-122.3137	123.1548	1618.27	-0.38135	1.2798	0.075195	NaN	NaN	NaN	NaN	NaN	NaN
1.392	18.613	114.4067	1107.113	-0.33307	0.97267	-0.22643	213.556	-169.961	2442.22	-1.3594	1.5106	-0.54843	-101	162.932	1510.743	-0.33936	1.2046	0.056641	NaN	NaN	NaN	NaN	NaN	NaN
1.394	7.478	109.3528	1094.311	-0.32527	0.95632	-0.21588	218.579	-76.4804	2429.733	-1.3451	1.5029	-0.54844	-137.4085	142.975	1495.69	-0.3103	1.1543	0.048828	NaN	NaN	NaN	NaN	NaN	NaN
1.396	-19.647	115.08959	1068.3464	-0.31717	0.9451	-0.21132	161.236	-101.827	2371.75	-1.3335	1.4946	-0.54053	-105.246	205.931	1445.76	-0.28516	1.1094	0.041992	NaN	NaN	NaN	NaN	NaN	NaN
1.398	-22.385	117.2328	1048.9631	-0.30615	0.93408	-0.20361	220.1249	-52.541	2400.383	-1.3218	1.4904	-0.53545	-86.489	205.337	1453.13	-0.25391	1.061	0.039063	NaN	NaN	NaN	NaN	NaN	NaN
1.4	-48.995	126.998	1034.423	-0.29776	0.92101	-0.188	184.658	-16.2487	2363.291	-1.3133	1.484	-0.52773	-19.548	265.849	1379.53	-0.23828	1.0332	0.036133	NaN	NaN	NaN	NaN	NaN	NaN
1.402	-40.878	127.109	1010.1781	-0.28518	0.90744	-0.17754	157.164	-77.51	2316.66	-1.3055	1.4793	-0.51836	-30.225	257.235	1368.22	-0.21143	0.99023	0.038574	NaN	NaN	NaN	NaN	NaN	NaN
1.404	-69.4353	129.227	982.92948	-0.27149	0.8922	-0.17247	165.5661	7.566	2369.997	-1.3043	1.466	-0.50429	-26.25	282.135	1292.91	-0.18969	0.95898	0.035889	NaN	NaN	NaN	NaN	NaN	NaN
1.406	-59.0297	128.909	958.4831	-0.25401	0.87179	-0.1627	122.555	37.7609	2340.718	-1.3066	1.457	-0.49121	-63.04	239.464	1288.51	-0.1709	0.93799	0.038574	NaN	NaN	NaN	NaN	NaN	NaN
1.408	-64.2238	114.327	952.6838	-0.23535	0.85547	-0.1543	137.936	78.295	2335.892	-1.3262	1.445	-0.48633	-24.218	259.054	1185.83	-0.14209	0.9165	0.030273	NaN	NaN	NaN	NaN	NaN	NaN
1.41	-51.171	119.221	940.063	-0.2207	0.83329	-0.14697	144.916	168.691	2322.3866	-1.3478	1.4379	-0.4791	-29.643	215.498	1141.8	-0.13379	0.90234	0.033203	NaN	NaN	NaN	NaN	NaN	NaN
1.412	-54.846	126.123	914.5572	-0.20497	0.812	-0.13945	85.02	92.965	2267.7102	-1.3698	1.441	-0.4627	-3.32000000000001	247.951	1068.585	-0.12402	0.87891	0.025391	NaN	NaN	NaN	NaN	NaN	NaN
1.414	-52.85	140.094	881.8945	-0.19169	0.787	-0.13125	105.375	88.518	2308.967	-1.3959	1.4428	-0.45	-37.927	204.991	1044.97	-0.11035	0.86841	0.016114	NaN	NaN	NaN	NaN	NaN	NaN
1.416	-41.546	137.4519	878.7201	-0.17558	0.7707	-0.125	50.356	89.267	2275.0758	-1.4185	1.4478	-0.43506	-46.403	263.206	953.58	-0.09668	0.85547	0.0092773	NaN	NaN	NaN	NaN	NaN	NaN
1.418	-46.376	143.951	859.0928	-0.15771	0.75049	-0.11572	21.322	17.3511	2220.6157	-1.4383	1.4527	-0.42168	-87.482	246.762	907.37	-0.078613	0.84033	0.0039063	NaN	NaN	NaN	NaN	NaN	NaN
1.42	-18.04	148.692	829.04539	-0.146	0.72979	-0.10928	51.028	76.5132	2249.781	-1.4472	1.4556	-0.41084	-60.091	295.126	845.582	-0.11377	0.7915	-0.046387	NaN	NaN	NaN	NaN	NaN	NaN
1.422	-21.35	149.766	809.0606	-0.12793	0.7125	-0.099219	-30.725	28.433	2200.0459	-1.4437	1.4552	-0.40225	-38.212	275.018	860.5	-0.064941	0.81104	0.087402	NaN	NaN	NaN	NaN	NaN	NaN
1.424	-0.0700000000000003	135.16	809.2966	-0.10567	0.6918	-0.089845	-32.28	0.829000000000001	2169.3727	-1.4342	1.4549	-0.39366	-2.29199999999999	303.813	830.61	-0.065674	0.77148	0.01416	NaN	NaN	NaN	NaN	NaN	NaN
1.426	13.787	124.1485	793.4317	-0.088086	0.67246	-0.086329	-24.003	63.681	2157.901	-1.417	1.4453	-0.3833	-46.893	277.534	803.61	-0.029785	0.76611	-0.041016	NaN	NaN	NaN	NaN	NaN	NaN
1.428	15.327	132.351	769.0553	-0.062988	0.65137	-0.077637	-50.456	30.135	2115.026	-1.3919	1.4296	-0.37744	-42.181	322.338	734.04	0.037598	0.74658	-0.048828	NaN	NaN	NaN	NaN	NaN	NaN
1.43	29.707	149.802	755.55134	-0.043848	0.6292	-0.070605	4.932	91.79	2145.94	-1.3653	1.4078	-0.37735	-77.499	273.397	684.87	0.060059	0.73438	-0.046875	NaN	NaN	NaN	NaN	NaN	NaN
1.432	26.484	151.362	738.0122	-0.018261	0.60976	-0.068262	19.723	153.494	2093.819	-1.3398	1.3793	-0.36445	-47.52	285.824	652.74	0.079102	0.70313	-0.073242	NaN	NaN	NaN	NaN	NaN	NaN
1.434	32.435	144.2007	730.881	0.0012698	0.58516	-0.065918	37.149	120.804	2012.111	-1.3097	1.356	-0.35772	-46.713	206.105	623.64	0.099366	0.68531	-0.087402	NaN	NaN	NaN	NaN	NaN	NaN
1.436	11.815	141.362	697.3976	0.020703	0.56611	-0.063281	99.812	219.016	2012.183	-1.2832	1.3262	-0.35742	-61.764	202.8795	571.877	0.11475	0.66455	-0.094238	NaN	NaN	NaN	NaN	NaN	NaN
1.438	32.326	134.4152	683.9643	0.041992	0.55127	-0.061035	81.608	207.488	1963.711	-1.2546	1.2985	-0.34854	-48.625	145.2365	553.392	0.13428	0.63037	-0.10449	NaN	NaN	NaN	NaN	NaN	NaN
1.44	-5.711	137.9473	673.798	0.058984	0.52871	-0.059082	96.077	219.581	1944.74	-1.2285	1.2725	-0.34014	-48.579	168.612	517.901	0.13232	0.61328	-0.11035	NaN	NaN	NaN	NaN	NaN	NaN
1.442	-10.728	139.949	661.384	0.075195	0.50937	-0.055078	119.72	265.584	1929.746	-1.2023	1.2439	-0.33076	-54.723	135.343	497.49	0.14014	0.59277	-0.12207	NaN	NaN	NaN	NaN	NaN	NaN
1.444	-9.392	140.332	637.928	0.091992	0.49219	-0.054688	88.849	181.7946	1862.543	-1.1743	1.2161	-0.31973	-29.314	186.947	462.98	0.14453	0.58862	-0.12768	NaN	NaN	NaN	NaN	NaN	NaN
1.446	-19.367	142.883	607.9785	0.097852	0.47862	-0.05	123.2409	184.268	1884.668	-1.1484	1.1914	-0.31152	-33.001	171.7998	424.973	0.15381	0.58594	-0.12695	NaN	NaN	NaN	NaN	NaN	NaN
1.448	-27.726	141.607	601.6868	0.1084	0.46777	-0.04541	106.367	184.145	1859.035	-1.1204	1.1604	-0.30449	4.737	226.8697	422.99	0.17285	0.58545	-0.12939	NaN	NaN	NaN	NaN	NaN	NaN
1.45	-54.6482	148.638	589.402	0.11836	0.45586	-0.050098	106.547	148.401	1782.411	-1.0934	1.1379	-0.29707	26.318	174.1251	406.01	0.18311	0.58203	-0.13086	NaN	NaN	NaN	NaN	NaN	NaN
1.452	-53.4054	152.587	574.693	0.12705	0.44395	-0.045312	152.0218	218.6523	1771.541	-1.0687	1.1156	-0.28809	25.015	187.16	372.22	0.20703	0.57959	-0.14014	NaN	NaN	NaN	NaN	NaN	NaN
1.454	-75.0472	140.057	553.7609	0.13096	0.43848	-0.042578	88.709	183.055	1714.311	-1.0396	1.0974	-0.28017	3.399	120.196	306.77	0.22705	0.57959	-0.14453	NaN	NaN	NaN	NaN	NaN	NaN
1.456	-68.1214	140.515	530.225	0.13574	0.43232	-0.044043	96.886	171.7716	1723.929	-1.0093	1.0728	-0.26318	8.577	144.3599	264.34	0.23193	0.57813	-0.14795	NaN	NaN	NaN	NaN	NaN	NaN
1.458	-87.864	125.041	516.2446	0.13818	0.42578	-0.041992	117.09681	206.589	1719.178	-0.97959	1.0574	-0.26162	20.108	107.7363	223.566	0.23877	0.5791	-0.14355	NaN	NaN	NaN	NaN	NaN	NaN
1.46	-92.002	134.378	502.112	0.13896	0.4249	-0.039941	83.889	154.2622	1644.853	-0.95156	1.0385	-0.25439	19.997	138.9894	233.18	0.24536	0.57862	-0.14331	NaN	NaN	NaN	NaN	NaN	NaN
1.462	-79.235	130.393	496.253	0.1375	0.42422	-0.036719	76.113	190.198	1655.235	-0.91875	1.0221	-0.24619	17.534	98.0565	184.416	0.24805	0.57422	-0.13916	NaN	NaN	NaN	NaN	NaN	NaN
1.464	-91.359	125.315	480.675	0.13906	0.42734	-0.033984	20.395	217.905	1566.856	-0.87871	1.0041	-0.23965	-3.585	123.7609	169.478	0.25	0.5708	-0.13721	NaN	NaN	NaN	NaN	NaN	NaN
1.466	-75.652	132.865	457.75966	0.13252	0.42793	-0.02959	-21.961	202.458	1485.1981	-0.84082	0.99121	-0.2334	-10.802	77.019	159.015	0.25195	0.56641	-0.13574	NaN	NaN	NaN	NaN	NaN	NaN
1.468	-85.655	128.926	454.6662	0.12744	0.4292	-0.022949	-25.02	274.362	1436.986	-0.79775	0.96865	-0.22168	-16.796	78.518	168.183	0.25977	0.56885	-0.13818	NaN	NaN	NaN	NaN	NaN	NaN
1.47	-55.4708	125.725	439.798	0.12647	0.43164	-0.016699	-74.756	243.337	1357.769	-0.75615	0.95127	-0.21435	-12.379	34.223	144.999	0.26294	0.5708	-0.13062	NaN	NaN	NaN	NaN	NaN	NaN
1.472	-48.997	119.353	431.961	0.12675	0.43359	-0.013574	-89.4565	228.0228	1348.9942	-0.71748	0.9251	-0.20459	-23.188	66.8689	143.009	0.27148	0.56445	-0.13525	NaN	NaN	NaN	NaN	NaN	NaN
1.474	-40.8402	124.891	410.2118	0.12285	0.4289	-0.010449	-83.3954	254.618	1330.613	-0.68467	0.89932	-0.19697	8.182	42.5117	106.036	0.29004	0.56543	-0.13721	NaN	NaN	NaN	NaN	NaN	NaN
1.476	-26.423	120.278	394.22929	0.12783	0.42881	-0.0069336	-111.4124	207.2995	1251.2343	-0.65137	0.87305	-0.19141	-12.733	71.8645	124.586	0.30127	0.56445	-0.13672	NaN	NaN	NaN	NaN	NaN	NaN
1.478	-14.662	125.126	393.234	0.13281	0.41846	-0.014648	-93.05997	263.154	1237.0075	-0.61728	0.84854	-0.179	-34.464	38.275	92.0796	0.31494	0.55908	-0.13916	NaN	NaN	NaN	NaN	NaN	NaN
1.48	-2.675	108.8608	387.598	0.13506	0.41602	-0.012012	-100.2823	266.489	1194.4777	-0.58838	0.82353	-0.1665	-83.4926	48.495	118.161	0.32519	0.55103	-0.1394	NaN	NaN	NaN	NaN	NaN	NaN
1.482	-17.226	110.415	361.7042	0.1333	0.40557	-0.014258	-85.683	230.803	1156.4727	-0.56143	0.79658	-0.15752	-62.585	42.4185	88.9136	0.33203	0.54102	-0.14209	NaN	NaN	NaN	NaN	NaN	NaN
1.484	7.711	116.9879	347.9167	0.13643	0.39775	-0.014648	-51.001	258.393	1134.789	-0.53349	0.77275	-0.14268	-65.536	62.279	124.938	0.33643	0.5293	-0.13672	NaN	NaN	NaN	NaN	NaN	NaN
1.486	-3.547	118.6574	336.531	0.13272	0.38799	-0.010254	-64.10252	193.3556	1045.383	-0.50342	0.75439	-0.13135	-37.282	43.704	113.089	0.33008	0.52002	-0.1333	NaN	NaN	NaN	NaN	NaN	NaN
1.488	17.682	119.595	327.2357	0.13525	0.37891	-0.0063477	-41.432	200.5341	1026.9981	-0.47256	0.73233	-0.12041	-72.993	20.3102	122.346	0.3252	0.51074	-0.12695	NaN	NaN	NaN	NaN	NaN	NaN
1.49	5.184	113.018	312.7026	0.13457	0.36875	-0.0027344	-44.639	226.491	1010.0746	-0.43809	0.71065	-0.10605	-78.56	-5.6316	87.7028	0.31274	0.50366	-0.11743	NaN	NaN	NaN	NaN	NaN	NaN
1.492	0.034000000000006	98.5748	311.0429	0.13672	0.35986	0.003711	-45.677	184.5598	947.4177	-0.41309	0.68721	-0.095508	-88.7023	-1.39685	113.901	0.30176	0.49023	-0.11133	NaN	NaN	NaN	NaN	NaN	NaN
1.494	8.286	92.1927	299.4689	0.13985	0.3497	0.0056641	-4.774	221.6082	929.632	-0.37842	0.66592	-0.088574	-44.844	16.597	108.2441	0.28369	0.47168	-0.10889	NaN	NaN	NaN	NaN	NaN	NaN
1.496	-22.767	84.19366	295.973	0.14189	0.33936	0.0097655	-7.38500000000001	202.032	867.779	-0.34717	0.64502	-0.076172	-32.103	32.2373	152.329	0.27588	0.4668	-0.10693	NaN	NaN	NaN	NaN	NaN	NaN
1.498	-25.766	98.149	288.964	0.14697	0.32617	0.02002	15.433	190.978	840.842	-0.3126	0.61904	-0.064942	-18.908	39.0034	139.875	0.25977	0.44775	-0.099121	NaN	NaN	NaN	NaN	NaN	NaN
1.5	-40.223	101.106	269.338	0.154	0.31562	0.013476	38.233	250.7707	819.984	-0.28369	0.60009	-0.050195	-33.63	33.8303	142.539	0.25659	0.42554	-0.098634	NaN	NaN	NaN	NaN	NaN	NaN
1.502	-26.893	97.524	263.254	0.16074	0.30059	0.023145	16.961	238.776	744.7261	-0.25557	0.57666	-0.04082	-16.128	42.3465	113.9403	0.24854	0.40625	-0.10449	NaN	NaN	NaN	NaN	NaN	NaN
1.504	-69.4441	85.042	240.27789	0.16504	0.29043	0.029785	43.349	255.353	717.882	-0.23398	0.55401	-0.029785	-28.458	13.648	129.458	0.2417	0.37256	-0.10742	NaN	NaN	NaN	NaN	NaN	NaN
1.506	-62.4014	67.3559	237.2156	0.17324	0.27696	0.030468	34.121	265.619	671.681	-0.21094	0.5293	-0.016113	-17.41	-4.284	109.1351	0.23828	0.354	-0.10693	NaN	NaN	NaN	NaN	NaN	NaN
1.508	-62.9628	62.6492	234.0622	0.18408	0.26074	0.033203	15.958	220.682	630.543	-0.19112	0.50654	-0.002539	-33.973	-41.5414	146.747	0.23096	0.31738	-0.11865	NaN	NaN	NaN	NaN	NaN	NaN
1.51	-83.3516	62.9992	220.32039	0.18682	0.25322	0.038672	44.884	258.247	627.5776	-0.16875	0.4875	0.016114	-0.588999999999999	-23.4079	119.6289	0.2212	0.29297	-0.12597	NaN	NaN	NaN	NaN	NaN	NaN
1.512	-73.9534	65.232	209.97561	0.19385	0.2376	0.041308	7.014	236.176	578.8127	-0.14883	0.46407	0.025879	0.683	-28.4821	125.856	0.20313	0.27393	-0.13428	NaN	NaN	NaN	NaN	NaN	NaN
1.514	-85.2726	61.063	215.743	0.20244	0.22822	0.047949	-26.548	213.098	566.4849	-0.13204	0.44356	0.039062	7.142	2.73	115.9997	0.16943	0.25439	-0.13916	NaN	NaN	NaN	NaN	NaN	NaN
1.516	-62.5975	45.7862	229.787	0.20722	0.21601	0.049317	-42.3585	217.5603	542.366	-0.11426	0.42627	0.046875	-24.631	-9.3947	107.313	0.14648	0.24902	-0.13867	NaN	NaN	NaN	NaN	NaN	NaN
1.518	-77.1777	36.8753	216.922	0.2124	0.20117	0.044922	-79.0221	157.79	486.2021	-0.092578	0.40244	0.051172	-12.55	11.727	83.676	0.093262	0.24951	-0.13672	NaN	NaN	NaN	NaN	NaN	NaN
1.52	-56.90939	36.7764	200.589	0.20879	0.19346	0.044726	-64.415	189.6061	466.9082	-0.074414	0.37959	0.058886	4.073	-4.53213	88.9979	0.053955	0.25879	-0.12524	NaN	NaN	NaN	NaN	NaN	NaN
1.522	-48.485	26.099	206.818	0.20459	0.18887	0.046289	-78.5158	200.375	427.1163	-0.05918	0.36318	0.063965	3.244	19.226	87.3305	0.015137	0.28369	-0.11572	NaN	NaN	NaN	NaN	NaN	NaN
1.524	-28.504	30.608	208.663	0.196	0.18613	0.047852	-128.915	165.4792	411.3874	-0.038379	0.33857	0.067285	-8.629	-18.4068	101.185	-0.010254	0.32178	-0.1123	NaN	NaN	NaN	NaN	NaN	NaN
1.526	-22.226	15.423	207.205	0.18916	0.18623	0.054102	-106.247	193.031	423.892	-0.01709	0.31641	0.069824	-31.369	4.929	90.106	-0.011719	0.34229	-0.10742	NaN	NaN	NaN	NaN	NaN	NaN
1.528	-33.355	1.443	207.455	0.18311	0.19385	0.061523	-133.726	148.045	358.5461	-0.00068362	0.29785	0.073144	-59.75	-6.8803	79.369	0.0029297	0.38965	-0.099609	NaN	NaN	NaN	NaN	NaN	NaN
1.53	-6.795	-1.698	227.419	0.18066	0.19561	0.067187	-131.978	153.732	345.09052	0.012109	0.28096	0.073535	-62.558	63.7452	73.076	0.023925	0.41064	-0.10181	NaN	NaN	NaN	NaN	NaN	NaN
1.532	3.508	7.049	265.27	0.1793	0.2041	0.068847	-112.212	172.501	356.665	0.023828	0.25986	0.075879	-34.111	49.98	94.3838	0.05957	0.42432	-0.10498	NaN	NaN	NaN	NaN	NaN	NaN
1.534	21.563	35.478	278.72	0.17617	0.20918	0.071973	-113.2547	140.682	320.251	0.040625	0.24414	0.07793	-48.602	69.133	126.311	0.11426	0.4292	-0.11328	NaN	NaN	NaN	NaN	NaN	NaN
1.536	11.135	54.958	294.87	0.16719	0.21904	0.071582	-89.53296	179.767	304.433	0.053223	0.22461	0.08252	-47.112	23.508	92.9053	0.14795	0.42627	-0.11816	NaN	NaN	NaN	NaN	NaN	NaN
1.538	30.117	72.664	321.79	0.15283	0.22266	0.069824	-100.975	176.084	234.486	0.068261	0.20928	0.080371	-61.199	31.40327	86.9576	0.20801	0.40137	-0.13184	NaN	NaN	NaN	NaN	NaN	NaN
1.54	11.321	89.918	368.17	0.12569	0.2334	0.067383	-91.254	143.173	217.498	0.077539	0.19014	0.078027	-67.2691	-5.57	72.5614	0.2566	0.37671	-0.14331	NaN	NaN	NaN	NaN	NaN	NaN
1.542	7.71299999999999	130.643	403.49	0.087696	0.24756	0.063477	-52.9495	150.501	251.6686	0.082226	0.17373	0.077637	-64.8358	17.949	96.82688	0.30127	0.35889	-0.1499	NaN	NaN	NaN	NaN	NaN	NaN
1.544	36.8461	160.632	453.79	0.036133	0.26553	0.061523	-64.12947	99.02665	222.3783	0.083398	0.1541	0.075879	-69.596	1.201	103.91	0.35596	0.31738	-0.17041	NaN	NaN	NaN	NaN	NaN	NaN
1.546	11.267	181.765	524.34	-0.029101	0.28926	0.057519	-35.941	97.9236	217.5197	0.084473	0.1416	0.072754	-42.41	52.101	119.133	0.38867	0.29736	-0.17676	NaN	NaN	NaN	NaN	NaN	NaN
1.548	9.984	189.043	618.27	-0.10449	0.32324	0.052246	-11.702	116.473	201.7642	0.088086	0.13008	0.078418	-23.895	49.629	102.171	0.44678	0.25586	-0.19238	NaN	NaN	NaN	NaN	NaN	NaN
1.55	-5.238	185.795	687.52	-0.19912	0.37266	0.05625	0.346999999999994	73.193	188.92	0.096582	0.12568	0.081347	-41.676	82.736	144.869	0.46752	0.22803	-0.20508	NaN	NaN	NaN	NaN	NaN	NaN
1.552	0.230999999999998	173.749	749.51	-0.3	0.43125	0.066016	29.992	82.764	219.817	0.10283	0.121	0.078613	-36.716	44.953	137.04	0.46582	0.18408	-0.22168	NaN	NaN	NaN	NaN	NaN	NaN
1.554	-10.317	140.751	819.73	-0.40742	0.50274	0.085547	36.853	65.362	163.26583	0.12138	0.1165	0.074512	-61.808	50.943	148.828	0.49365	0.17432	-0.19629	NaN	NaN	NaN	NaN	NaN	NaN
1.556	-5.07899999999999	112.971	867.38	-0.50937	0.59228	0.11191	39.545	34.961	136.39	0.14502	0.11475	0.067871	-11.973	16.9071	115.441	0.48584	0.15771	-0.22949	NaN	NaN	NaN	NaN	NaN	NaN
1.558	-23.611	79.464	918.21	-0.60498	0.69971	0.14795	61.2057	64.9289	161.79557	0.16162	0.11348	0.058691	-16.71	15.0216	146.23	0.51367	0.16162	-0.23682	NaN	NaN	NaN	NaN	NaN	NaN
1.56	-57.5508	48.811	955.03	-0.68447	0.8124	0.18789	27.002	24.248	143.8179	0.17725	0.10713	0.050879	12.391	-12.0185	125.754	0.51148	0.16333	-0.22608	NaN	NaN	NaN	NaN	NaN	NaN
1.562	-20.384	9.2956	994.7	-0.74004	0.92852	0.22724	12.247	30.99099	167.045	0.1917	0.10205	0.045801	-26.029	-18.7612	195.67	0.50586	0.17236	-0.22656	NaN	NaN	NaN	NaN	NaN	NaN
1.564	-29.875	-28.3448	1028.3	-0.77129	1.0348	0.25459	12.645	44.228	135.6408	0.2043	0.099998	0.037109	-31.553	-39.8653	170.079	0.4834	0.20215	-0.22412	NaN	NaN	NaN	NaN	NaN	NaN
1.566	1.09200000000001	-38.237	1071.68	-0.7667	1.1122	0.26485	-17.428	-1.2206	114.701	0.21533	0.096191	0.037109	11.949	-29.351	206.813	0.4751	0.2168	-0.22363	NaN	NaN	NaN	NaN	NaN	NaN
1.568	-17.706	-44.52	1140.34	-0.74023	1.1641	0.25635	-18.454	33.686	147.043	0.22334	0.090722	0.033105	31.149	-32.409	230.856	0.4541	0.24902	-0.22217	NaN	NaN	NaN	NaN	NaN	NaN
1.57	-5.898	-24.09	1178.51	-0.70352	1.1865	0.24023	-35.434	18.3617	118.215	0.22314	0.089453	0.026855	-5.276	-43.987	343.731	0.4353	0.27197	-0.21558	NaN	NaN	NaN	NaN	NaN	NaN
1.572	-16.485	-14.621	1245.78	-0.66055	1.1933	0.22217	-48.062	8.2144	86.253	0.22158	0.092187	0.025683	24.282	-88.737	401.9	0.41064	0.29688	-0.21289	NaN	NaN	NaN	NaN	NaN	NaN
1.574	11.821	-27.2447	1295.34	-0.63984	1.1883	0.20459	-40.529	48.865	85.71	0.21943	0.097461	0.023633	17.757	-110.177	477.48657	0.36426	0.32568	-0.21094	NaN	NaN	NaN	NaN	NaN	NaN
1.576	13.572	-40.377	1376.39	-0.6419	1.1864	0.19512	-75.579	1.3213	67.2957	0.2207	0.10449	0.014648	5.684	-116.712	525.755	0.33447	0.33789	-0.21924	NaN	NaN	NaN	NaN	NaN	NaN
1.578	-10.045	-35.0989	1448.11	-0.66211	1.1816	0.19287	-82.45	1.583	102.8112	0.22119	0.10644	0.014062	18.246	-134.078	646.949	0.25977	0.35059	-0.23242	NaN	NaN	NaN	NaN	NaN	NaN
1.58	9.601	-26.758	1470.05	-0.69668	1.1746	0.20127	-92.70586	0.768999999999998	102.778	0.21035	0.1125	0.016992	13.257	-99.2599	748.353	0.17334	0.36841	-0.23584	NaN	NaN	NaN	NaN	NaN	NaN
1.582	-15.213	-28.952	1484.22	-0.73819	1.1675	0.21435	-102.0402	-32.618	76.118	0.20371	0.12149	0.012304	-38.629	-46.455	908.6507	0.072266	0.39893	-0.23584	NaN	NaN	NaN	NaN	NaN	NaN
1.584	2.65	-30.0343	1483.04	-0.76631	1.1597	0.23662	-89.3925	16.057	118.755	0.18857	0.12549	0.016211	7.63999999999999	33.724	991.788	-0.086914	0.45166	-0.21191	NaN	NaN	NaN	NaN	NaN	NaN
1.586	28.747	-52.896	1460.02	-0.76631	1.1497	0.25508	-97.814	2.943	92.546	0.17432	0.13232	0.022461	35.604	28.4919	1125.484	-0.16455	0.48633	-0.19873	NaN	NaN	NaN	NaN	NaN	NaN
1.588	31.257	-66.0123	1426.68	-0.72412	1.1255	0.2627	-113.2767	-25.8054	92.4077	0.14883	0.13877	0.02998	17.87	30.126	1223.908	-0.32813	0.57031	-0.1709	NaN	NaN	NaN	NaN	NaN	NaN
1.59	38.405	-85.2999	1405.77	-0.63076	1.0884	0.25361	-84.8021	16.7234	98.5338	0.13213	0.14844	0.038282	-42.594	-23.645	1351.6487	-0.44507	0.6311	-0.15259	NaN	NaN	NaN	NaN	NaN	NaN
1.592	25.753	-105.164	1391.38	-0.50849	1.0396	0.22656	-98.9442	-8.4753	59.21	0.11221	0.1543	0.04375	-6.111	-23.484	1449.729	-0.56592	0.6958	-0.13867	NaN	NaN	NaN	NaN	NaN	NaN
1.594	69.15	-113.352	1384.37	-0.37373	0.97666	0.18672	-42.733	19.6691	95.2606	0.09658	0.16005	0.052246	-0.811000000000007	-79.378	1547.034	-0.73779	0.78369	-0.12695	NaN	NaN	NaN	NaN	NaN	NaN
1.596	26.633	-102.564	1371.83	-0.25274	0.91035	0.14141	-19.865	24.711	114.257	0.07959	0.17285	0.057129	13.018	-77.813	1581.862	-0.82568	0.82861	-0.12646	NaN	NaN	NaN	NaN	NaN	NaN
1.598	28.025	-93.961	1369.31	-0.14844	0.84619	0.09082	-26.433	-18.5233	99.671	0.065723	0.17285	0.056543	-4.94	-172.913	1607.529	-1.0176	0.93945	-0.099121	NaN	NaN	NaN	NaN	NaN	NaN
1.6	6.223	-101.484	1376.27	-0.089455	0.78223	0.048633	16.712	36.369	122.058	0.050293	0.179	0.060742	-17.007	-161.169	1603.2828	-1.2007	1.0747	-0.071289	NaN	NaN	NaN	NaN	NaN	NaN
1.602	-54.073	-107.076	1384.62	-0.061816	0.72891	0.011328	14.682	25.943926	94.3019	0.040918	0.18603	0.058789	-82.346	-238.638	1647.474	-1.2886	1.145	-0.050293	NaN	NaN	NaN	NaN	NaN	NaN
1.604	-85.133	-85.392	1378.77	-0.07041	0.68945	-0.0082031	27.911	11.3135	96.671	0.030957	0.18857	0.058398	-50.262	-177.6247	1680.483	-1.4141	1.2813	-0.019531	NaN	NaN	NaN	NaN	NaN	NaN
1.606	-120.195	-57.159	1381.67	-0.099901	0.67646	-0.016894	56.517	46.068	112.519	0.023438	0.19434	0.058594	-7.435	-225.962	1702.8239	-1.461	1.3751	1.3878e-14	NaN	NaN	NaN	NaN	NaN	NaN
1.608	-107.447797	-62.069	1398.49	-0.14453	0.67676	-0.016113	7.942	1.8	78.499	0.02002	0.20654	0.055469	-24.228	-178.13748	1723.898	-1.4609	1.4531	0.020996	NaN	NaN	NaN	NaN	NaN	NaN
1.61	-137.4426	-102.588	1413.81	-0.18808	0.70928	-0.014941	35.359	26.6613	104.3212	0.02207	0.21435	0.058105	-42.407	-271.668	1736.87	-1.3711	1.5352	0.02832	NaN	NaN	NaN	NaN	NaN	NaN
1.612	-126.6328	-130.109	1416.83	-0.22578	0.75371	-0.011621	44.818	32.5714	109.533	0.032617	0.2249	0.061231	-62.934	-225.382	1756.181	-1.2949	1.5566	0.028809	NaN	NaN	NaN	NaN	NaN	NaN
1.614	-123.922	-160.556	1456.67	-0.25156	0.81309	-0.0073242	15.72	-23.0847	105.25	0.04668	0.23233	0.057031	-57.596	-230.227	1709.188	-1.1089	1.5601	0.0029297	NaN	NaN	NaN	NaN	NaN	NaN
1.616	-71.75	-172.365	1479.93	-0.2586	0.87988	-0.016992	33.025	5.45902	138.848	0.064453	0.23486	0.055176	-38.53	-108.04	1670.488	-0.9441	1.51	-0.031982	NaN	NaN	NaN	NaN	NaN	NaN
1.618	-75.6907	-186.794	1497.28	-0.25635	0.94141	-0.035156	26.729	-10.2444	107.663	0.08457	0.23857	0.054199	-55.3489	-132.035	1576.58	-0.78516	1.4199	-0.066895	NaN	NaN	NaN	NaN	NaN	NaN
1.62	-119.39	-199.612	1512.14	-0.24561	0.98711	-0.059277	-7.546	-20.1695	107.4154	0.1042	0.24004	0.05459	-48.3502	-76.793	1548.7741	-0.58105	1.2441	-0.10156	NaN	NaN	NaN	NaN	NaN	NaN
1.622	-103.7189	-216.709	1532.43	-0.23945	1.0281	-0.08252	3.032	27.1369	118.9558	0.12256	0.23535	0.056933	-14.281	-161.352	1516.7425	-0.48584	1.145	-0.11035	NaN	NaN	NaN	NaN	NaN	NaN
1.624	-132.339	-195.505	1556.08	-0.25352	1.0629	-0.099708	-36.108	-10.0481	87.0844	0.13838	0.229	0.059277	-8.76900000000001	-155.8343	1524.37	-0.30859	0.93164	-0.13721	NaN	NaN	NaN	NaN	NaN	NaN
1.626	-141.951	-167.571	1591.08	-0.28565	1.094	-0.10732	-53.553	5.883	105.9268	0.15234	0.21973	0.060059	-21.198	-271.881	1535.882	-0.18823	0.7688	-0.16894	NaN	NaN	NaN	NaN	NaN	NaN
1.628	-142.527	-140.235	1610.55	-0.33496	1.1191	-0.11523	-54.937	27.8346	89.4691	0.1668	0.21484	0.059277	-28.943	-274.904	1594.101	-0.077148	0.60693	-0.21436	NaN	NaN	NaN	NaN	NaN	NaN
1.63	-134.1469	-131.224	1642.91	-0.39609	1.1455	-0.10186	-93.1843	-3.113	87.4743	0.18077	0.20508	0.061328	-34.687	-319.678	1634.1504	0.030273	0.4126	-0.28857	NaN	NaN	NaN	NaN	NaN	NaN
1.632	-138.724	-115.08	1671.54	-0.45928	1.1704	-0.086914	-79.2583	36.8785	124.058	0.19287	0.20079	0.05586	-12.21	-281.226	1680.9019	0.068359	0.32471	-0.3335	NaN	NaN	NaN	NaN	NaN	NaN
1.634	-126.3862	-96.576	1664.36	-0.51436	1.1986	-0.070898	-93.9192	2.8989	111.032	0.2083	0.19649	0.052442	36.86	-308.59	1717.967	0.11719	0.19141	-0.39453	NaN	NaN	NaN	NaN	NaN	NaN
1.636	-81.4553	-84.2229	1702.29	-0.56621	1.2266	-0.052246	-111.9363	-12.8447	106.848	0.21924	0.1958	0.049316	64.72	-285.385	1790.398	0.12573	0.14038	-0.41382	NaN	NaN	NaN	NaN	NaN	NaN
1.638	-78.147	-93.9563	1705.73	-0.60547	1.2617	-0.033203	-86.1038	28.8911	112.0373	0.22324	0.1957	0.051172	128.509	-311.9329	1838.901	0.11182	0.12939	-0.42236	NaN	NaN	NaN	NaN	NaN	NaN
1.64	-46.387	-114.32781	1731.29	-0.62881	1.2935	-0.019434	-109.474	-16.558	72.2693	0.2291	0.19697	0.049512	126.328	-329.551	1873.6573	0.056152	0.18457	-0.41016	NaN	NaN	NaN	NaN	NaN	NaN
1.642	-49.242	-133.2108	1743.14	-0.6374	1.3267	-0.013965	-78.911	-17.3811	129.11	0.22246	0.20166	0.0542	119.611	-355.191	1928.323	0.014648	0.24854	-0.39551	NaN	NaN	NaN	NaN	NaN	NaN
1.644	-68.994	-147.79	1768.71	-0.64053	1.3564	-0.016309	-68.311	-26.971	160.654	0.21143	0.20722	0.050684	117.875	-343.284	2007.808	-0.082031	0.44092	-0.34277	NaN	NaN	NaN	NaN	NaN	NaN
1.646	-82.203	-159.444	1788.29	-0.62451	1.3878	-0.029297	-86.676	-71.518	148.511	0.1958	0.20898	0.047363	140.099	-313.217	2027.67	-0.16137	0.62158	-0.30908	NaN	NaN	NaN	NaN	NaN	NaN
1.648	-93.9413	-174.699	1802.25	-0.59814	1.4185	-0.055176	-23.746	-33.8574	198.155	0.16221	0.21045	0.038672	123.652	-288.3727	2022.2743	-0.22412	0.80518	-0.29541	NaN	NaN	NaN	NaN	NaN	NaN
1.65	-103.58171	-171.486	1802.63	-0.56943	1.4417	-0.064941	-17.812	-65.2062	215.203	0.10644	0.21387	0.029199	106.772	-266.218	1972.377	-0.28906	1.0254	-0.27881	NaN	NaN	NaN	NaN	NaN	NaN
1.652	-134.322	-168.082	1822.84	-0.55068	1.4673	-0.083789	-37.333	-101.754	289.382	0.024024	0.22168	0.022559	71.24	-284.41	2012.381	-0.31201	1.1211	-0.27637	NaN	NaN	NaN	NaN	NaN	NaN
1.654	-130.918	-159.988	1835.52	-0.53701	1.4881	-0.090429	-9.86000000000001	-60.8533	339.76	-0.073534	0.23486	0.031836	68.88	-251.403	2058.604	-0.36914	1.2832	-0.26514	NaN	NaN	NaN	NaN	NaN	NaN
1.656	-148.223	-150.66	1860.55	-0.54131	1.503	-0.089746	-19.256	-82.5363	325.552	-0.17285	0.25439	0.041504	96.836	-249.726	2123.3385	-0.41699	1.3813	-0.25147	NaN	NaN	NaN	NaN	NaN	NaN
1.658	-118.5453	-125.3087	1876.52	-0.56152	1.5195	-0.078613	2.931	-61.4533	409.143	-0.27109	0.2831	0.047266	144.878	-188.684	2154.9388	-0.47852	1.4746	-0.23535	NaN	NaN	NaN	NaN	NaN	NaN
1.66	-121.499	-124.831	1881.02	-0.58593	1.5404	-0.058594	2.491	-19.375	500.34	-0.35537	0.3206	0.062989	137.218	-231.005	2203.089	-0.57275	1.5923	-0.21045	NaN	NaN	NaN	NaN	NaN	NaN
1.662	-121.379	-96.503	1877.43	-0.6208	1.5567	-0.036719	-19.282	-15.8229	568.093	-0.43115	0.36787	0.078613	100.04	-190.129	2192.416	-0.61914	1.6465	-0.20508	NaN	NaN	NaN	NaN	NaN	NaN
1.664	-136.451	-90.608	1862.6	-0.65049	1.5763	-0.018359	20.461	55.388	686.48	-0.51045	0.41435	0.094532	87.364	-228.534	2226.119	-0.69971	1.7407	-0.19922	NaN	NaN	NaN	NaN	NaN	NaN
1.666	-155.27	-68.662	1861.87	-0.6834	1.5937	0.00078126	-13.87	69.4399	762.36	-0.58447	0.45898	0.1123	110.683	-171.035	2230.7379	-0.74854	1.793	-0.20776	NaN	NaN	NaN	NaN	NaN	NaN
1.668	-147.289	-64.547	1871.19	-0.70752	1.6118	0.018066	-72.629	55.842	922.52	-0.6749	0.49795	0.11182	77.415	-239.514	2280.142	-0.78076	1.8306	-0.21729	NaN	NaN	NaN	NaN	NaN	NaN
1.67	-172.34	-67.36	1876.3	-0.73408	1.6312	0.030176	-28.623	107.0572	1081.2	-0.77666	0.52647	0.11241	40.648	-205.808	2293.22	-0.79199	1.8652	-0.22852	NaN	NaN	NaN	NaN	NaN	NaN
1.672	-162.215	-74.195	1873.59	-0.74922	1.6469	0.039453	-42.368	75.1975	1156.9	-0.90635	0.5499	0.10967	1.482	-285.94	2303.06	-0.79004	1.877	-0.23486	NaN	NaN	NaN	NaN	NaN	NaN
1.674	-201.361	-84.313	1891.93	-0.76172	1.6657	0.047656	-64.672	64.165	1264.46	-1.064	0.57275	0.10733	-33.183	-211.95844	2292.6136	-0.771	1.8755	-0.26904	NaN	NaN	NaN	NaN	NaN	NaN
1.676	-169.733	-84.029	1909.76	-0.77109	1.6795	0.048632	-83.801	45.7974	1329.99	-1.2397	0.59912	0.11133	-15.629	-229.1576	2306.334	-0.75196	1.8638	-0.29931	NaN	NaN	NaN	NaN	NaN	NaN
1.678	-166.522	-72.611	1927.81	-0.77881	1.686	0.056152	-92.2976	-62.9243	1392.31	-1.4239	0.63154	0.12012	-11.52	-123.024	2331.0899	-0.74365	1.8521	-0.3208	NaN	NaN	NaN	NaN	NaN	NaN
1.68	-158.875	-65.412	1932.94	-0.78233	1.6852	0.060449	-73.291	-94.6385	1503.34	-1.5875	0.68398	0.14101	32.463	-158.0495	2357.526	-0.75977	1.8398	-0.33789	NaN	NaN	NaN	NaN	NaN	NaN
1.682	-123.935	-66.9	1938.26	-0.78799	1.6816	0.062207	-61.9356	-164.253	1527.34	-1.7234	0.75117	0.17227	57.184	-101.621	2347.878	-0.77539	1.8379	-0.33789	NaN	NaN	NaN	NaN	NaN	NaN
1.684	-129.988	-74.361	1941.7	-0.79502	1.6754	0.068067	-112.081	-229.975	1542.59	-1.8092	0.81963	0.21738	60.244	-150.8916	2334.4	-0.81982	1.8521	-0.33789	NaN	NaN	NaN	NaN	NaN	NaN
1.686	-103.282	-66.25	1946.8	-0.79893	1.6608	0.071582	-75.707	-220.445	1544.52	-1.8511	0.90088	0.26465	66.447	-101.866	2340.291	-0.87744	1.8409	-0.32642	NaN	NaN	NaN	NaN	NaN	NaN
1.688	-103.8633	-65.745	1947.59	-0.79639	1.6392	0.083496	-87.551	-283.48	1478.4	-1.8504	0.96602	0.29502	83.971	-149.554	2305.209	-0.90723	1.8677	-0.31494	NaN	NaN	NaN	NaN	NaN	NaN
1.69	-72.1976	-57.255	1957.55	-0.79766	1.618	0.084961	-79.476	-281.41	1512.14	-1.8011	1.0247	0.3164	74.14	-69.404	2284.411	-0.93555	1.9043	-0.37305	NaN	NaN	NaN	NaN	NaN	NaN
1.692	-100.5763	-62.25	1946.79	-0.7919	1.5942	0.093066	-46.451	-228.689	1526.51	-1.7225	1.0696	0.33086	87.021	-125.227	2270.415	-0.9292	1.9302	-0.37256	NaN	NaN	NaN	NaN	NaN	NaN
1.694	-112.344	-47.767	1921.14	-0.78057	1.5766	0.098535	-44.183	-193.654	1521.18	-1.6303	1.1043	0.33701	87.499	-72.048	2277.8986	-0.94482	1.9575	-0.37061	NaN	NaN	NaN	NaN	NaN	NaN
1.696	-96.51143	-22.946	1902.94	-0.76768	1.5643	0.10274	6.621	-109.972	1564.18	-1.5308	1.1177	0.33398	123.804	-119.857	2318.433	-0.96679	1.9766	-0.38721	NaN	NaN	NaN	NaN	NaN	NaN
1.698	-128.022	4.026	1896.56	-0.75195	1.5508	0.098633	-37.011	-65.173	1543.63	-1.4312	1.102	0.31153	137.385	-65.774	2315.9189	-0.97998	1.9868	-0.39209	NaN	NaN	NaN	NaN	NaN	NaN
1.7	-116.195	14.995	1903.97	-0.72881	1.5458	0.10098	-38.417	-57.287	1554.71	-1.323	1.0469	0.27861	159.345	-107.119	2307.2677	-0.99219	1.9844	-0.41504	NaN	NaN	NaN	NaN	NaN	NaN
1.702	-133.403	5.505	1888.65	-0.70596	1.5388	0.098243	37.418	2.334	1563.48	-1.2106	0.96329	0.24697	143.211	-55.501	2307.1793	-0.99414	1.9668	-0.42529	NaN	NaN	NaN	NaN	NaN	NaN
1.704	-108.349	-3.307	1872.17	-0.68447	1.529	0.10293	36.506	-16.8191	1508.61	-1.0919	0.87881	0.20371	107.944	-84.582	2285.4337	-0.99365	1.938	-0.44482	NaN	NaN	NaN	NaN	NaN	NaN
1.706	-119.13	-18.25	1874.48	-0.66123	1.5243	0.097852	54.017	-56.622	1533.39	-0.98096	0.80615	0.15381	142.118	-25.863	2311.003	-0.99121	1.9146	-0.4602	NaN	NaN	NaN	NaN	NaN	NaN
1.708	-92.06161	-10.01	1868.73	-0.63818	1.5181	0.09375	54.92	-112.059	1568.83	-0.87168	0.75137	0.11445	183.633	-37.847	2294.651	-0.98438	1.8887	-0.46631	NaN	NaN	NaN	NaN	NaN	NaN
1.71	-79.7014	-16.75	1856.52	-0.6127	1.5123	0.097754	35.982	-241.136	1576.46	-0.76562	0.70429	0.069824	169.34	-0.757999999999996	2269.6452	-0.97461	1.8477	-0.48682	NaN	NaN	NaN	NaN	NaN	NaN
1.712	-111.914	-17.238	1830.86	-0.58213	1.4996	0.094433	54.462	-298.53	1650.13	-0.67813	0.66211	0.02334	150.42	-25.743	2242.47	-0.96826	1.8306	-0.49463	NaN	NaN	NaN	NaN	NaN	NaN
1.714	-126.108	-30.384	1810.93	-0.55322	1.4895	0.093653	8.572	-350.27	1699.38	-0.61768	0.62627	-0.024219	112.915	22.128	2214.5275	-0.94873	1.7856	-0.50439	NaN	NaN	NaN	NaN	NaN	NaN
1.716	-145.583	-25.318	1789.72	-0.52051	1.4704	0.091797	-11.438	-438.74	1740.69	-0.59766	0.58984	-0.067383	104.819	49.872	2179.1211	-0.9353	1.7542	-0.51197	NaN	NaN	NaN	NaN	NaN	NaN
1.718	-147.339	-15.953	1769.78	-0.48926	1.4492	0.088379	-17.235	-408.34	1796.44	-0.62676	0.55752	-0.094534	100.722	122.09	2165.009	-0.91553	1.7173	-0.52002	NaN	NaN	NaN	NaN	NaN	NaN
1.72	-169.762	-14.255	1755.76	-0.46309	1.4318	0.085937	-70.6739	-395.39	1766.73	-0.69619	0.53388	-0.10615	96.109	102.05	2113.071	-0.89746	1.6826	-0.53613	NaN	NaN	NaN	NaN	NaN	NaN
1.722	-160.551	-0.402999999999999	1733.4	-0.43574	1.4098	0.079395	-84.49	-373.09	1828.7	-0.78838	0.52842	-0.099902	46.063	93.993	2100.068	-0.89844	1.6641	-0.53613	NaN	NaN	NaN	NaN	NaN	NaN
1.724	-149.263	5.313	1704.96	-0.41387	1.3894	0.076269	-84.353	-295.1	1901.62	-0.879	0.54834	-0.078809	20.329	60.693	2071.2299	-0.89648	1.6348	-0.54492	NaN	NaN	NaN	NaN	NaN	NaN
1.726	-147.503	18.991	1667.7	-0.39014	1.3677	0.065332	-122.39326	-304.32	1924.49	-0.94678	0.58447	-0.046875	-3.479	86.24	2044.256	-0.90674	1.6172	-0.54688	NaN	NaN	NaN	NaN	NaN	NaN
1.728	-121.856	25.265	1664.97	-0.37012	1.3535	0.067871	-130.9319	-266.547	1984.2	-0.975	0.63672	-0.019043	-3.657	140.079	2031.0054	-0.91943	1.6079	-0.54443	NaN	NaN	NaN	NaN	NaN	NaN
1.73	-108.482	31.953	1654.07	-0.34931	1.3362	0.060742	-180.726	-223.134	2000.36	-0.99131	0.6831	-0.0042969	-2.78700000000001	174.988	2014.5088	-0.93945	1.5938	-0.53076	NaN	NaN	NaN	NaN	NaN	NaN
1.732	-73.918	33.89	1642.36	-0.33418	1.3265	0.057129	-174.915	-244.698	2006.31	-1.0014	0.71826	-0.010156	14.988	184.644	1975.8951	-0.94141	1.5918	-0.52441	NaN	NaN	NaN	NaN	NaN	NaN
1.734	-87.5703	36.462	1611.77	-0.31582	1.3113	0.056739	-127.528	-187.4549	2033.69	-1.0135	0.72012	-0.025	31.312	162.207	1963.913	-0.95068	1.5845	-0.49951	NaN	NaN	NaN	NaN	NaN	NaN
1.736	-79.044	33.701	1591.85	-0.29443	1.2972	0.051465	-165.09	-200.64	1998.23	-1.0527	0.70801	-0.038086	33.399	156.384	1917.4917	-0.94996	1.5764	-0.4878	NaN	NaN	NaN	NaN	NaN	NaN
1.738	-89.5657	19.263	1576.95	-0.28564	1.2817	0.046875	-194.731	-245.406	2037.43	-1.1064	0.68056	-0.042383	56.496	146.479	1914.112	-0.94531	1.5625	-0.47656	NaN	NaN	NaN	NaN	NaN	NaN
1.74	-87.994	22.518	1535.24	-0.26738	1.2666	0.043066	-199.832	-222.244	2096.89	-1.1816	0.65595	-0.043555	70.075	164.726	1880.595	-0.92725	1.5454	-0.45996	NaN	NaN	NaN	NaN	NaN	NaN
1.742	-88.375	14.749	1512.06	-0.25195	1.2488	0.040723	-230.42	-283.095	2130.09	-1.2604	0.65049	-0.048633	73.698	163.9131	1854.26	-0.91114	1.5249	-0.45215	NaN	NaN	NaN	NaN	NaN	NaN
1.744	-88.501	14.184	1496.93	-0.2461	1.2364	0.036035	-198.825	-306.602	2226.56	-1.3351	0.67353	-0.055762	52.674	210.4205	1788.523	-0.89844	1.502	-0.43848	NaN	NaN	NaN	NaN	NaN	NaN
1.746	-90.226	8.258	1491.83	-0.23916	1.2206	0.035938	-175.946	-303.182	2251.45	-1.4043	0.70703	-0.05957	37.892	201.852	1742.073	-0.87158	1.4751	-0.43213	NaN	NaN	NaN	NaN	NaN	NaN
1.748	-82.671	28.441	1464.61	-0.23291	1.2036	0.030273	-138.677	-370.016	2276.24	-1.4559	0.75898	-0.048926	36.067	254.769	1715.71291	-0.85938	1.459	-0.4248	NaN	NaN	NaN	NaN	NaN	NaN
1.75	-44.633	39.365	1449.02	-0.22803	1.1902	0.033692	-91.303	-319.707	2317.91	-1.5106	0.80215	-0.030567	61.799	242.898	1693.282	-0.83203	1.4297	-0.41211	NaN	NaN	NaN	NaN	NaN	NaN
1.752	-59.3537	56.759	1436.77	-0.225	1.1723	0.035254	-91.47796	-289.257	2311.39	-1.5742	0.84473	-0.018067	61.084	283.996	1649.716	-0.8081	1.4126	-0.39868	NaN	NaN	NaN	NaN	NaN	NaN
1.754	-36.594	56.23	1424.29	-0.21601	1.1567	0.032911	-52.112	-286.595	2341.82	-1.6308	0.88877	-0.011914	89.78	230.7844	1613.634	-0.77588	1.3936	-0.3877	NaN	NaN	NaN	NaN	NaN	NaN
1.756	-50.26	61.793	1379.27	-0.21191	1.1391	0.029785	-1.744	-229.309	2393.48	-1.6831	0.92432	-0.010254	96.501	245.4439	1555.335	-0.73975	1.3677	-0.37305	NaN	NaN	NaN	NaN	NaN	NaN
1.758	-62.3915	74.7445	1348.12	-0.20703	1.1211	0.026855	2.978	-256.63	2393.22	-1.7283	0.95488	-0.011914	123.071	192.648	1511.11	-0.71582	1.3521	-0.36572	NaN	NaN	NaN	NaN	NaN	NaN
1.76	-78.157	80.1572	1335.21	-0.20547	1.107	0.022851	13.772	-252.3144	2442.73	-1.7667	0.98135	-0.022364	102.75	235.384	1469.933	-0.67969	1.3145	-0.34961	NaN	NaN	NaN	NaN	NaN	NaN
1.762	-96.804	91.152	1298.67	-0.20225	1.0896	0.022754	-7.104	-182.207	2430.38	-1.8069	1.0115	-0.025098	81.335	214.804	1411.409	-0.646	1.2886	-0.33448	NaN	NaN	NaN	NaN	NaN	NaN
1.764	-98.148	93.413	1275.78	-0.20342	1.0751	0.02002	-13.899	-193.529	2407.84	-1.854	1.0284	-0.02373	33.108	262.791	1371.612	-0.61523	1.2598	-0.32129	NaN	NaN	NaN	NaN	NaN	NaN
1.766	-135.54	86.767	1245.05	-0.20264	1.0597	0.019629	-10.987	-118.381	2435.43	-1.9141	1.0449	-0.0068359	28.403	217.9031	1343.037	-0.57422	1.2227	-0.30469	NaN	NaN	NaN	NaN	NaN	NaN
1.768	-103.993	91.011	1231.92	-0.20801	1.042	0.017578	-51.383	-100.479	2407.83	-1.9956	1.061	0.01709	-3.25099999999999	266.666	1318.845	-0.55664	1.2041	-0.29102	NaN	NaN	NaN	NaN	NaN	NaN
1.77	-103.144	89.6862	1220.63	-0.20928	1.0344	0.014746	-75.0334	-146.2191	2423.63	-2.0757	1.0794	0.041895	17.696	218.062	1268.853	-0.51318	1.1704	-0.27783	NaN	NaN	NaN	NaN	NaN	NaN
1.772	-91.245	90.43933	1199.75	-0.20791	1.0223	0.013281	-56.8476	-122.12	2467.82	-2.1503	1.0954	0.072363	-18.785	279.191	1212.24275	-0.49048	1.1448	-0.2605	NaN	NaN	NaN	NaN	NaN	NaN
1.774	-104.805	90.4587	1181.35	-0.20166	1.0099	0.010547	-106.066	-166.514	2481.85	-2.2161	1.1219	0.099707	-38.321	230.6898	1134.301	-0.46631	1.1147	-0.24561	NaN	NaN	NaN	NaN	NaN	NaN
1.776	-77.111	91.4869	1153.25	-0.19346	0.99131	0.0099608	-86.2564	-185.742	2532.37	-2.2695	1.1484	0.11963	-70.455	285.282	1091.0412	-0.43359	1.082	-0.22705	NaN	NaN	NaN	NaN	NaN	NaN
1.778	-79.196	91.7948	1132.85	-0.18213	0.97314	0.0048828	-97.156	-129.79	2528.03	-2.3015	1.181	0.13536	-70.2509	244.4885	1042.8184	-0.42139	1.0669	-0.21484	NaN	NaN	NaN	NaN	NaN	NaN
1.78	-82.199	95.1211	1101.72	-0.17188	0.95176	0.00097656	-140.84	-180.671	2511.93	-2.3159	1.2114	0.15019	-35.058	315.502	1015.2575	-0.38965	1.0371	-0.20215	NaN	NaN	NaN	NaN	NaN	NaN
1.782	-72.554	79.11263	1110.12	-0.16328	0.9293	-0.0085938	-152.699	-146.692	2537.06	-2.3116	1.222	0.14942	-35.123	297.9	963.9131	-0.36987	1.0193	-0.17968	NaN	NaN	NaN	NaN	NaN	NaN
1.784	-68.297	84.3897	1091.64	-0.15586	0.90469	-0.01836	-189.874	-137.411	2500.24	-2.29	1.229	0.14541	-51.922	362.844	923.44992	-0.34912	0.99854	-0.16113	NaN	NaN	NaN	NaN	NaN	NaN
1.786	-61.74	74.908	1049.9	-0.15078	0.8834	-0.022558	-198.99	-172.894	2500.3	-2.2578	1.2246	0.13184	-70.214	314.583	848.842	-0.32373	0.96924	-0.13379	NaN	NaN	NaN	NaN	NaN	NaN
1.788	-87.451	91.513	1014.8	-0.14941	0.86182	-0.030762	-188.723	-108.961	2529.92	-2.2242	1.2141	0.11533	-84.053	348.322	833.2474	-0.31348	0.95166	-0.12207	NaN	NaN	NaN	NaN	NaN	NaN
1.79	-68.072	104.677	993.86	-0.13955	0.84355	-0.031738	-222.782	-111.077	2495.11	-2.182	1.1981	0.095703	-72.5511	287.671	780.793	-0.28809	0.92578	-0.096191	NaN	NaN	NaN	NaN	NaN	NaN
1.792	-43.831	105.941	981.08	-0.13496	0.82353	-0.037891	-205.228	-102.965	2477.62	-2.1535	1.1805	0.0875	-58.545	322.099	773.507	-0.26636	0.89917	-0.084961	NaN	NaN	NaN	NaN	NaN	NaN
1.794	-53.1808	114.916	950.46	-0.12949	0.8001	-0.04336	-206.411	-19.96	2448.12	-2.1281	1.1687	0.076074	-27.112	265.0943	729.1031	-0.24268	0.87549	-0.058105	NaN	NaN	NaN	NaN	NaN	NaN
1.796	-29.6729	112.921	933.91	-0.12119	0.78115	-0.046679	-194.686	-47.71	2421.43	-2.1108	1.1528	0.066406	-57.397	293.624	690.6634	-0.21143	0.83789	-0.043457	NaN	NaN	NaN	NaN	NaN	NaN
1.798	-15.6612	111.373	932.99	-0.11426	0.75635	-0.057617	-125.751	-3.47	2451.62	-2.0934	1.1356	0.065723	-50.233	273.4867	642.0018	-0.19092	0.8208	-0.033203	NaN	NaN	NaN	NaN	NaN	NaN
1.8	10.6555	121.798	924.38	-0.10479	0.74365	-0.061328	-124.723	3.65000000000001	2419.44	-2.0746	1.1211	0.064258	-22.158	328.638	633.835	-0.15918	0.78125	-0.015625	NaN	NaN	NaN	NaN	NaN	NaN
1.802	-19.7073	118.029	891.21	-0.094824	0.72276	-0.069239	-98.961	-37.58	2408.03	-2.0633	1.1027	0.067383	-15.89	304.416	605.636	-0.12915	0.75	0.0021973	NaN	NaN	NaN	NaN	NaN	NaN
1.804	-7.373	118.621	861.49	-0.078418	0.70205	-0.075879	-54.707	11.06	2426.03	-2.0444	1.0938	0.072071	14.95	302.496	593.596	-0.099609	0.71924	0.012207	NaN	NaN	NaN	NaN	NaN	NaN
1.806	-25.5199	113.183	840.76	-0.071777	0.68086	-0.082813	-42.7357	-19.6	2377.01	-2.0249	1.0806	0.078125	28.8588	222.69932	563.22	-0.066895	0.68164	0.025879	NaN	NaN	NaN	NaN	NaN	NaN
1.808	-40.9621	122.568	822.52	-0.0625	0.65625	-0.091309	-13.592	-40.34	2360.37	-2.0033	1.065	0.077637	10.68	222.6308	538.621	-0.046875	0.65674	0.026367	NaN	NaN	NaN	NaN	NaN	NaN
1.81	-34.9209	125.827	793.5	-0.046777	0.63799	-0.098635	-26.6254	-3.97999999999999	2322.19	-1.9715	1.0543	0.073242	-0.849000000000004	194.6581	484.287	-0.0083008	0.61523	0.025879	NaN	NaN	NaN	NaN	NaN	NaN
1.812	-54.73094	115.67	791.66	-0.034277	0.61699	-0.10713	-37.2773	-61.658	2284.39	-1.9336	1.0414	0.07207	-0.919000000000004	230.122	429.2531	0.012451	0.58985	0.031005	NaN	NaN	NaN	NaN	NaN	NaN
1.814	-45.4904	114.193	787.83	-0.022168	0.59903	-0.11221	7.1727	-30.725	2289.37	-1.9011	1.0224	0.07627	-13.479	225.654	405.884	0.037598	0.5708	0.029297	NaN	NaN	NaN	NaN	NaN	NaN
1.816	-66.728	117.891	757.91	-0.0061524	0.57686	-0.1166	-23.354	-17.245	2250.9	-1.8647	1.0083	0.079102	-2.709	232.6817	398.136	0.06543	0.55078	0.036133	NaN	NaN	NaN	NaN	NaN	NaN
1.818	-38.4399	119.415	737.53	0.0063477	0.55469	-0.12256	-25.4634	-25.462	2219.99	-1.8275	0.99092	0.082227	-5.109	200.2134	364.9318	0.083984	0.54492	0.029785	NaN	NaN	NaN	NaN	NaN	NaN
1.82	-50.0576	114.408	723.54	0.018848	0.53564	-0.129	-6.043	48.55	2192.56	-1.7921	0.97842	0.082715	-43.244	207.1414	353.959	0.12012	0.53516	0.04541	NaN	NaN	NaN	NaN	NaN	NaN
1.822	-30.4461	126.235	714.81	0.028613	0.51631	-0.13272	-30.5124	63.83	2132.69	-1.7526	0.96006	0.087013	-56.6193	202.787	318.173	0.15015	0.52905	0.044677	NaN	NaN	NaN	NaN	NaN	NaN
1.824	-41.5833	130.902	694.16	0.037989	0.49365	-0.13897	-33.9229	88.32	2107.7	-1.7217	0.94238	0.097169	-58.0961	182.7702	303.527	0.17871	0.51611	0.046875	NaN	NaN	NaN	NaN	NaN	NaN
1.826	-50.924	131.664	660.39	0.047851	0.47432	-0.15049	-35.042	131.449	2082.85	-1.689	0.93018	0.098633	-81.4542	165.419	269.732	0.22363	0.50293	0.041016	NaN	NaN	NaN	NaN	NaN	NaN
1.828	-41.1382	125.514	658.02	0.054688	0.45752	-0.15479	-74.108	93.83	2040.53	-1.6476	0.92344	0.091114	-84.732	140.479	234.0446	0.2417	0.49414	0.039551	NaN	NaN	NaN	NaN	NaN	NaN
1.83	-55.0922	118.418	656.33	0.061524	0.43965	-0.16309	-70.596	113.092	2017.21	-1.5922	0.91719	0.089649	-71.0378	150.169	190.604	0.26563	0.48096	0.030762	NaN	NaN	NaN	NaN	NaN	NaN
1.832	-65.5243	115.451	633.34	0.068652	0.42568	-0.16758	-137.962	113.028	1945.07	-1.5391	0.91368	0.087306	-78.858	133.683	183.188	0.28003	0.47095	0.019287	NaN	NaN	NaN	NaN	NaN	NaN
1.834	-62.7373	118.25	624.04	0.071778	0.41201	-0.17109	-168.855	77.634	1883.94	-1.4856	0.90762	0.085157	-96.43	141.552	179.65	0.28857	0.45605	0.01416	NaN	NaN	NaN	NaN	NaN	NaN
1.836	-39.6155	120.308	602.32	0.07627	0.39727	-0.1791	-156.137	105.487	1877.15	-1.4277	0.89453	0.084473	-112.636	98.321	177.841	0.28662	0.44971	0.0073242	NaN	NaN	NaN	NaN	NaN	NaN
1.838	-42.2504	109.065	588.66	0.076172	0.38721	-0.18164	-193.635	75.352	1823.62	-1.3713	0.87714	0.08027	-107.465	100.325	138.075	0.28516	0.44434	0.010742	NaN	NaN	NaN	NaN	NaN	NaN
1.84	-40.2842	106.803	560.8	0.074219	0.38008	-0.18662	-184.09	60.332	1818.74	-1.3227	0.85633	0.082228	-87.7713	72.849	134.5928	0.28271	0.43701	0.016602	NaN	NaN	NaN	NaN	NaN	NaN
1.842	-29.2866	96.64	558.52	0.072656	0.37441	-0.19277	-170.593	91.117	1790.4	-1.2821	0.83289	0.086923	-66.504	99.947	153.142	0.27051	0.4314	0.024902	NaN	NaN	NaN	NaN	NaN	NaN
1.844	-8.852	117.085	551.77	0.067969	0.36817	-0.19472	-201.87	56.616	1758.05	-1.2483	0.80749	0.094444	-62.031	54.834	151.397	0.26758	0.42725	0.029297	NaN	NaN	NaN	NaN	NaN	NaN
1.846	17.503	124.666	545.09	0.063379	0.36387	-0.19746	-143.887	100.325	1735.56	-1.2266	0.78027	0.10596	-75.76	78.685	108.49	0.26221	0.41797	0.038086	NaN	NaN	NaN	NaN	NaN	NaN
1.848	-16.314	123.223	527.13	0.057129	0.36328	-0.19629	-146.117	134.495	1686.28	-1.2078	0.75863	0.11279	-64.0846	35.661	92.9984	0.26318	0.40967	0.040039	NaN	NaN	NaN	NaN	NaN	NaN
1.85	9.294	110.794	526.19	0.04707	0.36074	-0.19531	-118.19	135.379	1637.81	-1.1903	0.73992	0.11677	-60.43002	80.684	92.676	0.2627	0.39502	0.04541	NaN	NaN	NaN	NaN	NaN	NaN
1.852	7.688	109.866	514.03	0.040039	0.36436	-0.20137	-67.506	180.042	1613.73	-1.17	0.72038	0.12109	-19.761	28.1728	115.028	0.2688	0.37549	0.047852	NaN	NaN	NaN	NaN	NaN	NaN
1.854	3.046	120.102	480.37	0.031836	0.36513	-0.20059	-108.308	158.656	1538.48	-1.1466	0.7049	0.12031	-1.434	71.567	127.559	0.27051	0.35645	0.045898	NaN	NaN	NaN	NaN	NaN	NaN
1.856	-14.5501	119.27	463.05	0.021973	0.3669	-0.20332	-66.073	158.526	1501.55	-1.1152	0.68945	0.11914	-5.07100000000001	19.2562	100.818	0.28027	0.33496	0.047363	NaN	NaN	NaN	NaN	NaN	NaN
1.858	-23.257	114.451	450.98	0.013184	0.36963	-0.20313	-39.136	196.9508	1469.34	-1.0757	0.68024	0.11459	15.553	64.32	91.6409	0.2876	0.31641	0.044922	NaN	NaN	NaN	NaN	NaN	NaN
1.86	-30.6135	109.138	445.39	0.0064453	0.36904	-0.20439	-47.76	168.1864	1402.67	-1.0314	0.66896	0.10808	18.801	-0.7328	106.442	0.29834	0.2876	0.04541	NaN	NaN	NaN	NaN	NaN	NaN
1.862	-42.877	113.933	413.48	-0.00625	0.36836	-0.20527	10.947	191.809	1373.69	-0.98587	0.66271	0.10049	6.86799999999999	43.157	118.949	0.302	0.26343	0.048828	NaN	NaN	NaN	NaN	NaN	NaN
1.864	3.353	113.777	403.82	-0.019141	0.37227	-0.20215	0.888000000000002	179.328	1327.81	-0.94154	0.65187	0.090557	26.594	-10.8194	122.156	0.30371	0.23682	0.050781	NaN	NaN	NaN	NaN	NaN	NaN
1.866	-25.373	108.029	416.48	-0.027832	0.37275	-0.20186	15.446	156.231	1285.27	-0.89844	0.6377	0.078613	28.651	53.929	108.8058	0.30713	0.20068	0.050781	NaN	NaN	NaN	NaN	NaN	NaN
1.868	-12.4	102.751	410.8	-0.039551	0.37646	-0.19775	47.169	180.23	1264.79	-0.84838	0.62674	0.068891	13.816	13.1866	119.72	0.30664	0.18994	0.051758	NaN	NaN	NaN	NaN	NaN	NaN
1.87	-13.392	104.715	378.12	-0.057031	0.38018	-0.196	36.477	165.2246	1195.65	-0.79957	0.61154	0.059899	-7.303	63.128	123.481	0.30859	0.14502	0.053711	NaN	NaN	NaN	NaN	NaN	NaN
1.872	-12.578	104.42	362.25	-0.066797	0.38154	-0.19189	41.02	165.9194	1187.76	-0.75786	0.59916	0.049819	-22.763	-7.5643	122.283	0.30517	0.12305	0.054444	NaN	NaN	NaN	NaN	NaN	NaN
1.874	-35.586	102.624	368.22	-0.078125	0.37959	-0.18682	41.121	171.117	1159.55	-0.71566	0.5818	0.03586	-29.706	31.665	119.574	0.30273	0.094238	0.058105	NaN	NaN	NaN	NaN	NaN	NaN
1.876	-37.517	93.946	366.68	-0.087109	0.3914	-0.17461	-5.235	143.0184	1105.19	-0.66943	0.56494	0.021973	-21.886	-13.9915	123.294	0.2915	0.058105	0.056641	NaN	NaN	NaN	NaN	NaN	NaN
1.878	-48.811	90.205	337.11	-0.097168	0.39307	-0.1748	5.4	169.395	1087.97	-0.62632	0.54616	0.008795	-33.748	22.4544	141.049	0.2832	0.042969	0.058594	NaN	NaN	NaN	NaN	NaN	NaN
1.88	-64.8852	86.623	338.28	-0.10088	0.39307	-0.16768	-29.2334	172.443	1029.99	-0.58339	0.53102	-0.0042927	-29.45	-20.1605	114.023	0.26514	0.0092773	0.04834	NaN	NaN	NaN	NaN	NaN	NaN
1.882	-48.2665	90.009	331.8	-0.10567	0.39287	-0.16416	-31.1333	156.715	990.93	-0.54071	0.5074	-0.020327	-59.387	12.81887	87.2101	0.23682	-0.01709	0.041504	NaN	NaN	NaN	NaN	NaN	NaN
1.884	-63.68	76.383	326.02	-0.10644	0.39365	-0.15986	-32.712	165.407	967.48	-0.49446	0.49021	-0.031312	-83.8532	-10.4883	71.287	0.21387	-0.025391	0.038086	NaN	NaN	NaN	NaN	NaN	NaN
1.886	-48.3467	70.9929	316.36	-0.10957	0.38399	-0.15439	-78.352	156.434	897.11	-0.45654	0.46826	-0.044922	-71.091	21.7585	79.026	0.15771	-0.041016	0.030273	NaN	NaN	NaN	NaN	NaN	NaN
1.888	-31.37	56.1967	301.2	-0.10791	0.38184	-0.15088	-56.367	183.761	873.43	-0.42126	0.45453	-0.055542	-64.175	-24.19	94.166	0.10718	-0.040772	0.030273	NaN	NaN	NaN	NaN	NaN	NaN
1.89	-13.445	56.9691	291.97	-0.10957	0.37441	-0.14512	-72.382	205.524	840.1	-0.38788	0.43481	-0.066745	-84.281	-6.078	112.573	0.054199	-0.021973	0.044434	NaN	NaN	NaN	NaN	NaN	NaN
1.892	7.005	49.841	292.77	-0.11026	0.37031	-0.14101	-102.407	192.468	791.15	-0.35841	0.4227	-0.0831	-65.4736	-25.8495	100.8078	-0.012695	0.0014648	0.069824	NaN	NaN	NaN	NaN	NaN	NaN
1.894	-7.339	53.505	287.56	-0.098926	0.36172	-0.13555	-68.509	203.808	777.24	-0.33207	0.40485	-0.092265	-69.146	10.234	91.5592	-0.043457	0.016113	0.087402	NaN	NaN	NaN	NaN	NaN	NaN
1.896	11.703	40.663	296.06	-0.089746	0.35303	-0.13565	-87.25	191.627	723.68	-0.31055	0.38428	-0.10107	-61.4373	9.006	92.6372	-0.07959	0.049316	0.11084	NaN	NaN	NaN	NaN	NaN	NaN
1.898	-1.867	39.493	294.41	-0.07666	0.34033	-0.14453	-81.844	185.547	699.82	-0.29677	0.36456	-0.10632	-64.292	23.1501	81.452	-0.084717	0.072022	0.11939	NaN	NaN	NaN	NaN	NaN	NaN
1.9	6.329	50.044	276.62	-0.065821	0.32871	-0.14248	-31.9267	195.237	694.79	-0.28691	0.34642	-0.10923	-55.891	11.6532	68.885	-0.083496	0.093262	0.12598	NaN	NaN	NaN	NaN	NaN	NaN
1.902	-24.312	43.194	284.01	-0.052051	0.32217	-0.14619	-72.834	177.214	645.69	-0.28102	0.3319	-0.11655	-51.604	11.5855	76.9815	-0.063477	0.11377	0.12549	NaN	NaN	NaN	NaN	NaN	NaN
1.904	-8.297	23.784	297.95	-0.042285	0.30967	-0.15284	-36.309	183.23	622.01	-0.26493	0.32503	-0.12339	-17.496	21.0249	81.047	-0.047363	0.12207	0.12646	NaN	NaN	NaN	NaN	NaN	NaN
1.906	8.391	7.695	298.08	-0.034571	0.2958	-0.15537	-19.151	175.395	591.48	-0.24658	0.31543	-0.12354	-4.489	17.6982	95.3788	-0.0058594	0.12744	0.12549	NaN	NaN	NaN	NaN	NaN	NaN
1.908	1.363	-5.914	270.61	-0.028809	0.2832	-0.15918	-16.594	146.884	553.72	-0.23589	0.31013	-0.12579	-4.77	17.894	95.6048	0.036621	0.12281	0.12452	NaN	NaN	NaN	NaN	NaN	NaN
1.91	20.566	-27.186	286.55	-0.026172	0.27412	-0.16504	48.4295	138.302	561.28	-0.222	0.30722	-0.12734	-23.802	12.9924	80.8638	0.083984	0.10742	0.10938	NaN	NaN	NaN	NaN	NaN	NaN
1.912	19.433	-35.882	300.25	-0.030859	0.26426	-0.171	21.253	133.258	529.66	-0.20719	0.30134	-0.12813	19.713	48.9572	99.9867	0.13916	0.084961	0.09668	NaN	NaN	NaN	NaN	NaN	NaN
1.914	23.583	-33.247	335.13	-0.036328	0.2627	-0.17256	36.0678	133.616	497.98	-0.18845	0.29402	-0.12842	23.571	48.0857	115.582	0.16211	0.07373	0.087891	NaN	NaN	NaN	NaN	NaN	NaN
1.916	11.12	-13.785	336.575	-0.041406	0.26406	-0.17481	79.19	147.197	476.55	-0.17285	0.28955	-0.12451	30.953	67.744	112.584	0.18652	0.043457	0.074219	NaN	NaN	NaN	NaN	NaN	NaN
1.918	12.283	-9.177	369.142	-0.055664	0.26855	-0.18115	52.8904	141.842	430.04	-0.15372	0.28662	-0.12852	18.581	18.3664	118.32	0.19995	0.027832	0.077393	NaN	NaN	NaN	NaN	NaN	NaN
1.92	16.93	8.544	429.117	-0.074316	0.2791	-0.18896	94.5846	148.255	425	-0.13421	0.28654	-0.12822	-17.24	40.527	85.571	0.20557	0.0078125	0.060059	NaN	NaN	NaN	NaN	NaN	NaN
1.922	5.446	31.1456	482.041	-0.099902	0.29278	-0.20166	79.9003	157.731	376.63	-0.11232	0.28223	-0.12822	-9.582	11.9743	110.557	0.2207	0.003418	0.055176	NaN	NaN	NaN	NaN	NaN	NaN
1.924	5.67700000000001	67.389	543.542	-0.14443	0.3123	-0.20674	45.396	153.55	356.57	-0.094341	0.27354	-0.13145	10.597	47.998	163.904	0.22998	0.0053711	0.060059	NaN	NaN	NaN	NaN	NaN	NaN
1.926	-3.659	125.369	601.443	-0.20898	0.33828	-0.21856	93.506	172.839	351.14	-0.080566	0.26221	-0.13086	-21.58	-30.666	216.042	0.23096	0.010254	0.057129	NaN	NaN	NaN	NaN	NaN	NaN
1.928	-11.168	166.665	697.585	-0.29443	0.37549	-0.23096	29.783	159.924	314.93	-0.068648	0.25537	-0.12959	-52.77	-1.172	245.893	0.22681	0.024414	0.047607	NaN	NaN	NaN	NaN	NaN	NaN
1.93	-6.26900000000001	185.421	776.583	-0.39482	0.42304	-0.23467	15.83	141.807	314.3	-0.058981	0.24218	-0.12988	-33.745	-57.427	262.312	0.21973	0.044922	0.046875	NaN	NaN	NaN	NaN	NaN	NaN
1.932	-15.969	192.744	841.521	-0.50967	0.48858	-0.23096	29.213	126.051	303.98	-0.048827	0.22969	-0.13106	-50.116	-11.262	311.47	0.20361	0.074219	0.044922	NaN	NaN	NaN	NaN	NaN	NaN
1.934	-16.949	188.016	920.616	-0.62959	0.57334	-0.21416	-13.05	109.6426	253.739	-0.04082	0.22334	-0.13555	-111.148	-57.05409	390.083	0.18994	0.092773	0.040527	NaN	NaN	NaN	NaN	NaN	NaN
1.936	15.668	175.723	981.482	-0.73643	0.67471	-0.18213	9.936	104.1057	261.31	-0.030273	0.21533	-0.13623	-107.682	-10.566	431.234	0.14355	0.13965	0.013184	NaN	NaN	NaN	NaN	NaN	NaN
1.938	24.882	131.496	1011.518	-0.82764	0.78662	-0.13818	-43.541	86.3001	224.946	-0.012208	0.20527	-0.13936	-98.113	-58.196	519.232	0.08496	0.17578	-0.012451	NaN	NaN	NaN	NaN	NaN	NaN
1.94	1.078	89.063	1059.415	-0.88789	0.90469	-0.097851	-70.2244	63.418	209.09	0.0044905	0.19482	-0.14424	-93.314	32.0751	614.598	0.013184	0.21289	-0.047852	NaN	NaN	NaN	NaN	NaN	NaN
1.942	35.621	40.129	1084.437	-0.92422	1.0164	-0.06084	-45.389	67.945	202.048	0.024412	0.18936	-0.15244	-105.3764	9.745	764.92	-0.085938	0.29834	-0.052734	NaN	NaN	NaN	NaN	NaN	NaN
1.944	34.916	8.8519	1094.094	-0.91992	1.1098	-0.037012	-81.645	72.439	158.852	0.047753	0.18311	-0.15859	-101.469	96.741	896.733	-0.14014	0.3501	-0.032227	NaN	NaN	NaN	NaN	NaN	NaN
1.946	46.423	-9.883	1108.86	-0.87754	1.1668	-0.041992	-68.981	57.353	182.022	0.064453	0.17188	-0.16602	-121.5849	77.525	1038.864	-0.23779	0.44922	-0.00048828	NaN	NaN	NaN	NaN	NaN	NaN
1.948	5.954	-28.3554	1127.284	-0.80078	1.1992	-0.068359	-69.73266	54.522	188.706	0.084082	0.15977	-0.17285	-122.9636	147.13074	1172.045	-0.29566	0.52173	0.020507	NaN	NaN	NaN	NaN	NaN	NaN
1.95	39.176	-44.956	1178.293	-0.69434	1.1807	-0.10586	-114.976	53.896	165.671	0.094728	0.15068	-0.18095	-80.6055	109.352	1299.512	-0.3457	0.58594	0.032715	NaN	NaN	NaN	NaN	NaN	NaN
1.952	14.988	-55.569	1230.39	-0.57842	1.1411	-0.1417	-56.5096	56.821	168.991	0.10528	0.13584	-0.18487	-58.957	129.147	1391.25	-0.41504	0.66016	0.019531	NaN	NaN	NaN	NaN	NaN	NaN
1.954	8.351	-42.919	1212.774	-0.46436	1.0739	-0.18662	-50.3036	50.4094	142.558	0.1125	0.12314	-0.18369	-17.369	23.269	1436.38	-0.45605	0.69141	0.0024414	NaN	NaN	NaN	NaN	NaN	NaN
1.956	16.75	-38.6789	1227.592	-0.3709	0.99608	-0.22539	-74.359	27.599	138.081	0.11279	0.11475	-0.1875	-30.927	-1.398	1455.4	-0.56201	0.74658	-0.038574	NaN	NaN	NaN	NaN	NaN	NaN
1.958	-6.11	-26.4865	1233.995	-0.30469	0.92676	-0.25391	-30.005	27.1322	124.491	0.11348	0.1083	-0.18135	-38.0561	-108.566	1455.3	-0.66259	0.79248	-0.06543	NaN	NaN	NaN	NaN	NaN	NaN
1.96	-3.54799999999999	-14.0698	1233.503	-0.25312	0.87499	-0.27285	-54.959	23.97433	81.1181	0.11201	0.10029	-0.18252	-26.0742	-121.771	1465.3	-0.7832	0.83984	-0.081543	NaN	NaN	NaN	NaN	NaN	NaN
1.962	-25.7	6.193	1206.2045	-0.2127	0.82685	-0.27998	-21.561	21.2528	92.79542	0.1085	0.09209	-0.17666	10.531	-208.392	1441.52	-0.95264	0.93408	-0.060547	NaN	NaN	NaN	NaN	NaN	NaN
1.964	-2.909	7.759	1196.1104	-0.1791	0.78271	-0.28818	8.729	11.0894	117.077	0.10459	0.087793	-0.17334	53.478	-200.605	1418.36	-1.0371	0.98438	-0.035156	NaN	NaN	NaN	NaN	NaN	NaN
1.966	12.558	7.719	1191.34154	-0.15322	0.74756	-0.29326	-2.003	-24.1281	111.506	0.095703	0.082031	-0.16846	72.618	-206.865	1360.17	-1.1772	1.1079	0.038574	NaN	NaN	NaN	NaN	NaN	NaN
1.968	-9.765	-1.536	1193.1947	-0.12549	0.71484	-0.29785	43.979	-26.28762	118.556	0.09541	0.081836	-0.16181	66.846	-155.651	1322.579	-1.2453	1.1926	0.11377	NaN	NaN	NaN	NaN	NaN	NaN
1.97	-33.421	-17.886	1193.4944	-0.097369	0.6999	-0.30205	29.54	-14.0577	100.5248	0.088379	0.077051	-0.15459	58.906	-129.44	1269.99	-1.2769	1.2622	0.18066	NaN	NaN	NaN	NaN	NaN	NaN
1.972	-31.807	-45.727	1189.6215	-0.055381	0.69961	-0.3082	16.413	3.8578	101.07639	0.081739	0.080957	-0.15029	62.6591	-91.3624	1290.63	-1.2437	1.3208	0.25977	NaN	NaN	NaN	NaN	NaN	NaN
1.974	-20.285	-61.1236	1204.9752	-0.0065582	0.70977	-0.3164	52.565	10.753	127.9571	0.075098	0.078711	-0.14756	98.116	-39.322	1293.51	-1.1968	1.3364	0.28223	NaN	NaN	NaN	NaN	NaN	NaN
1.976	-34.45	-95.331	1208.4854	0.046277	0.72041	-0.33076	1.772	1.34052	104.34255	0.07373	0.075684	-0.14355	88.976	26.468	1299.02	-1.0562	1.311	0.28564	NaN	NaN	NaN	NaN	NaN	NaN
1.978	-20.366	-122.962	1222.5863	0.099609	0.73682	-0.34424	31.548	-10.7098	113.5078	0.058399	0.071094	-0.13769	55.258	81.6081	1288.639	-0.92602	1.2473	0.26269	NaN	NaN	NaN	NaN	NaN	NaN
1.98	0.528000000000006	-137.663	1232.602087	0.14083	0.74483	-0.35733	51.357	-12.3202	103.9667	0.044433	0.068262	-0.14336	27.416	63.312	1269.508	-0.79736	1.1528	0.22852	NaN	NaN	NaN	NaN	NaN	NaN
1.982	2.072	-126.1103	1259.6283	0.16447	0.75832	-0.3667	-4.157	-8.0372	107.678	0.016309	0.058106	-0.13594	-36.087	43.121	1270.893	-0.63428	0.99854	0.18262	NaN	NaN	NaN	NaN	NaN	NaN
1.984	12.258	-117.647	1260.5187	0.16718	0.77551	-0.36826	3.463	-1.6773	131.777	-0.018945	0.047558	-0.12705	-65.708	-38.606	1296.712	-0.56445	0.91797	0.16113	NaN	NaN	NaN	NaN	NaN	NaN
1.986	29.428	-124.119	1283.394	0.14137	0.80032	-0.36034	-24.02	21.9276	93.736	-0.056152	0.037598	-0.12061	-51.107	-101.691	1309.072	-0.44531	0.7627	0.12451	NaN	NaN	NaN	NaN	NaN	NaN
1.988	57.234	-125.69	1308.9746	0.1001	0.82715	-0.34766	-59.202	16.7157	78.2367	-0.096384	0.032129	-0.11435	-62.227	-229.5445	1390.999	-0.3667	0.66162	0.09131	NaN	NaN	NaN	NaN	NaN	NaN
1.99	68.963	-131.773	1324.416	0.042276	0.86673	-0.32971	-21.457	19.698	89.6858	-0.12998	0.034473	-0.10567	-91.902	-297.093	1469.95	-0.29395	0.57178	0.047852	NaN	NaN	NaN	NaN	NaN	NaN
1.992	87.669	-127.1685	1334.441	-0.017377	0.91078	-0.31071	-81.3673	14.1113	82.52543	-0.15732	0.037597	-0.10293	-145.6636	-378.004	1523.042	-0.2085	0.48096	-0.012695	NaN	NaN	NaN	NaN	NaN	NaN
1.994	69.612	-114.2333	1364.58124	-0.072851	0.96189	-0.29701	-78.1954	1.228	115.8619	-0.17217	0.044726	-0.092285	-151.5517	-323.155	1573.922	-0.17188	0.44775	-0.047852	NaN	NaN	NaN	NaN	NaN	NaN
1.996	81.762	-86.875	1390.8394	-0.12515	1.02	-0.28391	-71.7982	14.602	113.186	-0.17822	0.057129	-0.090332	-175.812	-353.161	1635.88	-0.11572	0.40723	-0.10205	NaN	NaN	NaN	NaN	NaN	NaN
1.998	93.785	-75.135	1411.6769	-0.16699	1.0762	-0.27734	-113.751	15.5646	87.197	-0.16904	0.064844	-0.090625	-177.261	-294.701	1723.3	-0.091065	0.40576	-0.12915	NaN	NaN	NaN	NaN	NaN	NaN
2	92.803	-70.064	1425.882	-0.20773	1.1326	-0.26165	-83.4293	12.742	123.058	-0.14805	0.078516	-0.093946	-209.7228	-310.051	1802.36	-0.081055	0.41992	-0.1416	NaN	NaN	NaN	NaN	NaN	NaN
2.002	90.129	-83.5837	1464.2164	-0.2404	1.1914	-0.25278	-95.8345	1.8485	118.955	-0.11836	0.082422	-0.09668	-204.127	-222.3696	1837.19	-0.10205	0.48828	-0.14014	NaN	NaN	NaN	NaN	NaN	NaN
2.004	110.443	-81.127	1509.908	-0.26454	1.2362	-0.24928	-93.2235	-16.3567	107.948	-0.077246	0.093359	-0.10927	-196.2848	-223.284	1849.37	-0.12891	0.5415	-0.12451	NaN	NaN	NaN	NaN	NaN	NaN
2.006	117.513	-87.659	1538.6129	-0.2807	1.2788	-0.24208	-52.063	-1.8109	99.8053	-0.038086	0.092773	-0.12061	-213.114	-139.2984	1901.65	-0.21289	0.68799	-0.080078	NaN	NaN	NaN	NaN	NaN	NaN
2.008	102.766	-86.786	1545.7551	-0.29297	1.3086	-0.2373	-100.152	15.88098	74.879	0.0029297	0.089941	-0.12305	-209.88	-183.089	1917.276	-0.27783	0.81397	-0.038574	NaN	NaN	NaN	NaN	NaN	NaN
2.01	117.851	-99.495	1555.941	-0.30053	1.3341	-0.2352	-53.748	13.673	105.9019	0.039063	0.080957	-0.13076	-181.5393	-153.8858	1943.381	-0.33496	0.92822	-0.0029297	NaN	NaN	NaN	NaN	NaN	NaN
2.012	104.14	-111.4818	1600.131	-0.30628	1.3526	-0.23075	-33.193	3.16203	116.713	0.06875	0.075098	-0.1335	-146.773	-211.98264	1982.501	-0.38965	1.0547	0.043945	NaN	NaN	NaN	NaN	NaN	NaN
2.014	105.592	-119.208	1609.383	-0.30783	1.3601	-0.22677	-53.655	8.2785	89.8461	0.097167	0.064844	-0.13701	-119.592	-160.259	2068.721	-0.41357	1.0962	0.054688	NaN	NaN	NaN	NaN	NaN	NaN
2.016	86.58	-130.863	1617.298	-0.31573	1.3671	-0.22399	17.924	13.7545	105.8775	0.12305	0.055176	-0.14063	-80.724	-196.961	2128.43	-0.4873	1.1572	0.044434	NaN	NaN	NaN	NaN	NaN	NaN
2.018	75.888	-125.2996	1627.866	-0.32422	1.375	-0.21582	5.052	32.259	105.6305	0.14141	0.045019	-0.1416	-100.367	-161.666	2154.97	-0.56445	1.1865	0.018311	NaN	NaN	NaN	NaN	NaN	NaN
2.02	69.447	-122.01276	1655.46	-0.3398	1.3869	-0.20415	0.661999999999999	28.9716	135.245	0.15303	0.030078	-0.1377	-126.388	-232.4697	2150.4	-0.6499	1.2114	-0.013672	NaN	NaN	NaN	NaN	NaN	NaN
2.022	49.962	-116.70335	1664.74	-0.3694	1.3977	-0.18968	40.125	19.7581	125.711	0.15263	0.014844	-0.14082	-110.701	-260.0613	2195.96	-0.76953	1.2559	-0.028809	NaN	NaN	NaN	NaN	NaN	NaN
2.024	35.957	-111.8353	1671.735	-0.398	1.412	-0.18046	7.738	17.797	81.171	0.14326	0.00039066	-0.13721	-72.539	-343.349	2239.73	-0.82275	1.2935	-0.025391	NaN	NaN	NaN	NaN	NaN	NaN
2.026	50.09	-104.3733	1648.413	-0.42801	1.4306	-0.17851	30.071	2.8034	100.994	0.12842	-0.010742	-0.13232	-54.542	-332.236	2318.02	-0.91895	1.375	-0.021973	NaN	NaN	NaN	NaN	NaN	NaN
2.028	53.566	-80.036	1676.1997	-0.44434	1.4473	-0.17578	55.501	6.1791	109.7864	0.11651	-0.016992	-0.13125	-42.867	-328.821	2323.86	-0.99756	1.4712	-0.011719	NaN	NaN	NaN	NaN	NaN	NaN
2.03	58.313	-55.982	1691.72664	-0.46262	1.4635	-0.18068	10.926	3.6215	109.2949	0.10059	-0.012207	-0.11768	-87.381	-278.189	2346.91	-1.0327	1.5181	-0.0029297	NaN	NaN	NaN	NaN	NaN	NaN
2.032	50.301	-52.294	1703.4687	-0.47387	1.4818	-0.19055	21.285	-6.0243	146.808291	0.082226	-0.0063477	-0.11611	-70.399	-260.216	2357.29	-1.1001	1.6196	0.015625	NaN	NaN	NaN	NaN	NaN	NaN
2.034	66.131	-43.21	1733.2882	-0.47718	1.5024	-0.20687	9.941	-15.7013	153.8169	0.061328	0.0010742	-0.11026	-66.394	-227.888	2411.24	-1.1411	1.689	0.029297	NaN	NaN	NaN	NaN	NaN	NaN
2.036	83.842	-46.55	1747.8995	-0.47726	1.519	-0.22355	-7.515	-51.788	178.342	0.036133	0.0092773	-0.10693	-66.688	-179.663	2451.02	-1.186	1.7524	0.030273	NaN	NaN	NaN	NaN	NaN	NaN
2.038	85.045	-47.905	1762.9083	-0.47119	1.5337	-0.2417	25.317	-68.626	190.989	-0.0018554	0.018554	-0.099709	-98.47	-118.304	2506.04	-1.252	1.8262	0.036133	NaN	NaN	NaN	NaN	NaN	NaN
2.04	79.335	-47.846	1782.5611	-0.46205	1.5427	-0.26149	-43.511	-66.022	198.066	-0.056348	0.028711	-0.088867	-79.876	-58.452	2496.548	-1.2915	1.8608	0.039063	NaN	NaN	NaN	NaN	NaN	NaN
2.042	92.433	-49.3311	1795.383	-0.44719	1.5493	-0.28053	-52.825	-50.301	246.2759	-0.12471	0.037696	-0.076758	-168.901	-26.392	2509.329	-1.3984	1.9199	0.062012	NaN	NaN	NaN	NaN	NaN	NaN
2.044	118.155	-39.612	1794.51	-0.43194	1.555	-0.30344	-38.989	-36.161	294.7569	-0.20078	0.049414	-0.069336	-212.7334	6.347	2490.518	-1.489	1.9524	0.093264	NaN	NaN	NaN	NaN	NaN	NaN
2.046	105.463	-52.3093	1800.757	-0.4135	1.5498	-0.32878	-62.682	-29.077	312.476	-0.27393	0.068848	-0.055664	-217.4219	0.679000000000002	2528.782	-1.5742	1.9805	0.13037	NaN	NaN	NaN	NaN	NaN	NaN
2.048	116.13	-78.3902	1809.833	-0.39404	1.5435	-0.34863	-36.526	-56.3771	395.9499	-0.36133	0.085351	-0.047266	-200.346	13.4863	2556.909	-1.6616	2.0103	0.16113	NaN	NaN	NaN	NaN	NaN	NaN
2.05	145.907	-89.21	1827.296	-0.38162	1.5385	-0.36958	-57.794	-40.8207	467.9099	-0.43721	0.10937	-0.037109	-237.2249	-6.968	2603.471	-1.6909	2.0181	0.1792	NaN	NaN	NaN	NaN	NaN	NaN
2.052	161.993	-79.025	1825.3248	-0.37234	1.529	-0.38116	-102.371	-7.418	570.4986	-0.52236	0.13047	-0.024609	-214.7718	9.5537	2620.404	-1.7168	2.0176	0.18945	NaN	NaN	NaN	NaN	NaN	NaN
2.054	142.1	-60.4917	1810.2396	-0.37081	1.522	-0.38743	-59.756	57.34	683.577	-0.6123	0.15068	-0.014258	-221.36642	-34.28374	2656.657	-1.7139	2.0039	0.18847	NaN	NaN	NaN	NaN	NaN	NaN
2.056	148.691	-44.0947	1821.071	-0.38156	1.5114	-0.3911	-53.424	100.585	773.3109	-0.7124	0.17041	0.0019531	-234.626	-19.12826	2652.92	-1.707	1.9805	0.18506	NaN	NaN	NaN	NaN	NaN	NaN
2.058	171.164	-28.032	1842.764	-0.39746	1.5068	-0.39258	-52.011	102.212	937.503	-0.82627	0.18272	0.0079102	-232.785	-64.407	2649.06	-1.6929	1.9458	0.17383	NaN	NaN	NaN	NaN	NaN	NaN
2.06	174.344	-26.557	1823.909	-0.41346	1.515	-0.3876	-17.546	116.06079	1065.843	-0.96211	0.1959	0.016894	-200.2756	-48.5404	2663.88	-1.6909	1.9302	0.17041	NaN	NaN	NaN	NaN	NaN	NaN
2.062	129.749	-32.523	1821.388	-0.43698	1.5183	-0.38877	-16.395	113.033	1125.293	-1.1176	0.20957	0.02627	-214.5675	-78.472	2703.21	-1.689	1.9126	0.16699	NaN	NaN	NaN	NaN	NaN	NaN
2.064	135.595	-33.319	1829.972	-0.45809	1.5245	-0.38487	69.289	73.058	1221.264	-1.2922	0.23418	0.049609	-192.565	-11.327	2677.19	-1.6939	1.9106	0.17554	NaN	NaN	NaN	NaN	NaN	NaN
2.066	124.606	-25.9299	1841.252	-0.48007	1.5311	-0.38165	51.983	35.3866	1320.039	-1.4702	0.26855	0.071777	-207.944	-3.954	2632.89	-1.7026	1.9165	0.18652	NaN	NaN	NaN	NaN	NaN	NaN
2.068	116.607	-3.0988	1809.3987	-0.5	1.5449	-0.37744	53.71	-38.402	1403.824	-1.6321	0.31699	0.092969	-191.792	85.4861	2587.8	-1.7085	1.9399	0.20898	NaN	NaN	NaN	NaN	NaN	NaN
2.07	98.285	-12.5547	1802.3798	-0.52168	1.5576	-0.38086	146.604	-100.695	1432.531	-1.7653	0.38672	0.11103	-170.576	64.44507	2585.74	-1.7124	1.9497	0.22217	NaN	NaN	NaN	NaN	NaN	NaN
2.072	97.094	-18.03317	1801.2316	-0.53868	1.5664	-0.38633	105.408	-120.902	1367.853	-1.8508	0.48243	0.11963	-138.243	127.616	2573.23	-1.6953	1.9648	0.22949	NaN	NaN	NaN	NaN	NaN	NaN
2.074	103.211	-33.728	1842.86	-0.55274	1.568	-0.3832	103.62	-152.8992	1361.1109	-1.8713	0.5959	0.12207	-126.432	79.243	2550.273	-1.6748	1.958	0.23901	NaN	NaN	NaN	NaN	NaN	NaN
2.076	67.649	-21.725	1826.766	-0.56104	1.5761	-0.38272	86.095	-151.442	1374.3518	-1.8184	0.7207	0.11572	-113.493	156.513	2519.234	-1.6519	1.9458	0.23975	NaN	NaN	NaN	NaN	NaN	NaN
2.078	81.41	-26.389	1822.368	-0.56738	1.5781	-0.38477	13.308	-134.567	1357.7769	-1.6872	0.84209	0.092284	-101.294	123.471	2484.651	-1.603	1.9204	0.2373	NaN	NaN	NaN	NaN	NaN	NaN
2.08	84.234	-15.175	1820.866	-0.56494	1.5712	-0.38701	39.6909	-116.54	1381.3687	-1.511	0.93555	0.058691	-117.299	171.577	2437.7	-1.5742	1.9023	0.23584	NaN	NaN	NaN	NaN	NaN	NaN
2.082	84.177	-4.2945	1809.7546	-0.55547	1.5634	-0.39004	20.6122	-86.038	1391.541	-1.3106	1.0008	0.02627	-129.231	109.883	2377.28	-1.5078	1.8613	0.22949	NaN	NaN	NaN	NaN	NaN	NaN
2.084	70.736	11.6438	1785.473	-0.54492	1.549	-0.38926	-20.1433	-93.182	1437.85	-1.1248	1.0088	-0.015528	-146.638	153.8623	2336.314	-1.4656	1.8235	0.22193	NaN	NaN	NaN	NaN	NaN	NaN
2.086	71.768	18.5773	1752.042	-0.529	1.5305	-0.39863	-2.239	-86.485	1478.696	-0.97949	0.96289	-0.057617	-129.924	88.287	2321.209	-1.4199	1.7891	0.21338	NaN	NaN	NaN	NaN	NaN	NaN
2.088	95.758	21.1841	1763.2917	-0.51465	1.5156	-0.40234	-57.208	-35.927	1458.6504	-0.88906	0.85508	-0.10078	-111.42	131.456	2304.088	-1.3667	1.7466	0.19287	NaN	NaN	NaN	NaN	NaN	NaN
2.09	87.093	25.067	1756.4884	-0.50254	1.4957	-0.40645	-46.906	-31.4	1473.12	-0.84092	0.72685	-0.13818	-138.411	78.48	2252.43	-1.3418	1.7188	0.18506	NaN	NaN	NaN	NaN	NaN	NaN
2.092	78.254	28.499	1757.103	-0.4831	1.4751	-0.40811	-45.606	-28.12	1513.135	-0.82803	0.59013	-0.15459	-179.409	132.463	2187.4	-1.2949	1.6797	0.16895	NaN	NaN	NaN	NaN	NaN	NaN
2.094	107.616	27.5329	1740.513	-0.46943	1.4575	-0.41006	-95.847	-67.35	1538.072	-0.84922	0.46778	-0.16328	-182.285	106.402	2100.63	-1.2644	1.6594	0.16797	NaN	NaN	NaN	NaN	NaN	NaN
2.096	138.514	38.678	1726.8414	-0.45742	1.4359	-0.41328	-56.2886	-188.981	1587.183	-0.89209	0.37549	-0.15381	-205.961	173.2761	2072.871	-1.2324	1.6328	0.16211	NaN	NaN	NaN	NaN	NaN	NaN
2.098	128.985	50.907	1703.589	-0.4375	1.4238	-0.40918	-31.084	-239.8628	1652.8124	-0.9501	0.32998	-0.13887	-220.0405	158.602	2055.338	-1.1948	1.6099	0.16406	NaN	NaN	NaN	NaN	NaN	NaN
2.1	118.223	56.691	1686.32	-0.43281	1.4121	-0.41524	-54.07	-279.227	1706.6445	-0.99882	0.31484	-0.11855	-206.438	214.272	2037.178	-1.1738	1.5996	0.16406	NaN	NaN	NaN	NaN	NaN	NaN
2.102	145.357	49.0908	1669.002	-0.42022	1.3973	-0.41084	-44.891	-306.061	1778.232	-1.0348	0.33359	-0.10215	-218.2965	196.6354	1961.738	-1.1191	1.5703	0.16309	NaN	NaN	NaN	NaN	NaN	NaN
2.104	168.999	38.146	1683.867	-0.40811	1.39	-0.40654	-138.65	-266.422	1827.292	-1.0688	0.37559	-0.085742	-258.447	261.96	1912.179	-1.0743	1.5439	0.16284	NaN	NaN	NaN	NaN	NaN	NaN
2.106	162.576	26.795	1656.5746	-0.39902	1.3806	-0.40234	-151.577	-296.607	1847.047	-1.1211	0.41699	-0.079102	-251.456	250.9264	1850.078	-1.0229	1.5161	0.16113	NaN	NaN	NaN	NaN	NaN	NaN
2.108	152.18	6.7488	1642.508	-0.3877	1.3716	-0.39697	-126.789	-296.48	1901.69907	-1.2041	0.46836	-0.07666	-232.0917	305.371	1815.014	-0.95752	1.4771	0.15039	NaN	NaN	NaN	NaN	NaN	NaN
2.11	167.977	9.4498	1634.525	-0.37608	1.3615	-0.39267	-127.142	-234.565	1935.064	-1.3075	0.51572	-0.068067	-217.521	289.513	1767.583	-0.92383	1.4551	0.14648	NaN	NaN	NaN	NaN	NaN	NaN
2.112	150.984	21.2373	1621.728	-0.36719	1.3536	-0.38516	-26.755	-216.586	2016.2585	-1.4075	0.55947	-0.0583	-200.022	317.194	1733.07	-0.85498	1.4087	0.13623	NaN	NaN	NaN	NaN	NaN	NaN
2.114	129.701	51.026	1569.675	-0.3582	1.3391	-0.37539	7.55399999999999	-133.532	2082.634	-1.4827	0.6084	-0.059765	-163.776	275.669	1700.024	-0.80689	1.3753	0.12793	NaN	NaN	NaN	NaN	NaN	NaN
2.116	99.74	48.2839	1546.977	-0.35313	1.3304	-0.36719	11.92	-107.503	2095.813	-1.5098	0.66797	-0.060547	-174.854	278.819	1677.365	-0.75684	1.3379	0.11719	NaN	NaN	NaN	NaN	NaN	NaN
2.118	122.199	52.177	1532.6443	-0.34766	1.3203	-0.3623	94.959	-134.862	2106.429	-1.4947	0.72871	-0.069238	-147.373	239.7452	1610.07	-0.69336	1.2949	0.10986	NaN	NaN	NaN	NaN	NaN	NaN
2.12	124.324	38.8924	1530.941	-0.34434	1.3104	-0.34805	109.438	-104.856	2125.944	-1.4492	0.77558	-0.077246	-141.242	242.5829	1567.26	-0.66162	1.27	0.099609	NaN	NaN	NaN	NaN	NaN	NaN
2.122	91.285	44.0215	1506.578	-0.34277	1.2979	-0.34365	151.699	-167.094	2128.3956	-1.4102	0.78965	-0.081153	-100.86	225.5748	1505.79	-0.60059	1.2227	0.088867	NaN	NaN	NaN	NaN	NaN	NaN
2.124	92.185	45.652	1482.6107	-0.34239	1.2921	-0.32803	191.271	-205.2236	2145.826	-1.3895	0.77353	-0.077441	-91.18	228.4298	1490.81	-0.55224	1.1845	0.081054	NaN	NaN	NaN	NaN	NaN	NaN
2.126	84.624	55.228	1465.334	-0.3418	1.2861	-0.32344	127.4993	-175.5793	2131.602	-1.4004	0.73633	-0.068359	-61.694	208.699	1433.83	-0.50586	1.1484	0.072754	NaN	NaN	NaN	NaN	NaN	NaN
2.128	62.915	70.047	1437.1645	-0.34229	1.2764	-0.31299	113.2326	-239.558	2150.37	-1.4239	0.70166	-0.06875	-76.556	213.4821	1381.71	-0.44531	1.0977	0.061035	NaN	NaN	NaN	NaN	NaN	NaN
2.13	49.16	80.964	1406.7523	-0.34248	1.2677	-0.30439	100.42	-239.656	2202.1172	-1.4561	0.68252	-0.071485	-41.215	228.267	1286.38	-0.41699	1.0688	0.056641	NaN	NaN	NaN	NaN	NaN	NaN
2.132	61.094	77.501	1385.9704	-0.33935	1.2591	-0.296	74.016	-248.776	2235.992	-1.4816	0.69619	-0.078906	-22.089	257.1751	1227.49	-0.35596	1.0132	0.048828	NaN	NaN	NaN	NaN	NaN	NaN
2.134	66.358	73.89	1380.63728	-0.33545	1.2497	-0.29014	135.1072	-303.65	2275.708	-1.4969	0.72637	-0.085547	-9.032	277.7679	1173.56	-0.31909	0.97094	0.039307	NaN	NaN	NaN	NaN	NaN	NaN
2.136	37.592	73.433	1363.023	-0.33115	1.2404	-0.28398	104.468	-241.739	2338.463	-1.5054	0.76318	-0.094238	-16.045	288.8363	1124.495	-0.28369	0.93164	0.035156	NaN	NaN	NaN	NaN	NaN	NaN
2.138	30.686	56.6043	1344.257	-0.32666	1.2329	-0.28027	89.006	-235.035	2357.19	-1.5179	0.80429	-0.10908	0.841999999999999	311.32385	1053.38	-0.2417	0.88135	0.029297	NaN	NaN	NaN	NaN	NaN	NaN
2.14	24.432	53.2757	1321.6171	-0.325	1.2176	-0.26924	105.156	-214.444	2397.63	-1.5262	0.83594	-0.12685	-8.06800000000001	302.4885	990.295	-0.229	0.86084	0.02832	NaN	NaN	NaN	NaN	NaN	NaN
2.142	39.057	58.2093	1318.92	-0.32051	1.2004	-0.26289	47.149	-118.729	2382.374	-1.5262	0.86094	-0.15459	-11.744	307.6923	942.38	-0.18506	0.82275	0.025879	NaN	NaN	NaN	NaN	NaN	NaN
2.144	52.604	68.2785	1291.2817	-0.31426	1.1926	-0.25664	64.482	-160.404	2348.3202	-1.5252	0.87969	-0.18369	-44.447	275.9232	907.38	-0.16016	0.78809	0.016114	NaN	NaN	NaN	NaN	NaN	NaN
2.146	65.498	81.699	1272.8824	-0.31182	1.1826	-0.25342	31.002	-128.29	2373.7073	-1.5239	0.89307	-0.20459	-57.01	292.042	860.021	-0.12939	0.76172	0.0029297	NaN	NaN	NaN	NaN	NaN	NaN
2.148	70.994	101.951	1263.446	-0.30762	1.1777	-0.24512	-44.781	-98.719	2361.48658	-1.526	0.90723	-0.2168	-52.097	269.201	809.373	-0.10352	0.7207	-0.015625	NaN	NaN	NaN	NaN	NaN	NaN
2.15	76.177	121.964	1249.9467	-0.30683	1.1597	-0.23877	-36.29	-131.872	2352.3469	-1.5398	0.91485	-0.22793	-58.287	297.52	761.275	-0.09375	0.6958	-0.023438	NaN	NaN	NaN	NaN	NaN	NaN
2.152	71.623	129.156	1227.78081	-0.30156	1.1457	-0.23321	-86.515	-64.162	2372.2578	-1.5676	0.93008	-0.23535	-73.273	249.28	736.285	-0.05957	0.66504	-0.023926	NaN	NaN	NaN	NaN	NaN	NaN
2.154	79.446	109.457	1204.7185	-0.30235	1.13	-0.22422	-111.738	-84.2695	2349.029	-1.5936	0.93994	-0.23877	-92.708	257.569	687.246	-0.031494	0.64331	-0.039063	NaN	NaN	NaN	NaN	NaN	NaN
2.156	96.08	108.532	1187.4066	-0.29922	1.1175	-0.21758	-67.607	-118.746	2366.2528	-1.625	0.95117	-0.23877	-85.3527	212.283	625.625	-0.0073242	0.62549	-0.055664	NaN	NaN	NaN	NaN	NaN	NaN
2.158	99.984	114.498	1181.064	-0.29395	1.1045	-0.20996	-79.024	-46.247	2355.754	-1.6486	0.9584	-0.24092	-68.9766	262.108	612.955	0.018066	0.59424	-0.076172	NaN	NaN	NaN	NaN	NaN	NaN
2.16	93.992	123.5549	1151.268	-0.28926	1.0889	-0.20235	-41.383	-96.2488	2337.607	-1.6714	0.96914	-0.24297	-51.4953	257.8	613.476	0.026367	0.58252	-0.089844	NaN	NaN	NaN	NaN	NaN	NaN
2.162	70.338	121.0618	1133.394	-0.27998	1.0724	-0.19521	-17.235	-64.92	2413.293	-1.6879	0.98789	-0.24141	-36.424	311.4957	600.34	0.047852	0.55615	-0.10205	NaN	NaN	NaN	NaN	NaN	NaN
2.164	85.999	126.486	1111.3929	-0.27021	1.0564	-0.18975	-13.852	-36.045	2426.563	-1.6999	1.0056	-0.24033	-41.724	261.431	561.518	0.055175	0.53418	-0.11206	NaN	NaN	NaN	NaN	NaN	NaN
2.166	75.678	125.931	1088.2407	-0.26094	1.041	-0.18828	55.659	-120.786	2420.773	-1.7051	1.0156	-0.24805	-45.549	304.111	512.244	0.060059	0.51855	-0.12109	NaN	NaN	NaN	NaN	NaN	NaN
2.168	58.189	122.909	1070.1189	-0.24805	1.0215	-0.17871	68.395	-64.056	2429.778	-1.71	1.0279	-0.24766	-50.515	250.155	487.443	0.068359	0.50098	-0.12695	NaN	NaN	NaN	NaN	NaN	NaN
2.17	46.643	111.6673	1064.175	-0.23652	1.0047	-0.17266	82.385	-87.4783	2381.5267	-1.7153	1.0438	-0.24688	-20.632	293.087	466.541	0.073486	0.49146	-0.12524	NaN	NaN	NaN	NaN	NaN	NaN
2.172	56.412	125.969	1044.957	-0.22519	0.98291	-0.16855	136.747	-99.685	2402.365	-1.7156	1.0527	-0.25195	-8.609	226.081	448.608	0.080078	0.48047	-0.12695	NaN	NaN	NaN	NaN	NaN	NaN
2.174	49.482	127.326	1016.609	-0.21191	0.96807	-0.15332	109.152	9.7983	2397.2579	-1.7132	1.0616	-0.25293	-8.271	260.301	394.07	0.085449	0.46045	-0.12988	NaN	NaN	NaN	NaN	NaN	NaN
2.176	10.023	127.341	993.2671	-0.20049	0.94814	-0.15029	124.73	-32.4673	2354.384259	-1.7129	1.0664	-0.25586	10.014	194.179	360.972	0.093262	0.4502	-0.12988	NaN	NaN	NaN	NaN	NaN	NaN
2.178	17.085	129.846	972.614	-0.18408	0.92578	-0.14111	151.11881	2.328	2355.90861	-1.7065	1.0662	-0.25781	2.672	223.124	344.15	0.099609	0.43213	-0.13672	NaN	NaN	NaN	NaN	NaN	NaN
2.18	26.127	132.042	964.198	-0.16807	0.90586	-0.13184	105.235	27.9009	2361.7393	-1.6996	1.0687	-0.26562	23.899	162.742	326.35	0.09961	0.41504	-0.1416	NaN	NaN	NaN	NaN	NaN	NaN
2.182	-9.89	142.655	939.418	-0.15762	0.88418	-0.12695	168.946	-9.602	2346.9701	-1.6891	1.0676	-0.27031	41.19	215.001	307.74	0.1001	0.40137	-0.15088	NaN	NaN	NaN	NaN	NaN	NaN
2.184	-19.719	143.253	921.226	-0.13965	0.86231	-0.11719	188.4997	101.625	2358.9979	-1.678	1.0661	-0.28077	49.7127	144.7367	300.43	0.087402	0.38086	-0.15576	NaN	NaN	NaN	NaN	NaN	NaN
2.186	-14.388	143.94	900.548	-0.12305	0.84385	-0.10791	163.7726	108.505	2309.579	-1.6699	1.0625	-0.28906	62.8161	187.799	274.64	0.082031	0.36865	-0.16211	NaN	NaN	NaN	NaN	NaN	NaN
2.188	-11.268	149.569	876.6253	-0.10547	0.81982	-0.099121	163.0734	90.701	2319.9414	-1.6674	1.0594	-0.29453	53.8215	100.8076	265.89	0.066895	0.35742	-0.16406	NaN	NaN	NaN	NaN	NaN	NaN
2.19	-37.293	144.2726	858.7772	-0.091406	0.79805	-0.088769	95.814	133.287	2322.9538	-1.668	1.0605	-0.29902	41.996	108.1319	224.27	0.048096	0.34595	-0.16236	NaN	NaN	NaN	NaN	NaN	NaN
2.192	-26.125	131.7619	832.8937	-0.074805	0.77354	-0.081348	92.73	35.1323	2269.77603	-1.666	1.0671	-0.29824	19.839	22.699	195.97	0.029785	0.34375	-0.16016	NaN	NaN	NaN	NaN	NaN	NaN
2.194	-19.95	131.495	828.883	-0.05957	0.75322	-0.069238	84.152	39.268	2277.292	-1.6622	1.0792	-0.29892	4.888	68.87497	163.643	0.013672	0.33984	-0.16113	NaN	NaN	NaN	NaN	NaN	NaN
2.196	-5.564	145.317	813.1139	-0.045117	0.73154	-0.063086	16.256	64.19	2233.3357	-1.6577	1.0962	-0.29736	-28.06	26.1676	170.56	0.0043945	0.33936	-0.15039	NaN	NaN	NaN	NaN	NaN	NaN
2.198	5.623	142.203	791.6528	-0.033691	0.71484	-0.049316	18.216	10.351	2225.023	-1.6527	1.111	-0.28955	-4.941	62.613	147.676	-0.0092773	0.33838	-0.14746	NaN	NaN	NaN	NaN	NaN	NaN
2.2	-0.381	149.227	780.3005	-0.017286	0.69424	-0.039063	-29.127	90.915	2208.85	-1.6375	1.1277	-0.28203	-24.304	-2.7031	136.791	-0.011963	0.34082	-0.14648	NaN	NaN	NaN	NaN	NaN	NaN
2.202	1.753	148.961	771.0449	-0.00097658	0.67715	-0.027149	-65.995	80.2312	2122.2991	-1.614	1.1481	-0.26836	-64.597	24.6396	105.09543	-0.012207	0.33838	-0.146	NaN	NaN	NaN	NaN	NaN	NaN
2.204	23.701	146.5232	744.6985	0.01543	0.6541	-0.013086	-69.097	52.659	2129.8332	-1.5911	1.1601	-0.26006	-54.498	-31.22795	99.498	-0.015137	0.33398	-0.14453	NaN	NaN	NaN	NaN	NaN	NaN
2.206	27.255	147.6997	721.1045	0.033106	0.63896	-0.00078126	-91.492	128.477	2120.2476	-1.5679	1.1763	-0.25537	-34.84	13.227	85.642	-0.0097656	0.33008	-0.14355	NaN	NaN	NaN	NaN	NaN	NaN
2.208	17.134	129.7319	721.216	0.055176	0.62354	0.0097656	-80.637	92.626	2079.206	-1.5319	1.1888	-0.24473	-66.267	-26.4166	99.4159	-0.0043945	0.3291	-0.14355	NaN	NaN	NaN	NaN	NaN	NaN
2.21	32.676	138.739	709.8307	0.074902	0.60019	0.018164	-40.082	168.984	2070.855	-1.4941	1.1989	-0.23984	-74.21	16.686	84.125	0.0029297	0.32105	-0.13648	NaN	NaN	NaN	NaN	NaN	NaN
2.212	38.938	143.0868	687.747	0.1001	0.57969	0.021973	-44.906	212.097	2004.4555	-1.4524	1.2093	-0.22852	-73.9031	-9.0894	95.7403	0.0083008	0.31152	-0.13818	NaN	NaN	NaN	NaN	NaN	NaN
2.214	21.689	135.0082	657.6673	0.12158	0.56133	0.027051	-2.53	165.533	1969.0678	-1.4137	1.2187	-0.21826	-70.431	33.008	94.8385	0.016113	0.29248	-0.13721	NaN	NaN	NaN	NaN	NaN	NaN
2.216	31.329	139.617	654.1215	0.14766	0.5416	0.025879	-5.571	226.743	1961.6536	-1.3711	1.2227	-0.20508	-92.98047	5.339	106.8326	0.015625	0.28857	-0.13672	NaN	NaN	NaN	NaN	NaN	NaN
2.218	42.403	138.2568	637.6508	0.17236	0.52148	0.024902	-8.93400000000001	183.569	1888.787	-1.3323	1.2217	-0.20088	-79.699	35.801	92.14271	0.011719	0.26611	-0.13818	NaN	NaN	NaN	NaN	NaN	NaN
2.22	38.169	159.405	605.7762	0.19346	0.5042	0.026758	33.38	164.755	1884.0142	-1.2913	1.2157	-0.19238	-89.9454	8.1381	111.9346	0.0095216	0.25928	-0.13379	NaN	NaN	NaN	NaN	NaN	NaN
2.222	14.365	159.231	597.6061	0.20986	0.48711	0.027637	-14.156	214.268	1872.747	-1.2507	1.2033	-0.18653	-68.767	51.361	105.103	0.0087891	0.24609	-0.13232	NaN	NaN	NaN	NaN	NaN	NaN
2.224	9.285	152.784	585.82112	0.22705	0.47344	0.022168	17.441	150.3459	1837.049	-1.212	1.1812	-0.18135	-23.241	34.881	111.382	0.0048828	0.23682	-0.125	NaN	NaN	NaN	NaN	NaN	NaN
2.226	22.659	149.701	573.2424	0.24229	0.46094	0.022363	65.159	172.511	1814.3616	-1.1777	1.1523	-0.17188	-32.816	43.4867	89.0373	0.0019531	0.23145	-0.12305	NaN	NaN	NaN	NaN	NaN	NaN
2.228	-12.265	151.383	557.6419	0.25586	0.4458	0.021484	52.225	169.6895	1747.1974	-1.1389	1.1115	-0.16465	-29.335	19.5574	107.6228	0.003418	0.2124	-0.12305	NaN	NaN	NaN	NaN	NaN	NaN
2.23	-23.863	147.767	537.667506	0.26201	0.43984	0.020996	113.9253	127.327	1706.6	-1.1008	1.0646	-0.16045	-7.893	35.6358	102.8079	0.0036621	0.20361	-0.12353	NaN	NaN	NaN	NaN	NaN	NaN
2.232	-15.803	154.353	531.3013	0.26748	0.43516	0.019727	98.6517	201.931	1715.623	-1.0594	1.0162	-0.1499	-5.051	46.805	133.761	-0.00048828	0.19385	-0.12451	NaN	NaN	NaN	NaN	NaN	NaN
2.234	-33.445	145.004	515.5717	0.27373	0.42929	0.016211	98.7435	200.122	1646.804	-1.0164	0.9668	-0.14219	24.824	72.3593	136.767	-0.012207	0.17773	-0.12451	NaN	NaN	NaN	NaN	NaN	NaN
2.236	-48.569	143.955	498.8759	0.27588	0.43018	0.0125	127.841	194.3133	1615.3	-0.97168	0.91943	-0.13184	34.295	60.556	152.627	-0.023438	0.17188	-0.12451	NaN	NaN	NaN	NaN	NaN	NaN
2.238	-42.417	131.147	477.9503	0.27832	0.43018	0.012207	78.6281	237.478	1575.263	-0.92949	0.87402	-0.12461	11.137	24.8235	134.554	-0.053711	0.1709	-0.12061	NaN	NaN	NaN	NaN	NaN	NaN
2.24	-35.957	125.0886	466.3747	0.27353	0.43555	0.011328	55.123	176.3091	1535.979	-0.8831	0.82979	-0.11367	-7.339	12.247	112.755	-0.079346	0.16553	-0.11572	NaN	NaN	NaN	NaN	NaN	NaN
2.242	-50.325	132.922	455.90148	0.2666	0.43984	0.015625	38.206	217.6733	1505.586	-0.84366	0.77861	-0.10468	6.194	0.8138	110.503	-0.10059	0.17041	-0.11426	NaN	NaN	NaN	NaN	NaN	NaN
2.244	-46.597	141.327	447.7228	0.25488	0.44649	0.022266	-4.895	247.85	1415.245	-0.81279	0.72646	-0.094043	-14.411	32.8809	121.74	-0.12598	0.18213	-0.10254	NaN	NaN	NaN	NaN	NaN	NaN
2.246	-47.421	130.677	433.6935	0.24619	0.45625	0.028418	-10.845	230.3583	1353.929	-0.78467	0.68896	-0.083984	-2.565	13.0799	139.789	-0.12988	0.19287	-0.097656	NaN	NaN	NaN	NaN	NaN	NaN
2.248	-32.173	135.24	428.693	0.23584	0.46338	0.036621	-47.409	282.728	1329.396	-0.76016	0.64493	-0.075782	-17.754	22.9328	136.059	-0.14063	0.20166	-0.086426	NaN	NaN	NaN	NaN	NaN	NaN
2.25	-25.952	136.181	410.5953	0.22705	0.46846	0.037207	-96.879	230.9261	1286.6942	-0.73818	0.61064	-0.065039	-13.804	-4.0057	124.378	-0.13086	0.21582	-0.083497	NaN	NaN	NaN	NaN	NaN	NaN
2.252	-22.322	135.182	390.2655	0.22002	0.47891	0.040723	-78.6704	215.423	1257.53106	-0.71631	0.5872	-0.055273	-21.045	13.774	119.2709	-0.11475	0.22363	-0.085938	NaN	NaN	NaN	NaN	NaN	NaN
2.254	-19.664	140.903	389.4272	0.21416	0.48281	0.048925	-115.43	254.674	1202.6373	-0.69287	0.56435	-0.039844	-15.037	-12.206	123.586	-0.077637	0.21826	-0.086914	NaN	NaN	NaN	NaN	NaN	NaN
2.256	-12.235	138.913	379.4033	0.20703	0.48486	0.050684	-120.114	208.347	1172.4658	-0.6709	0.55664	-0.034668	-51.317	11.1983	137.744	-0.053223	0.20996	-0.089355	NaN	NaN	NaN	NaN	NaN	NaN
2.258	0.498999999999995	143.188	349.86275	0.20605	0.48438	0.050781	-111.622	242.064	1171.845	-0.64443	0.54219	-0.016797	-47.863	-19.4677	125.271	0.0073242	0.19971	-0.099121	NaN	NaN	NaN	NaN	NaN	NaN
2.26	-15.451	140.167	343.6557	0.20439	0.4835	0.053418	-143.461	246.008	1103.757	-0.62773	0.53125	-0.002539	-60.657	9.3917	102.6286	0.053955	0.18164	-0.1062	NaN	NaN	NaN	NaN	NaN	NaN
2.262	11.53	125.932	345.407	0.19922	0.47871	0.058105	-93.8345	220.571	1049.237	-0.61211	0.52735	0.011133	-64.8126	-21.1894	102.2105	0.10547	0.16406	-0.11377	NaN	NaN	NaN	NaN	NaN	NaN
2.264	25.225	119.333	330.608	0.19649	0.47207	0.059277	-133.821	256.685	1005.292	-0.5959	0.52519	0.026563	-85.856	0.283000000000001	91.935	0.17578	0.1333	-0.12842	NaN	NaN	NaN	NaN	NaN	NaN
2.266	16.586	116.639	317.188	0.19238	0.46455	0.067188	-146.228	222.484	961.901	-0.5835	0.52393	0.039063	-86.2963	-26.7536	107.4196	0.20117	0.1167	-0.13916	NaN	NaN	NaN	NaN	NaN	NaN
2.268	1.09399999999999	114.47	298.5256	0.19092	0.45605	0.068359	-105.464	213.4093	957.5877	-0.55839	0.52441	0.048828	-97.9491	24.3308	90.346	0.25781	0.07959	-0.15674	NaN	NaN	NaN	NaN	NaN	NaN
2.27	20.827	113.869	304.694	0.19141	0.44961	0.072558	-105.07	241.656	907.063	-0.53584	0.52705	0.05586	-78.4076	0.786	107.007	0.28907	0.054443	-0.17334	NaN	NaN	NaN	NaN	NaN	NaN
2.272	29.878	107.476	309.73	0.196	0.44424	0.077149	-59.42227	206.199	879.576	-0.50342	0.52822	0.060937	-47.342	38.2919	112.207	0.31006	0.031738	-0.18164	NaN	NaN	NaN	NaN	NaN	NaN
2.274	9.14	111.7389	281.851	0.20459	0.43213	0.08457	-50.1834	241.561	850.318	-0.4667	0.53135	0.061719	-54.4483	-19.0553	113.58319	0.32275	0.0039063	-0.18848	NaN	NaN	NaN	NaN	NaN	NaN
2.276	-11.605	97.408	282.102	0.20459	0.41973	0.086328	-39.792	238.677	793.387	-0.42969	0.5332	0.066895	-58.564	1.637	80.244	0.32373	-0.0014648	-0.18994	NaN	NaN	NaN	NaN	NaN	NaN
2.278	-14.524	87.6306	282.002	0.20703	0.41064	0.091309	5.793	218.0682	765.3386	-0.38857	0.53125	0.069531	-29.78	-14.41	94.996	0.31934	-0.0087891	-0.18848	NaN	NaN	NaN	NaN	NaN	NaN
2.28	-6.148	74.196	278.335	0.20752	0.39697	0.097754	-4.521	252.463	717.423	-0.33925	0.53008	0.072168	-18.295	42.494	78.161	0.30518	-0.0073243	-0.19116	NaN	NaN	NaN	NaN	NaN	NaN
2.282	-34.095	78.4385	272.299	0.20674	0.38105	0.10283	3.825	228.713	673.282	-0.29433	0.51719	0.070996	-11.68	24.2563	115.55	0.29443	0.0029297	-0.19189	NaN	NaN	NaN	NaN	NaN	NaN
2.284	-49.272	53.047	258.674	0.21103	0.36387	0.10439	42.595	220.1629	682.3978	-0.25449	0.50849	0.074707	0.762999999999998	60.975	129.964	0.27197	0.03125	-0.18945	NaN	NaN	NaN	NaN	NaN	NaN
2.286	-39.094	37.988	262.209	0.2205	0.3499	0.10879	36.453	228.978	635.908	-0.20996	0.50293	0.071777	-24.498	3.2683	190.0798	0.25977	0.041016	-0.19922	NaN	NaN	NaN	NaN	NaN	NaN
2.288	-41.713	39.767	249.497	0.22656	0.33252	0.11182	60.452	175.2721	603.7765	-0.1707	0.49131	0.070605	25.171	11.11	191.414	0.24316	0.087402	-0.15527	NaN	NaN	NaN	NaN	NaN	NaN
2.29	-59.641	36.424	254.852	0.23594	0.32031	0.10967	29.0885	183.10275	576.43959	-0.12744	0.49356	0.073047	3.626	-31.386	220.6149	0.21387	0.11743	-0.17285	NaN	NaN	NaN	NaN	NaN	NaN
2.292	-51.406	23.243	252.869	0.24717	0.304	0.11523	-19.912	173.837	532.773	-0.0958	0.48457	0.073437	-10.634	-11.619	266.4209	0.19092	0.15088	-0.20605	NaN	NaN	NaN	NaN	NaN	NaN
2.294	-44.618	11.536	256.119	0.25341	0.28955	0.11407	15.507	167.7358	523.7598	-0.070312	0.46914	0.075781	-8.393	-27.391	378.565	0.19189	0.1958	-0.19873	NaN	NaN	NaN	NaN	NaN	NaN
2.296	-64.737	17.162	250.245	0.25957	0.27715	0.11318	-33.206	182.7772	484.1331	-0.041992	0.45898	0.080566	49.073	-9.09999999999999	434.0063	0.18164	0.21729	-0.19531	NaN	NaN	NaN	NaN	NaN	NaN
2.298	-56.2082	5.689	257.454	0.26514	0.26074	0.10742	-33.709	151.9917	444.9128	-0.020215	0.44912	0.084571	41.551	-37.121	530.9078	0.13379	0.25049	-0.20752	NaN	NaN	NaN	NaN	NaN	NaN
2.3	-47.614	-1.42299999999999	263.63	0.26192	0.25205	0.1125	-51.7916	147.635	430.27037	-0.0058594	0.44336	0.08916	64.749	-42.536	598.375	0.078369	0.27392	-0.22778	NaN	NaN	NaN	NaN	NaN	NaN
2.302	-66.74302	-1.588	281.44	0.25889	0.2459	0.11162	-96.714	157.666	379.1611	0.013281	0.43672	0.09541	13.018	-64.6822	733.3482	0.0058594	0.30078	-0.23779	NaN	NaN	NaN	NaN	NaN	NaN
2.304	-45.473	4.906	278.12	0.25498	0.23926	0.10615	-74.30867	124.66	366.0195	0.034082	0.43213	0.09248	-7.76900000000001	-3.828	873.821	-0.13232	0.35791	-0.24561	NaN	NaN	NaN	NaN	NaN	NaN
2.306	-53.033	19.297	307.63	0.24717	0.24004	0.098927	-104.368	149.595	345.8486	0.052734	0.42627	0.097656	-17.211	39.0089	1026.91	-0.2085	0.39453	-0.23242	NaN	NaN	NaN	NaN	NaN	NaN
2.308	-31.048	42.8746	376.04	0.23389	0.24609	0.09375	-148.159	136.852	311.7052	0.068262	0.4291	0.098535	57.995	72.05	1098.48	-0.37061	0.49561	-0.20264	NaN	NaN	NaN	NaN	NaN	NaN
2.31	-19.662	75.421	406.31	0.20733	0.25762	0.087793	-113.972	130.659	304.6761	0.076465	0.42656	0.098145	27.8	28.132	1193.726	-0.51953	0.6084	-0.16406	NaN	NaN	NaN	NaN	NaN	NaN
2.312	0.231999999999999	111.17	439.21	0.16651	0.28037	0.088574	-131.729	146.324	258.1172	0.083105	0.42461	0.099707	-32.205	8.678	1278.279	-0.59131	0.67432	-0.15088	NaN	NaN	NaN	NaN	NaN	NaN
2.314	-14.441	141.534	503.29	0.11728	0.31084	0.092089	-131.704	124.046	235.1653	0.089648	0.42539	0.094726	-73.584	-11.5753	1394.565	-0.72461	0.7998	-0.13477	NaN	NaN	NaN	NaN	NaN	NaN
2.316	13.661	169.582	575.33	0.06123	0.34785	0.088379	-116.811	128.323	234.456	0.094727	0.4292	0.097168	-16.738	-10.278	1439.007	-0.83374	0.88696	-0.125	NaN	NaN	NaN	NaN	NaN	NaN
2.318	29.438	176.817	649.22	-0.00048828	0.38867	0.091309	-147.085	123.9	205.86476	0.097559	0.43506	0.096973	-27.924	-50.26	1492.422	-0.95166	0.98047	-0.10986	NaN	NaN	NaN	NaN	NaN	NaN
2.32	-11.758	193.844	698.6	-0.06836	0.43496	0.091211	-108.5035	89.6283	198.26054	0.10586	0.43916	0.094824	-35.392	-132.971	1504.383	-1.123	1.1074	-0.089844	NaN	NaN	NaN	NaN	NaN	NaN
2.322	-7.419	178.4	745.25	-0.14336	0.48867	0.095702	-76.9313	94.295	194.8874	0.11524	0.43838	0.0917	-59.55	-199.651	1523.832	-1.1992	1.1738	-0.072266	NaN	NaN	NaN	NaN	NaN	NaN
2.324	1.132	162.032	796.47	-0.22031	0.55391	0.1082	-75.5871	73.417	173.9784	0.1249	0.44023	0.090235	-66.119	-241.893	1541.4412	-1.3213	1.3066	-0.041016	NaN	NaN	NaN	NaN	NaN	NaN
2.326	-4.007	134.087	855.07	-0.28896	0.62715	0.12695	-21.611	59.712	186.4252	0.13672	0.44092	0.089355	-72.731	-228.056	1553.27	-1.3677	1.3857	-0.021728	NaN	NaN	NaN	NaN	NaN	NaN
2.328	-31.699	97.343	877.36	-0.34912	0.70752	0.14648	-40.778	77.124	162.9511	0.14053	0.43848	0.087988	-60.18	-202.384	1531.052	-1.3755	1.4478	-0.0039063	NaN	NaN	NaN	NaN	NaN	NaN
2.33	-22.98	56.61	912.965	-0.3877	0.78682	0.17695	1.38	56.02	134.19501	0.14473	0.42647	0.0833	-82.8751	-171.366	1550.9791	-1.3257	1.4888	0.0024414	NaN	NaN	NaN	NaN	NaN	NaN
2.332	-19.256	20.5528	935.375	-0.41045	0.86455	0.20469	36.402	64.030349	144.9026	0.14785	0.41592	0.080176	-52.3036	-191.836	1568.906	-1.2852	1.5078	-0.0063477	NaN	NaN	NaN	NaN	NaN	NaN
2.334	-32.0559	-0.834299999999999	939.763	-0.41201	0.93018	0.22227	19.448	53.0472	124.3061	0.1498	0.40576	0.081445	-77.1361	-185.198	1578.661	-1.1719	1.5352	-0.017578	NaN	NaN	NaN	NaN	NaN	NaN
2.336	-34.215	-13.679	964.525	-0.39082	0.98379	0.22657	52.301	24.96	137.2953	0.15088	0.40039	0.08252	-70.2319	-184.514	1558.006	-1.0667	1.5472	-0.042968	NaN	NaN	NaN	NaN	NaN	NaN
2.338	-34.232	-27.85	963.131	-0.34766	1.0127	0.229	60.215	44.1048	120.1894	0.14805	0.38652	0.080371	-86.1717	-134.083	1491.78925	-0.95703	1.5273	-0.072266	NaN	NaN	NaN	NaN	NaN	NaN
2.34	-34.038	-20.348	983.459	-0.29287	1.0225	0.21621	36.96	22.8496	97.2754	0.15049	0.37735	0.081153	-81.555	-106.871	1478.0904	-0.80225	1.4263	-0.12207	NaN	NaN	NaN	NaN	NaN	NaN
2.342	-42.227	-7.075	1013.554	-0.23877	1.0156	0.20469	54.927	20.2588	121.2503	0.15478	0.36679	0.078809	-71.677	-78.538	1446.926	-0.71875	1.3438	-0.13916	NaN	NaN	NaN	NaN	NaN	NaN
2.344	-27.4216	7.97799999999999	1054.514	-0.18955	0.99726	0.18867	22.817	30.637	100.0876	0.16133	0.35557	0.077539	-45.991	-89.445	1436.645	-0.56982	1.147	-0.1626	NaN	NaN	NaN	NaN	NaN	NaN
2.346	-44.81	19.451	1099.368	-0.15488	0.97432	0.17715	23.872	21.1785	97.2201	0.1709	0.33984	0.073242	14.083	-116.323	1441.034	-0.48389	0.99561	-0.17798	NaN	NaN	NaN	NaN	NaN	NaN
2.348	-42.675	39.2223	1120.795	-0.13428	0.9458	0.16797	39.246	31.563	114.7773	0.18144	0.33428	0.072656	39.965	-170.574	1502.595	-0.41064	0.86084	-0.18555	NaN	NaN	NaN	NaN	NaN	NaN
2.35	-40.831	36.3924	1134.343	-0.13857	0.92627	0.15234	-12.908	26.2969	93.7411	0.19257	0.32637	0.074609	4.62	-221.912	1538.842	-0.32861	0.71875	-0.21094	NaN	NaN	NaN	NaN	NaN	NaN
2.352	-60.98	29.4076	1150.248	-0.15781	0.91914	0.15019	8.321	-6.7974	106.0183	0.1957	0.30605	0.073437	-10.616	-256.759	1621.8878	-0.28711	0.66016	-0.21631	NaN	NaN	NaN	NaN	NaN	NaN
2.354	-52.561	3.094	1184.921	-0.17812	0.91875	0.15371	-41.53	12.9977	103.8016	0.19189	0.27988	0.066016	1.56	-264.105	1650.408	-0.21875	0.56445	-0.25293	NaN	NaN	NaN	NaN	NaN	NaN
2.356	-56	-17.652	1169.318	-0.19336	0.92822	0.15537	-66.064	2.088	72.857	0.17822	0.24951	0.071289	54.694	-278.93	1740.036	-0.18261	0.51318	-0.27783	NaN	NaN	NaN	NaN	NaN	NaN
2.358	-42.69	-44.288	1154.324	-0.19385	0.9458	0.15674	-48.911	-10.4262	110.3476	0.15547	0.22413	0.069629	93.165	-269.003	1755.286	-0.17285	0.48438	-0.30664	NaN	NaN	NaN	NaN	NaN	NaN
2.36	-54.2438	-59.3576	1165.538	-0.17774	0.96094	0.15322	-105.4449	-2.118	105.499	0.12841	0.2001	0.068945	98.776	-269.177	1812.7291	-0.20166	0.5	-0.31836	NaN	NaN	NaN	NaN	NaN	NaN
2.362	-25.189	-68.667	1179.292	-0.13437	0.979	0.13945	-109.174	-30.84	99.131	0.096386	0.17978	0.07168	105.693	-252.98339	1829.2342	-0.24512	0.52588	-0.3125	NaN	NaN	NaN	NaN	NaN	NaN
2.364	-10.892	-72.113	1178.362	-0.077734	0.98643	0.1168	-111.7546	-9.9775	117.91	0.05957	0.16602	0.073731	64.563	-246.605	1912.781	-0.35303	0.63525	-0.29346	NaN	NaN	NaN	NaN	NaN	NaN
2.366	-7.11	-82.667	1165.139	-0.01123	0.98506	0.086035	-136.678	16.506	76.22258	0.020996	0.15771	0.081543	76.983	-226.9817	1961.921	-0.44825	0.74462	-0.26782	NaN	NaN	NaN	NaN	NaN	NaN
2.368	-14.871	-93.407	1193.468	0.052734	0.98047	0.045898	-105.25	3.597	100.1208	-0.013379	0.15518	0.088965	95.611	-231.721	2052.74	-0.54199	0.85938	-0.24609	NaN	NaN	NaN	NaN	NaN	NaN
2.37	-6.139	-97.537	1225.382	0.1082	0.96573	0.011523	-103.145	32.1589	104.5738	-0.043164	0.16104	0.098144	126.095	-232.452	2042.34	-0.65088	1.0063	-0.21826	NaN	NaN	NaN	NaN	NaN	NaN
2.372	13.223	-94.8576	1247.917	0.14873	0.95107	-0.027051	-96.4804	1.98	74.04119	-0.056836	0.17275	0.10674	118.129	-247.597	2070.923	-0.6875	1.0703	-0.21191	NaN	NaN	NaN	NaN	NaN	NaN
2.374	-30.791	-98.054	1258.241	0.16397	0.94483	-0.054394	-56.885	-7.3468	92.6571	-0.057715	0.17861	0.10605	69.379	-218.595	2052.049	-0.74268	1.166	-0.20752	NaN	NaN	NaN	NaN	NaN	NaN
2.376	-60.464	-95.513	1288.975	0.16172	0.94942	-0.069043	-64.5459	10.817	92.6374	-0.052734	0.1875	0.10889	59.076	-196.935	2110.414	-0.76855	1.2217	-0.21826	NaN	NaN	NaN	NaN	NaN	NaN
2.378	-82.282	-91.526	1322.357	0.14844	0.96533	-0.081543	-40.336	-10.575	106.438	-0.035449	0.19493	0.10703	66.236	-157.104	2146.649	-0.79883	1.2578	-0.22314	NaN	NaN	NaN	NaN	NaN	NaN
2.38	-77.475	-74.659	1326.105	0.11972	0.98994	-0.086719	-7.636	4.3213	127.835	-0.015625	0.20019	0.10889	72.51	-169.135	2217.706	-0.84717	1.313	-0.22412	NaN	NaN	NaN	NaN	NaN	NaN
2.382	-96.111	-78.979	1337.652	0.086133	1.0286	-0.090137	-25.958	10.304	89.8789	0.013672	0.20762	0.095996	102.903	-194.276	2216.639	-0.875	1.332	-0.2207	NaN	NaN	NaN	NaN	NaN	NaN
2.384	-109.611	-89.5136	1362.465	0.05293	1.0692	-0.090527	29.215	-4.536	87.118	0.045019	0.20528	0.092871	67.922	-230.284	2258.835	-0.93555	1.3887	-0.20898	NaN	NaN	NaN	NaN	NaN	NaN
2.386	-92.819	-111.3057	1393.753	0.023242	1.1109	-0.097365	29.231	19.5018	99.5855	0.068848	0.20313	0.09082	76.133	-224.2471	2259.411	-0.97535	1.4378	-0.19702	NaN	NaN	NaN	NaN	NaN	NaN
2.388	-111.342	-125.422	1414.092	-0.0029297	1.1523	-0.10254	28.832	-11.3792	91.0025	0.098046	0.19765	0.091504	20.223	-218.184	2275.1063	-1.0151	1.4849	-0.1875	NaN	NaN	NaN	NaN	NaN	NaN
2.39	-75.807	-135.815	1451.453	-0.015723	1.2025	-0.10185	57.886	-25.64	111.1748	0.11777	0.19082	0.086523	38.8	-190.065	2277.7566	-1.0591	1.5532	-0.18018	NaN	NaN	NaN	NaN	NaN	NaN
2.392	-84.491	-148.615	1488.163	-0.031738	1.2481	-0.10508	26.724	2.5527	100.7403	0.13535	0.18653	0.081055	16.701	-214.75	2304.6771	-1.0718	1.5825	-0.18311	NaN	NaN	NaN	NaN	NaN	NaN
2.394	-88.477	-151.351	1539.067	-0.052051	1.2867	-0.10352	39.156	-17.4092	92.6587	0.1543	0.1794	0.076172	0.117000000000004	-206.7733	2320.6843	-1.0781	1.627	-0.20313	NaN	NaN	NaN	NaN	NaN	NaN
2.396	-106.983	-143.675	1556.317	-0.083596	1.3228	-0.099807	78.5453	-2.0674	119.67	0.17773	0.17236	0.075684	-40.409	-215.42	2350.1387	-1.0611	1.644	-0.22583	NaN	NaN	NaN	NaN	NaN	NaN
2.398	-143.9233	-130.03	1556.101	-0.12744	1.354	-0.086426	40.317	8.741	87.0216	0.2	0.16797	0.06914	-1.417	-153.28	2349.166	-1.0332	1.6582	-0.25439	NaN	NaN	NaN	NaN	NaN	NaN
2.4	-142.247	-117.684	1583.931	-0.17813	1.3805	-0.071777	30.362	-5.2167	93.5083	0.23164	0.16611	0.062304	2.548	-120.403	2368.3112	-0.98975	1.6733	-0.29639	NaN	NaN	NaN	NaN	NaN	NaN
2.402	-173.153	-120.696	1606.872	-0.23145	1.401	-0.057031	17.715	42.567	86.924	0.26015	0.16377	0.053711	7.878	-58.397	2353.9114	-0.97314	1.6743	-0.31787	NaN	NaN	NaN	NaN	NaN	NaN
2.404	-146.532	-123.181	1616.623	-0.28418	1.4214	-0.04414	-22.02	25.8358	73.46181	0.29405	0.16064	0.044824	26.858	-69.2351	2344.2729	-0.94336	1.6738	-0.35205	NaN	NaN	NaN	NaN	NaN	NaN
2.406	-159.1979	-128.5488	1628.219	-0.32481	1.441	-0.03584	-13.059	13.3249	107.6019	0.33008	0.15479	0.031738	77.249	-40.336	2343.2875	-0.93311	1.6661	-0.37866	NaN	NaN	NaN	NaN	NaN	NaN
2.408	-125.65	-133.157	1648.344	-0.35498	1.4653	-0.037109	-66.92	29.487	83.69759	0.35527	0.15274	0.01582	53.435	-53.594	2345.962	-0.92188	1.6563	-0.4043	NaN	NaN	NaN	NaN	NaN	NaN
2.41	-103.082	-141.889	1666.748	-0.36738	1.4785	-0.046289	-83.4722	-13.181	78.7951	0.37754	0.1543	-0.0029296	41.849	-20.535	2374.682	-0.92041	1.6489	-0.44189	NaN	NaN	NaN	NaN	NaN	NaN
2.412	-116.473	-125.925	1676.964	-0.37529	1.4949	-0.054102	-69.997	9.2813	140.193	0.3959	0.16172	-0.017773	36.321	-13.602	2368.3697	-0.92676	1.6445	-0.45508	NaN	NaN	NaN	NaN	NaN	NaN
2.414	-90.581	-117.955	1697.213	-0.37803	1.5011	-0.059961	-101.617	7.9343	137.465	0.40117	0.17402	-0.028125	42.595	23.866	2371.282	-0.94287	1.6431	-0.47803	NaN	NaN	NaN	NaN	NaN	NaN
2.416	-87.755	-105.57964	1728.372	-0.38154	1.504	-0.073633	-121.914	-34.075	163.271	0.39307	0.19092	-0.043945	53.73	26.385	2369.5876	-0.97241	1.634	-0.49195	NaN	NaN	NaN	NaN	NaN	NaN
2.418	-62.885	-98.509	1758.168	-0.37988	1.5044	-0.086914	-116.618	-15.3663	183.437	0.37393	0.21377	-0.052246	76.066	61.331	2392.356	-1.0327	1.6157	-0.51318	NaN	NaN	NaN	NaN	NaN	NaN
2.42	-122.61	-107.843	1777.889	-0.37969	1.5094	-0.098337	-112.9234	-38.804	180.217	0.33125	0.23828	-0.069629	129.314	42.1478	2403.91	-1.084	1.6484	-0.44434	NaN	NaN	NaN	NaN	NaN	NaN
2.422	-110.664	-112.478	1798.198	-0.38428	1.5173	-0.10146	-90.4954	-27.7549	273.86	0.25742	0.2668	-0.082129	100.312	52.3549	2419.642	-1.1245	1.6528	-0.48193	NaN	NaN	NaN	NaN	NaN	NaN
2.424	-133.864	-135.6588	1833.346	-0.39131	1.52	-0.10303	-130.225	23.3185	324.911	0.15977	0.30664	-0.084473	88.458	17.499	2390.619	-1.1543	1.6797	-0.50391	NaN	NaN	NaN	NaN	NaN	NaN
2.426	-144.228	-143.9922	1829.782	-0.42168	1.5294	-0.086426	-114.876315	-8.884	366.699	0.048828	0.35449	-0.072754	72.307	23.153	2412.57	-1.1706	1.6857	-0.48169	NaN	NaN	NaN	NaN	NaN	NaN
2.428	-135.971	-151.081	1824.35	-0.4668	1.5371	-0.060547	-95.412	1.103	453.61	-0.060547	0.41582	-0.055957	121.207	37.8861	2402.483	-1.1982	1.6855	-0.46289	NaN	NaN	NaN	NaN	NaN	NaN
2.43	-144.365	-153.57	1830.441	-0.52568	1.5475	-0.032617	-111.126	34.242	504.473	-0.1456	0.48447	-0.036817	129.61	80.845	2403.755	-1.2363	1.6855	-0.46875	NaN	NaN	NaN	NaN	NaN	NaN
2.432	-111.161	-138.6513	1865.616	-0.58818	1.5614	0.009375	-46.439	58.972	617.12	-0.22178	0.55401	-0.011426	88.957	108.318	2318.96926	-1.2397	1.6802	-0.47314	NaN	NaN	NaN	NaN	NaN	NaN
2.434	-127.201	-132.658	1880.628	-0.65537	1.5802	0.048438	-43.678	128.7198	717.93	-0.28233	0.62832	0.0045898	57.883	138.513	2315.808	-1.2266	1.6523	-0.47461	NaN	NaN	NaN	NaN	NaN	NaN
2.436	-120.304	-115.35	1885.664	-0.71768	1.5995	0.090429	-91.569	135.16577	797.421	-0.34521	0.68848	0.016602	74.285	130.569	2272.0735	-1.2121	1.6286	-0.48413	NaN	NaN	NaN	NaN	NaN	NaN
2.438	-135.971	-122.404	1907.53	-0.77588	1.6177	0.12939	-47.652	137.386	927.695	-0.41943	0.7376	0.010547	14.782	136.5891	2287.69	-1.1948	1.5923	-0.49219	NaN	NaN	NaN	NaN	NaN	NaN
2.44	-143.509	-106.144	1912.331	-0.82353	1.6343	0.17295	-40.757	169.984	1040.2	-0.50898	0.77344	0.0053711	47.083	135.49	2238.868	-1.1738	1.5469	-0.49609	NaN	NaN	NaN	NaN	NaN	NaN
2.442	-151.455	-88.2975	1922.752	-0.8668	1.6516	0.20674	-31.38	111.2387	1162.71	-0.63672	0.80117	0.0041993	46.876	135.722	2237.47	-1.1694	1.522	-0.49951	NaN	NaN	NaN	NaN	NaN	NaN
2.444	-183.1065	-77.885	1922.836	-0.89492	1.6641	0.2333	21.216	80.1121	1278.01	-0.79531	0.83711	0.0021485	42.407	156.2508	2181.964	-1.1655	1.4829	-0.49951	NaN	NaN	NaN	NaN	NaN	NaN
2.446	-171.14	-77.011	1921.864	-0.9082	1.6719	0.25	-14.182	25.646	1313.8	-0.96436	0.89307	0.010742	-29.353	158.102	2176.115	-1.1653	1.4514	-0.49683	NaN	NaN	NaN	NaN	NaN	NaN
2.448	-204.9282	-87.554	1930.698	-0.91064	1.6802	0.26855	14.934	-53.8159	1371.78	-1.1268	0.96543	0.042676	-24.924	186.732	2082.592	-1.1748	1.4336	-0.49023	NaN	NaN	NaN	NaN	NaN	NaN
2.45	-172.876	-95.178	1931.061	-0.90186	1.6687	0.27187	12.86	-84.824	1405.79	-1.264	1.0513	0.090625	-11.894	176.935	2107.604	-1.1914	1.4199	-0.47656	NaN	NaN	NaN	NaN	NaN	NaN
2.452	-184.1664	-94.6948	1937.191	-0.88389	1.6595	0.27618	19.26	-155.897	1445.03	-1.3722	1.1383	0.14414	13.54	182.788	2044.307	-1.1958	1.4165	-0.46826	NaN	NaN	NaN	NaN	NaN	NaN
2.454	-161.797	-90.465	1942.991	-0.86357	1.6431	0.27539	37.299	-214.828	1519.52	-1.4281	1.2176	0.19551	0.74199999999999	157.8452	2057.3356	-1.1924	1.4219	-0.44922	NaN	NaN	NaN	NaN	NaN	NaN
2.456	-143.272	-85.123	1939.097	-0.8377	1.627	0.27276	0.855000000000004	-215.276	1512.45	-1.4429	1.272	0.23633	20.885	177.959	1986.6432	-1.1694	1.4282	-0.43115	NaN	NaN	NaN	NaN	NaN	NaN
2.458	-150.159	-80.096	1943.125	-0.80908	1.6138	0.26709	14.79	-249.072	1508.64	-1.4123	1.2967	0.26162	17.921	187.23031	1964.6925	-1.1499	1.4282	-0.42139	NaN	NaN	NaN	NaN	NaN	NaN
2.46	-136.848	-73.007	1964.928	-0.77998	1.5968	0.26309	14.403	-215.431	1594.16	-1.3692	1.2977	0.2582	29.729	223.17	1899.545	-1.1055	1.416	-0.41309	NaN	NaN	NaN	NaN	NaN	NaN
2.462	-154.631	-72.639	1975.868	-0.75078	1.5826	0.26357	-53.042	-189.231	1652.81	-1.3236	1.2872	0.2375	0.453000000000003	232.3355	1901.4108	-1.0718	1.3999	-0.40674	NaN	NaN	NaN	NaN	NaN	NaN
2.464	-97.431	-62.1892	1989.49	-0.71914	1.5737	0.25888	-24.165	-180.95	1709.88	-1.2889	1.2623	0.21416	23.269	257.359	1825.813	-1.0332	1.3789	-0.40332	NaN	NaN	NaN	NaN	NaN	NaN
2.466	-143.893	-53.5371	1979.827	-0.68389	1.5651	0.25703	-23.511	-131.43	1716.1	-1.2715	1.2402	0.1958	36.126	279.0533	1821.132	-0.99219	1.3516	-0.39453	NaN	NaN	NaN	NaN	NaN	NaN
2.468	-141.312	-30.714	1977.77	-0.64893	1.5591	0.25195	-31.827	-122.979	1699.16	-1.2544	1.196	0.18701	34.407	312.841	1751.8293	-0.96631	1.3384	-0.38428	NaN	NaN	NaN	NaN	NaN	NaN
2.47	-136.978	-25.797	1968.127	-0.6084	1.55	0.24893	17.144	-94.799	1727.17	-1.2301	1.149	0.17637	-2.225	317.345	1727.6582	-0.93311	1.3071	-0.36572	NaN	NaN	NaN	NaN	NaN	NaN
2.472	-126.525	-11.392	1940.059	-0.56992	1.5461	0.24346	-48.159	-45.505	1683.48	-1.1755	1.095	0.1748	17.59	333.654	1658.531	-0.90844	1.2839	-0.35327	NaN	NaN	NaN	NaN	NaN	NaN
2.474	-133.271	-25.0633	1930.342	-0.53789	1.5352	0.23525	-43.464	-75.956	1622.52	-1.0916	1.0455	0.17158	2.664	316.114	1623.198	-0.88281	1.2598	-0.33984	NaN	NaN	NaN	NaN	NaN	NaN
2.476	-128.977	-35.1562	1909.021	-0.5043	1.5387	0.22764	3.64399999999999	-120.51	1612.31	-0.98584	0.99951	0.16748	22.005	326.622	1566.01	-0.84375	1.2305	-0.31641	NaN	NaN	NaN	NaN	NaN	NaN
2.478	-109.138	-39.201	1913.597	-0.47461	1.5332	0.22119	-33.711	-215.311	1604.34	-0.86133	0.95606	0.15859	42.048	314.418	1531.8432	-0.82617	1.2109	-0.30469	NaN	NaN	NaN	NaN	NaN	NaN
2.48	-127.563	-18.651	1902.23	-0.4458	1.5307	0.21328	-22.701	-300.87	1629.89	-0.73633	0.90703	0.14102	56.545	329.955	1491.2006	-0.7749	1.1802	-0.27539	NaN	NaN	NaN	NaN	NaN	NaN
2.482	-123.092	-13.1566	1886.345	-0.42021	1.5298	0.20693	-24.607	-323.06	1651.33	-0.62383	0.84688	0.11641	27.641	341.553	1470.278	-0.73779	1.1504	-0.25537	NaN	NaN	NaN	NaN	NaN	NaN
2.484	-131.026	-15.4928	1889.891	-0.39795	1.5267	0.19912	-65.418	-338.016	1660.96	-0.54355	0.77247	0.082911	-0.479999999999997	347.462	1422.545	-0.69678	1.1216	-0.23975	NaN	NaN	NaN	NaN	NaN	NaN
2.486	-129.748	-13.1985	1874.74	-0.37383	1.5241	0.18799	-25.813	-319.47	1720.77	-0.50977	0.69141	0.041016	-40.707	329.9926	1367.476	-0.64404	1.0854	-0.21289	NaN	NaN	NaN	NaN	NaN	NaN
2.488	-134.801	-13.8064	1843.663	-0.35156	1.5176	0.1748	-60.261	-272.469	1752.91	-0.53779	0.62412	0.0014635	-59.18	326.2146	1327.216	-0.62061	1.061	-0.2041	NaN	NaN	NaN	NaN	NaN	NaN
2.49	-160.2719	-8.9688	1826.681	-0.32275	1.5077	0.16357	-69.363	-278.004	1796.36	-0.61563	0.57109	-0.020508	-57.634	319.71	1292.475	-0.57275	1.0195	-0.18018	NaN	NaN	NaN	NaN	NaN	NaN
2.492	-173.7437	-8.236	1844.484	-0.29717	1.4969	0.15283	-30.09	-264.798	1877.47	-0.72071	0.55742	-0.013476	-61.184	338.5777	1255.311	-0.54321	0.99148	-0.1648	NaN	NaN	NaN	NaN	NaN	NaN
2.494	-174.02761	1.495	1821.53	-0.27334	1.4841	0.14228	-90.631	-237.344	1889.26	-0.81768	0.57959	0.018557	-61.057	343.3129	1203.649	-0.52148	0.95508	-0.13281	NaN	NaN	NaN	NaN	NaN	NaN
2.496	-146.61	4.81672	1775.608	-0.25322	1.4702	0.13652	-99.012	-220.343	1915.41	-0.86963	0.63135	0.054688	-106.605	342.167	1120.7394	-0.49805	0.9209	-0.10938	NaN	NaN	NaN	NaN	NaN	NaN
2.498	-180.8681	-8.023	1732.373	-0.23389	1.4517	0.12451	-67.672	-198.978	1927.42	-0.86729	0.70263	0.080662	-102.577	330.357	1068.6358	-0.48682	0.90674	-0.090332	NaN	NaN	NaN	NaN	NaN	NaN
2.5	-153.309	8.165	1723.663	-0.21709	1.4329	0.12012	-95.388	-243.321	1896.2	-0.84102	0.77616	0.074516	-86.4065	323.112	1033.8406	-0.47021	0.87158	-0.062012	NaN	NaN	NaN	NaN	NaN	NaN
2.502	-151.145	18.451	1715.947	-0.20596	1.4203	0.11699	-51.976	-273.742	1932.93	-0.81368	0.84022	0.043274	-65.458	322.01	969.7307	-0.45752	0.84472	-0.038818	NaN	NaN	NaN	NaN	NaN	NaN
2.504	-149.34	42.575	1689.272	-0.19424	1.4047	0.10957	-81.002	-286.842	1963.91	-0.79034	0.88271	-0.0052579	-51.481	327.791	943.603	-0.44482	0.82275	-0.01709	NaN	NaN	NaN	NaN	NaN	NaN
2.506	-141.174	49.55532	1695.165	-0.18682	1.3895	0.10547	-103.399	-314.031	1997.61	-0.76904	0.90576	-0.060547	-55.032	353.431	872.2833	-0.42773	0.79297	0.0092773	NaN	NaN	NaN	NaN	NaN	NaN
2.508	-128.581	51.5221	1678.743	-0.17236	1.3755	0.097656	-100.585	-268.022	2060.11	-0.77081	0.91827	-0.086338	-84.275	329.866	851.1084	-0.41602	0.77539	0.025391	NaN	NaN	NaN	NaN	NaN	NaN
2.51	-114.776	42.4064	1672.195	-0.16543	1.3633	0.097462	-171.3395	-251.98	2073.8	-0.79731	0.93713	-0.094727	-85.9473	318.78	767.885	-0.39941	0.74512	0.044434	NaN	NaN	NaN	NaN	NaN	NaN
2.512	-134.021	43.987	1630.873	-0.15166	1.351	0.089356	-163.7753	-261.554	2118.56	-0.86023	0.96879	-0.092378	-115.264	302.4275	734.795	-0.37696	0.72168	0.058837	NaN	NaN	NaN	NaN	NaN	NaN
2.514	-132.475	39.755	1618.518	-0.14385	1.3362	0.083496	-137.606	-248.275	2158.43	-0.9451	1.0152	-0.078009	-63.67	325.447	695.012	-0.35352	0.69922	0.069824	NaN	NaN	NaN	NaN	NaN	NaN
2.516	-126.973	45.981	1594.132	-0.13281	1.3202	0.075	-170.5834	-284.121	2173.3	-1.0376	1.061	-0.055176	-63.64715	310.9561	696.356	-0.32666	0.66602	0.076172	NaN	NaN	NaN	NaN	NaN	NaN
2.518	-99.464	39.314	1559.923	-0.1333	1.3032	0.068359	-131.526	-288.511	2235.64	-1.1267	1.1048	-0.030913	-43.468	307.642	624.3607	-0.31006	0.64697	0.076172	NaN	NaN	NaN	NaN	NaN	NaN
2.52	-107.299	37.8701	1538.807	-0.12588	1.2849	0.059765	-139.854	-272.457	2241.73	-1.2041	1.137	-0.0069815	-72.5	277.1655	615.3634	-0.28857	0.61914	0.087402	NaN	NaN	NaN	NaN	NaN	NaN
2.522	-111.973	39.553	1526.299	-0.12549	1.2747	0.061914	-140.901	-271.565	2228.12	-1.2653	1.1702	0.0059127	-34.3158	277.865	523.229	-0.2688	0.59766	0.091553	NaN	NaN	NaN	NaN	NaN	NaN
2.524	-76.797	55.346	1523.228	-0.13291	1.2497	0.050195	-79.325	-244.199	2252.11	-1.3104	1.1926	0.0053711	-37.9455	251.1991	528.22	-0.25098	0.57568	0.099609	NaN	NaN	NaN	NaN	NaN	NaN
2.526	-91.323	76.49	1490.905	-0.13985	1.2371	0.050098	-99.823	-254.205	2239.39	-1.3433	1.2056	0.0039063	-13.924	265.28	488.454	-0.2251	0.5498	0.10498	NaN	NaN	NaN	NaN	NaN	NaN
2.528	-83.279	98.632	1477.927	-0.14307	1.2231	0.047363	-88.695	-260.71	2273.12	-1.366	1.2218	0.0015248	-27.785	239.935	496.137	-0.21338	0.53857	0.10254	NaN	NaN	NaN	NaN	NaN	NaN
2.53	-67.104	95.5742	1458.928	-0.15	1.208	0.04707	-68.798	-235.201	2312.93	-1.396	1.2386	-0.0093245	-21.43	273.067	427.0338	-0.18311	0.51514	0.10498	NaN	NaN	NaN	NaN	NaN	NaN
2.532	-56.31	103.062	1437.732	-0.15469	1.1966	0.044922	-126.411	-228.83	2328.41	-1.4261	1.2595	-0.013645	-38.02806	257.003	402.12091	-0.16186	0.50146	0.10474	NaN	NaN	NaN	NaN	NaN	NaN
2.534	-86.619	101.725	1397.136	-0.15859	1.1751	0.037891	-93.4	-189.971	2367.51	-1.4566	1.2919	-0.023392	-39.583	268.117	343.34	-0.14355	0.48438	0.10449	NaN	NaN	NaN	NaN	NaN	NaN
2.536	-116.756	100.075	1374.453	-0.16045	1.1599	0.033203	-86.85	-164.775	2361.94	-1.4878	1.3374	-0.023926	-79.081	239.48	360.5001	-0.10938	0.46826	0.10791	NaN	NaN	NaN	NaN	NaN	NaN
2.538	-89.909	95.075	1368.145	-0.15967	1.145	0.028809	-107.262	-178.668	2366.36	-1.5239	1.3798	-0.023269	-47.785	255.253	318.9986	-0.097168	0.45898	0.10938	NaN	NaN	NaN	NaN	NaN	NaN
2.54	-124.5969	100.747	1341.244	-0.16377	1.1284	0.028613	-96.337	-142.992	2410.31	-1.5656	1.4288	-0.011732	-77.4616	235.6234	324.846	-0.069824	0.44385	0.10449	NaN	NaN	NaN	NaN	NaN	NaN
2.542	-110.106	100.4778	1288.217	-0.16231	1.1105	0.021972	-89.104	-138.606	2415.7	-1.6144	1.4843	0.0011678	-57.473934	268.691	277.258	-0.054199	0.42993	0.10449	NaN	NaN	NaN	NaN	NaN	NaN
2.544	-121.4589	95.252	1263.348	-0.16504	1.0937	0.023926	-62.702	-136.219	2433.05	-1.6593	1.5382	0.0098973	-95.177	225.839	288.573	-0.033203	0.41992	0.104	NaN	NaN	NaN	NaN	NaN	NaN
2.546	-88.989	96.548	1248.184	-0.16455	1.0764	0.023633	-53.857	-127.494	2450.4	-1.6953	1.5859	0.022949	-68.032	219.903	242.221	-0.029785	0.4126	0.099609	NaN	NaN	NaN	NaN	NaN	NaN
2.548	-92.479	97.646	1233.56	-0.1626	1.0552	0.022949	-104.076	-167.485	2428.18	-1.7276	1.6268	0.030212	-101.863	173.873	244.645	-0.020996	0.40234	0.10205	NaN	NaN	NaN	NaN	NaN	NaN
2.55	-77.028	106.317	1189.317	-0.17315	1.0395	0.01416	-65.908	-180.597	2417.78	-1.7453	1.6604	0.038961	-91.942	181.548	175.34	-0.024902	0.40234	0.10254	NaN	NaN	NaN	NaN	NaN	NaN
2.552	-84.74	100.0353	1186.881	-0.18056	1.0228	0.010449	-88.128	-172.261	2399.74	-1.7512	1.6823	0.045949	-84.75993	134.1837	203.398	-0.024903	0.40186	0.10279	NaN	NaN	NaN	NaN	NaN	NaN
2.554	-77.839	99.5641	1177.64	-0.17784	1.0091	0.010449	-142.4971	-165.148	2370.27	-1.7429	1.6951	0.051541	-61.5648	135.224	190.893	-0.030762	0.40234	0.10498	NaN	NaN	NaN	NaN	NaN	NaN
2.556	-70.75	96.4095	1155.465	-0.17334	0.99297	0.0087891	-98.648	-125.446	2390.58	-1.7212	1.7017	0.056641	-84.24199	82.7769	205.162	-0.044922	0.39697	0.10742	NaN	NaN	NaN	NaN	NaN	NaN
2.558	-84.842	104.2247	1123.121	-0.16895	0.97607	0.01123	-141.5522	-114.673	2366.51	-1.7038	1.6992	0.058772	-80.8798	77.648	167.721	-0.047363	0.39209	0.10791	NaN	NaN	NaN	NaN	NaN	NaN
2.56	-89.161	102.26715	1107.617	-0.15752	0.95293	0.0023437	-151.323	-86.138	2380.4	-1.6878	1.6995	0.061679	-95.534	51.1142	153.5337	-0.059082	0.38672	0.11328	NaN	NaN	NaN	NaN	NaN	NaN
2.562	-87.1957	116.0837	1067.256	-0.14267	0.93018	-0.0015625	-124.9086	-38.7117	2399.58	-1.6819	1.6919	0.062753	-78.0398	52.391	162.636	-0.070068	0.38111	0.11328	NaN	NaN	NaN	NaN	NaN	NaN
2.564	-90.5291	122.313	1026.102	-0.12939	0.90518	-0.010937	-144.685	-42.132	2354.86	-1.6823	1.6921	0.063774	-69.343	37.541	173.657	-0.08252	0.37793	0.11475	NaN	NaN	NaN	NaN	NaN	NaN
2.566	-68.409	117.8894	1009.211	-0.11709	0.87793	-0.024511	-108.0262	-23.9392	2367.59	-1.6753	1.686	0.062988	-44.339	52.701	131.9353	-0.086426	0.37061	0.10254	NaN	NaN	NaN	NaN	NaN	NaN
2.568	-37.117	110.113901	986.079	-0.10254	0.84814	-0.034668	-124.3406	-3.108	2328.37	-1.6671	1.6718	0.07408	-45.475	31.7214	122.2847	-0.094727	0.36572	0.11279	NaN	NaN	NaN	NaN	NaN	NaN
2.57	-26.053	113.9409	969.25	-0.09336	0.829	-0.046094	-139.9421	-11.808	2275.51	-1.6583	1.6592	0.087311	-13.26	14.9186	103.7002	-0.099609	0.35156	0.10986	NaN	NaN	NaN	NaN	NaN	NaN
2.572	-36.248	111.428	937.066	-0.083399	0.80537	-0.056934	-80.75	0.221999999999998	2298.58	-1.6427	1.6422	0.099847	-30.43	-30.609	107.4119	-0.094483	0.34766	0.1084	NaN	NaN	NaN	NaN	NaN	NaN
2.574	-14.201	115.519	927.584	-0.073633	0.78311	-0.063575	-108.3451	-16.499	2270.26	-1.633	1.6223	0.11883	-9.051	-32.323	100.2218	-0.086914	0.33545	0.10693	NaN	NaN	NaN	NaN	NaN	NaN
2.576	-20.063	118.442	925.15	-0.057031	0.76143	-0.078907	-90.8962	-20.808	2259.95	-1.6167	1.5981	0.13184	-1.28400000000001	-29.4153	89.6965	-0.064453	0.31689	0.10205	NaN	NaN	NaN	NaN	NaN	NaN
2.578	-26.973	138.8677	903.642	-0.044922	0.74023	-0.089844	-61.665	-3.08	2263.35	-1.5987	1.5711	0.14027	38.172	13.983	96.8599	-0.050781	0.30469	0.10205	NaN	NaN	NaN	NaN	NaN	NaN
2.58	-35.654	143.105	856.852	-0.022656	0.72188	-0.099023	-118.4892	7.876	2208.61	-1.5769	1.5429	0.14704	20.784	17.5458	104.3136	-0.02002	0.27832	0.092773	NaN	NaN	NaN	NaN	NaN	NaN
2.582	-39.984	149.101	831.203	-0.0067383	0.70528	-0.1127	-77.552	30.7499	2214.51	-1.5491	1.5238	0.15557	-10.501	9.1913	108.6378	0.0029297	0.25561	0.084229	NaN	NaN	NaN	NaN	NaN	NaN
2.584	-44.054	141.222	830.071	0.010449	0.68731	-0.1209	-94.102	46.823	2164.5	-1.5102	1.5026	0.16211	-11.633	0.2447938	74.17	0.032715	0.23291	0.073242	NaN	NaN	NaN	NaN	NaN	NaN
2.586	-67.4111	135.155	811.358	0.028027	0.66689	-0.13008	-81.396	57.1476	2088.39	-1.4741	1.4849	0.1665	-12.004	10.1846	75.713	0.066406	0.19238	0.064453	NaN	NaN	NaN	NaN	NaN	NaN
2.588	-48.089	123.7149	772.33	0.04248	0.64893	-0.14014	-35.57	84.832	2105.02	-1.4285	1.4622	0.16709	-11.407	11.4356	91.1728	0.083008	0.1748	0.056641	NaN	NaN	NaN	NaN	NaN	NaN
2.59	-48.976	114.081	758.256	0.056836	0.63047	-0.14932	-78.351	90.6937	2064.37	-1.3828	1.4443	0.16592	-24.376	24.2108	141.275	0.11182	0.13379	0.054688	NaN	NaN	NaN	NaN	NaN	NaN
2.592	-33.325	104.837	736.102	0.07334	0.61298	-0.15263	-52.412	89.714	2055.77	-1.3394	1.4228	0.16396	-29.041	25.1233	120.003	0.13525	0.10571	0.055176	NaN	NaN	NaN	NaN	NaN	NaN
2.594	-55.005	128.789	717.475	0.088184	0.59306	-0.15771	-28.346	97.9409	2014.77	-1.2881	1.4018	0.15791	-26.58	23.9228	108.287	0.1543	0.076172	0.049316	NaN	NaN	NaN	NaN	NaN	NaN
2.596	-38.898	136.178	682.018	0.10381	0.575	-0.16075	-77.382	101.861	1926.354	-1.2329	1.3813	0.15869	-34.199	31.1655	73.848	0.17969	0.037109	0.051758	NaN	NaN	NaN	NaN	NaN	NaN
2.598	-37.961	158.3633	670.799	0.11963	0.56299	-0.16357	-47.475	114.3973	1904.63	-1.1766	1.3612	0.15879	-46.472	31.075	94.126	0.19971	0.0080568	0.046631	NaN	NaN	NaN	NaN	NaN	NaN
2.6	-54.657	160.9399	665.119	0.13271	0.53926	-0.16485	-62.266	122.694	1856.67	-1.1166	1.3352	0.16093	-41.668	46.90474	87.767	0.21924	-0.01709	0.045898	NaN	NaN	NaN	NaN	NaN	NaN
2.602	-49.848	152.949	655.704	0.14492	0.51768	-0.1706	-113.11	92.7933	1807.699	-1.0475	1.3121	0.15742	-38.475	46.458	101.051	0.2373	-0.04834	0.036133	NaN	NaN	NaN	NaN	NaN	NaN
2.604	-58.111	128.77452	640.576	0.15352	0.49853	-0.17685	-97.555	73.883	1814.51	-0.96982	1.2905	0.13515	-55.474	46.5913	67.0914	0.24463	-0.067871	0.035645	NaN	NaN	NaN	NaN	NaN	NaN
2.606	-57.451	124.115653	636.418	0.16504	0.48291	-0.17803	-126.2153	55.2198	1754.104	-0.89502	1.2603	0.12939	-86.3181	26.2326	115.303	0.25879	-0.092773	0.027344	NaN	NaN	NaN	NaN	NaN	NaN
2.608	-67.3215	131.8072	609.298	0.17041	0.46289	-0.18164	-114.9283	51.345	1709.844	-0.82344	1.2246	0.11084	-69.565	17.04	93.5015	0.26221	-0.11157	0.025879	NaN	NaN	NaN	NaN	NaN	NaN
2.61	-54.398	130.0616	584.893	0.17539	0.44951	-0.1872	-98.102	67.321	1696.32	-0.76358	1.1846	0.093361	-78.556	7.4924	120.776	0.26318	-0.12061	0.023438	NaN	NaN	NaN	NaN	NaN	NaN
2.612	-56.846	125.5742	556.688	0.17803	0.43838	-0.18809	-156.6392	73.228	1620.528	-0.7124	1.1437	0.080079	-66.663	41.7754	102.498	0.25684	-0.13281	0.017578	NaN	NaN	NaN	NaN	NaN	NaN
2.614	-54.016	124.2697	544.348	0.17803	0.42549	-0.19043	-94.221	84.825	1597.14	-0.67295	1.1063	0.0625	-58.7404	51.8668	131.292	0.25049	-0.13672	0.01709	NaN	NaN	NaN	NaN	NaN	NaN
2.616	-27.468	134.90742	520.466	0.1794	0.41748	-0.19228	-104.195	110.416	1554	-0.64209	1.0728	0.054199	-51.605	61.353	116.332	0.22705	-0.12793	0.019531	NaN	NaN	NaN	NaN	NaN	NaN
2.618	-24.825	122.1901	516.042	0.17871	0.41309	-0.19629	-111.2207	127.186	1491.351	-0.61797	1.0431	0.047851	-38.967	30.1688	133.746	0.20459	-0.11938	0.0087891	NaN	NaN	NaN	NaN	NaN	NaN
2.62	-24.223	115.467	524.435	0.17549	0.40195	-0.19717	-45.311	121.674	1500.22	-0.60313	1.0196	0.045899	-23.47	6.261	75.166	0.18506	-0.10449	0.013672	NaN	NaN	NaN	NaN	NaN	NaN
2.622	-8.028	110.15	514.172	0.17071	0.40205	-0.19932	-90.614	136.041	1426.513	-0.5875	0.99843	0.04707	-45.857	-18.0409	116.5505	0.14355	-0.078613	0.014648	NaN	NaN	NaN	NaN	NaN	NaN
2.624	-0.857999999999997	121.8306	492.397	0.16094	0.3997	-0.19697	-80.917	141.851	1386.432	-0.5708	0.97822	0.045215	-26.576	-3.021	105.411	0.12695	-0.060547	0.01709	NaN	NaN	NaN	NaN	NaN	NaN
2.626	-20.292	119.2181	459.774	0.1501	0.39629	-0.1999	-65.587	163.9831	1361.727	-0.55664	0.95703	0.046387	-0.826000000000001	-9.2898	137.724	0.085938	-0.018555	0.025879	NaN	NaN	NaN	NaN	NaN	NaN
2.628	-14.515	122.595	467.327	0.13867	0.39307	-0.19873	-88.876	175.6171	1272.064	-0.53037	0.94092	0.048535	18.059	18.6696	108	0.059326	0.016113	0.035645	NaN	NaN	NaN	NaN	NaN	NaN
2.63	-12.218	132.304	446.097	0.12647	0.39678	-0.19522	-35.654	158.488	1257.76	-0.50625	0.91767	0.045117	-1.512	4.569	124.335	0.035156	0.053223	0.047852	NaN	NaN	NaN	NaN	NaN	NaN
2.632	-27.193	148.473	431.611	0.11435	0.40117	-0.19297	-54.826	171.324	1216.81	-0.48047	0.89424	0.037696	-6.467	16.0801	104.469	0.0087891	0.091797	0.068359	NaN	NaN	NaN	NaN	NaN	NaN
2.634	-38.768	143.235	405.044	0.098729	0.40703	-0.18984	-73.379	169.242	1168.614	-0.45635	0.86621	0.032617	-18.777	-8.2253	126.2551	0.0039063	0.11035	0.075684	NaN	NaN	NaN	NaN	NaN	NaN
2.636	-32.681	121.1753	403.651	0.087792	0.40977	-0.18828	-1.519	169.688	1174.35	-0.43164	0.84082	0.023926	-0.855000000000004	6.547	105.6733	0.0043945	0.14502	0.085938	NaN	NaN	NaN	NaN	NaN	NaN
2.638	-18.233	100.826	403.286	0.074707	0.41553	-0.18555	-28.502	183.4183	1095.37	-0.40713	0.81494	0.015527	-6.612	-7.613	110.385	0.015869	0.16406	0.09082	NaN	NaN	NaN	NaN	NaN	NaN
2.64	-19.108	92.574	372.313	0.061915	0.41328	-0.17685	-0.798999999999999	145.815	1074.15	-0.3878	0.78506	0.0033203	10.776	17.9598	100.6483	0.030762	0.1792	0.089355	NaN	NaN	NaN	NaN	NaN	NaN
2.642	-20.3	88.566	343.95	0.051956	0.41807	-0.17832	11.719	139.85	1063.2	-0.36552	0.75733	-0.0037109	-5.012	-21.042	105.5464	0.053223	0.18799	0.091309	NaN	NaN	NaN	NaN	NaN	NaN
2.644	-17.759	104.1953	349.044	0.038285	0.41768	-0.17442	-20.951	159.04	990.388	-0.33945	0.73047	-0.0072266	-2.456	-3.181	83.463	0.0625	0.19043	0.086914	NaN	NaN	NaN	NaN	NaN	NaN
2.646	-21.356	112.1434	340.178	0.025883	0.41992	-0.17236	25.601	153.357	972.07	-0.31689	0.70117	-0.020508	-40.793	-29.6619	108.598	0.086426	0.19482	0.091797	NaN	NaN	NaN	NaN	NaN	NaN
2.648	-37.963	112.1821	330.617	0.010254	0.41748	-0.16895	-3.681	186.918	930.253	-0.29561	0.67764	-0.032227	-28.792	-14.3103	127.744	0.10034	0.19312	0.088867	NaN	NaN	NaN	NaN	NaN	NaN
2.65	-58.989	105.917	321.447	-0.0043996	0.41904	-0.162	-22.44	179.8812	878.779	-0.27334	0.64854	-0.043848	-75.055	-43.3351	166.866	0.10791	0.19482	0.083496	NaN	NaN	NaN	NaN	NaN	NaN
2.652	-44.46	104.5222	329.152	-0.020606	0.42119	-0.15596	-2.859	172.5105	881.24	-0.25381	0.62041	-0.053223	-30.966	-22.0446	178.182	0.1084	0.19336	0.077637	NaN	NaN	NaN	NaN	NaN	NaN
2.654	-46.733	108.4435	320.031	-0.030783	0.4212	-0.15204	-52.1005	212.1461	821.579	-0.2418	0.59365	-0.070898	-29.332	-51.849	196.825	0.104	0.19727	0.072266	NaN	NaN	NaN	NaN	NaN	NaN
2.656	-62.584	96.522	309.077	-0.041019	0.42636	-0.1455	-19.159	194.2195	803.94	-0.23633	0.56543	-0.081055	-46.232	-65.6673	238.785	0.083496	0.20801	0.064941	NaN	NaN	NaN	NaN	NaN	NaN
2.658	-55.034	79.0017	275.558	-0.048828	0.42725	-0.14111	-25.806	211.423	797.11	-0.23213	0.54268	-0.090918	-103.4697	-117.2209	268.559	0.0625	0.22436	0.060059	NaN	NaN	NaN	NaN	NaN	NaN
2.66	-32.791	72.7022	252.46	-0.05087	0.4209	-0.14122	-51.614	215.3538	716.156	-0.22998	0.52588	-0.097852	-110.43	-116.914	306.677	0.038574	0.24561	0.053223	NaN	NaN	NaN	NaN	NaN	NaN
2.662	-36.422	78.8707	234.929	-0.055296	0.42421	-0.13848	-11.566	183.191	696.02	-0.22295	0.50986	-0.10567	-84.873	-151.0427	335.819	-0.0087891	0.27539	0.039551	NaN	NaN	NaN	NaN	NaN	NaN
2.664	-41.698	65.5123	224.858	-0.053695	0.41648	-0.1346	-32.659	222.61	656.425	-0.21455	0.49941	-0.1086	-80.577	-121.83188	431.153	-0.038086	0.29639	0.029785	NaN	NaN	NaN	NaN	NaN	NaN
2.666	-24.713	64.3388	239.724	-0.044922	0.41054	-0.13593	-52.1882	193.8335	619.622	-0.19922	0.48633	-0.11084	-95.695	-125.5627	535.26	-0.094238	0.35498	0.029297	NaN	NaN	NaN	NaN	NaN	NaN
2.668	-11.857	64.574	232.117	-0.038086	0.40088	-0.13525	-13.731	165.4387	638.18	-0.17402	0.48145	-0.1165	-93.2263	-86.2449	648.75	-0.1377	0.40259	0.035157	NaN	NaN	NaN	NaN	NaN	NaN
2.67	-7.463	68.9125	223.741	-0.030203	0.39007	-0.14105	-54.334	194.855	596.837	-0.14326	0.47021	-0.12129	-77.834	-54.6769	761.01	-0.17871	0.45654	0.04248	NaN	NaN	NaN	NaN	NaN	NaN
2.672	-30.214	67.4644	230.534	-0.018019	0.38142	-0.13907	-25.981	157.919	582.52	-0.11826	0.45889	-0.12871	-57.719	4.0508	978.87	-0.22803	0.5293	0.054199	NaN	NaN	NaN	NaN	NaN	NaN
2.674	-18.627	54.442	239.06	-0.0064539	0.36922	-0.13928	-11.282	164.2659	568.25	-0.097069	0.44297	-0.13789	-64.268	78.193	1188.22	-0.25049	0.56201	0.058594	NaN	NaN	NaN	NaN	NaN	NaN
2.676	-0.877000000000002	33.184	224.88	0.002329	0.3493	-0.14856	-33.1568	167.3759	525.43	-0.07373	0.42578	-0.13965	-0.131	159.189	1431.13	-0.29639	0.62646	0.064453	NaN	NaN	NaN	NaN	NaN	NaN
2.678	-15.93	35.284	195.19	0.0097656	0.33838	-0.1499	3.757	129.11669	523.25	-0.052832	0.40606	-0.1416	26.172	171.857	1551.38	-0.32739	0.66528	0.063965	NaN	NaN	NaN	NaN	NaN	NaN
2.68	-28.053	33.665	186.645	0.018321	0.32475	-0.1547	-16.593	174.107	469.75	-0.046094	0.3875	-0.14825	1.716	137.928	1675.58	-0.37061	0.69189	0.047852	NaN	NaN	NaN	NaN	NaN	NaN
2.682	-0.946000000000002	24.64	208.388	0.023202	0.30775	-0.16126	-16.399	148.615	432.74	-0.037891	0.37227	-0.14785	16.101	99.369	1696.04	-0.45801	0.70947	-0.003418	NaN	NaN	NaN	NaN	NaN	NaN
2.684	4.997	11.306	223.39	0.026289	0.29675	-0.16627	19.167	118.262	447.63	-0.032715	0.35879	-0.14375	42.135	41.8206	1728.3	-0.52148	0.71582	-0.037598	NaN	NaN	NaN	NaN	NaN	NaN
2.686	-12.293	2.651	203.839	0.032564	0.28599	-0.17025	10.24	138.852	412.066	-0.025879	0.34961	-0.13867	99.9856	-36.8904	1668.89	-0.70117	0.75586	-0.099609	NaN	NaN	NaN	NaN	NaN	NaN
2.688	-2.102	-22.478	200.876	0.037109	0.2793	-0.1709	12.725	92.627	392.31	-0.02461	0.33682	-0.13154	101.1434	-155.166	1658.24	-0.85986	0.8164	-0.11377	NaN	NaN	NaN	NaN	NaN	NaN
2.69	15.818	-25.911	224.681	0.05326	0.27771	-0.17541	18.786	123.4706	363.11	-0.025196	0.33428	-0.12481	119.959	-229.875	1549.78	-1.0366	0.90283	-0.092773	NaN	NaN	NaN	NaN	NaN	NaN
2.692	1.659	-33.066	245.66	0.059314	0.26937	-0.18506	23.077	153.4223	301.315	-0.022852	0.33037	-0.11738	144.792	-300.451	1524.41	-1.2612	1.0532	-0.003418	NaN	NaN	NaN	NaN	NaN	NaN
2.694	-10.175	-45.847	251.158	0.064093	0.26648	-0.19541	28.258	120.299	296.93	-0.02168	0.32451	-0.10606	137.728	-288.25	1440.93	-1.353	1.1392	0.052246	NaN	NaN	NaN	NaN	NaN	NaN
2.696	-1.95	-63.542	258.458	0.061987	0.2652	-0.2127	-3.624	147.299	272.16	-0.018555	0.32324	-0.10107	68.08315	-246.124	1414.07	-1.459	1.2949	0.18311	NaN	NaN	NaN	NaN	NaN	NaN
2.698	-1.23	-63.377	316.357	0.045898	0.27051	-0.22314	-3.296	105.852515	235.807	-0.0098633	0.31533	-0.095313	110.4897	-150.213	1347.06	-1.4421	1.3841	0.2788	NaN	NaN	NaN	NaN	NaN	NaN
2.7	-11.335	-47.55	366.297	0.022677	0.27904	-0.24041	17.937	78.043	262.61	-0.0050781	0.31328	-0.092676	92.5251	-72.547	1403.07	-1.3594	1.4395	0.34521	NaN	NaN	NaN	NaN	NaN	NaN
2.702	-20.071	-17.952	414.089	-0.015044	0.29827	-0.24997	-3.126	94.526	259.229	0.0023438	0.30703	-0.087207	64.51	19.727	1434.03	-1.1504	1.4375	0.354	NaN	NaN	NaN	NaN	NaN	NaN
2.704	-6.10599999999999	11.204	461.041	-0.066192	0.32282	-0.25798	5.443	34.507	234.59	0.014258	0.29443	-0.085352	26.25	61.22	1500.75	-1.0254	1.4023	0.33008	NaN	NaN	NaN	NaN	NaN	NaN
2.706	9.22499999999999	51.302	536.755	-0.13456	0.35908	-0.2718	-23.148	55.422	211.86	0.021484	0.28662	-0.084961	5.506	87.479	1474.32	-0.74756	1.2661	0.24023	NaN	NaN	NaN	NaN	NaN	NaN
2.708	17.188	91.327	636.696	-0.20996	0.40527	-0.2832	-46.256	73.0857	155.888	0.028906	0.27402	-0.083203	-50.105	67.473	1463.79	-0.58057	1.1323	0.16211	NaN	NaN	NaN	NaN	NaN	NaN
2.71	14.665	109.208	749.394	-0.30218	0.46135	-0.30046	-9.971	32.1402	145.734	0.03584	0.26328	-0.087304	-23.614	19.681	1446.69	-0.45557	0.99756	0.089844	NaN	NaN	NaN	NaN	NaN	NaN
2.712	41.043	128.067	864.4549	-0.4153	0.52291	-0.31385	-46.814	71.5163	132.802	0.044433	0.24843	-0.086914	-45.5642	-115.656	1497.1	-0.36426	0.84961	0.019531	NaN	NaN	NaN	NaN	NaN	NaN
2.714	27.635	142.712	963.5622	-0.53744	0.60704	-0.31825	-48.112	26.272	124.797	0.049219	0.23506	-0.08125	-60.319	-244.79	1538.78	-0.3374	0.80127	-0.0058594	NaN	NaN	NaN	NaN	NaN	NaN
2.716	4.63200000000001	155.919	1038.537	-0.67473	0.71872	-0.30882	-39.648	-16.8054	129.028	0.056641	0.22168	-0.082031	-119.733	-398.52	1608.58	-0.30615	0.73096	-0.023926	NaN	NaN	NaN	NaN	NaN	NaN
2.718	-18.871	130.412	1121.336	-0.80176	0.84766	-0.2793	-69.16147	26.01	139.014	0.061621	0.20645	-0.079688	-155.121	-454.29	1632.39	-0.28491	0.71851	-0.026612	NaN	NaN	NaN	NaN	NaN	NaN
2.72	-2.408	98.163	1201.747	-0.91222	0.99934	-0.23481	-50.252	-9.436	140.159	0.061035	0.19092	-0.081347	-211.553	-470.37	1713.87	-0.25488	0.71924	-0.021484	NaN	NaN	NaN	NaN	NaN	NaN
2.722	39.927	47.062	1260.572	-0.99359	1.151	-0.1792	-33.101	23.6567	135.502	0.061817	0.17647	-0.08291	-228.343	-379.65	1787.36	-0.21143	0.75	-0.03125	NaN	NaN	NaN	NaN	NaN	NaN
2.724	29.528	-7.073	1288.305	-1.0329	1.2903	-0.13906	-68.5863	48.511	101.4715	0.058496	0.16465	-0.084473	-227.85	-330.395	1869.84	-0.18262	0.78125	-0.04248	NaN	NaN	NaN	NaN	NaN	NaN
2.726	30.908	-53.45	1308.482	-1.0178	1.3955	-0.11598	-44.952	10.9061	85.96	0.052734	0.14453	-0.085449	-222.196	-253.963	1982.37	-0.14551	0.854	-0.081055	NaN	NaN	NaN	NaN	NaN	NaN
2.728	38.325	-89.1763	1329.587	-0.95166	1.4634	-0.10986	-42.657	62.851	88.198	0.04834	0.13467	-0.093945	-211.742	-241.351	2089.42	-0.13794	0.92041	-0.10132	NaN	NaN	NaN	NaN	NaN	NaN
2.73	16.84	-91.332	1333.688	-0.85156	1.4779	-0.13122	-39.909	27.7163	79.503	0.046289	0.13027	-0.086426	-180.431	-194.74888	2172.7	-0.15381	0.98926	-0.11914	NaN	NaN	NaN	NaN	NaN	NaN
2.732	-17.5003	-97.794	1344.549	-0.72035	1.4525	-0.16343	-40.676	-22.5298	115.912347	0.042383	0.11933	-0.091504	-201.689	-145.383	2156.99	-0.21777	1.0859	-0.11523	NaN	NaN	NaN	NaN	NaN	NaN
2.734	-41.245	-95.356	1342.6067	-0.58674	1.3978	-0.20017	-42.8	13.058	104.741	0.04834	0.11416	-0.09541	-216.768	-63.14	2148.37	-0.2666	1.1372	-0.094727	NaN	NaN	NaN	NaN	NaN	NaN
2.736	-47.4758	-69.411	1376.101	-0.46313	1.3156	-0.24393	-9.322	-39.6576	98.763	0.046387	0.10742	-0.099121	-196.359	-54.58	2121.76	-0.39404	1.2231	-0.062012	NaN	NaN	NaN	NaN	NaN	NaN
2.738	-72.613	-40.213	1404.398	-0.36084	1.2173	-0.27783	-22.388	3.4872	113.957	0.048145	0.097169	-0.10391	-175.104	-88.496	2145.84	-0.52881	1.2915	-0.04541	NaN	NaN	NaN	NaN	NaN	NaN
2.74	-102.532	-0.146500000000001	1401.511	-0.29842	1.1232	-0.30371	-11.49	40.0681	105.6936	0.047071	0.082715	-0.1084	-119.153	-186.055	2160.68	-0.59082	1.3242	-0.047852	NaN	NaN	NaN	NaN	NaN	NaN
2.742	-113.132	27.1106	1388.173	-0.24931	1.0401	-0.30791	6.912	-10.92021	107.316	0.04043	0.075293	-0.11504	-117.042	-246.581	2210.3	-0.69971	1.3755	-0.066406	NaN	NaN	NaN	NaN	NaN	NaN
2.744	-91.0223	45.254	1387.11	-0.22431	0.95887	-0.30635	-10.578	37.91	117.4618	0.030078	0.062109	-0.12061	-113.558	-289.479	2253.82	-0.77343	1.4165	-0.081055	NaN	NaN	NaN	NaN	NaN	NaN
2.746	-87.0775	44.816	1368.8137	-0.20088	0.88193	-0.29502	0.305999999999997	14.7088	101.0781	0.013184	0.053223	-0.12402	-111.753	-282.857	2322.01	-0.84082	1.4629	-0.10547	NaN	NaN	NaN	NaN	NaN	NaN
2.748	-96.15	16.294	1364.768	-0.18115	0.81445	-0.2832	1.769	-15.717644	118.7691	-0.0062498	0.045801	-0.12578	-100.627	-273.714	2384.05	-0.92334	1.5396	-0.12842	NaN	NaN	NaN	NaN	NaN	NaN
2.75	-66.6	-30.466	1342.296	-0.154	0.76494	-0.27002	-10.612	41.1948	113.318	-0.026074	0.043555	-0.12529	-83.833	-277.722	2497.13	-0.95068	1.5825	-0.13428	NaN	NaN	NaN	NaN	NaN	NaN
2.752	-47.893	-73.732	1345.52	-0.11954	0.73526	-0.26699	-8.48099999999999	-18.54528	114.2929	-0.041309	0.04668	-0.12529	-34.359	-301.337	2547.29	-0.98975	1.6704	-0.14941	NaN	NaN	NaN	NaN	NaN	NaN
2.754	-35.935	-107.463	1373.8579	-0.064457	0.71494	-0.2752	-20.952	14.1862	104.1629	-0.051465	0.051562	-0.11719	-16.771	-283.37	2639.1	-1.0015	1.7329	-0.15747	NaN	NaN	NaN	NaN	NaN	NaN
2.756	-28.695	-151.3883	1395.759	-0.011623	0.7043	-0.29922	-15.005	31.4447	92.8538	-0.055176	0.061523	-0.11963	-24.2838	-222.122	2652.74	-1.0098	1.7852	-0.16406	NaN	NaN	NaN	NaN	NaN	NaN
2.758	-40.631	-185.1557	1401.469	0.035645	0.70313	-0.32813	-16.286	-13.8663	99.7041	-0.043652	0.072559	-0.11856	-60.011	-159.347	2699.01	-1.0405	1.8247	-0.15576	NaN	NaN	NaN	NaN	NaN	NaN
2.76	-45.386	-209.579	1411.934	0.061035	0.71601	-0.34512	-32.384	39.184	112.8992	-0.031055	0.081055	-0.12266	-33.243	-111.657	2670.74	-1.0718	1.8345	-0.146	NaN	NaN	NaN	NaN	NaN	NaN
2.762	-71.6601	-204.251	1437.8955	0.052636	0.74492	-0.34609	-31.178	26.28574	106.7409	-0.0080078	0.088867	-0.12148	-71.763	-110.315	2696.4	-1.1738	1.8379	-0.11865	NaN	NaN	NaN	NaN	NaN	NaN
2.764	-29.35	-196.168	1470.6248	0.019824	0.80117	-0.3375	-34.956	0.42239	119.566	0.0098631	0.09502	-0.12402	-68.377	-113.189	2668.62	-1.2671	1.8443	-0.087158	NaN	NaN	NaN	NaN	NaN	NaN
2.766	3.405	-169.66	1489.4123	-0.029981	0.86211	-0.31094	-48.514	45.8313	121.82	0.037598	0.096191	-0.12842	-115.648	-114.086	2673.31	-1.3667	1.8481	-0.043945	NaN	NaN	NaN	NaN	NaN	NaN
2.768	52.365	-126.337	1501.9809	-0.093262	0.92627	-0.26855	-56.308	-20.47	113.9231	0.067969	0.090723	-0.13183	-137.346	-68.24	2639.46	-1.498	1.8691	0.010742	NaN	NaN	NaN	NaN	NaN	NaN
2.77	66.934	-100.0992	1523.2893	-0.16308	0.98752	-0.23418	-57.304	-21.87697	136.389	0.094434	0.08584	-0.13515	-195.877	-34.11	2646.73	-1.564	1.8735	0.039063	NaN	NaN	NaN	NaN	NaN	NaN
2.772	95.712	-76.418	1543.192	-0.23594	1.0512	-0.2003	-65.5484	-0.193000000000001	121.699	0.12139	0.083887	-0.13555	-178.157	8.94999999999999	2602.35	-1.6831	1.897	0.072266	NaN	NaN	NaN	NaN	NaN	NaN
2.774	119.396	-67.802	1564.508	-0.30156	1.1148	-0.18115	-45.806	-48.189	106.2053	0.14424	0.07959	-0.13741	-193.405	15.88	2647.05	-1.7666	1.9131	0.095215	NaN	NaN	NaN	NaN	NaN	NaN
2.776	144.5409	-66.658	1574.4658	-0.35342	1.1741	-0.16611	-46.916	16.869	112.7321	0.16943	0.068359	-0.14111	-172.187	44.6	2674.36	-1.8359	1.9238	0.10791	NaN	NaN	NaN	NaN	NaN	NaN
2.778	158.134	-86.047	1592.1259	-0.39014	1.2251	-0.15723	-54.258	8.476	97.116	0.18574	0.058789	-0.14765	-177.989	39.37	2735.33	-1.9121	1.9531	0.12451	NaN	NaN	NaN	NaN	NaN	NaN
2.78	123.8358	-110.385	1589.828	-0.39492	1.2685	-0.15879	-42.017	-23.3877	106.66173	0.19541	0.04707	-0.15078	-183.326	66.57	2731.43	-1.9507	1.9673	0.12988	NaN	NaN	NaN	NaN	NaN	NaN
2.782	118.5012	-118.4743	1598.336	-0.39267	1.295	-0.16806	-47.333	26.5059	103.5564	0.19893	0.038867	-0.14883	-216.638	53.53	2757.82	-2.0083	2.0005	0.14746	NaN	NaN	NaN	NaN	NaN	NaN
2.784	97.226	-126.349	1612.219	-0.37783	1.313	-0.18721	-30.858	-9.5777	94.0473	0.19414	0.03291	-0.14805	-185.495	58.43	2718.05	-2.0378	2.0119	0.1665	NaN	NaN	NaN	NaN	NaN	NaN
2.786	73.054	-147.626	1647.476	-0.35801	1.3166	-0.20566	-20.852	7.55431	146.227	0.18701	0.033203	-0.14404	-186.578	12.47	2721.74	-2.064	2.0278	0.18457	NaN	NaN	NaN	NaN	NaN	NaN
2.788	67.122	-177.062	1687.5356	-0.33984	1.3164	-0.2207	-43.123	12.069	168.632	0.17686	0.031445	-0.14746	-178.034	21.93	2701.12	-2.0684	2.0234	0.19141	NaN	NaN	NaN	NaN	NaN	NaN
2.79	68.408	-197.328	1726.504	-0.31933	1.308	-0.23184	-4.468	-52.4593	151.7466	0.16103	0.04375	-0.14678	-177.983	6.00999999999999	2695.74	-2.064	2.0181	0.19336	NaN	NaN	NaN	NaN	NaN	NaN
2.792	71.076	-200.225	1764.211	-0.30898	1.2972	-0.24346	-18.798	-8.413	155.35	0.13838	0.052344	-0.15459	-163.443	67.41	2649.08	-2.0249	1.9868	0.18555	NaN	NaN	NaN	NaN	NaN	NaN
2.794	56.13	-187.55	1776.195	-0.30742	1.2895	-0.2415	-29.36	-26.53	159.3037	0.099218	0.067969	-0.1583	-177.45	98.28	2643.32	-1.9851	1.9475	0.18335	NaN	NaN	NaN	NaN	NaN	NaN
2.796	40.594	-165.9916	1790.421	-0.32344	1.2878	-0.23486	1.006	-57.1943	220.715	0.046387	0.086914	-0.16064	-169.457	162.49	2615.59	-1.9336	1.9102	0.18018	NaN	NaN	NaN	NaN	NaN	NaN
2.798	29.218	-135.96	1783.6021	-0.35205	1.2998	-0.2168	-5.051	-22.441	259.6343	-0.022266	0.11396	-0.15654	-131.959	161.48	2610.31	-1.8687	1.8618	0.16797	NaN	NaN	NaN	NaN	NaN	NaN
2.8	27.015	-112.525	1772.3485	-0.38818	1.319	-0.21026	19.117	-84.667	255.525	-0.092579	0.14825	-0.14873	-48.226	221.57	2600.54	-1.834	1.8398	0.16602	NaN	NaN	NaN	NaN	NaN	NaN
2.802	3.672	-112.789	1782.42291	-0.42237	1.3493	-0.19795	25.508	-71.01	299.352	-0.16094	0.18692	-0.14482	-32.942	229.337	2593.1	-1.7534	1.8013	0.15527	NaN	NaN	NaN	NaN	NaN	NaN
2.804	2.49900000000001	-114.041	1791.0525	-0.44306	1.3685	-0.20616	-0.206000000000003	-15.377	373.3909	-0.22031	0.23086	-0.13457	-32.445	281.113	2554.5	-1.689	1.7652	0.14697	NaN	NaN	NaN	NaN	NaN	NaN
2.806	11.948	-120.848	1793.2584	-0.45635	1.39	-0.21748	1.073	-39.087	474.6179	-0.27734	0.27539	-0.13525	-59.834	260.823	2496.84	-1.6323	1.729	0.13818	NaN	NaN	NaN	NaN	NaN	NaN
2.808	-26.179	-103.374	1819.3074	-0.45996	1.4141	-0.23193	8.37	63.614	555.5448	-0.34238	0.31807	-0.13887	-52.67	269.943	2447.73	-1.5684	1.6904	0.12842	NaN	NaN	NaN	NaN	NaN	NaN
2.81	-1.976	-88.0146	1811.4105	-0.45908	1.4433	-0.24756	7.864	96.869	616.0751	-0.41963	0.35869	-0.14541	-59.053	190.671	2408.37	-1.5405	1.6743	0.11816	NaN	NaN	NaN	NaN	NaN	NaN
2.812	0.447999999999993	-73.2034	1807.234	-0.45254	1.4636	-0.26895	13.631	99.2207	716.5625	-0.51143	0.40401	-0.15127	-62.853	169.182	2374.72	-1.4956	1.6587	0.10645	NaN	NaN	NaN	NaN	NaN	NaN
2.814	26.081	-53.592	1817.314	-0.44004	1.484	-0.29161	15.917	181.519	829.289	-0.62607	0.4458	-0.15615	-60.439	127.545	2326.91	-1.4633	1.6538	0.10547	NaN	NaN	NaN	NaN	NaN	NaN
2.816	34.313	-61.119	1848.121	-0.4207	1.4947	-0.3123	-8.163	150.1748	978.8901	-0.75586	0.49805	-0.14893	-114.341	152.516	2295.64	-1.437	1.6509	0.10352	NaN	NaN	NaN	NaN	NaN	NaN
2.818	80.028	-71.408	1884.7925	-0.40625	1.4961	-0.33691	-5.47	184.559	1092.055	-0.89678	0.55732	-0.1459	-129.624	129.696	2226.21	-1.4058	1.6489	0.10986	NaN	NaN	NaN	NaN	NaN	NaN
2.82	101.441	-97.092	1912.616	-0.39267	1.4897	-0.36338	32.966	202.116	1159.054	-1.048	0.62852	-0.13779	-178.017	166.258	2180.83	-1.3926	1.6445	0.11621	NaN	NaN	NaN	NaN	NaN	NaN
2.822	104.33	-101.222	1917.3246	-0.39189	1.4841	-0.38154	32.204	101.516	1216.6162	-1.2055	0.71875	-0.1253	-172.434	183.796	2127.15	-1.3569	1.6372	0.12158	NaN	NaN	NaN	NaN	NaN	NaN
2.824	141.506	-115.8745	1940.313	-0.39541	1.4806	-0.4003	-18.989	77.858	1280.819	-1.3572	0.82334	-0.10703	-145.04	237.048	2119.85	-1.3242	1.626	0.12646	NaN	NaN	NaN	NaN	NaN	NaN
2.826	132.885	-113.9147	1941.528	-0.41064	1.4769	-0.40889	-48.393	-6.289	1341.292	-1.4937	0.93799	-0.072266	-113.622	261.61	2067.59	-1.2793	1.6133	0.12646	NaN	NaN	NaN	NaN	NaN	NaN
2.828	166.864	-107.056	1941.224	-0.42529	1.479	-0.4126	-11.405	-81.7492	1368.632	-1.578	1.0642	-0.034668	-158.063	304.345	2043.84	-1.2188	1.582	0.12451	NaN	NaN	NaN	NaN	NaN	NaN
2.83	159.944	-70.9797	1926.60717	-0.44072	1.4808	-0.42119	3.596	-38.321	1349.197	-1.6022	1.1853	0.0085938	-167.82	310.722	1942.56	-1.186	1.563	0.11816	NaN	NaN	NaN	NaN	NaN	NaN
2.832	147.397	-66.1648	1924.0029	-0.4583	1.4853	-0.42334	3.041	-106.8032	1300.644	-1.537	1.2731	0.042578	-164.34	326.0507	1887.09	-1.1074	1.5176	0.11084	NaN	NaN	NaN	NaN	NaN	NaN
2.834	131.402	-68.1064	1940.118	-0.47471	1.4899	-0.42334	-53.5528	-138.885	1305.522	-1.3976	1.3134	0.055957	-143.152	305.924	1775.73	-1.0467	1.4837	0.10157	NaN	NaN	NaN	NaN	NaN	NaN
2.836	144.851	-64.2702	1931.4644	-0.49345	1.4921	-0.42441	-66.837	-119.145	1309.138	-1.2163	1.3052	0.041992	-163.401	297.873	1750.87	-0.98584	1.4458	0.091797	NaN	NaN	NaN	NaN	NaN	NaN
2.838	118.792	-48.4678	1929.74773	-0.51123	1.4966	-0.42139	-33.73914	-159.584	1294.2542	-1.024	1.2733	0.0028319	-154.922	282.822	1630.67	-0.91211	1.3965	0.082031	NaN	NaN	NaN	NaN	NaN	NaN
2.84	107.462	-25.601	1910.826	-0.52842	1.4987	-0.42354	-21.963	-78.139	1303.59	-0.84805	1.2254	-0.047754	-166.409	286.444	1622.94	-0.87305	1.3711	0.073242	NaN	NaN	NaN	NaN	NaN	NaN
2.842	121.985	-16.03	1911.2057	-0.54394	1.4942	-0.42237	-62.8569	-59.134	1299.448	-0.71719	1.1493	-0.10127	-135.516	306.105	1545.02	-0.80078	1.3232	0.0625	NaN	NaN	NaN	NaN	NaN	NaN
2.844	120.986	-9.571	1914.2057	-0.56035	1.4911	-0.42705	-66.6714	-86.0581	1328.685	-0.63047	1.0439	-0.15615	-122.508	296.947	1534.37	-0.75561	1.2806	0.055908	NaN	NaN	NaN	NaN	NaN	NaN
2.846	84.42	-3.861	1922.777	-0.56856	1.485	-0.42627	-75.546	5.78700000000001	1334.818	-0.57617	0.91602	-0.20459	-65.296	312.784	1455.8	-0.71045	1.2427	0.046875	NaN	NaN	NaN	NaN	NaN	NaN
2.848	67.257	-18.767	1918.207	-0.57959	1.479	-0.42236	-66.367	-7.423	1310.983	-0.54111	0.77608	-0.23213	-45.941	329.198	1443.01	-0.6543	1.1914	0.04541	NaN	NaN	NaN	NaN	NaN	NaN
2.85	60.708	-35.958	1927.142	-0.59033	1.4661	-0.43194	0.257000000000005	-8.908	1363.206	-0.5334	0.65742	-0.24619	29.483	370.289	1362.21	-0.62598	1.1641	0.041504	NaN	NaN	NaN	NaN	NaN	NaN
2.852	41.028	-44.3409	1914.795	-0.59805	1.4568	-0.43213	20.909	-3.42999999999999	1411.097	-0.54863	0.56953	-0.25518	22.72	365.02	1359.99	-0.57666	1.1152	0.034668	NaN	NaN	NaN	NaN	NaN	NaN
2.854	-1.84400000000001	-43.6639	1909.0527	-0.6039	1.4439	-0.43487	-8.92599999999999	-141.775	1450.359	-0.5752	0.52032	-0.25078	35.404	371.97	1263	-0.53369	1.0757	0.027344	NaN	NaN	NaN	NaN	NaN	NaN
2.856	10.098	-38.062	1891.8699	-0.60586	1.4326	-0.43828	21.436	-191.855	1514.853	-0.60156	0.49609	-0.25195	13.683	328.536	1223.87	-0.49609	1.0352	0.014648	NaN	NaN	NaN	NaN	NaN	NaN
2.858	9.721	-40.32	1882.3763	-0.60596	1.4146	-0.43701	17.836	-249.4318	1549.009	-0.62979	0.49971	-0.24287	57.242	327.402	1129.16	-0.43994	0.98193	0.0048828	NaN	NaN	NaN	NaN	NaN	NaN
2.86	4.717	-18.78	1882.2013	-0.6042	1.4028	-0.44131	37.199	-322.408	1609.536	-0.65694	0.52842	-0.23662	32.434	305.63	1094.65	-0.41357	0.95508	-0.00097656	NaN	NaN	NaN	NaN	NaN	NaN
2.862	-21.988	-11.141	1882.618	-0.60381	1.3872	-0.44248	40.055	-258.8383	1665.983	-0.69639	0.57646	-0.22217	50.517	355.56	999.49	-0.36035	0.90283	-0.016113	NaN	NaN	NaN	NaN	NaN	NaN
2.864	24.839	9.029	1876.876	-0.60107	1.3747	-0.44404	31.178	-305.125	1655.079	-0.75029	0.64033	-0.21172	20.686	333.98	977.03	-0.32105	0.85889	-0.029053	NaN	NaN	NaN	NaN	NaN	NaN
2.866	58.524	22.01473	1860.551	-0.59941	1.3636	-0.44648	24.914	-313.626	1700.4794	-0.82373	0.7124	-0.19873	2.916	353.58	890.49	-0.28076	0.82471	-0.037598	NaN	NaN	NaN	NaN	NaN	NaN
2.868	52.369	51.797	1840.0128	-0.59375	1.3535	-0.44971	40.994	-236.749	1760.1952	-0.92314	0.78213	-0.17705	-22.525	301.5	857.29	-0.23096	0.76123	-0.075195	NaN	NaN	NaN	NaN	NaN	NaN
2.87	78.86	64.416	1809.3157	-0.58819	1.3484	-0.44815	77.775	-260.28	1819.869	-1.0386	0.85049	-0.14766	-0.795000000000002	307.14	802.93	-0.21045	0.73682	-0.081543	NaN	NaN	NaN	NaN	NaN	NaN
2.872	98.217	52.494	1794.5917	-0.58154	1.3423	-0.4417	89.424	-160.66	1898.651	-1.1487	0.90674	-0.10664	-7.896	289.33	795.5	-0.16943	0.68213	-0.10352	NaN	NaN	NaN	NaN	NaN	NaN
2.874	108.564	51.905	1768.436	-0.5749	1.34	-0.44599	104.456	-112.764	1911.741	-1.231	0.95381	-0.07168	19.899	345.48	736.48	-0.14233	0.64282	-0.11939	NaN	NaN	NaN	NaN	NaN	NaN
2.876	82.702	48.227	1765.1424	-0.56641	1.3326	-0.44385	117.913	-156.486	1901.217	-1.2808	0.98096	-0.054199	-23.046	329.16	694.39	-0.11572	0.60693	-0.12939	NaN	NaN	NaN	NaN	NaN	NaN
2.878	111.527	26.141452	1765.3985	-0.56104	1.3325	-0.44287	118.607	-84.531	1927.073	-1.2893	0.99082	-0.04668	-19.384	335.48	631.38	-0.089844	0.55762	-0.1416	NaN	NaN	NaN	NaN	NaN	NaN
2.88	120.632	8.595	1768.118	-0.55176	1.326	-0.4414	140.465	-122.902	1920.187	-1.2887	0.99297	-0.057519	-41.835	259.17	617.32	-0.072754	0.5376	-0.14893	NaN	NaN	NaN	NaN	NaN	NaN
2.882	130.715	16.2632	1752.277	-0.54062	1.323	-0.43516	163.46005	-147.044	1941.899	-1.2871	0.98047	-0.058691	-60.137	255.333	566.71	-0.041504	0.49609	-0.16211	NaN	NaN	NaN	NaN	NaN	NaN
2.884	123.722	21.949	1725.157	-0.5293	1.311	-0.43555	130.26	-99.805	1975.898	-1.2933	0.96025	-0.076074	-73.1479	187.918	549.99	-0.0083008	0.45508	-0.18066	NaN	NaN	NaN	NaN	NaN	NaN
2.886	120.376	36.109	1706.87	-0.51064	1.3021	-0.43399	46.703	-202.309	1990.97	-1.2949	0.94141	-0.083008	-31.477	221.207	499.46	0.003418	0.43994	-0.19287	NaN	NaN	NaN	NaN	NaN	NaN
2.888	138.226	35.527	1694.363	-0.50098	1.2876	-0.43115	42.343	-186.378	2055.8926	-1.3178	0.92989	-0.084961	-64.58	184.697	474.99	0.020508	0.39844	-0.21777	NaN	NaN	NaN	NaN	NaN	NaN
2.89	128.706	33.63529	1660.07569	-0.48125	1.2785	-0.42734	55.891	-173.2768	2110.0387	-1.3514	0.94297	-0.089551	-83.1294	228.457	430.13	0.035644	0.37109	-0.22998	NaN	NaN	NaN	NaN	NaN	NaN
2.892	122.662	26.628	1649.4143	-0.46729	1.262	-0.42715	73.553	-252.276	2162.619	-1.3834	0.98359	-0.088769	-88.9224	174.19	384.56	0.041016	0.3457	-0.24805	NaN	NaN	NaN	NaN	NaN	NaN
2.894	91.948	17.149	1636.371	-0.45674	1.2499	-0.42754	103.992	-183.2744	2217.179	-1.4037	1.0354	-0.089649	-48.352	226.949	354.6	0.044922	0.32129	-0.25879	NaN	NaN	NaN	NaN	NaN	NaN
2.896	86.032	32.2932	1618.571	-0.44697	1.2353	-0.42715	39.84	-211.023	2223.433	-1.4233	1.0884	-0.088867	-12.554	187.053	344.3	0.044922	0.31104	-0.25928	NaN	NaN	NaN	NaN	NaN	NaN
2.898	64.276	66.636	1582.407	-0.44092	1.2271	-0.4248	43.738	-216.156	2249.612	-1.4212	1.1331	-0.082715	13.567	221.918	328.41	0.03125	0.28809	-0.26465	NaN	NaN	NaN	NaN	NaN	NaN
2.9	11.786	96.235	1542.578	-0.43447	1.2184	-0.42178	66.157	-111.667	2284.905	-1.4168	1.1715	-0.086231	3.05200000000001	180.858	302.1	0.0271	0.28369	-0.26514	NaN	NaN	NaN	NaN	NaN	NaN
2.902	5.583	113.788	1530.2108	-0.42618	1.2097	-0.41875	40.084	-148.3335	2240.698	-1.3906	1.2133	-0.1042	6.924	218.08	250.86	0.017578	0.28076	-0.25781	NaN	NaN	NaN	NaN	NaN	NaN
2.904	-9.093	101.961	1514.8933	-0.4125	1.2031	-0.41446	74.534	-101.478	2280.7236	-1.3463	1.2533	-0.12441	22.528	164.82	197.827	0.0092773	0.27295	-0.25195	NaN	NaN	NaN	NaN	NaN	NaN
2.906	-10.607	95.5846	1489.6087	-0.40361	1.1959	-0.40547	56.768	-53.886	2277.086	-1.3008	1.2773	-0.15088	28.401	172.332	205.696	0.0019531	0.27344	-0.24854	NaN	NaN	NaN	NaN	NaN	NaN
2.908	-31.998	91.323	1470.8434	-0.39355	1.1914	-0.39648	4.248	-108.8274	2267.7591	-1.2501	1.2944	-0.18067	12.531	107.6714	172.698	-0.0043945	0.27393	-0.23486	NaN	NaN	NaN	NaN	NaN	NaN
2.91	-17.571	83.739	1452.6945	-0.38174	1.1808	-0.3959	33.795	-25.335	2316.277	-1.2124	1.306	-0.21299	19.863	140.602	166.188	-0.013672	0.27051	-0.22607	NaN	NaN	NaN	NaN	NaN	NaN
2.912	-25.73	84.644	1446.615	-0.36778	1.1722	-0.39297	34.289	-33.753	2281.34	-1.1839	1.3172	-0.23564	34.417	87.992	143.869	-0.023438	0.26709	-0.21777	NaN	NaN	NaN	NaN	NaN	NaN
2.914	-26.758	93.883	1412.8859	-0.35019	1.1602	-0.38555	47.896	-57.698	2313.336	-1.1758	1.3194	-0.26338	22.818	96.149	169.9	-0.029785	0.25977	-0.21045	NaN	NaN	NaN	NaN	NaN	NaN
2.916	-11.825	80.63	1386.4038	-0.33448	1.1456	-0.38525	88.808	21.808	2336.714	-1.1738	1.3203	-0.27783	10.582	18.585	150.928	-0.030762	0.25635	-0.19922	NaN	NaN	NaN	NaN	NaN	NaN
2.918	-2.389	82.119	1362.024	-0.32373	1.1294	-0.38037	56.971	-37.2754	2308.608	-1.1731	1.3218	-0.28447	4.25	39.3004	137.337	-0.036621	0.24414	-0.20068	NaN	NaN	NaN	NaN	NaN	NaN
2.92	16.472	86.721	1348.80044	-0.31396	1.1204	-0.37471	98.56	3.903	2395.1888	-1.1913	1.3275	-0.28349	10.54	5.8243	102.4905	-0.041015	0.23731	-0.2002	NaN	NaN	NaN	NaN	NaN	NaN
2.922	-3.611	102.305	1321.1761	-0.30732	1.1052	-0.36885	110.577	34.322	2424.6308	-1.2101	1.3337	-0.28154	10.588	38.532	121.507	-0.044922	0.23096	-0.19824	NaN	NaN	NaN	NaN	NaN	NaN
2.924	14.351	90.9852	1297.553234	-0.30498	1.0872	-0.35791	123.512	-69.0027	2437.759	-1.2371	1.3422	-0.27441	-11.127	3.27243	127.498	-0.04834	0.22119	-0.19531	NaN	NaN	NaN	NaN	NaN	NaN
2.926	29.388	81.6228	1281.0398	-0.29951	1.0767	-0.34346	169.9661	-21.949	2474.093	-1.2695	1.3535	-0.26953	-54.39	35.04	150.431	-0.053711	0.21533	-0.19238	NaN	NaN	NaN	NaN	NaN	NaN
2.928	48.27	90.7254	1257.6829	-0.29932	1.0649	-0.33154	134.113	-66.424	2424.046	-1.2969	1.3734	-0.26992	-45.292	6.104	112.641	-0.05957	0.21191	-0.18652	NaN	NaN	NaN	NaN	NaN	NaN
2.93	53.086	106.0197	1234.2655	-0.29902	1.05	-0.32012	138.796	-87.307	2429.512	-1.3158	1.392	-0.25293	-69.246	43.0792	125.679	-0.069336	0.21192	-0.18091	NaN	NaN	NaN	NaN	NaN	NaN
2.932	53.063	119.0274	1212.6107	-0.28994	1.0394	-0.30967	135.549	18.1104	2441.21	-1.3314	1.4107	-0.25605	-81.071	19.0276	119.458	-0.077148	0.20996	-0.17383	NaN	NaN	NaN	NaN	NaN	NaN
2.934	77.71	139.015	1198.685	-0.28799	1.0234	-0.29678	123.718	-21.4228	2400.5377	-1.3384	1.4138	-0.25527	-107.0576	37.68	138.155	-0.083984	0.20508	-0.16992	NaN	NaN	NaN	NaN	NaN	NaN
2.936	89.024	147.975	1164.5066	-0.28164	1.0106	-0.2832	142.153	13.373	2405.1155	-1.3438	1.416	-0.25928	-69.247	21.828	106.1642	-0.091309	0.20654	-0.16455	NaN	NaN	NaN	NaN	NaN	NaN
2.938	85.162	136.631	1131.4774	-0.27539	0.99512	-0.27246	99.476	55.5668	2390.9674	-1.3537	1.4127	-0.25947	-83.5442	24.6286	124.948	-0.10254	0.20703	-0.1543	NaN	NaN	NaN	NaN	NaN	NaN
2.94	54.428	128.475	1099.738	-0.26475	0.97724	-0.26299	99.181	18.892	2377.8014	-1.3651	1.4051	-0.26396	-72.7494	-9.542	103.7673	-0.10547	0.20947	-0.14868	NaN	NaN	NaN	NaN	NaN	NaN
2.942	83.6265	126.616	1080.615	-0.25508	0.95801	-0.25019	141.47	140.093	2418.153	-1.3827	1.3891	-0.2706	-77.987	-16.3507	122.432	-0.10645	0.20947	-0.1377	NaN	NaN	NaN	NaN	NaN	NaN
2.944	46.196	126.401	1060.5735	-0.24687	0.9377	-0.23535	110.355	171.402	2363.4011	-1.4056	1.3739	-0.27354	-76.907	-5.381	95.572	-0.10693	0.20996	-0.13135	NaN	NaN	NaN	NaN	NaN	NaN
2.946	16.06	127.6826	1055.5834	-0.24102	0.92139	-0.22364	95.764	146.954	2331.692	-1.4272	1.3599	-0.27393	-52.252	15.9372	104.2691	-0.096191	0.20557	-0.13184	NaN	NaN	NaN	NaN	NaN	NaN
2.948	8.876	121.289	1029.7596	-0.2373	0.89404	-0.21143	90.518	182.636	2340.6078	-1.4492	1.3512	-0.27051	-21.105	26.758	99.3394	-0.072266	0.19775	-0.13184	NaN	NaN	NaN	NaN	NaN	NaN
2.95	17.667	132.637	1011.911	-0.2292	0.87647	-0.19512	33.257	74.7121	2295.8952	-1.4703	1.3398	-0.26973	-58.761	-2.338	136.983	-0.047608	0.19824	-0.13379	NaN	NaN	NaN	NaN	NaN	NaN
2.952	-3.972	138.733	1001.923	-0.22217	0.85615	-0.18369	81.28	84.597	2316.672	-1.4816	1.3317	-0.26621	-42.055	-20.396	113.3618	-0.021973	0.18896	-0.14209	NaN	NaN	NaN	NaN	NaN	NaN
2.954	-49.965	142.69	962.529	-0.21435	0.83819	-0.17119	73.307	113.783	2295.6529	-1.4837	1.3206	-0.26787	-28.226	-41.143	124.0205	0.0068359	0.1709	-0.14307	NaN	NaN	NaN	NaN	NaN	NaN
2.956	-47.052	150.667	945.238	-0.20694	0.81767	-0.15781	26.111	49.307	2247.6583	-1.48	1.3169	-0.26318	-1.207	-4.57	96.492	0.027832	0.1626	-0.14355	NaN	NaN	NaN	NaN	NaN	NaN
2.958	-41.655	147.626	916.645	-0.19336	0.80078	-0.14063	46.88	117.73988	2257.268	-1.4731	1.3058	-0.26475	3.356	-10.79231	122.7997	0.069824	0.14063	-0.14355	NaN	NaN	NaN	NaN	NaN	NaN
2.96	-44.825	153.664	879.982	-0.18047	0.77842	-0.13017	18.428	83.14	2191.5371	-1.4469	1.2996	-0.26748	30.025	29.1024	107.6214	0.099853	0.12622	-0.14185	NaN	NaN	NaN	NaN	NaN	NaN
2.962	-71.547	143.31	867.205	-0.16807	0.76221	-0.11827	30.178	65.549	2176.056	-1.4223	1.2953	-0.2706	-21.929	3.0316	99.7922	0.13135	0.11084	-0.14404	NaN	NaN	NaN	NaN	NaN	NaN
2.964	-73.55	149.027	849.9345	-0.1501	0.7415	-0.10537	73.973	158.713	2183.358	-1.392	1.2877	-0.26719	21.444	34.8176	71.943	0.1665	0.080566	-0.146	NaN	NaN	NaN	NaN	NaN	NaN
2.966	-42.563	158.724	832.566	-0.13037	0.71963	-0.094922	54.268	119.432	2120.7692	-1.3672	1.2813	-0.26807	28.229	3.471	92.2339	0.18457	0.068848	-0.14453	NaN	NaN	NaN	NaN	NaN	NaN
2.968	-65.695	170.33	802.998	-0.11621	0.69531	-0.083984	75.075	174.127	2110.4	-1.3425	1.269	-0.2667	17.615	35.568	91.165	0.21094	0.032715	-0.14844	NaN	NaN	NaN	NaN	NaN	NaN
2.97	-67.2216	161.237	792.525	-0.09209	0.67353	-0.072852	76.202	230.075	2041.9957	-1.3148	1.261	-0.26406	12.067	4.8496	95.77	0.22192	0.0085447	-0.1521	NaN	NaN	NaN	NaN	NaN	NaN
2.972	-39.746	159.707	782.03	-0.077051	0.64737	-0.06416	83.262	190.404	1992.1736	-1.287	1.2567	-0.26016	17.201	65.3799	76.5828	0.22266	-0.016113	-0.15674	NaN	NaN	NaN	NaN	NaN	NaN
2.974	-17.208	157.478	759.467	-0.055176	0.63173	-0.053223	117.433	265.094	2000.846	-1.2584	1.2482	-0.25351	-15.377	37.143	91.3771	0.20801	-0.041504	-0.16113	NaN	NaN	NaN	NaN	NaN	NaN
2.976	-26.069	152.9363	727.4247	-0.034765	0.60889	-0.044434	104.026	233.897	1936.182	-1.2319	1.2407	-0.24316	-31.075	78.531	107.4923	0.19287	-0.050781	-0.16113	NaN	NaN	NaN	NaN	NaN	NaN
2.978	-17.356	140.0869	712.03081	-0.015625	0.59131	-0.035156	87.062	219.7703	1900.369	-1.2104	1.2348	-0.23887	-34.917	20.3966	103.9104	0.1499	-0.058594	-0.1582	NaN	NaN	NaN	NaN	NaN	NaN
2.98	11.571	150.57	692.2299	0.0048827	0.57373	-0.026367	88.703	284.046	1889.4774	-1.1871	1.2222	-0.22305	-57.808	66.202	109.1362	0.10913	-0.052247	-0.14624	NaN	NaN	NaN	NaN	NaN	NaN
2.982	25.616	161.972	670.9782	0.025879	0.55791	-0.014063	59.968	215.78	1836.6276	-1.1735	1.2156	-0.21914	-52.418	19.5663	116.487	0.063965	-0.036133	-0.13428	NaN	NaN	NaN	NaN	NaN	NaN
2.984	43.706	148.11	667.405	0.043457	0.54111	-0.0035156	99.407	228.3841	1848.19434	-1.1565	1.2044	-0.2083	-56.254	62.159	128.186	0.010742	-0.0043945	-0.11377	NaN	NaN	NaN	NaN	NaN	NaN
2.986	30.349	125.498	651.341	0.066992	0.52363	0.0041015	120.505	234.6075	1804.1363	-1.1406	1.1914	-0.19482	-78.5094	3.7502	128.743	-0.01123	0.019043	-0.10791	NaN	NaN	NaN	NaN	NaN	NaN
2.988	60.999	123.3079	637.826	0.09082	0.5083	0.010742	73.361	173.39	1749.8465	-1.1205	1.1799	-0.18242	-88.158	27.9391	115.641	-0.041016	0.05957	-0.087402	NaN	NaN	NaN	NaN	NaN	NaN
2.99	41.287	144.6211	600.43439	0.11572	0.49189	0.014551	95.312	261.535	1759.027	-1.0907	1.1687	-0.16807	-59.653	-28.00773	98.2475	-0.04419	0.092039	-0.081787	NaN	NaN	NaN	NaN	NaN	NaN
2.992	41.36	154.6817	585.1048	0.13584	0.47724	0.014258	48.775	240.986	1702.092	-1.0625	1.1563	-0.15596	-84.5862	29.8475	116.3824	-0.044434	0.11328	-0.083008	NaN	NaN	NaN	NaN	NaN	NaN
2.994	28.594	144.693	574.3154	0.1581	0.46279	0.018555	57.483	225.818	1673.031	-1.0264	1.1391	-0.14668	-82.4488	-14.7045	121.755	-0.027832	0.13037	-0.073242	NaN	NaN	NaN	NaN	NaN	NaN
2.996	22.863	145.39419	554.43955	0.18008	0.44668	0.019726	66.837	272.637	1637.166	-0.99219	1.1113	-0.14014	-62.136	43.652	143.043	-0.013184	0.13428	-0.074707	NaN	NaN	NaN	NaN	NaN	NaN
2.998	10.194	147.821	534.4865	0.19873	0.43457	0.014648	15.252	199.8882	1562.617	-0.94522	1.088	-0.13105	-66.513	14.421	124.803	0.023438	0.13574	-0.078125	NaN	NaN	NaN	NaN	NaN	NaN
3	-2.871	141.897	517.415	0.21611	0.42119	0.014355	16.998	244.029	1549.496	-0.90059	1.0586	-0.12383	-56.498	54.54	128.187	0.054199	0.12305	-0.081055	NaN	NaN	NaN	NaN	NaN	NaN
3.002	-10.476	138.611	515.547	0.23125	0.4124	0.011719	-10.683	273.273	1475.418	-0.85488	1.0285	-0.1164	-43.203	4.4427	115.876	0.081055	0.10547	-0.091309	NaN	NaN	NaN	NaN	NaN	NaN
3.004	-39.68	131.308	495.551	0.24062	0.40537	0.014062	-10.428	230.7503	1399.062	-0.80498	0.99382	-0.11807	-46.582	21.3762	128.522	0.11475	0.077637	-0.10205	NaN	NaN	NaN	NaN	NaN	NaN
3.006	-18.266	137.196	467.778	0.25088	0.40234	0.012695	-2.896	289.646	1380.031	-0.76123	0.95947	-0.11133	-32.205	-31.431	108.647	0.12012	0.06543	-0.11084	NaN	NaN	NaN	NaN	NaN	NaN
3.008	-57.494	132.199	434.379	0.25781	0.39795	0.012207	-45.767	257.1363	1305.59	-0.71728	0.93037	-0.1043	-7.122	7.84423	125.637	0.12598	0.037598	-0.1167	NaN	NaN	NaN	NaN	NaN	NaN
3.01	-67.934	127.581	433.8476	0.26446	0.40088	0.013965	-38.956	252.42058	1291.8311	-0.67685	0.89522	-0.09873	11.134	-16.1457	103.5022	0.11963	0.023682	-0.12085	NaN	NaN	NaN	NaN	NaN	NaN
3.012	-65.8671	127.302	406.227	0.26416	0.39697	0.014551	-29.656	319.057	1253.351	-0.64092	0.86553	-0.092871	-3.992	9.37803	109.914	0.11035	0.015625	-0.12402	NaN	NaN	NaN	NaN	NaN	NaN
3.014	-74.442	124.082	388.6082	0.26807	0.39463	0.016895	-41.957	273.446	1176.387	-0.60605	0.83457	-0.087207	22.754	-23.4725	84.81	0.086426	0.013184	-0.12402	NaN	NaN	NaN	NaN	NaN	NaN
3.016	-97.628	112.29	401.1126	0.2667	0.39805	0.016699	-17.716	306.873	1180.9033	-0.57715	0.80859	-0.071289	21.689	-2.666	97.094	0.068359	0.018066	-0.12646	NaN	NaN	NaN	NaN	NaN	NaN
3.018	-98.976	105.441	387.238	0.26904	0.40186	0.019531	-22.577	291.832	1134.332	-0.55117	0.78496	-0.05918	4.704	-26.6673	147.668	0.039063	0.038574	-0.12451	NaN	NaN	NaN	NaN	NaN	NaN
3.02	-69.4457	97.347	362.1405	0.26856	0.40303	0.018359	-22.605	221.0495	1080.27321	-0.52451	0.75987	-0.044531	38.743	-28.092	220.8791	0.023437	0.063233	-0.11914	NaN	NaN	NaN	NaN	NaN	NaN
3.022	-88.3217	107.902	350.9753	0.26846	0.40176	0.013476	-5.017	262.798	1049.824	-0.50264	0.73877	-0.027734	39.287	-60.469	210.779	0.012695	0.091797	-0.12109	NaN	NaN	NaN	NaN	NaN	NaN
3.024	-54.277	103.603	336.50734	0.26924	0.40606	0.019336	-23.317	219.73732	983.0482	-0.48349	0.71846	-0.0064455	-2.405	-59.587	256.065	0.0053711	0.13672	-0.12061	NaN	NaN	NaN	NaN	NaN	NaN
3.026	-37.686	103.803	324.9567	0.2706	0.40459	0.021289	-22.016	209.369	981.5491	-0.46094	0.69141	0.01123	7.201	-66.311	293.6068	-0.0029297	0.17188	-0.12622	NaN	NaN	NaN	NaN	NaN	NaN
3.028	-37.505	113.928	302.2763	0.26611	0.4043	0.021484	3.233	265.601	924.395	-0.44024	0.67461	0.029199	-4.185	-74.723	382.182	-0.010742	0.19971	-0.13184	NaN	NaN	NaN	NaN	NaN	NaN
3.03	-17.266	103.834	304.1628	0.26338	0.40391	0.024316	-14.939	204.791	859.2386	-0.41865	0.65478	0.041015	3.57899999999999	-70.718	432.898	-0.026367	0.2334	-0.14551	NaN	NaN	NaN	NaN	NaN	NaN
3.032	-8.491	98.011	289.3738	0.26123	0.40322	0.02832	-13.211	240.8265	843.675	-0.39365	0.63134	0.050781	19.39	-98.117	525.6	-0.04541	0.24023	-0.1582	NaN	NaN	NaN	NaN	NaN	NaN
3.034	7.753	88.375	295.2101	0.26006	0.39893	0.031445	1.753	232.6705	800.568	-0.3665	0.60683	0.063672	14.102	-93.258	607.986	-0.12793	0.26074	-0.18311	NaN	NaN	NaN	NaN	NaN	NaN
3.036	11.233	95.38	273.1874	0.2541	0.39385	0.034766	-3.267	219.0405	774.2343	-0.33887	0.58301	0.078125	-29.049	-88.44	775.08	-0.21802	0.28638	-0.19507	NaN	NaN	NaN	NaN	NaN	NaN
3.038	20.843	98.767	255.0432	0.24609	0.39307	0.04248	12.37	282.655	728.4297	-0.30479	0.56055	0.085059	-20.23	-48.74	905.741	-0.3291	0.31934	-0.18945	NaN	NaN	NaN	NaN	NaN	NaN
3.04	12.023	85.3276	255.2421	0.24717	0.38935	0.041894	-14.592	262.885	650.697	-0.27324	0.53994	0.089453	-6.075	-28.594	1058.6689	-0.48145	0.38916	-0.1626	NaN	NaN	NaN	NaN	NaN	NaN
3.042	27.726	87.9044	234.1447	0.24131	0.38281	0.041895	-23.514	266.064	644.838879	-0.23965	0.51572	0.097656	19.381	13.169	1168.12	-0.55225	0.43604	-0.14648	NaN	NaN	NaN	NaN	NaN	NaN
3.044	27.813	84.0378	219.269	0.23584	0.37773	0.047754	-6.82	279.908	618.6519	-0.19893	0.49405	0.10645	2.78699999999999	-9.887	1330.219	-0.67578	0.53223	-0.12207	NaN	NaN	NaN	NaN	NaN	NaN
3.046	32.073	85.7345	216.5208	0.23399	0.37617	0.053711	-28.352	215.9974	574.3297	-0.16309	0.46973	0.10547	-12.904	21.948	1472.979	-0.75488	0.61329	-0.11133	NaN	NaN	NaN	NaN	NaN	NaN
3.048	12.725	79.5619	219.5405	0.23975	0.36572	0.055176	-22.381	255.489	558.583	-0.12969	0.44727	0.10469	-38.466	-53.4	1609.813	-0.83203	0.69141	-0.1123	NaN	NaN	NaN	NaN	NaN	NaN
3.05	17.332	85.119	209.7639	0.23848	0.35928	0.058789	-53.7749	224.511	506.3113	-0.093652	0.43017	0.10508	-4.88799999999999	-62.259	1673.804	-0.94873	0.78955	-0.13672	NaN	NaN	NaN	NaN	NaN	NaN
3.052	15.602	83.876	197.3728	0.24346	0.35196	0.062597	-62.4612	187.8377	490.578	-0.062402	0.40517	0.10781	-2.31	-184.268	1698.076	-1.0195	0.83398	-0.15234	NaN	NaN	NaN	NaN	NaN	NaN
3.054	-14.425	60.398	187.2066	0.24736	0.34063	0.065723	-68.3155	209.986	476.458	-0.030859	0.38506	0.10342	-0.616999999999997	-194.697	1730.371	-1.186	0.93604	-0.16943	NaN	NaN	NaN	NaN	NaN	NaN
3.056	-21.047	43.697	194.019	0.25879	0.32578	0.067578	-77.5194	167.8999	398.34	-0.0068359	0.36914	0.1001	2.791	-306.42	1776.126	-1.3266	1.0317	-0.16431	NaN	NaN	NaN	NaN	NaN	NaN
3.058	-44.661	48.229	170.8101	0.26465	0.30664	0.07373	-65.122	168.8037	397.07	0.013769	0.34903	0.092871	5.182	-281.395	1808.298	-1.4668	1.1367	-0.14648	NaN	NaN	NaN	NaN	NaN	NaN
3.06	-40.2264	57.206	154.74635	0.27256	0.29395	0.07207	-69.8117	188.241	388.918	0.029004	0.3334	0.086328	28.539	-346.626	1794.144	-1.6323	1.2974	-0.095215	NaN	NaN	NaN	NaN	NaN	NaN
3.062	-72.2594	58.412	152.93429	0.28506	0.27842	0.070703	-95.959	140.2535	365.961	0.038379	0.32051	0.084765	55.233	-277.152	1778.053	-1.686	1.3794	-0.065918	NaN	NaN	NaN	NaN	NaN	NaN
3.064	-84.7928	56.423	155.6511	0.29053	0.26084	0.070703	-72.2334	169.325	367.046	0.053027	0.31318	0.08789	17.793	-365.938	1743.8388	-1.7358	1.5239	-0.0073242	NaN	NaN	NaN	NaN	NaN	NaN
3.066	-68.1659	53.397	139.4463	0.30146	0.24883	0.072558	-62.1228	153.059	317.7164	0.058594	0.31201	0.088379	-22.679	-297.727	1775.701	-1.7022	1.6162	0.03125	NaN	NaN	NaN	NaN	NaN	NaN
3.068	-102.587	51.762	135.2621	0.30957	0.23438	0.073242	-70.941	148.37	294.60623	0.059082	0.30567	0.084277	-9.936	-331.869	1744.83	-1.6289	1.7021	0.056152	NaN	NaN	NaN	NaN	NaN	NaN
3.07	-77.8297	43.625	135.8011	0.31963	0.21992	0.075195	-45.956	186.455	280.4535	0.067773	0.30869	0.090137	-6.819	-210.528	1712.264	-1.4644	1.7642	0.055664	NaN	NaN	NaN	NaN	NaN	NaN
3.072	-82.8093	32.018	143.271	0.32237	0.2082	0.079102	-57.423	146.734	234.8427	0.075977	0.31104	0.094824	-4.731	-226.118	1654.885	-1.355	1.7603	0.035156	NaN	NaN	NaN	NaN	NaN	NaN
3.074	-65.239	38.102	145.409	0.33096	0.19609	0.075977	-58.561	152.764	230.9666	0.079004	0.31484	0.098632	-20	-158.605	1621.1094	-1.064	1.6196	-0.028809	NaN	NaN	NaN	NaN	NaN	NaN
3.076	-72.6791	21.3884	161.737	0.33018	0.18476	0.072949	-42.5156	150.232	196.6798	0.086914	0.31445	0.10254	5.725	-226.49915	1547.573	-0.81519	1.4289	-0.07251	NaN	NaN	NaN	NaN	NaN	NaN
3.078	-55.718	0.1951	150.761	0.32227	0.17432	0.0625	-64.849	97.8885	184.824	0.089062	0.31592	0.10977	3.896	-206.006	1539.574	-0.58984	1.2266	-0.11035	NaN	NaN	NaN	NaN	NaN	NaN
3.08	-47.396	-7.302	158.983	0.31191	0.16748	0.043652	-12.323	118.739	203.2158	0.10059	0.3126	0.11562	2.85499999999999	-271.1447	1533.228	-0.34131	0.98291	-0.15186	NaN	NaN	NaN	NaN	NaN	NaN
3.082	-53.08	-5.421	163.074	0.28799	0.16709	0.040234	-15.595	86.447	161.4044	0.11113	0.31104	0.11993	-10.92	-289.28	1572.146	-0.24268	0.86963	-0.17139	NaN	NaN	NaN	NaN	NaN	NaN
3.084	-17.308	-11.384	194.709	0.26025	0.18154	0.044922	-23.024	77.4475	169.6403	0.11827	0.30449	0.12138	-2.87700000000001	-363.896	1636.356	-0.091797	0.65869	-0.21338	NaN	NaN	NaN	NaN	NaN	NaN
3.086	-19.226	-18.202	229.035	0.22754	0.20352	0.055371	-23.656	109.978	160.77474	0.12793	0.2915	0.11914	-5.61999999999999	-414.833	1665.162	-0.026123	0.51782	-0.25659	NaN	NaN	NaN	NaN	NaN	NaN
3.088	-0.962000000000003	-25.132	241.46	0.1958	0.23584	0.066406	7.504	51.582	133.7758	0.13535	0.28389	0.11836	3.91	-459.636	1710.248	0.012695	0.40234	-0.2998	NaN	NaN	NaN	NaN	NaN	NaN
3.09	-5.569	-36.1826	247.286	0.16972	0.26983	0.079981	7.702	44.753	171.986	0.13955	0.26992	0.1167	43.62	-461.039	1794.852	0.013672	0.30371	-0.32227	NaN	NaN	NaN	NaN	NaN	NaN
3.092	-8.424	-41.498	301.215	0.14619	0.30244	0.086329	-12.437	31.08	139.1024	0.14345	0.25508	0.11162	97.227	-441.862	1858.074	-0.0058594	0.27734	-0.32813	NaN	NaN	NaN	NaN	NaN	NaN
3.094	18.14	-4.445	364.326	0.11768	0.329	0.086719	-26.739	-13.7717	134.1072	0.14375	0.24482	0.10723	103.895	-387.8	1904.724	-0.090332	0.28369	-0.3418	NaN	NaN	NaN	NaN	NaN	NaN
3.096	17.526	54.993	405.23	0.084375	0.35527	0.080176	-5.013	23.4421	147.891	0.14551	0.22803	0.10449	111.513	-359.1945	1967.663	-0.18652	0.34204	-0.32935	NaN	NaN	NaN	NaN	NaN	NaN
3.098	6.80399999999999	96.9111	449.394	0.04541	0.37744	0.064453	-12.44	-0.1974	120.9092	0.14102	0.21905	0.10469	99.012	-348.1584	2041.071	-0.30371	0.43652	-0.31836	NaN	NaN	NaN	NaN	NaN	NaN
3.1	-24.976	107.424	529.188	-0.012695	0.40703	0.05127	-26.884	-5.358	117.1114	0.13682	0.20967	0.10342	126.827	-321.78008	2119.767	-0.4751	0.62207	-0.29199	NaN	NaN	NaN	NaN	NaN	NaN
3.102	-12.362	132.525	622.638	-0.082325	0.43447	0.029883	-31.131	17.0641	118.6966	0.13838	0.20342	0.10537	130.462	-330.904	2157.624	-0.55371	0.7207	-0.27734	NaN	NaN	NaN	NaN	NaN	NaN
3.104	-21.214	161.415	701.663	-0.17608	0.46924	0.012695	-48.062	-19.94174	89.5041	0.13642	0.19619	0.10293	149.059	-295.863	2168.4532	-0.68799	0.91455	-0.25781	NaN	NaN	NaN	NaN	NaN	NaN
3.106	-37.224	168.247	808.031	-0.28437	0.52392	0.0020508	-33.743	9.7214	112.2853	0.1416	0.19287	0.10254	133.382	-292.855	2222.985	-0.76685	1.0422	-0.24805	NaN	NaN	NaN	NaN	NaN	NaN
3.108	-55.282	134.547	897.527	-0.40332	0.58643	0	-35.884	20.9566	89.61756	0.14639	0.1834	0.099317	116.638	-223.505	2265.49056	-0.8374	1.1528	-0.25049	NaN	NaN	NaN	NaN	NaN	NaN
3.11	-82.3112	105.977	974.574	-0.529	0.67509	0.011719	-70.641	-12.173	81.4339	0.15147	0.17646	0.094434	152.141	-228.355	2296.282	-0.91797	1.2676	-0.26318	NaN	NaN	NaN	NaN	NaN	NaN
3.112	-95.479	78.832	1021.491	-0.65049	0.78095	0.042383	-45.019	30.1507	114.516	0.15108	0.1667	0.0917	195.417	-184.722	2301.9995	-0.96143	1.3149	-0.27002	NaN	NaN	NaN	NaN	NaN	NaN
3.114	-103.17	40.65	1068.417	-0.76494	0.90244	0.084961	-56.653	-0.557000000000002	80.9666	0.14883	0.15342	0.084668	165.99	-256.548	2342.918	-1.0503	1.4106	-0.27393	NaN	NaN	NaN	NaN	NaN	NaN
3.116	-86.3123	11.5025	1124.32	-0.86328	1.0328	0.14072	-59.375	-4.282	101.4119	0.14209	0.14258	0.075684	147.117	-272.71349	2376.452	-1.1182	1.4756	-0.27954	NaN	NaN	NaN	NaN	NaN	NaN
3.118	-111.526	-23.27661	1165.56	-0.92773	1.1602	0.1958	-51.715	14.6644	113.022	0.13096	0.12852	0.068067	145.4751	-342.647	2396.203	-1.1758	1.5352	-0.27832	NaN	NaN	NaN	NaN	NaN	NaN
3.12	-113.594	-61.768	1179.041	-0.95547	1.2685	0.23457	-60.221	-19.7326	90.6112	0.11338	0.1207	0.062793	134.307	-299.795	2407.197	-1.2217	1.5996	-0.27783	NaN	NaN	NaN	NaN	NaN	NaN
3.122	-115.444	-114.876	1214.465	-0.94492	1.3482	0.24922	-62.6936	9.3447	116.0193	0.097364	0.11406	0.058496	132.159	-340.674	2425.168	-1.2378	1.6284	-0.27588	NaN	NaN	NaN	NaN	NaN	NaN
3.124	-74.0961	-142.605	1259.4	-0.89766	1.3955	0.24961	-56.205	16.5433	88.8261	0.075683	0.10928	0.059668	92.445	-301.759	2411.827	-1.2637	1.668	-0.29688	NaN	NaN	NaN	NaN	NaN	NaN
3.126	-49.55826	-149.353	1308.28	-0.82871	1.4252	0.23936	-47.681	-30.2	77.3226	0.054688	0.11279	0.061035	41.949	-349.902	2435.338	-1.2654	1.6897	-0.32031	NaN	NaN	NaN	NaN	NaN	NaN
3.128	-54.3997	-121.193	1311.853	-0.75781	1.4316	0.22705	-25.86	12.1253	109.20509	0.032422	0.11563	0.068067	0.530000000000001	-284.5528	2433.1181	-1.2632	1.7134	-0.35938	NaN	NaN	NaN	NaN	NaN	NaN
3.13	-62.6096	-93.343	1327.624	-0.69502	1.4112	0.1998	-36.614	-15.9632	88.352	0.0073242	0.12041	0.067578	11.563	-289.478	2469.358	-1.2324	1.7383	-0.42773	NaN	NaN	NaN	NaN	NaN	NaN
3.132	-54.356	-70.0777	1375.208	-0.63808	1.3719	0.17832	-13.819	-10.6638	102.9195	-0.0083007	0.13095	0.076953	7.27	-214.2088	2502.199	-1.2183	1.7446	-0.4624	NaN	NaN	NaN	NaN	NaN	NaN
3.134	4.46599999999999	-59.043	1431.68	-0.59277	1.3032	0.14395	14.895	18.6006	112.083	-0.019043	0.14082	0.080469	45.336	-203.875	2486.47	-1.1948	1.7466	-0.52295	NaN	NaN	NaN	NaN	NaN	NaN
3.136	-33.774	-43.459	1470.04	-0.56396	1.2243	0.11992	-15.245	-9.1375	86.2567	-0.021973	0.1543	0.090332	38.221	-146.94	2437.6126	-1.1941	1.739	-0.55933	NaN	NaN	NaN	NaN	NaN	NaN
3.138	-21.276	-40.297	1478.98	-0.54004	1.1504	0.10352	-13.619	26.6251	122.4161	-0.015625	0.16924	0.092578	41.36	-159.9046	2413.6176	-1.2012	1.7305	-0.58789	NaN	NaN	NaN	NaN	NaN	NaN
3.14	7.139	-59.935	1483.506	-0.51709	1.0939	0.10391	14.096	52.184	81.9876	-0.0019535	0.18076	0.097948	26.43	-113.209	2385.861	-1.2114	1.7192	-0.61084	NaN	NaN	NaN	NaN	NaN	NaN
3.142	11.623	-84.078	1455.479	-0.48428	1.0495	0.11094	-7.814	13.2049	74.246	0.019921	0.18936	0.096386	27.29	-124.226	2413.27	-1.2168	1.7148	-0.62305	NaN	NaN	NaN	NaN	NaN	NaN
3.144	14.228	-97.133	1423.11	-0.42021	1.0151	0.12422	4.887	53.792	117.6296	0.04912	0.18672	0.094532	18.6	-100.217	2391.32	-1.2222	1.7134	-0.63818	NaN	NaN	NaN	NaN	NaN	NaN
3.146	42.418	-142.5666	1392.432	-0.32617	0.9793	0.13017	-10.991	4.9688	91.3203	0.080078	0.18506	0.094238	69.799	-142.624	2381.249	-1.2341	1.7121	-0.64429	NaN	NaN	NaN	NaN	NaN	NaN
3.148	61.3019	-171.101	1398.07	-0.2124	0.95117	0.11719	-27.711	-5.1311	111.316	0.10947	0.18379	0.090039	73.713	-108.818	2345.128	-1.2495	1.7134	-0.64404	NaN	NaN	NaN	NaN	NaN	NaN
3.15	25.357	-207.945	1400.458	-0.096875	0.9043	0.075293	-4.269	32.3464	109.844	0.12764	0.17656	0.083984	97.224	-107.8972	2334.638	-1.272	1.7153	-0.64014	NaN	NaN	NaN	NaN	NaN	NaN
3.152	18.085	-225.399	1398.802	0.0011719	0.86552	0.02002	-18.431	-17.325332	107.766	0.14365	0.16485	0.08164	114.661	-70.303	2322.413	-1.2905	1.7173	-0.63818	NaN	NaN	NaN	NaN	NaN	NaN
3.154	7.896	-231.446	1409.313	0.072656	0.82334	-0.02959	-12.711	-19.3317	152.872	0.15684	0.15518	0.084277	142.722	-92.634	2347.1482	-1.3291	1.7305	-0.63086	NaN	NaN	NaN	NaN	NaN	NaN
3.156	-10.55	-222.321	1430.73	0.10937	0.79678	-0.077246	-49.233	-30.27	127.326	0.16992	0.14404	0.082031	149.9	-100.128	2351.433	-1.3532	1.7385	-0.62183	NaN	NaN	NaN	NaN	NaN	NaN
3.158	-20.536	-213.6699	1418.745	0.1167	0.77588	-0.11426	-34.165	-56.65	117.163	0.1789	0.13301	0.074903	177.934	-117.972	2357.108	-1.375	1.7461	-0.61523	NaN	NaN	NaN	NaN	NaN	NaN
3.16	-65.037	-201.215	1434.604	0.096581	0.77715	-0.12891	-7.744	-0.950000000000001	164.126	0.18037	0.12412	0.064161	198.9545	-79.265	2323.927	-1.3921	1.7388	-0.60889	NaN	NaN	NaN	NaN	NaN	NaN
3.162	-109.8356	-182.36	1459.33	0.053516	0.79238	-0.12588	-48.5863	-41.5103	172.659	0.17608	0.1167	0.056351	201.483	-28.5979	2290.334	-1.3984	1.7285	-0.60547	NaN	NaN	NaN	NaN	NaN	NaN
3.164	-122.9299	-158.256	1472.038	-0.00039056	0.82715	-0.11612	-60.407	-70.411	204.85	0.15567	0.1167	0.049906	208.284	40.259	2244.6568	-1.4077	1.7095	-0.60693	NaN	NaN	NaN	NaN	NaN	NaN
3.166	-134.9385	-137.742	1497.652	-0.058496	0.87637	-0.098245	-59.173	-64.7696	209.706	0.13232	0.12305	0.040039	180.351	67.1254	2214.989	-1.3867	1.6875	-0.60742	NaN	NaN	NaN	NaN	NaN	NaN
3.168	-146.631	-159.1366	1514.062	-0.11035	0.94189	-0.081543	-67.607	-109.853	193.027	0.10566	0.138	0.033003	155.713	68.742	2195.485	-1.375	1.6719	-0.62109	NaN	NaN	NaN	NaN	NaN	NaN
3.17	-160.484	-182.734	1529.287	-0.14961	1.0154	-0.073633	-63.318	-84.927	277.43	0.079566	0.15979	0.034967	167.477	27.9337	2181.8579	-1.3452	1.6489	-0.62646	NaN	NaN	NaN	NaN	NaN	NaN
3.172	-140.0588	-203.375	1548.578	-0.1706	1.0833	-0.08164	-68.024	-79.6207	308.718	0.054565	0.1844	0.03652	190.5389	23.19804	2168.653	-1.3228	1.6211	-0.62134	NaN	NaN	NaN	NaN	NaN	NaN
3.174	-159.68062	-210.392	1569.579	-0.18857	1.1349	-0.095704	-90.393	-104.273	318.845	0.02361	0.21468	0.03505	168.106	73.5321	2133.393	-1.3003	1.5884	-0.62061	NaN	NaN	NaN	NaN	NaN	NaN
3.176	-137.7986	-226.108	1605.951	-0.21396	1.181	-0.11182	-73.179	-47.143	367.152	-0.0048828	0.24658	0.030762	137.034	112.014	2094.464	-1.2871	1.5488	-0.61914	NaN	NaN	NaN	NaN	NaN	NaN
3.178	-135.763	-242.699	1663.273	-0.25342	1.2246	-0.12109	-80.319	-51.668	411.338	-0.04134	0.27915	0.023051	95.818	131.746	2036.384	-1.2813	1.5313	-0.61328	NaN	NaN	NaN	NaN	NaN	NaN
3.18	-143.5005	-247.648	1682.237	-0.29765	1.2546	-0.12461	-67.446	-24.5242	539.306	-0.084226	0.30994	0.022556	45.49	104.02	2010.993	-1.2778	1.5005	-0.60303	NaN	NaN	NaN	NaN	NaN	NaN
3.182	-153.6002	-236.531	1725.815	-0.34102	1.286	-0.12188	-50.966	52.456	671.764	-0.13338	0.34896	0.014425	42.6	90.8151	1990.408	-1.282	1.4798	-0.59058	NaN	NaN	NaN	NaN	NaN	NaN
3.184	-156.327	-226.637	1756.685	-0.38281	1.3176	-0.1125	-71.465	50.12	757.482	-0.19578	0.38418	0.0089291	47.782	62.491	1963.154	-1.2847	1.4653	-0.57959	NaN	NaN	NaN	NaN	NaN	NaN
3.186	-147.154	-204.167	1795.97	-0.421	1.3501	-0.098633	-79.251	100.343	913.397	-0.28076	0.4165	-0.0058594	19.236	83.4727	1939.3343	-1.2871	1.4492	-0.56055	NaN	NaN	NaN	NaN	NaN	NaN
3.188	-110.789	-190.4555	1798.9	-0.46094	1.3833	-0.08252	-80.998	126.4905	1023.605	-0.39306	0.45852	-0.027425	14.105	78.7113	1898.4601	-1.2832	1.4453	-0.54688	NaN	NaN	NaN	NaN	NaN	NaN
3.19	-114.731	-176.989	1800.45	-0.49277	1.4209	-0.074023	-72.774	101.827	1128.969	-0.53124	0.50397	-0.054983	2.97	118.5589	1869.274	-1.2725	1.4395	-0.52783	NaN	NaN	NaN	NaN	NaN	NaN
3.192	-110.456	-181.086	1818.18	-0.51191	1.4598	-0.078808	-23.812	137.24	1235.62	-0.69591	0.56408	-0.063793	42.45	132.259	1828.455	-1.2488	1.4333	-0.50977	NaN	NaN	NaN	NaN	NaN	NaN
3.194	-66.372	-176.496	1845.92	-0.51933	1.4961	-0.093652	-36.836	92.926	1260.43	-0.88144	0.64449	-0.05808	44.66	176.976	1798.2074	-1.2148	1.4199	-0.49658	NaN	NaN	NaN	NaN	NaN	NaN
3.196	-48.272	-181.7766	1851.84	-0.51015	1.534	-0.12011	-59.882	40.4156	1328.76	-1.0713	0.74609	-0.026855	72.239	154.031	1764.5955	-1.1597	1.4028	-0.48584	NaN	NaN	NaN	NaN	NaN	NaN
3.198	-48.038	-184.855	1853.056	-0.48828	1.5615	-0.13965	-27.212	9.5384	1385.89	-1.239	0.86666	0.023961	68.42	181.0026	1721.498	-1.1328	1.3887	-0.4834	NaN	NaN	NaN	NaN	NaN	NaN
3.2	-34.788	-201.407	1860.676	-0.46553	1.5868	-0.15215	-42.1168	-105.676	1379.03	-1.3823	0.99377	0.096203	46.801	153.453	1657.9404	-1.0718	1.356	-0.47412	NaN	NaN	NaN	NaN	NaN	NaN
3.202	-50.688	-203.2696	1862.71	-0.45459	1.6101	-0.16426	-55.691	-161.837	1400.41	-1.4673	1.1165	0.16452	45.06	216.9212	1617.081	-1.0357	1.3262	-0.47022	NaN	NaN	NaN	NaN	NaN	NaN
3.204	-72.492	-185.3509	1868.36	-0.44717	1.6325	-0.15996	-35.994	-187.808	1353.46	-1.4969	1.2144	0.22439	67.102	189.4843	1562.654	-1.0044	1.2993	-0.45947	NaN	NaN	NaN	NaN	NaN	NaN
3.206	-98.429	-188.8219	1872.71	-0.4624	1.6499	-0.14932	-51.153	-239.226	1291.88	-1.459	1.2842	0.27686	78.615	241.488	1500.492	-0.98047	1.2656	-0.44336	NaN	NaN	NaN	NaN	NaN	NaN
3.208	-106.196	-193.6775	1896.8	-0.48828	1.6699	-0.13574	-38.537	-181.034	1304.88	-1.3646	1.314	0.30211	68.528	209.97	1460.485	-0.9624	1.2524	-0.43115	NaN	NaN	NaN	NaN	NaN	NaN
3.21	-128.26	-198.102	1931.71	-0.52304	1.6926	-0.12139	-57.012	-169.617	1255.056	-1.2423	1.3006	0.30523	88.242	256.344	1422.203	-0.92383	1.2246	-0.40137	NaN	NaN	NaN	NaN	NaN	NaN
3.212	-130.427	-203.078	1954.55	-0.56387	1.7134	-0.10498	-41.449	-142.916	1276.34	-1.1241	1.2486	0.28434	108.88262	227.177	1397.1837	-0.89234	1.2024	-0.37818	NaN	NaN	NaN	NaN	NaN	NaN
3.214	-145.514	-192.661	1957.223	-0.60527	1.7306	-0.088184	-19.153	-51.49	1286.45	-1.0259	1.1704	0.24584	138.6005	270.957	1387.1012	-0.85693	1.1802	-0.3584	NaN	NaN	NaN	NaN	NaN	NaN
3.216	-164.322	-189.243	1973.89	-0.65088	1.7521	-0.073828	-27.399	-47.104	1260.802	-0.9375	1.0762	0.21143	140.40212	223.3781	1350.144	-0.79834	1.147	-0.34326	NaN	NaN	NaN	NaN	NaN	NaN
3.218	-141.986	-165.828	1968.97	-0.69287	1.7681	-0.052246	-10.253	-3.566	1295.281	-0.85336	0.98452	0.19774	125.748	265.397	1301.959	-0.76953	1.1191	-0.33008	NaN	NaN	NaN	NaN	NaN	NaN
3.22	-160.778	-151.7051	1964.48	-0.73379	1.7797	-0.036133	-49.884	27.917	1287.428	-0.76686	0.90739	0.19169	88.02	217.8606	1249.7725	-0.7168	1.0742	-0.3125	NaN	NaN	NaN	NaN	NaN	NaN
3.222	-177.8927	-151.5525	1960.28	-0.77451	1.7931	-0.018359	-39.854	-11.934	1265.636	-0.68084	0.83765	0.19026	51.993	284.532	1193.527	-0.68017	1.0434	-0.29834	NaN	NaN	NaN	NaN	NaN	NaN
3.224	-191.54281	-163.99	1986.585	-0.81397	1.8044	0.0042969	-11.953	-27.637	1304.78	-0.59179	0.79271	0.17847	28.798	239.347	1177.068	-0.64795	1.0103	-0.28662	NaN	NaN	NaN	NaN	NaN	NaN
3.226	-195.4603	-157.463	1986.38	-0.84902	1.8111	0.016114	-68.464	-98.754	1317.726	-0.50586	0.75195	0.15479	26.104	287.51	1132.103	-0.61377	0.97119	-0.26074	NaN	NaN	NaN	NaN	NaN	NaN
3.228	-210.6	-139.289	1976.097	-0.87646	1.8169	0.029785	-68.394	-202.8273	1378.276	-0.42748	0.72859	0.11154	7.45	231.80665	1098.461	-0.59473	0.95605	-0.24463	NaN	NaN	NaN	NaN	NaN	NaN
3.23	-209.361	-121.359	1965.525	-0.89609	1.8164	0.04043	-69.095	-229.6399	1428.811	-0.35891	0.70951	0.064794	12.018	281.535	1034.451	-0.57031	0.92871	-0.21094	NaN	NaN	NaN	NaN	NaN	NaN
3.232	-203.277	-118.2813	1978.546	-0.9082	1.8164	0.043946	-99.188	-299.866	1469.633	-0.31591	0.70203	0.0076517	-38.524	254.7649	974.5887	-0.54688	0.91113	-0.18627	NaN	NaN	NaN	NaN	NaN	NaN
3.234	-202.0186	-108.0773	1993.72	-0.90938	1.8028	0.04707	-111.788	-315.931	1558.84	-0.30583	0.70862	-0.042411	-46.841	327.081	928.4585	-0.52344	0.88867	-0.15918	NaN	NaN	NaN	NaN	NaN	NaN
3.236	-173.4525	-95.21	2006.14	-0.90313	1.7902	0.049707	-98.109	-287.922	1603.631	-0.33105	0.72461	-0.083008	-74.761	291.676	907.965	-0.49951	0.86182	-0.13086	NaN	NaN	NaN	NaN	NaN	NaN
3.238	-146.443	-96.409	2020.04	-0.89404	1.7681	0.050781	-136.385	-312.381	1639.72	-0.40018	0.76294	-0.09393	-58.092	326.598	846.137	-0.48633	0.84375	-0.11914	NaN	NaN	NaN	NaN	NaN	NaN
3.24	-133.916	-105.6507	2039.72	-0.88243	1.7399	0.050879	-148.192	-256.219	1725.44	-0.50783	0.82193	-0.074378	-65.3513	263.418	832.141	-0.46289	0.81885	-0.089355	NaN	NaN	NaN	NaN	NaN	NaN
3.242	-107.809	-119.043	2027.19	-0.87149	1.7125	0.054199	-145.918	-220.469	1777.33	-0.63116	0.90151	-0.035303	-70.823	297.678	768.632	-0.44434	0.79541	-0.071778	NaN	NaN	NaN	NaN	NaN	NaN
3.244	-129.222	-116.983	1996	-0.85859	1.684	0.056934	-125.562	-215.952	1832.48	-0.73383	0.98287	0.023151	-94.5652	259.48	753.456	-0.42383	0.76953	-0.059082	NaN	NaN	NaN	NaN	NaN	NaN
3.246	-116.003	-116.732	1993.88	-0.84619	1.6589	0.052637	-128.724	-148.7275	1883.46	-0.80664	1.0625	0.08252	-95.791	324.314	682.7348	-0.39844	0.74854	-0.041992	NaN	NaN	NaN	NaN	NaN	NaN
3.248	-97.266	-113.714	2009.89	-0.8335	1.6333	0.068359	-155.4468	-160.06	1858.79	-0.84607	1.1201	0.13005	-111.9626	281.634	637.876	-0.38477	0.73633	-0.033203	NaN	NaN	NaN	NaN	NaN	NaN
3.25	-56.905	-108.3241	1986.12	-0.82022	1.6151	0.070899	-139.1809	-157.975	1872.43	-0.85635	1.1597	0.15195	-89.627	284.034	593.449	-0.35352	0.70703	-0.0097656	NaN	NaN	NaN	NaN	NaN	NaN
3.252	-104.616	-117.6825	1974.99	-0.80039	1.5976	0.08125	-151.0421	-133.326	1872.199	-0.84698	1.1659	0.1422	-79.0142	201.494	580.5117	-0.32617	0.68701	0.0026856	NaN	NaN	NaN	NaN	NaN	NaN
3.254	-101.187	-109.1265	1941.61	-0.78398	1.5867	0.084375	-154.982	-188.105	1887.851	-0.83214	1.1548	0.11027	-43.616	203.205	551.453	-0.29883	0.66943	0.015137	NaN	NaN	NaN	NaN	NaN	NaN
3.256	-104.212	-103.0864	1942.59	-0.76016	1.5734	0.093555	-147.087	-195.411	1935.559	-0.81055	1.1367	0.072754	-36.80658	185.966	553.852	-0.25684	0.64111	0.023438	NaN	NaN	NaN	NaN	NaN	NaN
3.258	-100.1	-72.08141	1920.32	-0.73828	1.5645	0.092773	-163.149	-228.4647	1942.133	-0.79932	1.121	0.038178	-3.906	213.282	492.6744	-0.23584	0.62646	0.03125	NaN	NaN	NaN	NaN	NaN	NaN
3.26	-118.917	-56.0928	1906.98	-0.7166	1.5572	0.092285	-160.7156	-284.317	1980.56	-0.80831	1.1239	0.017183	-34.334	185.118	478.8633	-0.18213	0.60059	0.032227	NaN	NaN	NaN	NaN	NaN	NaN
3.262	-119.073	-52.9023	1895.31	-0.69112	1.5486	0.10059	-161.5537	-268.681	2047.02	-0.83917	1.1407	0.005076	-15.308	194.777	430.9669	-0.14673	0.57715	0.033936	NaN	NaN	NaN	NaN	NaN	NaN
3.264	-114.452	-51.1285	1899.29	-0.66768	1.533	0.10528	-163.4502	-288.26	2069.81	-0.88252	1.1753	-0.01221	-16.42	174.0014	394.551	-0.10986	0.55859	0.036133	NaN	NaN	NaN	NaN	NaN	NaN
3.266	-126.828	-45.6936	1878.26	-0.64561	1.5247	0.11504	-133.757	-290.979	2146.43	-0.92139	1.2212	-0.030273	22.664	183.25	362.431	-0.066406	0.53076	0.036133	NaN	NaN	NaN	NaN	NaN	NaN
3.268	-156.5169	-54.582	1840.71	-0.62305	1.5195	0.11621	-121.083	-241.73	2190.94	-0.95391	1.2828	-0.03955	0.968	167.0271	348.432	-0.044434	0.51514	0.034668	NaN	NaN	NaN	NaN	NaN	NaN
3.27	-150.224	-72.216	1831.57	-0.60273	1.5133	0.10908	-116.399	-258.711	2229.38	-0.9832	1.3457	-0.037891	-2.089	165.251	315.2711	-0.0083008	0.49463	0.04248	NaN	NaN	NaN	NaN	NaN	NaN
3.272	-161.537	-77.259	1797.53	-0.5793	1.4996	0.10371	-89.687	-244.012	2272.2	-1.0117	1.4	-0.034375	-21.024	172.4968	294.31	0.016846	0.48413	0.047607	NaN	NaN	NaN	NaN	NaN	NaN
3.274	-170.7604	-78.003	1777.87	-0.55781	1.4875	0.10332	-113.403	-237.732	2269.47	-1.0508	1.4341	-0.040821	-2.341	177.167	264.8284	0.035156	0.46729	0.049316	NaN	NaN	NaN	NaN	NaN	NaN
3.276	-205.5765	-70.473	1757.45	-0.54522	1.4692	0.10576	-108.411	-245.389	2279.07	-1.0913	1.4595	-0.040527	-21.729	198.165	247.195	0.061523	0.44873	0.058594	NaN	NaN	NaN	NaN	NaN	NaN
3.278	-192.505	-62.4478	1753.85	-0.53418	1.4517	0.10693	-102.489	-205.688	2298.41	-1.1431	1.4785	-0.02998	-24.703	183.63	246.542	0.067383	0.44189	0.060059	NaN	NaN	NaN	NaN	NaN	NaN
3.28	-190.5022	-44.1024	1735.95	-0.52695	1.4348	0.11035	-124.254	-190.33	2297.615	-1.2039	1.4947	-0.020898	-52.1422	183.581	232.7779	0.081055	0.41846	0.057617	NaN	NaN	NaN	NaN	NaN	NaN
3.282	-205.675	-29.3848	1723.23	-0.52109	1.416	0.11064	-113.275	-185.5622	2344.32	-1.2664	1.5103	-0.0091794	-68.816	154.286	200.12	0.085205	0.40137	0.060546	NaN	NaN	NaN	NaN	NaN	NaN
3.284	-179.1519	-27.913	1710.78	-0.5125	1.4008	0.11064	-149.313	-142.491	2341.976	-1.3318	1.5284	0.0070312	-93.416	151.74	177.8418	0.083984	0.38672	0.062988	NaN	NaN	NaN	NaN	NaN	NaN
3.286	-150.304	-17.2021	1690.66	-0.50137	1.3877	0.11094	-147.698	-151.8693	2344.346	-1.4043	1.5469	0.026855	-91.073	105.787	163.77003	0.081543	0.37012	0.061035	NaN	NaN	NaN	NaN	NaN	NaN
3.288	-149.117	-4.8394	1667.29	-0.48828	1.3691	0.11133	-124.229	-139.2457	2383.987	-1.4738	1.5695	0.046387	-115.0582	115.165	160.2319	0.073242	0.36279	0.064453	NaN	NaN	NaN	NaN	NaN	NaN
3.29	-140.636	5.0298	1644.98	-0.46934	1.3513	0.11191	-160.9702	-96.088	2391.714	-1.5327	1.6001	0.059375	-102.5095	77.592	140.3893	0.070313	0.34814	0.074707	NaN	NaN	NaN	NaN	NaN	NaN
3.292	-126.041	-7.8008	1631.77	-0.4501	1.3318	0.11045	-148.241	-106.06261	2434.45	-1.5878	1.6325	0.069532	-111.922	115.896	136.0047	0.069825	0.34057	0.088623	NaN	NaN	NaN	NaN	NaN	NaN
3.294	-110.405	-17.4124	1619.16	-0.43291	1.3094	0.10771	-148.63	-78.9633	2476.2	-1.6338	1.6723	0.080567	-114.134	69.19	146.8	0.074707	0.33057	0.098633	NaN	NaN	NaN	NaN	NaN	NaN
3.296	-104.709	-15.2215	1576.005	-0.41142	1.2837	0.10498	-155.563	-68.6302	2484.52	-1.6636	1.7017	0.085938	-113.737	92.856	147.963	0.089355	0.31738	0.10547	NaN	NaN	NaN	NaN	NaN	NaN
3.298	-99.994	-7.352	1538.812	-0.40137	1.2544	0.10742	-144.906	-103.08	2527.05	-1.6831	1.7192	0.095508	-98.544	24.2973	154.792	0.09668	0.31006	0.11133	NaN	NaN	NaN	NaN	NaN	NaN
3.3	-81.185	-0.5962	1523.32	-0.38106	1.2361	0.10039	-175.786	-89.495	2526.33	-1.6906	1.7352	0.095019	-91.561	69.181	121.5528	0.1167	0.28418	0.10303	NaN	NaN	NaN	NaN	NaN	NaN
3.302	-96.478	8.781	1512.27	-0.37207	1.2126	0.096485	-182.947	-125.303	2502.66	-1.6848	1.7363	0.087988	-94.32027	17.9564	103.0981	0.13476	0.26538	0.098631	NaN	NaN	NaN	NaN	NaN	NaN
3.304	-86.151	21.8638	1468.939	-0.35879	1.1907	0.094923	-173.406	-129.124	2487.25	-1.67	1.7374	0.077832	-75.218	59.955	108.4411	0.15186	0.24365	0.095703	NaN	NaN	NaN	NaN	NaN	NaN
3.306	-88.3	0.732699999999999	1457.148	-0.34395	1.1717	0.092968	-201.52937	-65.51132	2439.601	-1.644	1.731	0.074707	-61.60311	-5.5302	104.552	0.1709	0.21582	0.090332	NaN	NaN	NaN	NaN	NaN	NaN
3.308	-57.155	-6.6237	1450.35	-0.33447	1.1504	0.092285	-164.275	-80.0118	2458.92	-1.6149	1.7222	0.066016	-45.096	31.8671	107.689	0.17676	0.19971	0.087402	NaN	NaN	NaN	NaN	NaN	NaN
3.31	-58.856	-1.41138	1447.55	-0.31942	1.1329	0.092087	-165.461	-39.73	2452.716	-1.5914	1.7125	0.060938	-10.028	-26.4789	114.127	0.18799	0.17383	0.083984	NaN	NaN	NaN	NaN	NaN	NaN
3.312	-65.587	23.7613	1421.7	-0.30497	1.1146	0.086127	-176.5615	-36.81496	2430.67	-1.5722	1.7004	0.052344	6.25700000000001	25.098	94.9823	0.2041	0.14404	0.080566	NaN	NaN	NaN	NaN	NaN	NaN
3.314	-75.951	32.5577	1387.433	-0.29129	1.093	0.081442	-136.64	-60.924	2423.73	-1.5623	1.6869	0.054492	22.726	-12.1623	116.717	0.21289	0.13281	0.080566	NaN	NaN	NaN	NaN	NaN	NaN
3.316	-81.967	45.804	1353.416	-0.27548	1.0751	0.075288	-150.9624	14.0762	2402.539	-1.5562	1.6802	0.055664	15.693	56.189	112.9062	0.22803	0.10156	0.077637	NaN	NaN	NaN	NaN	NaN	NaN
3.318	-111.149	59.175	1313.6	-0.26367	1.061	0.065918	-125.217	16.9355	2385.78	-1.5513	1.6636	0.054297	37.713	-7.6835	104.2655	0.23584	0.082764	0.078369	NaN	NaN	NaN	NaN	NaN	NaN
3.32	-116.304	62.1	1274.946	-0.24662	1.0351	0.064656	-106.777	37.547	2364.91	-1.5444	1.6532	0.053613	34.688	24.8386	91.017	0.24219	0.066895	0.076172	NaN	NaN	NaN	NaN	NaN	NaN
3.322	-118.916	56.1254	1263.038	-0.2384	1.0197	0.059189	-125.928	98.627	2323.5	-1.5359	1.6407	0.059473	21.108	-48.188	119.02482	0.25	0.036621	0.072754	NaN	NaN	NaN	NaN	NaN	NaN
3.324	-117.5982	51.75	1248.471	-0.22944	1.0014	0.047543	-110.649	40.6936	2310.82	-1.532	1.6254	0.063379	6.84	-1.302	110.4838	0.25391	0.022461	0.069336	NaN	NaN	NaN	NaN	NaN	NaN
3.326	-132.5681	57.4959	1236.134	-0.22443	0.97994	0.038895	-90.238	38.9626	2303.01	-1.521	1.6196	0.072266	33.736	-29.9072	126.365	0.25195	0.003418	0.068848	NaN	NaN	NaN	NaN	NaN	NaN
3.328	-129.4802	58.2092	1201.193	-0.21387	0.96582	0.032227	-99.798	10.86	2293.73	-1.5114	1.6035	0.073047	13.653	39.5756	106.1812	0.25025	-0.01416	0.063721	NaN	NaN	NaN	NaN	NaN	NaN
3.33	-127.073	68.7084	1181.933	-0.20881	0.9484	0.029678	-112.45	-21.085	2286.5	-1.4915	1.5923	0.07832	-3.035	4.606	100.901	0.24854	-0.030273	0.0625	NaN	NaN	NaN	NaN	NaN	NaN
3.332	-123.278	93.7062	1167.301	-0.20103	0.92847	0.024735	-117.93	38.022	2223.512	-1.4724	1.5786	0.079492	-6.155	32.0509	84.522	0.24121	-0.048828	0.058594	NaN	NaN	NaN	NaN	NaN	NaN
3.334	-103.667	99.473	1135.712	-0.19048	0.91009	0.022659	-120.908	45.6271	2172.67	-1.4398	1.5595	0.083399	-19.388	-19.2194	86.485	0.23242	-0.057129	0.058105	NaN	NaN	NaN	NaN	NaN	NaN
3.336	-95.399	89.681	1126.134	-0.17413	0.88734	0.021722	-124.83	76.8374	2161.58	-1.4082	1.5371	0.10205	-25.654	12.852	55.444	0.20703	-0.071289	0.049805	NaN	NaN	NaN	NaN	NaN	NaN
3.338	-115.045	68.629	1108.25	-0.15771	0.86328	0.013184	-134.353	108.90555	2136.04	-1.3788	1.5118	0.11875	-57.7618	-10.2405	70.996	0.17994	-0.07788	0.043213	NaN	NaN	NaN	NaN	NaN	NaN
3.34	-78.384	64.4522	1082.309	-0.1485	0.84328	0.0040134	-118.581	56.323	2109.24	-1.345	1.4945	0.1165	-68.059	26.073	93.0437	0.14648	-0.080566	0.042969	NaN	NaN	NaN	NaN	NaN	NaN
3.342	-80.419	59.537	1045.538	-0.13835	0.82069	-0.0032622	-129.965	93.853	2090.05	-1.2875	1.4761	0.11377	-90.085	17.966	108.775	0.081055	-0.081055	0.040039	NaN	NaN	NaN	NaN	NaN	NaN
3.344	-87.415	61.324	1028.207	-0.13415	0.80104	-0.011216	-131.871	107.341	2054.75	-1.2217	1.4552	0.10244	-84.392	42.681	83.0911	0.04834	-0.073242	0.047363	NaN	NaN	NaN	NaN	NaN	NaN
3.346	-64.643	59.034	1010.04	-0.12064	0.77657	-0.021278	-122.876	98.189	2020.44	-1.1558	1.4302	0.095703	-99.6814	37.0729	86.17376	-0.023438	-0.05127	0.064941	NaN	NaN	NaN	NaN	NaN	NaN
3.348	-39.176	81.9254	983.096	-0.11035	0.75977	-0.021973	-152.482	144.4636	1959.699	-1.1013	1.3882	0.09043	-96.6887	45.9428	85.1627	-0.071777	-0.02832	0.083008	NaN	NaN	NaN	NaN	NaN	NaN
3.35	-27.575	101.538	971.048	-0.10762	0.73925	-0.027733	-175.549	119.0367	1887.774	-1.0572	1.3523	0.08877	-87.59	40.46	108.802	-0.10498	-0.0068359	0.099609	NaN	NaN	NaN	NaN	NaN	NaN
3.352	-13.422	102.475	964.187	-0.10038	0.71559	-0.028656	-153.313	128.2684	1862.448	-1.0119	1.3133	0.086035	-86.2311	36.5703	110.761	-0.11914	0.022461	0.11865	NaN	NaN	NaN	NaN	NaN	NaN
3.354	19.738	93.399	957.57	-0.091439	0.69768	-0.039164	-164.1291	135.0172	1833.313	-0.96651	1.2796	0.081055	-85.2777	21.91	90.8326	-0.12305	0.038574	0.12939	NaN	NaN	NaN	NaN	NaN	NaN
3.356	-2.679	90.4102	938.42	-0.085641	0.67687	-0.045843	-166.0502	89.951	1823.14	-0.92334	1.2505	0.081543	-69.804	1.556	85.8361	-0.10205	0.053711	0.12842	NaN	NaN	NaN	NaN	NaN	NaN
3.358	-4.482	90.3474	894.068	-0.071777	0.66113	-0.052734	-154.285	128.423	1784.474	-0.88359	1.2191	0.080371	-55.415	10.94293	99.6926	-0.073242	0.064697	0.12939	NaN	NaN	NaN	NaN	NaN	NaN
3.36	-5.981	94.36385	874.469	-0.062951	0.64088	-0.061693	-154.232	131.591	1730.961	-0.84834	1.1903	0.079102	-37.651	23.273	97.957	-0.042969	0.063477	0.12354	NaN	NaN	NaN	NaN	NaN	NaN
3.362	-5.665	104.4495	848.473	-0.050265	0.62557	-0.071034	-128.332	123.969	1698.05	-0.81748	1.1634	0.080664	-18.289	53.356	108.29	0.0068359	0.05127	0.11768	NaN	NaN	NaN	NaN	NaN	NaN
3.364	-11.568	105.2328	831.05	-0.040309	0.60345	-0.081147	-115.073	154.306	1664.26	-0.78584	1.1322	0.083398	-9.725	38.613	123.041	0.033203	0.039551	0.11133	NaN	NaN	NaN	NaN	NaN	NaN
3.366	-24.707	109.097	797.463	-0.024859	0.58767	-0.085535	-129.855	126.469	1642.84	-0.75977	1.1035	0.084961	-16.208	31.0804	122.391	0.07666	0.017578	0.10498	NaN	NaN	NaN	NaN	NaN	NaN
3.368	-33.129	109.113	777.374	-0.013184	0.56641	-0.088867	-81.57	139.9338	1613.17	-0.7291	1.0726	0.08291	16.756	8.50802	131.999	0.10718	-0.0048828	0.093994	NaN	NaN	NaN	NaN	NaN	NaN
3.37	-33.359	122.5966	780.573	-0.0064397	0.54961	-0.097316	-79.46	162.2536	1548.329	-0.70088	1.0435	0.077149	15.816	21.014	118.4742	0.1333	-0.025879	0.088867	NaN	NaN	NaN	NaN	NaN	NaN
3.372	-15.557	125.8647	768.646	0.0025212	0.53241	-0.097882	-85.289	131.526	1508.55	-0.67197	1.0188	0.071289	38.31	3.0168	97.55	0.1582	-0.051758	0.08252	NaN	NaN	NaN	NaN	NaN	NaN
3.374	-43.958	97.763	758.493	0.013577	0.51191	-0.10542	-74.469	166.9524	1472.61	-0.63946	0.99531	0.068555	12.71	30.9822	99.90923	0.16211	-0.064453	0.083008	NaN	NaN	NaN	NaN	NaN	NaN
3.376	-35.86	90.181	734.661	0.01129	0.49443	-0.10566	-73.522	164.467	1402.975	-0.61182	0.96924	0.0625	26.011	3.3534	123.051	0.17578	-0.091797	0.075195	NaN	NaN	NaN	NaN	NaN	NaN
3.378	-52.1008	89.539	719.619	0.012695	0.479	-0.10938	-77.383	156.275062	1352.28	-0.58252	0.94209	0.055761	25.014	19.207	105.734	0.17724	-0.10132	0.072998	NaN	NaN	NaN	NaN	NaN	NaN
3.38	-59.072	105.167	685.341	0.020443	0.46284	-0.11028	-57.237	200.653	1305.307	-0.55849	0.91787	0.045899	44.854	-15.5059	119.623	0.17676	-0.11035	0.068359	NaN	NaN	NaN	NaN	NaN	NaN
3.382	-74.24636	98.8792	673.598	0.020895	0.44956	-0.11621	-44.815	176.007	1289.188	-0.53389	0.88818	0.039258	-7.806	12.7512	101.1906	0.17188	-0.10742	0.066895	NaN	NaN	NaN	NaN	NaN	NaN
3.384	-68.618	108.3825	649.714	0.019721	0.43943	-0.11778	-30.052	190.347	1262.72	-0.51201	0.86319	0.034863	-22.708	-16.251	96.076	0.1665	-0.10742	0.064941	NaN	NaN	NaN	NaN	NaN	NaN
3.386	-71.2354	120.3808	631.478	0.017388	0.42861	-0.12246	-44.497	217.3624	1199.47	-0.48682	0.83838	0.025391	-8.005	20.1821	114.641	0.1543	-0.089355	0.067871	NaN	NaN	NaN	NaN	NaN	NaN
3.388	-73.701	113.46802	627.024	0.019531	0.41699	-0.12598	-65.847	194.1366	1155.452	-0.46035	0.8168	0.020898	-41.7727	-33.6684	171.605	0.1399	-0.073487	0.068359	NaN	NaN	NaN	NaN	NaN	NaN
3.39	-59.683	97.988	615.394	0.019242	0.41045	-0.12441	-43.993	245.1103	1134.019	-0.43428	0.78994	0.015918	-28.674	-15.452	186.471	0.12354	-0.059082	0.061035	NaN	NaN	NaN	NaN	NaN	NaN
3.392	-50.377	92.959	605.623	0.017288	0.40509	-0.12538	-52.39	223.0295	1105.83	-0.40928	0.76729	0.0045898	-26.44	-76.4263	227.3735	0.10498	-0.020508	0.061035	NaN	NaN	NaN	NaN	NaN	NaN
3.394	-28.781	98.687	576.146	0.017283	0.39844	-0.13515	-73.731	195.6356	1068	-0.38076	0.74092	-0.0061525	-83.565	-37.187	248.6882	0.09082	-0.0014648	0.06543	NaN	NaN	NaN	NaN	NaN	NaN
3.396	-14.158	97.9045	553.676	0.013283	0.39317	-0.13389	-67.106	217.742	1031.178	-0.35352	0.71631	-0.015625	-121.845	-62.083	339.66	0.060059	0.03418	0.067871	NaN	NaN	NaN	NaN	NaN	NaN
3.398	-21.939	103.4744	542.538	0.0043945	0.38574	-0.13281	-72.67	171.87338	993.09	-0.33105	0.68633	-0.028223	-99.22291	-8.004	394.737	0.034668	0.063477	0.070068	NaN	NaN	NaN	NaN	NaN	NaN
3.4	11.127	117.8658	531.338	0.00048653	0.38095	-0.13223	-56.402	188.6701	968.36	-0.30967	0.65596	-0.044043	-105.945	-41.099	471.658	0.0024414	0.093262	0.063965	NaN	NaN	NaN	NaN	NaN	NaN
3.402	3.384	126.109	506.947	-0.0080116	0.37627	-0.13779	-97.7574	186.491	927.491	-0.29248	0.62627	-0.060449	-120.16	-13.415	522.952	-0.04834	0.12158	0.048828	NaN	NaN	NaN	NaN	NaN	NaN
3.404	-1.498	124.054	498.493	-0.019729	0.37314	-0.1335	-107.536	161.103	898.56	-0.28789	0.59648	-0.070703	-91.5488	-44.602	653.51	-0.091309	0.13965	0.041992	NaN	NaN	NaN	NaN	NaN	NaN
3.406	-2.766	109.7945	498.118	-0.032912	0.37363	-0.13535	-53.815	205.958	869.879	-0.2832	0.57715	-0.087891	-134.3866	23.371316	805.82	-0.19482	0.17676	0.020508	NaN	NaN	NaN	NaN	NaN	NaN
3.408	31.16	111.1431	487.676	-0.047363	0.37549	-0.12939	-58.75	178.325	832.958	-0.28848	0.55791	-0.090332	-109.11319	55.809	982.22	-0.28637	0.21411	0.018555	NaN	NaN	NaN	NaN	NaN	NaN
3.41	20.709	105.2477	458.012	-0.061229	0.37236	-0.12285	-74.022	169.687	824.09	-0.28457	0.54316	-0.091309	-93.628	133.407	1113.74	-0.37451	0.24512	0.025879	NaN	NaN	NaN	NaN	NaN	NaN
3.412	1.9	106.5271	431.299	-0.076366	0.37432	-0.11787	-36.247	204.2772	778.09	-0.27793	0.53301	-0.089746	-70.504	116.506	1271.8	-0.479	0.30615	0.04248	NaN	NaN	NaN	NaN	NaN	NaN
3.414	31.678	112.9071	408.648	-0.095116	0.37705	-0.11397	-44.256	193.52575	726.97	-0.27012	0.51924	-0.093652	-7.557	123.589	1410.47	-0.52441	0.33789	0.047363	NaN	NaN	NaN	NaN	NaN	NaN
3.416	23.152	119.1633	394.337	-0.11133	0.37813	-0.11035	-46.025	226.1735	701.34	-0.25684	0.50977	-0.094727	16.868	63.971	1550.91	-0.61914	0.40137	0.049316	NaN	NaN	NaN	NaN	NaN	NaN
3.418	17.931	112.1995	401.725	-0.12695	0.38232	-0.10596	-41.809	216.8089	668.374	-0.24395	0.49082	-0.10117	43.308	45.4538	1598.8	-0.69385	0.44873	0.039551	NaN	NaN	NaN	NaN	NaN	NaN
3.42	-3.528	110.0574	381.771	-0.14043	0.37881	-0.097169	-16.817	171.834	656.57	-0.22685	0.475	-0.10518	80.41	-29.3344	1640.37	-0.7832	0.49512	0.016113	NaN	NaN	NaN	NaN	NaN	NaN
3.422	0.230999999999998	104.7965	375.102	-0.1543	0.37519	-0.096485	-0.292000000000002	190.684	625.41	-0.21123	0.46289	-0.10596	164.867	-81.5951	1658.82	-0.93652	0.55664	-0.025391	NaN	NaN	NaN	NaN	NaN	NaN
3.424	-1.956	110.1038	376.413	-0.16992	0.37793	-0.089062	-11.547	163.372	574.695	-0.19941	0.44531	-0.11191	174.5445	-163.632	1705.26	-1.0283	0.59619	-0.043457	NaN	NaN	NaN	NaN	NaN	NaN
3.426	-14.843	96.0549	362.634	-0.18057	0.37578	-0.080566	-0.0500000000000043	161.5394	551	-0.18945	0.43359	-0.1123	183.967	-210.479	1693.55	-1.2261	0.68213	-0.058594	NaN	NaN	NaN	NaN	NaN	NaN
3.428	-44.895	80.404	349.684	-0.18848	0.36914	-0.07666	5.63	182.655	536.19	-0.18262	0.41445	-0.10381	149.433	-243.3	1700.42	-1.3689	0.76977	-0.048828	NaN	NaN	NaN	NaN	NaN	NaN
3.43	-48.8628	80.4624	326.895	-0.19365	0.36377	-0.073438	-18.349	149.574957	497.57	-0.17451	0.40498	-0.1085	151.19	-241.34	1685.7	-1.4839	0.86768	-0.023438	NaN	NaN	NaN	NaN	NaN	NaN
3.432	-40.6591	92.6684	300.02	-0.19951	0.35693	-0.066309	4.756	155.8269	478	-0.16709	0.39287	-0.10967	128.762	-236.969	1728.58	-1.5718	1.0093	0.043457	NaN	NaN	NaN	NaN	NaN	NaN
3.434	-59.2505	97.8373	300.173	-0.1956	0.34873	-0.062793	12.212	141.229	457.434	-0.15713	0.38447	-0.11015	97.105	-233.33	1777.43	-1.5771	1.0703	0.078125	NaN	NaN	NaN	NaN	NaN	NaN
3.436	-51.681	87.5542	289.679	-0.19639	0.33691	-0.059961	3.015	113.511	454.72	-0.14697	0.375	-0.1123	85.339	-186.516	1793.64	-1.5098	1.1719	0.13721	NaN	NaN	NaN	NaN	NaN	NaN
3.438	-45.794	78.5028	284.945	-0.18994	0.32568	-0.060547	30.084	129.953	453.66	-0.14072	0.36729	-0.11328	81.492	-158.055	1776.98	-1.4073	1.2109	0.15844	NaN	NaN	NaN	NaN	NaN	NaN
3.44	-46.9199	88.27	262.482	-0.18369	0.31172	-0.060547	-3.159	111.815	394.82	-0.12178	0.35791	-0.11367	76.363	-78.2331	1781.63	-1.2832	1.2285	0.15283	NaN	NaN	NaN	NaN	NaN	NaN
3.442	-54.8067	74.854	270.639	-0.17099	0.30146	-0.059179	0.789999999999999	118.6407	358.43	-0.10616	0.34971	-0.11836	75.562	-59.403	1725.61	-1.1069	1.2056	0.12842	NaN	NaN	NaN	NaN	NaN	NaN
3.444	-30.173	67.11	271.21	-0.1585	0.28389	-0.058399	16.965	137.713	333.39	-0.086621	0.34258	-0.12402	47.09	-25.9391	1706.79	-1.0293	1.168	0.10693	NaN	NaN	NaN	NaN	NaN	NaN
3.446	-10.088	57.467	260.833	-0.14307	0.26807	-0.061328	-40.909	109.2139	313.83	-0.067383	0.32764	-0.12891	60.997	-130.448	1665.67	-0.89209	1.0532	0.063965	NaN	NaN	NaN	NaN	NaN	NaN
3.448	-35.459	70.8058	232.081	-0.12256	0.25635	-0.055176	-18.624	124.938	302.37	-0.044629	0.31914	-0.13134	14.616	-201.768	1656.98	-0.81934	0.95215	0.044922	NaN	NaN	NaN	NaN	NaN	NaN
3.45	-5.165	69.397	223.839	-0.10107	0.24131	-0.05498	-29.791	107.1486	263.888	-0.021387	0.31045	-0.1417	-22.992	-342.37	1697.73	-0.76318	0.85986	0.030762	NaN	NaN	NaN	NaN	NaN	NaN
3.452	-12.229	60.336	224.798	-0.077246	0.22813	-0.060059	-54.554	87.003	248.698	0.0063476	0.30069	-0.1503	-58.723	-386.64	1744.28	-0.71826	0.7583	0.026367	NaN	NaN	NaN	NaN	NaN	NaN
3.454	3.541	64.5547	219.728	-0.04873	0.21055	-0.062793	-14.683	100.1	248.368	0.029004	0.28496	-0.1498	-92.14	-433.37	1763.71	-0.68799	0.70898	0.031983	NaN	NaN	NaN	NaN	NaN	NaN
3.456	-6.26300000000001	59.541	223.01	-0.018848	0.18916	-0.072656	-35.798	77.632	207.855	0.059082	0.27002	-0.15625	-164.0893	-403.26	1799.35	-0.66113	0.67578	0.029297	NaN	NaN	NaN	NaN	NaN	NaN
3.458	-0.856999999999999	39.9677	219.18	0.0087891	0.17188	-0.079102	-34.999	85.2359	181.626	0.081446	0.25391	-0.16055	-197.806	-425.71	1871.95	-0.60352	0.6543	0.029297	NaN	NaN	NaN	NaN	NaN	NaN
3.46	24.033	16.513	238.43	0.033398	0.14795	-0.091114	-36.285	117.287	161.336	0.10166	0.2414	-0.16416	-231.328	-373.38	1958.72	-0.58008	0.65234	0.019043	NaN	NaN	NaN	NaN	NaN	NaN
3.462	30.316	19.406	214.63	0.053516	0.12773	-0.10059	-69.455	93.626	158.183	0.11689	0.22656	-0.17041	-193.604	-358.46	2073.52	-0.55664	0.65527	-0.0053711	NaN	NaN	NaN	NaN	NaN	NaN
3.464	17.681	12.934	209.377	0.069141	0.11016	-0.11543	-45.318	93.694	178.486	0.12842	0.2124	-0.17539	-174.5278	-283.078	2115.95	-0.57592	0.677	-0.014893	NaN	NaN	NaN	NaN	NaN	NaN
3.466	6.187	11.63	206.325	0.078223	0.09541	-0.12256	-39.61	59.48618	153.385	0.13672	0.19678	-0.18262	-172.5764	-283.08	2176.15	-0.63867	0.70703	-0.00097656	NaN	NaN	NaN	NaN	NaN	NaN
3.468	44.594	4.105	209.342	0.088379	0.086426	-0.13086	-55.225	30.174	148.932	0.15	0.18437	-0.17969	-159.8762	-250.511	2190.82	-0.77734	0.75684	0.010742	NaN	NaN	NaN	NaN	NaN	NaN
3.47	24.038	-1.344	209.209	0.092773	0.079297	-0.13535	-20.556	42.16228	158.965	0.15723	0.17588	-0.17774	-116.081	-287.301	2224.33	-0.86279	0.78369	0.019043	NaN	NaN	NaN	NaN	NaN	NaN
3.472	1.535	-24.73	230.022	0.096386	0.079394	-0.13642	-35.41	25.0371	134.503	0.16113	0.17002	-0.17969	-80.612	-245.266	2208.5	-1.0093	0.85107	0.044922	NaN	NaN	NaN	NaN	NaN	NaN
3.474	-0.407000000000004	-44.562	239.67	0.099906	0.083691	-0.14502	-19.811	25.9525	130.874	0.17149	0.16445	-0.17871	-39.764	-267.1	2226.95	-1.1103	0.91699	0.062011	NaN	NaN	NaN	NaN	NaN	NaN
3.476	-10.112	-38.99	264.904	0.094141	0.092578	-0.14815	-5.142	40.373	115.1152	0.17725	0.1626	-0.18213	-29.677	-233.075	2254.33	-1.1934	0.9873	0.074707	NaN	NaN	NaN	NaN	NaN	NaN
3.478	-20.935	-22.2	296.692	0.086914	0.1001	-0.15674	-41.809	-9.2194	88.209	0.18359	0.15772	-0.1793	-46.338	-260.213	2293.7	-1.2734	1.0742	0.074707	NaN	NaN	NaN	NaN	NaN	NaN
3.48	-33.549	-15.064	308.614	0.072754	0.11299	-0.16807	16.373	-4.8199	126.825	0.18633	0.15459	-0.17676	-40.315	-247.196	2322.5	-1.2979	1.1074	0.05957	NaN	NaN	NaN	NaN	NaN	NaN
3.482	-11.679	-8.104	344.307	0.048731	0.12744	-0.1792	6.204	1.339	124.826	0.18711	0.14912	-0.17676	-24.569	-270.99	2373.6	-1.3276	1.1685	0.032227	NaN	NaN	NaN	NaN	NaN	NaN
3.484	-21.356	15.2449	390.926	0.00459	0.14659	-0.18701	-2.965	-0.882999999999999	116.9621	0.18027	0.14336	-0.17891	-15.244	-254.549	2417.2	-1.3486	1.2065	-0.0002442	NaN	NaN	NaN	NaN	NaN	NaN
3.486	-14.697	51.307	439.952	-0.05459	0.17285	-0.19463	13.566	21.5703	132.222	0.16406	0.13916	-0.17627	-10.775	-277.28	2488.8	-1.3774	1.2485	-0.02832	NaN	NaN	NaN	NaN	NaN	NaN
3.488	-12.385	76.101	506.58	-0.12744	0.20801	-0.19824	-33.724	16.68995	90.2864	0.15195	0.13613	-0.17275	17.122	-248.058	2517.7	-1.4238	1.3008	-0.04248	NaN	NaN	NaN	NaN	NaN	NaN
3.49	-10.635	95.84	568.882	-0.20762	0.25293	-0.20742	-11.701	15.7559	105.675	0.13642	0.13096	-0.17022	12.464	-245.755	2565.6	-1.4546	1.3247	-0.041504	NaN	NaN	NaN	NaN	NaN	NaN
3.492	12.127	102.64	629.018	-0.28769	0.30517	-0.20801	6.202	32.431	105.9145	0.12197	0.12978	-0.16319	28.557	-219.183	2574.6	-1.5186	1.375	-0.027344	NaN	NaN	NaN	NaN	NaN	NaN
3.494	-10.91	112.468	692.301	-0.37051	0.36142	-0.20879	-42.704	0.694	95.306	0.1042	0.13271	-0.15977	34.959	-217.542	2603.3	-1.5801	1.416	-0.0046387	NaN	NaN	NaN	NaN	NaN	NaN
3.496	1.524	106.143	782.923	-0.45498	0.42647	-0.20713	-18.96	14.8409	128.42	0.092285	0.13574	-0.1582	31.437	-214.4657	2591	-1.6421	1.4575	0.0078125	NaN	NaN	NaN	NaN	NaN	NaN
3.498	12.677	113.243	874.217	-0.54346	0.49463	-0.20459	-25.635	17.5475	124.728	0.079102	0.13447	-0.15654	-2.575	-209.016	2609.2	-1.7358	1.5161	0.015625	NaN	NaN	NaN	NaN	NaN	NaN
3.5	46.205	108.637	921.81863	-0.63662	0.57939	-0.20401	-39.853	6.744	125.721	0.058984	0.13056	-0.16133	-14.583	-211.93	2594.3	-1.7808	1.5532	0.018066	NaN	NaN	NaN	NaN	NaN	NaN
3.502	12.385	88.656	955.703	-0.73301	0.67187	-0.19268	-0.899999999999999	4.755	139.924	0.031641	0.13252	-0.1668	-69.1316	-193.214	2595.8	-1.8633	1.6191	0.012207	NaN	NaN	NaN	NaN	NaN	NaN
3.504	18.721	52.522	996.502	-0.82168	0.77774	-0.17705	-61.328	-14.8204	105.956	9.768e-05	0.13477	-0.1627	-101.1933	-197.78	2591.7	-1.9245	1.6672	0.0041504	NaN	NaN	NaN	NaN	NaN	NaN
3.506	38.038	5.5054	1063.3579	-0.89248	0.89131	-0.15166	-46.575	-21.333	128.1531	-0.031738	0.1377	-0.16406	-146.303	-167.008	2578	-1.9746	1.707	-0.0024414	NaN	NaN	NaN	NaN	NaN	NaN
3.508	43.85	-8.674	1129.5735	-0.94482	0.99854	-0.12305	-38.564	-5.1022	100.3816	-0.066504	0.14883	-0.16016	-172.361	-139.918	2551.6	-2.0293	1.7441	-0.012695	NaN	NaN	NaN	NaN	NaN	NaN
3.51	64.3112	-33.752	1174.395	-0.96895	1.1006	-0.096191	-75.6955	-16.6842	99.7955	-0.099707	0.1625	-0.15097	-194.722	-72.346	2582.7	-2.0522	1.7603	-0.020996	NaN	NaN	NaN	NaN	NaN	NaN
3.512	52.774	-42.671	1190.825	-0.96826	1.1763	-0.075879	-51.558	-3.6307	142.256	-0.12471	0.18164	-0.1459	-168.343	-39.031	2593	-2.0938	1.791	-0.029785	NaN	NaN	NaN	NaN	NaN	NaN
3.514	35.465	-57.4706	1212.503	-0.9292	1.2278	-0.066504	-81.10673	-2.907	112.589	-0.13398	0.1998	-0.13818	-151.558	-14.813	2594.6	-2.1187	1.8062	-0.028076	NaN	NaN	NaN	NaN	NaN	NaN
3.516	5.241	-65.064	1238.743	-0.87461	1.2445	-0.075976	-50.182	-12.631	118.312	-0.13867	0.21973	-0.13721	-125.085	-61.854	2577.8	-2.1445	1.8242	-0.015137	NaN	NaN	NaN	NaN	NaN	NaN
3.518	-2.022	-66.68	1240.723	-0.79688	1.2324	-0.086426	-30.252	14.015	133.465	-0.12256	0.23692	-0.1333	-106.05	-67.698	2565.9	-2.1655	1.8286	0.0073242	NaN	NaN	NaN	NaN	NaN	NaN
3.52	-24.8985	-57.336	1247.0529	-0.71074	1.1896	-0.11025	-54.253	13.7873	107.525	-0.10068	0.25029	-0.13271	-102.879	-92.732	2538.8	-2.1772	1.8228	0.01709	NaN	NaN	NaN	NaN	NaN	NaN
3.522	-38.4262	-44.671	1243.5031	-0.63213	1.1321	-0.1168	-44.327	8.76	128.87	-0.065136	0.25732	-0.13155	-109.988	-39.45	2535.8	-2.187	1.8091	0.04541	NaN	NaN	NaN	NaN	NaN	NaN
3.524	-63.296	-45.5589	1244.651	-0.57002	1.0669	-0.1414	-28.106	17.7613	103.23682	-0.024805	0.25625	-0.13828	-108.96	-57.857	2516.5	-2.1895	1.7872	0.060547	NaN	NaN	NaN	NaN	NaN	NaN
3.526	-91.3	-51.8802	1256.235	-0.52354	1.0028	-0.15957	-28.415	-3.496	84.375	0.020508	0.24609	-0.14893	-85.7053	-18.454	2507	-2.189	1.7642	0.06543	NaN	NaN	NaN	NaN	NaN	NaN
3.528	-91.063	-46.129	1260.884	-0.49023	0.93359	-0.16748	-6.03	3.7126	112.0361	0.068555	0.23056	-0.15459	-88.706	-43.994	2502.6	-2.1582	1.7266	0.063965	NaN	NaN	NaN	NaN	NaN	NaN
3.53	-69.1669	-40.67	1259.0482	-0.46299	0.86045	-0.16914	-34.674	10.6386	104.2495	0.11231	0.20928	-0.16719	-88.788	5.851	2464.3	-2.1348	1.707	0.055664	NaN	NaN	NaN	NaN	NaN	NaN
3.532	-89.0957	-31.26	1272.4503	-0.44179	0.78594	-0.16934	-27.946	-9.8606	110.9644	0.15215	0.18388	-0.18008	-51.1772	32.8404	2461.4	-2.0757	1.6587	0.050781	NaN	NaN	NaN	NaN	NaN	NaN
3.534	-81.108	-46.932	1275.8715	-0.41602	0.72031	-0.17598	10.594	11.4704	118.153	0.18857	0.15928	-0.18701	-39.166	127.782	2436	-2.0271	1.6126	0.041748	NaN	NaN	NaN	NaN	NaN	NaN
3.536	-71.3737	-78.027	1290.4372	-0.38945	0.67256	-0.18672	-26.848	6.3654	101.5827	0.20801	0.1333	-0.20166	-7.823	128.081	2414.2	-1.9844	1.5703	0.032227	NaN	NaN	NaN	NaN	NaN	NaN
3.538	-84.0273	-111.114	1308.3683	-0.3501	0.64404	-0.19678	-8.659	-10.6872	119.216	0.22285	0.11211	-0.20996	23.462	170.783	2372.1	-1.9219	1.5176	0.031738	NaN	NaN	NaN	NaN	NaN	NaN
3.54	-88.60489	-144.087	1316.377	-0.30635	0.63067	-0.21465	35.279	-0.427	120.8076	0.22607	0.091797	-0.21328	44.7873	114.899	2343.2	-1.8906	1.498	0.03125	NaN	NaN	NaN	NaN	NaN	NaN
3.542	-47.356	-172.4325	1355.1026	-0.24951	0.62148	-0.2334	-36.51	-13.4718	125.745	0.21983	0.079687	-0.21328	77.4907	162.57887	2289.4	-1.8433	1.438	0.027344	NaN	NaN	NaN	NaN	NaN	NaN
3.544	-56.607	-178.2156	1386.69	-0.19756	0.6168	-0.25722	5.431	-15.833	146.111	0.20918	0.075391	-0.21777	62.2608	150.243	2269.8	-1.8052	1.4058	0.038574	NaN	NaN	NaN	NaN	NaN	NaN
3.546	-55.573	-189.026	1406.627	-0.16074	0.62148	-0.27402	-15.189	-21.241	141.7121	0.19482	0.075195	-0.22119	42.86	211.689	2221.4	-1.7695	1.3789	0.035156	NaN	NaN	NaN	NaN	NaN	NaN
3.548	-57.05	-191.877	1433.051	-0.14502	0.64307	-0.28662	-40.768	-48.074	165.9899	0.17041	0.08291	-0.22129	11.716	176.892	2186.8	-1.7207	1.3496	0.039063	NaN	NaN	NaN	NaN	NaN	NaN
3.55	7.325	-175.194	1452.8699	-0.15264	0.67627	-0.28252	-24.961	-33.926	203.075	0.13516	0.10215	-0.2249	11.413	177.06	2113.4	-1.6948	1.3403	0.043945	NaN	NaN	NaN	NaN	NaN	NaN
3.552	53.831	-153.18192	1478.0232	-0.18653	0.72744	-0.27041	-41.015	-47.613	212.51258	0.080859	0.12832	-0.22373	-42.6057	117.311	2104.7	-1.644	1.3208	0.050781	NaN	NaN	NaN	NaN	NaN	NaN
3.554	55.153	-130.125	1502.181	-0.23809	0.79073	-0.24931	-20.519	-61.777	257.3993	0.016309	0.16807	-0.20771	-77.2633	156.742	2065.4	-1.6111	1.3079	0.05542	NaN	NaN	NaN	NaN	NaN	NaN
3.556	74.824	-128.114	1534.3057	-0.29063	0.8539	-0.22793	-14.506	-61.944	286.835	-0.049316	0.2124	-0.19482	-107.096	165.578	2052.7	-1.5796	1.2993	0.060547	NaN	NaN	NaN	NaN	NaN	NaN
3.558	97.333	-124.6	1555.4708	-0.33789	0.91602	-0.20508	-60.469	-79.648	332.131	-0.10684	0.26397	-0.18428	-92.2071	247.3	1990.27	-1.5366	1.2876	0.068848	NaN	NaN	NaN	NaN	NaN	NaN
3.56	125.4718	-117.224	1578.3621	-0.37812	0.97803	-0.18672	-38.085	-77.4803	438.295	-0.16308	0.31992	-0.17383	-85.924	230.62	1957.25	-1.5156	1.2832	0.076172	NaN	NaN	NaN	NaN	NaN	NaN
3.562	122.005187	-116.352	1598.94508	-0.4084	1.0343	-0.17539	-49.39	-46.58	510.751	-0.22207	0.3707	-0.16797	-65.501	268.515	1868.89	-1.4707	1.2754	0.07959	NaN	NaN	NaN	NaN	NaN	NaN
3.564	135.863	-130.151	1645.5646	-0.43145	1.0859	-0.17461	-42.909	-32.692	624.1211	-0.29209	0.41553	-0.16982	-97.19	234.295	1848.83	-1.4272	1.27	0.084473	NaN	NaN	NaN	NaN	NaN	NaN
3.566	127.3377	-142.9777	1676.206	-0.44277	1.1324	-0.18233	19.585	27.29	728.7505	-0.38086	0.46289	-0.17676	-62.931	274.029	1764.75	-1.3804	1.2642	0.083984	NaN	NaN	NaN	NaN	NaN	NaN
3.568	87.81	-148.18605	1673.0013	-0.45215	1.1665	-0.19092	-38.542	64.228	824.5	-0.48759	0.51338	-0.17822	-67.2445	235.483	1720.21	-1.3125	1.2461	0.091309	NaN	NaN	NaN	NaN	NaN	NaN
3.57	74.444	-154.8036	1695.8693	-0.45449	1.1885	-0.20098	-11.707	93.791	991.8004	-0.62402	0.5627	-0.17647	-54.751	258.48	1646.97	-1.2773	1.2363	0.087402	NaN	NaN	NaN	NaN	NaN	NaN
3.572	84.179	-177.942	1734.0914	-0.44639	1.2071	-0.21728	-15.917	143.56	1167.6753	-0.7834	0.62871	-0.17178	-93.675	219.488	1600.46	-1.2012	1.2129	0.075684	NaN	NaN	NaN	NaN	NaN	NaN
3.574	77.985	-198.939	1764.3783	-0.43857	1.2212	-0.22666	-7.242	149.767	1314.3486	-0.95646	0.70762	-0.15528	-48.483	235.65	1514.76	-1.1363	1.188	0.072021	NaN	NaN	NaN	NaN	NaN	NaN
3.576	58.716	-207.243	1775.337	-0.42754	1.2357	-0.23271	88.696	127.165	1436.386	-1.1479	0.80127	-0.13623	-47.27	218.553	1483.16	-1.0767	1.1646	0.067871	NaN	NaN	NaN	NaN	NaN	NaN
3.578	39.588	-204.596	1806.032	-0.41797	1.252	-0.2373	18.022	84.44	1453.836	-1.353	0.91807	-0.1125	-55.525	259.77	1404.21	-0.98877	1.1294	0.05957	NaN	NaN	NaN	NaN	NaN	NaN
3.58	21.256	-184.5703	1844.87	-0.42373	1.2679	-0.23526	-37.134	-3.186	1520.41	-1.5554	1.0633	-0.067481	-48.2428	260.341	1387.3	-0.94727	1.1094	0.056152	NaN	NaN	NaN	NaN	NaN	NaN
3.582	10.581	-178.263	1871.625	-0.44023	1.2926	-0.23144	-3.13999999999999	-67.375	1611.2	-1.7297	1.2242	-0.022949	0.477000000000004	299.79	1311.51	-0.86719	1.0723	0.049805	NaN	NaN	NaN	NaN	NaN	NaN
3.584	-17.64	-162.015	1861.114	-0.47148	1.3207	-0.22793	21.662	-136.593	1597.33	-1.8388	1.3822	0.031738	16.646	280.981	1288.2	-0.81446	1.045	0.043945	NaN	NaN	NaN	NaN	NaN	NaN
3.586	-25.079	-158.972	1879.361	-0.5126	1.3585	-0.22363	55.734	-206.5919	1565.45	-1.8667	1.5239	0.083984	95.2708	288.99	1222.26	-0.76855	1.0176	0.044922	NaN	NaN	NaN	NaN	NaN	NaN
3.588	-37.476	-151.153	1883.859	-0.55273	1.3965	-0.22168	15.116	-230.954	1516.31	-1.7877	1.6256	0.12881	83.082	251.22	1201.4	-0.71045	0.98291	0.04834	NaN	NaN	NaN	NaN	NaN	NaN
3.59	-47.175	-144.096	1870.9182	-0.58154	1.4349	-0.22343	-53.412	-247.254	1492.9	-1.6479	1.7032	0.16905	92.6312	268.52	1128.57	-0.6875	0.96875	0.056152	NaN	NaN	NaN	NaN	NaN	NaN
3.592	-50.951	-129.161	1872.163	-0.60117	1.4766	-0.23144	-37.529	-246.688	1522.6	-1.4765	1.745	0.17256	95.26086	276.38	1079.46	-0.63281	0.93945	0.057129	NaN	NaN	NaN	NaN	NaN	NaN
3.594	-42.477	-134.297	1880.822	-0.60156	1.5191	-0.24941	-39.46	-190.554	1490.96	-1.2731	1.7019	0.099998	125.649	293.93	1005.04	-0.58154	0.90674	0.053711	NaN	NaN	NaN	NaN	NaN	NaN
3.596	-28.869	-139.7077	1904.3234	-0.59649	1.5553	-0.25781	-59.962	-177.618	1471.081	-1.0459	1.5605	-0.0058594	92.2021	286.463	978.8	-0.55908	0.89307	0.056152	NaN	NaN	NaN	NaN	NaN	NaN
3.598	-15.72	-148.5694	1915.6234	-0.57617	1.5898	-0.27637	-56.245	-139.54	1537.58	-0.81983	1.353	-0.1001	101.714	281.993	921.14	-0.51514	0.86377	0.055664	NaN	NaN	NaN	NaN	NaN	NaN
3.6	2.36499999999999	-129.343	1916.83	-0.54834	1.613	-0.2956	-133.686	-86.642	1567.07	-0.63115	1.1368	-0.1626	62.34	266.537	855.62	-0.48901	0.83764	0.047364	NaN	NaN	NaN	NaN	NaN	NaN
3.602	45.894	-118.302	1951.262	-0.5249	1.6275	-0.321	-118.4008	-61.37	1572.95	-0.50029	0.94814	-0.20049	9.841	279.232	807.1	-0.46631	0.81299	0.041992	NaN	NaN	NaN	NaN	NaN	NaN
3.604	50.054	-108.299	1973.771	-0.50888	1.6294	-0.34404	-89.668	-21.58	1572.957	-0.41299	0.78828	-0.21006	-5.539	283.253	790.4	-0.43701	0.78467	0.038086	NaN	NaN	NaN	NaN	NaN	NaN
3.606	75.128	-124.129	1966.8166	-0.49277	1.6303	-0.37012	-88.528	-49.71	1565.128	-0.34912	0.65625	-0.20508	5.348	280.19	764.75	-0.41699	0.77148	0.041504	NaN	NaN	NaN	NaN	NaN	NaN
3.608	80.105	-132.252	1958.6447	-0.48682	1.6196	-0.38672	-3.535	-124.37	1619.408	-0.29561	0.55781	-0.2167	-3.803	277.06	747.15	-0.37695	0.74365	0.033691	NaN	NaN	NaN	NaN	NaN	NaN
3.61	108.88	-158.635	1979.0462	-0.48877	1.6062	-0.40293	-24.544	-186.262	1646.116	-0.25303	0.47627	-0.23155	33.229	275.21	681.07	-0.34277	0.72364	0.026367	NaN	NaN	NaN	NaN	NaN	NaN
3.612	117.323	-160.607	2001.823	-0.49014	1.5952	-0.41904	-40.834	-299.5715	1664.119	-0.23818	0.43448	-0.25459	9.051	286.19	635.62	-0.3042	0.70313	0.019043	NaN	NaN	NaN	NaN	NaN	NaN
3.614	144.7362	-150.407	1995.7836	-0.49873	1.5874	-0.43155	15.509	-372.824	1737.949	-0.28018	0.41768	-0.27617	-19.422	278.62	598.01	-0.26172	0.67188	0.0083008	NaN	NaN	NaN	NaN	NaN	NaN
3.616	145.152	-128.871	1992.7805	-0.51074	1.5802	-0.4459	-32.213	-384.723	1784.165	-0.39404	0.43359	-0.29443	-43.218	281.87	544.88	-0.23926	0.66113	0.0058594	NaN	NaN	NaN	NaN	NaN	NaN
3.618	135.691	-107.50797	1974.8209	-0.52783	1.5776	-0.45166	-11.779	-402.984	1830.324	-0.57617	0.51465	-0.25996	-44.182	245.16	519.83	-0.20117	0.625	-0.015625	NaN	NaN	NaN	NaN	NaN	NaN
3.62	130.134	-93.1531	1993.7762	-0.54971	1.5737	-0.46299	-3.71899999999999	-362.114	1887.674	-0.78125	0.63632	-0.19609	-56.483	208.525	496.78	-0.18335	0.59839	-0.02002	NaN	NaN	NaN	NaN	NaN	NaN
3.622	125.902	-85.2704	1993.2708	-0.57158	1.5696	-0.46582	-62.546	-332.729	1932.448	-0.96758	0.78594	-0.13125	-45.388	154.841	493.88	-0.1626	0.56885	-0.026855	NaN	NaN	NaN	NaN	NaN	NaN
3.624	142.8912	-73.871	1990.1451	-0.60322	1.5739	-0.47402	11.726	-330.05	2023.18	-1.101	0.93887	-0.073438	-49.808	172.836	464.36	-0.13623	0.53906	-0.033203	NaN	NaN	NaN	NaN	NaN	NaN
3.626	110.203	-69.4553	2000.56633	-0.62549	1.5753	-0.47783	78.49	-257.376	2081.31	-1.1812	1.0786	-0.026367	-87.7687	170.654	435.35	-0.12354	0.52979	-0.033691	NaN	NaN	NaN	NaN	NaN	NaN
3.628	104.985	-69.0807	1992.94113	-0.64551	1.5781	-0.4834	100.972	-210.9567	2100.85	-1.2082	1.1891	-0.003125	-68.047	208.322	385.44	-0.089844	0.50195	-0.037598	NaN	NaN	NaN	NaN	NaN	NaN
3.63	70.7	-62.106	1991.9763	-0.65986	1.5814	-0.48858	129.585	-187.675	2141.25	-1.1781	1.2598	0.0033203	-28.91	188.182	362.83	-0.064209	0.48266	-0.040284	NaN	NaN	NaN	NaN	NaN	NaN
3.632	47.196	-51.68	1993.003	-0.66914	1.5879	-0.49297	94.922	-145.934	2128.95	-1.1043	1.2773	-0.016211	-23.35	189.297	330.796	-0.039063	0.46484	-0.046875	NaN	NaN	NaN	NaN	NaN	NaN
3.634	31.2	-46.775	1980.462	-0.67031	1.5859	-0.49805	115.273	-189.061	2132.17	-0.99912	1.2493	-0.057129	26.316	131.306	319.778	-0.012695	0.42969	-0.052734	NaN	NaN	NaN	NaN	NaN	NaN
3.636	21.852	-55.976	1975.041	-0.66436	1.5876	-0.51045	187.3062	-195.817	2155.144	-0.89697	1.1919	-0.11768	54.171	143.969	273.859	0.0058594	0.4165	-0.061035	NaN	NaN	NaN	NaN	NaN	NaN
3.638	0.415000000000006	-73.2553	1968.731	-0.6582	1.582	-0.51758	156.70439	-214.106	2149.483	-0.82783	1.1038	-0.17139	28.736	110.553	271.261	0.023438	0.38672	-0.070801	NaN	NaN	NaN	NaN	NaN	NaN
3.64	-24.311	-78.99915	1947.0775	-0.64424	1.5722	-0.52705	150.279817	-297.428	2190.883	-0.8084	1.0235	-0.20635	50.634	139.912	222.822	0.042236	0.36353	-0.07959	NaN	NaN	NaN	NaN	NaN	NaN
3.642	-35.478	-79.0248	1931.6392	-0.63311	1.5608	-0.53447	90.585	-276.339	2242.046	-0.83301	0.96758	-0.21651	41.91	103.54	217.513	0.057129	0.34521	-0.087891	NaN	NaN	NaN	NaN	NaN	NaN
3.644	-15.005	-69.27444	1905.2423	-0.62178	1.5472	-0.54424	42.758	-283.088	2266.44	-0.9001	0.94053	-0.21318	42.11	121.039	160.029	0.068359	0.31982	-0.091309	NaN	NaN	NaN	NaN	NaN	NaN
3.646	-24.886	-52.952	1889.1478	-0.61582	1.525	-0.55098	64.703	-287.778	2326.41	-0.99805	0.95313	-0.20508	32.457	90.794	166.96	0.077148	0.31006	-0.091309	NaN	NaN	NaN	NaN	NaN	NaN
3.648	-26.897	-42.89	1898.7907	-0.60693	1.5083	-0.56396	41.248	-234.612	2359.58	-1.1059	1.0173	-0.20049	53.056	106.814	132.958	0.084961	0.28711	-0.098145	NaN	NaN	NaN	NaN	NaN	NaN
3.65	0.195000000000007	-34.328	1892.369	-0.59727	1.4912	-0.56621	41.584	-273.002	2381.04	-1.195	1.1017	-0.19775	-6.4	65.831	142.5738	0.097654	0.27198	-0.10522	NaN	NaN	NaN	NaN	NaN	NaN
3.652	29.08	-28.982	1875.549	-0.58623	1.4732	-0.57334	50.548	-267.734	2456.92	-1.2485	1.1809	-0.20049	9.693	72.496	111.39369	0.10254	0.25635	-0.10693	NaN	NaN	NaN	NaN	NaN	NaN
3.654	16.297	-13.675	1867.516	-0.57998	1.4568	-0.57178	-27.375	-219.165	2475.14	-1.2759	1.2421	-0.20908	5.965	17.43327	122.2573	0.11084	0.23779	-0.1084	NaN	NaN	NaN	NaN	NaN	NaN
3.656	35.455	-4.722	1859.5234	-0.56895	1.4451	-0.57119	3.256	-229.369	2485.01	-1.292	1.2949	-0.21582	12.745	24.42	101.5664	0.11084	0.23047	-0.11133	NaN	NaN	NaN	NaN	NaN	NaN
3.658	73.297	15.0521	1840.2851	-0.56348	1.4336	-0.57227	30.358	-168.827	2498.27	-1.2872	1.3552	-0.23057	13.001	-15.75101	131.07	0.10693	0.21387	-0.1084	NaN	NaN	NaN	NaN	NaN	NaN
3.66	85.881	25.0802	1788.842	-0.55156	1.4202	-0.56728	-15.654	-163.236	2428.265	-1.2897	1.4056	-0.24766	7.17399999999999	33.421	85.2038	0.1062	0.19824	-0.11157	NaN	NaN	NaN	NaN	NaN	NaN
3.662	67.702	13.92263	1778.501	-0.54219	1.4129	-0.56269	5.44	-202.9794	2421.83	-1.2816	1.4435	-0.26992	-76.6398	31.7879	115.157	0.098633	0.18604	-0.11182	NaN	NaN	NaN	NaN	NaN	NaN
3.664	101.43	-10.9526	1784.2717	-0.5375	1.4082	-0.55644	-43.334	-145.313	2430.517	-1.2858	1.4623	-0.28731	-56.879	66.4695	77.5804	0.088379	0.16992	-0.11719	NaN	NaN	NaN	NaN	NaN	NaN
3.666	119.982	-31.694	1793.161	-0.53642	1.4015	-0.54707	-43.54	-173.472	2434.67	-1.2949	1.4668	-0.30664	-83.1971	27.8247	104.973	0.081543	0.16211	-0.11084	NaN	NaN	NaN	NaN	NaN	NaN
3.668	124.23905	-21.5985	1758.098	-0.52881	1.397	-0.53613	15.844	-156.453	2469.9	-1.3142	1.4585	-0.31885	-84.806	24.597	84.7773	0.067383	0.14941	-0.1084	NaN	NaN	NaN	NaN	NaN	NaN
3.67	125.4364	-11.7671	1735.0156	-0.52285	1.3928	-0.52402	-31.918	-117.049	2461.822	-1.3378	1.4419	-0.32959	-110.822	-1.1569	115.515	0.058594	0.13892	-0.1023	NaN	NaN	NaN	NaN	NaN	NaN
3.672	124.662	15.4244	1717.1905	-0.51963	1.3865	-0.51328	18.088	-176.819	2461.088	-1.3581	1.4263	-0.33897	-89.9926	28.1603	97.71	0.057129	0.12793	-0.098145	NaN	NaN	NaN	NaN	NaN	NaN
3.674	126.261	26.2123	1698.9379	-0.51416	1.3803	-0.5039	34.958	-107.07	2496.21	-1.3833	1.412	-0.34795	-117.131	31.3359	133.995	0.047363	0.11719	-0.095703	NaN	NaN	NaN	NaN	NaN	NaN
3.676	101.097	28.042	1659.18916	-0.50899	1.3773	-0.49482	27.649	-81.033	2498.65	-1.4019	1.4028	-0.36182	-103.2451	51.564	112.161	0.039063	0.11328	-0.095703	NaN	NaN	NaN	NaN	NaN	NaN
3.678	92.718	18.5382	1652.486	-0.49951	1.3716	-0.48486	123.75	-105.385	2542.3	-1.4154	1.3976	-0.36553	-87.8507	33.3612	116.032	0.034668	0.10254	-0.090332	NaN	NaN	NaN	NaN	NaN	NaN
3.68	85.374	25.0109	1654.163	-0.49687	1.3637	-0.47168	139.843	-70.786	2562.03	-1.4265	1.3962	-0.37021	-62.57	24.6473	95.4737	0.029785	0.095459	-0.090088	NaN	NaN	NaN	NaN	NaN	NaN
3.682	57.204	24.71245	1621.236	-0.49092	1.3587	-0.46357	136.8877	-149.7573	2526.32	-1.4296	1.3962	-0.37646	-44.449	15.2548	99.2541	0.031738	0.085938	-0.086914	NaN	NaN	NaN	NaN	NaN	NaN
3.684	32.574	50.178	1590.395	-0.48467	1.3513	-0.45146	160.3527	-162.411	2531.9	-1.4287	1.3947	-0.38106	-30.417	34.8811	109.575	0.038574	0.082031	-0.088867	NaN	NaN	NaN	NaN	NaN	NaN
3.686	20.922	71.196	1558.2647	-0.47627	1.339	-0.44297	133.7461	-105.582	2501.31	-1.4238	1.3945	-0.38184	-62.122	29.6736	125.505	0.049805	0.076172	-0.088867	NaN	NaN	NaN	NaN	NaN	NaN
3.688	6.446	74.719	1531.7954	-0.46631	1.3247	-0.43506	161.003	-134.899	2490.58	-1.4142	1.3894	-0.38213	-7.754	6.94	109.4035	0.0625	0.065918	-0.094238	NaN	NaN	NaN	NaN	NaN	NaN
3.69	-27.117	78.43	1501.2457	-0.45606	1.3149	-0.42793	155.137	-42.909	2497.14	-1.4033	1.381	-0.38233	-6.061	-11.3844	99.9208	0.073242	0.058594	-0.094726	NaN	NaN	NaN	NaN	NaN	NaN
3.692	-28.931	65.764	1488.5058	-0.44766	1.3035	-0.41806	107.716	-27.8231	2445.98	-1.3876	1.37	-0.38662	0.767999999999994	-23.8807	107.415	0.082031	0.038574	-0.10547	NaN	NaN	NaN	NaN	NaN	NaN
3.694	-34.955	62.137	1480.937	-0.43477	1.2879	-0.41338	113.833	-52.811	2448.52	-1.3744	1.3545	-0.38887	22.306	-12.126	135.279	0.081055	0.019531	-0.11084	NaN	NaN	NaN	NaN	NaN	NaN
3.696	-36.638	60.188	1486.977	-0.42813	1.2723	-0.40273	77.988	29.089	2464.87	-1.3687	1.3325	-0.39209	43.842	9.782	136.573	0.07666	0.01123	-0.11475	NaN	NaN	NaN	NaN	NaN	NaN
3.698	-59.295	62.5828	1437.274	-0.4209	1.2617	-0.39355	90.282	15.2324	2423.407	-1.3647	1.3133	-0.39512	16.063	27.8700861	112.5751	0.049805	-0.0078125	-0.11572	NaN	NaN	NaN	NaN	NaN	NaN
3.7	-48.577	77.917	1401.8932	-0.4043	1.246	-0.38545	123.386	51.87	2422.71	-1.364	1.2981	-0.4001	26.055	11.8218	103.5572	0.025147	-0.022705	-0.11499	NaN	NaN	NaN	NaN	NaN	NaN
3.702	-35.047	85.332	1384.7779	-0.39551	1.2344	-0.37832	69.385	113.607	2381.03	-1.3609	1.2793	-0.41182	27.131	-20.724	88.1	-0.010742	-0.024902	-0.1123	NaN	NaN	NaN	NaN	NaN	NaN
3.704	-24.781	72.64	1365.8733	-0.37949	1.2219	-0.37285	53.97	33.48395	2347.65	-1.3552	1.271	-0.40615	14.15	-37.337	81.784	-0.054688	-0.022949	-0.1001	NaN	NaN	NaN	NaN	NaN	NaN
3.706	-23.064	77.289	1334.115259	-0.36768	1.2057	-0.36231	33.171	64.698	2360.84	-1.3535	1.2578	-0.41211	29.843	-15.741	73.731	-0.070801	-0.021973	-0.09668	NaN	NaN	NaN	NaN	NaN	NaN
3.708	-8.598	63.5311	1325.444	-0.35498	1.1968	-0.35254	-14.978	43.275	2300.52	-1.3505	1.255	-0.41182	27.825	12.034	77.907	-0.10303	-0.0024414	-0.08252	NaN	NaN	NaN	NaN	NaN	NaN
3.71	14.384	56.96966	1303.3223	-0.34405	1.1832	-0.34511	35.42	-10.929	2292.27	-1.348	1.2523	-0.41416	-9.566	49.8017	88.8468	-0.11011	0.0078127	-0.078125	NaN	NaN	NaN	NaN	NaN	NaN
3.712	28.622	60.5797	1281.6404	-0.32852	1.1715	-0.33506	-14.133	47.908	2277.5	-1.3383	1.2582	-0.41221	-31.381	34.3545	107.4749	-0.10986	0.022461	-0.068848	NaN	NaN	NaN	NaN	NaN	NaN
3.714	34.259	79.5161	1241.5498	-0.31758	1.1571	-0.32139	-75.216	16.9204	2220.9	-1.3333	1.2636	-0.40752	-51.894	37.126	63.321	-0.079102	0.040527	-0.074219	NaN	NaN	NaN	NaN	NaN	NaN
3.716	56.373	89.1791	1215.905	-0.31123	1.1431	-0.31182	-40.414	58.002	2208.32	-1.3198	1.272	-0.3999	-64.364	16.5135	102.6708	-0.063477	0.047363	-0.06543	NaN	NaN	NaN	NaN	NaN	NaN
3.718	68.307	96.0549	1207.9372	-0.30176	1.1313	-0.30029	-78.667	124.732	2172.67	-1.3038	1.2731	-0.39531	-73.03	33.326845	89.6265	-0.017578	0.046875	-0.070801	NaN	NaN	NaN	NaN	NaN	NaN
3.72	68.8932	98.4128	1179.5266	-0.29238	1.1203	-0.28887	-36.416	91.84	2152.94	-1.2812	1.2751	-0.38926	-88.0244	27.1054	115.231	0.021729	0.042481	-0.075439	NaN	NaN	NaN	NaN	NaN	NaN
3.722	67.669	100.252	1137.0827	-0.28779	1.1043	-0.27978	18.864	142.85	2160.28	-1.2515	1.2689	-0.37246	-84.203	44.8647	89.329	0.063477	0.031738	-0.077637	NaN	NaN	NaN	NaN	NaN	NaN
3.724	79.903	91.64313	1130.6424	-0.28115	1.0887	-0.26142	-7.559	132.365	2083.92	-1.2217	1.2564	-0.36543	-102.209	14.879	93.22	0.11377	0.020508	-0.084961	NaN	NaN	NaN	NaN	NaN	NaN
3.726	66.902	91.6974	1110.7813	-0.27725	1.07	-0.24775	57.266	121.706	2074.31	-1.1855	1.2529	-0.36719	-98.393	14.64	64.913	0.13818	0.0087891	-0.092285	NaN	NaN	NaN	NaN	NaN	NaN
3.728	48.263	103.9521	1080.6542	-0.27051	1.0547	-0.23633	45.938	194.137	2037.54	-1.152	1.2317	-0.34873	-100.3984	-0.917999999999999	104.4096	0.17627	-0.01416	-0.095703	NaN	NaN	NaN	NaN	NaN	NaN
3.73	51.213	113.074	1058.1435	-0.26211	1.0458	-0.22383	46.1	155.426	1964.04	-1.1179	1.2099	-0.34697	-84.607	30.26	91.5649	0.20312	-0.036621	-0.10083	NaN	NaN	NaN	NaN	NaN	NaN
3.732	29.716	111.139	1030.1348	-0.24883	1.0293	-0.20732	67.169	161.447	1941.6	-1.0839	1.1852	-0.33603	-58.7388	38.478	137.528	0.22021	-0.062012	-0.104	NaN	NaN	NaN	NaN	NaN	NaN
3.734	27.668	105.1724	1029.854	-0.2375	1.0086	-0.19326	35.07	174.816	1864.35	-1.0522	1.1676	-0.32617	-47.506	64.678	107.532	0.22705	-0.092773	-0.11133	NaN	NaN	NaN	NaN	NaN	NaN
3.736	-10.316	98.5802	1008.233	-0.2207	0.99375	-0.18467	59.204	118.496	1836.39	-1.0273	1.1484	-0.31152	-65.5163	28.0852	141.527	0.22656	-0.10498	-0.11133	NaN	NaN	NaN	NaN	NaN	NaN
3.738	-5.868	104.826	976.7615	-0.20313	0.9707	-0.1709	55.971	174.672	1863.72	-0.99823	1.1303	-0.30293	-44.968	29.1571	96.732	0.20508	-0.13086	-0.11621	NaN	NaN	NaN	NaN	NaN	NaN
3.74	-35.268	113.199	951.04706	-0.18858	0.95186	-0.16045	54.712	180.429	1821.04	-0.97061	1.1114	-0.2875	-31.103	-0.695500000000001	118.8976	0.16846	-0.15234	-0.11816	NaN	NaN	NaN	NaN	NaN	NaN
3.742	-61.331	120.135	921.81	-0.17109	0.92852	-0.15488	95.31	151.856	1795.47	-0.94248	1.0926	-0.2793	-20.694	23.8726	104.0296	0.14502	-0.15137	-0.11816	NaN	NaN	NaN	NaN	NaN	NaN
3.744	-76.24	118.738	908.8123	-0.15742	0.90664	-0.14355	52.83	187.552	1753.63	-0.91563	1.0789	-0.26387	-31.066	20.645	175.88	0.082031	-0.1582	-0.10791	NaN	NaN	NaN	NaN	NaN	NaN
3.746	-74.595122	123.772	893.3619	-0.1374	0.88271	-0.1376	48.847	148.577	1678.13	-0.88623	1.061	-0.24951	10.188	17.3991	192.7356	0.037842	-0.14746	-0.10473	NaN	NaN	NaN	NaN	NaN	NaN
3.748	-86.356	124.686	885.83	-0.12158	0.86377	-0.12744	52.034	186.251	1663.85	-0.8669	1.0462	-0.23584	36.216	-27.5806	218.891	-0.0073242	-0.13379	-0.098145	NaN	NaN	NaN	NaN	NaN	NaN
3.75	-78.73484	126.844	870.133	-0.10508	0.84541	-0.11513	11.567	223.069	1612.77	-0.84209	1.0298	-0.21728	50.519	-37.437	204.256	-0.055664	-0.098145	-0.082031	NaN	NaN	NaN	NaN	NaN	NaN
3.752	-80.3521	121.997	850.122	-0.084765	0.82207	-0.10391	26.274	179.428	1565.36	-0.82022	1.0141	-0.20049	4.53700000000001	-74.5153	287.0638	-0.069336	-0.079102	-0.082031	NaN	NaN	NaN	NaN	NaN	NaN
3.754	-73.7093	125.778	816.7759	-0.063672	0.80332	-0.09375	-8.328	201.939	1537.14	-0.7958	0.99326	-0.18135	33.005	-60.671	362.126	-0.095215	-0.045898	-0.070801	NaN	NaN	NaN	NaN	NaN	NaN
3.756	-68.354	124.542	793.7805	-0.0375	0.78398	-0.081934	-62.093	174.017	1440.36	-0.76465	0.97656	-0.16602	42.135	-72.396	460.4145	-0.11377	-0.025878	-0.070557	NaN	NaN	NaN	NaN	NaN	NaN
3.758	-54.881	120.767	777.4354	-0.01709	0.76611	-0.068848	-35.058	150.818	1406.28	-0.73184	0.9541	-0.14561	71.564	-48.171	510.771	-0.14502	-0.01123	-0.068848	NaN	NaN	NaN	NaN	NaN	NaN
3.76	-32.864	123.961	747.773	0.0095704	0.74385	-0.066113	-76.072	205.055	1358.39	-0.70381	0.93682	-0.13281	33.082	-75.879	627.046	-0.21582	-0.0039063	-0.069336	NaN	NaN	NaN	NaN	NaN	NaN
3.762	-27.959	123.942	738.8019	0.033008	0.71963	-0.059668	-111.395	188.842	1307.08	-0.67334	0.91182	-0.11563	14.693	-54.4456	735.617	-0.2749	0.00048828	-0.067871	NaN	NaN	NaN	NaN	NaN	NaN
3.764	-17.332	128.902	726.9642	0.05957	0.69814	-0.05459	-77.997	200.413	1271.38	-0.6417	0.88994	-0.10263	-54.864	-34.531	891.371	-0.4248	0.0014648	-0.0625	NaN	NaN	NaN	NaN	NaN	NaN
3.766	6.794	130.364	722.864	0.0875	0.6748	-0.050196	-135.10486	224.512	1192.13	-0.60986	0.87158	-0.088379	-26.766	30.12348	982.992	-0.54712	0.019775	-0.055176	NaN	NaN	NaN	NaN	NaN	NaN
3.768	13.237	141.251	700.8024	0.10938	0.65234	-0.042969	-127.8601	206.206	1159.64	-0.58125	0.84414	-0.07461	-4.667	31.1901	1070.9656	-0.67383	0.037109	-0.046387	NaN	NaN	NaN	NaN	NaN	NaN
3.77	30.157	134.679	686.727	0.13086	0.63066	-0.040918	-93.429	259.61	1143.68	-0.54941	0.82031	-0.058399	5.43499999999999	28.731	1183.548	-0.83203	0.078125	-0.024902	NaN	NaN	NaN	NaN	NaN	NaN
3.772	35.171	125.424	666.543	0.15117	0.60713	-0.042969	-91.601	253.06	1087.89	-0.51543	0.80313	-0.045899	-62.151	-9.747	1293.25	-0.89844	0.11035	-0.018555	NaN	NaN	NaN	NaN	NaN	NaN
3.774	59.07771	123.3094	639.125806	0.17265	0.58564	-0.041016	-67.935	225.48	1064.681	-0.47812	0.7792	-0.035938	-80.911	-39.502	1361.06	-1.041	0.17773	-0.0048828	NaN	NaN	NaN	NaN	NaN	NaN
3.776	57.1206	120.55629	620.5114	0.1875	0.56953	-0.036621	-83.255	243.43	1010.304	-0.44238	0.76172	-0.027344	-90.713	-81.706	1389.28	-1.1531	0.22974	-0.0065918	NaN	NaN	NaN	NaN	NaN	NaN
3.778	35.7469	117.3691	604.7733	0.20215	0.55664	-0.038086	-61.702	191.158	944.64	-0.40664	0.7334	-0.010547	-105.21	-99.2202	1432.06	-1.2695	0.2832	-0.0043945	NaN	NaN	NaN	NaN	NaN	NaN
3.78	31.314	121.6544	589.3859	0.21289	0.53857	-0.031934	-37.175	196.667	928.136	-0.36963	0.71289	0.00039062	-133.279	-145.789	1499.87	-1.4258	0.36279	-0.0048828	NaN	NaN	NaN	NaN	NaN	NaN
3.782	18.947	136.448	577.368	0.225	0.52978	-0.035938	-51.313	214.183	857.156	-0.33213	0.69375	0.010547	-113.567	-169.549	1525.67	-1.5073	0.40625	-0.0019531	NaN	NaN	NaN	NaN	NaN	NaN
3.784	28.425	137.792	557.7992	0.22969	0.52275	-0.031641	-42.413	172.665	838.637	-0.29492	0.67148	0.017187	-136.649	-201.725	1500.55	-1.6323	0.5083	0.0058594	NaN	NaN	NaN	NaN	NaN	NaN
3.786	-11.574	127.913	554.671	0.2332	0.51318	-0.02793	-23.999	213.854	806.002	-0.26416	0.65283	0.026367	-127.612	-195.809	1513.45	-1.6902	0.58764	0.0073242	NaN	NaN	NaN	NaN	NaN	NaN
3.788	-26.959	122.017	537.152	0.23682	0.50391	-0.026367	-44.642	202.987	766.651	-0.2334	0.63477	0.03584	-143.103	-213.375	1511.48	-1.7144	0.67139	0.0097656	NaN	NaN	NaN	NaN	NaN	NaN
3.79	-29.325	121.014	507.3576	0.23897	0.49981	-0.024609	12.221	203.224	760.072	-0.20752	0.61768	0.041113	-139.993	-193.493	1563.16	-1.6812	0.7876	0.003418	NaN	NaN	NaN	NaN	NaN	NaN
3.792	-47.3349	114.683	491.333	0.2332	0.49639	-0.021387	-14.242	233.577	718.579	-0.18135	0.60518	0.050879	-124.5218	-187.85	1548.06	-1.6343	0.83057	-0.003418	NaN	NaN	NaN	NaN	NaN	NaN
3.794	-58.734	100.3179	486.1913	0.23359	0.49443	-0.015136	1.596	196.356	682.461	-0.15732	0.59131	0.059375	-109.538	-144.022	1544.12	-1.5117	0.89844	-0.033203	NaN	NaN	NaN	NaN	NaN	NaN
3.796	-98.553	104.7071	464.6279	0.23545	0.50078	-0.011718	25.991	207.514	651.957	-0.13477	0.58203	0.067383	-112.47	-116.794	1501.94	-1.3962	0.92602	-0.055419	NaN	NaN	NaN	NaN	NaN	NaN
3.798	-72.9346	120.297	441.4012	0.23242	0.49854	-0.010254	-23.974	218.171	571.155	-0.11192	0.56699	0.07959	-98.074	-64.6214	1515.97	-1.2852	0.93359	-0.084961	NaN	NaN	NaN	NaN	NaN	NaN
3.8	-93.101	128.094	417.9857	0.2376	0.49737	-0.0059571	15.558	206.245	558.0171	-0.091211	0.55928	0.087597	-55.4286	-53.4276	1451.61	-1.1519	0.90283	-0.11914	NaN	NaN	NaN	NaN	NaN	NaN
3.802	-106.388	122.217	427.762	0.23759	0.4918	-0.0041992	-15.437	233.79	556.679	-0.068946	0.54834	0.092676	-24.516	-55.744	1457.17	-1.0957	0.875	-0.1377	NaN	NaN	NaN	NaN	NaN	NaN
3.804	-104.519	111.112	426.375	0.24151	0.48359	-0.0026367	-33.081	200.826	514.256	-0.049805	0.54267	0.099511	-34.787	-109.592	1441.87	-0.98584	0.7876	-0.16748	NaN	NaN	NaN	NaN	NaN	NaN
3.806	-89.999	98.233	381.8567	0.24024	0.47725	-0.00068357	-31.438	173.995	498.082	-0.029297	0.53662	0.10938	-44.964	-177.801	1538.26	-0.89698	0.69873	-0.18017	NaN	NaN	NaN	NaN	NaN	NaN
3.808	-75.9119	100.233	362.32532	0.23975	0.46533	0.0024414	-97.123	182.785	439.464	-0.010253	0.52764	0.10567	-22.934	-230.497	1568.37	-0.80859	0.61133	-0.19141	NaN	NaN	NaN	NaN	NaN	NaN
3.81	-85.493	95.4919	360.7083	0.23809	0.45811	0.00078125	-79.337	158.264	422.949	0.015333	0.51552	0.1085	-17.373	-274.158	1634.14	-0.70117	0.51367	-0.19824	NaN	NaN	NaN	NaN	NaN	NaN
3.812	-58.054	93.6158	357.6913	0.2375	0.44697	0	-89.758	163.54017	408.8288	0.031349	0.50772	0.11123	8.391	-288.178	1642.62	-0.64893	0.47314	-0.2041	NaN	NaN	NaN	NaN	NaN	NaN
3.814	-58.5047	101.9644	344.807	0.23164	0.4376	0.0050782	-128.462	166.701	365.1571	0.052833	0.49873	0.11347	27.589	-321.417	1710.84	-0.55713	0.41113	-0.20215	NaN	NaN	NaN	NaN	NaN	NaN
3.816	-25.377	105.6397	332.8199	0.22773	0.42764	0.0094726	-95.4278	141.4576	335.876	0.068848	0.4873	0.11621	67.686	-322.228	1727.89	-0.5127	0.37989	-0.20752	NaN	NaN	NaN	NaN	NaN	NaN
3.818	-21.374	96.416	328.942	0.22168	0.4126	0.013672	-112.002	151.83	315.9287	0.085642	0.47998	0.11504	102.148	-329.25	1805.69	-0.49512	0.35352	-0.20898	NaN	NaN	NaN	NaN	NaN	NaN
3.82	0.68	98.357	330.286	0.22041	0.4041	0.018262	-125.736	132.194	311.267	0.10595	0.47149	0.11699	124.5	-312.341	1835.18	-0.55615	0.33545	-0.20947	NaN	NaN	NaN	NaN	NaN	NaN
3.822	3.409	91.604	313.376	0.22275	0.39199	0.022852	-83.414	128.722	326.744	0.11728	0.46289	0.1127	83.645	-319.45	1919.81	-0.63184	0.33398	-0.20215	NaN	NaN	NaN	NaN	NaN	NaN
3.824	23.787	87.4765	282.90388	0.22158	0.37832	0.026367	-102.487	147.278	289.954	0.129	0.45	0.11709	66.867	-296.668	1952.18	-0.85547	0.36328	-0.18506	NaN	NaN	NaN	NaN	NaN	NaN
3.826	25.905	73.5593	270.331	0.2247	0.36631	0.024024	-89.2356	121.492	256.996	0.13379	0.44141	0.10596	10.293	-296.63	1992.57	-1.0447	0.4187	-0.15113	NaN	NaN	NaN	NaN	NaN	NaN
3.828	30.4284	75.473	254.417	0.22705	0.35059	0.026367	-76.0224	125.547	235.2785	0.13428	0.43428	0.10821	4.47499999999999	-280.095	1991.81	-1.2188	0.49023	-0.11523	NaN	NaN	NaN	NaN	NaN	NaN
3.83	41.098	75.583	260.5417	0.23643	0.33711	0.028125	-98.3078	99.301	195.7472	0.1331	0.42763	0.10831	14.614	-282.64	2058.78	-1.3979	0.60205	-0.069336	NaN	NaN	NaN	NaN	NaN	NaN
3.832	28.601	79.6982	259.5562	0.25	0.31904	0.030664	-46.631	70.4778	196.289	0.13467	0.42646	0.10673	38.014	-232.879	2054.13	-1.4644	0.66504	-0.056152	NaN	NaN	NaN	NaN	NaN	NaN
3.834	37.556	78.4591	247.4393	0.25781	0.30576	0.030273	-55.0192	78.2969	169.19	0.13702	0.42246	0.11397	6.976	-219.859	2097.83	-1.5371	0.78516	-0.020996	NaN	NaN	NaN	NaN	NaN	NaN
3.836	4.881	87.476	240.326	0.26777	0.2832	0.032227	-54.736	59.574	165.4752	0.1416	0.42432	0.11328	25.915	-179.018	2114.02	-1.573	0.85083	-0.010254	NaN	NaN	NaN	NaN	NaN	NaN
3.838	-11.603	79.794	239.827	0.28467	0.27246	0.030273	-7.726	64.636	189.813	0.15535	0.42344	0.11662	-26.827	-218.975	2169.43	-1.6011	0.89307	-0.0039063	NaN	NaN	NaN	NaN	NaN	NaN
3.84	-7.432	69.639	234.381	0.29463	0.25175	0.028906	-5.657	64.197	162.386	0.16606	0.42163	0.11407	16.763	-206.75	2227.5	-1.6294	0.92822	0.0019531	NaN	NaN	NaN	NaN	NaN	NaN
3.842	-24.147	56.988	197.7561	0.30684	0.23291	0.030664	11.588	47.164	147.4633	0.17858	0.413	0.11445	12.982	-237.168	2271.33	-1.6479	0.93213	0.003418	NaN	NaN	NaN	NaN	NaN	NaN
3.844	-39.8633	55.328	190.073	0.31778	0.21377	0.030273	21.934	53.101	140.209	0.19168	0.4049	0.10529	35.665	-178.541	2309.13	-1.6772	0.94189	0.0039063	NaN	NaN	NaN	NaN	NaN	NaN
3.846	-64.31359	45.568	182.3963	0.32764	0.19824	0.024121	10.431	44.204	125.581357	0.20313	0.39648	0.099609	-10.17	-182.942	2343.63	-1.7019	0.95434	0.00048828	NaN	NaN	NaN	NaN	NaN	NaN
3.848	-53.589	42.5828	181.2538	0.3335	0.18115	0.025879	30.41	25.5281	146.2874	0.21266	0.38421	0.099371	-45.09	-137.983	2355.09	-1.7207	0.97266	0.0043945	NaN	NaN	NaN	NaN	NaN	NaN
3.85	-91.2958	51.393	176.841	0.33965	0.1665	0.023926	20.938	25.4991	139.774	0.22048	0.37247	0.097455	-87.214	-186.572	2361.85	-1.748	1.0176	-0.010742	NaN	NaN	NaN	NaN	NaN	NaN
3.852	-84.8131	58.918	177.3051	0.34131	0.15449	0.015918	-13.718	11.8188	104.0008	0.22194	0.36322	0.098091	-77.976	-181.824	2388.54	-1.7554	1.0415	-0.023438	NaN	NaN	NaN	NaN	NaN	NaN
3.854	-83.5198	49.961	177.677	0.34014	0.14278	0.015918	15.505	7.8311	131.5246	0.22379	0.35134	0.10258	-68.677	-231.307	2411.46	-1.7476	1.0864	-0.049316	NaN	NaN	NaN	NaN	NaN	NaN
3.856	-90.183	40.317	184.375	0.3416	0.13691	0.013379	-25.919	13.8614	108.293	0.22656	0.33936	0.10254	-42.96	-173.234	2446.5	-1.7256	1.1045	-0.071045	NaN	NaN	NaN	NaN	NaN	NaN
3.858	-81.2953	23.385	180.917	0.33643	0.13281	0.011719	-22.483	-3.9176	107.126	0.22824	0.327	0.10324	-39.031	-155.492	2430.66	-1.6934	1.1133	-0.095703	NaN	NaN	NaN	NaN	NaN	NaN
3.86	-91.465	19.0103	166.4246	0.32578	0.1292	0.011035	-26.833	11.525	110.599	0.23053	0.31466	0.10936	-57.287	-78.17	2423.85	-1.644	1.1099	-0.13965	NaN	NaN	NaN	NaN	NaN	NaN
3.862	-74.954	22.4789	181.169	0.31572	0.12724	0.0063476	-64.8529	3.3567	74.7356	0.23234	0.3006	0.10561	-21.875	-92.416	2395.84	-1.6118	1.1118	-0.15625	NaN	NaN	NaN	NaN	NaN	NaN
3.864	-67.6692	27.607	192.498	0.30127	0.12842	0.0036133	-9.935	-11.67537	102.0152	0.23143	0.28487	0.11004	27.912	-69.0934	2411.76	-1.5488	1.1045	-0.19238	NaN	NaN	NaN	NaN	NaN	NaN
3.866	-34.501	47.205	208.545	0.27588	0.13906	0.0035156	-52.772	2.7376	102.6753	0.23096	0.26611	0.10645	57.034	-79.258	2393.94	-1.5083	1.0981	-0.22217	NaN	NaN	NaN	NaN	NaN	NaN
3.868	-43.974	61.205	238.398	0.24658	0.15234	0.0014648	-80.521	-8.432	74.2628	0.22815	0.24561	0.10422	32.49	-43.306	2444.44	-1.4766	1.0938	-0.24463	NaN	NaN	NaN	NaN	NaN	NaN
3.87	-23.614	68.647	272.958	0.21816	0.17041	0.015137	-66.42	14.2305	98.9929	0.22132	0.2262	0.10205	12.244	-46.101	2436.92	-1.4492	1.0918	-0.27588	NaN	NaN	NaN	NaN	NaN	NaN
3.872	-5.564	64.8308	296.55	0.18545	0.1914	0.01416	-113.2851	32.8356	90.602	0.21783	0.20105	0.099299	-25.402	-13.41	2464.75	-1.4487	1.0923	-0.28369	NaN	NaN	NaN	NaN	NaN	NaN
3.874	-7.075	82.3169	318.74	0.15225	0.21211	0.022363	-79.6478	25.268	104.715	0.20578	0.18224	0.098769	4.61699999999999	-26.44	2422.65	-1.4663	1.1021	-0.29834	NaN	NaN	NaN	NaN	NaN	NaN
3.876	11.879	89.153	352.77	0.12266	0.23887	0.023145	-72.7579	35.535	112.7897	0.18701	0.16504	0.09082	10.342	-17.8314	2458.11	-1.5017	1.1086	-0.30005	NaN	NaN	NaN	NaN	NaN	NaN
3.878	16.835	114.88	385.38	0.088867	0.26611	0.020508	-102.02	13.98896	86.99359	0.16266	0.14856	0.088003	35.462	-25.16	2469.3	-1.5542	1.1177	-0.29932	NaN	NaN	NaN	NaN	NaN	NaN
3.88	13.994	131.83	424.91	0.046192	0.29052	0.016992	-58.749	0.46844	101.6826	0.13183	0.14083	0.08455	36.661	-8.706	2518.25	-1.6245	1.1353	-0.2876	NaN	NaN	NaN	NaN	NaN	NaN
3.882	-0.250999999999998	162.202	468.14	-0.0042968	0.31172	0.0043945	-74.1417	18.5889	96.6534	0.099521	0.13802	0.083387	79.643	-3.1721	2496.83	-1.6743	1.1474	-0.27564	NaN	NaN	NaN	NaN	NaN	NaN
3.884	30.816	170.634	525.08	-0.067969	0.34688	-0.0053711	-62.707	4.109	78.9288	0.071773	0.14107	0.0908	45.028	-7.7264	2508.31	-1.728	1.1587	-0.26611	NaN	NaN	NaN	NaN	NaN	NaN
3.886	31.973	171.309	601.62	-0.14395	0.38769	-0.0087891	-10.873	0.36859	115.80789	0.04248	0.14941	0.098633	63.967	-27.73	2459.43	-1.7729	1.1743	-0.25391	NaN	NaN	NaN	NaN	NaN	NaN
3.888	0.874000000000002	168.549	652.34	-0.229	0.43213	-0.010742	-27.799	5.8333	94.6147	0.02537	0.16136	0.10508	49.243	-29.504	2453.05	-1.7847	1.1763	-0.25	NaN	NaN	NaN	NaN	NaN	NaN
3.89	4.333	152.393	710.34	-0.31738	0.48809	-0.0017578	-2.957	-10.026	109.8694	0.016404	0.17764	0.1148	59.62	11.856	2399.93	-1.7979	1.1748	-0.24463	NaN	NaN	NaN	NaN	NaN	NaN
3.892	-2.322	117.261	759.41	-0.40371	0.55469	0.006543	19.213	16.39896	124.91	0.018521	0.18408	0.11886	22.272	65.946	2425.94	-1.7983	1.1567	-0.24903	NaN	NaN	NaN	NaN	NaN	NaN
3.894	-6.545	87.189	814.01	-0.48301	0.6289	0.02373	13.073	14.517	98.8241	0.030072	0.19809	0.11969	13.014	128.247	2394.22	-1.7871	1.1348	-0.25879	NaN	NaN	NaN	NaN	NaN	NaN
3.896	-27.303	64.5584	839.89	-0.55615	0.70791	0.052734	27.697	12.0444	128.5944	0.047852	0.20264	0.12207	-15.51	145.957	2394.82	-1.7695	1.0918	-0.27344	NaN	NaN	NaN	NaN	NaN	NaN
3.898	-19.456	38.9786	875.37	-0.61523	0.78516	0.072266	11.895	31.599	117.5074	0.068947	0.20833	0.11737	-8.35599999999999	152.124	2309.42	-1.7598	1.0723	-0.28613	NaN	NaN	NaN	NaN	NaN	NaN
3.9	-26.776	12.71	911.03	-0.66895	0.85527	0.089649	26.011	2.8321	106.542	0.091807	0.20722	0.11667	-39.401	112.402	2324.99	-1.7612	1.0269	-0.29736	NaN	NaN	NaN	NaN	NaN	NaN
3.902	-28.97	1.966	972.7	-0.70449	0.92071	0.1044	35.941	0.5977	131.6572	0.11599	0.2033	0.10769	-28.75	142.548	2292.6	-1.7695	0.99463	-0.3103	NaN	NaN	NaN	NaN	NaN	NaN
3.904	-20.487	-3.40799999999999	1038.15	-0.73145	0.97344	0.11377	0.987000000000002	2.47795	108.1286	0.1392	0.19999	0.10909	-53.533	144.001	2308.48	-1.7847	0.96338	-0.31543	NaN	NaN	NaN	NaN	NaN	NaN
3.906	-62.257	-13.653	1095.23	-0.74512	1.0113	0.11826	1.978	-11.6518	109.00929	0.16113	0.19385	0.11279	-7.47	192.503	2243.05	-1.8027	0.94336	-0.31836	NaN	NaN	NaN	NaN	NaN	NaN
3.908	-50.586	-22.011	1137.95	-0.74805	1.043	0.11523	0.197000000000003	15.4201	116.2075	0.17664	0.18555	0.10996	-28.089	167.243	2227.54	-1.8125	0.93359	-0.32227	NaN	NaN	NaN	NaN	NaN	NaN
3.91	-55.779	-26.159	1163.93	-0.74834	1.0637	0.11621	-25.492	9.001	80.52747	0.19296	0.17891	0.10928	-10.12	182.301	2178.26	-1.8262	0.92871	-0.32324	NaN	NaN	NaN	NaN	NaN	NaN
3.912	-38.744	-25.346	1219.8	-0.75302	1.0802	0.11162	-3.595	-4.224	109.447	0.20351	0.175	0.10928	-18.231	143.741	2205.33	-1.8213	0.92822	-0.32446	NaN	NaN	NaN	NaN	NaN	NaN
3.914	-65.518	-25.5078	1295.28	-0.76514	1.0884	0.10655	-21.222	-1.146	121.567	0.22002	0.17178	0.10869	23.246	196.127	2151.1	-1.8086	0.93359	-0.32666	NaN	NaN	NaN	NaN	NaN	NaN
3.916	-30.705	-17.2567	1328.72	-0.77969	1.0845	0.1041	-53.726	-17.233	96.1064	0.23535	0.17188	0.11035	14.271	184.531	2168.92	-1.7788	0.93994	-0.3208	NaN	NaN	NaN	NaN	NaN	NaN
3.918	-23.863	-23.6201	1345.73	-0.80273	1.082	0.10156	-32.987	-0.947999999999999	116.1041	0.24727	0.16895	0.10498	37.575	234.685	2125.02	-1.7559	0.94531	-0.32031	NaN	NaN	NaN	NaN	NaN	NaN
3.92	-9.656	-28.7205	1348.61	-0.82256	1.0745	0.10938	-81.6785	15.7586	107.239	0.2625	0.17051	0.10752	-15.018	211.7745	2095.15	-1.7065	0.94385	-0.32178	NaN	NaN	NaN	NaN	NaN	NaN
3.922	33.379	-50.999	1381.12	-0.84512	1.0664	0.11924	-91.4219	-9.575	114.227	0.27657	0.17324	0.10283	-16.257	258.747	2020.62	-1.6668	0.94751	-0.31811	NaN	NaN	NaN	NaN	NaN	NaN
3.924	42.545	-64.5139	1396.01	-0.84941	1.0559	0.13291	-72.328	1.699	126.898	0.28975	0.18008	0.097853	0.709000000000003	241.747	1981.84	-1.6265	0.94775	-0.31396	NaN	NaN	NaN	NaN	NaN	NaN
3.926	84.735	-66.7064	1366.09	-0.83105	1.0362	0.15117	-95.9938	3.604	72.7636	0.29639	0.18506	0.083496	-15.836	317.469	1944.97	-1.5859	0.9375	-0.30859	NaN	NaN	NaN	NaN	NaN	NaN
3.928	64.146	-63.493	1332.78	-0.78271	1.0142	0.16162	-80.1307	-9.5114	92.58769	0.29424	0.19531	0.080957	-22.282	297.959	1945.8	-1.5605	0.93555	-0.30127	NaN	NaN	NaN	NaN	NaN	NaN
3.93	65.123	-77.577	1325.07	-0.70733	0.9831	0.167	-82.4487	5.4565	143.451	0.28613	0.2122	0.072949	42.804	338.76	1877.23	-1.5278	0.93213	-0.29053	NaN	NaN	NaN	NaN	NaN	NaN
3.932	67.489	-87.989	1347.46	-0.61338	0.94619	0.16992	-84.1317	-37.842	143.063	0.2791	0.23213	0.068262	44.187	298.372	1814.99	-1.4998	0.92896	-0.2749	NaN	NaN	NaN	NaN	NaN	NaN
3.934	50.811	-86.281	1333.02	-0.51338	0.9001	0.16953	-68.778	-46.26	183.552	0.25703	0.2543	0.058692	51.838	318.48	1750.352	-1.4741	0.92529	-0.26025	NaN	NaN	NaN	NaN	NaN	NaN
3.936	41.17	-83.661	1339.21	-0.42285	0.84395	0.15986	-58.571	-25.2441	153.731	0.22461	0.27979	0.045898	32.162	276.064	1702.269	-1.4297	0.91992	-0.24512	NaN	NaN	NaN	NaN	NaN	NaN
3.938	21.265	-84.748	1358.11	-0.34473	0.7832	0.14551	-18.075	-42.1092	198.204	0.16914	0.31416	0.022558	2.923	318.863	1666.071	-1.4043	0.91797	-0.2334	NaN	NaN	NaN	NaN	NaN	NaN
3.94	4.828	-92.442	1398.68	-0.30713	0.72559	0.12949	-9.998	-9.392	306.28	0.096583	0.34961	0.0015625	-5.56599999999999	278.08	1619.941	-1.3394	0.91846	-0.2168	NaN	NaN	NaN	NaN	NaN	NaN
3.942	-14.962	-87.905	1387.37	-0.29805	0.67539	0.11875	-79.391	3.9838	334.253	0.013377	0.39453	0.00039057	-29.803	310.489	1587.42	-1.2861	0.90918	-0.20752	NaN	NaN	NaN	NaN	NaN	NaN
3.944	-10	-93.425	1376.38	-0.31758	0.64375	0.11367	-36.173	-8.9373	398.472	-0.074515	0.4458	0.0038086	-47.257	267.026	1561.53	-1.2266	0.9043	-0.20361	NaN	NaN	NaN	NaN	NaN	NaN
3.946	-28.296	-101.629	1381.66	-0.36016	0.63115	0.12002	-27.592	9.6139	460.138	-0.15967	0.50635	0.01416	-82.77	301.35	1526.75	-1.144	0.89111	-0.19385	NaN	NaN	NaN	NaN	NaN	NaN
3.948	-40.363	-115.012	1405.55	-0.40039	0.63965	0.125	-30.911	2.169	542.751	-0.24209	0.56592	0.031739	-65.637	277.155	1441.126	-1.0996	0.88086	-0.18701	NaN	NaN	NaN	NaN	NaN	NaN
3.95	-55.854	-123.373	1424.89	-0.44307	0.67549	0.14463	1.821	51.8983	676.99	-0.32207	0.63985	0.049414	-87.986	317.089	1379.133	-1.0234	0.85742	-0.17871	NaN	NaN	NaN	NaN	NaN	NaN
3.952	-60.94	-138.561	1430.55	-0.47754	0.72246	0.16289	-59.239	111.3284	732.858	-0.40097	0.70625	0.054101	-82.853	289.241	1308.689	-0.97095	0.84058	-0.16382	NaN	NaN	NaN	NaN	NaN	NaN
3.954	-63.072	-154.388	1463.22	-0.4916	0.78497	0.17422	-43.959	106.6693	816.497	-0.48282	0.77275	0.06709	-85.99	311.514	1297.998	-0.9209	0.81738	-0.15527	NaN	NaN	NaN	NaN	NaN	NaN
3.956	-90.503	-177.161	1495.98	-0.49394	0.84121	0.17012	-39.979	127.393	961.61	-0.57129	0.83984	0.073242	-66.949	293.684	1212.084	-0.87109	0.78516	-0.13574	NaN	NaN	NaN	NaN	NaN	NaN
3.958	-101.0089	-179.716	1521.64	-0.47998	0.89453	0.15723	-76.282	113.1486	1084.513	-0.68027	0.89922	0.062598	-61.085	320.967	1165.373	-0.85059	0.76953	-0.12695	NaN	NaN	NaN	NaN	NaN	NaN
3.96	-140.619	-169.449	1528.53	-0.46084	0.93935	0.13379	-24.269	89.0433	1224.01	-0.8041	0.95859	0.055859	-42.16	313.789	1065.974	-0.81592	0.74365	-0.097168	NaN	NaN	NaN	NaN	NaN	NaN
3.962	-138.072	-143.286	1552.33	-0.4462	0.97392	0.10938	-60.324	93.011	1297.33	-0.94316	1.0227	0.051172	-84.652	356.811	1037.538	-0.79492	0.71485	-0.07251	NaN	NaN	NaN	NaN	NaN	NaN
3.964	-128.2801	-127.998	1587.2	-0.44814	1.0079	0.085944	-75.334	49.483	1371.533	-1.0889	1.095	0.059863	-78.013	364.144	969.5418	-0.77832	0.69434	-0.050293	NaN	NaN	NaN	NaN	NaN	NaN
3.966	-124.636	-100.699	1619.76	-0.45937	1.0346	0.06348	-55.0807	-3.513	1466.7	-1.2324	1.1777	0.086426	-90.1894	387.654	965.582	-0.75391	0.65527	-0.01416	NaN	NaN	NaN	NaN	NaN	NaN
3.968	-122.9654	-101.878	1645.18	-0.48584	1.0527	0.049316	-101.34	-49.7591	1471.98	-1.3462	1.2636	0.11894	-69.794	366.779	872.8848	-0.74609	0.64746	0.00097656	NaN	NaN	NaN	NaN	NaN	NaN
3.97	-101.1186	-97.772	1673.51	-0.52062	1.0794	0.036419	-80.797	-133.731	1484.61	-1.4195	1.3434	0.15742	-95.118	352.582	867.008	-0.71973	0.61719	0.023438	NaN	NaN	NaN	NaN	NaN	NaN
3.972	-69.926	-108.797	1712.27	-0.55452	1.0985	0.034963	-70.3646	-188.042	1503.46	-1.4441	1.4094	0.18945	-62.6658	323.572	778.639	-0.69507	0.5979	0.038085	NaN	NaN	NaN	NaN	NaN	NaN
3.974	-63.4	-110.41	1736.9	-0.59085	1.1207	0.040439	-129.816	-232.63	1518.7	-1.4284	1.4567	0.22334	-82.9753	323.883	767.901	-0.67188	0.57422	0.048828	NaN	NaN	NaN	NaN	NaN	NaN
3.976	-38.349	-115.858	1750.12	-0.62317	1.1468	0.050589	-73.325	-262.963	1568.45	-1.3809	1.4863	0.24463	-26.951	327.607	701.02195	-0.63623	0.54736	0.058105	NaN	NaN	NaN	NaN	NaN	NaN
3.978	-34.317	-117.606	1758.57	-0.64941	1.166	0.061523	-66.4141	-214.636	1566.56	-1.288	1.4757	0.25098	-28.957	315.828	695.903	-0.62012	0.53125	0.060059	NaN	NaN	NaN	NaN	NaN	NaN
3.98	-15.936	-127.857	1754.01	-0.66608	1.1954	0.068544	-69.0295	-201.058	1560.044	-1.1726	1.42	0.22539	-14.062	309.316	640.2176	-0.58984	0.50488	0.064941	NaN	NaN	NaN	NaN	NaN	NaN
3.982	-46.444	-124.262	1776.81	-0.67906	1.2269	0.07323	14.437	-167.934	1618.85	-1.039	1.3231	0.18125	-14.235	283.1694	630.768	-0.56055	0.4834	0.067138	NaN	NaN	NaN	NaN	NaN	NaN
3.984	-57.669	-128.321	1810.34	-0.68651	1.2616	0.072871	3.1093	-145.862	1625.68	-0.91611	1.2093	0.13711	-14.312	278.755	554.5277	-0.53467	0.4585	0.066406	NaN	NaN	NaN	NaN	NaN	NaN
3.986	-27.173	-116.403	1843.51	-0.68955	1.2976	0.074001	14.1	-133.661	1669.84	-0.81299	1.1108	0.10449	-60.029	278.099	542.59	-0.49561	0.43213	0.067383	NaN	NaN	NaN	NaN	NaN	NaN
3.988	-14.222	-123.825	1862.54	-0.69287	1.3364	0.073242	31.7724	-69.771	1675.03	-0.72822	1.0257	0.078125	-53.575	272.883	491.9373	-0.47559	0.41748	0.067383	NaN	NaN	NaN	NaN	NaN	NaN
3.99	-16.845	-126.928	1874.62	-0.68492	1.3707	0.073302	39.76	-61.59	1606.52	-0.65733	0.94971	0.062012	-78.0407	243.236	491.091	-0.42676	0.39258	0.066406	NaN	NaN	NaN	NaN	NaN	NaN
3.992	-22.495	-131.532	1887.68	-0.67591	1.4067	0.067563	55.4419	-72.558	1618.39	-0.59521	0.89151	0.046387	-52.575	247.4838	434.193	-0.3894	0.37891	0.075928	NaN	NaN	NaN	NaN	NaN	NaN
3.994	-9.749	-116.452	1901.2	-0.6634	1.4348	0.054939	58.604	-110.193	1597.65	-0.53204	0.84883	0.025879	-74.89305	230.083	399.497	-0.34814	0.36035	0.07373	NaN	NaN	NaN	NaN	NaN	NaN
3.996	-11.887	-102.152	1905.6	-0.64712	1.4664	0.045343	17.641	-215.04627	1582.42	-0.47021	0.81689	0.0068359	-79.945	253.332	348.909	-0.30615	0.3374	0.079102	NaN	NaN	NaN	NaN	NaN	NaN
[truncated: 28,002 more rows]
