# Supplementary material for: Reliability and Validity of Running Cadence and Stance Time Derived from Instrumented Wireless Earbuds
Source: Sensors (Basel). 2021 Nov 30;21(23):7995. doi: 10.3390/s21237995 (PMC8659722; doi:10.3390/s21237995)
Supplement: Supplementary file 1 [file sensors-21-07995-s001.zip › Data_P06_speeds_2.csv]

time	S7kmh_force_plate_1	S7kmh_force_plate_2	S7kmh_force_plate_3	S7kmh_earbuds_1	S7kmh_earbuds_2	S7kmh_earbuds_3	S10kmh_force_plate_1	S10kmh_force_plate_2	S10kmh_force_plate_3	S10kmh_earbuds_1	S10kmh_earbuds_2	S10kmh_earbuds_3	S13kmh_force_plate_1	S13kmh_force_plate_2	S13kmh_force_plate_3	S13kmh_earbuds_1	S13kmh_earbuds_2	S13kmh_earbuds_3	max_force_plate_1	max_force_plate_2	max_force_plate_3	max_earbuds_1	max_earbuds_2	max_earbuds_3
0	-130.381	-146.8604	1345.933	-0.0024414	0.92188	-0.034668	-119.334	116.72	1935	-1.2631	1.5694	0.60752	-130.8779	77.718	95.56234	-0.11621	0.45996	0.024414	NaN	NaN	NaN	NaN	NaN	NaN
0.002	-154.615	-142.483	1360.879	0.026855	0.92041	-0.056641	-113.018	158.122	1899.9	-1.2262	1.541	0.60068	-143.22	65.125	118.4	-0.13672	0.44336	0.02002	NaN	NaN	NaN	NaN	NaN	NaN
0.004	-181.8985	-138.39243	1377.99	0.060059	0.90479	-0.099609	-126.872	155.678	1830.14	-1.1899	1.5086	0.58935	-131.1259	33.866	87.1045	-0.146	0.43994	0.012695	NaN	NaN	NaN	NaN	NaN	NaN
0.006	-186.0348	-139.2297	1408.992	0.05835	0.90454	-0.11621	-128.6372	103.793	1802.18	-1.1486	1.4742	0.57823	-152.088	45.174	101.136763	-0.16943	0.43213	0.014648	NaN	NaN	NaN	NaN	NaN	NaN
0.008	-164.3203	-143.8347	1449.956	0.036621	0.9126	-0.13037	-139.987	163.808	1788.55	-1.1011	1.438	0.56836	-114.0566	-5.496	52.574	-0.18262	0.43604	0.021973	NaN	NaN	NaN	NaN	NaN	NaN
0.01	-161.6985	-160.371	1482.91	-0.016602	0.94824	-0.12793	-164.145	140.418	1744.91	-1.0466	1.3984	0.54824	-118.357	35.6585	75.5797	-0.19092	0.43555	0.035156	NaN	NaN	NaN	NaN	NaN	NaN
0.012	-176.3617	-158.8	1489.422	-0.053711	0.97314	-0.12207	-153.247	149.283	1725.44	-0.99063	1.3578	0.53193	-92.385	-4.574	67.777	-0.17676	0.43213	0.058105	NaN	NaN	NaN	NaN	NaN	NaN
0.014	-159.955	-166.497	1514.377	-0.12402	1.0293	-0.10889	-150.533	189.429	1695.57	-0.93281	1.3188	0.51787	-91.6931	60.797	76.135	-0.16113	0.42285	0.062012	NaN	NaN	NaN	NaN	NaN	NaN
0.016	-167.152	-173.613	1545.992	-0.1626	1.082	-0.10205	-150.783	144.693	1652.36	-0.86885	1.28	0.50147	-47.066	26.73944	47.533	-0.12402	0.40137	0.063965	NaN	NaN	NaN	NaN	NaN	NaN
0.018	-160.761	-176.812	1568.583	-0.19824	1.1387	-0.099609	-115.203	176.22	1625.9	-0.80615	1.2427	0.4834	-40.255	81.122	37.372	-0.095214	0.37744	0.058105	NaN	NaN	NaN	NaN	NaN	NaN
0.02	-157.965	-178.29	1584.501	-0.21875	1.209	-0.099609	-128.7965	179.082	1574.04	-0.74521	1.2042	0.46855	-20.326	28.9482	40.957	-0.060547	0.3501	0.05127	NaN	NaN	NaN	NaN	NaN	NaN
0.022	-144.762	-187.819	1612.804	-0.22705	1.2407	-0.10254	-123.0998	147.09	1543.14	-0.68701	1.1653	0.45488	-4.02499999999999	36.78	51.144	-0.029785	0.31348	0.053223	NaN	NaN	NaN	NaN	NaN	NaN
0.024	-128.073	-187.869	1664.831	-0.24707	1.2876	-0.10645	-93.9148	198.063	1513.91	-0.6378	1.1232	0.4377	19.526	1.44	64.64758	-0.010742	0.28564	0.046875	NaN	NaN	NaN	NaN	NaN	NaN
0.026	-108.42	-173.3404	1695.248	-0.26514	1.3056	-0.11426	-85.9712	172.172	1440.68	-0.58467	1.0814	0.41885	69.613	35.223	48.777	0.024414	0.25195	0.062988	NaN	NaN	NaN	NaN	NaN	NaN
0.028	-84.422	-150.2861	1725.075	-0.30225	1.3188	-0.12109	-70.62	169.854	1402.3	-0.53076	1.0444	0.4082	70.0082	46.918	86.901	0.04956	0.21778	0.074218	NaN	NaN	NaN	NaN	NaN	NaN
0.03	-52.322	-145.534	1749.021	-0.36328	1.3301	-0.12305	-74.823	217.184	1340.17	-0.48535	1.0037	0.38506	115.381	34.8506	65.51066	0.072266	0.19092	0.087891	NaN	NaN	NaN	NaN	NaN	NaN
0.032	-12.201	-144.349	1762.452	-0.39795	1.332	-0.11914	-83.234	188.39	1287.49	-0.43584	0.9626	0.36191	55.6712	33.9421	104.1746	0.10693	0.14063	0.094238	NaN	NaN	NaN	NaN	NaN	NaN
0.034	-6.23999999999999	-161.049	1791.045	-0.45605	1.3438	-0.11426	-63.178	227.906	1258.47	-0.39131	0.92744	0.34707	71.534	-0.244	45.851	0.12402	0.1167	0.10352	NaN	NaN	NaN	NaN	NaN	NaN
0.036	-7.49199999999999	-164.4516	1782.734	-0.49634	1.354	-0.098877	-52.074	230.577	1198.25	-0.34961	0.88184	0.32588	65.24	52.024	91.4343	0.15918	0.071777	0.104	NaN	NaN	NaN	NaN	NaN	NaN
0.038	-4.83	-187.6517	1800.03	-0.53271	1.3696	-0.088867	-40.103	198.4461	1175.32	-0.31006	0.84814	0.31006	92.312	20.7607	75.97	0.18555	0.039551	0.10938	NaN	NaN	NaN	NaN	NaN	NaN
0.04	-30.416	-183.161	1810.232	-0.56201	1.3892	-0.075684	-19.16	243.624	1144.92	-0.27383	0.81953	0.29502	46.711	53.017	136.12	0.21289	0.01123	0.11182	NaN	NaN	NaN	NaN	NaN	NaN
0.042	-39.941	-185.302	1820.246	-0.57275	1.3965	-0.074707	-42.218	215.25484	1097.49	-0.24316	0.78818	0.27832	14.905	-10.2488	91.516	0.24902	-0.022461	0.12012	NaN	NaN	NaN	NaN	NaN	NaN
0.044	-61.654	-182.0604	1821.795	-0.58105	1.4082	-0.089844	-33.431	227.807	1060.67	-0.21192	0.75615	0.27207	-10.308	14.6313	78.3875	0.2666	-0.041016	0.13135	NaN	NaN	NaN	NaN	NaN	NaN
0.046	-95.453	-162.751	1837.218	-0.56103	1.4156	-0.11059	-40.516	256.265	1019.9	-0.18105	0.72403	0.26045	-33.292	-22.18	63.642	0.29443	-0.072266	0.13037	NaN	NaN	NaN	NaN	NaN	NaN
0.048	-104.392	-150.352	1874.886	-0.53076	1.4185	-0.13428	-25.456	205.227	969.42	-0.14746	0.69238	0.24414	-47.779	21.835	71.18121	0.31104	-0.093018	0.12426	NaN	NaN	NaN	NaN	NaN	NaN
0.05	-107.208	-132.676	1898.066	-0.47803	1.4297	-0.16699	-25.726	212.462	952.66	-0.12275	0.66465	0.23427	-71.722	6.7587	101.473	0.32764	-0.11328	0.11572	NaN	NaN	NaN	NaN	NaN	NaN
0.052	-126.706	-143.2581	1919.577	-0.45703	1.4395	-0.18164	-59.536	179.288	902.49	-0.09375	0.63281	0.2166	-76.186	31.6672	44.7812	0.34033	-0.12354	0.094727	NaN	NaN	NaN	NaN	NaN	NaN
0.054	-147.318	-147.7823	1940.898	-0.42578	1.4531	-0.19531	-57.667	138.4775	877.75	-0.073438	0.60547	0.20332	-125.475	24.9424	72.078	0.34277	-0.12842	0.086914	NaN	NaN	NaN	NaN	NaN	NaN
0.056	-140.438	-143.825	1945.687	-0.43018	1.4712	-0.19385	-66.484	188.139	859.07	-0.059375	0.57559	0.18926	-105.965	11.889	29.4102	0.33936	-0.12744	0.077148	NaN	NaN	NaN	NaN	NaN	NaN
0.058	-190.414	-134.809	1943.873	-0.44824	1.4941	-0.1875	-86.495	183.713	804.91	-0.040527	0.54639	0.17725	-131.71	1.162	91.365	0.33325	-0.11596	0.069824	NaN	NaN	NaN	NaN	NaN	NaN
0.06	-198.98	-130.792	1955.42	-0.49658	1.5239	-0.16113	-57.379	205.831	790.08	-0.027441	0.51787	0.1541	-116.064	-14.664	42.08326	0.3252	-0.096191	0.0625	NaN	NaN	NaN	NaN	NaN	NaN
0.062	-200.429	-122.737	1959.88	-0.52686	1.5396	-0.14551	-48.655	234.71	740.93	-0.015136	0.49306	0.15146	-139.582	26.8434	62.543	0.31348	-0.060059	0.057617	NaN	NaN	NaN	NaN	NaN	NaN
0.064	-207.7171	-117.642	1950.867	-0.59424	1.584	-0.11475	-66.454	188.886	703.9	-0.003417	0.46963	0.14366	-90.003	16.484	35.2307	0.30078	-0.040527	0.058594	NaN	NaN	NaN	NaN	NaN	NaN
0.066	-231.898	-109.193	1956.662	-0.64551	1.6133	-0.095457	-49.259	229.889	675.71	0.0055667	0.44541	0.1295	-95.3089	43.242	87.96	0.27637	0.0068359	0.058594	NaN	NaN	NaN	NaN	NaN	NaN
0.068	-207.8514	-112.012	1975.316	-0.69043	1.6484	-0.078613	-46.238	212.837	628.962	0.016113	0.42188	0.12061	-51.611	-18.0798	46.639	0.26221	0.048584	0.061279	NaN	NaN	NaN	NaN	NaN	NaN
0.07	-189.447	-101.606	1998.063	-0.73438	1.6797	-0.058105	-44.088	191.63	608.01	0.023534	0.40577	0.10294	-67.533	8.245	43.161	0.24414	0.09082	0.07959	NaN	NaN	NaN	NaN	NaN	NaN
0.072	-179.833	-87.776	2004.625	-0.75488	1.6934	-0.053223	-20.306	212.478	584.759	0.032517	0.38809	0.092678	-43.197	-11.615	45.2047	0.22949	0.14941	0.104	NaN	NaN	NaN	NaN	NaN	NaN
0.074	-165.286	-73.6661	1999.996	-0.79053	1.7173	-0.040527	-47.031	167.765	538.426	0.044234	0.37481	0.080962	1.353	32.6081	55.3257	0.23047	0.17139	0.11328	NaN	NaN	NaN	NaN	NaN	NaN
0.076	-134.829	-72.9847	2031.608	-0.81445	1.7295	-0.038086	-25.451	177.412	517.084	0.051951	0.36983	0.071488	11.754	5.844	75.305	0.23096	0.2041	0.11328	NaN	NaN	NaN	NaN	NaN	NaN
0.078	-110.616	-51.5308	2051.229	-0.83838	1.7407	-0.031738	10.653	201.749	483.696	0.063965	0.35889	0.061523	40.955	25.1242	47.8541	0.23706	0.22779	0.11352	NaN	NaN	NaN	NaN	NaN	NaN
0.08	-89.1	-47.4576	2044.477	-0.86475	1.7524	-0.018066	-11.774	169.101	466.925	0.076175	0.35146	0.053318	43.844	21.59124	60.1119	0.24707	0.24121	0.11328	NaN	NaN	NaN	NaN	NaN	NaN
0.082	-93.436	-42.1827	2027.872	-0.87793	1.748	-0.0073242	-2.319	184.442	467.39	0.087508	0.34257	0.04442	94.341	41.058	23.15	0.25	0.26074	0.11133	NaN	NaN	NaN	NaN	NaN	NaN
0.084	-67.047	-54.9562	2032.858	-0.89844	1.75	0.0058594	-10.537	144.043	427.531	0.098847	0.33006	0.031532	65.171	45.7922	83.7974	0.25439	0.27246	0.11572	NaN	NaN	NaN	NaN	NaN	NaN
0.086	-53.594	-61.6954	2014.154	-0.91162	1.7534	0.015137	-7.23999999999999	120.5331	418.224	0.10988	0.32636	0.024896	77.973	51.692	55.1715	0.25684	0.28516	0.12402	NaN	NaN	NaN	NaN	NaN	NaN
0.088	-54.513	-69.56175	1999.659	-0.91992	1.748	0.029785	20.433	136.1366	407.393	0.12207	0.31787	0.012207	67.721	50.4008	128.017	0.25195	0.292	0.125	NaN	NaN	NaN	NaN	NaN	NaN
0.09	-69.547	-81.375	1992.713	-0.9209	1.7266	0.039551	-1.84999999999999	93.978	371.569	0.13671	0.3172	0.0014899	80.138	-5.134	105.943	0.24023	0.29736	0.12012	NaN	NaN	NaN	NaN	NaN	NaN
0.092	-38.525	-75.4414	1982.897	-0.91602	1.7266	0.043457	9.535	116.5617	357.529	0.15454	0.31707	-0.0052634	31.648	-15.213	164.68	0.20898	0.30859	0.104	NaN	NaN	NaN	NaN	NaN	NaN
0.094	-66.239	-78.0277	1996.563	-0.90576	1.7036	0.054199	5.736	143.206	319.277	0.16666	0.32138	-0.015747	51.74	-65.5061	149.928	0.18701	0.31836	0.094238	NaN	NaN	NaN	NaN	NaN	NaN
0.096	-76.768	-61.2154	1983.705	-0.89136	1.6868	0.058837	-12.394	115.4581	287.618	0.17614	0.32499	-0.026548	19.328	-42.783	197.947	0.13086	0.35596	0.069824	NaN	NaN	NaN	NaN	NaN	NaN
0.098	-66.253	-46.987	1984.298	-0.875	1.6738	0.060059	4.81	149.077	286.696	0.18457	0.33057	-0.038086	-28.831	-97.7078	206.094	0.08838	0.39087	0.065674	NaN	NaN	NaN	NaN	NaN	NaN
0.1	-85.905	-23.3777	1967.869	-0.84912	1.6489	0.063477	-15.629	116.9863	253.164	0.195	0.33417	-0.044612	-64.873	-79.6	249.514	0.040527	0.43555	0.074707	NaN	NaN	NaN	NaN	NaN	NaN
0.102	-91.678	-15.0959	1964.597	-0.83154	1.6411	0.070801	-15.452	106.093	241.054	0.20246	0.34283	-0.048709	-67.935	-158.98	305.571	-0.023438	0.51025	0.089355	NaN	NaN	NaN	NaN	NaN	NaN
0.104	-120.768	-14.0366	1933.119	-0.81006	1.6216	0.065918	-9.937	129.7996	219.54	0.21186	0.34754	-0.051356	-91.242	-174.076	383.439	-0.04834	0.54297	0.094238	NaN	NaN	NaN	NaN	NaN	NaN
0.106	-144.775	-24.7432	1923.821	-0.79151	1.6099	0.073486	-58.875	91.886	198.798	0.21632	0.35238	-0.057492	-155.408	-187.924	511.758	-0.11377	0.61865	0.09375	NaN	NaN	NaN	NaN	NaN	NaN
0.108	-157.574	-23.0925	1917.553	-0.77686	1.5962	0.071289	-38.803	98.833	210.964	0.21875	0.36084	-0.061035	-158.913	-106.177	627.785	-0.16187	0.66822	0.087646	NaN	NaN	NaN	NaN	NaN	NaN
0.11	-174.622	-23.4614	1890.122	-0.75391	1.582	0.078125	-26.335	101.436	176.996	0.22289	0.3632	-0.065727	-188.369	-37.8735	825.758	-0.21582	0.71533	0.073242	NaN	NaN	NaN	NaN	NaN	NaN
0.112	-199.054	-15.7917	1866.925	-0.74609	1.5781	0.080078	-59.998	85.2093	147.285	0.22393	0.36895	-0.072519	-180.054	40.185	990.284	-0.30664	0.77002	0.029785	NaN	NaN	NaN	NaN	NaN	NaN
0.114	-210.4926	-14.2686	1861.132	-0.72949	1.5684	0.089355	-48.031	116.0412	152.255	0.223	0.36941	-0.075953	-233.176	98.4265	1251.038	-0.40601	0.81372	-0.02417	NaN	NaN	NaN	NaN	NaN	NaN
0.116	-176.06	-4.9849	1861.684	-0.71655	1.5667	0.088867	-67.405	87.31648	123.586	0.22202	0.37272	-0.085101	-185.368	130.209	1403.1442	-0.5293	0.86328	-0.085449	NaN	NaN	NaN	NaN	NaN	NaN
0.118	-193.346	3.067	1844.676	-0.70361	1.563	0.085938	-78.596	61.943	141.091	0.22119	0.37695	-0.09082	-153.7139	161.594	1610.204	-0.73828	0.96289	-0.15039	NaN	NaN	NaN	NaN	NaN	NaN
0.12	-207.6839	1.741	1840.675	-0.69092	1.5532	0.086914	-57.589	59.271	129.612	0.22229	0.38066	-0.10176	-96.915	96.653	1717.057	-0.85693	1.0356	-0.15869	NaN	NaN	NaN	NaN	NaN	NaN
0.122	-170.677	-2.598	1842.922	-0.67773	1.5454	0.085449	-65.088	16.977	95.158	0.22494	0.38366	-0.11398	-97.148	69.936	1845.93	-1.1035	1.2285	-0.11914	NaN	NaN	NaN	NaN	NaN	NaN
0.124	-150.242	5.975	1832.469	-0.66406	1.5371	0.086426	-49.385	30.63	127.513	0.22744	0.38564	-0.12572	-98.841	-40.1779	1846.56	-1.2832	1.3897	-0.044189	NaN	NaN	NaN	NaN	NaN	NaN
0.126	-147.374	6.826	1811.435	-0.65259	1.5295	0.084473	-37.485	44.1226	109.502	0.22986	0.39307	-0.1319	-79.854	-69.1	1816.5	-1.4292	1.5493	0.046875	NaN	NaN	NaN	NaN	NaN	NaN
0.128	-136.677	18.6745	1781.19	-0.63818	1.5239	0.082031	-51.439	30.8582	92.747	0.22705	0.39258	-0.14014	5.03999999999999	-219.138	1748.65	-1.5503	1.7056	0.16309	NaN	NaN	NaN	NaN	NaN	NaN
0.13	-119.617	14.146	1759.898	-0.61914	1.5156	0.081055	-30.23	64.5927	100.416	0.22463	0.39553	-0.14387	6.074	-287.544	1744.83	-1.5659	1.7603	0.20557	NaN	NaN	NaN	NaN	NaN	NaN
0.132	-104.924	34.3263	1731.432	-0.60986	1.5122	0.076172	-22.916	44.06648	71.094	0.22263	0.39655	-0.14106	-23.033	-402.57	1748.475	-1.4956	1.7954	0.2583	NaN	NaN	NaN	NaN	NaN	NaN
0.134	-96.928	20.9921	1708.235	-0.58398	1.4941	0.073242	0.0679999999999978	9.681	91.631	0.21352	0.39423	-0.15346	4.2	-373.18	1652.899	-1.3716	1.7475	0.25733	NaN	NaN	NaN	NaN	NaN	NaN
0.136	-72.77	22.26717	1683.274	-0.56006	1.479	0.063477	3.366	23.3807	93.476	0.20873	0.39082	-0.15188	58.5976	-352.961	1651.089	-1.2026	1.6431	0.22168	NaN	NaN	NaN	NaN	NaN	NaN
0.138	-50.769	24.5872	1672.17	-0.54297	1.4707	0.058105	-33.266	-8.2953	49.0625	0.21094	0.38525	-0.1543	110.976	-271.744	1640.781	-0.94824	1.4141	0.11523	NaN	NaN	NaN	NaN	NaN	NaN
0.14	-33.835	30.9994	1647.495	-0.51563	1.4453	0.054199	1.663	32.3456	74.1524	0.20834	0.37891	-0.15162	121.931	-171.6228	1703.9	-0.82422	1.2979	0.0625	NaN	NaN	NaN	NaN	NaN	NaN
0.142	-32.468	27.588	1618.327	-0.49316	1.4277	0.04834	-8.155	44.32	57.7289	0.20804	0.374	-0.15518	109.54	-93.259	1679.067	-0.6416	1.0977	0.013184	NaN	NaN	NaN	NaN	NaN	NaN
0.144	-39.681	37.6227	1612.517	-0.47314	1.4067	0.04248	-31.813	12.834	62.755	0.20171	0.36815	-0.1601	85.86	11.732	1731.34	-0.54297	0.9966	0.02124	NaN	NaN	NaN	NaN	NaN	NaN
0.146	-27.002	55.0903	1582.899	-0.45068	1.3813	0.037598	8.826	30.0041	97.353	0.1985	0.36691	-0.16276	99.554	-21.92	1747.124	-0.45459	0.91943	0.041016	NaN	NaN	NaN	NaN	NaN	NaN
0.148	-26.929	65.148	1561.659	-0.44141	1.3672	0.031738	-15.736	8.5112	64.2716	0.18848	0.36377	-0.15967	80.229	-7.48000000000002	1801.99	-0.32227	0.81836	0.035645	NaN	NaN	NaN	NaN	NaN	NaN
0.15	-53.24	56.0958	1536.365	-0.42822	1.3442	0.027344	-9.663	2.8166	99.516	0.18122	0.3575	-0.1628	71.012	-131.56	1745.616	-0.24414	0.76807	0.01416	NaN	NaN	NaN	NaN	NaN	NaN
0.152	-63.853	56.8171	1526.596	-0.42163	1.3313	0.032227	5.493	20.23754	98.587	0.16754	0.35225	-0.16282	17.403	-178.76	1702.678	-0.080566	0.68799	-0.059082	NaN	NaN	NaN	NaN	NaN	NaN
0.154	-80.125	66.4159	1499.242	-0.41406	1.3145	0.036133	-47.993	-11.5913	60.7153	0.157	0.35381	-0.16474	-30.17	-367.127	1688.7859	0.022949	0.66479	-0.12452	NaN	NaN	NaN	NaN	NaN	NaN
0.156	-82.402	69.4587	1462.028	-0.40186	1.2954	0.039551	-22.832	3.75	74.6231	0.14305	0.35127	-0.16632	-135.316	-450.565	1775.75	0.10645	0.66113	-0.20313	NaN	NaN	NaN	NaN	NaN	NaN
0.158	-112.503	75.084	1422.725	-0.40039	1.2852	0.032227	-20.658	-1.6724	59.8277	0.12842	0.35498	-0.16943	-168.27	-551.476	1857.565	0.18018	0.69629	-0.29395	NaN	NaN	NaN	NaN	NaN	NaN
0.16	-105.932	76.55	1412.991	-0.38037	1.2661	0.02832	-53.201	-11.8547	59.4659	0.10578	0.35449	-0.16729	-203.525	-513.61	1922.212	0.19629	0.73096	-0.31543	NaN	NaN	NaN	NaN	NaN	NaN
0.162	-106.016	75.546	1392.418	-0.37622	1.2473	0.026368	-31.933	21.8307	97.494	0.083619	0.3581	-0.16046	-227.338	-483.8	2004.342	0.1626	0.82617	-0.2998	NaN	NaN	NaN	NaN	NaN	NaN
0.164	-119.285	86.654	1349.864	-0.36426	1.2324	0.027832	-56.014	14.0137	70.621	0.061737	0.3624	-0.15459	-228.5418	-424.723	2084.781	0.058103	0.91919	-0.23486	NaN	NaN	NaN	NaN	NaN	NaN
0.166	-142.4815	79.472	1336.137	-0.35449	1.2051	0.023438	-63.199	5.066	77.072	0.03839	0.36552	-0.15361	-246.002	-378.203	2197.375	-0.10645	1.0117	-0.15674	NaN	NaN	NaN	NaN	NaN	NaN
0.168	-122.069	91.011	1323.656	-0.35107	1.1958	0.020508	-46.484	26.3982	82.115	0.013184	0.37109	-0.15283	-258.477	-369.479	2250.81	-0.36328	1.1333	-0.077148	NaN	NaN	NaN	NaN	NaN	NaN
0.17	-102.92	95.8679	1308.821	-0.34033	1.1724	0.024414	-82.819	-5.508755	51.5305	-0.0042038	0.38106	-0.15215	-254.37602	-293.097	2313.78	-0.48193	1.1875	-0.041992	NaN	NaN	NaN	NaN	NaN	NaN
0.172	-127.928	108.9659	1268.725	-0.33471	1.1538	0.02417	-45.154	13.89236	68.7738	-0.018754	0.39082	-0.14883	-243.478	-314.1488	2321.506	-0.67822	1.2954	-0.0053711	NaN	NaN	NaN	NaN	NaN	NaN
0.174	-131.5229	101.7805	1243.226	-0.33057	1.1372	0.026855	-49.232	21.2903	58.3694	-0.028127	0.39824	-0.14961	-309.112	-228.957	2305.938	-0.7998	1.3838	0.0021972	NaN	NaN	NaN	NaN	NaN	NaN
0.176	-97.478	103.2392	1226.841	-0.31885	1.1118	0.026855	-77.605	2.508	54.898	-0.027929	0.40605	-0.14072	-260.6229	-278.667	2219.812	-0.9126	1.481	0.0039063	NaN	NaN	NaN	NaN	NaN	NaN
0.178	-73.908	110.42826	1206.571	-0.31396	1.1021	0.026367	-23.112	21.461	84.672	-0.024902	0.41504	-0.1377	-272.913	-244.054	2214.534	-1.0366	1.6274	0.019531	NaN	NaN	NaN	NaN	NaN	NaN
0.18	-86.094	113.3715	1172.622	-0.30566	1.0776	0.025879	-47.841	-2.581	57.83975	-0.011231	0.41807	-0.13604	-247.5668	-337.312	2223.676	-1.0884	1.6997	0.027344	NaN	NaN	NaN	NaN	NaN	NaN
0.182	-58.129	108.0438	1149.59	-0.29614	1.0571	0.029541	-42.187	-20.863	92.3949	0.010838	0.41778	-0.13965	-256.87541	-347.67	2309.068	-1.1187	1.8345	0.017578	NaN	NaN	NaN	NaN	NaN	NaN
0.184	-30.205	111.4456	1127.213	-0.28857	1.0332	0.021484	4.715	-0.0399999999999991	89.723	0.038963	0.41621	-0.1334	-185.884	-406.161	2345.774	-1.0811	1.914	-0.0053708	NaN	NaN	NaN	NaN	NaN	NaN
0.186	-5.798	119.021	1104.442	-0.28418	1.0078	0.013184	-28.461	-30.1201	69.522	0.07285	0.39717	-0.14405	-169.976	-394.769	2408.8	-1.0254	1.9727	-0.03125	NaN	NaN	NaN	NaN	NaN	NaN
0.188	-3.23100000000001	113.621	1093.758	-0.27832	0.99268	0.011719	-18.529	-11.748	94.9235	0.10742	0.37744	-0.146	-121.415	-379.8115	2464.878	-0.99951	2.0239	-0.035156	NaN	NaN	NaN	NaN	NaN	NaN
0.19	27.427	110.168	1079.598	-0.27832	0.96289	0.0058594	-14.17	-9.265	95.5163	0.14356	0.35352	-0.1543	-73.508	-356.8346	2531.207	-1.0288	2.0571	-0.022949	NaN	NaN	NaN	NaN	NaN	NaN
0.192	33.626	128.2744	1052.517	-0.27294	0.94849	0.012207	-27.906	-42.537	104.788	0.17715	0.32832	-0.15576	-74.291	-334.892	2573.84	-1.1382	2.1157	0.0068359	NaN	NaN	NaN	NaN	NaN	NaN
0.194	22.802	141.773	1011.383	-0.27148	0.93555	0.0083008	5.40300000000001	-20.033	145.7502	0.20996	0.29902	-0.1624	-51.35	-372.511	2587.564	-1.2295	2.1563	0.058594	NaN	NaN	NaN	NaN	NaN	NaN
0.196	24.178	134.64	996.738	-0.26025	0.91064	0.0068359	-7.30500000000001	-46.307	125.1872	0.23564	0.26856	-0.17012	-69.558	-338.617	2632.21	-1.3198	2.1841	0.098145	NaN	NaN	NaN	NaN	NaN	NaN
0.198	19.442	125.212	991.706	-0.25049	0.90039	0.0078125	-4.288	-56.666	141.42771	0.25684	0.23682	-0.17822	-46.35	-331.07	2609.61	-1.4648	2.2207	0.14404	NaN	NaN	NaN	NaN	NaN	NaN
0.2	3.94799999999999	134.3561	963.515	-0.23389	0.87158	0.0039063	14.479	-40.185	180.509	0.27012	0.20146	-0.18388	-88.784	-241.4008	2600.35	-1.5249	2.2563	0.15771	NaN	NaN	NaN	NaN	NaN	NaN
0.202	6.6	133.34973	921.091	-0.21753	0.85205	-0.00073241	-12.237	-82.964	165.922	0.27764	0.17032	-0.19463	-74.803	-260.801	2510.299	-1.5996	2.3125	0.1748	NaN	NaN	NaN	NaN	NaN	NaN
0.204	-13.826	133.1263	895.914	-0.20557	0.82861	-0.0068359	-0.694000000000003	-90.61	218.449	0.27373	0.14258	-0.20283	-129.74	-235.768	2536.592	-1.5762	2.3106	0.16724	NaN	NaN	NaN	NaN	NaN	NaN
0.206	-7.965	137.124	894.7	-0.18652	0.80176	-0.0087891	5.348	-88.71	218.635	0.25937	0.12724	-0.20644	-111.573	-269.7325	2496.222	-1.5229	2.2739	0.14551	NaN	NaN	NaN	NaN	NaN	NaN
0.208	-33.871	153.3021	865.315	-0.1792	0.77979	-0.010742	-17.129	-104.973	250.815	0.24658	0.11377	-0.22217	-151.463	-211.615	2547.281	-1.4277	2.2188	0.10107	NaN	NaN	NaN	NaN	NaN	NaN
0.21	-19.822	152.5365	837.782	-0.16992	0.75391	-0.020508	0.310000000000002	-59.135	358.819	0.22969	0.10713	-0.21807	-156.736	-165.777	2539.687	-1.3862	2.1919	0.076172	NaN	NaN	NaN	NaN	NaN	NaN
0.212	-49.099	148.5591	819.439	-0.16162	0.73437	-0.024659	-43.489	-41.774	420.0124	0.20986	0.11133	-0.21729	-189.448	-109.318	2582.58	-1.3359	2.1523	0.038086	NaN	NaN	NaN	NaN	NaN	NaN
0.214	-36.872	149.6245	809.893	-0.15527	0.71143	-0.026367	-14.875	-12.623	509.80774	0.18838	0.11641	-0.21221	-213.874	-68.351	2539.257	-1.3227	2.1294	0.032959	NaN	NaN	NaN	NaN	NaN	NaN
0.216	-82.497	152.4254	797.269	-0.14648	0.6875	-0.029297	13.14	51.529	625.9904	0.1586	0.12754	-0.21455	-243.506	-50.068	2527.258	-1.3315	2.1138	0.047363	NaN	NaN	NaN	NaN	NaN	NaN
0.218	-81.438	141.1963	774.633	-0.13916	0.67627	-0.030273	-26.661	60.402	705.961	0.12256	0.14063	-0.21289	-260.546	-41.3941	2501.967	-1.3633	2.0781	0.072266	NaN	NaN	NaN	NaN	NaN	NaN
0.22	-100.707	123.9757	763.8	-0.125	0.6582	-0.03125	-22.058	100.0177	848.4548	0.079199	0.1581	-0.21934	-262.8673	-93.447	2509.918	-1.3789	2.0605	0.090332	NaN	NaN	NaN	NaN	NaN	NaN
0.222	-83.828	132.7328	732.733	-0.11328	0.63843	-0.036621	-57.394	141.7069	932.3666	0.02334	0.18525	-0.20879	-324.671	-106.285	2524.91	-1.4082	2.0117	0.1167	NaN	NaN	NaN	NaN	NaN	NaN
0.224	-82.8874	135.4621	709.288	-0.104	0.62549	-0.038574	-79.555	134.593	994.4134	-0.054785	0.1958	-0.19941	-292.60304	-169.723	2459.217	-1.409	1.9631	0.1333	NaN	NaN	NaN	NaN	NaN	NaN
0.226	-100.513	134.881	677.783	-0.083008	0.59961	-0.043945	-28.02	161.964	1104.714	-0.13457	0.21924	-0.23516	-325.361	-157.585	2443.471	-1.396	1.9204	0.14063	NaN	NaN	NaN	NaN	NaN	NaN
0.228	-73.157	134.1445	666.971	-0.07666	0.58887	-0.047363	-52.419	109.983	1179.1	-0.20068	0.2583	-0.24902	-271.261	-195.442	2368.472	-1.3608	1.8608	0.1416	NaN	NaN	NaN	NaN	NaN	NaN
0.23	-63.002	140.8638	652.394	-0.058105	0.56738	-0.048828	-29.234	40.17827	1220.071	-0.28467	0.29405	-0.25469	-264.689	-138.7035	2372.936	-1.3374	1.8345	0.13477	NaN	NaN	NaN	NaN	NaN	NaN
0.232	-33.879	138.077	633.986	-0.045166	0.55151	-0.049804	32.667	12.495	1228.654	-0.39336	0.34502	-0.26279	-203.19	-112.079	2300.336	-1.2612	1.7896	0.11621	NaN	NaN	NaN	NaN	NaN	NaN
0.234	-27.748	120.257	624.14	-0.035156	0.53516	-0.046875	6.093	-48.88	1173.156	-0.51523	0.4001	-0.26553	-250.034	-48.6313	2325.205	-1.1892	1.7619	0.099851	NaN	NaN	NaN	NaN	NaN	NaN
0.236	-10.845	109.301	610.23	-0.015137	0.51318	-0.057617	47.558	-98.014711	1195.119	-0.64619	0.47373	-0.26328	-171.737	-23.3338	2276.248	-1.1206	1.731	0.09082	NaN	NaN	NaN	NaN	NaN	NaN
0.238	10.471	126.8826	592.243	-0.0078125	0.49707	-0.058594	51.363	-124.911	1195.0207	-0.78857	0.56299	-0.23535	-170.633	20.1648	2303.166	-1.041	1.6934	0.098633	NaN	NaN	NaN	NaN	NaN	NaN
0.24	2.672	144.851	567.504	0.013672	0.47266	-0.063477	28.881	-181.489	1165.705	-0.93203	0.68047	-0.1833	-115.415	60.919	2231.281	-1.0054	1.6763	0.099121	NaN	NaN	NaN	NaN	NaN	NaN
0.242	25.886	138.615	557.193	0.02832	0.45362	-0.069092	80.896	-149.442	1182.4148	-1.0708	0.80752	-0.11513	-103.396	95.495	2210.612	-0.93506	1.6528	0.087891	NaN	NaN	NaN	NaN	NaN	NaN
0.244	26.326	135.62	545.225	0.038086	0.43799	-0.070801	39.279	-119.448	1135.0715	-1.1958	0.93799	-0.041308	-45.911	135.031	2149.281	-0.89233	1.6301	0.090332	NaN	NaN	NaN	NaN	NaN	NaN
0.246	24.605	142.863	510.104	0.052246	0.4082	-0.078613	7.313	-101.817	1178.803	-1.2952	1.0606	0.015234	-54.15	125.577	2121.102	-0.85596	1.6138	0.085938	NaN	NaN	NaN	NaN	NaN	NaN
0.248	12.601	134.045	493.427	0.056641	0.39502	-0.07959	27.515	-30.783	1199.353	-1.3608	1.1558	0.05127	-43.436	140.456	2080.979	-0.81006	1.5884	0.083496	NaN	NaN	NaN	NaN	NaN	NaN
0.25	36.285	124.8742	488.427	0.067383	0.37646	-0.087402	7.38	-22.922	1169.67685	-1.3885	1.2049	0.06084	-33.17	82.247	2031.357	-0.79346	1.5728	0.083008	NaN	NaN	NaN	NaN	NaN	NaN
0.252	28.756	114.539	471.724	0.075928	0.35742	-0.091553	37.696	-8.84099999999999	1213.1698	-1.3827	1.2176	0.047266	-41.416	99.9659	1996.354	-0.76123	1.5435	0.088379	NaN	NaN	NaN	NaN	NaN	NaN
0.254	22.167	125.5634	439.094	0.079102	0.34375	-0.09375	49.727	-13.922	1246.582	-1.3409	1.2048	0.003125	-36.91	38.355	1926.285	-0.73438	1.5039	0.089844	NaN	NaN	NaN	NaN	NaN	NaN
0.256	41.998	105.123	415.003	0.083008	0.33447	-0.10107	40.144	-82.546	1270.935	-1.2567	1.1763	-0.051074	-82.561	72.549	1887.66	-0.71826	1.4946	0.089844	NaN	NaN	NaN	NaN	NaN	NaN
0.258	14.827	113.402	410.91	0.086426	0.32861	-0.104	94.735	-113.229	1331.691	-1.1406	1.1289	-0.094727	-87.125	58.087	1818.468	-0.69092	1.4634	0.096191	NaN	NaN	NaN	NaN	NaN	NaN
0.26	8.074	111.1575	414.914	0.092773	0.31152	-0.11084	73.96	-137.993	1356.258	-1.01	1.0664	-0.1418	-133.777	152.146	1825.417	-0.66089	1.4348	0.096924	NaN	NaN	NaN	NaN	NaN	NaN
0.262	-27.234	123.9539	401.744	0.095947	0.30078	-0.11377	113.574	-218.456	1395.373	-0.89092	0.9831	-0.18701	-98.022	135.986	1771.68	-0.62695	1.4082	0.09668	NaN	NaN	NaN	NaN	NaN	NaN
0.264	-35.743	115.8437	382.048	0.093262	0.29297	-0.11719	136.866	-243.015	1463.2057	-0.77725	0.90186	-0.23115	-123.553	208.0006	1744.503	-0.57373	1.3618	0.091797	NaN	NaN	NaN	NaN	NaN	NaN
0.266	-59.986	109.5981	380.399	0.091797	0.27979	-0.12256	73.52	-300.947	1477.396	-0.69316	0.82598	-0.26856	-121.993	183.097	1668.763	-0.54639	1.3379	0.086426	NaN	NaN	NaN	NaN	NaN	NaN
0.268	-51.35	109.6994	358.147	0.091309	0.27783	-0.12354	105.963	-332.338	1528.719	-0.60938	0.75391	-0.30469	-160.401	240.956	1639.103	-0.48438	1.2813	0.072266	NaN	NaN	NaN	NaN	NaN	NaN
0.27	-77.85	107.92322	349.298	0.083496	0.27637	-0.12598	94.309	-288.296	1596.213	-0.5418	0.68164	-0.3416	-179.4927	223.0092	1554.512	-0.43359	1.2431	0.062256	NaN	NaN	NaN	NaN	NaN	NaN
0.272	-85.322	91.55	323.597	0.076172	0.27197	-0.13037	76.37	-269.096	1643.6462	-0.47988	0.604	-0.37549	-195.025	233.998	1501.793	-0.38135	1.2012	0.047852	NaN	NaN	NaN	NaN	NaN	NaN
0.274	-83.569	94.957	311.077	0.071777	0.27197	-0.13086	116.199	-225.868	1725.152	-0.43926	0.53604	-0.41651	-209.468	198.3083	1403.671	-0.31738	1.1445	0.03125	NaN	NaN	NaN	NaN	NaN	NaN
0.276	-83.987	104.755	294.172	0.063965	0.27197	-0.13281	83.23	-175.216	1748.079	-0.40703	0.50801	-0.43545	-214.0549	172.7789	1344.623	-0.28809	1.1143	0.026367	NaN	NaN	NaN	NaN	NaN	NaN
0.278	-62.437	104.458	282.838	0.055908	0.27075	-0.13647	92.198	-183.533	1772.352	-0.40332	0.50391	-0.47754	-242.937	180.1316	1294.063	-0.22607	1.0571	0.01416	NaN	NaN	NaN	NaN	NaN	NaN
0.28	-60.43	97.155	278.27	0.04834	0.27344	-0.13574	158.016	-148.39	1832.164	-0.40371	0.53282	-0.51328	-213.4989	197.189	1215.327	-0.18823	1.0132	0.0039063	NaN	NaN	NaN	NaN	NaN	NaN
0.282	-41.074	93.636	284.115	0.039551	0.27393	-0.13818	154.791	-123.115	1832.0755	-0.41572	0.58448	-0.52256	-212.572	278.777	1184.818	-0.15674	0.97314	-0.0039063	NaN	NaN	NaN	NaN	NaN	NaN
0.284	-36.961	98.1421	266.558	0.033203	0.27197	-0.14014	178.207	-152.12	1847.6742	-0.44658	0.66416	-0.50068	-120.981	268.7283	1151.403	-0.11719	0.92578	-0.01416	NaN	NaN	NaN	NaN	NaN	NaN
0.286	-39.071	103.6165	254.353	0.022949	0.27539	-0.14063	187.516	-131.282	1872.563	-0.51807	0.7622	-0.47978	-126.0698	317.906	1168.98	-0.10059	0.89941	-0.012207	NaN	NaN	NaN	NaN	NaN	NaN
0.288	-35.892	85.6683	264.746	0.0058593	0.27588	-0.13672	157.352	-152.494	1856.008	-0.60205	0.86963	-0.45264	-47.856	263.4003	1122.715	-0.069336	0.85547	-0.020996	NaN	NaN	NaN	NaN	NaN	NaN
0.29	-33.291	76.4714	251.396	-0.0053711	0.27783	-0.13281	179.208	-182.428	1899.529	-0.68193	0.96807	-0.43291	-51.766	311.134	1101.081	-0.050537	0.82153	-0.029297	NaN	NaN	NaN	NaN	NaN	NaN
0.292	4.736	81.7373	229.684	-0.022461	0.28223	-0.12793	164.31	-162.852	1944.141	-0.73691	1.061	-0.41367	18.492	245.451	1023.621	-0.02832	0.79688	-0.029297	NaN	NaN	NaN	NaN	NaN	NaN
0.294	-4.977	81.5166	204.386	-0.030273	0.28467	-0.12451	145.073	-203.607	1989.9191	-0.76387	1.1309	-0.40976	-8.739	277.549	1008.55	-0.0053711	0.75635	-0.057129	NaN	NaN	NaN	NaN	NaN	NaN
0.296	24.101	92.6972	204.628	-0.050781	0.28613	-0.11523	156.369	-208.265	2068.125	-0.7582	1.1789	-0.43242	7.77	212.0571	929.821	0.0048828	0.74023	-0.064941	NaN	NaN	NaN	NaN	NaN	NaN
0.298	29.787	85.5721	205.771	-0.063965	0.29078	-0.10864	126.196	-185.981	2077.762	-0.7251	1.2173	-0.48389	27.004	231.379	866.173	0.029297	0.70703	-0.080078	NaN	NaN	NaN	NaN	NaN	NaN
0.3	32.688	85.07759	188.7	-0.074707	0.29248	-0.104	149.431	-217.547	2098.794	-0.66816	1.2525	-0.53672	40.878	197.5342	784.439	0.045899	0.68628	-0.090576	NaN	NaN	NaN	NaN	NaN	NaN
0.302	34.41	64.3124	178.693	-0.08252	0.29248	-0.09668	155.2	-175.4113	2142.198	-0.61133	1.2945	-0.59151	48.924	216.399	756.908	0.05957	0.66846	-0.097168	NaN	NaN	NaN	NaN	NaN	NaN
0.304	34.31	54.405	181.947	-0.088867	0.29248	-0.092773	129.16	-157.987	2138.7448	-0.57539	1.3524	-0.62549	47.757	200.9055	744.792	0.078613	0.64746	-0.10107	NaN	NaN	NaN	NaN	NaN	NaN
0.306	28.877	53.664	176.818	-0.09082	0.29541	-0.086426	156.075	-176.931	2175.747	-0.57207	1.4158	-0.64668	62.704	212.0443	678.742	0.092285	0.63525	-0.10303	NaN	NaN	NaN	NaN	NaN	NaN
0.308	0.0539999999999949	72.1618	167.185	-0.083984	0.28784	-0.083496	143.048	-122.235	2201.554	-0.61328	1.4727	-0.66406	28.779	251.0498	659.501	0.10547	0.60938	-0.11572	NaN	NaN	NaN	NaN	NaN	NaN
0.31	7.12899999999999	64.5936	161.564	-0.084473	0.28369	-0.08252	137.329	-146.733	2190.615	-0.67773	1.5205	-0.61172	67.932	237.643	609.377	0.11157	0.59936	-0.11548	NaN	NaN	NaN	NaN	NaN	NaN
0.312	-22.124	73.9344	155.326	-0.072754	0.27051	-0.074219	174.001	-133.3369	2207.644	-0.78809	1.5562	-0.61347	57.9993	274.281	611.039	0.10889	0.5835	-0.11328	NaN	NaN	NaN	NaN	NaN	NaN
0.314	-21.414	66.7385	162.57	-0.070313	0.26416	-0.078125	136.968	-61.116	2199.132	-0.91465	1.6187	-0.63691	42.739	242.905	535.235	0.099609	0.56641	-0.11279	NaN	NaN	NaN	NaN	NaN	NaN
0.316	-44.941	54.1342	166.249	-0.058105	0.25244	-0.074219	151.31	-71.1613	2168.037	-1.0249	1.7001	-0.61416	-2.637	278.158	496.974	0.095703	0.55908	-0.11768	NaN	NaN	NaN	NaN	NaN	NaN
0.318	-56.147	25.637	161.266	-0.049804	0.24267	-0.074463	148.96	-19.11	2195.059	-1.1382	1.7856	-0.58936	-12.948	211.027	412.237	0.088379	0.53906	-0.095703	NaN	NaN	NaN	NaN	NaN	NaN
0.32	-53.53	18.731	166.413	-0.030762	0.23242	-0.08252	94.84	-15.162	2199.546	-1.2323	1.8845	-0.58291	-82.2576	238.6047	416.676	0.083252	0.52905	-0.09082	NaN	NaN	NaN	NaN	NaN	NaN
0.322	-77.435	24.992	147.418	-0.013184	0.21826	-0.082031	148.12	-67.2254	2237.798	-1.2882	1.9786	-0.5917	-83.1723	140.2	356.911	0.08252	0.51611	-0.086426	NaN	NaN	NaN	NaN	NaN	NaN
0.324	-62.847	17.948	158.732	-0.0043945	0.21387	-0.080566	173.824	-17.148	2280.05	-1.3038	2.0474	-0.6042	-88.805	148.1251	324.696	0.080566	0.49951	-0.090332	NaN	NaN	NaN	NaN	NaN	NaN
0.326	-82.851	-6.945	163.843	0.018555	0.19922	-0.084961	170.017	-42.963	2251.0979	-1.2912	2.0877	-0.6169	-104.6347	101.506	276.299	0.082031	0.48828	-0.090332	NaN	NaN	NaN	NaN	NaN	NaN
0.328	-57.706	-13.542	172.377	0.028076	0.18457	-0.090576	215.355	-53.0342	2260.4048	-1.269	2.104	-0.63721	-121.9645	148.2043	233.164	0.088867	0.4624	-0.097656	NaN	NaN	NaN	NaN	NaN	NaN
0.33	-66.86	-16.402	171.273	0.038574	0.17627	-0.092773	199.008	-0.713000000000001	2238.756	-1.2341	2.0972	-0.66533	-95.614	125.58	226.643	0.095703	0.44238	-0.10815	NaN	NaN	NaN	NaN	NaN	NaN
0.332	-77.694	-24.042	185.457	0.044922	0.16016	-0.10449	204.71	-60.311	2214.6541	-1.1933	2.0755	-0.69561	-108.7431	143.4075	192.168	0.10498	0.42188	-0.12109	NaN	NaN	NaN	NaN	NaN	NaN
0.334	-58.64	-30.444	214.584	0.044434	0.16211	-0.10205	233.574	-51.77127	2247.3252	-1.1487	2.0536	-0.73233	-100.936	145.586	187.116	0.12061	0.39502	-0.13574	NaN	NaN	NaN	NaN	NaN	NaN
0.336	-59.423	-33.805	234.771	0.044922	0.15479	-0.10742	184.658	-56.0241	2224.9601	-1.1024	2.0268	-0.75967	-61.181	160.417	129.426	0.12207	0.37744	-0.14404	NaN	NaN	NaN	NaN	NaN	NaN
0.338	-29.404	-32.005	238.813	0.043213	0.15381	-0.10987	240.706	-113.075	2232.616	-1.0508	2.0098	-0.79297	-67.12794	165.0645	163.309	0.12598	0.34766	-0.15869	NaN	NaN	NaN	NaN	NaN	NaN
0.34	-31.56	-38.948	273.776	0.039551	0.15771	-0.11328	221.883	-35.4773	2235.616	-1.0084	1.998	-0.82695	-13.015	114.234	123.947	0.12475	0.32837	-0.16186	NaN	NaN	NaN	NaN	NaN	NaN
0.342	6.61399999999999	-33.375	331.788	0.032227	0.16309	-0.12207	162.552	0.5443	2175.38228	-0.97031	1.9886	-0.85449	-33.414	108.145	131.683	0.12012	0.31396	-0.15723	NaN	NaN	NaN	NaN	NaN	NaN
0.344	10.681	0.850000000000001	382.206	0.036133	0.16846	-0.12305	217.209	55.0449	2164.6617	-0.93399	1.9782	-0.87754	-6.242	49.468	68.655	0.094238	0.28564	-0.1665	NaN	NaN	NaN	NaN	NaN	NaN
0.346	31.272	45.595	421.6596	0.025879	0.18457	-0.12744	173.588	152.864	2152.76	-0.90303	1.9671	-0.89033	-7.187	75.377	77.479	0.08252	0.27783	-0.16406	NaN	NaN	NaN	NaN	NaN	NaN
0.348	37.283	71.647	462.466	0.010742	0.19776	-0.13623	180.401	102.239	2122.987	-0.875	1.9551	-0.90039	61.152	19.9941	64.939	0.050781	0.26416	-0.15527	NaN	NaN	NaN	NaN	NaN	NaN
0.35	52.074	93.222	555.8412	-0.0068359	0.21582	-0.146	211.113	116.114	2149.254	-0.85635	1.9419	-0.91181	31.247	44.503	71.3017	0.029785	0.25586	-0.14062	NaN	NaN	NaN	NaN	NaN	NaN
0.352	79.035	102.691	650.943	-0.046387	0.23828	-0.1582	165.611	129.571	2105.0854	-0.83564	1.9294	-0.9167	41.756	-4.533	41.423	0.011719	0.25684	-0.13281	NaN	NaN	NaN	NaN	NaN	NaN
0.354	49.972	120.761	733.8016	-0.076172	0.25293	-0.15967	208.334	70.224	2082.7319	-0.81963	1.9267	-0.91162	65.765	31.753	50.064	-0.019531	0.25146	-0.10986	NaN	NaN	NaN	NaN	NaN	NaN
0.356	64.945	122.1561	836.51	-0.14209	0.29395	-0.17871	173.186	127.285	2070.6862	-0.81338	1.9144	-0.91455	61.0083	-4.829	86.4111	-0.026855	0.25049	-0.1084	NaN	NaN	NaN	NaN	NaN	NaN
0.358	46.713	129.64	920.784	-0.20312	0.32446	-0.1958	140.47	91.458	1999.166	-0.80664	1.9023	-0.89063	71.61	8.176	84.7255	-0.035156	0.25342	-0.099609	NaN	NaN	NaN	NaN	NaN	NaN
0.36	43.133	119.837	992.811	-0.26904	0.36963	-0.19531	179.095	70.007	1992.9374	-0.80713	1.8925	-0.88389	50.164	-10.219	111.999	-0.036133	0.24927	-0.095947	NaN	NaN	NaN	NaN	NaN	NaN
0.362	-2.43599999999999	97.066	1049.6387	-0.37061	0.43506	-0.2041	121.74	112.159	1966.738	-0.81289	1.8856	-0.8586	61.041	23.253	75.22261	-0.030762	0.24512	-0.095703	NaN	NaN	NaN	NaN	NaN	NaN
0.364	-6.175	45.885	1092.0886	-0.4292	0.47119	-0.21143	110.07	43.7524	1942.0968	-0.82891	1.8813	-0.83555	29.922	42.19	101.372	-0.018066	0.22998	-0.094238	NaN	NaN	NaN	NaN	NaN	NaN
0.366	18.254	13.6758	1154.072	-0.5542	0.55859	-0.21924	140.059	72.263	1960.203	-0.84355	1.8795	-0.81075	55.695	47.337	60.1861	-0.010742	0.22607	-0.097656	NaN	NaN	NaN	NaN	NaN	NaN
0.368	10.178	-24.24	1198.751	-0.66138	0.64966	-0.2124	95.056	103.6055	1904.5689	-0.86279	1.8735	-0.78076	-30.586	64.173	96.2102	0.0058594	0.20508	-0.10156	NaN	NaN	NaN	NaN	NaN	NaN
0.37	-3.97000000000001	-56.74	1240.317	-0.76953	0.75195	-0.1958	125.199	86.869	1872.526	-0.88545	1.8661	-0.75107	-47.605	28.419	44.869	0.011963	0.18897	-0.10644	NaN	NaN	NaN	NaN	NaN	NaN
0.372	-42.264	-101.9438	1252.298	-0.90771	0.91064	-0.15137	128.582	174.526	1851.737	-0.90859	1.8516	-0.71992	-77.7752	41.875	80.033	0.017578	0.17432	-0.11133	NaN	NaN	NaN	NaN	NaN	NaN
0.374	-66.054	-108.259	1262.521	-0.9668	0.99609	-0.12598	128.47	170.346	1786.347	-0.92891	1.8375	-0.69102	-77.899	-0.506999999999998	50.1879	0.031738	0.1543	-0.11279	NaN	NaN	NaN	NaN	NaN	NaN
0.376	-96.01975	-100.592	1268.0541	-1.0425	1.1548	-0.075684	171.737	165.375	1790.611	-0.94727	1.8211	-0.66563	-118.012	39.3505	95.057	0.039551	0.14404	-0.11523	NaN	NaN	NaN	NaN	NaN	NaN
0.378	-122.344	-81.049	1279.7372	-1.065	1.2485	-0.049804	137.425	217.168	1737.8713	-0.96436	1.8052	-0.63818	-92.596	-16.664	80.486	0.063965	0.125	-0.12109	NaN	NaN	NaN	NaN	NaN	NaN
0.38	-122.72	-74.645	1302.169	-1.0508	1.3184	-0.036621	145.28	174.843	1681.208	-0.96914	1.7895	-0.62422	-115.52906	12.997	74.639	0.089356	0.11304	-0.12256	NaN	NaN	NaN	NaN	NaN	NaN
0.382	-127.528	-50.955567	1322.705	-0.97998	1.3579	-0.041504	175.493	207.345	1672.7689	-0.96719	1.7715	-0.6039	-124.03	-23.52	60.495	0.11914	0.10205	-0.12939	NaN	NaN	NaN	NaN	NaN	NaN
0.384	-134.18	-35.251	1306.204	-0.92529	1.354	-0.054688	132.032	214.209	1615.96	-0.95156	1.7465	-0.58359	-97.792	14.748	67.7284	0.15625	0.07666	-0.14746	NaN	NaN	NaN	NaN	NaN	NaN
0.386	-150.924	-15.237	1305.217	-0.77686	1.2993	-0.095215	161.039	181.8519	1576.832	-0.93252	1.7155	-0.56709	-92.6878	-13.401	100.537	0.17725	0.061523	-0.14844	NaN	NaN	NaN	NaN	NaN	NaN
0.388	-125.9896	-9.55	1310.656	-0.66114	1.2373	-0.12915	142.346	238.187	1571.001	-0.90576	1.686	-0.55176	-78.847	-2.268	75.707	0.2207	0.028809	-0.16064	NaN	NaN	NaN	NaN	NaN	NaN
0.39	-99.899	-4.7	1308.307	-0.55176	1.1582	-0.16211	102.634	199.228	1533.2189	-0.87315	1.6554	-0.53916	-88.485	-12.8627	91.37	0.26318	0.00097656	-0.16895	NaN	NaN	NaN	NaN	NaN	NaN
0.392	-70.3894	-23.701	1306.844	-0.4541	1.0571	-0.19873	142.33	184.6428	1545.442	-0.84014	1.6212	-0.51982	-66.63	5.661	55.787	0.28223	-0.013184	-0.18652	NaN	NaN	NaN	NaN	NaN	NaN
0.394	-58.913	-67.274	1313.242	-0.42285	1.0078	-0.20898	111.205	215.427	1518.286	-0.81358	1.5868	-0.49834	-77.1024	11.6146	97.485	0.31592	-0.049316	-0.2002	NaN	NaN	NaN	NaN	NaN	NaN
0.396	-19.802	-101.389	1343.5506	-0.38232	0.92139	-0.20557	125.131	165.126	1457.641	-0.78008	1.5578	-0.4793	-26.089	11.607	53.58844	0.32861	-0.075195	-0.2124	NaN	NaN	NaN	NaN	NaN	NaN
0.398	8.65300000000001	-131.472	1370.58068	-0.3667	0.85645	-0.20264	152.715	215.7839	1446.92	-0.74805	1.5215	-0.45996	-41.63	43.921	92.417	0.32861	-0.097168	-0.22607	NaN	NaN	NaN	NaN	NaN	NaN
0.4	6.429	-162.0065	1390.632	-0.3457	0.79346	-0.19531	86.363	233.903	1371.6163	-0.71396	1.4899	-0.44297	18.004	27.0073	37.817	0.31201	-0.11768	-0.23535	NaN	NaN	NaN	NaN	NaN	NaN
0.402	6.93000000000001	-190.941	1404.8872	-0.31348	0.72461	-0.19141	107.213	213.349	1323.659	-0.68477	1.4562	-0.42696	42.671	60.977	78.779	0.29541	-0.12158	-0.24219	NaN	NaN	NaN	NaN	NaN	NaN
0.404	4.884	-208.242	1441.63374	-0.29053	0.69971	-0.20166	78.37	242.103	1297.8949	-0.65977	1.4234	-0.40391	72.045	-4.0449	57.70933	0.2583	-0.12256	-0.23926	NaN	NaN	NaN	NaN	NaN	NaN
0.406	26.452	-200.749	1460.859	-0.23242	0.66113	-0.22607	43.118	204.746	1238.7637	-0.63115	1.3979	-0.38271	59.96	33.5917	71.99482	0.21875	-0.10694	-0.23438	NaN	NaN	NaN	NaN	NaN	NaN
0.408	60.243	-181.22	1495.108	-0.17578	0.64355	-0.26172	93.98	187.6122	1239.217	-0.61084	1.3755	-0.36475	97.234	0.5196	38.189	0.17969	-0.081543	-0.22607	NaN	NaN	NaN	NaN	NaN	NaN
0.41	87.654	-158.7168	1517.2041	-0.14893	0.64893	-0.28174	40.551	225.213	1180.236	-0.5831	1.347	-0.34121	79.054	52.117	50.2227	0.13037	-0.033691	-0.20801	NaN	NaN	NaN	NaN	NaN	NaN
0.412	93.865	-129.218	1562.4283	-0.11963	0.66797	-0.30664	29.594	211.9308	1109.1636	-0.55498	1.3177	-0.31748	55.519	12.8622	60.4161	0.10645	-0.0092773	-0.19922	NaN	NaN	NaN	NaN	NaN	NaN
0.414	106.025	-109.718	1570.7724	-0.13282	0.70654	-0.31177	18.02	264.3658	1083.971	-0.52412	1.2923	-0.2999	42.899	48.52	59.4774	0.078613	0.04248	-0.18018	NaN	NaN	NaN	NaN	NaN	NaN
0.416	111.006	-118.589	1605.3774	-0.16797	0.76611	-0.30713	-31.878	283.029	1004.539	-0.48682	1.2604	-0.27314	7.415	27.7606	68.99456	0.077149	0.078369	-0.17798	NaN	NaN	NaN	NaN	NaN	NaN
0.418	107.481	-121.237	1623.6065	-0.25586	0.87012	-0.26563	20.211	250.015	991.695	-0.4502	1.2246	-0.25391	4.28099999999999	51.1	53.004	0.082031	0.11182	-0.18701	NaN	NaN	NaN	NaN	NaN	NaN
0.42	115.956	-126.636	1650.43243	-0.30029	0.92627	-0.24512	-2.16500000000001	271.908	970.8398	-0.40908	1.1874	-0.23994	-17.323	32.666	107.479	0.10693	0.13721	-0.1792	NaN	NaN	NaN	NaN	NaN	NaN
0.422	98.505	-128.29	1659.561	-0.38965	1.0278	-0.20264	-8.84399999999999	232.256	925.2817	-0.36631	1.1504	-0.22539	-17.078	16.44429	65.9254	0.12061	0.146	-0.18799	NaN	NaN	NaN	NaN	NaN	NaN
0.424	75.946	-130.565	1667.276	-0.43457	1.1001	-0.17969	32.119	213.244	921.257	-0.33154	1.1156	-0.21368	-81.9817	21.5755	97	0.15576	0.14893	-0.20557	NaN	NaN	NaN	NaN	NaN	NaN
0.426	15.035	-135.866	1685.9699	-0.47119	1.1606	-0.16064	-10.167	249.662	872.1843	-0.29189	1.0759	-0.20127	-34.701	14.222	51.776	0.17481	0.14331	-0.21631	NaN	NaN	NaN	NaN	NaN	NaN
0.428	17.925	-134.468	1708.48	-0.49561	1.231	-0.1543	15.797	207.685	836.5808	-0.25977	1.0352	-0.18652	-75.9628	33.325	99.581	0.18848	0.13184	-0.23193	NaN	NaN	NaN	NaN	NaN	NaN
0.43	-3.84	-156.042	1758.8453	-0.5	1.2598	-0.1543	16.134	237.485	796.294	-0.22617	0.99648	-0.17461	-55.79	5.405	65.8014	0.19141	0.12061	-0.24561	NaN	NaN	NaN	NaN	NaN	NaN
0.432	-5.78400000000001	-180.612	1785.74	-0.4917	1.3013	-0.1665	-29.366	230.755	734.196	-0.19775	0.95713	-0.15791	-100.3717	35.0842	88.506	0.1875	0.11377	-0.25195	NaN	NaN	NaN	NaN	NaN	NaN
0.434	7.294	-200.5539	1816.344	-0.48413	1.2956	-0.17847	6.98700000000001	204.4844	735.0458	-0.17275	0.92119	-0.13604	-114.967	-2.348	48.7498	0.16797	0.11035	-0.25244	NaN	NaN	NaN	NaN	NaN	NaN
0.436	-5.62700000000001	-186.9868	1824.663	-0.47021	1.2856	-0.19678	12.865	237.263	705.6648	-0.14951	0.88623	-0.1208	-133.959	48.3301	62.5457	0.13843	0.12036	-0.25122	NaN	NaN	NaN	NaN	NaN	NaN
0.438	-4.208	-166.871	1846.435	-0.4668	1.251	-0.21533	-4.649	210.666	664.4399	-0.12695	0.85156	-0.10449	-103.656	16.177	72.2922	0.10889	0.13525	-0.24805	NaN	NaN	NaN	NaN	NaN	NaN
0.44	-13.5	-139.482	1860.943	-0.46338	1.2349	-0.22559	2.477	227.406	657.134	-0.10518	0.82168	-0.085351	-98.399	40.6324	128.271	0.067383	0.16846	-0.23682	NaN	NaN	NaN	NaN	NaN	NaN
0.442	-1.42	-132.473	1872.522	-0.48096	1.2095	-0.24072	-16.874	247.026	610.3786	-0.086035	0.79111	-0.069043	-120.213	-28.2202	165.216	0.046387	0.1875	-0.22998	NaN	NaN	NaN	NaN	NaN	NaN
0.444	-1.09	-126.759	1871.8522	-0.48609	1.2024	-0.24683	9.342	225.471	566.1213	-0.066895	0.75986	-0.058106	-55.031	-36.598	144.242	0.0068359	0.23242	-0.23438	NaN	NaN	NaN	NaN	NaN	NaN
0.446	-17.916	-142.992	1895.858	-0.50537	1.1978	-0.25049	9.231	254.557	553.032	-0.051855	0.7335	-0.039063	-49.368	-66.6435	162.617	-0.01831	0.26123	-0.23974	NaN	NaN	NaN	NaN	NaN	NaN
0.448	-2.182	-143.023	1912.175	-0.52637	1.2173	-0.25146	-24.793	232.478	509.0639	-0.035156	0.70557	-0.024902	-29.482	-51.313	189.734	-0.058594	0.28711	-0.24609	NaN	NaN	NaN	NaN	NaN	NaN
0.45	20.389	-132.16	1913.393	-0.54492	1.2305	-0.25098	20.921	227.153	480.8111	-0.016504	0.67451	-0.0088867	6.13	-66.591	288.171	-0.13232	0.33887	-0.25195	NaN	NaN	NaN	NaN	NaN	NaN
0.452	29.86	-99.402	1902.841	-0.57227	1.2617	-0.25195	-13.064	248.45	471.41	-0.0033203	0.64883	0.0044922	43.97	-103.509	245.601	-0.17627	0.3623	-0.24951	NaN	NaN	NaN	NaN	NaN	NaN
0.454	56.425	-89.333	1893.697	-0.59009	1.2864	-0.25317	-32.649	222.006	419.221	0.012695	0.62148	0.017383	44.602	-115.684	328.095	-0.26563	0.43164	-0.23242	NaN	NaN	NaN	NaN	NaN	NaN
0.456	64.573	-87.511	1899.909	-0.60547	1.3135	-0.25391	-4.25899999999999	207.005	428.714	0.030566	0.59492	0.026367	86.929	-165.916196	364.19	-0.33789	0.48999	-0.21679	NaN	NaN	NaN	NaN	NaN	NaN
0.458	89.579	-88.901	1917.005	-0.62891	1.3418	-0.2583	-54.171	198.3	396.5566	0.053711	0.56055	0.044922	74.511	-118.3607	547.56976	-0.4043	0.54492	-0.20605	NaN	NaN	NaN	NaN	NaN	NaN
0.46	96.512	-90.347	1959.765	-0.62842	1.3579	-0.2666	-50.059	169.146	380.4896	0.064453	0.53174	0.056543	99.988	-109.595	653.514	-0.49316	0.62109	-0.20117	NaN	NaN	NaN	NaN	NaN	NaN
0.462	135.793	-102.237	1978.221	-0.63037	1.3872	-0.28369	-39.651	185.4527	370.7466	0.073047	0.50283	0.069531	107.92	14.847	780.617	-0.54297	0.65625	-0.20801	NaN	NaN	NaN	NaN	NaN	NaN
0.464	136.512	-107.179	1995.466	-0.62719	1.4075	-0.29956	-85.545	167.136	328.7698	0.082422	0.4747	0.078906	142.899	53.9367	890.585	-0.66357	0.72314	-0.23584	NaN	NaN	NaN	NaN	NaN	NaN
0.466	138.148	-107.252	1983.838	-0.62646	1.4272	-0.31592	-55.261	156.2869	328.663	0.097363	0.44639	0.086719	113.831	126.675	1111.314	-0.77734	0.77295	-0.25512	NaN	NaN	NaN	NaN	NaN	NaN
0.468	127.152	-102.32	1972.7506	-0.61328	1.4434	-0.33154	-67.609	165.691	310.5023	0.1084	0.41406	0.095703	87.585	120.98952	1356.722	-0.91406	0.83984	-0.27734	NaN	NaN	NaN	NaN	NaN	NaN
0.47	138.272	-102.72051	1983.4811	-0.60693	1.4438	-0.33936	-69.426	152.909	263.4072	0.11836	0.3875	0.099318	105.036	158.679	1515.362	-1.1304	0.94775	-0.29492	NaN	NaN	NaN	NaN	NaN	NaN
0.472	118.993	-108.1708	1987.4859	-0.59619	1.4497	-0.36865	-43.85	164.893	276.8651	0.125	0.35869	0.10322	100.296	126.651	1625.976	-1.252	1.0254	-0.29199	NaN	NaN	NaN	NaN	NaN	NaN
0.474	126.537	-99.9286	1976.784	-0.58814	1.4439	-0.38403	-87.74	158.778	252.198	0.13399	0.33564	0.1083	63.119	73.619	1672.2338	-1.5093	1.2134	-0.26318	NaN	NaN	NaN	NaN	NaN	NaN
0.476	93.352	-101.711	1989.47028	-0.58203	1.4414	-0.39893	-63.268	132.783	246.06	0.13779	0.30782	0.11055	-1.053	-17.357	1781.74	-1.7028	1.3929	-0.198	NaN	NaN	NaN	NaN	NaN	NaN
0.478	87.109	-93.79	1998.1505	-0.5791	1.438	-0.42041	-53.382	140.102	236.2045	0.14111	0.28809	0.11279	44.389	-134.67	1782.058	-1.877	1.5859	-0.10498	NaN	NaN	NaN	NaN	NaN	NaN
0.48	73.562	-60.8941	2005.516	-0.58008	1.4375	-0.43164	-77.295	123.843	179.458	0.14864	0.27178	0.11552	32.577	-200.579	1811.547	-2.0347	1.8472	0.0058594	NaN	NaN	NaN	NaN	NaN	NaN
0.482	77.704	-26.23	1991.2308	-0.58936	1.4438	-0.44189	-15.317	128.313	191.109	0.15332	0.25772	0.12276	62.189	-266.2436	1680.764	-2.0581	1.9634	0.062012	NaN	NaN	NaN	NaN	NaN	NaN
0.484	62.182	-13.806	1972.401	-0.60352	1.4512	-0.45996	-64.41	127.789	172.70741	0.15645	0.23974	0.12588	-18.851	-253.886	1682.696	-2.0015	2.1489	0.12842	NaN	NaN	NaN	NaN	NaN	NaN
0.486	46.55	-10.969	1987.0185	-0.62109	1.4629	-0.47266	-47.856	107.343	156.48068	0.15859	0.22529	0.12754	-40.931	-277.767	1586.098	-1.8638	2.2212	0.11035	NaN	NaN	NaN	NaN	NaN	NaN
0.488	47.511	-30.756	1984.6143	-0.63428	1.479	-0.48193	-19.86	105.8905	155.5944	0.15967	0.21191	0.1333	-106.357	-244.915	1579.4541	-1.6382	2.1997	0.0625	NaN	NaN	NaN	NaN	NaN	NaN
0.49	13.46	-27.805	1976.2753	-0.64355	1.4922	-0.49316	-65.269	91.673	124.049	0.15713	0.19629	0.13691	-97.048	-226.46	1484.581	-1.1875	1.918	-0.058594	NaN	NaN	NaN	NaN	NaN	NaN
0.492	5.28100000000001	-24.627	1979.644	-0.65723	1.5039	-0.50195	-7.477	72.128	135.4413	0.15849	0.18457	0.14297	-115.844	-153.597	1521.29678	-0.94287	1.7329	-0.12793	NaN	NaN	NaN	NaN	NaN	NaN
0.494	13.43	-25.199	1980.47	-0.65845	1.5103	-0.50879	-6.101	73.267	138.9097	0.16045	0.17363	0.1418	-74.3714	-73.939	1563.258	-0.51758	1.3809	-0.24512	NaN	NaN	NaN	NaN	NaN	NaN
0.496	34.717	-18.364	1961.0789	-0.65918	1.5137	-0.52148	-34.348	60.514	109.4902	0.16016	0.16201	0.14746	-98.908	-22.154	1575.342	-0.2666	1.1557	-0.29956	NaN	NaN	NaN	NaN	NaN	NaN
0.498	7.87	-18.162	1940.8406	-0.6543	1.5117	-0.53613	12.29	60.4536	110.627	0.16357	0.14893	0.14453	-128.121	18.67	1589.337	-0.056641	0.95898	-0.34375	NaN	NaN	NaN	NaN	NaN	NaN
0.5	21.95	-27.1399	1927.6885	-0.65332	1.5117	-0.53906	-33.015	65.441	94.9359	0.16729	0.13721	0.14688	-32.916	6.34	1535.865	0.16309	0.7168	-0.4082	NaN	NaN	NaN	NaN	NaN	NaN
0.502	39.826	-47.3551	1937.9913	-0.6499	1.5044	-0.55615	-30.296	30.6229	106.4011	0.16738	0.12149	0.14394	26.189	-11.8	1612.298	0.25391	0.5957	-0.44922	NaN	NaN	NaN	NaN	NaN	NaN
0.504	38.518	-44.4758	1922.7666	-0.64478	1.5007	-0.56127	-6.542	25.3955	115.8021	0.17168	0.10898	0.14161	105.982	-116.37	1566.845	0.38232	0.36426	-0.53906	NaN	NaN	NaN	NaN	NaN	NaN
0.506	51.078	-29.225	1915.8778	-0.64111	1.4927	-0.56689	-43.198	15.4763	60.654	0.17246	0.099219	0.13965	68.466	-227.818	1657.759	0.42114	0.21753	-0.60083	NaN	NaN	NaN	NaN	NaN	NaN
0.508	80.808	-9.218	1901.2057	-0.63867	1.4824	-0.57617	-45.092	20.7706	67.371	0.17578	0.088379	0.13672	132.104	-364.2942	1626.177	0.3999	0.11621	-0.65039	NaN	NaN	NaN	NaN	NaN	NaN
0.51	92.52	1.76	1891.33741	-0.64209	1.4731	-0.57764	-21.289	42.76	76.8531	0.1831	0.083692	0.13262	122.51	-441.573	1759.261	0.28564	0.094727	-0.66992	NaN	NaN	NaN	NaN	NaN	NaN
0.512	108.388	27.8137	1875.2975	-0.64209	1.4673	-0.57959	-48.658	34.52026	51.3967	0.18838	0.077051	0.12422	187.114	-456.236	1766.5072	0.1958	0.14111	-0.64697	NaN	NaN	NaN	NaN	NaN	NaN
0.514	112.827	38.0813	1872.2179	-0.64258	1.4531	-0.5791	-32.481	31.9894	71.862	0.19736	0.067676	0.12461	162.089	-453.91	1870.6618	-0.033203	0.30908	-0.55518	NaN	NaN	NaN	NaN	NaN	NaN
0.516	130.313	38.485	1863.43018	-0.64648	1.4492	-0.58105	-60.736	12.9693	47.26	0.20918	0.059765	0.12383	166.044	-413.04	1915.9596	-0.22534	0.48852	-0.48267	NaN	NaN	NaN	NaN	NaN	NaN
0.518	107.107	32.925	1844.7097	-0.64941	1.4434	-0.57178	-46.795	1.144	53.86551	0.21777	0.053711	0.1167	164.557	-393.87	1962.232	-0.41357	0.68213	-0.41748	NaN	NaN	NaN	NaN	NaN	NaN
0.52	129.018	26.0165	1821.9011	-0.65674	1.438	-0.56982	-37.478	18.911	90.5153	0.22549	0.046289	0.11006	143.243	-314.747	2046.377	-0.61865	0.93018	-0.35693	NaN	NaN	NaN	NaN	NaN	NaN
0.522	110.479	25.2532	1803.8076	-0.66748	1.438	-0.55713	-67.142	22.022	53.8842	0.23594	0.041211	0.104	210.334	-249.061	2088.739	-0.70996	1.0493	-0.33496	NaN	NaN	NaN	NaN	NaN	NaN
0.524	109.865	21.9001	1795.4505	-0.67774	1.4384	-0.54736	-25.983	25.9954	56.605	0.24375	0.038086	0.097754	249.515	-175.733	2183.593	-0.85547	1.2646	-0.31592	NaN	NaN	NaN	NaN	NaN	NaN
0.526	100.373	28.835	1771.4699	-0.68604	1.436	-0.5376	-71.022	29.0973	54.863	0.25	0.031934	0.092187	276.76	-158.17	2123.214	-0.96875	1.4414	-0.30029	NaN	NaN	NaN	NaN	NaN	NaN
0.528	98.722	41.337	1741.754	-0.69922	1.4336	-0.52344	-63.09	13.238	44.2102	0.25244	0.02832	0.091797	247.927	-125.629	2151.5566	-1.0039	1.5117	-0.28369	NaN	NaN	NaN	NaN	NaN	NaN
0.53	82.483	39.387	1755.6118	-0.69824	1.4375	-0.51563	-21.139	5.659	81.5396	0.25596	0.02793	0.09668	297.9533	-141.067	2069.253	-1.0688	1.6196	-0.24951	NaN	NaN	NaN	NaN	NaN	NaN
0.532	77.603	36.146	1741.011	-0.70898	1.4355	-0.49805	-76.46	1.079	74.5371	0.25254	0.021777	0.099514	237.4451	-154.866	2172.647	-1.1072	1.6858	-0.22436	NaN	NaN	NaN	NaN	NaN	NaN
0.534	70.807	39.924	1728.1285	-0.71606	1.4397	-0.48584	-51.033	5.61	62.2357	0.25488	0.015918	0.09795	209.734	-178.976	2133.131	-1.1362	1.7466	-0.2124	NaN	NaN	NaN	NaN	NaN	NaN
0.536	63.409	52.704	1697.84125	-0.71973	1.4395	-0.47266	-10.16	21.6188	91.838	0.25654	0.015918	0.095508	157.019	-230.868	2198.401	-1.1558	1.7896	-0.20361	NaN	NaN	NaN	NaN	NaN	NaN
0.538	31.989	54.095	1674.7797	-0.71582	1.438	-0.45654	-56.113	20.305	66.8036	0.25488	0.015625	0.096191	124.972	-237.242	2202.4098	-1.1602	1.793	-0.20752	NaN	NaN	NaN	NaN	NaN	NaN
0.54	18.95	62.069	1671.06	-0.71631	1.4341	-0.45117	-5.40000000000001	20.653	68.2923	0.25449	0.012012	0.09668	45.02	-278.95	2279.84	-1.1475	1.7676	-0.23438	NaN	NaN	NaN	NaN	NaN	NaN
0.542	9.607	71.521	1636.8289	-0.71094	1.4258	-0.44141	10.355	28.573	76.8484	0.24961	0.0085938	0.094336	26.15	-243.602	2327.137	-1.146	1.7378	-0.27124	NaN	NaN	NaN	NaN	NaN	NaN
0.544	1.84	79.932	1606.9729	-0.70288	1.416	-0.42846	-34.338	17.8507	57.3226	0.23711	0.010937	0.09043	57.84	-274.049	2362.101	-1.1367	1.7383	-0.30957	NaN	NaN	NaN	NaN	NaN	NaN
0.546	-4.024	87.986	1600.8718	-0.6875	1.4063	-0.42236	15.93	28.7548	108.778	0.22119	0.017676	0.086328	59.307	-237.6883	2408.178	-1.0859	1.7559	-0.37695	NaN	NaN	NaN	NaN	NaN	NaN
0.548	-10.32	74.108	1581.2212	-0.67432	1.3892	-0.41162	-9.108	32.657	81.012	0.20605	0.024902	0.084961	73.81	-257.4	2393.265	-1.0386	1.7329	-0.40869	NaN	NaN	NaN	NaN	NaN	NaN
0.55	-6.00999999999999	85.34	1554.83335	-0.66113	1.373	-0.4043	-29.082	8.953	74.9752	0.18613	0.040625	0.090723	56.07	-204.8179	2486.754	-0.97412	1.6626	-0.45264	NaN	NaN	NaN	NaN	NaN	NaN
0.552	5.88399999999999	100.394	1527.77274	-0.64648	1.3613	-0.39746	7.70400000000001	19.7317	88.783	0.16787	0.058789	0.095996	115.06	-157.78	2396.557	-0.99489	1.674	-0.49292	NaN	NaN	NaN	NaN	NaN	NaN
0.554	22.139	94.77	1501.411	-0.62305	1.3457	-0.38672	-32.845	4.618	54.0579	0.1542	0.080274	0.10303	89.48	-100.836	2401.6958	-1.0078	1.7344	-0.5293	NaN	NaN	NaN	NaN	NaN	NaN
0.556	27.477	90.918	1515.698	-0.61621	1.3379	-0.38477	-4.007	0.877000000000001	80.8892	0.14658	0.097072	0.11396	99.07	-90.5	2314.329	-0.94873	1.7427	-0.57764	NaN	NaN	NaN	NaN	NaN	NaN
0.558	40.818	94.241	1490.5649	-0.6001	1.3247	-0.38135	-12.863	12.9338	76.7836	0.14258	0.1167	0.10693	59.051	-105.26	2372.5998	-0.90234	1.7227	-0.59473	NaN	NaN	NaN	NaN	NaN	NaN
0.56	50.283	85.69	1469.982	-0.59057	1.3118	-0.37304	-35.308	-1.0096	59.3955	0.15332	0.13389	0.1209	95.455	-94.28	2314.628	-0.81445	1.6621	-0.625	NaN	NaN	NaN	NaN	NaN	NaN
0.562	53.472	87.827	1449.132	-0.58154	1.3013	-0.36475	-21.052	6.4409	88.10731	0.16543	0.14668	0.12168	105.364	-76.598	2348.7329	-0.78174	1.6431	-0.65136	NaN	NaN	NaN	NaN	NaN	NaN
0.564	45.567	96.546	1424.0682	-0.57178	1.2896	-0.35498	-46.909	8.8523	70.5028	0.18144	0.15683	0.11934	143.698	6.369	2329.085	-0.77002	1.6489	-0.6665	NaN	NaN	NaN	NaN	NaN	NaN
0.566	80	105.483	1394.9687	-0.56592	1.2817	-0.3501	-15.582	-2.068	69.2938	0.19639	0.16192	0.11348	156.349	20.6987	2350.473	-0.79102	1.6738	-0.66797	NaN	NaN	NaN	NaN	NaN	NaN
0.568	77.08	104.199	1369.3685	-0.55273	1.2676	-0.33984	-22.103	9.63414	84.9438	0.2168	0.16602	0.10938	145.167	65.275	2348.28	-0.8042	1.6938	-0.66943	NaN	NaN	NaN	NaN	NaN	NaN
0.57	74.108	93.4608	1352.1634	-0.54297	1.2549	-0.33593	-80.994	5.615	56.561	0.23721	0.16621	0.10303	195.167	-6.844	2347.5542	-0.85938	1.7207	-0.64258	NaN	NaN	NaN	NaN	NaN	NaN
0.572	70.302	90.003	1328.05	-0.53418	1.2461	-0.32617	-43.977	0.573600000000001	72.143	0.24971	0.16592	0.095996	228.7193	-8.017	2404.022	-0.89649	1.7359	-0.62085	NaN	NaN	NaN	NaN	NaN	NaN
0.574	89.112	102.108	1286.7886	-0.52051	1.2285	-0.31982	-53.83	18.9662	67.6192	0.26142	0.16631	0.093262	296.033	-59.74	2411.75	-0.93848	1.7344	-0.60254	NaN	NaN	NaN	NaN	NaN	NaN
0.576	74.104	93.8722	1281.8531	-0.51709	1.2231	-0.31201	-77.808	0.163	44.562	0.27295	0.16387	0.092383	296.8519	-47.822	2435.99	-0.9668	1.7227	-0.58203	NaN	NaN	NaN	NaN	NaN	NaN
0.578	75.403	110.776	1252.404	-0.50537	1.2021	-0.30762	-33.732	10.30157	80.259	0.27881	0.16211	0.093262	313.8428	-66.65	2321.6538	-0.98047	1.7109	-0.5791	NaN	NaN	NaN	NaN	NaN	NaN
0.58	53.099	113.541	1231.7352	-0.49462	1.1838	-0.30005	-87.533	14.8326	95.882	0.27842	0.16572	0.087891	237.236	-59.435	2314.9543	-0.97754	1.6797	-0.57617	NaN	NaN	NaN	NaN	NaN	NaN
0.582	43.829	131.656	1201.4985	-0.48242	1.1709	-0.28955	-59.521	-21.51	122.9768	0.28223	0.16904	0.096875	210.235	-48.9114	2249.834	-0.95826	1.6477	-0.58667	NaN	NaN	NaN	NaN	NaN	NaN
0.584	27.321	123.55	1168.9495	-0.47266	1.1426	-0.28125	5.592	-28.538	151.8968	0.28691	0.17842	0.098438	195.05	-31.603	2303.407	-0.93359	1.6113	-0.59863	NaN	NaN	NaN	NaN	NaN	NaN
0.586	9.52000000000001	123.991	1160.0779	-0.4624	1.1333	-0.27783	-80.415	-56.993	148.3634	0.29844	0.17861	0.1043	214.289	8.334	2242.167	-0.91016	1.5586	-0.62109	NaN	NaN	NaN	NaN	NaN	NaN
0.588	5.876	126.272	1136.0458	-0.45313	1.1074	-0.26953	-46.716	-81.208	219.4518	0.31201	0.18555	0.11084	184.115	60.998	2247.006	-0.8999	1.5259	-0.62402	NaN	NaN	NaN	NaN	NaN	NaN
0.59	-21.419	133.259	1124.378	-0.44019	1.0887	-0.2627	-31.174	-55.306	262.2954	0.3249	0.18584	0.10957	143.856	134.1519	2178.233	-0.88672	1.4746	-0.6416	NaN	NaN	NaN	NaN	NaN	NaN
0.592	-26.571	126.451	1091.449	-0.43164	1.0664	-0.25391	-56.782	-46.668	291.131	0.33926	0.19033	0.099514	123.293	179.4015	2149.65	-0.8877	1.4454	-0.63916	NaN	NaN	NaN	NaN	NaN	NaN
0.594	-33.957	118.553	1069.916	-0.41699	1.043	-0.23828	-13.982	-36.572	375.697	0.34629	0.19228	0.087402	81.1	247.231	2107.4901	-0.88672	1.4219	-0.64258	NaN	NaN	NaN	NaN	NaN	NaN
0.596	-33.129	121.407	1040.9521	-0.40869	1.0317	-0.23486	-55.558	-28.6907	429.224	0.34951	0.20244	0.072754	110.17	232.949	2069.045	-0.89258	1.4082	-0.63281	NaN	NaN	NaN	NaN	NaN	NaN
0.598	-40.624	120.52	1020.131	-0.39502	1.0049	-0.22559	-70.9291	-17.5336	546.2625	0.33789	0.2085	0.047852	94.718	216.991	2073.0238	-0.89648	1.4063	-0.625	NaN	NaN	NaN	NaN	NaN	NaN
0.6	-54.046	114.569	998.06881	-0.38575	0.98633	-0.21557	-52.428	45.6048	698.1122	0.31738	0.2292	0.022168	80.479	171.549	2033.7515	-0.90186	1.4194	-0.60596	NaN	NaN	NaN	NaN	NaN	NaN
0.602	-44.621	114.259	977.89841	-0.37646	0.96826	-0.2085	-72.0551	101.75	813.733	0.27519	0.25771	-0.00039064	35.977	169.809	2020.296	-0.89624	1.428	-0.5896	NaN	NaN	NaN	NaN	NaN	NaN
0.604	-43.4	124.42	954.056	-0.36377	0.94385	-0.19531	-27.656	137.919	963.799	0.2123	0.30263	-0.010547	85.526	157.624	1928.1652	-0.88281	1.4297	-0.57227	NaN	NaN	NaN	NaN	NaN	NaN
0.606	-27.444	131.987	930.1937	-0.35596	0.93213	-0.19287	-67.42	191.244	1132.544	0.15166	0.35283	-0.011914	37.67	166.1716	1918.065	-0.85547	1.4248	-0.55762	NaN	NaN	NaN	NaN	NaN	NaN
0.608	-35.009	129.952	921.497	-0.3457	0.90869	-0.1748	-87.375	196.842	1235.805	0.086426	0.40918	-0.0029297	37.19	164.3464	1860.944	-0.83936	1.4204	-0.54443	NaN	NaN	NaN	NaN	NaN	NaN
0.61	-14.37	146.849	909.0842	-0.33203	0.8916	-0.16772	-20.724	183.146	1380.8032	0.018164	0.46523	0.00039062	12.42	171.732	1872.746	-0.80664	1.4063	-0.5293	NaN	NaN	NaN	NaN	NaN	NaN
0.612	-9.768	154.723	886.6382	-0.31494	0.87549	-0.15479	-50.582	151.935	1506.007	-0.049024	0.5291	0.0072266	62.526	184.789	1805.6716	-0.77636	1.3931	-0.51562	NaN	NaN	NaN	NaN	NaN	NaN
0.614	-2.346	144.012	843.8687	-0.2998	0.85352	-0.14404	-4.91	51.76	1599.467	-0.11231	0.59082	0.0052735	91.406	220.577	1845.043	-0.74805	1.377	-0.50781	NaN	NaN	NaN	NaN	NaN	NaN
0.616	9.90800000000001	136.0437	832.0693	-0.28662	0.83838	-0.1377	19.308	-26.943	1665.694	-0.1831	0.65029	-0.0051758	93.186	266.855	1747.1433	-0.71436	1.3521	-0.47607	NaN	NaN	NaN	NaN	NaN	NaN
0.618	31.718	152.877	812.437	-0.26855	0.80859	-0.13135	-37.748	-99.158	1629.044	-0.26416	0.70898	-0.029785	91.207	312.74	1725.3394	-0.69727	1.3359	-0.47852	NaN	NaN	NaN	NaN	NaN	NaN
0.62	42.489	155.897	791.025	-0.25196	0.78785	-0.12109	23.753	-198.199	1632.108	-0.36992	0.76728	-0.065136	107.496	345.89	1627.055	-0.67139	1.3071	-0.4458	NaN	NaN	NaN	NaN	NaN	NaN
0.622	31.241	154.617	763.844	-0.23633	0.77002	-0.12012	3.71100000000001	-232.762	1677.609	-0.49521	0.84033	-0.097168	153.31	352.237	1597.1204	-0.65308	1.2798	-0.42212	NaN	NaN	NaN	NaN	NaN	NaN
0.624	15.024	151.452	747.233	-0.2124	0.74219	-0.11133	1.34	-268.289	1706.9471	-0.6417	0.92744	-0.12569	163.449	346.539	1554.14406	-0.63281	1.2559	-0.39844	NaN	NaN	NaN	NaN	NaN	NaN
0.626	38.148	143.673	737.8776	-0.20557	0.729	-0.10596	109.184	-274.053	1770.6855	-0.78535	1.0523	-0.10996	177.062	322.06	1501.67	-0.60742	1.2188	-0.36523	NaN	NaN	NaN	NaN	NaN	NaN
0.628	38.252	144.393	725.6617	-0.18018	0.70508	-0.091797	65.218	-222.387	1771.3791	-0.92578	1.1953	-0.069336	178.115	291.733	1445.41	-0.59033	1.1968	-0.35107	NaN	NaN	NaN	NaN	NaN	NaN
0.63	29.765	142.212	713.9863	-0.16308	0.68994	-0.083252	55.16	-192.993	1792.304	-1.0496	1.3442	-0.0013676	171.129	275.9932	1380.047	-0.56738	1.1602	-0.31641	NaN	NaN	NaN	NaN	NaN	NaN
0.632	16.622	149.687	689.329	-0.14209	0.67188	-0.07373	79.9	-128.509	1839.202	-1.1479	1.4966	0.079589	103.036	276.084	1341.127	-0.54761	1.1321	-0.29175	NaN	NaN	NaN	NaN	NaN	NaN
0.634	11.877	155.875	659.313	-0.11426	0.64648	-0.064453	48.14	-48.011	1799.125	-1.205	1.6122	0.15927	103.435	307.9158	1274.374	-0.53076	1.1079	-0.26855	NaN	NaN	NaN	NaN	NaN	NaN
0.636	-4.35899999999999	157.532	642.634	-0.104	0.63477	-0.060547	93.887	-24.142	1760.394	-1.2274	1.696	0.21895	88.245	315.6617	1286.831	-0.5127	1.0708	-0.2334	NaN	NaN	NaN	NaN	NaN	NaN
0.638	-20.243	152.936	630.1766	-0.071289	0.60938	-0.056641	132.713	2.238	1701.792	-1.2246	1.7422	0.25049	108.084	291.108	1241.282	-0.50488	1.0488	-0.21338	NaN	NaN	NaN	NaN	NaN	NaN
0.64	-17.944	140.821	620.0513	-0.046875	0.59204	-0.050537	115.05	-21.826	1637.161	-1.1868	1.7507	0.24766	48.432	269.984	1241.31	-0.48779	1.0176	-0.1792	NaN	NaN	NaN	NaN	NaN	NaN
0.642	-34.618	147.977	607.3956	-0.021484	0.57471	-0.044434	128.783	-93.338	1627.242	-1.1117	1.7149	0.22041	43.592	258.217	1149.345	-0.48022	0.98682	-0.14966	NaN	NaN	NaN	NaN	NaN	NaN
0.644	-48.746	148.038	586.792	0.0068359	0.54736	-0.041016	97.225	-139.284	1584.479	-1.0051	1.6324	0.17549	5.488	273.426	1141.558	-0.47168	0.96338	-0.11816	NaN	NaN	NaN	NaN	NaN	NaN
0.646	-76.639	143.88	579.812	0.018555	0.53809	-0.035645	100.893	-219.553	1560.308	-0.87988	1.5197	0.13877	5.006	292.755	1057.696	-0.46729	0.92236	-0.077637	NaN	NaN	NaN	NaN	NaN	NaN
0.648	-67.051	143.897	551.54924	0.048828	0.50928	-0.031738	81.597	-312.873	1611.607	-0.76025	1.4009	0.11133	-1.29000000000001	310.896	1033.397	-0.4624	0.89697	-0.057617	NaN	NaN	NaN	NaN	NaN	NaN
0.65	-80.479	147.076	520.622	0.068359	0.49292	-0.030274	-11.065	-360.604	1636.729	-0.65449	1.2928	0.1085	-21.42	296.768	919.035	-0.46289	0.85742	-0.021973	NaN	NaN	NaN	NaN	NaN	NaN
0.652	-76.933	144.622	500.144	0.086426	0.47656	-0.029297	-16.473	-422.997	1696.6622	-0.56123	1.2079	0.1166	-42.242	292.501	907.4843	-0.45947	0.83301	0.00097655	NaN	NaN	NaN	NaN	NaN	NaN
0.654	-82.925	125.012	496.27086	0.10449	0.45264	-0.026367	-63.319	-396.755	1786.212	-0.47295	1.1345	0.11543	-91.793	260.146	821.63395	-0.4585	0.81104	0.02002	NaN	NaN	NaN	NaN	NaN	NaN
0.656	-73.883	133.936	493.8014	0.11084	0.44287	-0.023926	-89.674	-337.23	1832.463	-0.37998	1.0554	0.10186	-87.655	270.8651	799.6846	-0.43018	0.78662	0.032227	NaN	NaN	NaN	NaN	NaN	NaN
0.658	-67.018	144.865	473.704	0.125	0.42188	-0.016602	-71.747	-327.53	1898.309	-0.28857	0.97314	0.058594	-116.6004	264.454	757.753	-0.41455	0.77588	0.039063	NaN	NaN	NaN	NaN	NaN	NaN
0.66	-74.475	147.49	461.6825	0.13892	0.41064	-0.019532	-129.5844	-275.799	1948.625	-0.21084	0.90029	-0.016113	-71.313	297.742	689.7385	-0.3833	0.75195	0.04248	NaN	NaN	NaN	NaN	NaN	NaN
0.662	-48.246	136.015	457.747	0.14795	0.39844	-0.018066	-122.4384	-284.425	1965.553	-0.16143	0.84375	-0.10449	-95.622	304.04	646.7832	-0.34717	0.73682	0.043945	NaN	NaN	NaN	NaN	NaN	NaN
0.664	-53.895	138.281	440.5962	0.15576	0.38623	-0.015137	-93.2363	-296.111	2021.233	-0.13252	0.82343	-0.17207	-74.552	325.37	586.937	-0.32861	0.7251	0.039551	NaN	NaN	NaN	NaN	NaN	NaN
0.666	-42.742	133.203	420.14025	0.16016	0.3833	-0.016113	-114.23	-217.84832	2028.556	-0.14912	0.82451	-0.22031	-65.36	317.678	579.9809	-0.28809	0.70898	0.037109	NaN	NaN	NaN	NaN	NaN	NaN
0.668	-21.102	136.631	399.8873	0.16455	0.37158	-0.015137	-100.9865	-219.354	2014.549	-0.19043	0.86768	-0.22314	-29.25	323.99	513.676	-0.25756	0.70044	0.033691	NaN	NaN	NaN	NaN	NaN	NaN
0.67	-17.416	126.19	401.0998	0.16113	0.36767	-0.016114	-130.105	-204.232	2024.369	-0.26446	0.93516	-0.18731	-26.73	298.441	524.1627	-0.22168	0.69385	0.031738	NaN	NaN	NaN	NaN	NaN	NaN
0.672	-4.966	126.089	386.6827	0.15771	0.36182	-0.0092773	-214.827	-183.247	2008.6911	-0.3543	1.0293	-0.12578	7.944	266.158	451.2299	-0.17969	0.68555	0.037598	NaN	NaN	NaN	NaN	NaN	NaN
0.674	-5.514	119.915	363.9292	0.1582	0.35645	0.0019531	-175.496	-238.2406	2030.64	-0.45078	1.139	-0.054297	13.81	244.726	470.103	-0.16064	0.67676	0.034668	NaN	NaN	NaN	NaN	NaN	NaN
0.676	-5.33500000000001	119.989	360.2072	0.14355	0.35303	-0.014648	-147.464	-205.9822	2093.44799	-0.52666	1.2421	0.0043947	18.19	217.436	382.069	-0.11865	0.66455	0.039063	NaN	NaN	NaN	NaN	NaN	NaN
0.678	10.141	127.165	358.548	0.14697	0.35742	-0.011719	-141.753	-203.8253	2144.997	-0.58203	1.3164	0.04248	27.253	210.09783	387.2566	-0.092039	0.65015	0.038575	NaN	NaN	NaN	NaN	NaN	NaN
0.68	14.009	131.954	355.157	0.14477	0.36182	-0.0043945	-102.1918	-235.385	2219.053	-0.61992	1.3692	0.051563	19.464	188.457	322.984	-0.064453	0.64063	0.037109	NaN	NaN	NaN	NaN	NaN	NaN
0.682	1.20800000000001	128.464	340.126	0.14014	0.36426	9.0206e-14	-116.0169	-165.815	2248.287	-0.64317	1.4133	0.046875	17.216	188.878	337.0291	-0.036621	0.62158	0.03125	NaN	NaN	NaN	NaN	NaN	NaN
0.684	-8.52999999999999	114.699	320.4794	0.13232	0.37158	0.0058594	-73.729	-200.388	2258.058	-0.66309	1.4496	0.033594	8.131	171.2175557	290.7719	-0.029297	0.61377	0.035645	NaN	NaN	NaN	NaN	NaN	NaN
0.686	-6.795	105.728	308.2815	0.13062	0.37524	0.0090329	-42.402	-221.813	2305.2	-0.68887	1.485	0.022754	36.096	198.6697	288.027	-0.01123	0.6001	0.03125	NaN	NaN	NaN	NaN	NaN	NaN
0.688	-28.097	108.724	294.4896	0.12939	0.375	0.014648	-36.602	-209.4691	2312.795	-0.71973	1.5352	0.020508	10.535	181.246	247.697	-0.0090332	0.58618	0.039551	NaN	NaN	NaN	NaN	NaN	NaN
0.69	-24.905	104.698	305.907	0.12402	0.37305	0.013672	3.471	-289.004	2339.358	-0.76289	1.5885	0.028711	26.109	190.519	226.3611	-0.0058594	0.57715	0.050781	NaN	NaN	NaN	NaN	NaN	NaN
0.692	-25.149	105.697	278.5562	0.12256	0.37012	0.016113	20.553	-243.27	2369.363	-0.80313	1.6457	0.043066	-17.486	151.53	199.7345	-0.003418	0.56348	0.047852	NaN	NaN	NaN	NaN	NaN	NaN
0.694	-47.864	103.658	277.473	0.11768	0.37012	0.012695	-7.62	-214.584	2358.684	-0.83047	1.702	0.055566	0.958999999999996	150.79	150.0902	-0.0039063	0.55518	0.049316	NaN	NaN	NaN	NaN	NaN	NaN
0.696	-68.442	104.828	266.8481	0.11547	0.36866	0.017823	12.235	-221.117	2390.527	-0.85537	1.7575	0.069434	-37.048	133.147	162.891	-0.0092773	0.54346	0.050781	NaN	NaN	NaN	NaN	NaN	NaN
0.698	-62.353	85.309	268.876	0.11182	0.3667	0.023926	2.11399999999999	-115.989	2393.353	-0.87305	1.8164	0.078613	-30.209	134.804	130.0102	-0.010254	0.53003	0.054444	NaN	NaN	NaN	NaN	NaN	NaN
0.7	-74.368	74.344	256.435	0.10596	0.36621	0.02832	5.047	-130.717	2381.483	-0.89375	1.8689	0.075195	-80.653	104.065	163.147	-0.013184	0.52002	0.054199	NaN	NaN	NaN	NaN	NaN	NaN
0.702	-74.223	82.861	239.28509	0.10156	0.36182	0.030273	8.992	-103.114	2432.019	-0.91699	1.9175	0.077832	-68.617	90.224	80.34	-0.018066	0.50488	0.050781	NaN	NaN	NaN	NaN	NaN	NaN
0.704	-83.365	90.428	213.9005	0.097168	0.35547	0.035156	-49.107	-61.46	2451.85	-0.94395	1.9625	0.090332	-119.1229	71.259	94.3501	-0.019043	0.49854	0.056641	NaN	NaN	NaN	NaN	NaN	NaN
0.706	-84.685	84.1	203.9496	0.094727	0.34961	0.042481	-16.554	-96.667	2477.25	-0.98282	2.0008	0.11367	-126.7318	33.4617	53.817	-0.022461	0.48096	0.054199	NaN	NaN	NaN	NaN	NaN	NaN
0.708	-70.944	71.329	213.624	0.089844	0.34912	0.046387	-32.502	-38.2774	2436.89	-1.0151	2.0396	0.13867	-120.289	0.0230000000000006	113.275	-0.020264	0.46851	0.061523	NaN	NaN	NaN	NaN	NaN	NaN
0.71	-84.814	79.099	207.871	0.09668	0.33643	0.044922	-80.959	-35.295	2379.066	-1.0557	2.0798	0.15703	-91.7902	-28.6809	71.801	-0.019043	0.45215	0.060059	NaN	NaN	NaN	NaN	NaN	NaN
0.712	-70.889	79.077	189.1185	0.09668	0.33203	0.046387	-65.093	-80.3538	2390.805	-1.0867	2.1137	0.16592	-87.980818	-13.8679	94.258	-0.015137	0.43213	0.061523	NaN	NaN	NaN	NaN	NaN	NaN
0.714	-48.061	76.491	181.9033	0.10938	0.32324	0.045898	-120.032	-40.629	2400.888	-1.1121	2.1484	0.17685	-102.2987	-29.995	47.7752	-0.0092773	0.41846	0.064453	NaN	NaN	NaN	NaN	NaN	NaN
0.716	-37.26	68.01	185.0198	0.11988	0.31324	0.045899	-106.782	-101.7078	2394.72	-1.1309	2.1688	0.18291	-70.587	3.973	74.187	0.0014648	0.39258	0.06543	NaN	NaN	NaN	NaN	NaN	NaN
0.718	-43.484	72.416	184.4632	0.13135	0.30127	0.04541	-79.53	-117.313	2440.11	-1.145	2.1899	0.19238	-77.282	-1.341	49.8552	0.016602	0.36743	0.066406	NaN	NaN	NaN	NaN	NaN	NaN
0.72	-23.755	59.3183	184.271	0.14795	0.28857	0.042969	-115.541	-84.942	2438.15	-1.1481	2.1984	0.19775	-17.27	35.9504	41.035	0.037109	0.34326	0.071289	NaN	NaN	NaN	NaN	NaN	NaN
0.722	-11.027	33.818	176.331	0.15869	0.28076	0.045898	-101.35951	-144.847	2436.44	-1.1471	2.1981	0.19795	-36.674	27.7949	51.2166	0.060547	0.30566	0.076172	NaN	NaN	NaN	NaN	NaN	NaN
0.724	-16.011	26.191	177.135	0.1748	0.25977	0.042969	-128.482	-75.6236	2434.31	-1.1355	2.1856	0.19756	24.052	30.6145	46.8577	0.07373	0.28711	0.075195	NaN	NaN	NaN	NaN	NaN	NaN
0.726	10.815	22.188	175.612	0.18555	0.24975	0.04419	-151.137	-24.1324	2392.41	-1.1133	2.1703	0.19443	-12.147	-0.7868	82.862	0.10791	0.24658	0.073242	NaN	NaN	NaN	NaN	NaN	NaN
0.728	1.012	19.78	189.059	0.19824	0.23242	0.040527	-104.735	-19.14	2422.95	-1.082	2.1406	0.19287	30.049	5.6977	37.582	0.12622	0.21582	0.076416	NaN	NaN	NaN	NaN	NaN	NaN
0.73	8.77099999999999	20.672	194.087	0.21143	0.21387	0.035156	-99.093	71.459	2425.24	-1.045	2.1097	0.18242	-21.268	13.181	49.833	0.14844	0.18262	0.076172	NaN	NaN	NaN	NaN	NaN	NaN
0.732	17.515	9.658	197.383	0.20996	0.20117	0.030273	-99.743	28.812	2386.35	-1.0058	2.0696	0.17305	35.608	44.643	15.651	0.17578	0.1416	0.084473	NaN	NaN	NaN	NaN	NaN	NaN
0.734	9.729	3.871	188.164	0.20654	0.18115	0.023438	-44.996	26.4274	2391.85	-0.97256	2.0458	0.15781	36.316	62.007	76.398	0.19482	0.12012	0.09082	NaN	NaN	NaN	NaN	NaN	NaN
0.736	9.083	-23.216	211.49	0.19849	0.17871	0.022705	-40.179	80.107	2349.42	-0.94599	2.0185	0.1416	39.631	51.654	27.9889	0.22021	0.077148	0.092773	NaN	NaN	NaN	NaN	NaN	NaN
0.738	-3.651	-17.057	231	0.1875	0.17773	0.018555	2.691	49.6244	2324.83	-0.92773	1.9971	0.12988	44.012	39.63398	90.593	0.24122	0.043213	0.098386	NaN	NaN	NaN	NaN	NaN	NaN
0.74	-4.97000000000001	8.8528	247.29	0.1665	0.18408	0.027344	9.98	121.705	2304.98	-0.92314	1.9812	0.12461	47.973	13.437	29.044	0.25391	0.012207	0.099121	NaN	NaN	NaN	NaN	NaN	NaN
0.742	-29.869	40.719	271.84	0.15332	0.19434	0.036621	17.19	115.558	2256.1	-0.92451	1.9692	0.1335	38.878	19.8768	88.9792	0.27734	-0.019043	0.096191	NaN	NaN	NaN	NaN	NaN	NaN
0.744	-25.309	56.495	296.116	0.12988	0.20801	0.044922	66.032	39.167	2239.42	-0.93076	1.9583	0.13467	0.14200000000001	-2.979	67.7048	0.28223	-0.035645	0.10352	NaN	NaN	NaN	NaN	NaN	NaN
0.746	-47.599	69.652	333.435	0.11988	0.22217	0.048584	28.207	63.04618	2237.02	-0.93828	1.9582	0.14033	28.542	20.3099	79.795	0.30029	-0.06543	0.10645	NaN	NaN	NaN	NaN	NaN	NaN
0.748	-50.92	97.847	365.826	0.11182	0.23975	0.050781	28.54	11.065	2198.73	-0.93945	1.9512	0.13916	-29.844	30.3986	58.9551	0.30981	-0.081299	0.10473	NaN	NaN	NaN	NaN	NaN	NaN
0.75	-61.142	121.896	413.743	0.097656	0.25977	0.052246	50.279	31.706	2179.79	-0.93935	1.9407	0.14521	-15.518	54.246	71.9439	0.31738	-0.091309	0.10205	NaN	NaN	NaN	NaN	NaN	NaN
0.752	-83.305	137.493	477.715	0.088867	0.27148	0.050781	12.981	104.349	2125	-0.93974	1.9357	0.14775	-64.4709	29.2779	95.47	0.32617	-0.10352	0.10107	NaN	NaN	NaN	NaN	NaN	NaN
0.754	-97.194	142.888	550.15	0.070313	0.2959	0.04248	12.867	73.442	2069.91	-0.93896	1.9201	0.14463	-53.469	25.4589	69.4347	0.3208	-0.104	0.094238	NaN	NaN	NaN	NaN	NaN	NaN
0.756	-97.344	154.6767	590.946	0.05249	0.31055	0.036865	0.00800000000000978	127.167	2045.63	-0.93077	1.9052	0.13418	-128.774	12.9439	87.987	0.31543	-0.099121	0.090332	NaN	NaN	NaN	NaN	NaN	NaN
0.758	-75.427	151.621	649.92	0.027832	0.3291	0.030273	23.941	126.357	2004.29	-0.91846	1.8813	0.12549	-79.456	43.085977	29.935	0.30664	-0.08667	0.090332	NaN	NaN	NaN	NaN	NaN	NaN
0.76	-74.366	126.8662	726.876	-0.020996	0.354	0.019043	44.942	88.369	1993.65	-0.90488	1.8576	0.12197	-85.352	37.364	70.784	0.29736	-0.071289	0.083496	NaN	NaN	NaN	NaN	NaN	NaN
0.762	-81.3858	104.2342	799.951	-0.055176	0.37061	0.013184	-16.774	151.252	1965.39	-0.89854	1.8243	0.11797	-70.92	34.396	46.8901	0.27637	-0.044434	0.076172	NaN	NaN	NaN	NaN	NaN	NaN
0.764	-80.936	74.20662	854.746	-0.13135	0.40674	-0.00048828	-51.445	127.958	1886.61	-0.89112	1.7942	0.11446	-99.1708	9.042	87.677	0.26758	-0.026855	0.069824	NaN	NaN	NaN	NaN	NaN	NaN
0.766	-67.019	32.47286	884.058	-0.20923	0.44116	-0.0087888	-59.946	141.566	1838.6	-0.88145	1.7623	0.11211	-68.037	6.155	29.852	0.24707	0.025391	0.078613	NaN	NaN	NaN	NaN	NaN	NaN
0.768	-53.062	-1.2408	936.415	-0.2915	0.48877	-0.012207	-101.307	181.137	1765.61	-0.87695	1.7305	0.11084	-89.348	10.892	86.3309	0.23486	0.064941	0.083007	NaN	NaN	NaN	NaN	NaN	NaN
0.77	-25.532	-26.64	962.918	-0.41699	0.56445	-0.0024414	-98.362	122.553	1729.26	-0.86015	1.6998	0.1084	-57.163	17.437	60.0731	0.22705	0.099121	0.089355	NaN	NaN	NaN	NaN	NaN	NaN
0.772	-10.223	-43.468	979.036	-0.47852	0.60742	0.0063477	-134.15	175.959	1720.66	-0.84481	1.6704	0.10156	-44.54	30.503	75.764	0.22559	0.13916	0.09668	NaN	NaN	NaN	NaN	NaN	NaN
0.774	-12.777	-47.547	1016.961	-0.60352	0.71484	0.035156	-136.1946	175.025	1669.76	-0.82136	1.6392	0.09843	-54.827	14.3657	49.1878	0.23193	0.16064	0.098145	NaN	NaN	NaN	NaN	NaN	NaN
0.776	11.533	-57.196	1058.688	-0.68359	0.80517	0.066162	-110.8271	157.34	1665.06	-0.79098	1.6116	0.090033	-29.316	7.50493	65.8514	0.25	0.19189	0.098145	NaN	NaN	NaN	NaN	NaN	NaN
0.778	-21.785	-52.796	1111.164	-0.74805	0.89063	0.10107	-126.6673	210.806	1651.54	-0.75732	1.5796	0.087891	-17.235	-32.7567	53.7895	0.27002	0.20679	0.098389	NaN	NaN	NaN	NaN	NaN	NaN
0.78	24.003	-62.359	1142.539	-0.79004	1.002	0.12744	-74.849	180.269	1610.36	-0.71735	1.5452	0.076869	-3.193	-22.155	72.0008	0.28955	0.21875	0.097656	NaN	NaN	NaN	NaN	NaN	NaN
0.782	46.071	-81.053	1171.825	-0.78955	1.0454	0.14404	-50.143	181.916	1589.44	-0.67858	1.5139	0.06841	-10.128	-34.4853	82.276	0.31494	0.21826	0.099121	NaN	NaN	NaN	NaN	NaN	NaN
0.784	35.067	-77.6017	1219.175	-0.7627	1.1016	0.15234	-68.084	204.255	1521.07	-0.63521	1.4791	0.06016	74.985	29.554	46.4116	0.32031	0.21582	0.10107	NaN	NaN	NaN	NaN	NaN	NaN
0.786	7.78	-66.598	1263.769	-0.72412	1.1184	0.14404	-29.643	151.153	1482.78	-0.59467	1.4368	0.050704	27.743	17.7454	65.5027	0.32324	0.20703	0.092285	NaN	NaN	NaN	NaN	NaN	NaN
0.788	-1.562	-56.876	1266.074	-0.68115	1.1235	0.12891	-44.979	175.615	1446.45	-0.55811	1.4009	0.044434	62.691	53.857	38.441	0.31689	0.20361	0.093262	NaN	NaN	NaN	NaN	NaN	NaN
0.79	22.989	-64.833	1283.769	-0.62256	1.1079	0.10889	-25.539	175.837	1376.17	-0.52455	1.362	0.042588	43.604	12.1868	70.878	0.31396	0.20215	0.093262	NaN	NaN	NaN	NaN	NaN	NaN
0.792	0.795999999999999	-98.711	1309.714	-0.59375	1.0957	0.1001	13.544	158.951	1351.13	-0.49961	1.3255	0.039431	38.327	23.6237	48.962	0.30713	0.20313	0.085938	NaN	NaN	NaN	NaN	NaN	NaN
0.794	6.444	-116.5416	1326.846	-0.57031	1.0508	0.084473	-4.158	210.089	1298.92	-0.4733	1.2882	0.040066	1.523	9.2386	82.955	0.29883	0.2041	0.09375	NaN	NaN	NaN	NaN	NaN	NaN
0.796	-11.391	-126.197	1320.745	-0.57031	1.0205	0.086181	12.962	189.447	1235.58	-0.45277	1.2536	0.034952	33.733	36.14	34.5026	0.28857	0.20752	0.086426	NaN	NaN	NaN	NaN	NaN	NaN
0.798	-41.236	-133.979	1295.56	-0.58936	0.99463	0.087402	46.288	206.469	1210.34	-0.43164	1.2148	0.037598	-8.133	29.1386	87.513	0.27441	0.22705	0.084961	NaN	NaN	NaN	NaN	NaN	NaN
0.8	-32.276	-149.031	1280.895	-0.61914	0.97461	0.10205	44.416	233.97	1159.99	-0.41113	1.1838	0.033352	-28.055	27.07	74.881	0.26807	0.23926	0.07959	NaN	NaN	NaN	NaN	NaN	NaN
0.802	-38.067	-167.666	1282.983	-0.62402	0.9707	0.10889	83.156	198.976	1133.6	-0.39484	1.1498	0.033094	-9.274	2.296	119.472	0.24365	0.26416	0.07373	NaN	NaN	NaN	NaN	NaN	NaN
0.804	-36.641	-175.282	1280.35	-0.60107	0.95557	0.12695	60.765	231.026	1103.44	-0.37512	1.119	0.034257	-85.952	-15.7368	127.4	0.22925	0.28711	0.062988	NaN	NaN	NaN	NaN	NaN	NaN
0.806	-55.186	-188.211	1286.125	-0.55127	0.9458	0.12695	49.407	222.735	1029.083	-0.35847	1.0856	0.03402	-59.644	-22.572	181.037	0.2041	0.30615	0.042969	NaN	NaN	NaN	NaN	NaN	NaN
0.808	-73.389	-185.511	1303.85	-0.479	0.93213	0.12646	70.586	207.525	997.924	-0.33643	1.0474	0.041016	-54.907	-35.7651	212.904	0.15186	0.33398	0.00097656	NaN	NaN	NaN	NaN	NaN	NaN
0.81	-111.21	-167.3635	1326.676	-0.36475	0.91064	0.086914	18.528	235.822	955.539	-0.3197	1.0136	0.033691	-77.513	-12.153	320.498	0.1167	0.36182	-0.011719	NaN	NaN	NaN	NaN	NaN	NaN
0.812	-132.4965	-141.256	1334.453	-0.30176	0.90039	0.065918	6.991	194.918	916.117	-0.297	0.97715	0.031506	-149.3821	-4.6552	371.818	0.027344	0.41748	-0.025391	NaN	NaN	NaN	NaN	NaN	NaN
0.814	-125.574	-143.929	1323.617	-0.19336	0.86035	0.0068359	4.791	190.045	873.277	-0.27683	0.93812	0.025596	-102.91	18.1962	430.853	-0.046387	0.47095	-0.018799	NaN	NaN	NaN	NaN	NaN	NaN
0.816	-136.584	-149.611	1344.067	-0.13159	0.83105	-0.035889	-42.166	188.637	833.477	-0.25084	0.90228	0.019315	-158.7419	-12.782	545.63	-0.12256	0.52246	-0.0068359	NaN	NaN	NaN	NaN	NaN	NaN
0.818	-126.439	-159.373	1356.773	-0.094238	0.7998	-0.078613	-15.033	144.791	812.465	-0.23389	0.86572	0.013672	-138.174	60.0282	696.774	-0.22461	0.60303	0.0043945	NaN	NaN	NaN	NaN	NaN	NaN
0.82	-143.23	-175.475	1382.196	-0.094727	0.77783	-0.12109	-43.017	179.027	795.34	-0.21495	0.83568	0.0074464	-152.0354	88.619	884.14	-0.27686	0.64063	0.013184	NaN	NaN	NaN	NaN	NaN	NaN
0.822	-104.734	-174.0926	1423.929	-0.12915	0.76929	-0.13574	-83.678	200.781	739.387	-0.19589	0.80406	0.0054067	-157.2827	171.168	1038.6	-0.39063	0.70752	-0.00048828	NaN	NaN	NaN	NaN	NaN	NaN
0.824	-86.633	-190.163	1454.844	-0.18994	0.77588	-0.13623	-36.893	200.218	719.715	-0.17462	0.77724	-0.0021889	-152.4513	137.7949	1205.5	-0.49511	0.75488	-0.028808	NaN	NaN	NaN	NaN	NaN	NaN
0.826	-63.53	-201.653	1462.823	-0.28857	0.8125	-0.11719	-82.55	232.72	669.867	-0.14741	0.74953	-0.0033128	-90.611	156.2155	1314.74	-0.6167	0.80127	-0.065918	NaN	NaN	NaN	NaN	NaN	NaN
0.828	-53.218	-225.151	1499.639	-0.34082	0.83984	-0.10547	-65.258	186.13	637.673	-0.12354	0.72119	-0.013184	-79.508	88.76	1488.56	-0.82666	0.88916	-0.1001	NaN	NaN	NaN	NaN	NaN	NaN
0.83	-51.737	-245.229	1518.91	-0.42041	0.90771	-0.082031	-51.773	197.556	614.997	-0.096638	0.68905	-0.020687	-39.601	91.869	1561.98	-0.93799	0.95166	-0.099609	NaN	NaN	NaN	NaN	NaN	NaN
0.832	-47.214	-232.059	1571.286	-0.4624	0.95849	-0.071777	-53.603	221.67	553.417	-0.074488	0.65583	-0.032504	4.759	-17.326	1679.29	-1.1812	1.1021	-0.059082	NaN	NaN	NaN	NaN	NaN	NaN
0.834	-79.094	-202.04191	1591.748	-0.48828	1.0059	-0.073242	-21.55	207.711	534.868	-0.051339	0.62718	-0.045256	0.694000000000003	-76.749	1712.4	-1.3474	1.2371	-0.0009765	NaN	NaN	NaN	NaN	NaN	NaN
0.836	-74.297	-204.297	1621.636	-0.49805	1.0576	-0.076172	-46.844	221.907	516.148	-0.03113	0.60035	-0.055105	19.475	-201.356	1769.15	-1.4844	1.375	0.065918	NaN	NaN	NaN	NaN	NaN	NaN
0.838	-84.04	-199.858	1648.078	-0.50195	1.0742	-0.084961	-37.547	187.048	464.197	-0.01416	0.5752	-0.062988	60.221	-234.684	1738.13	-1.5854	1.522	0.14697	NaN	NaN	NaN	NaN	NaN	NaN
0.84	-98.249	-192.598	1675.249	-0.50439	1.1011	-0.094727	-2.324	156.976	459.622	0.0020932	0.55246	-0.070222	108.646	-295.13	1749.57	-1.6016	1.5801	0.18945	NaN	NaN	NaN	NaN	NaN	NaN
0.842	-76.226	-176.241	1698.251	-0.52832	1.1099	-0.10034	-1.724	191.663	435.217	0.01744	0.52844	-0.079133	82.82	-322.46	1764	-1.5757	1.6372	0.21924	NaN	NaN	NaN	NaN	NaN	NaN
0.844	-70.646	-159.1965	1705.871	-0.56689	1.1152	-0.097168	60.057	164.186	417.617	0.034243	0.51049	-0.08576	90.927	-312.78	1798.48	-1.5066	1.6448	0.23438	NaN	NaN	NaN	NaN	NaN	NaN
0.846	-65.443	-153.825	1725.102	-0.64355	1.1211	-0.078125	51.753	181.995	414.222	0.045923	0.49078	-0.095519	63.339	-301.13	1799.31	-1.4238	1.6309	0.2373	NaN	NaN	NaN	NaN	NaN	NaN
0.848	-81.235	-158.6431	1726.979	-0.68701	1.1235	-0.064453	32.113	183.316	354.4281	0.054688	0.47266	-0.104	120.3819	-219.05	1782.47	-1.2773	1.5469	0.2124	NaN	NaN	NaN	NaN	NaN	NaN
0.85	-76.935	-162.5492	1757.75	-0.77393	1.1313	-0.030762	66.138	151.6835	325.6301	0.061719	0.46261	-0.10927	115.8483	-177.881	1763.73	-1.1968	1.481	0.20068	NaN	NaN	NaN	NaN	NaN	NaN
0.852	-96.12	-184.079	1771.321	-0.8291	1.1411	-0.010987	48.816	166.438	317.2321	0.0707	0.45303	-0.1123	134.664	-49.1725	1738.8	-1.0215	1.3164	0.16895	NaN	NaN	NaN	NaN	NaN	NaN
0.854	-101.985	-175.667	1795.837	-0.87305	1.1543	0.003418	72.283	131.511	298.877	0.076945	0.44678	-0.11269	71.814	-31.68	1711.39	-0.86303	1.1917	0.16773	NaN	NaN	NaN	NaN	NaN	NaN
0.856	-120.851	-186.801	1816.019	-0.90576	1.186	0.024902	95.225	125.3745	298.278	0.095891	0.44072	-0.10498	82.454	28.717	1656.05	-0.69727	1.0762	0.17529	NaN	NaN	NaN	NaN	NaN	NaN
0.858	-160.029	-179.4597	1832.643	-0.91992	1.1934	0.01416	40.527	149.927	257.889	0.1123	0.43115	-0.10547	20.728	-68.129	1638.8	-0.47217	0.92822	0.16309	NaN	NaN	NaN	NaN	NaN	NaN
0.86	-163.061	-186.7547	1847.192	-0.91357	1.2134	0.0078125	54.856	144.145	215.4203	0.13164	0.41923	-0.11465	27.153	-103.80205	1644.56	-0.36865	0.85303	0.13721	NaN	NaN	NaN	NaN	NaN	NaN
0.862	-178.901	-182.2331	1861.189	-0.896	1.2275	-0.0048826	51.713	163.368	209.018	0.1501	0.40175	-0.1251	1.571	-248.257	1684.06	-0.16357	0.72119	0.042969	NaN	NaN	NaN	NaN	NaN	NaN
0.864	-155.582	-179.0047	1859.05	-0.87158	1.2388	-0.025879	7.57300000000001	152.578	169.276	0.16221	0.38066	-0.13096	-37.222	-276.13	1682.35	-0.029297	0.66113	-0.036133	NaN	NaN	NaN	NaN	NaN	NaN
0.866	-165.339	-184.9416	1878.942	-0.83154	1.2563	-0.053711	15.296	123.034	173.046	0.17881	0.36416	-0.1417	-113.475	-373.68	1732.92	0.078125	0.59619	-0.11279	NaN	NaN	NaN	NaN	NaN	NaN
0.868	-148.212	-187.241	1880.369	-0.81396	1.2642	-0.067871	-21.595	120.173	157.5867	0.1875	0.33936	-0.14795	-147.197	-364.12	1779.84	0.17285	0.54443	-0.20605	NaN	NaN	NaN	NaN	NaN	NaN
0.87	-154.154	-176.631	1887.948	-0.78516	1.2773	-0.088379	-33.783	98.846	125.713	0.19786	0.32266	-0.15801	-169.6	-409.76	1855.51	0.19678	0.52539	-0.23633	NaN	NaN	NaN	NaN	NaN	NaN
0.872	-122.446	-163.206	1882.572	-0.78394	1.2913	-0.09741	-25.539	82.665	151.671	0.20391	0.30362	-0.1666	-223.747	-364.6	1923.67	0.1665	0.52148	-0.23242	NaN	NaN	NaN	NaN	NaN	NaN
0.874	-111.003	-168.319	1904.082	-0.79395	1.3027	-0.1001	-80.806	88.026	103.166	0.21211	0.28603	-0.17402	-197.186	-395.394	2002.51	0.054441	0.55322	-0.18994	NaN	NaN	NaN	NaN	NaN	NaN
0.876	-118.354	-162.006	1912.409	-0.81689	1.3208	-0.095703	-86.255	59.246	80.4363	0.21504	0.2707	-0.18574	-235.558	-364.15	2042.88	-0.11719	0.61523	-0.13867	NaN	NaN	NaN	NaN	NaN	NaN
0.878	-88.227	-137.1627	1928.656	-0.83594	1.332	-0.088379	-86.287	78.281	64.7202	0.21875	0.25635	-0.19189	-232.902	-365.382	2111.92	-0.38818	0.75781	-0.066406	NaN	NaN	NaN	NaN	NaN	NaN
0.88	-112.398	-112.614	1925.979	-0.87305	1.3496	-0.073242	-103.968	73.848	36.7892	0.22256	0.23965	-0.1918	-230.709	-310.6511	2141.03	-0.5293	0.83203	-0.043945	NaN	NaN	NaN	NaN	NaN	NaN
0.882	-108.705	-104.096	1941.392	-0.90014	1.3674	-0.056641	-68.987	39.6059	65.7843	0.22373	0.22656	-0.19512	-194.128	-283.126	2176.54	-0.76514	1.0034	0.003418	NaN	NaN	NaN	NaN	NaN	NaN
0.884	-115.021	-125.957	1951.322	-0.9292	1.3931	-0.053223	-117.4271	52.0852	59.429	0.2253	0.2125	-0.20449	-190.597	-247.847	2187.16	-0.91284	1.1448	0.025391	NaN	NaN	NaN	NaN	NaN	NaN
0.886	-95.547	-131.444	1949.25	-0.95898	1.416	-0.038086	-72.876	31.647	47.357	0.22598	0.2002	-0.20771	-157.026	-254.117	2162.39	-1.0327	1.2876	0.033691	NaN	NaN	NaN	NaN	NaN	NaN
0.888	-96.396	-124.5309	1932.328	-0.96924	1.4297	-0.030273	-50.266	21.741	60.1655	0.22217	0.18652	-0.21484	-180.014	-256.312	2200.39	-1.1426	1.4746	0.012695	NaN	NaN	NaN	NaN	NaN	NaN
0.89	-104.766	-114.6154	1933.214	-0.98779	1.4536	-0.02002	-86.06	24.534	35.59	0.22431	0.17695	-0.21602	-150.19742	-257.833	2239.46	-1.166	1.5684	0	NaN	NaN	NaN	NaN	NaN	NaN
0.892	-82.675	-103.941	1951.304	-0.99782	1.467	-0.012696	-49.591	0.644000000000002	41.736	0.221	0.16602	-0.22109	-173.1318	-276.9995	2280.16	-1.1621	1.7031	-0.038574	NaN	NaN	NaN	NaN	NaN	NaN
0.894	-92.779	-101.163	1950.206	-1.002	1.4785	-0.01123	-31.914	26.2701	25.26886	0.21709	0.1582	-0.22851	-128.077	-256.132	2297.48	-1.1348	1.7773	-0.043457	NaN	NaN	NaN	NaN	NaN	NaN
0.896	-72.403	-91.615	1951.037	-1.0127	1.4883	-0.003418	-20.3	32.2214	-6.6523	0.20928	0.14971	-0.2295	-141.8601	-306.499	2339.51	-1.1147	1.8208	-0.051758	NaN	NaN	NaN	NaN	NaN	NaN
0.898	-81.781	-99.191	1957.686	-1.0137	1.4922	-0.0024414	39.765	2.4404	12.153	0.20117	0.14795	-0.23242	-96.3842	-266.6431	2387.61	-1.1245	1.8228	-0.046387	NaN	NaN	NaN	NaN	NaN	NaN
0.9	-80.968	-97.848	1974.151	-1.021	1.5024	-0.0014648	-11.907	7.0079	6.707	0.18935	0.13975	-0.23223	-87.3614	-316.3413	2467.15	-1.1558	1.8188	-0.037598	NaN	NaN	NaN	NaN	NaN	NaN
0.902	-109.138	-81.1157	1966.499	-1.0212	1.5061	0.0029297	7.136	-8.3869	0.5668	0.17148	0.13564	-0.23232	-38.73	-267.23	2514.83	-1.2637	1.8262	-0.018555	NaN	NaN	NaN	NaN	NaN	NaN
0.904	-151.108	-61.032	1947.698	-1.0303	1.5098	0.0083008	62.126	-2.659	19.9068	0.15078	0.13525	-0.22803	0.905000000000001	-322.3779	2558.85	-1.3543	1.8499	-0.0002441	NaN	NaN	NaN	NaN	NaN	NaN
0.906	-144.675	-55.348	1942.173	-1.0327	1.5122	0.018066	9.751	21.303	9.6152	0.12763	0.13516	-0.22715	-2.402	-268.066	2579.22	-1.4409	1.8774	0.028809	NaN	NaN	NaN	NaN	NaN	NaN
0.908	-157.394	-58.577	1942.962	-1.0332	1.5098	0.020996	38.849	2.3136	21.5045	0.10498	0.1416	-0.2207	-14.667	-302.728	2621.53	-1.5913	1.9146	0.077637	NaN	NaN	NaN	NaN	NaN	NaN
0.91	-155.151	-65.3153	1919.698	-1.0332	1.5117	0.022949	8.542	12.66987	33.5192	0.083301	0.14346	-0.21689	-37.172	-214.658	2608.94	-1.6772	1.9517	0.095703	NaN	NaN	NaN	NaN	NaN	NaN
0.912	-192.1564	-68.7689	1893.265	-1.0261	1.512	0.029785	8.173	23.5629	-9.1671	0.063086	0.14765	-0.208	-50.105	-236.628	2597.9	-1.8262	2.0586	0.11768	NaN	NaN	NaN	NaN	NaN	NaN
0.914	-169.137	-67.396	1869.07	-1.0073	1.5044	0.02832	58.061	4.4887	11.503	0.044726	0.15313	-0.20176	-112.0829	-152.94	2591.27	-1.863	2.1116	0.1145	NaN	NaN	NaN	NaN	NaN	NaN
0.916	-152.314	-48.293	1875.313	-0.9917	1.5005	0.030762	1.702	34.461	12.381	0.029394	0.15869	-0.20029	-111.929	-192.421	2600.74	-1.8477	2.1172	0.10205	NaN	NaN	NaN	NaN	NaN	NaN
0.918	-139.438	-42.472	1855.748	-0.97656	1.4902	0.030273	-8.75699999999999	11.479	6.4723	0.0092773	0.16016	-0.1958	-101.087	-111.09	2588.68	-1.7632	2.0767	0.073242	NaN	NaN	NaN	NaN	NaN	NaN
0.92	-146.389	-65.389	1864.693	-0.94971	1.4829	0.029785	3.836	0.468	23.2293	-0.0018555	0.16064	-0.19717	-125.053	-117.098	2552.67	-1.7183	2.0532	0.050781	NaN	NaN	NaN	NaN	NaN	NaN
0.922	-135.718	-72.695	1848.112	-0.93261	1.4726	0.024902	-50.85	23.298	-6.7433	-0.014355	0.16231	-0.19609	-165.364	-41.12	2531.31	-1.6367	2.0195	0.0073242	NaN	NaN	NaN	NaN	NaN	NaN
0.924	-119.136	-68.309	1846.27	-0.91162	1.4673	0.021484	-49.564	-1.444	0.905999999999999	-0.025683	0.15918	-0.1957	-156.102	-66.16	2523.46	-1.5957	2.0088	-0.0048828	NaN	NaN	NaN	NaN	NaN	NaN
0.926	-126.646	-42.98171	1826.374	-0.9043	1.4561	0.025391	-56.129	22.8684	19.538	-0.043555	0.16211	-0.19551	-163.191	-15.21	2523.85	-1.5703	2.0078	-0.0048828	NaN	NaN	NaN	NaN	NaN	NaN
0.928	-150.951	-41.419	1820.245	-0.89648	1.4531	0.026855	-96.837	22.195	2.4084	-0.061035	0.16016	-0.19678	-158.465	-39.7	2526.04	-1.5859	2.0176	0.020996	NaN	NaN	NaN	NaN	NaN	NaN
0.93	-141.052	-33.904	1802.203	-0.89404	1.4497	0.030273	-67.672	14.314	15.0139	-0.081933	0.16006	-0.19522	-187.449	-3.69	2543.93	-1.5957	2.0156	0.035156	NaN	NaN	NaN	NaN	NaN	NaN
0.932	-113.761	-28.358	1770.256	-0.89283	1.4394	0.035889	-100.152	56.913	17.3306	-0.10771	0.16094	-0.18887	-156.447	-29.23	2554.87	-1.6172	1.9941	0.076172	NaN	NaN	NaN	NaN	NaN	NaN
0.934	-107.041	-24.3123	1747.576	-0.88867	1.4336	0.043945	-96.038	28.305	13.194	-0.12998	0.16406	-0.18418	-171.574	-0.819999999999993	2533.16	-1.6316	1.9475	0.098878	NaN	NaN	NaN	NaN	NaN	NaN
0.936	-111.082	-27.9961	1744.712	-0.89502	1.4282	0.052246	-79.105	11.496	38.0631	-0.14688	0.17842	-0.1789	-177.494	-15.77	2515.53	-1.6367	1.8906	0.11572	NaN	NaN	NaN	NaN	NaN	NaN
0.938	-64.171	-32.2244	1741.988	-0.89307	1.4302	0.058594	-106.816	12.231	19.5127	-0.15869	0.1875	-0.1665	-171.059	-3.31999999999999	2501.25	-1.6382	1.8091	0.12891	NaN	NaN	NaN	NaN	NaN	NaN
0.94	-66.033	-16.8685	1716.928	-0.88672	1.418	0.067871	-37.717	-19.244	8.7963	-0.16269	0.20273	-0.16094	-132.324	-19.47	2490.11	-1.6284	1.7544	0.13721	NaN	NaN	NaN	NaN	NaN	NaN
0.942	-60.737	-3.4233	1694.749	-0.87841	1.4141	0.069092	-63.062	14.0406	31.595	-0.15625	0.21308	-0.15654	-109.156	-3.72999999999999	2492.68	-1.6128	1.7017	0.13086	NaN	NaN	NaN	NaN	NaN	NaN
0.944	-76.618	3.85101	1681.025	-0.86523	1.4023	0.074707	-62.645	28.659	16.9469	-0.13594	0.21777	-0.15147	-100.644	34.44	2472.48	-1.564	1.647	0.12842	NaN	NaN	NaN	NaN	NaN	NaN
0.946	-47.804	6.3582	1682.837	-0.84912	1.3931	0.07666	-11.703	12.311	23.9874	-0.11104	0.2166	-0.15157	-75.2365	68.49	2438.24	-1.5352	1.6289	0.12061	NaN	NaN	NaN	NaN	NaN	NaN
0.948	-70.24	10.3844	1668.453	-0.84375	1.3809	0.080078	-30.689	39.84541	15.88245	-0.074707	0.21436	-0.15723	-53.256	133.65	2397.84	-1.4746	1.584	0.1123	NaN	NaN	NaN	NaN	NaN	NaN
0.95	-112.153	11.6627	1634.716	-0.82373	1.3677	0.083496	-14.807	10.641	9.334	-0.032422	0.19727	-0.15889	-49.87235	175.43	2371.66	-1.4228	1.5576	0.099119	NaN	NaN	NaN	NaN	NaN	NaN
0.952	-120.324	-5.7948	1626.034	-0.80493	1.3577	0.078369	-7.60700000000001	3.96194	41.563	0.016211	0.18095	-0.1625	-39.3709	227.99	2338.87	-1.3628	1.5337	0.085449	NaN	NaN	NaN	NaN	NaN	NaN
0.954	-118.56	-8.48204	1599.744	-0.78223	1.3438	0.074219	-3.209	31.4168	35.372	0.060743	0.15595	-0.16992	-1.61	206.09	2324.85	-1.2832	1.5	0.063477	NaN	NaN	NaN	NaN	NaN	NaN
0.956	-108.963	-10.4118	1571.91	-0.74854	1.3306	0.054688	38.465	10.4856	38.958	0.098436	0.13721	-0.17784	22.9075	214.86	2269.31	-1.2461	1.4863	0.060547	NaN	NaN	NaN	NaN	NaN	NaN
0.958	-126.7	2.271	1545.452	-0.72705	1.3188	0.058105	39.838	32.59722	50.8484	0.14111	0.10742	-0.18115	9.104	170.58	2214.46	-1.1875	1.4629	0.061035	NaN	NaN	NaN	NaN	NaN	NaN
0.96	-123.24	6.844	1513.801	-0.68506	1.3032	0.047852	-1.416	15.3066	45.6692	0.17148	0.079883	-0.1998	3.125	182.71	2143.29	-1.1538	1.4497	0.059814	NaN	NaN	NaN	NaN	NaN	NaN
0.962	-105.027	21.094	1499.854	-0.6499	1.2754	0.043945	36.126	-30.9362	62.8174	0.19365	0.055468	-0.20635	-16.4041	142.05	2096.1	-1.1211	1.4297	0.060547	NaN	NaN	NaN	NaN	NaN	NaN
0.964	-111.831	20.87	1471.898	-0.63037	1.2622	0.038086	28.858	-17.214	53.5802	0.20889	0.032032	-0.21181	-19.808	157.85	2045.4	-1.0869	1.4004	0.071289	NaN	NaN	NaN	NaN	NaN	NaN
0.966	-125.004	16.712	1471.601	-0.60938	1.2383	0.032715	12.897	-45.211	47.20926	0.21445	0.011524	-0.21924	-22.2587	100.07	2004.86	-1.0664	1.3867	0.081543	NaN	NaN	NaN	NaN	NaN	NaN
0.968	-118.728	30.328	1446.932	-0.59497	1.2139	0.028076	-1.622	-45.9637	96.1437	0.21094	-0.003418	-0.22119	-45.1299	148.93	1953.36	-1.0254	1.3496	0.087402	NaN	NaN	NaN	NaN	NaN	NaN
0.97	-99.797	45.2335	1423.747	-0.58203	1.1953	0.032715	-45.42	-37.254	99.7882	0.20781	-0.011914	-0.22275	-77.2	136.15	1911.18	-0.99218	1.3247	0.090332	NaN	NaN	NaN	NaN	NaN	NaN
0.972	-128.579	60.5788	1386.311	-0.57568	1.1782	0.036621	16.418	-79.8152	119.1959	0.20468	-0.0125	-0.22363	-96.557	219.897	1836.74	-0.95703	1.293	0.091797	NaN	NaN	NaN	NaN	NaN	NaN
0.974	-138.607	51.2991	1379.488	-0.56934	1.165	0.038574	-20.276	-78.6662	159.05	0.19688	-0.010547	-0.22168	-98.64	219.722	1777.39	-0.89795	1.2583	0.086426	NaN	NaN	NaN	NaN	NaN	NaN
0.976	-121.514	52.70151	1346.735	-0.56494	1.145	0.043457	-77.395	-83.7402	186.5851	0.18194	-0.0028321	-0.22256	-111.907	271.127	1730.08	-0.86572	1.2368	0.081543	NaN	NaN	NaN	NaN	NaN	NaN
0.978	-98.034	65.7436	1326.75	-0.56373	1.1311	0.043945	-59.797	-91.6372	271.7641	0.15771	0.0097656	-0.22412	-88.92	230.225	1680.7	-0.79639	1.1978	0.079102	NaN	NaN	NaN	NaN	NaN	NaN
0.98	-73.206	66.5548	1295.457	-0.55225	1.1235	0.04834	-96.726	-43.38	348.479	0.12285	0.025	-0.22969	-103.734	288.221	1614.93	-0.73901	1.1652	0.067138	NaN	NaN	NaN	NaN	NaN	NaN
0.982	-76.705	65.5637	1284.533	-0.54492	1.1045	0.049316	-60.569	-35.093	380.6466	0.077832	0.048731	-0.225	-106.069	260.37	1560.32	-0.68506	1.1294	0.062988	NaN	NaN	NaN	NaN	NaN	NaN
0.984	-55.625	70.3724	1264.04	-0.54102	1.1006	0.049805	-49.978	-23.501	462.068	0.024316	0.078418	-0.21875	-113.905	327.589	1482.97	-0.61035	1.0742	0.052734	NaN	NaN	NaN	NaN	NaN	NaN
0.986	-34.762	77.4129	1227.612	-0.52539	1.0781	0.05127	-112.482	18.417	540.974	-0.037989	0.11543	-0.21055	-119.263	280.252	1392.81	-0.56787	1.0493	0.05127	NaN	NaN	NaN	NaN	NaN	NaN
0.988	-24.724	67.585	1207.056	-0.50732	1.0676	0.047608	-71.897	27.2613	653.598	-0.097656	0.15869	-0.20068	-116.608	325.492	1303.57	-0.49316	0.99023	0.040527	NaN	NaN	NaN	NaN	NaN	NaN
0.99	-24.503	70.205	1196.062	-0.49512	1.0532	0.047363	-85.961	99.851	873.804	-0.15459	0.20596	-0.1919	-84.666	273.2901	1255.39	-0.43384	0.94946	0.035644	NaN	NaN	NaN	NaN	NaN	NaN
0.992	-17.648	71.655	1194.244	-0.47119	1.0278	0.042969	-98.554	141.577	1013.551	-0.20586	0.25293	-0.18613	-56.572	316.262	1219.16	-0.38037	0.90283	0.02832	NaN	NaN	NaN	NaN	NaN	NaN
0.994	-14.258	82.4854	1166.842	-0.45605	1.0156	0.038574	-32.831	108.78	1135.077	-0.25821	0.29551	-0.18731	-42.278	266.317	1194.61	-0.31494	0.84326	0.018066	NaN	NaN	NaN	NaN	NaN	NaN
0.996	-32.918	79.47	1144.145	-0.43701	0.99463	0.031738	-83.153	103.201	1194.51	-0.31162	0.33955	-0.19219	-22.647	312.883	1130.32	-0.28418	0.80859	0.015137	NaN	NaN	NaN	NaN	NaN	NaN
0.998	-25.96	95.914	1116.498	-0.42066	0.97046	0.031982	-107.2873	45.6032	1269.169	-0.37354	0.38379	-0.20117	-11.143	289.214	1087.86	-0.23242	0.7583	0.003418	NaN	NaN	NaN	NaN	NaN	NaN
1	-31.196	96.2753	1097.256	-0.40283	0.95166	0.025391	-58.4318	-16.46	1387.652	-0.44561	0.4334	-0.21748	21.054	342.398	1041.86	-0.19776	0.70996	-0.0021972	NaN	NaN	NaN	NaN	NaN	NaN
1.002	-30.751	98.9689	1070.474	-0.38086	0.92188	0.022949	-33.3429	-24.806	1402.738	-0.53037	0.48438	-0.23281	58.6912	314.702	1016.13	-0.16797	0.66992	-0.0078125	NaN	NaN	NaN	NaN	NaN	NaN
1.004	-39.261	95.77477	1039.664	-0.36865	0.90771	0.022949	-3.177	-98.576	1389.4829	-0.62491	0.53594	-0.25234	81.5264	344.044	978.98	-0.12842	0.62549	-0.019043	NaN	NaN	NaN	NaN	NaN	NaN
1.006	-40.737	101.224	1026.455	-0.34961	0.87695	0.020508	-22.124	-127.6977	1382.221	-0.74658	0.59443	-0.27666	85.797	291.519	927.88	-0.11279	0.604	-0.022949	NaN	NaN	NaN	NaN	NaN	NaN
1.008	-27.472	108.797	1013.1	-0.33203	0.86084	0.0095213	-42.7	-165.843	1375.027	-0.88818	0.68018	-0.28271	72.074	303.276	843.68	-0.083984	0.56299	-0.034668	NaN	NaN	NaN	NaN	NaN	NaN
1.01	-28.963	102.5	1009.798	-0.31787	0.84131	0.01123	-29.9735	-223.212	1397.1724	-1.0402	0.79375	-0.27022	70.4471	262.547	781.24	-0.062989	0.5415	-0.034423	NaN	NaN	NaN	NaN	NaN	NaN
1.012	-30.674	98.176	982.281	-0.2959	0.81445	0.0029297	-64.331	-173.879	1399.796	-1.1995	0.94248	-0.2292	68.048	277.899	722.85	-0.049316	0.51807	-0.037598	NaN	NaN	NaN	NaN	NaN	NaN
1.014	-46.911	101.923	952.504	-0.28662	0.79932	-0.0024414	-29.6165	-147.441	1390.6103	-1.3413	1.1257	-0.1663	73.0216	254.451	688.36	-0.021973	0.49365	-0.040039	NaN	NaN	NaN	NaN	NaN	NaN
1.016	-52.287	112.7226	937.516	-0.26904	0.77783	-0.014648	-49.157	-129.0366	1441.754	-1.4399	1.3119	-0.098924	41.234	287.471	631.61	-0.013672	0.48584	-0.038574	NaN	NaN	NaN	NaN	NaN	NaN
1.018	-71.871	110.545	930.81	-0.2605	0.75927	-0.013916	-126.056	-61.097	1454.166	-1.4863	1.4805	-0.039063	44.531	268.477	619.15	-0.003418	0.46289	-0.036621	NaN	NaN	NaN	NaN	NaN	NaN
1.02	-68.537	101.519	930.382	-0.25635	0.74463	-0.013184	-139.075	-63.664	1440.7128	-1.4533	1.5959	-0.0070311	47.063	281.835	560.522	0.0085449	0.45337	-0.04248	NaN	NaN	NaN	NaN	NaN	NaN
1.022	-72.795	112.1485	891.525	-0.24072	0.72607	-0.013672	-120.121	-30.563	1450.298	-1.3707	1.6504	-0.0045898	15.047	274.829	537.78	0.0097656	0.43945	-0.037109	NaN	NaN	NaN	NaN	NaN	NaN
1.024	-77.488	118.3202	857.023	-0.23975	0.71729	-0.010254	-104.37556	-2.46000000000001	1467.715	-1.2418	1.6722	-0.02998	-7.994	284.969	464.676	0.0092773	0.43213	-0.03418	NaN	NaN	NaN	NaN	NaN	NaN
1.026	-57.863	125.5903	837.238	-0.22852	0.69922	-0.013672	-89.3675	-68.357	1501.822	-1.0868	1.6579	-0.081347	-11.054	274.413	427.674	0.0092773	0.43018	-0.02832	NaN	NaN	NaN	NaN	NaN	NaN
1.028	-58.696	119.02	845.328	-0.22217	0.6897	-0.012696	-112.517	-99.162	1545.481	-0.92578	1.6133	-0.1499	-13.827	256.216	384.444	-0.0019531	0.42383	-0.020508	NaN	NaN	NaN	NaN	NaN	NaN
1.03	-36.869	139.019	823.219	-0.21338	0.67822	-0.01709	-92.8182	-196.85	1537.094	-0.76533	1.521	-0.22539	-52.892	230.365	354.21	-0.0058594	0.41699	-0.018066	NaN	NaN	NaN	NaN	NaN	NaN
1.032	-14.399	129.159	792.928	-0.19678	0.6626	-0.012207	-62.369	-312.0329	1586.066	-0.6209	1.3961	-0.27636	-45.634	203.989	308.34	-0.011719	0.41162	-0.013672	NaN	NaN	NaN	NaN	NaN	NaN
1.034	-0.935999999999993	124.369	782.074	-0.19189	0.65186	-0.015137	-81.323	-310.477	1631.2078	-0.51973	1.2637	-0.29785	-80.21	189.43662	276.588	-0.024414	0.40088	-0.014648	NaN	NaN	NaN	NaN	NaN	NaN
1.036	11.012	105.715	774.746	-0.18066	0.63477	-0.011719	-116.215	-352.683	1637.063	-0.46631	1.1345	-0.3041	-76.2734	167.424	234.255	-0.026855	0.39697	-0.017578	NaN	NaN	NaN	NaN	NaN	NaN
1.038	-18.993	113.3995	759.747	-0.16772	0.62109	-0.017822	-120.2681	-351.141	1713.228	-0.44678	1.0122	-0.28369	-74.5036	168.8517	221.676	-0.036133	0.38428	-0.018066	NaN	NaN	NaN	NaN	NaN	NaN
1.04	-5.899	122.7842	740.541	-0.15625	0.60938	-0.019043	-121.3158	-301.406	1740.387	-0.45371	0.90899	-0.26064	-73.94228	138.733	192.796	-0.044434	0.37183	-0.028809	NaN	NaN	NaN	NaN	NaN	NaN
1.042	10.145	126.718	725.946	-0.13818	0.58936	-0.021973	-84.245	-320.903	1782.483	-0.45342	0.82666	-0.23887	-55.373	137.6885	171.942	-0.051758	0.36475	-0.029297	NaN	NaN	NaN	NaN	NaN	NaN
1.044	10.652	126.098	702.754	-0.12451	0.58008	-0.024414	-32.83	-241.366	1880.917	-0.43935	0.77275	-0.23809	-31.664	98.852	145.416	-0.061035	0.34521	-0.032227	NaN	NaN	NaN	NaN	NaN	NaN
1.046	-20.002	111.0954	693.107	-0.10156	0.56152	-0.026855	-7.226	-188.652	1924.729	-0.41465	0.74668	-0.26153	-40.428	100.0243	123.151	-0.065918	0.33789	-0.034668	NaN	NaN	NaN	NaN	NaN	NaN
1.048	-3.83499999999999	110.1193	669.939	-0.08667	0.54321	-0.031739	-3.619	-208.959	1955.288	-0.39209	0.74072	-0.28711	-49.045	61.966	108.027	-0.076172	0.31592	-0.042969	NaN	NaN	NaN	NaN	NaN	NaN
1.05	-2.96	104.5757	658.532	-0.071777	0.52783	-0.035156	-26.831	-138.311	1948.9	-0.40635	0.76299	-0.29922	-26.994	83.366	78.649	-0.084961	0.30517	-0.041748	NaN	NaN	NaN	NaN	NaN	NaN
1.052	11.333	113.4049	637.317	-0.051758	0.50439	-0.043945	26.814	-151.875	1912.5859	-0.47226	0.82421	-0.29189	0.572000000000003	62.17	81.826	-0.091309	0.2915	-0.040527	NaN	NaN	NaN	NaN	NaN	NaN
1.054	17.476	117.9366	621.151	-0.045898	0.49805	-0.048828	100.843	-157.624	1940.875	-0.58594	0.91523	-0.25478	4.46999999999999	80.373	80.384	-0.10303	0.26807	-0.04834	NaN	NaN	NaN	NaN	NaN	NaN
1.056	22.158	109.3312	601.96	-0.038574	0.47461	-0.059082	103.2157	-111.457	1937.12	-0.70488	1.0285	-0.19941	36.512	44.978	80.865	-0.10791	0.2583	-0.047363	NaN	NaN	NaN	NaN	NaN	NaN
1.058	12.405	107.1787	596.031	-0.032227	0.4624	-0.054688	92.075	-200.2874	1923.502	-0.79492	1.1309	-0.14063	17.607	50.017	44.352	-0.10938	0.23926	-0.054199	NaN	NaN	NaN	NaN	NaN	NaN
1.06	-2.007	113.338	578.05	-0.030273	0.45166	-0.055664	74.332	-195.1647	1971.583	-0.82764	1.2171	-0.10537	29.765	6.9401	58.6968	-0.11377	0.22705	-0.052979	NaN	NaN	NaN	NaN	NaN	NaN
1.062	-14.225	117.9647	570.36	-0.024414	0.43555	-0.058594	26.866	-193.472	2025.5362	-0.81934	1.2734	-0.098828	31.187	34.833	41.647	-0.11328	0.21436	-0.057129	NaN	NaN	NaN	NaN	NaN	NaN
1.064	-30.066	118.6703	555.798	-0.023926	0.43213	-0.060059	34.089	-269.599	2094.399	-0.76973	1.2989	-0.12109	62.823	12.0773	63.9975	-0.10547	0.19629	-0.068359	NaN	NaN	NaN	NaN	NaN	NaN
1.066	-46.201	112.5157	533.67	-0.018555	0.42578	-0.060547	53.223	-214.6986	2146.202	-0.70742	1.2947	-0.15352	42.171	30.2608	63.4697	-0.10547	0.19141	-0.0625	NaN	NaN	NaN	NaN	NaN	NaN
1.068	-44.593	112.096	505.908	-0.015625	0.41381	-0.062256	58.056	-246.994	2134.2663	-0.66553	1.2759	-0.18896	35.599	-2.3022	88.918	-0.086426	0.17773	-0.0625	NaN	NaN	NaN	NaN	NaN	NaN
1.07	-65.293	118.7213	481.111	-0.010254	0.40723	-0.06543	21.212	-253.048	2165.542	-0.65967	1.2575	-0.20703	6.607	14.266	60.4829	-0.071533	0.15967	-0.066651	NaN	NaN	NaN	NaN	NaN	NaN
1.072	-39.977	119.9633	475.213	-0.01123	0.40137	-0.068848	-31.228	-134.976	2195.229	-0.6834	1.2473	-0.21787	-11.039	-0.808	86.718	-0.050781	0.14844	-0.068359	NaN	NaN	NaN	NaN	NaN	NaN
1.074	-58.842	114.673	456.685	-0.0083008	0.39795	-0.071289	-19.539	-162.6178	2201.7094	-0.72402	1.2365	-0.22725	-16.54	47.9303	66.3759	-0.01416	0.12744	-0.074707	NaN	NaN	NaN	NaN	NaN	NaN
1.076	-41.187	120.627	435.746	-0.0078125	0.38965	-0.075684	-4.57700000000001	-116.715	2230.0155	-0.77187	1.234	-0.23731	-14.28	41.262	86.6453	0.0078127	0.10962	-0.080811	NaN	NaN	NaN	NaN	NaN	NaN
1.078	-32.192	112.182	422.943	-0.0070801	0.38696	-0.075928	-35.232	-102.723	2223.3586	-0.82422	1.2363	-0.24609	-31.426	49.214	69.2509	0.030762	0.087891	-0.087891	NaN	NaN	NaN	NaN	NaN	NaN
1.08	5.671	120.231	409.706	-0.011719	0.3833	-0.070313	-42.54	-177.1438	2217.011	-0.88838	1.2628	-0.25947	-79.292	29.4568	91.107	0.057129	0.062988	-0.097656	NaN	NaN	NaN	NaN	NaN	NaN
1.082	-10.559	107.83	409.729	-0.017578	0.37598	-0.087891	-70.887	-83.677	2235.677	-0.94414	1.3047	-0.2789	-71.033	33.5502	58.7873	0.071777	0.048828	-0.095703	NaN	NaN	NaN	NaN	NaN	NaN
1.084	-18.963	114.8274	390.315	-0.02002	0.37549	-0.081055	-89.551	-71.95	2184.87	-0.9789	1.366	-0.28906	-79.562	15.035	71.0544	0.1001	0.024902	-0.10498	NaN	NaN	NaN	NaN	NaN	NaN
1.086	-21.382	107.0693	377.03	-0.033691	0.375	-0.07959	-71.591	-67.613	2168.116	-0.98399	1.4256	-0.30596	-84.22	6.255	74.0708	0.125	0.01001	-0.11084	NaN	NaN	NaN	NaN	NaN	NaN
1.088	-33.216	108.1344	380.006	-0.039307	0.37573	-0.084228	-100.637	5.987	2200.897	-0.97217	1.4771	-0.32764	-91.6119	-0.619	81.823	0.14746	-0.0068359	-0.11475	NaN	NaN	NaN	NaN	NaN	NaN
1.09	-10.992	102.0632	355.827	-0.04834	0.37354	-0.083008	-110.293	-69.5844	2183.628	-0.94834	1.5175	-0.35147	-77.407	-17.278	82.87	0.18896	-0.024414	-0.11719	NaN	NaN	NaN	NaN	NaN	NaN
1.092	-23.759	98.2681	351.728	-0.062012	0.375	-0.083984	-86.32	-51.793	2234.462	-0.92539	1.5543	-0.38233	-66.567	2.542	69.024	0.20996	-0.030762	-0.12061	NaN	NaN	NaN	NaN	NaN	NaN
1.094	-5.344	99.1243	341.773	-0.068848	0.37744	-0.07959	-61.514	-2.277	2252.633	-0.90508	1.5793	-0.40967	-73.142	-9.911	47.1644	0.25098	-0.047852	-0.13281	NaN	NaN	NaN	NaN	NaN	NaN
1.096	8.205	102.241	321.984	-0.086426	0.38135	-0.075684	-22.756	-72.46	2286.149	-0.89541	1.5968	-0.43799	-80.076	13.9145	58.267	0.28198	-0.062256	-0.14209	NaN	NaN	NaN	NaN	NaN	NaN
1.098	22.331	107.9569	301.302	-0.098145	0.38574	-0.07666	8.46299999999999	-4.73700000000001	2319.617	-0.89551	1.6133	-0.46777	-72.893	-1.953	67.8524	0.31396	-0.081055	-0.15674	NaN	NaN	NaN	NaN	NaN	NaN
1.1	10.565	97.328	295.511	-0.10938	0.39063	-0.072754	12.221	-36.26	2255.5626	-0.90088	1.6268	-0.49502	-54.492	23.22	66.627	0.34375	-0.10352	-0.17627	NaN	NaN	NaN	NaN	NaN	NaN
1.102	23.334	84.714	284.056	-0.12402	0.39063	-0.064941	44.487	-85.3135	2251.97846	-0.9043	1.634	-0.50937	-35.098	8.8795	85.222	0.35742	-0.11621	-0.18799	NaN	NaN	NaN	NaN	NaN	NaN
1.104	28.893	72.942	281.671	-0.12964	0.38941	-0.060059	60.958	-6.726	2285.177	-0.91211	1.6418	-0.52265	-10.755	20.1836	88.848	0.36768	-0.13525	-0.2085	NaN	NaN	NaN	NaN	NaN	NaN
1.106	6.828	70.457	275.874	-0.13379	0.38477	-0.06543	53.993	-69.496	2269.0795	-0.91524	1.6428	-0.53574	20.235	0.218	72.527	0.36279	-0.14624	-0.22315	NaN	NaN	NaN	NaN	NaN	NaN
1.108	2.938	88.0992	270.39	-0.13867	0.39502	-0.054199	90.536	-27.4758	2288.734	-0.91357	1.6431	-0.55176	4.211	30.329	59.8603	0.34668	-0.15332	-0.22998	NaN	NaN	NaN	NaN	NaN	NaN
1.11	-9.20200000000001	96.899	265.892	-0.14014	0.396	-0.053711	87.463	42.6332	2252.541	-0.91338	1.6386	-0.57822	26.619	16.5817	46.241	0.30664	-0.15186	-0.24121	NaN	NaN	NaN	NaN	NaN	NaN
1.112	-28.391	100.612	240.236	-0.14014	0.39258	-0.055176	58.748	-2.934	2228.2406	-0.9168	1.634	-0.59297	17.54	42.596	32.48	0.28271	-0.146	-0.24609	NaN	NaN	NaN	NaN	NaN	NaN
1.114	-27.481	97.162	226.533	-0.14112	0.3877	-0.053711	49.836	101.1494	2260.925	-0.91953	1.6312	-0.60782	49.139	15.8309	61.5903	0.2168	-0.12012	-0.25293	NaN	NaN	NaN	NaN	NaN	NaN
1.116	-42.75	89.043	217.598	-0.13672	0.38232	-0.053711	55.299	116.279	2211.4762	-0.9292	1.6349	-0.61318	33.815	32.092	61.1709	0.16919	-0.089845	-0.24048	NaN	NaN	NaN	NaN	NaN	NaN
1.118	-37.082	71.5509	225.223	-0.12939	0.37451	-0.047852	92.461	131.508	2200.5496	-0.93896	1.6411	-0.61475	68.842	18.153	44.3964	0.11768	-0.05957	-0.22949	NaN	NaN	NaN	NaN	NaN	NaN
1.12	-55.891	66.1035	205.219	-0.12891	0.36621	-0.044922	69.342	196.984	2213.3438	-0.94795	1.6437	-0.60987	15.088	45.982	42.736	0.056152	-0.0024414	-0.21289	NaN	NaN	NaN	NaN	NaN	NaN
1.122	-31.512	63.663	212.568	-0.12109	0.35791	-0.042969	24.019	104.626	2175.4034	-0.95195	1.6418	-0.60683	-7.653	31.697	53.2504	0.030762	0.030762	-0.2085	NaN	NaN	NaN	NaN	NaN	NaN
1.124	-54.069	51.512	212.29	-0.11108	0.34375	-0.040772	31.813	105.693	2190.934	-0.95586	1.641	-0.60293	-5.44799999999999	49.533	60.06602	-0.01123	0.091309	-0.20215	NaN	NaN	NaN	NaN	NaN	NaN
1.126	-22.76	42.713	201.671	-0.098633	0.33252	-0.037598	32.489	130.846	2139.111	-0.96328	1.6332	-0.59609	6.044	24.5235	85.8795	-0.029785	0.13598	-0.20117	NaN	NaN	NaN	NaN	NaN	NaN
1.128	-40.344	35.038	185.12	-0.080566	0.31055	-0.038574	8.34	58.73183	2077.359	-0.9707	1.625	-0.58789	-13.353	57.928	73.7098	-0.041504	0.17334	-0.19922	NaN	NaN	NaN	NaN	NaN	NaN
1.13	-69.653	47.316	187.876	-0.073242	0.30029	-0.03418	-32.705	115.345	2083.3568	-0.98565	1.6159	-0.57588	-15.061	24.7928	77.042	-0.043457	0.21045	-0.19971	NaN	NaN	NaN	NaN	NaN	NaN
1.132	-54.662	44.791	206.19	-0.056641	0.27393	-0.045898	-84.321	63.191	2034.3608	-0.99882	1.6043	-0.57129	-52.636	29.632	58.61628	-0.039551	0.22949	-0.20557	NaN	NaN	NaN	NaN	NaN	NaN
1.134	-52.106	37.036	208.33	-0.041748	0.25219	-0.044678	-91.062	33.603	2006.143	-1.0231	1.598	-0.54629	-84.8342	5.794	77.4956	-0.037598	0.25635	-0.20898	NaN	NaN	NaN	NaN	NaN	NaN
1.136	-36.121	18.913	206.875	-0.029297	0.23584	-0.046387	-105.845	109.4723	1992.624	-1.0517	1.5943	-0.52559	-63.842	29.358	45.2045	-0.036377	0.27075	-0.21509	NaN	NaN	NaN	NaN	NaN	NaN
1.138	-39.321	-4.03899999999999	205.058	-0.012207	0.20703	-0.050781	-108.329	61.198	1941.94	-1.0781	1.5918	-0.50586	-56.42	14.8534	87.8233	-0.036621	0.28955	-0.21924	NaN	NaN	NaN	NaN	NaN	NaN
1.14	-35.449	-25.421	221.646	-0.0068359	0.19727	-0.052734	-75.549	124.1315	1960.163	-1.098	1.5872	-0.48389	-76.191	7.994	116.4067	-0.04834	0.30225	-0.21973	NaN	NaN	NaN	NaN	NaN	NaN
1.142	-25.577	-25.865	229.631	0.0024414	0.17725	-0.054688	-83.458	199.212	1900.889	-1.1121	1.5824	-0.46719	-61.092	-31.6892	134.63	-0.057129	0.31055	-0.22119	NaN	NaN	NaN	NaN	NaN	NaN
1.144	5.74300000000001	-13.597	227.491	0.0053711	0.16358	-0.057861	-80.893	173.04	1818.6022	-1.1133	1.5797	-0.45195	-81.234	-48.264	119.0444	-0.089844	0.31982	-0.22314	NaN	NaN	NaN	NaN	NaN	NaN
1.146	8.332	-13.439	233.789	0.0087891	0.15234	-0.058105	-35.571	257.589	1820.4045	-1.1113	1.5697	-0.42793	-111.651	-35.349	160.1706	-0.1211	0.33398	-0.2207	NaN	NaN	NaN	NaN	NaN	NaN
1.148	11.578	-21.193	262.43	0.016113	0.14404	-0.062012	-41.411	218.934	1763.694	-1.0952	1.5591	-0.4126	-62.457	-37.302	194.64	-0.1665	0.35107	-0.2251	NaN	NaN	NaN	NaN	NaN	NaN
1.15	20.452	-20.37	299.98	0.015625	0.14209	-0.060547	-10.999	176.701	1728.814	-1.0714	1.5443	-0.39951	-42.904	-66.054	276.523	-0.24072	0.38477	-0.2168	NaN	NaN	NaN	NaN	NaN	NaN
1.152	21.157	5.348	333.253	0.019531	0.14014	-0.067871	-7.93	212.447	1694.316	-1.0491	1.5206	-0.38721	-13.589	-102.797	289.873	-0.2832	0.40625	-0.21094	NaN	NaN	NaN	NaN	NaN	NaN
1.154	22.072	43.1588	381.657	0.01709	0.14087	-0.075195	-24.414	146.7636	1633.291	-1.0183	1.4975	-0.37666	-0.5	-135.0015973	304.0505	-0.36572	0.45947	-0.19238	NaN	NaN	NaN	NaN	NaN	NaN
1.156	20.137	67.899	450.293	0.0058594	0.14404	-0.086426	-2.67699999999999	195.406	1641.002	-0.99248	1.4774	-0.3667	21.081	-160.386	380.9091	-0.4226	0.50366	-0.17627	NaN	NaN	NaN	NaN	NaN	NaN
1.158	28.744	94.913	509.152	-0.012207	0.146	-0.095215	-2.991	224.096	1604.569	-0.96826	1.4536	-0.34131	1	-156.821	497.7295	-0.46924	0.55273	-0.16504	NaN	NaN	NaN	NaN	NaN	NaN
1.16	0.826000000000008	108.448	581.898	-0.030273	0.15234	-0.099121	18.114	161.576	1538.867	-0.93936	1.4294	-0.33174	40.915	-155.539	602.753	-0.53662	0.61377	-0.16162	NaN	NaN	NaN	NaN	NaN	NaN
1.162	3.154	122.152	652.499	-0.07959	0.17236	-0.10596	35.87	204.16555	1546.1577	-0.91094	1.4055	-0.31807	62.111	-97.98261	733.921	-0.57617	0.64453	-0.16504	NaN	NaN	NaN	NaN	NaN	NaN
1.164	11.893	135.347	732.6405	-0.13623	0.19361	-0.10816	26.016	178.075	1503.7913	-0.87852	1.3785	-0.3083	97.95	-51.1771	852.485	-0.66797	0.70898	-0.18652	NaN	NaN	NaN	NaN	NaN	NaN
1.166	-19.928	154.717	800.19513	-0.19629	0.22217	-0.10986	23.205	172.059	1505.79	-0.84717	1.3513	-0.29522	87.554	47.6558	1036.738	-0.76026	0.75147	-0.20166	NaN	NaN	NaN	NaN	NaN	NaN
1.168	-1.252	150.678	866.40515	-0.28857	0.27539	-0.10303	49.79	243.878	1472.347	-0.81201	1.3228	-0.28711	84.455	118.678	1259.271	-0.87451	0.79932	-0.21631	NaN	NaN	NaN	NaN	NaN	NaN
1.17	-39.289	118.827	914.083	-0.3457	0.30615	-0.10303	30.505	195.55	1387.3611	-0.78311	1.2982	-0.28281	58.955	185.447	1414.128	-1.0679	0.88623	-0.22607	NaN	NaN	NaN	NaN	NaN	NaN
1.172	-12.246	74.483	974.449	-0.47021	0.37646	-0.11035	13.321	228.597	1362.7935	-0.74951	1.2704	-0.27402	74.098	191.796	1524.3768	-1.1792	0.94385	-0.23047	NaN	NaN	NaN	NaN	NaN	NaN
1.174	-37.475	21.4575	1034.366	-0.56909	0.43799	-0.11181	-23.978	243.388	1294.40038545	-0.72491	1.2419	-0.26661	3.322	163.888	1635.147	-1.416	1.0762	-0.2085	NaN	NaN	NaN	NaN	NaN	NaN
1.176	-25.246	-1.417	1068.68	-0.67725	0.5083	-0.10889	-52.238	201.1437	1241.4519	-0.70108	1.2218	-0.2544	-30.0528	67.359	1731.934	-1.5933	1.2026	-0.16455	NaN	NaN	NaN	NaN	NaN	NaN
1.178	-40.93	-14.2625	1114.302	-0.81738	0.62109	-0.091309	-43.435	269.161	1222.2019	-0.67725	1.2056	-0.24023	-40.789	-7.193	1757.727	-1.7593	1.3442	-0.10693	NaN	NaN	NaN	NaN	NaN	NaN
1.18	-68.492	-9.811	1110.4182	-0.88574	0.67969	-0.086426	-70.132	238.683	1134.229	-0.66084	1.1843	-0.22509	-30.1351	-98.9676	1731.139	-1.9097	1.5396	-0.018066	NaN	NaN	NaN	NaN	NaN	NaN
1.182	-74.6807	-14.8013	1125.5176	-0.98828	0.80078	-0.049316	-82.81	221.0964	1121.28414	-0.6375	1.1676	-0.21826	-52.4015	-163.67	1633.106	-1.9453	1.6211	0.022949	NaN	NaN	NaN	NaN	NaN	NaN
1.184	-113.078	-36.665	1149.0998	-1.0352	0.89356	-0.023682	-101.26348	255.619	1079.375	-0.61328	1.1472	-0.19482	-75.729	-244.786	1608.175	-1.9097	1.7524	0.069336	NaN	NaN	NaN	NaN	NaN	NaN
1.186	-88.123	-50.865	1174.2432	-1.0581	0.97803	-0.0019531	-139.603	207.9842	1008.6922	-0.59199	1.1275	-0.18184	-125.57	-288.677	1580.9564	-1.783	1.7795	0.061768	NaN	NaN	NaN	NaN	NaN	NaN
1.188	-82.409	-44.569	1186.981	-1.0288	1.0649	0.0097656	-128.294	257.459	1016.289	-0.56348	1.1055	-0.16992	-158.305	-278.479	1560.5498	-1.5835	1.7407	0.032227	NaN	NaN	NaN	NaN	NaN	NaN
1.19	-81.81	-29.6358	1195.228	-0.99609	1.0938	0.0097656	-133.294	266.307	958.6506	-0.52802	1.0815	-0.16211	-172.906	-220.336	1514.1231	-1.2202	1.5376	-0.052246	NaN	NaN	NaN	NaN	NaN	NaN
1.192	-90.3101	-18.031	1209.977	-0.9043	1.1211	-0.0029297	-121.383	219.901	941.3851	-0.49551	1.0564	-0.15547	-197.435	-150.818	1522.221	-1.0371	1.3945	-0.087891	NaN	NaN	NaN	NaN	NaN	NaN
1.194	-83.502	-11.304	1200.52	-0.82495	1.1125	-0.010498	-138.923	255.223	913.075	-0.46113	1.0259	-0.14922	-247.98	-76.23	1529.775	-0.72266	1.1152	-0.15576	NaN	NaN	NaN	NaN	NaN	NaN
1.196	-62.603	9.60299999999999	1189.021	-0.74561	1.0884	-0.027832	-132.067	218.791	846.1274	-0.43174	1.0021	-0.14443	-253.37	-19.386	1568.418	-0.53906	0.93579	-0.1914	NaN	NaN	NaN	NaN	NaN	NaN
1.198	-62.839	17.121	1174.833	-0.6543	1.0293	-0.060059	-119.5895	213.277	823.3875	-0.40088	0.9751	-0.1377	-243.26	15.847	1534.746	-0.3833	0.78027	-0.2207	NaN	NaN	NaN	NaN	NaN	NaN
1.2	-36.496	1.529	1181.961	-0.61865	0.99268	-0.070801	-104.1949	239.208	788.671	-0.37558	0.94629	-0.12607	-213.233	43.948	1553.043	-0.20703	0.60156	-0.24951	NaN	NaN	NaN	NaN	NaN	NaN
1.202	-43.388	-42.837	1205.5364	-0.56104	0.92773	-0.083008	-93.6746	172.1087	740.0473	-0.35078	0.91866	-0.11817	-197.89	28.25	1530.107	-0.12646	0.52148	-0.2666	NaN	NaN	NaN	NaN	NaN	NaN
1.204	-41.75	-62.871	1216.2652	-0.52906	0.87793	-0.0896	-79.1705	194.268	722.036	-0.32617	0.88935	-0.10566	-179.201	-42.56	1569.8631	0.024902	0.36572	-0.32471	NaN	NaN	NaN	NaN	NaN	NaN
1.206	-21.44	-92.8811	1230.8381	-0.50537	0.82666	-0.091309	-67.4295	200.047	667.555	-0.30606	0.86406	-0.091015	-132.104	-129.72	1566.921	0.10937	0.27295	-0.38428	NaN	NaN	NaN	NaN	NaN	NaN
1.208	-19.437	-115.2088	1264.76356	-0.47363	0.76807	-0.091309	-50.78	193.521	635.8959	-0.28271	0.84131	-0.07666	-68.819	-260.851	1597.534	0.15576	0.19678	-0.44922	NaN	NaN	NaN	NaN	NaN	NaN
1.21	1.938	-143.4854	1280.7129	-0.45557	0.74414	-0.09082	-56.76	270.148	624.285	-0.26133	0.81113	-0.07041	-3.67100000000001	-369.14	1655.949	0.12354	0.15039	-0.52979	NaN	NaN	NaN	NaN	NaN	NaN
1.212	-31.167	-152.7886	1284.805	-0.41992	0.69775	-0.094727	-35.787	239.761	567.26	-0.2415	0.78975	-0.063477	42.628	-448.24	1717.867	0.02124	0.18262	-0.55053	NaN	NaN	NaN	NaN	NaN	NaN
1.214	10.948	-161.0321	1310.313	-0.38598	0.67969	-0.10792	-19.449	243.205	540.587	-0.21845	0.76826	-0.058398	73.782	-448.947	1771.0062	-0.13428	0.26953	-0.52539	NaN	NaN	NaN	NaN	NaN	NaN
1.216	21.023	-144.5334	1347.3701	-0.34668	0.66016	-0.12109	-23.274	255.9	495.6114	-0.20147	0.74443	-0.049902	68.951	-428.37	1839.135	-0.39697	0.47656	-0.43164	NaN	NaN	NaN	NaN	NaN	NaN
1.218	59.575	-130.679	1370.3696	-0.29443	0.64697	-0.14404	-3.005	201.472	486.4711	-0.18262	0.72266	-0.037109	78.426	-372.208	1888.036	-0.5249	0.59229	-0.38135	NaN	NaN	NaN	NaN	NaN	NaN
1.22	43.352	-120.477	1400.5195	-0.27148	0.64258	-0.15674	8.472	232.467	484.357	-0.16416	0.70263	-0.025781	84.603	-337.771	1933.936	-0.71826	0.82178	-0.29834	NaN	NaN	NaN	NaN	NaN	NaN
1.222	50.186	-117.264	1424.4874	-0.25195	0.64648	-0.1875	4.202	205.212	435.2532	-0.14726	0.68301	-0.014648	123.466	-270.318	2014.028	-0.81153	0.98342	-0.26025	NaN	NaN	NaN	NaN	NaN	NaN
1.224	51.371	-114.346	1453.0495	-0.26464	0.66528	-0.19336	-24.988	179.0907	386.051	-0.12852	0.65957	-0.0033203	153.989	-249.838	2041.801	-0.87158	1.1196	-0.24463	NaN	NaN	NaN	NaN	NaN	NaN
1.226	48.08	-90.037	1471.8742	-0.30518	0.68994	-0.19385	-47.897	227.535	368.8871	-0.11494	0.63896	0.0068358	171.6077	-189.537	2066.36	-0.93359	1.2578	-0.25537	NaN	NaN	NaN	NaN	NaN	NaN
1.228	47.419	-84.364	1501.0632	-0.38525	0.74658	-0.18115	-43.985	178.8004	339.18023	-0.10205	0.61475	0.018066	158.35429	-185.424	2071.017	-0.95898	1.3105	-0.2583	NaN	NaN	NaN	NaN	NaN	NaN
1.23	46.7	-82.191	1531.3085	-0.42871	0.77734	-0.16943	-51.159	170.4137	337.5109	-0.079004	0.59346	0.028809	184.2265	-163.342	2070.5935	-1.0195	1.3848	-0.25488	NaN	NaN	NaN	NaN	NaN	NaN
1.232	60.376	-87.239	1544.4645	-0.51123	0.84619	-0.14355	-88.0203	169.067	306.8636	-0.071094	0.56963	0.044727	185.55831	-185.994	2047.44	-1.0635	1.4228	-0.23413	NaN	NaN	NaN	NaN	NaN	NaN
1.234	19.04	-86.394	1555.754	-0.56787	0.9126	-0.12402	-93.7738	125.7981	276.7469	-0.059765	0.54736	0.050196	202.5069	-201.381	2056.369	-1.1079	1.4478	-0.21631	NaN	NaN	NaN	NaN	NaN	NaN
1.236	25.9	-85.824	1582.975	-0.58838	0.9458	-0.11963	-99.0146	155.207	280.2646	-0.046387	0.52451	0.057519	160.794	-250.331	2049.321	-1.1489	1.4692	-0.20557	NaN	NaN	NaN	NaN	NaN	NaN
1.238	27.31	-90.715	1641.15675	-0.61084	1.0024	-0.11865	-120.118	150.905	243.3486	-0.039551	0.50195	0.066895	107.793	-229.4308	2115.067	-1.1597	1.4829	-0.20752	NaN	NaN	NaN	NaN	NaN	NaN
1.24	33.667	-104.104	1676.227	-0.61621	1.0332	-0.11865	-113.5191	140.416	231.536	-0.029101	0.48017	0.07295	40.92	-250.4408	2167.8431	-1.1875	1.4863	-0.22754	NaN	NaN	NaN	NaN	NaN	NaN
1.242	46.377	-117.601	1703.183	-0.62012	1.0527	-0.12598	-119.06576	187.612	214.4534	-0.024707	0.46308	0.082422	-15.086	-239.124	2236.8084	-1.208	1.5039	-0.25708	NaN	NaN	NaN	NaN	NaN	NaN
1.244	22.561	-115.915	1712.986	-0.61816	1.0664	-0.14453	-102.6006	159.264	182.3291	-0.017676	0.44707	0.09375	-43.833	-277.129	2279.754	-1.2266	1.5254	-0.29199	NaN	NaN	NaN	NaN	NaN	NaN
1.246	22.866	-115.921	1752.384	-0.62158	1.0615	-0.15137	-97.161	166.79	182.7376	-0.0095705	0.43194	0.10019	-84.566	-273.739	2332.507	-1.2261	1.5571	-0.3374	NaN	NaN	NaN	NaN	NaN	NaN
1.248	15.198	-106.754	1776.279	-0.64258	1.0576	-0.16406	-124.56	162.249	143.43628	-0.00097656	0.42041	0.10791	-98.301	-271.42778	2360.817	-1.2207	1.5645	-0.36133	NaN	NaN	NaN	NaN	NaN	NaN
1.25	14.779	-88.937	1781.431	-0.6582	1.0534	-0.17261	-109.9647	109.809	122.634	0.0066407	0.40909	0.10293	-90.444	-225.33094	2430.596	-1.2173	1.5962	-0.41309	NaN	NaN	NaN	NaN	NaN	NaN
1.252	9.714	-90.174	1795.608	-0.68115	1.0571	-0.17822	-105.142	136.009	131.1453	0.016797	0.39394	0.10899	-90.988	-195.645	2413.143	-1.2136	1.6379	-0.44361	NaN	NaN	NaN	NaN	NaN	NaN
1.254	10.9	-100.015	1817.139	-0.71045	1.0669	-0.18457	-85.439	115.291	98.6591	0.023828	0.38535	0.11094	-90.772	-153.309	2402.309	-1.1895	1.6699	-0.4834	NaN	NaN	NaN	NaN	NaN	NaN
1.256	18.581	-108.6384	1833.894	-0.71875	1.0723	-0.19043	-58.261	93.515	101.911	0.030664	0.36983	0.11172	-81.261	-143.552	2356.222	-1.1108	1.6431	-0.53271	NaN	NaN	NaN	NaN	NaN	NaN
1.258	11.971	-87.8093	1816.8403	-0.74121	1.0859	-0.17773	-54.918	115.61	90.69817	0.041016	0.36182	0.11523	-63.278	-139.917	2350.971	-1.0693	1.6055	-0.56152	NaN	NaN	NaN	NaN	NaN	NaN
1.26	26.584	-76.34	1831.6262	-0.7522	1.1008	-0.17334	-27.928	69.305	87.965	0.050391	0.35567	0.1125	-23.95	-109.597	2353.7685	-1.0049	1.5254	-0.6084	NaN	NaN	NaN	NaN	NaN	NaN
1.262	40.016	-57.672	1848.80113	-0.76318	1.1138	-0.16748	-11.384	79.454	105.2002	0.058984	0.34668	0.11475	-13.39	-90.407	2358.5706	-0.98926	1.4751	-0.63428	NaN	NaN	NaN	NaN	NaN	NaN
1.264	35.681	-44.101	1849.3211	-0.78516	1.1367	-0.16357	6.1	83.854	83.394	0.064844	0.33652	0.11475	1.396	-55.382	2359.746	-0.98438	1.4473	-0.65625	NaN	NaN	NaN	NaN	NaN	NaN
1.266	51.894	-48.226	1851.7236	-0.80029	1.147	-0.15918	29.68	39.4788	71.06699	0.07041	0.32939	0.11152	-15.102	-57.351	2376.9032	-1.0112	1.4438	-0.63623	NaN	NaN	NaN	NaN	NaN	NaN
1.268	61.492	-55.63	1874.248	-0.83154	1.1704	-0.16064	30.95	58.708	82.248	0.072266	0.31836	0.10254	22.519	-23.563	2372.355	-1.0439	1.4473	-0.62695	NaN	NaN	NaN	NaN	NaN	NaN
1.27	64.903	-55.608	1917.074	-0.85816	1.1867	-0.16528	23.764	30.817	57.7	0.075195	0.31103	0.095899	44.587	-19.6513	2386.1791	-1.1191	1.4785	-0.5918	NaN	NaN	NaN	NaN	NaN	NaN
1.272	54.888	-50.643	1922.1266	-0.87891	1.2031	-0.16211	31.91	19.18	64.9107	0.077051	0.30889	0.094922	115.454	32.3143	2386.343	-1.1716	1.5071	-0.56568	NaN	NaN	NaN	NaN	NaN	NaN
1.274	65.358	-48.0626	1918.1924	-0.90625	1.2305	-0.1709	16.437	41.906	43.1592	0.075097	0.30772	0.094532	130.571	7.226	2411.683	-1.2109	1.5293	-0.54883	NaN	NaN	NaN	NaN	NaN	NaN
1.276	61.466	-51.8979	1919.5976	-0.91553	1.2427	-0.17236	7.751	16.5136	33.48	0.082617	0.31386	0.10225	182.1968	13.7	2435.272	-1.2344	1.5449	-0.53857	NaN	NaN	NaN	NaN	NaN	NaN
1.278	88.716	-54.054642	1940.164	-0.93555	1.2637	-0.18311	-3.616	38.229	59.8089	0.094238	0.31738	0.11084	199.6681	-58.3869	2421.986	-1.2261	1.5493	-0.54443	NaN	NaN	NaN	NaN	NaN	NaN
1.28	72.446	-62.2653	1950.722	-0.94165	1.2796	-0.19556	-11.905	53.204	28.5441	0.10996	0.31689	0.12041	209.936	-70.6622	2390.5295	-1.1851	1.5532	-0.55908	NaN	NaN	NaN	NaN	NaN	NaN
1.282	76.206	-70.87741	1950.9982	-0.94531	1.2891	-0.2041	4.52500000000001	20.0662	24.7439	0.13369	0.31211	0.11611	193.563	-117.202	2386.787	-1.143	1.5307	-0.57569	NaN	NaN	NaN	NaN	NaN	NaN
1.284	63.087	-71.4821	1953.6456	-0.94971	1.2974	-0.22754	-20.665	44.347	39.3698	0.16025	0.30156	0.11885	201.6417	-72.026	2365.2324	-1.1016	1.5059	-0.58984	NaN	NaN	NaN	NaN	NaN	NaN
1.286	73.813	-65.347	1960.3547	-0.94922	1.3027	-0.23926	-43.254	-5.713	29.679	0.18281	0.28223	0.11387	169.0359	-36.3012	2332.684	-1.0742	1.4668	-0.60156	NaN	NaN	NaN	NaN	NaN	NaN
1.288	69.348	-56.1128	1962.96	-0.95068	1.3032	-0.2583	-42.72	-18.5205	30.2554	0.20703	0.2666	0.10889	126.768	54.6783	2306.357	-1.0605	1.4434	-0.60742	NaN	NaN	NaN	NaN	NaN	NaN
1.29	61.888	-30.181	1947.9479	-0.95264	1.3051	-0.27588	-63.795	18.777	19.1218	0.23037	0.24277	0.10469	82.753	83.0679	2272.8953	-1.064	1.4028	-0.60693	NaN	NaN	NaN	NaN	NaN	NaN
1.292	87.079	-3.024	1957.8993	-0.95459	1.3071	-0.28955	-58.291	-0.393000000000001	2.593	0.24463	0.22597	0.10107	31.687	150.0035	2263.6243	-1.0796	1.3837	-0.6045	NaN	NaN	NaN	NaN	NaN	NaN
1.294	68.897	8.453	1957.54692	-0.95459	1.3071	-0.31982	-90.372	21.99078	42.8968545	0.25478	0.20097	0.093262	12.693	159.048	2241.43	-1.0996	1.3711	-0.60742	NaN	NaN	NaN	NaN	NaN	NaN
1.296	48.223	10.052	1964.884	-0.95264	1.3071	-0.32861	-112.07	21.845	25.4812	0.26992	0.18213	0.095019	-4.239	214.054	2217.038	-1.123	1.3848	-0.59375	NaN	NaN	NaN	NaN	NaN	NaN
1.298	23.983	5.701	1962.485	-0.95215	1.3135	-0.34375	-90.004	-21.32443	7.9464	0.28076	0.15674	0.091309	-24.953	217.773	2195.587	-1.1304	1.3892	-0.58154	NaN	NaN	NaN	NaN	NaN	NaN
1.3	49.499	-5.6387	1973.5185	-0.95606	1.3198	-0.35791	-88.574	12.4497	27.0234	0.27871	0.13427	0.095117	-56.217	234.746	2159.9494	-1.1323	1.4126	-0.56201	NaN	NaN	NaN	NaN	NaN	NaN
1.302	49.373	0.8367	1974.976	-0.96289	1.3223	-0.375	-85.077	-16.7949	32.823	0.27559	0.11738	0.094434	-59.991	213.485	2105.2847	-1.1128	1.4267	-0.55201	NaN	NaN	NaN	NaN	NaN	NaN
1.304	44.484	8.258	1955.0857	-0.97461	1.332	-0.39648	-78.842	-14.25177	51.14	0.27246	0.097462	0.096387	-87.464	206.171	2098.094	-1.0918	1.4355	-0.54688	NaN	NaN	NaN	NaN	NaN	NaN
1.306	36.824	6.5134	1933.0783	-0.97852	1.3359	-0.39648	-51.444	25.4222	26.5293	0.27188	0.081543	0.09375	-100.527	180.437	2031.303	-1.0513	1.436	-0.54248	NaN	NaN	NaN	NaN	NaN	NaN
1.308	48.534	14.7775	1931.132	-0.97803	1.3384	-0.41553	-40.404	5.4525	-16.5797	0.26807	0.072266	0.096191	-103.63	170.94	2025.3538	-1.0308	1.4282	-0.5415	NaN	NaN	NaN	NaN	NaN	NaN
1.31	58.429	15.6682	1934.4823	-0.9773	1.3362	-0.42163	-45.278	34.8214	12.7	0.26504	0.060644	0.091992	-100.081	166.8685	1970.406	-0.98682	1.4185	-0.53809	NaN	NaN	NaN	NaN	NaN	NaN
1.312	45.821	9.1857	1923.46881	-0.97607	1.3364	-0.43115	-23.446	31.5463	12.3429	0.2625	0.052246	0.09043	-81.164	187	1979.546	-0.95655	1.4058	-0.53077	NaN	NaN	NaN	NaN	NaN	NaN
1.314	64.753	3.6921	1930.3301	-0.97412	1.3345	-0.43604	2.667	1.229	14.637	0.25547	0.04834	0.083789	-52.964	223.2287	1923.7961	-0.93115	1.3989	-0.521	NaN	NaN	NaN	NaN	NaN	NaN
1.316	69.314	8.48617	1919.8738	-0.97119	1.3315	-0.44678	9.85599999999999	45.0336	36.98493	0.24463	0.043652	0.080274	-72.792	251.081	1911.104	-0.90625	1.375	-0.50098	NaN	NaN	NaN	NaN	NaN	NaN
1.318	63.028	40.767	1897.47241	-0.96387	1.3242	-0.4541	21.119	13.0255	14.3064	0.23291	0.041992	0.078613	-45.859	283.099	1848.8691	-0.89453	1.3711	-0.48633	NaN	NaN	NaN	NaN	NaN	NaN
1.32	71.354	60.124	1874.6411	-0.9519	1.3118	-0.45898	34.282	-3.8491	44.0475	0.21992	0.053027	0.080274	-14.44	303.213	1838.831	-0.86719	1.3457	-0.45703	NaN	NaN	NaN	NaN	NaN	NaN
1.322	60.439	64.257	1865.4352	-0.9458	1.3013	-0.46338	28.298	23.0915	35.9484	0.20967	0.065137	0.085449	58.384	330.602	1771.267	-0.84473	1.3281	-0.42822	NaN	NaN	NaN	NaN	NaN	NaN
1.324	78.704	67.973	1866.4916	-0.93506	1.2817	-0.46826	36.107	-6.6316	-9.27	0.19912	0.079981	0.092871	70.4	326.359	1747.274	-0.81836	1.3086	-0.40186	NaN	NaN	NaN	NaN	NaN	NaN
1.326	67.268	67.964	1842.9801	-0.93262	1.2705	-0.4707	22.291	17.9256	30.098	0.19932	0.098244	0.10059	105.7052	329.749	1677.92351	-0.771	1.2798	-0.36768	NaN	NaN	NaN	NaN	NaN	NaN
1.328	86.824	66.447	1826.2817	-0.92578	1.25	-0.47559	20.696	27.8579	13.3648	0.19873	0.11084	0.10938	103.261	300.239	1604.594	-0.74902	1.2617	-0.35205	NaN	NaN	NaN	NaN	NaN	NaN
1.33	65.656	74.288	1831.921	-0.92456	1.2375	-0.47778	12.483	-11.2332	32.3229	0.20967	0.12657	0.11328	126.1	308.838	1523.794	-0.70703	1.2305	-0.31445	NaN	NaN	NaN	NaN	NaN	NaN
1.332	85.576	83.983	1806.495	-0.9209	1.2227	-0.48242	9.27300000000001	25.972	42.1472	0.22109	0.13682	0.11201	123.851	300.4382	1476.76	-0.67431	1.1983	-0.29077	NaN	NaN	NaN	NaN	NaN	NaN
1.334	86.069	74.276	1782.282	-0.92578	1.2051	-0.4668	-10.853	-8.647	9.2379	0.23867	0.13955	0.10303	101.019	317.791	1429.823	-0.64844	1.1738	-0.26416	NaN	NaN	NaN	NaN	NaN	NaN
1.336	66.582	61.208	1765.6497	-0.92773	1.2012	-0.46094	-21.896	3.457	37.3926	0.25391	0.14258	0.10527	86.213	293.992	1421.0019	-0.61963	1.1353	-0.22607	NaN	NaN	NaN	NaN	NaN	NaN
1.338	77.535	51.183	1775.0486	-0.93262	1.1875	-0.45459	-28.289	47.598	29.4193	0.26953	0.14111	0.10156	81.2385	288.7662	1390.215	-0.60889	1.1216	-0.20459	NaN	NaN	NaN	NaN	NaN	NaN
1.34	78.036	55.878	1771.645	-0.93823	1.1838	-0.44556	-34.275	10.753	8.013	0.28408	0.13945	0.099806	37.889	278.513	1373.978	-0.60107	1.0884	-0.15869	NaN	NaN	NaN	NaN	NaN	NaN
1.342	68.438	67.999	1751.436	-0.93994	1.1802	-0.44238	-43.757	34.601	37.1708	0.29238	0.13652	0.097949	17.466	304.122	1324.167	-0.59839	1.0642	-0.12305	NaN	NaN	NaN	NaN	NaN	NaN
1.344	38.852	84.561	1715.5096	-0.95068	1.1724	-0.42676	-90.89	29.1065	41.98215	0.30098	0.13379	0.10186	-7.98399999999999	296.2817	1255.563	-0.60254	1.0381	-0.090332	NaN	NaN	NaN	NaN	NaN	NaN
1.346	47.716	87.187	1697.4395	-0.95215	1.166	-0.41455	-78.751	-4.84	73.8898	0.304	0.13232	0.10225	-32.064	319.8	1205.1293	-0.59424	1.0078	-0.054688	NaN	NaN	NaN	NaN	NaN	NaN
1.348	38.618	82.475	1678.8846	-0.9541	1.1563	-0.4043	-57.223	10.401	109.013	0.31152	0.12695	0.10498	-57.096	289.187	1156.727	-0.57275	0.98535	-0.031739	NaN	NaN	NaN	NaN	NaN	NaN
1.35	26.118	89.119	1652.5928	-0.95459	1.1519	-0.39697	-72.23	-49.859	89.181	0.31689	0.12344	0.10469	-70.7314	289.47	1093.091	-0.54688	0.95898	-0.01416	NaN	NaN	NaN	NaN	NaN	NaN
1.352	39.379	84.951	1635.9043	-0.95068	1.147	-0.3833	-78.382	-71.318	135.213	0.32373	0.12071	0.10713	-108.6185	274.86	1048.878	-0.50342	0.92041	0.0043945	NaN	NaN	NaN	NaN	NaN	NaN
1.354	41.09	97.089	1616.602	-0.94824	1.1367	-0.37598	-90.546	-45.569	185.967	0.33857	0.12187	0.10478	-127.946	275.789	974.844	-0.48047	0.89893	0.0048828	NaN	NaN	NaN	NaN	NaN	NaN
1.356	33.096	95.385	1595.6221	-0.93945	1.1289	-0.37402	-63.947	-77.831	210.489	0.35234	0.1248	0.10879	-136.648	271.883	907.5239	-0.42334	0.85303	0.010742	NaN	NaN	NaN	NaN	NaN	NaN
1.358	18.929	104.945	1551.8237	-0.92529	1.1216	-0.36475	-63.645	-56.3053	295.124	0.37256	0.12598	0.10059	-160.149	287.88	855.892	-0.38721	0.81421	0.0078125	NaN	NaN	NaN	NaN	NaN	NaN
1.36	32.561	94.928	1546.804065	-0.90796	1.1135	-0.35986	-70.192	-60.455	341.68	0.39023	0.12373	0.09248	-177.994	292.691	792.239	-0.34521	0.77344	0.0063477	NaN	NaN	NaN	NaN	NaN	NaN
1.362	40.238	110.304	1539.5414	-0.89453	1.1035	-0.35742	-60.716	-73.736	437.7	0.40341	0.12617	0.074707	-177.5	315.4188	752.942	-0.30371	0.73242	0.00048828	NaN	NaN	NaN	NaN	NaN	NaN
1.364	32.068	127.978	1516.0673	-0.86865	1.0884	-0.35547	-56.983	17.2181	587.58	0.40693	0.12422	0.052441	-162.24	337.319	717.4866	-0.27686	0.71143	0.0068359	NaN	NaN	NaN	NaN	NaN	NaN
1.366	23.373	140.571	1486.16091	-0.85547	1.0801	-0.35352	-59.578	44.5125	693.24	0.39746	0.13067	0.02168	-150.05	338.161	693.6611	-0.24072	0.67041	0.0053711	NaN	NaN	NaN	NaN	NaN	NaN
1.368	28.818	124.421	1481.971	-0.83447	1.0669	-0.3501	-46.243	56.023	838.13	0.37354	0.14697	0.0048828	-121.512	347.04	630.9195	-0.22119	0.64184	0.01294	NaN	NaN	NaN	NaN	NaN	NaN
1.37	20.238	115.381	1480.03	-0.81836	1.0533	-0.34741	-19.682	116.754	1019.85	0.3292	0.17188	-0.0038086	-103.6519	346.082	606.172	-0.19873	0.61768	0.01416	NaN	NaN	NaN	NaN	NaN	NaN
1.372	28.263	111.139	1445.614	-0.80469	1.043	-0.34766	-54.771	127.562	1188.65	0.27421	0.20684	-0.0032227	-64.705	320.362	551.7013	-0.17432	0.58838	0.013672	NaN	NaN	NaN	NaN	NaN	NaN
1.374	43.13	111.496	1415.0434	-0.78467	1.0298	-0.34131	-19.839	178.935	1337.64	0.20781	0.24512	-0.0075195	-42.111	283.184	549.888	-0.1626	0.57861	0.014648	NaN	NaN	NaN	NaN	NaN	NaN
1.376	41.761	125.896	1402.4818	-0.77002	1.0244	-0.33667	9.28	163.014	1378.6	0.13565	0.29101	-0.0030273	7.628	259.678	485.0918	-0.13965	0.55664	0.016113	NaN	NaN	NaN	NaN	NaN	NaN
1.378	59.926	131.641	1379.1892	-0.75586	1.0195	-0.33789	-9.92	41.686	1453.82	0.055664	0.33789	0	8.592	220.81426	470.732	-0.12476	0.54638	0.021485	NaN	NaN	NaN	NaN	NaN	NaN
1.38	37.796	140.12	1344.8476	-0.73779	1.0103	-0.3374	7.33	-12.288	1548.97	-0.032324	0.38311	0.0057617	40.1767	209.0135	421.74	-0.10547	0.54199	0.027832	NaN	NaN	NaN	NaN	NaN	NaN
1.382	50.721	138.002	1321.9416	-0.72754	1.0063	-0.32764	22.156	-115.986	1551.68	-0.13125	0.42422	0.0024414	20.118	175.943	410.346	-0.083496	0.53027	0.039063	NaN	NaN	NaN	NaN	NaN	NaN
1.384	53.449	138.928	1307.1084	-0.7124	1.0024	-0.31982	14.461	-194.032	1552.17	-0.24609	0.47344	0.002832	37.589	201.6051	358.986	-0.071777	0.52832	0.042969	NaN	NaN	NaN	NaN	NaN	NaN
1.386	36.851	139.271	1281.3644	-0.698	0.99292	-0.31274	34.952	-204.382	1485.26	-0.37734	0.52168	-0.0045898	27.553	209.211	377.608	-0.044434	0.51123	0.044922	NaN	NaN	NaN	NaN	NaN	NaN
1.388	37.285	135.435	1257.241	-0.6875	0.98438	-0.30811	79.241	-253.82	1413.06	-0.52734	0.58105	-0.015625	54.638	212.464	325.957	-0.031006	0.50293	0.043701	NaN	NaN	NaN	NaN	NaN	NaN
1.39	13.316	136.996	1240.618	-0.6748	0.97314	-0.30225	80.834	-205.703	1426.02	-0.70264	0.65459	-0.02041	18.612	183.1484	337.879	-0.014648	0.49561	0.040527	NaN	NaN	NaN	NaN	NaN	NaN
1.392	51.99	151.231	1215.595	-0.66943	0.96826	-0.29639	67.031	-147.913	1414.42	-0.89228	0.76182	0.000293	40.816	178.175	259.8737	0.0024414	0.47705	0.036133	NaN	NaN	NaN	NaN	NaN	NaN
1.394	24.664	147.4167	1183.3777	-0.66162	0.95947	-0.28467	72.732	-147.667	1441.09	-1.0814	0.90166	0.043653	-1.851	162.9251	228.7911	0.0083008	0.47217	0.029785	NaN	NaN	NaN	NaN	NaN	NaN
1.396	9.45999999999999	146.618	1151.475	-0.65673	0.94971	-0.27661	80.021	-111.0415	1523.4	-1.2498	1.0734	0.12666	-2.584	185.675	187.127	0.021484	0.45508	0.029297	NaN	NaN	NaN	NaN	NaN	NaN
1.398	4.58199999999999	146.615	1137.0767	-0.64941	0.9375	-0.27197	53.978	-56.396	1566.83	-1.3828	1.2578	0.22412	-46.28	171.358	181.5598	0.026855	0.43896	0.023681	NaN	NaN	NaN	NaN	NaN	NaN
1.4	9.327	154.904	1113.7146	-0.63867	0.91992	-0.25977	63.903	-0.881	1626.5	-1.4421	1.429	0.30928	-42.795	181.078	148.3319	0.020508	0.42773	0.020996	NaN	NaN	NaN	NaN	NaN	NaN
1.402	2.914	154.026	1088.7518	-0.63428	0.9126	-0.25342	61.132	82.0506	1621.84	-1.4289	1.5523	0.36289	-92.214	134.596	155.282	0.016113	0.40967	0.010254	NaN	NaN	NaN	NaN	NaN	NaN
1.404	-25.448	150.385	1062.9297	-0.62549	0.89697	-0.24609	34.436	34.213	1590.46	-1.3445	1.6195	0.38203	-88.3719	106.245	119.6055	0.012695	0.40771	0.010742	NaN	NaN	NaN	NaN	NaN	NaN
1.406	11.236	136.902	1049.3797	-0.61621	0.87842	-0.23755	47.317	-31.128	1598.61	-1.2132	1.636	0.36973	-134.83	48.437	125.601	0.0063477	0.40381	0.016113	NaN	NaN	NaN	NaN	NaN	NaN
1.408	-3.23400000000001	134.973	1030.205	-0.60498	0.86865	-0.2207	33.375	-104.04	1574.27	-1.0786	1.6157	0.33984	-149.192	28.5656	103.77	0.0083008	0.39477	0.020508	NaN	NaN	NaN	NaN	NaN	NaN
1.41	-17.663	149.137	995.57586	-0.58936	0.84424	-0.20752	-3.50999999999999	-271.07	1569.25	-0.96798	1.5636	0.28535	-153.042	11.687	83.192	0.010254	0.38623	0.023438	NaN	NaN	NaN	NaN	NaN	NaN
1.412	-36.274	159.85	968.6641	-0.58203	0.83203	-0.20508	-16.088	-342.2	1610.86	-0.87734	1.4832	0.23252	-149.029	13.2718	75.522	0.019043	0.36865	0.022949	NaN	NaN	NaN	NaN	NaN	NaN
1.414	-18.002	167.465	950.1227	-0.57568	0.81299	-0.18848	-33.554	-413.31	1628.98	-0.80547	1.377	0.18682	-160.319	-9.7586	60.0407	0.022949	0.35547	0.018066	NaN	NaN	NaN	NaN	NaN	NaN
1.416	-8.464	165.893	940.5709	-0.56054	0.7976	-0.18335	-27.165	-476.27	1671.66	-0.74229	1.2753	0.16875	-131.775	-13.143	44.3503	0.035645	0.33398	0.0014648	NaN	NaN	NaN	NaN	NaN	NaN
1.418	-24.203	167.983	903.6743	-0.54785	0.7793	-0.1748	-37.025	-415.83	1725.18	-0.67969	1.1914	0.1665	-127.704	-18.145	47.9007	0.038086	0.32129	-0.0012207	NaN	NaN	NaN	NaN	NaN	NaN
1.42	-6.01600000000001	159.178	891.1343	-0.5376	0.7583	-0.16553	-77.767	-372.17	1772.48	-0.62705	1.1202	0.16797	-92.3622	4.465	49.1111	0.047363	0.30859	-0.0097656	NaN	NaN	NaN	NaN	NaN	NaN
1.422	-13.361	155.725	872.4803	-0.5332	0.74805	-0.16064	-70.267	-311.83	1856.1	-0.57246	1.0553	0.15186	-79.308	29.597	48.467	0.051758	0.28271	-0.0087891	NaN	NaN	NaN	NaN	NaN	NaN
1.424	2.482	157.823	849.4937	-0.51611	0.729	-0.14844	-114.068	-215.858	1926.1	-0.52207	0.99786	0.12217	-17.162	51.8266	66.733	0.055176	0.27686	-0.01123	NaN	NaN	NaN	NaN	NaN	NaN
1.426	-7.387	162.625	817.822	-0.50122	0.71362	-0.13745	-141.485	-207.472	1970.96	-0.47558	0.95254	0.077539	-8.401	37.3007	37.0142	0.055176	0.25195	-0.0068359	NaN	NaN	NaN	NaN	NaN	NaN
1.428	3.14999999999999	155.92	812.0886	-0.48389	0.69971	-0.12744	-138.355	-130.887	2024.84	-0.42822	0.92041	0.027832	17.123	24.047	40.8321	0.058838	0.24097	-0.0070801	NaN	NaN	NaN	NaN	NaN	NaN
1.43	3.986	161.335	791.4342	-0.46191	0.67773	-0.12158	-134.648	-84.72748	1997.8	-0.39053	0.90576	-0.021484	24.845	15.799	18.353	0.062988	0.22656	-0.0024414	NaN	NaN	NaN	NaN	NaN	NaN
1.432	-2.983	170.681	765.5925	-0.44434	0.66992	-0.11426	-137.141	-125.735	1963.55	-0.38672	0.91445	-0.055077	29.272	31.7969	21.451	0.063477	0.20459	0.010742	NaN	NaN	NaN	NaN	NaN	NaN
1.434	6.605	168.26	748.0145	-0.4209	0.64063	-0.10742	-160.289	-138.35	1965.73	-0.41328	0.94101	-0.067969	63.917	57.569	36.7145	0.071777	0.2002	0.013672	NaN	NaN	NaN	NaN	NaN	NaN
1.436	5.82900000000001	162.713	735.6918	-0.40625	0.62133	-0.10132	-185.5255	-227.366	1961.83	-0.47402	0.99355	-0.060156	58.192	64.46677	63.0212	0.084473	0.17969	0.024414	NaN	NaN	NaN	NaN	NaN	NaN
1.438	21.499	158.479	727.9343	-0.38428	0.60791	-0.095703	-157.707	-284.58	2034.88	-0.54785	1.0547	-0.033203	61.043	59.077	49.8718	0.093262	0.16089	0.033448	NaN	NaN	NaN	NaN	NaN	NaN
1.44	-8.75200000000001	148.498	700.1793	-0.36621	0.5752	-0.085449	-173.647	-255.91	2078.33	-0.61035	1.1161	0.0041023	94.693	42.497	77.447	0.10205	0.14404	0.041504	NaN	NaN	NaN	NaN	NaN	NaN
1.442	-0.679000000000002	142.901	683.1746	-0.35107	0.56592	-0.088379	-185.132	-312.53	2118.85	-0.65117	1.1731	0.028809	81.63	10.707	28.806	0.12061	0.11719	0.050293	NaN	NaN	NaN	NaN	NaN	NaN
1.444	-8.376	146.799	655.2247	-0.32422	0.54297	-0.075684	-158.283	-276.31	2210.93	-0.66719	1.2156	0.035058	44.62	6.45076	89.8582	0.13135	0.10449	0.054688	NaN	NaN	NaN	NaN	NaN	NaN
1.446	-6.199	166.542	630.673	-0.30688	0.52978	-0.070556	-125.2422	-239.709	2243.71	-0.67676	1.2533	0.01699	64.55	19.306	82.486	0.15576	0.084961	0.0625	NaN	NaN	NaN	NaN	NaN	NaN
1.448	-8.435	169.088	615.0344	-0.28516	0.51465	-0.062012	-99.718	-285.54	2291.32	-0.68506	1.2739	-0.01709	41.27	20.114	104.349	0.16846	0.062011	0.067139	NaN	NaN	NaN	NaN	NaN	NaN
1.45	-23.957	163.249	596.4292	-0.26074	0.49805	-0.053223	-90.348	-228.281	2374	-0.70039	1.2879	-0.057124	35.434	29.0773	80.165	0.18408	0.043457	0.063965	NaN	NaN	NaN	NaN	NaN	NaN
1.452	-15.381	159.824	588.5362	-0.23828	0.48828	-0.048828	-97.467	-236.57	2397.2	-0.72148	1.3039	-0.093645	-15.87	7.0008	74.21639	0.18164	0.018555	0.061035	NaN	NaN	NaN	NaN	NaN	NaN
1.454	-27.994	163.593	566.8135	-0.20166	0.47119	-0.040527	-48.078	-219.915	2402	-0.73827	1.3278	-0.12216	-42.934	20.152	51.157	0.18555	0.0068359	0.060059	NaN	NaN	NaN	NaN	NaN	NaN
1.456	-24.16	162.252	548.4812	-0.17749	0.44946	-0.03418	-39.768	-130.85	2372.8	-0.75029	1.3688	-0.14629	-101.649	22.726	84.717	0.1709	-0.0029297	0.055176	NaN	NaN	NaN	NaN	NaN	NaN
1.458	-52.513	164.832	542.9854	-0.14746	0.43701	-0.030762	-61.523	-162.445	2338.8	-0.75146	1.4243	-0.16455	-108.674	43.1989	52.2655	0.16626	-0.0051269	0.051758	NaN	NaN	NaN	NaN	NaN	NaN
1.46	-33.977	158.579	523.5772	-0.11328	0.41455	-0.03125	-33.345	-134.1	2373.3	-0.77003	1.4904	-0.17032	-125.436	28.737	71.518	0.15381	-0.0053711	0.053223	NaN	NaN	NaN	NaN	NaN	NaN
1.462	-36.552	147.972	501.123006	-0.09375	0.40625	-0.03125	-36.484	-115.864	2382.4	-0.81342	1.5661	-0.17509	-110.0316	6.011	63.294	0.13623	0.0078125	0.059082	NaN	NaN	NaN	NaN	NaN	NaN
1.464	-55.16	156.827	466.929	-0.062988	0.38232	-0.036621	-46.98	-157.897	2381.3	-0.86656	1.6381	-0.16963	-117.6283	-20.253	54.775	0.13037	0.015625	0.063477	NaN	NaN	NaN	NaN	NaN	NaN
1.466	-43.117	148.448	461.6614	-0.041748	0.36499	-0.037598	-42.955	-100.983	2404.6	-0.93307	1.7062	-0.16308	-117.4784	7.728	28.672	0.11768	0.038574	0.056152	NaN	NaN	NaN	NaN	NaN	NaN
1.468	-45.88	148.134	458.9062	-0.022949	0.35156	-0.037109	-73.096	-106.619	2393.1	-1.0049	1.7676	-0.14893	-137.452	19.543	28.388	0.10571	0.056885	0.055176	NaN	NaN	NaN	NaN	NaN	NaN
1.47	-39.62	151.538	448.3098	-0.0039063	0.32666	-0.041016	-59.813	-98.128	2410.5	-1.0661	1.8284	-0.13128	-110.7842	55.3679	33.207	0.09375	0.077637	0.054688	NaN	NaN	NaN	NaN	NaN	NaN
1.472	-56.986	135.601	420.3372	0.0039063	0.32275	-0.039063	-68.007	-18.52475	2448.2	-1.1243	1.8824	-0.11664	-115.8524	22.5744	76.834	0.087402	0.10938	0.05957	NaN	NaN	NaN	NaN	NaN	NaN
1.474	-31.624	122.654	417.8024	0.013184	0.31348	-0.041504	-80.823	-57.5363	2461.5	-1.179	1.9246	-0.10144	-64.515	18.3968	66.903	0.083984	0.12744	0.067383	NaN	NaN	NaN	NaN	NaN	NaN
1.476	-26.96	117.941	418.116	0.021485	0.30762	-0.042236	-47.098	-47.619	2531.7	-1.2194	1.9634	-0.091206	-49.349	-21.24144	56.244	0.09082	0.1626	0.092773	NaN	NaN	NaN	NaN	NaN	NaN
1.478	-19.703	120.797	402.4024	0.029785	0.30469	-0.045898	-69.354	-39.25	2544.4	-1.2495	1.9927	-0.084473	-23.07	-22.876	58.027	0.1023	0.17041	0.10401	NaN	NaN	NaN	NaN	NaN	NaN
1.48	-22.306	127.392	377.5486	0.040039	0.30273	-0.038086	-95.634	-111.51	2506.7	-1.2739	2.0154	-0.091212	-59	-37.0797	53.301	0.12988	0.17773	0.10303	NaN	NaN	NaN	NaN	NaN	NaN
1.482	-35.123	131.876	357.1082	0.043945	0.30078	-0.044922	-113.284	-72.146	2511.9	-1.2987	2.0271	-0.096658	-5.258	-2.1731	52.5533	0.16211	0.17578	0.097168	NaN	NaN	NaN	NaN	NaN	NaN
1.484	-30.493	129.832	348.44588	0.049805	0.30664	-0.041016	-132.7474	-77.217	2463.1	-1.3182	2.0365	-0.082256	25.062	7.5228	36.9211	0.18262	0.16211	0.081543	NaN	NaN	NaN	NaN	NaN	NaN
1.486	-31.218	132.34	325.1575	0.048096	0.30737	-0.040771	-132.6926	-99.091	2459.7	-1.348	2.0478	-0.067574	70.68	30.0012	28.751	0.19824	0.16064	0.068848	NaN	NaN	NaN	NaN	NaN	NaN
1.488	-15.172	111.309	329.6654	0.047852	0.31299	-0.039551	-135.9035	-15.59	2451.3	-1.3789	2.0605	-0.054688	84.857	12.9292	49.5126	0.20801	0.15674	0.064453	NaN	NaN	NaN	NaN	NaN	NaN
1.49	-39.154	115.962	334.867	0.050781	0.32324	-0.040039	-163.682	-31.05479	2435.4	-1.4053	2.0711	-0.045115	78.742	41.481	52.007	0.20166	0.15332	0.056152	NaN	NaN	NaN	NaN	NaN	NaN
1.492	-2.75	122.774	317.519	0.05127	0.32422	-0.035645	-122.2214	42.3569	2472.4	-1.4267	2.0797	-0.035754	55.946	39.677	44.2552	0.19141	0.15967	0.059082	NaN	NaN	NaN	NaN	NaN	NaN
1.494	-23.783	109.293	296.662	0.047852	0.33105	-0.03418	-127.192	111.933	2470.4	-1.4418	2.0872	-0.031816	62.007	77.876	66.967	0.1814	0.17041	0.06543	NaN	NaN	NaN	NaN	NaN	NaN
1.496	-25.087	100.628	285.9661	0.045654	0.33863	-0.036377	-132.829	95.403	2434.8	-1.4435	2.0871	-0.029475	79.821	39.566	85.424	0.16992	0.18359	0.069824	NaN	NaN	NaN	NaN	NaN	NaN
1.498	-20.836	91.8779	286.253	0.045898	0.34717	-0.030762	-92.6159361	168.171	2440.4	-1.4404	2.0762	-0.029785	74.338	8.357	150.431	0.15283	0.20752	0.067871	NaN	NaN	NaN	NaN	NaN	NaN
1.5	-32.83	99.135	269.749	0.038574	0.35742	-0.026855	-79.557	145.031	2399.6	-1.4302	2.0665	-0.022443	40.466	-45.8981	126.569	0.15088	0.21973	0.05957	NaN	NaN	NaN	NaN	NaN	NaN
1.502	-18.594	91.5141	254.2521	0.038086	0.35547	-0.024902	-46.706	109.39	2395	-1.417	2.0406	-0.019428	10.01	-42.178	118.679	0.12207	0.23828	0.036133	NaN	NaN	NaN	NaN	NaN	NaN
1.504	-49.823	91.295	246.753	0.041992	0.36133	-0.022949	-53.458	144.264	2370.1	-1.4056	2.0123	-0.0094585	0.571999999999996	-35.355	129.466	0.090086	0.26293	0.014404	NaN	NaN	NaN	NaN	NaN	NaN
1.506	-29.926	81.3368	250.295	0.037354	0.37158	-0.013916	-72.12	65.225	2315.1	-1.3992	1.9789	-0.003282	-55.688	-35.203	233.124	0.044434	0.29639	0	NaN	NaN	NaN	NaN	NaN	NaN
1.508	-52.639	74.9309	248.54	0.03418	0.37305	-0.015137	-33.829	69.807	2312.1	-1.4038	1.9438	0.0039063	-89.313	-69.3954	281.141	-0.021484	0.35254	0.0019531	NaN	NaN	NaN	NaN	NaN	NaN
1.51	-50.521	56.6491	243.897	0.032227	0.37646	-0.016602	-47.7076	79.6809	2282.5	-1.4076	1.912	0.016001	-121.569	-113.5732	345.559	-0.053223	0.38818	0.0063477	NaN	NaN	NaN	NaN	NaN	NaN
1.512	-59.396	56.9439	236.348	0.040528	0.37548	-0.010986	-54.868	38.882	2252.8	-1.4096	1.8878	0.022822	-101.58	-133.652	388.913	-0.11572	0.44971	0.019043	NaN	NaN	NaN	NaN	NaN	NaN
1.514	-50.173	54.37	225.33	0.04248	0.37598	-0.0083008	-27.088	82.4764	2238.1	-1.4027	1.8602	0.029579	-155.14	-97.14	543.348	-0.16065	0.50171	0.024414	NaN	NaN	NaN	NaN	NaN	NaN
1.516	-38.266	54.978	218.584	0.046875	0.37451	-0.0092773	-39.683	87.212	2176.6	-1.3999	1.8372	0.03471	-170.8971	-22.021	674.859	-0.20801	0.5459	0.027832	NaN	NaN	NaN	NaN	NaN	NaN
1.518	-68.517	45.172	207.327	0.047852	0.37354	-0.0053711	-23.123	88.401	2146.7	-1.3862	1.8149	0.038086	-215.647	54.82902	842.47	-0.28906	0.60059	0.015137	NaN	NaN	NaN	NaN	NaN	NaN
1.52	-38.192	33.188	217.136	0.050293	0.36621	-0.0039063	-11.858	153.83	2113.3	-1.3705	1.794	0.039551	-190.3953	135.7842	974.16	-0.34668	0.625	0	NaN	NaN	NaN	NaN	NaN	NaN
1.522	-43.457	22.129	207.663	0.053467	0.35962	-0.0073243	-50.193	139.863	2054.3	-1.349	1.7735	0.04159	-192.0436	145.459	1186.95	-0.47998	0.67139	-0.04541	NaN	NaN	NaN	NaN	NaN	NaN
1.524	-45.624	16.545	205.489	0.054688	0.35693	-0.003418	-32.626	183.889	2055.2	-1.3291	1.7481	0.044279	-108.802	162.9444	1335.97	-0.61279	0.71337	-0.084228	NaN	NaN	NaN	NaN	NaN	NaN
1.526	-46.652	8.179	202.24	0.061035	0.3501	-0.0014648	-23.652	204.224	2001.08	-1.3081	1.7223	0.048972	-116.346	149.4185	1495.55	-0.771	0.77002	-0.11328	NaN	NaN	NaN	NaN	NaN	NaN
1.528	-37.351	-1.152	211.835	0.060547	0.34668	0.0014648	-70.052	161.542	1938.35	-1.2813	1.7012	0.050781	-103.305	138.386	1570.37	-1.0098	0.90039	-0.11133	NaN	NaN	NaN	NaN	NaN	NaN
1.53	-18.073	-5.702	219.791	0.063477	0.34131	0.0053711	-87.3398	192.553	1905.34	-1.2482	1.6845	0.053518	-88.361	58.92	1638.26	-1.1304	0.98291	-0.083008	NaN	NaN	NaN	NaN	NaN	NaN
1.532	-38.461	-16.155	201.923	0.059327	0.3313	0.005127	-124.316	170.172	1823.1	-1.2112	1.6581	0.047332	-40.443	-24.103	1669.2	-1.3574	1.168	0.003418	NaN	NaN	NaN	NaN	NaN	NaN
1.534	-25.345	-37.269	206.279	0.055664	0.32715	0.0068359	-114.6086	147.773	1781.85	-1.1726	1.6374	0.046996	4.905	-135.405	1682.93	-1.4961	1.295	0.080569	NaN	NaN	NaN	NaN	NaN	NaN
1.536	-34.13	-37.622	224.488	0.053223	0.31885	0.01123	-106.3366	175.057	1750.39	-1.1314	1.615	0.051061	93.485	-210.006	1652.96	-1.5859	1.4082	0.15186	NaN	NaN	NaN	NaN	NaN	NaN
1.538	-11.284	-35.644	234.13	0.052246	0.31445	0.0043945	-133.761	135.959	1717.45	-1.0874	1.5923	0.044922	116.399	-274.8	1643.21	-1.6089	1.5122	0.21973	NaN	NaN	NaN	NaN	NaN	NaN
1.54	-24.887	-26.706	234.5	0.045898	0.31299	0.0087891	-93.4053	178.039	1718.42	-1.0352	1.5629	0.034774	106.437	-287.45	1647.95	-1.5859	1.541	0.2373	NaN	NaN	NaN	NaN	NaN	NaN
1.542	-27.099	-33.529	268.11	0.047119	0.30542	0.012207	-108.3505	203.816	1682.43	-0.97576	1.5385	0.022768	90.836	-281.09	1633.65	-1.4727	1.5508	0.24072	NaN	NaN	NaN	NaN	NaN	NaN
1.544	-14.904	-20.4438	295.75	0.043457	0.30371	0.015625	-98.2585	190.514	1639.16	-0.91518	1.502	0.0094841	152.9407	-239.59	1597.51	-1.3491	1.5063	0.21728	NaN	NaN	NaN	NaN	NaN	NaN
1.546	-19.293	13.9544	329.11	0.040039	0.30225	0.015625	-55.532	232.37	1616.21	-0.85979	1.4631	-0.0028246	209.689	-196.733	1552.81	-1.2119	1.416	0.17432	NaN	NaN	NaN	NaN	NaN	NaN
1.548	-22.678	54.048	372.991	0.042969	0.29785	0.018066	-72.98	206.779	1551.94	-0.80225	1.4243	-0.01416	214.155	-111.636	1563.45	-1.0137	1.2402	0.11572	NaN	NaN	NaN	NaN	NaN	NaN
1.55	-51.53	88.2695	436.564	0.033691	0.29102	0.013672	-50.639	192.485	1508.46	-0.75781	1.3839	-0.019728	194.702	-18.3654	1539.45	-0.92188	1.1465	0.090332	NaN	NaN	NaN	NaN	NaN	NaN
1.552	-27.051	131.367	512.525	0.029297	0.29224	0.014892	-23.974	209.133	1445.41	-0.7205	1.341	-0.029395	135.079	48.4524	1528.37	-0.75146	0.97803	0.08252	NaN	NaN	NaN	NaN	NaN	NaN
1.554	-29.332	158.313	577.421	0.016113	0.29004	0.0087891	-54.364	175.04	1369.45	-0.68925	1.3066	-0.02236	81.534	60.691	1483.11	-0.62915	0.87231	0.076172	NaN	NaN	NaN	NaN	NaN	NaN
1.556	-22.879	165.564	652.467	-0.01123	0.28711	-0.0043945	-26.97	190.656	1354.25	-0.66123	1.2651	-0.021974	92.352	11.507	1483.77	-0.5	0.76953	0.046875	NaN	NaN	NaN	NaN	NaN	NaN
1.558	-51.493	152.5332	734.842	-0.036133	0.28857	-0.0039063	-10.51	201.752	1281.28	-0.64063	1.2305	-0.027832	91.625	-87.087	1471.65	-0.3125	0.64258	-0.019043	NaN	NaN	NaN	NaN	NaN	NaN
1.56	-32.909	151.774	793.181	-0.10059	0.29443	-0.019531	-4.834	182.299	1230.23	-0.62012	1.1924	-0.015918	42.046	-189.536	1528.56	-0.22705	0.5874	-0.076172	NaN	NaN	NaN	NaN	NaN	NaN
1.562	-31.487	125.638	827.458	-0.16675	0.31397	-0.028565	18.293	225.691	1203.1	-0.60069	1.1599	-0.013965	-20.78	-298.74	1529.1	-0.077148	0.50635	-0.18945	NaN	NaN	NaN	NaN	NaN	NaN
1.564	-58.369	87.14	841.315	-0.24854	0.34033	-0.039063	13.82	222.319	1133.33	-0.58038	1.1255	-0.01084	-117.153	-358.99	1586.69	0.0021975	0.46851	-0.26489	NaN	NaN	NaN	NaN	NaN	NaN
1.566	-60.504	40.79	873.71	-0.37939	0.39307	-0.049316	28.913	230.504	1123.79	-0.56045	1.0934	-0.0062501	-168.66	-392.33	1645.15	0.044922	0.44678	-0.32959	NaN	NaN	NaN	NaN	NaN	NaN
1.568	-51.304	3.3769	888.189	-0.44824	0.4248	-0.049316	41.893	274.161	1066.22	-0.53857	1.061	-0.0053711	-208.3176	-404.63	1745	0.054688	0.46094	-0.35352	NaN	NaN	NaN	NaN	NaN	NaN
1.57	-40.357	-25.9894	883.079	-0.58398	0.50391	-0.041016	13.042	244.282	1016.06	-0.51075	1.0334	-0.0051757	-219.144	-395.01	1832.5	0.035645	0.48486	-0.34521	NaN	NaN	NaN	NaN	NaN	NaN
1.572	-65.06	-39.1242	921.58	-0.67749	0.57154	-0.025878	32.476	263.52	1017.14	-0.48398	1	-0.00058604	-273.074	-397.62	1928.69	-0.052734	0.56885	-0.28857	NaN	NaN	NaN	NaN	NaN	NaN
1.574	-53.062	-29.982	956.436	-0.75586	0.6499	0.0014648	14.553	236.36	973.51	-0.45391	0.96875	-0.003711	-265.998	-355.75	1985.67	-0.15259	0.65966	-0.21753	NaN	NaN	NaN	NaN	NaN	NaN
1.576	-44.201	-24.158	987.917	-0.82617	0.75391	0.041992	14.292	193.271	944.01	-0.42851	0.94141	-0.0044922	-288.395	-335.64	2067.3	-0.27881	0.7583	-0.14893	NaN	NaN	NaN	NaN	NaN	NaN
1.578	-38.633	-5.03299999999999	992.647	-0.84131	0.80322	0.062988	18.302	212.291	898.53	-0.40186	0.91455	-0.0092773	-271.868	-311.618	2108.31	-0.47998	0.87549	-0.095703	NaN	NaN	NaN	NaN	NaN	NaN
1.58	-14.051	-9.579	1016.173	-0.82568	0.88525	0.095215	-25.349	173.794	821.57	-0.37578	0.883	-0.010254	-241.5262	-284.116	2118.98	-0.57568	0.92822	-0.083496	NaN	NaN	NaN	NaN	NaN	NaN
1.582	-17.112	1.121788	1070.553	-0.78149	0.91822	0.11792	-6.798	177.401	793.3	-0.34424	0.8501	-0.011231	-232.1585	-256.401	2122.47	-0.75732	1.0181	-0.07959	NaN	NaN	NaN	NaN	NaN	NaN
1.584	2.858	11.973	1089.754	-0.72461	0.93164	0.12451	-23.956	193.4	744.33	-0.31846	0.82237	-0.016309	-235.1256	-235.602	2121.42	-0.89039	1.0921	-0.06372	NaN	NaN	NaN	NaN	NaN	NaN
1.586	-44.8	7.561	1092.945	-0.65234	0.92773	0.11035	-41.731	170.043	722.3	-0.29082	0.79238	-0.019336	-193.743	-224.573	2137.14	-1.0195	1.1758	-0.042969	NaN	NaN	NaN	NaN	NaN	NaN
1.588	-19.039	-5.91	1082.159	-0.60742	0.91504	0.09375	-31.375	212.184	730.46	-0.26709	0.76416	-0.023926	-180.266	-248.34	2159.64	-1.1929	1.3032	-0.024414	NaN	NaN	NaN	NaN	NaN	NaN
1.59	-19.407	-32.236	1102.732	-0.54736	0.86572	0.075684	-37.204	221.216	688.8	-0.24336	0.73515	-0.031348	-157.236	-289.14	2214.31	-1.2651	1.3813	-0.012695	NaN	NaN	NaN	NaN	NaN	NaN
1.592	-25.143	-37.4935	1098.139	-0.53174	0.82471	0.068604	-44.831	227.69	674.05	-0.21904	0.70869	-0.037598	-129.618	-328.08	2232.2	-1.3613	1.5127	-0.0019531	NaN	NaN	NaN	NaN	NaN	NaN
1.594	-17.332	-49.953	1070.465	-0.53516	0.78711	0.063477	-31.595	259.82	638.97	-0.19912	0.68095	-0.042676	-94.207	-333.42	2284.26	-1.3823	1.605	-0.0019531	NaN	NaN	NaN	NaN	NaN	NaN
1.596	-38.478	-73.152	1066.746	-0.57324	0.76807	0.069824	-42.61	234.815	575.37	-0.1747	0.65039	-0.049707	-69.033	-312.16	2344.57	-1.3848	1.6777	0.0019531	NaN	NaN	NaN	NaN	NaN	NaN
1.598	-11.081	-97.689	1084.443	-0.59424	0.76904	0.081543	-31.712	234.49	554.07	-0.15479	0.62695	-0.049316	5.212	-299.86	2437.2	-1.4058	1.7427	0.017578	NaN	NaN	NaN	NaN	NaN	NaN
1.6	-35.435	-120.015	1114.105	-0.62256	0.78955	0.10205	3.075	230.91	508.34	-0.13223	0.60488	-0.052051	33.034	-301.77	2490.43	-1.4351	1.7817	0.03125	NaN	NaN	NaN	NaN	NaN	NaN
1.602	11.144	-130.426	1126.975	-0.62525	0.81616	0.11499	-13.647	186.528	462.15	-0.11133	0.57744	-0.054004	59.979	-337.15	2549.28	-1.5371	1.8574	0.057617	NaN	NaN	NaN	NaN	NaN	NaN
1.604	-15.246	-150.287	1174.915	-0.60742	0.84375	0.12305	-3.39400000000001	191.682	477.51	-0.088281	0.56026	-0.06377	52.996	-326.28	2581.16	-1.6316	1.8997	0.082763	NaN	NaN	NaN	NaN	NaN	NaN
1.606	-34.385	-147.0281	1201.979	-0.54199	0.87012	0.11768	-5.774	163.132	445.21	-0.062305	0.53643	-0.059668	59.853	-294.89	2642.64	-1.7476	1.9458	0.11865	NaN	NaN	NaN	NaN	NaN	NaN
1.608	-54.683	-137.573	1231.338	-0.49609	0.87891	0.10352	8.11	146.996	417.95	-0.04248	0.51318	-0.066895	59.195	-242.21	2622.56	-1.9199	2.0234	0.15332	NaN	NaN	NaN	NaN	NaN	NaN
1.61	-107.043	-125.654	1237.266	-0.39355	0.88672	0.056641	37.754	169.6	406.24	-0.022949	0.49043	-0.068652	14.45	-213.06	2619.6	-2.0117	2.0742	0.16748	NaN	NaN	NaN	NaN	NaN	NaN
1.612	-104.429	-122.11	1253.824	-0.31836	0.88135	0.011963	17.481	136.68	364.67	-0.0053711	0.46572	-0.076953	-29.914	-207.914	2605.54	-2.1211	2.168	0.17871	NaN	NaN	NaN	NaN	NaN	NaN
1.614	-122.45	-125.814	1266.713	-0.25684	0.87305	-0.03418	46.698	151.194	377.45	0.011035	0.44619	-0.079688	-77.51	-187.936	2609.04	-2.1318	2.1855	0.17969	NaN	NaN	NaN	NaN	NaN	NaN
1.616	-122.736	-130.9126	1292.765	-0.20801	0.85596	-0.087402	45.455	164.754	331.89	0.022852	0.42217	-0.082129	-90.5	-151.589	2599.73	-2.105	2.1685	0.16602	NaN	NaN	NaN	NaN	NaN	NaN
1.618	-140.652	-138.848	1312.745	-0.20166	0.8501	-0.11328	36.751	134.611	306.03	0.035156	0.40576	-0.083496	-151.79	-101.3845	2603.7	-2.0332	2.1191	0.14355	NaN	NaN	NaN	NaN	NaN	NaN
1.62	-117.339	-141.347	1350.136	-0.22266	0.84961	-0.14844	55.501	149.018	315.96	0.048828	0.39365	-0.08623	-162.755	-44.991	2564.94	-1.9844	2.0957	0.11914	NaN	NaN	NaN	NaN	NaN	NaN
1.622	-99.158	-145.698	1384.301	-0.26587	0.86279	-0.16919	28.482	120.376	273.01	0.061328	0.38086	-0.087402	-196.352	-21.642	2573.05	-1.8823	2.061	0.08252	NaN	NaN	NaN	NaN	NaN	NaN
1.624	-115.435	-160.366	1420.108	-0.32324	0.88818	-0.18652	25.572	120.26	255.04	0.069922	0.3711	-0.088184	-187.713	-10.58	2562.14	-1.7988	2.0449	0.066406	NaN	NaN	NaN	NaN	NaN	NaN
1.626	-80.066	-158.424	1456.862	-0.4082	0.92969	-0.18848	33.208	159.831	229.845	0.077929	0.36015	-0.09082	-220.365	-24.027	2577.54	-1.7671	2.0415	0.068848	NaN	NaN	NaN	NaN	NaN	NaN
1.628	-100.426	-150.795	1501.024	-0.45313	0.96289	-0.19189	5.50500000000001	136.69	175.586	0.094238	0.34766	-0.089844	-203.819	-32.79	2569.76	-1.7202	2.022	0.081543	NaN	NaN	NaN	NaN	NaN	NaN
1.63	-82.506	-130.9589	1544.663	-0.51318	1.0239	-0.19678	-0.828999999999994	134.389	168.407	0.10508	0.34101	-0.093066	-228.671	-50.616	2577.18	-1.6992	1.9932	0.089356	NaN	NaN	NaN	NaN	NaN	NaN
1.632	-125.09	-127.638	1568.68	-0.54614	1.0632	-0.20239	-16.928	116.941	133.335	0.11621	0.33213	-0.085547	-245.37	-53.642	2571.55	-1.6714	1.9497	0.099121	NaN	NaN	NaN	NaN	NaN	NaN
1.634	-135.178	-140.995	1600.164	-0.55859	1.1016	-0.20215	-43.692	73.108	115.273	0.12988	0.32119	-0.091016	-234.68	-54.015	2568.45	-1.6284	1.8735	0.11035	NaN	NaN	NaN	NaN	NaN	NaN
1.636	-129.008	-169.4758	1619.521	-0.56299	1.1528	-0.2041	-8.697	98.545	126.761	0.14024	0.31064	-0.092188	-217.579	-43.083	2554.68	-1.6133	1.8359	0.11377	NaN	NaN	NaN	NaN	NaN	NaN
1.638	-121.979	-187.8082	1635.013	-0.56055	1.1729	-0.19971	-39.05	82.078	106.407	0.1499	0.29443	-0.094238	-210.625	-48.203	2557.86	-1.5698	1.7759	0.12402	NaN	NaN	NaN	NaN	NaN	NaN
1.64	-111.135	-188.4322	1636.523	-0.56348	1.2031	-0.19824	-64.217	70.841	116.338	0.1544	0.28174	-0.099803	-142.21641	-27.981	2523.49	-1.5425	1.7309	0.13379	NaN	NaN	NaN	NaN	NaN	NaN
1.642	-97.926	-191.144	1649.709	-0.56275	1.2161	-0.19727	-36.678	98.771	104.476	0.154	0.26807	-0.10469	-135.4116	8.45599999999999	2514.49	-1.5171	1.6938	0.13672	NaN	NaN	NaN	NaN	NaN	NaN
1.644	-63.979	-181.765	1662.449	-0.57422	1.2227	-0.19629	-64.854	56.853	65.324	0.154	0.25283	-0.10782	-96.429	82.099	2508.71	-1.4692	1.6587	0.13232	NaN	NaN	NaN	NaN	NaN	NaN
1.646	-77.467	-180.69	1681.272	-0.60938	1.2188	-0.18604	-48.417	59.0745	81.025	0.15508	0.24278	-0.10918	-72.419	114.679	2494.95	-1.437	1.6411	0.12695	NaN	NaN	NaN	NaN	NaN	NaN
1.648	-47.208	-175.941	1697.217	-0.64795	1.2222	-0.17724	-51.295	51.195	53.8194	0.15381	0.23438	-0.1123	-15.215	163.104	2454.62	-1.3555	1.6074	0.11475	NaN	NaN	NaN	NaN	NaN	NaN
1.65	-40.241	-177.821	1728.68	-0.7002	1.2188	-0.16064	-75.961	17.3928	43.8275	0.15518	0.22656	-0.11172	-0.317000000000007	170.927	2429.99	-1.2999	1.5811	0.10498	NaN	NaN	NaN	NaN	NaN	NaN
1.652	-60.336	-171.808	1762.23	-0.76904	1.2251	-0.13965	-45.002	30.8825	57.911	0.15566	0.21416	-0.11465	54.647	205.544	2379.43	-1.2422	1.5576	0.09668	NaN	NaN	NaN	NaN	NaN	NaN
1.654	-74.043	-160.4448	1777.101	-0.80615	1.231	-0.13184	-62.615	6.253	38.712	0.15566	0.20635	-0.11426	50.506	207.567	2314.91	-1.187	1.5278	0.083984	NaN	NaN	NaN	NaN	NaN	NaN
1.656	-98.456	-146.638	1777.631	-0.85938	1.2471	-0.10693	-47.641	1.205	45.7492	0.15449	0.19531	-0.12051	48.74	193.3421	2256.51	-1.1616	1.5181	0.083984	NaN	NaN	NaN	NaN	NaN	NaN
1.658	-108.42	-138.764	1799.755	-0.8855	1.2542	-0.098142	-23.316	27.3474	61.9809	0.1543	0.18262	-0.11719	48.694	159.1008	2170.61	-1.1191	1.498	0.08252	NaN	NaN	NaN	NaN	NaN	NaN
1.66	-130.417	-140.921	1822.95	-0.8999	1.2642	-0.098145	-21.653	6.333	31.1643	0.1542	0.17666	-0.12422	35.764	105.171	2127.51	-1.0796	1.4819	0.084717	NaN	NaN	NaN	NaN	NaN	NaN
1.662	-111.119	-148.146	1839.748	-0.89404	1.2759	-0.1123	-7.10499999999999	42.1222	38.4618	0.15332	0.16504	-0.13096	26.505	60.972	2076.965	-1.043	1.4629	0.090332	NaN	NaN	NaN	NaN	NaN	NaN
1.664	-125.554	-153.8132	1853.461	-0.88379	1.2813	-0.12305	-0.198999999999998	45.016	32.97069	0.16152	0.15684	-0.13134	-18.926	70.264	2023.334	-0.98828	1.4277	0.091309	NaN	NaN	NaN	NaN	NaN	NaN
1.666	-142.286	-151.121	1859.054	-0.85693	1.2876	-0.15137	-11.854	4.0476	20.249	0.16309	0.14834	-0.13633	-46.223	97.906	1982.869	-0.95752	1.4126	0.097656	NaN	NaN	NaN	NaN	NaN	NaN
1.668	-110.244	-148.842	1881.807	-0.83448	1.2896	-0.16699	21.815	12.16	52.4015	0.16309	0.13721	-0.13818	-103.681	139.51	1947.748	-0.88867	1.3652	0.083496	NaN	NaN	NaN	NaN	NaN	NaN
1.67	-130.683	-147.753	1885.95	-0.82373	1.2954	-0.18213	-9.126	0.488	24.88945	0.16778	0.12998	-0.13926	-99.37	172.65	1887.874	-0.84131	1.3311	0.074951	NaN	NaN	NaN	NaN	NaN	NaN
1.672	-119.721	-143.402	1905.447	-0.8335	1.2925	-0.18213	-1.116	-1.858	36.58868	0.16768	0.11856	-0.14141	-117.691	208.625	1854.916	-0.78516	1.293	0.067383	NaN	NaN	NaN	NaN	NaN	NaN
1.674	-145.179	-145.911	1932.741	-0.85107	1.2954	-0.17725	26.346	47.822	56.484	0.16963	0.108	-0.14453	-123.37856	225.919	1782.158	-0.72021	1.2446	0.055664	NaN	NaN	NaN	NaN	NaN	NaN
1.676	-121.668	-124.706	1953.488	-0.90576	1.3071	-0.15332	-23.202	26.468	41.5873	0.17071	0.099998	-0.14229	-166.1884	241.8868	1732.66	-0.68604	1.2192	0.049316	NaN	NaN	NaN	NaN	NaN	NaN
1.678	-153.954	-112.09283	1976.982	-0.96582	1.3155	-0.12305	3.28399999999999	38.012	54.4247	0.1709	0.09375	-0.14746	-182.462	270.644	1649.823	-0.61426	1.1738	0.040527	NaN	NaN	NaN	NaN	NaN	NaN
1.68	-155.546	-84.343	1981.962	-1.019	1.3354	-0.096191	16.352	34.521	39.1148	0.16738	0.083399	-0.14873	-223.372	275.202	1589.844	-0.5625	1.1397	0.033447	NaN	NaN	NaN	NaN	NaN	NaN
1.682	-180.453	-91.079	1989.284	-1.0942	1.3716	-0.059082	-19.306	-13.0389	35.13232	0.16172	0.075293	-0.14326	-192.838	284.6785	1488.302	-0.51025	1.1021	0.027832	NaN	NaN	NaN	NaN	NaN	NaN
1.684	-162.588	-85.916	1969.902	-1.1304	1.3911	-0.038574	-19.778	-1.423	77.695	0.15742	0.067481	-0.14326	-216.227	261.706	1447.608	-0.43896	1.0493	0.016602	NaN	NaN	NaN	NaN	NaN	NaN
1.686	-138.691	-93.2104	1957.764	-1.1772	1.4341	-0.0043945	-27.266	-17.6252	49.242	0.15439	0.061719	-0.14199	-198.455	257.56	1372.486	-0.4043	1.0176	0.015625	NaN	NaN	NaN	NaN	NaN	NaN
1.688	-156.435	-102.7142	1962.721	-1.2058	1.4583	0.017823	-53.049	-18.5307	48.283	0.14746	0.057129	-0.14404	-193.899	271.029	1341.178	-0.33643	0.96533	0.0043945	NaN	NaN	NaN	NaN	NaN	NaN
1.69	-107.143	-109.864	1978.688	-1.2261	1.4868	0.035645	-40.135	31.0086	35.78324	0.14287	0.049316	-0.14365	-146.4898	317.772	1251.426	-0.29273	0.92822	-0.0046386	NaN	NaN	NaN	NaN	NaN	NaN
1.692	-108.231	-115.113	1976.009	-1.2461	1.5098	0.050781	-76.118	16.9905	15.4983	0.12696	0.04209	-0.14795	-155.276	311.012	1233.904	-0.25195	0.88623	-0.0083008	NaN	NaN	NaN	NaN	NaN	NaN
1.694	-104.126	-101.814	1964.951	-1.2524	1.5142	0.060059	-64.125	28.4994	50.45047	0.11094	0.034668	-0.14951	-77.195	323.197	1179.002	-0.1958	0.83398	-0.01416	NaN	NaN	NaN	NaN	NaN	NaN
1.696	-95.702	-97.822	1981.33	-1.2593	1.5298	0.075684	-63.909	32.67	44.0254	0.086133	0.032617	-0.15059	-73.899	275.9244	1172.084	-0.17285	0.81055	-0.019531	NaN	NaN	NaN	NaN	NaN	NaN
1.698	-91.283	-80.057	1988.517	-1.2666	1.5361	0.084229	-83.494	2.1171	29.2333	0.057129	0.032227	-0.14941	-9.062	299.135	1111.877	-0.12354	0.75928	-0.024414	NaN	NaN	NaN	NaN	NaN	NaN
1.7	-84.648	-69.09022	2004.172	-1.2715	1.5352	0.091797	-54.05	23.08002	65.981	0.024023	0.038282	-0.14326	12.083	281.0061	1094.942	-0.092775	0.72241	-0.035401	NaN	NaN	NaN	NaN	NaN	NaN
1.702	-108.216	-50.967	2000.49	-1.2754	1.5391	0.097656	-71.459	-0.578999999999999	56.385	-0.0057617	0.051758	-0.13818	67.867	313.3616	1019.131	-0.059082	0.68994	-0.046875	NaN	NaN	NaN	NaN	NaN	NaN
1.704	-85.909	-55.545	2001.729	-1.2729	1.5396	0.10352	-46.341	-20.556	43.0976	-0.031153	0.066992	-0.13389	49.307	276.397	996.135	-0.024414	0.6416	-0.056152	NaN	NaN	NaN	NaN	NaN	NaN
1.706	-111.303	-65.647	1990.492	-1.2695	1.5313	0.10205	-31.162	12.4476	29.688	-0.05332	0.086035	-0.125	97.774	285.608	897.787	-0.0029297	0.62109	-0.068359	NaN	NaN	NaN	NaN	NaN	NaN
1.708	-127.112	-82.3031	1959.513	-1.2566	1.5207	0.10351	-91.237	4.2817	-4.252	-0.069824	0.10645	-0.12012	91.211	237.35	840.199	0.02832	0.58594	-0.083496	NaN	NaN	NaN	NaN	NaN	NaN
1.71	-120.64	-70.685	1937.322	-1.2422	1.5078	0.10547	-20.066	25.582	34.9781	-0.078223	0.12451	-0.11885	88.785	265.436	772.737	0.045898	0.55298	-0.098389	NaN	NaN	NaN	NaN	NaN	NaN
1.712	-129.561	-43.91	1930.951	-1.2197	1.4883	0.10059	-13.332	29.2757	40.8169	-0.075391	0.14033	-0.11514	79.747	234.733	738.199	0.060059	0.52979	-0.11523	NaN	NaN	NaN	NaN	NaN	NaN
1.714	-89.087	-25.442	1933.327	-1.2031	1.4795	0.098633	-32.942	-9.0332	34.1504	-0.064062	0.15713	-0.11435	49.158	268.62022	687.447	0.065918	0.50195	-0.11182	NaN	NaN	NaN	NaN	NaN	NaN
1.716	-121.645	-29.395	1940.417	-1.1699	1.4531	0.096191	2.58900000000001	-1.9792	48.8006	-0.04834	0.16933	-0.11826	23.218	240.1789	647.105	0.058594	0.47656	-0.12354	NaN	NaN	NaN	NaN	NaN	NaN
1.718	-100.308	-30.9673	1943.541	-1.1455	1.4356	0.09668	-16.608	-4.5011	24.19166	-0.022949	0.17383	-0.12012	46.424	295.8558	588.982	0.049316	0.47559	-0.14307	NaN	NaN	NaN	NaN	NaN	NaN
1.72	-132.477	-34.942	1952.401	-1.123	1.4219	0.088867	-3.63300000000001	0.610000000000003	50.407	-0.00058596	0.17617	-0.12666	16.59	262.831	560.222	0.050537	0.47998	-0.12745	NaN	NaN	NaN	NaN	NaN	NaN
1.722	-98.848	-21.5548	1939.983	-1.0894	1.4048	0.083984	34.061	34.267	45.9823	0.025	0.16992	-0.13476	28.094	306.34226	514.968	0.04834	0.48438	-0.11572	NaN	NaN	NaN	NaN	NaN	NaN
1.724	-155.343	-21.1638	1926.411	-1.0757	1.4009	0.085938	-17.237	21.6697	9.906	0.048437	0.15547	-0.13476	-10.446	270.03319	460.418	0.04248	0.49854	-0.10547	NaN	NaN	NaN	NaN	NaN	NaN
1.726	-157.795	-5.214	1904.563	-1.0508	1.3965	0.083984	-3.46700000000001	24.707	35.937	0.07207	0.14238	-0.13603	-39.146	302.0245	413.152	0.043457	0.49902	-0.1001	NaN	NaN	NaN	NaN	NaN	NaN
1.728	-174.183	-19.297	1908.706	-1.0391	1.3975	0.08667	27.799	35.0134	35.7562	0.086426	0.12598	-0.13818	-73.1408	208.612	373.004	0.050781	0.49414	-0.087891	NaN	NaN	NaN	NaN	NaN	NaN
1.73	-165.867	-15.9842	1866.624	-1.0259	1.395	0.097168	-13.034	-0.342000000000002	41.6565	0.10801	0.11133	-0.1377	-114.2329	199.984	337.497	0.054932	0.48608	-0.088868	NaN	NaN	NaN	NaN	NaN	NaN
1.732	-167.25	-29.724	1857.056	-1.0132	1.397	0.10352	7.92599999999999	8.995	86.9978	0.11797	0.090723	-0.13486	-137.359	131.099	282.156	0.062012	0.47705	-0.089844	NaN	NaN	NaN	NaN	NaN	NaN
1.734	-162.188	-28.09102	1819.958	-1.0059	1.3945	0.10986	-16.552	-27.957	67.709	0.13125	0.073145	-0.14189	-143.204	178.0941	242.519	0.07373	0.45898	-0.096191	NaN	NaN	NaN	NaN	NaN	NaN
1.736	-134.045	-31.3347	1820.986	-0.98975	1.3931	0.11865	-35.839	-49.994	62.921	0.13447	0.062793	-0.14267	-129.125	156.806	201.119	0.082031	0.45166	-0.10547	NaN	NaN	NaN	NaN	NaN	NaN
1.738	-130.983	-13.471	1793.351	-0.97681	1.386	0.12232	-21.846	-27.471	95.2522	0.13379	0.053223	-0.14844	-151.685	196.628	190.805	0.097168	0.42139	-0.12451	NaN	NaN	NaN	NaN	NaN	NaN
1.74	-100.122	0.177	1774.269	-0.95459	1.3813	0.12207	-54.877	-38.746	121.5227	0.1334	0.053906	-0.14776	-117.644	135.123	151.276	0.10254	0.41138	-0.12842	NaN	NaN	NaN	NaN	NaN	NaN
1.742	-103.542	5.2067	1769.412	-0.92969	1.3691	0.11865	-45.594	-45.481	193.7425	0.12949	0.055078	-0.15049	-116.63	148.2788	142.5	0.104	0.38281	-0.14453	NaN	NaN	NaN	NaN	NaN	NaN
1.744	-90.136	-2.406	1746.03	-0.91016	1.3613	0.11768	-39.687	-28.672	218.6	0.12519	0.065625	-0.15205	-62.892	98.759	113.897	0.097168	0.36133	-0.15869	NaN	NaN	NaN	NaN	NaN	NaN
1.746	-102.955	1.1122	1731.487	-0.86914	1.3447	0.11279	-44.705	-68.393	269.88	0.12002	0.079688	-0.16094	-41.813	122.516	129.118	0.088867	0.34766	-0.16406	NaN	NaN	NaN	NaN	NaN	NaN
1.748	-137.117	7.85868	1701.851	-0.83887	1.333	0.10962	-10.211	-70.836	372.128	0.11182	0.095215	-0.16309	-4.422	89.9056	90.426	0.068359	0.33398	-0.17188	NaN	NaN	NaN	NaN	NaN	NaN
1.75	-104.373	17.6801	1692.471	-0.81152	1.3203	0.104	-53.509	-61.725	459.279	0.092578	0.11728	-0.16845	-17.92	100.103	92.56	0.041504	0.3252	-0.17114	NaN	NaN	NaN	NaN	NaN	NaN
1.752	-109.946	24.0273	1645.391	-0.77344	1.2969	0.090332	-73.433	-49.236	569.9304	0.069043	0.14043	-0.17685	-1.16300000000001	66.492	41.3156	0.016113	0.32227	-0.16602	NaN	NaN	NaN	NaN	NaN	NaN
1.754	-102.262	25.7208	1612.141	-0.75195	1.2832	0.098145	-4.577	41.41	690.704	0.022168	0.16504	-0.17881	17.406	59.701	75.4172	-0.018066	0.31787	-0.15967	NaN	NaN	NaN	NaN	NaN	NaN
1.756	-102.156	19.7097	1581.002	-0.71973	1.2637	0.07959	-33.368	75.611	823.567	-0.028906	0.19355	-0.18867	46.671	13.5524	56.5711	-0.034668	0.31738	-0.1582	NaN	NaN	NaN	NaN	NaN	NaN
1.758	-73.947	16.528	1566.165	-0.69019	1.2473	0.082276	19.194	112.105	996.076	-0.085938	0.22754	-0.19531	52.681	23.0937	93.895	-0.067383	0.31787	-0.1499	NaN	NaN	NaN	NaN	NaN	NaN
1.76	-67.858	11.933	1549.955	-0.66309	1.231	0.074219	35.105	147.006	1145.184	-0.14687	0.26358	-0.2	82.58028	4.1573	57.3605	-0.088379	0.32275	-0.14355	NaN	NaN	NaN	NaN	NaN	NaN
1.762	-87.3	23.02	1532.328	-0.63428	1.2017	0.067871	-19.39	104.146	1249.88511	-0.21055	0.30713	-0.20234	74.3418	6.357	75.6454	-0.098145	0.3208	-0.14209	NaN	NaN	NaN	NaN	NaN	NaN
1.764	-50.815	24.066	1527.46	-0.62305	1.1914	0.06543	84.86	76.285	1387.668	-0.28594	0.34854	-0.2125	99.9678	-1.952	60.5571	-0.104	0.31836	-0.13721	NaN	NaN	NaN	NaN	NaN	NaN
1.766	-75.8	48.4907	1508.787	-0.59033	1.1655	0.057617	93.349	4.85	1471.684	-0.37149	0.39717	-0.21768	79.688	-16.9245	77.540015	-0.1045	0.31446	-0.13135	NaN	NaN	NaN	NaN	NaN	NaN
1.768	-78.28	60.33954	1482.471	-0.57495	1.1457	0.053955	72.648	-99.097	1515.054	-0.46777	0.4541	-0.23145	87.274	0.321999999999999	49.501	-0.095215	0.31104	-0.12793	NaN	NaN	NaN	NaN	NaN	NaN
1.77	-126.679	74.8852	1455.774	-0.56055	1.1289	0.051758	97.601	-140.134	1522.432	-0.58301	0.51465	-0.2457	53.806	4.0516	87.753	-0.077637	0.29346	-0.12891	NaN	NaN	NaN	NaN	NaN	NaN
1.772	-108.969	70.676	1426.692	-0.53857	1.1079	0.046875	55.828	-174.027	1441.8734	-0.71201	0.59092	-0.25821	38.634	48.8665	73.3019	-0.060547	0.28369	-0.12842	NaN	NaN	NaN	NaN	NaN	NaN
1.774	-133.482	71.819	1423.108	-0.52441	1.0957	0.049316	67.9268	-180.552	1443.1405	-0.8667	0.68545	-0.26329	-5.716	46.432	92.559	-0.03418	0.25928	-0.13281	NaN	NaN	NaN	NaN	NaN	NaN
1.776	-101.207	75.418	1397.092	-0.50928	1.0708	0.046387	13.21642	-146.481	1423.5223	-1.0419	0.81279	-0.24756	-36.058	61.4262	57.1511	-0.010742	0.23828	-0.13794	NaN	NaN	NaN	NaN	NaN	NaN
1.778	-107.553	72.70615	1363.804	-0.49366	1.0576	0.042969	-50.4414	-159.826	1416.3994	-1.2305	0.98438	-0.21387	-98.022	25.5763	66.7503	0.0073242	0.2207	-0.14258	NaN	NaN	NaN	NaN	NaN	NaN
1.78	-106.146	76.101	1342.326	-0.48584	1.0435	0.04248	-23.8497	-164.91	1475.721	-1.4157	1.1807	-0.1707	-82.593	33.13	54.1226	0.033203	0.20117	-0.14404	NaN	NaN	NaN	NaN	NaN	NaN
1.782	-99.252	78.89	1315.605	-0.47607	1.02	0.048828	-56.172	-150.208	1489.704	-1.5672	1.4039	-0.11543	-98.8518	-1.7532	74.701	0.04248	0.18896	-0.14551	NaN	NaN	NaN	NaN	NaN	NaN
1.784	-86.779	88.409	1269.247	-0.47119	1.0122	0.04248	-78.4264	-133.49	1507.801	-1.6547	1.6226	-0.048242	-115.1892	14.4238	65.044	0.063477	0.16357	-0.14844	NaN	NaN	NaN	NaN	NaN	NaN
1.786	-91.271	86.332	1263.288	-0.47021	0.99072	0.045898	-109.3768	-59.23	1530.751	-1.6492	1.7851	0.00078116	-132.877	-17.3867	62.686	0.088379	0.14795	-0.14917	NaN	NaN	NaN	NaN	NaN	NaN
1.788	-79.209	84.477	1254.567	-0.47021	0.97314	0.041016	-180.23	0.340000000000003	1518.356	-1.5703	1.8789	0.024902	-129.465	-3.66399999999999	46.8401	0.10742	0.13428	-0.14551	NaN	NaN	NaN	NaN	NaN	NaN
1.79	-59.095	92.5346	1243.339	-0.46973	0.9668	0.045898	-115.364	-9.31	1507.241	-1.4041	1.8967	0.03164	-138.401	-33.487	42.7864	0.14014	0.11523	-0.14844	NaN	NaN	NaN	NaN	NaN	NaN
1.792	-82.02	109.761	1214.412	-0.46289	0.94922	0.04541	-96.734	-9.75	1519.292	-1.2153	1.8649	0.0020506	-109.392	0.881999999999998	48.6864	0.14941	0.10449	-0.14893	NaN	NaN	NaN	NaN	NaN	NaN
1.794	-83.125	106.9412	1189.009	-0.45141	0.93701	0.038574	-137.01	-106.632	1555.251	-1.0118	1.7731	-0.083496	-110.526	-8.999	47.5289	0.18213	0.07959	-0.14648	NaN	NaN	NaN	NaN	NaN	NaN
1.796	-62.202	109.1949	1172.713	-0.44287	0.92432	0.033203	-30.765	-221.804	1619.8913	-0.81778	1.6203	-0.19834	-92.833	28.522	74.924	0.2041	0.063232	-0.15357	NaN	NaN	NaN	NaN	NaN	NaN
1.798	-67.928	114.972	1135.436	-0.42334	0.90088	0.026855	-60.302	-288.7838	1652.2442	-0.63818	1.4399	-0.29541	-68.543	3.084	65.163	0.21729	0.047363	-0.15723	NaN	NaN	NaN	NaN	NaN	NaN
1.8	-57.815	111.7051	1105.415	-0.41797	0.89063	0.022461	-103.428	-378.127	1668.9054	-0.50068	1.2606	-0.34405	-63.079	24.8901	73.448	0.2373	0.022461	-0.16699	NaN	NaN	NaN	NaN	NaN	NaN
1.802	-42.791	114.1618	1081.991	-0.39697	0.86426	0.011719	-110.853	-385.281	1713.31088	-0.41601	1.1044	-0.35694	-67.262	2.992	69.593	0.24072	0.012695	-0.1709	NaN	NaN	NaN	NaN	NaN	NaN
1.804	-14.82	113.76646	1062.623	-0.3894	0.84399	0.014648	-184.4618	-369.351	1761.285	-0.37461	0.97198	-0.33975	-9.575	40.4179	71.7008	0.2373	-0.003418	-0.18115	NaN	NaN	NaN	NaN	NaN	NaN
1.806	-32.419	118.304	1032.829	-0.37891	0.82031	0.0068359	-132.401	-381.187	1803.241	-0.36611	0.85127	-0.30166	20.977	39.6633	45.235	0.22852	-0.01416	-0.18335	NaN	NaN	NaN	NaN	NaN	NaN
1.808	-30.785	117.869	1009.834	-0.36865	0.79932	-0.0039063	-83.406	-322.414	1848.022	-0.36377	0.75586	-0.28125	32.777	75.711	58.01002	0.21338	-0.021484	-0.18945	NaN	NaN	NaN	NaN	NaN	NaN
1.81	-26.886	113.719	1004.284	-0.36768	0.78516	-0.0087891	-67.644	-267.266	1892.319	-0.35293	0.68418	-0.27627	72.512	36.94	31.085	0.1875	-0.024414	-0.19434	NaN	NaN	NaN	NaN	NaN	NaN
1.812	-3.51900000000001	124.839	978.68	-0.36475	0.76025	-0.0078125	25.411	-239.7256	1977.309	-0.34326	0.6376	-0.29228	78.967	40.296	47.441	0.17725	-0.020996	-0.18506	NaN	NaN	NaN	NaN	NaN	NaN
1.814	-18.374	125.917	960.747	-0.35376	0.7439	-0.0073242	46.407	-157.61	2052.453	-0.35068	0.62549	-0.31963	72.097	4.934	28.844	0.13574	-0.013184	-0.20313	NaN	NaN	NaN	NaN	NaN	NaN
1.816	-32.862	129.4959	935.918	-0.34131	0.72656	-0.0087891	71.951	-140.819	2034.56	-0.40469	0.64863	-0.3461	89.813	30.1596	51.8142	0.11255	0.0041505	-0.20776	NaN	NaN	NaN	NaN	NaN	NaN
1.818	-30.378	122.927	932.18	-0.32373	0.70752	-0.0083008	151.026	-144.015	2033.0205	-0.51611	0.71729	-0.34424	98.9215	25.5365	64.6808	0.098633	0.027832	-0.19287	NaN	NaN	NaN	NaN	NaN	NaN
1.82	-44.366	131.04	899.505	-0.31641	0.69678	-0.012207	153.431	-122.167	2040.315	-0.68526	0.84541	-0.3001	55.352	56.645	92.226	0.069824	0.06543	-0.18408	NaN	NaN	NaN	NaN	NaN	NaN
1.822	-58.473	131.96	868.384	-0.29199	0.67188	-0.023926	168.22915	-178.738	2049.109	-0.84453	0.99922	-0.24296	51.284	39.747	64.9856	0.062988	0.08252	-0.18066	NaN	NaN	NaN	NaN	NaN	NaN
1.824	-56.206	126.23294	841.173	-0.27929	0.64917	-0.031495	193.892	-159.958	2077.21	-0.95742	1.1551	-0.17461	22.059	37.2247	76.378	0.061035	0.11475	-0.17773	NaN	NaN	NaN	NaN	NaN	NaN
1.826	-35.955	116.206	825.665	-0.26807	0.6333	-0.039063	131.15	-167.23	2088.693	-1.0131	1.2905	-0.11504	-11.203	14.3367	62.8701	0.076172	0.13696	-0.18115	NaN	NaN	NaN	NaN	NaN	NaN
1.828	-45.394	130.298	824.022	-0.25684	0.60742	-0.048828	120.412	-245.843	2137.901	-1.02	1.395	-0.089844	-29.299	17.6507	89.764	0.094727	0.1543	-0.18359	NaN	NaN	NaN	NaN	NaN	NaN
1.83	-34.808	129.839	799.508	-0.24805	0.59766	-0.05127	97.823	-254.071	2210.393	-0.99288	1.4501	-0.10655	-27.631	13.2941	68.784	0.125	0.16797	-0.19629	NaN	NaN	NaN	NaN	NaN	NaN
1.832	-32.171	120.496	786.263	-0.23486	0.58008	-0.057129	74.278	-300.268	2209.639	-0.94844	1.4668	-0.16182	-70.934	17.7896	79.102	0.13965	0.1709	-0.20361	NaN	NaN	NaN	NaN	NaN	NaN
1.834	-40.578	123.619	760.198	-0.22192	0.56811	-0.062256	120.82	-302.348	2240.176	-0.90117	1.4352	-0.23408	-69.587	13.518	49.3055	0.16797	0.17285	-0.21777	NaN	NaN	NaN	NaN	NaN	NaN
1.836	-27.679	129.5491	734.814	-0.20947	0.56104	-0.070801	65.681	-236.469	2290.004	-0.87041	1.3856	-0.29307	-108.5981	-2.813	73.279	0.17578	0.17334	-0.22339	NaN	NaN	NaN	NaN	NaN	NaN
1.838	-44.645	139.9218	719.195	-0.1875	0.53906	-0.080078	69.787	-260.517	2301.129	-0.86328	1.3359	-0.33008	-114.1763	0.606000000000002	42.706	0.18115	0.17627	-0.23291	NaN	NaN	NaN	NaN	NaN	NaN
1.84	-40.735	137.658	727.929	-0.17822	0.53418	-0.080078	75.507	-230.6964	2344.998	-0.87422	1.31	-0.34238	-130.59439	6.385	67.532	0.16455	0.18262	-0.23877	NaN	NaN	NaN	NaN	NaN	NaN
1.842	-47.708	143.223	704.596	-0.15967	0.52197	-0.086914	-3.074	-179.711	2320.27	-0.89433	1.2986	-0.33935	-112.57252	39.988	44.8114	0.14746	0.18994	-0.23389	NaN	NaN	NaN	NaN	NaN	NaN
1.844	-32.016	145.346	671.037	-0.14283	0.5083	-0.090332	0.490000000000009	-199.294	2321.778	-0.92559	1.2955	-0.33389	-129.632	22.6776	84.703	0.11768	0.2085	-0.23438	NaN	NaN	NaN	NaN	NaN	NaN
1.846	-53.568	137.7016	645.573	-0.12598	0.49561	-0.09668	-22.18	-125.823	2359.672	-0.97412	1.2958	-0.33291	-100.9438	26.211	76.913	0.090088	0.23462	-0.22216	NaN	NaN	NaN	NaN	NaN	NaN
1.848	-45.825	129.836	631.921	-0.10156	0.47754	-0.099609	-101.727	-96.292	2311.1238	-1.0347	1.313	-0.34033	-126.9563	-8.65314	121.305	0.063477	0.26074	-0.21582	NaN	NaN	NaN	NaN	NaN	NaN
1.85	-4.287	129.9968	618.22	-0.088867	0.4668	-0.10156	-64.058	-104.355	2294.4472	-1.0872	1.364	-0.3583	-104.2367	-14.581	132.86548	0.031738	0.30273	-0.21094	NaN	NaN	NaN	NaN	NaN	NaN
1.852	-10.321	135.7612	589.134	-0.05957	0.44971	-0.1084	-91.663	-50.136	2295.804	-1.1043	1.4144	-0.37871	-61.553	-60.9696	147.432	0.015625	0.32129	-0.20898	NaN	NaN	NaN	NaN	NaN	NaN
1.854	-0.265999999999998	123.247	577.084	-0.044922	0.43359	-0.11231	-114.537	-106.499	2284.761	-1.0954	1.4469	-0.39863	-37.293	-52.027	146.715	-0.024902	0.35742	-0.21436	NaN	NaN	NaN	NaN	NaN	NaN
1.856	25.195	122.296	558.27	-0.028809	0.41992	-0.12109	-62.913	-88.427	2334.8592	-1.0707	1.4766	-0.43027	-47.174	-81.8797	201.178	-0.065918	0.38648	-0.22339	NaN	NaN	NaN	NaN	NaN	NaN
1.858	11.208	112.9	563.295	-0.013184	0.39453	-0.11914	-93.72	-29.647	2336.3964	-1.0527	1.5049	-0.45117	29.852	-65.743	236.3749	-0.12207	0.41943	-0.22461	NaN	NaN	NaN	NaN	NaN	NaN
1.86	5.281	125.2092	543.839	-0.0073242	0.38721	-0.11865	-39.596	-72.533	2330.554	-1.0522	1.5501	-0.48291	62.201	-106.7438	297.151	-0.22217	0.47656	-0.2207	NaN	NaN	NaN	NaN	NaN	NaN
1.862	1.747	130.1661	531.691	0.00097656	0.37158	-0.12402	-8	-32.374	2386.086	-1.0577	1.5911	-0.51182	80.571	-91.543	337.203	-0.27637	0.51367	-0.20508	NaN	NaN	NaN	NaN	NaN	NaN
1.864	-10.402	131.506	527.859	0.0053711	0.35913	-0.12792	3.803	-75.822	2358.8521	-1.0749	1.6271	-0.52744	95.128	-131.305	443.546	-0.38916	0.59131	-0.1748	NaN	NaN	NaN	NaN	NaN	NaN
1.866	-12.568	138.514	502.884	0.01416	0.35107	-0.12549	116.035	-143.85	2364.1895	-1.1029	1.6526	-0.53076	110.105	-53.575	582.73	-0.47021	0.65136	-0.15698	NaN	NaN	NaN	NaN	NaN	NaN
1.868	-11.172	126.065	468.09	0.017578	0.34131	-0.12842	120.867	-97.24	2364.517	-1.145	1.6704	-0.52881	95.215	-27.109	750.63855	-0.55371	0.71094	-0.14746	NaN	NaN	NaN	NaN	NaN	NaN
1.87	-32.726	109.4283	464.486	0.015137	0.3374	-0.12842	118.942	-145.361	2333.4857	-1.1903	1.687	-0.52324	121.863	88.749	876.541	-0.67188	0.79102	-0.15771	NaN	NaN	NaN	NaN	NaN	NaN
1.872	-16.062	102.336	454.322	0.020996	0.33398	-0.12939	147.664	-103.365	2350.2126	-1.2359	1.6986	-0.51748	138.081	95.1663	1026.206	-0.73535	0.83203	-0.16016	NaN	NaN	NaN	NaN	NaN	NaN
1.874	-2.391	110.67	425.482	0.026123	0.33252	-0.13061	95.635	-16.1669	2316.918	-1.2679	1.7063	-0.51592	75.722	150.593	1188.826	-0.89404	0.92236	-0.17188	NaN	NaN	NaN	NaN	NaN	NaN
1.876	-9.777	105.296	418.946	0.032227	0.33105	-0.12988	157.485	-57.049	2277.813	-1.2865	1.7079	-0.52305	50.389	133.9247	1372.075	-1.0376	1.0073	-0.17163	NaN	NaN	NaN	NaN	NaN	NaN
1.878	-8.16800000000001	114.92	409.421	0.031738	0.33057	-0.12842	169.221	4.85	2304.6385	-1.2871	1.7031	-0.53711	64.405	168.754	1540.5033	-1.2012	1.0957	-0.16943	NaN	NaN	NaN	NaN	NaN	NaN
1.88	4.248	115.7804	393.409	0.031738	0.32861	-0.13623	132.365	26.1815	2265.7347	-1.2749	1.6888	-0.54991	68.591	87.491	1603.3954	-1.4336	1.2402	-0.14063	NaN	NaN	NaN	NaN	NaN	NaN
1.882	-20.362	121.0109	381.581	0.025391	0.32861	-0.12939	171.482	29.242	2244.139	-1.2547	1.6629	-0.5666	-7.571	58.373	1684.072	-1.5483	1.3237	-0.11426	NaN	NaN	NaN	NaN	NaN	NaN
1.884	-43.805	107.4469	371.283	0.022949	0.33203	-0.12939	132.777	127.945	2251.745	-1.2297	1.6332	-0.57519	-42.5111	-92.917	1715.502	-1.7788	1.52	-0.03418	NaN	NaN	NaN	NaN	NaN	NaN
1.886	-39.447	99.9609	376.728	0.013184	0.33691	-0.12793	117.736	105.321	2185.125	-1.199	1.6065	-0.5748	-67.348	-153.92	1759.83	-1.9187	1.6751	0.041748	NaN	NaN	NaN	NaN	NaN	NaN
1.888	-51.221	115.2996	356.378	0.0019531	0.34619	-0.12402	137.653	110.136	2211.824	-1.1758	1.5762	-0.58252	-49.0233	-265.586	1707.864	-2.0098	1.8281	0.10791	NaN	NaN	NaN	NaN	NaN	NaN
1.89	-44.022	117.4891	332.122	-0.0043945	0.34668	-0.12061	64.082	136.751	2183.05	-1.15	1.559	-0.58486	-83.0446	-248.7836	1661.875	-2.0132	1.9692	0.15869	NaN	NaN	NaN	NaN	NaN	NaN
1.892	-48.639	107.4149	322.9	-0.011719	0.36133	-0.11914	93.585	41.7358	2180.279	-1.1326	1.5453	-0.59023	-108.723	-270.723	1594.82221	-1.9512	2.0039	0.16064	NaN	NaN	NaN	NaN	NaN	NaN
1.894	-39.197	107.01	304.148	-0.023437	0.36889	-0.11621	70.466	77.723	2182.501	-1.115	1.5317	-0.58828	-160.244	-223.613	1604.654	-1.6777	1.9668	0.12549	NaN	NaN	NaN	NaN	NaN	NaN
1.896	-32.191	103.456	291.684	-0.030273	0.375	-0.11035	-27.852	64.1173	2123.418	-1.1089	1.5196	-0.58682	-181.697	-239.399	1547.4051	-1.2568	1.7363	0.022461	NaN	NaN	NaN	NaN	NaN	NaN
1.898	-15.639	114.2048	269.58	-0.045898	0.38867	-0.10742	-34.674	30.57	2096.648	-1.1089	1.5142	-0.5835	-246.7	-178.464	1541.9804	-1.0405	1.5786	-0.037109	NaN	NaN	NaN	NaN	NaN	NaN
1.9	-25.449	90.818	268.505	-0.053711	0.39502	-0.10303	-85.353	82.02	2052.324	-1.1191	1.5086	-0.5706	-193.557	-160.4059	1536.718	-0.66016	1.2891	-0.14063	NaN	NaN	NaN	NaN	NaN	NaN
1.902	1.512	88.529	280.092	-0.061523	0.40479	-0.097168	-124.817	27.821	1996.118	-1.1315	1.5111	-0.55811	-192.794	-66.975	1584.513	-0.42798	1.0918	-0.18652	NaN	NaN	NaN	NaN	NaN	NaN
1.904	3.169	78.822	263.924	-0.07129	0.41162	-0.094482	-78.246	59.318	1992.1211	-1.1483	1.5184	-0.54248	-187.241	-41.2	1574.547	-0.22949	0.92139	-0.2251	NaN	NaN	NaN	NaN	NaN	NaN
1.906	-16.698	82.38	247.056	-0.081055	0.41992	-0.087891	-129.369	123.863	1970.677	-1.1582	1.526	-0.52734	-188.143	-9.03	1580.535	-0.0024414	0.71826	-0.28223	NaN	NaN	NaN	NaN	NaN	NaN
1.908	-34.071	81.0598	247.721	-0.092773	0.42432	-0.082031	-62.126	121.156	1954.728	-1.166	1.5313	-0.50684	-89.737	-41.24	1566.4748	0.098145	0.62305	-0.30762	NaN	NaN	NaN	NaN	NaN	NaN
1.91	-9.11599999999999	88.6334	240.894	-0.10059	0.42578	-0.075195	-18.73	198.381	1942.009	-1.1685	1.5323	-0.49151	-56.598	-124.83	1593.468	0.24463	0.45508	-0.36523	NaN	NaN	NaN	NaN	NaN	NaN
1.912	-16.522	97.829	223.939	-0.10986	0.43604	-0.067871	-44.25	203.882	1851.728	-1.1699	1.5285	-0.46875	13.674	-234.915	1600.831	0.29297	0.34814	-0.41602	NaN	NaN	NaN	NaN	NaN	NaN
1.914	-20.55	91.981	209.453	-0.11548	0.43628	-0.065673	27.48	182.648	1814.2671	-1.168	1.5196	-0.44883	17.695	-362.988	1644.008	0.28467	0.26807	-0.47803	NaN	NaN	NaN	NaN	NaN	NaN
1.916	-15.133	75.0499	204.794	-0.12012	0.43604	-0.060547	5.771	221.947	1759.394	-1.1542	1.5075	-0.43115	61.012	-417.004	1697.543	0.17822	0.25977	-0.49609	NaN	NaN	NaN	NaN	NaN	NaN
1.918	-0.409999999999997	69.0576	207.022	-0.11816	0.43164	-0.050781	14.341	182.504	1713.973	-1.1348	1.4902	-0.41504	79.723	-470.023	1778.4088	0.087891	0.2832	-0.48047	NaN	NaN	NaN	NaN	NaN	NaN
1.92	-10.806	70.316	193.892	-0.11914	0.43066	-0.05127	55.436	184.286	1717.952	-1.1014	1.4682	-0.39961	101.445	-414.498	1841.1879	-0.13721	0.40625	-0.41309	NaN	NaN	NaN	NaN	NaN	NaN
1.922	-6.742	55.741	174.243	-0.10449	0.42383	-0.049316	7.723	190.524	1671.6662	-1.0667	1.4431	-0.38467	110.159	-417.248	1888.8776	-0.30908	0.54395	-0.34106	NaN	NaN	NaN	NaN	NaN	NaN
1.924	-0.0210000000000008	43.165	183.124	-0.083984	0.40869	-0.05127	63.185	120.285	1648.3751	-1.0296	1.4091	-0.37256	144.916	-369.946	1946.0063	-0.46094	0.70313	-0.27246	NaN	NaN	NaN	NaN	NaN	NaN
1.926	-7.555	53.896	170.081	-0.071289	0.39746	-0.053711	77.322	153.916	1654.909	-0.98545	1.3737	-0.35918	103.94	-391.134	2007.511	-0.61768	0.8999	-0.22119	NaN	NaN	NaN	NaN	NaN	NaN
1.928	-16.57	65.5219	168.964	-0.046875	0.38721	-0.057129	81.707	158.063	1591.3441	-0.93945	1.3379	-0.3457	116.837	-296.675	2056.1533	-0.67969	0.99609	-0.20752	NaN	NaN	NaN	NaN	NaN	NaN
1.93	-35.483	60.64604	156.348	-0.031739	0.36474	-0.055176	140.211	164.176	1566.571	-0.9	1.3023	-0.33477	146.242	-268.0804	2137.402	-0.76953	1.1729	-0.19629	NaN	NaN	NaN	NaN	NaN	NaN
1.932	-41.061	58.0143	164.301	-0.01123	0.34863	-0.055664	88.014	213.565	1541.487	-0.86006	1.2669	-0.32207	203.393	-155.704	2156.111	-0.82788	1.2796	-0.18262	NaN	NaN	NaN	NaN	NaN	NaN
1.934	-39.118	63.83	175.379	0.0068359	0.33252	-0.057129	93.076	149.0588	1487.603	-0.82256	1.2364	-0.3127	160.749	-191.458	2135.3217	-0.87793	1.3672	-0.17627	NaN	NaN	NaN	NaN	NaN	NaN
1.936	-54.509	44.528	178.649	0.018555	0.32178	-0.0625	117.379	147.6021	1462.969	-0.78653	1.2088	-0.30137	182.782	-130.2	2090.828	-0.94141	1.4434	-0.15771	NaN	NaN	NaN	NaN	NaN	NaN
1.938	-52.156	25.937	178.282	0.045898	0.29883	-0.063965	66.1	162.358	1398.968	-0.75586	1.1895	-0.29053	151.79	-206.372	2097.676	-0.97412	1.4712	-0.15332	NaN	NaN	NaN	NaN	NaN	NaN
1.94	-30.279	7.211	181.921	0.06543	0.28711	-0.063477	65.565	144.4173	1355.864	-0.73301	1.1709	-0.27461	124.788	-166.797	2117.519	-1.0234	1.5156	-0.13965	NaN	NaN	NaN	NaN	NaN	NaN
1.942	-42.787	15.525	169.856	0.081055	0.27295	-0.063965	18.85	231.744	1320.509	-0.70586	1.1535	-0.26035	83.369	-250.0379	2197.62	-1.0503	1.5381	-0.15674	NaN	NaN	NaN	NaN	NaN	NaN
1.944	-49.086	11.761	178.723	0.10352	0.25488	-0.072266	-54.218	237.292	1232.35	-0.68437	1.1469	-0.24121	55.136	-214.8176	2236.0214	-1.0659	1.5591	-0.18066	NaN	NaN	NaN	NaN	NaN	NaN
1.946	-23.499	-2.424	183.809	0.11035	0.24756	-0.07959	-42.778	221.909	1168.545	-0.65869	1.1351	-0.22432	-17.018	-296.694	2275.831	-1.0645	1.5625	-0.22852	NaN	NaN	NaN	NaN	NaN	NaN
1.948	-8.881	-14.439	184.807	0.12549	0.23047	-0.088379	-108.9503	231.674	1114.725	-0.63623	1.1235	-0.20654	-87.078	-250.17248	2312.5026	-1.0703	1.5645	-0.25244	NaN	NaN	NaN	NaN	NaN	NaN
1.95	-27.961	-13.142	206.065	0.12988	0.22631	-0.093995	-122.171	177.1335	1081.1193	-0.60186	1.1077	-0.18769	-67.202	-298.491	2364.511	-1.0762	1.5703	-0.30664	NaN	NaN	NaN	NaN	NaN	NaN
1.952	-21.594	-17.654	222.574	0.13086	0.22314	-0.10107	-101.5292	190.562	1075.0945	-0.5711	1.0949	-0.17539	-48.684	-217.558	2412.754	-1.0801	1.5791	-0.35791	NaN	NaN	NaN	NaN	NaN	NaN
1.954	-24.304	-21.315	289.392	0.125	0.22803	-0.10742	-147.824	221.286	1018.15	-0.5375	1.073	-0.1543	-51.846	-251.5132	2455.143	-1.0762	1.5684	-0.39355	NaN	NaN	NaN	NaN	NaN	NaN
1.956	-14.285	8.213	320.29	0.12354	0.23145	-0.10449	-137.685	206.755	971.8363	-0.51084	1.0505	-0.14131	-62.602	-194.011	2492.054	-1.1074	1.5381	-0.41895	NaN	NaN	NaN	NaN	NaN	NaN
1.958	-5.242	33.2524	356.856	0.11182	0.24414	-0.12012	-151.6	248.576	947.71638	-0.48291	1.0239	-0.12158	-21.302	-227.0237	2505.313	-1.146	1.5513	-0.42236	NaN	NaN	NaN	NaN	NaN	NaN
1.96	-4.07300000000001	52.367	389.542	0.10059	0.26123	-0.12451	-159.789	217.391	900.8303	-0.4585	0.99933	-0.10645	-12.92	-166.304	2462.309	-1.2188	1.6074	-0.4292	NaN	NaN	NaN	NaN	NaN	NaN
1.962	-3.869	68.655	461.876	0.088379	0.28076	-0.12939	-121.7731	206.119	866.272	-0.43457	0.9708	-0.092286	-7.27	-167.706	2403.321	-1.2236	1.626	-0.43555	NaN	NaN	NaN	NaN	NaN	NaN
1.964	15.685	103.389	519.289	0.054199	0.30566	-0.14355	-141.817	221.48	830.136	-0.41386	0.94267	-0.073926	-0.75	-95.17	2378.765	-1.2002	1.6055	-0.44336	NaN	NaN	NaN	NaN	NaN	NaN
1.966	25.271	136.722	573.8219	0.041504	0.32373	-0.1499	-112.1731	169.898	787.3595	-0.3916	0.92051	-0.057617	11.375	-105.574	2371.009	-1.1616	1.5688	-0.45459	NaN	NaN	NaN	NaN	NaN	NaN
1.968	11.079	150.253	669.8287	-0.013672	0.3584	-0.16016	-76.4832	174.2357	789.37	-0.37012	0.89453	-0.041992	-9.492	-58.539	2388.024	-1.1582	1.5508	-0.46875	NaN	NaN	NaN	NaN	NaN	NaN
1.97	29.659	150.67	804.2262	-0.068116	0.39014	-0.16651	-111.4622	169.0362	723.8158	-0.34727	0.87168	-0.026074	36.012	-66.7094	2383.82	-1.1538	1.5356	-0.49756	NaN	NaN	NaN	NaN	NaN	NaN
1.972	50.542	140.109	900.5705	-0.13086	0.42725	-0.16699	-46.89	152.7804	692.2418	-0.32754	0.84609	-0.0096676	50.652	-36.9495	2417.3877	-1.1651	1.545	-0.51026	NaN	NaN	NaN	NaN	NaN	NaN
1.974	17.868	123.578	941.787	-0.22949	0.4873	-0.17334	-28.524	201.882	670.8345	-0.30527	0.82227	9.7648e-05	88.713	-21.85	2401.269	-1.1855	1.5664	-0.51074	NaN	NaN	NaN	NaN	NaN	NaN
1.976	-10.311	91.317	1003.936	-0.27881	0.521	-0.1748	-43.86	201.583	621.5269	-0.28379	0.7998	0.011621	88.191	16.255	2372.8383	-1.2251	1.6021	-0.50146	NaN	NaN	NaN	NaN	NaN	NaN
1.978	-18.203	74.856	1081.746	-0.3999	0.5835	-0.17725	28.058	227.759	605.1328	-0.26123	0.77393	0.016113	136.439	7.6847	2368.9889	-1.2378	1.6157	-0.49463	NaN	NaN	NaN	NaN	NaN	NaN
1.98	-17.385	54.959	1159.258	-0.50097	0.65039	-0.18091	-4.912	247.081	575.2998	-0.24209	0.75947	0.025391	172.337	-5.456	2415.556	-1.269	1.6313	-0.47803	NaN	NaN	NaN	NaN	NaN	NaN
1.982	-1.13699999999999	2.7773	1177.59	-0.61475	0.7251	-0.1709	42.037	212.257	533.0559	-0.22139	0.73369	0.039453	209.4159	-42.8176	2406.303	-1.282	1.637	-0.47143	NaN	NaN	NaN	NaN	NaN	NaN
1.984	-24.657	-40.29951	1198.414	-0.77588	0.85205	-0.14697	65.068	215.318	531.24189	-0.20186	0.71338	0.046875	196.161	-79.094	2390.379	-1.2866	1.6294	-0.46924	NaN	NaN	NaN	NaN	NaN	NaN
1.986	-48.194	-67.4124	1221.675	-0.85498	0.92432	-0.12451	16.742	187.056	473.73436	-0.1834	0.69316	0.058398	178.1665	-70.933	2334.726	-1.2749	1.604	-0.46729	NaN	NaN	NaN	NaN	NaN	NaN
1.988	-59.661	-66.609	1247.518	-0.98584	1.0786	-0.072266	66.301	171.76	448.9057	-0.16895	0.66992	0.071289	144.117	-49.273	2320.484	-1.2563	1.5776	-0.47363	NaN	NaN	NaN	NaN	NaN	NaN
1.99	-62.2773	-73.752	1277.8695	-1.0517	1.1865	-0.029297	8.63800000000001	191.699	431.3285	-0.14824	0.64824	0.08164	86.045	32.189	2291.576	-1.2183	1.522	-0.47559	NaN	NaN	NaN	NaN	NaN	NaN
1.992	-82.2703	-70.128	1304.815	-1.0762	1.2793	-0.0024414	-34.122	176.024	396.70096	-0.13096	0.629	0.091406	93.748	81.9025	2287.778	-1.1904	1.4756	-0.49267	NaN	NaN	NaN	NaN	NaN	NaN
1.994	-66.382	-66.016	1325.494	-1.0449	1.3516	0.0068359	5.398	173.1722	400.3247	-0.11299	0.60752	0.10312	98.898	142.009	2252.8919	-1.1655	1.4321	-0.50146	NaN	NaN	NaN	NaN	NaN	NaN
1.996	-104.963	-48.4627	1338.375	-0.99951	1.356	-0.0014648	-66.1	166.5158	353.4916	-0.09502	0.58525	0.11103	60.022	127.3638	2275.611	-1.1523	1.3809	-0.51465	NaN	NaN	NaN	NaN	NaN	NaN
1.998	-114.988	-26.962	1352.463	-0.87256	1.3306	-0.032227	-62.909	131.9764	337.331	-0.078613	0.56738	0.11914	3.76600000000001	163.2574	2220.73	-1.1465	1.3633	-0.50977	NaN	NaN	NaN	NaN	NaN	NaN
2	-120.8107	-7.938	1346.2403	-0.77515	1.2863	-0.059326	-83.9991	133.9739	330.374	-0.056348	0.54727	0.12617	1.47500000000001	188.873	2190.778	-1.1514	1.3389	-0.49902	NaN	NaN	NaN	NaN	NaN	NaN
2.002	-110.052	17.451	1352.8131	-0.68359	1.2266	-0.087402	-134.338	125.469	293.453	-0.038672	0.52598	0.12988	-10.047	275.844	2133.4363	-1.1528	1.3364	-0.48535	NaN	NaN	NaN	NaN	NaN	NaN
2.004	-110.1008	23.51	1359.703	-0.59912	1.1372	-0.11768	-114.3861	119.983	291.037	-0.013281	0.50488	0.1334	-8.226	257.652	2092.9395	-1.1519	1.3296	-0.46533	NaN	NaN	NaN	NaN	NaN	NaN
2.006	-97.6408	-11.193	1370.0889	-0.57666	1.1006	-0.12939	-142.629	127.232	264.43	0.0026368	0.48633	0.13955	-23.073	270.833	2052.675	-1.127	1.3301	-0.45508	NaN	NaN	NaN	NaN	NaN	NaN
2.008	-82.2404	-55.002	1391.3235	-0.57178	1.0376	-0.13135	-149.783	113.323	222.6619	0.024902	0.47266	0.14844	-24.33	196.687	2037.7525	-1.1211	1.3281	-0.44531	NaN	NaN	NaN	NaN	NaN	NaN
2.01	-70.305	-89.091	1406.3814	-0.58057	0.99661	-0.12134	-125.836	142.444	232.603	0.052441	0.45898	0.15156	-64.399	201.745	1992.8373	-1.0938	1.3301	-0.43262	NaN	NaN	NaN	NaN	NaN	NaN
2.012	-46.664	-106.375	1426.3561	-0.58252	0.95557	-0.11084	-153.239	168.159	185.4736	0.074707	0.44062	0.15215	-61.12	151.0405	1963.7462	-1.0756	1.3266	-0.43017	NaN	NaN	NaN	NaN	NaN	NaN
2.014	-40.044	-135.928	1452.3426	-0.56836	0.91406	-0.10693	-147.711	148.07	164.71157	0.097367	0.42578	0.15527	-67.498	208.833	1941.8815	-1.0562	1.3267	-0.42725	NaN	NaN	NaN	NaN	NaN	NaN
2.016	-40.992	-160.629	1472.5318	-0.55225	0.89893	-0.10547	-142.631	146.804	163.7078	0.12002	0.40957	0.15147	-39.307	190.331	1926.693	-1.0269	1.3188	-0.40576	NaN	NaN	NaN	NaN	NaN	NaN
2.018	-28.561	-186.0922	1495.2674	-0.49805	0.87109	-0.11621	-144.518	92.425	131.3269	0.13721	0.39063	0.14404	-18.153	254.8689	1869.881	-1.0132	1.313	-0.38916	NaN	NaN	NaN	NaN	NaN	NaN
2.02	-12.784	-198.407	1510.012	-0.44434	0.86939	-0.12988	-80.233	71.8516	144.8296	0.14678	0.37676	0.13887	-2.38	230.794	1806.197	-0.97998	1.2993	-0.35986	NaN	NaN	NaN	NaN	NaN	NaN
2.022	13.41	-197.411	1538.606	-0.38232	0.87158	-0.146	-76.977	77.331	123.2718	0.15742	0.36611	0.13438	14.84	300.249	1774.01	-0.94849	1.2874	-0.34644	NaN	NaN	NaN	NaN	NaN	NaN
2.024	25.373	-170.7319	1580.4142	-0.29297	0.87744	-0.17529	-64.16	63.228	97.4144	0.15664	0.34971	0.13086	32.827	266.717	1765.083	-0.91602	1.2676	-0.32715	NaN	NaN	NaN	NaN	NaN	NaN
2.026	51.269	-134.215	1605.1103	-0.25342	0.88818	-0.19189	-6.017	91.758	108.7276	0.15987	0.34424	0.12979	45.73	318.679	1701.6991	-0.85889	1.2427	-0.30957	NaN	NaN	NaN	NaN	NaN	NaN
2.028	34.609	-122.029	1619.5785	-0.19971	0.90527	-0.21289	-24.996	95.389	81.889	0.15576	0.33594	0.13184	80.4413	258.522	1626.401	-0.82813	1.2305	-0.30322	NaN	NaN	NaN	NaN	NaN	NaN
2.03	48.674	-127.167	1639.427	-0.19409	0.93775	-0.21924	16.714	66.794	82.6978	0.15518	0.33682	0.13301	130.786	308.77	1550.307	-0.77588	1.1958	-0.2915	NaN	NaN	NaN	NaN	NaN	NaN
2.032	72.174	-129.236	1661.562	-0.22168	0.98438	-0.21094	54.774	56.71771	94.2372	0.15635	0.3293	0.14483	146.4263	268.616	1498.1485	-0.71533	1.1621	-0.27441	NaN	NaN	NaN	NaN	NaN	NaN
2.034	87.959	-107.048	1679.818	-0.29297	1.0659	-0.18262	38.263	18.1623	80.185	0.15244	0.33242	0.13896	97.398	333.651	1435.226	-0.68848	1.1426	-0.26367	NaN	NaN	NaN	NaN	NaN	NaN
2.036	92.623	-118.088	1690.016	-0.3335	1.106	-0.16211	78.344	14.30926	99.465	0.1501	0.33428	0.14082	66.963	278.236	1348.751	-0.63037	1.1079	-0.23633	NaN	NaN	NaN	NaN	NaN	NaN
2.038	53.219	-113.602	1705.035	-0.39648	1.1836	-0.13086	57.281	19.7525	76.6945	0.15088	0.33398	0.14111	61.218	326.4501	1305.82	-0.58813	1.081	-0.21997	NaN	NaN	NaN	NaN	NaN	NaN
2.04	44.859	-118.631	1726.519	-0.43262	1.2422	-0.11035	34.177	15.4286	39.943	0.15761	0.33321	0.14385	51.2314	265.535	1288.728	-0.55371	1.0547	-0.19238	NaN	NaN	NaN	NaN	NaN	NaN
2.042	25.36	-116.503	1758.325	-0.45313	1.293	-0.098145	51.266	46.0188	48.685	0.16797	0.33291	0.14278	36.511	320.66736	1269.214	-0.50293	1.0156	-0.1709	NaN	NaN	NaN	NaN	NaN	NaN
2.044	41.504	-132.563	1796.75828	-0.46191	1.3477	-0.092773	6.649	40.348	26.249	0.1836	0.32783	0.14199	33.326	278.546	1242.354	-0.47852	1.001	-0.15625	NaN	NaN	NaN	NaN	NaN	NaN
2.046	25.91	-145.924	1840.741	-0.46143	1.3643	-0.094238	29.368	28.149	34.088	0.19765	0.31885	0.13614	33.088	335.307	1174.983	-0.4458	0.96338	-0.13135	NaN	NaN	NaN	NaN	NaN	NaN
2.048	32.667	-154.38	1857.728	-0.46045	1.3853	-0.12061	15.015	37.884	49.456	0.20508	0.30225	0.12598	-20.262	288.573	1101.0928	-0.42138	0.93945	-0.11181	NaN	NaN	NaN	NaN	NaN	NaN
2.05	14.233	-149.4219	1891.451	-0.45898	1.3938	-0.14209	-55.859	13.318	23.4593	0.21484	0.28994	0.12344	-65.705	336.297	1063.0638	-0.39941	0.91602	-0.091309	NaN	NaN	NaN	NaN	NaN	NaN
2.052	-4.88	-145.854	1900.581	-0.45557	1.4048	-0.15918	-16.779	6.359	49.346	0.22412	0.27451	0.1208	-74.8787	282.647	1001.4626	-0.37109	0.88281	-0.066406	NaN	NaN	NaN	NaN	NaN	NaN
2.054	1.099	-132.4785	1911.9788	-0.4585	1.4165	-0.17236	-65.714	11.207	36.2772	0.22881	0.25498	0.11768	-42.982	333.626	969.774	-0.3584	0.87305	-0.059082	NaN	NaN	NaN	NaN	NaN	NaN
2.056	1.31999999999999	-110.824	1937.3339	-0.46191	1.4199	-0.16895	-88.864	2.931	8.97	0.23574	0.23809	0.1166	-38.752	282.331	908.7884	-0.33008	0.84766	-0.053711	NaN	NaN	NaN	NaN	NaN	NaN
2.058	1.83199999999999	-103.523	1947.6471	-0.48633	1.4395	-0.17383	-54.001	26.4726	37.232	0.23486	0.21777	0.10986	-92.569	321.382	858.4912	-0.30469	0.8269	-0.048584	NaN	NaN	NaN	NaN	NaN	NaN
2.06	-22.871	-103.224	1962.154	-0.51563	1.457	-0.16895	-141.0447	18.847	25.8846	0.23936	0.19961	0.11221	-141.423	290.54	793.0804	-0.27783	0.80713	-0.043457	NaN	NaN	NaN	NaN	NaN	NaN
2.062	-11.384	-96.111	1975.836	-0.52734	1.4736	-0.16846	-120.849	16.211	37.51934	0.23281	0.18077	0.1165	-153.122	334.347	738.7032	-0.24463	0.78809	-0.042969	NaN	NaN	NaN	NaN	NaN	NaN
2.064	10.63	-97.059	1979.259	-0.56348	1.5029	-0.1582	-110.77273	27.202	53.3266	0.23242	0.16241	0.11846	-155.268	303.4182	697.133	-0.22412	0.77686	-0.033691	NaN	NaN	NaN	NaN	NaN	NaN
2.066	20.37	-92.805	1972.0264	-0.58667	1.5266	-0.14746	-157	2.401	18.3983	0.22959	0.14687	0.1168	-116.6582	335.602	692.346	-0.19922	0.74805	-0.027344	NaN	NaN	NaN	NaN	NaN	NaN
2.068	16.666	-93.0887	1967.2813	-0.61182	1.5552	-0.13916	-107.5959	-0.989000000000001	53.679	0.22803	0.12793	0.12012	-110.842	302.784	642.1535	-0.17823	0.72388	-0.027588	NaN	NaN	NaN	NaN	NaN	NaN
2.07	14.124	-77.6406	1949.52	-0.64795	1.5903	-0.13379	-108.333	3.712	39.691	0.22324	0.10947	0.12129	-117.118	345.321	592.5196	-0.15723	0.70654	-0.033691	NaN	NaN	NaN	NaN	NaN	NaN
2.072	47.097	-56.656	1964.231	-0.66357	1.6118	-0.13037	-84.885	-13.824	30.5	0.21807	0.094531	0.12022	-86.9953	342.431	528.912	-0.13135	0.68652	-0.025879	NaN	NaN	NaN	NaN	NaN	NaN
2.074	36.92	-61.924	1986.578	-0.68896	1.6489	-0.13574	-42.975	19.315	55.2798	0.21494	0.079688	0.12217	-66.204	352.232	502.605	-0.12598	0.67725	-0.021973	NaN	NaN	NaN	NaN	NaN	NaN
2.076	52.661	-71.255	2009.6927	-0.69165	1.6702	-0.14233	-58.347	32.03603	29.873674	0.20762	0.065039	0.11836	-43.111	310.025	468.365	-0.11279	0.65869	-0.011719	NaN	NaN	NaN	NaN	NaN	NaN
2.078	84.704	-92.372	2024.542	-0.68799	1.6899	-0.146	-22.109	30.8587	43.675	0.19678	0.053711	0.11768	-3.067	272.849	458.1806	-0.11011	0.64673	-0.0014648	NaN	NaN	NaN	NaN	NaN	NaN
2.08	93.536	-90.28	2034.225	-0.68359	1.7168	-0.17676	30.052	48.057	59.6332	0.1877	0.04209	0.11269	26.0144	221.284	409.2447	-0.10547	0.63574	0.012207	NaN	NaN	NaN	NaN	NaN	NaN
2.082	101.195	-102.279	2035.158	-0.67139	1.7212	-0.1875	12.845	22.7419	29.8728	0.16924	0.032617	0.10059	32.2096	199.1731	399.874	-0.09668	0.61768	0.03418	NaN	NaN	NaN	NaN	NaN	NaN
2.084	81.173	-90.78414	2037.639	-0.65625	1.7305	-0.20557	46.044	17.6883	62.8639	0.14502	0.034961	0.10293	7.961	179.6264	368.9186	-0.098633	0.60938	0.04541	NaN	NaN	NaN	NaN	NaN	NaN
2.086	112.411	-91.9847	2016.3419	-0.65039	1.7304	-0.21875	42.108	17.3371	59.324	0.12607	0.03418	0.10342	-6.795	177.619	344.2512	-0.095215	0.58545	0.062012	NaN	NaN	NaN	NaN	NaN	NaN
2.088	82.587	-69.9069	1988.848	-0.64941	1.7285	-0.22705	42.916	-12.13857	62.087	0.10547	0.043945	0.11182	-3.186	186.5542	296.428	-0.088623	0.56689	0.063232	NaN	NaN	NaN	NaN	NaN	NaN
2.09	90.125	-80.25892	2002.4108	-0.65479	1.7285	-0.22754	84.094	14.7043	76.227	0.08916	0.05625	0.1168	21.86	172.9946	255.4609	-0.085938	0.54932	0.065918	NaN	NaN	NaN	NaN	NaN	NaN
2.092	75.748	-78.8485	2023.364	-0.66162	1.7212	-0.22998	27.717	6.7347	41.58898	0.084375	0.072461	0.12119	6.827	169.8569	255.346	-0.080078	0.53467	0.06543	NaN	NaN	NaN	NaN	NaN	NaN
2.094	79.506	-53.432	2032.878	-0.66602	1.7227	-0.24316	63.676	-0.6384	42.20344	0.085157	0.085742	0.12666	18.298	148.8594	241.945	-0.078613	0.52393	0.068848	NaN	NaN	NaN	NaN	NaN	NaN
2.096	63.601	-29.9	2029.269	-0.67627	1.7256	-0.24145	45.56	26.146	56.20899	0.094629	0.104	0.13086	-19.896	162.583	197.7103	-0.075684	0.50293	0.070801	NaN	NaN	NaN	NaN	NaN	NaN
2.098	57.446	-13.68	2012.8929	-0.6792	1.7271	-0.24609	10.268	7.25	25.89684	0.10986	0.11182	0.13086	-11.543	130.482	180.443	-0.075439	0.49462	0.073974	NaN	NaN	NaN	NaN	NaN	NaN
2.1	62.989	-5.983	2022.5333	-0.69482	1.7212	-0.24268	44.937	-1.1285	62.2311	0.12578	0.12031	0.13164	-27.274	146.084	136.2846	-0.074707	0.47998	0.078613	NaN	NaN	NaN	NaN	NaN	NaN
2.102	30.922	11.014	2001.5138	-0.70264	1.7231	-0.24365	-29.963	2.663	60.1757	0.14912	0.12549	0.1293	-17.237	105.144	130.258	-0.072266	0.46289	0.083984	NaN	NaN	NaN	NaN	NaN	NaN
2.104	27.515	20.9019	1998.3798	-0.72021	1.7231	-0.23975	-30.355	-21.123	48.623	0.17216	0.1251	0.12813	-50.268	131.177	113.8975	-0.073242	0.45215	0.08252	NaN	NaN	NaN	NaN	NaN	NaN
2.106	11.092	13.7941	1988.9276	-0.7312	1.7073	-0.23633	-10.732	4.004	61.592	0.19766	0.12305	0.12314	-50.924	86.306	72.0311	-0.070801	0.43945	0.083008	NaN	NaN	NaN	NaN	NaN	NaN
2.108	29.6	11.904	2000.154	-0.74561	1.6997	-0.23877	-94.349	30.75631	26.8934	0.2207	0.11816	0.12207	-99.4196	104.295	67.5364	-0.06372	0.42553	0.08252	NaN	NaN	NaN	NaN	NaN	NaN
2.11	4.767	7.497	1994.446	-0.7627	1.686	-0.23096	-104.926	23.46449	41.2522	0.24668	0.10801	0.11797	-130.427	20.00161	53.8958	-0.059082	0.41113	0.081543	NaN	NaN	NaN	NaN	NaN	NaN
2.112	6.958	-4.9424	1966.9571	-0.77148	1.6777	-0.22803	-98.739	43.131	70.1942	0.26807	0.10048	0.1167	-135.064	27.459	48.485	-0.052246	0.39795	0.074219	NaN	NaN	NaN	NaN	NaN	NaN
2.114	9.39500000000001	-18.6016	1957.0062	-0.78125	1.6641	-0.22754	-147.521	-2.527	60.449	0.29268	0.090723	0.11865	-127.4923	-27.7043	41.3572	-0.043457	0.38281	0.067871	NaN	NaN	NaN	NaN	NaN	NaN
2.116	23.564	-0.3596	1942.2486	-0.79102	1.6494	-0.22168	-82.571	-41.834	82.71	0.3083	0.080664	0.11641	-112.9379	23.8399	29.6838	-0.036133	0.36865	0.063965	NaN	NaN	NaN	NaN	NaN	NaN
2.118	32.648	17.510926	1940.5591	-0.79492	1.6406	-0.22314	-93.705	-53.452	91.872	0.3252	0.071777	0.11475	-91.2836	-11.04427	42.378	-0.028564	0.35522	0.060058	NaN	NaN	NaN	NaN	NaN	NaN
2.12	7.94000000000001	20.9409	1915.5261	-0.79541	1.6157	-0.21973	-125.552	-88.921	123.5104	0.3416	0.063867	0.11572	-77.307	46.2647	57.7	-0.022949	0.3418	0.054688	NaN	NaN	NaN	NaN	NaN	NaN
2.122	26.073	19.6483	1901.8685	-0.79639	1.6021	-0.22021	-86.262	-56.856	181.524	0.35821	0.061035	0.11289	-84.4028	-9.654	52.379	-0.012207	0.32959	0.055176	NaN	NaN	NaN	NaN	NaN	NaN
2.124	55.013	30.152	1878.13424	-0.79492	1.5781	-0.2168	-117.6979	-40.356	182.9161	0.37305	0.055176	0.11015	-52.712	44.3474	45.5901	-0.0073242	0.31982	0.054199	NaN	NaN	NaN	NaN	NaN	NaN
2.126	64.333	51.678	1876.7185	-0.79419	1.5584	-0.21704	-61.376	-64.31	244.396	0.3878	0.056543	0.10888	5.177	6.328	38.6996	0.01123	0.30225	0.061523	NaN	NaN	NaN	NaN	NaN	NaN
2.128	51.514	58.133	1852.6525	-0.79053	1.5396	-0.21045	-40.657	-49.1333	313.2604	0.39893	0.056152	0.098145	4.878	70.085	56.4215	0.029541	0.28638	0.068848	NaN	NaN	NaN	NaN	NaN	NaN
2.13	62.126	65.73	1817.6679	-0.78857	1.5083	-0.20654	-85.088	-50.9204	382.761	0.40625	0.053809	0.084374	13.546	31.775	50.2818	0.054199	0.27002	0.07666	NaN	NaN	NaN	NaN	NaN	NaN
2.132	83.795	69.657	1795.9745	-0.78662	1.4907	-0.20557	-23.364	-11.2085	512.782	0.40078	0.057129	0.059374	-14.835	68.175	36.8039	0.094238	0.23877	0.081543	NaN	NaN	NaN	NaN	NaN	NaN
2.134	54.899	74.138	1774.3015	-0.77881	1.4653	-0.19971	-36.792	52.13	597.169	0.3789	0.060645	0.03828	-1.708	14.58979	23.015	0.1167	0.22266	0.083008	NaN	NaN	NaN	NaN	NaN	NaN
2.136	80.878	50.839	1755.9135	-0.77954	1.4455	-0.19165	-39.453	74.595	684.02	0.34141	0.087112	0.02246	22.633	57.587	47.2117	0.16309	0.19043	0.084473	NaN	NaN	NaN	NaN	NaN	NaN
2.138	71.914	42.598	1738.6326	-0.7749	1.4233	-0.18701	2.49600000000001	119.991	841.174	0.28613	0.1167	0.018555	43.528	5.8838	72.8946	0.19677	0.15845	0.084229	NaN	NaN	NaN	NaN	NaN	NaN
2.14	92.365	46.108	1714.047	-0.77344	1.3945	-0.17383	-29.262	159.792	1022.332	0.21807	0.15986	0.023144	46.905	61.259	78.453	0.2334	0.13135	0.083984	NaN	NaN	NaN	NaN	NaN	NaN
2.142	60.265	50.9084	1702.5735	-0.77686	1.3833	-0.16895	44.137	181.705	1203.63	0.15314	0.21571	0.030077	46.869	35.141	55.3602	0.27295	0.087402	0.08252	NaN	NaN	NaN	NaN	NaN	NaN
2.144	45.013	61.285	1680.0743	-0.7793	1.3594	-0.15381	22.242	223.247	1349.05	0.078929	0.27	0.037888	58.123	73.48	46.2018	0.29199	0.070313	0.085938	NaN	NaN	NaN	NaN	NaN	NaN
2.146	54.013	66.4968	1669.5932	-0.78223	1.3442	-0.14404	-9.479	167.828	1384.55	0.0095867	0.33036	0.043262	40.606	8.249	59.7897	0.32275	0.026855	0.088867	NaN	NaN	NaN	NaN	NaN	NaN
2.148	39.582	78.888	1644.3419	-0.78125	1.3281	-0.13184	76.401	59.45852	1469.25	-0.065918	0.38379	0.049805	45.123	7.193	83.345	0.34424	-0.0043944	0.093994	NaN	NaN	NaN	NaN	NaN	NaN
2.15	28.362	82.802	1623.9598	-0.77881	1.3032	-0.11621	23.704	-28.1893	1539.46	-0.14994	0.43742	0.049901	23.118	-42.794	73.8964	0.35986	-0.032227	0.10205	NaN	NaN	NaN	NaN	NaN	NaN
2.152	8.92200000000001	71.246	1601.775	-0.77734	1.2969	-0.10986	-18.1	-140.074	1568.4	-0.24813	0.48685	0.048038	-1.90599999999999	-5.916	84.793	0.37793	-0.064453	0.11279	NaN	NaN	NaN	NaN	NaN	NaN
2.154	21.893	77.564	1579.206	-0.76855	1.2734	-0.099121	43.252	-186.769	1558.68	-0.35911	0.5318	0.040229	-12.64	-12.3757	79.093	0.38916	-0.074219	0.11572	NaN	NaN	NaN	NaN	NaN	NaN
2.156	-2.49300000000001	91.532	1555.4042	-0.76221	1.2515	-0.088135	9.58	-203.36	1464.31	-0.49554	0.58355	0.027423	-71.948	15.5882	89.784	0.40283	-0.092773	0.13477	NaN	NaN	NaN	NaN	NaN	NaN
2.158	-6.208	92.553	1523.963	-0.76074	1.2329	-0.074219	30.48	-232.41	1448.73	-0.6499	0.65283	0.0058594	-84.366	11.737	62.6275	0.41309	-0.10914	0.14136	NaN	NaN	NaN	NaN	NaN	NaN
2.16	-20.73	93.655	1498.364	-0.74951	1.2056	-0.061035	43.037	-188.185	1479.61	-0.83144	0.73959	0.0012558	-85.27	14.3567	31.2243	0.41455	-0.13477	0.1377	NaN	NaN	NaN	NaN	NaN	NaN
2.162	-21.166	112.202	1478.707	-0.74805	1.1895	-0.061523	17.29	-155.035	1450.57	-1.0146	0.85658	0.024884	-87.5556	8.7457	28.869	0.42676	-0.14697	0.12451	NaN	NaN	NaN	NaN	NaN	NaN
2.164	-16.454	127.599	1458.1371	-0.72998	1.1606	-0.051758	75.495	-130.273	1454.44	-1.1926	1.0017	0.075128	-97.9524	7.4095	63.332	0.4375	-0.15234	0.11523	NaN	NaN	NaN	NaN	NaN	NaN
2.166	-45.078	127.833	1437.4604	-0.71899	1.1379	-0.043213	57.63	-83.237	1466.77	-1.3439	1.1712	0.13922	-88.4005	9.116	46.6851	0.44531	-0.15234	0.11035	NaN	NaN	NaN	NaN	NaN	NaN
2.168	-20.486	115.731	1435.368	-0.70557	1.1157	-0.036133	25.515	-39.427	1460.43	-1.4395	1.3418	0.21289	-96.388	14.655	51.631	0.43726	-0.14111	0.094969	NaN	NaN	NaN	NaN	NaN	NaN
2.17	-26.445	123.6	1407.049	-0.68896	1.0894	-0.026367	27.491	51.913	1494.38	-1.4449	1.4771	0.26724	-92.577	33.63	19.943	0.42676	-0.13086	0.083984	NaN	NaN	NaN	NaN	NaN	NaN
2.172	4.01000000000001	121.294	1370.0119	-0.6792	1.0767	-0.020996	26.953	107.645	1464.91	-1.3738	1.5652	0.30605	-78.263	13.137	22.2493	0.39111	-0.11084	0.07666	NaN	NaN	NaN	NaN	NaN	NaN
2.174	-29.961	106.7	1349.68288	-0.65381	1.0435	-0.012207	56.822	61.553	1437.9	-1.2439	1.6099	0.32512	-78.389	35.044	39.4497	0.35913	-0.090332	0.068115	NaN	NaN	NaN	NaN	NaN	NaN
2.176	-4.90300000000001	114.97	1318.803	-0.6333	1.02	-0.013183	63.875	-4.481	1452.54	-1.0982	1.6167	0.3119	-67.621	16.66735	47.551	0.31396	-0.056152	0.066406	NaN	NaN	NaN	NaN	NaN	NaN
2.178	15.156	122.473	1298.7292	-0.61719	0.99805	-0.012207	6.663	-102.977	1437.49	-0.95703	1.5898	0.27588	-49.046	47.829	24.6403	0.25049	-0.0048828	0.086426	NaN	NaN	NaN	NaN	NaN	NaN
2.18	16.198	129.333	1275.882	-0.59326	0.97119	-0.0039063	37.529	-218.7	1458.4	-0.83994	1.5021	0.20838	-43.266	11.5276	42.069	0.2207	0.03125	0.10791	NaN	NaN	NaN	NaN	NaN	NaN
2.182	10.976	115.399	1263.011	-0.58105	0.95703	0.00048828	6.706	-301.65	1491.83	-0.73645	1.3734	0.14682	-32.926	23.2488	50.0072	0.17041	0.095703	0.13477	NaN	NaN	NaN	NaN	NaN	NaN
2.184	14.525	111.386	1252.889	-0.55664	0.92773	0.0019531	-29.083	-402.53	1505.59	-0.65296	1.2348	0.12073	-9.681	-24.4964	32.6516	0.14063	0.1333	0.15796	NaN	NaN	NaN	NaN	NaN	NaN
2.186	34.573	116.821	1222.951	-0.53858	0.90722	0.0073243	16.85	-461.79	1581.38	-0.58439	1.1168	0.11387	17.511	20.1276	27.984	0.12646	0.16406	0.17676	NaN	NaN	NaN	NaN	NaN	NaN
2.188	19.915	131.129	1179.1428	-0.52246	0.88721	0.0083008	-27.642	-432.69	1618.51	-0.53223	1.0239	0.11865	39.689	8.4624	35.12096	0.10938	0.20068	0.18896	NaN	NaN	NaN	NaN	NaN	NaN
2.19	27.775	130.46	1160.81471	-0.5	0.86523	0.018555	-21.111	-390.66	1682.98	-0.47773	0.94293	0.12744	48.305	71.344	68.0987	0.10986	0.21143	0.20215	NaN	NaN	NaN	NaN	NaN	NaN
2.192	19.45	138.438	1140.2784	-0.4917	0.8501	0.01709	-17.33	-300.58	1777	-0.41321	0.86929	0.1139	55.759	22.0934	71.697	0.11084	0.24072	0.20801	NaN	NaN	NaN	NaN	NaN	NaN
2.194	16.154	148.918	1106.8387	-0.47559	0.82422	0.022949	-106.951	-233.78	1822.7	-0.3519	0.81541	0.069626	48.585	59.351	45.219	0.11231	0.24609	0.21265	NaN	NaN	NaN	NaN	NaN	NaN
2.196	12.74	145.5	1083.4681	-0.46362	0.8059	0.030518	-82.23	-221.89	1897.81	-0.29683	0.77867	0.0033567	38.74	15.0425	43.9873	0.12207	0.25684	0.21826	NaN	NaN	NaN	NaN	NaN	NaN
2.198	1.801	147.565	1071.0283	-0.45557	0.78564	0.037109	-65.016	-165.55	1917.5	-0.2666	0.77588	-0.07373	59.804	74.443	49.5315	0.13281	0.26318	0.21924	NaN	NaN	NaN	NaN	NaN	NaN
2.2	5.327	141.075	1065.27	-0.44336	0.75977	0.045898	-99.257	-158.987	1897.53	-0.26647	0.79846	-0.12502	38.484	26.6926	88.427	0.14063	0.26025	0.21729	NaN	NaN	NaN	NaN	NaN	NaN
2.202	-12.891	142.366	1034.996	-0.43847	0.74414	0.054932	-71.125	-145.82	1902.27	-0.30064	0.84417	-0.15231	19.834	50.9494	121.718	0.15283	0.24609	0.20361	NaN	NaN	NaN	NaN	NaN	NaN
2.204	-12.342	131.412	1016.967	-0.43311	0.71924	0.058594	-147.339	-113.73	1885.19	-0.37099	0.90825	-0.1497	-16.193	-53.4665	120.7	0.16382	0.23608	0.19507	NaN	NaN	NaN	NaN	NaN	NaN
2.206	-28.426	119.713	976.1573	-0.42725	0.69775	0.070313	-152.144	-143.253	1892.58	-0.46212	0.98751	-0.1185	-29.741	-29.515	132.72	0.16162	0.22314	0.17041	NaN	NaN	NaN	NaN	NaN	NaN
2.208	-41.24	131.939	957.5556	-0.42334	0.68408	0.080078	-141.764	-164.747	1947.45	-0.56201	1.0728	-0.074707	5.673	-91.267	146.2	0.13867	0.21045	0.13477	NaN	NaN	NaN	NaN	NaN	NaN
2.21	-56.801	132.161	934.5693	-0.41504	0.6582	0.087891	-207.567	-202.421	1964.59	-0.65519	1.1529	-0.026148	-39.028	-51.8682	199.403	0.11621	0.20947	0.11621	NaN	NaN	NaN	NaN	NaN	NaN
2.212	-64.514	129.1327	908.5135	-0.40893	0.63891	0.095215	-158.437	-259.6	2037.75	-0.73684	1.2179	0.010697	-72.9807	-109.992	223.808	0.064453	0.23633	0.094727	NaN	NaN	NaN	NaN	NaN	NaN
2.214	-52.619	130.983	902.744	-0.39844	0.62109	0.098145	-125.996	-237.85	2114.88	-0.79801	1.2683	0.037957	-94.299	-105.0984	244.157	0.021973	0.26123	0.08374	NaN	NaN	NaN	NaN	NaN	NaN
2.216	-66.536	133.076	886.737	-0.38623	0.59912	0.1084	-154.1645	-248.3	2150.87	-0.84148	1.2959	0.047089	-100.4912	-174.995	316.653	-0.025879	0.29297	0.087402	NaN	NaN	NaN	NaN	NaN	NaN
2.218	-47.996	133.709	860.1132	-0.38818	0.5874	0.10938	-102.143	-253.69	2207.1	-0.875	1.3105	0.041504	-109.002	-148.972	440.058	-0.088867	0.35205	0.091309	NaN	NaN	NaN	NaN	NaN	NaN
2.22	-72.059	134.8	854.478	-0.37305	0.5625	0.12061	-123.812	-252.77	2229.85	-0.90264	1.3041	0.022103	-123.191	-153.876	553.56	-0.12305	0.38477	0.087402	NaN	NaN	NaN	NaN	NaN	NaN
2.222	-34.6	143.59	834.942	-0.36816	0.54688	0.12378	-76.925	-282.88	2265.69	-0.93954	1.2993	0.0022931	-157.915	-50.462	708.67	-0.18262	0.44385	0.056641	NaN	NaN	NaN	NaN	NaN	NaN
2.224	-55.477	144.922	793.9991	-0.35449	0.52832	0.13086	-20.667	-250.8	2315.08	-0.98363	1.3024	-0.0078377	-165.119	12.0882	906.15	-0.23853	0.48657	0.024414	NaN	NaN	NaN	NaN	NaN	NaN
2.226	-44.492	158.8	763.129	-0.33594	0.50586	0.1377	-55.712	-179.176	2303.58	-1.0304	1.3209	-0.014655	-133.411	102.056	1124.31	-0.30908	0.52344	-0.026367	NaN	NaN	NaN	NaN	NaN	NaN
2.228	-42.675	152.151	751.2589	-0.32715	0.49316	0.13965	-9.629	-154.769	2306.05	-1.0659	1.3599	-0.041016	-99.15	127.049	1336.61	-0.46143	0.57275	-0.11621	NaN	NaN	NaN	NaN	NaN	NaN
2.23	-21.185	160.224	730.2338	-0.30908	0.46875	0.14404	-18.437	-100.743	2313.06	-1.0711	1.4042	-0.047944	-69.611	169.986	1520.81	-0.56006	0.60742	-0.16016	NaN	NaN	NaN	NaN	NaN	NaN
2.232	-8.84200000000001	157.756	715.9543	-0.29565	0.44946	0.15357	-45.387	-104.148	2277.23	-1.0746	1.4628	-0.060728	-11.944	139.122	1677.06	-0.80859	0.71387	-0.19971	NaN	NaN	NaN	NaN	NaN	NaN
2.234	-35.09	155.693	700.2491	-0.2832	0.43164	0.15674	9.419	-123.011	2317.63	-1.0835	1.5383	-0.074792	-8.647	129.146	1795.89	-1.0212	0.82935	-0.17627	NaN	NaN	NaN	NaN	NaN	NaN
2.236	-5.819	141.368	686.337	-0.25977	0.40869	0.15869	-19.809	-88.895	2333.4	-1.1105	1.6195	-0.086811	-12.175	72.675	1842.08	-1.2417	0.97314	-0.11768	NaN	NaN	NaN	NaN	NaN	NaN
2.238	-2.621	140.489	672.3366	-0.25195	0.39746	0.1665	-4.298	-89.711	2341.8	-1.1426	1.7031	-0.09668	73.399	-12.7138	1840.03	-1.5137	1.1855	0.014648	NaN	NaN	NaN	NaN	NaN	NaN
2.24	10.771	146.964	643.813	-0.22705	0.37842	0.17236	16.122	-54.96	2384.87	-1.1727	1.7766	-0.097853	127.909	-138.378	1809.86	-1.6255	1.2974	0.078613	NaN	NaN	NaN	NaN	NaN	NaN
2.242	1.096	144.2338	629.5662	-0.21143	0.35864	0.17871	-49.353	-9.241	2392.15	-1.1967	1.8293	-0.091797	90.793	-273.712	1817.63	-1.7593	1.4771	0.18311	NaN	NaN	NaN	NaN	NaN	NaN
2.244	5.37100000000001	152.9946	608.795	-0.19189	0.3418	0.18555	-8.014	-24.108	2423.73	-1.2213	1.8703	-0.079682	109.497	-328.61	1789.34	-1.7763	1.5752	0.23095	NaN	NaN	NaN	NaN	NaN	NaN
2.246	0.890999999999998	146.8325	606.25308	-0.16602	0.31885	0.19287	5.00700000000001	-22.7919	2464.89	-1.2568	1.8998	-0.069529	135.826	-359.32	1727.93	-1.7363	1.6445	0.2627	NaN	NaN	NaN	NaN	NaN	NaN
2.248	-14.198	154.273	572.7999	-0.15088	0.30518	0.19727	-55.337	-62.78	2448.68	-1.2969	1.9297	-0.057617	184.244	-272.111	1649.98	-1.6035	1.6836	0.27393	NaN	NaN	NaN	NaN	NaN	NaN
2.25	-8.393	134.988	576.6434	-0.12744	0.28369	0.19629	-40.239	-116.77	2497.7	-1.336	1.957	-0.048341	195.778	-240.128	1620.09	-1.5112	1.6626	0.25977	NaN	NaN	NaN	NaN	NaN	NaN
2.252	-30.637	122.58	564.7275	-0.10742	0.26928	0.19556	-77.449	-102.962	2486.6	-1.3671	1.9813	-0.037013	185.426	-124.821	1597.31	-1.2612	1.5337	0.2085	NaN	NaN	NaN	NaN	NaN	NaN
2.254	-22.263	123.579	545.8678	-0.085449	0.25049	0.19287	-83.8147	-127.582	2461.5	-1.3917	2.0005	-0.026466	144.8464	-78.558	1583.33	-1.0566	1.3604	0.17481	NaN	NaN	NaN	NaN	NaN	NaN
2.256	-46.748	126.441	513.9296	-0.060059	0.23096	0.19531	-66.118	-105.808	2479.4	-1.4098	2.0047	-0.0050786	159.403	39.581	1582.74	-0.87451	1.1743	0.14844	NaN	NaN	NaN	NaN	NaN	NaN
2.258	-43.916	130.376	498.2743	-0.042969	0.21973	0.19824	-146.3556	-67.831	2434.4	-1.4307	2.0039	0.012207	158.32	33.466	1598.11	-0.70459	0.96338	0.1377	NaN	NaN	NaN	NaN	NaN	NaN
2.26	-41.843	129.695	481.521	-0.018555	0.20557	0.19385	-102.746	-44.5133	2448.7	-1.4572	2.01	0.030176	106.196	97.847	1615.03	-0.64063	0.89063	0.13867	NaN	NaN	NaN	NaN	NaN	NaN
2.262	-58.956	134.183	464.698	-0.0041504	0.19628	0.19214	-103.296	43.39253	2463.9	-1.4805	2.0137	0.041309	74.89	-11.321	1610.97	-0.51172	0.78711	0.12012	NaN	NaN	NaN	NaN	NaN	NaN
2.264	-64.035	131.475	452.3627	0.0078125	0.18945	0.18896	-165.955	100.373	2436.5	-1.4977	2.0152	0.047949	42.179	-72.411	1584.94	-0.40283	0.7207	0.08081	NaN	NaN	NaN	NaN	NaN	NaN
2.266	-80.991	129.513	429.5264	0.018555	0.1792	0.19141	-112.172	100.599	2442.2	-1.5031	2.0118	0.055957	-16.264	-286.82	1603.64	-0.28711	0.64941	0.017578	NaN	NaN	NaN	NaN	NaN	NaN
2.268	-70.436	135.983	434.68	0.026855	0.17676	0.19043	-115.229	128.363	2422.1	-1.5054	2.0005	0.058594	-83.731	-359.69	1665.66	-0.15283	0.58447	-0.091309	NaN	NaN	NaN	NaN	NaN	NaN
2.27	-90.5	142.241	408.3287	0.037598	0.17432	0.1875	-73.186	100.072	2377.1	-1.496	1.9919	0.060742	-141.837	-493.88	1730.96	-0.095703	0.56836	-0.1499	NaN	NaN	NaN	NaN	NaN	NaN
2.272	-72.842	135.88	382.6986	0.043213	0.1709	0.18628	-25.126	104.974	2409.1	-1.4754	1.9696	0.063379	-203.004	-443.19	1795.18	-0.024902	0.57227	-0.25586	NaN	NaN	NaN	NaN	NaN	NaN
2.274	-73.871	127.137	383.4984	0.048828	0.17236	0.18652	-74.871	133.407	2364.6	-1.4515	1.9402	0.061816	-237.287	-483.37	1858.56	-0.016113	0.60913	-0.31274	NaN	NaN	NaN	NaN	NaN	NaN
2.276	-54.416	132.411	362.901	0.050781	0.17383	0.18555	-15.551	92.478	2357.8	-1.4228	1.9088	0.059473	-239.039	-411.61	1953.02	-0.046387	0.65137	-0.34277	NaN	NaN	NaN	NaN	NaN	NaN
2.278	-52.476	138.932	345.529	0.052734	0.17725	0.18359	-5.719	100.873	2339.1	-1.3945	1.876	0.063477	-254.127	-448.13	2032.26	-0.16064	0.75195	-0.33008	NaN	NaN	NaN	NaN	NaN	NaN
2.28	-66.76	137.926	333.4602	0.052734	0.18018	0.18359	-43.7686	63.1876	2290	-1.373	1.832	0.058594	-259.189	-373.15	2113.56	-0.25146	0.82031	-0.31445	NaN	NaN	NaN	NaN	NaN	NaN
2.282	-44.918	130.227	334.3956	0.051757	0.18774	0.1814	13.039	12.4287	2295.3	-1.3624	1.7895	0.06289	-236.961	-371.936	2162.1	-0.43359	0.9707	-0.27441	NaN	NaN	NaN	NaN	NaN	NaN
2.284	-34.542	119.468	330.5549	0.044922	0.19336	0.18164	-10.542	45.2284	2242.1	-1.3577	1.752	0.071875	-246.996	-262.236	2210.32	-0.5691	1.0891	-0.25733	NaN	NaN	NaN	NaN	NaN	NaN
2.286	-17.613	114.641	312.5086	0.044434	0.20117	0.18018	12.22	36.0577	2210.8	-1.3603	1.7198	0.080957	-249.206	-234.99	2183.82	-0.69482	1.2056	-0.25244	NaN	NaN	NaN	NaN	NaN	NaN
2.288	-26.836	97.389	304.184	0.040039	0.20703	0.17773	58.125	84.022	2187.77	-1.3701	1.6914	0.087402	-234.035	-152.4536	2135.69	-0.85449	1.3594	-0.2666	NaN	NaN	NaN	NaN	NaN	NaN
2.29	-3.306	103.205	299.3147	0.038574	0.22021	0.17773	-26.043	140.644	2141.56	-1.3709	1.6736	0.097365	-191.702	-167.0174	2100.72	-0.9375	1.4395	-0.25781	NaN	NaN	NaN	NaN	NaN	NaN
2.292	1.812	103.389	292.3219	0.03833	0.22901	0.17724	20.85	130.564	2117.26	-1.3706	1.6619	0.10967	-186.425	-164.53418	2106.06	-1.1108	1.606	-0.23682	NaN	NaN	NaN	NaN	NaN	NaN
2.294	-15.833	104.552	274.3771	0.032715	0.23633	0.18164	38.692	177.277	2070.49	-1.3593	1.6411	0.11241	-194.079	-229.271	2145.74	-1.2481	1.7168	-0.19189	NaN	NaN	NaN	NaN	NaN	NaN
2.296	-9.801	99.504	262.5484	0.03418	0.24512	0.18262	-6.26600000000001	194.457	2017.75	-1.338	1.6284	0.1125	-211.636	-255.837	2193.07	-1.3828	1.8184	-0.13721	NaN	NaN	NaN	NaN	NaN	NaN
2.298	-22.742	87.7102	261.68765	0.03418	0.25	0.17822	1.472	186.55	2000.94	-1.3076	1.6172	0.11035	-151.577	-292.85	2243.97	-1.5508	1.9473	-0.059082	NaN	NaN	NaN	NaN	NaN	NaN
2.3	15.225	90.763	264.124	0.03418	0.25244	0.17676	-72.543	220.22	1933.72	-1.2799	1.5934	0.11006	-73.536	-278.42	2337.2	-1.6289	2.0107	-0.024902	NaN	NaN	NaN	NaN	NaN	NaN
2.302	-16.351	88.612	248.738	0.033203	0.25611	0.17676	-55.489	193.722	1859.58	-1.2505	1.572	0.11016	-19.714	-263.03	2379.6	-1.7422	2.125	0.023438	NaN	NaN	NaN	NaN	NaN	NaN
2.304	-19.436	79.729	257.45	0.035645	0.25049	0.16992	-52.973	167.413	1838.47	-1.2161	1.5485	0.11485	-17.861	-256.624	2456.33	-1.8025	2.2073	0.041993	NaN	NaN	NaN	NaN	NaN	NaN
2.306	-19.08	72.609	237.188	0.031738	0.25537	0.17432	-118.705	170.249	1794.24	-1.1822	1.5209	0.097461	10.75	-248.919	2502.36	-1.8457	2.2676	0.039063	NaN	NaN	NaN	NaN	NaN	NaN
2.308	-21.286	74.751	214.019	0.029785	0.25488	0.17676	-83.0416	148.81	1793.43	-1.1382	1.5005	0.09375	10.309	-247.681	2565.5	-1.8477	2.2715	0.09375	NaN	NaN	NaN	NaN	NaN	NaN
2.31	-35.86	59.6186	220.58	0.026855	0.25049	0.17725	-93.78094	196.431	1799.91	-1.0922	1.4723	0.091016	8.678	-199.221	2606.79	-1.8618	2.1723	-0.0007325	NaN	NaN	NaN	NaN	NaN	NaN
2.312	-59.85	57.804	222.307	0.02832	0.24951	0.177	-119.0739	213.707	1733.84	-1.0525	1.4375	0.087695	-15.947	-197.843	2616.68	-1.8042	2.1401	-0.072266	NaN	NaN	NaN	NaN	NaN	NaN
2.314	-42.77	45.985	218.601	0.027344	0.24463	0.1792	-95.2625	199.601	1734.19	-1.0135	1.4047	0.082617	-3.836	-137.7873	2574.27	-1.8237	2.061	-0.043945	NaN	NaN	NaN	NaN	NaN	NaN
2.316	-56.424	61.2454	204.181	0.027344	0.23438	0.18408	-113.7851	222.296	1679.26	-0.97725	1.3671	0.074805	-20.255	-143.6465	2549.56	-1.8477	2.0547	-0.055664	NaN	NaN	NaN	NaN	NaN	NaN
2.318	-57.436	34.868	201.646	0.026855	0.23193	0.18164	-70.129	179.319	1626.48	-0.93506	1.3306	0.066895	-77.472	-80.911	2500.79	-1.8477	2.0488	-0.09082	NaN	NaN	NaN	NaN	NaN	NaN
2.32	-65.302	14.052	213.773	0.024902	0.22119	0.18652	-25.439	175.147	1600.34	-0.89903	1.2979	0.061914	-137.7	-76.503	2512.72	-1.8086	2.0059	-0.10888	NaN	NaN	NaN	NaN	NaN	NaN
2.322	-46.67	4.787	215.933	0.023926	0.21167	0.18652	-102.7825	198.773	1531.86	-0.86572	1.2681	0.056348	-140.188	2.64400000000001	2532.74	-1.7632	1.9653	-0.12793	NaN	NaN	NaN	NaN	NaN	NaN
2.324	-72.158	3.176	202.289	0.022461	0.20166	0.1875	-44.695	196.999	1509.39	-0.83838	1.2353	0.053614	-131.183	-18.53	2538.56	-1.7266	1.9531	-0.15381	NaN	NaN	NaN	NaN	NaN	NaN
2.326	-56.056	3.62	176.633	0.020996	0.18994	0.19141	-18.044	234.071	1469.13	-0.80606	1.2053	0.053809	-151.135	37.84	2505.23	-1.7104	1.9595	-0.16162	NaN	NaN	NaN	NaN	NaN	NaN
2.328	-58.958	-6.302	206.626	0.021973	0.18164	0.19385	-32.987	236.25	1362.87	-0.78271	1.1743	0.054688	-187.37	-7.134	2489.79	-1.6948	1.9595	-0.15234	NaN	NaN	NaN	NaN	NaN	NaN
2.33	-40.891	-11.598	212.875	0.021484	0.16504	0.19971	14.274	216.194	1330.72	-0.75986	1.1497	0.054395	-203.039	71.047	2493.14	-1.6943	1.96	-0.14014	NaN	NaN	NaN	NaN	NaN	NaN
2.332	-31.731	-18.715	207.554	0.018066	0.15503	0.19604	-22.784	246.986	1263.3	-0.73311	1.12	0.05918	-212.652	28.95	2539.05	-1.6909	1.9478	-0.11523	NaN	NaN	NaN	NaN	NaN	NaN
2.334	-43.85	-33.365	208.898	0.019043	0.14258	0.19922	15.508	238.633	1234.33	-0.70616	1.0946	0.061523	-219.66	78.78	2543.84	-1.6719	1.8965	-0.077148	NaN	NaN	NaN	NaN	NaN	NaN
2.336	-16.437	-35.256	226.32	0.01416	0.13135	0.19922	65.095	243.335	1221.18	-0.67871	1.0713	0.06582	-240.16	-9.06	2549.44	-1.6621	1.8594	-0.064453	NaN	NaN	NaN	NaN	NaN	NaN
2.338	-17.946	-22.882	259.72	0.011718	0.12036	0.19507	16.823	250.422	1149.86	-0.64648	1.0449	0.064453	-234.16	27.32	2550.12	-1.6304	1.772	-0.041016	NaN	NaN	NaN	NaN	NaN	NaN
2.34	-9.257	-5.044	277.31	0.0058594	0.1123	0.19727	68.794	222.227	1134.39	-0.61396	1.0153	0.065625	-214.003	-32.24	2550.34	-1.6005	1.707	-0.048828	NaN	NaN	NaN	NaN	NaN	NaN
2.342	1.129	4.9887	309.042	-0.0058594	0.10449	0.19482	50.968	247.48	1090.4	-0.57969	0.98594	0.063086	-212.141	39.99	2514.05	-1.5684	1.6475	-0.052246	NaN	NaN	NaN	NaN	NaN	NaN
2.344	-3.192	38.375	348.246	-0.012695	0.10059	0.19189	43.278	239.01	1035.08	-0.54883	0.95118	0.061523	-186.252	-10.66	2473.54	-1.5229	1.5864	-0.059082	NaN	NaN	NaN	NaN	NaN	NaN
2.346	15.228	73.0643	420.79	-0.033691	0.1001	0.19189	57.763	213.373	1030.05	-0.52031	0.91797	0.059278	-170.148	56.553	2443.62	-1.5	1.5566	-0.061035	NaN	NaN	NaN	NaN	NaN	NaN
2.348	-2.895	115.048	490.521	-0.054443	0.099611	0.18823	0.562000000000005	214.607	969.86	-0.49219	0.88672	0.056641	-123.499	12.02	2441.6	-1.4531	1.5156	-0.061523	NaN	NaN	NaN	NaN	NaN	NaN
2.35	13.517	152.2661	579.113	-0.07959	0.10205	0.18164	15.783	162.45	920.69	-0.47012	0.8545	0.051758	-94.268	107.958	2416.54	-1.4218	1.4922	-0.070313	NaN	NaN	NaN	NaN	NaN	NaN
2.352	12.543	172.691	668.427	-0.12305	0.11279	0.17139	23.577	156.814	892.23	-0.44726	0.8247	0.051172	-68.229	98.825	2365.33	-1.3867	1.4746	-0.068848	NaN	NaN	NaN	NaN	NaN	NaN
2.354	23.682	179.596	731.008	-0.14893	0.12451	0.16992	-31.237	170.683	827.24	-0.42265	0.79775	0.052735	-35.346	232.124	2305.16	-1.3374	1.4517	-0.069824	NaN	NaN	NaN	NaN	NaN	NaN
2.356	17.093	157.2978	811.622	-0.22705	0.14111	0.15039	-14.916	166.537	819.88	-0.40547	0.77129	0.049219	11.70827	218.9993	2286.09	-1.3159	1.4419	-0.070801	NaN	NaN	NaN	NaN	NaN	NaN
2.358	14.698	143.337	858.906	-0.29199	0.16626	0.13184	-46.978	219.706	777.61	-0.38184	0.74707	0.046387	-0.673999999999999	300.047	2223.45	-1.2715	1.4238	-0.070801	NaN	NaN	NaN	NaN	NaN	NaN
2.36	23.197	116.353	891.36	-0.37646	0.19189	0.11035	-45.429	239.72	722.03	-0.36123	0.72471	0.041699	23.92036	227.403	2176.63	-1.2386	1.4104	-0.072998	NaN	NaN	NaN	NaN	NaN	NaN
2.362	-9.114	82.197	903.261	-0.50391	0.25244	0.09375	-9.63500000000001	243.786	722.46	-0.34043	0.7043	0.03711	31.825	257.143	2128.02	-1.2124	1.3931	-0.070313	NaN	NaN	NaN	NaN	NaN	NaN
2.364	-0.728999999999999	22.4279	929.616	-0.56982	0.28271	0.088379	-73.922	257.57	682.89	-0.31895	0.68203	0.035547	33.0048	162.7695	2085.4	-1.1797	1.377	-0.054199	NaN	NaN	NaN	NaN	NaN	NaN
2.366	-17.202	-23.8845	961.308	-0.71289	0.36035	0.095703	-50.882	225.97	637.71	-0.3003	0.66016	0.031543	28.137	177.7894	2030.25	-1.1641	1.3652	-0.050781	NaN	NaN	NaN	NaN	NaN	NaN
2.368	-4.053	-41.5242	984.854	-0.81225	0.42505	0.11255	-28.114	224.754	595.67	-0.2832	0.64063	0.030273	-27.003	106.05	1970.81	-1.1445	1.3438	-0.02832	NaN	NaN	NaN	NaN	NaN	NaN
2.37	-13.876	-51.7384	1007.948	-0.9043	0.49707	0.14307	-64.804	238.38	528.65	-0.2664	0.62041	0.025586	-25.6259	175.1187	1935.05	-1.1255	1.3223	-0.015381	NaN	NaN	NaN	NaN	NaN	NaN
2.372	-42.803	-49.699	1042.942	-0.99951	0.59814	0.19336	-24.162	196.986	548.31	-0.25039	0.60742	0.024316	-39.0859	159.86163	1897.07	-1.0996	1.3105	-0.0024414	NaN	NaN	NaN	NaN	NaN	NaN
2.374	-25.113	-50.4943	1102.551	-1.0371	0.64355	0.21826	-34.013	204.462	532.02	-0.23984	0.58555	0.023535	-50.878	246.845	1871.93	-1.0601	1.2798	0.0048828	NaN	NaN	NaN	NaN	NaN	NaN
2.376	-11.101	-32.8066	1125.623	-1.0703	0.73535	0.26563	-26.922	175.59	480.55	-0.2252	0.57197	0.016406	-81.182	233.421	1825.49	-1.0332	1.2617	0.0058594	NaN	NaN	NaN	NaN	NaN	NaN
2.378	-6.211	-22.516	1166.618	-1.0676	0.78638	0.29419	22.117	171.968	465.51	-0.20703	0.56299	0.012207	-100.627	301.227	1757.76	-0.97607	1.231	0.0073242	NaN	NaN	NaN	NaN	NaN	NaN
2.38	-25.535	-19.731	1211.759	-1.0469	0.82813	0.31494	-18.577	191.778	448.31	-0.1874	0.54131	0.012109	-111.527	281.055	1704.15	-0.92773	1.1943	0.0073242	NaN	NaN	NaN	NaN	NaN	NaN
2.382	0.902000000000001	-23.048	1260.128	-0.99902	0.85742	0.31396	22.623	157.272	434.35	-0.17129	0.52813	0.010351	-131.108	315.454	1658.8	-0.87891	1.1582	0.0078125	NaN	NaN	NaN	NaN	NaN	NaN
2.384	-14	-18.387	1263.736	-0.97607	0.86182	0.30957	25.498	147.177	434.3	-0.14551	0.51914	0.0037109	-161.084	288.899	1602.87	-0.80664	1.1074	0.0073242	NaN	NaN	NaN	NaN	NaN	NaN
2.386	-20.839	-24.377	1246.913	-0.94141	0.86133	0.27588	29.301	149.175	370.54	-0.12481	0.50312	-0.00039062	-147.325	319.679	1540.38	-0.76904	1.0806	0.0068359	NaN	NaN	NaN	NaN	NaN	NaN
2.388	-1.859	-47.105	1228.618	-0.92701	0.85132	0.25049	81.699	111.846	367.41	-0.098145	0.48438	-0.0083008	-144.262	284.127	1460.36	-0.70313	1.0254	0.012695	NaN	NaN	NaN	NaN	NaN	NaN
2.39	-22.586	-83.854	1216.748	-0.91992	0.8418	0.23584	44.144	142.613	366.33	-0.083496	0.46943	-0.012695	-166.033	316.195	1388.44	-0.65625	0.98145	0.010986	NaN	NaN	NaN	NaN	NaN	NaN
2.392	-11.372	-95.462	1189.772	-0.92969	0.82227	0.229	45.697	150.648	327.38	-0.063184	0.45029	-0.021582	-180.788	286.893	1333.93	-0.61182	0.93994	0.0092773	NaN	NaN	NaN	NaN	NaN	NaN
2.394	-15	-122.192	1154.609	-0.93164	0.81836	0.23047	68.593	162.903	304.45	-0.047558	0.43623	-0.027832	-149.115	307.905	1291.29	-0.55273	0.8833	0.014648	NaN	NaN	NaN	NaN	NaN	NaN
2.396	13.749	-137.546	1155.263	-0.91797	0.79492	0.24756	18.611	194.686	244.068	-0.03457	0.42266	-0.035742	-90.8085	292.494	1256.93	-0.52686	0.85889	0.010254	NaN	NaN	NaN	NaN	NaN	NaN
2.398	17.788	-148.055	1184.808	-0.89063	0.7749	0.25342	34.626	153.147	242.572	-0.02002	0.41309	-0.038574	-38.827	302.35	1224.06	-0.47412	0.81006	0.015137	NaN	NaN	NaN	NaN	NaN	NaN
2.4	31.798	-146.748	1205.452	-0.84961	0.75195	0.26367	47.836	134.941	243.209	-0.0021482	0.40224	-0.042285	-31.081	287.56	1180.15	-0.43824	0.76953	0.018067	NaN	NaN	NaN	NaN	NaN	NaN
2.402	12.958	-147.4003	1218.376	-0.77344	0.72461	0.27295	-1.84099999999999	121.966	205.145	0.014453	0.38887	-0.045703	-10.919	286.939	1138.6	-0.39795	0.73389	0.014648	NaN	NaN	NaN	NaN	NaN	NaN
2.404	-32.177	-145.0926	1248.74	-0.73047	0.70898	0.27246	8.549	86.288	186.732	0.023047	0.37168	-0.053125	19.677	292.25	1104.59	-0.34912	0.68604	0.015137	NaN	NaN	NaN	NaN	NaN	NaN
2.406	-25.752	-114.618	1268.323	-0.63623	0.67041	0.26563	-23.777	100.454	173.351	0.033496	0.35898	-0.056152	37.18	295.29	1054.97	-0.32471	0.66602	0.012207	NaN	NaN	NaN	NaN	NaN	NaN
2.408	-75.742	-94.196	1284.568	-0.56934	0.64502	0.25488	-47.006	95.52	151.151	0.04541	0.34326	-0.062012	55.247	285.71	1010.57	-0.27734	0.61963	0.010742	NaN	NaN	NaN	NaN	NaN	NaN
2.41	-91.608	-105.789	1304.335	-0.51514	0.625	0.23682	-25.754	86.811	160.523	0.04541	0.32402	-0.068945	91.845	265.25	943.87	-0.24121	0.58935	0.010986	NaN	NaN	NaN	NaN	NaN	NaN
2.412	-113.23	-134.877	1324.016	-0.46484	0.60352	0.20996	-70.37	110.758	112.676	0.050195	0.30713	-0.072266	85.0437	268.7	862.29	-0.21533	0.55811	0.0048828	NaN	NaN	NaN	NaN	NaN	NaN
2.414	-93.902	-152.0843	1347.927	-0.45703	0.59961	0.19336	-50.461	75.801	99.841	0.055664	0.2958	-0.078125	93.0182	254.32	784.01	-0.18408	0.50586	0.030762	NaN	NaN	NaN	NaN	NaN	NaN
2.416	-93.787	-170.351	1367.763	-0.4668	0.60449	0.16943	-76.272	62.482	120.489	0.057812	0.27979	-0.080664	61.352	275.45	725.76	-0.17041	0.48584	0.030762	NaN	NaN	NaN	NaN	NaN	NaN
2.418	-93.11	-194.922	1397.531	-0.50293	0.62744	0.15992	-104.2418	49.099	97.904	0.063477	0.26416	-0.085938	69.403	255.21	693.4	-0.14453	0.45898	0.0029297	NaN	NaN	NaN	NaN	NaN	NaN
2.42	-74.024	-200.895	1421.87	-0.55908	0.65869	0.16406	-65.692	-4.535	112.281	0.071289	0.25351	-0.092871	78.634	279.24	675.12	-0.11059	0.45117	0.0058593	NaN	NaN	NaN	NaN	NaN	NaN
2.422	-82.064	-200.766	1449.848	-0.65625	0.72266	0.18018	-78.365	23.655	87.819	0.080274	0.24033	-0.10088	79.537	256.18	630.63	-0.085938	0.43311	0.013672	NaN	NaN	NaN	NaN	NaN	NaN
2.424	-75.433	-193.119	1475.975	-0.70459	0.75635	0.1875	-68.293	31.212	62.941	0.088476	0.22353	-0.10908	71.949	307.18	593.65	-0.067871	0.41602	0.0083008	NaN	NaN	NaN	NaN	NaN	NaN
2.426	-106.777	-183.576	1520.321	-0.79297	0.83008	0.21387	-43.782	29.5864	78.936	0.096973	0.20723	-0.11846	50.682	288.77	555.14	-0.0625	0.40918	-0.0024414	NaN	NaN	NaN	NaN	NaN	NaN
2.428	-106.707	-166.241	1582.105	-0.8418	0.88428	0.22998	-70.537	67.286	52.0658	0.097656	0.18994	-0.12451	-0.939	337.75	510.25	-0.045898	0.38965	-0.0058594	NaN	NaN	NaN	NaN	NaN	NaN
2.43	-116.87	-149.47864	1602.79	-0.88086	0.93164	0.24707	-36.492	24.1649	31.2508	0.1001	0.17315	-0.13213	-23.734	289.48	455.96	-0.033936	0.37598	-0.010254	NaN	NaN	NaN	NaN	NaN	NaN
2.432	-144.403	-147.2594	1618.865	-0.9043	1	0.27002	-21.89	26.7648	50.1232	0.10117	0.16172	-0.13936	-55.457	300.01	400.29	-0.026855	0.36377	-0.014648	NaN	NaN	NaN	NaN	NaN	NaN
2.434	-143.531	-150.192	1631.158	-0.90771	1.0259	0.27441	-57.783	16.979	45.858	0.098438	0.14648	-0.14131	-55.08	235.27	382.15	-0.019531	0.34912	-0.024414	NaN	NaN	NaN	NaN	NaN	NaN
2.436	-118.728	-157.373	1654.776	-0.9082	1.0645	0.2832	18.044	-33.334	58.716	0.09209	0.13106	-0.14053	-80.415	243.75	376.89	-0.012207	0.34766	-0.023926	NaN	NaN	NaN	NaN	NaN	NaN
2.438	-85.27	-149.173	1648.833	-0.91309	1.0845	0.28198	0.466999999999999	-0.629300000000001	46.7314	0.088379	0.12109	-0.14063	-97.721	180.946	364.38	-0.0043945	0.33447	-0.024902	NaN	NaN	NaN	NaN	NaN	NaN
2.44	-92.696	-155.478	1656.928	-0.91553	1.0991	0.27637	-6.042	6.967	22.354	0.088086	0.11162	-0.13613	-118.4235	241.028	327.73	0.0019531	0.32568	-0.032959	NaN	NaN	NaN	NaN	NaN	NaN
2.442	-58.144	-160.26022	1664.25	-0.94141	1.1055	0.26221	14.438	4.6338	42.365	0.084668	0.10127	-0.13291	-83.7838	196.115	280.69	0.0058594	0.31543	-0.040039	NaN	NaN	NaN	NaN	NaN	NaN
2.444	-42.24	-164.775	1701.926	-0.95947	1.1079	0.25293	1.104	49.733	46.6085	0.085059	0.097364	-0.12822	-75.336	235.063	261.43	0.019531	0.30078	-0.041504	NaN	NaN	NaN	NaN	NaN	NaN
2.446	-58.359	-166.513	1715.677	-1.0039	1.1035	0.24756	50.332	16.34456	46.491	0.090722	0.090527	-0.12979	-69.942	173.907	271.38	0.033447	0.28662	-0.047607	NaN	NaN	NaN	NaN	NaN	NaN
2.448	-48.786	-175.309	1730.678	-1.0444	1.0942	0.24145	35.31	8.3448	56.7384	0.09668	0.083984	-0.13281	-40.938	213.961	228.35	0.039063	0.26807	-0.050781	NaN	NaN	NaN	NaN	NaN	NaN
2.45	-66.993	-172.748	1754.053	-1.082	1.082	0.24414	-14.386	19.9348	35.6969	0.10703	0.077246	-0.13369	-30.623	152.63	196.501	0.054688	0.25098	-0.063965	NaN	NaN	NaN	NaN	NaN	NaN
2.452	-68.986	-150.5327	1793	-1.1211	1.0645	0.24658	7.90199999999999	-26.9717	57.9923	0.1209	0.069336	-0.13555	-28.113	185.644	168.624	0.05957	0.24023	-0.069336	NaN	NaN	NaN	NaN	NaN	NaN
2.454	-101.582	-140.91	1806.377	-1.1338	1.0547	0.25049	8.474	6.788	54.004	0.1291	0.059961	-0.14609	-31.709	106.8103	155.727	0.065918	0.21729	-0.077148	NaN	NaN	NaN	NaN	NaN	NaN
2.456	-86.863	-144.54	1817.869	-1.1499	1.0396	0.26025	-5.65899999999999	6.154	23.031	0.14131	0.049218	-0.14531	-19.762	135.6676	137.598	0.067383	0.19433	-0.084717	NaN	NaN	NaN	NaN	NaN	NaN
2.458	-101.769	-154.215	1856.736	-1.1511	1.0266	0.27124	-16.727	-6.26553	36.655	0.15674	0.039063	-0.15039	25.055	69.8008	128.345	0.071777	0.18262	-0.09082	NaN	NaN	NaN	NaN	NaN	NaN
2.46	-86.233	-153.941	1862.434	-1.1543	1.0156	0.26709	-53.886	50.439	29.2542	0.16895	0.024609	-0.15361	48.305	95.407	99.349	0.065918	0.16064	-0.096191	NaN	NaN	NaN	NaN	NaN	NaN
2.462	-86.453	-160.7155	1858.234	-1.1401	1.0083	0.26416	-49.031	38.5371	37.0217	0.18057	0.010449	-0.1582	41.166	20.6083	109	0.061035	0.15332	-0.10156	NaN	NaN	NaN	NaN	NaN	NaN
2.464	-108.687	-154.991	1842.133	-1.1343	1.0054	0.26367	-51.869	45.835	55.6991	0.18603	-0.0043945	-0.1664	42.465	38.6428	81.218	0.053223	0.13232	-0.10303	NaN	NaN	NaN	NaN	NaN	NaN
2.466	-99.079	-152.763	1843.78	-1.125	1.0088	0.26221	-83.207	48.2094	37.6953	0.18398	-0.02168	-0.1708	48.503	-17.8593	81.7626	0.0354	0.12867	-0.099123	NaN	NaN	NaN	NaN	NaN	NaN
2.468	-111.289	-149.153	1855.44	-1.1316	1.0159	0.25977	-73.46	-20.406	52.4814	0.16699	-0.036621	-0.17773	78.695	21.521	55.2658	0.016602	0.12012	-0.09668	NaN	NaN	NaN	NaN	NaN	NaN
2.47	-108.787	-142.052	1867.442	-1.1426	1.0234	0.26318	-88.349	6.746	66.807	0.14942	-0.050782	-0.1794	74.1534	-27.728	79.126	-0.0053711	0.1167	-0.092285	NaN	NaN	NaN	NaN	NaN	NaN
2.472	-116.355	-148.399	1891.817	-1.1729	1.0371	0.26855	-60.249	2.122	43.628	0.11523	-0.059863	-0.17734	54.86	-13.4294	77.988	-0.020508	0.1167	-0.091797	NaN	NaN	NaN	NaN	NaN	NaN
2.474	-139.354	-131.288	1906.422	-1.1994	1.0515	0.27807	-47.858	-2.121	55.1904	0.080469	-0.064551	-0.16797	33.205	-47.005	77.066	-0.041504	0.11865	-0.082031	NaN	NaN	NaN	NaN	NaN	NaN
2.476	-143.857	-104.4417	1922.013	-1.2319	1.064	0.29053	-107.2756	38.7748	45.1382	0.039844	-0.058789	-0.16582	25.12	0.797000000000001	40.4647	-0.055664	0.12232	-0.073731	NaN	NaN	NaN	NaN	NaN	NaN
2.478	-164.345	-72.349	1922.764	-1.272	1.0786	0.30078	-64.117	11.079	41.301	0.0014648	-0.044922	-0.15967	-18.746	-1.7617	52.1004	-0.068848	0.13037	-0.067383	NaN	NaN	NaN	NaN	NaN	NaN
2.48	-157.801	-68.161	1929.109	-1.2891	1.082	0.30322	-47.707	10.5296	63.815	-0.026367	-0.023828	-0.14551	-53.5	30.39045	43.3687	-0.073242	0.13574	-0.060059	NaN	NaN	NaN	NaN	NaN	NaN
2.482	-156.544	-76.532	1949.328	-1.3242	1.0957	0.31006	-67.558	19.987	51.7649	-0.054199	0.0017578	-0.13721	-54.536	20.9611	46.492	-0.067871	0.14111	-0.055176	NaN	NaN	NaN	NaN	NaN	NaN
2.484	-122.342	-89.2238	1932.718	-1.3487	1.1045	0.31054	-21.052	-36.5669	77.0802	-0.072168	0.024414	-0.12158	-48.048	44.5104	12.326	-0.050781	0.13916	-0.056152	NaN	NaN	NaN	NaN	NaN	NaN
2.486	-136.689	-109.613	1923.876	-1.3691	1.1084	0.3208	-28.724	-11.5908	94.914	-0.079297	0.049512	-0.11162	-65.692	34.284	28.7929	-0.023681	0.12524	-0.056153	NaN	NaN	NaN	NaN	NaN	NaN
2.488	-143.156	-115.773	1924.933	-1.3857	1.1035	0.32617	-41.43	-10.063	82.903	-0.07666	0.075684	-0.10693	-85.096	54.0679	39.589	-0.0024414	0.11523	-0.062988	NaN	NaN	NaN	NaN	NaN	NaN
2.49	-98.395	-108.112	1939.959	-1.394	1.1021	0.33057	15.499	-10.764	82.0726	-0.068945	0.093359	-0.10567	-117.8034	30.1792	64.4861	0.025879	0.084961	-0.066895	NaN	NaN	NaN	NaN	NaN	NaN
2.492	-87.639	-79.935	1927.77	-1.4077	1.0884	0.33203	-13.791	24.9738	84.1997	-0.051954	0.10528	-0.10313	-102.75	17.738	38.3203	0.040039	0.068848	-0.074707	NaN	NaN	NaN	NaN	NaN	NaN
2.494	-92.224	-72.571	1933.587	-1.4153	1.0744	0.33618	-2.59899999999999	-9.54	96.4265	-0.039454	0.11582	-0.10352	-94.138	13.152	32.4056	0.058594	0.035645	-0.081543	NaN	NaN	NaN	NaN	NaN	NaN
2.496	-102.212	-66.19707	1942.472	-1.4199	1.0635	0.33447	24.71	-23.8478	112.9136	-0.025488	0.11855	-0.10469	-96.9633	19.842	17.1683	0.069581	0.018554	-0.075927	NaN	NaN	NaN	NaN	NaN	NaN
2.498	-66.67	-36.884	1972.616	-1.4253	1.0396	0.33936	-3.816	-1.764	95.3965	-0.017578	0.12158	-0.10742	-92.4348	32.128	45.8552	0.083496	-0.003418	-0.077637	NaN	NaN	NaN	NaN	NaN	NaN
2.5	-86.377	-28.853	1984.814	-1.4277	1.0293	0.33643	31.178	-75.833	122.75	-0.005957	0.11582	-0.10312	-81.215	15.8912	48.0651	0.098633	-0.023438	-0.087891	NaN	NaN	NaN	NaN	NaN	NaN
2.502	-87.892	-32.372	1965.651	-1.4268	1.0098	0.34033	-5.34399999999999	-62.4197	152.6987	-0.00058594	0.1126	-0.099218	-106.318	32.535	35.618	0.11035	-0.035156	-0.088379	NaN	NaN	NaN	NaN	NaN	NaN
2.504	-103.19	-44.019	1952.645	-1.4287	0.99219	0.33691	-18.773	-97.3401	150.8822	0.00058594	0.10908	-0.096484	-67.095	26.3594	49.0997	0.13184	-0.061035	-0.091309	NaN	NaN	NaN	NaN	NaN	NaN
2.506	-82.337	-41.41032	1925.053	-1.4312	0.979	0.33984	8.14100000000001	-116.8253	162.577	0.0042969	0.10703	-0.098731	-20.979	43.459	76.393	0.14087	-0.068115	-0.095459	NaN	NaN	NaN	NaN	NaN	NaN
2.508	-86.941	-37.7771	1902.99	-1.4316	0.95508	0.33643	-23.634	-77.696	182.8671	0.0083008	0.10889	-0.10059	5.55399999999999	17.60988	91.912	0.1499	-0.081055	-0.10596	NaN	NaN	NaN	NaN	NaN	NaN
2.51	-83.851	-29.408	1887.697	-1.4292	0.9458	0.34473	-30.214	-116.99	251.3108	0.0033203	0.1083	-0.10215	-4.292	47.578	86.272	0.14502	-0.089844	-0.11816	NaN	NaN	NaN	NaN	NaN	NaN
2.512	-83.428	-30.128	1906.977	-1.4272	0.92041	0.34619	-40.233	-119.6715	324.0651	-0.0044922	0.11172	-0.10791	40.928	24.7292	75.404	0.14502	-0.092285	-0.125	NaN	NaN	NaN	NaN	NaN	NaN
2.514	-77.142	-31.0361	1893.849	-1.4194	0.89844	0.34229	-53.45	-96.927	360.6161	-0.015039	0.11211	-0.11416	13.942	53.864	66.6936	0.13232	-0.093262	-0.12598	NaN	NaN	NaN	NaN	NaN	NaN
2.516	-77.63	-36.784	1889.448	-1.4067	0.87744	0.34717	-19.013	-136.5082	409.615	-0.033594	0.11914	-0.11309	50.063	13.4895	74.3183	0.11743	-0.083496	-0.13379	NaN	NaN	NaN	NaN	NaN	NaN
2.518	-106.152	-30.933	1884.087	-1.396	0.85596	0.3457	-39.408	-65.483	508.025	-0.061035	0.13037	-0.11084	59.006	23.377	48.454	0.098633	-0.074219	-0.13428	NaN	NaN	NaN	NaN	NaN	NaN
2.52	-108.533	-18.8522	1877.039	-1.3862	0.84717	0.35254	-50.386	-29.612	639.056	-0.094626	0.14414	-0.11153	68.086	-7.7982	52.87964	0.072266	-0.04541	-0.13232	NaN	NaN	NaN	NaN	NaN	NaN
2.522	-107.396	-7.944	1853.388	-1.373	0.83008	0.35596	-60.269	17.6839	818.643	-0.13593	0.16572	-0.10879	49.022	46.603	57.7946	0.061035	-0.027344	-0.13184	NaN	NaN	NaN	NaN	NaN	NaN
2.524	-139.421	4.172	1834.732	-1.3591	0.82104	0.35596	-52.392	138.801	952.638	-0.18593	0.18721	-0.1002	53.091	14.2405	67.921	0.047363	0.0019531	-0.11816	NaN	NaN	NaN	NaN	NaN	NaN
2.526	-148.282	-5.125	1821.262	-1.3433	0.80908	0.35791	2.91499999999999	150.15	1052.428	-0.23906	0.2164	-0.098926	18.065	39.0043	57.0713	0.035644	0.027832	-0.125	NaN	NaN	NaN	NaN	NaN	NaN
2.528	-142.024	-15.769	1813.26	-1.3203	0.80273	0.36279	-30.428	155.776	1168.492	-0.2998	0.23926	-0.099121	-2.283	-13.5657	61.8014	0.035645	0.045898	-0.13086	NaN	NaN	NaN	NaN	NaN	NaN
2.53	-124.609	-7.3479	1780.984	-1.3086	0.80664	0.36768	-104.402	149.689	1279.399	-0.37178	0.27763	-0.092773	13.152	8.8931	58.3117	0.056641	0.075195	-0.12012	NaN	NaN	NaN	NaN	NaN	NaN
2.532	-152.753	-3.593	1753.846	-1.2813	0.7998	0.36377	-70.001	40.31	1361.768	-0.45478	0.3128	-0.086426	1.579	-21.1052	73.783	0.067383	0.083008	-0.12598	NaN	NaN	NaN	NaN	NaN	NaN
2.534	-116.921	10.545	1724.685	-1.2593	0.80322	0.3667	-40.627	15.766	1392.992	-0.54736	0.35693	-0.079785	-31.881	17.7337	70.327	0.098145	0.09375	-0.14404	NaN	NaN	NaN	NaN	NaN	NaN
2.536	-89.272	18.973	1711.12	-1.2383	0.80273	0.36768	-4.516	-39.538	1336.373	-0.65088	0.39932	-0.078223	-60.205	-3.4705	67.53	0.1316	0.095214	-0.15479	NaN	NaN	NaN	NaN	NaN	NaN
2.538	-95.655	25.302	1693.213	-1.2031	0.79883	0.36377	-16.249	-128.3957	1299.572	-0.771	0.44727	-0.085938	-77.554	26.194	63.8239	0.15869	0.091797	-0.16016	NaN	NaN	NaN	NaN	NaN	NaN
2.54	-96.125	7.6365	1687.687	-1.1851	0.80322	0.36133	-43.376	-120.3435	1270.5787	-0.91846	0.5085	-0.099121	-98.2399	-38.366	68.6973	0.17432	0.083496	-0.18848	NaN	NaN	NaN	NaN	NaN	NaN
2.542	-94.821	2.1682	1687.22	-1.1479	0.79736	0.35645	-34.0822	-163.135	1229.456	-1.0918	0.58359	-0.089356	-67.714	-14.596	62.5457	0.17236	0.079102	-0.20117	NaN	NaN	NaN	NaN	NaN	NaN
2.544	-81.719	14.1092	1674.046	-1.1201	0.7959	0.35449	-39.964	-142.8	1222.331	-1.2867	0.69258	-0.061231	-103.35	-59.166	97.26	0.15479	0.078125	-0.22559	NaN	NaN	NaN	NaN	NaN	NaN
2.546	-97.481	42.819	1639.899	-1.0903	0.7876	0.34961	-48.95	-84.143	1231.0027	-1.4655	0.84385	-0.013086	-111.096	-28.849	112.203	0.11988	0.081543	-0.24024	NaN	NaN	NaN	NaN	NaN	NaN
2.548	-98.992	41.708	1611.924	-1.0547	0.78418	0.34082	-65.134	-142.187	1253.469	-1.6211	1.0234	0.043457	-112.625	-51.66	133.202	0.070313	0.095215	-0.24365	NaN	NaN	NaN	NaN	NaN	NaN
2.55	-97.379	37.608	1594.217	-1.0313	0.78125	0.33984	-110.534	-102.366	1295.708	-1.6964	1.2175	0.087013	-102.3908	-22.226	134.251	-0.0058594	0.13281	-0.24756	NaN	NaN	NaN	NaN	NaN	NaN
2.552	-61.184	40.6018	1560.687	-0.99023	0.77344	0.33203	-131.22	-35.343	1283.249	-1.6901	1.3895	0.12109	-92.6316	-78.666	164.318	-0.040039	0.1582	-0.24658	NaN	NaN	NaN	NaN	NaN	NaN
2.554	-66.883	32.2119	1538.08	-0.9519	0.76587	0.32202	-111.0525	-11.197	1280.9587	-1.5792	1.5005	0.13164	-67.373	-87.808	186.3	-0.11328	0.21533	-0.24219	NaN	NaN	NaN	NaN	NaN	NaN
2.556	-45.586	21.591	1512.832	-0.9126	0.7583	0.31348	-109.4999	71.437	1316.271	-1.3864	1.5328	0.11875	-87.523	-122.2975	257.993	-0.16162	0.26098	-0.23975	NaN	NaN	NaN	NaN	NaN	NaN
2.558	-42.191	18.761	1508.468	-0.85059	0.75195	0.29688	-78.7384	19.48	1325.577	-1.1426	1.5059	0.089844	-53.945	-104.229	303.579	-0.21045	0.30615	-0.23584	NaN	NaN	NaN	NaN	NaN	NaN
2.56	-33.298	49.57	1482.634	-0.82715	0.74023	0.29053	-58.248	-73.179	1374.598	-0.8748	1.4283	0.037305	11.15	-142.601	375.524	-0.27539	0.37207	-0.23535	NaN	NaN	NaN	NaN	NaN	NaN
2.562	-44.986	50.525	1473.216	-0.76709	0.72314	0.27734	-56.531	-119.649	1412.5722	-0.62744	1.327	-0.054884	19.169	-167.418	440.953	-0.30908	0.40088	-0.23877	NaN	NaN	NaN	NaN	NaN	NaN
2.564	-31.194	57.277	1441.943	-0.73023	0.71216	0.26733	-35.196	-263.0503	1454.16	-0.4333	1.2177	-0.15683	3.26799999999999	-203.0317	557.098	-0.39844	0.45703	-0.25146	NaN	NaN	NaN	NaN	NaN	NaN
2.566	-54.343	77.0045	1428.421	-0.69775	0.69971	0.25586	-20.829	-297.0547	1526.584	-0.28144	1.0985	-0.23252	71.792	-163.558	680.52	-0.48535	0.49683	-0.25049	NaN	NaN	NaN	NaN	NaN	NaN
2.568	-78.474	100.336	1405.933	-0.65381	0.68604	0.24512	-65.54	-290.407	1547.986	-0.16748	0.97314	-0.27783	57.363	-75.4307	875.73	-0.58984	0.53418	-0.26172	NaN	NaN	NaN	NaN	NaN	NaN
2.57	-92.284	99.348	1377.253	-0.63379	0.68164	0.23877	-95.571	-367.65	1583.67	-0.10693	0.84492	-0.29864	73.311	52.479	1099.76	-0.7793	0.58691	-0.27881	NaN	NaN	NaN	NaN	NaN	NaN
2.572	-76.659	94.571	1360.65	-0.61035	0.67773	0.2334	-113.667	-307.588	1668.1451	-0.087305	0.72695	-0.30205	75.895	143.43591	1307.96	-0.89014	0.62158	-0.28809	NaN	NaN	NaN	NaN	NaN	NaN
2.574	-84.957	92.9316	1356.849	-0.58838	0.66895	0.23169	-90.933	-305.796	1725.5652	-0.09902	0.62813	-0.29814	48.289	192.45	1447.011	-1.168	0.7207	-0.28174	NaN	NaN	NaN	NaN	NaN	NaN
2.576	-64.229	91.4113	1312.288	-0.56543	0.66211	0.22607	-19.904	-268.495	1811.774	-0.11748	0.55859	-0.29375	-53.9686	195.35	1651.835	-1.4167	0.84008	-0.23803	NaN	NaN	NaN	NaN	NaN	NaN
2.578	-81.265	84.763	1289.441	-0.53662	0.65674	0.21582	-6.29300000000001	-128.842	1886.542	-0.1416	0.52441	-0.2915	-39.029	134.65	1760.884	-1.7026	0.98877	-0.16113	NaN	NaN	NaN	NaN	NaN	NaN
2.58	-53.363	88.544	1260.779	-0.521	0.65479	0.20703	10.203	-152.24	1922.767	-0.1751	0.51592	-0.31221	-43.082	81.805	1843.374	-2.1113	1.2402	-0.026367	NaN	NaN	NaN	NaN	NaN	NaN
2.582	-66.365	102.705	1234.272	-0.4917	0.66357	0.19824	48.719	-111.565	1965.013	-0.22305	0.54707	-0.32988	-21.164	-5.923	1823.2	-2.3754	1.4507	0.068848	NaN	NaN	NaN	NaN	NaN	NaN
2.584	-54.775	111.0546	1214.374	-0.47314	0.65747	0.19409	57.468	-85.714	1935.954	-0.31094	0.61348	-0.32324	-20.406	-106.362	1766.178	-2.5679	1.647	0.14063	NaN	NaN	NaN	NaN	NaN	NaN
2.586	-78.66	96.4106	1197.481	-0.45459	0.6626	0.18457	122.637	-159.856	1929.766	-0.43496	0.70196	-0.3039	-18.988	-270.8714	1697.73	-2.6187	1.8345	0.22461	NaN	NaN	NaN	NaN	NaN	NaN
2.588	-41.155	101.3582	1180.102	-0.42822	0.65479	0.17773	150.370825	-115.772	1970.918	-0.5835	0.80518	-0.2749	-61.552	-355.014	1584.741	-2.5605	1.9043	0.25928	NaN	NaN	NaN	NaN	NaN	NaN
2.59	-63.215	109.6838	1165.807	-0.41699	0.65771	0.17725	122.496	-159.518	1964.218	-0.71953	0.91016	-0.24356	-74.511	-376.435	1481.58	-2.3184	2.0156	0.31299	NaN	NaN	NaN	NaN	NaN	NaN
2.592	-72.253	126.301	1135.773	-0.39551	0.65576	0.16895	89.27	-210.891	1991.311	-0.82959	1.0177	-0.21153	-104.007	-295.678	1412.919	-2.0293	1.9898	0.28174	NaN	NaN	NaN	NaN	NaN	NaN
2.594	-58.851	103.7913	1120.436	-0.37671	0.65284	0.16723	42.322	-161.405	2033.753	-0.91436	1.1204	-0.19121	-145.242	-239.111	1394.146	-1.6851	1.8345	0.19141	NaN	NaN	NaN	NaN	NaN	NaN
2.596	-45.052	104.7792	1093.278	-0.3667	0.65381	0.16064	39.088	-244.535	2067.764	-0.95762	1.2125	-0.18203	-167.397	-150.819	1411.177	-1.1934	1.457	0.045898	NaN	NaN	NaN	NaN	NaN	NaN
2.598	-39.606	107.8817	1057.763	-0.34033	0.65479	0.14941	69.114	-235.973	2151.184	-0.96631	1.2876	-0.18604	-145.355	-119.673	1426.982	-0.96631	1.2681	-0.012695	NaN	NaN	NaN	NaN	NaN	NaN
2.6	-25.084	118.3723	1026.116	-0.32861	0.65527	0.15088	60.934	-199.569	2178.612	-0.93975	1.3141	-0.20694	-170.711	-72.008	1410.994	-0.61279	0.91748	-0.09375	NaN	NaN	NaN	NaN	NaN	NaN
2.602	-8.438	110.0413	1006.793	-0.30811	0.65088	0.1377	60.635	-279.78	2190.501	-0.90429	1.307	-0.23496	-184.998	-27.653	1408.258	-0.43945	0.70337	-0.13794	NaN	NaN	NaN	NaN	NaN	NaN
2.604	-19.04	131.0158	989.445	-0.29297	0.64038	0.12963	28.664	-208.443	2261.123	-0.8875	1.2692	-0.25879	-228.277	37.58	1370.126	-0.30371	0.51563	-0.18506	NaN	NaN	NaN	NaN	NaN	NaN
2.606	4.48799999999999	133.61	962.358	-0.27783	0.6377	0.12842	4.19200000000001	-200.4561	2276.629	-0.90196	1.218	-0.27988	-173.669	53.75	1387.107	-0.14893	0.27393	-0.24072	NaN	NaN	NaN	NaN	NaN	NaN
2.608	-4.86499999999999	123.769	954.336	-0.25879	0.63037	0.11523	30.675	-221.4351	2292.0226	-0.95117	1.1787	-0.28711	-71.831	-6.89000000000001	1348.623	-0.068848	0.16992	-0.27002	NaN	NaN	NaN	NaN	NaN	NaN
2.61	0.504000000000005	109.996	934.114	-0.24658	0.61963	0.10986	24.583	-110.281	2312.5077	-1.0279	1.1701	-0.28213	14.194	-148.833	1370.891	0.075195	0.0039063	-0.37012	NaN	NaN	NaN	NaN	NaN	NaN
2.612	10.816	118.2945	919.132	-0.22119	0.61572	0.10352	-22.58	-152.229	2296.9965	-1.1034	1.1798	-0.28232	83.404	-317.838	1367.467	0.16797	-0.064942	-0.45801	NaN	NaN	NaN	NaN	NaN	NaN
2.614	-6.81099999999999	139.008	882.085	-0.20215	0.60156	0.084473	-43.942	-120.706	2320.8099	-1.1644	1.1954	-0.2792	133.51	-441.629	1436.225	0.23047	-0.094238	-0.54248	NaN	NaN	NaN	NaN	NaN	NaN
2.616	-26.023	146.005	877.594	-0.18311	0.6001	0.076172	-64.096	-35.744	2318.426	-1.2221	1.2064	-0.29053	137.46	-485.007	1479.492	0.24414	-0.050293	-0.57959	NaN	NaN	NaN	NaN	NaN	NaN
2.618	-26.104	138.581	850.578	-0.1499	0.59082	0.05127	-70.757	-123.575	2306.374	-1.2974	1.2368	-0.30127	128.636	-474.1	1593.8771	0.20313	0.010254	-0.56787	NaN	NaN	NaN	NaN	NaN	NaN
2.62	-29.453	136.977	834.679	-0.12378	0.58764	0.035156	-67.723	-64	2349.758	-1.3746	1.3139	-0.3123	201.006	-415.219	1670.394	0.027344	0.20361	-0.51123	NaN	NaN	NaN	NaN	NaN	NaN
2.622	-38.978	127.5102	807.937	-0.095215	0.58789	0.02832	-84.417	-52.304	2368.625	-1.4288	1.4147	-0.32158	220.728	-359.04	1769.99	-0.17187	0.40821	-0.42578	NaN	NaN	NaN	NaN	NaN	NaN
2.624	-27.911	128.639	785.22	-0.058594	0.58203	0.01709	-59.33	-72.467	2396.0948	-1.4413	1.5054	-0.33096	215.971	-296.357	1814.8392	-0.396	0.62744	-0.34326	NaN	NaN	NaN	NaN	NaN	NaN
2.626	-13.061	133.535	768.593	-0.044434	0.58057	0.0097656	-44.136	54.913	2440.826	-1.418	1.5686	-0.34678	180.687	-239.559	1903.0324	-0.65967	0.91064	-0.26025	NaN	NaN	NaN	NaN	NaN	NaN
2.628	-34.591	151.147	731.858	-0.01416	0.56836	-0.0073242	-41.727	16.071	2440.4786	-1.3789	1.6133	-0.37012	182.749	-157.3663	1949.799	-0.76709	1.0493	-0.23682	NaN	NaN	NaN	NaN	NaN	NaN
2.63	-25.056	149.314	711.59	0.00073245	0.56031	-0.01416	16.987	-8.09999999999999	2475.9459	-1.3319	1.6322	-0.39893	203.582	-72.126	2016.021	-0.92627	1.2817	-0.21631	NaN	NaN	NaN	NaN	NaN	NaN
2.632	-44.063	147.7801	694.715	0.016113	0.55127	-0.019043	48.67	10.569	2477.21244	-1.2895	1.6422	-0.43428	261.9386	-24.64	1953.951	-1.0235	1.4321	-0.21997	NaN	NaN	NaN	NaN	NaN	NaN
2.634	-30.556	138.47051	689.797	0.04834	0.53076	-0.032715	54.291	-109.8935	2453.77	-1.2543	1.6484	-0.46905	292.809	-77.675	1946.986	-1.1025	1.5547	-0.22656	NaN	NaN	NaN	NaN	NaN	NaN
2.636	-32.986	149.538	687.648	0.060059	0.52979	-0.051758	83.925	-55.334	2490.547	-1.2287	1.647	-0.49306	317.277	-152.808	1893.959	-1.1812	1.6704	-0.23389	NaN	NaN	NaN	NaN	NaN	NaN
2.638	-29.213	147.482	679.36	0.087402	0.51758	-0.065918	85.348	-29.1874	2473.5011	-1.2124	1.6431	-0.51221	226.8347	-226.932	1881.984	-1.2188	1.7129	-0.23779	NaN	NaN	NaN	NaN	NaN	NaN
2.64	-61.357	136.4813	671.981	0.10791	0.49926	-0.07251	96.651	-70.242	2461.5959	-1.209	1.634	-0.52217	177.909	-226.22	1903.73	-1.2202	1.7427	-0.27881	NaN	NaN	NaN	NaN	NaN	NaN
2.642	-40.555	143.0471	631.099	0.13623	0.49463	-0.081055	85.655	43.6608	2465.333	-1.2112	1.6267	-0.53271	140.184	-235.6758	1978.698	-1.1879	1.7349	-0.23706	NaN	NaN	NaN	NaN	NaN	NaN
2.644	-41.431	142.6403	598.366	0.17236	0.49414	-0.094238	67.723	3.694	2433.3338	-1.2159	1.6157	-0.54951	96.409	-226.332	2044.2838	-1.1279	1.6855	-0.15918	NaN	NaN	NaN	NaN	NaN	NaN
2.646	-44.588	137.8041	573.542	0.17627	0.49219	-0.10645	98.131	30.788	2469.547	-1.2204	1.6129	-0.56406	18.45	-247.973	2121.648	-1.0718	1.6743	-0.43018	NaN	NaN	NaN	NaN	NaN	NaN
2.648	-20.864	124.2967	563.394	0.20801	0.47217	-0.11279	68.748	147.616	2454.431	-1.2202	1.6157	-0.57568	25.09	-259.9128	2158.81	-0.98438	1.6953	-0.39648	NaN	NaN	NaN	NaN	NaN	NaN
2.65	-13.05	122.958	557.945	0.24658	0.45703	-0.11914	68.25	99.99	2409.7976	-1.2212	1.6173	-0.58525	-11.76	-271.053	2228.27	-0.96045	1.6899	-0.33447	NaN	NaN	NaN	NaN	NaN	NaN
2.652	1.447	128.095	534.302	0.27881	0.46094	-0.13135	99.55	172.417	2423.944	-1.2148	1.6238	-0.59375	-33.01	-210.5923	2284.203	-1.0107	1.7505	-0.39184	NaN	NaN	NaN	NaN	NaN	NaN
2.654	4.92	120.961	533.847	0.28271	0.45996	-0.14307	59.451	153.255	2382.922	-1.1988	1.632	-0.60273	-53.169	-198.979	2329.724	-1.019	1.7563	-0.42139	NaN	NaN	NaN	NaN	NaN	NaN
2.656	15.538	122.285	533.62	0.28955	0.45801	-0.12695	44.367	76.538	2373.32071	-1.1843	1.6263	-0.60889	-12.24	-136.659	2320.877	-1.0454	1.6802	-0.41748	NaN	NaN	NaN	NaN	NaN	NaN
2.658	4.32	129.8968	530.69	0.30908	0.42578	-0.14746	43.166	158.206	2388.352	-1.1719	1.6172	-0.6123	1.64999999999999	-142.6155	2283.836	-1.1055	1.6836	-0.42773	NaN	NaN	NaN	NaN	NaN	NaN
2.66	-1.806	141.5897	490.724	0.31812	0.44873	-0.15039	48.418	99.575	2357.375	-1.1558	1.6073	-0.61738	24.13	-104.158	2239.1204	-1.1919	1.8071	-0.47607	NaN	NaN	NaN	NaN	NaN	NaN
2.662	0.155000000000001	133.355	476.115	0.30664	0.45361	-0.15967	10.564	108.5995	2355.127	-1.1437	1.5902	-0.61543	45.69	-104.06	2205.655	-1.1548	1.8486	-0.53125	NaN	NaN	NaN	NaN	NaN	NaN
2.664	-20.022	138.211	457.735	0.29395	0.4502	-0.12598	-66.7	148.513	2301.0107	-1.1418	1.5766	-0.61426	28.51	-60.953	2189.126	-1.0605	1.8223	-0.56641	NaN	NaN	NaN	NaN	NaN	NaN
2.666	-9.501	128.765	439.364	0.29248	0.43164	-0.14697	-85.385	51.628	2235.318	-1.1351	1.5652	-0.61328	11.94	-81.516	2174.514	-0.93018	1.7427	-0.61865	NaN	NaN	NaN	NaN	NaN	NaN
2.668	-30.443	120.0609	412.101	0.29199	0.46533	-0.1499	-75.022	99.225	2245.3254	-1.1353	1.5552	-0.60498	44.532	-50.4983	2198.546	-0.89063	1.7051	-0.64648	NaN	NaN	NaN	NaN	NaN	NaN
2.67	-16.966	108.479	413.962	0.28735	0.48951	-0.1499	-86.778	91.38	2209.7395	-1.1277	1.5511	-0.59736	99.842	-30.066	2201.154	-0.86035	1.6484	-0.68945	NaN	NaN	NaN	NaN	NaN	NaN
2.672	-11.323	106.211	393.038	0.26855	0.49463	-0.13135	-85.244	70.586	2180.29207	-1.1237	1.5486	-0.58554	147.598	40.2588	2217.28	-0.86914	1.6284	-0.70508	NaN	NaN	NaN	NaN	NaN	NaN
2.674	-10.194	120.388	375.774	0.27002	0.54102	-0.11621	-56.55	196.078	2178.723	-1.1206	1.5579	-0.57226	139.432	64.443	2190.819	-0.89404	1.6235	-0.6958	NaN	NaN	NaN	NaN	NaN	NaN
2.676	-16.764	114.489	376.561	0.24756	0.53125	-0.14355	-43.755	168.482	2110.174	-1.1147	1.5614	-0.55674	153.69	103.814	2220.693	-0.94678	1.6274	-0.67432	NaN	NaN	NaN	NaN	NaN	NaN
2.678	-15.971	111.1257	356.402	0.23486	0.5957	-0.11914	-5.015	198.302	2082.26	-1.1108	1.5728	-0.53662	191.528	85.746	2259.67	-0.97656	1.6211	-0.66602	NaN	NaN	NaN	NaN	NaN	NaN
2.68	-13.637	107.9415	345.696	0.21069	0.57447	-0.13427	3.011	252.454	2046.8057	-1.1046	1.577	-0.52412	222.4886	69.0481	2304.268	-1.0015	1.6021	-0.64209	NaN	NaN	NaN	NaN	NaN	NaN
2.682	-50.075	115.9956	335.765	0.22461	0.64111	-0.10156	1.605	172.173	1971.278	-1.0976	1.572	-0.50293	292.613	22.8655	2289.641	-1.008	1.5823	-0.62329	NaN	NaN	NaN	NaN	NaN	NaN
2.684	-49.116	105.4297	333.606	0.18896	0.65771	-0.12256	17.651	224.307	1956.55	-1.0945	1.5689	-0.48457	330.1	2.928	2281.523	-1.0015	1.5649	-0.61768	NaN	NaN	NaN	NaN	NaN	NaN
2.686	-64.92	96.26797	326.403	0.1709	0.66553	-0.11816	0.359999999999999	204.207	1897.489	-1.0935	1.5631	-0.46084	297.236	1.2494	2211.157	-0.97852	1.5371	-0.63672	NaN	NaN	NaN	NaN	NaN	NaN
2.688	-52.62	91.6194	311.27	0.17041	0.68555	-0.11426	-5.42699999999999	167.021	1860.947	-1.0938	1.5547	-0.43457	197.243	24.577	2196.42	-0.96777	1.5293	-0.64063	NaN	NaN	NaN	NaN	NaN	NaN
2.69	-66.269	89.952	303.476	0.14599	0.70141	-0.11987	29.453	237.714	1859.655	-1.0958	1.5456	-0.40928	165.447	65.6575	2164.62	-0.95801	1.4961	-0.65527	NaN	NaN	NaN	NaN	NaN	NaN
2.692	-49.049	96.64919	282.832	0.14063	0.74463	-0.098633	14.707	174.127	1803.925	-1.0948	1.5337	-0.38291	140.221	99.215	2198.62	-0.97413	1.4781	-0.65136	NaN	NaN	NaN	NaN	NaN	NaN
2.694	-44.894	87.9948	272.236	0.11963	0.72266	-0.12256	53.291	199.1979	1786.7325	-1.0933	1.5212	-0.35791	152.968	162.0202	2171.001	-1.0034	1.4673	-0.65186	NaN	NaN	NaN	NaN	NaN	NaN
2.696	-32.07	96.4283	235.545	0.12305	0.77734	-0.075195	71.237	262.168	1759.1796	-1.0798	1.5007	-0.33437	114.636	197.378	2165.676	-1.0537	1.4668	-0.63867	NaN	NaN	NaN	NaN	NaN	NaN
2.698	-22.458	88.6742	237.649	0.095215	0.78564	-0.088379	57.829	201.594	1717.391	-1.0625	1.4785	-0.3125	77.129	259.489	2106.172	-1.0669	1.4712	-0.62842	NaN	NaN	NaN	NaN	NaN	NaN
2.7	-32.551	71.759	235.921	0.067138	0.75708	-0.10205	79.055	251.406	1707.068	-1.0363	1.4562	-0.29141	16.035	292.3	2105.775	-1.1011	1.479	-0.60889	NaN	NaN	NaN	NaN	NaN	NaN
2.702	-13.485	61.584	239.155	0.077637	0.81006	-0.065918	56.598	206.923	1643.069	-1.0074	1.4293	-0.27774	-5.61	309.27	2032.991	-1.1138	1.4882	-0.60523	NaN	NaN	NaN	NaN	NaN	NaN
2.704	-24.257	67.343	234.441	0.055664	0.80371	-0.081055	44.808	168.51815	1574.3244	-0.97265	1.3965	-0.26758	-25.43	277.767	2045.0441	-1.1172	1.4941	-0.60352	NaN	NaN	NaN	NaN	NaN	NaN
2.706	-26.903	74.7209	213.809	0.037109	0.78906	-0.091309	20.346	246.551	1545.337	-0.94228	1.365	-0.25537	20.94	244.09	1998.003	-1.0977	1.5039	-0.61523	NaN	NaN	NaN	NaN	NaN	NaN
2.708	-25.383	71.3981	221.505	0.056152	0.82471	-0.054199	-30.516	215.927	1470.8413	-0.9082	1.332	-0.24023	-4.24000000000001	179.609	1988.208	-1.082	1.5059	-0.61719	NaN	NaN	NaN	NaN	NaN	NaN
2.71	-17.506	77.3927	202.589	0.027832	0.79688	-0.091796	-36.398	253.058	1445.887	-0.88194	1.304	-0.22862	-21.041	183.761	1901.5302	-1.0283	1.4961	-0.625	NaN	NaN	NaN	NaN	NaN	NaN
2.712	-25.506	81.1921	199.396	0.027832	0.80322	-0.086914	-23.977	295.729	1372.4303	-0.85781	1.2762	-0.21445	-52.643	161.1461	1881.8331	-0.98682	1.48	-0.62378	NaN	NaN	NaN	NaN	NaN	NaN
2.714	-26.799	72.8029	186.223	0.042969	0.82617	-0.055176	-70.043	233.9008	1294.029	-0.83632	1.2492	-0.19765	-31.629	191.463	1822.435	-0.94287	1.4634	-0.62061	NaN	NaN	NaN	NaN	NaN	NaN
2.716	-0.575000000000003	41.671	186.613	0.022461	0.77783	-0.091309	-102.694	276.087	1270.3431	-0.81494	1.228	-0.18291	-52.809	175.66	1845.53	-0.88818	1.4263	-0.6167	NaN	NaN	NaN	NaN	NaN	NaN
2.718	-14.017	38.58	179.381	0.032715	0.78516	-0.081543	-107.996	253.578	1197.935	-0.79395	1.2041	-0.16455	-9.53999999999999	200.082	1795.632	-0.85302	1.3974	-0.61133	NaN	NaN	NaN	NaN	NaN	NaN
2.72	-8.946	34.278	183.954	0.046876	0.7793	-0.076416	-98.513	233.824	1179.8174	-0.76875	1.1795	-0.14443	25.21	208.105	1795.153	-0.81641	1.3652	-0.60547	NaN	NaN	NaN	NaN	NaN	NaN
2.722	6.158	18.423	187.787	0.041016	0.75	-0.092285	-83.2527	308.385	1160.573	-0.7416	1.1536	-0.1248	63.769	259.418	1747.558	-0.78271	1.3149	-0.58643	NaN	NaN	NaN	NaN	NaN	NaN
2.724	-12.931	16.89	186.949	0.062988	0.74463	-0.089355	-114.70573	248.124	1092.5759	-0.70918	1.1239	-0.10957	46.311	286.168	1716.484	-0.76758	1.2949	-0.57617	NaN	NaN	NaN	NaN	NaN	NaN
2.726	-20.648	21.504	185.005	0.071289	0.72656	-0.09375	-115.5425	268.816	1077.498	-0.6747	1.0992	-0.097556	109.401	329.448	1626.8469	-0.7417	1.2446	-0.55225	NaN	NaN	NaN	NaN	NaN	NaN
2.728	-52.812	16.864	183.05	0.075684	0.70654	-0.097168	-101.7937	280.801	1006.2826	-0.63867	1.0586	-0.088379	140.05	320.547	1597.3626	-0.71875	1.2124	-0.52685	NaN	NaN	NaN	NaN	NaN	NaN
2.73	-35.713	10.208	200.707	0.08789	0.6875	-0.10083	-100.368	228.585	939.579	-0.59902	1.032	-0.080664	177.9546	326.581	1512.495	-0.70313	1.1777	-0.50195	NaN	NaN	NaN	NaN	NaN	NaN
2.732	-57.689	-2.144	205.59	0.09668	0.6665	-0.10449	-90.287	259.749	944.9335	-0.56621	0.99808	-0.069922	188.971	301.3489	1476.124	-0.67383	1.1348	-0.46875	NaN	NaN	NaN	NaN	NaN	NaN
2.734	-36.653	-4.03299999999999	198.572	0.10352	0.64453	-0.10254	-103.5487	200.2593	871.82054	-0.53574	0.96836	-0.061328	190.9458	308.366	1399.419	-0.66211	1.1133	-0.45117	NaN	NaN	NaN	NaN	NaN	NaN
2.736	-50.543	-24.617	200.726	0.11279	0.63281	-0.10156	-70.856	179.118	841.7946	-0.50508	0.94024	-0.054004	156.7246	290.8931	1362.451	-0.62354	1.0688	-0.41943	NaN	NaN	NaN	NaN	NaN	NaN
2.738	-47.624	-49.066	215.372	0.13232	0.61328	-0.097656	-44.492	220.1165	809.895	-0.47607	0.9165	-0.040039	115.847	289.442	1301.994	-0.59766	1.0381	-0.40112	NaN	NaN	NaN	NaN	NaN	NaN
2.74	-35.53	-52.499	234.605	0.14184	0.5979	-0.10913	-42.078	177.622	752.5873	-0.4501	0.88974	-0.032227	84.236	278.372	1270.968	-0.57813	1.0137	-0.375	NaN	NaN	NaN	NaN	NaN	NaN
2.742	-38.424	-33.011	260.198	0.15674	0.57617	-0.11865	-31.456	220.0298	770.205	-0.42569	0.86416	-0.022168	89.796	292.9648	1272.576	-0.54883	0.97949	-0.34473	NaN	NaN	NaN	NaN	NaN	NaN
2.744	-21.201	-26.555	297.212	0.16992	0.56445	-0.11914	-13.152	262.319	690.332	-0.39717	0.83916	-0.009668	96.663	308.353	1249.103	-0.53662	0.96875	-0.3252	NaN	NaN	NaN	NaN	NaN	NaN
2.746	-25.591	-12.337	344.125	0.17529	0.55713	-0.12646	1.723	246.77	637.201	-0.37217	0.81455	0.0014649	69.615	335.066	1198.938	-0.5127	0.9375	-0.28516	NaN	NaN	NaN	NaN	NaN	NaN
2.748	-9.625	14.888	382.302	0.17822	0.54004	-0.14551	-4.68	290.808	611.0434	-0.34424	0.78955	0.016602	14.389	330.452	1154.788	-0.4917	0.9165	-0.25293	NaN	NaN	NaN	NaN	NaN	NaN
2.75	-23.591	56.393	440.873	0.17041	0.5415	-0.15576	-2.595	235.002	562.4748	-0.32041	0.76553	0.02168	-17.766	331.962	1107.424	-0.47656	0.89258	-0.22314	NaN	NaN	NaN	NaN	NaN	NaN
2.752	-14.875	86.674	526.601	0.16455	0.53223	-0.16016	2.52999999999999	206.2543	557.4199	-0.2957	0.73681	0.029883	-43.321	323.485	1062.69	-0.44336	0.85986	-0.18848	NaN	NaN	NaN	NaN	NaN	NaN
2.754	-14.983	112.207	619.821	0.13672	0.53516	-0.17822	10.159	239.209	509.6749	-0.26797	0.71377	0.039258	-47.925	326.816	1016.9	-0.43604	0.83838	-0.17432	NaN	NaN	NaN	NaN	NaN	NaN
2.756	-12.689	137.77	685.789	0.10815	0.54322	-0.18433	-5.603	186.711	464.6851	-0.24668	0.68613	0.045117	-56.718	328.416	950.7	-0.39893	0.80127	-0.14258	NaN	NaN	NaN	NaN	NaN	NaN
2.758	-5.363	156.206	761.8128	0.065918	0.56006	-0.18115	-31.626	210.589	468.4532	-0.21826	0.66064	0.050781	-100.057	327.424	908.497	-0.38037	0.77441	-0.11621	NaN	NaN	NaN	NaN	NaN	NaN
2.76	-28.183	157.015	858.213	-0.013184	0.5957	-0.18066	-53.333	206.357	432.581	-0.20088	0.63438	0.062305	-132.7828	322.376	828.0287	-0.36084	0.74365	-0.070313	NaN	NaN	NaN	NaN	NaN	NaN
2.762	-36.241	159.476	948.733	-0.061035	0.61035	-0.18506	-58.391	173.5	399.372	-0.1793	0.60352	0.069922	-182.444	312.163	782.289	-0.36865	0.67578	-0.09082	NaN	NaN	NaN	NaN	NaN	NaN
2.764	-9.567	152.133	996.61	-0.16797	0.6709	-0.18945	-53.386	210.026	356.241	-0.15547	0.57813	0.079688	-148.888	317.366	725.858	-0.34521	0.67236	-0.080078	NaN	NaN	NaN	NaN	NaN	NaN
2.766	8.273	117.192	1018.507	-0.25781	0.72217	-0.19068	-74.5084	154.3678	319.546	-0.13955	0.55254	0.090527	-148.727	301.6	722.0282	-0.30078	0.66016	-0.040039	NaN	NaN	NaN	NaN	NaN	NaN
2.768	-1.21299999999999	64.832	1062.093	-0.35303	0.78271	-0.19141	-95.9344	129.8737	342.336	-0.12158	0.52734	0.098145	-104.439	320.156	672.4738	-0.2937	0.64795	-0.016113	NaN	NaN	NaN	NaN	NaN	NaN
2.77	-0.0339999999999989	5.5702	1115.64	-0.48828	0.87891	-0.18848	-117.888	149.952	306.0289	-0.10948	0.50156	0.10225	-97.7305	324.115	669.278	-0.2959	0.63086	-0.0039063	NaN	NaN	NaN	NaN	NaN	NaN
2.772	-7.346	-24.7382	1157.2059	-0.55127	0.92773	-0.17578	-106.6497	117.598	272.5444	-0.096875	0.47588	0.10938	-80.897	353.55	585.0879	-0.29248	0.61475	0.018066	NaN	NaN	NaN	NaN	NaN	NaN
2.774	-15.572	-42.9825	1172.9042	-0.67139	1.0435	-0.15186	-93.7817	169.485	270.5432	-0.082031	0.45244	0.11211	-78.5918	334.769	566.8408	-0.28906	0.6001	0.039063	NaN	NaN	NaN	NaN	NaN	NaN
2.776	-20.136	-56.0565	1195.1151	-0.74389	1.1311	-0.12695	-113.4716	171.451	235.4375	-0.069238	0.42607	0.12002	-34.853	317.678	513.644	-0.27979	0.57813	0.058105	NaN	NaN	NaN	NaN	NaN	NaN
2.778	-44.271	-59.2464	1226.178	-0.79834	1.2192	-0.11133	-116.0315	149.533	232.1256	-0.056641	0.40332	0.12256	-27.746	249.255	527.441	-0.26783	0.57056	0.063964	NaN	NaN	NaN	NaN	NaN	NaN
2.78	-80.9725	-55.948	1248.745	-0.83008	1.3115	-0.088867	-118.4856	182.871	197.6306	-0.04502	0.38076	0.12803	30.003	228.895	464.6183	-0.24854	0.56494	0.061523	NaN	NaN	NaN	NaN	NaN	NaN
2.782	-77.618	-50.021	1262.033	-0.82129	1.3516	-0.089355	-103.1253	139.168	141.768	-0.037598	0.35996	0.13682	22.202	177.356	450.591	-0.22217	0.54785	0.063477	NaN	NaN	NaN	NaN	NaN	NaN
2.784	-78.84325	-29.8807	1272.451	-0.76953	1.3984	-0.080078	-90.3074	128.125	160.01	-0.027051	0.34433	0.1415	35.398	199.4932	389.0637	-0.20947	0.53906	0.058594	NaN	NaN	NaN	NaN	NaN	NaN
2.786	-81.3706	-17.3036	1280.238	-0.72021	1.4082	-0.089356	-78.06	121.25	153.1457	-0.019336	0.32695	0.14561	37.683	183.13	387.7019	-0.18018	0.521	0.04541	NaN	NaN	NaN	NaN	NaN	NaN
2.788	-94.1209	-5.369	1289.985	-0.66309	1.3872	-0.11084	-68.212	74.29	122.1937	-0.010254	0.30859	0.1499	36.478	200.38429	320.265	-0.16846	0.51074	0.037109	NaN	NaN	NaN	NaN	NaN	NaN
2.79	-97.64	-5.738	1283.624	-0.58545	1.3325	-0.13623	-50.983	100.411	123.3229	0.0018555	0.29707	0.15459	18.985	178.203	328.657	-0.15234	0.5083	0.030762	NaN	NaN	NaN	NaN	NaN	NaN
2.792	-96.5619	-2.029	1271.62729	-0.54199	1.291	-0.15137	-27.274	101.825	89.0067	0.010644	0.28379	0.15605	55.5423	206.556	273.679	-0.13916	0.49805	0.029297	NaN	NaN	NaN	NaN	NaN	NaN
2.794	-70.938	-11.614	1275.4178	-0.47803	1.186	-0.1792	-18.076	83.95	119.7256	0.023926	0.27207	0.15684	32.733	185.895	295.872	-0.13965	0.49512	0.026367	NaN	NaN	NaN	NaN	NaN	NaN
2.796	-64.315	-18.874	1288.492	-0.43164	1.1201	-0.1936	1.357	111.261	128.064	0.039062	0.25821	0.15694	10.06	209.767	248.437	-0.13867	0.49072	0.028809	NaN	NaN	NaN	NaN	NaN	NaN
2.798	-31.644	-53.153	1316.5111	-0.38477	1.0684	-0.20117	43.192	59.871	85.43017	0.054199	0.24756	0.15674	-25.787	172.475	222.2861	-0.14917	0.48608	0.032471	NaN	NaN	NaN	NaN	NaN	NaN
2.8	-41.086	-83.909	1331.732	-0.31299	1.0103	-0.20947	44.117	48.1497	99.6504	0.069336	0.23945	0.15274	-24.725	207.478	141.159	-0.15723	0.48682	0.043945	NaN	NaN	NaN	NaN	NaN	NaN
2.802	-27.944	-126.7824	1356.21056	-0.27539	0.98828	-0.21289	16.403	43.464	86.938	0.081543	0.23008	0.14512	-71.6648	185.573	141.4046	-0.17383	0.48584	0.05957	NaN	NaN	NaN	NaN	NaN	NaN
2.804	-29.651	-158.9116	1391.1979	-0.19531	0.94971	-0.23096	29.455	-6.590075	90.924	0.095605	0.21836	0.14707	-53.633	185.984	108.452	-0.17529	0.48438	0.070313	NaN	NaN	NaN	NaN	NaN	NaN
2.806	-5.97	-186.073	1418.5491	-0.13403	0.91821	-0.24536	31.283	23.746	109.688	0.1041	0.20644	0.1334	-121.096	132.2905	130.5809	-0.18945	0.48486	0.096191	NaN	NaN	NaN	NaN	NaN	NaN
2.808	10.939	-182.8	1448.7994	-0.073242	0.89502	-0.25781	8.189	16.625	50.3898	0.10986	0.19531	0.13184	-113.716	128.626	106.1268	-0.19384	0.47558	0.10669	NaN	NaN	NaN	NaN	NaN	NaN
2.81	16.108	-168.1536	1461.6312	-0.0019531	0.8833	-0.29053	3.009	21.7997	63.6533	0.11552	0.18799	0.13594	-157.659	80.9734	86.75726	-0.19434	0.46729	0.11719	NaN	NaN	NaN	NaN	NaN	NaN
2.812	32.969	-162.83154	1487.1053	0.026855	0.87793	-0.30859	-13.144	60.363	81.603	0.11953	0.18037	0.13477	-153.624	68.701	70.0086	-0.19336	0.4541	0.12939	NaN	NaN	NaN	NaN	NaN	NaN
2.814	52.81	-149.0246	1520.0897	0.054199	0.88135	-0.33545	1.366	6.6887	48.3185	0.12032	0.17217	0.1293	-169.086	21.4738	81.629	-0.19434	0.45117	0.14258	NaN	NaN	NaN	NaN	NaN	NaN
2.816	86.493	-139.265	1545.6883	0.048828	0.89747	-0.3501	-9.514	12.1975	49.6562	0.11455	0.16494	0.12822	-151.675	16.393	46.8703	-0.19092	0.43213	0.14258	NaN	NaN	NaN	NaN	NaN	NaN
2.818	85.91	-129.919	1576.8229	0.021973	0.91992	-0.34961	-37.47	20.0712	31.2893	0.11035	0.16309	0.12256	-126.1553	-0.7965	54.95882	-0.17896	0.42065	0.15405	NaN	NaN	NaN	NaN	NaN	NaN
2.82	101.525	-126.967	1596.7061	-0.050781	0.9707	-0.33691	-46.919	-14.7774	40.8557	0.10088	0.1706	0.13027	-114.36	10.033	43.5385	-0.1748	0.40234	0.15723	NaN	NaN	NaN	NaN	NaN	NaN
2.822	92.642	-117.4954	1624.9766	-0.10059	1.0005	-0.32129	-49.809	22.24	76.275	0.098731	0.17422	0.13154	-113.4084	9.235	66.2593	-0.15918	0.38623	0.17236	NaN	NaN	NaN	NaN	NaN	NaN
2.824	100.705	-96.94	1635.8281	-0.20166	1.0708	-0.28076	-73.191	8.577	46.333	0.10537	0.1793	0.14014	-72.607	32.154	62.784	-0.14893	0.37061	0.17236	NaN	NaN	NaN	NaN	NaN	NaN
2.826	84.088	-96.212	1652.5992	-0.27564	1.1233	-0.25831	-88.412	4.196	56.3064	0.1166	0.18604	0.15479	-52.808	35.753	55.9239	-0.12207	0.34082	0.17334	NaN	NaN	NaN	NaN	NaN	NaN
2.828	75.764	-110.623	1666.846	-0.34082	1.1699	-0.23389	-98.163	55.291	60.5189	0.14014	0.18848	0.16406	-4.009	57.405	42.5745	-0.10376	0.31347	0.17407	NaN	NaN	NaN	NaN	NaN	NaN
2.83	59.537	-111.369	1696.957	-0.40674	1.2192	-0.20508	-103.904	9.485	44.431	0.16103	0.18555	0.16221	8.089	51.964	58.6775	-0.080566	0.29248	0.17383	NaN	NaN	NaN	NaN	NaN	NaN
2.832	56.696	-116.023	1720.6642	-0.43701	1.2388	-0.19287	-103.551	13.3176	64.1258	0.18193	0.17754	0.16084	16.524	34.2291	69.3865	-0.054199	0.26074	0.17529	NaN	NaN	NaN	NaN	NaN	NaN
2.834	27.449	-115.5873	1755.5762	-0.48486	1.2563	-0.18066	-91.517	12.7766	40.5988	0.20263	0.16348	0.15694	20.097	5.4064	60.787	-0.035156	0.24219	0.17969	NaN	NaN	NaN	NaN	NaN	NaN
2.836	38.327	-121.4521	1791.37075	-0.50269	1.2571	-0.18311	-81.339	-44.387	37.7995	0.22402	0.15244	0.15625	32.572	6.763	37.8578	0.0043945	0.21094	0.18213	NaN	NaN	NaN	NaN	NaN	NaN
2.838	53.235	-115.196	1818.4025	-0.50049	1.2544	-0.18701	-63.914	-6.8332	70.9269	0.24658	0.13672	0.15479	45.042	20.394	49.374	0.036865	0.17822	0.17968	NaN	NaN	NaN	NaN	NaN	NaN
2.84	36.894	-117.674	1829.016	-0.46826	1.2407	-0.19873	-37.31	-16.055	29.4423	0.26299	0.12069	0.15811	82.2443	22.8361	65.7345	0.06543	0.14893	0.17676	NaN	NaN	NaN	NaN	NaN	NaN
2.842	-9.38200000000001	-118.085	1855.173	-0.45068	1.231	-0.20752	-30.292	-5.206	40.7541	0.27893	0.099788	0.16025	89.2	21.0494	60.331	0.10791	0.1084	0.17432	NaN	NaN	NaN	NaN	NaN	NaN
2.844	4.58	-122.173	1881.733	-0.41357	1.2075	-0.22217	-27.97	58.3961	59.4991	0.29611	0.078685	0.15478	75.445	20.3742	55.7686	0.12988	0.083008	0.17041	NaN	NaN	NaN	NaN	NaN	NaN
2.846	8.05699999999999	-121.501	1892.293	-0.39795	1.1958	-0.22851	-4.47000000000001	22.647	41.53517	0.30656	0.059849	0.15312	79.623	11.7125	49.6627	0.17041	0.041992	0.16309	NaN	NaN	NaN	NaN	NaN	NaN
2.848	17.87	-122.173	1896.07402	-0.39209	1.186	-0.22607	12.743	41.8855	71.7554	0.31689	0.043945	0.15039	71.575	-5.7178	86.031	0.19628	0.011963	0.15747	NaN	NaN	NaN	NaN	NaN	NaN
2.85	-5.333	-125.6394	1899.186	-0.42676	1.1836	-0.21484	28.863	42.756	34.2426	0.32644	0.026976	0.14571	54.961	-20.2427	93.289	0.21924	-0.015137	0.15625	NaN	NaN	NaN	NaN	NaN	NaN
2.852	10.179	-111.7375	1899.2968	-0.4541	1.1914	-0.20898	29.035	-24.1234	42.8708	0.33133	0.010304	0.14573	6.093	-37.1141	86.049	0.24902	-0.045898	0.14941	NaN	NaN	NaN	NaN	NaN	NaN
2.854	3.20999999999999	-87.855	1899.4649	-0.5332	1.2183	-0.18555	7.715	23.817	70.648	0.33603	-0.0095695	0.14527	-17.916	-1.617	33.2223	0.26367	-0.06543	0.14648	NaN	NaN	NaN	NaN	NaN	NaN
2.856	21.129	-58.97	1902.639	-0.60254	1.2514	-0.16773	0.609000000000002	7.81891	43.7706	0.33644	-0.019416	0.13723	-62.6136	16.7053	68.071	0.2876	-0.089355	0.14258	NaN	NaN	NaN	NaN	NaN	NaN
2.858	40.638	-55.797	1934.414144	-0.66748	1.2876	-0.15186	46.821	7.9305	36.026	0.32959	-0.030762	0.1333	-65.49	38.7182	39.72353	0.31006	-0.10303	0.13965	NaN	NaN	NaN	NaN	NaN	NaN
2.86	61.826	-59.876	1955.288	-0.74316	1.335	-0.1416	33.16	39.3837	52.05845	0.32056	-0.032036	0.12981	-96.7225	26.1446	64.3769	0.32373	-0.11523	0.13428	NaN	NaN	NaN	NaN	NaN	NaN
2.862	88.539	-75.014	1964.855	-0.77197	1.3579	-0.14209	22.075	-10.8767	44.2344	0.31199	-0.033061	0.12744	-99.337	26.71884	11.328	0.33008	-0.12695	0.11963	NaN	NaN	NaN	NaN	NaN	NaN
2.864	77.197	-68.518	1954.8655	-0.80811	1.4028	-0.15869	3.94800000000001	8.3266	66.922759	0.29678	-0.022514	0.13227	-116.0116	5.24522	39.726	0.33569	-0.1311	0.11963	NaN	NaN	NaN	NaN	NaN	NaN
2.866	89.081	-67.596	1972.172	-0.80371	1.4326	-0.17383	0.728999999999999	37.0152	38.73116	0.27902	-0.0085125	0.13086	-111.4222	19.6541	25.3008	0.33594	-0.12939	0.1123	NaN	NaN	NaN	NaN	NaN	NaN
2.868	99.042	-55.521	1984.66096	-0.79053	1.4653	-0.18945	-3.328	-11.847	24.904	0.25928	0.010742	0.14502	-132.054	19.1725	49.4	0.32959	-0.11816	0.10449	NaN	NaN	NaN	NaN	NaN	NaN
2.87	110.877	-58.554	1979.6901	-0.77148	1.4902	-0.20947	-38.836	15.684	75.5919	0.25081	0.039739	0.15169	-127.3235	37.838	-2.577	0.31982	-0.11084	0.098145	NaN	NaN	NaN	NaN	NaN	NaN
2.872	112.708	-71.546	1977.9617	-0.75781	1.5049	-0.22607	-46.026	-11.455	45.36919	0.24419	0.064427	0.16024	-112.0527	39.0577	26.0593	0.29883	-0.087402	0.087402	NaN	NaN	NaN	NaN	NaN	NaN
2.874	128.217	-93.1311	1994.173	-0.74756	1.5181	-0.25439	-70.691	-5.8163	53.44	0.24364	0.095429	0.16961	-107.625	51.834	5.012	0.27197	-0.062255	0.087402	NaN	NaN	NaN	NaN	NaN	NaN
2.876	113.503	-101.7332	2036.57	-0.74267	1.5186	-0.26758	-65.501	62.1274	61.807	0.24949	0.12199	0.17738	-92.7465	38.536	65.417	0.2373	-0.02832	0.087402	NaN	NaN	NaN	NaN	NaN	NaN
2.878	126.566	-82.396	2022.574	-0.74561	1.5142	-0.28076	-79.797	31.901	31.2869	0.25928	0.14648	0.18115	-66.146	53.3523	53.726	0.18262	0.02832	0.10205	NaN	NaN	NaN	NaN	NaN	NaN
2.88	107.124	-69.2303	2015.6064	-0.75537	1.5063	-0.29443	-102.187	41.6123	77.079	0.27597	0.16326	0.17815	-61.791	26.3745	55.0459	0.16699	0.060547	0.12109	NaN	NaN	NaN	NaN	NaN	NaN
2.882	109.89	-49.1934	2003.3613	-0.76172	1.5029	-0.2998	-86.878	42.3895	43.3329	0.29616	0.1748	0.17416	-22.671	41.0526	38.5687	0.13037	0.12305	0.16064	NaN	NaN	NaN	NaN	NaN	NaN
2.884	96.307	-44.2129	2027.4952	-0.76904	1.4985	-0.31787	-85.367	-24.0805	7.028	0.31597	0.18246	0.16889	-19.829	2.0042	67.319	0.12134	0.15942	0.17749	NaN	NaN	NaN	NaN	NaN	NaN
2.886	88.252	-21.422	2008.9123	-0.77686	1.4927	-0.32666	-78.655	13.691	62.306	0.33574	0.18844	0.16773	29.017	0.420999999999999	44.8879	0.12451	0.19141	0.19385	NaN	NaN	NaN	NaN	NaN	NaN
2.888	71.235	-4.389	2017.7452	-0.78271	1.4946	-0.33545	-72.198	-25.6325	83.758	0.34912	0.19189	0.17236	44.762	-10.879	62.32	0.13867	0.22021	0.18311	NaN	NaN	NaN	NaN	NaN	NaN
2.89	71.236	1.925	2036.142	-0.79004	1.4883	-0.35547	-80.132	-55.933	93.362	0.3594	0.19451	0.16665	88.22	22.201	37.5734	0.146	0.22314	0.17627	NaN	NaN	NaN	NaN	NaN	NaN
2.892	49.047	12.074	2026.78	-0.78784	1.4866	-0.36523	-78.865	-12.0658	118.332	0.37155	0.19657	0.15917	41.254	22.6354	73.0715	0.15283	0.2373	0.15869	NaN	NaN	NaN	NaN	NaN	NaN
2.894	36.126	4.452	2007.668	-0.78711	1.4824	-0.37891	-29.64	-40.3453	102.004	0.38127	0.20237	0.15589	92.555	55.8873	60.61	0.15112	0.2478	0.16138	NaN	NaN	NaN	NaN	NaN	NaN
2.896	21.57	1.972	1990.6596	-0.78125	1.4707	-0.39844	8.521	-36	174.815	0.39116	0.20461	0.15427	64.097	42.039	62.5567	0.14355	0.26025	0.17139	NaN	NaN	NaN	NaN	NaN	NaN
2.898	53.295	-3.651	1992.0709	-0.7793	1.4648	-0.4043	-10.823	-44.713	230.061	0.40088	0.20801	0.15576	67.622	47.28762	57.3038	0.12988	0.27588	0.17969	NaN	NaN	NaN	NaN	NaN	NaN
2.9	31.73	-5.3377	1991.6067	-0.771	1.4536	-0.41553	-38.957	-129.4868	223.272	0.40616	0.21987	0.14967	47.146	4.414	101.492	0.12451	0.2832	0.18457	NaN	NaN	NaN	NaN	NaN	NaN
2.902	21.264	-5.993	1972.8804	-0.77075	1.4487	-0.42505	-17.861	-119.00282	272.306	0.41804	0.22829	0.14155	73.876	-2.712691	132.233	0.11279	0.30225	0.18311	NaN	NaN	NaN	NaN	NaN	NaN
2.904	18.41	-10.8317	1954.47124	-0.76709	1.4438	-0.4375	-4.04299999999999	-140.417	340.162	0.42186	0.23979	0.131	0.786000000000001	-48.1302	150.646	0.10303	0.3125	0.17969	NaN	NaN	NaN	NaN	NaN	NaN
2.906	34.529	-9.124	1962.086	-0.76123	1.4399	-0.44482	7.946	-132.3	454.574	0.41929	0.25392	0.10979	-7.805	-51.9683	133.188	0.088379	0.31885	0.16602	NaN	NaN	NaN	NaN	NaN	NaN
2.908	36.414	-8.497	1967.89	-0.75928	1.436	-0.44873	-3.19	-55.4148	565.864	0.40869	0.26904	0.083496	-24.083	-83.3671	136.846	0.055176	0.33691	0.13623	NaN	NaN	NaN	NaN	NaN	NaN
2.91	48.277	5.763	1947.095	-0.75635	1.4204	-0.46045	-46.244	-17.7923	629.9	0.37852	0.30166	0.066639	-50.66	-82.746	198.381	0.030762	0.34277	0.11914	NaN	NaN	NaN	NaN	NaN	NaN
2.912	72.245	13.7671	1920.5945	-0.75562	1.4094	-0.46606	-50.715	57.625	813.305	0.339	0.33287	0.050299	-93.656	-100.4743	249.275	-0.033203	0.37207	0.10889	NaN	NaN	NaN	NaN	NaN	NaN
2.914	58.83	32.68	1903.041	-0.75195	1.4004	-0.47168	-55.98	121.208	1032.34	0.29526	0.37113	0.032772	-122.0266	-103.84	308.89	-0.092771	0.41138	0.11939	NaN	NaN	NaN	NaN	NaN	NaN
2.916	74.845	42.484	1874.9395	-0.74365	1.395	-0.47461	-73.152	91.8549	1272.13	0.24601	0.41893	0.025283	-160.3292	-137.637	383.297	-0.15088	0.44971	0.13428	NaN	NaN	NaN	NaN	NaN	NaN
2.918	80.222	43.545	1860.4771	-0.73584	1.3872	-0.48096	-38.836	123.4787	1464.77	0.2002	0.46729	0.019043	-171.0928	-113.476	519.426	-0.22266	0.49805	0.13477	NaN	NaN	NaN	NaN	NaN	NaN
2.92	116.551	43.837	1834.533	-0.72852	1.3789	-0.48291	-89.807	100.749	1527.28	0.13951	0.527	0.013483	-202.0784	-72.208	659.12	-0.25537	0.52393	0.12842	NaN	NaN	NaN	NaN	NaN	NaN
2.922	111.73	38.8791	1834.3156	-0.71826	1.3716	-0.48438	-102.307	27.039	1647.03	0.073815	0.57904	0.0018775	-202.5242	18.426	830.75	-0.33154	0.56494	0.10547	NaN	NaN	NaN	NaN	NaN	NaN
2.924	105.661	57.9596	1799.6789	-0.71045	1.3638	-0.48486	-81.234	-42.459	1738.72	-0.011736	0.6353	-0.01922	-202.5879	86.4985417	988.99	-0.40601	0.59326	0.070069	NaN	NaN	NaN	NaN	NaN	NaN
2.926	100.591	66.251	1797.704483	-0.69922	1.3535	-0.48438	-98.832	-183.822	1761.7	-0.11489	0.69207	-0.048816	-205.498	156.174	1231.95	-0.49902	0.62354	0.026367	NaN	NaN	NaN	NaN	NaN	NaN
2.928	105.357	75.003	1786.7229	-0.69727	1.3477	-0.48145	-117.415	-273.83	1769.98	-0.2373	0.74707	-0.080078	-155.013	195.481	1414.28	-0.66357	0.67041	-0.03418	NaN	NaN	NaN	NaN	NaN	NaN
2.93	101.089	66.142	1769.55892	-0.69141	1.3418	-0.47852	-86.471	-317.61	1719.46	-0.39457	0.81974	-0.12384	-136.3125	213.433	1591.32	-0.76514	0.69873	-0.062012	NaN	NaN	NaN	NaN	NaN	NaN
2.932	92.359	56.608	1738.3805	-0.68677	1.3391	-0.47144	-54.54	-402.24	1709.06	-0.57164	0.91107	-0.16123	-93.377	170.221	1672.27	-1.0117	0.80664	-0.07959	NaN	NaN	NaN	NaN	NaN	NaN
2.934	106.249	44.7138	1718.4396	-0.68799	1.3306	-0.46143	-69.657	-376.78	1765.37	-0.76967	1.031	-0.17647	-70.636	53.997	1716.94	-1.2048	0.92798	-0.040527	NaN	NaN	NaN	NaN	NaN	NaN
2.936	100.689	43.6897	1706.0253	-0.68896	1.3228	-0.45117	-40.923	-324.75	1735	-0.97364	1.1912	-0.15585	-41.181	-40.471	1727.26	-1.3931	1.0786	0.036133	NaN	NaN	NaN	NaN	NaN	NaN
2.938	67.644	50.2783	1689.823847	-0.68555	1.3184	-0.44141	65.608	-289.79	1708.26	-1.1694	1.3657	-0.10059	-36.127	-139.165	1754.38	-1.5815	1.2817	0.16602	NaN	NaN	NaN	NaN	NaN	NaN
2.94	62.572	61.569	1656.258	-0.68506	1.313	-0.4209	73.36	-167.429	1745.42	-1.3376	1.5429	-0.027935	39.159	-201.567	1696.22	-1.6406	1.375	0.23291	NaN	NaN	NaN	NaN	NaN	NaN
2.942	44.062	60.89	1644.1417	-0.68139	1.3089	-0.41992	46.603	-112.51	1770.14	-1.4519	1.6973	0.06181	77.514	-271.863	1711.81	-1.6655	1.5112	0.33301	NaN	NaN	NaN	NaN	NaN	NaN
2.944	43.048	67.298	1626.83844	-0.67529	1.3032	-0.41162	72.134	-38.011	1838.77	-1.5007	1.8056	0.15009	112.697	-285.05	1650.01	-1.5981	1.5533	0.36963	NaN	NaN	NaN	NaN	NaN	NaN
2.946	11.891	71.774	1594.9396	-0.66357	1.2925	-0.39209	92.388	78.0969	1817.96	-1.5067	1.8655	0.22373	156.89485	-288.669	1654.88	-1.4839	1.5454	0.3667	NaN	NaN	NaN	NaN	NaN	NaN
2.948	20.761	96.473	1569.6234	-0.65674	1.2837	-0.38916	139.99	81.885	1740.6	-1.4727	1.8867	0.26318	211.576	-224.282	1597.4	-1.29	1.4375	0.30176	NaN	NaN	NaN	NaN	NaN	NaN
2.95	0.11399999999999	105.243	1558.2251	-0.64941	1.2739	-0.38037	173.384	41.3821	1722.96	-1.3994	1.8557	0.2667	195.802	-171.327	1623.87	-1.1836	1.3535	0.25439	NaN	NaN	NaN	NaN	NaN	NaN
2.952	15.638	123.028	1528.4448	-0.64233	1.2629	-0.37085	115.836	-77.2253	1668.37	-1.2836	1.7766	0.22646	199.35	-77.1	1633.16	-0.99023	1.166	0.18457	NaN	NaN	NaN	NaN	NaN	NaN
2.954	-3.63	112.967	1501.3686	-0.6377	1.2559	-0.36621	65.207	-288.748	1646.15	-1.1359	1.6484	0.19131	159.6341	-50.0313	1706	-0.86963	1.0391	0.15674	NaN	NaN	NaN	NaN	NaN	NaN
2.956	-15.973	120.817	1457.59	-0.62744	1.2427	-0.35303	69.775	-393.33	1650.52	-0.97323	1.5021	0.18115	166.979	0.537000000000001	1678.65	-0.76465	0.93164	0.15234	NaN	NaN	NaN	NaN	NaN	NaN
2.958	3.46299999999999	122.534	1461.242	-0.62061	1.2368	-0.34912	50.698	-473.35	1663.81	-0.82178	1.3735	0.18945	134.416	11.6369	1706.04	-0.63037	0.81299	0.18652	NaN	NaN	NaN	NaN	NaN	NaN
2.96	18.037	131.675	1442.774	-0.60889	1.2212	-0.34131	33.978	-495.96	1751.21	-0.70264	1.297	0.21328	112.816	-11.987	1697.09	-0.55811	0.75537	0.19629	NaN	NaN	NaN	NaN	NaN	NaN
2.962	19.504	141.057	1412.55782	-0.59546	1.2102	-0.33618	33.682	-428.49	1794.95	-0.58633	1.2476	0.225	10.3	-133.99	1705.37	-0.40283	0.63525	0.15869	NaN	NaN	NaN	NaN	NaN	NaN
2.964	17.05	138.401	1393.6597	-0.58154	1.1992	-0.32715	6.593	-455.26	1823.09	-0.47813	1.2071	0.20117	-38.402	-279.58	1690.12	-0.2771	0.552	0.096193	NaN	NaN	NaN	NaN	NaN	NaN
2.966	28.218	117.965	1350.262	-0.56641	1.1914	-0.32031	-30.589	-435.64	1917.66	-0.37422	1.1605	0.1416	-73.9457	-424.76	1779.61	-0.15088	0.49512	0.031738	NaN	NaN	NaN	NaN	NaN	NaN
2.968	37.164	110.848	1339.8469	-0.55566	1.1836	-0.31641	-48.639	-361.44	1980.69	-0.28418	1.1104	0.04541	-74.486	-474.55	1840.34	-0.0063477	0.47217	-0.047363	NaN	NaN	NaN	NaN	NaN	NaN
2.97	33.73	121.298	1302.79	-0.5376	1.1733	-0.30762	-75.547	-350.89	2042.11	-0.20908	1.0691	-0.079983	-185.647	-480.8	1931.47	0.045898	0.46973	-0.087891	NaN	NaN	NaN	NaN	NaN	NaN
2.972	48.688	131.405	1288.589	-0.52564	1.1614	-0.30127	-117.592	-247.483	2080.74	-0.15683	1.0442	-0.21006	-238.828	-445.26	1958.2	0.10107	0.49658	-0.15771	NaN	NaN	NaN	NaN	NaN	NaN
2.974	55.349	142.879	1265.2517	-0.51221	1.1509	-0.2915	-176.0903	-205.865	2039.75	-0.1291	1.0462	-0.3124	-279.513	-456.8	2026.63	0.092284	0.54785	-0.17701	NaN	NaN	NaN	NaN	NaN	NaN
2.976	54.677	141.423	1253.016	-0.50391	1.1328	-0.2793	-197.2685	-178.406	2011.3	-0.13652	1.0774	-0.36328	-251.068	-420.51	2093.13	0.041016	0.62842	-0.15918	NaN	NaN	NaN	NaN	NaN	NaN
2.978	35.086	139.133	1233.98	-0.50098	1.127	-0.27441	-192.5705	-115.291	1979.89	-0.17383	1.1406	-0.37012	-281.08	-406.27	2204.58	-0.12988	0.77148	-0.089844	NaN	NaN	NaN	NaN	NaN	NaN
2.98	63.85	144.732	1222.955	-0.49023	1.1143	-0.2666	-232.816	-176.2568	1975.96	-0.22773	1.2258	-0.34102	-281.02	-339.111	2253.16	-0.25049	0.854	-0.057617	NaN	NaN	NaN	NaN	NaN	NaN
2.982	62.856	141.053	1191.179	-0.47973	1.1018	-0.25928	-253.951	-237.593	2051.76	-0.2918	1.3102	-0.28984	-294.42	-320.623	2282.81	-0.50928	1.0317	0.0073242	NaN	NaN	NaN	NaN	NaN	NaN
2.984	47.222	151.376	1158.8689	-0.46729	1.0879	-0.24854	-284.87	-273.542	2070.63	-0.36797	1.3859	-0.2293	-272.225	-253.249	2250.74	-0.71289	1.166	0.029541	NaN	NaN	NaN	NaN	NaN	NaN
2.986	35.942	144.122	1116.5547	-0.45654	1.0669	-0.23389	-266.427	-356.01	2099.2	-0.44219	1.4271	-0.18564	-262.181	-192.666	2205.84	-0.89258	1.3125	0.042969	NaN	NaN	NaN	NaN	NaN	NaN
2.988	21.578	142.126	1090.2444	-0.45508	1.0527	-0.22754	-204.957	-305.64	2166.86	-0.5293	1.4473	-0.16602	-265.549	-172.396	2187.94	-1.0674	1.5078	0.030273	NaN	NaN	NaN	NaN	NaN	NaN
2.99	13.902	132.1964	1070.8872	-0.44434	1.0313	-0.2085	-169.6918	-276.782	2207.8	-0.63057	1.4536	-0.17061	-253.633	-210.3818	2201.75	-1.105	1.6118	0.010254	NaN	NaN	NaN	NaN	NaN	NaN
2.992	5.173	147.009	1051.9341	-0.43677	1.0176	-0.198	-105.869	-288.754	2255.78	-0.73593	1.466	-0.1793	-249.664	-263.768	2253.8	-1.084	1.7969	-0.057617	NaN	NaN	NaN	NaN	NaN	NaN
2.994	6.65499999999999	146.085	1027.6065	-0.42773	0.99609	-0.19043	-106.578	-240.887	2306.78	-0.84024	1.4922	-0.17617	-231.299	-304.76	2291.63	-0.95313	1.9297	-0.15234	NaN	NaN	NaN	NaN	NaN	NaN
2.996	-16.237	161.066	1034.593	-0.4126	0.97021	-0.17725	-106.9913	-288.795	2342.42	-0.94248	1.5362	-0.15156	-199.743	-279.4	2365.89	-0.86182	1.9731	-0.20654	NaN	NaN	NaN	NaN	NaN	NaN
2.998	-25.788	159.716	1006.619	-0.40283	0.95947	-0.16992	-34.137	-299.362	2415.12	-1.0352	1.5908	-0.11963	-111.911	-241.364	2421.79	-0.71436	2.0239	-0.29053	NaN	NaN	NaN	NaN	NaN	NaN
3	-50.946	150.778	963.984	-0.39258	0.92383	-0.15479	1.88800000000001	-240.24	2401.41	-1.1163	1.6614	-0.070703	-52.462	-222.449	2521.45	-0.68287	2.0452	-0.31299	NaN	NaN	NaN	NaN	NaN	NaN
3.002	-23.915	145.009	940.4464	-0.38257	0.90308	-0.14428	33.738	-262.603	2354.19	-1.1715	1.7332	-0.027149	-5.837	-226.896	2581.85	-0.73047	2.0684	-0.30566	NaN	NaN	NaN	NaN	NaN	NaN
3.004	-44.684	136.6626	917.2235	-0.37061	0.87744	-0.13135	42.482	-193.708	2335.52	-1.2055	1.793	0.0017577	1.221	-235.901	2655.25	-0.90869	2.1196	-0.27295	NaN	NaN	NaN	NaN	NaN	NaN
3.006	-46.712	150.092	890.3546	-0.354	0.85791	-0.13135	9.866	-150.316	2293.4	-1.2083	1.8495	0.0057617	23.196	-205.5898	2685.15	-1.0093	2.147	-0.25195	NaN	NaN	NaN	NaN	NaN	NaN
3.008	-56.957	160.801	856.1049	-0.34668	0.84277	-0.11621	27.092	-160.917	2316.22	-1.1895	1.8906	-0.0024414	12.7082	-187.1578	2735.97	-1.2358	2.2036	-0.19678	NaN	NaN	NaN	NaN	NaN	NaN
3.01	-48.861	162.605	848.3974	-0.33105	0.80908	-0.10547	53.723	-96.121	2362.97	-1.1564	1.916	-0.025488	19.647	-156.201	2682.09	-1.4138	2.2668	-0.1565	NaN	NaN	NaN	NaN	NaN	NaN
3.012	-40.75	163.623	835.22	-0.31494	0.78955	-0.095215	49.824	-132.216	2366.91	-1.1219	1.9336	-0.056934	-19.094	-140.2652	2669.73	-1.5894	2.3462	-0.11816	NaN	NaN	NaN	NaN	NaN	NaN
3.014	-34.035	151.509	830.725	-0.30566	0.76563	-0.085449	66.556	-140.675	2384.99	-1.1078	1.9492	-0.07959	-23.976	-118.47	2603.17	-1.7383	2.4512	-0.093262	NaN	NaN	NaN	NaN	NaN	NaN
3.016	-18.913	153.5	794.585	-0.2876	0.73682	-0.068848	8.096	-83.556	2342.28	-1.1172	1.9562	-0.094336	-77.246	-126.3193	2621.09	-1.7681	2.4731	-0.094238	NaN	NaN	NaN	NaN	NaN	NaN
3.018	-9.996	157.576	779.3	-0.28271	0.72314	-0.062012	-51.929	-120.768	2349.4	-1.1382	1.9712	-0.091309	-89.2831	-86.959	2620.42	-1.7632	2.4731	-0.11279	NaN	NaN	NaN	NaN	NaN	NaN
3.02	-0.358000000000004	155.2216	741.3719	-0.26367	0.69141	-0.050293	-41.586	-68.953	2397.32	-1.1769	1.9899	-0.079395	-134.074	-52.335	2662.03	-1.739	2.4309	-0.12696	NaN	NaN	NaN	NaN	NaN	NaN
3.022	-11.966	151.47543	718.3197	-0.2544	0.66944	-0.046631	-69.914	-95.994	2392.99	-1.2179	2.0106	-0.058789	-125.461	11.08	2633.27	-1.7168	2.3867	-0.14063	NaN	NaN	NaN	NaN	NaN	NaN
3.024	-6.557	162.57	694.651	-0.23779	0.65039	-0.034668	-95.875	-195.768	2428.13	-1.2644	2.0298	-0.026758	-161.374	23.577	2661.28	-1.7026	2.3208	-0.1499	NaN	NaN	NaN	NaN	NaN	NaN
3.026	16.846	160.319	679.492	-0.2168	0.61719	-0.021484	-148.595	-148.919	2444.98	-1.3129	2.0594	0.0019529	-153.927	94.69	2609.62	-1.6992	2.2813	-0.14551	NaN	NaN	NaN	NaN	NaN	NaN
3.028	17.228	151.943	670.0959	-0.20264	0.59864	-0.013184	-197.31	-157.6758	2415.78	-1.355	2.0806	0.030273	-202.316	89.053	2619.27	-1.6987	2.2153	-0.14209	NaN	NaN	NaN	NaN	NaN	NaN
3.03	7.209	147.718	667.39	-0.18604	0.57471	-0.0068359	-205.753	-127.9997	2402.71	-1.3895	2.0996	0.064063	-226.808	104.04	2602.89	-1.7077	2.1633	-0.12866	NaN	NaN	NaN	NaN	NaN	NaN
3.032	9.639	148.611	647.546	-0.16357	0.54492	0.0078125	-244.721	-64.375	2360.68	-1.4144	2.1109	0.10068	-271.37	46.91	2634.21	-1.7163	2.106	-0.1084	NaN	NaN	NaN	NaN	NaN	NaN
3.034	22.101	149.241	629.169	-0.15381	0.53174	0.010742	-239.782	-116.3224	2335.57	-1.4254	2.1032	0.12256	-257.18	30.66	2598.12	-1.7344	2.0293	-0.077148	NaN	NaN	NaN	NaN	NaN	NaN
3.036	31.667	139.5673	600.3275	-0.13135	0.50391	0.019043	-214.637	-79.021	2361.62	-1.4288	2.0802	0.13916	-275.62	-35.17	2603.84	-1.7417	1.9927	-0.069336	NaN	NaN	NaN	NaN	NaN	NaN
3.038	16.399	137.1257	573.542	-0.11865	0.48388	0.027832	-234.721	-53.452	2338.03	-1.4141	2.043	0.146	-249.45	-12.15	2559.3	-1.7383	1.9336	-0.088867	NaN	NaN	NaN	NaN	NaN	NaN
3.04	7.70200000000001	128.843197	552.318	-0.10352	0.46338	0.036621	-204.064	-34.48	2336.69	-1.382	1.9953	0.14736	-252.67	3.75	2539.9	-1.707	1.8956	-0.083008	NaN	NaN	NaN	NaN	NaN	NaN
3.042	-12.683	138.8615	538.0257	-0.083008	0.43896	0.046875	-157.526	80.949	2347.55	-1.3425	1.9544	0.14024	-202.776	72.097	2471.88	-1.6641	1.8633	-0.095703	NaN	NaN	NaN	NaN	NaN	NaN
3.044	-11.037	145.553	529.90494	-0.071289	0.42676	0.053223	-119.481	62.688	2317.36	-1.3015	1.9126	0.1375	-199.026	69.166	2450.82	-1.5796	1.8228	-0.10693	NaN	NaN	NaN	NaN	NaN	NaN
3.046	-34.873	142.105	509.4344	-0.047363	0.40527	0.060547	-87.76	53.282	2304.2	-1.2582	1.8719	0.12764	-172.98	114.174	2392.37	-1.5391	1.8066	-0.11377	NaN	NaN	NaN	NaN	NaN	NaN
3.048	-41.521	134.06	503.3495	-0.02539	0.38964	0.06543	-90.827	80.975	2254.48	-1.2144	1.8306	0.11816	-140.054	106.4	2407.95	-1.4429	1.7661	-0.12549	NaN	NaN	NaN	NaN	NaN	NaN
3.05	-47.808	136.197	489.007	-0.0053711	0.375	0.072754	-63.849	13.847	2236.77	-1.1775	1.7928	0.10654	-61.757	194.389	2363.01	-1.3767	1.7356	-0.13281	NaN	NaN	NaN	NaN	NaN	NaN
3.052	-44.123	138.558	454.628	0.021484	0.35693	0.078613	8.418	14.901	2242.64	-1.1427	1.756	0.099414	-31.614	208.194	2303.82	-1.3145	1.7051	-0.13525	NaN	NaN	NaN	NaN	NaN	NaN
3.054	-65.847	149.402	424.098	0.03418	0.34814	0.077637	-12.624	-12.486	2204.94	-1.1188	1.7204	0.090039	-6.984	283.7417	2222.61	-1.2417	1.6626	-0.12744	NaN	NaN	NaN	NaN	NaN	NaN
3.056	-49.616	141.871	410.559	0.058594	0.32666	0.077637	-2.73200000000001	-83.2623	2166	-1.1036	1.6913	0.09502	-1.092	280.998	2178.19	-1.2109	1.6465	-0.11865	NaN	NaN	NaN	NaN	NaN	NaN
3.058	-60.276	139.024	395.845	0.082276	0.31324	0.077149	52.4854	-16.882	2148.52	-1.0952	1.6646	0.095215	39.313	306.057	2122.21	-1.1538	1.6118	-0.092285	NaN	NaN	NaN	NaN	NaN	NaN
3.06	-52.586	129.184	387.4837	0.097656	0.30078	0.064453	68.853	-13.884	2113.08	-1.0943	1.6558	0.10469	57.9123	241.714	2077.99	-1.1167	1.5864	-0.084716	NaN	NaN	NaN	NaN	NaN	NaN
3.062	-63.455	133.704	369.726	0.12207	0.28711	0.063477	81.752	32.313	2114.89	-1.089	1.6466	0.10771	49.277	232.148	2018.81	-1.0742	1.5586	-0.072754	NaN	NaN	NaN	NaN	NaN	NaN
3.064	-61.287	131.31	360.5762	0.13135	0.28174	0.0625	80.8523	92.0369	2077.47	-1.0816	1.64	0.11591	61.469	160.227	1974.54	-1.019	1.522	-0.06543	NaN	NaN	NaN	NaN	NaN	NaN
3.066	-66.486	130.882	364.2332	0.14844	0.27588	0.058105	63.2181	61.5482	2005.76	-1.0754	1.6367	0.13398	12.858	184.822	1921.9	-0.99609	1.5078	-0.059082	NaN	NaN	NaN	NaN	NaN	NaN
3.068	-44.615	119.285	345.3364	0.15576	0.27246	0.059814	55.573	109.628	1975.42	-1.0669	1.6333	0.14551	-33.506	187.1405	1855.59	-0.93359	1.4668	-0.058594	NaN	NaN	NaN	NaN	NaN	NaN
3.07	-42.099	124.317	322.6826	0.16846	0.27051	0.054688	7.143	109.83	1941.08	-1.0548	1.6277	0.14336	-35.856	258.205	1804.01	-0.88623	1.435	-0.053955	NaN	NaN	NaN	NaN	NaN	NaN
3.072	-20.637	118.692	322.1768	0.17529	0.27686	0.049316	-5.733	91.6755	1925.26	-1.0301	1.6234	0.13545	-26.759	257.605	1760.14	-0.83252	1.4048	-0.055176	NaN	NaN	NaN	NaN	NaN	NaN
3.074	-19.302	125.328	307.832	0.17969	0.28076	0.055176	-13.888	156.235	1878.92	-1.0043	1.6078	0.13076	-68.3786	303.888	1740.84	-0.75342	1.3657	-0.057129	NaN	NaN	NaN	NaN	NaN	NaN
3.076	4.93	114.309	296.5087	0.18311	0.28467	0.053223	-77.1292	117.0943	1787.99	-0.98281	1.5809	0.12773	-67.1238	296.598	1673.33	-0.71436	1.3403	-0.057617	NaN	NaN	NaN	NaN	NaN	NaN
3.078	-15.507	112.379	294.1333	0.18359	0.28589	0.057617	-117.512	111.82765	1749.56	-0.96973	1.5488	0.12305	-113.941	331.048	1637.88	-0.63672	1.2949	-0.056641	NaN	NaN	NaN	NaN	NaN	NaN
3.08	-4.50700000000001	107.645	281.5734	0.17871	0.29492	0.060547	-157.95	124.596	1730.34	-0.95371	1.5166	0.13017	-115.796	320.513	1540.9	-0.58179	1.2483	-0.057373	NaN	NaN	NaN	NaN	NaN	NaN
3.082	23.603	100.804	278.544	0.17871	0.30371	0.060547	-170.33	82.8666	1697.99	-0.93632	1.4809	0.12968	-139.925	311.073	1488.02	-0.52783	1.2056	-0.055176	NaN	NaN	NaN	NaN	NaN	NaN
3.084	16.431	93.777	271.0385	0.17969	0.31006	0.066895	-139.364	122.954	1672.4	-0.91406	1.4469	0.12734	-141.7354	260.493	1386.5	-0.47021	1.1392	-0.044434	NaN	NaN	NaN	NaN	NaN	NaN
3.086	-0.721000000000004	89.599	252.0155	0.1748	0.31641	0.067383	-169.445	125.2969	1617.18	-0.88926	1.4072	0.1249	-179.622	259.45	1316.95	-0.43945	1.1094	-0.04248	NaN	NaN	NaN	NaN	NaN	NaN
3.088	13.905	99.792	229.9077	0.17529	0.32569	0.06958	-190.686	102.998	1623.16	-0.86279	1.3716	0.12451	-168.531	242.612	1222.31	-0.39014	1.0459	-0.035645	NaN	NaN	NaN	NaN	NaN	NaN
3.09	9.635	107.335	218.824	0.17432	0.32959	0.070313	-159.345	152.8703	1616.72	-0.83174	1.328	0.11914	-159.334	275.982	1196.94	-0.35327	0.9895	-0.028076	NaN	NaN	NaN	NaN	NaN	NaN
3.092	-20.367	113.589	204.868	0.17676	0.33936	0.078125	-152.947	118.864	1566.11	-0.80078	1.2875	0.12021	-152.787	286.28	1122.49	-0.31689	0.94189	-0.024414	NaN	NaN	NaN	NaN	NaN	NaN
3.094	-10.303	101.32	214.0532	0.1748	0.3418	0.07666	-100.3144	132.553	1543.72	-0.77265	1.2438	0.11552	-143.22	331.87	1094.05	-0.27832	0.88086	-0.021484	NaN	NaN	NaN	NaN	NaN	NaN
3.096	-14.195	89.736	224.066	0.17725	0.34521	0.07666	-89.577	158.768	1473.41	-0.73555	1.2054	0.11875	-66.101	324.81	1016.29	-0.25244	0.854	-0.022461	NaN	NaN	NaN	NaN	NaN	NaN
3.098	-10.522	86.379	216.128	0.17602	0.34985	0.081299	-111.837	137.918	1412.42	-0.70605	1.1685	0.11816	-49.569	338.34	1023.75	-0.2085	0.80273	-0.02002	NaN	NaN	NaN	NaN	NaN	NaN
3.1	-30.068	77.244	201.944	0.18066	0.34424	0.081543	-72.7664	187.711	1355.35	-0.67695	1.1324	0.11182	4.448	318.54	965.98	-0.17041	0.76196	-0.023438	NaN	NaN	NaN	NaN	NaN	NaN
3.102	-43.881	73.744	184.6864	0.18408	0.34375	0.083984	-51.752	175.585	1291.17	-0.64532	1.1024	0.10723	23.993	292.06	957.06	-0.13574	0.72656	-0.027344	NaN	NaN	NaN	NaN	NaN	NaN
3.104	-54.148	68.574	185.359	0.18213	0.34229	0.085938	6.202	152.7	1271.98	-0.62266	1.068	0.1002	68.6046	267.257	846.73	-0.09082	0.6792	-0.041016	NaN	NaN	NaN	NaN	NaN	NaN
3.106	-51.77	72.05	165.9431	0.17969	0.33887	0.091309	59.17	186.385	1251.21	-0.59795	1.0403	0.10244	74.4432	244.14	815.1	-0.066895	0.65625	-0.054688	NaN	NaN	NaN	NaN	NaN	NaN
3.108	-68.219	57.574	153.455845	0.18286	0.33033	0.089599	52.5639	162.659	1186.22	-0.57813	1.0137	0.098633	105.9956	248.96	724.58	-0.025879	0.6123	-0.069824	NaN	NaN	NaN	NaN	NaN	NaN
3.11	-81.243	47.4448	168.003	0.18359	0.32471	0.092285	97.076	197.117	1166.67	-0.5542	0.99325	0.095117	89.26	251.54	701.9	-0.0083008	0.58252	-0.080322	NaN	NaN	NaN	NaN	NaN	NaN
3.112	-60.445	38.0264	165.993	0.17773	0.32471	0.096191	116.441	240.38	1127.93	-0.52773	0.97227	0.091016	128.218	260.14	617.81	0.0053711	0.55371	-0.08252	NaN	NaN	NaN	NaN	NaN	NaN
3.114	-68.653	29.3923	176.749	0.18457	0.31787	0.097168	108.014	227.44	1084.7	-0.50429	0.95117	0.083985	110.9525	256.897	578.88	0.012207	0.54102	-0.080078	NaN	NaN	NaN	NaN	NaN	NaN
3.116	-75.47	26.2166	185.438	0.18799	0.30811	0.099609	128.2294	250.01	1049.92	-0.47051	0.93145	0.076074	110.0937	263.38	498.66	0.0083008	0.53662	-0.07959	NaN	NaN	NaN	NaN	NaN	NaN
3.118	-50.409	15.2525	178.148	0.19018	0.30249	0.10132	96.728	207.635	990.21	-0.44141	0.91016	0.067871	87.8618	254.99	519.72	0.012695	0.53564	-0.061035	NaN	NaN	NaN	NaN	NaN	NaN
3.12	-49.274	2.682	180.362	0.19092	0.29346	0.098633	76.467	151.735	989.68	-0.41162	0.88955	0.057519	131.589	265.8	459.96	0.023437	0.53199	-0.053711	NaN	NaN	NaN	NaN	NaN	NaN
3.122	-32.304	-1.6112	162.897	0.18701	0.27881	0.10107	75.0121	154.567	979.42	-0.37998	0.86904	0.045801	79.241	269.92	457.58	0.043945	0.51953	-0.045898	NaN	NaN	NaN	NaN	NaN	NaN
3.124	-43.354	-14.679	172.341	0.18457	0.27539	0.10059	35.927	134.439	921.75	-0.346	0.84991	0.039551	99.22	312.74	384.68	0.063965	0.50732	-0.04541	NaN	NaN	NaN	NaN	NaN	NaN
3.126	-36.859	-8.206	173.86	0.18164	0.26709	0.10352	37.236	159.642	890.8	-0.31641	0.82637	0.033496	34.986	302.95	372.41	0.076172	0.49658	-0.049805	NaN	NaN	NaN	NaN	NaN	NaN
3.128	-24.667	-22.919	170.602	0.17627	0.25879	0.11231	10.433	181.135	822.74	-0.28271	0.80469	0.022949	1.555	307.58	310.05	0.094727	0.47705	-0.058105	NaN	NaN	NaN	NaN	NaN	NaN
3.13	-10.242	-28.145	177.985	0.17529	0.25635	0.11621	-56.755	159.48	787.62	-0.25801	0.78477	0.021094	-41.96	246.01	290.84	0.10596	0.4458	-0.062012	NaN	NaN	NaN	NaN	NaN	NaN
3.132	-35.105	-57.432	199.407	0.17676	0.24951	0.12646	-61.503	209.01	783.86	-0.22695	0.76191	0.013379	-60.258	221.044	236.52	0.10596	0.4375	-0.060059	NaN	NaN	NaN	NaN	NaN	NaN
3.134	-9.008	-50.698	215.529	0.17969	0.25	0.13623	-75.7339	205.566	737.42	-0.20156	0.73809	0.0067383	-86.928	162.125	229.79	0.10059	0.40869	-0.064453	NaN	NaN	NaN	NaN	NaN	NaN
3.136	5.10400000000001	-56.197	237.802	0.18115	0.23926	0.13525	-77.23987	215.127	741.76	-0.18057	0.71386	-0.0030274	-89.933	159.72	183.285	0.096437	0.39258	-0.064453	NaN	NaN	NaN	NaN	NaN	NaN
3.138	-18.713	-41.2778	246.054	0.18554	0.23267	0.1311	-61.2985	221.714	729.22	-0.16016	0.6875	-0.01123	-136.173	108.07	181.916	0.086914	0.37793	-0.072266	NaN	NaN	NaN	NaN	NaN	NaN
3.14	-23.655	-23.4089	286.705	0.18848	0.22803	0.12891	-108.4946	179.057	661.12	-0.14014	0.66328	-0.019434	-146.677	113.3916	128.13	0.069824	0.3623	-0.074707	NaN	NaN	NaN	NaN	NaN	NaN
3.142	-7.029	5.9944	341.491	0.18652	0.22021	0.125	-99.272	205.099	629	-0.12276	0.63828	-0.025586	-143.087	66.083	118.192	0.060547	0.34961	-0.07666	NaN	NaN	NaN	NaN	NaN	NaN
3.144	-21.046	42.3039	389.025	0.18359	0.21729	0.12256	-111.1834	226.48	572.34	-0.11143	0.61953	-0.02793	-101.30267	104.208	105.93	0.047852	0.33008	-0.080078	NaN	NaN	NaN	NaN	NaN	NaN
3.146	-35.73	81.91586	471.229	0.16455	0.21143	0.12012	-88.482	208.07	551.49	-0.097947	0.60352	-0.027734	-88.36	56.018	148.292	0.037109	0.32202	-0.079101	NaN	NaN	NaN	NaN	NaN	NaN
3.148	-23.995	111.1069	557.865	0.14869	0.21582	0.12012	-47.282	208.01	553.75	-0.081543	0.58594	-0.027344	-64.165	80.502	115.378	0.024414	0.30762	-0.084473	NaN	NaN	NaN	NaN	NaN	NaN
3.15	-32.951	123.504	662.957	0.125	0.21973	0.11865	-81.0425	151.728	502.2	-0.066797	0.56738	-0.025683	-71.873	34.475	97.602	0.0019531	0.29346	-0.087402	NaN	NaN	NaN	NaN	NaN	NaN
3.152	-53.91	133.4296	736.498	0.086426	0.23584	0.10693	-37.366	121.638	494.05	-0.054394	0.54961	-0.033301	-48.315	53.971	54.7133	-0.010742	0.28516	-0.089355	NaN	NaN	NaN	NaN	NaN	NaN
3.154	-58.37	126.75634	800.359	0.057129	0.24561	0.095215	12.139	143.101	484.93	-0.038379	0.53164	-0.032911	-25.355	-7.1418	73.131	-0.048828	0.27734	-0.085938	NaN	NaN	NaN	NaN	NaN	NaN
3.156	-60.275	117.5743	858.234	-0.017578	0.26953	0.073242	23.475	126.66	469.7	-0.028907	0.51328	-0.044238	-15.193	14.9311	71.399	-0.072754	0.27368	-0.080566	NaN	NaN	NaN	NaN	NaN	NaN
3.158	-53.66	98.696	918.125	-0.092529	0.30029	0.05664	71.429	151.349	475.99	-0.015625	0.49756	-0.04834	-2.11300000000001	-25.8	48.564	-0.099121	0.27246	-0.074219	NaN	NaN	NaN	NaN	NaN	NaN
3.16	-83.209	67.044	945.555	-0.18311	0.33887	0.037109	87.235	157.805	406.81	-0.00058594	0.4833	-0.049121	32.048	12.858	41.7534	-0.12891	0.27881	-0.067871	NaN	NaN	NaN	NaN	NaN	NaN
3.162	-91.947	31.61	983.57	-0.3208	0.40674	0.037598	81.886	131.956	380.48	0.011816	0.47246	-0.051465	36.686	-12.069	43.2836	-0.14111	0.27979	-0.068359	NaN	NaN	NaN	NaN	NaN	NaN
3.164	-89.399	-21.7522	1021.49	-0.42505	0.47119	0.047852	129.26	162.2	373.32	0.027442	0.45527	-0.049512	39.619	31.6993	59.158	-0.15381	0.27881	-0.052246	NaN	NaN	NaN	NaN	NaN	NaN
3.166	-66.341	-57.599	1057.541	-0.52783	0.54736	0.063965	97.9265	134.841	347.31	0.038476	0.44053	-0.04668	69.326	-22.1228	48.856	-0.14794	0.27734	-0.04956	NaN	NaN	NaN	NaN	NaN	NaN
3.168	-62.863	-75.691	1094.792	-0.65039	0.66406	0.095703	78.34	131.852	339.01	0.05127	0.42871	-0.041992	80.617	14.559	38.727	-0.13721	0.27344	-0.045898	NaN	NaN	NaN	NaN	NaN	NaN
3.17	-75.178	-68.0369	1127.816	-0.70313	0.73047	0.125	101.7261	147.821	281.95	0.059961	0.4124	-0.04248	83.4846	-26.7773	42.7468	-0.1084	0.2583	-0.046387	NaN	NaN	NaN	NaN	NaN	NaN
3.172	-35.696	-55.179	1166.293	-0.77979	0.86084	0.1748	75.435	126.649	235.912	0.066992	0.39883	-0.04082	94.5817	19.3819	74.035	-0.095215	0.24756	-0.055176	NaN	NaN	NaN	NaN	NaN	NaN
3.174	-24.969	-40.774	1198.516	-0.80689	0.95728	0.20777	81.425	145.839	256.794	0.077539	0.38516	-0.036914	76.815	-2.0336	61.191	-0.062988	0.21582	-0.054199	NaN	NaN	NaN	NaN	NaN	NaN
3.176	-32.412	-24.098	1238.923	-0.80713	1.0356	0.23486	64.263	130.074	215.03	0.084863	0.37314	-0.038086	36.398	55.654	55.988	-0.041992	0.19165	-0.062256	NaN	NaN	NaN	NaN	NaN	NaN
3.178	-1.996	-23.681	1280.004	-0.78613	1.1035	0.25195	7.73899999999999	110.505	215.178	0.094238	0.36377	-0.035645	15.781	21.8958	14.035	-0.02002	0.16943	-0.065918	NaN	NaN	NaN	NaN	NaN	NaN
3.18	13.784	-25.7	1289.525	-0.7583	1.1235	0.25684	19.564	142.546	202.367	0.10411	0.34648	-0.030957	-57.97	56.665	35.9441	0.0048828	0.13525	-0.068359	NaN	NaN	NaN	NaN	NaN	NaN
3.182	35.877	-30.107	1283.73	-0.7124	1.145	0.25928	-24.736	106.5688	169.685	0.11875	0.33487	-0.02832	-64.104	29.3469	25.9341	0.021973	0.12158	-0.073242	NaN	NaN	NaN	NaN	NaN	NaN
3.184	38.143	-34.306	1257.677	-0.68554	1.1431	0.2478	-49.474	81.944	191.154	0.13867	0.32119	-0.023633	-72.683	52.208	44.5217	0.055664	0.085938	-0.074219	NaN	NaN	NaN	NaN	NaN	NaN
3.186	18.019	-48.986	1224.876	-0.66162	1.1392	0.25391	-64.181	71.509	175.289	0.15332	0.30576	-0.025781	-97.9652	25.935	37.34521	0.089109	0.068603	-0.076416	NaN	NaN	NaN	NaN	NaN	NaN
3.188	18.713	-67.4991	1188.445	-0.64063	1.1211	0.26611	-100.292	39.926	130.467	0.16797	0.28955	-0.030273	-104.5515	44.3646	53.3739	0.12158	0.041016	-0.072266	NaN	NaN	NaN	NaN	NaN	NaN
3.19	26.514	-93.286	1155.288	-0.63184	1.1094	0.27686	-91.2855	76.692	133.078	0.1876	0.26885	-0.03584	-111.9366	1.86300000000001	33.8073	0.16357	0.0097656	-0.082031	NaN	NaN	NaN	NaN	NaN	NaN
3.192	11.894	-119.073	1153.481	-0.62354	1.0825	0.28906	-127.281	69.096	106.706	0.20401	0.25303	-0.041797	-113.81	24.869	61.89	0.1875	-0.0043945	-0.086914	NaN	NaN	NaN	NaN	NaN	NaN
3.194	8.617	-132.476	1172.562	-0.60864	1.0656	0.29443	-159.791	54.195	104.518	0.2165	0.23037	-0.048047	-103.617	21.167	24.4488	0.2334	-0.040039	-0.091309	NaN	NaN	NaN	NaN	NaN	NaN
3.196	36.871	-128.948	1197.276	-0.5708	1.0376	0.29102	-128.0966	75.2483	109.612	0.22978	0.21152	-0.053808	-104.3277	42.26612	57.14	0.26538	-0.066406	-0.10449	NaN	NaN	NaN	NaN	NaN	NaN
3.198	23.39	-127.6562	1217.113	-0.4917	0.99463	0.27734	-129.49423	63.181	65.238	0.24609	0.1958	-0.062012	-92.4191	48.9573	53.885	0.29443	-0.087402	-0.11816	NaN	NaN	NaN	NaN	NaN	NaN
3.2	-2.583	-122.6114	1240.85	-0.43994	0.9707	0.26709	-84.211	54.827	93.2	0.25205	0.17588	-0.066992	-96.8186	32.6514	82.013	0.31982	-0.12451	-0.13086	NaN	NaN	NaN	NaN	NaN	NaN
3.202	-27.445	-142.066	1254.328	-0.32813	0.91211	0.24561	-65.19	53.879	114.313	0.26329	0.16074	-0.064453	-91.9422	14.285	53.4439	0.32129	-0.13867	-0.13525	NaN	NaN	NaN	NaN	NaN	NaN
3.204	-48.849	-145.798	1272.086	-0.24634	0.8684	0.2146	-84.972	13.672	74.983	0.27461	0.1459	-0.078515	-105.9098	1.2317	76.596	0.32275	-0.16211	-0.14453	NaN	NaN	NaN	NaN	NaN	NaN
3.206	-94.767	-146.603	1282.578	-0.16553	0.83057	0.18408	-20.079	40.484	74.228	0.28281	0.12539	-0.081836	-54.29	25.285926	52.5212	0.30786	-0.17578	-0.15064	NaN	NaN	NaN	NaN	NaN	NaN
3.208	-116.161	-146.437	1312.385	-0.09082	0.78711	0.12842	-13.926	53.4074	44.1289	0.28516	0.10938	-0.091309	-29.851	30.1995	102.112	0.27881	-0.17822	-0.1543	NaN	NaN	NaN	NaN	NaN	NaN
3.21	-122.973	-153.644	1332.481	-0.059082	0.77393	0.10254	-2.26100000000001	40.218	52.162	0.29395	0.098925	-0.09541	-2.672	30.8188	81.417	0.23975	-0.17529	-0.15918	NaN	NaN	NaN	NaN	NaN	NaN
3.212	-138.418	-172.3982	1350.177	-0.028809	0.75391	0.049805	37.929	41.553	77.5363	0.29561	0.085156	-0.10088	26.502	5.6604	67.087	0.21436	-0.16357	-0.14307	NaN	NaN	NaN	NaN	NaN	NaN
3.214	-135.042	-187.145	1357.068	-0.030518	0.75122	0.022705	9.91099999999999	12.4479	33.4071	0.29482	0.073437	-0.10088	58.91	2.959	42.7194	0.16016	-0.1333	-0.14551	NaN	NaN	NaN	NaN	NaN	NaN
3.216	-125.754	-191.528	1376.898	-0.046387	0.76416	0.0087891	48.236	4.9313	56.5864	0.28877	0.065234	-0.10977	55.453	-11.4546	64.0059	0.12256	-0.10181	-0.13257	NaN	NaN	NaN	NaN	NaN	NaN
3.218	-131.683	-182.062	1430.554	-0.096191	0.80371	0.0063477	75.08	15.5263	73.563	0.27881	0.060059	-0.10938	82.118	14.264	49.0783	0.094727	-0.063965	-0.12207	NaN	NaN	NaN	NaN	NaN	NaN
3.22	-115.937	-161.457	1476.861	-0.13379	0.83398	0.015137	50.895	-29.669	84.429	0.27432	0.055762	-0.11074	94.622	2.13377	75.612	0.063965	-0.015625	-0.10596	NaN	NaN	NaN	NaN	NaN	NaN
3.222	-115.313	-138.326	1521.995	-0.19678	0.9082	0.020996	78.77	-20.8088	95.009	0.25898	0.051465	-0.11143	77.837	31.8871	46.6254	0.062988	0.0073242	-0.10059	NaN	NaN	NaN	NaN	NaN	NaN
3.224	-105.294	-130.4406	1574.851	-0.23315	0.9624	0.025635	62.765	-4.0702	38.267	0.24649	0.051465	-0.11377	47.317	3.6042	51.9603	0.055664	0.04541	-0.098145	NaN	NaN	NaN	NaN	NaN	NaN
3.226	-111.24	-122.7047	1610.968	-0.25781	1.0176	0.03125	46.546	5.9922	53.619	0.22959	0.046387	-0.11328	52.045	19.305	60.6852	0.068115	0.068604	-0.099853	NaN	NaN	NaN	NaN	NaN	NaN
3.228	-110.778	-107.325	1638.647	-0.2749	1.0942	0.02832	57.134	42.655	75.431	0.20654	0.04834	-0.11719	9.898	-15.923	54.9336	0.080566	0.083496	-0.10938	NaN	NaN	NaN	NaN	NaN	NaN
3.23	-104.921	-104.099	1650.082	-0.27002	1.1255	0.021973	0.463999999999999	12.2982	50.2899	0.17695	0.050098	-0.1169	-0.488999999999997	21.577	48.8875	0.10156	0.086914	-0.11963	NaN	NaN	NaN	NaN	NaN	NaN
3.232	-116.891	-108.783	1647.51	-0.26855	1.1763	0.010742	7.742	3.053	65.336	0.14443	0.047852	-0.12187	-17.559	-8.362	40.3662	0.10547	0.085938	-0.12549	NaN	NaN	NaN	NaN	NaN	NaN
3.234	-108.74	-131.751	1662.949	-0.27002	1.2066	0.0004883	-1.68	17.6148	57.6731	0.10029	0.054492	-0.12266	-30.296	36.621	42.5933	0.10205	0.078613	-0.13281	NaN	NaN	NaN	NaN	NaN	NaN
3.236	-74.469	-151.402	1672.468	-0.2793	1.2256	-0.0083008	-81.767	-0.686999999999999	38.0456	0.058007	0.0625	-0.11563	-33.37	2.0541	46.78	0.087891	0.074218	-0.14356	NaN	NaN	NaN	NaN	NaN	NaN
3.238	-27.955	-187.025	1681.517	-0.30566	1.25	-0.017578	-81.962	27.5723	70.319	0.01123	0.076172	-0.10889	-50.858	29.226	48.434	0.066406	0.074707	-0.14063	NaN	NaN	NaN	NaN	NaN	NaN
3.24	-23.07	-205.226	1703.95	-0.32715	1.2598	-0.018555	-110.024	32.942	34.135	-0.027344	0.091699	-0.10059	-101.4666	-35.909	67.116	0.031738	0.07959	-0.14355	NaN	NaN	NaN	NaN	NaN	NaN
3.242	-15.083	-204.729	1729.842	-0.375	1.2832	-0.0068359	-126.303	21.03103	48.6683	-0.072558	0.1084	-0.089746	-103.58276	4.359	74.318	0.0078125	0.084473	-0.14209	NaN	NaN	NaN	NaN	NaN	NaN
3.244	-7.20399999999999	-188.64	1739.975	-0.41358	1.3081	0.0058594	-91.641	39.401	74.499	-0.11162	0.12442	-0.080762	-98.9046	-34.838	81.1593	-0.041016	0.097656	-0.14453	NaN	NaN	NaN	NaN	NaN	NaN
3.246	-17.717	-165.66	1742.073	-0.44434	1.332	0.020996	-148.824	7.427	52.552	-0.14248	0.14102	-0.071289	-119.5331	16.51	127.767	-0.089599	0.11743	-0.14111	NaN	NaN	NaN	NaN	NaN	NaN
3.248	-43.754	-155.332	1780.837	-0.47803	1.3657	0.032227	-121.0357	-0.383000000000003	79.526	-0.1748	0.15723	-0.061523	-125.9644	-36.829	145.3661	-0.146	0.13818	-0.14453	NaN	NaN	NaN	NaN	NaN	NaN
3.25	-47.313	-144.122	1801.84	-0.49219	1.377	0.029785	-96.513	2.283	61.705	-0.19785	0.17305	-0.044922	-120.9783	-21.031	192.1268	-0.23145	0.18018	-0.13477	NaN	NaN	NaN	NaN	NaN	NaN
3.252	-52.496	-145.109	1826.66	-0.51367	1.418	0.020508	-129.347	-23.498	25.165	-0.21377	0.18233	-0.038574	-105.4986	-91.52	201.903	-0.27441	0.21289	-0.12402	NaN	NaN	NaN	NaN	NaN	NaN
3.254	-104.594	-131.499	1833.77	-0.51904	1.4443	0.011963	-108.202	-11.735	59.1495	-0.2169	0.19326	-0.027636	-81.22	-94.533	260.6892	-0.36279	0.27588	-0.1001	NaN	NaN	NaN	NaN	NaN	NaN
3.256	-95.378	-135.83	1843.62	-0.52686	1.4634	-0.0024414	-74.372	-0.555	31.173	-0.21191	0.19951	-0.02002	-68.852	-133.1969	323.693	-0.42236	0.33057	-0.091553	NaN	NaN	NaN	NaN	NaN	NaN
3.258	-109.542	-147.126	1850.233	-0.53857	1.5005	-0.010742	-41.405	-16.05	41.4976	-0.19482	0.19531	-0.014648	-47.173	-85.833	451.642	-0.47217	0.38232	-0.083984	NaN	NaN	NaN	NaN	NaN	NaN
3.26	-115.819	-146.3171	1840.978	-0.54834	1.5083	-0.015137	-15.46	23.2647	77.8086	-0.17129	0.18701	-0.016699	-4.22500000000001	-103.874	502.9686	-0.53223	0.44922	-0.081055	NaN	NaN	NaN	NaN	NaN	NaN
3.262	-130.43	-140.304	1841.103	-0.58105	1.5332	-0.011719	-34.189	27.1387	51.5846	-0.13886	0.16816	-0.017285	53.61	-54.282	621.411	-0.56641	0.48877	-0.082031	NaN	NaN	NaN	NaN	NaN	NaN
3.264	-125.749	-132.646	1857.553	-0.61474	1.5528	-0.00073245	-2.988	49.635	65.925	-0.096288	0.14785	-0.028613	53.2	-75.766	705.939	-0.64795	0.5415	-0.10645	NaN	NaN	NaN	NaN	NaN	NaN
3.266	-145.218	-126.338	1899.6	-0.6499	1.5708	0.015625	39.892	53.928	66.1643	-0.052832	0.11875	-0.035645	48.052	27.812	889.065	-0.76709	0.59229	-0.13965	NaN	NaN	NaN	NaN	NaN	NaN
3.268	-156.414	-132.442	1910.274	-0.70703	1.5977	0.051758	36.88	9.6438	36.041	-0.003418	0.090332	-0.046387	75.865	74.0008	1089.893	-0.84473	0.62012	-0.14063	NaN	NaN	NaN	NaN	NaN	NaN
3.27	-146.506	-124.868	1936.972	-0.74023	1.6094	0.070801	63.818	7.6249	52.96	0.031641	0.056055	-0.057129	90.672	178.276	1289.0375	-1.0366	0.68994	-0.15771	NaN	NaN	NaN	NaN	NaN	NaN
3.272	-187.2473	-130.305	1959.346	-0.80225	1.6411	0.10205	53.509	15.696	39.564	0.064355	0.029102	-0.070215	99.907	189.892	1415.7959	-1.2116	0.75952	-0.15772	NaN	NaN	NaN	NaN	NaN	NaN
3.274	-169.26	-108.985	1973.833	-0.84717	1.6568	0.12061	65.977	2.487	38.485	0.090527	0.00097648	-0.081152	19.616	179.684	1567.039	-1.4082	0.85156	-0.14795	NaN	NaN	NaN	NaN	NaN	NaN
3.276	-159.758	-90.545	1961.545	-0.88965	1.6738	0.1377	99.492	26.187	64.5468	0.10762	-0.022559	-0.088965	-11.37	100.403	1596.73	-1.6797	1.043	-0.095703	NaN	NaN	NaN	NaN	NaN	NaN
3.278	-182.572	-75.086	1968.842	-0.94385	1.6938	0.15332	20.262	12.3	53.352	0.12158	-0.032715	-0.092285	-33.9	46.305	1660.198	-1.8047	1.1504	-0.053711	NaN	NaN	NaN	NaN	NaN	NaN
3.28	-158.022	-79.245	1981.53	-0.96484	1.6953	0.16162	16.031	2.783	105.978	0.13086	-0.052539	-0.10371	22.6119	-57.649	1614.726	-1.9863	1.3818	0.042969	NaN	NaN	NaN	NaN	NaN	NaN
3.282	-141.455	-93.95	1969.692	-1.0039	1.7012	0.17285	55.317	-0.509999999999998	121.8509	0.13653	-0.059179	-0.10498	26.137	-166.4105	1606.65	-2.0411	1.5449	0.10742	NaN	NaN	NaN	NaN	NaN	NaN
3.284	-111.659	-112.603	1957.969	-1.0234	1.7022	0.1792	6.44199999999999	-31.195	114.5001	0.14473	-0.062695	-0.10889	52.121	-278.035	1540.876	-2.019	1.6919	0.15283	NaN	NaN	NaN	NaN	NaN	NaN
3.286	-136.686	-116.794	1938.232	-1.0347	1.6997	0.18311	-5.694	-32.787	174.656	0.14912	-0.054297	-0.1127	-10.329	-348.945	1484.1107	-1.8789	1.8164	0.17041	NaN	NaN	NaN	NaN	NaN	NaN
3.288	-97.276	-107.427	1946.371	-1.041	1.6934	0.18799	-74.57	-27.8481	207.2239	0.14844	-0.04541	-0.1123	-87.48782	-322.083	1372.432	-1.7559	1.8359	0.14209	NaN	NaN	NaN	NaN	NaN	NaN
3.29	-91.354	-93.376	1948.435	-1.0425	1.6899	0.18994	-109.0015	-32.973	262.3928	0.14843	-0.037207	-0.11563	-135.714	-262.854	1347.799	-1.4141	1.7363	0.049805	NaN	NaN	NaN	NaN	NaN	NaN
3.292	-64.567	-76.6	1948.257	-1.0386	1.6821	0.19141	-30.674	9.22199999999999	314.3372	0.14404	-0.023633	-0.11387	-133.188	-149.2212	1336.223	-1.1057	1.5308	-0.043457	NaN	NaN	NaN	NaN	NaN	NaN
3.294	-40.816	-75.5042	1970.797	-1.0345	1.6672	0.19043	-72.733	2.712	344.243	0.13935	-0.005664	-0.11426	-153.431	-110.832	1397.353	-0.82813	1.293	-0.12695	NaN	NaN	NaN	NaN	NaN	NaN
3.296	-53.97	-80.247	1979.203	-1.0327	1.6489	0.19043	-104.798	7.635	468.0809	0.12012	0.0057616	-0.11777	-152.318	-32.385	1399.559	-0.5293	1.0176	-0.21777	NaN	NaN	NaN	NaN	NaN	NaN
3.298	-42.076	-77.671	1983.623	-1.0249	1.6255	0.19531	-118.352	39.064	581.012	0.092773	0.020508	-0.12646	-194.735	-52.744	1392.794	-0.41602	0.89648	-0.25049	NaN	NaN	NaN	NaN	NaN	NaN
3.3	-83.393	-55.119	1950.536	-1.0225	1.6055	0.19946	-135.5558	65.286	646.5487	0.049414	0.040722	-0.14239	-220.527	28.577	1390.785	-0.22656	0.69727	-0.28711	NaN	NaN	NaN	NaN	NaN	NaN
3.302	-93.887	-47.63	1925.842	-1.0156	1.5859	0.20068	-74.563	100.891	777.1177	-0.010156	0.066894	-0.15147	-220.519	-30.1	1391.1489	-0.10718	0.56103	-0.29541	NaN	NaN	NaN	NaN	NaN	NaN
3.304	-98.523	-60.004	1913.719	-0.99951	1.561	0.20264	-63.72	91.656	890.7334	-0.090234	0.10127	-0.17178	-184.775	-9.09999999999999	1387.172	0	0.43408	-0.31445	NaN	NaN	NaN	NaN	NaN	NaN
3.306	-95.808	-64.23736	1899.596	-0.9917	1.5493	0.20557	-126.919	63.9436	1091.959	-0.17549	0.14853	-0.17334	-86.779	-137.477	1410.966	0.12305	0.28516	-0.37354	NaN	NaN	NaN	NaN	NaN	NaN
3.308	-100.684	-75.539	1904.173	-0.97217	1.5259	0.21387	-76.124	85.972	1263.7164	-0.2627	0.20068	-0.16846	37.802	-188.119	1455.535	0.15967	0.23145	-0.42041	NaN	NaN	NaN	NaN	NaN	NaN
3.31	-108.236	-82.184	1888.128	-0.95508	1.5102	0.20312	-16.274	88.752	1312.772	-0.34746	0.25703	-0.16563	80.151	-356.4447	1503.476	0.17041	0.15918	-0.49609	NaN	NaN	NaN	NaN	NaN	NaN
3.312	-90.052	-74.795	1882.386	-0.93701	1.4946	0.2002	-3.05	52.8753	1398.904	-0.44033	0.31972	-0.16025	63.1	-365.177	1563.443	0.099119	0.15722	-0.5227	NaN	NaN	NaN	NaN	NaN	NaN
3.314	-130.798	-40.7576	1877.533	-0.91602	1.4766	0.20215	-43.962	-3.73	1522.728	-0.5372	0.38808	-0.15947	76.358	-456.587	1630.587	-0.033691	0.19971	-0.52393	NaN	NaN	NaN	NaN	NaN	NaN
3.316	-133.59	-12.8134	1870.772	-0.9082	1.4688	0.20166	-51.365	-116.162	1583.288	-0.64297	0.46758	-0.15987	122.374	-373.558	1743.392	-0.28662	0.34863	-0.47852	NaN	NaN	NaN	NaN	NaN	NaN
3.318	-149.717	0.337	1875.976	-0.89014	1.4536	0.20898	61.9572	-168.2464	1617.756	-0.75439	0.5542	-0.16455	148.514	-400.959	1826.0106	-0.41797	0.45313	-0.43359	NaN	NaN	NaN	NaN	NaN	NaN
3.32	-150.036	3.404	1887.057	-0.87817	1.4446	0.2102	85.9847	-194.0886	1578.186	-0.88711	0.66133	-0.16367	184.678	-289.62	1924.12	-0.6582	0.67139	-0.35156	NaN	NaN	NaN	NaN	NaN	NaN
3.322	-163.689	-6.609	1887.392	-0.86914	1.4395	0.21533	44.719	-231.745	1547.528	-1.0223	0.77236	-0.16055	201.7161	-294.769	2009.748	-0.79395	0.83301	-0.30664	NaN	NaN	NaN	NaN	NaN	NaN
3.324	-173.5923	-14.5228	1872.575	-0.84326	1.4302	0.21338	35.532	-229.23	1598.93	-1.1743	0.89385	-0.15235	199.698	-163.6735	2060.459	-0.90039	0.98242	-0.28223	NaN	NaN	NaN	NaN	NaN	NaN
3.326	-194.6507	-24.6072	1860.785	-0.83594	1.4297	0.21533	-26.193	-222.114	1573.03648	-1.3408	1.0369	-0.12412	192.935	-147.994	2103.3	-1.0156	1.1465	-0.25635	NaN	NaN	NaN	NaN	NaN	NaN
3.328	-198.364	-15.876	1802.59	-0.8125	1.4219	0.21631	14.4223	-197.003	1552.794	-1.5015	1.1938	-0.088379	224.999	-58.49	2122.364	-1.0742	1.2129	-0.24805	NaN	NaN	NaN	NaN	NaN	NaN
3.33	-152.841	-17.096	1766.511	-0.79248	1.4189	0.21777	9.947	-163.795	1548.1845	-1.647	1.3507	-0.039355	272.866	-127.145	2114.153	-1.1909	1.3286	-0.20361	NaN	NaN	NaN	NaN	NaN	NaN
3.332	-155.66	-14.3153	1750.019	-0.77148	1.4141	0.21631	-80.502	-124.2674	1549.4039	-1.7493	1.4833	0.011719	312.484	-140.877	2101.033	-1.2842	1.3842	-0.16065	NaN	NaN	NaN	NaN	NaN	NaN
3.334	-127.627	-21.1565	1753.445	-0.74219	1.3965	0.21191	-64.4505	-84.768	1591.491	-1.7993	1.5731	0.051172	309.751	-256.193	2058.997	-1.3711	1.4375	-0.10889	NaN	NaN	NaN	NaN	NaN	NaN
3.336	-88.678	-27.1296	1754.06	-0.72607	1.3892	0.21191	-87.558	-17.559	1554.3613	-1.7817	1.6311	0.082813	240.934	-270.3261	2067.827	-1.4565	1.4771	-0.067871	NaN	NaN	NaN	NaN	NaN	NaN
3.338	-89.28	-28.6935	1737.746	-0.70117	1.375	0.20752	-131.752	-17.2	1522.765	-1.7227	1.6719	0.1084	170.868	-314.276	2109.529	-1.4824	1.5	-0.055176	NaN	NaN	NaN	NaN	NaN	NaN
3.34	-88.687	-20.9791	1736.195	-0.677	1.3645	0.20532	-65.245	-66.125	1563.857	-1.6053	1.6815	0.093066	67.34	-274.358	2159.995	-1.519	1.5024	-0.0625	NaN	NaN	NaN	NaN	NaN	NaN
3.342	-90.143	-4.1608	1710.193	-0.65576	1.354	0.20557	-83.72	-108.303	1578.471	-1.4397	1.6462	0.01582	47.469	-266.165	2226.257	-1.5434	1.5043	-0.089599	NaN	NaN	NaN	NaN	NaN	NaN
3.344	-77.569	26.167	1681.831	-0.62549	1.3345	0.19531	-81.511	-196.036	1601.736	-1.2179	1.5275	-0.079493	36.179	-235.9279	2307.415	-1.5557	1.5156	-0.12939	NaN	NaN	NaN	NaN	NaN	NaN
3.346	-88.428	41.848	1651.117	-0.61279	1.3247	0.19824	-61.732	-254.547	1633.453	-0.98791	1.3559	-0.16396	-23.268	-223.448	2383.824	-1.5391	1.5469	-0.18652	NaN	NaN	NaN	NaN	NaN	NaN
3.348	-55.017	33.0058	1622.754	-0.58301	1.3052	0.19238	-121.876	-300.569	1661.958	-0.80322	1.1724	-0.2334	-71.298	-199.788	2438.417	-1.5171	1.5474	-0.20752	NaN	NaN	NaN	NaN	NaN	NaN
3.35	-77.652	6.84	1617.335	-0.55786	1.2913	0.18896	-120.8	-364.6771	1733.639	-0.66787	1.0119	-0.26182	-67.401	-174.299	2446.387	-1.4722	1.5259	-0.24707	NaN	NaN	NaN	NaN	NaN	NaN
3.352	-64.006	-0.4228	1597.186	-0.53711	1.2734	0.18359	-104.464	-370.4809	1766.5472	-0.57178	0.85947	-0.27871	-73.916	-159.891	2428.403	-1.478	1.5386	-0.2815	NaN	NaN	NaN	NaN	NaN	NaN
3.354	-47.187	6.23	1554.055	-0.50537	1.2563	0.1748	-124.376	-391.856	1781.689	-0.49248	0.73174	-0.27754	-65.763	-143.093	2413.541	-1.4683	1.5845	-0.31641	NaN	NaN	NaN	NaN	NaN	NaN
3.356	-55.173	15.419	1521.73	-0.49609	1.2461	0.1748	-63.377	-391.164	1865.4022	-0.41123	0.63447	-0.28857	-42.453	-153.021	2387.836	-1.3789	1.5811	-0.375	NaN	NaN	NaN	NaN	NaN	NaN
3.358	-59.496	23.224	1501.885	-0.46875	1.2227	0.1582	-71.965	-312.833	1914.0414	-0.32275	0.56885	-0.31396	9.04000000000002	-120.857	2348.1477	-1.3105	1.5527	-0.4043	NaN	NaN	NaN	NaN	NaN	NaN
3.36	-50.858	39.566	1467.942	-0.44824	1.207	0.15747	-23.88	-268.522	1973.549	-0.23867	0.52754	-0.38144	-26.85	-116.229	2314.404	-1.1924	1.459	-0.45361	NaN	NaN	NaN	NaN	NaN	NaN
3.362	-69.503	31.908	1481.42	-0.43018	1.1919	0.15234	49.988	-191.437	2046.845	-0.17373	0.50928	-0.46201	-36.108	-65.163	2308.32	-1.1411	1.4028	-0.50342	NaN	NaN	NaN	NaN	NaN	NaN
3.364	-76.9	35.7947	1481.415	-0.40771	1.1733	0.14746	58.637	-141.777	2071.095	-0.14912	0.52334	-0.53232	-32.436	-73.606	2326.423	-1.1055	1.3652	-0.55469	NaN	NaN	NaN	NaN	NaN	NaN
3.366	-85.418	41.6613	1463.481	-0.3999	1.1606	0.13916	100.931	-169.481	2087.438	-0.18818	0.56514	-0.57344	1.96000000000001	-3.444	2315.003	-1.0957	1.3613	-0.57861	NaN	NaN	NaN	NaN	NaN	NaN
3.368	-114.323	51.77826	1444.868	-0.39111	1.1411	0.13086	110.806	-136.969	2097.5841	-0.29053	0.64307	-0.5874	54.31	4.018	2331.008	-1.1055	1.375	-0.57422	NaN	NaN	NaN	NaN	NaN	NaN
3.37	-136.059	60.5768	1407.62	-0.3794	1.1236	0.12476	135.361	-142.471	2094.205	-0.43418	0.76757	-0.56035	137.091	87.4222	2358.053	-1.1597	1.4243	-0.54443	NaN	NaN	NaN	NaN	NaN	NaN
3.372	-125.764	73.145	1379.322	-0.37158	1.1089	0.12451	204.629	-166.338	2128.622	-0.59053	0.91416	-0.5081	141.782	78.2819	2384.824	-1.2195	1.4651	-0.51343	NaN	NaN	NaN	NaN	NaN	NaN
3.374	-137.48	79.8719	1346.954	-0.35986	1.0903	0.11963	149.757	-128.841	2155.097	-0.72412	1.0501	-0.44873	148.219	135.99	2383.4448	-1.27	1.5005	-0.47559	NaN	NaN	NaN	NaN	NaN	NaN
3.376	-122.538	73.5698	1327.295	-0.35742	1.084	0.11426	145.076	-205.9116	2162.793	-0.82862	1.1628	-0.41416	192.5634	75.202	2399.578	-1.3203	1.5234	-0.43945	NaN	NaN	NaN	NaN	NaN	NaN
3.378	-106.458	70.546	1315.047	-0.34375	1.0605	0.11035	167.294	-259.288	2224.461	-0.89355	1.252	-0.41504	277.759	88.72	2384.3081	-1.3276	1.5298	-0.42871	NaN	NaN	NaN	NaN	NaN	NaN
3.38	-92.772	66.549	1300.289	-0.33618	1.0513	0.10596	97.942	-253.674	2263.285	-0.93144	1.3213	-0.42558	314.551	25.3062	2403.282	-1.3203	1.5293	-0.42041	NaN	NaN	NaN	NaN	NaN	NaN
3.382	-88.785	74.016	1277.847	-0.3291	1.0352	0.10059	126.282	-289.733	2303.866	-0.94805	1.3738	-0.45283	301.873	72.254	2349.1091	-1.2795	1.5208	-0.42993	NaN	NaN	NaN	NaN	NaN	NaN
3.384	-71.591	78.256	1266.582	-0.31885	1.0181	0.089844	137.973	-230.309	2355.699	-0.94648	1.4012	-0.48096	293.776	24.036	2308.1269	-1.23	1.4966	-0.43701	NaN	NaN	NaN	NaN	NaN	NaN
3.386	-68.621	90.831	1242.482	-0.3125	1.0122	0.092773	57.564	-215.9425	2343.501	-0.92764	1.4142	-0.50752	219.629	91.51634	2264.568	-1.1714	1.4556	-0.46436	NaN	NaN	NaN	NaN	NaN	NaN
3.388	-72.731	108.8865	1205.885	-0.29639	0.99268	0.085938	73.519	-248.446	2356.484	-0.90381	1.4165	-0.53076	185.0964	49.33	2267.757	-1.1519	1.436	-0.46777	NaN	NaN	NaN	NaN	NaN	NaN
3.39	-51.917	120.309	1189.924	-0.29248	0.98169	0.077393	6.59	-167.589	2375.882	-0.89043	1.4197	-0.5377	132.551	139.573	2254.4338	-1.1426	1.3887	-0.48828	NaN	NaN	NaN	NaN	NaN	NaN
3.392	-62.803	120.543	1172.573	-0.28174	0.96777	0.072754	-2.11	-167.36	2361.5164	-0.89941	1.4256	-0.54228	144.575	142.11	2252.088	-1.1538	1.3618	-0.48437	NaN	NaN	NaN	NaN	NaN	NaN
3.394	-39.016	110.467	1168.566	-0.26953	0.95361	0.071289	32.876	-152.861	2394.825	-0.92715	1.44	-0.54541	116.466	269.508	2223.899	-1.1855	1.3457	-0.47705	NaN	NaN	NaN	NaN	NaN	NaN
3.396	-30.967	103.3	1139.31	-0.2666	0.94336	0.062988	-53.44	-107.095	2373.373	-0.96377	1.454	-0.54131	55.534	271.756	2189.492	-1.2349	1.356	-0.46045	NaN	NaN	NaN	NaN	NaN	NaN
3.398	-15.544	99.2993	1101.548	-0.25146	0.92041	0.058105	-48.284	-158.543	2336.654	-1.0039	1.4668	-0.53809	8.75	339.629	2152.052	-1.2593	1.3657	-0.44971	NaN	NaN	NaN	NaN	NaN	NaN
3.4	-22.599	106.405	1072.651	-0.24243	0.91089	0.048096	-33.312	-116.3149	2323.2648	-1.0484	1.4778	-0.53701	-21.401	258.369	2095.9795	-1.2725	1.3945	-0.43457	NaN	NaN	NaN	NaN	NaN	NaN
3.402	12.874	99.797	1049.16	-0.23438	0.89258	0.041016	-87.764	-96.327	2294.833	-1.1	1.5025	-0.54219	-29.159	261.19	2052.76513	-1.2618	1.4043	-0.42139	NaN	NaN	NaN	NaN	NaN	NaN
3.404	12.055	107.189	1017.713	-0.22607	0.87354	0.027344	-53.24	-130.023	2305.048	-1.1453	1.5588	-0.54648	-21.285	161.505	2006.411	-1.2324	1.4043	-0.41846	NaN	NaN	NaN	NaN	NaN	NaN
3.406	22.543	108.362	1002.903	-0.21973	0.86914	0.023438	-65.46	-70.737	2339.062	-1.1691	1.6297	-0.55938	-21.3	208.088	1982.264	-1.1855	1.3818	-0.4126	NaN	NaN	NaN	NaN	NaN	NaN
3.408	18.349	114.0882	982.338	-0.2085	0.84619	0.022949	-71.268	-97.415	2320.862	-1.1538	1.6919	-0.57861	-38.207	175.293	1928.543	-1.145	1.3638	-0.40748	NaN	NaN	NaN	NaN	NaN	NaN
3.41	13.662	124.3108	979.922	-0.198	0.82813	0.01416	0.600000000000009	-101.948	2379.73	-1.1202	1.7333	-0.59014	-84.74	232.136	1871.9672	-1.1113	1.334	-0.40527	NaN	NaN	NaN	NaN	NaN	NaN
3.412	-28.681	140.562	959.882	-0.18555	0.8125	0.0097656	26.767	-43.189	2418.379	-1.0852	1.7536	-0.60469	-97.244	172.865	1805.439	-1.0703	1.3047	-0.37891	NaN	NaN	NaN	NaN	NaN	NaN
3.414	-32.428	147.32	925.267	-0.1709	0.79297	-0.0019531	86.144	-99.432	2404.531	-1.0547	1.7613	-0.62149	-92.366	235.8553	1794.86614	-1.0542	1.2856	-0.3667	NaN	NaN	NaN	NaN	NaN	NaN
3.416	-53.396	131.504	921.427	-0.16406	0.77344	-0.0058594	134.92	-72.83	2412.076	-1.0291	1.7658	-0.63613	-36.688	204.447	1782.399	-1.0171	1.2544	-0.33838	NaN	NaN	NaN	NaN	NaN	NaN
3.418	-25.007	122.11	895.938	-0.14795	0.75049	-0.016113	114.816	-67.328	2365.087	-1.0151	1.7661	-0.646	-0.879000000000005	305.399	1747.798	-0.99805	1.2241	-0.31665	NaN	NaN	NaN	NaN	NaN	NaN
3.42	-43.179	107.407	864.351	-0.13696	0.73095	-0.025391	159.999	-118.844	2375.2551	-1.0105	1.7616	-0.65019	13.589	317.276	1679.364	-0.97461	1.1992	-0.29004	NaN	NaN	NaN	NaN	NaN	NaN
3.422	-55.472	113.0666	840.873	-0.12646	0.71533	-0.03418	172.919	-45.35	2391.5168	-1.0148	1.7626	-0.64717	56.808	377.848	1622.991	-0.94922	1.1641	-0.25586	NaN	NaN	NaN	NaN	NaN	NaN
3.424	-61.191	123.4247	820.422	-0.11475	0.68799	-0.043457	170.879	-61.371	2325.395	-1.03	1.77	-0.64443	67.323	336.737	1553.945	-0.93506	1.1489	-0.23975	NaN	NaN	NaN	NaN	NaN	NaN
3.426	-48.969	142.5755	795.226	-0.10938	0.67578	-0.048828	230.0071	-47.103	2327.8843	-1.0432	1.7848	-0.63907	128.003	344.072	1470.548	-0.89893	1.1157	-0.19873	NaN	NaN	NaN	NaN	NaN	NaN
3.428	-56.453	140.43	778.373	-0.10303	0.65283	-0.056152	175.941	36.76	2319.385	-1.0537	1.7949	-0.63135	160.6633	305.345	1416.485	-0.8728	1.0905	-0.16382	NaN	NaN	NaN	NaN	NaN	NaN
3.43	-53.423	128.148	774.783	-0.09497	0.63623	-0.060059	158.716	14.1949	2279.6563	-1.0676	1.7992	-0.62539	211.084	332.969	1379.4194	-0.83984	1.0645	-0.125	NaN	NaN	NaN	NaN	NaN	NaN
3.432	-26.614	122.031	768.96	-0.089355	0.62256	-0.068359	186.087	79.625	2299.7484	-1.081	1.8013	-0.62295	205.541	310.802	1338.9623	-0.80469	1.0273	-0.080078	NaN	NaN	NaN	NaN	NaN	NaN
3.434	-34.643	123.859	752.477	-0.083496	0.60889	-0.072754	161.97	103.079	2261.171	-1.0841	1.8044	-0.62138	134.308	339.3829	1258.978	-0.78467	1.0044	-0.058105	NaN	NaN	NaN	NaN	NaN	NaN
3.436	-53.452	137.3621	736.222	-0.07959	0.59912	-0.080566	198.808	46.042	2265.1592	-1.0814	1.8068	-0.625	115.677	314.9519	1183.463	-0.75586	0.9707	-0.025391	NaN	NaN	NaN	NaN	NaN	NaN
3.438	-41.318	144.128	722.083	-0.072266	0.58398	-0.083984	140.234	96.181	2263.974	-1.0718	1.8071	-0.62256	109.426	319.943	1142.647	-0.72803	0.94092	0.0034178	NaN	NaN	NaN	NaN	NaN	NaN
3.44	-24.648	144.921	696.664	-0.058105	0.56836	-0.083496	102.354	53.46	2189.2741	-1.0607	1.8046	-0.61573	75.767	311.56	1152.959	-0.69775	0.91455	0.029297	NaN	NaN	NaN	NaN	NaN	NaN
3.442	-25.915	142.7023	665.016	-0.053223	0.55908	-0.083496	123.422	41.119	2187.327	-1.0496	1.8008	-0.61016	87.742	340.2302	1128.229	-0.64795	0.87939	0.056641	NaN	NaN	NaN	NaN	NaN	NaN
3.444	-31.827	132.8671	655.703	-0.03418	0.54395	-0.088379	43.451	90.315	2160.126	-1.0453	1.7926	-0.60117	53.856	363.047	1083.049	-0.6167	0.85889	0.066895	NaN	NaN	NaN	NaN	NaN	NaN
3.446	5.71	134.3917	643.842	-0.023437	0.53149	-0.089356	19.5	20.253	2123.3617	-1.044	1.7801	-0.58857	35.528	370.691	1019.638	-0.55859	0.81836	0.077637	NaN	NaN	NaN	NaN	NaN	NaN
3.448	22.75	127.652	623.947	-0.015625	0.51807	-0.09668	0.390000000000001	37.11	2109.3461	-1.0444	1.772	-0.56982	-28.306	341.889	951.88087	-0.5083	0.78638	0.086914	NaN	NaN	NaN	NaN	NaN	NaN
3.45	27.942	130.778	596.493	-0.00097656	0.49951	-0.099121	-73.494	55.2651	2039.2843	-1.0477	1.7577	-0.554	-33.199	313.661	890.678	-0.46338	0.75049	0.092285	NaN	NaN	NaN	NaN	NaN	NaN
3.452	28.303	119.14	568.383	0.0053711	0.48633	-0.10059	-67.488	26.097	2025.5688	-1.0513	1.7434	-0.53545	-66.352	301.008	845.5394	-0.40674	0.70752	0.09082	NaN	NaN	NaN	NaN	NaN	NaN
3.454	39.117	126.3892	555.247	0.0097656	0.4668	-0.10645	-65.13	119.646	2025.867	-1.0606	1.731	-0.51982	-89.137	293.214	782.567	-0.38135	0.68408	0.091309	NaN	NaN	NaN	NaN	NaN	NaN
3.456	50.498	127.03296	556.972	0.015625	0.45971	-0.11133	-54.139	118.653	1976.9556	-1.0655	1.7121	-0.49922	-110.0285	301.664	740.204	-0.33154	0.63721	0.09375	NaN	NaN	NaN	NaN	NaN	NaN
3.458	27.882	135.5514	549.616	0.012695	0.44629	-0.10498	-25.46	144.645	1966.473	-1.0737	1.6997	-0.479	-147.413	260.432	680.902	-0.30078	0.60206	0.10107	NaN	NaN	NaN	NaN	NaN	NaN
3.46	20.093	130.162	550.757	0.016602	0.44092	-0.10938	-23.18	204.304	1917.941	-1.0741	1.6856	-0.46416	-181.153	260.708	602.59	-0.26611	0.57666	0.104	NaN	NaN	NaN	NaN	NaN	NaN
3.462	14.815	133.944	537.878	0.017578	0.43018	-0.10986	9.59	166.34	1867.351	-1.075	1.6676	-0.44414	-202.505	234.9468	527.84	-0.23389	0.53906	0.11475	NaN	NaN	NaN	NaN	NaN	NaN
3.464	21.716	134.41	502.363	0.016602	0.42432	-0.11328	41.992	198.532	1848.3902333	-1.0688	1.6472	-0.43164	-195.286	275.565	484.87	-0.21826	0.5293	0.12061	NaN	NaN	NaN	NaN	NaN	NaN
3.466	-11.968	125.6131	480.066	0.018555	0.42017	-0.11206	13.935	183.012	1771.606	-1.0567	1.6289	-0.41875	-163.672	267.014	473.626	-0.18799	0.5	0.12256	NaN	NaN	NaN	NaN	NaN	NaN
3.468	-7.279	116.1445	454.641	0.020996	0.41553	-0.1167	51.151	120.8356	1723.017	-1.0342	1.6074	-0.4043	-147.755	307.003	448.958	-0.16455	0.48242	0.12695	NaN	NaN	NaN	NaN	NaN	NaN
3.47	-10.235	118.3201	426.245	0.019043	0.4082	-0.12012	70.873	149.3789	1717.1817	-1.0126	1.5804	-0.38731	-98.605	247.014	408.896	-0.13818	0.47314	0.12695	NaN	NaN	NaN	NaN	NaN	NaN
3.472	-14.213	115.71	409.923	0.019531	0.4082	-0.12061	84.783	119.1889	1689.337	-0.98575	1.5535	-0.37012	-77.876	256.933	357.8591	-0.10742	0.44922	0.12744	NaN	NaN	NaN	NaN	NaN	NaN
3.474	-14.43	99.95	411.111	0.013184	0.4043	-0.1167	117.946	140.002	1673.7756	-0.95293	1.5285	-0.35176	-40.209	182.073	306.615	-0.088379	0.44531	0.12695	NaN	NaN	NaN	NaN	NaN	NaN
3.476	-5.973	91.523	409.392	0.0070801	0.40137	-0.11866	98.466	182.6931	1635.369	-0.91768	1.4948	-0.33701	-27.592	190.675	270.43	-0.050781	0.42725	0.12256	NaN	NaN	NaN	NaN	NaN	NaN
3.478	-12.599	94.628	416.518	-0.0039063	0.40137	-0.1167	135.845	146.385	1597.29	-0.87939	1.4614	-0.31982	11.183	143.377	241.5739	-0.025879	0.41186	0.11352	NaN	NaN	NaN	NaN	NaN	NaN
3.48	-29.75	113.547	387.551	-0.010742	0.40381	-0.11768	166.4398	171.199	1601.719	-0.84072	1.4253	-0.30869	40.869	166.921	206.0958	-0.0058594	0.39697	0.10059	NaN	NaN	NaN	NaN	NaN	NaN
3.482	-41.913	130.1699	375.769	-0.016113	0.40527	-0.11182	110.453	194.6567	1535.64	-0.80078	1.3914	-0.29141	45.2403	102.566	170.036	0.01123	0.37646	0.083008	NaN	NaN	NaN	NaN	NaN	NaN
3.484	-49.676	132.019	364.075	-0.030762	0.40039	-0.10742	151.623	170.8733	1495.61	-0.75547	1.3555	-0.275	52.981	124.661	155.162	0.0078125	0.3623	0.074707	NaN	NaN	NaN	NaN	NaN	NaN
3.486	-42.672	122.349	338.154	-0.039551	0.40112	-0.10865	126.782	213.737	1455.651	-0.7168	1.3201	-0.26279	57.27	62.439	129.893	-0.003418	0.34229	0.064453	NaN	NaN	NaN	NaN	NaN	NaN
3.488	-46.58	102.0081	315.184	-0.045898	0.39746	-0.10645	97.4	177.219	1386.6038	-0.68164	1.291	-0.24951	41.937	131.9997	122.1626	-0.025879	0.33325	0.063477	NaN	NaN	NaN	NaN	NaN	NaN
3.49	-58.32	89.261	317.171	-0.0625	0.39844	-0.10205	81.679	169.5919	1346.3817	-0.64766	1.2575	-0.23653	51.591	105.961	116.4515	-0.053711	0.32617	0.068848	NaN	NaN	NaN	NaN	NaN	NaN
3.492	-5.523	93.803	312.085	-0.063965	0.39844	-0.098145	6.631	209.745	1268.906	-0.61553	1.2255	-0.22549	59.549	173.065	118.118	-0.099121	0.32129	0.078125	NaN	NaN	NaN	NaN	NaN	NaN
3.494	-16.805	104.0011	297.528	-0.080566	0.39697	-0.10156	6.316	187.263	1221.457	-0.5874	1.204	-0.20479	62.3259	123.942	115.133	-0.12305	0.32227	0.086914	NaN	NaN	NaN	NaN	NaN	NaN
3.496	3.581	98.562	280.281	-0.08789	0.3955	-0.098142	-6.01900000000001	228.837	1208.2318	-0.55996	1.1783	-0.18828	38.77	128.94	82.9541	-0.16748	0.32861	0.09668	NaN	NaN	NaN	NaN	NaN	NaN
3.498	1.138	87.598	273.235	-0.096191	0.39063	-0.095215	-53.511	220.12	1135.325	-0.53076	1.1528	-0.16504	-8.439	37.892	61.525	-0.19238	0.33447	0.099853	NaN	NaN	NaN	NaN	NaN	NaN
3.5	41.09	74.658	264.472	-0.1167	0.39502	-0.09082	-41.84	183.087	1095.294	-0.50762	1.1303	-0.14541	-21.041	70.191	48.685	-0.21338	0.34424	0.10156	NaN	NaN	NaN	NaN	NaN	NaN
3.502	24.651	77.11455	252.975	-0.12158	0.39307	-0.089355	-117.401	220.615	1063.8237	-0.48008	1.1133	-0.12871	-42.589	29.0172	40.914	-0.23584	0.35156	0.097656	NaN	NaN	NaN	NaN	NaN	NaN
3.504	12.117	83.5328	231.65	-0.13672	0.39307	-0.084473	-134.198	204.43	1026.1756	-0.45313	1.091	-0.11035	-68.732	94.319	53.055	-0.24268	0.35107	0.10059	NaN	NaN	NaN	NaN	NaN	NaN
3.506	15.186	76.3969	240.703	-0.14526	0.39404	-0.087646	-82.219	220.628	1018.097	-0.42022	1.0646	-0.098337	-77.451	20.851	63.781	-0.25098	0.35645	0.10156	NaN	NaN	NaN	NaN	NaN	NaN
3.508	3.86199999999999	82.678	233.207	-0.15137	0.39111	-0.084473	-139.73908	238.715	956.8771	-0.39209	1.0337	-0.083496	-143.2265	34.608	45.6826	-0.24878	0.35303	0.096435	NaN	NaN	NaN	NaN	NaN	NaN
3.51	8.928	73.5715	222.439	-0.15918	0.39355	-0.080566	-117.58	206.26	910.3335	-0.36504	1.0107	-0.073242	-154.667	-36.383	47.0844	-0.24316	0.3584	0.10107	NaN	NaN	NaN	NaN	NaN	NaN
3.512	-6.362	62.8006	215.101	-0.15869	0.3877	-0.083008	-111.706	229.369	884.3733	-0.33964	0.98867	-0.067773	-170.602	1.614	49.0659	-0.22119	0.3418	0.089844	NaN	NaN	NaN	NaN	NaN	NaN
3.514	13.583	52.096	200.925	-0.15283	0.38721	-0.074219	-109.599	226.054	828.518629	-0.31464	0.95859	-0.058007	-146.554	-15.3	47.0392	-0.20264	0.33643	0.086914	NaN	NaN	NaN	NaN	NaN	NaN
3.516	5.943	62.3956	193.207	-0.14429	0.38013	-0.072265	-56.327	209.432	801.548	-0.29131	0.93662	-0.049804	-137.839	27.798	79.462	-0.16748	0.3208	0.084473	NaN	NaN	NaN	NaN	NaN	NaN
3.518	6.15	73.242	166.504	-0.13574	0.37744	-0.074219	-80.442	211.483	757.393	-0.26758	0.9126	-0.037598	-117.5554	2.029	61.5715	-0.1377	0.30078	0.074951	NaN	NaN	NaN	NaN	NaN	NaN
3.52	-8.09699999999999	61.61902	167.071	-0.1123	0.35938	-0.072266	-49.045	168.0998	726.8262	-0.24863	0.89199	-0.026856	-88.596	27.655	66.399	-0.10645	0.28174	0.07373	NaN	NaN	NaN	NaN	NaN	NaN
3.522	-0.499000000000009	45.418	157.11	-0.10156	0.35449	-0.07666	-9.50099999999999	168.9391	730.658	-0.2334	0.86875	-0.017775	-88.9897	12.982	41.415	-0.063965	0.25	0.063965	NaN	NaN	NaN	NaN	NaN	NaN
3.524	-12.445	37.038	156.977	-0.075195	0.33301	-0.078125	-4.94	201.42	663.3833	-0.21427	0.84649	-0.0080116	-62.283	49.698	54.70324	-0.043945	0.23291	0.064453	NaN	NaN	NaN	NaN	NaN	NaN
3.526	-55.707	33.254	151.064	-0.057617	0.32129	-0.080566	28.377	198.748	652.2826	-0.19649	0.82608	0.0011699	-47.803	41.61	71.0246	-0.010742	0.19775	0.063965	NaN	NaN	NaN	NaN	NaN	NaN
3.528	-41.843	36.661	171.292	-0.033203	0.30664	-0.083984	18.721	235.036	626.3488	-0.18457	0.80664	0.0068359	-10.001	56.644	66.936	0.014405	0.16943	0.062989	NaN	NaN	NaN	NaN	NaN	NaN
3.53	-42.339	47.56388	158.372	-0.0058594	0.2832	-0.094238	44.501	231.138	575.728	-0.16406	0.7873	0.019826	4.272	19.10245	51.387	0.041504	0.14111	0.065918	NaN	NaN	NaN	NaN	NaN	NaN
3.532	-69.495	56.0412	158.207	0.0039063	0.26953	-0.093262	76.957	219.231	548.381	-0.14696	0.76951	0.027653	32.82	6.3726	41.981	0.072754	0.10938	0.063965	NaN	NaN	NaN	NaN	NaN	NaN
3.534	-69.27	49.7824	125.374	0.036133	0.25146	-0.096191	42.493	217.828	516.0807	-0.13016	0.75037	0.040536	43.046	-17.692	41.696	0.091309	0.094238	0.069824	NaN	NaN	NaN	NaN	NaN	NaN
3.536	-63.04	30.4027	130.666	0.054688	0.23584	-0.10132	72.293	173.86	506.285	-0.11346	0.73611	0.05421	60.611	-31.964	43.432	0.12744	0.061035	0.071289	NaN	NaN	NaN	NaN	NaN	NaN
3.538	-56.316	26.083	152.391	0.074707	0.22119	-0.11084	78.879	160.301	507.936	-0.097656	0.7168	0.06543	63.2213	2.641	38.112	0.1565	0.042969	0.078369	NaN	NaN	NaN	NaN	NaN	NaN
3.54	-56.844	9.185	152.451	0.099609	0.20654	-0.12109	6.27	160.066	447.1923	-0.082532	0.69466	0.074301	90.1395	11.3596	48.432	0.18408	0.023926	0.081543	NaN	NaN	NaN	NaN	NaN	NaN
3.542	-27.17	6.775	148.231	0.11475	0.19043	-0.12549	23.554	157.771	412.3104	-0.069969	0.67251	0.085208	110.9161	33.5034	73.978	0.22217	0.0024414	0.083984	NaN	NaN	NaN	NaN	NaN	NaN
3.544	-50.859	-7.443	180.604	0.13818	0.17969	-0.13379	-13.246	183.652	390.4843	-0.055913	0.65187	0.096547	108.497	-7.5605	80.733	0.25464	-0.017334	0.087403	NaN	NaN	NaN	NaN	NaN	NaN
3.546	-20.109	-2.415	205.683	0.15137	0.16821	-0.14599	-55.592	152.005	356.8043	-0.04068	0.63259	0.1029	71.177	12.1351	64.9907	0.29053	-0.032715	0.085938	NaN	NaN	NaN	NaN	NaN	NaN
3.548	-3.76900000000001	-9.48	226.814	0.15967	0.15723	-0.15674	-33.103	135.4768	353.80055	-0.016113	0.61377	0.10742	48.472	3.85	42.1318	0.32227	-0.063965	0.079102	NaN	NaN	NaN	NaN	NaN	NaN
3.55	-11.282	-3.148	251.3406	0.1626	0.15137	-0.17529	-100.637	138.6542	313.698	0.0071679	0.58729	0.109	10.254	28.1509	39.0109	0.33691	-0.074219	0.074707	NaN	NaN	NaN	NaN	NaN	NaN
3.552	7.708	-11.728	301.7488	0.16064	0.14844	-0.18506	-114.7762	135.293	286.716	0.031165	0.56417	0.10613	-11.965	-7.3614	66.497	0.36182	-0.091797	0.058594	NaN	NaN	NaN	NaN	NaN	NaN
3.554	7.357	16.9951	349.764	0.14355	0.15381	-0.19238	-97.8334	141.389	297.316	0.054442	0.54428	0.10417	-34.969	30.5842	64.003	0.36621	-0.11158	0.040771	NaN	NaN	NaN	NaN	NaN	NaN
3.556	5.053	34.709	431.2263	0.11987	0.16944	-0.19751	-162.357	129.201	264.427	0.073802	0.51836	0.096521	-60.684	5.8204	45.937	0.35986	-0.11963	0.031738	NaN	NaN	NaN	NaN	NaN	NaN
3.558	-1.78100000000001	52.831	538.7504	0.091309	0.1792	-0.20557	-122.115	117.294	252.479	0.092773	0.49951	0.091797	-81.205	64.297	17.366	0.34326	-0.11963	0.01709	NaN	NaN	NaN	NaN	NaN	NaN
3.56	58.428	79.122	604.4953	0.050293	0.21338	-0.2085	-127.0705	139.175	209.5779	0.11167	0.48306	0.083921	-110.0646	29.8422	26.589	0.33252	-0.11621	0.017578	NaN	NaN	NaN	NaN	NaN	NaN
3.562	50.757	105.857	670.60898	0.020508	0.23633	-0.21094	-161.253	142.353	170.6938	0.1248	0.46492	0.078251	-148.4012	70.871	22.481	0.29053	-0.1001	0.0063477	NaN	NaN	NaN	NaN	NaN	NaN
3.564	54.258	122.868	736.642	-0.043945	0.28223	-0.20801	-117.563	133.296	184.88485	0.13919	0.45036	0.07494	-125.537	20.4939	31.4389	0.25878	-0.074219	0	NaN	NaN	NaN	NaN	NaN	NaN
3.566	57.001	100.051	850.21	-0.094971	0.32056	-0.21851	-153.008	111.181	158.189	0.14744	0.43837	0.075392	-112.9802	64.5334	28.94	0.21484	-0.042969	-0.0014648	NaN	NaN	NaN	NaN	NaN	NaN
3.568	48.115	86.782	942.21	-0.15332	0.36133	-0.23047	-114.048	74.488	136.2098	0.15381	0.4248	0.072266	-97.0577	11.102	47.849	0.14648	0.0068359	0	NaN	NaN	NaN	NaN	NaN	NaN
3.57	50.066	65.218	1004.16	-0.24072	0.42725	-0.24365	-78.392	71.7489	126.3441	0.16506	0.40981	0.072772	-107.246	42.095	58.551	0.11377	0.036133	0.0024414	NaN	NaN	NaN	NaN	NaN	NaN
3.572	55.13	38.416	1007.06	-0.29248	0.4585	-0.25146	-94.038	70.064	99.5928	0.17113	0.40026	0.068282	-126.5116	-14.8454	53.6996	0.051758	0.1084	0.025879	NaN	NaN	NaN	NaN	NaN	NaN
3.574	4.00999999999999	14.0348	1055.31	-0.39893	0.53564	-0.26465	-20.969	59.23	119.2468	0.17362	0.38739	0.064248	-139.547062	56.611	38.357	0.018799	0.16064	0.048096	NaN	NaN	NaN	NaN	NaN	NaN
3.576	-83.223	-8.745	1089.56	-0.51123	0.62695	-0.26709	-26.328	71.7344	101.671	0.17389	0.37476	0.065603	-96.8193	24.4089	56.729	0.010254	0.20801	0.069336	NaN	NaN	NaN	NaN	NaN	NaN
3.578	-104.541	-19.928	1108.65	-0.57422	0.67969	-0.26465	-18.848	68.271	72.79	0.18018	0.36523	0.056152	-41.447	63.565	70.26	0.019531	0.25488	0.089355	NaN	NaN	NaN	NaN	NaN	NaN
3.58	-128.255	-12.094	1144.43	-0.68213	0.79736	-0.24365	58.191	76.385	94.0191	0.18476	0.35133	0.057429	-26.651	-9.3356	90.342	0.029785	0.27686	0.093262	NaN	NaN	NaN	NaN	NaN	NaN
3.582	-113.3609	-12.632	1217.99	-0.75733	0.89698	-0.2063	40.749	57.56	84.28709	0.18926	0.3398	0.058247	-18.94	19.0805	52.7695	0.047363	0.30273	0.089844	NaN	NaN	NaN	NaN	NaN	NaN
3.584	-117.685	-33.076842	1267.53	-0.81836	0.99707	-0.1709	71.356	16.153	101.375	0.19195	0.32572	0.058168	13.934	-37.856	37.8667	0.056396	0.31446	0.079101	NaN	NaN	NaN	NaN	NaN	NaN
3.586	-148.289	-47.708	1263.03	-0.86768	1.1216	-0.12158	79.595	28.1239	87.2182	0.19548	0.3108	0.058848	33.641	21.249	42.4269	0.061523	0.32422	0.064453	NaN	NaN	NaN	NaN	NaN	NaN
3.588	-193.8387	-54.121	1278.14	-0.87695	1.1719	-0.10254	13.988	31.035	46.301	0.19727	0.29346	0.055664	85.4225	-20.6529	68.6301	0.064941	0.32959	0.061035	NaN	NaN	NaN	NaN	NaN	NaN
3.59	-231.095	-33.908	1301.01	-0.87402	1.2402	-0.083984	66.65	44.77	53.46	0.20121	0.27639	0.054153	80.561	28.8107	81.95	0.066895	0.32861	0.0625	NaN	NaN	NaN	NaN	NaN	NaN
3.592	-199.477	-16.498	1311.83	-0.84839	1.2581	-0.089844	43.085	39.155	71.14403	0.20339	0.25676	0.051758	109.801	-13.2653	114.561	0.063477	0.33984	0.062012	NaN	NaN	NaN	NaN	NaN	NaN
3.594	-187.187	-7.92	1311.39	-0.81689	1.2544	-0.10205	16.977	11.087	50.754	0.20764	0.23922	0.051758	70.597	3.897	112.746	0.057617	0.3396	0.055664	NaN	NaN	NaN	NaN	NaN	NaN
3.596	-141.544	-24.285	1317.42	-0.76123	1.231	-0.13379	28.617	17.2648	55.667	0.20803	0.21868	0.047899	52.643	-36.93	150.114	0.046387	0.33789	0.045898	NaN	NaN	NaN	NaN	NaN	NaN
3.598	-119.063	-54.448	1346.88	-0.73633	1.209	-0.14209	-22.042	34.6982	40.2231	0.20508	0.19727	0.04541	62.371	-30.615	166.394	0.010254	0.33984	0.023438	NaN	NaN	NaN	NaN	NaN	NaN
3.6	-131.067	-67.3	1364.41	-0.69775	1.1704	-0.14844	-2.795	26.07	45.955	0.20412	0.18199	0.04239	39.836	-93.517	200.611	-0.013184	0.34814	0.0053711	NaN	NaN	NaN	NaN	NaN	NaN
3.602	-118.383	-94.697	1361.52	-0.69117	1.1355	-0.14063	-31.801	19.6756	79.462	0.20291	0.1638	0.039551	2.88600000000001	-95.37	257.354	-0.081543	0.37256	-0.016113	NaN	NaN	NaN	NaN	NaN	NaN
3.604	-142.466	-124.285	1374.09	-0.69434	1.1113	-0.12012	-98.527	-10.397	43.40615	0.19902	0.14898	0.039158	-18.364	-152.3701	297.136	-0.13818	0.40332	-0.02002	NaN	NaN	NaN	NaN	NaN	NaN
3.606	-126.1814	-154.657	1385.15	-0.69189	1.0698	-0.099121	-70.644	-11.781	34.553	0.19686	0.1372	0.041891	-42.867	-175.342	351.579	-0.1958	0.44385	-0.020996	NaN	NaN	NaN	NaN	NaN	NaN
3.608	-130.519	-183.204	1398.19	-0.68408	1.0532	-0.095215	-88.512	15.359	42.5678	0.19238	0.125	0.041992	-98.784	-185.639	461.26	-0.2666	0.51563	-0.016602	NaN	NaN	NaN	NaN	NaN	NaN
3.61	-55.759	-174.381	1389.44	-0.63672	0.98242	-0.087891	-113.606	19.657	41.2091	0.18633	0.11389	0.043546	-127.759	-129.09	588.218	-0.29541	0.55225	-0.019043	NaN	NaN	NaN	NaN	NaN	NaN
3.612	-9.21300000000001	-153.769	1408.66	-0.58203	0.9375	-0.096191	-124.6536	26.258	80.063	0.18038	0.10646	0.047759	-189.5824	-28.806	774.65	-0.3623	0.62109	-0.018066	NaN	NaN	NaN	NaN	NaN	NaN
3.614	32.435	-132.602	1436.48	-0.51611	0.89063	-0.10547	-164.157	26.4803	43.5696	0.17218	0.093174	0.04775	-186.3503	64.2406	1009.75	-0.42408	0.6665	-0.052246	NaN	NaN	NaN	NaN	NaN	NaN
3.616	29.572	-145.458	1483.28	-0.42139	0.83838	-0.12598	-120.2075	10.572	22.9258	0.16621	0.085257	0.045995	-205.456	108.709	1219.79	-0.50977	0.70703	-0.094727	NaN	NaN	NaN	NaN	NaN	NaN
3.618	33.414	-157.855	1497.72	-0.37207	0.8125	-0.14453	-93.743	13.862	59.665	0.15674	0.080078	0.043457	-207.7071	123.3671	1426.12	-0.68408	0.76416	-0.16357	NaN	NaN	NaN	NaN	NaN	NaN
3.62	95.835	-159.953	1543.14	-0.27686	0.76221	-0.18604	-114.15	-11.879	52.486	0.14638	0.071972	0.039159	-207.927	170.1224	1590.42	-0.79834	0.80518	-0.19189	NaN	NaN	NaN	NaN	NaN	NaN
3.622	113.41	-157.867	1568.3	-0.21704	0.73828	-0.21778	-75.576	-1.553	73.237	0.13173	0.064841	0.037204	-169.526	135.485	1762.16	-1.0708	0.91553	-0.20264	NaN	NaN	NaN	NaN	NaN	NaN
3.624	119.74479	-142.516	1583.8	-0.17627	0.72559	-0.24805	-66.245	31.113	48.5592	0.11533	0.060156	0.030175	-151.13	105.373	1872.65	-1.2989	1.0337	-0.16943	NaN	NaN	NaN	NaN	NaN	NaN
3.626	91.032	-133.939	1565.22	-0.15723	0.73633	-0.271	-48.763	30.428	26.9039	0.097653	0.060547	0.031642	-165.7659	-25.142	1913.53	-1.5151	1.1685	-0.11035	NaN	NaN	NaN	NaN	NaN	NaN
3.628	61.843	-118.852	1573.89	-0.15674	0.75244	-0.27588	9.959	26.6782	78.823	0.085449	0.061523	0.024414	-105.605	-94.339	1885.8	-1.7471	1.3584	-0.0019531	NaN	NaN	NaN	NaN	NaN	NaN
3.63	45.631	-135.912	1611.05	-0.17969	0.81055	-0.26563	-12.364	12.108	65.866	0.071387	0.074316	0.031055	-27.753	-237.76	1867.6	-1.8223	1.4375	0.054199	NaN	NaN	NaN	NaN	NaN	NaN
3.632	24.896	-147.364	1643.89	-0.20922	0.87646	-0.24805	27.299	-4.979	58.011	0.064356	0.082811	0.033496	-12.138	-291.35	1867.78	-1.8789	1.5566	0.13721	NaN	NaN	NaN	NaN	NaN	NaN
3.634	36.988	-179.813	1686.58	-0.2417	0.94141	-0.23096	57.694	17.7235	77.867	0.058496	0.096484	0.036621	0.852999999999994	-387.09	1833.03	-1.8316	1.5953	0.17261	NaN	NaN	NaN	NaN	NaN	NaN
3.636	28.382	-176.903	1728.86	-0.27686	1.0151	-0.2124	34.911	9.3927	51.33	0.062109	0.10528	0.04082	39.867	-349.83	1778.63	-1.7305	1.5977	0.17725	NaN	NaN	NaN	NaN	NaN	NaN
3.638	27.554	-153.668	1743.33	-0.28516	1.0513	-0.2124	76.008	-1.7232	80.119	0.069336	0.11475	0.044434	129.4578	-346.92	1708.35	-1.5239	1.5161	0.14014	NaN	NaN	NaN	NaN	NaN	NaN
3.64	-7.56400000000001	-139.627	1750.16	-0.30762	1.1089	-0.2168	59.071	0.327999999999999	72.1091	0.081543	0.12207	0.043457	184.63	-228.126	1691.51	-1.3979	1.436	0.10645	NaN	NaN	NaN	NaN	NaN	NaN
3.642	-28.226	-129.363	1768.15	-0.31787	1.1509	-0.22925	36.199	-5.4502	22.607	0.099902	0.12343	0.043848	231.64	-184.422	1686.24	-1.1465	1.2324	0.043457	NaN	NaN	NaN	NaN	NaN	NaN
3.644	-41.776	-126.34	1795.08	-0.33643	1.186	-0.2417	70.358	17.1977	65.7794	0.11435	0.12187	0.044629	214.777	-10.031	1667	-0.99024	1.084	0.020264	NaN	NaN	NaN	NaN	NaN	NaN
3.646	-50.523	-127.037	1819.42	-0.35352	1.2246	-0.25635	25.723	26.4221	56.2377	0.13252	0.11846	0.046093	208.31	21.066	1638.52	-0.87256	0.95557	0.01416	NaN	NaN	NaN	NaN	NaN	NaN
3.648	-74.126	-137.36	1825.02	-0.36768	1.2402	-0.26172	21.871	8.664	60.9535	0.146	0.11133	0.051758	193.787	112.492	1635.99	-0.75342	0.82666	0.019531	NaN	NaN	NaN	NaN	NaN	NaN
3.65	-123.794	-135.545	1841.47	-0.39746	1.2646	-0.26025	21.868	22.841	72.9717	0.1624	0.10615	0.056153	190.682	14.845	1643.38	-0.68701	0.78174	0.019531	NaN	NaN	NaN	NaN	NaN	NaN
3.652	-92.148	-115.285	1844.45	-0.41333	1.2815	-0.26001	-35.623	9.177	27.3783	0.1792	0.10069	0.064551	181.2538	-26.9342	1648.69	-0.56104	0.70508	0.01123	NaN	NaN	NaN	NaN	NaN	NaN
3.654	-87.474	-108.243	1844.49	-0.4209	1.2949	-0.2627	-0.786000000000001	4.562	53.5796	0.19717	0.088575	0.066504	159.222	-223.83	1604.92	-0.46313	0.65893	-0.0073242	NaN	NaN	NaN	NaN	NaN	NaN
3.656	-73.312	-98.70528	1836.68	-0.41455	1.313	-0.26709	-64.645	18.5542	96.414	0.21553	0.083203	0.067676	48.036	-328.73	1625.41	-0.37988	0.61914	-0.041504	NaN	NaN	NaN	NaN	NaN	NaN
3.658	-57.253	-104.6993	1854.44	-0.41553	1.3267	-0.26416	-96.251	-14.8242	80.602	0.2373	0.074707	0.068848	-32.037	-467.27	1670.52	-0.30518	0.59131	-0.12061	NaN	NaN	NaN	NaN	NaN	NaN
3.66	-6.66300000000001	-93.5202	1886.41	-0.41797	1.3516	-0.26367	-81.049	-9.2042	114.882	0.25967	0.065918	0.072558	-96.994	-493.02	1731.72	-0.2793	0.59766	-0.15381	NaN	NaN	NaN	NaN	NaN	NaN
3.662	8.285	-87.114	1920.28	-0.43262	1.3684	-0.26075	-129.7758	6.66881	109.313	0.28203	0.057617	0.066895	-132.5006	-531.09	1806.09	-0.27686	0.63379	-0.20117	NaN	NaN	NaN	NaN	NaN	NaN
3.664	13.129	-86.7138	1915.84	-0.45752	1.3853	-0.25537	-84.415	-20.9323	141.895	0.30703	0.054102	0.063379	-172.1531	-504.57	1911.78	-0.30982	0.6875	-0.20263	NaN	NaN	NaN	NaN	NaN	NaN
3.666	47.871	-88.434	1934.09	-0.50195	1.4165	-0.23926	-88.222	-4.8657	223.217	0.32568	0.043555	0.058301	-213.783	-495.91	1990.94	-0.36377	0.76025	-0.16602	NaN	NaN	NaN	NaN	NaN	NaN
3.668	69.253	-84.015	1922.13	-0.52832	1.4316	-0.23535	-180.934	5.306	229.977	0.34473	0.041016	0.048828	-258.709	-425.46	2069.17	-0.47705	0.86768	-0.085938	NaN	NaN	NaN	NaN	NaN	NaN
3.67	98.843	-84.427	1913.77	-0.5625	1.4609	-0.2373	-143.8683	3.418	260.818	0.35898	0.035058	0.037793	-288.638	-394.06	2146.48	-0.54688	0.91797	-0.048828	NaN	NaN	NaN	NaN	NaN	NaN
3.672	75.999	-83.431	1921.01	-0.58106	1.4839	-0.23535	-132.004	38.806	334.517	0.36094	0.030762	0.026075	-307.381	-339.699	2191.29	-0.69092	0.98584	0.0024414	NaN	NaN	NaN	NaN	NaN	NaN
3.674	117.504	-81.97	1953.49	-0.58789	1.5059	-0.24365	-130.163	46.878	417.13	0.35899	0.032324	0.0049805	-326.37	-312.016	2215.67	-0.78467	1.0107	0.015625	NaN	NaN	NaN	NaN	NaN	NaN
3.676	134.60754	-82.059	1979.9	-0.58203	1.5322	-0.26807	-65.251	79.6	529.219	0.33838	0.030078	-0.019336	-312.489	-281.21	2165.84	-0.87744	1.0278	0.015625	NaN	NaN	NaN	NaN	NaN	NaN
3.678	126.1078	-80.675	1979.42	-0.57275	1.5454	-0.28564	-94.225	150.7285	586.282	0.30322	0.042969	-0.041016	-279.121	-219.2262	2127.19	-1.0054	1.062	0.00097656	NaN	NaN	NaN	NaN	NaN	NaN
3.68	120.333	-94.106	1977.94	-0.55078	1.5605	-0.31445	-78.205	168.4123	704.885	0.24736	0.063281	-0.050781	-305.179	-209.8313	2136.58	-1.112	1.1067	-0.013184	NaN	NaN	NaN	NaN	NaN	NaN
3.682	130.888	-85.505	1985.08	-0.531	1.5745	-0.34839	-35.105	207.48	857.114	0.18096	0.092871	-0.052246	-291.783	-199.8734	2137.5	-1.2124	1.1626	-0.043457	NaN	NaN	NaN	NaN	NaN	NaN
3.684	150.1303	-58.362	1995.14	-0.51367	1.5801	-0.36621	-47.929	186.1055	950.898	0.10049	0.13076	-0.049121	-275.1	-257.286	2189.51	-1.3125	1.2598	-0.073242	NaN	NaN	NaN	NaN	NaN	NaN
3.686	116.653	-42.041	1980.52	-0.5	1.582	-0.3916	-3.34699999999999	136.8453	1065.641	0.01709	0.17988	-0.046289	-236.103	-251.518	2236.92	-1.3457	1.3125	-0.080078	NaN	NaN	NaN	NaN	NaN	NaN
3.688	93.595	-45.065	1984.17	-0.50146	1.5786	-0.40381	20.846	120.84	1135.974	-0.064453	0.23389	-0.041992	-171.823	-296.716	2336.14	-1.3745	1.4028	-0.083008	NaN	NaN	NaN	NaN	NaN	NaN
3.69	64.135	-51.576	1997.35	-0.50537	1.5806	-0.41846	23.56	75.456	1216.877	-0.13701	0.28594	-0.03457	-106.6794	-255.202	2431.91	-1.4052	1.4761	-0.065186	NaN	NaN	NaN	NaN	NaN	NaN
3.692	37.129	-38.117	2009.81	-0.51514	1.583	-0.42871	62.5753	46.417	1316.852	-0.21475	0.33798	-0.033105	-44.219	-288.962	2514.35	-1.459	1.5469	-0.035645	NaN	NaN	NaN	NaN	NaN	NaN
3.694	9.825	-25.778	2012.42	-0.53174	1.5884	-0.43701	15.469	23.4251	1318.703	-0.2956	0.38838	-0.03584	8.19	-230.2	2558.37	-1.5776	1.6528	0.0083008	NaN	NaN	NaN	NaN	NaN	NaN
3.696	-22.652	-13.27	2022.07	-0.55518	1.6001	-0.44287	46.839	-61.424	1311.495	-0.38799	0.43457	-0.051856	46.924	-299.58	2624.7	-1.6528	1.6997	0.031738	NaN	NaN	NaN	NaN	NaN	NaN
3.698	-10.514	2.21899999999999	2030.71	-0.57031	1.6055	-0.44531	43.082	-130.585	1349.993	-0.5	0.48828	-0.074219	59.184	-255.699	2691.2	-1.7949	1.8047	0.08252	NaN	NaN	NaN	NaN	NaN	NaN
3.7	-36.272	6.895	2002.92	-0.59814	1.6157	-0.44824	-1.33	-201.105	1373.199	-0.62265	0.54609	-0.090332	96.6774	-304.878	2727.6	-1.8911	1.8794	0.11646	NaN	NaN	NaN	NaN	NaN	NaN
3.702	-47.512	-7.563	2000.8	-0.62232	1.6255	-0.44751	60.721	-239.966	1423.565	-0.75664	0.62226	-0.087988	119.634	-213.9345	2714.7	-1.9688	1.9492	0.14307	NaN	NaN	NaN	NaN	NaN	NaN
3.704	-64.934	-13.617	2000.65	-0.64795	1.6313	-0.4458	4.85299999999999	-206.351	1447.652	-0.89414	0.70039	-0.068457	112.896	-240.265	2673.8	-2.0327	2.0103	0.16162	NaN	NaN	NaN	NaN	NaN	NaN
3.706	-27.276	-9.586	2011.08	-0.67529	1.6313	-0.44287	-17.075	-188.13	1442.427	-1.0259	0.79346	-0.025781	71.7807	-139.184	2651.6	-2.0444	2.0181	0.16309	NaN	NaN	NaN	NaN	NaN	NaN
3.708	-17.083	2.505	2002.4	-0.68896	1.6313	-0.44189	46.395	-134.194	1460.861	-1.1484	0.89648	0.031738	33.63	-179.359	2625.59	-2.0488	1.9961	0.15625	NaN	NaN	NaN	NaN	NaN	NaN
3.71	-36.276	10.715	2004.38	-0.71484	1.627	-0.44727	-6.711	-71.2483	1452.453	-1.2465	0.99806	0.090527	-17.548	-93.725	2609.45	-2.0303	1.9609	0.15161	NaN	NaN	NaN	NaN	NaN	NaN
3.712	-4.358	17.412	2019.59	-0.72461	1.6211	-0.44824	7.973	-65.457	1457.692	-1.3085	1.09	0.14492	-31.096	-133.9357	2619.01	-2.0151	1.9263	0.14697	NaN	NaN	NaN	NaN	NaN	NaN
3.714	-1.001	27.002	2009.68	-0.73047	1.6172	-0.44824	8.273	-35.6	1471.953	-1.3366	1.1556	0.19062	-57.068	-35.782	2611.66	-1.9956	1.8696	0.14063	NaN	NaN	NaN	NaN	NaN	NaN
3.716	25.709	43.144	1978.51	-0.7334	1.6035	-0.4541	-71.1665	-53.429	1440.369	-1.3279	1.1932	0.20654	-96.418	-57.366	2595.23	-1.9858	1.8462	0.14648	NaN	NaN	NaN	NaN	NaN	NaN
3.718	19.11	43.775	1953.76	-0.73267	1.5911	-0.45972	-17.933	-86.889	1433.795	-1.2979	1.209	0.20264	-153.337	39.419	2567.97	-1.98	1.8071	0.16797	NaN	NaN	NaN	NaN	NaN	NaN
3.72	58.335	37.664	1941.47	-0.73242	1.5762	-0.46582	-9.081	-102.328	1413.133	-1.2483	1.195	0.179	-203.726	-2.66	2554.44	-1.9676	1.7757	0.17993	NaN	NaN	NaN	NaN	NaN	NaN
3.722	53.045	41.943	1942.54	-0.73047	1.5527	-0.47363	-64.756	-185.147	1388.977	-1.2065	1.1693	0.14903	-218.11	53.49	2580.33	-1.9453	1.7383	0.18945	NaN	NaN	NaN	NaN	NaN	NaN
3.724	67.825	52.85	1921.24	-0.729	1.5435	-0.47119	-46.28	-229.337	1411.716	-1.1733	1.1493	0.12793	-236.469	-32.61	2588.18	-1.9023	1.6719	0.20361	NaN	NaN	NaN	NaN	NaN	NaN
3.726	102.068	33.505	1901.43	-0.73242	1.5332	-0.48242	-95.084	-267.233	1429.797	-1.1457	1.1264	0.11797	-245.815	-13.75	2584.86	-1.8809	1.6367	0.20654	NaN	NaN	NaN	NaN	NaN	NaN
3.728	120.4368	38.213	1902.61	-0.73633	1.5225	-0.48145	-89.628	-331.262	1507.833	-1.1152	1.1055	0.13037	-269.77	-91.354	2575.75	-1.8242	1.5762	0.19824	NaN	NaN	NaN	NaN	NaN	NaN
3.73	131.898	42.034	1897.99	-0.73389	1.5142	-0.48682	-58.252	-333.776	1582.313	-1.0528	1.0784	0.15273	-308.81	-53.92	2531.14	-1.7712	1.5305	0.19726	NaN	NaN	NaN	NaN	NaN	NaN
3.732	118.0287	61.052	1865.25	-0.73438	1.502	-0.4834	-84.246	-357.669	1611.681	-0.95342	1.0325	0.16748	-298.86	-93.659	2511.79	-1.7168	1.4902	0.18994	NaN	NaN	NaN	NaN	NaN	NaN
3.734	123.656	54.08	1846.28	-0.73047	1.4961	-0.48486	-82.687	-327.26	1680.135	-0.83115	0.979	0.1706	-281.37	-23.63	2499.81	-1.6367	1.4512	0.18457	NaN	NaN	NaN	NaN	NaN	NaN
3.736	104.651	55.539	1831.12	-0.71924	1.4863	-0.48438	-91.086	-260.19517	1717.381	-0.72324	0.92598	0.14971	-214.259	-32.418	2473.42	-1.6011	1.4341	0.18262	NaN	NaN	NaN	NaN	NaN	NaN
3.738	77.259	68.749	1815.21	-0.7124	1.48	-0.48901	-100.74	-256.124	1744.889	-0.62695	0.87891	0.11084	-182.091	66.861	2448.35	-1.519	1.3989	0.16016	NaN	NaN	NaN	NaN	NaN	NaN
3.74	46.671	57.141	1796.64	-0.70068	1.4771	-0.48877	-75.636	-225.6628	1815.924	-0.55322	0.83759	0.039258	-159.816	97.012	2439.72	-1.4587	1.3703	0.15039	NaN	NaN	NaN	NaN	NaN	NaN
3.742	26.629	44.483	1780.07	-0.6792	1.4692	-0.48486	-106.087	-214.4628	1828.961	-0.50186	0.79951	-0.031543	-115.928	213.422	2400.43	-1.4082	1.3477	0.1499	NaN	NaN	NaN	NaN	NaN	NaN
3.744	23.39	54.606	1766.43	-0.66895	1.4609	-0.48535	-74.775	-231.794	1852.695	-0.48154	0.77295	-0.09756	-58.167	221.841	2370.3	-1.3579	1.3364	0.15332	NaN	NaN	NaN	NaN	NaN	NaN
3.746	-14.76	72.202	1739.2	-0.6499	1.4453	-0.47949	-44.062	-179.2271	1893.443	-0.49336	0.75781	-0.14707	-0.527999999999999	260.1128	2313.63	-1.3301	1.334	0.14795	NaN	NaN	NaN	NaN	NaN	NaN
3.748	-15.074	74.159	1716.7	-0.63257	1.4358	-0.47974	-115.274	-198.63534	1879.125	-0.53662	0.76807	-0.17285	45.3593	213.601	2259.85	-1.2598	1.3379	0.13965	NaN	NaN	NaN	NaN	NaN	NaN
3.75	-36.272	90.1147	1693.93	-0.61865	1.4224	-0.47412	-130.543	-217.4584	1908.284	-0.61943	0.79463	-0.15469	79.22173	234.074	2191.87	-1.2014	1.3362	0.14038	NaN	NaN	NaN	NaN	NaN	NaN
3.752	-31.618	95.6828	1659.87	-0.59912	1.397	-0.46924	-115.524	-203.238	1912.863	-0.71807	0.8499	-0.11202	89.317	192.786	2151.97	-1.144	1.3286	0.14209	NaN	NaN	NaN	NaN	NaN	NaN
3.754	-55.782	89.426	1638.75	-0.59326	1.3853	-0.46436	-156.094	-256.934	1942.725	-0.81533	0.92764	-0.060449	75.395	189.393	2081.24	-1.0815	1.311	0.13379	NaN	NaN	NaN	NaN	NaN	NaN
3.756	-63.048	79.218	1623.36	-0.57959	1.3638	-0.45703	-121.122	-240.8174	2062.284	-0.89463	1.0132	-0.008887	77.528	139.718	2021.46	-1.0527	1.3008	0.13379	NaN	NaN	NaN	NaN	NaN	NaN
3.758	-43.039	86.415	1625.84	-0.5686	1.3533	-0.45483	-145.37	-239.5874	2089.232	-0.95117	1.0879	0.03125	82.356	136.5806	1961.83	-1.0039	1.2773	0.12744	NaN	NaN	NaN	NaN	NaN	NaN
3.76	-50.219	102.017	1609.48	-0.55029	1.3413	-0.45068	-181.302	-275.102	2109.589	-0.98711	1.1494	0.059082	69.756	133.8699	1932.03	-0.96363	1.2678	0.12744	NaN	NaN	NaN	NaN	NaN	NaN
3.762	-58.471	106.352	1582.42	-0.53369	1.3276	-0.44287	-161.772	-225.458	2142.039	-1.0167	1.1946	0.075781	64.8791	164.2133	1909.98	-0.91992	1.249	0.12061	NaN	NaN	NaN	NaN	NaN	NaN
3.764	-78.684	98.831	1551.75	-0.52539	1.3164	-0.43945	-173.551	-243.928	2121.789	-1.0554	1.2153	0.075391	4.787	181.562	1876.53	-0.86035	1.2285	0.11328	NaN	NaN	NaN	NaN	NaN	NaN
3.766	-40.492	97.114	1540.94	-0.51074	1.3071	-0.43311	-125.829	-247.054	2196.385	-1.0997	1.2214	0.062891	-32.5671	199.773	1822.82	-0.83105	1.2148	0.1123	NaN	NaN	NaN	NaN	NaN	NaN
3.768	-23.86	104.0535	1514.33	-0.5039	1.2891	-0.42871	-125.746	-229.687	2235.218	-1.1401	1.2231	0.040039	-43.9423	223.243	1770.3	-0.76318	1.186	0.10254	NaN	NaN	NaN	NaN	NaN	NaN
3.77	-1.434	110.7676	1498.27	-0.49854	1.2759	-0.42334	-177.051	-273.539	2204.168	-1.159	1.218	0.031934	-82.521	242.829	1732.3	-0.71777	1.1582	0.094238	NaN	NaN	NaN	NaN	NaN	NaN
3.772	11.907	107.4241	1486.67	-0.48633	1.2539	-0.41797	-129.618	-226.942	2240.818	-1.1828	1.2262	0.030762	-110.46	262.146	1688.69	-0.66357	1.1274	0.085938	NaN	NaN	NaN	NaN	NaN	NaN
3.774	46.767	105.199	1457.38	-0.48096	1.2461	-0.41699	-113.336	-209.756	2248.858	-1.211	1.2465	0.025683	-155.986	261.226	1605.14	-0.59961	1.0801	0.068848	NaN	NaN	NaN	NaN	NaN	NaN
3.776	64.521	101.692	1441.94	-0.47119	1.2349	-0.40967	-148.635	-206.962	2260.576	-1.2321	1.2937	0.01377	-194.967	286.857	1522.85	-0.56836	1.0605	0.058105	NaN	NaN	NaN	NaN	NaN	NaN
3.778	65.334	116.192	1409.61	-0.46338	1.2222	-0.40064	-134.114	-124.133	2302.923	-1.2471	1.3516	-0.0043945	-227.184	279.68	1424.56	-0.50635	1.0181	0.04541	NaN	NaN	NaN	NaN	NaN	NaN
3.78	77.535	118.215	1406.19	-0.45361	1.2153	-0.39111	-141.68	-132.025	2291.884	-1.2591	1.4118	-0.0125	-256.24	272.198	1346.44	-0.46386	0.98291	0.03247	NaN	NaN	NaN	NaN	NaN	NaN
3.782	78.066	133.286	1377.05	-0.44434	1.1934	-0.37695	-109.984	-118.6509	2351.278	-1.2813	1.4715	-0.010156	-257.15	226.356	1288.34	-0.42627	0.95752	0.024414	NaN	NaN	NaN	NaN	NaN	NaN
3.784	69.955	143.933	1334.99	-0.44092	1.1919	-0.37305	-113.849	-89.767	2398.345	-1.3156	1.5168	-0.011328	-232.023	237.757	1244.49	-0.36865	0.91455	0.016113	NaN	NaN	NaN	NaN	NaN	NaN
3.786	38.115	142.052	1306.62	-0.43164	1.1621	-0.36475	-135.526	-147.977	2382.617	-1.3555	1.5517	-0.0057617	-195.783	225.827	1197.64	-0.34131	0.89893	0.0073242	NaN	NaN	NaN	NaN	NaN	NaN
3.788	30.067	135.672	1280.35	-0.42676	1.1431	-0.35547	-72.677	-110.4974	2415.988	-1.3901	1.5786	-0.0063477	-165.996	296	1179.84	-0.28613	0.86084	-0.0083008	NaN	NaN	NaN	NaN	NaN	NaN
3.79	28.457	132.453	1263.57	-0.42676	1.127	-0.34668	-85.331	-95.4546	2404.491	-1.4284	1.6017	0.0043945	-124.608	307.66	1144.08	-0.24902	0.83154	-0.016846	NaN	NaN	NaN	NaN	NaN	NaN
3.792	-0.798999999999999	133.223	1223.01	-0.42236	1.106	-0.33154	-97.465	-118.67	2413.15	-1.465	1.6243	0.017969	-96.5991	348.5	1101.89	-0.21533	0.80469	-0.026855	NaN	NaN	NaN	NaN	NaN	NaN
3.794	-10.434	130.183	1195.98	-0.41943	1.0942	-0.32764	-66.516	-81.98716	2461.41	-1.5071	1.6454	0.030078	-51.589	293.74	1056.09	-0.16748	0.76416	-0.047852	NaN	NaN	NaN	NaN	NaN	NaN
3.796	-23.928	138.968	1181.03	-0.41016	1.0723	-0.31201	-121.917	-132.677	2409.779	-1.5592	1.6763	0.042969	-27.243	297	1005.53	-0.14844	0.74219	-0.057617	NaN	NaN	NaN	NaN	NaN	NaN
3.798	-7.934	159.4	1150.55	-0.40747	1.0596	-0.29614	-101.199	-155.516	2409.572	-1.605	1.6997	0.058105	38.77	249.58	965.35	-0.11279	0.70117	-0.078125	NaN	NaN	NaN	NaN	NaN	NaN
3.8	-40.923	161.957	1114.03	-0.40039	1.0391	-0.29102	-77.493	-124.919	2417.027	-1.6519	1.7169	0.07207	74.338	268.5	891.71	-0.086426	0.67211	-0.092286	NaN	NaN	NaN	NaN	NaN	NaN
3.802	-63.775	148.524	1111.07	-0.39258	1.0176	-0.27197	-135.303	-155.418	2393.737	-1.6949	1.7247	0.10537	88.9637	208.049	817.76	-0.064941	0.64111	-0.1084	NaN	NaN	NaN	NaN	NaN	NaN
3.804	-91.946	143.509	1096.9	-0.38623	1.0063	-0.2666	-111.244	-72.7195	2399.752	-1.7421	1.7368	0.13155	83.736	248.72	742.63	-0.041504	0.60254	-0.11768	NaN	NaN	NaN	NaN	NaN	NaN
3.806	-104.945	149.611	1063.06	-0.37744	0.97852	-0.25098	-129.51	-25.564	2345.427	-1.78	1.7454	0.15654	119.796	210.378	675.84	-0.031738	0.58447	-0.12158	NaN	NaN	NaN	NaN	NaN	NaN
3.808	-120.449	156.908	1026.64	-0.37109	0.96216	-0.23242	-144.254	-20.67268	2338.432	-1.8101	1.7485	0.17383	132.28374	290.85	643.07	-0.027344	0.55518	-0.13037	NaN	NaN	NaN	NaN	NaN	NaN
3.81	-128.018	149.045	1004.29	-0.36328	0.94141	-0.22803	-114.067	43.579	2398.688	-1.8272	1.7485	0.19004	153.11	281.09	637.54	-0.028076	0.53467	-0.13256	NaN	NaN	NaN	NaN	NaN	NaN
3.812	-114.935	145.391	995.57	-0.3457	0.91406	-0.21289	-125.084	10.9907	2375.277	-1.8246	1.7418	0.20205	151.82	352.25	596.83	-0.039551	0.52002	-0.1333	NaN	NaN	NaN	NaN	NaN	NaN
3.814	-108.9934	149.303	953.7	-0.33936	0.90283	-0.20459	-123.51	17.5174	2362.848	-1.8058	1.7215	0.20556	102.853	318.82	573.51	-0.046387	0.51025	-0.13184	NaN	NaN	NaN	NaN	NaN	NaN
3.816	-97.5234	150.468	913.67	-0.32764	0.87158	-0.19141	-106.803	68.039	2338.809	-1.772	1.6948	0.20508	109.562	354.76	519	-0.059326	0.50586	-0.12402	NaN	NaN	NaN	NaN	NaN	NaN
3.818	-79.732	153.723	903.05	-0.31713	0.84985	-0.18139	-135.402	40.219	2278.943	-1.7227	1.6621	0.19287	70.485	281.1	479.71	-0.074707	0.50586	-0.12109	NaN	NaN	NaN	NaN	NaN	NaN
3.82	-45.788	158.448	899.75	-0.30713	0.82861	-0.17285	-104.096	71.5662	2302.609	-1.6754	1.6277	0.18252	54.054	308.13	437.22	-0.085938	0.50195	-0.11719	NaN	NaN	NaN	NaN	NaN	NaN
3.822	-28.752	158.663	883.66	-0.2915	0.80273	-0.15674	-139.509	43.033	2277.314	-1.6332	1.5902	0.17314	8.977	229.76	405.11	-0.092773	0.49805	-0.12305	NaN	NaN	NaN	NaN	NaN	NaN
3.824	-21.485	147.857	856.59	-0.28271	0.79053	-0.15137	-145.033	-3.213	2221.216	-1.6012	1.5527	0.16377	-35.469	260.26	354.08	-0.096191	0.49219	-0.12109	NaN	NaN	NaN	NaN	NaN	NaN
3.826	6.10599999999999	144.35	835.06	-0.26953	0.76367	-0.13232	-82.931	39.068	2255.257	-1.5701	1.5186	0.15928	-86.621353	193.824	342.53	-0.10157	0.48803	-0.12671	NaN	NaN	NaN	NaN	NaN	NaN
3.828	6.194	154.136	813.71	-0.25293	0.74511	-0.12255	-106.597	34.637	2219.306	-1.5508	1.4844	0.1499	-127.8426	214.137	303.85	-0.098145	0.48193	-0.12842	NaN	NaN	NaN	NaN	NaN	NaN
3.83	22.37	164.313	783.96	-0.23633	0.72705	-0.11475	-84.558	67.526	2198.367	-1.5416	1.4506	0.15049	-145.741	147.967	300.5	-0.091309	0.47021	-0.13818	NaN	NaN	NaN	NaN	NaN	NaN
3.832	-3.138	172.684	756.92	-0.21875	0.69727	-0.10498	-84.266	114.4144	2166.491	-1.5293	1.4285	0.15068	-152.3311	195.915	234.351	-0.086426	0.45996	-0.13721	NaN	NaN	NaN	NaN	NaN	NaN
3.834	33.613	165.903	743.59	-0.20996	0.68213	-0.096191	-120.749	99.802	2055.289	-1.5227	1.4047	0.15185	-147.109	135.349	220.962	-0.073242	0.44775	-0.14746	NaN	NaN	NaN	NaN	NaN	NaN
3.836	35.668	158.853	723.5	-0.19092	0.65967	-0.076172	-58.684	137.7106	2064.465	-1.5106	1.3918	0.15108	-141.116	177.001	203.209	-0.064942	0.42651	-0.15747	NaN	NaN	NaN	NaN	NaN	NaN
3.838	24.138	150.426	699.17	-0.177	0.63574	-0.067871	-63.147	140.5411	2063.419	-1.4941	1.377	0.1499	-159.45	121.8214	217.034	-0.056152	0.40576	-0.16162	NaN	NaN	NaN	NaN	NaN	NaN
3.84	29.91	139.126	687.38	-0.1626	0.62061	-0.062012	-86.051	123.606	2014.388	-1.4674	1.3669	0.14375	-121.9758	157.979	169.095	-0.043945	0.3833	-0.15869	NaN	NaN	NaN	NaN	NaN	NaN
3.842	24.979	131.187	679.18	-0.14844	0.59326	-0.047363	-23.708	158.777	2004.078	-1.4346	1.357	0.13984	-116.084	95.695	143.906	-0.037109	0.37012	-0.16357	NaN	NaN	NaN	NaN	NaN	NaN
3.844	29.162	142.304	660.13	-0.1416	0.58008	-0.041992	-84.186	149.3886	1917.298	-1.3908	1.3477	0.13281	-68.981	112.633	116.534	-0.028809	0.34473	-0.16943	NaN	NaN	NaN	NaN	NaN	NaN
3.846	-16.966	145.545	620.18	-0.12109	0.55762	-0.024414	-85.359	148.8166	1883.653	-1.3532	1.337	0.12539	-67.0038	59.113	122.205	-0.025879	0.32568	-0.17334	NaN	NaN	NaN	NaN	NaN	NaN
3.848	-10.216	141.431	595.511	-0.10376	0.54516	-0.012695	-63.663	166.787	1854.869	-1.3042	1.3267	0.11523	-29.582	86.7758	92.861	-0.030273	0.31104	-0.16943	NaN	NaN	NaN	NaN	NaN	NaN
3.85	-24.111	142.382	591.72	-0.081055	0.52539	-0.0063477	-113.663	130.7012	1763.913	-1.2538	1.3122	0.10498	-19.899	27.2152	76.518	-0.050781	0.30176	-0.16943	NaN	NaN	NaN	NaN	NaN	NaN
3.852	-48.693	152.378	563.112	-0.053223	0.50439	0.0014648	-60.863	128.46	1771.926	-1.2043	1.2922	0.093848	33.521	26.392379	61.687	-0.05957	0.2998	-0.16797	NaN	NaN	NaN	NaN	NaN	NaN
3.854	-94.5897	146.18	547.614	-0.027099	0.48144	0.006836	-94.533	117.0418	1756.479	-1.1531	1.2754	0.088379	34.892	-35.326	66.591	-0.088379	0.29834	-0.15771	NaN	NaN	NaN	NaN	NaN	NaN
3.856	-106.4586	140.281	536.02	-0.0083008	0.46777	0.0097656	-94.341	88.691	1719.047	-1.1027	1.2574	0.081738	58.827	-34.549	43.0508	-0.10815	0.29688	-0.14428	NaN	NaN	NaN	NaN	NaN	NaN
3.858	-96.746	131.449	529.11	0.024414	0.44043	0.010742	-45.441	109.599	1726.172	-1.0513	1.2446	0.073242	80.978	-31.704	58.863539	-0.12891	0.30176	-0.13086	NaN	NaN	NaN	NaN	NaN	NaN
3.86	-123.291	138.529	496.191	0.041016	0.43018	0.0068359	-106.751	109.681	1633.58	-1.0042	1.2296	0.07168	124.9909	8.6406	45.7477	-0.14453	0.31299	-0.12305	NaN	NaN	NaN	NaN	NaN	NaN
3.862	-115.0533	128.895	465.084	0.067383	0.40527	0.0097656	-82.371	132.024	1586.017	-0.95254	1.2151	0.06748	130.204	21.2805	86.349	-0.15088	0.31738	-0.1084	NaN	NaN	NaN	NaN	NaN	NaN
3.864	-111.9617	132.551	442.9	0.088867	0.38818	0.011719	-77.394	175.40495	1571.752	-0.90254	1.1987	0.065918	122.4714	24.2	72.476	-0.14746	0.32178	-0.10107	NaN	NaN	NaN	NaN	NaN	NaN
3.866	-97.578	130.549	429.515	0.10547	0.37695	0.010742	-102.23	162.4194	1512.319	-0.85039	1.1789	0.064844	96.39	9.3323	58.993	-0.12964	0.32593	-0.097656	NaN	NaN	NaN	NaN	NaN	NaN
3.868	-100.75	134.053	409.326	0.13037	0.35596	0.01416	-41.989	171.22319	1504.779	-0.80518	1.1626	0.056152	62.417	20.1467	32.1	-0.10059	0.32275	-0.09375	NaN	NaN	NaN	NaN	NaN	NaN
3.87	-86.964	122.31	408.165	0.14111	0.35059	0.019043	-79.897	178.02865	1436.68	-0.75508	1.1476	0.052539	58.367	36.2309	44.2002	-0.057617	0.30908	-0.097168	NaN	NaN	NaN	NaN	NaN	NaN
3.872	-61.825	123.563	410.461	0.15625	0.3291	0.018555	-72.536	167.983	1374.474	-0.71279	1.1313	0.038867	25.773	56.655	49.3754	-0.032715	0.29883	-0.10059	NaN	NaN	NaN	NaN	NaN	NaN
3.874	-52.02	123.122	396.694	0.16821	0.32105	0.020752	-34.261	200.2973	1373.927	-0.66435	1.1173	0.029492	-0.332000000000001	73.347	64.37	0.022461	0.26904	-0.11523	NaN	NaN	NaN	NaN	NaN	NaN
3.876	-49.382	129.695	378.617	0.17871	0.31396	0.024414	-88.659	218.0175	1295.943	-0.62227	1.0984	0.023242	-24.038	40.73	26.6169	0.064453	0.25049	-0.12353	NaN	NaN	NaN	NaN	NaN	NaN
3.878	-51.554	128.845	369.264	0.20166	0.30176	0.023926	-41.307	215.757	1251.76	-0.58984	1.0791	0.019531	-106.1782	43.859	30.517	0.095703	0.2251	-0.13477	NaN	NaN	NaN	NaN	NaN	NaN
3.88	-13.052	124.134	365.691	0.20361	0.29736	0.019043	-24.673	229.767	1227.706	-0.56074	1.0674	0.0073243	-104.9284	26.5103	46.2084	0.14307	0.19775	-0.14355	NaN	NaN	NaN	NaN	NaN	NaN
3.882	-2.596	117.763	339.514	0.21484	0.28662	0.021973	-58.863	207.355	1173.119	-0.53115	1.0489	0.0020508	-134.9093	44.8324	52.3199	0.16211	0.18066	-0.14795	NaN	NaN	NaN	NaN	NaN	NaN
3.884	5.284	111.569	313.781	0.22217	0.28344	0.022216	0.0230000000000032	191.7128	1168.959	-0.50732	1.0321	-0.00068356	-133.2727	29.32	65.098	0.19971	0.16162	-0.16357	NaN	NaN	NaN	NaN	NaN	NaN
3.886	12.522	94.887	313.765	0.22754	0.28271	0.017578	-33.766	189.25646	1117.602	-0.49053	1.0165	-0.003711	-142.626	45.3669	54.2	0.22803	0.1372	-0.15942	NaN	NaN	NaN	NaN	NaN	NaN
3.888	29.662	97.931	308.322	0.23047	0.27832	0.01416	-48.976	171.78	1076.685	-0.479	1.0024	-0.010254	-157.687	10.227	65.777	0.24658	0.11768	-0.16357	NaN	NaN	NaN	NaN	NaN	NaN
3.89	26.72	102.968	285.985	0.23291	0.2749	0.018066	2.024	175.25	1081.621	-0.46514	0.9875	-0.017188	-144.874	25.436	61.106	0.27148	0.1001	-0.16211	NaN	NaN	NaN	NaN	NaN	NaN
3.892	5.456	109.189	273.262	0.23438	0.27783	0.022461	-23.701	175.883	1004.909	-0.45176	0.96797	-0.015136	-147.861	-18.756	82.022	0.28467	0.09082	-0.15967	NaN	NaN	NaN	NaN	NaN	NaN
3.894	33.841	104.74	275.923	0.22998	0.28076	0.02002	-6.209	153.909	972.959	-0.43457	0.94922	-0.018262	-130.4092	16.1572	62.6454	0.31543	0.075195	-0.15576	NaN	NaN	NaN	NaN	NaN	NaN
3.896	23.553	97.857	284.29	0.23047	0.28125	0.022949	-11.212	170.5651	953.949	-0.4127	0.93516	-0.019727	-120.8129	-5.6546	84.144	0.33667	0.059326	-0.15967	NaN	NaN	NaN	NaN	NaN	NaN
3.898	8.92699999999999	105.918	263.863	0.22461	0.28613	0.025391	-44.393	178.6711	887.275	-0.3877	0.91797	-0.026855	-92.424	35.5235	79.615	0.36279	0.04248	-0.16357	NaN	NaN	NaN	NaN	NaN	NaN
3.9	-34.086	107.433	239.095	0.22217	0.29004	0.022461	-1.409	184.3907	881.888	-0.36036	0.89824	-0.033691	-62.44	1.6945	100.549	0.37402	0.018555	-0.1748	NaN	NaN	NaN	NaN	NaN	NaN
3.902	-38.621	104.488	227.1396	0.22119	0.29492	0.030273	-33.296	221.9304	833.351	-0.32207	0.87695	-0.034082	-30.079	29.1126	73.95	0.37354	0.0073242	-0.17871	NaN	NaN	NaN	NaN	NaN	NaN
3.904	-55.103	95.313	239.182	0.21997	0.30029	0.033936	-33.328	202.652	794.9	-0.29472	0.8543	-0.044239	-6.819	-11.6321	62.1166	0.3584	-0.0097656	-0.18896	NaN	NaN	NaN	NaN	NaN	NaN
3.906	-85.787	91.081	228.457	0.22266	0.29834	0.03418	-4.07600000000001	198.3355	794.299	-0.26562	0.82949	-0.050488	37.266	21.713	49.3482	0.33106	-0.01831	-0.19067	NaN	NaN	NaN	NaN	NaN	NaN
3.908	-83.356	62.041	212.441	0.21777	0.29932	0.040527	-51.172	210.7373	725.223	-0.24268	0.79932	-0.064453	78.9755	2.3623	75.316	0.2998	-0.022461	-0.19189	NaN	NaN	NaN	NaN	NaN	NaN
3.91	-97.2759	59.346	208.951	0.21777	0.29688	0.040527	-4.678	204.9921	689.87	-0.22471	0.77256	-0.070996	98.596	22.8942	56.1451	0.24609	-0.016602	-0.18701	NaN	NaN	NaN	NaN	NaN	NaN
3.912	-84.758	60.271	211.041	0.2168	0.29736	0.044922	-15.68	220.107	669.218	-0.21006	0.74541	-0.075	99.0274	-2.7658	74.897	0.21875	-0.0063477	-0.18359	NaN	NaN	NaN	NaN	NaN	NaN
3.914	-106.3883	60.276	197.475	0.2207	0.29444	0.046631	-50.374	220.874	623.761	-0.19756	0.72158	-0.082031	115.693	28.8601	30.212	0.16553	0.021484	-0.17285	NaN	NaN	NaN	NaN	NaN	NaN
3.916	-99.8927	44.49	192.953	0.22021	0.29443	0.051758	-4.092	187.5014	615.289	-0.18301	0.69991	-0.083594	84.4757	10.0013	47.564	0.125	0.048584	-0.15771	NaN	NaN	NaN	NaN	NaN	NaN
3.918	-86.056	39.7172	191.371	0.21484	0.29053	0.052734	-41.519	208.852	574.84	-0.16797	0.6748	-0.080078	83.208	36.0219	42.0319	0.095703	0.078613	-0.15039	NaN	NaN	NaN	NaN	NaN	NaN
3.92	-90.5205	39.9605	175.236	0.21289	0.28906	0.055176	-30.588	172.028	551.646	-0.15049	0.65722	-0.087012	70.548	3.391	75.591	0.066406	0.1167	-0.13916	NaN	NaN	NaN	NaN	NaN	NaN
3.922	-85.663	29.5552	194.36	0.20801	0.28613	0.05957	13.009	147.805	575.86	-0.13467	0.63164	-0.093262	60.832	27.846	61.981	0.057129	0.13818	-0.14014	NaN	NaN	NaN	NaN	NaN	NaN
3.924	-84.82	16.681	200.313	0.19703	0.28735	0.064697	-35.218	166.295	535.724	-0.12334	0.61211	-0.099904	36.965	-0.644	69.331	0.058594	0.1665	-0.13916	NaN	NaN	NaN	NaN	NaN	NaN
3.926	-61.458	20.25	197.612	0.1875	0.28516	0.067383	-14.248	142.762	493.956	-0.10879	0.59014	-0.10635	18.52	10.3785	38.0281	0.070069	0.18042	-0.14527	NaN	NaN	NaN	NaN	NaN	NaN
3.928	-58.701	29.7788	181.758	0.17627	0.28809	0.076172	22.179	174.7472	476.201	-0.09668	0.57666	-0.1084	-21.416	-11.3456	56.1514	0.085449	0.18311	-0.15088	NaN	NaN	NaN	NaN	NaN	NaN
3.93	-14.18	17.549	187.4	0.17236	0.28711	0.086426	-18.963	184.3022	429.869	-0.089941	0.55488	-0.10986	-57.35	2.717	12.002	0.095703	0.18896	-0.16357	NaN	NaN	NaN	NaN	NaN	NaN
3.932	-22.056	6.704	201.132	0.16064	0.29395	0.086914	32.528	134.743	428.553	-0.080957	0.53974	-0.10693	-91.7086	12.2498	26.8668	0.098145	0.19043	-0.1665	NaN	NaN	NaN	NaN	NaN	NaN
3.934	11.66	-3.803	193.515	0.15503	0.29077	0.096192	-6.822	158.1358	394.758	-0.073144	0.52529	-0.10655	-80.96	41.9268	31.5035	0.097168	0.1875	-0.1748	NaN	NaN	NaN	NaN	NaN	NaN
3.936	18.627	-14.782	174.72	0.14893	0.28955	0.10205	4.67899999999999	135.66	353.83	-0.063476	0.51329	-0.10381	-115.7282	41.3696	70.377	0.08667	0.19018	-0.1748	NaN	NaN	NaN	NaN	NaN	NaN
3.938	23.548	-24.677	186.567	0.14648	0.28955	0.1084	45.646	133.385	365.803	-0.056641	0.50781	-0.10352	-114.48	62.0483	48.477	0.077637	0.18994	-0.17285	NaN	NaN	NaN	NaN	NaN	NaN
3.94	44.795	-34.193	226.42	0.14453	0.28857	0.11035	5.83900000000001	159.3438	330.827	-0.049707	0.49609	-0.10127	-185.86	51.219	55.6602	0.057129	0.19531	-0.16992	NaN	NaN	NaN	NaN	NaN	NaN
3.942	30.012	-33.6871	253.11	0.14648	0.28418	0.11328	28.434	138.57817	315.301	-0.047754	0.48545	-0.097462	-160.292	59.932	35.8396	0.04541	0.2002	-0.1626	NaN	NaN	NaN	NaN	NaN	NaN
3.944	42.823	-6.206	265.39	0.14404	0.28027	0.11987	3.198	160.903	276.904	-0.043848	0.47217	-0.099805	-143.557	50.479	72.34	0.018555	0.2207	-0.15479	NaN	NaN	NaN	NaN	NaN	NaN
3.946	8.413	31.971	290.565	0.14697	0.27979	0.12305	-8.53599999999999	171.205	236.607	-0.03916	0.46162	-0.089356	-131.0761	34.311	79.256	-0.0019531	0.24341	-0.14893	NaN	NaN	NaN	NaN	NaN	NaN
3.948	14.57	57.663	352.606	0.14063	0.26953	0.12305	36.177	124.66388	253.239	-0.035156	0.4458	-0.086426	-118.639014	20.4841	86.331	-0.01709	0.26563	-0.14258	NaN	NaN	NaN	NaN	NaN	NaN
3.95	8.069	85.636	433.925	0.13867	0.26807	0.12354	-6.611	129.1007	250.847	-0.022168	0.43721	-0.08457	-78.566	4.895	97.1597	-0.032227	0.30566	-0.1416	NaN	NaN	NaN	NaN	NaN	NaN
3.952	5.103	120.479	474.987	0.12402	0.26563	0.12158	9.634	77.343	235.542	-0.0094725	0.42451	-0.087891	-100.4682	-12.861	129.066	-0.038818	0.33545	-0.13794	NaN	NaN	NaN	NaN	NaN	NaN
3.954	-17.848	134.027	544.119	0.10864	0.26367	0.12012	13.744	59.326	220.808	-0.0008789	0.40889	-0.082422	-27.487	-51.768	140.642	-0.051758	0.35693	-0.14014	NaN	NaN	NaN	NaN	NaN	NaN
3.956	-29.403	147.807183	619.115	0.084961	0.26611	0.11328	-29.985	105.2543	173.565	0.01084	0.39004	-0.09043	3.093	-45.963	163.718	-0.083984	0.38281	-0.15479	NaN	NaN	NaN	NaN	NaN	NaN
3.958	-29.293	154.8291	682.72	0.04541	0.28906	0.10986	21.794	61.359	163.056	0.023926	0.37305	-0.09668	30.166	-56.151	224.73	-0.11084	0.39307	-0.16357	NaN	NaN	NaN	NaN	NaN	NaN
3.96	-67.167	160.2048	752.093	0.01416	0.30273	0.10693	-31.824	78.3702	156.129	0.034375	0.35049	-0.099608	48.202	-54.846	326.516	-0.19873	0.42627	-0.1709	NaN	NaN	NaN	NaN	NaN	NaN
3.962	-82.879	130.5506	795.218	-0.055176	0.32764	0.097168	-72.799	88.8681	126.213	0.04375	0.32998	-0.10352	93.832	-83.813	396.3557	-0.29199	0.45972	-0.15771	NaN	NaN	NaN	NaN	NaN	NaN
3.964	-79.956	89.6012	842.283	-0.11865	0.36108	0.086182	-0.251999999999995	37.212	128.671	0.051563	0.3128	-0.10976	109.618	-77.5631	475.46	-0.39355	0.51172	-0.13867	NaN	NaN	NaN	NaN	NaN	NaN
3.966	-80.897	62.3797	868.651	-0.19531	0.39746	0.07959	-28.986	70.147	135.802	0.064356	0.29648	-0.11514	125.346	-101.389	597.357	-0.54053	0.59326	-0.11475	NaN	NaN	NaN	NaN	NaN	NaN
3.968	-95.857	24.2858	902.275	-0.30225	0.4668	0.086914	-31.342	24.432	138.521	0.074707	0.27832	-0.11768	129.186	-48.643	741.045	-0.60205	0.63721	-0.10645	NaN	NaN	NaN	NaN	NaN	NaN
3.97	-117.51	-3.249	923.447	-0.35938	0.50781	0.092773	-21.966	13.617	125.848	0.08125	0.26094	-0.1249	108.071	5.799	943.88	-0.73779	0.72998	-0.10938	NaN	NaN	NaN	NaN	NaN	NaN
3.972	-100.344	-19.542	950.366	-0.45605	0.59814	0.12793	-60.178	67.723	76.968	0.090723	0.2458	-0.12451	130.015	104.281	1095.908	-0.86206	0.80054	-0.11353	NaN	NaN	NaN	NaN	NaN	NaN
3.974	-100.6021	-16.921	966.836	-0.5249	0.67187	0.16113	-22.855	39.527868	51.9404	0.10049	0.23096	-0.13037	154.108	105.226	1277.856	-1.0078	0.88379	-0.11572	NaN	NaN	NaN	NaN	NaN	NaN
3.976	-74.867	-29.055	1012.755	-0.58008	0.74219	0.19287	-31.028	64.75	68.0749	0.10928	0.21797	-0.1373	75.568	125.516	1487.293	-1.2476	1.021	-0.10596	NaN	NaN	NaN	NaN	NaN	NaN
3.978	-80.495	-35.1375	1070.24	-0.61963	0.84229	0.22803	-52.428	58.1751	71.8608	0.12061	0.20459	-0.13818	57.588	77.863	1679.888	-1.3789	1.1006	-0.09375	NaN	NaN	NaN	NaN	NaN	NaN
3.98	-22.224	-22.8861	1106.878	-0.62744	0.88721	0.24268	-11.235	-21.5429	67.1049	0.1291	0.19365	-0.1458	76.953	55.5716	1758.7144	-1.6421	1.2954	-0.043457	NaN	NaN	NaN	NaN	NaN	NaN
3.982	-27.157	-1.0687	1141.916	-0.60498	0.94678	0.26172	-27.614	24.2901	53.256	0.1375	0.18233	-0.14981	50.329	-50.924	1835.131	-1.8327	1.4602	0.0097658	NaN	NaN	NaN	NaN	NaN	NaN
3.984	-34.652	-1.387	1169.479	-0.57422	0.96777	0.26709	-18.249	2.945	52.8166	0.1457	0.17256	-0.15371	-21.252	-142.889	1885.613	-1.9819	1.6353	0.069336	NaN	NaN	NaN	NaN	NaN	NaN
3.986	-16.006	-18.606	1198.467	-0.5376	0.97705	0.26465	-16.385	-21.9925	71.91859	0.15166	0.16221	-0.15801	-47.619	-272.084	1959.549	-2.1074	1.8594	0.1499	NaN	NaN	NaN	NaN	NaN	NaN
3.988	-6.929	-14.419	1187.144	-0.48682	0.96436	0.25488	-63.134	20.3917	53.105	0.1582	0.15381	-0.16602	-41.817	-322.006	1889.205	-2.1328	1.9648	0.19092	NaN	NaN	NaN	NaN	NaN	NaN
3.99	20.124	-15.615	1169.47	-0.46362	0.95019	0.24585	-15.925	-19.8167	27.165	0.16357	0.14561	-0.17012	-83.818	-367.408	1826.0472	-2.0796	2.1079	0.22607	NaN	NaN	NaN	NaN	NaN	NaN
3.992	7.197	-21.29	1138.692	-0.44775	0.93604	0.23535	-10.351	25.711	47.451	0.16319	0.1336	-0.17051	-142.616	-334.209	1721.2048	-1.9097	2.1187	0.20776	NaN	NaN	NaN	NaN	NaN	NaN
3.994	17.132	-32.3214	1136.972	-0.45166	0.91846	0.23926	-20.977	36.7334	74.7879	0.16631	0.12695	-0.17207	-224.303	-309.3	1764.9908	-1.6289	2.0098	0.15479	NaN	NaN	NaN	NaN	NaN	NaN
3.996	1.48	-38.403	1119.185	-0.45752	0.9165	0.24414	-3.693	-27.137	90.339	0.16514	0.11827	-0.17539	-231.782	-250.688	1728.351	-1.1479	1.6724	0.026855	NaN	NaN	NaN	NaN	NaN	NaN
[truncated: 28,002 more rows]
