# Supplementary material for: Reliability and Validity of Running Cadence and Stance Time Derived from Instrumented Wireless Earbuds
Source: Sensors (Basel). 2021 Nov 30;21(23):7995. doi: 10.3390/s21237995 (PMC8659722; doi:10.3390/s21237995)
Supplement: Supplementary file 1 [file sensors-21-07995-s001.zip › Data_P07_HeadMovements.csv]

time	up_force_plate_1	up_force_plate_2	up_force_plate_3	up_earbuds_1	up_earbuds_2	up_earbuds_3	down_force_plate_1	down_force_plate_2	down_force_plate_3	down_earbuds_1	down_earbuds_2	down_earbuds_3	shake_force_plate_1	shake_force_plate_2	shake_force_plate_3	shake_earbuds_1	shake_earbuds_2	shake_earbuds_3	nod_force_plate_1	nod_force_plate_2	nod_force_plate_3	nod_earbuds_1	nod_earbuds_2	nod_earbuds_3	bird_L_force_plate_1	bird_L_force_plate_2	bird_L_force_plate_3	bird_L_earbuds_1	bird_L_earbuds_2	bird_L_earbuds_3	bird_R_force_plate_1	bird_R_force_plate_2	bird_R_force_plate_3	bird_R_earbuds_1	bird_R_earbuds_2	bird_R_earbuds_3	check_watch_force_plate_1	check_watch_force_plate_2	check_watch_force_plate_3	check_watch_earbuds_1	check_watch_earbuds_2	check_watch_earbuds_3
0	-86.383	-348.283	1678.201	-0.89404	1.0688	-0.15967	-49.026	5.631	16.9925	0.18359	0.13281	0.079102	-52.427	47.38637	45.41	0.083496	-0.12012	-0.068359	37.192	-191.708	1387.4	-0.94141	1.1484	-0.062988	-36.487	243.621	1290.87	-1.0801	0.90234	0.27197	-27.053	215.672	1218.7686	-1.1304	0.9458	0.025879	-32.918	164.997	1435.5209	-1.5082	1.1063	0.025293
0.002	-55.009	-284.765	1767.4834	-0.92764	1.0775	-0.15049	-35.691	60.0951	11.509	0.18506	0.14258	0.088867	-30.153	62.921	34.649	0.065918	-0.12744	-0.068848	37.888	-225.37	1387.24	-0.9292	1.1587	-0.061035	19.258	209.835	1281.74	-1.0562	0.88135	0.26563	-44.806	266.47	1164.377	-1.0894	0.8999	0.040527	-36.313	252.105	1397.0869	-1.4883	1.0889	0.027344
0.004	-29.819	-195.781	1830.148	-1.0137	1.109	-0.11914	-32.26	20.945	16.2102	0.18945	0.14795	0.09082	-64.425	27.5075	22.657	0.049805	-0.13111	-0.069091	-7.461	-301.68	1451.56	-0.93848	1.1523	-0.054688	18.333	239.018	1239.6	-1.0127	0.84082	0.24121	-58.691	230.726	1096.8652	-1.0564	0.86792	0.050293	-40.974	232.194	1389.6204	-1.4655	1.0739	0.033594
0.006	5.19799999999999	-180.78	1925.334	-1.1476	1.1813	-0.078906	-28.151	4.1022	34.575	0.19922	0.15283	0.09668	-51.028	31.2259	15.729	0.033691	-0.13623	-0.073242	2.268	-335.23	1521.8	-0.98998	1.1458	-0.048828	-19.411	227.975	1184.06	-0.98779	0.81543	0.23047	-47.396	195.1869	1085.38187	-1.0269	0.83936	0.060059	20.385	259.327	1397.709	-1.4399	1.0554	0.041699
0.008	37.16	-103.87	1955.793	-1.2926	1.266	-0.037793	-38.066	16.3092	22.3189	0.19506	0.15723	0.095948	-41.574	18.8363	-2.784	0.0039063	-0.13818	-0.056641	-28.958	-352.67	1519.39	-1.0654	1.1504	-0.032715	32.532	214.711	1183.41	-0.95703	0.79297	0.21387	-60.5	256.377	1038.0743	-0.98389	0.80029	0.068359	-30.692	271.013	1343.067	-1.4117	1.039	0.040136
0.01	30.611	-88.148	1929.853	-1.4219	1.3438	0.0029297	-24.418	-12.8019	31.289	0.2002	0.15625	0.097168	-49.864	9.056	5.1117	-0.0068359	-0.13916	-0.054199	-15.741	-383.94	1589.22	-1.2012	1.1934	-0.0048828	18.932	233.97	1124.76	-0.90967	0.75928	0.19629	-39.143	196.6	1011.5488	-0.95898	0.78516	0.071289	-25.191	219.454	1322.5544	-1.3817	1.0195	0.045996
0.012	75.618	-107.123	1963.602	-1.5329	1.3839	0.041895	-19.507	39.709	22.81	0.19287	0.16455	0.10303	-20.687	11.19008	35.528	-0.037598	-0.13525	-0.044922	26.733	-342.061	1642.98	-1.2734	1.2285	0.012695	24.496	197.794	1115.71	-0.88428	0.73877	0.19336	-6.988	216.421	1019.225	-0.90723	0.74805	0.093262	-30.042	248.51	1266.8414	-1.353	0.99463	0.052246
0.014	78.822	-46.64	1945.382	-1.6448	1.413	0.078223	-6.45	52.862	3.367	0.18848	0.16455	0.10303	-41.102	4.27304	27.8708	-0.050293	-0.1311	-0.040772	5.435	-292.727	1715.07	-1.4004	1.291	0.046875	66.5434	216.482	1107.47	-0.84131	0.70557	0.17676	-24.608	235.083	989.114	-0.86987	0.72046	0.10205	-65.07	213.602	1211.3482	-1.3229	0.97471	0.054492
0.016	30.181	-90.59	1908.3311	-1.7643	1.4333	0.11026	1.146	28.131	4.9138	0.1748	0.16602	0.11475	-15.307	24.20774	20.156	-0.064453	-0.12891	-0.037598	61.9376	-247.133	1819.78	-1.4888	1.3184	0.075196	33.677	233.524	1066.71	-0.80444	0.67993	0.15845	-6.151	193.59	955.266	-0.83594	0.69727	0.10645	-37.589	195.3502	1186.099	-1.2887	0.95	0.059864
0.018	8.133	-128.547	1920.319	-1.8772	1.4564	0.12129	-7.648	63.996	-21.5086	0.15991	0.1709	0.1145	-11.399	63.675	8.431	-0.072754	-0.13184	-0.036133	63.9539	-162.582	1860.39	-1.5864	1.3306	0.095215	56.6541	199.709	1045.44	-0.76758	0.6543	0.14111	-4.994	271.641	907.225	-0.79053	0.66748	0.11523	-63.228	232.103	1142.79	-1.2578	0.92305	0.061035
0.02	-38.383	-135.005	1914.6258	-1.9805	1.4785	0.14307	1.43	14.877	-17.116	0.14014	0.17676	0.12354	-56.268	59.4254	4.643	-0.078125	-0.13379	-0.026367	67.083	-119.8515	1890.77	-1.7202	1.3384	0.11719	52.302	217.03	982.27	-0.7124	0.61572	0.12842	-48.822	252.315	847.222	-0.76318	0.65381	0.12012	-69.66	190.0179	1142.457	-1.2131	0.89902	0.064844
0.022	-82.477	-220.032	1958.8368	-2.0629	1.5059	0.15771	16.74	1.066	12.7946	0.12158	0.18799	0.12988	-9.416	62.6	28.3028	-0.078125	-0.13379	-0.023438	119.7162	-75.086	1916.26	-1.7793	1.3438	0.12158	-8.224	207.528	901.6	-0.68506	0.59814	0.11719	-46.378	224.905	818.702	-0.70801	0.6123	0.14014	-25.459	215.0562	1137.056	-1.1719	0.87891	0.064453
0.024	-28.025	-201.9684	2004.241	-2.1297	1.5408	0.1666	-9.823	22.896	21.0606	0.11328	0.19385	0.13184	-35.013	59.257	-1.396	-0.08081	-0.14185	-0.023682	78.109	-25.518	1863.65	-1.8999	1.3442	0.15088	30.077	182.589	880.04	-0.62891	0.55469	0.092285	-75.2829	255.828	742.579	-0.6687	0.58081	0.13941	-48.842	245.722	1088.792	-1.1294	0.85654	0.068262
0.026	-7.521	-200.05	1991.502	-2.1844	1.5768	0.16972	-23.016	-32.513	57.839	0.095215	0.21143	0.1416	-50.038	32.4817	5.5535	-0.08252	-0.14404	-0.020508	58.702	-76.689	1876	-1.9734	1.3431	0.17041	10.633	223.84	803.08	-0.58472	0.52173	0.077393	-53.791	184.0135	692.441	-0.62793	0.55273	0.14111	-11.882	220.568	1054.645	-1.0909	0.83369	0.068848
0.028	31.221	-224.513	2033.76	-2.2161	1.6007	0.15928	-15.687	2.571	74.972	0.087647	0.21924	0.14722	-5.352	37.359	23.7647	-0.085938	-0.14893	-0.016602	29.552	-117.1106	1899.41	-2.0376	1.3481	0.18506	-12.131	199.061	762.15	-0.54053	0.48926	0.064941	-43.221	207.8051	643.744	-0.56445	0.51465	0.14746	-13.333	264.015	1009.004	-1.0523	0.81299	0.073535
0.03	41.066	-149.864	2030.744	-2.2344	1.6152	0.14502	-27.941	11.164	54.206	0.075684	0.23486	0.14795	-52.986	23.65	15.3184	-0.088867	-0.15234	-0.010254	-61.1651	-151.304	1925.86	-2.1035	1.3574	0.19482	4.631	219.82	733.82	-0.48535	0.44727	0.039063	-63.396	218.235	597.319	-0.53174	0.49414	0.14404	-51.658	230.798	969.359	-1.017	0.79024	0.07627
0.032	16.975	-158.2343	1996.282	-2.2274	1.6233	0.12978	-34.535	-20.7202	73.969	0.048828	0.26025	0.14404	-18.39	25.57097	29.2973	-0.09375	-0.15625	-0.0039063	-55.621	-203.038	2003.39	-2.1328	1.3652	0.20557	-45.418	241.752	691.03	-0.45898	0.42676	0.030762	-47.072	165.0298	570.02	-0.47119	0.45654	0.1582	-0.0700000000000003	210.851	944.016	-0.98193	0.7583	0.080566
0.034	15.254	-143.744	2034.331	-2.2053	1.6193	0.10498	-67.789	4.991	122.268	0.032715	0.27295	0.1377	3.79	41.999	12.0019	-0.09668	-0.15405	-0.0065917	-76.1768	-153.995	2012.78	-2.1914	1.3818	0.21436	18.245	206.026	682.52	-0.39844	0.38184	0.011719	-67.085	201.033	503.557	-0.4248	0.42944	0.15259	-22.511	241.77	881.829	-0.95127	0.73643	0.087012
0.036	-22.678	-52.991	1997.936	-2.1694	1.5981	0.084668	-86.2085	-60.43	171.299	-0.024414	0.29883	0.14258	-67.533	32.7845	13.3435	-0.10449	-0.14893	-0.0019531	-122.048	-128.976	2017.28	-2.2214	1.3948	0.22046	-13.128	230.784	621.3	-0.35522	0.35327	-0.0036621	-47.042	160.325	467.7428	-0.38184	0.4082	0.15088	-66.0405	203.955	865.699	-0.92305	0.71211	0.096875
0.038	-51.795	-76.669	1982.176	-2.1321	1.5687	0.061426	-63.216	-74.0544	243.419	-0.071533	0.32251	0.14698	-4.838	40.1186	44.7395	-0.11377	-0.14014	0.0053711	-99.61763	-101.885	2062.17	-2.2461	1.4023	0.23291	-38.527	207.954	567.84	-0.31982	0.32568	-0.017578	-19.144	145.265	459.724	-0.3208	0.375	0.15283	-54.2077	222.029	811.22	-0.88867	0.69336	0.10312
0.04	-12.223	-20.639	1983.175	-2.0933	1.5317	0.04541	-80.4366	-53.898	304.663	-0.12939	0.34521	0.15234	-35.093	33.669	30.5769	-0.11475	-0.13721	0.0058594	-112.923	-60.544	2031.83	-2.2637	1.4082	0.2417	-1.943	182.616	560.67	-0.27197	0.28955	-0.031738	-63.7083	200.965	420.22	-0.29102	0.35938	0.1499	-96.33925	221.393	735.401	-0.85635	0.66894	0.10654
0.042	-51.376	20.028	1903.9406	-2.0615	1.4951	0.031836	-68.383	-65.8204	426.038	-0.20166	0.37939	0.15869	-53.513	19.1807	20.9146	-0.11328	-0.12744	0.01123	-111.1214	-112.356	2073.89	-2.2637	1.4023	0.24756	-59.7036	204.87	487.96	-0.25049	0.27246	-0.038574	-41.762	152.169	407.851	-0.22998	0.32666	0.14209	-50.9	190.548	678.5604	-0.82178	0.64893	0.11572
0.044	-64.606	-17.031	1899.928	-2.0374	1.4606	0.024512	-53.413	21.4773	619.03	-0.23828	0.40039	0.15918	-15.025	18.8331	35.169	-0.11303	-0.11841	0.013184	-51.342	-117.249	2113.19	-2.2617	1.3867	0.25195	-42.97	156.451	456.12	-0.21484	0.23682	-0.053711	-36.365	160.881	363.454	-0.18286	0.29663	0.14185	-70.619	206.7436	621.3705	-0.78769	0.62715	0.12227
0.046	-62.838	34.926	1879.721	-2.0335	1.4263	0.020605	-21.345	98.082	799.47	-0.31592	0.45654	0.14258	-48.483	18.2881645	15.9771	-0.1123	-0.11084	0.016602	-89.2637	-115.2058	2072.44	-2.2517	1.3635	0.25659	-6.689	134.466	428.64	-0.18433	0.21167	-0.06128	-69.922	148.996	334.208	-0.13818	0.26611	0.13818	-95.8214	167.363	590.3521	-0.76045	0.60205	0.13007
0.048	-85.062	7.3724	1841.344	-2.0428	1.401	0.022656	-27.241	131.338	976.78	-0.39014	0.50464	0.12597	-56.317	17.4163	41.827	-0.104	-0.097656	0.01416	-93.0883	-118.04086	2051.57	-2.2363	1.3359	0.26221	-66.0547	144.762	385.04	-0.1582	0.18848	-0.069336	-31.215	66.484	308.402	-0.081055	0.22119	0.13281	-45.531	157.51868	580.959	-0.72802	0.57744	0.1375
0.05	-43.139	-9.24601	1902.7694	-2.0527	1.3789	0.02832	-15.916	148.799	1116.73	-0.48535	0.5625	0.098145	-24.415	36.05	22.4943	-0.097168	-0.092285	0.010742	-101.045	-22.925	1980.92	-2.2046	1.2896	0.25391	-15.387	104.28	388.02	-0.12891	0.15723	-0.071289	-55.878	98.4091	264.054	-0.055176	0.19824	0.12988	-62.9318	187.694	539.31	-0.69882	0.55234	0.15049
0.052	-29.703	50.5229	1870.8173	-2.0578	1.3578	0.03086	17.883	58.1174	1254.74	-0.65771	0.65771	0.077637	-60.579	35.9323	21.4202	-0.084473	-0.083008	0.0097656	-148.527	16.097	1935.85	-2.1855	1.2676	0.24805	6.459	127.321	354.507	-0.11328	0.1416	-0.082031	-42.981	63.626851	237.3	-0.0048828	0.15918	0.125	-46.498	172.214	508.619	-0.66309	0.52539	0.15723
0.054	-12.949	-3.076	1881.909	-2.0561	1.3318	0.03916	5.90700000000001	6.358	1375.66	-0.83252	0.74805	0.096926	-30.132	47.548	38.509	-0.073487	-0.076416	0.0078125	-86.711	43.55	1947.67	-2.1499	1.2212	0.23486	-38.429	122.749	305.945	-0.083984	0.11816	-0.087402	-29.424	56.853	210.944	0.023925	0.13476	0.12378	-31.435	194.684	482.582	-0.62667	0.49561	0.16582
0.056	35.185	28.131	1937.489	-2.0526	1.3102	0.041894	-21.185	37.959	1409.43	-1.0313	0.83887	0.14355	-47.205	46.472	7.6942	-0.062988	-0.069824	0	-86.944	87.131	1885.92	-2.1255	1.1905	0.22241	-2.466	93.633	307.05	-0.060547	0.096925	-0.093994	-61.772	102.303	176.8168	0.051758	0.10938	0.12305	-87.507	196.255	441.288	-0.58312	0.471	0.16748
0.058	9.162	37.905	1888.223	-2.0424	1.285	0.039942	-16.794	-13.7898	1380.62	-1.3374	0.96338	0.22852	-49.357	28.5535	11.6113	-0.04248	-0.066895	-0.0019531	-76.111	29.71	1892.49	-2.0913	1.1548	0.21094	-15.106	133.235	245.048	-0.034668	0.07666	-0.099121	-24.296	64.197	163.1248	0.081543	0.075684	0.12354	-33.288	152.587	402.15	-0.5261	0.43663	0.17294
0.06	3.02500000000001	-23.435	1886.7209	-2.0332	1.2627	0.041504	-16.667	-22.826	1327.05	-1.4956	1.0347	0.27441	-19.719	28.9816	0.420299999999999	-0.033691	-0.067871	-0.0078125	-18.041	30.86	1915.29	-2.0522	1.1216	0.19531	-6.822	96.004	219.421	-0.0048828	0.05127	-0.11084	-12.043	94.293	134.0911	0.095215	0.064941	0.11328	-43.787	148.78	338.6685	-0.47657	0.41837	0.1708
0.062	39.437	33.677	1884.576	-2.0095	1.2441	0.042383	24.807	-67.071	1269.75	-1.7866	1.1743	0.40234	-49.537	23.3259	-1.074	-0.01416	-0.069336	-0.015625	-43.403	37.14	1889.07	-2.0308	1.1089	0.18164	21.369	116.686	195.548	0.010254	0.038086	-0.11523	-22.467	100.174	123.2987	0.12598	0.035645	0.10596	-87.204	96.6534	320.4021	-0.42188	0.39404	0.16943
0.064	17.721	-0.664	1825.284	-1.9894	1.2278	0.041602	127.137	-96.9245	1246.61	-1.9282	1.2681	0.47949	-40.822	17.156	39.027	-0.0036621	-0.067871	-0.021485	15.334	1.7	1918.2	-1.9941	1.082	0.16943	-7.7	134.861	177.393	0.036133	0.014648	-0.12207	-1.923	67.468	126.459	0.14648	0.018311	0.10767	-46.822	86.791	298.9777	-0.37136	0.37177	0.16592
0.066	18.362	-31.5674	1830.528	-1.9624	1.2157	0.04043	149.509	-52.4499	1195.32	-1.9844	1.332	0.52393	-20.362	16.1858	38.06064	0.0048828	-0.063477	-0.029297	41.82	36.885	1894.18	-1.9648	1.0655	0.16455	15.568	84.0604	182.021	0.05249	-0.0019531	-0.12866	-36.441	107.868	107.428	0.16211	-0.00097656	0.11035	-57.299	103.47603	246.6124	-0.32301	0.34431	0.16123
0.068	20.267	39.664	1772.171	-1.9326	1.2049	0.034277	87.434	-87.829	1143.43	-1.8862	1.395	0.54102	-50.38	7.306	12.9667	0.016602	-0.061523	-0.03125	38.985	35.361	1881.01	-1.9375	1.0547	0.15674	2.58499999999999	115.413	145.3298	0.06543	-0.016113	-0.13574	-32.67	81.423	95.584	0.18652	-0.022461	0.10254	-33.222	84.096	223.2958	-0.27494	0.31618	0.15888
0.07	7.83800000000001	2.907	1742.72	-1.9009	1.1938	0.039063	82.701	-125.415	1167.75	-1.7793	1.4355	0.53271	-21.014	23.3472	36.295	0.021484	-0.060547	-0.036621	79.266	32.402	1890.61	-1.9077	1.0513	0.14844	5.856	93.4251	116.8015	0.089844	-0.034668	-0.14404	2.134	75.161	68.62547	0.19531	-0.035156	0.104	-15.109	116.37	197.4742	-0.22827	0.28064	0.15879
0.072	33.936	86.693	1758.425	-1.8725	1.1868	0.036719	48.048	-117.181	1187.22	-1.5293	1.5332	0.51807	-43.859	35.558	3.4245	0.035645	-0.056152	-0.038574	56.717	78.159	1854.5	-1.8867	1.0508	0.14795	20.799	58.4	94.654	0.096191	-0.043457	-0.14697	-37.555	88.104	36.9416	0.21826	-0.051758	0.10059	-55.751	118.822	199.54	-0.18164	0.25537	0.14941
0.074	-2.79400000000001	147.929	1723.154	-1.843	1.18	0.033007	25.96	-114.551	1245.77	-1.3391	1.5549	0.4917	-39.124	30.4815	12.217	0.046875	-0.052246	-0.04126	40.736	38.981	1843.74	-1.8496	1.0469	0.14111	-42.316	92.897	73.6329	0.11035	-0.060059	-0.15479	-38.497	52.296	38.55149	0.23657	-0.060547	0.095703	-6.457	109.82	201.122	-0.13269	0.22388	0.14785
0.076	7.845	132.712	1707.849	-1.8051	1.1625	0.026367	2.596	-42.656	1276.52	-1.1523	1.4961	0.44971	11.817	35.9986	22.6579	0.054199	-0.04834	-0.048828	61.629	32.001	1827.42	-1.8213	1.0507	0.13696	-22.189	75.9608	73.74	0.12231	-0.068848	-0.16528	-30.869	70.074	32.977	0.24609	-0.07666	0.09082	2.129	121.848	173.461	-0.092208	0.20098	0.14179
0.078	47.573	206.555	1707.55	-1.7682	1.1463	0.026172	-39.317	-12.283	1235.01	-0.94531	1.3027	0.39404	-60.4081	17.9527	-8.3867	0.066406	-0.046387	-0.046387	5.501	4.27	1761.99	-1.793	1.0508	0.13086	-7.23	80.137	44.417	0.13135	-0.076172	-0.16602	-47.854	68.292	17.2528	0.25781	-0.091309	0.090332	-19.44	89.703	154.1931	-0.057069	0.17248	0.14141
0.08	0.768000000000001	165.323	1654.8792	-1.7363	1.125	0.030762	-41.657	-52.1952	1224.77	-0.86865	1.1958	0.37695	-30.997	5.791	12.7875	0.078613	-0.044922	-0.048828	16.45	-48.8	1758.71	-1.7524	1.0493	0.12451	-51.796	77.0444	38.561	0.1333	-0.093262	-0.1709	-16.612	27.0579	24.0065	0.26221	-0.1001	0.085205	6.91	84.822	132.45058	-0.026853	0.15494	0.14344
0.082	11.848	135.866	1684.716	-1.7098	1.1024	0.034766	-29.681	-44.1627	1232.55	-0.76318	1.0376	0.34766	-11.007	17.2774	19.866	0.082031	-0.043457	-0.04834	4.50200000000001	32.61	1721.53	-1.7339	1.0474	0.12598	-23.156	22.253	73.8684	0.13672	-0.095215	-0.17334	-42.701	35.4778	7.58724	0.271	-0.104	0.089355	-35.798	94.229	99.5054	0.0014648	0.13184	0.14111
0.084	18.966	167.603	1654.389	-1.6844	1.0871	0.035938	-32.453	-130.16	1244.54	-0.71386	0.98095	0.34302	-38.482	28.442	10.64028	0.083984	-0.042969	-0.053711	-41.699	79.751	1697.5	-1.7026	1.0454	0.11963	-57.8	42.6186	57.6371	0.12939	-0.1001	-0.17236	-36.912	-0.106000000000002	8.2203	0.26758	-0.11182	0.082031	-13.741	92	98.909	0.026401	0.11512	0.14277
0.086	-31.275	91.888	1607.182	-1.6613	1.0648	0.039453	-39.476	-263.15	1324.84	-0.69629	0.95898	0.34326	-4.241	49.4544	27.474	0.083496	-0.039551	-0.055664	0.0510000000000019	128.597	1707.96	-1.6743	1.042	0.11353	-69.8934	53.918	43.9429	0.12402	-0.11036	-0.17456	-5.825	6.634	13.1521	0.25781	-0.11621	0.085938	-12.544	114.889	72.063	0.047754	0.098929	0.14078
0.088	-15.366	124.9922	1599.112	-1.6376	1.0472	0.046484	-78.2957	-348.67	1350.89	-0.7417	0.979	0.34912	-50.679	59.143	-0.4611	0.078125	-0.031738	-0.056641	-42.497	204.993	1644.34	-1.6445	1.0449	0.10986	-28.666	37.9891	42.9383	0.11475	-0.11523	-0.16748	-45.351	45.299	7.1791	0.24316	-0.12451	0.090332	-56.16	90.68	59.655	0.068425	0.081247	0.14267
0.09	-65.687	128.756	1541.436	-1.6133	1.0313	0.050781	-137.591	-469.61	1359.09	-0.79297	1.0098	0.36035	-48.509	50.8699	3.2872	0.07959	-0.025635	-0.058349	-56.429	182.213	1628.35	-1.6055	1.0352	0.10742	-91.7645	74.377	7.6367	0.097656	-0.11768	-0.16553	-32.002	25.812	22.6163	0.22925	-0.12867	0.093262	-23.803	66.254	81.609	0.086815	0.059294	0.14869
0.092	-86.791	91.552	1528.778	-1.5921	1.0116	0.056543	-164.743	-448.38	1407.37	-0.9502	1.1016	0.39111	-4.014	45.337	16.6096	0.077148	-0.01709	-0.05957	-32.285	178.322	1624.04	-1.5938	1.0332	0.10449	-81.359	13.6293	18.3321	0.088379	-0.12012	-0.16309	-24.914	58.07	32.3727	0.21094	-0.13184	0.094238	-40.936	69.052	48.11	0.095215	0.041504	0.15186
0.094	-62.089	148.3983	1499.833	-1.5723	0.99511	0.065136	-168.567	-347.55	1436.02	-1.0708	1.1958	0.4165	-51.19	31.6614	3.66	0.076172	-0.0083008	-0.058105	-81.402	151.713	1604.57	-1.562	1.0317	0.10352	-45.765	15.9174	16.1442	0.058105	-0.11475	-0.15527	-66.198	65.0405	15.5877	0.18945	-0.13086	0.10254	-42.063	49.135	27.5734	0.10277	0.029128	0.15394
0.096	-129.623	113.6963	1434.31296	-1.5457	0.98106	0.070215	-139.779	-323.44	1509.77	-1.1772	1.2974	0.4375	-32.014	17.257	31.0756	0.075684	0	-0.05957	-63.144	86.951	1595.54	-1.5273	1.0254	0.10547	-80.7891	41.0776	0.122	0.033936	-0.11328	-0.15088	-32.267	45.623	11.5677	0.18213	-0.13281	0.10498	-6.495	45.147	34.5731	0.11643	0.013937	0.15611
0.098	-110.12651	112.2559	1427.026	-1.5193	0.96875	0.077246	-135.1705	-253.013	1570.37	-1.2754	1.4063	0.4458	-21.857	19.7432	16.43	0.077637	0.0043945	-0.058594	-94.3712	93.903	1550.35	-1.5107	1.0234	0.098633	-53.226	5.417	30.9216	0.011719	-0.10693	-0.14111	-65.183	71.634	-12.618	0.1626	-0.12646	0.11377	-59.128	42.6826	21.3335	0.12937	-3.5618e-05	0.15428
0.1	-60.784	189.994	1390.676	-1.4961	0.9502	0.084473	-164.082	-250.271	1596.94	-1.3086	1.4492	0.45166	-63.345	23.4226	13.1542	0.073974	0.010254	-0.06372	-119.4089	76.092	1500.1	-1.4824	1.0117	0.097168	-60.774	41.512	27.838	-0.01709	-0.10107	-0.12695	-56.555	45.6215	1.538	0.14209	-0.12745	0.11499	-35.117	33.378	32.8302	0.14414	-0.015221	0.15994
0.102	-69.927	175.628	1355.5821	-1.466	0.93066	0.084668	-139.244	-227.729	1684.2	-1.3628	1.5063	0.44873	-20.108	33.8885	29.7578	0.073242	0.01123	-0.064453	-101.9243	72.4	1494	-1.4568	1.0041	0.097168	-74.84	44.992	14.837	-0.03125	-0.097168	-0.12061	-40.031	38.546	14.385	0.12598	-0.12891	0.11816	5.576	58.9795	33.2627	0.15723	-0.027832	0.1626
0.104	-29.653	257.236	1336.188	-1.4335	0.91299	0.095214	-136.839	-122.33	1726.12	-1.4021	1.5179	0.44702	-41.874	40.271	5.9604	0.074219	0.01709	-0.067871	-121.1224	140.013	1437.4	-1.4297	0.99219	0.096191	-30.859	14.0582	18.1475	-0.051758	-0.087891	-0.11084	-64.8118	45.6723	1.978	0.10596	-0.12695	0.12109	-59.494	52.9055	24.1312	0.16498	-0.046714	0.1624
0.106	-48.942	279.654	1271.616	-1.4069	0.8958	0.10459	-109.0093	-116.358	1761.96	-1.4258	1.5273	0.43408	-61.418	35.4976	20.3326	0.076172	0.016113	-0.069336	-125.501	152.248	1421.36	-1.3901	0.97314	0.098145	-39.653	51.42	16.8841	-0.06958	-0.083984	-0.104	-6.981	14.906	27.0246	0.10107	-0.12891	0.12451	-32.544	42.6431	44.971	0.18023	-0.067385	0.16172
0.108	-54.238	241.561	1252.25	-1.3828	0.88047	0.1207	-94.553	-93.567	1781.6	-1.4414	1.541	0.41846	-22.195	40.521	17.2571	0.072754	0.02002	-0.066895	-64.888	178.188	1403.99	-1.377	0.96289	0.10303	-34.405	11.2896	18.21329	-0.083008	-0.079102	-0.099121	-36.052	48.101	27.7979	0.083008	-0.12207	0.12158	-40.954	47.034	18.0057	0.19197	-0.090304	0.16026
0.11	-41.1574	283.257	1219.3242	-1.3589	0.86475	0.13574	-102.6726	-72.514	1740.22	-1.4448	1.5513	0.41895	-58.1	37.4755	10.34	0.074951	0.016357	-0.069336	-101.0679	185.8281	1354.92	-1.3374	0.93994	0.10352	-13.244	22.8802	29.243	-0.093262	-0.078613	-0.088379	-49.173	52.7572	31.0194	0.071777	-0.12256	0.1233	-73.064	22.8316	0.0122	0.20469	-0.11038	0.1535
0.112	-85.8664	228.303	1159.6714	-1.3361	0.85195	0.14687	-67.4964	-117.35	1764.02	-1.4746	1.5684	0.40186	-34.333	27.61526	35.0016	0.077148	0.02002	-0.072266	-71.521	155.0187	1354.1	-1.3115	0.91797	0.10473	-27.897	54.218	36.7738	-0.09668	-0.079102	-0.088379	11.675	45.029	38.464	0.062012	-0.12305	0.125	-26.436	26.104	2.7104	0.21631	-0.12305	0.146
0.114	-51.037	205.1401	1108.3063	-1.3097	0.83799	0.16113	-33.006	-65.788	1807.15	-1.5056	1.591	0.38916	-22.128	42.155	20.575	0.067383	0.022461	-0.074707	-9.736	195.5465	1308.355	-1.2813	0.89844	0.104	11.727	17.12043	32.03229	-0.1084	-0.076172	-0.077148	-43.049	66.5	27.9848	0.047363	-0.12256	0.11914	-71.064	15.36248	-5.14	0.2176	-0.13204	0.14224
0.116	-49.629	212.6092	1051.8436	-1.2772	0.82197	0.16543	-25.215	-70.759	1863.57	-1.5469	1.6191	0.38721	-53.12	36.62634	23.5392	0.063477	0.028809	-0.078613	-33.835	203.349	1236.469	-1.2393	0.87305	0.1084	-17.138	33.999	10.237	-0.11523	-0.074463	-0.071777	-22.555	22.04749	37.947	0.036621	-0.12158	0.11475	-51.701	-2.791	30.591	0.21603	-0.13903	0.13721
0.118	-81.692	151.872	1011.539	-1.2398	0.80625	0.17451	11.831	-120.819	1959.89	-1.6167	1.6626	0.40137	0.417999999999999	27.5665	56.819	0.046875	0.036133	-0.083008	3.545	217.065	1223.226	-1.2163	0.85693	0.10938	-7.325	22.622	16.8902	-0.125	-0.070801	-0.062988	-19.358	4.17	41.2645	0.032227	-0.12109	0.11865	-34.616	17.7103	17.7313	0.21235	-0.13814	0.13636
0.12	-41.949	189.9163	991.0441	-1.1997	0.78174	0.18506	24.933	-103.48	1973.53	-1.6558	1.6821	0.40967	-35.969	2.636	62.1597	0.027832	0.047607	-0.085449	-15.886	272.691	1145.79	-1.1777	0.82422	0.11133	0.609999999999999	-9.8321	21.7767	-0.12939	-0.072754	-0.058594	-57.578	9.13889	28.47914	0.040283	-0.11548	0.11254	-42.566	23.572	15.2425	0.20208	-0.13137	0.14173
0.122	-43.038	192.269	961.9614	-1.1631	0.76387	0.19414	57.21631	-173.959	1990.19	-1.7305	1.7188	0.43799	-72.85	-14.3005	84.033	0.0068359	0.0625	-0.086914	-17.572	263.219	1110.443	-1.1484	0.80664	0.11841	-32.684	44.296	3.3422	-0.13428	-0.072754	-0.052734	-26.268	-14.5934	42.896	0.041016	-0.1167	0.11084	-20.052	52.602	21.7886	0.19336	-0.12793	0.14307
0.124	-27.797	186.087	959.8303	-1.1148	0.74102	0.20322	63.8083	-187.892	2030.56	-1.781	1.7376	0.45532	-13.46	-9.3476	122.111	-0.043945	0.10205	-0.080566	8.7	264.472	1096.276	-1.1133	0.78516	0.11377	3.99	15.762833	31.009	-0.13379	-0.070801	-0.04248	-35.063	37.302	26.8414	0.055176	-0.1084	0.10303	-22.813	64.854	24.9345	0.18104	-0.12891	0.13944
0.126	22.06	251.165	942.964	-1.0672	0.72696	0.20986	61.30147	-124.004	2043.22	-1.8203	1.7422	0.4751	-53.172	-27.4998	149.74	-0.083008	0.12012	-0.077637	-45.997	239.95	1041.588	-1.0703	0.75293	0.12549	0.658000000000001	17.17429	18.1685	-0.13208	-0.066406	-0.034912	-50.927	43.1608	22.17165	0.059082	-0.10742	0.098633	-22.919	29.6628	26.5396	0.17539	-0.12618	0.14243
0.128	-8.364	216.307	896.41	-1.0193	0.70654	0.21289	52.33	-116.613	2057.98	-1.8594	1.7373	0.50928	-30.741	-57.3141	241.342	-0.1748	0.16016	-0.060547	-28.111	187.269	1029.169	-1.0527	0.73633	0.12695	-50.739	50.7993	11.7235	-0.13037	-0.066406	-0.035156	-17.228	38.666	25.4108	0.074219	-0.10303	0.087891	16.115	20.4639	11.9845	0.16399	-0.13054	0.14633
0.13	-14.613	224.078	855.933	-0.96533	0.69092	0.21631	21.201	-21.154	2046.43	-1.8789	1.7285	0.52588	-16.601	-49.982	294.93	-0.2561	0.18873	-0.045899	-31.26	197.785	991.28	-1.0117	0.70508	0.13721	9.475	8.9446	25.1571	-0.12451	-0.055664	-0.027344	-34.497	56.31	12.4789	0.085694	-0.10107	0.084228	-37.752	8.6086	-4.5533	0.14609	-0.13947	0.14388
0.132	-23.154	249.067	787.637	-0.91172	0.66953	0.22226	-48.708	21.816	1995.47	-1.9102	1.709	0.54736	-38.386	-51.1357	377.71	-0.33838	0.22656	-0.025391	-54.581	197.6801	931.734	-0.97339	0.68872	0.1377	-22.349	54.627	0.497	-0.12354	-0.052246	-0.025879	-16.475	24.1244	22.2588	0.098633	-0.10059	0.076172	-18.773	0.522	34.3546	0.12842	-0.14014	0.14551
0.134	-55.761	189.992	735.4648	-0.86094	0.64648	0.22334	-35.329	-5.617	2009.63	-1.9297	1.6904	0.56787	3.211	-21.6526	522.05	-0.46191	0.2832	-0.0014648	-15.84	189.73375	934.264	-0.93506	0.66846	0.13965	-54.788	64.001	8.2269	-0.10693	-0.044922	-0.030273	-18.067	19.9352	21.979	0.11279	-0.099609	0.069336	-25.177	27.206	25.4329	0.11324	-0.14305	0.14102
0.136	-42.847	217.108	684.4014	-0.8082	0.61953	0.22998	-4.124	38.083	1998.74	-1.939	1.6724	0.58594	-33.3201	27.259	647.92	-0.52539	0.31934	0.011719	-60.014	227.15	887.817	-0.875	0.64355	0.14307	-33.396	17.3099	31.488	-0.094482	-0.041016	-0.024903	-44.937	20.238	13.9957	0.12061	-0.097168	0.064941	-58.443	23.554029	10.1322	0.093857	-0.13945	0.14264
0.138	-85.1665	188.575	626.49692	-0.75742	0.60137	0.22783	3.904	-0.6372	1973.87	-1.9434	1.6387	0.61035	-54.0237	44.617	797.71	-0.69092	0.396	0.04541	-62.42	216.006	863.319	-0.84814	0.63135	0.14404	-60.271	55.718	5.051	-0.083008	-0.037598	-0.027832	-28.075	-6.689	18.6875	0.13281	-0.095703	0.060547	1.876	40.57	17.2664	0.074752	-0.13159	0.14152
0.14	-90.974303	175.093	572.7939	-0.70898	0.57617	0.21924	-37.0883	-4.82	1988.56	-1.9487	1.6157	0.62109	-38.3427	68.47	904.39	-0.83936	0.46338	0.079346	-24.627	229.94	826.856	-0.78857	0.60791	0.13721	-65.822	13.124	3.5841	-0.068359	-0.035156	-0.030762	-50.786	23.5692	1.7927	0.14111	-0.087158	0.057861	-38.418	51.247	-7.3769	0.058765	-0.12098	0.14746
0.142	-56.572	227.185	531.518	-0.64678	0.54814	0.22217	-86.831	43.702	1945.19	-1.9414	1.5742	0.63623	-118.611	86.809	1014.24	-1.0098	0.53467	0.12256	-99.551	243.237	756.404	-0.74414	0.58349	0.13721	-39.679	13.4383	1.118	-0.057129	-0.028808	-0.033935	-60.863	18.185	5.80519	0.15137	-0.081543	0.058105	-49.12	20.5877	20.7971	0.037109	-0.11377	0.15039
0.144	-86.214	180.794	488.1716	-0.58896	0.5374	0.23555	-121.641	12.91166	1928.11	-1.9402	1.5472	0.65429	-135.243	71.799	1183.02	-1.2891	0.65234	0.2002	-86.6769	210.994	756.887	-0.69873	0.55713	0.13672	-100.2611	44.9588	-3.5477	-0.049316	-0.022949	-0.033691	-35.613	15.9092	15.7255	0.1582	-0.077148	0.058594	8.375	17.4435	26.43318	0.011935	-0.10714	0.15167
0.146	-70.752	181.588	467.964	-0.53896	0.52256	0.22656	-118.8881	75.765	1918.79	-1.9429	1.5239	0.6626	-112.2466	100.9	1294.78	-1.4395	0.71973	0.24854	-89.9718	220.96	693.756	-0.62842	0.51904	0.13232	-71.619	19.9777	32.324	-0.04248	-0.013672	-0.031738	-64.904	50.84	8.01348	0.15918	-0.071777	0.056152	-46.945	1.408	-7.4819	-0.0091593	-0.10469	0.15761
0.148	-70.703	179.193	427.409	-0.49346	0.50264	0.21387	-134.13	84.548	1885.42	-1.9351	1.5044	0.67188	-140.4034	70.703	1358.87	-1.7671	0.87744	0.36084	-143.709	194.615	624.512	-0.60059	0.50244	0.13086	-52.354	58.524	11.9541	-0.040039	-0.011719	-0.032227	-47.136	20.0813	12.8672	0.16797	-0.064941	0.061035	-30.171	1.819	4.30411	-0.027913	-0.10274	0.15684
0.15	-67.577	133.08	420.176	-0.44043	0.47559	0.21143	-133.233	31.407	1949.11	-1.9312	1.4927	0.67773	-112.404	17.1585	1389.69	-2.0017	1.0027	0.43164	-97.5642	160.9896	585.268	-0.53857	0.46729	0.13086	-66.09	47.17574	13.6743	-0.030762	0.0014648	-0.03125	-31.223	20.396	16.3493	0.16944	-0.062988	0.064454	-3.793	30.0041534	9.3053	-0.039353	-0.1044	0.15821
0.152	-35.095	174.305	398.187	-0.3876	0.44629	0.21279	-137.685	61.5	1981.48	-1.9199	1.4844	0.67627	-102.0276	-30.3712	1327.91	-2.1836	1.1133	0.48682	-143.128	198.827	520.601	-0.50146	0.43994	0.13501	-48.419	8.83412	32.1556	-0.023681	0.012695	-0.031738	-65.521	11.427	6.278	0.17676	-0.059082	0.066895	-57.367	31.185	-8.9741	-0.040527	-0.10449	0.16064
0.154	-90.8259	143.759	362.681	-0.33135	0.42627	0.20664	-141.932	8.28599999999999	1966.26	-1.9019	1.48	0.67481	-93.7172	-93.195	1309.3	-2.2534	1.2339	0.54883	-138.1	182.852	496.09	-0.46729	0.42432	0.13477	-55.482	41.86853	22.0063	-0.01123	0.016602	-0.034668	-16.172	-11.392	14.3767	0.18506	-0.056641	0.069336	-34.115	55.0557	5.39197	-0.030759	-0.10674	0.15459
0.156	-74.718	126.139	347.52	-0.27744	0.40791	0.19688	-108.922	-16.918	1986.31	-1.8804	1.4751	0.66992	-42.025	-87.402	1272.01	-2.2378	1.2739	0.57617	-82.7545	195.01	449.301	-0.42188	0.39551	0.1377	-42.272	18.139	22.3843	-0.00097656	0.035156	-0.03418	-22.672	23.266	4.326	0.19043	-0.05127	0.061035	-46.224	65.614	-3.4951	-0.015227	-0.11143	0.14795
0.158	-59.327	140.938	303.545	-0.22178	0.39365	0.18535	-113.221	20.504	1927.07	-1.8354	1.4673	0.66211	-65.052	-97.383	1206.74	-2.1953	1.3008	0.52686	-115.0876	200.402	407.688	-0.396	0.38184	0.13867	-37.638	20.939	2.8986	0.010254	0.038574	-0.035645	-43.625	30.944	-7.0102	0.19189	-0.04248	0.068848	-77.74	40.811	14.38653	0.0062547	-0.11767	0.13896
0.16	-74.185	82.766	262.538	-0.16455	0.37305	0.17578	-87.88941	-20.207	1876.72	-1.814	1.4614	0.6543	-83.203	-127.426	1203.09	-2.0808	1.2727	0.417	-69.565	167.364	393.2053	-0.35059	0.35156	0.14355	-53.155	58.6512	12.7437	0.031738	0.046387	-0.042969	-6.39	45.4557	5.01286	0.19629	-0.03833	0.07129	-35.972	48.395	26.4376	0.032229	-0.11856	0.12422
0.162	-55.506	78.0357	242.032	-0.11787	0.34658	0.16816	-55.579	33.63	1844.43	-1.7656	1.4492	0.63965	-102.536	-136.552	1183.78	-1.8535	1.2227	0.29883	-53.668	167.115	358.902	-0.30933	0.32764	0.14112	-11.756	19.16767	28.1791	0.039063	0.056153	-0.045166	-58.407	83.214	-0.9726	0.19678	-0.030762	0.074219	-56.578	10.20957	5.53	0.056152	-0.12061	0.1084
0.164	-62.539	78.9899	206.918	-0.075293	0.31827	0.17071	-101.7927	74.278	1809.58	-1.727	1.4409	0.61914	-157.279	-162.041	1177.64	-1.4214	1.1333	0.13086	-61.631	152.432	344.195	-0.27246	0.30518	0.14063	-28.519	53.783	30.1467	0.054199	0.058594	-0.049316	-37.74	49.6757	1.731	0.19189	-0.026855	0.073242	-39.368	6.611	-2.0584	0.082811	-0.12012	0.096387
0.166	-36.578	41.416	194.223	-0.039746	0.29092	0.16758	-66.436	74.205	1839.35	-1.6875	1.4258	0.604	-99.8679	-164.084	1250.52	-1.2197	1.0859	0.04834	-16.156	124.029	326.669	-0.22998	0.27295	0.13623	-12.355	62.552	9.7194	0.070801	0.064453	-0.054688	-14.629	55.192	18.5655	0.18457	-0.020996	0.080566	-42.594	36.7678	-4.902	0.10254	-0.11484	0.082911
0.168	-10.88	78.3165	172.972	-0.010742	0.27031	0.16865	-12.619	133.213	1832.14	-1.6387	1.4121	0.57959	-84.818	-136.145	1260.09	-0.92969	1.0137	-0.083984	-40.875	140.21	288.597	-0.20654	0.2583	0.13574	-4.109	34.002	31.6469	0.078125	0.068359	-0.062012	-65.18	56.9264	5.687	0.16748	-0.0092773	0.081543	-56.371	31.305	9.0532	0.11816	-0.11172	0.068067
0.17	-25.107	69.604	124.6612	0.021484	0.25049	0.16504	-23.354	102.958	1794.03	-1.6147	1.4009	0.56836	-84.205	-134.896	1293.68	-0.81665	1.0178	-0.17236	-17.696	97.222	286.222	-0.16553	0.2251	0.12891	-31.576	67.624	16.2324	0.093262	0.074219	-0.068359	-27.134	16.5001	22.50738	0.15063	-0.0034179	0.087647	1.333	54.0364	20.3122	0.13584	-0.10527	0.061621
0.172	-15.587	83.248	126.6139	0.05625	0.23281	0.16211	-5.015	110.009	1791.27	-1.5703	1.3848	0.54932	-17.924	-137.051	1326.47	-0.74072	1.0562	-0.23486	5.23	85.975	234.85	-0.13891	0.20605	0.13208	-12.635	16.442	28.8746	0.10303	0.078857	-0.074951	-20.888	32.9645	15.815	0.13525	0.0048828	0.087891	-42.682	63.468	5.6206	0.15723	-0.099609	0.051758
0.174	0.534999999999997	125.768	128.04	0.089063	0.21338	0.15732	1.248	176.555	1732.06	-1.5457	1.3714	0.54028	0.187999999999995	-136.221	1318.85	-0.66895	1.1152	-0.28516	-38.754	88.918	185.2306	-0.11572	0.18506	0.12988	28.323	8.1406	30.2388	0.11816	0.084473	-0.077148	-37.483	20.295	11.6147	0.11768	0.014648	0.098145	-40.307	29.4583	26.982	0.17871	-0.092187	0.048144
0.176	6.069	96.739	122.429	0.11836	0.19346	0.15537	3.921	163.777	1721.05	-1.5215	1.3574	0.52783	40.53	-169.044	1376.16	-0.646	1.1372	-0.3042	11.289	60.663	186.4295	-0.094238	0.15283	0.12598	-32.35	31.8079	8.8666	0.12207	0.086914	-0.078613	-4.484	29.032	22.6678	0.10498	0.019043	0.099609	-4.61	46.682	34.859	0.19873	-0.084277	0.046484
0.178	24	104.301	123.328	0.14668	0.17217	0.15088	56.637	209.457	1709.02	-1.4966	1.3345	0.51465	60.694	-191.612	1409.18	-0.6709	1.166	-0.31445	6.735	84.787	160.4404	-0.07959	0.13965	0.12305	21.861	-12.5091	38.959	0.12402	0.089844	-0.084473	-25.845	66.369	2.075	0.089355	0.030762	0.11133	-45.267	33.7415	13.5952	0.21552	-0.081934	0.045703
0.18	-3.284	95.98	82.394	0.17578	0.15332	0.14209	44.566	203.561	1655.39	-1.4805	1.3203	0.50488	10.377	-242.52	1428.25	-0.75879	1.2124	-0.2998	-19.463	81.616	143.13318	-0.059082	0.11963	0.13232	-13.278	36.686	27.5684	0.125	0.09375	-0.07959	-24.423	38.5283	4.8191	0.080322	0.039795	0.11621	-18.483	25.5369	20.28084	0.22891	-0.083301	0.047266
0.182	-10.942	48.4081	60.89522	0.1919	0.13926	0.14375	31.468	138.334	1656.03	-1.4546	1.2974	0.49512	28.333	-301.41	1496.09	-0.88965	1.2852	-0.26123	39.425	54.2598	136.028	-0.042968	0.096436	0.12549	-53.155	49.3918	14.8462	0.11963	0.095947	-0.079834	-27.471	49.304	16.87994	0.07373	0.042969	0.12158	-19.122	35.307	8.616	0.24463	-0.080566	0.048828
0.184	-10.626	72.062	43.5882	0.20898	0.12354	0.14424	30.87	166.927	1626.49	-1.4387	1.2776	0.48022	28.923	-298.26	1525.79	-1.1035	1.4023	-0.2041	4.32400000000001	76.156	111.35	-0.024414	0.073242	0.11963	-18.865	27.503	18.0253	0.11475	0.099609	-0.07666	-52.559	48.3391	26.287	0.067871	0.059082	0.12842	-57.245	17.081	15.59619	0.25459	-0.093067	0.055371
0.186	-31.798	46.79157	22.7058	0.22226	0.11142	0.14189	21.479	122.652	1591.57	-1.4097	1.2583	0.46387	27.566	-311.73	1576.3	-1.1948	1.4536	-0.17139	-9.513	59.1824	123.153	0.011719	0.060547	0.11182	-56.104	60.849	12.872	0.10938	0.1001	-0.075684	-25.416	16.6082	54.056	0.067383	0.063965	0.12646	-13.363	36.9297	34.4744	0.25918	-0.10059	0.060058
0.188	-24.857	37.386	25.1317	0.23018	0.09375	0.14482	13.915	123.652	1588.36	-1.3745	1.2329	0.44531	71.798	-291.112	1651.27	-1.3472	1.5122	-0.10986	25.242	85.118	118.345	0.032227	0.055176	0.11084	-57.52	6.678	36.1047	0.1084	0.10547	-0.081055	-34.25	42.636	33.3152	0.05957	0.075684	0.13135	-14.569	56.513	8.8198	0.26543	-0.11114	0.065527
0.19	-30.17	47.457	0.3169	0.2334	0.085449	0.14355	-25.41	162.836	1525.4	-1.3555	1.2148	0.44043	18.407	-253.184	1667.71	-1.4571	1.5381	-0.065185	-44.227	116.933	71.7047	0.0625	0.047852	0.1001	-28.614	0.712	35.8695	0.10352	0.11621	-0.080566	-50.562	33.42036	21.2386	0.055175	0.086426	0.12842	-40.169	35.0087	16.9926	0.26572	-0.11748	0.067578
0.192	-45.377	-5.9688	8.3035	0.23369	0.069433	0.14434	-25.756	127.225	1506.97	-1.3184	1.1719	0.41504	42.466	-236.016	1741.65	-1.5659	1.5513	-0.034668	-16.763	94.206	58.4119	0.08374	0.040528	0.10058	-63.5396	34.5627	34.421	0.097656	0.12647	-0.082763	-34.899	27.106	51.914	0.04834	0.099121	0.13184	0.0450000000000017	56.546	32.408	0.25977	-0.12207	0.072266
0.194	-31.129	10.702	34.415	0.2415	0.05957	0.14589	-11.689	195.553	1451.75	-1.2919	1.146	0.39795	45.413	-176.388	1789.9	-1.6978	1.5649	0.0043945	-22.778	78.868	44.4886	0.10107	0.03125	0.1001	-53.2341	-27.2423	64.9738	0.092285	0.13477	-0.089844	-73.953	46.0925	66.339	0.030273	0.11816	0.13281	-29.075	32.4699	2.488	0.25029	-0.12568	0.085742
0.196	-37.272	14.185	23.1584	0.25088	0.049023	0.14317	-35.656	240.06	1415.56	-1.2583	1.1138	0.37793	-3.583	-139.424	1818.7	-1.7559	1.5664	0.024414	-84.541	52.533	30.16643	0.12158	0.019531	0.092773	-60.912	-3.055	69.2306	0.071289	0.14941	-0.091309	-12.535	-3.015	87.8869	0.015137	0.12256	0.13867	-20.804	7.4	17.77182	0.23682	-0.12734	0.097364
0.198	-50.114	5.789	18.3335	0.25303	0.036329	0.14502	-25.874	236.18	1415.67	-1.2065	1.0747	0.36328	60.478	-127.1118	1896.5	-1.855	1.5708	0.052734	-55.781	18.2147	52.569	0.13525	0.0097656	0.096191	-54.374	-14.034	84.5745	0.052246	0.1626	-0.092285	-29.287	-1.991	122.315	-0.025879	0.14063	0.13379	-17.374	13.662	15.006	0.21416	-0.12422	0.11143
0.2	-46.832	45.7429	15.4559	0.25146	0.02832	0.14355	-20.297	309.9	1381.46	-1.1792	1.0591	0.35059	41.165	-78.663	1874.73	-1.9145	1.5786	0.069092	-82.8219	36.681	26.813	0.15088	-0.0048828	0.087402	-69.286	-51.916	125.679	-0.010254	0.18018	-0.084961	-100.6342	3.28400000000001	167.474	-0.064941	0.16504	0.13672	-56.159	0.0420000000000016	27.9443	0.1918	-0.1208	0.12217
0.202	-67.293	32.10741	-2.5217	0.24971	0.019434	0.14405	-42.621	274.13	1326.53	-1.123	1.0146	0.32666	8.317	-88.926	1869.92	-1.9688	1.5762	0.076172	-96.5802	28.501	37.901	0.16772	-0.019287	0.07959	-74.5153	-27.812	152.7329	-0.0791	0.20777	-0.072754	-60.7711	-23.761	271.749	-0.11719	0.18652	0.13916	-46.735	21.90187	63.849	0.17139	-0.11523	0.13281
0.204	-44.714	38.575	12.4465	0.24805	0.0097653	0.1415	-46.516	255.483	1301.44	-1.0679	0.97217	0.30469	17.801	-83.284	1886.64	-2.0229	1.5786	0.083008	-81.694	23.8663	15.852	0.18311	-0.027832	0.079102	-40.038	-73.774	231.2381	-0.1499	0.22412	-0.062012	-45.34258	21.64301	348.533	-0.19775	0.22705	0.14551	-53.14	25.5231	52.849	0.1501	-0.09922	0.14092
0.206	-62.4	62.125	1.872	0.25	0.0011719	0.13799	-54.268	264.19	1243.2	-1.0469	0.94727	0.29346	-28.223	-73.316	1876.95	-2.0488	1.5742	0.086426	-98.6086	41.45	-8.3913	0.20068	-0.040039	0.07666	-30.379	-85.627	317.086	-0.24463	0.26123	-0.047363	-63.7261	46.295	452.267	-0.23779	0.25098	0.14551	-28.14	-6.461	63.0945	0.12354	-0.083301	0.15557
0.208	-89.9067	32.4729	-14.2782	0.24268	-0.0090821	0.13623	-65.981	220.03	1210.18	-1.0015	0.8999	0.27002	-16.974	-106.896	1916.87	-2.1016	1.5879	0.09082	-55.761	22.847	-5.6838	0.20313	-0.044922	0.071289	-31.846	-40.964	378.976	-0.28955	0.2793	-0.041016	-41.15	59.683	656.721	-0.3374	0.30908	0.14844	-32.231	-11.133	96.438	0.10049	-0.066113	0.1747
0.21	-65.678	61.886	1.6529	0.2373	-0.015625	0.13428	-16.087	275.85	1160.29	-0.96924	0.86206	0.24976	-5.39100000000001	-101.968	1945.74	-2.1308	1.6006	0.086182	-50.869	28.7295	-17.4391	0.20898	-0.052734	0.067871	3.118	-32.083	510.398	-0.39063	0.32275	-0.028809	-47.458	132.8431	864.357	-0.42602	0.35889	0.12768	-79.448	-36.162	134.04	0.071973	-0.043066	0.19248
0.212	-81.5	48.854	-17.2234	0.22646	-0.020606	0.13242	-32.898	290.5	1086.26	-0.93213	0.82666	0.23438	-79.18	-115.06329	1953.87	-2.1567	1.6118	0.07959	-74.909	26.846	16.3735	0.21314	-0.057618	0.070557	-70.478	51.8001	625.366	-0.47558	0.3667	-0.017823	-6.96299999999999	109.7594	1049.306	-0.53076	0.41748	0.10205	-41.223	-51.717	208.802	0.050293	-0.021484	0.21191
0.214	-67.211	21.8663	-1.3469	0.21621	-0.027344	0.12852	-33.361	266.55	1084.29	-0.88623	0.78174	0.21094	-63.91241	-139.8164	2005.71	-2.1714	1.6177	0.067871	-37.06	15.1883	35.3646	0.21191	-0.063965	0.07373	-101.95	103.882	772.981	-0.57373	0.4126	-0.0083008	37.99	101.6815	1171.953	-0.70801	0.52246	0.094727	-36.914	-27.72	259.5371	0.030274	0.0019531	0.22842
0.216	-41.179	53.123	8.7571	0.20254	-0.027344	0.12539	13.211	299.28	1067.99	-0.86572	0.76416	0.20068	-63.9695	-89.232	2005.05	-2.1694	1.6157	0.060059	-45.311	49.1351	15.028	0.21143	-0.066406	0.074707	-73.8987	95.781	948.005	-0.74414	0.49512	0.015625	-11.009	62.927	1266.349	-0.82031	0.57617	0.10352	-65.978	-14.354	335.739	0.010352	0.02334	0.2415
0.218	-40.998	26.614	5.4545	0.19228	-0.035254	0.12588	36.733	239.882	1041.63	-0.81445	0.73242	0.18115	-108.405	-101.365	2021.6	-2.1563	1.6133	0.047363	-32.225	44.4633	28.4221	0.20557	-0.066406	0.073242	-129.018	145.05707	1092.1	-0.84961	0.5332	0.041992	-8.65100000000001	-2.314	1382.399	-1.0977	0.70508	0.13184	-18.367	29.2355	453.2325	-0.0068359	0.049902	0.24346
0.22	-8.939	35.929	33.977	0.17627	-0.039551	0.12158	48.372	229.142	1049.54	-0.77734	0.71289	0.16699	-42.977	-94.587	2055.62	-2.1384	1.6008	0.042724	-15.349	55.065	22.0973	0.19727	-0.068848	0.080566	-90.8294	115.4872	1244.361	-1.1064	0.63086	0.11377	9.832	15.714	1426.117	-1.3448	0.81201	0.17627	-30.404	108.821	566.3474	-0.035254	0.083887	0.25019
0.222	4.41	49.6326	28.088547	0.16045	-0.045996	0.11845	58.831	229.988	991.93	-0.73779	0.69873	0.15137	-50.79	-81.225	1998	-2.1172	1.582	0.033203	-61.226	73.505	-7.8214	0.18726	-0.066895	0.077637	-64.089	88.837	1329.52	-1.3377	0.71949	0.18531	27.054	-14.483	1394.128	-1.6055	0.92871	0.24316	-17.434	129.919	711.28	-0.076172	0.12451	0.26367
0.224	-26.521	21.13	26.4125	0.14805	-0.051953	0.11592	38.881	184.468	951.35	-0.68555	0.67578	0.12646	-36.365	-118.403	1989.43	-2.0918	1.5527	0.021973	-9.867	53.339	-5.5959	0.18018	-0.067383	0.086914	-78.585	80.893	1349.69	-1.5894	0.82666	0.26367	100.977	-58.253	1377.146	-1.9312	1.106	0.35547	82.4	171.976	870.956	-0.12979	0.16338	0.27285
0.226	-0.812000000000005	62.3943	29.5862	0.13282	-0.057031	0.11123	54.255	223.18	901.97	-0.6582	0.66113	0.11621	10.267	-93.04	1966.04	-2.0613	1.5237	0.014893	-14.071	56.604	-22.8989	0.1709	-0.067383	0.087402	-15.779	-21.4055	1334.46	-1.9038	0.98096	0.36475	110.806	-58.007	1367.236	-2.1267	1.2269	0.43824	25.884	143.853	1026.683	-0.19697	0.20176	0.28145
0.228	-3.98399999999999	35.2765	18.6661	0.12588	-0.064453	0.10488	48.099	226.71	830.46	-0.60156	0.625	0.096191	-43.173	-54.421	1925.26	-2.0371	1.4922	0.0043945	-21.02	34.7909	-9.10722	0.16797	-0.067383	0.087402	20.855	-30.1658	1304.71	-2.043	1.0625	0.40479	121.251	-95.914	1377.172	-2.25	1.3203	0.48975	26.95	100.3	1179.2	-0.27471	0.24864	0.29239
0.23	-18.149	10.4926	26.0116	0.11523	-0.065918	0.098633	55.047	209.56	786.33	-0.55811	0.59668	0.082764	-17.213	-43.429	1942.8	-1.999	1.457	-0.0078125	48.737	7.5213	35.6874	0.15869	-0.060547	0.08252	-15.922	-49.639	1265.99	-2.1914	1.168	0.45068	109.397	-89.1809	1327.072	-2.2051	1.4238	0.55518	86.944	84.341	1265.3	-0.3666	0.30059	0.30215
0.232	-0.204999999999998	34.18	27.2741	0.11084	-0.071875	0.09248	55.569	237.81	731.03	-0.52002	0.56787	0.064453	-9.831	28.459	1901.05	-1.9741	1.4341	-0.023438	12.293	24.131	17.499	0.16015	-0.062012	0.078125	-17.674	-112.384	1233.41	-2.1787	1.2183	0.48755	69.724	-112.057	1285.594	-2.1563	1.4629	0.57764	52.893	18.6492	1283.86	-0.46631	0.35986	0.30469
0.234	-50.636	20.5419	11.5388	0.10303	-0.07627	0.084375	41.435	192.446	675.27	-0.46875	0.53516	0.052246	-35.92	10.43	1887.97	-1.9331	1.4028	-0.029297	23.659	24.924	36.3008	0.1543	-0.0625	0.073242	-37.5063	-89.515	1171.96	-2.1187	1.2349	0.49609	66.703	-171.102	1346.319	-2.0562	1.5122	0.53906	78.845	-23.985	1328.89	-0.58555	0.43672	0.3001
0.236	-10.377	44.908	41.4074	0.096776	-0.080567	0.079297	35.708	195.391	647.04	-0.44824	0.50879	0.035156	-3.896	25.11	1916.23	-1.9057	1.3803	-0.036377	38.759	43.366	44.9578	0.15527	-0.069336	0.071777	-75.3109	-111.449	1132.786	-1.9805	1.1973	0.39795	37.302	-141.1783	1407.33	-1.8721	1.4956	0.46826	66.554	-39.21	1295.42	-0.71748	0.52002	0.30235
0.238	4.884	63.75	32.106	0.092774	-0.07832	0.073731	10.515	198.738	598.92	-0.4043	0.46484	0.027344	-31.256	57.89	1882.3	-1.8789	1.3633	-0.043945	-27.894	71.59	34.164	0.1499	-0.071777	0.066406	-63.076	-115.544	1110.232	-1.8418	1.1563	0.31787	14.777	-95.14	1415.537	-1.5801	1.418	0.42627	48.232	-78.191	1272.98	-0.87217	0.62002	0.29883
0.24	-33.439	32.51321	20.5552	0.089844	-0.07959	0.064453	20	147.303	557.61	-0.37036	0.43676	0.016602	8.876	28.897	1887.25	-1.8477	1.3535	-0.044434	3.234	40.889	43.349	0.13867	-0.079102	0.062012	-94.367	-91.431	1098.22	-1.4512	1.0586	0.17236	59.916	-82.414	1393.294	-1.2026	1.2417	0.40039	77.663	-89.336	1229.56	-1.0495	0.73057	0.30488
0.242	-10.388	58.6279	23.27487	0.089746	-0.078027	0.061328	-3.977	177.662	517.5	-0.33789	0.40967	0.010254	43.384	42.607	1880.69	-1.832	1.3438	-0.044434	-22.105	40.164	10.00528	0.13281	-0.081543	0.059082	-90.59	-146.431	1133.376	-1.1741	0.97974	0.069093	24.571	-45.477	1337.64	-1.0996	1.1523	0.38184	65.307	-117.94	1184.35	-1.2417	0.85205	0.31494
0.244	-21.855	34.06234	3.92	0.088184	-0.079785	0.056445	-36.126	176.621	450.78	-0.30127	0.37012	-0.0024414	6.034	18.552	1839.82	-1.811	1.3394	-0.046875	-54.054	25.65423	0.1523	0.12695	-0.083984	0.055664	-95.802	-107.108	1152.324	-0.95752	0.90576	-0.027832	28.1	-73.498	1333.2615	-1.0093	1.0454	0.33789	96.131	-147.609	1174.38	-1.4267	0.96983	0.33438
0.246	-38.528	20.714	9.12894	0.09209	-0.078223	0.048633	-23.231	167.493	441.76	-0.27832	0.35547	-0.0083008	49.655	-29.678	1857.95	-1.7908	1.343	-0.039795	-40.791	-2.8551	15.8606	0.12842	-0.082031	0.04834	-67.308	-72.488	1184.094	-0.76953	0.87207	-0.13916	91.266	-109.613	1392.649	-0.98194	1.0298	0.33227	100.931	-135.9464	1120.08	-1.5965	1.0656	0.35352
0.248	-30.274	32.5746	14.2057	0.095117	-0.075293	0.038867	-49.1883	203.741	401.93	-0.23828	0.32324	-0.018066	50.763	8.827	1823.95	-1.7734	1.3457	-0.033203	-71.463	21.0171	21.033	0.12866	-0.078857	0.046387	1.02199999999999	-94.357	1228.018	-0.69873	0.88916	-0.1792	76.205	-141.8561	1416.415	-0.94092	1.0347	0.33594	23.151	-126.058	1081.71	-1.7234	1.1433	0.38359
0.25	-54.742	-0.27	17.62761	0.10449	-0.074219	0.03125	-75.584	156.818	357.77	-0.20166	0.30102	-0.028565	12.704	8.955	1816.76	-1.7554	1.3521	-0.024902	-66.159	26.76	28.6936	0.12695	-0.077148	0.039063	18.904	-45.97	1212.581	-0.57275	0.94336	-0.24023	72.394	-261.397	1480.62	-0.91211	1.043	0.33252	4.68799999999999	-108.827	1137.26	-1.7893	1.2198	0.44375
0.252	-58.293	11.556	19.1374	0.1125	-0.067871	0.027929	-63.957	121.268	327.76	-0.16748	0.28027	-0.033691	26.727	15.426	1834.29	-1.7515	1.3579	-0.022461	-37.827	42.118	39.9046	0.12744	-0.067383	0.038086	53.514	-106.55	1253.407	-0.50781	0.97461	-0.26954	4.733	-319.057	1531.6	-0.92529	1.0454	0.33008	-44.506	-59.344	1161.2	-1.8198	1.2974	0.50977
0.254	-57.858	29.8544	19.324	0.121	-0.062109	0.025293	-73.094	92.645	279.66	-0.12158	0.25244	-0.04541	-23.231	41.447	1781.31	-1.7261	1.3638	-0.0087891	-78.287	65.578	23.9369	0.13037	-0.067871	0.037109	95.257	-186.213	1278.364	-0.4917	1.0063	-0.28125	-88	-312.577	1526.35	-1.0215	1.0664	0.32861	-59.3438	-28.495	1196.57	-1.8312	1.3861	0.52851
0.256	-78.169	6.6063	11.33056	0.1249	-0.056641	0.020996	-92.589	31.39737	262	-0.098145	0.23682	-0.05127	-23.934	17.739	1769.39	-1.7139	1.3662	-0.0031738	-48.237	41.631	24.8921	0.12402	-0.05127	0.037598	58.08	-226.244	1309.635	-0.57764	1.0728	-0.24512	-74.918	-315.26	1580.755	-1.1423	1.1321	0.33862	-3.187	1.685	1209.88	-1.7928	1.4786	0.49161
0.258	-77.656	37.069	38.149	0.12559	-0.050293	0.017481	-74.132	58.8696	235.418	-0.061035	0.21045	-0.061035	-4.853	33.999	1756.95	-1.6953	1.3652	0.00048828	-69.359	46.152	2.9738	0.12134	-0.045166	0.042969	78.991	-357.002	1387.94	-0.65967	1.1196	-0.21924	-93.5383	-239.334	1626.374	-1.2773	1.2207	0.3457	-58.282	-8.605	1180.78	-1.6409	1.5532	0.44082
0.26	-82.384	26.635	17.8863	0.13184	-0.040039	0.01709	-75.8604	49.198	207.604	-0.035157	0.18506	-0.060302	-30.779	68.22	1713.47	-1.665	1.3574	0.0068359	-94.596	27.051	0.6382	0.11914	-0.03418	0.043457	33.872	-351.324	1429.184	-0.85498	1.2368	-0.16357	-125.1732	-226.004	1655.928	-1.4302	1.3618	0.38281	-56.054	-75.076	1236.16	-1.3731	1.5773	0.40098
0.262	-62.936	6.769	5.7191	0.13008	-0.030957	0.018652	-73.881	65.344	202.379	-0.017578	0.15918	-0.068359	-11.249	57.348	1726.31	-1.6426	1.3535	0.0043945	-43.684	-5.849	24.1063	0.11865	-0.015625	0.044922	-24.969	-332.832	1449.046	-0.98879	1.3169	-0.12085	-104.924	-241.978	1739.4	-1.4922	1.4209	0.3999	-21.823	-131.665	1276.08	-1.0781	1.5273	0.36719
0.264	-26.29	31.6564	8.05	0.1335	-0.015137	0.020996	-60.195	114.748	176.987	0.0019531	0.12695	-0.077637	-34.41	127.529	1681.12	-1.6011	1.3423	0.0048828	-100.12749	1.799	7.75	0.11816	-0.0073242	0.045898	-16.884	-354.96	1518.279	-1.1074	1.375	-0.07666	-94.66	-196.821	1781.21	-1.5762	1.5039	0.41797	-82.942	-208.706	1287.22	-0.85283	1.4432	0.31905
0.266	-41.465	-8.749	-0.628	0.13233	-0.0010742	0.026464	-68.497	99.361	151.072	0.017578	0.11865	-0.077637	-71.2874	126.424	1661.18	-1.5712	1.33	0.0078125	-67.232	-6.278	23.37529	0.12354	0.0087891	0.04541	-6.414	-253.947	1541.895	-1.2651	1.438	-0.036133	-45.875	-201.352	1844.57	-1.6238	1.5422	0.42041	-75.71	-314.32	1365.51	-0.70586	1.359	0.28262
0.268	-37.604	11.61	20.5938	0.13555	0.011719	0.03291	-52.523	105.355	140.378	0.035156	0.094727	-0.083008	-26.747	133.487	1660.49	-1.5386	1.313	0.003418	-24.661	8.9037	29.49418	0.1294	0.022705	0.046631	17.557	-208.307	1594.818	-1.3452	1.4653	-0.017578	-30.539	-158.7941	1892.03	-1.6636	1.5747	0.41895	-143.665	-358.33	1384.77	-0.62343	1.2836	0.26738
0.27	-30.383	38.9103	8.5483	0.13965	0.027832	0.030762	-37.171	104.413	111.1912	0.041015	0.071045	-0.080322	-59.537	178.3409	1630.3	-1.5015	1.2896	0.0063477	-87.5081	44.432	12.3043	0.13965	0.033691	0.049805	62.748	-174.385	1686.105	-1.498	1.498	0.0043945	-49.192	-89.456	1871.55	-1.707	1.6211	0.40918	-185.029	-388.98	1402.44	-0.58662	1.2193	0.27256
0.272	-52.795	25.2401	-5.5676	0.14717	0.041992	0.035352	-34.267	68.594	114.209	0.04541	0.051758	-0.087402	-51.729	155.625	1619.04	-1.4858	1.2817	0.0048828	-32.467	43.349	41.059	0.14746	0.043457	0.049805	60.724	-76.087	1743.719	-1.5977	1.5156	0.017578	-4.151	-117.813	1882.56	-1.7168	1.6406	0.40479	-131.471397	-365.06	1474.93	-0.59766	1.1738	0.28418
0.274	-18.235	69.761	16.4613	0.1541	0.05625	0.044043	-15.949	94.527	107.669	0.051758	0.03418	-0.092773	-23.281	161.891	1605.85	-1.4507	1.2544	0.0019531	-0.349000000000004	54.895	2.9464	0.15332	0.045898	0.052246	111.576	-123.55	1816.58	-1.6738	1.5352	0.038574	-17.244	-62.0916	1879.27	-1.7417	1.688	0.39941	-163.755	-312.13	1503	-0.65313	1.1559	0.31445
0.276	-24.152	41.635	2.3908	0.15957	0.070312	0.049512	-3.661	73.637	75.9965	0.057617	0.027344	-0.093262	-82.4141	151.953	1557.9	-1.4302	1.2309	0.0083009	-35.435	32.0779	-2.9279	0.16357	0.054199	0.053711	127.438	-96.278	1822.08	-1.7637	1.5605	0.045898	-36.829	-76.088	1900.697	-1.7566	1.7239	0.39771	-127.9507	-303.68	1579.41	-0.75469	1.1715	0.34365
0.278	-25.634	23.0533	3.1518	0.16269	0.079101	0.052442	13.539	65.216	50.6745	0.064453	0.012695	-0.092285	-55.307	107.084	1568.48	-1.4141	1.2051	0.0087891	16.975	-10.541	10.0554	0.16821	0.056397	0.057373	121.63	-61.442	1786.2	-1.7988	1.5664	0.053711	-21.343	-120.937	1988.01	-1.7813	1.7598	0.39502	-56.969	-276.32	1636.52	-0.88594	1.2231	0.37725
0.28	-4.754	61.239	2.157	0.1665	0.090332	0.055176	9.607	101.635	34.071	0.061768	0.0051269	-0.093995	-55.546	146.578	1536.18	-1.3848	1.1758	0.024902	8.292	-0.392999999999997	-13.79	0.17334	0.063965	0.05957	79.736	-123.7139	1786.991	-1.8589	1.5845	0.046387	-50.515	-82.904	2011.85	-1.8237	1.7993	0.39453	-96.953	-235.14	1661.01	-1.0319	1.3087	0.41367
0.282	-14.792	15.9759	0.5142	0.16533	0.10313	0.058106	3.538	77.251	30.7274	0.062988	-0.0087891	-0.092285	-57.131	145.797	1507.43	-1.375	1.1543	0.014648	9.805	3.653	6.8067	0.17578	0.066406	0.060547	21.698	-67.837	1785.314	-1.8916	1.6059	0.050782	-34.049	-141.26	2041.25	-1.8496	1.8223	0.39746	-61.533	-209.44	1728.34	-1.1719	1.4199	0.45752
0.284	-4.741	8.4695	27.3628	0.16963	0.1125	0.06416	9.06300000000001	86.64	53.5764	0.059082	-0.029297	-0.09375	-38.297	153.039	1509.57	-1.3433	1.1235	0.022949	28.882	29.1496	14.81227	0.17969	0.07373	0.062988	-9.91800000000001	-103.0229	1793.831	-1.9199	1.625	0.04834	4.553	-144.873	2073.13	-1.9082	1.8594	0.42871	-41.172	-118.148	1757.27	-1.2948	1.5373	0.48213
0.286	-2.234	16.4398	23.8518	0.16611	0.12383	0.065723	1.138	88.456	17.451	0.052734	-0.038574	-0.098145	-65.7527	202.895	1451.82	-1.316	1.0938	0.027099	-17.544	69.104	1.43265	0.18359	0.080566	0.072266	-47.807	-162.162	1838.036	-1.9395	1.6563	0.041016	24.064	-97.419	2052.54	-1.9617	1.8792	0.45288	-57.971	-67.473	1768.09	-1.4051	1.6321	0.49942
0.288	-22.791	-2.725	2.5749	0.15655	0.1332	0.071974	0.625	23.9715	21.5429	0.052734	-0.048828	-0.091797	-41.491	195.8572	1425.37	-1.2876	1.063	0.026367	5.959	61.404	24.1514	0.17798	0.086426	0.076172	-57.869	-117.12	1867.393	-1.9361	1.6772	0.03003	64.41	-144.966	2105.67	-2.0151	1.8853	0.48633	6.82000000000001	-44.585	1792.86	-1.4962	1.6895	0.51426
0.29	19.064	46.70912	6.94378	0.14648	0.14111	0.077148	6.775	27.8369	38.742	0.051513	-0.05957	-0.08789	-12.052	226.8063	1408.17	-1.2495	1.0298	0.02832	-13.193	64.95	15.54901	0.16992	0.089844	0.081055	-49.131	-192.083	1908.902	-1.9258	1.6816	0.01416	56.336	-73.585	2126.76	-2.0942	1.8774	0.54102	-16.249	-37.437	1782.92	-1.5769	1.72	0.52656
0.292	-4.547	54.7923	-0.61329	0.1293	0.15078	0.085057	-1.709	4.1084	27.9919	0.049805	-0.067871	-0.086914	-36.997	241.562	1358.65	-1.2261	1.0122	0.027832	-26.038	52.373	4.6112	0.15332	0.097168	0.089844	-39.768	-161.618	1932.448	-1.8789	1.6777	-0.0058594	39.2	-59.166	2106.65	-2.1289	1.873	0.56885	-28.415	-99.8839	1849.66	-1.6523	1.7324	0.5415
0.294	-49.203	42.56158	5.3985	0.1167	0.15654	0.088671	-21.361	15.44778	50.494	0.052734	-0.076172	-0.092773	2.722	196.83	1335.68	-1.187	0.96338	0.027344	-3.412	12.9962	16.1862	0.14355	0.092773	0.091797	-16.032	-97.8104	1884.353	-1.8535	1.6738	-0.015625	22.96	-65.047	2115.87	-2.1816	1.8418	0.61865	17.957	-137.2071	1912.17	-1.7182	1.7357	0.54795
0.296	-17.981	68.248	7.5405	0.1003	0.1663	0.093749	-29.545	66.939	37.743	0.056641	-0.083008	-0.089844	2.343	233.88	1294.82	-1.1528	0.93847	0.030762	-42.969	18.0369	0.835000000000001	0.12646	0.099121	0.099609	-8.261	-138.548	1919.675	-1.8145	1.6543	-0.037598	-18.975	-4.7475	2073.05	-2.2019	1.8059	0.64746	-6.008	-146.977	1933.49	-1.7667	1.7376	0.54571
0.298	-55.357	25.9073	-2.137	0.091508	0.1749	0.10029	-85.488	57.746	26.0183	0.056641	-0.095215	-0.09082	-60.104	240.9245	1244.76	-1.1245	0.90771	0.028809	-35.38	-4.222	15.446	0.11158	0.10181	0.10962	-5.15599999999999	-54.226	1934.324	-1.7797	1.6303	-0.045411	1.72399999999999	-56.11	2052.7	-2.2065	1.7603	0.6748	39.013	-197.505	1986.93	-1.8077	1.745	0.5375
0.3	-33.292	22.8997	34.0715	0.077637	0.18213	0.10596	-58.58	65.826	38.875	0.052246	-0.10449	-0.09082	-17.622	233.152	1240.28	-1.0776	0.86572	0.03125	-14.419	8.9924	3.188	0.094727	0.10547	0.1167	-11.535	-34.468	1896.969	-1.7573	1.606	-0.057617	6.26299999999999	-50.5	2054.07	-2.1987	1.6938	0.70117	20.316	-167.692	1973.12	-1.8331	1.7505	0.52744
0.302	-28.085	23.714	71.039	0.074902	0.19727	0.10703	-60.385	63.857	7.927	0.053711	-0.1167	-0.092773	-82.133	265.0106	1189.57	-1.062	0.84521	0.029297	-61.114	36.6133	-1.082	0.078125	0.11133	0.12549	4.845	-71.516	1897.854	-1.7422	1.5664	-0.06543	-37.543	2.363	1994.69	-2.187	1.6548	0.71094	12.82	-161.95	1978.07	-1.8594	1.7559	0.51318
0.304	-93.796	-22.9791	81.3939	0.068651	0.20939	0.11055	-76.332	27.4895	-5.3455	0.053223	-0.12744	-0.094238	-78.7843	236.3036	1165.5	-1.0234	0.80371	0.033691	-44.206	47.0762	37.605	0.070801	0.11426	0.12939	-47.405	18.891	1853.931	-1.7305	1.5566	-0.061035	-61.257	-47.937	1994.17	-2.1675	1.5864	0.73438	86.5779	-156.005	2026.31	-1.8779	1.7752	0.50361
0.306	-67.388	23.053	102.3123	0.064348	0.22501	0.11524	-66.932	35.4602	11.931	0.057129	-0.13428	-0.095703	-28.701	232.262	1131.99	-0.99294	0.76977	0.036621	-62.294	63.57	60.83804	0.057617	0.12207	0.1333	-59.001	-21.033	1847.062	-1.7305	1.5293	-0.05957	-83.48	11.414	1981.75	-2.1443	1.5363	0.73804	32.063	-101.832	2033.95	-1.9004	1.7883	0.48759
0.308	-57.536	28.6177	116.0971	0.058102	0.24133	0.1128	-88.4487	0.677	-1.211	0.054688	-0.13525	-0.091309	-99.9923	252.943	1075.72	-0.95898	0.74219	0.03418	-98.9282	30.237	66.34949	0.053467	0.12964	0.13843	-46.89	3.849	1850.039	-1.7341	1.509	-0.057373	-83.382	29.157	1941.822	-2.1167	1.4966	0.74902	4.671	-110.078	2073.84	-1.9176	1.8024	0.48759
0.31	-78.265	13.28303	182.828	0.052246	0.25635	0.1167	-91.273	-0.0820000000000007	39.261	0.055908	-0.13916	-0.092774	-62.857	212.51811	1076.46	-0.91748	0.7085	0.04248	-70.389	-16.268	84.8179	0.055176	0.14209	0.13867	-37.325	65.311	1784.77301	-1.7358	1.4907	-0.048828	-49.835	11.067	1960.681	-2.0771	1.4551	0.76611	3.845	-86.544	2087.1	-1.9387	1.8094	0.48789
0.312	-76.776	24.9655	245.332	0.038206	0.27078	0.12315	-68.0417	43.68067	25.95999	0.057617	-0.14551	-0.095703	-68.4861	234.016	1021.33	-0.89209	0.68799	0.045898	-73.193	-9.495	79.235	0.047852	0.14551	0.13916	-20.79	-16.956	1794.8848	-1.7437	1.4673	-0.036621	-70.65	71.9705	1948.87	-2.0542	1.4399	0.77148	-91.392	-47.36838	2011.2	-1.9434	1.8066	0.49072
0.314	-98.862	-16.287	305.305	0.024883	0.28353	0.12316	-71.032	36.91642	20.2913	0.067383	-0.14893	-0.099609	-86.2868	201.993	994.26	-0.8457	0.64746	0.053223	-68.044	-35.8521	130.2476	0.046387	0.15723	0.13525	-7.18000000000001	47.0331	1805.38	-1.748	1.457	-0.027344	-78.179	25.232	1960.36	-2.0132	1.4224	0.76367	-79.785	-61.374	1999.36	-1.946	1.7931	0.49609
0.316	-69.411	7.303	410.06	-0.0016407	0.29645	0.11498	-68.978	56.479	41.759	0.067383	-0.15332	-0.1001	-56.878	172.7581	982.63	-0.80469	0.6167	0.05542	-51.849	-32.432	191.618	0.022949	0.17725	0.1333	0.676999999999992	56.808	1807.58	-1.7559	1.4355	-0.015137	-77.538	6.692	1971.46	-1.98	1.4136	0.75781	-66.625	-17.01	1954.26	-1.9366	1.7607	0.49297
0.318	-74.194	74.93	559.14	-0.038707	0.313	0.12182	-68.732	53.371	20.345	0.072754	-0.1543	-0.10449	-90.179	215.72	925.2	-0.7627	0.58691	0.056641	-116.817	1.4805	233.28	-0.0073241	0.1958	0.13476	52.503	16.7603	1852.526	-1.753	1.4248	-0.0080567	-79.871	49.032	1923.63	-1.9434	1.4023	0.75049	-110.8195	7.00700000000001	1917.21	-1.932	1.7325	0.49297
0.32	-75.4	81.3234	766.07	-0.090332	0.33301	0.12891	-61.289	19.318	26.3085	0.068848	-0.15479	-0.10498	-80.165	208.347	903.77	-0.70898	0.54492	0.061035	-75.067	4.0812	338.36	-0.047363	0.21533	0.14063	68.273	93.607	1846.937	-1.7515	1.4087	0.0019531	-68.168	-10.489	1906.06	-1.8921	1.395	0.73145	-50.972	17.879	1942.86	-1.9222	1.6981	0.4958
0.322	-47.399	136.403	953.2	-0.14664	0.35677	0.13608	-37.874	29.52138	22.3884	0.064453	-0.15479	-0.10596	-62.6782	233.445	848.87	-0.6792	0.52393	0.066406	-56.082	58.903	449.47	-0.12305	0.23877	0.15723	63.835	6.88	1846.036	-1.7383	1.3945	0.0058594	-72.642	43.807	1900.72	-1.8633	1.3867	0.72119	-114.123	58.361	1920.79	-1.9238	1.666	0.50049
0.324	-44.62	137.81	1072.97	-0.21368	0.37918	0.15168	-37.946	-12.5534	4.0736	0.051758	-0.14941	-0.095215	-114.198	251.225	769.43	-0.62012	0.48633	0.060059	-46.681	99.699	630.4	-0.16406	0.24658	0.15771	84.772	0.396000000000001	1854.116	-1.7266	1.3887	0.0097656	-90.9893	52.164	1840.52	-1.8008	1.373	0.70068	-140.676	37.081	1944.05	-1.9205	1.6344	0.50263
0.326	-16.212	73.794	1207.28	-0.28533	0.41054	0.16228	-8.057	-29.7558	47.286	0.045898	-0.14648	-0.094727	-85.8564	207.2925	741.56	-0.57666	0.46143	0.060547	67.653	101.922	821.69	-0.25684	0.27441	0.16797	87.544	46.004	1798.808	-1.6992	1.377	0.014648	-70.632	23.873	1842.07	-1.7534	1.3648	0.68457	-83.876	15.671	1966.13	-1.9225	1.6052	0.51016
0.328	-10.821	45.343	1342.19	-0.35927	0.44405	0.16904	7.13	7.783	22.9876	0.023438	-0.14014	-0.084473	-83.8783	220.964	679.91	-0.53125	0.43164	0.065918	46.716	151.707	948.65	-0.32983	0.30298	0.16968	84.287	-24.7684	1785.3	-1.6804	1.3732	0.015625	-55.757	108.337	1812.19	-1.7085	1.3599	0.66797	-93.386	25.4114	1937.31	-1.9175	1.5782	0.51406
0.33	-51.694	-19.8179	1424.95	-0.4375	0.47754	0.17285	-1.126	-2.1161	4.8956	0.0051269	-0.13623	-0.079834	-108.201	194.98	637.321	-0.48047	0.38916	0.070801	40.94	107.921	1089.6	-0.41992	0.33496	0.16699	61.215	60.715	1752.888	-1.6582	1.3672	0.021484	-46.612	83.563	1798.75	-1.6504	1.3496	0.6499	-68.997	-26.501	1981.16	-1.9186	1.5529	0.52353
0.332	-18.047	-37.248	1446.38	-0.53557	0.51656	0.16322	6.775	49.7	21.728	-0.010254	-0.12891	-0.075195	-42.671	182.205	619.172	-0.45508	0.36621	0.066895	117.588	48.969	1202.59	-0.5625	0.3916	0.15234	21.437	57.8063	1715.01	-1.6362	1.3638	0.021973	-13.805	97.309	1798.55	-1.6206	1.3403	0.63672	-67.83	1.283	1987.73	-1.9097	1.5259	0.52148
0.334	-22.737	-46.5964	1381.19	-0.64815	0.57287	0.15394	10.625	71.772	17.3835	-0.026855	-0.11816	-0.067383	-76.5158	206.195	566.603	-0.40332	0.32227	0.063477	96.196	31.906	1262.19	-0.65039	0.42822	0.15576	39.514	17.06	1702.967	-1.6206	1.3599	0.026855	-33.194	155.485	1734.5	-1.5664	1.3242	0.61768	-92.5608	2.348	1975.24	-1.9029	1.5066	0.52608
0.336	-37.198	-129.955	1330.1	-0.79861	0.63656	0.15756	15.58	26.097	18.6238	-0.03418	-0.10498	-0.06543	-45.452	187.798	540.34	-0.36401	0.28808	0.06836	56.19	-2.40676	1333.5	-0.85498	0.51611	0.17236	28.282	108.431	1681.898	-1.5859	1.3574	0.031738	8.611	112.7352	1719.37	-1.5302	1.3105	0.60449	-57.302	-6.499	1967.42	-1.8925	1.4828	0.52549
0.338	66.757	-126.019	1325.12	-0.99037	0.70905	0.1713	27.13	25.8683	17.628	-0.05127	-0.09668	-0.060059	-9.022	197.709	506.771	-0.31982	0.25928	0.069336	15.995	14.8757	1286.39	-1.0408	0.57764	0.19947	21.709	66.6682	1659.033	-1.56	1.352	0.030273	36.314	171.702	1721.9	-1.5039	1.3008	0.58838	-51.498	35.914	1919.8	-1.8757	1.4684	0.51846
0.34	68.788	-128.867	1288.03	-1.2222	0.77783	0.20654	-2.58	0.450299999999999	-10.0986	-0.060547	-0.084961	-0.051025	-65.0235	206.12	442.605	-0.27881	0.21875	0.070801	3.768	-25.383	1244.23	-1.2393	0.63477	0.23877	22.538	101.468	1673.338	-1.5352	1.3477	0.029297	18.85	192.734	1704.47	-1.4663	1.2817	0.56787	-68.782	10.026	1910.89	-1.8627	1.4545	0.51533
0.342	47.376	-155.366	1274.2	-1.491	0.84299	0.26031	-12.094	-4.7629	-0.700899999999999	-0.075684	-0.081055	-0.037109	1.59	156.537	442.951	-0.25684	0.20654	0.06543	79.858	-62.441	1231.72	-1.5254	0.72266	0.3208	3.801	164.25	1633.893	-1.4917	1.3325	0.026855	67.652	165.8425	1700.7	-1.4487	1.2739	0.55615	-24.143	17.348	1893.47	-1.8569	1.4458	0.50977
0.344	27.448	-140.682	1272.02	-1.7477	0.92222	0.3417	-3.771	38.4819	8.545	-0.084961	-0.073242	-0.026367	-28.376	167.779	392.3	-0.21191	0.17383	0.075684	67.942	-52.076	1190.13	-1.668	0.76367	0.36768	6.08999999999999	92.873	1619.464	-1.4785	1.3262	0.027832	44.038	226.105	1641.16	-1.4102	1.2568	0.5376	-50.99	54.461	1839.83	-1.8485	1.4289	0.50264
0.346	-40.419	-174.9	1284.41	-1.9525	0.99558	0.42896	-23.344	25.1137	-15.54108	-0.087891	-0.073242	-0.02002	-61.0369	140.088	376.828	-0.18311	0.1582	0.073487	124.9515	-102.055	1159.77	-1.9155	0.84814	0.45313	12.17	154.192	1595.814	-1.437	1.2993	0.023438	43.653	175.18	1600.136	-1.3852	1.2348	0.52075	2.866	46.416	1833.74	-1.839	1.4172	0.4999
0.348	-40.966	-155.265	1323.24	-2.0417	1.0423	0.47802	-42.157	49.884	5.1046	-0.099121	-0.069336	-0.012695	-2.033	115.36	358.156	-0.15234	0.13916	0.07373	118.096	-141.244	1134.9	-2.0311	0.89673	0.4917	-0.733999999999995	119.251	1580.3576	-1.4065	1.2849	0.021972	39.7	163.107	1595.44	-1.353	1.2173	0.50342	7.055	104.043	1813.52	-1.8313	1.4047	0.49366
0.35	-41.286	-82.881	1311.11	-1.9961	1.0645	0.48486	-45.556	60.596	-9.3229	-0.097656	-0.073242	-0.0078125	-30.376	118.729	301.969	-0.1167	0.11572	0.075195	11.272	-133.666	1127.76	-2.0625	0.94336	0.54053	-7.57299999999999	60.8912	1602.531	-1.3745	1.2583	0.019043	27.167	203.18867	1542.031	-1.3027	1.1875	0.4834	-20.843	132.97	1802.66	-1.8171	1.3939	0.48555
0.352	-80.492	-82.832	1324.16	-1.8516	1.1093	0.48081	-52.077	29.9503	9.90441	-0.093262	-0.071777	-0.0053711	-43.42	93.136	292.398	-0.10059	0.10352	0.077148	44.289	-146.052	1202.91	-1.9941	1.0078	0.60107	-23.758	134.75	1563.057	-1.3374	1.2388	0.019043	15.712	131.001	1514.184	-1.2749	1.1685	0.4707	41.904	156.891	1780.67	-1.8027	1.3789	0.47803
0.354	-74.479	-60.515	1359.95	-1.6933	1.1821	0.50553	-44.152	46.3521	15.328	-0.083496	-0.074707	-0.0014648	-16.772	105.91553	268.834	-0.068359	0.070313	0.081055	-12.049	-60.1548	1248.22	-1.9688	1.0313	0.59277	-49.66	66.526	1523.241	-1.3257	1.2251	0.020508	9.42899999999999	163.8529	1485.381	-1.2207	1.1289	0.44238	11.162	202.948	1742.56	-1.7811	1.3579	0.46973
0.356	-97.167	-80.99	1358.57	-1.5499	1.2455	0.53296	-69.834	28.1076	-1.0654	-0.086181	-0.068848	-0.0039063	-58.411	127.415	239.041	-0.041748	0.042481	0.076904	-62.653	-15.906	1267.17	-1.8628	1.0356	0.5166	-59.099	83.607	1519.582	-1.3003	1.1978	0.025879	-9.901	173.722	1447.748	-1.1814	1.0949	0.42651	3.388	185.618	1750.08	-1.762	1.3341	0.46113
0.358	-105.9668	-163.266	1406.95	-1.4227	1.2445	0.52466	-76.252	7.625	11.3365	-0.083008	-0.063965	-0.0097656	-30.141	109.581	228.015	-0.022461	0.018066	0.083984	-36.675	-29.2138	1252.05	-1.6543	1.0141	0.47656	-68.366	128.945979	1483.686	-1.282	1.1717	0.026855	9.863	167.5558	1436.947	-1.144	1.0474	0.40039	30.041	148.963	1773.62	-1.746	1.3141	0.4584
0.36	-71.806	-217.784	1454.84	-1.2969	1.168	0.49756	-55.745	28.9118	13.757	-0.075195	-0.058105	-0.013672	-37.411	132.386	206.382	0.017578	-0.0053711	0.076172	-93.537	-55.345	1226.77	-1.4141	0.96484	0.46436	-70.566	78.656	1470.419	-1.2617	1.1426	0.03418	32.642	269.869	1395.172	-1.0874	1.0044	0.3916	-24.592	128.64583	1732.7	-1.7253	1.286	0.44727
0.362	-91.327	-313.89	1491.92	-1.1843	1.0399	0.46301	-83.067	16.733	-0.526	-0.072266	-0.053711	-0.02002	-58.281	114.651	183.527	0.035645	-0.02002	0.079102	-99.6712	-122.869	1260.49	-1.1772	0.88916	0.45313	-56.669	173.52	1424.3361	-1.2407	1.1099	0.04248	32.038	254.376	1349.27	-1.0737	0.98975	0.38721	-17.083	66.53	1690.5	-1.7031	1.2598	0.44385
0.364	-80.768	-378.59	1541	-1.0973	0.92008	0.44212	-73.756	51.4035	15.3325	-0.057617	-0.051758	-0.029785	-25.285	93.072	177.622	0.073242	-0.038086	0.081543	-47.7296	-192.14	1327.21	-1.1265	0.85596	0.45117	-55.779	198.598	1380.4393	-1.2261	1.0942	0.043945	30.363	268.479	1331.499	-1.0469	0.96289	0.35693	-43.222	79.967	1642.41	-1.6827	1.2352	0.43496
0.366	-85.746	-380.04	1551.76	-1.0654	0.83993	0.44015	-90.446	77.728	-0.6351	-0.040771	-0.044678	-0.036377	-61.525	117.515	138.041	0.09717	-0.05127	0.080323	-93.291	-259.841	1366.17	-1.0996	0.83398	0.4458	-28.499	191.33	1377.9948	-1.2007	1.0591	0.047852	-3.74700000000001	280.042	1273.316	-1.0166	0.93897	0.34058	-62.587	91.556	1590.79	-1.6653	1.209	0.42549
0.368	-138.259	-419.97	1588.95	-1.0905	0.80734	0.44412	-106.5442	58.037	19.5278	-0.024414	-0.037109	-0.047852	-51.566	86.666	142.514	0.11865	-0.0625	0.079102	-103.9939	-382.95	1400.11	-1.1001	0.84034	0.45997	1.886	280.969	1352.603	-1.1807	1.0283	0.054444	-3.69699999999999	190.1283	1241.302	-0.979	0.91162	0.32178	-13.322	101.903	1585.76	-1.6453	1.1898	0.41572
0.37	-99.59244	-374.58	1683.39	-1.1772	0.83057	0.45508	-41.836	76.987	28.5608	-0.00097656	-0.027344	-0.060547	-44.652	86.983	134.536	0.15527	-0.079102	0.078613	-125.6741	-386.26	1413.69	-1.1128	0.8501	0.48291	11.844	219.55	1324.1103	-1.1533	1.0039	0.059082	7.838	222.206	1198.321	-0.9375	0.85742	0.30713	-42.063	161.235	1549.38	-1.6207	1.1657	0.40967
0.372	-104.1807	-304.99	1720.05	-1.2999	0.90506	0.47019	-63.89	45.136	-5.794	0.0068359	-0.020508	-0.069824	-86.667988	89.47	117.106	0.18262	-0.094483	0.075196	-129.169	-356.18	1440.07	-1.1616	0.87939	0.49902	31.214	227.871	1282.5809	-1.1226	0.98096	0.072754	-2.77	206.981	1139.297	-0.92017	0.81738	0.29102	-40.686	153.953	1547	-1.5933	1.1431	0.39893
0.374	-125.9218	-292.54	1782.93	-1.4171	0.99736	0.49305	-29.892	17.616	19.1518	0.02832	-0.0029297	-0.07666	-36.184	52.6917	115.121	0.20801	-0.10742	0.072754	-49.927	-306.05	1508.73	-1.2012	0.90234	0.50439	9.474	252.969	1238.3276	-1.1011	0.96729	0.076172	20.769	193.8817	1118.668	-0.89893	0.77881	0.27295	-5.133	171.1984	1549.23	-1.5687	1.1195	0.39014
0.376	-118.359	-201.736	1847.91	-1.5123	1.0942	0.51845	-9.077	39.1259	30.3134	0.036621	0.0029297	-0.081787	-59.7001	78.171	69.4667	0.23193	-0.12549	0.0625	-64.3595	-221.535	1560.57	-1.2832	0.98926	0.50928	-46.813	191.7489	1222.0472	-1.0547	0.9375	0.075684	-3.63799999999999	260.501	1048.78	-0.86328	0.74219	0.24854	-51.197	217.092	1497.73	-1.543	1.0934	0.38096
0.378	-167.134	-137.246	1858.07	-1.5777	1.1772	0.5339	-30.876	26.4705	23.9855	0.04834	0.0092773	-0.096191	-70.327	49.111	71.936	0.24219	-0.12988	0.061035	-68.6827	-232.253	1651.98	-1.3522	1.0652	0.51246	-24.061	243.528	1187.9308	-1.0139	0.90942	0.078125	8.914	233.627	1007.667	-0.84082	0.72656	0.23584	-19.14	216.116	1455.04	-1.5164	1.0699	0.36846
0.38	-148.599	-108.083	1899.59	-1.6265	1.229	0.53711	16.692	52.2868	47.101	0.061035	0.021484	-0.091309	-36.815	26.0065	83.7	0.25732	-0.1377	0.050781	-46.178	-238.815	1721.88	-1.4155	1.147	0.51465	-18.206	224.748	1145.399	-0.97559	0.88574	0.082031	45.787	242.7	994.577	-0.79492	0.69141	0.21436	0.506	265.18	1380.41	-1.4892	1.044	0.35781
0.382	-89.934	-39.546	1891.51	-1.6737	1.2552	0.53067	-14.446	67.997	16.0044	0.06543	0.027344	-0.098145	-62.293	45.933	51.707	0.25464	-0.1482	0.048828	-109.072	-168.954	1752.76	-1.4941	1.2432	0.51807	-42.722	182.785	1130.741	-0.93701	0.83447	0.085938	59.494	256.071	954.684	-0.76123	0.67383	0.19385	-51.166	261.799	1319.82	-1.4585	1.0122	0.34717
0.384	-78.592	-69.7815	1898.04	-1.7197	1.2651	0.52168	-7.255	33.1539	28.8296	0.07666	0.055176	-0.11426	-32.273	16.27	49.669	0.24707	-0.14502	0.053711	-61.5336	-137.017	1806.04	-1.5293	1.2773	0.51807	-47.7734	238.395	1116.213	-0.92139	0.81201	0.091309	57.992	197.721	937.233	-0.72852	0.64404	0.17676	-7.279	232.7776	1313.28	-1.4225	0.99024	0.33506
0.386	-21.731	-88.533	1941.23	-1.7651	1.276	0.51894	30.749	45.686	43.064	0.088135	0.070069	-0.10547	2.29	19.54402	43.298	0.22998	-0.14111	0.055664	-34.905	-54.6923	1778.22	-1.5991	1.3247	0.51367	-33.737	181.3722	1095.812	-0.88477	0.76953	0.09375	65.233	231.912	887.41	-0.67969	0.60352	0.15723	-22.913	254.715	1239.41	-1.3909	0.96436	0.31953
0.388	-31.485	-71.463	1913.5	-1.8055	1.2975	0.51543	11.334	21.0461	19.4729	0.092285	0.088867	-0.11426	-47.944	31.7384	49.178	0.21777	-0.13867	0.058594	-40.614	-24.9057	1776.91	-1.6492	1.343	0.5127	-31.869	208.81	1071.35	-0.85645	0.7417	0.0979	60.761	216.195	828.271	-0.65869	0.58252	0.14209	1.112	227.838	1235.73	-1.3492	0.94053	0.30313
0.39	-37.018	-122.291	1957.28	-1.8472	1.3228	0.51172	-0.911999999999999	10.5794	32.4805	0.092773	0.10938	-0.11279	-6.236	20.1699	45.183	0.18555	-0.12891	0.066406	12.966	-48.694	1810.71	-1.6895	1.3633	0.50879	-30.89	244.911	1021.786	-0.82959	0.71533	0.104	70.078	200.767	811.336	-0.61035	0.54297	0.11816	37.401	228.206	1207.91	-1.3054	0.91592	0.28672
0.392	-4.578	-103.668	2032.02	-1.8786	1.3636	0.5123	-7.935	30.1317	43.4016	0.091309	0.12207	-0.11816	-15.912	55.267	21.535	0.16235	-0.1206	0.076416	-1.343	-64.773	1828.27	-1.7437	1.3813	0.50586	-16.905	188.455	1009.963	-0.78467	0.68115	0.11182	63.901	245.501	752.752	-0.5664	0.51367	0.095214	25.047	238.973	1162.97	-1.2598	0.89258	0.27393
0.394	-48.056	-111.397	2044.61	-1.9207	1.4075	0.51494	-9.265	-14.542	76.442	0.087402	0.14453	-0.11816	-50.161	52.5185	6.5371	0.1333	-0.10889	0.083008	-9.775	-121.374	1915.46	-1.7795	1.3996	0.50513	-38.251	249.62	968.767	-0.76367	0.66406	0.11426	59.179	197.74	692.1479	-0.52148	0.47754	0.076172	77.691	205.976	1143.85	-1.2157	0.86358	0.25371
0.396	-28.702	-156.86	2095.9	-1.9617	1.4555	0.52393	2.15	-17.027	97.539	0.08081	0.16138	-0.12598	24.75	28.118	15.9474	0.099121	-0.094727	0.095215	31.177	-138.101	1987.28	-1.8184	1.4219	0.50732	-60.9912	236.309	911.963	-0.71875	0.62891	0.12305	51.359	207.114	644.418	-0.46484	0.43701	0.052734	74.916	226.03	1103.89	-1.1718	0.84043	0.23662
0.398	-31.4249	-133.923	2099.36	-2.0039	1.4988	0.52959	-4.606	-11.134	83.19817	0.069824	0.18311	-0.13379	-28.061	46.5	12.796	0.083984	-0.089355	0.10547	13.798	-100.3202	1992.25	-1.8804	1.4556	0.50342	-60.2268	230.988	876.33	-0.69067	0.60327	0.12402	23.468	226.74	587.388	-0.43701	0.41211	0.035645	79.09	220.763	1068.53	-1.1289	0.81387	0.21982
0.4	-74.535	-160.83	2119.37	-2.0386	1.5415	0.53613	-36.339	-50.684	106.1921	0.044922	0.2207	-0.12891	-20.506	18.469	14.095	0.053223	-0.08252	0.1084	33.8698	-131.776	2044.79	-1.9141	1.4766	0.50635	-87.864	300.655	829.533	-0.66162	0.57568	0.13477	36.332	171.624	563.198	-0.37939	0.36865	0.013672	114.9549	201.89	1076.45	-1.0866	0.78682	0.19903
0.402	-59.3897	-119.185	2176.4	-2.0603	1.5687	0.54844	-34.883	-29.246	168.796	0.027832	0.24316	-0.12305	-3.995	23.844	0.76	0.036133	-0.071533	0.1145	16.3733	-111.466	2035.99	-1.98	1.52	0.51563	-98.741	227.842	794.1469	-0.61133	0.54004	0.13037	31.105	192.042	512.465	-0.34252	0.32934	-0.0031738	64.622	247.882	1023.11	-1.0464	0.76416	0.18262
0.404	-65.66	-46.1951	2145.6	-2.078	1.5872	0.56015	-57.897	-60.707	199.515	-0.041992	0.28613	-0.11035	-51.447	42.74085	-0.712800000000001	0.022461	-0.070313	0.11572	-21.799	-110.557	2063.85	-2.0213	1.5472	0.52319	-106.19	230.912	750.944	-0.58154	0.51807	0.12988	27.83	164.058	465.73	-0.30615	0.29053	-0.015625	74.717	238.795	984.49	-1.0062	0.73838	0.1709
0.406	-93.9472	-65.7376	2104.2	-2.0901	1.5938	0.56602	-35.662	-103.435	259.032	-0.10962	0.31079	-0.094483	0.815000000000005	12.2041	16.6674	0.010254	-0.070313	0.10693	7.54	-115.658	2102	-2.0547	1.5664	0.53662	-109.559	228.296	684.751	-0.53467	0.479	0.13623	30.065	140.104	444.399	-0.25732	0.25049	-0.033203	85.512	242.16	930.52	-0.9625	0.70801	0.15137
0.408	-79.1308	-30.004	2095.07	-2.105	1.5965	0.57481	-17.937	-98.642	320.8006	-0.17529	0.33838	-0.082031	-22.994	34.8894	6.4534	0.0043945	-0.070313	0.11377	-45.331	-58.7032	2105.83	-2.0957	1.5781	0.54932	-91.4872	165.1821	645.649	-0.49731	0.44897	0.13452	-2.37	186.026	403.791	-0.23193	0.23828	-0.039551	28.165	258.633	855.9	-0.92149	0.68652	0.13886
0.41	-82.243	-15.09	2012.82	-2.1206	1.5884	0.58105	-54.326	-98.9046	418.441	-0.25586	0.38477	-0.058105	-48.435	30	13.8882	0.0024414	-0.070801	0.10986	-76.202	-50.399	2089.07	-2.1108	1.5845	0.55859	-81.87871	214.12	624.658	-0.45654	0.41943	0.13232	8.309	168.253	376.784	-0.18896	0.20068	-0.056152	55.485	216.965	822.9	-0.88028	0.65996	0.12686
0.412	-72.0477	-31.667	2011.77	-2.1361	1.5783	0.59209	-51.257	-30.087	582.884	-0.30029	0.40918	-0.04248	-0.320999999999998	7.4512	30.6209	0.0021972	-0.070556	0.10351	-46.34649	-60.96	2060.85	-2.1304	1.5786	0.57422	-71.4466	189.547	591.054	-0.4082	0.38086	0.1333	-2.72399999999999	191.964	352.983	-0.15234	0.1709	-0.062744	44.917	236.833	756.89	-0.84326	0.62939	0.11621
0.414	-68.991	21.549	1998.68	-2.1469	1.5584	0.59385	-97.4383	62.314	737.946	-0.38867	0.46826	-0.039551	-52.044	41.07908	20.596	-0.00097656	-0.070801	0.098633	-81.1771	-9.96099999999999	2010.73	-2.1401	1.5669	0.57715	-44.198	182.92	568.353	-0.38281	0.36475	0.13232	-30.804	201.66	296.9	-0.12549	0.1499	-0.074219	-4.077	226.921	700.08	-0.80547	0.60488	0.099315
0.416	-132.293	4.57600000000001	1958.85	-2.1566	1.5424	0.60986	-113.413	86.798	932.625	-0.47192	0.52172	-0.031982	-35.437	15.904	39.13385	0.003418	-0.063965	0.091309	-47.677	-31.858	2013.95	-2.1465	1.5469	0.58643	-59.86428	233.922	520.893	-0.33838	0.32422	0.13281	-22.888	136.685	274.702	-0.088379	0.12305	-0.084961	38.097	215.451	674.2	-0.77256	0.58291	0.087304
0.418	-132.918	0.399000000000001	1965.95	-2.1577	1.5212	0.60938	-97.847	113.768	1135.48	-0.58252	0.57959	-0.022949	-34.692	27.3904	10.8941	0.0014648	-0.0625	0.089844	-23.89	14.734	2019.65	-2.1538	1.5132	0.59375	-39.126	158.806	508.233	-0.30127	0.29395	0.13648	-60.299	138.781	245.476	-0.070313	0.10547	-0.091797	-11.445	240.41	622.04	-0.73662	0.55635	0.073242
0.42	-154.173	35.608	1911.05	-2.1519	1.5024	0.61328	-139.494	80.363	1286.62	-0.79492	0.67188	0.020508	-75.66	40.8809	1.266	0.0058594	-0.057129	0.085938	-87.571	43.585	1992.55	-2.1577	1.4956	0.59863	-43.96	174.624	487.453	-0.27393	0.26807	0.13623	-63.279	102.216	215.584	-0.043457	0.083008	-0.098145	-12.469	228.963	604.61	-0.7	0.53398	0.061719
0.422	-177.329	8.404	1911.98	-2.1421	1.4857	0.61602	-125.686	17.529	1440.99	-0.94141	0.73242	0.064941	-46.017	21.1947	21.5131	0.010742	-0.053222	0.074951	-93.096	31.308	1984.22	-2.1602	1.4492	0.60693	-48.361	164.459	440.27	-0.23096	0.22949	0.14063	-45.191	73.558	207.383	-0.026123	0.062011	-0.10352	14.695	234.902	577.74	-0.6582	0.50586	0.058594
0.424	-130.52	51.63441	1963.14	-2.1285	1.4676	0.62002	-85.837	14.507	1511.18	-1.3223	0.84961	0.18604	-71.0848	48.053	-3.185	0.020508	-0.041992	0.065918	-118.518	57.659	1970.34	-2.1628	1.4153	0.61548	-35.273	103.34619	413.202	-0.20898	0.21436	0.13623	-58.695	106.233	199.57	-0.014648	0.040527	-0.11621	-42.651	238.84	527.27	-0.62246	0.48086	0.050097
0.426	-147.234	56.739	1929.88	-2.1066	1.4457	0.62627	-103.554	-10.259	1512.62	-1.6697	0.94458	0.29859	-80.04477	39.70459	18.9147	0.029297	-0.026855	0.064941	-129.214	35.779	1990.69	-2.1655	1.3804	0.62109	-43.78	129.666	362.426	-0.1665	0.17676	0.14844	-37.948	77.735	184.708	-0.0014648	0.01709	-0.12354	-35.959	183.77	509.12	-0.58379	0.45937	0.040234
0.428	-128.12	0.471000000000004	1939.36	-2.0799	1.426	0.62608	-82.7896	-22.8678	1503.54	-2.0249	1.0376	0.41357	-32.588	24.5573	28.8951	0.036133	-0.020996	0.055664	-60.962	25.346	2021.88	-2.1719	1.3379	0.63721	-38.55	89.1685	324.306	-0.14185	0.15162	0.14673	-45.705	101.032	147.605	0.00048828	0.0092773	-0.12305	-52.392	173.684	459.74	-0.54395	0.4336	0.030469
0.43	-103.612	9.699	1914.78	-2.0469	1.4043	0.62451	-59.5067	-63.949	1419.63	-2.4355	1.1563	0.5293	-64.9819	62.401	15.74	0.05127	-0.022949	0.044922	-89.614	39.969	1995.28	-2.1812	1.3247	0.64404	-18.079	90.212	302.812	-0.10938	0.13232	0.14795	-53.92	119.461	121.398	0.010742	-0.013672	-0.12891	-77.062	143.741	417.95	-0.50127	0.40947	0.018457
0.432	-135.417	-25.712	1877.39	-2.0046	1.3841	0.61035	-93.896	-156.756	1356.75	-2.5586	1.2109	0.56201	-38.733	36.3031	21.5281	0.064209	-0.010498	0.035645	-69.981	-24.985	2002.44	-2.2026	1.2954	0.6582	-17.286	147.095	267.3192	-0.07373	0.099609	0.14844	-31.787	79.696	135.52	0.011963	-0.028564	-0.1333	-40.616	110.692	378.907	-0.45654	0.3833	0.0053711
0.434	-74.0611	-10.946	1891.65	-1.955	1.3626	0.59473	-78.883	-177.837	1311.81	-2.5776	1.3149	0.54785	-17.589	47.269	11.852	0.074707	-0.010254	0.036621	-70.826	0.417999999999999	1990.97	-2.2021	1.2813	0.6687	-22.219	111.216	258.0712	-0.057617	0.086914	0.146	-5.04	107.194	127.041	0.016602	-0.04248	-0.12891	-57.201	114.498	326.46	-0.40977	0.36172	-0.0089845
0.436	-70.9688	41.357	1824.26	-1.9062	1.3395	0.58261	-81.85	-193.919	1255.45	-2.399	1.3887	0.49463	-49.377	56.297	9.1988	0.090332	-0.003418	0.026855	-71.487	31.609	1957.89	-2.2012	1.2666	0.67627	-11.342	148.437	249.658	-0.024902	0.06543	0.14014	-27.016	72.821	110.525	0.016602	-0.054688	-0.13525	-53.671	97.319	305.038	-0.36572	0.33868	-0.024316
0.438	-104.836	18.386	1789.32	-1.8706	1.3149	0.56777	-81.877	-236.971	1257.55	-2.1406	1.4707	0.42725	-25.548	26.8261	27.166	0.098633	0	0.023438	-4.608	16.883	1964.78	-2.1953	1.252	0.67725	-25.403	132.785	213.041	0.010742	0.043457	0.14063	-11.436	51.1614	101.931	0.018066	-0.060547	-0.13574	-40.616	86.698	296.8	-0.31924	0.31328	-0.036816
0.44	-58.453	52.51868	1788.53	-1.8359	1.2891	0.55713	-76.216	-230.869	1260.96	-1.75	1.5059	0.29053	-38.313	45.921	19.6963	0.12012	0.0014648	0.017578	-36.119	43.916	1919.51	-2.1836	1.2461	0.68213	-20.413	77.266	204.972	0.033203	0.029297	0.14111	-27.855	79.068	69.693	0.013184	-0.071289	-0.13428	-51.834	107.024	261.269	-0.27422	0.2915	-0.05166
0.442	-82.1769	85.462	1741.52	-1.8139	1.2658	0.54423	-100.122	-230.02	1279.21	-1.5605	1.4609	0.20947	-38.193	17.0792	31.585	0.12915	0.0048828	0.011963	-38.017	21.618	1888.89	-2.1577	1.231	0.67188	-10.444	109.283	187.983	0.064941	0.012207	0.13525	-9.816	45.5618	60.305	0.015869	-0.076416	-0.13598	0.679000000000002	86.968	243.79	-0.24072	0.26904	-0.059082
0.444	-55.442	93.652	1746.48	-1.7938	1.2411	0.52784	-75.732	-187	1348.89	-1.2378	1.27	0.071289	-10.822	-6.112004	33.2766	0.14014	0.0087891	0.0063477	-15.913	23.677	1876.39	-2.1306	1.2141	0.66284	-16.563	76.846	179.405	0.090332	-0.003418	0.13501	4.735	76.773	62.053	0.020508	-0.07959	-0.13867	-14.861	112.261	204.645	-0.19961	0.24063	-0.07334
0.446	2.693	166.686	1727.16	-1.7754	1.2195	0.51689	-46.101	-97.1637	1359.37	-1.0632	1.1189	-0.015869	-42.083	27.5999	18.7528	0.15137	0.013184	-0.00048828	-46.558	89.028	1844.54	-2.0938	1.1934	0.65771	-31.193	71.446	173.352	0.11719	-0.020508	0.13623	-22.996	78.848	37.8348	0.015625	-0.087402	-0.14355	-30.403	108.867	178.189	-0.17139	0.22109	-0.087988
0.448	-43.824	178.593	1676.18	-1.7531	1.1984	0.50596	-46.474	-83.5862	1402.03	-0.9375	1.0156	-0.099609	-17.472	20.5664	37.9095	0.16162	0.015137	-0.0014648	-5.418	93.35	1856.37	-2.0503	1.1802	0.64209	-58.0519	100.661	121.698	0.146	-0.039551	0.12744	-9.253	34.36859	34.9857	0.020996	-0.089355	-0.146	15.454	95.583	164.577	-0.13975	0.19844	-0.10088
0.45	-20.447	186.014	1682.35	-1.7344	1.1797	0.50146	-22.168	-54.8264	1438.52	-0.78857	0.99561	-0.1748	2.711	38.033	24.3203	0.16748	0.01416	0.0024414	8.713	138.86	1831.75	-2.0254	1.1699	0.63721	-64.055	52.4258	105.86507	0.15723	-0.049316	0.11816	-16.837	50.788	41.911	0.023438	-0.096191	-0.14746	-32.483	111.831	129.655	-0.10898	0.17578	-0.10586
0.452	-33.2205	227.22	1633.21	-1.7191	1.1567	0.49404	-17.098	-79.508	1423.97	-0.72656	1.0078	-0.19922	-35.953	52.0332	22.8248	0.17285	0.012939	0.00048827	-25.982	168.97	1762.98	-1.9707	1.1484	0.61865	-69.378	83.616	116.2672	0.18799	-0.061523	0.12646	-17.662	13.367	36.0336	0.020996	-0.098391	-0.14917	6.12	86.604	138.703	-0.086426	0.15576	-0.11328
0.454	-54.603	196.492	1618.66	-1.7074	1.1366	0.48935	29.148	-196.688	1457.07	-0.64697	1.0435	-0.24316	0.911999999999999	11.1272	24.758	0.17627	0.01416	0.0053711	2.225	157.344	1743.52	-1.9243	1.1343	0.60693	-63.965	81.547	100.261	0.20264	-0.079834	0.12036	-12.32	-0.231999999999999	32.187	0.020508	-0.098633	-0.15479	35.966	82.047	112.743	-0.066504	0.13437	-0.11475
0.456	5.184	212.121	1631.15	-1.6949	1.1194	0.48271	29.176	-276.72	1490.51	-0.63452	1.0422	-0.24804	-23.269	40.015	13.6605	0.17383	0.015137	0.0087891	-29.316	198.846	1736.51	-1.8813	1.1187	0.59521	-52.87	42.5672	76.87048	0.21729	-0.085938	0.11816	-16.715	21.139	15.83334	0.017578	-0.10352	-0.14795	-37.815	91.014	91.243	-0.054785	0.12012	-0.12061
0.458	-26.576	203.518	1544.84	-1.6806	1.0988	0.48047	-41.279	-369.62	1503.76	-0.68799	1.0435	-0.21631	-16.176	33.8643	18.9879	0.1748	0.012695	0.0092773	-50.562	169.814	1749.4	-1.8237	1.1079	0.57227	-69.863	59.277	65.417	0.23486	-0.093262	0.11084	-16.471	-10.3118	19.1989	0.01123	-0.10156	-0.15234	10.666	61.887	81.856	-0.045801	0.10137	-0.12256
0.46	-50.786	153.117	1517.13	-1.6641	1.0781	0.47119	-51.897	-417.59	1577.93	-0.89551	1.1094	-0.125	8.766	23.9119	25.535	0.17041	0.018066	0.016602	-8.463	133.384	1729.49	-1.7925	1.0981	0.56543	-61.419	28.3245	50.757	0.23877	-0.1001	0.10986	-28.882	16.8307	35.5082	-0.00097656	-0.10547	-0.14502	15.512	77.309	33.5032	-0.043359	0.088184	-0.121
0.462	-26.193	175.561	1489.34	-1.6461	1.0609	0.471	-72.391	-362.57	1604.97	-1.0288	1.1665	-0.091797	-54.647	47.3816	19.1103	0.16503	0.024658	0.020752	-50.004	127.881	1659.58	-1.7383	1.082	0.5415	-43.239	35.64351	53.31	0.24854	-0.1084	0.096191	-51.052	38.505	27.6419	-0.0092776	-0.10717	-0.14234	-25.141	54.052	38.458	-0.038086	0.070313	-0.11816
0.464	-64.83909	160.096	1463.97	-1.629	1.031	0.46445	-107.9564	-356.49	1626.13	-1.2769	1.2856	-0.032715	-54.78	14.8889	32.3409	0.1582	0.029785	0.029297	-60.9409	86.766	1643.33	-1.6982	1.0674	0.52295	-44.512	76.7087	35.814	0.25073	-0.11011	0.093261	-42.714	7.5159	23.5541	-0.016113	-0.10547	-0.13916	13.061	3.995	43.122	-0.03877	0.056641	-0.1128
0.466	-20.995	164.887	1473.78	-1.5974	1.0079	0.46016	-48.876	-310.79	1707.29	-1.3758	1.3352	-0.0014648	-23.446	33.032	20.4654	0.1499	0.037109	0.037109	-51.528	135.428	1629.81	-1.6602	1.0508	0.50439	-39.335	45.5773	29.1068	0.24414	-0.11279	0.086426	-47.387	43.006	11.63268	-0.023926	-0.10645	-0.13672	-40.395	15.5413	30.201	-0.040137	0.047558	-0.10703
0.468	-58.0436	189.639	1419.64	-1.569	0.98897	0.45313	-46.88	-238.717	1731.19	-1.4277	1.3574	0.018066	-73.8945	50.7118	13.5974	0.13623	0.039551	0.043457	-66.366	199.194	1598.32	-1.6074	1.0195	0.48877	-38.77	83.394	35.169	0.23242	-0.11182	0.086914	-64.561	10.088	-1.2336	-0.030762	-0.10645	-0.12646	-43.4	0.544999999999998	44.985	-0.044434	0.033105	-0.10039
0.47	-112.0474	186.558	1384.39	-1.5327	0.95947	0.44434	-17.415	-226.34	1802.09	-1.4819	1.3696	0.022949	-22.112	19.3967	24.917	0.1167	0.046875	0.053223	-26.207	197.716	1573.69	-1.5801	1.0049	0.48389	-56.715	87.773	19.7972	0.22412	-0.10938	0.087402	-82.871	3.875	3.0518	-0.033691	-0.10742	-0.12891	-14.68	23.65	46.8353	-0.043164	0.024121	-0.092969
0.472	-64.87	255.52	1362.91	-1.4958	0.93681	0.43027	44.378	-153.527	1867.74	-1.5215	1.375	0.017578	-53.824	38.627	23.0757	0.10083	0.056884	0.065918	-51.902	244.88	1529.82	-1.5327	0.96533	0.45654	-21.456	47.14	17.49549	0.20654	-0.10449	0.089355	-99.5402	44.7848	-10.1597	-0.035401	-0.10547	-0.12744	-77.435	64.4847	31.36204	-0.037109	0.0087891	-0.087402
0.474	-74.337	288.2	1300.06	-1.4492	0.90899	0.41416	37.155	-131.471	1880.74	-1.6074	1.3906	0.014648	-81.5591	18.269	14.61377	0.085449	0.063477	0.079102	-55.739	217.95	1511.92	-1.489	0.948	0.44336	-35.457	69.71	10.8834	0.18824	-0.096926	0.095214	-53.296	8.675	2.84408	-0.031738	-0.10596	-0.12744	-52.711	43.8689	13.5937	-0.032129	-0.0061521	-0.080566
0.476	-67.688	273.74	1273.1	-1.4007	0.88633	0.39697	52.317	-130.335	1927.18	-1.6744	1.397	0.018555	-31.689	-12.2705	32.1884	0.068359	0.07373	0.089355	-6.476	211.226	1495.45	-1.4448	0.92236	0.42578	-27.49	15.6098	8.43006	0.16748	-0.090332	0.099609	-46.135	41.5614	25.0121	-0.024902	-0.11035	-0.12891	-53.154	57.998	-5.3417	-0.026855	-0.021387	-0.075586
0.478	-31.778	268.23	1237.71	-1.3475	0.85566	0.37764	75.738	-76.784	1887.01	-1.7461	1.418	0.024902	-54.109	3.95	38.931	0.060547	0.07666	0.092773	-13.626	248.69	1435.84	-1.3843	0.8833	0.40234	-15.14	-0.3879	27.5719	0.13965	-0.081543	0.097656	-68.335	43.4164	5.5373	-0.023926	-0.11084	-0.12988	-85.561	50.076	-8.2935	-0.013183	-0.031152	-0.076757
0.48	-66.5858	233.33	1168.44	-1.2944	0.82666	0.35742	22.945	-102.663	1841.38	-1.832	1.4453	0.03418	-36.997	-49.275	74.54	0.058105	0.086914	0.095703	3.994	230.02	1395.08	-1.3574	0.86523	0.3916	-29.354	23.534	9.236	0.12256	-0.075684	0.10156	-42.397	24.1403	11.8966	-0.030762	-0.11719	-0.12646	-61.828	9.1613	8.0632	0.0023438	-0.047168	-0.077539
0.482	-22.469	221.633	1142.08	-1.2399	0.79258	0.33535	8.969	-110.8012	1852.38	-1.8691	1.4668	0.032715	-56.985	-36.5752	77.6898	0.037842	0.10156	0.10572	6.877	252.16	1352.94	-1.3042	0.83057	0.37207	-15.934	0.442	5.4392	0.092773	-0.0625	0.10889	-63.182	63.659	-2.382	-0.034668	-0.12012	-0.12353	-92.8439	37.0849	-5.8283	0.02002	-0.046387	-0.080566
0.484	-29.253	247.751	1085.5	-1.187	0.75947	0.31465	-46.631	-99.277	1830.06	-1.9336	1.5078	0.02002	-40.477	4.72376	69.273	0.022949	0.11084	0.11182	-34.737	274.67	1279.62	-1.2667	0.80176	0.35889	3.139	45.8893	27.156	0.080322	-0.053955	0.10889	-63.438	38.6278	-7.913	-0.039551	-0.12354	-0.11084	-79.781	23.026	22.8337	0.037402	-0.057129	-0.078809
0.486	-54.906	249.772	1039.41	-1.1417	0.73213	0.2998	-70.317	-183.585	1895.26	-1.9656	1.549	0.020019	-21.918	-29.344	105.3871	-0.029785	0.13037	0.12744	31.007	260.845	1256.78	-1.2285	0.77441	0.34912	-8.894	53.4793	27.6843	0.0625	-0.050293	0.11279	-25.504	25.2624	17.2627	-0.048828	-0.12891	-0.10693	-62.25	41.234	-6.388	0.049317	-0.063965	-0.083106
0.488	-0.872	267.029	1021.71	-1.0965	0.69668	0.27978	-35.325	-195.908	1940.49	-1.9941	1.5781	0.0097656	-49.334	-26.91	122.737	-0.063965	0.13965	0.13477	37.853	300.94	1226.63	-1.1797	0.74219	0.33057	-5.614	30.3736	37.403	0.053223	-0.043457	0.10938	-39.322	40.30707	6.097	-0.05127	-0.12939	-0.10303	-60.609	61.0846	-18.941	0.05791	-0.076074	-0.084668
0.49	-30.647	260.27	954.16	-1.0586	0.64648	0.24902	-47.083	-224.369	1940.74	-2.0078	1.6094	0.0014648	-67.178	-47.7469	156.955	-0.13525	0.15527	0.1626	32.852	279.88	1214.27	-1.1494	0.72363	0.32275	-6.203	65.733	21.3778	0.049316	-0.04248	0.10986	-20.681	-3.02	5.5917	-0.056641	-0.13379	-0.1001	-37.268	35.1834	13.4828	0.063086	-0.083203	-0.086914
0.492	-32.937	235.889	932.47	-1.0145	0.62832	0.26358	-29.273	-249.926	1989.42	-2.0132	1.6177	-0.0043945	-15.45	-84.571	195.453	-0.18848	0.17651	0.18042	53.843	248.503	1206.49	-1.0996	0.68945	0.29834	-18.101	19.5635	25.42767	0.044434	-0.033691	0.10596	-26.177	34.9924	24.109	-0.058593	-0.13013	-0.095215	-64.962	62.552	-11.31567	0.069824	-0.091309	-0.085938
0.494	14.216	234.258	925.82	-0.98789	0.61055	0.24814	-4.724	-166.901	2000.46	-2.0112	1.6196	-0.01709	-55.963	-32.7764	253.8612	-0.23975	0.19922	0.1958	25.952	251.952	1135.21	-1.0554	0.66334	0.28686	-31.914	19.5324	49.4732	0.044678	-0.035156	0.10279	-18.116	42.5614	26.166	-0.056152	-0.12451	-0.089844	-47.987	47.6724	30.567	0.079199	-0.10566	-0.086426
0.496	-14.315	208.868	886.96	-0.96485	0.59063	0.22627	-24.37	-122.874	1995.83	-1.9961	1.6152	-0.032715	-32.794	-27.531	359.722	-0.30957	0.23535	0.21094	50.703	205.316	1108.13	-1.0122	0.63818	0.27539	-35.896	32.9384	41.5991	0.04541	-0.029785	0.095215	-2.08199999999999	27.927	24.885	-0.053223	-0.11816	-0.085938	-5.91	8.9872	39.199	0.083789	-0.11709	-0.0875
0.498	41.657	197.973	858.08	-0.93603	0.56084	0.22109	-0.336999999999996	-65.3185	2027.01	-1.9883	1.6094	-0.037109	7.962	21.93018	461.07	-0.34521	0.25684	0.21436	58.134	222.464	1077.45	-0.95752	0.60596	0.24463	-35.328	2.974	23.4856	0.05127	-0.033691	0.09082	-6.301	66.317	15.6467	-0.046387	-0.11377	-0.085449	-61.615	27.9887	24.6614	0.090039	-0.12334	-0.085547
0.5	26.785	203.586	782.5	-0.91016	0.53271	0.22363	-36.775	-14.844	1960.8	-1.9604	1.5825	-0.043457	-8.876	71.328	525.63	-0.4292	0.30615	0.22168	44.648	236.674	1018.95	-0.92773	0.59229	0.23486	-50.954	47.725	3.49	0.050781	-0.033203	0.078125	-7.074	40.3223	-1.351466	-0.035645	-0.10254	-0.087402	-16.018	6.8683	38.614	0.08916	-0.12969	-0.082129
0.502	-2.575	187.851	731.97	-0.87637	0.51231	0.21592	-78.748	-79.634	1934.35	-1.9324	1.5608	-0.053711	29.428	65.907	633	-0.51392	0.34961	0.23267	82.259	217.295	989.87	-0.87891	0.55664	0.21387	-61.229	50.803	-4.9357	0.060547	-0.021973	0.077637	-2.636	26.723	16.7046	-0.023438	-0.098143	-0.085449	23.944	21.3762	24.6241	0.08252	-0.13721	-0.075195
0.504	41.086	199.564	694.53	-0.82998	0.50361	0.19804	-44.314	-77.989	1919.45	-1.8979	1.5415	-0.061035	66.0854	118.551	771.07	-0.61865	0.39307	0.24219	32.105	273.02	934.1	-0.8396	0.53344	0.19409	-50.548	32.81	27.309	0.061768	-0.026611	0.076172	-10.172	53.032	22.076	-0.01416	-0.087891	-0.084473	-12.78	62.333	10.797	0.075097	-0.14268	-0.073047
0.506	5.106	198.802	648.47	-0.78154	0.49033	0.18555	-87.5887	-54.733	1840.06	-1.8687	1.5103	-0.0625	85.4454	140.296	961.37	-0.79785	0.46973	0.24854	14.391	257.55	897.54	-0.79883	0.50879	0.18311	-54.249	77.529	21.9696	0.067871	-0.023926	0.072266	-14.426	30.344	23.4924	0.0014648	-0.080078	-0.08252	15.802	47.8001	23.101	0.06416	-0.14766	-0.064453
0.508	19.436	184.136	616.28	-0.73428	0.46279	0.1709	-87.7352	-83.403	1862.77	-1.8589	1.4946	-0.063477	84.965	124.723	1103.08	-0.90186	0.5083	0.26514	59.238	236.211	867.84	-0.74561	0.4751	0.15381	-39.622	25.1349	15.8546	0.075684	-0.02002	0.069824	-22.445	68.827	21.3298	0.0058594	-0.078125	-0.088867	10.031	54.621	8.6863	0.043848	-0.14687	-0.057812
0.51	31.032	186.182	562.03	-0.68555	0.4375	0.16064	-87.90053	-11.599	1826.84	-1.8555	1.4707	-0.053223	39.406	110.424	1102.24	-1.1343	0.60986	0.30908	6.74699999999999	254.73	799.7	-0.7207	0.45557	0.14648	-49.239	4.173	28.6183	0.081055	-0.015137	0.069824	-26.396	61.3578	11.386	0.015625	-0.064453	-0.085938	-32.707	35.1486	13.4253	0.025	-0.14687	-0.042871
0.512	-45.135	164.751	496.38	-0.64658	0.40694	0.15069	-121.44947	-8.628	1779.708	-1.8503	1.4577	-0.044434	70.919	11.484	1087.43	-1.3191	0.69556	0.34741	16.973	199.084	755.9	-0.66992	0.42188	0.12793	-73.141	8.391	26.04	0.088867	-0.013672	0.064453	-22.384	30.5834	24.8049	0.023682	-0.054443	-0.084961	26.33	8.3418	37.96	0.0014648	-0.14502	-0.032227
0.514	-13.156	151.518	453.22	-0.59932	0.37685	0.14248	-59.63	8.35499999999999	1819.56	-1.8359	1.4434	-0.041016	56.798	-33.292	1097.54	-1.4961	0.79102	0.39551	13.63	204.975	693.46	-0.63648	0.39624	0.11646	-49.513	-20.5995	40.8317	0.10058	-0.0078125	0.065185	-43.794	59.194	23.3792	0.02832	-0.047852	-0.083496	7.331	48.7552	20.0664	-0.015625	-0.13906	-0.023731
0.516	-37.504	160.057	397.49	-0.55166	0.35811	0.1288	-27.221	81.052	1784.96	-1.8198	1.4243	-0.025879	-34.753	-28.833	1095.95	-1.7026	0.92236	0.45898	-36.413	215.57	625.78	-0.59521	0.37207	0.10205	-44.57	32.91802	22.7183	0.10645	-0.0058594	0.0625	-50.857	29.617	22.2272	0.038086	-0.041504	-0.083984	7.496	26.1936	30.1203	-0.031836	-0.13291	-0.010156
0.518	-70.39	162.728	381.14	-0.49824	0.32832	0.11103	-49.355	37.103	1830.82	-1.8101	1.4165	-0.018555	0.692	-66.2142	1100.31	-1.7886	1.0102	0.49024	-6.925	191.011	601.62	-0.53955	0.34814	0.079102	-61.6336	39.489	-3.5048	0.12451	-0.0039063	0.062012	-34.762	27.9276	33.8776	0.047363	-0.03418	-0.082764	-16.867	31.973	23.66074	-0.04707	-0.12822	-0.0011719
0.52	-18.803	167.362	377.98	-0.44434	0.2959	0.098145	21.797	55.6496	1862.8	-1.7939	1.4102	-0.0029297	-9.728	-31.5109	1057.49	-1.812	1.0864	0.52002	-38.892	238.58	556.75	-0.51123	0.33008	0.071777	-47.607	20.6535	10.5366	0.12891	-0.0053711	0.063477	-56.299	41.463	17.73423	0.051758	-0.029297	-0.081055	-46.566	60.792	8.133	-0.059472	-0.12353	0.0087891
0.522	-58.393	167.566	324.85	-0.3916	0.2709	0.080762	-16.137	29.6851	1831.76	-1.7859	1.4006	0.0073243	-57.0242	-34.123	1041.94	-1.7231	1.1606	0.55273	-31.468	228.99	532.24	-0.45703	0.30176	0.059082	-63.218	50.095	7.6987	0.14014	0.0014648	0.060059	-68.044	-8.612201	24.935	0.062012	-0.020508	-0.081055	-25.527	28.009424	21.7506	-0.064941	-0.11768	0.01709
0.524	-59.455	155.533	314.99	-0.3376	0.24863	0.06543	-2.402	-42.9095	1846.15	-1.7676	1.3965	0.016113	22.058	-60.34266	1056.79	-1.6582	1.1836	0.55127	-30.029	205.691	514.79	-0.41944	0.28443	0.042236	-52.402	11.2827	6.6618	0.15649	0.0061036	0.058593	-67.307	25.984644	30.054	0.064941	-0.01709	-0.085938	-43.932	43.659	15.97288	-0.067481	-0.11094	0.014844
0.526	-39.649	155.329	286.7	-0.29307	0.22246	0.051758	32.226	11.002	1811.081	-1.748	1.3945	0.029297	17.976	-48.263	1047.16	-1.4937	1.188	0.5	-64.299	218.28	450.1	-0.38086	0.26074	0.031738	-17.584	19.9436	18.8759	0.16406	0.003418	0.062988	-79.334	34.182	26.831	0.074707	-0.012695	-0.083984	-79.53	28.0628	22.5402	-0.065723	-0.10742	0.019239
0.528	-84.8991	122.281	244.54	-0.25039	0.20137	0.037695	-1.94	-4.274	1748.915	-1.7363	1.3926	0.028809	14.038	-80.804	1086.54	-1.3103	1.1462	0.43164	-33.397	152.714	427.87	-0.33594	0.23096	0.012207	-31.996	38.67258	8.108	0.18018	0.010254	0.065918	-44.316	14.504	38.3519	0.082763	-0.011719	-0.086914	-40.878	-8.94633	17.7687	-0.06377	-0.1	0.023535
0.53	-46.097	97.196	218.58	-0.20801	0.18018	0.024902	34.745	16.134	1744.61	-1.7012	1.3945	0.036621	7.284	-69.771	1117.66	-1.0864	1.0874	0.37695	-45.655	146.691	391.17	-0.30908	0.22021	0.0092773	-13.192	-3.074	31.7405	0.18506	0.0097656	0.06543	-51.649	49.5208	42.8668	0.093262	-0.010742	-0.092285	-75.231	22.895	-0.969999999999999	-0.056543	-0.097852	0.017578
0.532	-64.122	89.503	167.367	-0.1708	0.15811	0.0088868	9.866	73.141	1679.315	-1.6692	1.3958	0.031982	-75.4096	-52.974	1133	-0.79443	0.96729	0.32617	-52.447	137.611	352.35	-0.26758	0.18799	0.00097656	9.429	33.0359	22.1983	0.19385	0.015137	0.071777	-85.8034	24.1855	14.2729	0.099121	0.0014648	-0.095703	-53.519	-2.923	21.9102	-0.050293	-0.097656	0.012695
0.534	-95.8333	72.399	150.283	-0.14112	0.13789	0.00039062	0.590000000000003	39.276	1676.994	-1.6284	1.395	0.025391	-84.81124	-64.177	1161.14	-0.69482	0.9126	0.30176	-1.66699999999999	99.04	319.92	-0.23999	0.16406	-0.0063477	-13.429	51.5066	-22.1389	0.19995	0.014405	0.073731	-49.888	8.3296	30.783	0.10693	0.00097656	-0.09375	-52.604	-2.304	20.29811	-0.038965	-0.092969	0.012988
0.536	-47.171	72.16	167.258	-0.1083	0.11484	-0.0078125	49.768	60.388	1692.262	-1.5776	1.3892	0.022461	-112.558	-49.2869	1141.18	-0.604	0.854	0.2793	-43.551	129.974	268.738	-0.21143	0.14063	-0.011719	-9.504	42.546	1.019	0.19727	0.021484	0.080566	-47.562	38.664	18.4951	0.11426	0.0024414	-0.10107	-98.1439	28.5496	14.6601	-0.029394	-0.094532	0.0084961
0.538	-94.3948	90.577	146.464	-0.078711	0.10283	-0.017285	19.842	72.5679	1648.721	-1.5469	1.3828	0.024902	-101.157	-84.7422	1139.79	-0.59472	0.85254	0.27417	-41.962	113.481	267.062	-0.18066	0.11328	-0.013672	-7.576	83.011	12.9449	0.19336	0.03125	0.078125	-42.54	0.9146	23.1985	0.11353	0.008789	-0.10328	-46.746	16.08722	21.0275	-0.012988	-0.091797	0.0053711
0.54	-65.281	96.912	149.93	-0.055176	0.083984	-0.023438	48.939	42.3962	1652.185	-1.499	1.3652	0.022461	-26.088	-138.429	1168.53	-0.60547	0.86914	0.28223	9.505	107.318	260.357	-0.16919	0.10156	-0.019287	-16.173	29.5457	20.4939	0.18359	0.041016	0.081543	-26.056	27.3742	24.3674	0.11426	0.012695	-0.1001	-63.558	58.021	0.927	-0.0021484	-0.091601	0.0015625
0.542	-29.135	120.544	124.363	-0.032129	0.066113	-0.033985	25.804	127.213	1613.411	-1.4619	1.3535	0.014893	-62.2379	-159.467	1193.77	-0.68066	0.92773	0.31885	-24.926	153.592	227.468	-0.15674	0.080078	-0.020508	-20.622	19.6889	26.052	0.1626	0.045898	0.088867	-37.858	39.3144	16.718	0.10352	0.01709	-0.099121	-88.8233	59.004	5.691	0.012207	-0.088867	0.0014648
0.544	-54.838	110.292	107.476	-0.014356	0.049414	-0.037988	-24.932	136.802	1577.041	-1.4233	1.3462	0.0058594	-65.5763	-249.732	1271.29	-0.73584	0.96924	0.3374	1.78400000000001	126.889	215.858	-0.13623	0.053223	-0.031738	-34.175	37.9091	6.023	0.14722	0.061035	0.098145	-22.746	15.8914	19.8485	0.095703	0.021484	-0.099609	-38.483	23.1149	22.135	0.024804	-0.092969	-0.0036133
0.546	-17.359	93.712	102.498	-0.0006836	0.03457	-0.045019	25.974	153.21	1583.89	-1.377	1.334	-0.00048828	-66.9243	-304.789	1328.22	-0.88086	1.0703	0.36963	1.305	130.038	181.152	-0.11914	0.039551	-0.034668	-29.161	-11.8726	27.1829	0.13379	0.071289	0.10303	-11.066	47.5477	13.255	0.087402	0.028809	-0.095703	-58.75	43.1169	-7.796	0.034375	-0.093262	-0.0072265
0.548	-19.01	90.01	64.2766	0.0080078	0.021972	-0.048633	13.548	188.408	1552.372	-1.353	1.3286	-0.0043945	-90.5917	-314.651	1359.57	-0.98021	1.1584	0.39087	-41.032	119.651	151.975	-0.088379	0.025391	-0.047852	-21.929	28.88853	36.9312	0.10498	0.084473	0.11621	-7.123	14.801	-0.0468000000000002	0.083496	0.033692	-0.09375	-29.748	3.307	8.1357	0.052734	-0.0917	-0.0080078
0.55	-6.553	74.597	52.739	0.016602	0.0097656	-0.053711	-28.21	117.088	1544.052	-1.3101	1.3071	-0.013672	-42.683	-318.357	1409.65	-1.0708	1.2407	0.4082	6.879	76.736	143.447	-0.069092	0.025147	-0.05249	-27.011	29.3814	18.0809	0.092285	0.092773	0.12305	-1.482	4.99754	7.75	0.07373	0.042969	-0.098633	-12.145	8.0023	2.6378	0.072168	-0.091309	-0.020312
0.552	9.53200000000001	51.3951	48.6804	0.023828	-0.0070312	-0.052832	0.678000000000004	107.942	1538.816	-1.279	1.2879	-0.016358	-49.007	-255.454	1431.3	-1.1689	1.3193	0.41797	1.746	118.521	121.406	-0.057129	0.021484	-0.062012	-20.699	5.0372	25.6939	0.070801	0.1084	0.12842	-8.799	34.598	-2.0437	0.070313	0.057617	-0.096191	-43.377	48.8733	0.00750000000000006	0.092285	-0.09082	-0.025879
0.554	-40.701	54.663	27.466	0.029785	-0.015625	-0.058594	-51.634	92.1666	1469.867	-1.248	1.2695	-0.01709	-95.447	-211.831	1495.66	-1.209	1.3496	0.42529	-11.144	98.66	130.181	-0.046387	0.016113	-0.060059	-45.105	24.6873	42.53	0.056885	0.12085	0.13232	-20.326	-5.27345	12.5223	0.070801	0.061523	-0.098633	1.70200000000001	30.636	20.65179	0.11445	-0.086426	-0.038281
0.556	-18.45	58.646	35.96215	0.03252	-0.023828	-0.060938	-64.725	30.874	1463.263	-1.209	1.2461	-0.02002	-28.998	-180.26	1569.99	-1.2964	1.3853	0.42773	0.908000000000001	80.768	117.433	-0.043945	0.0092773	-0.059082	-55.851	-19.2602	78.54637	0.04834	0.13818	0.13232	-21.172	23.0649	44.14	0.060547	0.078613	-0.10059	15.704	58.485	-0.5256	0.12812	-0.086523	-0.04248
0.558	-3.202	75.191	23.847	0.037403	-0.034961	-0.06416	-59.581	74.415	1419.887	-1.1851	1.2349	-0.020996	-33.6963	-135.953	1626.12	-1.357	1.4038	0.43408	-47.794	118.975	93.3846	-0.039551	-0.00097656	-0.068848	-6.684	-24.43139	121.329	0.023438	0.1665	0.13525	-30.084	12.867	58.178	0.050537	0.087891	-0.092774	-4.501	50.8007	-0.0325800000000001	0.13984	-0.07793	-0.04248
0.56	-36.656	72.714	33.0365	0.041504	-0.040527	-0.067871	-127.75	62.094	1372.4162	-1.1479	1.2017	-0.012695	-19.699	-167.037	1697.93	-1.418	1.4082	0.43799	-17.566	75.742	63.403	-0.036377	-0.015381	-0.069092	-53.6178	-9.7377	129.3561	0.00048828	0.18457	0.13672	-10.484	-29.556	73.412	0.036621	0.099121	-0.095703	20.279	5.1287	18.6635	0.14775	-0.075	-0.051172
0.562	-9.20799999999999	36.652	66.644	0.048731	-0.044238	-0.073535	-93.1211	92.462	1363.719	-1.1276	1.177	-0.0048828	-17.575	-181.805	1717.19	-1.4966	1.4224	0.44238	-16.01	78.43	43.3892	-0.033691	-0.036133	-0.077148	-69.459	-53.2925	168.852	-0.050781	0.21924	0.14063	-24.479	2.064	70.743	0.01709	0.1123	-0.099609	-3.494	29.9063	7.118	0.14551	-0.068848	-0.053711
0.564	-36.91	23.7721	28.1448	0.051367	-0.049414	-0.074512	-87.5063	161.645	1321.094	-1.105	1.1431	0.0014648	-85.22367	-180.606	1692.95	-1.5269	1.436	0.4502	-53.965	67.4069	46.5564	-0.021973	-0.050781	-0.084961	-71.5163	-26.3	223.912	-0.093262	0.24244	0.14942	-45.252	-28.254	79.7499	0.003418	0.12451	-0.1001	-1.256	2.382	23.7009	0.14297	-0.065918	-0.056055
0.566	-49.004	5.605	18.7295	0.05957	-0.060742	-0.087012	-109.9446	169.995	1310.59	-1.0698	1.0991	0.0078125	-36.724	-164.398	1694.1	-1.585	1.4785	0.46533	-39.393	-4.859	55.478	-0.014648	-0.060059	-0.087402	-72.496	-27.6785	269.375	-0.14502	0.26807	0.15869	-51.056	-44.113	135.72	-0.042969	0.13818	-0.083984	13.383	12.4427	26.794	0.13926	-0.053907	-0.057714
0.568	-14.3	-9.684	30.2569	0.061328	-0.065039	-0.085156	-66.2158	225.41	1324.777	-1.0542	1.0767	0.015625	-24.293	-97.318	1725.08	-1.6313	1.5171	0.47266	-56.653	32.94	35.171	-0.0053711	-0.079102	-0.089355	-72.562	-9.785	354.507	-0.2251	0.31201	0.16699	-61.953	-22.666	167.4412	-0.098389	0.15845	-0.070556	-25.709	40.5915	6.25611	0.13496	-0.043359	-0.053418
0.57	-62.233	7.634	25.4364	0.0625	-0.077148	-0.087402	-60.8026	232.005	1264.835	-1.0122	1.0337	0.023438	-33.301	-96.738	1779.07	-1.687	1.5679	0.48438	-44.565	21.583	40.2784	-0.003418	-0.088379	-0.093994	-73.006	66.9	467.22	-0.26904	0.33643	0.16406	-31.157	-75.365	236.292	-0.15674	0.17725	-0.061523	-1.944	34.178	13.7817	0.12842	-0.033887	-0.056836
0.572	-48.305	19.052	36.5189	0.063379	-0.079785	-0.089648	-48.629	175.186	1235.888	-0.97998	1.001	0.033448	-1.503	-136.4	1839.74	-1.7598	1.6309	0.51025	-39.449	27.9994	47.97	-0.0078125	-0.09668	-0.094238	-20.497	64.9045	628.9	-0.36328	0.40039	0.16064	-2.702	-46.159	346.01	-0.24023	0.19922	-0.046875	-35.993	68.831	0.8892	0.12354	-0.02002	-0.056641
0.574	-20.073	42.0234	25.33	0.059277	-0.088184	-0.091211	-45.3081	189.055	1177.353	-0.95117	0.9668	0.044922	-38.547	-119.465	1854.84	-1.7988	1.666	0.52295	-83.2549	77.939	38.6777	-0.0083008	-0.1084	-0.094727	-17.48	91.516	812.63	-0.44677	0.4602	0.14771	-37.966	14.868	442.557	-0.2832	0.21484	-0.043945	-31.67	70.343	7.84	0.11924	-0.004785	-0.056641
0.576	-66.3641	43.852	-0.233999999999998	0.052636	-0.097168	-0.091992	-87.798	143.4824	1108.3313	-0.91895	0.91211	0.05957	-35.138	-121.793	1913.84	-1.8687	1.7192	0.54688	-56.147	34.549	38.57	-0.010742	-0.11377	-0.091797	1.596	114.5692	952.86	-0.53906	0.5332	0.13379	-102.7599	52.341	593.05	-0.36963	0.24756	-0.038574	-13.205	45.611	23	0.11397	0.0078125	-0.055957
0.578	-35.328	21.8245	31.209	0.038965	-0.10274	-0.091602	-62.236	133.06055	1104.134	-0.90088	0.88525	0.064941	-11.341	-96.572	1969.96	-1.9053	1.7534	0.56201	-74.595	50.602	0.5977	-0.016113	-0.12451	-0.092285	49.541	54.85	1064.77	-0.72998	0.65088	0.12354	-139.278	153.407	770.4	-0.45044	0.27588	-0.034179	-75.158	50.116873	9.442	0.10733	0.019531	-0.056739
0.58	-74.137	25.742	10.5691	0.026367	-0.11035	-0.087891	-81.3755	194.031	1047.993	-0.86865	0.83154	0.083984	-51.244	-72.89	1955.42	-1.9316	1.7891	0.57666	-94.3697	48.5753	-2.5116	-0.028564	-0.12719	-0.087159	59.067	63.5107	1185.42	-0.84521	0.71631	0.13135	-145.913	154.976	936.76	-0.54541	0.31055	-0.030762	-54.45	10.828	24.03964	0.10303	0.03086	-0.0625
0.582	-81.276	24.8238	9.6531	0.012598	-0.1126	-0.088477	-97.556	172.314	1016.0807	-0.84302	0.7854	0.098631	-44.727	-94.537	1963.58	-1.9487	1.811	0.58398	-38.301	-5.9796	26.3486	-0.041992	-0.13379	-0.084473	39.704	63.1439	1230.28	-1.1216	0.84912	0.16553	-166.743	125.3396	1114.62	-0.72607	0.37061	0.010742	-63.53	-3.784	46.89	0.094727	0.047852	-0.061035
0.584	-24.571	20.9874	8.829	0.0035156	-0.1125	-0.08457	-52.7978	194.366	1005.143	-0.8208	0.74854	0.11182	-75.1038	-105.547	1957.81	-1.9507	1.8149	0.58984	-64.927	21.846	16.708	-0.053711	-0.13672	-0.083008	19.768	46.0712	1231.02	-1.4429	1.0005	0.23828	-180.467	121.0839	1228.09	-0.84131	0.41162	0.04248	-84.5175	19.704	48.59219	0.086328	0.058496	-0.064649
0.586	-86.928	27.1861	-8.467	-0.0023438	-0.11015	-0.082227	-86.302	191.751	957.564	-0.78955	0.68408	0.12695	-127.861	-111.9	1946.6	-1.9604	1.813	0.60547	-52.498	-2.047	8.484	-0.066406	-0.13232	-0.080078	7.796	53.15	1174.01	-1.6074	1.0703	0.28223	-181.5265	42.193	1325.84	-1.1387	0.49805	0.13379	-54.234	-16.755	88.1002	0.075879	0.068848	-0.064941
0.588	-59.066	17.6977	21.9715	0.0035156	-0.11484	-0.082422	-52.113	158.9104	953.065	-0.77441	0.65723	0.13428	-88.764	-97.16	1991.65	-1.9671	1.7923	0.61353	-16.227	7.2703	0.0439999999999987	-0.080078	-0.13135	-0.069824	-2.069	-12.933	1120.48	-1.8804	1.2017	0.3916	-151.579	67.104	1384.11	-1.4019	0.58691	0.22265	-66.882	9.572	108.0282	0.060644	0.08291	-0.065332
0.59	-37.838	24.208	12.3374	0.0068359	-0.11816	-0.075195	-22.374	205.852	933.168	-0.73193	0.604	0.14746	-92.6013	-41.24	1958.39	-1.9746	1.7695	0.62158	-48.251	54.6915	-8.7018	-0.094727	-0.12964	-0.065429	43.64	-43.998	1146.75	-2.0039	1.2607	0.42944	-111.2777	75.338	1362.71	-1.6831	0.69971	0.31934	-99.7766	11.441	168.47	0.042383	0.099608	-0.062305
0.592	-68.913	42.32766	4.1455	0.016894	-0.12305	-0.083594	-67.0697	185.707	887.374	-0.69677	0.56787	0.15283	-91.7244	-38.46	1956.07	-1.98	1.729	0.625	-24.261	24.598	31.0336	-0.10498	-0.12402	-0.057129	44.0075	-48.706	1124.94	-2.0313	1.3008	0.45459	-58.758	23.5463	1316.87	-2.041	0.88184	0.4292	-44.617	-33.508	240.702	0.021973	0.11475	-0.064453
0.594	-14.413	37.096	16.3591	0.025684	-0.12959	-0.085157	-33.03	184.015	874.845	-0.66748	0.53271	0.15527	-60.42	-24.48	1965.08	-1.9824	1.6992	0.62744	-4.986	46.708	26.876	-0.099121	-0.12305	-0.049805	40.4648	-110.2188	1100.19	-1.8867	1.3164	0.46924	-72.572	7.202	1257.55	-2.1855	0.97852	0.45557	-47.926	-5.774	287.416	-0.00039064	0.13184	-0.062109
0.596	-43.286	34.161	-0.979500000000001	0.042871	-0.13662	-0.089453	-61.4716	218.549	804.185	-0.62451	0.48877	0.1582	-108.228	-19.3	1955.88	-1.9824	1.6426	0.63525	-14.405	47.6752	17.6897	-0.097168	-0.12012	-0.047363	40.362	-100.032	1078.73	-1.7783	1.3242	0.46582	-126.109	-52.174	1215.64	-2.2559	1.1514	0.52197	-39.572	-22.626	371.4137	-0.024804	0.15	-0.069727
0.598	-50.75	9.831	17.874	0.049902	-0.14766	-0.090234	-62.8602	181.268	768.389	-0.60156	0.46973	0.15674	-65.681	-28.93	1981.83	-1.9858	1.6001	0.63965	-5.051	-19.2158	30.674	-0.08252	-0.12256	-0.060547	18.224	-106.853	1049.43	-1.4956	1.3208	0.41699	-92.524	-78.309	1197.76	-2.2031	1.2393	0.56934	6.81699999999999	2.0937	457.268	-0.050976	0.17383	-0.076367
0.6	19.209	0.0762	5.9481	0.053711	-0.15967	-0.089844	-42.8514	214.783	732.42	-0.55615	0.44385	0.15771	-58.769	11.85	1976.81	-1.9922	1.5625	0.64307	-27.265	19.8746	18.734	-0.067871	-0.12061	-0.056641	19.533	-106.913	1091.09	-1.2485	1.2739	0.35522	-102.6577	-47.686	1155.54	-2.166	1.2852	0.53271	-48.874	86.353	577.204	-0.07998	0.19951	-0.076465
0.602	-5.313	14.303	-12.955	0.049805	-0.16729	-0.089062	-120.987	211.176	671.547	-0.51807	0.42066	0.15795	-103.247	34.41	1967.72	-1.9937	1.5112	0.65039	-16.558	1.885	22.4016	-0.049316	-0.12402	-0.0625	-26.382	-23.5509	1121.64	-1	1.1836	0.3125	-89.359	-106.3257	1141.1	-1.9961	1.2285	0.36182	-55.297	109.47877	764.777	-0.11719	0.22119	-0.083008
0.604	-3.122	8.502	21.9204	0.041308	-0.17803	-0.087207	-100.631	170.954	635.9346	-0.47852	0.39648	0.15381	-85.017381	13.64	1970.84	-1.9897	1.4897	0.65234	0.282000000000004	8.8696	2.2055	-0.023438	-0.12939	-0.072266	-77.594	-32.5117	1138.52	-0.76123	1.0396	0.25781	-96.038	-123.188	1162.85	-1.8135	1.166	0.27881	-47.6072	169.848	933.455	-0.16465	0.24434	-0.078125
0.606	3.982	26.323	24.4663	0.027246	-0.18349	-0.08252	-103.944	179.9504	572.345	-0.42627	0.37549	0.15234	-118.034	39.66	1961.74	-1.9824	1.4453	0.65576	-15.409	64.5	-16.7646	-0.011719	-0.12842	-0.075684	-96.80495	-58.678	1171.83	-0.69336	0.98242	0.23682	-100.378	-114.58	1182.21	-1.3843	1.0571	0.13525	-66.6582	153.574	1100.4	-0.22832	0.27305	-0.071973
0.608	-35.626	44.706	17.5446	0.0078126	-0.18447	-0.078125	-129.145	145.7556	531.3944	-0.40186	0.36328	0.15234	-99.8544	20.41	1962.27	-1.9692	1.4126	0.65576	-22.845	25.602	7.0515	0.0078125	-0.13428	-0.082031	-110.585	-83.332	1172.02	-0.59326	0.93994	0.21582	-74.301	-120.889	1215.38	-1.1026	1.0137	0.032959	-58.073	84.711	1256.1	-0.30566	0.30313	-0.073925
0.61	5.839	41.995	28.756	-0.012207	-0.18164	-0.067871	-86.6971	140.6733	510.649	-0.34814	0.33936	0.14453	-44.682	1.06	1968.13	-1.9546	1.3853	0.6543	-7.813	40.618	16.8264	0.021485	-0.14087	-0.083985	-86.923	-172.409	1214.6	-0.54444	0.94214	0.20849	-24.627	-32.552	1270.89	-0.896	0.98096	-0.07373	-66.345	62.183	1340.2	-0.3831	0.33642	-0.070215
0.612	-15.589	60.88	-10.314	-0.033008	-0.1749	-0.061133	-106.632	178.599	468.973	-0.30884	0.31567	0.13892	-82.3788	-0.219999999999999	1949.39	-1.9316	1.3516	0.64697	-6.09	55.9764	13.0948	0.038574	-0.14307	-0.09082	-65.3348	-206.499	1288.99	-0.52588	0.97119	0.21436	-5.194	-21.286	1287.35	-0.72803	0.98877	-0.17529	-44.173	3.248	1415.86	-0.47217	0.37256	-0.069824
0.614	-45.712	47.9287	4.3042	-0.050782	-0.16435	-0.057813	-106.336	172.553	457.883	-0.26807	0.29883	0.13916	-57.741	-23.18	1943.31	-1.918	1.3398	0.64697	-0.186999999999998	11.9261	17.6105	0.049805	-0.14648	-0.088867	-104.158	-234.152	1298.85	-0.59863	1.0527	0.2373	20.871	-74.361	1301.934	-0.67822	1.0181	-0.20117	-28.323	-22.068	1394.6	-0.57783	0.41436	-0.059863
0.616	-4.746	21.4104	18.2028	-0.073438	-0.15381	-0.047656	-78.314	199.622	439.003	-0.21094	0.28223	0.13184	-54.529	17.82	1920.12	-1.8945	1.3193	0.64111	-46.166	49.1416	10.073	0.053223	-0.14551	-0.092773	-116.9988	-312.16	1317.99	-0.66016	1.1201	0.25244	38.403	-95.4476	1298.977	-0.61768	1.0747	-0.22412	-45.581	-21.4999	1336.32	-0.70235	0.46914	-0.046387
0.618	-49.964	35.8582	-26.4066	-0.084375	-0.13789	-0.042578	-109.478	188.322	393.939	-0.18359	0.27588	0.12842	-102.04	27.53	1898.69	-1.8721	1.3066	0.62842	-42.915	26.967	21.378	0.060547	-0.14258	-0.094238	-128.082	-315.229	1328.6	-0.81787	1.2769	0.29395	52.638	-223.025	1326.141	-0.60962	1.094	-0.23194	-34.641	-108.7076	1305.02	-0.86094	0.53242	-0.013574
0.62	-20.368	40.757	-6.588	-0.087891	-0.11768	-0.040527	-97.0659	156.813	370.2288	-0.12695	0.25977	0.12354	-36.947	22.32	1915.39	-1.8511	1.2954	0.62109	-31.67	13.9218	17.8409	0.0625	-0.13867	-0.098145	-136.514	-332.05	1367.37	-0.93408	1.4013	0.31567	61.573	-291.4	1409.91	-0.64063	1.0986	-0.2207	-82.318	-119.7753	1250.86	-1.0582	0.61221	0.040039
0.622	-15.584	47.114	-3.99	-0.084278	-0.10313	-0.035644	-66.8115	147.136	322.758	-0.089111	0.24927	0.11645	-61.014	73.43	1890.18	-1.8262	1.2813	0.61768	-76.588	54.983	-16.3148	0.061523	-0.12793	-0.09082	-96.573	-303.014	1447.21	-1.0225	1.5078	0.33447	8.376	-313.42	1455.87	-0.78418	1.1328	-0.16699	-103.367	-132.7524	1231.45	-1.2866	0.69873	0.10547
0.624	-65.22	52.0729	15.6062	-0.071777	-0.090918	-0.037891	-79.085	97.674	276.6027	-0.046387	0.24561	0.11621	-80.2374	61.29	1871.96	-1.8179	1.2759	0.61328	-46.657	28.566	-11.875	0.058105	-0.11475	-0.092773	-89.23	-253.178	1503.18	-1.1108	1.6196	0.3457	-33.99	-360.81	1495.849	-0.89014	1.1724	-0.12988	-59.415	-178.8592	1228.86	-1.5488	0.80352	0.19228
0.626	-38.647	43.1014	42.617	-0.06084	-0.080762	-0.039063	-64.53	68.5136	250.444	0	0.22705	0.10693	-54.412	89.51	1869.27	-1.7847	1.2583	0.60498	-68.284	48.87	13.145	0.057129	-0.1084	-0.088379	-85.317	-277.839	1568.73	-1.1484	1.6523	0.34229	-49.953	-296.26	1535.902	-1.1304	1.2817	-0.070313	-111.9532	-155.231	1197.72	-1.8116	0.90986	0.27871
0.628	-60.867	54.022	5.2264	-0.044922	-0.078711	-0.044727	-83.749	74.763	215.29	0.029785	0.21777	0.099121	-101.6227	134.635	1853.31	-1.7553	1.248	0.59765	-103.1377	59.9001	12.962	0.050293	-0.089355	-0.083496	-108.101	-225.802	1645.89	-1.2261	1.7173	0.34131	-66.586	-260.6	1558.861	-1.2876	1.356	-0.027344	-122.174	-194.426	1209.84	-2.0503	1.0103	0.34434
0.63	-73.337	44.1184	23.1944	-0.026367	-0.075684	-0.046387	-66.835	58.156	200.387	0.080566	0.19775	0.091797	-56.372	117.301	1851.21	-1.7319	1.2427	0.58984	-37.141	8.0423	17.3218	0.044433	-0.069824	-0.079346	-121.004	-153.4579	1652.39	-1.2832	1.7452	0.33912	-42.94	-246.58	1652.319	-1.4214	1.4106	0.019043	-93.301	-190.389	1245.86	-2.2101	1.0766	0.36113
0.632	-52.638	29.8682	51.835	-0.015332	-0.077051	-0.051074	-24.145	89.374	194.368	0.1106	0.18091	0.087158	-62.81	142.987	1797.1	-1.6968	1.2231	0.58008	-72.49	45.9607	9.567	0.036133	-0.053223	-0.075195	-89.939	-133.379	1678.99	-1.3379	1.7598	0.33643	-22.012	-137.173	1701.936	-1.5742	1.4639	0.058105	-144.4825	-116.5659	1251.57	-2.2573	1.1235	0.36279
0.634	-82.8148	30.501	26.5633	-0.0051758	-0.074805	-0.056543	-39.264	91.606	162.518	0.13623	0.1665	0.092773	-94.648	121.79	1767.3	-1.6875	1.2129	0.58252	-72.898	32.684	17.8558	0.026367	-0.025391	-0.070313	-84.6288	-61.74	1685.53	-1.3945	1.7793	0.33936	5.608	-136.373	1770.526	-1.6479	1.4907	0.067383	-79.557	-106.64	1296.8	-2.1717	1.1638	0.38633
0.636	-61.786	7.565	30.7758	-0.0051758	-0.073242	-0.060449	-23.008	84.181	160.4771	0.16357	0.14746	0.079102	-81.239	88.66	1768.2	-1.6621	1.1953	0.57275	-20.209	16.5777	37.9627	0.023438	-0.013184	-0.068359	-72.818	-85.754	1690.37	-1.4214	1.7837	0.3374	7.898	-98.289	1861.35	-1.7813	1.5361	0.078613	-63.243	-58.056	1341.13	-2.0776	1.2069	0.39297
0.638	-43.758	23.1826	12.419	-0.00058594	-0.070605	-0.064453	-8.868	98.148	140.976	0.1748	0.13428	0.081055	-117.4542	134.72	1741	-1.6355	1.1857	0.5647	-50.411	70.208	14.97	0.020508	0.011719	-0.0625	-21.9038	-130.706	1721.84	-1.4702	1.8022	0.33545	1.799	-43.711	1862.88	-1.8686	1.5669	0.081055	-92.6348	-43.748	1355.52	-1.9964	1.2374	0.31211
0.64	-84.341	41.5531	-5.166	0.0053711	-0.065918	-0.066406	-16.595	68.824	132.831	0.1958	0.11865	0.07959	-82.931	124.53	1725	-1.6167	1.1704	0.5542	-48.957	41.501	7.9719	0.02002	0.030274	-0.060547	-6.092	-131.312	1748.73	-1.5093	1.8228	0.33178	17.218	-69.6327	1864.65	-1.9292	1.5845	0.083008	-23.836	-128.082	1397.38	-1.8221	1.2354	0.18945
0.642	-37.557	33.8215	28.317	0.010254	-0.063184	-0.066992	10.549	55.406	133.92	0.20703	0.10791	0.080078	-18.319	145.45	1707.69	-1.582	1.1563	0.53857	-27.714	53.025	9.9586	0.02002	0.047852	-0.05957	7.2144	-192.244	1810.74	-1.5493	1.8481	0.33252	14.437	-29.464	1877.19	-1.9902	1.5996	0.084961	-23.149	-151.608	1410.7	-1.5464	1.2095	0.07959
0.644	-46.928	51.327	6.9489	0.020215	-0.056055	-0.074316	-1.778	48.469	100.872	0.21143	0.10449	0.085449	-91.12194	168.823	1667.49	-1.5645	1.1445	0.52881	-41.644	48.8146	13.0838	0.020508	0.063477	-0.058105	27.5319	-192.264	1893.26	-1.6191	1.8887	0.3374	-28.183	-18.6381	1870.05	-2.0151	1.6157	0.080078	-38.281	-270.98	1457.92	-1.2756	1.1346	-0.011816
0.646	-50.73	48.75327	23.0418	0.032324	-0.049414	-0.079394	-16.847	41.748	87.511	0.20459	0.097656	0.083008	-67.609	147.718	1644.73	-1.5283	1.1191	0.5127	-27.523	3.5122	29.3596	0.023926	0.068848	-0.050781	-2.2882	-152.753	1874.4	-1.6543	1.9102	0.34814	-78.84	-67.902	1902.579	-2.0601	1.6333	0.068848	-59.188	-354.72	1516.35	-1.0831	1.0606	-0.080274
0.648	2.893	34.2064	37.428	0.049902	-0.043848	-0.088281	16.227	65.426	61.571	0.19678	0.083496	0.084717	-41.747	198.963	1616.67	-1.4922	1.102	0.49902	-10.288	53.608	22.152	0.026367	0.083008	-0.055664	-9.7656	-166.365	1888.53	-1.7339	1.9399	0.3623	-108.0466	-45.834	1909.068	-2.0818	1.6442	0.061035	-105.415	-356.58	1548.83	-0.97997	1.0184	-0.12012
0.65	-46.869	35.5937	31.088	0.066406	-0.038574	-0.095215	-37.952	76.524	30.396	0.18799	0.072266	0.086426	-100.8598	224.855	1580.17	-1.4624	1.0747	0.48584	-33.051	30.5268	24.2911	0.033203	0.09082	-0.052979	-19.5341	-106.068	1942.61	-1.7891	1.9531	0.38037	-113.36104	-106.808	1932.012	-2.1011	1.6646	0.051758	-72.193	-388.12	1595.92	-0.9499	1.0138	-0.13574
0.652	-23.24	24.059	42.1098	0.08418	-0.031543	-0.10654	-24.092	61.609	26.289	0.1626	0.062012	0.092773	-32.875	211.755	1580.24	-1.4058	1.0396	0.46484	-23.34	19.1032	31.2526	0.040527	0.091309	-0.052246	-20.071	-98.369	1968.12	-1.832	1.9531	0.39551	-93.044	-141.335	2006.5	-2.1069	1.6763	0.031738	-51.771	-327.58	1643.45	-0.95898	1.0283	-0.14355
0.654	6.576	32.444	15.867	0.099024	-0.028027	-0.11455	-24.917	48.8091	22.3556	0.14893	0.057617	0.097656	-32.275	237.978	1520.69	-1.3867	1.0195	0.45703	-4.17	54.526	22.1644	0.049316	0.094727	-0.057617	-16.25	-101.133	2027.6	-1.8652	1.9336	0.41748	-73.592	-114.475	2007.01	-2.103	1.6821	0.021973	-32.343	-245.44	1695.04	-0.98867	1.0332	-0.13086
0.656	-47.105	46.7628	10.496	0.10449	-0.02373	-0.12315	-69.15	12.3074	29.1661	0.12012	0.050293	0.11377	-40.22	226.862	1472.09	-1.3374	0.98486	0.4375	17.792	11.53108	22.7514	0.058594	0.095703	-0.063477	-44.394	-64.41	2014.85	-1.8706	1.9204	0.42725	-63.583	-157.114	2004.61	-2.082	1.6719	0.003418	15.18	-229.08	1758.88	-1.0464	1.0438	-0.10948
0.658	-4.265	20.3457	30.6013	0.10176	-0.016602	-0.1292	-21.604	-4.486	46.66	0.099854	0.05127	0.11768	-20.751	230.679	1444.85	-1.3054	0.95972	0.42359	-2.459	39.281	11.7152	0.068848	0.094238	-0.067383	-57.065	-119.711	1989.11	-1.8848	1.877	0.45557	-40.201	-92.823	2037.47	-2.0671	1.6565	-0.0080568	29.53	-113.028	1805.06	-1.1444	1.0786	-0.072363
0.66	-9.889	20.4171	-1.135	0.10059	-0.010254	-0.13086	-45.683	6.428	15.3111	0.077637	0.052246	0.125	-12.976	265.989	1401.58	-1.271	0.92627	0.4126	-24.777	45.3455	17.2971	0.08374	0.092285	-0.075195	-64.801	-109.577	1997.26	-1.8965	1.835	0.47412	-47.57	-29.136	2024.51	-2.0488	1.6367	-0.015625	50.523	-81.003	1854.59	-1.2736	1.1381	-0.032813
0.662	-18.444	3.4005	5.896	0.096973	0.00058594	-0.13769	-57.983	7.87	28.9923	0.052734	0.056641	0.13135	7.86499999999999	232.368	1384.41	-1.2261	0.89111	0.39063	-0.789999999999992	-10.5247	39.772	0.092773	0.092285	-0.081055	-70.446	-58.68	1918.83	-1.9058	1.7896	0.50049	-50.786	-41.0974	2066.29	-2.0269	1.606	-0.020508	75.866	-80.301	1900.23	-1.4038	1.2095	0.00097656
0.664	20.648	-1.82053	14.5814	0.088086	0.01377	-0.14502	-30.573	34.78432	24.208	0.039551	0.057129	0.13672	1.457	270.784	1344.01	-1.1968	0.87158	0.38135	-31.483	31.3719	19.2409	0.098633	0.088867	-0.092773	-68.541	-66.37	1909.09	-1.9219	1.7266	0.5376	-23.658	29.174	2039.439	-2.0229	1.5923	-0.022461	37.779	-15.93	1881.23	-1.5044	1.2729	0.038672
0.666	-34.334	20.734	13.3148	0.077149	0.033691	-0.13838	-69.849	51.3385	0.6372	0.019043	0.059082	0.14307	-3.01	270.3	1291.58	-1.1406	0.82813	0.36182	-22.82	12.393	21.745	0.10156	0.086914	-0.089355	-57.879	8.38999999999999	1918.92	-1.9277	1.6953	0.55518	-51.467	7.5488	1973.207	-2.0132	1.5571	-0.022461	45.601	-50.7279	1873.59	-1.5913	1.3169	0.066894
0.668	-18.972	6.771	56.461	0.062696	0.050684	-0.13594	-48.574	37.6115	9.1827	0.0061033	0.052735	0.14624	34.897	247.518	1290.91	-1.0977	0.78711	0.3501	-14.128	7.5357	30.944	0.097168	0.084961	-0.09668	-109.236	16.89	1890.19	-1.9316	1.627	0.58838	-57.994	-0.5675	1972.017	-2.0093	1.522	-0.013672	11.128	-40.743	1846.48	-1.6686	1.3466	0.079004
0.67	-1.751	-11.9126	57.374	0.052734	0.069336	-0.13672	-58.274	38.303	-17.2808	-0.0078125	0.046875	0.15088	-0.491	290.896	1258.58	-1.0742	0.75977	0.33447	-57.603	63.127	14.707	0.091797	0.085938	-0.097657	-117.991	-10.8	1911.01	-1.9392	1.5813	0.61377	-66.847	65.9	1930.895	-2.0156	1.5059	-0.010254	-63.108	-8.977	1834.68	-1.7492	1.3652	0.093066
0.672	-42.01	-10.173	57.8214	0.04834	0.081543	-0.13653	-86.0228	10.7892	-6.5819	-0.017578	0.037598	0.14844	2.288	270.147	1213.63	-1.0327	0.72705	0.31543	-33.555	21.9384	19.4923	0.083984	0.090332	-0.097168	-132.433	34.36	1923.47	-1.9473	1.543	0.6333	-89.428	25.376	1917.573	-2.0273	1.4688	0.0039063	-65.119	-86.982	1901.1	-1.832	1.3809	0.099609
0.674	-12.766	-42.066	105.717	0.038868	0.09961	-0.1377	-45.904	18.4078	18.7555	-0.020508	0.031738	0.146	51.34	264.411	1191.29	-0.99245	0.69604	0.30322	-46.204	44.096	5.8853	0.075195	0.091797	-0.095703	-120.355	9.52999999999997	1935.82	-1.9521	1.5039	0.65527	-61.496	58.26	1945.708	-2.032	1.4446	0.014892	-94.249	-61.409	1923.95	-1.9161	1.3948	0.11426
0.676	-48.429	-23.194	104.9453	0.031836	0.11055	-0.14082	-72.079	23.6613	-11.8987	-0.021973	0.021973	0.14111	-32.019	279.467	1132.31	-0.95117	0.66504	0.2959	-72.396	53.458116	-4.52929	0.067871	0.095703	-0.098633	-95.383	13.84	1974.39	-1.9536	1.4946	0.66406	-54.551	65.009	1903.6	-2.0386	1.4204	0.029297	-93.0021	-109.118	1952.62	-1.9886	1.4114	0.12783
0.678	-56.358	-52.89	175.1381	0.02373	0.12734	-0.14356	-62.198	23.3324	10.45815	-0.017822	0.013672	0.1399	3.366	243.75832	1104.98	-0.9082	0.625	0.2749	-52.53	-14.2287	36.1107	0.053223	0.10059	-0.098633	-118.506	19.15	1929.65	-1.937	1.4712	0.66797	-31.833	7.42100000000001	1936.709	-2.041	1.3906	0.044922	-65.28	-167.865	2022.43	-2.0523	1.4423	0.13955
0.68	-6.00700000000001	-87.054	229.5208	0.0097656	0.13818	-0.14941	-46.947	38.713	8.725	-0.017578	0.01123	0.14014	30.298	268.607	1062.89	-0.87646	0.61182	0.26465	-60.07	-2.587	60.79	0.040039	0.10693	-0.099123	-125.982	-36.4	1914.63	-1.9108	1.4524	0.67017	4.21299999999999	88.0455	1949.638	-2.0347	1.3823	0.049805	-101.0116	-111.913	2015.26	-2.1024	1.4749	0.14199
0.682	-33.125	-68.084	263.936	-0.0056642	0.15127	-0.15478	-60.726	48.6283	-10.8179	-0.015137	-0.00097656	0.13428	-38.125	265.8744	994.75	-0.82666	0.57471	0.24072	-67.211	-43.533	60.6369	0.029785	0.11328	-0.099609	-91.99	6.94999999999999	1909.9	-1.8765	1.436	0.66211	1.276	79.014	1936.027	-2.0146	1.3574	0.066895	-79.289	-151.817	2027.89	-2.1309	1.5098	0.14551
0.684	-2.667	-69.515	388.324	-0.034766	0.17481	-0.15097	-0.167000000000002	59.638	26.798	-0.02002	-0.0068359	0.13477	3.741	248.3227	983.39	-0.78858	0.54541	0.22656	-51.953	-66.08	98.458	0.011719	0.12793	-0.10498	-83.313	16.68	1873.5	-1.8296	1.4185	0.64453	15.3	52.034	1971.912	-1.9902	1.3467	0.071289	-71.779	-105.363	2038.21	-2.151	1.5377	0.14043
0.686	-7.06400000000001	-2.635	481.5402	-0.083984	0.19942	-0.14199	-14.025	80.816	2.887	-0.010742	-0.015137	0.12988	-13.877	285.7905	908.276	-0.74707	0.51855	0.20703	-79.9041	-11.526	114.337	-0.0029297	0.13574	-0.10937	-70.421	-11.09	1898.69	-1.8042	1.4067	0.63428	-5.376	83.419	1922.806	-1.9668	1.3379	0.075195	-108.9005	-37.4888	2015.1	-2.1523	1.5535	0.1332
0.688	-85.636	53.201	620.3298	-0.15147	0.22608	-0.12861	-38.278	54.5205	9.40187	-0.0039062	-0.024658	0.12231	-24.405	269.9153	850.59	-0.68945	0.48242	0.18604	-69.531	-58.033	155.754	-0.024414	0.14355	-0.11328	-67.752	26.32	1879.35	-1.7515	1.3911	0.61133	-16.412	-11.2705	1898.769	-1.9219	1.3359	0.08252	-101.412	-87.054	2019.01	-2.143	1.5566	0.13086
0.69	-63.679	95.147	797.724	-0.22852	0.25928	-0.11377	7.663	36.8109	26.2487	0.0083008	-0.030273	0.1167	-5.68	263.513	825.66	-0.65479	0.4624	0.17627	-30.674	-71.183	207.687	-0.075195	0.1582	-0.10791	-61.2864	-29.68	1852.26	-1.7133	1.3775	0.59864	20.325	2.5146	1907.168	-1.9038	1.3345	0.084473	-115.9385	-13.4837	1985.72	-2.1252	1.5552	0.11885
0.692	-64.086	155.368	931.308	-0.29658	0.28584	-0.1001	-13.296	17.64048	10.564	0.026367	-0.037598	0.11133	-37.602	285.227	764.199	-0.5835	0.42041	0.14648	-22.709	-65.337	271.067	-0.10938	0.16455	-0.10547	-49.6583	-14.1	1848.94	-1.6836	1.3672	0.58447	-18.537	32.0649	1852.259	-1.8643	1.3291	0.083984	-134.3595	-5.088	1937.01	-2.103	1.5532	0.11133
0.694	-85.3804	143.785	1091.484	-0.36768	0.31768	-0.0875	-12.731	17.5134	22.579	0.038086	-0.041992	0.10547	-8.254	222.922	744.62	-0.52906	0.38599	0.12378	-1.568	-104.395	366.853	-0.19092	0.18799	-0.097168	-42.8109	53.21	1818.64	-1.644	1.3521	0.56445	-8.147	-8.496	1849.442	-1.8357	1.3304	0.08667	-105.843	-20.854	1933.03	-2.0712	1.5351	0.099903
0.696	-32.725	106.208	1213.061	-0.43642	0.35517	-0.076953	6.883	47.584	36.496	0.061035	-0.047363	0.098633	-22.726	243.018	698.657	-0.47168	0.35059	0.099121	-39.783	-9.907	479.74	-0.25854	0.20093	-0.086426	-32.008	58.459	1817.54	-1.625	1.3438	0.55811	-1.207	70.443	1802.143	-1.8086	1.3379	0.087891	-128.734	66.286	1895.297	-2.0354	1.5181	0.088281
0.698	-76.76	86.439	1269.862	-0.51406	0.39727	-0.072461	-30.009	55.993	24.6789	0.078125	-0.051514	0.092041	-46.4743	238.8663	644.791	-0.38965	0.30859	0.070313	-54.272	23.563	640.2	-0.32813	0.21973	-0.083008	-11.423	148.165	1803.43	-1.5996	1.3359	0.53857	-36.792	63.96	1727.6464	-1.7671	1.3364	0.092285	-104.4303	20.631	1875.013	-1.9964	1.4884	0.073047
0.7	-33.829	41.935	1324.153	-0.60352	0.44336	-0.061035	-4.06	50.858	39.996	0.098145	-0.05127	0.086914	-23.123	208.2206	611.94	-0.35107	0.29736	0.057617	-61.6704	59.658	822.69	-0.42871	0.24609	-0.07666	-37.455	179.604	1754.09	-1.5727	1.3276	0.53052	-31.848	53.21	1731.2433	-1.7495	1.3345	0.089844	-84.755	49.37	1869.588	-1.9704	1.4552	0.066211
0.702	3.72900000000001	17.807	1297.447	-0.72344	0.49239	-0.033789	-13.664	61.486	14.3483	0.12402	-0.059082	0.073242	-45.109	244.07	566.983	-0.28857	0.26514	0.035645	-78.91	137.422	985.44	-0.48584	0.2627	-0.075684	-28.11	151.509	1773.36	-1.5527	1.3203	0.52002	-17.126	135.8	1696.231	-1.7046	1.3325	0.093262	-68.24	96.661	1862.863	-1.9512	1.4258	0.057617
0.704	-8.39700000000001	6.85499999999999	1239.251	-0.88594	0.54531	0.0080077	-52.752	33.0027	15.5115	0.13721	-0.05957	0.068848	-21.035	201.7813	512.164	-0.24096	0.24463	0.01001	-79.4577	108.1	1157.4	-0.61377	0.31201	-0.072266	-25.424	190.397	1765.62	-1.5229	1.3013	0.50342	-32.791	99.832	1699.1331	-1.6638	1.3294	0.094482	-8.562	41.048	1895.91	-1.9514	1.4037	0.053027
0.706	33.148	-57.024	1199.826	-1.0879	0.60507	0.058007	12.951	32.7806	31.3856	0.15869	-0.061035	0.056641	11.088	179.324	492.821	-0.19336	0.21875	-0.018066	-92.924	123.3284	1277.94	-0.73316	0.34717	-0.059082	-17.804	130.9	1724.44	-1.5073	1.2935	0.49219	-3.378	136.265	1728.361	-1.6187	1.3228	0.096191	-10.35	107.33	1892.24	-1.9535	1.382	0.044434
0.708	-13.047	-60.376	1140.07249	-1.3185	0.675	0.12334	-26.142	20.1361	23.7829	0.17554	-0.068848	0.042969	-45.2264	184.108	421.796	-0.13086	0.18457	-0.036133	-94.883	133.853	1345.22	-0.88428	0.39014	-0.034668	-22.362	106.46	1699.3	-1.4771	1.2739	0.47656	-30.272	157.915	1681.3387	-1.564	1.3032	0.076172	13.887	68.93	1893.654	-1.9477	1.3676	0.049121
0.71	-39.6931	-96.599	1115.4603	-1.5645	0.74805	0.20166	-40.366	9.125	45.658	0.19189	-0.064453	0.033203	0.361000000000004	109.1978	403.986	-0.10352	0.16699	-0.041016	-44.821	64.086	1385.54	-1.1387	0.47119	0.02832	-51.8698	119.48	1635.57	-1.447	1.2502	0.4646	-37.421	101.099	1677.9995	-1.5439	1.293	0.073242	32.258	6.507	1898.588	-1.9471	1.3454	0.045117
0.712	10.458	-139.258	1109.78	-1.7797	0.83203	0.28135	-28.357	26.7764	35.5101	0.21387	-0.061035	0.019531	-14.94	140.732	376.244	-0.065918	0.12158	-0.064453	-45.131	82.818	1334.83	-1.2886	0.51807	0.075195	-54.992	70.92	1613.96	-1.4219	1.2227	0.45361	-16.096	158.296	1653.977	-1.4917	1.2739	0.06543	23.354	51.8765	1864.462	-1.939	1.3247	0.04248
0.714	-19.098	-162.865	1123.014	-1.9465	0.91641	0.35205	-60.017	38.2156	14.6747	0.2251	-0.05957	0.015137	-38.787	146.844	345.0699	-0.047119	0.093749	-0.075684	-37.301	10.72495	1261.64	-1.6343	0.62646	0.20459	-29.222	124.294	1603.52	-1.3765	1.1899	0.44141	-45.596	120.141	1589.9755	-1.4558	1.26	0.060791	47.239	-29.516	1847.763	-1.9277	1.3028	0.038574
0.716	-26.589	-194.51494	1187.122	-2.0363	0.98828	0.38447	-42.893	59.7216088	31.964	0.24072	-0.053223	0.0087891	12.953	115.5474	333.6984	-0.025391	0.070801	-0.091309	-36.2625	-78.462	1207.24	-1.9157	0.7351	0.31006	-51.4418	141.82	1565.68	-1.3516	1.168	0.4292	-45.898	102.0548	1579.824	-1.4219	1.2461	0.055664	36.964	-11.625	1811.139	-1.9171	1.2871	0.035156
0.718	-36.729	-170.506	1228.583	-2.0319	1.0446	0.3752	-54.256	59.346	7.5972	0.24878	-0.046143	0.001709	-17.119	158.6101	281.431	0.00097656	0.049316	-0.10645	-104.644	-51.7547	1180.59	-2.1855	0.85156	0.39209	-71.6882	117.469	1576.24	-1.3032	1.1333	0.40625	-60.8808	141.9656	1548.124	-1.3765	1.2231	0.052734	-0.924000000000007	27.941	1771.342	-1.9015	1.2683	0.029688
0.72	-62.967	-97.36	1228.761	-1.9512	1.0762	0.33545	-89.308	36.5981	7.0816	0.24951	-0.036133	-0.003418	-18.02	120.203	254.80334	0.018066	0.038086	-0.11035	-94.776	-95.9189	1155.79	-2.4102	1.0039	0.46338	-80.731	191.711	1556.41	-1.2671	1.0943	0.39063	-99.171	68.898	1524.5889	-1.3574	1.209	0.055176	18.638	-20.267	1750.276	-1.883	1.2576	0.02627
0.722	-2.17999999999999	-93.3	1274.487	-1.8116	1.1063	0.31377	-54.085	28.3426	31.9795	0.26221	-0.022949	-0.0092773	-0.738	123.85	245.4423	0.040039	0.029785	-0.11768	-48.747	-50.589	1121.72	-2.4155	1.062	0.5	-91.04	186.17	1497.5	-1.2363	1.0645	0.37451	-77.8213	101.271	1518.134	-1.3242	1.1797	0.055176	-2.966	73.541	1730.985	-1.8667	1.2505	0.028809
0.724	19.499	-77.1	1297.822	-1.6925	1.1513	0.32441	-72.6001	4.0656	12.986	0.26172	-0.01709	-0.0063477	-25.608	164.029	224.40737	0.049316	0.017578	-0.11719	-111.568	-34.492	1058.72	-2.3691	1.1289	0.52783	-51.7494	210.567	1473.78	-1.188	1.0259	0.35498	-92.479	158.08	1452.89203	-1.2998	1.1558	0.053711	-18.944	96.85122	1698.607	-1.8485	1.2441	0.028809
0.726	16.503	-124.99	1342.895	-1.6128	1.209	0.31113	-64.478	-15.577	48.083	0.26904	-0.0014648	-0.0014648	-29.509	109.5642	205.635	0.053223	0.0097656	-0.12451	-98.439	-134.349	1074.49	-2.2966	1.1311	0.4458	-37.984	245.0189	1420.54	-1.1636	1.0044	0.35547	-91.4387	143.496	1452.091	-1.2734	1.1338	0.055176	-3.739	94.7113	1706.512	-1.8273	1.236	0.027832
0.728	75.722	-241.871	1398.227	-1.5043	1.2227	0.21767	-37.196	3.091	45.7018	0.27368	0.0065918	-0.0041504	-1.345	107.706	161.258	0.055664	-0.010254	-0.12842	-115.918	-93.078	1115.14	-2.1323	1.1001	0.33594	-36.032	199.748	1378.28	-1.1172	0.96094	0.32568	-60.377	255.672	1431.112	-1.2378	1.1099	0.052246	-41.507	185.156	1659.619	-1.8065	1.2318	0.023145
0.73	42.311	-290.449	1404.053	-1.3198	1.1812	0.084961	-78.8191	9.209	6.4657	0.27734	0.017578	-0.0053711	-34.7	85.838	132.506	0.056152	-0.013184	-0.12939	-99.2365	-96.192	1172.69	-1.7554	1.0308	0.19727	-35.851	226.1867	1342.26	-1.0684	0.91992	0.30615	-56.3212	261.765	1360.124	-1.2188	1.0938	0.051758	-26.743	148.936	1629.3588	-1.7799	1.2324	0.023437
0.732	26.691	-359.806	1449.218	-1.1025	1.0928	0.0086915	-23.404	26.87	19.598	0.27832	0.03418	-0.0019531	-30.166	40.538	140.9311	0.051758	-0.02832	-0.12842	-25.908	-92.719	1213.26	-1.5605	0.99805	0.1377	-50.5317	226.332	1275.96	-1.0396	0.90479	0.29639	-22.994	254.073	1352.69	-1.187	1.0708	0.060547	-47.356	176.484	1624.6214	-1.7529	1.2266	0.021973
0.734	-10.218	-380.133	1492.588	-0.95127	1.0193	-0.043848	-25.17	50.712	0.673000000000002	0.28174	0.044434	0.0039063	-35.714	95.9021	130.9075	0.055176	-0.035888	-0.1333	-30.624	-39.685	1241.5	-1.228	0.93604	0.022949	-8.712	206.628	1275.24	-0.99268	0.86377	0.26758	-27.3657	295.093	1312.276	-1.1547	1.0484	0.058594	-80.916	209.91	1594.3407	-1.7206	1.2184	0.019922
0.736	-61.739	-321.597	1510.042	-0.90049	0.98018	-0.092285	-53.425	29.303	6.6642	0.2832	0.057129	0.0068359	-43.024	81.311	104.158	0.056641	-0.04541	-0.13525	-6.46599999999999	-104.3354	1256.63	-1.0727	0.89746	-0.053467	24.087	266.976	1243.34	-0.95606	0.83545	0.25733	-70.89906	236.287	1286.02606	-1.1255	1.0259	0.051758	-78.587	141.784	1603.183	-1.6891	1.2051	0.023437
0.738	-37.192	-345.3	1589.60179	-0.90606	0.97598	-0.12656	-1.367	15.8093	19.2142	0.27905	0.069825	0.011719	-55.632	83.273	91.53318	0.058594	-0.054688	-0.14014	37.144	-140.95	1271.58	-0.97021	0.88135	-0.12646	14.005	238.368	1188.12	-0.92139	0.80615	0.24219	-51.2105	256.554	1273.722	-1.0825	0.97998	0.061035	-82.671	176.794	1576.075	-1.6609	1.1934	0.014453
0.74	-50.583	-283.533	1621.404	-0.93506	0.99854	-0.13379	-25.263	10.0829	1.4416	0.2749	0.083496	0.013672	-70.904	111.89	58.529	0.059082	-0.057617	-0.14014	59.788	-165.897	1290.12	-0.86426	0.9082	-0.19971	25.99	237.125	1154.39	-0.88818	0.77197	0.22461	-97.634	268.942	1188.985	-1.0645	0.96289	0.062988	-108.151	133.064	1536.85	-1.6271	1.1807	0.014355
0.742	-47.085	-222.256	1689.137	-0.98996	1.03	-0.11797	-40.931	-7.829	23.1416	0.25488	0.10645	0.022949	-54.635	49.9272708	48.1565	0.062988	-0.067383	-0.13818	57.688	-282.9	1356.97	-0.80811	0.92334	-0.21826	7.193	251.735	1106.361	-0.86768	0.75635	0.21631	-101.323	224.275	1170.289	-1.0229	0.92236	0.063965	-120.037	78.551	1542.462	-1.5894	1.1685	0.0078125
0.744	32.037	-211.65335	1789.798	-1.0673	1.0778	-0.093164	7.644	19.7409	26.704	0.24219	0.11719	0.028809	-53.37	65.225	46.0671	0.060302	-0.070556	-0.13818	0.587999999999994	-287.8	1404.79	-0.72852	0.92578	-0.26221	11.011	197.049	1090.12	-0.82764	0.71143	0.19629	-87	265.973	1156.751	-0.99269	0.89404	0.069336	-126.527	131.6053	1500.899	-1.5544	1.1558	0.0089843
0.746	42.424	-112.384	1815.891	-1.1517	1.1372	-0.063477	-27.657	23.737	12.5116	0.21875	0.13965	0.037598	-78.53	50.4547	30.471	0.060059	-0.074707	-0.13867	-31.501	-329	1444.24	-0.7207	0.91699	-0.28198	49.889	224.14	1085.08	-0.79883	0.67822	0.18701	-121.737	227.254	1110.55	-0.9668	0.85352	0.058105	-140.386	84.253	1462.5717	-1.5253	1.1442	0.013379
0.748	66.878	-107.505	1836.798	-1.238	1.1924	-0.037891	-16.569	50.075	20.4974	0.19238	0.15356	0.043945	-46.517	10.5693	59.317	0.042969	-0.080078	-0.13379	-24.986	-374.26	1482.81	-0.77295	0.93311	-0.271	32.439	211.7512	1028.88	-0.77344	0.64941	0.1709	-68.5956	222.936	1102.076	-0.91211	0.82324	0.080566	-120.575	115.4619	1439.8006	-1.4987	1.1341	0.016894
0.75	114.566	-138.568	1844.623	-1.334	1.2344	-0.015625	-1.441	68.289	-11.6291	0.16846	0.16406	0.052246	-76.4086	66.931	34.2063	0.033203	-0.07959	-0.12891	-14.699	-285.86	1514.29	-0.92773	1	-0.23291	39.958	180.508	999.1	-0.72559	0.6123	0.15869	-74.767	259.985	1055.298	-0.89307	0.81299	0.098145	-121.399	174.892	1388.9659	-1.479	1.1245	0.022949
0.752	84.776	-89.449	1857.572	-1.443	1.2667	0.0084963	-20.268	44.5316	-9.9798	0.13037	0.18994	0.066406	-61.949	31.526	21.654	0.012695	-0.083008	-0.12158	14.109	-263.95	1591.53	-1.0171	1.0513	-0.21484	47.742	225.5079	937.409	-0.69727	0.59277	0.15234	-92.918	216.36	1018	-0.87451	0.7876	0.092285	-90.7721	149.366	1386.076	-1.4565	1.1167	0.029785
0.754	88.558	-148.33	1887.953	-1.5577	1.2966	0.024903	13.839	27.7044	6.6323	0.11475	0.19727	0.074219	-32.558	26.7306	8.309	-0.0043947	-0.080567	-0.11352	47.632	-177.725	1658.27	-1.2026	1.147	-0.1665	34.573	192.1533	893.021	-0.646	0.55908	0.12988	-46.458	241	1030.307	-0.84009	0.75171	0.083008	-79.3223	247.027	1367.019	-1.4278	1.1066	0.034765
0.756	68.85	-107.102	1888.6686	-1.6639	1.3184	0.036231	-31.448	11.4144	-11.2124	0.083008	0.21777	0.084473	-72.199	76.374	-2.115	-0.02002	-0.083984	-0.10645	47.79	-55.5578	1719.1	-1.3188	1.1919	-0.12549	45.88	212.471	869.851	-0.60425	0.52954	0.11474	-65.9982	262.457	956.514	-0.79053	0.72021	0.092285	-60.546	261.854	1340.654	-1.4012	1.0926	0.042676
0.758	16.171	-85.541	1873.02	-1.7628	1.3462	0.053711	-14.435	-2.777	4.3918	0.060059	0.23145	0.092773	-27.108	23.3881	13.7558	-0.047852	-0.089844	-0.099121	86.707	-81.929	1778.12	-1.4346	1.2246	-0.089844	20.663	236.428	790.258	-0.56055	0.50586	0.10107	-73.4405	227.676	939.707	-0.75635	0.65869	0.104	-21.994	243.128	1322.884	-1.3742	1.0805	0.043457
0.76	-4.107	-164.297	1921.066	-1.8574	1.3848	0.073242	3.424	16.0403	14.832	0.037598	0.24707	0.089355	-44.947	57.41	19.1978	-0.05957	-0.087402	-0.092773	103.134	-32.78631	1801.83	-1.5952	1.2544	-0.047852	6.02399999999999	182.119	743.655	-0.50586	0.47266	0.09375	-71.971	278.89	899.331	-0.74561	0.62646	0.11182	-51.717	296.637	1253.618	-1.3516	1.0602	0.056738
0.762	-43.028	-131.389	1926.6897	-1.9451	1.4228	0.090429	-35.436	19.60836	43.271	0.01123	0.27344	0.10156	-48.405	53.97	1.668	-0.084961	-0.07959	-0.077148	87.547	-55.187	1792.4	-1.6777	1.2656	-0.031738	-12.185	209.718	687.927	-0.48438	0.45703	0.084473	-112.69	238.842	842.733	-0.70068	0.58838	0.10938	-40.242541	229.894	1203.3843	-1.3262	1.0391	0.071777
0.764	-14.358	-168.25	1944.772	-2.0238	1.4599	0.10117	-39.807	-7.508	83.5616	0.0014648	0.28809	0.10205	3.78	-17.0035	13.6444	-0.10596	-0.076905	-0.067383	80.008	-121.597	1810.1	-1.8184	1.293	0.0053711	-25.397	180.9571	633.848	-0.43945	0.42773	0.06543	-94.965	239.344	792.931	-0.66114	0.56494	0.10913	-26.779	232.4095	1158.4158	-1.3074	1.0121	0.081836
0.766	54.766	-205.331	1995.19	-2.0941	1.4942	0.1164	-84.943	14.586	74.673	-0.028809	0.31641	0.10596	-30.456	32.8229	30.5637	-0.125	-0.07373	-0.060547	6.013	-70.809	1799.36	-1.9021	1.3103	0.027833	-16.497	166.1603	621.736	-0.40796	0.40992	0.053467	-91.988	265.111	706.462	-0.61914	0.54688	0.10986	-58.1482	250.611	1110.2641	-1.2789	0.98086	0.088476
0.768	44.32	-124.4162	2008.745	-2.1549	1.525	0.13447	-50.608	17.4494	106.3557	-0.046631	0.33691	0.10302	-29.467	12.444	42.156	-0.146	-0.067871	-0.042969	-61.307	-124.896	1818.72	-1.9761	1.3247	0.043457	-19.67	213.1675	566.633	-0.36914	0.38184	0.046875	-102.3425	200.06333	643.0202	-0.56006	0.521	0.11182	-47.438	191.5764	1099.3414	-1.241	0.95313	0.10019
0.77	56.166	-155.96	2038.27	-2.2046	1.5454	0.15137	-15.364	11.105	159.9062	-0.067383	0.36328	0.10742	3.631	24.9923	43.1074	-0.15332	-0.071289	-0.036133	-73.817	-131.024	1871.04	-2.0527	1.3418	0.067383	-32.613	174.8987	537.33	-0.32129	0.3457	0.02832	-76.33605	214.848	619.048	-0.5332	0.50488	0.11865	-47.4883	249.9	1061.112	-1.2019	0.92187	0.10986
0.772	45.567	-96.068	2053.043	-2.2487	1.5565	0.17226	-97.542	-7.893	183.754	-0.1123	0.3999	0.1084	-40.908	80.2	22.8946	-0.16553	-0.072266	-0.023926	-69.714	-80.185	1891.77	-2.0918	1.3555	0.078613	-30.307	190.119	509.678	-0.29492	0.32617	0.020996	-102.18	199.05	578.763	-0.48291	0.46289	0.12109	-51.19344	217.967	1031.79	-1.1577	0.88916	0.11328
0.774	14.355	-12.08	1996.5831	-2.2772	1.5698	0.1916	-97.2748	-18.2246	266.402	-0.13672	0.41406	0.11279	-19.57	21.5038	20.2035	-0.16992	-0.07666	-0.018067	-90.253	-135.964	1938.21	-2.1538	1.3872	0.095215	-52.0647	197.782	445.9469	-0.24561	0.2998	0.013184	-80.3098	162.526	564.3064	-0.4497	0.43384	0.12255	-26.906	188.024	1024.253	-1.1161	0.85849	0.11865
0.776	31.404	-63.848	1984.3845	-2.2882	1.5745	0.20215	-39.253	-1.8306	363.615	-0.19434	0.44531	0.11133	-9.936	52.968	17.1287	-0.17627	-0.08252	-0.011719	-103.5835	-89.1685	1985.34	-2.1975	1.4114	0.10522	-48.647	151.349	397.706	-0.21387	0.28003	0.0056152	-42.968	214.114	536.847	-0.41943	0.40869	0.12207	-55.2616	241.757	1001.56	-1.0787	0.82656	0.12139
0.778	-7.547	13.227	1961.2092	-2.2753	1.5747	0.20117	-79.319	45.532	492.65	-0.24169	0.47266	0.11206	-17.173	44.3974	14.32413	-0.18652	-0.085449	-0.0043945	-106.7599	-65.7529	1968.15	-2.2339	1.4321	0.11328	-33.519	171.754	363.1994	-0.18115	0.26611	-0.0058594	-71.5178	180.19	514.238	-0.37451	0.36768	0.12939	-54.711	177.61994	984.697	-1.0432	0.79023	0.12529
0.78	-54.242	-1.294	1935.407	-2.252	1.5596	0.19385	-23.857	90.712	709	-0.29297	0.49805	0.11035	-3.7	-9.4	21.7231	-0.1875	-0.091309	-0.0063477	-76.176	-105.7596	2012.2	-2.2598	1.4473	0.12158	-56.896	132.2923	331.801	-0.12891	0.23828	-0.028809	-60.234	179.838	499.159	-0.35303	0.35303	0.12988	-66.957	201.011	938.036	-1.0066	0.75801	0.12549
0.782	-27.325	-48.2911	1942.4577	-2.2092	1.5326	0.17813	1.64	150.819	876.57	-0.38281	0.55176	0.10889	-28.055	38.538	9.4336	-0.18506	-0.097168	-0.0043945	-69.34	-23.9685	2021.77	-2.2671	1.4556	0.12305	-62.98	91.857	326.094	-0.098145	0.22314	-0.039551	-55.785	182.762	428.696	-0.31934	0.31152	0.13721	-84.236	228.752	879.165	-0.9707	0.72754	0.14111
0.784	-61.07	24.0052	1901.7716	-2.1668	1.4941	0.16504	-48.1	171.444	991.35	-0.43799	0.57666	0.11084	-47.122	5.6631	25.1745	-0.17798	-0.097168	0.0021973	-65.592	-51.564	1998.21	-2.2651	1.4497	0.12109	-48.8948	104.076	299.531	-0.053223	0.18311	-0.043945	-65.307	113.953	383.38525	-0.28931	0.2898	0.13086	-78.4387	171.1994	836.893	-0.93213	0.69288	0.14141
0.786	-45.938	-37.4025	1917.5645	-2.1227	1.4617	0.14473	31.772	142.391	1120.29	-0.58594	0.6377	0.11768	-44.494	19.6168	44.608	-0.16895	-0.096191	0.003418	-56.845	-51.183	1979.54	-2.2515	1.437	0.12012	-44.566	55.592	262.909	-0.033691	0.15844	-0.052735	-55.5112	125.165	342.4698	-0.26025	0.26611	0.13281	-116.501	246.175	782.994	-0.89327	0.66104	0.15146
0.788	-26.292	7.767	1921.8416	-2.0819	1.42	0.12549	39.904	73.791	1179.97	-0.79297	0.72266	0.15088	-18.668	64.3117	35.1315	-0.15918	-0.097168	-0.0029297	-103.222	36.108	1924.82	-2.2383	1.418	0.11523	-19.714	83.2197	259.284	-0.0063477	0.13135	-0.062012	-64.4294	92.6594	308.4516	-0.2207	0.23779	0.13574	-126.238	226.233	739.111	-0.86045	0.63448	0.15732
0.79	-35.588	79.611	1883.52259	-2.0566	1.3789	0.11279	19.057	28.2784	1257.44	-0.9209	0.76172	0.16846	-22.256	11.6535	30.939	-0.14893	-0.095215	-0.0053711	-116.817	12.696	1909.65	-2.2065	1.3872	0.11719	-29.901	119.23	227.26	0.025879	0.11084	-0.07666	-58.024	51.246	295.803	-0.19678	0.22021	0.13525	-110.0045	208.044	693.405	-0.82618	0.61153	0.16533
0.792	-6.49300000000001	24.554	1911.365	-2.0346	1.3483	0.09922	30.62	15.9069	1261.68	-1.2031	0.84668	0.21094	-53.221	51.025	6.2646	-0.12256	-0.094238	-0.017578	-91.627	76.9744	1921.7	-2.1914	1.3652	0.11279	-51.822	104.275	193.16	0.039063	0.10205	-0.083008	-38.462	93.9961	262.157	-0.15479	0.19287	0.13721	-136.96	248.343	626.1083	-0.79297	0.58691	0.17627
0.794	13.375	86.8894	1930.663	-2.0221	1.3146	0.09668	-10.058	-16.726	1167.82	-1.3975	0.91504	0.24732	-56.536	46.1271	11.1573	-0.10767	-0.091552	-0.022705	-96.435	95.74036	1878.6	-2.1582	1.3223	0.10938	-15.973	139.26	162.4924	0.060059	0.086914	-0.087891	-64.59	90.3145	221.3208	-0.12646	0.17261	0.13183	-151.085	172.6421	582.7	-0.75565	0.56072	0.18203
0.796	21.175	31.445	1931.728	-2.0159	1.2849	0.099023	25.229	-56.445	1145.55	-1.5659	0.98877	0.28906	-36.493	3.0167	21.1624	-0.088379	-0.087402	-0.034668	-66.233	4.146	1874.602	-2.1357	1.2924	0.10791	2.578	95.353	141.27	0.068603	0.078369	-0.093506	-38.367	109.674	222.7633	-0.091309	0.15381	0.13184	-125.91	193.925	531.8125	-0.72194	0.5365	0.18789
0.798	64.112	-46.612	1949.856	-2.0117	1.2609	0.10215	55.497	-41.448	1128.91	-1.7012	1.0869	0.34131	-55.219	44.0161	9.075	-0.063965	-0.083984	-0.038086	-57.438	48.786	1871.51	-2.1191	1.2539	0.10547	-2.082	71.3263	171.751	0.067871	0.064941	-0.098145	-41.307	135.698	209.243	-0.054688	0.12793	0.13184	-120.003	203.04	497.6792	-0.68052	0.51149	0.19102
0.8	56.87	18.506	1900.578	-2.0059	1.2422	0.10986	74.103	-44.616	1132.87	-1.7163	1.1294	0.35645	-55.787	-10.743	15.1883	-0.052246	-0.081543	-0.041992	-22.82	22.969	1878.17	-2.1011	1.2231	0.10645	20.971	89.7583	169.647	0.063477	0.043457	-0.089355	-55.289	100.926	172.72599	-0.036621	0.11719	0.12646	-81.0296	152.079	472.3988	-0.63482	0.48445	0.19473
0.802	56.24	-47.355	1858.838	-1.9948	1.2357	0.11026	107.07374	-58.1424	1111.41	-1.6406	1.1875	0.36084	-46.029	-23.6208	24.5751	-0.03125	-0.07666	-0.050781	18.741	48.673	1921.9	-2.0898	1.2031	0.10498	4.831	64.442	125.5989	0.058105	0.034668	-0.099609	-7.688	105.002	156.02	-0.00097656	0.092285	0.12451	-92.8994	217.083	443.03	-0.59229	0.45068	0.20313
0.804	45.584	-0.429200000000001	1834.91	-1.9754	1.2289	0.11084	37.872	-87.724	1057.78	-1.5051	1.2229	0.35571	-74.375	37.5268	13.6039	-0.020752	-0.077881	-0.055908	19.746	116.992	1913.62	-2.0698	1.1763	0.097656	-10.951	100.8171	99.1732	0.047363	0.027344	-0.097168	-38.48	90.866	116.0947	0.027344	0.071777	0.12281	-92.4891	188.536	416.2698	-0.5482	0.42513	0.20477
0.806	24.197	67.508	1781.434	-1.9488	1.2195	0.11045	4.96400000000001	-128.36	1100.91	-1.3574	1.2617	0.34668	-49.181	13.4307	7.4581	-0.0053711	-0.074219	-0.062012	36.871	46.1946	1914.35	-2.0544	1.1595	0.10083	-25.26	114.13	55.04	0.043213	0.020996	-0.095947	-57.299	72.465	128.6355	0.054688	0.05127	0.12109	-69.943	169.911	397.8583	-0.50471	0.39939	0.20508
0.808	55.026	12.558	1780.501	-1.9238	1.2133	0.10957	14.54	-104.237	1167.84	-1.1753	1.3208	0.32861	-45.002	70.036	4.4659	0.0063477	-0.07373	-0.062988	46.441	76.324	1928.43	-2.0347	1.1489	0.098145	-30.108	81.926	40.444	0.044434	0.012207	-0.094727	-28.085	112.879	118.719	0.080078	0.027832	0.12256	-51.09	201.532	376.895	-0.46259	0.37868	0.2043
0.81	54.024	95.5789	1770.616	-1.8887	1.209	0.11084	-38.648	-64.492	1216.44	-1.0879	1.334	0.31299	-67.1704	65.157	0.582599999999999	0.012695	-0.071777	-0.063965	42.181	85.354	1884.283	-2.0068	1.1436	0.094727	-11.86	100.541	46.7341	0.050781	-0.00048828	-0.099121	-41.923	78.162	94.5914	0.095215	0.015137	0.12012	-39.345	110.113	355.629	-0.41546	0.35088	0.2115
0.812	22.032	88.9591	1734.365	-1.8623	1.2064	0.11162	-20.822	-42.9152	1239.82	-0.93896	1.2759	0.2876	-29.113	5.646027	19.42526	0.023926	-0.06543	-0.063965	49.904	20.189	1888.701	-1.9878	1.1411	0.092773	-4.974	63.0721	40.536	0.050781	-0.0073242	-0.104	-46.701	84.122	102.7	0.11914	-0.0083008	0.11914	-22.153	96.9794	299.9339	-0.37695	0.31836	0.2124
0.814	56.384	65.2932	1735.14	-1.8352	1.2062	0.11074	-48.805	-36.798	1203.53	-0.87281	1.1858	0.27124	-23.287	40.6992	11.877	0.037109	-0.060059	-0.06543	21.915	73.889	1858.01	-1.957	1.1465	0.088379	-29.555	35.462	74.21714	0.05957	-0.014648	-0.10498	-47.905	92.463	76.92	0.14404	-0.033691	0.12012	-24.409	93.64	268.582	-0.34289	0.29145	0.21495
0.816	38.909	165.998	1705.812	-1.8113	1.2082	0.108	-112.209	-104.106	1208.25	-0.84424	1.0942	0.25684	-20.972	8.264	1.971	0.041992	-0.05957	-0.070313	8.096	21.598	1792.946	-1.9257	1.1484	0.083985	-59.9954	47.3624	72.951	0.059815	-0.0271	-0.10547	-47.49	34.5235	67.827	0.14648	-0.040527	0.11963	-18.642	41.24	240.823	-0.30411	0.2606	0.21763
0.818	46.724	106.633	1687.1943	-1.7808	1.2075	0.10733	-27.092	-146.724	1265.48	-0.86426	1.0107	0.25781	-23.892	13.5885	20.099	0.054199	-0.053223	-0.071777	-8.67699999999999	9.982	1788.984	-1.8921	1.1509	0.080078	-56.989	10.684	54.0559	0.060547	-0.034668	-0.10791	-21.065	52.487	64.101	0.1665	-0.059082	0.1167	-11.863	100.772	213.977	-0.26575	0.22175	0.20588
0.82	73.366	129.387	1678.7346	-1.7534	1.2065	0.10449	-28.309	-190.608	1297.37	-0.89844	0.98633	0.26904	-39.543	63.3177	28.3895	0.063965	-0.054199	-0.074707	-19.287	90.4063	1744.79	-1.8438	1.1523	0.070801	-39.323	37.886	43.1709	0.064453	-0.045898	-0.11182	-53.933	33.125	21.8799	0.17701	-0.068848	0.11035	-0.836000000000006	101.842	207.495	-0.22154	0.19255	0.21213
0.822	41.733	158.811	1664.476	-1.7235	1.1941	0.10596	-59.172	-288.027	1360.14	-0.99805	0.99609	0.30518	-14.445	15.170911	22.5751	0.070801	-0.047852	-0.080566	-16.51	60.332	1742.052	-1.8203	1.1484	0.069336	-68.436	42.26724	-0.664	0.062988	-0.05127	-0.11426	-53.782	16.223	35.4425	0.18066	-0.077637	0.11133	-3.39700000000001	110.972	184.7297	-0.17969	0.1626	0.20801
0.824	35.187	71.0987	1658.16	-1.7002	1.1867	0.10595	-60.189	-358.31	1392.66	-1.1033	1.0442	0.32495	-17.904	49.881	10.3826	0.082031	-0.045898	-0.087891	-21.777	141.929	1751.119	-1.7715	1.1523	0.057617	-80.034	8.0845	15.7338	0.058105	-0.062012	-0.12305	-38.016	55.456	38.3142	0.17969	-0.093262	0.11621	4.409	166.982	165.736	-0.15264	0.12876	0.19729
0.826	2.929	138.701	1641.051	-1.6811	1.1824	0.10166	-124.732	-415.55	1381.85	-1.2007	1.106	0.3457	-21.426	54.499	-8.4782	0.085938	-0.041992	-0.088379	-45.715	183.057	1717.266	-1.739	1.1399	0.053467	-63.059	42.228	25.37	0.05249	-0.06958	-0.11523	-27.431	40.2895	40.198	0.17676	-0.094727	0.11084	21.689	107.441	151.105	-0.11425	0.093729	0.19218
0.828	-31.442	115.1963	1596.909	-1.656	1.1731	0.099608	-78.3643	-403.53	1458.41	-1.3164	1.207	0.37549	-6.831	8.0918	14.897	0.10059	-0.04248	-0.096191	-50.786	136.497	1719.539	-1.7065	1.1372	0.051758	-78.7023	26.13371	11.3164	0.04248	-0.079102	-0.10889	-8.934	74.346	53.959	0.16455	-0.10596	0.10889	11.573	120.336	139.275	-0.067432	0.067092	0.18507
0.83	-20.552	73.954	1574.383	-1.627	1.1563	0.10352	-52.8605	-299.71	1537.49	-1.3613	1.2539	0.38232	-46.634	57.851	25.945	0.10962	-0.041016	-0.11304	-52.067	198.395	1698.197	-1.6636	1.1294	0.043945	-50.892	18.9218	27.729	0.023926	-0.081543	-0.104	-27.91	94.257	37.71064	0.15478	-0.11011	0.1145	-24.44	115.337	129.512	-0.02015	0.045617	0.17741
0.832	-77.539	148.5852	1523.814	-1.5962	1.1491	0.099416	-79.4387	-226.596	1622.86	-1.4272	1.3257	0.39453	-23.821	34.5245	24.0863	0.1123	-0.033691	-0.11523	-64.416	140.942	1674.003	-1.6316	1.1252	0.046387	-54.838	39.47645	28.824	0.016602	-0.08252	-0.099121	-32.595	59.927	45.731	0.1416	-0.11035	0.12012	10.094	62.683	123.768	0.019043	0.034668	0.16748
0.834	-93.944	78.362	1479.8615	-1.5624	1.1329	0.090332	-69.9457	-168.077	1709.81	-1.4702	1.3638	0.39941	-0.492000000000004	13.6793	21.1614	0.1167	-0.03125	-0.12158	-56.56	106.42	1673.792	-1.5986	1.1123	0.049805	-81.255	5.052	10.13	-2.4286e-14	-0.085938	-0.095215	-33.995	69.059	41.1607	0.12793	-0.11328	0.12061	-29.162	94.857	98.382	0.060789	0.018208	0.15313
0.836	-75.348	132.4769	1465.687	-1.5327	1.1157	0.095801	-94.268	-122.63	1713.74	-1.5024	1.3853	0.39209	-28.734	41.4287	11.279	0.11475	-0.026855	-0.12646	-69.434	150	1619.488	-1.5581	1.0962	0.044922	-39.922	32.68346	23.4267	-0.0063476	-0.084717	-0.088623	-54.705	24.5704	-7.553	0.11621	-0.1167	0.12402	-50.045	77.796	78.481	0.098301	0.0041362	0.14419
0.838	-85.528	208.873	1438.3922	-1.5039	1.107	0.099709	-111.682	-122.775	1756.92	-1.5391	1.3945	0.39307	-18.023	-4.0109	36.667	0.1084	-0.022461	-0.12646	-99.35	79.5362	1577.602	-1.5444	1.0845	0.043457	-37.157	43.142	6.359	-0.01416	-0.083008	-0.083496	-33.923	5.33481	-4.0511	0.1001	-0.11719	0.12988	-36.201	65.9505	68.094	0.13425	-0.011794	0.1358
0.84	-48.32	168.249	1434.6056	-1.4785	1.0918	0.104	-28.544	-72.424	1793.5	-1.5469	1.3984	0.38721	-19.076	51.136	22.3906	0.096926	-0.010254	-0.12622	-89.3386	120.8536	1576.988	-1.5156	1.0664	0.041016	-56.821	27.6639	14.0145	-0.018555	-0.083496	-0.085938	-42.714	45.022	-3.178	0.08667	-0.11548	0.13208	-83.09	111.023	53.227	0.15921	-0.025317	0.13037
0.842	-32.168	271.789	1397.624	-1.4537	1.0736	0.11348	-14.264	-66.922	1770.01	-1.564	1.4126	0.37891	-49.181	71.306	10.1132	0.087402	-0.0019531	-0.12793	-127.897	142.656	1527.767	-1.4861	1.0549	0.038818	-30.135	48.772	28.601	-0.017578	-0.084961	-0.081543	-48.525	17.3607	3.0301	0.071777	-0.12061	0.1333	-76.299	45.892	52.873	0.17725	-0.04248	0.12061
0.844	-24.036	271.398	1359.668	-1.421	1.0591	0.121	15.441	-86.6329	1818.39	-1.576	1.4251	0.38012	-46.853	35.483	20.1887	0.067383	0.015137	-0.12744	-116.912	106.3565	1507.047	-1.4565	1.0376	0.040039	-24.641	23.2855	8.3898	-0.018555	-0.084961	-0.082031	-25.93	30.3457	31.4575	0.055176	-0.125	0.13086	-62.292	38.705	39.767	0.18476	-0.056218	0.11702
0.846	-3.284	237.069	1334.24	-1.3874	1.0411	0.12373	34.728	-87.1	1830.86	-1.5918	1.4395	0.37256	-60.117	70.143	14.871	0.062988	0.021484	-0.12549	-85.987	190.8	1474.588	-1.4111	1.0127	0.033203	-26.777	19.7057	13.3337	-0.022461	-0.086914	-0.081299	-29.285	39.5815	39.0974	0.049805	-0.12598	0.12891	-86.679	12.225	43.95	0.18917	-0.067616	0.11222
0.848	-39.485	303.394	1279.6296	-1.3532	1.0229	0.12715	-8.4272	-101.232	1846.83	-1.6284	1.4722	0.36865	-50.436	13.441	17.2029	0.048828	0.034668	-0.12842	-105.6773883	178.15	1429.953	-1.3867	1.001	0.033203	-14.979	45.672	4.05	-0.024414	-0.088867	-0.081055	-45.404	14.599	52.466	0.048828	-0.13428	0.12842	-64.727	-47.0093	40.464	0.18805	-0.077304	0.11382
0.85	-36.033	214.837	1238.185	-1.3247	1.0005	0.12891	38.2043	-75.4083	1921.26	-1.6558	1.4888	0.36426	-31.448	12.1093	22.5352	0.043702	0.048096	-0.12597	-71.105	193.205	1440.177	-1.3413	0.96924	0.038574	-14.307	15.5935	19.7532	-0.027344	-0.095703	-0.077148	-7.759	43.3043	66.443	0.044434	-0.13672	0.1228	-61.103	10.747	43.0571	0.18909	-0.082053	0.11704
0.852	-42.022	223.172	1198.4516	-1.2989	0.97568	0.1416	57.1641	-45.543	1919.9	-1.7246	1.5313	0.36572	-53.9677	57.093	16.2845	0.03418	0.056641	-0.12988	-48.63	266.9	1409.534	-1.311	0.94629	0.038331	-6.345	31.3959	36.618	-0.028809	-0.096191	-0.073242	-25.533	20.7601	30.8872	0.04541	-0.13916	0.11719	-58.589	24.617	40.977	0.18506	-0.085449	0.11816
0.854	-66.445	232.184	1165.1355	-1.2746	0.95899	0.14961	52.9507	-86.915	1984.55	-1.7701	1.563	0.37061	-79.9204	-0.2587	49.864	0.022949	0.072754	-0.13281	-14.854	223.189	1362.039	-1.2847	0.92627	0.039063	6.758	18.1342	18.75432	-0.038574	-0.098145	-0.069824	-37.74	10.4169	24.56	0.047363	-0.14014	0.10938	-39.742	34.5393	25.327	0.18124	-0.08186	0.11372
0.856	-45.145	170.423	1153.0662	-1.2402	0.94024	0.15586	51.288	-92.908	2041.34	-1.8027	1.5938	0.3833	-55.697	17.9722	85.821	0.0087891	0.079102	-0.13184	24.121	266.816	1337.75	-1.2456	0.896	0.043945	-3.064	-6.2642	23.4657	-0.042969	-0.097412	-0.067627	-30.703	31.231	4.0995	0.048828	-0.1377	0.10742	-48.057	86.245	9.4379	0.17563	-0.086571	0.12168
0.858	-50.548	244.924	1126.61	-1.2038	0.92158	0.1539	1.8815	-111.7071	2014.74	-1.8594	1.623	0.4126	-52.636	-6.911	79.8978	-0.015625	0.095703	-0.1333	-31.248	278.397	1270.668	-1.2266	0.88086	0.046387	-2.388	30.134	21.44	-0.044434	-0.10156	-0.060547	-54.276	-5.8483	12.2477	0.051758	-0.13818	0.10449	-48.927	29.01	1.3933	0.17382	-0.084198	0.11486
0.86	-33.947	221.376	1089.154	-1.1621	0.90234	0.15479	33.7012	-132.8754	2083.47	-1.8833	1.6353	0.42529	-37.978	-63.1336	94.6686	-0.045899	0.11792	-0.13379	-46.266	217.333	1250.519	-1.1929	0.85596	0.061035	-24.586	26.8072	-2.192	-0.046875	-0.097656	-0.060059	-44.435	27.1874	20.5049	0.060791	-0.13697	0.096191	-38.998	55.987	-11.0258	0.17079	-0.078149	0.11447
0.862	-0.773000000000003	199.5194	1073.525	-1.1248	0.87734	0.1584	27.8012	-71.962	2107.99	-1.9312	1.6421	0.43945	-41.718	-25.717	106.994	-0.09375	0.13867	-0.12891	-24.802	282.865	1213.104	-1.176	0.83325	0.071778	-14.251	37.2638	17.6974	-0.046387	-0.092285	-0.056152	-36.485	43.365	12.3142	0.070801	-0.13477	0.091309	-41.721	45.32	6.39	0.16748	-0.076172	0.1167
0.864	-15.815	264.474	1039.323	-1.0866	0.85284	0.16113	-27.3857	-48.488	2073.15	-1.9604	1.6441	0.45483	-36.994	-69.255	162.396	-0.16602	0.17236	-0.11816	-50.49	234.396	1170.259	-1.1577	0.81006	0.08252	-6.447	63.22	8.888	-0.041504	-0.092773	-0.057617	-53.57	25.0153	30.4699	0.082031	-0.12402	0.081543	-18.317	-3.1876	8.12273	0.15874	-0.072651	0.11571
0.866	16.404	202.471	1019.788	-1.0445	0.82705	0.16504	-6.9949	-25.13	2049.34	-1.9863	1.6426	0.47168	-22.539	-98.324	227.08	-0.20313	0.18945	-0.11377	-50.943	206.431	1161.14	-1.1313	0.78564	0.10107	-49.107	31.31802	3.8632	-0.035157	-0.088623	-0.05957	-34.453	53.866	44.556	0.089844	-0.12012	0.082031	-35.171	28.7879	-11.262	0.15063	-0.073629	0.11738
0.868	36.469	245.043	979.083	-1.0113	0.80527	0.16426	-28.527	11.618	1983.16	-2.0098	1.6309	0.49316	-25.463	-80.237	265.217	-0.28467	0.22803	-0.098145	-59.4263	253.751	1126.466	-1.1152	0.76758	0.10693	-25.651	41.2659	34.7827	-0.028809	-0.083984	-0.058105	-50.789	29.9026	7.8247	0.098633	-0.10693	0.077637	-11.45	1.536	-1.4695	0.13932	-0.074814	0.11542
0.87	-9.317	262.157	920.907	-0.97363	0.78613	0.16455	-57.231	-2.357	2004.31	-2.0151	1.6274	0.50391	-5.19900000000001	-135.841	342.207	-0.34717	0.26026	-0.084961	-67.105	201.4592	1097.209	-1.0776	0.73584	0.11914	-42.214	39.432	6.455	-0.018066	-0.077637	-0.064941	-24.136	17.8811	10.6148	0.10791	-0.093994	0.072754	16.502	13.2721	10.3208	0.12782	-0.077833	0.11631
0.872	-6.412	214.215	885.824	-0.94024	0.75703	0.16807	9.7106	6.77999999999999	2031.43	-2.0249	1.6157	0.52441	-24.429	-81.486	465.137	-0.41699	0.29688	-0.077148	-56.872	265.272	1075.582	-1.0547	0.7168	0.13818	-46.451	31.6397	1.5612	-0.014648	-0.068848	-0.066406	-6.324	24.56559	-6.0789	0.11719	-0.083496	0.075195	5.386	63	10.8023	0.11328	-0.079102	0.11572
0.874	-42.87	275.016	831.054	-0.90469	0.7332	0.171	-71.337	-15.667	1980.28	-2.0173	1.5998	0.5293	-51.227	-36.0051	571.47	-0.51758	0.35547	-0.058594	-61.8092	270.682	1029.703	-1.0273	0.68945	0.14502	-40.421	57.796	6.0402	-0.0039063	-0.059082	-0.066895	-47.607	-10.5471	0.797300000000001	0.13037	-0.072754	0.074219	27.728	22.2255	33.724	0.098066	-0.080068	0.11583
0.876	-74.348	239.745	798.458	-0.86563	0.71289	0.16905	-93.413	-32.386	1983.05	-2.0117	1.5859	0.54004	-59.202	-12.13	695.15	-0.57715	0.38818	-0.044922	-48.865	217.442	1026.242	-0.98584	0.65674	0.15234	-94.2017	40.2552	-9.2077691	0.0014648	-0.052734	-0.074707	-42.724	21.7467	24.2634	0.13428	-0.065918	0.074707	21.97	51.054	10.63838	0.078626	-0.081534	0.11591
0.878	-65.568	223.013	730.2268	-0.82461	0.68906	0.16875	-100.559	6.78	1972.48	-2.0034	1.5552	0.55078	-81.69291	84.914	787.66	-0.72266	0.45166	-0.012695	-64.3323	276.774	968.803	-0.96289	0.64355	0.15283	-68.838	28.4048	14.686	0.0087891	-0.046387	-0.075195	-35.911	39.9585	2.438	0.14502	-0.051758	0.070313	-1.294	32.936	11.8473	0.063785	-0.082719	0.11358
0.88	-91.0578	251.899	671.472	-0.78271	0.6665	0.17285	-168.649	31.489	1954.22	-1.9956	1.5396	0.55664	-106.434	66.4	890.33	-0.85254	0.5	0.021973	-88.2124	239.528	913.582	-0.91797	0.61426	0.16455	-40.547	38.1059	18.415	0.013184	-0.033691	-0.075684	-51.504	16.333	14.30074	0.15893	-0.045899	0.070068	13.157	-20.3892	19.646384	0.057717	-0.083105	0.11514
0.882	-61.351	180.96429	643.64	-0.74482	0.6417	0.16983	-120.529	66.624	1993.94	-1.9824	1.5156	0.57666	-123.1607	83.6924	1016.53	-0.99561	0.55322	0.063965	-79.4058	250.32	888.321	-0.88379	0.58984	0.17114	-79.363	17.225	11.863	0.015625	-0.019532	-0.07837	-28.944	33.745	28.8632	0.17285	-0.03418	0.064453	-9.53	17.0055	11.0281	0.052246	-0.083008	0.1084
0.884	-61.566	217.146	595.342	-0.70606	0.61875	0.16885	-91.716	97.654	1978.49	-1.9809	1.5024	0.58106	-136.612	131.55	1104.05	-1.2046	0.63428	0.12988	-108.105	298.394	840.608	-0.84766	0.56348	0.17822	-62.2005	41.2789	47.677	0.018066	-0.0083008	-0.078125	-63.768	10.5579	3.9618	0.18506	-0.021973	0.064941	-30.719	-0.377000000000002	9.624	0.045896	-0.085743	0.10176
0.886	-85.83698	217.403	578.751	-0.66308	0.59375	0.16416	-107.758	34.24	2001.62	-1.98	1.4888	0.5918	-95.5152	89.9654	1161.8	-1.3164	0.67773	0.16455	-122.89	220.312	802.033	-0.80225	0.53369	0.18359	-67.1354	50.3565	24.6557	0.02832	0.0019531	-0.078613	-41.374	9.0973	1.7594	0.19287	-0.018555	0.064453	-34.86	12.373	13.6121	0.037009	-0.08291	0.1042
0.888	-58.459	165.857	542.656	-0.61641	0.56797	0.16201	-85.52	7.27	2005.7	-1.9663	1.4722	0.60352	-58.841	115.33	1174.69	-1.5112	0.78027	0.22998	-115.111	247.769	748.514	-0.77979	0.51953	0.18799	-74.355	27.9231	25.244	0.03125	0.0078125	-0.081055	-22.136	47.558	-10.5794	0.20605	-0.010742	0.063477	-57.383	80.632	4.18	0.03037	-0.083301	0.099901
0.89	-67.69	207.478	520.719	-0.56738	0.54004	0.16406	-104.099	-10.78	1940.64	-1.9551	1.4609	0.60889	-116.513	89.942	1138.52	-1.6199	0.85572	0.26001	-150.507	233.571	675.773	-0.72754	0.49805	0.19238	-24.437	46.3104	14.6906	0.035645	0.02002	-0.084473	-45.023	19.5313	-8.1742	0.21753	0.0004883	0.064453	-61.422	52.811	17.3463	0.024706	-0.084569	0.09746
0.892	-69.472	168.112	504.455	-0.51963	0.51201	0.15645	-36.068	-32.1	1953	-1.9355	1.4414	0.60254	-82.973	-15.4773	1132.33	-1.6855	0.92578	0.28369	-130.255	188.9326	641.8902	-0.68262	0.46728	0.18628	-35.713	7.8756	0.1039	0.043457	0.024414	-0.088623	-13.798	42.91302	12.9708	0.22314	0.0053711	0.063477	-50.92	80.617	15.9266	0.021973	-0.08252	0.098633
0.894	-45.156	148.871	461.429	-0.46797	0.47861	0.14668	-22.05599	3.44	1941.55	-1.9158	1.4319	0.59644	-61.142	-7.01226	1088.06	-1.6914	1.0098	0.31738	-92.527	241.458	597.008	-0.62891	0.43994	0.19336	-43.003	14.285	31.791	0.056152	0.033203	-0.092285	-18.283	48.8708	4.065	0.23389	0.01709	0.066406	-57.982	64.192	4.4915	0.027051	-0.075976	0.090234
0.896	-87.109	174.683	416.414	-0.41562	0.44971	0.14355	-81.653	4.07000000000002	1900.32	-1.894	1.4185	0.59082	-74.229	-61.582	1062.32	-1.6714	1.0474	0.33008	-102.9702	198.242	561.9854	-0.56006	0.42236	0.20557	-25.027	44.573	31.8168	0.075684	0.036133	-0.10254	-38.132	34.826	11.1081	0.24121	0.020508	0.06543	-55.16	13.6297	12.0831	0.0333	-0.071094	0.082325
0.898	-51.34	93.629	380.02	-0.36885	0.41865	0.13672	-39.89118	-5.297	1891.17	-1.8555	1.3906	0.58643	-63.804	-78.104	1055.85	-1.6265	1.0845	0.30078	-75.031	193.644	525.048	-0.53076	0.40283	0.20117	-23.653	37.5631	14.8084	0.085449	0.042969	-0.10986	-16.366	76.2147	25.542	0.2417	0.028809	0.070313	-73.277	49.9455	16.811	0.044628	-0.06875	0.081153
0.9	-65.313	109.71473	335.813	-0.32617	0.39258	0.12939	-55.298	60.276	1848.93	-1.8379	1.3809	0.58057	-72.284	-45.15	1008.09	-1.5439	1.0771	0.25024	-55.6484	220.199	495.251	-0.47559	0.35742	0.18555	-11.41	60.317	28.9433	0.104	0.051758	-0.11475	-49.814	55.1966	14.273	0.2395	0.037109	0.072754	-64.721	20.321	11.883	0.049902	-0.063965	0.080371
0.902	-85.4062	101.2373	306.603	-0.28291	0.36465	0.12754	-56.641	71.859	1861.67	-1.8037	1.3613	0.57471	-87.232	-95.257	1005.06	-1.4155	1.0571	0.18506	-72.923	159.524	481.319	-0.42261	0.31543	0.18262	-32.341	59.404	14.938132	0.11695	0.055176	-0.12842	-36.597	42.6114	24.748	0.2373	0.040527	0.07666	-74.01	15.204	10.298	0.055664	-0.063965	0.073242
0.904	-26.359	65.791	280.889	-0.24317	0.33594	0.12539	17.0735	110.919	1851.63	-1.7734	1.3564	0.56958	-85.4501	-67.501	1003.798	-1.1948	1.02	0.083496	-50.589	202.881	458.887	-0.36963	0.28564	0.18018	-2.96299999999999	30.7585	30.109	0.12646	0.061035	-0.13037	-33.981	50.559	13.2917	0.21924	0.045898	0.084473	-85.077	49.2844	6.7302	0.060937	-0.06123	0.065625
0.906	-48.885	127.054	250.224	-0.2002	0.30664	0.11602	-35.36	120.25	1770.8	-1.7437	1.3472	0.56055	-101.1888	-54.701	1029.257	-1.0835	1.0083	0.03418	-29.441	178.283	427.202	-0.30273	0.25293	0.16602	18.252	52.584	31.808	0.13281	0.06543	-0.13721	-46.383	13.6393	-3.1204	0.20654	0.045898	0.088867	-63.562	14.921	15.5146	0.067676	-0.061035	0.061914
0.908	-31.631	102.11	245.596	-0.16426	0.27734	0.11484	-24.5112	88.134	1761.48	-1.6948	1.3228	0.54736	-73.128	-112.047	1098.859	-0.91602	1.002	-0.04541	-21.13	115.3698	374.6023	-0.27002	0.24072	0.16357	-8.568	21.88887	4.819	0.13232	0.077637	-0.14014	-43.817	34.906	19.8904	0.18408	0.05127	0.095215	-64.438	54.864	14.8159	0.080176	-0.060254	0.061133
0.91	-2.898	104.358	223.22	-0.13037	0.24902	0.11035	-4.565	124.7473	1752.82	-1.6738	1.3086	0.54199	-54.54	-72.5628	1125.62	-0.83764	1.0247	-0.092531	-29.878	131.914	315.3765	-0.21729	0.2124	0.16064	-5.486	4.2301	34.0382	0.13281	0.086914	-0.14551	-47.629	39.683	26.118	0.16822	0.056397	0.10352	-61.819	50.658	13.2279	0.088574	-0.053809	0.054102
0.912	-30.41	139.202	170.10713	-0.10069	0.22158	0.10703	-51.35562	121.872	1720.28	-1.627	1.2891	0.53027	-11.644	-103.18588	1136.496	-0.79395	1.0664	-0.12598	-46.593	59.967	269.65418	-0.18384	0.19385	0.14795	-4.332	12.4018	27.3669	0.13111	0.092041	-0.1499	-40.362	23.2907	31.134	0.15332	0.058594	0.11084	-24.907	9.12001	35.085	0.099121	-0.04541	0.049805
0.914	8.725	100.346	157.7721	-0.072168	0.19541	0.10283	15.932	121.696	1743.07	-1.5935	1.2736	0.52173	20.291	-128.7258	1192.956	-0.78076	1.1431	-0.13818	-27.26	71.943	247.9949	-0.14844	0.17383	0.14697	-28.149	-3.268	10.5599	0.125	0.10498	-0.15234	-27.453	53.0743	33.8286	0.13623	0.070801	0.11328	-48.986	38.027	37.5732	0.10869	-0.03789	0.04668
0.916	5.49	128.01	134.579	-0.040137	0.17627	0.104	-14.841	157.889	1688.81	-1.5625	1.2559	0.51416	49.18	-101.82	1201.93	-0.78906	1.1777	-0.1416	-10.686	115.764	231.031	-0.10498	0.14746	0.14648	6.345	27.5014	9.3782	0.12207	0.12012	-0.15527	-38.721	30.5122	25.0749	0.13086	0.076172	0.11475	-16.159	3.345	21.3356	0.12012	-0.029297	0.04707
0.918	-7.145	112.431	129.81	-0.0029294	0.15205	0.09668	-48.6218	119.101	1666.32	-1.5288	1.2368	0.50195	79.812	-182.8569	1245.262	-0.82617	1.252	-0.13867	-5.665	85.9409	217.3032	-0.081055	0.13672	0.13867	-35.527	47.839	-3.252	0.11426	0.12939	-0.1543	-23.093	17.6384	36.835	0.11719	0.082031	0.12354	12.14	4.205	11.9726	0.13144	-0.022657	0.042382
0.92	17.448	74.9016	118.3198	0.032227	0.13525	0.091797	-14.2647	128.168	1649.25	-1.5112	1.2212	0.49414	73.088	-181.193	1293.071	-0.8645	1.3076	-0.13233	-3.404	133.971	204.668	-0.037598	0.12158	0.13428	-55.393	30.2814	27.6319	0.10596	0.14697	-0.16162	-19.571	39.193	25.1722	0.10595	0.089356	0.13062	-18.581	49.9367	1.949	0.14512	-0.020801	0.04082
0.922	-16.685	110.077	95.4679	0.057617	0.1166	0.091113	-52.503224	140.305	1581.67	-1.4883	1.2012	0.48096	23.963	-181.787	1311.31	-0.90771	1.3647	-0.12256	-20.472	116.789	180.622	-0.0095215	0.11059	0.13891	-23.687	46.853	41.9733	0.095216	0.1604	-0.15966	-48.903	15.2632	25.2863	0.099609	0.095215	0.12891	-6.92100000000001	31.5978	8.232	0.16113	-0.023926	0.037598
0.924	-31.822	78.601	97.7387	0.087012	0.1001	0.083105	-44.5776	118.745	1590.29	-1.4705	1.177	0.46851	63.295	-254.386	1392.029	-0.97852	1.418	-0.098145	0.292000000000002	82.39	175.465	0.013184	0.09668	0.13916	-47.868	17.7437	19.506	0.084961	0.17236	-0.16162	-16.505	24.9186	58.5662	0.085938	0.10352	0.13965	19.485	75.236	21.1566	0.17578	-0.028027	0.028027
0.926	-9.631	67.1245	84.521	0.11513	0.079394	0.078418	-39.9052	150.386	1576.36	-1.4487	1.1528	0.45117	14.948	-207.815	1447.13	-1.0225	1.4395	-0.08252	-17.78	121.8	151.196	0.04248	0.078613	0.13379	-51.976	-1.138	17.8838	0.066895	0.18652	-0.16602	-47.163	11.503	60.845	0.077148	0.10742	0.14014	-4.026	74.565	5.71958	0.1833	-0.027246	0.026856
0.928	-43.439	86.909	51.4497	0.13633	0.062207	0.077051	-95.299	163.349	1517.28	-1.4121	1.1133	0.43262	6.63200000000001	-216.709	1489.334	-1.1465	1.4746	-0.04541	-38.62	77.798	125.8202	0.054199	0.066895	0.13232	-51.647	16.3622	17.403	0.053711	0.19775	-0.16162	-60.004	-23.2201	103.9734	0.056641	0.12354	0.13525	24.443	16.1491	14.1535	0.18486	-0.025684	0.026464
0.93	-28.159	28.3995	43.4984	0.15625	0.043457	0.071289	-81.3469	188.999	1521.58	-1.3882	1.0962	0.4209	29.262	-220.201	1569.135	-1.239	1.4954	-0.012451	-20.973	65.088	113.642	0.07666	0.048828	0.12598	-93.8828	-2.591	40.179	0.024902	0.20996	-0.15918	-13.848	3.716	124.5005	0.033447	0.14649	0.13501	5.643	45.724	22.3368	0.18711	-0.021289	0.023828
0.932	-41.22	50.247	27.595818	0.1747	0.024707	0.071778	-65.2311	244.577	1476.82	-1.3359	1.0566	0.39697	-7.526	-126.585	1612.923	-1.3413	1.5122	0.011719	-53.711	92.017	76.711	0.094971	0.040283	0.12842	-48.866	-1.753	69.265	-0.00024415	0.21924	-0.15747	-54.941	-11.037	134.5891	0.0014648	0.16406	0.13477	-22.101	-1.0805	32.8822	0.19092	-0.023438	0.018066
0.934	-66.553	37.8105	19.5937	0.18906	0.011133	0.07373	-66.9452	251.98	1452.73	-1.2949	1.021	0.38183	27.534	-143.383	1666.302	-1.4688	1.5449	0.03418	-59.237	47.3907	64.2783	0.11426	0.033691	0.12598	-43.059	6.369	59.929	-0.03418	0.23096	-0.15283	-63.996	-5.639	203.818	-0.053711	0.19287	0.15234	-4.961	3.7575	27.1678	0.18974	-0.022949	0.017188
0.936	-23.6	6.209	31.253	0.19883	0.0013672	0.071386	-1.52	267.551	1415.03	-1.2554	0.98682	0.36279	42.475	-93.453	1729.34	-1.5229	1.563	0.052246	-56.708	88.738	69.007	0.12256	0.019043	0.12451	-71.409	-37.7958	114.787	-0.10156	0.25439	-0.14746	-44.462	13.369	268.118	-0.087402	0.20801	0.16016	3.586	38.1267	17.25	0.18926	-0.016894	0.025
0.938	-46.166	58.7498	20.8635	0.20606	-0.010449	0.073731	-42.7953	253.73	1330.55	-1.2065	0.94189	0.34912	15.245	-52.669	1733.742	-1.6206	1.5923	0.067383	-77.06	85.111	67.197	0.13037	0.011719	0.12402	-69.5284	-27.5124	196.35	-0.14063	0.26807	-0.14063	-66.693	-7.5247	345.27	-0.1626	0.23633	0.16602	-46.871	-3.5757	14.6345	0.18301	-0.018066	0.018359
0.94	-62.907	55.507	29.311	0.20752	-0.018555	0.068359	-17.463	213.585	1320.26	-1.1733	0.91553	0.33496	16.223	-103.923	1760.494	-1.6853	1.6253	0.075927	-71.556	46.5787	71.181	0.13867	0.0014648	0.12402	-59.781	-65.32	250.4	-0.22998	0.29541	-0.13184	-32.051	37.975	468.18	-0.21875	0.2688	0.16626	-31.537	24.8682	20.7318	0.16846	-0.015527	0.014746
0.942	-48.435	76.465	28.604	0.21797	-0.029004	0.075	23.116	242.619	1287.27	-1.1406	0.88574	0.32324	2.3	-55.478	1753.823	-1.7339	1.6509	0.077637	-65.659	76.087	42.685	0.14526	-0.0053711	0.12549	-35.257	-48.838	320.47	-0.29395	0.32129	-0.099854	-9.903	75.992	594.29	-0.27734	0.30664	0.15918	-31.374	28.283	13.1843	0.16064	-0.012695	0.0078125
0.944	-66.106	81.691	8.5806	0.22148	-0.035938	0.081641	-13.12	241.331	1241.41	-1.0991	0.85107	0.30762	-42.944	-78.584012	1729.318	-1.7871	1.6738	0.073242	-81.052	22.3955	20.0541	0.1499	-0.01416	0.12207	-26.82	-11.6086	395.06	-0.38232	0.3374	-0.095215	45.019	97.94	783.57	-0.37842	0.3667	0.15088	-46.615	-1.906	30.7964	0.16084	-0.0038086	0.0097655
0.946	-48.761	34.603	9.0306	0.22032	-0.044141	0.085547	30.926	247.25	1247.63	-1.083	0.83594	0.30615	-49.102	-114.449	1783.394	-1.8062	1.686	0.068848	-51.751	18.4446	22.0696	0.15918	-0.020996	0.12354	-45.895	-11.997	525.16	-0.51904	0.37256	-0.083496	50.975	156.703	942.67	-0.43701	0.39893	0.14355	-44.032	15.3209	51.399	0.15117	0.011133	0.011035
0.948	-79.865	55.468	-8.0554	0.21846	-0.053906	0.085254	-1.011	281.08	1202.72	-1.0464	0.80518	0.28711	-44.969	-56.615621	1813.304	-1.8379	1.6973	0.060059	-49.157	42.1301	7.8008	0.16113	-0.027832	0.12012	-35.56	48.6552	691.42	-0.58984	0.40234	-0.064941	13.691	131.747	1045.53	-0.59912	0.47314	0.13916	-84.717	-42.119	69.154	0.14336	0.02168	0.010644
0.95	-90.3755	36.4015	-10.2112	0.21436	-0.05957	0.087402	-9.759	270.182	1169.7	-1.0181	0.7749	0.27832	-54.187	-110.833	1834.662	-1.8601	1.6956	0.053467	-52.666	15.585	5.4733	0.17285	-0.035156	0.11719	-69.7971	98.964	805.49	-0.75	0.46875	-0.039063	71.583	77.682	1133.45	-0.75171	0.54493	0.15406	-70.191	-41.2881	104.37	0.12978	0.034765	0.010644
0.952	-45.999	22.6773	11.6291	0.20508	-0.06084	0.091992	73.7539	271.66	1162.71	-0.98926	0.75	0.26563	-75.548	-94.647	1865.552	-1.8745	1.6899	0.055176	-31.577	75.908	10.504	0.17285	-0.034912	0.11646	-85.473	116.124	960.26	-0.89648	0.53174	-0.0087893	55.903	52.023	1186.84	-0.93311	0.62158	0.19434	-66.556	-0.6206	111.9365	0.11523	0.053223	0.02002
0.954	-72.381	56.9271	1.033	0.19111	-0.063476	0.097558	42.108	264.438	1103.44	-0.95117	0.71777	0.25146	-96.8192	-48.588	1848.331	-1.8926	1.6797	0.050781	-38.951	73.676	15.68	0.17188	-0.036133	0.1123	-82.275	144.129	1150.97	-1.0542	0.61182	0.036133	-34.521	5.814	1203.26	-1.23	0.729	0.26904	-75.146	-27.78161	162.206	0.1	0.067578	0.025782
0.956	-50.425	24.644	21.8989	0.17783	-0.068164	0.10147	67.364	228.38	1087.01	-0.92334	0.7041	0.24121	-95.604	-101.175	1882.473	-1.894	1.6763	0.046875	-19.643	45.578	44.668	0.16797	-0.033691	0.10986	-139	107.202	1300.94	-1.3159	0.73096	0.11035	-24.604	0.684999999999999	1195.2	-1.3906	0.79492	0.29932	-106.573	21.82256	228.135	0.086621	0.086914	0.031836
0.958	-3.151	32.29715	33.445	0.16143	-0.070801	0.10342	79.8761	222.55	1050.72	-0.87939	0.67041	0.23145	-70.098	-32.615	1896.054	-1.9019	1.6567	0.049805	-19.032	77.155	23.0965	0.16553	-0.038086	0.11084	-116.941	75.018	1400.3	-1.4644	0.79932	0.1582	-38.802	-19.809	1141.41	-1.6992	0.94336	0.39355	-115.1937	29.0786	282.962	0.074121	0.10411	0.024023
0.96	-56.836	54.0031	28.7993	0.14111	-0.072266	0.11133	27.324	217.214	957.82	-0.84644	0.64331	0.21948	-33.485	-47.1153	1875.303	-1.9019	1.6294	0.047852	-29.92	18.5959	17.437	0.16162	-0.042969	0.10742	-107.747	65.219	1396.56	-1.7876	0.95459	0.25879	-21.371	-45.4677	1154.24	-1.9434	1.1016	0.48193	-75.317	22.783	380.16	0.06084	0.13349	0.022949
0.962	8.126	27.7964	35.49	0.12158	-0.064746	0.11709	87.3798	215.281	952.03	-0.80762	0.62109	0.20654	-25.901	-100.234	1903.112	-1.8989	1.6138	0.054688	-19.09	29.479	0.9242	0.15869	-0.045166	0.11035	-132.8876	0.369	1364.6	-2.0193	1.0847	0.33569	72.375	-15.4388	1178.95	-2.0132	1.1646	0.50391	-72.455	92.623	494.82	0.042969	0.17188	0.016113
0.964	8.844	47.679	19.22225	0.097756	-0.063867	0.12158	50.879	242.047	911.79	-0.75684	0.58398	0.19043	-22.084	-45.95291	1882.185	-1.8906	1.5723	0.054688	-27.797	31.119	-13.7973	0.15869	-0.04541	0.10352	-88.2569	-53.5237	1361.34	-2.2124	1.1978	0.38867	49.3147	-51.239	1129.4	-2.0117	1.2656	0.53271	-34.809	71.2347	619.25	0.007422	0.21309	0.012988
0.966	-35.157	20.3341	30.9848	0.078223	-0.05918	0.12276	34.581	240.821	885.51	-0.72998	0.56494	0.18359	-16.735	-71.639	1878.979	-1.8814	1.5396	0.052002	-25.371	-5.3175	4.6308	0.14502	-0.052734	0.10449	-91.862	-78.8656	1297.35	-2.3184	1.291	0.4165	54.507	-79.724	1130.3	-1.9311	1.3365	0.55835	34.961	89.09	783.9	-0.044336	0.24424	0.016895
0.968	15.335	7.91051	35.1246	0.063867	-0.053125	0.13057	63.893	244.83	840.45	-0.68164	0.53125	0.16406	-11.031	-18.4725	1884.889	-1.8662	1.502	0.052246	10	41.4712	16.7437	0.1416	-0.051758	0.10449	-125.59	-129.52	1240.6	-2.2969	1.3164	0.42236	56.351	-71.076	1155.42	-1.8457	1.377	0.53564	37.03	146.376	932.36	-0.11153	0.27744	0.025488
0.97	-13.023	38.5768	15.101	0.050293	-0.052734	0.13477	-7.723	240.037	741.06	-0.63843	0.50391	0.1499	-33.364	64.592	1843.095	-1.8452	1.4556	0.043457	11.179	40.1462	17.8295	0.13037	-0.051758	0.097656	-115.422	-122.614	1217.62	-2.1563	1.3047	0.4165	-12.784	-87.6026	1192.51	-1.6362	1.3579	0.45898	32.678	121.044	1050.83	-0.18946	0.31367	0.027637
0.972	-16.16	18.839	25.1322	0.03877	-0.051172	0.13633	-10.674	204.788	699.03	-0.60303	0.47998	0.13867	-10.451	7.394	1854.931	-1.8374	1.4302	0.041992	-6.67700000000001	35.3452	49.832	0.1294	-0.05127	0.10449	-149.485	-140.573	1166.19	-1.9978	1.2795	0.34887	-13.36	-49.516	1259.35	-1.4722	1.3081	0.42773	77.877	140.478	1144.42	-0.26855	0.35352	0.033691
0.974	-10.857	43.675	32.3726	0.030273	-0.047265	0.13711	-13.608	202.38	666.44	-0.54834	0.4502	0.12598	6.15300000000001	57.632	1856.164	-1.8237	1.3892	0.037109	8.03	83.104	56.0341	0.12061	-0.05127	0.10791	-167.375	-167.114	1158.57	-1.7754	1.2441	0.23975	-59.922	-33.445	1225.71	-1.1265	1.1606	0.3916	50.719	84.125	1195.12	-0.35274	0.39922	0.041797
0.976	-39.054	60.666	26.0023	0.026758	-0.047265	0.13438	-33.87	202.324	597.04	-0.51709	0.43359	0.12207	19.968	41.4369	1826.164	-1.8193	1.3603	0.039306	-14.798	33.013	37.031	0.11621	-0.051758	0.10059	-134.39	-144.61	1140.37	-1.3774	1.1665	0.095703	-79.999	-74.918	1200.9	-0.95874	1.0446	0.3606	14.574	-20.0075	1238.37	-0.45088	0.44736	0.045899
0.978	-3.618	25.967	28.1283	0.028125	-0.042676	0.13496	-3.254	199.589	584.47	-0.46191	0.40234	0.10645	23.216	-6.5	1860.756	-1.8203	1.332	0.039551	-10.949	30.479	41.131	0.11377	-0.052979	0.096435	-178.727	-167.347	1163.56	-1.1924	1.1211	0.035645	-23.379	-75.074	1233.01	-0.87109	0.96484	0.33057	-0.401000000000003	-21.1433	1209.41	-0.56494	0.5044	0.058008
0.98	-5.806	43.713	0.8429	0.025879	-0.041016	0.13379	-43.556	223.565	555.85	-0.42139	0.37622	0.096924	47.72	58.89	1845.899	-1.8179	1.3101	0.035156	-24.454	34.097	17.9161	0.11035	-0.055664	0.088867	-134.265	-136.02	1246.08	-0.93115	1.022	-0.090332	-28.789	-104.976	1257.16	-0.80664	0.93848	0.3208	-25.608	-78.35	1160.75	-0.70654	0.56543	0.066602
0.982	-23.818	9.584	1.3929	0.030859	-0.038965	0.13057	-71.026322	207.755	528.847	-0.37891	0.35352	0.086426	14.668	19.3572	1846.708	-1.814	1.2974	0.044922	-47.57	-18.6207	11.9546	0.11182	-0.059082	0.083496	-111.185	-97.89	1271.77	-0.80371	0.98633	-0.17945	-39.302	-160.092	1328.64	-0.78369	0.94189	0.3291	11.138	-104.977	1124.26	-0.86816	0.64063	0.092773
0.984	-17.248	-9.6959	9.7484	0.034082	-0.037305	0.12627	-18.299	203.474	504.85	-0.3291	0.31982	0.078613	48.182	16.1686	1849.556	-1.8105	1.2773	0.037109	-59.117	26.5206	14.035	0.11377	-0.064453	0.081543	-110.586	-118.779	1307.35	-0.70605	0.99316	-0.24854	-43.8284	-207.717	1361.16	-0.76904	0.95068	0.33838	32.416	-76.774	1091.66	-1.0689	0.71768	0.13535
0.986	-62.164	26.4843	6.071	0.039551	-0.036523	0.1247	-53.672	199.856	421.773	-0.30664	0.30469	0.070313	56.783	82.4	1816.273	-1.8062	1.2671	0.038574	-71.24	20.769	11.922	0.098633	-0.064453	0.072266	-58.581	-93.696	1334.93	-0.59326	1.0454	-0.30811	-77.2743	-306.863	1375.23	-0.8125	0.97314	0.35156	82.75	-103.533	1052.85	-1.2823	0.79365	0.1834
0.988	-41.533	9.574	18.133	0.045996	-0.035352	0.12236	-21.647	148.485	391.264	-0.25342	0.27734	0.062012	42.185	16.1863	1827.183	-1.8003	1.2563	0.039063	-78.862	21.1113	26.0848	0.097901	-0.062011	0.069824	-58.9132	-115.961	1335	-0.56006	1.063	-0.3335	-77.0787	-324.238	1418.66	-0.88672	1.0137	0.36572	80.009	-65.849	1013	-1.4886	0.85928	0.24473
0.99	-28.031	32.1667	22.2604	0.055176	-0.03125	0.11475	-32.54	125.614	344.954	-0.22241	0.25806	0.052246	41.23	64.076	1851.361	-1.7886	1.2544	0.038574	-55.843	71.879	28.1081	0.097168	-0.061523	0.063477	-30.994	-192.248	1405.37	-0.56738	1.0742	-0.34961	-87.038	-290.676	1440.89	-1.0195	1.1094	0.38525	45.792	-53.1553	993.84	-1.6531	0.925	0.30889
0.992	-77.438	38.5738	17.4477	0.063965	-0.022559	0.11025	-91.9147	100.01688	299.809	-0.18945	0.23779	0.04541	7.871	61.742	1804.38	-1.7832	1.252	0.037109	-45.442	27.8008	26.4786	0.099121	-0.054199	0.057129	-20.927	-249.68	1420.53	-0.65893	1.1076	-0.31226	-64.65939	-252.011	1498.44	-1.0908	1.166	0.39307	5.219	-94.06	1047.97	-1.7554	0.97119	0.36914
0.994	-56.366	2.801	25.929	0.070703	-0.021094	0.11133	-8.838	77.9855	281.964	-0.14502	0.20654	0.038574	2.88199999999999	13.741	1793.694	-1.7651	1.2466	0.033691	-45.19	28.9133	23.137	0.10352	-0.047363	0.05127	-53.3301	-368.97	1452.77	-0.80225	1.1724	-0.26611	-33.7559	-181.921	1596.28	-1.2104	1.2759	0.40234	-32.204	-46.746	1082.22	-1.7717	1.0018	0.40849
0.996	-81.85	38.423	2.8515	0.082031	-0.012109	0.10977	-34.599	116.719	263.2678	-0.11963	0.19531	0.030273	21.442	78.507	1774.218	-1.7478	1.2454	0.035156	-61.098	30.6249	11.7198	0.10449	-0.048828	0.043457	-8.633	-408.8	1516.95	-1.0347	1.2896	-0.20361	-79.418	-156.617	1653.47	-1.283	1.342	0.41284	-47.244	-42.244	1124.21	-1.7343	1.0223	0.42734
0.998	-86.0688	19.7838	3.74133	0.092968	-0.0087891	0.10196	-39.244	125.674	272.811	-0.08252	0.16699	0.012207	-23.524	42.2908	1737.59	-1.7305	1.2422	0.031738	-49.882	-17.1763	14.8243	0.10107	-0.040283	0.040772	-11.029	-370.01	1520.72	-1.1421	1.3403	-0.16553	-82.551	-176.495	1744.45	-1.3472	1.3931	0.41504	-80.837	-42.038	1145.06	-1.6561	1.0474	0.42969
1	-45.738	1.57066	5.8009	0.10547	-0.0029297	0.1001	-4.873	123.899	279.2	-0.054687	0.14624	0.0073242	-19.615	56.357788	1758.952	-1.7012	1.2383	0.03125	-62.71	20.182	22.4147	0.10254	-0.035156	0.041504	-6.483	-356.95	1561.75	-1.3164	1.4141	-0.095703	-61.8478	-135.942	1766.62	-1.4336	1.4375	0.42139	-119.1627	-33.759	1136.94	-1.5481	1.0993	0.43115
1.002	-78.687	22.4122	-7.259	0.12324	0.0027344	0.09375	-22.982	157.817	214.0953	-0.036621	0.12207	0.00097656	-7.20800000000001	137.072	1712.208	-1.687	1.231	0.03125	-80.7795	10.651	-2.494	0.094727	-0.024414	0.040527	23.428	-281.43	1647.09	-1.4187	1.4446	-0.073975	-88.075	-141.3243	1762.05	-1.4722	1.4595	0.41992	-122.953	-145.472	1165.42	-1.4219	1.1563	0.42041
1.004	-44.587	-5.751	5.05	0.13662	0.0061524	0.088183	-8.233	135.655	188.692	-0.012695	0.097656	-0.003418	-25.88	90.672	1706.889	-1.6616	1.231	0.033691	-43.044	3.44	14.6109	0.094238	-0.015137	0.038574	14.774	-202.341	1700.99	-1.5151	1.4692	-0.054688	-69.1561	-120.7585	1808.94	-1.5332	1.498	0.4126	-115.294	-180.153	1200.09	-1.2695	1.1742	0.38487
1.006	-17.259	36.7597	-5.2482	0.15732	0.010449	0.081543	5.907	121.973	170.2077	-0.0024414	0.085449	-0.0048828	-34.576	157.896	1722.622	-1.6413	1.2283	0.026123	-46.848	49.8638	9.327	0.086426	-0.0019531	0.040039	23.281	-171.522	1788.6	-1.6309	1.4902	-0.036621	-80.837	-91.7895	1794.51	-1.5645	1.5264	0.4082	-129.049	-212.191	1225.65	-1.1125	1.1282	0.34482
1.008	-43.444	61.13254	-5.0872	0.17597	0.017871	0.078711	-6.968	88.0008	144.2214	0.014648	0.066895	-0.022949	-29.479	148.239	1677.925	-1.6128	1.2251	0.025879	-64.915	27.6018	13.5135	0.091064	0.0095212	0.042481	30.19729	-90.887	1831.05	-1.687	1.4946	-0.023926	-68.657	-126.312	1826.55	-1.5859	1.5625	0.39258	-106.904	-322.54	1286.84	-0.97578	1.0359	0.30576
1.01	-24.379	44.4776	25.9727	0.18994	0.01709	0.07959	16.833	47.484	135.6162	0.032471	0.0542	-0.02832	-8.41500000000001	92.306	1684.808	-1.582	1.2129	0.023926	-20.91	49.623	26.177	0.092773	0.025879	0.046387	-16.4103	-83.996	1819.52	-1.7856	1.5024	-0.0024414	-11.928	-105.7281	1889.15	-1.623	1.6035	0.37549	-122.135	-363.79	1320.45	-0.87519	0.94258	0.27129
1.012	-35.727	72.411	15.4717	0.20528	0.013183	0.073633	-5.559	81.464	92.283	0.04541	0.04248	-0.035645	-0.518000000000001	158.895	1650.53	-1.5684	1.2109	0.019043	-25.232	50.29	-6.76505	0.091309	0.045898	0.048828	8.824	-74.728	1848.73	-1.8445	1.5081	0.0078123	-30.6885	-103.85404	1909.67	-1.6406	1.627	0.37305	-138.339	-441.53	1322.64	-0.8042	0.8667	0.24902
1.014	-44.148	39.0214	4.04987	0.22412	0.013672	0.071485	-13.835	88.067	106.654	0.059082	0.028809	-0.038574	-28.512	100.859	1611.336	-1.5366	1.1938	0.019043	-12.521	-7.4858	11.7536	0.099121	0.056152	0.055664	-2.994	-39.936	1802.93	-1.8882	1.5142	0.018066	-40.057	-123.7938	1997.92	-1.6968	1.6704	0.37109	-89.143	-457.23	1387.62	-0.78516	0.82031	0.23975
1.016	3.687	14.8588	4.961	0.23545	0.013282	0.06914	20.851	104.276	130.7878	0.066895	0.023926	-0.043945	-24.411	98.0619	1628.495	-1.51	1.1799	0.013916	7.883	14.1712	3.9122	0.11328	0.068848	0.058594	-67.6467	-102.263	1775.62	-1.9331	1.5239	0.018066	-26.1225	-69.016	2025.86	-1.7517	1.7024	0.37744	-81.7949	-355.05	1442.78	-0.8086	0.80547	0.24541
1.018	-25.482	36.746	-1.3058	0.24902	0.010351	0.0625	-33.725	146.516	94.498	0.074707	0.017578	-0.048828	-14.764	163.022	1592.942	-1.4863	1.166	0.014648	-13.529	11.646	-11.75	0.12427	0.07959	0.063965	-48.5226	-114.895	1841.84	-1.9414	1.5293	0.019531	-40.3478	-98.422	2014.59	-1.8066	1.7266	0.39014	-72.2453	-324.76	1523.98	-0.87304	0.82383	0.26611
1.02	-24.002	-0.9642	21.3732	0.26074	0.0073242	0.062988	-15.086	103.627	80.492	0.080322	0.0080565	-0.052002	-8.052	109.206	1596.565	-1.4512	1.1445	0.019531	3.131	20.94	12.7979	0.13184	0.085449	0.066406	-96.017	-128.77	1838.39	-1.9624	1.5493	0.019531	-6.198	-110.354	2058.11	-1.8809	1.7617	0.4126	-79.3608	-250.274	1599.5	-0.96455	0.88037	0.29062
1.022	3.764	38.224	18.8931	0.27031	0.016796	0.057714	-31.415	76.895	48.7696	0.086426	0.0073242	-0.058105	9.71	189.978	1605.723	-1.4336	1.1328	0.019043	20.745	79.599	8.512	0.13574	0.097656	0.072754	-117.805	-178.049	1897.66	-1.98	1.5688	0.022461	-14.1069	-104.287	2057.48	-1.9116	1.7778	0.42725	-97.075	-177.696	1634.93	-1.0562	0.96143	0.33008
1.024	-23.164	54.6875	7.7018	0.26924	0.021291	0.058887	-78.18	52.394	43.11	0.09375	0.00048828	-0.058594	-5.019	208.63	1549.969	-1.4063	1.1016	0.026855	-14.108	53.028	17.89256	0.14355	0.10889	0.074219	-139.813	-123.424	1915.47	-1.9922	1.5859	0.023438	-63.4267	-125.765	2070.69	-1.9722	1.7993	0.45508	-72.8005	-160.082	1688.99	-1.1519	1.0603	0.36338
1.026	10.33	34.3634	3.771	0.26103	0.025972	0.060838	-19.008	6.278	74.346	0.10156	-0.0039063	-0.062012	-15.738	168.8735	1538.272	-1.3864	1.0813	0.030762	-20.404	54.732	22.888	0.15869	0.12207	0.077637	-182.186	-130.654	1917.1	-2.0176	1.5996	0.028809	-40.1301	-69.36	2091.53	-2.012	1.8039	0.47925	-50.447	-80.4859	1722.15	-1.2323	1.1552	0.38848
1.028	-6.73	54.988	19.52844	0.25166	0.029881	0.06328	-55.428	32.369	46.5452	0.10059	-0.012207	-0.070313	7.7	246.793	1497.023	-1.3647	1.063	0.036621	-7.567	50.203	2.622	0.1731	0.13257	0.080322	-164.895	-128.931	1983.5	-2.0308	1.5991	0.038574	-82.902	-15.587	2028.83	-2.0547	1.8066	0.50537	-29.926	-62.3	1725.17	-1.2968	1.2236	0.40176
1.03	-28.123	25.309	22.4259	0.24219	0.037598	0.069336	-78.076	51.105	36.3789	0.10132	-0.016358	-0.072022	-13.673	213.648	1434.384	-1.3354	1.0376	0.043945	-33.972	11.6445	18.604	0.18457	0.1416	0.076172	-164.323	-81.3311	1966.26	-2.0444	1.5942	0.050781	-108.212	-27.735	2045.1	-2.1035	1.7949	0.53076	-10.845	-101.733	1749.89	-1.3523	1.266	0.40752
1.032	-0.561999999999998	27.27573	15.7303	0.22694	0.038869	0.074122	-50.633	53.2124	47.9809	0.09375	-0.01416	-0.073242	17.514	208.903	1444.59466	-1.3164	1.0215	0.048828	-32.325	44.083	18.3868974	0.18994	0.15674	0.083008	-182.182	-112.983	1974.04	-2.0366	1.5825	0.058594	-56.2291	18.302	2041.49	-2.1226	1.7856	0.55664	-2.573	-93.4032	1781.66	-1.4004	1.29	0.41602
1.034	-36.265	63.5694	-1.3372	0.21102	0.044922	0.078525	-104.815	74.1556	25.031	0.080078	-0.014648	-0.071289	23.659	254.086	1393.9327	-1.2813	0.99219	0.05127	-50.856	19.2596	9.8723	0.1875	0.16162	0.089355	-149.924	-80.3398	2015.66	-2.0308	1.5708	0.063965	-60.3677	-18.09	1986.55	-2.1484	1.7666	0.58643	4.174	-146.854	1823.26	-1.4523	1.3091	0.42031
1.036	-28.47	25.8092	25.6447	0.19657	0.050794	0.088682	-55.55	49.84133	32.149	0.07373	-0.013672	-0.067871	-9.169	194.451	1381.435	-1.2564	0.97168	0.058593	-43.519	6.9877	14.7174	0.18555	0.16846	0.091309	-148.54	-47.478	1956.75	-2.0098	1.5391	0.069336	-53.5937	-30.59	2018.84	-2.1609	1.7365	0.6106	29.36	-134.6862	1900.41	-1.5058	1.3309	0.41894
1.038	-28.76	44.44	43.656	0.18281	0.058993	0.091415	-43.024	38.919	25.6967	0.054688	-0.015625	-0.071777	5.535	256.148	1368.561	-1.23	0.95166	0.05957	-40.847	49.5705	4.395	0.17822	0.17334	0.093017	-135.728	-67.2219	1939.24	-1.9951	1.5176	0.074951	-79.517	9.089	1983.02	-2.1621	1.709	0.62451	16.782	-92.441	1929.62	-1.5522	1.3634	0.41699
1.04	-80.711	47.6116	49.005	0.16943	0.07373	0.10303	-108.1751	32.8182	12.1263	0.034912	-0.015137	-0.065185	-27.545	274.405	1314.6854	-1.1997	0.91846	0.071777	-39.852	21.397	4.54	0.17188	0.17773	0.099609	-103.894	-4.712	1897.71	-1.978	1.4966	0.080078	-111.541	-4.16	1973.79	-2.1582	1.6582	0.64502	27.866	-142.73	1976.94	-1.5989	1.4077	0.41582
1.042	-40.548	8.284	77.794	0.15626	0.083376	0.10565	-48.866	-11.8126	28.6431	0.018555	-0.01416	-0.064453	-41.985	236.676	1317.443	-1.1816	0.90039	0.074707	-42.13	55.6754	34.817	0.15088	0.18311	0.10352	-141.062	-8.69	1845.55	-1.9585	1.4634	0.087402	-89.071	46.425	1991.63	-2.146	1.6353	0.64844	21.692	-107.8397	2008.57	-1.6504	1.4629	0.41846
1.044	-46.251	28.216	90.462	0.14586	0.099749	0.11259	-63.124	2.088	3.671	-0.00097656	-0.0073242	-0.054199	-26.181	293.717	1288.639	-1.1445	0.87109	0.083984	-67.413	70.009	27.9887	0.14404	0.18701	0.10889	-83.6555	-8.1363	1882.6	-1.9492	1.4492	0.088867	-122.407	72.079	1941.99	-2.1108	1.5864	0.65234	14.5912	-115.17669	2028.26	-1.7188	1.5179	0.42676
1.046	-103.6149	-4.38	118.912	0.13062	0.12041	0.11571	-62.908	7.731	3.004	-0.01123	-0.0039063	-0.05127	-61.869	230.8318	1240.3848	-1.114	0.84692	0.090332	-57.171	27.7406	39.579	0.12842	0.18701	0.11816	-63.918	32.702	1840.55	-1.9272	1.4204	0.09375	-115.912	30.71	1962.94	-2.073	1.552	0.65064	-3.407	-161.301	2093.4	-1.7867	1.5703	0.44463
1.048	-83.597	-23.301	169.352	0.119	0.13384	0.12059	-28.112	18.7492	32.9236	-0.033203	0.0019531	-0.041992	-61.642	224.253	1221.824	-1.0854	0.82178	0.092285	-51.455	36.675	64.8824	0.12304	0.19751	0.12011	-98.586	3.368	1828.63	-1.9089	1.4065	0.0979	-82.882	67.599	1982.39	-2.0352	1.5195	0.64697	-42.1724	-107.105	2101.07	-1.8617	1.6211	0.46963
1.05	-87.7784	4.185	218.2283	0.1084	0.15332	0.12354	-64.887	74.8583	40.4386	-0.055176	0.0080566	-0.031006	-77.4843	278.689	1181.117	-1.0488	0.78711	0.10059	-90.4756	-6.8219	62.6193	0.11328	0.19727	0.12256	-34.75004	22.669	1872.14	-1.8921	1.3931	0.10498	-130.049	49.341	1928.26	-1.9824	1.4863	0.63965	-64.6736	-124.1366	2085.5	-1.933	1.6639	0.49014
1.052	-63.4696	-16.494	282.4656	0.091381	0.16836	0.12445	-2.561	46.9727	55.864	-0.069336	0.0053711	-0.02832	-83.7275	215.399	1163.886	-1.0254	0.77344	0.10498	-64.36	-41.769	102.516	0.10596	0.20264	0.12305	-21.9244	46.3888	1850.35	-1.8628	1.3892	0.10205	-63.8276	35.042	1927	-1.9585	1.4712	0.63477	-98.245	-78.2838	2058.24	-1.9883	1.6973	0.5083
1.054	-48.511	26.783	374.6285	0.068183	0.18742	0.12397	-10.483	37.581	27.719	-0.078125	0.0053711	-0.020996	-64.595	261.228	1154.784	-0.98193	0.73291	0.10889	-34.186	-2.23912	106.137	0.1001	0.20947	0.11816	17.341	12.1781	1871.42	-1.8496	1.3906	0.104	-52.095	66.777	1879.4	-1.916	1.4434	0.6333	-126.384	19.906	2008.6	-2.0244	1.7142	0.52099
1.056	-88.8375	81.874	496.504	0.032578	0.20948	0.12328	-40.052	23.30496	7.591	-0.07666	-0.00097656	-0.020996	-78.1526	279.703	1085.162	-0.94629	0.70605	0.11621	-89.0948	-39.39	146.323	0.09082	0.22949	0.11133	53.0299	47.601	1872.71	-1.8091	1.3843	0.09668	-102.6582	27.739	1852.92	-1.8867	1.4287	0.61279	-88.11	9.028	2002.85	-2.0487	1.72	0.5334
1.058	-60.204	96.22	687.519	-0.016804	0.24027	0.12341	12.068	-25.5391	16.4372	-0.070313	0.0019531	-0.032715	-68.1758	234.372	1064.572	-0.91211	0.67969	0.12109	-71.411	-19.6543	222.13	0.066406	0.25245	0.10473	37.556	18.54	1849.33	-1.778	1.3855	0.095703	-43.019	49.706	1878.87	-1.8535	1.4063	0.60645	-62.3817	59.95	1999.55	-2.0569	1.7243	0.55605
1.06	-37.031	170.828	856.208	-0.078125	0.27344	0.12549	6.955	4.1054	-7.508	-0.066406	-0.0080567	-0.0271	-44.842	303.145	1025.031	-0.86328	0.64258	0.13037	-59.316	-9.407	297.17	0.033691	0.2793	0.098633	67.614	-13.1544	1872.26	-1.7437	1.3833	0.091797	-74.402	84.329	1822.75	-1.8081	1.3794	0.5957	-99.306	37.97	1976.3	-2.065	1.7194	0.57402
1.062	-20.918	157.473	1013.456	-0.14981	0.30471	0.13167	-0.585999999999999	-6.987	9.809	-0.063477	-0.016113	-0.02832	-82.5778	263.741	955.9539	-0.8335	0.62646	0.13037	-77.176	-35.689	408.207	-0.029785	0.32178	0.10254	66.133	28.6884	1828.74	-1.7031	1.3799	0.091309	-89.9038	83.136	1837.48	-1.7852	1.3652	0.58838	-117.153	-21.323	1986.1	-2.083	1.707	0.57715
1.064	31.32	82.2746	1127.201	-0.22237	0.34192	0.13206	-4.02	-7.7858	12.628	-0.060059	-0.028809	-0.035156	-75.8813	260.853	936.5589	-0.78516	0.58984	0.13574	5.67100000000001	30.2808	596.78	-0.074219	0.34033	0.10547	8.849	-24.5748	1786.11	-1.6836	1.3828	0.086426	-46.59	158.92644	1829.4	-1.7417	1.3403	0.57422	-116.921	30	1979.23	-2.0917	1.6833	0.5832
1.066	-0.679999999999993	52.286	1199.619	-0.30306	0.38896	0.15123	-32.329	46.152	12.273	-0.055176	-0.033203	-0.040527	-75.696	290.773	858.30022	-0.74341	0.56323	0.13892	19.831	65.1525	799.66	-0.16943	0.38037	0.1123	27.9528	2.531	1796.05	-1.6426	1.3789	0.07959	-61.461	158.127	1778.57	-1.7056	1.3203	0.56616	-134.205	6.33999999999999	1987.55	-2.0918	1.6525	0.59463
1.068	-15.695	-7.7998	1299.627	-0.39248	0.45091	0.1525	4.30099999999999	39.8652	37.944	-0.056641	-0.049805	-0.040039	-94.5391	217.9121	836.2707	-0.70117	0.53711	0.13916	-5.20099999999999	96.416	994.06	-0.25366	0.4126	0.10792	-5.396	27.321	1744.73	-1.6052	1.3801	0.066651	-31.135	166.198	1772.64	-1.6699	1.3008	0.55615	-98.196	32.105	2005.75	-2.0953	1.6193	0.60048
1.07	-6.741	-8.8963	1363.181	-0.50293	0.51709	0.15479	11.33	51.073	21.6085	-0.056397	-0.054199	-0.03833	-42.037	257.679	822.687	-0.64209	0.49854	0.14697	31.044	127.806	1123.62	-0.34766	0.45166	0.097168	-20.118	14.6	1726.44	-1.5679	1.3813	0.0625	-28.157	191.264	1716.23	-1.6226	1.2778	0.54199	-98.833	74.836	1998.65	-2.1033	1.5897	0.60928
1.072	27.863	-4.913	1334.101	-0.64625	0.59307	0.15853	-41.081	56.385	3.5815	-0.062988	-0.061523	-0.041504	-46.1748	269.645	750.885	-0.61377	0.47705	0.14551	76.699	44.487	1225.81	-0.51172	0.51074	0.068359	-1.23699999999999	73.822	1718.87	-1.5215	1.3809	0.048828	-30.619	141.581	1693.23	-1.5913	1.2622	0.52832	-94.223	12.715	2010.12	-2.1152	1.5625	0.62744
1.074	87.05	-77.016	1328.218	-0.83414	0.67849	0.17103	1.098	5.812	11.1382	-0.065918	-0.060547	-0.043945	-37.595	238.768	732.687	-0.55713	0.43604	0.14551	67.996	17.619	1346.91	-0.60693	0.55518	0.071289	-69.2115	86.612	1666.95	-1.5015	1.3774	0.046387	-1.277	161.568	1709.72	-1.5483	1.2407	0.51953	-87.262	31.398	2024.21	-2.1212	1.5476	0.64082
1.076	116.734	-86.439	1303.367	-1.0718	0.76508	0.1967	-32.771	21.6704	-15.468	-0.063965	-0.05957	-0.043945	-26.062	291.235	688.313	-0.51221	0.40429	0.14331	43.624	46.5389	1376.6	-0.8335	0.64502	0.086914	-52.3459	98.381	1696.83	-1.4561	1.375	0.037109	-38.889	193.816	1666.83	-1.5173	1.2229	0.50903	-80.03	16.42	2001.8	-2.125	1.5347	0.6501
1.078	115.099	-109.338	1268.238	-1.3407	0.84006	0.23486	-52.668	11.819	-12.3	-0.062012	-0.057617	-0.042969	-34.694	228.393	631.85767	-0.46973	0.375	0.14355	29.796	2.979	1366.71	-1.0464	0.71338	0.11597	-52.7034	142.5282	1648.21	-1.4199	1.3662	0.026611	-32.696	164.529	1660.26	-1.4883	1.1992	0.50049	-69.905	-36.337	1997.09	-2.127	1.5281	0.66846
1.08	106.308	-127.098	1273.946	-1.6011	0.9126	0.29004	-12.888	-2.8207	4.059	-0.058593	-0.050537	-0.046875	-16.219	209.611	606.5006	-0.41406	0.33984	0.14111	18.053	5.52200000000001	1296.75	-1.2788	0.78369	0.16211	-113.645	105.292	1618.45	-1.3887	1.3545	0.01709	11.865	215.763	1616.63	-1.4429	1.1685	0.48145	-44.428	8.023	1949.3	-2.1229	1.5135	0.6753
1.082	53.787	-108.505	1245.215	-1.8016	0.98517	0.35751	-75.258	51.183509	-5.851	-0.052246	-0.04541	-0.046387	-12.928	238.199	556.146	-0.38965	0.31982	0.12744	62.248	-48.071	1238.72	-1.5972	0.8833	0.26172	-80.277	128.092	1639.77	-1.3413	1.3403	0.012695	-38.999	211.696	1551.14	-1.4199	1.1484	0.48193	-25.269	-32.603	1903.09	-2.1099	1.5015	0.68164
1.084	62.092	-158.457	1252.449	-1.942	1.0614	0.41663	-64.809	39.7112	19.1031	-0.035156	-0.043457	-0.049316	-22.715	170.0552	519.639	-0.34082	0.28418	0.13037	131.219	-82.79518	1242.48	-1.748	0.93359	0.32275	-97.282	133.869	1592.32	-1.3159	1.3286	0.0078125	-10.061	202.675	1540.34	-1.3706	1.1196	0.45264	-37.9111	-4.212	1888.2	-2.1016	1.4808	0.68623
1.086	33.679	-140.212	1277.183	-1.9858	1.1263	0.44953	-77.021	75.181	4.732	-0.024658	-0.037598	-0.052491	-12.951	198.707	511.826	-0.30664	0.26147	0.12842	150.294	-36.454	1163.62	-1.9741	1.0161	0.42871	-104.084	85.094	1577.9	-1.271	1.3052	0.00048828	-18.402	238.438	1507.53	-1.3311	1.0879	0.43628	-46.7575	84.634	1882.17	-2.0785	1.4602	0.68291
1.088	-22.362	-61.045	1270.973	-1.9487	1.1778	0.46822	-90.1504	84.762	4.4881	-0.011719	-0.037598	-0.056641	-43.8657	181.279	448.686	-0.271	0.23877	0.12207	103.073	-85.88504	1082.84	-2.0474	1.0494	0.47291	-97.855	107.235	1555.48	-1.2361	1.2815	-0.001709	-48.325	201.709	1474.12	-1.291	1.0605	0.41943	-22.173	88.167	1883.46	-2.0535	1.4398	0.67432
1.09	9.041	-48.492	1276.855	-1.8677	1.2485	0.48779	-51.847	27.7281	17.6107	0.0073242	-0.035156	-0.06543	-34.968	142.0227	427.916	-0.22021	0.21631	0.11621	82.111	-88.9936	1105.57	-2.0073	1.0747	0.51367	-135.813	82.8932	1514.32	-1.209	1.2617	-0.0019531	21.727	212.604	1463.72	-1.2324	1.0176	0.3999	-6.89	163.9199	1858.59	-2.0257	1.4279	0.66758
1.092	-1.80900000000001	4.848	1290.504	-1.7602	1.3219	0.50536	-70.468	27.3446	5.629	0.018066	-0.025391	-0.070801	-21.588	188.615	388.069	-0.1958	0.20508	0.11768	37.464	-57.21	1131.93	-1.8652	1.1367	0.58447	-89.8447	65.96	1526.68	-1.1812	1.2192	-0.0043945	-8.179	226.362	1396.97	-1.2026	0.99658	0.39258	-29.4539	175.1119	1810.24	-1.9897	1.4126	0.65234
1.094	-24.089	2.033	1304.64	-1.6292	1.387	0.51248	-88.122	7.279	25.6776	0.037598	-0.024414	-0.074219	-54.022	146.176	351.7153	-0.146	0.17578	0.10693	28.165	-53.549	1206.61	-1.8223	1.1758	0.58301	-84.5852	128.78815	1490.81	-1.1655	1.2026	-0.0073242	-15.849	214.797	1378.54	-1.1538	0.9458	0.37305	-23.069	141.5754	1782.66	-1.9595	1.396	0.63711
1.096	14.948	-74.3741	1385.863	-1.4634	1.3987	0.4817	-41.66	-5.337	19.846	0.051025	-0.019043	-0.080078	-37.057	155.919	336.773	-0.11353	0.15893	0.097656	7.43300000000001	8.573	1223.36	-1.7383	1.2324	0.50732	-119.513	124.1113	1451.52	-1.1445	1.1699	0.0019531	13.696	288.64	1348.24	-1.1177	0.91944	0.3584	-16.74	164.4399	1762.76	-1.9211	1.3796	0.62784
1.098	12.079	-123.535	1413.974	-1.2745	1.3401	0.41756	-64.438	53.9914	8.199	0.06543	-0.014648	-0.08252	-38.231	185.452	291.81	-0.07959	0.13867	0.087402	-62.556	-7.479	1170.41	-1.5608	1.2161	0.46631	-69.0239	168.784	1456.43	-1.1211	1.1446	0.0031738	-30.916	288.54	1269.23	-1.0796	0.88525	0.33984	-53.9141	97.43	1730.44	-1.8852	1.3656	0.61612
1.1	-28.656	-233.982	1431.61	-1.0898	1.2324	0.35693	-38.049	50.9403	24.0561	0.077637	0.00097656	-0.080078	-69.379	125.554	266.8437	-0.025391	0.11279	0.081543	-66.694	-55.847	1165.26	-1.3237	1.1401	0.44727	-82.758	199.551	1408.03	-1.1011	1.1255	0.0029297	3.391	266.41	1244.17	-1.0313	0.83594	0.32275	-53.805	66.728	1729.84	-1.8517	1.3525	0.60967
1.102	-46.127	-304.06	1465.2	-0.961	1.1372	0.31955	-28.892	77.95	20.4116	0.085938	0.0053711	-0.085938	-34.871	160.558	257.206	-0.0087891	0.09668	0.077148	-33.325	-43.4118	1186.81	-1.0815	1.0005	0.42725	-62.552	187.92	1396.89	-1.0776	1.0903	0.017578	10.024	268.08	1198.43	-1.0059	0.81445	0.31201	-74.7803	87.137	1688.13	-1.8223	1.3359	0.60107
1.104	-106.1774	-297.926	1497.06	-0.89552	1.0664	0.29723	-45.068	86.257	7.7442	0.10156	0.018555	-0.092285	-53.588	129.33	226.58	0.03418	0.068848	0.066406	-30.083	-125.959	1217.58	-1.0166	0.95898	0.4126	-13.36	240.087	1366.55	-1.0703	1.0723	0.022461	-13.636	222.21	1155.01	-0.96094	0.77539	0.2915	-88.3182	36.607	1681.05	-1.7957	1.3129	0.58252
1.106	-116.1887	-317.439	1559.67	-0.88978	1.0434	0.29415	-4.229	40.655	30.686	0.11914	0.027832	-0.099363	-64.772	104.1	217.875	0.067383	0.041992	0.062988	-19.655	-218.59	1298.45	-0.94922	0.92188	0.39697	-62.7292	231.028	1309.43	-1.0444	1.0435	0.027344	42.53	229.33	1127.95	-0.91846	0.74268	0.27881	-82.143	111.362	1666.85	-1.7523	1.2972	0.58115
1.108	-117.6754	-280.938	1613.9	-0.94259	1.0568	0.30619	-51.12	34.292	20.2104	0.13818	0.039063	-0.11133	-35.656	141.032	192.889	0.084961	0.032227	0.055664	-58.693	-306.12	1320.01	-0.93139	0.91626	0.39966	-10.113	223.365	1297.11	-1.0271	1.0169	0.036133	27.4	254.2	1065.83	-0.89453	0.72363	0.27051	-77.775	128.288	1624.69	-1.7102	1.2816	0.56748
1.11	-148.742	-257.951	1648.22	-1.0293	1.1055	0.33447	-25.517	18.357	38.471	0.15625	0.052734	-0.10986	-78.7658	94.511	178.986	0.11475	0.01123	0.042969	-105.513	-415.73	1325.9	-0.92969	0.91992	0.40576	-9.52500000000001	248.408	1247.49	-1.0039	0.99512	0.039063	12.498	234.205	1032.85	-0.84814	0.68604	0.25195	-72.2402	104.157	1599.37	-1.672	1.2687	0.55058
1.112	-109.207	-297.47	1734.46	-1.1295	1.1748	0.3614	25.969	4.4777	48.2039	0.16406	0.058105	-0.12109	-70.128	102.884	173.97	0.13867	-0.0073244	0.03711	-117.082	-378.23	1373.34	-0.98389	0.95557	0.41406	-44.469	211.905	1213.1	-0.97656	0.96094	0.049316	32.676	265.75	1015.04	-0.8125	0.65577	0.23877	-71.90918	150.152	1581.53	-1.6206	1.2505	0.54102
1.114	-92.155	-219.612	1790.72	-1.2295	1.2473	0.39412	-21.291	59.654	25.8027	0.1792	0.071777	-0.12549	-56.519	104.851	133.2994	0.15674	-0.021973	0.032227	-98.9316	-319.3	1422.38	-1.022	0.98291	0.41748	-12.919	223.629	1212.74	-0.96484	0.94238	0.056152	10.887	259.44	951.29	-0.771	0.62744	0.22363	-95.996	134.0662	1538.94	-1.5795	1.2248	0.52393
1.116	-77.39	-169.911	1808.7	-1.3193	1.3192	0.41132	17.37	36.5844	25.0412	0.18555	0.081055	-0.12939	-55.93	53.0314	125.5573	0.17969	-0.037598	0.020508	-80.0334	-285.115	1521.59	-1.105	1.0562	0.41406	-83.11502	236.633	1173.78	-0.94287	0.90674	0.068848	49.528	252.68	925.28	-0.7207	0.58789	0.20605	-77.7564	160.421	1515.32	-1.5445	1.2008	0.50771
1.118	-35.92	-131.187	1837.86	-1.4076	1.3877	0.43153	3.542	49.057	28.6679	0.18652	0.093262	-0.12988	-35.665	92.122	113.647	0.18848	-0.048828	0.018555	-81.6236	-225.827	1581.69	-1.1763	1.1192	0.41162	-67.463	210.085	1157.58	-0.9292	0.87939	0.07544	55.931	269.75	879.51	-0.6958	0.5708	0.1958	-72.2238	232.897	1462.74	-1.5133	1.168	0.48858
1.12	-57.4	-40.519	1848.14	-1.4956	1.4419	0.44922	-16.752	60.117	28.6874	0.17822	0.10449	-0.12988	-44	62.507	95.041	0.21631	-0.067383	0.014648	-113.359	-243.81	1625.06	-1.2397	1.1899	0.40137	-47.624	245.913	1141.25	-0.91406	0.85156	0.083008	4.274	208.877	835.61	-0.64648	0.53418	0.17285	-67.843	217.637	1425.54	-1.4788	1.14	0.47168
1.122	-47.488	-60.083	1880.18	-1.5695	1.4665	0.46974	29.186	13.9409	38.937	0.17383	0.11279	-0.1333	-24.164	50.574	93.03	0.23023	-0.077637	0.0073242	-101.7612	-195.755	1712.77	-1.3301	1.2793	0.40674	-106.366	229.394	1100.69	-0.89258	0.81641	0.094727	42.01	216.466	804.07	-0.60571	0.50634	0.15942	-49.296	286.058	1381.65	-1.4492	1.1074	0.45752
1.124	8.82899999999999	-29.5993	1901.87	-1.6378	1.4845	0.49669	-21.849	23.764	25.6399	0.16016	0.12793	-0.12598	-38.739	72.734	66.598	0.24414	-0.087402	0.0039063	-81.026	-89.637	1748.25	-1.377	1.3125	0.40186	-93.3128	220.127	1082.32	-0.87451	0.79932	0.1001	-1.18	224.661	723.71	-0.56543	0.48047	0.14258	-40.603	273.834	1324.88	-1.4142	1.0663	0.44297
1.126	20.318	6.039	1894.36	-1.6929	1.4981	0.51153	-49.077	-3.919	28.7789	0.14624	0.1416	-0.12305	-41.733	26.778	56.34	0.25098	-0.095703	-0.0053711	-58.307	-78.191	1771.03	-1.4644	1.3579	0.40576	-83.2959	241.1	1050.17	-0.84131	0.7627	0.10547	1.104	198.103	691.39	-0.5166	0.44141	0.13232	-20.013	237.823	1304.3	-1.3812	1.0329	0.42852
1.128	16.644	-53.671	1950.61	-1.7407	1.5202	0.52129	-8.447	-20.96579	38.2457	0.12891	0.1543	-0.1167	0.378999999999998	47.999	60.513	0.25049	-0.099121	-0.0092773	-58.653	-39.543	1791.11	-1.5508	1.3877	0.41357	-133.28	216.51	1013.22	-0.8147	0.74341	0.11133	37.628	226.821	657.65	-0.48828	0.41553	0.11426	5	267.128	1250.58	-1.3499	1.0017	0.41446
1.13	-9.18900000000001	-39.462	1979.49	-1.7695	1.5469	0.52393	-44.519	31.3279	13.392	0.10791	0.1748	-0.11035	-13.164	64.38	27.83	0.24512	-0.10107	-0.015625	-46.208	-65.227	1782.36	-1.5938	1.4023	0.41846	-113.6303	232.61	1007.62	-0.78516	0.72363	0.11572	-22.575	214.852	601.03	-0.42432	0.37354	0.104	20.127	201.401	1228.78	-1.3124	0.97275	0.39316
1.132	-19.58	-96.6376	1986.18	-1.7942	1.5747	0.52539	-44.447	26.6524	18.5676	0.094727	0.18262	-0.10889	3.738	37.86	21.0051	0.2268	-0.10376	-0.014648	-21.307	-142.883	1862.54	-1.666	1.4395	0.41846	-138.772	242.7	949.93	-0.73877	0.69775	0.12256	19.452	216.099	571.22	-0.38233	0.35816	0.098634	41.862	212.696	1193.99	-1.2734	0.94336	0.37939
1.134	19.471	-149.544	2027.92	-1.8265	1.6072	0.53106	-41.756	50.326	36.196	0.07959	0.19775	-0.1084	17.608	76.253	27.623	0.20654	-0.10791	-0.0083008	-0.967999999999996	-106.042	1926.66	-1.7136	1.4729	0.42334	-134.193	231.89	913.06	-0.71338	0.68213	0.12109	13.778	223.26	521.1	-0.35498	0.33838	0.076172	27.875	252.378	1150.97	-1.2345	0.90928	0.35879
1.136	38.348	-104.737	2037.38	-1.8686	1.6446	0.54043	-91.5314	39.0932	52.591	0.064697	0.20825	-0.10229	-16.385	43.497	7.6993	0.17285	-0.10059	-0.0029297	-1.909	-114.897	1960.77	-1.7656	1.5176	0.42773	-125.098	269.41	873.06	-0.66992	0.64453	0.12646	-39.591	184.62	489.84	-0.28418	0.29395	0.041016	29.681	198.626	1137.94	-1.187	0.87354	0.33633
1.138	53.254	-150.175	2065.59	-1.9212	1.6808	0.5539	-50.571	-34.5914	83.5539	0.046875	0.22266	-0.1001	-12.436	24.4254	24.436	0.15332	-0.096191	0.0014648	20.778	-104.233	2040.7	-1.8477	1.5801	0.44385	-176.42	248.229	794.6	-0.63892	0.61695	0.12476	6.312	169.824	465.31	-0.25635	0.27344	0.041992	61.145	245.454	1137.93	-1.1433	0.83682	0.32148
1.14	55.641	-115.194	2100.83	-1.9688	1.7051	0.56494	-67.184	-40.454	73.921	0.013184	0.23242	-0.09668	-3.802	47.003	14.5343	0.1123	-0.091309	0.015137	18.356	-60.583	2040.54	-1.8882	1.6118	0.45898	-149.586	225.601	767.61	-0.60156	0.58887	0.12549	-36.177	157.482	400.28	-0.21631	0.20996	0.037109	52.179	242.363	1104.52	-1.0976	0.8	0.31162
1.142	32.267	-53.6186	2087.61	-2.0112	1.7333	0.59726	-73.346	-64.77	106.754	-0.003418	0.24658	-0.096191	-38.423	5.1095	-1.7857	0.080811	-0.085938	0.024414	18.899	-137.914	2048.97	-1.98	1.6685	0.49219	-155.416	224.114	713.07	-0.55225	0.5498	0.12402	-45.956	146.174	375.28	-0.18726	0.17652	0.023682	57.671	233.589	1075.99	-1.064	0.76416	0.30273
1.144	27.643	-81.0353	2112.39	-2.0511	1.7517	0.61914	-55.71	-80.431	152.26	-0.061523	0.26416	-0.083984	-16.355	27.4492	23.4236	0.049805	-0.076172	0.03418	73.5271	-142.887	2113.6	-2.0415	1.6982	0.52148	-165.58	194.932	675.94	-0.53125	0.53271	0.12305	-21.966	184.982	351.562	-0.15234	0.1543	0.012207	61.3266	284.28	1011.45	-1.0273	0.72461	0.28867
1.146	-12.236	-18.873	2091.16	-2.0808	1.7657	0.63984	-78.667	-35.447	191.702	-0.12012	0.28663	-0.067383	-26.044	37.39838	13.406	0.0087891	-0.068359	0.046875	59.95008	-134.598	2138.03	-2.0879	1.7188	0.54541	-102.7778	209.134	663.5	-0.47803	0.49609	0.12402	-50.7889	174.078	309.466	-0.104	0.12891	-0.0092773	25.574	233.877	944.8	-0.99336	0.69102	0.2709
1.148	-32.277	-25.1665	2036.64	-2.104	1.7671	0.65801	-43.764	-44.497	264.905	-0.18799	0.30225	-0.048828	-25.088	8.913	10.9299	-0.0053711	-0.063477	0.052734	45.042	-143.518	2182.91	-2.1323	1.7212	0.58789	-121.091	222.09	627.1	-0.44897	0.46606	0.12696	-37.667	146.645	300.785	-0.085938	0.12402	-0.01123	26.018	232.354	892.45	-0.95898	0.65586	0.25683
1.15	-20.099	-51.092	2001.89	-2.1167	1.7642	0.66797	-53.901	-7.4203	329.13	-0.28027	0.33105	-0.038086	-36.37	45.1674	2.3055	-0.030762	-0.05957	0.066895	23.215	-44.074	2143.85	-2.1479	1.7212	0.60449	-96.6621	205.713	599.17	-0.41748	0.44189	0.12305	-26.805	137.788	248.041	-0.052246	0.10596	-0.015137	29.508	253.928	831.84	-0.92412	0.62803	0.25088
1.152	-68.842	20.046	1954.96	-2.1179	1.7571	0.6793	-60.12	39.6144	441.16	-0.32373	0.34668	-0.027344	-49.772	22.7015	17.25117	-0.043213	-0.060059	0.067871	-45.568	-9.6306	2062.66	-2.1719	1.6992	0.63135	-44.677	223.66	576.19	-0.375	0.40137	0.13135	-53.164	105.896	229.977	-0.037353	0.088623	-0.020264	-2.111	222.357	805.63	-0.896	0.60205	0.24023
1.154	-105.3531	-3.354	1941.06	-2.1147	1.7367	0.68828	-30.746	31.5213	586.67	-0.41846	0.37939	-0.0092773	-53.642	29.33578	36.423	-0.047363	-0.060547	0.065918	-25.744	6.723	2077.52	-2.1853	1.6838	0.64966	-72.8084	209.641	514.67	-0.35986	0.38965	0.12793	-8.98500000000001	99.25	218.955	-0.02832	0.067871	-0.024414	11.109	274.883	772.85	-0.86396	0.57471	0.22802
1.156	-88.652	20.459	1953.24	-2.1066	1.7066	0.68711	-85.534	90.174	718.56	-0.48999	0.4165	0.0039063	-40.838	64.86	27.8254	-0.044434	-0.055664	0.062988	18.847	50.353	2046.37	-2.1953	1.6602	0.66455	-12.889	168.427	511.35	-0.32422	0.35449	0.12939	-40.422	91.458	185.9429	-0.021973	0.043945	-0.015625	-10.095	258.96	711.54	-0.82734	0.54453	0.21992
1.158	-83	81.406	1910.22	-2.0875	1.6691	0.68174	-113.649	109.532	884.44	-0.57617	0.45996	0.013672	-57.742	23.3339	14.27936	-0.04248	-0.05127	0.060059	23.928	-3.587	2029.94	-2.209	1.6348	0.67822	-16.724	154.853	465.22	-0.29467	0.33105	0.12769	-58.155	69.3543	188.275	-0.022461	0.037598	-0.020508	-27.47	225.707	675.95	-0.79414	0.50664	0.19531
1.16	-97.89	33.264	1897.86	-2.0645	1.6348	0.68604	-62.006	84.108	1042.1	-0.71045	0.52686	0.04834	-66.452	39.841	17.5803	-0.029785	-0.060547	0.048828	-0.169999999999995	15.058	2051	-2.2168	1.623	0.68115	-60.344	107.109	417.672	-0.26465	0.30713	0.12305	-33.606	97.539	161.5544	-0.022949	0.019043	-0.019043	-33.517	267.883	615.58	-0.74873	0.4666	0.17715
1.162	-103.047	78.1742	1898.53	-2.0394	1.5973	0.68565	-108.097	105.988	1155.05	-0.79688	0.55957	0.064453	-57.056	32.4096	9.991	-0.026367	-0.06543	0.043457	-43.9649	32.508	2020.93	-2.2163	1.606	0.68555	-20.911	103.004	379.039	-0.23193	0.27148	0.12354	-61.849	100.885	133.9825	-0.027832	0.0092775	-0.020996	-46.78	218.752	586.56	-0.70166	0.44678	0.17188
1.164	-111.4433	66.391	1896.04	-2.0145	1.5617	0.68291	-108.885	57.279	1257.37	-1.0098	0.64453	0.12207	-59.911	14.5616	13.9781	-0.020508	-0.067871	0.036621	-72.7241	-11.17	2012.29	-2.2097	1.5911	0.68433	-33.113	101.264	338.617	-0.21094	0.26074	0.12402	-33.655	111.818	131.9886	-0.028809	-0.00048828	-0.024902	-31.168	218.946	545.62	-0.66436	0.43467	0.15781
1.166	-88.942	21.527	1919.68	-1.9961	1.5285	0.68096	-64.267	64.393	1320.6	-1.2094	0.7207	0.18433	-61.568	64.532	21.23062	-0.016113	-0.069336	0.033203	-67.223	60.741	1991.42	-2.2026	1.5747	0.68652	-35.332	89.01	329.291	-0.17529	0.22754	0.12256	-20.446	110.3	115.57079	-0.032227	-0.0058594	-0.022949	-50.757	219.234	494.93	-0.61865	0.41631	0.14893
1.168	-73.093	62.465	1905.83	-1.975	1.5043	0.67764	-98.267	81.533	1318.15	-1.4258	0.80469	0.25928	-63.317	44.7916	-10.4361	-0.0083008	-0.065918	0.030273	-76.833	58.466	1969.74	-2.1816	1.5605	0.68457	-13.82	122.744	298.708	-0.14111	0.19727	0.12109	-48.843	74.178	100.1712	-0.033203	-0.0097656	-0.026367	-66.076	163.32	489.44	-0.57021	0.37178	0.12236
1.17	-91.94	8.499	1884.63	-1.9531	1.4805	0.67334	-30.612	14.4634	1312.4	-1.7188	0.92773	0.35205	-46.799	46.13	35.7443	0.0063477	-0.069336	0.027344	-83.617	35.669	2023.33	-2.1714	1.5474	0.6875	-45.598	139.593	274.987	-0.12207	0.17969	0.12158	-0.244999999999997	63.249	99.781	-0.030273	-0.01123	-0.020996	-36.657	181.999	465.11	-0.5209	0.32198	0.10274
1.172	-72.762	16.209	1881.06	-1.9225	1.4654	0.66748	-41.2155	-14.194	1255.01	-1.8491	0.98877	0.38086	-29.885	75.103	18.9361	0.012207	-0.064941	0.024414	-91.406	75.924	2042.66	-2.1362	1.5298	0.6792	-12.278	145.85	264.656	-0.08252	0.15137	0.12109	-44.229	55.105	64.7539	-0.028076	-0.014649	-0.024659	-41.189	152.797	419.58	-0.47607	0.28223	0.10205
1.174	-79.025	69.77	1830.44	-1.8887	1.4493	0.66572	-94.185	-91.417	1218.23	-2.0244	1.0918	0.40869	-47.349	17.5465	20.107	0.020508	-0.060059	0.028809	-98.431	18.70133	2031.27	-2.1043	1.5179	0.66773	-17.864	155.45	242.407	-0.052735	0.12793	0.11866	-34.074	19.698	72.11	-0.022461	-0.018066	-0.028809	-42.365	116.483	391.2	-0.44512	0.24668	0.083203
1.176	-69.105	24.232	1817.57	-1.8543	1.4321	0.66338	-87.709	-147.034	1220.56	-2.0391	1.1347	0.38794	-11.682	33.304	42.935	0.036133	-0.050781	0.029297	-45.3725	29.946	2024.75	-2.0659	1.5063	0.65234	-63.944	110.437	217.131	-0.018555	0.10693	0.11084	-2.693	33.0821	52.2967	-0.010742	-0.027832	-0.036133	-25.279	131.867	334.522	-0.40899	0.22021	0.068067
1.178	-54.814	85.472	1804.07	-1.8274	1.4107	0.65303	-132.089	-96.99	1161.7	-1.9683	1.1626	0.36426	-36.102	27.7537	21.5587	0.045898	-0.049805	0.027832	-42.5563	32.1199	1964.98	-2.0166	1.4941	0.6333	-23.182	94.52	213.809	0.025879	0.083496	0.10693	-60.775	47.6903	28.367	-0.0073242	-0.033691	-0.038086	-41.742	83.126	284.917	-0.35859	0.19912	0.053613
1.18	-36.609	87.84	1752.96	-1.7949	1.3848	0.64697	-93.2188	-101.398	1120.71	-1.7773	1.1934	0.32178	-21.072	-5.781	37.2182	0.060547	-0.046387	0.02002	-51.829	-33.5361	1933.46	-1.9863	1.4902	0.62451	-64.1654	90.934	175.298	0.044434	0.069336	0.10547	-26.285	64.694	32.48988	-0.0039063	-0.044434	-0.047852	-24.947	96.689	266.49	-0.30742	0.17578	0.039062
1.182	3.018	51.881	1741.56	-1.751	1.3537	0.63642	-101.3514	-90.544	1111.39	-1.6577	1.2095	0.28027	2.072	29.31053	29.1685	0.076904	-0.044434	0.025879	-40.512	35.9286	1895.2	-1.939	1.4692	0.59863	-69.6548	76.388	172.047	0.078125	0.044434	0.097656	-16.559	62.926	22.145	-0.0021973	-0.05542	-0.044434	-19.459	117.888	225.757	-0.26025	0.15479	0.031738
1.184	5.997	138.1287	1705.73	-1.7101	1.3286	0.61836	-157.861	-76.089	1123.35	-1.3887	1.209	0.15674	-31.913	11.5042	2.13171	0.094238	-0.039063	0.028809	-68.58	59.446	1854.73	-1.906	1.4563	0.58765	-68.2627	92.551	154.42	0.096192	0.023193	0.093018	-66.356	29.4031	27.0661	-0.003418	-0.062012	-0.049316	-9.758	73.5704	214.266	-0.22373	0.13281	0.016601
1.186	15.003	145.286	1694.56	-1.6636	1.3001	0.60547	-96.48875	-108.608	1184.96	-1.1645	1.1694	0.076415	-17.314	24.3726	26.969	0.11719	-0.033203	0.032715	-30.631	92.842	1887.24	-1.8784	1.4419	0.57617	-109.573	87.893	127.39	0.11914	0.0063477	0.086426	-26.662	-2.3115	39.963	-0.0083008	-0.068359	-0.053223	20.681	115.444	196.53	-0.18437	0.10742	0.0063476
1.188	45.108	197.726	1692.5	-1.6202	1.2743	0.59453	-83.4034	-71.874	1208.9	-0.9668	1.0977	-0.0087891	3.15	56.967	19.13656	0.12158	-0.03418	0.033203	-8.97199999999999	174.576	1880.84	-1.8511	1.4185	0.55664	-67.992	86.168	118.71746	0.15234	-0.01123	0.083984	-49.305	2.612355	10.71438	-0.0092773	-0.07373	-0.051758	-9.166	118.003	177.885	-0.14727	0.092578	-0.0057617
1.19	40.236	270.561	1663.18	-1.5874	1.2466	0.57959	-53.1644	-97.9112	1252.17	-0.78711	1.0059	-0.099121	-21.567	25.8843	10.3247	0.12891	-0.03125	0.041504	-11.826	146.948	1845.17	-1.8359	1.4023	0.54834	-97.683	100.806	87.8222	0.1709	-0.020996	0.080078	-41.637	0.18	22.8168	-0.014648	-0.078613	-0.049316	9.219	118.846	167.617	-0.11612	0.07041	-0.013086
1.192	46.271	212.877	1633.35	-1.5534	1.222	0.5625	-9.437	-163.13	1299.74	-0.72217	0.98291	-0.13965	-6.057	47.786	30.725	0.13477	-0.031982	0.04712	10.109	184.86	1822.75	-1.8047	1.375	0.5415	-107.5117	68.875	85.7494	0.18652	-0.035156	0.074219	-28.486	18.2143	36.92	-0.023926	-0.081055	-0.052978	21.597	151.51	147.224	-0.09082	0.05127	-0.023926
1.194	42.474	242.316	1614.29	-1.5249	1.1931	0.55157	-35.735	-142.062	1302.99	-0.61914	0.96875	-0.19531	-8.644	28.044	9.92942	0.13965	-0.033691	0.053711	-6.267	212.749	1779.49	-1.781	1.3508	0.53198	-61.479	50.7481	97.405	0.19556	-0.050781	0.071534	-70.573	29.73077	8.580708	-0.029297	-0.081543	-0.050293	2.78	84.967	121.401	-0.067774	0.030664	-0.029297
1.196	36.543	216.329	1590.03	-1.4952	1.1681	0.5418	0.259999999999998	-197.159	1335.96	-0.58691	0.97559	-0.21631	-14.692	6.2986	31.824	0.146	-0.023926	0.065918	-6.846	156.825	1790.79	-1.7617	1.3203	0.52197	-108.482	54.499	81.887	0.20459	-0.065918	0.081055	-35.413	25.3752	21.5397	-0.029297	-0.08252	-0.057617	4.467	67.64	90.8456	-0.051367	0.010743	-0.039062
1.198	29.965	148.575	1576.22	-1.4686	1.1454	0.53008	6.199	-230.05	1374.79	-0.59863	0.99414	-0.21875	-8.246	42.6872	28.2004	0.14648	-0.022949	0.067871	37.279	190.053	1779.91	-1.7261	1.2798	0.51318	-72.385	46.5544	87.689	0.20264	-0.081543	0.074707	-27.488	43.8049	-9.849	-0.030273	-0.083984	-0.057129	-7.352	72.5528	46.216	-0.034179	-0.0025391	-0.039062
1.2	2.646	183.198	1522.77	-1.4473	1.1201	0.52197	-71.5433	-267.29	1422.64	-0.71289	1.0566	-0.19287	-25.337	17.6089	12.6578	0.1377	-0.0053711	0.077637	10.752	159.979	1717.74	-1.7046	1.2544	0.50537	-34.575	62.385	82.647	0.19678	-0.083496	0.067871	-48.011	29.51	-3.0476	-0.030762	-0.080566	-0.055664	-17.333	23.193	59.116	-0.021875	-0.012891	-0.039649
1.202	-16.206	132.574	1471.33	-1.4265	1.0992	0.51279	-38.149	-353.57	1507.15	-0.79297	1.1074	-0.17383	-42.159	30.12289	21.3196	0.13476	0.005371	0.084961	14.98	129.979	1711.97	-1.668	1.208	0.49072	-64.851	74.644	56.038	0.18799	-0.089355	0.075684	-26.867	17.957	18.4026	-0.027832	-0.083984	-0.053711	-11.474	66.9897	57.267	-0.017578	-0.021484	-0.045898
1.204	-19.448	146.502	1447.07	-1.403	1.0746	0.50205	-32.3568	-332.19	1528.39	-0.97217	1.2192	-0.12305	-58.5377	63.128	-1.252	0.12207	0.02002	0.091797	26.482	181.733	1669.65	-1.6414	1.1741	0.47559	-19.245	76.043	49.201	0.18213	-0.090088	0.08081	-68.734	18.5628	-2.9693	-0.019043	-0.09082	-0.057617	-35.014	52.408	45.952	-0.0098633	-0.034082	-0.043359
1.206	-20.089	205.393	1421.63	-1.3791	1.05	0.48994	-8.621	-333.66	1563.09	-1.0933	1.2973	-0.084229	-54.784	21.9459	10.1514	0.10791	0.04541	0.10547	8.289	155.268	1647.12	-1.6113	1.1387	0.46143	0.795000000000002	98.228	17.2156	0.17432	-0.086426	0.078613	-52.46	10.089	17.142	-0.015625	-0.093262	-0.064453	-40.07	36.7643	43.1987	-0.0051758	-0.036621	-0.042969
1.208	-9.113	183.9	1413.79	-1.3474	1.0233	0.47412	18.067	-336.24	1635.36	-1.1934	1.3574	-0.044922	-49.405	40.1603	24.3516	0.097168	0.052734	0.11133	26.918	197.812	1642.64	-1.5771	1.0938	0.44092	-26.646	81.865	12.9204	0.16064	-0.085449	0.084473	-25.772	28.4264	11.0277	-0.0087891	-0.09375	-0.067871	-44.753	59.5978	18.9628	-0.009082	-0.044824	-0.040625
1.21	-15.749	248.895	1396.73	-1.3096	0.99121	0.45752	-25.837	-247.27	1697.06	-1.3262	1.3984	-0.0039063	-62.5582	19.2282	4.372	0.073242	0.066406	0.12305	-0.149999999999999	215.417	1583.64	-1.5586	1.0723	0.43213	8.637	62.779	25.3696	0.15088	-0.085449	0.082031	-60.618	36.09	-3.9514	0.0048828	-0.097168	-0.070313	-65.599	10.6804	31.137	-0.0078125	-0.050293	-0.040625
1.212	-11.56	244.734	1354.78	-1.2701	0.96133	0.44004	33.351	-193.011	1763.68	-1.3979	1.4185	0.022949	-52.325	-24.1473	22.6584	0.057129	0.075927	0.13428	-14.647	164.041	1568.74	-1.5205	1.0234	0.4126	-5.619	25.3281	19.5583	0.12842	-0.09082	0.085938	-34.753	41.61192	30.91	0.019531	-0.10083	-0.075439	-45.349	27.37522	42.835	-0.0029297	-0.062012	-0.043945
1.214	5.584	221.743	1324.76	-1.2323	0.93252	0.42051	68.10288	-99.308	1807.83	-1.543	1.4443	0.046875	-46.035	19.69	27.2023	0.044922	0.087402	0.14453	11.598	222.161	1532.34	-1.4941	0.99023	0.40063	-9.07	-2.914	20.3577	0.11572	-0.092529	0.090576	-26.569	63.192	2.588	0.030762	-0.10205	-0.07373	-88.997	49.0315	23.77744	0.0032226	-0.070801	-0.043164
1.216	-22.594	282.242	1262.87	-1.1933	0.89658	0.39277	32.737	-14.617	1836.63	-1.6475	1.4722	0.06958	-49.468	-3.54	11.753	0.03125	0.095703	0.15479	5.01600000000001	228.011	1480.78	-1.4663	0.95947	0.38574	12.272	17.176	22.157	0.094727	-0.099121	0.090332	-46.472	53.987	7.249	0.039551	-0.10693	-0.076172	-100.905	19.3062	15.9341	0.006543	-0.078906	-0.044336
1.218	-19.89	239.85	1214.134	-1.1547	0.86426	0.3667	49.7864	-45.1362	1886.09	-1.748	1.502	0.090332	-53.898	12.381	40.6685	0.029785	0.10498	0.15674	20.237	248.437	1469.27	-1.4336	0.92285	0.37061	-14.351	31.4609	33.70867	0.074219	-0.10303	0.092285	-6.061	43.7087	21.1991	0.050293	-0.11133	-0.078613	-50.713	62.6254	12.702	0.0057617	-0.091406	-0.044727
1.22	-11.875	248.05	1175.361	-1.1147	0.83252	0.34521	34.412	-28.7602	1872.53	-1.8594	1.5449	0.1084	-39.448	35.3825	31.205	0.022949	0.1123	0.16113	7.908	313.83	1406.52	-1.4175	0.90967	0.36572	29.327	44.9962	43.742	0.065918	-0.10449	0.09375	-35.976	24.5984	-8.0209	0.056641	-0.11328	-0.08252	-70.518	50.02948	-6.086	0.0056641	-0.10361	-0.047559
1.222	-15.574	266.692	1115.897	-1.0744	0.79473	0.32559	-3.007	-71.455	1858.4	-1.8984	1.5645	0.11279	-88.7562	4.2617	37.4447	0.019043	0.12378	0.16455	-28.741	286.54	1367.65	-1.375	0.86328	0.34424	8.064	54.768	18.4456	0.045898	-0.094727	0.092773	-32.904	12.045	9.8602	0.068848	-0.11548	-0.087158	-85.003	40.0837	14.32972	0.0014648	-0.10889	-0.045898
1.224	-4.29100000000001	218.472	1079.329	-1.041	0.76094	0.30127	-12.139	-159.611	1872.25	-1.978	1.6021	0.11719	-19.009	29.0197	70.5698	0.0073242	0.13477	0.17383	3.356	300.971	1329.26	-1.3389	0.83325	0.33081	-23.153	38.7833	18.4663	0.041016	-0.088867	0.099363	8.195	20.0181	19.7096	0.077637	-0.11523	-0.094727	-61.304	75.759	1.7929	-0.0018555	-0.11914	-0.05
1.226	-7.74299999999999	269.453	1051.208	-1.0063	0.73164	0.2751	-87.722	-150.579	1870.3	-2.0223	1.6204	0.11377	-25.175	8.9093	69.4724	-0.019043	0.15674	0.17529	-11.937	292.937	1265.61	-1.2983	0.80127	0.31104	7.546	25.3473	37.2164	0.032715	-0.077637	0.10547	-46.149	36.5627	8.44977	0.088379	-0.11523	-0.097656	-65.999	45.912	-2.6087	-0.011426	-0.12675	-0.050293
1.228	23.548	264.237	1004.84	-0.96924	0.70401	0.2541	-105.678	-182.587	1890.41	-2.0542	1.6431	0.10693	-59.528	-47.5889	110.99	-0.040527	0.16748	0.17871	7.35	236.423	1244.14	-1.2373	0.75195	0.29395	-23.49	16.6179	21.9688	0.022461	-0.07373	0.10107	-28.826	41.5165	41.4369	0.095703	-0.11377	-0.10156	-49.902	43.0746	4.2188	-0.029004	-0.1291	-0.046777
1.23	47.659	223.699	968.783	-0.93164	0.67188	0.23291	-90.535	-161.12	1924.88	-2.082	1.6602	0.097656	-45.873	-33.806	153.888	-0.087402	0.19434	0.18799	54.569	269.306	1206.2	-1.2104	0.73096	0.28564	-34.151	10.28	34.294	0.02002	-0.071289	0.098633	-18.448	65.694	24.878	0.10889	-0.12207	-0.10596	-38.875	35.2088	-10.9292	-0.047461	-0.1332	-0.042969
1.232	60.675	247.876	919.096	-0.90156	0.63984	0.21153	-139.144	-98.479	1935.38	-2.0953	1.6685	0.091064	-31.67	-88.849	164.307	-0.12891	0.21436	0.18873	-11.605	246.207	1141.76	-1.1616	0.68604	0.27295	-27.014	22.2128	19.013	0.019531	-0.068848	0.104	-58.182	52.94676	33.926	0.11816	-0.11963	-0.10547	-38.228	-9.716	23.41795	-0.062012	-0.13428	-0.04248
1.234	68.48	193.385	902.498	-0.87139	0.61435	0.18594	-112.916	-127.838	2006.18	-2.1069	1.6763	0.083008	-35.055	-95.848	241.89	-0.17822	0.24365	0.19482	6.88600000000001	238.669	1119.74	-1.1258	0.65161	0.26514	-92.2797	25.2192	15.789	0.025635	-0.068115	0.093505	-13.046	47.804	34.6338	0.12305	-0.1167	-0.10645	-6.155	33.274	29.8333	-0.083106	-0.13496	-0.035352
1.236	69.466	201.815	886.335	-0.84014	0.58271	0.1668	-109.044	-78.641	2022.12	-2.1113	1.668	0.072754	-8.047	-49.3768	322.26	-0.25586	0.28711	0.20361	38.724	280.991	1092.3	-1.0933	0.61963	0.25195	-57.825	29.1997	38.9847	0.026855	-0.063965	0.089355	-38.743	44.236	2.442	0.13232	-0.10791	-0.104	-12.338	35.4864	32.9041	-0.09834	-0.13496	-0.02539
1.238	60.124	228.332	857.906	-0.80566	0.55098	0.15556	-102.199	-88.288	2001.27	-2.105	1.6587	0.074219	-15.087	-49.741	422.18	-0.30811	0.30811	0.20703	28.522	250.852	1061.29	-1.0488	0.58984	0.23145	-59.542	43.697	11.739	0.03125	-0.063477	0.084961	-52.256	24.5184	4.3934	0.13086	-0.10889	-0.10693	-9.48800000000001	36.77476	63.403	-0.11123	-0.13379	-0.021484
1.24	89.896	193.887	823.087	-0.76904	0.52051	0.13867	-85.878	-121.148	2021.54	-2.0977	1.6348	0.072754	40.355	17.9517	550.65	-0.4165	0.37256	0.20313	92.427	274.85	1055.63	-1.0156	0.57129	0.2251	-116.279	37.8512	0.5823	0.037598	-0.058105	0.085938	-3.489	25.506	19.9703	0.13135	-0.09668	-0.104	-2.756	64.716	33.1914	-0.1209	-0.12637	-0.018164
1.242	53.214	246.257	761.279	-0.73233	0.48799	0.11172	-132.287	-50.141	1988.6	-2.0857	1.6106	0.075439	71.9545	47.9982	649.33	-0.51489	0.43067	0.2041	70.3466	281.09	993.09	-0.9585	0.53223	0.20996	-67.594	44.563	31.0578	0.048828	-0.047363	0.07666	-58.69	32.667	13.7571	0.12207	-0.086914	-0.099611	-18.668	24.8931	25.8929	-0.12305	-0.13184	-0.01416
1.244	39.575	215.329	700.217	-0.69356	0.45586	0.095508	-89.552	-60.3179	1940.04	-2.0718	1.5825	0.078125	91.976	35.363	784.08	-0.63281	0.49609	0.20947	33.539	228.305	946.03	-0.91675	0.50171	0.19506	-89.3664	46.9059	21.4705	0.058349	-0.039795	0.073242	-30.098	35.3458	30.404	0.11865	-0.077637	-0.095703	10.514	31.337	18.2597	-0.12344	-0.13193	-0.0090821
1.246	59.262	181.375	639.087	-0.66543	0.42305	0.082617	-76.1714	-29.6707	1914.97	-2.0562	1.5435	0.084961	135.066	95.518	956.69	-0.81445	0.59668	0.22412	65.676	251.93	895.38	-0.87061	0.47314	0.17188	-62.908	20.046	7.7996	0.070801	-0.030762	0.070801	-43.301	52.154	20.258	0.10107	-0.05957	-0.08252	1.919	28.7321	-7.8962	-0.11699	-0.13858	-0.0084961
1.248	30.474	206.689	574.871	-0.63633	0.39053	0.068261	-139.623	40.24712	1873.24	-2.0527	1.5215	0.086914	133.732	78.5185	1095.89	-0.91797	0.6543	0.23291	42.347	226.763	832.19	-0.80273	0.43311	0.16211	-38.194	8.9351	8.462	0.092773	-0.022461	0.066406	-67.141	50.3237	32.643	0.094238	-0.050781	-0.081055	5.276	-14.08432	11.2937	-0.10215	-0.14287	-0.0092773
1.25	25.986	146.166	549.243	-0.60156	0.36426	0.057129	-96.515	18.2686	1903.02	-2.0229	1.4888	0.097656	70.435	108.088	1214.66	-1.1304	0.77393	0.26953	36.877	217.392	774.82	-0.76563	0.40771	0.1416	-88.5003	6.59	-3.4501	0.1001	-0.016602	0.063965	-17.11	38.7676	47.6739	0.072754	-0.030762	-0.075195	8.668	30.115	30.1001	-0.088281	-0.154	-0.014356
1.252	23.293	156.3575	502.858	-0.57275	0.33819	0.04707	-57.3109	66.0286	1878.82	-2.0144	1.4592	0.10961	69.927	112.85	1217.98	-1.3301	0.88672	0.30908	52.422	243.939	711.01	-0.6875	0.35254	0.11523	-46.132	4.991	37.98	0.12549	-0.012695	0.050293	-55.437	47.442	5.948	0.060547	-0.0019531	-0.066895	-21.524	21.792	6.315	-0.074219	-0.16406	-0.018555
1.254	-22.28	185.59	453.273	-0.54024	0.31172	0.034961	-70.35	54.02335	1847.64	-2.0034	1.4302	0.12109	55.579	37.633	1203.53	-1.4253	0.93311	0.32227	16.643	211.25	661.96	-0.63208	0.3374	0.11596	-48.694	32.4771	12.712	0.14014	-0.0073242	0.050293	-61.389	19.32334	26.413	0.054688	0.010254	-0.068848	1.241	36.2106	26.8248	-0.063574	-0.17246	-0.019336
1.256	-9.619	164.127	420.936	-0.51093	0.29336	0.030274	-16.441	-7.798	1875.26	-1.9961	1.3926	0.13232	45.198	39.805	1204.43	-1.5464	1.0356	0.39258	31.456	241.17	639.72	-0.59229	0.31104	0.088379	-66.778	38.56014	7.0824	0.15967	-0.00097656	0.042969	-18.709	10.7	17.5612	0.054688	0.036621	-0.056641	4.102	75.911	32.4474	-0.049219	-0.18721	-0.028321
1.258	-2.31699999999999	216.598	394.47	-0.48174	0.27217	0.019336	-18.273	30.857	1861.01	-1.9844	1.3711	0.14453	-4.457	21.117	1135.39	-1.5794	1.0847	0.42749	19.549	240.48	588.15	-0.52539	0.27393	0.056152	-12.77	28.711	22.5215	0.18311	0.01123	0.032715	-64.108	2.3004	18.2432	0.049805	0.044189	-0.057861	-44.702	49.002	19.2439	-0.0375	-0.19423	-0.036133
1.26	-27.784	190.887	382.858	-0.44922	0.25146	0.01416	10.994	5.1	1875.88	-1.9629	1.3359	0.15918	-9.137	-47.6685	1104.67	-1.5625	1.123	0.46094	17.223	206.809	565.92	-0.48291	0.24268	0.056641	-31.876	28.536	3.027	0.19141	0.01416	0.033691	-38.333	6.4594	52.072	0.051758	0.060547	-0.056152	-44.33	52.51	26.53	-0.031836	-0.20518	-0.036914
1.262	-50.476	166.808	367.12	-0.41406	0.23213	0.0075195	54.0002	25.95	1862.4	-1.938	1.3188	0.16211	25.821	-41.498	1076.6	-1.4941	1.168	0.48242	12.056	224.726	508.06	-0.41943	0.18848	0.040039	-4.704	20.9198	19.8557	0.20703	0.026855	0.016602	-45.092	34.9	23.217	0.057129	0.067871	-0.061035	-56.116	38.843	-4.289	-0.02832	-0.21143	-0.039063
1.264	-55.518	195.087	299.536	-0.37422	0.20752	-0.0047852	16.967	58.327	1850.24	-1.9155	1.3032	0.17041	8.614	-92.293	1052.1	-1.4409	1.1802	0.48096	-33.274	188.567	454.85	-0.37207	0.16577	0.02124	12.929	31.779	-1.8189	0.21826	0.039063	0.014404	-60.471	35.9853	23.3892	0.064941	0.071777	-0.069824	-67.824	-23.3781	14.7686	-0.027344	-0.21729	-0.038477
1.266	-71.842	129.577	276.384	-0.3418	0.18525	-0.0083008	60.7332	20.687	1889.66	-1.8784	1.2896	0.17578	52.583	-95.592	1079.37	-1.2979	1.1855	0.44189	-27.156	188.542	442.07	-0.3208	0.14893	0.0053711	-9.977	30.6885	-0.4708	0.23096	0.047363	0.010742	-9.32	29.5811	37.4114	0.084473	0.071777	-0.07666	-39.559	-2.823	21.62	-0.026269	-0.22031	-0.040137
1.268	-69.981	111.31	241.511	-0.30654	0.16104	-0.018067	66.244	74.4722	1864.45	-1.8589	1.2856	0.18164	71.22283	-56.392	1028.67	-1.1216	1.1684	0.40796	-40.235	210.653	396.11	-0.26025	0.13135	-0.021973	10.638	22.6335	33.592	0.23975	0.05957	0.0087891	-45.686	45.294	-0.535	0.090088	0.073975	-0.083984	-87.95	-11.812	4.604	-0.02002	-0.22383	-0.039746
1.27	-89.248	101.008	218.635	-0.27393	0.1333	-0.024902	46.057	64.439	1813.81	-1.8203	1.2734	0.18604	3.31	-80.854	1029.46	-0.92236	1.1255	0.37695	-42.82	159.881	360.06	-0.23242	0.12012	-0.039063	-3.045	44.44	17.4057	0.24023	0.070801	-1.3878e-14	-35.217	11.6273	9.2879	0.10303	0.072754	-0.091797	-80.18	-3.113	13.365	-0.020215	-0.21846	-0.042578
1.272	-74.998	60.579	200.4	-0.24385	0.10743	-0.033398	46.3485	1.269	1799.18	-1.7889	1.2659	0.18506	-13.047	-62.288	1102.55	-0.69434	1.041	0.35107	1.88	151.748	323.17	-0.17969	0.099121	-0.050293	-2.416	47.28052	1.1862	0.23389	0.081543	-0.00048828	-4.104	14.6307	7.26422	0.11084	0.075195	-0.096191	-63.955	55.391	-0.0839999999999996	-0.01709	-0.21289	-0.041992
1.274	-72.866	110.882	186.846	-0.21807	0.083301	-0.038184	0.507999999999999	32.667	1771.39	-1.7593	1.2603	0.18262	-51.089	-42.1627	1124.94	-0.62354	1.0098	0.34229	-53.618	131.958	279.85	-0.13672	0.066406	-0.052246	57.128	48.153	10.9808	0.22412	0.096923	-0.003418	-40.109	8.685	-2.41872	0.11426	0.075195	-0.098145	-76.745	42.788	-1.14561	-0.011426	-0.21074	-0.04209
1.276	-61.348	98.846	195.106	-0.19385	0.05791	-0.042481	13.671	7.48	1724.61	-1.7065	1.2505	0.18408	-82.1726	-60.2887	1174.72	-0.55908	0.98486	0.33203	-60.414	95.52	267.52	-0.11914	0.053223	-0.060059	-29.275	56.246	-4.7993	0.20898	0.10938	0.003418	-8.51300000000001	2.388	38.364	0.10498	0.076172	-0.10254	-66.28	45.907	23.9357	-0.0039062	-0.20508	-0.040039
1.278	-50.961	91.571	193.427	-0.17461	0.0375	-0.042383	24.115	43.662	1695.96	-1.6792	1.2437	0.17773	-83.703	-61.6976	1170.33	-0.56031	1.0002	0.34522	-20.173	112.566	248.645	-0.088379	0.025391	-0.068359	-14.417	39.4774	22.9643	0.18945	0.12744	0.0083008	-20.971	29.352	27.5159	0.09961	0.081543	-0.10352	-39.804	37.092	-3.6187	0.0019531	-0.19336	-0.04668
1.28	-46.493	118.655	139.822	-0.15967	0.01709	-0.043945	-29.832	115.763	1667.74	-1.627	1.2363	0.16309	-95.2299	-146.239	1145.34	-0.59375	1.0293	0.35889	-53.837	89.937	210.24	-0.068603	0.013672	-0.075928	0.027000000000001	44.755	24.058	0.17822	0.13867	0.010742	-53.318	37.4504	17.9553	0.086914	0.087891	-0.098633	-50.918	-11.6862	19.0453	0.0098634	-0.19199	-0.040625
1.282	-3.961	78.848	123.806	-0.14746	9.764e-05	-0.044238	-12.248	103.598	1695.26	-1.5808	1.2298	0.15113	-77.147	-221.77	1177.68	-0.69482	1.1138	0.38867	-41.576	93.687	201.57	-0.047363	-0.0029297	-0.080078	-70.05	33.4266	8.3231	0.15625	0.16748	0.019043	-3.338	40.565	30.313	0.074219	0.10059	-0.10059	-42.739	27.8452	24.924	0.01709	-0.18164	-0.050293
1.284	-4.55699999999999	99.326	108.755	-0.14287	-0.020019	-0.04375	-22.153	172.275	1683.08	-1.5371	1.2227	0.13916	-57.5235	-229.65	1200.17	-0.74951	1.1646	0.40527	-20.047	130.575	172.684	-0.026855	-0.012695	-0.086914	-30.496	6.9209	36.939	0.14111	0.18311	0.026855	-55.669	36.3766	31.7981	0.066406	0.10986	-0.09668	-37.329	17.299	3.902	0.027344	-0.16983	-0.050976
1.286	-17.042	103.153	88.911	-0.1378	-0.034473	-0.040235	-50.8179	176.361	1642.25	-1.4785	1.2129	0.12207	-68.522	-285.51	1241.6	-0.8501	1.2749	0.42773	-68.924	109.93	158.924	-0.012207	-0.021484	-0.091797	-53.731	17.2174	25.7214	0.12305	0.2041	0.03418	-34.712	-20.908	58.6058	0.042969	0.11963	-0.098633	-28.625	26.624	20.4134	0.042285	-0.16054	-0.054101
1.288	11.397	73.597	96.024	-0.13965	-0.047754	-0.035351	-35.078	131.089	1648.37	-1.4487	1.2056	0.11377	-73.3837	-298.58	1333.24	-0.91382	1.3518	0.43091	-24.921	133.291	141.8	0.0029297	-0.030273	-0.096191	-90.4041	24.275	14.92036	0.1084	0.22949	0.041016	-19.732	-40.701	69.854	0.019043	0.12842	-0.10327	-27.814	85.096	-0.3288	0.055566	-0.15039	-0.05918
1.29	0.677999999999997	115.132	73.187	-0.13916	-0.063477	-0.037598	-85.6655	151.456	1627.62	-1.3984	1.1895	0.09375	-118.622	-290.04	1351.35	-0.97314	1.4224	0.42969	-27.229	115.311	125.712	0.011231	-0.03711	-0.10254	-42.024	47.346263	18.1734	0.09668	0.24365	0.043945	-81.932	-59.273	75.7489	-0.0078125	0.14307	-0.098145	-23.195	57.629	-11.0753	0.061328	-0.14101	-0.066015
1.292	10.964	94.401	71.036	-0.13985	-0.070898	-0.033887	-80.104	79.9124	1578.9	-1.3611	1.176	0.087646	-123.8626	-323.83	1418.88	-1.0581	1.5024	0.41211	-52.479	87.867	124.485	0.013184	-0.034668	-0.10059	-65.967	50.2189	0.579000000000001	0.081543	0.26025	0.046875	-19.242	-74.897	137.27	-0.067383	0.1626	-0.086426	17	63.915	17.4695	0.069824	-0.12646	-0.071289
1.294	22.976	80.957	70.177	-0.13916	-0.082226	-0.030761	-76.7946	70.868	1539.04	-1.3223	1.1621	0.07959	-86.2618	-251.543	1485.23	-1.105	1.5376	0.41309	-7.23	101.955	106.255	0.0087891	-0.043945	-0.099609	-90.5697	35.422	22.3983	0.068115	0.27441	0.04834	-16.369	-80.811	183.566	-0.10352	0.17334	-0.07666	-2.278	49.395	0.448300000000001	0.073242	-0.11592	-0.072754
1.296	-11.062	91.796	38.593	-0.13603	-0.092774	-0.031153	-122.706	111.458	1507.03	-1.2861	1.1426	0.074219	-56.0947	-226.273	1529.77	-1.1934	1.5898	0.4165	-27.749	77.012	66.2804	0.0048828	-0.04248	-0.097168	-49.102	35.39508	48.184	0.05957	0.2793	0.048828	-37.169	-95.104	252.695	-0.18799	0.19482	-0.061523	-9.188	-1.4377	14.0385	0.077051	-0.10361	-0.076953
1.298	-8.047	39.3196	26.3359	-0.13447	-0.10683	-0.029981	-84.8737	77.9757	1522.35	-1.269	1.1353	0.070313	-34.411	-213.819	1627.27	-1.2673	1.6115	0.42358	-14.547	62.169	57.441	-0.00097656	-0.047363	-0.09668	-106.5701	27.303	58.666	0.039551	0.28271	0.046875	0.914000000000001	-94.929	337.14	-0.2566	0.21753	-0.047363	20.967	13.4839	32.4058	0.081347	-0.093458	-0.084765
1.3	1.528	37.98	13.2721	-0.12988	-0.11768	-0.029297	-82.1925	136.012	1496.69	-1.2324	1.1191	0.06543	-22.58	-162.313	1648.8	-1.3379	1.6299	0.43604	4.03	70.98	29.52395	-0.0036621	-0.050049	-0.092774	-60.563	7.044	84.884	0.025391	0.28125	0.043457	-43.164	-48.893	403.25	-0.32324	0.24316	-0.039063	-11.24	3.354	4.564	0.089844	-0.080176	-0.089062
1.302	-13.047	23.976	18.5946	-0.13125	-0.12998	-0.029687	-95.473	165.373	1438.82	-1.2124	1.1059	0.066651	-58.4834	-182.681	1689.83	-1.4233	1.6626	0.44336	-14.274	36.3919	45.037	-0.0097656	-0.057129	-0.083984	-56.582	7.878	88.822	0.00048828	0.29102	0.043457	-69.4996	-35.3898	552.56	-0.41357	0.27881	-0.029297	-2.011	0.291	29.999	0.10352	-0.067383	-0.095215
1.304	2.656	-21.7305	38.022	-0.13076	-0.13594	-0.030274	-56.608	157.854	1423.8	-1.1934	1.0938	0.0625	-49.286	-142.296	1746.86	-1.4629	1.6758	0.4458	-14.544	50.709	53.4344	-0.019043	-0.060059	-0.078613	-88.797	-14.808	122.395	-0.027832	0.30469	0.048584	-77.051	20.2346	714.49	-0.46631	0.30127	-0.016113	1.532	53.312	9.6365	0.12002	-0.051856	-0.1042
1.306	-15.676	2.761	37.74173	-0.12803	-0.14414	-0.02793	-69.3238	222.15	1404.34	-1.1699	1.0684	0.068359	-53.38	-103.8012	1742.57	-1.5327	1.7134	0.4502	-28.309	45.568	31.475	-0.025879	-0.064453	-0.07666	-55.67	-12.832	180.508	-0.060059	0.31934	0.051758	-135.037	75.0098	875.76	-0.58594	0.35059	-0.010742	-22.848	48.383	6.5207	0.12861	-0.033789	-0.1084
1.308	-30.577	-3.002	41.486	-0.12675	-0.15401	-0.029199	-62.094	189.254	1365.11	-1.1558	1.0562	0.064453	-31.991	-136.486	1774.94	-1.5811	1.7549	0.46631	-26.706	8.449	57.474	-0.031738	-0.067871	-0.07373	-58.867	0.390000000000001	199.441	-0.11768	0.34131	0.066406	-96.828	83.2885	1059.66	-0.70776	0.39014	0.0073243	-10.842	76.913	23.3908	0.13565	-0.021289	-0.11543
1.31	-27.494	12.6137	41.769	-0.12451	-0.15576	-0.027832	-21.69	197.263	1324.43	-1.1265	1.0239	0.065918	-8.341	-117.0326	1823.53	-1.6328	1.792	0.4751	-33.909	31.0112	32.8928	-0.03418	-0.075928	-0.070557	-39.332	-7.003	271.83	-0.146	0.35352	0.068848	-109.201	97.65687	1211.05	-0.85938	0.44336	0.033203	-15.699	70.235	15.3498	0.14229	-0.0083986	-0.12198
1.312	-58.652	66.499	20.80298	-0.12461	-0.1628	-0.026269	-32.558	238.145	1256.12	-1.1033	1.0105	0.066651	-44.97	-136.156	1837.79	-1.707	1.8379	0.49023	-30.43	20.585	19.2445	-0.035156	-0.082031	-0.066895	-33.474	12.9692	355.85	-0.229	0.38379	0.081543	-168.702	79.636	1341.7	-1.1211	0.53125	0.11816	-59.96	14.5136	15.812	0.13721	0.0019531	-0.11914
1.314	-64.12	17.7055	20.4805	-0.12744	-0.16719	-0.020606	-16.864	202.491	1267.63	-1.0806	0.98389	0.071289	-30.811	-161.904	1902.47	-1.7437	1.8579	0.49512	-18.314	24.247	35.597	-0.036133	-0.087891	-0.068359	-42.172	43.7798	480.183	-0.30078	0.41748	0.088623	-109.072	70.96263	1420.71	-1.2827	0.58447	0.17432	-44.557	25.9608	28.4904	0.13721	0.019434	-0.11807
1.316	-68.766	23.2529	11.1817	-0.13173	-0.16523	-0.015918	-35.078	267.68	1245.35	-1.0527	0.95117	0.067871	6.213	-107.01	1927.18	-1.8022	1.8755	0.50879	-38.22	35.414	21.9778	-0.035156	-0.083496	-0.067871	37.735	86.7748	665.76	-0.3833	0.46143	0.097168	-107.097	101.175	1371.29	-1.6445	0.71094	0.2915	-51.845	20.6401	1.682	0.13272	0.028125	-0.1126
1.318	-88.8553	10.454	-13.216	-0.13945	-0.16748	-0.0086911	-23.479	275.28	1187.11	-1.0391	0.93555	0.067383	-10.386	-112.866	1941.46	-1.8421	1.8802	0.52271	-88.831	11.3467	23.4729	-0.04248	-0.089844	-0.0625	40.505	154.002	814.13	-0.53613	0.5293	0.1123	-99.0346	65.477	1312.23	-1.916	0.84131	0.39038	-70.407	16.297	32.785	0.11748	0.043359	-0.10596
1.32	-72.369	-17.10098	-11.5496	-0.14648	-0.16895	-0.0019531	14.194	232.852	1165.3	-1.0078	0.9043	0.06543	-10.343	-104.81	2003.6	-1.8745	1.8774	0.53809	-33.751	33.2815	40.1923	-0.046386	-0.093018	-0.0625	20.335	156.314	977.36	-0.67432	0.6001	0.13013	-67.388	13.6743	1228.67	-2.1348	0.98047	0.50439	-64.067	47.0454	50.641	0.1083	0.056054	-0.098536
1.322	-100.7839	37.7758	-18.7393	-0.1582	-0.16318	0.0046875	-45.695	255.917	1129.91	-0.98071	0.87916	0.066895	-15.835	-69.5309	1983.71	-1.8984	1.8691	0.55615	-54.457	42.9119	-10.096	-0.050293	-0.094238	-0.058105	98.238	107.221	1117.05	-0.84619	0.68262	0.15283	-139.71	-55.186	1167.6	-2.3491	1.147	0.60938	-81.502	-5.436	65.8414	0.099121	0.070313	-0.093262
1.324	-101.3606	36.298	0.6627	-0.15742	-0.16611	0.011523	-65.192	193.06	1116.91	-0.95068	0.85596	0.066895	-59.8599	-96.0583	2024.9	-1.8999	1.8618	0.56445	-66.658	21.466	6.1807	-0.055664	-0.099121	-0.058105	63.663	70.193	1212.96	-1.1387	0.80859	0.20068	-113.645	-111.966	1171.12	-2.4121	1.209	0.62354	-70.532	-8.453	110.33	0.084961	0.083886	-0.091992
1.326	-51.507	50.954	13.5593	-0.15625	-0.16533	0.017773	-38.55	199.999	1077.77	-0.92188	0.82422	0.069336	-36.991	-72.582	2064.3	-1.9097	1.8403	0.58594	-27.099	36.2609	-5.354	-0.05957	-0.10107	-0.055176	78.773	38.835	1313.29	-1.3096	0.88867	0.23584	-85.115	-94.132	1138.41	-2.3628	1.2485	0.57031	-80.811	-12.626	112.952	0.078906	0.10244	-0.0917
1.328	-62.549	80.685	-14.9928	-0.15381	-0.16172	0.021777	-71.3972	232.017	1019.15	-0.90625	0.81055	0.068359	-60.2153	-78.196	2039.75	-1.9246	1.8089	0.60083	-72.047	5.273	-34.3391	-0.059082	-0.104	-0.05127	120.855	31.8807	1334.52	-1.6714	1.0493	0.32373	-91.023	-97.388	1104.36	-2.1648	1.2043	0.47583	-65.31	-65.557	170.441	0.067188	0.11651	-0.090528
1.33	-49.458	27.8455	10.4576	-0.1416	-0.15674	0.022949	-58.249	188.763	1032.18	-0.88428	0.77783	0.072754	-65.199	-104.786	2028.02	-1.9351	1.7739	0.61914	-51.196	8.902	2.9211	-0.05542	-0.10693	-0.05249	35.642	12.6104	1308.41	-1.9441	1.176	0.41602	-97.036	-128.073	1119.53	-1.8784	1.1157	0.35156	-23.476	-60.472	230.5	0.057617	0.14033	-0.094823
1.332	-31.508	38.297	12.9073	-0.1375	-0.15635	0.02793	-84.4861	243.553	1002.76	-0.86645	0.75318	0.081299	-58.37	-40.902	1967.55	-1.9492	1.7266	0.63818	-39.592	37.4639	1.876	-0.048828	-0.1123	-0.056152	87.264	-53.2768	1311.64	-2.2012	1.2949	0.46484	-135.2168	-100.522	1103.56	-1.4512	1.0293	0.19189	-43.489	-66.518	272.2944	0.047363	0.16309	-0.10156
1.334	-38.572	29.1107	10.6936	-0.12695	-0.15615	0.026563	-71.047	250.7	966.88	-0.85303	0.73291	0.087402	-92.14	-52.099	1940.1	-1.9565	1.6978	0.6499	-62.861	22.8173	17.19195	-0.03125	-0.11426	-0.060547	114.123	-76.413	1276.22	-2.3848	1.3984	0.49658	-107.2206	-103.728	1156.09	-1.2617	1.002	0.12207	-11.913	-61.2166	371.3225	0.030567	0.19209	-0.10674
1.336	-37.305	-2.771	18.2301	-0.11679	-0.15576	0.03164	-51.495	247.303	935.1	-0.82617	0.70117	0.086914	-78.11	-38.141	1993.81	-1.9668	1.6367	0.67041	-44.542	35.2395	40.996	-0.019043	-0.11377	-0.05957	82.978	-86.974	1267.57	-2.3804	1.4233	0.50977	-24.883	-59.091	1208.85	-0.98633	0.96875	-0.0058594	-30.673	27.735	451.9023	0.0055664	0.2208	-0.10723
1.338	-32.115	33.8771	-0.725999999999999	-0.10176	-0.15459	0.025391	-111.551	300.62	879.88	-0.80859	0.68896	0.089844	-86.6912	6.364	1964.31	-1.9724	1.5969	0.68213	-54.925	37.09	10.523	-0.0058594	-0.12402	-0.068359	109.796	-90.532	1279.5	-2.2261	1.4399	0.57227	-33.201	-47.0663	1228.48	-0.87475	0.9646	-0.09619	-61.182	55.9512	591.0635	-0.03623	0.24932	-0.10411
1.34	-16.511	15.997	-2.1769	-0.095703	-0.15283	0.027832	-111.09995	236.415	856.85	-0.771	0.65674	0.096191	-81.7819	-39.744	1985.38	-1.9761	1.5591	0.69336	-57.425	32.1636	16.0991	0.0075682	-0.12793	-0.068848	64.685	-94.619	1217.91	-2.0562	1.4312	0.57666	13.471	-110.872	1266.71	-0.78711	0.98633	-0.17041	-53.6808	129.033	792.7117	-0.094826	0.27812	-0.093554
1.342	-1.89999999999999	14.1298	27.2513	-0.083008	-0.15254	0.029492	-106.8892	230.527	815.81	-0.7395	0.64038	0.099611	-62.6743	-3.715	2012.12	-1.9722	1.5103	0.70117	-15.713	53.223	3.387	0.018066	-0.1377	-0.074707	35.707	-126.402	1202.78	-1.8281	1.3867	0.51318	47.802	-142.442	1259.21	-0.6582	1.043	-0.2334	-52.335	173.925	942.9645	-0.16455	0.30615	-0.078613
1.344	4.784	56.794	11.9147	-0.066504	-0.14961	0.02793	-134.95	254.71	734.71	-0.70898	0.62109	0.10107	-91.0716	17.44	1978.19	-1.9688	1.4863	0.70557	-28.621	28.4098	-15.73947	0.030762	-0.14258	-0.081055	9.846	-110.695	1214.25	-1.3916	1.2305	0.41357	41.242	-200.654	1280.87	-0.59717	1.0571	-0.24951	-72.283	133.76	1100.4086	-0.24033	0.32783	-0.064844
1.346	4.981	28.696	24.58313	-0.052051	-0.1461	0.027148	-110.5449	192.862	701.69	-0.6582	0.58789	0.10449	-85.773	7.61899999999999	1991.64	-1.9526	1.4497	0.70801	-24.871	13.516	2.9749	0.034668	-0.14502	-0.08252	-15.924	-72.0569	1244.93	-1.1777	1.1299	0.3833	87.053	-268.71	1350.23	-0.54883	1.0586	-0.28223	-31.614	125.984	1207.326	-0.31367	0.36006	-0.053711
1.348	-0.524000000000001	59.172	14.9165	-0.037988	-0.14512	0.022266	-125.557	231.389	673.92	-0.63086	0.57422	0.10547	-75.316	66.232	1961.66	-1.9341	1.4292	0.70288	-6.239	20.6509	-2.724	0.045898	-0.15283	-0.085449	-5.107	-63.462	1303.91	-0.87451	0.90869	0.33984	17.815	-287.08	1367.82	-0.60303	1.0645	-0.26904	-63.757	69.776	1275.324	-0.39453	0.39951	-0.04082
1.35	27.523	45.7184	12.9017	-0.014648	-0.14551	0.021484	-132.287	230.57	636.99	-0.58301	0.5415	0.099609	-108.8164	29.145	1930.44	-1.9043	1.4121	0.69873	-23.738	13.093	7.455	0.049561	-0.15698	-0.083984	-48.885	-34.4724	1286.24	-0.75854	0.7981	0.31079	-38.447	-357.65	1398.74	-0.72021	1.1021	-0.23584	-58.776	24.554	1348.837	-0.4835	0.45127	-0.033203
1.352	14.111	12.8143	16.5316	0.002539	-0.14766	0.016504	-94.533	202.449	591.21	-0.54004	0.51416	0.10254	-83.272	4.636	1962.81	-1.8589	1.3833	0.68457	11.62	49.3827	33.681	0.044922	-0.1582	-0.081543	-39.657	-57.076	1264.01	-0.68066	0.75098	0.29541	7.045	-363.51	1432.01	-0.92725	1.187	-0.18799	13.144	52.255	1337.051	-0.59375	0.50586	-0.022949
1.354	2.78	55.5784	5.114	0.021485	-0.14795	0.0086914	-102.554	244.744	540.65	-0.50049	0.48877	0.10352	-80.8604	21.266	1927.32	-1.8374	1.3716	0.67188	-15.789	69.885	7.2966	0.042969	-0.15674	-0.08252	22.791	-99.341	1279.95	-0.58398	0.77344	0.27588	-19.053	-344.45	1464.17	-1.0269	1.2329	-0.17236	-33.308	14.268	1284.514	-0.7333	0.56983	-0.00087872
1.356	9.675	49.284	-6.38	0.044922	-0.15303	0.0024414	-82.6516	182.924	520.94	-0.44434	0.44922	0.10205	-79.056	-23.569	1930.56	-1.7959	1.3418	0.65869	-10.802	48.928	38.98	0.043945	-0.15527	-0.082031	14.011	-129.86	1304.42	-0.54199	0.79004	0.26611	11.322	-319.17	1561.37	-1.1772	1.3071	-0.10889	-60.891	-21.044	1265.98	-0.91718	0.64121	0.043457
1.358	-17.09	64.104	17.8014	0.064648	-0.15215	-9.768e-05	-63.813	178.642	517.05	-0.41992	0.43457	0.10889	-38.242	26.03	1927.5	-1.7661	1.3247	0.64209	4.663	66.035	23.9506	0.033691	-0.15332	-0.081055	11.878	-229.497	1366.65	-0.52393	0.80859	0.26563	25.191	-237.499	1631.7	-1.2773	1.353	-0.070801	-73.06	-50.189	1228.262	-1.1468	0.70371	0.10518
1.36	-55.29	94.065	8.104	0.083008	-0.15039	-0.0068359	-76.239	187.653	477.73	-0.37305	0.40234	0.1001	-44.975	42.859	1858.32	-1.7358	1.3032	0.62646	-51.201	42.982	-14.985	0.026368	-0.15137	-0.073974	-7.57599999999999	-304.64	1387.23	-0.61352	0.85474	0.29541	-4.64	-179.654	1692.54	-1.3848	1.3945	-0.039063	-95.266	-118.826	1233.354	-1.4272	0.77363	0.18106
1.362	-55.759	38.7005	26.185	0.099511	-0.14941	-0.0075195	-33.218	134.536	438.93	-0.33862	0.375	0.09961	-68.415	20.002	1850.52	-1.6929	1.2856	0.61279	-16.338	24.2494	12.8376	0.015625	-0.14404	-0.072266	-99.972	-341.36	1391.56	-0.77148	0.94922	0.34375	29.578	-141.428	1761.25	-1.5532	1.4575	-0.0019531	-61.3731	-102.573	1237.8	-1.7188	0.84961	0.27246
1.364	-44.5	48.908	21.8793	0.11289	-0.14385	-0.015918	-33.478	162.524	397.51	-0.30127	0.34814	0.093262	-54.463	86.345	1826.74	-1.6714	1.2778	0.59668	-27.441	30.6143	-9.997	0.0048828	-0.13086	-0.066406	-66.471	-360.56	1458.89	-1.0483	1.1499	0.4043	34.983	-66.108	1763.77	-1.6309	1.4844	0.013184	-93.0161	-130.503	1209.436	-1.9938	0.9334	0.35967
1.366	-70.43	26.0674	4.86	0.11836	-0.14072	-0.019824	-45.539	131.92	372.12	-0.25781	0.31299	0.088379	-78.978	77.447	1825.05	-1.627	1.2578	0.58447	-67.788	20.2521	1.2467	-0.00048828	-0.12354	-0.064941	-58.365	-307.2	1514.26	-1.1831	1.2563	0.43945	28.38	-61.247	1786.8	-1.769	1.5376	0.047363	-109.858	-157.131	1240.568	-2.2144	1.0216	0.42656
1.368	-47.934	-4.4142	37.2755	0.12676	-0.13301	-0.021973	-9.065	91.294	343.465	-0.23389	0.29688	0.089355	-47.864	87.658	1844.95	-1.5916	1.24	0.5647	-5.59999999999999	41.491	22.9514	-0.0019531	-0.10693	-0.058105	-94.804	-271.17	1569.63	-1.3867	1.4277	0.49756	58.224	-59.551	1785.91	-1.8504	1.5676	0.066651	-136.288	-113.573	1247.182	-2.3221	1.1028	0.44102
1.37	-80.421	35.56453	32.8466	0.13232	-0.12598	-0.022461	-19.33	137.666	289.383	-0.19238	0.26172	0.083984	-31.395	138.833	1807.26	-1.5581	1.2231	0.54785	-47.673	57.446	0.196999999999999	-0.0014648	-0.090088	-0.063721	-21.918	-252.66	1648.17	-1.4844	1.5254	0.53369	-12.191	-51.001	1771.72	-1.916	1.5996	0.080078	-120.568	-84.802	1252.0232	-2.296	1.1532	0.40508
1.372	-85.7344	10.059	25.5251	0.13477	-0.11748	-0.028809	-10.745	87.315	265.872	-0.16284	0.24072	0.083007	-74.999	100.4431	1773.21	-1.5112	1.1997	0.52441	-64.718	41.1285	41.069	0.00048828	-0.086914	-0.057617	-50.313	-205.148	1659.16	-1.5605	1.5938	0.54639	-47.8006	-117.2673	1832.09	-1.9819	1.6353	0.085938	-77.853	-46.77	1316.0648	-2.1558	1.1743	0.33789
1.374	-59.568	22.712	26.7577	0.13681	-0.10527	-0.036035	-11.103	85.5281	240.913	-0.13184	0.21631	0.080566	-59.699	141.158	1771.67	-1.4937	1.1909	0.51563	-18.283	51.848	45.468	-0.0014648	-0.062988	-0.056152	-35.358	-190.886	1714.72	-1.6284	1.645	0.53906	-74.498446	-117.165	1866.35	-2.0112	1.6548	0.089844	-61.768	-20.16	1351.3992	-1.9593	1.1724	0.25166
1.376	-76.561	47.273	10.917	0.14345	-0.092383	-0.039942	-42.788	104.512	220.351	-0.086426	0.19385	0.072754	-52.278	154.103	1710.8	-1.4609	1.1699	0.49365	-58.974	38.0905	14.69532	-0.00048828	-0.057617	-0.060059	22.589	-139.305	1743.68	-1.646	1.6606	0.53711	-100.5246	-122.4485	1902.33	-2.0508	1.6943	0.088379	-53.438	-90.46	1404.0618	-1.7796	1.1771	0.1584
1.378	-74.369	4.372	24.565	0.146	-0.08418	-0.04414	-4.519	59.7564	221.099	-0.053711	0.17578	0.071533	-53.681	109.3713	1698.46	-1.4379	1.1494	0.48242	-53.046	23.8425	27.0671	0.0063477	-0.041992	-0.05957	16.576	-81.124	1739.21	-1.6597	1.6763	0.51855	-75.4988	-132.2156	1965.84	-2.0679	1.7144	0.081543	8.505	-144.976	1455.354	-1.614	1.1771	0.073242
1.38	-52.177	40.202	37.53319	0.14746	-0.071777	-0.050781	0.975999999999999	116.839	191.102	-0.025391	0.1582	0.065918	-46.759	153.111	1675.04	-1.4194	1.1313	0.47607	-41.747	23.2167	6.322	0.0095214	-0.029297	-0.059326	49.529	-88.519	1772.63	-1.6533	1.6738	0.50244	-108.515	-79.949	1965.34	-2.0854	1.7212	0.07373	-3.553	-195.988	1436.593	-1.4477	1.1745	-0.0001956
1.382	-67.594	48.9825	17.7141	0.14892	-0.067774	-0.048828	-15.14	113.97	178.628	0.017578	0.13965	0.071289	-78.86	134.585	1631.15	-1.3867	1.1055	0.45361	-71.111	6.204	15.4251	0.011719	-0.020508	-0.064453	21.934	-64.1588	1774.6	-1.6445	1.666	0.49072	-140.301	-82.963	1976.2	-2.082	1.7227	0.062012	-25.371	-268.8341	1509.401	-1.2969	1.1426	-0.063477
1.384	-60.874	6.8357	23.0906	0.14883	-0.060547	-0.05625	-10.236	72.715	175.774	0.033203	0.12549	0.060059	-60.125	157.905	1634.17	-1.373	1.0908	0.44189	-48.296	18.8072	27.416	0.020996	-0.0078125	-0.066895	-23.842	-68.372	1813.78	-1.6421	1.6626	0.47363	-88.40237	-67.061	1998.75	-2.0742	1.7148	0.054688	-27.143	-261.1	1563.91	-1.1822	1.0978	-0.11455
1.386	-30.141	35.829	22.344	0.15274	-0.052735	-0.062109	-41.727	110.783	148.394	0.0625	0.10156	0.052734	-51.859	219.272	1589.5	-1.3374	1.0591	0.41992	-58.346	41.535	13.9311	0.026367	0.00048828	-0.070801	21.707	-84.135	1871.98	-1.6455	1.6621	0.47021	-98.6436	-37.065	1987.06	-2.0566	1.6934	0.041992	-99.892	-276.417	1580.6787	-1.103	1.0653	-0.15049
1.388	-26.613	6.97113	19.5372	0.15615	-0.046191	-0.067871	-42.272	60.572	119.016	0.085693	0.078858	0.050781	-73.52	184.607	1569.38	-1.3054	1.0354	0.40551	-66.557	40.6061	31.241	0.028809	0.013672	-0.077148	17.872	-62.84524	1883.62	-1.6616	1.6685	0.46387	-61.812	-74.764	2036.07	-2.0427	1.6751	0.030274	-79.473	-298.934	1652.9864	-1.0449	1.0626	-0.17275
1.39	-39.437	23.06	13.01496	0.16016	-0.041504	-0.067871	-49.302	57.825	103.43681	0.1084	0.058105	0.04834	-31.122	222.399	1572.02	-1.2729	1.0122	0.39063	-49.095	57.697	30.6544	0.035157	0.02002	-0.078125	20.878	-105.341	1917.28	-1.6763	1.6831	0.46729	-42.304	-45.94	2027.48	-2.0229	1.645	0.021484	-40.224	-253.578	1696.7283	-1.0062	1.0795	-0.1917
1.392	-8.116	71.414	-1.529	0.16778	-0.037403	-0.075684	-89.7161	73.413	79.82431	0.12842	0.027344	0.041992	-31.232	228.49	1512.94	-1.2344	0.9707	0.37402	-53.183	44.511	11.0692	0.041016	0.027832	-0.080078	51.778	-123.4904	1937.45	-1.6934	1.6973	0.47705	-92.9062	-27.712	1971.56	-1.998	1.5996	0.011719	-48.631	-235.292	1768.1899	-0.98779	1.104	-0.19971
1.394	-12.45	36.26	13.0002	0.17227	-0.033496	-0.081054	-60.502	12.905	79.0816	0.13721	0.014648	0.046387	-45.127	217.845	1486.46	-1.2188	0.95508	0.36572	-19.107	20.1972	28.07	0.04541	0.040527	-0.090332	23.244	-122.0369	1939.21	-1.7266	1.7285	0.49268	-70.1943	-15.398	1956.39	-1.9844	1.5781	0.0053711	34.843	-178.008	1861.563	-1.0047	1.1305	-0.19209
1.396	8.605	41.021	19.6103	0.17539	-0.022949	-0.085352	-71.835	60.219	61.568	0.15283	-0.0043945	0.04248	2.394	274.89	1456.53	-1.1777	0.91699	0.34668	-12.112	22.4052	-0.190999999999999	0.047363	0.047363	-0.087402	49.135	-169.758	2015.36	-1.7378	1.7466	0.5	-73.1716	60.88	1900.21	-1.9668	1.5391	0.0019531	30.117	-104.045	1854.794	-1.0665	1.1688	-0.17002
1.398	15.494	15.4786	9.8722	0.17647	-0.02041	-0.093359	-76.9073	64.096	48.223	0.15991	-0.017822	0.036866	-30.806	259.68	1393.59	-1.1392	0.87939	0.32617	-12.391	-10.27	16.4524	0.058594	0.047852	-0.091797	60.299	-137.16	2033.34	-1.7598	1.7656	0.52393	-92.0938	56.274	1904	-1.9629	1.5039	0.0068359	38.98	-97.474	1893.388	-1.1744	1.2282	-0.14658
1.4	15.032	-32.4536	15.9098	0.17236	-0.014648	-0.099609	-52.837	43.659	63.566	0.16699	-0.027344	0.033203	-16.084	241.26	1382.25	-1.123	0.86328	0.31152	10.47	7.702	31.1028	0.065674	0.059326	-0.095947	4.855	-115.93	2024.51	-1.769	1.7622	0.5376	-40.729	43.99	1910.73	-1.9629	1.4902	0.0083008	95.944	-49.024	1904.042	-1.2879	1.2959	-0.12597
1.402	-5.50700000000001	10.691	14.581	0.16572	-0.012988	-0.10449	-82.1194	83.447	51.184	0.17285	-0.035645	0.030762	-1.979	276.59	1321.76	-1.084	0.82227	0.29541	-33.147	29.43176	-6.7381	0.07666	0.070313	-0.10205	12.431	-94.4101	2036.91	-1.769	1.7466	0.55469	-75.004	39.34	1867.6	-1.9512	1.4648	0.013672	77.98	-32.461	1885.371	-1.3921	1.3462	-0.097168
1.404	26.241	-2.1849	33.528	0.15546	-0.0057618	-0.10625	-55.074	23.6868	33.904	0.17529	-0.039063	0.03418	-33.42	226.617	1288.61	-1.0556	0.80029	0.2793	-31.683	29.8163	25.241	0.088867	0.078613	-0.1084	-33.034	-16.504	1980.57	-1.7715	1.6973	0.57764	-34.079	-5.29999999999998	1905.1	-1.9385	1.4448	0.017334	69.018	-50.401	1944.76	-1.4938	1.3589	-0.062598
1.406	-3.665	-8.95672	77.5829	0.14141	0.0040039	-0.10625	-35.401	29.2259	14.6797	0.16553	-0.049805	0.033203	10.639	262.74	1294.04	-1.0278	0.7749	0.27637	9.561	48.818	23.5134	0.089844	0.084961	-0.10742	-43.841	-19.695	1952.31	-1.7656	1.6719	0.58643	-6.168	41.38	1921.35	-1.9253	1.4302	0.019531	39.413	-22.259	1944.394	-1.6117	1.3621	-0.029395
1.408	-23.33	14.711	47.1763	0.12979	0.01416	-0.10664	-58.729	65.908	7.1901	0.15454	-0.049805	0.030273	9.027	265.28	1239.31	-0.99414	0.73828	0.25244	-46.414	30.9446	0.537299999999999	0.094238	0.099121	-0.1084	7.99400000000001	-7.353	1951.78	-1.7539	1.6035	0.59961	-34.134	64.148	1921.14	-1.9063	1.4004	0.030273	-66.757	-53.675	1924.7551	-1.7364	1.3672	-0.00048816
1.41	-14.123	-29.528	69.0757	0.11328	0.024902	-0.10254	-24.538	23.8944	23.1437	0.14355	-0.053711	0.03125	10.513	246.27	1202.73	-0.97803	0.72314	0.24219	-13.341	9.67651	26.554	0.091553	0.10596	-0.10449	-38.593	2.138	1899.83	-1.7488	1.5589	0.61255	42.272	57.31	1936.09	-1.8921	1.395	0.03125	-58.185	-83.464	1965.327	-1.8541	1.3775	0.022754
1.412	-41.505	-21.356	81.997	0.098244	0.041992	-0.1	-20.505	69.548	13.5583	0.125	-0.057617	0.044922	50.969	288.93	1157.11	-0.94873	0.69189	0.22559	3.85899999999999	25.122	-3.385	0.089844	0.11621	-0.10254	-25.922	-52.811	1928.84	-1.7515	1.5239	0.62305	25.524	86.236	1893.96	-1.8604	1.3789	0.032715	-80.469	-82.127	1944.735	-1.9629	1.3965	0.047363
1.414	-77.115	-44.542	117.999	0.075391	0.050684	-0.09873	-29.117	56.257	5.8382	0.11621	-0.05957	0.043945	-4.60400000000001	283.41	1103.67	-0.92188	0.667	0.21314	-48.518	12.832	-5.494	0.078125	0.12451	-0.10205	-35.389	-9.56100000000001	1919.26	-1.7559	1.4844	0.63428	11.501	49.141	1901.11	-1.8325	1.3706	0.031494	-89.028	-140.666	1972.787	-2.0543	1.4268	0.075195
1.416	-46.993	-106.534	173.4519	0.055859	0.062793	-0.10107	-10.139	32.656	3.5569	0.092773	-0.060059	0.04834	27.647	283.48	1097.62	-0.89404	0.65088	0.19873	-4.77	20.539	12.4824	0.078125	0.13232	-0.10156	-66.313	13.495	1882.17	-1.7617	1.4707	0.63818	49.507	27.847	1906.98	-1.8022	1.3696	0.033691	-37.887	-119.328	2018.42	-2.1406	1.4602	0.094042
1.418	-61.624	-77.676	199.244	0.031445	0.073144	-0.10723	-25.367	84.036	8.433	0.073975	-0.061768	0.05249	18.062	308.49	1053.55	-0.84912	0.62354	0.17871	-24.969	24.1939	-9.525	0.066406	0.14404	-0.1001	-5.38000000000001	25.011	1908.55	-1.7695	1.4453	0.64404	3.401	44.629	1864.52	-1.7715	1.3672	0.029785	-57.146	-91.26929	1999.558	-2.2156	1.4961	0.10576
1.42	-70.818	-116.397	249.206	0.0024414	0.088379	-0.10693	-10.396	33.0572	13.968	0.0625	-0.059082	0.055664	-11.669	259.84	1028.1	-0.82617	0.60352	0.17139	-60.737	20.187	12.0353	0.058105	0.1582	-0.091309	-51.149	76.0105	1866.75	-1.7607	1.4219	0.63623	-6.418	-10.787	1843.16	-1.7539	1.3691	0.024902	-36.425	-116.428	2056.583	-2.2679	1.5278	0.11445
1.422	-54.569	-103.748	376.1344	-0.037988	0.10918	-0.10322	0.361000000000004	34.71	5.3315	0.047363	-0.058105	0.058594	18.509	265.95	1002.13	-0.78076	0.5708	0.15381	-23.447	53.087	34.35	0.057129	0.1665	-0.09668	-61.118	39.532	1883.23	-1.7441	1.4023	0.6333	-13.077	2.64999999999999	1816.4	-1.7207	1.3652	0.026855	-42.786	-58.306	2056.236	-2.3008	1.5488	0.11523
1.424	-95.58609	-26.413	465.493	-0.086426	0.133	-0.10039	-13.25	50.169	-15.6014	0.040039	-0.058105	0.061035	-4.65000000000001	256.55	923.23	-0.74048	0.54809	0.13672	-62.549	43.2791	43.5035	0.042969	0.17773	-0.09082	-19.106	24.158	1903.93	-1.709	1.3633	0.61377	-64.089	17.92	1769.18	-1.6961	1.3703	0.021973	-79.245	-56.625	2013.488	-2.3058	1.5552	0.10937
1.426	-138.723	7.154	571.937	-0.14775	0.15879	-0.096875	2.997	-4.8726	16.3299	0.031738	-0.05957	0.060059	-16.395	216.717	870.98	-0.70068	0.52197	0.12012	-36.08	-2.594	81.4468	0.03418	0.18384	-0.089843	-62.94	23.205	1884.25	-1.689	1.3442	0.60742	-29.443	20.66	1763.36	-1.6685	1.3706	0.018066	-40.674	-64.709	2011.346	-2.2917	1.5524	0.093555
1.428	-95.084	86.12	704.3073	-0.20567	0.18643	-0.090137	9.176	43.9435	31.0799	0.026367	-0.058593	0.059571	31.761	246.76	813.79	-0.64697	0.48584	0.10938	-36.012	-16.524	67.1948	0.027344	0.19092	-0.090332	-10.826	-24.816	1892.25	-1.6479	1.313	0.59473	-39.111	128.25	1717.42	-1.6328	1.3643	0.016113	-78.254	-0.260000000000005	1921.305	-2.2577	1.5474	0.074414
1.43	-152.878	107.378	808.028	-0.26416	0.21045	-0.084473	5.71	52.412	28.5454	0.022461	-0.061523	0.058594	-26.325	237.2	759.66	-0.61572	0.46729	0.091309	-95.8133	-62.424	83.228	-0.0019531	0.20068	-0.09668	6.128	2.81399999999999	1846.76	-1.6225	1.2866	0.57276	-62.419	142.265	1718.23	-1.6152	1.3594	0.019043	-117.481	-24.5	1908.5441	-2.2206	1.5263	0.053028
1.432	-192.401	75.6353	967.381	-0.3208	0.24248	-0.081543	4.159	45.838	39.361	0.02002	-0.064941	0.058594	-6.72200000000001	230.533	729.55	-0.56152	0.42871	0.077637	-70.395	-72.883	142.281	-0.010742	0.20361	-0.093262	-43.622	-3.02800000000001	1808.09	-1.5991	1.2681	0.56055	-28.833	161.0451	1724.58	-1.5762	1.3535	0.010254	-81.199	9.939	1934.178	-2.1782	1.5024	0.035156
1.434	-177.205	116.612	1068.486	-0.38506	0.27549	-0.077539	-23.868	95.818	38.8955	0.022461	-0.068848	0.060059	-5.26000000000001	241.829	674.01	-0.52294	0.40332	0.069824	-59.002	-94.536	178.346	-0.054688	0.21826	-0.087891	-20.221	1.47500000000001	1805.82	-1.5698	1.2505	0.53906	-83.5421	178.824	1683.08	-1.5483	1.3418	0.0095215	-110.5377	45.211	1869.779	-2.1372	1.4679	0.015528
1.436	-128.678	111.419	1141.258	-0.45459	0.31025	-0.075976	-10.23	35.48239	31.1376	0.025879	-0.075684	0.060547	-30.101	197.611	656.16	-0.47705	0.37402	0.055664	-44.45	-104.673	282.8291	-0.10327	0.22583	-0.077881	-44.473	65.352	1750.84	-1.5586	1.2461	0.53369	-54.267	110.8515	1684.63	-1.5195	1.3262	0.00097656	-67.484	8.741	1884.803	-2.096	1.4372	0.0017578
1.438	-121.651	106.885	1181.415	-0.5335	0.35019	-0.075098	-31.65	27.8458	26.4553	0.03247	-0.08081	0.05835	-11.449	212.274	653.45	-0.41162	0.3374	0.043457	-18.687	-95.656	371.145	-0.16309	0.2373	-0.069824	-10.59	68.798	1741.69	-1.5332	1.2461	0.52393	-30.741	111.27	1676.77	-1.4824	1.3105	0.00048828	-22.185	75.2718	1849.8139	-2.0647	1.4059	-0.0099606
1.44	-93.6528	122.923	1178.099	-0.63623	0.38867	-0.056641	-61.861	35.9581	4.5874	0.03418	-0.083008	0.058105	-20.132	218.46	590.36	-0.38428	0.31445	0.035156	-37.848	-66.383	479.217	-0.25977	0.26025	-0.053711	34.539	98.4396	1719.69	-1.5164	1.2449	0.51123	-77.242	124.3627	1639.181	-1.4668	1.3047	-0.0019531	-40.313	85.069	1814.1956	-2.0399	1.3832	-0.023242
1.442	-71.286	47.2844	1160.296	-0.76748	0.44111	-0.028418	-46.168	-24.0341	18.693	0.040039	-0.085449	0.061523	-25.249	197.192	533.52	-0.3291	0.2793	0.019043	-47.861	-24.993	649.33	-0.30762	0.27246	-0.054199	-3.402	143.822	1673.45	-1.4956	1.2407	0.49316	-68.805	109.173	1618.228	-1.4258	1.2813	-0.0058594	26.565	78.348	1851.304	-2.0273	1.3662	-0.022949
1.444	-26.228	31.717	1110.887	-0.92255	0.49336	-8e-08	-60.779	31.7858	28.1921	0.049805	-0.084961	0.052246	-8.23399999999999	218.619	464.12	-0.28711	0.25073	0.0036621	-91.304	51.007	787.87	-0.40088	0.30664	-0.056641	0.518000000000001	116.366	1673.98	-1.4785	1.2363	0.48193	-85.9775	165.79	1552.275	-1.3984	1.2671	-0.0056153	35.571	117.151	1825.121	-2.0173	1.3464	-0.033399
1.446	-4.895	-5.461	1047.295	-1.1038	0.55312	0.047266	-77.3341	36.9788	21.01613	0.06543	-0.08252	0.050293	-48.532	177.47	417.38	-0.24463	0.22168	-0.003418	-133.1	64.364	976.318	-0.47485	0.34082	-0.052735	-7.7	155.081	1655.68	-1.4644	1.2358	0.46875	-107.345	149.332	1534.359	-1.3745	1.2524	-0.0073242	40.734	23.773	1838.314	-1.9989	1.3242	-0.031152
1.448	2.046	-71.5126	1048.669	-1.2975	0.62657	0.1001	-67.83	29.5747	26.0366	0.075195	-0.083985	0.047852	-42.668	152.155	410.14	-0.19385	0.18799	-0.018555	-100.1851	86.308	1188.36	-0.56396	0.37988	-0.051758	-20.359	143.014	1631.03	-1.4375	1.2227	0.45557	-62.118	138.879	1532.132	-1.3398	1.2285	-0.0039063	79.692	-3.213	1858.462	-1.9789	1.291	-0.03584
1.45	8.188	-66.6533	1019.207	-1.4922	0.70703	0.15283	-83.809	72.4241	39.3232	0.083984	-0.083496	0.045898	-20.526	156.364	346.16	-0.16943	0.1709	-0.026367	-140.854	111.294	1310.44	-0.72607	0.43604	-0.045898	30.784	131.5815	1642.48	-1.4089	1.2082	0.44043	-94.204	171.105	1488.448	-1.3237	1.2134	-0.0058594	41.846	6.414	1815.6807	-1.9612	1.2681	-0.040527
1.452	0.467999999999996	-111.745	1011.274	-1.6615	0.79355	0.196	-70.494	26.631	36.2697	0.09668	-0.08252	0.042969	-29.247	123.478	316.455	-0.12939	0.14111	-0.04248	-132.18	81.511	1423.73	-0.83057	0.46729	-0.031738	-6.338	165.979	1618.42	-1.3789	1.1914	0.41943	-82.5741	143.508	1479.717	-1.2969	1.1875	-0.00048828	54.713	-25.56419	1794.7286	-1.9414	1.2441	-0.04248
1.454	7.55100000000001	-133.004	1049.236	-1.7878	0.87295	0.23203	-37.603	27.7175	37.7096	0.10059	-0.080566	0.044922	-0.734000000000002	133.929	317.828	-0.10205	0.12695	-0.052246	-95.738	80.742	1474.41	-1.0908	0.5332	0.018555	-13.441	158.83	1594.57	-1.3359	1.1621	0.39307	-63.047	188.5404	1458.628	-1.2675	1.167	0.0017089	63.609	63.417	1746.006	-1.9305	1.2268	-0.049121
1.456	6.17800000000001	-78.056	1079.684	-1.8562	0.94053	0.25938	-69.0801	39.7786	4.576	0.11963	-0.085449	0.035156	-32.463	128.642	286.074	-0.083496	0.10303	-0.054688	-116.232	62.2194	1442.47	-1.3318	0.59742	0.090332	17.933	168.26469	1550.99	-1.3198	1.145	0.37939	-74.8728	222.181	1399.203	-1.2441	1.1367	0.0029297	12.775	70.86921	1686.7173	-1.9156	1.2074	-0.052637
1.458	-9.452	-104.419	1156.38	-1.8809	0.99825	0.28389	-46.605	-29.4136	8.305	0.12647	-0.07666	0.034179	-17.884	106.843	268.708	-0.050781	0.081543	-0.068359	-45.827	24.301	1404.07	-1.6016	0.67285	0.1792	-28.56	177.253	1497.7	-1.2847	1.1118	0.35547	-25.032	207.1776	1395.328	-1.209	1.1055	0.0063477	27.578	38.853	1684.3	-1.8941	1.1914	-0.049121
1.46	11.017	-83.119	1226.599	-1.8608	1.0474	0.29688	-52.444	4.5657	15.293	0.13623	-0.080078	0.033691	14.731	127.673	222.797	-0.040039	0.072754	-0.071289	-27.021	-12.5039	1305.55	-1.9629	0.80664	0.3208	-3.22499999999999	116.187	1497.32	-1.2575	1.0827	0.34131	-15.989	282.889	1339.557	-1.1875	1.0898	0.0068359	18.845	88.282	1642.985	-1.8757	1.1761	-0.041894
1.462	4.673	-79.91	1229.8874	-1.8018	1.085	0.27979	-68.013	-1.776	15.4403	0.14648	-0.070313	0.037109	-36.184	105.121	191.591	-0.021973	0.053223	-0.076172	-98.226	-93.723	1239.96	-2.1172	0.88574	0.38916	12.948	140.406	1470.05	-1.228	1.0571	0.32227	-44.836	278.763	1307.873	-1.1406	1.0479	0.0083008	-1.831	44.497	1649.013	-1.8594	1.166	-0.036621
1.464	40.07	-161.812	1296.389	-1.7113	1.0977	0.23125	-34.384	-5.9418	9.40991	0.15088	-0.066406	0.035645	-19.144	100.796	204.226	-0.012451	0.045898	-0.081054	-63.503	-157.454	1213.25	-2.3184	1.0313	0.43896	-50.245	149.861	1436.55	-1.1895	1.0176	0.30225	-7.64100000000001	277.168	1299.441	-1.1094	1.0171	0.010742	34.404	96.478	1668.898	-1.8393	1.1502	-0.029199
1.466	77.913	-160.982	1326.238	-1.5625	1.0887	0.13867	-46.485	62.837	13.7287	0.15625	-0.057129	0.040039	-26.962	114.842	162.1136	-0.0053711	0.03125	-0.081055	-51.836	-166.118	1156.066	-2.2862	1.1191	0.43408	12.851	151.4684	1429.33	-1.1504	0.98632	0.28076	-76.1965	308.77	1239.134	-1.0718	0.98291	0.01123	-27.14	175.686	1611.416	-1.8226	1.1399	-0.022852
1.468	81.809	-228.796	1333.012	-1.3857	1.044	0.045996	-32.502	29.9563	32.1457	0.16211	-0.046875	0.045166	-55.301	97.178	145.0847	-0.0029297	0.019043	-0.084961	-64.912	-183.523	1162.703	-2.1113	1.1963	0.48877	-6.44	225.826	1389.83	-1.1187	0.95947	0.26416	-62.94	256.792	1224.286	-1.0313	0.93066	0.015625	-34.318	175.684	1594.5904	-1.7975	1.1353	-0.019336
1.47	85.371	-305.809	1386.377	-1.2212	0.98096	-0.045898	0.100999999999999	46.448	23.051	0.16553	-0.036621	0.047363	-5.954	107.334	138.4017	-0.0053711	0.013672	-0.082031	-49.728	-176.554	1194.79	-1.98	1.2612	0.46094	10.024	230.71	1354.44	-1.0703	0.91797	0.23926	-51.898	247.4189	1182.596	-1.0137	0.90918	0.012695	-9.34800000000001	244.27	1566.237284	-1.7692	1.1258	-0.013281
1.472	41.04	-279.1856	1402.6111	-1.1119	0.9291	-0.11797	-14.204	51.1845	4.388	0.17627	-0.023438	0.046875	-32.418	89.026	117.4347	-0.0092773	0.0063477	-0.07959	-111.489	-155.473	1218.18	-1.9727	1.25	0.37256	59.722	255.623	1327.05	-1.0498	0.89844	0.22803	-95.0599	231.386	1132.322	-0.97998	0.85986	0.02002	-68.214	217.193	1537.1882	-1.7397	1.1196	-0.01123
1.474	-31.519	-314.086	1456.0959	-1.0564	0.90195	-0.17148	14.322	-25.4911	-5.4979	0.17871	-0.016113	0.050293	-49.116	65.8823	122.356	-0.015869	-0.0043945	-0.075683	-94.99	-146.3309	1294.52	-1.7891	1.1895	0.15234	19.465	291.52	1251.65	-1.0117	0.85938	0.21436	-60.371	204.823	1118.748	-0.9563	0.82203	0.0271	-28.583	174.8	1561.207	-1.7025	1.1083	-0.013183
1.476	-39.259	-289.945	1562.281	-1.04	0.91133	-0.20703	16.1	7.4885	10.2229	0.18408	-0.0053711	0.049805	-9.44600000000001	84.867	91.1173	-0.020996	-0.0083008	-0.073242	-36.376	-80.558	1307.519	-1.5053	1.1436	0.053223	38.183	240.212	1245.2	-0.99146	0.82788	0.19922	-96.979	265.674	1057.59	-0.93311	0.78467	0.038574	-57.765	195.658	1520.345	-1.6666	1.0925	-0.0041992
1.478	-56.71	-222.288	1598.046	-1.0592	0.94121	-0.21875	-15.076	6.868	8.1547	0.18848	0.0051269	0.049805	-56.005	84.365	44.1829	-0.022461	-0.015625	-0.070801	-33.738	-78.423	1339.426	-1.2266	1.0957	-0.041016	41.943	245.654	1210.44	-0.97266	0.80176	0.18604	-104.147	265.225	1052.23	-0.90381	0.73877	0.045898	-114.91	124.386	1498.958	-1.6307	1.0801	0.0036133
1.48	-67.549	-239.105	1663.2052	-1.0991	0.98096	-0.21729	15.857	10.16549	11.7375	0.18652	0.010254	0.049805	-33.248	79.75126	54.35506	-0.024414	-0.021973	-0.071289	18.273	-100.331	1389.484	-0.98047	1.0693	-0.16016	3.744	221.863	1168.05	-0.95361	0.76172	0.17139	-55.6983	273.926	1043.341	-0.88672	0.71484	0.049316	-118.046	116.102	1480.5	-1.6093	1.0669	0.015918
1.482	-49.828	-175.3813	1716.1508	-1.1551	1.044	-0.20908	-11.287	77.167	-8.1136	0.18164	0.023926	0.0625	-43.921	60.6693	42.033	-0.027344	-0.027344	-0.071289	35.507	-130.756	1377.224	-0.91895	1.0762	-0.20996	66.545	197.141	1145.3	-0.93945	0.74707	0.16162	-96.661	293.959	992.246	-0.84961	0.67578	0.070801	-151.039	118.992	1401.215	-1.5869	1.0488	0.018555
1.484	-58.408	-143.025	1747.0824	-1.2171	1.1153	-0.18662	-19.712	48.643	9.17	0.18311	0.031738	0.044922	-57.853	42.68	44.4316	-0.022217	-0.033935	-0.073486	42.206	-220.791	1409.732	-0.85205	1.104	-0.26318	30.741	236.591	1079.55	-0.90918	0.70801	0.146	-72.5959	247.69	966.613	-0.82177	0.64892	0.081543	-123.74212	83.191	1376.805	-1.56	1.0376	0.028223
1.486	-53.065	-130.62	1850.331	-1.2843	1.1786	-0.15889	-7.14700000000001	58.953	29.49457	0.17432	0.041504	0.057129	-18.796	59.28181	53.3492	-0.021973	-0.039551	-0.070801	71.619	-299.214	1458.421	-0.82495	1.1125	-0.2771	31.839	221.691	1050.24	-0.87915	0.68482	0.13086	-93.583	251.15	910.302	-0.78857	0.61963	0.092285	-76.8529	161.561	1352.0892	-1.5339	1.0268	0.03418
1.488	-15.355	-53.151	1884.173	-1.3606	1.2207	-0.12627	-28.891	61.866	2.035	0.16748	0.045898	0.059815	-50.9492	61.3	25.549	-0.020996	-0.053711	-0.071289	14.709	-345.522	1474.316	-0.81787	1.106	-0.28467	71.071	236.447	1038.81	-0.85205	0.66455	0.11621	-131.163	251.452	850.831	-0.75	0.5791	0.10498	-112.393	198.847	1328.3238	-1.4999	1.0085	0.039648
1.49	-1.322	-69.216	1890.591	-1.4414	1.2422	-0.087402	-29.916	-7.6809	-3.3605	0.16162	0.055176	0.06543	-63.414	54.752	54.5803	-0.021973	-0.059082	-0.076172	-0.0889999999999986	-371.102	1555.416	-0.87061	1.0903	-0.26416	32.905	264.105	989.37	-0.81592	0.6333	0.099609	-85.8852	219.38	822.029	-0.73047	0.55859	0.11377	-71.97427	217.761	1336.715	-1.4708	0.9917	0.048633
1.492	12.614	-75.204	1928.158	-1.5329	1.2597	-0.052735	-48.036	23.5586	-2.736	0.14941	0.062988	0.062988	-47.099	59.178	41.82679	-0.03125	-0.071289	-0.074707	1.71000000000001	-334.625	1557.936	-0.92725	1.0962	-0.24072	91.214	224.9	985.22	-0.79639	0.61768	0.091797	-120.25	247.895	747.096	-0.67773	0.51172	0.11865	-59.0722	274.062	1294.832	-1.4355	0.97363	0.051758
1.494	5.577	-30.42	1886.9482	-1.6289	1.2758	-0.013672	-43.96	14.879	-9.587	0.14209	0.061035	0.068848	-54.282	37.121	15.7033	-0.034424	-0.071778	-0.072265	-41.136	-313.287	1575.034	-1.103	1.1528	-0.17773	75.46	233.679	956.34	-0.75879	0.57813	0.073242	-130.591	213.854	704.653	-0.6372	0.48389	0.11596	-61.178	223.349	1256.118	-1.3937	0.95264	0.059375
1.496	-14.668	-90.521	1894.62524	-1.7269	1.2996	0.020703	-28.04	2.7722	14.0852	0.13428	0.071777	0.073242	-35.771	28.28306	25.295	-0.046387	-0.074219	-0.070801	14.403	-275.7	1668.181	-1.251	1.2261	-0.14039	26.611	212.3	905.95	-0.72949	0.55249	0.057861	-79.11225	198.9279	654.299	-0.59375	0.45264	0.1123	6.896	222.707	1230.475	-1.3566	0.9293	0.070215
1.498	-28.19	-84.647	1937.2271	-1.8119	1.324	0.054883	-59.629	71.966	19.2704	0.12378	0.078613	0.075928	-59.965	21.9212	6.2042	-0.061523	-0.077148	-0.064941	23.602	-182.925	1728.293	-1.3887	1.2852	-0.098633	60.48	177.33	884.97	-0.7002	0.52539	0.041504	-125.832	234.974	596.426	-0.52539	0.4082	0.12256	-37.864	244.805	1157.5697	-1.3207	0.90351	0.081934
1.5	-66.791	-104.0144	1932.2393	-1.8945	1.3535	0.088379	-70.287	42.1825	22.5011	0.1123	0.092285	0.080078	-62.27	7.192	23.0262	-0.068359	-0.079102	-0.0625	22.558	-137.964	1825.209	-1.5366	1.3481	-0.048828	8.105	223.745	815.13	-0.64941	0.47754	0.021484	-90.583	206.039	577.311	-0.49805	0.38672	0.12549	-41.825	211.764	1126.371	-1.2862	0.87901	0.082227
1.502	-55.64	-183.781	1983.912	-1.9703	1.3867	0.11534	-57.215	58.731	58.9581	0.1001	0.10596	0.086914	-14.505	32.3433	34.0449	-0.077148	-0.078125	-0.057129	69.713	-101.0076	1887.61	-1.603	1.3716	-0.026367	26.254	216.315	768.52	-0.62598	0.46143	0.017578	-64.9526	218.162	534.057	-0.45459	0.34473	0.12842	-28.6178	252.715	1057.616	-1.2417	0.85352	0.095703
1.504	-30.712	-132.533	1992.52	-2.0386	1.4224	0.1417	-72.888	40.845	69.812	0.097168	0.11279	0.087891	-30.764	39.4436	-7.859	-0.08252	-0.075195	-0.052246	40.979	-51.86	1867.1	-1.7305	1.4102	0.00048828	42.827	220.666	728.39	-0.57617	0.4248	0.0014648	-90.855	194.955	488.678	-0.42432	0.3125	0.12988	-80.1929	224.049	1013.07544	-1.2012	0.84043	0.1126
1.506	-31.915	-99.509	1989.838	-2.096	1.454	0.15928	-84.057	-20.8973	86.6464	0.083984	0.12695	0.09082	-27.347	40.7911	23.372	-0.086914	-0.071777	-0.049805	42.457	-69.414	1889.32	-1.8135	1.4341	0.017822	-9.694	241.628	652.8	-0.53931	0.39868	-0.015381	-50.549	157.106	468.696	-0.39502	0.27344	0.13623	-37.663	204.94479	1011.0015	-1.1667	0.81572	0.11855
1.508	6.002	-71.53233	2046.945	-2.1408	1.4799	0.17148	-22.183	-11.664	107.3739	0.068848	0.14258	0.098389	3.992	34.1137	28.6203	-0.087402	-0.071289	-0.049316	94.876	-38.659	1856.108	-1.8926	1.4551	0.039551	13.864	190.821	624	-0.50439	0.37354	-0.02832	-63.55472	177.845	417.323	-0.3584	0.23145	0.14746	-41.554	234.74	957.8366	-1.1194	0.7872	0.12442
1.51	18.871	45.844	2022.018	-2.1772	1.4946	0.18506	-52.549	-42.6618	132.313	0.050293	0.15918	0.098145	-48.102	19.3548	19.2954	-0.085449	-0.072266	-0.048828	21.623	-46.127	1830.767	-1.9839	1.4829	0.066406	4.184	216.478	582.89	-0.45361	0.34229	-0.044922	-48.889	153.945	391.70958	-0.33594	0.21094	0.14648	-55.538	183.747	929.8747	-1.073	0.75703	0.13369
1.512	9.866	17.511	2017.944	-2.2086	1.5082	0.19756	-58.767	-81.0823	209.8448	-0.0029297	0.18652	0.10498	-16.942	27.5761	41.393	-0.070801	-0.072266	-0.04541	14.033	-116.634	1877.221	-2.0269	1.4985	0.070801	-29.502	212.303	552.37	-0.42773	0.32666	-0.057129	-7.263	151.201	363.748	-0.29932	0.16455	0.13623	-16.854	189.9983	908.256	-1.0332	0.72559	0.13721
1.514	48.321	27.991	2035.534	-2.228	1.5216	0.2042	-59.835	-6.921	269.609	-0.035156	0.20605	0.10498	-21.632	42.63	20.8494	-0.062012	-0.075195	-0.046631	-29.893	-126.962	1887.432	-2.0933	1.522	0.083496	16.865	180.566	535.59	-0.37939	0.29102	-0.069824	-52.46	155.869	322.824	-0.25806	0.14526	0.14477	-45.523	186.622	875.883	-0.98858	0.69892	0.13916
1.516	10.356	43.167	1999.908	-2.2436	1.534	0.21123	-46.919	-19.7156	351.257	-0.11328	0.23633	0.11914	-50.628	36.501	28.1995	-0.046387	-0.078613	-0.042969	-75.33	-153.167	1929.112	-2.1328	1.543	0.087403	-28.455	207.976	485.37	-0.34228	0.26367	-0.082032	-38.654	98.4872	285.793	-0.2207	0.14746	0.17041	-39.815	156.688	867.378	-0.94805	0.67343	0.146
1.518	-11.146	-20.219	1999.9221	-2.247	1.5432	0.21475	-47.039	61.119	503.82	-0.17383	0.26343	0.12573	-2.999	27.2831	38.1728	-0.027832	-0.087891	-0.051758	-39.002	-156.286	1986.62	-2.1602	1.5605	0.094727	-27.724	189.564	460.84	-0.31201	0.23877	-0.089844	-25.581	89.7792	257.221	-0.19092	0.12549	0.14258	-24.221	194.038	816.388	-0.9039	0.64961	0.15069
1.52	-17.362	42.828	1996.081	-2.2461	1.5488	0.21826	-9.74299999999999	122.735	658.021	-0.24756	0.29736	0.13281	-41.862	16.21715	-10.6472	-0.016113	-0.093262	-0.051758	-59.515	-96.22	1974.21	-2.1812	1.5767	0.10107	-1.035	188.874	427.04	-0.27686	0.20605	-0.093262	-47.7	69.4881	219.3395	-0.16357	0.11475	0.14063	-77.2184	190.862	757.255	-0.85869	0.62607	0.15244
1.522	-66.704	49.578213	1916.153	-2.2329	1.5464	0.21201	47.845	94.9407	833.63	-0.3501	0.3501	0.14648	-31.536	23.0337	8.3672	0	-0.096191	-0.053223	-41.076	-105.623	1990.3	-2.1855	1.582	0.10107	-64.279	193.837	384.91	-0.25977	0.19629	-0.095703	-28.12	47.037	209.2703	-0.12891	0.071777	0.14502	-63.6131	202.676	719	-0.81445	0.5957	0.15381
1.524	-40.624	24.672	1941.436	-2.2101	1.5341	0.20635	24.735	124.131	966.06	-0.44678	0.39527	0.15039	-11.293	42.354	18.1969	0.0083005	-0.10132	-0.054199	-7.89399999999999	-62.976	1988.4	-2.1851	1.5806	0.1001	-33.522	152.112	366.2	-0.23828	0.16553	-0.091309	-43.91	103.003	168.43486	-0.095216	0.034912	0.14306	-117.28	240.702	647.219	-0.76944	0.57003	0.15771
1.526	-40.023	107.222	1922.7811	-2.1847	1.5188	0.19619	27.257	86.359	1102.1	-0.55518	0.45068	0.1543	-50.479	28.79374	27.7741	0.016113	-0.10449	-0.055176	-39.828	-55.095	1982.75	-2.178	1.5745	0.091553	-28.934	148.973	312.83	-0.22119	0.14038	-0.092773	-45.436	93.443	159.1144	-0.063477	0.01416	0.13428	-137.391	208.627	622.326	-0.72316	0.54659	0.16191
1.528	-58.375	52.8269	1938.3372	-2.1631	1.5002	0.18203	97.3312	16.77	1226.11	-0.74414	0.54297	0.18555	-15.661	19.4788	45.512	0.020508	-0.10498	-0.053711	-8.02	-88.25	2048.93	-2.1499	1.5591	0.085938	-71.263	128.32	283.21	-0.20313	0.12256	-0.09668	-12.54	100.682	156.772	-0.017578	-0.0058594	0.12256	-112.066	198.196	561.0555	-0.67746	0.52237	0.16348
1.53	-33.313	69.288	2000.835	-2.1367	1.4785	0.16797	79.924	39.618	1306.66	-0.85498	0.58936	0.19971	-25.619	15.0309	7.4209	0.020508	-0.10352	-0.053223	-26.444	-41.706	2003.331	-2.1094	1.5273	0.060547	-5.295	87.905	275.09	-0.18164	0.10059	-0.09375	-49.42	117.205	134.726	-0.00048828	-0.021973	0.12744	-132.149	167.064	504.8899	-0.63975	0.5003	0.15918
1.532	-26.464	89.38	1968.146	-2.1014	1.4588	0.16103	43.629	2.172	1324.24	-1.1206	0.68896	0.24561	-55.957	7.058	9.6208	0.026367	-0.094727	-0.052246	-50.061	-42.685	1959.699	-2.0859	1.5078	0.045898	-21.819	105.233	254.82	-0.16846	0.092773	-0.091797	-15.455	79.952	148.644	0.025391	-0.041992	0.12402	-123.535	112.7409	477.5629	-0.59961	0.4707	0.16797
1.534	-46.048	16.784	1976.412	-2.0723	1.4355	0.15264	-3.85100000000001	1.452	1272.81	-1.3374	0.75976	0.28418	-17.122	30.0661	25.5564	0.030274	-0.090332	-0.056153	-15.651	-27.589	1928.36	-2.0415	1.4653	0.032227	-28.304	90.531	245.303	-0.1416	0.068848	-0.095703	-12.061	89.516	125.416	0.043213	-0.064209	0.12597	-98.2878	146.937	415.384	-0.55164	0.4493	0.17236
1.536	-3.512	50.837	1987.672	-2.0437	1.4203	0.14952	-10.741	-10.979	1199.52	-1.5464	0.83301	0.33203	-45.041	31.4157	7.4563	0.035645	-0.089355	-0.054199	-60.75	64.046	1852.456	-2.0239	1.44	0.01416	5.719	98.99	235.218	-0.12109	0.054932	-0.095703	-69.434	87.76	91.114	0.055664	-0.085938	0.12598	-116.5941	156.948	392.2064	-0.50669	0.42723	0.1666
1.538	-19.829	38.284	1921.291	-2.021	1.405	0.14326	49.168	-90.846	1170.46	-1.791	0.92773	0.41211	-48.002	29.818	31.9138	0.044922	-0.07666	-0.0625	-46.859	36.548	1869.581	-2.0117	1.4102	0.01123	-34.617	141.833	187.348	-0.099121	0.042969	-0.099121	-43.586	67.063	75.557	0.07373	-0.10938	0.12793	-66.51	178.358	377.996	-0.45356	0.40769	0.17012
1.54	7.33200000000001	22.73	1932.289	-1.9941	1.3867	0.14014	69.235	-88.113	1168.07	-1.8745	0.96338	0.43164	-41.123	35.965	10.293	0.043945	-0.070313	-0.062988	-12.154	46.148	1884.793	-2.0015	1.3833	0.010254	12.692	110.512	192.079	-0.065918	0.023438	-0.10645	-62.433	85.938	25.6071	0.081543	-0.11328	0.12793	-71.067	205.856	329.557	-0.4026	0.38015	0.16856
1.542	23.908	109.093	1873.587	-1.9622	1.3788	0.13613	63.8193	-113.939	1119.04	-1.9565	1.0161	0.45459	-75.3314	24.58481	-10.6219	0.062012	-0.062988	-0.06543	-34.264	40.596	1863.754	-2	1.373	0.01709	-18.006	120.137	155.516	-0.044434	0.018066	-0.10693	-77.808	59.572	29.9737	0.091309	-0.12549	0.12646	-78.474	152.266	316.0204	-0.35889	0.354	0.16748
1.544	-33.398	62.3753	1842.2307	-1.9234	1.3699	0.13281	40.502	-159.774	1080.25	-1.9248	1.0488	0.46118	-48.062	26.0365	24.5195	0.06543	-0.059082	-0.06543	9.589	-6.14599999999999	1922.538	-1.9897	1.3462	0.027832	-47.714	95.713	138.503	0.0014648	0.00097656	-0.12012	-28.957	52.331	39.5163	0.10718	-0.13916	0.12476	-43.229	143.271	299.902	-0.31902	0.33383	0.16427
1.546	-13.062	78.897	1861.285	-1.8887	1.361	0.12617	0.784000000000006	-119.199	1076.07	-1.832	1.0879	0.46387	-40.202	31.781	-1.2449	0.071289	-0.057129	-0.070801	18.916	42.126	1900.502	-1.9877	1.334	0.039307	-5.07100000000001	64.764	140.884	0.036865	-0.010498	-0.12842	-80.3449	69.989	27.4808	0.12158	-0.14697	0.12012	-66.464	116.913	282.7595	-0.27337	0.31042	0.16004
1.548	-9.116	99.1118	1786.501	-1.8612	1.3485	0.12119	-9.407	-128.297	1093.06	-1.6089	1.1353	0.4668	-68.692	26.5321	5.4563	0.07373	-0.047363	-0.07373	5.449	48.809	1878.5	-1.9785	1.3164	0.041992	-20.537	88.347	105.712	0.068359	-0.023438	-0.13428	-56.685	44.8342	48.272	0.12695	-0.15771	0.12256	-37.113	84.782	268.423	-0.22697	0.28818	0.16086
1.55	-0.685999999999993	42.518	1782.742	-1.8257	1.3364	0.11523	-32.425	-58.19	1159.78	-1.4722	1.1372	0.45996	-19.449	38.5552	15.4449	0.069824	-0.044189	-0.075439	52.19	44.668	1897.156	-1.9546	1.2954	0.047852	-41.419	60.469	116.812	0.11426	-0.037598	-0.15234	-43.578	50.419	40.63958	0.12671	-0.16211	0.12426	-12.726	83.5233	216.592	-0.18139	0.26588	0.15901
1.552	31.021	105.7513	1764.543	-1.7975	1.3294	0.11377	-90.388	40.16	1177.53	-1.2241	1.0464	0.4209	-50.2658	39.9812	-9.047	0.070801	-0.041016	-0.077637	25.984	80.676	1846.484	-1.937	1.2856	0.053223	0.499000000000002	59.773	98.669	0.13281	-0.044922	-0.15918	-45.368	55.7509	29.1419	0.12646	-0.16797	0.12451	-39.847	48.3868	176.2309	-0.14258	0.24902	0.15527
1.554	-28.128	106.352	1725.027	-1.773	1.3204	0.11357	-96.7405	-3.336	1159.09	-1.0759	0.92652	0.39282	-24.476	24.54	26.6574	0.069336	-0.027832	-0.080078	33.061	10.767	1870.773	-1.8999	1.272	0.054688	-49.82	87.533	69.279	0.16357	-0.060059	-0.1709	3.72799999999999	18.775	36.527	0.12207	-0.17578	0.13916	2.793	60.7695	165.988	-0.099991	0.22596	0.14722
1.556	24.124	91.019	1753.335	-1.7526	1.3064	0.11279	-90.7153	-49.1544	1172.818	-0.9707	0.80469	0.37012	-22.949	34.9314	19.1534	0.065918	-0.025391	-0.077148	75.946	21.3571	1852.588	-1.8809	1.2564	0.05542	-18.603	54.451	53.752	0.18286	-0.074463	-0.17919	-28.889	38.2009	11.4963	0.11768	-0.17578	0.13379	-18.132	95.394	136.337	-0.056943	0.20809	0.1409
1.558	53.199	180.693	1720.261	-1.7321	1.3027	0.11318	-89.494	-130.138	1167.653	-0.87646	0.69092	0.36523	-52.495	35.0018	7.3025	0.06543	-0.02002	-0.067383	22.172	15.1848	1807.236	-1.853	1.2446	0.055664	-29.668	60.15	39.0508	0.19678	-0.088867	-0.18506	-22.838	32.693	18.4378	0.11182	-0.17383	0.13477	13.758	92.528	142.087	-0.013568	0.18562	0.14014
1.56	8.568	132.263	1695.676	-1.7124	1.3032	0.11426	-62.1894	-226.54	1229.119	-0.85156	0.65918	0.36914	-32.381	44.0812	29.1714	0.068359	-0.013184	-0.072998	41.968	-30.83572	1817.709	-1.8262	1.2363	0.050781	-73.414	34.3968	38.3504	0.20459	-0.10059	-0.18848	-9.437	35.611	27.5671	0.1062	-0.17138	0.14209	29.602	107.217	128.819	0.020559	0.16913	0.1344
1.562	51.387	132.41	1715.6	-1.6839	1.297	0.11944	-62.3487	-258.24	1272.132	-0.86523	0.62695	0.37305	-28.974	56.71	6.816	0.076172	-0.0092773	-0.072266	23.224	20.4	1734.459	-1.8027	1.2285	0.048828	-31.66	-3.974	62.663	0.20459	-0.10742	-0.18555	-55.421	69.106	17.392	0.10303	-0.16895	0.1499	-5.912	92.184	109.1075	0.055176	0.14941	0.13281
1.564	24.648	169.016	1663.757	-1.6698	1.2888	0.12051	-84.434	-361.42	1300.64	-0.92041	0.64721	0.37939	-35.456	22.9516	17.5515	0.08252	-0.0078125	-0.077637	-11.192	24.876	1693.573	-1.7729	1.2144	0.051758	-63.002	32.918	41.865	0.18799	-0.11523	-0.18604	-14.765	41.489	20.8272	0.10059	-0.16211	0.15039	17.153	62.956	123.608	0.079268	0.13126	0.12798
1.566	6.285	104.7533	1635.082	-1.6479	1.2857	0.11972	-98.399	-398.46	1355.3	-1.0176	0.70508	0.40186	-8.983	23.803	27.6746	0.092285	-0.0068359	-0.080566	8.673	44.083	1697.676	-1.7441	1.2012	0.048828	-52.121	25.766	45.5796	0.17089	-0.11939	-0.1792	-23.052	47.56	7.583	0.099121	-0.15869	0.15283	19.201	88.917	86.961	0.10089	0.11811	0.11797
1.568	24.309	159.685	1597.932	-1.6207	1.2703	0.11963	-79.6701	-367.22	1410.98	-1.1826	0.83008	0.43213	-31.601	28.4775	8.9726	0.11133	-0.0087891	-0.092773	-13.367	134.063	1666.908	-1.7344	1.1914	0.050293	-34.499	20.1146	39.6535	0.14258	-0.11963	-0.17529	-41.4	33.24	6.441	0.10059	-0.14844	0.15576	-12.463	79.888	81.836	0.12389	0.097507	0.11323
1.57	-31.634	149.263	1547.7972	-1.5801	1.248	0.11279	-11.831	-366.66	1466.24	-1.2656	0.89844	0.45166	-26.63	29.5104	26.7289	0.13037	-0.0061036	-0.10523	-12.8	124.323	1688.946	-1.7109	1.1758	0.048828	-84.4545	50.229	21.3803	0.10742	-0.10791	-0.15918	-3.948	-0.3067	21.32044	0.098633	-0.14283	0.15576	22.769	87.537	81.677	0.13608	0.077242	0.11054
1.572	-41.747	116.9	1557.368	-1.5414	1.2214	0.1081	10.023	-296.73	1536	-1.3999	1.0435	0.47217	-16.258	45.035	22.9653	0.15039	-0.0063477	-0.12012	10.491	167.097	1674.578	-1.6919	1.1636	0.052246	-42.64	23.8496	26.354	0.086426	-0.10303	-0.146	-30.965	41.976	14.4571	0.099121	-0.13721	0.15869	-42.527	90.514	51.995	0.13477	0.057129	0.10742
1.574	-47.561	208.454	1518.416	-1.5097	1.1974	0.10029	-46.904	-273.89	1626.68	-1.4732	1.1187	0.48902	-45.46	41.8585	8.9612	0.1709	-0.0024414	-0.13623	-48.583	174.871	1649.9339	-1.6733	1.1528	0.054199	-59.046	44.142	-2.78381	0.037109	-0.085449	-0.13184	-31.318	34.549	35.879	0.099121	-0.12891	0.15576	-71.028	67.14	59.574	0.13586	0.042542	0.11405
1.576	-85.181	186.099	1467.6367	-1.4815	1.1677	0.099511	-37.011	-289.5	1718.01	-1.5293	1.1699	0.50049	-8.164	44.1831	30.908	0.17627	0.0019531	-0.14258	-30.216	116.091	1661.847	-1.645	1.1411	0.055664	-69.564	32.6791	3.1546	0.0007325	-0.074463	-0.11743	20.124	37.987	48.783	0.099121	-0.12842	0.15479	-35.279	85.217	37.015	0.13078	0.028345	0.11434
1.578	-42.304	244.82	1455.29983	-1.4518	1.1412	0.099608	-58.478	-188.892	1761.68	-1.5918	1.1934	0.51611	-14.643	41.172	5.201	0.18359	0.003418	-0.1582	-9.63	143.782	1624.064	-1.6289	1.1309	0.059082	-35.091	-7.9963	14.9949	-0.032715	-0.059082	-0.10303	-26.182	63.227	28.7438	0.097656	-0.12109	0.15283	-75.492	53.298	24.378	0.12546	0.019635	0.11138
1.58	-53.167	304.002	1417.0596	-1.4238	1.1133	0.099121	-58.3669	-135.987	1778.36	-1.6206	1.1997	0.521	-32.641	24.295	27.349	0.18164	0.010254	-0.15894	-52.579	117.14	1571.4417	-1.5977	1.1152	0.059082	-59.358	21.9324	-1.806	-0.078125	-0.044434	-0.083984	-25.702	20.18969	23.0305	0.098878	-0.11718	0.15015	-72.565	4.2628	51.082	0.11886	0.01361	0.11951
1.582	-66.06	255.385	1417.6747	-1.3929	1.0808	0.10391	-45.051	-110.787	1805.75	-1.668	1.2246	0.52197	-5.748	25.7238	50.819	0.17822	0.018555	-0.16211	-12.311	95.29	1558.049	-1.572	1.1028	0.060546	-49.921	19.795	3.21	-0.10303	-0.030762	-0.075195	-24.955	34.802	24.4113	0.095703	-0.10986	0.14453	-56.848	1.6941	20.5227	0.11865	0.0058594	0.12305
1.584	-26.39	313.618	1375.588	-1.3641	1.0453	0.10762	-52.1965	-78.807	1800.48	-1.6887	1.2356	0.52271	-65.0551	33.74	11.608	0.16406	0.031738	-0.15723	-65.12	145.5831	1506.259	-1.5488	1.0869	0.063477	-0.244999999999997	24.9648	20.8564	-0.12842	-0.023438	-0.061523	-64.271	35.3757	26.3868	0.098145	-0.1001	0.14209	-84.123	-19.1	8.6293	0.12523	0.0042256	0.12501
1.586	-63.186	281.304	1302.79624	-1.3316	1.0105	0.10683	-6.45	-122.932	1797.82	-1.7168	1.2578	0.51807	-46.31	37.4975	37.268	0.15967	0.038086	-0.15479	-80.777	115.4162	1491.936	-1.519	1.0688	0.07666	-56.7292	60.5294	18.07851	-0.14209	-0.013184	-0.049561	-34.815	-5.2693	39.603	0.097656	-0.099609	0.13232	-33.309	1.689	25.76474	0.12857	0.0018894	0.12235
1.588	-63.889	244.027	1311.8671	-1.2978	0.97881	0.10869	18.222	-115.0769	1848.7	-1.7559	1.3086	0.50439	-26.035	48.093	16.7942	0.13721	0.061035	-0.15234	-58.43	148.81524	1475.702	-1.5078	1.0586	0.078125	-27.714	22.8139	36.6974	-0.15332	-0.0068359	-0.048828	-50.299	15.1351	10.6357	0.10254	-0.083496	0.13086	-64.433	8.261	14.3661	0.13219	-4.6328e-05	0.12645
1.59	-60.143	292.453	1267.022	-1.2651	0.95557	0.10986	7.504	-116.407	1883.28	-1.7773	1.3398	0.49756	-63.102	36.8255	10.168064	0.12329	0.075195	-0.15087	-119.9874	181.928	1429.1849	-1.4771	1.0376	0.083496	-28.015	48.136	20.4415	-0.16357	-0.00097656	-0.046875	-76.084	-6.6609	12.0398	0.10718	-0.08081	0.12647	-66.447	9.685	37.842	0.13336	-0.0066454	0.12063
1.592	-96.2681	243.208	1231.2277	-1.2305	0.91973	0.11279	33.033	-174.295	1941.56	-1.8237	1.3872	0.49023	-48.899	19.2866	29.0022	0.11182	0.091797	-0.14746	-65.161	157.115	1440.523	-1.448	1.0227	0.081543	-38.635	40.742	-7.3259	-0.16553	0.0024414	-0.04834	-45.441	5.2867	21.2976	0.11084	-0.077148	0.12207	-49.755	48.135	17.3473	0.13477	-0.0092773	0.12158
1.594	-61.483	273.13	1216.671	-1.1969	0.89062	0.11074	16.83	-145.1504	1990.63	-1.8609	1.4253	0.4934	-37.706	28.4995	22.2974	0.10059	0.10547	-0.14795	-47.499	206.567	1405.958	-1.4155	1.0083	0.098633	8.1	16.156	16.5979	-0.16846	0.0053711	-0.044922	-62.579	58.738	13.6313	0.11719	-0.068848	0.11621	-70.657	57.574	-5.76	0.13806	-0.018166	0.12122
1.596	-91.2834	284.627	1160.3264	-1.1598	0.85664	0.11699	-17.5801	-160.825	2012.12	-1.9038	1.4575	0.50195	-67.5976	16.855	22.4073	0.093262	0.11914	-0.14795	-52.33	217.205	1364.251	-1.3726	0.979	0.083984	-44.619	35.695	0.139000000000003	-0.17285	0.0024414	-0.042724	-40.69	29.3006	35.895	0.12451	-0.0625	0.10791	-56.523	45.574	12.9582	0.13982	-0.028604	0.11833
1.598	-98.0393	209.0194	1152.4446	-1.1314	0.82403	0.11846	-27.2238	-175.263	2086.09	-1.9644	1.4907	0.52148	-10.263	18.444	43.236	0.085449	0.13867	-0.15234	7.146	232.671	1343.901	-1.3496	0.96094	0.088379	-21.034	7.372	20.6885	-0.16992	0.0048828	-0.041992	-38.342	46.915	18.9372	0.14404	-0.059082	0.098633	-61.701	32.8639	7.207	0.13189	-0.038706	0.11914
1.6	-65.4	264.601	1121.978	-1.1021	0.79346	0.12402	-69.658	-132.196	2103.05	-1.9941	1.498	0.53174	-53.989	12.75	43.497	0.074707	0.15503	-0.16113	-18.101	294.206	1277.328	-1.3003	0.93506	0.092285	1.765	18.1234	15.895	-0.16748	0.010254	-0.046875	-56.494	39.6413	6.006	0.1582	-0.044922	0.091553	-51.371	10.1897	7.6512	0.12638	-0.041504	0.12411
1.602	-64.6304	256.851	1083.981	-1.075	0.76367	0.12431	-101.04	-152.962	2105.67	-2.0327	1.5044	0.55762	-54.847	-25.564	73.7075	0.062012	0.16797	-0.17334	-21.687	262.925	1257.8758	-1.2663	0.90942	0.089844	-46.3969	61.9975	13.056	-0.16309	0.0068359	-0.043457	-25.382	-0.690999999999999	13.7901	0.16699	-0.037598	0.08252	-5.059	26.025	-1.0448	0.12207	-0.044434	0.11865
1.604	-30.804	258.943	1075.449	-1.0542	0.73096	0.13027	-96.5355	-123.2265	2107.41	-2.062	1.5005	0.58497	-8.863	-17.138	73.19349	0.03125	0.2041	-0.17041	-1.376	276.582	1233.899	-1.2344	0.88086	0.091309	-13.202	34.61976	32.357	-0.15283	0.012695	-0.050293	-44.865	30.7179	-17.06875	0.18262	-0.018066	0.074707	-30.276	41.129	-18.9232	0.11941	-0.051565	0.12395
1.606	-12.929	317.136	1019.944	-1.0264	0.70323	0.13418	-115.189	-105.621	2053.29	-2.0894	1.4946	0.61035	-81.5452	-29.366	85.1121	0.0078125	0.21826	-0.17236	-61.883	284.123	1172.6664	-1.1909	0.85107	0.10059	-16.319	61.247	28.3368	-0.14038	0.016846	-0.056885	-51.153	17.3	-2.7019	0.1875	-0.015137	0.0625	-13.09	28.8605	4.2828	0.11542	-0.049402	0.12949
1.608	-48.237	254.609	969.715	-1.0091	0.67764	0.14121	-92.7479	-144.624	2043.9	-2.1245	1.4868	0.63477	-44.022	-42.342	156.489	-0.064941	0.25293	-0.16406	-39.536	223.6444	1178.055	-1.1733	0.83447	0.10254	-39.757	56.188	16.5594	-0.12695	0.024414	-0.060059	-33.068	12.0752	10.77872	0.20459	0.0024414	0.055176	26.018	51.633	6.298	0.11465	-0.050604	0.12949
1.61	-0.00500000000000256	282.083	928.663	-0.99219	0.65625	0.14648	-98.482	-102.5325	2054.435	-2.1445	1.4746	0.66357	-17.096	-63.284	199.972	-0.13111	0.28223	-0.15991	-50.255	248.0583	1122.502	-1.127	0.7832	0.09082	-10.745	29.732	9.81341	-0.10791	0.03418	-0.063965	-68.238	48.9436	-5.6382	0.21143	0.011963	0.048095	8.938	42.8196	-7.0893	0.11191	-0.046577	0.1334
1.612	-24.725	302.983	863.015	-0.96983	0.63281	0.15684	-71.386	-83.391	2022.662	-2.1777	1.4629	0.68701	-41.564	-74.153	271.47269	-0.20313	0.31348	-0.15332	-83.2268	213.0392	1085.9564	-1.0815	0.78272	0.11792	-37.488	45.8967	3.031	-0.092773	0.036133	-0.066163	-25.542	20.22687	19.3849	0.22266	0.025879	0.037598	35.301	31.7247	9.182	0.11328	-0.04541	0.13379
1.614	-66.599	256.966	830.3241	-0.9543	0.61406	0.16181	-54.8709	-77.628	2022.62	-2.1855	1.4512	0.7085	13.683	-63.93	367.7691	-0.30273	0.36523	-0.13867	-49.105	198.763	1077.349	-1.0552	0.771	0.12451	-46.676	17.007	24.9548	-0.071289	0.037109	-0.073242	-24.231	42.524	22.7145	0.23438	0.04541	0.023438	39.34	30.2297	17.8142	0.11348	-0.046971	0.13222
1.616	-37.046	283.946	785.608	-0.93086	0.59531	0.16845	-125.444	-18.278	1984.606	-2.1934	1.4434	0.72705	-6.45	-35.809	442.4178	-0.36084	0.39209	-0.13379	-67.7271	234.573	1014.361	-1.0132	0.73877	0.10645	-16.887	10.7397	27.1656	-0.052734	0.046875	-0.078125	-34.797	40.2021	6.56651	0.2373	0.055664	0.022949	-21.973	-4.25	32.1863	0.11504	-0.051939	0.13145
1.618	-87.82683	221.7089	721.025	-0.90098	0.57597	0.17432	-140.434	-11.628	1957.744	-2.1968	1.4263	0.74902	-23.125	-5.9	595.8016	-0.48975	0.44629	-0.12207	-61.359	208.036	1007.76	-0.99023	0.71973	0.11816	-71.1488	50.7292	19.029	-0.040039	0.043945	-0.081055	3.331	6.759	20.9132	0.24707	0.081055	0.013672	17.233	5.77966	34.3782	0.11387	-0.061713	0.12637
1.62	-53.496	205.4265	690.8	-0.86523	0.5542	0.17969	-106.0978	18.652	1961.989	-2.1929	1.4185	0.75781	-38.776	51.3543	717.0245	-0.60547	0.49927	-0.10913	-23.904	249.827	984.966	-0.94727	0.66602	0.14697	-53.715	31.4895	26.3633	-0.017578	0.050781	-0.085449	-27.623	37.40108	-13.536	0.25317	0.093017	0.011719	-25.099	25.76	4.2408	0.11446	-0.066795	0.12188
1.622	-47.544	246.587	635.377	-0.82754	0.53047	0.18086	-121.655	41.594	1945.007	-2.1875	1.4043	0.76611	-60.5258	105.179	841.249	-0.74561	0.56104	-0.084473	-60.127	263.609	943.566	-0.91504	0.63282	0.13648	-52.318	61.189	18.656	-0.0053711	0.051758	-0.085938	-24.488	17.825	-2.7498	0.25732	0.10547	0.0097656	-42.258	35.6035	19.2471	0.11279	-0.07666	0.1167
1.624	-69.204	203.664	597.259	-0.78711	0.50566	0.18144	-89.674	-12.656	1986.363	-2.1756	1.3938	0.77075	-40.16159	105.13	987.153	-0.96826	0.64893	-0.033691	-37.994	232.554	936.838	-0.87646	0.60986	0.13818	-83.886	53.3503	9.2982	0.0039063	0.056152	-0.093262	19.832	12.6023	16.6697	0.25488	0.11768	0.01123	-17.293	58.414	18.9207	0.1086	-0.081251	0.10977
1.626	-45.275	234.25	561.265	-0.74453	0.48184	0.18262	-103.967	-15.583	2028.559	-2.1582	1.377	0.77197	-79.817	127.757	1074.973	-1.0938	0.69727	0.00048828	-66.5012	262.605	860.805	-0.81641	0.58643	0.13916	-29.524	11.874	27.378	0.027832	0.060059	-0.10156	-35.324	54.2817	13.4844	0.25586	0.11426	0.0097656	-59.321	41.737	-4.6963	0.10371	-0.084571	0.10986
1.628	-62.984	219.369	512.319	-0.69775	0.45429	0.17773	-93.0158	-42.8562	1988.11	-2.1284	1.3716	0.7666	-123.093	117.134	1174.582	-1.3433	0.80713	0.10498	-97.6143	232.757	808.302	-0.79053	0.57471	0.14014	-69.90513	42.1497	6.1136	0.039063	0.060547	-0.10107	-6.733	39.7971	27.312	0.26221	0.12158	0.010254	-39.745	43.4078	22.0787	0.10332	-0.083788	0.10126
1.63	-60.603	169.424	497.823	-0.65039	0.42285	0.17578	-56.89	-67.566	1968.248	-2.1113	1.3711	0.76318	-73.288	116.432	1230.544	-1.543	0.89698	0.17309	-61.273	216.89	756.454	-0.73584	0.54443	0.14697	-45.801	3.868	34.4161	0.0625	0.066406	-0.11133	-15.644	72.506	17.1178	0.25977	0.12183	0.0031738	-27.563	62.576	-4.502	0.093847	-0.084668	0.10342
1.632	-56.03	192.01	460.947	-0.59805	0.39258	0.17432	-85.522	-13.7	1934.218	-2.0664	1.3672	0.75439	-101.786	126.055	1239.485	-1.7124	0.99268	0.2334	-112.431	232.098	682.7924	-0.69971	0.521	0.14551	-10.002	6.9099	35.954	0.077637	0.068603	-0.11938	-57.138	74.493	14.3737	0.26074	0.1167	-0.0063477	-54.85	37.36	15.1287	0.094238	-0.083984	0.097656
1.634	-69.2549	147.888	426.599	-0.54991	0.36357	0.17129	-56.193	-40.052	1916.629	-2.0337	1.3647	0.74609	-75.5605	78.905	1258.607	-1.853	1.1147	0.3042	-106.7879	194.159	650.3846	-0.6582	0.5	0.14893	-71.803	41.4929	16.83	0.092773	0.074219	-0.12793	-31.441	41.454	21.7206	0.25488	0.11084	-0.014648	-32.241	35.773	28.4548	0.089844	-0.079005	0.095313
1.636	-69.242	123.867	399.343	-0.50342	0.33545	0.16074	-38.887	-34.998	1922.8	-2.0034	1.3618	0.73047	-12.526	27.929	1251.026	-1.8765	1.1724	0.3335	-71.3393	205.0814	601.248	-0.60156	0.47266	0.15332	-24.091	26.409	38.826	0.10986	0.077148	-0.13281	-44.98	57.939	13.017	0.25098	0.10498	-0.012695	-70.915	32.3348	-1.938	0.094433	-0.073144	0.085743
1.638	-74.7799	142.21	350.284	-0.46191	0.31104	0.16006	-68.585	-20.035	1894.347	-1.9531	1.3584	0.71338	-90.71	-20.001	1184.7349	-1.8589	1.2524	0.38965	-107.706	208.275	558.9138	-0.57227	0.45996	0.15186	-17.848	65.143	18.8813	0.11328	0.084961	-0.1377	-52.857	21.102	18.0063	0.23242	0.10254	-0.020508	-69.859	36.653	12.3737	0.094434	-0.071192	0.081055
1.64	-104.51067	100.3636	315.606	-0.41992	0.28418	0.15283	-68.893	-62.5511	1893.358	-1.9277	1.3535	0.70557	-35.197	-71.2531	1203.704	-1.8494	1.2923	0.41675	-67.0659	180.074	533.9506	-0.51709	0.42725	0.14453	-57.812	59.273	22.1179	0.12061	0.088867	-0.146	-23.092	-0.4397	9.501	0.2085	0.099366	-0.014648	-62.855	59.819	19.4731	0.10019	-0.066406	0.078809
1.642	-79.331	126.76	284.417	-0.38174	0.2667	0.15166	-72.831	-11.638	1884.3	-1.8774	1.354	0.67773	-41.384	-76.8275	1159.14	-1.8477	1.3145	0.39795	-54.337	201.38	494.036	-0.47461	0.40087	0.14771	-17.834	14.37571	25.38	0.12256	0.09082	-0.14526	-69.563	38.144	8.065	0.18164	0.10059	-0.0097656	-86.809	44.7033	17.5043	0.104	-0.057617	0.07373
1.644	-60.936	129.143	226.5639	-0.34326	0.2458	0.14668	-62.929	46.759	1816.061	-1.8377	1.3499	0.65942	-68.8505	-93.778	1133.927	-1.7554	1.3306	0.32275	-75.966	176.336	469.652	-0.43408	0.38135	0.15918	-39.844	30.996	6.5075	0.12256	0.09668	-0.14502	-50.912	18.452	30.69617	0.14551	0.10059	-0.0078125	-69.085	25.80765	36.5053	0.10595	-0.053125	0.070312
1.646	-53.492	96.907	220.6555	-0.29912	0.22861	0.14121	-64.371	81.233	1793.477	-1.7983	1.3481	0.63867	-34.619	-131.656	1130.467	-1.6367	1.3359	0.28174	-28.408	164.851	436.561	-0.38281	0.33838	0.15186	-33.301	-3.099	17.8072	0.10938	0.10303	-0.14355	-39.359	57.008	25.1334	0.12695	0.10547	-0.003418	-74.591	30.128	8.634	0.10879	-0.050781	0.069824
1.648	-46.855	140.434	186.1303	-0.26777	0.21045	0.13613	-105.167	157.461	1766.6709	-1.7422	1.3359	0.60986	-76.4154	-140.1619	1083.164	-1.3379	1.3242	0.16748	-46.285	174.495	390.869	-0.36084	0.31738	0.14795	0.987000000000002	1.04605	27.8686	0.10352	0.10791	-0.1416	-50.932	63.9432	27.8796	0.094727	0.11768	0.012207	-90.204	4.665	16.153	0.1166	-0.046484	0.063184
1.65	-62.514	109.767	168.8822	-0.23047	0.19238	0.13721	-91.014	132.35	1760.871	-1.7207	1.3301	0.59863	-83.3011	-147.582	1101.634	-1.1294	1.3012	0.073731	-37.849	126.283	377.3032	-0.31396	0.28857	0.14697	-33.341	33.43929	15.229	0.086914	0.11865	-0.13965	-19.119	18.6741	48.3724	0.07251	0.12475	0.017822	-21.418	12.9048	35.705	0.12754	-0.041406	0.057715
1.652	-23.579	101.024	163.8819	-0.20352	0.17588	0.1331	-80.482	133.336	1754.108	-1.6602	1.3164	0.57471	-65.185	-118.599	1154.811	-0.96289	1.2813	-0.0068359	-24.741	123.765	342.595	-0.27613	0.26855	0.14551	-16.655	15.174	22.7218	0.071533	0.12378	-0.13452	-64.536	12.2963	48.191	0.055664	0.13721	0.029785	-30.835	11.5517	22.7134	0.13965	-0.040039	0.045898
1.654	-10.95	122.039	139.891	-0.17891	0.1625	0.12598	-125.6956	132.0061	1717.388	-1.6303	1.2984	0.56103	-54.279	-82.123	1185.126	-0.82813	1.2637	-0.093262	-30.152	110.693	301.0096	-0.2373	0.24561	0.14844	-8.394	54.011	17.554	0.057617	0.13623	-0.13037	-73.76	-29.6729	77.7454	0.031738	0.14746	0.030762	-8.392	8.505	26.513	0.15156	-0.037012	0.045606
1.656	-30.34	81.805	138.941	-0.15156	0.14297	0.12168	-104.786	78.887	1691.811	-1.6069	1.2817	0.5459	-27.071	-132.924	1248.432	-0.78662	1.2642	-0.12939	-14.594	84.2367	278.4424	-0.19531	0.22266	0.14111	-27.322	48.69923	26.81336	0.04541	0.15088	-0.12354	-16.524	-40.767	94.6757	0.020996	0.14844	0.026855	5.109	42.762	15.41725	0.1623	-0.037109	0.046875
1.658	-6.514	117.695	107.989	-0.12295	0.12431	0.1206	-91.944	92.501	1651.9394	-1.5762	1.2539	0.53174	5.708	-163.835	1246.678	-0.73828	1.251	-0.19531	-51.596	107.7756	232.3043	-0.16992	0.20898	0.13672	13.583	11.442	25.2212	0.036621	0.15479	-0.125	-50.555	-12.369	94.26618	-0.0048828	0.16016	0.026367	-22.543	43.73742	-8.1642	0.17051	-0.034766	0.047266
1.66	-17.996	113.68	77.9746	-0.098633	0.10498	0.1167	-110.982	87.714	1592.6464	-1.564	1.2368	0.51758	6.06700000000001	-211.361	1281.164	-0.72778	1.2405	-0.23755	-47.762	93.472	218.9428	-0.11914	0.18408	0.13574	-33.424	37.817	24.81892	0.023926	0.16699	-0.12402	-40.084	-49.6066	156.273	-0.030274	0.17139	0.022705	12.555	49.8378	21.1394	0.19082	-0.028809	0.05625
1.662	-17.554	94.307	65.1453	-0.068164	0.088477	0.10859	-101.989	77.118	1594.854	-1.5366	1.2036	0.50586	85.37	-258.565	1373.691	-0.74219	1.2363	-0.271	-10.584	88.1799	199.9565	-0.085938	0.16041	0.13208	-52.408	-17.408	53.58463	0.011719	0.1748	-0.12598	-50.504	-36.043	182.637	-0.059082	0.18164	0.022461	15.192	47.126	13.5973	0.21289	-0.013184	0.064453
1.664	-4.356	110.83	40.4156	-0.040235	0.068164	0.10176	-97.638	136.8598	1582.794	-1.5134	1.1858	0.4895	43.491	-242.486	1407.106	-0.80371	1.2402	-0.29102	-44.748	111.676	155.0989	-0.052246	0.13672	0.12012	-29.332	-37.80595	63.3123	0.003418	0.1875	-0.13086	-61.682	-31.502	227.354	-0.11133	0.20508	0.020508	-11.789	20.0501	18.0408	0.23262	0.019726	0.078516
1.666	-7.587	49.13479	39.0392	-0.0093751	0.048242	0.097851	-73.955	115.4658	1580.927	-1.4883	1.1611	0.47607	39.42	-260.752	1454.3234	-0.8584	1.2539	-0.29004	-14.123	83.744	168.17	-0.014648	0.10791	0.11377	-59.421	-18.11	73.08	-0.024902	0.20166	-0.12549	-31.101	-42.293	343.07	-0.1377	0.21875	0.021484	11.129	25.791	26.3969	0.24336	0.050098	0.080567
1.668	1.95	35.49193	41.5565	0.02002	0.029883	0.092774	-88.247	134.832	1575.47	-1.4424	1.1289	0.45557	49.366	-274.9167	1476.864	-1.0112	1.2817	-0.26514	-6.415	102	140.018	0.0078125	0.091797	0.11768	-53.123	-49.703	118.342	-0.044434	0.2124	-0.12256	-51.47	16.84957	445.33	-0.2085	0.25195	0.015137	-7.313	28.544	7.508	0.24609	0.069238	0.074707
1.67	-11.444	44.04	30.859	0.044922	0.0068359	0.091309	-121.533	181.108	1510.093	-1.4077	1.0987	0.44092	-0.238	-261.952	1501.354	-1.1562	1.3007	-0.22998	-40.728	118.783	131.506	0.037109	0.056641	0.1123	-55.315	-27.275	161.024	-0.10889	0.22998	-0.11523	-20.148	23.603	606.51	-0.26929	0.28809	0.0090332	-10.517	17.6404	25.4505	0.2457	0.077637	0.067774
1.672	-21.222	18.4561	39.002	0.061133	-0.0080076	0.08711	-39.223	160.407	1463.169	-1.3706	1.0747	0.42676	28.431	-290.37	1616.2255	-1.314	1.3208	-0.19922	8.59400000000001	111.711	124.836	0.057861	0.030517	0.10815	-65.622	-23.261	211.2633	-0.16406	0.24951	-0.10132	69.571	44.1499	787.33	-0.33838	0.32764	0.0068359	1.16	37.9991	21.507	0.24561	0.07959	0.0625
1.674	-5.40300000000001	61.8676	34.013	0.078613	-0.024903	0.086816	-33.288	189.951	1408.367	-1.3164	1.0293	0.40576	30.072	-232.1537	1694.176	-1.5156	1.3535	-0.15332	-27.309	126.366	92.4138	0.076172	0.010254	0.10254	-29.695	-41.36	299.5397	-0.22607	0.26758	-0.086914	13.173	111.834	930.1	-0.46533	0.39697	-0.013184	-40.518	32.92	11.18591	0.2332	0.071386	0.062012
1.676	-23.459	65.1607	29.102	0.098929	-0.038965	0.082519	-49.178	194.89	1366.12	-1.293	1.0117	0.39502	14.064	-194.231	1763.206	-1.6011	1.3687	-0.13232	-67.045	101.585	85.2633	0.10107	-0.011719	0.10449	-39.246	-1.194	363.421	-0.33105	0.29883	-0.061035	43.708	74.333	1095.15	-0.53809	0.42773	-0.019043	-9.812	19.545	32.6162	0.21943	0.068945	0.063574
1.678	-18.684	58.76035	13.0962	0.11172	-0.049511	0.079883	-24.211	167.994	1342.461	-1.2397	0.97119	0.36914	48.037	-207.4103	1850.406	-1.7559	1.4111	-0.099609	-25.234	81.515	87.074	0.12061	-0.024414	0.10303	-39.254	10.7585	476.757	-0.38281	0.31299	-0.050781	101.932	61.235	1205.78	-0.71826	0.53076	-0.0068359	-5.677	-7.555	34.721	0.2003	0.075976	0.065918
1.68	-16.609	74.47	1.5893	0.12549	-0.059082	0.079102	-3.488	224.205	1281.67	-1.1999	0.93775	0.35401	17.928	-163.784	1848.97	-1.8538	1.4436	-0.080078	-56.772	84.604	54.878	0.14551	-0.047852	0.098633	-68.326	39.8254	607.31	-0.50781	0.3584	-0.034668	53.842	43.1315	1288.18	-0.88306	0.60376	0.031738	-31.905	-59.461	60.789	0.19043	0.082812	0.071484
1.682	-54.028	32.4989	-4.5489	0.13311	-0.071191	0.08291	19.893	214.165	1259.099	-1.1577	0.90479	0.33398	42.193	-174.798	1860.235	-1.9312	1.4712	-0.070801	-65.307	55.986	62.185	0.16479	-0.060791	0.094971	-130.708	120.534	733.6817	-0.61987	0.40943	-0.015137	11.345	12.333	1318.11	-1.0742	0.68652	0.078613	-12.187	-63.2	101.742	0.18213	0.092773	0.074219
1.684	-44.06	38.582	30.8246	0.1374	-0.07461	0.080371	22.897	243.436	1249.368	-1.1084	0.87109	0.3125	78.859	-153.341	1859.578	-2.0054	1.5044	-0.062988	-56.932	57.3251	34.693	0.18359	-0.070313	0.092773	-98.246	127.788	908.814	-0.75586	0.45898	0.011719	-15.36	25.353	1261.31	-1.3525	0.81641	0.16211	-66.542	-50.303	106.722	0.16865	0.10313	0.078906
1.686	-48.196	45.1802	23.1462	0.14248	-0.077344	0.079981	12.374	276.152	1193.389	-1.0786	0.85205	0.30566	10.864	-90.314	1838.855	-2.0308	1.5103	-0.059082	-76.52	55.578	22.2366	0.20264	-0.080566	0.086426	-151.091	159.925	1072.778	-0.98438	0.5459	0.075195	-10.403	-45.8	1207.24	-1.4858	0.88428	0.20898	-66.731	-53.369	181.275	0.15517	0.11319	0.082324
1.688	-93.996	8.8151	24.9646	0.14521	-0.083887	0.079101	43.13	229.472	1139.968	-1.0308	0.81494	0.28906	-13.49	-128.275	1889.8018	-2.0664	1.5176	-0.055176	-39.118	21.7607	42.527	0.21045	-0.08252	0.083496	-173.96	174.901	1216.492	-1.1289	0.59766	0.1167	46.538	-99.7728	1174.75	-1.7007	1.0239	0.30859	-39.771	-25.079	214.5912	0.14541	0.12412	0.083106
1.69	-50.896	44.9595	30.3132	0.14453	-0.088379	0.080566	13.341	239.283	1081.021	-0.99465	0.78955	0.2727	-5.153	-127.467	1895.975	-2.0867	1.5198	-0.055909	-32.093	39.0164	9.6473	0.22363	-0.09375	0.077148	-111.643	115.614	1350.462	-1.4604	0.73682	0.25439	60.072	-72.379	1140.96	-1.8018	1.1026	0.36865	-114.5127	-4.649	273.419	0.13018	0.129	0.078808
1.692	-70.551	33.8667	16.931	0.13808	-0.088477	0.079394	16.246	188.516	1061.72	-0.95654	0.76807	0.26221	-49.955	-135.661	1899.011	-2.1069	1.5278	-0.047852	-45.23	25.427	31.2333	0.23047	-0.10181	0.072998	-103.3163	122.857	1388.953	-1.7505	0.84033	0.33545	102.2159	-98.7	1113.91	-1.8462	1.1499	0.40088	-55.12	15.7808	395.613	0.10889	0.146	0.07666
1.694	-77.615	39.1073	27.3721	0.13028	-0.091211	0.081054	38.359	160.866	1059.355	-0.91162	0.73389	0.24023	13.737	-196.3247	1941.356	-2.1348	1.5469	-0.041016	-14.423	36.828	41.593	0.23242	-0.10156	0.07666	-79.583	54.351	1411.175	-2.0352	0.96094	0.39502	86.2495	-74.59	1071.04	-1.7964	1.1821	0.41992	-32.947	73.196	492.1586	0.085352	0.16221	0.078516
1.696	-50.919	70.007	14.909	0.12246	-0.091992	0.077539	33.751	212.279	1021.053	-0.88477	0.71289	0.23047	-11.301	-152.545	1940.647	-2.1563	1.5664	-0.03125	-43.011	57.625	30.4952	0.22705	-0.11035	0.066895	-55.711	-7.593	1377.847	-2.3081	1.1147	0.4375	51.955	-76.538	1053.81	-1.7202	1.1811	0.42187	-37.535	86.308	637.4172	0.051367	0.18467	0.082227
1.698	-66.148	29.0027	-1.3678	0.11651	-0.093652	0.082031	31.956	183.186	983.813	-0.83789	0.67773	0.20801	-51.738	-145.497	1932.395	-2.1797	1.5859	-0.01416	-17.635	43.57319	48.35	0.22266	-0.11816	0.068359	-82.278	-29.471	1316.682	-2.353	1.1743	0.45898	72.658	-97.714	1127.57	-1.6284	1.1626	0.41797	43.006	104.395	837.892	-0.004492	0.20342	0.086133
1.7	-43.556	20.056	33.539	0.1084	-0.087402	0.085449	3.628	203.488	950.735	-0.79322	0.65625	0.19019	-31.2	-146.6622	1946.53	-2.1968	1.5884	0.0029297	-28	41.889	13.196	0.20898	-0.12354	0.065918	-64.4412	-91.224	1284.575	-2.3237	1.2642	0.51953	-1.749	-29.1397	1170.01	-1.4551	1.1348	0.4126	35.1	126.395	964.726	-0.069531	0.22393	0.094824
1.702	-36.81	11.221	24.113	0.10332	-0.083301	0.084375	-21.901	213.965	899.897	-0.74902	0.625	0.17578	-83.2285	-85.07	1897.9235	-2.207	1.5898	0.011719	-71.619	44.848	2.4422	0.19751	-0.12891	0.064453	-66.138	-90.285	1244.357	-2.253	1.2813	0.48389	-43.142	-22.681	1197.14	-1.3574	1.1191	0.42236	56.37	110.626	1103.937	-0.14209	0.25098	0.099121
1.704	-27.533	-7.102	37.0733	0.09668	-0.083691	0.084961	-5.34700000000001	166.597	851.489	-0.68945	0.58398	0.14697	-65.736	-136.655	1966.703	-2.2085	1.5845	0.033691	-13.425	34.575	20.91285	0.18506	-0.12891	0.064453	-74.581	-94.631	1214.904	-2.1113	1.2598	0.39307	-49.906	-49.331	1156.48	-1.1987	1.0728	0.43945	103.064	131.28	1157.016	-0.23066	0.2791	0.10059
1.706	-15.175	40.2738	39.3338	0.094726	-0.077441	0.081836	-8.527	199.467	782.164	-0.65723	0.56689	0.1333	-9.399	-116.052	1989.79	-2.2009	1.5726	0.041993	-42.591	59.613	-5.28	0.16602	-0.13086	0.067383	-21.2663	-132.094	1207.094	-1.7183	1.1841	0.2334	-99.728	-52.922	1111.83	-1.1218	1.0286	0.4441	33.806	105.921	1186.448	-0.32227	0.31894	0.10166
1.708	-21.861	35.943	30.21749	0.09375	-0.073828	0.082617	-25.317	162.7366	712.727	-0.59131	0.53369	0.11133	-15.409	-93.233	1953.299	-2.1831	1.5552	0.044922	-42.152	35.2056	18.2995	0.15479	-0.12646	0.068359	-69.2035	-101.757	1178.652	-1.48	1.1372	0.15918	-48.968	-134.536	1153.08	-1.0776	1.0103	0.45215	60.333	63.402	1259.359	-0.42851	0.36661	0.10479
1.71	-33.462	32.063	53.893	0.090332	-0.070801	0.080078	-31.018	137.17	680.3387	-0.54614	0.49194	0.097657	-8.958	-132.491	1954.347	-2.1445	1.5273	0.042969	3.537	16.22047	25.358	0.13232	-0.12402	0.068848	-87.6	-118.3688	1181.312	-1.062	1.0532	0.0097656	-5.69	-173.953	1216.78	-1.0444	1.0103	0.47852	82.9384	31.578	1224.731	-0.55049	0.41592	0.10274
1.712	-34.857	54.111	12.1943	0.077539	-0.065527	0.080566	-53.5469	175.32286	606.437	-0.50391	0.45703	0.083496	-17.849	-54.944	1911.185	-2.1191	1.5117	0.043457	-50.529	20.74013	3.07741	0.11963	-0.1167	0.066895	-66.88	-115.936	1196.189	-0.86182	1.0034	-0.091062	-48.6804	-236.53	1251.17	-1.0366	1.022	0.48438	83.1921	-33.9174	1175.05	-0.70117	0.47363	0.10742
1.714	-31.729	11.671	-0.71509	0.068848	-0.062597	0.079981	-53.466	147.979	574.6425	-0.43701	0.4126	0.059082	-10.342	-51.157	1901.265	-2.0796	1.4673	0.033691	-5.25999999999999	5.963	36.333	0.11182	-0.11865	0.06543	-95.324	-58.915	1221.1295	-0.72217	0.98486	-0.18262	-59.854	-355.53	1306.11	-1.0542	1.0571	0.50049	140.916	-78.852	1122.604	-0.87978	0.5374	0.13233
1.716	-14.48	20.5991	9.6097	0.063769	-0.055566	0.080371	-39.924	201.0195	539.3004	-0.40771	0.39111	0.050781	31.863	-56.947	1915.3749	-2.0476	1.4407	0.034424	18.76	33.58687	24.7211	0.098633	-0.11328	0.063965	-30.508	-82.55	1267.6447	-0.58936	1.0259	-0.26807	-120.51487	-377.22	1318.66	-1.084	1.1084	0.50513	130.513	-83.116	1087.752	-1.0714	0.60244	0.16845
1.718	-13.61	12.4146	7.184	0.05625	-0.054395	0.080371	-42.229	222.511	503.32134	-0.33936	0.34277	0.034668	9.866	10.707	1855.213	-2.0195	1.4082	0.02832	-39.653	45.45	12.1477	0.086181	-0.10791	0.064942	5.914	-87.19	1288.448	-0.52783	1.061	-0.2915	-132.936	-381.75	1362.26	-1.127	1.1719	0.50635	126.432	-89.015	1087.008	-1.2808	0.6626	0.23173
1.72	-8.05899999999999	-23.86695	15.5584	0.048828	-0.049316	0.086914	-35.039	186.901	486.07	-0.28564	0.31323	0.023437	27.169	-41.449	1881.0335	-1.9902	1.3691	0.03125	1.04199999999999	22.5776	46.304	0.072754	-0.099609	0.061523	41.67	-94.42	1309.694	-0.42969	1.1113	-0.32666	-76.2571	-348.09	1417.13	-1.1836	1.2637	0.49609	123.364	-62.846	1044.305	-1.4962	0.72744	0.31211
1.722	9.53	19.6796	16.7364	0.043945	-0.042969	0.09209	-53.036	220.473	424.5588	-0.24023	0.2793	0.0029297	20.199	-12.694	1904.831	-1.9839	1.3579	0.03418	-18.552	29.8382	14.812	0.060547	-0.089355	0.061035	82.272	-169.847	1353.909	-0.42823	1.1145	-0.32861	-73.082	-262.297	1444.49	-1.207	1.3047	0.48486	60.096	-57.7403	1008.41	-1.7012	0.79297	0.3877
1.724	-19.184	17.9413	-5.7803	0.04248	-0.042578	0.089551	-30.707	160.897	372.561	-0.17969	0.23828	-0.0063477	-0.239000000000004	39.959	1890.641	-1.9741	1.3286	0.04541	-46.62	9.198	15.6468	0.057129	-0.088379	0.057617	66.347	-175.82	1389.176	-0.49609	1.1328	-0.29688	-65.9362	-287.954	1509.83	-1.2437	1.3677	0.45605	54.341	-80.952	1078.303	-1.8551	0.87188	0.46455
1.726	-1.98	26.0683	28.737	0.046777	-0.041016	0.087988	-25.566	123.9809	345.116	-0.14697	0.21924	-0.016602	81.622	-26.181	1906.057	-1.9724	1.3156	0.049805	-25.958	14.2258	24.9043	0.052246	-0.07666	0.054199	51.777	-257.512	1418.718	-0.72412	1.2153	-0.21826	-79.262	-257.89	1576.04	-1.2647	1.4019	0.43555	7.175	-52.217	1125.81	-1.9366	0.94306	0.52226
1.728	-7.681	56.714	24.2658	0.059082	-0.037891	0.083594	-34.103	130.607	299.766	-0.094238	0.17725	-0.029785	58.219	20.741	1864.632	-1.9688	1.3066	0.057617	-63.62	32.645	12.0954	0.05249	-0.072999	0.049805	34.66	-345.148	1452.74	-0.8667	1.2739	-0.17725	-113.779	-188.836	1622	-1.2944	1.4341	0.41553	-42.605	-36.984	1140.13	-1.9195	0.9915	0.55977
1.73	-40.744	25.9912	-4.4689	0.071289	-0.035645	0.078125	-32.195	74.817	279.844	-0.056397	0.14356	-0.040039	57.941	-14.379	1832.1307	-1.9609	1.2949	0.068848	-68.753	15.8305	39.815	0.055664	-0.066406	0.044922	-30.7	-328.078	1480.964	-1.1421	1.3833	-0.10254	-80.42281	-154.612	1672.56	-1.3418	1.4629	0.39404	9.589	-39.4	1163.01	-1.8333	1.0304	0.58613
1.732	-38.643	39.856	7.1739	0.086817	-0.02832	0.072852	-21.708	104.971	267.069	-0.027344	0.11182	-0.05127	102.186	-49.035	1858.83	-1.9487	1.2905	0.067871	-38.681	32.734	15.8771	0.064941	-0.058594	0.038574	-41.24	-367.035	1544.39	-1.3072	1.4361	-0.044922	-75.832	-71.8602	1686.26	-1.3613	1.4902	0.37891	-18.869	-49.99	1144.7	-1.7202	1.0747	0.60352
1.734	-48.134	30.2175	-19.4571	0.098048	-0.022559	0.068359	-7.558	105.5539	256.21	0.0087891	0.074219	-0.058594	60.388	37.111	1822.789	-1.9336	1.2852	0.077637	-51.231	33.6231	1.749	0.068848	-0.052734	0.033203	-18.749	-305.541	1602.201	-1.4438	1.479	-0.0083008	-95.9984	-86.679	1687.94	-1.4019	1.5571	0.36328	-37.484	-145.795	1198.39	-1.6101	1.1237	0.59512
1.736	-76.847	-4.518	6.2762	0.10821	-0.014356	0.060938	7.186	80.2708	253.255	0.019531	0.058594	-0.06543	65.587	-23.6	1843.8033	-1.9216	1.2815	0.081787	-17.29	15.202	16.7413	0.085449	-0.046875	0.02832	-10.261	-210.118	1648.304	-1.5815	1.5259	0.010254	-36.599	-133.593	1711.07	-1.435	1.6074	0.35938	-23.668	-207.993	1277.23	-1.4785	1.1492	0.55371
1.738	-38.245	28.1435	16.105	0.125	-0.0087891	0.051954	0.0609999999999999	115.88	219.412	0.047852	0.03125	-0.077148	65.232	-0.216000000000001	1854.155	-1.8989	1.2798	0.084961	-60.555	36.7148	-1.723	0.089356	-0.043213	0.023438	43.132	-210.2497	1721.558	-1.6382	1.5415	0.013672	-53.1645	-128.387	1727.88	-1.4668	1.6621	0.35986	-87.233	-261.444	1273.67	-1.2957	1.1289	0.49746
1.74	-57.098	14.4347	-13.2398	0.13623	-0.0014648	0.04541	-1.328	78.299	186.337	0.064941	0.01001	-0.087647	15.022	19.411	1814.576	-1.8667	1.27	0.081543	-41.783	29.259	-4.1399	0.097656	-0.040527	0.020508	42.054	-122.154	1769.094	-1.7183	1.561	0.020996	-13.193	-173.983	1815.41	-1.5132	1.7349	0.37109	-101.149	-334.4	1331.33	-1.1073	1.0595	0.44473
1.742	-73.196	33.44337	3.4075	0.14824	0.0057617	0.040918	-11.267	93.114	170.9517	0.080566	-0.003418	-0.092773	69.782	-37.307	1808.163	-1.8477	1.2646	0.084473	-29.634	33.898	-1.577205	0.10986	-0.034668	0.018555	41.317	-99.35	1780.78	-1.7644	1.5656	0.024658	7.522	-158.59	1899.93	-1.543	1.7695	0.37988	-157.2965	-347.19	1358.23	-0.9624	0.98975	0.40039
1.744	-37.542	75.61	9.8007	0.15557	0.016016	0.03545	-29.871	121.334	127.153	0.086914	-0.028809	-0.09668	45.982	69.999	1757.944	-1.8042	1.2563	0.084961	-70.793	36.6604	-16.799	0.12061	-0.034668	0.019043	94.763	-112.159	1829.834	-1.7964	1.5698	0.035645	-11.389	-139.711	1923.45	-1.5991	1.8306	0.40234	-229.648	-362.11	1375.48	-0.88955	0.93721	0.36953
1.746	-64.104	43.0737	12.5739	0.15557	0.022656	0.035058	-18.489	67.921	114.622	0.088867	-0.032715	-0.098633	11.708	74.354	1726.574	-1.7635	1.2483	0.086182	-47.279	9.906	29.086	0.13086	-0.025879	0.016113	76.858	-32.71	1807.786	-1.8359	1.5723	0.040527	18.95	-162.889	1962.87	-1.6519	1.8706	0.427	-150.3516	-375.89	1451.24	-0.84599	0.89814	0.35508
1.748	-46.954	53.8971	13.7585	0.15625	0.032324	0.033399	9.395	93.0711	113.928	0.086914	-0.046875	-0.09668	31.483	54.031	1740.883	-1.7261	1.2368	0.082031	-45.467	23.2564	14.9154	0.13599	-0.023925	0.022217	37.154	-58.835	1799.5984	-1.8608	1.5728	0.041016	17.8346	-115.237	1973.76	-1.7129	1.9023	0.46045	-134.8907	-332.04	1479.89	-0.83427	0.86924	0.35351
1.75	-47.615	44.8189	-1.429	0.15527	0.042969	0.031738	-14.768	101.4524	99.8897	0.082275	-0.057862	-0.1001	-7.934	100.724	1691.073	-1.6675	1.2251	0.07959	-60.503	36.293	5.387	0.14063	-0.01416	0.026855	17.791	-67.656	1824.1	-1.9023	1.5811	0.050781	22.9278	-117.7	2007.43	-1.7891	1.9414	0.50635	-131.2973	-323.84	1579.61	-0.86025	0.87666	0.35879
1.752	-71.341	11.048	3.6095	0.15156	0.055371	0.036914	-23.443	78.441	101.983	0.078125	-0.063965	-0.093262	-2.19499999999999	19.8204	1685.307	-1.6343	1.2173	0.080078	-20.004	33.1377	30.5819	0.14111	-0.0039063	0.03418	-16.477	-55.068	1820.4169	-1.9404	1.5899	0.060058	63.7034	-130.353	2067.5	-1.8198	1.9536	0.52246	-67.141	-263.15	1675.52	-0.91797	0.91992	0.36865
1.754	-31.909	48.3848	19.9003	0.15537	0.068458	0.039063	-25.506	131.207	74.957	0.070801	-0.07373	-0.095703	36.126	45.948	1677.505	-1.5703	1.2012	0.075684	-51.138	55.145	-4.638	0.14111	0.00048828	0.039551	-40.805	-143.146	1885.2155	-1.9814	1.6016	0.062988	17.881	-63.2817	2055.7	-1.8926	1.9746	0.56885	-89.273	-154.067	1696.86	-0.99522	0.98523	0.39277
1.756	-48.292	29.0968	14.1375	0.15029	0.080177	0.046485	-55.76	103.704	40.351	0.068848	-0.074707	-0.097168	-18.357	94.351	1632.844	-1.5212	1.1877	0.073242	-49.269	39.38641	3.2208	0.14453	0.0092773	0.047852	-60.683	-116.9426	1909.026	-2.021	1.6177	0.066406	-4.367	-68.7581	2036.96	-1.9346	1.9727	0.58741	-44.031	-103.885	1759.77	-1.0812	1.075	0.42207
1.758	-51.273	34.1828	25.798	0.14668	0.094628	0.049707	-57.316	71.411	37.028	0.067383	-0.079102	-0.099121	16.528	62.31	1625.476	-1.4746	1.1748	0.068848	16.697	27.7231	-2.5956	0.15454	0.013184	0.051758	-66.313	-134.0531	1919.351	-2.0418	1.6223	0.069824	3.27	-45.976	2022.13	-1.9683	1.9731	0.61914	4.85799999999999	-37.0024	1776.54	-1.1727	1.1703	0.45215
1.76	-38.505	72.413	18.7033	0.14307	0.10498	0.049805	-49.348	65.8155	13.698	0.067871	-0.080078	-0.099119	0.719000000000008	123.652	1584.329	-1.4121	1.1543	0.05957	-27.399	38.4437	-26.608	0.16748	0.015137	0.056152	-50.228	-186.849	1947.175	-2.0498	1.627	0.066895	-33.606	-2.136	1970.51	-1.9976	1.9575	0.65576	-5.52	-20.3724	1779.81	-1.2592	1.256	0.46797
1.762	-34.353	46.566	16.99006	0.14414	0.11572	0.057518	-67.962	-11.34	27.154	0.062988	-0.083008	-0.10352	-31.663	90.847	1547.703	-1.3882	1.145	0.05957	-14.882	12.583	17.6623	0.18311	0.016602	0.056641	-31.669	-113.323	1922.834	-2.0347	1.6177	0.063477	15.426	-23.879	1989.33	-2.0073	1.9478	0.66699	50.341	-57.8822	1832.98	-1.3477	1.3145	0.48291
1.764	-3.062	52.8813	35.7935	0.14229	0.12353	0.06406	-80.204	16.601	47.694186	0.055176	-0.087402	-0.10107	11.82	47.712	1579.457	-1.3281	1.125	0.055664	-0.0810000000000031	34.918	37.0262	0.18848	0.021973	0.058594	-3.835	-153.3655	1919.97	-2.0195	1.6055	0.059082	34.4456	17.291	1982.88	-2.0098	1.9121	0.68896	30.815	-55.46	1847.74	-1.421	1.3583	0.49941
1.766	-12.554	47.3	7.7333	0.1458	0.13643	0.067579	-86.5487	20.749	43.9756	0.04834	-0.091797	-0.10352	-14.009	131.575	1558.26	-1.2898	1.1027	0.052978	-39.116	57.79968	22.8976	0.20117	0.021973	0.061523	13.99	-136.761	1968.705	-1.9785	1.5762	0.04541	-41.2687	19.138	1960.87	-2.0037	1.887	0.6897	23.162	-108.985	1904.64	-1.4886	1.3908	0.50928
1.768	-19.812	8.269	21.6424	0.14971	0.14297	0.071093	-65.206	5.725	57.502	0.033203	-0.098145	-0.104	-10.637	94.3651	1552.063	-1.2563	1.0825	0.053223	-7.733	56.8936	24.54228	0.21069	0.026123	0.068359	-21.61	-44.711	1960.709	-1.9438	1.5542	0.038086	-35.4602	0.453999999999997	1961.1	-1.9883	1.8535	0.69385	69.946	-132.6415	1961.67	-1.5496	1.4221	0.51709
1.77	14.348	45.7949	22.31643	0.15332	0.15039	0.069336	-80.536	65.399	42.0141	0.020264	-0.10034	-0.10083	24.638	155.797	1517.991	-1.2173	1.0552	0.049805	-20.581	73.12	8.701	0.21582	0.025879	0.068359	-14.133	-81.916	1958.192	-1.9082	1.5234	0.02832	-66.8127	41.657	1921.42	-1.9624	1.813	0.68945	66.118	-106.5897	1962.37	-1.6049	1.4502	0.52393
1.772	-13.543	22.462	6.855	0.15615	0.15508	0.076368	-70.919	35.4277	18.0538	-0.0029297	-0.10596	-0.098145	-17.186	200.225	1428.4575	-1.2007	1.0435	0.055664	-47.891	48.745	16.9474	0.21533	0.022461	0.07373	-29.053	2.01600000000001	1924.72	-1.8569	1.4849	0.015137	-66.4447	12.62	1927.9	-1.9492	1.791	0.68604	104.735	-133.153	2006.5	-1.6602	1.4863	0.52393
1.774	-16.136	22.935	44.0012	0.15928	0.16085	0.077047	-51.296	18.5166	29.767	-0.029785	-0.10791	-0.09375	6.26199999999999	142.896	1427.465	-1.166	1.0195	0.060059	-21.201	43.739	20.3687	0.21143	0.022949	0.07666	-73.436	28.758	1876.311	-1.8403	1.4595	0.0039063	-45.265	15.047	1974.71	-1.9253	1.7544	0.6792	136.475	-89.462	2025.52	-1.7205	1.5244	0.53164
1.776	0.289999999999999	36.963	57.0264	0.1581	0.16514	0.075882	-60.283	32.024	17.539	-0.045898	-0.1084	-0.09082	29.025	209.484	1400.334	-1.137	0.99831	0.065918	-52.604	49.426	3.836	0.18896	0.022949	0.083008	-41.872	-9.449	1876.293	-1.8042	1.4243	0.0024414	-106.458	24.539	1972.36	-1.9067	1.7339	0.66699	108.882	-65.274	2026.11	-1.7886	1.5669	0.54453
1.778	-58.191	-13.5584	74.6522	0.15761	0.17384	0.080666	-40.193	-16.119	29.8467	-0.082031	-0.10449	-0.08252	18.491	190.365	1365.5508	-1.1108	0.9751	0.080566	-31.317	17.1561	34.6064	0.1792	0.028076	0.088867	-48.066	73.6563	1842.0332	-1.7795	1.3938	-0.0031738	-81.447	-27.845	1997.34	-1.8882	1.7095	0.6582	162.12	-104.0864	2096.39	-1.8557	1.6185	0.55742
1.78	-17.028	7.765	104.574	0.1543	0.17969	0.081055	-21.903	18.275	24.7355	-0.10327	-0.10059	-0.075927	57.049	175.8512	1379.196	-1.0649	0.9458	0.078613	-28.147	13.494	35.4883	0.15918	0.02832	0.097656	-40.068	21.5934	1814.4488	-1.7554	1.3716	-0.0014648	-84.54	19.499	1991.75	-1.875	1.6914	0.646	113.737	-76.9882	2110.25	-1.921	1.6622	0.57656
1.782	-0.505000000000003	-13.514	104.691	0.14669	0.18603	0.087593	-33.721	28.1067	-7.384	-0.12695	-0.093262	-0.067871	-24.262	248.638	1315.238	-1.0474	0.93018	0.07959	-39.814	4.463	42.7944	0.13916	0.039063	0.104	-27.235	19.3967	1844.9538	-1.7227	1.3477	-0.0019531	-85.901	23.979	1953.38	-1.8711	1.6777	0.63818	51.054	-94.846	2116.43	-1.9746	1.6992	0.59424
1.784	-49.552	-78.716	144.121	0.13927	0.19159	0.091105	-23.547	9.4253	3.935	-0.15088	-0.081055	-0.047852	-10.637	193.979	1296.5759	-1.0059	0.89063	0.086914	-3.401	-23.5278	71.3182	0.12891	0.045898	0.10938	-32.173	76.619	1837.3041	-1.7061	1.3359	-0.00097656	-39.4101	0.472000000000001	1935.3	-1.853	1.6577	0.62012	48.015	-73.96967	2104.51	-2.0146	1.7303	0.61436
1.786	-51.495	-87.075	203.766	0.13731	0.19976	0.09306	-3.545	66.788	10.034	-0.16309	-0.078125	-0.049316	5.196	226.113	1269.539	-0.97095	0.8606	0.091308	-70.036	5.6077	38.189	0.11279	0.061523	0.12402	8.223	-1.5052	1845.3297	-1.6729	1.3135	0.0014648	-84.67	57.377	1881.74	-1.8364	1.6333	0.60962	-29.883	11.568	2024.94	-2.0407	1.7461	0.62979
1.788	-54.1	-118.599	233.636	0.13518	0.2066	0.097849	-28.127	34.802	13.5141	-0.18018	-0.072266	-0.040527	-28.637	268.309	1196.8374	-0.9375	0.83301	0.094238	-58.883	6.3252	86.6796	0.099119	0.069092	0.12402	27.686	55.6207	1851.951	-1.6489	1.3013	-0.0019531	-74.6395	19.994	1870.51	-1.8179	1.6138	0.59668	-45.156	28.537	2005.93	-2.0527	1.748	0.63643
1.79	-52.94	-123.206	339.71	0.13086	0.21875	0.094727	-26.114	33.657	27.21287	-0.18701	-0.074462	-0.037354	-9.402	222.771	1197.946	-0.89453	0.79102	0.10107	-0.693000000000005	-8.394	117.374	0.088379	0.076172	0.12402	18.511	46.062	1829.968	-1.625	1.2871	0.0024414	-57.876	43.445	1871.35	-1.79	1.582	0.57959	-28.281	78.386	1983.62	-2.0525	1.7379	0.6376
1.792	-51.15	-63.4053	448.34	0.11257	0.23575	0.093285	-7.057	45.052	15.2322	-0.19678	-0.078125	-0.037109	-35.371	280.602	1175.118	-0.87256	0.771	0.10156	-67.271	-23.571	125.29853	0.063965	0.09375	0.12207	28.859	-28.255	1847.771	-1.6035	1.2695	0.00097656	-75.288486	105.276	1849.72	-1.7773	1.5664	0.5752	-85.735	97.478	1965.1	-2.0464	1.7271	0.63379
1.794	-54.484	-64.334	619.65	0.084167	0.25497	0.098239	-14.12	-19.1374	16.0791	-0.20166	-0.084473	-0.029297	-56.5208	249.67	1148.857	-0.83008	0.73242	0.10693	-70.784	-63.4406	191.077	0.048828	0.10791	0.12354	34.684	34.609	1832.917	-1.5938	1.2695	0.0068359	-24.898	103.7184	1855.22	-1.7539	1.5313	0.55908	-74.885	57.673	2022.29	-2.0335	1.702	0.63847
1.796	7.172	10.2689	807.9	0.037402	0.27187	0.10245	18.907	20.125	28.4894	-0.20166	-0.088379	-0.03125	-19.934	206.73852	1149.045	-0.80737	0.69849	0.10937	-48.084	-51.171	238.716	-0.0029297	0.13037	0.12598	34.766	-30.964	1794.775	-1.5801	1.2578	0.0068359	-31.864	160.86	1827.48	-1.7329	1.5035	0.54688	-83.832	70.051	2015.36	-2.0215	1.6758	0.64073
1.798	13.323	83.237	940.88	-0.020314	0.2888	0.11823	2.67	11.42	1.77	-0.19824	-0.098145	-0.031738	-59.1813	261.389	1090.094	-0.7832	0.67383	0.11523	-96.118	-34.03	335.254	-0.049805	0.14721	0.13159	25.88	-34.568	1794.218	-1.5664	1.2553	0.0070801	-61.3063	165.817	1787.71	-1.709	1.4766	0.54248	-118.232	36.693	1990.55	-2.0265	1.641	0.64424
1.8	-39.499	64.547	1080.92	-0.09082	0.31445	0.13037	-13.907	-7.7777	-1.6193	-0.18945	-0.097656	-0.035889	-62.013	213.89	1065.494	-0.75586	0.64063	0.12305	-47.315	-11.2011	467.46	-0.10742	0.1626	0.13916	-10.608	33.89577	1739.769	-1.5566	1.25	0.0024414	-30.471	144.082	1780.4	-1.6753	1.436	0.51953	-91.316	24.414	2013.98	-2.0301	1.607	0.65049
1.802	32.061	49.973	1176.72	-0.16446	0.34835	0.14049	0.500999999999998	41.3925	13.539	-0.18311	-0.10352	-0.040039	-47.796	252.963	1017.838	-0.74268	0.62158	0.12891	-21.549	46.926	602.62	-0.18896	0.19482	0.14551	-17.356	-15.435	1702.202	-1.5347	1.2446	0.01416	-33.661	178.635	1782.66	-1.6631	1.4141	0.51025	-103.515	67.574	1983.02	-2.0366	1.5728	0.65625
1.804	-13.851	-19.6861	1252.33	-0.24847	0.38896	0.15048	-33.311	7.682	17.357	-0.16553	-0.10498	-0.043945	-80.6543	289.304	940.645	-0.71484	0.58887	0.13525	6.473	81.263	752.06	-0.23242	0.21777	0.14355	-1.658	80.694518	1673.248	-1.5234	1.2383	0.016602	-15.078	121.022	1774.66	-1.627	1.3721	0.49463	-89.523	27.4554	2014.47	-2.0512	1.5441	0.66767
1.806	-59.081	-24.3949	1312.27	-0.3355	0.43318	0.16222	-18.398	14.0399	28.002	-0.15625	-0.10449	-0.044922	-58.1668	239.175	928.678	-0.69019	0.56616	0.14355	39.493	94.703	915.8	-0.32813	0.26074	0.14355	-21.015	117.319	1609.297	-1.5034	1.231	0.019043	2.415	116.625	1768.49	-1.6049	1.3433	0.48242	-65.132	37.432	2031.59	-2.0646	1.5231	0.6751
1.808	-48.3821	32.62718	1265.9	-0.45525	0.48092	0.17069	-30.31	49.064	8.2024	-0.13232	-0.1001	-0.054199	-70.9818	274.393	889.261	-0.66162	0.54541	0.15186	16.507	91.09	1026.95	-0.42114	0.30347	0.13623	6.06899999999999	70.423	1630.806	-1.4842	1.2209	0.019043	-34.216	132.364	1714.67	-1.582	1.3105	0.47119	-104.441	46.082	1984.01	-2.0783	1.5055	0.68564
1.81	-72.7905	-12.5692	1203.13	-0.59912	0.54053	0.18311	-51.187	7.8357	7.40836	-0.11597	-0.11084	-0.058838	-88.041	227.589	851.883	-0.61963	0.51416	0.16162	59.693	5.211	1138.18	-0.52734	0.34766	0.12744	9.72199999999999	143.592	1625.578	-1.4702	1.2095	0.020996	2.727	92.176	1692.16	-1.5522	1.2651	0.4502	-49.207	4.61799999999999	2014.3	-2.0901	1.4877	0.69814
1.812	-17.915	2.316	1183.67	-0.79852	0.61078	0.20991	-47.587	53.5034	13.165	-0.10059	-0.11328	-0.063965	-55.301	209.0981	826.597	-0.60303	0.50244	0.16162	52.477	-15.0492	1226.97	-0.7124	0.42822	0.12646	-5.215	81.731	1616.619	-1.4453	1.1895	0.02832	0.544000000000004	154.837	1681.6	-1.5371	1.2441	0.44238	-38.832	40.021	1959.39	-2.0933	1.4731	0.70215
1.814	29.615	8.701	1117.1	-1.0281	0.68532	0.24728	-55.602	50.7096	-10.626	-0.077148	-0.12012	-0.064453	-74.7811	264.834	751.727	-0.5625	0.46484	0.16455	-8.076	-14.288	1279.24	-0.82568	0.46777	0.13867	9.215	98.214	1616.76	-1.4336	1.1816	0.032715	-19.761	156.891	1652.04	-1.5	1.2012	0.41846	-51.015	23.178	1910.2	-2.0977	1.45	0.70752
1.816	43.499	-58.0964	1083.09	-1.2747	0.77278	0.30098	-77.568	30.3103	0.2072	-0.065918	-0.12061	-0.06543	-77.8556	217.821	730.259	-0.5293	0.44239	0.16626	-8.074	-30.323	1255.77	-1.0928	0.55762	0.17578	-25.569	166.304	1562.0655	-1.4229	1.1602	0.04248	13.258	126.445	1636.49	-1.4685	1.1662	0.40356	11.02	18.49	1895.58	-2.0941	1.4324	0.70869
1.818	50.541	-93.401	1084.56	-1.5017	0.85846	0.36892	-49.217	85.115	2.566	-0.047363	-0.12354	-0.070801	-34.922	243.632	681.636	-0.49561	0.40967	0.1665	-1.244	-39.4818	1182.98	-1.3198	0.62744	0.22119	-36.574	106.078	1550.1252	-1.4128	1.1486	0.051758	-10.462	193.595	1591.81	-1.4414	1.127	0.38721	-15.78	76.162	1844.59	-2.0804	1.4172	0.71065
1.82	-9.503	-141.985	1128.76	-1.6797	0.93945	0.43115	-68.845	36.3291	-1.374	-0.030273	-0.12305	-0.074707	-62.779	253.218	631.177	-0.45557	0.37158	0.16553	6.74000000000001	-52.468	1179.55	-1.5444	0.71143	0.29492	-36.292	155.94	1520.131	-1.3979	1.1392	0.061035	-19.072	184.423	1567.01	-1.3999	1.0806	0.36523	31.171	82.268	1835.51	-2.0686	1.3994	0.70654
1.822	-19.781	-166.857	1236.98	-1.7825	1.0087	0.47525	-65.916	36.583	17.0611	-0.018066	-0.12061	-0.07373	-42.154	206.344	597.0838	-0.43799	0.35254	0.16553	60.339	-54.761	1180.98	-1.8184	0.8418	0.41113	-58.919	147.914	1475.829	-1.3784	1.1157	0.070313	-4.15799999999999	212.528	1544.5	-1.377	1.0547	0.35107	74.412	137.461	1828.24	-2.0444	1.3892	0.70508
1.824	-11.971	-65.7156	1272.16	-1.8023	1.0615	0.49894	-75.6997	69.531	-11.3693	-0.003418	-0.11719	-0.079102	-37.449	240.096	544.884	-0.39844	0.31934	0.1665	51.403	-63.837	1109.9	-1.9258	0.89844	0.46387	-53.641	59.179	1478.642	-1.3613	1.1064	0.073242	-24.166	263.52	1481.83	-1.3315	1.0044	0.3291	33.082	184.531	1794.73	-2.0259	1.3738	0.69785
1.826	-79.926	-28.967	1259.13	-1.7403	1.1113	0.51808	-86.061	19.61867	0.8853	0.010254	-0.11255	-0.077393	-57.8474	204.825	509.811	-0.36401	0.29321	0.16406	44.524	-145.442	1105.54	-2.0249	0.99561	0.52148	-57.5229	115.66992	1467.339	-1.3301	1.084	0.083008	-4.61999999999999	237.53	1448.46	-1.3017	0.96631	0.31372	71.624	169.3666	1807.13	-1.9991	1.3639	0.68242
1.828	-72.26	-31.7428	1269.97	-1.6481	1.1659	0.54307	-43.683	50.9739	23.44406	0.023926	-0.11035	-0.082031	-8.608	171.3041	490.386	-0.33789	0.26758	0.16064	28.292	-173.774	1121.04	-1.989	1.0257	0.51856	-83.943	67.713	1428.172	-1.3015	1.0652	0.091553	-20.027	277.81	1421.04	-1.2676	0.92383	0.30029	68.751	191.562	1781.01	-1.9632	1.3452	0.66367
1.83	-43.934	-60.409	1256.63	-1.5562	1.2251	0.55762	-59.917	40.68342	22.4715	0.036133	-0.10498	-0.084961	-41.265	198.033	440.504	-0.2793	0.23438	0.1626	2.53299999999999	-169.409	1167.68	-1.8926	1.043	0.5083	-76.18351	99.05	1400.342	-1.2715	1.0449	0.098633	-52.504	257.1	1377.21	-1.2178	0.87109	0.27881	35.658	156.145	1751.5	-1.9263	1.332	0.65645
1.832	-89.652	-152.007	1311.31	-1.4545	1.2663	0.54578	-42.967	5.6026	30.8625	0.04834	-0.1001	-0.083984	-31.676	136.486	429.442	-0.26025	0.21924	0.15039	29.972	-95.6001	1232.89	-1.7363	1.1084	0.56934	-63.319	184.935	1335.1615	-1.2324	1.0137	0.10596	-1.90600000000001	208.544	1355.83	-1.1934	0.8457	0.26416	63.527	103.857	1751.69	-1.8901	1.313	0.63623
1.834	-53.271	-186.562	1395.07	-1.3187	1.2586	0.50625	-14.216	51.968	22.8393	0.064453	-0.099121	-0.077148	-15.439	148.562	396.14	-0.20703	0.18652	0.14258	-37.985	-29.499	1199.39	-1.6968	1.1724	0.59961	-55.671	156.385	1303.279	-1.2109	1.0029	0.11084	8.688	246.93	1285.59	-1.144	0.79541	0.24512	12.901	121.74	1691.56	-1.843	1.2969	0.62061
1.836	-73.4292	-267.976	1438.39	-1.1628	1.1917	0.45584	-41.191	31.0429	15.9032	0.069824	-0.096924	-0.084961	-49.7796	148.073	353.266	-0.16186	0.16528	0.1333	-83.416	-64.3982	1198.72	-1.6479	1.2485	0.55518	-43.022	244.833	1303.2606	-1.1714	0.97119	0.11816	7.566	199.116	1260.63	-1.1057	0.75415	0.23315	-0.450999999999993	82.972	1662.5	-1.7976	1.2825	0.60313
1.838	-102.6691	-378.33	1491.95	-1.0367	1.1057	0.41777	-24.606	38.1931	44.039	0.07959	-0.096191	-0.086426	-14.557	116.9022	324.1577	-0.12061	0.14648	0.12256	-48.767	-121.341	1242.47	-1.4936	1.2094	0.50122	-34.916	276.808	1257.8355	-1.1355	0.94848	0.12574	12.925	203.337	1253.18	-1.0684	0.7207	0.22803	8.649	114.976	1646.2	-1.7636	1.2665	0.58477
1.84	-120.19654	-365.33	1482.87	-0.96289	1.0488	0.40088	-3.014	57.715	24.4702	0.088379	-0.098633	-0.087402	-47.056	155.007	287.8468	-0.0625	0.12158	0.1084	-92.46	-145.128	1268.51	-1.2769	1.1001	0.46387	-6.318	229.782	1252.249	-1.1035	0.92578	0.13037	-14.365	236.43	1192.7	-1.0269	0.68115	0.21143	-48.065	149.254	1583.36	-1.7313	1.2429	0.56621
1.842	-157.59	-358.91	1483.38	-0.93962	1.0295	0.38837	-19.095	2.65981	11.2219	0.091797	-0.097168	-0.092773	-53.14	140.321	253.55261	-0.023437	0.098877	0.1062	-56.522	-204.417	1335.94	-1.0366	0.94971	0.42236	-41.9645	290.441	1226.649	-1.0513	0.89209	0.14111	29.055	200.824	1187.11	-0.99269	0.64502	0.20337	-13.416	122.23	1595.68	-1.6929	1.2114	0.55371
1.844	-101.77	-294.147	1572.27	-0.95641	1.0388	0.3902	-14.737	43.769	27.159	0.10254	-0.094238	-0.096191	-17.149	119.269	251.997	0.013184	0.07666	0.10303	-47.82	-269.721	1380.35	-0.95654	0.89893	0.39697	-58.7053	213.399	1164.6409	-1.0322	0.87305	0.14648	27.44	255.25	1155.4	-0.96191	0.61914	0.19141	-24.534	175.33961	1557.12	-1.6591	1.1878	0.53623
1.846	-88.3471	-199.237	1622.81	-1.0096	1.0787	0.40031	-11.716	51.263	24.362	0.10986	-0.089844	-0.099608	-63.6541	124.005	209.318	0.060059	0.050293	0.089355	-133.82	-354.23	1381.06	-0.86475	0.83154	0.36621	-45.504	199.132	1129.7354	-0.98828	0.83984	0.15186	24.324	253.59	1129.26	-0.91162	0.58105	0.17676	-71.545	178.389	1530.09	-1.6207	1.1635	0.51729
1.848	-128.0299	-217.539	1707.1	-1.0917	1.1413	0.41202	0.339999999999996	34.2678	42.341	0.11621	-0.08252	-0.10303	-48.481	67.113	216.705	0.083496	0.033691	0.084473	-98.2334	-402.45	1416.58	-0.86401	0.81763	0.34375	-68.5096	231.076	1068.9066	-0.95288	0.81665	0.15918	56.902	230.03	1095.32	-0.88086	0.56836	0.1665	-26.64	203.0601	1523.59	-1.5863	1.1416	0.49776
1.85	-117.264	-180.127	1803.22	-1.1758	1.2178	0.42236	9.107	75.525	32.4187	0.12012	-0.071777	-0.10938	-39.161	99.239	202.027	0.13086	0.0019531	0.073242	-71.2397	-375.7	1411.66	-0.89795	0.83643	0.34229	-75.275	171.567	1042.79	-0.92334	0.78955	0.16797	27.074	273.59	1007.59	-0.81836	0.52441	0.14893	-47.096	273.648	1454.43	-1.5486	1.1151	0.47861
1.852	-139.953	-141.858	1827.1	-1.2484	1.2952	0.43622	-23.074	40.629	12.7923	0.11963	-0.066406	-0.10742	-65.847	115.273	174.378	0.16186	-0.021972	0.066651	-55.9682	-347.739	1472.37	-0.98828	0.9043	0.35059	-67.0061	227.376	1044.234	-0.88379	0.75098	0.17285	46.43	224.54	964.95	-0.77637	0.49072	0.13184	-20.676	253.424	1417.14	-1.5156	1.0898	0.46729
1.854	-116.4891	-128.4607	1874.35	-1.321	1.3776	0.45028	-4.831	29.0486	31.114	0.11426	-0.055664	-0.10449	-28.902	93.872	159.685	0.1958	-0.047363	0.05127	-19.569	-299.618	1570.82	-1.0386	0.95361	0.35254	-66.809	228.756	1009.523	-0.86719	0.7334	0.1792	62.782	232.52	935.95	-0.73486	0.46143	0.11816	-3.461	272.34	1353.92	-1.4843	1.0591	0.44493
1.856	-112.7381	-50.188	1873.89	-1.3957	1.4468	0.45849	-5.891	39.6977	21.3944	0.10327	-0.04541	-0.10987	-62.096	121.865	105.9889	0.23438	-0.06543	0.046387	-61.772	-266.256	1611.27	-1.1602	1.0703	0.36963	-45.864	172.676	997.389	-0.81592	0.69775	0.18213	44.984	257.98	871.7	-0.67676	0.41797	0.096191	-54.047	288.199	1305.28	-1.4511	1.0274	0.4293
1.858	-127.9957	-77.8737	1854.49	-1.4756	1.5008	0.46777	-22.141	-18.3214	25.491	0.09668	-0.034668	-0.104	-77.505	96.813	91.4921	0.25342	-0.07373	0.037109	-82.19588	-258.654	1681.79	-1.2749	1.1958	0.37549	-37.8872	234.091	975.693	-0.78247	0.67188	0.18677	69.542	218.09	831.45	-0.6416	0.40625	0.086914	-7.63300000000001	251.3353	1308.02	-1.4175	0.99542	0.41172
1.86	-64.0609	-109.989	1877.59	-1.5547	1.541	0.48291	-20.322	7.565	39.122	0.08252	-0.01709	-0.104	-34.131	78.76	86.386	0.27686	-0.095215	0.022949	-85.8454	-186.12	1740.43	-1.3281	1.2598	0.38232	-39.412	182.034	934.409	-0.74365	0.64063	0.18457	22.787	266.7	759.21	-0.58008	0.36377	0.068848	-12.344	285.162	1253.6	-1.3775	0.96191	0.38545
1.862	-41.2599	-106.902	1871.94	-1.6332	1.5697	0.49121	-54.736	9.868	13.3554	0.071289	-0.012207	-0.10107	-70.67447	90.422	66.857	0.29004	-0.10595	0.019776	-113.481	-139.982	1761.46	-1.4292	1.3491	0.4043	-48.996	196.164	904.747	-0.69287	0.61475	0.18799	-13.398	253.28	728.65	-0.53589	0.33154	0.05542	-9.673	253.862	1212.715	-1.3315	0.92725	0.36133
1.864	-52.1635	-176.507	1919.72	-1.7038	1.5962	0.49805	-46.713	-16.775	29.6515	0.057129	-0.0014648	-0.098633	-53.455	38.032	79.945	0.29688	-0.11133	0.015137	-55.616	-138.149	1790.3	-1.4986	1.3902	0.4104	-60.14	239.453	851.264	-0.66406	0.60059	0.18262	33.459	232.46	703.4	-0.49658	0.31006	0.035156	51.214	213.037	1197.703	-1.2848	0.88818	0.3416
1.866	2.031	-167.157	2004.97	-1.7737	1.6286	0.50156	-49.974	41.0608	15.003	0.048339	0.011475	-0.09668	-50.151	40.1089	61.865	0.29395	-0.11572	0.013184	-54.9042	-122.021	1756.87	-1.5645	1.4219	0.41846	-58.6289	182.565	796.998	-0.59766	0.57031	0.18799	20.974	269.29	649.06	-0.43799	0.28223	0.010742	36.997	251.29	1144.845	-1.2421	0.85322	0.32217
1.868	-16.17	-159.5265	2007.27	-1.8356	1.659	0.5082	-76.439	22.5005	4.191	0.037598	0.020508	-0.095703	-62.294	43.569	51.173	0.2832	-0.12109	0.011719	-70.189	-153.943	1774.98	-1.6504	1.4609	0.42041	-79.9651	232.403	766.676	-0.55224	0.54687	0.18066	17.756	214.076	608.92	-0.41016	0.2627	0.0039063	69.279	226.357	1141.786	-1.2003	0.81377	0.29912
1.87	-23.424	-175.966	2029.77	-1.8984	1.6953	0.52002	-54.753	29.12959	25.6867	0.029297	0.033203	-0.088379	-26.033	52.476	40.488	0.26709	-0.12256	0.016602	6.7411	-168.802	1853.39	-1.6948	1.4829	0.4292	-91.561	223.086	699.096	-0.50684	0.5249	0.18457	2.421	202.315	586.48	-0.35693	0.23389	-0.0073242	121.492	257.497	1108.59	-1.1586	0.78359	0.27598
1.872	2.088	-116.204	2060.19	-1.9585	1.731	0.53418	-48.809	41.3948	22.0633	0.018066	0.040527	-0.088867	-25.393	77.571	14.7441	0.2417	-0.11841	0.017334	-4.124	-166.203	1882.87	-1.7813	1.5371	0.43506	-86.9174	193.144	655.316	-0.45215	0.49219	0.17432	-26.593	209.171	543.62	-0.32202	0.21118	-0.017334	100.323	259.185	1078.88	-1.1167	0.74902	0.25586
1.874	-38.3282	-123.0121	2081.11	-2.018	1.7694	0.55244	-76.823	-14.924	2.4386	-0.00048828	0.052246	-0.091309	-19.056	57.7776	14.1577	0.21875	-0.11523	0.023438	5.183	-183.608	1950.12	-1.8552	1.5833	0.44507	-84.4905	252.892	599.532	-0.42041	0.47705	0.17188	-10.29	162.261	522.01	-0.2959	0.19189	-0.023926	134.22	228.126	1057.36	-1.0832	0.71855	0.2377
1.876	-38.7036	-121.7667	2141.84	-2.0738	1.8072	0.56846	-65.043	10.6029	15.6076	-0.017089	0.064941	-0.095215	-17.775	43.699	22.1859	0.18408	-0.10303	0.03125	21.311	-166.32	1985.29	-1.9297	1.6328	0.45947	-86.8861	182.676	562.231	-0.35693	0.43994	0.1709	-28.496	194.111	468.37	-0.26025	0.1626	-0.035156	141.1057	257.44	998.09	-1.0495	0.68584	0.22041
1.878	-8.605	-54.135	2108.07	-2.1212	1.8294	0.58496	-77.5467	21.4213	10.04354	-0.03418	0.077148	-0.093262	-33.772	39.4572	8.6056	0.16455	-0.096191	0.032715	-27.881	-171.249	1997.66	-2.0171	1.7036	0.48633	-53.339	166.122	532.28	-0.31714	0.40942	0.1687	-39.514	166.631	415.89	-0.24707	0.15332	-0.039063	112.197	254.004	936.927	-1.0089	0.65303	0.20127
1.88	-70.3762	-69.212	2044.8	-2.1597	1.8501	0.61035	-76.247	-14.538	55.935	-0.050781	0.092773	-0.089355	3.664	2.305	24.7697	0.125	-0.081055	0.04834	-3.6752	-179.9	2054.03	-2.0547	1.7305	0.50049	-74.5513	164.2	482.805	-0.271	0.38623	0.16846	-27.651	136.092	381.92	-0.21191	0.12109	-0.038574	115.78	248.815	905.002	-0.97607	0.62725	0.18623
1.882	-67.4807	-38.769	2037.47	-2.1848	1.8519	0.62529	-19.796	20.225	66.21	-0.058105	0.10205	-0.10059	-2.74299999999999	24.5	18.4708	0.10083	-0.066894	0.059082	-28.6871	-145.897	2069.39	-2.1265	1.7778	0.52734	-60.9547	99.9432	454.2805	-0.21289	0.34619	0.16943	-42.22	167.121	333.59	-0.18799	0.10352	-0.047607	60.91	264.462	831.941	-0.93701	0.6001	0.16992
1.884	-79.294	-23.324	1986.99	-2.2031	1.8488	0.6376	-51.819	-8.58600000000001	62.2396	-0.074707	0.11475	-0.098145	-40.47	24.5002	11.30416	0.078613	-0.053223	0.067383	-52.348	-159.712	2108.84	-2.1558	1.7974	0.54931	-53.4206	166.297	433.053	-0.18262	0.32813	0.1709	-21.043	117.17	303.154	-0.16895	0.086426	-0.05127	65.157	230.8475	797.512	-0.90059	0.56777	0.15615
1.886	-74.4101	-67.678	1984.64	-2.2043	1.8351	0.64541	-45.929	-32.22	127.413	-0.083496	0.13012	-0.11231	-13.388	26.2816	19.9516	0.04834	-0.033691	0.079102	0.184000000000001	-145.407	2133.18	-2.1733	1.8013	0.56738	-65.14	163.377	415.28	-0.12988	0.29785	0.16846	-31.218	111.323	289.915	-0.14453	0.063477	-0.052734	60.264	255.11	736.297	-0.86123	0.5376	0.14453
1.888	-50.9274	-27.566	1987.73	-2.1956	1.8087	0.65391	-13.31	-8.539	186.609	-0.098633	0.15234	-0.11426	-20.7	59.575	4.457	0.038574	-0.027344	0.08252	-76.573	-97.173	2047.92	-2.1855	1.793	0.58496	-46.247	138.54	383.744	-0.091063	0.27221	0.1648	-53.211	127.019	254.338	-0.13379	0.055664	-0.051758	28.533	272.709	663.59	-0.82334	0.5083	0.12461
1.89	-98.904	-37.707	1945.22	-2.1772	1.7798	0.65137	-6.034	-55.6056	277.733	-0.14355	0.17383	-0.11816	-33.107	43.309	9.2195	0.018066	-0.019043	0.089844	-103.36	-98.185	2039.52	-2.1812	1.7856	0.5918	-36.832	166.201	343.831	-0.052734	0.25146	0.16357	-37.969	83.913	235.437	-0.12256	0.038574	-0.056152	62.911	242.862	661.829	-0.78144	0.48506	0.10996
1.892	-122.878	-23.554	1960.51	-2.1515	1.7418	0.65039	26.499	-25.7916	352.636	-0.17139	0.18896	-0.12207	-3.769	39.106	21.3263	0.017822	-0.014649	0.090088	-36.6105	-64.85	2042.01	-2.1772	1.7603	0.60938	-38.603	80.7716	311.8	-0.0043945	0.21875	0.1582	-47.705	141.099	208.975	-0.11694	0.028809	-0.052978	13.157	254.487	613.588	-0.73193	0.4585	0.094727
1.894	-139.809	59.285	1918.34	-2.1246	1.6996	0.64697	24.579	-14.812	441.17	-0.24951	0.21729	-0.11377	-39.717	43.5689	15.7049	0.011719	-0.016113	0.095215	-63.437	-51.8	2000.55	-2.1777	1.7364	0.625	-40.231	63.7325	293.865	0.013672	0.20947	0.15869	-43.004	137.103	186.312	-0.11328	0.016113	-0.055664	-19.548	224.758	586.125	-0.68125	0.42949	0.081152
1.896	-181.992	35.839	1918.44	-2.0922	1.6524	0.63447	-19.934	-3.592	585.4	-0.32471	0.24048	-0.10278	-22.106	26.941	27.0209	0.020508	-0.015137	0.088379	-31.39	-71.45	2016.9	-2.1816	1.707	0.63379	-59.3959	64.8912	266.473	0.050293	0.17432	0.15381	-13.523	113.398	185.856	-0.11182	-0.0078125	-0.052246	4.60299999999999	203.166	545.929	-0.63828	0.40527	0.060742
1.898	-115.678	51.833	1960.21	-2.0543	1.6094	0.62939	-37.309	96.749	757.93	-0.41797	0.26563	-0.091797	-14.229	49.719	11.932	0.027344	-0.01709	0.090332	-53.188	-36.05	1975.71	-2.1855	1.6563	0.65674	-32.302	26.834	225.4729	0.078857	0.15088	0.15405	-26.349	136.243	158.218	-0.11133	-0.012207	-0.047363	-50.583	216.615	495.757	-0.59258	0.37832	0.040821
1.9	-134.224	31.652	1944.83	-2.021	1.5688	0.6167	-53.22315	121.622	916.24	-0.55566	0.31152	-0.070313	-55.756	33.9516	26.8819	0.025879	-0.018555	0.084961	-123.193	-31.86	1974.06	-2.1851	1.6313	0.6582	-34.04	82.836	185.8028	0.10205	0.12158	0.1582	-24.796	64.233	141.4439	-0.13086	-0.021484	-0.02832	-50.9	162.021	489.203	-0.54492	0.34649	0.028613
1.902	-161.972	-31.508	1970.2	-1.9901	1.5306	0.60957	-7.119	122.1351	1086.69	-0.63672	0.33887	-0.056152	-24.62	16.6819	45.831	0.025147	-0.017334	0.08374	-81.874	1.27000000000001	1989.23	-2.1836	1.5781	0.67432	-45.976	89.167	167.7931	0.12207	0.091797	0.15479	-19.055	54.094	130.9796	-0.13916	-0.033692	-0.039551	-65.336	152.975	440.607	-0.50049	0.31689	0.013672
1.904	-115.117	12.118	1956.62	-1.9648	1.4953	0.60518	-37.018	119.4026	1172.39	-0.82568	0.40869	-0.0083008	-58.927	45.17	27.873	0.028809	-0.01416	0.080566	-104.463	43.03	1954.01	-2.1777	1.538	0.69287	-27.612	86.174	166.079	0.13598	0.071778	0.15406	-48.776	74.4257	95.3515	-0.15332	-0.050293	-0.029297	-115.2034	161.755	388.575	-0.45625	0.28496	0.0025391
1.906	-141.692	19.197	1903.02	-1.9472	1.466	0.59854	-60.173	22.476	1258.11	-0.9978	0.47827	0.041504	-52.98	33.5677	26.3242	0.033691	-0.015625	0.080566	-99.062	22.29	1984.66	-2.1694	1.5024	0.70508	-28.895	137.423	154.032	0.14844	0.052734	0.15186	-5.569	28.0857	87.268	-0.16406	-0.083496	-0.02002	-66.091	129.849	347.443	-0.41631	0.25674	-0.0079102
1.908	-117.596	17.739	1887.81	-1.9249	1.4349	0.59238	-19.407	4.564	1305.07	-1.1992	0.5625	0.10693	-45.596	45.813	24.5946	0.040527	-0.01123	0.075684	-69.008	9.27000000000001	2006.63	-2.1421	1.4595	0.71484	-19.534	85.303	146.108	0.16504	0.029297	0.15283	-28.714	75.7281	69.5321	-0.15723	-0.10156	-0.024414	-83.0661	137.588	305.825	-0.37607	0.22901	-0.022363
1.91	-97.998	70.183	1817.3	-1.9058	1.4106	0.58203	-28.314	4.2053	1257.67	-1.502	0.69336	0.21045	-84.4873	51.657	8.0439	0.045898	-0.0083008	0.07666	-95.092	-9.56	1978.52	-2.1245	1.4341	0.7168	-23.336	83.196	142.167	0.17041	0.019043	0.15869	-30.206	55.843	54.5303	-0.1377	-0.11523	-0.037109	-86.06	101.521	291.414	-0.33974	0.20283	-0.030273
1.912	-132.879	30.959	1785.41	-1.884	1.3875	0.57314	-43.817	-24.9649	1232.23	-1.6558	0.76611	0.26563	-49.777	19.0922	29.776	0.0542	0.0024414	0.074219	-46.069	-28.54	1975.26	-2.0796	1.397	0.71484	-34.815	77.727	127.687	0.18311	0.0014648	0.15674	5.885	21.834	73.544	-0.12085	-0.10914	-0.050293	-33.921	73.1531	275.965	-0.30811	0.17969	-0.03418
1.914	-81.4262	49.911	1804.58	-1.8575	1.355	0.57695	-27.2211	-12.5068	1184.3	-1.9336	0.90918	0.36768	-37.748	29.342	11.3552	0.062988	0.0014648	0.071777	-42.286	18.95	1938.17	-2.043	1.3682	0.70313	-5.331	19.7588	123.3	0.18482	-0.011475	0.16211	-20.55	65.7823	53.68623	-0.10156	-0.10449	-0.052734	-60.651	113.26	221.449	-0.27617	0.15791	-0.043457
1.916	-71.253	71.488	1809.44	-1.834	1.3269	0.5707	-77.298	-49.235	1137.76	-2.0708	0.99462	0.39355	-56.597	20.466	26.61981	0.075195	0.013184	0.071777	-54.977	14.24	1921.78	-2.0015	1.3442	0.68945	-31.444	60.772	81.5816	0.19336	-0.021484	0.16064	-19.553	24.0343	65.226	-0.083496	-0.11426	-0.059082	-18.507	94.911	214.926	-0.24405	0.1414	-0.050293
1.918	-71.176	52.586	1816.3	-1.8172	1.2992	0.56494	-76.0688	-63.7127	1139.38	-2.1304	1.0552	0.38867	-21.911	3.4398	47.841	0.078125	0.015137	0.06543	-23.6574	1.64000000000001	1907.98	-1.9473	1.3164	0.66846	-48.489	56.312	55.5112	0.18799	-0.038086	0.16504	-11.236	43.542	56.328	-0.074707	-0.12207	-0.0625	-1.357	124.105	190.353	-0.21045	0.12032	-0.057715
1.92	-20.9602	112.66	1811.41	-1.7925	1.2739	0.55762	-82.4646	-42.738	1111.6	-2.0508	1.0977	0.37354	-60.561	28.0819	40.6472	0.098145	0.018066	0.06543	-70.9934	23.19	1866.42	-1.9214	1.3071	0.65625	-33.765	47.7133	70.0249	0.18555	-0.043945	0.16455	-26.192	53.716	17.2913	-0.069336	-0.14697	-0.069824	-21.418	143.775	171.601	-0.17617	0.093748	-0.063672
1.922	-49.7932	144.545	1744.07	-1.7693	1.2478	0.54834	-102.889	-111.173	1108.56	-1.9688	1.1113	0.36523	-41.179	21.762	26.267	0.10522	0.02124	0.064941	-45.9072	13.65	1868.76	-1.8726	1.2739	0.64453	-61.5679	90.708	59.432	0.1875	-0.057129	0.16016	-45.951	2.6402	-6.459	-0.065918	-0.16309	-0.074463	38.159	117.485	160.932	-0.15088	0.068848	-0.069824
1.924	-37.34	173.7333	1710.83	-1.7409	1.2224	0.54756	-103.157	-141.486	1153.22	-1.7866	1.1304	0.32031	-12.412	40.844	13.1896	0.11377	0.021484	0.065918	31.16146	62.28	1874.28	-1.8445	1.2576	0.63794	-53.218	29.539	52.603	0.18116	-0.060547	0.15942	-59.015	44.409	-10.6567	-0.06543	-0.18262	-0.080566	4.54799999999999	139.165	103.1	-0.11787	0.044238	-0.078906
1.926	-14.429	253.683	1680.49	-1.7174	1.1919	0.54482	-108.426	-146.936	1175.73	-1.6304	1.1226	0.24268	-51.298	55.3072	-11.3805	0.13037	0.023926	0.068359	-31.829	121.64	1836.05	-1.8145	1.2422	0.62402	-36.55	30.903	46.673	0.17773	-0.066895	0.15723	-56.936	31.7906	3.8777	-0.060547	-0.20068	-0.085449	10.868	108.365	104.208	-0.091601	0.023047	-0.085156
1.928	-40.987	201.86	1681.4	-1.6888	1.1683	0.53974	-112.103	-167.914	1213.04	-1.4409	1.0864	0.15479	-18.654	16.5127	9.3476	0.14014	0.02832	0.063965	4.4116	133.853	1838.48	-1.7808	1.2271	0.61035	-61.068	32.9655	44.648	0.17334	-0.072754	0.15625	-40.518	11.5688	16.0542	-0.058594	-0.20703	-0.087402	40.449	74.4261	95.272	-0.074805	0.001172	-0.086328
1.93	4.415	191.0457	1687.64	-1.668	1.1445	0.53564	-46.342	-90.473	1234.59	-1.1836	0.98633	0.053223	-25.682	35.476	16.8248	0.14893	0.022461	0.066895	5.3977	177.5	1788.62	-1.7656	1.2168	0.60303	-39.745	0.473999999999997	54.957	0.16553	-0.074707	0.15625	-57.38	65.0917	10.2296	-0.059082	-0.21582	-0.085938	4.27800000000001	74.671	60.4652	-0.060449	-0.020703	-0.096092
1.932	-16.7981	156.134	1633.41	-1.6397	1.1194	0.52822	-22.652	-76.577	1224.74	-1.0913	0.93213	0.010254	-46.595	24.2993	12.5545	0.15918	0.024414	0.063721	-44.948	175.181	1748.93	-1.7285	1.208	0.58496	-33.964	54.0386	27.236	0.15479	-0.075195	0.15723	-46.043	12.5986	6.73397	-0.060059	-0.21924	-0.083741	41.187	47.815	69.0185	-0.053711	-0.043457	-0.099609
1.934	-39.084	84.017	1600.1	-1.609	1.0967	0.52607	-3.117	-96.932	1268.13	-0.96729	0.87939	-0.0625	20.332	6.331	31.9721	0.16504	0.024414	0.066406	-1.638	164.114	1779.47	-1.699	1.1985	0.57276	-26.871	53.4698	16.3859	0.1455	-0.081543	0.15552	-48.699	23.0104	11.4013	-0.067383	-0.21875	-0.079102	45.352	59.3482	35.633	-0.046582	-0.062012	-0.098242
1.936	-9.076	113.354	1582.4	-1.5836	1.0705	0.51397	27.19	-113.05	1309.29	-0.90796	0.87525	-0.10181	-18.828	30.7095	25.4642	0.17627	0.029785	0.069336	-35.2718	183.672	1746.52	-1.6738	1.1855	0.56055	-26.266	55.345	27.714	0.13721	-0.08252	0.15527	-59.09	41.973	-1.9509	-0.063965	-0.21484	-0.074707	11.679	62.184	54.321	-0.046387	-0.076856	-0.099511
1.938	-60.9915	130.777	1508.88	-1.5525	1.0523	0.50449	15.973	-229.502	1334.15	-0.87061	0.88965	-0.12744	-21.996	11.12	27.0391	0.17822	0.034668	0.069336	-47.2546	138.869	1714.14	-1.644	1.1704	0.5498	-37.652	91.103	16.947	0.12793	-0.087891	0.15234	-45.15	-16.3296	9.8915	-0.063965	-0.21631	-0.075684	41.425	32.943	57.607	-0.052636	-0.093262	-0.09834
1.94	-48.78	152.4052	1496.06	-1.5176	1.0313	0.4917	32.53	-300.23	1404.19	-0.87695	0.9375	-0.14551	-4.267	36.885	19.1572	0.18408	0.037109	0.071289	-8.7892	137.63	1653.74	-1.626	1.1582	0.54248	-37.481	41.9408	18.6351	0.12207	-0.091309	0.14941	-41.745	28.6946	5.2123	-0.059082	-0.21484	-0.072266	-19.76	57.152	28.137	-0.0583	-0.10361	-0.088379
1.942	-55.6971	216.341	1457.27	-1.4813	1.0086	0.47705	5.61	-356.65	1425.6	-0.90723	0.9668	-0.1333	-28.621	59.0509	-14.5683	0.1897	0.041504	0.069824	-63.147	135.48	1596.35	-1.5938	1.1445	0.52979	-47.036	60.893	-2.678	0.11572	-0.10059	0.14795	-50.761	25.499	10.037	-0.050537	-0.21362	-0.067383	-25.812	52.2932	20.4162	-0.064941	-0.11377	-0.086914
1.944	-90.768	190.823	1436.38	-1.4437	0.98926	0.46338	-32.041	-412.25	1482.3	-1.02	1.0532	-0.11035	-15.286	26.9702	17.3856	0.18506	0.041016	0.073242	-20.794	104.63	1607.69	-1.5672	1.1258	0.51343	-59.478	49.5373	6.033	0.1062	-0.10449	0.14233	-47.328	13.5337	29.6519	-0.044922	-0.21436	-0.065918	-21.756	37.625	32.781	-0.076367	-0.12285	-0.078613
1.946	-40.1823	221.746	1442.59	-1.4078	0.96582	0.44815	-10.353	-336.87	1510.68	-1.1206	1.1333	-0.085449	-20.807	31.092	15.2298	0.18506	0.051758	0.074219	-16.518	156.484	1578.66	-1.5391	1.1113	0.49561	-36.091	2.3931	14.8036	0.10254	-0.11426	0.13721	-50.536	73.3698	9.798	-0.027344	-0.21729	-0.069336	-74.623	43.6578	0.427999999999999	-0.08418	-0.12871	-0.077149
1.948	-66.3325	230.866	1385.29	-1.3607	0.94082	0.43428	0.951999999999998	-287.202	1516.66	-1.2144	1.2075	-0.06543	-47.693	5.407	16.7667	0.18408	0.05957	0.078613	-60.523	164.449	1550.86	-1.4785	1.0859	0.46729	-47.887	26.59299	20.1132	0.088867	-0.12109	0.12695	-39.059	32.6144	7.5972	-0.015137	-0.22168	-0.065918	-63.153	13.7347	18.3142	-0.088086	-0.13183	-0.072852
1.95	-72.0892	203.125	1341.79	-1.3203	0.91406	0.41797	43.914	-231.831	1603.75	-1.3037	1.2734	-0.038086	-25.725	3.7029	19.1913	0.17627	0.069336	0.084961	-23.4752	169.773	1540.09	-1.4512	1.0742	0.45801	-14.17	9.285	10.68502	0.083984	-0.12451	0.13086	-30.093	42.456	14.2243	-0.0073242	-0.22656	-0.06543	-59.75	35.087	4.988	-0.087305	-0.1333	-0.068653
1.952	-42.777	228.848	1300.63	-1.2755	0.89268	0.40137	58.936	-138.403	1674.91	-1.3359	1.292	-0.03125	-50.109	39.1192	4.496	0.1687	0.082764	0.086914	-75.218	214.608	1484.34	-1.3984	1.0488	0.43408	-11.591	8.5736	22.787	0.066406	-0.1333	0.11768	-34.072	64.9713	-6.252	-0.0056152	-0.23145	-0.068359	-98.0242	63.716	-3.6235	-0.081055	-0.13916	-0.069336
1.954	-79.0688	207.362	1224	-1.2355	0.87031	0.38369	49.657	-132.623	1762.35	-1.4077	1.3208	-0.0097656	-45.266	31.286	27.4065	0.15479	0.095703	0.09375	-52.4733	196.935	1461.41	-1.3541	1.022	0.41504	-48.076	62.692	28.6034	0.059082	-0.13648	0.11181	-22.252	10.7411	9.96146	-0.0073242	-0.23242	-0.060059	-77.272	50.012	31.511	-0.077637	-0.14317	-0.068945
1.956	-76.1323	186.828	1186.41	-1.1981	0.84062	0.36806	101.3366	-98.061	1821.31	-1.4697	1.333	0.0056151	-20.627	35.535	22.948	0.13672	0.1167	0.10254	-8.617	214.629	1408.02	-1.3125	0.99414	0.39746	-30.163	23.9513	55.506	0.049316	-0.1416	0.11084	-17.351	53.995	19.195	-0.0053711	-0.2251	-0.058594	-112.8307	61.636	11.667	-0.076172	-0.1501	-0.067676
1.958	-38.483	230.366	1133.05	-1.1605	0.81328	0.35596	94.26811	-67.7426	1793.84	-1.5449	1.3398	0.019531	-61.548	41.3385	6.2497	0.12549	0.12158	0.10791	-58.711	228.284	1323.76	-1.2554	0.95361	0.36621	-5.261	59.856	43.2513	0.030762	-0.14502	0.10693	-32.211	47.4654	14.0755	-0.0058594	-0.22314	-0.054199	-105.619	51.994	-4.2014	-0.079687	-0.15439	-0.06377
1.96	-57.2349	224.082	1102.72	-1.1226	0.78955	0.3418	41.374	-120.8701	1800.8	-1.6445	1.3418	0.037109	-52.326	25.9999	11.4638	0.10938	0.14111	0.11279	-25.834	204.99	1300.25	-1.2246	0.93555	0.35498	-21.285	44.6434	20.555	0.023926	-0.14453	0.10107	-1.99	27.2003	28.4813	-0.01123	-0.21729	-0.044922	-72.772	42.092	-11.1671	-0.082813	-0.16152	-0.06543
1.962	-14.9	252.644	1089.19	-1.0918	0.76621	0.33311	51.793	-100.987	1807.98	-1.6914	1.3438	0.046387	-51.298	48.739	5.124	0.098144	0.15601	0.1211	-16.483	229.252	1237.55	-1.1621	0.88281	0.32275	-8.566	-11.7242	32.9776	0.021484	-0.14453	0.09375	-15.848	84.084	13.866	-0.01416	-0.20606	-0.039307	-101.556	47.4527	-11.9665	-0.083496	-0.16748	-0.062012
1.964	-43.513	251.678	1020.88	-1.0582	0.74082	0.31025	3.272	-111.052	1761.98	-1.7827	1.3462	0.062988	-65.691	35.2244	14.705	0.086914	0.16943	0.12451	-29.11633	210.5358	1186.71	-1.1123	0.8501	0.30567	-40.296	20.1662	33.039	0.02124	-0.14599	0.094238	-21.802	31.37875	14.726	-0.015625	-0.19336	-0.039551	-65.107	8.652	32.464	-0.086817	-0.175	-0.059277
1.966	-35.436	199.766	990.7	-1.0164	0.71934	0.29736	-28.58	-127.852	1813.9	-1.8633	1.3711	0.080078	-12.065	30.6817	29.4408	0.078613	0.19189	0.12256	39.4738	198.931	1183.4	-1.0601	0.83252	0.30078	-63.2039	4.153	22.3323	0.020508	-0.14502	0.088867	-11.808	39.92	31.0732	-0.015625	-0.18066	-0.036621	-51.816	7.92	31.1476	-0.092871	-0.17852	-0.056836
1.968	15.741	217.336	961.24	-0.97676	0.6999	0.2834	-33.197	-87.471	1840.46	-1.9102	1.3887	0.094727	-67.5745	49.7515	3.104	0.075684	0.2002	0.12646	12.939	239.746	1128.97	-1.0156	0.79688	0.27393	-22.464	23.147	15.872	0.02832	-0.14551	0.084961	-33.829	52.5932	17.1605	-0.01416	-0.16895	-0.037109	-92.0515	25.523	22.8994	-0.094434	-0.18321	-0.050977
1.97	-10.574	202.996	919.01	-0.93555	0.67285	0.27295	-113.045	-111.366	1867.52	-1.9995	1.4263	0.11182	-42.769	25.1292	19.5647	0.065918	0.22217	0.125	-11.408	218.140383	1086.21	-0.99463	0.77881	0.26855	-56.436	64.377	5.425	0.035645	-0.14014	0.081055	-17.115	-6.0205	27.774	-0.0073242	-0.14453	-0.040039	-18.702	22.5283	50.493	-0.1	-0.18545	-0.050391
1.972	15.083	189.853	894.02	-0.89912	0.64834	0.25567	-94.8965	-115.649	1933.56	-2.0601	1.4467	0.12891	-20.914	24.29	38.4024	0.051514	0.23608	0.12647	24.824	227.838	1025.06	-0.95117	0.72754	0.24365	-50.701	24.0951	15.8031	0.050293	-0.13916	0.073242	-33.159	29.1701	13.371	-0.0014649	-0.13281	-0.035889	-15.043	45.201	36.6052	-0.10449	-0.18359	-0.043945
1.974	35.068	225.569	839.11	-0.85966	0.62783	0.24082	-81.2074	-87.831	1913.92	-2.1172	1.4609	0.1377	-54.858	18.126	53.2801	0.030762	0.25391	0.125	10.104	245.859	953.18	-0.91528	0.69311	0.23633	-23.128	50.567	28.4815	0.055176	-0.13941	0.07251	-40.549	24.88629	10.4843	0.003418	-0.12549	-0.035156	-14.546	47.841	39.342	-0.10733	-0.18174	-0.038086
1.976	-27.037	200.829	792.85	-0.81592	0.60517	0.22363	-76.601	-138.177	1939.35	-2.1641	1.4746	0.15381	-34.053	-8.012	81.189	-0.0029297	0.2749	0.12305	39.466	204.8117	954.51	-0.87109	0.66406	0.22168	-45.099	43.5201	6.98	0.06543	-0.1377	0.068848	-35.916	13.6875	30.1929	0.0039063	-0.104	-0.027344	23.731	35.89538	34.936	-0.10254	-0.18008	-0.03291
1.978	38.771	224.063	763.51	-0.77002	0.57451	0.21367	-37.617	-94.748	1975.51	-2.1792	1.481	0.1626	-25.786	3.995	76.8061	-0.019043	0.29053	0.11816	59.2233	211.361	930.75	-0.81006	0.63623	0.19678	-30.135	5.083	18.0454	0.085938	-0.13867	0.062988	-43.911	75.982	18.699	0.0083008	-0.095703	-0.031738	-4.92299999999999	40.209	-10.5748	-0.097071	-0.17852	-0.024707
1.98	23.483	231.236	688.41	-0.72803	0.54248	0.19922	-55.832	-77.363	1928.98	-2.1973	1.4805	0.16504	-49.292	-15.7626	100.87182	-0.069824	0.32813	0.13037	37.912	199.3906	861.5	-0.78125	0.62598	0.18555	-41.937	26.4783	23.539	0.094727	-0.13916	0.067383	-27.056	28.9408	27.6124	0	-0.089844	-0.020996	24.611	8.3508	19.6236	-0.096777	-0.18242	-0.030371
1.982	8.793	184.941	639.97	-0.68799	0.51611	0.18594	-62.308	-75.782	1961.83	-2.1972	1.4707	0.17358	-5.814	-34.8847	165.447	-0.11499	0.35401	0.12891	42.836	177.135	824.47	-0.71436	0.59424	0.16211	-49.93	-1.753	24.7893	0.1123	-0.13037	0.067383	-46.427	37.343	40.1245	0.0019531	-0.08081	-0.021728	42.53	6.0147	14.5869	-0.089844	-0.18652	-0.02832
1.984	48.999	179.415	598.2	-0.64414	0.49004	0.17402	-54.909	2.60299999999999	1938.27	-2.1875	1.457	0.18408	-47.152	-11.7257	215.961	-0.16309	0.38623	0.12744	3.52	218.803	780.042	-0.66553	0.56494	0.14771	-38.005	-2.4147	17.6979	0.12573	-0.1272	0.068848	-64.2635	53.4148	27.2376	0	-0.070801	-0.020508	9.22	16.657	10.2435	-0.065039	-0.1874	-0.029102
1.986	-23.414	155.467	541.66	-0.59844	0.45137	0.16582	-100.99121	-19.452	1915.97	-2.1694	1.4185	0.18164	-44.164	-25.311	291.18	-0.229	0.43652	0.13037	7.44900000000001	210.018	738.075	-0.62061	0.5376	0.13672	-39.188	42.522	-9.1555	0.13672	-0.12207	0.070313	-53.682	0.2693	25.064	0	-0.062012	-0.015625	39.873	18.1629	37.0783	-0.044922	-0.18828	-0.035058
1.988	-11.972	146.694	500.74	-0.55459	0.42266	0.15361	-63.498	-7.79499999999999	1941.14	-2.1523	1.4023	0.18408	-0.954000000000001	10.961	390.48	-0.29053	0.4856	0.13062	32.046	215.631	692.132	-0.56006	0.49463	0.11914	-56.486	15.1258	5.31779	0.15283	-0.10791	0.071777	-47.17	47.688	8.6703	-0.0012208	-0.051758	-0.013428	21.108	62.463	15.7591	-0.021485	-0.19102	-0.040137
1.99	9.552	180.658	457.28	-0.50781	0.39941	0.12939	-47.312	41.884	1892.19	-2.1284	1.3657	0.19141	-36.287	55.097	498.02	-0.36621	0.54053	0.12939	-9.75	194.87	597.506	-0.5332	0.47266	0.1084	-54.608	46.701	21.9532	0.15527	-0.104	0.077148	-71.714	30.6313	3.92308	-0.0019531	-0.043457	-0.0097656	19.779	55.477	23.096	0.0035158	-0.19219	-0.042676
1.992	-45.123	182.491	416.62	-0.46094	0.37295	0.11602	-65.586	0.359999999999985	1892.5	-2.105	1.3355	0.20068	6.622	64.39401	641.93	-0.49316	0.625	0.12549	14.927	137.8711	559.474	-0.47119	0.43506	0.087402	-43.925	40.366	13.9654	0.16455	-0.09668	0.08252	-38.143	6.3195	25.2857	-0.00097656	-0.038086	-0.0058594	14.906	39.4454	14.6814	0.021973	-0.1958	-0.045898
1.994	-20.039	196.693	413.519	-0.41397	0.3458	0.1041	-14.866	38.52	1908.71	-2.0894	1.3071	0.20898	63.974	109.29726	764.53	-0.57568	0.66797	0.12744	-15.278	150.384	526.901	-0.42969	0.40527	0.075195	-35.07	2.2525	18.6263	0.16895	-0.087891	0.081299	-53.027	57.186	20.4972	0.003418	-0.035156	-0.01123	-23.974	53.14	-2.28935	0.036425	-0.19649	-0.052344
1.996	-60.133	211.792	366.694	-0.37607	0.31806	0.092774	-36.43	35.25	1869.62	-2.062	1.2759	0.21631	57.066	112.836	902.83	-0.77148	0.77344	0.14697	-55.066	156.6448	479.947	-0.3833	0.37451	0.067871	-33.188	39.392	4.071	0.17285	-0.077637	0.086914	-54.079	6.4022	18.92749	0.021973	-0.032715	-0.01709	-25.249	15.7639	14.4263	0.052734	-0.19922	-0.057714
1.998	-49.006	183.133	336.014	-0.34033	0.29463	0.075586	-3.892	16.77	1903.12	-2.0503	1.2583	0.22217	135.012	102.712	1100.09	-0.94531	0.86035	0.16187	-3.23500000000001	154.117	453.735	-0.31885	0.33838	0.041992	-16.231	12.7344	12.239	0.18115	-0.058105	0.084961	-40.796	16.3521	33.5866	0.037109	-0.032471	-0.023193	-32.373	2.6109	11.247	0.065234	-0.19688	-0.058886
2	-22.864	167.771	315.849	-0.30273	0.27051	0.062988	38.676	70.765	1931.78	-2.0293	1.2383	0.22705	106.6986	107.739	1247.54	-1.1323	0.95947	0.18652	-57.598	204.836	400.4664	-0.28955	0.31543	0.02832	-14.678	23.4121	14.8457	0.18359	-0.05127	0.089844	-43.116	38.73285	19.0135	0.058105	-0.03125	-0.030273	-85.235	-2.917	0.708000000000002	0.074511	-0.19629	-0.056738
2.002	-82.37044	123.774	268.434	-0.26621	0.24336	0.053516	14.672	61.353	1924.36	-2.0056	1.2225	0.23169	70.949	63.002	1349.24	-1.394	1.0923	0.24902	-70.039	168.093	368.1867	-0.2334	0.28076	0.0083008	-46.668	77.254	-1.76568	0.18018	-0.02832	0.089844	-27.683	-15.3661	29.9978	0.074219	-0.029297	-0.038574	-65.038	-28.0439	22.1146	0.077148	-0.19336	-0.04834
2.004	-64.915	81.1227	251.952	-0.23076	0.21553	0.045214	81.853	62.77	1964.93	-1.9839	1.2114	0.23682	53.498	29.419	1390.9	-1.5186	1.1514	0.2876	-36.047	165.766	352.3821	-0.19287	0.25586	-0.0026856	-31.041	45.7836	7.4374	0.17383	-0.016601	0.090576	-29.164	31.3547	8.6439	0.075684	-0.023438	-0.043457	-95.4013	19.856	2.044	0.081641	-0.18741	-0.049805
2.006	-52.457	85.011	181.4386	-0.2003	0.18584	0.035058	66.9364	78.003	1927.22	-1.9453	1.2031	0.23682	17.337	-25.86141	1372.6	-1.7358	1.2544	0.33984	-59.0802	182.164	299.917	-0.15332	0.23291	-0.017578	-20.298	67.244	25.1389	0.16895	-0.0043945	0.089844	-29.93	20.818	3.9887	0.08252	-0.026855	-0.053223	-76.15	38.025	2.6299	0.076855	-0.17441	-0.04707
2.008	-87.9824	71.9294	174.4425	-0.17383	0.16309	0.02041	45.168	18.353	1916.82	-1.9258	1.1973	0.23877	10.165	-115.985	1415.46	-1.8259	1.2952	0.36694	-26.313	126.1909	287.895	-0.104	0.2002	-0.032715	-44.589	48.089	15.7738	0.15967	0.01709	0.090332	-23.776	-1.3808	16.84704	0.085938	-0.020752	-0.054688	-79.743	42.13	23.7583	0.07295	-0.16816	-0.04043
2.01	-55.928	80.5109	199.089	-0.14307	0.14063	0.017578	67.001	32.651	1907.56	-1.8926	1.1953	0.2334	-1.236	-135.931	1368.93	-1.8438	1.3164	0.40088	-48.962	121.806	257.6441	-0.072998	0.1792	-0.045899	-12.178	10.045	16.5382	0.15527	0.025879	0.091797	-15.72	43.4299	15.7282	0.083496	-0.018066	-0.054199	-117.07932	64.772	-16.4571	0.070996	-0.15146	-0.035742
2.012	-88.366	90.207	183.676	-0.10986	0.11572	0.010352	8.006	30.485	1841.27	-1.8701	1.2002	0.22949	-38.392	-177.118	1329.6	-1.7788	1.354	0.44922	-64.086	87.579	210.604	-0.043457	0.1543	-0.05957	-32.76	58.044	12.224	0.15332	0.050293	0.086914	-8.093	11.226	12.7927	0.077148	-0.0053711	-0.055664	-61.695	26.2563	11.9343	0.068848	-0.13428	-0.03125
2.014	-59.729	81.0317	175.051	-0.084472	0.091113	-0.0024414	11.858	0.950000000000003	1826.99	-1.8511	1.2017	0.2251	22.4	-201.725	1309.95	-1.7539	1.375	0.44336	-31.797	49.157	193.013	-0.0078125	0.12451	-0.065918	-23.855	24.0193	14.7437	0.14917	0.061768	0.090332	-23.038	33.4617	15.4643	0.074707	0.00048828	-0.057617	-85.869	29.7126	-4.449	0.068652	-0.12246	-0.025098
2.016	-32.056	105.701	153.8358	-0.055957	0.077441	-0.013379	25.432	51.73	1801.2	-1.8237	1.2095	0.2168	39.216	-170.629	1279.28	-1.6265	1.3892	0.36523	-38.466	103.7413	161.845	0.0048828	0.1084	-0.070801	-19.608	3.3626	47.2902	0.14502	0.075195	0.094727	-22.973	67.559	-3.256	0.062988	0.01709	-0.059082	-100.833	34.968	-3.3755	0.066504	-0.10811	-0.025196
2.018	-75.52	96.585	123.3773	-0.029004	0.061426	-0.021875	-25.011	43.9	1786.28	-1.8086	1.2168	0.21777	79.359	-178.666	1267.18	-1.3903	1.3616	0.31372	-28.611	77.741	182.2914	0.026367	0.084473	-0.083496	-30.403	15.9868	54.56516	0.13086	0.094238	0.091797	-19.841	9.469	13.8367	0.059326	0.030029	-0.060547	-29.604	2.8761	26.307	0.068066	-0.089355	-0.023242
2.02	-13.711	70.5823	122.9522	-0.0063477	0.043457	-0.031738	-11.442	68.668	1800.94	-1.7793	1.2266	0.21094	110.7517	-151.848	1261.65	-1.1147	1.2856	0.2793	-36.824	86.415	193.363	0.033203	0.066895	-0.087891	-53.22	-24.2078	53.866	0.12207	0.10498	0.086426	-28.426	34.762116	35.3625	0.058594	0.041016	-0.062012	-81.621	49.615	20.4059	0.076074	-0.077735	-0.024805
2.022	-4.84	69.35805	78.421	0.011426	0.027051	-0.038183	-4.373	126.41	1761.88	-1.7547	1.2346	0.19947	14.793	-129.294	1239.68	-0.83691	1.1436	0.24561	-62.332	114.082	162.9828	0.039551	0.052734	-0.087891	-16.922	20.0443	72.7671	0.1084	0.12695	0.07959	-31.199	11.151	29.751	0.054199	0.060059	-0.070313	-70.896	48.0099	2.5847	0.082031	-0.066406	-0.021484
2.024	-36.449	59.674	63.1342	0.019434	0.006543	-0.044824	-38.307	100.289	1733.81	-1.7266	1.2402	0.19238	-15.847	-113.764	1286.01	-0.75537	1.0864	0.22998	-2.566	68.948	134.0492	0.042969	0.036133	-0.090332	-29.51	17.8482	87.8906	0.088623	0.15088	0.082519	-12.567	-32.422	70.3966	0.043457	0.068359	-0.074219	-4.278	51.873	4.935	0.090332	-0.055078	-0.02334
2.026	17.496	57.5525	74.6871	0.025293	-0.010644	-0.04834	-44.632	135.163	1737.94	-1.687	1.2407	0.17676	-28.603	-67.095	1308.34	-0.6792	1.019	0.22168	-30.501	98.108	102.9139	0.041504	0.032227	-0.088867	-52.362	-28.8088	118.795	0.067871	0.17529	0.074219	-60.196	-4.337	90.107	0.017578	0.090332	-0.070801	-29.607	77.63	-9.28365	0.092188	-0.045605	-0.026172
2.028	-9.98	64.5685	53.7034	0.021582	-0.028125	-0.050489	-85.899	148.238	1688.2	-1.6626	1.2368	0.1709	-69.7065	-66.344	1307.73	-0.65796	1.0042	0.23608	-31.189	92.597	99.044	0.039551	0.012695	-0.088379	-44.934	2.56412	152.729	0.018555	0.21094	0.075684	-52.144	-53.429	113.006	-0.015869	0.10718	-0.072265	-15.582	27.5034	13.735	0.09336	-0.042871	-0.029687
2.03	-12.965	57.2375	54.984	0.0078125	-0.042969	-0.044434	-64.155	111.35	1699.63	-1.6133	1.2266	0.15527	-41.877	-92.061	1312.17	-0.66846	1.0161	0.25195	16.019	52.9839	91.301	0.035889	0.0053711	-0.083008	-50.489	-38.754	195.91	-0.0097656	0.22852	0.077637	-33.4	-59.321	147.217	-0.061035	0.12598	-0.060059	35.722	23.405	16.8879	0.092871	-0.036523	-0.028125
2.032	22.131	73.28	21.3003	-0.0045898	-0.054199	-0.044531	-41.898	137.12	1667.28	-1.5739	1.2278	0.1416	-52.522	-122.606	1287.91	-0.75586	1.0547	0.29492	-21.203	97.9611	42.033	0.032715	-0.003418	-0.080078	-47.539	-21.38	301.74	-0.0625	0.26953	0.077637	-27.076	-52.81	176.344	-0.12598	0.15576	-0.050781	-2.21	16.9946	17.4105	0.094727	-0.029297	-0.026367
2.034	-32.514	67.014	7.193	-0.016699	-0.062109	-0.040723	-107.2539	89.897	1635.85	-1.5327	1.2251	0.13232	-31.916	-181.443	1309.49	-0.82373	1.0884	0.31836	-16.254	48.573	55.5066	0.035156	-0.010254	-0.079102	-40.01	39.009	383.27	-0.12158	0.3042	0.079346	-15.48	-137.1239	237.134	-0.16699	0.16797	-0.04541	54.241	-5.3369	35.794	0.09336	-0.019629	-0.029492
2.036	-27.7	31.5452	27.4395	-0.02959	-0.066406	-0.035254	-75.562	85.288	1641.66	-1.478	1.2114	0.12256	-9.623	-223.42	1386.92	-0.97852	1.1777	0.35107	-0.408000000000001	32.3152	68.7273	0.032227	-0.014648	-0.081055	-28.79	39.866	480.87	-0.19482	0.33594	0.071289	-40.712	-89.28	309.306	-0.22949	0.20996	-0.038086	42.733	33.081	17.2508	0.099804	-0.012012	-0.031641
2.038	-0.640000000000001	2.3533	15.48	-0.044043	-0.075879	-0.030957	-77.14423	135.722	1587.8	-1.4546	1.2075	0.11865	-37.604	-272.31	1437.7	-1.0991	1.2574	0.3706	-28.887	69.0964	52.937	0.037109	-0.030273	-0.080566	19.321	116.7372	608.82	-0.3125	0.39844	0.083496	-69.0256	-74.0789	403.88	-0.28003	0.24389	-0.035644	14.832	30.9587	25.4231	0.11074	-0.0038086	-0.035157
2.04	-40.858	-22.8931	17.342	-0.053223	-0.078125	-0.023438	-108.2187	120.017	1557.326	-1.4116	1.1948	0.1001	-31.22	-354.51	1499.52	-1.207	1.3359	0.39111	0.799999999999997	42.5324	51.374	0.039307	-0.040527	-0.086914	50.222	145.023	760.54	-0.3916	0.43164	0.08252	-72.7388	-50.583	537.62	-0.32959	0.28467	-0.033691	35.38	36.433	34.083	0.1207	0.0087892	-0.038477
2.042	-5.799	-16.54903	34.8581	-0.065528	-0.082422	-0.016406	-64.7749	150.679	1538.81	-1.3713	1.1809	0.10279	-69.6657	-372.49	1536.82	-1.3398	1.4238	0.42041	-34.876	83.627	8.179	0.042969	-0.050293	-0.091797	50.193	121.011	914.29	-0.5752	0.50879	0.098633	-109.197	53.957	676.06	-0.42383	0.33008	-0.029785	-13.855	76.501	-6.3776	0.12354	0.018555	-0.047852
2.044	-17.34	11.10613	32.0529	-0.073144	-0.083691	-0.013477	-96.1456	167.329	1479.927	-1.3438	1.1582	0.10742	-129.921	-379.05	1558.65	-1.4063	1.4609	0.43408	-66.296	47.233	-9.254	0.033691	-0.062988	-0.091797	60.334	136.288	1008.18	-0.74219	0.57739	0.12891	-151.893	61.2076	842.78	-0.48877	0.35596	-0.01709	2.078	57.578	23.4514	0.12383	0.025782	-0.050879
2.046	-33.06	21.3716	42.625	-0.073144	-0.087598	-0.013867	-76.372	155.687	1483.32	-1.3135	1.1367	0.099609	-72.112	-354.61	1635.87	-1.5293	1.5137	0.4541	-45.083	-23.753	15.8083	0.033203	-0.068848	-0.091797	92.9	49.849	1062.89	-0.94141	0.65234	0.16846	-140.913	85.938	1003.82	-0.65234	0.41016	0.01123	1.493	49.103	5.3621	0.12569	0.033692	-0.055859
2.048	-26.671	37.745	9.0867	-0.069824	-0.093945	-0.010742	-15.181	228.493	1465.04	-1.2939	1.1211	0.098145	-56.1712	-271.27	1681.62	-1.6052	1.5393	0.46509	-54.364	15.1649	10.7124	0.019043	-0.081543	-0.085449	52.505	12.8823	1122.91	-1.23	0.76514	0.24121	-152.965	126.0887	1131.25	-0.82178	0.46436	0.046631	-21.699	42.7358	8.1629	0.12764	0.044629	-0.058203
2.05	-73.376	36.1101	-16.9735	-0.067871	-0.10303	-0.0063477	-42.283	218.599	1424.417	-1.2515	1.0903	0.104	-53.2832	-236.022	1727.34	-1.6631	1.5527	0.46973	-46.384	-11.638	32.404	0.0063477	-0.089355	-0.090087	0.243000000000002	40.7749	1137.09	-1.46	0.85986	0.30761	-164.4317	84.954	1239.1	-1.019	0.53467	0.098145	-28.265	7.3294	48.56	0.12471	0.052734	-0.061914
2.052	-45.807	24.1015	-3.83574	-0.067481	-0.10957	-0.0091796	-11.05	237.342	1414.377	-1.2253	1.0705	0.10034	-12.524	-213.901	1781.34	-1.7031	1.5625	0.46338	-35.502	-0.711399999999999	53.152	-0.0068359	-0.092773	-0.086914	20.734	-6.1575	1130.8	-1.6772	0.96436	0.38672	-110.729	98.0336	1303.72	-1.3203	0.6582	0.17041	-66.444	20.5267	38.459	0.12598	0.057129	-0.071289
2.054	-52.645	20.16116	-4.975	-0.070312	-0.11533	-0.0072265	-9.739	284.116	1352.785	-1.1953	1.0508	0.094727	-74.0135	-165.038	1782.21	-1.7109	1.5703	0.45654	-77.301	42.8278	30.1375	-0.024902	-0.09668	-0.083008	31.484	15.864	1104.99	-1.9272	1.0825	0.44336	-92.373	56.3644	1307.23	-1.4785	0.73828	0.2124	-62.601	-7.414	64.383	0.12159	0.069824	-0.077441
2.056	-74.638	21.787	0.915000000000001	-0.063672	-0.12393	-0.009961	-32.105	248.277	1314.249	-1.1499	1.022	0.091797	-68.3742	-142.995	1815.09	-1.7158	1.5938	0.42822	-60.057	17.6778	27.1909	-0.036621	-0.09375	-0.077637	22.542	17.741	1101.85	-2.0112	1.1333	0.45508	-62.243	-29.21611	1277.45	-1.7578	0.91797	0.27686	-61.772	-24.795	91.21	0.11563	0.086621	-0.075586
2.058	-46.137	6.7529	12.5938	-0.059278	-0.1291	-0.008789	-1.951	272.8576	1293.942	-1.1284	1.0103	0.10303	-33.07	-90.147	1820.39	-1.7127	1.6106	0.41577	-50.041	60.0023	-9.6504	-0.058105	-0.097656	-0.066895	78.537	-25.637	1130.78	-2.0449	1.1973	0.48096	-110.927	-35.057	1224.52	-1.8891	1.0762	0.34913	-112.297	-4.93899999999999	88.733	0.10586	0.094043	-0.077539
2.06	-95.4199	25.8469	-14.5821	-0.052734	-0.13379	-0.0058594	-35.364	264.5813	1240.527	-1.0913	0.98096	0.10352	-77.702	-86.771	1802.73	-1.7134	1.6294	0.40088	-45.517	52.244	-7.5716	-0.074463	-0.094971	-0.062011	89.6614	-10.203	1135.27	-1.9677	1.2256	0.49219	-103.676	-116.199	1176.76	-1.9883	1.2266	0.40479	-92.1682	-52.635	122.415	0.096484	0.10693	-0.080957
2.062	-74.707	47.6573	4.0586	-0.046777	-0.13613	-0.010742	-34.073	230.9	1233.077	-1.0703	0.95117	0.10474	-21.552	-109.953	1848.04	-1.7383	1.6543	0.39795	-39.467	-6.6598	24.979	-0.084961	-0.092285	-0.059082	53.7835	-80.2534	1139.46	-1.853	1.2358	0.48633	-76.778	-123.522	1170.61	-2.0249	1.3774	0.39258	-93.07	-57.366	158.487	0.080078	0.12402	-0.08252
2.064	-50.384	67.317	-0.308671	-0.035254	-0.14043	-0.0091797	-21.551	267.876	1208.058	-1.0444	0.92627	0.1084	-27.848	-126.267	1862.2	-1.7578	1.666	0.39893	-79.009	23.4473	-11.142	-0.094727	-0.094727	-0.054199	38.802	-136.923	1189.46	-1.6187	1.2212	0.44189	-78.384	-94.436	1109.23	-1.9663	1.4067	0.35107	-113.1457	-67.675	197.663	0.063183	0.13975	-0.083985
2.066	-62.439	66.366	-18.244915	-0.024707	-0.14238	-0.0072265	-82.3598	241.784	1172.113	-1.0117	0.89258	0.11328	-51.3491	-160.624	1893.64	-1.8042	1.6899	0.41016	-59.573	-4.915	3.411	-0.094238	-0.094238	-0.05127	17.127	-84.246	1227.31	-1.4741	1.189	0.41211	-91.8601	-167.007	1083.78	-1.6851	1.3599	0.21631	-47.863	-121.4926	287.5828	0.041602	0.15352	-0.089453
2.068	-31.972	37.4912	23.792	-0.016113	-0.14785	-0.0055664	-56.795	259.406	1163.529	-1.002	0.87598	0.11768	-18.656	-155.211	1970.63	-1.8452	1.7027	0.42627	-56.85	14.1647	7.1	-0.095703	-0.099121	-0.059082	-23.269	-69.039	1246.84	-1.1963	1.0918	0.35791	-109.1892	-165.876	1072.37	-1.393	1.269	0.095705	-80.886	-72.6926	357.044	0.012695	0.17734	-0.088672
2.07	-50.507	28.4222	10.552	-0.0068359	-0.14795	-0.003418	-36.605	282.571	1112.208	-0.97607	0.84521	0.13135	-52.249	-122.5958	1966.52	-1.8862	1.7114	0.44531	-55.128	73.9104	7.496	-0.094238	-0.10523	-0.052734	-21.979	-14.765	1253.02	-1.0464	1.0015	0.32983	-123.9451	-177.287	1099.9	-1.1152	1.1816	-0.020996	-98.158	-33.211	451.9847	-0.033301	0.20049	-0.086621
2.072	-58.153	23.341	-2.952	-0.00068364	-0.15019	-0.0017578	-67.742	245.497	1092.428	-0.95459	0.8208	0.13721	-26.8752	-156.717	2015.94	-1.9155	1.7056	0.47803	-10.253	31.4802	21.6573	-0.083496	-0.11084	-0.056641	-37.562	-22.268	1220.39	-0.94482	0.93799	0.31201	-76.347	-191.704	1182.98	-0.82959	1.1138	-0.15137	-37.57	17.2732	590.853	-0.089355	0.22559	-0.082031
2.074	6.967	16.787	18.0375	0.0085937	-0.15176	0.00019531	-62.0394	277.25	1081.644	-0.92969	0.79492	0.14014	-13.024	-149.257	2028.74	-1.9312	1.6978	0.49512	-44.333	53.694	-1.547	-0.077637	-0.11621	-0.058594	-40.975	-108.2507	1255.74	-0.87305	0.92773	0.30029	-54.578	-91.723	1222.51	-0.74023	1.0977	-0.20166	-77.0206	115.776	712.328	-0.15059	0.24873	-0.076074
2.076	-27.877	32.7315	-4.4458	0.017187	-0.15449	0.0029297	-82.2261	270.413	1016.012	-0.89551	0.76953	0.14795	-84.542	-157.851	2041.03	-1.9434	1.666	0.51514	-38.909	57.5321	0.231	-0.071289	-0.12061	-0.057129	-22.462	-121.816	1312.99	-0.85107	0.94775	0.30176	-33.49	-103.41	1227.43	-0.64502	1.0825	-0.28516	-66.7119	121.7951	900.4255	-0.21494	0.27207	-0.064063
2.078	-33.117	37.6664	15.50644	0.02539	-0.15147	0.0016602	-87.67927	257.467	1005.003	-0.87598	0.75586	0.15381	-35.977	-194.061	2055.63	-1.9519	1.6389	0.53564	16.19	19.5408	23.0776	-0.060547	-0.12354	-0.059082	-9.0708	-200.249	1358.79	-0.83984	1.0127	0.30615	5.867	-113.621	1252.24	-0.62158	1.086	-0.31665	-77.963	155.3626	1040.483	-0.28643	0.29942	-0.059766
2.08	11.409	50.946	30.75	0.02832	-0.15039	0.0039063	-93.1416	293.983	963.8	-0.83594	0.73047	0.15674	-74.1875	-159.346	2017.49	-1.9624	1.604	0.55176	-16.995	61.1878	3.0802	-0.049561	-0.13061	-0.057373	-43.6487	-269.86	1416.3	-0.88452	1.0794	0.32446	25.764	-108.2587	1243.8	-0.61914	1.0898	-0.31836	-104.406	161.018	1159.519	-0.34795	0.32686	-0.056152
2.082	-28.975	54.332	16.374	0.031055	-0.14346	0.0035157	-125.831	261.955	906.686	-0.80908	0.70898	0.15454	-108.135	-133.485	1970.73	-1.9824	1.5547	0.5708	-6.107	13.044	12.4254	-0.034668	-0.12988	-0.065918	-86.2049	-267.639	1430.91	-0.96045	1.1626	0.34961	52.299	-205.387	1280.86	-0.66699	1.1064	-0.31006	-57.071	82.673	1305.369	-0.41113	0.3584	-0.061523
2.084	6.58900000000001	39.0719	46.055	0.035059	-0.14424	0.0074218	-113.5476	260.262	875.411	-0.77637	0.68555	0.15674	-83.505	-107.4283	1961.21	-1.9883	1.5332	0.57764	17.09	-2.8546	11.8497	-0.016113	-0.13232	-0.067871	-93.97	-285.13	1430.46	-1.085	1.291	0.37744	65.953	-238.06	1343.25	-0.72266	1.1172	-0.29297	-56.272	69.726	1366.53	-0.47949	0.39687	-0.06582
2.086	4.123	37.702	36.0428	0.034668	-0.14151	0.015625	-125.077	274.15	803.749	-0.73145	0.64551	0.15137	-124.003	-50.67	1922.44	-1.9922	1.4805	0.59131	-45.897	41.4387	3.987	-0.0068359	-0.13574	-0.072754	-84.512	-220.646	1469.26	-1.1406	1.3516	0.38818	17.64	-304.43	1361.79	-0.89844	1.1816	-0.23828	-32.4	39.7225	1369.955	-0.56973	0.44004	-0.069531
2.088	-40.707	38.588	18.7138	0.038672	-0.13945	0.010351	-132.11	235.656	747.02	-0.70508	0.62695	0.15381	-99.973	-57.38	1929.1	-1.9907	1.4536	0.59521	-6.829	22.0111	33.9817	0.0092773	-0.13525	-0.07666	-97.56	-154.925	1514.74	-1.2163	1.4438	0.39844	0.600000000000001	-400.21	1433.91	-1.0629	1.2632	-0.18237	-18.086	6.45682	1324.92	-0.69316	0.48106	-0.075
2.09	17.17	39.1475	17.259	0.032715	-0.13428	0.013672	-89.1715	235.0139	722.236	-0.65283	0.58838	0.15381	-63.0343	-16.841	1923.63	-1.9858	1.4243	0.60449	-6.248	63.564	32.80669	0.016358	-0.13843	-0.078614	-46.8922	-164.642	1604.81	-1.2615	1.4787	0.40405	-37.222	-349.24	1481.34	-1.2241	1.3403	-0.13379	-49.0662	6.2456	1251.426	-0.85293	0.52911	-0.049902
2.092	-15.184	45.9616	-17.794	0.028125	-0.13086	0.017383	-118.57	225.5	669.067	-0.61084	0.55591	0.15649	-102.898	-3.828	1894.55	-1.9785	1.3945	0.60986	-31.022	66.243	20.9537	0.024902	-0.13965	-0.086914	-53.4811	-126.62	1688	-1.3042	1.5063	0.4043	-42.675	-341.43	1526.59	-1.3901	1.4204	-0.077148	-32.7265	-85.062	1230.025	-1.0625	0.58203	-0.0048828
2.094	-26.154	41.8223	-1.0788	0.025976	-0.13223	0.024024	-82.3561	208.889	630.55	-0.56982	0.52588	0.15332	-77.1543	-13.642	1914.32	-1.9722	1.3804	0.61133	-22.276	17.8822	26.463	0.032227	-0.1416	-0.085938	-54.795	-138.251	1736.34	-1.3862	1.5181	0.40234	-5.603	-294.43	1600.48	-1.4551	1.4492	-0.054199	-50.0934	-107.3734	1218.563	-1.3192	0.64463	0.070117
2.096	-14.449	49.551	19.8124	0.015039	-0.1291	0.028711	-55.7817	243.573	595.043	-0.51807	0.48486	0.14258	-94.472	17.066	1887.68	-1.957	1.3574	0.60596	-49.015	61.899	-6.06	0.033203	-0.14258	-0.085449	-24.679	-146.256	1783.41	-1.4277	1.5215	0.40723	-23.304	-189.083	1639.84	-1.564	1.4868	-0.030762	-58.030341	-111.277	1177.023	-1.6028	0.72432	0.16514
2.098	-64.917	54.676	11.4448	0.005664	-0.12686	0.03125	-86.5948	217.024	571.207	-0.49268	0.46338	0.14404	-108.185	-11.765	1872.43	-1.937	1.352	0.60205	-28.295	33.8445	-7.4696	0.032227	-0.14307	-0.093262	-26.663	-77.412	1776.92	-1.5156	1.5332	0.41846	-27.769	-195.597	1712.1	-1.6294	1.5137	-0.023193	-13.602	-178.205	1191.385	-1.8829	0.82393	0.27608
2.1	-36.626	41.6701	50.797	-0.003418	-0.11914	0.029785	-23.396	220.499	557.601	-0.43799	0.42725	0.13525	-79.688	-32.859	1911.08	-1.9116	1.3423	0.59961	-27.358	28.0783	8.3901	0.033692	-0.13403	-0.09082	-11.018	-77.461	1758.64	-1.5818	1.5442	0.42212	-21.195	-125.684	1801.36	-1.6992	1.5313	-0.017578	-96.417	-164.143	1183.382	-2.1109	0.94297	0.36407
2.102	-38.147	28.412	27.565	-0.010156	-0.11601	0.033887	-28.973	223.604	517.136	-0.39624	0.39844	0.13062	-104.3948	-9.67200000000001	1868.47	-1.8765	1.3306	0.58984	-50.971	56.7952	20.8773	0.033203	-0.12695	-0.084473	-3.542	-46.8975	1782.78	-1.6387	1.5586	0.42676	19.343	-78.125	1832.99	-1.7808	1.5571	-0.0014648	-125.353	-159.937	1231.449	-2.2339	1.063	0.42529
2.104	-81.874	24.437	36.0009	-0.013965	-0.10577	0.034277	-48.116	167.409	465.341	-0.35693	0.37305	0.12646	-88.959	-54.732	1883.96	-1.8491	1.3228	0.5918	-41.922	9.085	42.6669	0.026855	-0.11719	-0.075684	-52.968	-27.309	1812.74	-1.7026	1.5903	0.43359	43.223	-118.741	1881.42	-1.8237	1.5669	0.003418	-88.587	-137.567	1291.636	-2.2147	1.1809	0.51504
2.106	-34.313	15.623	51.4257	-0.012402	-0.10029	0.032325	-6.732	153.7638	426.037	-0.31152	0.33252	0.11328	-72.402	-41.315	1888.84	-1.8066	1.3105	0.57666	-72.431	44.8126	17.614	0.023438	-0.1123	-0.075684	-14.71229	-89.6888	1870.6	-1.7378	1.6138	0.43652	31.374	-53.784	1859.17	-1.9102	1.5869	0.019531	-85.508	-46.24	1291.23693	-2.1746	1.2684	0.5584
2.108	-63.713	30.9068	16.624	-0.010351	-0.09082	0.025976	-45.889	117.4346	368.707	-0.28613	0.31641	0.10742	-101.431	-43.541	1857.37	-1.7705	1.3032	0.57227	-43.004	56.48019	9.4245	0.014648	-0.098633	-0.069824	9.9101	-70.361	1931.96	-1.7969	1.6504	0.4458	-6.082	-84.277	1822.14	-1.9665	1.6037	0.020752	-32.188	-66.34	1335.5599	-2.1653	1.2996	0.49317
2.11	-72.892	8.202	31.0344	-0.0083008	-0.083496	0.024414	-45.378	80.4835	339.4804	-0.23975	0.28467	0.104	-41.661	-71.499	1854.16	-1.7383	1.2891	0.56396	-51.764	22.4741	26.792	0.0078125	-0.088867	-0.068115	8.127	-99.472	1954.76	-1.8396	1.6828	0.4563	-32.931	-115.2209	1856.74	-2.0156	1.6211	0.027344	-36.022	-76.71	1366.353	-2.079	1.2968	0.36543
2.112	-45.976	10.6041	18.6947	-0.00068359	-0.079688	0.016406	-4.033	97.32409	305.014	-0.19043	0.24854	0.089844	-45.142	-32.679	1794.08	-1.6914	1.2725	0.5498	-79.272	74.921	9.9773	0.0092773	-0.08252	-0.066406	29.128	-142.217	1986.76	-1.8867	1.709	0.47217	-55.792	-70.821	1861.05	-2.0669	1.645	0.032227	-41.785	-90.104	1373.534	-1.853	1.272	0.24609
2.114	-97.256	17.87845	-2.2467	0.0012695	-0.074121	0.0089844	-29.892	92.144	271.726	-0.16455	0.23828	0.088379	-80.314	-20.907	1765.11	-1.6714	1.2661	0.54492	-41.373	27.7645	21.5747	0.016113	-0.074219	-0.061035	34.39	-76.15	1976.19	-1.9292	1.7329	0.49512	-85.595	-134.3948	1898.53	-2.0874	1.6606	0.033691	16.915	-190.502	1442.371	-1.5524	1.2281	0.13467
2.116	-58.111	7.787	24.6164	0.0051758	-0.072558	0.0066406	-4.582	114.876	274.872	-0.11719	0.20313	0.078125	-46.464	10.157	1764.97	-1.6226	1.2407	0.53906	-42.79	11.5778	30.95298	0.019043	-0.070313	-0.061035	16.224	-79.002	1966.69	-1.9487	1.7446	0.50977	-90.024	-127.6491	1956.5	-2.103	1.6724	0.022461	-16.095	-222.0986	1483.814	-1.2875	1.1617	0.016601
2.118	-30.892	24.61994	9.386	0.0014649	-0.071777	0.0084961	-3.667	140.959	241.093	-0.077148	0.18482	0.071777	-74.966	78.113	1730.99	-1.5899	1.2247	0.5293	-90.63791	20.936	10.478	0.025879	-0.069336	-0.061523	30.628	-60.54	2005.35	-1.9824	1.7461	0.54346	-121.997	-117.9811	1964.86	-2.1088	1.6724	0.011719	-58.811	-283.012	1516.842	-1.1012	1.0957	-0.090433
2.12	-71.312	25.817	2.734	-0.0068359	-0.074219	0.0029297	-31.833	124.755	219.3885	-0.042969	0.15918	0.067871	-64.232	94.59614	1729.9	-1.5566	1.2109	0.52393	-31.861	-34.1238	43.831	0.033691	-0.065674	-0.065918	-5.97	-21.7542	2023.64	-2.0005	1.7408	0.56787	-118.039	-169.2602	2007.4	-2.103	1.6665	0	-79.556	-349.595	1584.446	-0.99093	1.0564	-0.16924
2.122	-30.085	15.9624	34.06696	-0.012793	-0.076562	0.0012695	-5.724	135.752	198.3995	0.0043945	0.13232	0.051758	-27.754	139.015	1733.12	-1.5195	1.1807	0.51025	-38.463	21.0485	28.6477	0.034668	-0.063477	-0.063965	-44.4384	-68.405	2038.67	-2.0171	1.7251	0.58936	-78.3073	-78.036	2020.04	-2.0918	1.6367	-0.01416	-105.514	-309.904	1602.768	-0.92334	1.0347	-0.22217
2.124	-44.993	38.091	16.316	-0.019434	-0.079492	0.0045898	-34.394	118.095	161.2558	0.03125	0.11328	0.047852	-66.2576	164.127	1686.24	-1.5039	1.168	0.50244	-48.12	48.8414	8.5969	0.040527	-0.0625	-0.067383	-56.0183	-16.615	2012.48	-2.0386	1.6899	0.62109	-65.2886	-55.381	2024	-2.0874	1.6235	-0.018066	-70.394	-307.143	1647.2635	-0.88857	1.0231	-0.25713
2.126	-28.236	37.4348	22.502	-0.027637	-0.079102	0.0022461	-43.857	77.237	156.6689	0.072266	0.080078	0.038574	-23.664	142.077	1676.75	-1.4727	1.1465	0.49561	2.942	28.269	16.0413	0.045898	-0.059082	-0.075684	-79.215	-17.316	1970.74	-2.0464	1.6704	0.64063	-29.063	-66.455	2071.97	-2.0757	1.5981	-0.025879	-20.339	-262.364	1725.534	-0.88428	1.0103	-0.28096
2.128	0.399000000000001	48.484	20.4458	-0.023633	-0.081934	-0.00097655	-48.735	81.722	125.846	0.099122	0.055664	0.030273	-37.511	161.003	1631.47	-1.4531	1.1284	0.49365	-45.537	64.266	-4.938	0.052734	-0.052734	-0.07959	-83.1333	-47.4055	1988.77	-2.0586	1.6309	0.67236	-46.35	1.83000000000001	2028.7	-2.0593	1.5735	-0.031983	-14.343	-166.051	1764.48	-0.92021	1.0149	-0.28252
2.13	-32.538	44.87	-3.5886	-0.023926	-0.085449	0.00048828	-83.037	69.929	108.282	0.12549	0.033203	0.02002	-64.353	133.7369	1595.7	-1.4336	1.1143	0.48877	-35.791	18.3365	20.2311	0.057617	-0.043945	-0.082519	-71.5946	-2.461	1958.92	-2.0623	1.594	0.69312	-74.984	-52.044	1983.37	-2.0425	1.5415	-0.030762	24.965	-182.037	1859.034	-1.0199	1.0453	-0.2586
2.132	-11.241	15.67909	20.9367	-0.019043	-0.083789	-0.0042969	-50.936	91.186	115.656	0.15381	0.011719	0.010742	-12.053	91.4775	1614.75	-1.4023	1.0801	0.47998	14.773	18.1313	36.3523	0.062988	-0.037109	-0.086426	-69.853	-29.5938	1926.09	-2.0664	1.5586	0.71729	-57.619	-15.44	1987.54	-2.0313	1.502	-0.029785	40.347	-118.977	1929.783	-1.1699	1.1133	-0.21045
2.134	-17.726	13.7775	-9.491	-0.019531	-0.079004	-0.010352	-69.115	118.876	78.313	0.16357	0.0058594	-0.0048828	-34.535	110.11776	1558.98	-1.3789	1.0547	0.47119	-6.553	50.4083	17.0747	0.068359	-0.032715	-0.091797	-83.638	-9.051	1937.75	-2.0732	1.5078	0.75049	-69.7172	35.627	1953.86	-2.0283	1.4726	-0.027588	65.235	-48.214	1946.198	-1.3296	1.2054	-0.1626
2.136	-16.591	3.721	-6.8563	-0.019922	-0.081348	-0.01543	-95.973	92.805	77.3371	0.18408	-0.0083008	-0.0078125	-8.333	75.619	1544.9	-1.3472	1.0317	0.46289	-19.819	0.0167000000000002	33.691	0.075684	-0.029785	-0.09375	-140.706	57.858	1938.32	-2.0796	1.4829	0.75781	-66.836	-25.753	1946.98	-2.0332	1.4453	-0.01709	106.597	-61.105	1976.626	-1.4737	1.2872	-0.11436
2.138	32.762	-14.4189	10.5415	-0.02334	-0.084278	-0.019922	-44.632	95.61	63.243	0.19238	-0.015869	-0.0065918	-11.507	103.615	1523.98	-1.3047	0.99219	0.44775	-26.606	25.063	26.285	0.081055	-0.03125	-0.10449	-108.009	39.82042	1963.45	-2.0762	1.4375	0.76611	-70.02536	28.885	1912.04	-2.0391	1.4082	-0.0073242	53.349	12.156	1941.849	-1.5987	1.3403	-0.069043
2.14	-19.922	10.6028	11.9674	-0.031738	-0.080078	-0.022461	-85.9323	66.896	36.343	0.1958	-0.024902	-0.0078125	-77.998	146.268	1494.08	-1.2769	0.97705	0.44141	-16.663	37.4517	7.7796	0.086426	-0.029785	-0.10473	-101.428	87.069	1956.02	-2.0708	1.4082	0.77832	-82.0633	6.41	1867.8	-2.0347	1.3872	-0.00048828	13.58	-24.134	1916.759	-1.719	1.3766	-0.029395
2.142	-25.743	6.69	51.6035	-0.039746	-0.07373	-0.027149	-59.101	30.767	58.2982	0.18359	-0.033203	-0.0073242	-11.092	138.549	1496.74	-1.2358	0.94189	0.42871	-4.845	4.57677	4.6411	0.083496	-0.020508	-0.10742	-101.913	72.207	1927.42	-2.0581	1.3794	0.7793	-62.364	-1.93000000000001	1914.07	-2.0273	1.3457	0.0078125	-15.011	-59.936	1924.547	-1.832	1.4004	-0.0024414
2.144	11.85	10.1318	45.3066	-0.041309	-0.069043	-0.0375	-49.504	36.1312	55.767	0.17871	-0.032227	-0.0043945	-23.942	177.787	1447.42	-1.2031	0.91308	0.41357	-14.827	47.374	-6.6447	0.075684	-0.01123	-0.10547	-91.58123	-4.154	1943.29	-2.0195	1.3418	0.77197	-29.51	102.809	1917.17	-2.0144	1.3186	0.0053711	-79.058	-32.218	1915.352	-1.9286	1.4202	0.021191
2.146	-43.296	17.793	54.4697	-0.038184	-0.058496	-0.041797	-72.654	29.238	41.509	0.16357	-0.038086	0.003418	-31.448	177.916	1397.11	-1.1694	0.88525	0.40137	-34.254	13.8151	8.0699	0.069824	-0.0048828	-0.11035	-78.08	19.854	1913.87	-1.9922	1.3184	0.76611	-21.278	66.328	1923.05	-1.9956	1.2935	0.0073242	-73.92	-140.664	1992.036	-2.0118	1.434	0.04375
2.148	-35.861	-31.587	100.368	-0.035938	-0.045508	-0.047656	-30.301	58.3099	56.964	0.15015	-0.039307	0.0078122	10.599	173.164	1383.57	-1.126	0.85059	0.38379	-32.425	11.6881	17.504	0.062012	0.0083008	-0.10791	-74.875	-4.213	1866.57	-1.937	1.2817	0.75293	20.816	83.737	1943.44	-1.9624	1.2681	0.0058594	-87.337	-127.428	2024.975	-2.0836	1.448	0.064453
2.15	-44.9	-48.705	129.99	-0.032715	-0.03125	-0.060059	-43.998	93.042	21.4725	0.13525	-0.039551	0.016113	-13.376	236.21	1307.7	-1.1055	0.83105	0.37256	-42.931	49.1336	3.218	0.058838	0.020996	-0.10693	-53.624	16.52	1870.23	-1.8936	1.2519	0.73584	4.044	81.871	1917.74	-1.9512	1.2598	0.0043945	-72.898	-103.6247	2019.951	-2.1442	1.4578	0.083985
2.152	-61.226	-83.483	160.9275	-0.015918	-0.014648	-0.07959	-37.762	90.532	17.6276	0.11182	-0.039063	0.023926	8.173	235.07	1274.72	-1.0664	0.79883	0.35791	-18.376	9.034	11.6756	0.053711	0.034668	-0.10791	-67.69136	80.726	1839.17	-1.8555	1.2285	0.72217	3.916	-6.01	1933.7	-1.9097	1.2554	-0.0053711	-56.26	-131.937	2055.364	-2.2026	1.4839	0.10449
2.154	-8.919	-102.538	215.224	-0.0017578	-0.0008789	-0.10078	10.835	91.177	27.759	0.10303	-0.036133	0.027832	16.908	257.63	1233.04	-1.0315	0.7732	0.3479	-45.917	39.98409	11.00584	0.055176	0.048828	-0.11475	-57.198	39.6044	1839.48	-1.7983	1.2017	0.69531	19.456	53.103	1901.44	-1.8823	1.2553	-0.0039063	-81.691	-26.064	2051.587	-2.2573	1.5106	0.12344
2.156	-56.541	-94.804	238.8105	0.0099606	0.013574	-0.12265	-14.789	59.004	10.02474	0.083984	-0.03418	0.030273	-14.717	252.929	1182.11	-1.002	0.74707	0.33447	-55.449	35.556	21.0653	0.060302	0.058593	-0.1184	-53.336	96.23	1830.83	-1.7651	1.188	0.68359	15.241	28.661	1840.787	-1.8491	1.2544	-0.0043945	-79.919	-40.588	2065.06	-2.2922	1.5371	0.14355
2.158	-57.356	-83.374	355.007	0.0014648	0.037793	-0.13603	-17.155	19.2432	18.8001	0.069092	-0.02832	0.034668	23.634	197.422	1180.82	-0.95459	0.71729	0.31592	-34.005	0.8805	52.394	0.062012	0.066406	-0.12207	-30.645	110.557	1796.73	-1.709	1.168	0.65479	-9.458	-8.781	1822.556	-1.8086	1.248	-0.012695	-71.09	-66.028	2099.138	-2.3144	1.5633	0.16543
2.16	-36.448	-37.868	456.9862	-0.023438	0.064941	-0.14697	12.683	13.3638	0.957999999999998	0.055664	-0.025391	0.039551	3.908	235.77	1132.9	-0.93213	0.69775	0.30811	-80.97507	19.8934	44.342	0.058105	0.080078	-0.13086	-20.548	80.463	1806.07	-1.6646	1.1616	0.63086	-33.429	60.21	1768.523	-1.7847	1.2466	-0.0063477	-110.2073	-12.055	2057.813	-2.3248	1.5877	0.18291
2.162	-102.5336	33.303	591.245	-0.063574	0.096292	-0.16074	-28.393	3.561	19.4798	0.044922	-0.018066	0.049316	4.723	232.47	1081.15	-0.88867	0.66797	0.28809	-63.839	-19.3565	63.126	0.059082	0.08252	-0.13135	-19.798	150.406	1784.13	-1.6226	1.1509	0.60742	-27.826	16.81	1730.83	-1.7344	1.2422	-0.01123	-140.4925	-78.13	2015.817	-2.3179	1.6021	0.1875
2.164	-88.3185	64.645	814.521	-0.10937	0.11953	-0.15479	5.448	26.6292	23.61	0.045898	-0.016113	0.049805	30.922	214.04	1074.74	-0.85254	0.6416	0.27051	-52.408	-34.816	100.305	0.051758	0.098633	-0.13818	-27.951	147.863	1736.69	-1.5601	1.1411	0.56836	-5.364	67.331	1739.979	-1.6914	1.2353	-0.016846	-146.163	-12.85	1980.101	-2.3067	1.6027	0.19619
2.166	-99.3025	81.759	989.455	-0.14961	0.15586	-0.15948	16.868	48.4637	7.1552	0.04834	-0.0073242	0.057129	-7.497	247.71	1024.3	-0.81836	0.61719	0.25439	-84.195	-16.858	123.957	0.039306	0.10938	-0.15308	0.785000000000004	162.43	1716.72	-1.5347	1.1353	0.55469	-11.256	112.9749	1716.974	-1.646	1.229	-0.020508	-151.3632	46.0237	1908.442	-2.2773	1.5906	0.19472
2.168	-132.689	92.4162	1147.76	-0.19297	0.1914	-0.16279	-34.447	50.91803	32.97	0.042969	-0.010742	0.056884	12.873	192.646	989.65	-0.75781	0.58203	0.2373	-38.347	-83.473	200.126	0.017578	0.12988	-0.15723	-17.417	216.46	1678.7	-1.4839	1.1255	0.51855	-42.871	64.1	1717.452	-1.6045	1.2148	-0.026855	-150.1688	15.1533	1902.828	-2.2352	1.5718	0.18731
2.17	-103.887	64.818	1251.448	-0.24365	0.23535	-0.16553	-0.731999999999999	74.953	49.296	0.04248	-0.010742	0.060059	25.417	196.887	980.34	-0.73633	0.5625	0.22119	-46.34	-53.898	265.48	-0.034668	0.16357	-0.13965	-12.396	174.907	1679.12	-1.4578	1.1155	0.49707	-23.828	151.296	1689.784	-1.5815	1.2075	-0.032227	-139.11811	110.297	1877.9559	-2.1878	1.543	0.18193
2.172	-124.4008	74.803	1305.85	-0.30781	0.2792	-0.16386	-17.173	55.347	42.5575	0.04248	-0.012695	0.056152	6.828	211.359	947.01	-0.67725	0.53662	0.1958	-43.393	-52.868	364.2	-0.07373	0.18213	-0.13818	-0.234000000000002	207.717	1690.02	-1.4219	1.1045	0.479	-33.87	143.943	1643.014	-1.5352	1.1914	-0.04248	-93.44	76.623	1871.3323	-2.1323	1.5142	0.17676
2.174	-66.451	56.684	1377.99	-0.40332	0.32695	-0.15225	-5.668	24.46003	62.672	0.044434	-0.01123	0.055176	42.971	183.807	941.38	-0.6311	0.51099	0.17749	-7.155	-66.456	504.09	-0.16406	0.22412	-0.12646	-15.029	194.778	1656.5	-1.3887	1.0918	0.45557	-27.522	127.643	1658.138	-1.4995	1.1826	-0.046143	-58.498	50.3697	1935.375	-2.078	1.4778	0.16269
2.176	-50.723	36.7486	1354.59	-0.53926	0.3789	-0.12959	4.163	12.3584	28.1209	0.058105	-0.013672	0.057129	25.036	212.018	873.86	-0.58398	0.48047	0.16357	-35.571	29.7813	629.86	-0.23047	0.25073	-0.11303	-24.312	146.224	1636.88	-1.3784	1.0825	0.43359	-2.617	190.079	1628.274	-1.4707	1.1699	-0.045898	-49.021	121.342	1923.258	-2.0319	1.4408	0.15927
2.178	-85.0478	33.8528	1272.36	-0.72735	0.43818	-0.079199	-59.889	-15.93649	20.7949	0.06543	-0.017578	0.051269	-13.459	190.082	795.08	-0.52979	0.45166	0.13477	-79.2763	55.186	777.55	-0.30811	0.28564	-0.10205	-10.498	181.832	1574.57	-1.3491	1.0669	0.4082	-34.195	125.364	1579.1522	-1.4355	1.1494	-0.050781	-25.759	54.618	1921.329	-1.9913	1.4095	0.15732
2.18	-66.955	-23.8137	1252.381	-0.97266	0.5	-0.00097656	-45.854	-1.44	28.201	0.073242	-0.020996	0.047852	5.244	172.878	749.86	-0.50391	0.43262	0.13135	-104.843	86.978	975.77	-0.42529	0.3291	-0.083496	-22.33	162.605	1499.94	-1.3233	1.0434	0.39258	-27.912	135.293	1582.365	-1.4121	1.1367	-0.058105	3.833	98.878	1910.638	-1.9626	1.3862	0.15391
2.182	-58.538	-54.23	1183.241	-1.2649	0.57803	0.095802	-78.349	19.1269	4.3966	0.072754	-0.02002	0.033203	-21.113	216.012	681.84	-0.45264	0.39648	0.10742	-126.28	133.582	1163.59	-0.49561	0.35693	-0.075684	-26.183	185.907	1494.98	-1.2969	1.0215	0.37256	-54.5165	141.964	1530.585	-1.377	1.1152	-0.058594	3.983	95.4296	1851.4851	-1.9272	1.3657	0.15869
2.184	-88.425	-87.6036	1130.185	-1.5687	0.67901	0.20166	-73.793	31.522	24.3204	0.079102	-0.021973	0.038574	-9.70999999999999	195.671	643.4	-0.41016	0.3667	0.091797	-113.74	77.816	1348.13	-0.66357	0.42139	-0.057129	-39.764	252.34	1456.3	-1.2578	0.98633	0.34277	-66.1734	73.564	1526.78	-1.3503	1.1008	-0.059326	14.871	11.2046	1845.4378	-1.9039	1.3469	0.16591
2.186	-21.591	-160.073	1126.115	-1.855	0.80947	0.30401	-36.728	52.7883	37.457	0.091797	-0.02832	0.032715	-2.69	216.55	605.49	-0.36475	0.33447	0.081543	-130.456	103.663	1450.42	-0.82104	0.47387	-0.0354	-20.404	221.682	1461.03	-1.2339	0.96729	0.3335	-47.873	135.877	1504.279	-1.3291	1.0781	-0.058105	23.562	80.172	1838.932	-1.8774	1.334	0.17627
2.188	-52.982	-166.775	1120.413	-2.0716	0.95029	0.38848	-93.1377	49.0679	20.626	0.098879	-0.03247	0.03003	-45.766	234.705	557.32	-0.30908	0.30762	0.057129	-124.465	79.937	1490.7	-1.0073	0.5376	0.00097656	-9.23	270.37	1481.51	-1.1836	0.92285	0.30615	-93.7986	129.7181	1433.4789	-1.2988	1.0557	-0.04834	41.622	49.208	1825.39	-1.8554	1.3199	0.18408
2.19	-57.351	-158.584	1214.532	-2.1929	1.0806	0.42334	-58.775	27.586	37.913	0.10938	-0.039551	0.026855	-24.206	197.191	543.69	-0.28125	0.29248	0.04834	-107.219	12.569	1496.81	-1.314	0.63525	0.088867	-10.566	271.56	1421.39	-1.1399	0.89087	0.28492	-76.991	131.1002	1424.4856	-1.2847	1.0488	-0.046387	37.642	21.363	1820.952	-1.8349	1.3142	0.19326
2.192	-33.643	-118.074	1276.096	-2.1727	1.1707	0.37705	-43.996	19.98379	12.511	0.11914	-0.041992	0.021484	-27.349	205.912	500.43	-0.22656	0.26172	0.03125	-112.7892	2.8345	1410.7	-1.48	0.6958	0.14453	-0.875	244.33	1397.14	-1.0991	0.85596	0.25879	-69.7837	216.079	1393.404	-1.2617	1.0273	-0.04248	-3.972	84.6762	1743.508	-1.8101	1.3052	0.20313
2.194	-74.745	-38.31	1247.706	-2.0308	1.2446	0.32168	-93.7631	1.902	2.86392	0.12549	-0.039551	0.018555	-13.687	190.894	459.84	-0.18604	0.2395	0.014405	-72.65164	-96.5014	1351.75	-1.8276	0.83252	0.2793	24.752	297.05	1320.1	-1.0508	0.80664	0.23486	-68.6971	197.884	1377.3879	-1.2387	1.0102	-0.035644	13.587	7.581	1705.302	-1.7838	1.2948	0.21475
2.196	-23.616	-64.971	1322.46	-1.828	1.3403	0.3627	-48.003	-3.5502	32.545	0.13477	-0.037598	0.016602	-3.56	163.342	445.74	-0.15039	0.21875	0.0014648	-90.92	-152.636	1305.34	-2.0537	0.94678	0.38183	3.929	268.39	1238.32	-1.0332	0.78516	0.21973	-17.242	246.464	1392.907	-1.2153	0.98877	-0.026855	21.263	71.838	1677.243	-1.756	1.2907	0.22041
2.198	13.903	-71.753	1360.207	-1.7159	1.4347	0.40361	-46.2	10.1264	0.3216	0.14404	-0.031982	0.014405	-51.809	186.322	393.43	-0.10352	0.18799	-0.017578	-152.534	-140.12	1263.56	-2.2266	1.043	0.4458	16.802	257.548	1205.9	-0.99023	0.73828	0.19434	-21.189	285.235	1337.411	-1.1836	0.96289	-0.025391	5.68599999999999	147.106	1640.9723	-1.729	1.2872	0.23174
2.2	15.749	-110.387	1381.0527	-1.6675	1.4878	0.32178	-70.782	13.646	6.0944	0.14893	-0.02002	0.0097656	-28.161	141.647	362.336	-0.083496	0.17285	-0.020996	-134.715	-187.721	1219.62	-2.2495	1.1431	0.5	12.238	272.45	1157.25	-0.94629	0.69531	0.16943	-49.762	231.774	1302.833	-1.1582	0.95313	-0.024902	1.98999999999999	118.297	1646.30989	-1.7043	1.2799	0.2376
2.202	85.659	-214.0103	1410.413	-1.4956	1.449	0.17246	-30.974	32.01846	15.338	0.16211	-0.016602	0.010254	-27.166	120.359	332.101	-0.047852	0.14941	-0.040039	-163.776	-145.236	1173.15	-2.1792	1.1772	0.56201	23.28	226.965	1155.68	-0.92969	0.67773	0.15869	-42.1704	276.291	1247.244	-1.1108	0.94189	-0.020508	-32.571	213.279	1631.368	-1.6831	1.2739	0.23975
2.204	45.972	-272.122	1415.979	-1.2198	1.3169	0.048633	-66.281	40.4267	0.327000000000002	0.16602	-0.0068359	0.01416	-59.9522	116.362	299.64	-0.025146	0.11938	-0.049073	-178.624	-156.992	1154.25	-2.1484	1.2441	0.61377	55.923	278.13	1146.09	-0.89648	0.63672	0.13672	-73.841	245.221	1175.5505	-1.0659	0.91992	-0.019287	-50.858	180.802	1637.992	-1.6547	1.264	0.2499
2.206	3.477	-353.131	1479.7	-0.95459	1.1735	-0.041601	-39.424	30.288	19.1031	0.17432	0.0048828	0.013184	-23.568	68.18	295.01	-0.00097656	0.099609	-0.062012	-149.448	-187.549	1213.02	-2.1963	1.2813	0.52002	43.838	284.29	1112.12	-0.87377	0.61059	0.12695	-71.8399	210.819	1172.1907	-1.0347	0.90088	-0.016602	-42.685	163.088	1639.893	-1.6211	1.2551	0.25205
2.208	-21.967	-389.986	1520.897	-0.79502	1.0766	-0.12002	-2.287	39.817	-3.312	0.18188	0.013183	0.013428	-32.021	110.729	269.502	0.025391	0.077637	-0.072266	-143.002	-119.735	1250.51	-2.1211	1.292	0.39551	66.394	262.61	1084.04	-0.85352	0.58594	0.11377	-64.8104	266.164	1129.32	-0.98975	0.86963	-0.0092773	-54.198	232.88	1592.308	-1.5871	1.2492	0.25713
2.21	-61.568	-321.835	1521.819	-0.71289	1.0273	-0.17529	-22.403	3.2559	-0.081999999999999	0.18115	0.020508	0.018555	-26.113	108.459	227.706	0.035645	0.068848	-0.07373	-134.837	-122.721	1280.2	-1.7456	1.2681	0.27051	85.931	300.79	1025.96	-0.83008	0.55273	0.099121	-82.085	219.3444	1088.402	-0.96777	0.85254	-0.0097656	-72.422	150.828	1570.758	-1.5526	1.2399	0.25586
2.212	-52.818	-327.802	1602.802	-0.70684	1.0357	-0.18105	19.245	-4.0919	11.61456	0.18066	0.030762	0.018555	-14.2	93.151	232.615	0.049805	0.053223	-0.086426	-103.1379	-112.462	1313.67	-1.5391	1.2344	0.21973	82.375	260.72	967.4	-0.81592	0.53369	0.093262	-83.436	240.219	1080.164	-0.92578	0.81836	0.00048828	-98.4131	163.987	1534.191	-1.5137	1.2246	0.25439
2.214	-59.927	-267.327	1647.5324	-0.75859	1.05	-0.17285	-6.506	12.67591	2.341	0.18799	0.029785	0.020996	-62.1317	123.419	211.335	0.056885	0.043701	-0.087646	-111.7898	-78.646	1313.42	-1.2383	1.1484	0.097656	101.751	243.39	928.59	-0.78613	0.49219	0.07959	-95.583	258.181	1042.233	-0.89233	0.79174	0.0097659	-128.958	147.3951	1474.244	-1.4655	1.2122	0.25059
2.216	-79.44	-191.1829	1700.27	-0.86641	1.0844	-0.13301	-0.725999999999999	21.4567	8.9973	0.19238	0.038086	0.019531	-34.959	91.981	190.161	0.060547	0.036621	-0.093262	-43.74	-162.394	1334.12	-1.1277	1.1184	0.013428	68.012	242.35	879.04	-0.75879	0.4646	0.067138	-97.791	206.2985	1034.138	-0.8667	0.76465	0.018555	-136.219	70.045	1453.731	-1.4155	1.1934	0.24443
2.218	-1.039	-179.324418	1776.261	-1.0041	1.1252	-0.082129	23.571	57.338	8.8766	0.19605	0.047363	0.016113	-8.294	108.947	162.6879	0.061523	0.023926	-0.097656	-28.911	-214.199	1374.18	-1.0469	1.1152	-0.046875	36.276	196.201	853.89	-0.73047	0.4375	0.055176	-55.24513	269.671	1007.448	-0.82373	0.73291	0.025391	-128.883	145.17218	1441.759	-1.3706	1.179	0.23936
2.22	8.434	-114.913	1805.212	-1.1553	1.1865	-0.026367	-29.212	68.594	-7.227	0.19873	0.056152	0.015137	-52.123	132.034	123.556	0.060547	0.020508	-0.099609	-46.769	-295.88	1410.79	-0.98779	1.1187	-0.079102	43.889	234.17	823.77	-0.67773	0.39941	0.038086	-86.035	236.73	943.149	-0.79834	0.7251	0.030762	-142.238	136.8674	1424.117	-1.3257	1.1625	0.23184
2.222	19.526	-120.56	1868.401	-1.3037	1.2522	0.031055	-10.461	67.2563	23.17173	0.2002	0.067383	0.016113	-9.587	91.748	126.7354	0.066406	0.011719	-0.098145	-34.389	-420.97	1481.9	-0.97607	1.1157	-0.088867	35.342	244.65	755.65	-0.6499	0.38428	0.030762	-89.903	210.273	918.669	-0.75537	0.69873	0.039551	-144.651	159.111	1415.354	-1.2905	1.145	0.22656
2.224	55.828	-128.335	1911.605	-1.4426	1.3078	0.087304	6.654	68.852	-0.463000000000001	0.19629	0.074219	0.016113	-39.406	122.571	107.454	0.066651	0.0024414	-0.097656	-38.97	-401.23	1507.85	-0.98828	1.1113	-0.096191	10.771	224.171	730.11	-0.59912	0.34717	0.013184	-89.419	258.911	857.164	-0.72266	0.67578	0.046631	-144.101	263.267	1368.674	-1.257	1.1243	0.23203
2.226	47.668	-50.067	1874.257	-1.5707	1.3515	0.13887	-39.463	37.337	6.0543	0.18945	0.090332	0.02002	-31.26	97.799	89.6648	0.069336	-0.0014648	-0.098145	-14.846	-422.56	1509.23	-1.0349	1.1233	-0.087647	27.293	257.03	657.26	-0.56397	0.3252	0.00024415	-103.101	203.963	810.543	-0.68408	0.65479	0.057129	-81.5401	222.364	1330.804	-1.2265	1.1009	0.23018
2.228	47.332	-67.906	1895.56	-1.6967	1.3897	0.18086	-17.431	24.5188	28.914	0.18238	0.10376	0.024658	-17.683	57.2204	79.835	0.077148	-0.010254	-0.104	23.096	-408.25	1567.7	-1.103	1.1587	-0.075684	9.422	196.464	602.59	-0.52979	0.30225	-0.010742	-79.9504	234.148	788.249	-0.64697	0.61963	0.068359	-64.053	264.892	1311.531	-1.2007	1.0837	0.23174
2.23	21.463	-55.557	1895.701	-1.8081	1.4204	0.21289	-41.023	24.6367	8.77644	0.16797	0.11768	0.035156	-68.7936	74.293	59.95691	0.083008	-0.013672	-0.10547	1.563	-313.39	1633.45	-1.2134	1.2427	-0.044922	-0.464999999999996	204.412	563.7	-0.48584	0.27686	-0.023926	-98.637	240.106	714.887	-0.62842	0.60791	0.067383	-52.87	269.077	1264.666	-1.172	1.0651	0.23486
2.232	-58.264	-67.728	1877.6714	-1.8908	1.4514	0.23565	-78.5755	13.3895	15.3879	0.15234	0.13428	0.045898	-38.509	28.067	67.723	0.089844	-0.019531	-0.10156	25.224	-303.01	1728.73	-1.2734	1.2773	-0.032715	-8.565	218.05	527.28	-0.46436	0.25928	-0.033203	-120.442	172.43	672.038	-0.57275	0.5708	0.075195	-30.553	204.4191	1225.033	-1.1445	1.0469	0.23584
2.234	-41.673	-159.068	1937.961	-1.9528	1.4761	0.24912	-28.73	44.018	22.419	0.14111	0.14697	0.055664	-37.771	46.5087	60.6509	0.093994	-0.027344	-0.10522	15.308	-196.4	1829.81	-1.3906	1.3203	-0.0048828	-18.695	175.556	497.05	-0.41797	0.22559	-0.044922	-102.797	215.237	622.213	-0.52636	0.54395	0.082032	-46.265	271.346	1176.22	-1.1171	1.0261	0.2373
2.236	-72.481	-150.482	1951.971	-1.9934	1.5074	0.24873	-46.915	57.804	3.611	0.12549	0.16309	0.064453	-47.373	70.7911	45.4039	0.096191	-0.036133	-0.1084	5.724	-103.515	1900.18	-1.4854	1.3286	0.0036621	-17.464	207.179	468.9	-0.39014	0.19922	-0.053223	-95.945	186.1163	563.804	-0.48193	0.51904	0.083496	-44.17	231.462	1124.0957	-1.0895	1.0102	0.23662
2.238	-70.672	-169.275	1991.783	-2.0337	1.5218	0.24433	-54.434	39.7676	52.9032	0.11596	0.17163	0.071534	-18.568	14.9322	44.5925	0.10059	-0.045898	-0.11084	10.63	-100.77	1952.96	-1.584	1.334	0.0073242	-35.734	196.675	438.69	-0.35938	0.17773	-0.060059	-94.08	175.6697	533.1864	-0.42969	0.47852	0.084473	-46.026	218.3481	1111.125	-1.0629	0.99142	0.23662
2.24	1.064	-197.393	2055.33	-2.0679	1.5376	0.23828	-35.513	35.04	63.246	0.10645	0.18457	0.076172	-54.865	32.549	40.4808	0.10107	-0.05127	-0.11279	0.951000000000001	-21.557	1921.72	-1.7202	1.3442	0.028809	-41.819	179.036	411.52	-0.31885	0.1499	-0.067383	-74.4	213.23	478.1652	-0.3999	0.46338	0.087402	-72.4313	271.674	1070.0865	-1.0304	0.97119	0.23867
2.242	3.969	-96.137	2043.482	-2.1013	1.5487	0.22461	-97.4608	0.1094	60.2028	0.093262	0.19824	0.092285	-74.6447	12.9294	41.618	0.091309	-0.062988	-0.11084	-12.418	-56.034	1867.52	-1.7847	1.3521	0.035645	-20.315	211.542	371.15	-0.2998	0.13721	-0.075684	-97.349	159.541	436.0518	-0.34326	0.42627	0.085449	-52.649	208.9198	1039.4853	-0.99561	0.94775	0.2373
2.244	17.003	-72.84937	2049.947	-2.1276	1.5567	0.21396	-56.518	-11.912	99.161	0.083496	0.20361	0.091797	-37.517	10.9835	34.593	0.075683	-0.06958	-0.10962	-2.051	-111.196	1883.88	-1.9214	1.3833	0.055664	-47.943	147.227	325.05	-0.25977	0.11523	-0.084473	-67.0516	190.8	427.749	-0.30615	0.39941	0.085937	-26.7539	237.721	1016.993	-0.96963	0.92568	0.23447
2.246	22.663	-21.52	2050.52	-2.1483	1.5548	0.1999	-57.543	-12.485	107.158	0.062988	0.22168	0.097656	-46.898	54.921	7.94	0.064453	-0.071777	-0.10596	-52.261	-115.927	1900.39	-2.0202	1.4084	0.078613	-49.712	124.145	302.57	-0.22876	0.10327	-0.098877	-45.3307	199.276	391.998	-0.26416	0.37451	0.083008	-47.816	235.453	957.539	-0.93994	0.89931	0.23125
2.248	-22.698	57.872	1999.743	-2.1624	1.5544	0.19004	-80.215	-30.4571	137.962	0.037354	0.23681	0.10303	-50.931	5.6153	26.195	0.038086	-0.07373	-0.10156	-51.652	-192.444	1956.96	-2.1133	1.4541	0.097656	-53.766	112.549	254.991	-0.19922	0.088867	-0.10303	-58.675	147.564	383.2099	-0.21094	0.33887	0.078125	-23.024	172.832	950.22	-0.9083	0.87236	0.23047
2.25	-17.255	3.154	2019.329	-2.1675	1.5513	0.17773	-68.685	-11.404	177.76	-0.00097656	0.25488	0.11084	-52.355	20.4524	27.2966	0.022949	-0.077148	-0.097656	-103.633	-165.557	2008.16	-2.23	1.4985	0.12549	-57.261	73.137	232.203	-0.16797	0.075195	-0.11328	-35.457	165.142	337.375	-0.18115	0.32422	0.07373	-25.222	244.557	917.491	-0.87803	0.8458	0.22637
2.252	-38.406	48.443	1986.166	-2.1732	1.5437	0.16914	-83.933	-7.3607	194.185	-0.068359	0.27734	0.12305	-58.822	47.9621	-3.8975	-0.0073242	-0.07373	-0.086914	-168.389	-129.487	2022.23	-2.2871	1.5156	0.14111	-16.986	110.478	228.206	-0.15283	0.066895	-0.1123	-50.9745	100.354	286.8461	-0.12988	0.28711	0.069336	-25.837	215.02	882.952	-0.85352	0.82324	0.22852
2.254	-39.644	30.39	1956.91	-2.1695	1.5406	0.16357	-65.935	11.3387	285.58	-0.10645	0.28955	0.12939	-7.41699999999999	21.8394	8.6441	-0.026368	-0.067383	-0.078369	-153.2	-160.977	2076.75	-2.3804	1.5532	0.16748	-12.375	110.172	211.076	-0.13135	0.049805	-0.12695	-44.252	74.7371	250.9086	-0.095458	0.26172	0.066407	-26.559	207.511	847.164	-0.8252	0.80255	0.2251
2.256	-41.709	-34.3635	1950.408	-2.1579	1.5344	0.15577	-46.167	49.041	389.01	-0.18896	0.31641	0.146	-38.894	66.462	1.274	-0.04834	-0.060059	-0.071777	-203.26	-83.4035	2084.35	-2.4258	1.5723	0.18677	-10.268	108.79	218.863	-0.12011	0.038574	-0.13135	-41.988	95.432	205.9008	-0.062012	0.23438	0.067383	-69.8668	256.04	788.74	-0.79298	0.77676	0.22383
[truncated: 11,871 more rows]
