# Supplementary material for: Reliability and Validity of Running Cadence and Stance Time Derived from Instrumented Wireless Earbuds
Source: Sensors (Basel). 2021 Nov 30;21(23):7995. doi: 10.3390/s21237995 (PMC8659722; doi:10.3390/s21237995)
Supplement: Supplementary file 1 [file sensors-21-07995-s001.zip › Data_P07_speeds_1.csv]

time	S7kmh_force_plate_1	S7kmh_force_plate_2	S7kmh_force_plate_3	S7kmh_earbuds_1	S7kmh_earbuds_2	S7kmh_earbuds_3	S10kmh_force_plate_1	S10kmh_force_plate_2	S10kmh_force_plate_3	S10kmh_earbuds_1	S10kmh_earbuds_2	S10kmh_earbuds_3	S13kmh_force_plate_1	S13kmh_force_plate_2	S13kmh_force_plate_3	S13kmh_earbuds_1	S13kmh_earbuds_2	S13kmh_earbuds_3	max_force_plate_1	max_force_plate_2	max_force_plate_3	max_earbuds_1	max_earbuds_2	max_earbuds_3
0	-14.7656	-24.447	186.35	-0.20215	0.14355	-0.025391	-83.376	-148.9293	1878.126	-1.627	1.6758	0.49756	-88.531	-191.722	1123.362	-2.0522	1.4927	0.39648	NaN	NaN	NaN	NaN	NaN	NaN
0.002	0.167999999999999	11.963	226.998	-0.25977	0.1665	-0.016602	-69.332	-67.035	1849.8	-1.6313	1.6411	0.49927	-57.278	-154.943	1231.209	-1.8022	1.4712	0.20703	NaN	NaN	NaN	NaN	NaN	NaN
0.004	-14.6316	35.5701	297.1969	-0.28613	0.16943	-0.015137	-66.399	-70.547	1822.954	-1.6387	1.6055	0.50391	-12.1827	-108.806	1329.2617	-1.5991	1.4399	0.11182	NaN	NaN	NaN	NaN	NaN	NaN
0.006	-13.299	43.7752	361.707	-0.34326	0.19434	-0.012207	-57.494	-30.9251	1839.189	-1.6606	1.5688	0.52344	6.507	-81.25	1447.8489	-1.1758	1.3691	-0.075195	NaN	NaN	NaN	NaN	NaN	NaN
0.008	-16.76	63.3774	404.1071	-0.3938	0.21508	-0.010254	-84.411	6.1809	1849.556	-1.6753	1.5474	0.5332	54.936	-58.98	1503.514	-0.9426	1.3176	-0.20142	NaN	NaN	NaN	NaN	NaN	NaN
0.01	-28.849	77.6442	469.626	-0.45313	0.23438	-0.0087891	-83.31	-63.1392	1885.901	-1.6968	1.5161	0.54785	58.5249	-91.46	1525.2543	-0.79395	1.2852	-0.30469	NaN	NaN	NaN	NaN	NaN	NaN
0.012	-29.816	100.944	525.6643	-0.54248	0.26758	-0.0039063	-80.058	-40.095	1898.9784	-1.7017	1.4838	0.55713	57.276	-160.048	1505.2839	-0.69678	1.272	-0.37451	NaN	NaN	NaN	NaN	NaN	NaN
0.014	-15.453	101.99	578.8191	-0.60059	0.28906	0.0048828	-99.757	-63.318	1882.3799	-1.7031	1.4531	0.56592	25.506	-303.72	1544.553	-0.68408	1.272	-0.39014	NaN	NaN	NaN	NaN	NaN	NaN
0.016	-6.64400000000001	97.767	606.2978	-0.70459	0.33447	0.022949	-100.203	-91.979	1883.7411	-1.6987	1.4048	0.56445	69.265	-409.62	1562.128	-0.71875	1.2617	-0.38867	NaN	NaN	NaN	NaN	NaN	NaN
0.018	-30.095	92.547	640.736	-0.78906	0.3623	0.037597	-129.241	-38.087	1860.518	-1.6929	1.3843	0.56836	100.522	-492.43	1648.139	-0.81275	1.2571	-0.34741	NaN	NaN	NaN	NaN	NaN	NaN
0.02	-15.707	69.07	700.759	-0.87451	0.39844	0.053711	-137.751	-96.2013	1843.264	-1.6768	1.3398	0.56885	176.483	-477.92	1681.909	-0.95508	1.2754	-0.29346	NaN	NaN	NaN	NaN	NaN	NaN
0.022	-10.788	52.5816	742.42	-0.98828	0.45117	0.079102	-120.189	-105.924	1834.2573	-1.6658	1.3113	0.57178	203.335	-444.292	1709.92	-1.209	1.3613	-0.18848	NaN	NaN	NaN	NaN	NaN	NaN
0.024	-42.148	42.36528	796.6925	-1.0288	0.47217	0.088867	-125.2978	-98.899	1817.3557	-1.6582	1.2852	0.5708	171.288	-375.729	1742.7045	-1.3413	1.4165	-0.146	NaN	NaN	NaN	NaN	NaN	NaN
0.026	-52.535	14.591	831.195	-1.1055	0.51367	0.11426	-100.007	-158.115	1814.716	-1.6367	1.2539	0.57275	129.168	-285.3649	1808.297	-1.584	1.5195	-0.066406	NaN	NaN	NaN	NaN	NaN	NaN
0.028	-40.791	-14.32256	871.38	-1.1443	0.54566	0.12354	-101.023	-82.224	1797.73776	-1.6294	1.2388	0.5752	80.55	-178.136	1887.614	-1.7234	1.5667	-0.021484	NaN	NaN	NaN	NaN	NaN	NaN
0.03	-35.985	-21.35454	883.667	-1.1709	0.56641	0.13037	-141.81	-46.676	1753.66891	-1.6191	1.209	0.56982	63.245	-95.638	1966.275	-1.8394	1.606	0.010254	NaN	NaN	NaN	NaN	NaN	NaN
0.032	-31.799	-21.76175	878.076	-1.1812	0.59424	0.12939	-149.486	-22.778	1727.104	-1.6069	1.188	0.57226	39.499	-62.327	1977.77	-1.9434	1.6445	0.029297	NaN	NaN	NaN	NaN	NaN	NaN
0.034	-32.0109	-29.525	887.188	-1.1733	0.60205	0.13037	-147.8093	59.581	1705.1093	-1.5938	1.168	0.56885	9.858	-40.61	1942.4364	-1.98	1.6646	0.038086	NaN	NaN	NaN	NaN	NaN	NaN
0.036	-31.6337	-24.6377	884.57	-1.1499	0.61768	0.11816	-134.497	34.1481	1691.8793	-1.5718	1.145	0.56445	-19.0323	-43.108	1896.086	-2.0352	1.6875	0.035645	NaN	NaN	NaN	NaN	NaN	NaN
0.038	-39.404	-24.14	868.3967	-1.1119	0.62647	0.11036	-136.6851	58.28687	1700.977	-1.5581	1.1372	0.56055	-36.4174	-52.402	1870.106	-2.0534	1.7083	0.029296	NaN	NaN	NaN	NaN	NaN	NaN
0.04	-14.018	-18.2929	846.9211	-1.0659	0.63916	0.099121	-154.869	89.012	1675.09	-1.5371	1.123	0.55908	-51.3628	-104.7609	1923.589	-2.064	1.7349	0.019043	NaN	NaN	NaN	NaN	NaN	NaN
0.042	-24.773	-34.827	838.27625	-1.0034	0.65869	0.06543	-143.24904	38.6954	1653.0272	-1.5117	1.1079	0.55298	-55.598	-188.151	1975.1315	-2.0723	1.7656	-0.00097656	NaN	NaN	NaN	NaN	NaN	NaN
0.044	-25.133	-44.9798	835.9176	-0.96875	0.65625	0.044434	-145.3685	68.13	1635.674	-1.4961	1.0938	0.5415	-39.885	-260.38	2046.022	-2.0757	1.7817	-0.0039063	NaN	NaN	NaN	NaN	NaN	NaN
0.046	-21.53361	-56.1672	841.1855	-0.88281	0.66602	0.0043945	-139.417	33.814	1603.068	-1.4644	1.0845	0.52148	-71.14829	-254.222	2063.4914	-2.1011	1.8091	-0.0029297	NaN	NaN	NaN	NaN	NaN	NaN
0.048	15.3701	-63.334	842.0382	-0.82324	0.67334	-0.03125	-111.377	-9.434	1598.2919	-1.4473	1.0781	0.51709	-75.078	-228.443	2091.995	-2.1081	1.8264	-0.0036621	NaN	NaN	NaN	NaN	NaN	NaN
0.05	11.4919	-76.882	870.576	-0.77197	0.68213	-0.066406	-74.829	48.627	1591.0317	-1.4141	1.0654	0.49854	-119.22	-168.577	2069.953	-2.1108	1.8325	-0.010254	NaN	NaN	NaN	NaN	NaN	NaN
0.052	46.184	-96.389	903.05	-0.72607	0.7085	-0.1001	-85.7053	18.432	1590.237	-1.3886	1.0547	0.48486	-149.083	-150.022	2093.593	-2.0918	1.8281	-0.018066	NaN	NaN	NaN	NaN	NaN	NaN
0.054	63.209	-131.0673	904.908	-0.7124	0.73096	-0.12109	-72.562	62.698	1599.438	-1.3589	1.0493	0.4668	-158.209	-122.699	2072.386	-2.0781	1.8184	-0.020996	NaN	NaN	NaN	NaN	NaN	NaN
0.056	57.831	-145.6965	951.338	-0.7168	0.78027	-0.14746	-62.294	103.45654	1569.629	-1.3242	1.0332	0.45361	-93.613	-137.795	2062.356	-2.0352	1.7676	-0.032715	NaN	NaN	NaN	NaN	NaN	NaN
0.058	62.206	-157.005	1001.721	-0.7295	0.82959	-0.15796	-73.94	72.273	1534.405	-1.3062	1.0249	0.44922	-81.422	-112.1853	2038.495	-1.9917	1.7056	-0.049805	NaN	NaN	NaN	NaN	NaN	NaN
0.06	93.389	-169.909	1038.9207	-0.75342	0.87842	-0.16943	-54.594	141.958	1495.6337	-1.2671	1.0034	0.42773	-50.583	-86.1282	1999.632	-1.9668	1.6699	-0.047363	NaN	NaN	NaN	NaN	NaN	NaN
0.062	108.041	-179.208	1088.6735	-0.80664	0.93555	-0.17139	-43.019	133.663	1452.534	-1.2319	0.99365	0.41114	-29.673	-29.481	1932.17569	-1.9297	1.5938	-0.060547	NaN	NaN	NaN	NaN	NaN	NaN
0.064	105.828	-184.92	1112.0336	-0.8418	0.96875	-0.16992	-42.88	140.875	1443.9016	-1.1948	0.98584	0.396	0.545999999999999	-1.612	1868.295	-1.9033	1.5429	-0.063965	NaN	NaN	NaN	NaN	NaN	NaN
0.066	100.638	-200.186	1151.713	-0.91553	1.0181	-0.16895	-52.2079	209.253	1403.5832	-1.1484	0.96484	0.37598	18.086	26.5926	1818.278	-1.8784	1.4985	-0.065918	NaN	NaN	NaN	NaN	NaN	NaN
0.068	121.937	-203.349	1178.2582	-0.97779	1.052	-0.15894	-60.9136	164.989	1378.714	-1.1226	0.94971	0.36914	59.2341	-9.4339	1834.156	-1.8613	1.4512	-0.061523	NaN	NaN	NaN	NaN	NaN	NaN
0.07	109.568	-189.982	1225.4059	-1.0483	1.0903	-0.15088	-28.888	185.3197	1337.3124	-1.0879	0.92969	0.34229	103.6681	-9.9521	1846.368	-1.8438	1.4277	-0.059082	NaN	NaN	NaN	NaN	NaN	NaN
0.072	94.009	-161.88222	1260.4239	-1.1348	1.1328	-0.12598	-35.735	186.7416	1306.3445	-1.0503	0.90869	0.32129	75.159	-17.4546	1870.724	-1.8242	1.3965	-0.050781	NaN	NaN	NaN	NaN	NaN	NaN
0.074	106.135	-155.198	1309.204587	-1.1758	1.1543	-0.11914	-38.271	160.919	1265.445	-1.0273	0.89063	0.3208	73.184	23.406	1878.8498	-1.8069	1.3898	-0.046142	NaN	NaN	NaN	NaN	NaN	NaN
0.076	115.013	-142.506	1322.893	-1.2598	1.1934	-0.10205	-8.567	202.9312	1240.096	-0.99023	0.85547	0.30176	70.887	13.633	1879.98	-1.7964	1.3833	-0.038574	NaN	NaN	NaN	NaN	NaN	NaN
0.078	96.562	-112.858	1355.195	-1.3113	1.2239	-0.088623	-41.072	189.7947	1210.631	-0.96289	0.8418	0.28662	73.234	12.4441	1867.086	-1.7847	1.3774	-0.027832	NaN	NaN	NaN	NaN	NaN	NaN
0.08	76.214	-98.802	1384.8344	-1.3691	1.248	-0.074219	-47.6199	161.558	1211.075	-0.93164	0.82422	0.26953	91.689	-10.76	1871.809	-1.7715	1.375	-0.016113	NaN	NaN	NaN	NaN	NaN	NaN
0.082	82.04	-90.793	1433.395	-1.4341	1.2896	-0.050293	-35.2935	185.3091	1190.503	-0.88623	0.79639	0.25293	108.017	2.1317	1865.184	-1.7578	1.3691	-0.0087891	NaN	NaN	NaN	NaN	NaN	NaN
0.084	62.511	-86.005	1465.717	-1.4624	1.313	-0.037109	-76.3479	134.341	1151.355	-0.85938	0.78516	0.24268	74.083	-14.3354	1866.511	-1.75	1.3672	0.0039064	NaN	NaN	NaN	NaN	NaN	NaN
0.086	44.14314	-94.903	1482.5984	-1.5313	1.3555	-0.013184	-59.4885	166.898	1127.143	-0.81641	0.76465	0.21582	47.25	-15.935	1818.069	-1.7402	1.3691	0.022949	NaN	NaN	NaN	NaN	NaN	NaN
0.088	53.372	-103.9359	1520.7416	-1.5828	1.385	0.0034179	-48.51866	189.8683	1082.056	-0.77954	0.74682	0.20727	5.2985	-23.6851	1769.9317	-1.7324	1.3711	0.039551	NaN	NaN	NaN	NaN	NaN	NaN
0.09	50.118	-131.6819	1542.742	-1.6284	1.4165	0.023926	-47.029	156.815	1042.029	-0.74414	0.72266	0.18848	15.693	4.562	1715.482	-1.7202	1.3716	0.045898	NaN	NaN	NaN	NaN	NaN	NaN
0.092	32.7598	-133.784	1560.5105	-1.6753	1.4497	0.044434	-32.3977	204.3503	980.3901	-0.69678	0.69385	0.16699	20.0967	24.5665	1724.068	-1.7007	1.3696	0.061523	NaN	NaN	NaN	NaN	NaN	NaN
0.094	24.713	-117.4427	1564.304	-1.7028	1.4699	0.05957	-24.681	173.106	907.913	-0.67236	0.67334	0.16064	8.286	74.5779	1715.91646	-1.6697	1.3645	0.06543	NaN	NaN	NaN	NaN	NaN	NaN
0.096	16.167	-115.070785	1584.2871	-1.7222	1.4849	0.070801	-3.419	168.909	876.796	-0.6167	0.63916	0.13574	-73.0138	98.333	1715.486	-1.6323	1.3521	0.06543	NaN	NaN	NaN	NaN	NaN	NaN
0.098	6.9973	-130.147	1612.7816	-1.728	1.4985	0.077148	-9.869	227.1037	832.436	-0.57202	0.61352	0.1206	-84.566	165.114	1678.844	-1.582	1.3477	0.065918	NaN	NaN	NaN	NaN	NaN	NaN
0.1	23.5224	-132.5946	1621.975	-1.728	1.5044	0.077148	-26.093	213.0813	790.1919	-0.5332	0.58398	0.10449	-131.829	189.431	1642.36	-1.5547	1.334	0.063965	NaN	NaN	NaN	NaN	NaN	NaN
0.102	29.791	-127.562	1634.047	-1.7266	1.5029	0.069336	-17.461	245.657	740.8906	-0.47314	0.55127	0.083984	-109.126	228.805	1608.448	-1.5054	1.3091	0.056641	NaN	NaN	NaN	NaN	NaN	NaN
0.104	25.1499	-110.5436	1629.929	-1.7212	1.499	0.064941	-17.719	240.407	698.162	-0.4458	0.5332	0.070801	-96.521	203.51	1585.395	-1.4655	1.2922	0.055176	NaN	NaN	NaN	NaN	NaN	NaN
0.106	37.783	-102.608	1614.82326	-1.7148	1.4883	0.053711	-26.877	194.367	676.7174	-0.39258	0.49707	0.056152	-75.875	201.6293	1546.705	-1.4272	1.2661	0.05127	NaN	NaN	NaN	NaN	NaN	NaN
0.108	37.8924	-89.879	1621.941	-1.707	1.4746	0.04541	15.97	213.639	640.554663	-0.35546	0.47168	0.040527	-102.1975	162.9233	1543.779	-1.3887	1.2344	0.048828	NaN	NaN	NaN	NaN	NaN	NaN
0.11	57.183	-67.8512	1631.311	-1.7026	1.4653	0.037598	-9.748	187.22	588.5023	-0.3125	0.44678	0.029785	-86.76026	168.289	1504.2535	-1.3667	1.2212	0.050781	NaN	NaN	NaN	NaN	NaN	NaN
0.112	68.426	-68.9232	1642.647	-1.6987	1.4478	0.033691	-13.578	183.135	555.4006	-0.26123	0.41064	0.013184	-86.0452	133.684	1494.73	-1.3315	1.1938	0.049316	NaN	NaN	NaN	NaN	NaN	NaN
0.114	97.442	-69.046	1658.77	-1.7007	1.4336	0.031494	6.567	197.555	506.015	-0.23828	0.39307	0.0053711	-62.999	153.798	1454.943	-1.3111	1.1748	0.052978	NaN	NaN	NaN	NaN	NaN	NaN
0.116	88.77	-70.42	1672.1588	-1.6948	1.4165	0.037109	-10.871	130.34	474.597	-0.18994	0.35352	-0.0058594	-70.185	138.562	1432.135	-1.2891	1.1602	0.057129	NaN	NaN	NaN	NaN	NaN	NaN
0.118	57.033	-55.42	1667.6701	-1.6973	1.3926	0.032227	10.179	131.654	459.92066	-0.14843	0.33105	-0.016846	-27.436	212.553	1381.247	-1.2612	1.1313	0.066406	NaN	NaN	NaN	NaN	NaN	NaN
0.12	61.106	-58.985	1673.549	-1.6948	1.3833	0.029785	2.551	119.0665	419.6049	-0.11475	0.30859	-0.027344	-25.87	232.328	1348.795	-1.2461	1.125	0.072266	NaN	NaN	NaN	NaN	NaN	NaN
0.122	67.717	-75.05	1671.1163	-1.6875	1.3594	0.027832	-6.489	78.778	416.372	-0.072266	0.26953	-0.038574	-14.478	300.776	1293.626	-1.2114	1.0981	0.084961	NaN	NaN	NaN	NaN	NaN	NaN
0.124	74.775	-91.049	1681.114	-1.6767	1.3413	0.026611	7.597	129.7333	378.443	-0.053711	0.25439	-0.043457	-48.348	296.829	1277.3376	-1.1797	1.0791	0.085693	NaN	NaN	NaN	NaN	NaN	NaN
0.126	75.254	-101.15	1673.5728	-1.6636	1.3208	0.023926	-50.7883	121.9933	332.6267	-0.019531	0.22461	-0.054688	-27.727	325.8203	1223.483	-1.1484	1.0566	0.092285	NaN	NaN	NaN	NaN	NaN	NaN
0.128	71.361	-109.367	1677.3494	-1.6479	1.3013	0.014648	-40.42	123.0283	302.5636	0.0053711	0.2041	-0.061524	-19.35	304.498	1205.7697	-1.1055	1.0254	0.098633	NaN	NaN	NaN	NaN	NaN	NaN
0.13	66.26	-99.557	1680.9039	-1.6406	1.2871	0.0063477	-24.636	136.621	260.701	0.029785	0.18408	-0.070313	8.12	335.044	1151.528	-1.0815	1.0103	0.10107	NaN	NaN	NaN	NaN	NaN	NaN
0.132	66.296	-76.345	1664.6311	-1.6309	1.2695	0.0053711	-54.6038	97.29029	246.1429	0.057617	0.15771	-0.085938	11.898	306.123	1109.417	-1.0449	0.96582	0.11182	NaN	NaN	NaN	NaN	NaN	NaN
0.134	69.27	-65.449	1665.4853	-1.627	1.2607	-0.0012207	-27.966	128.513	240.586919	0.065918	0.14551	-0.087402	-5.845	342.249	1056.56072	-1.0227	0.93042	0.12329	NaN	NaN	NaN	NaN	NaN	NaN
0.136	70.689	-81.2709	1663.304	-1.623	1.2578	-0.0039063	-29.491	131.528	216.4143	0.079102	0.12549	-0.09082	-59.935	302.374	1005.1622	-0.99463	0.89697	0.12744	NaN	NaN	NaN	NaN	NaN	NaN
0.138	37.51	-69.1131	1665.87	-1.6167	1.2622	-0.0063477	-54.7078	101.668	203.555	0.089111	0.11059	-0.092774	-68.63	319.2869	936.558	-0.9585	0.84814	0.13818	NaN	NaN	NaN	NaN	NaN	NaN
0.14	31.2057	-45.859	1634.5356	-1.6113	1.2598	-0.0048828	-30.909	113.951	178.0181	0.085449	0.088867	-0.089355	-83.889	233.809	907.38	-0.93311	0.82471	0.14746	NaN	NaN	NaN	NaN	NaN	NaN
0.142	15.32	-36.133	1619.6576	-1.5957	1.2637	-0.013184	-59.9948	75.5249	138.2189	0.078613	0.080078	-0.087891	-91.213	261.9088	872.642	-0.8833	0.78174	0.15625	NaN	NaN	NaN	NaN	NaN	NaN
0.144	22.33522	-39.5384	1602.01011	-1.5888	1.2612	-0.0065918	-45.874	60.411	128.6134	0.074707	0.072266	-0.087891	-100.59	236.615	859.823	-0.84448	0.74389	0.16724	NaN	NaN	NaN	NaN	NaN	NaN
0.146	8.723	-36.719	1575.3647	-1.5762	1.2559	-0.0048828	-35.41	81.712	103.723	0.0625	0.0625	-0.086914	-98.6288	298.5	816.6334	-0.8042	0.71338	0.16992	NaN	NaN	NaN	NaN	NaN	NaN
0.148	35.5339	-46.69	1552.619	-1.5566	1.252	-0.0039063	-75.9239	46.152	116.8194129	0.064941	0.050293	-0.08374	-147.402	255.5078	786.435	-0.74805	0.66602	0.18066	NaN	NaN	NaN	NaN	NaN	NaN
0.15	41.0097	-45.9299	1538.649	-1.5449	1.248	-0.0073242	-32.58	58.3533	126.437	0.05957	0.045898	-0.083984	-157.064	276.0512	736.996	-0.71631	0.64307	0.18164	NaN	NaN	NaN	NaN	NaN	NaN
0.152	49.857	-61.9705	1554.6191	-1.5234	1.2422	-0.0024414	-30.179	43.3244	100.4229	0.062988	0.036133	-0.072266	-161.587	216.529	686.65	-0.65771	0.5874	0.19141	NaN	NaN	NaN	NaN	NaN	NaN
0.154	51.9484	-55.297	1542.0326	-1.5059	1.2349	-0.0014648	-37.91	7.555	92.847	0.064453	0.034668	-0.081055	-129.3578	280.1396	620.517	-0.61108	0.54078	0.19214	NaN	NaN	NaN	NaN	NaN	NaN
0.156	63.532	-67.084	1521.164	-1.4937	1.2271	-0.00097656	-0.0700000000000003	28.1639	66.8485	0.060547	0.026855	-0.080566	-95.5907	240.4528	560.653	-0.56787	0.50146	0.19189	NaN	NaN	NaN	NaN	NaN	NaN
0.158	52.9316	-74.319	1512.66	-1.4727	1.2129	0.01123	-31.559	18.2234	48.5621	0.054687	0.01709	-0.07666	-106.6307	272.849	499.422	-0.50391	0.44727	0.18994	NaN	NaN	NaN	NaN	NaN	NaN
0.16	71.497	-77.615	1481.1086	-1.4585	1.2026	0.0073242	-36.102	17.193	52.22	0.049805	0.01123	-0.07373	-121.9032	192.22333	451.407	-0.4707	0.42188	0.19189	NaN	NaN	NaN	NaN	NaN	NaN
0.162	77.598	-79.984	1481.9699	-1.4355	1.1855	0.015625	-11.425	42.791	23.5409	0.038574	-0.0019531	-0.070313	-142.6412	202.6958	406.80869	-0.40381	0.36914	0.18604	NaN	NaN	NaN	NaN	NaN	NaN
0.164	60.571	-45.07452	1434.35573	-1.4114	1.1643	0.013183	-37.662	14.0228	8.9427	0.02832	-0.0014648	-0.070801	-95.1089	145.1609	347.6198	-0.36329	0.33936	0.18726	NaN	NaN	NaN	NaN	NaN	NaN
0.166	62.205	-33.982	1411.5189	-1.3882	1.1489	0.023438	-0.708999999999996	27.5803	14.8345	0.01416	-0.010254	-0.054688	-74.2104	182.436	326.264	-0.31738	0.30811	0.18555	NaN	NaN	NaN	NaN	NaN	NaN
0.168	90.803	-26.753	1378.915	-1.353	1.1245	0.022949	-1.492	28.032	-12.405	0.0007324	-0.010742	-0.053222	-49.088	146.577	293.942	-0.26416	0.26855	0.17578	NaN	NaN	NaN	NaN	NaN	NaN
0.17	89.346	-31.2257	1359.9003	-1.334	1.1113	0.021484	-26.641	16.8928	6.9151	-0.017578	-0.011719	-0.043457	-70.04	209.328	280.673	-0.23096	0.25049	0.17578	NaN	NaN	NaN	NaN	NaN	NaN
0.172	75.603	-20.1867	1351.04243	-1.3047	1.082	0.024902	-4.728	52.638	8.3765	-0.039063	-0.01123	-0.034668	-35.855	178.167	228.222	-0.17676	0.20361	0.16846	NaN	NaN	NaN	NaN	NaN	NaN
0.174	91.673	-7.5393	1333.63137	-1.2724	1.0634	0.025147	-35.2704	23.653	3.7696	-0.043457	-0.0092773	-0.037109	-15.266	202.39	218.871	-0.13647	0.16431	0.16308	NaN	NaN	NaN	NaN	NaN	NaN
0.176	102.87	5.267	1313.2734	-1.2378	1.0415	0.024414	-7.273	3.2333	28.1674	-0.062012	-0.0053711	-0.025879	14.173	121.707	198.224	-0.10596	0.12305	0.15234	NaN	NaN	NaN	NaN	NaN	NaN
0.178	75.426	16.68379	1295.24	-1.2007	1.0103	0.022461	-8.07	10.8105	5.3168	-0.074463	-0.0058594	-0.023682	43.132	136.174	192.616	-0.064941	0.081055	0.146	NaN	NaN	NaN	NaN	NaN	NaN
0.18	58.334	20.3738	1296.4522	-1.1831	1.0005	0.027344	-39.651	-15.694	0.4429	-0.07959	-0.003418	-0.023438	66.8669	95.614	151.0746	-0.052246	0.062012	0.1416	NaN	NaN	NaN	NaN	NaN	NaN
0.182	47.014	11.4144	1288.5272	-1.1602	0.96289	0.029785	-15.852	10.2842	14.2295	-0.081543	-0.0058594	-0.01709	64.7839	122.9621	132.446	-0.027832	0.018555	0.13721	NaN	NaN	NaN	NaN	NaN	NaN
0.184	56.536	20.3039	1281.26	-1.1469	0.94385	0.032959	-40.2176	19.601	6.346	-0.083984	-0.003418	-0.017578	35.34	82.686	84.6836	-0.012695	-0.00024415	0.13452	NaN	NaN	NaN	NaN	NaN	NaN
0.186	42.629	34.5174	1261.5872	-1.1377	0.92578	0.037109	-47.8677	2.858	13.24589	-0.081543	-0.0087891	-0.014648	-21.769	83.01398	87.39256	0.00048828	-0.01709	0.14063	NaN	NaN	NaN	NaN	NaN	NaN
0.188	11.7033	40.409	1271.55313	-1.1289	0.88867	0.050781	-22.825	20.3461	12.108	-0.082031	-0.010987	-0.017334	-19.988	55.289	42.20974	0.016113	-0.028809	0.13818	NaN	NaN	NaN	NaN	NaN	NaN
0.19	6.0477	34.4301	1251.7916	-1.1206	0.87646	0.054688	-51.9377	0.4993	1.0641	-0.079102	-0.018066	-0.017578	-36.547	80.602	42.534	0.021973	-0.035645	0.1333	NaN	NaN	NaN	NaN	NaN	NaN
0.192	-0.4631	39.7371	1215.9855	-1.1147	0.84424	0.066406	-35.342	-2.9567	13.8556	-0.080078	-0.022949	-0.013184	-6.621	81.93	21.866	0.041504	-0.045898	0.13672	NaN	NaN	NaN	NaN	NaN	NaN
0.194	-6.6541	47.967	1197.4968	-1.0984	0.82446	0.073731	-38.695	38.764	11.9871	-0.080566	-0.022949	-0.013184	-18.225	98.623	52.907	0.053955	-0.057129	0.13476	NaN	NaN	NaN	NaN	NaN	NaN
0.196	-13.0688	54.441	1185.8745	-1.0864	0.80225	0.083496	-63.9026	38.653	0.3241	-0.07959	-0.025879	-0.01123	-43.582	74.169	52.062	0.071777	-0.076172	0.13232	NaN	NaN	NaN	NaN	NaN	NaN
0.198	-0.715	61.989	1176.0959	-1.0762	0.7793	0.091309	-10.544	63.499	11.9771	-0.079834	-0.031006	-0.010986	-51.637	62.8169	59.3723	0.093262	-0.092285	0.13086	NaN	NaN	NaN	NaN	NaN	NaN
0.2	9.1846	93.051	1136.298	-1.0684	0.76953	0.09668	-34.669	53.982	-1.612	-0.075684	-0.034668	-0.012695	-51.2888	20.135	32.5193	0.11084	-0.10839	0.1184	NaN	NaN	NaN	NaN	NaN	NaN
0.202	-0.3592	108.7978	1125.579	-1.0542	0.73877	0.10791	-49.2784	24.7985	13.3077	-0.072266	-0.030273	-0.011719	-74.3301	3.528	38.5142	0.12646	-0.12549	0.11279	NaN	NaN	NaN	NaN	NaN	NaN
0.204	-3.5346	114.738	1126.3701	-1.0447	0.72242	0.11304	-0.116	42.452	17.2307	-0.066895	-0.033203	-0.012695	-75.3573	8.334	30.061	0.14844	-0.1416	0.099609	NaN	NaN	NaN	NaN	NaN	NaN
0.206	18.871884	100.967	1100.0515	-1.0273	0.69629	0.1167	-42.9046	30.4256	-0.937200000000001	-0.055664	-0.029785	-0.015137	-89.0012	20.5808	23.451	0.15723	-0.14941	0.09375	NaN	NaN	NaN	NaN	NaN	NaN
0.208	11.4892	109.218	1088.007	-1.0039	0.6582	0.11963	-38.412	35.9473	15.5854	-0.049072	-0.027588	-0.018555	-100.861	45.2071	-2.588	0.16309	-0.14941	0.090332	NaN	NaN	NaN	NaN	NaN	NaN
0.21	-10.81613	109.974	1051.9628	-0.9834	0.6416	0.12549	-9.208	36.915	2.5281	-0.037598	-0.02832	-0.023926	-111.835	21.1867	-4.992	0.15772	-0.15771	0.085694	NaN	NaN	NaN	NaN	NaN	NaN
0.212	-10.8873	112.08	1037.89706	-0.94775	0.60938	0.12549	-42.9658	4.67099	4.7035	-0.020508	-0.024902	-0.030762	-92.7487	12.34	-4.3651	0.15088	-0.15918	0.087891	NaN	NaN	NaN	NaN	NaN	NaN
0.214	27.8809	109.368	1007.688	-0.9248	0.58545	0.12939	-8.535	9.471	33.655	-0.013428	-0.023193	-0.03418	-114.6971	-14.27364	26.2074	0.12988	-0.15039	0.09375	NaN	NaN	NaN	NaN	NaN	NaN
0.216	20.561	107.5724	972.2763	-0.89795	0.56494	0.12793	-9.784	11.2778	13.9964	-0.0014648	-0.023926	-0.040039	-64.4214	16.8688	28.713	0.12207	-0.14697	0.09668	NaN	NaN	NaN	NaN	NaN	NaN
0.218	12.367	97.971	963.9563	-0.86865	0.54834	0.1333	-19.548	9.667	49.609	0.0073242	-0.026855	-0.046875	-48.7291	12.888	48.819	0.11035	-0.13867	0.10547	NaN	NaN	NaN	NaN	NaN	NaN
0.22	31.7479	97.529	936.6629	-0.85547	0.5293	0.13184	9.838	32.572	46.6379	0.015625	-0.025879	-0.054199	-34.335	48.134	42.432	0.10376	-0.13867	0.11133	NaN	NaN	NaN	NaN	NaN	NaN
0.222	43.8901	103.91	916.00716	-0.82422	0.49561	0.13037	-35.941	21.0171	18.3086	0.032227	-0.026367	-0.057617	-28.695	17.2318	30.4503	0.10498	-0.13135	0.11377	NaN	NaN	NaN	NaN	NaN	NaN
0.224	36.711	118.915	900.3448	-0.80273	0.46875	0.13184	-7.993	19.7511	29.87	0.047119	-0.024414	-0.062256	-2.683	54.2603	-4.6676	0.12305	-0.12695	0.10938	NaN	NaN	NaN	NaN	NaN	NaN
0.226	37.017	118.763	889.396	-0.78125	0.44727	0.13721	1.974	34.261	0.6678	0.060059	-0.025391	-0.063965	5.436	37.0611479	-12.2537	0.12988	-0.12598	0.11133	NaN	NaN	NaN	NaN	NaN	NaN
0.228	43.8016	112.038	871.803	-0.75977	0.41846	0.14404	-35.2154	13.9584	10.8308	0.071777	-0.029297	-0.073242	35.443	78.044	-22.0759	0.15186	-0.12744	0.1001	NaN	NaN	NaN	NaN	NaN	NaN
0.23	10.8231	111.539	830.8229	-0.73804	0.40454	0.1416	-2.784	20.2939	35.379	0.075195	-0.030273	-0.078613	18.31	28.859	14.8156	0.16699	-0.12354	0.093018	NaN	NaN	NaN	NaN	NaN	NaN
0.232	-18.5623	121.455	784.6359	-0.71094	0.3916	0.14111	-35.7806	33.612	6.4003	0.087402	-0.035156	-0.083984	11.36	46.159	8.2452	0.18652	-0.12207	0.085449	NaN	NaN	NaN	NaN	NaN	NaN
0.234	-17.4343	122.706	771.3731	-0.67627	0.37744	0.14697	-38.082	23.7458	22.6958	0.093994	-0.032227	-0.087647	10.902	-15.12715	7.0011	0.20117	-0.12402	0.073242	NaN	NaN	NaN	NaN	NaN	NaN
0.236	-10.915	117.356	746.5477	-0.66016	0.36914	0.15186	0.943000000000005	37.93	26.1658	0.095215	-0.037109	-0.093262	10.31	19.1095	23.8993	0.21191	-0.12305	0.071289	NaN	NaN	NaN	NaN	NaN	NaN
0.238	-40.7072	122.9458	701.6871	-0.62012	0.35254	0.14551	-49.6418	24.2543	9.6936	0.10498	-0.037598	-0.10059	1.258	-19.104	28.78643	0.22656	-0.12305	0.068359	NaN	NaN	NaN	NaN	NaN	NaN
0.24	-14.655	117.12844	665.3554	-0.58911	0.33325	0.14721	-36.586	12.018	36.448	0.10938	-0.037109	-0.10205	6.606	37.3468	31.144	0.23828	-0.12427	0.066651	NaN	NaN	NaN	NaN	NaN	NaN
0.242	-16.203	98.1396	653.538	-0.55615	0.31494	0.13867	-26.466	17.8709	18.658	0.11182	-0.030762	-0.10498	3.212	13.2658	26.0155	0.24756	-0.125	0.061523	NaN	NaN	NaN	NaN	NaN	NaN
0.244	-23.669	90.932	644.5592	-0.51318	0.28955	0.13379	-65.744	-8.351	12.3807	0.11108	-0.023681	-0.11109	-7.434	68.1087	9.954	0.25586	-0.12354	0.053711	NaN	NaN	NaN	NaN	NaN	NaN
0.246	-29.8908	100.539	620.996	-0.49365	0.27051	0.13086	-30.215	-15.02678	31.835	0.10938	-0.020508	-0.11475	-7.795	11.866	17.7499	0.26416	-0.12646	0.054688	NaN	NaN	NaN	NaN	NaN	NaN
0.248	-37.3428	105.6283	601.091	-0.44775	0.25244	0.12695	-49.3012	-14.624	13.2945	0.104	-0.011719	-0.11133	-34.626	35.263	25.7282	0.26758	-0.12451	0.037598	NaN	NaN	NaN	NaN	NaN	NaN
0.25	-26.811	96.9043	577.927	-0.41015	0.23657	0.12256	-47.907	-14.771	19.997	0.10303	-0.0087891	-0.11572	-57.1644	-11.224	16.4213	0.26343	-0.12256	0.032715	NaN	NaN	NaN	NaN	NaN	NaN
0.252	-35.7844	83.8945	538.9577	-0.37842	0.22021	0.11768	-3.458	18.55025	9.2	0.094727	0.0063477	-0.11523	-54.48	39.9879	15.0274	0.25537	-0.12451	0.029297	NaN	NaN	NaN	NaN	NaN	NaN
0.254	-39.8035	82.59624	518.5073	-0.32715	0.21045	0.11475	-47.958	20.7273	-5.714	0.080322	0.017334	-0.11596	-80.222	12.3617	21.3189	0.23877	-0.12256	0.020996	NaN	NaN	NaN	NaN	NaN	NaN
0.256	-36.9987	82.4907	485.515378	-0.30273	0.20117	0.10986	-30.305	18.0642	22.4623	0.07373	0.025879	-0.11621	-87.086	64.314	34.1634	0.23486	-0.11865	0.021484	NaN	NaN	NaN	NaN	NaN	NaN
0.258	-31.118	83.7094	466.8031	-0.25098	0.18457	0.10059	-14.834	29.721	23.3325	0.060059	0.036621	-0.125	-90.7195	28.9039	26.265	0.22412	-0.10498	0.020508	NaN	NaN	NaN	NaN	NaN	NaN
0.26	-5.594	90.3053	425.97131	-0.21557	0.17236	0.093262	-33.8636	-14.8353	41.1814	0.05127	0.040527	-0.13086	-109.7495	63.274	15.506	0.21948	-0.093994	0.017334	NaN	NaN	NaN	NaN	NaN	NaN
0.262	-25.4117	82.2156	414.1524	-0.17822	0.15869	0.090332	-13.564	-31.0821	65.06928	0.026367	0.062012	-0.13721	-96.329	25.0418	5.409	0.2124	-0.083008	0.013672	NaN	NaN	NaN	NaN	NaN	NaN
0.264	-5.084	71.5156	397.6205	-0.13281	0.14453	0.07959	-16.845	-31.931	50.389	-0.0065918	0.082763	-0.13477	-98.631	49.206	16.27	0.20215	-0.0625	0.013184	NaN	NaN	NaN	NaN	NaN	NaN
0.266	16.31	69.8799	371.7795	-0.11621	0.14014	0.081543	-25.518	-45.9846	94.469	-0.050781	0.104	-0.12842	-77.776	14.106	9.355	0.2002	-0.050293	0.0092773	NaN	NaN	NaN	NaN	NaN	NaN
0.268	32.393	95.784	331.7857	-0.074219	0.12939	0.072754	-13.186	-49.445	130.943	-0.1333	0.13525	-0.12012	-64.033	28.05147	22.582	0.1875	-0.029785	0.013672	NaN	NaN	NaN	NaN	NaN	NaN
0.27	14.334	91.117	320.6340234	-0.043457	0.11792	0.06543	-36.9802	-81.428	137.349	-0.17725	0.15381	-0.1167	-35.695	-10.8	6.7441	0.17334	-0.010986	0.019287	NaN	NaN	NaN	NaN	NaN	NaN
0.272	32.524	85.5461	302.3105	-0.018066	0.1167	0.062012	-2.413	-129.8735	205.357	-0.26563	0.19189	-0.097168	-62.098	-2.9316	17.4535	0.16211	0.0043945	0.023926	NaN	NaN	NaN	NaN	NaN	NaN
0.274	11.178	66.0478	281.7046	0.012207	0.11035	0.05127	-9.113	-122.604	253.616	-0.33765	0.22363	-0.085449	-32.655	0.169	12.0398	0.14697	0.019531	0.033691	NaN	NaN	NaN	NaN	NaN	NaN
0.276	3.575	72.3292	259.0217	0.024414	0.10596	0.05127	-15.486	-134.88	350.85554	-0.40625	0.25781	-0.076172	-20.309	28.8918	16.6621	0.1377	0.024414	0.042969	NaN	NaN	NaN	NaN	NaN	NaN
0.278	11.215	65.6459	257.6036	0.044922	0.10205	0.044434	17.723	-97.352	461.5459	-0.49951	0.30957	-0.070801	-1.098	43.637	10.7076	0.12354	0.046387	0.053223	NaN	NaN	NaN	NaN	NaN	NaN
0.28	14.336	61.467	255.85859	0.054687	0.10425	0.034424	-23.484	-34.118	528.6	-0.55078	0.33594	-0.063965	-2.099	56.573	37.6351	0.11621	0.056885	0.061035	NaN	NaN	NaN	NaN	NaN	NaN
0.282	4.678	55.233	239.9192	0.062988	0.1001	0.03125	-48.446	-17.927	668.481	-0.6665	0.396	-0.053223	14.559	50.452	21.7844	0.10693	0.062988	0.070313	NaN	NaN	NaN	NaN	NaN	NaN
0.284	-13.747	52.862	218.3173	0.067383	0.10352	0.022949	-19.559	20.754	787.534	-0.77148	0.4441	-0.031494	4.05	30.58286	26.9361	0.10059	0.07373	0.083496	NaN	NaN	NaN	NaN	NaN	NaN
0.286	-1.42	50.2876	200.99129	0.064453	0.10645	0.025879	-79.498	49.052	882.1518	-0.89795	0.49854	-0.0019531	18.422	18.8943	4.802	0.094727	0.07373	0.097168	NaN	NaN	NaN	NaN	NaN	NaN
0.288	-2.323	39.946	196.569	0.057129	0.11719	0.023926	-42.038	67.2972	1014.624	-1.0952	0.57275	0.051758	9.16	0.360799999999999	22.917	0.080566	0.069336	0.1084	NaN	NaN	NaN	NaN	NaN	NaN
0.29	6.568	44.831	170.9065	0.050048	0.11596	0.026367	-60.157	108.552	1081.859	-1.2026	0.61768	0.088379	22.689	18.9817	27.7354	0.076904	0.065429	0.11597	NaN	NaN	NaN	NaN	NaN	NaN
0.292	-16.625	41.334	160.6793	0.045898	0.12549	0.025879	-106.8231	92.282	1138.02	-1.4116	0.70557	0.16797	27.672	15.5086	22.9151	0.064453	0.063477	0.11768	NaN	NaN	NaN	NaN	NaN	NaN
0.294	-34.1594	47.791	155.049	0.02832	0.12988	0.032227	-88.802	75.135	1164.318	-1.5542	0.77978	0.22387	10.563	49.2877	-8.4968	0.053711	0.063477	0.12549	NaN	NaN	NaN	NaN	NaN	NaN
0.296	-8.8849	55.7172	149.147	0.022461	0.13281	0.03125	-100.9099	43.898	1122.2919	-1.6758	0.85156	0.26318	-9.91	20.9406	2.603	0.049316	0.068359	0.1333	NaN	NaN	NaN	NaN	NaN	NaN
0.298	-35.3448	60.079	138.644	0.0078125	0.13184	0.03125	-94.6817	-29.562	1137.934	-1.7358	0.95166	0.31641	-2.544	48.8886	-1.339	0.024902	0.079102	0.13965	NaN	NaN	NaN	NaN	NaN	NaN
0.3	-46.9699	60.3915	147.0559	0.0004883	0.13062	0.033447	-56.194	-54.169	1142.089	-1.7319	0.99658	0.35742	-31.236	11.5109	29.4999	0.0078125	0.081298	0.14355	NaN	NaN	NaN	NaN	NaN	NaN
0.302	-37.9398	49.699	137.5637	-0.010742	0.12793	0.038574	-111.219	-63.229	1122.8166	-1.73	1.0786	0.396	-43.392	56.0756	30.77	-0.0087891	0.089355	0.14844	NaN	NaN	NaN	NaN	NaN	NaN
0.304	-48.463045	57.93	129.779935	-0.021484	0.12695	0.039551	-83.077	-66.52	1097.708	-1.7182	1.1035	0.35937	-66.026	6.5521	39.8383	-0.023438	0.10059	0.15088	NaN	NaN	NaN	NaN	NaN	NaN
0.306	-36.5709	58.1874	92.926	-0.022949	0.12451	0.036621	-52.93	-48.79	1044.792	-1.6343	1.106	0.2998	-85.2098	38.0561	40.432	-0.027344	0.10498	0.1543	NaN	NaN	NaN	NaN	NaN	NaN
0.308	-30.988	44.6431	96.592	-0.029297	0.12305	0.036621	-74.337	-83.259	1036.4832	-1.3945	1.0566	0.19775	-94.7065	-22.0189	41.424	-0.032715	0.11475	0.1582	NaN	NaN	NaN	NaN	NaN	NaN
0.31	-15.503	42.53	93.2739	-0.029785	0.11865	0.036377	-21.169	-88.338	1072.597	-1.2515	1.0337	0.14795	-102.0041	37.993	-1.24605	-0.026856	0.12207	0.16162	NaN	NaN	NaN	NaN	NaN	NaN
0.312	-27.545	45.1036	86.5629	-0.030273	0.11914	0.031738	-25.5275	-72.6909	1051.6352	-1.0054	0.98291	0.045898	-93.95	7.263	18.854	-0.021973	0.12793	0.15869	NaN	NaN	NaN	NaN	NaN	NaN
0.314	1.598	50.538	64.141	-0.034668	0.10742	0.02832	-11.7494	-109.6472	1084.813	-0.8706	0.96777	-0.018555	-86.0065	47.85643	29.291	-0.0063477	0.1333	0.1582	NaN	NaN	NaN	NaN	NaN	NaN
0.316	-5.479	39.692	76.597	-0.03418	0.10498	0.023926	34.358	-83.745	1106.6024	-0.76563	0.97461	-0.075684	-73.2663	-42.888	72.145	-0.00048828	0.13721	0.16016	NaN	NaN	NaN	NaN	NaN	NaN
0.318	-1.27	40.0016	96.2967	-0.02832	0.098633	0.021484	5.9855	-93.976	1106.2002	-0.67432	1.0005	-0.13428	-79.933	0.5259	81.328	0.01416	0.14209	0.1582	NaN	NaN	NaN	NaN	NaN	NaN
0.32	8.896	31.099	81.902	-0.027344	0.09497	0.020752	52.274	-127.017	1130.1679	-0.64648	1.0234	-0.15771	-44.147	-74.09	124.145	0.023194	0.15015	0.15283	NaN	NaN	NaN	NaN	NaN	NaN
0.322	10.717	41.328	69.7955	-0.021484	0.09082	0.02002	82.606	-115.22	1113.75	-0.61377	1.063	-0.19678	-68.503	-46.363	197.8153	0.035156	0.16016	0.15283	NaN	NaN	NaN	NaN	NaN	NaN
0.324	8.664	37.927	69.4738	-0.02002	0.083008	0.010254	53.654	-193.38	1143.082	-0.61889	1.0955	-0.20996	-98.1937	-138.7525	308.183	0.029785	0.17969	0.14307	NaN	NaN	NaN	NaN	NaN	NaN
0.326	3.149	32.498	68.8155	-0.012695	0.07959	0.011719	105.822	-229.3545	1219.7366	-0.64258	1.1289	-0.21875	-103.467	-69.987	393.12	0.020508	0.19385	0.13574	NaN	NaN	NaN	NaN	NaN	NaN
0.328	9.384	32.859	46.1767	-0.0092773	0.074707	0.012695	113.769	-236.045	1257.683	-0.7124	1.1646	-0.21826	-56.774	-94.4203	515.934	-0.029297	0.24414	0.1416	NaN	NaN	NaN	NaN	NaN	NaN
0.33	-14.485	31.7694	40.4581	-0.00024415	0.068603	0.0095216	116.473	-287.276	1330.736	-0.75977	1.1797	-0.21387	-33.764	20.7478	654.198	-0.089844	0.2832	0.14942	NaN	NaN	NaN	NaN	NaN	NaN
0.332	11.46	33.381	42.339	0.0078125	0.061523	0.0083008	163.294	-278.08	1372.802	-0.875	1.2246	-0.19482	12.348	-6.8556	828.802	-0.16162	0.33447	0.15527	NaN	NaN	NaN	NaN	NaN	NaN
0.334	3.352	27.31967	66.5375	0.027832	0.05127	0.00048828	134.715	-285.784	1397.54	-0.97437	1.257	-0.18189	31.9875	56.0803	972.672	-0.2832	0.40625	0.17334	NaN	NaN	NaN	NaN	NaN	NaN
0.336	1.896	31.28128	42.6327	0.034668	0.041016	0.0024414	141.952	-274.901	1487.6916	-1.0859	1.2949	-0.15234	91.277	14.36	1137.437	-0.3457	0.44141	0.1792	NaN	NaN	NaN	NaN	NaN	NaN
0.338	-3.702	22.8513	45.0893	0.049316	0.03418	-0.0019531	145.14	-186.753	1519.31983	-1.2437	1.3521	-0.11475	127.02	74.12	1327.512	-0.47266	0.53125	0.18799	NaN	NaN	NaN	NaN	NaN	NaN
0.34	12.184	29.9297	42.614	0.058349	0.025635	-0.0007324	89.275	-202.3421	1593.93	-1.3237	1.3892	-0.09082	174.119	24.3854	1507.49	-0.62549	0.62744	0.19824	NaN	NaN	NaN	NaN	NaN	NaN
0.342	-1.829	29.8602	49.9801	0.066895	0.015625	-0.0087891	80.234	-182.089	1655.345	-1.4741	1.4663	-0.050781	126.774	31.311	1648.203	-0.71631	0.68115	0.20313	NaN	NaN	NaN	NaN	NaN	NaN
0.344	-22.577	21.1163	43.1249	0.080566	0.010742	-0.010742	61.904	-178.406	1666.3097	-1.5769	1.5261	-0.027099	99.493	-49.302	1650.13	-0.92725	0.80322	0.22266	NaN	NaN	NaN	NaN	NaN	NaN
0.346	-30.1716	4.8633	47.9946	0.089844	0.0078125	-0.015137	35.3485	-222.0966	1705.7853	-1.668	1.582	-0.00048828	49.904	-52.991	1588.458	-1.1123	0.90332	0.24682	NaN	NaN	NaN	NaN	NaN	NaN
0.348	-50.7246	11.8419	45.34368	0.10303	0.0053711	-0.012695	52.031	-180.221	1730.762	-1.7734	1.6426	0.025879	25.5886	-142.4931	1492.353	-1.2988	1.002	0.28076	NaN	NaN	NaN	NaN	NaN	NaN
0.35	-32.5348	16.7166	45.2814	0.10986	0.0024414	-0.014648	20.7068	-151.221	1745.832	-1.8448	1.6788	0.039307	-26.99	-170.739	1436.667	-1.541	1.1309	0.33545	NaN	NaN	NaN	NaN	NaN	NaN
0.352	-33.3602	18.2322	25.4447	0.11816	-0.0024414	-0.016113	4.9134	-152.8452	1802.69551	-1.9004	1.7051	0.048828	-25.321	-205.023	1322.368	-1.6421	1.1938	0.38037	NaN	NaN	NaN	NaN	NaN	NaN
0.354	-58.7881	10.72486	32.3891	0.12402	-0.0063477	-0.013184	2.115	-86.217	1820.954	-1.9644	1.7388	0.060547	-33.867	-207.703	1243.329	-1.8096	1.3105	0.50244	NaN	NaN	NaN	NaN	NaN	NaN
0.356	-30.8583	3.816	29.5598	0.12305	-0.0029297	-0.013672	-25.816	-115.336	1843.233	-1.9937	1.7524	0.067383	-33.98108	-222.193	1154.685	-1.8781	1.3596	0.60522	NaN	NaN	NaN	NaN	NaN	NaN
0.358	-35.7687	0.59247	22.86712	0.13232	-0.0053711	-0.010254	-5.2351	-102.606	1921.5449	-2.043	1.7715	0.072754	-59.884	-226.382	1143.636	-1.9077	1.3853	0.68945	NaN	NaN	NaN	NaN	NaN	NaN
0.36	-20.488	6.5109	19.59523	0.13111	-0.0043946	-0.0087891	-9.0045	-62.236	1953.6918	-2.0743	1.7822	0.076172	-56.7406	-215.837	1144.1081	-1.8994	1.3906	0.72803	NaN	NaN	NaN	NaN	NaN	NaN
0.362	-14.874	5.8884	30.146	0.13428	-0.0058594	-0.0058594	-48.445	-98.258	1989.297	-2.0957	1.791	0.077637	-33.983	-199.398	1225.971	-1.8516	1.3945	0.71582	NaN	NaN	NaN	NaN	NaN	NaN
0.364	-7.643	7.8572	40.1213	0.13818	0.0019531	-0.0014648	-28.0757	-53.4	2025.24	-2.1128	1.7974	0.082031	-56.708	-133.509	1272.703	-1.6348	1.4141	0.68799	NaN	NaN	NaN	NaN	NaN	NaN
0.366	-19.013	0.5307	29.6415	0.13746	0.0026855	0.0031738	-48.306	-56.562	1990.139	-2.1089	1.7876	0.08252	-108.355	-102.837	1341.086	-1.4011	1.3947	0.66625	NaN	NaN	NaN	NaN	NaN	NaN
0.368	-6.865	3.9371	23.838	0.13818	0.010254	0.0092773	-25.492	-95.3823	1983.629	-2.0996	1.7734	0.07666	-142.864	-91.28	1370.961	-1.1792	1.3286	0.63672	NaN	NaN	NaN	NaN	NaN	NaN
0.37	-8.336	1.2846	27.2558	0.13525	0.010254	0.013184	15.1401	-52.653	1957.4578	-2.0762	1.7568	0.064698	-167.5231	-137.06	1400.208	-0.97217	1.2075	0.60156	NaN	NaN	NaN	NaN	NaN	NaN
0.372	-6.336	-6.36	54.3726	0.13135	0.012207	0.015625	-27.479	-104.0649	1911.16	-2.0488	1.7363	0.055176	-199.908	-156.329	1417.3501	-0.9043	1.1543	0.58936	NaN	NaN	NaN	NaN	NaN	NaN
0.374	-1.02	-21.2535	53.5761	0.11035	0.019531	0.020508	14.1348	-89.962	1946.6143	-1.9883	1.6934	0.036621	-219.848	-272.371	1450.09	-0.83545	1.0669	0.56592	NaN	NaN	NaN	NaN	NaN	NaN
0.376	-18.281	-44.0816	59.385	0.085937	0.034912	0.028809	50.959	-49.90179	1909.986	-1.9551	1.6719	0.02832	-203.505	-362.336	1481.4979	-0.81934	1.0366	0.55517	NaN	NaN	NaN	NaN	NaN	NaN
0.378	14.213	-46.98285	69.674	0.050293	0.05127	0.037109	32.1011	-113.996	1906.8524	-1.8926	1.6113	0.0087891	-183.649	-480.454	1540.878	-0.83594	1.0313	0.55127	NaN	NaN	NaN	NaN	NaN	NaN
0.38	5.449	-54.9836	83.937	-0.0029297	0.076172	0.057129	86.695	-58.1009	1913.073	-1.8467	1.564	-0.0063476	-142.8815	-506.55	1577.532	-0.90332	1.1006	0.54541	NaN	NaN	NaN	NaN	NaN	NaN
0.382	4.645	-44.1117	109.5787	-0.033691	0.09082	0.066406	87.893	-45.555	1858.5901	-1.8105	1.5137	-0.01416	-96.729	-530.27	1630.098	-0.94873	1.1548	0.55078	NaN	NaN	NaN	NaN	NaN	NaN
0.384	-8.658	-33.5829	148.5772	-0.089355	0.12012	0.086914	86.851	-48.8922	1870.207	-1.7656	1.4531	-0.024414	-83.878	-454.38	1673.004	-1.0464	1.2954	0.56006	NaN	NaN	NaN	NaN	NaN	NaN
0.386	5.89400000000001	-18.0459	185.9656	-0.12989	0.14209	0.10205	84.197	22.734	1849.1556	-1.75	1.4219	-0.024902	-61.105	-428.491	1737.049	-1.133	1.4153	0.59326	NaN	NaN	NaN	NaN	NaN	NaN
0.388	4.419	1.6283	245.8939	-0.17773	0.15723	0.11719	57.9	-9.147	1856.60469	-1.7227	1.3691	-0.041016	-97.206	-335.868	1818.447	-1.2227	1.5254	0.61377	NaN	NaN	NaN	NaN	NaN	NaN
0.39	-14.996	21.631	284.576	-0.24707	0.19385	0.13379	108.112	-1.123	1866.8132	-1.7104	1.3295	-0.033691	-89.168	-281.198	1871.687	-1.3394	1.6411	0.63867	NaN	NaN	NaN	NaN	NaN	NaN
0.392	6.8071	45.916	349.93638	-0.28467	0.20752	0.14209	87.839	5.027	1823.851	-1.6987	1.2954	-0.027344	-92.311	-161.396	1947.774	-1.394	1.6802	0.64258	NaN	NaN	NaN	NaN	NaN	NaN
0.394	12.43757	75.61152	428.8967	-0.38525	0.24463	0.16016	81.769	-58.926	1817.2896	-1.6929	1.2661	-0.024414	-100.446	-136.308	1985.293	-1.4951	1.7109	0.65869	NaN	NaN	NaN	NaN	NaN	NaN
0.396	26.9215	107.1478	492.885	-0.46704	0.27612	0.17554	98.418	-21.7217	1803.7975	-1.689	1.2505	-0.024414	-134.957	-90.04	1993.999	-1.5506	1.7268	0.66846	NaN	NaN	NaN	NaN	NaN	NaN
0.398	32.864	104.84425	559.852	-0.55957	0.31543	0.18457	49.9581	-31.802	1776.6232	-1.6812	1.2251	-0.02002	-142.66181	-102.141	1967.2801	-1.5996	1.748	0.67627	NaN	NaN	NaN	NaN	NaN	NaN
0.4	27.8183	109.4821	635.9757	-0.7002	0.37646	0.20605	43.9922	-43.461	1775.018	-1.6682	1.2073	-0.013428	-123.991	-76.822	1942.976	-1.6509	1.7876	0.67773	NaN	NaN	NaN	NaN	NaN	NaN
0.402	29.4942	97.7116	716.8761	-0.76904	0.41064	0.21875	54.635	8.6902	1746.2532	-1.6621	1.1973	-0.011719	-55.473	-120.663	1949.845	-1.6714	1.8091	0.68164	NaN	NaN	NaN	NaN	NaN	NaN
0.404	25.662	106.1559	770.3285	-0.91943	0.4751	0.24316	43.622	-25.8936	1732.708	-1.6499	1.186	-0.0039063	-27.897	-160.392	2015.388	-1.7129	1.8672	0.6958	NaN	NaN	NaN	NaN	NaN	NaN
0.406	53.285	103.1207	818.416	-1.0369	0.53394	0.2688	42.131	-15.5255	1724.5317	-1.644	1.1782	-0.0019531	-35.604	-218.848	2061.6194	-1.7491	1.8916	0.70704	NaN	NaN	NaN	NaN	NaN	NaN
0.408	28.4164	79.518	892.671	-1.1528	0.58643	0.29883	14.211	35.3481	1699.124	-1.6367	1.1699	0.0058594	-64.915	-214.109	2102.805	-1.7847	1.9165	0.71973	NaN	NaN	NaN	NaN	NaN	NaN
0.41	46.105	61.4422	945.7661	-1.2925	0.65088	0.34082	-13.3521	-6.739	1665.7819	-1.6231	1.1567	0.010254	-45.473	-218.065	2127.815	-1.8384	1.9351	0.74414	NaN	NaN	NaN	NaN	NaN	NaN
0.412	39.2067	30.5908	982.0718	-1.3496	0.68164	0.35986	35.4022	43.296	1653.25395	-1.6011	1.1499	0.01416	-108.9342	-212.921	2160.464	-1.8633	1.9375	0.7583	NaN	NaN	NaN	NaN	NaN	NaN
0.414	31.978	5.477	1019.817	-1.4434	0.73047	0.39697	-1.1293	39.2334	1597.3235	-1.5698	1.1353	0.0068359	-120.4537	-216.22	2162.869	-1.896	1.938	0.77734	NaN	NaN	NaN	NaN	NaN	NaN
0.416	12.8228	-15.5456	1043.409	-1.4824	0.75537	0.41797	-24.891329	25.1331	1581.7198	-1.5503	1.1333	0.010254	-155.0644	-180.079	2142.083	-1.9106	1.9234	0.78711	NaN	NaN	NaN	NaN	NaN	NaN
0.418	42.249	-20.0447	1030.201	-1.4995	0.76807	0.43652	45.014	88.368	1555.4454	-1.5093	1.1157	0	-180.9854	-137.153	2095.599	-1.9214	1.9009	0.7998	NaN	NaN	NaN	NaN	NaN	NaN
0.42	48.429	-10.01882	1007.682	-1.4805	0.79004	0.46338	-6.4967	45.66511	1521.724	-1.477	1.102	0.0004883	-222.836	-77.57	2048.998	-1.9292	1.8628	0.80957	NaN	NaN	NaN	NaN	NaN	NaN
0.422	38.547	-11.24366	990.2562	-1.4526	0.79346	0.47266	37.8557	64.9047	1551.4975	-1.4526	1.0903	-0.0043945	-179.259	-47.5118	1996.5101	-1.9302	1.8423	0.81543	NaN	NaN	NaN	NaN	NaN	NaN
0.424	82.387	-15.77049	989.506	-1.3652	0.81445	0.48096	43.184	81.9756	1531.6735	-1.4214	1.0688	-0.0048828	-169.7509	-24.396	1960.407	-1.9194	1.7817	0.81934	NaN	NaN	NaN	NaN	NaN	NaN
0.426	50.839	-24.288	986.148	-1.26	0.81811	0.47217	29.819	35.174	1516.1927	-1.4102	1.0605	-0.0063477	-99.415	-3.1929	1940.583	-1.9092	1.7373	0.82324	NaN	NaN	NaN	NaN	NaN	NaN
0.428	41.4047	-20.2704	975.054	-1.1362	0.80615	0.44434	89.8	102.4761	1485.5866	-1.3809	1.0352	-0.0029297	-93.762	4.594	1934.963	-1.9004	1.6914	0.83838	NaN	NaN	NaN	NaN	NaN	NaN
0.43	21.5156	-26.47891	986.313	-0.95068	0.75049	0.39355	46.839	107.503	1446.179	-1.3555	1.0259	-0.0024414	-100.563	22.538	1921.807	-1.8921	1.6294	0.8457	NaN	NaN	NaN	NaN	NaN	NaN
0.432	28.7769	-32.17	978.022	-0.85352	0.71582	0.37012	54.889	110.0655	1440.7745	-1.3286	1.0103	-0.0024414	-142.33	20.9851	1909.879	-1.8906	1.5967	0.84717	NaN	NaN	NaN	NaN	NaN	NaN
0.434	27.0148	-30.774	964.731	-0.68359	0.66211	0.32764	89.825	169.92	1427.6355	-1.2891	0.99023	-0.003418	-125.218	56.919	1891.0061	-1.8828	1.5293	0.85205	NaN	NaN	NaN	NaN	NaN	NaN
0.436	3.178	-33.864	961.784	-0.60059	0.64404	0.30664	51.943	145.521	1398.1827	-1.2695	0.98047	-0.0053711	-163.6143	41.935	1899.401	-1.8806	1.4875	0.85669	NaN	NaN	NaN	NaN	NaN	NaN
0.438	-2.631	-43.252	979.7451	-0.54883	0.64063	0.29541	66.084	145.6084	1389.838	-1.2358	0.96143	-0.00048828	-130.6615	63.2454	1915.282	-1.8784	1.4458	0.85547	NaN	NaN	NaN	NaN	NaN	NaN
0.44	-43.827	-65.454	1007.1196	-0.52148	0.68115	0.28711	70.325	157.463	1354.3789	-1.2153	0.9458	-0.00097656	-145.1143	9.116	1944.494	-1.8726	1.4048	0.85254	NaN	NaN	NaN	NaN	NaN	NaN
0.442	-39.4616	-80.9081	1028.9942	-0.52148	0.70313	0.29834	30.4049	124.0583	1313.26811	-1.1924	0.92578	0.0024414	-111.281	39.64	1923.96833	-1.8628	1.3892	0.8418	NaN	NaN	NaN	NaN	NaN	NaN
0.444	-42.143	-100.859	1032.458	-0.5498	0.77344	0.31445	57.8498	186.146	1282.124	-1.1484	0.89844	-0.0019531	-115.735	10.9783	1911.3441	-1.8335	1.3677	0.82617	NaN	NaN	NaN	NaN	NaN	NaN
0.446	-48.6026	-112.352	1061.47793	-0.59424	0.83008	0.32935	25.54039	201.257	1234.261	-1.1328	0.88477	-0.0029297	-100.996	60.9565	1896.135	-1.8083	1.3508	0.81372	NaN	NaN	NaN	NaN	NaN	NaN
0.448	-29.753	-122.598	1088.0052	-0.64014	0.88135	0.34375	17.023	193.5036	1230.8153	-1.0972	0.86377	0.0024414	-85.653	13.071	1900.1575	-1.7769	1.3325	0.79395	NaN	NaN	NaN	NaN	NaN	NaN
0.45	-62.4946	-115.892	1093.2506	-0.72217	0.94775	0.36084	35.511	242.156	1210.021	-1.0698	0.8479	0.0097657	-41.314	52.875	1862.8316	-1.7397	1.3071	0.77539	NaN	NaN	NaN	NaN	NaN	NaN
0.452	-53.8035	-114.616	1105.838	-0.76904	0.97705	0.36865	-34.08787	204.4334	1176.5856	-1.0483	0.83447	0.01416	-33.241	16.038	1860.0322	-1.7266	1.2891	0.76221	NaN	NaN	NaN	NaN	NaN	NaN
0.454	-88.2814	-134.078	1143.70746	-0.86328	1.0293	0.37744	-19.1296	214.4605	1181.853	-1.0112	0.81299	0.020996	-35.957	119.813	1818.679	-1.6895	1.2598	0.73682	NaN	NaN	NaN	NaN	NaN	NaN
0.456	-60.177	-131.2893	1173.9767	-0.92578	1.0722	0.38184	-32.4394	240.206	1145.0434	-0.99219	0.78516	0.024414	-55.796	133.453	1794.79	-1.6635	1.2378	0.72266	NaN	NaN	NaN	NaN	NaN	NaN
0.458	-77.699	-125.0421	1206.919	-0.98584	1.1157	0.38867	-83.402	203.2081	1112.392	-0.96094	0.75	0.026367	-56.524	236.179	1734.2447	-1.6406	1.2207	0.70752	NaN	NaN	NaN	NaN	NaN	NaN
0.46	-68.1585	-111.865	1223.122	-1.0566	1.1777	0.39111	-22.446	225.231	1083.51	-0.93139	0.72973	0.030274	-117.8003	202.921	1700.797	-1.6069	1.1997	0.6875	NaN	NaN	NaN	NaN	NaN	NaN
0.462	-71.7619	-103.388	1260.419	-1.0884	1.2085	0.3916	-75.1866	212.6378	1028.8534	-0.89307	0.70361	0.035156	-82.354	268.54	1673.77	-1.5903	1.1899	0.67188	NaN	NaN	NaN	NaN	NaN	NaN
0.464	-80.837	-103.5	1300.0462	-1.1362	1.27	0.38379	-77.257	190.911	1001.1145	-0.84229	0.67041	0.034668	-70.449	203.347	1661.6432	-1.5444	1.1685	0.64355	NaN	NaN	NaN	NaN	NaN	NaN
0.466	-64.105	-96.011	1317.9307	-1.1726	1.3117	0.37793	-47.9508	217.0395	976.1304	-0.81738	0.65723	0.04248	-76.99307	253.809	1617.2475	-1.5181	1.1548	0.62793	NaN	NaN	NaN	NaN	NaN	NaN
0.468	-72.485	-94.392	1353.637	-1.2007	1.3599	0.37695	-91.181	191.138	928.3075	-0.76709	0.62158	0.047852	-98.41	184.942	1606.652	-1.4868	1.1392	0.60938	NaN	NaN	NaN	NaN	NaN	NaN
0.47	-47.629	-95.7737	1398.285	-1.2344	1.4141	0.36377	-47.105	203.33	913.4148	-0.72461	0.59961	0.050049	-88.57674	224.81995	1547.7644	-1.4409	1.1157	0.58398	NaN	NaN	NaN	NaN	NaN	NaN
0.472	-54.016	-114.7947	1438.8707	-1.2495	1.4399	0.35742	-54.0729	212.1584	871.6441	-0.68164	0.57422	0.049316	-69.1306	166.985	1502.5649	-1.4219	1.0977	0.57471	NaN	NaN	NaN	NaN	NaN	NaN
0.474	-40.174	-116.533	1469.9473	-1.2925	1.4868	0.35205	-69.3779	180.3614	838.099	-0.61914	0.5332	0.054199	-40.067	224.267	1451.7348	-1.3809	1.0684	0.55322	NaN	NaN	NaN	NaN	NaN	NaN
0.476	-39.624	-114.441	1483.48373	-1.3203	1.5156	0.35108	-2.387	191.7225	799.044	-0.59033	0.5166	0.058105	6.037	160.89	1442.4435	-1.3496	1.042	0.5332	NaN	NaN	NaN	NaN	NaN	NaN
0.478	-31.637	-115.068	1516.2901	-1.3496	1.541	0.35205	-45.5913	202.8189	735.461	-0.53467	0.48193	0.05957	-18.26	239.376	1419.759	-1.313	1.0161	0.51367	NaN	NaN	NaN	NaN	NaN	NaN
0.48	-15.487	-113.4996	1541.854	-1.3823	1.561	0.34961	-40.138	186.8668	693.9559	-0.49902	0.45435	0.058349	-60.9633	182.278	1380.926	-1.2632	0.98096	0.4873	NaN	NaN	NaN	NaN	NaN	NaN
0.482	-46.274	-110.1708	1557.669	-1.396	1.5688	0.35156	-6.12	222.725	655.4587	-0.45898	0.42773	0.05957	-70.463	262.929	1337.258	-1.2246	0.95459	0.46973	NaN	NaN	NaN	NaN	NaN	NaN
0.484	-50.23	-104.756	1575.004	-1.4155	1.5806	0.36035	-32.413	198.0595	605.53	-0.40088	0.39893	0.061035	-62.1873	228.301	1293.76	-1.187	0.92822	0.44922	NaN	NaN	NaN	NaN	NaN	NaN
0.486	-57.133	-102.317	1594.494	-1.4334	1.5803	0.37012	15.398	172.1387	596.163	-0.37598	0.38135	0.066895	-36.83	311.485	1235.9492	-1.1348	0.88867	0.42822	NaN	NaN	NaN	NaN	NaN	NaN
0.488	-56.747	-99.1371	1594.226	-1.4487	1.5806	0.37695	17.388	174.659	550.754	-0.32227	0.35352	0.061035	-9.144	285.301	1166.934	-1.1074	0.87012	0.41113	NaN	NaN	NaN	NaN	NaN	NaN
0.49	-58.041	-97.004	1579.82	-1.4683	1.5708	0.40039	-7.671	137.7261	515.7785	-0.27393	0.30762	0.061035	-45.281	363.651	1085.797	-1.0566	0.82617	0.3833	NaN	NaN	NaN	NaN	NaN	NaN
0.492	-82.705	-90.883	1574.3079	-1.4844	1.5566	0.40869	32.338	134.7839	486.6672	-0.24756	0.28857	0.062012	-38.2255	319.4249	1039.02	-1.0164	0.802	0.36279	NaN	NaN	NaN	NaN	NaN	NaN
0.494	-69.546	-90.202	1571.4947	-1.5161	1.5435	0.43945	-30.128	143.118	438.3455	-0.20605	0.26123	0.0625	-15.994	354.3058	1008.919	-0.97852	0.77344	0.34277	NaN	NaN	NaN	NaN	NaN	NaN
0.496	-74.14	-84.1635	1588.835	-1.5425	1.5259	0.46289	-16.076	116.386	401.613	-0.1709	0.24194	0.066162	15.268	278.542	967.8048	-0.92773	0.73438	0.31689	NaN	NaN	NaN	NaN	NaN	NaN
0.498	-53.678	-65.43739	1591.717	-1.5703	1.5059	0.4873	5.569	123.3684	372.858	-0.14551	0.2251	0.071289	17.032	320.077	923.552	-0.9043	0.71289	0.30908	NaN	NaN	NaN	NaN	NaN	NaN
0.5	-95.167	-66.3038	1618.1598	-1.6094	1.4844	0.51904	-35.22	118.3	344.978	-0.10742	0.20313	0.077148	54.7625	256.982	871.5512	-0.85645	0.67773	0.2876	NaN	NaN	NaN	NaN	NaN	NaN
0.502	-72.768	-76.0925	1649.8529	-1.6362	1.4653	0.54321	-17.949	109.74	345.3952	-0.09375	0.19141	0.079102	13.891	287.0115	837.0004	-0.823	0.65258	0.27344	NaN	NaN	NaN	NaN	NaN	NaN
0.504	-94.9603	-89.4178	1653.6128	-1.6616	1.4536	0.56836	-20.691	130.855	317.249	-0.063477	0.17285	0.086426	-10.961	242.1817	786.1047	-0.78662	0.62549	0.25586	NaN	NaN	NaN	NaN	NaN	NaN
0.506	-106.3054	-80.283	1655.4559	-1.6875	1.4375	0.59424	-63.2288	113.4874	286.8547	-0.039062	0.15405	0.090088	-40.855	268.17	755.4526	-0.73291	0.59424	0.23389	NaN	NaN	NaN	NaN	NaN	NaN
0.508	-96.30987	-84.678	1650.51174	-1.6953	1.4238	0.60693	-44.21	113.0691	269.387	-0.016113	0.13135	0.093262	-29.7251	231.721	710.8862	-0.70654	0.57861	0.22656	NaN	NaN	NaN	NaN	NaN	NaN
0.51	-100.208	-91.8144	1643.6228	-1.709	1.3984	0.62061	-72.451	124.254	216.8452	0.0092773	0.10645	0.096191	-32.979	252.822	672.65	-0.63623	0.55225	0.19678	NaN	NaN	NaN	NaN	NaN	NaN
0.512	-99.1912	-83.8436	1649.1371	-1.7136	1.3732	0.62989	-64.878	83.297	212.8489	0.016602	0.09668	0.10107	-32.6347	208.7834	616.679	-0.57812	0.51758	0.18554	NaN	NaN	NaN	NaN	NaN	NaN
0.514	-98.2782	-74.138	1647.2508	-1.7144	1.354	0.63672	-37.859	89.1006	181.03	0.04248	0.072754	0.10596	-48.151	229.9994	579.9081	-0.52197	0.48193	0.16162	NaN	NaN	NaN	NaN	NaN	NaN
0.516	-65.776	-72.182	1651.93	-1.7085	1.3286	0.63672	-85.721	102.4908	158.771	0.06128	0.060791	0.11109	-50.733	197.143	534.113	-0.45166	0.44287	0.12842	NaN	NaN	NaN	NaN	NaN	NaN
0.518	-67.897	-85.341	1656.3215	-1.6973	1.3164	0.63525	-41.8091	93.2267	174.3034	0.081055	0.051758	0.11719	-50.731	211.2407	483.583	-0.40576	0.42236	0.11084	NaN	NaN	NaN	NaN	NaN	NaN
0.52	-59.778	-69.398	1662.9612	-1.6777	1.2891	0.63428	-54.3695	123.845	145.005	0.11279	0.033203	0.11914	-14.974	172.604	412.099	-0.31934	0.37305	0.079102	NaN	NaN	NaN	NaN	NaN	NaN
0.522	-45.536	-47.6416	1655.7205	-1.6579	1.2692	0.63354	-76.539	104.48966	131.4197	0.12549	0.02832	0.11572	-26.293	168.8195	380.5455	-0.25806	0.32837	0.055908	NaN	NaN	NaN	NaN	NaN	NaN
0.524	-47.092	-31.608	1656.988	-1.6426	1.248	0.62939	-21.255	91.291	120.3325	0.15576	0.012207	0.11621	-4.866	160.279	311.999	-0.20557	0.28662	0.032715	NaN	NaN	NaN	NaN	NaN	NaN
0.526	-51.528	-31.11	1645.3407	-1.6113	1.2207	0.62158	-78.9481	111.337	82.593	0.17651	0.0036622	0.1128	-31.71	160.581	269.132	-0.14209	0.24316	-0.00048828	NaN	NaN	NaN	NaN	NaN	NaN
0.528	-71.555	-26.148	1632.627	-1.5972	1.2095	0.61523	-36.327	77.9644	94.949	0.18994	-0.0083008	0.10156	-66.44	174.927	226.103	-0.10791	0.22021	-0.012695	NaN	NaN	NaN	NaN	NaN	NaN
0.53	-64.477	-24.798	1613.95448	-1.5703	1.1777	0.60645	12.129	69.763	100.999	0.20996	-0.020996	0.094238	-87.1889	162.583	218.903	-0.053223	0.17236	-0.036621	NaN	NaN	NaN	NaN	NaN	NaN
0.532	-75.9171	-29.961	1610.1837	-1.5508	1.1582	0.59961	-44.5042	78.96888	82.0826	0.21729	-0.027344	0.087891	-75.07124	155.524	184.266	-0.019775	0.14136	-0.056152	NaN	NaN	NaN	NaN	NaN	NaN
0.534	-58.163	-27.2676	1599.444	-1.5293	1.1406	0.59033	3.101	43.4402	84.468	0.22314	-0.039551	0.084961	-81.5904	121.507	196.1456	0.016113	0.11523	-0.080078	NaN	NaN	NaN	NaN	NaN	NaN
0.536	-57.573	-34.0427	1585.68	-1.4985	1.1157	0.58398	1.87	61.871	54.089	0.21801	-0.046387	0.081299	-41.813	122.847	178.984	0.04248	0.083008	-0.085449	NaN	NaN	NaN	NaN	NaN	NaN
0.538	-64.31	-32.964	1563.75841	-1.4878	1.104	0.57813	-4.124	54.8182	40.3899	0.20898	-0.045898	0.084961	-21.946	92.7072	182.619	0.055176	0.067383	-0.093262	NaN	NaN	NaN	NaN	NaN	NaN
0.54	-48.804	-40.344	1562.9113	-1.4702	1.0806	0.57324	40.179	45.722	42.81	0.18994	-0.056641	0.079102	-26.594	108.50087	138.248	0.05957	0.041992	-0.10449	NaN	NaN	NaN	NaN	NaN	NaN
0.542	-50.861	-30.901	1558.8342	-1.4566	1.0596	0.57202	-3.71	73.978	27.71199	0.18262	-0.052734	0.085449	-23.552	74.523	102.83	0.051758	0.027344	-0.10522	NaN	NaN	NaN	NaN	NaN	NaN
0.544	-60.924	-14.5349	1561.914	-1.4468	1.0493	0.57031	26.878	21.414	29.964	0.15332	-0.050781	0.091309	-8.70800000000001	79.577	36.973	0.038086	0.0092773	-0.1084	NaN	NaN	NaN	NaN	NaN	NaN
0.546	-84.04	-8.0973	1562.0241	-1.4292	1.0298	0.56738	23.9979	11.2983	26.1671	0.13623	-0.042725	0.094483	1.69900000000001	23.002	37.359	0.011719	-0.0087891	-0.099121	NaN	NaN	NaN	NaN	NaN	NaN
0.548	-59.922	3.684	1530.88147	-1.4175	1.0181	0.56641	-21.2633	25.7186	28.8561	0.11523	-0.035156	0.098145	20.575	47.136	27.852	-0.0029297	-0.018066	-0.09375	NaN	NaN	NaN	NaN	NaN	NaN
0.55	-90.0505	3.8236	1508.046	-1.3979	1.0044	0.56104	9.293	-5.0203	47.381	0.088379	-0.022461	0.10498	0.939999999999998	-1.302	52.20923	-0.033691	-0.027832	-0.085449	NaN	NaN	NaN	NaN	NaN	NaN
0.552	-90.9701	24.128	1482.062	-1.3818	0.9961	0.55908	-15.333	41.417	7.1687	0.072754	-0.016602	0.10889	-28.806	63.0892	27.81	-0.057617	-0.032959	-0.086914	NaN	NaN	NaN	NaN	NaN	NaN
0.554	-105.4001	19.0936	1488.777	-1.3613	0.98633	0.55322	-43.407	44.8562	24.7167	0.054688	-0.0063477	0.1123	-50.3914	15.43961	34.9729	-0.069824	-0.040527	-0.084473	NaN	NaN	NaN	NaN	NaN	NaN
0.556	-82.383	33.976	1482.4212	-1.3354	0.96533	0.54395	1.325	34.991	10.918	0.036865	0.0014649	0.11524	-63.819	71.855	3.3384	-0.084961	-0.043945	-0.080078	NaN	NaN	NaN	NaN	NaN	NaN
0.558	-85.577	43.689	1467.5616	-1.3237	0.95947	0.53662	-38.3153	44.747	12.338	0.025391	0.0063477	0.11426	-57.18	33.832	36.083	-0.088867	-0.050293	-0.080078	NaN	NaN	NaN	NaN	NaN	NaN
0.56	-65.9194	62.2309	1446.7229	-1.2964	0.94189	0.52539	-33.8947	3.827	28.4167	0.016602	0.0078125	0.11621	-20.318	87.236	16.754	-0.090332	-0.062988	-0.083496	NaN	NaN	NaN	NaN	NaN	NaN
0.562	-45.4329	53.2015	1438.198	-1.2786	0.92749	0.51879	-25.8724	-6.7708	26.6356	0.012695	0.0073242	0.11475	-13.638	21.7022	27.033	-0.094483	-0.069092	-0.088379	NaN	NaN	NaN	NaN	NaN	NaN
0.564	-41.251	47.295	1414.266	-1.2617	0.91504	0.51025	-91.302	2.571	21.186	0.012695	0.0078125	0.10547	-21.058	66.0761	11.7844	-0.10547	-0.076172	-0.091309	NaN	NaN	NaN	NaN	NaN	NaN
0.566	-38.239	68.158	1400.5797	-1.2354	0.9043	0.49512	-57.0916	-23.49352	36.792	0.020996	0.01123	0.10083	-35.497	-8.392	19.072	-0.11865	-0.097168	-0.094238	NaN	NaN	NaN	NaN	NaN	NaN
0.568	-38.322	72.103	1392.94738	-1.2222	0.89307	0.48633	-83.00939	8.76673	13.7203	0.033691	0.016113	0.098145	-23.446	47.763	5.988	-0.1333	-0.095215	-0.094238	NaN	NaN	NaN	NaN	NaN	NaN
0.57	-9.905	72.4618	1381.940299	-1.1914	0.875	0.48291	-75.62907	19.629	8.6454	0.041992	0.015625	0.084961	-26.273	-18.523	27.62409	-0.17676	-0.10596	-0.084961	NaN	NaN	NaN	NaN	NaN	NaN
0.572	-14.78	64.323	1371.6838	-1.1726	0.86451	0.47193	-12.584	8.78958	15.2698	0.050293	0.015137	0.081055	-12.678	36.4485	8.2492	-0.21362	-0.10229	-0.080322	NaN	NaN	NaN	NaN	NaN	NaN
0.574	-26.376	64.394	1354.16	-1.1494	0.84961	0.46338	-75.088	37.15823	-4.704	0.067383	0.021973	0.071777	-37.614	-23.9613	25.9499	-0.25586	-0.10205	-0.068359	NaN	NaN	NaN	NaN	NaN	NaN
0.576	-21.268	69.779	1340.662	-1.1191	0.82715	0.44775	-46.52574	3.887	24.743	0.075928	0.022217	0.066894	-69.283	47.231	30.0349	-0.29639	-0.091797	-0.056152	NaN	NaN	NaN	NaN	NaN	NaN
0.578	-20.065	79.832	1317.8157	-1.104	0.81543	0.44189	-39.715	-3.1139	25.5428	0.084473	0.025879	0.060059	-84.901	-7.63256	27.75667	-0.31885	-0.07959	-0.046387	NaN	NaN	NaN	NaN	NaN	NaN
0.58	-10.226	105.6587	1279.5199	-1.0767	0.80127	0.42139	-68.9245	27.2755	1.75985	0.092773	0.028809	0.056152	-77.6887	53.368	15.1425	-0.34424	-0.064453	-0.036133	NaN	NaN	NaN	NaN	NaN	NaN
0.582	-4.543	104.8717	1248.3252	-1.0584	0.79078	0.40845	-3.972	-8.1532	29.8436	0.1001	0.03125	0.054688	-62.943	8.623	26.15493	-0.3479	-0.056396	-0.032227	NaN	NaN	NaN	NaN	NaN	NaN
0.584	12.508	107.1919	1231.1212	-1.0449	0.7793	0.40137	-16.588	22.8496	-3.4088	0.11182	0.031738	0.050781	-59.917	61.368	25	-0.34473	-0.054199	-0.027344	NaN	NaN	NaN	NaN	NaN	NaN
0.586	13.092	116.828	1222.3767	-1.0264	0.75781	0.38818	-34.858	36.3813	0.0274999999999999	0.12304	0.036133	0.047119	-32.986	24.415	19.043	-0.32617	-0.056152	-0.026855	NaN	NaN	NaN	NaN	NaN	NaN
0.588	21.8873	124.459	1190.9644	-1.0176	0.75	0.38232	13.021	20.6211	6.864	0.13623	0.035645	0.041504	-22.264	63.263	12.944	-0.31201	-0.057617	-0.022461	NaN	NaN	NaN	NaN	NaN	NaN
0.59	34.1322	120.2385	1166.2261	-1.0015	0.73291	0.36475	-25.3607	48.158	-14.546	0.15137	0.032227	0.044922	-41.9013	13.1539	16.6496	-0.29102	-0.06543	-0.027832	NaN	NaN	NaN	NaN	NaN	NaN
0.592	-2.643	121.8675	1165.6	-0.98388	0.71435	0.35425	5.782	12.546	19.4521	0.16064	0.035156	0.043457	-38.426	45.78905	25.9585	-0.26416	-0.068848	-0.030029	NaN	NaN	NaN	NaN	NaN	NaN
0.594	-1.529	120.577	1128.888	-0.96631	0.69971	0.34961	24.599	7.016	6.3314	0.17334	0.032227	0.041992	-21.966	14.895	12.21765	-0.23389	-0.07666	-0.038086	NaN	NaN	NaN	NaN	NaN	NaN
0.596	-17.7514	118.811	1109.0711	-0.94043	0.68164	0.33447	-1.741	21.96792	0.7329	0.17871	0.029297	0.044678	2.063	42.5007	-0.972999999999999	-0.19678	-0.087891	-0.04834	NaN	NaN	NaN	NaN	NaN	NaN
0.598	-20.486	122.378	1075.9454	-0.92529	0.67041	0.32227	30.422	-4.7589	13.0603	0.18604	0.023438	0.046875	-9.973	15.803	-6.2445	-0.17188	-0.09082	-0.054199	NaN	NaN	NaN	NaN	NaN	NaN
0.6	-47.1947	110.295	1059.8028	-0.89014	0.6499	0.30615	-15.467	30.9864	6.1192	0.19482	0.023926	0.052246	-32.584	32.056	23.2273	-0.12061	-0.099609	-0.065918	NaN	NaN	NaN	NaN	NaN	NaN
0.602	-18.733	110.9265	1032.5926	-0.86499	0.63111	0.2876	-2.503	31.9051	22.7898	0.19482	0.021484	0.049805	-52.368	10.4636	30.901	-0.086671	-0.1045	-0.075195	NaN	NaN	NaN	NaN	NaN	NaN
0.604	-27.7309	107.8062	986.2584	-0.83594	0.6123	0.27393	22.387	14.2772	28.1065	0.19873	0.023926	0.055176	-29.736	21.4609	29.727	-0.050293	-0.10938	-0.083984	NaN	NaN	NaN	NaN	NaN	NaN
0.606	-31.2576	119.166	969.1495	-0.80371	0.58984	0.25537	-39.0133	50.318	-6.142	0.19189	0.022705	0.062256	-36.3683	5.8482	35.532	0.0058594	-0.10693	-0.092285	NaN	NaN	NaN	NaN	NaN	NaN
0.608	2.188	111.823	951.6801	-0.78516	0.57422	0.24609	-16.534	25.925	13.4957	0.18262	0.029785	0.065918	-38.839	5.1728	36.134	0.035156	-0.10693	-0.11182	NaN	NaN	NaN	NaN	NaN	NaN
0.61	5.638	105.776	919.3958	-0.75195	0.5498	0.23291	-25.33	26.467	10.607	0.16992	0.032715	0.079102	-15.706	17.1205	34.498	0.096191	-0.12061	-0.11816	NaN	NaN	NaN	NaN	NaN	NaN
0.612	0.420999999999999	118.312	891.129	-0.72632	0.5315	0.21777	-66.2763	55.741	4.5953	0.15918	0.035645	0.086426	-10.596	33.175	8.4125	0.14014	-0.12451	-0.13135	NaN	NaN	NaN	NaN	NaN	NaN
0.614	-1.21	126.4203	870.588	-0.69629	0.51172	0.20313	-24.388	22.0711	25.79	0.14111	0.041016	0.09668	-16.328	44.777	-12.4873	0.17871	-0.13721	-0.14209	NaN	NaN	NaN	NaN	NaN	NaN
0.616	12.412876	132.28	842.9403	-0.66406	0.49023	0.18457	-51.8263	29.607	5.9998	0.1228	0.048096	0.10962	-15.006	25.298	2.1893	0.21533	-0.15283	-0.1582	NaN	NaN	NaN	NaN	NaN	NaN
0.618	-15.3534	136.455	801.7916	-0.64453	0.47949	0.18213	-57.2404	34.73896	34.837	0.11133	0.056641	0.11865	-31.956	36.496	6.47749	0.22266	-0.15918	-0.16016	NaN	NaN	NaN	NaN	NaN	NaN
0.62	-27.249	130.781	772.8913	-0.6167	0.45654	0.16113	-47.0846	14.7187	36.2497	0.092773	0.068359	0.12939	-24.093	17.54	30.7519	0.22363	-0.17578	-0.15771	NaN	NaN	NaN	NaN	NaN	NaN
0.622	-2.965	120.285	745.392	-0.59692	0.4436	0.15698	-85.2648	50.2705	5.5627	0.085938	0.07373	0.13477	-3.95	55.687	25.2122	0.2168	-0.1875	-0.15088	NaN	NaN	NaN	NaN	NaN	NaN
0.624	-5.359	119.778	722.363	-0.57178	0.42627	0.14209	-53.528	24.776	31.14	0.068848	0.086426	0.14502	-56.4283	26.4889	41.121	0.20508	-0.19043	-0.14209	NaN	NaN	NaN	NaN	NaN	NaN
0.626	1.5093	118.63207	682.555	-0.54639	0.40674	0.13379	-49.995	24.7358	22.2108	0.055664	0.097656	0.15771	-89.3803	55.184	26.556	0.18457	-0.19434	-0.13672	NaN	NaN	NaN	NaN	NaN	NaN
0.628	8.396	116.4587	649.744	-0.52979	0.39697	0.12549	-77.227	38.2854	18.8391	0.052246	0.10791	0.16406	-71.78691	11.8764	14.07189	0.16894	-0.18555	-0.12964	NaN	NaN	NaN	NaN	NaN	NaN
0.63	26.4778	110.5208	626.515	-0.49756	0.36963	0.11426	-16.541	-12.9246	36.1992	0.038086	0.12012	0.17725	-63.818	52.801	-20.1461	0.1499	-0.17627	-0.12305	NaN	NaN	NaN	NaN	NaN	NaN
0.632	12.225	117.6671	597.733	-0.47314	0.35498	0.10669	-39.14943	10.4796	39.5307	0.024902	0.12305	0.17822	-36.834	-3.487	-4.313	0.13037	-0.15918	-0.11621	NaN	NaN	NaN	NaN	NaN	NaN
0.634	32.0542	121.5594	571.7684	-0.45117	0.3335	0.097168	-49.9018	-25.944	88.2182	0.0053711	0.13525	0.17871	-27.405	36.89252	5.643	0.11914	-0.14648	-0.10205	NaN	NaN	NaN	NaN	NaN	NaN
0.636	27.2564	96.957	549.6252	-0.41748	0.30908	0.091797	-14.742	-53.2879	100.376	-0.030273	0.15625	0.17871	-47.594	-5.969	33.0188	0.10596	-0.12061	-0.097168	NaN	NaN	NaN	NaN	NaN	NaN
0.638	18.584	101.563	528.6717	-0.39917	0.28955	0.085937	-41.502	-11.8049	101.59978	-0.060547	0.16895	0.18018	-34.318	51.2087	2.934	0.095948	-0.10766	-0.095459	NaN	NaN	NaN	NaN	NaN	NaN
0.64	4.889	94.0629	495.2166	-0.375	0.26758	0.077148	19.587	-43.377	134.7054	-0.1333	0.19629	0.19434	-31.436	-7.499	7.0108	0.088867	-0.09668	-0.093262	NaN	NaN	NaN	NaN	NaN	NaN
0.642	-16.66	97.8019	460.681	-0.33789	0.24561	0.079102	-15.744	-60.369	183.9713	-0.19433	0.21509	0.19873	-47.67	54.532	31.649	0.08252	-0.082031	-0.095703	NaN	NaN	NaN	NaN	NaN	NaN
0.644	-2.464	84.6218	434.15	-0.31787	0.22949	0.067383	-43.815	-27.5742	229.404	-0.25488	0.23779	0.20947	-31.296	-2.7694	61.153	0.08252	-0.071289	-0.098145	NaN	NaN	NaN	NaN	NaN	NaN
0.646	-27.1006	90.107	413.4469	-0.28076	0.20654	0.060059	22.597	-38.0949	315.638	-0.35059	0.27979	0.21191	-16.552	63.612	43.4308	0.080078	-0.0625	-0.10547	NaN	NaN	NaN	NaN	NaN	NaN
0.648	-11.829	90.421	379.065	-0.25561	0.18579	0.050293	1.4	12.6509	402.712	-0.3999	0.30908	0.21094	-29.678	15.59754	27.69	0.079345	-0.052978	-0.11304	NaN	NaN	NaN	NaN	NaN	NaN
0.65	-32.7438	92.693	339.2505	-0.229	0.17041	0.043945	4.355	50.006	530.8644	-0.5127	0.37402	0.20459	-41.863	63.691	-8.012	0.08252	-0.046387	-0.12109	NaN	NaN	NaN	NaN	NaN	NaN
0.652	-30.2083	89.295	324.9227	-0.20166	0.14404	0.038574	57.5647	19.524	652.4661	-0.61035	0.43824	0.19751	-44.2036	-10.8385	13.7608	0.087891	-0.033691	-0.12939	NaN	NaN	NaN	NaN	NaN	NaN
0.654	-19.617	75.6611	320.926	-0.18359	0.13184	0.035156	54.588	93.101	746.186	-0.71826	0.50928	0.20313	-39.633	47.172	-4.8586	0.085938	-0.029785	-0.13916	NaN	NaN	NaN	NaN	NaN	NaN
0.656	-14.624	57.28	274.881	-0.1543	0.11133	0.027832	82.678	90.7242	882.019	-0.89795	0.604	0.21631	-2.14	4.4041	6.5046	0.080078	-0.024414	-0.15088	NaN	NaN	NaN	NaN	NaN	NaN
0.658	-16.285	57.814	258.101	-0.13648	0.10059	0.025147	120.54	98.714	972.7606	-1	0.6543	0.229	-3.342	72.021	16.9158	0.071533	-0.0070801	-0.16162	NaN	NaN	NaN	NaN	NaN	NaN
0.66	-26.339	64.98	231.734	-0.11963	0.083496	0.020996	72.1814	103.504	1076.9987	-1.2148	0.76563	0.26221	-18.582	6.0958	46.3	0.056641	0.0014648	-0.16406	NaN	NaN	NaN	NaN	NaN	NaN
0.662	0.177	66.57851	232.0405	-0.092285	0.065918	0.016113	63.855	27.7786	1175.089	-1.3806	0.85571	0.30616	-6.928	41.5737	28.7066	0.040527	0.019531	-0.17285	NaN	NaN	NaN	NaN	NaN	NaN
0.664	-32.808	57.095	220.9631	-0.079102	0.05957	0.01416	38.492	33.632	1178.619	-1.5396	0.94971	0.34961	-17.506	-7.9666	38.1864	0.02832	0.027832	-0.17676	NaN	NaN	NaN	NaN	NaN	NaN
0.666	-48.7389	62.57	209.754	-0.060547	0.042969	-0.00048828	0.72705	-22.4698	1193.5701	-1.7144	1.0591	0.41357	-21.248	52.7598	2.7296	-0.0043945	0.050781	-0.1748	NaN	NaN	NaN	NaN	NaN	NaN
0.668	-29.8626	57.193	204.6313	-0.046631	0.034424	0.00073242	22.7031	-71.08103	1208.505	-1.7695	1.1113	0.44189	-20.562	1.034	22.4774	-0.024902	0.067872	-0.17895	NaN	NaN	NaN	NaN	NaN	NaN
0.67	-20.0259	54.82	175.90028	-0.03418	0.020996	0.00048828	-47.6052	-56.0549	1168.675	-1.8125	1.1973	0.49854	-27.727	44.1441	25.8503	-0.04541	0.083496	-0.18018	NaN	NaN	NaN	NaN	NaN	NaN
0.672	-32.897	47.982	157.1751	-0.02002	0.0063477	-0.0029297	-8.956	-94.896	1168.188	-1.7942	1.2346	0.50171	-52.7483	1.2657	39.90978	-0.071289	0.1123	-0.17969	NaN	NaN	NaN	NaN	NaN	NaN
0.674	-44.4171	43.1903	145.896	-0.013672	-0.0019531	-0.0048828	-3.238	-88.8123	1078.622	-1.7266	1.2441	0.47412	-27.647	3.0431	34.811	-0.081055	0.12842	-0.18164	NaN	NaN	NaN	NaN	NaN	NaN
0.676	1.843	34.2227	129.0701	0	-0.014648	-0.0092773	-49.451	-70.417	1033.45851	-1.4937	1.2192	0.41211	-69.3543	-54.0987	68.4526	-0.084473	0.15771	-0.18896	NaN	NaN	NaN	NaN	NaN	NaN
0.678	1.254	49.2118	95.096	0.0048828	-0.023682	-0.0097656	27.687	-100.306	1055.952	-1.3218	1.1899	0.38867	-62.833	-30.07	98.9714	-0.07788	0.17846	-0.1941	NaN	NaN	NaN	NaN	NaN	NaN
0.68	11.383	52.4066	84.8457	0.0068359	-0.035156	-0.0063477	8.1828	-71.415	1028.3704	-0.98779	1.104	0.35156	-21.108	-80.287	131.2868	-0.072266	0.20313	-0.20313	NaN	NaN	NaN	NaN	NaN	NaN
0.682	14.28	43.0265	85.9039	0.018555	-0.040527	-0.0083008	-2.505	-60.834	1066.8023	-0.80542	1.0344	0.31884	-46.805	-74.4251	182.296	-0.06543	0.22021	-0.21533	NaN	NaN	NaN	NaN	NaN	NaN
0.684	15.069	49.732	97.854	0.021484	-0.047363	-0.0097656	25.3828	-42.679	1073.25	-0.68262	0.97461	0.2915	-41.4454	-114.7184	215.426	-0.06543	0.23682	-0.22852	NaN	NaN	NaN	NaN	NaN	NaN
0.686	-4.267	49.189	81.045	0.027344	-0.054688	-0.0068359	-40.9448	-26.515	1079.854	-0.57617	0.92578	0.27295	-18.94	-141.157	287.442	-0.083496	0.25781	-0.24072	NaN	NaN	NaN	NaN	NaN	NaN
0.688	-19.834	46.6372	69.4451	0.029053	-0.059327	-0.01123	-33.53	-56.911	1138.8996	-0.53906	0.90332	0.27686	-29.0389	-163.33	401.983	-0.11938	0.28052	-0.24316	NaN	NaN	NaN	NaN	NaN	NaN
0.69	-7.867	35.3675	69.6209	0.027832	-0.061523	-0.013672	-28.059	-60.493	1120.65505	-0.51367	0.88477	0.2915	-54.106	-120.054	560.335	-0.17188	0.30127	-0.2373	NaN	NaN	NaN	NaN	NaN	NaN
0.692	-27.962	31.383	58.37747	0.033691	-0.065918	-0.01416	-87.5906	-71.275	1125.624	-0.54615	0.89966	0.31494	-31.239	-83.4765	697.006	-0.271	0.32617	-0.22217	NaN	NaN	NaN	NaN	NaN	NaN
0.694	-7.866	37.092	34.3099	0.032715	-0.066895	-0.013672	-59.632	-132.775	1180.6128	-0.60889	0.93506	0.34082	-45.217	-27.6141	860.354	-0.33057	0.34619	-0.21436	NaN	NaN	NaN	NaN	NaN	NaN
0.696	-33.7694	28.861	8.73	0.035645	-0.067383	-0.013672	-81.316	-178.174	1189.054	-0.73242	1.0107	0.37256	-66.001	1.96358	998.665	-0.45264	0.39697	-0.18604	NaN	NaN	NaN	NaN	NaN	NaN
0.698	-23.687	26.9503	17.8378	0.036377	-0.066407	-0.01538	-65.998	-258.073	1253.172	-0.80273	1.0488	0.38232	-65.927	-14.768	1138.216	-0.5481	0.43506	-0.17261	NaN	NaN	NaN	NaN	NaN	NaN
0.7	-19.611	14.4517	32.7091	0.038574	-0.066406	-0.01416	1.922	-289.913	1300.68811	-0.92578	1.1279	0.39893	-73.106	23.2894	1261.015	-0.65381	0.48096	-0.1582	NaN	NaN	NaN	NaN	NaN	NaN
0.702	-20.58	-2.769	17.0351	0.038086	-0.067383	-0.019531	-8.374	-265.332	1333.5712	-1.0068	1.1778	0.40332	-84.061	24.0886	1356.929	-0.82959	0.55127	-0.12842	NaN	NaN	NaN	NaN	NaN	NaN
0.704	-21.199	-0.768000000000001	19.2629	0.038086	-0.065918	-0.018555	6.204	-263.568	1399.398	-1.0757	1.2251	0.4043	-95.326	54.2914	1381.249	-0.9292	0.59131	-0.10498	NaN	NaN	NaN	NaN	NaN	NaN
0.706	-19.414	9.904	32.8089	0.038086	-0.058594	-0.01709	1.459	-238.535	1426.7557	-1.1655	1.2856	0.40039	-42.193	-3.317	1367.897	-1.167	0.68359	-0.039551	NaN	NaN	NaN	NaN	NaN	NaN
0.708	-13.52	11.6999	37.4753	0.038086	-0.055175	-0.019287	-51.772	-208.562	1477.7622	-1.207	1.3145	0.39502	-49.902	-12.833	1279.97	-1.3748	0.76294	0.029785	NaN	NaN	NaN	NaN	NaN	NaN
0.71	-52.4982	14.05737	17.0746	0.038086	-0.054688	-0.016113	-17.862	-177.5827	1555.863	-1.2832	1.3633	0.40674	-36.685	-96.0294	1241.529	-1.5879	0.84961	0.10693	NaN	NaN	NaN	NaN	NaN	NaN
0.712	-51.0445	14.5096	3.4576	0.037109	-0.043945	-0.018555	-10.538	-128.043	1592.1954	-1.3425	1.4113	0.41382	-24.3028	-109.088	1165.879	-1.8354	0.98291	0.23096	NaN	NaN	NaN	NaN	NaN	NaN
0.714	-40.95741	18.3108	-9.26339	0.037598	-0.041504	-0.019043	-76.34124	-123.303	1674.774	-1.4009	1.4478	0.41699	-53.652	-202.189	1135.2767	-1.9336	1.0547	0.30518	NaN	NaN	NaN	NaN	NaN	NaN
0.716	-29.7851	19.2703	5.6553	0.041016	-0.032227	-0.018066	-73.8535	-88.22	1709.644	-1.4756	1.5068	0.43213	-89.0047	-165.982	1110.844	-2.082	1.1855	0.45361	NaN	NaN	NaN	NaN	NaN	NaN
0.718	-42.496	12.8522	9.9356	0.037109	-0.029541	-0.015381	-87.2492	-54.889	1697.037	-1.5098	1.5352	0.43018	-46.798	-203.302	1141.251	-2.1502	1.258	0.53247	NaN	NaN	NaN	NaN	NaN	NaN
0.72	-35.3316	0.7457	6.6884	0.037109	-0.023438	-0.016113	-87.0456	-69.546	1729.6236	-1.5796	1.5845	0.44238	-45.775	-153.5702	1132.396	-2.187	1.2935	0.55469	NaN	NaN	NaN	NaN	NaN	NaN
0.722	1.021	7.19553	11.2913	0.02832	-0.023438	-0.015625	-19.972	-62.197	1746.688	-1.6346	1.6253	0.45191	9.49	-201.4813	1198.122	-2.1328	1.2715	0.48975	NaN	NaN	NaN	NaN	NaN	NaN
0.724	-14.6083	12.9852	5.2629	0.027832	-0.020508	-0.015137	-38.349	-99.9869	1765.1043	-1.6812	1.6626	0.4668	-3.893	-156.806	1291.6061	-2.0527	1.248	0.43896	NaN	NaN	NaN	NaN	NaN	NaN
0.726	-7.361	14.048	2.577	0.027832	-0.013184	-0.012695	-20.254	-151.761	1827.857	-1.7358	1.7056	0.47754	8.552	-182.341	1409.763	-1.8296	1.2231	0.3125	NaN	NaN	NaN	NaN	NaN	NaN
0.728	1.016	6.144	16.6105	0.022705	-0.0083007	-0.0085451	-18.764	-132.654	1835.6705	-1.7578	1.7207	0.48486	39.277	-111.37	1481.036	-1.6275	1.228	0.20874	NaN	NaN	NaN	NaN	NaN	NaN
0.73	11.713	11.818	0.3989	0.017578	0.00097656	-0.0024414	-57.8799	-156.763	1869.2715	-1.7827	1.7329	0.50586	53.858	-159.812	1529.119	-1.4316	1.2227	0.11084	NaN	NaN	NaN	NaN	NaN	NaN
0.732	-25.559	14.6921	-13.1323	0.013184	0.0053711	0.0024414	-19.838	-138.816	1908.984	-1.7937	1.7366	0.52198	48.4042	-171.981	1539.2423	-1.2383	1.2109	0.00097656	NaN	NaN	NaN	NaN	NaN	NaN
0.734	-18.613	13.4988	-0.7924	0.01416	0.010254	0.00097656	-60.0706	-122.341	1881.679	-1.8042	1.731	0.53125	53.2217	-310.169	1562.9703	-1.1733	1.1997	-0.041016	NaN	NaN	NaN	NaN	NaN	NaN
0.736	16.801	-7.3582	20.6927	0.0097656	0.017578	0.0043945	-82.72	-135.225	1917.038	-1.8047	1.7129	0.54736	21.81	-357.789	1577.7837	-1.0957	1.2002	-0.089355	NaN	NaN	NaN	NaN	NaN	NaN
0.738	-5.386	0.7053	24.0769	0.0073242	0.021241	0.0070801	-56.712	-92.119	1919.796	-1.8047	1.7051	0.54932	31.4837	-425.399	1607.9994	-1.0605	1.1953	-0.12134	NaN	NaN	NaN	NaN	NaN	NaN
0.74	-7.171	1.3286	10.8603	0.013672	0.021973	0.0029297	-124.295	-80.529	1909.751	-1.8125	1.6758	0.56494	84.96	-407.29	1666.3599	-1.0488	1.1992	-0.13623	NaN	NaN	NaN	NaN	NaN	NaN
0.742	-8.942	7.3473	-0.4775	0.017578	0.034668	0.0073242	-62.034	-75.982	1944.262	-1.8184	1.6597	0.5813	139.26	-401.17	1715.069	-1.0762	1.2324	-0.12598	NaN	NaN	NaN	NaN	NaN	NaN
0.744	21.102	23.2105	7.0516	0.021973	0.037598	0.0048828	-53.955	-59.671	1895.21	-1.832	1.6328	0.59619	128.663	-337.887	1735.231	-1.1113	1.2637	-0.11475	NaN	NaN	NaN	NaN	NaN	NaN
0.746	-2.145	12.6596	2.0104	0.03125	0.040039	-0.0029297	-74.4018	-82.085	1876.594	-1.8608	1.6021	0.62012	128.42	-300.147	1773.769	-1.2046	1.3521	-0.074707	NaN	NaN	NaN	NaN	NaN	NaN
0.748	-5.462	7.656	-17.2332	0.038086	0.04248	-0.0075684	-19.079	-49.0305	1872.418	-1.8789	1.584	0.6333	85.135	-235.127	1882.19098	-1.3008	1.4175	-0.03418	NaN	NaN	NaN	NaN	NaN	NaN
0.75	-7.979	9.094	-20.8285	0.043945	0.045898	-0.0083008	-58.053	-22.7716	1835.887	-1.8984	1.5518	0.64893	60.401	-170.095	1947.827	-1.4058	1.4712	0.0048828	NaN	NaN	NaN	NaN	NaN	NaN
0.752	-13.171	15.6484	-3.5714	0.052734	0.045898	-0.01416	-80.036	-16.7894	1867.9138	-1.9157	1.5315	0.66382	44.4813	-104.399	2003.144	-1.5547	1.5352	0.057617	NaN	NaN	NaN	NaN	NaN	NaN
0.754	-8.033	17.5579	12.405	0.054688	0.046387	-0.012695	-52.231	26.0012	1865.8001	-1.9199	1.5098	0.67627	54.388	-52.361	1993.19	-1.6245	1.5591	0.080078	NaN	NaN	NaN	NaN	NaN	NaN
0.756	-19.627	5.25325	-1.6028	0.063477	0.046387	-0.018066	-88.534	15.9455	1867.3015	-1.918	1.4824	0.68604	53.703	-58.724	1972.004	-1.7441	1.6035	0.10889	NaN	NaN	NaN	NaN	NaN	NaN
0.758	-37.9331	8.922	11.9391	0.063232	0.050049	-0.023682	-71.747	-14.607	1914.0725	-1.9121	1.4688	0.6958	54.869	-90.234	1948.867	-1.7898	1.6292	0.11255	NaN	NaN	NaN	NaN	NaN	NaN
0.76	-35.0385	6.7137	10.7914	0.063477	0.046875	-0.024902	-89.2847	-12.545	1905.375	-1.8848	1.4268	0.69775	-8.514	-167.4942	1997.018	-1.8145	1.6445	0.10254	NaN	NaN	NaN	NaN	NaN	NaN
0.762	-34.8298	5.0881	11.206	0.061035	0.052246	-0.024902	-119.6189	-39.8412	1900.0733	-1.853	1.3853	0.69922	-18.841	-177.794	1991.705	-1.8198	1.6587	0.091797	NaN	NaN	NaN	NaN	NaN	NaN
0.764	-47.3942	-12.7348	26.792	0.057617	0.056641	-0.030273	-82.765	-17.7575	1890.29918	-1.8301	1.3672	0.69385	3.974	-217.568	2064.8009	-1.8279	1.6682	0.076905	NaN	NaN	NaN	NaN	NaN	NaN
0.766	-30.7784	-36.7351	52.394	0.039063	0.070313	-0.036133	-118.9235	-6.863	1844.349	-1.793	1.332	0.68408	-3.8249	-182.643	2077.45757	-1.8452	1.6782	0.061523	NaN	NaN	NaN	NaN	NaN	NaN
0.768	-24.725	-44.8826	54.005	0.0097656	0.082031	-0.039795	-136.3267	-28.9204	1841.9806	-1.7646	1.313	0.67382	-9.54086	-198.008	2112.9174	-1.8809	1.707	0.049805	NaN	NaN	NaN	NaN	NaN	NaN
0.77	-14.0758	-48.2209	68.83	-0.02832	0.094727	-0.040039	-77.556	3.9204	1824.9005	-1.748	1.2969	0.66846	1.1715	-134.109	2133.71	-1.9023	1.7246	0.048828	NaN	NaN	NaN	NaN	NaN	NaN
0.772	-2.481	-57.3066	105.548	-0.10596	0.11963	-0.023438	-115.4486	8.161	1814.6557	-1.7183	1.2837	0.65674	-32.761	-151.623	2133.812	-1.9551	1.7539	0.051758	NaN	NaN	NaN	NaN	NaN	NaN
0.774	-14.365	-49.7329	174.7085	-0.14941	0.13428	-0.015625	-77.772	24.172	1838.367	-1.7046	1.27	0.64648	-32.72	-89.069	2134.631	-1.9946	1.7754	0.064453	NaN	NaN	NaN	NaN	NaN	NaN
0.776	-3.856	-29.248	226.0019	-0.24463	0.16455	0.0039063	-89.626	53.361	1811.7434	-1.6719	1.2598	0.63916	-39.95	-104.682	2133.547	-2.0273	1.7852	0.072754	NaN	NaN	NaN	NaN	NaN	NaN
0.778	-19.4194	-2.8917	281.2604	-0.33643	0.18945	0.022461	-142.0976	31.809	1803.0298	-1.6502	1.2483	0.62671	-29.9925	-57.17	2090.534	-2.0586	1.7793	0.081055	NaN	NaN	NaN	NaN	NaN	NaN
0.78	-11.3226	32.92502	337.4737	-0.37695	0.20508	0.029297	-87.256	78.585	1781.8297	-1.623	1.2334	0.61475	1.2276	-96.625	2062.8981	-2.0659	1.77	0.083496	NaN	NaN	NaN	NaN	NaN	NaN
0.782	11.078	47.7337	428.0512	-0.47021	0.24365	0.041992	-101.852	113.014	1737.011	-1.5933	1.2153	0.60352	38.592	-46.446	2022.017	-2.064	1.7485	0.085449	NaN	NaN	NaN	NaN	NaN	NaN
0.784	-0.625	72.672	496.4277	-0.55079	0.27344	0.047852	-108.021	98.355	1752.691	-1.5742	1.207	0.58838	53.834	-88.962	1984.763	-2.0652	1.7131	0.087403	NaN	NaN	NaN	NaN	NaN	NaN
0.786	-18.048	91.2132	558.068	-0.63525	0.3042	0.05127	-93.079	126.63	1738.991	-1.5361	1.1885	0.58105	64.614	-23.542	1954.218	-2.0566	1.6797	0.079102	NaN	NaN	NaN	NaN	NaN	NaN
0.788	-15.455	100.93021	643.653	-0.75586	0.35645	0.066406	-138.7629	100.63	1719.4049	-1.5112	1.1777	0.56225	66.602	-57.033	1943.317	-2.0391	1.6406	0.068848	NaN	NaN	NaN	NaN	NaN	NaN
0.79	17.778	96.835	729.5396	-0.81592	0.3833	0.071289	-94.2593	79.9272	1724.0418	-1.4863	1.1641	0.54736	46.339	22.8451	1938.437	-2.0269	1.6196	0.0625	NaN	NaN	NaN	NaN	NaN	NaN
0.792	-13.711	90.042	792.088	-0.94775	0.43896	0.092773	-74.108	79.507	1689.5502	-1.4546	1.1431	0.52734	92.672	-32.955	1961.698	-2.0093	1.5747	0.056641	NaN	NaN	NaN	NaN	NaN	NaN
0.794	-28.327	83.78	840.238	-1.0415	0.48779	0.11303	-66.625	64.819	1662.78	-1.4419	1.1333	0.51758	106.604	39.346	1976.357	-1.9956	1.5415	0.056397	NaN	NaN	NaN	NaN	NaN	NaN
0.796	-25.141	63.162	881.47334	-1.1304	0.5376	0.13281	-7.351	75.98	1651.599	-1.4175	1.1138	0.50391	139.135	-15.7951	1982.52	-1.9878	1.5122	0.054199	NaN	NaN	NaN	NaN	NaN	NaN
0.798	-36.981	53.57	921.916	-1.2227	0.59473	0.15039	-44.318	110.18	1603.2626	-1.3943	1.0861	0.49341	131.37	49.023	1981.26	-1.9741	1.4888	0.055176	NaN	NaN	NaN	NaN	NaN	NaN
0.8	-84.2864	30.516	966.135	-1.252	0.62109	0.16064	-45.645	116.456	1598.86	-1.3672	1.0664	0.47803	103.571	-7.7093	1976.122	-1.9668	1.4766	0.057129	NaN	NaN	NaN	NaN	NaN	NaN
0.802	-75.76	-10.8692	983.2672	-1.2852	0.66406	0.15625	-6.259	160.6864	1587.851	-1.3242	1.0313	0.45557	100.397	49.36	1972.374	-1.9448	1.4556	0.060059	NaN	NaN	NaN	NaN	NaN	NaN
0.804	-63.2386	-47.504	1031.978	-1.2859	0.68579	0.15136	-44.912	171.284397	1538.99	-1.3022	1.0083	0.44385	95.077	-12.1244	1943.5912	-1.9285	1.4397	0.061523	NaN	NaN	NaN	NaN	NaN	NaN
0.806	-77.9787	-57.061	1040.994	-1.2754	0.69922	0.13672	-19.491	182.9534	1529.266	-1.2573	0.96924	0.4209	92.452	25.4655	1927.4735	-1.9077	1.4224	0.065918	NaN	NaN	NaN	NaN	NaN	NaN
0.808	-51.6778	-68.264	1042.191	-1.2437	0.71533	0.11328	-21.903	219.006	1471.189	-1.2256	0.94238	0.40429	89.008	-12.799	1902.79	-1.8867	1.3965	0.073242	NaN	NaN	NaN	NaN	NaN	NaN
0.81	-66.7572	-61.625	1021.155	-1.2188	0.7207	0.098633	-61.376	209.568	1440.171	-1.1909	0.91357	0.38477	49.119	73.698	1866.981	-1.8765	1.3794	0.066895	NaN	NaN	NaN	NaN	NaN	NaN
0.812	-81.7368	-51.5309	1010.165	-1.1572	0.7334	0.074707	4.878	215.792	1429.232	-1.146	0.87354	0.35986	36.9641	71.913	1856.6149	-1.855	1.3579	0.077148	NaN	NaN	NaN	NaN	NaN	NaN
0.814	-45.7	-45.4618	988.29	-1.1069	0.74756	0.051269	-41.0655	231.66	1366.6079	-1.127	0.8584	0.35693	13.0562	158.4435	1833.885	-1.8462	1.3388	0.082275	NaN	NaN	NaN	NaN	NaN	NaN
0.816	-61.2291	-54.9173	969.579	-1.0552	0.76416	0.028809	-18.107	204.352	1339.6773	-1.0854	0.82227	0.33008	30.903	139.894	1839.514	-1.8433	1.3218	0.091309	NaN	NaN	NaN	NaN	NaN	NaN
0.818	-63.2625	-68.2457	948.55743	-0.979	0.77197	-0.015625	35.1391	218.58181	1311.316	-1.0606	0.79492	0.31543	49.9797	186.609	1844.7477	-1.8413	1.3052	0.10498	NaN	NaN	NaN	NaN	NaN	NaN
0.82	-57.8821	-85.8918	925.733	-0.93896	0.77783	-0.034668	-42.2456	223.221	1258.259	-1.0352	0.77051	0.30322	21.3511	175.86	1809.322	-1.8418	1.293	0.1167	NaN	NaN	NaN	NaN	NaN	NaN
0.822	-22.058	-98.3866	930.867	-0.85889	0.78174	-0.07959	15.791	213.06	1256.954	-1.0039	0.73682	0.28418	-8.0839	237.52	1802.148	-1.8394	1.2778	0.125	NaN	NaN	NaN	NaN	NaN	NaN
0.824	-27.2527	-106.896	919.592	-0.80786	0.79615	-0.10059	6.214	222.1103	1239.538	-0.98633	0.72266	0.27979	-32.632	229.605	1750.685	-1.8264	1.2785	0.13208	NaN	NaN	NaN	NaN	NaN	NaN
0.826	-3.7952	-109.755	926.638	-0.77002	0.81396	-0.12305	-28.4597	213.164	1199.808	-0.95117	0.69482	0.25928	-55.595	247.078	1701.205	-1.8022	1.2563	0.14307	NaN	NaN	NaN	NaN	NaN	NaN
0.828	34.636	-134.855	958.26	-0.73828	0.85742	-0.15039	10.5518	202.1032	1191.985	-0.9253	0.67578	0.25074	-34.155	205.087	1644.25	-1.7769	1.2349	0.14551	NaN	NaN	NaN	NaN	NaN	NaN
0.83	38.428	-147.166	989.4108	-0.73047	0.88281	-0.16162	-27.71	225.674	1124.0206	-0.896	0.65723	0.23682	-16.71	189.7005	1632.691	-1.7583	1.231	0.146	NaN	NaN	NaN	NaN	NaN	NaN
0.832	52.383	-154.734	1025.9659	-0.72607	0.93311	-0.18213	-27.2258	218.236	1089.8732	-0.85547	0.63086	0.21729	-5.385	158.492	1595.703	-1.7065	1.2095	0.14355	NaN	NaN	NaN	NaN	NaN	NaN
0.834	67.74	-151.5725	1074.955	-0.7268	0.96753	-0.19995	8.802	260.2843	1058.22728	-0.83154	0.61426	0.2085	-32.658	183.05	1589.0057	-1.657	1.1843	0.14184	NaN	NaN	NaN	NaN	NaN	NaN
0.836	117.93	-161.44	1103.3536	-0.72607	0.99463	-0.21924	-18.3779	272.9595	991.9	-0.78076	0.58252	0.19092	-28.656	203.622	1544.051	-1.6187	1.1646	0.13477	NaN	NaN	NaN	NaN	NaN	NaN
0.838	88.069	-199.179	1125.5474	-0.74023	1.0186	-0.24805	14.892	238.8307	972.6946	-0.74682	0.56176	0.17871	-17.668	237.261	1505.412	-1.5605	1.1328	0.12988	NaN	NaN	NaN	NaN	NaN	NaN
0.84	89.3	-218.532	1139.4459	-0.74854	1.0298	-0.25146	8.088	257.301	912.7005	-0.70605	0.52783	0.16553	15.234	270.4202	1461.593	-1.5288	1.1079	0.125	NaN	NaN	NaN	NaN	NaN	NaN
0.842	85.356	-226.617	1184.6921	-0.80273	1.0547	-0.27393	9.6114	253.439	857.7729	-0.65381	0.49463	0.14648	37.145	311.308	1421.1104	-1.4761	1.0649	0.13525	NaN	NaN	NaN	NaN	NaN	NaN
0.844	104.325	-219.397	1222.2252	-0.84961	1.0756	-0.27978	38.8829	238.738	836.2088	-0.62793	0.47266	0.13672	26.389	347.409	1360.159	-1.4383	1.0325	0.12842	NaN	NaN	NaN	NaN	NaN	NaN
0.846	80.035	-219.0696	1274.42	-0.9126	1.1001	-0.28125	-10.6837	284.438	760.669	-0.56641	0.43555	0.11865	26.549	350.834	1350.4909	-1.3999	1.0103	0.13135	NaN	NaN	NaN	NaN	NaN	NaN
0.848	57.559	-198.93	1292.1367	-1.0171	1.1353	-0.26855	1.882	240.7158	736.5466	-0.52124	0.40967	0.10694	-15.189	355.333	1300.552	-1.3413	0.97021	0.13672	NaN	NaN	NaN	NaN	NaN	NaN
0.85	56.754	-186.358	1338.49	-1.0737	1.1567	-0.26318	18.941	229.023	696.546	-0.479	0.38525	0.087891	-21.452	318.9796	1253.242	-1.3145	0.95117	0.14063	NaN	NaN	NaN	NaN	NaN	NaN
0.852	55.821	-160.753	1381.5154	-1.1909	1.2056	-0.23682	-35.1427	244.4369	651.092	-0.4126	0.35693	0.077637	6.266	311.145	1174.0346	-1.2632	0.91162	0.15039	NaN	NaN	NaN	NaN	NaN	NaN
0.854	53.952	-136.91	1403.479	-1.2769	1.2466	-0.21557	20.648	205.5808	642.862	-0.38623	0.34082	0.068848	-8.335	268.056	1132.8442	-1.2292	0.8811	0.15357	NaN	NaN	NaN	NaN	NaN	NaN
0.856	27.5607	-130.6763	1426.787	-1.3628	1.2915	-0.19141	8.2622	225.054	611.3339	-0.33057	0.30908	0.057617	-12.278	295.465	1074.917	-1.1831	0.8501	0.15723	NaN	NaN	NaN	NaN	NaN	NaN
0.858	18.6619	-116.73	1454.6898	-1.4761	1.3511	-0.14795	-3.893	202.543	553.697	-0.29956	0.28589	0.047607	-21.684	278.584	1047.7713	-1.1108	0.80908	0.16846	NaN	NaN	NaN	NaN	NaN	NaN
0.86	11.3608	-116.454	1490.9917	-1.5249	1.3813	-0.13379	15.796	161.385	535.258	-0.26514	0.26074	0.04248	-55.706	312.0955	965.4049	-1.0776	0.78809	0.16602	NaN	NaN	NaN	NaN	NaN	NaN
0.862	-15.7761	-122.659	1510.6612	-1.625	1.4326	-0.089844	-19.9114	182.8983	469.6276	-0.22852	0.23779	0.038086	-74.44059	274.457	927.63602	-1.0132	0.75049	0.1748	NaN	NaN	NaN	NaN	NaN	NaN
0.864	-2.268	-123.6	1555.5942	-1.6892	1.4661	-0.05957	-12.734	135.048	432.749	-0.20947	0.21631	0.024414	-59.165	284.743	875.6065	-0.95825	0.72046	0.1748	NaN	NaN	NaN	NaN	NaN	NaN
0.866	-27.4219	-143.7927	1583.905	-1.7495	1.4927	-0.028809	22.007	132.397	421.9913	-0.18115	0.18604	0.026367	-54.005	249.561	848.9234	-0.89795	0.68311	0.17578	NaN	NaN	NaN	NaN	NaN	NaN
0.868	-8.9788	-145.15606	1607.278	-1.812	1.522	0.0024414	-32.351	159.101	368.0783	-0.16479	0.16821	0.022216	-73.297	311.4788	798.2701	-0.81787	0.63232	0.18457	NaN	NaN	NaN	NaN	NaN	NaN
0.87	-45.601	-161.127	1596.977	-1.8374	1.5317	0.013184	-11.872	117.424	359.6672	-0.14746	0.14746	0.018555	-68.347	275.451	780.418	-0.78076	0.60498	0.18555	NaN	NaN	NaN	NaN	NaN	NaN
0.872	-50.072	-140.90594	1591.528	-1.8594	1.542	0.024902	-1.02	148.864	334.0889	-0.12646	0.12207	0.01416	-98.8152	306.177	715.69	-0.69922	0.55176	0.19189	NaN	NaN	NaN	NaN	NaN	NaN
0.874	-48.9893	-139.1923	1615.6867	-1.8647	1.5454	0.030029	-41.9493	144.2782	289.497	-0.12012	0.11133	0.012207	-110.159	237.1171	657.606	-0.63794	0.51392	0.19067	NaN	NaN	NaN	NaN	NaN	NaN
0.876	-24.4035	-148.6372	1625.3451	-1.8574	1.5449	0.032227	-4.55099999999999	106.871	285.873	-0.1084	0.086914	0.0058594	-114.127	266.63	581.4222	-0.58203	0.47607	0.19287	NaN	NaN	NaN	NaN	NaN	NaN
0.878	-12.5845	-138.335	1621.9041	-1.8359	1.5371	0.022949	-54.374	157.694	242.5751	-0.099853	0.077148	0.0024414	-89.8825	211.78517	539.081	-0.49609	0.43115	0.19434	NaN	NaN	NaN	NaN	NaN	NaN
0.88	-13.6847	-134.381	1629.6992	-1.8203	1.5313	0.018066	-57.2871	112.213	233.5894	-0.091797	0.06543	0.0043945	-77.498	246.991	444.743	-0.45459	0.40381	0.18994	NaN	NaN	NaN	NaN	NaN	NaN
0.882	36.353	-113.717	1647.0996	-1.7886	1.52	0.0048828	-24.989	99.343	212.4654	-0.083984	0.04541	0.0014648	-89.967	186.6251	415.58	-0.36963	0.3667	0.19141	NaN	NaN	NaN	NaN	NaN	NaN
0.884	22.9187	-107.389	1664.8422	-1.7585	1.5149	-0.0036621	-45.0175	101.2227	183.693	-0.084473	0.036621	0.00097656	-90.251	207.752	338.73	-0.30078	0.32812	0.18579	NaN	NaN	NaN	NaN	NaN	NaN
0.886	41.6687	-79.4704	1660.024	-1.7422	1.5117	-0.0097656	-11.936	38.187	191.517	-0.076172	0.024414	-0.0024414	-69.0609	143.312	302.155	-0.23633	0.28955	0.18164	NaN	NaN	NaN	NaN	NaN	NaN
0.888	50.795	-73.884	1664.7947	-1.7246	1.5029	-0.020996	-25.638	75.2575	150.8066	-0.072265	0.015381	-0.0031738	-57.264	185.2932	270.072	-0.14893	0.24463	0.17822	NaN	NaN	NaN	NaN	NaN	NaN
0.89	60.514	-67.04	1663.537	-1.7188	1.4961	-0.024414	-42.4522	72.974	125.5705	-0.066406	0.0092773	-0.0048828	-33.4339	127.445	280.7342	-0.10889	0.21582	0.17383	NaN	NaN	NaN	NaN	NaN	NaN
0.892	51.694	-86.272	1669.131	-1.7046	1.4868	-0.018555	-6.88200000000001	32.568	101.185	-0.055176	0.0029297	-0.0078125	-29.901	183.388	260.7936	-0.036133	0.17236	0.16553	NaN	NaN	NaN	NaN	NaN	NaN
0.894	29.61259	-94.017	1673.466	-1.6919	1.478	-0.024658	-65.2707	84.88709	62.541	-0.049316	0	-0.0097656	10.529	156.285	251.764	0.015625	0.13745	0.15698	NaN	NaN	NaN	NaN	NaN	NaN
0.896	35.976	-93.204	1684.5465	-1.6831	1.4663	-0.027832	-23.697	16.45	67.284	-0.023438	-0.0092773	-0.016113	-1.274	200.351	184.1562	0.061035	0.1001	0.14795	NaN	NaN	NaN	NaN	NaN	NaN
0.898	24.4163	-104.205	1670.897	-1.6577	1.4575	-0.036133	-7.188	5.237	79.418	-0.0078124	-0.018066	-0.016113	-13.823	142.739	161.85022	0.11377	0.058594	0.14502	NaN	NaN	NaN	NaN	NaN	NaN
0.9	45.746	-121.4474	1668.3974	-1.6484	1.4512	-0.041016	-44.3131	45.4372	47.6093	0.0068359	-0.024902	-0.019531	-4.868	154.524	126.5712	0.13281	0.037109	0.13818	NaN	NaN	NaN	NaN	NaN	NaN
0.902	28.6421	-121.351	1657.6063	-1.6187	1.4419	-0.046387	-11.602	-2.8731	66.424	0.024902	-0.040039	-0.023926	-5.094	78.391	104.0444	0.16406	0.0019531	0.13281	NaN	NaN	NaN	NaN	NaN	NaN
0.904	23.9763	-105.728	1673.339	-1.6052	1.4289	-0.054443	-33.77	53.357	26.351	0.03418	-0.044922	-0.031494	-2.152	94.035	72.8427	0.18457	-0.017578	0.1333	NaN	NaN	NaN	NaN	NaN	NaN
0.906	42.699	-92.012	1698.124	-1.5918	1.4199	-0.064453	-47.2489	64.8126	-1.509	0.042969	-0.052734	-0.036133	0.553000000000001	38.1203	75.0369	0.19092	-0.02832	0.13232	NaN	NaN	NaN	NaN	NaN	NaN
0.908	22.143	-96.461	1680.432	-1.5659	1.4067	-0.073242	-7.381	19.3821	-12.5856	0.04248	-0.064941	-0.040527	-11.797	54.4983	45.4111	0.20361	-0.041504	0.13232	NaN	NaN	NaN	NaN	NaN	NaN
0.91	21.1385	-89.946	1675.70594	-1.5562	1.395	-0.081055	-34.973	67.561	-29.0307	0.038086	-0.063477	-0.040039	-35.056	13.7793	55.004	0.20508	-0.045899	0.13721	NaN	NaN	NaN	NaN	NaN	NaN
0.912	-8.7558	-82.7902	1676.9076	-1.5366	1.3872	-0.084473	-24.47	4.735	-7.9093	0.024414	-0.067383	-0.043945	-24.093	66.6415	26.3053	0.20264	-0.04541	0.13184	NaN	NaN	NaN	NaN	NaN	NaN
0.914	11.8886	-67.8314	1647.523	-1.5215	1.375	-0.095215	-6.028	-6.837185	7.0689	0.011963	-0.072754	-0.039551	-11.648	49.0387	22.1848	0.1958	-0.050293	0.13477	NaN	NaN	NaN	NaN	NaN	NaN
0.916	-29.9278	-56.094	1649.267	-1.5112	1.3755	-0.089355	-42.31009	44.8398	5.8102	-0.003418	-0.067871	-0.031738	2.521	89.0663	23.478	0.1958	-0.051758	0.13477	NaN	NaN	NaN	NaN	NaN	NaN
0.918	-29.6651	-33.968	1616.517	-1.5034	1.3755	-0.095215	12.979	-18.8898	12.132	-0.033203	-0.059082	-0.019531	-26.901	36.444	44.0115	0.18164	-0.055176	0.125	NaN	NaN	NaN	NaN	NaN	NaN
0.92	-36.1	-50.697	1624.9379	-1.4917	1.3725	-0.093018	-30.924	31.295	4.3676	-0.050781	-0.056641	-0.015625	-35.056	47.6795	32.1577	0.17529	-0.061279	0.12158	NaN	NaN	NaN	NaN	NaN	NaN
0.922	-13.8439	-55.912	1626.356	-1.4741	1.3774	-0.099609	-40.873	40.5866	3.884	-0.080566	-0.046875	-0.0043945	-73.9337	7.3235	39.164	0.16846	-0.064941	0.12598	NaN	NaN	NaN	NaN	NaN	NaN
0.924	2.186	-61.8119	1607.5205	-1.4551	1.3691	-0.10107	-18.087	-0.2267	17.2809	-0.10303	-0.039062	0.0019532	-75.726	8.252	33.12627	0.16553	-0.068359	0.12695	NaN	NaN	NaN	NaN	NaN	NaN
0.926	1.44103	-43.571	1583.3523	-1.4429	1.3677	-0.10156	-27.896	56.877	-7.924	-0.11816	-0.029785	0.013184	-91.6385	-13.8703	23.056	0.15381	-0.067871	0.12842	NaN	NaN	NaN	NaN	NaN	NaN
0.928	43.262	-55.455	1574.84262	-1.4233	1.3618	-0.10303	-29.957	8.8074	16.8019	-0.13281	-0.015137	0.02002	-68.132	25.057	17.6689	0.13818	-0.065918	0.13672	NaN	NaN	NaN	NaN	NaN	NaN
0.93	24.7241	-64.307	1560.8879	-1.4113	1.3567	-0.10254	-40.099	-0.3911	20.9617	-0.14209	-0.013672	0.024902	-70.8866	27.6644	-1.172	0.13281	-0.060546	0.14087	NaN	NaN	NaN	NaN	NaN	NaN
0.932	34.358	-61.98	1540.6302	-1.3926	1.3477	-0.10107	-48.92447	52.1863	16.0999	-0.14404	-0.0083008	0.030273	-71.062	42.27	-19.072	0.12744	-0.060547	0.14502	NaN	NaN	NaN	NaN	NaN	NaN
0.934	50.807	-66.319	1549.1026	-1.375	1.3359	-0.10498	-8.198	-0.2598	16.4027	-0.14502	-0.0078125	0.033203	-61.3328	23.3691	-16.645	0.13037	-0.053711	0.14502	NaN	NaN	NaN	NaN	NaN	NaN
0.936	88.521	-63.8572	1531.1505	-1.3613	1.335	-0.10254	-40.438	53.973	16.0192	-0.14111	-0.0078125	0.036621	-55.52	18.955	6.3199	0.12939	-0.049316	0.14551	NaN	NaN	NaN	NaN	NaN	NaN
0.938	65.965	-61.071	1524.0943	-1.334	1.3223	-0.10107	-30.443	65.257	12.1032	-0.13379	-0.012695	0.03418	-46.395	13.9548	18.3544	0.12695	-0.046387	0.14209	NaN	NaN	NaN	NaN	NaN	NaN
0.94	39.806	-47.018	1483.952	-1.3171	1.3186	-0.096192	-14.46	19.1463	29.368	-0.12646	-0.018066	0.024414	-19.032	32.865	39.0411	0.13453	-0.046631	0.13867	NaN	NaN	NaN	NaN	NaN	NaN
0.942	60.538	-23.967	1469.364	-1.2988	1.3047	-0.098633	-52.274	75.845	8.901	-0.1123	-0.023438	0.022949	-12.033	43.282	43.3334	0.13916	-0.04834	0.12988	NaN	NaN	NaN	NaN	NaN	NaN
0.944	64.472	-8.707	1429.1636	-1.2612	1.2817	-0.096191	-27.297	20.0939	16.6714	-0.095215	-0.030517	0.024659	-13.259	35.5635	35.5794	0.14795	-0.044922	0.12939	NaN	NaN	NaN	NaN	NaN	NaN
0.946	72.996	-2.663	1405.2355	-1.2495	1.2661	-0.10059	-21.07	6.9745	26.2591	-0.079102	-0.035645	0.016113	-55.015	48.439	21.90572	0.15479	-0.046875	0.12451	NaN	NaN	NaN	NaN	NaN	NaN
0.948	77.66	-13.8096	1385.7027	-1.2104	1.2388	-0.099609	-50.6645	56.1223	19.4589	-0.057129	-0.045898	0.0073242	-30.635	46.3907	6.928	0.15625	-0.041992	0.12207	NaN	NaN	NaN	NaN	NaN	NaN
0.95	87.785	-6.93084	1376.6318	-1.1822	1.2163	-0.099853	1.39	-11.0358	26.675	-0.052246	-0.04541	0.003418	-19.058	49.567	-18.897	0.15771	-0.036133	0.11426	NaN	NaN	NaN	NaN	NaN	NaN
0.952	72.404	4.5048	1354.287	-1.1523	1.1953	-0.098633	-32.688	27.5255	25.037	-0.028809	-0.04834	-0.0053711	-8.698	39.617	4.87	0.1626	-0.03125	0.11084	NaN	NaN	NaN	NaN	NaN	NaN
0.954	53.72	13.737	1339.123	-1.1211	1.166	-0.098633	-50.0482	31.9931	33.996	-0.018066	-0.051757	-0.012207	-5.037	26.3736	9.271	0.16846	-0.027344	0.10889	NaN	NaN	NaN	NaN	NaN	NaN
0.956	47.298	12.153	1329.377	-1.1055	1.1543	-0.098633	2.29199999999999	-23.291	38.581	-0.0083008	-0.054688	-0.019043	0.222000000000001	4.68392	8.901	0.16895	-0.026855	0.10303	NaN	NaN	NaN	NaN	NaN	NaN
0.958	10.3586	12.0931	1332.781	-1.0781	1.1211	-0.095215	-26.412	45.5867	20.279	0.0078125	-0.054688	-0.027832	6.246	16.5669	13.9003	0.16797	-0.023438	0.099609	NaN	NaN	NaN	NaN	NaN	NaN
0.96	22.459	18.2182	1332.473	-1.064	1.0977	-0.091065	-8.191	4.587	12.72188	0.01709	-0.056152	-0.032715	2.218	3.649	30.3128	0.16455	-0.023194	0.10132	NaN	NaN	NaN	NaN	NaN	NaN
0.962	-12.4715	18.5147	1307.4558	-1.0469	1.0703	-0.087402	-3.107	-0.7401	14.55997	0.030762	-0.052246	-0.041016	-19.134	24.4235	35.281	0.16504	-0.02002	0.10205	NaN	NaN	NaN	NaN	NaN	NaN
0.964	-15.6016	34.0696	1297.1085	-1.0313	1.0391	-0.073242	-41.5839	47.5013	15.011	0.04126	-0.051026	-0.052002	-10.406	15.5818	73.323	0.1709	-0.019531	0.095703	NaN	NaN	NaN	NaN	NaN	NaN
0.966	-34.604	31.768	1278.1745	-1.0229	1.022	-0.074707	-9.556	-11.3388	28.464	0.058594	-0.04834	-0.058105	-34.693	53.704	35.748981	0.18066	-0.020508	0.091309	NaN	NaN	NaN	NaN	NaN	NaN
0.968	-19.4697	34.357	1250.3657	-1.0117	0.99023	-0.062988	-20.84	23.0054	18.05881	0.078613	-0.046875	-0.069336	-7.83	37.0032	23.1218	0.19922	-0.030273	0.086426	NaN	NaN	NaN	NaN	NaN	NaN
0.97	-23.7034	39.55	1222.3917	-0.99876	0.96704	-0.058838	-21.9071	34.1272	29.1814	0.085449	-0.046875	-0.077148	-40.519	47.031	-2.689	0.20801	-0.034668	0.079346	NaN	NaN	NaN	NaN	NaN	NaN
0.972	-44.9507	51.899	1190.902	-0.97998	0.94385	-0.050781	-9.365	-10.65587	26.702	0.10547	-0.042969	-0.087402	-85.085	13.2446	6.4302	0.2207	-0.043457	0.070801	NaN	NaN	NaN	NaN	NaN	NaN
0.974	-2.02	62.079	1195.9269	-0.95947	0.91455	-0.04834	-53.22	50.629	0.879999999999999	0.11816	-0.044434	-0.096436	-64.511	30.97	-2.53875	0.23242	-0.046875	0.055176	NaN	NaN	NaN	NaN	NaN	NaN
0.976	-21.4581	75.997	1177.1943	-0.94727	0.89844	-0.044434	-25.381	16.031	-2.9144	0.12939	-0.038574	-0.10645	-55.6967	5.43245	21.987	0.24365	-0.052734	0.049805	NaN	NaN	NaN	NaN	NaN	NaN
0.978	-12.4985	95.7838	1165.619	-0.92529	0.86865	-0.044434	-21.355	0.139	7.454	0.14453	-0.042969	-0.11377	-57.116	24.7074	16.7021	0.24902	-0.057617	0.041992	NaN	NaN	NaN	NaN	NaN	NaN
0.98	-7.6627	104.838	1137.51912	-0.90966	0.84814	-0.035157	-39.0779	36.5273	-3.7066	0.15234	-0.038086	-0.11768	-73.377	5.5207	38.54	0.25196	-0.056152	0.033448	NaN	NaN	NaN	NaN	NaN	NaN
0.982	8.676	94.845	1107.9925	-0.89453	0.82227	-0.030762	-15.536	-40.096	23.856	0.16553	-0.036133	-0.12695	-63.666	31.268	28.339	0.24463	-0.056152	0.024414	NaN	NaN	NaN	NaN	NaN	NaN
0.984	-4.584	91.913	1081.944	-0.86914	0.79199	-0.026367	-35.7418	10.137	12.328	0.16822	-0.034424	-0.13184	-63.5497	20.794	15.3308	0.22266	-0.047852	0.032227	NaN	NaN	NaN	NaN	NaN	NaN
0.986	-19.328	94.375	1043.1142	-0.85547	0.77539	-0.019531	-29.9983	19.675	18.8978	0.17041	-0.027344	-0.1377	-43.476	59.678	-16.321	0.21387	-0.039551	0.029297	NaN	NaN	NaN	NaN	NaN	NaN
0.988	4.125	91.179	1029.164	-0.82813	0.74316	-0.015625	-28.203	-12.2353	30.1854	0.1709	-0.017578	-0.13525	-49.265	25.235	21.1709	0.18896	-0.020996	0.035156	NaN	NaN	NaN	NaN	NaN	NaN
0.99	7.08	92.3286	1009.684	-0.81103	0.72437	-0.0085447	-47.6802	45.3606	5.60044	0.16699	-0.016113	-0.13721	-44.444	30.674	14.514	0.16919	-0.01001	0.044922	NaN	NaN	NaN	NaN	NaN	NaN
0.992	2.931	97.21992	979.3361	-0.78809	0.71484	-0.0068359	-28.606	6.9303	4.9484	0.14844	-0.0014648	-0.14453	-29.296	-2.0648	5.8785	0.14404	0.0068359	0.061035	NaN	NaN	NaN	NaN	NaN	NaN
0.994	15.129	91.4088	963.78744	-0.75732	0.68408	-0.0014648	-23.725	1.6442	5.2439	0.13989	0.010498	-0.14624	-48.231	26.14	-12.1159	0.11084	0.025391	0.071777	NaN	NaN	NaN	NaN	NaN	NaN
0.996	29.9342	96.549	950.258	-0.74268	0.67041	0.0024414	-44.12271	49.268	-8.748	0.12451	0.024902	-0.14355	-73.0052	13.1327	17.6066	0.098145	0.038086	0.079102	NaN	NaN	NaN	NaN	NaN	NaN
0.998	26.8689	115.84	932.7263	-0.71143	0.6377	0.0068359	-7.757	-5.4342	7.2725	0.10352	0.040039	-0.13867	-36.258	32.7574	24.969	0.079102	0.054199	0.098633	NaN	NaN	NaN	NaN	NaN	NaN
1	26.8989	129.7552	910.16962	-0.69043	0.62011	0.010254	-28.732	35.636	8.133	0.087891	0.046387	-0.1416	-29.471	20.871	35.97451	0.072509	0.064697	0.10767	NaN	NaN	NaN	NaN	NaN	NaN
1.002	9.21	106.1747	869.7381	-0.66748	0.59717	0.0097656	-16.286	52.3653	-1.085	0.069336	0.064453	-0.13867	6.61199999999999	56.0029	4.906	0.070801	0.075195	0.10938	NaN	NaN	NaN	NaN	NaN	NaN
1.004	-7.722	110.4837	858.0268	-0.64014	0.56689	0.023438	-26.207	10.1935	7.2094	0.056152	0.080811	-0.13794	13.645	40.871	-1.182	0.064941	0.09375	0.12402	NaN	NaN	NaN	NaN	NaN	NaN
1.006	-11.423	118.202	827.6073	-0.62842	0.55615	0.024414	-45.262	66.934	2.8182	0.041016	0.095215	-0.13818	1.948	55.9258	22.633	0.06543	0.10303	0.1333	NaN	NaN	NaN	NaN	NaN	NaN
1.008	-33.6272	123.884	792.858	-0.60303	0.53369	0.033691	-16.558	21.6426	41.3932	0.026855	0.11035	-0.15088	-6.237	24.8692	26.8506	0.069824	0.11084	0.14307	NaN	NaN	NaN	NaN	NaN	NaN
1.01	-32.387	113.433	790.0987	-0.58642	0.51318	0.035401	-6.261	-26.886	71.4546	0.013672	0.11963	-0.16064	1.26	26.686	7.2835	0.072266	0.11621	0.15039	NaN	NaN	NaN	NaN	NaN	NaN
1.012	-64.4683	116.686	756.6413	-0.56641	0.49805	0.038086	-40.7707	-1.906	79.6004	-0.019531	0.14502	-0.17676	-17.537	11.7171	29.1459	0.078613	0.11621	0.15723	NaN	NaN	NaN	NaN	NaN	NaN
1.014	-51.66415	124.477	728.2894	-0.54541	0.48047	0.053711	-5.328	-76.41487	86.815	-0.067138	0.16723	-0.15918	7.047	18.5712	35.7383	0.084473	0.10889	0.16748	NaN	NaN	NaN	NaN	NaN	NaN
1.016	-58.5689	117.3737	696.4985	-0.53369	0.46826	0.054688	-16.687	-64.203	116.702	-0.125	0.18848	-0.14355	-17.745	21.3187	36.8207	0.082031	0.11279	0.16748	NaN	NaN	NaN	NaN	NaN	NaN
1.018	-59.8082	112.859	667.5223	-0.51611	0.44873	0.060059	-41.372	-72.603	178.0793	-0.21143	0.22363	-0.13184	-18.472	50.619	33.5616	0.081543	0.10547	0.17676	NaN	NaN	NaN	NaN	NaN	NaN
1.02	-36.531	109.5353	664.56751	-0.49707	0.43872	0.0625	-14.849	-129.5454	230.6581	-0.26123	0.23975	-0.12549	-43.985	48.39	0.154999999999999	0.073731	0.10717	0.18238	NaN	NaN	NaN	NaN	NaN	NaN
1.022	-43.074	102.6888	623.8573	-0.47803	0.42139	0.065918	-17.6405	-81.741	269.934	-0.35693	0.2793	-0.10742	-51.48	37.988	17.0166	0.061523	0.10693	0.18848	NaN	NaN	NaN	NaN	NaN	NaN
1.024	-48.9531	102.686	617.7819	-0.44824	0.39355	0.068848	-7.586	-84.5387	366.8171	-0.43042	0.31421	-0.097654	-64.505	30.3529	30.428	0.042969	0.10645	0.19873	NaN	NaN	NaN	NaN	NaN	NaN
1.026	-55.90099	105.487	592.5354	-0.4292	0.38086	0.068359	-32.272	-64.4678	500.6758	-0.50928	0.35596	-0.096191	-47.902	17.4774	27.93768	0.035156	0.10254	0.19824	NaN	NaN	NaN	NaN	NaN	NaN
1.028	-26.209	96.1295	578.068474	-0.39453	0.35645	0.072754	-67.2327	15.7283	625.877	-0.62646	0.42041	-0.089355	-42.401	21.4799	19.4407	0.020996	0.10742	0.19873	NaN	NaN	NaN	NaN	NaN	NaN
1.03	-43.4012	98.5505	561.0671	-0.36475	0.3396	0.071533	-51.244	3.579	732.434	-0.69727	0.45508	-0.082031	-46.6835	17.3571	33.2214	0.015381	0.11133	0.19824	NaN	NaN	NaN	NaN	NaN	NaN
1.032	-56.3552	94.219	521.2191	-0.33789	0.32422	0.071289	-87.553	39.807	855.879	-0.87305	0.54102	-0.044434	-75.9946	12.4532	23.2507	0.016602	0.11768	0.20117	NaN	NaN	NaN	NaN	NaN	NaN
1.034	-24.954	103.475	498.0736	-0.29639	0.30957	0.064941	-92.681	53.736	992.006	-1.0427	0.61352	-0.0007325	-59.365	11.587	26.762	0.020508	0.11914	0.20166	NaN	NaN	NaN	NaN	NaN	NaN
1.036	-18.954	111.356	473.2856	-0.27344	0.29785	0.060547	-73.282	25.6529	1156.718	-1.2339	0.6958	0.054688	-64.018	20.57124	18.6306	0.021484	0.11963	0.19385	NaN	NaN	NaN	NaN	NaN	NaN
1.038	-27.431	101.507	441.04368	-0.23145	0.27881	0.059082	-121.103	93.053	1244.875	-1.5093	0.82178	0.15918	-26.368	22.943	33.36	0.026855	0.12158	0.18799	NaN	NaN	NaN	NaN	NaN	NaN
1.04	-8.511	90.9636	417.35494	-0.20214	0.26294	0.053466	-121.677	68.881	1276.541	-1.7126	0.92896	0.23462	-57.878	4.943	57.228	0.025879	0.12793	0.18848	NaN	NaN	NaN	NaN	NaN	NaN
1.042	18.228	87.6206	404.301	-0.17676	0.25293	0.050781	-101.92	7.543	1291.387	-1.8979	1.0259	0.29395	-65.667	-28.3832	84.3731	0.031738	0.13428	0.18408	NaN	NaN	NaN	NaN	NaN	NaN
1.044	19.123	98.0323	373.59	-0.13721	0.23779	0.041016	-129.483	-3.586	1267.154	-2.0542	1.1294	0.33887	-48.465	-34.543	103.6464	0.03125	0.15039	0.17969	NaN	NaN	NaN	NaN	NaN	NaN
1.046	16.745	95.6904	363.831	-0.11572	0.22607	0.038086	-114.8941	-85.614	1264.424	-2.0698	1.1753	0.37695	-43.265	-84.6211	154.256	0.040528	0.16235	0.17676	NaN	NaN	NaN	NaN	NaN	NaN
1.048	23.097	90.53264	368.7053	-0.085449	0.21533	0.033203	-99.803	-98.346	1228.8029	-2.0391	1.2441	0.45215	-66.657	-126.2689	228.3562	0.036133	0.17871	0.16748	NaN	NaN	NaN	NaN	NaN	NaN
1.05	8.771	93.417	350.858	-0.059082	0.2085	0.029785	-123.344	-120.373	1200.307	-2.0357	1.2661	0.41553	-53.141	-142.11968	328.46383	0.022461	0.20752	0.16016	NaN	NaN	NaN	NaN	NaN	NaN
1.052	8.055	99.981	324.962	-0.044434	0.20068	0.027832	-95.8074	-163.551	1191.489	-1.9702	1.2593	0.33594	-3.533	-122.0458	414.19	0.003418	0.2251	0.16016	NaN	NaN	NaN	NaN	NaN	NaN
1.054	-23.237	88.178	297.36177	-0.021484	0.18994	0.018066	-92.3288	-121.127	1164.3266	-1.6777	1.2012	0.22168	-12.357	-80.713	561.399	-0.054688	0.26514	0.16797	NaN	NaN	NaN	NaN	NaN	NaN
1.056	-23.199	64.651	289.70471	-0.0051269	0.18554	0.016601	-51.405	-139.961	1135.0481	-1.4956	1.1704	0.16602	-4.634	-41.604	706.223	-0.11401	0.29688	0.17505	NaN	NaN	NaN	NaN	NaN	NaN
1.058	-28.243	64.8416	280.8569	0.0019531	0.17969	0.013184	-29.894	-142.91	1142.3394	-1.1816	1.1016	0.05127	43.2181	-25.576	889.076	-0.18506	0.33643	0.18555	NaN	NaN	NaN	NaN	NaN	NaN
1.06	-23.336	59.1499	265.66737	0.010742	0.17578	0.015137	-51.9212	-97.791	1166.6471	-1.0339	1.0857	-0.024902	71.615	29.741	1045.908	-0.2876	0.39307	0.19043	NaN	NaN	NaN	NaN	NaN	NaN
1.062	-44.19389	57.476	233.3556	0.0092773	0.17773	0.012207	-22.811	-140.338	1207.6072	-0.92383	1.0918	-0.091309	111.4027	35.631	1221.784	-0.34668	0.42285	0.19434	NaN	NaN	NaN	NaN	NaN	NaN
1.064	-30.441	55.363	236.3336	0.0068359	0.17871	0.015625	-22.0096	-120.502	1254.419	-0.82031	1.1191	-0.14551	139.263	62.6744	1388.6732	-0.47705	0.49072	0.2002	NaN	NaN	NaN	NaN	NaN	NaN
1.066	-21.699	53.381	216.1841	0.0012207	0.18066	0.022217	-5.81287	-130.111	1264.964	-0.78174	1.1372	-0.15967	123.1864	31.338	1567.318	-0.60254	0.55639	0.20069	NaN	NaN	NaN	NaN	NaN	NaN
1.068	-40.373	58.145	200.2768	-0.0078125	0.18018	0.025391	28.305	-179.109	1304.598	-0.74316	1.1709	-0.18359	114.031	22.447	1617.047	-0.75146	0.63721	0.21094	NaN	NaN	NaN	NaN	NaN	NaN
1.07	-42.0719	72.297638	200.987	-0.01709	0.18164	0.025391	22.18	-171.889	1307.969	-0.75098	1.1953	-0.1919	85.758	-29.756	1618.081	-0.99268	0.75635	0.23145	NaN	NaN	NaN	NaN	NaN	NaN
1.072	-54.2771	67.6621	190.3187	-0.022461	0.18555	0.030762	19.5519	-219.0096	1342.2131	-0.771	1.2271	-0.1958	66.166	-57.89	1530.473	-1.1196	0.82568	0.25	NaN	NaN	NaN	NaN	NaN	NaN
1.074	-48.0975	62.8453	194.2056	-0.023926	0.18359	0.031738	60.311	-260.363	1397.04576	-0.82471	1.2563	-0.19092	20.7882	-135.0908	1445.816	-1.373	0.9668	0.30078	NaN	NaN	NaN	NaN	NaN	NaN
1.076	-58.37772	40.9107	166.793	-0.023925	0.17969	0.033691	65.11	-290.144	1434.259	-0.86475	1.2661	-0.18408	24.593	-165.257	1339.664	-1.5418	1.0686	0.35401	NaN	NaN	NaN	NaN	NaN	NaN
1.078	-75.4432	36.5701	153.3857	-0.026855	0.17773	0.037598	103.028	-353.865	1499.1387	-0.96436	1.272	-0.16748	7.205	-198.254	1251.141	-1.6875	1.1543	0.40869	NaN	NaN	NaN	NaN	NaN	NaN
1.08	-51.4117	54.1549	144.387	-0.030762	0.17139	0.041016	141.179	-351.017	1543.655	-1.0652	1.2747	-0.14819	3.032	-190.153	1132.5566	-1.8218	1.2134	0.49414	NaN	NaN	NaN	NaN	NaN	NaN
1.082	-39.424	56.3097	133.58	-0.029785	0.16748	0.041504	111.753	-321.126	1588.974	-1.1909	1.2837	-0.12354	-5.276	-179.681	1098.0981	-1.8574	1.2109	0.53857	NaN	NaN	NaN	NaN	NaN	NaN
1.084	-40.805	61.4166	120.3552	-0.036621	0.16113	0.04541	99.766	-271.002	1641.0026	-1.3789	1.3125	-0.091797	-43.473	-153.374	1062.2747	-1.8765	1.1997	0.66113	NaN	NaN	NaN	NaN	NaN	NaN
1.086	-29.9042	48.63535	109.7623	-0.035889	0.15698	0.048096	43.481	-168.997	1670.1676	-1.4688	1.3398	-0.076172	-26.947	-111.3269	1083.6627	-1.9048	1.2251	0.73096	NaN	NaN	NaN	NaN	NaN	NaN
1.088	-4.683	39.989	109.64	-0.037109	0.15039	0.047363	8.4343	-133.955	1716.105	-1.6372	1.4087	-0.043457	-26.126	-73.977	1147.9948	-1.9258	1.2637	0.74268	NaN	NaN	NaN	NaN	NaN	NaN
1.09	3.151	42.799	96.36513	-0.032715	0.14502	0.051758	31.4384	-115.934	1771.202	-1.736	1.467	-0.020997	-27.699	-40.36	1197.889855	-1.7632	1.2661	0.68945	NaN	NaN	NaN	NaN	NaN	NaN
1.092	-4.986	29.425	102.8494	-0.033203	0.14404	0.046875	-13.7679	-95.129	1789.119	-1.8296	1.52	0	-61.916	-35.64	1252.97649	-1.5898	1.2148	0.66943	NaN	NaN	NaN	NaN	NaN	NaN
1.094	17.612	28.975	99.8139	-0.021484	0.14307	0.050781	-0.3225	-108.247	1827.2676	-1.9219	1.5762	0.013672	-102.6145	-40.34	1278.927	-1.2163	1.0532	0.64795	NaN	NaN	NaN	NaN	NaN	NaN
1.096	6.716	35.4216	85.5867	-0.013916	0.1355	0.050293	7.3967	-98.212	1851.45718	-1.9624	1.5981	0.019531	-130.829	-103.76	1288.519	-1.0447	0.94287	0.62427	NaN	NaN	NaN	NaN	NaN	NaN
1.098	2.068	42.6561	59.3489	-0.0087891	0.12744	0.050293	-39.057	-93.725	1859.205	-2.0093	1.6294	0.026367	-159.5518	-171.097	1296.313	-0.94873	0.86377	0.58691	NaN	NaN	NaN	NaN	NaN	NaN
1.1	-2.178	35.383	62.705	-0.00048828	0.12256	0.046875	-4.646	-101.8759	1855.51953	-2.0291	1.6443	0.020019	-169.6327	-308.956	1357.1535	-0.89404	0.7915	0.56201	NaN	NaN	NaN	NaN	NaN	NaN
1.102	18.998	30.655	81.5249	0.00097656	0.11816	0.047852	-42.7464	-104.6454	1853.917	-2.041	1.6543	0.015137	-188.7141	-416.337	1402.168	-0.88818	0.77979	0.56201	NaN	NaN	NaN	NaN	NaN	NaN
1.104	2.166	32.899	69.6204	0.01123	0.11475	0.043945	-61.1775	-123.081	1884.0306	-2.0371	1.6699	0.0024414	-145.389	-515.45	1493.287	-0.92822	0.78564	0.56836	NaN	NaN	NaN	NaN	NaN	NaN
1.106	-1.417	36.992	51.19443	0.021484	0.10645	0.045899	-26.6085	-141.981	1934.964	-2.0332	1.6738	-0.0048828	-137.64985	-500.01	1527.193	-0.9917	0.83056	0.57104	NaN	NaN	NaN	NaN	NaN	NaN
1.108	-14.27	28.3684	41.295	0.02832	0.10254	0.046387	-97.129	-140.938	1965.274	-2.0112	1.6782	-0.016113	-101.8241	-497.95	1590.456	-1.0742	0.90234	0.56885	NaN	NaN	NaN	NaN	NaN	NaN
1.11	8.482	16.7901	59.2514	0.044922	0.094238	0.041992	-90.671	-164.366	1978.958	-1.9997	1.6702	-0.020264	-84.046	-407.235	1654.103	-1.2031	1.0391	0.59229	NaN	NaN	NaN	NaN	NaN	NaN
1.112	-7.564	11.516	47.3313	0.052246	0.089844	0.041016	-63.813	-166.076	1965.153	-1.9844	1.666	-0.022949	-76.402	-390.992	1770.4884	-1.2715	1.125	0.61768	NaN	NaN	NaN	NaN	NaN	NaN
1.114	-20.452	11.174	38.7815	0.068359	0.080566	0.039063	-79.09	-156.317	1932.366	-1.9507	1.6392	-0.03125	-68.548	-283.619	1835.3919	-1.4258	1.2832	0.65479	NaN	NaN	NaN	NaN	NaN	NaN
1.116	-13.524	23.5678	34.2619	0.075684	0.067383	0.02832	-21.8432	-144.0321	1909.112	-1.937	1.6274	-0.038086	-61.481	-237.7098	1932.931	-1.5308	1.377	0.68579	NaN	NaN	NaN	NaN	NaN	NaN
1.118	-22.697	29.4053	29.957	0.083008	0.061523	0.028809	-2.318	-89.769	1874.9347	-1.9121	1.5996	-0.041992	-102.574	-139.221	1982.348	-1.6147	1.4419	0.70508	NaN	NaN	NaN	NaN	NaN	NaN
1.12	-18.139	31.1202	37.8162	0.097168	0.053223	0.026855	3.6868	-62.8024	1856.65263	-1.8923	1.5754	-0.041748	-141.121	-116.955	2003.603	-1.7046	1.4907	0.72168	NaN	NaN	NaN	NaN	NaN	NaN
1.122	-44.636	21.8167	33.1999	0.10254	0.047363	0.022949	42.303	-58.7897	1852.2392	-1.8745	1.5474	-0.046875	-108.89724	-40.128	1958.2841	-1.7476	1.5063	0.72363	NaN	NaN	NaN	NaN	NaN	NaN
1.124	-51.9337	20.1904	44.9323	0.10303	0.037598	0.024414	39.796	-35.846	1850.906	-1.8574	1.5059	-0.039551	-73.5703	-63.438	1975.793	-1.8022	1.5454	0.72461	NaN	NaN	NaN	NaN	NaN	NaN
1.126	-45.3127	10.7027	44.8847	0.10523	0.03418	0.022461	78.747	-53.817	1829.284	-1.8477	1.4824	-0.037109	-35.952	-46.236	1971.929	-1.8357	1.5803	0.72242	NaN	NaN	NaN	NaN	NaN	NaN
1.128	-53.5714	8.1371	24.4395	0.10596	0.027344	0.03125	107.24	-40.2935	1832.5878	-1.8413	1.4536	-0.024414	12.047	-130.012	2002.23	-1.8628	1.6216	0.7168	NaN	NaN	NaN	NaN	NaN	NaN
1.13	-51.7657	1.055876	25.1479	0.10547	0.026367	0.030762	75.51	-15.9596	1813.3377	-1.8365	1.4283	-0.017823	-0.0330000000000013	-146.504	2035.029	-1.8984	1.6729	0.71924	NaN	NaN	NaN	NaN	NaN	NaN
1.132	-41.9799	9.54651	6.9369	0.10645	0.022461	0.029297	92.421	-14.201	1826.3469	-1.8218	1.4067	-0.010254	-10.698	-186.634	2068.9945	-1.918	1.6973	0.71924	NaN	NaN	NaN	NaN	NaN	NaN
1.134	-20.231	21.4714	8.6	0.10205	0.020508	0.03418	78.917	2.201	1803.259	-1.8105	1.3828	-0.0014648	0.223999999999997	-160.419	2097.565	-1.9512	1.7461	0.72803	NaN	NaN	NaN	NaN	NaN	NaN
1.136	-21.425	25.534898	-1.201	0.097901	0.018799	0.039063	53.284	-24.425	1809.6089	-1.7935	1.3716	0.0014648	7.629	-206.429	2140.406	-1.977	1.7778	0.74463	NaN	NaN	NaN	NaN	NaN	NaN
1.138	-20.063	16.226	3.766	0.095703	0.013184	0.042969	111.682	-38.309	1824.1555	-1.7695	1.3477	-0.0019531	-20.343	-205.035	2165.058	-2	1.7969	0.76123	NaN	NaN	NaN	NaN	NaN	NaN
1.14	12.229	5.5965	20.7124	0.090332	0.010742	0.043457	64.389	-43.691	1803.529	-1.7397	1.3418	-0.0051269	-38.191	-218.222	2176.235	-2.0132	1.8149	0.78516	NaN	NaN	NaN	NaN	NaN	NaN
1.142	0.355	8.995	36.204	0.09082	0.0048828	0.048828	76.82	-61.63	1796.3192	-1.7026	1.3306	-0.0048828	-53.317	-144.13	2152.835	-2.0195	1.8145	0.79932	NaN	NaN	NaN	NaN	NaN	NaN
1.144	-6.171	17.7798	34.077	0.092285	0.0029297	0.05127	62.237	-47.678	1764.2501	-1.6641	1.3125	-0.0029297	-107.312	-99.664	2122.956	-2.0137	1.8047	0.81885	NaN	NaN	NaN	NaN	NaN	NaN
1.146	-1.702	18.4963	25.3309	0.093995	0.0014648	0.054199	18.4833	-43.9772	1733.343	-1.6465	1.3125	-0.0083008	-116.265	-42.96	2083.055	-2.0031	1.7903	0.82739	NaN	NaN	NaN	NaN	NaN	NaN
1.148	16.312	9.06423	18.3892	0.097168	0.0024414	0.057129	55.997	-57.644	1731.096	-1.6074	1.2988	-0.01416	-100.0197	-49.819	2033.259	-1.998	1.7754	0.83252	NaN	NaN	NaN	NaN	NaN	NaN
1.15	-12.702	14.7025	-9.3932	0.09375	0	0.058594	26.158	-17.8113	1692.2344	-1.5779	1.2864	-0.017822	-67.06	-39.184	1975.555	-1.9702	1.7505	0.83203	NaN	NaN	NaN	NaN	NaN	NaN
1.152	-9.981	15.1064	-12.3243	0.092773	-0.0014648	0.060547	6.38	19.303	1669.6468	-1.5503	1.2739	-0.018555	-44.409	-35.769	1960.206	-1.9492	1.7383	0.83838	NaN	NaN	NaN	NaN	NaN	NaN
1.154	4.423	16.9346	-8.5034	0.089844	0.0014648	0.064941	23.886	46.735	1665.836	-1.5132	1.2603	-0.020996	-52.148	-6.794	1955.731	-1.9102	1.6934	0.83838	NaN	NaN	NaN	NaN	NaN	NaN
1.156	27.19	9.295	15.181	0.088378	0.0070801	0.06543	-16.2754	101.14	1633.49	-1.498	1.2539	-0.024414	-83.775	7.6022	1936.7663	-1.8759	1.6543	0.83398	NaN	NaN	NaN	NaN	NaN	NaN
1.158	11.84	20.5119	5.7671	0.091797	0.015137	0.066895	-20.8251	91.16	1644.891	-1.4727	1.2461	-0.024902	-100.988	30.2354	1921.2144	-1.8394	1.6099	0.82617	NaN	NaN	NaN	NaN	NaN	NaN
1.16	4.371	16.0741	6.8033	0.087891	0.026855	0.072266	-34.42793	81.387	1637.933	-1.451	1.2415	-0.023681	-116.0504	37.588	1901.659	-1.8027	1.5547	0.81299	NaN	NaN	NaN	NaN	NaN	NaN
1.162	21.453	21.469	14.5029	0.085449	0.029297	0.070313	-41.083	84.513	1610.8614	-1.4409	1.2388	-0.015625	-75.472	31.9015	1913.518	-1.7827	1.5259	0.80566	NaN	NaN	NaN	NaN	NaN	NaN
1.164	10.719	23.2263	31.157	0.07666	0.042969	0.079102	-9.7371	71.199	1601.221	-1.4238	1.2266	-0.0092773	-85.689	19.6011	1912.496	-1.7534	1.4731	0.78906	NaN	NaN	NaN	NaN	NaN	NaN
1.166	-25.405	7.7833	61.6777	0.06958	0.055176	0.075439	-21.4511	104.033	1568.8657	-1.4175	1.2192	-0.0029297	-88.727	18	1939.272	-1.7309	1.437	0.771	NaN	NaN	NaN	NaN	NaN	NaN
1.168	-48.6221	-11.1687	64.137	0.056152	0.073242	0.077148	-19.3196	100.531	1545.596	-1.3999	1.2017	0	-139.834	25.1354	1918.309	-1.7104	1.4087	0.75195	NaN	NaN	NaN	NaN	NaN	NaN
1.17	-22.06	-0.8208	104.30206	0.023926	0.10938	0.081543	40.011	82.092	1543.5689	-1.3842	1.187	0.0070801	-119.046	7.3789	1899.207	-1.6934	1.377	0.73193	NaN	NaN	NaN	NaN	NaN	NaN
1.172	-28.4218	23.2115	122.7466	-0.0039063	0.12744	0.085938	18.7836	104.564	1526.1181	-1.3672	1.1729	0.0092773	-98.8684	-19.5941	1891.618	-1.6816	1.3633	0.71777	NaN	NaN	NaN	NaN	NaN	NaN
1.174	-71.9557	31.9727	164.8048	-0.065918	0.17529	0.1001	29.8387	59.535	1527.929	-1.3413	1.1548	0.01709	-69.974	-56.54	1875.766	-1.666	1.3301	0.70264	NaN	NaN	NaN	NaN	NaN	NaN
1.176	-62.312	34.4393	201.735	-0.12158	0.2085	0.10913	38.6618	86.2083	1504.823	-1.3257	1.147	0.020508	-25.589	-30.253	1866.378	-1.6578	1.311	0.68652	NaN	NaN	NaN	NaN	NaN	NaN
1.178	-51.8542	40.5263	256.069	-0.1792	0.24854	0.11719	15.5357	132.252	1459.6462	-1.2983	1.1255	0.020996	-31.14	14.665	1837.411	-1.6445	1.2852	0.67432	NaN	NaN	NaN	NaN	NaN	NaN
1.18	-42.2017	69.569	317.9588	-0.24951	0.30322	0.13232	50.9876	138.49	1442.707	-1.269	1.0962	0.026855	-51.015	114.55	1780.6032	-1.6265	1.2603	0.65918	NaN	NaN	NaN	NaN	NaN	NaN
1.182	-17.7541	88.046	419.901	-0.29102	0.32813	0.14063	13.5762	178.069	1399.1938	-1.25	1.0859	0.033691	-38.431	167.357	1750.43264	-1.6062	1.2366	0.65162	NaN	NaN	NaN	NaN	NaN	NaN
1.184	7.148	87.012	492.033	-0.38184	0.39063	0.15332	17.9609	183.226	1365.8118	-1.2065	1.0591	0.03418	-51.419	223.842	1710.965	-1.5879	1.2207	0.63135	NaN	NaN	NaN	NaN	NaN	NaN
1.186	10.8439	88.458	530.1495	-0.4917	0.45752	0.17432	40.7478	184.026	1346.8054	-1.1785	1.0373	0.038818	-14.69	220.435	1689.813	-1.5664	1.1855	0.61426	NaN	NaN	NaN	NaN	NaN	NaN
1.188	-8.4724	102.5741	602.04	-0.56006	0.4917	0.18164	14.964	234.916	1306.162	-1.1519	1.0083	0.043945	-5.53100000000001	244.696	1686.57	-1.5576	1.1699	0.604	NaN	NaN	NaN	NaN	NaN	NaN
1.19	25.737	103.2756	675.473	-0.70313	0.56445	0.21143	20.521	219.6932	1287.4046	-1.1147	0.97705	0.049316	-15.252	233.035	1680.7252	-1.5317	1.1411	0.58203	NaN	NaN	NaN	NaN	NaN	NaN
1.192	30.8546	96.7752	772.928	-0.82544	0.62427	0.23096	14.442	238.49	1261.111	-1.0972	0.96045	0.046875	-40.926	268.893	1645.178	-1.5107	1.1172	0.56787	NaN	NaN	NaN	NaN	NaN	NaN
1.194	62.924	88.064	847.1894	-0.95117	0.68555	0.26025	16.493	232.155	1209.218	-1.0488	0.93164	0.051758	-42.3196	253.394	1607.333	-1.4883	1.0938	0.5542	NaN	NaN	NaN	NaN	NaN	NaN
1.196	51.89216	74.464	882.8159	-1.1094	0.76367	0.29932	16.306	176.8316	1197.8367	-1.0131	0.8999	0.061767	-16.251	261.5033	1526.851	-1.4512	1.0654	0.53125	NaN	NaN	NaN	NaN	NaN	NaN
1.198	47.831	53.915	957.2902	-1.1772	0.80322	0.31982	-31.84	198.3601	1167.38844	-0.98779	0.87549	0.065918	-10.109	210.494	1505.148	-1.4336	1.0527	0.51416	NaN	NaN	NaN	NaN	NaN	NaN
1.2	63.0699	44.2516	1024.02067	-1.2949	0.86914	0.35693	-68.3188	182.163	1144.559	-0.9541	0.83936	0.070801	36.081	199.649	1477.492	-1.3945	1.0176	0.49463	NaN	NaN	NaN	NaN	NaN	NaN
1.202	89.671	23.555	1066.7688	-1.3499	0.90894	0.37842	-60.8409	176.635	1139.511	-0.9292	0.81494	0.075684	12.42	175.991	1467.763	-1.3601	0.99244	0.4768	NaN	NaN	NaN	NaN	NaN	NaN
1.204	89.319	15.129	1087.299	-1.3906	0.94922	0.39307	-119.591	215.1037	1078.5567	-0.88477	0.77344	0.087402	-16.002	230.043	1442.194	-1.3262	0.96582	0.45557	NaN	NaN	NaN	NaN	NaN	NaN
1.206	63.772	-22.4266	1090.793	-1.3906	0.98047	0.40869	-91.9916	154.484	1054.8265	-0.84424	0.74415	0.0896	-0.0499999999999998	242.498	1404.652	-1.272	0.92822	0.41992	NaN	NaN	NaN	NaN	NaN	NaN
1.208	69.036	-31.993	1106.144	-1.3765	0.99854	0.41406	-82.62675	183.4387	1026.557	-0.80664	0.71484	0.098145	-12.5231	263.3153	1345.324	-1.2437	0.90967	0.41016	NaN	NaN	NaN	NaN	NaN	NaN
1.21	64.409	-33.208	1101.1636	-1.3164	1.0352	0.42432	-102.519	185.996	977.461	-0.75146	0.67432	0.097656	-15.6555	264.736	1310.732	-1.1973	0.875	0.38037	NaN	NaN	NaN	NaN	NaN	NaN
1.212	44.7872	-30.6549	1087.96	-1.2397	1.0552	0.41455	-85.0172	150.746	954.5	-0.72998	0.66064	0.1084	4.482	314.356	1250.0794	-1.1641	0.84472	0.354	NaN	NaN	NaN	NaN	NaN	NaN
1.214	45.031	-25.614	1061.972	-1.1353	1.0552	0.39941	-93.1	206.8014	887.4343	-0.6792	0.61182	0.10693	16.704	343.821	1225.5801	-1.1333	0.81494	0.33154	NaN	NaN	NaN	NaN	NaN	NaN
1.216	25.6207	-32.694	1050.622	-0.94775	1.0083	0.3457	-92.771	191.237	839.0472	-0.63745	0.5813	0.10645	1.577	393.666	1167.1723	-1.0952	0.78076	0.31006	NaN	NaN	NaN	NaN	NaN	NaN
1.218	6.0001	-20.7862	1021.6226	-0.84668	0.9668	0.3208	-42.332	187.81	802.9849	-0.59326	0.54932	0.11035	-14.93	350.43	1117.145	-1.0781	0.75977	0.2959	NaN	NaN	NaN	NaN	NaN	NaN
1.22	-24.4602	-29.6722	1014.336	-0.65381	0.86768	0.27539	-65.2119	227.9595	735.362	-0.53662	0.49854	0.10938	16.4765	327.4366	1038.5587	-1.0405	0.73486	0.27051	NaN	NaN	NaN	NaN	NaN	NaN
1.222	-17.546	-33.856	1008.212	-0.54883	0.80762	0.2483	-46.907	188.6713	690.4713	-0.51221	0.47705	0.11377	19.4858	275.4027	988.378	-1.0073	0.71143	0.25196	NaN	NaN	NaN	NaN	NaN	NaN
1.224	-26.387	-38.099	1022.1755	-0.47803	0.76807	0.23633	-49.916	214.953	669.9984	-0.46338	0.43018	0.11328	40.282	299.4323	917.272	-0.97266	0.68945	0.23633	NaN	NaN	NaN	NaN	NaN	NaN
1.226	-31.162	-29.972	1031.1961	-0.4458	0.75635	0.24902	-63.6551	214.682	624.9574	-0.43115	0.39575	0.11499	36.02497	285.743	886.947	-0.91211	0.66016	0.20996	NaN	NaN	NaN	NaN	NaN	NaN
1.228	-43.9818	-31.137	1029.472	-0.44775	0.76807	0.2627	-38.084	154.723	591.349	-0.39746	0.36523	0.11768	22.9067	305.1865	827.21394	-0.87695	0.64941	0.19873	NaN	NaN	NaN	NaN	NaN	NaN
1.23	-66.665	-38.165	1062.954	-0.49316	0.80322	0.31201	-32.966	183.599	541.047	-0.34912	0.31787	0.12646	-19.779	280.199	811.545	-0.81592	0.61816	0.16455	NaN	NaN	NaN	NaN	NaN	NaN
1.232	-75.16597	-49.725	1091.0895	-0.54834	0.84131	0.35059	-13.57	144.3957	483.381	-0.32568	0.29932	0.125	-9.779903	285.236	758.9137	-0.76343	0.59545	0.14551	NaN	NaN	NaN	NaN	NaN	NaN
1.234	-91.1939	-67.388	1104.8695	-0.61523	0.88477	0.396	13.556	120.424	479.33	-0.27783	0.26123	0.12793	25.6363	252.379	743.865	-0.71387	0.55762	0.12061	NaN	NaN	NaN	NaN	NaN	NaN
1.236	-92.0229	-96.283102	1107.0117	-0.70264	0.94775	0.44629	-2.133	163.9317	443.457	-0.24585	0.23486	0.12842	53.5223	267.115	716.496	-0.65381	0.51611	0.092773	NaN	NaN	NaN	NaN	NaN	NaN
1.238	-114.248	-131.72	1124.279	-0.74658	0.979	0.46436	14.379	106.388	428.7233	-0.20898	0.21094	0.125	36.849	242.5764	681.899	-0.62305	0.49512	0.07959	NaN	NaN	NaN	NaN	NaN	NaN
1.24	-103.5346	-158.452	1148.857	-0.81641	1.0273	0.4873	21.219	118.62561	398.0896	-0.16016	0.17773	0.11377	6.26	247.828	595.952	-0.56006	0.45557	0.048828	NaN	NaN	NaN	NaN	NaN	NaN
1.242	-97.7597	-161.597	1191.2758	-0.86475	1.0611	0.49756	8.801	107.132	355.0882	-0.13574	0.16309	0.104	-4.602	208.9454	539.298	-0.51514	0.42578	0.030518	NaN	NaN	NaN	NaN	NaN	NaN
1.244	-87.5481	-157.236	1206.617	-0.90576	1.0903	0.50488	-0.440000000000005	51.659	335.89	-0.088867	0.12793	0.099609	14.647	198.487	456.415	-0.47119	0.396	0.010742	NaN	NaN	NaN	NaN	NaN	NaN
1.246	-73.8879	-147.145	1231.629	-0.96094	1.1328	0.51123	-33.115	119.2826	284.496	-0.054932	0.10571	0.093506	1.46	154.1335	425.3561	-0.41455	0.36035	-0.0068359	NaN	NaN	NaN	NaN	NaN	NaN
1.248	-41.519	-144.583	1268.697	-0.98828	1.1523	0.51318	-39.145	107.80638	262.312	-0.023438	0.085938	0.082031	8.045	178.102	361.396	-0.39209	0.34326	-0.013672	NaN	NaN	NaN	NaN	NaN	NaN
1.25	-62.927	-137.5923	1308.7158	-1.0386	1.1997	0.51172	-32.379	108.666	251.2788	0.016602	0.053711	0.07959	-13.112	176.758	320.234	-0.34375	0.30713	-0.03418	NaN	NaN	NaN	NaN	NaN	NaN
1.252	-67.678	-102.274	1360.6355	-1.0703	1.2353	0.51123	-41.0746	153.053	213.577	0.03418	0.039063	0.072754	-12.538	220.8339	255.421	-0.3081	0.27978	-0.044678	NaN	NaN	NaN	NaN	NaN	NaN
1.254	-49.411	-77.877	1424.328	-1.103	1.272	0.50781	-30.5389	92.488	209.864	0.068848	0.015625	0.072754	-39.933	178.441	244.313	-0.27734	0.25586	-0.056152	NaN	NaN	NaN	NaN	NaN	NaN
1.256	-13.286	-75.567	1444.951	-1.1465	1.3203	0.50879	-56.241	121.262	188.981	0.09253	-0.00073245	0.068359	-27.437	180.0704	233.8792	-0.23877	0.2207	-0.064941	NaN	NaN	NaN	NaN	NaN	NaN
1.258	-48.828	-76.862	1456.4107	-1.1733	1.3423	0.51172	-63.07126	134.574	158.97	0.11475	-0.012695	0.069824	-25.529	142.735	243.404	-0.22412	0.20166	-0.075195	NaN	NaN	NaN	NaN	NaN	NaN
1.26	-66.146	-78.108	1469.483	-1.2207	1.3965	0.51611	-54.651	89.4231	160.0415	0.14453	-0.02832	0.065918	0.331	162.92192	198.9386	-0.19824	0.16357	-0.081543	NaN	NaN	NaN	NaN	NaN	NaN
1.262	-39.606	-70.963	1502.7941	-1.2547	1.4329	0.51807	-79.9971	133.162	141.0042	0.15869	-0.037109	0.067383	-5.576	132.11	176.651	-0.18847	0.13525	-0.084473	NaN	NaN	NaN	NaN	NaN	NaN
1.264	-34.227	-73.8691	1528.9427	-1.2886	1.4634	0.52051	-53.0947	81.8855	110.7168	0.19336	-0.050781	0.056641	-26.0182	156.686	148.0594	-0.18506	0.10986	-0.084961	NaN	NaN	NaN	NaN	NaN	NaN
1.266	-40.357	-80.1634	1565.719	-1.3359	1.502	0.5249	-55.2996	49.045	127.2071	0.21387	-0.055664	0.046875	-58.3957	109.913	122.0924	-0.1875	0.08252	-0.083008	NaN	NaN	NaN	NaN	NaN	NaN
1.268	-34.185	-83.8518	1586.258	-1.355	1.52	0.52295	-72.009	98.5282	108.1399	0.23438	-0.063477	0.040039	-15.45	107.773	77.7986	-0.18896	0.067383	-0.080566	NaN	NaN	NaN	NaN	NaN	NaN
1.27	-32.174	-89.0773	1630.556	-1.396	1.5493	0.52832	-60.0768	30.698	110.983	0.25244	-0.068359	0.032227	-34.627	49.8021	47.503	-0.19434	0.041992	-0.076172	NaN	NaN	NaN	NaN	NaN	NaN
1.272	-46.398	-85.5752	1648.558	-1.4292	1.5606	0.52979	-53.0236	53.084	120.93	0.25684	-0.07373	0.027344	-34.502	52.648	53.149	-0.19898	0.022705	-0.069336	NaN	NaN	NaN	NaN	NaN	NaN
1.274	-67.471	-64.667	1655.142	-1.4624	1.5698	0.53516	-53.2323	47.8079	82.426	0.25586	-0.08252	0.025879	-39.551	13.66322	45.151	-0.20264	0.0043945	-0.062988	NaN	NaN	NaN	NaN	NaN	NaN
1.276	-73.593	-55.66	1675.605	-1.4995	1.5786	0.54492	-36.52	-9.37459	69.1128	0.25196	-0.089355	0.025635	-44.316	47.741	58.488	-0.20459	-0.014648	-0.050293	NaN	NaN	NaN	NaN	NaN	NaN
1.278	-83.4057	-49.93	1666.2012	-1.5132	1.5747	0.54688	-13.277	50.5114	58.5715	0.2373	-0.09082	0.027832	-43.091	37.382	38.707	-0.20264	-0.024902	-0.047363	NaN	NaN	NaN	NaN	NaN	NaN
1.28	-85.9291	-39.1154	1673.422	-1.5293	1.5664	0.55176	-1.227	10.73	37.8701	0.21338	-0.086426	0.032227	-28.285	52.93	42.281	-0.19678	-0.046875	-0.04541	NaN	NaN	NaN	NaN	NaN	NaN
1.282	-109.811	-36.019	1683.676	-1.5371	1.56	0.55517	1.984	9.859	44.421	0.19775	-0.081543	0.032227	-46.227	16.1679	27.6329	-0.18774	-0.057373	-0.05127	NaN	NaN	NaN	NaN	NaN	NaN
1.284	-99.2116	-46.349	1698.2879	-1.5352	1.5508	0.55518	-6.5692	74.0148	31.4324	0.16992	-0.068359	0.042969	-38.596	48.179	37.1429	-0.18164	-0.072754	-0.047852	NaN	NaN	NaN	NaN	NaN	NaN
1.286	-79.319	-54.1091	1706.134	-1.5366	1.5376	0.55664	23.025	22.4026	14.3274	0.14648	-0.054932	0.049561	-19.233	35.05	17.1945	-0.17236	-0.10205	-0.04834	NaN	NaN	NaN	NaN	NaN	NaN
1.288	-101.23845	-52.4045	1695.5398	-1.5366	1.5337	0.5625	28.149	41.984	22.4098	0.12207	-0.038086	0.05957	-6.252	75.508	24.7893	-0.17041	-0.11084	-0.054688	NaN	NaN	NaN	NaN	NaN	NaN
1.29	-96.7141	-41.4208	1661.2659	-1.5449	1.5215	0.57471	6.348	56.071	19.2251	0.096191	-0.021973	0.064453	-26.994	22.3831	12.8186	-0.16699	-0.13086	-0.059082	NaN	NaN	NaN	NaN	NaN	NaN
1.292	-92.1882	-32.7059	1667.952	-1.5495	1.5071	0.57592	15.699	7.2663	18.2519	0.07959	-0.012207	0.06543	-27.292	20.1283	13.9459	-0.16846	-0.14429	-0.061767	NaN	NaN	NaN	NaN	NaN	NaN
1.294	-68.806	-41.126	1697.792	-1.5522	1.4927	0.58984	17.629	58.592	2.631	0.053223	-0.0048828	0.07373	-45.713	-17.2093	-10.1561	-0.17627	-0.15527	-0.061523	NaN	NaN	NaN	NaN	NaN	NaN
1.296	-80.468	-43.331	1721.7784	-1.5713	1.4707	0.59912	9.909	9.585	5.962	0.031494	0.0026856	0.079346	-20.575	15.7379	9.9484	-0.18896	-0.16602	-0.055176	NaN	NaN	NaN	NaN	NaN	NaN
1.298	-57.804	-32.79	1744.6322	-1.5781	1.4629	0.60986	-18.686	-17.4981	13.1188	0.014648	0.01123	0.084473	-6.048	0.5863	15.1764	-0.19775	-0.17139	-0.056641	NaN	NaN	NaN	NaN	NaN	NaN
1.3	-52.578	-23.564	1746.542549	-1.5952	1.4497	0.62109	-20.374	24.8481	15.2532	-0.00048828	0.013184	0.083984	-33.219	35.3995	49.763	-0.22607	-0.16748	-0.045898	NaN	NaN	NaN	NaN	NaN	NaN
1.302	-41.403	-22.945	1752.4204	-1.5996	1.4394	0.63135	-12.457	-38.058	15.5364	-0.01123	0.02002	0.087402	-31.74	14.238	12.8109	-0.24097	-0.16822	-0.040771	NaN	NaN	NaN	NaN	NaN	NaN
1.304	-52.889	-24.2175	1745.048	-1.5972	1.4302	0.6377	-35.479	2.5813	17.4295	-0.0092773	0.023926	0.083008	-48.9491	12.318	10.41	-0.24854	-0.16357	-0.037109	NaN	NaN	NaN	NaN	NaN	NaN
1.306	-58.424	-20.513	1717.035	-1.5835	1.4126	0.63477	-44.4092	24.4743	6.72496	-0.012695	0.026612	0.083496	-29.826	9.207	12.6028	-0.25049	-0.16162	-0.026367	NaN	NaN	NaN	NaN	NaN	NaN
1.308	-32.936	-21.509	1721.195	-1.5776	1.3999	0.63672	-42.164	-36.552	17.2382	-0.010254	0.034668	0.080566	-39.371	35.4544	28.664	-0.24512	-0.1543	-0.032227	NaN	NaN	NaN	NaN	NaN	NaN
1.31	-23.484	-28.487	1699.47852	-1.5581	1.3804	0.62891	-48.8468	34.1174	16.63	-0.0058594	0.037109	0.076172	-20.742	37.539	25.5095	-0.22119	-0.15283	-0.027344	NaN	NaN	NaN	NaN	NaN	NaN
1.312	-42.465	-24.3247	1677.1066	-1.5434	1.3618	0.62402	-53.1027	-0.792000000000002	5.084	-0.0019531	0.032715	0.077637	-44.274	57.17	24.9649	-0.19433	-0.15528	-0.029785	NaN	NaN	NaN	NaN	NaN	NaN
1.314	-46.786	-23.538	1654.901	-1.5273	1.3477	0.61377	-54.0553	-10.0452	16.8401	0.0087891	0.039551	0.071289	-51.7519	27.2583	-9.8814	-0.16699	-0.15869	-0.032227	NaN	NaN	NaN	NaN	NaN	NaN
1.316	-39.494	-12.1327	1638.02	-1.5039	1.3223	0.61035	-68.371	55.8019	7.215	0.016113	0.035645	0.067383	-40.126	30.044	3.825	-0.1333	-0.16064	-0.043945	NaN	NaN	NaN	NaN	NaN	NaN
1.318	-35.949	5.732	1633.8662	-1.4961	1.3086	0.60596	-71.4001	15.3744	-1.3562	0.02002	0.03418	0.067383	-42.291	36.169	0.0943000000000005	-0.11182	-0.16211	-0.046875	NaN	NaN	NaN	NaN	NaN	NaN
1.32	-42.118	12.867	1627.8069	-1.4692	1.2876	0.59766	-71.04702	53.739	4.58803	0.02832	0.033203	0.064941	-44.468	49.788	11.968	-0.071289	-0.16211	-0.060059	NaN	NaN	NaN	NaN	NaN	NaN
1.322	-38.46	9.2144	1623.113	-1.4487	1.27	0.58936	-72.0935	68.584	-11.9731908	0.037598	0.031982	0.065673	-27.568	53.6503	1.557	-0.029785	-0.15869	-0.071777	NaN	NaN	NaN	NaN	NaN	NaN
1.324	-56.333	16.4705	1629.126	-1.4331	1.2622	0.58594	-49.0347	5.7853	0.896399999999999	0.048828	0.030273	0.064941	-42.709	36.752	11.728	-0.012207	-0.15332	-0.07959	NaN	NaN	NaN	NaN	NaN	NaN
1.326	-69.418	21.0165	1609.353	-1.4077	1.2407	0.5752	-42.9329	55.668	2.559	0.068359	0.026367	0.063965	-56.3	27.6275	18.983	0.030273	-0.13916	-0.084473	NaN	NaN	NaN	NaN	NaN	NaN
1.328	-77.54276	20.2959	1582.8004	-1.3858	1.2207	0.57324	-43.0697	11.4399	-5.018	0.077637	0.027832	0.064453	-57.3647	12.1036	39.424	0.066406	-0.12769	-0.092529	NaN	NaN	NaN	NaN	NaN	NaN
1.33	-88.9144	8.0041	1560.703	-1.3687	1.2036	0.56836	-30.096	1.6854	6.1542	0.098145	0.019531	0.060547	-14.94	13.695	41.7058	0.095215	-0.11621	-0.097656	NaN	NaN	NaN	NaN	NaN	NaN
1.332	-107.2199	-8.0396	1504.242	-1.3481	1.1782	0.5625	-13.574	43.6963	5.42	0.11597	0.01538	0.060303	-47.824	17.84704	45.021	0.13867	-0.10156	-0.104	NaN	NaN	NaN	NaN	NaN	NaN
1.334	-92.6948	2.359	1474.668	-1.334	1.1641	0.55908	-8.841	-10.98531	11.6641	0.13184	0.011719	0.060059	-17.209	36.9086	25.6853	0.15918	-0.09082	-0.10498	NaN	NaN	NaN	NaN	NaN	NaN
1.336	-88.2746	6.079	1443.726	-1.3164	1.1406	0.55518	3.815	23.5657	22.2111	0.15234	0.0014648	0.058105	-50.619	21.1485	21.192	0.20215	-0.074707	-0.12695	NaN	NaN	NaN	NaN	NaN	NaN
1.338	-82.0043	10.287	1436.555	-1.2976	1.1253	0.55005	11.535	48.145	14.9185	0.16162	0	0.057617	-26.678	32.4131	3.838	0.23144	-0.071045	-0.13354	NaN	NaN	NaN	NaN	NaN	NaN
1.34	-63.499	3.902	1455.8979	-1.2734	1.1035	0.54248	17.951	-2.2716	22.9329	0.17236	-0.01123	0.060547	-25.445	3.1589	22.8248	0.25781	-0.064941	-0.13965	NaN	NaN	NaN	NaN	NaN	NaN
1.342	-67.2194	3.68	1428.318	-1.2471	1.0859	0.53125	9.981	53.983	33.8679	0.18457	-0.017579	0.058349	-20.52	35.0928	17.0304	0.27881	-0.062988	-0.14502	NaN	NaN	NaN	NaN	NaN	NaN
1.344	-54.439	24.6268	1393.16161	-1.2261	1.0688	0.52344	-4.222	12.9224	27.4504	0.18994	-0.025391	0.063477	-37.785	20.1695	37.5385	0.27881	-0.059082	-0.14404	NaN	NaN	NaN	NaN	NaN	NaN
1.346	-52.195	51.0551	1375.9075	-1.1924	1.0352	0.50537	1.923	3.50807	19.9146	0.18945	-0.031738	0.064941	-19.972	48.885	24.3738	0.27686	-0.062012	-0.14014	NaN	NaN	NaN	NaN	NaN	NaN
1.348	-31.273	70.937	1351.2668	-1.1596	1.0166	0.49707	12.378	55.759	6.4797	0.18799	-0.035645	0.071777	-34.214	26.69797	40.035	0.26806	-0.061524	-0.1355	NaN	NaN	NaN	NaN	NaN	NaN
1.35	-57.456	71.906	1324.2974	-1.1284	0.99365	0.48389	-0.601000000000003	15.7759	-2.6961	0.18555	-0.037598	0.075684	-27.029	49.8605	17.753	0.25635	-0.062012	-0.12305	NaN	NaN	NaN	NaN	NaN	NaN
1.352	-51.852	60.049	1292.272	-1.0781	0.96094	0.46191	-16.608	58.657	14.1637	0.17725	-0.039306	0.081543	-13.001	8.2667	9.3389	0.2334	-0.069336	-0.11084	NaN	NaN	NaN	NaN	NaN	NaN
1.354	-40.863	63.117	1297.114	-1.062	0.94385	0.45117	-5.439	75.948	17.3929	0.16455	-0.035645	0.088867	-30.485	31.058	11.6772	0.21729	-0.07666	-0.10596	NaN	NaN	NaN	NaN	NaN	NaN
1.356	-22.664	63.388	1286.492	-1.0269	0.91846	0.42969	-15.993	19.4422	21.6498	0.146	-0.028809	0.098145	-39.554	-3.0397	2.373	0.19043	-0.091797	-0.09082	NaN	NaN	NaN	NaN	NaN	NaN
1.358	-7.862	67.02993	1285.399	-1.0049	0.90039	0.41259	-29.668	52.5828	31.1574	0.13428	-0.025879	0.10059	-10.516	31.3495	-5.963	0.16114	-0.10547	-0.080323	NaN	NaN	NaN	NaN	NaN	NaN
1.36	-15.828	81.897	1242.97148	-0.98584	0.88721	0.396	-38.9181	5.417	26.5211	0.11768	-0.016602	0.1123	-36.471	4.1215	13.8565	0.13623	-0.11377	-0.065918	NaN	NaN	NaN	NaN	NaN	NaN
1.362	-3.047	97.799	1233.4082	-0.96436	0.87158	0.38232	-47.9088	-14.0383	41.588	0.10107	-0.0053711	0.12573	-26.098	35.926	5.0996	0.1084	-0.12793	-0.062012	NaN	NaN	NaN	NaN	NaN	NaN
1.364	23.981	115.4301	1212.5967	-0.95654	0.86182	0.37061	-58.0891	28.7426	29.1818	0.091797	0.0078125	0.13184	-39.681	-9.428	14.0227	0.094238	-0.13135	-0.057617	NaN	NaN	NaN	NaN	NaN	NaN
1.366	6.3	116.7471	1209.2039	-0.94385	0.83643	0.36865	-76.377	-17.0203	24.1499	0.07666	0.022949	0.13818	-49.379	28.9705	17.234	0.077148	-0.12256	-0.055664	NaN	NaN	NaN	NaN	NaN	NaN
1.368	5.402	122.1864	1206.316	-0.92554	0.82983	0.35498	-56.3986	6.095	37.8155	0.070313	0.030273	0.14551	-72.2191	4.105	9.59391	0.067139	-0.11719	-0.055664	NaN	NaN	NaN	NaN	NaN	NaN
1.37	14.196	135.544	1194.992	-0.91211	0.81641	0.34814	-64.893	21.6307	4.455	0.055664	0.043457	0.15674	-37.321	52.5968	32.8712	0.063477	-0.10303	-0.052246	NaN	NaN	NaN	NaN	NaN	NaN
1.372	-3.414	139.765	1173.6381	-0.89258	0.79883	0.33301	-80.3214	-24.1697	25.903	0.046875	0.050293	0.15967	-37.486	24.281	30.1574	0.050781	-0.080078	-0.050293	NaN	NaN	NaN	NaN	NaN	NaN
1.374	-38.7872	135.785	1126.844	-0.88184	0.78906	0.32861	-65.2647	28.8753	31.97226	0.036621	0.053711	0.17041	-41.475	44.7848	8.801	0.047363	-0.068359	-0.049805	NaN	NaN	NaN	NaN	NaN	NaN
1.376	-37.0153	125.8089	1106.693	-0.85742	0.77344	0.31689	-46.3462	15.9406	21.8492	0.030273	0.061523	0.17334	-34.234	8.903	5.881	0.029785	-0.04541	-0.048828	NaN	NaN	NaN	NaN	NaN	NaN
1.378	-28.1523	130.723	1080.2963	-0.84424	0.76123	0.30957	-30.046	-25.177	70.07	0.023438	0.064941	0.16895	-43.932	39.2338	-0.846	0.022705	-0.02124	-0.045654	NaN	NaN	NaN	NaN	NaN	NaN
1.38	-38.9037	148.288	1061.097	-0.83105	0.75	0.30176	-44.6582	-20.53138	65.439	0.0014648	0.076172	0.16602	-48.84	33.8106	13.241	0.020508	-0.0058594	-0.046875	NaN	NaN	NaN	NaN	NaN	NaN
1.382	-27.4138	141.5972	1041.2607	-0.81836	0.73633	0.2915	-42.125	-56.9423	72.588	-0.032226	0.10327	0.16651	-13.175	72.93	29.3127	0.021484	0.024902	-0.04834	NaN	NaN	NaN	NaN	NaN	NaN
1.384	-16.2716	142.7054	1029.3894	-0.81543	0.729	0.28418	0.278000000000006	-31.1757	112.986	-0.068848	0.12891	0.17188	-35.699	29.0211	18.4212	0.027344	0.034668	-0.046875	NaN	NaN	NaN	NaN	NaN	NaN
1.386	-13.497	134.492	998.0859	-0.80029	0.71387	0.27441	-26.412	-24.601	134.661	-0.1333	0.16113	0.18652	-47.643	40.722	23.7505	0.044922	0.061035	-0.061523	NaN	NaN	NaN	NaN	NaN	NaN
1.388	-16.2077	139.871	977.049	-0.78833	0.70337	0.26977	-46.338	-70.9146	189.879	-0.17334	0.18213	0.1958	-52.775	2.634	15.9431	0.058594	0.080323	-0.064209	NaN	NaN	NaN	NaN	NaN	NaN
1.39	-12.537	147.148	955.1099	-0.77588	0.68994	0.26709	-16.756	-23.82	249.9	-0.24951	0.22852	0.2041	-42.385	37.885	25.5624	0.071289	0.099121	-0.069824	NaN	NaN	NaN	NaN	NaN	NaN
1.392	-10.5358	153.578	941.6251	-0.74805	0.67188	0.25342	-7.051	-32.0297	322.46	-0.3147	0.26709	0.20288	-18.828	30.4669	17.228	0.076172	0.1167	-0.079102	NaN	NaN	NaN	NaN	NaN	NaN
1.394	8.86	154.2327	930.4089	-0.7334	0.66211	0.24854	16.717	-18.2826	459.8878	-0.38135	0.31787	0.20752	-24.925	46.35	36.389	0.076172	0.12402	-0.07959	NaN	NaN	NaN	NaN	NaN	NaN
1.396	-24.1075	135.542	897.895	-0.69922	0.63867	0.23682	38.2432	35.19	573.987	-0.48682	0.38916	0.20605	-22.272	22.8207	25.5698	0.071777	0.14404	-0.085938	NaN	NaN	NaN	NaN	NaN	NaN
1.398	-33.6506	143.07	864.292	-0.6709	0.62085	0.22535	53.823	7.094	675.9561	-0.54688	0.43555	0.21045	-17.317	24.68891	39.5579	0.062011	0.15796	-0.088379	NaN	NaN	NaN	NaN	NaN	NaN
1.4	-7.539	161.328	854.262	-0.63965	0.60547	0.2124	81.737	50.077	801.491	-0.70654	0.52783	0.22266	-10.815	-11.2805	52.228	0.055176	0.17725	-0.088379	NaN	NaN	NaN	NaN	NaN	NaN
1.402	19.02	164.752	801.5646	-0.60889	0.57471	0.19238	81.241	86.8969	922.515	-0.85327	0.60328	0.23536	-32.707	-29.034	84.762	0.050781	0.2002	-0.09668	NaN	NaN	NaN	NaN	NaN	NaN
1.404	-4.406	149.3447	778.659	-0.59277	0.5625	0.18848	83.141	57.3042	1082.4049	-1.0269	0.68994	0.26123	-25.96	-46.2807	99.742	0.04834	0.21289	-0.098633	NaN	NaN	NaN	NaN	NaN	NaN
1.406	5.391	135	741.368	-0.55859	0.53711	0.17578	73.569	87.868	1198.4452	-1.2773	0.82617	0.31982	-32.609	-45.872	122.6304	0.044922	0.24121	-0.11133	NaN	NaN	NaN	NaN	NaN	NaN
1.408	28.99462	130.827	723.258	-0.53418	0.51758	0.1604	41.898	42.2563	1224.37486	-1.4102	0.9043	0.35791	-13.147	-80.5447	155.249	0.04834	0.26391	-0.12085	NaN	NaN	NaN	NaN	NaN	NaN
1.41	59.883	160.275	692.3606	-0.50928	0.50049	0.15332	3.856	-31.905	1252.314	-1.6699	1.0488	0.41846	-27.202	-111.214	212.696	0.046875	0.28271	-0.13232	NaN	NaN	NaN	NaN	NaN	NaN
1.412	34.2931	145.3679	689.106	-0.47803	0.47705	0.1416	-38.97058	-49.744	1252.776	-1.8118	1.153	0.4602	-10.964	-148.2972	274.3269	0.030762	0.31055	-0.13623	NaN	NaN	NaN	NaN	NaN	NaN
1.414	32.885	155.998	677.068	-0.46631	0.46924	0.13623	-71.5494	-120.6616	1218.619	-1.8887	1.248	0.49658	-27.81	-155.8804	376.63	0.0014648	0.31934	-0.13818	NaN	NaN	NaN	NaN	NaN	NaN
1.416	16.9753	148.741	644.826	-0.43701	0.44092	0.12354	-64.768	-122.0727	1216.435	-1.8628	1.3521	0.56055	-27.878	-106.67617	488.6517	-0.083008	0.34033	-0.12744	NaN	NaN	NaN	NaN	NaN	NaN
1.418	6.345	155.585	617.5015	-0.41431	0.42627	0.11425	-36.0778	-119.058	1160.632	-1.8262	1.3867	0.5708	-37.84	-94.672	665.853	-0.16016	0.36231	-0.11181	NaN	NaN	NaN	NaN	NaN	NaN
1.42	-13.9663	140.554	595.8368	-0.39404	0.40918	0.10596	-46.282	-161.792	1150.8485	-1.7129	1.3984	0.49268	-38.327	-50.781	818.5203	-0.24463	0.38086	-0.09375	NaN	NaN	NaN	NaN	NaN	NaN
1.422	-2.664	112.9049	590.80762	-0.36816	0.38672	0.095703	-12.3182	-113.949	1155.284	-1.5015	1.3501	0.42358	-47.824	-46.197	1006.371	-0.37061	0.42236	-0.067383	NaN	NaN	NaN	NaN	NaN	NaN
1.424	8.934	98.6315	554.713	-0.35547	0.37744	0.09082	-9.32168	-131.79	1135.5363	-1.2144	1.2778	0.37793	-71.854	-2.814	1172.834	-0.43555	0.44434	-0.058105	NaN	NaN	NaN	NaN	NaN	NaN
1.426	-26.2671	108.32	493.775	-0.33203	0.35254	0.08252	-13.077	-157.197	1185.423	-0.87109	1.1484	0.33252	-100.385	-5.499	1321.6	-0.57617	0.49414	-0.026367	NaN	NaN	NaN	NaN	NaN	NaN
1.428	-25.0551	105.5979	450.98	-0.31128	0.34082	0.075684	-33.444	-100.8204	1216.194	-0.75586	1.0859	0.30908	-93.434	29.68	1419.9838	-0.70215	0.53711	-0.003174	NaN	NaN	NaN	NaN	NaN	NaN
1.43	-0.640000000000001	108.05	456.0376	-0.29053	0.32275	0.072754	-58.655	-121.201	1223.128	-0.62646	1.0024	0.26172	-89.558	10.417	1503.525	-0.85107	0.5874	0.025879	NaN	NaN	NaN	NaN	NaN	NaN
1.432	1.484	111.65	452.026	-0.26807	0.30322	0.065918	-35.945	-107.068	1261.829	-0.5791	0.96533	0.24854	-74.146	54.319	1481.632	-1.1035	0.66016	0.087402	NaN	NaN	NaN	NaN	NaN	NaN
1.434	-37.5867	105.052	444.236	-0.25586	0.29395	0.064941	-51.317	-86.135	1230.517	-0.55176	0.94727	0.24951	-79.9838	6.803	1421.351	-1.2441	0.69922	0.13428	NaN	NaN	NaN	NaN	NaN	NaN
1.436	-19.027	104.427	417.8067	-0.23242	0.26855	0.056641	-70.9181	-138.461	1250.2119	-0.58008	0.95508	0.27295	-83.48	-18.494	1364.179	-1.5625	0.78711	0.24463	NaN	NaN	NaN	NaN	NaN	NaN
1.438	-14.3438	101.615	389.789	-0.21484	0.25635	0.054199	-84.557	-150.702	1278.00829	-0.625	0.97949	0.29053	-109.334	-115.41	1309.487	-1.7934	0.85962	0.33276	NaN	NaN	NaN	NaN	NaN	NaN
1.44	-29.0714	112.3031	365.88	-0.19531	0.24023	0.044434	-81.788	-213.5037	1279.962	-0.76123	1.0669	0.32813	-140.252	-135.331	1291.1333	-1.9839	0.95361	0.42188	NaN	NaN	NaN	NaN	NaN	NaN
1.442	-38.8732	106.911	337.8191	-0.16846	0.21777	0.037598	-45.641	-295.061	1326.484	-0.88013	1.1429	0.35132	-101.93	-197.459	1258.36	-2.1226	1.106	0.58398	NaN	NaN	NaN	NaN	NaN	NaN
1.444	-33.694	99.27	302.8436	-0.15674	0.20654	0.035645	-30.307	-309.496	1351.344	-0.97803	1.2134	0.37109	-85.206	-201.694	1239.554	-2.167	1.1895	0.65576	NaN	NaN	NaN	NaN	NaN	NaN
1.446	-27.6344	97.498	282.2024	-0.13428	0.18652	0.029785	2.016	-375.413	1392.2208	-1.0757	1.2935	0.38672	-41.432	-228.849	1246.153	-2.2417	1.3228	0.68359	NaN	NaN	NaN	NaN	NaN	NaN
1.448	-25.0493	89.513	255.812	-0.1189	0.17309	0.023437	42.908	-369.084	1465.025	-1.1172	1.3262	0.39111	-47.4167	-209.1723	1308.874	-2.2175	1.3616	0.60229	NaN	NaN	NaN	NaN	NaN	NaN
1.45	-39.5662	74.0069	262.0955	-0.10254	0.15869	0.021484	25.995	-329.337	1502.4666	-1.1777	1.3789	0.37793	-33.2563	-160.861	1361.9228	-2.1094	1.3613	0.49365	NaN	NaN	NaN	NaN	NaN	NaN
1.452	-15.488	65.319	247.1023	-0.086426	0.13867	0.014648	-16.258	-328.304	1548.671	-1.2363	1.418	0.37549	-17.8359	-75.32	1431.818	-1.8315	1.3403	0.34033	NaN	NaN	NaN	NaN	NaN	NaN
1.454	9.711	70.298	234.9326	-0.083496	0.12793	0.013184	-15.05	-252.682	1602.788	-1.2637	1.4316	0.37256	-7.0418	-71.28	1471.998	-1.6675	1.3345	0.2583	NaN	NaN	NaN	NaN	NaN	NaN
1.456	11.848	78.507	202.8837	-0.068359	0.12012	0.010254	-49.655	-205.96	1640.2695	-1.3218	1.4751	0.36572	6.5462	-106.082	1521.8058	-1.3823	1.3462	0.12158	NaN	NaN	NaN	NaN	NaN	NaN
1.458	-13.933	70.739	186.624	-0.055664	0.10352	0.0083008	-53.479	-219.283	1714.191	-1.3696	1.5141	0.36621	-6.388	-199.665	1547.9956	-1.23	1.3437	0.034912	NaN	NaN	NaN	NaN	NaN	NaN
1.46	15.276	69.3133	168.56	-0.050781	0.097656	0.0053711	-95.3945	-180.607	1746.9088	-1.4185	1.5552	0.37842	-10.263	-263.682	1567.385	-1.1289	1.334	-0.036133	NaN	NaN	NaN	NaN	NaN	NaN
1.462	15.761	74.6637	161.7364	-0.044434	0.086914	0.0024414	-113.0239	-195.94	1749.7372	-1.5137	1.6211	0.39893	32.121	-330.364	1567.235	-1.0278	1.3032	-0.095215	NaN	NaN	NaN	NaN	NaN	NaN
1.464	3.975	83.559	159.4658	-0.037353	0.076172	-0.0036621	-84.7602	-198.981	1764.6223	-1.5742	1.6621	0.40869	58.0602	-355.1	1584.36796	-0.97803	1.2754	-0.12476	NaN	NaN	NaN	NaN	NaN	NaN
1.466	-7.435	56.611	172.3269	-0.032227	0.066895	-0.0058594	-77.4657	-153.977	1776.026	-1.6973	1.7324	0.43701	81.48	-358.605	1585.068	-0.93701	1.2407	-0.14746	NaN	NaN	NaN	NaN	NaN	NaN
1.468	2.888	45.4275	159.4451	-0.027344	0.055664	-0.0083008	-37.286	-180.8969	1819.204	-1.7766	1.7756	0.45727	87.313	-340.505	1627.795	-0.9585	1.2153	-0.14111	NaN	NaN	NaN	NaN	NaN	NaN
1.47	-24.5928	48.69	130.46973	-0.02832	0.051758	-0.0073242	-37.675	-151.9397	1861.617	-1.8438	1.8125	0.47314	118.404	-310.326	1673.995	-1	1.2188	-0.12109	NaN	NaN	NaN	NaN	NaN	NaN
1.472	-30.0226	63.527	110.8868	-0.032227	0.040039	-0.0087891	-57.316	-134.215	1860.396	-1.8984	1.8418	0.48096	75.926	-283.552	1793.9888	-1.144	1.2603	-0.067871	NaN	NaN	NaN	NaN	NaN	NaN
1.474	-10.273	56.46	93.4432	-0.035644	0.037842	-0.0034179	-64.884	-171.845	1915.15523	-1.9077	1.8521	0.48047	34.1974	-217.845	1886.058	-1.2861	1.3121	-0.025635	NaN	NaN	NaN	NaN	NaN	NaN
1.476	-0.721999999999998	49.61977	89.3481	-0.040039	0.03418	-0.0048828	-102.745	-127.437	1938.6176	-1.9199	1.8574	0.49658	17.947	-143.92	1937.791	-1.4175	1.3618	0.01416	NaN	NaN	NaN	NaN	NaN	NaN
1.478	-13.577	45.289	66.175	-0.042969	0.024902	-0.0029297	-117.864	-148.87	1967.284	-1.9255	1.8576	0.50171	20.343	-49.038	1933.987	-1.5737	1.4224	0.040527	NaN	NaN	NaN	NaN	NaN	NaN
1.48	-31.215	41.3373	52.146	-0.043945	0.021973	-0.0043945	-105.4967	-167.4207	1996.629	-1.9331	1.8521	0.50781	21.206	-0.928000000000011	1931.2588	-1.6328	1.4473	0.050781	NaN	NaN	NaN	NaN	NaN	NaN
1.482	-12.033	35.569	71.9487	-0.04541	0.01709	-0.0039063	-137.313	-128.24	1986.563	-1.9448	1.8325	0.51416	37.197	-10.84	1931.4008	-1.7461	1.5	0.069336	NaN	NaN	NaN	NaN	NaN	NaN
1.484	-24.09	43.4059	71.4356	-0.049805	0.012939	0.00024414	-142.9963	-154.47	1976.762	-1.9414	1.8184	0.52197	-22.474	-70.768	1943.0053	-1.8279	1.5373	0.091552	NaN	NaN	NaN	NaN	NaN	NaN
1.486	-32.276	53.7847	75.132	-0.056152	0.0083008	0.00097656	-118.5229	-111.23	1952.4963	-1.939	1.7856	0.53125	-19.269	-130.597	1948.1856	-1.9077	1.5708	0.11084	NaN	NaN	NaN	NaN	NaN	NaN
1.488	-48.577148	40.5	65.488	-0.050293	0.0068359	0.0039063	-131.3003	-79.172	1902.191	-1.939	1.7602	0.54297	-40.8728	-162.072	1949.99	-2.0132	1.6255	0.13281	NaN	NaN	NaN	NaN	NaN	NaN
1.49	-54.9589	31.051	45.7271	-0.055176	0.0073242	0.00097656	-83.77	-106.70882	1908.377	-1.939	1.7271	0.55615	-23.9337	-167.536	1960.07649	-2.0522	1.6489	0.14209	NaN	NaN	NaN	NaN	NaN	NaN
1.492	-48.08774	36.417	35.4935	-0.05127	0.0073242	0.0019531	-64.456	-55.73595	1901.667	-1.9429	1.6899	0.57422	-51.1399	-180.679	1969.511	-2.1113	1.6953	0.14551	NaN	NaN	NaN	NaN	NaN	NaN
1.494	-56.457	32.419	17.1	-0.050293	0.0080566	0.00073242	-41.252	-91.675	1903.353	-1.9473	1.668	0.58838	-58.1191	-168.35	1974.3885	-2.1365	1.719	0.15283	NaN	NaN	NaN	NaN	NaN	NaN
1.496	-60.109	19.8633	12.8751	-0.046387	0.0048828	-0.0019531	-37.477	-89.399	1926.3893	-1.9487	1.6235	0.60547	-96.488	-156.221	1974.9863	-2.1504	1.7363	0.1543	NaN	NaN	NaN	NaN	NaN	NaN
1.498	-39.458	16.5383	12.822	-0.043457	0.00097656	0.0043945	-81.508	-31.7631	1900.4209	-1.9371	1.5816	0.62183	-98.279	-132.668	1994.677	-2.1714	1.7554	0.15869	NaN	NaN	NaN	NaN	NaN	NaN
1.5	-40.6861	29.7278	4.299	-0.044922	0.00097656	0.00097656	-73.488	-48.1042	1895.708	-1.918	1.5391	0.63379	-111.053	-111.299	2009.938	-2.1733	1.7603	0.15869	NaN	NaN	NaN	NaN	NaN	NaN
1.502	-12.966	22.2752	5.5361	-0.044434	-0.0039063	0.00097656	-71.586	-6.247	1895.6758	-1.8804	1.4829	0.64355	-93.486	-76.623	2029.976	-2.1636	1.7583	0.1543	NaN	NaN	NaN	NaN	NaN	NaN
1.504	-11.609	9.2054	32.6524	-0.046143	-0.003418	0.0036621	-119.2396	20.382	1872.7682	-1.8608	1.4673	0.64258	-56.1533	-34.813	2016.2665	-2.1414	1.7414	0.14917	NaN	NaN	NaN	NaN	NaN	NaN
1.506	11.282	18.43078	28.7425	-0.041992	-0.0068359	0.0053711	-89.996	-32.526	1891.4804	-1.8301	1.416	0.63916	-7.799	6.98	1979.44	-2.1089	1.7114	0.1377	NaN	NaN	NaN	NaN	NaN	NaN
1.508	-18.62	32.889	29.5581	-0.033203	0.00048828	0.0029297	-75.416	-4.81100000000001	1880.121	-1.8045	1.385	0.63599	9.728	4.431	1942.342	-2.0425	1.6626	0.11475	NaN	NaN	NaN	NaN	NaN	NaN
1.51	-6.557	29.429	20.4687	-0.021973	-0.003418	0.0029297	-93.2049	-33.532	1876.1517	-1.7769	1.356	0.63281	5.279	21.2759	1921.511	-2.0156	1.6289	0.104	NaN	NaN	NaN	NaN	NaN	NaN
1.512	-19.353	15.8499	20.6662	-0.013672	-0.0019531	-0.0029297	-91.959	-63.706	1860.9474	-1.7319	1.3208	0.61523	1.203	13.54687	1908.005	-1.9644	1.5806	0.083984	NaN	NaN	NaN	NaN	NaN	NaN
1.514	-11.518	6.5111	-0.446999999999999	-0.0046387	0.00048828	-0.00073242	-83.302	-26.4666	1813.1141	-1.7085	1.3052	0.61328	11.0174	47.776	1878.954	-1.939	1.5474	0.072998	NaN	NaN	NaN	NaN	NaN	NaN
1.516	-0.561	6.593	-3.68185	0.0019531	0.00097656	-0.0097656	-91.303	-60.9368	1811.629	-1.6641	1.2754	0.59912	15.682	36.432	1870.041	-1.9199	1.5156	0.070801	NaN	NaN	NaN	NaN	NaN	NaN
1.518	-11.29	13.103	4.3114	0.016602	-0.0029297	-0.010742	-81.244	-12.065	1826.86	-1.6323	1.2504	0.58838	58.2308	39.263	1872.202	-1.9199	1.4824	0.069824	NaN	NaN	NaN	NaN	NaN	NaN
1.52	1.548	6.0551	2.327	0.022949	0.00048828	-0.017578	-84.724	33.022	1824.179	-1.6055	1.2363	0.57715	70.3657	11.74314	1865.044	-1.9214	1.4634	0.076172	NaN	NaN	NaN	NaN	NaN	NaN
1.522	5.287	4.8868	10.3441	0.033691	0	-0.021973	-97.498	13.06	1835.351	-1.5703	1.2148	0.56152	57.1984	26.07333	1868.45848	-1.9243	1.4321	0.089844	NaN	NaN	NaN	NaN	NaN	NaN
1.524	13.324	13.53571	2.246	0.043701	0.001709	-0.025634	-114.6193	90.604	1804.4354	-1.5586	1.2109	0.55127	41.8399	29.4115	1882.231	-1.9233	1.4078	0.10034	NaN	NaN	NaN	NaN	NaN	NaN
1.526	4.187	7.069	14.6671	0.055176	0.0087891	-0.035645	-130.753	83.132	1768.8268	-1.5371	1.2031	0.53955	44.764	46.767	1902.802	-1.9194	1.3853	0.10791	NaN	NaN	NaN	NaN	NaN	NaN
1.528	8.497	12.4341	19.6395	0.06543	0.0078125	-0.041992	-119.094001	86.785	1749.8303	-1.5205	1.1963	0.53076	61.814	36.055	1919.152	-1.9097	1.3618	0.11914	NaN	NaN	NaN	NaN	NaN	NaN
1.53	-9.829	21.581	16.6394	0.072266	0.016113	-0.04541	-123.058	131.926	1721.5768	-1.5034	1.1919	0.5166	71.897	50.564	1904.98	-1.9058	1.3481	0.12109	NaN	NaN	NaN	NaN	NaN	NaN
1.532	-25.94	21.60982	8.4857	0.088867	0.020996	-0.053711	-104.216	86.042	1713.1773	-1.48	1.1841	0.50098	69.138	57.231	1876.218	-1.8789	1.3242	0.11719	NaN	NaN	NaN	NaN	NaN	NaN
1.534	-20.655	10.2674	7.6986	0.090576	0.025147	-0.057617	-97.8156	106.9903	1678.7313	-1.4609	1.1758	0.4917	41.1141	85.411	1823.9237	-1.8633	1.3056	0.12549	NaN	NaN	NaN	NaN	NaN	NaN
1.536	-36.407	3.26613	20.6118	0.097168	0.032227	-0.063965	-98.996	118.338	1633.668	-1.4238	1.1641	0.48291	27.256	103.634	1775.6256	-1.8472	1.2876	0.13037	NaN	NaN	NaN	NaN	NaN	NaN
1.538	-29.5717	13.6047	11.85314	0.099609	0.044922	-0.071777	-58.127	79.246	1631.427	-1.3836	1.1487	0.4646	-41.727	122.9252	1764.712	-1.8262	1.2695	0.13525	NaN	NaN	NaN	NaN	NaN	NaN
1.54	-23.622	1.3365	-4.2255	0.10449	0.043945	-0.075684	-32.234	131.986	1584.6353	-1.3511	1.1294	0.4502	-32.5029	138.3027	1752.534	-1.8203	1.2559	0.13916	NaN	NaN	NaN	NaN	NaN	NaN
1.542	-40.4253	-8.3787	23.9538	0.099609	0.057617	-0.07959	-28.678	113.669	1558.7446	-1.3066	1.1035	0.43066	-23.018	168.775	1752.6205	-1.8003	1.2349	0.14893	NaN	NaN	NaN	NaN	NaN	NaN
1.544	-44.7897	-37.9097	41.886	0.093994	0.066651	-0.089356	-9.28899999999999	116.579	1544.7411	-1.2842	1.0898	0.4209	-17.449	176.856	1724.208	-1.7859	1.22	0.15674	NaN	NaN	NaN	NaN	NaN	NaN
1.546	-41.0427	-31.5039	67.15893	0.078125	0.077637	-0.09668	-26.158	163.2324	1505.481	-1.2388	1.063	0.396	-65.025936	194.359	1710.6778	-1.769	1.2017	0.16406	NaN	NaN	NaN	NaN	NaN	NaN
1.548	-1.742	-47.701	79.5622	0.04541	0.095215	-0.096191	-22.928	121.5826	1498.5385	-1.2046	1.0381	0.37964	-86.4095	230.7675	1659.9	-1.7422	1.1816	0.17773	NaN	NaN	NaN	NaN	NaN	NaN
1.55	-35.859	-76.976	104.8246	0.026367	0.10547	-0.092773	-31.7062	169.8	1450.9871	-1.1685	1.0161	0.36377	-103.457	253.6058	1616.076	-1.73	1.1685	0.17773	NaN	NaN	NaN	NaN	NaN	NaN
1.552	-29.434	-71.3733	126.17	-0.044434	0.12744	-0.081055	-40.4231	187.986	1400.873	-1.1245	0.98486	0.34473	-84.2791	266.95	1576.297	-1.707	1.1445	0.18408	NaN	NaN	NaN	NaN	NaN	NaN
1.554	-32.5422	-49.602613	175.889	-0.097654	0.14599	-0.070313	-10.011	161.564	1391.1437	-1.103	0.96729	0.33447	-73.2056	247.073	1577.046	-1.6917	1.1282	0.19067	NaN	NaN	NaN	NaN	NaN	NaN
1.556	-10.931	-27.8736	217.047	-0.14502	0.16309	-0.062988	-3.045	222.73	1347.087	-1.0615	0.94238	0.31494	-42.457	230.038	1558.5878	-1.6733	1.104	0.1958	NaN	NaN	NaN	NaN	NaN	NaN
1.558	-26.0863	7.1889	270.964	-0.20654	0.19873	-0.060059	5.476	190.4848	1301.8657	-1.0319	0.91723	0.30078	-59.1149	209.275	1530.606	-1.6367	1.0684	0.19385	NaN	NaN	NaN	NaN	NaN	NaN
1.56	-11.301	22.8987	341.7185	-0.23486	0.21338	-0.057617	17.232	187.5838	1268.7882	-1.0044	0.88721	0.29248	-60.4049	232.476	1475.508	-1.6191	1.0508	0.19287	NaN	NaN	NaN	NaN	NaN	NaN
1.562	-35.821	49.799	399.6652	-0.31592	0.24951	-0.053223	20.0015	216.7873	1210.559	-0.96826	0.86377	0.2666	-85.8012	231.1183	1463.036	-1.5684	1.0098	0.1958	NaN	NaN	NaN	NaN	NaN	NaN
1.564	-54.239	81.07	470.7324	-0.3855	0.28223	-0.04834	9.743	164.14	1194.01187	-0.94922	0.85938	0.25928	-52.85	273.908	1413.70805	-1.5203	0.98364	0.1936	NaN	NaN	NaN	NaN	NaN	NaN
1.566	-25.048	95.8712	536.4694	-0.46875	0.31104	-0.027344	24.8584	219.4016	1139.313	-0.90088	0.81104	0.24512	-44.292	278.633	1376.777	-1.4819	0.95459	0.19141	NaN	NaN	NaN	NaN	NaN	NaN
1.568	-12.726	107.1178	595.1669	-0.58789	0.35547	-0.018066	-10.052	234.71667	1100.765	-0.87085	0.78589	0.22925	-23.625	326.747	1320.13	-1.4297	0.91406	0.18604	NaN	NaN	NaN	NaN	NaN	NaN
1.57	-21.497	122.498	653.512	-0.646	0.38135	-0.0092773	-25.596	218.8871	1095.0803	-0.83594	0.76563	0.21143	-43.031	315.958	1287.38	-1.3984	0.89258	0.19092	NaN	NaN	NaN	NaN	NaN	NaN
1.572	-43.682	97.089	709.9624	-0.7749	0.43213	0.015625	-27.2477	262.357	1053.5588	-0.78857	0.73096	0.19238	-25.478	362.949	1230.495	-1.3438	0.85742	0.19092	NaN	NaN	NaN	NaN	NaN	NaN
1.574	-33.042	93.586	739.59	-0.87036	0.47583	0.039307	-46.9661	219.549	1026.964	-0.76465	0.71387	0.18896	-38.378	338.952	1199.9796	-1.2944	0.83252	0.19238	NaN	NaN	NaN	NaN	NaN	NaN
1.576	-51.297	70.389	767.146	-0.96045	0.51807	0.061035	-34.419	220.408	999.757	-0.71875	0.66992	0.16797	-20.609	381.646	1146.193	-1.248	0.8125	0.19043	NaN	NaN	NaN	NaN	NaN	NaN
1.578	-77.062	76.606	794.1521	-1.0703	0.56836	0.098145	-29.1618	234.286	944.4048	-0.68189	0.64576	0.15625	-20.84	344.82	1123.65923	-1.1802	0.7749	0.18945	NaN	NaN	NaN	NaN	NaN	NaN
1.58	-85.0821	38.741	843.3664	-1.1133	0.59375	0.11426	-38.1927	188.2052	898.3784	-0.64209	0.61963	0.13916	8.061	360.908	1076.5036	-1.1445	0.75781	0.18896	NaN	NaN	NaN	NaN	NaN	NaN
1.582	-91.429	21.2177	870.2705	-1.166	0.62695	0.14404	-34.041	225.9258	849.7563	-0.5874	0.58643	0.12109	-27.944	308.489	1039.2364	-1.0815	0.72705	0.18652	NaN	NaN	NaN	NaN	NaN	NaN
1.584	-84.72425	15.224	888.5645	-1.1814	0.64136	0.1543	-24.39	213.605	798.835	-0.55664	0.56641	0.11182	-34.523	340.3947	967.5957	-1.0334	0.70044	0.1875	NaN	NaN	NaN	NaN	NaN	NaN
1.586	-82.0941	10.896	881.2377	-1.1855	0.65332	0.16016	-23.892	178.262	771.307	-0.49902	0.52979	0.09375	-73.3615	291.997	929.1191	-0.98438	0.67578	0.18604	NaN	NaN	NaN	NaN	NaN	NaN
1.588	-61.0075	-11.462	893.612	-1.1694	0.6665	0.16406	-22.4946	205.8518	724.798	-0.45459	0.50146	0.08081	-71.9402	324.429	856.812	-0.91309	0.63477	0.18652	NaN	NaN	NaN	NaN	NaN	NaN
1.59	-45.8599	-0.954999999999998	878.33	-1.1489	0.67529	0.15381	-29.8273	167.5516	678.2235	-0.41553	0.47412	0.064453	-74.656	255.1291	832.79	-0.87842	0.61768	0.18555	NaN	NaN	NaN	NaN	NaN	NaN
1.592	-44.04858	10.081	852.2128	-1.1074	0.67773	0.13916	-22.0625	181.603	650.81	-0.36719	0.44043	0.04834	-79.525	290.413	776.3566	-0.80615	0.58057	0.17969	NaN	NaN	NaN	NaN	NaN	NaN
1.594	-33.91	14.06894	826.71972	-1.0332	0.69141	0.12158	-21.0288	210.736	601.93987	-0.32788	0.41089	0.037598	-92.98	229.7623	755.829	-0.74903	0.54981	0.18091	NaN	NaN	NaN	NaN	NaN	NaN
1.596	-54.42557	3.478	828.0431	-0.99072	0.6958	0.11328	-21.861	161.143	561.954	-0.29248	0.38477	0.025879	-107.2385	296.7017	697.615	-0.6875	0.51611	0.17871	NaN	NaN	NaN	NaN	NaN	NaN
1.598	-30.531	-4.585	819.7169	-0.90771	0.71045	0.089355	-2.092	185.193	515.179	-0.24756	0.34766	0.011719	-95.2119	235.115	668.874	-0.61719	0.4834	0.17627	NaN	NaN	NaN	NaN	NaN	NaN
1.6	-53.446	-9.229	815.223	-0.85694	0.71387	0.067627	-29.48	162.8477	466.1422	-0.22266	0.32861	0.003418	-83.468	290.9015	599.067	-0.58252	0.46582	0.17529	NaN	NaN	NaN	NaN	NaN	NaN
1.602	-27.1782	-23.313	816.214	-0.80859	0.70898	0.043945	-15.811	135.767	452.9197	-0.17773	0.2915	-0.0014648	-91.2044	219.4186	557.59	-0.50977	0.42334	0.17139	NaN	NaN	NaN	NaN	NaN	NaN
1.604	-23.5888	-62.792	842.576	-0.74609	0.69824	0.010742	9.738	176.501	405.2307	-0.14013	0.26391	-0.012451	-75.381	279.3	485.3002	-0.44043	0.38477	0.16602	NaN	NaN	NaN	NaN	NaN	NaN
1.606	22.1824	-76.537	861.559	-0.72119	0.69873	0.00048828	4.624	130.1299	366.3226	-0.10938	0.2417	-0.019531	-59.757	198.798	438.332	-0.3999	0.36768	0.16602	NaN	NaN	NaN	NaN	NaN	NaN
1.608	36.501	-94.98	898.556	-0.69922	0.71484	-0.024414	19.119	118.406	344.779	-0.075195	0.20605	-0.03125	-66.578	238.0539	357.57	-0.32617	0.33008	0.17041	NaN	NaN	NaN	NaN	NaN	NaN
1.61	58.073	-102.271	926.9183	-0.70093	0.74268	-0.035645	15.828	102.1256	292.7086	-0.05957	0.18896	-0.036621	-88.1695	147.564	339.2874	-0.27759	0.29565	0.15747	NaN	NaN	NaN	NaN	NaN	NaN
1.612	90.4	-114.6231	976.4732	-0.71826	0.77783	-0.042969	-18.511	53.446	265.7548	-0.029785	0.15967	-0.041016	-90.25355	190.80747	298.2759	-0.23584	0.26611	0.15137	NaN	NaN	NaN	NaN	NaN	NaN
1.614	101.824	-126.9577	1037.6953	-0.75049	0.83447	-0.05957	-1.831	91.226	256.6085	-0.015625	0.13379	-0.051026	-59.72	124.9599	258.0821	-0.18652	0.21973	0.13965	NaN	NaN	NaN	NaN	NaN	NaN
1.616	97.759	-124.3888	1085.026	-0.77148	0.86133	-0.05957	-22.866	84.54	228.317	-0.0053711	0.11035	-0.053223	-46.547	190.051	234.074	-0.16406	0.20801	0.13623	NaN	NaN	NaN	NaN	NaN	NaN
1.618	86.318	-147.195	1122.966	-0.81982	0.92236	-0.060547	-30.164	72.6873	233.359	0.00048828	0.083984	-0.055664	-11.437	134.7226	208.3869	-0.11768	0.16846	0.13184	NaN	NaN	NaN	NaN	NaN	NaN
1.62	121.104	-158.283	1144.1758	-0.86768	0.95655	-0.062256	-24.631	99.114	217.733827	0.0024414	0.069824	-0.055176	-35.052	199.808	181.3534	-0.093505	0.14551	0.13232	NaN	NaN	NaN	NaN	NaN	NaN
1.622	96.956	-157.777	1168.5329	-0.91455	0.99268	-0.066895	-21.291	52.1701	190.48657	0.0043945	0.043457	-0.055664	-3.246	137.481	166.1495	-0.074707	0.11963	0.12793	NaN	NaN	NaN	NaN	NaN	NaN
1.624	47.386	-140.092	1196.6566	-0.99463	1.0386	-0.058594	-31.453	64.777	173.142	0.0065918	0.030273	-0.060059	-12.482	179.0784	143.1778	-0.056641	0.097168	0.12646	NaN	NaN	NaN	NaN	NaN	NaN
1.626	49.305	-130.711	1236.0486	-1.0371	1.0654	-0.051758	-41.266184	83.031	141.465	0.0048828	0.015625	-0.059082	9.192	107.882	117.87	-0.050293	0.086914	0.12549	NaN	NaN	NaN	NaN	NaN	NaN
1.628	51.47	-120.149	1282.5277	-1.1265	1.1138	-0.041504	-62.5278	44.596	117.26865	0.014648	0.0024414	-0.061523	38.324	126.64647	106.21	-0.040527	0.072266	0.12939	NaN	NaN	NaN	NaN	NaN	NaN
1.63	56.805	-94.865	1321.6018	-1.1889	1.146	-0.029785	-33.281	76.971	96.118	0.01123	-0.0063477	-0.059082	29.21	48.306	71.8101	-0.038574	0.057129	0.13038	NaN	NaN	NaN	NaN	NaN	NaN
1.632	39.427	-84.57	1364.909	-1.2534	1.1821	-0.020996	-44.8552	50.619	59.741	0.021973	-0.022461	-0.060059	6.451	98.113	61.6004	-0.03418	0.041504	0.13623	NaN	NaN	NaN	NaN	NaN	NaN
1.634	51.156	-63.262	1410.1878	-1.3237	1.2329	-0.013184	-44.931	19.24	50.423	0.028565	-0.029541	-0.064453	-24.578	51.037	30.83125	-0.02832	0.017578	0.12549	NaN	NaN	NaN	NaN	NaN	NaN
1.636	33.136	-52.8891	1450.7919	-1.355	1.2603	-0.0063477	-26.618	59.6724	54.3284	0.033691	-0.036621	-0.062988	-37.227	93.724	32.9	-0.023438	0.0039063	0.12354	NaN	NaN	NaN	NaN	NaN	NaN
1.638	3.87371	-37.2554	1474.6089	-1.4175	1.3052	0	-48.4115	38.7355	49.7596	0.04248	-0.053223	-0.075195	-44.277	44.537	26.666	-0.016602	-0.01709	0.12646	NaN	NaN	NaN	NaN	NaN	NaN
1.64	-4.1142	-40.6367	1503.2702	-1.4694	1.3323	0.019531	-42.8849	57.659	49.736	0.046875	-0.058594	-0.072266	-44.026	69.149	34.667	-0.010742	-0.033936	0.12377	NaN	NaN	NaN	NaN	NaN	NaN
1.642	-25.1164	-69.5695	1539.153	-1.5215	1.3711	0.03418	-39.2096	73.043	17.368	0.051758	-0.071777	-0.077148	-5.43	34.961	30.298	-0.0024414	-0.051758	0.11719	NaN	NaN	NaN	NaN	NaN	NaN
1.644	-5.726	-89.166	1575.626	-1.5894	1.4126	0.05127	-66.81771	19.1884	12.2792	0.051514	-0.081543	-0.075195	-41.818	49.526	44.064	0.0078125	-0.060059	0.11914	NaN	NaN	NaN	NaN	NaN	NaN
1.646	-38.892	-89.65	1592.47785	-1.623	1.4336	0.068848	-39.164	25.9863	12.593	0.041504	-0.091309	-0.069824	-44.881	16.7861	34.072	0.016113	-0.077148	0.11572	NaN	NaN	NaN	NaN	NaN	NaN
1.648	-25.4742	-90.1248	1601.9233	-1.6714	1.4712	0.091309	-34.572	-2.2057	3.761	0.027832	-0.10059	-0.067383	-74.657	26.6959	47.714	0.025391	-0.091309	0.10645	NaN	NaN	NaN	NaN	NaN	NaN
1.65	-38.821	-95.102	1618.7659	-1.7029	1.4964	0.1084	-32.949	-1.2853	17.23669	0.019531	-0.10303	-0.061523	-57.333	8.2278	24.602	0.031738	-0.10034	0.10302	NaN	NaN	NaN	NaN	NaN	NaN
1.652	-40.9699	-102.389	1624.37	-1.7222	1.5122	0.11816	-5.038	39.922	17.3666	-0.0058594	-0.10938	-0.054688	-55.864	20.8483	36.737	0.038574	-0.11182	0.10107	NaN	NaN	NaN	NaN	NaN	NaN
1.654	-39.988	-94.942	1642.448	-1.7339	1.5298	0.12207	-28.48	19.6605	7.5241	-0.018555	-0.10718	-0.042969	-43.062	25.8847	11.5923	0.044922	-0.12207	0.094238	NaN	NaN	NaN	NaN	NaN	NaN
1.656	-9.683	-78.238	1633.3224	-1.7344	1.5313	0.12451	14.756	25.326	15.0821	-0.038574	-0.10596	-0.037109	-69.192	32.8924	19.01	0.046875	-0.13135	0.09668	NaN	NaN	NaN	NaN	NaN	NaN
1.658	15.5613	-72.438	1633.36343	-1.7261	1.5396	0.11621	7.962	53.249	-14.59964	-0.056152	-0.10156	-0.023438	-74.5717	27.96156	18.68	0.036133	-0.13818	0.095703	NaN	NaN	NaN	NaN	NaN	NaN
1.66	15.446	-69.783	1642.8456	-1.7146	1.5403	0.10571	-20.189	7.0105	0.717	-0.06543	-0.098633	-0.021973	-82.0105	7.71097	26.7111	0.025879	-0.14233	0.10351	NaN	NaN	NaN	NaN	NaN	NaN
1.662	29.731	-52.029	1651.1073	-1.7046	1.5415	0.088379	10.132	26.5818	33.9788	-0.075684	-0.087891	-0.01416	-67.1395	25.8647	-5.4915	0.022949	-0.14941	0.10889	NaN	NaN	NaN	NaN	NaN	NaN
1.664	37.0392	-38.893	1658.5368	-1.6855	1.5391	0.074219	-11.924	12.34	16.8713	-0.072998	-0.088623	-0.011475	-39.748	2.9494	26.2624	0.019531	-0.15527	0.11914	NaN	NaN	NaN	NaN	NaN	NaN
1.666	52.644	-27.3013	1653.741	-1.6758	1.5352	0.0625	-20.196	6.7282	31.2863	-0.069824	-0.085449	-0.010254	-34.105	30.372	14.1128	0.019531	-0.15674	0.11914	NaN	NaN	NaN	NaN	NaN	NaN
1.668	67.92	-33.584	1657.885	-1.6582	1.5352	0.043457	-0.206	56.35	12.9651	-0.066895	-0.092285	-0.012695	-41.565	9.82242	21.9314	0.031738	-0.1543	0.11719	NaN	NaN	NaN	NaN	NaN	NaN
1.67	45.7242	-22.303	1666.7533	-1.643	1.5308	0.039063	-28.506	33.819	-3.91248	-0.068848	-0.092285	-0.0039063	-27.415	45.7458	8.4288	0.051025	-0.15552	0.11866	NaN	NaN	NaN	NaN	NaN	NaN
1.672	35.6854	-20.417	1676.3719	-1.6343	1.5317	0.032715	-23.014	52.189	19.979	-0.067383	-0.097168	-0.0068359	-25.478	16.836	10.23622	0.074219	-0.15186	0.11328	NaN	NaN	NaN	NaN	NaN	NaN
1.674	42.806	-27.776	1675.706	-1.6187	1.522	0.025391	-38.8491	62.382	1.326	-0.067383	-0.10132	-0.0048829	3.03	52.364	2.4257	0.11035	-0.15283	0.10303	NaN	NaN	NaN	NaN	NaN	NaN
1.676	52.642	-43.5847	1676.2323	-1.6113	1.5176	0.018066	-47.081	11.7547	15.3991	-0.064941	-0.10693	-0.0029297	8.24	-0.426000000000002	4.452	0.12793	-0.15674	0.098145	NaN	NaN	NaN	NaN	NaN	NaN
1.678	23.6212	-67.609	1684.1933	-1.5933	1.5083	0.0078125	-15.274	35.9119	43.016	-0.066406	-0.10693	-0.0058594	12.554	45.13706	-5.6266	0.1665	-0.15918	0.080078	NaN	NaN	NaN	NaN	NaN	NaN
1.68	19.7359	-74.363	1675.14389	-1.5776	1.4995	0.0056152	-38.5086	4.381	27.5871	-0.0625	-0.10938	-0.00097656	2.149	3.6516	8.3446	0.19141	-0.16602	0.069092	NaN	NaN	NaN	NaN	NaN	NaN
1.682	54.626	-67.675	1688.6914	-1.5723	1.4844	-0.0019531	-34.151	-6.792	34.156	-0.060059	-0.1084	-0.00048828	-13.11	49.36	0.3595	0.21484	-0.16895	0.064453	NaN	NaN	NaN	NaN	NaN	NaN
1.684	40.9059	-35.999	1677.419	-1.5566	1.4785	-0.0097656	-25.0557	23.37406	31.19171	-0.061523	-0.10401	-0.00024415	-29.56	-15.0889	24.554	0.23975	-0.17285	0.049316	NaN	NaN	NaN	NaN	NaN	NaN
1.686	21.3715	-26.22	1679.60372	-1.5522	1.4692	-0.010742	-65.1368	6.6326	17.6129	-0.058105	-0.10059	0.00048828	-42.927	36.7464	20.8115	0.25195	-0.17578	0.046875	NaN	NaN	NaN	NaN	NaN	NaN
1.688	8.032	-25.1139	1696.164	-1.5449	1.4609	-0.0097656	-49.2397	29.2341	35.826	-0.053223	-0.099609	0.0048828	-5.512	-3.7247	31.0265	0.26807	-0.17871	0.040527	NaN	NaN	NaN	NaN	NaN	NaN
1.69	7.5194	-17.7737	1693.841	-1.5476	1.4612	-0.016846	-55.1989	39.169	26.075	-0.044922	-0.096191	-0.0024414	-3.571	78.513	15.7	0.2854	-0.17847	0.038086	NaN	NaN	NaN	NaN	NaN	NaN
1.692	-25.625	-8.992	1684.121	-1.5425	1.4614	-0.01709	-64.0676	0.529499999999999	33.614	-0.031738	-0.086426	-0.0063477	-14.267	32.3546	15.029	0.29883	-0.17822	0.030762	NaN	NaN	NaN	NaN	NaN	NaN
1.694	-22.5893	8.2272	1645.569	-1.541	1.4668	-0.014648	-18.739	10.7541	25.298	-0.020752	-0.084717	-0.013183	-38.661	73.8863	9.03	0.31885	-0.18652	0.023438	NaN	NaN	NaN	NaN	NaN	NaN
1.696	-33.311	6.7795	1626.705	-1.5425	1.4653	-0.011719	-54.3536	-2.5208	0.0510000000000002	-0.010254	-0.078613	-0.016602	-31.886	5.718	12.5656	0.32471	-0.18457	0.015137	NaN	NaN	NaN	NaN	NaN	NaN
1.698	-21.963	3.9958	1610.915	-1.5288	1.4673	-0.0087891	-47.808	-1.459	13.78449	0.0048828	-0.073242	-0.024414	-44.424	50.6631	7.8779	0.3335	-0.18799	-0.00097656	NaN	NaN	NaN	NaN	NaN	NaN
1.7	-21.69187	18.8854	1596.173	-1.5222	1.4661	-0.008789	-9.559	33.3809	24.4156	0.0087891	-0.070801	-0.027344	-45.952	0.748000000000001	20.6539	0.33667	-0.19043	-0.0061035	NaN	NaN	NaN	NaN	NaN	NaN
1.702	-8.6237	11.0686	1578.073	-1.5151	1.4673	-0.01123	-28.983	12.3785	9.1176	0.020508	-0.071289	-0.035156	-54.451	62.916	32.8225	0.33643	-0.18994	-0.017578	NaN	NaN	NaN	NaN	NaN	NaN
1.704	9.4402	0.478999999999999	1575.71592	-1.4937	1.4595	-0.010742	-2.163	16.4876	24.8334	0.025391	-0.068604	-0.041016	-71.7316	7.00043	31.432	0.32715	-0.17676	-0.024902	NaN	NaN	NaN	NaN	NaN	NaN
1.706	29.5625	-16.60954	1571.9549	-1.4844	1.4551	-0.012695	5.662	31.1374	8.475	0.030762	-0.063965	-0.047363	-82.3681	69.471	27.3196	0.31836	-0.1709	-0.023438	NaN	NaN	NaN	NaN	NaN	NaN
1.708	43.699	-6.7748	1562.766	-1.4526	1.4497	-0.012207	-31.723	7.0614	14.1995	0.035645	-0.063965	-0.05127	-87.6145	24.6707	25.04136	0.30322	-0.15039	-0.023438	NaN	NaN	NaN	NaN	NaN	NaN
1.71	45.15	-2.71784	1537.05826	-1.4314	1.4378	-0.015137	-2.404	39.6219	28.1889	0.037598	-0.06543	-0.052734	-69.762	63.728	20.334	0.29126	-0.13184	-0.026856	NaN	NaN	NaN	NaN	NaN	NaN
1.712	63.459	-10.0595	1520.8461	-1.4063	1.4277	-0.01416	-29.7324	12.6825	4.9805	0.036621	-0.06543	-0.05127	-57.41597	-1.15085	34.0211	0.27783	-0.11328	-0.020996	NaN	NaN	NaN	NaN	NaN	NaN
1.714	61.696	-22.51745	1511.2002	-1.3755	1.4146	-0.01123	-12.614	-9.7705	7.9823	0.035401	-0.062012	-0.059082	-51.601	30.99	24.557	0.25635	-0.084961	-0.018555	NaN	NaN	NaN	NaN	NaN	NaN
1.716	50.432	-13.1585	1483.8703	-1.3594	1.4023	-0.012695	6.669	1.70971	10.36	0.040039	-0.062012	-0.05957	-43.305	-4.0271	18.2541	0.24756	-0.071289	-0.010742	NaN	NaN	NaN	NaN	NaN	NaN
1.718	50.837	-1.795	1455.5175	-1.3223	1.3828	-0.015625	-19.295	-23.6918	-2.914	0.039551	-0.058105	-0.064453	-29.205	27.39116	7.1559	0.22168	-0.037598	-0.0014648	NaN	NaN	NaN	NaN	NaN	NaN
1.72	61.38	10.02634	1440.1169	-1.3017	1.3628	-0.013916	-2.487	11.3204	28.6895	0.041992	-0.053711	-0.065918	-35.502	-12.3551	21.3248	0.20117	-0.014649	0.0092776	NaN	NaN	NaN	NaN	NaN	NaN
1.722	96.667	30.609	1397.601	-1.2754	1.3418	-0.01416	-11.053	37.332	-1.79	0.04834	-0.053223	-0.070801	-45.808	25.1559	16.267	0.17432	0.0092773	0.023926	NaN	NaN	NaN	NaN	NaN	NaN
1.724	68.457	36.298	1377.8163	-1.2422	1.3135	-0.015137	-37.562	19.7443	-1.44635	0.052978	-0.050049	-0.070313	-7.313	10.044	13.7871	0.13818	0.035645	0.047363	NaN	NaN	NaN	NaN	NaN	NaN
1.726	64.535	44.717	1349.8561	-1.2246	1.2969	-0.013672	-13.382	42.112	17.7505	0.055664	-0.050781	-0.072754	-0.882000000000005	51.469	8.4585	0.12256	0.045898	0.055176	NaN	NaN	NaN	NaN	NaN	NaN
1.728	78.817	54.876	1336.40629	-1.189	1.2739	-0.01123	-37.7136	23.6743	-3.6716	0.059082	-0.040039	-0.078125	-3.632	43.459	23.6853	0.098633	0.069336	0.075195	NaN	NaN	NaN	NaN	NaN	NaN
1.73	92.174	61.36	1328.7899	-1.1685	1.2481	-0.010742	-13.391	13.9431	19.0834	0.058106	-0.036377	-0.083007	-9.511	38.402	33.13156	0.088867	0.081787	0.088135	NaN	NaN	NaN	NaN	NaN	NaN
1.732	64.949	53.116	1320.7271	-1.1484	1.2266	-0.01123	-22.854	36.933	20.7837	0.056641	-0.029785	-0.084473	-15.237	11.9739	26.424	0.085449	0.090332	0.098633	NaN	NaN	NaN	NaN	NaN	NaN
1.734	32.0253	37.904	1322.8561	-1.124	1.1875	-0.003418	-76.0657	20.2192	1.6686	0.05127	-0.019043	-0.085938	-12.875	12.7172	8.20422	0.080078	0.096191	0.1123	NaN	NaN	NaN	NaN	NaN	NaN
1.736	48.998	47.7212	1312.5638	-1.1066	1.1672	-0.0019531	-35.474	29.8149	22.0688	0.045898	-0.021484	-0.088379	12.021	9.1553	-9.1802	0.074219	0.095703	0.12158	NaN	NaN	NaN	NaN	NaN	NaN
1.738	-2.6483	66.3684	1301.6141	-1.0938	1.1367	0.0087891	-28.819	47.369	1.684	0.039551	-0.0053711	-0.084961	-6.761	9.3004	12.5558	0.062988	0.10156	0.1333	NaN	NaN	NaN	NaN	NaN	NaN
1.74	-22.0188	75.5082	1277.7898	-1.0874	1.104	0.013672	-73.40391	23.1266	-4.57833	0.03125	-0.001709	-0.087891	-6.104	35.5008	14.4265	0.052246	0.10644	0.14307	NaN	NaN	NaN	NaN	NaN	NaN
1.742	-28.7746	56.5113	1282.7139	-1.0815	1.0845	0.019043	-12.46	39.763	17.4911	0.029785	0.0058594	-0.095215	-22.622	23.462	22.991	0.040527	0.10352	0.15674	NaN	NaN	NaN	NaN	NaN	NaN
1.744	-13.3817	62.6223	1267.626	-1.064	1.0454	0.023438	-56.2051	33.72	-2.19559	0.027344	0.019043	-0.095703	-8.916	46.266	-6.5751	0.021484	0.10742	0.16357	NaN	NaN	NaN	NaN	NaN	NaN
1.746	-38.02	75.153	1253.149	-1.0542	1.0186	0.038819	-50.7824	14.9016	24.7248	0.020508	0.025879	-0.10449	-39.973	18.684	9.137	0.010254	0.10743	0.16943	NaN	NaN	NaN	NaN	NaN	NaN
1.748	-23.1631	91.859	1222.4941	-1.0449	0.99219	0.047852	-11.244	30.774	48.2297	0.016113	0.035156	-0.11426	-42.964	43.435	24.201	-0.0024414	0.10791	0.17285	NaN	NaN	NaN	NaN	NaN	NaN
1.75	-15.17434	98.462	1217.6532	-1.0332	0.95898	0.053711	-49.8839	-38.056	64.494	0.0048828	0.043213	-0.12549	-46.597	9.6999	77.011	-0.016602	0.1167	0.17773	NaN	NaN	NaN	NaN	NaN	NaN
1.752	-22.646	113.062	1194.8028	-1.0273	0.93848	0.061035	-33.136	-41.344	98.55367	-0.013184	0.055664	-0.12695	-37.231	16.23715	54.902	-0.01709	0.11719	0.17773	NaN	NaN	NaN	NaN	NaN	NaN
1.754	-30.82221	136.1784	1160.24778	-1.0029	0.90234	0.071289	-24.918	-32.9818	108.156	-0.074707	0.078613	-0.125	-75.843	-41.3849	86.3947	-0.025391	0.12549	0.18506	NaN	NaN	NaN	NaN	NaN	NaN
1.756	-30.5636	140.30133	1140.668	-0.99096	0.86938	0.078858	-15.51	-70.0532	138.9277	-0.1167	0.09375	-0.12012	-63.8924	-10.35	91.4735	-0.027099	0.13037	0.18579	NaN	NaN	NaN	NaN	NaN	NaN
1.758	-13.7341	143.963	1139.4374	-0.98047	0.83887	0.083984	-15.294	-70.386	185.4878	-0.20459	0.12744	-0.10205	-49.2174	-79.2751	133.1015	-0.027832	0.1377	0.19287	NaN	NaN	NaN	NaN	NaN	NaN
1.76	-2.518	144.632	1131.5974	-0.9624	0.80322	0.092285	-32.1978	-96.492	207.0884	-0.28662	0.15723	-0.081787	-81.8528	-65.652	164.42	-0.033203	0.15088	0.18945	NaN	NaN	NaN	NaN	NaN	NaN
1.762	-24.925	147.426	1112.096	-0.9541	0.7832	0.095215	-1.477	-130.459	293.68305	-0.37207	0.18555	-0.067383	-75.2951	-126.0314	223.352	-0.041016	0.16211	0.18896	NaN	NaN	NaN	NaN	NaN	NaN
1.764	-20.2691	140.201	1076.6483	-0.94141	0.73828	0.104	15.938	-84.837	380.272	-0.49365	0.23975	-0.051758	-35.428	-111.989	302.114	-0.070801	0.18848	0.18896	NaN	NaN	NaN	NaN	NaN	NaN
1.766	-5.765	137.145	1040.2451	-0.92554	0.71484	0.12036	-20.139	-62.114	502.246	-0.55615	0.271	-0.04248	-46.343	-174.9418	463.742	-0.1145	0.21021	0.19336	NaN	NaN	NaN	NaN	NaN	NaN
1.768	13.077	130.7391	1009.6826	-0.91113	0.68945	0.11963	-19.676	-27.95338	652.6357	-0.69873	0.33447	-0.02002	-48.667	-99.6539	592.616	-0.16895	0.23535	0.1958	NaN	NaN	NaN	NaN	NaN	NaN
1.77	-12.732	124.208	1005.6418	-0.89404	0.65576	0.12891	-63.183	28.158	761.699	-0.823	0.39062	0.0014648	-18.901	-115.072	761.71	-0.2583	0.27686	0.20898	NaN	NaN	NaN	NaN	NaN	NaN
1.772	16.889	124.253	986.1103	-0.87842	0.63916	0.13281	-62.565	20.683	901.891	-0.96387	0.46338	0.037598	16.1547	-2.733	915.917	-0.30273	0.29932	0.21387	NaN	NaN	NaN	NaN	NaN	NaN
1.774	36.7288	141.004	960.5227	-0.86084	0.60889	0.14014	-51.121	58.7572	1058.515	-1.1968	0.57275	0.10547	53.9305	-19.3709	1123.305	-0.39941	0.35498	0.22754	NaN	NaN	NaN	NaN	NaN	NaN
1.776	33.92	150.608	935.3676	-0.84448	0.583	0.14404	-80.618	69.837	1162.034	-1.3276	0.6333	0.14844	98.619	73.464	1284.931	-0.4917	0.40186	0.23096	NaN	NaN	NaN	NaN	NaN	NaN
1.778	1.561	144.537	927.5532	-0.82764	0.56104	0.15088	-83.79	46.87	1288.47	-1.5913	0.77588	0.23633	140.313	24.511	1473.381	-0.59766	0.45898	0.23047	NaN	NaN	NaN	NaN	NaN	NaN
1.78	3.77699999999999	146.0593	912.8322	-0.79688	0.52344	0.1543	-112.694	61.0933	1338.129	-1.7737	0.88892	0.29444	125.604	60.525	1583.681	-0.76709	0.54736	0.23047	NaN	NaN	NaN	NaN	NaN	NaN
1.782	3.32	140.5887	890.095	-0.78223	0.51172	0.15967	-171.589	5.827	1327.883	-1.9233	0.99658	0.33594	108.016	-17.9007	1664.45	-0.87109	0.59375	0.24316	NaN	NaN	NaN	NaN	NaN	NaN
1.784	-28.363	163.104	843.7256	-0.75	0.47656	0.16309	-122.5827	-43.9982	1345.526	-2.0308	1.0923	0.3252	96.01	-20.442	1632.675	-1.1118	0.71533	0.27148	NaN	NaN	NaN	NaN	NaN	NaN
1.786	-41.6491	149.648	808.8666	-0.72242	0.45264	0.16382	-133.747	-45.152	1293.756	-2.0176	1.127	0.3291	100.094	-124.947	1535.575	-1.3042	0.80908	0.30664	NaN	NaN	NaN	NaN	NaN	NaN
1.788	-52.6247	142.211	791.3055	-0.69141	0.43457	0.16309	-145.074	-99.222	1257.687	-1.9116	1.1665	0.37695	62.334	-155.12	1422.876	-1.5093	0.90479	0.35156	NaN	NaN	NaN	NaN	NaN	NaN
1.79	-36.017	147.205	743.2	-0.66016	0.4043	0.16846	-100.752	-89.912	1208.8148	-1.8718	1.1652	0.34863	35.1979	-247.158	1311.686	-1.7432	1.0332	0.43115	NaN	NaN	NaN	NaN	NaN	NaN
1.792	-62.6749	146.3738	720.681	-0.63916	0.38818	0.16895	-137.279	-81.586	1112.145	-1.8101	1.1353	0.25488	-2.821	-255.427	1209.52	-1.8359	1.0977	0.48389	NaN	NaN	NaN	NaN	NaN	NaN
1.794	-45.332	149.1	695.166	-0.61084	0.35596	0.16504	-146.12	-106.256	1091.641	-1.5361	1.0654	0.11523	-14.935	-249.887	1095.35	-1.9448	1.1978	0.61914	NaN	NaN	NaN	NaN	NaN	NaN
1.796	-42.8581	129.173	697.141	-0.58374	0.3374	0.1626	-81.053	-84.589	1082.925	-1.3628	1.0239	0.056152	-36.265	-195.528	1041.437	-1.9685	1.2483	0.71753	NaN	NaN	NaN	NaN	NaN	NaN
1.798	-48.952	135.182	672.0814	-0.55322	0.31787	0.16016	-96.4889	-112.401	1061.8204	-1.0527	0.95898	-0.050781	-27.955	-179.581	1008.125	-1.9648	1.2637	0.77979	NaN	NaN	NaN	NaN	NaN	NaN
1.8	-51.3033	133.9606	666.321	-0.51953	0.29053	0.15625	-60.586	-104.2158	1084.3032	-0.90234	0.94629	-0.12671	-39.287	-160.148	1055.489	-1.8828	1.2578	0.76611	NaN	NaN	NaN	NaN	NaN	NaN
1.802	-44.237	129.6664	632.713	-0.50537	0.27686	0.15918	-37.203	-55.858	1091.369	-0.80859	0.96289	-0.19141	-59.365	-149.0943	1104.797	-1.7832	1.2461	0.73975	NaN	NaN	NaN	NaN	NaN	NaN
1.804	-32.5181	123.5809	618.977	-0.46924	0.25977	0.15332	-29.972	-74.956	1126.785	-0.72363	1.0078	-0.24805	-94.996	-123.103	1209.931	-1.4629	1.2168	0.70068	NaN	NaN	NaN	NaN	NaN	NaN
1.806	-53.066	121.0324	573.5305	-0.43237	0.24609	0.14746	10.8495	-48.68	1153.337	-0.69531	1.0381	-0.26563	-113.171	-84.155	1263.905	-1.2188	1.1846	0.67871	NaN	NaN	NaN	NaN	NaN	NaN
1.808	-55.6812	107.944	543.909	-0.39648	0.22949	0.14795	13.279	-83.286	1138.129	-0.6875	1.0859	-0.2832	-159.3757	-95.35	1304.07437	-1.0449	1.1406	0.64502	NaN	NaN	NaN	NaN	NaN	NaN
1.81	-35.041	109.8105	522.949	-0.34424	0.20264	0.14063	12.96409	-177.803	1181.904	-0.71997	1.1204	-0.2749	-178.7535	-113.35	1302.57	-0.92188	1.0996	0.604	NaN	NaN	NaN	NaN	NaN	NaN
1.812	-24.1176	122.0002	498.64	-0.3208	0.18945	0.13428	46.45	-225.353	1229.435	-0.77197	1.1519	-0.26855	-234.845	-214.695	1333.898	-0.88281	1.0869	0.58301	NaN	NaN	NaN	NaN	NaN	NaN
1.814	-9.458	122.24301	468.276	-0.26855	0.16602	0.12158	68.128	-294.822	1284.4378	-0.87061	1.1899	-0.2417	-257.302	-277.6477	1354.714	-0.84668	1.0742	0.56104	NaN	NaN	NaN	NaN	NaN	NaN
1.816	-17.15	120.0321	450.3944	-0.22754	0.14649	0.1128	122.251	-331.488	1367.632	-0.92432	1.1997	-0.22217	-280.477	-396.917	1437.416	-0.86474	1.0879	0.54736	NaN	NaN	NaN	NaN	NaN	NaN
1.818	10.622	124.6978	430.8522	-0.18115	0.13525	0.10352	182.495	-309.337	1395.099	-1.0522	1.2173	-0.19189	-243.768	-437.5	1479.66	-0.91455	1.1235	0.53711	NaN	NaN	NaN	NaN	NaN	NaN
1.82	17.806	130.9089	404.1317	-0.125	0.13184	0.084961	166.504	-337.179	1419.128	-1.1672	1.2307	-0.15869	-212.866	-497.92	1549.041	-1.0151	1.2056	0.53711	NaN	NaN	NaN	NaN	NaN	NaN
1.822	34.2972	131.0327	391.8892	-0.074707	0.13574	0.11963	170.71	-296.789	1489.725	-1.2905	1.2544	-0.13232	-168.9827	-441.89	1606.312	-1.0796	1.2583	0.53906	NaN	NaN	NaN	NaN	NaN	NaN
1.824	22.248	115.7684	390.1879	-0.060059	0.089844	0.086914	141.372	-243.927	1534.746	-1.4629	1.2871	-0.09668	-138.8826	-441.767	1704.737	-1.2007	1.3892	0.55762	NaN	NaN	NaN	NaN	NaN	NaN
1.826	24.807	108.8514	365.6324	-0.05127	0.077637	0.069092	112.123	-228.1338	1648.955	-1.5483	1.3149	-0.083008	-125.553	-337.294	1780.513	-1.2832	1.4815	0.56592	NaN	NaN	NaN	NaN	NaN	NaN
1.828	19.688	105.3783	329.999	-0.01123	0.067383	0.068359	92.032	-144.919	1731.001	-1.7051	1.3809	-0.04834	-115.643	-301.113	1863.4512	-1.3594	1.5625	0.57324	NaN	NaN	NaN	NaN	NaN	NaN
1.83	1.498	110.291	306.953	0.040039	0.049805	0.064453	33.1181	-130.078	1755.74	-1.8074	1.4417	-0.024658	-136.47	-167.777	1899.34	-1.4644	1.6333	0.58105	NaN	NaN	NaN	NaN	NaN	NaN
1.832	-4.896	101.03	301.1794	0.054688	0.04541	0.062012	44.573	-134.345	1815.207	-1.9077	1.5024	0.00048828	-140.106	-129.41	1967.511	-1.5156	1.6563	0.58447	NaN	NaN	NaN	NaN	NaN	NaN
1.834	-10.795	103.602	306.3737	0.071289	0.035156	0.057617	34.4697	-76.251	1797.568	-2.0176	1.5801	0.028809	-159.1915	-26.06	1968.656	-1.6011	1.688	0.58594	NaN	NaN	NaN	NaN	NaN	NaN
1.836	-8.779	94.565	278.4235	0.076904	0.0354	0.051513	-16.8043	-102.559	1815.895	-2.0601	1.6079	0.03418	-118.297	-54.37	1956.3457	-1.655	1.719	0.58911	NaN	NaN	NaN	NaN	NaN	NaN
1.838	-32.1327	83.0618	266.3502	0.08252	0.02832	0.045898	6.925	-94.12	1893.157	-2.1304	1.6743	0.047852	-99.279	-54.19	1957.2153	-1.6895	1.752	0.58887	NaN	NaN	NaN	NaN	NaN	NaN
1.84	-11.19	70.2019	251.0178	0.087402	0.030273	0.047852	-14.799	-94.238	1867.6775	-2.1704	1.7016	0.05542	-63.213	-158.85	1940.681	-1.728	1.8208	0.59766	NaN	NaN	NaN	NaN	NaN	NaN
1.842	-30.6084	65.357	236.8509	0.08252	0.030762	0.052246	-66.682	-162.01	1920.678	-2.1934	1.7266	0.059082	-40.929	-183.159	1951.177	-1.7441	1.8535	0.60205	NaN	NaN	NaN	NaN	NaN	NaN
1.844	-17.772	75.361	220.2827	0.080566	0.024414	0.05127	-44.4427	-139.044	1949.2239	-2.2046	1.7583	0.05127	-25.781	-261.05	2001.584	-1.7749	1.9087	0.62109	NaN	NaN	NaN	NaN	NaN	NaN
1.846	-27.416	83.981	199.303	0.069824	0.030762	0.055908	-77.539	-184.302	1951.2225	-2.2026	1.7661	0.048828	-11.099	-245.68	2055.002	-1.7978	1.9365	0.64404	NaN	NaN	NaN	NaN	NaN	NaN
1.848	-24.677	88.7712	183.965	0.054688	0.030762	0.061523	-74.053	-199.685	2014.049	-2.1855	1.7832	0.038574	13.204	-253.143	2083.464	-1.8237	1.9517	0.6626	NaN	NaN	NaN	NaN	NaN	NaN
1.85	-36.01877	87.375	178.7245	0.033691	0.041016	0.06543	-113.891	-144.511	1998.587	-2.163	1.791	0.022705	1.30799999999999	-202.534	2094.3695	-1.8477	1.959	0.6958	NaN	NaN	NaN	NaN	NaN	NaN
1.852	-54.60167	78.494	183.4438	0.022949	0.04248	0.067871	-137.904	-178.792	1994.435	-2.1265	1.7974	0.0048828	-17.73	-221.753	2106.95	-1.8589	1.9556	0.70898	NaN	NaN	NaN	NaN	NaN	NaN
1.854	-63.255	77.164	192.623	0.0039063	0.050293	0.078125	-117.811	-126.2553	2013.257	-2.062	1.7896	-0.021973	-71.468	-170.262	2156.727	-1.8784	1.936	0.73828	NaN	NaN	NaN	NaN	NaN	NaN
1.856	-51.0018	68.661	166.9116	-0.0014648	0.055176	0.082031	-125.144	-88.206	1964.045	-2.0273	1.7832	-0.035645	-110.0987	-158.584	2161.045	-1.8906	1.9043	0.75732	NaN	NaN	NaN	NaN	NaN	NaN
1.858	-39.4901	71.6063	148.1028	-0.0092773	0.051758	0.082031	-60.8374	-118.477	1962.223	-1.9619	1.7598	-0.063965	-158.003	-103.3344	2145.714	-1.8999	1.8677	0.76855	NaN	NaN	NaN	NaN	NaN	NaN
1.86	-48.9417	66.8542	123.7854	-0.0097656	0.055664	0.089355	-16.9174	-70.091	1941.305	-1.9275	1.7356	-0.076904	-145.789	-94.478	2067.448	-1.8999	1.8032	0.78906	NaN	NaN	NaN	NaN	NaN	NaN
1.862	-38.897	50.9002	118.0421	-0.013672	0.051758	0.088379	-19.2287	-100.136	1899.836	-1.8901	1.7056	-0.099609	-167.982	-87.771	1973.262	-1.8999	1.77	0.79688	NaN	NaN	NaN	NaN	NaN	NaN
1.864	0.102	51.097	104.9993	-0.017578	0.050293	0.090332	16.154	-111.392	1893.342	-1.8613	1.6543	-0.10547	-140.5451	-87.933	1909.135	-1.8823	1.7017	0.80273	NaN	NaN	NaN	NaN	NaN	NaN
1.866	-4.576	59.481	87.1564	-0.020996	0.043457	0.088867	20.9607	-39.991	1863.427	-1.8477	1.6328	-0.10742	-126.993	-46.772	1880.178	-1.8686	1.6469	0.80664	NaN	NaN	NaN	NaN	NaN	NaN
1.868	19.863	56.3854	92.1164	-0.022461	0.041504	0.09082	32.677	-49.473	1852.9862	-1.8242	1.5781	-0.11328	-137.005	-18.383	1878.351	-1.8535	1.5918	0.80908	NaN	NaN	NaN	NaN	NaN	NaN
1.87	6.45	44.2601	109.254	-0.024414	0.041992	0.086914	70.637	-4.776	1881.4091	-1.8047	1.5234	-0.11426	-167.30692	5.413	1873.852	-1.834	1.5215	0.80908	NaN	NaN	NaN	NaN	NaN	NaN
1.872	10.856	33.39498	106.97	-0.025146	0.044678	0.087403	89.405	19.966	1846.613	-1.7949	1.498	-0.11328	-164.0113	13.164	1864.774	-1.8198	1.4907	0.80566	NaN	NaN	NaN	NaN	NaN	NaN
1.874	9.364	41.6091	83.6741	-0.027344	0.049316	0.088867	71.009	-50.516	1873.3776	-1.7729	1.4458	-0.10205	-171.426	14.245	1876.457	-1.8047	1.4316	0.79932	NaN	NaN	NaN	NaN	NaN	NaN
1.876	15.211	33.921	76.6995	-0.025879	0.050781	0.090332	88.563	-17.865	1875.839	-1.7608	1.4019	-0.10351	-149.773	29.548	1896.348	-1.7907	1.3962	0.78735	NaN	NaN	NaN	NaN	NaN	NaN
1.878	12.854	23.4555	68.1431	-0.026367	0.051758	0.086426	73.496	-53.1495	1854.5963	-1.7461	1.3701	-0.10107	-155.999	23.8502	1944.151	-1.7769	1.3657	0.77734	NaN	NaN	NaN	NaN	NaN	NaN
1.88	2.974	25.7749	45.6529	-0.012695	0.048828	0.08252	51.6803	-76.766	1859.543	-1.71	1.3223	-0.095703	-166.3533	43.978	1958.748	-1.7617	1.3379	0.76221	NaN	NaN	NaN	NaN	NaN	NaN
1.882	5.619	32.156	35.0042	-0.0019531	0.052491	0.079345	70.805	-26.49863	1810.613	-1.689	1.3032	-0.099121	-178.786	12.516	1967.229	-1.7534	1.3247	0.76172	NaN	NaN	NaN	NaN	NaN	NaN
1.884	-3.807	37.323	34.4517	0.0092773	0.054688	0.075195	45.3878	-84.524	1762.5801	-1.6582	1.2715	-0.097656	-157.9536	16.398	1909.8152	-1.7324	1.3066	0.73682	NaN	NaN	NaN	NaN	NaN	NaN
1.886	23.724	28.8034	34.5597	0.02832	0.055176	0.070313	65.226	-29.981	1762.3606	-1.6316	1.259	-0.096192	-130.057	-15.8433	1879.846	-1.7026	1.2896	0.71729	NaN	NaN	NaN	NaN	NaN	NaN
1.888	8.112	23.6714	45.8398	0.043457	0.054199	0.058105	29.984	7.9599	1727.2474	-1.6094	1.2402	-0.086914	-98.177	10.593	1846.241	-1.6875	1.2773	0.71045	NaN	NaN	NaN	NaN	NaN	NaN
1.89	10.277	17.844	37.611	0.063477	0.042969	0.060059	-0.8817	-12.999	1741.041	-1.5879	1.2188	-0.081055	-66.499	-17.085	1831.197	-1.6675	1.2534	0.68359	NaN	NaN	NaN	NaN	NaN	NaN
1.892	-12.108	6.739	35.2788	0.079346	0.03833	0.051026	19.7421	58.2896	1722.025	-1.5781	1.2031	-0.069336	-63.931	46.059	1809.5784	-1.658	1.2347	0.67701	NaN	NaN	NaN	NaN	NaN	NaN
1.894	-15.779	6.247	39.1411	0.09668	0.032227	0.043457	-30.832	33.925	1659.078	-1.564	1.1802	-0.058594	-69.641	37.499	1803.183	-1.6543	1.2148	0.66699	NaN	NaN	NaN	NaN	NaN	NaN
1.896	-22.203	7.9233	32.65719	0.11523	0.02832	0.039551	-28.3161	35.449	1652.978	-1.5571	1.1611	-0.048095	-44.625	129.784	1787.518	-1.6504	1.1953	0.66064	NaN	NaN	NaN	NaN	NaN	NaN
1.898	-43.9435	2.5993	10.2207	0.12256	0.022461	0.035645	-28.6714	96.956	1624.358	-1.5449	1.1406	-0.036133	-35.053	132.0927	1790.751	-1.6558	1.1821	0.6543	NaN	NaN	NaN	NaN	NaN	NaN
1.9	-41.9929	4.9039	14.13594	0.12988	0.018066	0.035645	-70.31	53.232	1610.9884	-1.521	1.1235	-0.020508	-11.807	220.212	1754.12	-1.6465	1.1602	0.646	NaN	NaN	NaN	NaN	NaN	NaN
1.902	-47.69783	4.0674	-5.7615	0.1372	0.013428	0.030518	-55.496	88.275	1634.5657	-1.5078	1.1143	-0.019043	-48.153	205.568	1741.7662	-1.6345	1.1389	0.63257	NaN	NaN	NaN	NaN	NaN	NaN
1.904	-34.9108	10.4101	7.667	0.14258	0.0083008	0.030273	-91.3	105.698	1583.222	-1.4819	1.0903	-0.0014648	-61.404	273.624	1694.01954	-1.6108	1.1177	0.61328	NaN	NaN	NaN	NaN	NaN	NaN
1.906	-50.8034	1.0874	17.635	0.14307	0.0073242	0.034668	-84.428	66.926	1579.0793	-1.4644	1.0772	0.0046387	-78.6218	219.316	1660.0725	-1.5757	1.0864	0.58789	NaN	NaN	NaN	NaN	NaN	NaN
1.908	-44.91172	-6.3626	34.419	0.14355	0.003418	0.03418	-18.3492	95.4201	1576.4137	-1.4492	1.0586	0.012695	-74.957	259.631	1619.2108	-1.5503	1.0718	0.57422	NaN	NaN	NaN	NaN	NaN	NaN
1.91	-20.224	-9.2176	4.9233	0.14795	0.003418	0.036621	-28.3541	61.443	1530.0926	-1.4199	1.041	0.026367	-73.363	157.5306	1591.243	-1.5059	1.0361	0.5498	NaN	NaN	NaN	NaN	NaN	NaN
1.912	-22.1288	11.274	-4.6355	0.14771	0.0073242	0.040772	-25.437	43.266	1530.792	-1.4063	1.0332	0.034668	-52.354	173.568	1537.9744	-1.4753	1.0105	0.52563	NaN	NaN	NaN	NaN	NaN	NaN
1.914	-27.536	15.1667	-5.622	0.15039	0.0083008	0.041016	9.75501	94.4443	1503.0997	-1.3726	1.0073	0.04248	-67.131	89.683	1499.8428	-1.4395	0.98438	0.49854	NaN	NaN	NaN	NaN	NaN	NaN
1.916	-24.226	19.7363	-10.0321	0.14551	0.011719	0.04834	-5.831	69.59	1481.458	-1.3413	0.99707	0.041992	-77.5254	155.266	1458.7888	-1.3901	0.95459	0.46875	NaN	NaN	NaN	NaN	NaN	NaN
1.918	5.098	28.9262	-10.739	0.13867	0.012207	0.053223	31.5342	122.8105	1470.388	-1.313	0.98291	0.046875	-63.9672	118.883	1454.902	-1.3652	0.9375	0.45459	NaN	NaN	NaN	NaN	NaN	NaN
1.92	-14.929	39.293	-10.780725	0.13428	0.019531	0.061523	24.466	171.151	1414.20185	-1.269	0.96143	0.042969	-58.773	236.481	1419.241	-1.3174	0.90625	0.42139	NaN	NaN	NaN	NaN	NaN	NaN
1.922	-5.632	22.3358	-0.3939	0.12768	0.024415	0.062744	14.355	160.7871	1370.0207	-1.2495	0.95361	0.047852	-60.4815	209.254	1393.083	-1.2854	0.88403	0.39624	NaN	NaN	NaN	NaN	NaN	NaN
1.924	0.501999999999999	-2.475	24.2905	0.12354	0.029785	0.066895	40.7216	222.264	1355.881	-1.2046	0.93018	0.053711	-60.722	318.767	1314.576	-1.2593	0.86182	0.37695	NaN	NaN	NaN	NaN	NaN	NaN
1.926	2.9	7.626	18.834	0.11475	0.040039	0.07959	12.668	199.824	1329.77372	-1.175	0.91479	0.052734	-60.9162	274.908	1289.061	-1.2275	0.83398	0.35596	NaN	NaN	NaN	NaN	NaN	NaN
1.928	0.965	17.653962	5.1863	0.11084	0.047852	0.07666	31.536	181.626	1321.284	-1.1445	0.89453	0.052734	-86.0287	375.962	1251.3568	-1.2144	0.8208	0.33984	NaN	NaN	NaN	NaN	NaN	NaN
1.93	8.25	20.0232	-10.50737	0.10059	0.060059	0.086914	57.585	208.57	1270.207	-1.0996	0.87305	0.055176	-60.8652	301.176	1209.455	-1.1855	0.78906	0.32764	NaN	NaN	NaN	NaN	NaN	NaN
1.932	38.086	10.4764	-16.3106	0.094727	0.068603	0.095215	19.375	174.0038	1214.1752	-1.0742	0.86328	0.057617	-74.7418	352.343	1144.3408	-1.1551	0.76685	0.30615	NaN	NaN	NaN	NaN	NaN	NaN
1.934	-9.285	7.901	-13.74234	0.083984	0.079102	0.10547	19.991	204.8997	1185.274	-1.0283	0.83789	0.05957	-72.036	247.071	1084.628	-1.126	0.75	0.29102	NaN	NaN	NaN	NaN	NaN	NaN
1.936	14.761	3.124	-8.0707	0.074219	0.097168	0.11182	-3.123	212.0112	1146.04	-0.99489	0.81079	0.0625	-38.566	311.052	1016.188	-1.0752	0.71875	0.27197	NaN	NaN	NaN	NaN	NaN	NaN
1.938	3.712	1.0721	18.2364	0.068848	0.10156	0.1123	-39.618	189.606	1136.3799	-0.95361	0.78857	0.05957	6.45	246.184	971.972	-1.0542	0.70166	0.2583	NaN	NaN	NaN	NaN	NaN	NaN
1.94	9.094	-5.3184	40.884	0.039063	0.12256	0.11914	-30.607	212.3673	1135.479	-0.9082	0.77734	0.068359	1.344	354.803	919.802	-1.0073	0.66846	0.23633	NaN	NaN	NaN	NaN	NaN	NaN
1.942	-15.158	-15.2748	76.0127	0.013183	0.14697	0.12598	-69.9786	168.902	1113.764	-0.88428	0.77002	0.070313	19.613	292.2222	899.82	-0.96533	0.64404	0.21704	NaN	NaN	NaN	NaN	NaN	NaN
1.944	-10.354	-21.441	92.8777	-0.029297	0.17383	0.13232	-76.9627	143.578	1101.013	-0.83838	0.74463	0.082031	26.598	336.0179	864.7244	-0.92334	0.61719	0.20068	NaN	NaN	NaN	NaN	NaN	NaN
1.946	-20.493	-16.907	134.715	-0.10791	0.20996	0.14893	-83.985	171.4341	1038.092	-0.80615	0.729	0.085938	5.208	240.041	857.737	-0.86816	0.57227	0.18359	NaN	NaN	NaN	NaN	NaN	NaN
1.948	-58.68855	7.6429	162.6526	-0.14795	0.22852	0.1582	-129.755	151.79	964.2657	-0.76709	0.70166	0.084473	10.502	297.0175	837.37	-0.8457	0.55273	0.17334	NaN	NaN	NaN	NaN	NaN	NaN
1.95	-50.6648	21.2122	191.687	-0.22705	0.27197	0.1792	-100.3613887	192.448	933.4447	-0.7168	0.65918	0.084961	34.2435	230.4019	807.126	-0.79883	0.51758	0.15088	NaN	NaN	NaN	NaN	NaN	NaN
1.952	-84.23616	19.3333	232.924	-0.28345	0.30445	0.19263	-127.185	220.384	876.376	-0.69287	0.63721	0.091797	16.647	290.291	749.36	-0.75537	0.49121	0.13452	NaN	NaN	NaN	NaN	NaN	NaN
1.954	-65.13272	45.6646	312.794	-0.34375	0.34277	0.20459	-121.4786	188.069	850.897	-0.63525	0.60498	0.095703	6.566	225.808	663.905	-0.70752	0.46143	0.12109	NaN	NaN	NaN	NaN	NaN	NaN
1.956	-16.144	76.293	386.337	-0.43066	0.39063	0.21924	-75.78818	216.5947	822.1852	-0.59864	0.58741	0.099611	-34.732	267.32	584.636	-0.64844	0.41895	0.094727	NaN	NaN	NaN	NaN	NaN	NaN
1.958	-12.7493	100.769	463.371	-0.47705	0.41846	0.22217	-105.21	198.350911	768.9135	-0.55859	0.56934	0.10205	-21.236	198.677	526.256	-0.61914	0.4043	0.086426	NaN	NaN	NaN	NaN	NaN	NaN
1.96	-11.3757	105.328	563.80139	-0.58887	0.47559	0.22998	-67.216	196.555	739.3793	-0.49854	0.54541	0.1001	-2.662	232.208	475.235	-0.54834	0.36182	0.061523	NaN	NaN	NaN	NaN	NaN	NaN
1.962	-12.6973	97.4199	662.1582	-0.69824	0.5227	0.24047	-58.3325	215.943	691.585	-0.47021	0.53271	0.1084	14.559	186.665	454.3436	-0.49756	0.33398	0.042969	NaN	NaN	NaN	NaN	NaN	NaN
1.964	40.51	97.28	740.083	-0.82324	0.57422	0.25732	-110.7788	191.13	623.266	-0.41602	0.49707	0.11279	-8.75899999999999	220.461	400.7607	-0.44141	0.30078	0.019531	NaN	NaN	NaN	NaN	NaN	NaN
1.966	28.7281	106.125	821.001	-1.0039	0.66211	0.29248	-57.786	196.377	591.389	-0.37988	0.47021	0.11695	-37.0937	160.7012	342.232	-0.36572	0.26904	-0.003418	NaN	NaN	NaN	NaN	NaN	NaN
1.968	46.046	92.649	930.8609	-1.0962	0.70557	0.30762	-55.6887	184.376	551.875	-0.34717	0.44385	0.12109	-55.17	166.8736	304.4165	-0.3335	0.25635	-0.013184	NaN	NaN	NaN	NaN	NaN	NaN
1.97	28.259	64.09	1013.058	-1.2729	0.80518	0.35889	-51.583	160.9026	529.8801	-0.2998	0.39844	0.12744	-67.5162	120.343	286.983	-0.2583	0.2168	-0.047363	NaN	NaN	NaN	NaN	NaN	NaN
1.972	18.6964	41.417	1085.353	-1.3877	0.88232	0.39795	15.008	168.28	509.5895	-0.27734	0.38086	0.125	-48.025	162.1483	265.743	-0.21094	0.17994	-0.064941	NaN	NaN	NaN	NaN	NaN	NaN
1.974	39.101	14.45187	1127.555	-1.4722	0.95166	0.4292	-2.291	151.825	471.211	-0.23438	0.35156	0.13086	-36.426	154.361	230.56012	-0.16748	0.14063	-0.077148	NaN	NaN	NaN	NaN	NaN	NaN
1.976	31.061	-24.3175	1180.1819	-1.5293	1.0156	0.45947	8.369	137.5789	468.529	-0.19726	0.33008	0.12573	-59.432	167.773	213.074	-0.12109	0.099609	-0.097656	NaN	NaN	NaN	NaN	NaN	NaN
1.978	53.925	-57.385	1237.272	-1.5352	1.041	0.4624	36.751	140.136	413.69454	-0.16211	0.31494	0.12988	-80.0745	131.657	172.756	-0.10205	0.081055	-0.10791	NaN	NaN	NaN	NaN	NaN	NaN
1.98	61.352	-76.221	1235.038	-1.4839	1.0679	0.46875	7.484	98.521	384.49	-0.11719	0.29688	0.13184	-79.7978	102.979	161.7069	-0.066406	0.051758	-0.1167	NaN	NaN	NaN	NaN	NaN	NaN
1.982	71.227	-76.591	1232.598	-1.4148	1.094	0.47583	36.664	90.049	363.704	-0.096191	0.28418	0.13037	-53.848	70.024	127.9422	-0.053955	0.035888	-0.12622	NaN	NaN	NaN	NaN	NaN	NaN
1.984	69.928	-76.1706	1212.881	-1.3379	1.1348	0.47852	10.301	112.8319	327.022	-0.059082	0.2583	0.13281	-44.124	50.417	104.867	-0.048828	0.016113	-0.12793	NaN	NaN	NaN	NaN	NaN	NaN
1.986	104.631	-83.2181	1211.625	-1.2305	1.1836	0.45557	-4.672	117.4755	309.88921	-0.032959	0.23706	0.13599	-18.132	47.986	75.2386	-0.066406	-0.00097656	-0.12012	NaN	NaN	NaN	NaN	NaN	NaN
1.988	94.785	-94.964	1196.359	-1.1582	1.1797	0.43408	13.066	153.074	280.8405	-0.010254	0.20313	0.13379	-46.8477	44.035	66.62	-0.084961	-0.01123	-0.11328	NaN	NaN	NaN	NaN	NaN	NaN
1.99	70.665	-94.4	1180.563	-0.95459	1.1313	0.38184	-38.522	167.11	247.7033	0.0073242	0.16699	0.12842	-44.742	65.2621	32.078	-0.12988	-0.028809	-0.09668	NaN	NaN	NaN	NaN	NaN	NaN
1.992	50.39	-96.639	1184.6032	-0.79248	1.0503	0.34717	-17.108	145.21	237.966	0.020996	0.14941	0.12598	-14.942	55.404	43.347	-0.15796	-0.037597	-0.080078	NaN	NaN	NaN	NaN	NaN	NaN
1.994	30.123	-83.4407	1171.07	-0.6499	0.96924	0.31152	-34.636	146.227	212.5979	0.040039	0.11914	0.125	-3.709	86.5184	26.1129	-0.18457	-0.042969	-0.064941	NaN	NaN	NaN	NaN	NaN	NaN
1.996	24.3159	-75.8189	1157.483	-0.53418	0.88281	0.29346	-71.01478	118.8623	205.4028	0.052735	0.104	0.12281	16.847	68.64	51.55356	-0.21045	-0.047363	-0.047852	NaN	NaN	NaN	NaN	NaN	NaN
1.998	8.351	-67.565	1145.7627	-0.50391	0.86328	0.2915	-40.4838	111.722106	216.3057	0.064941	0.087891	0.125	-14.565	99.501	28.345	-0.21045	-0.048828	-0.044434	NaN	NaN	NaN	NaN	NaN	NaN
2	-9.557	-71.833	1144.657	-0.50195	0.85547	0.30566	-78.174	108.3186	182.2142	0.087402	0.077637	0.12549	-15.858	53.883	43.1789	-0.21338	-0.054688	-0.039551	NaN	NaN	NaN	NaN	NaN	NaN
2.002	-16.922	-75.357	1158.3358	-0.53687	0.87036	0.34082	-74.8284	82.06	170.1224	0.094238	0.068359	0.12744	-17.296	66.686	13.931	-0.20679	-0.062744	-0.039551	NaN	NaN	NaN	NaN	NaN	NaN
2.004	-26.51684	-81.493	1182.0166	-0.59912	0.896	0.37842	-45.825	91.6017	146.722	0.10449	0.054688	0.12354	-3.46	5.76842	24.135	-0.19775	-0.072266	-0.039063	NaN	NaN	NaN	NaN	NaN	NaN
2.006	-31.4605	-101.2595	1187.529	-0.69922	0.94336	0.44043	-113.905	98.9957	112.4669	0.12207	0.040039	0.12256	-11.794	32.551	8.8494	-0.19678	-0.080566	-0.049805	NaN	NaN	NaN	NaN	NaN	NaN
2.008	-38.28864	-125.23	1212.045	-0.78003	0.98658	0.4729	-84.41818	74.2033	130.731	0.13135	0.029297	0.11621	-20.702	-1.819	1.059	-0.19922	-0.096191	-0.046387	NaN	NaN	NaN	NaN	NaN	NaN
2.01	-3.154	-150.806	1222.474	-0.8457	1.0254	0.49854	-77.1788	72.4726	115.56202	0.15771	0.010254	0.11523	-13.977	48.3314	8.27699999999999	-0.2124	-0.10791	-0.046387	NaN	NaN	NaN	NaN	NaN	NaN
2.012	-41.1024	-178.577	1238.819	-0.91992	1.0684	0.52393	-106.706	49.154	106.469	0.16821	-0.0012207	0.11523	-17.045	13.302	31.08	-0.23316	-0.11425	-0.039307	NaN	NaN	NaN	NaN	NaN	NaN
2.014	-49.722	-200.599	1263.0866	-0.95654	1.0854	0.52832	-38.0533	24.528	114.003	0.18701	-0.01416	0.10547	-16.248	44.39723	24.8019	-0.26563	-0.11621	-0.033203	NaN	NaN	NaN	NaN	NaN	NaN
2.016	-59.1135	-231.79	1287.02	-1.0288	1.1294	0.54004	-50.1441	29.089	81.115	0.20605	-0.030273	0.097656	-2.91200000000001	-7.881	40.818	-0.31396	-0.11426	-0.0092773	NaN	NaN	NaN	NaN	NaN	NaN
2.018	-48.667	-215.7437	1328.093	-1.0784	1.1643	0.54883	-50.382	27.554	75.0202	0.21387	-0.037109	0.091797	-25.102	31.956	26.9564	-0.34229	-0.10938	0.0039063	NaN	NaN	NaN	NaN	NaN	NaN
2.02	-69.87	-205.26686	1341.4898	-1.1187	1.2017	0.55371	5.90600000000001	54.2346	56.0664	0.22998	-0.046387	0.086914	-45.4253	-11.8838	40.984	-0.38525	-0.092773	0.018555	NaN	NaN	NaN	NaN	NaN	NaN
2.022	-68.6838	-193.0014	1362.724	-1.1621	1.248	0.5542	-21.175	82.12	31.1957	0.23389	-0.059082	0.07959	-70.675	55.931	23.6076	-0.40039	-0.081299	0.023438	NaN	NaN	NaN	NaN	NaN	NaN
2.024	-62.331	-202.195	1388.928	-1.1816	1.2793	0.55127	4.684	63.425	34.727	0.23242	-0.067383	0.074219	-68.9895	15.6559	42.88	-0.40039	-0.066406	0.026367	NaN	NaN	NaN	NaN	NaN	NaN
2.026	-75.319	-189.512	1410.199	-1.2051	1.3398	0.54346	25.131	54.973	14.342	0.22998	-0.072754	0.069824	-82.321	74.731	11.2644	-0.37646	-0.046387	0.019531	NaN	NaN	NaN	NaN	NaN	NaN
2.028	-31.348	-162.1085	1437.75154	-1.2222	1.377	0.53906	-1.068	27.1644	10.866	0.22217	-0.076172	0.070313	-60.8655	20.45791	5.155	-0.34912	-0.040771	0.014893	NaN	NaN	NaN	NaN	NaN	NaN
2.03	-39.517	-134.521	1467.0153	-1.2402	1.4141	0.53564	55.008	2.902	26.2022	0.20654	-0.077148	0.067871	-73.34	63.662	-6.589	-0.31445	-0.036133	0.0043945	NaN	NaN	NaN	NaN	NaN	NaN
2.032	-15.477	-128.253	1494.3391	-1.2788	1.4517	0.53418	15.03	22.4562	8.824	0.19141	-0.076172	0.066407	-75.2071	22.7222	8.8765	-0.26123	-0.036133	-0.017578	NaN	NaN	NaN	NaN	NaN	NaN
2.034	-14.271	-133.874	1522.3393	-1.2988	1.4717	0.54004	14.621	9.89	20.4886	0.17773	-0.071289	0.070801	-58.303	64.945	16.2814	-0.23486	-0.036621	-0.03125	NaN	NaN	NaN	NaN	NaN	NaN
2.036	-21.31	-139.468	1555.058	-1.334	1.5117	0.5415	53.0004	14.2816	14.9253	0.15039	-0.065918	0.075684	-35.168	12.65334	14.4473	-0.18262	-0.046875	-0.049805	NaN	NaN	NaN	NaN	NaN	NaN
2.038	-23.891	-138.4664	1567.2081	-1.3498	1.5403	0.54761	-3.366	21.0422	0.317	0.13916	-0.057129	0.07666	-27.916	15.167	14.6031	-0.15015	-0.051514	-0.05957	NaN	NaN	NaN	NaN	NaN	NaN
2.04	-17.27	-152.149	1571.9531	-1.3647	1.5688	0.55371	17.741	1.1624	12.56354	0.11377	-0.046387	0.071777	-40.09	-47.346	24.4458	-0.11523	-0.053223	-0.073242	NaN	NaN	NaN	NaN	NaN	NaN
2.042	-26.608	-148.1667	1587.1163	-1.3828	1.5918	0.55371	3.345	9.0918	4.925	0.098387	-0.042724	0.074951	-44.624	-4.559	18.62	-0.071777	-0.047852	-0.087402	NaN	NaN	NaN	NaN	NaN	NaN
2.044	-68.18	-144.3536	1583.4726	-1.3882	1.5981	0.55469	-16.503	13.8843	11.1168	0.092285	-0.034668	0.072754	-35.463	-1.331	21.7607	-0.044434	-0.039063	-0.095703	NaN	NaN	NaN	NaN	NaN	NaN
2.046	-56.616	-141.39726	1606.99	-1.4082	1.6055	0.55713	2.189	-3.643	15.2947	0.077148	-0.025879	0.071777	-20.405	48.9557	30.2321	0.0053711	-0.037598	-0.10742	NaN	NaN	NaN	NaN	NaN	NaN
2.048	-27.097	-136.7845	1625.157	-1.4263	1.6031	0.56031	-60.2031	14.866	-4.925	0.077637	-0.024414	0.070801	-12.791	22.432156	25.7859	0.043457	-0.029297	-0.11889	NaN	NaN	NaN	NaN	NaN	NaN
2.05	-49.4574	-122.3402	1629.9525	-1.4453	1.5918	0.56396	-48.45	-0.830000000000002	12.948	0.074219	-0.017578	0.067383	-8.89	28.8748	20.86457	0.082031	-0.027832	-0.13281	NaN	NaN	NaN	NaN	NaN	NaN
2.052	-49.8333	-122.834	1662.92	-1.4639	1.5723	0.57568	-42.397	9.12532	17.0742	0.072754	-0.012451	0.058838	-25.492	-1.317	-7.5492	0.14258	-0.023926	-0.1543	NaN	NaN	NaN	NaN	NaN	NaN
2.054	-78.8021	-118.1046	1655.3011	-1.478	1.561	0.58105	-84.959	57.63	4.3686	0.081055	-0.013184	0.048828	-13.18	27.664	19.4172	0.17285	-0.025879	-0.16064	NaN	NaN	NaN	NaN	NaN	NaN
2.056	-44.111	-100.9954	1648.8464	-1.4971	1.5391	0.59619	-50.6353	49.44	11.5752	0.08252	-0.013184	0.042969	-12.079	31.074	19.1351	0.22656	-0.027832	-0.17334	NaN	NaN	NaN	NaN	NaN	NaN
2.058	-72.7152	-76.476	1634.2382	-1.5086	1.5246	0.61011	-79.4709	65.39	-2.12	0.088867	-0.011719	0.040039	1.793	41.1466	28.203	0.25879	-0.037109	-0.1897	NaN	NaN	NaN	NaN	NaN	NaN
2.06	-61.33	-67.06	1622.7822	-1.5171	1.5063	0.62012	-117.98	55.81	1.8818	0.097168	-0.0073242	0.035645	1.874	41.0441	24.88238	0.27637	-0.041504	-0.1958	NaN	NaN	NaN	NaN	NaN	NaN
2.062	-76.9763	-84.26	1617.658	-1.521	1.479	0.63428	-48.238	23.0596	14.825	0.10889	-0.0063476	0.024414	-7.939	36.114	-5.719	0.29053	-0.052734	-0.19434	NaN	NaN	NaN	NaN	NaN	NaN
2.064	-79.3628	-85.232	1616.455	-1.5273	1.4727	0.64502	-81.488	23.93153	-2.385	0.11816	-0.0048828	0.028809	-7.694	45.754	-9.88800000000001	0.28564	-0.057129	-0.19678	NaN	NaN	NaN	NaN	NaN	NaN
2.066	-95.604	-74.5694	1618.661	-1.5288	1.4399	0.65039	-79.205	7.607	10.9018	0.1333	-0.00097656	0.02002	-8.36199999999999	55.5601	6.485	0.26318	-0.06543	-0.18506	NaN	NaN	NaN	NaN	NaN	NaN
2.068	-85.3937	-73.8346	1617.591	-1.5315	1.4172	0.65577	-24.216	7.6795	24.949	0.13818	0.003418	0.01416	-30.785	58.395	6.22	0.24316	-0.068848	-0.17382	NaN	NaN	NaN	NaN	NaN	NaN
2.07	-52.774	-82.633	1609.713	-1.5259	1.397	0.66406	-82.3442	31.1917	5.9605	0.15381	0.0068359	0.014648	-50.4183	40.0035	24.6165	0.21777	-0.072266	-0.15918	NaN	NaN	NaN	NaN	NaN	NaN
2.072	-59.575	-74.3207	1618.1098	-1.5229	1.3716	0.66797	-28.63	28.2073	29.334	0.16138	0.014648	0.015137	-46.913	28.5135	10.142	0.18604	-0.072754	-0.14404	NaN	NaN	NaN	NaN	NaN	NaN
2.074	-53.917	-60.1272	1627.8819	-1.5229	1.3599	0.66895	-1.279	36.546	9.9109	0.16895	0.021484	0.014648	-54.828	-15.9993966	15.0786	0.16699	-0.067871	-0.1377	NaN	NaN	NaN	NaN	NaN	NaN
2.076	-46.633	-58.3549	1644.262	-1.5059	1.3359	0.66846	-13.058	27.3115	11.1386	0.17383	0.036133	0.018555	-75.0959	13.7022	17.915	0.15479	-0.058594	-0.12207	NaN	NaN	NaN	NaN	NaN	NaN
2.078	-16.632	-60.4928	1644.32	-1.4998	1.3196	0.6643	19.587	11.1857	32.098	0.18164	0.04248	0.01709	-61.044	6.1116	25.171	0.14307	-0.049805	-0.10791	NaN	NaN	NaN	NaN	NaN	NaN
2.08	-36.367	-53.4527	1635.184	-1.4902	1.3057	0.6665	5.264	24.522	25.7399	0.18701	0.053711	0.02002	-75.2503	63.334	15.537	0.13867	-0.048828	-0.095215	NaN	NaN	NaN	NaN	NaN	NaN
2.082	-31.121	-51.5045	1603.791	-1.4785	1.2803	0.65674	22.281	21.98487	24.633	0.18896	0.057129	0.03003	-59.7498	41.5817	24.935	0.13379	-0.040039	-0.096191	NaN	NaN	NaN	NaN	NaN	NaN
2.084	-26.473	-49.9655	1588.755	-1.4663	1.27	0.65137	54.7114	12.2461	31.419	0.18994	0.063965	0.034668	-46.722	56.474	22.173	0.13574	-0.039551	-0.083496	NaN	NaN	NaN	NaN	NaN	NaN
2.086	-37.725	-33.2342	1569.146	-1.4453	1.2461	0.63916	-22.226	37.99	18.1235	0.19141	0.06543	0.04834	-43.489	3.225	43.6485	0.13818	-0.039551	-0.085938	NaN	NaN	NaN	NaN	NaN	NaN
2.088	-29.11	-23.214	1570.4962	-1.4231	1.2263	0.62378	37.284	27.2578	27.6336	0.18994	0.06543	0.05127	-59.868	35.1169	29.932	0.1416	-0.038574	-0.087158	NaN	NaN	NaN	NaN	NaN	NaN
2.09	-40.306	-22.589	1563.038	-1.4009	1.2056	0.6123	40.231	46.356	6.5491	0.18457	0.063965	0.0625	-54.7552	-0.305899999999999	21.9083	0.14404	-0.042969	-0.085938	NaN	NaN	NaN	NaN	NaN	NaN
2.092	-41.6234	-17.378	1547.627	-1.3701	1.1777	0.59619	-14.334	48.2496	14.8124	0.17578	0.059326	0.070801	-52.487	42.932	16.6189	0.14014	-0.040039	-0.084961	NaN	NaN	NaN	NaN	NaN	NaN
2.094	-32.855	-17.7567	1528.8569	-1.3555	1.1621	0.59033	19.666	26.6568	29.377	0.16699	0.064941	0.077637	-55.2447	4.9721	24.4194	0.14453	-0.041504	-0.089355	NaN	NaN	NaN	NaN	NaN	NaN
2.096	-22.089	3.3906	1516.5144	-1.3296	1.1294	0.57324	-20.261	20.3147	12.1842	0.15283	0.068359	0.095215	-30.757	50.555	14.8039	0.14258	-0.036133	-0.088379	NaN	NaN	NaN	NaN	NaN	NaN
2.098	-34.93	1.2608	1494.957	-1.3139	1.1098	0.56592	-10.262	-1.313	33.847	0.14941	0.072754	0.1001	-7.478	7.8196	17.1653	0.14184	-0.02832	-0.084717	NaN	NaN	NaN	NaN	NaN	NaN
2.1	-55.598	11.4383	1485.231	-1.2964	1.0864	0.55859	3.009	-12.6288	21.30457	0.13916	0.079102	0.11035	-8.712	44.2826	2.7523	0.14111	-0.019043	-0.080566	NaN	NaN	NaN	NaN	NaN	NaN
2.102	-22.34	14.26216	1487.6169	-1.2769	1.061	0.55078	-84.103	14.7024	16.5284	0.12964	0.08789	0.11646	-18.584	3.942	31.452	0.12256	-0.0092773	-0.068359	NaN	NaN	NaN	NaN	NaN	NaN
2.104	-54.1841	3.8892	1473.93558	-1.271	1.0454	0.55176	-50.378	-0.59	51.263	0.11914	0.095703	0.12695	-21.921	45.96501	25.6219	0.11621	-0.0068359	-0.063477	NaN	NaN	NaN	NaN	NaN	NaN
2.106	-55.665	-10.5473	1476.391	-1.2637	1.0117	0.54736	-66.9888	18.1966	26.7373	0.11084	0.10205	0.14111	-5.308	-3.637	35.931	0.094727	0.003418	-0.059082	NaN	NaN	NaN	NaN	NaN	NaN
2.108	-73.013	-26.7508	1466.284	-1.2588	0.99317	0.54639	-86.455	15.424	8.5619	0.10645	0.10693	0.14746	-0.564	29.2354	38.279	0.082032	0.013916	-0.05542	NaN	NaN	NaN	NaN	NaN	NaN
2.11	-48.582	-7.33328	1431.748	-1.252	0.97852	0.54346	-51.0502	-7.2716	13.7097	0.09375	0.11279	0.15723	9.046	-23.8499	31.263065	0.067383	0.023438	-0.049316	NaN	NaN	NaN	NaN	NaN	NaN
2.112	-68.3105	17.378	1411.8736	-1.2456	0.96338	0.53613	-95.923	8.417482	0.0609999999999999	0.086182	0.1272	0.17017	-5.737	15.294	9.57114	0.053223	0.040039	-0.047363	NaN	NaN	NaN	NaN	NaN	NaN
2.114	-62.95	33.1	1384.124	-1.2397	0.94775	0.54199	-78.23862	4.522	32.8031	0.069824	0.13086	0.16699	-20.007	-29.213	40.3383	0.05127	0.053223	-0.043945	NaN	NaN	NaN	NaN	NaN	NaN
2.116	-48.3912	23.858	1360.707	-1.2319	0.93994	0.53516	-37.252	-23.42429	53.407	0.057617	0.146	0.17139	-30.596	4.74499	24.219	0.052246	0.072266	-0.04248	NaN	NaN	NaN	NaN	NaN	NaN
2.118	-31.606	39.855	1350.988	-1.2172	0.93603	0.52588	-109.279	-18.9277	52.614	0.046387	0.15332	0.16699	-25.242	-33.4533	67.194	0.060547	0.086914	-0.051513	NaN	NaN	NaN	NaN	NaN	NaN
2.12	-5.988	64.3956	1355.0617	-1.2012	0.92578	0.52051	-24.855	-45.5328	99.6438	0.0043945	0.18213	0.1748	2.984	-9.6095	100.384	0.077148	0.10303	-0.060059	NaN	NaN	NaN	NaN	NaN	NaN
2.122	-14.626	72.4804	1347.9308	-1.1758	0.89453	0.51221	-30.3546	-50.354	109.836	-0.036622	0.20044	0.18311	-42.91	-79.603	155.6778	0.093262	0.11768	-0.080566	NaN	NaN	NaN	NaN	NaN	NaN
2.124	7.218	79.2291	1337.733	-1.1558	0.88135	0.49951	-64.80032	-59.646	151.197	-0.091797	0.22607	0.18945	-55.252	-89.159	187.131	0.097168	0.12646	-0.09375	NaN	NaN	NaN	NaN	NaN	NaN
2.126	-25.635	89.98	1289.6221	-1.1191	0.85547	0.48877	-18.082	-86.087	182.493	-0.16895	0.25977	0.19678	-67.5353	-154.616	228.419	0.085938	0.13477	-0.10254	NaN	NaN	NaN	NaN	NaN	NaN
2.128	-14.886	86.961	1259.685	-1.0937	0.83105	0.47705	-42.823	-85.032	227.481	-0.21582	0.27637	0.20654	-48.286	-157.482	290.865	0.051758	0.15186	-0.10743	NaN	NaN	NaN	NaN	NaN	NaN
2.13	-6.044	76.641	1238.1623	-1.0684	0.8125	0.46338	-27.521	-77.27568	329.6778	-0.30225	0.32422	0.20459	-40.52218	-186.518	426.186	-0.0053711	0.16455	-0.10693	NaN	NaN	NaN	NaN	NaN	NaN
2.132	10.312	73.7801	1232.588	-1.0371	0.79102	0.44531	12.492	-56.1323	429.12	-0.38257	0.36181	0.2041	-39.002	-179.554	560.891	-0.10156	0.18848	-0.10156	NaN	NaN	NaN	NaN	NaN	NaN
2.134	17.7253	76.89074	1221.999	-1.0181	0.77686	0.43457	3.65	-8.776	528.777	-0.46729	0.40771	0.20264	-38.62134	-160.9866	699.241	-0.15527	0.19922	-0.098145	NaN	NaN	NaN	NaN	NaN	NaN
2.136	0.586	75.3581	1187.322	-0.98486	0.75342	0.41699	63.3684	9.304	665.878	-0.60498	0.47852	0.2041	-60.1291	-90.738	852.147	-0.26318	0.24463	-0.083496	NaN	NaN	NaN	NaN	NaN	NaN
2.138	18.8279	75.789	1164.469	-0.96509	0.73999	0.40405	71.51	59.8037	800.492	-0.68457	0.51758	0.21143	-84.012	-38.561	1024.797	-0.36035	0.27539	-0.074463	NaN	NaN	NaN	NaN	NaN	NaN
2.14	28.537	86.681	1144.283	-0.94336	0.72266	0.38818	105.762	98.9052	945.4761	-0.87842	0.60107	0.21289	-93.828	15.602	1221.575	-0.46191	0.31641	-0.057617	NaN	NaN	NaN	NaN	NaN	NaN
2.142	43.2068	96.851	1139.998	-0.92334	0.70752	0.375	172.427	107.09	1103.953	-1.1094	0.70117	0.24121	-83.709	41.5804	1394.972	-0.61816	0.38232	-0.039063	NaN	NaN	NaN	NaN	NaN	NaN
2.144	42.73	93.0404	1141.511	-0.906	0.69556	0.36182	111.082	120.262	1195.2919	-1.2383	0.75391	0.26074	-99.458	39.089	1497.635	-0.7124	0.4165	-0.026855	NaN	NaN	NaN	NaN	NaN	NaN
2.146	26.7168	106.4224	1124.219	-0.88672	0.67773	0.35205	74.78	75.248	1272.915	-1.4976	0.86768	0.3252	-87.186	32.719	1549.415	-0.92969	0.49805	0.030273	NaN	NaN	NaN	NaN	NaN	NaN
2.148	36.5108	111.05	1090.1942	-0.85938	0.66309	0.33252	73.385	11.231	1285.454	-1.6719	0.95263	0.37671	-54.719	-21.707	1543.56	-1.1297	0.57544	0.08374	NaN	NaN	NaN	NaN	NaN	NaN
2.15	3.5553	118.614	1060.09	-0.84473	0.65137	0.32666	-3.985	-23.808	1264.975	-1.8145	1.0352	0.43018	-52.2535	-30.86	1430.597	-1.3491	0.66064	0.1499	NaN	NaN	NaN	NaN	NaN	NaN
2.152	-5.726	114.419	1031.157	-0.82373	0.63135	0.31348	11.565	-62.61	1252.493	-1.9136	1.1274	0.48633	-10.7887	-104.1838	1362.998	-1.6426	0.79688	0.24463	NaN	NaN	NaN	NaN	NaN	NaN
2.154	-18.358	110.9063	998.522	-0.80615	0.61572	0.30078	-1.943	-62.739	1186.805	-1.9253	1.1567	0.49609	-19.0881	-155.5674	1224.3389	-1.771	0.88037	0.30078	NaN	NaN	NaN	NaN	NaN	NaN
2.156	14.885	111.4414	950.598	-0.79102	0.60547	0.28955	-42.103	-76.735	1132.19	-1.8496	1.1563	0.46631	-48.897	-263.067	1170.876	-1.9585	1.0649	0.4292	NaN	NaN	NaN	NaN	NaN	NaN
2.158	-30.1102	121.1509	927.169	-0.76563	0.58203	0.27588	-5.96499	-91.848	1089.534	-1.6941	1.1096	0.40576	-46.225	-246.863	1128.179	-2.0591	1.2007	0.52246	NaN	NaN	NaN	NaN	NaN	NaN
2.16	-20.2585	125.7052	913.0529	-0.75293	0.57422	0.26904	-34.6526	-92.054	1032.8143	-1.459	1.0527	0.35449	-21.224	-302.825	1125.575	-2.1362	1.3091	0.58008	NaN	NaN	NaN	NaN	NaN	NaN
2.162	10.7368	110.0001	904.5658	-0.72656	0.55469	0.25781	-32.177	-112.554	1047.49	-1.1001	0.96924	0.3125	-15.426	-266.71	1123.9373	-2.1758	1.3555	0.56299	NaN	NaN	NaN	NaN	NaN	NaN
2.164	13.807	116.2	884.7949	-0.70508	0.53907	0.24292	8.698	-107.148	1034.273	-0.94678	0.93213	0.29395	-3.213	-294.073	1184.7622	-2.1538	1.3403	0.51855	NaN	NaN	NaN	NaN	NaN	NaN
2.166	-9.4514	126.6795	870.615	-0.68311	0.52197	0.23682	-33.769	-82.744	1028.911	-0.74609	0.86914	0.271	12.5881	-236.096	1245.588	-2.0078	1.3037	0.41943	NaN	NaN	NaN	NaN	NaN	NaN
2.168	4.494	121.575	848.2667	-0.65381	0.50244	0.22412	-49.048	-56.773	1060.006	-0.67529	0.83838	0.26929	71.2	-237.877	1392.83808	-1.7515	1.3071	0.30029	NaN	NaN	NaN	NaN	NaN	NaN
2.17	16.3882	115.3254	822.14	-0.63965	0.49219	0.21777	-63.679	-8.72200000000001	1065.348	-0.64258	0.81836	0.27979	81.68	-136.176	1492.1397	-1.6069	1.3208	0.23926	NaN	NaN	NaN	NaN	NaN	NaN
2.172	-23.2159117	122.9821	786.879	-0.604	0.46436	0.20117	-119.6911	-7.188	1076.565	-0.646	0.80127	0.31836	110.84	-145.623	1574.752	-1.3481	1.3364	0.11865	NaN	NaN	NaN	NaN	NaN	NaN
2.174	-6.341	121.9	771.08024	-0.58154	0.4497	0.18969	-119.5821	-41.405	1095.9406	-0.67188	0.80273	0.33643	70.166	-146.428	1585.8199	-1.2095	1.3306	0.046142	NaN	NaN	NaN	NaN	NaN	NaN
2.176	10.869	114.685	734.4374	-0.56006	0.4292	0.17773	-160.155	-98.145	1084.848	-0.76025	0.83154	0.37207	53.149	-267.7349	1616.558	-1.1167	1.3228	-0.0068359	NaN	NaN	NaN	NaN	NaN	NaN
2.178	1.115	107.4146	711.53139	-0.52881	0.40674	0.16602	-159.3715	-203.005	1108.581	-0.85767	0.8938	0.3938	25.6177	-325.887	1663.491	-1.0552	1.2837	-0.043945	NaN	NaN	NaN	NaN	NaN	NaN
2.18	-14.758	119.1316	677.753	-0.51514	0.39502	0.1582	-126.777	-265.814	1165.221	-0.95264	0.97412	0.4082	69.11	-431.677	1724.995	-1.0508	1.2656	-0.053223	NaN	NaN	NaN	NaN	NaN	NaN
2.182	-2.564	116.894	660.3115	-0.48975	0.37061	0.14551	-127.5735	-306.265	1183.815	-1.0552	1.0845	0.41553	99.85	-430.329	1778.6431	-1.083	1.2344	-0.041016	NaN	NaN	NaN	NaN	NaN	NaN
2.184	28.1855	125.1202	650.115	-0.46655	0.35522	0.1355	-44.12	-350.344	1250.51652	-1.0977	1.1289	0.41748	127.669	-448.89	1772.658	-1.1655	1.2339	-0.0061035	NaN	NaN	NaN	NaN	NaN	NaN
2.186	31.9913	139.562	604.68197	-0.44482	0.33643	0.12451	-8.852	-345.686	1279.426	-1.1675	1.1958	0.40918	105.933	-391.651	1759.739	-1.2954	1.2583	0.057617	NaN	NaN	NaN	NaN	NaN	NaN
2.188	49.8346	131.3141	596.72281	-0.4209	0.31543	0.11475	-43.152	-353.151	1319.818	-1.2246	1.2334	0.40723	88.475	-351.332	1783.497	-1.4912	1.3242	0.15137	NaN	NaN	NaN	NaN	NaN	NaN
2.19	27.0467	121.079	575.612	-0.40625	0.31055	0.10986	-9.239	-312.868	1417.5786	-1.2754	1.2656	0.40088	84.59	-257.259	1871.853	-1.584	1.3613	0.19238	NaN	NaN	NaN	NaN	NaN	NaN
2.192	18.306	123.2786	544.4447	-0.38184	0.28809	0.092773	-39.595	-243.374	1476.241	-1.3433	1.2983	0.40381	77.754	-196.626	1967.992	-1.7285	1.4082	0.26025	NaN	NaN	NaN	NaN	NaN	NaN
2.194	19.821	133.485	519.5942	-0.36059	0.27197	0.086182	-87.025	-233.9935	1550.677	-1.3691	1.3203	0.40381	66.079	-127.475	2012.851	-1.8083	1.4289	0.28516	NaN	NaN	NaN	NaN	NaN	NaN
2.196	0.151999999999997	119.664	507.5451	-0.3418	0.25537	0.076172	-48.575	-177.211	1617.047	-1.4292	1.3735	0.39551	65.727	-99.65	2005.589	-1.8691	1.4336	0.29492	NaN	NaN	NaN	NaN	NaN	NaN
2.198	-1.233	96.451	491.9116	-0.31104	0.23975	0.061523	-108.0065	-157.171	1615.8369	-1.4627	1.4172	0.39722	30.4628	-97.83	1953.168	-1.9199	1.4355	0.28027	NaN	NaN	NaN	NaN	NaN	NaN
2.2	-13.1071	84.6832	462.1927	-0.30029	0.2207	0.060547	-108.1714	-150.886	1654.7433	-1.502	1.4746	0.39795	-4.644	-104.443	1890.0376	-1.9409	1.4302	0.26416	NaN	NaN	NaN	NaN	NaN	NaN
2.202	-4.195	81.7328	426.176	-0.27002	0.20557	0.049805	-56.5423	-96.032	1659.963	-1.5542	1.5474	0.38867	12.1876	-150.471	1889.265	-1.9312	1.4341	0.22168	NaN	NaN	NaN	NaN	NaN	NaN
2.204	-19.5071	83.00332	398.08792	-0.2478	0.18799	0.040527	-89.424	-102.776	1676.121	-1.582	1.5801	0.39111	22.1719	-180.7365	1892.946	-1.9028	1.436	0.19458	NaN	NaN	NaN	NaN	NaN	NaN
2.206	1.251	83.9923	384.5224	-0.22363	0.1748	0.035645	-25.454	-99.719	1737.5617	-1.6362	1.6392	0.38672	4.907	-238.735	1948.159	-1.877	1.4473	0.16455	NaN	NaN	NaN	NaN	NaN	NaN
2.208	-11.567	70.0741	355.1843	-0.19629	0.14795	0.023438	-7.701	-95.631	1723.633	-1.6638	1.6722	0.39136	9.878	-228.168	1990.854	-1.8574	1.4795	0.12695	NaN	NaN	NaN	NaN	NaN	NaN
2.21	-29.921	73.933	326.2397	-0.1792	0.13867	0.017578	-20.275	-155.458	1772.838	-1.6929	1.6958	0.39551	-5.02567	-241.494	2027.6908	-1.853	1.5005	0.11377	NaN	NaN	NaN	NaN	NaN	NaN
2.212	-3.359	71.321	324.8241	-0.15479	0.11523	0.0043945	-10.236	-136.779	1828.2864	-1.7261	1.7075	0.40039	-4.4754	-182.833	2076.18	-1.8809	1.5352	0.10205	NaN	NaN	NaN	NaN	NaN	NaN
2.214	3.67	67.098	314.0293	-0.13574	0.097657	-0.0004883	-43.9289	-162.005	1860.0035	-1.7417	1.6997	0.41553	-10.115155	-188.917	2103.913	-1.9109	1.552	0.09375	NaN	NaN	NaN	NaN	NaN	NaN
2.216	-10.146	60.0927	300.7028	-0.11768	0.083984	-0.003418	-34.4034	-179.221	1906.643	-1.77	1.6978	0.43262	-34.5091	-133.8951	2103.342	-1.9395	1.5625	0.091797	NaN	NaN	NaN	NaN	NaN	NaN
2.218	-44.51226	66.4404	281.147	-0.098145	0.063965	-0.014648	-56.5206	-139.073	1905.8	-1.7937	1.6966	0.44116	-19.27427	-148.999	2130.763	-1.9761	1.5708	0.092773	NaN	NaN	NaN	NaN	NaN	NaN
2.22	-31.877	69.481	261.2748	-0.091797	0.055664	-0.019043	-115.622	-143.8324	1926.401	-1.8042	1.6899	0.45508	-8.3462	-74.011	2105.077	-1.9844	1.5635	0.093262	NaN	NaN	NaN	NaN	NaN	NaN
2.222	-26.806	73.014	226.7936	-0.074219	0.044922	-0.026855	-91.462	-103.476	1946.631	-1.8101	1.6724	0.46875	16.6522	-95.3924	2067.22	-2.0054	1.5493	0.10059	NaN	NaN	NaN	NaN	NaN	NaN
2.224	-30.9789	64.0306	203.48751	-0.06665	0.035889	-0.029053	-87.2411	-69.089	1902.934	-1.814	1.6665	0.48438	27.2097	-13.249	1976.3904	-2.0097	1.5254	0.10669	NaN	NaN	NaN	NaN	NaN	NaN
2.226	-31.375	50.657	185.26018	-0.061035	0.026855	-0.032227	-107.3723	-100.887	1893.9667	-1.8203	1.6445	0.49658	41.351	-45.2912	1923.7	-2.0176	1.5	0.11182	NaN	NaN	NaN	NaN	NaN	NaN
2.228	-18.547	34.639	175.4461	-0.059082	0.010742	-0.038086	-43.4867	-64.827	1901.461	-1.8247	1.6186	0.50831	37.974	21.5449	1858.589	-2.0195	1.4648	0.12451	NaN	NaN	NaN	NaN	NaN	NaN
2.23	-2.853	33.6952	163.413	-0.055176	0.0092773	-0.037109	-35.9447	-82.0013	1869.821	-1.8379	1.5918	0.52002	54.827	-49.5086	1859.613	-2.021	1.4438	0.13867	NaN	NaN	NaN	NaN	NaN	NaN
2.232	-6.141	44.38	133.835	-0.0625	0.0014648	-0.038086	-21.273	-92.211	1884.523	-1.8535	1.5469	0.53174	73.953	-10.53	1854.207	-2.0269	1.4067	0.15039	NaN	NaN	NaN	NaN	NaN	NaN
2.234	16.267	34.778	143.8703	-0.067871	-0.0039063	-0.032715	-28.897	-27.355	1871.329	-1.8608	1.5298	0.53711	64.606	-83.244	1863.2502	-2.023	1.3863	0.16406	NaN	NaN	NaN	NaN	NaN	NaN
2.236	11.621	28.0433	148.092	-0.071777	-0.0043945	-0.030273	-59.294	-21.07	1854.716	-1.8779	1.4922	0.5376	68.812	-13.0389	1849.5469	-2.0112	1.3696	0.17725	NaN	NaN	NaN	NaN	NaN	NaN
2.238	-6.069	46.60047	131.208	-0.078613	-0.0063477	-0.023926	-28.077	31.1337	1892.739	-1.8865	1.4641	0.54956	65.09	-50.482	1824.983	-1.9956	1.3481	0.18848	NaN	NaN	NaN	NaN	NaN	NaN
2.24	-4.607	59.2139	97.2885	-0.084961	-0.011719	-0.025391	-75.087	56.692	1895.15969	-1.9019	1.4419	0.55859	54.488	39.085	1817.054	-1.9883	1.3418	0.1958	NaN	NaN	NaN	NaN	NaN	NaN
2.242	-1.335	43.3783	110.1446	-0.089355	-0.0083008	-0.021484	-92.5172	4.794	1930.916	-1.9238	1.4023	0.56299	75.336	-16.1557	1843.37	-1.9688	1.3359	0.20361	NaN	NaN	NaN	NaN	NaN	NaN
2.244	3.615	23.083	121.519	-0.097656	-0.008545	-0.024659	-32.462	3.362	1962.7943	-1.9331	1.3853	0.56836	67.578	45.952	1853.293	-1.9558	1.3274	0.20289	NaN	NaN	NaN	NaN	NaN	NaN
2.246	-29.4607	15.8613	90.0465	-0.10107	-0.0083008	-0.020508	-74.133	-29.235	1929.6672	-1.9531	1.3477	0.57861	74.951	-23.3022	1863.251	-1.9351	1.3169	0.20459	NaN	NaN	NaN	NaN	NaN	NaN
2.248	2.80200000000001	16.09718	71.0552	-0.10547	-0.0063477	-0.023438	-95.787	-45.8593	1941.3783	-1.9665	1.3196	0.58594	38.767	31.7468	1830.766	-1.9043	1.3027	0.20361	NaN	NaN	NaN	NaN	NaN	NaN
2.25	-14.654	23.0567	47.612	-0.10303	-0.0078125	-0.020508	-64.592	-16.6336	1918.1413	-1.9746	1.2988	0.59033	39.196	-26.013	1795.314	-1.8901	1.2954	0.20117	NaN	NaN	NaN	NaN	NaN	NaN
2.252	-19.565	28.6468	35.336	-0.10059	-0.0068359	-0.023438	-104.8732	-54.887	1872.9736	-1.9741	1.2661	0.59375	32.0753	49.673	1762.782	-1.8608	1.2856	0.20947	NaN	NaN	NaN	NaN	NaN	NaN
2.254	-29.1909	22.9646	30.97	-0.097656	-0.0048828	-0.02417	-60.571	-47.8849	1888.714	-1.9727	1.2559	0.60205	18.0515	11.112	1746.848	-1.8464	1.2698	0.2107	NaN	NaN	NaN	NaN	NaN	NaN
2.256	-13.695	11.0133	40.0877	-0.095703	-0.0063477	-0.027832	-57.326	-28.722	1866.748	-1.9565	1.2251	0.60742	24.151	116.6984	1738.997	-1.8315	1.2544	0.20654	NaN	NaN	NaN	NaN	NaN	NaN
2.258	-27.655	16.4892	33.5929	-0.088379	-0.0092773	-0.028809	-90.059	-46.362	1880.806	-1.9439	1.2085	0.60693	19.1867	94.2784	1719.759	-1.7988	1.2539	0.2085	NaN	NaN	NaN	NaN	NaN	NaN
2.26	-24.161	14.2344	33.4445	-0.086426	-0.012207	-0.02832	-47.294	4.168	1876.377	-1.9258	1.1836	0.61377	-18.268	199.043	1693.866	-1.7769	1.2544	0.20361	NaN	NaN	NaN	NaN	NaN	NaN
2.262	-24.177	17.0298	35.9163	-0.077148	-0.012207	-0.038574	-100.974	15.9577	1807.9384	-1.8906	1.1582	0.6123	-38.203	193.38	1677.9659	-1.7261	1.2446	0.19531	NaN	NaN	NaN	NaN	NaN	NaN
2.264	-47.626	16.8304	21.3434	-0.065674	-0.01416	-0.046386	-109.647	13.115	1788.69517	-1.8809	1.1484	0.60596	-26.5884	287.803	1663.0093	-1.6911	1.2429	0.18896	NaN	NaN	NaN	NaN	NaN	NaN
2.266	-38.021	14.94292	28.3078	-0.055176	-0.015137	-0.04248	-95.7336	63.667	1765.776	-1.8398	1.1221	0.6001	-20.5997	230.013	1662.587	-1.6533	1.2402	0.1792	NaN	NaN	NaN	NaN	NaN	NaN
2.268	-32.0186	15.85236	3.064	-0.044922	-0.0083008	-0.05127	-128.682	55.023	1746.168	-1.8093	1.1052	0.5979	-12.485	247.849	1645.45	-1.606	1.2153	0.1792	NaN	NaN	NaN	NaN	NaN	NaN
2.27	-44.4546	8.76833	-13.3009	-0.03418	-0.0087891	-0.049805	-100.409	75.859	1765.7345	-1.7769	1.0903	0.59375	-14.208	168.2	1624.243	-1.5815	1.2036	0.17578	NaN	NaN	NaN	NaN	NaN	NaN
2.272	-48.830426	3.12738	0.2711	-0.020996	-0.0087891	-0.052734	-103.6121	96.125	1717.474	-1.7402	1.0723	0.58057	-25.345	191.891	1570.4719	-1.543	1.1816	0.17578	NaN	NaN	NaN	NaN	NaN	NaN
2.274	-36.693	-0.415000000000001	7.6124	-0.01123	-0.0097656	-0.057373	-110.8067	45.978	1698.08375	-1.7168	1.0645	0.57275	-24.0736	155.086	1509.2398	-1.5137	1.1641	0.16944	NaN	NaN	NaN	NaN	NaN	NaN
2.276	-33.497	14.4561	-2.91152	-0.0014648	-0.010254	-0.063477	-58.348	64.566	1700.4147	-1.6733	1.0474	0.55811	-20.566	196.754	1469.477	-1.4824	1.1533	0.16992	NaN	NaN	NaN	NaN	NaN	NaN
2.278	-18.08	22.1171	-20.2006	0.0019531	-0.0097656	-0.064941	-63.866	49.39	1669.0595	-1.6347	1.0303	0.54224	-7.393	157.983	1448.6068	-1.4473	1.1367	0.1748	NaN	NaN	NaN	NaN	NaN	NaN
2.28	-14.981	13.2635	-4.3632	0.010498	-0.011718	-0.065673	-23.753	36.624	1665.2865	-1.5996	1.0176	0.52979	3.84500000000001	198.394	1432.7773	-1.4312	1.1333	0.17676	NaN	NaN	NaN	NaN	NaN	NaN
2.282	-23.138	7.72	0.459899999999999	0.015137	-0.0078125	-0.06543	16.029	71.319	1648.3285	-1.5444	0.99268	0.5083	5.061	182.3971	1401.374	-1.3994	1.1094	0.18506	NaN	NaN	NaN	NaN	NaN	NaN
2.284	-4.008	13.5757	8.4229	0.02002	-0.0068359	-0.067383	-59.285	63.078	1618.1571	-1.5056	0.96802	0.48559	-1.687	254.59831	1371.566	-1.3679	1.0862	0.18872	NaN	NaN	NaN	NaN	NaN	NaN
2.286	12.66	18.985889	6.656	0.024902	-0.0073242	-0.064453	-15.759	100.0945	1617.0712	-1.4648	0.94922	0.47412	-5.448	259.33	1318.016	-1.3398	1.0645	0.19287	NaN	NaN	NaN	NaN	NaN	NaN
2.288	6.249	32.994	15.9395	0.029785	0.0029297	-0.064941	-23.299	159.355	1565.748	-1.4102	0.9209	0.44775	-17.714	311.905	1268.458	-1.2969	1.0391	0.1875	NaN	NaN	NaN	NaN	NaN	NaN
2.29	5.866	19.6948	19.945	0.032959	0.005615	-0.066407	-51.3574	159.506	1532.144	-1.3823	0.90771	0.43164	-0.377000000000002	306.822	1208.677	-1.2715	1.0254	0.18799	NaN	NaN	NaN	NaN	NaN	NaN
2.292	-10.701	24.9826	-8.68216	0.036621	0.013184	-0.072266	16.15	198.631	1534.2321	-1.3281	0.87891	0.40869	17.721	337.1568	1151.302	-1.2275	0.99805	0.19482	NaN	NaN	NaN	NaN	NaN	NaN
2.294	-19.465	24.173	-11.7512	0.035156	0.015625	-0.070313	-26.6681	197.755	1483.699	-1.2925	0.85791	0.39063	17.106	316.685	1103.526	-1.197	0.9768	0.19824	NaN	NaN	NaN	NaN	NaN	NaN
2.296	-16.729	23.0235	-2.7241	0.028809	0.019531	-0.067383	5.7	178.4725	1468.1086	-1.2578	0.83984	0.36914	14.159	306.827	1064.965	-1.1636	0.95459	0.19531	NaN	NaN	NaN	NaN	NaN	NaN
2.298	7.958	6.907	19.4734	0.029297	0.023438	-0.068848	30.6063	213.541	1431.891	-1.2153	0.81104	0.34863	-32.981	284.2253	1010.5583	-1.1074	0.93359	0.19385	NaN	NaN	NaN	NaN	NaN	NaN
2.3	-9.755	10.52663	7.1885	0.024414	0.032715	-0.066162	-13.584	212.6357	1379.276	-1.1953	0.79688	0.34033	-31.381	275.33	964.728	-1.0713	0.91553	0.19141	NaN	NaN	NaN	NaN	NaN	NaN
2.302	2.915	3.4628	9.5882	0.024414	0.033203	-0.066406	24.684	227.511	1362.6785	-1.1504	0.7832	0.3208	-35.975	256.4379	895.84	-1.0117	0.86914	0.19629	NaN	NaN	NaN	NaN	NaN	NaN
2.304	7.286	19.6945	1.573	0.022949	0.04248	-0.072754	27.974	266.26	1311.728	-1.1259	0.76464	0.31103	-56.198	259.303	856.8683	-0.95264	0.82715	0.18555	NaN	NaN	NaN	NaN	NaN	NaN
2.306	2.328	24.40727	-2.5243	0.023926	0.045898	-0.072754	9.528	261.5975	1284.065	-1.0996	0.74219	0.29932	-55.18	257.316	818.345	-0.9165	0.80615	0.17578	NaN	NaN	NaN	NaN	NaN	NaN
2.308	-9.259	29.2551	7.04286	0.023926	0.051758	-0.072266	26.8096	268.027	1308.8126	-1.0566	0.72461	0.28369	-57.838	270.814	787.0075	-0.83008	0.76367	0.17822	NaN	NaN	NaN	NaN	NaN	NaN
2.31	-18.22	25.0903	12.02397	0.029053	0.056884	-0.074951	-23.2518	255.589	1273.08697	-1.0356	0.70947	0.27148	-79.13755	290.6584	736.3001	-0.77002	0.73194	0.17383	NaN	NaN	NaN	NaN	NaN	NaN
2.312	-29.2026	25.9094	28.043	0.025391	0.0625	-0.074219	-14.5717	213.8535	1262.5	-0.9917	0.68799	0.25537	-83.2077	282.144	700.68889	-0.7085	0.70361	0.17139	NaN	NaN	NaN	NaN	NaN	NaN
2.314	-24.3641	4.936	29.0532	0.026855	0.064941	-0.083984	1.1887	238.256	1232.535	-0.95679	0.66382	0.24536	-71.419	262.1592	655.9698	-0.61719	0.66309	0.15967	NaN	NaN	NaN	NaN	NaN	NaN
2.316	-18.386	2.84247	29.8482	0.022949	0.06543	-0.088867	-51.808	230.714	1176.021	-0.91992	0.6416	0.22705	-60.23	251.215	631.0695	-0.57275	0.63916	0.15234	NaN	NaN	NaN	NaN	NaN	NaN
2.318	-49.5028	-13.9249	37.563	0.02002	0.074219	-0.091309	9.676	231.0074	1149.52	-0.86621	0.61328	0.20947	-53.129	258.4	572.8348	-0.48633	0.5957	0.146	NaN	NaN	NaN	NaN	NaN	NaN
2.32	-51.907	-17.7144	57.0499	0.0004883	0.083496	-0.096435	-13.9175	273.461	1088.8223	-0.84521	0.60303	0.19287	-58.6849	243.0795	517.5973	-0.42749	0.56152	0.14209	NaN	NaN	NaN	NaN	NaN	NaN
2.322	-21.62	-28.0505	59.868	-0.024414	0.098145	-0.09668	-13.2727	260.699	1052.5627	-0.79297	0.57031	0.17236	-64.557	234.36	456.672739	-0.36719	0.51807	0.13428	NaN	NaN	NaN	NaN	NaN	NaN
2.324	-34.7184	-41.2354	65.761	-0.077148	0.11914	-0.089355	55.864	261.6548	1033.527	-0.7566	0.5437	0.15527	-75.741	193.515	400.3659	-0.29883	0.45898	0.13184	NaN	NaN	NaN	NaN	NaN	NaN
2.326	-42.1905	-61.1637	124.6399	-0.10742	0.12988	-0.085449	14.7164	258.56239	980.9708	-0.71875	0.52441	0.13525	-72.343	175.905	333.051	-0.26367	0.43408	0.125	NaN	NaN	NaN	NaN	NaN	NaN
2.328	-21.4637	-62.47496	164.6857	-0.16992	0.15625	-0.066406	11.055	228.052	934.569	-0.66162	0.48877	0.11621	-57.894	163.5671	286.762	-0.20166	0.37988	0.11816	NaN	NaN	NaN	NaN	NaN	NaN
2.33	-15.458	-40.0949	210.1012	-0.21558	0.17798	-0.059814	28.6586	254.233	885.16761	-0.63477	0.47266	0.10547	-37.309	179.032	241.188	-0.15185	0.34326	0.11255	NaN	NaN	NaN	NaN	NaN	NaN
2.332	-36.7096	-0.1892	251.3212	-0.26318	0.19629	-0.051758	-12.8579	268.1705	829.715	-0.5835	0.43701	0.085449	-32.632	171.101	254.699	-0.10547	0.30469	0.11133	NaN	NaN	NaN	NaN	NaN	NaN
2.334	-35.846	28.5346	328.9212	-0.32861	0.23145	-0.037109	28.5036	251.2002	803.505	-0.53491	0.41626	0.070801	-32.379	171.457	222.2744	-0.053711	0.2666	0.11377	NaN	NaN	NaN	NaN	NaN	NaN
2.336	-25.143	41.894	398.555	-0.36572	0.24951	-0.029785	5.2699	272.582	754.0141	-0.48682	0.39209	0.05127	-33.635	146.403	235.422	-0.032227	0.25049	0.10742	NaN	NaN	NaN	NaN	NaN	NaN
2.338	-49.35	68.069	464.947	-0.45801	0.28125	-0.018066	13.8868	254.4557	700.36756	-0.42725	0.36279	0.025391	-4.89899999999999	153.326	201.942	0.013672	0.22021	0.097168	NaN	NaN	NaN	NaN	NaN	NaN
2.34	-55.763	83.661	542.8483	-0.53808	0.31567	-0.0058592	56.157	238.909	688.3339	-0.39258	0.34521	0.01709	9.362	123.1567	199.002	0.047852	0.19019	0.088623	NaN	NaN	NaN	NaN	NaN	NaN
2.342	-48.921	95.6129	632.3353	-0.63086	0.35352	0.01709	11.1895	257.985	638.8012	-0.33789	0.31445	-0.003418	4.576	134.162	156.273	0.08252	0.16943	0.082031	NaN	NaN	NaN	NaN	NaN	NaN
2.344	-34.065	95.073	715.975	-0.77344	0.40137	0.047852	45.2945	201.42746	599.6208	-0.30102	0.29272	-0.020264	9.981	106.4688	130.2932	0.11133	0.12598	0.072754	NaN	NaN	NaN	NaN	NaN	NaN
2.346	-77.82	99.688	767.712	-0.85059	0.43652	0.06543	42.6524	189.0702	549.0384	-0.26514	0.26904	-0.026855	4.557	101.7238	64.989	0.11865	0.10352	0.071289	NaN	NaN	NaN	NaN	NaN	NaN
2.348	-66.065	93.307	803.31	-1.0005	0.50635	0.1084	-1.969	160.082	497.2885	-0.22217	0.2373	-0.042969	-13.104	43.557	53.696	0.13037	0.06543	0.066895	NaN	NaN	NaN	NaN	NaN	NaN
2.35	-62.516	68.96	855.041	-1.1003	0.55542	0.13965	34.4349	112.557	491.9004	-0.20361	0.2251	-0.051758	-15.956	19.086	34.1557	0.13428	0.037598	0.064942	NaN	NaN	NaN	NaN	NaN	NaN
2.352	-75.526	38.645	910.26	-1.1914	0.60352	0.17139	8.4076	158.228	455.1071	-0.16699	0.19727	-0.062012	-50.9543	-2.7701	52.313	0.13574	0.012695	0.067871	NaN	NaN	NaN	NaN	NaN	NaN
2.354	-124.2732	18.8785	958.057	-1.2754	0.66211	0.20557	1.828	154.194	406.82901	-0.14013	0.18359	-0.068848	-29.141	39.3297	36.212	0.1333	-0.015137	0.074219	NaN	NaN	NaN	NaN	NaN	NaN
2.356	-110.2442	-22.4434	996.3129	-1.3018	0.68555	0.2207	29.0993	154	387.0428	-0.1167	0.16455	-0.077637	-34.1827	57.219	41.146	0.13428	-0.020996	0.071289	NaN	NaN	NaN	NaN	NaN	NaN
2.358	-71.152	-34.1246	1016.79	-1.3296	0.70654	0.2334	-37.23046	180.44	339.606	-0.089844	0.14111	-0.083496	-48.989	79.35	19.7344	0.12012	-0.04248	0.069336	NaN	NaN	NaN	NaN	NaN	NaN
2.36	-73.63703	-35.7857	1025.2326	-1.3337	0.72583	0.24536	-18.372	123.3279	328.2481	-0.079102	0.13281	-0.099609	-43.898	53.281	37.0621	0.1145	-0.04541	0.0708	NaN	NaN	NaN	NaN	NaN	NaN
2.362	-76.1366	-37.9257	1033.13	-1.3257	0.73096	0.25537	-4.358	125.653	295.2468	-0.055176	0.10986	-0.1001	-43.494	36.169	8.288	0.10742	-0.047852	0.06543	NaN	NaN	NaN	NaN	NaN	NaN
2.364	-61.8462	-50.597	1027.905	-1.3086	0.74414	0.27051	-43.374	125.5255	254.73	-0.046143	0.10376	-0.10474	-38.105	11.582	27.883	0.10693	-0.04834	0.064453	NaN	NaN	NaN	NaN	NaN	NaN
2.366	-58.3559	-43.8688	1010.855	-1.2949	0.75391	0.26855	-8.697	79.208	245.3258	-0.039063	0.095703	-0.10791	-42.973	23.316	10.7874	0.10791	-0.05127	0.05957	NaN	NaN	NaN	NaN	NaN	NaN
2.368	-49.6925	-39.2294	973.881	-1.2417	0.77295	0.25195	-27.262	114.4514	214.695	-0.038086	0.082031	-0.10986	-61.8641	19.1078	25.5195	0.1001	-0.056641	0.060059	NaN	NaN	NaN	NaN	NaN	NaN
2.37	-35.97978	-48.373	952.909	-1.1696	0.76587	0.22192	-45.7986	115.622	182.1222	-0.033203	0.07959	-0.11182	-58.055	33.999	4.8174	0.091064	-0.062012	0.056397	NaN	NaN	NaN	NaN	NaN	NaN
2.372	-43.9914	-68.0508	926.6455	-1.0771	0.75195	0.18359	-11.899	108.3846	155.094	-0.035645	0.066895	-0.11035	-84.2122	20.0008	-13.1079	0.084961	-0.072266	0.050781	NaN	NaN	NaN	NaN	NaN	NaN
2.374	-60.1255	-81.04618	913.126	-0.93408	0.72314	0.12305	-47.36881	143.566	120.131	-0.038574	0.063476	-0.10938	-59.807	30.142	-21.4525	0.079102	-0.080078	0.047852	NaN	NaN	NaN	NaN	NaN	NaN
2.376	-24.592	-84.415	897.035	-0.86865	0.70752	0.091797	-30.58	86.6121	132.5609	-0.041016	0.057617	-0.10254	-77.95679	18.4957	-0.425999999999998	0.07959	-0.080566	0.046387	NaN	NaN	NaN	NaN	NaN	NaN
2.378	7.9073	-92.887	906.508	-0.77002	0.69775	0.039551	-15.365	88.501	122.1328	-0.044434	0.056641	-0.096191	-58.457	36.3739	12.698	0.071777	-0.09082	0.046875	NaN	NaN	NaN	NaN	NaN	NaN
2.38	43.225	-114.66	939.407	-0.72266	0.70703	0.0021973	-63.4294	99.4169	95.1973	-0.048828	0.050293	-0.094238	-47.5146	28.0492	32.956	0.063721	-0.092285	0.045654	NaN	NaN	NaN	NaN	NaN	NaN
2.382	59.449	-146.555	971.1117	-0.69678	0.73096	-0.025391	-19.995	42.2458	94.7317	-0.045898	0.04248	-0.092285	-46.544	42.7163	15.845	0.05957	-0.09082	0.046387	NaN	NaN	NaN	NaN	NaN	NaN
2.384	73.099	-163.215	1005.9935	-0.68359	0.7793	-0.0625	-32.6739	72.07	74.705	-0.050781	0.033447	-0.089844	-22.819	25.004	20.984	0.066406	-0.085938	0.046875	NaN	NaN	NaN	NaN	NaN	NaN
2.386	84.981	-152.166	1037.0007	-0.68799	0.80518	-0.069824	-42.452	49.877	68.18057	-0.04541	0.025391	-0.087891	-7.684	33.0802	16.8346	0.076172	-0.083008	0.048828	NaN	NaN	NaN	NaN	NaN	NaN
2.388	111.028	-156.8749	1069.8155	-0.70459	0.85596	-0.091309	-10.773	37.3481	62.541	-0.039551	0.020508	-0.083984	-10.676	45.056	17.364	0.088379	-0.074707	0.05127	NaN	NaN	NaN	NaN	NaN	NaN
2.39	132.477	-180.429	1097.4511	-0.73584	0.8999	-0.10424	-40.5023	87.766	27.9326	-0.038086	0.013672	-0.083008	1.215	68.106	27.4262	0.096437	-0.068603	0.050049	NaN	NaN	NaN	NaN	NaN	NaN
2.392	101.563	-211.186	1127.2771	-0.78125	0.94727	-0.1084	-10.119	47.0029	30.535	-0.037598	0.0048828	-0.082031	-18.762	65.446	34.8895	0.104	-0.061523	0.050781	NaN	NaN	NaN	NaN	NaN	NaN
2.394	116.366	-229.258	1160.9182	-0.85254	0.99609	-0.10547	-18.549	54.188	28.6142	-0.039551	0.0036621	-0.077881	-13.49	50.897	34.18	0.11328	-0.060059	0.050781	NaN	NaN	NaN	NaN	NaN	NaN
2.396	102.387	-248.793	1196.892	-0.89453	1.0146	-0.10645	-41.614	58.3755	17.244	-0.043457	-0.0063477	-0.075684	-30.207	24.4924	15.03119	0.11523	-0.060547	0.056152	NaN	NaN	NaN	NaN	NaN	NaN
2.398	104.362	-241.693	1246.1758	-0.98438	1.0537	-0.099609	14.858	-6.053	14.588	-0.058594	-0.014648	-0.064941	2.495	11.9115	6.2582	0.12305	-0.056641	0.053711	NaN	NaN	NaN	NaN	NaN	NaN
2.4	87.612	-214.4547	1288.825	-1.0538	1.0811	-0.089599	-24.717	24.8715	5.72	-0.061523	-0.015625	-0.066895	-23.319	10.914	3.65	0.12525	-0.053467	0.059326	NaN	NaN	NaN	NaN	NaN	NaN
2.402	90.961	-186.643	1314.9368	-1.1172	1.1074	-0.083984	-18.415	26.4087	30.3283	-0.075684	-0.025879	-0.059082	-18.497	20.4492	27.7411	0.13428	-0.049805	0.061035	NaN	NaN	NaN	NaN	NaN	NaN
2.404	70.64	-171.57	1358.16	-1.2031	1.1445	-0.067383	-4.62	0.198	50.313	-0.085937	-0.031006	-0.050049	-25.793	16.54268	35.3911	0.15137	-0.046875	0.059082	NaN	NaN	NaN	NaN	NaN	NaN
2.406	52.313	-161.703	1384.854	-1.2437	1.1665	-0.050293	-54.0254	70.294	25.447	-0.10059	-0.037109	-0.044434	-28.09	10.613	51.161	0.15967	-0.046875	0.062012	NaN	NaN	NaN	NaN	NaN	NaN
2.408	68.514	-142.028	1450.5202	-1.3398	1.2109	-0.025391	-8.607	34.139	13.4658	-0.1167	-0.039063	-0.040527	-21.474	3.4877	53.868	0.18506	-0.044922	0.057617	NaN	NaN	NaN	NaN	NaN	NaN
2.41	39.5297	-124.1263	1482.192	-1.4087	1.2466	-0.0073243	-19.612	40.822	-3.99402	-0.12451	-0.036621	-0.040039	-21.289	5.768	43.7695	0.19873	-0.048095	0.054443	NaN	NaN	NaN	NaN	NaN	NaN
2.412	24.0702	-113.2466	1508.689	-1.4883	1.2852	0.024902	-57.99647	46.9368	10.4279	-0.13135	-0.026855	-0.029297	-27.416	36.5436	13.71503	0.21436	-0.055664	0.05127	NaN	NaN	NaN	NaN	NaN	NaN
2.414	6.8373	-118.4163	1521.7521	-1.5957	1.3496	0.061523	-3.599	-24.61288	33.4729	-0.13037	-0.025146	-0.022461	-48.878	36.2728	5.6107	0.2334	-0.060547	0.047363	NaN	NaN	NaN	NaN	NaN	NaN
2.416	-6.93753	-131.983	1534.545	-1.6687	1.3947	0.092772	-32.349	12.611	23.399	-0.12451	-0.021973	-0.024414	-61	41.394	-13.0973	0.23877	-0.065918	0.038574	NaN	NaN	NaN	NaN	NaN	NaN
2.418	-13.913	-142.6528	1582.0404	-1.7358	1.436	0.11768	-43.3516	6.359	36.5718	-0.1123	-0.02832	-0.022949	-69.521	7.695	13.1782	0.24512	-0.078613	0.034668	NaN	NaN	NaN	NaN	NaN	NaN
2.42	-13.1415	-147.9423	1618.707	-1.8022	1.4849	0.14453	-5.641	-23.154	42.453	-0.10205	-0.032227	-0.028321	-59.496	-4.585	4.7283	0.2456	-0.07959	0.030274	NaN	NaN	NaN	NaN	NaN	NaN
2.422	-2.8066	-152.8079	1636.479	-1.8242	1.5	0.15674	-61.6504	39.4071	29.223	-0.089355	-0.041992	-0.029785	-60.9694	-9.413	23.8863	0.23975	-0.083008	0.029297	NaN	NaN	NaN	NaN	NaN	NaN
2.424	-22.65	-156.0873	1638.66977	-1.8589	1.5259	0.16797	-46.415	10.6585	30.9632	-0.069824	-0.055664	-0.032227	-53.522	28.8413	7.1129	0.22266	-0.091797	0.02832	NaN	NaN	NaN	NaN	NaN	NaN
2.426	-23.5299	-164.8782	1650.0736	-1.8662	1.5313	0.17261	-25.265	34.364	3.2146	-0.06543	-0.061523	-0.035645	-65.524	45.533	25.7328	0.21094	-0.084961	0.030273	NaN	NaN	NaN	NaN	NaN	NaN
2.428	-47.5878	-176.815	1664.8087	-1.8667	1.5317	0.16943	-76.23	52.925	10.0789	-0.046875	-0.069336	-0.042969	-54.679	70.358	9.89451	0.1875	-0.081543	0.035156	NaN	NaN	NaN	NaN	NaN	NaN
2.43	-4.215	-150.667	1660.187	-1.853	1.5239	0.16211	-28.978	-13.1149	27.7656	-0.039795	-0.074219	-0.047119	-54.193	42.0618	7.599357	0.16992	-0.077148	0.0354	NaN	NaN	NaN	NaN	NaN	NaN
2.432	9.9764	-127.283	1644.3922	-1.8438	1.5156	0.14941	-46.8309	7.8587	9.465	-0.024902	-0.076172	-0.049316	-35.15	12.33	-27.7369	0.15332	-0.070313	0.049316	NaN	NaN	NaN	NaN	NaN	NaN
2.434	6.2224	-97.4846	1647.2914	-1.8164	1.502	0.12988	-30.763	-8.783	7.65	-0.0083008	-0.075684	-0.05127	-45.319	-25.08	-3.993	0.1416	-0.052734	0.051758	NaN	NaN	NaN	NaN	NaN	NaN
2.436	36.954	-104.346018	1655.5042	-1.7956	1.4885	0.11694	-0.0459999999999994	-16.0809	6.514	-0.00048828	-0.071777	-0.053711	-19.87	13.471	-14.129	0.13379	-0.045898	0.053711	NaN	NaN	NaN	NaN	NaN	NaN
2.438	41.601	-105.21286	1686.7044	-1.7754	1.4746	0.092773	-38.6566	54.7461	0.836	0.021484	-0.076172	-0.060059	-19.501	35.2355	26.735	0.12305	-0.02832	0.058105	NaN	NaN	NaN	NaN	NaN	NaN
2.44	75.346	-94.25919	1694.06	-1.7534	1.4595	0.078613	-9.961	19.3707	25.004	0.034423	-0.072021	-0.065918	-6.148	66.339	22.534	0.11548	-0.015625	0.062988	NaN	NaN	NaN	NaN	NaN	NaN
2.442	62.658	-96.9482	1685.3742	-1.75	1.4531	0.074707	-28.78	29.428	5.12461	0.049805	-0.068848	-0.073242	-24.813	42.163	19.4243	0.1084	-0.0039063	0.06543	NaN	NaN	NaN	NaN	NaN	NaN
2.444	87.902	-97.858	1683.27155	-1.7358	1.4419	0.065918	-28.486	45.3291	-5.8388	0.068359	-0.064941	-0.081543	-25.02	41.607	22.0987	0.10547	0.0083008	0.07373	NaN	NaN	NaN	NaN	NaN	NaN
2.446	46.3491	-86.479	1676.8196	-1.7309	1.4302	0.057617	1.119	-17.921	14.7612	0.077148	-0.058105	-0.083496	-25.648	23.7984	30.828	0.1018	0.016846	0.080567	NaN	NaN	NaN	NaN	NaN	NaN
2.448	30.9498	-66.828	1668.336	-1.7202	1.4185	0.05127	-39.1753	16.4127	15.085	0.091797	-0.054688	-0.086914	-10.628	60.299	27.5828	0.09668	0.021484	0.084961	NaN	NaN	NaN	NaN	NaN	NaN
2.45	46.976	-85.519	1698.2771	-1.709	1.3965	0.043945	-9.035	8.983	18.804	0.10376	-0.044678	-0.09082	-27.468	45.8995	40.0114	0.099609	0.030273	0.096191	NaN	NaN	NaN	NaN	NaN	NaN
2.452	45.24	-120.9878	1694.1651	-1.7026	1.3872	0.036133	3.824	-10.9828	7.493	0.11182	-0.039551	-0.094238	5.011	48.7689	11.913	0.104	0.030273	0.10156	NaN	NaN	NaN	NaN	NaN	NaN
2.454	53.532	-131.539	1710.157	-1.6875	1.3564	0.026367	-37.1702	39.451	-12.8501	0.12451	-0.030273	-0.095703	-14.59	8.7828	9.15	0.11328	0.024414	0.099121	NaN	NaN	NaN	NaN	NaN	NaN
2.456	24.2763	-121.863	1692.3965	-1.6785	1.3352	0.024903	-24.085	4.52454	10.7956	0.11816	-0.025391	-0.094238	1.912	25.89	0.505000000000001	0.11816	0.032959	0.1084	NaN	NaN	NaN	NaN	NaN	NaN
2.458	12.8377	-103.876	1696.8206	-1.6694	1.3091	0.020508	-11.367	17.3615	15.8967	0.11865	-0.016113	-0.09668	-16.789	10.7631	15.9293	0.1123	0.035645	0.11426	NaN	NaN	NaN	NaN	NaN	NaN
2.46	33.42813	-83.522	1682.0531	-1.6641	1.2793	0.020996	-37.714	53.908	1.02676	0.11792	-0.0031738	-0.095459	-20.987	60.3677	37.516	0.10498	0.039551	0.12354	NaN	NaN	NaN	NaN	NaN	NaN
2.462	16.0761	-79.19	1696.004	-1.6616	1.2681	0.019043	5.836	7.93629	9.6875	0.11328	0.0068359	-0.09375	-39.708	38.9185	77.387	0.095215	0.042969	0.12988	NaN	NaN	NaN	NaN	NaN	NaN
2.464	-0.412999999999997	-83.937	1706.344	-1.6699	1.2441	0.018555	-26.0915	51.881	-5.8537	0.10791	0.024414	-0.091797	-34.175	43.519	48.139	0.080078	0.043457	0.14111	NaN	NaN	NaN	NaN	NaN	NaN
2.466	-23.697	-89.518	1688.722	-1.6694	1.231	0.023193	-34.4436	33.14355	5.494	0.10352	0.032227	-0.089844	-56.8168	10.812	35.323	0.066895	0.04126	0.15137	NaN	NaN	NaN	NaN	NaN	NaN
2.468	-19.9012	-72.11327	1679.193	-1.6772	1.2153	0.026367	-10.112	11.5591	21.9237	0.10205	0.051758	-0.09082	-49.29	15.25	8.73033	0.056152	0.04541	0.1543	NaN	NaN	NaN	NaN	NaN	NaN
2.47	-56.05	-31.972	1657.513	-1.686	1.1997	0.029297	-59.6378	54.3601	12.139	0.10278	0.061036	-0.095703	-74.729	-5.5492	16.5466	0.044922	0.049316	0.16748	NaN	NaN	NaN	NaN	NaN	NaN
2.472	-43.70992	-21.228	1646.3477	-1.6855	1.1953	0.03418	-34.607	22.9876	16.7463	0.10742	0.071289	-0.09668	-56.015	18.622	13.9826	0.044922	0.04834	0.17139	NaN	NaN	NaN	NaN	NaN	NaN
2.474	-33.4463	-41.191	1630.4447	-1.6875	1.1758	0.034668	-42.098	22.84884	26.882	0.11328	0.07666	-0.097656	-70.1346	0.9633	21.984	0.044434	0.055176	0.16748	NaN	NaN	NaN	NaN	NaN	NaN
2.476	-29.9927	-55.4834	1615.1706	-1.6912	1.1648	0.038086	-67.8302	59.276	19.8431	0.11475	0.079102	-0.10352	-41.101	18.353	48.8852	0.05127	0.057862	0.17017	NaN	NaN	NaN	NaN	NaN	NaN
2.478	-44.031	-66.746	1620.3836	-1.6885	1.1504	0.041016	-12.262	12.9484	14.9451	0.11768	0.082031	-0.10986	-45.224	-40.1093	74.1357	0.05957	0.062988	0.16797	NaN	NaN	NaN	NaN	NaN	NaN
2.48	-14.447	-66.547	1624.0898	-1.6772	1.1353	0.037598	-27.631	40.85	5.3761	0.11988	0.075439	-0.11548	-60.237	-42.974	76.585	0.066895	0.07373	0.16357	NaN	NaN	NaN	NaN	NaN	NaN
2.482	13.4442	-65.426	1612.349	-1.6714	1.1294	0.038086	-39.2418	19.286	10.21279	0.11768	0.074219	-0.1167	-53.046	-56.7812	107.0215	0.067871	0.08252	0.15869	NaN	NaN	NaN	NaN	NaN	NaN
2.484	6.6655	-52.028	1582.5709	-1.6577	1.1177	0.030273	-23.106	-13.8264	26.0824	0.10742	0.071289	-0.12256	-40.001	-54.8197	142.9833	0.062988	0.099609	0.16211	NaN	NaN	NaN	NaN	NaN	NaN
2.486	44.6672	-54.504	1553.921	-1.6381	1.104	0.030274	-56.1452	27.4837	23.398	0.1001	0.067383	-0.11914	-84.705	-106.253	229.321	0.052247	0.12134	0.15796	NaN	NaN	NaN	NaN	NaN	NaN
2.488	37.7329	-72.071	1536.106	-1.625	1.0938	0.027344	-22.626	6.685	38.965	0.077637	0.068359	-0.11426	-61.118	-111.5453	321.332	0.035156	0.1499	0.1499	NaN	NaN	NaN	NaN	NaN	NaN
2.49	37.9598	-73.853	1535.4981	-1.5952	1.0767	0.022461	-34.589	32.575	25.6074	0.055664	0.072754	-0.10962	-44.876	-145.8013	416.893	-0.00048828	0.19336	0.15088	NaN	NaN	NaN	NaN	NaN	NaN
2.492	29.984	-58.6441	1540.872	-1.5859	1.0664	0.019531	-22.824	61.81	22.6049	0.033203	0.07959	-0.10498	-49.152	-92.05	589.171	-0.030273	0.21533	0.15137	NaN	NaN	NaN	NaN	NaN	NaN
2.494	38.344	-32.334	1510.647	-1.5566	1.0498	0.02002	-10.497	-0.1119	21.2295	0.0073242	0.088867	-0.10596	-52.923	-53.47	760.45	-0.11377	0.26416	0.15576	NaN	NaN	NaN	NaN	NaN	NaN
2.496	41.407	-35.494	1481.4725	-1.5349	1.0383	0.016845	-24.891	38.294	7.7125	-0.0024414	0.09375	-0.10742	-15.412	6.814	931.276	-0.1936	0.30469	0.16675	NaN	NaN	NaN	NaN	NaN	NaN
2.498	37.4424	-25.86	1420.932	-1.5112	1.0259	0.013184	-17.238	17.25	19.0902	-0.020996	0.10596	-0.11035	38.488	35.807	1108.98	-0.2832	0.34961	0.1792	NaN	NaN	NaN	NaN	NaN	NaN
2.5	44.21853	-8.7264	1401.527	-1.4741	1.0063	0.0073242	-13.171	-11.873	26.7923	-0.026367	0.11475	-0.10962	87.72	56.8485	1280.522	-0.42432	0.40674	0.20313	NaN	NaN	NaN	NaN	NaN	NaN
2.502	36.086	14.2099	1371.837	-1.457	1	0.0083008	-38.79	34.6839	33.9716	-0.035645	0.12207	-0.11377	125.7	56.3835	1429.5762	-0.50244	0.43896	0.20752	NaN	NaN	NaN	NaN	NaN	NaN
2.504	56.829	24.5883	1378.7767	-1.4199	0.97559	0.0024414	10.37	-13.9175	54.93602	-0.054688	0.12842	-0.13086	120.566	60.3619	1579.2	-0.68018	0.52393	0.22949	NaN	NaN	NaN	NaN	NaN	NaN
2.506	46.061	29.4581	1363.514	-1.3931	0.96338	0.00024412	-1.696	-28.3272	68.527	-0.060547	0.1333	-0.13574	75.798	36.968	1632.126	-0.84693	0.59302	0.24927	NaN	NaN	NaN	NaN	NaN	NaN
2.508	38.001	14.9904	1362.3661	-1.3647	0.94971	-0.0043945	-52.4474	-2.8234	75.04	-0.093262	0.15186	-0.14453	61.68	8.371	1615.325	-1.0327	0.67432	0.28613	NaN	NaN	NaN	NaN	NaN	NaN
2.51	24.8186	5.808116	1364.3741	-1.3262	0.92773	-0.003418	9.755	-86.50382	127.336	-0.13232	0.16479	-0.14843	39.686	-56.524	1547.78	-1.3228	0.79248	0.35742	NaN	NaN	NaN	NaN	NaN	NaN
2.512	-8.774	18.2411	1354.4954	-1.3066	0.91895	-0.0024414	-14.946	-73.133	163.1031	-0.18555	0.18457	-0.14404	32.19507	-129.951	1463.703	-1.4722	0.84619	0.4043	NaN	NaN	NaN	NaN	NaN	NaN
2.514	-25.763	37.6823	1343.89	-1.271	0.89307	-0.0068359	-48.11449	-130.243	217.7807	-0.26318	0.20703	-0.146	3.621	-184.609	1333.437	-1.7573	0.96436	0.50049	NaN	NaN	NaN	NaN	NaN	NaN
2.516	-52.7968	49.4728	1317.3215	-1.249	0.87548	-0.0021973	-4.753	-164.2997	272.43	-0.30811	0.2251	-0.14258	-17.59	-232.102	1239.737	-1.9236	1.0588	0.59156	NaN	NaN	NaN	NaN	NaN	NaN
2.518	-55.08082	46.1838	1294.6568	-1.2227	0.86035	-0.0019531	-39.4523	-111.6481	346.325	-0.39795	0.25732	-0.14795	-29.737	-226.618	1110.86	-2.0381	1.1523	0.69971	NaN	NaN	NaN	NaN	NaN	NaN
2.52	-67.045	39.8494	1276.636	-1.1963	0.83105	0.00097656	-22.187	-94.454	462.025	-0.4707	0.29712	-0.15185	-57.6996	-192.884	1046.41	-2.1147	1.2446	0.82422	NaN	NaN	NaN	NaN	NaN	NaN
2.522	-42.2423	45.0999	1264.041	-1.1797	0.82031	0.0083008	-21.103	-34.1624	604.268	-0.55176	0.33838	-0.15723	-10.429	-158.019	1006.347	-2.1343	1.2642	0.83203	NaN	NaN	NaN	NaN	NaN	NaN
2.524	-39.6711	64.266	1251.8553	-1.1519	0.80029	0.010742	-51.8077	43.76	729.784	-0.68896	0.40576	-0.15576	-14.597	-154.635	1044.321	-2.0854	1.2603	0.77832	NaN	NaN	NaN	NaN	NaN	NaN
2.526	-45.199	85.487	1226.17314	-1.1279	0.78125	0.017822	-48.453	20.843	883.832	-0.771	0.44678	-0.14795	-12.304	-136.2247	1112.079	-1.8823	1.2388	0.72216	NaN	NaN	NaN	NaN	NaN	NaN
2.528	-49.761	87.423	1205.6816	-1.106	0.76611	0.024902	-78.883	58.922	1052.12	-0.98389	0.53467	-0.10986	-42.42	-115.144	1219.105	-1.5835	1.2075	0.68457	NaN	NaN	NaN	NaN	NaN	NaN
2.53	-58.8241	106.5814	1193.664	-1.082	0.74023	0.031738	-94.298	52.419	1216.991	-1.1763	0.61499	-0.057373	-73.029	-97.939	1274.403	-1.1909	1.1606	0.63867	NaN	NaN	NaN	NaN	NaN	NaN
2.532	-39.6311	118.1526	1173.1517	-1.0659	0.72314	0.03418	-58.89	37.527	1353.155	-1.4023	0.70703	0.0063477	-93.766	-97.39	1341.156	-1.0464	1.1177	0.61719	NaN	NaN	NaN	NaN	NaN	NaN
2.534	-26.514	113.493	1171.531	-1.0386	0.69775	0.041504	-55.65	78.831	1396.233	-1.7305	0.86426	0.11621	-122.57	-132.79	1341.874	-0.86719	1.0527	0.57373	NaN	NaN	NaN	NaN	NaN	NaN
2.536	-16.269	117.703	1138.60611	-1.0178	0.67749	0.050781	-62.012	47.7098	1405.404	-1.8804	0.95557	0.18701	-155.232	-193.49	1364.3775	-0.78223	1.0205	0.55469	NaN	NaN	NaN	NaN	NaN	NaN
2.538	-46.4872	135.457	1100.033	-0.99805	0.66016	0.049805	-54.541	32.911	1379.427	-2.1265	1.145	0.3125	-188.2966	-293.119	1383.33	-0.72021	0.99658	0.54004	NaN	NaN	NaN	NaN	NaN	NaN
2.54	-35.031	130.494	1067.272	-0.96484	0.64355	0.057617	-71.815	18.222	1324.9109	-2.2525	1.2701	0.36231	-191.789	-389.146	1437.187	-0.70703	0.98145	0.54443	NaN	NaN	NaN	NaN	NaN	NaN
2.542	-19.504	123.042	1043.814	-0.95264	0.6333	0.061035	-51.7811	-75.631	1291.901	-2.3086	1.3555	0.36279	-147.3343	-485.62	1522.875	-0.73926	0.99023	0.54639	NaN	NaN	NaN	NaN	NaN	NaN
2.544	3.059	111.9925	1027.9047	-0.91406	0.62109	0.063477	-76.9126	-81.844	1266.183	-2.1851	1.3853	0.29199	-115.4124	-523.13	1588.302	-0.86719	1.0469	0.55762	NaN	NaN	NaN	NaN	NaN	NaN
2.546	5.262	109.7034	1011.832	-0.88989	0.60791	0.070069	-108.768	-137.398	1237.1482	-2.0522	1.3618	0.24609	-71.728	-520.83	1651.882	-0.99267	1.1323	0.57764	NaN	NaN	NaN	NaN	NaN	NaN
2.548	3.221	110.5391	999.837	-0.87256	0.59131	0.07666	-39.173	-176.012	1208.4185	-1.7104	1.3032	0.12207	-64.806	-443.76	1718.142	-1.124	1.2461	0.60791	NaN	NaN	NaN	NaN	NaN	NaN
2.55	-8.499	121.7625	981.807	-0.84912	0.5708	0.076172	-52.3662	-169.277	1192.228	-1.4375	1.2832	0.020996	-65.418	-393.822	1808.197	-1.2764	1.4219	0.6333	NaN	NaN	NaN	NaN	NaN	NaN
2.552	-4.202	140.1761	937.7021	-0.82397	0.55396	0.083008	22.5432	-195.324	1232.6641	-1.1909	1.2739	-0.062988	-94.964	-292.3901	1880.601	-1.3413	1.5024	0.64453	NaN	NaN	NaN	NaN	NaN	NaN
2.554	-13.326	134.4306	935.2616	-0.80225	0.5376	0.089844	63.824	-143.045	1259.0736	-0.96191	1.2637	-0.15527	-106.079	-212.251	1965.441	-1.4546	1.6274	0.66992	NaN	NaN	NaN	NaN	NaN	NaN
2.556	-0.345000000000006	136.89508	891.6469	-0.77686	0.52295	0.095703	13.6903	-85.112	1294.6893	-0.89209	1.2739	-0.19727	-111.049	-113.335	2001.927	-1.5352	1.6802	0.6792	NaN	NaN	NaN	NaN	NaN	NaN
2.558	-21.674	133.873	857.693	-0.7583	0.51416	0.097656	43.678	-97.75	1306.5844	-0.78271	1.3169	-0.24365	-106.7039	-96.43	2006.285	-1.6128	1.7192	0.68555	NaN	NaN	NaN	NaN	NaN	NaN
2.56	-11.293	135.056	822.711	-0.72705	0.50391	0.10254	21.52426	-79.25	1309.709	-0.71875	1.3457	-0.26807	-116.9364	-61.768	1980.732	-1.6973	1.7676	0.68994	NaN	NaN	NaN	NaN	NaN	NaN
2.562	-60.175	129.25	806.363	-0.69287	0.49536	0.10792	8.1426	-130.554	1339.2801	-0.71533	1.3652	-0.27246	-93.0438	-106.456	1971.078	-1.7266	1.793	0.68652	NaN	NaN	NaN	NaN	NaN	NaN
2.564	-55.195	132.854	802.098	-0.6665	0.47949	0.10254	43.004	-216.623	1377.7633	-0.78516	1.4082	-0.24951	-66.479	-103.773	1965.405	-1.7612	1.8442	0.67676	NaN	NaN	NaN	NaN	NaN	NaN
2.566	-71.7853	131.64	765.812	-0.63086	0.46631	0.11084	39.5336	-291.277	1414.77023	-0.89746	1.458	-0.21656	-34.125	-179.4502	2019.417	-1.7752	1.8821	0.67114	NaN	NaN	NaN	NaN	NaN	NaN
2.568	-65.821	136.802	721.205	-0.60547	0.45703	0.11084	87.862	-380.475	1464.73	-1.0229	1.5122	-0.18701	-29.35	-191.67	2064.5511	-1.7827	1.9263	0.66797	NaN	NaN	NaN	NaN	NaN	NaN
2.57	-65.283	130.1221	689.108	-0.56299	0.43066	0.11035	115.636	-386.961	1495.7348	-1.1675	1.561	-0.13818	-20.925	-237.788	2125.536	-1.8062	1.9751	0.68164	NaN	NaN	NaN	NaN	NaN	NaN
2.572	-69.9844	127.0641	674.214	-0.53272	0.41162	0.11181	107.631	-359.179	1513.395	-1.2363	1.5723	-0.10889	-3.22	-184.961	2154.0102	-1.8184	2	0.68408	NaN	NaN	NaN	NaN	NaN	NaN
2.574	-60.1515	128.643	644.295	-0.49561	0.39404	0.11084	171.677	-328.783	1548.713	-1.3647	1.5786	-0.067383	-23.782	-183.54	2197.8912	-1.8516	2.0449	0.70654	NaN	NaN	NaN	NaN	NaN	NaN
2.576	-63.5553	115.798	626.0468	-0.4458	0.37354	0.1084	158.88	-292.197	1606.164	-1.4744	1.5882	-0.045166	-26.98	-156.024	2225.3611	-1.8709	2.0667	0.71802	NaN	NaN	NaN	NaN	NaN	NaN
2.578	-45.9004	111.624	600.4263	-0.41748	0.36377	0.10742	96.93	-289.412	1698.2459	-1.5859	1.6035	-0.026855	-58.706	-180.456	2228.719	-1.8804	2.0669	0.73047	NaN	NaN	NaN	NaN	NaN	NaN
2.58	-64.2997	91.1224	578.7341	-0.36377	0.34619	0.10498	92.009	-278.273	1791.669	-1.7202	1.6372	-0.0063477	-86.608	-150.942	2230.525	-1.8921	2.0513	0.74609	NaN	NaN	NaN	NaN	NaN	NaN
2.582	-55.184	80.1071	551.24	-0.32276	0.33741	0.09668	61.0797	-238.4874	1843.906	-1.7754	1.6563	0.00048828	-140.2271	-130.6375	2192.194	-1.8965	2.0352	0.75439	NaN	NaN	NaN	NaN	NaN	NaN
2.584	-47.581	98.591	525.1394	-0.27832	0.32227	0.089355	26.186	-199.827	1871.903	-1.8711	1.6973	0.019531	-140.8381	-83.457	2125.892	-1.9082	2	0.76221	NaN	NaN	NaN	NaN	NaN	NaN
2.586	-48.24	111.64	509.892	-0.22705	0.30762	0.078125	13.2815	-140.755	1859.627	-1.9292	1.7231	0.038086	-129.3513	-75.787	2064.6743	-1.9058	1.938	0.77539	NaN	NaN	NaN	NaN	NaN	NaN
2.588	-34.404	112.4026	475.0152	-0.20361	0.28809	0.070801	-3.972	-104.005	1813.8234	-1.9858	1.7524	0.058105	-97.856	-49.751	2026.282	-1.9048	1.9009	0.78125	NaN	NaN	NaN	NaN	NaN	NaN
2.59	-31.648	91.7143	419.0264	-0.15625	0.26855	0.071777	14.1988	-126.567	1823.833	-2.0469	1.7871	0.060059	-86.764	-45.877	2007.67	-1.8999	1.8228	0.79199	NaN	NaN	NaN	NaN	NaN	NaN
2.592	-29.708	82.513	399.2501	-0.12378	0.25317	0.061767	28.7526	-132.614	1870.409	-2.0601	1.7993	0.061523	-66.433	-4.6807	1986.302	-1.893	1.7612	0.80127	NaN	NaN	NaN	NaN	NaN	NaN
2.594	-12.241	92.2446	374.563	-0.091309	0.2373	0.057617	9.9535	-185.503	1914.327	-2.0723	1.8223	0.057617	-115.94	-9.355	1958.278	-1.8926	1.7031	0.81299	NaN	NaN	NaN	NaN	NaN	NaN
2.596	20.538	105.3362	354.908	-0.056641	0.22314	0.051758	46.69	-206.073	1973.57076	-2.0713	1.8242	0.050781	-104.226	7.822	1928.578	-1.8984	1.6309	0.82666	NaN	NaN	NaN	NaN	NaN	NaN
2.598	32.788	119.85922	318.678	-0.038086	0.21631	0.042969	-1.973	-212.283	1961.0812	-2.064	1.8286	0.044922	-153.831	-22.2323	1939.868	-1.8984	1.5938	0.83154	NaN	NaN	NaN	NaN	NaN	NaN
2.6	10.12	98.2745	319.1351	-0.0039063	0.20361	0.034668	-53.533	-221.51	1970.21	-2.0527	1.8125	0.043457	-141.9271	-8.8789	1955.24805	-1.9038	1.5317	0.83594	NaN	NaN	NaN	NaN	NaN	NaN
2.602	19.252	76.4812	308.0857	0.013184	0.19409	0.028076	-15.624	-181.946	1981.385	-2.0444	1.8071	0.04248	-159.9024	-36.513	1971.06	-1.9092	1.4912	0.83838	NaN	NaN	NaN	NaN	NaN	NaN
2.604	3.302	73.281	294.6321	0.034668	0.18555	0.020508	-99.735	-165.1851	1979.1	-2.0234	1.7676	0.04541	-154.8973	-18.96683	1990.514	-1.9058	1.4653	0.83984	NaN	NaN	NaN	NaN	NaN	NaN
2.606	6.045	84.2653	270.3047	0.057617	0.17627	0.01709	-40.0907	-149.51	2021.05	-2.0066	1.7346	0.04126	-157.3977	-27.283	1960.845	-1.8926	1.4316	0.82178	NaN	NaN	NaN	NaN	NaN	NaN
2.608	2.309	78.647	260.1249	0.066895	0.17822	0.011719	-27.032	-132.416	2006.613	-1.9839	1.6958	0.041016	-155.2422	-6.196	1926.434	-1.8843	1.4175	0.82031	NaN	NaN	NaN	NaN	NaN	NaN
2.61	2.559	80.453	236.781	0.078613	0.16797	0.0078125	-72.898	-154.2462	1995.57087	-1.9512	1.6387	0.046387	-149.9244	-3.4124	1898.9633	-1.8594	1.3965	0.81104	NaN	NaN	NaN	NaN	NaN	NaN
2.612	-27.7341	61.1996	190.331	0.08667	0.16528	0.010986	20.2615	-136.8029	1959.346	-1.9395	1.6016	0.041504	-94.028	-2.745	1847.04	-1.8306	1.3775	0.79786	NaN	NaN	NaN	NaN	NaN	NaN
2.614	-29.644	64.0112	183.672	0.086426	0.15771	0.003418	4.0482	-136.9758	1897.366	-1.918	1.5391	0.04248	-70.946	-21.089	1833.881	-1.8003	1.3579	0.77637	NaN	NaN	NaN	NaN	NaN	NaN
2.616	-23.434	49.561	181.277	0.080078	0.15283	0.0063477	35.0982	-128.64	1885.639	-1.8906	1.4907	0.044922	-60.294	-1.792	1833.4372	-1.75	1.3252	0.75732	NaN	NaN	NaN	NaN	NaN	NaN
2.618	-19.942	48.313	201.925	0.079102	0.146	0.0078125	54.4142	-98.67739	1882.987	-1.8667	1.4419	0.046875	-82.992	34.989	1812.399	-1.7266	1.3086	0.74658	NaN	NaN	NaN	NaN	NaN	NaN
2.62	-22.277	54.186	168.1209	0.062988	0.14453	0.010742	41.9767	-65.3371	1879.015	-1.8438	1.3809	0.05127	-86.7	124.825	1806.16	-1.6807	1.2822	0.71826	NaN	NaN	NaN	NaN	NaN	NaN
2.622	-34.731	55.112	158.9592	0.047363	0.14258	0.01709	71.67	-42.0193	1870.1532	-1.8379	1.3574	0.054199	-94.311	179.496	1766.9287	-1.653	1.2615	0.69702	NaN	NaN	NaN	NaN	NaN	NaN
2.624	-31.286	66.8527	145.3624	0.036133	0.146	0.020996	47.518	-23.828	1875.102	-1.8164	1.3125	0.064453	-81.001	237.638	1735.3046	-1.6226	1.2397	0.67969	NaN	NaN	NaN	NaN	NaN	NaN
2.626	-33.5982	70.4364	130.8239	0.019531	0.13916	0.029785	50.219	0.379	1863.074	-1.8054	1.2795	0.073731	-81.694	250.096	1707.538	-1.5781	1.2129	0.65088	NaN	NaN	NaN	NaN	NaN	NaN
2.628	-40.093	69.8469	117.3529	0.015625	0.1377	0.029297	74.618	-4.434	1877.0092	-1.8027	1.2598	0.07959	-81.562	259.062	1675.062	-1.5566	1.1963	0.63721	NaN	NaN	NaN	NaN	NaN	NaN
2.63	-70.971	71.326	103.7285	0.0063477	0.13623	0.030762	65.052	-1.793	1875.671	-1.7852	1.2441	0.094238	-84.41	238.214	1637.235	-1.5098	1.168	0.6123	NaN	NaN	NaN	NaN	NaN	NaN
2.632	-54.3526	63.684	106.446	-0.00048826	0.13525	0.0354	49.021	-22.455	1862.3717	-1.7793	1.2383	0.09668	-69.3406	216.682	1607.966	-1.4768	1.1487	0.57763	NaN	NaN	NaN	NaN	NaN	NaN
2.634	-42.3651	59.6688	111.894	-0.0058594	0.13232	0.037109	76.027	-34.042	1870.6652	-1.748	1.2256	0.11572	-75.459	180.551	1573.82	-1.4409	1.1294	0.56055	NaN	NaN	NaN	NaN	NaN	NaN
2.636	-45.7275	46.83161	91.696	-0.013672	0.12646	0.039551	45.87	-29.75401	1832.1009	-1.7256	1.2134	0.10986	-36.642	173.391	1547.7688	-1.4019	1.0942	0.53223	NaN	NaN	NaN	NaN	NaN	NaN
2.638	-35.058	49.6374	86.3962	-0.01709	0.11816	0.04248	65.573	-47.784	1837.541	-1.6914	1.207	0.10889	-27.018	162.867	1505.126	-1.3789	1.0781	0.51221	NaN	NaN	NaN	NaN	NaN	NaN
2.64	-24.323	55.8151	74.244	-0.019531	0.11426	0.041016	53.807	-15.201	1810.07262	-1.6543	1.1973	0.10791	-22.023	188.855	1496.914	-1.3296	1.0415	0.4834	NaN	NaN	NaN	NaN	NaN	NaN
2.642	-0.827999999999999	55.43403	58.6045	-0.022461	0.10986	0.041993	5.9711	-22.509	1782.6995	-1.6372	1.1919	0.10938	-55.284	203.842	1475.885	-1.2934	1.0132	0.45898	NaN	NaN	NaN	NaN	NaN	NaN
2.644	2.305	56.5193	40.566	-0.023438	0.10596	0.042969	54.512	-8.8262	1806.486	-1.6055	1.1797	0.11084	-46.971	247.5239	1441.705	-1.2598	0.98438	0.43408	NaN	NaN	NaN	NaN	NaN	NaN
2.646	13.425	41.7393	63.6196	-0.025391	0.10352	0.046387	2.8448	26.974	1787.8722	-1.5893	1.1714	0.1084	-61.2612	270.724	1374.983	-1.2129	0.9502	0.40283	NaN	NaN	NaN	NaN	NaN	NaN
2.648	17.154	26.2059	59.2757	-0.025391	0.096191	0.046875	-24.7881	36.623	1794.678	-1.5723	1.1699	0.11426	-66.7433	300.202	1328.807	-1.1895	0.92969	0.38916	NaN	NaN	NaN	NaN	NaN	NaN
2.65	20.981	30.6064	51.4925	-0.025391	0.09668	0.047363	12.0871	72.13	1784.121	-1.5679	1.1636	0.11816	-43.935	287.343	1274.635	-1.1416	0.88086	0.36377	NaN	NaN	NaN	NaN	NaN	NaN
2.652	18.876	32.4472	45.0426	-0.020996	0.092285	0.041016	-45.739	103.057	1725.9947	-1.5625	1.1602	0.11865	-44.565	293.259	1226.716	-1.108	0.85205	0.33911	NaN	NaN	NaN	NaN	NaN	NaN
2.654	-8.81	33.443	42.8848	-0.01123	0.087891	0.041504	-28.643	115.886	1708.7601	-1.5469	1.1543	0.11377	-50.857	290.034	1168.8173	-1.0771	0.82227	0.31592	NaN	NaN	NaN	NaN	NaN	NaN
2.656	16.472	33.6348	46.278	-0.0029297	0.087891	0.041504	-23.7834	154.264	1697.612	-1.5271	1.1477	0.11303	-62.297	304.478	1122.473	-1.0234	0.78223	0.28564	NaN	NaN	NaN	NaN	NaN	NaN
2.658	-2.598	35.5496	31.609	0.003418	0.087402	0.033691	-40.934	141.8069	1679.4924	-1.5015	1.1411	0.10645	-10.795	293.2825	1065.879	-0.99951	0.76318	0.26855	NaN	NaN	NaN	NaN	NaN	NaN
2.66	1.065	40.948	29.566	0.016113	0.086426	0.034668	7.227	119.411	1686.158	-1.4644	1.1216	0.10352	-8.803	305.7826	1014.2905	-0.95068	0.72314	0.24219	NaN	NaN	NaN	NaN	NaN	NaN
2.662	15.993	29.2892	23.29995	0.027344	0.081055	0.021973	-18.9172	98.155	1647.935	-1.4429	1.1138	0.094727	12.758	293.9323	932.897	-0.91431	0.69507	0.22534	NaN	NaN	NaN	NaN	NaN	NaN
2.664	4.239	17.7003	22.8249	0.038086	0.082031	0.021484	-7.3437	67.704	1599.826	-1.3984	1.0938	0.080566	15.042	304.21023	896.893	-0.87891	0.66211	0.2002	NaN	NaN	NaN	NaN	NaN	NaN
2.666	-5.791	23.225	5.64	0.054688	0.080078	0.025391	23.9573	69.522	1581.0171	-1.3628	1.0757	0.073486	15.826	268.445	835.433	-0.83203	0.62305	0.17041	NaN	NaN	NaN	NaN	NaN	NaN
2.668	-10.233	19.722	13.408	0.061523	0.079102	0.023926	-5.299	105.249	1516.952	-1.3281	1.0625	0.063965	-31.5296	254.202	820.2186	-0.80225	0.60547	0.15381	NaN	NaN	NaN	NaN	NaN	NaN
2.67	16.077	19.231	23.626	0.078125	0.07959	0.019043	21.601	109.123	1508.264	-1.2813	1.042	0.055664	-14.711	220.461	795.231	-0.74561	0.57471	0.12451	NaN	NaN	NaN	NaN	NaN	NaN
2.672	-18.204	-0.1662	32.2163	0.090576	0.079102	0.017334	-0.663	153.715	1484.728	-1.2554	1.0317	0.052734	-24.3786	223.90479	780.936	-0.70337	0.54321	0.10181	NaN	NaN	NaN	NaN	NaN	NaN
2.674	-47.7199	2.92688	22.1475	0.10156	0.082031	0.01709	3.394	164.0758	1471.0954	-1.2163	1.0161	0.046875	17.906	226.1893	714.194	-0.66504	0.51367	0.081543	NaN	NaN	NaN	NaN	NaN	NaN
2.676	-55.024	-0.864600000000001	27.194	0.1123	0.08252	0.013672	22.6443	161.18	1469.769	-1.1882	1.0012	0.045654	-17.004	245.636	658.04	-0.61133	0.47412	0.052734	NaN	NaN	NaN	NaN	NaN	NaN
2.678	-47.5085	18.39191	24.313	0.11865	0.083496	0.013672	1.9659	194.113	1427.864	-1.1641	0.98438	0.046387	-5.901	247.19825	573.091	-0.58057	0.45068	0.036133	NaN	NaN	NaN	NaN	NaN	NaN
2.68	-41.459593	25.919	10.5996	0.13037	0.086426	0.010742	6.954	182.5918	1389.437	-1.1328	0.96094	0.043457	-46.411	246.1165	530.3192	-0.52051	0.40625	0.01123	NaN	NaN	NaN	NaN	NaN	NaN
2.682	-57.2766	11.4587	-4.18909	0.1355	0.090576	0.011719	51.9119	189.956	1342.27932	-1.1167	0.94775	0.04248	-10.548	220.049	450.587	-0.46753	0.38013	-0.015869	NaN	NaN	NaN	NaN	NaN	NaN
2.684	-42.2596	1.298	1.97	0.1416	0.094727	0.016113	7.545	223.1754	1265.864	-1.0815	0.93018	0.038086	0.540999999999997	196.881	424.533	-0.41992	0.34473	-0.033203	NaN	NaN	NaN	NaN	NaN	NaN
2.686	-34.2953	-1.198	9.106	0.15039	0.099609	0.011719	18.686	193.985	1232.887	-1.0481	0.91504	0.03833	41.505	175.474	362.796	-0.35303	0.31152	-0.06543	NaN	NaN	NaN	NaN	NaN	NaN
2.688	-24.938	8.243	10.9752	0.15479	0.11328	0.012207	7.062	223.12733	1195.96	-1.019	0.89307	0.039551	14.543	172.0326	338.939	-0.31982	0.29492	-0.076172	NaN	NaN	NaN	NaN	NaN	NaN
2.69	-22.514	8.713	6.4274	0.15869	0.11768	0.018066	-40.53944	218.858	1143.62	-0.9917	0.87744	0.037109	-40.238	175.7196	277.381	-0.25732	0.25537	-0.10107	NaN	NaN	NaN	NaN	NaN	NaN
2.692	-9.648	14.704541	18.1597	0.16357	0.12646	0.013184	-2.412	205.5516	1155.6789	-0.9707	0.87305	0.029297	-53.9628	178.835	265.983	-0.22314	0.22558	-0.11792	NaN	NaN	NaN	NaN	NaN	NaN
2.694	-8.025	22.531	10.53411	0.16162	0.13281	0.01416	-61.5349	232.805	1111.875	-0.92139	0.84033	0.040039	-48.3722	197.868	215.0776	-0.19141	0.19629	-0.12793	NaN	NaN	NaN	NaN	NaN	NaN
2.696	-25.5389	29.353	-2.80056	0.16406	0.13965	0.015137	-58.1171	210.232	1070.76633	-0.88232	0.81494	0.046387	-61.7473	183.587	225.787	-0.1665	0.1626	-0.14111	NaN	NaN	NaN	NaN	NaN	NaN
2.698	-11.523	19.584	-6.7493	0.16137	0.14868	0.016846	-53.877	206.201	1056.0271	-0.86328	0.80273	0.043457	-35.325	174.751	199.81	-0.15576	0.146	-0.1416	NaN	NaN	NaN	NaN	NaN	NaN
2.7	-0.528000000000002	15.425	16.9372	0.15967	0.15918	0.022461	-107.749	227.1604	991.434	-0.8125	0.77734	0.04248	-39.707	150.982	190.147	-0.14258	0.11865	-0.14404	NaN	NaN	NaN	NaN	NaN	NaN
2.702	9.257	3.3983	25.337	0.15186	0.17627	0.025879	-67.0329	190.864	982.306	-0.76733	0.75415	0.047607	-31.149	138.6196	151.9979	-0.13989	0.096434	-0.13965	NaN	NaN	NaN	NaN	NaN	NaN
2.704	-23.059	-1.279	11.378	0.14697	0.18115	0.03125	-67.185	241.2815	946.2601	-0.72217	0.73486	0.050293	-51.372	91.1653	140.2795	-0.14209	0.086914	-0.14795	NaN	NaN	NaN	NaN	NaN	NaN
2.706	14.409	-8.17319	-2.7688	0.13623	0.19434	0.03418	-80.753	230.1079	893.1844	-0.66357	0.69775	0.051758	-34.244	85.251	103.051	-0.15234	0.061523	-0.13379	NaN	NaN	NaN	NaN	NaN	NaN
2.708	15.036	-3.55495	-12.8991	0.12036	0.20386	0.045166	-42.036	200.0044	860.9199	-0.63867	0.68359	0.055176	-19.642	49.357	93.8588	-0.15918	0.058594	-0.12646	NaN	NaN	NaN	NaN	NaN	NaN
2.71	6.779	5.36838	-8.6546	0.10547	0.21338	0.057129	-71.89644	227.305	795.6988	-0.58301	0.64453	0.055176	-2.817	60.151	59.185	-0.18115	0.044434	-0.11719	NaN	NaN	NaN	NaN	NaN	NaN
2.712	15.069	15.6257	-8.0547	0.092285	0.21973	0.064941	-67.009	182.29	743.9939	-0.54224	0.60865	0.058106	-29.418	32.8839	57.19933	-0.19995	0.028809	-0.10522	NaN	NaN	NaN	NaN	NaN	NaN
2.714	3.962	14.5818	16.155	0.07959	0.23096	0.072754	-42.307	182.78656	709.6836	-0.50146	0.57764	0.058105	-42.066	60.309	40.5485	-0.2168	0.016602	-0.098145	NaN	NaN	NaN	NaN	NaN	NaN
2.716	17.6123	5.088	32.1208	0.066406	0.24219	0.07959	-64.9918	197.48	643.6264	-0.44824	0.53125	0.063477	-58.1118	29.433	46.2666	-0.23682	0.0029297	-0.091309	NaN	NaN	NaN	NaN	NaN	NaN
2.718	-11.445	-27.9793	51.455	0.058594	0.2478	0.08667	-39.521	152.7974	617.9044	-0.42578	0.51025	0.0625	-27.343	52.2973	30.616	-0.23438	-0.0039063	-0.089355	NaN	NaN	NaN	NaN	NaN	NaN
2.72	-32.26	-24.3165	61.971	0.043945	0.25732	0.094238	-46.259	209.481	586.8906	-0.37598	0.4751	0.063965	-42.182	14.602	38.5335	-0.23047	-0.016602	-0.086914	NaN	NaN	NaN	NaN	NaN	NaN
2.722	-11.899	-10.111	95.0323	0.0068359	0.2666	0.10596	-28.727	210.975	551.7928	-0.33667	0.44775	0.063721	-24.441	49.529	33.0435	-0.21973	-0.022949	-0.084961	NaN	NaN	NaN	NaN	NaN	NaN
2.724	-20.8	20.9662	116.1667	-0.016113	0.2749	0.10596	-1.232	197.159	530.164	-0.30029	0.42725	0.069336	-29.165	16.8831	34.179	-0.21143	-0.032715	-0.084473	NaN	NaN	NaN	NaN	NaN	NaN
2.726	-58.3054	25.728	162.344	-0.074219	0.2832	0.12402	-27.076	230.318	474.5243	-0.25732	0.39453	0.070801	-27.448	39.9351	22.0645	-0.18994	-0.044434	-0.086426	NaN	NaN	NaN	NaN	NaN	NaN
2.728	-84.7227	19.8003	199.103	-0.13159	0.30078	0.13672	4.807	169.15	437.3309	-0.23486	0.37646	0.073242	-37.958	0.3862	10.684	-0.17993	-0.057129	-0.097655	NaN	NaN	NaN	NaN	NaN	NaN
2.73	-52.421	32.9722	275.412	-0.19043	0.31689	0.14941	7.184	141.738	416.94077	-0.19775	0.34131	0.076172	-17.259	23.419	10.869	-0.16699	-0.071289	-0.10596	NaN	NaN	NaN	NaN	NaN	NaN
2.732	-37.078	69.7526	353.0495	-0.28076	0.3457	0.16602	-2.407	149.305	376.126	-0.17504	0.31201	0.074707	-17.506	-5.496	1.4776	-0.16504	-0.087402	-0.10742	NaN	NaN	NaN	NaN	NaN	NaN
2.734	-34.506	106.615	424.6216	-0.32617	0.36328	0.16943	11.777	87.399	342.4154	-0.15039	0.27539	0.074219	3.977	31.088	4.682	-0.17188	-0.1001	-0.10303	NaN	NaN	NaN	NaN	NaN	NaN
2.736	-22.4618	111.911	517.8755	-0.43896	0.40186	0.18604	12.73	119.245	313.6339	-0.11768	0.23877	0.080078	0.895000000000003	-2.168	-4.196	-0.19043	-0.11621	-0.099121	NaN	NaN	NaN	NaN	NaN	NaN
2.738	-21.847	121.9666	589.82	-0.53833	0.44458	0.19727	-25.684	106.166	283.4394	-0.099609	0.22754	0.08252	-24.347	34.112	11.0944	-0.21827	-0.12256	-0.089355	NaN	NaN	NaN	NaN	NaN	NaN
2.74	-11.921	113.6415	662.634	-0.65332	0.48486	0.2124	-15.03	79.6921	285.354	-0.075195	0.1958	0.084473	-45.429	-12.1011	8.13942	-0.24951	-0.12402	-0.073242	NaN	NaN	NaN	NaN	NaN	NaN
2.742	14.2939	112.4894	761.32	-0.83008	0.54688	0.24316	-21.865	138.202	259.0035	-0.048828	0.17602	0.084229	-58.0945	21.8277	9.1365	-0.28906	-0.12207	-0.059082	NaN	NaN	NaN	NaN	NaN	NaN
2.744	27.531	100.5746	881.7249	-0.92334	0.57666	0.26172	-22.383	93.0283	240.2769	-0.018066	0.15723	0.083496	-47.654	-8.3426	26.4019	-0.29834	-0.11719	-0.051758	NaN	NaN	NaN	NaN	NaN	NaN
2.746	9.4769	91.678	993.6193	-1.1094	0.64111	0.29297	-19.844	94.84	227.3712	0.014648	0.13623	0.081055	-56.267	43.716	20.987	-0.31299	-0.10059	-0.036621	NaN	NaN	NaN	NaN	NaN	NaN
2.748	6.9959	75.4	1065.0009	-1.25	0.68994	0.32813	-55.2675	118.7248	189.794	0.035645	0.12451	0.083496	-40.484	33.9881	7.933	-0.30713	-0.093506	-0.02832	NaN	NaN	NaN	NaN	NaN	NaN
2.75	-13.9978	57.085	1100.966	-1.3691	0.73828	0.35791	-32.583	52.645	173.3218	0.066406	0.097656	0.078125	-47.079	79.579	4.097	-0.29785	-0.085938	-0.022461	NaN	NaN	NaN	NaN	NaN	NaN
2.752	8.4955	25.855	1154.6207	-1.4956	0.7915	0.41113	-43.743	114.2044	140.8088	0.095705	0.082764	0.075928	-50.342	45.782	-22.6856	-0.26465	-0.077637	-0.020508	NaN	NaN	NaN	NaN	NaN	NaN
2.754	17.6678	-0.7035	1190.9594	-1.5371	0.81836	0.43408	-69.3396	99.472	122.0437	0.11719	0.066406	0.07373	-54.421	71.5035	-10.368	-0.25049	-0.07959	-0.020996	NaN	NaN	NaN	NaN	NaN	NaN
2.756	33.16	-17.1838	1186.187	-1.5815	0.854	0.47949	-28.536	62.7342	123.706	0.16064	0.043457	0.072754	-38.643	35.5249	2.686	-0.2168	-0.09082	-0.021484	NaN	NaN	NaN	NaN	NaN	NaN
2.758	14.4434	-19.8002	1161.5223	-1.5886	0.86743	0.50269	-60.1391	120.165	92.878	0.17139	0.032227	0.066895	-37.118	59.924	18.249	-0.18286	-0.10278	-0.032226	NaN	NaN	NaN	NaN	NaN	NaN
2.76	16.0261	-25.916	1151.7	-1.5718	0.86377	0.50879	-47.3081	64.556551	80.8665	0.20313	0.010254	0.053223	-2.73200000000001	30.3066	22.3741	-0.14941	-0.11523	-0.041016	NaN	NaN	NaN	NaN	NaN	NaN
2.762	46.073	-22.5809	1150.362	-1.4995	0.83936	0.49316	-39.3205	60.357	53.264	0.2312	0.0021972	0.052246	-45.015	39.672	29.4214	-0.10156	-0.12402	-0.05127	NaN	NaN	NaN	NaN	NaN	NaN
2.764	33.9589	-29.6553	1122.946	-1.4292	0.81689	0.47461	-63.198	74.8198	25.246	0.25342	-0.011719	0.043945	-64.0565	9.0148	30.887	-0.072266	-0.12988	-0.054199	NaN	NaN	NaN	NaN	NaN	NaN
2.766	40.6782	-23.4783	1104.999	-1.2515	0.78174	0.43359	-34.759	-7.9596	50.0118	0.2749	-0.027832	0.041504	-69.7906	29.1415	40.6064	-0.022461	-0.13672	-0.062012	NaN	NaN	NaN	NaN	NaN	NaN
2.768	4.445	-16.1201	1094.299	-1.0903	0.74146	0.39673	-45.7891	33.6689	33.182	0.27734	-0.032715	0.037598	-39.432	24.9349	27.7975	0.016601	-0.13917	-0.068604	NaN	NaN	NaN	NaN	NaN	NaN
2.77	-37.842	-10.234	1094.8595	-0.93896	0.69385	0.36719	-43.4711	26.196	24.298	0.28369	-0.048828	0.039551	-29.036	46.588	46.7027	0.061035	-0.14063	-0.074219	NaN	NaN	NaN	NaN	NaN	NaN
2.772	-36.594	-16.375	1050.227	-0.78125	0.63672	0.34033	-10.833	-12.6325	43.794	0.28149	-0.054931	0.032471	-14.115	35.165	30.6283	0.11279	-0.14795	-0.083984	NaN	NaN	NaN	NaN	NaN	NaN
2.774	-59.288	-26.171	1057.625	-0.72656	0.60742	0.33643	-22.788	56.67	26.9491	0.2749	-0.060059	0.033691	-41.614	21.6021	37.694	0.14355	-0.14893	-0.09082	NaN	NaN	NaN	NaN	NaN	NaN
2.776	-61.664	-27.92	1059.1	-0.66553	0.57568	0.34766	-6.625	9.6018	27.8727	0.2583	-0.064941	0.037109	-33.828	19.249	17.4635	0.19482	-0.15967	-0.10254	NaN	NaN	NaN	NaN	NaN	NaN
2.778	-85.5872	-44.897	1070.108	-0.64795	0.56983	0.36475	27.1	12.5823	5.4506	0.25195	-0.061035	0.03125	-17.261	10.3182	23.448	0.23145	-0.15966	-0.10986	NaN	NaN	NaN	NaN	NaN	NaN
2.78	-102.8996	-54.592	1088.184	-0.65381	0.58252	0.39258	7.395	48.7114	-13.5853	0.229	-0.057617	0.039551	-3.81399999999999	3.802	28.7029	0.26123	-0.16748	-0.12158	NaN	NaN	NaN	NaN	NaN	NaN
2.782	-125.5085	-70.396	1118.0862	-0.69287	0.61963	0.43457	14.917	-21.8168	-4.2788	0.20655	-0.045899	0.045898	-10.299	-0.3801	48.08	0.28174	-0.16846	-0.11816	NaN	NaN	NaN	NaN	NaN	NaN
2.784	-112.494	-98.0912	1162.983	-0.73193	0.6499	0.46289	3.502	25.505	-8.886	0.18652	-0.036133	0.057617	4.265	28.6807	26.2739	0.28516	-0.16992	-0.11377	NaN	NaN	NaN	NaN	NaN	NaN
2.786	-86.376	-129.617	1188.889	-0.82178	0.72412	0.50684	-14.417	25.4817	0.147	0.15576	-0.027344	0.057617	-14.032	39.896	28.48958	0.28125	-0.16992	-0.10693	NaN	NaN	NaN	NaN	NaN	NaN
2.788	-106.5027	-158.537	1195.9908	-0.89526	0.77465	0.52856	10.198	1.949	6.0238	0.1377	-0.017578	0.066406	-27.569	61.0771	-2.06887	0.26733	-0.16992	-0.097899	NaN	NaN	NaN	NaN	NaN	NaN
2.79	-114.2422	-190.846	1211.3202	-0.96582	0.82324	0.54834	-19.115	80.521	2.1325	0.11182	-0.0087891	0.075684	-52.445	21.5134	12.79454	0.24512	-0.16357	-0.086914	NaN	NaN	NaN	NaN	NaN	NaN
2.792	-131.76738	-208.317	1245.0954	-1.0601	0.87451	0.56152	-22.976	37.563	19.2697	0.090576	-0.0029297	0.081543	-46.114	33.1508	4.7818	0.21436	-0.15381	-0.070801	NaN	NaN	NaN	NaN	NaN	NaN
2.794	-132.985	-211.403	1256.5383	-1.0977	0.89453	0.56299	-29.889	40.231	17.1032	0.071777	0.0087891	0.084473	-38.474	-18.5625	13.548	0.19531	-0.14063	-0.061523	NaN	NaN	NaN	NaN	NaN	NaN
2.796	-144.0536	-196.354	1286.0601	-1.1719	0.93555	0.56494	-6.914	73.661	3.742	0.050781	0.015625	0.092773	-11.857	6.344	-6.0942	0.17334	-0.11719	-0.039551	NaN	NaN	NaN	NaN	NaN	NaN
2.798	-139.9333	-192.7455	1318.55	-1.2207	0.96582	0.56347	-12.357	-5.6078	10.4022	0.037109	0.019531	0.099121	-44.691	-31.283	18.8738	0.15772	-0.095701	-0.03125	NaN	NaN	NaN	NaN	NaN	NaN
2.8	-133.4279	-186.24362	1372.125	-1.2598	1	0.56494	-41.7527	27.1116	18.445	0.025391	0.022461	0.095703	-37.416	24.285	-10.8915	0.14844	-0.078125	-0.021973	NaN	NaN	NaN	NaN	NaN	NaN
2.802	-135.863	-177.075	1403.496	-1.3042	1.0513	0.55957	-44.0142	11.114	16.4992	0.018554	0.028809	0.096924	-63.588	-0.113	-1.77928	0.15088	-0.053711	-0.020996	NaN	NaN	NaN	NaN	NaN	NaN
2.804	-131.0745	-140.23	1448.387	-1.3257	1.0688	0.55176	-31.847	-20.0387	19.8936	0.022949	0.029297	0.097656	-44.153	61.792	-15.8779	0.15381	-0.044922	-0.01416	NaN	NaN	NaN	NaN	NaN	NaN
2.806	-94.248	-115.858	1474.266	-1.3535	1.1172	0.53467	-65.1426	56.881	20.7727	0.029785	0.03418	0.088379	-42.808	25.6127	10.396	0.16357	-0.023926	-0.020508	NaN	NaN	NaN	NaN	NaN	NaN
2.808	-70.948	-118.88	1501.6522	-1.3775	1.1519	0.52099	-69.3373	18.64055	43.931	0.041016	0.032715	0.092285	-26.849	71.9378	24.741	0.17041	-0.021728	-0.028809	NaN	NaN	NaN	NaN	NaN	NaN
2.81	-84.743	-138.1152	1521.6847	-1.3984	1.1875	0.51221	-64.6103	21.3245	57.794	0.057617	0.029297	0.081543	-53.5201	17.776	46.4476	0.18018	-0.016602	-0.031738	NaN	NaN	NaN	NaN	NaN	NaN
2.812	-99.918	-145.681463	1539.7453	-1.4331	1.2407	0.49414	-69.071	51.584	27.9144	0.075684	0.031494	0.072754	-38.03	62.2512	11.1326	0.18945	-0.011719	-0.044434	NaN	NaN	NaN	NaN	NaN	NaN
2.814	-73.234	-148.6454	1571.8803	-1.4438	1.2642	0.48926	-51.424	-23.545	21.8151	0.091797	0.02832	0.063965	-62.591	3.2352	8.7605	0.19775	-0.02002	-0.050293	NaN	NaN	NaN	NaN	NaN	NaN
2.816	-58.051	-152.271	1603.9287	-1.4741	1.3188	0.48145	-61.8765	35.4392	19.0828	0.11572	0.024414	0.052734	-61.909	40.367	-2.9368	0.20068	-0.0092773	-0.061035	NaN	NaN	NaN	NaN	NaN	NaN
2.818	-76.25	-157.146	1618.679	-1.4988	1.3587	0.48121	-55.39949	36.5219	18.82946	0.12451	0.023926	0.050781	-47.464	1.3765	9.1627	0.19727	-0.012207	-0.067627	NaN	NaN	NaN	NaN	NaN	NaN
2.82	-99.038	-160.045	1631.878	-1.5249	1.3911	0.48535	-19.804	-9.4992	26.688	0.13916	0.01709	0.039063	-22.986	80.357	15.476	0.1875	-0.0048828	-0.072266	NaN	NaN	NaN	NaN	NaN	NaN
2.822	-95.502	-150.935	1647.753	-1.5605	1.4238	0.49756	-38.382	56.393	4.55	0.13867	0.01294	0.039795	-26.469	46.086	9.988	0.16309	0.0019531	-0.074219	NaN	NaN	NaN	NaN	NaN	NaN
2.824	-97.889	-130.3368	1653.457	-1.5781	1.4316	0.50342	-17.58	12.886	15.3804	0.14355	0.013184	0.039551	-34.697	92.901	24.768	0.15332	0.0087891	-0.080566	NaN	NaN	NaN	NaN	NaN	NaN
2.826	-98.663	-112.8832	1672.1621	-1.6108	1.4556	0.51465	-8.707	24.55224	18.3755	0.14111	0.01123	0.040039	-28.112	26.3271	35.498	0.12939	0.030273	-0.077637	NaN	NaN	NaN	NaN	NaN	NaN
2.828	-91.788	-107.8016	1674.2413	-1.6323	1.4595	0.53174	-20.754	59.4754	34.8174	0.14209	0.01123	0.042969	-33.448	51.939	44.904	0.11694	0.043213	-0.080078	NaN	NaN	NaN	NaN	NaN	NaN
2.83	-102.87	-111.0234	1684.9907	-1.644	1.4614	0.53516	-10.422	-11.42918	24.3473	0.13721	0.014648	0.044434	-12.175	1.4153	45.475	0.10156	0.06543	-0.087891	NaN	NaN	NaN	NaN	NaN	NaN
2.832	-103.2431	-103.712	1674.3818	-1.6519	1.4536	0.5498	4.305	21.5954	9.133	0.13135	0.021484	0.046387	-1.848	47.281	39.784	0.075684	0.085938	-0.081055	NaN	NaN	NaN	NaN	NaN	NaN
2.834	-113.968	-87.9929	1667.833	-1.6553	1.4478	0.55615	-2.105	3.9314	10.9495	0.13037	0.021484	0.052734	-14.311	-18.3607	42.073	0.061035	0.091797	-0.080078	NaN	NaN	NaN	NaN	NaN	NaN
2.836	-109.896	-62.24559	1653.4954	-1.6558	1.4399	0.56836	0.328000000000003	-40.706	19.8901	0.12695	0.025879	0.065918	-28.07	23.75532	39.7321	0.030273	0.11084	-0.083008	NaN	NaN	NaN	NaN	NaN	NaN
2.838	-123.405	-48.769	1646.4907	-1.6563	1.4102	0.58643	0.804999999999996	33.2636	11.277	0.12695	0.029541	0.066895	-37.523	-13.8668	19.8475	0.0068357	0.12549	-0.083252	NaN	NaN	NaN	NaN	NaN	NaN
2.84	-131.735	-59.101	1649.1259	-1.6611	1.3984	0.59229	-0.925999999999998	-2.1749	14.0075	0.12354	0.030762	0.075195	-30.416	52.657	6.8196	-0.014648	0.1333	-0.083496	NaN	NaN	NaN	NaN	NaN	NaN
2.842	-138.795	-70.95	1649.714	-1.6602	1.3711	0.60791	-2.761	8.287	19.011	0.12256	0.024414	0.085449	-9.645	27.61665	18.3106	-0.027832	0.14453	-0.09375	NaN	NaN	NaN	NaN	NaN	NaN
2.844	-138.9289	-83.8673	1651.725	-1.6606	1.3511	0.62353	-7.925	47.1068	10.934	0.12451	0.023438	0.089355	-14.172	38.97	65.5654	-0.031738	0.1499	-0.09668	NaN	NaN	NaN	NaN	NaN	NaN
2.846	-121.2494	-96.342	1659.585	-1.6597	1.3364	0.63867	-9.933	-19.7099	19.545	0.12451	0.0097656	0.094238	-16.585	-38.03068	64.2699	-0.027832	0.16748	-0.11523	NaN	NaN	NaN	NaN	NaN	NaN
2.848	-122.706	-94.061	1655.6072	-1.6738	1.3203	0.65283	-13.038	23.65734	8.4289	0.12989	0.0051269	0.099609	-48.732	-37.768	88.3308	-0.022461	0.17896	-0.12866	NaN	NaN	NaN	NaN	NaN	NaN
2.85	-117.0269	-68.007	1642.975	-1.6772	1.3188	0.65625	-6.06	29.0428	-4.933	0.1333	-4.1634e-14	0.10498	-25.127	-84.809	119.78	-0.016113	0.18896	-0.14893	NaN	NaN	NaN	NaN	NaN	NaN
2.852	-96.951	-55.2099	1656.112	-1.6885	1.3086	0.67822	-39.425	-3.8373	9.388	0.13574	-0.0087891	0.10889	-29.085	-99.54573	185.684	-0.0019531	0.20166	-0.17236	NaN	NaN	NaN	NaN	NaN	NaN
2.854	-87.818	-53.015371	1673.2809	-1.6931	1.2985	0.68628	-65.5558	61.178	9.386	0.12744	-0.015625	0.11279	-45.581	-146.999	237.7964	-0.00048828	0.20605	-0.18164	NaN	NaN	NaN	NaN	NaN	NaN
2.856	-82.985	-65.0179	1693.145	-1.6948	1.2915	0.69043	-44.377	14.9006	8.108	0.12549	-0.018555	0.11377	-36.036	-129.129	307.164	-0.0053711	0.22363	-0.21289	NaN	NaN	NaN	NaN	NaN	NaN
2.858	-77.415	-55.2814	1663.966	-1.6948	1.27	0.70215	-43.704	22.354	18.4474	0.11743	-0.022949	0.12011	-19.2885	-116.3328	390.061	-0.043701	0.24048	-0.21118	NaN	NaN	NaN	NaN	NaN	NaN
2.86	-79.951	-37.93636	1654.046	-1.6914	1.2539	0.69775	-64.7366	56.895	5.362	0.1123	-0.021484	0.13428	-18.1166	-79.2524	568.514	-0.10303	0.26221	-0.21436	NaN	NaN	NaN	NaN	NaN	NaN
2.862	-87.87	-26.7078	1627.9148	-1.6758	1.2227	0.69629	-51.466	-7.33948	20.6556	0.10156	-0.024902	0.13525	-33.9696	-61.302	760.161	-0.21729	0.29688	-0.21094	NaN	NaN	NaN	NaN	NaN	NaN
2.864	-75.27	-18.2608	1585.567	-1.6611	1.2046	0.69482	-47.3159	27.691	27.7061	0.097168	-0.025391	0.14453	-48.22	-42.8611	943.4	-0.28369	0.31494	-0.20117	NaN	NaN	NaN	NaN	NaN	NaN
2.866	-71.815	-9.304	1575.95	-1.6421	1.1821	0.68848	-70.554	19.4084	1.653	0.084473	-0.017578	0.14014	-56.458	2.683	1101.872	-0.42969	0.35938	-0.17822	NaN	NaN	NaN	NaN	NaN	NaN
2.868	-66.332	-9.58	1563.9623	-1.6201	1.1504	0.68799	-50.3566	-16.99137	14.48561	0.083496	-0.011719	0.14062	-77.844	9.772	1315.304	-0.59521	0.41455	-0.15137	NaN	NaN	NaN	NaN	NaN	NaN
2.87	-60.963	-6.889	1568.6168	-1.605	1.1294	0.68066	-36.872	41.9194	3.225	0.081055	-0.003418	0.14307	-37.872	45.0645	1502.3884	-0.68945	0.44141	-0.13818	NaN	NaN	NaN	NaN	NaN	NaN
2.872	-57.454	1.0554	1566.3412	-1.582	1.0977	0.67627	-46.396	9.578	8.6609	0.090332	0.0029297	0.13916	-71.144	41.143	1646.751	-0.896	0.51221	-0.10791	NaN	NaN	NaN	NaN	NaN	NaN
2.874	-65.308	8.8645	1561.1607	-1.5679	1.0737	0.67481	-33.928	35.434	32.4115	0.092285	0.0083008	0.13867	-71.21	68.753	1680.634	-1.0779	0.57788	-0.070068	NaN	NaN	NaN	NaN	NaN	NaN
2.876	-66.076	16.1774	1553.559	-1.5522	1.0474	0.66797	-30.608	67.673	17.1159	0.104	0.017578	0.13672	-75.959	0.887	1623.712	-1.2847	0.65283	-0.01416	NaN	NaN	NaN	NaN	NaN	NaN
2.878	-58.752	15.227	1532.94	-1.5332	1.0156	0.66846	-29.875	17.0013	22.0621	0.11475	0.022217	0.13086	-64.5412	-44.089	1520.237	-1.6187	0.77588	0.099609	NaN	NaN	NaN	NaN	NaN	NaN
2.88	-63.06	4.57361	1507.1378	-1.5215	1.0059	0.6626	3.611	44.571	27.886	0.12256	0.025879	0.12988	-64.1424	-159.7102	1429.329	-1.7891	0.85156	0.16162	NaN	NaN	NaN	NaN	NaN	NaN
2.882	-86.2379	-10.0577	1492.4587	-1.4863	0.97852	0.65381	-17.335	22.951	14.26529	0.12939	0.040527	0.12305	-37.8231	-206.998	1291.4	-2.105	1.0298	0.30957	NaN	NaN	NaN	NaN	NaN	NaN
2.884	-104.83476	-22.0567	1497.0097	-1.4587	0.96313	0.64428	-10.504	-9.6037	20.7373	0.13232	0.046875	0.1167	-52.8225	-277.251	1194.152	-2.2549	1.1768	0.43408	NaN	NaN	NaN	NaN	NaN	NaN
2.886	-85.5543	-14.5182	1471.8284	-1.4326	0.94727	0.64111	6.167	27.361	42.98	0.12744	0.060059	0.098633	-76.7769	-246.862	1091.565	-2.3457	1.3086	0.55029	NaN	NaN	NaN	NaN	NaN	NaN
2.888	-78.5482	-6.1434	1438.4176	-1.396	0.93213	0.62695	-5.353	-24.9852	53.033	0.10938	0.080322	0.097412	-81.939	-257.181	1051.192	-2.396	1.4126	0.61035	NaN	NaN	NaN	NaN	NaN	NaN
2.89	-78.613	15.9361	1414.302	-1.3823	0.91748	0.61719	-14.048	-21.838	90.5859	0.085449	0.10645	0.10205	-78.432	-185.356	1053.278	-2.3867	1.4219	0.58154	NaN	NaN	NaN	NaN	NaN	NaN
2.892	-91.3592	28.1601	1402.195	-1.3472	0.89697	0.60059	29.165	17.1958	127.9298	0.019531	0.15186	0.10059	-33.967	-163.0156	1105.687	-2.2368	1.3813	0.45117	NaN	NaN	NaN	NaN	NaN	NaN
2.894	-70.839	41.7478	1390.665	-1.3218	0.8833	0.58691	-0.116	-46.9883	176.1611	-0.020996	0.1748	0.097656	32.995	-104.663	1195.372	-1.9834	1.3428	0.33252	NaN	NaN	NaN	NaN	NaN	NaN
2.896	-73.9816	68.8486	1385.7342	-1.2964	0.87158	0.57959	-24.131	-16.609	267.4485	-0.11035	0.22168	0.1084	61.928	-110.81	1317.839	-1.6768	1.3145	0.20215	NaN	NaN	NaN	NaN	NaN	NaN
2.898	-66.1941	71.6439	1383.693	-1.2656	0.86426	0.56104	-24.644	-24.99806	341.51	-0.17993	0.26757	0.1167	19.328	-66.24	1435.973	-1.2754	1.2783	0.019043	NaN	NaN	NaN	NaN	NaN	NaN
2.9	-38.786	79.7165	1372.3785	-1.2456	0.85889	0.54883	-36.81	-44.094	460.6998	-0.25977	0.31641	0.12549	37.67	-91.44	1446.941	-1.1152	1.2598	-0.055664	NaN	NaN	NaN	NaN	NaN	NaN
2.902	-35.056	71.7469	1337.3984	-1.2061	0.84668	0.53613	-16.249	51.831	584.4597	-0.38916	0.40088	0.13867	31.89	-110.12	1444.4019	-0.8833	1.2349	-0.18066	NaN	NaN	NaN	NaN	NaN	NaN
2.904	-56.9529	90.382	1305.5538	-1.1814	0.82691	0.51758	6.375	33.21	711.3271	-0.46387	0.44141	0.14795	24.279	-221.419	1456.34695	-0.77393	1.228	-0.24511	NaN	NaN	NaN	NaN	NaN	NaN
2.906	-36.035	91.14	1289.42	-1.1538	0.81299	0.5	9.7018	61.8221	831.5283	-0.6416	0.53516	0.18018	21.6712	-354.606	1529.0253	-0.69531	1.2207	-0.29297	NaN	NaN	NaN	NaN	NaN	NaN
2.908	-9.338	86.12	1281.3813	-1.1079	0.78955	0.47949	8.007	113.3163	981.967	-0.81153	0.62354	0.20874	59.8716	-478.39	1595.59626	-0.66211	1.1914	-0.31494	NaN	NaN	NaN	NaN	NaN	NaN
2.91	-23.803	82.8483	1261.4857	-1.0854	0.77979	0.46826	27.554	60.5442	1158.447	-1.0073	0.71533	0.24951	56.01959	-513.27	1653.1772	-0.6748	1.1768	-0.31494	NaN	NaN	NaN	NaN	NaN	NaN
2.912	-34.854	83.7807	1255.669	-1.0581	0.75488	0.45508	36.9083	71.932	1327.65164	-1.3154	0.87109	0.32129	118.99	-510.64	1663.527	-0.79248	1.1782	-0.26123	NaN	NaN	NaN	NaN	NaN	NaN
2.914	-9.582	84.5527	1236.7831	-1.0388	0.74536	0.4397	-0.457848	22.3858	1401.851342	-1.4878	0.95752	0.36914	152.174	-462.26	1716.855	-0.95214	1.2226	-0.19312	NaN	NaN	NaN	NaN	NaN	NaN
2.916	-3.654	92.1574	1222.0778	-1.0146	0.73535	0.42432	1.092	-94.4968	1441.779	-1.8359	1.1406	0.46533	168.976	-414.36	1745.0053	-1.1362	1.2964	-0.12012	NaN	NaN	NaN	NaN	NaN	NaN
2.918	4.579	103.241	1190.1911	-0.98975	0.71729	0.4082	-54.0059	-85.5959	1414.614	-2.0603	1.2561	0.51685	115.88	-341.463	1813.3541	-1.3828	1.3848	-0.03125	NaN	NaN	NaN	NaN	NaN	NaN
2.92	6.743	103.508	1186.24	-0.97217	0.70166	0.40039	-66.8928	-108.1637	1357.46	-2.207	1.3398	0.54736	104.841	-258.0156	1891.003	-1.4941	1.4219	0.01123	NaN	NaN	NaN	NaN	NaN	NaN
2.922	9.573	109.356	1169.702	-0.94922	0.67969	0.38232	-74.804	-90.45	1301.614	-2.1641	1.4102	0.62646	57.194	-176.267	1962.969	-1.6812	1.4927	0.07373	NaN	NaN	NaN	NaN	NaN	NaN
2.924	4.65	107.4986	1145.3971	-0.93555	0.66406	0.36914	-69.0288	-43.15171	1227.668	-2.1074	1.4258	0.64111	48.701	-101.724	1958.705	-1.8028	1.5435	0.11158	NaN	NaN	NaN	NaN	NaN	NaN
2.926	-5.684	121.3656	1109.2929	-0.91406	0.64844	0.35547	-31.2847	-128.117	1196.081	-1.9585	1.4106	0.50195	18.1146	-61.78	1918.192	-1.8921	1.5825	0.12793	NaN	NaN	NaN	NaN	NaN	NaN
2.928	-21.5	121.193	1091.3001	-0.8833	0.62744	0.34375	-25.7789	-143.818	1173.41625	-1.6626	1.3462	0.375	8.812	-27.82	1850.586	-1.9722	1.6333	0.14014	NaN	NaN	NaN	NaN	NaN	NaN
2.93	-18.349	130.53	1073.6312	-0.87158	0.6167	0.33398	-18.6631	-159.561	1166.38	-1.2515	1.2622	0.31055	26.8732	-67.672	1838.029	-2	1.6523	0.13916	NaN	NaN	NaN	NaN	NaN	NaN
2.932	-21.456	137.243	1030.3045	-0.85156	0.5957	0.31592	-9.45	-189.784	1179.26521	-0.771	1.1294	0.27002	13.932	-109.9626	1900.307	-2.0371	1.6875	0.14453	NaN	NaN	NaN	NaN	NaN	NaN
2.934	-44.5231	131.3509	996.197	-0.83472	0.57983	0.30542	-13.389	-110.582	1192.9783	-0.63232	1.0708	0.24414	6.558	-172.381	1969.435	-2.0603	1.7073	0.13648	NaN	NaN	NaN	NaN	NaN	NaN
2.936	-33.606	123.4725	964.783	-0.82129	0.56836	0.29541	-21.362	-84.943	1175.5447	-0.50488	0.98047	0.18213	46.6506	-192.471	2016.7557	-2.0737	1.731	0.12891	NaN	NaN	NaN	NaN	NaN	NaN
2.938	-30.0263	112.531	955.1039	-0.80664	0.54492	0.28125	-41.241	-42.2	1197.182	-0.44751	0.94995	0.16675	32.0763	-202.177	2069.276	-2.082	1.7598	0.11621	NaN	NaN	NaN	NaN	NaN	NaN
2.94	-18.51	120.754	923.6091	-0.79639	0.5376	0.27441	-69.507	0.319999999999993	1219.31	-0.396	0.92627	0.18018	-12.9875	-172.582	2111.58	-2.0928	1.7754	0.11426	NaN	NaN	NaN	NaN	NaN	NaN
2.942	-29.2134	123.709	912.3953	-0.78125	0.51758	0.26611	-90.308	-88.79	1261.183	-0.38867	0.92188	0.22314	-59.104	-163.505	2162.44	-2.1089	1.7915	0.10547	NaN	NaN	NaN	NaN	NaN	NaN
2.944	-9.859	127.956	902.92877	-0.76294	0.49926	0.25708	-106.9371	-140.843	1305.5682	-0.43896	0.94385	0.25879	-77.483	-128.971	2186.488	-2.1218	1.7961	0.10742	NaN	NaN	NaN	NaN	NaN	NaN
2.946	-18.637	121.921	876.0768	-0.74365	0.48584	0.25	-127.428	-208.178	1329.5538	-0.63184	1.042	0.3335	-81.7153	-117.0051	2164.096	-2.1304	1.7837	0.10938	NaN	NaN	NaN	NaN	NaN	NaN
2.948	-25.868	120.6873	847.2733	-0.71387	0.46436	0.23389	-119.089	-312.367	1350.1685	-0.80786	1.156	0.39087	-68.234	-72.6825	2145.455	-2.1289	1.75	0.10938	NaN	NaN	NaN	NaN	NaN	NaN
2.95	-33.4568	125.3393	830.6099	-0.69824	0.44971	0.22705	-77.9	-340.448	1374.907	-0.97021	1.2778	0.44336	-67.685	-81.961	2081.547	-2.1191	1.7305	0.10693	NaN	NaN	NaN	NaN	NaN	NaN
2.952	-38.4709	129.61	792.5762	-0.66357	0.43018	0.2085	-69.44	-388.212	1401.426	-1.1348	1.4063	0.49854	-33.74	-52.382	2029.3285	-2.0879	1.6797	0.10693	NaN	NaN	NaN	NaN	NaN	NaN
2.954	-13.2116	134.157	765.1247	-0.63477	0.40894	0.19898	-35.81	-395.327	1460.9948	-1.2012	1.459	0.5166	-16.6876	-59.607	1951.545	-2.061	1.6352	0.1023	NaN	NaN	NaN	NaN	NaN	NaN
2.956	-31.4365	123.3169	717.032	-0.60938	0.39063	0.18506	-58.075	-340.533	1535.1952	-1.3203	1.5371	0.52295	22.86051	-22.912	1921.017	-2.0269	1.5884	0.092773	NaN	NaN	NaN	NaN	NaN	NaN
2.958	-29.369	126.91155	682.1037	-0.57422	0.36914	0.16748	-53.276	-332.795	1598.8469	-1.3969	1.5747	0.52148	40.0109	-36.9694	1909.453	-1.9746	1.5313	0.088867	NaN	NaN	NaN	NaN	NaN	NaN
2.96	-11.207	130.9774	666.932	-0.55615	0.35596	0.15625	-87.451	-268.8985	1670.7946	-1.4688	1.6074	0.51904	80.29	-1.1073	1897.551	-1.9512	1.5	0.083984	NaN	NaN	NaN	NaN	NaN	NaN
2.962	9.654	139.9349	651.3542	-0.51563	0.3335	0.14111	-145.2433	-202.905	1717.3093	-1.5625	1.6504	0.53369	28.9379	-5.8603	1890.823	-1.9058	1.4517	0.079102	NaN	NaN	NaN	NaN	NaN	NaN
2.964	13.032	142.273	622.5891	-0.48584	0.31299	0.12891	-117.488	-197.061	1750.6699	-1.603	1.6743	0.53564	39.5053	32.1063	1879.63	-1.8767	1.4123	0.075439	NaN	NaN	NaN	NaN	NaN	NaN
2.966	-1.762	138.7822	618.4717	-0.46924	0.30273	0.12695	-147.2258	-143.069	1770.2839	-1.6777	1.7207	0.53955	45.92	5.451	1878.944	-1.8594	1.3789	0.078613	NaN	NaN	NaN	NaN	NaN	NaN
2.968	32.6049	132.4988	603.959	-0.43945	0.27979	0.11426	-189.334	-106.105	1788.0711	-1.7236	1.7544	0.54492	56.583	20.114	1924.8303	-1.8413	1.3423	0.080566	NaN	NaN	NaN	NaN	NaN	NaN
2.97	-2.731	128.902	569.7963	-0.41699	0.26294	0.10717	-134.071	-98.905	1802.177	-1.7656	1.791	0.54932	72.619	-27.059	1919.39	-1.8301	1.3262	0.091309	NaN	NaN	NaN	NaN	NaN	NaN
2.972	-8.191	125.575	535.6742	-0.39453	0.24854	0.10059	-127.76	-68.065	1814.96686	-1.8281	1.8418	0.56055	52.9643	-24.074	1919.226	-1.812	1.3091	0.09375	NaN	NaN	NaN	NaN	NaN	NaN
2.974	-8.635	101.352	511.6469	-0.36572	0.22607	0.092773	-79.454	-93.812	1845.1143	-1.872	1.8809	0.56372	57.582	-58.988	1901.207	-1.7976	1.2991	0.10351	NaN	NaN	NaN	NaN	NaN	NaN
2.976	-26.02	103.543	492.6114	-0.354	0.21729	0.084473	-17.194	-125.27706	1876.7188	-1.9141	1.916	0.57959	26.2956	-53.635	1868.896	-1.7827	1.2935	0.10938	NaN	NaN	NaN	NaN	NaN	NaN
2.978	-35.5069	97.9454	449.998	-0.32568	0.20264	0.077637	-40.038	-133.033	1883.501	-1.9688	1.959	0.59424	55.827	-82.731	1836.389	-1.7651	1.3013	0.11865	NaN	NaN	NaN	NaN	NaN	NaN
2.98	-28.649	93.7764	417.855	-0.3042	0.18799	0.068848	-31.774	-190.915	1917.8896	-1.9863	1.9766	0.60791	86.807	-53.703	1808.5555	-1.7554	1.3013	0.12988	NaN	NaN	NaN	NaN	NaN	NaN
2.982	6.03	80.276	413.4867	-0.28125	0.16895	0.060547	-62.506	-184.529	1965.857	-2.0098	2.002	0.62354	72.084	-56.232	1781.1905	-1.7393	1.3008	0.14551	NaN	NaN	NaN	NaN	NaN	NaN
2.984	-23.134	84.002	413.371	-0.24609	0.15479	0.050781	-95.5952	-187.915	1989.536	-2.0085	2.0012	0.63672	41.6613	30.865	1782.599	-1.7288	1.3005	0.15381	NaN	NaN	NaN	NaN	NaN	NaN
2.986	-15.777	93.56373	373.3486	-0.22998	0.14307	0.050781	-92.5351	-207.094	2011.389	-2.0059	2.002	0.65088	11.545	82.322	1750.4556	-1.7163	1.3032	0.15869	NaN	NaN	NaN	NaN	NaN	NaN
2.988	-31.571	91.6279	357.858	-0.2002	0.11768	0.040039	-130.25394	-144.705876	1992.135	-1.978	1.9771	0.65967	-18.706	168.648	1729.6713	-1.6963	1.2988	0.1665	NaN	NaN	NaN	NaN	NaN	NaN
2.99	-17.772	93.53439	330.04875	-0.18164	0.10474	0.027588	-123.608	-125.7758	1970.895	-1.9648	1.9609	0.66162	-23.1217	194.568	1690.687787	-1.689	1.2974	0.17236	NaN	NaN	NaN	NaN	NaN	NaN
2.992	-26.932	85.6481	320.5899	-0.16504	0.090332	0.017578	-110.012	-92	1950.128	-1.9219	1.9219	0.66748	-33.346	230.698	1680.6734	-1.667	1.2871	0.1748	NaN	NaN	NaN	NaN	NaN	NaN
2.994	-37.836	71.2802	289.9403	-0.14258	0.072266	0.013672	-131.6488	-47.818	1911.8497	-1.8862	1.8862	0.66406	-35.828	223.367	1680.9262	-1.6472	1.2746	0.18116	NaN	NaN	NaN	NaN	NaN	NaN
2.996	-49.2678	71.6429	271.9256	-0.13232	0.066895	0.010742	-82.343	-92.0791	1897.0797	-1.8511	1.8481	0.66504	-60.6222	220.082	1688.239	-1.6284	1.2622	0.18896	NaN	NaN	NaN	NaN	NaN	NaN
2.998	-49.0578	76.246	258.919	-0.11475	0.050781	0.0024414	-59.842	-73.62459	1896.469	-1.8101	1.7954	0.6582	-66.0279	209.8956	1636.2648	-1.6089	1.2446	0.18896	NaN	NaN	NaN	NaN	NaN	NaN
3	-37.2133	83.79	229.389	-0.10596	0.040283	-0.0012207	-78.252	-76.874	1864.666	-1.793	1.7676	0.65381	-70.7752	208.2604	1583.491	-1.5913	1.2378	0.19141	NaN	NaN	NaN	NaN	NaN	NaN
3.002	-59.3537	73.286	205.42035	-0.094727	0.035645	-0.0058594	-56.911	-79.398	1849.206	-1.7578	1.7148	0.64697	-34.113	194.8	1510.9	-1.5566	1.2129	0.19092	NaN	NaN	NaN	NaN	NaN	NaN
3.004	-43.77	69.501	210.429	-0.07959	0.019043	-0.01123	-110.698	-6.923	1818.218	-1.729	1.6831	0.63379	-40.7169	176.902	1500.51	-1.5193	1.1994	0.1831	NaN	NaN	NaN	NaN	NaN	NaN
3.006	-28.639	57.5663	185.8215	-0.074707	0.013672	-0.013184	-153.4868	-5.5101	1813.4195	-1.7012	1.6484	0.62354	-7.271	171.128	1480.786	-1.4839	1.186	0.18115	NaN	NaN	NaN	NaN	NaN	NaN
3.008	-17.311	55.7021	169.3413	-0.058594	0	-0.020508	-139.337	9.7577	1836.0968	-1.6582	1.6055	0.61572	-14.704	168.242	1494.9023	-1.4351	1.1685	0.17383	NaN	NaN	NaN	NaN	NaN	NaN
3.01	-9.277	40.59	158.9613	-0.050537	-0.0061036	-0.02417	-174.03	17.053	1848.996	-1.6401	1.5845	0.60547	-22.796	196.836	1472.24	-1.404	1.1511	0.17285	NaN	NaN	NaN	NaN	NaN	NaN
3.012	-11.327	37.925	155.9049	-0.04541	-0.018066	-0.030762	-146.3577	-42.497	1860.2488	-1.6089	1.5376	0.58691	-34.097	228.696	1448.493	-1.3726	1.1294	0.17334	NaN	NaN	NaN	NaN	NaN	NaN
3.014	2.887	37.89	143.4625	-0.040039	-0.026367	-0.031738	-141.705	-48.682	1869.3795	-1.5901	1.5051	0.57544	-28.429	284.889	1375.711	-1.3281	1.1016	0.1709	NaN	NaN	NaN	NaN	NaN	NaN
3.016	-21.388	51.0921	127.40389	-0.036133	-0.03125	-0.035645	-151.359	-43.521	1832.51	-1.5723	1.4785	0.56299	-38.065	314.18	1345.7419	-1.3086	1.0879	0.16992	NaN	NaN	NaN	NaN	NaN	NaN
3.018	-7.61	52.4953	111.0275	-0.033203	-0.035156	-0.040039	-162.5815	-75.989	1813.8652	-1.5415	1.4438	0.54102	-16.848	371.396	1284.449	-1.2671	1.0532	0.16748	NaN	NaN	NaN	NaN	NaN	NaN
3.02	-23.097	49.938	119.9675	-0.03125	-0.036621	-0.040528	-150.5446	-31.2877	1767.674	-1.5215	1.4316	0.53369	-11.786	345.605	1265.8717	-1.2329	1.0298	0.16723	NaN	NaN	NaN	NaN	NaN	NaN
3.022	-0.482000000000003	51.151	105.918	-0.027832	-0.040527	-0.047852	-119.555	-54.15117	1745.2637	-1.4897	1.4048	0.51367	9.916	358.464	1208.458	-1.1909	1.0034	0.16504	NaN	NaN	NaN	NaN	NaN	NaN
3.024	-12.031	50.479	87.3208	-0.024414	-0.032227	-0.055664	-107.949	-31.806	1757.731	-1.4604	1.3881	0.5	-2.633	312.247	1143.772	-1.1304	0.97607	0.16211	NaN	NaN	NaN	NaN	NaN	NaN
3.026	-22.337	32.7034	77.780161	-0.020996	-0.033691	-0.051758	-105.1071	28.997	1744.2328	-1.4355	1.3672	0.48682	-0.338999999999999	318.8341	1054.8206	-1.1035	0.95508	0.16357	NaN	NaN	NaN	NaN	NaN	NaN
3.028	-0.831000000000003	18.0981	69.421	-0.019531	-0.024414	-0.058105	-91.733	20.433	1751.835	-1.4097	1.3462	0.46387	-27.63	254.3197	1021.109	-1.0449	0.91016	0.15869	NaN	NaN	NaN	NaN	NaN	NaN
3.03	-19.756	21.531	42.7208	-0.017822	-0.021729	-0.061523	-113.0674	69.344	1726.7255	-1.397	1.3325	0.4541	-12.464	280.0912	950.244	-0.9973	0.87915	0.15747	NaN	NaN	NaN	NaN	NaN	NaN
3.032	-10.801	25.939	32.6652	-0.01416	-0.01416	-0.063965	-124.7138	81.241	1687.23144	-1.3711	1.3008	0.43408	-31.883	238.504	940.8095	-0.95313	0.84961	0.16016	NaN	NaN	NaN	NaN	NaN	NaN
3.034	-20.851	26.347	29.1404	-0.012207	-0.0014648	-0.068359	-85.372	74.924	1672.6729	-1.3564	1.2852	0.43017	-24.484	286.9846	894.4296	-0.89258	0.80176	0.16064	NaN	NaN	NaN	NaN	NaN	NaN
3.036	15.711	26.8214	45.9491	-0.0053711	-0.00048828	-0.076172	-79.731	149.393	1630.755	-1.3418	1.2617	0.41748	-83.78764	236.1652	882.562	-0.86328	0.77832	0.16309	NaN	NaN	NaN	NaN	NaN	NaN
3.038	-24.043	22.38243	36.3762	-0.0019531	0.0073242	-0.078125	-87.779	137.866	1638.66	-1.3242	1.2344	0.40039	-84.9779	297.6494	844.18	-0.80615	0.729	0.16357	NaN	NaN	NaN	NaN	NaN	NaN
3.04	-39.262	14.9778	24.7113	0.0087893	0.013428	-0.080567	-73.432	146.737	1646.8887	-1.3164	1.2227	0.38672	-92.5393	230.9772	819.8	-0.76318	0.69336	0.16601	NaN	NaN	NaN	NaN	NaN	NaN
3.042	-29.724	14.3523	34.675	0.017578	0.018066	-0.081543	-76.94296	157.1585	1599.7674	-1.3003	1.188	0.38184	-67.689	289.8049	740.997	-0.71875	0.66016	0.16455	NaN	NaN	NaN	NaN	NaN	NaN
3.044	-40.002	14.496	28.8347	0.027344	0.023438	-0.083984	-39.889	88.424	1602.294	-1.2891	1.1621	0.37232	-79.7171	218.688	710.708	-0.66602	0.61035	0.16846	NaN	NaN	NaN	NaN	NaN	NaN
3.046	-38.974	4.0978	19.2719	0.03125	0.02002	-0.088867	-27.415	110.091	1568.132	-1.2788	1.1333	0.36426	-81.2924	243.4669	609.223	-0.63232	0.59521	0.16895	NaN	NaN	NaN	NaN	NaN	NaN
3.048	-57.3288	-2.4414	-2.656	0.037598	0.020508	-0.095215	-11.497	102.2	1538.6778	-1.2539	1.0898	0.3501	-99.15638	164.345	543.7616	-0.57813	0.54639	0.16943	NaN	NaN	NaN	NaN	NaN	NaN
3.05	-48.7374	0.0322	-5.8922	0.043945	0.018798	-0.092773	9.913	92.37	1524.084	-1.2407	1.0669	0.3418	-100.7483	221.173	462.652	-0.53443	0.51563	0.1709	NaN	NaN	NaN	NaN	NaN	NaN
3.052	-30.582	12.2946	-7.914	0.049316	0.01709	-0.098145	-26.023	149.0477	1486.7324	-1.2104	1.0181	0.32227	-86.8349	160.484	416.381	-0.4834	0.48438	0.17139	NaN	NaN	NaN	NaN	NaN	NaN
3.054	-20.529	20.5866	-3.8027	0.051758	0.018555	-0.1001	-46.7709	131.837	1465.0258	-1.1857	0.97925	0.31225	-87.051	246.2995	355.495	-0.42969	0.4458	0.17334	NaN	NaN	NaN	NaN	NaN	NaN
3.056	-16.402	12.7374	-2.3733	0.052246	0.017578	-0.10205	-38.926	160.365	1465.5621	-1.1597	0.94385	0.29785	-51.561	180.751	327.841	-0.3999	0.41943	0.17676	NaN	NaN	NaN	NaN	NaN	NaN
3.058	-21.596	13.0951	5.5175	0.054688	0.015625	-0.10742	-76.3054	210.886	1418.4777	-1.1245	0.89502	0.27539	-69.428	259.376	273.947	-0.33887	0.37354	0.17041	NaN	NaN	NaN	NaN	NaN	NaN
3.06	-3.222	14.8958	6.16593	0.058593	0.01709	-0.11133	-49.811	194.242	1398.735	-1.1128	0.86572	0.26953	-61.787	182.012	288.6	-0.29419	0.3352	0.16724	NaN	NaN	NaN	NaN	NaN	NaN
3.062	-24.1331	14.7414	7.4838	0.05957	0.019043	-0.11426	-49.5928	251.344	1366.9997	-1.0947	0.81836	0.25439	-54.561	241.811	266.9907	-0.24951	0.2959	0.16162	NaN	NaN	NaN	NaN	NaN	NaN
3.064	9.612	8.1654	8.7065	0.056152	0.010742	-0.10693	-62.6638	238.784	1312.45588	-1.0757	0.78564	0.24414	-60.0447	150.099	254.861	-0.19727	0.24951	0.15039	NaN	NaN	NaN	NaN	NaN	NaN
3.066	-5.912	-4.9009	18.7202	0.051758	0.0078125	-0.10889	-24.488	213.4029	1293.7556	-1.0586	0.75293	0.229	-20.522	196.773	203.13132	-0.16895	0.22803	0.14746	NaN	NaN	NaN	NaN	NaN	NaN
3.068	-8.466	14.0426	1.0107	0.043457	0.0078125	-0.10938	-24.2798	233.979	1236.093	-1.0386	0.72021	0.21582	-29.026	116.63123	163.873	-0.11621	0.18066	0.14551	NaN	NaN	NaN	NaN	NaN	NaN
3.07	-28.4123	18.1298	-16.30878	0.036377	0.0046386	-0.10889	-15.033	180.575	1213.4498	-1.0229	0.6958	0.21387	-16.93	172.022	161.859	-0.089355	0.14624	0.13916	NaN	NaN	NaN	NaN	NaN	NaN
3.072	-5.101	21.1064	-15.6046	0.037598	-0.00097656	-0.11084	-9.315	214.854	1200.26	-1.001	0.65479	0.20215	3.732	98.58	145.975	-0.064453	0.10742	0.13379	NaN	NaN	NaN	NaN	NaN	NaN
3.074	7.332	6.6645	4.9218	0.026855	-0.0024414	-0.11084	-17.077	246.492	1152.045	-0.98316	0.62817	0.19458	0.811999999999998	129.5784	99.095	-0.03418	0.069336	0.125	NaN	NaN	NaN	NaN	NaN	NaN
3.076	2.673	3.2597	11.821	0.02832	-0.0058594	-0.11279	-16.304	217.1722	1147.3455	-0.96338	0.60596	0.18311	23.925	47.512	76.6119	-0.020996	0.046875	0.12061	NaN	NaN	NaN	NaN	NaN	NaN
3.078	7.39	3.9892	9.9623	0.016113	-0.0078125	-0.10889	-30.8474	257.689	1114.5033	-0.93018	0.56885	0.17432	3.777	91.1844	69.304	0.00048828	0.01123	0.12061	NaN	NaN	NaN	NaN	NaN	NaN
3.08	-6.093	11.9865	3.1059	0.0095215	-0.0051269	-0.11133	-35.7705	208.9283	1082.538	-0.91406	0.55566	0.16699	10.484	32.90559	76.805	0.016846	-0.016602	0.11547	NaN	NaN	NaN	NaN	NaN	NaN
3.082	19.579	18.4533	7.48	0.0014648	-0.0014648	-0.10938	-23.381	187.89055	1071.164	-0.86865	0.52783	0.15088	-21.206	77.702	85.388	0.027832	-0.029297	0.11816	NaN	NaN	NaN	NaN	NaN	NaN
3.084	-3.801	21.16114	7.57964	-0.0024414	0.003418	-0.10645	-37.513655	231.40479	1024.9732	-0.83643	0.50537	0.14136	-16.787	39.919	67.347	0.041992	-0.043945	0.11133	NaN	NaN	NaN	NaN	NaN	NaN
3.086	-15.798	21.1249	6.2454	-0.0078125	0.0019531	-0.10742	-19.196	207.4774	1000.9684	-0.80225	0.48486	0.13232	-47.919	95.359	66.327	0.049316	-0.04834	0.11182	NaN	NaN	NaN	NaN	NaN	NaN
3.088	-10.716	15.6533	3.9445	-0.02002	0.0092773	-0.10303	11.774	244.9621	965.7516	-0.76123	0.45752	0.11475	-30.867	60.448	51.9097	0.060547	-0.063477	0.10645	NaN	NaN	NaN	NaN	NaN	NaN
3.09	-9.521	24.8608	-8.7229	-0.026123	0.0090332	-0.10816	-3.885	247.3023	906.991	-0.74805	0.43945	0.10791	-40.365	87.82	37.109	0.068115	-0.071777	0.1045	NaN	NaN	NaN	NaN	NaN	NaN
3.092	-29.6002	25.415	2.324	-0.025879	0.0078125	-0.10645	20.237	204.4278	879.063	-0.71484	0.41406	0.09375	-54.0461	44.018	34.2448	0.072266	-0.085449	0.1001	NaN	NaN	NaN	NaN	NaN	NaN
3.094	-56.7991	10.9493	1.5322	-0.033203	0.0039063	-0.10938	30.5642	239.38478	817.116	-0.69482	0.39038	0.084717	-44.704	48.797	23.9898	0.08252	-0.099121	0.092773	NaN	NaN	NaN	NaN	NaN	NaN
3.096	-19.93	1.8032	25.1983	-0.038086	0.0043945	-0.10889	21.5903	217.4566	764.3082	-0.67432	0.37061	0.080078	-38.904	-4.9163	12.0357	0.080078	-0.10596	0.088867	NaN	NaN	NaN	NaN	NaN	NaN
3.098	-22.5353	-3.9955	21.9225	-0.047363	0.01123	-0.11133	5.667	211.8671	735.8873	-0.64551	0.34473	0.073242	-59.869	-4.424	12.2824	0.07959	-0.11768	0.083984	NaN	NaN	NaN	NaN	NaN	NaN
3.1	-32.9554	-23.4082	35.458	-0.067383	0.015137	-0.10889	-12.8856	248.228	673.239	-0.63232	0.33252	0.07373	-69.3213	-37.839	-11.5962	0.080567	-0.12012	0.085938	NaN	NaN	NaN	NaN	NaN	NaN
3.102	-38.781	-45.6487	49.738	-0.083984	0.024414	-0.10596	-13.151	190.97486	644.1925	-0.59717	0.30908	0.062988	-53.066	-19.401	9.3975	0.081543	-0.11523	0.085449	NaN	NaN	NaN	NaN	NaN	NaN
3.104	-26.288	-47.9928	82.2732	-0.13574	0.04541	-0.098633	-6.16	217.524	623.363	-0.57397	0.29223	0.057861	-69.4474	-9.292	12.67163	0.07666	-0.10645	0.092773	NaN	NaN	NaN	NaN	NaN	NaN
3.106	-4.891	-44.6543	96.2742	-0.17822	0.055175	-0.088624	-23.5467	223.949	594.095	-0.54834	0.28174	0.051758	-69.798	5.419	30.3118	0.07666	-0.10156	0.087891	NaN	NaN	NaN	NaN	NaN	NaN
3.108	-42.6	-54.921	114.374	-0.22607	0.06543	-0.074219	-15.321	190.281	573.4462	-0.51514	0.25439	0.041016	-57.4641	21.276	22.4177	0.07666	-0.09668	0.09375	NaN	NaN	NaN	NaN	NaN	NaN
3.11	0.831	-72.2954	152.03	-0.2749	0.091309	-0.0625	-3.944	229.295	535.5756	-0.48559	0.24048	0.037842	-69.991	12.27	35.5179	0.08545	-0.090332	0.096679	NaN	NaN	NaN	NaN	NaN	NaN
3.112	-26.6612	-80.5279	204.545	-0.29883	0.098633	-0.052246	-30.7196	182.847	483.083	-0.45313	0.22705	0.037109	-58.466	29.3154	16.4413	0.097656	-0.092285	0.095215	NaN	NaN	NaN	NaN	NaN	NaN
3.114	2.592	-48.3951	263.6146	-0.35156	0.11914	-0.043457	-19.488	154.1017	439.8828	-0.4126	0.19824	0.022949	-35.318	17.1419	23.37595	0.12158	-0.09668	0.095215	NaN	NaN	NaN	NaN	NaN	NaN
3.116	-5.4804	-9.8728	319.1399	-0.38794	0.13819	-0.042236	-7.555	171.5677	383.867	-0.39111	0.18506	0.024902	-30.566	46.615	-10.6335	0.13672	-0.098145	0.092285	NaN	NaN	NaN	NaN	NaN	NaN
3.118	5.76	23.9241	389.1764	-0.4292	0.15674	-0.04248	-32.645	93.15	358.6053	-0.34424	0.15479	0.015625	-23.605	20.7685	-14.7232	0.1665	-0.1001	0.087891	NaN	NaN	NaN	NaN	NaN	NaN
3.12	7.083	43.15	442.263	-0.49023	0.18408	-0.044922	-20.78	131.648	365.955	-0.31665	0.13232	0.01123	-21.441	58.8347	-23.136	0.1875	-0.097168	0.084473	NaN	NaN	NaN	NaN	NaN	NaN
3.122	-6.655	60.644	521.5087	-0.54297	0.19531	-0.044434	-36.3761	127.8919	336.495	-0.28809	0.10986	0.0087891	-10.823	24.939	-30.2214	0.21289	-0.098145	0.077637	NaN	NaN	NaN	NaN	NaN	NaN
3.124	10.674	79.248	607.0762	-0.66211	0.23633	-0.03125	-38.8787	105.52	333.584	-0.25391	0.077148	-1.5612e-14	-2.406	85.7037	-27.0062	0.23828	-0.088379	0.072266	NaN	NaN	NaN	NaN	NaN	NaN
3.126	23.464	100.96714	707.093	-0.76953	0.2793	-0.020752	-33.5462	154.929	298.7576	-0.2417	0.060547	-0.0043945	7.006	45.7621	10.8	0.25098	-0.091797	0.062988	NaN	NaN	NaN	NaN	NaN	NaN
3.128	54.7257	109.839	805.283	-0.89063	0.31934	-0.00048828	-44.9806	125.218	256.0487	-0.2168	0.03418	-0.011719	-12.622	85.228	5.3977	0.27783	-0.081543	0.0625	NaN	NaN	NaN	NaN	NaN	NaN
3.13	-17.532	101.884	860.3595	-1.0571	0.38135	0.047363	-43.474	117.664	230.0279	-0.20337	0.013672	-0.01123	-8.171	19.6577	33.4107	0.29224	-0.080566	0.052735	NaN	NaN	NaN	NaN	NaN	NaN
3.132	-18.61	73.985	901.6593	-1.1416	0.41797	0.071777	-39.89854	148.636	196.711	-0.18945	-0.0043945	-0.012695	-11.567	56.579	30.0564	0.30078	-0.078613	0.044434	NaN	NaN	NaN	NaN	NaN	NaN
3.134	2.567	51.332	933.6951	-1.2969	0.49121	0.12646	-20.39	81.11361	201.8683	-0.17676	-0.032227	-0.016113	-26.639	-4.61961	46.693	0.30664	-0.07666	0.04834	NaN	NaN	NaN	NaN	NaN	NaN
3.136	2.898	32.869	969.5278	-1.3923	0.54761	0.16211	-5.596	93.785	199.5308	-0.17139	-0.039063	-0.018066	-11.828	37.868	50.852	0.31494	-0.076172	0.044434	NaN	NaN	NaN	NaN	NaN	NaN
3.138	-16.7166	12.0264	1001.527	-1.4629	0.58984	0.20557	-9.779	84.5086	180.493	-0.15186	-0.057617	-0.017578	-12.499	-7.3765	54.014	0.31787	-0.07373	0.039551	NaN	NaN	NaN	NaN	NaN	NaN
3.14	-50.1928	-17.5312	1007.7757	-1.5313	0.63623	0.25098	-4.824	55.456	172.383	-0.13647	-0.06665	-0.022216	-35.555	59.032	13.779	0.31665	-0.076905	0.035644	NaN	NaN	NaN	NaN	NaN	NaN
3.142	-24.4519	-24.883	1002.7787	-1.5483	0.65283	0.27148	7.157	119.9792	116.98109	-0.12402	-0.076172	-0.021973	-29.506	13.3483	6.949	0.31641	-0.075195	0.03125	NaN	NaN	NaN	NaN	NaN	NaN
3.144	-36.5689	-22.356	975.1458	-1.564	0.67627	0.30664	-9.161	86.5848	103.7368	-0.10596	-0.080566	-0.026855	-37.569	65.936	2.198	0.30322	-0.075195	0.027344	NaN	NaN	NaN	NaN	NaN	NaN
3.146	-23.041	-23.091	980.363	-1.563	0.69189	0.31665	-17.047	72.8482	99.112	-0.097168	-0.086426	-0.027344	-58.8076	1.023	31.038	0.29736	-0.072754	0.026855	NaN	NaN	NaN	NaN	NaN	NaN
3.148	14.425	-43.7222	985.161	-1.5483	0.70166	0.32031	-4.702	73.711	68.5158	-0.080078	-0.092773	-0.025879	-55.727	47.973	32.968	0.28027	-0.074219	0.025391	NaN	NaN	NaN	NaN	NaN	NaN
3.15	1.466	-48.968	999.753	-1.4819	0.71143	0.29297	-5.578	-5.384	67.280353	-0.066162	-0.10352	-0.027099	-46.6503	0.3305	53.677	0.26172	-0.074219	0.019531	NaN	NaN	NaN	NaN	NaN	NaN
3.152	-13.9287	-53.9397	1003.924	-1.4219	0.72266	0.27197	-5.905	25.962	67.2305	-0.054688	-0.1123	-0.025391	-54.507	57.646	44.3616	0.25781	-0.070801	0.02002	NaN	NaN	NaN	NaN	NaN	NaN
3.154	-27.4973	-54.664	999.2446	-1.2852	0.72656	0.21924	-33.7309	30.8399	55.8811	-0.039551	-0.11816	-0.028809	-69.4433	0.5998	41.579	0.24219	-0.069824	0.017578	NaN	NaN	NaN	NaN	NaN	NaN
3.156	29.195	-72.455	998.609	-1.1873	0.73609	0.17675	-22.282	24.4721	58.819	-0.033691	-0.12695	-0.030762	-64.517	69.57	27.007	0.23047	-0.053955	0.023194	NaN	NaN	NaN	NaN	NaN	NaN
3.158	15.5303	-87.952	1002.206	-1.1011	0.73877	0.12988	-9.472	84.212	34.1674	-0.018066	-0.13477	-0.032227	-58.004	11.5248	12.2493	0.21729	-0.038086	0.025391	NaN	NaN	NaN	NaN	NaN	NaN
3.16	30.3413	-94.397	994.235	-1.0078	0.7334	0.074707	-30.026	35.6092	13.7762	-0.011963	-0.13843	-0.029541	-55.656	50.4908	-11.7615	0.19092	-0.0078125	0.030273	NaN	NaN	NaN	NaN	NaN	NaN
3.162	20.133	-124.987	1015.425	-0.97217	0.72998	0.048828	-14.838	10.087	14.1932	-0.0043945	-0.1499	-0.029297	-63.9052	-17.6535	2.201	0.17773	0.0043945	0.043945	NaN	NaN	NaN	NaN	NaN	NaN
3.164	55.316	-137.5962	1071.604	-0.92236	0.73096	0.01416	-15.411	28.3865	16.05	-0.003418	-0.16113	-0.021484	-48.159	5.811	4.107	0.1582	0.036621	0.050293	NaN	NaN	NaN	NaN	NaN	NaN
3.166	74.883	-149.897	1130.063	-0.9104	0.73999	-0.013184	-48.528	-22.087	-4.1487	-0.003418	-0.16309	-0.020508	-42.3924	-29.16272	10.3811	0.14404	0.057129	0.058838	NaN	NaN	NaN	NaN	NaN	NaN
3.168	101.604	-168.135	1164.577	-0.91553	0.76221	-0.023926	-34.343	9.73	-2.2245	-0.0058594	-0.17041	-0.013672	-34.98	14.2	16.5778	0.12988	0.072266	0.066895	NaN	NaN	NaN	NaN	NaN	NaN
3.17	142.639	-178.562	1177.125	-0.95996	0.80859	-0.036133	-41.0436	22.6878	-6.601	-0.0051269	-0.17554	-0.010254	-29.877	-20.376	4.873	0.11279	0.094238	0.081055	NaN	NaN	NaN	NaN	NaN	NaN
3.172	119.037	-195.959	1207.324	-0.98633	0.83789	-0.033691	-60.9525	-12.7678	-1.543	-0.0073242	-0.17773	-0.0039063	-16.267	16.8258	10.6389	0.11328	0.10107	0.084961	NaN	NaN	NaN	NaN	NaN	NaN
3.174	148.305	-189.199	1249.17	-1.0527	0.88672	-0.03125	-31.493	47.345	14.725	-0.0083008	-0.18262	0.00097656	-18.098	11.02841	15.8107	0.10205	0.11328	0.094238	NaN	NaN	NaN	NaN	NaN	NaN
3.176	119.326	-184.525	1302.2527	-1.0974	0.91529	-0.023193	-48.9173	26.6746	8.541	-0.0087891	-0.18506	0.0053711	-14.448	52.399	8.685	0.097412	0.12305	0.099123	NaN	NaN	NaN	NaN	NaN	NaN
3.178	129.908	-165.6597	1330.277	-1.1479	0.94189	-0.018555	-45.974	21.1093	29.597	-0.0063477	-0.18945	0.010254	3.657	36.5821	20.3589	0.096191	0.12891	0.1084	NaN	NaN	NaN	NaN	NaN	NaN
3.18	122.175	-152.3585	1359.6162	-1.2227	0.97266	-0.0087891	-30.0763	48.152	21.4839	-0.01123	-0.18994	0.017334	-2.497	41.3359	14.503	0.091797	0.14063	0.12207	NaN	NaN	NaN	NaN	NaN	NaN
3.182	127.252	-145.906	1375.444	-1.2593	0.98682	-0.0039063	-57.4195	-17.6223	8.5523	-0.012207	-0.18555	0.023438	-21.546	22.7741	1.9109	0.09082	0.13867	0.12109	NaN	NaN	NaN	NaN	NaN	NaN
3.184	100.416	-132.243	1394.529	-1.3257	1.02	0.012207	-22.492	23.9592	0.241	-0.015625	-0.18311	0.036133	-7.564	30.9796	-4.669	0.083496	0.1416	0.13086	NaN	NaN	NaN	NaN	NaN	NaN
3.186	73.128	-104.628	1450.39512	-1.3711	1.0488	0.02002	-17.78	19.865	-24.524	-0.0073242	-0.18408	0.032715	-5.539	42.717	-13.7162	0.082763	0.14356	0.13012	NaN	NaN	NaN	NaN	NaN	NaN
3.188	127.977	-82.995	1492.247	-1.4155	1.0786	0.025879	-23.821	-8.758335	8.4989	-0.010254	-0.18115	0.030762	-10.596	59.072	2.248	0.077148	0.14404	0.13379	NaN	NaN	NaN	NaN	NaN	NaN
3.19	108.643	-88.62	1513.1798	-1.4761	1.1235	0.039063	-16.82	58.22	27.6594	-0.011231	-0.17871	0.033936	-20.78	66.053	21.39442	0.067871	0.14355	0.14111	NaN	NaN	NaN	NaN	NaN	NaN
3.192	100.918	-95.3259	1528.546	-1.5151	1.1548	0.047852	-32.0389	32.681	26.9096	-0.014648	-0.17383	0.039063	-34.743	51.702	23.30872	0.061523	0.1416	0.13965	NaN	NaN	NaN	NaN	NaN	NaN
3.194	83.761	-105.909	1543.499	-1.5757	1.2104	0.070801	-14.859	28.957	31.434	-0.010742	-0.16895	0.034668	-44.183	49.662	15.0822	0.04834	0.13477	0.1416	NaN	NaN	NaN	NaN	NaN	NaN
3.196	68.151	-92.12	1582.0099	-1.6316	1.2503	0.081055	-6.655	51.845	18.0422	-0.013672	-0.1665	0.036621	-39.961	29.1567	14.829	0.043213	0.13134	0.1438	NaN	NaN	NaN	NaN	NaN	NaN
3.198	64.909	-76.1761	1598.85454	-1.6836	1.291	0.095703	-19.955	-2.4556	12.2822	-0.0092773	-0.15576	0.037598	-40.063	44.1995	34.126	0.037598	0.12598	0.14209	NaN	NaN	NaN	NaN	NaN	NaN
3.2	34.3719	-81.1355	1604.14894	-1.748	1.3477	0.11377	-6.281	33.453	6.6182	-0.005127	-0.15284	0.03833	-38.7	20.38167	64.1476	0.032227	0.12891	0.14014	NaN	NaN	NaN	NaN	NaN	NaN
3.202	51.8679	-99.456	1629.0279	-1.7754	1.3809	0.12451	0.931999999999999	31.698	-12.4447	-0.0043945	-0.14893	0.039063	-51.677	38.375	46.3218	0.030762	0.13037	0.14209	NaN	NaN	NaN	NaN	NaN	NaN
3.204	-0.23	-129.25688	1651.981	-1.8203	1.4355	0.14307	-17.041	1.2937	11.4615	-0.0029297	-0.13525	0.037598	-64.4347	7.2588	47.974	0.025879	0.1377	0.13965	NaN	NaN	NaN	NaN	NaN	NaN
3.206	30.8056	-118.4461	1666.821	-1.8457	1.4659	0.14233	-6.618	49.858	22.6881	-0.0058594	-0.13672	0.038086	-67.6006	16.4196	43.4008	0.020752	0.14258	0.14843	NaN	NaN	NaN	NaN	NaN	NaN
3.208	13.655	-103.9952	1651.002	-1.855	1.4966	0.14063	-21.023	20.4705	9.7806	-0.0043945	-0.12646	0.030762	-57.5365	-56.7466	79.2997	0.02002	0.15137	0.14941	NaN	NaN	NaN	NaN	NaN	NaN
3.21	38.3626	-96.945	1631.5797	-1.8589	1.5142	0.13574	-17.318	30.2481	31.946	-0.0097654	-0.12109	0.034424	-83.4092	-9.409	94.2738	0.026367	0.16748	0.1543	NaN	NaN	NaN	NaN	NaN	NaN
3.212	44.6494	-81.384	1637.931	-1.855	1.52	0.12939	-8.956	73.328	14.1921	-0.01123	-0.11084	0.026855	-47.687	-48.237	133.321	0.023438	0.17773	0.16162	NaN	NaN	NaN	NaN	NaN	NaN
3.214	49.502	-79.31	1629.327	-1.8359	1.5273	0.11279	-40.021	16.1249	19.4688	-0.0029297	-0.10059	0.019531	-36.926	-16.73	179.54	0.023926	0.19238	0.16699	NaN	NaN	NaN	NaN	NaN	NaN
3.216	84.603	-63.263	1643.666	-1.8172	1.5251	0.1001	-21.426	31.7006	31.286	-0.00048828	-0.097656	0.016602	-82.7025	-96.1404	297.565	0.013672	0.20703	0.16772	NaN	NaN	NaN	NaN	NaN	NaN
3.218	98.596	-53.4	1683.022	-1.7964	1.5181	0.082031	-42.118	9.1379	15.29775	0.016113	-0.078613	0.0024414	-83.095	-51.524	373.4605	-0.003418	0.22217	0.16504	NaN	NaN	NaN	NaN	NaN	NaN
3.22	124.599	-43.0871	1682.7513	-1.7632	1.5103	0.068848	-43.252	-23.12223	21.8869	0.025635	-0.072998	-0.0065915	-42.923	-72.726	512.3915	-0.04834	0.25342	0.16943	NaN	NaN	NaN	NaN	NaN	NaN
3.222	95.214	-29.92	1685.4835	-1.7461	1.5039	0.063477	-28.525	25.1021	27.2661	0.038574	-0.060547	-0.019043	-39.971	41.996	653.3163	-0.077637	0.26855	0.17139	NaN	NaN	NaN	NaN	NaN	NaN
3.224	82.265	-16.632	1677.952	-1.7148	1.4922	0.056641	-65.4265	13.998	13.6847	0.065918	-0.050293	-0.033203	8.607	9.174	833.3622	-0.1626	0.29541	0.18799	NaN	NaN	NaN	NaN	NaN	NaN
3.226	77.485	-16.603	1673.4022	-1.696	1.4807	0.04834	-44.591	36.98	13.6605	0.081543	-0.04541	-0.039063	36.232	69.90555	977.662	-0.2461	0.31983	0.19068	NaN	NaN	NaN	NaN	NaN	NaN
3.228	101.572	-26.185	1690.2608	-1.6816	1.4707	0.050293	-37.4919	54.15	18.6953	0.10156	-0.041016	-0.057129	87.0942	19.258	1114.602	-0.3335	0.35742	0.19727	NaN	NaN	NaN	NaN	NaN	NaN
3.23	123.046	-47.482	1673.4143	-1.668	1.4551	0.045898	-55.5759	-0.138	16.2687	0.12354	-0.032715	-0.065918	105.226	68.844	1216.746	-0.46875	0.40234	0.19775	NaN	NaN	NaN	NaN	NaN	NaN
3.232	81.927	-55.3562	1659.1168	-1.6675	1.4458	0.052734	-15.404	16.3726	31.937	0.13623	-0.023926	-0.080078	131.691	-1.198	1365.698	-0.53809	0.43945	0.1958	NaN	NaN	NaN	NaN	NaN	NaN
3.234	103.273	-60.259	1667.034	-1.6582	1.418	0.053223	-26.1299	11.6304	19.8662	0.14893	-0.011719	-0.089355	92.751	35.173	1451.764	-0.7041	0.52344	0.19434	NaN	NaN	NaN	NaN	NaN	NaN
3.236	110.142	-65.322	1671.821	-1.6519	1.3872	0.056152	-49.0915	-13.043	24.3039	0.15869	-0.0097656	-0.1001	84.911	-45.54	1480.604	-0.85718	0.60083	0.20899	NaN	NaN	NaN	NaN	NaN	NaN
3.238	98.686	-51.371	1675.1898	-1.6543	1.373	0.060547	-25.219	40.0554	30.7581	0.16016	0.0073242	-0.10449	85.232	-32.523	1448.988	-1.0313	0.68164	0.2417	NaN	NaN	NaN	NaN	NaN	NaN
3.24	99.89	-52.451	1686.46	-1.6499	1.3511	0.062988	-41.683	23.69203	13.6669	0.15552	0.017334	-0.10572	68.5	-130.489	1377.81	-1.2881	0.7959	0.30225	NaN	NaN	NaN	NaN	NaN	NaN
3.242	107.029	-43.3952	1677.848	-1.6482	1.3362	0.067627	-13.232	20.8063	18.2678	0.1543	0.029297	-0.11133	35.5689	-139.36	1300.922	-1.4185	0.85596	0.33984	NaN	NaN	NaN	NaN	NaN	NaN
3.244	101.085	-32.3163	1674.488	-1.646	1.3149	0.069824	-8.66	34.098	13.7047	0.14258	0.043945	-0.10742	2.587	-195.345	1221.999	-1.6465	0.97266	0.42822	NaN	NaN	NaN	NaN	NaN	NaN
3.246	24.908	-12.322	1656.17516	-1.646	1.2896	0.077148	-40.4258	-8.2857	13.2898	0.13525	0.054199	-0.10791	-16.239	-161.026	1095.0358	-1.7707	1.0544	0.48804	NaN	NaN	NaN	NaN	NaN	NaN
3.248	38.2624	-3.539	1636.8572	-1.6484	1.2754	0.083008	1.141	12.7935	26.8353	0.11963	0.072754	-0.11084	7.69	-169.765	997.584	-1.8379	1.1191	0.54346	NaN	NaN	NaN	NaN	NaN	NaN
3.25	34.56961	-3.567	1630.0152	-1.6406	1.2539	0.086914	-5.83	6.0404	-3.753	0.098633	0.089844	-0.1123	1.17	-121.843	978.435	-1.8086	1.1797	0.6665	NaN	NaN	NaN	NaN	NaN	NaN
3.252	32.23655	-5.204	1584.3156	-1.6316	1.2395	0.09375	-29.141	-23.7492	18.4577	0.089844	0.10205	-0.11621	4.995	-116.562	981.191	-1.7798	1.2036	0.7207	NaN	NaN	NaN	NaN	NaN	NaN
3.254	10.319	-5.9125	1549.853	-1.6206	1.2329	0.094727	13.977	0.2948	37.461	0.068359	0.12158	-0.12646	-3.096	-74.8385	1027.246	-1.7402	1.2285	0.7251	NaN	NaN	NaN	NaN	NaN	NaN
3.256	43.772	-15.1326	1539.315	-1.6074	1.2285	0.10205	-24.283	-28.6459	47.282	0.045166	0.1399	-0.12573	-12.159	-62.982	1077.6191	-1.6445	1.2227	0.67529	NaN	NaN	NaN	NaN	NaN	NaN
3.258	33.6088	-27.6897	1554.0242	-1.6016	1.2227	0.10303	-13.584	-27.099	108.11467	0.01416	0.1582	-0.12109	-67.244	-48.142	1139.76828	-1.4316	1.1973	0.62695	NaN	NaN	NaN	NaN	NaN	NaN
3.26	46.1834	-20.0543	1552.523	-1.5762	1.209	0.099609	6.633	-13.683	107.0006	-0.064941	0.18945	-0.092285	-81.7903	-59.75	1176.558	-1.0684	1.123	0.60303	NaN	NaN	NaN	NaN	NaN	NaN
3.262	65.2108	-25.2792	1537.862	-1.56	1.1919	0.10108	-17.271	-82.148	146.1663	-0.11035	0.20068	-0.088379	-101.455	-125.8	1223.733	-0.93164	1.0762	0.58252	NaN	NaN	NaN	NaN	NaN	NaN
3.264	74.93	-39.0071	1530.0724	-1.5347	1.1646	0.09375	-5.274	-93.763	199.076	-0.21387	0.23047	-0.064453	-144.463	-158.957	1208.386	-0.76318	1.0005	0.53516	NaN	NaN	NaN	NaN	NaN	NaN
3.266	76.566	-38.936	1520.0366	-1.5034	1.1333	0.092285	-18.7899	-121.125	219.383	-0.29419	0.25684	-0.053223	-180.799483	-243.583	1257.796	-0.69604	0.97192	0.50439	NaN	NaN	NaN	NaN	NaN	NaN
3.268	51.583	-21.1274	1484.48171	-1.4829	1.1177	0.09082	-18.5948	-150.7788	295.754	-0.37598	0.29102	-0.036621	-200.966	-300.1436	1288.353	-0.65186	0.94971	0.48438	NaN	NaN	NaN	NaN	NaN	NaN
3.27	68.458	-0.369	1443.8062	-1.4604	1.0864	0.086914	11.8431	-77.7781	388.234	-0.48682	0.34521	-0.024902	-202.087	-399.339	1349.935	-0.65381	0.93994	0.46777	NaN	NaN	NaN	NaN	NaN	NaN
3.272	80.162	0.0960000000000001	1430.1641	-1.4294	1.0642	0.083252	-39.0991	-51.9959	512.19	-0.5498	0.37061	-0.015137	-161.226	-412.391	1398.631	-0.68115	0.94971	0.46289	NaN	NaN	NaN	NaN	NaN	NaN
3.274	77.843	-3.63	1429.8037	-1.4038	1.0356	0.084961	-26.326	-6.143	646.777	-0.69775	0.43896	0.01123	-106.2363	-467.28	1499.0839	-0.78613	1	0.45605	NaN	NaN	NaN	NaN	NaN	NaN
3.276	70.339	-19.8439	1406.4367	-1.3672	1.0098	0.077148	-31.915	47.6732	777.305	-0.8435	0.50146	0.046875	-74.678	-398.09	1583.5767	-0.88769	1.0699	0.45752	NaN	NaN	NaN	NaN	NaN	NaN
3.278	64.618	-13.4027	1386.1491	-1.3521	0.99072	0.078613	-57.804	31.594	923.523	-1.0234	0.56982	0.093262	-81.418	-398.956	1688.401	-0.99463	1.1587	0.47803	NaN	NaN	NaN	NaN	NaN	NaN
3.28	101.696	28.9774	1374.517942	-1.3276	0.96729	0.077637	-32.779	59.1168	1101.2105	-1.3164	0.68555	0.17236	-92.633	-299.939	1735.369	-1.1465	1.3008	0.50635	NaN	NaN	NaN	NaN	NaN	NaN
3.282	91.416	65.7825	1370.3267	-1.312	0.94434	0.077393	-60.992	87.836	1245.6198	-1.4883	0.75684	0.22119	-111.356	-266.7501	1794.953	-1.2129	1.373	0.51318	NaN	NaN	NaN	NaN	NaN	NaN
3.284	98.782	90.7113	1332.653	-1.2969	0.91992	0.076172	-74.621	45.898	1367.097	-1.8433	0.92432	0.31348	-92.856	-124.827	1850.808	-1.332	1.4863	0.52295	NaN	NaN	NaN	NaN	NaN	NaN
3.286	71.219	77.04613	1314.394	-1.2847	0.89307	0.080566	-43.607	61.1849	1418.418	-2.0967	1.0567	0.35767	-101.613	-102.95	1917.939	-1.3982	1.5402	0.53198	NaN	NaN	NaN	NaN	NaN	NaN
3.288	80.104	87.3646	1323.9076	-1.2754	0.87305	0.086426	-77.9155	26.596	1414.784	-2.2617	1.1875	0.40967	-111.453	-26.918	1932.6457	-1.4551	1.5762	0.5415	NaN	NaN	NaN	NaN	NaN	NaN
3.29	88.564	77.9858	1338.2966	-1.2534	0.84814	0.085938	-86.377	-7.978	1417.111	-2.3296	1.3462	0.53174	-93.5487	-81.62	1946.3045	-1.5288	1.6177	0.54492	NaN	NaN	NaN	NaN	NaN	NaN
3.292	36.212	78.5707	1339.818	-1.2332	0.82691	0.092773	-57.044	-4.199	1367.26	-2.3638	1.4048	0.54688	-74.242	-57.667	1942.168	-1.5757	1.6489	0.542	NaN	NaN	NaN	NaN	NaN	NaN
3.294	13.0598	70.7786	1323.919	-1.2168	0.81055	0.096191	-86.317	-79.663	1308.094	-2.3613	1.4063	0.44385	-35.535	-130.6397	1963.39	-1.6128	1.6851	0.54443	NaN	NaN	NaN	NaN	NaN	NaN
3.296	-5.59358	71.598	1276.565	-1.1904	0.78516	0.097168	-76.8828	-109.795	1278.092	-2.157	1.3147	0.34009	3.044	-116.7912	1992.8949	-1.6675	1.7368	0.55078	NaN	NaN	NaN	NaN	NaN	NaN
3.298	-1.23866	75.33998	1238.2013	-1.1729	0.77441	0.095215	-76.135	-116.356	1215.304	-1.8491	1.1997	0.23145	9.671	-184.807	2045.955	-1.6929	1.7661	0.5498	NaN	NaN	NaN	NaN	NaN	NaN
3.3	-29.539	78.395	1222.283	-1.1479	0.74658	0.099609	-80.909	-183.592	1192.066	-1.3965	1.0781	0.078613	-16.178	-156.222	2045.475	-1.7578	1.8164	0.57275	NaN	NaN	NaN	NaN	NaN	NaN
3.302	2.0585	84.826	1220.61372	-1.1333	0.72461	0.099119	-26.628	-133.839	1170.43	-1.1987	1.0493	0.003418	3.768	-194.381	2059.1401	-1.8164	1.858	0.60205	NaN	NaN	NaN	NaN	NaN	NaN
3.304	5.4721	100.145	1224.1119	-1.1167	0.70166	0.098633	-3.778	-124.431	1165.1983	-0.89844	1.0186	-0.13086	-11.014	-144.954	2087.192	-1.8784	1.8833	0.63281	NaN	NaN	NaN	NaN	NaN	NaN
3.306	1.1377	116.094	1187.6734	-1.0903	0.66846	0.10156	-8.066	-104.584	1220.193	-0.74658	1.0217	-0.21485	-32.438	-169.228	2123.845	-1.9453	1.9023	0.65918	NaN	NaN	NaN	NaN	NaN	NaN
3.308	-9.6708	125.417	1170.356	-1.0815	0.65674	0.10059	14.9069	-48.186	1230.508	-0.62891	1.043	-0.28174	-85.627	-108.57766	2133.127	-1.9722	1.9048	0.67773	NaN	NaN	NaN	NaN	NaN	NaN
3.31	8.1777	130.276	1163.5061	-1.0537	0.63281	0.11377	8.7403	-77.955	1238.277	-0.51025	1.0728	-0.33203	-89.9931	-109.917	2102.78	-2.0107	1.8945	0.70752	NaN	NaN	NaN	NaN	NaN	NaN
3.312	21.0337	134.6264	1153.0426	-1.0408	0.61987	0.1106	23.146	-82.972	1256.1937	-0.47559	1.0703	-0.35059	-146.6814	-74.942	2075.9673	-2.0242	1.8772	0.72095	NaN	NaN	NaN	NaN	NaN	NaN
3.314	-11.199	149.227	1123.236	-1.0288	0.59814	0.11133	25.253	-97.741	1229.245	-0.47803	1.0752	-0.36621	-139.13008	-80.087	2027.071	-2.0308	1.8501	0.73242	NaN	NaN	NaN	NaN	NaN	NaN
3.316	4.73391	155.432	1089.3748	-1.002	0.58203	0.11621	27.7525	-196.4688	1276.93359	-0.56738	1.0913	-0.33814	-131.083	-39.229	1991.84	-2.0332	1.8125	0.74951	NaN	NaN	NaN	NaN	NaN	NaN
3.318	-16.3911	157.37	1065.0341	-0.99512	0.56738	0.11426	50.852	-227.072	1308.361	-0.70996	1.1289	-0.30664	-110.5308	-22.7045	1940.913	-2.0254	1.791	0.7583	NaN	NaN	NaN	NaN	NaN	NaN
3.32	7.4719	150.732	1040.7605	-0.97607	0.55127	0.12354	54.256	-310.165	1360.8342	-0.92334	1.2095	-0.25244	-118.08	28.0302	1948.129	-2.0171	1.7446	0.76758	NaN	NaN	NaN	NaN	NaN	NaN
3.322	7.698	135.85939	1001.02	-0.95948	0.53369	0.12305	119.78	-367.762	1420.7089	-1.0234	1.2422	-0.2251	-103.861	31.5567	1959.685	-2.0076	1.7073	0.77808	NaN	NaN	NaN	NaN	NaN	NaN
3.324	20.011	134.467	974.37	-0.94482	0.52002	0.12891	150.963	-325.483	1453.934	-1.2007	1.2896	-0.17383	-115.238	52.03	1972.562	-2.002	1.666	0.78955	NaN	NaN	NaN	NaN	NaN	NaN
3.326	44.146	136.565	955.147	-0.92334	0.49268	0.13184	140.847	-322.999	1476.407	-1.3347	1.3152	-0.1477	-114.652	59.7854	1978.1927	-2.0015	1.6196	0.80371	NaN	NaN	NaN	NaN	NaN	NaN
3.328	46.6739	141.878	933.2501	-0.91553	0.48291	0.1333	157.56	-275.765	1544.4	-1.4741	1.3403	-0.13379	-138.834	51.1253	1994.208	-2.0015	1.6021	0.81445	NaN	NaN	NaN	NaN	NaN	NaN
3.33	52.555	138.149	923.76425	-0.88281	0.45801	0.13525	122.369	-205.49319	1578.179	-1.6465	1.3867	-0.10352	-169.2338	46.413	1981.103	-2.0098	1.5576	0.8335	NaN	NaN	NaN	NaN	NaN	NaN
3.332	29.3199	139.7412	919.64	-0.86035	0.44605	0.13306	65.641	-222.4331	1666.8923	-1.7227	1.4063	-0.081055	-185.763	18.6017	2012.078	-2.0134	1.5276	0.83521	NaN	NaN	NaN	NaN	NaN	NaN
3.334	49.353	158.99	906.832	-0.83203	0.43164	0.12988	79.155	-160.007	1775.443	-1.8745	1.4497	-0.034668	-173.539	20.444	1979.4395	-2.0073	1.4946	0.83789	NaN	NaN	NaN	NaN	NaN	NaN
3.336	42.5156	167.03	865.2168	-0.79639	0.41162	0.13086	58.62	-112.886	1780.829	-1.979	1.4927	-0.008545	-141.916	-8.104	1977.9382	-1.9883	1.459	0.82959	NaN	NaN	NaN	NaN	NaN	NaN
3.338	-7.431	161.929	828.481	-0.7876	0.39307	0.12793	49.741	-99.089	1814.763	-2.0703	1.5332	0.01123	-121.111	7.0552	1953.512	-1.9785	1.4414	0.82471	NaN	NaN	NaN	NaN	NaN	NaN
3.34	0.145999999999997	147.714	809.674	-0.74023	0.375	0.13037	51.1158	-23.96	1810.168	-2.1563	1.5801	0.030762	-131.487	-34.195	1930.873	-1.9355	1.4043	0.81104	NaN	NaN	NaN	NaN	NaN	NaN
3.342	-15.8817	156.945	780.6324	-0.70947	0.36132	0.12549	35.598	-53.522	1791.954	-2.1797	1.6016	0.036621	-123.319	0.0229999999999997	1898.482	-1.8933	1.3816	0.79614	NaN	NaN	NaN	NaN	NaN	NaN
3.344	-9.9987	152.8093	734.7861	-0.68066	0.34326	0.12939	50.429	-76.596	1842.425	-2.2051	1.6367	0.036133	-106.177	-9.36199999999999	1879.252	-1.855	1.356	0.7793	NaN	NaN	NaN	NaN	NaN	NaN
3.346	-21.4262	140.961	708.1289	-0.64453	0.32324	0.12744	40.669	-92.6729	1844.187	-2.197	1.6545	0.033448	-76.984	50.305	1851.739	-1.8164	1.3262	0.76025	NaN	NaN	NaN	NaN	NaN	NaN
3.348	-9.951	130.3135	681.5222	-0.62842	0.31592	0.12646	10.714	-182.429	1881.5026	-2.1812	1.6665	0.025391	-57.449	35.619	1882.626	-1.7969	1.3066	0.75049	NaN	NaN	NaN	NaN	NaN	NaN
3.35	-30.21	127.8767	671.122	-0.58447	0.2998	0.12061	18.8831	-167.696	1925.65562	-2.1343	1.6704	0.0078125	-51.99	113.2787	1842.692	-1.7598	1.2734	0.73291	NaN	NaN	NaN	NaN	NaN	NaN
3.352	-19.499	143.306	646.6479	-0.54834	0.28345	0.11866	-28.0848	-163.191	1910.1982	-2.1074	1.6641	-0.003418	-76.182	113.8003	1808.2475	-1.7344	1.2505	0.71972	NaN	NaN	NaN	NaN	NaN	NaN
3.354	-34.9933	147.7452	639.9129	-0.51123	0.26611	0.11523	-57.437	-182.214	1954.467	-2.0444	1.6431	-0.026367	-90.683	221.527	1746.36	-1.7104	1.2349	0.70508	NaN	NaN	NaN	NaN	NaN	NaN
3.356	-11.016	141.2578	625.1292	-0.46973	0.25146	0.10693	-38.171	-100.437	1944.834	-1.9978	1.6203	-0.041993	-85.859	201.544	1738.12295	-1.6792	1.2114	0.68359	NaN	NaN	NaN	NaN	NaN	NaN
3.358	-19.0753	130.7406	592.5676	-0.44922	0.24512	0.099609	-63.31	-123.9452	1943.52	-1.9521	1.5977	-0.060547	-82.241	259.154	1700.14232	-1.6582	1.1992	0.67041	NaN	NaN	NaN	NaN	NaN	NaN
3.36	-49.72859	118.7	546.4358	-0.40088	0.22461	0.095215	-49.5908	-97.275	1960.748	-1.918	1.5586	-0.061523	-71.731	174.361	1690.9183	-1.6147	1.1763	0.64258	NaN	NaN	NaN	NaN	NaN	NaN
3.362	-43.4668	120.0101	523.1431	-0.37427	0.20556	0.093018	-59.878	-41.659	1925.7209	-1.9063	1.541	-0.060059	-61.273	197.151	1641.972	-1.575	1.1609	0.62525	NaN	NaN	NaN	NaN	NaN	NaN
3.364	-27.1813	129.212	498.0898	-0.35107	0.1958	0.093262	-11.2664	-93.842	1922.3033	-1.9019	1.5083	-0.050781	-74.639	117.651	1632.47717	-1.5371	1.1406	0.59912	NaN	NaN	NaN	NaN	NaN	NaN
3.366	-11.255	119.346	485.936	-0.31348	0.17334	0.087402	38.123	-58.718	1897.5742	-1.908	1.4826	-0.04248	-63.602	184.611	1584.1832	-1.4785	1.1074	0.56982	NaN	NaN	NaN	NaN	NaN	NaN
3.368	-45.9429	106.0781	448.776	-0.29395	0.16309	0.088379	27.4957	-60.301	1839.317	-1.9126	1.4595	-0.033691	-50.773	154.525	1545.0144	-1.4551	1.0869	0.55518	NaN	NaN	NaN	NaN	NaN	NaN
3.37	-9.927	96.0047	438.1907	-0.25635	0.14502	0.085938	52.883	-83.242	1822.575	-1.894	1.4204	-0.026855	-61.452	259.245	1502.112	-1.4004	1.0518	0.53076	NaN	NaN	NaN	NaN	NaN	NaN
3.372	30.5261	95.349	400.4169	-0.22559	0.13135	0.084473	45.229	-3.1723	1812.269	-1.8804	1.3989	-0.023438	-36.551	224.707	1482.997	-1.365	1.0227	0.5061	NaN	NaN	NaN	NaN	NaN	NaN
3.374	15.2283	114.0056	381.668	-0.21387	0.12598	0.085449	49.141	4.4098	1796.277	-1.8418	1.3633	-0.024414	-26.991	315.31	1444.392	-1.3301	0.99414	0.48682	NaN	NaN	NaN	NaN	NaN	NaN
3.376	29.652	106.7908	371.739	-0.18262	0.11084	0.081055	50.288	36.2971	1839.041	-1.8093	1.3401	-0.022217	-59.0971	268.7808	1446.099	-1.2842	0.9502	0.45557	NaN	NaN	NaN	NaN	NaN	NaN
3.378	25.9	104.03885	346.1273	-0.1626	0.10132	0.078858	56.44	54.5499	1849.4368	-1.7827	1.3188	-0.02002	-60.647	375.204	1405.518	-1.2612	0.93408	0.4502	NaN	NaN	NaN	NaN	NaN	NaN
3.38	34.0139	103.3831	325.6184	-0.14404	0.089355	0.079102	78.859	-33.635	1834.93	-1.748	1.2891	-0.019043	-67.037	326.253	1384.213	-1.2192	0.89209	0.42041	NaN	NaN	NaN	NaN	NaN	NaN
3.382	18.849	97.2874	308.9233	-0.12354	0.075684	0.072754	82.201	-26.051	1848.8109	-1.7319	1.2798	-0.019531	-49.065	390.589	1305.4341	-1.1919	0.86962	0.40063	NaN	NaN	NaN	NaN	NaN	NaN
3.384	13.478	83.755	308.8179	-0.11719	0.068359	0.072266	73.556	-13.044	1808.2823	-1.6914	1.2676	-0.017578	-51.8002	311.342	1257.013	-1.1602	0.8418	0.37744	NaN	NaN	NaN	NaN	NaN	NaN
3.386	9.803	76.5638	308.0219	-0.10352	0.056641	0.066895	71.628	-49.384	1795.0933	-1.6621	1.2617	-0.01416	-38.021	383.624	1201.166	-1.1167	0.81006	0.3584	NaN	NaN	NaN	NaN	NaN	NaN
3.388	9.728	94.397	293.902	-0.089111	0.04834	0.068848	88.758	25.6348	1777.9641	-1.644	1.2603	-0.016602	-4.964	314.4753	1162.55	-1.0981	0.79346	0.3418	NaN	NaN	NaN	NaN	NaN	NaN
3.39	13.403	91.903	249.8621	-0.078125	0.035645	0.070313	55.692	-16.799	1726.6026	-1.603	1.2642	-0.016602	-7.675	388.176	1098.895	-1.0503	0.7583	0.32031	NaN	NaN	NaN	NaN	NaN	NaN
3.392	-18.483	71.03936	230.887	-0.072266	0.026855	0.066406	62.019	-16.525	1759.325	-1.5781	1.2607	-0.01416	2.497	317.3146	1067.8217	-1.0203	0.73462	0.29956	NaN	NaN	NaN	NaN	NaN	NaN
3.394	6.196	58.5782	228.3427	-0.066406	0.021484	0.064453	74.92	22.455	1733.752	-1.5552	1.2603	-0.012695	-3.076	362.0944	1003.053	-0.98828	0.70801	0.28174	NaN	NaN	NaN	NaN	NaN	NaN
3.396	-7.813	59.334	202.414	-0.061523	0.018066	0.066406	26.583	-12.8	1724.285	-1.5347	1.2563	-0.012695	32.7317	295.894	997.707	-0.93115	0.66943	0.25146	NaN	NaN	NaN	NaN	NaN	NaN
3.398	-9.063	66.643	184.0948	-0.060791	0.016357	0.066894	49.883	61.3275	1725.217	-1.5229	1.2534	-0.010742	20.08	358.458	965.89	-0.90674	0.65283	0.23633	NaN	NaN	NaN	NaN	NaN	NaN
3.4	-17.5452	65.956	184.822	-0.05957	0.0083008	0.069336	-1.26651	76.022	1680.546	-1.5029	1.2402	-0.0058594	24.2631	283.49333	955.915	-0.84375	0.61816	0.21045	NaN	NaN	NaN	NaN	NaN	NaN
3.402	-6.377	60.332	188.2466	-0.062988	0.0019531	0.066895	3.525	57.788	1655.816	-1.4961	1.2314	0.00097654	7.033	325.396	913.145	-0.80298	0.57911	0.1853	NaN	NaN	NaN	NaN	NaN	NaN
3.404	-32.187	61.8515	198.0608	-0.063965	-0.00048828	0.068359	9.5544	140.224	1649.477	-1.4839	1.2271	0.0048828	-5.751	255.7924	858.703	-0.75879	0.54297	0.1582	NaN	NaN	NaN	NaN	NaN	NaN
3.406	-48.129	65.12372	187.052	-0.07373	-0.0058594	0.068359	-50.896	120.694	1637.5966	-1.4761	1.2134	0.01416	-16.34	305.481	777.488	-0.68945	0.50391	0.12256	NaN	NaN	NaN	NaN	NaN	NaN
3.408	-43.48865	69.269	176.417	-0.077392	-0.0085449	0.06836	-19.7324	142.296	1651.927	-1.4663	1.2017	0.011719	14.642	253.239	713.704	-0.65674	0.4707	0.1084	NaN	NaN	NaN	NaN	NaN	NaN
3.41	-47.1054	79.239	138.59992	-0.081055	-0.0068359	0.067871	-44.532	162.584	1622.1417	-1.4492	1.1836	0.027832	10.876	289.598	634.35049	-0.58789	0.42139	0.075195	NaN	NaN	NaN	NaN	NaN	NaN
3.412	-53.5166	76.085	126.122	-0.07666	-0.01123	0.07373	-40.376	99.098	1596.147	-1.4304	1.1682	0.025879	-1.837	216.14113	566.2533	-0.53784	0.38891	0.055176	NaN	NaN	NaN	NaN	NaN	NaN
3.414	-67.629	69.8334	105.018	-0.076172	-0.011719	0.070313	-7.8475	101.167	1571.2385	-1.3999	1.1548	0.026855	-8.661	242.21	504.447	-0.49316	0.35742	0.028809	NaN	NaN	NaN	NaN	NaN	NaN
3.416	-37.5856	58.5583	102.139	-0.07666	-0.017578	0.068359	15.459	85.178	1507.682	-1.3594	1.123	0.026367	-8.969	191.815	462.2463	-0.43066	0.31445	0.00097656	NaN	NaN	NaN	NaN	NaN	NaN
3.418	-17.693	52.727	99.145	-0.071777	-0.017334	0.068848	1.939	57.298	1484.98489	-1.3354	1.1069	0.024902	-10.793	218.551	422.575	-0.40381	0.29199	-0.011719	NaN	NaN	NaN	NaN	NaN	NaN
3.42	-8.651	49.35	93.971	-0.062012	-0.02002	0.0625	2.6677	131.578	1474.114	-1.2969	1.0723	0.022461	-13.632	183.89	387.5168	-0.35059	0.25049	-0.033203	NaN	NaN	NaN	NaN	NaN	NaN
3.422	-13.786	26.417	94.28791	-0.053223	-0.022949	0.064453	-0.9447	122.327	1445.061	-1.2588	1.0484	0.020507	-17.503	220.734	336.573	-0.31616	0.22119	-0.048096	NaN	NaN	NaN	NaN	NaN	NaN
3.424	-0.534000000000002	33.8767	105.2908	-0.050293	-0.022461	0.064453	6.593	148.4656	1436.8138	-1.23	1.0278	0.016602	-29.206	208.84	285.015	-0.29004	0.19141	-0.063477	NaN	NaN	NaN	NaN	NaN	NaN
3.426	20.953	51.833	82.5761	-0.04541	-0.022949	0.062988	9.4727	206.49	1402.2798	-1.187	0.99072	0.022949	-41.549	238.942	267.833	-0.25635	0.15479	-0.074707	NaN	NaN	NaN	NaN	NaN	NaN
3.428	-9.687	59.601	67.1825	-0.032959	-0.023193	0.058349	-1.073	181.58	1370.4868	-1.1616	0.97314	0.024902	-54.24097	200.476	231.554	-0.24268	0.12915	-0.085694	NaN	NaN	NaN	NaN	NaN	NaN
3.43	2.429	43.921	62.8158	-0.026367	-0.023438	0.055664	22.9079	240.421	1338.1122	-1.1226	0.9458	0.023926	-46.46	172.3754	223.11111	-0.22998	0.10889	-0.092773	NaN	NaN	NaN	NaN	NaN	NaN
3.432	11.992	23.472	61.4622	-0.0078125	-0.02002	0.052734	-2.398	241.21	1261.981	-1.0888	0.92089	0.028321	-51.5053	128.3167	186.9186	-0.20996	0.084961	-0.093262	NaN	NaN	NaN	NaN	NaN	NaN
3.434	-8.521	30.4319	47.404	-0.0019531	-0.013672	0.052734	-10.444	192.491	1243.3136	-1.0615	0.90137	0.02002	-49.3023	117.126	156.443	-0.20508	0.07666	-0.09668	NaN	NaN	NaN	NaN	NaN	NaN
3.436	-3.672	33.9972	48.3076	0.012207	-0.01123	0.049805	39.7827	225.29	1218.3548	-1.0176	0.87793	0.031738	-23.916	103.0351	124.201	-0.1958	0.062988	-0.10303	NaN	NaN	NaN	NaN	NaN	NaN
3.438	18.911	31.1359	42.959	0.022461	-0.0075683	0.049072	22.693	186.1266	1175.632	-0.99512	0.85645	0.030762	-23.759	110.247	104.5	-0.19165	0.052246	-0.10083	NaN	NaN	NaN	NaN	NaN	NaN
3.44	30.023	30.3223	40.64903	0.03125	-0.0039063	0.047363	40.1823	214.2185	1149.732	-0.96045	0.83447	0.028809	-45.679	116.3622	64.7759	-0.18799	0.036621	-0.099121	NaN	NaN	NaN	NaN	NaN	NaN
3.442	0.829999999999998	33.509	27.6122	0.048828	0.0053711	0.041504	13.68	241.337	1102.905	-0.93262	0.81347	0.036865	-29.399	95.927	42.142	-0.18359	0.023926	-0.098633	NaN	NaN	NaN	NaN	NaN	NaN
3.444	14.041	30.7575	19.4614	0.054199	0.0078125	0.04248	-45.692	199.9483	1072.077	-0.90186	0.78369	0.041504	-19.656	83.507	31.46	-0.17871	0.015625	-0.10059	NaN	NaN	NaN	NaN	NaN	NaN
3.446	10.447	27.8284	19.0824	0.068359	0.01709	0.037109	-21.781	227.22	1065.289	-0.86377	0.74951	0.049316	-8.388	68.7414	58.1164	-0.16553	0.0024414	-0.099121	NaN	NaN	NaN	NaN	NaN	NaN
3.448	8.831	25.514	35.7329	0.07666	0.019287	0.034912	-73.4467	197.609	1007.12	-0.84717	0.73291	0.055176	-18.544	77.572	51.5488	-0.15088	-0.0092774	-0.099611	NaN	NaN	NaN	NaN	NaN	NaN
3.45	-25.488	15.8678	32.73967	0.081543	0.023926	0.033203	-76.35	169.7065	988.991	-0.79297	0.70117	0.058105	-5.474	76.661	79.02	-0.13916	-0.026367	-0.10645	NaN	NaN	NaN	NaN	NaN	NaN
3.452	-36.8947	10.0682	21.726	0.088867	0.033203	0.027832	-65.7613	214.169	964.864	-0.74853	0.67749	0.064697	-50.183	81.195	51.759	-0.12744	-0.046387	-0.11328	NaN	NaN	NaN	NaN	NaN	NaN
3.454	-29.9272	15.828	31.1307	0.092285	0.037109	0.028809	-96.767	197.269	907.521	-0.70215	0.65527	0.069824	-49.635	30.984	48.787	-0.12549	-0.057129	-0.11279	NaN	NaN	NaN	NaN	NaN	NaN
3.456	-22.5886	11.4006	18.1078	0.10059	0.039551	0.026855	-48.244	215.8192	879.4703	-0.64795	0.62158	0.071777	-45.009	38.6157	20.6316	-0.12598	-0.076172	-0.10938	NaN	NaN	NaN	NaN	NaN	NaN
3.458	-50.90921	9.3575	15.3587	0.10742	0.043701	0.02417	-59.472	246.5812	831.502	-0.62061	0.60693	0.067871	-15.597	7.7483	25.1807	-0.13697	-0.093751	-0.11108	NaN	NaN	NaN	NaN	NaN	NaN
3.46	-59.9172	6.56686	13.5994	0.11084	0.048828	0.022949	-72.6156	195.145	785.182	-0.56201	0.56494	0.069824	-2.985	40.961	17.8371	-0.15479	-0.1123	-0.10303	NaN	NaN	NaN	NaN	NaN	NaN
3.462	-28.4918	3.5947	11.6087	0.11865	0.04834	0.019531	-26.121	202.9595	739.325	-0.51612	0.5293	0.071777	0.449999999999999	7.159	26.5486	-0.19189	-0.12549	-0.094238	NaN	NaN	NaN	NaN	NaN	NaN
3.464	-34.4129	16.425	4.3931	0.11816	0.049316	0.020508	-62.7576	186.2418	665.7753	-0.4707	0.49707	0.078613	-24.247	12.2904	9.1576	-0.2124	-0.13281	-0.088867	NaN	NaN	NaN	NaN	NaN	NaN
3.466	-33.4362	13.9757	6.1319	0.12109	0.057617	0.016602	-75.4342	167.774	611.7168	-0.42334	0.44482	0.077637	-25.13	-30.0175	29.404	-0.26074	-0.1377	-0.07373	NaN	NaN	NaN	NaN	NaN	NaN
3.468	-19.184	9.185	-1.7879	0.11841	0.058105	0.015625	-45.2691	192.196	571.2575	-0.3999	0.42529	0.080566	-23.178	-1.127	27.4	-0.29809	-0.13989	-0.055176	NaN	NaN	NaN	NaN	NaN	NaN
3.47	-15.285	18.976	8.6911	0.12012	0.066895	0.019531	-67.6459	154.0703	530.2575	-0.34717	0.38135	0.082031	-27.175	-12.1961	50.389	-0.33008	-0.13672	-0.038574	NaN	NaN	NaN	NaN	NaN	NaN
3.472	-21.804	30.32487	4.9347	0.12061	0.067871	0.019043	-48.576	160.5922	507.9723	-0.30102	0.34912	0.08545	-25.14	33.193	54.341	-0.37109	-0.12158	-0.018555	NaN	NaN	NaN	NaN	NaN	NaN
3.474	-39.66952	31.359	6.2688	0.11963	0.077148	0.022949	-24.641	166.3709	469.876	-0.26025	0.31885	0.086914	-48.315	18.2392	60.932	-0.38525	-0.11621	-0.0083008	NaN	NaN	NaN	NaN	NaN	NaN
3.476	-21.939	19.1781	19.1677	0.10889	0.084473	0.024902	-35.421	130.7084	443.8871	-0.20605	0.28516	0.080566	-84.182	50.525	20.8001	-0.39258	-0.10693	0.0024414	NaN	NaN	NaN	NaN	NaN	NaN
3.478	-13.294	14.8973	20.584	0.10083	0.090087	0.027832	5.301	155.303	408.6254	-0.18115	0.27051	0.077637	-57.8166	7.049	4.6027	-0.3794	-0.10108	0.0026856	NaN	NaN	NaN	NaN	NaN	NaN
3.48	0.337	29.7964	13.0844	0.095703	0.094238	0.030273	-3.442	131.734	361.2682	-0.13281	0.23389	0.083496	-55.435	29.441	-23.817	-0.35303	-0.10156	0.0019531	NaN	NaN	NaN	NaN	NaN	NaN
3.482	-8.875	20.5354	10.31852	0.083008	0.10352	0.040527	12.015	105.9868	322.343	-0.097655	0.20337	0.076172	-44.024	-0.414	-18.3454	-0.30957	-0.10596	-0.0014648	NaN	NaN	NaN	NaN	NaN	NaN
3.484	-11.579	18.7828	2.023	0.075195	0.10986	0.044922	29.934	95.2921	265.827	-0.0625	0.17725	0.07373	-38.124	24.5767	-21.7501	-0.28564	-0.11377	-0.0087891	NaN	NaN	NaN	NaN	NaN	NaN
3.486	25.883	6.2516	-8.197	0.068848	0.11523	0.049316	6.291	58.631	225.141	-0.029785	0.14355	0.07666	-42.6654	11.2753	-5.7535	-0.2417	-0.13037	-0.013184	NaN	NaN	NaN	NaN	NaN	NaN
3.488	4.982	3.238	-1.1568	0.061767	0.11939	0.060059	21.965	63.246	228.2586	-0.015625	0.12549	0.078125	-59.6017	46.112	-2.3715	-0.2102	-0.13989	-0.022217	NaN	NaN	NaN	NaN	NaN	NaN
3.49	15.431	3.242	15.371	0.052734	0.11816	0.05957	22.0057	81.24	207.792	0.019531	0.091309	0.074707	-34.3384	4.619	9.4031	-0.17383	-0.15088	-0.027832	NaN	NaN	NaN	NaN	NaN	NaN
3.492	33.7414	-13.0619	36.7094	0.045898	0.12305	0.06543	-11.049	73.965	196.04521	0.039551	0.065918	0.073486	-32.77	28.449	11.8762	-0.11084	-0.16162	-0.042969	NaN	NaN	NaN	NaN	NaN	NaN
3.494	17.055	-27.5554	58.44	0.043945	0.12744	0.068359	20.283	94.836	166.15423	0.061523	0.043457	0.074219	-53.813	13.622	12.8709	-0.081055	-0.16602	-0.050293	NaN	NaN	NaN	NaN	NaN	NaN
3.496	-33.0616	-33.2651	68.8942	0.026855	0.14307	0.071777	-20.829	91.481	114.2898	0.083496	0.016602	0.072266	-25.977	65.7507	-1.814	-0.011719	-0.17139	-0.061523	NaN	NaN	NaN	NaN	NaN	NaN
3.498	-1.299	-39.998	76.0216	-0.0029297	0.15405	0.082031	-24.364	78.344	100.7616	0.091797	0.0048828	0.067871	-39.435	50.504	15.201	0.042481	-0.17993	-0.075195	NaN	NaN	NaN	NaN	NaN	NaN
3.5	-12.358	-39.108	108.473	-0.037109	0.16943	0.092773	1.662	103.62	103.362	0.11182	-0.018555	0.068359	-31.545	57.0169	17.9034	0.093262	-0.18555	-0.086914	NaN	NaN	NaN	NaN	NaN	NaN
3.502	-46.562	-40.885	126.7735	-0.10059	0.19287	0.11572	-55.1116	84.8278	76.257	0.12109	-0.035888	0.06372	-30.679	15.07706	21.981	0.15723	-0.19824	-0.11035	NaN	NaN	NaN	NaN	NaN	NaN
3.504	-54.706	-72.341	151.1543	-0.12598	0.20508	0.125	-5.667	66.537	80.9073	0.13037	-0.046875	0.064453	-23.29	24.7227	22.9037	0.18506	-0.20508	-0.11523	NaN	NaN	NaN	NaN	NaN	NaN
3.506	-66.2396	-74.3924	173.344	-0.17969	0.22656	0.14404	-29.6634	67.8906	54.099	0.14355	-0.064453	0.067383	-36.149	26.0379	9.167	0.22852	-0.21436	-0.12842	NaN	NaN	NaN	NaN	NaN	NaN
3.508	-54.5264	-40.053	235.5501	-0.22949	0.25586	0.15527	-65.55816	39.628	46.5316	0.14844	-0.067871	0.069336	-15.573	54.805	25.664	0.24805	-0.22217	-0.13501	NaN	NaN	NaN	NaN	NaN	NaN
3.51	-45.0744	3.136	288.597	-0.25488	0.271	0.15723	-16.73	54.59924	38.1544	0.16357	-0.080078	0.064453	-8.96	63.425	28.863	0.26025	-0.22949	-0.1333	NaN	NaN	NaN	NaN	NaN	NaN
3.512	-37.582	25.691	376.41	-0.30811	0.30371	0.17041	-69.558	62.155	-0.4682	0.17334	-0.084961	0.068603	-15.646	62.06786	10.7818	0.26123	-0.23096	-0.13281	NaN	NaN	NaN	NaN	NaN	NaN
3.514	-45.2068	48.525	447.673	-0.36645	0.33008	0.16675	-64.1262	35.957	5.94	0.18555	-0.087891	0.06543	-11.571	46.696	6.462	0.25488	-0.2334	-0.12549	NaN	NaN	NaN	NaN	NaN	NaN
3.516	-15.5022	65.83	544.0196	-0.44531	0.36572	0.17529	-41.0683	26.4979	5.62	0.19922	-0.095703	0.05957	-11.49	33.1138	30.2163	0.24072	-0.22656	-0.11475	NaN	NaN	NaN	NaN	NaN	NaN
3.518	10.8654	96.694	658.17018	-0.57861	0.41602	0.18945	-63.1867	-14.5812	14.016	0.20801	-0.096191	0.061035	-37.987	29.3603	28.8351	0.22144	-0.21338	-0.10669	NaN	NaN	NaN	NaN	NaN	NaN
3.52	0.8757	114.37174	787.605	-0.65381	0.44238	0.19434	-35.796	-14.1113	26.9325	0.20898	-0.1001	0.058594	-14.086	40.078	66.577	0.20557	-0.19678	-0.10254	NaN	NaN	NaN	NaN	NaN	NaN
3.522	13.97499	108.855	911.238	-0.81787	0.50635	0.21289	-32.3295	13.9091	21.815	0.21094	-0.099609	0.053223	-47.035	47.4647	50.512	0.18604	-0.16895	-0.091309	NaN	NaN	NaN	NaN	NaN	NaN
3.524	-6.8614	94.43	980.9567	-0.948	0.56128	0.23169	-59.5998	24.394	33.976	0.21533	-0.099121	0.054199	-29.909	31.4589	45.308	0.17676	-0.15381	-0.085449	NaN	NaN	NaN	NaN	NaN	NaN
3.526	-12.6203	64.733	1020.926	-1.0835	0.61963	0.25732	-30.757	55.912	30.111	0.20703	-0.097168	0.05957	-52.333	9.1838	19.87682	0.16504	-0.12451	-0.085938	NaN	NaN	NaN	NaN	NaN	NaN
3.528	-32.698	27.1955	1063.268	-1.2598	0.69824	0.31494	-41.963	68.861	-5.8632	0.19629	-0.094727	0.060547	-53.527	-21.2003	10.5584	0.15894	-0.09912	-0.084229	NaN	NaN	NaN	NaN	NaN	NaN
3.53	-3.254	10.30969	1097.32884	-1.3354	0.74072	0.3457	-7.90900000000001	30.95873	8.8158	0.18164	-0.086914	0.067383	-67.061	-5.0705	-0.088000000000001	0.15283	-0.083496	-0.090332	NaN	NaN	NaN	NaN	NaN	NaN
3.532	2.975	-16.6931	1106.2956	-1.4487	0.80322	0.39893	25.104	25.6936	0.546399999999999	0.16602	-0.076172	0.068359	-20.503	1.091	11.4368	0.14893	-0.059082	-0.091797	NaN	NaN	NaN	NaN	NaN	NaN
3.534	-22.8899	-34.0974	1108.399	-1.4939	0.84058	0.43921	-17.041	5.109	15.0466	0.15527	-0.072754	0.081543	-31.327	26.522153	11.669	0.14795	-0.050781	-0.092773	NaN	NaN	NaN	NaN	NaN	NaN
3.536	-9.2044	-61.853	1100.856	-1.5073	0.85986	0.46094	3.758	18.4196	26.19501	0.13037	-0.061523	0.083496	-43.909	9.725	19.1321	0.14551	-0.030762	-0.089844	NaN	NaN	NaN	NaN	NaN	NaN
3.538	32.055	-74.441	1096.14	-1.4688	0.87695	0.48291	15.7561	47.701	10.578	0.11059	-0.052002	0.088135	-46.405	14.7466	24.675	0.14306	-0.018555	-0.094482	NaN	NaN	NaN	NaN	NaN	NaN
3.54	80.382	-81.834	1088.976	-1.4355	0.87598	0.479	-3.882	36.57	7.6448	0.09082	-0.046875	0.09668	-56.4898	-3.487	26.4063	0.13916	-0.010742	-0.095703	NaN	NaN	NaN	NaN	NaN	NaN
3.542	51.02	-77.944	1091.451	-1.3516	0.875	0.46436	21.982	36.787	15.5346	0.067383	-0.037598	0.10205	-45.354	26.0777	27.1781	0.14307	0.0058594	-0.099609	NaN	NaN	NaN	NaN	NaN	NaN
3.544	33.627	-64.243	1087.051	-1.2727	0.87133	0.4436	-33.646	35.811	10.9726	0.059082	-0.031738	0.10693	-26.459	12.9645	36.457	0.14551	0.012207	-0.10059	NaN	NaN	NaN	NaN	NaN	NaN
3.546	19.162	-65.4058	1097.1346	-1.1851	0.87549	0.4292	-18.17	18.0819	27.0456	0.041016	-0.023438	0.1084	-46.396	51.416	3.198	0.15186	0.029785	-0.10645	NaN	NaN	NaN	NaN	NaN	NaN
3.548	13.221	-47.924	1089.4475	-1.0762	0.86328	0.41016	-9.563	19.5635	25.462	0.033447	-0.016357	0.11475	-54.65	21.7172	-14.756	0.15893	0.036865	-0.11181	NaN	NaN	NaN	NaN	NaN	NaN
3.55	-25.788	-53.888	1094.662	-1.0249	0.85986	0.4082	-53.8201	2.781	23.3485	0.02832	-0.015137	0.11475	-45.641	33.9517	-34.9831	0.15771	0.046875	-0.12012	NaN	NaN	NaN	NaN	NaN	NaN
3.552	-26.76	-60.22	1086.99472	-0.94043	0.83984	0.40137	-6.488	-8.742	45.656	0.027344	-0.013672	0.11084	-34.566	0.629999999999999	-10.57251	0.16064	0.057129	-0.12842	NaN	NaN	NaN	NaN	NaN	NaN
3.554	-28.41	-68.869	1101.527	-0.90258	0.82251	0.40113	-17.25	3.427	9.315	0.033203	-0.013184	0.10693	-33.09	40.054	-16.7681	0.15479	0.063965	-0.12891	NaN	NaN	NaN	NaN	NaN	NaN
3.556	-73.6192	-86.294	1081.491	-0.88965	0.81641	0.41064	-29.582	6.629	24.0987	0.047852	-0.013672	0.104	-18.053	19.5512	23.8637	0.13525	0.069336	-0.12451	NaN	NaN	NaN	NaN	NaN	NaN
3.558	-81.6866	-121.524	1102.232	-0.90381	0.82275	0.4209	-15.03	29.0357	29.5877	0.066162	-0.017334	0.094971	-21.067	58.1509	33.1978	0.11377	0.074707	-0.12378	NaN	NaN	NaN	NaN	NaN	NaN
3.56	-67.711	-160.215	1128.41	-0.92285	0.83008	0.43408	-88.104	43.141	12.5205	0.088867	-0.01709	0.092773	-4.986	25.04168	36.9878	0.084473	0.08252	-0.12646	NaN	NaN	NaN	NaN	NaN	NaN
3.562	-40.526	-183.95	1162.2169	-0.96875	0.86523	0.44873	-69.6768	27.4461	39.108	0.11133	-0.024902	0.083496	-18.616	40.0267	26.4057	0.04248	0.097656	-0.12207	NaN	NaN	NaN	NaN	NaN	NaN
3.564	-33.981	-206.383	1200.6353	-1.0037	0.90357	0.45923	-25.119	12.4938	16.64448	0.12842	-0.026855	0.07373	-16.019	10.6877	37.0342	0.021973	0.10693	-0.11621	NaN	NaN	NaN	NaN	NaN	NaN
3.566	-45.1242	-222.977	1240.7708	-1.0327	0.93311	0.46484	-78.709	8.283	1.946	0.15527	-0.033691	0.061523	-25.436	15.3809	26.496	-0.013672	0.1333	-0.11816	NaN	NaN	NaN	NaN	NaN	NaN
3.568	-56.388	-217.516	1282.9737	-1.063	0.97119	0.47266	-48.4096	-8.189	15.9235	0.17358	-0.043945	0.058349	-36.788	-14.332	65.113	-0.040039	0.16406	-0.12207	NaN	NaN	NaN	NaN	NaN	NaN
3.57	-71.6845	-206.306	1328.8681	-1.0815	0.98877	0.47559	-55.95864	11.7001	6.471	0.18799	-0.046875	0.052246	-26.022	5.114	88.102	-0.049316	0.17627	-0.12207	NaN	NaN	NaN	NaN	NaN	NaN
3.572	-78.223	-180.9203	1364.188	-1.1191	1.0059	0.47412	-75.4183	12.545	11.367	0.21045	-0.051758	0.04834	-20.965	-36.826	134.683	-0.052246	0.20752	-0.13623	NaN	NaN	NaN	NaN	NaN	NaN
3.574	-112.0152	-194.7213	1378.6141	-1.1606	1.0191	0.46801	-19.914	29.853	13.4086	0.21387	-0.054688	0.047852	-23.133	-64.231	184.4518	-0.059815	0.22388	-0.15332	NaN	NaN	NaN	NaN	NaN	NaN
3.576	-107.4755	-196.91	1405.7758	-1.2036	1.0298	0.45947	-39.4445	37.067	-1.68673	0.22314	-0.058105	0.04834	-63.7389	-125.62	235.417	-0.0625	0.2417	-0.16797	NaN	NaN	NaN	NaN	NaN	NaN
3.578	-115.26429	-197.205	1424.613	-1.2705	1.0596	0.45703	-17.398	12.2604	3.44019	0.2273	-0.059326	0.044678	-29.738	-144.5937	289.3875	-0.09375	0.26465	-0.17285	NaN	NaN	NaN	NaN	NaN	NaN
3.58	-116.9471	-169.511	1459.154	-1.3105	1.0859	0.45654	9.914	19.8077	2.7227	0.22559	-0.057617	0.044434	-35.9549	-155.824	414.768	-0.12012	0.27002	-0.17236	NaN	NaN	NaN	NaN	NaN	NaN
3.582	-79.797	-154.335	1501.3517	-1.396	1.1323	0.45898	-34.525	19.3721	-4.191	0.22021	-0.056152	0.050781	-22.779	-121.5127	545.677	-0.19629	0.2876	-0.17188	NaN	NaN	NaN	NaN	NaN	NaN
3.584	-64.938	-152.5927	1537.1394	-1.4658	1.1797	0.46582	4.628	2.728	26.156	0.21631	-0.054199	0.041992	-26.989	-96.9649	694.74	-0.26294	0.30151	-0.16504	NaN	NaN	NaN	NaN	NaN	NaN
3.586	-23.191	-166.4969	1559.0701	-1.5352	1.2363	0.48877	-13.021	5.24919	6.325	0.20166	-0.04541	0.058594	-36.442	-44.755	845.612	-0.33154	0.32129	-0.15332	NaN	NaN	NaN	NaN	NaN	NaN
3.588	-56.296	-165.597	1596.208	-1.6187	1.2915	0.49463	-33.495	0.155000000000001	25.2261	0.1914	-0.033203	0.063477	-84.7885	-20.3519	1010.88	-0.43506	0.35596	-0.13867	NaN	NaN	NaN	NaN	NaN	NaN
3.59	-39.912	-149.71043	1640.583	-1.6558	1.3149	0.50293	16.489	12.2605	19.9902	0.18359	-0.022461	0.067871	-100.799	14.747	1157.1415	-0.49219	0.37646	-0.1333	NaN	NaN	NaN	NaN	NaN	NaN
3.592	-37.051	-141.4309	1666.229	-1.7319	1.3599	0.52148	-2.189	45.976	-23.1833	0.16748	-0.01416	0.078613	-76.581	23.7196	1336.275	-0.62305	0.42676	-0.12305	NaN	NaN	NaN	NaN	NaN	NaN
3.594	-34.806	-149.2404	1678.06	-1.7739	1.3882	0.53881	10.106	56.247	8.3609	0.15869	-0.0043945	0.085449	-72.983	44.4942	1440.08	-0.73901	0.46509	-0.10376	NaN	NaN	NaN	NaN	NaN	NaN
3.596	-77.13	-165.3182	1693.437	-1.8164	1.4102	0.55322	17.84	54.901	-6.405731	0.14111	0.0078125	0.097656	-94.865	28.762	1488.185	-0.875	0.50781	-0.082031	NaN	NaN	NaN	NaN	NaN	NaN
3.598	-92.0858	-176.475	1694.807	-1.8574	1.4277	0.5752	-26.244	36.1306	1.3611	0.13135	0.01416	0.10351	-84.202	-20.582	1447.66	-1.0957	0.57813	-0.030762	NaN	NaN	NaN	NaN	NaN	NaN
3.6	-73.0664	-170.448	1714.3117	-1.8711	1.4297	0.58447	1.014	-2.339	28.9554	0.11719	0.020508	0.11377	-87.426	-57.871	1328.104	-1.2222	0.62158	0.00048828	NaN	NaN	NaN	NaN	NaN	NaN
3.602	-66.028	-150.7266	1728.9677	-1.8882	1.4321	0.59082	-16.615	1.2696	9.8398	0.099609	0.032715	0.12549	-67.3121	-109.388	1255.204	-1.4858	0.72021	0.081543	NaN	NaN	NaN	NaN	NaN	NaN
3.604	-67.183	-130.443	1742.097	-1.8952	1.424	0.59692	-46.073	15.299	24.2446	0.094238	0.035645	0.13086	-49.0897	-140.118	1177.911	-1.669	0.80469	0.14917	NaN	NaN	NaN	NaN	NaN	NaN
3.606	-67.212	-137.91299	1754.669	-1.8921	1.4126	0.60449	-1.193	39.746	32.791	0.071289	0.048828	0.13965	-44.774	-201.577	1123.9391	-1.8203	0.88867	0.21143	NaN	NaN	NaN	NaN	NaN	NaN
3.608	-53.787	-131.8574	1762.889	-1.8823	1.3853	0.60352	-64.3655	71.303	5.4097	0.057129	0.058106	0.14917	-56.3977	-176.732	1050.457	-1.9355	1.0029	0.2749	NaN	NaN	NaN	NaN	NaN	NaN
3.61	-58.026	-125.23819	1744.7482	-1.8711	1.377	0.60596	-43.231	52.991	18.4638	0.04541	0.064941	0.1582	-45.5925	-202.368	1047.945	-1.9375	1.0586	0.31201	NaN	NaN	NaN	NaN	NaN	NaN
3.612	-77.646	-114.9776	1745.3241	-1.854	1.3462	0.60449	-37.3695	34.5128	10.77088	0.02832	0.084473	0.16748	-43.481	-173.869	1040.154	-1.9175	1.1548	0.38574	NaN	NaN	NaN	NaN	NaN	NaN
3.614	-74.461	-102.46	1737.7781	-1.8406	1.3264	0.60132	-80.129	12.3938	4.7159	0.019043	0.086914	0.17139	-36.126	-192.982	1100.3805	-1.91	1.1985	0.36328	NaN	NaN	NaN	NaN	NaN	NaN
3.616	-111.4412	-98.2792	1739.1344	-1.8242	1.3008	0.59814	-22.199	-21.1809	65.316	0.0053711	0.10449	0.17529	-6.979	-131.164	1153.1976	-1.8706	1.2114	0.29492	NaN	NaN	NaN	NaN	NaN	NaN
3.618	-116.92921	-86.5543	1716.347	-1.8027	1.2773	0.60205	-55.6707	-39.3348	74.162	-0.012451	0.11768	0.1792	51.461	-135.473	1274.7727	-1.6943	1.2012	0.17871	NaN	NaN	NaN	NaN	NaN	NaN
3.62	-131.8821	-98.71512	1717.507	-1.8003	1.2661	0.60352	-87.2251	-38.111	93.467	-0.025391	0.13525	0.18799	82.768	-68.91	1323.388	-1.5625	1.2051	0.11328	NaN	NaN	NaN	NaN	NaN	NaN
3.622	-103.228	-98.3639	1729.1654	-1.7793	1.2354	0.60303	-17.744	-38.08468	107.5716	-0.072266	0.15869	0.1958	74.7757	-99.416	1398.4977	-1.2827	1.1958	-0.024902	NaN	NaN	NaN	NaN	NaN	NaN
3.624	-110.726	-113.6582	1755.382	-1.7691	1.2124	0.60644	-43.3694	-43.573	112.7164	-0.098633	0.17285	0.19629	71.253	-85.114	1378.679	-1.1089	1.2007	-0.11597	NaN	NaN	NaN	NaN	NaN	NaN
3.626	-113.4234	-100.5609	1743.2881	-1.7534	1.1899	0.61182	-57.894	-79.42383	185.337	-0.16064	0.20313	0.20459	66.90153	-192.496	1397.745	-0.97607	1.2095	-0.18506	NaN	NaN	NaN	NaN	NaN	NaN
3.628	-98.5369	-96.11702	1724.8735	-1.7378	1.1548	0.61426	-38.961	-90.346	225.4471	-0.20948	0.22852	0.20532	49.848	-262.772	1413.6003	-0.88281	1.2188	-0.23584	NaN	NaN	NaN	NaN	NaN	NaN
3.63	-107.5799	-109.574	1729.822	-1.7358	1.145	0.61914	-53.0478	-105.566	283.486	-0.26367	0.25537	0.21533	55.321	-401.126	1483.4194	-0.86084	1.2153	-0.25732	NaN	NaN	NaN	NaN	NaN	NaN
3.632	-80.179	-119.527	1719.29546	-1.7305	1.1104	0.62793	-14.81	-103.8598	409.3733	-0.34521	0.3042	0.21094	114.822	-406.585	1531.4947	-0.8667	1.2134	-0.25781	NaN	NaN	NaN	NaN	NaN	NaN
3.634	-92.773	-109.492	1712.0857	-1.7248	1.093	0.6377	-36.9655	-77.1381	508.303	-0.39014	0.33789	0.21582	146.592	-421.433	1576.138	-0.9043	1.209	-0.24438	NaN	NaN	NaN	NaN	NaN	NaN
3.636	-85.128	-90.85	1702.4074	-1.7148	1.0762	0.6333	-9.504	-59.95	631.537	-0.4917	0.40479	0.21387	160.209	-347.156	1580.253	-0.97021	1.2231	-0.21436	NaN	NaN	NaN	NaN	NaN	NaN
3.638	-80.69	-78.122	1701.0785	-1.6987	1.0571	0.64453	72.8	-13.855	755.823	-0.58984	0.46093	0.21948	146.44	-315.306	1610.039	-1.103	1.2837	-0.16455	NaN	NaN	NaN	NaN	NaN	NaN
3.64	-80.147	-60.4015	1680.7013	-1.687	1.0435	0.64111	79.3814	48.242	870.354	-0.71191	0.53027	0.22559	133.28	-226.6238	1701.447	-1.1777	1.3203	-0.14209	NaN	NaN	NaN	NaN	NaN	NaN
3.642	-90.259	-53.625	1663.5565	-1.6636	1.0278	0.64258	101.6858	77.186	1046.434	-0.90088	0.62939	0.23633	99.885	-164.64	1802.1178	-1.3428	1.3906	-0.091309	NaN	NaN	NaN	NaN	NaN	NaN
3.644	-85.771	-40.745	1629.623	-1.6401	1.0112	0.64453	122.739	114.563	1180.722	-1.0093	0.68018	0.25146	89.956	-88.545	1883.992	-1.4644	1.4322	-0.05835	NaN	NaN	NaN	NaN	NaN	NaN
3.646	-51.542	-36.814	1636.3776	-1.6265	1.0024	0.64844	81.427	81.829	1264.064	-1.2402	0.80859	0.2998	74.248	-72.38	1927.472	-1.5801	1.4727	-0.028809	NaN	NaN	NaN	NaN	NaN	NaN
3.648	-69.514	-33.486	1615.6456	-1.6069	0.979	0.64746	89.322	18.9562	1314.951	-1.4265	0.90844	0.34912	48.661	-71.102	1930.641	-1.7134	1.5298	0.0029297	NaN	NaN	NaN	NaN	NaN	NaN
3.65	-79.86	-31.0929	1602.425	-1.5876	0.96801	0.64575	50.349	-26.911	1260.078	-1.6089	1.0063	0.39941	32.43684	-85.338	1895.06	-1.769	1.5571	0.012695	NaN	NaN	NaN	NaN	NaN	NaN
3.652	-73.232	-35.394	1589.5142	-1.5718	0.95752	0.64648	10.531	-77.8439	1249.292	-1.812	1.1274	0.45508	19.6456	-118.819	1890.2176	-1.8667	1.6138	0.040527	NaN	NaN	NaN	NaN	NaN	NaN
3.654	-45.338	-27.021	1574.8689	-1.5483	0.94189	0.65332	29.852	-87.6453	1202.683	-1.875	1.1777	0.47607	30.686	-135.1848	1897.909	-1.9283	1.6519	0.043945	NaN	NaN	NaN	NaN	NaN	NaN
3.656	-50.851	-26.68	1565.9767	-1.5313	0.93555	0.64893	-27.627	-75.4837	1116.3308	-1.8726	1.2563	0.5166	40.2528	-183.536	1958.163	-1.9766	1.6914	0.050781	NaN	NaN	NaN	NaN	NaN	NaN
3.658	-77.216	-22.63	1543.2043	-1.5073	0.93213	0.64941	-28.062	-114.636	1089.645	-1.7803	1.2915	0.5371	41.3141	-204.915	1987.9628	-2.0093	1.7271	0.047852	NaN	NaN	NaN	NaN	NaN	NaN
3.66	-69.912	-29.485	1545.8172	-1.487	0.92701	0.64233	0.7308	-105.851	1022.744	-1.6621	1.3105	0.5083	1.711	-233.808	2021.36	-2.0176	1.7402	0.043457	NaN	NaN	NaN	NaN	NaN	NaN
3.662	-70.186	-12.4891	1535.7046	-1.4688	0.91797	0.63818	-39.4568	-128.699	978.526	-1.416	1.2813	0.41113	-6.7474	-190.251	2021.849	-2.0483	1.7681	0.041992	NaN	NaN	NaN	NaN	NaN	NaN
3.664	-64.54	8.9489	1539.494	-1.4448	0.9165	0.63672	-2.056	-130.195	990.922	-1.1535	1.217	0.36645	-18.8395	-191.391	2043.842	-2.0771	1.7861	0.042725	NaN	NaN	NaN	NaN	NaN	NaN
3.666	-92.6079	9.40969	1504.8068	-1.4253	0.9165	0.62988	-5.619	-106.892	984.924	-0.88623	1.1333	0.34473	-43.149	-154.602	2048.932	-2.0972	1.8091	0.046387	NaN	NaN	NaN	NaN	NaN	NaN
3.668	-72.798	9.002	1475.0296	-1.3926	0.9043	0.61768	-61.999	-104.2299	1056.5397	-0.65869	1.0098	0.3335	-26.6814	-153.324	2059.417	-2.1108	1.813	0.042969	NaN	NaN	NaN	NaN	NaN	NaN
3.67	-70.677	13.958	1439.208	-1.3697	0.8999	0.60889	-27.711	-77.258	1118.754	-0.60986	0.96924	0.32666	-35.077	-91.1838	2015.079	-2.1108	1.8091	0.04248	NaN	NaN	NaN	NaN	NaN	NaN
3.672	-88.7863	49.3401	1412.909	-1.3418	0.89258	0.59424	-72.1233	-46.964	1109.93	-0.58838	0.91748	0.33203	2.7314	-105.058	1974.70552	-2.0898	1.7852	0.032227	NaN	NaN	NaN	NaN	NaN	NaN
3.674	-70.7013	72.8981	1404.588	-1.2983	0.88721	0.57422	-104.6723	-68.641	1142.4286	-0.60669	0.90747	0.36743	7.7413	-39.053	1905.137	-2.0603	1.7571	0.022705	NaN	NaN	NaN	NaN	NaN	NaN
3.676	-36.676	79.2342	1401.5425	-1.2739	0.88135	0.56641	-114.4263	-68.96	1141.189	-0.65332	0.92188	0.40674	53.051	-62.2425	1860.714	-2.0273	1.7246	0.010254	NaN	NaN	NaN	NaN	NaN	NaN
3.678	-31.708	73.9437	1390.5681	-1.2241	0.87549	0.54688	-164.338	-153.339	1151.859	-0.7749	0.99463	0.45801	53.199	-2.912	1833.876	-1.9824	1.6758	-0.0039063	NaN	NaN	NaN	NaN	NaN	NaN
3.68	-72.7202	75.5097	1362.4593	-1.1941	0.8645	0.52759	-150.731	-232.914	1209.9	-0.84912	1.0513	0.48242	97.129	-43.5372	1842.931	-1.9604	1.6411	-0.0043945	NaN	NaN	NaN	NaN	NaN	NaN
3.682	-42.2201	71.1439	1337.2599	-1.1611	0.85938	0.5083	-136.697	-285.85	1239.082	-0.99023	1.186	0.5332	82.483	-3.171	1847.928	-1.9355	1.584	-0.016602	NaN	NaN	NaN	NaN	NaN	NaN
3.684	-30.635	91.359	1314.6467	-1.1133	0.83984	0.48291	-111.8119	-377.82	1298.357	-1.082	1.2803	0.54638	85.452	-45.402	1865.781	-1.9145	1.5395	-0.012696	NaN	NaN	NaN	NaN	NaN	NaN
3.686	-23.382	102.532	1291.8817	-1.0972	0.83252	0.46777	-51.241	-393.304	1365.543	-1.1523	1.3516	0.56445	64.681	34.6983	1851.5576	-1.8965	1.5	-0.012695	NaN	NaN	NaN	NaN	NaN	NaN
3.688	-42.986	103.8	1265.0686	-1.0605	0.82227	0.45459	-56.448	-364.573	1408.383	-1.2461	1.4277	0.58643	66.732	27.583	1843.6909	-1.8784	1.4448	-0.0068359	NaN	NaN	NaN	NaN	NaN	NaN
3.69	-38.169	83.2452	1236.8201	-1.04	0.81347	0.44043	-54.327	-359.35	1492.803	-1.2871	1.4668	0.58057	85.091	106.628	1837.756	-1.8667	1.4224	-0.003418	NaN	NaN	NaN	NaN	NaN	NaN
3.692	-6.0517	75.2453	1222.8039	-1.0215	0.80469	0.42578	-20.462	-260.578	1561.9575	-1.3765	1.5122	0.58789	112.631	50.86	1862.193	-1.8511	1.3794	0.01123	NaN	NaN	NaN	NaN	NaN	NaN
3.694	4.797	87.45	1206.5242	-0.99609	0.79297	0.40869	-53.472	-221.319	1619.5157	-1.4355	1.5351	0.59253	109.19	71.371	1867.268	-1.8447	1.3535	0.017334	NaN	NaN	NaN	NaN	NaN	NaN
3.696	1.293	93.968	1210.929	-0.97656	0.78418	0.3999	-44.524	-186.045	1703.619	-1.4902	1.5566	0.59131	116.199	-7.5713	1876.712	-1.8335	1.3315	0.026367	NaN	NaN	NaN	NaN	NaN	NaN
3.698	-1.943	104.619	1181.347	-0.95117	0.77344	0.38037	-49.94	-137.98	1746.855	-1.541	1.5957	0.59131	81.028	45.23	1844.101	-1.8179	1.3052	0.039063	NaN	NaN	NaN	NaN	NaN	NaN
3.7	15.781	129.8343	1153.0396	-0.93409	0.76074	0.36499	-106.509	-171.712	1767.903	-1.5625	1.6152	0.58643	82.555	-16.217	1826.735	-1.8125	1.2988	0.043945	NaN	NaN	NaN	NaN	NaN	NaN
3.702	18.412	126.532	1104.86635	-0.91504	0.74707	0.354	-85.40409	-152.017	1797.017	-1.6074	1.6738	0.58447	55.783	48.296	1800.4941	-1.7998	1.2871	0.056641	NaN	NaN	NaN	NaN	NaN	NaN
3.704	-6.537	114.577	1079.1032	-0.89063	0.73242	0.33838	-88.47359	-121.75	1792.312	-1.6485	1.7168	0.58887	48.001	41.2938	1797.93041	-1.7905	1.2798	0.07544	NaN	NaN	NaN	NaN	NaN	NaN
3.706	9.357	113.61	1062.732	-0.88086	0.72266	0.32275	-61.452	-162.203	1811.5073	-1.6934	1.7578	0.59424	61.262	133.928	1785.2511	-1.7808	1.2749	0.083496	NaN	NaN	NaN	NaN	NaN	NaN
3.708	-7.316	129.13	1026.5289	-0.85156	0.70117	0.30615	-4.287	-128.094	1845.1775	-1.7666	1.7988	0.59229	58.934	132.309	1762.3993	-1.7651	1.2642	0.094727	NaN	NaN	NaN	NaN	NaN	NaN
3.71	-11.581	143.192	986.62	-0.82471	0.68652	0.2854	-22.374	-160.2897	1863.84	-1.7852	1.8105	0.59717	-1.4303	194.433	1740.8775	-1.7517	1.2522	0.10303	NaN	NaN	NaN	NaN	NaN	NaN
3.712	-29.97905	129.11422	958.515	-0.80225	0.67139	0.26953	-2.425	-173.731	1950.173	-1.8145	1.8281	0.60498	-15.398	157.283	1728.866	-1.7319	1.2466	0.10693	NaN	NaN	NaN	NaN	NaN	NaN
3.714	-12.703	120.525	930.9298	-0.76563	0.64453	0.25928	-11.536	-145.437	1972.8427	-1.8237	1.8266	0.6001	-17.9301	215.605	1702.325	-1.7065	1.2329	0.11035	NaN	NaN	NaN	NaN	NaN	NaN
3.716	-15.5	122.151	897.5569	-0.74609	0.63086	0.24756	-55.1307	-201.556	2009.744	-1.8218	1.8169	0.59961	3.2694	179.031	1702.098	-1.6948	1.2231	0.11133	NaN	NaN	NaN	NaN	NaN	NaN
3.718	-8.853	119.8068	886.23	-0.70703	0.60938	0.22705	-58.409	-185.245	2044.183	-1.8022	1.7896	0.60547	12.476	212.883	1683.31	-1.668	1.1973	0.11279	NaN	NaN	NaN	NaN	NaN	NaN
3.72	-16.1501	127.52779	859.5128	-0.68579	0.59302	0.21167	-106.5108	-151.735	2016.567	-1.7988	1.7734	0.60645	22.4244	156.2675	1644.343	-1.6391	1.1811	0.1128	NaN	NaN	NaN	NaN	NaN	NaN
3.722	-7.3115	118.7482	837.1532	-0.65967	0.57471	0.19775	-137.8253	-162.173	2035.409	-1.7852	1.7422	0.61377	-2.492	195.442	1570.0272	-1.6147	1.1626	0.11572	NaN	NaN	NaN	NaN	NaN	NaN
3.724	-1.625	117.6867	802.8096	-0.61914	0.54834	0.17871	-122.6073	-78.089	2025.859	-1.7763	1.7164	0.62353	-45.183	149.566	1520.4735	-1.5742	1.1367	0.11328	NaN	NaN	NaN	NaN	NaN	NaN
3.726	-32.0294	112.8214	763.1042	-0.60107	0.5376	0.16797	-141.806	-92.146	1990.4101	-1.7754	1.6836	0.63623	-31.2147	177.01	1484.385	-1.5562	1.1235	0.11133	NaN	NaN	NaN	NaN	NaN	NaN
3.728	-18.209	107.969	734.234	-0.56104	0.51221	0.14648	-111.436	-104.801	2009.0997	-1.7769	1.6431	0.66113	0.122999999999999	143.805	1474.016	-1.5171	1.0981	0.10742	NaN	NaN	NaN	NaN	NaN	NaN
3.73	-17.3197	113.972	699.283	-0.52954	0.49243	0.1333	-84.493	-75.545	1954.154	-1.7847	1.6196	0.66992	38.277	182.016	1447.9885	-1.4873	1.0762	0.10889	NaN	NaN	NaN	NaN	NaN	NaN
3.732	-26.648	117.8394	665.68607	-0.50098	0.47266	0.11768	-101.226	-131.491	1936.888	-1.8101	1.5767	0.69336	22.33	188.8504	1409.0627	-1.4604	1.0552	0.11719	NaN	NaN	NaN	NaN	NaN	NaN
3.734	-45.59651	127.0494	633.9618	-0.45898	0.44873	0.10352	-57.91	-83.973	1926.961	-1.8301	1.5429	0.70801	14.477	262.1616	1359.862	-1.4189	1.0254	0.11768	NaN	NaN	NaN	NaN	NaN	NaN
3.736	-14.5787	123.094	602.851	-0.44092	0.43213	0.092285	-92.026	-51.932	1894.126	-1.8472	1.5063	0.71875	-9.1229	277.519	1319.61253	-1.3926	1.0117	0.1167	NaN	NaN	NaN	NaN	NaN	NaN
3.738	4.466	133.859	578.3448	-0.40137	0.4043	0.078125	-113.209	-55.165	1905.4585	-1.8569	1.4556	0.73242	4.61499999999999	339.6016	1296.202	-1.3477	0.97656	0.11865	NaN	NaN	NaN	NaN	NaN	NaN
3.74	9.042	136.4834	538.6105	-0.37598	0.38623	0.065674	-91.091	17.6767	1929.2802	-1.8672	1.4316	0.73877	9.929	334.882	1257.5424	-1.3064	0.95728	0.11889	NaN	NaN	NaN	NaN	NaN	NaN
3.742	-6.122	103.1277	514.843	-0.34766	0.36719	0.058105	-129.008	1.876	1952.3801	-1.8809	1.3887	0.74316	23.05	361.506	1207.471	-1.2651	0.93018	0.12109	NaN	NaN	NaN	NaN	NaN	NaN
3.744	8.863	94.478	500.954	-0.31494	0.3418	0.045898	-102.43106	-7.421	2003.037	-1.8845	1.3606	0.74634	23.893	340.671	1143.342	-1.2188	0.89941	0.12354	NaN	NaN	NaN	NaN	NaN	NaN
3.746	3.677	105.299	468.5511	-0.2959	0.32813	0.037598	-74.475	9.709	1992.45	-1.8906	1.3359	0.74072	17.919	350.0424	1087.565	-1.1943	0.88281	0.12207	NaN	NaN	NaN	NaN	NaN	NaN
3.748	29.8688	113.0332	441.7697	-0.26318	0.30225	0.026367	-130.724	-49.519	1966.558	-1.875	1.3125	0.73682	-20.945	300.823	1045.147	-1.1479	0.84619	0.13086	NaN	NaN	NaN	NaN	NaN	NaN
3.75	2.851	96.625	422.15481	-0.23877	0.28882	0.015136	-102.475	-30.31	1949.469	-1.8652	1.3008	0.729	-17.102	306.954	1015.9469	-1.1101	0.81762	0.13013	NaN	NaN	NaN	NaN	NaN	NaN
3.752	-1.455	91.249	388.9299	-0.21484	0.27051	0.0068359	-107.412	-35.596	1898.912	-1.8477	1.2852	0.71338	-35.743	272.629	973.192	-1.0654	0.78906	0.14014	NaN	NaN	NaN	NaN	NaN	NaN
3.754	-25.7096	92.947	359.527	-0.18164	0.24316	0.00048828	-121.979	-77.971	1889.46403	-1.8174	1.2656	0.69995	-25.482	285.9161	946.026	-1.0093	0.75439	0.13721	NaN	NaN	NaN	NaN	NaN	NaN
3.756	-5.434	84.6319	339.0535	-0.16699	0.23389	-0.0029297	-52.004	-28.8497	1891.2125	-1.7905	1.2524	0.69141	-51.02	280.219	921.224	-0.97656	0.7373	0.13916	NaN	NaN	NaN	NaN	NaN	NaN
3.758	-22.4236	65.7268	319.22726	-0.13672	0.20898	-0.010254	-85.572	-26.6137	1875.5858	-1.7656	1.2344	0.67822	-57.79	322.929	880.09041	-0.9126	0.70166	0.14209	NaN	NaN	NaN	NaN	NaN	NaN
3.76	-4.23	48.17	298.022	-0.11938	0.19262	-0.022461	-85.255	-12.65	1874.466	-1.7476	1.2212	0.6748	-69.6425	324.271	832.435	-0.85693	0.67236	0.14185	NaN	NaN	NaN	NaN	NaN	NaN
3.762	-11.316	43.077	269.86	-0.097168	0.17578	-0.03125	-72.275	43.59368	1837.8933	-1.7183	1.1978	0.65527	-65.7739	332.81409	769.926	-0.8042	0.64307	0.14209	NaN	NaN	NaN	NaN	NaN	NaN
3.764	0.754000000000005	52.866	245.273	-0.07373	0.15576	-0.035645	-123.263	20.68291	1810.3098	-1.6941	1.1829	0.64673	-87.5404	275.4785	733.682	-0.72656	0.59863	0.13965	NaN	NaN	NaN	NaN	NaN	NaN
3.766	-6.542	57.787	223.89	-0.061523	0.14648	-0.036621	-98.705	76.442	1805.22	-1.6714	1.1665	0.63281	-76.785	259.249	709.005	-0.68555	0.57617	0.13916	NaN	NaN	NaN	NaN	NaN	NaN
3.768	-5.845	65.7449	223.9683	-0.042969	0.12598	-0.045898	-119.7818	96.961	1770.3556	-1.6382	1.1528	0.62109	-53.611	244.989	652.703	-0.60645	0.52783	0.13525	NaN	NaN	NaN	NaN	NaN	NaN
3.77	-21.554	72.182	191.109	-0.030029	0.11694	-0.047364	-131.106	68.65	1768.6009	-1.625	1.1475	0.61182	-55.31	262.3858	609.094	-0.54858	0.49585	0.12768	NaN	NaN	NaN	NaN	NaN	NaN
3.772	-51.3833	68.665	189.5626	-0.01416	0.10352	-0.049316	-109.6649	117.752	1763.8039	-1.5879	1.1387	0.6001	-61.9671	236.798	554.682	-0.49268	0.46143	0.12402	NaN	NaN	NaN	NaN	NaN	NaN
3.774	-37.765	62.426	179.9207	0.0019531	0.094238	-0.057617	-158.69	94.254	1721.6557	-1.562	1.1274	0.58398	-81.3118	214.8452	485.774	-0.43213	0.4209	0.12158	NaN	NaN	NaN	NaN	NaN	NaN
3.776	-32.3412	62.1026	155.611	0.010254	0.085938	-0.058594	-116.1539	80.457	1714.005	-1.5317	1.1216	0.5752	-87.7836	179.29	415.326	-0.4043	0.40234	0.11572	NaN	NaN	NaN	NaN	NaN	NaN
3.778	-36.498	58.2508	137.5529	0.023438	0.072754	-0.063965	-85.363	112.77	1674.8621	-1.4985	1.106	0.55469	-50.686	167.6094	359.583	-0.34863	0.36523	0.11328	NaN	NaN	NaN	NaN	NaN	NaN
3.78	-48.5455	48.3729	112.189	0.031494	0.062012	-0.069824	-98.245	72.384	1650.448	-1.4702	1.0962	0.54297	-23.514	155.969	326.578	-0.31446	0.32911	0.11255	NaN	NaN	NaN	NaN	NaN	NaN
3.782	-44.2984	42.3145	93.256	0.038086	0.054688	-0.073242	-35.763	82.376	1651.146	-1.4316	1.0752	0.52393	-23.196	163.6204	314.6408	-0.27832	0.29639	0.11963	NaN	NaN	NaN	NaN	NaN	NaN
3.784	-23.891	50.37666	74.438	0.049805	0.037598	-0.073242	-64.9895	83.133	1608.0505	-1.3894	1.0667	0.50415	-38.661	144.7944	275.6092	-0.24072	0.25439	0.12451	NaN	NaN	NaN	NaN	NaN	NaN
3.786	-17.835	37.6208	77.4918	0.054687	0.03418	-0.07959	-79.655	73.472	1602.677	-1.3457	1.0527	0.48877	-27.62	145.255	245.629	-0.21826	0.23486	0.12598	NaN	NaN	NaN	NaN	NaN	NaN
3.788	-17.846	41.5946	87.137	0.055664	0.026367	-0.08252	-48.392	145.7807	1596.802	-1.2847	1.0239	0.45801	-29.341	120.801	210.909	-0.16748	0.20117	0.12549	NaN	NaN	NaN	NaN	NaN	NaN
3.79	-9.096	36.1461	78.734	0.058594	0.014648	-0.083496	-88.7176	164.3033	1541.5365	-1.2578	1.0137	0.4458	12.936	124.7214	215.937	-0.12768	0.1748	0.12891	NaN	NaN	NaN	NaN	NaN	NaN
3.792	-17.572	51.1116	68.7534	0.060547	0.012695	-0.086914	-64.921	183.312	1514.3938	-1.2046	0.98486	0.41748	35.739	129.2022	194.964	-0.092773	0.15479	0.12988	NaN	NaN	NaN	NaN	NaN	NaN
3.794	-20.889	42.0895	59.614	0.059082	0.0043945	-0.085449	-47.4266	224.391	1460.996	-1.1745	0.96606	0.40503	34.868	130.3604	147.6392	-0.058105	0.12939	0.12402	NaN	NaN	NaN	NaN	NaN	NaN
3.796	-34.432	15.9269	52.6939	0.057129	0.00073241	-0.088135	-59.228	185.85	1429.3946	-1.144	0.9458	0.39063	7.814	107.2104	68.293	-0.041504	0.11816	0.1167	NaN	NaN	NaN	NaN	NaN	NaN
3.798	-5.628	17.4093	34.6307	0.050781	-0.00097656	-0.092773	-1.802	195.105	1430.27	-1.105	0.92041	0.37207	-19.102	85.284	46.112	-0.013184	0.087891	0.11816	NaN	NaN	NaN	NaN	NaN	NaN
3.8	-15.761	30.0014	26.9763	0.048828	-0.0073242	-0.085938	-1.637	191.4647	1382.7833	-1.0798	0.90161	0.35791	-14.892	50.782	26.95	0.010254	0.057617	0.11279	NaN	NaN	NaN	NaN	NaN	NaN
3.802	-15.453	33.814	18.1927	0.044922	-0.0053711	-0.085449	-18.968	166.989	1317.8104	-1.0518	0.88477	0.34424	-32.095	50.542	50.946	0.035156	0.032227	0.10107	NaN	NaN	NaN	NaN	NaN	NaN
3.804	-2.628	34.49	25.2177	0.039551	-0.010742	-0.081055	21.567	214.113	1273.433	-1.0156	0.85938	0.33252	-4.032	66.4912	42.42208	0.066895	-0.0058594	0.10303	NaN	NaN	NaN	NaN	NaN	NaN
3.806	-5.862	21.6247	16.6126	0.029296	-0.015869	-0.081543	-10.217	225.602	1221.487	-1.0015	0.854	0.32666	-51.46963	84.112	45.4814	0.083008	-0.016113	0.095703	NaN	NaN	NaN	NaN	NaN	NaN
3.808	-13.338	25.4908	10.685	0.016602	-0.016113	-0.078613	4.634	226.965	1211.8627	-0.96484	0.82617	0.30664	-43.376	99.882	28.7963	0.10938	-0.040527	0.092773	NaN	NaN	NaN	NaN	NaN	NaN
3.81	1.562	21.9083	19.1792	0.0078125	-0.015137	-0.081055	17.365	254.734	1195.4005	-0.93774	0.80786	0.29028	-60.9766	100.969	43.283	0.12255	-0.057618	0.093505	NaN	NaN	NaN	NaN	NaN	NaN
3.812	4.442	23.003	16.31737	0	-0.015625	-0.073242	-30.3243	219.3295	1171.1808	-0.90625	0.78516	0.27783	-59.78	82.38503	7.516	0.125	-0.071289	0.097656	NaN	NaN	NaN	NaN	NaN	NaN
3.814	-13.392	18.9771	4.6217	-0.0029297	-0.013184	-0.070801	5.454	206.378	1150.637	-0.85693	0.74854	0.26074	-28.821	60.0817	30.005	0.11621	-0.096191	0.09375	NaN	NaN	NaN	NaN	NaN	NaN
3.816	-30.581	12.4677	3.7925	-0.0043946	-0.010254	-0.072998	-30.5575	218.16	1100.6385	-0.83008	0.72949	0.24658	-46.036	42.6152	5.179	0.11328	-0.1084	0.091309	NaN	NaN	NaN	NaN	NaN	NaN
3.818	-39.035	11.758038	4.1555	-0.011719	-0.0058594	-0.078613	-42.4612	198.332	1054.368	-0.76514	0.70752	0.21289	-50.739	19.3296	32.65	0.104	-0.12939	0.088867	NaN	NaN	NaN	NaN	NaN	NaN
3.82	-13.133	16.73801	2.7226	-0.0078125	-0.0029297	-0.076172	0.806000000000001	221.9958	1012.4349	-0.71289	0.67773	0.1958	-77.7583	29.431	17.5444	0.096189	-0.14722	0.094238	NaN	NaN	NaN	NaN	NaN	NaN
3.822	1.455	18.2384	2.86	-0.0058594	-0.0043945	-0.07666	-41.4441	229.865	927.812	-0.66162	0.64111	0.17822	-82.5914	31.84	33.5522	0.077148	-0.16211	0.094727	NaN	NaN	NaN	NaN	NaN	NaN
3.824	-33.8238	21.9069	15.0836	-0.0073242	0.0019531	-0.082031	-14.042	209.464	902.0036	-0.60596	0.61328	0.1377	-69.16	46.1236	27.31422	0.050293	-0.17139	0.1001	NaN	NaN	NaN	NaN	NaN	NaN
3.826	-43.659	11.94841	15.1328	-0.0065918	0.0029296	-0.080323	-4.539	234.2373	858.41	-0.57617	0.59473	0.12207	-74.755	23.3185	29.7793	0.03418	-0.17529	0.10303	NaN	NaN	NaN	NaN	NaN	NaN
3.828	-20.876	2.97611	20.8715	-0.0073242	0.0029297	-0.07959	-35.6287	223.8738	803.6022	-0.50635	0.54541	0.10156	-54.358	30.0334	31.074	0.0073242	-0.17334	0.11914	NaN	NaN	NaN	NaN	NaN	NaN
3.83	-19	12.9938	7.5428	-0.0058594	0.0053711	-0.07959	5.653	213.2646	772.22387	-0.46826	0.5166	0.084961	-68.9617	28.4346	39.758	-0.010254	-0.16797	0.12109	NaN	NaN	NaN	NaN	NaN	NaN
3.832	-41.8048	14.4744	-8.1151	-0.0024414	0.0029297	-0.082031	-30.1383	223.32	699.976	-0.43311	0.49316	0.067871	-22.05	45.2734	34.7721	-0.024902	-0.15625	0.12939	NaN	NaN	NaN	NaN	NaN	NaN
3.834	-26.102	4.738	2.8619	-0.0024414	0.0063477	-0.081543	-45.33304	196.775	662.776	-0.37598	0.45313	0.042969	-37.552	25.6442	48.6905	-0.03418	-0.13574	0.14014	NaN	NaN	NaN	NaN	NaN	NaN
3.836	-14.121	12.6218	4.535	5.204e-15	0.0078123	-0.078369	-14.133	209.6827	637.8751	-0.35205	0.4375	0.032227	-22.554	36.246	21.8972	-0.039551	-0.12842	0.13916	NaN	NaN	NaN	NaN	NaN	NaN
3.838	-32.361	33.6293	1.414	0.0029297	0.010254	-0.08252	-54.7133	236.779	570.317	-0.30176	0.40918	0.010742	-9.497	11.554447	21.176	-0.029785	-0.10547	0.14941	NaN	NaN	NaN	NaN	NaN	NaN
3.84	-17.908	24.027	8.0248	0.01709	0.01123	-0.083496	-23.498	220.947	553.435	-0.26294	0.38623	-0.0019531	-3.187	40.0901	19.7517	-0.017822	-0.091064	0.14746	NaN	NaN	NaN	NaN	NaN	NaN
3.842	-5.751	5.7706	30.986	0.018066	0.0092773	-0.082031	-18.276	239.711	518.0742	-0.23145	0.36475	-0.01709	0.00500000000000256	33.8934	35.505	0.00097656	-0.081055	0.14795	NaN	NaN	NaN	NaN	NaN	NaN
3.844	-1.992	5.337248	26.5952	0.029785	0.010254	-0.080078	-47.0743	211.399	471.984	-0.18994	0.3374	-0.029297	14.161	39.996	36.6823	0.04248	-0.069336	0.1377	NaN	NaN	NaN	NaN	NaN	NaN
3.846	-23.3651	13.05358	18.4718	0.040039	0.01001	-0.07666	12.702	164.954	437.0361	-0.17529	0.3208	-0.030762	-22.712	2.162	30.096	0.060547	-0.072754	0.12695	NaN	NaN	NaN	NaN	NaN	NaN
3.848	-8.585	17.0163	1.1361	0.049316	0.0092773	-0.075195	-23.588	165.094	381.743	-0.14063	0.29883	-0.044434	-14.833	-6.247	3.30276	0.10352	-0.074707	0.11768	NaN	NaN	NaN	NaN	NaN	NaN
3.85	-6.033	7.1597	6.6163	0.05957	0.01416	-0.071289	-16.818	116.516	364.0036	-0.11279	0.27514	-0.049561	-33.203	-29.48	-13.057	0.13525	-0.085449	0.10791	NaN	NaN	NaN	NaN	NaN	NaN
3.852	0.329999999999998	6.816	2.1534	0.061523	0.018066	-0.071289	16.054	93.648	365.1299	-0.089355	0.25586	-0.055664	-6.659	1.519	-6.4474	0.15039	-0.089355	0.099121	NaN	NaN	NaN	NaN	NaN	NaN
3.854	-24.7622	3.863	-5.5845	0.0625	0.020996	-0.068848	-36.4079	110.599	318.5811	-0.0625	0.22412	-0.058594	-6.478	-3.8228	12.6757	0.18604	-0.088867	0.10254	NaN	NaN	NaN	NaN	NaN	NaN
3.856	-5.881	-1.021	-1.5287	0.060791	0.023926	-0.063233	-7.749	89.78	301.757	-0.047852	0.21094	-0.063477	-12.017	29.376	25.382	0.21411	-0.086182	0.096435	NaN	NaN	NaN	NaN	NaN	NaN
3.858	13.243	9.2998	11.067	0.055664	0.029297	-0.056641	7.89	135.296	274.836	-0.02832	0.19141	-0.072754	-24.545	6.251	18.5795	0.23291	-0.080566	0.092285	NaN	NaN	NaN	NaN	NaN	NaN
3.86	4.506	12.62532	16.357	0.047363	0.034668	-0.046387	-55.5931	151.504	253.031	-0.016357	0.17187	-0.067871	-34.251	23.632	17.1929	0.26074	-0.061523	0.089844	NaN	NaN	NaN	NaN	NaN	NaN
3.862	-7.927	15.8388	16.3807	0.045898	0.040527	-0.046875	-9.726	127.43	252.76	-0.0097656	0.15479	-0.072266	-44.563	7.824	19.3547	0.27783	-0.059082	0.091309	NaN	NaN	NaN	NaN	NaN	NaN
3.864	2.525	14.1387	14.14754	0.043457	0.04834	-0.044434	-47.319	140.029	208.9451	-0.0043945	0.14404	-0.066895	-50.103	40.478	16.133	0.30762	-0.045898	0.083008	NaN	NaN	NaN	NaN	NaN	NaN
3.866	-4.704	14.5914	9.78689	0.042969	0.056153	-0.042724	-37.014	75.628	186.716	-0.0068359	0.13525	-0.064941	-45.963	31.435	-11.58	0.33765	-0.042725	0.076904	NaN	NaN	NaN	NaN	NaN	NaN
3.868	-26.2437	13.8239	-1.4222	0.040039	0.060059	-0.044922	-2.934	44.98	164.7898	-0.0063477	0.11865	-0.060547	-65.529	60.3546	-11.359	0.36377	-0.041992	0.070801	NaN	NaN	NaN	NaN	NaN	NaN
3.87	-37.653	5.2861	10.1783	0.041992	0.062012	-0.044434	-39.4501	74.7	135.0775	-0.0075683	0.10938	-0.059327	-82.03726	34.206	-30.8071	0.37695	-0.054199	0.055664	NaN	NaN	NaN	NaN	NaN	NaN
3.872	-26.483	0.350899999999999	-3.9553	0.041992	0.064941	-0.043945	-17.881	65.62	127.549	-0.0097656	0.099609	-0.052734	-80.2735	47.324	-4.059	0.37939	-0.0625	0.044922	NaN	NaN	NaN	NaN	NaN	NaN
3.874	-23.172	8.1696	-8.4858	0.041504	0.062012	-0.045898	-29.994	111.174	76.0481	-0.011719	0.09375	-0.039063	-67.7026	33.6696	13.0361	0.37061	-0.081543	0.035156	NaN	NaN	NaN	NaN	NaN	NaN
3.876	-8.098	-3.93329	16.282	0.033935	0.061768	-0.049073	-64.7581	117.928	51.3096	-0.010254	0.084961	-0.037109	-53.7097	64.856	32.0602	0.36401	-0.093262	0.026856	NaN	NaN	NaN	NaN	NaN	NaN
3.878	-41.4704	-31.1807	52.813	0.021484	0.0625	-0.053711	-28.692	60.4111	60.558	-0.016602	0.072266	-0.03418	-57.1892	54.2529	28.3549	0.35059	-0.098633	0.02002	NaN	NaN	NaN	NaN	NaN	NaN
3.88	-39.304	-39.1658	75.5048	-0.01123	0.075195	-0.051758	-53.2048	69.9897	47.0225	-0.014893	0.059815	-0.029541	-53.5407	65.156	24.6667	0.33203	-0.099121	0.019531	NaN	NaN	NaN	NaN	NaN	NaN
3.882	-3.442	-55.6448	84.887	-0.038086	0.081055	-0.047852	-54.753	19.319	65.8739	-0.012207	0.052246	-0.029297	-56.423	29.163	4.052	0.32178	-0.089355	0.01709	NaN	NaN	NaN	NaN	NaN	NaN
3.884	-21.328	-57.3331	104.2743	-0.10205	0.096191	-0.036133	-30.19	-13.1307	69.8828	-0.0048828	0.036621	-0.023926	-54.903	31.6811	10.775	0.29834	-0.062988	0.020996	NaN	NaN	NaN	NaN	NaN	NaN
3.886	-40.4282	-73.53542	137.651	-0.14697	0.11084	-0.017578	-76.222	23.348	37.044	0.0014648	0.031738	-0.033203	-19.44	23.0415	16.1578	0.27612	-0.040528	0.029297	NaN	NaN	NaN	NaN	NaN	NaN
3.888	-21.2656	-76.55176	170.501	-0.19238	0.12793	-0.015137	-54.664	-17.085	44.8645	0.0097656	0.028809	-0.029785	-35.199	37.556	28.4871	0.26221	-0.016113	0.03418	NaN	NaN	NaN	NaN	NaN	NaN
3.89	-1.762	-49.1847	200.27	-0.25195	0.14746	-0.0014648	-45.235	24.1689	5.422	0.013916	0.019531	-0.029541	-8.554	46.48	27.0437	0.24707	0.016113	0.044922	NaN	NaN	NaN	NaN	NaN	NaN
3.892	-36.7924	-6.1693	263.395	-0.28125	0.16016	-0.00048828	-50.021	44.6313	-8.2538	0.012695	0.016113	-0.027832	-20.52	49.0823	31.4941	0.24414	0.027832	0.049805	NaN	NaN	NaN	NaN	NaN	NaN
3.894	-3.347	22.1947	351.209	-0.33789	0.18701	0.0024414	-2.599	7.0546	4.7592	0.016602	0.0097656	-0.02832	-20.399	36.91	34.772	0.2417	0.043945	0.055176	NaN	NaN	NaN	NaN	NaN	NaN
3.896	-12.794	40.375	442.8798	-0.40258	0.20996	0.0048828	-50.908	44.359	9.4499	0.019531	-0.00048828	-0.021973	-37.557	24.9615	53.456	0.23755	0.052002	0.0625	NaN	NaN	NaN	NaN	NaN	NaN
3.898	-32.232	59.287	522.1063	-0.47852	0.2373	0.0029297	-32.955	1.783	31.1033	0.029785	-0.0092773	-0.021484	2.399	12.7026	49.144	0.22998	0.056641	0.069824	NaN	NaN	NaN	NaN	NaN	NaN
3.9	-29.724	74.7135	630.38617	-0.59814	0.28027	0.0097656	14.316	-27.1183	19.978	0.037353	-0.020997	-0.023193	-12.31	9.084382	52.0757	0.21143	0.05957	0.077637	NaN	NaN	NaN	NaN	NaN	NaN
3.902	2.806	85.196	748.6539	-0.67188	0.31055	0.016602	-27.5782	12.284	-7.525	0.04248	-0.027832	-0.027344	5.245	18.5403	24.6292	0.20313	0.064941	0.083496	NaN	NaN	NaN	NaN	NaN	NaN
3.904	-15.574	99.353	861.1203	-0.83154	0.38135	0.04541	3.87	-20.360353	9.8943	0.055664	-0.033691	-0.029785	-14.951	13.0149	23.0175	0.18652	0.068359	0.095703	NaN	NaN	NaN	NaN	NaN	NaN
3.906	-22.493	75.262	937.225	-0.97927	0.43921	0.077881	-12.116	33.7918	0.158000000000001	0.057129	-0.037598	-0.027344	-1.515	24.121	8.06342	0.17089	0.076661	0.11206	NaN	NaN	NaN	NaN	NaN	NaN
3.908	-18.317	55.4308	972.164	-1.1304	0.49854	0.11279	-36.8553	69.018	5.7257	0.0625	-0.040039	-0.035645	-20.158	8.1166	15.8465	0.15381	0.083984	0.12598	NaN	NaN	NaN	NaN	NaN	NaN
3.91	-49.1643	28.0965	1013.737	-1.3237	0.5835	0.16797	8.173	38.7105	11.02497	0.069336	-0.047607	-0.034668	-23.905	21.022	13.734	0.11914	0.092285	0.1416	NaN	NaN	NaN	NaN	NaN	NaN
3.912	-43.2535	17.6733	1040.421	-1.4038	0.61963	0.19385	-40.3365	72.954	-4.88152	0.074219	-0.046387	-0.032227	-47.8575	-3.0776	35.1443	0.099609	0.092773	0.15039	NaN	NaN	NaN	NaN	NaN	NaN
3.914	-45.9791	-6.41033	1053.8784	-1.5171	0.68457	0.23828	-29.039	21.0357	18.1459	0.083496	-0.048828	-0.03418	-28.232	11.974	22.29	0.074707	0.095215	0.16211	NaN	NaN	NaN	NaN	NaN	NaN
3.916	-68.8983	-32.771	1060.477	-1.5594	0.71606	0.2605	8.117	-10.0694	20.308	0.081543	-0.051758	-0.031738	-56.1163	-2.45542	46.636	0.053223	0.096436	0.1709	NaN	NaN	NaN	NaN	NaN	NaN
3.918	-80.73268	-38.9102	1035.423	-1.5605	0.73633	0.27246	-34.478	28.995	0.5	0.083496	-0.04834	-0.029785	-56.264	24.078	20.695	0.037109	0.10352	0.17969	NaN	NaN	NaN	NaN	NaN	NaN
3.92	-71.1317	-46.934	1016.452	-1.5171	0.73877	0.27441	-8.038	-6.53	24.07	0.083008	-0.05249	-0.027099	-74.2249	-4.4651	17.584	0.013184	0.11328	0.18896	NaN	NaN	NaN	NaN	NaN	NaN
3.922	-40.943	-46.5684	997.253	-1.4619	0.73437	0.26806	-11.456	9.1443	15.5897	0.083496	-0.054199	-0.026855	-39.513	-20.8981	35.019	0.0024414	0.11523	0.19141	NaN	NaN	NaN	NaN	NaN	NaN
3.924	-43.752	-62.003	1003.678	-1.4023	0.72852	0.26025	-33.5795	29.9542	19.1899	0.074707	-0.054688	-0.020508	-87.5633	-52.1235	49.721	-0.01709	0.13672	0.20166	NaN	NaN	NaN	NaN	NaN	NaN
3.926	-25.524	-61.208	1004.293	-1.334	0.74219	0.24561	-10.211	5.5285	28.3413	0.071777	-0.057617	-0.019043	-44.174	-9.055	75.865	-0.023437	0.1521	0.20922	NaN	NaN	NaN	NaN	NaN	NaN
3.928	-16.45	-49.3522	996.0907	-1.3086	0.75391	0.22119	-50.6208	61.428	-8.8481	0.063965	-0.051758	-0.017578	-35.098	-65.7918	129.134	-0.032227	0.17236	0.21826	NaN	NaN	NaN	NaN	NaN	NaN
3.93	-14.513	-45.177	982.185	-1.2271	0.78564	0.16699	-47.8	42.449	20.0717	0.057617	-0.048828	-0.013428	-68.4139	-89.4573	170.203	-0.042969	0.19385	0.2124	NaN	NaN	NaN	NaN	NaN	NaN
3.932	-19.2936	-57.525	980.812	-1.1416	0.80664	0.14453	-45.215	20.9557	23.8703	0.055176	-0.047852	-0.022461	-99.6058	-145.9042	229.995	-0.055664	0.20361	0.20996	NaN	NaN	NaN	NaN	NaN	NaN
3.934	-49.783	-84.508	1001.478	-1.0625	0.83398	0.11475	-72.36	45.2908	4.039	0.049316	-0.042969	-0.01709	-54.158	-120.5301	291.737	-0.078125	0.23486	0.2124	NaN	NaN	NaN	NaN	NaN	NaN
3.936	-5.74573	-101.04	995.0887	-0.99756	0.87939	0.082031	-22.832	-8.338	21.49569	0.055176	-0.041992	-0.016113	-62.192	-100.626	437.375	-0.11744	0.25709	0.21411	NaN	NaN	NaN	NaN	NaN	NaN
3.938	-4.3713	-113.786	1025.83837	-0.97314	0.89697	0.075195	-38.8302	4.205	6.6076	0.060059	-0.032715	-0.02002	-24.626	-20.622	615.322	-0.16455	0.28271	0.21924	NaN	NaN	NaN	NaN	NaN	NaN
3.94	-5.23	-142.3711	1058.8308	-0.94385	0.93018	0.055176	-53.211	39.56073	15.4892	0.061523	-0.029785	-0.022461	-16.557	-31.964	776.2	-0.24121	0.31543	0.21924	NaN	NaN	NaN	NaN	NaN	NaN
3.942	27.1541	-191.223	1107.3765	-0.92749	0.95483	0.041748	-11.302	25.2568	22.563	0.065918	-0.030762	-0.026855	18.7458	21.94638	911.142	-0.28271	0.33643	0.229	NaN	NaN	NaN	NaN	NaN	NaN
3.944	83.601	-232.746	1139.3244	-0.91943	0.98389	0.028809	-48.91	82.722	-7.03468	0.068359	-0.027344	-0.036621	52.9758	13.7675	1061.292	-0.38281	0.38818	0.23291	NaN	NaN	NaN	NaN	NaN	NaN
3.946	97.634	-235.719	1183.4611	-0.92578	1.0273	0.0068359	-34.557	58.327	9.70414	0.072998	-0.023682	-0.038331	97.435	64.60162	1194.7462	-0.46729	0.43164	0.23438	NaN	NaN	NaN	NaN	NaN	NaN
3.948	98.53	-238.046	1240.5047	-0.94141	1.0498	0.0058594	-19.965	14.0326	22.9429	0.077637	-0.019043	-0.040527	122.188	64.1244	1342.865	-0.56592	0.48584	0.2373	NaN	NaN	NaN	NaN	NaN	NaN
3.95	120.08	-233.797	1290.2351	-0.99023	1.0938	0.00048828	-55.9909	19.276	28.0133	0.07666	-0.0058594	-0.044922	102.519	84.917	1432.589	-0.72803	0.56104	0.24902	NaN	NaN	NaN	NaN	NaN	NaN
3.952	97.22	-226.1279	1341.541	-1.0408	1.1263	-0.0058593	4.988	-36.5	48.589	0.076172	-0.0019531	-0.053223	87.321	46.302	1426.933	-0.82813	0.60742	0.2749	NaN	NaN	NaN	NaN	NaN	NaN
3.954	54.153	-191.354	1373.633	-1.0977	1.1504	0.00048828	-11.717	-11.1595	29.55741	0.076172	0.0063477	-0.061035	47.3479	27.287	1377.306	-1.0532	0.69971	0.30371	NaN	NaN	NaN	NaN	NaN	NaN
3.956	53.066	-166.904	1407.852	-1.189	1.1685	0.012207	-36.6352	24.589	26.4949	0.074219	0.017578	-0.05957	44.408	-36.7473	1290.108	-1.238	0.77368	0.34253	NaN	NaN	NaN	NaN	NaN	NaN
3.958	47.757	-152.089	1433.2734	-1.2397	1.1724	0.02832	-4.594	-2.00374	33.513	0.077637	0.024414	-0.064941	-28.257	-63.6501	1228.511	-1.4219	0.84961	0.39111	NaN	NaN	NaN	NaN	NaN	NaN
3.96	24.32006	-146.189	1439.323	-1.3418	1.1953	0.049805	-36.606	44.843	-1.8586	0.080566	0.034668	-0.070801	-13.723	-89.631	1159.424	-1.6343	0.94775	0.45996	NaN	NaN	NaN	NaN	NaN	NaN
3.962	6.804	-139.12	1463.61	-1.4102	1.2168	0.062011	-10.831	24.1188	6.5861	0.078613	0.032227	-0.071289	-37.022	-107.8286	1077.6201	-1.7188	0.99609	0.49365	NaN	NaN	NaN	NaN	NaN	NaN
3.964	30.8892	-127.3822	1494.559	-1.4722	1.2388	0.064941	13.761	10.881	6.1248	0.078613	0.031738	-0.081543	-34.968	-142.613	1041.237	-1.8218	1.0747	0.57422	NaN	NaN	NaN	NaN	NaN	NaN
3.966	46.297	-125.36557	1550.226	-1.541	1.2715	0.077637	-36.3288	44.5512	25.2881	0.080078	0.038818	-0.085449	-41.375	-152.983	1070.155	-1.8376	1.1194	0.65649	NaN	NaN	NaN	NaN	NaN	NaN
3.968	60.707	-126.8255	1573.8841	-1.5762	1.2871	0.084473	-6.915	-1.658	49.146	0.08252	0.038574	-0.091797	-44.708	-168.453	1077.7025	-1.8335	1.1616	0.72656	NaN	NaN	NaN	NaN	NaN	NaN
3.97	19.7567	-121.9201	1607.805	-1.6406	1.3281	0.096191	-1.713	3.253	29.3691	0.09375	0.04541	-0.10156	-62.685	-159.3627	1164.479	-1.8145	1.2012	0.73389	NaN	NaN	NaN	NaN	NaN	NaN
3.972	-3.1	-128.4268	1635.722	-1.6765	1.3484	0.10083	-40.1312	20.671	19.3053	0.098145	0.050293	-0.104	-93.519	-134.125	1198.0437	-1.7651	1.2134	0.7041	NaN	NaN	NaN	NaN	NaN	NaN
3.974	-17.2901	-131.839	1648.236	-1.709	1.3682	0.10986	-8.289	-12.59087	15.6584	0.10205	0.053223	-0.11426	-110.636	-124.652	1269.407	-1.5137	1.2148	0.64063	NaN	NaN	NaN	NaN	NaN	NaN
3.976	-54.9914	-138.739	1672.175	-1.7461	1.3848	0.11523	-42.7	49.335	-6.4491	0.10767	0.05835	-0.11451	-111.118	-130.419	1314.424	-1.2685	1.1919	0.61719	NaN	NaN	NaN	NaN	NaN	NaN
3.978	-77.422	-158.076	1675.085	-1.7554	1.395	0.12256	-34.187	33.5366	5.69933	0.10986	0.062988	-0.11621	-155.9186	-161.391	1358.8925	-1.0601	1.1567	0.58203	NaN	NaN	NaN	NaN	NaN	NaN
3.98	-72.924	-190.631	1679.9176	-1.7813	1.4121	0.12793	-27.755	17.8321	14.207	0.10938	0.069336	-0.12061	-158.186	-211.9839	1384.132	-0.90771	1.1099	0.54736	NaN	NaN	NaN	NaN	NaN	NaN
3.982	-68.196	-189.061	1682.3565	-1.7986	1.4173	0.13599	-61.8892	32.8337	-4.475	0.10352	0.067383	-0.12354	-199.015	-292.779	1425.5726	-0.86963	1.0972	0.53223	NaN	NaN	NaN	NaN	NaN	NaN
3.984	-66.189	-165.2063	1687.8677	-1.8145	1.4238	0.14307	-20.717	-33.529	23.219	0.09375	0.070801	-0.12744	-202.902	-356.985	1458.20609	-0.83154	1.0981	0.5127	NaN	NaN	NaN	NaN	NaN	NaN
3.986	-27.606	-156.337	1672.5998	-1.8335	1.4282	0.14746	-38.633	-11.4833	13.578	0.089111	0.081787	-0.12744	-194.12	-394.242	1535.655	-0.82934	1.1214	0.50732	NaN	NaN	NaN	NaN	NaN	NaN
3.988	-18.713191	-148.296	1679.6757	-1.8354	1.4341	0.15088	-61.6258	21.407	11.767	0.084961	0.086914	-0.13232	-140.3235	-370.47	1587.991	-0.85742	1.1563	0.50342	NaN	NaN	NaN	NaN	NaN	NaN
3.99	8.436	-144.894	1681.6639	-1.8418	1.4316	0.15527	-23.833	0.259	19.6537	0.078613	0.10303	-0.13135	-108.54	-353.238	1638.092	-0.93359	1.2305	0.4873	NaN	NaN	NaN	NaN	NaN	NaN
3.992	24.0847	-116.079	1681.3705	-1.8347	1.426	0.15893	-52.83977	55.716	-4.544	0.074219	0.10791	-0.13379	-98.827	-314.651	1692.178	-1.0056	1.3128	0.48511	NaN	NaN	NaN	NaN	NaN	NaN
3.994	44.0124	-103.191	1692.832	-1.8281	1.418	0.15967	-40.096	29.0295	8.939	0.0625	0.12256	-0.1333	-103.291	-272.274	1778.792	-1.0889	1.4023	0.4834	NaN	NaN	NaN	NaN	NaN	NaN
3.996	40.574	-79.9451	1688.2004	-1.8184	1.3984	0.15771	-22.746	13.7112	3.37507	0.052978	0.13135	-0.13697	-109.82	-203.568	1853.935	-1.2124	1.5278	0.49756	NaN	NaN	NaN	NaN	NaN	NaN
[truncated: 28,002 more rows]
