# Supplementary material for: Reliability and Validity of Running Cadence and Stance Time Derived from Instrumented Wireless Earbuds
Source: Sensors (Basel). 2021 Nov 30;21(23):7995. doi: 10.3390/s21237995 (PMC8659722; doi:10.3390/s21237995)
Supplement: Supplementary file 1 [file sensors-21-07995-s001.zip › Data_P07_speeds_2.csv]

time	S7kmh_force_plate_1	S7kmh_force_plate_2	S7kmh_force_plate_3	S7kmh_earbuds_1	S7kmh_earbuds_2	S7kmh_earbuds_3	S10kmh_force_plate_1	S10kmh_force_plate_2	S10kmh_force_plate_3	S10kmh_earbuds_1	S10kmh_earbuds_2	S10kmh_earbuds_3	S13kmh_force_plate_1	S13kmh_force_plate_2	S13kmh_force_plate_3	S13kmh_earbuds_1	S13kmh_earbuds_2	S13kmh_earbuds_3	max_force_plate_1	max_force_plate_2	max_force_plate_3	max_earbuds_1	max_earbuds_2	max_earbuds_3
0	-20.469	-84.9922	1119.552	-1.2651	0.55908	0.23926	-66.858	148.037	93.358	-0.13803	0.17846	0.16466	-115.681	282.2936	643.725	-0.53613	0.59057	0.13257	NaN	NaN	NaN	NaN	NaN	NaN
0.002	-32.245	-131.762	1132.357	-1.0783	0.51733	0.19092	-68.86	84.261	92.646	-0.11347	0.16427	0.16005	-127.5716	217.1856	602.7733	-0.47998	0.55664	0.1416	NaN	NaN	NaN	NaN	NaN	NaN
0.004	-42.84	-181.071	1185.1456	-0.92383	0.48047	0.15967	-37.2	63.702	77.857	-0.084473	0.15576	0.15234	-96.351	224.315	554.886724	-0.41357	0.50586	0.13281	NaN	NaN	NaN	NaN	NaN	NaN
0.006	-20.823	-195.376	1215.949	-0.78271	0.47217	0.14014	-78.9792	97.663	64.095	-0.058428	0.14505	0.1377	-81.568	163.5656	497.5946	-0.37842	0.48828	0.13818	NaN	NaN	NaN	NaN	NaN	NaN
0.008	-23.592	-198.969	1234.9269	-0.73975	0.47705	0.14551	-35.353	47.092	66.6451	-0.030114	0.12737	0.13505	-91.3	177.556	430.0739	-0.31152	0.43896	0.13477	NaN	NaN	NaN	NaN	NaN	NaN
0.01	-3.536	-178.255	1251.898	-0.70459	0.50098	0.19238	-53.735	69.964	54.5023	-0.004952	0.11326	0.13107	-117.137	127.829	367.2747	-0.26587	0.40625	0.1355	NaN	NaN	NaN	NaN	NaN	NaN
0.012	-16.491	-172.66266	1292.129	-0.73364	0.52368	0.23608	-77.616	67.8213	41.55467	0.018841	0.10407	0.12556	-95.303	168.828	319.319	-0.22021	0.37695	0.13281	NaN	NaN	NaN	NaN	NaN	NaN
0.014	-33.828	-161.283	1354.6207	-0.79102	0.54785	0.29346	-23.792	18.5444	46.9264	0.035645	0.087891	0.12988	-100.57	154.656	295.9802	-0.16797	0.33398	0.13184	NaN	NaN	NaN	NaN	NaN	NaN
0.016	-68.652	-135.508	1377.9634	-0.89893	0.57275	0.36133	-56.547	63.655	29.726	0.04857	0.070648	0.12222	-75.998	193.863	267.291	-0.13867	0.3125	0.12744	NaN	NaN	NaN	NaN	NaN	NaN
0.018	-116.162	-151.23	1402.5117	-0.96289	0.58105	0.39551	-42.243	16.187	45.29272	0.056991	0.05247	0.11707	-72.771	167.552	256.567	-0.094238	0.27588	0.12207	NaN	NaN	NaN	NaN	NaN	NaN
0.02	-102.006	-139.864	1418.6108	-1.0762	0.60547	0.44238	-10.261	4.7422	42.2416	0.071042	0.039228	0.11278	-43.395	154.8176	241.721	-0.059327	0.24634	0.12232	NaN	NaN	NaN	NaN	NaN	NaN
0.022	-96.853	-147.0916	1432.207	-1.147	0.63526	0.46875	-36.458	46.5426	26.093	0.086552	0.021757	0.10761	-71.331	116.259	199.13	-0.030762	0.21436	0.12354	NaN	NaN	NaN	NaN	NaN	NaN
0.024	-74.569	-145.2291	1476.211	-1.2144	0.67432	0.49414	2.498	4.9158	20.5334	0.10547	0.013672	0.10059	-56.724	129.22638	188.281	-0.0019531	0.17383	0.11621	NaN	NaN	NaN	NaN	NaN	NaN
0.026	-89.127	-149.9721	1534.99	-1.3262	0.72949	0.51904	-19.067	56.988	-3.3505	0.11523	0.0058661	0.093747	-51.552	131.111	167.342	0.0078125	0.16016	0.11768	NaN	NaN	NaN	NaN	NaN	NaN
0.028	-54.734	-136.5809	1596.783	-1.3906	0.76172	0.53174	-27.431	69.359	-5.036	0.12362	0.00098077	0.089562	-21.532	116.9875	140.78	0.033203	0.11719	0.11133	NaN	NaN	NaN	NaN	NaN	NaN
0.03	-25.876	-122.846	1640.324	-1.5308	0.82471	0.56641	9.33000000000001	29.677	7.71057	0.13495	-0.0025364	0.083693	1.387	89.444	96.2032	0.040283	0.095703	0.10986	NaN	NaN	NaN	NaN	NaN	NaN
0.032	-37.538	-123.7602	1665.316	-1.6287	0.86939	0.58716	-29.844	88.517	-8.305	0.14511	-0.0084925	0.0793	-1.265	56.328	51.24	0.052246	0.074707	0.10791	NaN	NaN	NaN	NaN	NaN	NaN
0.034	-37.921	-130.048	1709.1597	-1.7266	0.90723	0.61377	-16.932	39.1137	8.6869	0.15283	-0.01709	0.076172	-19.858	37.72	32.165	0.055176	0.044434	0.10449	NaN	NaN	NaN	NaN	NaN	NaN
0.036	-62.428	-137.825	1748.4325	-1.8257	0.97119	0.625	4.029	1.366	19.9908	0.1584	-0.023048	0.07539	-2.125	39.444	38.589	0.052246	0.036133	0.11182	NaN	NaN	NaN	NaN	NaN	NaN
0.038	-85.128	-132.439	1764.202	-1.876	1	0.62305	-38.681	45.8894	30.7479	0.16133	-0.031448	0.068065	-29.369	54.0207	41.028901	0.050293	0.018066	0.11084	NaN	NaN	NaN	NaN	NaN	NaN
0.04	-103.26	-129.741	1783.594	-1.9473	1.0684	0.62354	-8.103	1.7287	43.642	0.16524	-0.036524	0.072757	-6.982	57.99473	40.363144	0.045898	0.0046386	0.11084	NaN	NaN	NaN	NaN	NaN	NaN
0.042	-114.722	-130.29	1810.961	-1.988	1.1292	0.61792	-17.901	39.258	21.4155	0.17139	-0.039063	0.0667	-20.45	70.968	25.3336	0.044922	-0.0048828	0.1084	NaN	NaN	NaN	NaN	NaN	NaN
0.044	-77.827	-123.4189	1827.934	-2.02	1.1782	0.6084	-26.688	50.72357	21.486	0.17529	-0.039063	0.062988	-23.387	65.351	38.4338	0.04248	-0.012207	0.1167	NaN	NaN	NaN	NaN	NaN	NaN
0.046	-69.98	-122.6156	1840.747	-2.0664	1.2324	0.58838	-28.743	3.4006	31.615	0.17607	-0.042285	0.059571	-38.413	91.058	37.39	0.039063	-0.01416	0.11768	NaN	NaN	NaN	NaN	NaN	NaN
0.048	-45.618	-98.0813	1818.563	-2.0879	1.2539	0.57861	-37.556	50.9093	13.5718	0.1833	-0.040723	0.05752	-27.263	81.909	41.475	0.041992	-0.020508	0.11816	NaN	NaN	NaN	NaN	NaN	NaN
0.05	-43.032	-111.309	1826.388	-2.1362	1.2876	0.56543	-34.187	1.272	28.87	0.19072	-0.044628	0.054394	-43.074	84.184	18.3756	0.042969	-0.02417	0.12036	NaN	NaN	NaN	NaN	NaN	NaN
0.052	-15.048	-104.846	1821.957	-2.1726	1.2952	0.56275	-29.418	-13.25428	32.751	0.19834	-0.043848	0.04834	-59.764	48.1785	13.8554	0.038574	-0.029297	0.11816	NaN	NaN	NaN	NaN	NaN	NaN
0.054	-33.219	-98.7347	1834.43867	-2.2065	1.2935	0.56641	-71.355	41.5212	13.6874	0.20557	-0.044922	0.044434	-31.392	43.4757	-1.092	0.03418	-0.034668	0.12158	NaN	NaN	NaN	NaN	NaN	NaN
0.056	-71.82	-75.7146	1833.0254	-2.25	1.2813	0.57861	-43.758	-3.7818	26.5189	0.21319	-0.045606	0.043262	-39.877	13.596	0.414999999999999	0.030762	-0.035645	0.12305	NaN	NaN	NaN	NaN	NaN	NaN
0.058	-83.735	-69.1005	1850.6562	-2.2773	1.2676	0.58447	-53.528	49.835	11.7995	0.2169	-0.05	0.037989	-53.805	33.69	-9.30058	0.030762	-0.047363	0.12598	NaN	NaN	NaN	NaN	NaN	NaN
0.06	-87.347	-61.9443	1857.624	-2.3237	1.2446	0.59277	-67.235	72.1674	16.7915	0.22275	-0.051953	0.037989	-70.398	21.232	16.7177	0.026123	-0.044678	0.12524	NaN	NaN	NaN	NaN	NaN	NaN
0.062	-100.086	-48.722	1848.3415	-2.3452	1.2065	0.60352	-45.817	25.6305	27.889	0.22315	-0.052051	0.02959	-68.674	34.5912	30.0398	0.022461	-0.045898	0.12793	NaN	NaN	NaN	NaN	NaN	NaN
0.064	-114.85	-40.425	1836.0066	-2.3433	1.187	0.60156	-69.614	66.788	8.405	0.23389	-0.053711	0.024902	-98.2625	16.0566	55.338	0.024902	-0.04541	0.1377	NaN	NaN	NaN	NaN	NaN	NaN
0.066	-94.829	-41.0498	1840.2782	-2.3379	1.1484	0.61768	-50.538	36.703	7.8943	0.24072	-0.051856	0.020117	-61.967	44.2805	51.682	0.023438	-0.041992	0.1416	NaN	NaN	NaN	NaN	NaN	NaN
0.068	-76.577	-39.274	1856.595	-2.3308	1.1184	0.62598	-18.468	15.1336	16.6256	0.24151	-0.052051	0.0125	-47.882	21.7475	65.057	0.020996	-0.039063	0.14697	NaN	NaN	NaN	NaN	NaN	NaN
0.07	-70.339	-47.17	1848.599	-2.3262	1.0918	0.6333	-46.665	48.4405	7.405	0.23526	-0.052051	0.0054688	-55.39	50.0004	36.7833	0.021729	-0.03418	0.15112	NaN	NaN	NaN	NaN	NaN	NaN
0.072	-71.84	-53.899	1849.138	-2.3042	1.0513	0.63184	-8.43300000000001	-19.5585	17.41777	0.22618	-0.05	0.00019532	-75.484	32.6124	44.8061	0.029297	-0.03125	0.15479	NaN	NaN	NaN	NaN	NaN	NaN
0.074	-63.816	-61.757	1851.67408	-2.2983	1.0278	0.63281	-14.306	6.7162	8.665	0.21875	-0.045898	0.00097656	-48.186	51.4862	18.181	0.041504	-0.030273	0.16064	NaN	NaN	NaN	NaN	NaN	NaN
0.076	-66.91	-53.651	1858.9427	-2.2676	0.99414	0.6333	-45.829	34.0351	1.977	0.21094	-0.043066	-0.0021485	-39.271	15.7342	20.008	0.049316	-0.028809	0.15967	NaN	NaN	NaN	NaN	NaN	NaN
0.078	-106.887	-32.5825	1847.5724	-2.2485	0.96777	0.63697	-15.108	-0.7462	22.38	0.20576	-0.032617	-0.00068355	-4.116	32.5488	24.7303	0.064941	-0.02832	0.1626	NaN	NaN	NaN	NaN	NaN	NaN
0.08	-124.423	-12.50778	1832.7478	-2.2422	0.94531	0.63721	-38.614	62.813	18.515	0.19951	-0.02207	-0.0010742	-21.354	-2.1369	20.8963	0.08081	-0.030762	0.15527	NaN	NaN	NaN	NaN	NaN	NaN
0.082	-104.535	-1.322	1822.128	-2.2305	0.92969	0.63672	-15.654	26.7537	22.3314	0.18945	-0.0091797	-0.0018555	-12.149	13.699	7.3899	0.10205	-0.030762	0.14697	NaN	NaN	NaN	NaN	NaN	NaN
0.084	-94.541	15.112	1804.0657	-2.2222	0.91846	0.64209	7.138	3.3404	20.0306	0.18408	0.0048828	-0.00097656	-40.926	8.3071	4.5433	0.12891	-0.039551	0.1416	NaN	NaN	NaN	NaN	NaN	NaN
0.086	-95.14	26.038	1781.388	-2.2026	0.91455	0.63867	-28.799	53.1265	7.554	0.17266	0.018554	0.00019531	-20.798	30.2285	-15.8757	0.13818	-0.037598	0.13818	NaN	NaN	NaN	NaN	NaN	NaN
0.088	-101.506	27.2271	1756.719	-2.1811	0.89844	0.64306	0.981000000000002	1.7479	27.9159	0.16973	0.028515	0.0026367	-24.075	17.28007	30.4312	0.16504	-0.052734	0.13086	NaN	NaN	NaN	NaN	NaN	NaN
0.09	-70.8	7.7675	1761.886	-2.1543	0.88672	0.64209	-6.108	43.266	15.297	0.16817	0.040234	0.0061524	-5.375	16.6157	32.7461	0.18115	-0.064453	0.12402	NaN	NaN	NaN	NaN	NaN	NaN
0.092	-89.73	6.9348	1750.18433	-2.1245	0.87158	0.6377	-23.027	53.8736	14.6078	0.16953	0.051074	0.0066406	-14.247	-2.637	38.07528	0.19824	-0.077148	0.11426	NaN	NaN	NaN	NaN	NaN	NaN
0.094	-90.252	5.912	1731.091	-2.1055	0.86328	0.63916	-10.42	18.51	28.1444	0.16748	0.0625	0.0092773	-7.574	18.6251	26.3921	0.21875	-0.093262	0.097168	NaN	NaN	NaN	NaN	NaN	NaN
0.096	-72.73	16.367	1720.914	-2.0742	0.85352	0.63232	-24.07	74.271	-3.066	0.16338	0.076074	0.017871	-23.13	16.1326	15.1877	0.22705	-0.098633	0.091309	NaN	NaN	NaN	NaN	NaN	NaN
0.098	-67.568	17.534	1704.1328	-2.0483	0.84082	0.63452	-30.032	37.397	1.8381	0.15586	0.089942	0.022949	-29.676	28.8651	8.8132	0.23486	-0.10889	0.078125	NaN	NaN	NaN	NaN	NaN	NaN
0.1	-74.811	24.7418	1704.97	-2.0254	0.83594	0.6333	-41.898	26.1755	17.5737	0.14961	0.10635	0.02998	-41.302	25.2536	4.8244	0.23584	-0.1189	0.07373	NaN	NaN	NaN	NaN	NaN	NaN
0.102	-94.368	17.7941	1685.2535	-1.998	0.82422	0.6333	-66.581	55.749	21.6597	0.14424	0.12187	0.040528	-15.341	21.393	-16.3824	0.23682	-0.12256	0.066895	NaN	NaN	NaN	NaN	NaN	NaN
0.104	-74.551	15.7855	1676.3202	-1.9746	0.82422	0.62646	-35.926	-0.651	29.0613	0.13477	0.1333	0.049805	-41.496	26.2329	-18.0897	0.23438	-0.12891	0.062988	NaN	NaN	NaN	NaN	NaN	NaN
0.106	-64.793	34.1995	1657.072	-1.9448	0.82275	0.625	-45.995	16.9044	32.3521	0.1331	0.1498	0.060059	-42.8	36.258	-14.669	0.2334	-0.12598	0.054688	NaN	NaN	NaN	NaN	NaN	NaN
0.108	-70.082	67.14	1621.586	-1.9165	0.81494	0.62451	-67.597	27.9396	16.8471	0.13682	0.1666	0.07002	-78.977	44.5136	10.3181	0.23291	-0.12305	0.046387	NaN	NaN	NaN	NaN	NaN	NaN
0.11	-99.335	91.96	1590.851	-1.8872	0.80713	0.61035	-36.423	-8.2359	32.106	0.14267	0.18027	0.073926	-54.265	62.2529	13.0555	0.23291	-0.12012	0.041993	NaN	NaN	NaN	NaN	NaN	NaN
0.112	-80.024	103.61	1572.76222	-1.8472	0.80127	0.60938	-65.235	63.933	15.2208	0.15244	0.18974	0.07793	-69.465	68.15	12.62166	0.23193	-0.11621	0.043945	NaN	NaN	NaN	NaN	NaN	NaN
0.114	-69.63	103.49142	1565.3438	-1.8257	0.79736	0.60156	-53.997	41.8371	17.0491	0.16113	0.19629	0.072266	-53.472	66.886	19.95158	0.2251	-0.10693	0.041016	NaN	NaN	NaN	NaN	NaN	NaN
0.116	-62.585	107.621	1537.184	-1.7827	0.78955	0.5874	-36.94	26.582	22.6744	0.17188	0.20654	0.075195	-69.015	44.874	19.2011	0.22363	-0.097168	0.041504	NaN	NaN	NaN	NaN	NaN	NaN
0.118	-68.641	101.798	1523.1838	-1.7478	0.77906	0.57788	-52.743	48.9998	-6.033	0.17735	0.2125	0.078711	-65.843	34.0344	28.744	0.21777	-0.080078	0.043945	NaN	NaN	NaN	NaN	NaN	NaN
0.12	-36.141	113.949	1482.4449	-1.7163	0.76514	0.56982	-36.3	-4.254	20.9591	0.17695	0.21367	0.083398	-68.955	50.684	18.97	0.21533	-0.050781	0.041992	NaN	NaN	NaN	NaN	NaN	NaN
0.122	-34.664	134.647	1454.578	-1.6699	0.74805	0.55469	-55.094	37.1875	25.8155	0.16895	0.21846	0.088379	-49.624	44.394	5.823	0.21436	-0.041016	0.043945	NaN	NaN	NaN	NaN	NaN	NaN
0.124	-55.319	142.03	1419.806	-1.6479	0.73682	0.54639	-44.979	62.5963	8.66527	0.15771	0.21875	0.093262	-59.94	40.1391	6.08	0.21094	-0.013672	0.047363	NaN	NaN	NaN	NaN	NaN	NaN
0.126	-73.09	121.594	1413.223	-1.5977	0.72266	0.52881	-24.965	17.0511	28.366	0.1458	0.225	0.096875	-54.519	21.456	29.6416	0.20972	-0.0004883	0.049072	NaN	NaN	NaN	NaN	NaN	NaN
0.128	-56.701	109.305	1399.73447	-1.5552	0.70654	0.52344	-39.472	69.82	15.82825	0.13487	0.23145	0.099999	-32.35	32.1721	37.5137	0.20898	0.013672	0.047363	NaN	NaN	NaN	NaN	NaN	NaN
0.13	-63.68	106.084	1385.7945	-1.5132	0.68457	0.50977	-24.075	21.7549	51.1097	0.12315	0.23301	0.10586	-26.095	36.4604	61.831	0.20703	0.026367	0.054688	NaN	NaN	NaN	NaN	NaN	NaN
0.132	-52.358	117.726	1363.8868	-1.4551	0.66504	0.49463	14.528	-20.1416	75.8597	0.12178	0.24277	0.11367	-30.52	46.0424	53.122	0.2085	0.027344	0.062012	NaN	NaN	NaN	NaN	NaN	NaN
0.134	-61.099	116.2766	1329.944	-1.4243	0.65479	0.48389	-30.164	0.7233	81.592	0.11719	0.24707	0.11963	-28.355	11.0272	63.772	0.21289	0.039551	0.063965	NaN	NaN	NaN	NaN	NaN	NaN
0.136	-42.747	118.881	1295.2241	-1.3579	0.63037	0.46973	-0.349000000000004	-50.708	115.7059	0.10987	0.25029	0.12237	-39.047	19.9541	50.5505	0.20752	0.042236	0.068603	NaN	NaN	NaN	NaN	NaN	NaN
0.138	-28.517	133.606	1254.5807	-1.3161	0.6062	0.45727	-12.837	-31.9226	140.6668	0.09971	0.25117	0.12393	-26.633	11.7518	36.8837	0.20264	0.046875	0.070313	NaN	NaN	NaN	NaN	NaN	NaN
0.14	-20.627	132.996	1237.6187	-1.2749	0.58789	0.44385	-43.68	-27.0867	185.669	0.089941	0.25429	0.13213	8.433	35.156	12.428	0.18604	0.052246	0.077637	NaN	NaN	NaN	NaN	NaN	NaN
0.142	1.757	132.233	1231.35212	-1.2241	0.55908	0.43262	-15.255	-50.4246	252.624	0.084668	0.25693	0.13262	-11.463	20.4659	44.3253	0.17627	0.055664	0.078125	NaN	NaN	NaN	NaN	NaN	NaN
0.144	10.474	141.5956	1212.5334	-1.2002	0.54688	0.42822	-33.564	35.046	346.717	0.080566	0.25635	0.14014	-19.838	29.7454	8.7068	0.1416	0.0625	0.087891	NaN	NaN	NaN	NaN	NaN	NaN
0.146	-5.36199999999999	157.622	1170.974	-1.1504	0.51563	0.4126	-12.361	66.659239	481.873	0.072656	0.26006	0.13828	-28.939	3.939	8.9378	0.11279	0.067627	0.091797	NaN	NaN	NaN	NaN	NaN	NaN
0.148	-22.698	158.463	1112.597924	-1.1169	0.49731	0.40405	-6.475	87.8419	636.7844	0.06709	0.26397	0.12861	-20.95	30.23437	-1.2772	0.085938	0.075684	0.1001	NaN	NaN	NaN	NaN	NaN	NaN
0.15	-18.625	154.278	1078.71	-1.0898	0.47656	0.39209	0.872	146.5736	756.04	0.047559	0.2753	0.12041	-24.868	15.8165	30.0842	0.046875	0.087402	0.11084	NaN	NaN	NaN	NaN	NaN	NaN
0.152	-16.958	160.7992	1040.7913	-1.0498	0.45117	0.38184	25.8546	119.586	914.8	0.012402	0.29678	0.12129	-4.323	15.9124	36.694	0.029297	0.088867	0.1167	NaN	NaN	NaN	NaN	NaN	NaN
0.154	-29.347	149.122	1000.9694	-1.0347	0.43994	0.37695	51.269	140.5985	1049.966	-0.036133	0.32031	0.12207	-32.973	-8.0355	44.874	-0.0039063	0.11572	0.12793	NaN	NaN	NaN	NaN	NaN	NaN
0.156	-30.279	146.72807	971.7948	-1.001	0.41406	0.36328	72.02	161.1078	1206.411	-0.092092	0.34854	0.13174	-53.503	12.201	-3.7455	-0.020264	0.12915	0.13257	NaN	NaN	NaN	NaN	NaN	NaN
0.158	10.714	151.197	947.6678	-0.97437	0.39624	0.35279	71.11	116.574	1353.9889	-0.15752	0.37422	0.13408	-48.514	6.43288	13.287	-0.03125	0.1499	0.1377	NaN	NaN	NaN	NaN	NaN	NaN
0.16	16.985	178.2543	918.03	-0.94385	0.38232	0.34521	46.067	136.803	1429.5359	-0.22861	0.40664	0.14072	-35.276	3.1565	35.787	-0.034668	0.17676	0.14893	NaN	NaN	NaN	NaN	NaN	NaN
0.162	19.062	170.2728	885.5124	-0.90234	0.36182	0.33105	39.874	45.958	1475.482	-0.30459	0.44717	0.14678	-80.155	-46.655	75.4619	-0.033203	0.19287	0.15088	NaN	NaN	NaN	NaN	NaN	NaN
0.164	-1.163	148.4228	844.5589	-0.87939	0.35498	0.32324	33.3445	-46.032	1471.484	-0.39746	0.49268	0.15283	-44.646	-11.6023	84.554	-0.026855	0.21484	0.15381	NaN	NaN	NaN	NaN	NaN	NaN
0.166	9.262	134.311	799.9121	-0.8335	0.34277	0.30518	-14.218	-79.4793	1431.533	-0.5042	0.54522	0.15059	-46.82	-41.337	138.739	-0.025879	0.23267	0.15649	NaN	NaN	NaN	NaN	NaN	NaN
0.168	2.085	142.80479	772.2195	-0.79712	0.32788	0.29663	31.007	-179.912	1367.919	-0.63623	0.60801	0.15654	-64.718	-44.041	204.47	-0.032227	0.24756	0.15137	NaN	NaN	NaN	NaN	NaN	NaN
0.17	-9.661	132.9911	740.1719	-0.75781	0.31738	0.28271	42.9425	-179.851	1276.635	-0.79482	0.67754	0.16123	-112.853	-80.881	328.67	-0.059082	0.27197	0.13965	NaN	NaN	NaN	NaN	NaN	NaN
0.172	-26.072	120.99676	723.5384	-0.70459	0.29639	0.26416	4.144	-178.362	1185.485	-0.97793	0.75059	0.16865	-70.553	-38.9241	420.97	-0.082031	0.28711	0.13232	NaN	NaN	NaN	NaN	NaN	NaN
0.174	-10.084	128.4376	672.9704	-0.68018	0.2876	0.25439	42.2179	-205.249	1133.515	-1.1787	0.82617	0.19141	-59.216	-7.494	555.406	-0.15234	0.32617	0.12939	NaN	NaN	NaN	NaN	NaN	NaN
0.176	-32.387	134.764	611.828	-0.63086	0.26953	0.23486	27.035	-143.504	1071.246	-1.3901	0.90332	0.2332	-8.023	61.1693	736.842	-0.22583	0.35962	0.13208	NaN	NaN	NaN	NaN	NaN	NaN
0.178	-31.926	145.7819	587.896	-0.58691	0.25122	0.22265	37.813	-141.633	1074.018	-1.5893	0.96924	0.29863	-10.506	55.884	950.838	-0.31201	0.3999	0.13916	NaN	NaN	NaN	NaN	NaN	NaN
0.18	-32.246	140.4759	562.8641	-0.54736	0.23633	0.20654	61.911	-98.365	1093.983	-1.7644	1.0302	0.37832	31.599	81.636	1113.516	-0.44873	0.45947	0.15137	NaN	NaN	NaN	NaN	NaN	NaN
0.182	-9.038	142.679	524.5132	-0.49658	0.2207	0.18799	6.2	-19.616	1119.83	-1.8863	1.059	0.44971	57.9356	68.3753	1284.067	-0.52783	0.50049	0.1582	NaN	NaN	NaN	NaN	NaN	NaN
0.184	-4.342	129.5024	490.2444	-0.47168	0.21289	0.17969	13.061	-34.498	1199.939	-1.9199	1.0566	0.48486	97.5314	69.8914	1419.2044	-0.69385	0.59033	0.1709	NaN	NaN	NaN	NaN	NaN	NaN
0.186	-3.671	109.5284	448.529	-0.41992	0.19922	0.15723	-19.865	-27.96	1228.193	-1.8509	1.0522	0.49785	106.587	35.201	1564.096	-0.83936	0.67041	0.17627	NaN	NaN	NaN	NaN	NaN	NaN
0.188	0.674999999999997	95.046	438.107	-0.38404	0.19189	0.14991	-70.706	-46.6	1264.948	-1.7371	1.0942	0.54112	155.021	4.5831	1664.693	-0.99951	0.76514	0.19141	NaN	NaN	NaN	NaN	NaN	NaN
0.19	-10.862	99.02	401.2404	-0.34766	0.18262	0.13672	-70.962	-123.087	1306.4817	-1.6266	1.1813	0.57041	101.961	-41.363	1681.389	-1.2578	0.90625	0.2334	NaN	NaN	NaN	NaN	NaN	NaN
0.192	-18.953	105.5955	361.4569	-0.2959	0.17188	0.11621	-107.493	-147.085	1311.337	-1.4844	1.2457	0.53955	116.47	-77.343	1621.664	-1.3999	0.98096	0.26318	NaN	NaN	NaN	NaN	NaN	NaN
0.194	-24.813	110.4291	333.061	-0.27246	0.16504	0.10742	-141.479	-238.452	1375.808	-1.2754	1.2207	0.49854	101.25	-154.823	1550.745	-1.7109	1.1289	0.34521	NaN	NaN	NaN	NaN	NaN	NaN
0.196	-32.676	112.883	315.5438	-0.22412	0.15332	0.087891	-105.223	-329.5	1426.6386	-1.0426	1.0961	0.46582	80.641	-214.846	1485.718	-1.9321	1.211	0.41113	NaN	NaN	NaN	NaN	NaN	NaN
0.198	-16.094	103.591	290.0767	-0.1875	0.13745	0.078369	-114.503	-385.298	1475.09	-0.87344	0.96719	0.43955	56.03599	-249.147	1375.995	-2.1128	1.2856	0.48535	NaN	NaN	NaN	NaN	NaN	NaN
0.2	-34.431	77.737	260.7179	-0.15234	0.12598	0.065918	-70.42	-444.7	1560.22	-0.78164	0.87305	0.41885	99.499	-261.44	1276.34	-2.2358	1.3677	0.60156	NaN	NaN	NaN	NaN	NaN	NaN
0.202	-32.826	58.5675	234.0423	-0.11279	0.10645	0.049805	-75.778	-435.42	1602.8457	-0.75498	0.8208	0.40625	78.906	-228.28	1165.96	-2.2593	1.4067	0.64648	NaN	NaN	NaN	NaN	NaN	NaN
0.204	-30.788	53.7179	208.5543	-0.081299	0.098634	0.037842	-107.281	-378.83	1668.688	-0.77734	0.80957	0.40479	52.2646	-216.757	1128.882	-2.2358	1.4556	0.63379	NaN	NaN	NaN	NaN	NaN	NaN
0.206	-5.96	59.604	188.372	-0.05127	0.088379	0.025391	-81.208	-320.729	1743.227	-0.8582	0.83242	0.42354	41.716	-173.946	1101.5372	-2.0476	1.4573	0.57056	NaN	NaN	NaN	NaN	NaN	NaN
0.208	-20.573	53.88	172.015	-0.014648	0.080566	0.013184	-120.977	-205.1409	1775.263	-0.97706	0.88525	0.44531	35.79	-145.6163	1120.2922	-1.7085	1.4126	0.52197	NaN	NaN	NaN	NaN	NaN	NaN
0.21	-8.66100000000001	63.4659	150.537	0.0014648	0.072754	0.01123	-129.904	-136.786	1836.715	-1.1083	0.95947	0.45938	9.15000000000001	-65.604	1121.813	-1.2144	1.2651	0.50391	NaN	NaN	NaN	NaN	NaN	NaN
0.212	-0.896999999999998	67.5257	133.2895	0.036133	0.066406	0	-118.728	-91.916	1875.322	-1.2329	1.0518	0.46973	8.733	-56.56	1192.589	-1.0313	1.1807	0.49854	NaN	NaN	NaN	NaN	NaN	NaN
0.214	-25.559	88.855	123.4943	0.057617	0.058105	-0.01416	-142.4596	-41.236	1866.0064	-1.3335	1.1548	0.48828	-11.005	-70.75	1249.225	-0.81641	1.0449	0.47217	NaN	NaN	NaN	NaN	NaN	NaN
0.216	-30.945	72.748	112.6245	0.075195	0.049316	-0.023926	-108.2885	-49.658	1860.3967	-1.4176	1.2457	0.4917	-79.637	-151.25	1293.6131	-0.70386	0.99731	0.44946	NaN	NaN	NaN	NaN	NaN	NaN
0.218	-44.833	62.046	96.9556	0.092773	0.033203	-0.036133	-59.576	-51.666	1846.832	-1.501	1.3159	0.50117	-114.009	-180.867	1290.755	-0.59668	0.97461	0.43213	NaN	NaN	NaN	NaN	NaN	NaN
0.22	-37.556	53.43	82.8225	0.10059	0.026367	-0.038086	-35.445	-66.163	1848.288	-1.5854	1.3675	0.50547	-165.358	-253.98	1321.718	-0.47314	0.95703	0.3999	NaN	NaN	NaN	NaN	NaN	NaN
0.222	-58.771	50.577	73.608	0.10449	0.012695	-0.043945	24.261	-147.215	1879.577	-1.6612	1.3942	0.50391	-173.4098	-322.828	1336.233	-0.44043	0.94336	0.38232	NaN	NaN	NaN	NaN	NaN	NaN
0.224	-39.086	48.3506	74.026	0.10498	0.0068359	-0.047364	14.265	-166.9256	1883.019	-1.7168	1.4141	0.50439	-196.097	-413.415	1430.318	-0.45898	0.94141	0.35693	NaN	NaN	NaN	NaN	NaN	NaN
0.226	-38.831	44.6305	62.277	0.10645	-0.0048828	-0.054688	2.944	-211.597	1939.644545	-1.7578	1.4342	0.5124	-160.764	-455.14	1473.539	-0.5669	0.97876	0.36059	NaN	NaN	NaN	NaN	NaN	NaN
0.228	-34.741	59.0299	27.091	0.10645	-0.012207	-0.058594	70.282	-217.014	2004.059	-1.7956	1.4593	0.51562	-138.5916	-483.79	1539.09	-0.73877	1.0454	0.37891	NaN	NaN	NaN	NaN	NaN	NaN
0.23	-31.762	57.6693	22.521	0.10059	-0.012207	-0.060547	44.63	-200.052	2034.19	-1.8378	1.4936	0.51172	-110.7975	-423.34	1612.12	-1.0073	1.186	0.43359	NaN	NaN	NaN	NaN	NaN	NaN
0.232	-41.619	56.677	18.8656	0.099121	-0.019531	-0.061035	50.6445	-231.99	2060.358	-1.8725	1.5376	0.52217	-131.9	-379.08	1711.49481	-1.1362	1.2563	0.46484	NaN	NaN	NaN	NaN	NaN	NaN
0.234	-11.544	43.42469	36.6635	0.1001	-0.022949	-0.067383	67.1216	-228.575	2067.816	-1.9121	1.5762	0.54346	-122.753	-298.497	1747.5249	-1.3418	1.3789	0.52783	NaN	NaN	NaN	NaN	NaN	NaN
0.236	-19.392	42.0215	28.0274	0.09668	-0.025879	-0.069336	-11.463	-204.756	2047.366	-1.9527	1.6118	0.56006	-107.679	-217.6341	1803.2682	-1.4478	1.4502	0.55371	NaN	NaN	NaN	NaN	NaN	NaN
0.238	-34.626	30.5667	26.939	0.09375	-0.030273	-0.073242	12.678	-166.111	2059.754	-1.9909	1.6399	0.58008	-100.156	-130.662	1833.1671	-1.5269	1.5024	0.5625	NaN	NaN	NaN	NaN	NaN	NaN
0.24	-51.296	23.4901	26.0912	0.091309	-0.033203	-0.076172	-4.30399999999999	-99.623	2015.136	-2.0109	1.6559	0.59375	-102.854	-79.873	1888.952	-1.5957	1.543	0.56299	NaN	NaN	NaN	NaN	NaN	NaN
0.242	-28.529	22.1155	28.8905	0.09082	-0.038086	-0.07666	-19.722	-71.654	1978.516	-2.0157	1.6512	0.60508	-81.523	-53.001	1935.698	-1.6206	1.563	0.55908	NaN	NaN	NaN	NaN	NaN	NaN
0.244	-40.171	36.6104	15.929	0.08667	-0.043457	-0.078857	33.393	-43.121	1956.148	-2.0098	1.6426	0.61475	-95.893	-42.884	1912.402	-1.6602	1.6016	0.54395	NaN	NaN	NaN	NaN	NaN	NaN
0.246	-56.463	56.008	15.03174	0.079102	-0.051758	-0.082031	13.542	-3.455	1921.098	-2.0107	1.6244	0.62197	-76.54	-27.638	1903.1055	-1.6772	1.6343	0.52588	NaN	NaN	NaN	NaN	NaN	NaN
0.248	-25.928	52.75	8.7802	0.074707	-0.05957	-0.085938	13.133	5.0776	1942.077	-2.0141	1.6086	0.6249	-15.375	-42.363	1896.277	-1.6909	1.6626	0.5166	NaN	NaN	NaN	NaN	NaN	NaN
0.25	-11.359	48.239	8.3952	0.065918	-0.0625	-0.085449	-30.976	22.981	1954.093	-2.0207	1.5816	0.62529	26.035	-126.8977	1932.713	-1.7065	1.6938	0.50195	NaN	NaN	NaN	NaN	NaN	NaN
0.252	-10.427	41.316	6.3703	0.053223	-0.066406	-0.091309	-66.657	46.594	1951.008	-2.0276	1.5463	0.63193	6.04499999999999	-183.5957	1964.6525	-1.7144	1.7095	0.49805	NaN	NaN	NaN	NaN	NaN	NaN
0.254	-23.528	19.9114	16.9315	0.044677	-0.072022	-0.09082	-55.658	28.717	1993.0849	-2.0313	1.5098	0.63721	28.304	-242.377	2031.219	-1.7358	1.7485	0.50879	NaN	NaN	NaN	NaN	NaN	NaN
0.256	-0.298000000000002	18.357	30.1986	0.033691	-0.072754	-0.091797	-93.756	34.6	2004.283	-2.0352	1.4753	0.63516	33.422	-215.357	2049.762	-1.7527	1.7747	0.51856	NaN	NaN	NaN	NaN	NaN	NaN
0.258	-3.353	18.676	20.3407	0.02002	-0.076172	-0.088379	-113.3647	17.6269	2026.494	-2.0386	1.4431	0.63164	46.197	-209.592	2106.269	-1.7798	1.7954	0.54004	NaN	NaN	NaN	NaN	NaN	NaN
0.26	-16.995	34.814	23.0871	0.0092773	-0.080078	-0.092285	-68.24	2.252	2033.459	-2.0386	1.4149	0.63633	2.3	-175.843	2143.806	-1.8184	1.8125	0.57568	NaN	NaN	NaN	NaN	NaN	NaN
0.262	-26.04	28.57133	23.4867	-0.0039063	-0.082031	-0.08252	-125.476	2.2227	2018.2613	-2.0418	1.3879	0.63584	-0.726999999999997	-176.691	2142.795	-1.8418	1.8203	0.59619	NaN	NaN	NaN	NaN	NaN	NaN
0.264	-30.282	40.407	10.344	-0.020019	-0.083496	-0.080811	-117.088	-36.905	2010.515	-2.0527	1.3691	0.64307	-26.872	-115.343	2126.633	-1.853	1.8091	0.61621	NaN	NaN	NaN	NaN	NaN	NaN
0.266	-23.945	49.761	10.2253	-0.035156	-0.084473	-0.074707	-77.381	-63.499	1988.45	-2.0647	1.3503	0.64824	-64.179	-95.468	2110.954	-1.8477	1.7852	0.63916	NaN	NaN	NaN	NaN	NaN	NaN
0.268	-56.823	49.866	22.8914	-0.057129	-0.084473	-0.064941	-78.714	-62.408	1947.033	-2.0797	1.3386	0.65596	-92.808	-25.7	2086.272	-1.8477	1.7676	0.65283	NaN	NaN	NaN	NaN	NaN	NaN
0.27	-23.062	26.379	17.0128	-0.067383	-0.081543	-0.062012	-32.731	-76.187	1929.222	-2.089	1.3262	0.65283	-90.843	-39.08	2037.9146	-1.8535	1.7246	0.66455	NaN	NaN	NaN	NaN	NaN	NaN
0.272	-23.405	8.5987	28.7281	-0.095215	-0.07666	-0.049316	-36.264	-17.322	1889.0533	-2.0916	1.3187	0.65127	-66.052	9.453	1986.801	-1.8747	1.6868	0.67944	NaN	NaN	NaN	NaN	NaN	NaN
0.274	-9.046	17.502	3.5248	-0.11426	-0.070069	-0.039307	-50.673	16.048	1860.7888	-2.0776	1.311	0.64551	-63.941	-16.074	1960.965	-1.8979	1.6489	0.69141	NaN	NaN	NaN	NaN	NaN	NaN
0.276	-41.366	25.672	23.4652	-0.13184	-0.064453	-0.038086	-8.654	68.4264	1846.785	-2.062	1.2962	0.63515	-64.965	23.2357	1943.973	-1.9336	1.5977	0.70947	NaN	NaN	NaN	NaN	NaN	NaN
0.278	-23.013	30.682	23.9039	-0.14893	-0.054688	-0.031738	-19.398	136.268	1797.5109	-2.041	1.2766	0.62862	-106.0204	-2.052	1930.43	-1.9473	1.5762	0.70557	NaN	NaN	NaN	NaN	NaN	NaN
0.28	-15.009	31.4291	20.0857	-0.15381	-0.049316	-0.030273	19.794	141.144	1792.68501	-2.0289	1.2582	0.62588	-146.217	60.2314	1897.096	-1.9727	1.5254	0.70947	NaN	NaN	NaN	NaN	NaN	NaN
0.282	-35.137	44.9004	2.2199	-0.15479	-0.044434	-0.027344	33.029	163.04	1784.345	-2.0177	1.2373	0.62295	-155.7476	51.8261	1892.247	-1.9734	1.4944	0.7102	NaN	NaN	NaN	NaN	NaN	NaN
0.284	-25.489	41.531	3.6493	-0.14868	-0.043945	-0.024414	11.74	162.695	1749.1204	-2.0093	1.2251	0.61719	-143.5374	80.448	1896.938	-1.9722	1.4673	0.70361	NaN	NaN	NaN	NaN	NaN	NaN
0.286	-44.254	29.6279	23.9241	-0.14746	-0.043457	-0.022949	46.511	113.78	1742.412	-2.0013	1.2116	0.61777	-116.442	20.7178	1948.862	-1.9512	1.4375	0.68604	NaN	NaN	NaN	NaN	NaN	NaN
0.288	-25.487	21.12735	36.6161	-0.13867	-0.052734	-0.016602	11.895	107.525	1707.9518	-1.9948	1.2016	0.62012	-111.265	37.3723	1963.2399	-1.9331	1.4263	0.67773	NaN	NaN	NaN	NaN	NaN	NaN
0.29	-46.871	9.6213	29.66362	-0.13232	-0.057129	-0.017578	16.017	69.003	1668.689897	-1.9855	1.1915	0.62246	-134.0172	0.1933	1970.642	-1.896	1.4087	0.65234	NaN	NaN	NaN	NaN	NaN	NaN
0.292	-51.966	6.7872	17.4451	-0.13135	-0.066895	-0.0097656	69.9	38.758	1675.74	-1.9711	1.1889	0.60869	-134.0138	39.3104	1927.859	-1.8669	1.3987	0.63501	NaN	NaN	NaN	NaN	NaN	NaN
0.294	-24.152	7.9211	24.1157	-0.12841	-0.071534	-0.0095215	35.47	69.047	1634.454	-1.9546	1.1821	0.59766	-141.5785	24.801	1919.641	-1.8374	1.3901	0.61328	NaN	NaN	NaN	NaN	NaN	NaN
0.296	-32.337	28.0943	11.9596	-0.12158	-0.075684	-0.0058594	47.948	58.388	1633.424	-1.9372	1.171	0.59609	-78.251	83.509	1875.5121	-1.8081	1.3813	0.59375	NaN	NaN	NaN	NaN	NaN	NaN
0.298	-17.192	38.0229	18.7681	-0.11719	-0.07959	-0.0053711	40.059	89.249	1613.4778	-1.9156	1.1627	0.58564	-39.649	55.314	1847.722	-1.8008	1.377	0.58545	NaN	NaN	NaN	NaN	NaN	NaN
0.3	-27.58	36.6856	-0.3706	-0.10986	-0.080566	-0.0048828	1.949	114.655	1593.021	-1.8863	1.1498	0.56885	-18.399	103.411	1824.97151	-1.7891	1.3672	0.57275	NaN	NaN	NaN	NaN	NaN	NaN
0.302	-16.87	28.4142	-2.9681	-0.096191	-0.079102	-0.0029297	6.918	111.229	1582.635	-1.8397	1.1322	0.55459	-38.093	96.936	1820.8031	-1.778	1.3577	0.56177	NaN	NaN	NaN	NaN	NaN	NaN
0.304	-11.012	28.8312	11.1289	-0.088378	-0.077393	-0.006836	-12.568	175.8757	1524.7324	-1.791	1.1172	0.54053	-26.376	163.578	1800.88	-1.7617	1.3398	0.54541	NaN	NaN	NaN	NaN	NaN	NaN
0.306	-29.998	27.1112	21.3718	-0.077637	-0.07373	-0.0087891	-25.288	214.4553707	1472.362	-1.7357	1.1042	0.52519	-36.934	188.929	1782.974	-1.7266	1.3203	0.54346	NaN	NaN	NaN	NaN	NaN	NaN
0.308	-10.011	12.71919	30.9508	-0.067871	-0.078125	-0.011719	-5.052	254.028	1457.652	-1.6882	1.0857	0.50723	-13.886	280.69	1741.0187	-1.707	1.3086	0.53662	NaN	NaN	NaN	NaN	NaN	NaN
0.31	-15.353	22.7089	32.5503	-0.062012	-0.075195	-0.016113	-40.2413	316.814	1404.281	-1.6355	1.0673	0.49277	-13.113	266.847	1711.8528	-1.6621	1.2813	0.51807	NaN	NaN	NaN	NaN	NaN	NaN
0.312	-26.567	32.627	12.71066	-0.049316	-0.070801	-0.019043	-24.1738	274.032	1368.9399	-1.5949	1.0438	0.47813	19.31	296.392	1686.6259	-1.6269	1.2578	0.50195	NaN	NaN	NaN	NaN	NaN	NaN
0.314	-38.652	31.0038	7.2292	-0.043457	-0.072754	-0.023681	-22.5907	273.333	1337.5175	-1.5508	1.0234	0.46143	-16.391	246.486	1693.8746	-1.5913	1.2329	0.4834	NaN	NaN	NaN	NaN	NaN	NaN
0.316	-16.063	31.6958	5.678	-0.040039	-0.073242	-0.023926	-24.3278	253.8746	1286.058	-1.5124	0.99871	0.44209	-2.35	260.744	1655.424	-1.5522	1.1938	0.46777	NaN	NaN	NaN	NaN	NaN	NaN
0.318	-26.677	23.0052	-16.4878	-0.034668	-0.070313	-0.025879	6.451	194.243	1278.856	-1.4684	0.96895	0.42432	-52.855	213.2394	1645.287	-1.5347	1.1724	0.46094	NaN	NaN	NaN	NaN	NaN	NaN
0.32	-25.546	16.7697	5.0402	-0.034668	-0.068848	-0.027344	-2.101	234.8484	1225.012	-1.4196	0.94434	0.41064	-24.96	208.334	1581.20623	-1.5034	1.1294	0.44238	NaN	NaN	NaN	NaN	NaN	NaN
0.322	-16.794	2.6036	37.3935	-0.032227	-0.065918	-0.03125	11.794	221.296	1195.526	-1.378	0.91689	0.3917	-17.001	163.705	1545.661	-1.4804	1.0967	0.43066	NaN	NaN	NaN	NaN	NaN	NaN
0.324	-30.018	-28.125	60.5367	-0.032471	-0.0625	-0.030517	36.8827	203.04	1195.6683	-1.3379	0.88477	0.37695	-8.997	177.494	1490.18	-1.4526	1.063	0.41504	NaN	NaN	NaN	NaN	NaN	NaN
0.326	-13.137	-20.6785	67.629	-0.032715	-0.061523	-0.027832	12.949	233.8629	1177.8285	-1.3023	0.86035	0.3585	-35.448	173.239	1465.5797	-1.4116	1.0181	0.40479	NaN	NaN	NaN	NaN	NaN	NaN
0.328	-28.526	-24.4972	83.788	-0.029785	-0.059082	-0.029785	35.6468	214.395	1170.078	-1.2695	0.83282	0.34228	-22.003	228.374	1435.499	-1.3882	0.99463	0.39258	NaN	NaN	NaN	NaN	NaN	NaN
0.33	-44.879	-44.6264	121.517	-0.030273	-0.052734	-0.029785	63.668	240.964	1151.908	-1.2344	0.81406	0.33174	-47.9418	242.549	1421.559	-1.3413	0.94775	0.37451	NaN	NaN	NaN	NaN	NaN	NaN
0.332	-36.844	-51.0009	148.061	-0.034668	-0.049805	-0.038574	68.696	251.5595	1089.169	-1.2039	0.78554	0.31455	-34.123	286.004	1347.5604	-1.3051	0.91699	0.36353	NaN	NaN	NaN	NaN	NaN	NaN
0.334	-15.505	-63.136	163.872	-0.046387	-0.046631	-0.04419	83.139	220.6217	1049.486	-1.1699	0.74805	0.2915	-40.425	283.074	1303.717	-1.2671	0.88721	0.34473	NaN	NaN	NaN	NaN	NaN	NaN
0.336	-33.411	-61.434	204.188	-0.063477	-0.037109	-0.041504	72.874	265.4683	964.7035	-1.1302	0.73487	0.30469	-16.077	330.1236	1240.684	-1.2222	0.84229	0.33008	NaN	NaN	NaN	NaN	NaN	NaN
0.338	-28.449	-48.623	284.91	-0.10205	-0.035645	-0.046875	90.711	236.221	874.089	-1.1023	0.72851	0.29804	-37.453	326.804	1190.652	-1.1948	0.82275	0.32178	NaN	NaN	NaN	NaN	NaN	NaN
0.34	-15.428	-16.9585	363.82	-0.125	-0.030273	-0.044922	130.525	247.0367	842.585	-1.077	0.72187	0.2836	-9.994	354.027	1140.045	-1.1592	0.77832	0.30322	NaN	NaN	NaN	NaN	NaN	NaN
0.342	-30.582	40.658	417.54	-0.17529	-0.02832	-0.039551	93.252	303.301	780.233	-1.0306	0.71612	0.27207	-1.539	335.638	1107.3998	-1.1228	0.74927	0.29199	NaN	NaN	NaN	NaN	NaN	NaN
0.344	-45.392	67.405	490.08	-0.23242	-0.019531	-0.039063	87.867	269.392	750.5911	-0.98193	0.69971	0.26465	13.653	335.999	1047.2424	-1.082	0.72168	0.2793	NaN	NaN	NaN	NaN	NaN	NaN
0.346	-84.0478	82.065	618.11	-0.26025	-0.013672	-0.035156	79.308	297.795	709.5309	-0.93711	0.66524	0.25166	35.2445	290.026	984.495	-1.0288	0.68115	0.26074	NaN	NaN	NaN	NaN	NaN	NaN
0.348	-62.093	95.657	722.63	-0.31641	-0.0039063	-0.030762	43.0701	300.635	653.666	-0.89521	0.62959	0.23359	62.85427	309.9595	932.737	-0.99365	0.66064	0.25781	NaN	NaN	NaN	NaN	NaN	NaN
0.35	-68.894	106.156	795.58	-0.36573	0.0046386	-0.027588	57.684	231.155	641.6412	-0.85537	0.60185	0.21289	44.96	289.977	891.95	-0.92627	0.62939	0.23682	NaN	NaN	NaN	NaN	NaN	NaN
0.352	-48.55	89.05	847.47	-0.42041	0.01709	-0.026367	32.964	266.081	603.455	-0.81416	0.57666	0.19443	72.8979	303.004	859.6808	-0.86743	0.60131	0.22265	NaN	NaN	NaN	NaN	NaN	NaN
0.354	-54.591	52.199	877.67	-0.51758	0.024414	-0.019531	24.11	217.1466	562.86	-0.75781	0.55273	0.17285	37.21004	266.9342	820.067	-0.81201	0.57861	0.20605	NaN	NaN	NaN	NaN	NaN	NaN
0.356	-58.96	43.091	895.9	-0.57471	0.029785	-0.013184	22.155	183.041	530.51551	-0.70088	0.53721	0.154	48.457	275.336	781.189	-0.73096	0.54053	0.18555	NaN	NaN	NaN	NaN	NaN	NaN
0.358	-25.814	46.21	897.19	-0.69775	0.043457	-0.00048828	-31.9633	210.038	484.6131	-0.64688	0.51601	0.13916	75.667	260.4771	748.282	-0.69531	0.52734	0.17334	NaN	NaN	NaN	NaN	NaN	NaN
0.36	-32.778	35.8044	870.47	-0.80225	0.058838	0.011475	-26.005	137.8091	452.314	-0.60195	0.48985	0.12431	102.558	285.5703	709.979	-0.6167	0.48584	0.14453	NaN	NaN	NaN	NaN	NaN	NaN
0.362	-39.217	11.38	870.82	-0.90771	0.076172	0.018066	-26.044	141.8029	400.9977	-0.55713	0.46552	0.11211	72.5713	283.025	641.028	-0.56031	0.45239	0.12989	NaN	NaN	NaN	NaN	NaN	NaN
0.364	-92.146	-6.863	885.93	-1.0474	0.10791	0.044434	-42.539	149.35	348.4969	-0.51514	0.43506	0.086914	49.9574	295.743	581.872	-0.50781	0.42285	0.11572	NaN	NaN	NaN	NaN	NaN	NaN
0.366	-82.1226	-27.561	881.65	-1.1147	0.12842	0.053223	-33.781	91.225	331.53	-0.4708	0.40772	0.085351	49.849	256.102	509.0825	-0.43945	0.37695	0.091309	NaN	NaN	NaN	NaN	NaN	NaN
0.368	-82.107	-42.934	885.87	-1.2344	0.17188	0.06543	-41.171	140.397	299.91	-0.42451	0.38486	0.075781	15.832	250.6102	462.9819	-0.40674	0.35938	0.07959	NaN	NaN	NaN	NaN	NaN	NaN
0.37	-66.747	-52.5602	895.33	-1.292	0.20679	0.069092	-61.6471	106.567	287.7426	-0.3749	0.36338	0.064062	45.662	215.82711	410.667	-0.3418	0.31641	0.063477	NaN	NaN	NaN	NaN	NaN	NaN
0.372	-68.319	-43.3343	923.26	-1.3398	0.24316	0.07373	-60.109	100.117	268.076	-0.31719	0.3457	0.054101	21.565	226.8806	377.959	-0.2937	0.29077	0.050781	NaN	NaN	NaN	NaN	NaN	NaN
0.374	-69.586	-31.41	962.45	-1.377	0.29492	0.063477	-34.604	173.577	209.8496	-0.2666	0.32617	0.040527	-4.45800000000001	199.2442	311.42	-0.24902	0.26172	0.038086	NaN	NaN	NaN	NaN	NaN	NaN
0.376	-37.742	-30.217	1004.84	-1.3887	0.31348	0.060059	-30.173	141.108	199.272	-0.21485	0.30616	0.026563	-25.04	214.424	283.742	-0.18506	0.23096	0.022461	NaN	NaN	NaN	NaN	NaN	NaN
0.378	-22.692	-36.494	978.78	-1.3984	0.35645	0.045898	-42.624	185.859	174.2075	-0.17031	0.28232	0.01748	-58.481	181.19932	256.306	-0.15723	0.21484	0.019043	NaN	NaN	NaN	NaN	NaN	NaN
0.38	2.728	-61.035	1000.59	-1.4023	0.38233	0.032715	-28.35	185.117	146.93	-0.12031	0.25615	0.0049805	-61.3602	178.5286	236.2435	-0.10986	0.18652	-0.0039063	NaN	NaN	NaN	NaN	NaN	NaN
0.382	-6.732	-98.668	1012.16	-1.4058	0.40869	0.018066	-16.321	99.398	146.3207	-0.078711	0.23047	-0.0043945	-39.287	134.6227	209.595	-0.076172	0.16406	-0.015625	NaN	NaN	NaN	NaN	NaN	NaN
0.384	-2.539	-125.99	1049.67	-1.4116	0.42725	0.0029297	-9.402	120.56064	127.9948	-0.041016	0.20801	-0.012207	-51.8808	141.741	207.672038	-0.050293	0.14453	-0.025391	NaN	NaN	NaN	NaN	NaN	NaN
0.386	11.464	-151.56	1063.85	-1.415	0.43555	0.0024414	-0.356999999999999	54.945	95.8473	-0.0081054	0.18222	-0.021582	-64.4095	119.141	166.775	-0.022461	0.11523	-0.034668	NaN	NaN	NaN	NaN	NaN	NaN
0.388	15.265	-171.562	1080.7	-1.4199	0.45898	-0.020996	11.804	31.211	94.702	0.020118	0.16621	-0.028125	-57.835	107.5705	168.331	-0.01416	0.104	-0.036621	NaN	NaN	NaN	NaN	NaN	NaN
0.39	7.90000000000001	-198.124	1133.97	-1.4267	0.48194	-0.026612	2.538	88.555	55.481	0.042774	0.14356	-0.028906	-65.154	77.85	131.8117	-0.0097656	0.081055	-0.037109	NaN	NaN	NaN	NaN	NaN	NaN
0.392	-16.693	-198.518	1214.01	-1.4395	0.50879	-0.033691	26.345	36.766	58.5247	0.061621	0.12471	-0.04043	-96.146	66.865	119.742	-0.0068359	0.065918	-0.039551	NaN	NaN	NaN	NaN	NaN	NaN
0.394	13.64	-186.417	1274.86	-1.4556	0.55615	-0.040527	30.407	54.0663	67.7656	0.074707	0.10547	-0.044922	-16.324	45.959	80.0155	-0.016602	0.056152	-0.037598	NaN	NaN	NaN	NaN	NaN	NaN
0.396	12.563	-152.53	1309.21	-1.4585	0.58057	-0.047363	14.327	51.3715	52.814175	0.088672	0.092384	-0.05	-49.319	38.6756	71.969	-0.03125	0.04248	-0.033691	NaN	NaN	NaN	NaN	NaN	NaN
0.398	17.08	-128.371	1354.97	-1.4551	0.63086	-0.052246	12.622	-16.0094	66.902	0.094922	0.078808	-0.051563	-30.336	35.0928	41.034	-0.041992	0.039551	-0.027344	NaN	NaN	NaN	NaN	NaN	NaN
0.4	19.354	-119.863	1404.87	-1.4512	0.66358	-0.060547	-5.037	48.1743	53.0667	0.1039	0.071387	-0.05625	-34.244	35.3839	39.585	-0.048828	0.035156	-0.020508	NaN	NaN	NaN	NaN	NaN	NaN
0.402	11.774	-103.632	1440.02	-1.4429	0.68311	-0.064453	-34.607	34.5891	33.895	0.10244	0.061524	-0.055469	-16.145	37.0233	18.0244	-0.058838	0.027832	-0.02124	NaN	NaN	NaN	NaN	NaN	NaN
0.404	26.365	-93.382	1463.34	-1.4351	0.69385	-0.070313	-30.679	30.952	22.8251	0.1084	0.056152	-0.057617	-40.15	40.846	7.329	-0.064941	0.027344	-0.021973	NaN	NaN	NaN	NaN	NaN	NaN
0.406	9.91999999999999	-85.448	1490.99	-1.4434	0.69531	-0.079102	-25.256	87.404	-11.3	0.11328	0.04668	-0.057031	-3.632	45.6788	-27.8553	-0.058594	0.023926	-0.019043	NaN	NaN	NaN	NaN	NaN	NaN
0.408	22.151	-100.812	1530.88	-1.4609	0.69727	-0.078613	-37.629	18.5183	-13.2888	0.11455	0.044433	-0.050293	-17.581	40.5522	5.53	-0.054199	0.022949	-0.019043	NaN	NaN	NaN	NaN	NaN	NaN
0.41	-21.382	-98.474	1570.92	-1.491	0.69458	-0.072021	-44.817	59.401	-3.0229	0.11455	0.038574	-0.04834	10.716	44.161	6.6971	-0.043945	0.0092773	-0.026367	NaN	NaN	NaN	NaN	NaN	NaN
0.412	-1.129	-76.805	1601.56	-1.5327	0.69971	-0.061035	-69.326	68.896	5.205	0.11094	0.031543	-0.045996	-2.268	41.846	46.421	-0.035156	-0.0058594	-0.038574	NaN	NaN	NaN	NaN	NaN	NaN
0.414	-5.342	-68.2153	1620.27	-1.6108	0.70557	-0.03418	-67.057	19.10606	9.1575	0.1001	0.025391	-0.043945	33.269	46.2166	29.4734	-0.035645	-0.015137	-0.041016	NaN	NaN	NaN	NaN	NaN	NaN
0.416	-16.467	-64.6624	1633.07	-1.6582	0.71289	-0.021973	-69.499	69.134	-6.628	0.089941	0.021094	-0.033106	-11.769	17.4062	10.4859	-0.039551	-0.030273	-0.047852	NaN	NaN	NaN	NaN	NaN	NaN
0.418	-52.61	-76.2281	1667.27	-1.7715	0.73633	0.010742	-74.656	25.0292	4.418	0.081543	0.018652	-0.032129	3.08300000000001	10.57	-15.1602	-0.049805	-0.040772	-0.052246	NaN	NaN	NaN	NaN	NaN	NaN
0.42	-61.492	-82.577	1689.16	-1.8581	0.75903	0.037353	-49.279	-1.9685	10.596	0.075684	0.020996	-0.035645	-33.405	0.5565	5.407	-0.067383	-0.048828	-0.051758	NaN	NaN	NaN	NaN	NaN	NaN
0.422	-59.009	-70.13	1740.83	-1.9463	0.77734	0.067871	-76.2841	45.6363	27.7713	0.076269	0.018457	-0.036523	11.654	35.545	-9.6017	-0.095703	-0.053223	-0.052734	NaN	NaN	NaN	NaN	NaN	NaN
0.424	-50.631	-59.204	1763.8	-2.0625	0.8125	0.094238	-91.1064	-10.6663	30.87	0.080566	0.01123	-0.037598	-12.463	22.8092	18.6908	-0.10791	-0.053711	-0.047852	NaN	NaN	NaN	NaN	NaN	NaN
0.426	-35.493	-39.663	1770.73	-2.1108	0.82666	0.10303	-76.623	19.32738	51.262	0.079102	0.0048828	-0.03125	-31.462	35.857	10.9441	-0.13135	-0.04248	-0.041016	NaN	NaN	NaN	NaN	NaN	NaN
0.428	-45.404	-44.366	1775.63	-2.2012	0.86133	0.11768	-59.448	46.3457	28.35462	0.075684	-0.003125	-0.027539	-83.491	15.0191	18.0455	-0.14893	-0.042237	-0.042969	NaN	NaN	NaN	NaN	NaN	NaN
0.43	-35.545	-38.038	1769.22	-2.2563	0.87842	0.11548	-46.717	0.1692	31.595	0.074512	-0.014844	-0.023242	-52.383	59.8855	16.34995	-0.15527	-0.03125	-0.035645	NaN	NaN	NaN	NaN	NaN	NaN
0.432	-38.252	-35.192	1757.23	-2.2944	0.89111	0.11621	-39.826	61.049	9.422	0.077051	-0.025879	-0.019141	-77.156	59.8	38.4208	-0.14844	-0.017578	-0.034668	NaN	NaN	NaN	NaN	NaN	NaN
0.434	-30.873	-17.4761	1767.17	-2.3257	0.89307	0.10645	-27.203	19.338	-6.878	0.081543	-0.037598	-0.022461	-60.297	93.479	28.935	-0.14014	-0.015137	-0.038574	NaN	NaN	NaN	NaN	NaN	NaN
0.436	-23.622	-29.219	1775.38	-2.3276	0.88818	0.10156	-14.233	12.017	22.5402	0.091114	-0.048144	-0.021777	-85.886	58.003	35.2461	-0.11133	-0.0063477	-0.044434	NaN	NaN	NaN	NaN	NaN	NaN
0.438	-17.113	-30.439	1774.97	-2.3145	0.87402	0.085449	3.252	72.667	18.4301	0.10576	-0.054395	-0.019531	-88.0306	74.8617	5.828	-0.079102	-0.0046387	-0.051758	NaN	NaN	NaN	NaN	NaN	NaN
0.44	12.909	-34.067	1800.37	-2.291	0.86181	0.064453	0.146999999999998	17.3732	22.1986	0.11709	-0.062988	-0.026172	-103.9475	44.785774	11.211	-0.050781	-0.0048828	-0.058594	NaN	NaN	NaN	NaN	NaN	NaN
0.442	1.195	-5.072	1791.54	-2.2637	0.85352	0.047852	11.988	51.528	36.139	0.12676	-0.075	-0.031347	-72.491	58.9997	22.5699	-0.003418	-0.015137	-0.067871	NaN	NaN	NaN	NaN	NaN	NaN
0.444	-7.827	33.593	1810.68	-2.2363	0.83398	0.028809	11.794	74.901	11.3724	0.13623	-0.087402	-0.035156	-68.817	10.571	30.686	0.012695	-0.025391	-0.07666	NaN	NaN	NaN	NaN	NaN	NaN
0.446	13.126	47.566	1819.9	-2.2192	0.83154	0.020508	3.37100000000001	32.3347	21.258	0.13838	-0.098829	-0.037989	-71.997	45.2541	36.9551	0.050293	-0.041016	-0.080566	NaN	NaN	NaN	NaN	NaN	NaN
0.448	23.196	45.47	1803.98	-2.2002	0.82227	0.0092773	15.06	81.343	21.2557	0.13906	-0.11152	-0.038672	-44.974	3.598	38.6873	0.070801	-0.050293	-0.089843	NaN	NaN	NaN	NaN	NaN	NaN
0.45	21.27	36.866	1800.49	-2.1902	0.81958	0.0063476	-3.771	25.0981	7.21337	0.13438	-0.12129	-0.038281	-44.89	17.664	33.0482	0.093262	-0.061035	-0.096191	NaN	NaN	NaN	NaN	NaN	NaN
0.452	14.985	29.046	1804.32	-2.1851	0.8208	0.0058594	3.403	-13.8492	28.061	0.12071	-0.1293	-0.036328	-54.37	-27.7381	44.289	0.11621	-0.069336	-0.1084	NaN	NaN	NaN	NaN	NaN	NaN
0.454	46.588	14.881	1806.58	-2.1738	0.81836	0.010742	-6.067	22.8708	13.851	0.11084	-0.13623	-0.033203	-32.266	-1.8429	54.367	0.12744	-0.078125	-0.11133	NaN	NaN	NaN	NaN	NaN	NaN
0.456	35.566	-0.573999999999998	1817.24	-2.1597	0.81689	0.013672	-1.429	-25.0622	5.0106	0.093946	-0.13994	-0.027246	-29.495	-17.6562	42.163	0.14502	-0.075195	-0.11182	NaN	NaN	NaN	NaN	NaN	NaN
0.458	36.958	4.254	1808.29	-2.1401	0.80908	0.021973	-33.629	15.6173	19.496763	0.077832	-0.14345	-0.017773	0.906999999999996	42.384	21.731	0.14868	-0.077881	-0.11036	NaN	NaN	NaN	NaN	NaN	NaN
0.46	26.394	10.984	1807.63	-2.1231	0.80273	0.028076	-54.579	49.2832	6.2364	0.057129	-0.14073	-0.010742	4.353	18.5057	12.613	0.15137	-0.074219	-0.10254	NaN	NaN	NaN	NaN	NaN	NaN
0.462	38.15	28.222	1788.65	-2.1108	0.79248	0.037598	-49.608	3.02	13.5439	0.037402	-0.13603	-0.0021485	-14.435	39.185	18.334	0.14453	-0.079102	-0.097656	NaN	NaN	NaN	NaN	NaN	NaN
0.464	28.13	47.492	1780.08	-2.0874	0.77295	0.04834	-55.032	57.76225	30.29153	0.019043	-0.1333	0.0043945	-7.259	6.98691	17.5627	0.14063	-0.074707	-0.09668	NaN	NaN	NaN	NaN	NaN	NaN
0.466	15.194	66.967	1771.99	-2.084	0.76367	0.056152	-58.905	29.1726	25.2998	0.0025391	-0.12548	0.0029297	-6.018	35.842	23.1	0.12598	-0.07373	-0.085938	NaN	NaN	NaN	NaN	NaN	NaN
0.468	13.252	67.135	1768.69	-2.0684	0.75	0.064941	-58.888	12.3877	35.1355	-0.0037109	-0.12451	0.0088867	19.711	14.0385	15.9571	0.11548	-0.069824	-0.071777	NaN	NaN	NaN	NaN	NaN	NaN
0.47	-1.93	64.71	1745.31	-2.0654	0.74121	0.076416	-63.403	60.5679	10.55	-0.0091797	-0.11904	0.0084961	2.754	36.7909	9.8632	0.10693	-0.060059	-0.062012	NaN	NaN	NaN	NaN	NaN	NaN
0.472	-8.651	57.92	1741.56	-2.0542	0.74072	0.084473	-82.23	20.702	-2.088	-0.019434	-0.11543	0.0096681	21.357	13.0232	-10.81089	0.090332	-0.053223	-0.058105	NaN	NaN	NaN	NaN	NaN	NaN
0.474	-26.603	60.24	1730.46	-2.0425	0.74121	0.09668	-69.625	35.0019	11.642	-0.023926	-0.10791	0.014648	-28.461	51.216	-11.977	0.083984	-0.045898	-0.053711	NaN	NaN	NaN	NaN	NaN	NaN
0.476	-12.571	72.36	1724.14	-2.0371	0.74414	0.097168	-71.798	63.6383	-0.734	-0.030176	-0.10664	0.011816	-13.776	43.2464	-27.484	0.075684	-0.030762	-0.04248	NaN	NaN	NaN	NaN	NaN	NaN
0.478	-5.40299999999999	78.457	1703.84	-2.0215	0.75	0.10449	-79.4	13.7996	14.7739	-0.032618	-0.10274	0.011426	-44.246	42.0001	-13.3479	0.068604	-0.018554	-0.03833	NaN	NaN	NaN	NaN	NaN	NaN
0.48	8.055	88.695	1666.3	-2.0044	0.75635	0.10694	-35.769	55.41	27.3971	-0.036133	-0.098828	0.0086914	-47.021	8.665	-6.7256	0.061523	-0.0043945	-0.027344	NaN	NaN	NaN	NaN	NaN	NaN
0.482	3.702	74.557	1652.97	-1.9878	0.76318	0.10986	-65.408	27.94316	17.4999	-0.038379	-0.094238	0.0056641	-67.851	19.4641	14.004	0.053711	0.0029297	-0.016113	NaN	NaN	NaN	NaN	NaN	NaN
0.484	2.032	68.158	1631.99	-1.9565	0.76709	0.10156	-49.663	8.422	28.1204	-0.034668	-0.090332	0.0043945	-40.928	28.436	12.66893	0.052734	0.0048828	-0.016602	NaN	NaN	NaN	NaN	NaN	NaN
0.486	16.833	57.438	1624.01	-1.9362	0.76245	0.10156	-31.142	39.0386	16.074	-0.02832	-0.084668	0.00058594	-64.836	46.508	32.2701	0.046875	0.0068359	-0.0087891	NaN	NaN	NaN	NaN	NaN	NaN
0.488	-7.748	57.83	1608.49	-1.9155	0.76123	0.10156	-29.568	-11.653	13.8346	-0.022949	-0.081153	-0.0029297	-84.957	37.573	12.5465	0.045654	0.0097655	-0.010742	NaN	NaN	NaN	NaN	NaN	NaN
0.49	-8.818	56.379	1618.14	-1.8823	0.75635	0.089355	4.00299999999999	9.63	47.5681	-0.014356	-0.077246	-0.0029297	-106.712	35.284	17.8682	0.044434	0.011719	-0.0097656	NaN	NaN	NaN	NaN	NaN	NaN
0.492	12.499	66.719	1595.81	-1.8667	0.7583	0.088379	1.631	32.7888	20.3782	-0.0064453	-0.075195	-0.0056641	-84.165	40.9419	-11.84232	0.049805	0.013184	-0.0087891	NaN	NaN	NaN	NaN	NaN	NaN
0.494	16.905	78.735	1579.09	-1.8242	0.75098	0.083984	9.043	-0.5342	21.791	0.003418	-0.072266	-0.012695	-78.29	65.887	28.935	0.050781	0.013672	-0.01123	NaN	NaN	NaN	NaN	NaN	NaN
0.496	4.565	108.434	1556.94	-1.7937	0.74829	0.077148	7.319	65.84	28.89228	0.021094	-0.070215	-0.019434	-40.322	70.8778	44.6215	0.055664	0.010742	-0.01416	NaN	NaN	NaN	NaN	NaN	NaN
0.498	10.765	131.886	1536.23	-1.7637	0.74316	0.07666	4.75	48.024	1.246	0.033593	-0.06914	-0.027246	-78.949	44.4661	44.4023	0.05957	0.012695	-0.018799	NaN	NaN	NaN	NaN	NaN	NaN
0.5	36.051	141.507	1517.93	-1.728	0.73486	0.070313	5.32599999999999	29.417	14.9804	0.053906	-0.064063	-0.033105	-75.739	49.636	16.6627	0.064941	0.013672	-0.027344	NaN	NaN	NaN	NaN	NaN	NaN
0.502	19.027	142.0898	1482.24	-1.7065	0.729	0.067383	7.419	61.861	-0.854000000000003	0.068555	-0.061816	-0.044824	-84.5876	29.1205	20.63567	0.079102	0.014648	-0.036133	NaN	NaN	NaN	NaN	NaN	NaN
0.504	14.244	134.4059	1478.07	-1.6675	0.71143	0.061523	-9.82700000000001	16.0179	-9.1547	0.079102	-0.054688	-0.05127	-38.302	54.3563	17.3334	0.080566	0.016602	-0.036621	NaN	NaN	NaN	NaN	NaN	NaN
0.506	14.401	122.887	1473.08	-1.6421	0.69532	0.060791	-8.207	33.2116	28.3939	0.093653	-0.049023	-0.060254	-25.315	35.251	48.4656	0.092773	0.026367	-0.054199	NaN	NaN	NaN	NaN	NaN	NaN
0.508	31.37	123.854	1457.8	-1.6133	0.68945	0.056641	-6.164	58.951	17.2625	0.097558	-0.042285	-0.072657	-11.581	43.649	50.114	0.096191	0.029296	-0.058106	NaN	NaN	NaN	NaN	NaN	NaN
0.51	4.075	150.0045	1433.42	-1.5859	0.67773	0.049805	-19.505	18.0873	25.1927	0.1042	-0.029394	-0.076953	-37.888	25.7582	49.8814	0.096191	0.036133	-0.068359	NaN	NaN	NaN	NaN	NaN	NaN
0.512	-20.92	165.4243	1420.92	-1.5718	0.67236	0.054688	-33.066	66.306	35.6729	0.10947	-0.016504	-0.080566	3.101	47.0025	30.5095	0.088867	0.050293	-0.078125	NaN	NaN	NaN	NaN	NaN	NaN
0.514	-23.401	170.352	1395.25	-1.5444	0.65674	0.054199	-44.685	14.41382	38.7031	0.10938	-0.0083008	-0.084473	-9.576	-3.3998	30.244	0.086914	0.054199	-0.079102	NaN	NaN	NaN	NaN	NaN	NaN
0.516	-19.917	166.621	1357.96	-1.5312	0.6416	0.049072	-58.384	-35.52955	70.5921	0.10909	0.0048828	-0.092187	-1.283	18.213	34.8566	0.071777	0.067383	-0.083496	NaN	NaN	NaN	NaN	NaN	NaN
0.518	-31.651	151.556	1335.18	-1.5088	0.63086	0.047363	-69.489	-2.9193	81.616	0.10615	0.016211	-0.095606	0.0300000000000011	-18.6026	47.9822	0.059814	0.08252	-0.079346	NaN	NaN	NaN	NaN	NaN	NaN
0.52	-50.196	140.42	1326.45	-1.48	0.60791	0.042969	-68.968	-77.819	100.6194	0.10537	0.030273	-0.10225	17.674	6.5799	30.56826	0.04834	0.096191	-0.082031	NaN	NaN	NaN	NaN	NaN	NaN
0.522	-38.63	135.429	1325.96	-1.4688	0.59961	0.044922	-74.826	-86.636	157.1507	0.10693	0.04336	-0.10977	5.35	-15.8508	30.9041	0.032227	0.11475	-0.083984	NaN	NaN	NaN	NaN	NaN	NaN
0.524	-35.915	150.5718	1284.47	-1.4375	0.58398	0.045898	-78.2238	-70.7511	156.226	0.11035	0.058105	-0.11816	-3.184	24.2777	24.20787	0.024902	0.12305	-0.084473	NaN	NaN	NaN	NaN	NaN	NaN
0.526	-41.312	170.028	1243.1	-1.4116	0.57373	0.045166	-67.033	-103.5724	191.379	0.11621	0.072558	-0.12695	-22.963	-30.5554	39.1289	0.016602	0.14453	-0.088867	NaN	NaN	NaN	NaN	NaN	NaN
0.528	-47.552	174.813	1222.86	-1.3921	0.56201	0.04541	-56.706	-29.022	274.2	0.11748	0.089941	-0.13701	-29.75	3.593	44.7608	0.0083008	0.15942	-0.094483	NaN	NaN	NaN	NaN	NaN	NaN
0.53	-56.974	179.446	1205.19	-1.3613	0.54297	0.043457	-62.584	-18.773	378.3123	0.11709	0.10127	-0.14717	-31.213	-29.218	70.764	0.003418	0.18018	-0.098145	NaN	NaN	NaN	NaN	NaN	NaN
0.532	-44.657	194.327	1168.96	-1.3438	0.5332	0.044434	-62.84	-2.5157	525.8076	0.1124	0.11875	-0.15547	-22.241	-13.193	106.572	0	0.19824	-0.10596	NaN	NaN	NaN	NaN	NaN	NaN
0.534	-49.01	195.055	1123.63	-1.3081	0.51904	0.053223	-39.894	72.3597	624.776	0.096191	0.13672	-0.15332	-31.024	-86.881	164.624	-0.0019531	0.20703	-0.11475	NaN	NaN	NaN	NaN	NaN	NaN
0.536	-31.895	192.231	1109.87	-1.2807	0.50439	0.049805	-59.46	45.283	744.828	0.052539	0.15107	-0.14522	-83.27	-93.383	226.5585	-0.025391	0.22363	-0.12158	NaN	NaN	NaN	NaN	NaN	NaN
0.538	-33.027	193.863	1080.66	-1.2559	0.49414	0.044434	-61.937	74.381	909.073	-0.013477	0.16562	-0.14024	-75.7082	-139.35527	285.41	-0.05542	0.24024	-0.1206	NaN	NaN	NaN	NaN	NaN	NaN
0.54	-29.825	186.327	1039.81	-1.2183	0.4751	0.04541	-37.129	111.6777	1056.58	-0.088868	0.18203	-0.12344	-45.345	-87.2542	400.349	-0.10107	0.25781	-0.11719	NaN	NaN	NaN	NaN	NaN	NaN
0.542	-43.974	188.511	1001.57	-1.1987	0.46533	0.047852	-67.076	86.18	1225.9	-0.16992	0.19814	-0.096972	-74.9965	-83.621	533.051	-0.18506	0.27783	-0.10352	NaN	NaN	NaN	NaN	NaN	NaN
0.544	-38.797	189.006	985.92	-1.1655	0.44922	0.050293	-66.508	119.545	1341.7955	-0.24854	0.22412	-0.081055	-113.11	-5.7326	715.773	-0.23242	0.28857	-0.097168	NaN	NaN	NaN	NaN	NaN	NaN
0.546	-30.016	191.574	951	-1.1328	0.44385	0.049805	-67.573	63.2091	1403.107	-0.32813	0.25137	-0.071875	-96.344	1.872	880.158	-0.34326	0.32275	-0.080566	NaN	NaN	NaN	NaN	NaN	NaN
0.548	-27.08	202.666	903.5	-1.0972	0.43604	0.05127	-56.06	-21.064	1472.265	-0.40703	0.28535	-0.060645	-120.47	64.918	1079.795	-0.44116	0.3518	-0.069092	NaN	NaN	NaN	NaN	NaN	NaN
0.55	-15.411	198.215	866.71	-1.0547	0.42285	0.057617	-61.252	-26.443	1462.727	-0.50274	0.32246	-0.052442	-150.615	42.497	1260.06	-0.54492	0.38965	-0.051758	NaN	NaN	NaN	NaN	NaN	NaN
0.552	-21.115	179.351	853.09	-1.0303	0.41504	0.056641	-41.164	-114.925	1423.911	-0.61523	0.36055	-0.038769	-159.574	65.062	1459.9186	-0.70654	0.44971	-0.033691	NaN	NaN	NaN	NaN	NaN	NaN
0.554	-3.095	162.712	820.65	-0.98975	0.40039	0.058105	-60.009	-157.497	1371.615	-0.75977	0.4043	-0.012207	-190.454	53.999	1583.311	-0.80859	0.48242	-0.030273	NaN	NaN	NaN	NaN	NaN	NaN
0.556	-7.107	160.182	782.13	-0.95361	0.38745	0.052978	-94.418	-164.252	1285.676	-0.93799	0.45303	0.035156	-199.327	64.5802	1655.696	-1.0449	0.57129	0.025879	NaN	NaN	NaN	NaN	NaN	NaN
0.558	-13.79	170.158	764.52	-0.91797	0.37012	0.055664	-91.665	-221.73	1227.897	-1.1664	0.51113	0.098632	-173.443	32.926	1617.427	-1.3438	0.68555	0.11865	NaN	NaN	NaN	NaN	NaN	NaN
0.56	-18.162	172.3829	734.7	-0.86279	0.354	0.060547	-80.621	-183.335	1188.7731	-1.4254	0.58731	0.18457	-202.02	-20.196	1554.986	-1.5176	0.75586	0.18018	NaN	NaN	NaN	NaN	NaN	NaN
0.562	-29.653	178.97	705.64	-0.83984	0.33984	0.05957	-87.371	-178.012	1153.257	-1.7075	0.68897	0.28115	-199.7745	-98.29	1446.081	-1.8926	0.93262	0.32666	NaN	NaN	NaN	NaN	NaN	NaN
0.564	-28.334	177.7495	651.729	-0.79248	0.31885	0.060059	-54.329	-177.79	1172.68	-1.9863	0.81055	0.38965	-177.131	-147.035	1333.976	-2.1765	1.0774	0.43653	NaN	NaN	NaN	NaN	NaN	NaN
0.566	-44.612	169.0375	612.162	-0.75585	0.30371	0.062011	-39.138	-119.939	1203.313	-2.2248	0.94668	0.47881	-152.2134	-176.592	1195.9513	-2.4023	1.2207	0.53174	NaN	NaN	NaN	NaN	NaN	NaN
0.568	-28.535	161.442	584.728	-0.71924	0.2915	0.062012	-45.2052	-138.164	1245.206	-2.3874	1.0657	0.51875	-150.551	-217.5	1145.466	-2.5034	1.3774	0.65039	NaN	NaN	NaN	NaN	NaN	NaN
0.57	-47.134	161.401	539.261	-0.65771	0.27588	0.069336	-43.8764	-110.8	1312.938	-2.423	1.1247	0.46836	-110.666	-231.15	1123.965	-2.5039	1.4219	0.67432	NaN	NaN	NaN	NaN	NaN	NaN
0.572	-44.963	155.056	514.645	-0.62842	0.26611	0.073242	-54.6693	-61.93	1341.429	-2.2466	1.1776	0.4959	-128.512	-244.063	1140.996	-2.4058	1.4243	0.57422	NaN	NaN	NaN	NaN	NaN	NaN
0.574	-26.657	147.169	489.145	-0.58008	0.25928	0.066406	-53.5789	-118.52	1373.1038	-2.0698	1.2251	0.55762	-98.479	-203.644	1135.489	-2.1647	1.3523	0.42749	NaN	NaN	NaN	NaN	NaN	NaN
0.576	-39.883	133.992	473.899	-0.54151	0.24854	0.064941	-58.4618	-147.222	1402.871	-2.0351	1.2415	0.42197	-78.001	-167.427	1216.6468	-1.8066	1.2588	0.27441	NaN	NaN	NaN	NaN	NaN	NaN
0.578	-30.591	148.975	434.834	-0.49707	0.23047	0.066895	-65.237	-239.04	1425.257	-1.8437	1.2055	0.22598	-60.142	-106.011	1291.301	-1.2832	1.1484	0.072754	NaN	NaN	NaN	NaN	NaN	NaN
0.58	-40.845	156.488	391.725	-0.44482	0.21533	0.065918	5.247	-358.917	1491.7658	-1.4577	1.1188	0.083398	-74.826	-94.56	1358.2596	-1.0605	1.1084	-0.014648	NaN	NaN	NaN	NaN	NaN	NaN
0.582	-21.601	153.714	382.481	-0.42383	0.20508	0.065918	49.51952	-394.124	1533.258	-1.0917	1.0378	-0.031641	-21.654	-73.68	1403.186	-0.78857	1.0552	-0.17432	NaN	NaN	NaN	NaN	NaN	NaN
0.584	-55.973	142.739	349.398	-0.37549	0.18213	0.064453	62.7901	-464.03	1578.0592	-0.85156	0.98047	-0.13574	-21.7355	-139.31	1446.183	-0.68775	1.0569	-0.27734	NaN	NaN	NaN	NaN	NaN	NaN
0.586	-47.444	120.113	328.092	-0.34253	0.17114	0.06665	80.9816	-480.76	1629.3679	-0.73799	0.99014	-0.22256	-17.1428	-205.916	1467.746	-0.60303	1.0903	-0.34326	NaN	NaN	NaN	NaN	NaN	NaN
0.588	-45.926	110.063	306.686	-0.31152	0.1543	0.066895	69.5578	-426.641	1654.398	-0.67617	1.0187	-0.27685	-12.576	-324.377	1503.6961	-0.52539	1.1372	-0.38379	NaN	NaN	NaN	NaN	NaN	NaN
0.59	-32.732	98.325	287.064	-0.26758	0.14209	0.070313	96.53758	-376.051	1720.2182	-0.64492	1.0367	-0.2956	-7.428	-396.61	1523.413319	-0.51172	1.1348	-0.39063	NaN	NaN	NaN	NaN	NaN	NaN
0.592	-22.923	96.373	275.534	-0.25244	0.13623	0.067871	64.6569	-260.777	1785.3529	-0.66172	1.041	-0.28125	-0.539000000000001	-466	1570.675	-0.58154	1.1099	-0.36963	NaN	NaN	NaN	NaN	NaN	NaN
0.594	-24.17	107.152	261.731	-0.21436	0.12451	0.067383	35.7162	-196.323	1861.982	-0.74951	1.0454	-0.2373	67.524	-463.27	1627.641	-0.75244	1.1285	-0.30713	NaN	NaN	NaN	NaN	NaN	NaN
0.596	-32.983	108.433	235.76	-0.18188	0.11597	0.068603	39.382	-169.373	1930.977	-0.92832	1.0869	-0.15606	119.1977	-448.961	1654.749	-0.98779	1.1919	-0.21973	NaN	NaN	NaN	NaN	NaN	NaN
0.598	3.678	110.399	211.879	-0.15479	0.10693	0.067383	4.469	-83.865	1942.4208	-1.1558	1.1755	-0.075684	104.0654	-363.33	1707.544	-1.3242	1.3223	-0.10498	NaN	NaN	NaN	NaN	NaN	NaN
0.6	3.446	91.875	200.401	-0.11816	0.091309	0.066406	4.592	-73.744	1933.0714	-1.3804	1.2844	-0.0022461	70.366	-285.866	1765.1993	-1.4609	1.3838	-0.04834	NaN	NaN	NaN	NaN	NaN	NaN
0.602	-0.858000000000004	84.098	191.017	-0.10205	0.08252	0.067383	19.204	-77.199	1926.4293	-1.5652	1.3763	0.067969	37.23177	-177.966	1823.4595	-1.6621	1.4805	0.035645	NaN	NaN	NaN	NaN	NaN	NaN
0.604	-7.243	64.216	184.886	-0.067383	0.063477	0.061523	16.691	-78.692	1913.247	-1.7031	1.4424	0.12305	-35.411	-118.974	1868.9807	-1.7651	1.5259	0.067139	NaN	NaN	NaN	NaN	NaN	NaN
0.606	-2.799	69.187	169.394	-0.046143	0.049072	0.05957	22.875	-152.442	1918.5183	-1.8237	1.4974	0.16328	-63.935	-64.619	1939.119	-1.8535	1.5664	0.084473	NaN	NaN	NaN	NaN	NaN	NaN
0.608	0.0429999999999993	82.397	141.898	-0.019043	0.037109	0.058594	11.739	-169.9439	1956.1988	-1.9307	1.5321	0.18174	-89.322	-48.137	1923.194	-1.9453	1.5977	0.083984	NaN	NaN	NaN	NaN	NaN	NaN
0.61	-5.374	78.969	139.608	0.0073242	0.015137	0.047363	-18.885	-180.431	1969.687	-2.0171	1.5646	0.19346	-82.803	-44.06	1896.573	-1.9746	1.6074	0.07666	NaN	NaN	NaN	NaN	NaN	NaN
0.612	-8.516	72.782	145.855	0.015625	0.0024414	0.046875	-34.015	-231.834	2000.879	-2.0854	1.5814	0.20127	-79.756	-43.931	1878.4337	-2.0059	1.6074	0.07373	NaN	NaN	NaN	NaN	NaN	NaN
0.614	-13.405	63.601	130.691	0.040527	-0.010254	0.050293	-82.29	-219.684	2012.389	-2.1367	1.5977	0.21436	-105.86	-59.229	1859.52	-2.0039	1.6113	0.06372	NaN	NaN	NaN	NaN	NaN	NaN
0.616	-7.069	67.344	99.178	0.053222	-0.024658	0.047119	-110.9256	-227.016	1990.753	-2.1707	1.6076	0.21045	-93.422	-95.0719	1867.127	-2.0015	1.6079	0.052246	NaN	NaN	NaN	NaN	NaN	NaN
0.618	-0.981000000000002	52.241	103.168	0.064453	-0.033691	0.044922	-132.4501	-244.373	2017.924	-2.1902	1.6246	0.20489	-121.638	-154.715	1932.145	-1.9917	1.6157	0.035645	NaN	NaN	NaN	NaN	NaN	NaN
0.62	-16.524	34.174	91.695	0.081055	-0.05127	0.046387	-153.663	-187.6937	2027.225	-2.2008	1.6359	0.19825	-110.867	-189.516	1962.4	-1.9878	1.6265	0.027832	NaN	NaN	NaN	NaN	NaN	NaN
0.622	-18.502	30.599	80.306	0.083984	-0.055664	0.043457	-119.889	-185.0015	2022.164	-2.209	1.6543	0.19532	-149.544	-200.71	2042.514	-1.9863	1.6543	0.012207	NaN	NaN	NaN	NaN	NaN	NaN
0.624	-13.846	37.8957	67.426	0.097656	-0.068848	0.038574	-94.1028	-130.481	1998.955	-2.2148	1.6758	0.19727	-146.727	-169.029	2082.191	-1.986	1.6799	0.0063476	NaN	NaN	NaN	NaN	NaN	NaN
0.626	-30.821	44.922	58.98	0.10645	-0.083008	0.038574	-98.28	-64.834	1923.7418	-2.2212	1.6893	0.19463	-212.635	-132.767	2135.253	-2.0034	1.7026	0.01709	NaN	NaN	NaN	NaN	NaN	NaN
0.628	-25.628	40.674	79.901	0.11426	-0.086426	0.039551	-54.74	-59.6172	1886.091	-2.223	1.6971	0.19512	-205.263	-85.108	2130.122	-2.0273	1.7168	0.022461	NaN	NaN	NaN	NaN	NaN	NaN
0.63	-41.492	42.647	75.121	0.12061	-0.092285	0.041016	-35.704	4.93875	1848.752	-2.2121	1.6987	0.18769	-177.23	-71.231	2127.387	-2.0391	1.7227	0.026367	NaN	NaN	NaN	NaN	NaN	NaN
0.632	-40.222	47.14	63.231	0.12085	-0.096924	0.037109	-45.932	-7.506	1831.286	-2.1856	1.6914	0.17627	-141.7071	-35.929	2072.37	-2.0405	1.7075	0.033203	NaN	NaN	NaN	NaN	NaN	NaN
0.634	-31.316	45.646	42.555	0.12256	-0.10156	0.038086	-10.425	-27.783	1854.032	-2.146	1.6724	0.1665	-141.9924	-19.722	2041.757	-2.0263	1.6836	0.031982	NaN	NaN	NaN	NaN	NaN	NaN
0.636	-14.817	37.677	30.93	0.12256	-0.10938	0.038574	19.604	9.4645	1833.354	-2.1055	1.6395	0.14766	-104.334	13.2946	1977.534	-1.999	1.6602	0.023926	NaN	NaN	NaN	NaN	NaN	NaN
0.638	-37.147	31.574	13.392	0.12598	-0.11035	0.040039	15.77	-36.562	1853.5602	-2.0591	1.6052	0.13095	-101.635	13.9063	1921.09	-1.9546	1.6138	0.0083008	NaN	NaN	NaN	NaN	NaN	NaN
0.64	-34.482	24.6046	19.2434	0.12598	-0.1123	0.041016	10.419	-13.053	1856.5636	-2.0146	1.5599	0.11338	-55.662	31.904	1883.985	-1.937	1.5884	0.0063477	NaN	NaN	NaN	NaN	NaN	NaN
0.642	-25.198	31.147	16.7797	0.12597	-0.11768	0.038574	-11.551	19.222	1842.673	-1.9749	1.5114	0.094921	-40.975	1.3038	1872.888	-1.9063	1.5352	-0.00048828	NaN	NaN	NaN	NaN	NaN	NaN
0.644	-23.153	32.93469	22.0838	0.12402	-0.12012	0.035645	41.569	-8.079	1874.3238	-1.937	1.4673	0.075684	4.568	7.975	1870.258	-1.8953	1.5032	-0.0061035	NaN	NaN	NaN	NaN	NaN	NaN
0.646	-18.33	31.462279	23.6351	0.11865	-0.12061	0.033691	37.693	25.3056	1864.652	-1.9084	1.4229	0.067678	-29.097	-16.49109	1887.1487	-1.8804	1.4653	-0.0043945	NaN	NaN	NaN	NaN	NaN	NaN
0.648	-25.98	26.0531	13.36141	0.11475	-0.12256	0.033203	36.455	-21.65314	1865.929	-1.887	1.3849	0.062891	-5.35499999999999	43.3389	1882.2308	-1.8726	1.4302	0.0014648	NaN	NaN	NaN	NaN	NaN	NaN
0.65	-20.989	20.2454	12.2299	0.10791	-0.12646	0.033691	72.82	-67.988	1859.265	-1.8761	1.3536	0.066014	-33.113	47.6064	1899.38099	-1.8667	1.4185	0.0053711	NaN	NaN	NaN	NaN	NaN	NaN
0.652	-10.229	23.97128	2.6388	0.10058	-0.12817	0.033936	53.6807	-35.886	1805.9552	-1.8704	1.3288	0.067672	-8.35700000000001	88.183	1883.9827	-1.855	1.4028	0.012695	NaN	NaN	NaN	NaN	NaN	NaN
0.654	-0.849000000000004	20.8035	11.2557	0.092773	-0.12988	0.037598	57.825	-50.995	1777.037	-1.8569	1.311	0.074707	-16.208	40.3	1895.013	-1.8433	1.3955	0.026367	NaN	NaN	NaN	NaN	NaN	NaN
0.656	-26.833	11.6506	10.89028	0.079102	-0.12549	0.041504	35.277	4.197	1726.878	-1.851	1.2998	0.081743	10.266	41.864	1871.7747	-1.8374	1.3892	0.040527	NaN	NaN	NaN	NaN	NaN	NaN
0.658	-21.106	5.54853	22.7799	0.074707	-0.12598	0.037598	2.48999999999999	53.584	1664.991	-1.8394	1.2945	0.086924	10.408	-8.9653	1876.787	-1.8218	1.3784	0.056641	NaN	NaN	NaN	NaN	NaN	NaN
0.66	-6.469	13.76513	21.445	0.060059	-0.12109	0.040039	2.881	56.0367	1665.79481	-1.827	1.2899	0.093165	-20.023	32.621	1855.836	-1.8203	1.3691	0.062012	NaN	NaN	NaN	NaN	NaN	NaN
0.662	-7.072	37.1784	6.888	0.054199	-0.1206	0.045166	-15.879	132.824	1634.19	-1.8104	1.2915	0.099121	-31.705	26.009	1815.479	-1.812	1.3638	0.081543	NaN	NaN	NaN	NaN	NaN	NaN
0.664	-18.754	44.212	5.5059	0.041992	-0.11865	0.046875	-37.387	103.675	1627.0766	-1.7925	1.2876	0.10254	-41.948	64.456	1763.545	-1.7978	1.3554	0.089355	NaN	NaN	NaN	NaN	NaN	NaN
0.666	-21.906	38.331	17.2214	0.043945	-0.12061	0.045898	-64.293	104.546	1629.1715	-1.7784	1.2912	0.11173	-45.828	44.317	1757.7978	-1.7749	1.3501	0.096191	NaN	NaN	NaN	NaN	NaN	NaN
0.668	-29.537	35.4834	-2.7406	0.04834	-0.11475	0.04541	-86.0964	138.193	1596.7262	-1.7544	1.2824	0.11484	-24.732	115.55	1738.112	-1.7383	1.3291	0.10156	NaN	NaN	NaN	NaN	NaN	NaN
0.67	-23.428	25.3441	-5.3531	0.055176	-0.10693	0.053223	-98.422	78.819	1573.1219	-1.7278	1.2762	0.11679	-62	140.0949	1743.456	-1.7183	1.3208	0.104	NaN	NaN	NaN	NaN	NaN	NaN
0.672	-33.515	13.2058	13.27685	0.064209	-0.10522	0.052002	-93.913	95.8633	1542.166	-1.6993	1.2705	0.12352	-92.29	251.629	1709.7494	-1.6772	1.2993	0.10791	NaN	NaN	NaN	NaN	NaN	NaN
0.674	-19.447	19.49669	22.399	0.070313	-0.10352	0.048828	-92.097	96.926	1511.812	-1.6699	1.2578	0.13086	-141.4398	259.872	1677.0153	-1.6521	1.2839	0.1084	NaN	NaN	NaN	NaN	NaN	NaN
0.676	-38.692	24.89672	20.24776	0.084961	-0.1001	0.044922	-77.133	62.306	1521.577	-1.6474	1.2489	0.12974	-173.402	317.978	1641.0364	-1.6265	1.27	0.10596	NaN	NaN	NaN	NaN	NaN	NaN
0.678	-31.27	41.1787	6.4982	0.088867	-0.1001	0.042969	-80.2316	104.041	1503.1186	-1.6208	1.235	0.13173	-172.4944	263.474	1622.5108	-1.5928	1.2441	0.10791	NaN	NaN	NaN	NaN	NaN	NaN
0.68	-42.404	44.563	-1.045	0.099121	-0.097168	0.041992	-85.311	59.59	1476.988	-1.5932	1.2241	0.12853	-149.885	277.026	1622.506	-1.5801	1.2344	0.11328	NaN	NaN	NaN	NaN	NaN	NaN
0.682	-33.224	30.936	16.4006	0.10962	-0.09375	0.043701	-71.91	61.52	1454.514	-1.5625	1.2131	0.12748	-122.951	219.2615	1631.384	-1.5566	1.2129	0.12158	NaN	NaN	NaN	NaN	NaN	NaN
0.684	-44.604	26.223	7.7947	0.12109	-0.094238	0.042969	-77.027	102.977	1415.3388	-1.5293	1.1982	0.12061	-132.655	246.1003	1576.573	-1.5454	1.1928	0.13282	NaN	NaN	NaN	NaN	NaN	NaN
0.686	-46.972	19.42796	7.6143	0.12598	-0.089355	0.050293	-70.434	98.448	1363.6023	-1.4924	1.1815	0.11186	-125.5961	205.179	1518.6346	-1.5313	1.1758	0.14111	NaN	NaN	NaN	NaN	NaN	NaN
0.688	-42.198	27.7648	12.2034	0.12939	-0.092773	0.049805	-49.324	173.551	1318.139	-1.461	1.1637	0.10128	-111.745	241.051	1469.089	-1.5024	1.145	0.14746	NaN	NaN	NaN	NaN	NaN	NaN
0.69	-26.62	24.30964	2.7544	0.12939	-0.087891	0.055176	-48.233	217.713	1284.185	-1.4244	1.1429	0.10284	-111.751	194.608	1438.607	-1.48	1.1333	0.15234	NaN	NaN	NaN	NaN	NaN	NaN
0.692	-43.326	31.84142	5.6827	0.13476	-0.085694	0.057129	-52.279	203.705	1277.96668	-1.393	1.1202	0.10059	-95.653	236.678	1421.435	-1.4316	1.0957	0.15283	NaN	NaN	NaN	NaN	NaN	NaN
0.694	-40.242	37.2463	6.2932	0.13867	-0.081055	0.063965	-26.936	266.348	1256.5614	-1.3647	1.0942	0.098145	-60.164	218.155	1411.9941	-1.3875	1.0696	0.15308	NaN	NaN	NaN	NaN	NaN	NaN
0.696	-10.247	47.962	20.9788	0.13965	-0.080566	0.067871	-37.568	234.869	1216.9803	-1.3356	1.0679	0.099474	-114.631	300.211	1377.2093	-1.3413	1.0435	0.15332	NaN	NaN	NaN	NaN	NaN	NaN
0.698	-7.759	50.224	19.3782	0.14111	-0.074219	0.070801	-24.05	237.911	1186.6633	-1.3068	1.0311	0.098739	-98.618	293.077	1334.652	-1.2788	1.0044	0.15234	NaN	NaN	NaN	NaN	NaN	NaN
0.7	-23.063	37.5523	14.0726	0.1416	-0.068848	0.075195	5.67699999999999	254.705	1122.073	-1.2725	1.0103	0.11487	-115.099	348.327	1299.394	-1.2358	0.97314	0.15161	NaN	NaN	NaN	NaN	NaN	NaN
0.702	-38.802	28.271	1.9362	0.13941	-0.063232	0.082276	-29.459	186.3382	1086.617	-1.2471	1.0002	0.12364	-80.377	330.16	1225.023	-1.1953	0.94336	0.15479	NaN	NaN	NaN	NaN	NaN	NaN
0.704	-21.516	23.7734	5.6463	0.13525	-0.058594	0.085449	-23.525	205.433	1049.675	-1.2241	0.98291	0.12744	-71.474	368.09	1163.255	-1.1426	0.90234	0.15674	NaN	NaN	NaN	NaN	NaN	NaN
0.706	-11.795	31.8573	-5.35278	0.12402	-0.054688	0.093262	-28.785	181.604	1029.315	-1.1911	0.95708	0.13384	-39.225	319.0985	1115.682	-1.1113	0.87891	0.15918	NaN	NaN	NaN	NaN	NaN	NaN
0.708	-16.552	36.08865	-6.1112	0.11621	-0.04248	0.1001	-46.296	136.34	1037.6377	-1.1616	0.92143	0.1433	-57.714	334.99	1081.991	-1.0576	0.84277	0.16162	NaN	NaN	NaN	NaN	NaN	NaN
0.71	-14.331	37.8148	6.7922	0.10596	-0.03125	0.099609	-76.861	179.226	1015.8797	-1.1455	0.87971	0.14703	-57.196	289.81	1007.225	-1.0137	0.8208	0.16797	NaN	NaN	NaN	NaN	NaN	NaN
0.712	-12.388	34.9687	18.3278	0.09375	-0.024902	0.11695	-99.056	153.982	992.291	-1.1205	0.8408	0.15158	-83.446	294.9815	960.6687	-0.97461	0.79492	0.17627	NaN	NaN	NaN	NaN	NaN	NaN
0.714	-3.143	37.326	29.8421	0.083496	-0.012207	0.12305	-81.544	175.3376	960.744	-1.0928	0.8125	0.15771	-87.714	239.107	887.155	-0.91699	0.75781	0.17383	NaN	NaN	NaN	NaN	NaN	NaN
0.716	-4.747	43.6255	33.4003	0.060547	0.0068359	0.13184	-81.895	208.3393	903.043	-1.0624	0.78633	0.15764	-119.97	254.6367	864.855	-0.88867	0.74316	0.17432	NaN	NaN	NaN	NaN	NaN	NaN
0.718	-11.842	13.5075	68.1194	0.056641	0.013672	0.13916	-107.991	162.6216	863.134	-1.028	0.7559	0.15886	-107.868	236.2454	825.047	-0.81982	0.70654	0.17139	NaN	NaN	NaN	NaN	NaN	NaN
0.72	-26.382	-24.5832	71.8317	0.043457	0.02832	0.14502	-94.745	198.1028	803.5414	-0.99531	0.73091	0.16196	-143.119	280.154	799.0011	-0.76514	0.67969	0.17358	NaN	NaN	NaN	NaN	NaN	NaN
0.722	-24.136	-22.1365	86.2914	0.034668	0.042236	0.15235	-94.382	196.274	733.715	-0.9583	0.70261	0.1623	-137.987	274.1099	743.074	-0.71094	0.65332	0.17383	NaN	NaN	NaN	NaN	NaN	NaN
0.724	-0.725000000000001	-18.3464	94.002	0.025391	0.052734	0.1626	-108.433	184.006	708.012	-0.92529	0.67432	0.16357	-170.6129	282.842	723.006	-0.63086	0.62109	0.17236	NaN	NaN	NaN	NaN	NaN	NaN
0.726	-35.368	-12.7446	156.631	0.01416	0.068359	0.16016	-100.256	245.3582	656.703	-0.89435	0.64356	0.16318	-138.6922	246.324	635.779	-0.5918	0.60938	0.17139	NaN	NaN	NaN	NaN	NaN	NaN
0.728	-42.763	-8.8641	214.075	0.0092773	0.080078	0.16357	-101.341	200.552	611.1883	-0.86265	0.61797	0.16895	-148.051	239.236	584.9205	-0.5166	0.56494	0.17383	NaN	NaN	NaN	NaN	NaN	NaN
0.73	-50.865	7.0669	243.37	-0.0058594	0.10205	0.16602	-96.996	204.641	561.159	-0.82949	0.59338	0.16934	-106.842	246.4746	528.637	-0.45654	0.53833	0.17456	NaN	NaN	NaN	NaN	NaN	NaN
0.732	-32.248	26.2709	316.113	-0.029053	0.11816	0.1665	-107.4199	213.618	515.875	-0.79183	0.56236	0.16837	-132.647	241.0569	489.2859	-0.39746	0.50586	0.16992	NaN	NaN	NaN	NaN	NaN	NaN
0.734	-45.785	69.0326	426.271	-0.062988	0.12988	0.17578	-103.04	154.141	483.1104	-0.75146	0.5415	0.16943	-112.492	217.761	427.4419	-0.32324	0.47461	0.16406	NaN	NaN	NaN	NaN	NaN	NaN
0.736	-30.92	79.3902	541.448	-0.12842	0.14551	0.17578	-69.725	185.418	460.561	-0.71312	0.5178	0.17313	-121.784	182.4856	387.1728	-0.28467	0.45166	0.16309	NaN	NaN	NaN	NaN	NaN	NaN
0.738	-10.771	88.45139	650.22	-0.16357	0.15332	0.18359	-65.417	161.663	425.46	-0.67006	0.49271	0.17676	-127.15783	178.853	291.854	-0.22656	0.41602	0.16309	NaN	NaN	NaN	NaN	NaN	NaN
0.74	10.842	99.701	778	-0.24854	0.16455	0.1958	-64.49	125.6521	400.171	-0.62866	0.46458	0.17441	-113.707	169.2338	271.335	-0.1814	0.3855	0.15918	NaN	NaN	NaN	NaN	NaN	NaN
0.742	27.763	95.483	919.05	-0.32495	0.17066	0.19678	-42.085	153.6054	385.754	-0.57512	0.43293	0.17061	-57.809	206.297	251.197	-0.14551	0.35938	0.15674	NaN	NaN	NaN	NaN	NaN	NaN
0.744	53.519	88.654	1008.01	-0.40283	0.18701	0.20166	-25.63	88.892	370.7366	-0.5293	0.39941	0.16748	-94.696	193.832	249.433	-0.099121	0.32861	0.14746	NaN	NaN	NaN	NaN	NaN	NaN
0.746	59.74	63.0814	1090.21	-0.53516	0.2124	0.21094	6.69399999999999	97.0871	338.815	-0.47646	0.36738	0.16357	-66.491	220.804	203.3283	-0.077637	0.31445	0.14453	NaN	NaN	NaN	NaN	NaN	NaN
0.748	10.219	29.548	1139	-0.61084	0.22607	0.21338	26.172	106.5203	302.607	-0.4241	0.33515	0.15537	-55.55	160.593	208.9371	-0.038574	0.28955	0.13867	NaN	NaN	NaN	NaN	NaN	NaN
0.75	-0.393000000000001	8.353	1141.64	-0.78662	0.25391	0.22559	-6.279	66.248	269.627	-0.37645	0.30117	0.15068	-26.18	167.8012	187.478	-0.013916	0.26807	0.1289	NaN	NaN	NaN	NaN	NaN	NaN
0.752	-6.80200000000001	-24.665	1132.58	-0.94529	0.27417	0.2478	-3.21700000000001	112.4335	229.609	-0.33056	0.26904	0.14434	1.63500000000001	112.518	206.824	0.0097656	0.25	0.13135	NaN	NaN	NaN	NaN	NaN	NaN
0.754	7.93	-43.288	1105.47	-1.1284	0.30127	0.27148	-15.941	91.1104	194.705	-0.28809	0.23438	0.1377	37.999	138.5924	178.718	0.037109	0.22803	0.12354	NaN	NaN	NaN	NaN	NaN	NaN
0.756	55.208	-60.334	1145.31	-1.394	0.34131	0.33008	-21.501	75.78579	168.5792	-0.24453	0.20508	0.13301	14.447	99.931	123.4806	0.045898	0.2168	0.12158	NaN	NaN	NaN	NaN	NaN	NaN
0.758	74.7803	-41.158	1160.71	-1.5327	0.36963	0.35547	2.733	139.971	159.934	-0.20108	0.17471	0.12988	11.196	125.35155	72.741	0.063477	0.19482	0.11426	NaN	NaN	NaN	NaN	NaN	NaN
0.76	54.338	-20.287	1145.81	-1.7793	0.44922	0.43701	-18.781	119.204	155.8536	-0.16318	0.14346	0.12598	-3.73399999999999	40.432	60.188	0.067627	0.17846	0.11133	NaN	NaN	NaN	NaN	NaN	NaN
0.762	67.762	-3.48	1141.41	-1.9306	0.51562	0.46826	-30.221	150.159	155.0245	-0.12656	0.10674	0.12637	-10.864	52.369	49.111	0.071777	0.16113	0.10938	NaN	NaN	NaN	NaN	NaN	NaN
0.764	68.034	-18.072	1137.69	-2.0308	0.57275	0.49902	-28.162	157.424	124.3967	-0.09668	0.076172	0.1084	-22.242	-7.8871	67.568	0.070801	0.13379	0.10645	NaN	NaN	NaN	NaN	NaN	NaN
0.766	52.458	-26.375	1158.81	-2.0742	0.63281	0.52295	-51.066	97.064	100.8831	-0.05918	0.054101	0.1086	-12.027	63.877	62.9348	0.074219	0.12451	0.10254	NaN	NaN	NaN	NaN	NaN	NaN
0.768	24.398	9.472	1164.67	-2.0293	0.65137	0.52588	-21.294	112.1507	91.3514	-0.027539	0.037793	0.10205	-37.409	14.4779	60.3591	0.070313	0.10547	0.104	NaN	NaN	NaN	NaN	NaN	NaN
0.77	-27.262	31.869	1138.42	-1.9512	0.65625	0.52979	-42.118	71.2844	64.4621	0.0076179	0.018652	0.10166	-25.166	70.563	43.34139	0.065674	0.089843	0.10498	NaN	NaN	NaN	NaN	NaN	NaN
0.772	-55.6212	16.256	1111.71	-1.8164	0.64648	0.51904	-54.938	36.881	81.1194	0.03545	0.0051757	0.097559	-43.237	3.96163	32.4571	0.066895	0.077637	0.10352	NaN	NaN	NaN	NaN	NaN	NaN
0.774	-42.483	-27.514	1111.33	-1.7402	0.64648	0.50391	-36.562	61.8097	56.99	0.057617	-0.0024414	0.094238	-61.147	59.3266	12.2558	0.070313	0.066406	0.10205	NaN	NaN	NaN	NaN	NaN	NaN
0.776	-44.92	-62.801	1124.44	-1.5679	0.65674	0.4624	-90.12725	15.351	47.9995	0.082324	-0.016016	0.086328	-42.054	6.507	13.6356	0.071777	0.065918	0.094238	NaN	NaN	NaN	NaN	NaN	NaN
0.778	-24.944	-83.52	1162.56	-1.415	0.65039	0.41845	-65.819	19.848	54.286	0.10664	-0.030469	0.08252	-47.418	57.5346	27.834	0.07373	0.058105	0.093262	NaN	NaN	NaN	NaN	NaN	NaN
0.78	-44.903	-129.14	1204.35	-1.2617	0.63965	0.37158	-62.929	29.23	27.2253	0.13203	-0.051172	0.081738	-67.029	-12.4835	21.3833	0.071777	0.047119	0.091064	NaN	NaN	NaN	NaN	NaN	NaN
0.782	-59.269	-177.889	1239.11	-1.0962	0.62939	0.3335	-84.266	3.083	27.3589	0.15381	-0.069336	0.078125	-85.084	41.8504	-17.039286	0.063965	0.040527	0.093262	NaN	NaN	NaN	NaN	NaN	NaN
0.784	-85.987	-206.178	1267.39	-1.0352	0.64063	0.31934	-58.123	30.4954	33.2903	0.17334	-0.083496	0.074219	-86.748	-17.1965	-16.2303	0.041992	0.029785	0.084961	NaN	NaN	NaN	NaN	NaN	NaN
0.786	-56.792	-217.268	1301.16	-0.96289	0.67578	0.29932	-63.847	18.5815	16.897	0.19024	-0.10293	0.065625	-91.309	32.2041	-23.036	0.032715	0.026855	0.086426	NaN	NaN	NaN	NaN	NaN	NaN
0.788	-30.187	-206.083	1338.74	-0.95484	0.70533	0.30347	-44.133	10.098	28.339	0.20752	-0.11406	0.065039	-72.463	-24.996	10.09093	0.020996	0.02002	0.092773	NaN	NaN	NaN	NaN	NaN	NaN
0.79	-48.4433	-196.443	1363.56	-0.97607	0.73877	0.31104	0.158999999999999	53.0477	23.078474	0.22471	-0.12617	0.061914	-83.0101	32.402	16.768247	0.0090332	0.016601	0.097168	NaN	NaN	NaN	NaN	NaN	NaN
0.792	-84.7648	-184.999	1407.64	-1.041	0.82031	0.32324	-40.894	40.81448	-5.0755	0.24307	-0.1332	0.055567	-78.4071	0.3358	7.5302	0.0019531	0.011719	0.099609	NaN	NaN	NaN	NaN	NaN	NaN
0.794	-102.5979	-159.663	1451.61	-1.0723	0.87695	0.34326	-13.921	64.2853	15.22328	0.25928	-0.13818	0.050781	-54.483	68.737	10.113	0.00048828	0.0083008	0.098633	NaN	NaN	NaN	NaN	NaN	NaN
0.796	-98.2346	-122.335	1481.91	-1.1382	0.97607	0.3457	-10.703	75.293	-15.0737	0.27666	-0.1459	0.043359	-25.522	19.373	9.4485	0.0073242	0.0048828	0.094238	NaN	NaN	NaN	NaN	NaN	NaN
0.798	-96.5443	-111.1201	1484.34	-1.2136	1.0408	0.35205	-24.782	36.2318	-10.0456	0.28897	-0.15293	0.03623	-47.446	67.04484	1.0061	0.024902	0.00097656	0.1001	NaN	NaN	NaN	NaN	NaN	NaN
0.8	-72.5472	-110.202	1506.37	-1.3022	1.0981	0.34473	12.227	46.2952	1.415	0.29404	-0.15957	0.030371	-19.95	49.6952	-1.7486	0.042481	-0.0048828	0.095459	NaN	NaN	NaN	NaN	NaN	NaN
0.802	-53.534	-127.7428	1530.6	-1.4116	1.1821	0.35742	-1.985	16.9967	-0.473000000000001	0.28828	-0.16025	0.022852	-10.157	91.035	1.63	0.060059	-0.0087891	0.093262	NaN	NaN	NaN	NaN	NaN	NaN
0.804	-33.211	-121.77342	1579.1	-1.459	1.2188	0.36133	-5.587	-12.8455	21.47973	0.2793	-0.15723	0.023926	4.877	54.2545	14.48939	0.088867	-0.020996	0.084473	NaN	NaN	NaN	NaN	NaN	NaN
0.806	-9.351	-108.341	1640.32	-1.5664	1.2715	0.37305	13.374	26.1341	19.759	0.2582	-0.15625	0.024902	11.261	60.13	43.149	0.10449	-0.027344	0.077148	NaN	NaN	NaN	NaN	NaN	NaN
0.808	24.7	-89.885	1684.57	-1.6484	1.3032	0.38818	-12.993	9.76058	10.64019	0.23047	-0.14775	0.028808	-10.304	16.1365	25.5386	0.13965	-0.041992	0.064453	NaN	NaN	NaN	NaN	NaN	NaN
0.81	17.721	-102.813	1735.04	-1.7266	1.3379	0.39697	6.953	23.8265	36.9118	0.19648	-0.13642	0.037793	-9.787	48.311	3.7016	0.15845	-0.050781	0.056641	NaN	NaN	NaN	NaN	NaN	NaN
0.812	-4.436	-115.327	1749.83	-1.8198	1.3813	0.41113	1.755	41.1851	22.1392	0.15938	-0.12422	0.043555	-14.481	52.232	8.4814	0.17773	-0.06543	0.048828	NaN	NaN	NaN	NaN	NaN	NaN
0.814	-19.885	-105.221	1762.13	-1.8574	1.4063	0.41797	-21.744	6.794	20.5248	0.12109	-0.10498	0.049805	-18.339	67.623	40.5142	0.19678	-0.089844	0.033691	NaN	NaN	NaN	NaN	NaN	NaN
0.816	-17.647	-77.233	1795.66	-1.9199	1.4434	0.4165	-5.129	23.5359	31.383	0.087402	-0.094532	0.061231	-10.673	36.451	49.279	0.20557	-0.097168	0.027344	NaN	NaN	NaN	NaN	NaN	NaN
0.818	-19.639	-80.023	1830.42	-1.9563	1.47	0.42139	-42.654	16.0915	3.929	0.062109	-0.079785	0.070215	-10.161	21.6605	52.734	0.21582	-0.11914	0.015625	NaN	NaN	NaN	NaN	NaN	NaN
0.82	-20.076	-99.184	1860.38	-1.9819	1.4907	0.42529	-49.592	20.2583	23.3292	0.0375	-0.061035	0.074511	-11.31	7.096	36.097	0.22144	-0.13159	0.0053711	NaN	NaN	NaN	NaN	NaN	NaN
0.822	-32.735	-121.42	1869.3	-2.0132	1.5063	0.42969	-32.503	63.854	15.325	0.012207	-0.045605	0.080664	-21.082	-0.809000000000001	46.53476	0.22803	-0.14551	0.0029297	NaN	NaN	NaN	NaN	NaN	NaN
0.824	-16.906	-121.703	1872.3	-2.0229	1.5103	0.43359	-79.05	43.411	0.6143	-0.0083008	-0.026855	0.083984	-19.7	14.539	40.0429	0.22803	-0.15137	-0.0019531	NaN	NaN	NaN	NaN	NaN	NaN
0.826	-18.121	-96.056	1880.56	-2.0449	1.5	0.44189	-59.973	51.716	26.819635	-0.023437	-0.013379	0.087597	-55.246	21.3852	42.1772	0.22607	-0.15283	-0.0092773	NaN	NaN	NaN	NaN	NaN	NaN
0.828	-5.12	-66.542	1882.77	-2.0616	1.4819	0.44849	-65.5	73.432	11.4693	-0.031543	-0.0016602	0.089062	-50.247	39.7043	15.0761	0.22314	-0.15137	-0.0053711	NaN	NaN	NaN	NaN	NaN	NaN
0.83	-21.65	-40.51	1869.79	-2.0737	1.4575	0.45605	-86.867	44.9216	21.113	-0.034668	0.0045898	0.089453	-55.859	21.9411	18.608	0.22144	-0.14185	-0.0051269	NaN	NaN	NaN	NaN	NaN	NaN
0.832	-41.525	-11.008	1850.63	-2.0972	1.4028	0.47266	-41.916	49.5304	33.503	-0.030078	0.012207	0.086524	-78.96	26.9452	25.7506	0.22119	-0.13818	-0.0048828	NaN	NaN	NaN	NaN	NaN	NaN
0.834	-65.3087	-8.72499999999999	1860.04	-2.1152	1.3848	0.4834	-64.67	23.6469	-4.023	-0.019043	0.011719	0.080566	-83.824	-0.9806	31.11694	0.22168	-0.12256	-0.0068359	NaN	NaN	NaN	NaN	NaN	NaN
0.836	-79.8883	-12.622	1864.81	-2.1582	1.332	0.51416	-71.03	-5.264	17.6765	-0.0056639	0.013086	0.078906	-97.7631	39.693	20.0325	0.22021	-0.12158	-0.0073242	NaN	NaN	NaN	NaN	NaN	NaN
0.838	-106.137	-19.53	1906.36	-2.186	1.2895	0.53516	-43.87	13.3477	6.721	0.0086915	0.011621	0.07334	-89.077	18.7164	24.3577	0.21729	-0.1084	-0.0043945	NaN	NaN	NaN	NaN	NaN	NaN
0.84	-105.615	-13.51	1908.71	-2.2144	1.2505	0.56152	-65.006	3.243	0.6903	0.027442	0.012012	0.069824	-75.476	44.023	7.128	0.21631	-0.10351	-0.0024414	NaN	NaN	NaN	NaN	NaN	NaN
0.842	-92.481	-4.65000000000001	1914.65	-2.2383	1.1973	0.58643	-34.41	25.46583	33.269	0.045313	0.013965	0.064355	-58.52	-16.69515	13.446	0.21191	-0.09668	0.003418	NaN	NaN	NaN	NaN	NaN	NaN
0.844	-100.817	-3.175	1907.193	-2.2534	1.1782	0.60156	-27.606	52.133	19.2408	0.064453	0.012207	0.063477	-69.888	6.841	-24.1446	0.19141	-0.083496	0.013672	NaN	NaN	NaN	NaN	NaN	NaN
0.846	-87.8471	-1.72	1911.98	-2.2754	1.1309	0.62939	-42.165	27.1803	19.4376	0.083886	0.015234	0.060352	-46.279	-19.092	-25.5	0.17725	-0.070556	0.021484	NaN	NaN	NaN	NaN	NaN	NaN
0.848	-59.659	-3.21799999999999	1918.92	-2.2859	1.0969	0.64575	1.842	48.779	32.7644	0.098438	0.01455	0.054004	-42.508	55.8215	-3.89439	0.1626	-0.058105	0.03125	NaN	NaN	NaN	NaN	NaN	NaN
0.85	-37.777	-21.09	1913.05	-2.2905	1.0669	0.65918	-28.656	29.5589	17.2838	0.11601	0.01455	0.049707	-29.118	23.4212	14.7345	0.14209	-0.044434	0.049316	NaN	NaN	NaN	NaN	NaN	NaN
0.852	-49.127	-37.098	1930.84	-2.3022	1.0317	0.68457	-7.363	16.6176	22.2313	0.13067	0.016406	0.048438	-18.392	60.109	6.197	0.13477	-0.035645	0.049316	NaN	NaN	NaN	NaN	NaN	NaN
0.854	-59.8286	-40.958	1935.697	-2.3042	1.0181	0.6875	26.42	36.894	16.1159	0.14893	0.017578	0.040527	-17.564	9.9342	9.7873	0.12842	-0.020996	0.064453	NaN	NaN	NaN	NaN	NaN	NaN
0.856	-78.71473	-46.042	1946.29	-2.312	0.99463	0.70313	-21.272	18.5712	-1.1117	0.15635	0.020606	0.042676	-26.64	52.893	-9.4992	0.12915	-0.014648	0.072022	NaN	NaN	NaN	NaN	NaN	NaN
0.858	-65.204	-25.848	1900.405	-2.3083	0.98804	0.7063	20.606	42.2568	22.4824	0.16377	0.02998	0.039356	-16.764	11.5436	28.063	0.13477	-0.0024414	0.07666	NaN	NaN	NaN	NaN	NaN	NaN
0.86	-54.227	14.211	1869.423	-2.3062	0.979	0.70605	7.12	65.268	-3.072	0.16846	0.040527	0.043261	-11.803	70.209	39.06	0.13818	0.0043945	0.078613	NaN	NaN	NaN	NaN	NaN	NaN
0.862	-51.091	41.959	1853.183	-2.2891	0.97266	0.70605	-5.924	42.1138	14.1829	0.17041	0.049121	0.048144	-14.431	18.6552	31.2813	0.13867	0.0058594	0.078613	NaN	NaN	NaN	NaN	NaN	NaN
0.864	-61.7457	63.1029	1849.235	-2.2788	0.97314	0.70313	12.601	59.365	25.9765	0.16943	0.058105	0.050293	1.74099999999999	75.903	-1.771	0.14258	0.01123	0.079102	NaN	NaN	NaN	NaN	NaN	NaN
0.866	-45.189	44.326	1833.476	-2.2461	0.98242	0.69092	-39.483	32.9582	11.033	0.1749	0.064942	0.056934	25.13	29.8269	0.24	0.13257	0.016113	0.087891	NaN	NaN	NaN	NaN	NaN	NaN
0.868	-38.439	46.513	1815.334	-2.2161	0.97974	0.677	-28.285	-3.059	41.314	0.17461	0.066309	0.056934	13.212	66.1538	4.3698	0.12305	0.022949	0.092773	NaN	NaN	NaN	NaN	NaN	NaN
0.87	-13.169	19.985	1808.69	-2.1792	0.98096	0.66211	-19.996	7.994	39.5349	0.18008	0.068653	0.063183	-9.55	27.537	20.175	0.096191	0.021484	0.099121	NaN	NaN	NaN	NaN	NaN	NaN
0.872	-36.654	6.392	1795.299	-2.1304	0.97705	0.64648	-58.57	-9.512	25.5381	0.18613	0.069043	0.064258	-29.249	83.554	15.3959	0.08252	0.025879	0.10156	NaN	NaN	NaN	NaN	NaN	NaN
0.874	-43.889	-0.840000000000003	1765.799	-2.1108	0.9751	0.63477	-34.806	0.34	36.6167	0.1958	0.066406	0.066406	-32.223	37.2742	31.0986	0.058105	0.03125	0.1123	NaN	NaN	NaN	NaN	NaN	NaN
0.876	-67.755	14.623	1741.69	-2.0684	0.96875	0.61963	-51.676	39.3589	2.016	0.2041	0.068555	0.069434	-38.061	70.984	61.8241	0.044189	0.041016	0.12207	NaN	NaN	NaN	NaN	NaN	NaN
0.878	-57.337	21.263	1737.869	-2.034	0.96314	0.60571	-85.834	33.469	7.0557	0.21182	0.070019	0.070411	-46.085	15.5415	58.563	0.026367	0.060547	0.12305	NaN	NaN	NaN	NaN	NaN	NaN
0.88	-59.869	16.681	1747.097	-2.0034	0.95752	0.59961	-40.994	50.8642	22.7547	0.21885	0.066895	0.070411	-54.69	42.6273	46.6344	0.02002	0.083008	0.13379	NaN	NaN	NaN	NaN	NaN	NaN
0.882	-80.173	11.715	1702.21	-1.9609	0.95215	0.57764	-85.302	33.2685	7.8289	0.22295	0.065625	0.072754	-80.786	16.7299	25.30416	0.019531	0.091797	0.13135	NaN	NaN	NaN	NaN	NaN	NaN
0.884	-86.8154	17.049	1679.657	-1.937	0.95557	0.57227	-65.367	10.901	18.6074	0.2207	0.06543	0.074707	-92.16	53.953	35.838	0.025879	0.12207	0.13623	NaN	NaN	NaN	NaN	NaN	NaN
0.886	-107.556	20.235	1644.309	-1.8965	0.94336	0.55518	-40.897	36.3529	7.155	0.21436	0.068262	0.081836	-78.3302	-1.2254	68.84	0.036377	0.1416	0.13599	NaN	NaN	NaN	NaN	NaN	NaN
0.888	-88.789	28.716	1640.376	-1.863	0.94018	0.55102	-81.9847	25.5655	-1.279	0.20283	0.06582	0.083594	-40.831	-22.51389	92.474	0.044922	0.16016	0.13721	NaN	NaN	NaN	NaN	NaN	NaN
0.89	-105.609	45.622	1615.888	-1.8296	0.92822	0.54688	-48.033	43.1263	26.6028	0.18642	0.069336	0.092969	-62.964	-72.321	90.46918	0.05957	0.17676	0.13867	NaN	NaN	NaN	NaN	NaN	NaN
0.892	-89.936	81.112	1592.253	-1.7847	0.90869	0.53076	-45.881	62.601	9.456	0.16856	0.074707	0.096387	-57.808	-67.95	116.50408	0.069824	0.18652	0.1416	NaN	NaN	NaN	NaN	NaN	NaN
0.894	-81.294	99.067	1571.397	-1.7637	0.90039	0.52588	-57.635	16.4174	46.374	0.15479	0.080566	0.099121	-55.265	-92.001	165.1349	0.067871	0.2002	0.13965	NaN	NaN	NaN	NaN	NaN	NaN
0.896	-70.582	111.018	1546.259	-1.7144	0.87549	0.51563	-36.887	4.096	77.887	0.13652	0.088672	0.10791	-93.513	-85.891	260.687	0.063232	0.20899	0.13623	NaN	NaN	NaN	NaN	NaN	NaN
0.898	-73.831	122.603	1529.488	-1.6782	0.854	0.50122	-50.93	-13.388	81.745	0.12392	0.10127	0.11641	-100.14	-72.011	328.23	0.046387	0.22168	0.13232	NaN	NaN	NaN	NaN	NaN	NaN
0.9	-63.081	132.6937	1485.433	-1.6445	0.82813	0.49072	-1.916	-36.29394	123.399	0.11768	0.11065	0.11797	-43.998	-55.504	441.842	-0.0058594	0.24268	0.13623	NaN	NaN	NaN	NaN	NaN	NaN
0.902	-55.784	121.8053	1490.087	-1.6016	0.79883	0.47705	-8.321	-19.029	172.361	0.10947	0.12383	0.12207	-27.019	-26.959	605.51	-0.049805	0.25195	0.14258	NaN	NaN	NaN	NaN	NaN	NaN
0.904	-52.467	105.7541	1451.122	-1.5796	0.78564	0.46582	-52.356	-44.6113	222.135	0.10498	0.13867	0.12891	-24.099	-12.9523	787.626	-0.14893	0.28418	0.14648	NaN	NaN	NaN	NaN	NaN	NaN
0.906	-67.13	91.2528	1428.644	-1.5371	0.75391	0.45166	-3.38000000000001	-31.946	300.425	0.10029	0.15098	0.13457	24.363	19.0567	945.101	-0.23852	0.31396	0.156	NaN	NaN	NaN	NaN	NaN	NaN
0.908	-65.053	101.0801	1390.774	-1.5005	0.729	0.43555	20.534	19.1767	400.727	0.096191	0.16045	0.13173	67.641	32.6264	1114.773	-0.34033	0.35498	0.17236	NaN	NaN	NaN	NaN	NaN	NaN
0.91	-43.315	112.3045	1375.369	-1.4741	0.71436	0.42285	-40.365	63.6566	549.5715	0.08916	0.17256	0.12978	119.139	78.829	1293.064	-0.49805	0.41211	0.17871	NaN	NaN	NaN	NaN	NaN	NaN
0.912	-10.788	114.7626	1352.779	-1.4292	0.68506	0.41211	27.545	120.124	707.4046	0.078711	0.19033	0.12607	189.41	34.4795	1494.715	-0.57959	0.45557	0.18359	NaN	NaN	NaN	NaN	NaN	NaN
0.914	-9.16	123.6499	1329.398	-1.3931	0.66163	0.40235	45.13	139.276	818.1135	0.057129	0.20508	0.12402	179.52	49.376	1618.333	-0.78125	0.55371	0.19385	NaN	NaN	NaN	NaN	NaN	NaN
0.916	1.44799999999999	129.8017	1298.577	-1.3652	0.64063	0.38721	39.4231	138.062	998.1595	0.022754	0.23916	0.12637	138.307	-20.5071	1684.72	-0.95484	0.64282	0.2229	NaN	NaN	NaN	NaN	NaN	NaN
0.918	2.014	127.2249	1261.046	-1.3223	0.61719	0.37402	77.54	161.645	1172.789	-0.033593	0.26894	0.12969	123.26	-16.857	1639.617	-1.1655	0.74463	0.26025	NaN	NaN	NaN	NaN	NaN	NaN
0.92	17.569	129.16192	1242.094	-1.3003	0.60205	0.36914	46.98	105.324	1334.561	-0.10547	0.29512	0.13711	89.698	-125.91	1603.246	-1.4829	0.90479	0.32861	NaN	NaN	NaN	NaN	NaN	NaN
0.922	7.007	149.695	1200.049	-1.2637	0.57715	0.35889	47.472	70.125	1473.208	-0.18633	0.32636	0.14463	81.1402	-115.8404	1511.138	-1.6494	0.98633	0.37744	NaN	NaN	NaN	NaN	NaN	NaN
0.924	4.072	160.22	1181.902	-1.2339	0.55664	0.34986	35.7285	14.189	1496.134	-0.26807	0.37109	0.15479	111.001	-185.93	1413.342	-1.9766	1.1523	0.4917	NaN	NaN	NaN	NaN	NaN	NaN
0.926	-8.459	164.529	1136.101	-1.2104	0.53174	0.3418	-20.963	-79.008	1507.042	-0.36279	0.41963	0.1666	80.771	-159.664	1284.37	-2.1757	1.2534	0.55298	NaN	NaN	NaN	NaN	NaN	NaN
0.928	-23.727	171.172	1083.919	-1.1729	0.50781	0.32617	-11.369	-100.831	1492.577	-0.47148	0.48105	0.17236	60.314	-235.593	1199.01175	-2.2905	1.3267	0.59961	NaN	NaN	NaN	NaN	NaN	NaN
0.93	-26.595	177.833	1038.942	-1.1553	0.49414	0.32568	-32.869	-102.4398	1392.665	-0.59297	0.54864	0.18877	29.879	-190.918	1157.406	-2.2202	1.3892	0.7002	NaN	NaN	NaN	NaN	NaN	NaN
0.932	-27.225	174.64	1014.315	-1.1133	0.4668	0.30908	-16.978	-133.985	1345.44	-0.7416	0.62871	0.20439	22.41	-223.457	1150.862	-2.1367	1.4063	0.74854	NaN	NaN	NaN	NaN	NaN	NaN
0.934	-14.443	162.209	980.177	-1.0827	0.44751	0.29931	21.453	-135.484	1275.79	-0.91699	0.7207	0.22607	45.613	-120.366	1149.562	-1.998	1.418	0.68115	NaN	NaN	NaN	NaN	NaN	NaN
0.936	-17.822	157.1581	917.518	-1.0483	0.42725	0.2832	-32.569	-204.429	1221.7726	-1.1239	0.81279	0.24981	35.092	-113.019	1207.288	-1.7607	1.3887	0.58276	NaN	NaN	NaN	NaN	NaN	NaN
0.938	-25.396	160.703	881.666	-1.0044	0.3999	0.27979	-7.334	-223.578	1219.3518	-1.3492	0.9123	0.29473	11.349	-36.22	1270.068	-1.4102	1.3359	0.53564	NaN	NaN	NaN	NaN	NaN	NaN
0.94	-9.063	158.004	872.657	-0.97998	0.38623	0.27393	3.313	-189.798	1181.08	-1.5894	1.0111	0.36309	-28.828	-80.34	1342.971	-0.95459	1.2192	0.53076	NaN	NaN	NaN	NaN	NaN	NaN
0.942	-14.926	159.096	844.595	-0.93359	0.36133	0.2583	4.879	-147.569	1190.0294	-1.8295	1.0963	0.4417	-59.103	-69.23	1407.03	-0.81787	1.1519	0.5293	NaN	NaN	NaN	NaN	NaN	NaN
0.944	-20.791	162.839	807.315	-0.89477	0.34155	0.2439	39.798	-29.471	1209.3158	-2.0391	1.1543	0.51025	-114.5109	-161.337	1438.1594	-0.72266	1.0703	0.50244	NaN	NaN	NaN	NaN	NaN	NaN
0.946	-35.583	163.254	761.004	-0.85498	0.3208	0.23584	-10.607	49.31	1187.761	-2.1561	1.1712	0.53359	-166.5448	-218.04	1476.527	-0.7041	1.063	0.4978	NaN	NaN	NaN	NaN	NaN	NaN
0.948	-22.078	155.396	727.591	-0.80273	0.29443	0.21924	-37.64	29.74	1239.482	-2.1507	1.1872	0.55	-164.601	-348.753	1517.244	-0.68115	1.0723	0.50635	NaN	NaN	NaN	NaN	NaN	NaN
0.95	-23.741	147.485	690.707	-0.76904	0.28564	0.20508	-50.668	18.31	1275.539	-2.0226	1.2466	0.59609	-153.3812	-414.631	1530.682	-0.68945	1.0742	0.52783	NaN	NaN	NaN	NaN	NaN	NaN
0.952	-36.601	139.529	654.993	-0.71289	0.25977	0.19092	-103.019	-110.848	1315.325	-1.8784	1.3333	0.575	-111.6827	-485.52	1577.638	-0.73779	1.0806	0.52295	NaN	NaN	NaN	NaN	NaN	NaN
0.954	-30.72	134.706	609.487	-0.67529	0.24121	0.17993	-86.385	-225.6565	1391.626	-1.6714	1.397	0.47607	-89.1358	-516.83	1641.253	-0.91406	1.1445	0.5415	NaN	NaN	NaN	NaN	NaN	NaN
0.956	-9.233	130.178	580.758	-0.6333	0.22461	0.17139	-67.12	-263.334	1374.1773	-1.3347	1.3462	0.3961	-76.6004	-546.41	1683.089	-1.0949	1.2414	0.55493	NaN	NaN	NaN	NaN	NaN	NaN
0.958	-8.41999999999999	136.256	535.012	-0.57813	0.2041	0.15479	-58.76	-350.454	1387.6669	-0.9957	1.2192	0.35674	-53.584	-484.39	1776.253	-1.2637	1.3535	0.56641	NaN	NaN	NaN	NaN	NaN	NaN
0.96	-10.372	131.794	511.345	-0.55322	0.19336	0.14502	-17.569	-372.433	1432.07	-0.77539	1.0692	0.33017	-52.811	-400.825	1851.459	-1.4243	1.4888	0.5752	NaN	NaN	NaN	NaN	NaN	NaN
0.962	11.433	132.185	484.469	-0.49268	0.1665	0.13379	-15.439	-402.616	1446.138	-0.68154	0.96455	0.30127	-50.276	-295.086	1923.1451	-1.4785	1.5371	0.58447	NaN	NaN	NaN	NaN	NaN	NaN
0.964	24.546	131.0365	441.3525	-0.45312	0.15039	0.11865	-9.551	-467.1	1530.737	-0.6377	0.91016	0.27295	-36.035	-200.935	1959.635	-1.5469	1.6035	0.57666	NaN	NaN	NaN	NaN	NaN	NaN
0.966	7.817	121.4849	422.25	-0.40771	0.13184	0.11182	3.892	-421.502	1629.389	-0.61172	0.87773	0.28496	-41.99	-166.32	1998.749	-1.5889	1.6313	0.56054	NaN	NaN	NaN	NaN	NaN	NaN
0.968	5.767	100.3661	388.2568	-0.35303	0.11572	0.094238	-35.582	-395.9	1699.0125	-0.62813	0.85156	0.30127	-40.24	-94.914	1970.277	-1.6304	1.6509	0.54785	NaN	NaN	NaN	NaN	NaN	NaN
0.97	15.451	96.88	362.14921	-0.32227	0.10645	0.085938	-63.485	-329.695	1782.719	-0.71015	0.85	0.33252	-35.673	-66.426	1965.6494	-1.6733	1.6851	0.54297	NaN	NaN	NaN	NaN	NaN	NaN
0.972	-1.555	101.2254	332.3793	-0.27441	0.09668	0.068848	-69.202	-195.557	1783.204	-0.86211	0.88281	0.36806	-33.933	-22.795	1925.637	-1.6973	1.7051	0.54346	NaN	NaN	NaN	NaN	NaN	NaN
0.974	0.145000000000003	102.0432	296.089	-0.23657	0.083252	0.056152	-103.591	-164.766	1773.622	-1.0469	0.95605	0.40674	-9.128	-83.978	1911.956	-1.7305	1.7441	0.54736	NaN	NaN	NaN	NaN	NaN	NaN
0.976	-9.84399999999999	98.7447	292.628	-0.19141	0.071777	0.04541	-113.555	-80.315	1819.439	-1.2337	1.0515	0.44444	53.398	-140.524	1935.701	-1.7495	1.7827	0.5542	NaN	NaN	NaN	NaN	NaN	NaN
0.978	-16.797	90.7854	268.1501	-0.14551	0.057617	0.028809	-120.9047	-31.088	1800.846	-1.3909	1.1536	0.47657	64.612	-245.6935	1974.322	-1.7632	1.811	0.55566	NaN	NaN	NaN	NaN	NaN	NaN
0.98	-15.111	83.0454	237.3517	-0.12207	0.05127	0.018555	-106.0529	-71.002	1837.372	-1.5112	1.2333	0.50937	84.2709	-233.628	2021.4946	-1.7891	1.8633	0.57861	NaN	NaN	NaN	NaN	NaN	NaN
0.982	-3.475	68.1534	198.687	-0.075195	0.038574	0.0053711	-41.309	-32.622	1872.199	-1.6018	1.2806	0.52929	88.904	-259.779	2079.213	-1.8057	1.8887	0.5835	NaN	NaN	NaN	NaN	NaN	NaN
0.984	-24.404	50.366	190.38723	-0.045655	0.02832	-0.0051269	-33.82	-106.119	1873.797	-1.6812	1.3013	0.54297	48.4215	-199.738	2119.376	-1.8433	1.9341	0.60693	NaN	NaN	NaN	NaN	NaN	NaN
0.986	-15.567	49.5298	180.9554	-0.011719	0.012207	-0.015137	-2.24300000000001	-167.502	1935.047	-1.7465	1.3164	0.54414	13.344	-222.279	2138.488	-1.874	1.958	0.62867	NaN	NaN	NaN	NaN	NaN	NaN
0.988	-30.992	51.3613	143.488	0.023438	0.0019531	-0.027832	16.957	-145.229	1941.836	-1.7878	1.3253	0.53203	-6.587	-153	2136.157	-1.8984	1.9707	0.64209	NaN	NaN	NaN	NaN	NaN	NaN
0.99	-40.137	62.6169	111.172	0.046387	-0.0048828	-0.032715	-27.153	-198.071	1983.735	-1.8085	1.3358	0.52539	-28.868	-153.862	2143.632	-1.9175	1.9634	0.66309	NaN	NaN	NaN	NaN	NaN	NaN
0.992	-53.901	61.4734	123.908	0.07666	-0.012207	-0.04248	-34.468	-188.313	2053.555	-1.8228	1.3507	0.51504	-63.724	-50.028	2144.889	-1.9116	1.937	0.67579	NaN	NaN	NaN	NaN	NaN	NaN
0.994	-44.125	62.026	130.9032	0.10352	-0.023437	-0.052246	-77.2229	-183.326	2044.837	-1.8496	1.3711	0.51025	-65.585	-33.875	2101.98	-1.9043	1.8984	0.68115	NaN	NaN	NaN	NaN	NaN	NaN
0.996	-56.976	55.2143	109.1714	0.12598	-0.033691	-0.060059	-85.162	-238.504	2075.254	-1.8874	1.4052	0.50938	-77.3314	57.551	2047.7913	-1.9043	1.8418	0.68604	NaN	NaN	NaN	NaN	NaN	NaN
0.998	-56.478	54.5087	83.3318	0.15234	-0.041504	-0.070313	-62.807	-185.8371	2066.736	-1.9409	1.4423	0.51601	-53.548	12.677	2000.154	-1.9116	1.8052	0.68555	NaN	NaN	NaN	NaN	NaN	NaN
1	-65.559	51.143	62.979	0.16357	-0.04541	-0.072754	-80.937	-201.6295	2021.123	-2.0015	1.4786	0.53906	-23.383	71.256	1987.735	-1.9199	1.7402	0.69189	NaN	NaN	NaN	NaN	NaN	NaN
1.002	-71.34	45.643	57.171	0.18555	-0.056641	-0.083496	-52.327	-181.308	2005.094	-2.0699	1.5141	0.56572	-21.319	29.6478	1982.081	-1.9245	1.6926	0.68433	NaN	NaN	NaN	NaN	NaN	NaN
1.004	-42.218	33.16359	30.774	0.198	-0.067871	-0.085938	-36.696	-93.521	1945.999	-2.1289	1.5449	0.59229	-38.958	104.8305	1933.054	-1.9258	1.6465	0.67822	NaN	NaN	NaN	NaN	NaN	NaN
1.006	-38.971	23.079	22.896	0.20947	-0.075684	-0.095703	-32.379	-103.522	1913.328	-2.1642	1.5631	0.61836	-73.992	65.815	1915.274	-1.9258	1.5918	0.67041	NaN	NaN	NaN	NaN	NaN	NaN
1.008	-42.032	26.2247	33.33	0.22119	-0.07666	-0.097168	-1.775	-55.733	1916.719	-2.1746	1.566	0.6376	-102.3797842	110.858	1911.482	-1.9214	1.5669	0.66797	NaN	NaN	NaN	NaN	NaN	NaN
1.01	-30.231	28.2737	31.205	0.22363	-0.083496	-0.10059	-1.336	-12.113	1882.579	-2.1625	1.5586	0.65557	-94.568	26.163	1939.529	-1.9102	1.5195	0.65674	NaN	NaN	NaN	NaN	NaN	NaN
1.012	-28.762	34.2848	35.84332	0.23145	-0.092773	-0.104	-15.87	-32.309	1871.332	-2.144	1.5454	0.66485	-79.745	73.215	1973.6925	-1.905	1.49	0.64819	NaN	NaN	NaN	NaN	NaN	NaN
1.014	-27.721	37.3625	31.4981	0.23193	-0.098634	-0.11011	-23.849	42.011	1868.309	-2.1245	1.5298	0.67188	-39.153	2.574	2020.738	-1.8896	1.4609	0.64111	NaN	NaN	NaN	NaN	NaN	NaN
1.016	-15.843	32.899	31.4423	0.23047	-0.10254	-0.1123	-59.492	27.899	1865.331	-2.1061	1.5084	0.6833	-56.559	63.41	2002.554	-1.8726	1.4282	0.62891	NaN	NaN	NaN	NaN	NaN	NaN
1.018	-22.261	27.12	17.457	0.22119	-0.10449	-0.11523	-75.988	-15.062	1910.1201	-2.0933	1.4777	0.68486	-47.527	19.1865	1998.314	-1.8599	1.4087	0.62207	NaN	NaN	NaN	NaN	NaN	NaN
1.02	-30.881	13.3781	2.69	0.21436	-0.10498	-0.11523	-55.56	12.741	1924.428	-2.073	1.4356	0.6958	-70.9311	80.08	1956.041	-1.8359	1.3809	0.61182	NaN	NaN	NaN	NaN	NaN	NaN
1.022	-23.319	19.6107	-1.13	0.1958	-0.10889	-0.10791	-80.458	-51.502	1929.7974	-2.0592	1.3908	0.70518	14.497	43.309	1915.3018	-1.822	1.3587	0.59692	NaN	NaN	NaN	NaN	NaN	NaN
1.024	-8.098	21.7504	11.3285	0.17822	-0.10938	-0.10791	-55.334	-37.678	1946.4394	-2.0508	1.3535	0.71094	57.56	95.154	1904.1241	-1.8125	1.3359	0.58838	NaN	NaN	NaN	NaN	NaN	NaN
1.026	-7.175	39.148	22.82429	0.16064	-0.10449	-0.10352	-93.101	-7.8581	1918.6677	-2.0465	1.3285	0.7208	77.6122	56.918	1883.821	-1.793	1.3066	0.57568	NaN	NaN	NaN	NaN	NaN	NaN
1.028	-1.729	36.8829	9.2059	0.13525	-0.10352	-0.099609	-110.525	-58.259	1922.325	-2.0433	1.3106	0.72715	60.157	150.811	1835.4367	-1.793	1.2891	0.5708	NaN	NaN	NaN	NaN	NaN	NaN
1.03	-11.217	37.1622	4.8945	0.12256	-0.10107	-0.095703	-58.589	-14.216	1902.974	-2.0398	1.3001	0.73379	53.70889	180.1088	1801.5859	-1.7749	1.2524	0.55957	NaN	NaN	NaN	NaN	NaN	NaN
1.032	-0.683999999999997	38.2905	5.1741	0.097656	-0.098633	-0.087891	-73.183	-46.239	1875.252	-2.0291	1.2955	0.73584	40.055	274.655	1755.64196	-1.7615	1.2346	0.55004	NaN	NaN	NaN	NaN	NaN	NaN
1.034	-15.698	37.8109	7.2239	0.074707	-0.09839	-0.082764	-48.572	-50.466	1871.374	-2.0117	1.2949	0.72949	56.2566	251.309	1734.506	-1.7441	1.21	0.5376	NaN	NaN	NaN	NaN	NaN	NaN
1.036	-16.043	35.2741	11.0972	0.058594	-0.091797	-0.082031	-47.069	32.191	1820.3495	-1.9847	1.2938	0.72041	46.334	280.636	1695.0637	-1.7188	1.1816	0.52979	NaN	NaN	NaN	NaN	NaN	NaN
1.038	-27.46	21.9488	10.66637	0.032715	-0.087402	-0.072754	-89.484	37.807	1769.5903	-1.9582	1.2914	0.70322	44.3799	249.34	1646.5382	-1.7046	1.1646	0.52148	NaN	NaN	NaN	NaN	NaN	NaN
1.04	-21.848	21.2639	-0.911100000000001	0.020508	-0.087402	-0.06543	-62.209	121.023	1739.815	-1.925	1.2934	0.6958	20.219	299.235	1621.456	-1.6719	1.1348	0.50146	NaN	NaN	NaN	NaN	NaN	NaN
1.042	-42.375	29.0503	1.166	-0.0024414	-0.085449	-0.060547	-68.762	168.275	1700.429	-1.8976	1.2883	0.68447	32.9373	271.206	1575.77	-1.6333	1.1049	0.48389	NaN	NaN	NaN	NaN	NaN	NaN
1.044	-62.102	40.971	16.77025	-0.019287	-0.083252	-0.054931	-74.655	141.317	1701.5357	-1.873	1.2852	0.67627	15.643	261.0467	1541.3921	-1.5894	1.0767	0.47461	NaN	NaN	NaN	NaN	NaN	NaN
1.046	-47.021	47.187	18.1139	-0.034668	-0.078613	-0.048828	-38.351	174.132	1689.3888	-1.849	1.2862	0.66015	41.7122	221.669	1507.246	-1.5386	1.0356	0.4502	NaN	NaN	NaN	NaN	NaN	NaN
1.048	-46.011	46.104	22.5917	-0.062988	-0.07959	-0.037598	-72.7	129.8	1652.405	-1.8269	1.2844	0.64649	57.4019	208.798	1486.5187	-1.5171	1.0122	0.44141	NaN	NaN	NaN	NaN	NaN	NaN
1.05	-40.838	36.0598	-9.2991	-0.079102	-0.079834	-0.032959	-59.246	92.4676	1644.4603	-1.8011	1.2751	0.63633	36.2571	206.694	1460.594	-1.4756	0.96484	0.42627	NaN	NaN	NaN	NaN	NaN	NaN
1.052	-52.353	21.586	3.598	-0.10107	-0.076172	-0.027344	-20.146	104.5017	1605.098	-1.7797	1.2652	0.62392	16.184	232.674	1438.214	-1.4422	0.93823	0.41333	NaN	NaN	NaN	NaN	NaN	NaN
1.054	-20.491	21.121	1.4312	-0.11865	-0.071289	-0.019531	-30.409	46.199	1577.1119	-1.7529	1.252	0.604	14.8615	268.901	1383.364	-1.4116	0.91064	0.39551	NaN	NaN	NaN	NaN	NaN	NaN
1.056	-33.233	22.75	15.077	-0.12793	-0.068848	-0.013184	16.046	62.868	1564.634	-1.7169	1.2366	0.58887	-6.845	293.9602	1317.109	-1.3647	0.87158	0.37842	NaN	NaN	NaN	NaN	NaN	NaN
1.058	-35.839	39.4626	6.72886	-0.14404	-0.066406	-0.0073242	17.657	90.67	1540.195	-1.6723	1.2126	0.56758	11.8147	324.786	1233.924	-1.3438	0.85156	0.37256	NaN	NaN	NaN	NaN	NaN	NaN
1.06	-37.926	41.59532	18.4696	-0.1499	-0.062256	-0.0068359	-1.02	66.704	1545.7163	-1.6283	1.1958	0.55117	-21.9424	333.94	1212.347	-1.3003	0.8208	0.35303	NaN	NaN	NaN	NaN	NaN	NaN
1.062	-29.206	49.405	24.9602	-0.16211	-0.058105	0.00097656	37.008	124.1445	1533.0972	-1.5828	1.1851	0.53174	-1.047	363.389	1177.399	-1.2605	0.80004	0.34057	NaN	NaN	NaN	NaN	NaN	NaN
1.064	-29.117	49.684	31.6612	-0.16699	-0.052246	0.0068359	-6.711	126.5483	1494.3909	-1.5405	1.1782	0.50928	8.472	368.79	1138.2463	-1.2114	0.77295	0.3291	NaN	NaN	NaN	NaN	NaN	NaN
1.066	-31.436	44.722	14.5278	-0.17676	-0.053223	0.010742	15.857	134.7	1468.924	-1.4977	1.1578	0.49034	17.6659	396.139	1063.258	-1.1499	0.74268	0.30664	NaN	NaN	NaN	NaN	NaN	NaN
1.068	-25.064	29.1046	34.3652	-0.18213	-0.053711	0.012695	35.52	188.426	1400.925	-1.4577	1.131	0.47344	40.735	340.3616	1011.84057	-1.1157	0.73291	0.30029	NaN	NaN	NaN	NaN	NaN	NaN
1.07	-10.116	24.4846	16.7686	-0.1814	-0.045899	0.017334	-24.339	187.465	1353.182	-1.4202	1.0966	0.45469	48.4294	332.115	944.1067	-1.0405	0.69385	0.27832	NaN	NaN	NaN	NaN	NaN	NaN
1.072	-17.208	20.2845	3.8345	-0.18262	-0.044434	0.011719	7.408	230.669	1308.94	-1.3898	1.0586	0.43291	69.1598	280.469	899.6926	-0.97827	0.65796	0.25659	NaN	NaN	NaN	NaN	NaN	NaN
1.074	-18.95	22.236	-3.6242	-0.16797	-0.041016	0.013184	11.436	259.687	1268.026	-1.3633	1.0254	0.41455	69.1547	310.6562	833.457	-0.91797	0.62891	0.23926	NaN	NaN	NaN	NaN	NaN	NaN
1.076	-9.533	22.968	11.819	-0.16504	-0.040039	0.013672	-7.788	243.84733	1247.0301	-1.3323	1.0054	0.39707	78.649	274.4326	801.625	-0.8291	0.5791	0.2168	NaN	NaN	NaN	NaN	NaN	NaN
1.078	19.104	33.9145	32.7251	-0.14746	-0.035645	0.0092773	43.6156	259.61	1221.494	-1.305	0.98291	0.37949	58.635	279.8994	758.3219	-0.78906	0.55273	0.19775	NaN	NaN	NaN	NaN	NaN	NaN
1.08	-9.263	51.583	21.4402	-0.12671	-0.031982	0.0026855	9.306	235.616	1177.699	-1.2772	0.9583	0.36387	36.97413	191.363	730.5532	-0.71484	0.50977	0.17041	NaN	NaN	NaN	NaN	NaN	NaN
1.082	-19.73	43.6913	19.0117	-0.10449	-0.033203	-0.0043945	32.371	216.558	1168.2532	-1.2478	0.93604	0.34844	60.1692863	205.6994	683.8599	-0.65039	0.47607	0.15039	NaN	NaN	NaN	NaN	NaN	NaN
1.084	-10.779	34.7819	23.6461	-0.077148	-0.032715	-0.011719	13.717	242.917	1135.6699	-1.2144	0.92041	0.33105	53.06	167.3427	647.859	-0.58691	0.44482	0.13086	NaN	NaN	NaN	NaN	NaN	NaN
1.086	4.465	25.6417	32.9777	-0.063477	-0.036133	-0.014648	-34.246	209.3875	1102.5929	-1.1848	0.89336	0.31241	55.3439	219.565	591.834	-0.51025	0.39844	0.10547	NaN	NaN	NaN	NaN	NaN	NaN
1.088	-38.873	19.2596	19.3637	-0.037598	-0.035156	-0.025879	-5.275	191.8685	1093.774	-1.1499	0.86807	0.29746	50.1154	158.6009	560.951	-0.46875	0.37842	0.096191	NaN	NaN	NaN	NaN	NaN	NaN
1.09	-44.873	21.3704	10.4441	-0.020019	-0.036133	-0.031495	-25.309	184.1244	1056.0296	-1.1221	0.84033	0.28887	22.328	199.647	467.283	-0.38477	0.3374	0.066895	NaN	NaN	NaN	NaN	NaN	NaN
1.092	-28.281	26.78171	8.3864	-0.0053711	-0.035645	-0.040039	-41.237	161.292	1048.322	-1.0966	0.81592	0.26973	22.705	136.772	377.5481	-0.33057	0.30542	0.05127	NaN	NaN	NaN	NaN	NaN	NaN
1.094	-43.496	35.6793	12.151	0.01123	-0.037598	-0.047852	19.52	206.5267	1023.64	-1.0659	0.79736	0.25098	25.696	181.9907	290.41	-0.27246	0.27441	0.024902	NaN	NaN	NaN	NaN	NaN	NaN
1.096	-36.009	41.1965	12.6889	0.016602	-0.036133	-0.050293	-8.333	200.6721	972.076	-1.0304	0.76836	0.24131	24.412	126.555	274.753	-0.20068	0.23682	-0.00097656	NaN	NaN	NaN	NaN	NaN	NaN
1.098	-37.281	21.5541	22.99824	0.027832	-0.027344	-0.058594	18.82	192.6526	931.418	-0.99717	0.74267	0.23301	-11.323	187.734	234.328	-0.16064	0.21826	-0.01123	NaN	NaN	NaN	NaN	NaN	NaN
1.1	-25.346	22.1585	15.39294	0.033936	-0.025635	-0.062012	28.586	211.345	851.3916	-0.97686	0.72393	0.21895	-15.257	147.1153	207.876	-0.1001	0.18262	-0.033203	NaN	NaN	NaN	NaN	NaN	NaN
1.102	-39.57	14.9925	5.22	0.044922	-0.019043	-0.06543	-3.05399999999999	187.13	777.48279	-0.94912	0.70469	0.2041	-47.267	189.269	152.725	-0.05664	0.15405	-0.049073	NaN	NaN	NaN	NaN	NaN	NaN
1.104	-56.107	22.9376	14.7356	0.049316	-0.010742	-0.069824	51.621	211.9922	742.00814	-0.91553	0.67676	0.19287	-65.6044	99.4644	149.642	-0.021484	0.12305	-0.067383	NaN	NaN	NaN	NaN	NaN	NaN
1.106	-46.801	14.7155	19.24	0.054199	-0.0097656	-0.075195	29.576	243.5989	685.432	-0.88496	0.65214	0.18281	-72.425	128.668	149.0407	0.021973	0.084473	-0.086914	NaN	NaN	NaN	NaN	NaN	NaN
1.108	-35.934	17.4033	27.86022	0.056152	-0.0024414	-0.075684	2.109	240.2648	650.8751	-0.85479	0.62588	0.16661	-83.562	86.4423	136.9401	0.037109	0.070801	-0.098145	NaN	NaN	NaN	NaN	NaN	NaN
1.11	-28.633	21.88737	-0.5861	0.054443	-0.00097655	-0.079346	29.206	254.754	620.405	-0.8208	0.60283	0.15176	-60.166	176.27	96.0577	0.058105	0.03418	-0.1123	NaN	NaN	NaN	NaN	NaN	NaN
1.112	-53.231	34.1364	-0.5282	0.053711	0.0029297	-0.087891	0.0670000000000002	237.967	574.682	-0.78223	0.57285	0.14795	-67.9049	131.298	73.501	0.064209	0.010742	-0.11573	NaN	NaN	NaN	NaN	NaN	NaN
1.114	-35.685	31.9065	38.417	0.054199	0.0068359	-0.088379	15.235	204.701	568.298	-0.75146	0.55127	0.13525	-77.018	134.1163	59.208	0.063477	-0.01123	-0.11816	NaN	NaN	NaN	NaN	NaN	NaN
1.116	-31.601	17.9022	74.364	0.056152	0.0083008	-0.095215	11.764	210.871	518.2377	-0.71787	0.52686	0.1205	-77.271	17.439	59.6966	0.052246	-0.026367	-0.11572	NaN	NaN	NaN	NaN	NaN	NaN
1.118	-27.09	-7.49	53.6275	0.049316	0.012207	-0.10596	-7.911	182.06	478.4273	-0.68184	0.50507	0.1083	-31.556	44.057	51.9084	0.039063	-0.028809	-0.12207	NaN	NaN	NaN	NaN	NaN	NaN
1.12	-19.49	-41.808	60.231	0.049561	0.019532	-0.10864	33.681	161.0451	440.669	-0.64355	0.48164	0.095018	-26.897	21.3	57.368	0.022461	-0.036621	-0.11914	NaN	NaN	NaN	NaN	NaN	NaN
1.122	-22.373	-46.086	90.744	0.045898	0.022949	-0.11328	12.68	141.4237	379.418	-0.60127	0.46006	0.085644	-29.502	80.4533	41.7746	0.0061035	-0.044678	-0.11011	NaN	NaN	NaN	NaN	NaN	NaN
1.124	-8.96400000000001	-52.965	134.701	0.040527	0.030273	-0.12939	-17.151	98.84	354.537	-0.55615	0.43799	0.072266	-43.867	41.553	58.1039	-0.003418	-0.052246	-0.10938	NaN	NaN	NaN	NaN	NaN	NaN
1.126	-17.571	-43.147	154.74	0.033691	0.038086	-0.13232	23.808	97.628	340.9541	-0.51875	0.41739	0.064942	-65.377	76.012	27.58223	-0.020508	-0.054199	-0.10596	NaN	NaN	NaN	NaN	NaN	NaN
1.128	14.998	-29.284	190.248	0.01123	0.056152	-0.14014	-23.051	100.962	312.2488	-0.48076	0.39736	0.051856	-45.31	34.825	12.3226	-0.026855	-0.061523	-0.11035	NaN	NaN	NaN	NaN	NaN	NaN
1.13	1.692	-30.039	262.6844	-0.01294	0.067627	-0.14209	-14.892	103.794	315.974	-0.44131	0.37822	0.045215	-20.447	76.972	20.915	-0.050293	-0.066406	-0.10107	NaN	NaN	NaN	NaN	NaN	NaN
1.132	14.9	-1.972	346.472	-0.04541	0.079102	-0.14111	-18.805	123.7425	279.84318	-0.40098	0.35332	0.031348	-16.836	42.609	49.62578	-0.072266	-0.076416	-0.0979	NaN	NaN	NaN	NaN	NaN	NaN
1.134	-22.04	3.5629	429.619	-0.099609	0.1001	-0.13721	-65.135	108.7105	235.1788	-0.36523	0.33203	0.030762	-13.543	63.749	59.0375	-0.099121	-0.081543	-0.092773	NaN	NaN	NaN	NaN	NaN	NaN
1.136	-35.401	50.359	514.4122	-0.13086	0.10352	-0.12891	-12.184	110.008	225.3833	-0.33369	0.31055	0.02334	-2.739	44.34	43.3956	-0.14355	-0.089844	-0.085938	NaN	NaN	NaN	NaN	NaN	NaN
1.138	-34.288	75.7521	647.3134	-0.18994	0.12012	-0.12598	-58.995	132.554	181.313	-0.29844	0.29004	0.019727	-3.339	42.7204	31.669	-0.18409	-0.092041	-0.074707	NaN	NaN	NaN	NaN	NaN	NaN
1.14	-49.582	92.378	770.996	-0.24634	0.1333	-0.12158	-64.233	133.11	168.493	-0.26641	0.27363	0.011524	3.671	-10.9692	34.84	-0.22656	-0.089355	-0.059082	NaN	NaN	NaN	NaN	NaN	NaN
1.142	-50.909	106.867	875.009	-0.30664	0.14844	-0.11572	-27.06	130.15	155.366	-0.23077	0.2583	0.0049805	29.453	-22.19	35.99	-0.27881	-0.084473	-0.044434	NaN	NaN	NaN	NaN	NaN	NaN
1.144	-55.095	80.881	946.247	-0.39697	0.18115	-0.10303	-78.297	119.24	109.806	-0.19531	0.23682	-1.6653e-14	-8.968	-25.448	25.3204	-0.29932	-0.074707	-0.038086	NaN	NaN	NaN	NaN	NaN	NaN
1.146	-14.102	62.3434	1015.15	-0.45215	0.19531	-0.10205	-39.024	89.84005	110.812	-0.16133	0.21826	-0.0041016	-10.194	22.5464	9.706	-0.33545	-0.058105	-0.020996	NaN	NaN	NaN	NaN	NaN	NaN
1.148	-32.944	32.394	1051.879	-0.58154	0.2373	-0.084473	-21.605	96.334	98.305	-0.1334	0.19981	-0.014746	-23.049	28.6709	22.033	-0.34717	-0.047363	-0.013184	NaN	NaN	NaN	NaN	NaN	NaN
1.15	-13.581	3.865	1077.05	-0.70166	0.26831	-0.05664	-47.687	84.1715	69.5084	-0.10293	0.17754	-0.018652	-41.307	9.575	28.1592	-0.34961	-0.032227	-0.0097656	NaN	NaN	NaN	NaN	NaN	NaN
1.152	2.38	-13.574	1079.055	-0.83838	0.30078	-0.01709	-17.816	67.6388	74.286	-0.079297	0.15693	-0.023828	-57.292	-20.4613	17.8256	-0.33398	-0.023926	-0.012207	NaN	NaN	NaN	NaN	NaN	NaN
1.154	-25.013	-41.186	1078.1929	-1.0645	0.35205	0.051758	-55.699	73.269	55.812	-0.066406	0.13232	-0.03125	-67.339	-20.7222	4.4659	-0.32178	-0.020996	-0.014648	NaN	NaN	NaN	NaN	NaN	NaN
1.156	-30.41	-59.9823	1082.3776	-1.1929	0.38037	0.091797	-55.018	47.15	64.426	-0.047461	0.1124	-0.037989	-81.65	21.0736	2.5264	-0.27979	-0.020996	-0.019531	NaN	NaN	NaN	NaN	NaN	NaN
1.158	-59.7575	-73.774	1097.93	-1.4551	0.44629	0.17969	7.379	36.7859	67.387	-0.030957	0.093946	-0.03584	-67.017	41.481	27.9145	-0.2417	-0.032227	-0.028565	NaN	NaN	NaN	NaN	NaN	NaN
1.16	-40.374	-76.463	1104.634	-1.6492	0.49146	0.25025	-42.312	38.5801	49.897507	-0.022754	0.074414	-0.038965	-56.456	63.604	26.2714	-0.2002	-0.042969	-0.040039	NaN	NaN	NaN	NaN	NaN	NaN
1.162	-38.296	-90.775	1118.644	-1.8301	0.54102	0.29541	-29.87	24.57978	62.142	-0.019433	0.060254	-0.042187	-72.62	28.8901	3.36574	-0.14209	-0.061035	-0.053223	NaN	NaN	NaN	NaN	NaN	NaN
1.164	-42.562	-97.5589	1135.986	-2	0.59375	0.32715	-23.884	39.141	41.346	-0.018066	0.04248	-0.038086	-65.66	46.9585	-42.85	-0.12207	-0.071777	-0.0625	NaN	NaN	NaN	NaN	NaN	NaN
1.166	-35.717	-109.631	1171.446	-2.0586	0.61719	0.34033	-50.331	47.5449	16.2898	-0.017774	0.033008	-0.036719	-53.991	26.257	-42.778	-0.064453	-0.079102	-0.073242	NaN	NaN	NaN	NaN	NaN	NaN
1.168	-27.01	-86.598	1192.361	-2.0894	0.64404	0.35107	-4.74099999999999	27.1323	21.0985	-0.019141	0.022656	-0.036621	-79.594	61.2917	-30.6194	-0.021484	-0.090088	-0.084473	NaN	NaN	NaN	NaN	NaN	NaN
1.17	9.33500000000001	-83.687	1189.634	-2.0583	0.65796	0.3479	-31.445	36.462	-16.71283	-0.015625	0.014453	-0.035449	-57.869	37.824	10.47	0.01709	-0.10107	-0.09082	NaN	NaN	NaN	NaN	NaN	NaN
1.172	10.946	-81.316	1202.352	-2.002	0.66211	0.34717	-20.447	21.3063	5.73293	-0.012891	0.0033203	-0.031445	-49.763	60.813	12.6132	0.075195	-0.10742	-0.10498	NaN	NaN	NaN	NaN	NaN	NaN
1.174	39.436	-107.166	1231.656	-1.9136	0.67432	0.33789	12.246	34.2	11.1011	-0.0097656	-0.0073242	-0.032715	-75.3665	15.7756	28.5531	0.1001	-0.10742	-0.11328	NaN	NaN	NaN	NaN	NaN	NaN
1.176	51.679	-134.843	1285.646	-1.8823	0.67822	0.31787	-45.106	65.043	-7.2651	-0.0024414	-0.011328	-0.033496	-47.482	24.7728	12.3998	0.15088	-0.10938	-0.13135	NaN	NaN	NaN	NaN	NaN	NaN
1.178	72.318	-151.036	1285.9992	-1.7925	0.68115	0.24023	-6.273	46.554	20.7546	0.0069337	-0.01875	-0.035254	-55.06	-8.1643	39.657	0.18848	-0.10474	-0.12671	NaN	NaN	NaN	NaN	NaN	NaN
1.18	60.705	-185.735	1335.362	-1.6804	0.65601	0.18335	-29.057	52.525	20.9166	0.018653	-0.024218	-0.037988	-55.412	72.012	37.5227	0.22705	-0.10352	-0.13574	NaN	NaN	NaN	NaN	NaN	NaN
1.182	28.33	-210.975	1390.103	-1.5527	0.625	0.14209	-48.555	38.0087	31.2796	0.031152	-0.032715	-0.042676	-26.151	57.833	35.125	0.26172	-0.10156	-0.13818	NaN	NaN	NaN	NaN	NaN	NaN
1.184	-8.065	-229.119	1444.55	-1.4272	0.60205	0.086914	-1.98999999999999	11.562	38.2285	0.041016	-0.039063	-0.049805	5.331	97.323	19.421	0.27197	-0.10352	-0.13867	NaN	NaN	NaN	NaN	NaN	NaN
1.186	-24.446	-226.449	1472.53589	-1.3828	0.604	0.052734	-46.458	18.5344	14.767	0.049414	-0.042285	-0.048926	-1.825	18.015	32.9129	0.29736	-0.10693	-0.1416	NaN	NaN	NaN	NaN	NaN	NaN
1.188	-15.321	-214.535	1514.1682	-1.3672	0.61914	0.025391	-58.364	12.372	20.1556	0.050391	-0.053418	-0.052149	-2.559	22.871	18.9699	0.31347	-0.11328	-0.1438	NaN	NaN	NaN	NaN	NaN	NaN
1.19	-3.89400000000001	-179.33	1572.1568	-1.3745	0.64502	0.0039063	-34.618	0.706700000000001	36.995	0.054297	-0.057714	-0.056445	5.49299999999999	5.96	30.664	0.31934	-0.11816	-0.14209	NaN	NaN	NaN	NaN	NaN	NaN
1.192	45.105	-147.194	1632.272	-1.3901	0.66162	-0.00048828	-83.747	22.689	8.24116	0.059473	-0.059277	-0.057519	1.02699999999999	65.3595	28.537	0.3208	-0.12158	-0.13867	NaN	NaN	NaN	NaN	NaN	NaN
1.194	36.849	-110.93	1669.731	-1.4316	0.71094	-0.018066	-36.398	4.184	18.7405	0.064453	-0.062012	-0.062012	0.398000000000003	54.288	63.211	0.31641	-0.125	-0.13428	NaN	NaN	NaN	NaN	NaN	NaN
1.196	67.097	-101.087	1710.222	-1.4588	0.75562	-0.029053	-29.801	17.3672	14.371	0.069239	-0.063965	-0.066113	-4.831	76.806	57.7021	0.29395	-0.12549	-0.12549	NaN	NaN	NaN	NaN	NaN	NaN
1.198	65.995	-108.326	1751.761	-1.4839	0.80713	-0.039551	-70.023	39.7462	13.18	0.07334	-0.067676	-0.068066	-25.225	14.20246	40.2986	0.26953	-0.1272	-0.11548	NaN	NaN	NaN	NaN	NaN	NaN
1.2	62.142	-104.969	1770.922	-1.522	0.86377	-0.055176	-22.455	20.9977	48.3973	0.074902	-0.069629	-0.071582	-29.307	41.47	6.478	0.24609	-0.11963	-0.10889	NaN	NaN	NaN	NaN	NaN	NaN
1.202	53.855	-98.731	1781.359	-1.5522	0.88721	-0.054688	-45.226	46.915	18.888	0.078613	-0.071777	-0.072363	-48.304	-0.7193	28.3557	0.20654	-0.1001	-0.087891	NaN	NaN	NaN	NaN	NaN	NaN
1.204	25.837	-98.433	1770.2602	-1.6348	0.92578	-0.053223	-35.735	39.295	29.5095	0.085449	-0.076172	-0.072754	-49.186	26.28037	20.682	0.18896	-0.091797	-0.087891	NaN	NaN	NaN	NaN	NaN	NaN
1.206	8.708	-83.908	1794.414	-1.7137	0.93188	-0.056397	-2.977	33.3024	20.4519	0.08164	-0.082129	-0.068457	-47.033	-4.8584	33.99	0.1665	-0.054199	-0.074219	NaN	NaN	NaN	NaN	NaN	NaN
1.208	-26.754	-83.426	1804.713	-1.8164	0.91016	-0.085938	-46.866	53.456	9.1773	0.083301	-0.085254	-0.064843	-38.975	16.536	1.909	0.14234	-0.025391	-0.069336	NaN	NaN	NaN	NaN	NaN	NaN
1.21	-30.322	-78.324	1831.21	-1.9038	0.93994	-0.049805	-15.838	43.3928	22.5097	0.077051	-0.090332	-0.065235	-50.095	-19.3532	-0.4635	0.12256	0.0043945	-0.064941	NaN	NaN	NaN	NaN	NaN	NaN
1.212	-4.092	-93.284	1857.815	-1.9375	0.96973	-0.025391	-24.236	55.688	1.359	0.072852	-0.094629	-0.059863	-62.773	-11.798	23.463	0.10352	0.046875	-0.055176	NaN	NaN	NaN	NaN	NaN	NaN
1.214	13.867	-97.8905	1890.901	-2.0332	1.0313	-0.018066	-45.503	39.37935	7.839	0.064453	-0.097168	-0.058594	-71.147	-12.372	42.94	0.094727	0.068848	-0.052246	NaN	NaN	NaN	NaN	NaN	NaN
1.216	44.64	-106.9854	1885.756	-2.0983	1.0725	-0.015137	-1.76900000000001	1.2208	11.548	0.0542	-0.10078	-0.055078	-78.301	31.9317	20.8142	0.082031	0.1001	-0.052734	NaN	NaN	NaN	NaN	NaN	NaN
1.218	45.826	-111.3629	1891.838	-2.1616	1.1021	-0.0039063	-20.721	3.8024	-1.874	0.047168	-0.096875	-0.050684	-68.257	43.112	3.53	0.085205	0.11353	-0.052734	NaN	NaN	NaN	NaN	NaN	NaN
1.22	61.003	-113.981	1904.075	-2.2363	1.124	0.012695	-26.857	8.671	9.13	0.03623	-0.095313	-0.044043	-60.424	44.971	-4.356	0.082031	0.12646	-0.05127	NaN	NaN	NaN	NaN	NaN	NaN
1.222	46.849	-100.49	1894.516	-2.2656	1.1348	0.020508	11.67	12.6514	23.4934	0.027832	-0.091797	-0.041211	-81.032	24.0489	3.227	0.078613	0.14111	-0.047852	NaN	NaN	NaN	NaN	NaN	NaN
1.224	45.394	-82.791	1894.349	-2.314	1.147	0.03418	-55.389	45.328	12.5214	0.016113	-0.087891	-0.033203	-44.174	16.5389	14.4914	0.082031	0.14355	-0.04541	NaN	NaN	NaN	NaN	NaN	NaN
1.226	36.098	-85.836	1877.579	-2.3374	1.1572	0.040772	-8.37	29.80204	38.268	0.0093751	-0.083398	-0.028516	-78.689	19.1175	-16.1079	0.080566	0.14063	-0.051758	NaN	NaN	NaN	NaN	NaN	NaN
1.228	-1.202	-80.819	1901.345	-2.3457	1.166	0.049805	-6.689	27.729	24.7036	0.008789	-0.082129	-0.02168	-57.973	29.6411	-0.573099999999998	0.080078	0.13378	-0.046631	NaN	NaN	NaN	NaN	NaN	NaN
1.23	21.462	-59.847	1892.425	-2.3433	1.1743	0.064941	-39.613	37.28474	13.8865	0.0037109	-0.078223	-0.015821	-47.465	47.933	12.12	0.076172	0.125	-0.049316	NaN	NaN	NaN	NaN	NaN	NaN
1.232	20.882	-42.2048	1868.5009	-2.3418	1.1699	0.070313	5.509	22.9853	32.5893	0.0054688	-0.075195	-0.012305	-20.065	47.9864	17.7727	0.07959	0.10205	-0.054199	NaN	NaN	NaN	NaN	NaN	NaN
1.234	39.789	-40.6416	1865.4602	-2.3315	1.1587	0.082031	-42.254	51.089	-0.457000000000001	0.0068359	-0.073242	-0.010254	-4.044	59.682	3.9543	0.081543	0.091797	-0.052246	NaN	NaN	NaN	NaN	NaN	NaN
1.236	28.296	-48.271	1861.887	-2.3171	1.1418	0.081054	-42.744	39.12118	5.961	0.021777	-0.073828	-0.011426	-2.625	37.884	3.3577	0.086426	0.07666	-0.060059	NaN	NaN	NaN	NaN	NaN	NaN
1.238	56.298	-41.90934	1856.9679	-2.2964	1.1138	0.083008	-30.426	28.849	12.204	0.03252	-0.064844	-0.012988	-29.552	48.435	6.355	0.08374	0.065918	-0.060303	NaN	NaN	NaN	NaN	NaN	NaN
1.24	55.062	-23.544	1862.348	-2.269	1.0688	0.081543	-68.399	50.916	-15.99077	0.046582	-0.065235	-0.017285	-0.0679999999999978	37.614	30.8693	0.07959	0.063965	-0.059082	NaN	NaN	NaN	NaN	NaN	NaN
1.242	68.687	-15.099	1869.15	-2.2554	1.0454	0.076172	-33.04	33.25	12.933	0.057715	-0.062109	-0.017481	-14.728	55.685	32.97938	0.058105	0.069824	-0.052246	NaN	NaN	NaN	NaN	NaN	NaN
1.244	63.92	-17.469	1900.483	-2.2266	0.99805	0.077637	-54.438	54.357	25.15838	0.067871	-0.060059	-0.023438	-2.844	35.8602	25.7313	0.037598	0.079102	-0.044922	NaN	NaN	NaN	NaN	NaN	NaN
1.246	67.321	-11.753	1892.13	-2.2137	0.97192	0.078369	-68.787	66.51	22.7877	0.079297	-0.055957	-0.025586	-17.515	43.017	28.495	0.011719	0.094727	-0.031738	NaN	NaN	NaN	NaN	NaN	NaN
1.248	59.548	-14.351	1859.634	-2.1987	0.94189	0.078613	-28.419	34.3396	39.957	0.090039	-0.053418	-0.033691	-11.09	11.7491	50.019	-0.0078124	0.11573	-0.020752	NaN	NaN	NaN	NaN	NaN	NaN
1.25	58.57	-23.537	1828.4861	-2.1777	0.91406	0.081055	-47.029	21.5257	33.18566	0.10332	-0.046386	-0.035645	-34.63	54.4567	32.7644	-0.023926	0.1333	-0.013672	NaN	NaN	NaN	NaN	NaN	NaN
1.252	68.486	-46.618215	1835.658	-2.168	0.89844	0.087891	-40.49	-8.049	36.084	0.1126	-0.043164	-0.042285	-31.429	45.392	22.8757	-0.035156	0.16016	-0.0048828	NaN	NaN	NaN	NaN	NaN	NaN
1.254	52.868	-50.758	1821.391	-2.1523	0.87793	0.096191	-9.109	-13.3845	40.212	0.12451	-0.03418	-0.046387	-25	73.58	9.688	-0.037109	0.17236	-0.0078125	NaN	NaN	NaN	NaN	NaN	NaN
1.256	38.481	-47.594	1815.098	-2.1385	0.86597	0.10669	-70.317	22.0567	9.7365	0.13525	-0.032129	-0.050879	-25.651	26.48152	57.928	-0.030762	0.19385	-0.018066	NaN	NaN	NaN	NaN	NaN	NaN
1.258	37.686	-36.2528	1783.472	-2.1289	0.86426	0.1123	-14.574	24.2547	18.6205	0.14033	-0.028125	-0.05293	-22.713	8.5197	71.364	-0.013672	0.2107	-0.026368	NaN	NaN	NaN	NaN	NaN	NaN
1.26	55.179	-22.0021	1780.194	-2.1226	0.85693	0.12549	-23.547	34.139	0.882000000000001	0.14776	-0.024609	-0.062696	-36.166	-55.622	111.756	0.0068359	0.22021	-0.038086	NaN	NaN	NaN	NaN	NaN	NaN
1.262	51.325	14.526	1760.6818	-2.1128	0.85889	0.12354	-49.8	45.8538	25.1368	0.15596	-0.023144	-0.071973	-59.308	-29.1068	111.2955	0.040039	0.23242	-0.058594	NaN	NaN	NaN	NaN	NaN	NaN
1.264	46.807	30.63	1730.9364	-2.1016	0.86133	0.13037	0.292999999999999	1.8185	69.313	0.16406	-0.015137	-0.07959	-61.3182	-84.75214	183.417	0.052734	0.23535	-0.066406	NaN	NaN	NaN	NaN	NaN	NaN
1.266	59.223	39.454	1712.079	-2.0869	0.86572	0.13012	-48.219	7.9781	46.407	0.17285	-0.011621	-0.086328	-58.5	-98.692	268.6223	0.061523	0.23877	-0.091309	NaN	NaN	NaN	NaN	NaN	NaN
1.268	63.375	31.433	1703.264	-2.0679	0.87158	0.13086	-29.187	-12.6362	92.2105	0.1749	-0.0070313	-0.094629	-61.694	-142.8689	361.154	0.04834	0.24707	-0.10425	NaN	NaN	NaN	NaN	NaN	NaN
1.27	63.935	25.17	1708.329	-2.0371	0.87891	0.12842	6.771	-34.307	107.2786	0.16904	-0.0019531	-0.10048	-33.518	-96.287	444.304	0.003418	0.25635	-0.10498	NaN	NaN	NaN	NaN	NaN	NaN
1.272	43.118	2.757	1679.889	-2.0156	0.88477	0.12744	-49.091	-39.697	123.3687	0.15527	0.0025391	-0.099805	-26.16798	-103.6579	602.318	-0.11035	0.27734	-0.09082	NaN	NaN	NaN	NaN	NaN	NaN
1.274	42.074	1.587	1655.856	-1.98	0.89697	0.12451	-10.873	-79.2776	148.2322	0.14209	0.014648	-0.10254	-60.828	-31.923	790.794	-0.18164	0.29004	-0.077637	NaN	NaN	NaN	NaN	NaN	NaN
1.276	53.279	15.7785	1618.813	-1.9499	0.89771	0.12231	3.692	-79.321	149.175	0.12715	0.025879	-0.10215	-98.659	-29.8132	1049.007	-0.36182	0.32861	-0.047363	NaN	NaN	NaN	NaN	NaN	NaN
1.278	26.456	42.086	1598.775	-1.9199	0.90039	0.11523	-27.445	-83.5767	215.975	0.11191	0.043067	-0.099121	-74.025	21.063	1269.881	-0.50683	0.36499	-0.011719	NaN	NaN	NaN	NaN	NaN	NaN
1.28	26.106	45.8786	1551.3024	-1.8706	0.90283	0.1123	4.442	-92.4757	328.9383	0.10293	0.061426	-0.097168	-80.539	-7.66256	1537.893	-0.65869	0.40869	0.018066	NaN	NaN	NaN	NaN	NaN	NaN
1.282	-2.056	43.856	1543.7238	-1.8477	0.9043	0.11035	-27.049	-47.7227	410.531	0.093262	0.077246	-0.097754	-56.79	27.6771	1779.948	-0.89551	0.48047	0.067871	NaN	NaN	NaN	NaN	NaN	NaN
1.284	37.653	36.5386	1537.6575	-1.7949	0.90527	0.097168	-27.582	-29.253	515.075	0.073242	0.097168	-0.095703	-118.313	-1.645	1990.669	-1.117	0.5542	0.11108	NaN	NaN	NaN	NaN	NaN	NaN
1.286	26.125	19.62	1558.794	-1.751	0.90772	0.087158	5.268	-13.671	629.018	0.044141	0.12402	-0.089062	-130.173	0.460999999999999	2051.843	-1.3828	0.64648	0.17822	NaN	NaN	NaN	NaN	NaN	NaN
1.288	29.541	31.5114	1553.341	-1.7051	0.9043	0.071289	-72.413	34.613	747.17	0.0026367	0.1457	-0.084668	-143.829	-69.072	2009.058	-1.8257	0.82275	0.32324	NaN	NaN	NaN	NaN	NaN	NaN
1.29	30.532	64.44	1520.707	-1.644	0.89697	0.062988	-53.325	60.223	898.6947	-0.048535	0.15937	-0.06709	-168.315	-129.379	1891.245	-2.082	0.9375	0.4126	NaN	NaN	NaN	NaN	NaN	NaN
1.292	55.24	109.154	1481.039	-1.6147	0.88916	0.060547	-49.72	123.02	1016.7578	-0.10244	0.17871	-0.050391	-163.7312	-249.283	1782	-2.6289	1.2227	0.60791	NaN	NaN	NaN	NaN	NaN	NaN
1.294	48.015	132.2	1457.3506	-1.5664	0.875	0.04834	-80.982	165.737	1127.8124	-0.16211	0.1958	-0.039551	-128.782	-301.87	1648.918	-2.9751	1.438	0.67285	NaN	NaN	NaN	NaN	NaN	NaN
1.296	14.768	131.57	1435.0678	-1.5281	0.86889	0.041748	-78.758	138.249	1214.952	-0.22129	0.21855	-0.029297	-137.516	-351.232	1546.172	-3.1304	1.6157	0.71973	NaN	NaN	NaN	NaN	NaN	NaN
1.298	18.565	111.428	1419.919	-1.4976	0.85889	0.039063	-116.084	114.896	1230.8113	-0.28359	0.24766	-0.022461	-168.449	-343.6	1450.65624	-3.0425	1.7583	0.83789	NaN	NaN	NaN	NaN	NaN	NaN
1.3	-1.392	110.382	1394.749	-1.4521	0.8418	0.033203	-75.426	49.479	1239.319	-0.3539	0.27774	-0.014649	-183.479	-316.24	1404.341	-2.9839	1.7661	0.8125	NaN	NaN	NaN	NaN	NaN	NaN
1.302	-34.91	109.227	1382.88	-1.4312	0.83936	0.037109	-60.321	5.238961	1225.683	-0.43555	0.31523	-0.0041992	-152.275	-290.51	1391.415	-2.73	1.6587	0.57227	NaN	NaN	NaN	NaN	NaN	NaN
1.304	-30.624	105.603	1370.514	-1.3965	0.82617	0.039551	-101.593	-26.659299	1177.766	-0.52881	0.354	0.010254	-141.352	-209.221	1405.679	-2.2713	1.5403	0.39942	NaN	NaN	NaN	NaN	NaN	NaN
1.306	5.932	103.315	1329.382	-1.3659	0.81763	0.03711	-70.023	-90.557	1127.664	-0.65576	0.39678	0.033691	-86.139	-148.535	1480.61	-1.7559	1.4355	0.25293	NaN	NaN	NaN	NaN	NaN	NaN
1.308	0.744	106.475	1298.4786	-1.3379	0.81152	0.032715	-93.001	-87.066	1049.2566	-0.80117	0.44375	0.076075	-79.802	-54.99	1575.1923	-1.2251	1.3501	0.11328	NaN	NaN	NaN	NaN	NaN	NaN
1.31	-12.613	122.637	1268.8838	-1.3013	0.79736	0.031738	-106.079	-84.558	1003.1626	-0.98637	0.50078	0.1253	-91.099	-32.96	1687.765	-1.0757	1.3228	0.050293	NaN	NaN	NaN	NaN	NaN	NaN
1.312	9.988	136.224	1273.53	-1.2798	0.78271	0.038086	-20.484	-101.514	999.2046	-1.186	0.57334	0.1833	-104.961	11.57	1695.348	-0.94092	1.2954	-0.064453	NaN	NaN	NaN	NaN	NaN	NaN
1.314	-1.315	162.283	1259.906	-1.2456	0.76416	0.037598	-70.738	-70.137	978.289	-1.4004	0.65039	0.2749	-88.506	-76.15	1673.5053	-0.86572	1.3218	-0.11499	NaN	NaN	NaN	NaN	NaN	NaN
1.316	-0.862000000000002	169.945	1228.503	-1.2209	0.74585	0.035889	-68.909	-86.455	994.4737	-1.6205	0.74824	0.35401	-105.8	-166.886	1659.81	-0.77979	1.3638	-0.13623	NaN	NaN	NaN	NaN	NaN	NaN
1.318	-31.986	148.246	1194.319	-1.1929	0.72705	0.032227	20.878	-82.069	1002.117	-1.8147	0.85224	0.42852	-70.184	-380.99	1714.89708	-0.6665	1.354	-0.16504	NaN	NaN	NaN	NaN	NaN	NaN
1.32	-24.47	136.361	1168.786	-1.1519	0.71533	0.041504	-18.9626	-79.568	1023.333	-1.9636	0.93545	0.46719	-92.716	-480.28	1770.3167	-0.63428	1.2935	-0.18262	NaN	NaN	NaN	NaN	NaN	NaN
1.322	-31.546	130.182	1142.402	-1.1343	0.70166	0.042969	6.797	-92.618	1092.187	-2.0118	0.99443	0.48096	5.994	-592.17	1815.416	-0.72266	1.1406	-0.16309	NaN	NaN	NaN	NaN	NaN	NaN
1.324	-40.342	145.801	1103	-1.0957	0.67871	0.047363	39.93	-78.15	1094.0155	-1.9492	1.0361	0.5293	70.684	-553.33	1808.511	-0.94216	1.1057	-0.087645	NaN	NaN	NaN	NaN	NaN	NaN
1.326	-45.136	148.604	1064.095	-1.062	0.65576	0.049316	13.209	-116.489	1109.103	-1.9099	1.0559	0.53105	114.045	-537.88	1833.436	-1.2358	1.1528	-0.0053711	NaN	NaN	NaN	NaN	NaN	NaN
1.328	-46.447	152.437	1021.869	-1.041	0.65039	0.050293	47.7388	-164.362	1174.181	-1.8644	1.0472	0.44023	122.816	-421.941	1884.496	-1.6328	1.2842	0.055176	NaN	NaN	NaN	NaN	NaN	NaN
1.33	-25.898	157.064	978.332	-1.0034	0.62158	0.052734	46.737	-200.303	1203.523	-1.6784	1.0065	0.30977	92.085	-382.941	1973.9845	-1.7695	1.3516	0.079102	NaN	NaN	NaN	NaN	NaN	NaN
1.332	-41.624	155.393	928.2584	-0.97119	0.60303	0.059814	75.186	-297.932	1283.8922	-1.3657	0.95283	0.19502	37.225	-255.561	2064.788	-1.9053	1.4492	0.099121	NaN	NaN	NaN	NaN	NaN	NaN
1.334	-21.783	147.045	910.846	-0.95508	0.58203	0.063965	119.417	-341.013	1317.0148	-1.0459	0.88867	0.088867	6.813	-225.581	2126.463	-1.9321	1.5083	0.073731	NaN	NaN	NaN	NaN	NaN	NaN
1.336	-27.689	154.899	897.585	-0.92871	0.55518	0.071777	83.224	-369.223	1353.685	-0.82206	0.8456	-0.025199	-8.049	-112.95	2124.908	-1.9395	1.5527	0.031738	NaN	NaN	NaN	NaN	NaN	NaN
1.338	-21	157.781	867.555	-0.91309	0.5459	0.071777	112.409	-367.259	1417.2834	-0.67812	0.83789	-0.10977	-19.498	-70.1	2035.877	-1.9482	1.5859	-0.015137	NaN	NaN	NaN	NaN	NaN	NaN
1.34	-28.716	159.957	826.781	-0.88428	0.51904	0.080078	114.254	-295.598	1462.5429	-0.58047	0.85586	-0.18047	-3.54000000000001	21.39	1943.549	-1.9546	1.5923	-0.034668	NaN	NaN	NaN	NaN	NaN	NaN
1.342	-38.934	156.165	789.425	-0.85815	0.50073	0.090088	70.697	-253.624	1562.659	-0.51474	0.8751	-0.22725	-16.646	-38.84	1872.941	-1.9849	1.5845	-0.047363	NaN	NaN	NaN	NaN	NaN	NaN
1.344	-32.408	144.097	758.133	-0.83643	0.48633	0.091309	75.973	-213.1806	1644.211	-0.47852	0.88086	-0.25977	-42.018	-114.361	1877.16	-2.0164	1.5803	-0.052979	NaN	NaN	NaN	NaN	NaN	NaN
1.346	-38.523	153.626	701.2729	-0.80127	0.46338	0.098633	40.1789	-160.869	1676.591	-0.50351	0.89707	-0.27305	-40.338	-257.785	1944.79	-2.0405	1.5825	-0.057129	NaN	NaN	NaN	NaN	NaN	NaN
1.348	-38.372	148.658	665.6656	-0.78564	0.4585	0.104	4.55	-159.069	1761.988	-0.57644	0.93153	-0.26202	-41.833	-282.023	1980.311	-2.0762	1.5898	-0.0625	NaN	NaN	NaN	NaN	NaN	NaN
1.35	-33.953	138.622	627.8832	-0.74805	0.43652	0.10449	36.399	-102.875	1782.589	-0.70533	1.0057	-0.23546	-56.816	-306.264	2022.334	-2.0972	1.5962	-0.067383	NaN	NaN	NaN	NaN	NaN	NaN
1.352	-21.705	117.5279	615.716	-0.71802	0.41772	0.11279	-13.35	-84.497	1769.19	-0.8609	1.0942	-0.19356	-78.994	-254.167	2063.139	-2.1426	1.6289	-0.058594	NaN	NaN	NaN	NaN	NaN	NaN
1.354	-40.773	96.9741	571.654	-0.68555	0.40137	0.11133	-7.096	-105.962	1789.6623	-1.0215	1.1826	-0.14453	-132.193	-255.587	2111.727	-2.1833	1.6556	-0.054443	NaN	NaN	NaN	NaN	NaN	NaN
1.356	-25.092	94.169	557.872	-0.64014	0.37744	0.1167	0.268999999999998	-105.028	1783.038	-1.1895	1.2492	-0.089041	-179.545	-216.249	2126.416	-2.2144	1.6743	-0.054688	NaN	NaN	NaN	NaN	NaN	NaN
1.358	-8.474	104.49	518.638	-0.61328	0.36328	0.11035	-34.842	-147.265	1811.117	-1.3629	1.3132	-0.036875	-177.258	-199.231	2138.8	-2.2144	1.6704	-0.068848	NaN	NaN	NaN	NaN	NaN	NaN
1.36	-29.589	119.116	477.35	-0.5625	0.33887	0.11279	-33.282	-167.951	1876.795	-1.5313	1.3652	0.010798	-181.187	-136.023	2156.236	-2.2031	1.6602	-0.07959	NaN	NaN	NaN	NaN	NaN	NaN
1.362	-42.255	148.045	442.181	-0.5205	0.32715	0.11011	-57.506	-133.04	1876.9586	-1.6932	1.4211	0.064207	-199.694	-89.2127	2126.062	-2.144	1.6313	-0.10498	NaN	NaN	NaN	NaN	NaN	NaN
1.364	-46.278	135.843	403.5832	-0.48584	0.31494	0.10693	-64.336	-146.88	1907.7418	-1.832	1.4746	0.10889	-168.338	-24.853	2044.177	-2.1055	1.5962	-0.11841	NaN	NaN	NaN	NaN	NaN	NaN
1.366	-3.29	118.218	394.568	-0.4292	0.29492	0.10791	-47.281	-113.698	1937.3145	-1.9388	1.5188	0.14528	-132.1065	32.7689	1935.9	-2.0781	1.5605	-0.12744	NaN	NaN	NaN	NaN	NaN	NaN
1.368	-29.895	108.979	368.066	-0.4043	0.28271	0.094727	-93.9883	-126.509	1935.776	-2.027	1.5617	0.17562	-86.134	48.0003	1855.007	-2.0703	1.5137	-0.12793	NaN	NaN	NaN	NaN	NaN	NaN
1.37	-39.379	102.592	330.5185	-0.34912	0.26416	0.089844	-90.0309	-153.585	1986.419	-2.0868	1.5926	0.19087	-50.19	42.1565	1867.985	-2.0664	1.4902	-0.12061	NaN	NaN	NaN	NaN	NaN	NaN
1.372	-35.664	98.563	317.289	-0.30762	0.24683	0.08252	-39.554	-114.52	1994.032	-2.1226	1.6159	0.19611	-44.406	25.913	1881.321	-2.0703	1.4512	-0.10498	NaN	NaN	NaN	NaN	NaN	NaN
1.374	-29.895	104.519	294.322	-0.26465	0.23047	0.077148	-65.7371	-114.97871	1966.45	-2.144	1.6294	0.19531	-70.474	49.0026	1858.106	-2.0603	1.4319	-0.089111	NaN	NaN	NaN	NaN	NaN	NaN
1.376	-31.153	97.215	258.186	-0.21191	0.20996	0.066895	-34.838	-95.9946	1968.883	-2.1533	1.6506	0.19813	-55.124	71.783	1821.872	-2.0522	1.4204	-0.07666	NaN	NaN	NaN	NaN	NaN	NaN
1.378	-36.877	87.209	236.1437	-0.18262	0.19873	0.055664	-28.988	-38.483	1890.372	-2.1601	1.6652	0.19601	-36.194	105.56	1802.187	-2.0288	1.4146	-0.060059	NaN	NaN	NaN	NaN	NaN	NaN
1.38	-25.351	68.56	216.6431	-0.12891	0.17383	0.04834	-40.331	-62.75	1868.199	-2.1616	1.6807	0.19235	-21.416	71.288	1799.063	-2.0137	1.4043	-0.046387	NaN	NaN	NaN	NaN	NaN	NaN
1.382	-22.01	73.932	198.15	-0.095216	0.16089	0.040283	24.93	-13.709306	1881.858	-2.1647	1.6891	0.18937	-11.113	51.002	1817.905	-1.9624	1.3911	-0.029297	NaN	NaN	NaN	NaN	NaN	NaN
1.384	-16.886	76.631	183.888	-0.0625	0.1499	0.025391	12.49	-26.9143	1868.822	-2.1636	1.688	0.18994	-7.995	-8.175	1828.607	-1.9236	1.3791	-0.026611	NaN	NaN	NaN	NaN	NaN	NaN
1.386	-50.669	67.808	173.4338	-0.018066	0.12744	0.018066	24.246	-46.9896	1918.8927	-2.163	1.6789	0.19487	-12.955	-9.6136	1844.16	-1.8828	1.3711	-0.033691	NaN	NaN	NaN	NaN	NaN	NaN
1.388	-26.751	66.225	176.541	-0.0029297	0.12256	0.01416	53.0171	11.151	1906.3664	-2.1599	1.6682	0.19965	-3.725	-48.0013	1850.642	-1.8184	1.3496	-0.037598	NaN	NaN	NaN	NaN	NaN	NaN
1.39	-13.048	70.737	155.905	0.027344	0.10547	0.003418	17.657	5.139	1880.023	-2.1536	1.6484	0.20269	15.707	-34.624	1815.54	-1.7847	1.3364	-0.037598	NaN	NaN	NaN	NaN	NaN	NaN
1.392	-18.498	77.545	135.792	0.05127	0.094971	-0.0012207	62.091	35.6204	1921.7252	-2.1368	1.6322	0.20217	27.706	-60.762	1742.7185	-1.728	1.3188	-0.042969	NaN	NaN	NaN	NaN	NaN	NaN
1.394	-21.931	69.86	138.034	0.066406	0.083496	-0.0083008	30.171	72.111	1898.42	-2.1108	1.606	0.19531	49.977	14.126	1691.627	-1.6873	1.3088	-0.043457	NaN	NaN	NaN	NaN	NaN	NaN
1.396	-35.182	75.976	124.23	0.083984	0.072754	-0.01416	26.242	27.729	1930.5312	-2.0696	1.5671	0.18399	11.186	34.682	1676.2983	-1.644	1.2974	-0.046875	NaN	NaN	NaN	NaN	NaN	NaN
1.398	-17.695	72.724	98.8429	0.091309	0.068848	-0.018555	70.0645	49.181	1954.082	-2.0226	1.5174	0.17861	-44.596	129.8408	1646.157	-1.5801	1.2773	-0.048828	NaN	NaN	NaN	NaN	NaN	NaN
1.4	-28.439	59.789	70.8298	0.099609	0.058594	-0.023438	0.248000000000001	2.34	1943.255	-1.9854	1.4636	0.17216	-94.368	152.102	1634.8909	-1.5508	1.2637	-0.052734	NaN	NaN	NaN	NaN	NaN	NaN
1.402	-17.579	42.006	65.5907	0.10425	0.048095	-0.025635	22.74	-17.229	1931.389	-1.961	1.4075	0.17668	-120.82	235.79	1567.948	-1.4941	1.248	-0.045898	NaN	NaN	NaN	NaN	NaN	NaN
1.404	-18.279	26.5728	74.579	0.10156	0.040039	-0.024902	24.528	11.9467	1876.7374	-1.9473	1.3672	0.18555	-139.2114	217.072	1545.598	-1.4573	1.2376	-0.044677	NaN	NaN	NaN	NaN	NaN	NaN
1.406	-11.412	40.097	70.507	0.10645	0.031738	-0.026367	-14.386	14.748	1823.6322	-1.9448	1.3327	0.19403	-127.359	274.276	1502.986	-1.4238	1.2207	-0.043945	NaN	NaN	NaN	NaN	NaN	NaN
1.408	-22.374	60.654	63.813	0.10693	0.022461	-0.02832	16.337	34.433	1829.8155	-1.9458	1.3134	0.20484	-172.609	245.464	1492.615	-1.3809	1.1934	-0.026855	NaN	NaN	NaN	NaN	NaN	NaN
1.41	-26.835	67.801	57.631	0.11084	0.017578	-0.021973	-3.125	71.635	1803.148	-1.9434	1.2979	0.21993	-199.6681	286.581	1421.732	-1.3628	1.1841	-0.022461	NaN	NaN	NaN	NaN	NaN	NaN
1.412	-6.883	47.319	64.602	0.11035	0.0097658	-0.030029	-44.386	42.2356	1804.077	-1.9437	1.2889	0.22873	-162.852	225.4673	1395.8915	-1.3281	1.1563	-0.0029297	NaN	NaN	NaN	NaN	NaN	NaN
1.414	-16.562	49.194	53.417	0.10547	0.0029297	-0.029297	-28.0302	64.851	1803.676	-1.9507	1.2856	0.24023	-162.2905	225.396	1337.587	-1.3061	1.1391	0.013428	NaN	NaN	NaN	NaN	NaN	NaN
1.416	-18.164	43.159	38.699	0.10449	-0.0043945	-0.031738	-52.1379	71.458	1749.1118	-1.9439	1.2886	0.25093	-130.161	134.226	1326.983	-1.2808	1.1187	0.033691	NaN	NaN	NaN	NaN	NaN	NaN
1.418	-26.446	34.8578	26.521	0.10254	-0.0087891	-0.028809	-68.0787	68.0174	1720.96	-1.9431	1.2938	0.26307	-105.4	153.065	1280.229	-1.2383	1.0967	0.056641	NaN	NaN	NaN	NaN	NaN	NaN
1.42	2.263	33.5466	31.791	0.099609	-0.015625	-0.026855	-28.086	112.668	1670.7861	-1.9289	1.2924	0.25988	-118.077	121.638	1268.523	-1.2095	1.0884	0.070801	NaN	NaN	NaN	NaN	NaN	NaN
1.422	-35.876	28.2449	36.386	0.092285	-0.02417	-0.02417	-73.066	80.3572	1622.705	-1.9142	1.2861	0.25518	-162.5286	201.031	1212.13	-1.1621	1.0664	0.087402	NaN	NaN	NaN	NaN	NaN	NaN
1.424	-46.105	21.3746	24.6018	0.085938	-0.026367	-0.023926	-34.74	75.3545	1626.42891	-1.8887	1.2715	0.24902	-170.8382	184.755	1201.029	-1.1155	1.0461	0.094238	NaN	NaN	NaN	NaN	NaN	NaN
1.426	-10.913	25.7854	31.336	0.074219	-0.035645	-0.01709	-14.512	82.9614	1608.7748	-1.8628	1.2566	0.24155	-155.253	264.277	1139.193	-1.0752	1.0186	0.11035	NaN	NaN	NaN	NaN	NaN	NaN
1.428	-19.448	32.9335	19.829	0.074707	-0.036133	-0.015625	-28.552	43.581	1613.7932	-1.8304	1.2449	0.22985	-144.014	257.268	1099.893	-1.0132	0.98291	0.12598	NaN	NaN	NaN	NaN	NaN	NaN
1.43	-10.297	46.39	16.2916	0.062012	-0.038086	-0.010742	24.99	71.817	1627.245	-1.7991	1.2339	0.21733	-83.568	357.773	1033.563	-0.97413	0.95215	0.13575	NaN	NaN	NaN	NaN	NaN	NaN
1.432	-36.495	33.9981	15.425	0.055664	-0.045655	-0.0087889	-21.937	89.379	1558.4506	-1.7585	1.2285	0.20436	-80.471	339.934	997.4739	-0.93115	0.92041	0.14551	NaN	NaN	NaN	NaN	NaN	NaN
1.434	-16.713	22.5581	13.6193	0.047363	-0.04834	-0.0078125	16.599	104.359	1535.2615	-1.7109	1.2148	0.19043	-69.221	374.422	915.3231	-0.86377	0.88281	0.15869	NaN	NaN	NaN	NaN	NaN	NaN
1.436	-29.987	21.6183	11.6226	0.039063	-0.053223	-0.0039063	9.73699999999999	150.811	1518.9487	-1.6602	1.1942	0.17696	-67.457	326.378	873.329	-0.83643	0.86768	0.1665	NaN	NaN	NaN	NaN	NaN	NaN
1.438	-26.084	21.31002	11.3088	0.031738	-0.054688	-0.0039063	-35.153	159.653	1477.9698	-1.6055	1.1743	0.15919	-30.263	329.215	781.412	-0.77832	0.82227	0.17773	NaN	NaN	NaN	NaN	NaN	NaN
1.44	-43.427	17.7439	22.2049	0.03125	-0.057617	0.0048828	23.995	170.7217	1486.032	-1.5497	1.1567	0.14825	-11.39	250.157	746.465	-0.72754	0.79639	0.18482	NaN	NaN	NaN	NaN	NaN	NaN
1.442	-46.55	32.3756	29.6025	0.023438	-0.057129	0.0065918	23.294	206.676	1447.656	-1.4948	1.1361	0.12882	9.08	256.321	687.939	-0.6792	0.77002	0.19531	NaN	NaN	NaN	NaN	NaN	NaN
1.444	-18.317	42.3823	19.7174	0.022949	-0.057617	0.0087891	-6.646	198.8157	1423.846	-1.4312	1.1157	0.11182	-47.561	210.5066	650.547	-0.60498	0.73682	0.19922	NaN	NaN	NaN	NaN	NaN	NaN
1.446	-40.2	41.2307	8.236	0.01123	-0.064453	0.013672	41.203	218.78	1406.6315	-1.3864	1.0947	0.097556	-81.039	259.194	604.287	-0.56689	0.71875	0.20752	NaN	NaN	NaN	NaN	NaN	NaN
1.448	-25.568	21.5266	18.0405	0.010254	-0.062012	0.01416	-11.488	226.522	1322.675	-1.3409	1.0759	0.082225	-87.864	217.54	594.5682	-0.48389	0.68018	0.20703	NaN	NaN	NaN	NaN	NaN	NaN
1.45	-18.639	7.8045	19.5234	0.0097656	-0.058594	0.019043	-6.185	212.3735	1307.68235	-1.305	1.0524	0.075584	-90.86	223.888	577.296	-0.42041	0.6499	0.2102	NaN	NaN	NaN	NaN	NaN	NaN
1.452	-9.912	16.9184	3.1041	0.011963	-0.060547	0.017334	5.01400000000001	228.233	1273.018	-1.2806	1.0261	0.077442	-112.149	160.822	561.898	-0.36182	0.61963	0.2085	NaN	NaN	NaN	NaN	NaN	NaN
1.454	-26.274	15.0346	0.089599999999999	0.012695	-0.058594	0.021973	-53.49	218.8264	1233.917	-1.2593	1.0024	0.072266	-81.265	161.1191	506.624	-0.27588	0.5835	0.20654	NaN	NaN	NaN	NaN	NaN	NaN
1.456	-33.954	17.5612	26.6213	0.017578	-0.062012	0.021973	-26.188	219.372263	1246.5618	-1.2395	0.97685	0.075	-111.275	125.99288	471.9573	-0.23633	0.55859	0.20166	NaN	NaN	NaN	NaN	NaN	NaN
1.458	-17.548	17.3418	33.6241	0.01709	-0.062012	0.015625	-56.586	250.9949	1204.602	-1.2164	0.95644	0.07666	-108.422	149.904	415.789	-0.15674	0.51074	0.20215	NaN	NaN	NaN	NaN	NaN	NaN
1.46	-30.713	29.5538	20.2117	0.01416	-0.063477	0.025391	-89.431	239.979	1178.609	-1.2008	0.93613	0.07666	-124.2423	102.213	380.924	-0.10083	0.47778	0.19922	NaN	NaN	NaN	NaN	NaN	NaN
1.462	-20.58	42.2754	24.6135	0.017578	-0.067871	0.022461	-55.167	248.27221	1169.7629	-1.1838	0.91875	0.07832	-107.097	120.886	281.0898	-0.051758	0.44238	0.19287	NaN	NaN	NaN	NaN	NaN	NaN
1.464	-38.571	33.84	18.2869	0.021484	-0.068359	0.020996	-115.243	258.758	1121.5325	-1.168	0.90039	0.090332	-119.532	93.496	210.393	0.0073242	0.39209	0.18164	NaN	NaN	NaN	NaN	NaN	NaN
1.466	-19.351	33.161	26.3511	0.026367	-0.066406	0.021973	-83.349	232.3394	1093.6	-1.1558	0.88408	0.099022	-92.256	156.524	151.147	0.036133	0.37061	0.18018	NaN	NaN	NaN	NaN	NaN	NaN
1.468	-34.939	24.822	9.4635	0.029541	-0.062744	0.020263	-62.234	231.416	1056.475	-1.1421	0.8583	0.11143	-108.955	150.703	129.439	0.090332	0.32666	0.17627	NaN	NaN	NaN	NaN	NaN	NaN
1.47	-29.143	13.9662	-9.29982	0.036133	-0.059082	0.02002	-101.6846	231.5783	1006.1082	-1.1249	0.83017	0.11611	-113.902	174.0187	129.814	0.125	0.29834	0.16553	NaN	NaN	NaN	NaN	NaN	NaN
1.472	-13.151	12.7573	-5.2968	0.03418	-0.054688	0.019043	-72.876	211.941	975.0483	-1.1077	0.80821	0.12314	-139.059	137.98	102.787	0.1582	0.26855	0.16211	NaN	NaN	NaN	NaN	NaN	NaN
1.474	-11.239	14.7169	15.3966	0.040527	-0.054199	0.022461	-69.303	236.443	918.768	-1.0879	0.7793	0.12842	-117.41459	144.54	115.42292	0.18555	0.22656	0.15674	NaN	NaN	NaN	NaN	NaN	NaN
1.476	-14.924	24.9195	17.9648	0.044922	-0.050293	0.023438	-100.93	235.587	855.588	-1.0648	0.75518	0.13603	-77.78	114.318	102.3991	0.19434	0.21387	0.14893	NaN	NaN	NaN	NaN	NaN	NaN
1.478	-34.59	30.9132	15.9947	0.053467	-0.047363	0.023926	-56.473	230.7455	830.085	-1.0424	0.72461	0.1457	-61.915	141.537	96.314	0.19629	0.16797	0.14307	NaN	NaN	NaN	NaN	NaN	NaN
1.48	-19.938	35.25597	25.5011	0.055176	-0.041992	0.022949	-77.094	255.993	779.049	-1.022	0.69336	0.15274	-46.393	140.74	62.21623	0.18823	0.14111	0.1438	NaN	NaN	NaN	NaN	NaN	NaN
1.482	-40.24	34.7128	3.4625	0.062988	-0.035645	0.02002	-48.886	223.395	745.581	-1.0035	0.66816	0.15557	-21.581	139.4318	47.7288	0.17188	0.11572	0.14404	NaN	NaN	NaN	NaN	NaN	NaN
1.484	-28.644	30.966	6.34823	0.064941	-0.037109	0.01123	-42.192	238.167	700.4646	-0.97656	0.64453	0.15381	-16.226	67.994	34.0422	0.15332	0.083008	0.14795	NaN	NaN	NaN	NaN	NaN	NaN
1.486	-24.078	15.408	-10.6564	0.066406	-0.03125	0.023438	-66.267	243.533	622.4006	-0.93965	0.61778	0.16133	13.197	17.72	25.891	0.13721	0.06543	0.15137	NaN	NaN	NaN	NaN	NaN	NaN
1.488	-28.707	27.9602	-6.1361	0.068848	-0.019532	0.025879	-7.85600000000001	209.0107	608.0493	-0.89678	0.59287	0.16201	29.989	-43.1909	15.091	0.11084	0.039551	0.1582	NaN	NaN	NaN	NaN	NaN	NaN
1.49	-29.235	35.002	3.7173	0.068848	-0.014648	0.030273	-27.638	248.253	560.768	-0.85654	0.56826	0.15928	49.207	-12.175	22.5474	0.085938	0.022949	0.15893	NaN	NaN	NaN	NaN	NaN	NaN
1.492	-47.375	31.5209	5.262	0.073242	0	0.029297	-24.198	219.9231	526.867	-0.81641	0.54746	0.15332	18.467	13.7514	19.5798	0.058594	0.0058594	0.16455	NaN	NaN	NaN	NaN	NaN	NaN
1.494	-18.387	25.8155	20.459	0.07373	0.0039063	0.028809	37.62	187.3223	503.3859	-0.77344	0.52246	0.15381	10.801	51.489	39.292	0.027344	-0.003418	0.16748	NaN	NaN	NaN	NaN	NaN	NaN
1.496	-26.624	31.9932	24.7121	0.077637	0.013184	0.033691	-10.014	205.361	456.0075	-0.72803	0.49854	0.14424	-16.973	54.7223	17.9914	0.0087891	-0.0083008	0.16895	NaN	NaN	NaN	NaN	NaN	NaN
1.498	-15.021	41.5673	1.40671	0.082764	0.025391	0.038818	-6.239	146.5329	423.883	-0.68184	0.4707	0.13916	-29.756	71.351	32.799	-0.022461	-0.023926	0.17529	NaN	NaN	NaN	NaN	NaN	NaN
1.5	-27.034	33.1163	3.6677	0.085938	0.02832	0.037109	-9.538	144.415	380.46062	-0.63184	0.43906	0.1333	-9.842	85.062	52.7527	-0.039063	-0.028809	0.17163	NaN	NaN	NaN	NaN	NaN	NaN
1.502	-33.497	39.1336	-2.609	0.085449	0.039063	0.043945	-49.974	150.7382	334.1829	-0.58115	0.40742	0.12656	6.107	90.206	67.7408	-0.058105	-0.041504	0.17432	NaN	NaN	NaN	NaN	NaN	NaN
1.504	-19.833	28.0818	-2.6065	0.086914	0.043457	0.04248	-9.114	91.435	323.757	-0.52686	0.37695	0.12207	-3.943	86.212	35.6486	-0.071289	-0.038574	0.17676	NaN	NaN	NaN	NaN	NaN	NaN
1.506	-27.254	31.1337	0.338999999999999	0.089355	0.050781	0.050781	-53.605	121.4565	295.908	-0.48086	0.34502	0.11846	-43.687	75.2485	30.2484	-0.07959	-0.04541	0.17773	NaN	NaN	NaN	NaN	NaN	NaN
1.508	-31.543	26.601	9.0168	0.085694	0.055664	0.057373	-57.205	108.57	290.2104	-0.43242	0.31386	0.11348	-35.194	42.149	5.235	-0.084473	-0.04541	0.17383	NaN	NaN	NaN	NaN	NaN	NaN
1.51	-37.297	34.1463	22.8149	0.083008	0.057617	0.06543	-9.058	106.99641	278.608	-0.38515	0.28926	0.10684	-56.035	16.287	9.29	-0.083008	-0.050781	0.17456	NaN	NaN	NaN	NaN	NaN	NaN
1.512	-2.546	41.5	24.08065	0.083984	0.063477	0.066406	-55.299	165.853	226.3642	-0.3333	0.26738	0.10049	-46.573	-1.205	12.2857	-0.083984	-0.049805	0.16943	NaN	NaN	NaN	NaN	NaN	NaN
1.514	-17.789	43.672	49.3882	0.078125	0.063477	0.071289	-51.062	118.9607	215.693	-0.28369	0.25098	0.096191	-84.0257	-7.9028	32.414	-0.070313	-0.055176	0.16357	NaN	NaN	NaN	NaN	NaN	NaN
1.516	-28.853	9.3972	70.52431	0.069336	0.070801	0.078613	-57.947	115.1759	184.397	-0.23994	0.2292	0.088379	-93.4451	10.2991	25.705	-0.061523	-0.060059	0.15576	NaN	NaN	NaN	NaN	NaN	NaN
1.518	-38.866	-7.09782	74.705	0.062989	0.073731	0.082275	-78.484	124.148	134.129	-0.1959	0.2126	0.08252	-125.259	9.7947	59.9758	-0.03418	-0.064941	0.14502	NaN	NaN	NaN	NaN	NaN	NaN
1.52	-6.09	-8.7305	84.7563	0.053223	0.081543	0.089355	-43.12	65.084	140.3749	-0.1541	0.1958	0.079394	-116.6051	7.305	26.5551	-0.0090331	-0.06665	0.13721	NaN	NaN	NaN	NaN	NaN	NaN
1.522	-15.115	-3.71615	119.7749	0.033203	0.09082	0.099121	-79.088	111.4832	111.508	-0.1168	0.17695	0.072852	-117.234	-22.008	43.8038	0.017578	-0.070313	0.12402	NaN	NaN	NaN	NaN	NaN	NaN
1.524	-46.783	3.1049	163.598	0.019043	0.09082	0.10059	-84.62	94.862	118.95864	-0.08252	0.15576	0.067383	-85.687	-14.259	25.5777	0.061035	-0.074219	0.12256	NaN	NaN	NaN	NaN	NaN	NaN
1.526	-48.68	23.289	239.59943	-0.0063477	0.10498	0.10254	-31.694	73.7494	106.1128	-0.053418	0.1333	0.065527	-87.3403	-10.6672	49.4539	0.081055	-0.07666	0.11133	NaN	NaN	NaN	NaN	NaN	NaN
1.528	-72.7	38.995	288.188	-0.033203	0.11695	0.1106	-71.964	122.751	64.93	-0.025781	0.11211	0.057226	-46.342	23.6705	28.0409	0.12207	-0.074707	0.10254	NaN	NaN	NaN	NaN	NaN	NaN
1.53	-55.751	67.835	402.22	-0.070313	0.1377	0.12012	-45.908	69.3758	58.65507	-0.0015625	0.093359	0.057226	-40.242	25.669	26.7881	0.15015	-0.079346	0.095947	NaN	NaN	NaN	NaN	NaN	NaN
1.532	-32.16	69.886	593.06	-0.12842	0.15674	0.13867	-27.99	72.877	48.4889	0.021094	0.07461	0.054687	-25.612	28.9342	-14.5844	0.17725	-0.083984	0.086914	NaN	NaN	NaN	NaN	NaN	NaN
1.534	-40.579	80.073	760.22	-0.16553	0.16406	0.1416	-46.294	71.9696	48.859	0.041992	0.060059	0.056152	-39.929	29.4211	-26.0204	0.22217	-0.090332	0.083008	NaN	NaN	NaN	NaN	NaN	NaN
1.536	-43.941	94.707	845.73	-0.24023	0.18311	0.1499	-9.185	9.746	45.5866	0.057129	0.050293	0.067676	1.694	56.9382	-60.566	0.24023	-0.098633	0.075684	NaN	NaN	NaN	NaN	NaN	NaN
1.538	-8.907	60.844	909.54	-0.29956	0.20142	0.15381	-17.038	45.06864	28.365	0.069629	0.041211	0.068262	-18.59	53.176	-35.2929	0.28027	-0.10254	0.059082	NaN	NaN	NaN	NaN	NaN	NaN
1.54	28.163	7.8465	1014.98	-0.36328	0.22559	0.15381	-5.26900000000001	21.444	28.9543	0.080957	0.029883	0.064356	9.896	66.467	-24.1733	0.31031	-0.10083	0.05127	NaN	NaN	NaN	NaN	NaN	NaN
1.542	-14.959	16.176	1125.1	-0.4751	0.26465	0.14063	30.071	3.6348	35.64612	0.096193	0.019043	0.068359	-22.04	38.6154	24.5389	0.33496	-0.10254	0.042969	NaN	NaN	NaN	NaN	NaN	NaN
1.544	-2.583	35.799	1157.43	-0.5415	0.2959	0.14258	-25.273	73.015	9.928	0.11475	0.0048828	0.067871	12.717	42.319	26.6444	0.35254	-0.1084	0.031738	NaN	NaN	NaN	NaN	NaN	NaN
1.546	-23.634	19.412	1125.89	-0.70947	0.35889	0.15625	20.819	37.576	9.6333	0.13418	-0.0057617	0.070019	9.381	15.6561	36.14	0.35693	-0.11377	0.026855	NaN	NaN	NaN	NaN	NaN	NaN
1.548	-11.521	-11.74	1130.71	-0.87036	0.39917	0.16479	4.621	42.8393	4.9047	0.14912	-0.018262	0.068066	25.204	37.5121	28.89	0.3501	-0.12354	0.01709	NaN	NaN	NaN	NaN	NaN	NaN
1.55	26.153	-12.715	1185.51	-1.0508	0.43164	0.18701	-17.734	58.228	13.1118	0.16553	-0.028418	0.061035	5.6	33.211	22.6471	0.3396	-0.12989	0.012451	NaN	NaN	NaN	NaN	NaN	NaN
1.552	62.012	-6.271	1204.41	-1.3159	0.48682	0.24219	17.398	-13.1978	12.9145	0.18281	-0.039844	0.05957	19.911	49.291	9.5216	0.32471	-0.13623	0.012207	NaN	NaN	NaN	NaN	NaN	NaN
1.554	86.23586	-13.711	1203.93	-1.4526	0.52246	0.29492	-1.798	27.65	4.826	0.19385	-0.046875	0.055664	12.585	33.2648	24.3495	0.2959	-0.14258	0.0087891	NaN	NaN	NaN	NaN	NaN	NaN
1.556	71.0062	-33.621	1206.13	-1.7559	0.58594	0.38916	-19.558	27.7018	12.9936	0.20039	-0.054297	0.054004	-5.037	24.826	2.3272	0.28174	-0.13916	0.013184	NaN	NaN	NaN	NaN	NaN	NaN
1.558	77.664	-36.2259	1224.42	-1.947	0.63769	0.4353	-11.318	17.4892	16.3537	0.20293	-0.061133	0.055078	-47.047	-0.597000000000001	5.8522	0.25195	-0.12842	0.018066	NaN	NaN	NaN	NaN	NaN	NaN
1.56	51.81	0.8665	1258.98	-2.0801	0.6875	0.46338	-56.314	86.888	17.4461	0.20371	-0.068945	0.056641	-40.642	36.53	27.2458	0.23145	-0.11231	0.027588	NaN	NaN	NaN	NaN	NaN	NaN
1.562	31.458	42.112	1264.71	-2.1289	0.76367	0.46729	-29.681	33.0274	29.429	0.19873	-0.075586	0.056152	-69.305	61.779	36.9903	0.21289	-0.098145	0.033203	NaN	NaN	NaN	NaN	NaN	NaN
1.564	52.835	43.9087	1248.94	-2.1084	0.80176	0.46582	-27.424	45.446	12.4724	0.18994	-0.078613	0.055176	-74.061	98.836	41.508	0.19336	-0.070801	0.041504	NaN	NaN	NaN	NaN	NaN	NaN
1.566	50.182	8.61	1224.18	-1.9937	0.87354	0.46875	-59.161	63.168	15.0143	0.17442	-0.07793	0.063574	-81.456	72.042	59.193	0.18848	-0.056152	0.043457	NaN	NaN	NaN	NaN	NaN	NaN
1.568	30.114	-40.727	1224.98	-1.8926	0.92481	0.45605	-41.34	-4.4821	30.1338	0.16172	-0.07168	0.065625	-101.2735	55.2424	50.125	0.17871	-0.033203	0.051758	NaN	NaN	NaN	NaN	NaN	NaN
1.57	42.39	-76.851	1243.83	-1.7847	0.95996	0.41846	-66.711	37.5909	15.422	0.14453	-0.069336	0.071875	-108.3629	34.5007	37.1077	0.1731	-0.018799	0.054932	NaN	NaN	NaN	NaN	NaN	NaN
1.572	91.486	-101.318	1296.49	-1.5703	0.96484	0.37109	-75.601	24.839	21.5214	0.12549	-0.064551	0.079785	-86.724	37.135	24.52	0.17041	-0.0053711	0.056152	NaN	NaN	NaN	NaN	NaN	NaN
1.574	58.235	-127.7172	1327.15	-1.4473	0.93359	0.35498	-51.634	-7.7096	25.972	0.10938	-0.053711	0.086914	-83.415	26.9261	-5.557	0.16699	0.0068359	0.061035	NaN	NaN	NaN	NaN	NaN	NaN
1.576	26.322	-179.377	1345.13	-1.2402	0.8418	0.32422	-103.50622	42.3116	15.84929	0.093652	-0.048632	0.090137	-76.574	24.617	12.648	0.16968	0.015625	0.058594	NaN	NaN	NaN	NaN	NaN	NaN
1.578	13.543	-227.273	1341.08	-1.1492	0.78198	0.30957	-47.083	15.44408	35.713	0.079492	-0.045605	0.094531	-69.426	1.635	6.962	0.16748	0.019043	0.054199	NaN	NaN	NaN	NaN	NaN	NaN
1.58	34.225	-233.475	1381.36	-1.0854	0.74561	0.30176	-55.445	48.957	24.012	0.06543	-0.03623	0.099218	-65.839	-6.95	15.6706	0.1665	0.035645	0.054688	NaN	NaN	NaN	NaN	NaN	NaN
1.582	38.778	-198.431	1437.91	-1.0366	0.73486	0.30762	-62.901	80.073	6.9977	0.053028	-0.031738	0.09541	-76.099	-24.0307	33.794	0.16895	0.040039	0.061035	NaN	NaN	NaN	NaN	NaN	NaN
1.584	9.905	-163.591	1475.34	-1.0366	0.74463	0.31152	-23.084	8.474	15.2646	0.043945	-0.024902	0.1001	-54.674	-4.2252	53.236	0.17383	0.050293	0.062012	NaN	NaN	NaN	NaN	NaN	NaN
1.586	2.24	-165.551	1514.24	-1.0645	0.7793	0.32666	-62.253	42.117	0.538	0.03877	-0.023926	0.099318	-49.558	-0.62918	41.181	0.18311	0.052002	0.059815	NaN	NaN	NaN	NaN	NaN	NaN
1.588	-41.572	-172.204	1525.52	-1.1208	0.83227	0.33569	-25.262	14.609	16.1809	0.03418	-0.024512	0.097851	-19.654	28.486	50.7111	0.19141	0.055176	0.058594	NaN	NaN	NaN	NaN	NaN	NaN
1.59	-62.13	-142.138	1535.25	-1.1953	0.89746	0.35889	5.512	-12.7072	23.2144	0.033008	-0.024121	0.097461	-9.525	22.2006	21.742	0.19922	0.056641	0.054199	NaN	NaN	NaN	NaN	NaN	NaN
1.592	-61.1	-121.571	1555.71	-1.3008	0.98633	0.37451	-30.153	66.5096	20.0378	0.034961	-0.025781	0.093066	-6.514	11.39073	18.485	0.2041	0.061035	0.045898	NaN	NaN	NaN	NaN	NaN	NaN
1.594	-33.695	-99.213	1585.3	-1.353	1.0278	0.38818	3.533	21.9928	26.4301	0.039551	-0.030273	0.092773	14.932	8.1443	-10.0129	0.20996	0.060059	0.041992	NaN	NaN	NaN	NaN	NaN	NaN
1.596	-36.564	-108.305	1612.67	-1.4434	1.082	0.40479	-5.23	40.051	16.7945	0.048536	-0.035938	0.088769	4.067	22.5021	1.8979	0.20679	0.059326	0.04541	NaN	NaN	NaN	NaN	NaN	NaN
1.598	-53.7124	-113.6387	1638.45	-1.503	1.1045	0.4187	-22.756	67.084	4.724	0.053711	-0.037989	0.08584	26.202	34.8865	-16.4526	0.20459	0.055664	0.041016	NaN	NaN	NaN	NaN	NaN	NaN
1.6	-42.72568	-122.3893	1654.27	-1.5586	1.1172	0.42627	20.125	-1.3779	8.1895	0.06543	-0.041504	0.080371	19.874	40.4774	4.433453	0.18848	0.059082	0.041016	NaN	NaN	NaN	NaN	NaN	NaN
1.602	-22.105	-111.075	1703.99	-1.6304	1.1294	0.43262	-3.869	35.9567	19.861	0.077344	-0.04541	0.076953	12.011	51.11	-14.2772	0.17773	0.058594	0.040527	NaN	NaN	NaN	NaN	NaN	NaN
1.604	13.927	-90.153	1748.32	-1.6616	1.1392	0.43457	-11.295	13.477	22.1281	0.087402	-0.047852	0.07666	2.46	50.857	-6.9464	0.15381	0.064941	0.04248	NaN	NaN	NaN	NaN	NaN	NaN
1.606	-10.559	-77.486	1786.11	-1.7266	1.166	0.44482	10.842	-22.8823	22.1887	0.10469	-0.053223	0.07041	20.858	51.156	-16.0231	0.13696	0.069825	0.049805	NaN	NaN	NaN	NaN	NaN	NaN
1.608	-16.467	-74.934	1816.32	-1.7925	1.2153	0.44824	-17.45	46.5902	17.285	0.11709	-0.059473	0.064843	-19.207	41.93	25.0176	0.11719	0.078125	0.056152	NaN	NaN	NaN	NaN	NaN	NaN
1.61	-28.0062	-69.152	1837.07	-1.8262	1.2412	0.45947	-12.848	11.512	22.1534	0.13701	-0.062207	0.05625	-35.98	44.153	9.2109	0.087402	0.093262	0.060547	NaN	NaN	NaN	NaN	NaN	NaN
1.612	-20.0401	-64.334	1864.47	-1.8691	1.293	0.46289	-7.291	36.91	22.1486	0.14971	-0.062988	0.054199	-35.116	33.521	39.2605	0.074219	0.1001	0.065918	NaN	NaN	NaN	NaN	NaN	NaN
1.614	-16.229	-64.537	1883.83	-1.8914	1.3323	0.46655	-42.707	70.362	12.8868	0.16113	-0.062012	0.054199	-37.821	50.1843	40.8113	0.054199	0.12012	0.077637	NaN	NaN	NaN	NaN	NaN	NaN
1.616	-19.798	-59.805	1870.05	-1.9102	1.3672	0.46436	-40.197	27.4799	11.8799	0.16885	-0.063184	0.052539	-77.954	23.7465	59.7804	0.043457	0.13183	0.085694	NaN	NaN	NaN	NaN	NaN	NaN
1.618	-5.977	-46.816	1863.51	-1.9277	1.4141	0.4541	-56.381	60.726	12.664	0.16895	-0.062891	0.049512	-73.577	-10.945	74.5696	0.033691	0.14111	0.096191	NaN	NaN	NaN	NaN	NaN	NaN
1.62	-22.405	-40.027	1851.89	-1.9272	1.4282	0.44727	-59.31	34.1538	26.2972	0.16817	-0.057031	0.051465	-108.1256	-50.8431	99.2964	0.023438	0.15771	0.10693	NaN	NaN	NaN	NaN	NaN	NaN
1.622	-7.754	-27.92	1862.67	-1.9312	1.4536	0.44531	-65.446	-6.6525	29.5033	0.16045	-0.05332	0.05459	-87.78	-16.364	118.662	0.01709	0.16309	0.10889	NaN	NaN	NaN	NaN	NaN	NaN
1.624	17.884	-35.77	1887.98	-1.9392	1.4641	0.44361	-78.803	46.4808	6.57	0.15576	-0.043945	0.061523	-80.432	-7.1667	215.003	0.003418	0.18555	0.104	NaN	NaN	NaN	NaN	NaN	NaN
1.626	31.4719	-21.38	1891.66	-1.9507	1.4673	0.44775	-60.364	12.2297	26.3517	0.14746	-0.039648	0.061914	-111.34	9.147	305.549	-0.01294	0.2002	0.097657	NaN	NaN	NaN	NaN	NaN	NaN
1.628	-4.271	-10	1877.36	-1.9707	1.4609	0.45752	-62.149	38.752	11.265	0.1415	-0.033594	0.067286	-130.381	-2.084	416.861	-0.035645	0.22461	0.086914	NaN	NaN	NaN	NaN	NaN	NaN
1.63	-55.172	16.83	1854.77	-1.9824	1.4521	0.46729	-72.262	64.1827	10.7431	0.13838	-0.025781	0.073926	-89.463	40.1649	530.953	-0.094727	0.26611	0.081543	NaN	NaN	NaN	NaN	NaN	NaN
1.632	-55.2845	15.14	1858.77	-2.0059	1.4316	0.479	-42.932	8.315	26.625	0.1373	-0.019824	0.079101	-105.0815	54.333	703.169	-0.14648	0.2915	0.079102	NaN	NaN	NaN	NaN	NaN	NaN
1.634	-51.2774	23.38	1867.47	-2.0125	1.4163	0.48511	-52.123	35.412	19.2058	0.13867	-0.013672	0.080566	-51.14	94.9447	893.96923	-0.27979	0.34082	0.086914	NaN	NaN	NaN	NaN	NaN	NaN
1.636	-51.4531	5.67999999999999	1880.7	-2.0078	1.3945	0.49414	-46.736	18.7507	16.7831	0.14551	-0.0092773	0.08125	-21.2424	62.97	1112.5747	-0.40185	0.38501	0.10327	NaN	NaN	NaN	NaN	NaN	NaN
1.638	-74.161	-18.42	1878.09	-1.999	1.3574	0.5083	-26.901	-5.4516	18.3313	0.15323	-0.0043945	0.09082	47.712	79.3624	1246.075	-0.53467	0.43604	0.12012	NaN	NaN	NaN	NaN	NaN	NaN
1.64	-56.786	-18.8	1878.4	-1.9937	1.3403	0.51563	-64.921	61.668	20.377	0.16025	0.00029297	0.093164	84.4471	38.2084	1416.543	-0.72852	0.51953	0.13818	NaN	NaN	NaN	NaN	NaN	NaN
1.642	-51.9464	-3.90000000000001	1865.47	-1.9819	1.3052	0.53613	-22.78	22.66073	29.8573	0.16064	0.0047851	0.097072	138.379	37.4629	1568.128	-0.82568	0.56787	0.14307	NaN	NaN	NaN	NaN	NaN	NaN
1.644	-64.542	29.19	1869.58	-1.9775	1.2773	0.5542	-5.466	32.395	53.2353	0.16211	0.0092773	0.10352	102.24	-23.4106	1696.9061	-1.0347	0.70361	0.16846	NaN	NaN	NaN	NaN	NaN	NaN
1.646	-37.9906	30.72	1860.31	-1.978	1.2524	0.57422	-22.762	26.0834	57.5171	0.15401	0.013477	0.1086	121.418	-52.904	1726.966	-1.2254	0.82642	0.20581	NaN	NaN	NaN	NaN	NaN	NaN
1.648	-48.8849	19.65	1844.31	-1.9839	1.2173	0.5918	-17.985	-38.712	65.0291	0.14824	0.018457	0.11152	120.402	-153.711	1692.89	-1.4429	0.95752	0.26416	NaN	NaN	NaN	NaN	NaN	NaN
1.65	-46.5817	7.47	1835.82	-1.9839	1.2036	0.60547	6.782	2.517	82.0709	0.13848	0.023535	0.11738	104.929	-211.9513	1642.836	-1.7847	1.1431	0.36377	NaN	NaN	NaN	NaN	NaN	NaN
1.652	-77.236	4.73999999999998	1841.65	-1.9785	1.1758	0.62451	16.294	-16.658	108.8152	0.1249	0.03711	0.12412	113.792	-282.749	1560.934	-1.9644	1.2271	0.41699	NaN	NaN	NaN	NaN	NaN	NaN
1.654	-35.499	30.72	1845.93	-1.9744	1.1594	0.64087	-9.074	-67.536	166.7822	0.11035	0.048828	0.13037	123.923	-284.64	1442.363	-2.2734	1.3438	0.48291	NaN	NaN	NaN	NaN	NaN	NaN
1.656	-38.2265	66.668	1835.11	-1.9683	1.1509	0.65039	-29.614	-37.301	202.525	0.098143	0.066504	0.13633	119.921	-287.588	1284.848	-2.3913	1.3967	0.53344	NaN	NaN	NaN	NaN	NaN	NaN
1.658	-36.9659	88.383	1787.6	-1.9512	1.1348	0.65674	-6.98799999999999	-73.448	270.313	0.08252	0.088086	0.14336	98.56	-261.497	1161.163	-2.3926	1.4336	0.63232	NaN	NaN	NaN	NaN	NaN	NaN
1.66	-46.0142	93.982	1759.6	-1.9331	1.1255	0.66504	-0.364999999999995	-14.7263	396.275	0.07002	0.11191	0.14492	57.641	-244.317	1091.77	-2.3433	1.4731	0.66211	NaN	NaN	NaN	NaN	NaN	NaN
1.662	-44.4482	85.818	1740.77	-1.9043	1.1152	0.66846	-35.271	64.1247	529.52	0.056641	0.13223	0.13975	69.98029	-218.019	1101.576	-2.2891	1.4863	0.60986	NaN	NaN	NaN	NaN	NaN	NaN
1.664	-13.7119	73.31	1763.1	-1.8845	1.1038	0.67016	19.935	41.4358	662.70316	0.039551	0.15479	0.14111	92.661	-160.832964	1121.812	-1.9004	1.4688	0.49316	NaN	NaN	NaN	NaN	NaN	NaN
1.666	-5.534	74.75	1734.43	-1.8633	1.0957	0.67041	42.1238	104.411	761.053	0.010352	0.18828	0.14209	84.127	-99.494	1218.7932	-1.4678	1.3882	0.47168	NaN	NaN	NaN	NaN	NaN	NaN
1.668	-4.648	48	1711.56	-1.834	1.0859	0.67041	23.3125	119.587	908.135	-0.023828	0.21729	0.14912	14.812	-40.05	1255.6571	-1.1133	1.2773	0.479	NaN	NaN	NaN	NaN	NaN	NaN
1.67	-11.682	37.16	1691.25	-1.8179	1.0806	0.6709	59.815	86.2441	1038.499	-0.070703	0.24814	0.15732	-51.407	-54.98	1302.355	-0.91162	1.1411	0.4707	NaN	NaN	NaN	NaN	NaN	NaN
1.672	9.857	32	1670.12	-1.7847	1.0688	0.67578	58.289	139.421	1157.619	-0.12061	0.2751	0.16338	-98.83	-105.36	1321.613	-0.86865	1.106	0.46875	NaN	NaN	NaN	NaN	NaN	NaN
1.674	10.096	52	1639.68	-1.7674	1.0589	0.67749	40.935	84.913	1264.118	-0.17432	0.30469	0.16357	-165.104	-189.41	1368.922	-0.80029	1.1021	0.48145	NaN	NaN	NaN	NaN	NaN	NaN
1.676	-5.711	59.717	1621.02	-1.7534	1.0474	0.67676	20.594	77.192	1314.39	-0.23291	0.33594	0.16992	-176.949	-260.833	1399.444	-0.7461	1.1135	0.4851	NaN	NaN	NaN	NaN	NaN	NaN
1.678	-12.356	68.37	1612.58	-1.7339	1.0415	0.67773	2.458	53.37	1308.1643	-0.29922	0.37597	0.16689	-194.778	-345.9212	1456.5205	-0.71094	1.1094	0.48779	NaN	NaN	NaN	NaN	NaN	NaN
1.68	-25.7833	88.47	1591.41	-1.7183	1.0356	0.67725	19.976	-46.021	1298.124	-0.37969	0.41661	0.16494	-221.451	-415.618	1494.668	-0.76074	1.0996	0.48486	NaN	NaN	NaN	NaN	NaN	NaN
1.682	-33.373	92.225	1559.72	-1.6914	1.0215	0.66455	-17.983	-57.413	1252.484	-0.47529	0.46553	0.16308	-204.462	-503.11	1540.827	-0.8418	1.1133	0.48926	NaN	NaN	NaN	NaN	NaN	NaN
1.684	-66.1988	82.127	1525.08	-1.664	1.0078	0.65478	-31.465	-106.796	1202.105	-0.58984	0.52148	0.16211	-155.289	-528.29	1577.227	-1.0791	1.1992	0.51807	NaN	NaN	NaN	NaN	NaN	NaN
1.686	-25.518	80.148	1515.13	-1.623	0.99609	0.6499	-12.613	-160.034	1134.631	-0.72012	0.57988	0.17266	-136.1429	-518.52	1687.148	-1.2618	1.3047	0.53613	NaN	NaN	NaN	NaN	NaN	NaN
1.688	-34.924	97.688	1482.68	-1.5684	0.97656	0.6333	-29.066	-101.787	1063.2126	-0.87403	0.64102	0.18975	-88.64	-445.93	1797.7057	-1.4141	1.4063	0.55127	NaN	NaN	NaN	NaN	NaN	NaN
1.69	-29.279	109.393	1459.81	-1.541	0.96484	0.62256	13.839	-114.476	1037.7746	-1.0435	0.70508	0.21514	-115.224	-378.184	1901.506	-1.5366	1.4907	0.5625	NaN	NaN	NaN	NaN	NaN	NaN
1.692	-23.988	109.933	1439.88	-1.4907	0.93799	0.59766	20.541	-86.347	1018.84541	-1.2192	0.76758	0.25557	-124.881	-262.965	1945.735	-1.5776	1.522	0.56396	NaN	NaN	NaN	NaN	NaN	NaN
1.694	0.940000000000001	121.971	1423.43	-1.448	0.91138	0.58276	-13.773	-33.404	1009.615	-1.3906	0.83398	0.31152	-131.495	-159.129	1983.369	-1.6421	1.5571	0.54883	NaN	NaN	NaN	NaN	NaN	NaN
1.696	17.775	139.127	1402.29	-1.4116	0.88916	0.56445	1.93600000000001	-41.0104	1029.574	-1.5443	0.89434	0.36338	-95.7609	-74.625	2034.277	-1.6941	1.5725	0.54248	NaN	NaN	NaN	NaN	NaN	NaN
1.698	-24.288	145.429	1366.8	-1.3652	0.86719	0.54736	-18.446	-7.307	1045.357	-1.6606	0.94218	0.41377	-74.4643	-40.45	2041.9825	-1.7437	1.5845	0.53125	NaN	NaN	NaN	NaN	NaN	NaN
1.7	-26.198	139.174	1347.06	-1.3433	0.85693	0.53613	-39.054	-17.184	1084.082	-1.7199	0.98828	0.45205	-59.325	-19.85	2039.76433	-1.7964	1.6079	0.5249	NaN	NaN	NaN	NaN	NaN	NaN
1.702	-29.978	129.1417	1327.36	-1.2847	0.83838	0.50977	-20.65	-52.276	1110.5654	-1.7119	1.0377	0.49307	-19.775	-37.68	1992.451	-1.8159	1.6235	0.52051	NaN	NaN	NaN	NaN	NaN	NaN
1.704	-26.681	123.008	1299.08	-1.2456	0.81689	0.49414	-68.1	-57.545	1143.046	-1.6655	1.0884	0.52539	1.407	-104.303	1993.322	-1.8442	1.6606	0.51953	NaN	NaN	NaN	NaN	NaN	NaN
1.706	-11.197	118.635	1273.37	-1.2114	0.78955	0.47363	-100.297	-115.875	1190.854	-1.5949	1.1246	0.5209	48.281	-178.13	2016.6593	-1.8633	1.6905	0.51611	NaN	NaN	NaN	NaN	NaN	NaN
1.708	14.547	123.682	1238.5	-1.1694	0.74316	0.44238	-106.491	-175.127	1221.08	-1.4671	1.1231	0.4918	114.428	-232.788	2066.406	-1.8828	1.7246	0.51709	NaN	NaN	NaN	NaN	NaN	NaN
1.71	31.441	146.231	1215.85	-1.1504	0.7168	0.43408	-138.0958	-230.619	1259.731	-1.2733	1.0903	0.46602	143.508	-236.078	2104.5141	-1.9292	1.7739	0.5332	NaN	NaN	NaN	NaN	NaN	NaN
1.712	34.522	171.3921	1168.68	-1.1147	0.66064	0.41113	-95.008	-320.626	1314.844	-1.0823	1.0153	0.45547	162.147	-229.223	2147.466	-1.9526	1.7993	0.54883	NaN	NaN	NaN	NaN	NaN	NaN
1.714	46.773	171.8328	1163.5	-1.0859	0.6372	0.39697	-79.34	-330.91	1372.946	-0.94336	0.93945	0.43799	125.248	-217.768	2198.3649	-2.0054	1.8384	0.58594	NaN	NaN	NaN	NaN	NaN	NaN
1.716	67.732	168.943	1138.4	-1.0562	0.61768	0.37793	-94.033	-330.137	1434.84	-0.8833	0.89639	0.42168	83.598	-216.795	2248.279	-2.0547	1.8516	0.62744	NaN	NaN	NaN	NaN	NaN	NaN
1.718	76.4343	166.1682	1120.17	-1.0088	0.59766	0.36084	-67.503	-336.451	1513.389	-0.85039	0.88105	0.41572	44.938	-174.877	2262.204	-2.0625	1.8535	0.64111	NaN	NaN	NaN	NaN	NaN	NaN
1.72	64.851	166.4224	1078.26	-0.98975	0.58643	0.34961	-108.422	-273.376	1579.268	-0.85235	0.8916	0.42627	3.04899999999999	-139.906	2267.11	-2.0625	1.8281	0.67041	NaN	NaN	NaN	NaN	NaN	NaN
1.722	43.276	150.5928	1037.18	-0.95654	0.56494	0.33252	-95.134	-244.677	1661.8683	-0.89131	0.92724	0.4334	-28.639	-84.645	2220.918	-2.0522	1.7959	0.68994	NaN	NaN	NaN	NaN	NaN	NaN
1.724	38.956	149.131	1006.15	-0.93213	0.55615	0.31811	-90.306	-177.923	1713.385	-0.95068	0.98291	0.43945	-48.507	-61.693	2189.074	-2.0425	1.7505	0.70996	NaN	NaN	NaN	NaN	NaN	NaN
1.726	28.411	174.559	978.19	-0.90771	0.53613	0.30273	-133.8881	-108.77	1761.206	-1.0121	1.0512	0.42978	-37.002	-14.238	2107.984	-2.0391	1.6875	0.72705	NaN	NaN	NaN	NaN	NaN	NaN
1.728	29.97	192.74	932	-0.88232	0.51221	0.29053	-133.319	-75.629	1815.867	-1.071	1.1364	0.41807	-16.591	6.747	2058.696	-2.0352	1.6563	0.7251	NaN	NaN	NaN	NaN	NaN	NaN
1.73	10.686	184.42	893.16	-0.86719	0.49707	0.27881	-132.81	-28.245	1829.9539	-1.1225	1.2224	0.41142	-28.685	51.8811	2020.304	-2.0269	1.5845	0.73242	NaN	NaN	NaN	NaN	NaN	NaN
1.732	23.103	163.157	876.66	-0.83984	0.48145	0.25879	-137.4832	-26.954	1828.3163	-1.1703	1.2961	0.39736	-54.723	63.181	1998.607	-2.021	1.5356	0.73389	NaN	NaN	NaN	NaN	NaN	NaN
1.734	21.58	162.373	849.4	-0.81812	0.4563	0.24707	-44.825	-74.927	1850.0743	-1.23	1.3638	0.38477	-79.303	82.67	1937.108	-2.0215	1.4902	0.73486	NaN	NaN	NaN	NaN	NaN	NaN
1.736	26.499	164.751	822.68	-0.7832	0.4375	0.23291	-48.828	-88.653	1853.416	-1.297	1.4054	0.37422	-86.795	82.6481	1923.008	-2.0215	1.4336	0.71924	NaN	NaN	NaN	NaN	NaN	NaN
1.738	18.584	160.3693	776.79	-0.74023	0.41504	0.21973	-49.912	-154.996	1902.1546	-1.377	1.439	0.37246	-98.6876	94.8508	1937.758	-2.0137	1.4141	0.70947	NaN	NaN	NaN	NaN	NaN	NaN
1.74	28.804	154.0395	735.14	-0.71289	0.4043	0.2124	-8.131	-171.572	1939.668	-1.4582	1.4641	0.38535	-119.198	63.45	2008.6859	-1.998	1.373	0.69678	NaN	NaN	NaN	NaN	NaN	NaN
1.742	3.316	162.68	694.58	-0.67676	0.37891	0.18994	-43.814	-144.198	1938.361	-1.5468	1.4985	0.40654	-109.438	67.075	2041.79	-1.9795	1.3554	0.68554	NaN	NaN	NaN	NaN	NaN	NaN
1.744	-19.374	168.078	656.689	-0.64112	0.36328	0.17871	-8.374	-142.66	1967.223	-1.6465	1.541	0.43018	-167.988	33.074	2031.8	-1.9531	1.3438	0.66846	NaN	NaN	NaN	NaN	NaN	NaN
1.746	-10.532	163.907	648.08	-0.60791	0.34326	0.16016	7.20500000000001	-121.706	1965.789	-1.7442	1.5894	0.45713	-148.177	65.163	1985.76184	-1.9214	1.3306	0.64648	NaN	NaN	NaN	NaN	NaN	NaN
1.748	-17.247	171.858	621.995	-0.56396	0.32275	0.14355	-42.297	-143.751	1992.899	-1.8366	1.6415	0.48418	-126.2216	58.213	1984.2652	-1.9004	1.3242	0.63623	NaN	NaN	NaN	NaN	NaN	NaN
1.75	-15.018	175.28	594.913	-0.53125	0.30152	0.13135	-38.191	-166.922	2028.658	-1.9226	1.6962	0.51113	-56.703	59.9955	1942.3993	-1.8511	1.3149	0.61719	NaN	NaN	NaN	NaN	NaN	NaN
1.752	-41.143	159.741	557.361	-0.49561	0.28125	0.11816	-72.217	-137.4551	2017.57	-1.9827	1.7423	0.53203	-41.239	18.298	1928.287	-1.8211	1.2986	0.60278	NaN	NaN	NaN	NaN	NaN	NaN
1.754	-17.583	139.201	524.802	-0.4585	0.25342	0.10254	-51.963	-124.718	1997.51	-2.0293	1.7715	0.56104	23.722	15.409	1881.741	-1.7969	1.2813	0.58936	NaN	NaN	NaN	NaN	NaN	NaN
1.756	-3.861	139.115	481.985	-0.44141	0.24023	0.09668	-58.087	-92.465	1969.283	-2.0565	1.7788	0.58223	-7.692	5.376	1873.207	-1.7695	1.2637	0.57178	NaN	NaN	NaN	NaN	NaN	NaN
1.758	2.248	135.329	443.516	-0.40381	0.21533	0.079102	-82.316	-51.043	1910.802	-2.0688	1.768	0.6042	19.214	64.48	1823.57	-1.7554	1.2485	0.56494	NaN	NaN	NaN	NaN	NaN	NaN
1.76	7.764	121.957	418.773	-0.3789	0.1958	0.077148	-42.11	-44.058	1887.511	-2.0688	1.7445	0.63506	19.598	108.188	1811.331	-1.7324	1.2188	0.55322	NaN	NaN	NaN	NaN	NaN	NaN
1.762	13.902	113.81559	396.553	-0.34814	0.18359	0.071289	-42.918	-14.976	1888.318	-2.0664	1.7043	0.65674	58.424	199.2059	1757.5585	-1.7109	1.1972	0.54248	NaN	NaN	NaN	NaN	NaN	NaN
1.764	10.221	118.2752	378.929	-0.31592	0.16016	0.060059	-89.825	-3.9924	1903.992	-2.0601	1.6626	0.67578	52.298	218.743	1735.144	-1.6816	1.168	0.52686	NaN	NaN	NaN	NaN	NaN	NaN
1.766	9.606	118.975	353.347	-0.30518	0.15479	0.056641	-61.178	-23.19	1927.97825	-2.0626	1.612	0.69336	54.177	261.545	1698.471	-1.646	1.1372	0.50781	NaN	NaN	NaN	NaN	NaN	NaN
1.768	15.282	103.413	347.707	-0.26807	0.13086	0.049316	-113.69	-8.419	1905.222	-2.066	1.5586	0.70967	-20.433	252.27	1695.59781	-1.6255	1.1138	0.49707	NaN	NaN	NaN	NaN	NaN	NaN
1.77	12.241	104.882	306.296	-0.24438	0.11475	0.041015	-131.117	-20.447	1895.241	-2.075	1.5114	0.72959	12.538	264.121	1655.7503	-1.583	1.0781	0.48584	NaN	NaN	NaN	NaN	NaN	NaN
1.772	3.86900000000001	99.866	279.2962	-0.21826	0.1001	0.037109	-108.472	-11.3613	1908.039	-2.089	1.4712	0.75078	5.848	220.161	1629.93802	-1.5498	1.0469	0.47534	NaN	NaN	NaN	NaN	NaN	NaN
1.774	-13.411	92.469	260.0173	-0.18848	0.074219	0.024902	-145.71	19.9414	1901.099	-2.1069	1.4458	0.76904	7.038	198.74	1569.1321	-1.5137	1.0117	0.45947	NaN	NaN	NaN	NaN	NaN	NaN
1.776	-24.375	72.2081	238.7053	-0.17041	0.067871	0.023926	-147.13	14.3076	1938.228	-2.1199	1.4219	0.79267	16.362	123.672	1555.4432	-1.4688	0.9707	0.43701	NaN	NaN	NaN	NaN	NaN	NaN
1.778	9.944	71.0175	219.50053	-0.14307	0.049805	0.01709	-154.3382	33.685	1954.4387	-2.1265	1.3966	0.80332	27.483	117.182	1498.6313	-1.4395	0.94727	0.43018	NaN	NaN	NaN	NaN	NaN	NaN
1.78	0.578999999999994	64.126	177.86715	-0.12256	0.036377	0.010986	-167.785	15.3729	1932.4999	-2.1171	1.3653	0.80645	-8.041	127.999	1474.114	-1.3809	0.91016	0.40479	NaN	NaN	NaN	NaN	NaN	NaN
1.782	-1.59	57.7929	162.60162	-0.10303	0.022461	0.0092773	-125.204	-17.7022	1926.8046	-2.092	1.3265	0.81279	-7.702	208.418	1407.106	-1.3454	0.87622	0.38696	NaN	NaN	NaN	NaN	NaN	NaN
1.784	-18.462	53.4193	149.983	-0.07959	0.011719	0.0043945	-151.817	6.956	1870.073	-2.0664	1.2871	0.81104	-53.168	215.317	1382.76926	-1.312	0.83838	0.37207	NaN	NaN	NaN	NaN	NaN	NaN
1.786	-17.18	56.0925	140.5628	-0.064941	0.00048828	-0.0024414	-111.113	13.957	1838.311	-2.0369	1.2564	0.79658	-36.5231	258.592	1321.725	-1.2744	0.79492	0.35205	NaN	NaN	NaN	NaN	NaN	NaN
1.788	-26.222	55.6381	121.5551	-0.041504	-0.022949	-0.0053711	-83.802	44.313	1822.555	-2.0042	1.2333	0.77852	-53.4634	254.3086	1268.907	-1.252	0.77148	0.34229	NaN	NaN	NaN	NaN	NaN	NaN
1.79	-39.516	47.932747	108.92654	-0.025146	-0.039063	-0.015625	-135.026	78.028	1809.0584	-1.9589	1.2106	0.76133	-38.114	331.833	1247.316	-1.21	0.74023	0.32178	NaN	NaN	NaN	NaN	NaN	NaN
1.792	-28.153	35.5758	104.6392	-0.015137	-0.057129	-0.027344	-111.264	72.8179	1801.142	-1.919	1.1923	0.74805	-91.323	357.027	1221.3099	-1.1772	0.70898	0.30883	NaN	NaN	NaN	NaN	NaN	NaN
1.794	-56.482	33.55431	85.37	0.00048828	-0.072266	-0.036133	-76.869	105.888	1787.6142	-1.8887	1.1797	0.72705	-66.273	411.667	1175.549	-1.144	0.68213	0.29785	NaN	NaN	NaN	NaN	NaN	NaN
1.796	-47.364	39.8131	72.229	0.0048828	-0.080566	-0.038574	-90.082	132.908	1750.18787	-1.856	1.1722	0.71504	-47.2695	376.27	1113.578	-1.105	0.65283	0.28369	NaN	NaN	NaN	NaN	NaN	NaN
1.798	-82.151	37.9436	66.1395	0.016602	-0.095215	-0.043945	-63.5	113.97	1734.23	-1.8218	1.1665	0.69727	-52.7555	388.491	1013.851	-1.0854	0.64111	0.28076	NaN	NaN	NaN	NaN	NaN	NaN
1.8	-63.876	32.701144	64.3525	0.019776	-0.10352	-0.046875	-99.029	132.024	1688.157	-1.7952	1.165	0.68399	-1.391	339.849	965.782	-1.0386	0.62158	0.26074	NaN	NaN	NaN	NaN	NaN	NaN
1.802	-42.527	31.9176	43.5374	0.024902	-0.11182	-0.04834	-87.686	92.409	1659.195946	-1.7706	1.1618	0.66778	50.409	368.052	918.149	-0.99416	0.59912	0.24952	NaN	NaN	NaN	NaN	NaN	NaN
1.804	-59.973	31.8771	28.8653	0.024902	-0.12256	-0.047852	-62.07	60.001	1646.2237	-1.7476	1.1587	0.6543	47.141	319.768	876.174	-0.94531	0.58691	0.23096	NaN	NaN	NaN	NaN	NaN	NaN
1.806	-53.67	19.621	18.709	0.023438	-0.13086	-0.049316	-77.988	61.191	1620.275	-1.7241	1.1614	0.63477	47.8895	350.932	821.903	-0.87793	0.56348	0.2041	NaN	NaN	NaN	NaN	NaN	NaN
1.808	-22.802	18.7515	28.979	0.01709	-0.13428	-0.05127	-29.752	41.714	1621.959	-1.702	1.157	0.61905	43.199	274.994	803.6718	-0.84229	0.54736	0.1958	NaN	NaN	NaN	NaN	NaN	NaN
1.81	-31.211	35.1263	18.668	0.017334	-0.14746	-0.048095	-39.739	94.176	1601.1716	-1.6734	1.1481	0.61006	63.144	286.09	792.099	-0.77686	0.51416	0.17285	NaN	NaN	NaN	NaN	NaN	NaN
1.812	-32.152	37.0556	7.654	0.014648	-0.15576	-0.043457	-59.56	134.275	1558.1672	-1.6467	1.1338	0.59756	82.669	242.7708	788.356	-0.72851	0.48706	0.15893	NaN	NaN	NaN	NaN	NaN	NaN
1.814	-18.534	26.3878	15.3934	0.0068359	-0.1626	-0.046875	-38.019	136.1731	1549.934	-1.6211	1.1172	0.58545	111.84	294.909	762.137	-0.67822	0.46143	0.1416	NaN	NaN	NaN	NaN	NaN	NaN
1.816	-28.872	9.4209	23.3081	0	-0.16309	-0.049805	-65.433	188.92	1525.166	-1.5923	1.0954	0.57314	73.741352	272.238	688.473	-0.61865	0.42139	0.11865	NaN	NaN	NaN	NaN	NaN	NaN
1.818	-38.442	16.16071	25.7953	-0.0097656	-0.17188	-0.049805	-49.118	157.1014	1505.354	-1.5606	1.0735	0.56152	32.1177	311.765	630.217	-0.58887	0.40039	0.10693	NaN	NaN	NaN	NaN	NaN	NaN
1.82	-17.472	19.2454	24.073	-0.016846	-0.17041	-0.048096	-40.021	167.496	1479.992	-1.532	1.0488	0.54707	45.1772	232.944	551.197	-0.52441	0.37109	0.086426	NaN	NaN	NaN	NaN	NaN	NaN
1.822	-18.738	28.9467	18.7694	-0.029297	-0.16406	-0.046387	-92.258	216.83	1429.703	-1.5094	1.0243	0.53174	75.6869	236.4371	488.068	-0.47681	0.34693	0.068359	NaN	NaN	NaN	NaN	NaN	NaN
1.824	-6.497	36.979	16.4271	-0.043457	-0.1626	-0.04248	-80.021	207.983	1408.209	-1.48	1.0024	0.51367	92.7239	168.887	420.671	-0.43115	0.32666	0.056152	NaN	NaN	NaN	NaN	NaN	NaN
1.826	-6.247	33.345	-5.07	-0.051758	-0.1626	-0.047852	-64.061	245.691	1355.474	-1.4594	0.97539	0.50029	70.135	215.8908	379.162	-0.37842	0.30322	0.035645	NaN	NaN	NaN	NaN	NaN	NaN
1.828	4.62799999999999	22.4264	-5.683	-0.061035	-0.16357	-0.037598	-91.523	236.76549	1308.533	-1.4363	0.9543	0.48252	22.19	184.6326	318.572	-0.34912	0.28467	0.027832	NaN	NaN	NaN	NaN	NaN	NaN
1.83	2.581	19.7978	-18.71425	-0.070801	-0.15722	-0.040039	-59.602	200.1259	1315.6693	-1.4183	0.92617	0.46338	-14.86	215.134	278.7602	-0.29541	0.26172	0.0078125	NaN	NaN	NaN	NaN	NaN	NaN
1.832	18.165	22.1095	5.0397	-0.077148	-0.15723	-0.041992	-54.437	232.9072	1276.178	-1.4016	0.89492	0.44795	-26.014	153.631	233.8173	-0.26196	0.23706	-0.0019531	NaN	NaN	NaN	NaN	NaN	NaN
1.834	-20.367	33.9675	14.1792	-0.087891	-0.14648	-0.038574	-27.083	209.865	1249.4477	-1.3828	0.86816	0.42822	-34.354	163.8795	227.5374	-0.22803	0.22168	-0.0083008	NaN	NaN	NaN	NaN	NaN	NaN
1.836	-32.366	21.944517	14.5838	-0.087891	-0.146	-0.036133	-40.793	223.08228	1233.802	-1.3567	0.84424	0.41035	-36.426	130.1348	202.746	-0.1875	0.19092	-0.025879	NaN	NaN	NaN	NaN	NaN	NaN
1.838	-23.665	28.227	19.815	-0.089844	-0.13818	-0.041016	-73.57	259.04	1171.8561	-1.3274	0.80967	0.39033	-71.4359	166.45	196.694	-0.16895	0.17969	-0.029785	NaN	NaN	NaN	NaN	NaN	NaN
1.84	-26.959	43.3287	6.3029	-0.089356	-0.12939	-0.035889	-23.369	214.405	1181.529	-1.2977	0.78545	0.3708	-95.9971	131.954	147.2	-0.13623	0.15527	-0.04248	NaN	NaN	NaN	NaN	NaN	NaN
1.842	-35.792	34.662	12.7956	-0.09082	-0.12256	-0.036133	-28.268	251.052	1144.2592	-1.2689	0.76084	0.34746	-121.3857	143.104	125.801	-0.11255	0.13965	-0.044677	NaN	NaN	NaN	NaN	NaN	NaN
1.844	-49.401	37.535	-1.126	-0.090332	-0.10986	-0.037598	-32.369	248.202	1117.4835	-1.2407	0.73682	0.33057	-86.2012	84.394	107.255	-0.088867	0.125	-0.050781	NaN	NaN	NaN	NaN	NaN	NaN
1.846	-37.275	32.155	3.229	-0.09082	-0.1084	-0.039551	9.323	227.5556	1115.706	-1.2145	0.71055	0.31396	-88.3987	68.087	97.201	-0.070801	0.11133	-0.054688	NaN	NaN	NaN	NaN	NaN	NaN
1.848	-39.256	39.569	-19.0721	-0.090332	-0.098633	-0.036621	20.983	273.381	1066.584	-1.1975	0.68897	0.29599	-47.748	16.335	61.706	-0.064941	0.10693	-0.058594	NaN	NaN	NaN	NaN	NaN	NaN
1.85	-42.772	30.411	0.340999999999999	-0.087402	-0.088623	-0.038819	11.21	236.7494	999.745	-1.1811	0.66787	0.2792	-62.799	27.124	54.869	-0.051758	0.087402	-0.066406	NaN	NaN	NaN	NaN	NaN	NaN
1.852	-33.593	21.522	14.3715	-0.089355	-0.082031	-0.038574	12.431	237.846	943.3645	-1.1592	0.64727	0.26807	-67.319	34.283	17.903	-0.049316	0.076416	-0.056641	NaN	NaN	NaN	NaN	NaN	NaN
1.854	-27.639	14.503	9.4872	-0.080566	-0.064453	-0.040039	2.596	257.7385	880.82	-1.1357	0.625	0.26074	-62.335	62.4643	16.713	-0.049316	0.064453	-0.05957	NaN	NaN	NaN	NaN	NaN	NaN
1.856	-36.565	40.1248	15.304	-0.080566	-0.058105	-0.037109	41.448	213.839	850.1208	-1.1081	0.60303	0.24864	-9.714	47.304	-5.0405	-0.04834	0.049805	-0.068359	NaN	NaN	NaN	NaN	NaN	NaN
1.858	-60.682	47.9123	19.1061	-0.069824	-0.04248	-0.033691	41.529	263.3638	811.112	-1.0791	0.5835	0.23916	-32.027	53.234	7.227	-0.047852	0.043945	-0.063965	NaN	NaN	NaN	NaN	NaN	NaN
1.86	-42.131	49.2996	32.0239	-0.05957	-0.034179	-0.040039	18.537	262.7011	767.705	-1.0506	0.56591	0.22705	-11.995	71.357	-1.9659	-0.050293	0.034668	-0.06543	NaN	NaN	NaN	NaN	NaN	NaN
1.862	-23.953	42.6635	21.20334	-0.047852	-0.020508	-0.041016	51.2129	233.48453	745.2648	-1.0215	0.54472	0.21553	-33.682	95.833	13.597	-0.062988	0.033691	-0.056152	NaN	NaN	NaN	NaN	NaN	NaN
1.864	-40.189	37.8385	7.6502	-0.035156	-0.010254	-0.041504	28.244	275.078	697.16	-0.99365	0.52197	0.19727	-9.164	109.24	27.1129	-0.068848	0.029297	-0.055176	NaN	NaN	NaN	NaN	NaN	NaN
1.866	-38.563	31.562	-4.7524	-0.029785	-0.0029297	-0.04248	31.464	235.9767	652.93447	-0.95478	0.4958	0.18926	-6.919	76.968	55.453	-0.096191	0.020996	-0.052246	NaN	NaN	NaN	NaN	NaN	NaN
1.868	-34.006	18.3042	14.7054	-0.01123	0.00097656	-0.044434	27.371	241.568	615.4787	-0.92002	0.47178	0.17637	28.052	44.9987	32.97	-0.12231	0.016113	-0.045654	NaN	NaN	NaN	NaN	NaN	NaN
1.87	-16.256	24.3094	15.0462	0.001709	0.008545	-0.044433	5.14299999999999	256.779	569.4885	-0.87978	0.45186	0.1623	13.729	15.6732	16.565	-0.14355	0.013672	-0.041016	NaN	NaN	NaN	NaN	NaN	NaN
1.872	-20.776	40.9438	8.5111	0.010254	0.013672	-0.046875	-4.973	189.0535	557.3541	-0.83487	0.42862	0.14882	40.24	36.558	-5.774	-0.16846	0.010742	-0.033203	NaN	NaN	NaN	NaN	NaN	NaN
1.874	-6.72800000000001	39.407	18.2819	0.022461	0.019043	-0.045898	-8.867	213.9081	509.527	-0.78418	0.40625	0.1377	28.543	20.7419	23.416	-0.17627	0.0087891	-0.022949	NaN	NaN	NaN	NaN	NaN	NaN
1.876	-3.042	34.9007	23.1397	0.02832	0.019531	-0.045898	-11.811	178.257	457.777	-0.73252	0.38359	0.12051	32.507	45.925	35.7071	-0.19434	0.0097656	-0.013184	NaN	NaN	NaN	NaN	NaN	NaN
1.878	3.151	40.6105	31.2683	0.036133	0.025391	-0.050781	0.512999999999998	145.8319	428.0772	-0.68291	0.3622	0.10733	10.598	8.143	36.6244	-0.20411	0.010742	-0.0065918	NaN	NaN	NaN	NaN	NaN	NaN
1.88	-5.602	48.7161	17.64608	0.040039	0.025391	-0.050537	-22.212	192.95	372.57	-0.63682	0.33955	0.092089	-10.856	31.117	20.992	-0.20557	0.0083008	-0.0029297	NaN	NaN	NaN	NaN	NaN	NaN
1.882	-8.422	41.9667	17.9786	0.04541	0.031738	-0.055176	-35.704	139.5462	347.631	-0.59473	0.3209	0.074316	-44.833	-23.959	36.908	-0.19824	0.0078125	-0.00097656	NaN	NaN	NaN	NaN	NaN	NaN
1.884	-0.00200000000000244	35.2225	24.3468	0.04541	0.033203	-0.054688	-34.473	151.638	326.924	-0.55225	0.30322	0.05957	-57.337	26.0406	45.423	-0.18799	0.00097656	-0.0068359	NaN	NaN	NaN	NaN	NaN	NaN
1.886	-9.402	27.3493	10.6743	0.043457	0.033203	-0.056641	-45.414	173.6431	291.725	-0.51689	0.2789	0.049317	-82.46	27.863	70.943	-0.15234	-0.00048828	-0.013184	NaN	NaN	NaN	NaN	NaN	NaN
1.888	-30.441	15.0253	25.7666	0.041016	0.038086	-0.059082	-26.182	99.2994	297.757	-0.4749	0.2626	0.037207	-78.344	81.319	49.2778	-0.11645	-0.003418	-0.023682	NaN	NaN	NaN	NaN	NaN	NaN
1.89	-33.746	9.4645	12.3555	0.03418	0.041504	-0.057129	-23.185	149.692	273.5868	-0.4335	0.2415	0.025489	-97.0214	34.821	35.272	-0.075195	-0.0087891	-0.036133	NaN	NaN	NaN	NaN	NaN	NaN
1.892	-25.135	22.76701	20.6483	0.03418	0.049316	-0.055176	-42.038	144.2345	237.6173	-0.39424	0.2251	0.015136	-86.64	38.5773	11.452	-0.018066	-0.020996	-0.052734	NaN	NaN	NaN	NaN	NaN	NaN
1.894	-28.192	44.1141	13.93498	0.025879	0.055664	-0.056152	-10.074	127.5	224.4301	-0.35303	0.20557	0.0039063	-103.207	-8.11094	7.366	0.013184	-0.032227	-0.0625	NaN	NaN	NaN	NaN	NaN	NaN
1.896	-35.958	42.1561	25.2706	0.019532	0.061035	-0.054931	-47.16	184.872	189.845	-0.31318	0.18584	-0.0010742	-87.607	61.456	4.502	0.05957	-0.045898	-0.080566	NaN	NaN	NaN	NaN	NaN	NaN
1.898	-21.482	22.8238	29.302	0.012207	0.067383	-0.052734	-40.15	107.532	162.799	-0.27725	0.16992	-0.011035	-90.1234	26.68083	11.3829	0.091063	-0.05542	-0.098146	NaN	NaN	NaN	NaN	NaN	NaN
1.9	-21.579	-13.192	49.5316	0.0043945	0.068848	-0.05127	-11.358	80.5985	147.639	-0.24521	0.14844	-0.018848	-79.012	45.037	11.5832	0.12402	-0.067871	-0.11475	NaN	NaN	NaN	NaN	NaN	NaN
1.902	-51.59	-3.9371	53.2562	-0.00048828	0.069336	-0.053711	-7.737	89.0165	105.348	-0.21357	0.13349	-0.025781	-96.3804	-45.814	15.2308	0.16211	-0.074219	-0.12158	NaN	NaN	NaN	NaN	NaN	NaN
1.904	-50.819	-22.3436	76.2552	-0.0058594	0.068848	-0.05957	-10.148	37.855	108.0596	-0.18457	0.11914	-0.035645	-82.119	-17.916	-7.321	0.18896	-0.077637	-0.12939	NaN	NaN	NaN	NaN	NaN	NaN
1.906	-44.529	-40.73878	119.719	-0.0078125	0.070312	-0.066163	-4.813	98.7036	89.4654	-0.15156	0.10224	-0.045801	-58.358	-42.7009	-1.4308	0.22607	-0.081543	-0.14355	NaN	NaN	NaN	NaN	NaN	NaN
1.908	-63.537	-53.80034	132.98	-0.010254	0.066895	-0.072754	2.107	84.011	81.7943	-0.12148	0.085644	-0.053809	-60.593	43.57	36.039	0.25025	-0.079834	-0.14942	NaN	NaN	NaN	NaN	NaN	NaN
1.91	-61.561	-50.4531	142.4384	-0.028809	0.06543	-0.07666	1.785	50.995	78.735	-0.096876	0.07666	-0.052246	-44.903	15.6986	33.8759	0.27344	-0.075684	-0.16016	NaN	NaN	NaN	NaN	NaN	NaN
1.912	-33.085	-68.8713	151.287	-0.043457	0.067871	-0.078613	1.845	102.448	53.5244	-0.075684	0.061328	-0.067969	-32.142	61.971	18.26	0.30029	-0.07373	-0.16943	NaN	NaN	NaN	NaN	NaN	NaN
1.914	-38.227	-62.694	222.2475	-0.084961	0.068359	-0.077148	-11.548	38.95553	49.239	-0.062012	0.044922	-0.067871	-3.16500000000001	14.4606	6.468	0.31348	-0.072754	-0.17334	NaN	NaN	NaN	NaN	NaN	NaN
1.916	-22.963	-43.379	291.06	-0.12452	0.073242	-0.071533	-12.152	53.79	48.5689	-0.049805	0.030469	-0.066895	7.14100000000001	39.813	-13.4828	0.32324	-0.065918	-0.18115	NaN	NaN	NaN	NaN	NaN	NaN
1.918	-38.902	-11.3039	360.524	-0.1665	0.07959	-0.068359	-12.421	88.009	30.8387	-0.044727	0.021972	-0.068945	32.867	6.8181	14.367	0.32886	-0.059814	-0.17675	NaN	NaN	NaN	NaN	NaN	NaN
1.92	-47.057	10.438	420.771	-0.22363	0.094727	-0.063477	-30.854	14.2563	29.2063	-0.049023	0.012988	-0.063868	17.335	56.991	18.8081	0.32422	-0.053223	-0.17871	NaN	NaN	NaN	NaN	NaN	NaN
1.922	-53.665	20.725	515.285	-0.24609	0.10156	-0.063477	-26.542	49.9291	12.507	-0.049023	0.0043945	-0.06084	12.425	41.14106	0.2147	0.30371	-0.044434	-0.16455	NaN	NaN	NaN	NaN	NaN	NaN
1.924	-51.338	41.098	624.284	-0.29834	0.12109	-0.069824	-47.664	29.453	6.44	-0.049805	-0.00097656	-0.058594	19.661	85.667	-3.041	0.29736	-0.041992	-0.16406	NaN	NaN	NaN	NaN	NaN	NaN
1.926	-83.154	74.851	764.36	-0.33642	0.13916	-0.078125	-38.381	-2.544	17.15485	-0.060645	-0.0030274	-0.058984	37.69	40.6749	-16.4933	0.26172	-0.03125	-0.14111	NaN	NaN	NaN	NaN	NaN	NaN
1.928	-77.345	95.219	873.47	-0.38086	0.16211	-0.086914	-34.459	59.0025	1.8805	-0.0625	-0.0049805	-0.05166	22.789	66.075	11.7753	0.2356	-0.023193	-0.12817	NaN	NaN	NaN	NaN	NaN	NaN
1.93	-94.1494	119.875	950.39	-0.45898	0.19922	-0.10352	-41.386	17.8649	2.6267478	-0.064453	-0.0088867	-0.043457	11.594	49.5062	28.469	0.20508	-0.015625	-0.11572	NaN	NaN	NaN	NaN	NaN	NaN
1.932	-107.5509	101.788	981.02	-0.51172	0.22461	-0.10791	-47.347	27.4338	5.5127	-0.066309	-0.0082031	-0.043164	-22.634	75.574	29.1685	0.17334	-0.0014648	-0.10107	NaN	NaN	NaN	NaN	NaN	NaN
1.934	-101.2684	75.072	1005.64	-0.64063	0.2666	-0.11328	-42.405	50.2367	-8.732	-0.062988	-0.01123	-0.042969	-46.302	50.422	21.4529	0.15869	0.0063477	-0.093262	NaN	NaN	NaN	NaN	NaN	NaN
1.936	-79.597	56.987	1011.05	-0.76489	0.3059	-0.1062	-50.926	-22.973	16.127	-0.066895	-0.011523	-0.041797	-54.493	41.196	40.122	0.14111	0.026367	-0.085938	NaN	NaN	NaN	NaN	NaN	NaN
1.938	-80.5167	29.608	1019.27	-0.90039	0.35156	-0.091309	-51.138	27.764	19.837	-0.059375	-0.012598	-0.040528	-54.321	4.214	19.3619	0.13916	0.038574	-0.082764	NaN	NaN	NaN	NaN	NaN	NaN
1.94	-106.429	-9.845	1002.77	-1.103	0.42822	-0.053711	-75.281	25.027	26.78669	-0.052735	-0.012598	-0.039356	-56.616	19.869	22.7831	0.13721	0.054199	-0.077637	NaN	NaN	NaN	NaN	NaN	NaN
1.942	-128.0842	-49.611	1028.61	-1.209	0.46973	-0.027832	-64.75	18.525	42.088	-0.047266	-0.017285	-0.042676	-79.418	28.575	10.591	0.13428	0.066406	-0.07959	NaN	NaN	NaN	NaN	NaN	NaN
1.944	-130.6778	-58.487	1040.49	-1.4199	0.57324	0.044434	-58.159	83.086	20.949	-0.041016	-0.016113	-0.040039	-112.2491	42.9386	43.471	0.13428	0.070313	-0.080566	NaN	NaN	NaN	NaN	NaN	NaN
1.946	-117.1778	-47.063	1036.34	-1.5723	0.6543	0.08667	-50.885	39.125	4.2484	-0.033301	-0.022266	-0.041699	-82.6289	40.476	50.7784	0.13916	0.085449	-0.092285	NaN	NaN	NaN	NaN	NaN	NaN
1.948	-93.3091	-42.344	1043.1	-1.6987	0.7251	0.12305	-25.475	39.118	7.96	-0.024024	-0.026855	-0.043164	-93.98	27.6096	61.5441	0.14429	0.091797	-0.094727	NaN	NaN	NaN	NaN	NaN	NaN
1.95	-123.401	-66.811	1052.3	-1.7891	0.80078	0.16064	-44.098	60.9551	-8.992	-0.013868	-0.027246	-0.039648	-72.303	26.642	32.966	0.14502	0.096191	-0.10498	NaN	NaN	NaN	NaN	NaN	NaN
1.952	-125.226	-85.186	1095.4	-1.8066	0.82324	0.15332	-43.21	-16.5205	7.5617	-0.0021484	-0.033008	-0.043262	-87.647	1.8751	31.012	0.15332	0.10303	-0.10742	NaN	NaN	NaN	NaN	NaN	NaN
1.954	-99.093	-88.148	1127.94	-1.7656	0.85156	0.12695	-18.28	28.8307	27.7421	0.0092773	-0.032715	-0.046875	-91.9521	14.4791	16.6411	0.15723	0.10742	-0.10889	NaN	NaN	NaN	NaN	NaN	NaN
1.956	-109.427	-77.776	1165.03	-1.686	0.86719	0.10669	-24.442	20.8866	20.668	0.01875	-0.03623	-0.046778	-108.475	3.228	40.1024	0.14941	0.11768	-0.11426	NaN	NaN	NaN	NaN	NaN	NaN
1.958	-100.3571	-91.683	1160.96	-1.5991	0.88721	0.07666	-7.10399999999999	7.2194	35.4419	0.030762	-0.037793	-0.044727	-76.568	39.0065	12.1199	0.13941	0.12012	-0.11621	NaN	NaN	NaN	NaN	NaN	NaN
1.96	-100.5465	-117.916	1167.12	-1.4761	0.89893	0.023438	6.253	79.051	27.9395	0.042481	-0.039746	-0.049414	-51.06	17.2467	20.969	0.12988	0.12305	-0.11133	NaN	NaN	NaN	NaN	NaN	NaN
1.962	-89.8443	-130.427	1164.81	-1.4102	0.89551	-0.003418	2.941	45.415	18.0092	0.053027	-0.043066	-0.047168	-34.429	28.7954	17.9369	0.10791	0.12305	-0.11035	NaN	NaN	NaN	NaN	NaN	NaN
1.964	-78.37174	-138.295	1212.4	-1.2754	0.85742	-0.053711	-6.912	46.506	22.2486	0.05957	-0.043457	-0.043945	-35.966	-6.24053	19.215	0.096191	0.12402	-0.10938	NaN	NaN	NaN	NaN	NaN	NaN
1.966	-33.306	-164.555	1266.41	-1.2098	0.83521	-0.075195	-37.037	60.745	9.7581	0.066211	-0.050293	-0.03916	-12.874	39.5742	7.514	0.079102	0.12744	-0.10498	NaN	NaN	NaN	NaN	NaN	NaN
1.968	-2.298	-194.798	1329.66	-1.1704	0.82666	-0.096191	-27.729	-20.0412	22.148	0.069336	-0.045019	-0.039062	-0.797000000000004	24.7734	19.6913	0.071289	0.13623	-0.10595	NaN	NaN	NaN	NaN	NaN	NaN
1.97	11.72	-227.838	1357.66	-1.166	0.84766	-0.10547	0.627000000000002	23.0401	19.9915	0.070898	-0.046582	-0.033594	18.267	49.152	22.0958	0.060059	0.13867	-0.10254	NaN	NaN	NaN	NaN	NaN	NaN
1.972	1.834	-227.793	1404.68	-1.1836	0.86719	-0.1001	-11.168	12.9106	10.3285	0.079004	-0.050293	-0.027539	33.584	-27.2733	45.3369	0.044434	0.15039	-0.10352	NaN	NaN	NaN	NaN	NaN	NaN
1.974	-18.317	-196.445	1461.1	-1.2397	0.93115	-0.08252	-24.082	8.7353	17.1888	0.084473	-0.049805	-0.022461	17.895	-4.7932	-3.6859	0.037109	0.15527	-0.11328	NaN	NaN	NaN	NaN	NaN	NaN
1.976	-24.295	-147.679	1511.9	-1.295	0.99611	-0.068848	-22.091	73.156	-0.442	0.088769	-0.051953	-0.02041	10.871	-31.421	-17.9428	0.018555	0.16309	-0.10547	NaN	NaN	NaN	NaN	NaN	NaN
1.978	-14.567	-113.452	1566.56	-1.3408	1.0645	-0.052734	-51.082	44.1315	4.475	0.095802	-0.054883	-0.018945	9.106	65.666	-12.214	0.0046387	0.16846	-0.11084	NaN	NaN	NaN	NaN	NaN	NaN
1.98	-43.231	-102.273	1609.39	-1.3799	1.127	-0.045898	-42.25	43.8917	32.972	0.10088	-0.063086	-0.016211	9.504	37.4349	14.128	-0.0058594	0.17773	-0.11182	NaN	NaN	NaN	NaN	NaN	NaN
1.982	-53.7908	-94.072	1648.15	-1.3926	1.1504	-0.041992	-42.63	60.9264	16.7457	0.10039	-0.072266	-0.011328	11.32	73.328	37.8431	-0.023438	0.18604	-0.11963	NaN	NaN	NaN	NaN	NaN	NaN
1.984	-50.2249	-94.739	1683.34	-1.4136	1.1724	-0.038086	-44.118	-14.5215	31.959	0.09668	-0.07959	-0.0078125	-7.188	-17.3258	38.036	-0.02832	0.19336	-0.12256	NaN	NaN	NaN	NaN	NaN	NaN
1.986	-43.3915	-82.422	1707.04	-1.4419	1.1714	-0.037842	-52.447	31.4891	25.0381	0.095215	-0.09658	-0.013477	-38.543	9.665	48	-0.033203	0.20361	-0.13477	NaN	NaN	NaN	NaN	NaN	NaN
1.988	-35.419	-88.584	1723.84	-1.4805	1.168	-0.03418	-52.757	21.9224	9.4386	0.094238	-0.10644	-0.0033203	-34.487	-54.036	102.839	-0.032959	0.2146	-0.14038	NaN	NaN	NaN	NaN	NaN	NaN
1.99	-36.124	-103.435	1746.63	-1.5342	1.1621	-0.026367	-64.581	0.252000000000001	18.4625	0.094238	-0.11972	-0.0064453	-47.344	-14.17	182.941	-0.032715	0.22754	-0.15039	NaN	NaN	NaN	NaN	NaN	NaN
1.992	-34.259	-112.176	1760.97	-1.564	1.1665	-0.018066	-44.69	56.1068	16.7762	0.095508	-0.12627	-0.0045899	-77.324	-80.759	225.4877	-0.044922	0.24219	-0.17432	NaN	NaN	NaN	NaN	NaN	NaN
1.994	-64.22086	-103.916	1773.14	-1.6465	1.1797	-0.0087891	-65.979	17.437	15.7886	0.092285	-0.13184	-0.0063477	-65.256	-38.418	285.082	-0.056641	0.25146	-0.18408	NaN	NaN	NaN	NaN	NaN	NaN
1.996	-92.586	-99.275	1823.03	-1.7075	1.1972	0.0019531	-43.889	27.4233	24.0374	0.089355	-0.13184	-0.0097655	-67.7089	-86.305	371.985	-0.10059	0.27881	-0.18896	NaN	NaN	NaN	NaN	NaN	NaN
1.998	-123.04	-92.241	1850.19	-1.7773	1.2227	0.01123	-56.237	54.7513	13.32245	0.083789	-0.13115	-0.010156	-98.23604	-18.0915	521.562	-0.15137	0.30152	-0.18945	NaN	NaN	NaN	NaN	NaN	NaN
2	-140.934	-83.132	1851.67	-1.8789	1.2725	0.030762	-56.692	5.7993	18.9903	0.082617	-0.12334	-0.011328	-100.1046	-30.039	708.196	-0.21631	0.32324	-0.18164	NaN	NaN	NaN	NaN	NaN	NaN
2.002	-164.678	-66.106	1861.97	-1.9253	1.3052	0.041504	-15.07	44.6765	24.1237	0.080371	-0.11289	-0.017773	-121.275	67.886	875.35	-0.32324	0.35596	-0.1709	NaN	NaN	NaN	NaN	NaN	NaN
2.004	-164.408	-78.351	1875.55	-2.0112	1.3638	0.060547	-34.795	23.119	9.8581	0.078125	-0.10254	-0.023926	-145.47172	64.559	1033.843	-0.37793	0.37646	-0.1626	NaN	NaN	NaN	NaN	NaN	NaN
2.006	-150.968	-84.744	1904.18	-2.0776	1.4067	0.074218	-30.313	-13.209	30.4418	0.082129	-0.087793	-0.027246	-153.422	86.7368	1221.107	-0.50342	0.42139	-0.15039	NaN	NaN	NaN	NaN	NaN	NaN
2.008	-118.389	-88.645	1902.33	-2.1206	1.4478	0.084961	-15.524	42.5349	22.266	0.083008	-0.075488	-0.033008	-122.15	52.87	1387.8429	-0.65918	0.47461	-0.1377	NaN	NaN	NaN	NaN	NaN	NaN
2.01	-119.061	-78.07	1889.18	-2.1538	1.4907	0.086914	-19.13	21.664	20.0582	0.083398	-0.060254	-0.039258	-152.426	91.141	1526.973	-0.74707	0.50732	-0.12451	NaN	NaN	NaN	NaN	NaN	NaN
2.012	-102.247	-82.307	1890.88	-2.1558	1.5024	0.087402	-6.25900000000001	41.462	19.631	0.083594	-0.048145	-0.040234	-136.52	85.582	1589.747	-0.9624	0.57666	-0.077637	NaN	NaN	NaN	NaN	NaN	NaN
2.014	-73.224	-80.115	1900.9	-2.1401	1.5259	0.077637	-12.668	71.858	5.3112	0.084473	-0.03418	-0.047363	-128.43	69.225	1580.425	-1.1716	0.64184	-0.028808	NaN	NaN	NaN	NaN	NaN	NaN
2.016	-66.773	-75.827	1899.61	-2.1132	1.5352	0.06958	-12.472	7.5655	6.17643	0.083691	-0.01875	-0.053222	-114.882	-18.12	1508.702	-1.4082	0.71924	0.040039	NaN	NaN	NaN	NaN	NaN	NaN
2.018	-67.2853	-50.004	1889.03	-2.0776	1.5356	0.054688	4.587	34.202	4.448	0.086523	-0.0034179	-0.064356	-92.323	-93.929	1443.855	-1.7642	0.8501	0.17432	NaN	NaN	NaN	NaN	NaN	NaN
2.02	-50.259	-45.886	1901.35	-2.0229	1.5298	0.03418	-17.05	28.36231	3.459	0.09668	0.013379	-0.076074	-51.428	-169.224	1326.074	-1.9531	0.92969	0.25342	NaN	NaN	NaN	NaN	NaN	NaN
2.022	-62.3588	-30.205	1904.68	-1.999	1.5293	0.018066	-31.626	-11.0787	31.604856	0.1084	0.025293	-0.084473	-63.635	-224.656	1239.707	-2.3066	1.0918	0.3833	NaN	NaN	NaN	NaN	NaN	NaN
2.024	-57.79	-26.339	1906.74	-1.9414	1.5117	-0.0043945	-19.027	31.8646	48.637	0.125	0.039551	-0.089844	-62.256	-239.123	1146.911	-2.4685	1.2044	0.41699	NaN	NaN	NaN	NaN	NaN	NaN
2.026	-62.7783	-30.43	1891.36	-1.8982	1.4954	-0.025879	-31.337	-19.6281	50.296	0.13877	0.053808	-0.10098	-72.927	-258.008	1123.034	-2.4878	1.3032	0.45752	NaN	NaN	NaN	NaN	NaN	NaN
2.028	-30.382	-24.752	1885.17	-1.8599	1.479	-0.041992	-31.687	-8.7146	63.027	0.14492	0.069824	-0.10527	-23.73	-218.024	1075.522	-2.3765	1.395	0.50977	NaN	NaN	NaN	NaN	NaN	NaN
2.03	-8.719	-25.878	1901.26	-1.8218	1.4595	-0.052734	-27.624	26.4239	59.984	0.15234	0.082324	-0.1084	10.543	-196.936	1109.63	-2.3281	1.4043	0.45947	NaN	NaN	NaN	NaN	NaN	NaN
2.032	-4.335	-23.357	1889.46	-1.8113	1.4456	-0.060303	-36.342	-44.893	95.1544	0.14785	0.095411	-0.10782	52.736	-141.149	1195.007	-2.1445	1.375	0.27246	NaN	NaN	NaN	NaN	NaN	NaN
2.034	-9.444	-29.788	1882.79	-1.7944	1.4419	-0.060059	-41.043	-23.542	127.1709	0.14355	0.10693	-0.104	38.8787	-144.661	1302.263	-1.8503	1.3254	0.13159	NaN	NaN	NaN	NaN	NaN	NaN
2.036	13.399	-40.42	1862.47	-1.791	1.4277	-0.062988	-65.812	-77.8361	139.496	0.13555	0.11924	-0.104	42.903	-92.22	1403.376	-1.5156	1.2813	-0.00048828	NaN	NaN	NaN	NaN	NaN	NaN
2.038	36.5436	-42.11	1852.7	-1.7886	1.4185	-0.064941	-62.638	-145.575	173.832	0.12588	0.13018	-0.095801	23.0121	-97.5	1472.213	-1.1367	1.2393	-0.15332	NaN	NaN	NaN	NaN	NaN	NaN
2.04	-5.657	-33.927	1842.58	-1.7793	1.3965	-0.064941	-57.257	-107.8954	227.963	0.11338	0.14932	-0.096582	30.9612	-91.45	1496.701	-1.0112	1.2251	-0.21289	NaN	NaN	NaN	NaN	NaN	NaN
2.042	-24.739	-24.164	1835.56	-1.7742	1.3782	-0.061768	-51.413	-132.1869	297.015	0.10772	0.16474	-0.09502	58.492	-183.242	1537.1366	-0.85498	1.2456	-0.31836	NaN	NaN	NaN	NaN	NaN	NaN
2.044	-31.893	-21.405	1808.5	-1.7676	1.3574	-0.061523	-41.774	-83.3694	368.6734	0.10059	0.18311	-0.097168	50.2945	-259.7018	1579.2876	-0.78637	1.2864	-0.37036	NaN	NaN	NaN	NaN	NaN	NaN
2.046	-45.55654	-8.082	1784.83	-1.7534	1.3403	-0.060059	-51.689	-7.854	443.954	0.092481	0.19921	-0.095509	29.1729	-367.454	1598.037	-0.73242	1.3203	-0.39258	NaN	NaN	NaN	NaN	NaN	NaN
2.048	-86.953	0.320999999999998	1779.04	-1.7476	1.3325	-0.062012	-65.362	-7.2262	585.101	0.074323	0.22031	-0.094047	25.486	-400.75	1660.768	-0.72266	1.3086	-0.40869	NaN	NaN	NaN	NaN	NaN	NaN
2.05	-82.0874	0.954999999999998	1760.02	-1.7241	1.3228	-0.063965	-39.062	73.6789	783.716	0.043076	0.23516	-0.083497	71.348	-444.64	1705.183	-0.75195	1.2881	-0.38867	NaN	NaN	NaN	NaN	NaN	NaN
2.052	-68.2464	1.52	1740.37	-1.7129	1.3135	-0.063965	-87.694	80.49	949.404	0.0042094	0.25088	-0.073536	100.664	-389.2	1754.747	-0.92285	1.2813	-0.32422	NaN	NaN	NaN	NaN	NaN	NaN
2.054	-67.7065	16.249	1707.27	-1.7051	1.3027	-0.066895	-74.249	27.7	1101.6038	-0.04541	0.26953	-0.065918	124.016	-344.649	1808.1326	-1.1355	1.3244	-0.24976	NaN	NaN	NaN	NaN	NaN	NaN
2.056	-66.461	20.064	1687.08	-1.6885	1.291	-0.078125	-39.522	47.493	1200.7269	-0.099151	0.2839	-0.057809	97.758	-242.656	1860.7952	-1.3687	1.397	-0.1792	NaN	NaN	NaN	NaN	NaN	NaN
2.058	-50.024	11.829	1674.98	-1.6885	1.2832	-0.068848	-57.963	16.242	1291.628	-0.16197	0.30314	-0.049306	31.133	-170.7556	1908.2917	-1.6367	1.4941	-0.09375	NaN	NaN	NaN	NaN	NaN	NaN
2.06	-41.6814	13.329	1659.1	-1.6641	1.2764	-0.075195	-57.011	42.341	1355.897	-0.23622	0.32816	-0.034453	-16.681	-97.56	2007.237	-1.7461	1.5352	-0.055664	NaN	NaN	NaN	NaN	NaN	NaN
2.062	-31.412	6.627	1626.44	-1.6413	1.2746	-0.081543	-55.005	87.5941	1332.272	-0.32781	0.35588	-0.027423	-31.007	-62.086	2027.042	-1.916	1.5996	-0.0029297	NaN	NaN	NaN	NaN	NaN	NaN
2.064	-45.9771	7.915	1607.38	-1.6211	1.2734	-0.086914	-82.493	15.318	1275.418	-0.42529	0.38037	-0.017578	-28.802	-11.15	1999.387	-2.0088	1.6534	0.012939	NaN	NaN	NaN	NaN	NaN	NaN
2.066	-62.6592	0.573	1581.78	-1.5874	1.2622	-0.092773	-102.377	-25.8051	1246.494	-0.53341	0.41039	-0.0061699	8.871	-4.91699999999999	1932.557	-2.0757	1.6821	0.016602	NaN	NaN	NaN	NaN	NaN	NaN
2.068	-50.3466	21.579	1557.1	-1.5718	1.2622	-0.095703	-107.799	-115.322	1240.23	-0.6656	0.44343	0.0090689	-15.782	-30.791	1888.098	-2.1211	1.7109	0.021484	NaN	NaN	NaN	NaN	NaN	NaN
2.07	-49.4598	47.6462	1522.65	-1.5347	1.2524	-0.10449	-94.401	-232.02	1236.46	-0.83878	0.48789	0.049615	-5.443	-94.226	1886.505	-2.1362	1.7173	0.02002	NaN	NaN	NaN	NaN	NaN	NaN
2.072	-59.1464	53.5618	1498.24	-1.5105	1.242	-0.10938	-61.706	-224.29	1225.82304	-1.0668	0.54734	0.13164	-15.586	-157.194	1948.055	-2.1309	1.7246	0.010254	NaN	NaN	NaN	NaN	NaN	NaN
2.074	-30.601	50.1242	1487.52	-1.4844	1.2383	-0.11816	-39.526	-266.128	1213.7017	-1.3535	0.62305	0.22705	3.79	-204.645	1998.805	-2.112	1.7317	0.0009766	NaN	NaN	NaN	NaN	NaN	NaN
2.076	-20.661	55.363	1472.13	-1.4414	1.2227	-0.12793	-25.955	-228.162	1233.18546	-1.6815	0.7298	0.33413	-0.913000000000004	-211.194	2049.674	-2.0918	1.7422	-0.0087891	NaN	NaN	NaN	NaN	NaN	NaN
2.078	12.521	71.525	1437.94	-1.4258	1.2148	-0.12793	-28.842	-128.338	1262.532	-1.9946	0.86699	0.43094	3.848	-199.255	2095.375	-2.0645	1.7637	-0.017578	NaN	NaN	NaN	NaN	NaN	NaN
2.08	20.304	71.582	1438.43	-1.3784	1.1997	-0.12842	-31.485	-125.517	1296.829	-2.2479	1.0033	0.48571	-35.157	-161.196	2137.649	-2.0527	1.7773	-0.020996	NaN	NaN	NaN	NaN	NaN	NaN
2.082	35.623	74.625	1407.59	-1.3498	1.1867	-0.13697	-39.446	-91.975	1362.808	-2.3545	1.1309	0.50021	-36.379	-106.115	2146.971	-2.043	1.7852	-0.015625	NaN	NaN	NaN	NaN	NaN	NaN
2.084	11.665	72.842	1386.33	-1.3242	1.1699	-0.13721	-55.6791	-115.14	1422.682	-2.2637	1.2324	0.55127	-55.8074	-83.469	2167.601	-2.041	1.792	-0.010254	NaN	NaN	NaN	NaN	NaN	NaN
2.086	-1.934	89.404	1363.22	-1.2891	1.1387	-0.14258	-40.1148	-214.065	1517.386	-2.1597	1.2982	0.55178	-36.056	-54.7296	2152.298	-2.0464	1.7915	0	NaN	NaN	NaN	NaN	NaN	NaN
2.088	-17.699	89.7519	1346.03	-1.2729	1.1235	-0.13818	-33.887	-213.788	1551.355	-2.0556	1.3072	0.43523	-65.5911	-51.452	2129.554	-2.0488	1.7637	0.018555	NaN	NaN	NaN	NaN	NaN	NaN
2.09	-31.246	112.821	1337.4	-1.2456	1.0884	-0.13672	-22.864	-288.35	1550.608	-1.8085	1.2453	0.27796	-13.023	2.2895	2057.5009	-2.0566	1.7402	0.039063	NaN	NaN	NaN	NaN	NaN	NaN
2.092	-64.133	126.355	1322.69	-1.2321	1.0657	-0.13232	38.075	-334.503	1544.4752	-1.4394	1.1608	0.14467	-2.112	-0.260000000000005	1991.487	-2.0566	1.6934	0.062012	NaN	NaN	NaN	NaN	NaN	NaN
2.094	-93.3939	136.603	1305.89	-1.2188	1.041	-0.12793	16.364	-320.741	1530.556	-1.0737	1.0786	0.019043	35.509	27.533	1937.385	-2.0566	1.6455	0.07959	NaN	NaN	NaN	NaN	NaN	NaN
2.096	-87.1481	116.378	1283.5	-1.2109	1.0098	-0.11914	52.711	-377.889	1573.577	-0.84335	0.99804	-0.099287	37.992	-6.901	1905.96	-2.0547	1.6016	0.091797	NaN	NaN	NaN	NaN	NaN	NaN
2.098	-97.290854	111.6905	1252.78	-1.2007	0.99658	-0.11523	76.4592	-358.887	1629	-0.73686	0.97037	-0.18753	42.588	17.006	1857.284	-2.0405	1.5415	0.10938	NaN	NaN	NaN	NaN	NaN	NaN
2.1	-81.7092	120.05469	1225.5	-1.1973	0.96973	-0.10596	63.82	-335.872	1705.577	-0.67915	0.98208	-0.23121	6.47	2.0225	1836.875	-2.0391	1.5137	0.125	NaN	NaN	NaN	NaN	NaN	NaN
2.102	-81.7162	123.3329	1197.32	-1.1845	0.9497	-0.094726	52.0429	-336.135	1798.8451	-0.64832	0.98499	-0.24269	15.896	55.8057	1817.516	-2.0234	1.4668	0.12891	NaN	NaN	NaN	NaN	NaN	NaN
2.104	-69.2158	132.3583	1169.46	-1.1753	0.92627	-0.083008	39.2107	-265.0836	1857.613	-0.67773	0.95654	-0.23145	-14.303	32.3909	1829.935	-2.0036	1.4358	0.13233	NaN	NaN	NaN	NaN	NaN	NaN
2.106	-85.9129	134.861	1155.66	-1.166	0.89844	-0.071777	26.587	-224.031	1854.735	-0.80845	0.95139	-0.17243	30.649	87.011	1839.744	-1.98	1.4146	0.13379	NaN	NaN	NaN	NaN	NaN	NaN
2.108	-91.2974	149.189	1117.13	-1.1616	0.88721	-0.068359	21.656	-165.484	1856.227	-1.0256	1.0062	-0.086537	13.651	41.0228	1876.4663	-1.9409	1.3794	0.13232	NaN	NaN	NaN	NaN	NaN	NaN
2.11	-113.594	155.888	1102.9	-1.1426	0.86328	-0.05127	-1.47	-76.61	1860.37	-1.2795	1.1028	-0.0070839	14.687	82.474	1879.685	-1.9155	1.3696	0.13281	NaN	NaN	NaN	NaN	NaN	NaN
2.112	-117.392	165.557	1068.64	-1.1284	0.8418	-0.04004	23.865	-103.437	1859.223	-1.5204	1.2091	0.067052	-4.394	31.751	1877.66	-1.8701	1.3418	0.13477	NaN	NaN	NaN	NaN	NaN	NaN
2.114	-122.283	167.591	1043.28	-1.1108	0.81689	-0.028809	35.902	-133.451	1882.4686	-1.709	1.3027	0.1333	-1.524	69.3457	1856.139	-1.8367	1.3264	0.13037	NaN	NaN	NaN	NaN	NaN	NaN
2.116	-129.452	165.55	1008.97	-1.0889	0.78906	-0.018555	21.92	-166.842	1870.29	-1.8341	1.3705	0.17384	-5.252	25.366	1835.252	-1.8008	1.3086	0.12842	NaN	NaN	NaN	NaN	NaN	NaN
2.118	-124.3932	149.932	980.81	-1.0762	0.77051	-0.014648	48.7317	-238.135	1858.748	-1.9259	1.4143	0.19347	28.235	72.991	1793.035	-1.7476	1.2876	0.11816	NaN	NaN	NaN	NaN	NaN	NaN
2.12	-93.60921	154.683	935.88	-1.0439	0.73828	-0.0019531	19.529	-225.348	1880.65	-1.9915	1.4447	0.19591	22.534	41.27	1785.557	-1.7144	1.2778	0.11719	NaN	NaN	NaN	NaN	NaN	NaN
2.122	-71.8618	152.032	899.47	-1.0166	0.71338	0.0068359	-14.346	-214.768	1891.4579	-2.0428	1.4573	0.20093	17.849	126.175	1752.3118	-1.6616	1.2524	0.11572	NaN	NaN	NaN	NaN	NaN	NaN
2.124	-67.1958	144.423	872.02	-0.99072	0.68799	0.01416	-28.708	-217.551	1926.007	-2.0815	1.4556	0.20605	-19.043	123.591	1737.79189	-1.6258	1.2307	0.11499	NaN	NaN	NaN	NaN	NaN	NaN
2.126	-67.088	156.721	851.96	-0.94336	0.6582	0.024902	-56.883	-161.1059	1947.199	-2.1135	1.4546	0.20544	-20.58	242.935	1710.840612	-1.5854	1.2134	0.11523	NaN	NaN	NaN	NaN	NaN	NaN
2.128	-34.92	158.443	821.4	-0.91943	0.64209	0.027344	-56.0933	-184.897	1972.338	-2.1285	1.4584	0.19468	-43.428	234.715	1714.928	-1.5503	1.1841	0.11328	NaN	NaN	NaN	NaN	NaN	NaN
2.13	-27.277	163.81	769.97	-0.875	0.61621	0.044922	-60.0014	-174.2044	2020.971	-2.1258	1.4745	0.17904	-34.842	310.446	1697.068	-1.5371	1.1719	0.11523	NaN	NaN	NaN	NaN	NaN	NaN
2.132	-22.297	151.855	753.29	-0.84106	0.59595	0.04834	-62.3407	-126.0656	2026.778	-2.1184	1.4944	0.16061	-32.203	249.576	1697.462	-1.5039	1.1465	0.12354	NaN	NaN	NaN	NaN	NaN	NaN
2.134	-39.73	125.718	736.08	-0.81104	0.58057	0.057617	-51.241	-138.0244	2001.43	-2.1152	1.5117	0.15674	-36.722	294.843	1638.7715	-1.4917	1.1284	0.13428	NaN	NaN	NaN	NaN	NaN	NaN
2.136	-48.566	120.951	696.71	-0.76074	0.54688	0.067383	-38.88	-68.264	1956.8635	-2.1263	1.5447	0.14834	-48.202	234.468	1604.87563	-1.478	1.1069	0.13818	NaN	NaN	NaN	NaN	NaN	NaN
2.138	-53.997	124.489	662.78	-0.74121	0.52979	0.071777	-30.462	-57.001	1886.437	-2.1474	1.5653	0.14346	-46.219	255.94648	1552.227	-1.4644	1.0825	0.15039	NaN	NaN	NaN	NaN	NaN	NaN
2.14	-50.941	143.002	623.14	-0.69678	0.49072	0.070801	6.282	-93.5571	1878.844	-2.1567	1.5872	0.14228	-17.213	167.882	1513.043	-1.457	1.0684	0.15918	NaN	NaN	NaN	NaN	NaN	NaN
2.142	-57.7705	133.647	597.34	-0.65942	0.46777	0.083252	7.016	-46.02	1865.5379	-2.1546	1.5926	0.1336	-7.181	203.517	1483.38	-1.4331	1.0396	0.16602	NaN	NaN	NaN	NaN	NaN	NaN
2.144	-37.052	128.728	573.75	-0.62305	0.45605	0.097168	5.575	-75.4844	1850.4001	-2.1343	1.5884	0.12354	6.082	149.278	1463.7383	-1.4129	1.0213	0.16943	NaN	NaN	NaN	NaN	NaN	NaN
2.146	-58.33	125.624	528.96	-0.58154	0.44092	0.10986	36.61	-55.9764	1860.905	-2.0917	1.5673	0.10722	-32.47	215.817	1435.262	-1.3848	1.001	0.17578	NaN	NaN	NaN	NaN	NaN	NaN
2.148	-63.77	128.48	497.87	-0.55664	0.43359	0.10596	-0.401	-33.8078	1840.16	-2.0543	1.5422	0.096677	-34.597	177.3	1398.764	-1.3433	0.97314	0.17188	NaN	NaN	NaN	NaN	NaN	NaN
2.15	-45.256	116.576	477.31	-0.49463	0.39551	0.1001	29.949	-94.164	1842.2616	-2.0281	1.5106	0.084958	-60.287	257.3438	1349.281	-1.3203	0.96094	0.17725	NaN	NaN	NaN	NaN	NaN	NaN
2.152	-50.506	110.494	446.21	-0.46069	0.35962	0.10522	35.752	-68.245	1833.4694	-2.0128	1.4771	0.078905	-43.911	243.8547	1283.4368	-1.2749	0.92627	0.18262	NaN	NaN	NaN	NaN	NaN	NaN
2.154	-64.155	100.287	417.36	-0.4292	0.31543	0.10938	32.475	-69.356	1839.512	-2.0054	1.4419	0.079102	-25.569	331.657	1236.724	-1.228	0.89404	0.17969	NaN	NaN	NaN	NaN	NaN	NaN
2.156	-66.182	92.168	384.9	-0.3877	0.27832	0.1123	49.4036	-80.256	1858.971	-2.0038	1.4042	0.078614	-16.852	302.55	1184.04	-1.2065	0.87744	0.17969	NaN	NaN	NaN	NaN	NaN	NaN
2.158	-73.632	97.02	368.26	-0.36768	0.26514	0.10449	33.843	-22	1840.7442	-2.0007	1.374	0.081933	-57.344	363.298	1147.782	-1.1602	0.84766	0.18408	NaN	NaN	NaN	NaN	NaN	NaN
2.16	-85.7104	118.923	335.11	-0.30957	0.24121	0.10156	56.327	-49.921	1821.16	-1.9905	1.352	0.081934	-36.928	328.757	1090.1717	-1.1167	0.8247	0.18726	NaN	NaN	NaN	NaN	NaN	NaN
2.162	-99.973	112.716	321.73	-0.26343	0.23193	0.099121	61.660222	-51.95	1791.5237	-1.9806	1.3378	0.088965	-62.801	365.183	1020.7163	-1.0786	0.80322	0.18701	NaN	NaN	NaN	NaN	NaN	NaN
2.164	-85.026	104.759	297.71	-0.22705	0.22119	0.096191	57.7847	-9.044	1769.3237	-1.9644	1.3267	0.087402	-41.493	304.035	953.02426	-1.0225	0.77344	0.19092	NaN	NaN	NaN	NaN	NaN	NaN
2.166	-79.664	84.768	263.36	-0.1709	0.19678	0.098633	43.859	-50.1038	1764.5419	-1.95	1.3125	0.087012	-43.567	309.308	901.823	-0.99219	0.75586	0.19482	NaN	NaN	NaN	NaN	NaN	NaN
2.168	-56.987	85.191	239.152	-0.14893	0.18848	0.10156	39.429	13.472	1754.87981	-1.9223	1.3037	0.085352	-43.004	266.4036	847.23	-0.92773	0.72266	0.19434	NaN	NaN	NaN	NaN	NaN	NaN
2.17	-64.809	62.342	230.267	-0.11182	0.16553	0.10352	22.1034	30.16803	1720.0939	-1.8988	1.2928	0.086133	-85.033	289.3359	801.462	-0.875	0.69824	0.19067	NaN	NaN	NaN	NaN	NaN	NaN
2.172	-44.091	58.478	208.042	-0.072754	0.146	0.094238	11.562	27.207	1715.9463	-1.8648	1.2885	0.08418	-72.533	269.035	731.276	-0.82568	0.67432	0.19238	NaN	NaN	NaN	NaN	NaN	NaN
2.174	-11.79	59.857	191.421	-0.053223	0.13525	0.087891	3.631	111.807	1693.766	-1.834	1.2773	0.084961	-96.278	284.2281	714.7181	-0.75195	0.63672	0.18506	NaN	NaN	NaN	NaN	NaN	NaN
2.176	-18.707	74.037	174.972	-0.014648	0.11523	0.090332	-14.304	91.2	1686.154	-1.803	1.2728	0.083203	-84.843	270.8578	682.5236	-0.7124	0.62158	0.18555	NaN	NaN	NaN	NaN	NaN	NaN
2.178	-15.802	71.945	171.551	0.012207	0.099122	0.083741	-21.275	133.987	1687.497	-1.7738	1.2681	0.083594	-83.335	286.179	670.919	-0.64795	0.58252	0.1875	NaN	NaN	NaN	NaN	NaN	NaN
2.18	-20.355	70.694	179.481	0.035645	0.089844	0.077637	-59.4557	150.71	1660.985	-1.7503	1.265	0.082422	-70.417	284.647	629.453	-0.59961	0.55664	0.18579	NaN	NaN	NaN	NaN	NaN	NaN
2.182	-4.32700000000001	72.044	155.511	0.062988	0.07666	0.071289	-55.797	75.0297	1666.4225	-1.7313	1.2593	0.087695	-86.504	269.593	605.265	-0.55078	0.52832	0.18994	NaN	NaN	NaN	NaN	NaN	NaN
2.184	-21.769	80.228	126.24	0.078613	0.063477	0.068848	-34.994	96.6584	1637.658	-1.7168	1.2617	0.087402	-84.162	236.0603	555.431	-0.48438	0.4873	0.19189	NaN	NaN	NaN	NaN	NaN	NaN
2.186	-13.246	70.022	126.789	0.094238	0.054199	0.071289	-35.832	73.021	1602.58	-1.7013	1.2563	0.097363	-99.635	216.1547	507.477	-0.4541	0.46973	0.18652	NaN	NaN	NaN	NaN	NaN	NaN
2.188	-15.437	43.7413	124.469	0.10473	0.043701	0.0708	-16.532	53.807	1583.405	-1.6858	1.2528	0.098046	-69.244	204.1226	405.6355	-0.39111	0.43408	0.18311	NaN	NaN	NaN	NaN	NaN	NaN
2.19	-7.72200000000001	38.487	91.936	0.11133	0.034668	0.064453	-27.208	108.773	1531.935	-1.6667	1.247	0.11211	-50.312	183.7416	353.288	-0.34717	0.40796	0.18042	NaN	NaN	NaN	NaN	NaN	NaN
2.192	0.481000000000002	43.619	80.069	0.12256	0.019531	0.067871	-46.136	89.222	1504.937	-1.6498	1.2377	0.11494	-42.337	166.9694	305.327	-0.30615	0.38428	0.17969	NaN	NaN	NaN	NaN	NaN	NaN
2.194	-5.452	59.068	78.759	0.12256	0.016602	0.067871	-48.606	126.315	1493.294	-1.6289	1.2305	0.11377	-81.105	149.8216	290.931	-0.25439	0.35303	0.17432	NaN	NaN	NaN	NaN	NaN	NaN
2.196	8.2	60.979	83.895	0.12402	0.0048828	0.06543	-37.409	165.8999	1485.508	-1.5961	1.2189	0.11357	-66.538	183.0782	238.873	-0.23242	0.3374	0.16992	NaN	NaN	NaN	NaN	NaN	NaN
2.198	-10.088	64.471	75.051	0.12793	-0.00024414	0.067627	-27.763	137.338	1480.593	-1.5636	1.2009	0.11181	-57.381	154.2405	228.016	-0.18115	0.30762	0.17285	NaN	NaN	NaN	NaN	NaN	NaN
2.2	-4.475	68.165	50.684	0.12793	-0.0029297	0.063477	-39.558	190.268	1450.6993	-1.5288	1.1841	0.11143	-41.787	163.082	195.7119	-0.14575	0.27514	0.16259	NaN	NaN	NaN	NaN	NaN	NaN
2.202	-29.428	58.446	59.606	0.13135	-0.0068359	0.068848	-32.991	186.536	1389.9739	-1.4959	1.1576	0.11045	-38.333	107.3571	220.751	-0.11035	0.25	0.16357	NaN	NaN	NaN	NaN	NaN	NaN
2.204	-27.858	48.771	62.973	0.1333	-0.0083008	0.068359	-21.677	181.915	1351.392	-1.4624	1.1392	0.10498	-29.603	145.633	181.648	-0.067383	0.21924	0.15332	NaN	NaN	NaN	NaN	NaN	NaN
2.206	-52.094	50.08	51.311	0.13135	-0.015137	0.065918	-14.367	242.014	1307.65	-1.4342	1.1158	0.10967	-7.587	132.6006	155.9524	-0.047852	0.20313	0.15088	NaN	NaN	NaN	NaN	NaN	NaN
2.208	-73.864	51.718	39.682	0.1333	-0.016113	0.064453	-29.395	187.3009	1286.064	-1.4011	1.0915	0.11318	-5.506	168.3961	117.7601	-0.01416	0.16895	0.14502	NaN	NaN	NaN	NaN	NaN	NaN
2.21	-60.698	42.974	38.076	0.13135	-0.017578	0.0625	-9.259	198.3044	1271.1516	-1.3726	1.0708	0.11201	-20.795	73.609	99.5326	0.0068359	0.14868	0.14307	NaN	NaN	NaN	NaN	NaN	NaN
2.212	-59.564	34.6914	35.629	0.12695	-0.021484	0.061035	-19.018	198.7494	1219.518	-1.3441	1.0493	0.1164	-25.222	63.504	72.2833	0.021484	0.12744	0.13965	NaN	NaN	NaN	NaN	NaN	NaN
2.214	-44.065	49.7821	34.19	0.12842	-0.029785	0.05957	-30.419	169.616	1198.5398	-1.3164	1.0273	0.12451	-22.256	-7.488	44.923	0.035156	0.10059	0.14063	NaN	NaN	NaN	NaN	NaN	NaN
2.216	-40.675	37.13808	22.616	0.12109	-0.035645	0.058594	-36.17	221.288	1174.73263	-1.2928	1.0048	0.12871	-11.338	37.269	26.16	0.040527	0.085938	0.13916	NaN	NaN	NaN	NaN	NaN	NaN
2.218	-34.138	33.0762	27.587	0.11694	-0.036377	0.061035	-47.39	190.4471	1142.1494	-1.2676	0.98047	0.13213	-21.251	-5.77428	35.7939	0.042969	0.062012	0.1416	NaN	NaN	NaN	NaN	NaN	NaN
2.22	-37.097	28.577	17.705	0.10742	-0.038086	0.05957	-60.68	175.3958	1115.1647	-1.2425	0.95703	0.13995	-55.081	48.389	16.6798	0.048095	0.041504	0.14014	NaN	NaN	NaN	NaN	NaN	NaN
2.222	-52.527	36.4368	9.2684	0.10303	-0.039063	0.064941	-73.602	204.978	1072.06235	-1.218	0.93594	0.14531	-68.18	-5.4899	3.5692	0.053223	0.023926	0.13916	NaN	NaN	NaN	NaN	NaN	NaN
2.224	-25.45	25.4733	20.5599	0.09375	-0.038574	0.064941	-96.511	172.571	1046.159	-1.1963	0.91211	0.15381	-46.306	65.671	-24.392	0.060059	0.0068359	0.14551	NaN	NaN	NaN	NaN	NaN	NaN
2.226	-34.914	21.7306	19.4201	0.085938	-0.034668	0.066406	-64.961	224.4585	1037.446	-1.1673	0.89072	0.1581	-23.879	11.355	11.924	0.067383	-0.0019531	0.13672	NaN	NaN	NaN	NaN	NaN	NaN
2.228	-9.86799999999999	27.6733	23.6103	0.083008	-0.033447	0.06543	-84.022	249.726	984.9729	-1.1347	0.86767	0.16211	-41.889	72.6551	35.15	0.076172	-0.012207	0.13574	NaN	NaN	NaN	NaN	NaN	NaN
2.23	-35.921	43.505	18.6601	0.074219	-0.030762	0.064453	-84.139	228.985	958.838	-1.0999	0.83994	0.16601	-25.438	28.6543	40.9085	0.078614	-0.020752	0.12988	NaN	NaN	NaN	NaN	NaN	NaN
2.232	-15.588	48.712	7.3305	0.068848	-0.026367	0.057617	-70.648	255.378	904.034	-1.0557	0.81729	0.16328	-38.537	100.673	2.4588	0.080078	-0.028809	0.12891	NaN	NaN	NaN	NaN	NaN	NaN
2.234	-19.405	34.9616	35.3539	0.069824	-0.023926	0.069824	-98.317	202.1832	851.36517	-1.0176	0.79199	0.16455	-70.987	33.5444	8.8074	0.077148	-0.039551	0.12061	NaN	NaN	NaN	NaN	NaN	NaN
2.236	-2.21700000000001	34.4328	19.67	0.062012	-0.018066	0.063965	-92.486	181.142	815.5871	-0.9791	0.76465	0.16494	-63.124	59.973	-2.548	0.077637	-0.046387	0.11963	NaN	NaN	NaN	NaN	NaN	NaN
2.238	-7.003	28.92165	11.46763	0.062745	-0.01709	0.063477	-75.934	205.343	737.024	-0.94258	0.73555	0.16885	-59.389	-12.9108	3.3037	0.066895	-0.055664	0.1123	NaN	NaN	NaN	NaN	NaN	NaN
2.24	2.068	24.7112	9.4783	0.066895	-0.0097656	0.061523	-95.349	156.975	713.0839	-0.91132	0.70742	0.17119	-61.794	54.6151	3.2	0.059082	-0.062256	0.11132	NaN	NaN	NaN	NaN	NaN	NaN
2.242	20.657	31.25129	-0.440900000000001	0.07666	-0.0073242	0.058105	-91.02	196.9038	672.76	-0.879	0.68037	0.16651	-53.88	28.0208	-11.022	0.051758	-0.06543	0.11426	NaN	NaN	NaN	NaN	NaN	NaN
2.244	2.684	33.12432	14.4626	0.080078	-0.0053711	0.056152	-94.69	198.8824	610.605	-0.84033	0.64697	0.16895	-61.791	82.335	-4.395	0.040039	-0.070313	0.11426	NaN	NaN	NaN	NaN	NaN	NaN
2.246	3.893	36.25576	29.598	0.09082	-0.0024414	0.050293	-75.376	171.7491	583.9099	-0.81348	0.61719	0.17139	-63.2749	24.7393	26.104	0.036621	-0.072266	0.12012	NaN	NaN	NaN	NaN	NaN	NaN
2.248	-11.411	24.1814	24.27699	0.097168	-0.0014648	0.044677	-44.644	220.088	571.584	-0.77686	0.59267	0.17246	-54.363	58.7544	25.4654	0.030273	-0.065918	0.12256	NaN	NaN	NaN	NaN	NaN	NaN
2.25	-8.694	26.9767	27.288694	0.104	-0.0014648	0.040039	-59.211	187.068	553.999	-0.74522	0.56728	0.17754	-9.206	23.6417	37.916	0.035889	-0.067871	0.12842	NaN	NaN	NaN	NaN	NaN	NaN
2.252	-30.339	28.7045	27.6541	0.11084	-0.0014648	0.036133	-38.801	161.0352	517.944	-0.70674	0.5415	0.18311	-10.393	63.062	48.7473	0.040039	-0.063965	0.13916	NaN	NaN	NaN	NaN	NaN	NaN
2.254	-39.875	30.4856	33.9266	0.11182	-0.00048828	0.033203	-24.043	168.3547	446.867	-0.66699	0.51563	0.18652	-29.282	40.9775	72.338	0.056641	-0.062012	0.14063	NaN	NaN	NaN	NaN	NaN	NaN
2.256	-32.665	25.0257	32.0027	0.11963	0.0014648	0.032227	-19.324	103.974	406.11	-0.62608	0.4917	0.18457	-37.463	63.799	67.656	0.068848	-0.061523	0.14014	NaN	NaN	NaN	NaN	NaN	NaN
2.258	-46.719	18.7427	9.3077	0.12109	0.003418	0.023926	-9.166	133.009	367.2985	-0.58154	0.46582	0.18232	-36.431	24.8073	33.124	0.1001	-0.060547	0.13818	NaN	NaN	NaN	NaN	NaN	NaN
2.26	-34.36	24.2198	-1.0533	0.12402	0.0063477	0.021484	-19.725	127.2676	335.919	-0.52842	0.43769	0.17724	-26.476	44.6905	8.214	0.12427	-0.062256	0.13427	NaN	NaN	NaN	NaN	NaN	NaN
2.262	-48.631	18.5884	1.768	0.12402	0.0092773	0.022461	-27.351	103.2193	307.6772	-0.4794	0.41064	0.17022	-19.973	13.0319	2.008	0.14697	-0.067383	0.12842	NaN	NaN	NaN	NaN	NaN	NaN
2.264	-40.692	16.1458	21.7118	0.125	0.0078125	0.02002	-16.758	141.335	265.258	-0.43164	0.37842	0.17432	-22.531	17.5686	0.893000000000001	0.1792	-0.076172	0.12061	NaN	NaN	NaN	NaN	NaN	NaN
2.266	-54.841	22.178	10.932	0.12402	0.012695	0.023438	-45.015	101.14	240.994	-0.38418	0.34609	0.16133	-34.972	9.66256	32.0509	0.19385	-0.077148	0.11523	NaN	NaN	NaN	NaN	NaN	NaN
2.268	-57.1	37.8458	17.1713	0.12158	0.018066	0.02124	-32.837	100.3665	242.50733	-0.33858	0.31338	0.15957	-41.869	19.9707	34.352	0.2251	-0.088867	0.10205	NaN	NaN	NaN	NaN	NaN	NaN
2.27	-42.165	28.201	20.9215	0.12061	0.018555	0.024902	-7.79199999999999	131.903	210.954	-0.29404	0.28135	0.14903	-29.153	4.2705	45.306	0.24902	-0.096922	0.094971	NaN	NaN	NaN	NaN	NaN	NaN
2.272	-44.839	23.20662	13.4664	0.11084	0.026855	0.025391	-36.649	83.9189	192.867	-0.25176	0.25127	0.14512	-16.196	-12.0754	49.126	0.26709	-0.10547	0.084961	NaN	NaN	NaN	NaN	NaN	NaN
2.274	-31.018	28.2478	7.678	0.10742	0.025391	0.028809	-33.718	108.9977	170.2	-0.20996	0.2207	0.13672	-22.697	-7.67097	34.39	0.28467	-0.11279	0.075684	NaN	NaN	NaN	NaN	NaN	NaN
2.276	-60.458	38.8655	13.2257	0.10352	0.025391	0.032715	-38.978	93.645	149.622	-0.16592	0.19922	0.13174	-30.962	21.2732	27.468	0.29004	-0.12646	0.055664	NaN	NaN	NaN	NaN	NaN	NaN
2.278	-18.603	30.338	7.8156	0.096435	0.030518	0.033203	-47.697	68.7234	152.014	-0.12754	0.17764	0.1249	-34.037	58.588	5.939	0.28418	-0.13623	0.056641	NaN	NaN	NaN	NaN	NaN	NaN
2.28	-40.194	20.2213	4.7671	0.091309	0.033691	0.03418	-14.981	119.728	113.4215	-0.091601	0.15771	0.12217	-40.866	33.9006	11.692	0.27563	-0.14893	0.050049	NaN	NaN	NaN	NaN	NaN	NaN
2.282	-25.14	15.22895	-3.3719	0.080566	0.038086	0.031738	-73.6	87.026	94.0946	-0.05166	0.14092	0.1164	-62.855	19.1491	-5.6901	0.26367	-0.15918	0.044922	NaN	NaN	NaN	NaN	NaN	NaN
2.284	-23.004	11.461	8.041	0.07959	0.039063	0.041016	-59.26	86.1746	80.209	-0.013672	0.12012	0.11182	-57.382	-23.8818	-12.7943	0.24365	-0.16406	0.047852	NaN	NaN	NaN	NaN	NaN	NaN
2.286	1.759	21.77888	8.8465	0.069824	0.042969	0.041992	-41.766	90.8325	61.237	0.017187	0.097656	0.10811	-73.197	16.8159	-24.3482	0.23291	-0.16504	0.049316	NaN	NaN	NaN	NaN	NaN	NaN
2.288	2.589	23.1005	12.1694	0.067627	0.048584	0.043457	-90.275	33.786	55.564	0.04668	0.071777	0.10234	-48.563	13.2392	19.7421	0.21436	-0.15918	0.056152	NaN	NaN	NaN	NaN	NaN	NaN
2.29	-2.79899999999999	31.0642	-0.9984	0.066895	0.054199	0.047363	-45.144	49.099	66.2335	0.077149	0.05498	0.092969	-54.093	62.554	15.4831	0.20313	-0.14746	0.059326	NaN	NaN	NaN	NaN	NaN	NaN
2.292	0.756999999999998	31.2118	6.16545	0.065918	0.063477	0.050781	-40.255	36.0098	43.64819	0.10508	0.036719	0.087598	-68.538	28.9119	19.8599	0.19775	-0.13232	0.057617	NaN	NaN	NaN	NaN	NaN	NaN
2.294	-6.906	28.4439	5.7923	0.062012	0.06543	0.050781	-61.919	29.9448	63.326	0.13037	0.015137	0.084961	-63.239	68.213	-12.08304	0.19629	-0.11084	0.059082	NaN	NaN	NaN	NaN	NaN	NaN
2.296	19.123	30.5129	8.1133	0.057617	0.067871	0.053711	-35.691	78.387	32.21269	0.15215	-0.0046875	0.080273	-28.365	22.295	-9.58245	0.19922	-0.097168	0.0625	NaN	NaN	NaN	NaN	NaN	NaN
2.298	10.938	32.038	19.6703	0.054688	0.074218	0.052978	-55.274	51.945	-0.186999999999999	0.17159	-0.023047	0.070312	-40.862	59.0806	-13.22	0.20215	-0.077148	0.060059	NaN	NaN	NaN	NaN	NaN	NaN
2.3	-10.1	18.3085	61.76406	0.052246	0.072754	0.056641	-30.897	49.5663	15.3193	0.19228	-0.041016	0.064063	-41.941	16.583	16.306	0.20313	-0.054688	0.064453	NaN	NaN	NaN	NaN	NaN	NaN
2.302	-17.924	0.0879999999999992	73.014	0.038086	0.077637	0.05957	-12.532	59.906	10.908	0.21435	-0.055468	0.057324	-43.39	72.995	13.498	0.20996	-0.044922	0.070801	NaN	NaN	NaN	NaN	NaN	NaN
2.304	-27.533	25.3648	84.244	0.030273	0.081055	0.064453	-29.119	8.661	19.5613	0.23047	-0.067383	0.052734	-39.568	35.0361	19.83935	0.21777	-0.029785	0.069824	NaN	NaN	NaN	NaN	NaN	NaN
2.306	13.647	49.3026	123.133	0.0078125	0.092285	0.06543	-13.289	21.6248	30.9366	0.25332	-0.078907	0.043164	-33.345	67.464	-2.3644	0.22022	-0.015869	0.070312	NaN	NaN	NaN	NaN	NaN	NaN
2.308	-16.634	68.531	173.778	-1.3878e-14	0.093262	0.074707	-8.18	21.1528	7.4381	0.27246	-0.088379	0.032617	-44.787	12.4114	30.4712	0.23047	-0.0048828	0.072754	NaN	NaN	NaN	NaN	NaN	NaN
2.31	-23.811	70.8446	246.991	-0.016602	0.098633	0.068359	-24.764	7.651	18.2657	0.28418	-0.095019	0.019336	-52.318	68.233	35.057	0.23682	0.015137	0.077637	NaN	NaN	NaN	NaN	NaN	NaN
2.312	-18.245	88.0397	285.541	-0.040527	0.11719	0.072754	7.574	47.601	14.3243	0.29111	-0.098437	0.017969	-33.076	39.179	44.7577	0.23633	0.024414	0.077148	NaN	NaN	NaN	NaN	NaN	NaN
2.314	8.229	104.39217	391.139	-0.072266	0.13355	0.07837	-16.63	38.747	11.8563	0.29297	-0.10205	0.018066	-23.439	103.873	45.276	0.23633	0.038574	0.084961	NaN	NaN	NaN	NaN	NaN	NaN
2.316	10.723	108.2728	503.7191	-0.11426	0.14893	0.081543	-9.84	24.4914	28.7484	0.28428	-0.10274	0.017578	-8.213	32.3697	39.253	0.23242	0.044434	0.08667	NaN	NaN	NaN	NaN	NaN	NaN
2.318	7.884	101.3627	599.6131	-0.18066	0.1709	0.083008	3.136	37.5247	9.974	0.26836	-0.1002	0.014062	-34.211	37.951	25.958	0.229	0.052246	0.09082	NaN	NaN	NaN	NaN	NaN	NaN
2.32	43.5973	124.1038	671.8962	-0.2207	0.18506	0.091309	-24.396	-3.573	23.08966	0.24648	-0.095508	0.013672	-13.97	-26.804	42.746	0.2124	0.056152	0.10205	NaN	NaN	NaN	NaN	NaN	NaN
2.322	18.7354	138.664	775.507	-0.30664	0.21631	0.099121	10.031	27.357	32.4758	0.22207	-0.090137	0.024512	-29.917	21.87	31.0944	0.19629	0.058594	0.10547	NaN	NaN	NaN	NaN	NaN	NaN
2.324	31.931	133.476	895.746	-0.38379	0.24023	0.11157	-26.038	24.3699	11.1093	0.19727	-0.085938	0.029785	-21.942	6.3001	57.455	0.16748	0.063477	0.1167	NaN	NaN	NaN	NaN	NaN	NaN
2.326	6.062	111.318	976.017	-0.47266	0.26855	0.12354	-53.366	16.65	8.4658	0.16904	-0.077149	0.039551	-12.29	58.143	53.707	0.14306	0.066651	0.12451	NaN	NaN	NaN	NaN	NaN	NaN
2.328	47.6155	90.4949	992.757	-0.6167	0.31299	0.14063	-18.27	48.371	8.8189	0.14102	-0.066016	0.04209	-44.824	13.0896	35.841	0.11768	0.07666	0.13574	NaN	NaN	NaN	NaN	NaN	NaN
2.33	33.135	43.94	1016.63	-0.69141	0.3418	0.15283	-58.069	35.6891	-10.06871	0.11602	-0.059375	0.047559	-46.64	49.073	21.1165	0.086914	0.08252	0.14941	NaN	NaN	NaN	NaN	NaN	NaN
2.332	34.756	21.793	1025.69	-0.85938	0.4043	0.18066	-33.878	32.6805	36.82	0.094626	-0.048926	0.05625	-50.558	0.00379999999999914	13.987	0.066406	0.091797	0.15674	NaN	NaN	NaN	NaN	NaN	NaN
2.334	17.395	-5.811	1037.445	-1.0007	0.46021	0.21093	-46.994	55.606	23.788	0.076172	-0.035645	0.055664	-54.981	17.0306	21.491	0.047363	0.10596	0.17285	NaN	NaN	NaN	NaN	NaN	NaN
2.336	36.46	-1.309	1015.682	-1.1465	0.52148	0.24316	-74.541	15.138	20.4987	0.063574	-0.02705	0.05625	-64.424	-8.0327	35.0695	0.036621	0.11841	0.1814	NaN	NaN	NaN	NaN	NaN	NaN
2.338	70.203	-7.862	1014.232	-1.3438	0.61523	0.30322	-41.868	34.1441	35.5857	0.049903	-0.02207	0.059668	-55.989	33.0966	32.4615	0.020508	0.13428	0.19287	NaN	NaN	NaN	NaN	NaN	NaN
2.34	60.5376	-4.436	1022.977	-1.4512	0.66406	0.32666	-66.826	28.32081	2.947	0.044043	-0.014649	0.058105	-42.854	3.28018	28.1364	0.010742	0.15576	0.2085	NaN	NaN	NaN	NaN	NaN	NaN
2.342	59.907	18.904	1012.362	-1.625	0.77148	0.36572	-76.552	11.49	29.1875	0.028515	-0.011719	0.05791	-32.168	-25.4736	65.4541	0.0039063	0.16699	0.21338	NaN	NaN	NaN	NaN	NaN	NaN
2.344	26.361	25.847	1012.102	-1.7273	0.83179	0.38941	-29.756	36.8477	15.306	0.025391	-0.010254	0.056641	-72.223	-68.9606	61.017	-0.0048828	0.18945	0.22607	NaN	NaN	NaN	NaN	NaN	NaN
2.346	4.48500000000001	30.83315	1021.483	-1.7871	0.8877	0.40283	-65.365	27.5723	0.763	0.013476	-0.0055664	0.055566	-54.75	-45.9834	83.8462	-0.014892	0.20727	0.2334	NaN	NaN	NaN	NaN	NaN	NaN
2.348	16.769	26.3954	1038.81	-1.7793	0.94141	0.40283	-45.495	21.578	23.7747	0.0095702	-0.0047852	0.051465	-19.572	-23.042	114.964	-0.023438	0.22656	0.24658	NaN	NaN	NaN	NaN	NaN	NaN
2.35	21.534	20.279	1048.851	-1.7363	0.96289	0.40088	-28.096	33.3628	-5.001	0.0044922	-0.0008789	0.052246	-33.721	-40.968	196.406	-0.047363	0.24707	0.24365	NaN	NaN	NaN	NaN	NaN	NaN
2.352	-5.185	18.843	1067.9016	-1.6152	0.98633	0.35059	-58.077	11.5829	6.67	0.0048828	0.0039063	0.048926	-86.861	-68.94	278.314	-0.066406	0.25635	0.24268	NaN	NaN	NaN	NaN	NaN	NaN
2.354	-53.172	-18.248	1087.1504	-1.4737	0.99756	0.29737	-8.032	47.065	20.9508	0.012207	0.0063477	0.046387	-61.143	-84.2635	379.261	-0.11133	0.29297	0.24072	NaN	NaN	NaN	NaN	NaN	NaN
2.356	-45.973	-45.241	1100.7868	-1.2886	0.98682	0.24512	-29.616	51.129	-5.728	0.025097	0.010351	0.041504	-56.726	-53.5845	520.427	-0.16357	0.31933	0.25024	NaN	NaN	NaN	NaN	NaN	NaN
2.358	-53.018	-72.80839	1126.4319	-1.0313	0.93164	0.19482	-40.1	29.5094	41.4448	0.040722	0.011523	0.037012	-60.422	12.089	724.26121	-0.23389	0.34668	0.25635	NaN	NaN	NaN	NaN	NaN	NaN
2.36	-25.347	-101.957	1137.98	-0.92529	0.88916	0.1709	-10.992	53.591	35.4867	0.058691	0.01543	0.032715	-12.67	73.862	907.7716	-0.35547	0.39453	0.27295	NaN	NaN	NaN	NaN	NaN	NaN
2.362	-43.96	-156.182	1173.69	-0.76465	0.82617	0.14404	-26.277	31.712	4.089	0.076563	0.012402	0.024023	43.311	82.096	1091.187	-0.42188	0.42578	0.28271	NaN	NaN	NaN	NaN	NaN	NaN
2.364	-57.08	-190.725	1232.289	-0.6958	0.79834	0.125	5.456	36.7576	25.6483	0.09668	0.010254	0.025879	69.566	123.544	1268.521	-0.56982	0.49463	0.29688	NaN	NaN	NaN	NaN	NaN	NaN
2.366	-64.654	-206.234	1267.276	-0.65527	0.78174	0.11523	7.681	46.593	1.855	0.10645	0.01709	0.021192	111.127	84.328	1478.406	-0.68677	0.55835	0.29834	NaN	NaN	NaN	NaN	NaN	NaN
2.368	-74.221	-199.089	1308.223	-0.64209	0.76611	0.12012	-24.753	20.3061	8.0773	0.11719	0.021582	0.023926	108.511	76.7333	1665.2725	-0.8042	0.62939	0.29785	NaN	NaN	NaN	NaN	NaN	NaN
2.37	-28.377	-192.151	1328.294	-0.65576	0.76611	0.13037	18.327	30.8857	24.13557	0.12656	0.021582	0.027051	85.415	7.167	1809.371	-0.99268	0.74561	0.30371	NaN	NaN	NaN	NaN	NaN	NaN
2.372	-46.684	-197.637	1372.006	-0.72168	0.79297	0.1543	-7.121	26.079	-5.3674	0.13213	0.024121	0.024512	72.351	-3.184	1800.655	-1.1055	0.80957	0.31055	NaN	NaN	NaN	NaN	NaN	NaN
2.374	-53.314	-157.367	1430.988	-0.80225	0.83203	0.18335	-29.654	9.0131	30.214	0.14063	0.03418	0.02832	61.1236	-115.075	1767.927	-1.3711	0.94238	0.33105	NaN	NaN	NaN	NaN	NaN	NaN
2.376	-82.8272	-123.1722	1470.312	-0.89258	0.87793	0.21729	-9.605	42.613	33.2389	0.15127	0.039649	0.03252	20.959	-142.998	1676.763	-1.6013	1.0481	0.37745	NaN	NaN	NaN	NaN	NaN	NaN
2.378	-71.446	-95.623	1513.726	-1.0229	0.93994	0.25488	-66.431	35.0737	24.5122	0.15469	0.045996	0.03457	5.582	-249.151	1596.55	-1.8413	1.1489	0.42822	NaN	NaN	NaN	NaN	NaN	NaN
2.38	-56.946	-92.1214	1557.082	-1.0884	0.96533	0.2749	-19.536	34.0309	41.343	0.1668	0.051856	0.035742	-13.904	-228.761	1473.794	-2.1465	1.2666	0.51025	NaN	NaN	NaN	NaN	NaN	NaN
2.382	-53.61	-90.0765	1565.978	-1.187	1.0083	0.31055	-20.123	53.923	6.8873	0.17481	0.055469	0.040039	-15.732	-283.784	1355.912	-2.2617	1.3184	0.56104	NaN	NaN	NaN	NaN	NaN	NaN
2.384	-14.499	-87.155	1566.6341	-1.2498	1.0305	0.33569	-77.314	21.8697	25.73	0.18457	0.060547	0.047852	-42.198	-236.238	1266.385	-2.3242	1.4023	0.70654	NaN	NaN	NaN	NaN	NaN	NaN
2.386	-22.89	-107.649	1593.8472	-1.3096	1.0449	0.34814	-29.563	26.0789	41.949	0.20078	0.058789	0.048242	-16.187	-291.11	1262.576	-2.2871	1.4453	0.76026	NaN	NaN	NaN	NaN	NaN	NaN
2.388	-3.348	-105.193	1650.737	-1.3823	1.0679	0.36035	-46.145	25.33898	7.7936	0.21465	0.057617	0.043457	22.038	-247.106	1274.921	-2.1934	1.4492	0.69678	NaN	NaN	NaN	NaN	NaN	NaN
2.39	-8.546	-99.514	1703.256	-1.4214	1.0806	0.37305	-74.716	8.087	19.99	0.22637	0.059961	0.037598	35.44	-258.423	1324.019	-1.8218	1.4165	0.55469	NaN	NaN	NaN	NaN	NaN	NaN
2.392	-3.13200000000001	-86.424	1746.179	-1.4961	1.1211	0.38428	-36.708	40.9849	11.8402	0.23809	0.059375	0.039941	-20.505	-155.752	1402.722	-1.5391	1.3848	0.52881	NaN	NaN	NaN	NaN	NaN	NaN
2.394	-6.482	-83.109	1779.165	-1.5564	1.1594	0.39283	-62.51	35.71766	-4.037	0.2417	0.058594	0.040039	-66.106	-118.77	1454.597	-1.0347	1.2876	0.50684	NaN	NaN	NaN	NaN	NaN	NaN
2.396	-25.775	-80.822	1815.729	-1.6108	1.2056	0.39844	-51.985	32.597	39.7167	0.24228	0.058106	0.049219	-121.733	-60.45	1495.3712	-0.85157	1.1983	0.48535	NaN	NaN	NaN	NaN	NaN	NaN
2.398	-30.305	-62.044	1827.241	-1.6836	1.2656	0.41553	-39.26	59.134	9.7815	0.2293	0.062989	0.054883	-153.4	-110.08	1521.49	-0.78467	1.1372	0.45117	NaN	NaN	NaN	NaN	NaN	NaN
2.4	-64.603	-59.651	1859.661	-1.7183	1.2954	0.41992	-75.5695	24.4502	16.8093	0.21172	0.062597	0.062695	-202.48	-187.35	1545.946	-0.76172	1.1348	0.44775	NaN	NaN	NaN	NaN	NaN	NaN
2.402	-47.554	-65.528	1876.543	-1.7896	1.3638	0.4292	-34.127	10.6775	81.192	0.18701	0.068945	0.071777	-205.7316	-322.254	1582.543	-0.74561	1.1431	0.44922	NaN	NaN	NaN	NaN	NaN	NaN
2.404	-49.844	-90.116	1872.629	-1.8359	1.4033	0.43066	-54.515	-17.2473	68.108	0.1626	0.074707	0.08252	-202.5255	-425.938	1606.979	-0.7207	1.1445	0.4458	NaN	NaN	NaN	NaN	NaN	NaN
2.406	-53.86	-89.65	1877.488	-1.873	1.4395	0.42334	-53.298	-44.595	95.36137	0.13418	0.086914	0.095605	-204.996	-518.84	1654.134	-0.7793	1.1485	0.44311	NaN	NaN	NaN	NaN	NaN	NaN
2.408	-71.951	-81.533	1880.451	-1.9082	1.4805	0.43018	-0.166999999999987	-2.9774	109.4608	0.11123	0.10049	0.10664	-171.9123	-547.41	1710.939	-0.89893	1.1743	0.45117	NaN	NaN	NaN	NaN	NaN	NaN
2.41	-71.51	-56.968	1871.545	-1.9155	1.4868	0.42188	-39.334	1.5398	138.988	0.091308	0.11689	0.12265	-131.3635	-533.85	1747.66	-1.1523	1.2803	0.47119	NaN	NaN	NaN	NaN	NaN	NaN
2.412	-49.711	-22.5566	1873.698	-1.9258	1.4941	0.42627	-48.682	-7.26033	232.6254	0.080664	0.13105	0.12939	-73.889	-485.59	1814.982	-1.2866	1.356	0.48438	NaN	NaN	NaN	NaN	NaN	NaN
2.414	-99.96	3.45	1858.247	-1.935	1.4995	0.43555	-24.67	10.5062	266.587	0.074219	0.14746	0.14014	-98.325	-408.383	1906.8407	-1.5171	1.5142	0.51709	NaN	NaN	NaN	NaN	NaN	NaN
2.416	-108.8329	7.512	1865.157	-1.9468	1.4966	0.44336	-6.454	10.335	314.221	0.067383	0.15566	0.14658	-130.677	-344.173	1981.7402	-1.6412	1.6099	0.54248	NaN	NaN	NaN	NaN	NaN	NaN
2.418	-119.8122	-12.296	1888.343	-1.9609	1.4922	0.46533	15.946	64.1638	437.478	0.065625	0.1709	0.15019	-150.792	-229.8061	2014.014	-1.7378	1.6782	0.55859	NaN	NaN	NaN	NaN	NaN	NaN
2.42	-103.166	-16.786	1901.187	-1.9644	1.4888	0.47217	-9.563	102.2236	555.305	0.057813	0.18574	0.15019	-170.789	-160.853	2061.048	-1.8315	1.7388	0.56738	NaN	NaN	NaN	NaN	NaN	NaN
2.422	-106.057	5.702	1928.847	-1.9761	1.4751	0.48828	-10.576	95.488	711.4397	0.044336	0.20244	0.14629	-166.9586	-58.433	2067.553	-1.8696	1.7544	0.56445	NaN	NaN	NaN	NaN	NaN	NaN
2.424	-96.541	6.5303	1927.118	-1.9878	1.4663	0.50123	46.8698	142.9451	805.259	0.018066	0.22168	0.14746	-147.679	-61.61	2046.3834	-1.9253	1.7837	0.54883	NaN	NaN	NaN	NaN	NaN	NaN
2.426	-80.2992	-3.1856	1921.667	-2	1.459	0.51221	29.1507	141.203	919.628	-0.029883	0.24775	0.15449	-116.922	-15.07	1997.53	-1.9463	1.7959	0.54834	NaN	NaN	NaN	NaN	NaN	NaN
2.428	-87.962	-7.8908	1919.798	-2.0215	1.4492	0.52783	56.513	125.851	1108.0982	-0.091504	0.26992	0.16309	-95.7	-87.306	1981.56	-1.959	1.8184	0.5459	NaN	NaN	NaN	NaN	NaN	NaN
2.43	-72.258	-10.6445	1925.338	-2.0273	1.4434	0.53467	56.463	129.235	1251.4475	-0.16729	0.29571	0.17441	-62.226	-98.981	1997.62	-1.9688	1.8418	0.54199	NaN	NaN	NaN	NaN	NaN	NaN
2.432	-74.158	-13.788	1923.937	-2.0425	1.4341	0.54004	15.458	63.951	1318.5166	-0.23965	0.32481	0.19648	-31.701	-205.734	2045.2204	-1.9707	1.8516	0.54736	NaN	NaN	NaN	NaN	NaN	NaN
2.434	-57.778	-4.089	1911.527	-2.0527	1.4224	0.55395	24.5	-1.437	1356.9859	-0.31982	0.36768	0.21289	-22.135	-195.414	2092.159	-1.978	1.8618	0.55469	NaN	NaN	NaN	NaN	NaN	NaN
2.436	-65.144	4.221	1892.012	-2.0601	1.4067	0.55859	-30.54	-76.523	1322.6241	-0.40566	0.41504	0.22647	10.23	-255.268	2127.3154	-1.9863	1.8711	0.56738	NaN	NaN	NaN	NaN	NaN	NaN
2.438	-70.52	13.778	1884.194	-2.0659	1.3892	0.56836	-43.705	-170.559	1342.574	-0.49844	0.46748	0.2375	1.69200000000001	-214.223	2139.6489	-2.002	1.8828	0.58838	NaN	NaN	NaN	NaN	NaN	NaN
2.44	-55.47	16.784	1880.093	-2.062	1.3755	0.57031	-0.459000000000003	-158.401	1285.458	-0.60781	0.5378	0.25586	-38.673	-262.157	2183.539	-2.0176	1.8867	0.61768	NaN	NaN	NaN	NaN	NaN	NaN
2.442	-58.686	32.06	1881.965	-2.0586	1.3496	0.57471	-42.659	-176.199	1209.757	-0.73525	0.6124	0.27978	-84.179	-159.229	2200.076	-2.0137	1.8828	0.62744	NaN	NaN	NaN	NaN	NaN	NaN
2.444	-42.437	59.7679	1871.093	-2.0507	1.3301	0.57568	-19.182	-160.091	1184.62	-0.89209	0.68604	0.31006	-84.975	-164.557	2206.036	-2.0117	1.8477	0.65771	NaN	NaN	NaN	NaN	NaN	NaN
2.446	-58.471	69.104	1851.761	-2.0464	1.3149	0.58203	-0.697999999999999	-131.283	1122.85265	-1.0665	0.76514	0.33926	-106.579	-61.86313	2205.659	-1.9961	1.7871	0.68213	NaN	NaN	NaN	NaN	NaN	NaN
2.448	-45.917	82.014	1827.017	-2.0488	1.291	0.59521	-23.463	-156.361	1101.9127	-1.2492	0.84277	0.37314	-105.827	-103.3366	2193.002	-1.9941	1.752	0.68994	NaN	NaN	NaN	NaN	NaN	NaN
2.45	-64.949	93.02	1813.945	-2.0488	1.2773	0.59229	5.489	-132.474	1102.5778	-1.4254	0.92051	0.41065	-94.793	-8.48699999999999	2129.381	-1.9917	1.686	0.70313	NaN	NaN	NaN	NaN	NaN	NaN
2.452	-68.132	93.162	1804.314	-2.0386	1.2661	0.59375	7.97	-99.26575	1092.403	-1.5852	0.99102	0.45244	-66.203	-35.177	2056.865	-2.0035	1.643	0.70801	NaN	NaN	NaN	NaN	NaN	NaN
2.454	-69.963	51.36389	1792.348	-2.0273	1.25	0.59424	-7.735	-92.07	1154.0844	-1.7012	1.0391	0.48291	-70.7	64.076	1992.938	-2.0156	1.6055	0.7251	NaN	NaN	NaN	NaN	NaN	NaN
2.456	-77.119	24.765	1761.953	-2.0156	1.2441	0.58789	-7.18899999999999	-24.35	1166.257	-1.7481	1.0519	0.49258	-97.443	22.861	1964.8	-2.0293	1.5605	0.72803	NaN	NaN	NaN	NaN	NaN	NaN
2.458	-84.793	15.738	1722.30698	-1.9897	1.2349	0.58496	-78.245	-19.35	1158.244	-1.7196	1.0457	0.49873	-115.752	70.473	1927.314	-2.0308	1.5415	0.73633	NaN	NaN	NaN	NaN	NaN	NaN
2.46	-100.994	26.461	1708.6222	-1.9663	1.2182	0.58154	-65.659	-60.6	1222.0565	-1.6176	1.0508	0.51631	-100.114	-12.3369	1893.779	-2.0229	1.5063	0.73047	NaN	NaN	NaN	NaN	NaN	NaN
2.462	-87.707	33.077	1690.74135	-1.9395	1.1992	0.58057	-86.197	-80.74	1221.014	-1.4916	1.0838	0.51963	-118.405	40.643	1870.688	-2.0056	1.4808	0.7312	NaN	NaN	NaN	NaN	NaN	NaN
2.464	-95.966	33.7864	1678.0065	-1.9023	1.1816	0.56592	-117.863	-182.301	1278.6711	-1.3433	1.1138	0.47266	-123.7723	-30.551	1904.367	-1.9766	1.4629	0.71826	NaN	NaN	NaN	NaN	NaN	NaN
2.466	-67.513	47.7471	1651.36	-1.8828	1.1719	0.55713	-87.704	-267.2079	1335.8807	-1.1464	1.104	0.41152	-144.5942	39.045	1916.334	-1.9141	1.4375	0.69971	NaN	NaN	NaN	NaN	NaN	NaN
2.468	-100.109	47.5029	1636.3499	-1.8379	1.1504	0.54541	-63.313	-328.81	1341.707	-0.92324	1.0223	0.37217	-162.444	0.136892	1922.203	-1.8745	1.4321	0.68555	NaN	NaN	NaN	NaN	NaN	NaN
2.47	-89.307	70.784	1600.431	-1.8201	1.137	0.54004	-43.732	-416.11	1403.2963	-0.7584	0.90352	0.34326	-184.5009	70.213	1894.618	-1.8115	1.4121	0.66455	NaN	NaN	NaN	NaN	NaN	NaN
2.472	-87.201	81.5481	1576.7896	-1.7949	1.1211	0.53271	-15.92	-416.42	1438.826	-0.67519	0.80879	0.31768	-122.412	11.1498	1882.816	-1.7732	1.3948	0.64673	NaN	NaN	NaN	NaN	NaN	NaN
2.474	-75.056	91.38705	1533.065	-1.7539	1.0986	0.51611	-35.156	-435.31	1477.195	-0.64648	0.74414	0.30908	-93.09	44.1922	1883.1722	-1.7319	1.3755	0.63672	NaN	NaN	NaN	NaN	NaN	NaN
2.476	-85.851	85.6144	1517.3819	-1.7231	1.0884	0.50391	-48.903	-431.33	1554.1143	-0.67051	0.71934	0.31836	-72.339	1.503	1878.5645	-1.6973	1.3555	0.61084	NaN	NaN	NaN	NaN	NaN	NaN
2.478	-72.431	86.6926	1486.919	-1.666	1.0605	0.48291	-54.804	-301.142	1629.4712	-0.74151	0.72353	0.34786	-45.095	76.599	1836.6689	-1.6831	1.3423	0.60352	NaN	NaN	NaN	NaN	NaN	NaN
2.48	-36.352	95.9638	1457.989	-1.614	1.0423	0.46924	-86.153	-239.7072	1690.976	-0.86689	0.76143	0.3959	-31.456	71.481	1809.711	-1.6597	1.3208	0.58594	NaN	NaN	NaN	NaN	NaN	NaN
2.482	-47.183	117.7828	1452.9702	-1.562	1.0239	0.44971	-93.24	-178.36	1756.838	-1.0188	0.83115	0.44473	-36.42	142.362	1752.243	-1.6423	1.3059	0.57202	NaN	NaN	NaN	NaN	NaN	NaN
2.484	-47.373	128.4096	1439.6228	-1.502	0.99023	0.42627	-102.3947	-130.523	1756.427	-1.1655	0.91455	0.48535	-32.899	138.156	1713.551	-1.6265	1.2837	0.55908	NaN	NaN	NaN	NaN	NaN	NaN
2.486	-35.919	127.23784	1401.511	-1.4668	0.97656	0.41553	-131.0488	-181.524	1770.038	-1.2878	1.0015	0.52051	-31.148	212.794	1692.8743	-1.6055	1.2539	0.54248	NaN	NaN	NaN	NaN	NaN	NaN
2.488	-22.863	124.0448	1377.8713	-1.4058	0.9458	0.39258	-96.814	-127.609	1777.579	-1.3937	1.0857	0.55302	-12.004	232.539	1661.3455	-1.5933	1.2466	0.53516	NaN	NaN	NaN	NaN	NaN	NaN
2.49	-3.334	130.6935	1349.626	-1.3643	0.92285	0.37011	-94.851	-104.412	1769.918	-1.4898	1.1529	0.56787	-19.806	313.217	1622.265	-1.5625	1.207	0.52197	NaN	NaN	NaN	NaN	NaN	NaN
2.492	-5.188	130.3994	1350.6079	-1.3281	0.89844	0.35986	-50.948	-136.913	1818.3261	-1.5727	1.2031	0.579	-25.893	306.771	1587.3996	-1.5405	1.1841	0.5083	NaN	NaN	NaN	NaN	NaN	NaN
2.494	19.718	140.1	1336.992	-1.2852	0.86914	0.33447	-39.668	-119.458	1851.812	-1.6421	1.2329	0.59375	-44.824	318.865	1557.6215	-1.5151	1.1587	0.49414	NaN	NaN	NaN	NaN	NaN	NaN
2.496	-0.650999999999996	140.288	1306.579	-1.2612	0.85303	0.32568	-33.808	-203.755	1878.048	-1.6985	1.2518	0.59834	11.651	274.404	1525.065	-1.4741	1.1157	0.47461	NaN	NaN	NaN	NaN	NaN	NaN
2.498	-5.729	152.603	1263.5699	-1.2222	0.82275	0.30664	-5.347	-230.875	1929.0721	-1.7323	1.2782	0.59453	29.069	249.32275	1499.209	-1.4531	1.1016	0.46338	NaN	NaN	NaN	NaN	NaN	NaN
2.5	-14.648	136.1389	1239.004	-1.1931	0.80298	0.29688	0.480000000000004	-209.53	1959.035	-1.7527	1.3173	0.58515	14.649	204.587	1479.768	-1.4038	1.0493	0.44141	NaN	NaN	NaN	NaN	NaN	NaN
2.502	-2.54900000000001	147.4566	1206.6448	-1.1602	0.78125	0.2876	-47.59	-262.251	2018.219	-1.7657	1.3569	0.57295	18.511	202.769	1470.54	-1.3689	1.0178	0.42651	NaN	NaN	NaN	NaN	NaN	NaN
2.504	-0.211999999999996	169.5323	1183.3155	-1.1206	0.75635	0.26611	-50.2	-208.2	2045.244	-1.7852	1.4023	0.56689	-12.477	211.944	1412.091	-1.3315	0.98975	0.4043	NaN	NaN	NaN	NaN	NaN	NaN
2.506	-12.333	199.094	1133.5392	-1.1016	0.74121	0.26172	-75.779	-197.249	2029.025	-1.8205	1.4525	0.56914	-33.677	230.576	1344.683	-1.2769	0.9458	0.37695	NaN	NaN	NaN	NaN	NaN	NaN
2.508	-1.273	185.452	1094.9989	-1.0581	0.71533	0.23535	-90.135	-214.105	2062.108	-1.8656	1.5051	0.56866	-38.373	223.966	1286.1741	-1.2485	0.92432	0.36035	NaN	NaN	NaN	NaN	NaN	NaN
2.51	-12.996	182.163	1065.931	-1.0317	0.69775	0.22559	-50.36	-132.365	2052.634	-1.9176	1.5563	0.58389	-27.027	218.627	1257.072	-1.1973	0.88086	0.3374	NaN	NaN	NaN	NaN	NaN	NaN
2.512	-9.566	181.3244	1039.2251	-1	0.67578	0.21191	-48.688	-139.3947	2023.87	-1.9643	1.6054	0.58906	-7.045	245.7249	1209.138	-1.1541	0.84546	0.31348	NaN	NaN	NaN	NaN	NaN	NaN
2.514	-5.159	187.2474	1013.7502	-0.9624	0.6499	0.19336	-31.244	-78.506	2006.512	-1.9937	1.6489	0.60107	-13.728	283.369	1164.848	-1.1143	0.81641	0.2915	NaN	NaN	NaN	NaN	NaN	NaN
2.516	6.869	183.115	982.2971	-0.94141	0.6377	0.18604	-21.929	0.628	1955.863	-2.0121	1.6774	0.61006	-38.5362	321.724	1094.7052	-1.0562	0.77344	0.26611	NaN	NaN	NaN	NaN	NaN	NaN
2.518	-16.265	195.284	951.4833	-0.90283	0.61182	0.16992	-36.256	-49.705	1938.593	-2.0168	1.6973	0.61543	-44.1463	296.851	1059.936	-1.0239	0.74854	0.25	NaN	NaN	NaN	NaN	NaN	NaN
2.52	-26.235	201.04	915.3541	-0.88379	0.59277	0.1626	-9.351	-26.269	1937.6	-2.0098	1.7113	0.6209	-39.958	299.049	979.98	-0.97217	0.70557	0.22754	NaN	NaN	NaN	NaN	NaN	NaN
2.522	-21.032	195.79	875.4023	-0.86035	0.58105	0.15576	-44.418	-38.0541	1899.47	-2.0127	1.7178	0.63291	-19.824	276.0878	925.0754	-0.93798	0.67041	0.21094	NaN	NaN	NaN	NaN	NaN	NaN
2.524	-17.552	192.653	841.7016	-0.82813	0.55078	0.14209	-51.697	-73.036	1917.049	-2.0098	1.7168	0.64111	1.85	317.009	851.038	-0.90039	0.64063	0.1958	NaN	NaN	NaN	NaN	NaN	NaN
2.526	4.816	191.84	805.2864	-0.81396	0.53955	0.14014	-63.648	-13.549	1919.3	-2.0111	1.7089	0.65	7.896	297.7883	807.35	-0.84521	0.59814	0.1792	NaN	NaN	NaN	NaN	NaN	NaN
2.528	-12.677	175.907	764.2301	-0.7793	0.5127	0.12793	-80.428	-44.973	1927.141	-2.0109	1.6926	0.6583	1.099	290.547	747.883	-0.81299	0.57178	0.16699	NaN	NaN	NaN	NaN	NaN	NaN
2.53	-7.998	171.4566	742.253	-0.74804	0.49707	0.12012	-89.141	-56.325	1971.13482	-2.0043	1.6648	0.67119	-22.713	231.403	708.5866	-0.74023	0.53711	0.14307	NaN	NaN	NaN	NaN	NaN	NaN
2.532	-1.91999999999999	173.2608	696.032	-0.71826	0.47412	0.11182	-60.472	-46.115	1942.6681	-2.0006	1.6334	0.68271	-16.348	228.391	654.0829	-0.68335	0.5022	0.12158	NaN	NaN	NaN	NaN	NaN	NaN
2.534	26.887	183.2889	663.6306	-0.66553	0.4458	0.10156	-74.421	-120.6256	1948.25	-1.9956	1.5962	0.69922	15.939	169.179	643.7713	-0.62793	0.47266	0.10498	NaN	NaN	NaN	NaN	NaN	NaN
2.536	16.463	183.974	643.8806	-0.64307	0.43066	0.081055	-71.727	-91.9334	1950.567	-1.9965	1.5582	0.71612	12.896	181.073	589.9766	-0.5542	0.43018	0.07666	NaN	NaN	NaN	NaN	NaN	NaN
2.538	17.97	187.817	615.755	-0.58203	0.39453	0.074219	-104.3287	-99.127	1907.678	-1.9961	1.5227	0.72647	21.063	152.606	563.752	-0.51563	0.41211	0.065918	NaN	NaN	NaN	NaN	NaN	NaN
2.54	35.33	191.897	582.9987	-0.54321	0.36987	0.061035	-85.346	-121.329	1878.439	-1.9867	1.4922	0.73623	-6.604	209.241	492.622	-0.43799	0.37451	0.041504	NaN	NaN	NaN	NaN	NaN	NaN
2.542	6.012	208.914	554.8907	-0.50195	0.33789	0.050781	-44.696	-44.1616	1842.7889	-1.9776	1.4665	0.74433	-0.195999999999998	177.481	451.351	-0.37622	0.34351	0.020508	NaN	NaN	NaN	NaN	NaN	NaN
2.544	8.414	186.032	531.1034	-0.4502	0.30469	0.029785	-67.425	-52.5164	1799.2106	-1.9604	1.4478	0.74805	-5.54	198.9213	389.338	-0.31689	0.31738	0.0019531	NaN	NaN	NaN	NaN	NaN	NaN
2.546	13.561	162.196	509.1948	-0.42432	0.29297	0.02002	-48.215	-15.312	1794.4033	-1.9422	1.4328	0.74736	28.48	132.544	353.0612	-0.23438	0.28711	-0.021973	NaN	NaN	NaN	NaN	NaN	NaN
2.548	24.169	134.7572	473.89981	-0.37451	0.25537	-0.00048828	-63.772	58.784	1779.042	-1.9211	1.4191	0.74112	19.448	173.6538	295.2002	-0.19287	0.26758	-0.037598	NaN	NaN	NaN	NaN	NaN	NaN
2.55	-13.889	130.695	420.58	-0.33814	0.23145	-0.010986	-90.725	57.363	1783.968	-1.8906	1.4035	0.73643	17.559	157.1208	265.129	-0.11816	0.22852	-0.080566	NaN	NaN	NaN	NaN	NaN	NaN
2.552	-0.577000000000005	139.4852	404.497	-0.30908	0.20752	-0.016602	-43.833	121.172	1789.203	-1.8613	1.3922	0.72666	-1.558	208.174	216.133	-0.058838	0.20508	-0.0896	NaN	NaN	NaN	NaN	NaN	NaN
2.554	-0.794000000000004	142.378	379.3935	-0.27441	0.18066	-0.027344	-75.024	121.917	1736.908	-1.8335	1.3813	0.7168	-41.592	146.042	192.4097	-0.012695	0.1792	-0.1084	NaN	NaN	NaN	NaN	NaN	NaN
2.556	-4.622	139.518	352.6702	-0.25537	0.16748	-0.028809	-67.448	93.584	1704.116	-1.8043	1.3703	0.70049	-56.301	153.575	150.6558	0.039551	0.15186	-0.12988	NaN	NaN	NaN	NaN	NaN	NaN
2.558	-7.847	130.622	339.035	-0.22656	0.13867	-0.032227	-50.163	132.536	1662.079	-1.7774	1.3629	0.69131	-79.905	87.5912	141.5206	0.059082	0.1416	-0.13623	NaN	NaN	NaN	NaN	NaN	NaN
2.56	-25.007	126.574	326.848	-0.20337	0.1272	-0.041016	-76.365	75.2029	1646.964	-1.7527	1.3547	0.68077	-46.264	149.149	119.825	0.088379	0.11084	-0.14844	NaN	NaN	NaN	NaN	NaN	NaN
2.562	-16.994	120.312	309.64247	-0.18311	0.10693	-0.044922	-45.858	63.906	1657.4477	-1.7249	1.3438	0.6664	-44.56	136.6	127.389	0.10181	0.090576	-0.1565	NaN	NaN	NaN	NaN	NaN	NaN
2.564	-21.368	115.3551	286.5574	-0.16113	0.09082	-0.048828	-20.261	61.585	1648.3872	-1.6953	1.3379	0.64893	-63.171	169.858	100.627	0.10254	0.070313	-0.16211	NaN	NaN	NaN	NaN	NaN	NaN
2.566	-43.55	101.0321	269.12463	-0.15186	0.083984	-0.047852	-34.034	3.104	1642.989	-1.6761	1.3246	0.63194	-93.2592	100.5323	89.9875	0.083496	0.054688	-0.15771	NaN	NaN	NaN	NaN	NaN	NaN
2.568	-39.08	93.2924	241.1177	-0.12891	0.066406	-0.056152	15.155	36.395	1610.38	-1.6456	1.311	0.61308	-71.809	77.025	61.84	0.069336	0.050293	-0.15674	NaN	NaN	NaN	NaN	NaN	NaN
2.57	-36.791	96.1202	199.862	-0.11596	0.054443	-0.057129	-15.336	54.946	1550.1892	-1.621	1.295	0.59473	-54.0894	-1.919	76.175	0.032715	0.041992	-0.13916	NaN	NaN	NaN	NaN	NaN	NaN
2.572	-55.708	84.4199	168.5448	-0.10352	0.045898	-0.058594	-27.542	72.173	1510.8391	-1.5907	1.2777	0.579	-36.839	4.897	72.383	0.0046387	0.044434	-0.13135	NaN	NaN	NaN	NaN	NaN	NaN
2.574	-71.318	89.6111	166.0686	-0.089844	0.033203	-0.060547	-6.331	162.0507	1497.8194	-1.5605	1.2588	0.55713	-49.765	-15.6276	84.121	-0.013184	0.045898	-0.11182	NaN	NaN	NaN	NaN	NaN	NaN
2.576	-35.737	93.53	158.3751	-0.084961	0.029297	-0.057129	-37.239	168.6041	1448.044	-1.5276	1.2402	0.53838	-55.725	33.2262	50.84	-0.04248	0.054688	-0.10693	NaN	NaN	NaN	NaN	NaN	NaN
2.578	-37.655	98.55	139.3558	-0.075684	0.023926	-0.052246	-10.948	190.267	1434.6416	-1.496	1.2196	0.51641	-83.8158	23.1623	13.713	-0.048828	0.054199	-0.098145	NaN	NaN	NaN	NaN	NaN	NaN
2.58	-24.547	87.4929	121.187	-0.070313	0.021973	-0.048096	-24.69	219.73	1400.453	-1.4585	1.1938	0.49609	-68.561	39.9497	-6.724	-0.073242	0.0625	-0.086426	NaN	NaN	NaN	NaN	NaN	NaN
2.582	-26.688	60.3439	109.146	-0.061035	0.011719	-0.050293	-41.178	199.733	1363.5511	-1.4334	1.1627	0.47549	-73.849	-10.1292	23.0956	-0.088623	0.057374	-0.07666	NaN	NaN	NaN	NaN	NaN	NaN
2.584	-33.82	45.328	104.035	-0.056152	0.012695	-0.04541	9.842	244.498	1333.4284	-1.4082	1.1387	0.45557	-37.85	20.2896	25.5197	-0.10645	0.05127	-0.073242	NaN	NaN	NaN	NaN	NaN	NaN
2.586	-34.298	46.399	81.3495	-0.04834	0.013672	-0.039063	-10.958	242.639	1255.833	-1.3747	1.1065	0.43437	-29.806	26.71029	46.0767	-0.13965	0.038574	-0.062012	NaN	NaN	NaN	NaN	NaN	NaN
2.588	-26.665	52.5755	82.2055	-0.033691	0.019043	-0.038574	-9.501	208.0683	1229.551	-1.3451	1.0744	0.41162	-5.081	64.731	30.5666	-0.15723	0.030273	-0.058105	NaN	NaN	NaN	NaN	NaN	NaN
2.59	-22.709	65.6666	79.383	-0.03003	0.01001	-0.049072	9.642	219.548	1197.247	-1.3107	1.0416	0.39248	-3.60100000000001	23.2628	26.053	-0.2041	0.020508	-0.045898	NaN	NaN	NaN	NaN	NaN	NaN
2.592	-35.672	57.165	68.695	-0.020996	0.0019531	-0.055176	-12.439	178.621	1166.78	-1.2704	1.007	0.37529	-13.428	7.273	10.140324	-0.26025	0.01416	-0.031738	NaN	NaN	NaN	NaN	NaN	NaN
2.594	-20.113	52.9048	52.47945	-0.0048828	-0.019043	-0.053223	19.677	183.303	1170.6736	-1.2383	0.97266	0.35498	-16.87	0.9008	-0.22202	-0.28271	0.013184	-0.022461	NaN	NaN	NaN	NaN	NaN	NaN
2.596	-31.779	43.08139	42.5838	0.0039063	-0.027344	-0.05542	8.487	203.634	1160.4998	-1.2018	0.93955	0.33125	25.32	39.969	-11.5931	-0.32764	0.027832	-0.0063477	NaN	NaN	NaN	NaN	NaN	NaN
2.598	-9.754	37.5678	46.069459	0.0073242	-0.029785	-0.058105	-33.176	180.8891	1133.777	-1.1729	0.90283	0.31289	20.728	41.631	3.129	-0.35425	0.032959	0.003418	NaN	NaN	NaN	NaN	NaN	NaN
2.6	-12.557	10.6702	48.3131	0.010742	-0.029297	-0.060059	17.57	190.6759	1111.342	-1.1413	0.87198	0.29883	-6.508	33.5323	14.243	-0.37012	0.041504	0.0078125	NaN	NaN	NaN	NaN	NaN	NaN
2.602	-14.699	15.3391	20.0014	0.013672	-0.028809	-0.061035	-25.344	190.1289	1051.352	-1.1117	0.83799	0.27744	-43.422	12.2275	0.5808	-0.37256	0.055664	0.018555	NaN	NaN	NaN	NaN	NaN	NaN
2.604	-27.811	9.2599	10.643	0.01416	-0.030762	-0.052734	-16.251	184.756	1015.039	-1.0918	0.80664	0.2583	-32.701	-0.088000000000001	-7.89844	-0.36475	0.055176	0.023438	NaN	NaN	NaN	NaN	NaN	NaN
2.606	-18.895	30.5555	15.3064	0.0075685	-0.036866	-0.052002	34.433	223.6475	971.29	-1.0638	0.77783	0.24434	-36.921	-6.3842	-13.2886	-0.34326	0.058105	0.020508	NaN	NaN	NaN	NaN	NaN	NaN
2.608	-13.99	31.17721	17.4238	-0.003418	-0.039063	-0.034668	-5.055	212.9827	906.5893	-1.0382	0.7497	0.22881	-46.242	-0.483999999999998	19.8724	-0.31519	0.048584	0.016602	NaN	NaN	NaN	NaN	NaN	NaN
2.61	-47.567	39.7328	18.375115	-0.016602	-0.046387	-0.043457	28.345	230.546	882.85272	-1.0132	0.72002	0.21943	-44.661	41.854	23.347	-0.28516	0.036621	0.0053711	NaN	NaN	NaN	NaN	NaN	NaN
2.612	-24.927	32.40275	32.8631	-0.017578	-0.050781	-0.040039	32.172	254.21	822.363	-0.98945	0.69219	0.20703	-44.46	59.283	14.5785	-0.22852	0.0092773	-0.016602	NaN	NaN	NaN	NaN	NaN	NaN
2.614	-39.598	31.4129	41.31133	-0.03418	-0.050781	-0.041504	25.111	231.792	785.3871	-0.96533	0.67041	0.19043	-46.903	103.47	1.552	-0.19775	-0.0019531	-0.021973	NaN	NaN	NaN	NaN	NaN	NaN
2.616	-27.941	26.0711	25.6149	-0.042968	-0.048828	-0.035157	34.248	238.342	737.89243	-0.9376	0.64658	0.17842	-48.622	65.0077	9.172	-0.12695	-0.026855	-0.043457	NaN	NaN	NaN	NaN	NaN	NaN
2.618	-44.265	21.3709	14.4426	-0.053223	-0.04248	-0.026855	-31.826	221.561	670.756	-0.90976	0.62148	0.16572	-62.391	62.630396	12.1325	-0.075928	-0.041993	-0.062256	NaN	NaN	NaN	NaN	NaN	NaN
2.62	-45.034	10.9431	4.9498	-0.072754	-0.043945	-0.019043	-17.748	192.4887	635.249	-0.88125	0.59765	0.14892	-51.239	52.159	22.3948	-0.025879	-0.057617	-0.080078	NaN	NaN	NaN	NaN	NaN	NaN
2.622	-31.763	11.2641	-3.608	-0.076172	-0.040039	-0.019531	3.467	206.371	599.623	-0.8541	0.57285	0.13574	-68.619	86.285	7.681	0.045898	-0.075195	-0.10059	NaN	NaN	NaN	NaN	NaN	NaN
2.624	-48.21	21.1773	-22.1818	-0.084473	-0.038086	-0.0078125	-28.978	201.775	566.6259	-0.82178	0.54736	0.12012	-69.3371	56.8546	19.6029	0.081055	-0.084473	-0.10791	NaN	NaN	NaN	NaN	NaN	NaN
2.626	-51.151	34.9304	9.529	-0.09668	-0.031738	-0.0036621	22.328	189.925	555.506	-0.78408	0.51562	0.1084	-87.729	45.493	34.59	0.14648	-0.10254	-0.12939	NaN	NaN	NaN	NaN	NaN	NaN
2.628	-40.095	25.3494	18.0435	-0.1001	-0.032715	-0.0024414	9.16	187.751	512.791572	-0.75039	0.48516	0.094531	-97.9588	-0.395	53.136	0.19189	-0.11157	-0.14673	NaN	NaN	NaN	NaN	NaN	NaN
2.63	-25.817	24.82405	23.24024	-0.097168	-0.032227	0.00048828	-31.972	151.918	481.778	-0.71992	0.45937	0.078516	-77.75	32.0218	23.4316	0.23633	-0.125	-0.15625	NaN	NaN	NaN	NaN	NaN	NaN
2.632	-43.924	31.3708	17.77668	-0.10107	-0.032715	0.0024414	27.39	134.717	444.1617	-0.68291	0.43525	0.070996	-50.737	18.108	38.2087	0.28662	-0.14404	-0.18311	NaN	NaN	NaN	NaN	NaN	NaN
2.634	-42.342	31.6484	14.4011	-0.10107	-0.033203	0.003418	-24.155	122.403	380.1055	-0.64795	0.41162	0.055664	-51.53	52.9966	46.356	0.31494	-0.15088	-0.18945	NaN	NaN	NaN	NaN	NaN	NaN
2.636	-13.067	19.3161	20.23591	-0.096435	-0.033935	0.0041504	-5.613	93.416	356.652	-0.61201	0.38428	0.047754	-33.116	10.1377	73.7621	0.34766	-0.16553	-0.20605	NaN	NaN	NaN	NaN	NaN	NaN
2.638	-28.538	24.4061	11.1296	-0.091797	-0.039551	0.0039063	22.541	112.421	320.6782	-0.57744	0.3624	0.0375	-9.93299999999999	16.4183	34.8569	0.35498	-0.17993	-0.2085	NaN	NaN	NaN	NaN	NaN	NaN
2.64	-17.587	26.006	2.247	-0.083984	-0.043945	0.0053711	-46.028	116.833	281.256	-0.5419	0.34248	0.023828	-10.083	-22.8982	40.668	0.34814	-0.19434	-0.20947	NaN	NaN	NaN	NaN	NaN	NaN
2.642	-22.958	25.6748	2.442	-0.081055	-0.040039	0.0053711	-8.84200000000001	113.0102	263.5464	-0.50313	0.32178	0.013867	-17.112	-7.999	30.982	0.31641	-0.2085	-0.19922	NaN	NaN	NaN	NaN	NaN	NaN
2.644	-4.194	29.888	19.4175	-0.071289	-0.042969	0.0019531	-32.66	134.503	217.1874	-0.46436	0.29834	0.0029297	-13.725	-9.71745	47.417	0.29883	-0.21191	-0.19531	NaN	NaN	NaN	NaN	NaN	NaN
2.646	-22.588	31.1022	5.0552	-0.064209	-0.043701	-0.001709	-55.566	130.2987	230.879	-0.42529	0.27842	-0.0056641	-13.276	47.558	25.2099	0.24463	-0.21826	-0.17725	NaN	NaN	NaN	NaN	NaN	NaN
2.648	-5.387	36.569	11.4513	-0.056152	-0.047852	-0.003418	-6.65599999999999	146.184	198.8934	-0.38564	0.25459	-0.014941	-8.40300000000001	45.572	19.7569	0.20264	-0.20996	-0.16748	NaN	NaN	NaN	NaN	NaN	NaN
2.65	-0.764000000000003	33.9487	17.4305	-0.039551	-0.053223	-0.012695	-53.317	143.579	156.132	-0.34775	0.23506	-0.022364	-12.098	65.545	5.278	0.16113	-0.20215	-0.14453	NaN	NaN	NaN	NaN	NaN	NaN
2.652	-17.051	34.447	13.2678	-0.032715	-0.054199	-0.011719	-40.928	110.2044	128.214	-0.31142	0.21319	-0.032031	-24.233	9.424	21.516	0.10986	-0.1748	-0.12061	NaN	NaN	NaN	NaN	NaN	NaN
2.654	6.503	24.7737	8.4241	-0.01709	-0.059082	-0.021484	22.323	88.43	100.083	-0.27832	0.19385	-0.037109	0.858000000000004	16.8233	6.9048	0.087891	-0.16016	-0.10986	NaN	NaN	NaN	NaN	NaN	NaN
2.656	-18.287	13.1779	8.098	-0.0058594	-0.058838	-0.023194	-35.532	80.165	84.8734	-0.24609	0.17305	-0.04209	-25.939	1.426	4.1394	0.062012	-0.11914	-0.09375	NaN	NaN	NaN	NaN	NaN	NaN
2.658	-17.295	22.2823	17.19005	0.012207	-0.062012	-0.032715	-9.147	62.23	98.724	-0.21543	0.15361	-0.049121	-10.536	25.8843	-9.2822	0.052002	-0.094729	-0.082032	NaN	NaN	NaN	NaN	NaN	NaN
2.66	-29.95	32.3152	16.4901	0.027832	-0.062012	-0.041016	-20.457	78.6917	68.494	-0.18613	0.13487	-0.052637	-35.564	2.9097	-7.02968	0.045898	-0.072266	-0.076172	NaN	NaN	NaN	NaN	NaN	NaN
2.662	-21.428	43.391	4.5139	0.035645	-0.066895	-0.034668	-58.762	67.079	69.36432	-0.15849	0.11807	-0.060937	-31.819	17.001	-12.3608	0.037598	-0.04834	-0.073242	NaN	NaN	NaN	NaN	NaN	NaN
2.664	-39.669	51.986	-1.1444	0.056641	-0.069824	-0.046387	-16.448	59.3858	73.2374	-0.13477	0.094727	-0.05957	-44.097	1.884	-13.7537	0.036133	-0.036621	-0.068848	NaN	NaN	NaN	NaN	NaN	NaN
2.666	-21.638	51.328	10.45714	0.067383	-0.070312	-0.047851	-32.258	55.1466	45.932	-0.11319	0.078125	-0.060059	-40.909	27.032	-29.2472	0.032715	-0.02832	-0.065918	NaN	NaN	NaN	NaN	NaN	NaN
2.668	-23.042	30.6314	19.8555	0.07666	-0.071289	-0.05127	7.20399999999999	21.334	53.74	-0.091016	0.062304	-0.061231	-67.698	36.131	20.138	0.033447	-0.02539	-0.066651	NaN	NaN	NaN	NaN	NaN	NaN
2.67	-46.914	32.3135	0.836	0.091797	-0.071289	-0.053711	-21.488	16.5712	29.3024	-0.075781	0.048633	-0.060059	-48.905	60.2195	21.6578	0.033203	-0.022461	-0.068848	NaN	NaN	NaN	NaN	NaN	NaN
2.672	-46.401	26.3303	11.88146	0.096191	-0.067871	-0.059082	-76.924	27.95237	13.199	-0.059863	0.032324	-0.059473	-67.5	49.676	28.9021	0.02832	-0.029297	-0.076172	NaN	NaN	NaN	NaN	NaN	NaN
2.674	-34.407	18.9359	17.564	0.10205	-0.070313	-0.060059	-23.824	13.71665	28.743	-0.04541	0.01416	-0.060547	-74.438	59.63	14.3014	0.02832	-0.023926	-0.071777	NaN	NaN	NaN	NaN	NaN	NaN
2.676	-39.901	27.02479	15.4734	0.10669	-0.063476	-0.0625	-37.113	51.434	-4.792	-0.037695	0.0021484	-0.05957	-101.3496	38.7492	8.7333	0.022949	-0.01416	-0.074219	NaN	NaN	NaN	NaN	NaN	NaN
2.678	-50.748	41.8645	1.9788	0.10498	-0.053223	-0.062988	-46.393	51.5743	7.8774	-0.031445	-0.01377	-0.061621	-78.319	41.1818	19.3692	0.024902	-0.0080567	-0.073243	NaN	NaN	NaN	NaN	NaN	NaN
2.68	-38.581	50.0987	11.2261	0.10303	-0.049316	-0.068359	-1.246	48.897	16.3756	-0.02168	-0.025098	-0.06045	-76.595	42.012	26.7502	0.02832	-0.003418	-0.07666	NaN	NaN	NaN	NaN	NaN	NaN
2.682	-26.689	36.332	17.25773	0.099121	-0.043457	-0.060547	-49.747	74.707	1.905	-0.010742	-0.037793	-0.063965	-58.128	63.2504	13.8042	0.036133	0.0048828	-0.085449	NaN	NaN	NaN	NaN	NaN	NaN
2.684	-53.701	33.6186	14.9648	0.089355	-0.033691	-0.063965	-29.256	57.0699	23.7862	-0.010742	-0.052246	-0.067871	-62.468	73.298	11.055	0.042969	0.0073242	-0.086426	NaN	NaN	NaN	NaN	NaN	NaN
2.686	-38.477	35.255	13.7786	0.079589	-0.021728	-0.062255	-12.185	50.836	-0.625	-0.0080078	-0.056543	-0.061133	-24.739	68.388	12.03	0.052734	0.0092773	-0.098145	NaN	NaN	NaN	NaN	NaN	NaN
2.688	-39.879	27.9267	13.80838	0.068848	-0.01416	-0.056641	-67.153	28.1431	7.12	-0.008789	-0.066113	-0.059863	-34.13	49.5197	29.2168	0.053711	0.010986	-0.10206	NaN	NaN	NaN	NaN	NaN	NaN
2.69	-17.301	31.2394	32.3767	0.058594	0.00097656	-0.056641	-15.151	-1.71028	17.3157	-0.016992	-0.074707	-0.057129	-25.699	39.263	53.809	0.046875	0.012207	-0.10303	NaN	NaN	NaN	NaN	NaN	NaN
2.692	-26.501	19.344	34.4091	0.050293	0.0053711	-0.055664	-28.253	15.0225	18.8537	-0.024414	-0.077832	-0.055469	-41.722	35.805	58.088	0.022461	0.019531	-0.10205	NaN	NaN	NaN	NaN	NaN	NaN
2.694	-10.152	-7.775	59.506969	0.037598	0.025391	-0.054688	-57.27	24.7201	27.1416	-0.029297	-0.086914	-0.055664	-13.496	30.8589	68.545	0.0087891	0.024902	-0.10449	NaN	NaN	NaN	NaN	NaN	NaN
2.696	-5.995	-13.833	78.3396	0.03003	0.037109	-0.055176	-22.256	20.8014	41.9967	-0.0375	-0.092481	-0.055078	-20.289	16.4064	60.758	-0.024902	0.038574	-0.097168	NaN	NaN	NaN	NaN	NaN	NaN
2.698	-17.211	-13.891	109.529	0.021973	0.050781	-0.055176	-55.133	51.94	25.8617	-0.040722	-0.096386	-0.050391	-28.985	5.6631	55.803	-0.053466	0.052001	-0.092529	NaN	NaN	NaN	NaN	NaN	NaN
2.7	-7.75	-22.358	132.584	0.011719	0.061035	-0.065918	-32.207	24.633	46.454	-0.044629	-0.10225	-0.049219	-23.508	14.7108	21.4304	-0.079102	0.068359	-0.091309	NaN	NaN	NaN	NaN	NaN	NaN
2.702	-7.809	-48.835	173.597	0.01123	0.064941	-0.072266	-24.508	14.3339	14.418	-0.043457	-0.10352	-0.044629	-9.797	9.034	36.4895	-0.094727	0.091797	-0.086914	NaN	NaN	NaN	NaN	NaN	NaN
2.704	15.83	-48.547	219.785	0	0.070801	-0.084473	-56.667	22.2909	-13.9469	-0.035156	-0.10205	-0.041504	-9.217	-5.02169	55.718	-0.097168	0.10596	-0.086426	NaN	NaN	NaN	NaN	NaN	NaN
2.706	11.29	-39.964	281.336	-0.018799	0.087647	-0.084717	-19.139	6.8191	22.5697	-0.025391	-0.10107	-0.046289	-13.21	-51.251	84.79	-0.088867	0.13086	-0.089355	NaN	NaN	NaN	NaN	NaN	NaN
2.708	6.301	-17.6918	329.789	-0.047852	0.095215	-0.078125	-23.004	43.411	8.061	-0.0078123	-0.10117	-0.048535	-1.473	-55.1915	101.763	-0.085937	0.14991	-0.097168	NaN	NaN	NaN	NaN	NaN	NaN
2.71	-45.014	22.6568	409.484	-0.1123	0.11328	-0.070313	-36.843	49.9745	35.561	0.014453	-0.1039	-0.062207	27.256	-78.48756	154.384	-0.075195	0.16455	-0.10156	NaN	NaN	NaN	NaN	NaN	NaN
2.712	-54.48	64.7848	493.484	-0.14648	0.12207	-0.066406	-2.17	44.74	39.21802	0.037891	-0.10479	-0.063086	-25.015	-102.061	209.1978	-0.071289	0.17578	-0.11035	NaN	NaN	NaN	NaN	NaN	NaN
2.714	-62.883	94.573	574.664	-0.22363	0.13574	-0.054199	-31.525	62.006	16.863	0.063477	-0.11182	-0.06543	-28.351	-132.164	288.1346	-0.073242	0.18604	-0.12061	NaN	NaN	NaN	NaN	NaN	NaN
2.716	-72.956	114.099	680.575	-0.28369	0.15015	-0.046875	-32.905	39.8241	32.8689	0.087695	-0.11905	-0.076758	-33.315	-98.02	356.902	-0.099121	0.20361	-0.12793	NaN	NaN	NaN	NaN	NaN	NaN
2.718	-91.067	112.178	786.62	-0.34619	0.17334	-0.036621	-20.624	39.712	20.09486	0.11387	-0.12295	-0.086817	-22.385	-76.378	502.105	-0.14624	0.22021	-0.12427	NaN	NaN	NaN	NaN	NaN	NaN
2.72	-87.78	119.833	882.28	-0.43945	0.20459	-0.024414	-69.229	36.4439	13.3526	0.13652	-0.13076	-0.091504	-49.118	-20.01	658.205	-0.21289	0.24023	-0.11279	NaN	NaN	NaN	NaN	NaN	NaN
2.722	-84.402	105.208	918.6	-0.49219	0.22412	-0.01123	-12.564	-3.5404	16.2465	0.15694	-0.13633	-0.10088	-71.8177	-31.2925	893.752	-0.32178	0.2666	-0.10352	NaN	NaN	NaN	NaN	NaN	NaN
2.724	-54.708	87.783	955.633	-0.61865	0.27051	0.0048828	-39.776	7.5504	-14.9537	0.17822	-0.14111	-0.10986	-97.57	5.869	1050.763	-0.39404	0.28271	-0.092285	NaN	NaN	NaN	NaN	NaN	NaN
2.726	-35.779	61.573	985.31	-0.72216	0.30493	0.027343	-35.849	-10.532	2.9399	0.19404	-0.14824	-0.11436	-103.732	1.27	1266.275	-0.55078	0.3291	-0.063477	NaN	NaN	NaN	NaN	NaN	NaN
2.728	-20.915	21.60562	984.93	-0.83545	0.3501	0.055664	15.188	-12.5834	21.0781	0.20566	-0.14629	-0.11865	-97.501	45.9428	1452.981	-0.68774	0.37231	-0.050293	NaN	NaN	NaN	NaN	NaN	NaN
2.73	-55.201	7.30358	941.92	-1.0117	0.41113	0.11621	-59.153	40.631	22.149	0.20722	-0.14785	-0.11943	-139.691	27.7718	1627.088	-0.84131	0.42041	-0.033691	NaN	NaN	NaN	NaN	NaN	NaN
2.732	-54.034	-0.5896	928.63	-1.105	0.45068	0.1416	-36.219	46.174	37.1501	0.20508	-0.14414	-0.11905	-119.813	34.4796	1698.769	-1.0898	0.50586	0.0078125	NaN	NaN	NaN	NaN	NaN	NaN
2.734	-64.277	-0.548000000000002	949.7	-1.2988	0.53906	0.20752	-27.437	26.2019	32.5692	0.19482	-0.14063	-0.10303	-125.171	-33.361	1697.722	-1.2358	0.56201	0.039551	NaN	NaN	NaN	NaN	NaN	NaN
2.736	-49.498	-3.068	970.41	-1.48	0.62939	0.28223	-64.387	43.3816	24.7067	0.17334	-0.13779	-0.096973	-120.679	-60.941	1595.477	-1.5645	0.69629	0.13379	NaN	NaN	NaN	NaN	NaN	NaN
2.738	-78.107	-18.969	967.46	-1.5562	0.67627	0.30273	-8.975	13.4441	30.613	0.14951	-0.12539	-0.085449	-129.563	-125.7396	1536.561	-1.9199	0.85938	0.27588	NaN	NaN	NaN	NaN	NaN	NaN
2.74	-70.042	-30.764	965.102	-1.6719	0.74805	0.30811	-28.031	31.542	-14.8512	0.121	-0.11094	-0.072169	-120.86	-156.669	1412.023	-2.0894	0.95557	0.35352	NaN	NaN	NaN	NaN	NaN	NaN
2.742	-80.563	-30.1244	968.421	-1.6836	0.78516	0.29809	-52.546	38.4923	-1.6998	0.088965	-0.095998	-0.058985	-136.635	-222.749	1321.616	-2.3608	1.145	0.48242	NaN	NaN	NaN	NaN	NaN	NaN
2.744	-54.729	-13.8372	1005.697	-1.6406	0.8125	0.28662	-34.33	32.6196	7.284	0.063477	-0.077637	-0.046387	-142.372	-237.587	1244.677	-2.4324	1.2801	0.58887	NaN	NaN	NaN	NaN	NaN	NaN
2.746	-14.228	-7.654	1030.016	-1.5313	0.84766	0.2876	-70.887	59.7654	-4.937	0.041503	-0.051269	-0.038769	-165.142	-269.819	1215.103	-2.4238	1.3896	0.70361	NaN	NaN	NaN	NaN	NaN	NaN
2.748	11.35	-23.011	1046.14	-1.4839	0.86377	0.25928	-33.238	27.667	35.976	0.025781	-0.030272	-0.031348	-91.49	-280.247	1209.495	-2.3921	1.4614	0.70898	NaN	NaN	NaN	NaN	NaN	NaN
2.75	38.692	-61.265	1064.626	-1.3789	0.86914	0.16797	-5.389	26.0248	10.118	0.021094	-0.012304	-0.027442	-80.857	-261.89	1264.26	-2.3691	1.4541	0.64404	NaN	NaN	NaN	NaN	NaN	NaN
2.752	57.406	-82.901	1068.734	-1.2487	0.86059	0.10058	-50.829	44.6942	15.4591	0.017577	0.0056647	-0.025293	-37.154	-208.692	1325.9015	-2.1484	1.3945	0.47803	NaN	NaN	NaN	NaN	NaN	NaN
2.754	86.795	-108.354	1101.604	-1.1074	0.83594	0.045898	-9.181	21.0728	43.6792	0.012695	0.020508	-0.027344	-29.32	-145.3	1404.167	-1.821	1.3664	0.3418	NaN	NaN	NaN	NaN	NaN	NaN
2.756	69.547	-128.511	1160.811	-0.96875	0.80762	-0.0078125	-45.32	40.16	16.42	0.013085	0.03281	-0.03164	-10.7114	-123.94	1503.293	-1.4551	1.3496	0.20459	NaN	NaN	NaN	NaN	NaN	NaN
2.758	70.983	-139.1629	1211.064	-0.92822	0.79736	-0.034668	-53.99	26.348	10.69234	0.019725	0.046384	-0.044139	-9.8921	-95.39	1578.903	-1.0684	1.3184	0.037109	NaN	NaN	NaN	NaN	NaN	NaN
2.76	35.847	-167.75	1246.779	-0.89648	0.81055	-0.056641	-9.735	3.6767	13.0999	0.030659	0.053027	-0.049218	12.835	-134.523	1619.482	-0.95361	1.3115	-0.040039	NaN	NaN	NaN	NaN	NaN	NaN
2.762	4.307	-190.122	1287.821	-0.90992	0.84009	-0.063476	-45.764	23.3841	11.9679	0.043845	0.06162	-0.055365	-6.157	-188.178	1649.863	-0.82227	1.3164	-0.15576	NaN	NaN	NaN	NaN	NaN	NaN
2.764	-21.97	-198.946	1348.674	-0.9375	0.87695	-0.063477	-27.991	16.0638	42.5247	0.054199	0.070313	-0.069336	-13.434	-321.096	1679.226	-0.75733	1.3233	-0.1914	NaN	NaN	NaN	NaN	NaN	NaN
2.766	-8.777	-179.966	1417.525	-0.98584	0.92236	-0.062988	-23.804	41.588	25.687	0.062503	0.0793	-0.076763	-26.533	-419.882	1721.3237	-0.71094	1.3223	-0.21582	NaN	NaN	NaN	NaN	NaN	NaN
2.768	13.507	-145.618	1463.835	-1.0098	0.94727	-0.057617	-29.071	64.406	3.198	0.069248	0.089847	-0.087793	53.71	-529.66	1792.2533	-0.71436	1.2974	-0.23193	NaN	NaN	NaN	NaN	NaN	NaN
2.77	20.696	-111.071	1483.003	-1.0474	0.99658	-0.05127	5.857	31.964	16.1987	0.079404	0.098454	-0.0921	92.7318	-491.96	1788.334	-0.75	1.2793	-0.23242	NaN	NaN	NaN	NaN	NaN	NaN
2.772	21.615	-83.061	1537.755	-1.0713	1.0235	-0.044189	-26.559	38.233	10.3503	0.08702	0.10791	-0.098053	136.573	-472.1	1828.516	-0.9248	1.2969	-0.16602	NaN	NaN	NaN	NaN	NaN	NaN
2.774	43.141	-73.9	1582.161	-1.1055	1.041	-0.033691	-47.611	32.8631	14.1252	0.093262	0.11475	-0.10205	119.819	-354.112	1843.851	-1.1321	1.3674	-0.096191	NaN	NaN	NaN	NaN	NaN	NaN
2.776	61.073	-69.995	1613.221	-1.166	1.0566	-0.022461	-5.96599999999999	21.8385	15.1714	0.099691	0.12312	-0.10937	51.496	-331.744	1906.532	-1.3472	1.4673	-0.023438	NaN	NaN	NaN	NaN	NaN	NaN
2.778	43.599	-58.514	1634.438	-1.207	1.0625	-0.01123	-45.981	75.18	-2.3945	0.11228	0.12541	-0.11144	4.371	-219.673	1981.2311	-1.5898	1.5625	0.061035	NaN	NaN	NaN	NaN	NaN	NaN
2.78	13.25	-44.518	1654.734	-1.3086	1.0664	0.016113	-47.941	46.359	35.532	0.11931	0.13002	-0.11218	-22.661	-195.74	2063.834	-1.686	1.5981	0.10059	NaN	NaN	NaN	NaN	NaN	NaN
2.782	-14.639	-37.285	1690.157	-1.3933	1.0852	0.031982	-13.524	39.918	34.9106	0.12627	0.13232	-0.11552	8.639	-100.43	2078.951	-1.8433	1.6646	0.13867	NaN	NaN	NaN	NaN	NaN	NaN
2.784	-25.411	-32.286	1697.032	-1.4805	1.1035	0.05127	-56.565	34.59006	22.5831	0.125	0.12744	-0.11865	14.703	-106.96	2032.673	-1.9263	1.7075	0.14429	NaN	NaN	NaN	NaN	NaN	NaN
2.786	-50.552	-36.7928	1728.898	-1.5933	1.1372	0.070801	-11.273	-9.3708	51.9539	0.12406	0.12357	-0.11695	-30.336	-54.95	1953.1581	-1.9766	1.7441	0.14063	NaN	NaN	NaN	NaN	NaN	NaN
2.788	-24.826	-42.8389	1767.792	-1.6577	1.1665	0.083496	-35.558	-21.426	58.037	0.12118	0.11535	-0.10581	-48.1608	-101.811	1886.757	-1.9937	1.7661	0.12891	NaN	NaN	NaN	NaN	NaN	NaN
2.79	-27.745	-34.5379	1794.922	-1.7788	1.2251	0.10596	-68.409	-41.371	94.22219	0.10112	0.10787	-0.097683	-40.411	-103.345	1892.238	-1.9902	1.7715	0.11768	NaN	NaN	NaN	NaN	NaN	NaN
2.792	-33.292	-18.066	1808.306	-1.8652	1.2662	0.11768	-15.367	-59.8163	102.5504	0.086287	0.09744	-0.089105	-12.935	-196.183	1961.978	-1.9746	1.7852	0.092773	NaN	NaN	NaN	NaN	NaN	NaN
2.794	-22.257	-14.97	1824.846	-1.9448	1.311	0.13281	-28.77	-24.229	101.959	0.067871	0.092773	-0.082031	-0.152999999999992	-204.789	2032.169	-1.9673	1.7974	0.066894	NaN	NaN	NaN	NaN	NaN	NaN
2.796	36.552	-29.05	1850.42	-2.0386	1.356	0.14795	-26.927	-61.0491	183.997	0.055241	0.084856	-0.075217	-15.631	-223.877	2091.119191	-1.9663	1.8188	0.047852	NaN	NaN	NaN	NaN	NaN	NaN
2.798	60.749	-39.697	1863.868	-2.0762	1.373	0.14893	-16.608	-52.197	242.362	0.04711	0.077826	-0.071572	-36.46	-162.547	2136	-1.9819	1.856	0.034668	NaN	NaN	NaN	NaN	NaN	NaN
2.8	57.874	-48.816	1847.784	-2.1206	1.3989	0.146	-51.4324	-16.8301	312.982	0.040209	0.077714	-0.067935	-89.408	-150.315	2175.934	-1.9937	1.8657	0.029297	NaN	NaN	NaN	NaN	NaN	NaN
2.802	20.076	-50.624	1839.984	-2.1358	1.4048	0.14014	20.926	-0.697999999999999	429.8617	0.03694	0.080839	-0.073721	-98.8488	-105.899	2204.501	-2.0386	1.8931	0.036133	NaN	NaN	NaN	NaN	NaN	NaN
2.804	16.351	-26.949	1868.77	-2.1323	1.4116	0.13135	-12.418	54.9061	530.66	0.03125	0.088379	-0.07959	-104.604	-103.6672	2198.801	-2.0642	1.8987	0.043213	NaN	NaN	NaN	NaN	NaN	NaN
2.806	5.149	3.816	1859.531	-2.1113	1.4141	0.12207	-41.141	70.328	701.1996	0.0251	0.097868	-0.090153	-58.668	-51.121	2179.655	-2.0859	1.8945	0.049316	NaN	NaN	NaN	NaN	NaN	NaN
2.808	12.855	22.4037	1862.461	-2.0991	1.4126	0.11035	-12.632	75.015	861.359	0.0051109	0.11578	-0.089252	-41.987	-33.105	2144.3763	-2.0898	1.8633	0.057129	NaN	NaN	NaN	NaN	NaN	NaN
2.81	7.39999999999999	27.95	1851.152	-2.0605	1.4131	0.087891	-34.962	109.8445	976.26	-0.043758	0.14047	-0.086656	-60.652	22.3742	2103.1938	-2.084	1.8398	0.053223	NaN	NaN	NaN	NaN	NaN	NaN
2.812	39.845	29.4405	1858.315	-2.031	1.407	0.07251	-36.061	92.6147	1183.7072	-0.11891	0.16108	-0.079077	-15.368	37.391	2027.894	-2.0522	1.7817	0.050293	NaN	NaN	NaN	NaN	NaN	NaN
2.814	31.771	34.7352	1859.137	-1.9922	1.3906	0.054199	-36.982	97.121	1330.2312	-0.21191	0.1875	-0.0625	24.595	54.22	1950.917	-2.0278	1.7309	0.047851	NaN	NaN	NaN	NaN	NaN	NaN
2.816	28.523	30.852	1857.312	-1.9512	1.3691	0.040039	-75.507	81.006	1436.175	-0.31047	0.2114	-0.045034	9.535	39.8313	1925.692	-2.0112	1.6743	0.04541	NaN	NaN	NaN	NaN	NaN	NaN
2.818	49.784	31.1519	1858.019	-1.9375	1.3555	0.035156	-45.881	2.827	1498.636	-0.40707	0.23928	-0.031774	38.402	35.998	1919.206	-1.9883	1.6094	0.043457	NaN	NaN	NaN	NaN	NaN	NaN
2.82	80.18	25.77	1865.508	-1.9219	1.3438	0.028809	-86.552	-16.704	1456.864	-0.50572	0.27486	-0.01525	31.148	24.669	1935.954	-1.9785	1.5723	0.044922	NaN	NaN	NaN	NaN	NaN	NaN
2.822	61.424	6.773	1850.282	-1.9141	1.3335	0.030029	-88.6654	-67.605	1425.044	-0.61837	0.31187	0.00093687	28.706	44.6252	1932.6359	-1.9526	1.5181	0.045898	NaN	NaN	NaN	NaN	NaN	NaN
2.824	12.301	3.843	1853.786	-1.9077	1.3188	0.032715	-65.548	-114.512	1406.232	-0.75195	0.35938	0.029785	7.88	53.553	1910.0738	-1.9316	1.4917	0.043945	NaN	NaN	NaN	NaN	NaN	NaN
2.826	27.39	10.076	1867.353	-1.9038	1.2974	0.032227	-133.96	-100.886	1340.535	-0.9208	0.40935	0.076458	9.601	52.81	1893.989	-1.9063	1.4648	0.043945	NaN	NaN	NaN	NaN	NaN	NaN
2.828	30.761	25.9748	1865.947	-1.9023	1.2773	0.037109	-119.921	-156.37	1314.095	-1.1419	0.47481	0.15681	7.739	37.5611	1895.75	-1.875	1.4531	0.052734	NaN	NaN	NaN	NaN	NaN	NaN
2.83	38.341	29.472	1837.767	-1.8911	1.2544	0.042969	-90.947	-175.573	1274.5486	-1.4134	0.54936	0.24414	3.915	27.6747	1889.9635	-1.8569	1.4438	0.058594	NaN	NaN	NaN	NaN	NaN	NaN
2.832	8.77	21.2145	1823.675	-1.8872	1.2319	0.048829	-116.196	-200.981	1252.044	-1.721	0.6545	0.34445	36.055	38.833	1898.787	-1.8159	1.4341	0.062012	NaN	NaN	NaN	NaN	NaN	NaN
2.834	20.749	15.722	1812.49	-1.8862	1.2153	0.054199	-43.935	-232.81	1274.424	-2.0313	0.78125	0.45605	22.101	15.062	1881.937	-1.781	1.4182	0.063965	NaN	NaN	NaN	NaN	NaN	NaN
2.836	31.025	16.4557	1804.083	-1.8828	1.1973	0.053711	-51.157	-173.082	1273.925	-2.3029	0.93271	0.55149	-3.349	-4.95	1843.079	-1.7515	1.4087	0.068848	NaN	NaN	NaN	NaN	NaN	NaN
2.838	4.196	34.968	1778.599	-1.8809	1.1875	0.056152	-89.3801	-124.851	1340.33	-2.4832	1.0707	0.57068	-11.675	-30.421	1794.801	-1.709	1.3926	0.07373	NaN	NaN	NaN	NaN	NaN	NaN
2.84	13.379	58.553	1763.456	-1.875	1.1699	0.064453	-50.052	-75.56	1384.491	-2.4715	1.1737	0.5654	-19.123	21.643	1746.11	-1.6914	1.3887	0.075684	NaN	NaN	NaN	NaN	NaN	NaN
2.842	38.36	66.347	1752.04	-1.866	1.1687	0.061279	-90.0547	-39.64	1410.648	-2.3013	1.2658	0.64277	0.787999999999997	85.468	1729.113	-1.6543	1.3711	0.080078	NaN	NaN	NaN	NaN	NaN	NaN
2.844	35.556	74.478	1721.816	-1.8574	1.1641	0.0625	-91.7096	-107.69	1478.3994	-2.207	1.3262	0.62939	-9.182	173.9749	1704.671	-1.6294	1.3618	0.087646	NaN	NaN	NaN	NaN	NaN	NaN
2.846	27.699	73.639	1702.989	-1.8433	1.1626	0.059082	-65.603	-146.736	1518.5499	-2.0964	1.3217	0.47564	-32.212	215.914	1679.531	-1.6074	1.3438	0.093262	NaN	NaN	NaN	NaN	NaN	NaN
2.848	46.449	71.535	1688.809	-1.8384	1.1626	0.060059	-78.526	-237.072	1564.9462	-1.8183	1.2787	0.32628	-73.402	262.241	1630.719	-1.5938	1.3203	0.10693	NaN	NaN	NaN	NaN	NaN	NaN
2.85	56.217	52.809	1693.68	-1.8203	1.166	0.056152	-29.513	-339.472	1622.831	-1.4584	1.2431	0.22665	-89.072	265.447	1631.9123	-1.5869	1.3086	0.11133	NaN	NaN	NaN	NaN	NaN	NaN
2.852	34.833	48.599	1658.717	-1.8008	1.1597	0.052247	5.10400000000001	-382.409	1605.815	-1.1727	1.2021	0.12866	-104.782	290.478	1597.5132	-1.5659	1.2856	0.12793	NaN	NaN	NaN	NaN	NaN	NaN
2.854	13.793	31.3358	1612.559	-1.7749	1.1567	0.046875	33.261	-448.79	1622.686	-1.0117	1.166	0.04541	-79.492	246.386	1583.341	-1.5474	1.2627	0.13599	NaN	NaN	NaN	NaN	NaN	NaN
2.856	36.515	29.017	1595.426	-1.7422	1.1504	0.043457	99.8215	-431.205	1645.469	-0.94931	1.163	-0.0093853	-63.079	247.687	1530.7225	-1.519	1.2388	0.13867	NaN	NaN	NaN	NaN	NaN	NaN
2.858	40.075	39.8281	1589.364	-1.7324	1.1484	0.04248	48.277	-361.569	1689.625	-0.90936	1.1738	-0.037704	-84.27	216.14	1459.723	-1.4629	1.2051	0.14404	NaN	NaN	NaN	NaN	NaN	NaN
2.86	32.895	65.23	1558.2489	-1.7007	1.1353	0.038086	30.653	-323.507	1810.188	-0.86952	1.173	-0.056838	-74.569	241.556	1389.253	-1.436	1.188	0.13916	NaN	NaN	NaN	NaN	NaN	NaN
2.862	15.003	76.498	1532.6931	-1.6872	1.1242	0.039063	40.921	-232.62	1853.295	-0.85684	1.1434	-0.063477	-41.737	212.295	1368.749	-1.3745	1.1509	0.13379	NaN	NaN	NaN	NaN	NaN	NaN
2.864	31.863	80.388	1526.0627	-1.6655	1.1138	0.041016	-22.516	-205.642	1876.674	-0.89063	1.1133	-0.061523	-59.834	233.542	1341.6468	-1.3318	1.1223	0.13281	NaN	NaN	NaN	NaN	NaN	NaN
2.866	34.022	76.854	1527.708	-1.6304	1.0972	0.04248	2.596	-170.271	1927.082	-1.0025	1.1269	-0.027248	-40.314	223.812	1353.336	-1.2866	1.0942	0.13184	NaN	NaN	NaN	NaN	NaN	NaN
2.868	39.784	89.022	1509.789	-1.6094	1.0889	0.043457	-7.011	-97.694	1894.597	-1.1753	1.1853	0.019332	-12.579	281.421	1294.580001	-1.2314	1.0547	0.13477	NaN	NaN	NaN	NaN	NaN	NaN
2.87	51.171	101.491	1470.492	-1.5645	1.0693	0.04541	-8.306	-100.22	1907.42	-1.3631	1.2575	0.067379	-62.312	285.4971	1277.457	-1.2051	1.0313	0.13428	NaN	NaN	NaN	NaN	NaN	NaN
2.872	43.849	138.72	1449.726	-1.5366	1.06	0.042968	10.415	-75.482	1901.7998	-1.52	1.3116	0.10674	-43.362	333.115	1211.719	-1.146	0.99658	0.13867	NaN	NaN	NaN	NaN	NaN	NaN
2.874	17.876	155.827	1422.4377	-1.5112	1.0513	0.043945	-7.681	-96.33	1876.271	-1.6367	1.3438	0.14502	-76.595	313.355	1175.755	-1.1033	0.96557	0.1394	NaN	NaN	NaN	NaN	NaN	NaN
2.876	-17.58	165.91	1395.93949	-1.4722	1.0317	0.04541	4.963	-165.0837	1914.234	-1.7211	1.3563	0.15518	-64.875	357.885	1093.452	-1.062	0.93604	0.14063	NaN	NaN	NaN	NaN	NaN	NaN
2.878	-32.296	159.602	1390.948	-1.4472	1.0147	0.051514	10.817	-162.896	1933.028	-1.7905	1.3564	0.15703	-68.822	346.881	1046.8071	-1.0054	0.896	0.14355	NaN	NaN	NaN	NaN	NaN	NaN
2.88	-24.479	164.283	1386.7	-1.4316	0.99805	0.056152	-45.134	-194.254	1962.042	-1.8468	1.3548	0.1543	-29.264	367.833	972.684	-0.9646	0.8645	0.15113	NaN	NaN	NaN	NaN	NaN	NaN
2.882	-28.255	171.161	1354.519	-1.4063	0.97461	0.063477	-56.402	-192.768	2005.919	-1.8924	1.3502	0.15879	-40.014	319.359	937.637	-0.92139	0.83643	0.15674	NaN	NaN	NaN	NaN	NaN	NaN
2.884	-36.522	167.68	1319.53	-1.3921	0.96143	0.075684	-89.745	-169.287	2016.877	-1.9331	1.3501	0.15332	-40.946	316.2691	831.176	-0.86133	0.79688	0.15527	NaN	NaN	NaN	NaN	NaN	NaN
2.886	-36.305	167.002	1304.349	-1.3667	0.94287	0.081055	-129.5463	-225.715	2038.564	-1.9649	1.3618	0.15186	-57.978	285.577	794.4224	-0.82666	0.77393	0.1543	NaN	NaN	NaN	NaN	NaN	NaN
2.888	-16.298	157.405	1285.598	-1.3405	0.92309	0.089112	-102.9281	-214.455	2058.711	-1.9975	1.3923	0.1459	-61.793	274.212	727.6586	-0.75635	0.73096	0.15967	NaN	NaN	NaN	NaN	NaN	NaN
2.89	-12.117	163.755	1267.0068	-1.3125	0.90625	0.093262	-108.675	-187.613	2053.001	-2.0288	1.436	0.14277	-90.753	212.625	716.866	-0.70166	0.69971	0.15967	NaN	NaN	NaN	NaN	NaN	NaN
2.892	-24.006	164.96	1255.0197	-1.2793	0.88379	0.10449	-99.93025	-165.004	2047.362	-2.0658	1.4812	0.14736	-67.332	220.703	671.628	-0.64307	0.66846	0.1582	NaN	NaN	NaN	NaN	NaN	NaN
2.894	-16.926	180.607	1227.019	-1.2617	0.87695	0.10205	-69.722	-64.432	1993.387	-2.1108	1.522	0.15283	-97.731	204.064	646.688	-0.56299	0.62061	0.1582	NaN	NaN	NaN	NaN	NaN	NaN
2.896	-27.348	188.347	1210.422	-1.228	0.85889	0.10596	-89.176	-34.991	1909.144	-2.1558	1.5579	0.16924	-69.68	250.023	577.1924	-0.5293	0.59668	0.15674	NaN	NaN	NaN	NaN	NaN	NaN
2.898	-46.911	209.487	1176.198	-1.1997	0.84229	0.11059	-38.737	-19.978	1868.259	-2.198	1.5833	0.18047	-114.5322	210.548	551.8133	-0.44727	0.54883	0.16455	NaN	NaN	NaN	NaN	NaN	NaN
2.9	-45.41	213.341	1142.532	-1.1758	0.82813	0.11768	-6.331	2.649	1847.847	-2.2292	1.5927	0.19375	-112.408	221.9252	481.5337	-0.39038	0.51001	0.15137	NaN	NaN	NaN	NaN	NaN	NaN
2.902	-32.951	203.181	1118.768	-1.1387	0.79883	0.11963	-29.818	-65.078	1847.453	-2.2415	1.5921	0.20313	-127.1799	163.9221	451.6886	-0.33154	0.46729	0.14795	NaN	NaN	NaN	NaN	NaN	NaN
2.904	-30.52	185.093	1079.0761	-1.1187	0.78564	0.12451	12.166	-63.667	1849.7635	-2.2417	1.5864	0.20313	-73.196	180.8298	400.3823	-0.25342	0.40918	0.14453	NaN	NaN	NaN	NaN	NaN	NaN
2.906	-48.56	185.105	1044.275	-1.0859	0.75391	0.13525	-8.857	-57.8897	1797.554	-2.2204	1.5636	0.19824	-75.771	139.0032	360.843	-0.2207	0.38477	0.14355	NaN	NaN	NaN	NaN	NaN	NaN
2.908	-28.316	194.076	1008.164	-1.0583	0.72974	0.13892	-13.37	-57.0226	1787.105	-2.1929	1.5415	0.19082	-45.542	145.022	301.547	-0.15332	0.33203	0.13477	NaN	NaN	NaN	NaN	NaN	NaN
2.91	-11.101	208.76	986.88	-1.0269	0.71045	0.14453	20.172	14.453	1782.87	-2.1554	1.5165	0.19394	-75.828	116.6406	249.4642	-0.11206	0.29126	0.13159	NaN	NaN	NaN	NaN	NaN	NaN
2.912	-14.661	212.291	949.3284	-0.99023	0.67969	0.1543	-0.453999999999994	5.83499999999999	1791.092	-2.1193	1.4802	0.17784	-71.703	154.878	170.672	-0.067383	0.25391	0.12549	NaN	NaN	NaN	NaN	NaN	NaN
2.914	-32.095	213.386	914.8784	-0.97656	0.66699	0.15918	24.891	-10.374	1836.5675	-2.0742	1.4414	0.17432	-58.105	150.5194	145.487	-0.019531	0.20068	0.12256	NaN	NaN	NaN	NaN	NaN	NaN
2.916	-15.802	201.182	888.714	-0.92969	0.63965	0.16113	38.27	-20.263	1838.90959	-2.036	1.3953	0.16807	9.491	175.4757	116.904	0.0014648	0.17822	0.11914	NaN	NaN	NaN	NaN	NaN	NaN
2.918	-20.594	200.85	868.882	-0.90234	0.62305	0.16284	2.433	-81.831	1834.064	-1.9999	1.3591	0.16894	-30.747	148.446	123.615	0.032227	0.13086	0.11523	NaN	NaN	NaN	NaN	NaN	NaN
2.92	-29.129	215.136	829.7159	-0.87061	0.604	0.16943	56.3314	-70.788	1813.365	-1.9686	1.3278	0.16543	-33.148	188.033	104.432	0.052978	0.098391	0.11719	NaN	NaN	NaN	NaN	NaN	NaN
2.922	-42.605	201.362	803.46	-0.82471	0.57617	0.16895	26.199	-46.1963	1736.8999	-1.943	1.3026	0.16924	-47.873	163.25	91.7201	0.062988	0.074707	0.1167	NaN	NaN	NaN	NaN	NaN	NaN
2.924	-40.335	188.22	774.899	-0.80273	0.55957	0.16895	32.011	-34.025	1696.5237	-1.9199	1.2813	0.1792	-45.941	179.282	98.7	0.078125	0.039063	0.12451	NaN	NaN	NaN	NaN	NaN	NaN
2.926	-54.142	175.665	736.879	-0.75195	0.53467	0.1665	57.747	39.071	1658.882	-1.8981	1.2687	0.18262	-23.952	126.183	101.332	0.081055	0.020996	0.11768	NaN	NaN	NaN	NaN	NaN	NaN
2.928	-54.682	174.606	698.215	-0.71484	0.51026	0.16406	3.517	55.247	1641.601	-1.877	1.2558	0.18428	7.996	122.3858	79.056	0.089355	-0.0078125	0.12402	NaN	NaN	NaN	NaN	NaN	NaN
2.93	-46.801	177.808	655.8959	-0.67725	0.48877	0.16602	-13.214	83.802	1670.993	-1.8511	1.2442	0.19092	-9.3	72.7669	53.936	0.097656	-0.024414	0.12256	NaN	NaN	NaN	NaN	NaN	NaN
2.932	-31.575	168.61	651.533	-0.62793	0.45215	0.14697	-9.842	130.473	1656.3729	-1.827	1.231	0.19385	13.921	72.5	23.193	0.099609	-0.04248	0.12451	NaN	NaN	NaN	NaN	NaN	NaN
2.934	-37.879	169.792	620.28	-0.60205	0.43799	0.1543	-54.134	113.897	1620.2441	-1.8062	1.2153	0.19336	-8.17	5.414	23.369	0.10693	-0.062012	0.12109	NaN	NaN	NaN	NaN	NaN	NaN
2.936	-37.823	159.941	573.467	-0.55322	0.40918	0.14746	-51.116	133.956	1582.7839	-1.7858	1.2045	0.19522	5.58500000000001	22.143	21.8587	0.10352	-0.070801	0.125	NaN	NaN	NaN	NaN	NaN	NaN
2.938	-56.566	149.314	541.177	-0.51831	0.38404	0.14502	-84.218	140.081	1509.717	-1.7644	1.1979	0.1959	-42.702	-0.786000000000001	17.6479	0.10059	-0.089844	0.12256	NaN	NaN	NaN	NaN	NaN	NaN
2.94	-53.201	147.01	497.3434	-0.48633	0.3623	0.13525	-95.65	91.981	1485.999	-1.7409	1.187	0.19629	-13.839	45.2336	31.9192	0.10059	-0.098631	0.1289	NaN	NaN	NaN	NaN	NaN	NaN
2.942	-51.532	140.245	493.467	-0.43848	0.32813	0.13623	-52.319	92.742	1492.631	-1.7159	1.1794	0.19697	-49.806	19.097	37.9647	0.091797	-0.10693	0.13135	NaN	NaN	NaN	NaN	NaN	NaN
2.944	-38.633	148.536	466.841	-0.41602	0.31396	0.13379	-104.1294	61.752	1494.0762	-1.6914	1.168	0.19775	-61.681	48.2172	68.174	0.07666	-0.1123	0.13232	NaN	NaN	NaN	NaN	NaN	NaN
2.946	-49.815	136.035	439.451	-0.37256	0.28174	0.12891	-49.701	37.265	1499.178	-1.6616	1.1583	0.19649	-76.36	30.071	78.04	0.070313	-0.11328	0.1377	NaN	NaN	NaN	NaN	NaN	NaN
2.948	-41.729	126.486	407.775	-0.34009	0.26196	0.12329	-33.211	51.248	1465.89	-1.63	1.147	0.19658	-84.804	57.9414	73.001	0.055176	-0.11182	0.14844	NaN	NaN	NaN	NaN	NaN	NaN
2.95	-45.087	119.034	368.328	-0.30908	0.24365	0.11816	-94.535	45.841	1399.9533	-1.594	1.129	0.19502	-47.88	48.2568	45.1342	0.03833	-0.10986	0.14697	NaN	NaN	NaN	NaN	NaN	NaN
2.952	-41.783	120.795	344.178	-0.26709	0.2168	0.11328	-28.379	80.335	1389.931	-1.5464	1.1144	0.18828	-46.416	47.5155	31.66	0.027832	-0.10303	0.15039	NaN	NaN	NaN	NaN	NaN	NaN
2.954	-30.323	112.852	319.059	-0.24512	0.20313	0.10889	-50.277	111.6472	1343.89889	-1.4937	1.0962	0.18457	-48.552	18.4282	0.989000000000001	0.0073242	-0.095215	0.15869	NaN	NaN	NaN	NaN	NaN	NaN
2.956	-7.895	95.588	306.653	-0.20264	0.17627	0.1001	-50.997	106.2344	1318.767	-1.4378	1.0755	0.17617	-54.932	31.1846	8.788	0.0053711	-0.085938	0.1626	NaN	NaN	NaN	NaN	NaN	NaN
2.958	-20.898	88.135	284.329	-0.17603	0.15894	0.099368	-38.422	144.84	1303.672	-1.3784	1.0594	0.16387	-68.634	14.7949	-6.375	-0.0048828	-0.080078	0.16553	NaN	NaN	NaN	NaN	NaN	NaN
2.96	-28.253	75.036	255.754	-0.14355	0.13721	0.09375	-69.212	166.044	1265.7846	-1.3264	1.0324	0.15449	-68.3106	5.497	20.952	-0.001709	-0.071289	0.1665	NaN	NaN	NaN	NaN	NaN	NaN
2.962	-10.361	64.993	242.04	-0.10205	0.1123	0.083008	-25.625	181.9295	1237.3386	-1.2769	1.0145	0.14883	-66.341	-28.835	27.182	0.00048828	-0.066895	0.16455	NaN	NaN	NaN	NaN	NaN	NaN
2.964	-5.606	76.69	233.616	-0.082031	0.097168	0.080078	-28.289	241.606	1190.048	-1.2383	0.99316	0.1499	-66.359	-19.3026	15.6429	0.015625	-0.063477	0.16406	NaN	NaN	NaN	NaN	NaN	NaN
2.966	-17.162	86.553	204.2206	-0.044434	0.073242	0.072754	-60.451	256.601	1120.9749	-1.2023	0.97041	0.14522	-42.011	-1.1797	1.901	0.024414	-0.061523	0.15674	NaN	NaN	NaN	NaN	NaN	NaN
2.968	-26.057	93.756	189.5	-0.022461	0.055908	0.062256	11.664	233.205	1093.1735	-1.1735	0.94258	0.14903	-44.806	31.374	9.247	0.047852	-0.053223	0.15527	NaN	NaN	NaN	NaN	NaN	NaN
2.97	-10.811	89.833	169.174	0.0019531	0.039551	0.061035	-5.357	220.154	1040.736	-1.1472	0.91797	0.15411	-27.492	23.4858	4.2521	0.071778	-0.049804	0.15014	NaN	NaN	NaN	NaN	NaN	NaN
2.972	-9.98500000000001	88.497	166.788	0.02832	0.021973	0.046387	-53.633	162.641	1021.6274	-1.1195	0.89473	0.15605	-57.131	17.3687	22.1482	0.091797	-0.043457	0.14209	NaN	NaN	NaN	NaN	NaN	NaN
2.974	-8.152	78.033	152.595	0.040527	0.013672	0.044922	-9.425	158.707	1019.4487	-1.0913	0.87158	0.1582	-5.225	13.69235	3.8234	0.12402	-0.036133	0.14063	NaN	NaN	NaN	NaN	NaN	NaN
2.976	-36.966	59.816	137.154	0.070313	-0.0024414	0.039551	-72.947	162.545	1000.959	-1.0654	0.8541	0.16289	-26.187	27.4469	6.9928	0.13379	-0.02832	0.1333	NaN	NaN	NaN	NaN	NaN	NaN
2.978	-13.639	47.224	125.364	0.081543	-0.0087889	0.036865	-51.724	143.173	994.5127	-1.0371	0.83281	0.16738	25.038	44.081	3.1293	0.16504	-0.019531	0.12988	NaN	NaN	NaN	NaN	NaN	NaN
2.98	-22.152	50.68	104.574	0.095215	-0.018555	0.03418	-64.519	178.9873	955.3092	-1.0039	0.80977	0.16894	-12.349	51.118	18.3918	0.19043	-0.018066	0.12354	NaN	NaN	NaN	NaN	NaN	NaN
2.982	-28.16	62.257	79.031	0.10889	-0.026367	0.023438	-116.091	181.788	906.5352	-0.9707	0.78477	0.16689	-17.629	52.8429	-33.8571	0.20996	-0.023438	0.1167	NaN	NaN	NaN	NaN	NaN	NaN
2.984	-28.089	53.513	73.644	0.11035	-0.028809	0.023926	-74.292	181.6654	902.795	-0.93311	0.7583	0.17725	-34.51	45.0367	-45.138	0.24707	-0.02832	0.10205	NaN	NaN	NaN	NaN	NaN	NaN
2.986	-22.54	52.849	71.9532	0.11084	-0.032227	0.025879	-112.258	210.6811	847.255	-0.89453	0.73399	0.16973	-5.808	49.981	-34.86	0.27197	-0.032715	0.09668	NaN	NaN	NaN	NaN	NaN	NaN
2.988	-29.348	57.881	79.429	0.10816	-0.036621	0.025635	-112.0029	175.309	811.401	-0.85469	0.70605	0.16729	-33.687	38.82	19.297	0.31641	-0.047852	0.084961	NaN	NaN	NaN	NaN	NaN	NaN
2.99	-42.969	53.931	70.382	0.099121	-0.035645	0.027832	-82.724	173.3594	782.3881	-0.82071	0.6791	0.16573	-0.351999999999997	61.0555	19.6091	0.34375	-0.056885	0.074708	NaN	NaN	NaN	NaN	NaN	NaN
2.992	-41.61	49.278	63.59	0.086914	-0.03125	0.032227	-108.663	199.162	705.275	-0.78223	0.65078	0.16407	-26.477	57.051	46.6116	0.36914	-0.06543	0.063477	NaN	NaN	NaN	NaN	NaN	NaN
2.994	-31.419	55.054	59.057	0.075195	-0.030762	0.033203	-76.103	175.188	682.209	-0.75	0.62695	0.16748	-40.292	76.037	31.789	0.39258	-0.068359	0.040527	NaN	NaN	NaN	NaN	NaN	NaN
2.996	-26.972	49.389	44.197	0.053711	-0.020996	0.042969	-89.454	207.8679	626.715	-0.71797	0.6	0.16875	-65.68	43.302	49.734	0.40576	-0.07373	0.028809	NaN	NaN	NaN	NaN	NaN	NaN
2.998	-33.351	42.276	30.8372	0.039551	-0.021484	0.050781	-117.0897	203.358451	577.192	-0.68554	0.57579	0.17041	-52.366	46.645	48.717	0.40918	-0.085449	0.0019531	NaN	NaN	NaN	NaN	NaN	NaN
3	-36.932	37.721	21.4434	0.022949	-0.016113	0.057617	-85.194	176.109	545.628	-0.65547	0.55351	0.17159	-62.542	25.7455	43.3038	0.40137	-0.081299	0.003418	NaN	NaN	NaN	NaN	NaN	NaN
3.002	-20.304	36.88	28.41	0.0024414	-0.0083008	0.067383	-108.2615	199.93	480.91	-0.62002	0.53252	0.17813	-41.835	40.581	13.6473	0.38672	-0.081543	-0.0024414	NaN	NaN	NaN	NaN	NaN	NaN
3.004	-17.12	39.588	20.839	-0.011719	-0.0039063	0.070313	-103.317	177.393	453.31	-0.58984	0.51074	0.18506	-64.281	13.6084	36.459	0.36279	-0.081055	-0.0068359	NaN	NaN	NaN	NaN	NaN	NaN
3.006	-27.838	39.9389	20.0892	-0.038086	0.0068359	0.080078	-48.974	177.172	445.393	-0.55879	0.49394	0.1835	-72.843	28.194	21.705	0.34375	-0.077637	-0.0097656	NaN	NaN	NaN	NaN	NaN	NaN
3.008	-15.683	36.9436	1.655	-0.052002	0.0065918	0.088135	-84.145	193.134	420.581	-0.52734	0.47344	0.19101	-74.216	8.352	43.6078	0.31348	-0.062012	-0.0024414	NaN	NaN	NaN	NaN	NaN	NaN
3.01	-6.63	39.54	15.059	-0.062988	0.013672	0.089844	-47.736	133.0346	426.6266	-0.49883	0.45078	0.19062	-52.136	49.7395	39.93	0.29614	-0.052002	0.0012207	NaN	NaN	NaN	NaN	NaN	NaN
3.012	-6.648	44.293	2.2305	-0.072266	0.01416	0.088867	-22.946	132.5657	399.1744	-0.46446	0.43164	0.19013	-73.189	23.775	55.582	0.28125	-0.03418	0.0029297	NaN	NaN	NaN	NaN	NaN	NaN
3.014	-26.444	37.6184	8.9583	-0.074707	0.01709	0.086914	-19.09	107.296	355.4922	-0.42969	0.40625	0.19287	-38.372	47.468	57.706	0.26221	-0.0053711	0.0073242	NaN	NaN	NaN	NaN	NaN	NaN
3.016	-4.762	33.2837	7.84893	-0.070313	0.01709	0.087891	19.113	69.309	337.101	-0.40283	0.38272	0.19336	-63.218	11.7459	61.4028	0.25928	0.0087891	0.0063477	NaN	NaN	NaN	NaN	NaN	NaN
3.018	-10.158	27.794	12.14569	-0.063965	0.016113	0.085938	-29.361	111.6262	255.123	-0.37393	0.35156	0.19639	-48.439	32.4838	12.28	0.24658	0.032715	0.0073242	NaN	NaN	NaN	NaN	NaN	NaN
3.02	-28.996	38.6883	6.3059	-0.062012	0.012695	0.083496	-9.59	91.5121	226.5898	-0.34307	0.32188	0.19248	-63.465	-4.8683	-0.370999999999999	0.23438	0.051269	0.0080567	NaN	NaN	NaN	NaN	NaN	NaN
3.022	-39.933	35.05909	11.6428	-0.056152	0.01123	0.081543	4.29599999999999	86.641	203.621	-0.31279	0.29404	0.1876	-49.848	14.3	-2.161	0.22314	0.062988	0.010742	NaN	NaN	NaN	NaN	NaN	NaN
3.024	-8.00300000000001	35.74873	17.951	-0.049805	0.0090332	0.083008	-47.17	112.135	180.443	-0.27686	0.27002	0.1875	-30.413	-12.5283	-8.738	0.21143	0.068359	0.019531	NaN	NaN	NaN	NaN	NaN	NaN
3.026	-16.275	40.5713	15.6115	-0.04541	0.0083008	0.078125	-28.759	68.937	210.429	-0.24101	0.24873	0.18047	-2.39100000000001	30.591664	-8.183	0.19751	0.077393	0.028564	NaN	NaN	NaN	NaN	NaN	NaN
3.028	-20.786	41.2915	7.336	-0.043457	0.0087891	0.077637	-15.399	113.701	186.9806	-0.2044	0.23037	0.18164	-16.346	15.48068	5.596	0.18604	0.081055	0.038086	NaN	NaN	NaN	NaN	NaN	NaN
3.03	-13.72	26.7075	6.305	-0.043457	0.0083008	0.077148	-41.728	133.95	174.1098	-0.16807	0.21045	0.17851	-26.765	32.702	29.384	0.17188	0.092285	0.052734	NaN	NaN	NaN	NaN	NaN	NaN
3.032	-21.248	28.0789	12.4292	-0.040039	0.0063477	0.072266	-22.55	99.701	158.185	-0.13633	0.19531	0.17451	-8.232	-13.0378	49.3097	0.16309	0.098633	0.058105	NaN	NaN	NaN	NaN	NaN	NaN
3.034	-27.299	36.7739	15.4879	-0.036621	0.0097658	0.074463	-50.454	139.692	104.31	-0.10303	0.17725	0.17139	-13.082	7.7646	28.7086	0.14844	0.10742	0.068848	NaN	NaN	NaN	NaN	NaN	NaN
3.036	-38.674	39.45369	13.7256	-0.025879	0.012695	0.070313	-42.626	93.1314	82.13408	-0.067383	0.15918	0.15517	-15.776	2.9928	-11.81426	0.13843	0.10913	0.076416	NaN	NaN	NaN	NaN	NaN	NaN
3.038	-40.74	24.561	21.5598	-0.0024414	0.02002	0.0625	-21.913	70.5744	80.8359	-0.031348	0.13282	0.15303	-9.555	43.584	-4.314	0.12549	0.11621	0.085449	NaN	NaN	NaN	NaN	NaN	NaN
3.04	-42.569	36.4454	36.696	0.0073242	0.024414	0.060059	-69.375	100.4059	68.1539	0.0045898	0.11406	0.14482	-8.893	18.9909	-7.485	0.10498	0.11865	0.098145	NaN	NaN	NaN	NaN	NaN	NaN
3.042	-43.496	45.825	23.32548	0.03125	0.027344	0.055176	-44.618	27.854	99.047	0.032617	0.096582	0.13604	-17.066	40.501	2.36	0.092773	0.12646	0.099121	NaN	NaN	NaN	NaN	NaN	NaN
3.044	-46.048	44.0131	24.6894	0.041503	0.024659	0.047364	-67.007	48.318	66.8015	0.057617	0.080078	0.12842	-21.562	26.32	-20.6521	0.059082	0.13037	0.11523	NaN	NaN	NaN	NaN	NaN	NaN
3.046	-42.038	38.0903	36.4186	0.059082	0.019531	0.038086	-89.362	48.946	50.7565	0.080957	0.065723	0.12344	-43.588	65.014	12.32939	0.028564	0.13428	0.13013	NaN	NaN	NaN	NaN	NaN	NaN
3.048	-27.061	31.5095	25.9319	0.081055	0.0097656	0.030273	-53.218	2.483	59.378	0.09668	0.051465	0.1207	-40.573	60.043	11.4799	-0.00097656	0.1377	0.13818	NaN	NaN	NaN	NaN	NaN	NaN
3.05	-36.82	22.8796	-2.1397	0.091309	0.0048828	0.024902	-77.999	51.18908	22.18224	0.11308	0.038965	0.11953	-44.806	76.385	42.014	-0.038574	0.14453	0.15137	NaN	NaN	NaN	NaN	NaN	NaN
3.052	-36.892	6.293	9.005	0.1123	0.0029297	0.0092773	-50.38	14.533	32.712	0.12861	0.025586	0.11474	-45.692	63.468	22.3469	-0.055176	0.15039	0.16016	NaN	NaN	NaN	NaN	NaN	NaN
3.054	-31.503	20.97	22.9533	0.12622	0.0026856	0.0012207	-27.337	8.0126	21.3713	0.146	0.015625	0.1123	-53.198	64.97	29.0977	-0.071777	0.16406	0.16895	NaN	NaN	NaN	NaN	NaN	NaN
3.056	-19.296	30.0934	36.4555	0.14307	-0.0043945	-0.0078125	-66.112	46.7256	11.449	0.16211	0.0074219	0.10772	-60.914	32.872	13.91567	-0.078125	0.17749	0.17724	NaN	NaN	NaN	NaN	NaN	NaN
3.058	-12.396	34.5216	28.3261	0.16406	-0.0058594	-0.027832	-26.524	7.829	38.5035	0.17764	-0.0044922	0.096972	-84.022	37.8546	34.7928	-0.084473	0.19238	0.18262	NaN	NaN	NaN	NaN	NaN	NaN
3.06	-29.43	38.1258	18.9383	0.17432	-0.0014648	-0.032227	-14.39	46.1015	27.125	0.19131	-0.0087891	0.099316	-62.899	34.47	20.4405	-0.083008	0.21094	0.18652	NaN	NaN	NaN	NaN	NaN	NaN
3.062	-29.436	33.975	19.413	0.18994	0.00097656	-0.035645	-21.8	70.962	2.293	0.20166	-0.014746	0.094434	-62.104	32.2941	73.907	-0.078613	0.2251	0.18457	NaN	NaN	NaN	NaN	NaN	NaN
3.064	-22.53	28.3935	30.5199	0.19556	0.0046387	-0.038574	-9.08200000000001	29.50376	11.3667	0.20605	-0.02002	0.088867	-46.275	-4.6248	89.011	-0.06543	0.24658	0.17969	NaN	NaN	NaN	NaN	NaN	NaN
3.066	-15.53	29.453	22.0934	0.20068	0.010254	-0.041992	-24.609	75.502	-21.77965	0.21406	-0.023633	0.085645	-80.688	-40.3881	114.7943	-0.052002	0.26441	0.17675	NaN	NaN	NaN	NaN	NaN	NaN
3.068	-22.438	20.16546	11.3298	0.20264	0.013672	-0.048828	-1.437	31.1196	-6.9435	0.21865	-0.02959	0.082422	-38.703	-51.137	148.811	-0.039551	0.28174	0.17285	NaN	NaN	NaN	NaN	NaN	NaN
3.07	-7.139	16.22192	17.627641	0.20264	0.01709	-0.040527	8.053	8.46224	-1.132	0.21709	-0.034277	0.075	-58.203	-86.9421	219.2931	-0.022949	0.31055	0.15869	NaN	NaN	NaN	NaN	NaN	NaN
3.072	-4.008	13.3807	-0.19	0.18945	0.022949	-0.036621	-22.153	39.4199	-2.837	0.21299	-0.037305	0.069922	-69.569	-82.06434	289.514	-0.024414	0.32227	0.14697	NaN	NaN	NaN	NaN	NaN	NaN
3.074	-19.741	18.9246	5.4336	0.18726	0.029297	-0.030273	14.744	-18.3451	32.4378	0.20605	-0.040039	0.072266	-69.231	-69.256	411.223	-0.043945	0.35742	0.12695	NaN	NaN	NaN	NaN	NaN	NaN
3.076	-9.835	26.6017	24.67741	0.17725	0.034668	-0.023926	-10.694	30.033	33.4668	0.19531	-0.041406	0.065625	-18.568	-48.7497	542.574	-0.079834	0.39526	0.1294	NaN	NaN	NaN	NaN	NaN	NaN
3.078	-6.8	0.42747	45.45931	0.16016	0.042969	-0.0097656	-24.075	56.692	27.93	0.18613	-0.041407	0.067187	-13.275	-20.1144	729.152	-0.13916	0.42822	0.13184	NaN	NaN	NaN	NaN	NaN	NaN
3.08	-19.772	-5.1015	56.8047	0.15674	0.050781	-0.012207	8.295	14.6818	32.6122	0.17325	-0.044531	0.06289	12.504	23.548	934.019	-0.25049	0.47949	0.13916	NaN	NaN	NaN	NaN	NaN	NaN
3.082	-29.375	-11.4729	64.148	0.14111	0.06543	0.0092773	-21.045	61.445	21.0273	0.16309	-0.041602	0.062598	40.975	35.2566	1131.569	-0.31592	0.5083	0.14746	NaN	NaN	NaN	NaN	NaN	NaN
3.084	-4.575	-29.7646	88.6356	0.125	0.072998	0.010742	-13.639	15.195	15.7802	0.15576	-0.039551	0.06543	103.028	85.256	1304.135	-0.46533	0.56934	0.15723	NaN	NaN	NaN	NaN	NaN	NaN
3.086	-22.874	-28.7187	108.8724	0.11475	0.082031	0.012695	-28.726	-11.3609	2.8318	0.14306	-0.036816	0.05957	129.783	60.155	1543.4459	-0.59815	0.62891	0.15845	NaN	NaN	NaN	NaN	NaN	NaN
3.088	-52.48	-33.0819	119.6231	0.094727	0.1001	0.0087891	-63.85	36.9061	-1.285	0.1336	-0.035547	0.060449	175.748	73.1382	1698.335	-0.74219	0.69922	0.1665	NaN	NaN	NaN	NaN	NaN	NaN
3.09	-35.087	-16.8462	144.668	0.080566	0.10791	0.016113	-38.19	7.8266	14.8167	0.12657	-0.032813	0.055371	126.365	22.59231	1817.756	-0.97803	0.81104	0.18652	NaN	NaN	NaN	NaN	NaN	NaN
3.092	-56.707	-10.3754	197.479	0.050781	0.13232	0.018066	-62.357	64.013	23.483	0.1208	-0.031152	0.049317	119.045	-8.589	1812.314	-1.1138	0.87354	0.20898	NaN	NaN	NaN	NaN	NaN	NaN
3.094	-52.469	4.5243	250.034	0.015381	0.14771	0.025391	-76.861	78.04	30.1557	0.11865	-0.030273	0.05127	66.208	-123.762	1727.293	-1.4224	1.0083	0.2749	NaN	NaN	NaN	NaN	NaN	NaN
3.096	-35.654	24.0906	338.657	-0.023438	0.16309	0.038086	-41.193	38.629	40.871	0.11728	-0.025977	0.043945	48.2393	-182.6664	1648.547	-1.6745	1.1097	0.33984	NaN	NaN	NaN	NaN	NaN	NaN
3.098	-40.066	63.926	450.556	-0.091797	0.18408	0.061035	-79.7473	86.846	24.432	0.11416	-0.026367	0.039551	34.648	-237.477	1541.713	-1.9297	1.2129	0.4126	NaN	NaN	NaN	NaN	NaN	NaN
3.1	-56.63	96.751	566.9	-0.12598	0.19531	0.07373	-76.979	40.3532	24.1649	0.10987	-0.025977	0.034864	23.331	-235.887	1418.031	-2.1953	1.3242	0.52051	NaN	NaN	NaN	NaN	NaN	NaN
3.102	-51.871	91.968	661.79	-0.19775	0.22607	0.096191	-58.191	12.1719	17.1227	0.10938	-0.025488	0.03125	44.6512	-274.35	1288.459	-2.2754	1.377	0.59424	NaN	NaN	NaN	NaN	NaN	NaN
3.104	-11.298	67.835	718.14	-0.24121	0.25146	0.10596	-81.546	43.9172	1.256	0.11035	-0.024414	0.030273	-7.683	-267.369	1200.139	-2.3477	1.4902	0.73682	NaN	NaN	NaN	NaN	NaN	NaN
3.106	-28.076	44.996	829.51	-0.29053	0.27393	0.093262	-28.074	-22.9521	7.2052	0.11885	-0.025391	0.025781	-38.974	-250.27	1138.897	-2.3772	1.5657	0.74219	NaN	NaN	NaN	NaN	NaN	NaN
3.108	-19.655	51.678	923.37	-0.36816	0.32422	0.096191	-35.317	2.5378	1.225	0.12373	-0.025391	0.023047	3.362	-177.844	1156.517	-2.3374	1.6118	0.65039	NaN	NaN	NaN	NaN	NaN	NaN
3.11	-36.324	58.241	988.7	-0.41406	0.3584	0.096191	-53.916	30.2987	18.9516	0.13388	-0.025	0.020312	11.695	-130.1551	1207.65	-1.9233	1.6079	0.52051	NaN	NaN	NaN	NaN	NaN	NaN
3.112	-36.485	70.082	996.22	-0.54346	0.43359	0.11719	-23.877	10.9539	42.11	0.14561	-0.027734	0.010644	12.004	-57.657	1322.9219	-1.6108	1.5708	0.48535	NaN	NaN	NaN	NaN	NaN	NaN
3.114	-7.16	63.614	995.08	-0.68116	0.48779	0.1438	-25.829	78.426	25.9143	0.15869	-0.026855	0.010254	-19.583	-10.16	1386.054	-1.0815	1.4302	0.41992	NaN	NaN	NaN	NaN	NaN	NaN
3.116	27.349	43.386	1010.39	-0.84961	0.54492	0.17725	-25.298	37.067	34.44	0.16699	-0.022266	0.0070313	-73.264	4.79999999999998	1436.27	-0.85718	1.3108	0.35547	NaN	NaN	NaN	NaN	NaN	NaN
3.118	41.555	31.9579	1018.8	-1.1074	0.63867	0.27197	-13.039	18.908071	27.7072	0.17471	-0.019141	0.0076172	-110.71	-29.75	1446.592	-0.72656	1.2246	0.2959	NaN	NaN	NaN	NaN	NaN	NaN
3.12	20.325	24.367	1035.91	-1.25	0.69336	0.31445	-23.323	45.041	7.198	0.18525	-0.011328	0.0060547	-180.9726	-109.62	1504.339	-0.61133	1.1621	0.25488	NaN	NaN	NaN	NaN	NaN	NaN
3.122	12.617	6.483	1076.98	-1.5269	0.80713	0.38281	13.795	-15.0952	10.759	0.19033	0.00097658	0.0091797	-180.27029	-229.342	1540.626	-0.56494	1.1411	0.24609	NaN	NaN	NaN	NaN	NaN	NaN
3.124	20.614	-21.3749	1107.04	-1.6814	0.88501	0.41431	-7.489	27.6645	10.5109	0.1958	0.0083008	0.010254	-200.379	-352.917	1587.4728	-0.53467	1.0981	0.23047	NaN	NaN	NaN	NaN	NaN	NaN
3.126	38.106	8.103	1121.72	-1.7671	0.9458	0.42285	-11.491	44.3642	14.35	0.20234	0.014844	0.012793	-131.869	-456.82	1634.607	-0.58984	1.0644	0.22339	NaN	NaN	NaN	NaN	NaN	NaN
3.128	21.02	31.421	1129.02	-1.7422	1.0059	0.42871	7.974	18.57648	31.06	0.20772	0.024804	0.017968	-111.8099	-524.27	1685.121	-0.71436	1.0513	0.229	NaN	NaN	NaN	NaN	NaN	NaN
3.13	-0.176999999999992	19.7953	1142.96	-1.6851	1.0259	0.42188	-2.29600000000001	76.55	4.62	0.20498	0.029101	0.021484	-80.699	-532.97	1697.747	-0.99805	1.1094	0.26709	NaN	NaN	NaN	NaN	NaN	NaN
3.132	18.372	-13.284	1171.18	-1.5449	1.0449	0.37549	5.279	44.5867	9.97804	0.20381	0.031055	0.029101	-60.914	-473.92	1759.951	-1.1616	1.1763	0.30078	NaN	NaN	NaN	NaN	NaN	NaN
3.134	-11.245	-43.396	1170.22	-1.4047	1.0347	0.31861	-10.098	24.939	27.5514	0.20361	0.026855	0.036133	-72.203	-382.67	1836.413	-1.4604	1.3481	0.37891	NaN	NaN	NaN	NaN	NaN	NaN
3.136	-10.824	-68.549	1195.8	-1.2339	1.0015	0.26514	-40.965	49.5037	17.227	0.20732	0.029589	0.035059	-65.347	-318.839	1957.575	-1.6294	1.4717	0.43482	NaN	NaN	NaN	NaN	NaN	NaN
3.138	27.5	-104.245	1225.64	-1.0039	0.94531	0.229	-20.999	-23.5741	30.602	0.21016	0.031347	0.032422	-33.133	-233.7234	2034.576	-1.7627	1.5742	0.47705	NaN	NaN	NaN	NaN	NaN	NaN
3.14	15.65	-138.431	1242.86	-0.9248	0.9082	0.21777	-57.237	-2.196	19.2588	0.2125	0.029395	0.0375	-79.379	-151.018	2087.529	-1.8848	1.6738	0.49854	NaN	NaN	NaN	NaN	NaN	NaN
3.142	-22.752	-157.157	1255.87	-0.8374	0.85986	0.20801	-63.675	11.176	15.7373	0.20782	0.03252	0.039844	-66.403	-46.496	2074.395	-1.9253	1.7114	0.50586	NaN	NaN	NaN	NaN	NaN	NaN
3.144	-14.857	-181.947	1273.93	-0.82226	0.85107	0.21045	-53.257	-9.2321	38.3447	0.19922	0.033203	0.04541	-100.3521	16.07	2040.26082	-1.9814	1.752	0.50439	NaN	NaN	NaN	NaN	NaN	NaN
3.146	6.487	-178.602	1330.45	-0.82617	0.85742	0.22607	-58.868	67.1168	20.1387	0.18633	0.032324	0.052636	-80.4729	27.295	2011.072	-2.0114	1.7678	0.49048	NaN	NaN	NaN	NaN	NaN	NaN
3.148	2.356	-163.933	1393.89	-0.86523	0.86914	0.25928	-52.555	49.4794	23.606	0.16133	0.033399	0.058496	-73.458	-34.434	1978.859	-2.0249	1.7837	0.47852	NaN	NaN	NaN	NaN	NaN	NaN
3.15	6.175	-160.244	1438.98	-0.9082	0.88867	0.27881	-38.802	20.7518	43.627	0.13946	0.031836	0.069434	10.633	-108.384	2020.652	-2.0249	1.8032	0.45654	NaN	NaN	NaN	NaN	NaN	NaN
3.152	-26.959	-157.73	1491.19	-1.0039	0.93555	0.32324	-77.1884	14.09345	59.191	0.11299	0.032422	0.079199	52.024	-185.683	2085.322	-2.0249	1.811	0.45117	NaN	NaN	NaN	NaN	NaN	NaN
3.154	-28.837	-141.368	1515.28	-1.0918	1	0.36182	-60.015	-52.81	72.509	0.083496	0.039551	0.09082	57.264	-214.041	2143.724	-2.0332	1.8262	0.45166	NaN	NaN	NaN	NaN	NaN	NaN
3.156	-53.307	-130.063	1537.94	-1.125	1.0234	0.37744	-39.837	-15.6747	83.679	0.061426	0.045801	0.099221	38.713	-203.026	2171.94	-2.0386	1.8413	0.45752	NaN	NaN	NaN	NaN	NaN	NaN
3.158	-42.542	-117.181	1552.57	-1.1724	1.061	0.39844	-56.117	1.75185	118.437	0.038379	0.061621	0.11582	4.203	-171.261	2198.942	-2.0537	1.8555	0.479	NaN	NaN	NaN	NaN	NaN	NaN
3.16	-43.539	-131.035	1588.75	-1.208	1.0694	0.40845	-76.875	-20.396	189.3242	0.026269	0.070996	0.12403	-21.054	-165.304	2234.596	-2.0796	1.8696	0.50781	NaN	NaN	NaN	NaN	NaN	NaN
3.162	-24.393	-141.201	1625.99	-1.2485	1.0649	0.41602	-58.247	44.767	225.954	0.018457	0.085547	0.13086	-21.504	-156.07	2255.77	-2.082	1.875	0.52295	NaN	NaN	NaN	NaN	NaN	NaN
3.164	-19.6457	-144.278	1673	-1.3096	1.0645	0.42236	-36.668	41.093	316.568	0.01709	0.098633	0.13721	-40.018	-142.304	2255.903	-2.0835	1.8657	0.55859	NaN	NaN	NaN	NaN	NaN	NaN
3.166	-30.526	-120.869	1689.75	-1.3442	1.063	0.42969	-0.460999999999999	66.99	436.776	0.021777	0.11104	0.14121	-61.229	-79.3721	2229.831	-2.0691	1.8381	0.58032	NaN	NaN	NaN	NaN	NaN	NaN
3.168	-13.971	-92.102	1724.88	-1.4199	1.0762	0.44873	0.222000000000001	98.4081	534.574	0.033203	0.11651	0.13867	-123.9094	-30.284	2168.413	-2.0625	1.7988	0.60205	NaN	NaN	NaN	NaN	NaN	NaN
3.17	0.587000000000003	-84.4067	1754.79	-1.4785	1.1036	0.46777	63.6251	43.788	644.5251	0.042187	0.1294	0.1332	-119.468	10.866	2087.9858	-2.0566	1.7324	0.62354	NaN	NaN	NaN	NaN	NaN	NaN
3.172	-18.861	-78.998	1777.89	-1.5449	1.1426	0.48291	73.582	102.492	726.456	0.033203	0.14522	0.12862	-93.259248	1.036	2011.988	-2.0606	1.6797	0.6504	NaN	NaN	NaN	NaN	NaN	NaN
3.174	-19.192	-88.049	1836.7	-1.6265	1.2114	0.48828	82.347	121.083	827.944	0.010254	0.1626	0.12207	-58.812	10.94	2004.452	-2.0679	1.6235	0.66211	NaN	NaN	NaN	NaN	NaN	NaN
3.176	-5.403	-104.719	1892.51	-1.666	1.249	0.49756	144.102	94.049	943.667	-0.035449	0.1832	0.12451	-44.027	47.03	1968.204	-2.0703	1.5527	0.69482	NaN	NaN	NaN	NaN	NaN	NaN
3.178	5.23	-110.752	1922.06	-1.7456	1.3257	0.50781	98.244	153.296	1025.5513	-0.094043	0.19873	0.12813	-75.089	81.6352	1950.238	-2.0601	1.5181	0.70313	NaN	NaN	NaN	NaN	NaN	NaN
3.18	-24.766	-97.451	1921.11	-1.8064	1.3763	0.51709	114.944	131.583	1112.651	-0.1581	0.21983	0.13359	-98.572	109.7386	1904.487	-2.0293	1.4551	0.71338	NaN	NaN	NaN	NaN	NaN	NaN
3.182	-31.904	-85.051	1884.74	-1.8647	1.4243	0.52051	106.202	104.686	1159.958	-0.23799	0.25029	0.14229	-120.8471	114.69391	1880.086	-1.9978	1.4173	0.71118	NaN	NaN	NaN	NaN	NaN	NaN
3.184	-32.933	-88.347	1899.72	-1.937	1.4771	0.53906	49.232	95.004	1158.6489	-0.32471	0.28467	0.14941	-115.87	97.52	1895.48	-1.959	1.3809	0.70459	NaN	NaN	NaN	NaN	NaN	NaN
3.186	-22.447	-82.796	1911.98	-1.9663	1.5005	0.54395	69.236	-5.18549	1155.849	-0.43242	0.32715	0.15547	-89.766	91.0168	1960.3888	-1.9023	1.3535	0.69336	NaN	NaN	NaN	NaN	NaN	NaN
3.188	-23.693	-82.646	1914.54	-2.0117	1.5293	0.55811	61.9104	-41.3198	1122.875	-0.54121	0.38711	0.15733	-77.301	80.602	1988.622	-1.8765	1.3442	0.68164	NaN	NaN	NaN	NaN	NaN	NaN
3.19	-10.248	-83.128	1916.27	-2.0376	1.5488	0.56299	44.7719	-94.235	1072.737	-0.66348	0.44961	0.16553	-116.887	70.056	2006.014	-1.8379	1.3359	0.6626	NaN	NaN	NaN	NaN	NaN	NaN
3.192	-13.552	-78.923	1933.03	-2.0469	1.5605	0.56494	41.839	-143.419	1043.444	-0.80381	0.52158	0.1791	-103.487	59.365	1970.68	-1.8025	1.3323	0.64478	NaN	NaN	NaN	NaN	NaN	NaN
3.194	-71.3795	-51.746	1936.26	-2.0527	1.5723	0.5708	-1.538	-79.5475	1012.636	-0.94678	0.59814	0.20508	-107.2092	55.9307	1927.907	-1.7715	1.332	0.62988	NaN	NaN	NaN	NaN	NaN	NaN
3.196	-70.67471	-26.72	1911.14	-2.0488	1.5762	0.57861	11.914	-102.288	991.596	-1.0996	0.66777	0.24072	-73.017	39.173	1875.01	-1.7261	1.3247	0.61426	NaN	NaN	NaN	NaN	NaN	NaN
3.198	-63.731	-10.593	1903.84	-2.0347	1.5747	0.57617	15.46	-77.256	970.8669	-1.26	0.73486	0.28809	-28.681	7.517	1860.874	-1.7046	1.3188	0.60449	NaN	NaN	NaN	NaN	NaN	NaN
3.2	-29.755	-1.559	1917.02	-2.0232	1.5656	0.58081	-46.942	-34.446	968.1735	-1.4175	0.79697	0.34082	6.566	12.184	1826.775	-1.6616	1.3032	0.58398	NaN	NaN	NaN	NaN	NaN	NaN
3.202	-45.7481	-1.445	1938.45	-2.0098	1.5557	0.58643	-36.994	-69.385	984.4733	-1.5507	0.84854	0.39707	-34.038	55.132	1816.7822	-1.625	1.2891	0.56836	NaN	NaN	NaN	NaN	NaN	NaN
3.204	-52.3747	-12.492	1928.52	-1.998	1.5293	0.58838	-50.145	-64.994	1010.806	-1.6504	0.88672	0.43994	-18.331	146.655	1756.312	-1.5952	1.27	0.55225	NaN	NaN	NaN	NaN	NaN	NaN
3.206	-55.03	-19.21	1930.56	-1.9961	1.5195	0.59229	-103.616	-77.669	1064.5232	-1.6822	0.90918	0.46319	-52.872	196.0586	1730.591	-1.5425	1.2427	0.53271	NaN	NaN	NaN	NaN	NaN	NaN
3.208	-62.9715	-23.447	1914.6	-1.9878	1.4907	0.60156	-85.259	-111.26	1125.119	-1.6602	0.91934	0.48701	-0.469000000000001	234.89575	1697.5	-1.5195	1.2256	0.52197	NaN	NaN	NaN	NaN	NaN	NaN
3.21	-58.14217	-16.87	1891.81	-1.977	1.4687	0.61011	-120.018	-79.317	1132.5337	-1.5863	0.93691	0.50694	-23.561	245.395	1693.254	-1.48	1.1919	0.50391	NaN	NaN	NaN	NaN	NaN	NaN
3.212	-58.258	-17.836	1874.55	-1.9741	1.4419	0.62109	-127.096	-129.751	1152.157	-1.4943	0.96221	0.51992	-3.90500000000001	296.958	1633.2086	-1.4558	1.1702	0.49292	NaN	NaN	NaN	NaN	NaN	NaN
3.214	-53.903	-5.369	1860.95	-1.9648	1.4141	0.63135	-126.607	-180.945	1164.859	-1.3848	0.97852	0.50586	-26.66	309.14	1609.076	-1.4331	1.1489	0.48633	NaN	NaN	NaN	NaN	NaN	NaN
3.216	-49.479	-8.08500000000001	1876.5	-1.9546	1.3989	0.63379	-165.44978	-219.699	1191.499	-1.2165	0.95498	0.47656	-16.046	326.603	1532.279	-1.4038	1.1216	0.46582	NaN	NaN	NaN	NaN	NaN	NaN
3.218	-41.6737	7.033	1874.41	-1.9414	1.3652	0.64307	-96.498	-291.228	1280.246	-1.0254	0.88476	0.45323	-61.698	254.267	1488.938	-1.3867	1.1055	0.45605	NaN	NaN	NaN	NaN	NaN	NaN
3.22	-36.518	20.846	1868.91	-1.9334	1.3401	0.64917	-78.232	-299.344	1319.453	-0.88086	0.79883	0.43526	-47.443	205.128	1417.115	-1.3394	1.0747	0.44043	NaN	NaN	NaN	NaN	NaN	NaN
3.222	-24.392	49.004	1851.32	-1.9199	1.3145	0.65918	-93.903	-309.129	1404.9614	-0.80508	0.74551	0.43037	-43.199	145.532	1393.451	-1.2996	1.0511	0.43189	NaN	NaN	NaN	NaN	NaN	NaN
3.224	2.623	63.471	1822.89	-1.8945	1.2754	0.67041	-82.07	-331.106	1465.9719	-0.78076	0.71533	0.43652	-3.379	171.849	1369.231	-1.2578	1.0195	0.4126	NaN	NaN	NaN	NaN	NaN	NaN
3.226	-22.275	72.235	1799.48	-1.8843	1.2563	0.67578	-83.675	-268.179	1498.84	-0.80996	0.71797	0.45771	-16.215	175.685	1384.851	-1.2007	0.98291	0.38965	NaN	NaN	NaN	NaN	NaN	NaN
3.228	-18.742	71.586	1782.5	-1.8691	1.2266	0.68896	-69.479	-233.08	1573.8629	-0.88233	0.73995	0.47969	-19.699	252.126	1307.31	-1.1733	0.96143	0.37988	NaN	NaN	NaN	NaN	NaN	NaN
3.23	-21.201	55.097	1782.94	-1.8579	1.2075	0.69531	-33.462	-173.844	1640.7201	-0.98154	0.79619	0.49765	-52.528	283.0097	1250.116	-1.1167	0.92334	0.354	NaN	NaN	NaN	NaN	NaN	NaN
3.232	-20.031	55.47	1765.88	-1.8452	1.1841	0.69727	-71.447	-117.547	1707.6151	-1.0824	0.87266	0.51455	-30.38	348.0399	1145.095	-1.0774	0.88989	0.33789	NaN	NaN	NaN	NaN	NaN	NaN
3.234	-45.267	55.16	1744.08	-1.8218	1.1646	0.70313	-42.176	-131.837	1762.421	-1.1675	0.96143	0.53174	-15.49	331.477	1124.397	-1.0386	0.85596	0.32178	NaN	NaN	NaN	NaN	NaN	NaN
3.236	-43.731	62.611	1712.92	-1.8066	1.1523	0.7085	-35.085	-120.548	1784.1778	-1.2503	1.0552	0.55176	-16.242	395.558	1080.73	-0.98975	0.81885	0.29492	NaN	NaN	NaN	NaN	NaN	NaN
3.238	-30.73	83.922	1701.98	-1.7754	1.1328	0.70947	-59.925	-95.199	1836.4162	-1.3249	1.1364	0.56015	-12.555	381.059	1061.8482	-0.97021	0.7915	0.28516	NaN	NaN	NaN	NaN	NaN	NaN
3.24	-29.599	95.056	1690.75	-1.7497	1.1204	0.70044	10.046	-114.4739	1874.9673	-1.3979	1.2173	0.56523	-8.61	426.31	1002.7255	-0.92188	0.75195	0.26807	NaN	NaN	NaN	NaN	NaN	NaN
3.242	-10.002	108.814	1672.31	-1.7207	1.1055	0.69189	5.55	-90.9628	1848.332	-1.47	1.2835	0.56709	-36.7707	352.901	930.09521	-0.88061	0.72485	0.25122	NaN	NaN	NaN	NaN	NaN	NaN
3.244	-16.869	105.912	1665.23	-1.6758	1.084	0.68604	-27.483	-109.947	1862.0078	-1.5352	1.3398	0.56885	-3.332	365.392	861.4644	-0.83936	0.6958	0.23584	NaN	NaN	NaN	NaN	NaN	NaN
3.246	-12.967	116.6537	1648.71	-1.6519	1.0747	0.67773	10.087	-113.5687	1882.0115	-1.5897	1.3794	0.57266	7.808	312.482	806.5501	-0.78076	0.65674	0.21484	NaN	NaN	NaN	NaN	NaN	NaN
3.248	-25.81	127.047	1620.21	-1.6113	1.0586	0.66455	-20.063	-105.3915	1909.424	-1.6297	1.4211	0.57432	34.457	362.684	725.376	-0.75146	0.6333	0.20313	NaN	NaN	NaN	NaN	NaN	NaN
3.25	-40.86	139.76	1573.15	-1.5752	1.0444	0.64942	-11.127	-136.6976	1974.31	-1.6637	1.4715	0.57705	36.185	307.017	704.773	-0.68311	0.59521	0.17383	NaN	NaN	NaN	NaN	NaN	NaN
3.252	-44.331	146.158	1548.58	-1.5376	1.0298	0.63477	-31.421	-144.7844	2001.42	-1.6996	1.5168	0.58291	23.162	309.3473	665.451	-0.62695	0.56299	0.15625	NaN	NaN	NaN	NaN	NaN	NaN
3.254	-27.407	160.278	1523.62	-1.4863	1.0117	0.60986	-74.17	-153.431	2019.846	-1.748	1.5645	0.58447	-10.224	209.439	666.0893	-0.57617	0.5293	0.13525	NaN	NaN	NaN	NaN	NaN	NaN
3.256	-28.606	162.308	1491.15	-1.4609	1.0039	0.59424	-70.68	-169.7	2035.192	-1.7992	1.6067	0.59844	14.778	239.938	639.175	-0.51025	0.48242	0.1084	NaN	NaN	NaN	NaN	NaN	NaN
3.258	-41.514	152.975	1459.94	-1.3965	0.98047	0.57666	-115.905	-112.386	2008.50952	-1.8562	1.6488	0.61065	11.057	190.894	599.764	-0.4751	0.45654	0.091309	NaN	NaN	NaN	NaN	NaN	NaN
3.26	-4.045	153.392	1431.73	-1.3562	0.96313	0.55688	-140.746	-95.1628	2001.9153	-1.9062	1.6848	0.61768	21.867	241.9402	549.065	-0.41504	0.41016	0.069824	NaN	NaN	NaN	NaN	NaN	NaN
3.262	7.256	169.59	1412.15	-1.314	0.94385	0.53809	-78.474	-68.62	1982.2086	-1.9437	1.7137	0.62646	29.622	180.4558	510.814	-0.375	0.37598	0.051514	NaN	NaN	NaN	NaN	NaN	NaN
3.264	3.242	180.341	1382.78	-1.2622	0.92432	0.51221	-104.912	-51.468	1972.358	-1.9624	1.7329	0.63477	-11.558	226.512	446.421	-0.33008	0.3457	0.035156	NaN	NaN	NaN	NaN	NaN	NaN
3.266	-2.459	171.005	1356.03	-1.2402	0.91797	0.50146	-93.872	-73.5687	1992.9186	-1.9676	1.7394	0.64287	-13.799	165.52505	373.33429	-0.27637	0.29932	0.02002	NaN	NaN	NaN	NaN	NaN	NaN
3.268	15.79	170.385	1329.36	-1.1846	0.88867	0.48291	-79.389	-67.4289	1993.052	-1.9641	1.7376	0.64688	-5.313	198.6713	316.273	-0.24756	0.27637	0.011719	NaN	NaN	NaN	NaN	NaN	NaN
3.27	21.282	169.707	1295.14	-1.1521	0.87085	0.46802	-109.507	-54.031	1982.191	-1.9591	1.7287	0.65352	-20.434	97.839	261.885	-0.20264	0.24365	-0.0014648	NaN	NaN	NaN	NaN	NaN	NaN
3.272	10.761	169.181	1286.2	-1.126	0.85352	0.45557	-76.505	-53.426	1989.1126	-1.9618	1.7065	0.66543	-18.181	140.6122	216.686	-0.177	0.21948	-0.016846	NaN	NaN	NaN	NaN	NaN	NaN
3.274	27.367	169.775	1261.73	-1.0869	0.83398	0.42969	-106.926	7.21036	1958.195	-1.9746	1.6836	0.6792	-36.125	105.88924	170.958	-0.15137	0.20068	-0.027832	NaN	NaN	NaN	NaN	NaN	NaN
3.276	32.828	182.215	1229.51	-1.0659	0.81885	0.42188	-112.901	31.988	1962.0069	-1.9896	1.6568	0.69912	-41.218	182.477	136.833	-0.12012	0.1709	-0.034668	NaN	NaN	NaN	NaN	NaN	NaN
3.278	35.328	192.024	1166.76	-1.0327	0.7915	0.40723	-85.065	53.194	1984.752	-2.0093	1.6251	0.71328	-59.425	110.00055	133.1428	-0.10449	0.15625	-0.04248	NaN	NaN	NaN	NaN	NaN	NaN
3.28	13.567	182.387	1125.05	-1.0054	0.76807	0.39673	-107.969	64.533	2008.569	-2.0265	1.5892	0.72969	-59.687	132.202	137.916	-0.085449	0.13184	-0.05127	NaN	NaN	NaN	NaN	NaN	NaN
3.282	12.417	178.228	1086.26	-0.98242	0.74707	0.38135	-87.799	32.678	2056.675	-2.042	1.5569	0.74073	-65.344	76.7071	103.1558	-0.078613	0.11621	-0.05835	NaN	NaN	NaN	NaN	NaN	NaN
3.284	14.153	164.71	1080.04	-0.94336	0.7168	0.36475	-66.374	11.471	2046.756	-2.0522	1.5239	0.75195	-57.21	149.946	59.926	-0.069824	0.10059	-0.06543	NaN	NaN	NaN	NaN	NaN	NaN
3.286	37.169	172.842	1030.66	-0.92627	0.69971	0.35742	-83.998	1.32	2006.0088	-2.0648	1.4922	0.76143	-16.416	100.72843	47.702	-0.070801	0.081055	-0.068848	NaN	NaN	NaN	NaN	NaN	NaN
3.288	5.95500000000001	162.918	997.45	-0.88721	0.66748	0.33594	-55.088	-15.621	2002.027	-2.0734	1.4642	0.76797	-53.534	104.995	53.984	-0.071289	0.070313	-0.071289	NaN	NaN	NaN	NaN	NaN	NaN
3.29	4.102	178.734	942.4	-0.85083	0.64477	0.32544	-43.647	37.084	1942.6704	-2.085	1.4391	0.77656	-48.139	11.4	35.9842	-0.086914	0.05127	-0.066406	NaN	NaN	NaN	NaN	NaN	NaN
3.292	27.242	185.862	910.27	-0.82178	0.61963	0.30664	-46.759	47.577	1925.151	-2.0893	1.4201	0.77256	-67.628	22.3543	17.9596	-0.095949	0.045898	-0.062988	NaN	NaN	NaN	NaN	NaN	NaN
3.294	5.05799999999999	205.548	869.33	-0.78418	0.58789	0.2915	-13.443	56.7085	1932.858	-2.0933	1.4048	0.77344	-32.961	-18.8	-0.23	-0.11426	0.039551	-0.058594	NaN	NaN	NaN	NaN	NaN	NaN
3.296	-7.506	195.485	822.5	-0.75488	0.56909	0.2771	-80.149	72.7857	1910.3365	-2.091	1.3903	0.76894	-33.336	21.53	-1.869	-0.12793	0.035645	-0.053711	NaN	NaN	NaN	NaN	NaN	NaN
3.298	-16.315	180.302	811.85	-0.72461	0.54492	0.26025	-60.458	40.439	1908.249	-2.0835	1.3821	0.76621	-44.981	11.6998	18.688	-0.13379	0.029785	-0.046387	NaN	NaN	NaN	NaN	NaN	NaN
3.3	3.425	165.815	774.71	-0.68115	0.51807	0.24219	-50.201	49.3988	1864.7771	-2.0784	1.374	0.76426	-61.925	68.713	12.2772	-0.14453	0.023438	-0.046875	NaN	NaN	NaN	NaN	NaN	NaN
3.302	-10.182	153.163	722.97	-0.66016	0.50586	0.23096	-111.228	78.7426	1807.535	-2.0706	1.3603	0.75664	-43.606	62.5466	-16.5041	-0.14527	0.026611	-0.046142	NaN	NaN	NaN	NaN	NaN	NaN
3.304	-29.076	137.095	686.89	-0.60889	0.47852	0.20996	-65.824	73.195	1777.644	-2.0601	1.3462	0.75	-24.455	89.621	19.612	-0.15723	0.017578	-0.04541	NaN	NaN	NaN	NaN	NaN	NaN
3.306	-18.186	128.059	643.63	-0.57129	0.4541	0.18897	-85.569	110.575	1719.283	-2.0352	1.3233	0.74375	6.681	60.1041	28.4297	-0.17041	0.010254	-0.044922	NaN	NaN	NaN	NaN	NaN	NaN
3.308	-24.97	139.766	587.91	-0.53174	0.43408	0.17139	-104.173	103.5559	1710.8272	-2.0137	1.3086	0.73799	-4.137	78.225	59.015	-0.1792	0.0092773	-0.043457	NaN	NaN	NaN	NaN	NaN	NaN
3.31	-17.798	139.269	546.49	-0.48145	0.39648	0.14697	-83.04	102.7991	1740.39	-1.9824	1.2836	0.71689	11.223	76.945	44.111	-0.21484	0.0024414	-0.042969	NaN	NaN	NaN	NaN	NaN	NaN
3.312	-19.118	131.398	510.09	-0.45605	0.37988	0.13916	-90.559	129.0441	1715.8707	-1.9502	1.258	0.71084	-13.31	71.452	33.85065	-0.24268	-0.0029297	-0.037353	NaN	NaN	NaN	NaN	NaN	NaN
3.314	1.621	130.075	508.33	-0.40771	0.34766	0.11426	-47.514	107.552	1694.9679	-1.9116	1.2271	0.69922	-36.34	50.7194	45.201	-0.27344	-0.003418	-0.026367	NaN	NaN	NaN	NaN	NaN	NaN
3.316	-3.626	130.346	481.63	-0.37256	0.32129	0.095215	-78.969	115.381	1655.612	-1.8717	1.1994	0.68487	-44.576	28.9194	48.931	-0.31104	-0.0063477	-0.020508	NaN	NaN	NaN	NaN	NaN	NaN
3.318	-9.63500000000001	128.46	444.02	-0.34131	0.29736	0.076172	-111.786	129.474	1589.814	-1.8331	1.1677	0.67227	-32.396	25.304	16.9231	-0.33106	-0.0021972	-0.014405	NaN	NaN	NaN	NaN	NaN	NaN
3.32	-12.949	110.67	405.4	-0.29346	0.26709	0.057129	-60.938	98.801	1586.179	-1.8003	1.145	0.65976	-35.375	16.31285	21.272	-0.3457	0.0019531	-0.011719	NaN	NaN	NaN	NaN	NaN	NaN
3.322	-2.061	101.294	383.052	-0.27393	0.24609	0.045898	-74.551	146.7413	1548.101	-1.7693	1.119	0.64561	-34.8	21.0088	24.3375	-0.34619	0.013672	-0.015137	NaN	NaN	NaN	NaN	NaN	NaN
3.324	-5.752	108.522	347.494	-0.23486	0.21973	0.029297	-96.796	149.3436	1546.6895	-1.7363	1.0879	0.6333	-57.652	-13.58256	53.828	-0.34131	0.016602	-0.0097656	NaN	NaN	NaN	NaN	NaN	NaN
3.326	-20.604	95.444	309.147	-0.20849	0.19726	0.017578	-51.701	168.417	1558.6293	-1.7012	1.0619	0.61299	-48.894	-4.498	32.8655	-0.32275	0.020996	-0.019531	NaN	NaN	NaN	NaN	NaN	NaN
3.328	-1.74100000000001	92.716	281.15	-0.18359	0.17871	0.0097656	-74.6218	226.198	1512.526	-1.6655	1.0376	0.59941	-49.162	-29.0278	39.0609	-0.30395	0.023193	-0.023193	NaN	NaN	NaN	NaN	NaN	NaN
3.33	-18.853	85.554	273.61	-0.15576	0.15381	0	-35.406	212.3571	1476.717	-1.63	1.0098	0.58144	-30.293	14.838	27.343	-0.2749	0.020996	-0.031738	NaN	NaN	NaN	NaN	NaN	NaN
3.332	-9.149	80.941	237.02	-0.14307	0.13525	-0.0053711	-29.838	239.522	1431.126	-1.5964	0.97939	0.56582	-56.612	-13.262	60.326	-0.23145	0.015137	-0.041992	NaN	NaN	NaN	NaN	NaN	NaN
3.334	-22.705	65.089	223.407	-0.11426	0.11572	-0.018066	-25.863	243.344	1376.0237	-1.564	0.94482	0.54297	-52.16	47.322	46.4926	-0.20898	0.0058594	-0.046387	NaN	NaN	NaN	NaN	NaN	NaN
3.336	-5.55099999999999	66.284	218.02	-0.092774	0.098878	-0.029297	16.841	197.9098	1351.784	-1.5262	0.9166	0.52549	-56.622	28.4306	19.851	-0.15967	-0.013672	-0.054688	NaN	NaN	NaN	NaN	NaN	NaN
3.338	0.381	68.858	202.794	-0.077148	0.084473	-0.033203	-7.848	235.749	1295.854	-1.4926	0.88633	0.50518	-54.776	78.143	-14.7587	-0.1272	-0.025879	-0.063476	NaN	NaN	NaN	NaN	NaN	NaN
3.34	-10.901	69.026	185.247	-0.053223	0.06543	-0.042969	-16.487	214.0356	1285.863	-1.4582	0.85664	0.48096	-69.385	24.1038	-12.2985	-0.096191	-0.037598	-0.074707	NaN	NaN	NaN	NaN	NaN	NaN
3.342	-28.104	56.908	156.5849	-0.04541	0.054688	-0.043457	24.985	221.5652	1292.60334	-1.4203	0.83047	0.46084	-72.656	54.26	-25.3433	-0.042969	-0.056152	-0.080078	NaN	NaN	NaN	NaN	NaN	NaN
3.344	-26.119	57.958	148.0022	-0.028809	0.034668	-0.049316	-8.442	269.1583	1246.9003	-1.3906	0.80273	0.44092	-62.638	-5.86358	-14.457	-0.018555	-0.068359	-0.089844	NaN	NaN	NaN	NaN	NaN	NaN
3.346	-20.968	61.021	135.3027	-0.016846	0.021972	-0.053711	9.062	245.318	1230.664	-1.3599	0.77315	0.42149	-37.877	33.255	-7.9935	0.032715	-0.075195	-0.10547	NaN	NaN	NaN	NaN	NaN	NaN
3.348	-42.065	59.759	112.3694	-0.0058594	0.012207	-0.056641	9.985	275.874	1199.2464	-1.328	0.7458	0.40566	-35.416	-22.4712	19.5246	0.074707	-0.086426	-0.10962	NaN	NaN	NaN	NaN	NaN	NaN
3.35	-55.329	58.2918	102.731	0.003418	-0.0058594	-0.058105	-2.68	273.413	1128.5828	-1.2979	0.71728	0.38613	-43.175	26.6986	22.74939	0.12061	-0.091797	-0.125	NaN	NaN	NaN	NaN	NaN	NaN
3.352	-43.591	49.8774	91.737	0.0097656	-0.011719	-0.057617	7.624	219.656	1108.737	-1.2593	0.69062	0.36689	-27.585	-14.6946	28.658	0.18359	-0.1001	-0.14209	NaN	NaN	NaN	NaN	NaN	NaN
3.354	-41.316	56.3482	79.2057	0.013184	-0.029785	-0.0625	-7.805	245.58	1060.122	-1.2227	0.6709	0.34863	-14.767	61.7788	-3.5755	0.2168	-0.10693	-0.15039	NaN	NaN	NaN	NaN	NaN	NaN
3.356	-50.53	48.0304	57.63237	0.015625	-0.041504	-0.065185	-24.783	203.265	1018.278	-1.1863	0.6457	0.33359	-23.071	17.201	-14.7543	0.27783	-0.12061	-0.1748	NaN	NaN	NaN	NaN	NaN	NaN
3.358	-43.98	36.1141	47.09967	0.015625	-0.049316	-0.064453	-5.547	193.02	994.9184	-1.1508	0.62578	0.30674	-9.50599999999999	78.784	7.8706	0.32055	-0.12817	-0.18652	NaN	NaN	NaN	NaN	NaN	NaN
3.36	-23.672	42.4619	42.6066	0.012207	-0.06543	-0.069824	-12.671	234.553	936.265	-1.1082	0.6043	0.29267	-12.006	14.5793	21.9882	0.35645	-0.1377	-0.20117	NaN	NaN	NaN	NaN	NaN	NaN
3.362	-39.971	53.45	30.855	0.010742	-0.073242	-0.068359	5.523	209.933	911.8535	-1.0689	0.58028	0.2752	-17.874	67.826	28.5581	0.3916	-0.14844	-0.21533	NaN	NaN	NaN	NaN	NaN	NaN
3.364	-34.318	61.323	32.009	0.0078125	-0.078125	-0.067383	3.942	257.0762215	865.56	-1.0308	0.55518	0.26611	-37.39	24.64226	19.0112	0.40137	-0.15576	-0.2207	NaN	NaN	NaN	NaN	NaN	NaN
3.366	-21.962	51.891	37.6714	0.001709	-0.087647	-0.064453	-12.712	266.8373	793.988	-0.99609	0.52383	0.24541	-28.998	66.728	8.4881	0.40332	-0.16846	-0.22754	NaN	NaN	NaN	NaN	NaN	NaN
3.368	-29.658	51.7089	37.5495	-0.0092773	-0.089355	-0.064453	-3.778	217.116	746.285	-0.96357	0.50459	0.22852	-38.082	34.106	30.4775	0.38819	-0.17774	-0.22021	NaN	NaN	NaN	NaN	NaN	NaN
3.37	-52.537	42.1022	27.9638	-0.024414	-0.095215	-0.05957	-46.653	257.967	684.7191	-0.92412	0.48155	0.21563	-27.695	93.201	32.859	0.36377	-0.18018	-0.21094	NaN	NaN	NaN	NaN	NaN	NaN
3.372	-67.502	38.20146	15.3274	-0.028809	-0.10107	-0.048828	-58.494	212.0164	637.9017	-0.88603	0.45537	0.20332	-21.512	59.668	13.074	0.31396	-0.18848	-0.19629	NaN	NaN	NaN	NaN	NaN	NaN
3.374	-32.31	31.0476	17.84319	-0.044434	-0.096191	-0.047852	-17.558	201.6854	625.8091	-0.84961	0.43262	0.19531	-21.882	103.757	17.872	0.28369	-0.17969	-0.17871	NaN	NaN	NaN	NaN	NaN	NaN
3.376	-18.847	29.4677	17.88586	-0.053223	-0.10107	-0.043457	-29.592	244.8611	574.9	-0.81836	0.42109	0.1835	-38.549	32.678	28.9221	0.22217	-0.16943	-0.15137	NaN	NaN	NaN	NaN	NaN	NaN
3.378	-5.954	27.797	6.2228	-0.064453	-0.10254	-0.039063	-15.184	187.598	571.7449	-0.77763	0.40733	0.16572	-63.29	46.612	24.9402	0.18701	-0.15357	-0.13159	NaN	NaN	NaN	NaN	NaN	NaN
3.38	-28.393	22.6459	13.015	-0.077637	-0.099609	-0.021484	-17.222	219.751	522.986	-0.73701	0.38936	0.15205	-21.265	-6.653	32.6591	0.15674	-0.12744	-0.11719	NaN	NaN	NaN	NaN	NaN	NaN
3.382	1.397	33.1767	13.0432	-0.086914	-0.095215	-0.018066	-31.487	210.6865	465.491	-0.70078	0.36738	0.13877	-49.67	23.433	29.0967	0.13867	-0.096191	-0.10107	NaN	NaN	NaN	NaN	NaN	NaN
3.384	-12.915	41.6456	23.546	-0.096191	-0.10303	-0.02002	-10.535	159.206	428.108	-0.65869	0.35303	0.12256	-54.818	-3.183	45.339	0.13477	-0.082031	-0.10107	NaN	NaN	NaN	NaN	NaN	NaN
3.386	-13.617	44.6593	29.0853	-0.10352	-0.10083	-0.011719	-17.926	200.095	370.9505	-0.61992	0.33281	0.1126	-69.022	15.0457	63.976	0.14551	-0.05957	-0.10205	NaN	NaN	NaN	NaN	NaN	NaN
3.388	-11.991	37.19867	45.529	-0.10986	-0.10156	-0.015137	-15.095	134.523	347.2407	-0.57978	0.31113	0.10107	-68.286	-3.4331	38.855	0.15552	-0.044922	-0.10547	NaN	NaN	NaN	NaN	NaN	NaN
3.39	-6.203	31.6888	37.091	-0.1123	-0.1001	-0.012695	-4.33799999999999	103.342	349.312	-0.53994	0.28379	0.088965	-68.603	37.06	18.216	0.16602	-0.036133	-0.11377	NaN	NaN	NaN	NaN	NaN	NaN
3.392	-9.788	34.025	14.41889	-0.1123	-0.10107	-0.013184	-21.336	136.902	327.43	-0.49814	0.25742	0.070313	-47.163	20.6842	12.6898	0.1792	-0.02832	-0.11816	NaN	NaN	NaN	NaN	NaN	NaN
3.394	-43.205	25.7455	17.512178	-0.10352	-0.10205	-0.015625	-11.883	78.278	326.4685	-0.45068	0.23389	0.0625	-60.436	20.2706	31.758	0.18066	-0.026855	-0.12793	NaN	NaN	NaN	NaN	NaN	NaN
3.396	-25.425	28.3766	22.2134	-0.1001	-0.10572	-0.018555	-7.27800000000001	123.4927	315.8243	-0.41113	0.21123	0.05166	-60.014	11.0977	31.263	0.18408	-0.025879	-0.13477	NaN	NaN	NaN	NaN	NaN	NaN
3.398	-32.707	27.4185	21.3599	-0.095215	-0.10938	-0.018555	-33.588	154.046	266.127	-0.36689	0.1915	0.039649	-42.019	13.5742	27.01	0.17334	-0.021973	-0.14136	NaN	NaN	NaN	NaN	NaN	NaN
3.4	-29.806	40.489	2.9164	-0.095703	-0.10889	-0.013184	-25.384	122.268	236.244	-0.32627	0.17236	0.025586	-38.865	7.396	14.701	0.15967	-0.013672	-0.14307	NaN	NaN	NaN	NaN	NaN	NaN
3.402	-34.736	32.465	4.796	-0.095703	-0.11035	-0.016113	-41.126	184.804	175.1015	-0.2878	0.15166	0.012793	-29.61	-7.1253	25.453	0.13184	0.0024414	-0.14111	NaN	NaN	NaN	NaN	NaN	NaN
3.404	-29.489	26.7167	23.8263	-0.098145	-0.10742	-0.014648	-32.254	117.911	150.499	-0.25391	0.12988	0.0014648	-32.323	13.99406	5.2228	0.11426	0.012207	-0.13525	NaN	NaN	NaN	NaN	NaN	NaN
3.406	-27.878	26.4557	34.0461	-0.10352	-0.10986	-0.011475	-21.494	83.9543	152.773	-0.21602	0.10693	-0.011133	-23.928	18.5008	13.4072	0.080078	0.041016	-0.1333	NaN	NaN	NaN	NaN	NaN	NaN
3.408	-36.886	31.735	18.3206	-0.097656	-0.10547	-0.010742	-23.164	106.95	139.542	-0.1835	0.090039	-0.016211	-13.221	72.425	-29.3552	0.060303	0.058838	-0.12891	NaN	NaN	NaN	NaN	NaN	NaN
3.41	-38.543	26.685	15.4857	-0.10303	-0.099609	-0.0024414	-19.222	52.357	148.9521	-0.1581	0.064258	-0.027148	-24.969	42.224	9.013	0.046387	0.077637	-0.12451	NaN	NaN	NaN	NaN	NaN	NaN
3.412	-28.299	13.889	22.7125	-0.10059	-0.096191	-0.0043945	-36.677	96.2969	125.975	-0.13086	0.042187	-0.042383	-39.923	49.815	2.3112	0.039551	0.104	-0.13379	NaN	NaN	NaN	NaN	NaN	NaN
3.414	-25.509	17.7747	27.1679	-0.10156	-0.084473	-0.0029297	-55.09	124.431	81.252	-0.10693	0.025391	-0.044922	-18.356	-5.6314	10.6235	0.038086	0.1123	-0.14063	NaN	NaN	NaN	NaN	NaN	NaN
3.416	-35.863	24.0201	12.4911	-0.10279	-0.07959	0.00097654	-61.791	92.873	71.687	-0.091797	0.002832	-0.047656	-13.716	28.9422	2.992	0.032227	0.13574	-0.14404	NaN	NaN	NaN	NaN	NaN	NaN
3.418	-50.47	27.8991	10.5573	-0.098145	-0.069336	-0.00048828	-50.289	147.721	41.0945	-0.079102	-0.010059	-0.053516	-33.581	2.2647	26.3316	0.020996	0.15039	-0.14746	NaN	NaN	NaN	NaN	NaN	NaN
3.42	-16.959	34.67	12.6065	-0.089355	-0.062012	0.0029297	-57.894	77.419	38.8501	-0.075195	-0.028028	-0.052734	-20.329	43.3373	13.5971	0.0039063	0.16211	-0.15527	NaN	NaN	NaN	NaN	NaN	NaN
3.422	-31.13	30.932	19.3509	-0.080566	-0.056641	-0.0024414	-68.352	32.8265	55.0967	-0.073828	-0.038282	-0.052246	-25.716	9.7755	61.457	-0.0097656	0.17822	-0.17041	NaN	NaN	NaN	NaN	NaN	NaN
3.424	-43.362	23.6227	10.6076	-0.069336	-0.048828	-0.003418	-76.3333	51.0212	48.967	-0.070801	-0.05127	-0.052246	-16.591	37.0929	36.6449	-0.018555	0.18262	-0.16016	NaN	NaN	NaN	NaN	NaN	NaN
3.426	-44.202	12.295	21.1968	-0.056397	-0.045655	-0.0036621	-65.64	-11.379	54.5244	-0.07041	-0.059277	-0.054004	-36.815	-15.7235	38.073	-0.025391	0.20947	-0.18848	NaN	NaN	NaN	NaN	NaN	NaN
3.428	1.088	20.2847	21.415	-0.046875	-0.037598	-0.0043945	-42.582	38.5252	58.538	-0.071094	-0.067285	-0.052442	-26.057	11.164	84.732	-0.025879	0.2312	-0.19458	NaN	NaN	NaN	NaN	NaN	NaN
3.43	-27.092	22.1169	3.9544	-0.027344	-0.039551	-0.013184	-50.07	61.598	15.9608	-0.069141	-0.070019	-0.055566	-33.659	-72.5815	160.8075	-0.021973	0.25635	-0.20752	NaN	NaN	NaN	NaN	NaN	NaN
3.432	-18.812	28.4455	6.5348	-0.016602	-0.041992	-0.0073242	-43.582	10.9168	8.78896	-0.068652	-0.07793	-0.048047	-53.926	-40.338	220.837	-0.024902	0.29736	-0.22949	NaN	NaN	NaN	NaN	NaN	NaN
3.434	-10.985	23.298	13.2648	-0.0014648	-0.038086	-0.022949	-23.339	72.331	-4.7473	-0.068848	-0.078613	-0.047363	-37.679	-110.775	301.314	-0.031738	0.31445	-0.23877	NaN	NaN	NaN	NaN	NaN	NaN
3.436	-9.303	24.90647	17.7706	0.012207	-0.035645	-0.025879	-36.735	23.6206	8.2766	-0.063575	-0.084668	-0.049414	-50.675	-85.165	372.347	-0.059082	0.35938	-0.24609	NaN	NaN	NaN	NaN	NaN	NaN
3.438	11.632	33.2604	14.7771	0.015625	-0.035156	-0.030762	-24.792	7.20483	30.242	-0.058887	-0.085645	-0.05039	-42.8648	-140.851	525.2214	-0.10254	0.39746	-0.2461	NaN	NaN	NaN	NaN	NaN	NaN
3.44	-27.416	22.0092	16.3629	0.030273	-0.029297	-0.035645	-21.309	39.6247	28.4371	-0.052637	-0.089941	-0.051562	-70.446	-50.3372	719.249	-0.1626	0.43213	-0.24219	NaN	NaN	NaN	NaN	NaN	NaN
3.442	-26.947	22.7534	13.0308	0.043213	-0.024414	-0.040772	-19.518	-17.66014	22.0409	-0.04502	-0.097169	-0.052442	-64.149	-29.5810942	903.075	-0.26807	0.48193	-0.22607	NaN	NaN	NaN	NaN	NaN	NaN
3.444	-29.659	12.8342	17.269	0.046875	-0.019043	-0.047852	-25.994	35.299	18.43	-0.039063	-0.10107	-0.053711	-71.99	78.3391	1139.033	-0.3335	0.50439	-0.21338	NaN	NaN	NaN	NaN	NaN	NaN
3.446	-23.083	26.6794	-2.104	0.057617	-0.015625	-0.04834	-19.695	61.644	2.707	-0.031348	-0.10557	-0.056934	-73.862	31.323	1386.99	-0.48438	0.56445	-0.18652	NaN	NaN	NaN	NaN	NaN	NaN
3.448	-41.671	26.92717	-9.056	0.060547	-0.012695	-0.046387	-7.056	19.0588	26.5358	-0.029297	-0.10732	-0.061036	-97.421	56.4367	1614.871	-0.61328	0.60693	-0.16993	NaN	NaN	NaN	NaN	NaN	NaN
3.45	-20.177	22.9711	7.24216	0.064941	-0.0097656	-0.04541	-11.823	74.173	21.7574	-0.028125	-0.10967	-0.063378	-100.565	-2.47	1777.034	-0.76953	0.65576	-0.14355	NaN	NaN	NaN	NaN	NaN	NaN
3.452	-12.288	17.423	13.2	0.061035	-0.0043946	-0.046875	-17.886	23.5174	16.776726	-0.025586	-0.10879	-0.064942	-85.357	6.817	1858.09	-1.0249	0.74658	-0.095215	NaN	NaN	NaN	NaN	NaN	NaN
3.454	-48.76	41.5167	7.0741	0.061523	-0.0029297	-0.046875	-11.715	-9.0368	24.4294	-0.030762	-0.10889	-0.068848	-68.313	-49.775	1818.56	-1.1831	0.79834	-0.054199	NaN	NaN	NaN	NaN	NaN	NaN
3.456	-28.65	31.147	13.3595	0.058594	-0.00097656	-0.037109	-23.276	36.6548	10.726	-0.03496	-0.11152	-0.06211	-73.902	-55.223	1729.01	-1.5684	0.93066	0.063477	NaN	NaN	NaN	NaN	NaN	NaN
3.458	-15.489	29.2869	20.697	0.058105	0.0024414	-0.041016	-21.277	-9.869	17.6391	-0.034568	-0.10831	-0.063865	-74.92	-138.9691	1570.56	-1.9229	1.0645	0.20654	NaN	NaN	NaN	NaN	NaN	NaN
3.46	-23.699	28.5895	16.7139	0.049805	0.0097656	-0.037598	-17.729	26.6815	19.7686	-0.04277	-0.10439	-0.060356	-86.3897	-178.556	1455.655	-2.3062	1.2329	0.37695	NaN	NaN	NaN	NaN	NaN	NaN
3.462	-39.744	31.8395	2.4016	0.044189	0.006836	-0.037598	-39.453	38.9836	11.512	-0.049509	-0.10136	-0.055958	-103.401	-240.77	1364.8439	-2.7808	1.4731	0.57324	NaN	NaN	NaN	NaN	NaN	NaN
3.464	-46.071	35.9333	-11.0136	0.04248	0.0073242	-0.036621	-41.548	-4.0733	24.1997	-0.052246	-0.10156	-0.056152	-126.845	-283.69	1301.208	-2.9536	1.6216	0.65576	NaN	NaN	NaN	NaN	NaN	NaN
3.466	-40.199	30.469805	3.455	0.035156	0.0039063	-0.035156	-34.795	56.735	23.983578	-0.060547	-0.093848	-0.051265	-90.24	-319.23	1269.69	-2.9019	1.7485	0.77344	NaN	NaN	NaN	NaN	NaN	NaN
3.468	-49.873	29.7553	19.2546	0.034668	0.0078125	-0.039063	-58.084	26.1908	4.92923	-0.062398	-0.091892	-0.048133	-44.845	-341.805	1278.363	-2.7676	1.8398	0.77979	NaN	NaN	NaN	NaN	NaN	NaN
3.47	-42.524	6.403	49.0833	0.02832	0.0014648	-0.031738	-42.972	14.1426	26.189	-0.065148	-0.088375	-0.041504	4.065	-292.633	1344.343	-2.7026	1.8423	0.64844	NaN	NaN	NaN	NaN	NaN	NaN
3.472	-29.961	-21.811	59.2085	0.016113	0.0024414	-0.032959	-46.374	62.8931	-0.693000000000001	-0.061321	-0.089548	-0.036325	18.838	-223.008	1465.6734	-2.2676	1.7383	0.34424	NaN	NaN	NaN	NaN	NaN	NaN
3.474	-10.065	-21.342	84.002	0.0024414	0.003418	-0.026855	-44.934	4.859	2.116	-0.055176	-0.093262	-0.031738	23.6118	-90.27	1561.081	-1.7666	1.6279	0.17066	NaN	NaN	NaN	NaN	NaN	NaN
3.476	-45.876	-18.861	107.888	-0.0092773	0.0053711	-0.029785	-49.616	34.8107	9.786	-0.053241	-0.091296	-0.029607	8.1235	-21.67	1629.664	-1.3101	1.5493	0.024902	NaN	NaN	NaN	NaN	NaN	NaN
3.478	-35.851	-36.989	148.747	-0.016602	0.0068359	-0.029785	-56.716	54.8351	-8.389	-0.040362	-0.093439	-0.025676	13.0198	18.59	1643.068	-0.96436	1.4712	-0.15723	NaN	NaN	NaN	NaN	NaN	NaN
3.48	-2.467	-56.449	198.756	-0.030273	0.012207	-0.030762	-51.211	11.6357	15.49199	-0.032545	-0.091542	-0.028017	-9.3477	-67.524	1694.629	-0.88477	1.4531	-0.23535	NaN	NaN	NaN	NaN	NaN	NaN
3.482	10.725	-52.49	245.0267	-0.048095	0.019775	-0.033203	-42.738	66.355	8.482	-0.018798	-0.094636	-0.024902	1.565	-159.8444	1739.658	-0.75928	1.4751	-0.32373	NaN	NaN	NaN	NaN	NaN	NaN
3.484	17.884	-45.692	311.472	-0.071777	0.035645	-0.026367	-47.48	30.98973	-0.575000000000001	-0.0029297	-0.094238	-0.032715	12.468	-354.05	1774.024	-0.68579	1.511	-0.33911	NaN	NaN	NaN	NaN	NaN	NaN
3.486	-13.396	-9.001	409.286	-0.13037	0.056152	-0.012695	-39.998	9.7936	12.8954	0.0066925	-0.096549	-0.02807	34.637	-455.77	1780.875	-0.64453	1.5313	-0.3418	NaN	NaN	NaN	NaN	NaN	NaN
3.488	-37.793	35.003	525.829	-0.16406	0.0625	-0.0053711	-33.469	60.092	5.953	0.011479	-0.095596	-0.027785	85.132	-533.3	1793.5311	-0.64063	1.4785	-0.3291	NaN	NaN	NaN	NaN	NaN	NaN
3.49	-75.329	88.21	607.698	-0.23779	0.081543	0.0048828	-22.829	-4.9371	26.6229	0.01798	-0.094007	-0.028696	140.97	-477.37	1784.759	-0.68115	1.4282	-0.30176	NaN	NaN	NaN	NaN	NaN	NaN
3.492	-56.301	113.996	729.749	-0.29004	0.096191	0.008545	-28.871	23.9061	40.9851	0.02153	-0.094964	-0.02681	153.614	-428.458	1810.136	-0.9292	1.3774	-0.18408	NaN	NaN	NaN	NaN	NaN	NaN
3.494	-100.124	102.4223	874.215	-0.35059	0.11377	0.0083008	-28.499	50.002	15.3764	0.022461	-0.094727	-0.027832	127.02	-329.28	1873.981	-1.2239	1.4314	-0.071535	NaN	NaN	NaN	NaN	NaN	NaN
3.496	-83.061	114.946	1007.999	-0.4292	0.14502	0.00097656	-15.749	15.1892	19.7777	0.030125	-0.088103	-0.028999	87.009	-313.64	1941.672	-1.5269	1.5239	0.029297	NaN	NaN	NaN	NaN	NaN	NaN
3.498	-82.728	111.2589	1078.86	-0.48096	0.16943	0.003418	-21.149	74.929	7.875	0.034243	-0.081952	-0.028446	37.9647	-225.875	2050.617	-1.8086	1.6406	0.12646	NaN	NaN	NaN	NaN	NaN	NaN
3.5	-76.424	110.518	1119.031	-0.59717	0.22119	0.00048828	-13.462	35.362	11.5133	0.035708	-0.077085	-0.02999	17.82794	-162.11	2087.069	-1.8848	1.6738	0.16016	NaN	NaN	NaN	NaN	NaN	NaN
3.502	-52.474	84.413	1157.825	-0.71558	0.26758	0.01587	-1.881	17.1877	20.2251	0.043936	-0.072632	-0.031889	26.311	-19.41	2063.007	-1.9434	1.7109	0.17041	NaN	NaN	NaN	NaN	NaN	NaN
3.504	-30.148	31.192	1185.38	-0.854	0.32178	0.040039	-8.02699999999999	57.559	4.6192	0.055176	-0.067383	-0.038574	29.265	10.08	2009.373	-1.9471	1.721	0.14111	NaN	NaN	NaN	NaN	NaN	NaN
3.506	-19.224	4.865	1172.93	-1.0786	0.39795	0.092773	-22.376	6.3997	23.408	0.067123	-0.059552	-0.042555	19.3188	9.64	1963.139	-1.957	1.7227	0.11035	NaN	NaN	NaN	NaN	NaN	NaN
3.508	-49.013	-26.5598	1126.548	-1.2041	0.44824	0.12646	-17.6	38.502	43.6558	0.079386	-0.052399	-0.049908	26.715	-128.902	1942.651	-1.9741	1.7173	0.091797	NaN	NaN	NaN	NaN	NaN	NaN
3.51	-69.5401	-46.117	1119.688	-1.478	0.56494	0.20313	-31.739	63.643	29.4833	0.095906	-0.04649	-0.056152	35.228	-204.542	1995.699	-2	1.7168	0.099609	NaN	NaN	NaN	NaN	NaN	NaN
3.512	-51.348	-54.555	1132.13	-1.6743	0.67236	0.28247	-32.597	26.0039	25.985	0.11233	-0.041522	-0.060529	53.684	-257.861	2057.1392	-2.0469	1.709	0.097168	NaN	NaN	NaN	NaN	NaN	NaN
3.514	-75.967	-43.685	1127.3	-1.8545	0.7793	0.31592	-11.511	70.352	15.15171	0.12939	-0.035645	-0.064453	48.7411	-202.933	2104.6972	-2.0713	1.7168	0.097412	NaN	NaN	NaN	NaN	NaN	NaN
3.516	-58.857	-60.588	1106.57	-1.98	0.90479	0.34961	-54.395	24.1956	6.431	0.14247	-0.035316	-0.074059	22.103	-180.626	2129.36084	-2.0854	1.7231	0.098633	NaN	NaN	NaN	NaN	NaN	NaN
3.518	-90.895	-78.319	1093.969	-1.9883	0.95605	0.375	-30.269	-2.8664	27.0486	0.15565	-0.031519	-0.082137	-34.561	-170.595	2131.302	-2.1074	1.7383	0.098145	NaN	NaN	NaN	NaN	NaN	NaN
3.52	-71.288	-69.942	1125.713	-1.9546	1.0269	0.4209	-32.876	25.7223	22.1673	0.16611	-0.031485	-0.088804	-29.5024	-202.97	2149.2618	-2.1167	1.7524	0.10156	NaN	NaN	NaN	NaN	NaN	NaN
3.522	-71.374	-45.626	1156.477	-1.9204	1.0425	0.38623	-53.677	-20.5243	18.1999	0.17742	-0.027705	-0.098719	-51.6145	-187.933	2207.977	-2.1328	1.7773	0.10645	NaN	NaN	NaN	NaN	NaN	NaN
3.524	-27.428	-29.62	1184.004	-1.8218	1.0239	0.31738	-43.752	14.4467	28.1854	0.18066	-0.023438	-0.10498	-54.278	-169.188	2241.49	-2.1355	1.7737	0.11255	NaN	NaN	NaN	NaN	NaN	NaN
3.526	11.068	-42.135	1201.23	-1.5581	0.98096	0.21094	-62.011	44.0387	19.5744	0.18871	-0.020224	-0.11139	-47.47346	-109.55006	2242.063	-2.1245	1.7583	0.10889	NaN	NaN	NaN	NaN	NaN	NaN
3.528	29.272	-70.557	1219.214	-1.3945	0.95703	0.16895	-47.321	12.8117	29.343	0.18801	-0.012927	-0.12178	-33.2444	-61.872	2163.17	-2.0801	1.7168	0.10205	NaN	NaN	NaN	NaN	NaN	NaN
3.53	46.847	-94.545	1244.475	-1.1299	0.91309	0.077148	-43.52	68.729	14.9627	0.19348	-0.0048576	-0.12652	-5.413	-6.45	2039.687	-2.0508	1.6934	0.092285	NaN	NaN	NaN	NaN	NaN	NaN
3.532	48.715	-140.937	1292.179	-1.0049	0.89941	0.01416	-53.769	39.7551	20.3725	0.19737	0.0044781	-0.13524	55.0609	19.5503	1940.085	-2.0015	1.6353	0.075195	NaN	NaN	NaN	NaN	NaN	NaN
3.534	80.031	-180.42359	1336.484	-0.91797	0.9082	-0.033203	-36.766	-0.52186	71.8812	0.1958	0.010742	-0.13623	66.929	4.905	1912.093	-1.9651	1.5998	0.060059	NaN	NaN	NaN	NaN	NaN	NaN
3.536	41.362	-213.707	1380.162	-0.86475	0.95557	-0.06543	-36.547	-6.0387	47.464	0.19794	0.025145	-0.14837	41.9742	15.848	1890.554	-1.9341	1.5649	0.052734	NaN	NaN	NaN	NaN	NaN	NaN
3.538	3.327	-232.175	1422.132	-0.85742	0.97656	-0.078613	-62.63	-58.869	50.085	0.19616	0.037359	-0.15431	-1.559	16.5414	1883.316	-1.8965	1.5293	0.044922	NaN	NaN	NaN	NaN	NaN	NaN
3.54	-30.46	-258.568	1470.349	-0.88379	1.0234	-0.084961	-42.294	-31.8934	67.7886	0.18639	0.049056	-0.159	13.307	46.8256	1873.962	-1.8809	1.5156	0.037109	NaN	NaN	NaN	NaN	NaN	NaN
3.542	-17.048	-243.271	1522.751	-0.948	1.0618	-0.080323	-38.15	-22.4171	95.6829	0.17362	0.06184	-0.15733	9.348	14.08	1867.312	-1.8394	1.4927	0.026855	NaN	NaN	NaN	NaN	NaN	NaN
3.544	-3.148	-205.651	1566.949	-1.0332	1.1172	-0.072266	-45.041	-81.65	151.2967	0.15674	0.07666	-0.15479	58.2343	27.0308	1858.716	-1.7994	1.478	0.019043	NaN	NaN	NaN	NaN	NaN	NaN
3.546	1.962	-150.4162	1611.238	-1.1616	1.2212	-0.047363	-24.864	-41.347	164.089	0.14113	0.088173	-0.1499	51.09	13.912	1878.0623	-1.7617	1.4648	0.018555	NaN	NaN	NaN	NaN	NaN	NaN
3.548	25.419	-119.731	1661.394	-1.2129	1.2676	-0.038574	-10.795	-105.84369	180.738	0.12092	0.10126	-0.14805	23.87	97.635	1881.968	-1.7202	1.438	0.013184	NaN	NaN	NaN	NaN	NaN	NaN
3.55	34.794	-107.396	1716.04	-1.2939	1.3477	-0.019531	10.226	-125.382	266.7268	0.10372	0.11259	-0.14181	-4.749	98.038	1907.835	-1.6992	1.4258	0.0048828	NaN	NaN	NaN	NaN	NaN	NaN
3.552	58.282	-93.712	1752.942	-1.3384	1.3726	-0.015381	-9.071	-85.5947	346.919	0.078328	0.12324	-0.14442	17.648	118.973	1918.539	-1.6675	1.4067	0.013184	NaN	NaN	NaN	NaN	NaN	NaN
3.554	52.465	-90.589	1763.452	-1.3823	1.3892	-0.01416	-18.572	-97.133	429.66	0.058105	0.13672	-0.14404	13.326	55.086	1904.542	-1.6495	1.3847	0.01416	NaN	NaN	NaN	NaN	NaN	NaN
3.556	38.923	-75.083	1770.863	-1.4473	1.3926	-0.0078125	-1.527	-33.244	518.94	0.029486	0.15215	-0.14287	61.067	74.033	1845.865	-1.6367	1.373	0.027344	NaN	NaN	NaN	NaN	NaN	NaN
3.558	22.684	-74.04	1774.816	-1.4761	1.3931	-0.019531	-25.436	32.059	609.813	-0.0056772	0.17579	-0.13515	22.508	35.684	1816.204	-1.6265	1.356	0.04541	NaN	NaN	NaN	NaN	NaN	NaN
3.56	-24.446	-65.457	1780.052	-1.5391	1.4023	-0.024902	-17.423	39.526	786.879	-0.053723	0.19805	-0.1207	-4.361	117.569	1780.587	-1.6201	1.3535	0.059082	NaN	NaN	NaN	NaN	NaN	NaN
3.562	-41.621	-65.1141	1787.866	-1.5874	1.4184	-0.028076	-52.095	130.7	920.6233	-0.1045	0.21641	-0.11289	-37.216	118.215	1776.817	-1.6211	1.3398	0.080566	NaN	NaN	NaN	NaN	NaN	NaN
3.564	-49.284	-84.4444	1814.295	-1.6445	1.4336	-0.029297	-72.775	129.979	1005.8542	-0.15527	0.23486	-0.10303	-68.7715	218.559	1732.915	-1.6228	1.3381	0.10449	NaN	NaN	NaN	NaN	NaN	NaN
3.566	-34.303	-90.2117	1850.306	-1.7358	1.4751	-0.023926	-56.26	114.142	1047.202	-0.20439	0.26035	-0.096095	-70.8402	201.342	1712.7406	-1.6206	1.3247	0.12695	NaN	NaN	NaN	NaN	NaN	NaN
3.568	-46.7	-89.447	1864.963	-1.7891	1.4922	-0.015625	-39.272	118.543	1072.528	-0.25439	0.2872	-0.092969	-36.917	284.058	1660.802	-1.6172	1.3125	0.15723	NaN	NaN	NaN	NaN	NaN	NaN
3.57	-35.542	-77.2874	1876.655	-1.8823	1.5376	0.0024414	-53.211	54.533	1063.099	-0.31728	0.31807	-0.090235	-60.671	238.855	1659.408	-1.6074	1.2998	0.16943	NaN	NaN	NaN	NaN	NaN	NaN
3.572	-10.96	-76.8473	1901.13	-1.945	1.5657	0.01123	-47.308	43.7	1055.627	-0.38779	0.34737	-0.08252	-89.743	318.108	1611.543	-1.5737	1.2759	0.18359	NaN	NaN	NaN	NaN	NaN	NaN
3.574	24.847	-70.363	1919.81	-1.998	1.5898	0.020996	-44.993	33.95	1007.2335	-0.47607	0.38135	-0.069824	-106.7114	258.412	1584.4187	-1.5422	1.2512	0.18872	NaN	NaN	NaN	NaN	NaN	NaN
3.576	49.035	-60.851	1910.533	-2.0503	1.6138	0.028809	-95.4582	-33.8831	1000.9633	-0.59453	0.4164	-0.049609	-87.3272	300.183	1543.93	-1.5039	1.2246	0.19092	NaN	NaN	NaN	NaN	NaN	NaN
3.578	26.903	-51.636	1899.593	-2.0708	1.6197	0.036377	-114.591	-14.525	1020.587	-0.73282	0.45235	-0.021093	-46.307	178.765	1511.329	-1.4546	1.186	0.1875	NaN	NaN	NaN	NaN	NaN	NaN
3.58	25.473	-39.132	1891.265	-2.0835	1.6235	0.045898	-100.26	-68.759	975.958	-0.90157	0.49961	0.022657	-42.628	191.027	1461.328	-1.4258	1.1699	0.18896	NaN	NaN	NaN	NaN	NaN	NaN
3.582	-13.131	-12.345	1884.319	-2.0938	1.6133	0.050293	-61.343	-114.261	995.019	-1.0892	0.56094	0.090723	-53.985	129.61	1408.042	-1.3745	1.1313	0.18652	NaN	NaN	NaN	NaN	NaN	NaN
3.584	-10.997	9.934	1888.761	-2.0957	1.6074	0.049805	-39.319	-100.3643	1010.918	-1.3022	0.62939	0.16748	-69.63	230.541	1342.024	-1.333	1.0981	0.18408	NaN	NaN	NaN	NaN	NaN	NaN
3.586	-8.357	13.542	1867.685	-2.0859	1.5918	0.05127	-38.665	-155.429	1058.8904	-1.5092	0.72246	0.23057	-70.779	197.046	1297.3671	-1.291	1.0723	0.18066	NaN	NaN	NaN	NaN	NaN	NaN
3.588	27.649	5.064	1853.672	-2.0847	1.5725	0.048096	-16.973	-142.152	1150.5598	-1.7089	0.82432	0.30312	-56.438	264.5632	1251.062	-1.231	1.0278	0.18115	NaN	NaN	NaN	NaN	NaN	NaN
3.59	18.635	-0.284000000000001	1853.396	-2.0737	1.5513	0.050781	-26.1858	-104.276	1181.56	-1.8901	0.92744	0.3582	-61.527	194.748	1203.286	-1.2031	1.0078	0.17871	NaN	NaN	NaN	NaN	NaN	NaN
3.592	27.569	15.4904	1851.1	-2.0605	1.5059	0.04834	15.052	-138.46	1231.3478	-2.0023	1.0238	0.40791	-33.717	277.202	1140.91	-1.1416	0.96289	0.17334	NaN	NaN	NaN	NaN	NaN	NaN
3.594	41.636	23.182	1864.754	-2.0542	1.481	0.046875	6.244	-105.068	1281.855	-2.0386	1.1138	0.4707	-27.5	250.022	1103.0339	-1.0994	0.93091	0.17188	NaN	NaN	NaN	NaN	NaN	NaN
3.596	69.218	38.935	1859.319	-2.0405	1.438	0.056152	5.491	-156.94	1296.6779	-2.0693	1.1785	0.49844	-53.742	354.207	1021.645	-1.0547	0.90039	0.17627	NaN	NaN	NaN	NaN	NaN	NaN
3.598	55.03	31.988	1872.879	-2.0359	1.4114	0.059571	8.482	-198.9702	1360.1689	-2.0842	1.2229	0.44951	-58.717	300.145	978.462	-0.99756	0.85596	0.17188	NaN	NaN	NaN	NaN	NaN	NaN
3.6	66.426	11.544	1859.378	-2.0269	1.3833	0.058594	33.546	-194.5738	1376.526	-1.9854	1.2312	0.35771	-65.265	367.698	884.58969	-0.96729	0.83057	0.16699	NaN	NaN	NaN	NaN	NaN	NaN
3.602	43.313	-9.874	1868.926	-2.0137	1.3516	0.070801	56.0731	-277.313	1416.617075	-1.7595	1.2089	0.27852	-32.687	289.117	798.036	-0.89844	0.7793	0.15771	NaN	NaN	NaN	NaN	NaN	NaN
3.604	46.2	-3.052	1849.483	-2.0088	1.3369	0.077637	104.92	-293.036	1492.526	-1.4995	1.1782	0.19775	-26.088	327.973	756.552	-0.84765	0.7456	0.16016	NaN	NaN	NaN	NaN	NaN	NaN
3.606	35.063	9.947	1821.173	-1.9849	1.2993	0.07959	99.286	-278.802	1540.613	-1.302	1.1371	0.11914	-19.303	250.404	706.635	-0.79443	0.7085	0.15674	NaN	NaN	NaN	NaN	NaN	NaN
3.608	21.868	16.0911	1797.311	-1.9756	1.2832	0.082519	97.956	-307.182	1624.729	-1.1664	1.0961	0.049707	-63.884	299.582	674.777	-0.73438	0.66309	0.15283	NaN	NaN	NaN	NaN	NaN	NaN
3.61	18.796	3.985	1762.317	-1.9565	1.2603	0.078125	100.059	-212.875	1689.236	-1.0848	1.0739	-0.0057614	-69.968	229.7239	632.9149	-0.68726	0.62427	0.14771	NaN	NaN	NaN	NaN	NaN	NaN
3.612	31.258	0.134999999999998	1749.065	-1.9355	1.2441	0.081055	51.4734	-176.8603	1750.6812	-1.0254	1.0773	-0.043164	-97.927	255.729	576.3677	-0.64014	0.58643	0.14502	NaN	NaN	NaN	NaN	NaN	NaN
3.614	20.707	23.7169	1747.008	-1.9199	1.2363	0.077148	73.6013	-150.005	1823.665	-0.97803	1.0845	-0.071289	-92.259	166.23779	545.281	-0.58789	0.53516	0.14453	NaN	NaN	NaN	NaN	NaN	NaN
3.616	18.466	51.179	1752.04	-1.8921	1.2173	0.076172	32.2294	-96.67	1847.33	-0.94922	1.0848	-0.094435	-96.459	202.332	531.593	-0.55957	0.5127	0.14697	NaN	NaN	NaN	NaN	NaN	NaN
3.618	26.723	73.113	1729.593	-1.8755	1.2056	0.075928	27.98	-127.119	1856.755	-0.95957	1.0979	-0.10489	-106.915	176.08	486.705	-0.50049	0.46338	0.14746	NaN	NaN	NaN	NaN	NaN	NaN
3.62	28.979	86.859	1698.333	-1.8555	1.1914	0.076172	12.111	-154.029	1878.284	-1.0186	1.1405	-0.087695	-114.064	242.3919	453.4082	-0.45532	0.42944	0.14234	NaN	NaN	NaN	NaN	NaN	NaN
3.622	13.61	81.4241	1661.08	-1.8242	1.1699	0.078613	-19.071	-159.6304	1848.256	-1.1199	1.2047	-0.060742	-115.3326	189.9	405.335	-0.40381	0.40283	0.1333	NaN	NaN	NaN	NaN	NaN	NaN
3.624	15.455	71.7864	1642.547	-1.8145	1.168	0.080566	-7.711	-208.712	1860.937	-1.2363	1.2676	-0.021973	-104.585	197.208	372.782	-0.32959	0.35693	0.13135	NaN	NaN	NaN	NaN	NaN	NaN
3.626	48.49	56.309	1625.656	-1.791	1.1582	0.07666	-15.474	-180.931	1864.564	-1.3507	1.3102	0.016797	-80.096	147.524	324.251	-0.2959	0.34131	0.12549	NaN	NaN	NaN	NaN	NaN	NaN
3.628	27.33	54.427	1597.698	-1.7681	1.1519	0.075439	-6.501	-150.753	1845.376	-1.4653	1.3398	0.056055	-50.314	179.0288	262.275	-0.22656	0.30078	0.1167	NaN	NaN	NaN	NaN	NaN	NaN
3.63	21.671	36.9107	1578.954	-1.7427	1.1372	0.08252	-24.736	-146.951	1888.851	-1.5773	1.3699	0.087305	-53.083	157.4386	219.622	-0.18286	0.26611	0.10254	NaN	NaN	NaN	NaN	NaN	NaN
3.632	-2.749	23.436	1547.47	-1.7188	1.1289	0.07959	-43.389	-91.9598	1930.5229	-1.6837	1.4007	0.11533	-73.547	158.4846	195.8377	-0.13818	0.23779	0.1001	NaN	NaN	NaN	NaN	NaN	NaN
3.634	13.179	25.7563	1529.413	-1.7031	1.1211	0.07373	-51.198	-105.234	1958.971	-1.7734	1.4258	0.13818	-90.063	113.3657	161.446	-0.081543	0.1875	0.086426	NaN	NaN	NaN	NaN	NaN	NaN
3.636	14.829	37.5386	1499.81	-1.6616	1.106	0.074219	-69.6419	-122.9841	2004.118	-1.8496	1.452	0.15517	-79.545	112.447	130.3862	-0.062012	0.17188	0.079102	NaN	NaN	NaN	NaN	NaN	NaN
3.638	6.328	50.938	1493.004	-1.6306	1.0881	0.069336	-86.658	-94.3838	1999.462	-1.9112	1.4751	0.17373	-68.092	104.293	89.191	-0.024414	0.12842	0.070313	NaN	NaN	NaN	NaN	NaN	NaN
3.64	21.617	55.756	1485.598	-1.5933	1.0728	0.06543	-77.3286	-139.527	1986.237	-1.9659	1.4985	0.18623	-48.511	121.011	96.208	-0.0012208	0.1001	0.068604	NaN	NaN	NaN	NaN	NaN	NaN
3.642	29.345	67.995	1469.317	-1.541	1.0547	0.05957	-36.919	-82.0547	1994.628	-2.0151	1.5252	0.19981	-23.677	117.13	86.713	0.018066	0.074707	0.069336	NaN	NaN	NaN	NaN	NaN	NaN
3.644	26.924	90.704	1445.788	-1.5171	1.0464	0.058105	-45.9037	-22.845	1952.467	-2.0581	1.5513	0.21045	-36.314	107.932	75.8934	0.036133	0.044922	0.071777	NaN	NaN	NaN	NaN	NaN	NaN
3.646	33.454	108.9	1419.433	-1.459	1.0293	0.056152	9.23800000000001	-31.554	1966.242	-2.0977	1.5805	0.22334	-11.795	76.727	61.898	0.040527	0.033203	0.074707	NaN	NaN	NaN	NaN	NaN	NaN
3.648	31.544	123.7	1399.192	-1.4102	1.0108	0.045899	13.356	21.0168	1980.641	-2.1312	1.6039	0.22823	1.601	16.348	60.63	0.05127	0.011719	0.078613	NaN	NaN	NaN	NaN	NaN	NaN
3.65	24.335	137.046	1374.111	-1.3608	1.0005	0.044434	8.515	-17.029	1977.313	-2.1508	1.6257	0.22666	22.214	-27.9091	54.776	0.052979	-0.00024415	0.078858	NaN	NaN	NaN	NaN	NaN	NaN
3.652	-2.805	147.847	1345.4239	-1.3105	0.97656	0.041992	63.0275	-39.343	2010.3505	-2.1649	1.6359	0.23223	17.386	-56.291	35.943	0.054688	-0.010254	0.083984	NaN	NaN	NaN	NaN	NaN	NaN
3.654	-16.609	136.466	1332.952	-1.292	0.97461	0.041016	55.5906	17.335	1968.24	-2.1738	1.6387	0.23486	10.921	-18.9285	-15.9315	0.05127	-0.02832	0.092773	NaN	NaN	NaN	NaN	NaN	NaN
3.656	-34.225	127.383	1323.012	-1.2524	0.95752	0.035156	90.4459	1.383	1966.802	-2.1758	1.6308	0.24492	-17.805	-2.2886	-29.4486	0.037598	-0.036133	0.099609	NaN	NaN	NaN	NaN	NaN	NaN
3.658	-15.988	128.557	1301.795	-1.2273	0.93969	0.042236	91.262	65.472	1966.4967	-2.18	1.6122	0.25528	-38.11	29.807	-23.6481	0.015137	-0.053711	0.099609	NaN	NaN	NaN	NaN	NaN	NaN
3.66	-29.598	124.555	1267.596	-1.207	0.92188	0.047363	53.0614	87.878	1952.545	-2.1765	1.5883	0.26856	-57.537	4.2615	-7.4874	0.0029297	-0.062011	0.10376	NaN	NaN	NaN	NaN	NaN	NaN
3.662	-32.412	127.904	1240.599	-1.1914	0.90625	0.05127	85.523	67.531	1984.0587	-2.1642	1.5588	0.27646	-46.822	45.801	-1.103837	-0.0087891	-0.072754	0.11035	NaN	NaN	NaN	NaN	NaN	NaN
3.664	-31.567	140.178	1214.461	-1.1758	0.89648	0.054199	84.86	101.416	1972.356	-2.1484	1.5215	0.27832	-33.952	43.67	26.42517	-0.031738	-0.088867	0.11719	NaN	NaN	NaN	NaN	NaN	NaN
3.666	-25.36	150.316	1209.603	-1.1484	0.87598	0.0625	66.355	75.402	1977.68	-2.1229	1.479	0.28018	-24.661	82.708	22.6417	-0.041504	-0.089355	0.12012	NaN	NaN	NaN	NaN	NaN	NaN
3.668	-37.005	161.058	1200.904	-1.1264	0.86377	0.064454	78.149	54.216	1960.729	-2.0969	1.4309	0.28066	-49.49	44.562	53.509	-0.077148	-0.092285	0.13037	NaN	NaN	NaN	NaN	NaN	NaN
3.67	-44.142	165.735	1172.32	-1.1074	0.84766	0.063965	62.079	76.868	1897.292	-2.0769	1.3797	0.27989	-50.376	65.661	12.4289	-0.098876	-0.095703	0.14209	NaN	NaN	NaN	NaN	NaN	NaN
3.672	-27.004	159.504	1149.219	-1.0835	0.82861	0.062012	57.9502	29.3469	1876.6263	-2.0618	1.3358	0.28008	-61.619	27.417	-15.5096	-0.11963	-0.10107	0.14648	NaN	NaN	NaN	NaN	NaN	NaN
3.674	-44.193	175.996	1112.333	-1.0679	0.81689	0.067383	42.0425	40.39221	1855.77802	-2.0469	1.2949	0.27441	-61.917	82.7717	-26.1997	-0.13623	-0.1001	0.15869	NaN	NaN	NaN	NaN	NaN	NaN
3.676	-50.813	169.366	1087.58	-1.0425	0.7915	0.07373	22.709	31.189	1833.3854	-2.0329	1.2708	0.2706	-47.891	38.334	-2.5624	-0.13867	-0.095703	0.16162	NaN	NaN	NaN	NaN	NaN	NaN
3.678	-57.136	170.803	1050.23	-1.0213	0.77759	0.077392	21.333	-2.562	1837.021	-2.0187	1.2505	0.26289	-63.847	88.054	0.401	-0.13867	-0.091309	0.1665	NaN	NaN	NaN	NaN	NaN	NaN
3.68	-52.279	161.083	1014.0151	-0.99756	0.75928	0.083008	1.4225	60.3377	1816.55249	-1.9983	1.2364	0.25312	-80.179	35.3458	30.79405	-0.12866	-0.09082	0.16846	NaN	NaN	NaN	NaN	NaN	NaN
3.682	-65.765	162.771	974.2241	-0.96484	0.74023	0.083008	0.103999999999999	46.668	1777	-1.9816	1.2277	0.24668	-80.708	52.932	11.3064	-0.11328	-0.09082	0.16846	NaN	NaN	NaN	NaN	NaN	NaN
3.684	-60.7976	155.8791	936.898	-0.94922	0.72656	0.088867	-19.898	55.0847	1757.4575	-1.959	1.2246	0.24121	-89.3869	-7.127	26.6029	-0.077637	-0.083984	0.16113	NaN	NaN	NaN	NaN	NaN	NaN
3.686	-38.617	173.478	908.569	-0.91357	0.70361	0.094238	-33.5758	111.44	1713.03899	-1.9396	1.2264	0.23818	-68.509	30.1659	29.543	-0.052246	-0.081055	0.15674	NaN	NaN	NaN	NaN	NaN	NaN
3.688	-23.314	184.785	866.29094	-0.88721	0.68555	0.096436	-38.794	62.4478	1705.256	-1.9145	1.2164	0.23623	-68.6437	-5.3742	60.641	-0.00048828	-0.078125	0.14355	NaN	NaN	NaN	NaN	NaN	NaN
3.69	-31.708	202.625	840.4551	-0.85889	0.67236	0.09668	-15.662	96.8082	1705.4559	-1.8863	1.2148	0.22568	-39.276	63.736	55.199	0.040284	-0.080078	0.13281	NaN	NaN	NaN	NaN	NaN	NaN
3.692	-49.207	183.175	824.1102	-0.82373	0.646	0.10596	-43.135	98.3045	1688.5484	-1.8535	1.2074	0.22129	-15.259	30.3349	59.6844	0.07959	-0.081543	0.12354	NaN	NaN	NaN	NaN	NaN	NaN
3.694	-26.878	171.548	807.69	-0.8042	0.63232	0.10156	-25.273	83.432	1686.398	-1.8228	1.1978	0.21387	-19.654	67.8472	29.8433	0.13574	-0.087891	0.11377	NaN	NaN	NaN	NaN	NaN	NaN
3.696	-25.967	174.59	764.2474	-0.76953	0.60645	0.10352	13.803	147.5999	1625.516	-1.7899	1.1863	0.20967	-20.618	25.234	24.4657	0.16406	-0.088379	0.11328	NaN	NaN	NaN	NaN	NaN	NaN
3.698	-21.373	182.868	738.1304	-0.7417	0.58642	0.11231	11.721	134.164	1572.119	-1.7536	1.17	0.19638	-14.724	74.46708	-1.27	0.22461	-0.099121	0.099121	NaN	NaN	NaN	NaN	NaN	NaN
3.7	-34.013	165.147	707.1765	-0.71436	0.56299	0.11279	21.421	156.9473	1561.1738	-1.713	1.1528	0.18935	-6.659	37.5536	18.69917	0.26172	-0.1045	0.085938	NaN	NaN	NaN	NaN	NaN	NaN
3.702	-39.354	156.188	668.856	-0.68164	0.53906	0.12012	25.679	198.7174	1534.183	-1.6713	1.1381	0.18477	-5.40600000000001	39.479	25.9315	0.30713	-0.10791	0.074707	NaN	NaN	NaN	NaN	NaN	NaN
3.704	-42.387	154.226	611.4971	-0.66211	0.52148	0.12939	21.663	153.4792	1533.09413	-1.6387	1.1221	0.17627	-28.018	-23.3642	36.1326	0.35547	-0.11523	0.060547	NaN	NaN	NaN	NaN	NaN	NaN
3.706	-52.696	156.819	578.2463	-0.625	0.49365	0.1167	41.164	194.415	1537.932528	-1.603	1.1103	0.17363	-20.846	-12.7129	27.21	0.38135	-0.11377	0.057617	NaN	NaN	NaN	NaN	NaN	NaN
3.708	-39.801	147.993	568.2683	-0.59204	0.47486	0.12183	24.277	205.6575	1500.8706	-1.575	1.0937	0.16787	-23.852	-15.6943	9.8475	0.41357	-0.11572	0.040039	NaN	NaN	NaN	NaN	NaN	NaN
3.71	-41.246	138.161	557.664	-0.56055	0.45703	0.11865	36.739	179.5491	1477.3572	-1.5531	1.0828	0.17256	-16.632	36.8327	11.9698	0.42383	-0.12548	0.029053	NaN	NaN	NaN	NaN	NaN	NaN
3.712	-20.683	146.307	521.899	-0.51416	0.42627	0.11133	38.741	243.298	1425.225	-1.5421	1.0704	0.17226	-27.402	30.409	33.6258	0.42773	-0.12939	0.020508	NaN	NaN	NaN	NaN	NaN	NaN
3.714	-50.721	148.406	484.552	-0.48877	0.4126	0.11279	29.588	229.724	1389.957	-1.5366	1.0591	0.17773	-12.975	43.1365	24.133	0.41504	-0.13623	0.018066	NaN	NaN	NaN	NaN	NaN	NaN
3.716	-55.963	143.734	459.0818	-0.44434	0.37939	0.10645	31.51	244.59	1374.0418	-1.5306	1.0468	0.1875	-13.407	15.4281	29.3635	0.39844	-0.14453	0.011719	NaN	NaN	NaN	NaN	NaN	NaN
3.718	-42.295	143.865	442.302	-0.39893	0.35303	0.10693	28.654	269.605	1333.321	-1.5207	1.0261	0.1915	-26.741	-2.593	20.9573	0.37451	-0.14355	0.013672	NaN	NaN	NaN	NaN	NaN	NaN
3.72	-37.449	146.758	407.838	-0.37695	0.33936	0.10596	5.63	206.626	1317.0768	-1.5047	1.0086	0.19658	-41.223	-29.549	1.303	0.34692	-0.13818	0.014649	NaN	NaN	NaN	NaN	NaN	NaN
3.722	-46.778	136.85	390.413	-0.33594	0.30762	0.1001	0.424999999999997	226.776	1296.5	-1.4827	0.99248	0.19785	-66.07	-11.9053	10.5128	0.32178	-0.13184	0.016113	NaN	NaN	NaN	NaN	NaN	NaN
3.724	-63.196	126.137	368.731	-0.29785	0.28882	0.096924	-24.853	237.584	1250.091	-1.4565	0.98096	0.19922	-78.781	20.2705	-6.968	0.29102	-0.10107	0.019043	NaN	NaN	NaN	NaN	NaN	NaN
3.726	-45.525	108.715	341.878	-0.26514	0.271	0.092285	-23.312	240.774	1233.8472	-1.4236	0.96113	0.2001	-43.711	48.33	-15.703	0.28271	-0.087891	0.02002	NaN	NaN	NaN	NaN	NaN	NaN
3.728	-63.264	115.074	306.696	-0.22021	0.24561	0.086426	-27.442	309.767	1180.966	-1.3956	0.94033	0.19522	-62.894	73.447	-8.566	0.26611	-0.053711	0.025879	NaN	NaN	NaN	NaN	NaN	NaN
3.73	-44.347	104.375	289.3893	-0.19971	0.23584	0.077637	-58.791	276.622	1144.2085	-1.3628	0.91924	0.19756	-70.608	56.525	0.4215	0.25293	-0.028077	0.027588	NaN	NaN	NaN	NaN	NaN	NaN
3.732	-33.145	77.234	275.919	-0.15137	0.2041	0.07373	-64.763	274.756	1137.2816	-1.3347	0.90322	0.19639	-90.765	71.731	5.3363	0.24951	-0.0024414	0.030273	NaN	NaN	NaN	NaN	NaN	NaN
3.734	-47.674	78.511	255.089	-0.11621	0.18213	0.070556	-75.134	287.967	1080.4122	-1.2993	0.87939	0.19385	-70.653	52.9807	16.2637	0.2334	0.019043	0.034668	NaN	NaN	NaN	NaN	NaN	NaN
3.736	-33.153	73.26	239.82	-0.08252	0.16504	0.066406	-83.968	229.0902	1055.871	-1.2662	0.85938	0.19072	-72.067	65.506	15.7815	0.2251	0.034668	0.039551	NaN	NaN	NaN	NaN	NaN	NaN
3.738	-34.521	75.619	221.608	-0.045898	0.14258	0.056641	-87.117	271.598	1023.66863	-1.2293	0.83633	0.18584	-51.959	25.415	26.1748	0.2085	0.051758	0.046387	NaN	NaN	NaN	NaN	NaN	NaN
3.74	-7.477	75.374	212.63	-0.036133	0.13135	0.055664	-104.414	262.0532	959.778	-1.1902	0.81523	0.18506	-40.386	28.6675	1.8189	0.19604	0.05835	0.050537	NaN	NaN	NaN	NaN	NaN	NaN
3.742	-18.373	94.19	187.217	0.00048828	0.10693	0.05127	-76.69	245.78	920.0623	-1.1529	0.79082	0.18135	-37.23	8.191	-6.25	0.18213	0.067871	0.051758	NaN	NaN	NaN	NaN	NaN	NaN
3.744	-13.116	102.81	171.445	0.018311	0.091309	0.046875	-57.997	295.6723	861.363	-1.1133	0.76563	0.17822	-51.873	64.9126	-9.7258	0.17578	0.084961	0.052246	NaN	NaN	NaN	NaN	NaN	NaN
3.746	-28.795	94.663	157.132	0.041016	0.071289	0.043945	-81.756	244.1715	813.8142	-1.0715	0.74219	0.17558	-43.917	46.5632	5.9888	0.1665	0.088379	0.050293	NaN	NaN	NaN	NaN	NaN	NaN
3.748	-10.893	84.865	151.719	0.061523	0.05127	0.04248	-61.141	233.401	785.933	-1.032	0.71797	0.17588	-39.003	82.607	26.0847	0.15869	0.10205	0.055664	NaN	NaN	NaN	NaN	NaN	NaN
3.75	-4.477	79.814	143.215	0.071777	0.037598	0.037109	-51.373	248.009	738.8679	-0.99297	0.69141	0.17471	-15.593	48.115	57.134	0.15405	0.1167	0.064454	NaN	NaN	NaN	NaN	NaN	NaN
3.752	-23.822	61.011	129.046	0.092773	0.020508	0.035156	-52.641	199.4721	702.979	-0.9543	0.66133	0.17021	-10.816	70.605	48.1065	0.14697	0.12256	0.070313	NaN	NaN	NaN	NaN	NaN	NaN
3.754	-17.278	52.007	120.659	0.09668	0.0092772	0.032959	-37.801	248.411	647.5157	-0.91357	0.64209	0.16797	-3.944	9.0522	63.928	0.13525	0.12939	0.079102	NaN	NaN	NaN	NaN	NaN	NaN
3.756	-17.399	52.754	93.089	0.104	0.00048828	0.032227	-31.597	225.5694	590.113	-0.86748	0.61006	0.16855	-33.378	28.6953	53.249	0.12622	0.13111	0.085449	NaN	NaN	NaN	NaN	NaN	NaN
3.758	-4.19600000000001	61.873	72.7185	0.10254	-0.0097656	0.035156	-19.872	197.0048	556.1412	-0.81553	0.57978	0.16875	-44.778	-18.936	57.426	0.11963	0.13428	0.088379	NaN	NaN	NaN	NaN	NaN	NaN
3.76	-17.45	58.922	68.2129	0.104	-0.015625	0.035156	-14.893	241.469	523.8622	-0.77569	0.5501	0.16797	-11.439	33.7859	19.7592	0.10693	0.13281	0.09375	NaN	NaN	NaN	NaN	NaN	NaN
3.762	-18.749	44.534	83.316	0.10156	-0.023926	0.034668	-20.056	202.535	490.085	-0.73946	0.52207	0.16143	8.70399999999999	3.4379	23.781	0.097168	0.13086	0.092773	NaN	NaN	NaN	NaN	NaN	NaN
3.764	-16.835	43.247	72.694	0.099366	-0.029786	0.035888	-3.913	202.005	446.944	-0.68994	0.49365	0.15771	6.06400000000001	60.776	10.661	0.074707	0.13525	0.10449	NaN	NaN	NaN	NaN	NaN	NaN
3.766	-8.047	51.156	66.473	0.09668	-0.029785	0.038086	-11.146	194.748	398.30915	-0.63692	0.46142	0.15615	-9.771	18.9482	29.3809	0.048095	0.1311	0.10694	NaN	NaN	NaN	NaN	NaN	NaN
3.768	-28.803	40.032	65.309	0.091309	-0.037598	0.036133	-29.234	113.7053	365.276	-0.59229	0.4333	0.15468	-28.162	52.1987	10.583	0.022461	0.12939	0.11572	NaN	NaN	NaN	NaN	NaN	NaN
3.77	-36.991	30.8906	65.804	0.089355	-0.042969	0.035156	-12.021	137.96	327.1657	-0.54619	0.40127	0.14688	-58.729	2.1433	40.4416	-0.011719	0.13379	0.12109	NaN	NaN	NaN	NaN	NaN	NaN
3.772	-23.232	22.2577	53.208	0.088379	-0.047363	0.039063	-12.818	101.237	282.177	-0.50098	0.38027	0.13906	-60.945	24.75193	40.023	-0.026367	0.13672	0.13135	NaN	NaN	NaN	NaN	NaN	NaN
3.774	-32.539	30.9673	27.2976	0.080811	-0.046875	0.041992	-33.873	92.176	270.07996	-0.44922	0.3501	0.13379	-39.212	-32.319	69.317	-0.053711	0.13965	0.13721	NaN	NaN	NaN	NaN	NaN	NaN
3.776	-36.8	23.7601	33.107	0.077637	-0.04541	0.045898	-41.314	152.7929	260.0572	-0.40147	0.32841	0.12207	-46.154	8.2001	37.87298	-0.067139	0.14429	0.14429	NaN	NaN	NaN	NaN	NaN	NaN
3.778	-27.494	15.7644	28.4315	0.069824	-0.046875	0.055176	-63.971	126.9991	237.681	-0.35527	0.29824	0.10957	-63.917	-11.3987	4.511	-0.075684	0.15332	0.15039	NaN	NaN	NaN	NaN	NaN	NaN
3.78	-27.025	22.1165	29.972	0.064453	-0.04834	0.050781	-47.303	144.845	230.181	-0.29981	0.27285	0.10215	-73.097	36.7604	1.769	-0.087891	0.15967	0.15918	NaN	NaN	NaN	NaN	NaN	NaN
3.782	-25.761	30.2574	17.1059	0.056152	-0.049316	0.060059	-57.387	150.768	177.7871	-0.24971	0.24443	0.099024	-84.9909	-26.1603	26.879	-0.090332	0.15967	0.1665	NaN	NaN	NaN	NaN	NaN	NaN
3.784	-27.874	29.414	5.7176	0.052246	-0.052735	0.059571	-77.282	84.4829	156.375	-0.20508	0.21826	0.077148	-73.935	-28.3344	39.119	-0.10107	0.16113	0.18213	NaN	NaN	NaN	NaN	NaN	NaN
3.786	-15.108	18.1009	18.786	0.049805	-0.055664	0.060547	-72.279	100.874	138.824	-0.15879	0.18936	0.071484	-41.732	-59.271	93.753	-0.10815	0.15625	0.1814	NaN	NaN	NaN	NaN	NaN	NaN
3.788	-30.663	27.3743	8.2197	0.049316	-0.05957	0.064453	-66.255	70.032	124.969	-0.11807	0.16123	0.060059	-7.76500000000001	-29.9748	155.146	-0.12012	0.15088	0.18604	NaN	NaN	NaN	NaN	NaN	NaN
3.79	-30.087	24.8624	14.0377	0.046387	-0.059082	0.062012	-83.754	62.821	102.3317	-0.08213	0.13428	0.057324	-80.016	-79.039	251.6615	-0.13867	0.14502	0.16992	NaN	NaN	NaN	NaN	NaN	NaN
3.792	-34.489	22.0276	2.6181	0.050293	-0.06543	0.057617	-56.04	104.475	77.001	-0.046289	0.11328	0.055078	-101.524	-31.92	334.5408	-0.15088	0.14893	0.16211	NaN	NaN	NaN	NaN	NaN	NaN
3.794	-8.983	24.4683	9.0357	0.047607	-0.064697	0.060303	-80.538	81.0931	50.671	-0.01709	0.088379	0.04834	-77.271	-28.246	417.622	-0.18799	0.17383	0.14014	NaN	NaN	NaN	NaN	NaN	NaN
3.796	-42.557	35.8551	2.2783	0.049316	-0.064453	0.060059	-58.066	105.797	39.9585	0.011523	0.065332	0.047656	-50.802	53.1037	552.42	-0.23511	0.19873	0.12842	NaN	NaN	NaN	NaN	NaN	NaN
3.798	-34.532	30.371	2.6204	0.046387	-0.067383	0.056641	-53.028	124.084	32.044	0.034179	0.049414	0.045215	-42.66	81.273	772.625	-0.29736	0.2251	0.12402	NaN	NaN	NaN	NaN	NaN	NaN
3.8	-13.537	29.411	8.601	0.047363	-0.062988	0.060547	-85.666	66.692	27.5705	0.054102	0.02832	0.044434	28.457	93.7192	959.742	-0.40479	0.27588	0.11719	NaN	NaN	NaN	NaN	NaN	NaN
3.802	-21.585	33.8117	9.0244	0.043457	-0.064453	0.061035	-23.198	62.9208	51.261	0.075391	0.015527	0.041504	54.6	100.883	1124.236	-0.4624	0.3042	0.11719	NaN	NaN	NaN	NaN	NaN	NaN
3.804	-5.935	31.1751	9.32731	0.040039	-0.058106	0.061768	-41.069	11.195	37.142	0.098633	0.0024414	0.037109	110.622	114.5502	1322.516	-0.58789	0.36621	0.11865	NaN	NaN	NaN	NaN	NaN	NaN
3.806	-17.98	9.5769	14.1092	0.040527	-0.050781	0.063965	-38.415	-5.572	37.4199	0.1207	-0.010059	0.038086	96.113	75.401	1502.9875	-0.6897	0.42554	0.11767	NaN	NaN	NaN	NaN	NaN	NaN
3.808	-5.58000000000001	7.8826	11.4905	0.038574	-0.051758	0.058105	-8.283	34.677	18.644	0.13857	-0.025293	0.031543	97.537	24.8515	1668.318	-0.80127	0.49463	0.10986	NaN	NaN	NaN	NaN	NaN	NaN
3.81	-18.31	28.9099	-3.7281	0.043945	-0.048828	0.056641	-9.418	33.6218	-3.6225	0.15888	-0.040137	0.030761	92.768	-21.892	1706.13	-0.98193	0.60205	0.10449	NaN	NaN	NaN	NaN	NaN	NaN
3.812	-11.536	48.4236	0.86875	0.041992	-0.042969	0.060547	5.19499999999999	65.928	9.571	0.17881	-0.052148	0.02832	92.709	-79.435	1674.251	-1.0981	0.66846	0.10938	NaN	NaN	NaN	NaN	NaN	NaN
3.814	-28.963	43.214	3.8132	0.044434	-0.033935	0.062744	-2.861	78.534	-1.256	0.1958	-0.061523	0.026855	42.6801	-120.892	1603.711	-1.3672	0.80078	0.1626	NaN	NaN	NaN	NaN	NaN	NaN
3.816	-34.738	41.9802	17.9549	0.041992	-0.027832	0.060547	-3.638	28.567	7.5815	0.20645	-0.073926	0.024902	21.375	-168.341	1547.936	-1.6101	0.91724	0.24365	NaN	NaN	NaN	NaN	NaN	NaN
3.818	-21.819	35.2715	14.07504	0.046875	-0.026855	0.060059	26.163	28.5432	23.018	0.21729	-0.085351	0.021875	-14.217	-180.527	1456.185	-1.8833	1.0483	0.34277	NaN	NaN	NaN	NaN	NaN	NaN
3.82	-44.679	39.58	16.4014	0.050293	-0.023438	0.0625	-11.011	-3.25	23.471	0.21846	-0.094336	0.016406	29.833	-218.81	1411.518	-2.2266	1.2402	0.47314	NaN	NaN	NaN	NaN	NaN	NaN
3.822	-29.171	29.792	25.8186	0.056641	-0.020508	0.062012	-7.815	-12.911	31.1518	0.21982	-0.099901	0.014258	13.358	-206.07	1350.3568	-2.353	1.3325	0.51758	NaN	NaN	NaN	NaN	NaN	NaN
3.824	-36.009	32.7743	18.04388	0.061035	-0.020996	0.059326	2.95200000000001	39.9518	18.965	0.21924	-0.10449	0.013672	19.096	-246.09	1349.783	-2.3999	1.4946	0.61719	NaN	NaN	NaN	NaN	NaN	NaN
3.826	-33.424	39.1446	11.6449	0.068359	-0.023438	0.056152	-28.63	41.687	1.91385	0.21543	-0.10606	0.014258	29.981	-219.662	1371.834	-2.2544	1.58	0.71142	NaN	NaN	NaN	NaN	NaN	NaN
3.828	-34.636	32.679	-15.5099	0.079102	-0.021484	0.04834	-8.448	70.328	5.6344	0.20928	-0.10596	0.014355	21.48	-236.711	1437.0764	-2.1309	1.6211	0.71436	NaN	NaN	NaN	NaN	NaN	NaN
3.83	-25.362	31.1963	-3.8212	0.084961	-0.022461	0.051758	-28.266	85.62	2.0452	0.20224	-0.10283	0.014355	-18.46	-144.353	1476.5186	-1.9629	1.625	0.57471	NaN	NaN	NaN	NaN	NaN	NaN
3.832	-28.433	30.0462	15.2921	0.090332	-0.024414	0.049316	-57.475	52.602	25.261	0.19619	-0.093848	0.0066406	-52.786	-117.849	1562.16917	-1.7822	1.625	0.53369	NaN	NaN	NaN	NaN	NaN	NaN
3.834	-25.839	42.4366	25.21557	0.096191	-0.024414	0.050293	-17.617	62.241	42.0812	0.18799	-0.083496	0.0092773	-88.116	-54.93	1570.841	-1.3184	1.5977	0.51611	NaN	NaN	NaN	NaN	NaN	NaN
3.836	-22.301	43.3452	22.1489	0.10303	-0.028809	0.045898	-70.556	16.301	12.49	0.18477	-0.070215	0.014941	-118.618	-111.81	1600.515	-1.0488	1.5332	0.50317	NaN	NaN	NaN	NaN	NaN	NaN
3.838	-47.396	34.332	21.15791	0.10693	-0.027832	0.049805	-74.357	-11.053	30.4054	0.18076	-0.062109	0.021582	-161.759	-143.82	1622.456	-0.91211	1.457	0.47852	NaN	NaN	NaN	NaN	NaN	NaN
3.84	-13.971	36.2183	23.5599	0.11182	-0.02832	0.045898	-37.036	11.132	22.781	0.17099	-0.053906	0.019629	-156.212	-270.308	1674.9005	-0.88232	1.3989	0.45313	NaN	NaN	NaN	NaN	NaN	NaN
3.842	-37.915	32.203	18.6797	0.11377	-0.028809	0.050781	-75.675	-5.717	12.1389	0.16611	-0.046582	0.024902	-166.604	-349.532	1709.345	-0.86914	1.3984	0.45801	NaN	NaN	NaN	NaN	NaN	NaN
3.844	-40.154	35.808	8.6429	0.11401	-0.030518	0.050781	-60.215	25.68183	33.6128	0.16113	-0.034668	0.025879	-145.288	-473.73	1726.396	-0.8374	1.4028	0.47949	NaN	NaN	NaN	NaN	NaN	NaN
3.846	-25.487	36.374	-0.266	0.11328	-0.033203	0.045898	-68.104	49.671	5.85167	0.16006	-0.028125	0.032519	-126.831	-496.46	1740.3854	-0.84424	1.3897	0.48389	NaN	NaN	NaN	NaN	NaN	NaN
3.848	-16.259	47.9987	10.2035	0.11182	-0.039551	0.052734	-80.819	35.9983	26.4903	0.15605	-0.023047	0.034375	-84.609	-501.82	1752.637	-0.89941	1.3789	0.49072	NaN	NaN	NaN	NaN	NaN	NaN
3.85	-20.729	37.77465	2.2149	0.11279	-0.038574	0.051758	-47.418	54.4604	41.6349	0.15332	-0.016016	0.038672	-33.839	-416.54	1786.693	-1.064	1.4087	0.51904	NaN	NaN	NaN	NaN	NaN	NaN
3.852	-30.327	25.854	21.122	0.10742	-0.038086	0.061035	-56.126	21.4434	15.34	0.14424	-0.010156	0.042871	-55.035	-370.353	1853.648	-1.1675	1.4546	0.53418	NaN	NaN	NaN	NaN	NaN	NaN
3.854	10.386	16.611	52.692157	0.10059	-0.038575	0.059814	-37.797	-0.759999999999998	30.8265	0.1377	-0.0068359	0.041992	-81.785	-313.004	1934.326	-1.3608	1.5591	0.56055	NaN	NaN	NaN	NaN	NaN	NaN
3.856	-5.91999999999999	-1.6024	51.75	0.091797	-0.041016	0.061035	-16.616	10.35	12.906	0.12969	-0.00048828	0.043945	-105.435	-228.881	2011.1111	-1.4626	1.6311	0.5918	NaN	NaN	NaN	NaN	NaN	NaN
3.858	-34.795	-7.7826	65.90662	0.07959	-0.034668	0.074707	-39.278	-2.649	0.6656	0.12871	0.0036133	0.053027	-109.009	-132.449	2095.748	-1.5366	1.6743	0.61621	NaN	NaN	NaN	NaN	NaN	NaN
3.86	-20.39	-10.501	99.9565	0.071533	-0.028564	0.082031	-26.372	28.33334	11.6345	0.12441	0.0067383	0.055762	-103.1501	-32.77	2138.174	-1.6309	1.707	0.6333	NaN	NaN	NaN	NaN	NaN	NaN
3.862	-3.316	-13.397	121.586	0.058594	-0.023438	0.086426	-25.836	68.24	-15.1939	0.11953	0.012305	0.057422	-102.927	15.36	2129.419	-1.6753	1.7231	0.6377	NaN	NaN	NaN	NaN	NaN	NaN
3.864	-46.969	-4.135	161.6178	0.043457	-0.010254	0.087891	-20.363	52.064	-5.5985	0.11475	0.017578	0.060059	-77.872	32.135	2078.251	-1.7656	1.7598	0.64502	NaN	NaN	NaN	NaN	NaN	NaN
3.866	-58.407	10.4044	179.11	0.033691	-0.0092773	0.086426	17.585	68.682	20.4216	0.11924	0.021582	0.062207	-51.014	-37.975	2044.489	-1.8308	1.7933	0.65601	NaN	NaN	NaN	NaN	NaN	NaN
3.868	-42.417	19.4919	228.378	0.0024414	0.011719	0.09082	-1.91699999999999	33.4413	7.708	0.12432	0.025391	0.061035	-29.77	-84.7055	2068.579	-1.8804	1.8208	0.6709	NaN	NaN	NaN	NaN	NaN	NaN
3.87	-52.341	40.0246	322.25	-0.036622	0.03003	0.10205	13.476	1.784	40.1047	0.13799	0.030078	0.058301	4.65300000000001	-160.921	2140.768	-1.9463	1.8535	0.68896	NaN	NaN	NaN	NaN	NaN	NaN
3.872	-37.726	73.7838	417.443	-0.08252	0.045898	0.1123	17.354	8.883	31.112	0.14307	0.031445	0.049609	38.23	-163.55	2188.5104	-1.9683	1.8657	0.69727	NaN	NaN	NaN	NaN	NaN	NaN
3.874	-18.386	85.062	509.342	-0.1543	0.064453	0.13232	-31.619	-21.0817	19.5357	0.15869	0.033691	0.040527	62.056	-186.313	2230.9114	-2.0112	1.8774	0.72266	NaN	NaN	NaN	NaN	NaN	NaN
3.876	-18.486	102.663	593.496	-0.19385	0.076172	0.14209	1.348	-2.332	30.351	0.16582	0.036231	0.040527	34.661	-126.689	2233.6652	-2.0425	1.8759	0.73584	NaN	NaN	NaN	NaN	NaN	NaN
3.878	-4.84200000000001	100.614	721.69	-0.27539	0.098145	0.16699	-14.856	34.694	-19.2566	0.17735	0.037597	0.03877	-8.915	-153.041	2259.743	-2.0679	1.8657	0.75	NaN	NaN	NaN	NaN	NaN	NaN
3.88	5.747	108.962	823.34	-0.33887	0.12524	0.17456	-28.765	39.5593	-5.37	0.18242	0.044238	0.035254	-59.79	-101.031	2284.378	-2.1055	1.8418	0.78369	NaN	NaN	NaN	NaN	NaN	NaN
3.882	11.184	87.26	904.78	-0.4043	0.15332	0.17822	4.442	74.77	3.562	0.18779	0.051563	0.039844	-111.427	-107.018	2290.508	-2.1172	1.8203	0.79736	NaN	NaN	NaN	NaN	NaN	NaN
3.884	2.86099999999999	56.528	962.51	-0.5	0.19824	0.18652	-40.863	55.245	7.948	0.18848	0.064941	0.037598	-106.399	-27.279	2257.189	-2.1475	1.7754	0.82764	NaN	NaN	NaN	NaN	NaN	NaN
3.886	-18.275	15.643	1011.38	-0.55811	0.22803	0.18848	-53.836	35.0741	44.38	0.18789	0.07168	0.033301	-110.8925	-45.806	2206.978	-2.1551	1.7239	0.8435	NaN	NaN	NaN	NaN	NaN	NaN
3.888	-78.292	-20.383	1025.16	-0.69629	0.28906	0.2041	-30.957	29.1582	36.474	0.18545	0.085157	0.037989	-83.43	1.212	2132.894	-2.1577	1.6646	0.86523	NaN	NaN	NaN	NaN	NaN	NaN
3.89	-48.551	-30.357	1025.51	-0.82495	0.34693	0.22607	-75.339	4.179	16.391	0.18779	0.094922	0.043457	-80.318	-15.351	2055.794	-2.1621	1.5781	0.88916	NaN	NaN	NaN	NaN	NaN	NaN
3.892	-18.307	-41.477	1004.73	-0.97412	0.40918	0.25879	-58.755	22.4169	27.8883	0.18662	0.10537	0.047363	-58.009	69.479	2023.334	-2.1616	1.5337	0.89941	NaN	NaN	NaN	NaN	NaN	NaN
3.894	24.93	-42.297	996.87	-1.2012	0.50684	0.31982	-69.513	60.728	-4.7578	0.18945	0.11035	0.050293	-63.697	44.8844	2004.932	-2.1597	1.4595	0.91602	NaN	NaN	NaN	NaN	NaN	NaN
3.896	22.539	-44.766	995.53	-1.3203	0.56152	0.36279	-73.025	52.331	-7.751	0.19209	0.11358	0.050195	-83.577	99.0045	1993.024	-2.1499	1.3989	0.91992	NaN	NaN	NaN	NaN	NaN	NaN
3.898	3.875	-58.602	992.57	-1.5522	0.67822	0.41797	-37.307	69.077	12.7666	0.19629	0.11973	0.049707	-88.406	21.044	1975.443	-2.1362	1.3667	0.92383	NaN	NaN	NaN	NaN	NaN	NaN
3.9	39.76	-64.568	998.35	-1.6873	0.76685	0.45483	-80.5814	51.85	-5.646	0.19668	0.1209	0.047754	-89.672	76.79	1939.282	-2.0957	1.3145	0.9165	NaN	NaN	NaN	NaN	NaN	NaN
3.902	37.677	-52.167	1004.77	-1.7734	0.84375	0.46924	-60.374	19.62	32.6453	0.19307	0.12539	0.048926	-111.426	34.952	1950.695	-2.0596	1.2832	0.896	NaN	NaN	NaN	NaN	NaN	NaN
3.904	28.168	-18.758	1050.7	-1.7715	0.91797	0.49463	-43.071	26.2281	22.765	0.18408	0.12793	0.050293	-123.096	115.702	1939.5167	-2.0156	1.2588	0.87549	NaN	NaN	NaN	NaN	NaN	NaN
3.906	-21.415	1.124	1053.46	-1.7285	0.93848	0.51709	-78.198	0.512	30.4363	0.17344	0.12675	0.057031	-133.151	49.934	1933.2926	-1.959	1.2344	0.84424	NaN	NaN	NaN	NaN	NaN	NaN
3.908	-17.82	0.987000000000002	1056.54	-1.6387	0.97656	0.49072	-37.141	15.6875	48.99	0.15009	0.1252	0.065235	-131.421	111.997	1900.753	-1.9331	1.2251	0.82813	NaN	NaN	NaN	NaN	NaN	NaN
3.91	-43.887	-16.387	1039.96	-1.5337	0.97461	0.42115	-30.17	42.013	10.63	0.12744	0.12598	0.073438	-95.615	45.817	1902.5839	-1.8784	1.2075	0.79297	NaN	NaN	NaN	NaN	NaN	NaN
3.912	-49.356	-47.10573	1033.19	-1.3608	0.94971	0.3457	-23.845	27.1121	20.0755	0.09961	0.12842	0.086231	-58.941	102.073	1879.4226	-1.8318	1.2009	0.76392	NaN	NaN	NaN	NaN	NaN	NaN
3.914	-7.061	-104.197	1078.42	-1.0703	0.8877	0.27686	9.947	44.043	49.251	0.074707	0.13037	0.10059	-25.153	31.626	1882.102	-1.7847	1.1919	0.73877	NaN	NaN	NaN	NaN	NaN	NaN
3.916	-10.79	-141.393	1100.03	-0.9375	0.84961	0.26025	-23.212	14.271	55.4747	0.055762	0.14131	0.10821	-35.52	100.465	1825.237	-1.7275	1.1875	0.70557	NaN	NaN	NaN	NaN	NaN	NaN
3.918	-46.38	-177.621	1135.2	-0.76318	0.7915	0.2168	-13.014	-19.4749	89.5766	0.044238	0.15078	0.11885	-36.213	83.134	1769.917	-1.6968	1.1802	0.69141	NaN	NaN	NaN	NaN	NaN	NaN
3.92	-44.89	-224.654	1160.35	-0.70288	0.76978	0.19653	7.70500000000001	-0.297000000000001	93.246	0.028613	0.16523	0.12237	-15.753	186.1	1712.046	-1.6387	1.1836	0.65771	NaN	NaN	NaN	NaN	NaN	NaN
3.922	-21.275	-251.891	1194.83	-0.6748	0.76367	0.18652	-18.953	-26.3865	117.7133	0.023828	0.17842	0.12979	15.892	178.968	1695.3681	-1.6035	1.1767	0.63355	NaN	NaN	NaN	NaN	NaN	NaN
3.924	-1.425	-260.901	1227.69	-0.67041	0.76416	0.19727	-5.372	-38.5502	191.0528	0.016113	0.1958	0.13281	12.598	266.577	1665.8189	-1.5659	1.1724	0.61133	NaN	NaN	NaN	NaN	NaN	NaN
3.926	-16.901	-237.823	1275.94	-0.68848	0.76074	0.21191	-17.262	-27.948	230.341	0.015039	0.2084	0.14199	24.206	259.59	1655.64738	-1.5332	1.1611	0.58691	NaN	NaN	NaN	NaN	NaN	NaN
3.928	-23.09	-232.447	1339.37	-0.75879	0.77051	0.24658	-17.669	-31.4303	310.0717	0.015136	0.22442	0.14268	15.718	357.121	1614.1632	-1.5195	1.1523	0.57324	NaN	NaN	NaN	NaN	NaN	NaN
3.93	-64.292	-195.204	1384.19	-0.83814	0.80103	0.26246	7.38099999999999	31.574	418.0761	0.020605	0.23926	0.14112	-17.4627	342.129	1604.075	-1.4961	1.1289	0.56006	NaN	NaN	NaN	NaN	NaN	NaN
3.932	-50.224	-169.776	1446.21	-0.92188	0.8457	0.28662	-56.13	65.497	518.7583	0.024512	0.25469	0.12598	1.564	372.414	1563.713	-1.4768	1.1106	0.54858	NaN	NaN	NaN	NaN	NaN	NaN
3.934	-63.57	-146.777	1480.71	-1.0273	0.91992	0.31494	-14.486	56.772	666.2813	0.023926	0.27002	0.11084	-2.293	291.07	1521.725	-1.4473	1.0879	0.53369	NaN	NaN	NaN	NaN	NaN	NaN
3.936	-78.777	-132.775	1506.31	-1.0684	0.95898	0.32617	20.526	95.1721	763.373	0.011914	0.29102	0.10781	11.956	291.9824	1445.949	-1.4019	1.0503	0.51563	NaN	NaN	NaN	NaN	NaN	NaN
3.938	-74.086	-127.721	1527.11	-1.144	1.0278	0.34473	-38.6539	70.603	905.385	-0.017773	0.31407	0.11172	17.091	229.179	1399.419	-1.3765	1.0337	0.50977	NaN	NaN	NaN	NaN	NaN	NaN
3.94	-36.456	-119.0781	1544.55	-1.1978	1.0659	0.34522	32.517	70.369	1096.460956	-0.068945	0.33555	0.12188	12.489	254.051	1359.964	-1.3276	0.99268	0.49658	NaN	NaN	NaN	NaN	NaN	NaN
3.942	-34.07	-104.336	1590.42	-1.2466	1.0981	0.34424	55.78	83.9917	1227.84	-0.13183	0.35469	0.12724	8.486	234.494	1337.998	-1.2881	0.9585	0.47046	NaN	NaN	NaN	NaN	NaN	NaN
3.944	-21.185	-102.673	1637.61	-1.3184	1.127	0.35254	-8.1577	64.3646	1348.704	-0.19775	0.37939	0.125	16.061	294.52	1270.237	-1.2471	0.92383	0.45605	NaN	NaN	NaN	NaN	NaN	NaN
3.946	19.811	-115.081	1677.96	-1.3579	1.1411	0.35498	7.87	46.537	1404.863	-0.2582	0.41894	0.14014	27.2807	281.337	1243.091	-1.1895	0.875	0.42871	NaN	NaN	NaN	NaN	NaN	NaN
3.948	6.79600000000001	-124.652	1725.52	-1.4468	1.1821	0.35938	-28.193	-17.774	1404.375	-0.33008	0.4584	0.14511	25.018	317.462	1194.4115	-1.1602	0.84961	0.42334	NaN	NaN	NaN	NaN	NaN	NaN
3.95	-16.044	-112.02	1762.49	-1.5183	1.221	0.36743	-42.643	-97.2005	1445.847	-0.41406	0.50645	0.15175	14.4	298.898	1163.427	-1.1089	0.78174	0.39941	NaN	NaN	NaN	NaN	NaN	NaN
3.952	-22.39	-113.131	1821.88	-1.5889	1.2598	0.37695	-11.858	-103.7787	1390.797	-0.51729	0.55645	0.16172	12.288	346.956	1109.5	-1.0681	0.74097	0.3772	NaN	NaN	NaN	NaN	NaN	NaN
3.954	-1.183	-102.566	1866.87	-1.6914	1.3223	0.39746	-28.004	-156.244	1309.528	-0.64404	0.61572	0.17627	-12.1771	340.951	1026.1468	-1.0244	0.69531	0.35889	NaN	NaN	NaN	NaN	NaN	NaN
3.956	-22.675	-106.249	1898.73	-1.7456	1.354	0.40234	16.584	-169.172	1270.215	-0.79434	0.68086	0.20303	-10.9862	364.855	961.514	-0.96826	0.63818	0.33398	NaN	NaN	NaN	NaN	NaN	NaN
3.958	-32.46	-99.855	1909.68	-1.8491	1.4106	0.41406	-13.9666	-143.843	1192.5275	-0.96884	0.75049	0.23223	-0.00339999999999985	303.173	880.055	-0.94336	0.61328	0.32275	NaN	NaN	NaN	NaN	NaN	NaN
3.96	-43.269	-117.427	1923.03	-1.9221	1.4534	0.427	-21.035	-180.37	1167.1639	-1.1634	0.82627	0.27168	26.962	293.474	802.265	-0.89258	0.55664	0.30029	NaN	NaN	NaN	NaN	NaN	NaN
3.962	-34.117	-112.37	1922.79	-1.9878	1.4946	0.44336	23.432	-146.78	1161.9494	-1.3644	0.90996	0.32353	48.609	281.2408	755.113	-0.85059	0.52588	0.27905	NaN	NaN	NaN	NaN	NaN	NaN
3.964	-9.992	-86.047	1929.38	-2.0703	1.541	0.45947	20.288	-128.716	1153.428	-1.5547	0.99121	0.38574	41.786	310.615	714.662	-0.79932	0.49219	0.25732	NaN	NaN	NaN	NaN	NaN	NaN
3.966	-20.83	-77.592	1912.56	-2.1011	1.5669	0.47461	25.007	-110.498	1214.2908	-1.7184	1.0636	0.44395	31.936	284.886	667.3426	-0.72998	0.44385	0.23242	NaN	NaN	NaN	NaN	NaN	NaN
3.968	-18.38	-80.818	1908.3	-2.1504	1.5996	0.49268	27.69	-41.74	1236.344	-1.8347	1.1102	0.48584	40.5244	258.9295	622.414	-0.68604	0.41748	0.2168	NaN	NaN	NaN	NaN	NaN	NaN
3.97	-13.163	-83.063	1903.83	-2.1694	1.6069	0.50293	-15.119	-48.92	1277.72	-1.8707	1.132	0.50341	33.1691	205.8699	569.374	-0.60889	0.36768	0.18506	NaN	NaN	NaN	NaN	NaN	NaN
3.972	-46.0569	-51.918	1904.69	-2.1797	1.6113	0.51611	-10.867	-61.59	1341.133	-1.8259	1.1432	0.50967	39.8341	203.477	525.7937	-0.54663	0.32715	0.16089	NaN	NaN	NaN	NaN	NaN	NaN
3.974	-41.457	-24.12	1939.17	-2.187	1.6021	0.52393	-53.654	-61.97	1334.161	-1.7065	1.1802	0.5332	49.628	205.742	485.04	-0.48389	0.28564	0.13574	NaN	NaN	NaN	NaN	NaN	NaN
3.976	-66.1992	-7.02	1948.07	-2.1909	1.5962	0.53027	-96.74	-147.767	1361.00962	-1.5596	1.2325	0.53281	43.057	214.7027	458.8557	-0.40625	0.22412	0.1167	NaN	NaN	NaN	NaN	NaN	NaN
3.978	-50.291	8.88000000000001	1965.02	-2.189	1.5806	0.54834	-79.911	-190.991	1403.46704	-1.4002	1.2543	0.49014	-7.001	201.946	407.2224	-0.37402	0.1958	0.10449	NaN	NaN	NaN	NaN	NaN	NaN
3.98	-66.33433	-7.73100000000001	1963.97	-2.1938	1.5688	0.55029	-74.885	-254.433	1425.041	-1.2025	1.1996	0.43623	-13.552	186.6267	364.7825	-0.30566	0.14355	0.069336	NaN	NaN	NaN	NaN	NaN	NaN
3.982	-60.0962	-33.894	1960.478	-2.1914	1.541	0.55908	-65.507	-340.091	1492.84365	-1.0228	1.0803	0.396	-9.309	172.423	310.338	-0.25366	0.10816	0.053467	NaN	NaN	NaN	NaN	NaN	NaN
3.984	-66.9187	-59.673	1967.241	-2.1851	1.5093	0.57324	-25.827	-344.602	1529.531	-0.89453	0.96484	0.35156	18.967	163.55	295.616	-0.2041	0.070313	0.040039	NaN	NaN	NaN	NaN	NaN	NaN
3.986	-54.688	-59.585	1941.86	-2.1875	1.4902	0.5874	-45.55	-397.12	1569.202	-0.82978	0.88838	0.32793	26.816	158.144	251.353	-0.15332	0.033691	0.026367	NaN	NaN	NaN	NaN	NaN	NaN
3.988	-53.577	-50.551	1908.763	-2.1909	1.4517	0.60547	-50.625	-401.31	1653.604	-0.80918	0.85078	0.31338	-10.435	165.8353	218.683	-0.12256	0.013184	0.011719	NaN	NaN	NaN	NaN	NaN	NaN
3.99	-77.1703	-57.642	1898.859	-2.1968	1.4282	0.61817	-101.03	-297.704	1673.721	-0.84433	0.84141	0.30869	-41.779	173.19	144.818	-0.070313	-0.01709	-0.0019531	NaN	NaN	NaN	NaN	NaN	NaN
3.992	-50.784	-62.293	1922.585	-2.2026	1.4106	0.62402	-134.501	-251.457	1756.120661	-0.93477	0.86719	0.31103	-35.874	145.237	119.074	-0.04541	-0.041749	-0.0095214	NaN	NaN	NaN	NaN	NaN	NaN
3.994	-62.999	-53.667	1928.006	-2.1934	1.3809	0.63916	-121.934	-142.299	1836.084	-1.0547	0.91797	0.32666	-40.75	128.003	90.899	-0.024902	-0.0625	-0.018555	NaN	NaN	NaN	NaN	NaN	NaN
3.996	-33.842	-24.243	1921.553	-2.1831	1.3657	0.64746	-155.083	-79.422	1848.683	-1.193	0.99182	0.34883	-27.188	101.453	117.1857	-0.016602	-0.089355	-0.018066	NaN	NaN	NaN	NaN	NaN	NaN
[truncated: 28,002 more rows]
