# Supplementary material for: Reliability and Validity of Running Cadence and Stance Time Derived from Instrumented Wireless Earbuds
Source: Sensors (Basel). 2021 Nov 30;21(23):7995. doi: 10.3390/s21237995 (PMC8659722; doi:10.3390/s21237995)
Supplement: Supplementary file 1 [file sensors-21-07995-s001.zip › Data_P08_HeadMovements.csv]

time	up_force_plate_1	up_force_plate_2	up_force_plate_3	up_earbuds_1	up_earbuds_2	up_earbuds_3	down_force_plate_1	down_force_plate_2	down_force_plate_3	down_earbuds_1	down_earbuds_2	down_earbuds_3	shake_force_plate_1	shake_force_plate_2	shake_force_plate_3	shake_earbuds_1	shake_earbuds_2	shake_earbuds_3	nod_force_plate_1	nod_force_plate_2	nod_force_plate_3	nod_earbuds_1	nod_earbuds_2	nod_earbuds_3	bird_L_force_plate_1	bird_L_force_plate_2	bird_L_force_plate_3	bird_L_earbuds_1	bird_L_earbuds_2	bird_L_earbuds_3	bird_R_force_plate_1	bird_R_force_plate_2	bird_R_force_plate_3	bird_R_earbuds_1	bird_R_earbuds_2	bird_R_earbuds_3	check_watch_force_plate_1	check_watch_force_plate_2	check_watch_force_plate_3	check_watch_earbuds_1	check_watch_earbuds_2	check_watch_earbuds_3
0	63.828	-43.546	1084.8145	-0.74443	0.91026	-0.52959	-8.009	-153.3603	1244.02556	-0.72754	1.3047	-0.90234	-12.545	57.4602	124.848	0.22754	0.035156	-0.0053711	-38.9166	-80.6356	1348.825	-0.81504	1.674	-0.90371	-23.196	93.7705	951.3369	-0.5876	1.1319	-0.51221	16.88269	60.7509	1300.63619	-0.90186	1.4185	-0.79248	8.823	25.8271	47.8502	-0.1289	0.12901	-0.065625
0.002	69.109	-51.503	1096.2535	-0.7914	0.97031	-0.53828	-17.438	-148.676	1261.2342	-0.7749	1.3697	-0.90733	-21.891	56.4361	127.2285	0.23693	0.035849	-0.0055627	-42.6954	-78.105	1364.30063	-0.84033	1.6821	-0.90967	-28.563	105.7701	941.9894	-0.57305	1.1055	-0.4997	32.2375	72.7271	1278.71	-0.88672	1.4063	-0.7793	25.709	27.6261	32.9313	-0.12109	0.12178	-0.066504
0.004	65.752	-50.335	1111.6527	-0.83711	1.0324	-0.55274	-27.706	-137.065	1276.2221	-0.80771	1.4266	-0.91748	-17.497	63.1299	117.5458	0.24035	0.03998	-0.0043354	-13.116	-83.4639	1364.571	-0.86339	1.688	-0.90615	-36.009	93.5159	921.667	-0.55938	1.0847	-0.48916	42.637	90.7436	1274.5837	-0.86475	1.3823	-0.771	0.845000000000006	19.833	40.3487	-0.11572	0.1167	-0.06543
0.006	37.94164	-62.48	1111.1775	-0.89112	1.0995	-0.57041	-40.139	-146.841	1306.732	-0.82998	1.4818	-0.93272	-49.407	54.913	103.7873	0.23785	0.043898	-0.010922	-30.581	-74.5511	1362.744	-0.88792	1.6808	-0.91328	-9.275	92.4243	895.018	-0.54414	1.064	-0.4749	33.086	94.6286	1259.8359	-0.85132	1.3645	-0.7605	-26.635	19.3629	53.8508	-0.11191	0.10752	-0.063184
0.008	13.38922	-68.432	1125.55302	-0.94092	1.1685	-0.58643	-18.921	-134.2324	1326.693	-0.84375	1.5194	-0.94238	-34.952	46.9881	104.6117	0.23793	0.049293	-0.008742	-15.075	-63.77	1370.6105	-0.91761	1.6762	-0.90546	0.831000000000003	107.7236	861.7376	-0.52441	1.0356	-0.46484	39.39	102.2849	1244.9149	-0.8335	1.3442	-0.74658	-13.292	25.876	65.583	-0.10459	0.098537	-0.064648
0.01	29.18526	-89.783	1154.3879	-0.99316	1.231	-0.60059	-40.1121	-124.9514	1352.695	-0.84766	1.5586	-0.95313	-40.847	53.8235	104.0464	0.23047	0.058594	-0.010254	13.327	-53.295	1401.2838	-0.95335	1.6795	-0.89843	-17.257	116.5302	828.756	-0.50596	1.0047	-0.45	49.74	117.467	1224.2732	-0.80957	1.3145	-0.73047	-21.379	36.792	69.318	-0.10185	0.08877	-0.05957
0.012	12.7384	-81.7259	1180.44594	-1.0374	1.2976	-0.62334	-43.8301	-107.60707	1349.425	-0.83604	1.5854	-0.96416	-35.924	48.7517	97.513	0.22448	0.070953	-0.01917	33.497	-43.508	1415.2778	-0.99365	1.688	-0.88818	-32.21	119.155	800.293	-0.4917	0.97588	-0.43565	50.228	122.263	1202.6629	-0.79688	1.3027	-0.7207	-35.046	19.5525	70.8927	-0.094238	0.072949	-0.062988
0.014	0.474	-117.155	1202.5843	-1.0784	1.3597	-0.64756	-58.4449	-108.5822	1355.7596	-0.82207	1.6121	-0.96719	-69.5358	50.7182	76.0144	0.21704	0.074553	-0.019632	9.105	-50.4209	1424.67626	-1.0345	1.7127	-0.88069	-25.389	122.81	792.534	-0.47295	0.9458	-0.41963	43.5665	119.958	1176.1438	-0.771	1.2681	-0.70264	-57.5195	0.427	66.973	-0.089844	0.062012	-0.064941
0.016	-1.93	-147.043	1227.8999	-1.1163	1.4241	-0.66592	-29.728	-92.7158	1335.722	-0.82051	1.6418	-0.97188	-50.769	51.1205	66.655	0.20809	0.08588	-0.022772	38.70336	-63.11529	1440.2472	-1.0837	1.7391	-0.87612	-35.309	132.2334	781.3802	-0.45664	0.91856	-0.40976	48.0858	111.702	1171.6708	-0.7478	1.24	-0.68921	-48.573	-6.53794	82.843	-0.084082	0.058398	-0.060352
0.018	-3.109	-151.918	1253.2017	-1.1504	1.4883	-0.68652	-71.0559	-81.203	1340.864	-0.83066	1.6857	-0.96699	-69.03783	49.1307	54.232	0.19773	0.092393	-0.028523	42.3226	-66.9696	1460.39482	-1.1317	1.7692	-0.864	-47.174	128.4619	760.5025	-0.43994	0.88525	-0.39697	48.2695	113.3262	1167.6461	-0.72461	1.207	-0.67383	-66.9196	-14.376	101.147	-0.089258	0.054786	-0.056836
0.02	-32.122631	-138.029	1277.4811	-1.1788	1.5511	-0.70401	-56.286	-81.1404	1343.746	-0.86084	1.7271	-0.96533	-58.033	46.3486	55.5709	0.18848	0.10352	-0.036133	35.49	-50.2865	1477.405	-1.1664	1.7913	-0.86044	-65.283	120.4717	733.067	-0.41923	0.85947	-0.3833	32.9948	108.7423	1142.9282	-0.69482	1.1704	-0.65967	-54.5462	-18.115	128.4	-0.094336	0.059473	-0.059961
0.022	-55.179	-129.5512	1297.15	-1.2051	1.6013	-0.72061	-49.4587	-83.9196	1359.345	-0.89141	1.7756	-0.97402	-55.1059	50.46214	59.4918	0.18224	0.1082	-0.039637	23.73	-35.68491	1482.729	-1.1973	1.8027	-0.85547	-74.066	135.9299	702.918	-0.4	0.82696	-0.37188	44.44	103.4232	1115.3984	-0.68164	1.1563	-0.65137	-83.2884	-19.8674	143.437	-0.10595	0.062891	-0.063867
0.024	-47.639	-110.8568	1311.861	-1.2243	1.6353	-0.73037	-18.352	-74.043	1385.477	-0.92978	1.8216	-0.97764	-33.677	52.62877	52.3944	0.16476	0.12353	-0.039849	29.585	-29.635	1489.847	-1.216	1.8069	-0.84752	-100.7188	156.594	687.994	-0.38203	0.79804	-0.36016	55.113	91.8159	1109.328	-0.64844	1.1113	-0.63281	-52.09	-7.36221	153.0939	-0.11963	0.06543	-0.063965
0.026	-35.3086	-91.1101	1305.508	-1.2454	1.6593	-0.74502	-45.4817	-78.0796	1404.7217	-0.96416	1.8575	-0.97764	-66.46335	54.8101	53.6944	0.14992	0.13407	-0.03087	10.324	-23.524	1483.8428	-1.223	1.8079	-0.84238	-74.5126	154.241	672.5142	-0.3583	0.76416	-0.35069	29.0729	109.498	1094.0861	-0.63209	1.0813	-0.60913	-83.49	8.4789	184.888	-0.12021	0.068555	-0.070606
0.028	-48.893	-85.9874	1312.6073	-1.2495	1.6626	-0.75732	-27.691	-78.3156	1409.0599	-0.98976	1.8895	-0.97685	-40.816	44.865	43.955	0.13224	0.14589	-0.026857	-11.193	-18.8352	1485.978	-1.2241	1.8003	-0.83378	-75.89268	146.4437	649.5732	-0.3374	0.73096	-0.3374	19.564	121.3938	1070.5048	-0.61475	1.0493	-0.59668	-60.4219	25.3081	234.4374	-0.11738	0.072558	-0.081348
0.03	-51.0749	-92.0017	1323.0815	-1.2538	1.6583	-0.76397	-4.672	-72.9284	1429.154112	-1.0176	1.9102	-0.98242	-34.863	35.1405	54.5105	0.11279	0.16016	-0.024902	-26.2956	-24.96115	1485.325	-1.2171	1.7964	-0.83349	-69.5505	136.3359	628.3578	-0.31582	0.70254	-0.33037	20.8922	129.539	1056.1645	-0.58545	1.0122	-0.57178	-39.155	59.3035	262.4499	-0.10996	0.07373	-0.090332
0.032	-10.205	-80.9444	1328.73	-1.2641	1.6539	-0.76758	1.904	-46.5911	1443.0236	-1.0339	1.9208	-0.98311	-14.519	49.13765	43.0035	0.093158	0.17754	-0.020895	-31.671	-17.1524	1497.1153	-1.2085	1.7817	-0.82666	-96.961	117.5556	624.1727	-0.29649	0.67392	-0.32373	-1.262	145.83	1029.3107	-0.57471	0.99463	-0.55811	-16.232	72.9038	307.28968	-0.10528	0.073535	-0.10166
0.034	-11.448	-75.36846	1325.186	-1.2805	1.6508	-0.77617	-5.425	-55.4362	1460.0028	-1.0509	1.9243	-0.98506	-30.238	33.1607	47.5631	0.072946	0.19151	-0.017674	-25.47	-5.6873	1479.3859	-1.2034	1.771	-0.82541	-65.224	109.747	600.6615	-0.27969	0.64463	-0.31162	-30.5259	151.1846	1009.087	-0.54639	0.94775	-0.54053	-44.7856	77.405	363.7224	-0.10254	0.071289	-0.094238
0.036	2.382	-87.5506	1322.305	-1.298	1.6467	-0.7793	32.2069	-58.51401	1463.767	-1.0637	1.9239	-0.98623	-20.101	22.554065	28.5389	0.059273	0.20479	-0.015722	-42.892	-3.94059	1469.125	-1.1953	1.7526	-0.82567	-58.208	130.5509	587.8762	-0.26133	0.62051	-0.30322	-13.321	153.098	973.908	-0.52954	0.91699	-0.52612	-31.393	90.8935	408.236	-0.099998	0.077832	-0.11767
0.038	13.6999	-81.745	1326.656	-1.3125	1.6523	-0.78223	25.651	-55.2641	1469.7917	-1.0744	1.9182	-0.98144	-13.287	23.9212	35.0116	0.039354	0.2126	-0.012109	-44.743	10.319	1454.028	-1.1873	1.7306	-0.82192	-50.33	148.1447	563.392	-0.25	0.59961	-0.30078	-21.141	145.5496	957.7967	-0.50635	0.88916	-0.50928	5.615	118.8852	465.165	-0.10566	0.086719	-0.13008
0.04	55.4447	-74.45	1352.552	-1.3286	1.6628	-0.7874	7.502	-48.637	1462.2668	-1.0835	1.9087	-0.98291	-9.054	27.7977	20.0282	0.025391	0.22168	-0.0068359	-42.31	26.1913	1473.2684	-1.1807	1.7068	-0.82066	-71.23286	125.9302	547.83765	-0.22978	0.57295	-0.29395	-30.422	154.3603	929.5894	-0.48047	0.84375	-0.48975	26.4118	138.029	526.8655	-0.1166	0.10781	-0.14805
0.042	21.476	-63.43	1384.3587	-1.3395	1.6742	-0.78887	11.841	-38.43	1459.7566	-1.0899	1.8929	-0.98779	9.55	28.74268	42.7404	0.010743	0.22539	-0.0061525	-58.8321	30.6502	1474.9474	-1.168	1.6777	-0.81543	-49.628	119.73036	515.5999	-0.21387	0.54239	-0.28545	-39.0657	143.4143	900.6686	-0.46582	0.82715	-0.47998	26.1815	127.865	581.53987	-0.1332	0.1417	-0.16504
0.044	50.8369	-61.508	1419.2903	-1.3504	1.6773	-0.79512	30.707	-2.8051	1459.3878	-1.0886	1.8691	-0.99414	4.999	40.628	43.5209	-0.00087866	0.23125	-0.0030279	-66.4175	25.30911	1478.6172	-1.1513	1.66	-0.81787	-52.041	135.2233	509.2542	-0.19668	0.51504	-0.27881	-38.6647	142.3796	864.212	-0.44287	0.78271	-0.46143	34.8779	110.295	645.1738	-0.16309	0.1792	-0.17676
0.046	42.0685	-57.93	1429.638	-1.364	1.686	-0.79863	15.33	12.9588	1470.82	-1.084	1.8379	-0.99414	-2.84	36.8407	37.2695	-0.0079094	0.23437	0.0020506	-57.2922	44.2259	1464.77799	-1.1387	1.6363	-0.81733	-30.537	154.177	495.8984	-0.17666	0.48096	-0.27237	-23.716	155.5582	849.597	-0.42456	0.75122	-0.44604	39.372	93.126	708.72559	-0.19229	0.2335	-0.19336
0.048	44.3981	-40.1634	1438.159	-1.3687	1.6919	-0.80322	0.0399999999999991	12.6726	1469.63978	-1.0721	1.8013	-0.99356	-6.029	35.1844	31.418	-0.018261	0.23321	0.0074217	-65.3226	41.5665	1457.33909	-1.1301	1.618	-0.81311	-18.343	142.064	478.0529	-0.15771	0.44971	-0.26221	-40.6365	160.592	825.628	-0.40479	0.72119	-0.42822	22.8169	71.878	770.0123	-0.22881	0.29043	-0.20684
0.05	33.5194	-43.1453	1431.599	-1.3751	1.6921	-0.80654	26.424	4.351	1467.3238	-1.0542	1.7661	-0.9917	-7.566	32.8213	36.6874	-0.029785	0.23926	0.013184	-77.3626	40.8821	1441.2829	-1.1209	1.6036	-0.81373	9.444	144.826	436.2668	-0.13184	0.41836	-0.25527	-23.191	146.8966	807.7377	-0.38232	0.68018	-0.40479	35.739	49.262	807.8769	-0.27725	0.35606	-0.2209
0.052	76.483	-47.822	1438.62175	-1.3757	1.6915	-0.81045	15.411	20.5038	1463.575	-1.0372	1.7386	-0.99307	-11.223	43.558	39.864	-0.043458	0.23975	0.018555	-47.47	32.541	1416.4704	-1.1133	1.5879	-0.81592	10.665	136.618	422.379	-0.11172	0.38867	-0.2458	-39.77	155.771	790.4439	-0.37109	0.66016	-0.40039	36.339	42.7968	829.6675	-0.33096	0.43194	-0.2374
0.054	67.385	-37.2659	1447.6233	-1.3683	1.6903	-0.81006	-13.206	38.734	1455.0273	-1.0259	1.7047	-0.99766	1.926	33.1503	43.3276	-0.051953	0.24287	0.024023	-34.726	33.6466	1409.2754	-1.1056	1.5805	-0.81851	8.91	116.299	404.951	-0.091015	0.36211	-0.24229	-34.9	169.7451	769.2829	-0.3457	0.625	-0.375	16.65	23.4115	825.2462	-0.38818	0.51416	-0.25342
0.056	56.019	-27.6364	1450.9623	-1.3668	1.6805	-0.8124	-43.7565	36.836	1452.4897	-1.0131	1.6723	-0.99883	-11.522	25.25378	21.203	-0.060547	0.24756	0.034961	-27.952	41.9638	1384.813	-1.0962	1.5715	-0.81883	27.447	104.4098	403.8352	-0.072461	0.3375	-0.23906	-44.546	166.1038	741.7513	-0.31934	0.58691	-0.35449	-2.395	-14.9493	847.2727	-0.44883	0.60742	-0.26601
0.058	52.845	-35.23	1465.5207	-1.3516	1.6719	-0.82227	-25.803	36.837	1432.56881	-0.99656	1.6439	-0.99951	-25.046	24.5251	33.868	-0.06748	0.25615	0.035449	-26.3286	36.94871	1380.6513	-1.0903	1.5667	-0.8147	24.797	120.4086	396.701	-0.05957	0.30664	-0.2334	-18.856	155.98948	723.225	-0.30029	0.56787	-0.34814	7.541	-24.3537	861.1498	-0.5084	0.70606	-0.28496
0.06	55.0785	-19.2753	1478.4456	-1.3339	1.6544	-0.81358	-52.719	35.33424	1420.7285	-0.97412	1.6118	-1.0005	-46.991	35.7115	29.519	-0.077148	0.26514	0.043457	8.87	41.249738	1365.186	-1.0744	1.5535	-0.81435	21.511	109.893	381.348	-0.037793	0.28281	-0.22559	-13.727	162.0678	701.38035	-0.27393	0.52393	-0.32373	-22.108	-33.58987	870.594	-0.56309	0.80879	-0.30488
0.062	24.832	10.5124	1480.4146	-1.3144	1.6384	-0.81552	-41.899	28.3853	1422.1263	-0.9582	1.5758	-0.99922	-37.887	33.8142	43.8619	-0.077246	0.26963	0.049512	-2.121	48.127	1373.52542	-1.064	1.5435	-0.81787	-3.695	103.247	356.6851	-0.018652	0.25645	-0.22442	-5.684	158.3779	678.8197	-0.25098	0.49194	-0.30884	-13.68	-46.042	879.497	-0.61777	0.90176	-0.31797
0.064	14.9006	35.654	1467.8492	-1.2925	1.618	-0.81865	-45.7314	12.477	1418.461	-0.94209	1.5431	-0.996	-43.251	38.1795	40.4096	-0.079687	0.27959	0.052832	19.165	59.7619	1346.3022	-1.0474	1.5277	-0.81437	-0.00300000000000011	109.216	332.1744	-0.0041992	0.2334	-0.22168	-5.91	147.4679	651.5065	-0.23047	0.4624	-0.29639	-15.866	-51.241	871.432	-0.66162	0.98096	-0.34521
0.066	12.216	39.336	1466.3558	-1.2687	1.593	-0.81387	-40.988	13.566	1407.0219	-0.9331	1.5099	-0.98936	-36.843	26.59587	29.0971	-0.082812	0.28193	0.060254	27.231	65.807	1335.345	-1.028	1.5107	-0.81325	-25.294	118.735	309.8523	0.0086915	0.2083	-0.21973	19.217	148.7624	613.6704	-0.20117	0.41797	-0.26953	-22.143	-36.6769	857.051	-0.69678	1.0356	-0.37295
0.068	-24.2114	64.34	1456.757	-1.25	1.5625	-0.81299	-78.1015	18.511	1372.5702	-0.92256	1.481	-0.98506	-62.6902	21.9868	21.02	-0.079297	0.28897	0.064356	12.798	83.815	1310.3472	-1.0077	1.4952	-0.81255	-12.943	107.5427	295.5406	0.020508	0.18311	-0.21484	2.486	142.7252	614.5865	-0.18262	0.39453	-0.25684	-43.4712	-26.779	839.83	-0.72578	1.0699	-0.40215
0.07	-56.448	67.776	1450.4454	-1.2294	1.5378	-0.81045	-79.1103	11.361	1349.909	-0.91406	1.4492	-0.97705	-55.4012	20.58441	34.706	-0.07666	0.28906	0.07373	5.317	95.353	1306.6977	-0.98509	1.4772	-0.80297	-31.053	93.1824	288.57816	0.03584	0.15566	-0.21347	3.433	148.6562	582.6767	-0.16211	0.35498	-0.24072	-70.6555	-36.763	842.824	-0.7457	1.0836	-0.41895
0.072	-60.542	44.926	1443.8062	-1.2085	1.5157	-0.80928	-46.008	17.1787	1330.264	-0.90723	1.4263	-0.96738	-47.93	20.0934	32.1872	-0.077148	0.29473	0.080469	15.741	93.27	1275.902	-0.96875	1.4609	-0.79199	-27.522	89.6509	276.7788	0.052637	0.13106	-0.21015	-3.105	142.66	553.9394	-0.13452	0.32226	-0.22754	-63.19195	-35.8895	833.345	-0.75537	1.0806	-0.4332
0.074	-25.9746	28.8091	1446.2391	-1.1913	1.4829	-0.79756	-45.62	40.0293	1330.6574	-0.89707	1.4063	-0.95977	-33.476	33.5491	36.4284	-0.073145	0.29619	0.087989	28.411	86.46	1259.9458	-0.94222	1.4409	-0.78147	-52.3466	85.0464	268.6092	0.063574	0.10645	-0.20351	-2.626	159.6	512.8807	-0.1123	0.29346	-0.21777	-62.6075	-29.607	839.736	-0.76318	1.0767	-0.45068
0.076	-35.8662	40.69	1426.637	-1.1717	1.4506	-0.79004	-63.6926	54.9836	1308.5897	-0.88965	1.3903	-0.95391	-49.978	33.07423	15.8809	-0.071582	0.30049	0.092285	0.276	82.1578	1226.974	-0.92606	1.4187	-0.77418	-28.934	84.8767	254.266879	0.075976	0.083301	-0.20049	-10.033	157.0563	497.5852	-0.078613	0.24219	-0.19824	-79.0748	-43.653	843.553	-0.77734	1.0762	-0.46054
0.078	-32.089	30.027	1426.6487	-1.1523	1.4219	-0.7793	-52.2692	54.971	1302.2629	-0.88555	1.3738	-0.94805	-44.944	26.1852	24.68	-0.073438	0.30557	0.1001	8.075	70.7944	1202.686	-0.9011	1.3992	-0.76953	-51.589	92.9282	236.3838	0.085938	0.061035	-0.19775	-19.347	153.6563	466.7085	-0.060059	0.22705	-0.18896	-84.5706	-51.561	848.037	-0.79033	1.0938	-0.47725
0.08	-16.306	21.4905	1390.399	-1.1318	1.3918	-0.77031	-36.899	76.195	1296.704	-0.88086	1.3613	-0.93359	-48.009	32.8264	38.562	-0.069824	0.30176	0.10791	1.636	60.1648	1188.046	-0.88493	1.3783	-0.75858	-52.358	105.233	220.5222	0.093457	0.035254	-0.19239	-13.224	149.5958	459.6948	-0.028809	0.18018	-0.17578	-58.9559	-62.106	846.614	-0.8083	1.1266	-0.4999
0.082	-22.312	33.7113	1397.4455	-1.1147	1.365	-0.76357	-45.656	97.5983	1276.9212	-0.88047	1.3551	-0.91836	-44.8909	42.2626	22.524	-0.069922	0.30723	0.11201	3.483	70.42559	1186.7197	-0.86523	1.3574	-0.74316	-71.83038	90.8521	206.972	0.10479	0.012402	-0.19063	-38.493	152.8793	421.6689	-0.011963	0.15088	-0.1604	-35.9463	-61.263	865.40657	-0.82373	1.1587	-0.51885
0.084	-13.7592	41.224	1389.6486	-1.1027	1.338	-0.75225	-23.55	84.483	1253.5111	-0.88388	1.3454	-0.90732	-21.213	39.0038	39.9747	-0.066016	0.31094	0.11934	-31.85	87.7698	1169.7107	-0.84435	1.3311	-0.72775	-70.38205	90.842	191.741	0.11455	-0.0083004	-0.1875	-24.915	138.17715	412.0368	0.0092773	0.11865	-0.14746	-31.7331	-71.8658	874.5343	-0.82617	1.1924	-0.54395
0.086	-22.19055	19.5816	1384.2688	-1.0753	1.3153	-0.74209	15.379	84.7078	1223.3764	-0.88896	1.338	-0.89131	-18.409	26.627	48.77061	-0.0625	0.30821	0.1127	-36.044	82.6964	1149.7661	-0.82474	1.3071	-0.71457	-75.0866	91.1864	185.526	0.12598	-0.027735	-0.18301	-31.956	129.9214	396.4196	0.029297	0.084961	-0.12842	-8.8796	-96.368	893.1878	-0.81709	1.2167	-0.56768
0.088	-7.621	35.9156	1349.165	-1.0527	1.2832	-0.73438	0.893000000000001	95.416	1207.787	-0.88906	1.3301	-0.88164	-21.727	8.45881	37.377	-0.056055	0.31465	0.10556	-60.9258	91.2066	1120.018	-0.80597	1.2806	-0.7005	-73.00482	74.6569	179.0844	0.13428	-0.050781	-0.18262	-31.572	130.4366	383.8123	0.038086	0.070313	-0.12158	6.232	-119.806	907.216	-0.79316	1.2239	-0.58125
0.09	1.17	65.4916	1342.273	-1.0302	1.2476	-0.72686	-2.634	83.3048	1196.661	-0.88574	1.3242	-0.87109	-10.995	5.6315	35.84	-0.051758	0.32275	0.10742	-71.8335	118.8826	1089.073	-0.78106	1.2603	-0.68419	-70.9692	55	166.4321	0.13965	-0.063867	-0.1753	-61.768	133.409	355.1212	0.054199	0.045898	-0.1123	-18.1693	-145.181	916.407	-0.75762	1.2008	-0.5914
0.092	8.803	73.772	1322.713	-1.0129	1.2188	-0.72031	-2.718	73.9697	1183.1519	-0.88018	1.3177	-0.85576	-4.925	6.331	53.643	-0.045606	0.32861	0.1003	-89.376	126.5042	1074.0426	-0.76318	1.2407	-0.66943	-45.763	63.5567	151.8243	0.14746	-0.080273	-0.16963	-44.871	111.6832	332.3589	0.069092	0.023926	-0.099366	26.0731	-171.995	951.57	-0.7126	1.1585	-0.60127
0.094	25.579	79.6279	1298.0362	-0.98751	1.1941	-0.71211	4.629	78.1887	1175.8122	-0.87178	1.3087	-0.84326	7.046	7.4898	74.3296	-0.040918	0.33955	0.094434	-60.179	128.4318	1041.96868	-0.73926	1.2146	-0.65098	-31.799	81.2374	148.2858	0.15683	-0.09668	-0.16689	-58.899	94.7208	310.2855	0.080078	0.012695	-0.092773	51.9937	-146.602	960.0257	-0.66553	1.104	-0.60889
0.096	37.46452	93.45	1293.6464	-0.97051	1.1592	-0.70625	0.818000000000005	77.45886	1171.1206	-0.86514	1.2943	-0.82022	-1.972	7.4497	96.647	-0.041309	0.35283	0.08584	-85.759	130.3115	1027.9407	-0.72099	1.188	-0.6374	-26.413	72.112	137.3986	0.16045	-0.10596	-0.16289	-64.011	97.2077	302.2258	0.092773	-0.00048828	-0.083008	42.4351	-126.5504	994.3082	-0.61367	1.0478	-0.60996
0.098	52.432	100.263	1288.6187	-0.95264	1.1353	-0.69482	-14.773	78.5875	1145.78222	-0.86074	1.2801	-0.80332	6.124	-3.6892	104.6418	-0.035937	0.36826	0.076367	-67.464	123.7803	1009.1247	-0.69912	1.1602	-0.62217	-13.252	65.2368	145.199	0.16309	-0.11768	-0.15479	-69.1929	101.0794	275.0743	0.095703	-0.0073242	-0.079102	40.0013	-107.024	1014.338	-0.56641	1.0051	-0.60722
0.1	61.438	89.752	1281.5506	-0.93838	1.1171	-0.6915	-10.029	90.2194	1132.8451	-0.85498	1.2661	-0.78174	-14.496	0.2195	117.621	-0.036133	0.38672	0.064941	-76.1071	119.9694	984.4259	-0.67851	1.1317	-0.60908	4.757	71.1368	143.5549	0.16679	-0.12744	-0.15097	-55.3456	93.8008	256.409	0.10645	-0.026367	-0.066406	36.012	-117.872	1050.7137	-0.53086	0.97188	-0.60918
0.102	80.708	99.8	1263.5147	-0.92285	1.0945	-0.68086	-6.443	116.101	1104.680553	-0.85332	1.2533	-0.76465	6.656	24.6931	148.9252	-0.032226	0.41143	0.054004	-48.744	129.752	950.5407	-0.65234	1.0977	-0.58789	6.283	56.0552	127.9665	0.16699	-0.14161	-0.1459	-62.5382	94.7626	246.901	0.12256	-0.039307	-0.056885	74.833	-110.234	1078.0401	-0.5126	0.96201	-0.60928
0.104	81.067	104.332	1241.62265	-0.90801	1.0695	-0.67188	-22.821	107.9664	1100.446	-0.8457	1.2375	-0.74395	-6.305	48.8633	178.9676	-0.03711	0.43847	0.0375	-67.9785	145.476	938.8301	-0.62871	1.068	-0.57715	-6.661	43.4995	123.9023	0.16387	-0.15176	-0.14551	-52.866	99.0883	249.735	0.12549	-0.05127	-0.05127	58.081	-106.89	1113.8304	-0.51367	0.95508	-0.61523
0.106	57.514	96.444	1211.0569	-0.89053	1.0489	-0.66885	-31.406	100.642	1059.596	-0.83672	1.223	-0.72597	2.785	60.23045	203.6202	-0.045703	0.46465	0.017578	-60.422	144.496	906.905	-0.59981	1.0375	-0.56211	2.233	40.4191	116.585	0.16553	-0.16025	-0.13935	-49.3878	87.419453	226.34179	0.13379	-0.059082	-0.045898	73.0243	-107.404	1135.1063	-0.52354	0.97647	-0.62392
0.108	35.7221	79.8639	1203.593	-0.87158	1.0278	-0.65771	-30.272	105.2954	1043.9276	-0.82148	1.2082	-0.70625	-13.412	70.1286	223.227	-0.055273	0.50147	-0.00029298	-62.311	127.4036	885.7054	-0.57246	1.0035	-0.54766	10.688	50.8297	98.336	0.16943	-0.16797	-0.14844	-28.062	85.4937	210.9623	0.13965	-0.070313	-0.04248	62.3773	-112.259	1154.36708	-0.53935	1.0075	-0.63506
0.11	27.7188	75.3465	1171.7404	-0.85889	1.0005	-0.6581	-37.902	117.2466	1015.5843	-0.80811	1.1919	-0.68408	-15.487	82.40949	267.125	-0.063965	0.53906	-0.028809	-38.363	132.6993	855.34	-0.54873	0.97197	-0.53076	4.9	60.9405	91.284338	0.16972	-0.17588	-0.14326	-20.952	102.463	193.1718	0.14844	-0.086426	-0.032227	46.106	-118.418	1159.935	-0.56006	1.0477	-0.65264
0.112	11.554	85.46495	1167.3437	-0.83936	0.98057	-0.65127	-57.399	112.8246	991.2274	-0.79267	1.1733	-0.66728	-37.7742	102.4093	335.4301	-0.081152	0.58955	-0.057129	-46.641	131.6629	839.5259	-0.52881	0.93555	-0.52148	17.799	55.615	88.1904	0.16475	-0.17764	-0.13984	-29.4	99.396	190.1384	0.16186	-0.097412	-0.027832	17.1613	-126.835	1197.9508	-0.5835	1.0981	-0.66591
0.114	12.025	91.9132	1168.3926	-0.82724	0.95986	-0.64072	-52.132	111.37202	959.6313	-0.77178	1.1548	-0.64814	-11.442	111.198	404.6785	-0.10146	0.63877	-0.082618	-29.426	132.9819	817.6487	-0.49541	0.904	-0.49971	14.709	73.356	80.867	0.15537	-0.1792	-0.13515	-21.826	75.5129	173.1643	0.17041	-0.10498	-0.020996	18.845	-153.4998	1224.2613	-0.61279	1.145	-0.6792
0.116	-1.468	106.3189	1146.6153	-0.81221	0.94014	-0.63955	-51.912	125.2096	943.8811	-0.75303	1.1391	-0.63174	-6.516	131.043	470.7359	-0.12842	0.69931	-0.11973	-12.578	140.6893	799.3003	-0.47099	0.87119	-0.48154	-8.222	67.576	78.47379	0.14795	-0.18555	-0.13877	-6.07100000000001	76.6876	154.23	0.18359	-0.12305	-0.012695	21.5148	-146.5056	1249.2447	-0.64317	1.2035	-0.69395
0.118	-5.057	114.5308	1128.715	-0.79639	0.92041	-0.6333	-82.12216	129.0703	913.995	-0.73418	1.1228	-0.61718	-22.718	126.807	523.5975	-0.16768	0.76768	-0.15733	-5.887	156.914	775.7775	-0.44678	0.8415	-0.46982	-2.843	56.739	79.4045	0.14258	-0.18604	-0.14111	-20.837	71.3352	144.9548	0.19434	-0.13135	-0.012207	-3.953	-147.3144	1266.981	-0.68272	1.2567	-0.70518
0.12	-23.2687	119.7186	1115.629	-0.77822	0.90225	-0.62471	-96.367	116.6216	884.4702	-0.71045	1.1069	-0.60596	-57.0106	107.544	596.667	-0.21436	0.84033	-0.19824	-7.075	157.4269	760.1684	-0.42217	0.81368	-0.45449	-1.442	55.077	70.1677	0.13174	-0.1792	-0.13682	-16.13	66.7064	135.8789	0.21191	-0.14453	-0.0063477	-57.8126	-169.481	1279.956	-0.72764	1.3079	-0.7165
0.122	-19.911	112.8516	1088.652	-0.76523	0.8748	-0.61836	-85.63181	127.869	857.257	-0.69199	1.0853	-0.58145	-65.0622	85.736	687.397	-0.27588	0.91787	-0.24111	10.215	144.469	741.823	-0.40234	0.78613	-0.44141	-8.92599999999999	69.8543	66.0308	0.11485	-0.16983	-0.13662	12.386	65.254	130.9365	0.21973	-0.15283	-0.00073245	-50.097	-171.7033	1288.9714	-0.76846	1.3509	-0.72841
0.124	-31.227	116.8131	1064.7402	-0.74922	0.85488	-0.61406	-79.0515	141.613	835.084	-0.67139	1.0673	-0.56826	-49.611	82.31941	789.872	-0.34258	0.99229	-0.26983	16.067	147.5738	724.346	-0.37968	0.76221	-0.42959	-26.234	54.7991	67.099	0.092578	-0.15654	-0.13623	-3.123	82.296	115.1595	0.229	-0.16357	0	-50.3517	-150.8273	1304.5313	-0.80664	1.3867	-0.74805
0.126	-24.25	131.757	1033.55444	-0.73125	0.83457	-0.60118	-82.577	143.7938	816.0791	-0.65381	1.0481	-0.54912	-43.313	63.5016	881.268	-0.4207	1.0688	-0.30186	3.704	155.5933	698.4847	-0.35752	0.73965	-0.41055	-46.418	45.4481	64.4379	0.071289	-0.13769	-0.13145	-14.681	73.207	109.9999	0.22803	-0.16699	0.0043945	-52.323	-143.9914	1334.9205	-0.83379	1.417	-0.7664
0.128	-57.6884	130.4522	1006.245	-0.71484	0.80664	-0.58984	-63.75	130.9706	793.4093	-0.62969	1.0211	-0.5336	-46.6346	49.174	951.898	-0.50615	1.1364	-0.32061	9.248	144.0209	667.6893	-0.33213	0.71191	-0.39258	-36.168	47.4726	50.6649	0.046875	-0.11572	-0.1333	5.067	61.14	105.1164	0.23242	-0.16748	0.0024414	-48.6517	-161.118	1359.8594	-0.84912	1.4477	-0.78466
0.13	-65.681	124.64171	964.237	-0.69336	0.78086	-0.57881	-64.041	140.096	763.986	-0.604	0.99463	-0.52295	-51.6692	27.796	986.012	-0.59619	1.1958	-0.34619	-19.885	149.0248	624.957	-0.31084	0.68789	-0.3791	-54.9872	52.5838	59.8521	0.019043	-0.093264	-0.13389	4.303	53.7524	107.304	0.23633	-0.1626	-0.0029297	-55.3448	-148.3906	1362.8663	-0.86045	1.4817	-0.80068
0.132	-76.028	140.7025	940.518	-0.67305	0.75938	-0.56445	-52.65	146.1688	755.9228	-0.57783	0.96338	-0.51006	-37.5586	0.4694	1016.7077	-0.67539	1.2415	-0.37363	-41.312	151.2584	609.004	-0.28662	0.66406	-0.36621	-66.342001	44.10176	54.5172	-0.0032226	-0.06875	-0.13545	-1.356	49.6928	101.6527	0.23657	-0.15185	-0.0065918	-60.274	-129.75384	1372.97695	-0.87177	1.5122	-0.81534
0.134	-66.9911	141.9207	913.976	-0.65157	0.73634	-0.55781	-51.4788	132.0929	733.1916	-0.54834	0.93155	-0.49365	-49.4911	-21.722	1045.956	-0.74463	1.2774	-0.39434	-48.135	149.111437	585.5213	-0.26562	0.63516	-0.35166	-72.7052	42.63909	58.809	-0.025879	-0.044922	-0.13428	-18.882	42.1725	97.21438	0.23682	-0.13916	-0.0087891	-81.235	-125.6947	1384.5967	-0.89063	1.5469	-0.83008
0.136	-76.9185	131.49376	895.0803	-0.63848	0.71563	-0.54317	-18.372	135.947	715.1557	-0.51865	0.8956	-0.48076	-28.99	-31.472	1054.296	-0.79112	1.3075	-0.41738	-35.271	143.8427	556.6337	-0.23769	0.60547	-0.33525	-62.2884	50.9581	49.043	-0.04248	-0.024316	-0.13281	-19.573	43.974445	83.2988	0.23682	-0.12793	-0.0078125	-44.6271	-104.7071	1381.9933	-0.9169	1.5739	-0.84619
0.138	-42.864	145.319	879.4324	-0.61865	0.69385	-0.53369	-36.751	150.83	690.7821	-0.49346	0.86279	-0.46533	-8.297	-47.763	1022.141	-0.81514	1.3224	-0.43525	-45.788	153.488	542.863	-0.20957	0.5793	-0.32158	-68.4649	37.2538	46.928	-0.060059	-0.0063477	-0.13379	-32.247	60.4821	66.9225	0.23145	-0.11377	-0.0073242	-39.925	-83.618	1382.7724	-0.94824	1.6036	-0.85391
0.14	-32.511	166.699	862.1706	-0.60146	0.67314	-0.51815	-33.788	131.452	656.8663	-0.46387	0.83691	-0.45117	11.169	-69.578	969.368	-0.81738	1.3242	-0.44824	-64.363	167.96	530.395	-0.18017	0.54717	-0.30479	-62.733	32.9887	37.927	-0.078906	0.019922	-0.13359	-38.166	55.5077	61.683	0.21338	-0.09375	-0.01416	-19.534	-97.775	1386.2276	-0.97363	1.6188	-0.86445
0.142	-32.564	152.297	832.612	-0.58622	0.65595	-0.50165	-28.28	123.9846	634.8887	-0.43867	0.79961	-0.44004	5.5936	-78.137	931.279	-0.8002	1.3068	-0.46348	-68.841	155.2533	514.8169	-0.1543	0.51953	-0.29004	-39.399	35.5151	53.4479	-0.09248	0.037989	-0.12705	-45.464	41.0191	57.9664	0.19922	-0.079834	-0.018555	-36.7754	-106.883	1388.939	-1.0059	1.6375	-0.87686
0.144	-15.192	143.044	823.5377	-0.57019	0.64148	-0.4825	-3.253	128.6193	607.5771	-0.41064	0.76601	-0.41973	43.082	-90.251	915.7963	-0.76748	1.2786	-0.48154	-54.342	147.783	485.9179	-0.1292	0.49326	-0.27256	-48.534	47.4401	36.824	-0.10889	0.05791	-0.12354	-36.237	43.3258	57.7031	0.18701	-0.066895	-0.027344	10.856	-112.9012	1429.26	-1.0405	1.6567	-0.88818
0.146	-4.627	139.687	788.0542	-0.55057	0.6203	-0.47323	-29.332	139.108	592.1099	-0.38603	0.73281	-0.40996	43.272	-67.653	886.8942	-0.73311	1.2404	-0.48818	-71.584	142.579	462.2897	-0.10439	0.46612	-0.25625	-48.6792	44.068	47.4359	-0.12373	0.075879	-0.11934	-61.317	51.9157	66.67	0.16992	-0.049316	-0.03418	15.216	-101.7057	1444.3294	-1.069	1.6771	-0.89472
0.148	5.009	138.3661	772.0217	-0.53271	0.60498	-0.46338	-17.958	136.836	568.0644	-0.35781	0.70195	-0.39531	44.9245	-53.71	863.8511	-0.69834	1.19	-0.48857	-83.3247	135.7017	434.379	-0.082129	0.4376	-0.23828	-44.748	49.8084	41.9566	-0.13818	0.09082	-0.11572	-52.1464	48.8114	53.344	0.16309	-0.041992	-0.041504	32.8039	-118.792	1463.9524	-1.0976	1.7026	-0.90635
0.15	-5.92	130.3962	766.1718	-0.50941	0.58442	-0.4465	-19.606	144.736	541.525763	-0.33154	0.67139	-0.3833	41.8805	-38.367	851.973	-0.66064	1.1353	-0.49268	-99.2442	111.041	416.401	-0.059375	0.41055	-0.22305	-6.478	50.1118	34.4066	-0.15176	0.10938	-0.11348	-48.5868	45.5667	43.1189	0.14844	-0.022461	-0.051758	43.5398	-119.6795	1462.8348	-1.1284	1.7327	-0.91494
0.152	18.989	136.3342	740.792	-0.48926	0.56451	-0.43287	-15.954	162.228	523.4121	-0.30683	0.63965	-0.37002	49.0587	-31.356	890.815	-0.62285	1.0793	-0.49433	-88.3571	123.19893	400.5306	-0.038574	0.38428	-0.20459	-27.249	46.106	35.67271	-0.16104	0.11709	-0.11318	-34.295	48.84727	37.1186	0.1355	-0.0075684	-0.050049	73.6359	-105.7756	1471.0367	-1.1607	1.7612	-0.92119
0.154	4.23399999999999	142.7379	702.97802	-0.46462	0.54463	-0.41957	-33.234	141.7473	507.1267	-0.27783	0.60889	-0.35362	25.7548	-8.15600000000001	895.4861	-0.57735	1.0277	-0.50117	-93.0131	126.1201	379.3192	-0.015039	0.35528	-0.18828	-2.691	34.14	50.1822	-0.16728	0.12725	-0.11201	-61.034	42.7143	33.5141	0.12451	-0.00097656	-0.056641	50.9526	-84.211	1487.3803	-1.1909	1.7915	-0.9292
0.156	10.177	150.384	670.8768	-0.43913	0.52234	-0.40611	-21.922	131.4191	484.779	-0.25166	0.58271	-0.34111	49.6231	-23.46	928.2751	-0.52969	0.99883	-0.49961	-82.6657	120.69994	365.8928	0.0049806	0.3292	-0.17461	-9.851	37.857	29.4232	-0.175	0.13242	-0.10703	-42.794	41.31914	22.6423	0.10938	0.016602	-0.061523	56.475	-87.665	1497.032	-1.2216	1.8112	-0.93526
0.158	-3.725	143.343	633.6782	-0.4209	0.50391	-0.40332	-17.954	133.3737	476.064	-0.22578	0.55566	-0.32832	16.367	-49.232	935.5741	-0.50108	0.98448	-0.50596	-67.4296	110.922	344.0514	0.02334	0.30186	-0.15625	13.983	31.385	31.912	-0.17773	0.1333	-0.10547	-36.663	46.1269	47.4759	0.092773	0.023926	-0.06543	67.367	-99.4884	1491.561	-1.2453	1.825	-0.93711
0.16	12.127	149.674	609.3508	-0.40008	0.48219	-0.37401	-48.363	136.2573	451.026	-0.20215	0.53125	-0.31152	1.898	-84.159	918.49	-0.48242	0.98242	-0.52539	-54.712	115.1613	330.0016	0.043457	0.2749	-0.14219	-4.828	29.363	39.8404	-0.18018	0.13818	-0.10264	-42.096	57.694	44.00298	0.068359	0.04834	-0.066895	74.865	-102.8721	1481.811	-1.2605	1.8355	-0.93828
0.162	-12.162	152.697	598.9719	-0.37687	0.46281	-0.36591	-52.631	119.4936	422.6482	-0.17685	0.50391	-0.29649	-29.342	-114.162	940.447	-0.47832	0.99651	-0.53857	-53.699	112.9999	312.366	0.057129	0.25391	-0.12549	17.918	19.6334	39.46173	-0.1793	0.13447	-0.10254	-42.979	40.3995	46.613	0.044922	0.062744	-0.066651	30.941	-95.243	1465.6675	-1.2673	1.8351	-0.9374
0.164	-4.998	149.6018	576.5678	-0.36158	0.44752	-0.35147	-54.572	122.0626	397.6857	-0.15176	0.4747	-0.28555	-4.74299999999999	-135.7834	952.667	-0.48613	1.0246	-0.55644	-31.096	102.5796	295.83	0.068554	0.23281	-0.10742	13.077	27.76254	34.8392	-0.17735	0.12314	-0.10176	-30.702	31.1722	35.6925	0.033691	0.075195	-0.069824	42.1046	-83.433	1470.387	-1.2671	1.8247	-0.93896
0.166	6.436	147.59234	562.2033	-0.34015	0.43031	-0.33967	-63.615	127.1308	378.5079	-0.13067	0.44385	-0.26719	-6.172	-169.032	983.1478	-0.49902	1.0656	-0.58067	-17.476	90.8018	289.596	0.083008	0.21123	-0.09336	7.1	31.0956	17.4811	-0.17392	0.11279	-0.099314	-7.626	29.1563	30.325	0.027344	0.086914	-0.080566	31.595	-62.9778	1465.778	-1.2573	1.8156	-0.93106
0.168	-0.349000000000004	155.7012	549.50183	-0.3208	0.40869	-0.33154	-83.162	126.8098	364.3127	-0.10694	0.41553	-0.25615	-2.75	-184.897	1002.26104	-0.51885	1.1136	-0.61006	1.636	97.5142	271.3327	0.09082	0.19248	-0.078125	-19.698	22.9344	42.7709	-0.17578	0.10059	-0.09375	-20.071	23.6304	23.49	0.029297	0.087402	-0.081055	17.473	-37.288	1485.1704	-1.2499	1.8024	-0.92686
0.17	-59.61	147.2808	520.0206	-0.29843	0.3937	-0.31624	-78.3006	113.0532	353.5673	-0.085449	0.38525	-0.24268	-25.969	-220.815	1024.9666	-0.53906	1.1572	-0.63672	-18.953	95.12846	256.8846	0.104	0.17129	-0.065137	5.723	31.4221	45.2214	-0.16953	0.088184	-0.08877	-7.063	19.9771	33.7324	0.022949	0.09082	-0.07373	13.932	-44.17	1478.7563	-1.2409	1.788	-0.92724
0.172	-54.778	151.3679	500.389	-0.27704	0.3775	-0.30294	-98.2362	123.8354	331.3426	-0.066211	0.35478	-0.22324	-49.0294	-225.963	1046.284	-0.55644	1.2051	-0.65927	-2.301	95.737	242.2452	0.1167	0.15479	-0.056152	5.861	31.0763	53.301	-0.16416	0.077445	-0.084767	5.658	31.762	34.9275	0.023926	0.091309	-0.072754	16.2994	-41.453	1475.2672	-1.2359	1.775	-0.92305
0.174	-61.139	165.904	460.5598	-0.25855	0.35746	-0.28923	-89.4719	122.20964	325.1705	-0.044238	0.32198	-0.20752	-49.58	-205.601	1086.1211	-0.57422	1.2426	-0.68008	-9.507	108.615	234.3053	0.12529	0.14043	-0.041992	-14.466	30.7538	33.58947	-0.16221	0.066897	-0.078908	15.757	35.9264	44.7088	0.023926	0.091797	-0.064453	-17.1785	-11.612	1471.2131	-1.2266	1.7578	-0.91602
0.176	-71.9399	177.395	437.2372	-0.23855	0.34333	-0.27496	-81.3195	106.0068	315.6087	-0.023535	0.29541	-0.19268	-68.9865	-166.23	1096.96503	-0.58984	1.2738	-0.69805	0.131	108.325	220.3014	0.13467	0.1167	-0.032422	-41.702	14.6696	39.4932	-0.15781	0.053811	-0.073829	-19.251	27.66358	38.6042	0.01709	0.081055	-0.065918	-41.93825	-2.8749	1464.153	-1.2125	1.7432	-0.91035
0.178	-90.5005	146.824	423.0849	-0.21338	0.32422	-0.26172	-52.887	103.7851	296.22351	-0.0010742	0.27217	-0.17705	-83.365	-148.9372	1136.8558	-0.60957	1.3039	-0.70781	-2.363	93.203	194.8998	0.14326	0.099902	-0.017188	-35.15	26.293	22.606	-0.15967	0.043945	-0.066406	-4.386	20.5337	35.2232	0.019043	0.07959	-0.061035	-36.688	-14.8333	1449.183	-1.2015	1.722	-0.90811
0.18	-76.5783	133.07063	399.803	-0.19091	0.31039	-0.24651	-62.384	112.2307	273.661	0.018066	0.24951	-0.16016	-91.3673	-118.506	1132.2959	-0.62451	1.3325	-0.7124	8.596	77.526	182.1078	0.15244	0.082032	-0.002539	-42.792	34.3702	31.2848	-0.15391	0.038671	-0.060937	4.466	32.90096	34.32602	0.016602	0.077637	-0.055176	-53.105	-6.40885	1423.204	-1.1878	1.702	-0.89365
0.182	-81.380957	130.619	381.127	-0.16221	0.29094	-0.23686	-57.052	111.4609	264.7052	0.033008	0.22422	-0.14267	-97.465977	-91.739	1122.344	-0.63369	1.3671	-0.72119	-11.826	76.0597	170.966	0.16211	0.067871	0.011719	-68.2395	39.891	26.9017	-0.15517	0.034173	-0.059272	13.954	36.7688	42.9941	0.020263	0.078125	-0.049316	-68.388	2.371	1425.121	-1.1785	1.684	-0.88594
0.184	-84.71119	115.92	367.517	-0.14202	0.27712	-0.22266	-80.3883	99.5247	238.41	0.048633	0.20596	-0.12822	-106.567	-76.84	1126.053	-0.63974	1.3985	-0.71982	-7.662	65.08913	160.983	0.16777	0.054101	0.014551	-48.244	40.5198	29.94654	-0.15517	0.029882	-0.054195	-23.985	38.319	32.62037	0.013184	0.083008	-0.044922	-53.214	-6.444	1418.8912	-1.1655	1.6665	-0.87451
0.186	-74.5247	106.963	361.2553	-0.12399	0.259	-0.20633	-42.963	101.8997	241.795	0.058789	0.18994	-0.11612	-94.3923	-65.948	1150.684	-0.64092	1.4333	-0.72725	-10.358	66.9197	159.7307	0.17558	0.045313	0.022851	-59.3165	38.4667	21.804	-0.15381	0.028423	-0.053904	-9.05	22.2953	45.7632	0.012695	0.087402	-0.039063	-44.0705	-12.5481	1423.0662	-1.1496	1.6484	-0.875
0.188	-72.311	128.07043	352.0159	-0.10449	0.24072	-0.19482	-34.568	100.8671	232.7639	0.070996	0.17002	-0.10303	-86.0488	-61.205	1149.274	-0.63829	1.4653	-0.73008	-16.995	66.0624	148.9787	0.18496	0.034766	0.035742	-73.3734	25.0332	45.5412	-0.15039	0.024902	-0.054199	-23.786	20.538	33.214	0.0068359	0.091309	-0.036133	-37.1536	4.77	1395.4618	-1.1305	1.6353	-0.86211
0.19	-62.41	139.5676	337.751	-0.086163	0.22519	-0.18208	-44.006	85.6981	216.747	0.076172	0.15088	-0.092773	-76.8	-83.064	1176.9693	-0.6333	1.5024	-0.72803	-42.572	70.1224	141.9652	0.19112	0.021972	0.046777	-77.80904	11.5705	48.0709	-0.15049	0.029981	-0.051961	-34.23	10.1149	38.5385	-0.0019531	0.095703	-0.024902	-33.9292	18.3144	1376.4066	-1.1113	1.6248	-0.85352
0.192	-65.6606	127.224	326.1629	-0.066223	0.20833	-0.16898	-37.391	70.4281	200.38397	0.089161	0.13691	-0.07959	-74.561	-109.788	1169.401	-0.62236	1.5345	-0.72295	-40.161	53.6384	135.29617	0.19141	0.012207	0.054688	-55.205	10.9654	47.6499	-0.14875	0.033976	-0.047662	-35.47	16.2866	46.7753	-0.010254	0.10621	-0.018311	-34.6355	13.9754	1341.354	-1.0927	1.6116	-0.84775
0.194	-45.46	126.326	302.8054	-0.050516	0.19505	-0.15969	-20.849	83.1974	179.532	0.104	0.11992	-0.069043	-52.351	-138.8812	1198.842	-0.62588	1.5548	-0.71748	-58.089	60.259	131.05293	0.19394	0.00058594	0.064551	-58.215	10.1949	63.6328	-0.14329	0.037868	-0.046488	-14.617	21.7355	50.2098	-0.01709	0.11377	-0.013184	-16.15	32.3268	1335.5967	-1.0776	1.5981	-0.83545
0.196	-29.915	127.7627	289.2612	-0.037129	0.18013	-0.14693	-25.458	76.9036	180.3784	0.11728	0.10234	-0.057324	-39.858	-148.0641	1217.1649	-0.62627	1.5653	-0.7042	-55.275	72.644	115.7851	0.2003	-0.0077149	0.07168	-51.566	-3.0801	81.4085	-0.13869	0.034192	-0.048931	-53.7354	17.42377	60.8383	-0.02832	0.13721	-0.00048828	-21.787	30.6323	1319.928	-1.0514	1.5888	-0.82647
0.198	-36.105	128.5485	270.2451	-0.021484	0.16504	-0.13477	-9.78	63.7059	166.2183	0.12569	0.08916	-0.047364	-24.886	-151.7839	1244.8446	-0.63916	1.5734	-0.69121	-66.9652	58.4191	109.9816	0.20694	-0.020215	0.083008	-53.128	-4.7157	84.898	-0.13232	0.027832	-0.055176	-52.809	0.1124	51.65	-0.030762	0.1499	0.0029297	-8.092	26.2341	1310.7353	-1.0332	1.573	-0.81328
0.2	-29.099	114.0814	247.0684	-0.011164	0.15252	-0.12201	14.602	61.5705	151.8658	0.13477	0.07959	-0.037109	-31.047	-159.9007	1269.2757	-0.6626	1.5786	-0.68701	-72.7939	43.38073	91.7677	0.21406	-0.028125	0.092578	-22.605	-1.1353	96.8184	-0.12723	0.029273	-0.055688	-44.465	-9.4844	64.1164	-0.043945	0.18115	0.0053711	15.8603	41.788	1285.9071	-1.0109	1.5625	-0.80508
0.202	-3.719	106.576	235.25	-0.0010092	0.13817	-0.11246	8.477	60.8515	146.114	0.14629	0.072656	-0.026074	-52.805	-163.3464	1282.4268	-0.69502	1.5909	-0.67744	-70.382	46.9257	95.683	0.21387	-0.03125	0.099609	-26.662	-1.9988	111.8284	-0.12235	0.032249	-0.054045	-44.749	-6.3513	65.93665	-0.049316	0.21093	0.013916	33.4685	72.117	1263.2672	-0.99141	1.5488	-0.79707
0.204	9.38800000000001	93.6002	226.1899	0.011042	0.12548	-0.09981	-13.679	46.09088	144.699	0.15078	0.058398	-0.010742	-43.143	-158.569	1292.6627	-0.73828	1.6133	-0.675	-79.26979	42.0776	83.31	0.22041	-0.028418	0.10459	-17.872	9.3528	153.05093	-0.1248	0.04182	-0.051356	-65.4242	-15.4046	61.3612	-0.064453	0.24316	0.017578	30.955	69.872	1236.1061	-0.97266	1.5332	-0.78564
0.206	-3.007	87.914	223.4674	0.024832	0.11446	-0.086831	-8.698	47.468	138.9455	0.16133	0.054101	-0.0029297	-46.464	-144.2909	1310.721	-0.79297	1.6508	-0.66641	-69.1763	32.14998	84.7498	0.221	-0.023731	0.1126	-11.61	27.6368	188.8537	-0.1354	0.05084	-0.058389	-48.462	-17.7338	57.2864	-0.079102	0.28809	0.020508	35.7084	65.208	1214.6153	-0.94502	1.5214	-0.77119
0.208	16.881	92.824	214.315	0.039063	0.093262	-0.074219	-13.618	68.1591	123.4831	0.16035	0.053906	-0.0024414	-25.051	-128.2682	1329.976	-0.84736	1.6952	-0.67315	-48.678	52.3	66.6472	0.21982	-0.015528	0.11104	21.864	45.8822	216.9714	-0.14893	0.060547	-0.061523	-52.366	-14.8094	67.691	-0.084961	0.31543	0.025391	73.925	60.253	1182.581	-0.92451	1.504	-0.75928
0.21	16.585	101.488	210.0759	0.054069	0.0905	-0.064055	-29.034	66.734	116.6608	0.16846	0.048828	0.0053711	-20.172	-98.2508	1318.373	-0.91943	1.7485	-0.67725	-47.692	66.553	61.5619	0.21514	-0.00625	0.11494	12.128	58.1348	247.7333	-0.15954	0.076956	-0.067552	-46.9785	-8.18	71.605	-0.10889	0.36523	0.019531	60.046	55.779	1161.2268	-0.9042	1.4884	-0.75224
0.212	7.918	93.819	190.2005	0.063206	0.083953	-0.059539	-46.638	54.241	113.50372	0.17559	0.051074	0.0076172	-34.462	-82.07	1324.0482	-0.98304	1.8108	-0.67656	-57.6178	60.226	59.3136	0.2124	0.0048828	0.11475	46.91496	80.2592	289.4963	-0.17429	0.087626	-0.074977	-29.016	-27.4531	99.9899	-0.12647	0.40455	0.01123	49.535	46.48	1148.5204	-0.88662	1.4645	-0.73193
0.214	-15.283	78.2021	186.9269	0.073781	0.073788	-0.05134	-35.021	48.138	89.698	0.1836	0.046875	0.013281	-33.538	-72.676	1302.581	-1.0492	1.8683	-0.68174	-47.284	52.1534	59.6183	0.20371	0.019043	0.10341	60.7998	93.7049	344.6819	-0.18448	0.10334	-0.08424	-24.957	-28.5403	105.7166	-0.13379	0.44727	0.0024414	55.237	43.0235	1130.0601	-0.8623	1.4409	-0.72217
0.216	9.002	66.86367	174.2125	0.078626	0.067573	-0.04139	-52.7421	52.5624	87.165	0.18906	0.048047	0.01836	-31.8	-69.241	1305.303	-1.1074	1.9172	-0.68759	-39.782	45.8713	57.4516	0.19844	0.027148	0.097168	61.3197	111.261	411.6058	-0.19171	0.12309	-0.090275	-24.884	-19.3154	117.0436	-0.14941	0.51025	-0.014648	57.8554	49.2904	1096.888	-0.8415	1.4163	-0.71015
0.218	4.41	76.30474	157.2928	0.084961	0.063477	-0.032715	-51.637	50.7121	80.3633	0.18887	0.043848	0.023828	-28.773	-56.411	1315.409	-1.1524	1.9567	-0.68945	-11.274	45.54815	54.2456	0.18633	0.039258	0.087403	32.4749	118.903	472.488	-0.20557	0.15137	-0.10742	-34.954	-26.337	118.1457	-0.16431	0.56006	-0.032715	32.1225	54.1601	1074.3481	-0.81797	1.3922	-0.69805
0.22	-23.552	72.6376	144.9731	0.091305	0.063088	-0.026855	-52.237	42.953771	78.5393	0.19092	0.050781	0.023438	-67.761	-37.823	1313.261	-1.1875	1.9902	-0.69336	-29.109	46.1667	49.6834	0.17295	0.05586	0.073536	55.9538	121.769	541.39	-0.22142	0.18184	-0.1182	-29.565	-26.3583	142.7787	-0.17773	0.61328	-0.050293	4.44	47.8432	1054.46141	-0.79726	1.3652	-0.67969
0.222	-35.647	55.6026	145.7911	0.097946	0.062694	-0.021102	-47.214	51.0786	78.3061	0.19033	0.059375	0.024902	-74.235	-41.808	1343.104	-1.2124	2.013	-0.68936	13.096	44.679	57.6572	0.15527	0.069824	0.064941	38.0981	109.498	637.131	-0.24918	0.22636	-0.12885	-10.439	8.6107	164.771	-0.20605	0.6958	-0.07666	-0.475999999999999	60.1096	1047.664	-0.77002	1.3331	-0.66553
0.224	-39.308	67.3402	123.3926	0.10029	0.058407	-0.016018	-76.543	43.5882	66.138	0.18691	0.066992	0.024609	-104.6831	-43.716	1334.493	-1.241	2.0313	-0.69082	-0.383000000000003	56.452	35.037	0.14736	0.084179	0.051172	30.3187	83.45	748.798	-0.29538	0.28497	-0.13675	14.715	30.46911	208.4307	-0.22217	0.74268	-0.087402	-19.505	93.841	1030.9359	-0.74707	1.2993	-0.64795
0.226	-63.2488	70.631	131.297	0.104	0.060842	-0.013574	-73.5366	35.4611	65.3457	0.18379	0.080273	0.023438	-117.95477	-53.101	1350.9183	-1.261	2.041	-0.69121	4.294	47.802	39.5245	0.13105	0.1041	0.034375	20.0762	71.551	832.714	-0.3558	0.35237	-0.14346	-9.13	41.7814	239.533	-0.26416	0.83643	-0.11963	-18.176	109.442	1004.086	-0.72363	1.2664	-0.63614
0.228	-58.5913	65.2477	118.97086	0.10596	0.063477	-0.010742	-73.4	40.6876	64.357	0.17695	0.09795	0.019336	-119.0529	-61.8665	1361.46551	-1.2674	2.0443	-0.69394	7.536	43.389	40.3216	0.11425	0.12715	0.019922	-14.5045	61.531	913.723	-0.43213	0.43506	-0.1626	4.33	63.2064	287.307	-0.30957	0.91602	-0.1521	-28.6037	98.7101	984.312	-0.69424	1.2263	-0.621
0.23	-48.762	56.80499	120.45261	0.10938	0.069533	-0.012207	-46.953	44.41356	70.075	0.17676	0.1084	0.011719	-100.729	-73.5825	1374.9467	-1.2578	2.0352	-0.69434	17.075	44.933	42.5293	0.097169	0.15137	0.0063477	-31.4364	35.966	974.802	-0.51529	0.52824	-0.17913	19.737	89.91703	338.059	-0.35791	0.99854	-0.17773	-22.463	105.3237	956.7666	-0.66806	1.1899	-0.60498
0.232	-64.834	60.36696	98.0823	0.10948	0.083107	-0.014455	-74.3522	46.3055	55.906509	0.17676	0.12041	0.012207	-124.8014	-61.068	1388.539	-1.2562	2.0213	-0.69746	-3.57	40.1463	46.2904	0.084473	0.17627	-0.0043945	-16.445	7.4823	1019.2011	-0.60162	0.62624	-0.19717	8.438	110.9219	404.852	-0.43066	1.0864	-0.2041	-46.2077	110.045	924.259	-0.64024	1.1527	-0.58975
0.234	-88.547	40.7772	93.1722	0.11064	0.088967	-0.016405	-65.535	33.1172	42.8582	0.1708	0.13545	0.0097656	-119.2073	-84.331	1402.2319	-1.2437	2.0075	-0.69571	-4.246	36.0528	36.6319	0.061231	0.1959	-0.012012	-24.562	-9.26706	1053.24	-0.68032	0.73529	-0.2092	12.435	125.0472	462.191	-0.47168	1.1333	-0.21436	-53.1083	105.6813	891.469	-0.61035	1.1162	-0.57031
0.236	-78.4329	35.357	66.78	0.10732	0.095998	-0.024512	-52.095	43.3115	35.151	0.1626	0.14834	0.0015612	-122.4227	-88.378	1397.1839	-1.2297	1.984	-0.69258	-1.702	26.6749	36.3051	0.044531	0.22129	-0.022266	-36.375	-29.714	1067.484	-0.76323	0.85436	-0.21695	23.969	133.131	509.0859	-0.55859	1.207	-0.23047	-60.4841	108.4458	873.2242	-0.58799	1.0823	-0.55791
0.238	-66.203	43.3875	58.322	0.10498	0.10889	-0.029785	-48.41	45.3801	34.882	0.1584	0.16368	-0.0041994	-93.886	-75.633	1409.6675	-1.2175	1.9606	-0.69404	0.272999999999996	37.64804	32.3691	0.02461	0.24434	-0.028125	-65.5839	-44.012	1047.176	-0.84326	0.97705	-0.23242	2.822	116.887	546.2327	-0.62158	1.2525	-0.2395	-46.0685	119.1313	856.9618	-0.56699	1.0492	-0.53965
0.24	-76.2625	49.8813	65.46007	0.09785	0.12509	-0.036132	-44.159	40.468	51.3313	0.14844	0.17529	-0.0092773	-108.45553	-59.925	1413.829	-1.1997	1.9438	-0.69092	-33.326	35.1429	41.1555	0.0066404	0.26816	-0.032617	-82.181574	-68.589	1027.243	-0.91336	1.0723	-0.266	-26.6	89.917	601.491	-0.68311	1.2876	-0.24854	-80.319	107.715	840.61253	-0.54824	1.0149	-0.51778
0.242	-60.488	40.663	64.7068	0.095215	0.14218	-0.04707	-10.963	34.5888	48.5428	0.13877	0.18818	-0.013477	-90.914	-46.643	1394.721	-1.1778	1.9186	-0.68545	-23.434	38.0913	32.946	-0.012695	0.29736	-0.03418	-94.44628	-65.717	1005.136	-0.96994	1.1594	-0.30926	-28.325	73.065	655.155	-0.74023	1.3184	-0.24707	-67.4513	108.966	809.3933	-0.52324	0.98028	-0.49824
0.244	-68.3195	50.5283	72.70052	0.088965	0.15351	-0.054882	-5	42.5143	43.8609	0.12832	0.19902	-0.023535	-101.1221	-25.0402	1384.6474	-1.1559	1.8949	-0.68437	-29.972	35.823	36.6203	-0.032715	0.32158	-0.041113	-75.645	-61.488	981.191	-1.0117	1.2316	-0.35893	-27.124	80.096	688.4843	-0.75928	1.3364	-0.24658	-59.4247	127.283	790.3236	-0.50781	0.93945	-0.48828
0.246	-42.067	62.1444	68.5414	0.082715	0.16846	-0.060449	-26.551	41.1818	33.3432	0.11817	0.21308	-0.027439	-99.568	1.7953	1359.2359	-1.1356	1.8652	-0.68047	-38.772	44.48	39.2379711	-0.045117	0.34306	-0.044434	-85.515	-58.172	949.7343	-1.0324	1.2787	-0.39444	-30.534	67.272	719.9448	-0.7876	1.3716	-0.26709	-34.552	133.621	769.58513	-0.47763	0.90771	-0.47002
0.248	-45.7423	52.2358	57.2888	0.074707	0.18652	-0.063477	-12.791	25.2383	41.3684	0.10508	0.22314	-0.031736	-94.05	20.752	1361.2601	-1.1137	1.8402	-0.67266	-55.167	32.6005	38.356468	-0.055274	0.36338	-0.043262	-79.45	-41.762	905.399	-1.0308	1.2993	-0.41504	-43.4608	44.1315	726.472	-0.79248	1.4043	-0.28247	-56.9675	120.9086	751.8877	-0.45	0.86944	-0.45166
0.25	-28.043	36.2061	60.6204	0.062988	0.20273	-0.072168	13.517	38.2317	32.9531	0.091797	0.23486	-0.040527	-55.785	26.5553	1364.5781	-1.0913	1.8228	-0.66943	-52.395	33.2235	40.3461	-0.065332	0.37432	-0.033496	-72.866	-24.237	894.153	-1.0283	1.291	-0.43598	-48.8405	26.9049	741.64	-0.78711	1.4375	-0.2998	-17.564	122.4882	723.8678	-0.42695	0.83389	-0.43291
0.252	-17.72	41.1154	52.7749	0.05332	0.2249	-0.075586	1.729	37.5234	29.5398	0.080756	0.2461	-0.043359	-56.783	37.106	1362.8019974	-1.0762	1.8029	-0.66738	-45.285	40.5342	48.178	-0.065918	0.38574	-0.028809	-63.569	-5.641	902.361	-1.0218	1.2639	-0.45536	-45.3939	22.561	760.44657	-0.76807	1.4751	-0.31592	-5.235	119.2497	700.1711	-0.40498	0.80137	-0.42168
0.254	-2.356	28.5141	23.3631	0.041601	0.23935	-0.082227	-12.466	29.8468	12.4788	0.06405	0.25714	-0.04327	-47.837	46.867	1350.4046	-1.057	1.7871	-0.66231	-84.4858	32.008	32.249	-0.065332	0.38926	-0.02666	-75.0279	9.22	938.8319	-1.0141	1.2264	-0.47407	-39.0791	7.942	764.527	-0.74951	1.4849	-0.32568	2.138	116.0825	686.0203	-0.37891	0.76367	-0.40332
0.256	-21.961	14.8048803	31.937	0.036329	0.25879	-0.089062	-3.719	26.6207	30.3511	0.048811	0.27121	-0.04834	-33.906	34.063	1352.3898	-1.0383	1.7715	-0.66504	-84.1618	18.873	38.4913	-0.059766	0.38721	-0.028223	-25.005	20.561	933.8218	-1.0029	1.1916	-0.49044	-21.618	-3.832	758.065	-0.72266	1.4824	-0.33984	2.262	106.5091	670.244	-0.35957	0.72988	-0.38613
0.258	8.53	21.5633	39.8027	0.024414	0.27441	-0.088867	-4.74	38.506	29.6674	0.034652	0.2839	-0.055857	-26.279	46.202	1333.8837	-1.0191	1.7477	-0.65107	-67.671	27.1359	35.1879	-0.055079	0.38369	-0.018457	-20.3741	6.093	934.111	-0.98779	1.1665	-0.49951	-23.194	-5.6943	753.141	-0.68848	1.469	-0.34717	26.505	122.3324	650.684	-0.33916	0.70391	-0.36757
0.26	14.578	26.020796	47.2344	0.019238	0.29502	-0.1002	-1.248	39.927	45.2597	0.020996	0.2998	-0.05127	-13.567	40.9889	1338.179	-0.99512	1.7251	-0.646	-41.237	43.6754	38.4333	-0.042187	0.37344	-0.0084958	-23.706	-13.342	920.373	-0.96654	1.1454	-0.524	-13.362	-2.8453	738.324	-0.66162	1.4517	-0.35986	19.979	122.4959	627.937	-0.32197	0.67656	-0.35
0.262	9.399	26.9479	37.3171	0.011524	0.31113	-0.099999	-19.585	46.206	46.04	0.0088203	0.31541	-0.053521	-29.211	28.5098	1328.767	-0.96806	1.6983	-0.63916	-51.389	37.7466	36.0534	-0.030273	0.3667	0.00048828	-20.521	-30.968	938.725	-0.92964	1.1252	-0.55651	-32.8834	-4.772738	724.06578	-0.60596	1.4258	-0.37158	9.261	124.224	609.9996	-0.30401	0.65166	-0.33311
0.264	-0.427	28.0668	44.7222	0.0052735	0.32285	-0.1043	5.625	39.5508	47.519	-0.0065002	0.33062	-0.050864	-27.173	4.974	1321.6249	-0.93242	1.666	-0.6334	-44.813	25.6007	27.9895	-0.016211	0.35234	0.0078125	23.134	-40.844	931.913	-0.88627	1.0841	-0.57996	-8.752	-0.3589	725.3549	-0.57764	1.4185	-0.37646	15.694	117.168	585.468	-0.28906	0.62744	-0.31396
0.266	15.642	44.764	18.4416	-0.0024414	0.33506	-0.10215	-29.006	46.7824	35.5808	-0.016283	0.34234	-0.050511	-50.942	-5.042	1287.5784	-0.90274	1.6285	-0.62598	-43.988	27.6079	33.465	0.00097656	0.33818	0.010254	35.22521	-95.427	967.0297	-0.83382	1.0291	-0.59003	2.146	7.2413	716.3267	-0.5332	1.4004	-0.38184	14.823	124.917	565.00433	-0.27656	0.60059	-0.30049
0.268	0.494999999999997	29.455	31.7126	-0.012695	0.34131	-0.10156	-38.333	30.7941	36.1857	-0.024865	0.353	-0.045037	-54.758	2.015	1273.2112	-0.87676	1.5862	-0.61718	-47.8559	28.83	43.6829	0.015039	0.32217	0.018457	23.9113	-156.289	977.762	-0.78223	0.95508	-0.58984	4.214	-11.709	713.216	-0.50464	1.386	-0.38575	-1.814	125.0836	538.6247	-0.26172	0.57578	-0.28535
0.27	-2.285	41.481	26.6421	-0.020215	0.34912	-0.10302	-37.712	30.0832	30.1798	-0.032715	0.35791	-0.037109	-57.351	18.502	1250.8633	-0.85596	1.5513	-0.59521	-24.939	24.7408	45.4381	0.032227	0.3083	0.025488	49.4094	-207.281	1008.3065	-0.73896	0.88035	-0.60156	-34.6941	-22.693	720.52	-0.48389	1.3716	-0.39502	-17.529	120.0284	500.1457	-0.23906	0.54726	-0.27168
0.272	-2.358	33.8855	22.6834	-0.026953	0.35088	-0.10283	-24.253	44.6478	26.267	-0.03724	0.3729	-0.033752	-41.989	34.677	1240.4697	-0.83125	1.5047	-0.58691	-5.248	29.1874	36.45559	0.04834	0.29688	0.032227	61.906	-204.482	1018.103	-0.69677	0.81219	-0.61123	-3.679	-29.048	734.875	-0.45215	1.3521	-0.40869	-3.593	124.35154	474.9114	-0.21397	0.51836	-0.25498
0.274	-19.169	38.2922	19.3116	-0.030468	0.35947	-0.10557	-68.2654	40.85642	23.46853	-0.041016	0.37635	-0.02482	-71.884	59.3558	1213.908	-0.79589	1.4531	-0.5875	2.992	30.058	29.058	0.066016	0.28692	0.04082	64.935	-185.091	1049.45333	-0.66669	0.76884	-0.61045	11.391	-23.624	762.7007	-0.44141	1.3477	-0.41699	-27.501	125.5162	462.5657	-0.19141	0.49658	-0.2417
0.276	-37.746	26.3684	27.8999	-0.038769	0.36015	-0.10547	-67.4672	24.6113	30.5233	-0.046248	0.37718	-0.012749	-74.817	68.854	1206.853	-0.76153	1.4094	-0.56446	-15.18	13.3451	39.694	0.080957	0.28242	0.046973	58.617	-162.888	1067.2854	-0.65175	0.75078	-0.61523	16.722	-49.541	783.9566	-0.41992	1.3379	-0.43359	-24.449	116.0405	448.1643	-0.1708	0.46777	-0.23017
0.278	-48.188	24.8498	36.5392	-0.043457	0.36084	-0.104	-62.4435	30.9928	30.154	-0.047159	0.38232	2.5738e-05	-85.355	74.592	1202.2043	-0.72812	1.3646	-0.55234	-10.536	5.0045	44.502	0.08916	0.27656	0.049316	52.0915	-136.04317	1070.8023	-0.64941	0.75195	-0.625	10.632	-63.448	814.7098	-0.41137	1.3421	-0.45483	-28.116	117.36771	437.6236	-0.14942	0.44405	-0.22022
0.28	-33.271	35.2408	36.7199	-0.043457	0.35938	-0.10381	-59.715	40.3041	36.1528	-0.050781	0.37695	0.012207	-89.9205	95.871	1200.3766	-0.69482	1.3267	-0.54541	21.586	10.7896	67.3133	0.10176	0.27217	0.05	21.15763	-119.6752	1087.4563	-0.65733	0.78311	-0.63466	15.956	-74.7973	841.986	-0.41406	1.3535	-0.47656	-29.69	120.144	427.9157	-0.13027	0.42256	-0.20654
0.282	-39.329	48.3289	30.0538	-0.047754	0.35449	-0.099219	-69.5719	39.043	53.859	-0.049763	0.38107	0.023308	-96.0361	111.22	1179.4669	-0.67392	1.2925	-0.53506	27.371	9.1156	70.0083	0.11035	0.26953	0.046875	11.663	-120.31	1112.22579	-0.66758	0.83144	-0.64882	4.149	-91.1115	875.741	-0.43311	1.3833	-0.51074	-76.8348	118.8259	407.9069	-0.11426	0.3959	-0.19531
0.284	-47.604	41.9051	28.0707	-0.047364	0.35176	-0.09961	-43.027	38.16683	47.3689	-0.049616	0.3799	0.032702	-91.235	103.796	1145.4903	-0.65918	1.2625	-0.52324	1.983	5.0156	78.3601	0.1249	0.27031	0.044141	14.6292	-93.535	1133.9643	-0.68828	0.89433	-0.66602	-6.913	-118.644	927.7771	-0.44824	1.4004	-0.53223	-85.7973	101.6454	396.844	-0.092773	0.37793	-0.18066
0.286	-85.7246	26.3496	15.997	-0.047754	0.35254	-0.10078	-45.518	39.576734	29.4516	-0.046606	0.38122	0.047335	-99.7842	103.9647	1112.095	-0.64239	1.2363	-0.51269	3.702	17.6337	92.336	0.13877	0.27383	0.042676	46.3343	-66.731	1141.7827	-0.71338	0.96104	-0.68233	-11.714	-130.043	949.593	-0.48291	1.4395	-0.56543	-85.48196	102.8657	356.881	-0.077735	0.35059	-0.16875
0.288	-76.80045	25.7714	13.459	-0.046875	0.34961	-0.094238	-60.2928	40.3894	24.807	-0.043982	0.38345	0.055946	-97.8152	100.6973	1077.478	-0.62705	1.2163	-0.4999	-3.006	36.826	99.853	0.14697	0.28008	0.037207	0.483000000000001	-64.932	1152.276	-0.73779	1.0337	-0.69873	-2.486	-135.3758	958.9942	-0.51367	1.4687	-0.60156	-90.2768	108.7486	320.098	-0.06084	0.3249	-0.16279
0.29	-69.2657	30.3827	13.577	-0.045996	0.34854	-0.093359	-56.824	31.5414	35.9634	-0.040527	0.38086	0.069824	-99.6494	94.330011	1054.427	-0.61035	1.1914	-0.49268	-23.912	48.8817	116.38	0.15254	0.28389	0.037012	13.724	-74.391	1139.545	-0.76904	1.1142	-0.72061	-36.601	-129.414	971.3233	-0.54688	1.5078	-0.63672	-84.8612	100.3607	309.9531	-0.042871	0.30186	-0.15654
0.292	-59.054	25.77	28.9259	-0.044238	0.34492	-0.086621	-34.284	34.5404	55.9289	-0.031936	0.38381	0.082965	-87.5348	90.8236	1051.9243	-0.59092	1.1686	-0.48291	-18.914	50.3936	151.524	0.15381	0.29102	0.026367	-4.531	-84.761	1164.166	-0.79472	1.1927	-0.73682	-39.267	-118.0541	996.552	-0.5957	1.5723	-0.67432	-84.2342	88.77096	310.4508	-0.023144	0.27246	-0.1458
0.294	-65.852	34.3792	50.8187	-0.043848	0.34062	-0.080371	-13.669	22.7058	68.9879	-0.028166	0.38451	0.097784	-95.71134	88.5776	1044.8969	-0.57686	1.1392	-0.46923	-15.924	65.625	178.8259	0.15947	0.29922	0.022363	-0.997	-90.713	1207.2008	-0.81387	1.2618	-0.76533	-31.806	-116.01522	1050.343	-0.61963	1.6055	-0.68945	-86.8454	102.5243	291.378	-0.00048828	0.25	-0.13525
0.296	-46.152	26.5764	49.51652	-0.03877	0.33838	-0.079688	-26.142	9.2199	71.8594	-0.019814	0.37857	0.10765	-80.2263	86.6672	1036.0656	-0.5585	1.1091	-0.45869	-17.115	83.1696	196.613	0.15576	0.31601	0.0073242	-26.475	-121.2098	1257.577	-0.82334	1.3235	-0.78955	-43.145	-106.7518	1084.6798	-0.67529	1.6724	-0.71533	-90.0991	90.3921	289.9592	0.017382	0.22783	-0.1251
0.298	-45.529	26.4601	54.2746	-0.039551	0.33643	-0.074707	-13.088	-3.2805	76.8791	-0.014803	0.37697	0.12508	-65.92	90.817	1026.4451	-0.54385	1.0857	-0.44756	-43.4721	95.4473	231.7722	0.15459	0.32929	-0.0036133	-20.944	-139.4571	1280.036	-0.82617	1.3789	-0.81543	-52.7826	-122.25	1120.6962	-0.70532	1.7068	-0.73145	-71.8359	82.845	281.4017	0.036817	0.19951	-0.1168
0.3	-32.306	35.9134	63.6751	-0.038086	0.33526	-0.074414	3.634	16.0094	76.868	-0.0078125	0.37256	0.13623	-51.349	90.4316	1005.821	-0.52783	1.063	-0.43896	-25.742	97.202	267.9709	0.15166	0.3542	-0.022168	-49.056	-153.694	1290.373	-0.8207	1.4228	-0.83496	-44.5973	-115.8524	1133.6225	-0.72607	1.7388	-0.74365	-43.161	91.6656	269.0316	0.055957	0.1753	-0.10234
0.302	-26.696	32.9352	54.5913	-0.037597	0.33916	-0.066309	5.401	22.2337	93.4574	-0.002601	0.37206	0.14702	-31.685	103.3286	1003.156	-0.51162	1.0385	-0.42832	-35.182	126.745	301.7239	0.13867	0.37744	-0.04248	-62.113	-162.051	1289.6531	-0.82295	1.4642	-0.85459	-44.59	-102.3136	1166.4339	-0.73828	1.752	-0.76367	-33.677	111.0752	250.3532	0.074903	0.15879	-0.091114
0.304	-12.09	19.7347	59.6337	-0.040723	0.3419	-0.062012	2.265	19.7917	108.2631	0.0016982	0.37137	0.15116	-13.488	116.2298	976.6701	-0.49688	1.0113	-0.41856	-34.005	120.126	343.0538	0.12764	0.40957	-0.063867	-75.363	-174.474	1307.3534	-0.82529	1.5063	-0.86943	-72.74199	-89.674	1181.5344	-0.73291	1.7524	-0.77002	-28.326	106.782	228.111	0.090332	0.13672	-0.079102
0.306	-19.652	1.7355	48.937	-0.039258	0.34355	-0.055567	6.999	19.1956	126.8855	0.011811	0.37377	0.15909	-20.84	112.582	954.442	-0.4789	0.98819	-0.40723	-54.52737	112.191	386.868	0.11241	0.44307	-0.08125	-43.956	-171.825	1326.572	-0.83086	1.5469	-0.88711	-65.036	-102.187	1196.2296	-0.71826	1.7446	-0.78076	-23.357	102.556	207.9847	0.10664	0.12139	-0.072461
0.308	-0.158999999999999	-2.3038	55.715	-0.041016	0.34424	-0.053711	5.34	27.7726	147.93	0.017387	0.37749	0.1582	-7.339	122.232	921.2151	-0.46094	0.96172	-0.39668	-54.038	98.64	435.076	0.093653	0.48174	-0.1043	-21.027	-158.027	1336.464	-0.83984	1.5977	-0.90625	-54.8666	-109.627	1201.402	-0.71387	1.7358	-0.78809	-13.247	96.079	198.9464	0.11914	0.10068	-0.064551
0.31	15.172	5.0573	58.86	-0.039453	0.34746	-0.048828	-2.328	43.7282	185.281	0.024902	0.3916	0.15674	-12.725	127.317	898.581	-0.44092	0.93506	-0.38525	-83.8183	93.6697	507.563	0.074902	0.52617	-0.13242	-24.772	-148.5292	1352.8836	-0.85645	1.6514	-0.91699	-46.052	-128.6266	1214.0448	-0.71582	1.7266	-0.79297	-15.47	91.7573	195.4149	0.13125	0.088965	-0.054004
0.312	6.946	-5.221	96.6167	-0.038965	0.35849	-0.040332	4.531	57.024	216.8188	0.0315	0.40159	0.15622	6.381	130.972	861.885	-0.42949	0.91006	-0.37598	-59.788	82.88845	578.377	0.043457	0.57617	-0.16699	-11.43	-129.9383	1360.978	-0.87187	1.7062	-0.93672	-76.2856	-154.133	1222.6628	-0.72998	1.7271	-0.80029	-2.443	82.7324	187.6348	0.15058	0.077246	-0.043262
0.314	5.637	-11.0076	112.372	-0.040528	0.36474	-0.039551	32.542	79.1634	255.665	0.030702	0.41537	0.15689	7.1	139.885	837.37389	-0.41445	0.88438	-0.36465	-52.096	87.200788	647.816	0.014355	0.6334	-0.19697	-0.664999999999999	-96.461	1358.0394	-0.89453	1.7578	-0.94766	-46.852	-177.841	1249.7932	-0.74414	1.7285	-0.80469	-8.593	91.1027	185.79456	0.16553	0.066406	-0.036133
0.316	0.128999999999998	-17.6938	112.13	-0.041113	0.37275	-0.0375	24.484	104.402	280.4856	0.03119	0.42726	0.1446	-0.941000000000003	149.016	819.2156	-0.40273	0.85743	-0.35215	-26.204	73.2143	739.144	-0.031348	0.69805	-0.23721	6.245	-71.396	1360.1855	-0.92031	1.7949	-0.95039	-48.445	-172.183	1259.863041	-0.78418	1.7363	-0.81055	1.812	96.42	174.799	0.18096	0.056738	-0.025196
0.318	0.545000000000002	-8.4395	127.2952	-0.041992	0.38428	-0.045898	-1.123	114.456	312.0928	0.026391	0.44551	0.14438	-10.661	142.125	792.6734	-0.3874	0.83037	-0.34053	-55.097	66.303	820.577	-0.085254	0.75938	-0.27432	10.743	-66.3929	1354.467	-0.94775	1.8208	-0.94873	-37.707	-155.9491	1279.8901	-0.80909	1.7514	-0.81005	2.224	82.671	164.134	0.18897	0.047754	-0.014258
0.32	-2.152	7.548	162.4936	-0.044336	0.39854	-0.050293	3.796	109.134	358.753	0.018555	0.45947	0.13672	-1.76	131.892	769.3775	-0.36621	0.80469	-0.32715	-33.325	51.031	898.4706	-0.15166	0.82695	-0.31045	29.0477	-64.591	1331.148	-0.98017	1.8339	-0.95381	-23.504	-162.3185	1290.913	-0.82959	1.7642	-0.8042	15.207	71.6938	140.7985	0.1999	0.036035	-0.0033203
0.322	-1.143	31.142	181.93918	-0.048144	0.41475	-0.060156	-1.444	116.107	419.566	0.010705	0.47821	0.12456	-5.089	130.348	763.3165	-0.3503	0.77588	-0.32431	-7.072	44.062	949.5435	-0.22461	0.89258	-0.34277	19.8896	-55.458	1339.138	-1.0152	1.832	-0.94746	-1.191	-150.4664	1310.0653	-0.85547	1.7676	-0.79102	-4.645	89.892	133.8147	0.20967	0.023535	0.0060547
0.324	4.868	52.4132	202.4947	-0.061816	0.43037	-0.070312	-0.981999999999999	96.186	490.7556	-0.0013957	0.4953	0.11458	-6.454	135.4967	747.0134	-0.33408	0.74346	-0.31211	14.583	27.4618	971.583	-0.30654	0.96504	-0.3623	6.526	-38.714	1351.709	-1.0461	1.8191	-0.94395	-4.375	-149.3375	1343.8982	-0.87891	1.7754	-0.78125	7.504	78.888	124.3524	0.2168	0.016113	0.015137
0.326	-7.918	68.5715	217.118	-0.077246	0.45068	-0.085644	-19.19	74.6036	573.931	-0.0099933	0.5152	0.10016	-21.685	133.82	729.58026	-0.31377	0.71611	-0.30469	-8.176	-1.3955	968.029	-0.39785	1.0351	-0.36904	29.523	-51.085	1381.5696	-1.0717	1.8072	-0.92675	-5.218	-147.6665	1355.967	-0.92188	1.7734	-0.76758	-24.169	63.1947	138.0162	0.22969	0.0092773	0.021485
0.328	-26.351	69.5165	270.203	-0.097168	0.47656	-0.10449	-20.013	66.5583	641.526	-0.029024	0.53919	0.085031	-37.664	132.1955	705.1647	-0.29512	0.68536	-0.29433	11.032	-32.4273	940.574	-0.48692	1.0988	-0.36709	47.1301	-50.307	1399.076	-1.0977	1.7949	-0.92188	3.781	-144.5019	1373.888	-0.95337	1.7698	-0.75269	-21.06	68.7435	127.8966	0.24268	0.0015625	0.026855
0.33	-37.252	92.361	332.179	-0.12129	0.50498	-0.12998	-43.19439	56.5984	714.813	-0.045898	0.56543	0.063965	-54.59	144.2151	679.5967	-0.27393	0.65723	-0.2793	23.785	-53.555	932.759	-0.56514	1.1579	-0.37041	30.1225	-61.085	1423.1394	-1.1152	1.7805	-0.91289	-11.805	-114.4781	1366.996	-0.98828	1.7676	-0.73535	-44.54	64.77331	126.7056	0.25127	-0.0011718	0.031933
0.332	-29.922	113.6071	410.7642	-0.14336	0.53594	-0.15459	-32.2845	47.872	808.05	-0.061318	0.59763	0.044845	-53.194	152.5655	661.4817	-0.25732	0.63008	-0.27109	25.8576	-49.758	892.597	-0.62646	1.2095	-0.37939	37.8184	-82.96583	1434.3931	-1.1389	1.7661	-0.89912	-20.531	-106.8822	1357.9635	-1.0308	1.7681	-0.71045	-46.839	68.37261	111.3253	0.25782	-0.00078124	0.034473
0.334	-49.644	131.9951	476.4908	-0.16992	0.5711	-0.18975	-23.8918	42.626	902.0695	-0.088543	0.63042	0.015171	-60.23677	146.8084	651.747	-0.23867	0.59492	-0.25596	48.189	-70.782	874.702	-0.66445	1.2306	-0.38858	46.7364	-91.98	1444.457	-1.1609	1.7521	-0.89287	-13.771	-93.779	1360.088	-1.0503	1.7739	-0.70264	-79.5045	66.2919	124.803	0.26318	0.00097656	0.032715
0.336	-43.517	137.7	527.0446	-0.20586	0.60938	-0.21601	-24.8346	48.197	973.2664	-0.11941	0.67418	-0.014526	-55.6799	141.1875	618.3937	-0.22148	0.56953	-0.24971	59.47	-78.486	842.41	-0.68115	1.2341	-0.39678	31.6746	-67.513	1462.7547	-1.1751	1.7366	-0.88243	-2.284	-85.331	1374.8876	-1.0972	1.7759	-0.68311	-75.3866	73.889	102.4243	0.26612	0.0027344	0.036328
0.338	-62.012	129.688	587.4253	-0.25439	0.65576	-0.24951	-21.10523	36.6916	1034.3537	-0.15584	0.71873	-0.043834	-63.9302	139.0106	581.5576	-0.2043	0.53994	-0.23857	66.678	-73.636	826.94657	-0.67803	1.2247	-0.39639	13.809	-70.292	1476.165	-1.1797	1.7148	-0.87695	-21.894	-70.401	1389.831	-1.1209	1.7718	-0.66821	-82.9183	70.841	94.56496	0.26885	0.0081055	0.034864
0.34	-73.0913	106.453	664.462	-0.31143	0.70654	-0.27783	-17.7111	5.7694	1050.276	-0.2002	0.76855	-0.077148	-60.4678	134.9748	560.4143	-0.18457	0.51318	-0.22998	30.6107	-54.2273	809.526	-0.65176	1.2119	-0.39717	16.433	-86.972	1471.451	-1.1822	1.6885	-0.87383	-29.599	-79.3693	1429.8079	-1.144	1.7681	-0.65967	-66.944	59.585	73.901	0.26768	0.019043	0.03291
0.342	-100.5289	78.416	739.911	-0.37666	0.75634	-0.30586	-2.161	-25.328	1078.56	-0.24542	0.82648	-0.10167	-53.7187	141.607	547.9626	-0.1626	0.48877	-0.21943	57.498	-40.596	828.6268	-0.61279	1.188	-0.396	-1.882	-63.516	1439.5909	-1.1768	1.6669	-0.86943	-44.231	-72.3904	1433.308	-1.1582	1.7676	-0.64063	-76.8318	50.0843	73.474	0.25771	0.031543	0.031543
0.344	-78.169	75.171	793.424	-0.4497	0.81298	-0.33203	9.034	-24.1697	1087.972	-0.30646	0.88713	-0.11778	-44.943	144.1608	538.9606	-0.14551	0.46142	-0.21084	41.8906	-16.322	826.3735	-0.56201	1.1735	-0.39404	-28.9383	-38.686	1448.7024	-1.1644	1.6434	-0.86943	-43.292	-57.7786	1455.3821	-1.1655	1.7661	-0.63623	-71.901	59.6484	60.063	0.24902	0.047363	0.025391
0.346	-78.7819	53.592	839.8479	-0.52285	0.86972	-0.34746	13.136	-47.283	1083.154	-0.37326	0.94728	-0.14004	-48.785	142.4414	531.5248	-0.13028	0.42822	-0.19951	55.78133	4.592	838.0075	-0.51162	1.1587	-0.38936	-24.2198	-17.9813	1446.258	-1.1569	1.6318	-0.87441	-50.525	-46.093	1463.4314	-1.1812	1.7642	-0.62646	-67.6478	45.1654	74.3524	0.23867	0.062598	0.016797
0.348	-92.9386	24.2875	856.681	-0.6001	0.91943	-0.3623	23.2673	-61.211	1035.168	-0.4505	1.0052	-0.15537	-62.55388	137.198	493.2717	-0.10635	0.39854	-0.19619	4.282	-15.604	842.3913	-0.46982	1.1458	-0.38818	-21.919	9.4484	1466.8255	-1.144	1.6157	-0.87842	-63.334	-39.0261	1473.15034	-1.1844	1.763	-0.62427	-71.0947	44.7455	70.2224	0.22881	0.079492	0.0025391
0.35	-94.652	1.018	871.5022	-0.67519	0.96192	-0.3707	46.2629	-69.043	972.96	-0.53223	1.0591	-0.1709	-27.641	150.723	475.1753	-0.089844	0.36768	-0.18848	-5.437	-42.438	871.874	-0.43262	1.141	-0.39082	-35.4135	41.789	1441.0237	-1.1306	1.602	-0.88115	-62.24	-45.92276	1481.3435	-1.1875	1.7637	-0.61328	-66.7646	59.2239	72.8746	0.22373	0.091992	-0.0033204
0.352	-59.238	-5.821	861.82	-0.7457	0.99218	-0.37754	29.827	-69.163	920.0813	-0.61006	1.1028	-0.18701	-34.269	159.995	455.8652	-0.068457	0.33936	-0.17832	-40.787	-65.852	906.411	-0.39697	1.1406	-0.40527	-36.99101	38.703	1442.728	-1.1272	1.586	-0.88232	-68.1806	-32.8711	1496.0019	-1.2012	1.7734	-0.6123	-56.6	74.5779	65.5942	0.21064	0.1086	-0.014843
0.354	-39.151	-12.862	861.159	-0.79453	1.0144	-0.39043	38.051	-77.094	895.2565	-0.69003	1.1328	-0.20879	-18.529	153.182	427.43	-0.050586	0.30987	-0.16709	-32.446	-96.8039	924.3617	-0.371	1.1569	-0.42588	-42.092	31.503	1428.214	-1.1175	1.5692	-0.87568	-100.6432	-28.028	1499.2447	-1.207	1.7754	-0.61133	-36.15	62.524	68.115	0.19775	0.12598	-0.02832
0.356	-28.305	-6.259	832.461	-0.8167	1.0312	-0.40391	57.401	-50.1124	861.057	-0.7623	1.1566	-0.22012	-21.283	151.459	407.2087	-0.035352	0.28213	-0.16631	-58.446	-127.9918	927.6294	-0.35732	1.1829	-0.44199	-33.226	46.72	1434.1825	-1.1125	1.5516	-0.87383	-98.3651	-23.631	1502.951	-1.2129	1.7832	-0.6123	-37.792	62.037	53.2381	0.17715	0.14424	-0.036426
0.358	-22.047	-21.2988	828.898	-0.81445	1.043	-0.42334	89.608	-32.9603	842.423	-0.81973	1.1715	-0.23272	-0.451000000000001	137.1741	386.7199	-0.014648	0.25566	-0.15547	-37.034	-144.911	934.031	-0.36162	1.2122	-0.46309	-35.555	52.982	1440.26562	-1.1094	1.5391	-0.87305	-77.694	-22.034	1507.191	-1.2131	1.7874	-0.6101	-20.195	58.186	43.0692	0.16055	0.16338	-0.044043
0.36	3.582	-17.368	784.163	-0.79932	1.0515	-0.43662	38.816	-39.908	835.552	-0.86279	1.1802	-0.23877	-13.163	120.5896	370.736	0.0014648	0.22754	-0.15137	-38.738	-178.719	950.693	-0.37656	1.2449	-0.48086	-29.1069	40.816	1433.7517	-1.1084	1.5207	-0.86836	-79.581	-5.78319	1497.1296	-1.2139	1.791	-0.60938	-26.834	48.013	36.4816	0.14258	0.18252	-0.052246
0.362	10.214	-28.6411	764.9907	-0.7707	1.0582	-0.44843	60.871	-35.079	847.0696	-0.87881	1.1798	-0.2458	23.88	109.4447	368.74929	0.016895	0.20361	-0.14111	-64.0208	-201.48	977.213	-0.40283	1.2739	-0.49951	-39.7443	31.7281	1422.8335	-1.1105	1.5035	-0.86718	-78.7889	-4.472583	1482.865	-1.2012	1.7969	-0.6084	-3.419	27.27103	52.439	0.12676	0.2042	-0.062305
0.364	11.93	-23.1434	761.7886	-0.74101	1.0644	-0.45547	62.482	-19.683	856.9817	-0.87617	1.1789	-0.25469	25.402	107.3916	371.0685	0.034473	0.17949	-0.13448	-74.9004	-224.804	1010.7224	-0.44014	1.3024	-0.52061	-29.5737	14.164	1405.0216	-1.1059	1.4926	-0.85703	-57.1416	2.5031	1480.372	-1.1914	1.8008	-0.60547	8.213	25.2196	50.608	0.11768	0.22314	-0.071777
0.366	30.11	-8.761	748.8912	-0.7084	1.0647	-0.45859	54.6811	-7.433	871.2979	-0.85273	1.168	-0.26407	40.52	117.0058	344.16043	0.04541	0.15566	-0.12822	-59.043	-204.062	1033.7366	-0.47324	1.3351	-0.53828	-43.63013	1.339	1393.0862	-1.0975	1.4747	-0.85498	-51.6704	15.0456	1492.2874	-1.1738	1.8027	-0.60742	27.243	28.4566	47.0085	0.099315	0.24219	-0.086231
0.368	10.033	3.84099999999999	735.998	-0.67529	1.0679	-0.46582	10.992	-34.496	911.1998	-0.81533	1.1538	-0.27832	8.065	115.4221	325.5115	0.055469	0.13154	-0.11992	-73.5088	-179.882	1059.4522	-0.50567	1.366	-0.56133	-10.594	3.301	1382.2422	-1.0913	1.4653	-0.8501	-61.9237	27.2921	1495.9234	-1.1577	1.8013	-0.60547	-2.925	19.1813	53.6016	0.085254	0.2623	-0.092285
0.37	-5.663	13.799	748.354	-0.63955	1.0718	-0.47275	2.9	-78.919	914.41532	-0.76758	1.1387	-0.28369	16.613	108.3949	313.2555	0.063477	0.10742	-0.11426	-94.1282	-145.454	1075.7616	-0.53662	1.4095	-0.58408	9.909	16.187	1375.486	-1.0836	1.4523	-0.84746	-34.242	26.6047	1481.9793	-1.1411	1.7993	-0.60498	17.753	30.5434	45.8672	0.071973	0.28574	-0.098928
0.372	-24.349	5.03	767.2711	-0.6083	1.0783	-0.47432	-6.663	-127.141	918.5254	-0.7045	1.1199	-0.28711	-2.736	109.3605	308.3124	0.073437	0.08584	-0.10342	-95.4533	-118.2562	1102.549271	-0.56543	1.459	-0.60254	23.315	28.12016	1347.6275	-1.0777	1.4441	-0.84336	-25.743	41.459	1463.23661	-1.1245	1.7974	-0.60254	5.002	41.6135	48.9039	0.059472	0.30478	-0.10635
0.374	-6.395	-12.267	782.857	-0.57275	1.0868	-0.47861	-31.646	-150.4751	917.5465	-0.64765	1.1074	-0.29219	-13.577	108.5589	284.0734	0.080078	0.061621	-0.097754	-81.436	-81.471	1115.987	-0.59444	1.4979	-0.62275	3.551	21.6405	1344.8416	-1.0711	1.4367	-0.83516	-19.011	65.722	1446.32616	-1.1033	1.7923	-0.5979	10.518	33.1314	41.2359	0.05127	0.32178	-0.11719
0.376	-26.513	-51.224	810.8242	-0.54414	1.0912	-0.48614	-39.475	-184.157	955.7784	-0.58828	1.1051	-0.29102	-18.437	95.6653	277.1966	0.089453	0.03545	-0.091113	-82.037	-74.203	1109.732	-0.61641	1.5441	-0.63437	41.9698	24.08818	1316.013	-1.062	1.4298	-0.82881	-18.564	69.245	1428.9674	-1.084	1.7891	-0.60742	-15.369	19.5745	44.5625	0.044434	0.33125	-0.11699
0.378	-22.21	-87.22	829.013	-0.51807	1.1069	-0.49658	-42.899	-195.448	955.9356	-0.54219	1.1105	-0.29219	-15.593	101.50321	244.552	0.094531	0.01084	-0.08711	-52.466	-80.155	1115.4685	-0.63398	1.5723	-0.64219	33.0356	49.1515	1316.8385	-1.0503	1.4204	-0.82666	-14.113	56.2441	1417.415	-1.0542	1.7759	-0.59521	-2.566	17.0548	43.6286	0.033203	0.34082	-0.12226
0.38	-42.684	-113.7235	846.889	-0.49814	1.121	-0.50635	-54.4127	-204.092	967.967	-0.50342	1.1235	-0.30518	-32.932	103.49528	242.772	0.10645	-0.013184	-0.083008	-61.22	-96.405	1131.805	-0.65039	1.6058	-0.64414	42.3219	81.847	1289.407	-1.0318	1.4065	-0.81728	1.697	57.8665	1422.858	-1.0347	1.7603	-0.59912	-21.789	13.8479	46.6345	0.028516	0.34434	-0.12656
0.382	-39.923	-123.183	878.549	-0.48672	1.1348	-0.51875	-83.259	-203.446	971.897	-0.47783	1.1536	-0.32158	-36.279	110.9318	225.209	0.11699	-0.039063	-0.077344	-55.454	-110.036	1143.3	-0.65771	1.6372	-0.64893	26.4653	84.549	1265.99459	-1.0126	1.3906	-0.80967	-11.863	45.9432	1401.72105	-1.0029	1.7324	-0.59082	-26.591	32.7845	38.284	0.025293	0.34355	-0.12695
0.384	-61.897	-152.109	915.8321	-0.49258	1.1508	-0.52305	-56.9449	-196.369	1024.0316	-0.45781	1.1801	-0.33907	-31.236	107.8689	219.7682	0.12891	-0.055078	-0.07666	-52.81	-131.4347	1165.176	-0.65811	1.6735	-0.65771	32.29	92.554	1228.379	-0.98876	1.3682	-0.80069	1.68	27.2141	1386.1394	-0.97608	1.7031	-0.58204	-41.062	26.09003	41.1214	0.025391	0.34717	-0.12402
0.386	-59.127	-177	951.627	-0.51719	1.1649	-0.5373	-60.122	-145.261	1064.7668	-0.44141	1.2168	-0.35859	-26.186	106.2851	221.9387	0.1375	-0.075	-0.073926	-27.367	-149.5874	1181.648	-0.65244	1.7064	-0.67841	16.224	98.109	1202.951	-0.9666	1.3457	-0.78946	8.307	40.001	1347.765	-0.95117	1.6777	-0.5752	-50.77	39.3214	42.4986	0.023535	0.34492	-0.12168
0.388	-94.957	-178.646	969.6559	-0.54541	1.1841	-0.54834	-68.938	-99.1211	1113.594	-0.44062	1.2488	-0.37822	-54.138	95.0766	205.7852	0.14072	-0.094922	-0.073536	-15.177	-154.361	1198.66208	-0.63447	1.7407	-0.6831	26.203	95.133	1194.0912	-0.94727	1.3262	-0.78027	2.268	59.4636	1344.302	-0.9165	1.6353	-0.56396	-48.875	35.1838	43.6829	0.02539	0.34082	-0.12568
0.39	-102.4451	-159.6	993.8458	-0.56992	1.2031	-0.57392	-90.7541	-72.217	1120.6009	-0.45508	1.2832	-0.40479	-69.5356	75.7679	195.775	0.146	-0.11133	-0.067383	-24.706	-160.925	1211.9746	-0.61953	1.7602	-0.69394	25.8369	62.1476	1188.0051	-0.92969	1.3117	-0.76055	-24.669	67.9224	1321.7242	-0.8999	1.6157	-0.55713	-66.7923	23.3274	42.0205	0.030859	0.33222	-0.12178
0.392	-120.5026	-144.328	1028.788	-0.59004	1.2262	-0.60176	-78.657	-52.349	1121.9166	-0.47109	1.3164	-0.42266	-56.516	75.7742	186.918	0.14472	-0.1249	-0.066113	-54.214	-156.93	1229.002	-0.60938	1.7656	-0.70117	12.417	63.9054	1168.5926	-0.91006	1.2989	-0.74717	-13.838	72.239	1320.4555	-0.85986	1.5669	-0.54248	-66.5846	23.7889	34.0931	0.035058	0.32803	-0.11758
0.394	-124.5148	-122.635	1056.517	-0.60879	1.2613	-0.62207	-96.7752	-28.331	1127.392	-0.49893	1.3563	-0.45273	-63.3461	87.31667	175.2331	0.14522	-0.13349	-0.063184	-17.444	-154.4275	1258.9063	-0.60147	1.769	-0.70439	1.09	53.288	1153.01	-0.89288	1.2817	-0.73154	-39.709	94.097	1301.3459	-0.83276	1.5334	-0.53198	-62.955	28.8542	29.4359	0.038086	0.31934	-0.11035
0.396	-139.658	-100.7997	1088.325	-0.62773	1.2978	-0.64834	-90.1614	-31.92	1146.578	-0.53096	1.3906	-0.48086	-66.1524	77.5312	159.1093	0.14482	-0.14326	-0.064356	-36.584	-137.1301	1283.167	-0.60684	1.7734	-0.7084	-9.18	44.4593	1120.746	-0.8751	1.2687	-0.71475	-49.491	96.2957	1282.2611	-0.80859	1.4961	-0.52148	-77.0747	24.0276	21.212	0.048242	0.30889	-0.10469
0.398	-147.973	-97.4646	1105.252	-0.65967	1.3384	-0.67285	-84.063	-72.631	1161.9682	-0.55947	1.4296	-0.50596	-62.7068	57.82033	144.1593	0.14541	-0.15049	-0.065723	-34.653	-151.831	1311.19	-0.6209	1.7715	-0.71347	-12.414	60.2702	1121.4215	-0.85791	1.252	-0.70117	-58.725	96.192	1258.3523	-0.76953	1.4639	-0.50928	-81.9239	21.4168	28.785	0.056055	0.29678	-0.097168
0.4	-133.884	-99.356	1127.3423	-0.69238	1.3756	-0.70527	-51.472	-86.299	1169.5176	-0.58252	1.4692	-0.53271	-53.33	67.5428	141.6	0.14063	-0.16162	-0.066406	-40.146	-149.669	1305.485	-0.64307	1.7734	-0.72022	-32.581	88.1212	1122.446	-0.83487	1.2376	-0.68427	-33.878	102.7848	1232.2644	-0.75195	1.4355	-0.49609	-61.5763	20.6754	30.821	0.065429	0.28193	-0.089746
0.402	-120.178	-81.882	1137.746	-0.72637	1.4203	-0.72656	-65.719	-107.251	1179.2351	-0.60254	1.5045	-0.54805	-58.6691	70.143	137.587	0.13799	-0.16992	-0.071875	-30.14	-127.6222	1297.6248	-0.67725	1.7798	-0.72998	-35.165	78.6332	1107.286	-0.81875	1.218	-0.66777	-75.4533	110.1147	1211.084	-0.71094	1.375	-0.47656	-48.963	12.5687	28.541	0.075	0.26552	-0.082129
0.404	-114.059	-59.236	1152.7581	-0.76347	1.4707	-0.74024	-47.962	-134.4566	1205.7701	-0.61592	1.5415	-0.56533	-25.472	62.9967	136.00042	0.13564	-0.17432	-0.072558	-62.031	-107.4144	1313.092	-0.71133	1.7955	-0.73613	-57.255	80.1455	1077.632	-0.80078	1.1961	-0.65059	-72.722	95.8093	1197.555	-0.68018	1.3296	-0.45948	-58.6263	19.8843	39.73	0.083008	0.24707	-0.075195
0.406	-112.482	-64.557	1190.555	-0.80889	1.5146	-0.76006	-30.686	-150.543	1235.0433	-0.62529	1.5728	-0.57783	3.98699999999999	59.0662	138.8822	0.13447	-0.18017	-0.075293	-62.474	-87.755	1299.4435	-0.75273	1.8133	-0.74297	-53.7073	94.3318	1056.2995	-0.7832	1.1752	-0.63223	-64.2464	84.1605	1173.0394	-0.65723	1.293	-0.45117	-41.87	29.881	51.2499	0.090625	0.23145	-0.063379
0.408	-98.491	-77.904	1198.3223	-0.84766	1.5547	-0.7793	-2.057	-150.596	1244.9265	-0.62588	1.5987	-0.58887	-5.538	53.983119	133.8458	0.12978	-0.18359	-0.076074	-62.253	-84.092	1311.9224	-0.78516	1.8285	-0.74805	-63.0999	116.4964	1031.3042	-0.76758	1.1504	-0.61719	-65.4369	84.4727	1154.6704	-0.62402	1.2544	-0.43066	-26.544	26.483	53.81785	0.095604	0.21884	-0.049023
0.41	-101.882	-103.125	1208.006	-0.87393	1.5944	-0.78564	-12.267	-163.576	1271.4343	-0.61914	1.627	-0.60156	-15.158	41.2265	112.1272	0.12354	-0.17334	-0.07373	-67.08	-68.515	1293.422	-0.81455	1.8499	-0.75557	-42.434	114.6454	1004.7461	-0.74385	1.129	-0.60049	-76.1057	100.9279	1139.18512	-0.60645	1.2363	-0.42383	-35.297	8.2989	47.997	0.098339	0.20556	-0.039258
0.412	-95.295	-139.104	1231.5946	-0.88857	1.6247	-0.79072	-8.419	-164.975	1287.6178	-0.60684	1.6465	-0.60195	2.975	46.6806	99.213	0.11436	-0.1751	-0.079297	-104.234	-77.0052	1295.158	-0.84375	1.8633	-0.76367	-42.213	126.2641	968.4501	-0.72471	1.1025	-0.58584	-85.06476	104.2668	1106.6931	-0.57031	1.1914	-0.40674	-17.978	9.9812	48.33	0.10127	0.19434	-0.020996
0.414	-89.847	-160.975	1241.6094	-0.89053	1.6478	-0.79424	-15.071	-147.051	1318.236	-0.59161	1.6597	-0.61074	17.497	50.4393	88.9463	0.10352	-0.17285	-0.079102	-101.4961	-76.4868	1300.01	-0.86856	1.8842	-0.76768	-30.014	134.5209	921.401	-0.70557	1.0724	-0.56436	-74.4146	108.8282	1095.53474	-0.54883	1.1547	-0.38892	9.683	7.0527	43.027	0.104	0.18164	-0.0083008
0.416	-61.126	-159.381	1258.003	-0.8957	1.6668	-0.79219	-19.371	-111.4527	1343.737	-0.58301	1.6578	-0.6166	11.567	62.572	88.1074	0.092969	-0.167	-0.081055	-111.4223	-85.8801	1335.987	-0.89101	1.8992	-0.775	-50.444	128.0874	901.174	-0.68076	1.0435	-0.54834	-70.375	125.6517	1044.9931	-0.52881	1.1216	-0.37451	4.853	11.722	66.8128	0.10342	0.17158	-0.000293
0.418	-67.326	-154.29	1281.2549	-0.90771	1.6782	-0.7915	-33.638	-99.5831	1339.284	-0.58379	1.6666	-0.62344	6.215	57.32	76.6036	0.079297	-0.14678	-0.089649	-105.8925	-68.50448	1348.289	-0.91172	1.9101	-0.77578	-22.846	120.608	894.7103	-0.65869	1.0103	-0.53174	-61.9824	123.758	1038.7563	-0.49805	1.0791	-0.35938	-16.618	7.064238	84.654	0.10908	0.1623	0.015722
0.42	-61.391	-168.641	1303.9373	-0.93017	1.6905	-0.79307	-27.111	-91.8497	1333.458	-0.59375	1.6816	-0.63281	4.67	61.008	73.0705	0.056152	-0.12695	-0.098633	-108.1043	-77.178	1364.6649	-0.93447	1.9187	-0.78291	-23.612	134.861	874.9971	-0.63311	0.98154	-0.51474	-34.188	127.6608	1011.9446	-0.48486	1.0552	-0.354	-2.592	18.0803	108.9575	0.11572	0.1541	0.025488
0.422	-51.415	-159.6919	1317.468	-0.95733	1.6962	-0.79502	-27.073	-68.226	1323.1588	-0.6208	1.6967	-0.64434	-0.149999999999999	65.961	57.918	0.041504	-0.10293	-0.098242	-97.5035	-79.5161	1371.6514	-0.95068	1.9263	-0.78662	-13.89	148.867	856.8847	-0.60898	0.95157	-0.5041	-18.002	130.2186	991.9076	-0.45557	1.0063	-0.33838	15.871	40.511	121.4851	0.1211	0.15146	0.033985
0.424	-48.757	-142.3241	1340.543	-0.98936	1.7165	-0.79814	-44.048	-61.51	1312.342	-0.66201	1.7231	-0.6544	-3.704	55.765	79.23473	0.018652	-0.072071	-0.10283	-80.994	-71.348	1404.6216	-0.95967	1.9321	-0.79326	-28.52	131.917	832.2638	-0.57969	0.9168	-0.48731	-25.66	147.6047	971.3286	-0.4292	0.9685	-0.32641	7.479	46.818	161.309	0.12207	0.15381	0.039551
0.426	-51.867	-121.8632	1350.679	-1.026	1.7342	-0.80293	-53.728	-46.689	1305.083	-0.71006	1.7525	-0.66416	10.055	55.984	62.5759	-0.00087894	-0.039258	-0.11455	-116.6392	-64.9339	1411.12	-0.96826	1.938	-0.80107	-17.23	128.4424	800.584	-0.55147	0.8831	-0.47022	-15.159	140.3609	953.1785704	-0.40967	0.93213	-0.31396	6.297	65.25	190.9453	0.11748	0.15908	0.044336
0.428	-51.59	-101.913	1354.071	-1.0571	1.7524	-0.80811	-28.348	-41.315	1311.142	-0.76035	1.7922	-0.67324	7.495	57.726	73.1702	-0.014844	-0.0063476	-0.11621	-87.12	-77.58452	1426.239	-0.96826	1.9286	-0.80576	-22.742	132.23147	780.2033	-0.52539	0.85352	-0.44922	23.398	141.708	921.79013	-0.37988	0.88477	-0.29883	10.537	77.6582	211.2028	0.11201	0.16318	0.045019
0.43	-63.294	-84.066	1336.0709	-1.0932	1.7749	-0.81084	-49.595	-47.0386	1311.869	-0.81299	1.8247	-0.67725	-8.467	53.7788	53.6224	-0.029297	0.025391	-0.12451	-86.0945	-69.6736	1410.7822	-0.96651	1.9171	-0.80498	2.907	135.9544	765.9176	-0.49922	0.82041	-0.44228	32.62	147.955	907.5205	-0.36816	0.86084	-0.29639	6.05	89.5973	230.9131	0.10772	0.16866	0.043457
0.432	-75.562	-80.3504	1324.205	-1.136	1.8015	-0.81192	-83.76	-67.6321	1326.682	-0.86299	1.8542	-0.68252	-33.241	37.01509	45.5513	-0.047559	0.050098	-0.13086	-67.934	-66.235	1400.0493	-0.9668	1.9004	-0.80273	17.832	127.0859	756.541	-0.46679	0.7918	-0.42744	-3.674	145.8542	870.79897	-0.33984	0.80859	-0.28027	-5.304	96.5766	280.4359	0.10156	0.18115	0.044336
0.434	-87.037	-85.4595	1311.516	-1.1734	1.8219	-0.81348	-95.205	-75.188	1339.197	-0.91201	1.8762	-0.6792	-32.777	38.11268	57.03596	-0.066308	0.071094	-0.12685	-88.902	-57.012	1373.438	-0.9625	1.8773	-0.79531	22.067	128.5248	736.069	-0.44297	0.76524	-0.41494	16.467	125.4375	847.9047	-0.31421	0.77539	-0.26733	-13.935	97.0282	326.8136	0.094238	0.19482	0.030273
0.436	-90.651	-79.0326	1343.183	-1.2106	1.846	-0.81807	-86.797	-59.9223	1365.972	-0.95771	1.897	-0.67412	-37.632	41.9734	62.2648	-0.084668	0.097653	-0.1292	-41.906	-48.34	1367.8777	-0.96318	1.8536	-0.79287	5.726	116.5087	709.686	-0.41211	0.74023	-0.40332	12.883	135.39	817.467	-0.2959	0.73828	-0.2583	-1.177	112.4641	375.129	0.091308	0.22031	0.030859
0.438	-110.379	-63.6505	1343.596	-1.2402	1.8711	-0.81445	-95.521062	-40.3162	1393.9176	-1.0043	1.9164	-0.67422	-53.3654	43.999	50.643	-0.093555	0.11934	-0.13565	-51.527	-15.2305	1379.14347	-0.96592	1.84	-0.79014	3.386	107.116	688.9908	-0.38232	0.71338	-0.39404	13.974	144.906	789.4249	-0.26709	0.6958	-0.24854	-38.756	122.702	433.0859	0.078613	0.246	0.016699
0.44	-118.949	-48.195	1385.834	-1.2665	1.8956	-0.81572	-93.9263	-52.5644	1418.741	-1.041	1.9355	-0.66895	-46.632	37.9859	36.5697	-0.10107	0.14111	-0.13916	-39.051	7.9314	1384.9131	-0.96279	1.8241	-0.78604	-3.068	109.362	666.5403	-0.36211	0.69004	-0.37988	1.571	142.7109	757.9167	-0.25146	0.67236	-0.23877	-47.326	117.254	498.437	0.062988	0.27256	-9.776e-05
0.442	-131.7424	-54.626	1398.913	-1.2929	1.913	-0.80869	-109.2313	-52.3202	1429.323	-1.0713	1.9541	-0.66738	-73.6203	31.0834	52.484	-0.10049	0.16084	-0.14776	-40.501	17.66	1385.5401	-0.96094	1.8125	-0.7832	4.392	134.2714	642.8868	-0.34043	0.66582	-0.3626	25.972	137.0712	736.5346	-0.22607	0.62842	-0.23193	-61.49186	117.378	562.7	0.042578	0.30772	-0.014746
0.444	-144.6167	-52.226	1417.2829	-1.3148	1.9208	-0.80322	-117.7228	-57.4214	1422.993	-1.0948	1.9665	-0.65674	-60.78	42.1303	45.0202	-0.098828	0.18496	-0.15683	-10.502	27.6422	1380.1526	-0.95791	1.8034	-0.78388	-14.873	143.4845	617.0181	-0.31895	0.63926	-0.34619	8.202	155.4532	719.2144	-0.20581	0.59106	-0.22387	-52.2273	110.867	638.2954	0.01709	0.34912	-0.035645
0.446	-138.676	-48.976	1427.9871	-1.3365	1.925	-0.79844	-124.914	-50.743	1403.0912	-1.1139	1.9661	-0.64854	-65.5899	39.0816	43.8787	-0.092187	0.20137	-0.16426	-38.063	41.2222	1394.2999	-0.94668	1.7875	-0.7832	-33.209	141.983	583.78	-0.29903	0.61875	-0.33398	-4.222	163.3821	715.6594	-0.18555	0.55713	-0.21924	-72.5852	89.629	710.2603	-0.013476	0.39443	-0.054101
0.448	-164.8667	-56.979	1444.5506	-1.3535	1.9238	-0.79297	-85.276	-54.171	1406.0461	-1.1337	1.9585	-0.63408	-39.372	40.4863	28.8164	-0.081836	0.20801	-0.16641	-35.847	52.386	1390.5577	-0.93262	1.7703	-0.77852	-43.551	155.081	566.6155	-0.27539	0.59424	-0.31836	-5.579	155.4638	686.0651	-0.15332	0.51514	-0.20996	-52.286	69.284	768.75	-0.055175	0.45069	-0.078907
0.45	-179.1307	-71.51	1449.9425	-1.3534	1.922	-0.78388	-69.556	-42.459	1391.9088	-1.1445	1.9492	-0.62598	-63.1005	47.0417	34.3086	-0.071289	0.21631	-0.16699	-44.226	38.889	1389.456	-0.92022	1.7462	-0.77393	-40.804	157.369	533.79	-0.25303	0.57725	-0.30693	6.924	168.3757	663.2259	-0.13965	0.49316	-0.20508	-75.4704	62.188	829.7352	-0.10987	0.51162	-0.10703
0.452	-170.7885	-66.341	1436.84566	-1.3543	1.9187	-0.77422	-60.409	-35.1172	1380.364	-1.1551	1.9261	-0.60596	-52.207	41.5512	28.9656	-0.059473	0.21338	-0.16729	-33.969	36.305	1363.92553	-0.90967	1.7192	-0.76807	-61.2638	154.814	517.6458	-0.23496	0.55821	-0.28887	-15.914	178.9104	639.1484	-0.11377	0.44727	-0.19629	-61.1612	45.195	852.571	-0.17041	0.58789	-0.1417
0.454	-163.8274	-72.216	1435.6611	-1.3555	1.9098	-0.77071	-64.358	-33.9182	1367.296	-1.1602	1.9066	-0.58995	-49.4948	33.8249	39.9169	-0.049121	0.20986	-0.16777	-64.486	20.4672	1353.1188	-0.89893	1.7023	-0.76182	-51.669	150.5983	500.0853	-0.20918	0.53906	-0.28339	-29.901	160.0836	605.635	-0.095213	0.41748	-0.19433	-57.8735	24.6748	885.7439	-0.23389	0.67627	-0.17676
0.456	-143.3854	-63.991	1441.301	-1.3461	1.9	-0.7752	-54.19	-23.383	1359.021	-1.1617	1.8801	-0.57431	-23.568	50.2888	36.766	-0.041699	0.2083	-0.17012	-59.441	9.802	1334.6642	-0.8918	1.6789	-0.75508	-54.247	152.89465	481.781	-0.18623	0.51474	-0.26514	-38.9977	146.091835	573.6672	-0.078125	0.38574	-0.18799	-37.6283	-1.4065	906.273	-0.29639	0.77138	-0.20645
0.458	-139.2531	-60.93	1451.5673	-1.3389	1.8809	-0.77344	-38.865	12.00368	1380.978	-1.1613	1.8519	-0.55625	-25.916	43.96039	48.679	-0.032617	0.19971	-0.17041	-47.595	8.682	1334.7479	-0.88321	1.661	-0.75039	-65.8803	141.7628	459.594	-0.16504	0.49512	-0.24951	-48.6502	156.7676	556.7891	-0.056152	0.35303	-0.17627	-49.0334	-25.6328	910.921	-0.36221	0.87198	-0.23349
0.46	-128.456	-31.807	1444.0669	-1.3315	1.8583	-0.76436	-35.031	29.2181	1362.4829	-1.1577	1.8228	-0.54346	-14.19	35.21155	34.7227	-0.027344	0.18896	-0.16797	-56.575	22.753	1314.3976	-0.86963	1.6364	-0.73936	-60.75716	130.6079	449.4746	-0.13994	0.47393	-0.23271	-70.8364	160.33606	528.6832	-0.047852	0.33447	-0.17236	-27.818	-37.104	888.33	-0.42041	0.97354	-0.25303
0.462	-139.3396	-15.3188	1442.3565	-1.3229	1.8345	-0.76748	-43.451	40.37044	1360.8229	-1.1549	1.7967	-0.52695	-23.589	22.5252	31.66	-0.018555	0.17597	-0.17246	-82.432	20.688	1314.0716	-0.85742	1.6133	-0.73047	-55.927	127.8592	422.7895	-0.12051	0.44688	-0.21807	-52.55599	160.3217	496.9965	-0.022461	0.2998	-0.16797	-11.43	-51.868	875.874	-0.48584	1.0587	-0.28193
0.464	-106.489	4.041	1440.8462	-1.3167	1.8094	-0.76592	-16.832	63.462	1343.6541	-1.1534	1.7767	-0.5127	-16.982	31.987	16.504	-0.0058594	0.16455	-0.17236	-78.121	25.4241	1291.92047	-0.8459	1.5834	-0.71504	-75.0037	125.7757553	403.1421	-0.10371	0.41914	-0.20127	-47.3287	164.3273	469.22	-0.0029297	0.2666	-0.15893	9.74	-40.172	831.876	-0.54395	1.1426	-0.30859
0.466	-101.439	23.8186	1435.7872	-1.3065	1.788	-0.76436	-16.602	71.087	1341.92837	-1.1503	1.7548	-0.49629	-3.391	27.7745	25.9689	0.0050782	0.14893	-0.17119	-80.758	54.3006	1287.2081	-0.83242	1.5563	-0.7082	-71.008	112.01417	382.5164	-0.083984	0.39844	-0.18418	-52.93524	167.227	445.154	0.015137	0.24072	-0.1582	20.334	-43.166	813.846	-0.60273	1.2004	-0.34453
0.468	-77.059	36.8223	1421.8444	-1.2925	1.772	-0.75928	-28.21	46.181	1326.6151	-1.1494	1.7307	-0.48262	0.510999999999996	24.9071	27.6803	0.016504	0.13203	-0.17041	-95.266	77.3472	1277.7517	-0.82148	1.5312	-0.69336	-71.9895	106.6788	360.6068	-0.062988	0.37549	-0.16895	-52.9427	150.2682	441.80057	0.034668	0.20605	-0.14648	27.271	-49.425	774.0492	-0.65069	1.2356	-0.38408
0.47	-91.324	23.9041	1409.4841	-1.2848	1.7529	-0.75684	-3.593	15.6162	1316.008	-1.146	1.7114	-0.46924	17.998	17.1229	44.356	0.029785	0.11621	-0.16406	-98.6805	81.9729	1265.963	-0.81934	1.5019	-0.67607	-61.761	112.6524352	341.885	-0.043652	0.35254	-0.15156	-16.37	139.0412	417.8187	0.049316	0.18604	-0.14453	31.9123	-47.776	774.8324	-0.68115	1.2481	-0.41455
0.472	-74.588	31.13	1404.6807	-1.2691	1.7361	-0.75342	-21.64	28.243	1279.7193	-1.1393	1.6966	-0.4624	9.035	26.0438	31.4444	0.035547	0.096876	-0.16709	-98.458	88.417	1241.4699	-0.81592	1.4849	-0.66943	-48.585	105.59709	354.2936	-0.028027	0.33262	-0.13564	-9.37	154.2498	404.681385	0.068848	0.15283	-0.13379	39.2027	-32.229	765.428	-0.6998	1.2365	-0.41114
0.474	-80.582	44.6249	1399.1898	-1.2492	1.7161	-0.74834	-14.047	19.342	1283.8068	-1.1311	1.6864	-0.45039	-0.137999999999998	21.8406	24.2161	0.043945	0.083203	-0.16963	-104.6182	109.5176	1218.61393	-0.79951	1.4637	-0.66299	-36.801	99.4687	338.2626	-0.014746	0.30957	-0.11767	-16.91	155.6267	387.4828	0.084229	0.12744	-0.13281	29.539	-35.349	799.0319	-0.71289	1.2148	-0.38721
0.476	-62.962	52.6055	1396.7328	-1.2224	1.6954	-0.74209	-27.924	4.017	1264.2318	-1.1226	1.6786	-0.44023	-8.851	30.6527	42.2003	0.048632	0.075	-0.16924	-112.9092	112.2696	1178.832	-0.78604	1.4313	-0.64951	-24.745	102.7499	312.757	0.0032227	0.28476	-0.10283	-18.823	126.2387	372.59341	0.098633	0.10107	-0.12207	21.843	-24.319	827.8994	-0.71006	1.1888	-0.3667
0.478	-55.935	38.2226	1404.03	-1.1982	1.6738	-0.73145	-16.818	15.889	1248.01024	-1.1109	1.6668	-0.43203	9.98	43.7787	45.148	0.051074	0.063574	-0.16856	-76.291	115.33028	1160.1598	-0.77627	1.4016	-0.62686	-28.472	116.354	288.2599	0.018555	0.26221	-0.089355	11.672	126.9307	342.1094	0.11719	0.063477	-0.12158	35.592	-22.869	840.9934	-0.70069	1.1761	-0.37022
0.48	-35.478	45.7438	1382.6134	-1.1715	1.642	-0.72187	-57.12	27.7203	1244.7172	-1.0962	1.6509	-0.43115	-0.509	40.82421	29.4338	0.056152	0.054199	-0.16748	-64.889	107.9402	1146.2113	-0.7792	1.3853	-0.60967	-10.404	110.114	275.0218	0.04209	0.2373	-0.072558	0.856999999999999	129.172	320.9988	0.12988	0.049316	-0.11377	8.33	-29.667	853.7857	-0.67881	1.1838	-0.39014
0.482	-48.207	32.2381	1373.5877	-1.1445	1.616	-0.71367	-53.727	35.359185	1224.2369	-1.0784	1.6356	-0.42314	-16.114	26.8309	21.0786	0.061035	0.044922	-0.16689	-61.556	102.6064	1143.5817	-0.77881	1.3716	-0.59717	-18.174	111.91	260.097	0.065234	0.21729	-0.070215	12.018	120.2508	295.0899	0.15234	0.015137	-0.10742	-5.538	-59.475	871.931	-0.65166	1.2077	-0.40879
0.484	-59.131	34.0758	1355.6256	-1.1137	1.5851	-0.69922	-88.7992	54.2873	1203.3842	-1.0612	1.6165	-0.41787	-39.208	19.0691	34.003	0.060839	0.04082	-0.16201	-53.81	82.8316	1119.7004	-0.77773	1.357	-0.58203	15.234	111.122	246.2547	0.089453	0.20283	-0.055371	-2.352	109.64	291.9771	0.16675	-0.0078126	-0.099119	-17.393	-108.005	895.931	-0.62842	1.2427	-0.42529
0.486	-62.039	35.684	1339.0386	-1.086	1.5586	-0.69131	-77.111	84.185	1185.2907	-1.0444	1.5966	-0.41553	-27.891	21.4827	36.401	0.058496	0.03457	-0.17099	-41.256	82.73478	1096.181	-0.77305	1.3433	-0.5666	-6.312	104.249	222.592	0.10703	0.18652	-0.042382	20.929	116.908	270.133	0.17725	-0.029297	-0.098145	-17.889	-134.81	913.659	-0.60625	1.2711	-0.42969
0.488	-74.125	55.632	1326.3675	-1.0566	1.5313	-0.67969	-105.4477	90.934	1166.1362	-1.0254	1.5795	-0.41308	-52.354	20.7469	58.336	0.058105	0.029785	-0.1711	-35.844	86.5077	1092.4095	-0.77618	1.3324	-0.5541	-15.51	84.247	215.591	0.12061	0.16797	-0.030762	1.468	104.209	268.4317	0.18506	-0.054199	-0.087402	-30.078	-176.721	944.8222	-0.58731	1.2996	-0.43886
0.49	-87.052	63.8718	1317.9692	-1.0307	1.5049	-0.67129	-83.991	92.759	1146.96171	-1.002	1.5586	-0.41016	-36.237	9.6677	61.3273	0.052246	0.029785	-0.17334	-43.833	85.924	1081.44589	-0.76826	1.3198	-0.53877	-20.094	82.3488	212.0483	0.13086	0.15127	-0.015723	24.373	87.81129	248.7834	0.19434	-0.065918	-0.088867	-34.768	-189.186	979.0453	-0.57168	1.32	-0.45137
0.492	-117.3872	69.9219	1304.496	-1.0023	1.4802	-0.65772	-102.8339	97.8881	1129.9911	-0.97481	1.5306	-0.40625	-59.1495	8.6735	66.502	0.036426	0.03457	-0.16817	-41.059	85.075	1061.7995	-0.76123	1.2974	-0.52441	1.689	85.1436	199.7073	0.14209	0.13916	-0.0013672	33.683	88.5402	236.8172	0.2085	-0.091309	-0.083984	-57.7	-204.066	997.7745	-0.55801	1.3436	-0.45254
0.494	-96.016	88.778	1283.5052	-0.97217	1.4509	-0.64483	-92.4224	99.8607	1097.7511	-0.95068	1.5016	-0.4042	-58.8452	1.6531	79.2196	0.024707	0.044824	-0.17099	-20.003	103.1624	1050.1623	-0.75459	1.2798	-0.50537	-19.352	89.811	190.6702	0.15342	0.13213	0.0041016	33.511	98.10581	220.5841	0.21631	-0.1062	-0.078125	-65.704	-202.492	1020.8358	-0.55273	1.3672	-0.46289
0.496	-128.9598	124.276	1272.4274	-0.95	1.4209	-0.63575	-105.9516	82.2753	1094.5579	-0.92452	1.4669	-0.39912	-77.5154	-13.37465	91.71	9.768e-05	0.062793	-0.17568	-17.562	120.4436	1022.5452	-0.74824	1.2594	-0.49063	2.831	89.55	180.5042	0.15664	0.12637	0.012988	-1.958	91.9992	206.3872	0.2207	-0.12402	-0.080566	-90.113	-193.858	1046.068	-0.54258	1.3897	-0.46504
0.498	-119.9185	135.405	1248.5111	-0.92578	1.3926	-0.61914	-90.069	80.1821	1075.1371	-0.89052	1.4305	-0.39619	-48.496	-11.5951	112.0236	-0.020118	0.083301	-0.17969	-17.59	113.9589	1007.754	-0.73886	1.2375	-0.48164	-22.349	92.277	154.7988	0.16406	0.12256	0.026367	-8.108	92.2657	199.8972	0.23486	-0.14355	-0.077637	-85.3744	-172.717	1096.5685	-0.53945	1.4144	-0.47089
0.5	-131.8366	138.252	1229.23178	-0.89873	1.3667	-0.60537	-71.995	87.2728	1054.7698	-0.85693	1.3911	-0.39014	-47.0251	-2.0455	127.5951	-0.035156	0.10791	-0.18701	-6.95800000000001	118.3887	978.23	-0.72646	1.2202	-0.47285	-17.372	72.5409	152.8855	0.16826	0.1207	0.034277	-3.672	98.559	199.8792	0.23633	-0.15039	-0.074219	-92.645	-131.863	1100.392885	-0.54024	1.4426	-0.47793
0.502	-108.235	127.5267	1214.826	-0.87569	1.3415	-0.59111	-56.235	88.5193	1037.88	-0.82451	1.3649	-0.38681	-50.872	-1.2156	149.97701	-0.052832	0.13223	-0.19072	12.265	131.5406	954.5911	-0.71533	1.1919	-0.45654	-42.138	59.43579	149.1875	0.17236	0.12148	0.042187	-24.934	99.136	181.113	0.24707	-0.16553	-0.074219	-96.873683	-108.3411	1114.6834	-0.54414	1.4718	-0.48711
0.504	-120.6485	108.3411	1184.808	-0.85693	1.3236	-0.57627	-76.3754	70.9148	1021.08	-0.79326	1.331	-0.38584	-51.5885	-0.279	152.778	-0.067773	0.16026	-0.20127	0.406999999999996	130.3952	911.631	-0.69893	1.1684	-0.45107	-28.178	55.1187	145.3705	0.1747	0.12539	0.046875	-48.8835	78.7289	165.349	0.25074	-0.17872	-0.073243	-127.176	-98.406	1125.0078	-0.55859	1.5	-0.49609
0.506	-104.424	95.225	1177.036	-0.83965	1.3033	-0.56543	-63.2689	83.7746	991.288	-0.76866	1.304	-0.38467	-41.312	24.5568	190.021	-0.089258	0.19034	-0.21416	-5.313	123.3393	889.165	-0.68438	1.1375	-0.44258	-56.405	66.8643	133.36391	0.17793	0.12724	0.047656	-37.786	80.4981	140.48	0.25635	-0.18652	-0.077148	-126.2958	-85.344	1137.333	-0.57178	1.5415	-0.51347
0.508	-99.517	102.188	1153.805	-0.81836	1.2813	-0.5625	-67.6461	101.9152	995.3461	-0.74112	1.2729	-0.38174	-32.203	39.2407	225.576	-0.11455	0.22666	-0.21729	-13.847	134.5331	867.451	-0.67227	1.1129	-0.43281	-60.137	53.25951	129.0906	0.18408	0.13379	0.049316	-43.06	80.8723	133.811	0.25391	-0.19678	-0.080078	-84.7	-70.588	1134.218	-0.58789	1.577	-0.53672
0.51	-99.51	115.2172	1132.2218	-0.80137	1.2553	-0.53633	-52.462	109.6786	992.091	-0.71436	1.2505	-0.37744	-22.76	72.2462	268.9478	-0.14209	0.271	-0.23096	-23.514	143.4419	849.453	-0.66426	1.0756	-0.42129	-63.441	48.156	122.5992	0.18877	0.14004	0.054297	-75.9491	67.2192	124.118	0.25488	-0.20264	-0.074707	-79.258	-71.292	1156.824	-0.59766	1.6102	-0.5543
0.512	-117.922	119.4016	1117.71417	-0.78007	1.2344	-0.51797	-17.548	112.2871	973.852	-0.69307	1.2278	-0.37588	1.631	92.3525	316.8062	-0.18037	0.31689	-0.23984	-39.17	135.9731	829.882	-0.65332	1.0376	-0.40771	-58.634	55.2263	117.0578	0.19258	0.1542	0.046387	-46.363	52.0509	124.7671	0.25439	-0.21045	-0.072266	-83.766	-92.365	1164.374	-0.6085	1.6403	-0.58037
0.514	-109.541	115.0086	1104.39	-0.75938	1.2148	-0.50469	0.402000000000001	124.5738	946.3528	-0.67217	1.2056	-0.37334	6.463	101.741	363.2683	-0.22334	0.37041	-0.24228	-33.171	132.384	804.0888	-0.63594	0.99982	-0.39648	-68.7439	56.5739	97.07	0.19336	0.16631	0.04873	-52.027	41.7372	110.6388	0.24658	-0.21069	-0.076905	-79.761	-109.777	1183.145	-0.62256	1.6704	-0.59863
0.516	-86.632	134.4979	1095.6748	-0.74053	1.1989	-0.48906	-1.839	122.2393	928.2365	-0.65069	1.1872	-0.37529	0.856999999999999	109.836	418.743	-0.27568	0.43526	-0.24463	-67.1516	146.278	780.98	-0.61836	0.96055	-0.38282	-67.1172	50.9186	94.8593	0.19346	0.17656	0.037109	-52.5236	48.0518	108.2355	0.23779	-0.21191	-0.075195	-73.829	-119.739	1192.013	-0.63672	1.6981	-0.61836
0.518	-56.855	138.033	1092.085	-0.72461	1.1836	-0.47656	1.533	125.2761	904.3202	-0.62822	1.1726	-0.36787	-5.952	107.677	483.512	-0.3418	0.51387	-0.2416	-53.261	155.666	766.678	-0.60156	0.91953	-0.36797	-70.96094	43.0273	88.4074	0.19287	0.19336	0.04248	-77.6017	43.9276	107.4026	0.22607	-0.21387	-0.068848	-76.947	-144.5028	1219.839	-0.6457	1.7223	-0.62861
0.52	-47.699	130.4733	1065.2096	-0.70459	1.1638	-0.4583	33.797	120.5037	877.01219	-0.60547	1.1523	-0.3623	41.0433	103.751	541.0005	-0.41895	0.60742	-0.23975	-63.8098	160.428	739.3879	-0.58057	0.87939	-0.3622	-54.961	45.21231	76.263	0.18965	0.2085	0.035644	-36.916	53.3314	97.1611	0.21777	-0.20801	-0.066895	-61.281	-154.0996	1229.877	-0.65664	1.752	-0.64736
0.522	-27.314	139.6074	1044.4246	-0.68428	1.1443	-0.44307	28.533	133.937	849.4296	-0.59141	1.1359	-0.35743	47.1933	99.151	604.082	-0.50703	0.71631	-0.23232	-39.101	159.1238	710.084	-0.55078	0.8374	-0.34668	-48.317	40.62983	59.043	0.18487	0.21816	0.024903	-50.639	67.2904	93.3527	0.19434	-0.19727	-0.069336	-43.572	-148.593	1235.0724	-0.65098	1.7721	-0.66231
0.524	-21.734	144.921	1000.7252	-0.66241	1.1302	-0.42978	12.753	121.071	824.7988	-0.57549	1.1198	-0.35283	28.898	81.489	676.467	-0.60186	0.83955	-0.23496	-58.86289	155.5027	696.2285	-0.52793	0.79727	-0.33574	-46.763	38.39941	55.8853	0.17588	0.23144	0.01748	-39.854	59.0677	96.2765	0.16968	-0.18261	-0.06958	-43.106	-152.438	1248.82	-0.63574	1.7754	-0.66748
0.526	-17.751	146.4866	977.66732	-0.64034	1.1101	-0.4167	1.511	110.6432	805.497	-0.55987	1.101	-0.35205	12.669	59.047	744.349	-0.70654	0.97549	-0.24863	-55.5532	131.245	682.6189	-0.50342	0.7583	-0.32647	-22.862	49.70783	62.99285	0.16641	0.25234	0.016407	-50.1503	32.1977	80.147283	0.14941	-0.1626	-0.05957	-38.236	-149.875	1285.90289	-0.61367	1.7762	-0.67598
0.528	6.34	149.021	942.3291	-0.61621	1.0869	-0.40137	-4.14400000000001	127.3923	778.442	-0.54111	1.0788	-0.34521	16.587	54.997	821.518	-0.81006	1.1152	-0.26709	-57.24061	129.082	652.0552	-0.47685	0.72002	-0.31944	-30.926	46.4752	58.9447	0.15332	0.26172	0.0048828	-16.227	31.0878	76.5522	0.1167	-0.13672	-0.067383	-40.844	-136.456	1313.243	-0.5832	1.7672	-0.67891
0.53	8.846	163.04	911.16026	-0.5962	1.0683	-0.38144	-13.81	136.228	764.5024	-0.52051	1.0566	-0.33887	-7.432	35.9938	890.7662	-0.90381	1.2485	-0.29834	-31.852	139.1453	623.119	-0.45254	0.68574	-0.31113	-30.383	50.509	52.9341	0.14307	0.28691	0.0006836	-30.767	38.3876	76.4502	0.10693	-0.12109	-0.076172	-29.248	-108.3336	1326.617	-0.55118	1.7484	-0.67891
0.532	-5.265	168.76	898.2435	-0.57314	1.0473	-0.36406	-28.616	126.681	745.1859	-0.5041	1.0291	-0.33193	-10.236	12.0792	946.037	-0.98389	1.3665	-0.33838	-34.618	149.9256	615.2312	-0.42676	0.64844	-0.30273	-20.104	56.829	59.2193	0.12588	0.30078	-0.0022461	-6.956	32.2972	64.8607	0.081055	-0.09375	-0.070801	-45.699	-92.8991	1343.652	-0.52949	1.7176	-0.67617
0.534	-22.439	159.482	892.2397	-0.54658	1.0222	-0.35547	-31.057	127.8563	726.6084	-0.48242	1.002	-0.32852	4.968	-25.7109	955.533	-1.0352	1.4691	-0.38799	-36.872	136.9844	599.3624	-0.40225	0.61006	-0.29091	-2.902	55.112	54.549	0.11299	0.31562	-0.0088867	-9.112	34.6279	60.8278	0.055176	-0.067383	-0.068359	-43.125	-77.923	1331.6435	-0.52246	1.6895	-0.67676
0.536	-28.084	167.764	861.7862	-0.52266	0.99375	-0.33477	-30.354	141.088	720.5614	-0.46211	0.96953	-0.31953	-27.752	-39.91689	960.964	-1.0665	1.5284	-0.41689	-42.225	142.262	580.5544	-0.36895	0.56845	-0.2833	-8.469	41.0687	44.4372	0.096094	0.33095	-0.019629	25.358	46.132	49.493	0.044922	-0.05127	-0.066895	-47.784	-60.51	1337.958	-0.52637	1.6683	-0.66563
0.538	-43.147	167.6061	840.7393	-0.49756	0.96631	-0.31787	-31.88	135.2384	695.796	-0.44043	0.93887	-0.31328	-45.078	-55.9334	953.949	-1.0505	1.5304	-0.43642	-33.6	158.667	545.9691	-0.34082	0.52627	-0.27549	7.59	24.3528	39.2403	0.088867	0.33789	-0.029785	-0.0559999999999974	33.5899	40.0364	0.015625	-0.0097656	-0.068359	-48.75	-47.051	1326.117	-0.55185	1.6569	-0.66846
0.54	-34.609	155.6131	807.7871	-0.47393	0.93408	-0.3044	-42.3104	120.4153	679.3158	-0.4165	0.90479	-0.31006	-42.726	-72.9538	945.744	-1.0127	1.4922	-0.4502	-31.8159	151.975	521.779	-0.30254	0.48672	-0.26758	-1.31	24.5611	13.095	0.075098	0.35381	-0.040332	13.901	23.8856	43.849258	-0.0046387	0.014893	-0.064453	-99.171	-54.125	1340.003	-0.58741	1.6534	-0.66846
0.542	-31.147	149.3646	767.193	-0.45244	0.90205	-0.28838	-25.911	120.274	648.6356	-0.39678	0.87198	-0.30293	-49.354	-85.134	923.327	-0.96035	1.4287	-0.45645	-6.002	148.786	493.5511	-0.26855	0.44531	-0.25293	-3.401	35.7632	24.9949	0.06416	0.35732	-0.037793	12.128	30.5881	41.76906	-0.023926	0.039063	-0.056641	-78.397	-64.9702	1337.784	-0.63418	1.6598	-0.67422
0.544	-32.624	158.1727	748.788	-0.43174	0.87197	-0.27588	-54.376	122.157	636.59328	-0.37559	0.83887	-0.29951	-67.8219	-87.923	912.707	-0.9168	1.3551	-0.46172	3.54900000000001	155.367	474.9008	-0.23642	0.40527	-0.24512	-2.61	31.8556	33.27803	0.051269	0.35889	-0.045996	13.335	47.8763	35.6815	-0.05127	0.078125	-0.052246	-103.038	-61.8525	1345.456	-0.68262	1.6782	-0.68506
0.546	-49.705	159.0237	732.9946	-0.40918	0.84072	-0.25752	-61.2697	116.1	607.0007	-0.35528	0.80644	-0.29443	-72.7856	-92.215	872.7915	-0.88046	1.2789	-0.47852	-3.772	149.705	446.633	-0.20127	0.36504	-0.23828	1.82	34.3273	43.5055	0.038086	0.35567	-0.046973	2.396	29.66941	24.6671	-0.060059	0.097656	-0.04834	-132.022	-60.0829	1359.353	-0.74219	1.7006	-0.70078
0.548	-58.849	156.7845	713.8403	-0.38477	0.80762	-0.24268	-61.9355	122.8624	577.44	-0.33213	0.77363	-0.28721	-74.782	-76.297	860.858	-0.84629	1.216	-0.49434	20.637	135.7073	425.1196	-0.17393	0.32558	-0.22617	-8.03599999999999	37.027	28.6667	0.030273	0.34766	-0.048828	-7.293	27.2857	20.196	-0.084473	0.12793	-0.043945	-153.53113	-59.73	1394.2291	-0.79707	1.7273	-0.71543
0.55	-65.036	148.5308	701.533	-0.36182	0.77383	-0.23193	-55.8253	141.942	560.6201	-0.31006	0.74365	-0.28027	-64.674	-46.1405	859.615	-0.80713	1.1665	-0.52295	24.176	132.6274	415.7369	-0.13994	0.29512	-0.22325	-14.349	37.245	33.99659	0.023047	0.33955	-0.045313	-6.999	40.7371	19.5774	-0.10254	0.14575	-0.030273	-120.707	-45.985	1412.7485	-0.8455	1.7508	-0.72637
0.552	-81.2248	155.308	672.6565	-0.33476	0.73789	-0.21836	-69.8957	145.661	544.8355	-0.28809	0.71055	-0.27773	-62.204	-44.5008	880.2686	-0.76407	1.118	-0.54063	30.061	130.4659	406.512	-0.11377	0.25244	-0.2041	-33.142	32.9426	34.2559	0.015722	0.32578	-0.043945	-19.59	37.1588	35.50456	-0.1167	0.16943	-0.033691	-135.0462	-46.9621	1443.565	-0.88379	1.7734	-0.73906
0.554	-73.7574	147.169	644.5544	-0.31094	0.70235	-0.20351	-65.3004	139.253	517.7087	-0.26924	0.67979	-0.26963	-67.4961	-33.223	890.0041	-0.7206	1.074	-0.55596	-6.652	128.0961	391.893	-0.083692	0.21758	-0.19873	-29.57	46.31547	47.6355	0.0098633	0.31289	-0.038086	-15.889	33.7949	34.2192	-0.13135	0.19092	-0.029297	-149.5554	-62.2431	1446.4218	-0.91748	1.7954	-0.75146
0.556	-77.2433	146.5237	623.512	-0.2835	0.66348	-0.19229	-36.78	151.914	491.948	-0.24658	0.64736	-0.26455	-35.4547	-28.3	911.9298	-0.68037	1.0212	-0.57041	19.047	126.8679	375.8488	-0.057324	0.18271	-0.19492	-24.49	40.5699	38.8755	0.0082031	0.29775	-0.033887	-24.657	36.556	27.73938	-0.13281	0.19434	-0.026367	-143.8007	-81.952	1479.0625	-0.94072	1.8067	-0.75966
0.558	-68.725	153.7154	588.8198	-0.2583	0.62305	-0.17822	-39.5324	152.799	470.107	-0.22422	0.61416	-0.25615	-40.5937	-26.061	929.921	-0.65635	0.9624	-0.5792	5.841	139.378	337.8489	-0.024121	0.14287	-0.18711	-36.868	32.0109	28.63173	0.01123	0.28662	-0.024902	-38.253	43.524	33.2351	-0.13916	0.20947	-0.023438	-138.5521	-72.905	1477.7105	-0.96123	1.8263	-0.7669
0.56	-93.4621	157.4644	553.5465	-0.22891	0.58408	-0.16387	-12.918	137.9	460.781	-0.20264	0.58154	-0.25098	-44.4665	-43.465	961.199	-0.62988	0.9082	-0.58301	4.475	136.034	319.9163	0.004004	0.11025	-0.1793	-59.4917	27.9747	27.4329	0.011621	0.2752	-0.016699	-60.3802	30.0651	25.5338	-0.13672	0.21435	-0.01709	-150.33299	-58.97	1496.636	-0.98115	1.8485	-0.77275
0.562	-61.6812	145.717	521.9721	-0.20029	0.54151	-0.15283	-2.484	136.544	452.9629	-0.1792	0.54678	-0.24424	-26.322	-63.488	994.6787	-0.60761	0.85381	-0.58643	-33.267	115.3957	291.5156	0.02832	0.070313	-0.17236	-60.3297	35.7105	28.882	0.009082	0.25752	-0.017871	-60.0431	20.3282	22.1304	-0.1416	0.21094	-0.017578	-125.589	-51.1869	1480.9738	-1.005	1.8727	-0.77901
0.564	-68.54408	142.0595	499.8306	-0.17139	0.5001	-0.13799	16.064	143.4772	433.59984	-0.15645	0.51387	-0.23594	18.396	-85.442	997.3083	-0.57929	0.81797	-0.58515	-18.258	105.5535	283.2532	0.054785	0.036718	-0.15703	-53.682	45.76877	30.5995	0.019629	0.24775	-0.0022461	-46.1	26.3157	21.1091	-0.13525	0.19727	-0.013184	-114.671	-40.6239	1471.1367	-1.0293	1.8984	-0.79004
0.566	-59.931	151.9081	467.7535	-0.14248	0.46025	-0.13194	4.048	140.593	416.54305	-0.1334	0.4834	-0.24024	-0.419	-126.434	1022.806	-0.56601	0.79297	-0.58594	-33.182	115.2192	266.8421	0.07793	0.0061523	-0.14863	-51.61	43.6102	27.9906	0.022852	0.23193	0.0053711	-54.354	19.05	24.3827	-0.14014	0.18506	-0.014648	-125.561	-15.555	1464.8645	-1.0492	1.9172	-0.79356
0.568	-49.917	145.683	463.7325	-0.11816	0.42139	-0.125	12.772	120.3298	398.8669	-0.11348	0.45401	-0.22676	7.732	-170.794	1029.4279	-0.56035	0.78848	-0.59629	-38.0189	98.2071	268.0297	0.10137	-0.025879	-0.14121	-62.8133	38.92506	36.8307	0.03418	0.21826	0.014648	-76.3323	22.3439	24.6295	-0.12695	0.15527	-0.01123	-110.7125	-4.8879	1469.879	-1.0652	1.9293	-0.79414
0.57	-18.945	145.207	443.5642	-0.085254	0.37402	-0.11621	9.503	121.4377	383.839	-0.095703	0.42383	-0.21826	24.21	-196.542	1052.158	-0.56445	0.79102	-0.60547	-41.4547	99.668	251.5332	0.11904	-0.058398	-0.13467	-65.16923	33.142	38.727	0.046777	0.20117	0.022852	-56.6115	29.8136	33.5719	-0.1206	0.13183	-0.0090332	-90.23	10.9103	1483.7172	-1.0824	1.9418	-0.78945
0.572	-14.695	138.8668	433.5333	-0.060058	0.3336	-0.10732	18.707	122.8238	357.4947	-0.076367	0.39356	-0.21338	50.356	-202.459	1062.617	-0.579	0.80108	-0.62432	-28.259	109.48765	230.1807	0.14258	-0.089844	-0.12891	-63.484	24.3712	41.2941	0.056153	0.18242	0.032031	-39.035	44.8588	33.3493	-0.10791	0.10693	-0.0078125	-59.448	29.2145	1472.20682	-1.0993	1.9473	-0.78203
0.574	-11.136	141.2721	392.7325	-0.033106	0.29453	-0.10381	3.846	113.945	342.6897	-0.057618	0.36318	-0.20664	39.18156	-211.868	1099.9061	-0.59297	0.82383	-0.64336	-50.594	120.1064	219.0556	0.15869	-0.12285	-0.12666	-33.933	27.7564141	54.253	0.069043	0.16524	0.037891	-60.124	40.826	42.8098	-0.092285	0.071289	-0.0019531	-62.642	37.403	1466.9677	-1.1084	1.957	-0.76953
0.576	0.655000000000001	114.193	374.9219	-0.0082029	0.25332	-0.095508	22.019	104.0993	327.532	-0.038867	0.33272	-0.20078	72.831	-198.262	1137.1019	-0.59961	0.85391	-0.65391	-59.0919	116.9482	197.0007	0.17344	-0.15674	-0.12246	-45.299	32.736	44.9744	0.078906	0.14824	0.044433	-48.925	41.5581	35.3282	-0.092285	0.054688	-1.3878e-14	-41.545	38.269	1447.737	-1.1187	1.964	-0.76015
0.578	-13.866	110.4465	351.0117	0.019531	0.21191	-0.088867	15.879	104.3945	308.9354	-0.022461	0.30166	-0.19463	51.241	-182.19	1162.02799	-0.6167	0.88682	-0.67139	-53.9056	101.500713	188.1068	0.19297	-0.18525	-0.12285	-28.591	29.4515	40.75672	0.083984	0.13281	0.051758	-31.393	47.474	45.8975	-0.078125	0.027344	0.0014648	-46.629	44.683	1452.6624	-1.1282	1.9668	-0.75313
0.58	-2.087	114.8478	332.15702	0.047949	0.16797	-0.085937	9.671	100.9107	292.7624	-0.0024414	0.27002	-0.18994	33.76905	-148.2966	1181.0011	-0.63135	0.92578	-0.68359	-52.856	96.0253	187.4556	0.20977	-0.21445	-0.12041	-40.034	24.6816	52.369	0.093359	0.11211	0.054492	-25.86	47.572	26.7479	-0.065918	0.0046387	0.0061036	-38.749	50.91	1457.4142	-1.134	1.9734	-0.7418
0.582	1.007	109.5275	307.3085	0.07627	0.12119	-0.079981	2.875	90.5418	292.2415	0.016309	0.23945	-0.18487	12.5381	-118.163	1216.77	-0.65576	0.97764	-0.70244	-71.0826	82.7115	171.50008	0.22656	-0.24609	-0.11719	-18.603	17.6728	52.815	0.097266	0.10176	0.057324	-34.3511	26.9771	35.4852	-0.054688	-0.013184	0.0097656	-66.923	28.667	1459.711	-1.1339	1.9745	-0.73174
0.584	13.085	90.4933	295.3306	0.104	0.084472	-0.071386	9.623	102.5709	281.9763	0.03545	0.21026	-0.17998	55.1152	-96.419	1217.9536	-0.68701	1.0282	-0.71592	-60.53797	68.4651	172.0101	0.23955	-0.2623	-0.11553	-14.411	15.7093	61.0816	0.10078	0.089258	0.056543	-13.99	26.1210889	32.9906	-0.036621	-0.035156	0.0087891	-46.178	12.1325	1446.368	-1.1323	1.979	-0.72217
0.586	-8.798	103.6204	284.098911	0.12529	0.042285	-0.062597	-15.302	115.1298	272.2873	0.053027	0.18018	-0.17334	21.0277	-79.387	1226.1285	-0.71905	1.0923	-0.74365	-33.721	85.0832	151.3276	0.24854	-0.27881	-0.11397	5.968	16.6174	64.6755	0.10567	0.083106	0.057813	0.597999999999999	28.65722	20.466	-0.023438	-0.045898	0.0078125	-56.545	27.5924	1436.001	-1.1332	1.9808	-0.71289
0.588	-0.027000000000001	92.1916	271.2014	0.14746	0.0014648	-0.059082	-30.654	114.84	255.7347	0.070996	0.1457	-0.16904	13.595	-76.533	1222.92	-0.74199	1.1541	-0.77988	-49.558	80.532	141.3548	0.25674	-0.29365	-0.10849	-10.969	10.4027	72.9079	0.10986	0.07666	0.055176	5.356	29.84052	14.2212	-0.0024414	-0.057129	0.0039063	-60.413	29.0187	1419.7102	-1.1287	1.982	-0.70254
0.59	-11.934	94.1388	258.2534	0.16152	-0.03457	-0.052344	-32.81	111.3248	242.4129	0.083984	0.10986	-0.1665	0.814	-94.273	1225.994	-0.75586	1.2129	-0.81641	-52.556	74.526	135.7551	0.26904	-0.30986	-0.10117	16.444	5.3298	66.523	0.11015	0.082226	0.057227	5.735	26.1277	20.48387	0.0092776	-0.06836	0.0031738	-80.008	22.849	1390.4693	-1.119	1.9762	-0.69121
0.592	-4.248	102.3327	238.4735	0.17881	-0.069922	-0.045312	-30.527	116.9135	219.4114	0.10391	0.08086	-0.16328	8.8	-117.5292	1251.761	-0.76885	1.2683	-0.84463	-19.654	59.5714	125.037	0.26465	-0.31689	-0.1001	6.588	10.9322	75.048	0.10381	0.09541	0.059472	9.553	39.871	25.1439	0.019043	-0.07666	0.003418	-73.923	27.738	1363.2583	-1.1054	1.9614	-0.67725
0.594	-39.166	97.8682	219.5509	0.19404	-0.09922	-0.039453	-55.182	112.6686	212.9006	0.12168	0.049316	-0.16602	-10.674	-120.788	1266.9671	-0.78379	1.3121	-0.86992	3.781	69.107	123.5412	0.26553	-0.32353	-0.099804	4.129	12.5329	101.0604	0.099902	0.11142	0.056348	19.747	44.17	45.99442	0.016602	-0.063965	0.029785	-97.992	22.63	1348.1991	-1.0967	1.9434	-0.66406
0.596	-26.922	83.4265	201.682	0.20332	-0.1249	-0.037696	-74.286	98.5959	194.8904	0.14199	0.022363	-0.16445	1.266	-135.627	1292.412	-0.80097	1.3558	-0.89336	-14.995	56.853	124.5259	0.26133	-0.3247	-0.099511	0.132000000000005	33.0464	126.2212	0.08916	0.12939	0.056543	7.288	34.8617	45.3471	0.011719	-0.055176	0.036621	-97.97	27.9	1343.1421	-1.0779	1.9248	-0.65
0.598	-45.357	79.4216	185.6245	0.21143	-0.15527	-0.032715	-65.99068	88.8894	173.897	0.16172	-0.005371	-0.16543	13.737	-160.702	1325.9153	-0.82656	1.3942	-0.91641	-8.484	36.9857	114.9662	0.25352	-0.31885	-0.10225	26.837	42.5638	152.6679	0.077148	0.15332	0.052246	8.201	26.4184	47.8769	-0.0019531	-0.042969	-0.0073242	-97.903	35.267	1346.1129	-1.0631	1.9029	-0.63856
0.6	-43.989	87.7135	176.7437	0.22207	-0.17891	-0.026856	-78.7079	95.4575	160.741	0.18018	-0.030762	-0.16406	-30.1523	-159.919	1350.53884	-0.84668	1.4434	-0.94141	8.73	34.8089	107.8318	0.2459	-0.31299	-0.097558	5.01	53.7338	174.3259	0.068848	0.16865	0.045996	0.751999999999995	23.0074	46.8382	-0.0021972	-0.025635	0.0026856	-117.18	73.468475	1324.331	-1.0467	1.87	-0.62293
0.602	-72.8742	86.0752	161.4774	0.23213	-0.20459	-0.023047	-60.2437	84.2773	172.0941	0.18926	-0.051758	-0.16123	-46.54874	-145.528	1359.8552	-0.86836	1.4898	-0.96563	-7.45200000000001	51.4561	98.0203	0.23682	-0.31055	-0.095703	-1.445	73.427	193.714	0.064844	0.19141	0.042871	-11.809	9.8605	55.9068	0.0014648	-0.0014648	0.0083008	-129.823	90.976	1306.8975	-1.0343	1.8366	-0.60907
0.604	-61.538	89.3956	148.2516	0.24815	-0.22881	-0.025391	-57.221	79.80224	165.3889	0.19697	-0.07207	-0.16241	-61.524	-152.3955	1389.611	-0.89258	1.5293	-0.98574	4.541	46.4131	87.72308	0.23057	-0.29317	-0.089453	9.938	97.5391	214.4993	0.065625	0.21172	0.035449	-29.772	11.9478	62.66	-0.0029297	0.019043	0.00097656	-146.4975	96.487	1283.1422	-1.0156	1.8027	-0.59668
0.606	-75.09005	89.912	133.501	0.26181	-0.24697	-0.026074	-46.163	85.53257	170.9502	0.20752	-0.089258	-0.16318	-46.3844	-152.6872	1410.868	-0.91563	1.5711	-0.99942	10.247	52.336	90.124	0.21895	-0.27989	-0.085547	23.145	110.7355	250.55628	0.058203	0.23945	0.026758	-5.367	13.9017	60.2213	-0.0053711	0.036621	-0.0063477	-151.8095	103.756	1244.16947	-0.99915	1.7701	-0.58781
0.608	-77.1814	91.181	117.157	0.27539	-0.26123	-0.024414	-65.0007	83.3345	150.4911	0.21426	-0.10391	-0.16269	-43.829	-149.647	1406.1104	-0.94023	1.5941	-1.0137	-1.486	57.426	74.5671	0.20488	-0.26269	-0.0875	9.419	108.5831	282.281	0.052734	0.26318	0.010254	-23.558	4.1032	77.1575	-0.0092773	0.05957	-0.019043	-166.07	113.1004	1217.9684	-0.97974	1.7341	-0.5782
0.61	-78.1562	71.7728	122.6929	0.2875	-0.28359	-0.023633	-49.641	74.3719	147.9399	0.22852	-0.11963	-0.16406	-24.6692	-144.89	1409.6108	-0.97021	1.6157	-1.0249	-21.292	65.346	72.0898	0.18682	-0.24805	-0.083105	-2.949	94.906	312.5653	0.043262	0.29395	-0.0052734	-36.849	-14.868	79.911	-0.010254	0.08374	-0.019532	-144.0636	98.5451	1194.6592	-0.96297	1.6985	-0.56292
0.612	-64.7499	65.3089	115.011	0.29697	-0.30108	-0.018945	-51.964	74.7083	146.4126	0.23584	-0.12939	-0.16739	-23.3279	-131.4881	1400.436	-1.0014	1.6342	-1.0295	-3.09399999999999	50.77	59.5744	0.17236	-0.23242	-0.072754	-0.665000000000003	92.683	342.9719	0.025098	0.32773	-0.021973	-62.126565	-33.2626	101.0616	-0.013672	0.10547	-0.024414	-143.8129	80.01267	1174.114	-0.93873	1.6576	-0.5545
0.614	-66.8906	55.88	112.438	0.3126	-0.31436	-0.01543	-21.653	80.782	135.365	0.24463	-0.13379	-0.17246	-12.599	-108.1896	1413.2807	-1.0383	1.65	-1.0379	-9.896	56.599	54.5782	0.15088	-0.21387	-0.067285	-22.236	96.164	393.74	0.011816	0.36328	-0.039942	-20.902	-21.8864	102.2924	-0.025879	0.15381	-0.034668	-133.4994	71.0781	1148.464	-0.91553	1.6235	-0.54639
0.616	-46.398	51.074	94.093	0.31846	-0.33057	-0.011035	-24.979	65.75	114.21307	0.25088	-0.14707	-0.17988	-12.59	-84.6462	1399.447	-1.0766	1.6719	-1.0449	-16.843	55.1957	42.3	0.12022	-0.17451	-0.064648	-20.372	99.518	463.866	-0.007324	0.40264	-0.056836	-47.7767	-28.3578	116.494	-0.038574	0.17432	-0.036621	-132.9204	58.928	1121.948	-0.89133	1.581	-0.53834
0.618	-42.831	43.3627	91.5544	0.32129	-0.33691	-0.0073242	-11.442	40.9877	116.54016	0.2626	-0.14678	-0.19023	19.742	-91.6014	1403.688	-1.1059	1.6967	-1.0522	-32.26	30.3963	46.303	0.099122	-0.13506	-0.072071	-30.145	91.1261	518.604	-0.034668	0.44971	-0.085449	-48.936	-37.8048	141.7526	-0.072754	0.23633	-0.050293	-115.369	60.444	1097.297	-0.86809	1.5417	-0.52541
0.62	-51.817	60.0228	98.7496	0.32715	-0.34121	-0.0076172	-6.898	59.5556	103.2233	0.27051	-0.15283	-0.19092	16.9691	-75.092	1408.178	-1.1294	1.7261	-1.0581	-16.621	28.7012	51.1576	0.080664	-0.10361	-0.069824	-22.046	78.5181	570.1581	-0.061817	0.50019	-0.10674	-49.5483	-31.01175	159.623	-0.10815	0.28638	-0.058106	-97.552	73.0321	1089.5544	-0.84253	1.5013	-0.51735
0.622	-29.207	68.2872	97.456	0.32823	-0.3456	-0.0054688	-0.0210000000000008	66.573	105.2426	0.27793	-0.15645	-0.19463	43.6034	-70.675	1416.069	-1.148	1.7494	-1.0635	-38.254	48.39439	46.4455	0.064453	-0.079102	-0.060059	-57.359	62.6357	637.493	-0.095997	0.5539	-0.13457	-33.547	-14.2645	179.039	-0.1543	0.34521	-0.066895	-95.095	90.476	1094.102	-0.81906	1.457	-0.50439
0.624	-17.955	67.039	77.034	0.32627	-0.33819	0.0015625	7.229	55.5678	102.1512	0.27871	-0.15635	-0.19658	40.202	-78.53	1436.965	-1.1583	1.7689	-1.0718	-51.554	44.3881	45.8494	0.04707	-0.051953	-0.051465	-35.882	64.0588	704.691	-0.13779	0.60938	-0.16817	-52.3563	-6.0174	223.202	-0.21582	0.43701	-0.083496	-78.056	92.519	1078.84	-0.79395	1.416	-0.49365
0.626	-22.067	53.401	80.8422	0.32256	-0.32793	0.0063476	17.057	60.637	97.32449	0.2748	-0.15517	-0.19932	25.4505	-69.72	1441.214	-1.1626	1.777	-1.0698	-64.789	37.1045	45.7886	0.026562	-0.028614	-0.047657	-35.785	59.8827	754.399	-0.18262	0.67618	-0.19375	-30.06	12.9381	268.7625	-0.24316	0.47754	-0.095703	-71.088	92.2954	1048.508	-0.76741	1.3782	-0.48192
0.628	-14.807	49.982	76.2444	0.31445	-0.31348	0.01416	14.264	50.3278	89.5532	0.2707	-0.14746	-0.20215	37.39923	-72.076	1427.5078	-1.1696	1.7776	-1.0684	-59.165	36.893	31.3187	0.0042969	0.0030274	-0.041016	3.541	45.806	782.5099	-0.22119	0.7417	-0.21729	-20.654	49.234747	317.0542	-0.31934	0.5957	-0.097168	-59.632	105.34746	998.39742	-0.7368	1.342	-0.47243
0.63	2.427	44.9702	71.752	0.30185	-0.30088	0.017578	1.152	53.1067	74.399	0.25928	-0.1377	-0.20117	45.0344	-72.478	1448.5244	-1.1738	1.7695	-1.0605	-64.9297	41.436	26.651	-0.011231	0.027637	-0.044824	-13.8749	31.9441	790.8428	-0.26709	0.79873	-0.24697	-8.354	68.5786	364.0873	-0.38159	0.69409	-0.11108	-54.413	116.2704	975.7734	-0.70773	1.3003	-0.4602
0.632	1.424	44.2216	52.092	0.28448	-0.28223	0.020117	-1.214	46.456	79.385	0.24961	-0.12598	-0.20869	26.261	-77.1885	1461.9129	-1.1798	1.7631	-1.0572	-74.7936	27.0104	26.809	-0.019531	0.045898	-0.048828	-11.973	8.6973	814.931	-0.31153	0.85195	-0.27324	-1.8	74.30147	412.2669	-0.44727	0.79834	-0.12549	-38.378	117.5408	936.4647	-0.6769	1.2564	-0.44829
0.634	8.083	43.3277	53.6755	0.26182	-0.25801	0.031055	-0.959000000000003	61.8724	74.8641	0.24248	-0.10957	-0.21133	44.4103	-78.118	1490.04	-1.1816	1.7546	-1.0484	-51.822	20.3898	33.314	-0.033984	0.067773	-0.049219	-15.03	-5.96011	820.769	-0.36348	0.89414	-0.29395	23.212	91.7563	463.236	-0.54346	0.94287	-0.14795	-24.957	121.993	904.4847	-0.646	1.2134	-0.43701
0.636	20.908	44.6964	36.6938	0.23965	-0.23867	0.038281	-3.018	57.7101	70.0368	0.22725	-0.085743	-0.20937	59.786	-83.9447	1485.96237	-1.1762	1.7422	-1.0414	-60.14	25.0886	30.251	-0.052734	0.09287	-0.045117	0.719000000000001	-15.5163	819.918	-0.40547	0.92871	-0.31982	27.9302	106.8655	526.0225	-0.58545	1.0132	-0.17041	-22.534	128.687	862.892	-0.60735	1.1619	-0.42192
0.638	2.085	39.122	39.6471	0.20752	-0.20068	0.035645	-22.596	53.5924	68.04803	0.20733	-0.061719	-0.2081	43.741	-68.022	1489.534	-1.1752	1.7252	-1.0357	-43.754	26.4347	24.0646	-0.06836	0.11631	-0.041602	22.9169	-30.52	789.85	-0.44775	0.95166	-0.35156	18.159	90.403	590.099	-0.66113	1.125	-0.21094	-20.121	136.107	851.2562	-0.57704	1.1131	-0.40707
0.64	-8.449	46.839	47.2067	0.17344	-0.15205	0.030859	-25.59	44.6838	71.9999	0.18506	-0.030762	-0.21143	34.972	-66.038	1488.709	-1.1704	1.7153	-1.0308	-54.735	24.86552	23.9014	-0.077735	0.13555	-0.044433	54	-23.3183	769.898	-0.48194	0.97744	-0.36182	38.6952	82.058	643.3825	-0.69873	1.1906	-0.24194	-22.696	134.705	828.4762	-0.54254	1.0621	-0.39756
0.642	4.11	55.065	50.9868	0.15489	-0.1169	0.030859	-31.083	60.952	66.8774	0.16319	-0.0069337	-0.21231	53.2374	-55.3784	1480.5391	-1.154	1.702	-1.0243	-20.172	40.0353	26.3177	-0.07373	0.14551	-0.052734	30.591	-32.8834	743.1873	-0.51738	0.99678	-0.37177	34.4989	82.709	701.0079	-0.71631	1.2329	-0.27539	-29.538	142.924	810.3802	-0.51306	1.01	-0.38044
0.644	-0.593999999999994	57.5391	45.2471	0.13145	-0.084863	0.033203	-40.445	52.7399	69.90245	0.13936	0.021094	-0.21026	20.715	-36.7734	1463.1344	-1.1433	1.6812	-1.0109	-29.363	54.112	23.9847	-0.069434	0.15351	-0.057617	20.7168	-34.789	726.968	-0.54551	1.0148	-0.37412	26.1048	72.872	763.2589	-0.71436	1.2427	-0.31006	-35.703	145.504	777.3621	-0.47998	0.96338	-0.36768
0.646	-24.867	51.621	46.8233	0.10274	-0.048535	0.033496	-53.1655	45.82249	64.70484	0.1128	0.055078	-0.20205	-0.296999999999999	-12.121	1467.4109	-1.1316	1.6672	-1.0063	-19.737	46.604	28.6915	-0.062793	0.15332	-0.060742	37.38114	-41.575	711.091	-0.56953	1.0289	-0.3752	-0.331999999999997	39.738	797.73749	-0.70703	1.2383	-0.3252	-43.636	141.896	754.629	-0.45596	0.91009	-0.35657
0.648	-27.252	33.858	34.666	0.071289	-0.015625	0.036133	-50.926	35.5915	58.5181	0.082227	0.079394	-0.19697	-1.836	-10.915	1465.1074	-1.1249	1.6462	-0.99834	-21.566	37.398	30.5952	-0.063184	0.15683	-0.058398	50.1816	-21.2298	711.8629	-0.58936	1.0454	-0.38232	18.15	25.4995	828.356	-0.67432	1.2192	-0.354	-67.521	148.658	725.626	-0.42858	0.86139	-0.34294
0.65	-42.303	29.1621	28.576	0.044434	0.020899	0.038379	-66.078	33.3428	40.072	0.054199	0.10938	-0.19043	-3.971	11.0396	1444.2056	-1.1147	1.6333	-0.9917	4.145	30.9046	29.9622	-0.058691	0.16113	-0.054101	39.1778	-25.559	728.17267	-0.59834	1.0638	-0.39111	5.786	1.93272	847.4928	-0.66089	1.1916	-0.37378	-60.131	158.8167	702.277	-0.40303	0.81262	-0.33326
0.652	-39.631	20.6372	39.6123	0.013281	0.055762	0.041308	-76.4862	28.322	42.158	0.021484	0.13682	-0.17822	-47.321	21.8191	1444.305	-1.1075	1.6208	-0.98349	-10.988	30.9335	28.824	-0.0625	0.15869	-0.05127	45.6072	-21.171	738.7317	-0.59912	1.079	-0.40478	-17.087	-16.2001	867.69	-0.65039	1.1812	-0.39502	-64.435	156.465	674.41497	-0.37332	0.769	-0.32466
0.654	-48.561	19.7094	34.7099	-0.014453	0.092481	0.039356	-63.685	36.14809	44.6731	-0.0041992	0.17051	-0.17363	-38.0685	26.202	1421.55382	-1.0984	1.6101	-0.97266	-1.778	27.0267	30.4522	-0.063965	0.15284	-0.052734	32.099	-8.215	772.5979	-0.59092	1.0965	-0.41455	-42.516	-50.985	866.6691	-0.65576	1.1763	-0.42139	-70.4882	149.782	650.4383	-0.33936	0.72119	-0.31396
0.656	-59.2924	20.4933	35.10375	-0.039746	0.12754	0.038281	-58.5439	43.709	48.8647	-0.032715	0.19785	-0.17637	-37.75538	28.692	1424.9303	-1.0871	1.6012	-0.96445	3.916	36.3384	28.0411	-0.060644	0.14697	-0.051758	5.771	-24.231	789.067	-0.58066	1.1086	-0.4247	-7.233	-67.265	872.813	-0.6582	1.1685	-0.44482	-102.5635	157.4438	630.565	-0.30871	0.67484	-0.3047
0.658	-65.792695	37.078	41.8333	-0.063477	0.15967	0.030273	-54.495	47.0267	44.7959	-0.056836	0.2249	-0.16768	-21.019	35.8595	1416.2516	-1.0773	1.593	-0.95469	10.91	45.407	22.2276	-0.055176	0.1376	-0.053711	-2.623	-60.846	814.08652	-0.56445	1.1196	-0.42773	-34.971	-72.853	866.067	-0.64404	1.1567	-0.4751	-81.0891	162.78613	615.3683	-0.28175	0.63045	-0.29013
0.66	-71.0934	33.2409	45.43481	-0.088672	0.18945	0.030859	-75.3152	33.1981	58.0513	-0.082031	0.25	-0.16504	-34.5895	20.873	1404.18065	-1.0581	1.5786	-0.94678	-14.424	41.178	33.274	-0.051856	0.12637	-0.052148	-18.168	-89.6911	826.5252	-0.54912	1.1297	-0.4294	-37.513	-70.394	870.646	-0.61157	1.1419	-0.49683	-82.44863	159.6794	596.216759	-0.25435	0.58046	-0.28405
0.662	-61.4343	25.0933	51.3879	-0.1043	0.22236	0.02793	-47.614	34.0627	45.0236	-0.10088	0.2749	-0.15908	-3.345	2.2268	1387.11922	-1.0443	1.5635	-0.93574	-6.763	24.547	44.405	-0.04541	0.12109	-0.050293	-21.295	-114.256	835.2316	-0.53516	1.1363	-0.43047	-38.94	-74.693	843.233	-0.5708	1.1157	-0.50732	-68.0397	146.5021	575.8485	-0.23046	0.53889	-0.27714
0.664	-56.736	19.891	42.7803	-0.11875	0.24932	0.022851	-41.77	40.5548	43.754	-0.11924	0.28623	-0.15244	-5.0543	-11.13997	1383.8293	-1.0258	1.5481	-0.92656	-0.491999999999997	27.8533	50.962	-0.040625	0.10596	-0.051953	-22.348	-123.001	830.587	-0.51953	1.1519	-0.42969	-36.567	-61.9869	821.6045	-0.52246	1.0708	-0.51807	-77.2989	143.7168	554.0369	-0.21045	0.50195	-0.27197
0.666	-49.823	19.234	34.4651	-0.13203	0.26631	0.019531	-32.34	41.7222	36.1771	-0.13526	0.29638	-0.15205	-6.2653	-4.388	1362.4579	-1.0008	1.523	-0.91484	-0.305999999999997	38.53162	35.8858	-0.036621	0.099124	-0.054492	-42.641	-141.16	863.267	-0.50703	1.1693	-0.43623	-71.3684	-49.7992	809.5054	-0.50195	1.0469	-0.51855	-62.777	141.8546	522.1147	-0.18823	0.46316	-0.26316
0.668	-60.8773	20.9165	25.24	-0.13623	0.27979	0.02002	-23.478	33.3566	36.7865	-0.14619	0.29853	-0.14561	-23.5806	-7.8862	1340.72949	-0.98028	1.5064	-0.89942	-27.265	28.8037	35.88822	-0.024121	0.086231	-0.05293	-41.63	-153.5	879.8353	-0.49609	1.1885	-0.43848	-71.8763	-32.029	807.7104	-0.47607	1.0161	-0.51514	-75.0757	140.7813	488.8456	-0.16848	0.42446	-0.24706
0.67	-51.732	31.5803	25.44	-0.14609	0.28496	0.018555	-6.98099999999999	42.006	17.6517	-0.15283	0.30225	-0.1416	10.536	5.359	1312.0961061	-0.96143	1.4819	-0.88818	-28.39	23.79361	33.064	-0.022754	0.075	-0.058594	-43.138	-161.967	910.4548	-0.48867	1.2062	-0.44717	-52.67	-34.855	811.723	-0.46558	0.99832	-0.52222	-56.638	158.502	463.7583	-0.14974	0.38974	-0.23961
0.672	-48.346	35.833	23.7713	-0.1457	0.28731	0.021192	-14.097	21.4562	31.41433	-0.16064	0.29902	-0.13799	0.647000000000002	15.9863	1290.79294	-0.9414	1.4627	-0.87285	-32.574	29.0972	41.517	-0.016113	0.063965	-0.060547	-43.939	-170.121	932.5555	-0.48438	1.2223	-0.45528	-57.0315	-35.154	816.68	-0.45264	0.99072	-0.5249	-65.5126	167.344	448.0405	-0.13063	0.35455	-0.2333
0.674	-23.35	34.122	22.5431	-0.14883	0.28027	0.020801	-12.27	21.7602	38.1951	-0.16319	0.29111	-0.13887	8.743	31.6403	1265.6308	-0.92255	1.4408	-0.85771	-55.201	20.1531	50.6232	-0.0088866	0.048145	-0.064356	-66.8991	-141.472	984.4057	-0.48906	1.241	-0.47402	-81.445	-56.5044	826.097	-0.43994	0.99072	-0.52881	-47.356	153.65	431.3631	-0.11475	0.32129	-0.2207
0.676	-22.098	31.702	35.7836	-0.14629	0.27187	0.021289	0.210000000000001	21.08443	44.8689	-0.16279	0.27862	-0.1334	11.9504	41.956	1257.2899	-0.90732	1.4177	-0.84092	-51.958	9.3587	57.8827	-0.0010742	0.031055	-0.077344	-66.15	-121.0628	1011.9244	-0.4918	1.2676	-0.48789	-42.3291	-72.7324	856.024	-0.44287	1.0024	-0.52979	-38.88	142.2009	429.0361	-0.09445	0.29173	-0.21505
0.678	6.05	37.344	40.5304	-0.14258	0.25684	0.02002	24.975	28.6834	49.5368	-0.15928	0.26084	-0.12803	48.6053	61.4	1241.06972	-0.88828	1.3949	-0.82559	-53.9144	19.8755	63.8936	0.0071289	0.020117	-0.078516	-79.2167	-86.635	1036.5705	-0.51123	1.2974	-0.50439	-20.939	-62.798	872.745	-0.43555	1.0313	-0.54883	-12.103	143.9318	401.46413	-0.082435	0.25638	-0.20489
0.68	-22.494	36.7528	43.4138	-0.1374	0.2375	0.018652	4.065	14.6843	52.3721	-0.15137	0.24561	-0.12598	36.9171	60.381	1226.1771	-0.86914	1.3711	-0.80859	-55.04	15.1759	83.1931	0.016211	0.013184	-0.082129	-81.0387	-79.38	1051.3861	-0.53642	1.3274	-0.52178	-2.571	-58.498	908.9661	-0.43725	1.0647	-0.56226	-7.598	132.5403	384.8815	-0.066423	0.22669	-0.19786
0.682	-1.751	28.8064	40.3236	-0.12422	0.21767	0.016895	-5.056	10.52049	63.8727	-0.14756	0.22148	-0.11787	44.0832	69.024	1194.1944	-0.84815	1.344	-0.78623	-83.26609	6.7284	82.1991	0.018555	0.013184	-0.085938	-72.0469	-67.433	1049.7243	-0.57051	1.3649	-0.5332	-19.034	-81.073	940.1033	-0.44531	1.0938	-0.58203	7.388	120.5477	363.458	-0.054301	0.19904	-0.18799
0.684	1.207	20.0342	38.7946	-0.11289	0.19346	0.019239	10.765	12.9192	57.9613	-0.13584	0.19649	-0.11514	76.792	75.062	1174.1228	-0.825	1.3129	-0.76836	-60.061	-6.7582	85.3095	0.016699	0.012402	-0.088575	-70.2988	-72.788	1054.004	-0.60684	1.4012	-0.54922	-1.96	-107.6044	947.8012	-0.4458	1.1216	-0.60498	16.819	116.4351	340.6639	-0.038086	0.17236	-0.18555
0.686	16.49	19.9341	19.2686	-0.093359	0.16426	0.013672	-2.679	7.9554	66.0904	-0.13154	0.17422	-0.10771	64.641	82.358	1152.286	-0.80781	1.2832	-0.75351	-48.825	-15.8168	89.619	0.0051758	0.016894	-0.095899	-77.1489	-82.744	1088.549	-0.64121	1.4355	-0.5752	-0.914000000000001	-122.9129	971.0482	-0.45898	1.1289	-0.61914	21.314	119.3231	320.7811	-0.026365	0.14814	-0.1749
0.688	0.196000000000002	5.4173	11.5811	-0.080078	0.13721	0.0097656	-11.708	2.1648	73.5335	-0.11924	0.14648	-0.10703	39.1443	79.4627	1129.2211	-0.78242	1.2515	-0.73614	-42.172	-30.428	120.93758	-0.0014648	0.019238	-0.10489	-60.081	-103.66	1108.8976	-0.67139	1.479	-0.59131	8.736	-149.171	984.7813	-0.49365	1.1646	-0.62451	18.248	99.27026	319.1924	-0.014448	0.1205	-0.16865
0.69	15.917	15.4555	13.976	-0.0625	0.10615	0.0068359	-30.269	3.1762	86.5237	-0.1123	0.11816	-0.10449	25.335	73.9943	1115.6985	-0.76123	1.2192	-0.72217	-46.5749	-47.116	131.7156	-0.010351	0.024023	-0.11806	-45.723	-121.366265	1126.4967	-0.7001	1.5202	-0.60889	14.695	-177.945	1037.9534	-0.48096	1.1919	-0.68408	2.728	93.9643	292.5776	-0.0003881	0.097065	-0.15927
0.692	-3.37	25.7854	23.0939	-0.042383	0.0792	0.0086914	-21.523	11.78851	98.899	-0.10049	0.098731	-0.10098	43.0177	73.6688	1103.0128	-0.73926	1.1838	-0.70566	-38.161	-32.7583	156.704	-0.015137	0.03125	-0.12793	-30.228	-133.6668	1144.7447	-0.73213	1.5684	-0.62266	39.981	-164.492	1057.6245	-0.47656	1.1997	-0.70068	3.894	92.1593	287.8453	0.012502	0.073435	-0.15244
0.694	-5.682	40.0754	33.2312	-0.025977	0.050293	0.0086914	-54.7197	1.178	122.448	-0.092871	0.074609	-0.088184	-8.716	83.9214	1086.0187	-0.71494	1.1491	-0.68506	-33.309	8.67854	186.686	-0.020898	0.037402	-0.14219	-19.979	-147.981	1155.8322	-0.7626	1.6231	-0.63281	21.367	-144.0099	1067.0177	-0.4707	1.2407	-0.72998	-11.598	98.4982	266.8901	0.024902	0.053223	-0.15283
0.696	-12.12	31.3232	41.8775	-0.014258	0.024902	0.0098633	-38.12	6.9349	153.1979	-0.086621	0.057422	-0.088574	-14.467	77.52	1059.9114	-0.69424	1.1175	-0.66358	-35.121	16.9084	218.443	-0.017676	0.045312	-0.15059	-22.83	-154.2	1175.1634	-0.78867	1.6633	-0.63906	23.355	-139.655767	1064.2861	-0.48511	1.2708	-0.75513	-6.84399999999999	101.1744	263.4222	0.034667	0.031349	-0.1456
0.698	-9.378	35.0296	35.6718	0.0014648	0.0014648	0.0097656	-45.258	29.395	170.4909	-0.084961	0.050098	-0.084961	-17.021	73.1895	1045.3632	-0.67334	1.0825	-0.64639	-24.328	34.9081	254.078	-0.021582	0.060547	-0.16192	-15.364	-143.5819	1192.345	-0.80322	1.6997	-0.64404	19.907	-129.703	1100.6888	-0.50879	1.3032	-0.7915	-22.436	103.8505	229.5876	0.045409	0.012795	-0.1417
0.7	-32.081	29.17992	33.7893	0.012207	-0.022461	0.0084961	-30.881	38.144	180.9625	-0.087402	0.038086	-0.082031	-23.634	80.4503	1026.8107	-0.65039	1.0547	-0.62695	11.403	56.67591	305.585	-0.027832	0.081641	-0.17285	-41.154	-143.1526	1223.0982	-0.81055	1.7242	-0.64766	50.5419	-106.639	1131.1562	-0.53271	1.356	-0.83643	-18.207	95.311	211.6881	0.057519	-0.0067373	-0.13389
0.702	-44.625	27.7593	29.7288	0.022949	-0.042774	0.0081055	-68.6793	59.0113	210.45	-0.089355	0.03252	-0.079785	-46.2657	84.105	1008.92434	-0.62461	1.0192	-0.61406	21.961	70.22475	365.2923	-0.041016	0.11865	-0.18066	-7.77	-144.6255	1248.6806	-0.80684	1.7438	-0.64531	17.09	-105.27	1174.2676	-0.54688	1.377	-0.8584	-42.989	80.0841	202.9812	0.070898	-0.025781	-0.13056
0.704	-33.979	18.7396	41.143	0.033496	-0.059961	0.0057617	-55.16	80.3374	249.547	-0.097265	0.034961	-0.077442	-12.655	77.045	996.2095	-0.60244	0.98603	-0.59111	12.4963	88.6096	442.37477	-0.063379	0.15185	-0.19141	-34.631	-137.5066	1253.481	-0.79512	1.7516	-0.64531	5.43	-113.223	1194.6611	-0.56348	1.4224	-0.89014	-32.77	67.843	206.8534	0.081055	-0.045898	-0.13037
0.706	-48.915	23.1893	41.55	0.044629	-0.076172	9.7656e-05	-64.0925	99.6891	295.0347	-0.10195	0.031836	-0.079394	-22.741	92.9847	973.39168	-0.57862	0.95439	-0.57158	30.0356	104.686	513.2306	-0.091503	0.20059	-0.20195	-15.871	-124.1064	1274.264	-0.78594	1.7496	-0.6417	5.62	-117.662	1201.5197	-0.5857	1.4622	-0.91187	-56.1317	84.3756	193.8755	0.09375	-0.068555	-0.12724
0.708	-54.744	2.5973	40.0318	0.053711	-0.087402	-0.0024414	-46.116	99.9156	346.6766	-0.10254	0.035449	-0.082422	-47.6837	106.6353	948.179614	-0.55752	0.92236	-0.55693	44.3586	111.777	565.54	-0.12744	0.25644	-0.20977	-32.124	-116.1446	1263.456	-0.78662	1.7427	-0.64307	-7.163	-119.129	1210.942	-0.62061	1.5005	-0.92139	-47.263	73.8616	186.5665	0.10547	-0.083106	-0.12178
0.71	-59.5152	-0.61182	48.655	0.064942	-0.085254	-0.00048832	-55.3025	93.70373	400.426	-0.10498	0.037598	-0.083984	-61.087	106.73167	929.489654	-0.53516	0.89355	-0.52734	35.6987	104.544	625.044	-0.16983	0.32276	-0.21855	-15.032	-107.2953	1268.7521	-0.7916	1.7254	-0.64023	-23.864	-137.8016	1225.96269	-0.68311	1.5493	-0.95068	-72.308	69.7932	174.5176	0.11718	-0.10693	-0.11748
0.712	-54.7112	-2.7599	79.591	0.064062	-0.078711	0.002539	-28.444	107.6255	452.9414	-0.10859	0.052929	-0.080469	-41.287	112.5135	897.46523	-0.51201	0.85967	-0.5167	40.63203	85.37	707.131	-0.22021	0.39502	-0.22412	-39.216	-85.557	1266.9196	-0.80312	1.716	-0.64336	-25.325	-138.5824	1238.8874	-0.71436	1.5864	-0.9624	-62.966	70.18404	168.568444	0.13164	-0.12578	-0.12139
0.714	-67.5919	4.416	88.5682	0.051953	-0.061133	0.008789	-45.3667	113.459	499.365	-0.1207	0.068164	-0.080957	-61.92983	128.0544	861.3016	-0.49062	0.8332	-0.49668	51.5607	82.435	787.561	-0.27998	0.48896	-0.22187	-28.724	-84.811	1268.081	-0.82656	1.7144	-0.64336	-45.686	-134.8338	1261.3311	-0.78174	1.6587	-0.99561	-74.23031	72.7777	140.0749	0.14355	-0.14063	-0.11865
0.716	-47.552	-4.5289	101.82873	0.027344	-0.036231	0.0076172	-39.6693	106.761	555.413	-0.13945	0.090039	-0.079004	-59.5932	131.7535	828.221	-0.46875	0.80508	-0.47636	26.5002	65.904	861.343	-0.35156	0.5959	-0.21983	-43.158	-97.1484	1286.042	-0.8499	1.7136	-0.65479	-62.52636	-150.5458	1281.9977	-0.84082	1.7017	-1.0122	-72.7408	66.916	124.2426	0.15127	-0.15381	-0.12041
0.718	-47.2409	-20.9942	117.1834	0.0029297	-0.010254	0.0014648	-19.291	92.338	618.083	-0.16758	0.11914	-0.086621	-44.3278	118.0324	791.877	-0.44355	0.77851	-0.45937	-8.327	25.36	906.8556	-0.43633	0.71543	-0.2249	-42.79	-101.2619	1287.601	-0.87451	1.7192	-0.66357	-76.501	-169.278	1301.3843	-0.89844	1.7344	-1.0273	-87.5754	54.2273	127.9788	0.1583	-0.16338	-0.11748
0.72	-37.032	-42.0282	146.2982	-0.021094	0.01748	-0.010351	4.555	85.0698	660.9265	-0.19678	0.16113	-0.095215	-35.091	129.101	758.788	-0.42578	0.75293	-0.43945	-1.707	-8.0547	929.6023	-0.52637	0.85097	-0.23887	-84.637	-99.6593	1299.832	-0.89678	1.7284	-0.67207	-70.607294	-168.402	1329.6777	-0.96826	1.7739	-1.0435	-75.2896	55.04381	116.693	0.16221	-0.17158	-0.11748
0.722	-48.7491	-46.947	153.1238	-0.03711	0.045606	-0.019824	-5.277	71.6861	705.141	-0.23525	0.20302	-0.10557	-48.7445	138.7401	764.981	-0.40528	0.72315	-0.4207	-4.431	-30.7867	925.5243	-0.61523	0.99219	-0.25977	-97.093	-77.716	1312.797	-0.92022	1.7351	-0.68232	-57.0277	-152.532	1350.3342	-0.99951	1.7866	-1.0522	-57.581	40.0575	110.801	0.16396	-0.18183	-0.11612
0.724	-13.737	-38.766	181.1878	-0.044922	0.069043	-0.026074	-10.628	57.4469	740.714	-0.2793	0.24619	-0.1164	-22.888	120.359	740.311	-0.38604	0.6962	-0.40303	-35.611	-55.309	923.813	-0.69687	1.1316	-0.27754	-116.8318	-78.679	1339.289	-0.94483	1.7355	-0.68506	-67.2804	-146.253	1353.9683	-1.041	1.8086	-1.0645	-34.777	40.6059	106.697	0.16162	-0.1875	-0.10547
0.726	-11.827	-13.7187	205.352	-0.054785	0.10293	-0.035156	2.732	50.3379	801.4252	-0.32422	0.29424	-0.12422	11.635	122.935	724.2496	-0.36768	0.663	-0.38624	-45.706	-75.58	936.72	-0.76934	1.2488	-0.30468	-94.0465	-56.567	1350.1751	-0.96885	1.7417	-0.68721	-76.6846	-150.89	1364.4112	-1.0728	1.8178	-1.0689	-28.17	42.5	109.2128	0.15625	-0.1873	-0.1084
0.728	-8.369	25.2706	261.396	-0.066406	0.13916	-0.040527	6.703	49.0173	850.184	-0.37334	0.35225	-0.13076	-0.676000000000002	136.738	721.8802	-0.34493	0.6379	-0.36612	-24.218	-82.211	905.746	-0.82714	1.3472	-0.34336	-97.3857	-66.5836	1364.49	-0.99072	1.7446	-0.68896	-67.8576	-145.3101	1373.2718	-1.0972	1.8247	-1.0649	-27.51	55.0437	101.348	0.14483	-0.18398	-0.10664
0.73	-2.621	52.0718	316.98	-0.086133	0.18613	-0.048242	1.744	40.33781	874.702	-0.42578	0.41797	-0.14014	-0.207999999999998	127.044	695.54007	-0.32373	0.60645	-0.3501	-53.4	-78.031	895.382	-0.86445	1.4105	-0.38242	-99.7967	-73.246	1372.9717	-1.0147	1.746	-0.69307	-49.9806	-128.92071	1393.010997	-1.1284	1.8276	-1.0698	-17.546	48.4221	106.8125	0.13975	-0.17774	-0.10391
0.732	30.315	69.2413	388.9441	-0.11729	0.2336	-0.055957	-7.148	16.0323	868.66	-0.47881	0.48642	-0.14668	11.756	110.4573	666.8948	-0.29715	0.58114	-0.33467	-62.708	-87.026	879.609	-0.88525	1.4517	-0.41992	-100.981	-84.282	1388.4128	-1.035	1.7406	-0.6918	-53.2064	-129.581	1405.995	-1.1387	1.8223	-1.0664	-9.5	48.113	93.5196	0.13203	-0.16963	-0.10674
0.734	23.02	90.7584	472.3313	-0.16534	0.30196	-0.06377	0.809999999999995	-5.6405	855.18	-0.53037	0.56143	-0.15859	17.592	126.8857	658.772	-0.27459	0.55544	-0.31942	-66.8111	-88.501	861.9289	-0.88662	1.4579	-0.43818	-96.0547	-62.622	1383.8973	-1.047	1.741	-0.69062	-26.604	-125.9152	1411.4181	-1.146	1.8013	-1.0679	2.632	61.687	76.8491	0.12695	-0.16895	-0.098633
0.736	34.3403	106.8985	554.0614	-0.22314	0.37119	-0.073633	-13.7	-17.1349	849.416	-0.5792	0.63916	-0.16836	-8.008	114.80063	619.30067	-0.25585	0.52497	-0.30457	-51.674	-56.648	835.878	-0.88457	1.4277	-0.4418	-84.552	-74.525	1402.3759	-1.0522	1.7391	-0.68975	-23.904	-108.91	1402.406	-1.1396	1.7856	-1.0659	-0.730999999999995	55.198	64.7901	0.11885	-0.15937	-0.10752
0.738	40.3803	112.677	633.891	-0.28174	0.45947	-0.083984	-22.996	-23.6189	840.379	-0.62119	0.70576	-0.17842	11.762	101.6242	590.7633	-0.23416	0.50262	-0.28993	-67.666	-28.707	837.867	-0.8791	1.3637	-0.44726	-77.278	-67.082	1383.3924	-1.0503	1.731	-0.68506	-21.484	-98.418	1383.789	-1.1323	1.7642	-1.0659	1.692	48.2352	53.936	0.10742	-0.14726	-0.11425
0.74	47.0478	112.674	708.838	-0.34189	0.56484	-0.10479	-24.853	-14.07299	794.8223	-0.65381	0.76807	-0.20215	-0.478999999999999	94.2859	565.481	-0.21484	0.48047	-0.27344	-60.608	-18.511	839.868	-0.88633	1.2965	-0.4539	-70.416	-67.15	1386.3129	-1.0556	1.7231	-0.69014	-14.164	-89.606	1376.73	-1.1113	1.7266	-1.0547	4.497	49.3075	47.463	0.094141	-0.14375	-0.10918
0.742	41.8528	96.707	783.31	-0.40977	0.6916	-0.12637	-21.231	-19.8336	766.0161	-0.67851	0.81602	-0.22197	-20.608	115.8805	540.545	-0.19857	0.46116	-0.26135	-50.8535	-21.275	849.484	-0.89209	1.2754	-0.47559	-73.203	-41.4257	1382.7438	-1.054	1.7091	-0.68291	19.215	-99.463	1406.178	-1.1074	1.7129	-1.0508	4.88800000000001	55.1802	51.076	0.078125	-0.13194	-0.11523
0.744	35.498	74.375	859.7678	-0.48282	0.82481	-0.14785	-55.577	-24.94	729.613	-0.68701	0.84931	-0.24375	-16.78	113.0592	523.7178	-0.18013	0.4398	-0.24368	-48.258	-32.185	864.522	-0.88818	1.2806	-0.51866	-63.865	-23.753	1390.4954	-1.0509	1.6935	-0.68135	11.096	-96.0155	1425.3454	-1.0957	1.6875	-1.0469	14.939	48.6509	50.7422	0.062988	-0.11816	-0.11816
0.746	9.119	36.6887	933.9805	-0.57197	0.97118	-0.16778	-60.548	-28.153	738.71	-0.68896	0.87159	-0.26601	-2.227	117.291	511.7301	-0.16567	0.42108	-0.23432	-59.3286	-60.925	879.883	-0.85029	1.2947	-0.55381	-71.417	3.286	1395.06024	-1.0431	1.6709	-0.67871	16.36	-122.0946	1443.2505	-1.0955	1.6712	-1.0418	7.376	58.119	59.9771	0.041211	-0.10039	-0.11973
0.748	-15.545	8.091	986.046	-0.67334	1.1196	-0.18311	-53.989	-1.2707	738.082	-0.67705	0.87724	-0.28613	-14.369	127.069	490.534	-0.14645	0.40481	-0.22159	-34.5079	-92.637	902.154	-0.79014	1.3055	-0.58584	-57.409	23.56235	1398.538	-1.0391	1.6484	-0.67188	36.5345	-128.0037	1447.043	-1.0894	1.6587	-1.0356	8.422	64.519	59.8567	0.020898	-0.083594	-0.12002
0.75	-29.911	-30.9733	1025.377	-0.77959	1.2552	-0.20215	-55.512	23.0172	756.91152	-0.66797	0.87207	-0.30469	-27.194	135.78	468.64165	-0.12988	0.38428	-0.20605	-2.812	-100.057	923.069	-0.72627	1.2905	-0.6	-56.838	36.021	1392.8634	-1.0335	1.6321	-0.66943	39.2914	-100.26714	1449.9519	-1.0918	1.6387	-1.0234	-1.634	71.019	42.3633	-0.0017579	-0.061328	-0.12276
0.752	-46.309	-72.498	1036.533	-0.87998	1.3759	-0.22714	-56.827	18.4345	759.7758	-0.65996	0.85625	-0.32256	-35.083	119.2845	449.203101	-0.11026	0.36431	-0.19269	3.7375	-125.126	933.7629	-0.66943	1.2466	-0.60986	-19.467	33.455	1398.9797	-1.0269	1.6184	-0.66475	32.156	-86.2964	1472.5269	-1.0952	1.6431	-1.021	-24.236	60.566	36.5974	-0.024023	-0.038184	-0.12685
0.754	-64.886	-107.622	1033.065	-0.96319	1.4645	-0.26114	-60.3289	10.05	765.284	-0.65674	0.84072	-0.33506	-57.878	129.026	434.29549	-0.099327	0.34475	-0.18026	0.424999999999999	-156.642	951.41186	-0.62608	1.1802	-0.61221	-22.864	40.443	1388.6328	-1.0284	1.6076	-0.66319	33.9	-83.2954	1467.612	-1.105	1.6392	-1.021	-38.206	64.358	52.10004	-0.046387	-0.016113	-0.13721
0.756	-52.397	-140.594	1018.1	-1.0148	1.51	-0.2917	-58.86496	-6.276	766.39	-0.64736	0.8251	-0.35616	-57.293	131.9473	404.9069	-0.080244	0.32502	-0.16383	24.968	-187.934	972.1374	-0.59179	1.1045	-0.6086	0.319000000000003	35.4994	1378.77425	-1.0272	1.6024	-0.66474	14.28	-80.1946	1465.08	-1.1108	1.6382	-1.0161	-38.658	50.2261	41.914	-0.064746	0.010352	-0.1419
0.758	-76.618	-166.159	1007.882	-1.0444	1.5161	-0.31689	-48.7246	-21.492	791.883	-0.64043	0.81357	-0.37275	-70.3495	124.2201	384.115939	-0.070049	0.30698	-0.14885	40.4901	-202.38	1003.1375	-0.56758	1.0311	-0.60703	-15.894	25.752779	1378.9978	-1.0244	1.5918	-0.66602	14.542	-61.2238	1467.7756	-1.1118	1.6411	-1.0161	-36.25	33.87	40.052	-0.079199	0.037305	-0.14805
0.76	-87.308	-163.103	984.642	-1.0394	1.5108	-0.34697	-41.5085	-44.967	803.2984	-0.63135	0.80518	-0.39355	-74.54573	109.8909	351.634	-0.05127	0.28711	-0.13477	30.962	-219.54	1036.2596	-0.54209	0.97002	-0.60527	-4.501	14.8364	1381.3869	-1.0231	1.5887	-0.66094	-13.512	-59.8387	1458.7879	-1.1147	1.6392	-1.0132	-54.895	22.6199	28.542	-0.095215	0.06543	-0.1539
0.762	-98.818	-150.264	977.261	-1.0261	1.4783	-0.37197	-40.0666	-67.2469	810.8163	-0.61572	0.79912	-0.41162	-92.0983	105.2219	331.9614	-0.041547	0.27119	-0.12646	52.3984	-223.322	1059.8221	-0.52002	0.91602	-0.60742	-13.206	24.0107	1368.4539	-1.0232	1.5851	-0.65391	-8.658	-40.9996	1461.5522	-1.1187	1.6431	-1.0112	-69.1018	37.3237	39.151	-0.104	0.089941	-0.15967
0.764	-104.689	-110.615	937.0541	-1.0151	1.4657	-0.40674	-31.8296	-92.784	804.808	-0.6	0.79414	-0.43047	-80.3893	118.3098	323.7969	-0.033359	0.25247	-0.11161	50.77821	-198.268	1084.0783	-0.496	0.87725	-0.61064	-32.181	33.922	1355.9965	-1.0194	1.5774	-0.65625	-11.5	-17.3411	1458.7572	-1.1167	1.6489	-1.0015	-66.4773	40.3046	38.3067	-0.1167	0.1084	-0.16357
0.766	-120.9273	-74.9	919.3994	-1.0069	1.4741	-0.44463	-24.2587	-124.343	820.728	-0.58242	0.79922	-0.44727	-66.4039	107.8222	322.4274	-0.022284	0.23569	-0.10069	38.0353	-154.836	1114.716	-0.47325	0.85391	-0.61504	-43.013	20.22109	1362.942	-1.0154	1.5758	-0.6543	-25.886	-10.1186	1451.698	-1.118	1.6468	-1.0008	-71.5164	51.561	47.9972	-0.12832	0.12451	-0.16406
0.768	-106.158	-54.212	892.066	-0.99316	1.4746	-0.47461	-10.387	-140.275	831.0924	-0.56836	0.78985	-0.46582	-58.405	95.4652	294.3036	-0.0091365	0.22129	-0.087966	14.5392	-138.586	1135.046	-0.45801	0.84336	-0.61621	-51.427	36.4075	1330.6393	-1.0059	1.5684	-0.65039	-33.2144	-8.6784	1440.128	-1.1133	1.6504	-0.99805	-67.253	56.6017	43.9332	-0.14082	0.13653	-0.15781
0.77	-107.1044	-36.582	888.185	-0.94717	1.4497	-0.49776	-0.00500000000000256	-128.118	853.3538	-0.54834	0.77783	-0.48096	-53.848	92.8675	301.4099	-0.00097656	0.20313	-0.077637	36.216996	-127.772	1143.769	-0.4542	0.85928	-0.62237	-71.032	57.9984	1326.71812	-1.0017	1.5706	-0.65205	-30.557	9.02485	1437.897	-1.0972	1.6401	-0.98584	-65.2181	50.3999	33.4053	-0.15332	0.15137	-0.16015
0.772	-100.8578	-26.263	880.803	-0.87412	1.4009	-0.525	10.743	-115.237	887.6501	-0.53242	0.76543	-0.49844	-61.11	80.0289	289.89506	0.017282	0.1836	-0.063322	17.0327	-108.681	1150.3936	-0.47217	0.88525	-0.61865	-57.474	70.218	1314.8125	-0.99483	1.5665	-0.64756	-25.951	25.8391	1470.2568	-1.0859	1.6309	-0.98242	-68.4788	39.5048	46.02661	-0.16045	0.16025	-0.15713
0.774	-104.712	-26.846	856.815	-0.79951	1.3239	-0.53242	29.287	-112.3927	914.275	-0.51299	0.75479	-0.50801	-43.932	79.116	275.30363	0.03264	0.17105	-0.052476	18.834	-94.225	1149.6985	-0.49825	0.92578	-0.61211	-67.862	65.3842	1304.1454	-0.98584	1.5614	-0.64795	-68.4967	33.221	1467.943	-1.0679	1.6216	-0.96436	-52.898	38.4359	55.3989	-0.17285	0.16895	-0.15039
0.776	-61.74619	-37.588	870.009	-0.71943	1.2231	-0.53076	52.2552	-99.698	950.1287	-0.49502	0.7501	-0.52285	-33.511	87.5019	267.0215	0.047825	0.15569	-0.04035	1.361	-97.816	1147.952	-0.53125	0.97462	-0.61621	-63.994	76.1789	1295.2052	-0.97373	1.5532	-0.64268	-56.2187	24.326	1459.399	-1.0815	1.6011	-0.95019	-46.953	47.74973	45.2296	-0.17842	0.16904	-0.14355
0.778	-41.4366	-57.348	860.657	-0.65039	1.1211	-0.52832	68.616	-77.349	963.5638	-0.48867	0.75684	-0.52949	-23.678	94.8224	248.8977	0.061332	0.13937	-0.024859	23.312	-114.282	1161.7005	-0.56953	1.0356	-0.62246	-72.044	79.0681	1279.81791	-0.9624	1.5396	-0.6377	-41.2367	27.01	1431.381	-1.0723	1.584	-0.96191	-28.702	51.4829	34.529	-0.18526	0.16484	-0.13867
0.78	-11.925	-83.041	860.052	-0.60157	1.0193	-0.53096	41.7487	-66.154	992.2108	-0.49023	0.77637	-0.54297	-33.717	97.8763	210.3409	0.077148	0.13135	-0.013672	0.0150000000000006	-123.0637	1174.6022	-0.60664	1.0918	-0.63946	-68.297	90.7148	1262.4818	-0.95371	1.5279	-0.63027	-59.5473	17.9768	1415.546	-1.0391	1.5625	-0.94531	-45.303	43.3927	17.2374	-0.1876	0.15976	-0.12969
0.782	-3.005	-118.3521	888.993	-0.55097	0.93525	-0.52881	61.2192	-68.522	1030.3619	-0.50908	0.80683	-0.54824	-12.22	90.584	208.0719	0.08467	0.11843	0.0021784	-12.05	-153.946	1199.01	-0.63623	1.1548	-0.65576	-67.827	95.7729	1254.2804	-0.94385	1.5126	-0.62607	-57.14465	4.219	1392.413	-1.0229	1.5571	-0.93506	-20.386	37.4269	33.9733	-0.18701	0.15225	-0.12237
0.784	6.807	-151.597	899.1635	-0.5123	0.84893	-0.5292	23.582	-54.753	1027.845	-0.53447	0.84737	-0.56357	-14.156	96.768	195.3177	0.089702	0.10621	0.0067366	-12.972	-167.508	1220.554	-0.65439	1.2208	-0.67744	-82.364	101.0609	1237.6368	-0.93135	1.4891	-0.61514	-31.436	9.424	1393.2088	-1.0015	1.5415	-0.92725	-17.328	41.914	43.8991	-0.18848	0.13965	-0.125
0.786	13.821	-171.529	924.9593	-0.47276	0.78291	-0.52178	28.229	-71.631	1041.7753	-0.56533	0.89307	-0.57803	-13.472	95.589	184.6746	0.093182	0.096099	0.018349	-14.076	-163.416	1255.06	-0.67344	1.2981	-0.69219	-91.4052293	95.6749	1226.9443	-0.9206	1.4675	-0.60088	-31.575	18.564	1383.6346	-0.99097	1.5324	-0.92456	5.511	34.4991	51.855	-0.18936	0.12793	-0.12149
0.788	17.629	-180.97	946.2979	-0.44385	0.729	-0.51416	12.661	-85.266	1057.8201	-0.59737	0.94092	-0.59658	-4.611	74.5379	189.8549	0.10685	0.082794	0.028789	-40.5453	-164.924	1282.904	-0.69179	1.375	-0.70351	-77.8429	83.8627	1207.3025	-0.91943	1.4497	-0.57959	-27.354	15.9288	1370.0607	-0.98438	1.5215	-0.91797	-0.600000000000001	36.1068	52.0197	-0.18174	0.1124	-0.11416
0.79	40.6987	-205.242	976.4976	-0.43711	0.70742	-0.51504	35.89	-122.0241	1084.6745	-0.62598	0.99707	-0.61523	19.77	66.0258	170.973	0.11719	0.064941	0.038086	-59.7267	-173.4166	1305.379	-0.73095	1.446	-0.71806	-73.9705	89.2997	1172.037	-0.90635	1.4376	-0.58447	0.616	17.82701	1341.7189	-0.96484	1.502	-0.90137	15.192	32.045	45.9581	-0.17471	0.09873	-0.11377
0.792	52.10588	-202.697	981.7272	-0.43779	0.70342	-0.51162	21.744	-126.9434	1109.2446	-0.65303	1.0509	-0.63076	-3.218	69.3198	160.6433	0.12694	0.054417	0.046545	-60.0359	-175.00699	1325.816	-0.76904	1.5083	-0.73779	-61.785	88.706	1158.642	-0.89297	1.4207	-0.57275	22.387	30.6379	1333.2057	-0.95654	1.4868	-0.89307	-6.305	27.6891	34.8025	-0.1665	0.077148	-0.11192
0.794	49.094	-193.681	993.0657	-0.46084	0.70771	-0.51045	9.789	-152.401	1125.474	-0.6832	1.1105	-0.65859	8.1	61.5085	156.1731	0.14188	0.042803	0.053474	-47.0711	-155.7139	1320.7407	-0.80871	1.5737	-0.74893	-67.143	89.452647	1146.97087	-0.88086	1.4063	-0.56182	19.471	59.704	1320.6577	-0.93115	1.4614	-0.88428	6.737	25.7846	26.47	-0.1582	0.063965	-0.10645
0.796	36.9382	-172.389	993.958	-0.48281	0.73809	-0.51387	-10.991	-160.71	1157.5809	-0.7164	1.1699	-0.68125	-19.727	55.0352	142.9748	0.15047	0.027151	0.068003	-53.594	-160.325	1308.0832	-0.84818	1.64	-0.76398	-36.708	100.33525	1132.4413	-0.87031	1.3877	-0.55332	22.51	66.19	1302.5644	-0.91357	1.4409	-0.87451	-1.51900000000001	24.9075	39.06719	-0.1458	0.044531	-0.10723
0.798	56.0718	-160.4592	1041.7461	-0.50732	0.77393	-0.51221	-12.504	-149.705	1178.1839	-0.75674	1.2352	-0.7044	2.302	72.0501	133.7065	0.16071	0.011837	0.078757	-30.6176	-160.738	1321.47056	-0.89194	1.7135	-0.78665	-32.257	112.85789	1116.2086	-0.85889	1.3716	-0.54932	32.501	56.538	1267.5398	-0.89355	1.4219	-0.86133	21.814	25.3569	45.9695	-0.13252	0.020411	-0.10732
0.8	42.207989	-128.7418	1046.095	-0.54707	0.82803	-0.51553	-39.7739	-134.0208	1213.209	-0.79541	1.3013	-0.72021	-18.216	71.3431	133.5333	0.16895	-0.0029297	0.089355	-15.619	-147.792	1338.90775	-0.92952	1.7963	-0.81467	-14.834	111.26876	1110.7543	-0.84746	1.3547	-0.53965	17.37	78.241	1249.6894	-0.87305	1.3945	-0.84668	-10.822	21.6976	46.9062	-0.12275	-0.0010742	-0.10498
0.802	45.32675	-121.14	1064.391	-0.58906	0.88262	-0.52109	-47.567	-125.6903	1250.618	-0.84004	1.3639	-0.73926	-33.285	65.7453	114.6196	0.17806	-0.013619	0.095548	-16.186	-125.555	1344.8193	-0.9624	1.8735	-0.83936	3.376	110.1805	1099.2283	-0.82891	1.332	-0.52813	20.442	83.837	1223.9888	-0.85889	1.3813	-0.84131	-6.57	27.6977	44.3957	-0.10996	-0.024219	-0.10703
0.804	45.1415	-111.729	1071.8224	-0.63164	0.94707	-0.52657	-65.5145	-114.3011	1267.972	-0.87764	1.4169	-0.75264	-47.7025	55.9908	113.3322	0.18127	-0.02278	0.097487	-2.523	-124.669	1354.2616	-0.99097	1.946	-0.85837	-0.217999999999996	123.51608	1075.9454	-0.81601	1.3121	-0.51836	42.9601	69.994	1202.503	-0.83154	1.3579	-0.82275	-19.878	40.0353	45.5068	-0.093262	-0.043945	-0.10449
0.806	46.693	-108.032	1082.964	-0.67754	1.0227	-0.54102	-63.7476	-98.1527	1274.702	-0.90615	1.4672	-0.77724	-41.779	53.33301	97.585	0.18989	-0.028631	0.099014	10.417	-100.9087	1347.3541	-1.0163	1.9987	-0.87378	-5.58	135.3441	1054.3311	-0.79629	1.2918	-0.51035	54.4315	91.06	1187.349239	-0.80982	1.3284	-0.80835	-21.517	47.895	31.31699	-0.08418	-0.068652	-0.10137
0.808	13.9	-108.801	1082.015	-0.72119	1.1001	-0.55615	-83.073	-84.6416	1276.809	-0.91025	1.5097	-0.80127	-68.942	37.699	98.8207	0.19433	-0.028517	0.096775	37.6728	-80.501	1362.716	-1.0476	2.0269	-0.88938	4.807	125.317	1015.2925	-0.78125	1.2656	-0.5	14.683	96.859	1186.0935	-0.78516	1.3047	-0.79395	-35.344	33.3391	49.80376	-0.07334	-0.090527	-0.1041
0.81	-2.658	-125.753	1095.9758	-0.7583	1.1784	-0.57744	-85.598	-86.6784	1281.0218	-0.9043	1.541	-0.81836	-52.72	36.282	90.35439	0.2002	-0.02002	0.09375	33.90163	-65.97	1357.415	-1.072	2.0373	-0.89198	3.086	124.986	993.7272	-0.76309	1.2469	-0.48828	-3.964	72.962	1173.5872	-0.75293	1.2695	-0.76953	-51.337	13.7667	53.564	-0.066309	-0.11357	-0.095898
0.812	-30.4906	-149.162	1122.7622	-0.78593	1.2512	-0.60293	-56.6799	-82.9867	1278.003	-0.8958	1.5577	-0.82744	-48.334	41.7047	93.1814	0.1999	-0.012808	0.093165	22.1147	-77.528	1383.161	-1.1011	2.0298	-0.90088	-7.067	136.091	969.86263	-0.74404	1.2255	-0.47861	20.291	71.7258	1155.8554	-0.73389	1.2534	-0.75928	-57.0064	-6.4457	55.469	-0.058301	-0.12705	-0.098242
0.814	-38.5979	-166.5719	1135.2198	-0.80508	1.3164	-0.62207	-54.3458	-71.9881354	1274.834	-0.88535	1.5645	-0.8373	-61.031	55.29924	72.434	0.19825	-0.0024499	0.092386	37.00094	-87.652	1390.49	-1.1126	2.0154	-0.90231	-12.573	142.102	952.6914	-0.7249	1.2009	-0.46807	17.104	90.699	1138.0614	-0.70459	1.2095	-0.74072	-69.3963	-8.7428	59.675	-0.056152	-0.14355	-0.095215
0.816	-47.6507	-181.242	1159.909	-0.81191	1.3666	-0.63926	-38.555	-79.4522	1295.641	-0.88301	1.5598	-0.84355	-73.69913	44.0842	62.0649	0.19004	0.010824	0.090041	29.4293	-107.901	1402.9104	-1.1188	1.9941	-0.90809	4.044	135.554	931.0399	-0.70196	1.1805	-0.45449	4.932	88.98095	1138.429	-0.67822	1.1757	-0.72387	-65.1642	-8.1279	93.9879	-0.052832	-0.15098	-0.097949
0.818	-41.134	-183.328	1190.7711	-0.81396	1.4067	-0.6499	-30.258	-81.2092	1321.683	-0.88604	1.5429	-0.84072	-55.9479	49.2018	60.316	0.18184	0.030848	0.086914	21.4678	-117.8151	1397.221	-1.1139	1.9644	-0.90831	-10.525	136.476	911.8899	-0.6792	1.1548	-0.44873	-26.831	75.70882	1118.5482	-0.64844	1.1445	-0.70117	-70.767	-1.72473	96.48914	-0.052246	-0.16055	-0.1043
0.82	-59.78468	-188.038	1219.881	-0.82734	1.4334	-0.66387	-4.015	-64.2756	1348.976	-0.90039	1.5254	-0.83203	-48.45	53.3965	56.4955	0.16992	0.056641	0.081543	56.8631	-119.6554	1416.24	-1.103	1.9304	-0.91353	-22.868	140.3705	905.9375	-0.65391	1.1261	-0.44004	-41.294	99.9104	1080.7632	-0.61035	1.1016	-0.67383	-62.8007	-5.8662	97.8321	-0.048731	-0.1625	-0.11055
0.822	-56.73307	-174.624	1233.684	-0.84834	1.4667	-0.67685	-21.194	-47.98	1378.032	-0.93457	1.5147	-0.833	-71.8498	44.1372	50.4925	0.1497	0.079497	0.0749	60.0691	-106.685	1422.5545	-1.0825	1.897	-0.91553	-2.003	127.3055	890.88219	-0.63174	1.0989	-0.42539	-65.7794	121.9133	1063.5155	-0.59766	1.0762	-0.66211	-61.9582	-4.4254	95.158	-0.050684	-0.16006	-0.10752
0.824	-74.029	-175.439	1257.227	-0.87803	1.5104	-0.68936	0.435000000000002	-53.474	1413.033	-0.97695	1.5056	-0.83261	-48.545	32.3553	53.2597	0.13144	0.10538	0.063766	33.6437	-95.112	1426.8089	-1.0628	1.8643	-0.91221	-12.748	130.2244	856.6207	-0.60557	1.0691	-0.41797	-55.4776	120.8094	1041.864	-0.5625	1.0293	-0.64648	-51.8906	1.99643	139.5391	-0.056152	-0.15576	-0.1123
0.826	-53.5105	-180.503	1267.9472	-0.91446	1.5791	-0.70176	2.016	-46.5988	1410.1081	-1.0199	1.5025	-0.83965	-45.487	41.5506	35.952	0.1123	0.1335	0.051658	35.1816	-105.836	1420.9048	-1.0415	1.8331	-0.91372	-28.442	140.4404	834.8695	-0.58359	1.043	-0.40234	-63.4849	115.2079	1023.767	-0.53466	1.0002	-0.62085	-54.7003	19.4224	184.3033	-0.064355	-0.1457	-0.11504
0.828	-40.9996	-182.005	1271.1556	-0.96289	1.6484	-0.7168	21.672	-42.8412	1420.3225	-1.0664	1.4998	-0.84629	-36.883	48.287	42.203	0.10068	0.1587	0.046973	58.588	-110.143	1430.1405	-1.0229	1.8048	-0.91659	-51.2263	131.4594	817.6467	-0.55811	1.0103	-0.39697	-42.07	127.4173	996.368	-0.51514	0.96533	-0.60107	-36.196	31.031	201.9148	-0.078223	-0.13262	-0.12324
0.83	-35.4486	-152.7222	1263.501	-0.99969	1.7132	-0.73799	8.023	-50.26	1421.7642	-1.0977	1.502	-0.85254	-34.185	41.794	36.577	0.082031	0.18359	0.044922	39.1264	-90.9105	1439.286	-1.0102	1.7791	-0.917	-49.691	138.2973	797.9306	-0.53926	0.98144	-0.38711	-65.26033	126.31777	977.157	-0.47754	0.92188	-0.57813	-26.748	42.294	223.784	-0.098532	-0.11464	-0.13106
0.832	-41.117	-142.34057	1271.0684	-1.0306	1.7571	-0.75205	30.103	-60.00313	1448.0675	-1.1261	1.5051	-0.86201	5.889	36.557	45.7092	0.067872	0.21367	0.039454	-4.108	-77.9424	1439.5557	-0.99219	1.75	-0.91895	-66.2125	154.0992	768.5385	-0.51436	0.94619	-0.37617	-45.739	121.9694	939.782	-0.45898	0.89893	-0.56787	-15.849	56.801	247.11	-0.11875	-0.094824	-0.13965
0.834	-28.28	-133.1875	1259.084	-1.0572	1.7806	-0.75947	39.6628	-54.5939	1448.99668	-1.1552	1.5056	-0.86982	-1.179	42.213	37.6617	0.056642	0.23662	0.033399	-14.086	-64.0086	1425.478	-0.97352	1.7195	-0.92141	-51.041	158.5379	749.4014	-0.48389	0.91494	-0.36875	-44.7159	126.8451	917.049	-0.42529	0.85596	-0.54541	-23.691	73.7558	280.11	-0.1333	-0.069824	-0.14551
0.836	-22.648	-119.4642	1272.519	-1.0795	1.7877	-0.76192	61.4027	-48.9799	1463.5722	-1.1896	1.5149	-0.87998	-15.732	27.2918	48.2334	0.042188	0.2581	0.025586	-26.377	-33.241	1402.418	-0.94667	1.6876	-0.92334	-52.7017	145.0439	724.88525	-0.46133	0.87646	-0.35674	-33.845	125.39093	897.8237	-0.39795	0.82227	-0.52637	9.459	95.281	341.2134	-0.15185	-0.042773	-0.1624
0.838	-9.491	-101.112	1272.746	-1.0957	1.7793	-0.7666	50.7741	-53.67	1466.5451	-1.219	1.5272	-0.89316	-12.871	16.8292	39.1521	0.030664	0.27568	0.019531	-46.094	-19.265	1405.397	-0.92332	1.6569	-0.92028	-45.338	143.9894	708.19964	-0.43213	0.84229	-0.34668	-57.28165	119.74795	887.47963	-0.37549	0.78906	-0.50781	21.919	105.743	397.479	-0.16416	-0.01084	-0.1752
0.84	35.0161	-101.237	1299.7589	-1.1112	1.7741	-0.76767	52.1378	-40.502	1456.1058	-1.2417	1.5356	-0.90967	14.791	30.4155	32.8224	0.024902	0.29004	0.014648	-54.589	-17.36	1392.9746	-0.90082	1.6272	-0.9225	-65.9233	158.93774	680.4651	-0.40879	0.81094	-0.34052	-44.4182	130.2763	843.696	-0.34619	0.75244	-0.48877	35.83506	114.209	439.6905	-0.1833	0.019629	-0.18926
0.842	45.0953	-96.725	1326.3384	-1.1266	1.7668	-0.76719	50.208	-16.6437	1451.797	-1.2557	1.5464	-0.92803	8.874	27.75351	36.2079	0.015918	0.30215	0.011133	-44.2859	-12.563	1402.6159	-0.88232	1.606	-0.92041	-33.464	156.28095	657.8987	-0.38428	0.77666	-0.32881	-30.8119	146.501	827.17	-0.33203	0.73242	-0.48047	14.9849	96.748	500.393	-0.20459	0.056054	-0.20616
0.844	46.4356	-97.676	1332.199	-1.139	1.7606	-0.77187	13.045	0.671000000000001	1465.2896	-1.2632	1.5462	-0.94443	4.39599999999999	13.5231	21.9645	0.015137	0.31552	0.0035156	-36.0188	0.908000000000001	1398.9727	-0.87694	1.5924	-0.92351	-30.7297	145.1064	628.134	-0.36045	0.74502	-0.32295	-21.513	152.967	796.434	-0.30176	0.69824	-0.45215	25.831	80.235	563.344	-0.2334	0.098145	-0.22314
0.846	46.9471	-112.996	1343.063	-1.1514	1.7545	-0.7752	-10.881	13.9699	1468.66675	-1.2616	1.5486	-0.95381	-2.15300000000001	14.9686	20.8604	0.011231	0.32295	-6.8958e-08	-48.8704	-10.0101	1391.043	-0.865	1.5783	-0.92013	-18.483	145.5232	622.9126	-0.33838	0.71533	-0.31387	-9.391	146.7624	787.921	-0.28271	0.67896	-0.43823	31.822	75.8296	630.335	-0.26289	0.14277	-0.24394
0.848	62.802	-112.354	1356.1464	-1.1616	1.7466	-0.77881	-15.836	35.631	1460.13138	-1.2603	1.5428	-0.96621	-4.662	31.733	28.12	0.010644	0.33223	-0.0019532	-20.084	-19.99249	1367.026	-0.85574	1.5677	-0.91943	-32.567	142.0205	593.9395	-0.31299	0.68164	-0.30078	1.682	146.6174	761.6413	-0.26025	0.65283	-0.4248	47.35581	81.5407	700.82	-0.29961	0.19638	-0.26563
0.85	65.078	-119.6136	1377.1313	-1.1659	1.736	-0.77881	-35.797	43.271	1463.0781	-1.2578	1.5352	-0.98438	-15.383	31.549	37.8669	0.010254	0.33643	-0.0029297	-30.777	-18.2654	1354.018	-0.84426	1.5465	-0.91402	1.486	146.5784	568.189	-0.29443	0.65049	-0.29346	1.556	145.6714	745.6291	-0.23438	0.62109	-0.40234	39.3295	56.5303	771.241	-0.33867	0.25225	-0.28632
0.852	69.4006	-130.5353	1390.0551	-1.1729	1.7208	-0.78389	-47.0816	42.993	1454.4735	-1.2528	1.5164	-0.98789	-7.041	44.824	38.123	0.010351	0.33623	-0.0035156	-18.789	-17.7977	1364.4138	-0.82959	1.5337	-0.91553	-3.148	157.598	559.3334	-0.27353	0.61826	-0.28789	7.618	131.9875	725.8512	-0.2102	0.59106	-0.38476	28.6009	49.833	834.512	-0.38399	0.3252	-0.30781
0.854	52.09162	-148.6247	1402.1969	-1.1698	1.7012	-0.78467	-36.931	42.6385	1462.6926	-1.2461	1.4988	-0.99492	-8.819	44.801	40.85	0.013575	0.33252	-0.0038087	-42.8998	-26.449	1350.488	-0.81719	1.5184	-0.91727	-8.495	156.7826	534.5107	-0.24971	0.58975	-0.27695	28.839	109.4103	702.50086	-0.18896	0.56494	-0.36768	1.989	25.583	887.5893	-0.43799	0.40283	-0.32959
0.856	34.8022	-133.2484	1399.6045	-1.1706	1.6755	-0.78349	-50.366	53.2647	1453.0042	-1.234	1.4703	-0.99844	-21.531	47.253	37.9158	0.015918	0.3251	-0.0045898	-11.975	-27.5632	1348.797	-0.80765	1.5092	-0.9161	1.819	141.5656	513.779	-0.22578	0.55235	-0.27109	26.897	118.94039	675.3215	-0.15674	0.52637	-0.34424	0.550000000000001	18.0688	930.103	-0.4916	0.49063	-0.35547
0.858	23.4626	-115.6005	1398.624	-1.168	1.6543	-0.79102	-66.985	49.8028	1455.9549	-1.2242	1.4489	-1.0014	-50.376	32.4154	37.0133	0.019726	0.31787	-0.0094724	-14.267	-1.8151	1331.2045	-0.79789	1.504	-0.91346	12.368	134.035	491.5999	-0.20117	0.51904	-0.26221	33.069	127.3475	654.502	-0.13818	0.51025	-0.33447	21.7492	-8.799	952.169	-0.55225	0.59033	-0.38262
0.86	6.838	-99.6088	1397.658	-1.157	1.6359	-0.78789	-55.1374	31.3659	1437.7205	-1.2148	1.4258	-1.002	-40.876	21.43072	35.9936	0.025391	0.31055	-0.0019531	-10.308	14.0456	1318.949	-0.79043	1.4929	-0.91615	8.342	132.9706	469.2208	-0.17403	0.48438	-0.25195	4.206	115.0869	633.2003	-0.11377	0.47168	-0.31689	12.692	-27.982	961.959	-0.60459	0.6919	-0.41621
0.862	9.097	-91.4398	1396.7552	-1.1538	1.6208	-0.78955	-53.6565	21.486	1439.4816	-1.2102	1.4154	-0.99785	-42.615	34.7489	38.58789	0.02959	0.30449	-0.00029297	-3.989	32.3664	1288.172	-0.77734	1.4854	-0.9082	14.302	132.0046	443.1347	-0.15147	0.45137	-0.24512	-6.241	121.7253	588.7311	-0.090088	0.44702	-0.30152	-6.212	-59.212	952.033	-0.66582	0.8002	-0.43808
0.864	-4.54799999999999	-75.928	1394.514	-1.1433	1.6063	-0.79463	-69.5907	23.734	1424.0385	-1.2101	1.4126	-0.99287	-57.8887	30.5115	29.80541	0.03457	0.29571	0.0015625	27.595	37.093	1264.5631	-0.77041	1.4794	-0.90186	35.4567	113.68547	435.4142	-0.12764	0.4166	-0.23535	-43.078	142.185	576.4217	-0.068359	0.41992	-0.28516	-16.865	-79.117	923.3646	-0.72803	0.90381	-0.46338
0.866	-20.505	-75.0783	1411.484	-1.1393	1.5973	-0.79756	-76.829	18.722	1411.5944	-1.2175	1.4177	-0.99092	-65.352	17.1511	27.3023	0.040429	0.28828	0.003125	13.185	46.555	1255.7594	-0.76904	1.4692	-0.89674	17.314	113.97029	416.6348	-0.10478	0.38584	-0.22559	-20.643	139.964	552.983	-0.039551	0.38281	-0.25781	-20.5509	-87.683	897.8399	-0.79131	1.0023	-0.49287
0.868	-36.1938	-52.5135	1405.171	-1.1348	1.5859	-0.80176	-59.3356	28.086	1396.922	-1.2274	1.4308	-0.98359	-46.657	19.15983	13.67	0.045117	0.28105	0.0051758	32.7207	38.918	1252.4264	-0.76786	1.4621	-0.8862	7.734	117.7441	394.6458	-0.085449	0.35059	-0.20947	-27.07	130.026	525.5985	-0.024902	0.36523	-0.25146	-23.075	-83.113	880.3149	-0.85693	1.0895	-0.5247
0.87	-24.352	-40.6689	1406.5419	-1.1238	1.5739	-0.79951	-63.7485	51.8601	1386.0963	-1.2358	1.4438	-0.97803	-63.4358	31.8473	24.2802	0.052246	0.27295	0.01416	59.0227	40.674	1223.5861	-0.76406	1.451	-0.87693	-1.515	123.76906	371.4129	-0.066211	0.31885	-0.20166	-15.102	147.7604	503.2564	-0.00097656	0.33252	-0.22852	-28.921	-74.246	838.0199	-0.92217	1.1727	-0.55401
0.872	-41.391	-27.722	1413.6275	-1.1206	1.5626	-0.79873	-57.9314	55.54244	1371.4538	-1.2469	1.4559	-0.96758	-50.76	31.5249	32.199	0.056933	0.27334	0.013476	81.966	62.576	1196.4014	-0.75781	1.4316	-0.86523	-3.343	116.7911	362.1819	-0.045898	0.2916	-0.1918	-57.5569	129.03159	482.964	0.018066	0.30322	-0.21143	-41.095	-57.477	821.205	-0.97862	1.2354	-0.58408
0.874	-83.467	-13.343	1405.6263	-1.121	1.5614	-0.79365	-40.1955	59.585	1368.7989	-1.2488	1.4727	-0.96094	-47.978	32.0764	46.939	0.06377	0.26679	0.01709	30.591	67.477	1184.5754	-0.75216	1.4167	-0.85527	-9.183	126.8028	334.2384	-0.02793	0.25801	-0.17773	-52.601	112.772	467.5953	0.040039	0.2749	-0.20313	-32.2628	-27.134	820.687	-1.0327	1.2837	-0.60889
0.876	-77.639	-3.121	1410.62891	-1.1257	1.5587	-0.78897	-17.96	70.257	1354.7776	-1.2481	1.4805	-0.95469	-34.996	28.2687	55.5169	0.065332	0.26407	0.020215	32.843	60.937	1161.2209	-0.74512	1.393	-0.83789	-24.576	131.4704	326.117	-0.0093748	0.22666	-0.16387	-61.763	116.954	449.3834	0.062012	0.23975	-0.17627	-23.1883	-1.393	837.907	-1.0711	1.3254	-0.63984
0.878	-61.11707	-6.966	1404.1817	-1.124	1.5547	-0.78564	-5.766	89.356	1343.6656	-1.2452	1.4857	-0.94482	-59.9779	16.6075	63.0805	0.064941	0.26631	0.024707	14.461	57.242	1140.3919	-0.74043	1.3805	-0.83165	-32.873	120.5891	300.1112	0.0087891	0.19775	-0.15576	-47.857	137.5307	422.9761	0.072266	0.22461	-0.16748	-19.86808	5.856	867.2152	-1.0952	1.3619	-0.66533
0.88	-68.6442	-20.0542	1405.501	-1.1277	1.5479	-0.78691	28.738	91.353	1314.3656	-1.2373	1.4863	-0.93164	-33.903	3.843	52.1407	0.070313	0.27002	0.023926	3.748	68.688	1136.7474	-0.73086	1.3682	-0.8207	-41.293	121.5692	289.878	0.02334	0.17451	-0.14942	-65.0777	123.8727	407.07164	0.095215	0.19238	-0.14795	-1.56	-15.926	895.9354	-1.1046	1.4055	-0.69658
0.882	-63.0225	-42.847	1387.8498	-1.1237	1.547	-0.79014	36.497	82.878	1297.5843	-1.2316	1.4802	-0.9167	-15.514	12.018	56.6339	0.06709	0.27666	0.027539	-7.238	51.1758	1120.854	-0.71338	1.3491	-0.80811	-57.6937	130.2347	261.507	0.035742	0.14316	-0.14141	-77.9129	115.772	371.606	0.11158	0.17187	-0.12988	6.3188	-39.497	893.928	-1.088	1.4333	-0.72432
0.884	-48.3467	-67.306	1392.0332	-1.1136	1.5408	-0.7917	45.095	92.1384	1276.2613	-1.223	1.4738	-0.90352	2.68	19.11189	59.4178	0.063965	0.28897	0.034961	5.275	38.53537	1114.0027	-0.70176	1.3334	-0.79297	-51.3654	105.7507	258.4336	0.054883	0.11543	-0.13008	-80.562	124.784	360.141	0.12402	0.15039	-0.11963	39.882	-44.547	908.45	-1.0503	1.4478	-0.74463
0.886	-49.3005	-54.972	1364.9366	-1.1004	1.5293	-0.78984	27.886	90.3255	1257.8851	-1.2191	1.4629	-0.88867	-14.973	7.55898	53.8353	0.057324	0.30185	0.036133	-3.2	52.2611	1089.8677	-0.68818	1.3169	-0.77997	-40.145	97.0426	241.1374	0.070215	0.091895	-0.12481	-86.9652	132.5248	335.922	0.1377	0.12158	-0.097656	20.8968	-49.335	914.752	-0.98546	1.4347	-0.76279
0.888	-46.0638	-58.785	1349.109	-1.0894	1.5161	-0.78857	33.832	75.4635	1241.251	-1.2086	1.4445	-0.87774	-5.162	-4.4564	56.6254	0.048535	0.31367	0.033984	-46.7542	61.0097	1070.8224	-0.67411	1.2962	-0.76162	-51.899	109.3778	240.3105	0.085938	0.063477	-0.11182	-78.7496	102.7681	327.7401	0.14307	0.11035	-0.09375	35.601	-68.518	927.3375	-0.91377	1.3974	-0.77139
0.89	-15.524	-46.851	1349.8715	-1.0734	1.5019	-0.79141	30.981	88.4897	1233.352	-1.1973	1.4258	-0.86719	13.185	6.6282	78.1106	0.042969	0.3335	0.033203	-42.2354	48.681	1050.5772	-0.6666	1.2715	-0.74726	-61.9832	110.998	221.657	0.09785	0.029687	-0.10664	-64.8659	99.219	309.97422	0.15527	0.091797	-0.078613	48.886	-109.9397	962.6674	-0.83448	1.3274	-0.77334
0.892	22.91	-20.1363	1356.2286	-1.0632	1.4855	-0.79141	33.435	109.873	1221.539	-1.1802	1.4132	-0.85713	18.051	29.7772	108.2194	0.038086	0.35312	0.029395	-30.831	64.794	1026.4387	-0.6499	1.2485	-0.72998	-61.4339	102.3839	218.202	0.11035	0.0057617	-0.098437	-51.079	101.7388	282.697	0.16211	0.077393	-0.064942	60.557	-153.996	960.54523	-0.76592	1.2388	-0.76728
0.894	3.685	10.7267	1345.85	-1.0484	1.4778	-0.78672	12.58	113.428	1200.9534	-1.1664	1.4004	-0.84102	2.803	39.1524	149.5566	0.029688	0.37471	0.026465	-27.677	81.584	1026.581	-0.63076	1.2192	-0.71358	-59.9674	98.0045	215.77098	0.12402	-0.020801	-0.091016	-40.819	109.1686	284.296	0.16699	0.069824	-0.056152	51.003	-195.566	997.0578	-0.70068	1.1353	-0.75049
0.896	33.386	17.5993	1331.2751	-1.0414	1.468	-0.78692	4.337	116.5	1188.4162	-1.1559	1.3797	-0.83515	14.207	51.9864	154.94066	0.023437	0.39346	0.019824	-55.9661	75.6221	1004.911	-0.6086	1.1848	-0.69141	-53.798	97.5131	208.0243	0.1332	-0.050684	-0.086914	-7.451	121.266	274.937	0.17236	0.05127	-0.034668	61.188	-201.321	1016.542	-0.65713	1.0329	-0.73662
0.898	15.709	25.9716	1311.6635	-1.0352	1.4531	-0.7832	2.543	126.7076	1164.4725	-1.1361	1.3553	-0.82559	17.124	68.00994	168.6591	0.010742	0.42314	0.017871	-55.4729	85.2621	976.5119	-0.58672	1.1523	-0.68282	-35.912	84.8165	186.470872	0.14844	-0.074707	-0.083496	-5.228	122.049	257.3007	0.17969	0.047852	-0.025391	78.151	-179.967	1054.3479	-0.62842	0.95009	-0.72295
0.9	32.036	39.547	1286.0003	-1.0258	1.4451	-0.78144	-11.646	115.38797	1149.31716	-1.123	1.332	-0.81445	-3.958	72.6121	197.226	-0.00048828	0.45166	0.010254	-58.589	107.7309	937.3734	-0.56201	1.1171	-0.66124	-44.859	74.38296	181.4802	0.15986	-0.098533	-0.077637	-10.075	113.893	252.4932	0.18848	0.04541	-0.021484	71.328	-143.1915	1055.7364	-0.60889	0.88135	-0.71787
0.902	26.542	55.141	1263.8814	-1.0129	1.4387	-0.775	2.722	106.8993	1138.228	-1.1047	1.3088	-0.80625	10.799	81.9955	243.71041	-0.01748	0.48438	0.00068364	-62.579	114.92689	917.8739	-0.54102	1.084	-0.63281	-44.618	74.6897	184.5119	0.1708	-0.11895	-0.076367	-28.434	91.7951	234.15151	0.18823	0.030518	-0.0041504	79.251	-118.954	1095.2718	-0.58994	0.82998	-0.70635
0.904	52.5174	55.786	1243.1355	-1.0047	1.4219	-0.76992	-19.737	118.2385	1115.273	-1.0874	1.2872	-0.78936	15.386	117.3876	276.8068	-0.038281	0.51992	-0.012598	-73.6377	113.379	869.369	-0.52265	1.0529	-0.62754	-22.26	76.9082	170.4339	0.1833	-0.13457	-0.074414	-16.806	86.316	217.7589	0.19238	0.019531	0.0073242	78.286	-99.997	1104.627	-0.56592	0.7915	-0.69873
0.906	18.917	55.095	1234.513	-0.99092	1.4157	-0.76611	-23.262	134.626	1091.4424	-1.073	1.2657	-0.7749	3.497	118.2836	313.3119	-0.058985	0.56328	-0.030567	-43.577	111.7537	852.7303	-0.49853	1.022	-0.61055	-2.203	76.1349	150.1954	0.18984	-0.1498	-0.069824	6.731	99.9482	211.1331	0.19873	0.0083008	0.02832	67.832	-88.94	1140.8527	-0.55615	0.7708	-0.69795
0.908	18.657	50.6373	1219.515	-0.98242	1.4063	-0.75586	-60.7582	133.0688	1069.846	-1.0634	1.2444	-0.76182	-24.598	102.023	342.5719	-0.080957	0.60537	-0.04668	-57.2325	122.955	824.162	-0.47549	0.98614	-0.59179	-12.856	68.1373	151.4077	0.19775	-0.16113	-0.071289	-1.21100000000001	95.725	195.2786	0.20117	0.003418	0.035156	42.425	-66.748	1162.3894	-0.54473	0.76562	-0.69961
0.91	4.806	30.56612	1223.7678	-0.96358	1.3931	-0.75576	-61.6288	133.38892	1044.1827	-1.0488	1.2285	-0.74414	-24.265	97.7325	393.303	-0.11035	0.65234	-0.068359	-45.192	110.706	833.187	-0.45488	0.95371	-0.57285	-2.476	67.3794	142.6896	0.1999	-0.16709	-0.07207	-1.824	88.725	179.192	0.21289	0.00097656	0.040527	68.329	-59.811	1196.091	-0.54629	0.78281	-0.70274
0.912	33.301	36.86017	1214.17156	-0.94795	1.3821	-0.74834	-79.4685	145.8988	1009.8122	-1.0333	1.2112	-0.72432	-43.678	110.4674	460.62	-0.14492	0.70381	-0.090234	-19.576	115.1621	802.7946	-0.43945	0.92188	-0.55469	3.174	62.9856	133.4148	0.2041	-0.17637	-0.073731	-1.357	81.32	172.0726	0.21924	-0.0026855	0.054199	43.594	-43.787	1187.23463	-0.56768	0.81572	-0.70166
0.914	14.477	51.8401	1207.771	-0.93388	1.3696	-0.74131	-74.07235	149.24308	986.5633	-1.012	1.1954	-0.70791	-25.348	94.4011	523.449	-0.18252	0.76094	-0.11133	6.70500000000001	125.6683	803.1475	-0.41787	0.88877	-0.5374	2.949	68.123	129.7232	0.21113	-0.18575	-0.074512	-0.707000000000001	78.1018	162.844	0.22266	-0.0039063	0.05957	42.426	-56.608	1177.025	-0.59912	0.85596	-0.71045
0.916	-13.359	46.3974	1175.4654	-0.91426	1.3463	-0.73291	-90.975	144.7958	970.1081	-0.99248	1.1766	-0.68916	-55.7121	79.8151	577.797	-0.22744	0.82187	-0.14023	-5.171	127.2742	782.319	-0.39805	0.85801	-0.52265	16.907	70.851	129.85605	0.21494	-0.19404	-0.072852	-11.27	71.6404	167.4352	0.23438	-0.0053711	0.066406	6.0804	-82.464	1189.157	-0.63106	0.89668	-0.71934
0.918	-38.145	39.0124	1162.762	-0.88623	1.3208	-0.72803	-68.7628	146.3876	941.781	-0.96865	1.1552	-0.67139	-46.829	81.5999	658.261	-0.27773	0.88984	-0.16621	-7.024	104.7874	750.7678	-0.37929	0.82246	-0.50898	0.805	74.3633	115.7848	0.21484	-0.20557	-0.065918	-5.49	63.3797	167.436	0.23975	-0.013184	0.072754	33.9539	-112.086	1217.511	-0.67031	0.93125	-0.72852
0.92	-56.9897	43.8806	1132.6902	-0.86055	1.2961	-0.71524	-81.246	146.7338	918.336	-0.94482	1.1313	-0.65967	-80.85	75.2795	726.157	-0.33154	0.96143	-0.19092	16.938	108.3763	736.30817	-0.3581	0.78936	-0.49599	-1.971	60.0116	109.4615	0.21875	-0.21065	-0.07334	-14.681	84.917	152.3678	0.25146	-0.02002	0.078613	15.6314	-135.1486	1257.9214	-0.71328	0.96562	-0.73477
0.922	-59.188	42.599	1126.375	-0.83175	1.2688	-0.70752	-57.07	151.3555	903.276	-0.91621	1.107	-0.63906	-72.6922	67.704	786.21	-0.39629	1.0269	-0.21865	9.626	112.34678	721.8777	-0.34131	0.75879	-0.47656	-17.793	47.0521	97.935	0.22207	-0.21338	-0.069629	-33.619	70.9705	132.1528	0.26318	-0.023682	0.079589	26.6601	-145.766	1281.165	-0.74502	1.0024	-0.75088
0.924	-64.516966	54.51	1099.6262	-0.79854	1.2349	-0.69619	-56.134	145.00485	893.4682	-0.88975	1.0864	-0.6249	-57.71239	62.897	840.1799	-0.46367	1.0937	-0.24209	10.755	103.0286	702.0512	-0.3167	0.73232	-0.46602	0.698	59.269	93.2193	0.21621	-0.2044	-0.07627	-47.759	57.6156	124.7749	0.26514	-0.022949	0.084473	1.8936	-164.911	1312.3184	-0.76855	1.0508	-0.76855
0.926	-63.2701	57.736	1095.384	-0.77139	1.2054	-0.68096	-36.586	154.9752	865.8687	-0.86552	1.0622	-0.60459	-25.639	56.3218	862.7862	-0.53399	1.1516	-0.26201	15.237	98.4729	666.8446	-0.29755	0.7042	-0.44521	-18.765	62.445	94.9714	0.20635	-0.19863	-0.079102	-45.831	55.4592	113.3283	0.26758	-0.033691	0.091797	15.972	-163.598	1316.084	-0.78926	1.1088	-0.78633
0.928	-83.2142	79.887	1070.3731	-0.74951	1.1743	-0.67139	-37.322	157.1526	853.0754	-0.84004	1.0369	-0.59023	-51.5992	30.5322	879.978	-0.60625	1.2018	-0.28027	11.936	100.7208	639.145	-0.27998	0.6792	-0.43467	-9.698	58.361	94.5083	0.19824	-0.19873	-0.074219	-64.4578	60.4156	112.1313	0.271	-0.033691	0.09375	-5.8349	-150.583	1319.7507	-0.81123	1.1667	-0.80224
0.93	-83.844	91.5257	1038.742	-0.71873	1.1447	-0.66073	-22.053	157.3484	836.3397	-0.8125	1.0137	-0.57129	-45.0272	12.223	886.992	-0.67188	1.2383	-0.29004	-17.47	108.5273	618.175	-0.26221	0.65078	-0.4165	-30.552	56.1685	92.1641	0.19493	-0.19727	-0.079395	-69.0926	50.1256	100.695	0.26611	-0.028809	0.094238	17.2701	-135.34	1314.618	-0.84443	1.2257	-0.81592
0.932	-66.637935	100.8265	1011.1368	-0.69334	1.1162	-0.64101	-6.727	157.2335	805.0853	-0.7916	0.98887	-0.55371	-33.399	-9.015	890.232	-0.74024	1.2539	-0.29375	-16.712	108.1771	609.9255	-0.24561	0.62549	-0.40381	-35.649	45.8931	81.9801	0.18155	-0.18272	-0.086328	-70.7369	47.15374	95.1751	0.25903	-0.025879	0.08789	9.2268	-137.017	1332.878	-0.8918	1.2864	-0.83233
0.934	-56.076	107.364	985.7918	-0.66873	1.0865	-0.62693	4.858	163.4605	777.688	-0.76416	0.96064	-0.53467	-13.895	-3.723	858.1743	-0.78662	1.2575	-0.29307	1.26600000000001	118.712	592.8723	-0.22978	0.5962	-0.39326	-52.5413	31.5646	75.1622	0.16514	-0.16318	-0.092578	-60.914	60.365	83.0209	0.25439	-0.018555	0.081543	27.7692	-112.4263	1330.23	-0.94141	1.3496	-0.85938
0.936	-75.12962	108.42	948.7697	-0.64187	1.0596	-0.6162	-4.792	156.9394	746.5224	-0.73955	0.93604	-0.51826	-3.746	-22.803	854.735	-0.81514	1.2513	-0.28955	-0.242000000000004	135.004	573.9079	-0.21279	0.56455	-0.3791	-50.302	32.8761	76.41219	0.14688	-0.14062	-0.095019	-67.581	53.7333	79.4541	0.25146	-0.0092773	0.072754	8.364	-116.209	1342.4015	-0.99094	1.4149	-0.86865
0.938	-55.667	106.885	929.956	-0.62061	1.0298	-0.60498	3.432	150.4851	711.7482	-0.71231	0.90722	-0.50254	16.077	-28.851	832.257	-0.82227	1.2422	-0.28379	-21.197	129.644	551.79842	-0.18858	0.53174	-0.36269	-55.719	46.8168	68.80905	0.125	-0.11865	-0.1001	-71.6683	44.2702	73.5951	0.24756	-0.0019531	0.069336	36.693	-105.1732	1322.903	-1.0313	1.4754	-0.8875
0.94	-57.6564	105.136	901.857	-0.59371	0.99977	-0.5925	2.316	147.9727	689.6455	-0.68359	0.88086	-0.48047	22.892	-22.3438	834.498	-0.81836	1.2344	-0.28467	-41.092	112.53	530.5795	-0.16983	0.50303	-0.35146	-46.19	45.8967	60.4758	0.10234	-0.093751	-0.10098	-44.217	52.0998	60.2748	0.23584	0.011719	0.063477	58.924	-106.80903	1332.099	-1.0664	1.527	-0.90937
0.942	-43.388	110.809	887.316	-0.56884	0.97197	-0.57837	-3.19199999999999	158.528	666.8636	-0.65644	0.85098	-0.46064	7.647	-12.8126	838.712	-0.79776	1.2349	-0.28066	-40.229	129.1795	485.836	-0.15479	0.47021	-0.33643	-66.187	36.1032	53.6863	0.072852	-0.057422	-0.1084	-51.461	58.9591	45.912	0.22754	0.023438	0.058594	82.575	-83.131	1312.283	-1.0984	1.5641	-0.925
0.944	-47.676	117.0413	874.3747	-0.54035	0.94037	-0.56547	25.21	156.368	664.9845	-0.62988	0.82149	-0.44277	8.741	-19.068	863.147	-0.78164	1.2356	-0.27812	-62.923	145.331	473.499	-0.13369	0.4374	-0.32451	-70.7138	42.8862	40.412	0.039259	-0.023438	-0.11191	-57.2941	40.59843	58.526	0.21436	0.032715	0.05127	87.451	-72.456	1322.002	-1.1323	1.5845	-0.93506
0.946	-22.687	112.2124	858.753	-0.51602	0.91523	-0.55249	25.353	155.6	648.945	-0.60527	0.79375	-0.42598	26.898	-15.522	876.8844	-0.77031	1.2391	-0.28008	-54.075	132.2091	441.0827	-0.11367	0.4083	-0.30869	-58.5533	47.4009	52.91288	0.0080083	0.0097654	-0.11533	-63.0693	37.0176	55.1093	0.20068	0.057129	0.043457	85.195	-66.871	1325.765	-1.168	1.5941	-0.94258
0.948	-21.378	128.1802	830.7927	-0.49561	0.88721	-0.53662	-2.551	161.3288	628.514	-0.575	0.76445	-0.40635	49.958	-2.127	893.047	-0.75283	1.2362	-0.2708	-65.4355	116.3013	427.3557	-0.096094	0.37822	-0.30205	-50.572	47.8775	48.1569	-0.023438	0.039551	-0.11377	-16.827	37.77812	56.3033	0.1958	0.065918	0.026855	69.603	-57.142	1342.122	-1.2	1.5968	-0.94453
0.95	-13.721	143.2391	815.8232	-0.46825	0.85845	-0.52231	-27.325	155.984	587.0552	-0.54492	0.73779	-0.38574	22.703	1.864	895.013	-0.73633	1.2266	-0.26855	-73.4986	119.8631	414.775	-0.075293	0.34951	-0.28506	-38.173	52.6481	56.2014	-0.053321	0.067188	-0.11504	-24.458	39.1872	42.83512	0.18311	0.091309	0.026367	70.157	-63.124	1360.4981	-1.2375	1.5922	-0.94844
0.952	10.418	117.973	804.8636	-0.44633	0.83532	-0.50805	-20.71	149.142	565.0846	-0.51728	0.7081	-0.36465	21.215	-15.74	911.3662	-0.70713	1.2112	-0.26358	-90.929	112.8903	410.1258	-0.056152	0.31689	-0.27539	-39.298	52.698	41.9345	-0.083693	0.094534	-0.11816	-16.166	29.7772	41.8134	0.17066	0.1084	0.020752	94.459	-78.0188	1372.2262	-1.2619	1.5934	-0.95429
0.954	26.601	115.87	778.57357	-0.42356	0.81007	-0.49632	-47.718	153.5344	529.2096	-0.4876	0.68291	-0.34639	17.384	-44.926	934.193	-0.67891	1.1977	-0.26465	-62.9116	104.56783	384.6432	-0.041895	0.28779	-0.26142	-44.23	41.4114	35.7095	-0.11221	0.12188	-0.11934	-18.927	35.9227	46.48169	0.15479	0.12549	0.0097656	96.164	-69.2319	1395.3643	-1.2754	1.6016	-0.96289
0.956	15.149	110.1191	767.65689	-0.3996	0.78468	-0.47696	-41.601	143.3709	508.2387	-0.45713	0.65713	-0.32607	10.923	-59.412	957.5581	-0.64453	1.1883	-0.26425	-64.1254	106.6827	375.3853	-0.021875	0.26015	-0.24717	-31.726	31.47526	35.6282	-0.13789	0.15196	-0.12617	4.05399999999999	31.408	40.8254	0.13916	0.15576	0.0029297	104.163	-66.623	1398.51	-1.2793	1.607	-0.9707
0.958	19.175	115.6331	745.2473	-0.38721	0.7583	-0.45654	-55.834	129.472	481.823	-0.43008	0.63223	-0.3084	-3.305	-106.941	970.2018	-0.61729	1.1755	-0.27695	-56.969	111.5875	358.3283	-0.0066406	0.23359	-0.23311	-3.127	30.4268	39.1366	-0.15918	0.18457	-0.12891	-4.758	24.553	40.32996	0.12744	0.1665	-0.00048828	86.598	-74.859	1409.455	-1.2774	1.607	-0.96993
0.96	-3.702	98.9779	725.328	-0.35815	0.73553	-0.45521	-64.202	115.9818	452.836	-0.40186	0.60791	-0.29248	-1.319	-139.041	980.4912	-0.59229	1.1802	-0.28076	-55.316	101.3401	344.0991	0.0076173	0.20781	-0.22295	-10.916	34.21941	39.652	-0.1749	0.21182	-0.13584	17.761	11.6133	36.5034	0.10986	0.19287	-0.0058594	85.311	-75.6958	1433.6303	-1.2727	1.6039	-0.97773
0.962	-19.113	121.48	701.5588	-0.33028	0.70575	-0.44218	-88.5848	123.4015	426.8359	-0.3708	0.58086	-0.27549	-7.879	-156.268	991.121	-0.58984	1.189	-0.29355	-40.598	91.9029	320.807	0.022461	0.18262	-0.21191	-14.251	27.499	24.1703	-0.18603	0.23203	-0.14063	6.407	10.5658	25.4805	0.09424	0.2085	-0.0024414	100.091	-58.1544	1441.82	-1.2657	1.5936	-0.97432
0.964	-22.101	140.22	683.188	-0.30721	0.68102	-0.42848	-90.2548	119.5899	426.5233	-0.34063	0.55781	-0.25791	-26.977	-161.734	1009.756	-0.59716	1.213	-0.31026	-44.091	101.4716	319.0065	0.038964	0.15108	-0.196	-11.277	31.771	24.1826	-0.19463	0.24843	-0.14102	15.345	16.073	18.944	0.083008	0.22119	-0.0063477	89.907	-40.045	1447.742	-1.2598	1.5801	-0.97266
0.966	-29.905	150.693	652.204	-0.28233	0.6554	-0.41443	-89.4077	120.62181	412.4555	-0.3086	0.52968	-0.24307	-40.955	-166.518	1027.66975	-0.61475	1.2423	-0.33252	-26.203	97.7907	302.5441	0.054394	0.12578	-0.1833	-4.751	37.087	40.8492	-0.19668	0.25986	-0.14238	-20	18.5086	22.468	0.078613	0.23145	-0.012207	70.004	-26.506	1442.161	-1.2557	1.5682	-0.97129
0.968	-30.577	155.392	628.6763	-0.25781	0.625	-0.40039	-72.7441	128.6084	390.24455	-0.27441	0.50235	-0.22461	-36.836	-151.8097	1040.2706	-0.63301	1.2728	-0.35752	-39.283	89.3068	288.806	0.071973	0.095704	-0.17784	-4.811	24.9664	33.7794	-0.2002	0.26709	-0.14404	2.30399999999999	32.2248	32.9906	0.067383	0.23779	-0.01416	42.488	-20.218	1425.894	-1.2515	1.5477	-0.96943
0.97	-54.682	159.856	603.4867	-0.22799	0.5996	-0.39082	-82.51334	124.9547	357.7671	-0.24609	0.47461	-0.20654	-46.299	-125.482	1047.56524	-0.65039	1.3027	-0.37598	-24.972	109.364	264.0003	0.088965	0.065235	-0.16865	14.469	21.2294	35.3514	-0.20127	0.26787	-0.14492	12.304	37.5156	36.7026	0.069824	0.24707	-0.018066	47.38	5.24707	1401.816	-1.2437	1.5353	-0.96787
0.972	-67.894	141.7826	588.5106	-0.2023	0.56815	-0.37818	-82.5359	110.7784	335.506	-0.21601	0.45244	-0.18936	-79.4387	-114.0273	1067.9323	-0.67217	1.3497	-0.39619	-16.675	115.689	254.494	0.11377	0.039063	-0.1582	-6.57	17.29619	24.8408	-0.20088	0.26005	-0.14386	-6.671	31.8517	33.9945	0.063476	0.24756	-0.013916	18.53039	21.9376	1391.018	-1.2296	1.5221	-0.9708
0.974	-60.332	123.6146	570.6311	-0.16972	0.53719	-0.36465	-79.6933	98.4838	328.802	-0.18623	0.4291	-0.17773	-76.223	-100.6257	1089.5156	-0.69297	1.3879	-0.41211	-16.742	96.77	246.8015	0.13047	0.016015	-0.14834	-2.8	21.830796	32.4697	-0.19775	0.25106	-0.14501	-32.604	16.6261	36.8645	0.064453	0.24609	-0.012695	22.344	25.31762	1405.4393	-1.2222	1.5132	-0.97021
0.976	-47.351	129.247	558.1717	-0.14054	0.50163	-0.34857	-73.0844	114.0921	305.3212	-0.16123	0.40762	-0.15937	-67.1625	-77.83	1110.7347	-0.71523	1.4285	-0.43437	0.729999999999997	84.5455	235.0321	0.15019	-0.0076172	-0.13281	-29.108	35.2772	23.3853	-0.19325	0.23572	-0.14248	-26.464	39.077	17.139	0.0625	0.24365	-0.0063477	25.539	28.606	1409.3523	-1.208	1.5018	-0.96933
0.978	-62.912	124.4104	532.683	-0.10889	0.47314	-0.33643	-68.948	109.7291	268.5351	-0.12969	0.3835	-0.14502	-64.0631	-47.409	1124.2885	-0.73691	1.476	-0.45107	11.735	85.7465	221.73754	0.16504	-0.034179	-0.12305	-5.8	40.0753	35.3709	-0.18896	0.22314	-0.14209	-32.236	40.395	28.008	0.064941	0.24414	-0.00048828	3.99606	40.89	1401.3293	-1.1929	1.4903	-0.96865
0.98	-87.5292	116.6849	510.3006	-0.078181	0.44194	-0.32219	-44.442	105.686	253.5172	-0.10693	0.3623	-0.13135	-71.11969	-47.579	1133.5932	-0.75586	1.5156	-0.4707	-0.482999999999997	83.3557	207.7157	0.18457	-0.054785	-0.1085	-14.483	38.6969	29.7199	-0.18088	0.20033	-0.14258	-69.3801	32.6209	29.4539	0.062012	0.24072	0.010254	18.8622	45.854	1407.28939	-1.1769	1.4837	-0.96748
0.982	-91.5947	118.404	486.5284	-0.051858	0.40601	-0.31833	-36.01	107.598	235.929	-0.081445	0.33965	-0.11523	-60.6958	-57.636	1130.6518	-0.77226	1.5676	-0.47812	-15.175	77.9931	211.6304	0.1958	-0.068848	-0.10156	-27.346	35.93082	28.3442	-0.17003	0.17907	-0.14125	-47.163	23.1183	26.9921	0.059082	0.23511	0.016601	41.258	44.679	1398.7249	-1.1654	1.4752	-0.96055
0.984	-103.6265	134.405	458.4364	-0.028341	0.37634	-0.29605	-25.299	103.959	238.4098	-0.059277	0.32325	-0.10235	-55.408	-68.91	1163.2477	-0.78086	1.6098	-0.49356	9.557	89.2978	195.5679	0.21495	-0.091113	-0.090625	-50.707	32.1074	17.1776	-0.16342	0.1549	-0.13497	-48.464	20.0787	22.265	0.057129	0.23242	0.021484	32.097	45.704	1422.336	-1.1543	1.4648	-0.94922
0.986	-99.9995	130.713	443.5145	-0.0054959	0.34874	-0.28208	-10.023	100.581	224.80935	-0.030371	0.30449	-0.094922	-71.722	-87.027	1179.1579	-0.77735	1.6445	-0.5041	-18.039	98.263	186.0172	0.22578	-0.10459	-0.074903	-50.464	37.5107	28.433	-0.1515	0.13018	-0.12872	-59.2024	20.1547	18.222	0.056641	0.2334	0.031738	20.0944	31.4803	1388.805	-1.152	1.4508	-0.94668
0.988	-93.19157	124.5156	428.398	0.01416	0.32324	-0.26807	10.94	87.8821	224.7205	-0.005957	0.28261	-0.07959	-45.401	-107.3843	1210.6542	-0.77617	1.6693	-0.51347	-10.424	89.3956	182.952	0.23516	-0.11709	-0.065137	-44.809	32.7374	39.831	-0.14502	0.11426	-0.11768	-64.5025	26.263	36.3724	0.060059	0.23096	0.038086	33.796	-4.672	1374.5988	-1.1461	1.45	-0.93906
0.99	-84.3167	107.6464	391.359	0.030499	0.30114	-0.2477	1.91	83.7929	203.4212	0.023438	0.2583	-0.071289	-30.155	-108.5069	1214.485	-0.76953	1.6855	-0.51953	-36.632	79.7355	163.8312	0.24677	-0.12334	-0.056836	-57.067	28.7317	44.6492	-0.13367	0.088047	-0.11994	-44.354	38.00984	35.811	0.063965	0.22998	0.047852	30.828	-6.459	1340.6681	-1.1414	1.4438	-0.9289
0.992	-80.3309	96.554	377.769	0.042448	0.28232	-0.23303	5.447	74.37	190.321	0.046582	0.24004	-0.060449	-26.858	-118.98	1236.9496	-0.75996	1.6936	-0.52812	-32.399	87.4388	162.1173	0.25439	-0.13037	-0.046387	-52.755	10.168966	50.1074	-0.12459	0.066706	-0.11551	-56.389	38.9913	33.5895	0.066895	0.22901	0.050537	23.1005	11.54	1333.7103	-1.133	1.4405	-0.92344
0.994	-55.656	96.295	355.478	0.051068	0.26521	-0.22023	-0.757999999999996	73.198	182.2891	0.074609	0.22285	-0.055566	-44.787	-130.561	1240.0512	-0.75615	1.6982	-0.53564	-56.7449	77.3492	153.2106	0.26094	-0.13164	-0.042871	-46.373	5.43905	52.7289	-0.11319	0.049423	-0.11435	-49.2598	27.53911	23.2043	0.07373	0.23145	0.060059	36.691	30.2086	1300.18871	-1.123	1.4375	-0.91406
0.996	-29.621	103.66097	350.7128	0.060904	0.24523	-0.20734	10.534	82.051	164.7031	0.098436	0.20058	-0.039941	-32.556	-132.287	1245.3583	-0.75889	1.6986	-0.53642	-47.445	64.8829	140.24176	0.26299	-0.12373	-0.0375	-71.0597	1.586065	65.5941	-0.10595	0.025728	-0.11158	-43.3123	14.5031	20.089	0.075684	0.23242	0.070801	62.518	27.5793	1287.3201	-1.1135	1.4334	-0.90371
0.998	-18.016	104.0893	340.867	0.067383	0.229	-0.19531	0.884999999999998	85.805	152.48	0.12471	0.17754	-0.032422	-22.244	-103.0931	1285.671	-0.77685	1.7025	-0.54756	-48.068	60.3107	136.1834	0.26533	-0.11358	-0.032032	-73.69	9.1793	74.7823	-0.094238	0.0058594	-0.10889	-26.461	27.5191	22.349	0.074219	0.22998	0.07666	45.073	38.0889	1287.79392	-1.0937	1.4258	-0.89883
1	-20.262	106.342	316.7925	0.076107	0.21135	-0.17995	5.955	64.093	139.348	0.15088	0.15576	-0.019531	-6.327	-87.4464	1304.668	-0.80273	1.7109	-0.55664	-44.139	63.1238	124.2351	0.26905	-0.10039	-0.030469	-53.359	13.0166	119.5937	-0.086936	-0.0044997	-0.10931	-31.274	30.8092	31.9434	0.072754	0.24268	0.087402	73.916	45.7208	1273.1296	-1.0781	1.4102	-0.88945
1.002	-10.114	98.283	295.956	0.081776	0.19309	-0.16703	-31.253	50.7317	147.7401	0.17452	0.13955	-0.010156	-12.588	-83.0964	1316.022	-0.82656	1.7258	-0.56797	-67.6113	46.6382	123.5719	0.27393	-0.086914	-0.022949	-28.23	20.21112	128.9175	-0.087449	-0.011373	-0.10566	-31.073	33.1709	27.9655	0.070313	0.24805	0.091308	85.662	56.91	1278.5745	-1.0616	1.3993	-0.88311
1.004	-4.08	100.184	291.6117	0.089178	0.17789	-0.15023	-23.982	59.569	133.3984	0.19267	0.11885	-0.0064453	14.971	-79.4704	1319.1994	-0.85703	1.7453	-0.58164	-64.5808	51.4929	125.0053	0.27549	-0.06709	-0.022949	-43.1179	15.247	138.3818	-0.088634	-0.015278	-0.10797	-20.308	45.0656	18.173	0.064941	0.25732	0.095703	114.604	87.408	1265.258	-1.0483	1.3892	-0.87451
1.006	-22.152	101.8577	275.7531	0.089457	0.15681	-0.13681	-34.118	60.6269	128.9284	0.20987	0.104	0.0033204	-20.691	-70.9989	1323.41866	-0.89453	1.7719	-0.59414	-60.686	66.7338	109.4652	0.27325	-0.056641	-0.015137	-20.403	20.501	151.022	-0.094848	-0.015165	-0.10706	-12.191	37.602	38.9318	0.048828	0.27197	0.092773	85.568	101.444	1244.5957	-1.041	1.3817	-0.86367
1.008	-11.342	92.19949	253.9575	0.088379	0.14307	-0.12695	-20.785	57.81662	110.8612	0.22529	0.084277	0.015332	-23.683	-69.1313	1323.0066	-0.92314	1.7933	-0.60635	-49.763	72.0736	100.1799	0.26973	-0.031641	-0.019824	-19.9	43.526	183.074	-0.10693	-0.0087891	-0.11377	-19.112	10.8023	50.392	0.040772	0.28442	0.096436	93.01	93.804	1207.24031	-1.0288	1.3825	-0.85674
1.01	-18.001	77.3768	238.4583	0.099601	0.12706	-0.11259	-50.948	50.6841	115.6242	0.23975	0.070313	0.025879	-26.688	-52.7084	1326.7776	-0.9502	1.8164	-0.61914	-57.9287	59.9578	82.2171	0.26435	0.00058606	-0.029688	-6.431	82.3783	223.804	-0.11581	-0.0017985	-0.12332	12.98	9.68722	63.9545	0.031738	0.30127	0.096191	58.433	82.64	1182.8619	-1.0249	1.3778	-0.84814
1.012	-5.047	74.724	208.466	0.10546	0.10998	-0.099222	-64.133	54.015887	79.144	0.25195	0.059375	0.026953	-9.217	-39.412	1321.215	-0.9792	1.8376	-0.63213	-65.4033	48.6308	65.262	0.25586	0.028809	-0.030762	-14.885	105.2116	260.2933	-0.1242	0.013057	-0.12883	38.045	23.2202	57.0917	0.021484	0.31885	0.09375	65.869	77.4869	1157.6766	-1.0148	1.3811	-0.84385
1.014	-26.703	75.1175	197.91	0.11562	0.09318	-0.092197	-84.2275	47.9399	79.9953	0.26436	0.048926	0.039355	-41.203	-33.511	1317.087	-1.0017	1.854	-0.63819	-39.262	48.5725	76.236	0.2459	0.069043	-0.041308	9.105	106.8937	294.3678	-0.13361	0.034279	-0.13939	19.953	27.7286	67.2514	0.016602	0.32813	0.089844	49.117	66.1949	1155.1617	-1.0078	1.3809	-0.83594
1.016	7.052	73.7756	196.6168	0.12382	0.077059	-0.075592	-77.6434	58.3807	78.8703	0.27646	0.034473	0.039747	-61.408	-36.017	1313.906	-1.0263	1.8684	-0.6417	-50.7858	48.2806	77.7627	0.23408	0.10479	-0.052832	8.026	107.792	329.73552	-0.14653	0.056844	-0.1535	-3.893	4.228956	60.062	0.012695	0.35498	0.082031	69.55	60.3755	1152.85	-0.99482	1.3782	-0.83037
1.018	-9.721	79.731	203.543	0.1333	0.05957	-0.063477	-76.30725	64.5611	91.9586	0.28584	0.030176	0.047363	-62.242	-36.218	1351.638	-1.0463	1.8771	-0.65332	-28.453	44.2976	81.5726	0.2208	0.13643	-0.061035	7.566	99.567	376.5584	-0.16016	0.085938	-0.16699	9.014	-17.6596	81.555	0.0004883	0.38061	0.070069	42.08	60.2634	1139.8734	-0.97842	1.3743	-0.82256
1.02	-21.021	87.8759	200.02	0.13926	0.045602	-0.053806	-86.7397	63.7507	77.372	0.29297	0.023926	0.061523	-72.047	-27.1381	1359.608	-1.0664	1.8887	-0.66406	-11	58.6649	76.4977	0.2127	0.17031	-0.069043	4.801	110.256	453.8435	-0.17812	0.12203	-0.1763	14.711	-7.8301	102.47483	-0.0083008	0.40576	0.05957	37.53	70.40946	1111.573	-0.96162	1.363	-0.81201
1.022	-50.7111	74.58596	180.9749	0.14512	0.032515	-0.044234	-84.4967	49.9529	84.639577	0.29326	0.019434	0.069532	-92.5477	-36.654	1401.5693	-1.0813	1.9054	-0.67197	-8.063	56.337	64.5834	0.2002	0.20361	-0.081055	21.293	122.92	482.175	-0.20298	0.15922	-0.18927	-7.415	4.25723	141.014	-0.02832	0.44482	0.041016	16.7226	63.9545	1104.3939	-0.94239	1.3498	-0.80469
1.024	-37.612	61.7146	171.4291	0.1541	0.018064	-0.034471	-82.5333	51.22529	54.24	0.29678	0.021973	0.074024	-64.7846	-41.785	1402.138	-1.0916	1.9102	-0.67617	-9.372	50.8785	66.1035	0.18525	0.23848	-0.088672	14.585	106.107	535.978	-0.23294	0.20191	-0.2029	-9.384	22.314	151.0308	-0.037109	0.46387	0.037598	21.8548	69.9217	1102.8859	-0.92529	1.3325	-0.79541
1.026	-62.104	66.2012	162.6678	0.15859	0.0082999	-0.030761	-85.0155	51.5798	50.508	0.28935	0.016894	0.075196	-54.857	-35.1341	1429.5869	-1.101	1.9086	-0.67773	-0.274000000000001	43.7163	65.4367	0.17432	0.27324	-0.095508	-1.337	81.818	575.863	-0.2669	0.25327	-0.21869	-13.421	40.4496	166.6895	-0.066406	0.50537	0.010254	19.5552	75.635	1091.61	-0.89834	1.3146	-0.78115
1.028	-71.972	71.513	139.6553	0.16113	-0.0014648	-0.018066	-68.9179	54.7339	57.8837	0.28731	0.016895	0.07373	-69.965	-10.66259	1432.5191	-1.1063	1.9074	-0.68594	14.755	43.76507	56.77536	0.16455	0.30098	-0.10918	-12.758	53.7469	648.91	-0.30127	0.30811	-0.22656	-30.816	57.1674	183.25	-0.083252	0.54956	-0.01416	0.164899999999999	91.873	1062.158	-0.87852	1.2926	-0.7707
1.03	-88.4777	65.4284	120.68049	0.16504	-0.0078123	-0.024316	-46.554	48.4868	55.1243	0.28271	0.012695	0.069824	-79.448	-13.3432	1451.775	-1.1025	1.9004	-0.68555	-4.401	30.7008	52.8597	0.15664	0.32647	-0.11621	-1.653	56.80318	696.332	-0.34256	0.38227	-0.23863	-18.227	60.0871	225.07	-0.10889	0.60107	-0.038574	-8.5301	91.9225	1047.41318	-0.8582	1.2707	-0.76016
1.032	-75.5814	61.6713	102.5535	0.16162	-0.015136	-0.012695	-52.923	55.1386	37.5893	0.27901	0.013672	0.07041	-78.1104	-10.1431	1437.56	-1.1032	1.88	-0.67783	-8.968	16.88	51.4183	0.14453	0.35156	-0.12354	-28.681	55.2023	763.4708	-0.38684	0.45243	-0.24285	-2.826	75.26641	273.6046	-0.14844	0.68555	-0.075684	-20.5054	106.8852	1015.7109	-0.83066	1.243	-0.7457
1.034	-100.127	67.1018	100.349	0.16591	-0.018262	-0.0087897	-33.691	47.0347	41.5691	0.2753	0.012404	0.073631	-62.6326	-0.2433	1439.1048	-1.0968	1.8646	-0.67373	4.595	26.1335	43.7762	0.14307	0.36758	-0.12734	-29.172	50.984	807.9749	-0.43585	0.53804	-0.24822	4.32	82.37028	315.19002	-0.17285	0.73096	-0.09668	-30.4633	132.559	994.74655	-0.80615	1.2134	-0.73486
1.036	-78.3525	59.0502	103.4084	0.16621	-0.024121	-0.0099609	-33.354	38.9099	54.8896	0.26709	0.01123	0.07871	-78.8365	-4.1854	1424.6458	-1.089	1.838	-0.66748	2.858	30.3529	27.754	0.13516	0.38008	-0.12891	-39.394	27.8303	869.156	-0.48833	0.62096	-0.25725	-31.4665	85.7519	366.4904	-0.23193	0.83838	-0.14355	-18.0837	145.3461	960.8112	-0.78115	1.1798	-0.72373
1.038	-69.0085	54.6436	111.6592	0.16455	-0.025879	-0.015137	-12.091	44.2019	68.0928	0.25674	0.017771	0.076662	-45.188	-1.5328	1413.674	-1.0813	1.8151	-0.66377	-4.77200000000001	39.326	42.39376	0.12734	0.38399	-0.13086	-71.702	8.9201	895.616	-0.54102	0.70801	-0.27344	-30.3103	81.0025	430.022	-0.29174	0.92187	-0.1831	1.949	140.123	937.1875	-0.75469	1.1451	-0.70469
1.04	-58.205	71.1787	109.8403	0.16416	-0.025488	-0.018652	-14.698	46.595	57.049	0.24365	0.024902	0.079102	-51.357	14.36023	1411.12	-1.0737	1.7935	-0.65967	-10.793	40.984	53.5505	0.12295	0.38428	-0.12656	-78.004	-16.9654	892.223	-0.58618	0.79724	-0.29284	-32.8263	92.089	498.552	-0.35596	1.0156	-0.2207	-22.8362	142.87	909.715	-0.72695	1.1073	-0.69492
1.042	-65.217	71.452	89.357	0.16182	-0.02295	-0.023633	16.551	38.097	45.5253	0.22274	0.03418	0.077832	-43.976	42.0959	1405.312	-1.0638	1.769	-0.65498	-13.494	50.351	51.0947	0.12354	0.37988	-0.12109	-77.888	-31.9559	900.678	-0.63199	0.87882	-0.31448	-13.845	91.4429	576.97	-0.45215	1.1411	-0.27002	-9.103	129.097	889.599	-0.70137	1.0717	-0.67754
1.044	-69.3891	53.7767	82.763	0.16065	-0.022168	-0.029883	-1.623	27.8053	37.9772	0.20818	0.04445	0.074805	-46.371	37.015	1386.174	-1.0503	1.7501	-0.65166	-23.432	35.117	45.7873	0.11533	0.37168	-0.11582	-87.968	-38.434	908.866	-0.66749	0.94943	-0.3461	-43.1526	62.2679	679.957	-0.50586	1.1992	-0.29102	6.614	121.941	873.408	-0.67871	1.0371	-0.66016
1.046	-59.376	58.0889	75.99	0.15596	-0.019141	-0.037109	10.604	31.4155	39.8577	0.18866	0.057723	0.073238	-4.645	41.225	1377.178	-1.0327	1.7208	-0.64736	-43.962	22.0383	49.6261	0.11582	0.35655	-0.1123	-134.19	-40.299	884.885	-0.70102	1.0071	-0.37055	-34.822	38.9667	769.997	-0.62891	1.3203	-0.30859	27.0367	125.9226	846.378	-0.65635	1.0011	-0.64502
1.048	-41.796	67.42592	73.35603	0.15039	-0.015625	-0.039551	10.274	35.692	37.2954	0.17089	0.067782	0.067283	-14.249	70.421	1394.7623	-1.0138	1.6931	-0.63916	-35.043	19.8072	44.274	0.11504	0.33271	-0.11152	-95.0484	-43.633	846.714	-0.72656	1.0566	-0.40088	-41.3444	35.176	869.032	-0.7251	1.3994	-0.31592	5.422	123.6704	829.137	-0.62832	0.96817	-0.63008
1.05	-26.347	54.23984	65.835	0.14453	-0.0082031	-0.04248	17.796	43.324	23.9145	0.15625	0.077148	0.061523	-8.809	64.497	1402.6123	-0.98975	1.6626	-0.63623	-55.525	17.1934	41.088	0.12353	0.30781	-0.10381	-107.0414	-43.6702	820.315	-0.7454	1.0866	-0.42859	-30.697	16.891	949.893	-0.81641	1.46	-0.32861	17.125	122.0075	815.4554	-0.60801	0.93066	-0.61133
1.052	-27.921	46.973	61.199	0.13398	0.0029296	-0.050098	5.492	36.0772	39.5282	0.14144	0.085145	0.06056	-2.038	62.559	1393.4824	-0.96728	1.6358	-0.62705	-53.3847	5.1147	29.123	0.12695	0.27783	-0.092773	-93.993	-38.326	813.287	-0.75418	1.1094	-0.45613	-30.395	-13.527	1011.4868	-0.90967	1.5161	-0.36816	4.869	119.2463	800.1873	-0.58125	0.9041	-0.58965
1.054	-14.361	55.429	66.2498	0.12226	0.017383	-0.05166	-1.11600000000001	35.5008	37.7613	0.12622	0.091581	0.054498	7.582	62.9612	1368.1096	-0.94609	1.6098	-0.62422	-66.7012	3.3832	38.5468	0.12841	0.2541	-0.07998	-115.876	-28.7781	829.0162	-0.76669	1.1223	-0.47762	-9.91	-50.5693	1046.2866	-0.9375	1.5293	-0.38672	21.9982	144.8476	796.0219	-0.55908	0.86719	-0.58105
1.056	-20.26	56.074	67.3993	0.10898	0.030664	-0.059473	-22.616	27.0805	55.4814	0.1172	0.10015	0.051774	-21.481	56.7462	1349.4438	-0.92265	1.5832	-0.61719	-51.731	10.6682	44.0809	0.13194	0.23067	-0.076465	-88.099	-13.5353	826.547952	-0.77617	1.1272	-0.49823	-17.363	-86.7378	1065.663	-0.96631	1.5493	-0.42773	37.3689	152.902	784.36	-0.52432	0.83779	-0.55986
1.058	-1.572	45.7903	79.3033	0.09375	0.043457	-0.05957	-16.624	33.9866	64.9133	0.09866	0.10935	0.048159	-16.558	48.5886	1318.7	-0.90127	1.5573	-0.61074	-68.6432	7.8172	61.4639	0.13194	0.21504	-0.066699	-84.598	-0.727999999999998	833.78	-0.78418	1.1328	-0.52734	-29.418	-101.508	1059.67	-0.9624	1.5601	-0.43799	31.97769	123.823	756.961	-0.49687	0.80996	-0.54883
1.06	13.711	38.2411	69.29022	0.082715	0.056738	-0.061914	-11.741	42.4508	53.8773	0.087402	0.10938	0.043945	-12.683	41.7526	1302.604	-0.88037	1.5356	-0.60693	-62.99	2.1402	69.9971	0.12441	0.19551	-0.065723	-63.608	-2.487	849.526	-0.78828	1.1402	-0.55333	-19.381	-115.755	1076.076	-0.94238	1.5684	-0.45215	15.333	103.17829	731.512	-0.47422	0.77637	-0.53008
1.062	24.134	42.3063	58.266	0.066601	0.07539	-0.066113	-27.914	42.0444	39.4076	0.079091	0.11553	0.039908	-15.928	64.4719	1286.608	-0.86181	1.5092	-0.60088	-49.046	13.5027	64.64035	0.12549	0.18604	-0.059082	-75.1979	-8.336	867.0862	-0.78545	1.1392	-0.57784	-0.536000000000001	-113.823	1043.329	-0.89453	1.5664	-0.45508	16.074	105.493	703.165	-0.44649	0.74785	-0.51347
1.064	-10.519	32.6573	33.816	0.052539	0.09375	-0.066504	-52.837	30.05993	28.1386	0.065884	0.12173	0.039718	-32.131	55.9517	1291.832	-0.83936	1.4884	-0.59404	-53.2201	11.6315	62.966	0.11748	0.16474	-0.051953	-42.107	-23.686	881.30451	-0.76982	1.1469	-0.59971	18.817	-126.912	1028.149	-0.86816	1.5508	-0.45703	38.6872	99.204	674.898	-0.42822	0.72119	-0.49561
1.066	9.651	35.6263	43.4853	0.036035	0.11885	-0.070312	-64.462	26.46381	24.594	0.055315	0.12603	0.038574	-25.196	61.9342	1271.0057	-0.82022	1.4591	-0.58818	-47.193	-6.8426	74.484	0.11259	0.15029	-0.045996	-29.958	-30.17	870.878	-0.74795	1.1477	-0.62042	15.766	-136.007	996.373	-0.8208	1.5181	-0.44678	21.986	120.2357	659.2602	-0.40449	0.69629	-0.48223
1.068	1.214	45.3865	35.7448	0.02002	0.14355	-0.070801	-64.332	26.5429	23.021	0.046532	0.12905	0.034193	-26.542	83.6355	1256.6814	-0.80049	1.4347	-0.58593	-49.225	-23.6696	86.1796	0.11259	0.13467	-0.037793	-28.002	-48.874	875.35066	-0.72266	1.1426	-0.63477	18.913	-128.889	956.582	-0.77929	1.4819	-0.43652	14.831	124.02	657.247	-0.38613	0.67188	-0.46094
1.07	-3.694	46.16271	56.411	0.0010742	0.16582	-0.075586	-67.3555	25.54694	41.3486	0.033691	0.13672	0.036621	-46.59	94.8944	1251.925	-0.78223	1.4072	-0.57617	-15.903	-17.3529	75.0663	0.11328	0.11757	-0.031934	-48.1189	-77.3436	894.5687	-0.68545	1.1128	-0.64893	9.707	-92.123	938.758	-0.73193	1.4458	-0.43506	-15.566	122.143	632.5158	-0.37129	0.65196	-0.44727
1.072	-30.954	44.18362	49.0342	-0.012402	0.18701	-0.072754	-74.2135	23.8218	56.8152	0.025371	0.13877	0.036091	-63.959	106.952	1242.9494	-0.76524	1.3793	-0.57109	-25.418	-13.5445	81.83	0.11572	0.10254	-0.021973	-25.44	-114.2682	898.6742	-0.65225	1.0774	-0.66396	-4.581	-74.645	946.298	-0.64893	1.3892	-0.43115	-19.208	123.163	611.0515	-0.35254	0.62471	-0.43154
1.074	-31.181	38.1169	54.8207	-0.030762	0.2085	-0.071973	-70.27291	29.5122	44.8052	0.016349	0.14339	0.039235	-65.745	113.023	1224.8726	-0.74775	1.354	-0.56386	-18.097	-10.43	101.74572	0.11504	0.090234	-0.020313	8.862	-150.15	916.9487	-0.62256	1.0376	-0.67647	-22.341	-62.577	959.5814	-0.60791	1.354	-0.43359	-18.354	143.758	588.1411	-0.3335	0.59961	-0.41699
1.076	-32.493	56.007	56.4432	-0.040918	0.22822	-0.072949	-73.7242	35.9903	38.215	0.0097936	0.1521	0.037803	-57.506	132.848	1192.2409	-0.73604	1.3305	-0.5584	-21.495	5.131	112.1648	0.12002	0.082715	-0.014551	4.69600000000001	-166.194	921.9138	-0.58906	1	-0.68008	20.113	-42.161	944.8545	-0.52539	1.3008	-0.43164	-31.549	150.7503	557.5945	-0.31299	0.57803	-0.40146
1.078	-40.527	53.578	55.2399	-0.057129	0.24951	-0.070313	-84.4958	36.3628	29.345	0.0036057	0.15685	0.038884	-70.16	127.522	1165.3523	-0.72266	1.3063	-0.54727	11.34	31.467	131.138	0.11963	0.081153	-0.0063477	12.701	-162.58	956.2682	-0.56055	0.96875	-0.69238	-23.868	-27.611	924.0378	-0.46777	1.2736	-0.43383	-33.348	155.0996	531.3773	-0.28603	0.55361	-0.38916
1.08	-40.305	40.7804	38.0617	-0.062988	0.25889	-0.062011	-67.6273	35.3771	35.196	-0.0048828	0.16504	0.041504	-69.2931	111.809	1134.43966	-0.70898	1.2813	-0.54785	-7.62	43.757	163.086	0.11494	0.083887	-0.0030274	16.641	-135.414	976.889	-0.53887	0.95489	-0.69199	-48.544	-38.793	930.213	-0.42188	1.2539	-0.4375	-43.313	151.8188	499.2214	-0.26455	0.53369	-0.37549
1.082	-52.157	34.576	34.32456	-0.064062	0.27139	-0.062012	-46.54	28.8764	32.9598	-0.0044317	0.17646	0.041232	-63.9052	103.592	1123.3529	-0.69356	1.249	-0.53017	7.78599999999999	52.8425	204.3203	0.10742	0.092285	-0.0063477	6.357	-106.1394	995.2525	-0.5333	0.95635	-0.69599	-90.2293	-65.749	937.2	-0.38135	1.2505	-0.44971	-38.166	153.0084	465.041	-0.24502	0.51241	-0.35859
1.084	-69.782	24.109	11.77	-0.068359	0.28076	-0.054199	-37.948	24.2334	19.9268	-0.0085836	0.18226	0.044332	-70.91145	115.4039	1102.857	-0.67568	1.2294	-0.52178	8.638	74.3743	237.842	0.098048	0.10918	-0.0024414	1.048	-93.249	1022.2399	-0.5376	0.97236	-0.70654	-49.434	-89.859	945.134	-0.36523	1.2534	-0.45166	-37.5704	142.09518	452.457	-0.2251	0.49268	-0.34521
1.086	-73.0661	17.1992	21.442	-0.069336	0.28994	-0.05127	-29.321	19.8157	29.4753	-0.012514	0.19302	0.046051	-65.2006	102.514	1083.352	-0.66279	1.2079	-0.51514	27.258	92.521575	266.1563	0.084278	0.12861	-0.0074219	10.56	-73.685	1055.6235	-0.54931	0.99423	-0.70762	-68.487	-140.02	951.308	-0.35205	1.2954	-0.47998	-35.765	133.7222	450.5609	-0.20566	0.47734	-0.33047
1.088	-60.681	22.2914	35.7949	-0.062988	0.29492	-0.046387	-13.499	21.841	48.3187	-0.014964	0.2009	0.051368	-39.672	109.7417	1061.7169	-0.65127	1.1905	-0.50439	-6.186	100.6057	314.0828	0.067871	0.16221	-0.0070312	-4.318	-55.631	1083.351	-0.56982	1.0317	-0.71826	-70.469	-195.431	965.716	-0.35816	1.3479	-0.5066	-41.324	128.8939	448.741	-0.18652	0.4543	-0.31064
1.09	-59.1629	32.678	53.1612	-0.05791	0.29453	-0.041699	-18.624	17.5953	50.8701	-0.020508	0.2002	0.053711	-18.383	111.559	1053.9163	-0.63965	1.1719	-0.49609	28.282	127.2558	352.4545	0.047949	0.204	-0.018066	-18.778	-55.295	1084.5864	-0.58535	1.0759	-0.73106	-79.636	-233.265	996.781	-0.37207	1.4033	-0.53516	-44.746	143.0426	416.24987	-0.16778	0.43203	-0.29854
1.092	-69.4371	28.652	54.1974	-0.054394	0.29228	-0.041113	-13.746	20.0526	61.92189	-0.021475	0.21014	0.052228	-32.143	129.599	1043.332	-0.62158	1.1466	-0.48506	13.934	132.393	409.0053	0.022461	0.25879	-0.027344	-46.326	-57.322	1098.7093	-0.60616	1.1247	-0.74853	-72.981	-232.909	1025.4583	-0.40039	1.4824	-0.56445	-72.3295	149.735	407.6475	-0.15352	0.41621	-0.28037
1.094	-50.0622	18.4559	53.2016	-0.046191	0.2872	-0.036817	-0.896000000000001	12.20713	61.5854	-0.019878	0.2159	0.055254	-27.943	119.8977	1024.966	-0.60606	1.1204	-0.47393	-5.402	133.761	455.65161	-0.0065431	0.31885	-0.0417	-52.831	-59.89	1121.3876	-0.63116	1.1826	-0.76104	-94.3135	-230.652	1052.9093	-0.4209	1.5112	-0.57275	-55.5031	128.4434	387.2739	-0.13672	0.39893	-0.26611
1.096	-53.319	21.676	36.119	-0.034961	0.28193	-0.02959	7.641	14.07903	61.0525	-0.013579	0.21771	0.052389	-14.097	131.2804	1006.45	-0.58691	1.0989	-0.4626	-19.398	110.107	493.8573	-0.036231	0.38584	-0.054004	-38.159	-74.3461	1126.971	-0.65791	1.2471	-0.77021	-83.685	-213.246	1081.32845	-0.44531	1.5625	-0.5957	-44.766	124.621	354.1197	-0.12578	0.38506	-0.24668
1.098	-38.471	28.483	35.752	-0.024902	0.27197	-0.025879	4.82	4.8576	72.9537	-0.0089161	0.22219	0.052458	3.206	153.1779	977.5217	-0.57383	1.0795	-0.45469	-11.462	100.648	536.3772	-0.07959	0.46006	-0.068067	-44.148	-104.1823	1164.5442	-0.68994	1.311	-0.78076	-89.085	-186.667	1109.33976	-0.45898	1.5939	-0.61255	-29.384	117.7848	344.1055	-0.11347	0.36914	-0.2332
1.1	-38.263	28.366	40.4737	-0.019043	0.26201	-0.023535	12.836	-9.788	82.09915	-0.00097656	0.22461	0.049805	-6.147	150.6303	960.1282	-0.56299	1.061	-0.44385	-32.124	88.999	588.74553	-0.12246	0.54648	-0.086426	-46.305	-135.643	1180.193	-0.7207	1.3785	-0.79726	-109.07748	-162.8546	1134.6578	-0.46143	1.6099	-0.61768	-22.39	122.8986	320.4212	-0.1002	0.35391	-0.21484
1.102	-10.952	20.7532	34.4555	-0.010156	0.254	-0.016114	24.656	-8.7973	91.2074	0.0087301	0.23246	0.044809	14.61	143.9203	927.7551	-0.5499	1.0423	-0.44072	-50.421	64.661	617.9839	-0.16357	0.63965	-0.10547	-51.635	-146.912	1209.783	-0.7581	1.4391	-0.82021	-125.8707	-142.9481	1153.1215	-0.45361	1.6333	-0.63232	-12.772	118.446	309.7659	-0.089453	0.3332	-0.20098
1.104	-7.716	19.6312	43.4323	-0.010547	0.24658	-0.012598	20.287	3.3289	109.6387	0.016774	0.24393	0.041676	21.85	158.6153	899.9691	-0.53623	1.0197	-0.43271	-41.527	47.5133	636.1086	-0.21103	0.74639	-0.12158	-68.40097	-137.105	1238.9617	-0.78037	1.4919	-0.84405	-105.958	-108.4043	1157.7384	-0.44873	1.6528	-0.64014	-29.343	126.1964	310.8152	-0.074707	0.31494	-0.18848
1.106	-10.249	7.67857	38.469	-0.0088867	0.24072	-0.0064453	1.322	23.210035	130.2362	0.023295	0.25252	0.038669	20.964	159.339	871.91693	-0.51904	0.99776	-0.42138	-61.5242	48.1822	623.7619	-0.25967	0.85166	-0.13623	-92.115	-130.7426	1264.5238	-0.78828	1.5314	-0.86055	-75.147	-77.596	1163.67166	-0.44482	1.6802	-0.64795	-6.776	111.20557	294.8512	-0.05791	0.3041	-0.16797
1.108	-14.796	-3.53222	55.8146	-0.0083008	0.2417	-0.0053711	-1.817	34.7396	174.1219	0.026605	0.26954	0.033203	14.693	144.4557	847.1382	-0.50176	0.96787	-0.41142	-59.8556	29.0431	646.2382	-0.31162	0.95791	-0.14444	-73.311	-127.068	1279.57	-0.78467	1.563	-0.87451	-97.011	-64.901	1164.098	-0.44214	1.7151	-0.65552	7.714	104.7028	297.11	-0.042774	0.27881	-0.14316
1.11	27.564	2.13784	72.7458	-0.01582	0.23926	0.0061523	-10.477	58.0964224	191.524	0.026367	0.28857	0.030762	32.583	148.305	818.1949	-0.48389	0.94189	-0.3999	-61.6124	16.013	649.2436	-0.36709	1.0573	-0.15489	-69.1993	-115.8421	1282.0379	-0.7749	1.5841	-0.88096	-79.783	-68.508	1167.878	-0.45117	1.752	-0.66406	20.461	113.39848	271.4002	-0.031445	0.2585	-0.12246
1.112	18.667	21.4965	79.8817	-0.023145	0.24268	0.011621	-10.297	84.7062	232.9766	0.0253	0.30161	0.020779	36.3898	159.6319	816.9275	-0.46973	0.91055	-0.39297	-48.8695	20.786	655.993	-0.42578	1.1445	-0.1626	-84.3333	-115.1109	1285.559	-0.77012	1.5988	-0.87969	-42.576	-76.26	1187.002	-0.46826	1.8032	-0.67334	-11.185	107.50945	270.0609	-0.015136	0.23613	-0.1081
1.114	18.801	16.8049	57.06658	-0.031348	0.2419	0.015527	-3.725	105.5452	264.9386	0.021331	0.3212	0.010509	4.332	151.4926	790.299	-0.45469	0.88086	-0.38496	-25.1223	29.89	642.485	-0.48301	1.2164	-0.17168	-82.53618	-100.5397	1328.709	-0.78223	1.6242	-0.88008	-46.387	-80.822	1207.773	-0.48828	1.8262	-0.67773	-14.078	101.692	244.3959	-0.0014648	0.21289	-0.09082
1.116	16.737	-5.323	57.4968	-0.03623	0.25186	0.022949	-4.484	111.973	296.7024	0.02676	0.34106	-0.0035761	6.555	139.3443	765.4266	-0.43555	0.84921	-0.37441	-15.442	29.82	612.597	-0.53135	1.2758	-0.18564	-60.318	-91.75651	1344.8239	-0.80898	1.647	-0.88809	-63.932	-109.092	1237.9472	-0.53662	1.8501	-0.6792	-14.063	100.103	230.8399	0.022461	0.18848	-0.075782
1.118	27.558	-15.872	53.144	-0.040527	0.25977	0.023926	-35.6926	121.755	347.67935	0.031757	0.35569	-0.011725	-7.763	148.8624	741.904	-0.41875	0.81738	-0.36426	-8.9114	29.743	588.6395	-0.56846	1.318	-0.19697	-61.5222	-86.8018	1344.9198	-0.84717	1.6724	-0.89014	-49.238	-128.6922	1244.79	-0.5791	1.8618	-0.67432	-18.48	106.317	211.4673	0.045313	0.16416	-0.062696
1.12	-1.517	-19.65656	84.9966	-0.044922	0.26699	0.028808	-38.155	125.542	382.8398	0.032715	0.37109	-0.02002	-14.557	166.375237	714.4875	-0.39844	0.78516	-0.35449	16.253	33.483	575.39497	-0.58154	1.3415	-0.21358	-33.682	-97.5135	1345.843	-0.88887	1.691	-0.88945	-51.011	-134.7496	1252.195	-0.62939	1.8638	-0.66748	-7.269	93.3491	196.7607	0.069141	0.1376	-0.051367
1.122	15.412	-30.5512	91.9707	-0.04502	0.27197	0.027637	-58.0384	125.924	448.771	0.037103	0.39393	-0.032804	-31.3559	170.328	677.8413	-0.37686	0.75225	-0.34746	-2.51	24.978	572.4251	-0.57422	1.3516	-0.21973	-3.85299999999999	-99.0022	1339.876	-0.93174	1.7145	-0.88974	-79.899	-140.0463	1263.329	-0.70117	1.873	-0.65723	-21.21	80.3653	183.1846	0.092773	0.10684	-0.040723
1.124	8.402	-14.3388	108.1993	-0.043848	0.2794	0.028809	-41.419	127.143	538.6593	0.035645	0.41686	-0.049304	-5.533	170.2029	665.7473	-0.35469	0.71797	-0.33311	-0.368000000000002	26.2998	572.5121	-0.55274	1.3371	-0.22227	-9.44	-93.1132	1349.621	-0.97627	1.7357	-0.89599	-79.434	-147.987	1270.2574	-0.729	1.8696	-0.65381	-17.014	86.348	194.0096	0.1167	0.081055	-0.030762
1.126	-17.028	6.3086	131.6179	-0.04502	0.28936	0.02334	-60.0681	107.0222	607.979	0.030965	0.4446	-0.063755	-42.5554	183.033	639.9363	-0.33399	0.68789	-0.32373	20.985	26.786	551.809	-0.5207	1.3115	-0.22715	-25.408	-73.673	1371.236	-1.0177	1.7606	-0.89346	-62.342	-154.675	1296.97	-0.79443	1.8794	-0.64014	-41.483	84.3738	174.5385	0.13692	0.050586	-0.021191
1.128	-36.8052	16.3742	146.5897	-0.04248	0.29834	0.02002	-51.819	93.7503	678.949	0.020614	0.47538	-0.077922	-37.222	170.48652	627.825	-0.31299	0.65557	-0.31396	32.2988	39.3937	559.359	-0.48321	1.2873	-0.23809	-36.461	-59.736	1394.7482	-1.0566	1.7793	-0.89648	-48.403	-148.266	1307.024	-0.82764	1.8745	-0.62695	-14.154	77.5674	181.96	0.15869	0.016992	-0.010351
1.13	-36.598	27.23395	181.6064	-0.046387	0.30908	0.019434	-68.8939	84.4623	773.438	0.0068359	0.50684	-0.097656	-39.6308	146.212	608.29399	-0.29297	0.61914	-0.31299	1.633	20.121	587.637	-0.44336	1.2553	-0.25029	-15.836	-64.344	1411.1505	-1.0894	1.7997	-0.89717	-69.024	-147.578	1325.716	-0.86328	1.8711	-0.61475	-33.286	75.2402	168.527	0.17979	-0.0083981	-0.00097656
1.132	-29.902	57.3646	202.9157	-0.05	0.31641	0.0074219	-58.046	82.4138	838.137	-0.015043	0.54698	-0.1208	-17.407	147.625	577.2918	-0.26943	0.58603	-0.30029	7.886	-2.318	622.1363	-0.40381	1.231	-0.26904	-9.992	-68.571	1424.0519	-1.1135	1.8153	-0.89834	-51.995	-138.507	1320.208	-0.8999	1.856	-0.59521	-28.354	72.053	151.3489	0.19297	-0.033301	0.0041015
1.134	-38.8776	69.6965	224.2004	-0.061328	0.33321	0.0035156	-73.7699	78.426	910.13	-0.040243	0.59337	-0.1418	-46.9748	157.572	560.6957	-0.24619	0.55225	-0.28701	33.058	-20.3	637.1824	-0.34853	1.1944	-0.28603	-15.153	-73.8214	1435.3058	-1.1366	1.8259	-0.89873	-51.186	-100.6947	1318.3796	-0.91162	1.8501	-0.58447	-75.386	64.31118	125.327	0.20264	-0.04834	0.010742
1.136	-32.3527	77.5024	261.281	-0.079297	0.35635	-0.002832	-24.437	54.108	931.5041	-0.072274	0.63986	-0.16485	-41.737	143.4067	534.18	-0.22237	0.5167	-0.27959	22.379	-52.2023	668.0252	-0.28682	1.1563	-0.29912	-6.835	-69.5244	1459.7122	-1.1473	1.8297	-0.89922	-70.96	-67.536	1304.85498	-0.9458	1.8247	-0.56885	-65.052	48.6836	115.366	0.21348	-0.059863	0.024316
1.138	-40.2835	98.2996	314.652	-0.10547	0.37939	-0.015625	-38.2699	28.282	968.4566	-0.11514	0.69269	-0.19229	-44.7707	151.373	500.2477	-0.20137	0.48047	-0.26953	17.474	-80.9428	700.4914	-0.23682	1.1157	-0.31279	3.195	-55.1122	1475.5894	-1.1597	1.8286	-0.89502	-78.638	-68.027	1297.60057	-0.96753	1.8068	-0.56127	-65.5202	54.6544	121.1036	0.2166	-0.062012	0.035742
1.14	-21.882	119.3461	377.439	-0.14004	0.41192	-0.029297	-28.255	13.6218	990.746	-0.16406	0.75	-0.22461	-30.086	171.72	465.311	-0.1748	0.44434	-0.26025	33.15	-111.869	731.4262	-0.1917	1.0825	-0.3249	-14.979	-43.282397	1483.9676	-1.1748	1.8188	-0.89082	-82.693	-56.473	1266.159	-0.98584	1.7876	-0.55225	-49.869	52.377	128.75445	0.22129	-0.062402	0.040039
1.142	-37.6392	117.0602	443.01	-0.18096	0.4497	-0.042676	-13.924	-14.8036	1027.51	-0.23281	0.8037	-0.24433	-47.6972	164.291	453.2067	-0.14883	0.40684	-0.24668	13.738	-110.038	745.6634	-0.15674	1.0493	-0.33252	-10.845	-58.8705	1484.857	-1.1831	1.8075	-0.88291	-89.299	-50.775	1273.776	-1.0059	1.7832	-0.53906	-67.1898	44.936	114.6827	0.2168	-0.060449	0.046192
1.144	-28.403	99.87043	505.0857	-0.23642	0.49385	-0.058691	1.96	-23.988	1025.515	-0.30615	0.86806	-0.26513	-31.3876	150.7459	430.8748	-0.12549	0.37529	-0.24004	-0.374000000000002	-115.116	764.414	-0.14238	1.024	-0.33926	-10.744	-63.9977	1500.5842	-1.1909	1.7919	-0.87822	-123.4278	-53.513	1277.293	-1.0132	1.7837	-0.53857	-54.5851	41.71524	107.8302	0.2124	-0.056641	0.053223
1.146	-37.5497	99.2342	568.6887	-0.30352	0.54258	-0.075	22.9056	-44.4115	994.583	-0.3956	0.929	-0.28076	-22.557	142.11242	426.1048	-0.10596	0.34287	-0.22598	-0.007000000000005	-143.472	787.64405	-0.12773	0.99997	-0.34609	-19.928	-51.4207	1491.7383	-1.1909	1.7772	-0.87588	-123.0257	-50.1627	1305.747	-1.0234	1.7832	-0.54102	-49.636	39.94785	88.185	0.19746	-0.043457	0.05332
1.148	-26.453	103.061	644.143	-0.38623	0.60596	-0.095703	52.902	-69.241	933.539	-0.4957	0.98398	-0.28975	-2.776	148.420876	402.45	-0.081836	0.3085	-0.21611	-23.273	-137.469	810.6173	-0.1164	0.97578	-0.34843	-47.098	-24.47881	1477.38851	-1.1855	1.7617	-0.87305	-101.148	-30.4152	1302.292	-1.0202	1.7756	-0.53491	-49.055	44.002	77.1746	0.18399	-0.025293	0.053516
1.15	-52.1406	90.301	693.858	-0.47441	0.66651	-0.11553	80.441	-77.474	890.716	-0.59961	1.041	-0.29443	-3.702	135.2678	381.6339	-0.062988	0.27588	-0.20654	-40.811	-115.8067	851.7667	-0.10645	0.96074	-0.35586	-51.591	-22.4616	1475.358	-1.176	1.7416	-0.87011	-112.1561	-29.531	1320.334	-1.021	1.7661	-0.53857	-27.205	43.2492	79.2946	0.17461	-0.0030274	0.054688
1.152	-20.587	81.411	739.086	-0.56855	0.73594	-0.12949	64.662	-59.24	862.1663	-0.6919	1.0807	-0.30293	30.897	129.6262	357.2556	-0.044727	0.24766	-0.19863	-46.0548	-97.4324	872.59813	-0.094727	0.95557	-0.3667	-73.488	-4.4891	1477.4414	-1.1632	1.7144	-0.86592	-109.282	-48.926	1340.549	-1.0156	1.752	-0.53711	-19.668	51.9945	66.3969	0.15703	0.015235	0.055859
1.154	-22.2096	62.375	774.032	-0.66543	0.80235	-0.14121	71.364	-32.1328	828.915	-0.77002	1.1122	-0.31855	33.211	132.554	345.1557	-0.024316	0.22032	-0.1873	-55.6137	-83.834	899.89	-0.083203	0.96152	-0.38291	-90.429	-0.4034	1471.0269	-1.153	1.6893	-0.85889	-78.12	-61.4458	1363.84676	-1.0107	1.7441	-0.52979	-32.193	42.5108	62.751	0.13916	0.036133	0.060547
1.156	5.028	34.9557	783.3132	-0.75107	0.87627	-0.14815	70.099	-19.189	828.477	-0.82002	1.1341	-0.33027	9.345	124.123	324.16456	-0.005957	0.19336	-0.18066	-59.7803	-70.1902	907.543	-0.079004	0.97353	-0.39678	-84.6358	7.5211	1475.2246	-1.1422	1.661	-0.85528	-89.298	-48.4774	1378.898	-1.0112	1.7271	-0.5249	-28.442	32.2983	54.676	0.12285	0.059961	0.054981
1.158	-4.458	14.523	813.6754	-0.83643	0.92822	-0.16309	66.036	-6.848	843.985	-0.84649	1.1463	-0.34785	11.233	99.89	309.4077	0.0092775	0.16113	-0.16699	-71.5387	-67.9593	914.601	-0.079395	0.99229	-0.40811	-66.893	16.961119	1485.1562	-1.1343	1.6313	-0.85059	-89.126	-65.404	1389.147	-1.0047	1.719	-0.5227	-18.665	31.54473	68.72693	0.11055	0.082715	0.057129
1.16	32.164	20.976	826.085	-0.88945	0.98437	-0.17822	60.287	-6.122	869.142	-0.84375	1.1523	-0.36523	23.217	105.06	293.1876	0.024902	0.13184	-0.16357	-58.7433	-60.1303	926.033	-0.095898	1.0241	-0.42637	-73.1331	30.192	1504.0175	-1.1286	1.6058	-0.83984	-105.212	-77.389	1371.84	-0.99951	1.7095	-0.521	-14.82	45.5305	57.1482	0.094532	0.10186	0.050098
1.162	36.71388	21.85	831.755	-0.92256	1.022	-0.19609	64.785	-17.52	888.9453	-0.82099	1.163	-0.37314	14.099	102.444	281.6572	0.039062	0.10381	-0.15674	-57.936	-43.731	955.957	-0.12012	1.0605	-0.44531	-74.2501	21.1223	1490.6699	-1.1258	1.5789	-0.83711	-91.491	-67.172	1349.1457	-0.98584	1.7095	-0.52686	-8.644	49.541	53.921	0.081055	0.12265	0.048047
1.164	60.936	16.453	842.057	-0.91552	1.0376	-0.21367	15.197	-27.296	907.9198	-0.78681	1.1661	-0.37998	-0.940999999999999	94.129	264.0511	0.060059	0.075586	-0.14814	-36.691	-33.266	977.5693	-0.15684	1.1049	-0.46973	-53.344	18.7386	1470.8113	-1.125	1.5571	-0.82539	-115.3709	-58.809	1340.5034	-0.97461	1.7012	-0.5293	-10.571	47.243	40.7529	0.069336	0.14355	0.045898
1.166	51.006	0.402000000000001	804.794	-0.88359	1.0434	-0.22539	19.517	-36.98	921.0541	-0.75322	1.1708	-0.37529	11.585	84.2145	245.4914	0.075684	0.046289	-0.14033	-56.9989	-68.322	1021.7152	-0.19512	1.1594	-0.49385	-66.6389	19.4165	1452.9165	-1.1256	1.5346	-0.81465	-76.664	-48.311	1318.7345	-0.95313	1.6895	-0.52148	-4.282	34.457	44.3187	0.05166	0.15508	0.040723
1.168	64.169	-4.011	762.118	-0.84033	1.0493	-0.22803	0.546999999999997	-61.569	930.21	-0.71699	1.1709	-0.37891	-5.7	87.7223	206.907	0.090332	0.016406	-0.13701	-52.3279	-82.527	1020.36188	-0.23457	1.2146	-0.52354	-49.453	9.073	1438.8697	-1.1289	1.5195	-0.80859	-87.349	-33.7424	1327.1061	-0.93311	1.6782	-0.521	-17.358	32.0365	30.134	0.037988	0.16885	0.032519
1.17	42.5814	-4.098	740.3387	-0.78369	1.04	-0.23193	-6.553	-104.432	928.252	-0.69043	1.168	-0.38281	-17.338	79.7084	208.1079	0.11084	-0.0058594	-0.13184	-54.5551	-99.25327	1039.77968	-0.27265	1.2756	-0.55478	-59.9359	-2.293	1414.8157	-1.1311	1.5124	-0.79775	-55.298	-7.091	1317.8492	-0.91943	1.6743	-0.5249	-6.638	26.821	29.6274	0.025488	0.18213	0.025488
1.172	26.785	-2.8138	725.391	-0.73427	1.0317	-0.23545	-30.723	-157.8828	944.827	-0.65879	1.1553	-0.38906	-8.878	75.2198	187.4422	0.12431	-0.027441	-0.13203	-45.123	-115.6225	1048.3173	-0.30957	1.3442	-0.57861	-58.285	1.9927	1392.9204	-1.133	1.5023	-0.79101	-78.1	-5.531	1308.2231	-0.89844	1.6563	-0.51563	-4.189	28.9499	29.0416	0.017578	0.18994	0.019336
1.174	38.713	-0.178999999999998	739.889	-0.68662	1.0208	-0.23467	-33.736	-199.516	982.407	-0.62393	1.1519	-0.40508	4.07400000000001	83.9982	191.3628	0.13633	-0.052051	-0.1253	-61.2671	-137.0423	1065.4117	-0.3457	1.4076	-0.61152	-61.8164	18.6188	1376.2921	-1.1361	1.4883	-0.78242	-43.341	-0.806000000000001	1280.611	-0.87524	1.6399	-0.52368	-14.726	39.4918	31.58	0.011719	0.20068	0.011719
1.176	28.353	20.854	732.39	-0.6376	1.0065	-0.23486	-50.4407	-223.265	999.566	-0.58369	1.1554	-0.41485	-23.77	90.58	174.9134	0.14804	-0.062598	-0.12607	-36.546	-137.04007	1075.3923	-0.38574	1.4684	-0.61963	-28.641	20.58824	1352.16955	-1.1354	1.4665	-0.77119	-66.409	19.8028	1294.5115	-0.85547	1.623	-0.52148	-29.561	37.7079	24.75	0.006543	0.2083	0.0083006
1.178	-0.475999999999999	12.66	731.6357	-0.59619	0.99072	-0.23584	-66.8789	-230.768	1043.3376	-0.55488	1.1683	-0.4289	-37.538	75.2937	181.0076	0.15976	-0.077441	-0.12158	-20.526	-129.7341	1082.7606	-0.42558	1.5294	-0.63603	-31.799	18.7525	1340.0898	-1.1328	1.4453	-0.75977	-43.451	32.623	1284.8546	-0.84766	1.6055	-0.50879	-33.19	25.0963	28.9559	0.0084961	0.21846	0.0021484
1.18	-15.194	3.616	724.907	-0.55088	0.98223	-0.24316	-76.6743	-230.962	1072.5432	-0.54688	1.1953	-0.44238	-52.8947	69.30882	154.3522	0.17139	-0.083008	-0.12109	-13.208	-129.8691	1089.8022	-0.46279	1.5851	-0.65557	-7.93	42.3644	1333.3321	-1.1307	1.4101	-0.74707	-66.665	16.104	1273.578	-0.83936	1.5981	-0.51807	-30.1	39.997	35.1245	0.0057617	0.22705	-0.0029297
1.182	-28.473	-10.067	743.6437	-0.50928	0.9751	-0.2538	-70.06708	-212.502	1112.8904	-0.56377	1.2182	-0.46338	-39.484	79.2825	143.564	0.179	-0.095508	-0.11914	-9.89	-128.4353	1121.6	-0.49561	1.6313	-0.66943	-8.104	54.166	1321.6971	-1.124	1.384	-0.73321	-69.956	13.8155	1252.5442	-0.81348	1.5723	-0.51563	-39.128	44.5342	48.176	0.00039062	0.23467	-0.0023437
1.184	-40.15	-14.03	761.80321	-0.47608	0.9708	-0.25303	-80.68465	-181.5453	1132.831	-0.59326	1.2462	-0.48506	-57.7952	72.2856	133.1964	0.18232	-0.10703	-0.10771	9.472	-116.319	1120.588	-0.52158	1.6727	-0.68555	14.198	59.934	1301.105	-1.1131	1.3496	-0.72226	-81.352	11.5447	1255.779	-0.79248	1.563	-0.51025	-38.455	32.6225	38.0786	0.0063477	0.24023	-0.0019531
1.186	-56.064	-31.097	780.4037	-0.44766	0.97461	-0.25977	-85.16823	-154.375	1174.41464	-0.63623	1.2759	-0.5128	-75.9787	55.901	114.1482	0.18818	-0.11132	-0.11123	4.287	-97.1043	1133.576	-0.53418	1.7146	-0.6956	11.225	68.002	1282.6361	-1.1045	1.3181	-0.70918	-77.584	7.8048	1233.97243	-0.771	1.5474	-0.50928	-53.977	39.015	31.0279	-0.00058594	0.24024	-0.0043945
1.188	-42.931	-56.844	781.94	-0.42969	0.98633	-0.271	-90.1616	-128.933	1201.3923	-0.68066	1.3071	-0.54297	-63.8048	54.773	99.1895	0.19004	-0.12119	-0.11113	-8.694	-72.1761	1145.8061	-0.54121	1.7505	-0.7042	12.894	70.335	1276.7905	-1.103	1.2817	-0.69092	-74.084	-10.6653	1220.0903	-0.75244	1.5259	-0.50928	-56.746	36.5911	11.371	0.00048828	0.23848	-0.0010742
1.19	-55.658	-93.5625	817.075	-0.42802	0.99905	-0.27862	-74.26451	-105.317	1222.3673	-0.72656	1.3477	-0.57227	-47.951	64.314	93.07	0.19824	-0.12988	-0.1084	-0.0130000000000052	-64.89	1142.2876	-0.54277	1.772	-0.70683	-3.334	62.5741	1237.1595	-1.0934	1.25	-0.67959	-74.449	1.82	1196.6385	-0.73877	1.5122	-0.50732	-44.875	36.2536	15.822	0.0055664	0.2334	0.0051758
1.192	-101.3764	-130.091	828.678	-0.43388	1.0184	-0.29316	-71.9621	-91.833	1210.565	-0.77676	1.3863	-0.60547	-53.7561	46.36485	92.2886	0.19727	-0.12725	-0.11133	4.39	-50.33	1152.261	-0.55176	1.793	-0.70508	14.044	63.9309	1216.9557	-1.0882	1.2188	-0.66914	-81.363	-1.461	1187.3108	-0.71973	1.4785	-0.50391	-40.469	29.8254	28.7406	0.0095703	0.23086	0.0090821
1.194	-93.7618	-162.392	864.26351	-0.45693	1.04	-0.30644	-55.7327	-99.811	1232.741	-0.82031	1.4371	-0.63945	-45.8139	40.0436	96.8476	0.19893	-0.12471	-0.1084	-21.082	-56.82	1171.52	-0.56592	1.8114	-0.70068	-3.079	73.3253	1185.2391	-1.0785	1.1879	-0.65704	-85.193	-0.0956000000000001	1178.355	-0.69824	1.456	-0.49755	-42.904	29.812	38.3119	0.016602	0.229	0.013184
1.196	-91.9254	-170.504	879.4814	-0.4874	1.0677	-0.31572	-49.654	-110.423	1238.107	-0.87265	1.4934	-0.66445	-17.275	52.3819	101.7538	0.19893	-0.12471	-0.099023	-47.765	-71.064	1178.277	-0.58183	1.8274	-0.69277	-23.017	73.0494	1172.6418	-1.0614	1.1577	-0.64248	-76.938	5.2717	1165.8713	-0.67627	1.4302	-0.49561	-63.33288	25.4994	38.0483	0.019434	0.22471	0.016308
1.198	-103.2878	-153.355	904.3294	-0.52344	1.1055	-0.33008	-28.715	-108.832	1253.989	-0.92705	1.5512	-0.69199	-12.321	54.936	100.3154	0.19639	-0.1249	-0.098339	-42.604	-66.702	1177.906	-0.60762	1.8351	-0.69472	-22.764	63.87314	1144.28557	-1.0444	1.1255	-0.63037	-84.01	36.0233	1153.8763	-0.64795	1.395	-0.48389	-70.9861	20.3813	49.8712	0.026563	0.21621	0.021387
1.2	-125.4363	-129.368	926.6788	-0.5586	1.1526	-0.34805	-34.416	-124.553	1290.1058	-0.98389	1.6138	-0.71045	-31.731	47.3926	90.37056	0.18945	-0.11621	-0.095215	-76.9805	-45.233	1201.685	-0.63467	1.8517	-0.68525	-22.942	61.6038	1127.0273	-1.0252	1.0951	-0.61309	-86.42	56.6089	1149.5989	-0.64063	1.3809	-0.48633	-42.929	28.658	70.3666	0.030469	0.20761	0.028028
1.202	-113.5894	-108.425	949.5278	-0.59609	1.2078	-0.37031	-2.53599999999999	-143.3124	1313.0471	-1.0266	1.6758	-0.74375	-8.883	45.4246	93.0551	0.18233	-0.10957	-0.096485	-87.404	-46.8977	1227.7949	-0.66455	1.8657	-0.67529	-42.882	65.9928	1109.886	-1.0128	1.0712	-0.59463	-100.466	63.5441	1129.2279	-0.61279	1.3501	-0.47217	-27.673	39.884	69.1418	0.04043	0.19824	0.034473
1.204	-92.858	-95.921	980.9149	-0.63828	1.2703	-0.39571	6.17899999999999	-155.81754	1339.7067	-1.0629	1.7316	-0.76563	-13.772	49.9386	80.4797	0.1752	-0.097657	-0.10098	-88.5333	-61.0835	1249.0665	-0.69746	1.8887	-0.66719	-34.448	67.8553	1097.0842	-0.99599	1.0411	-0.58018	-100.977	78.0364	1099.11564	-0.59961	1.3203	-0.46826	-25.762	31.7083	65.6463	0.044922	0.18945	0.041016
1.206	-90.6676	-94.6234	1007.3935	-0.67969	1.3363	-0.42148	15.793	-167.5243	1355.4743	-1.0891	1.782	-0.78945	-5.121	40.0397	70.8226	0.1623	-0.087109	-0.095118	-63.781	-60.147	1259.5008	-0.73311	1.9083	-0.65654	-31.266	63.7658	1073.2375	-0.98369	1.0097	-0.56758	-109.1719	94.987	1080.3947	-0.58008	1.293	-0.45898	-22.872	6.20748	51.8938	0.052637	0.1876	0.042578
1.208	-81.16	-92.19085	1037.2327	-0.72021	1.3931	-0.44824	9.984	-178.8278	1387.7145	-1.0895	1.82	-0.80732	-12.511	31.4193	65.35647	0.14981	-0.071485	-0.094727	-106.2843	-55.351	1291.6184	-0.77021	1.9259	-0.65147	-46.559	83.0282	1053.4364	-0.9624	0.98096	-0.54834	-85.013	98.777	1048.33	-0.55566	1.2539	-0.44531	-30.811	-2.0793	60.027	0.059082	0.18398	0.040918
1.21	-47.584	-78.7548	1064.629	-0.76592	1.4607	-0.47608	31.889	-162.6255	1387.27043	-1.0781	1.8438	-0.81836	13.868	38.3618	57.7256	0.13672	-0.058105	-0.097168	-101.1015	-65.168	1301.9192	-0.80742	1.9414	-0.64883	-51.6009	102.297	1033.1653	-0.94209	0.95596	-0.52998	-93.1421	89.263	1034.6464	-0.54248	1.2329	-0.44092	-15.553	0.9554	80.2771	0.058691	0.18281	0.060059
1.212	-42.169	-57.639	1083.506	-0.81201	1.5251	-0.50224	4.557	-145.8509	1411.837	-1.049	1.8572	-0.82519	-5.579	49.04	68.9084	0.12666	-0.044336	-0.090625	-96.1042	-58.596	1326.2277	-0.83789	1.9492	-0.64258	-52.5223	105.6832	1013.8707	-0.92177	0.9251	-0.51806	-66.344	78.129	1025.3757	-0.51953	1.1934	-0.42773	-8.632	-9.94177	101.528	0.055176	0.18681	0.062402
1.214	-52.85	-55.218	1102.8642	-0.85576	1.5876	-0.53116	-6.672	-131.0267	1412.899	-1.0224	1.8626	-0.82881	4.906	47.703	64.4707	0.11084	-0.025781	-0.09082	-105.7035	-32.9677	1336.083	-0.86387	1.9603	-0.6416	-56.303	119.9115	986.7139	-0.89521	0.89854	-0.50166	-76.532	57.8157	1004.806	-0.50561	1.1643	-0.41773	-2.253	-10.44069	108.225	0.046387	0.19043	0.061035
1.216	-32.812	-72.798	1111.6521	-0.8999	1.6486	-0.55381	-15.859	-130.5832	1436.909	-1.0033	1.8552	-0.8335	2.13	45.8789	50.8323	0.094434	-0.0027344	-0.09707	-125.4662	-30.7113	1352.3702	-0.89072	1.9677	-0.63936	-74.2897	134.8851	955.3013	-0.87363	0.8666	-0.4916	-68.722	48.1962	997.307	-0.48828	1.1367	-0.41211	-15.43	1.2414	118.57089	0.042383	0.1959	0.065039
1.218	-7.242	-83.859	1139.6463	-0.93311	1.6997	-0.57568	-1.216	-112.0863	1427.824	-0.98652	1.8346	-0.83223	16.127	51.9497	47.0115	0.079004	0.016308	-0.10108	-105.3775	-32.6653	1355.206	-0.90595	1.9743	-0.63428	-73.8354	141.2258	931.7033	-0.84668	0.8418	-0.47559	-64.993	60.0075	983.865	-0.46143	1.0923	-0.3999	0.0640000000000001	23.1867	135.1517	0.041308	0.20176	0.06582
1.22	-22.3	-102.691	1168.0155	-0.95557	1.737	-0.59658	-14.599	-102.389	1430.8699	-0.97461	1.8164	-0.83398	-23.321	40.44664	49.84957	0.067383	0.026855	-0.095215	-96.567	-8.1819	1348.2964	-0.92285	1.9763	-0.63242	-49.97	133.2251	890.862	-0.8247	0.8167	-0.4583	-40.098	85.1733	979.5045	-0.45459	1.0718	-0.39404	-27.049	40.618	159.5221	0.037012	0.2084	0.063086
1.222	-25.57	-122.7587	1181.4899	-0.96006	1.7755	-0.62588	1.183	-93.1387	1408.505	-0.97305	1.8016	-0.82929	-13.425	35.754	42.7307	0.053613	0.042969	-0.097949	-130.1273	18.7953	1345.08898	-0.92871	1.9727	-0.62793	-49.99	136.4686	872.177	-0.80313	0.79414	-0.4416	-54.345	78.89113	979.582	-0.43066	1.0313	-0.38086	14.286	64.0424	192.75762	0.033691	0.21641	0.070215
1.224	-17.419	-134.1628	1212.082	-0.93935	1.8025	-0.6419	-37.18	-79.504	1412.509	-0.97949	1.793	-0.83067	-10.98	46.5825	48.05692	0.038965	0.056055	-0.095215	-102.6463	21.338	1352.5096	-0.9332	1.9672	-0.62246	-40.103	126.4079	852.999	-0.78515	0.77383	-0.42442	-56.208	87.3846	961.819	-0.41406	0.99806	-0.37548	16.846	79.6506	226.793	0.032227	0.23096	0.067871
1.226	-8.43	-138.7425	1219.7982	-0.92256	1.8173	-0.6585	-44.691	-62.522	1386.156	-0.98301	1.7934	-0.83183	-14.814	48.0291	46.8855	0.026074	0.072461	-0.092481	-66.473	26.906	1348.49079	-0.93633	1.9621	-0.60976	-37.955	113.2489	831.476	-0.76435	0.75303	-0.41162	-47.431	99.391873	933.443	-0.40186	0.96924	-0.36865	6.956	83.475	246.7925	0.031836	0.24414	0.06582
1.228	-33.346	-145.81	1222.072	-0.8999	1.8208	-0.66943	-82.558	-61.838	1405.713	-0.99229	1.7931	-0.83564	-49.8678	37.2843	42.2296	0.012305	0.084961	-0.095801	-54.047	38.4083	1350.2843	-0.93633	1.9543	-0.60468	-29.191	114.6263	808.4452	-0.74609	0.73438	-0.39453	-39.408	107.3753	924.2526	-0.38379	0.92969	-0.35596	-15.872	88.7831	275.2549	0.02539	0.26699	0.068164
1.23	-0.800999999999995	-151.5	1237.8763	-0.88164	1.8129	-0.67735	-90.206	-53.898	1412.559	-1.0122	1.8071	-0.83936	-41.272	26.477	35.3475	0.0014648	0.095215	-0.092285	-52.277	15.4063	1361.3485	-0.9373	1.9397	-0.60059	-32.793	130.7134	800.6197	-0.72119	0.71787	-0.37607	-33.135	104.846	904.029	-0.37402	0.91016	-0.35352	-11.762	109.29715	310.977	0.014844	0.29121	0.059961
1.232	-11.302	-139.844	1263.921	-0.86572	1.8075	-0.68662	-81.9055	-58.38	1415.6275	-1.0309	1.8227	-0.84199	-49.527	39.6212	32.9935	-0.017382	0.11113	-0.091601	-29.736	2.11	1354.7508	-0.92822	1.9165	-0.59131	-16.781	130.9155	772.7099	-0.69795	0.69981	-0.36319	-20.931	118.9059	876.426	-0.35742	0.87598	-0.34863	-22.452	123.03486	367.5652	2e-08	0.3165	0.055566
1.234	-6.721	-111.2017	1285.483	-0.85596	1.797	-0.68701	-106.2213	-46.5662	1417.5567	-1.0605	1.8406	-0.84648	-54.964	43.675	34.8554	-0.027539	0.11982	-0.099415	-9.785	21.2664	1365.8138	-0.92207	1.8926	-0.5752	-17.334	127.994	768.3803	-0.67373	0.6795	-0.34834	-12.393	124.8836	838.7813	-0.34351	0.84937	-0.33863	-6.967	124.542	423.1998	-0.012695	0.34375	0.047363
1.236	-37.221	-101.7991	1314.972	-0.8625	1.7779	-0.68496	-116.498	-38.3162	1438.40186	-1.0918	1.868	-0.85117	-57.3512	29.3875	34.4024	-0.038867	0.12959	-0.10059	-21.493	37.1026	1369.5729	-0.91279	1.87	-0.56416	-15.05	136.36	741.6679	-0.65	0.65937	-0.33486	-25.021	119.9678	813.692	-0.33154	0.8208	-0.32959	-16.015	117.718	475.4663	-0.029297	0.37676	0.035742
1.238	-14.119	-86.1634	1312.5165	-0.86914	1.7656	-0.67969	-112.962	-27.072	1449.5453	-1.12	1.89	-0.85488	-59.186	31.5739	35.2323	-0.040527	0.13232	-0.10136	-25.669	27.8802	1377.972	-0.90498	1.8466	-0.55439	-12.16	137.6732	724.2095	-0.62549	0.63525	-0.32031	-23.623	118.1034	792.0252	-0.31396	0.78516	-0.32227	-30.867	104.224	516.461	-0.048926	0.41103	0.018164
1.24	-48.897	-64.4736	1297.3337	-0.88232	1.7524	-0.6749	-97.1905	-32.817	1456.263	-1.1543	1.916	-0.86133	-65.4902	34.0726	28.688	-0.045898	0.13623	-0.10254	-6.001	24.5364	1368.4426	-0.89737	1.8148	-0.54307	-15.572	129.5041	678.8471	-0.59327	0.61084	-0.30869	-21.291	131.4943	779.9787	-0.30371	0.76563	-0.31982	-57.4708	90.55	562.975	-0.07041	0.44424	0.0013672
1.242	-52.685	-62.95775	1286.783	-0.89424	1.745	-0.66582	-106.4585	-36.4814	1472.489	-1.1777	1.9271	-0.85634	-71.7505	22.355	27.051	-0.043848	0.13691	-0.10703	-23.826	29.73867	1349.71871	-0.88232	1.7837	-0.53271	-22.538	120.2389	666.9024	-0.56679	0.59023	-0.29609	-34.719	145.988	776.63178	-0.28613	0.73047	-0.31348	-51.161	74.755	620.774	-0.094532	0.48594	-0.015137
1.244	-86.1285	-55.3432	1270.858	-0.91767	1.7357	-0.65723	-64.981	-45.2041	1466.2693	-1.1902	1.938	-0.86084	-41.462	19.296	37.4362	-0.04541	0.1333	-0.10655	-34.891	35.6896	1339.9895	-0.86426	1.7572	-0.51778	-20.142	130.01652	631.621	-0.53984	0.56797	-0.2875	-50.065	138.361	762.1928	-0.27246	0.70459	-0.31055	-48.949	65.2904	684.556	-0.12158	0.53174	-0.032715
1.246	-69.308	-44.45	1297.653	-0.94366	1.7253	-0.64443	-67.356	-39.215	1472.9652	-1.1898	1.9399	-0.86123	-40.611	49.12375	30.3293	-0.043848	0.12822	-0.10655	-39.812	33.1979	1321.5008	-0.8499	1.7314	-0.50772	-30.209	126.9074	615.4523	-0.51865	0.5415	-0.27061	-52.564	136.3105	740.5405	-0.25879	0.67676	-0.3042	-51.213	69.1198	711.8347	-0.15313	0.5795	-0.060156
1.248	-79.48991	-31.397	1331.393	-0.97314	1.7202	-0.63232	-70.912	-26.4603	1452.8339	-1.1856	1.9409	-0.86494	-27.009	43.479	32.93658	-0.040234	0.11699	-0.10693	-34.017	51.887	1319.2631	-0.83428	1.7094	-0.50537	-29.401	133.951	592.0024	-0.49756	0.51807	-0.25732	-36.952	138.2665	717.745	-0.24316	0.65039	-0.30371	-34.4536	48.61	737.061	-0.19082	0.63144	-0.080664
1.25	-84.40904	-41.616	1356.386	-1.0034	1.7263	-0.61826	-96.69	-19.219	1448.698	-1.1802	1.938	-0.86279	-37.35	33.5766	33.4079	-0.038086	0.10449	-0.10449	-47.243	70.38752	1307.929	-0.81865	1.6907	-0.49287	-32.535	136.251	574.9654	-0.47236	0.49717	-0.25302	-47.194	135.3223	691.5429	-0.24023	0.63086	-0.29297	-38.78596	23.663	753.15	-0.23418	0.68926	-0.108
1.252	-71.516	-48.888	1377.1007	-1.0348	1.7289	-0.60967	-40.772	-7.1457	1449.7629	-1.1713	1.9354	-0.87011	-14.621	35.3496	32.2028	-0.035254	0.091016	-0.10459	-47.215	70.28464	1305.126	-0.80664	1.6763	-0.4917	-43.308	143.813	549.7754	-0.44913	0.47822	-0.24697	-32.664	132.5265	680.07542	-0.22217	0.59473	-0.28711	-34.008	26.313	784.963	-0.27647	0.75401	-0.13232
1.254	-63.101	-42.5272	1390.9659	-1.0649	1.7394	-0.60381	-57.669	16.0177	1439.9563	-1.1703	1.9328	-0.86895	-31.338	37.1019	37.6157	-0.028516	0.072949	-0.10009	-33.15	80.5006	1298.533	-0.78887	1.661	-0.48398	-44.079	134.2432	536.9809	-0.42256	0.45947	-0.23603	-40.22	142.2848	661.0538	-0.21118	0.56689	-0.28174	-40.641	25.103	778.296	-0.31836	0.81445	-0.15625
1.256	-86.2671	-34.3004	1399.0526	-1.0872	1.7454	-0.59853	-30.818	36.9163	1425.13479	-1.1633	1.9219	-0.86192	-4.229	19.328	36.744	-0.022656	0.059668	-0.10517	-52.153	104.146	1311.07074	-0.77217	1.6438	-0.47959	-73.953	136.8564	516.3102	-0.39834	0.44307	-0.22754	-29.874	130.7975	649.4569	-0.19678	0.54297	-0.28027	-20.829	22.012	771.715	-0.36856	0.87559	-0.18038
1.258	-69.568	-14.9975	1421.7684	-1.1016	1.7559	-0.59131	-19.591	53.426	1420.7522	-1.1561	1.9085	-0.86299	-20.684	20.0757	41.3918	-0.018164	0.044043	-0.10703	-89.97	112.084	1297.6165	-0.76123	1.6345	-0.47099	-61.102	140.1909	497.5087	-0.37354	0.43018	-0.22412	-48.6772	112.3503	646.0328	-0.18018	0.50537	-0.27295	-22.21	18.2807	745.973	-0.41494	0.93135	-0.20009
1.26	-63.302	-18.85294	1426.6482	-1.1127	1.7588	-0.58086	-7.538	67.971	1424.1109	-1.1484	1.8906	-0.85938	17.722	24.726	40.749	-0.015137	0.034668	-0.10791	-98.548	112.174	1285.81	-0.74522	1.6175	-0.46611	-80.537	139.2559	464.2423	-0.34795	0.4127	-0.21406	-32.35	111.978	621.1431	-0.17041	0.48877	-0.27051	-20.488	9.847	728.2681	-0.46298	0.97236	-0.22314
1.262	-50.259	-27.18	1429.34652	-1.1214	1.7615	-0.57686	-6.419	81.714	1421.0895	-1.1404	1.8686	-0.84815	-8.424	14.0527	43.266	-0.012207	0.025195	-0.10684	-106.7377	103.9926	1266.7657	-0.72852	1.5977	-0.46191	-84.4123	132.5632	430.5493	-0.3206	0.39727	-0.21123	-27.954	126.124	608.1683	-0.15674	0.45459	-0.26318	-29.2979	-5.324	717.906	-0.50821	1.0062	-0.23906
1.264	-46.208	-47.545	1434.465	-1.1272	1.7696	-0.57178	25.496	71.87	1399.9	-1.1304	1.843	-0.8414	-10.241	7.9234	61.0048	-0.011817	0.025684	-0.10547	-133.274	96.1039	1245.9894	-0.71504	1.5728	-0.45293	-96.5358	129.779	404.7892	-0.29834	0.38399	-0.20185	-26.009	132.138	577.4753	-0.14356	0.42872	-0.25781	4.967	-18.7584	745.3405	-0.54541	1.0278	-0.25537
1.266	-48.109	-50.312	1430.2637	-1.1349	1.7753	-0.57119	14.456	45.691	1384.2053	-1.1168	1.816	-0.8293	-5.093	6.9997	65.8332	-0.011425	0.02334	-0.10352	-116.746	77.2476	1234.4147	-0.69804	1.543	-0.44805	-79.889	141.574	394.5488	-0.27354	0.3667	-0.19756	-50.9389	135.992	566.23428	-0.13086	0.40625	-0.25098	4.421	-11.0389	744.087	-0.57969	1.0462	-0.26777
1.268	-37.847	-29.586	1436.4838	-1.1309	1.7793	-0.56738	25.763	47.7397	1371.52599	-1.1061	1.7896	-0.82363	14.116	6.7247	68.1449	-0.021875	0.024805	-0.10869	-105.4322	74.1906	1223.9407	-0.67812	1.5098	-0.43711	-101.6074	123.9501	394.11627	-0.24902	0.35449	-0.19043	-37.442	145.2731	526.4193	-0.11133	0.37305	-0.24023	-8.863	-8.83	751.786	-0.61084	1.0583	-0.26621
1.27	-41.272	5.4001	1435.7855	-1.1304	1.7837	-0.5665	-6.171	40.286	1364.7428	-1.0879	1.7715	-0.81836	-19.136	1.9216	76.0135	-0.029297	0.029785	-0.10742	-107.2716	82.1204	1202.773	-0.65869	1.4823	-0.42412	-69.339	111.44688	366.27248	-0.22256	0.34112	-0.1832	-20.116	150.372	517.743966	-0.10254	0.3584	-0.23438	-35.169	-9.858	757.561	-0.6374	1.0669	-0.26582
1.272	-13.841	29.0915	1441.9049	-1.125	1.7832	-0.56787	-21.139	51.9001	1340.8838	-1.0763	1.7524	-0.81689	-12.087	-7.5598	79.0427	-0.037305	0.028906	-0.10469	-108.6152	85.52982	1214.5587	-0.64502	1.4492	-0.41602	-77.042	107.5226	373.1567	-0.2003	0.32627	-0.17539	-14.556	143.9	494.0468	-0.087402	0.32813	-0.229	-20.879	-3.566	785.253	-0.65781	1.082	-0.26553
1.274	-10.495	42.4402	1433.2973	-1.1207	1.7789	-0.56748	-57.456	50.1945	1315.1474	-1.0609	1.7387	-0.81289	-13.102	-8.2613	83.6945	-0.04502	0.028418	-0.10743	-87.4694	80.4848	1197.62484	-0.63232	1.4268	-0.40547	-75.971	105.6999	337.614	-0.18037	0.31494	-0.17031	-10.774	140.302	490.1804	-0.070801	0.30737	-0.2251	-22.646	-7.525	811.6396	-0.68311	1.1021	-0.26855
1.276	3.506	57.424	1443.7005	-1.1184	1.7733	-0.56416	-48.914	64.2145	1288.2384	-1.0422	1.7199	-0.80742	-14.637	-18.0409	92.5182	-0.046192	0.02998	-0.11133	-70.026	93.8739	1197.6337	-0.62558	1.4095	-0.40381	-82.1382	90.4633	331.90172	-0.15596	0.30225	-0.15576	-3.445	151.7622	465.8438	-0.058594	0.28613	-0.22314	-28.276	-20.743	851.8969	-0.69932	1.1303	-0.27949
1.278	-10.075	64.52	1429.475	-1.1035	1.7607	-0.56348	-58.759	64.9332	1260.8294	-1.0267	1.7011	-0.80478	-38.915	-22.7688	102.7747	-0.050293	0.030176	-0.11289	-52.585	117.7169	1178.6731	-0.61973	1.386	-0.38974	-48.28	101.4566	311.7336	-0.13965	0.29541	-0.14502	-6.311	145.5433	454.7399	-0.039551	0.25586	-0.21387	-27.619	-58.2311	871.6449	-0.71416	1.1681	-0.29736
1.28	-4.194	56.702	1437.0383	-1.0973	1.752	-0.5628	-72.1422	66.5115	1247.837	-1.0034	1.6782	-0.79834	-38.057	-25.8422	107.0313	-0.052734	0.033203	-0.12402	-51.991	120.2393	1160.9317	-0.61485	1.3744	-0.37989	-63.048	97.884	282.5829	-0.11709	0.27881	-0.13525	-1.71	140.0519	426.8221	-0.030762	0.24023	-0.21289	-30.756	-85.6524	887.402	-0.71572	1.2122	-0.31416
1.282	-5.847	71.159	1428.776	-1.0837	1.7452	-0.56338	-70.766	85.9104	1246.374	-0.98633	1.6496	-0.79258	-47.607	-7.129	123.991	-0.054102	0.040723	-0.12061	-50.079	125.4178	1133.2506	-0.60303	1.3599	-0.37354	-54.716	96.5005	261.0643	-0.097363	0.27002	-0.13174	9.446	125.00969	410.9134	-0.014648	0.21338	-0.20605	-50.933	-107.161	904.551	-0.72099	1.263	-0.32598
1.284	-10.704	77.3328	1427.8522	-1.0685	1.7386	-0.56533	-75.781	97.7831	1242.454	-0.95976	1.618	-0.78516	-66.22	16.4324	149.069	-0.054981	0.058593	-0.1293	-40.181	148.596	1108.45687	-0.59355	1.3392	-0.36426	-48.304	83.5159	258.9182	-0.077832	0.25908	-0.12158	-4.646	121.227	401.1693	-0.0029297	0.19385	-0.19849	-49.822	-111.712	928.2434	-0.72803	1.3032	-0.34131
1.286	-22.457	64.6066	1398.8835	-1.0605	1.7313	-0.56426	-69.628	101.16638	1216.1439	-0.93672	1.5887	-0.77148	-68.0832	27.692	189.1577	-0.070606	0.084375	-0.13399	-46.621	151.814	1087.459	-0.5794	1.3185	-0.35908	-28.232	91.7363	249.4497	-0.057422	0.25146	-0.11777	-8.158	107.4792	393.8741	0.0058594	0.17725	-0.19385	-42.011	-118.738	964.583	-0.7331	1.3394	-0.34814
1.288	-6.395	57.6542	1404.1868	-1.0601	1.7231	-0.56592	-87.2795	109.4265	1192.5962	-0.90898	1.5511	-0.7625	-55.27	47.7557	212.023	-0.087402	0.11357	-0.14111	-10.938	145.961	1055.3305	-0.57002	1.2997	-0.35166	-37.658	94.541	241.4113	-0.03418	0.2334	-0.10352	-13.716	104.1689	366.5372	0.016113	0.15283	-0.18945	-57.591	-114.1324	986.5335	-0.73594	1.3713	-0.35196
1.29	-34.136	59.0291	1395.9318	-1.054	1.7156	-0.56416	-91.165	115.158	1174.4877	-0.88281	1.5176	-0.75488	-51.114	65.4621	250.2071	-0.11475	0.1582	-0.15479	-15.458	148.138	1040.5057	-0.55732	1.2825	-0.34541	-27.353	93.2415	226.6948	-0.012695	0.22627	-0.09375	-5.027	107.4766	343.3551	0.027832	0.14355	-0.17773	-70.6845	-119.714	997.9918	-0.7332	1.3865	-0.36055
1.292	-38.906	52.1448	1396.5184	-1.0484	1.7074	-0.56367	-107.2415	123.135	1139.296	-0.85625	1.4776	-0.73633	-57.955	69.2766	293.4567	-0.13779	0.20976	-0.16602	-5.332	161.435	1020.845	-0.54443	1.2622	-0.33643	-13.419	87.27	209.5327	0.0066406	0.2167	-0.083887	-26.513	104.9002	341.1016	0.043457	0.12549	-0.18018	-88.2742	-107.818	1010.2332	-0.72529	1.3939	-0.36592
1.294	-55.9241	52.09543	1390.9682	-1.0434	1.6961	-0.56484	-98.6161	129.179	1117.8408	-0.82764	1.4442	-0.72226	-51.505	85.6889	351.0782	-0.17158	0.26562	-0.18183	-21.323	159.88	1010.2435	-0.5333	1.2489	-0.33155	-15.143	88.3518	190.921	0.026953	0.21084	-0.074121	-16.843	90.5559	338.4886	0.054443	0.11402	-0.17139	-75.817	-94.0079	1037.844	-0.70313	1.3926	-0.37695
1.296	-50.551	67.6079	1368.5551	-1.0345	1.6858	-0.56065	-108.692	129.8277	1084.316	-0.80498	1.404	-0.71016	-30.165	117.7784	393.1444	-0.20947	0.33359	-0.19434	2.531	156.813	992.927	-0.52656	1.241	-0.32451	-14.433	82.9712	195.0711	0.045215	0.19697	-0.062305	-10.728	94.7682	308.6395	0.062988	0.10596	-0.16699	-83.212	-67.6532	1067.4645	-0.68095	1.3917	-0.38545
1.298	-55.529	76.2816	1356.341	-1.021	1.6704	-0.56104	-98.9916	104.8878	1057.237	-0.7791	1.3656	-0.70137	-27.752	121.454	455.58163	-0.25117	0.40039	-0.20879	-7.898	158.0129	984.2784	-0.51602	1.2282	-0.31865	-15.745	83.479	176.0105	0.071289	0.19287	-0.058105	-15.139	98.5592	288.7847	0.078613	0.099121	-0.16406	-92.6549	-65.1204	1091.4871	-0.66494	1.3911	-0.39404
1.3	-62.974	66.4797	1340.232	-1.0054	1.6497	-0.55615	-90.5243041	92.166	1033.01	-0.75781	1.332	-0.68555	-21.883	105.082	501.6905	-0.29834	0.479	-0.2207	-9.52	148.46387	962.8923	-0.50439	1.2148	-0.30947	-16.291	86.607	167.8088	0.089062	0.18702	-0.052929	-32.121	97.39754	275.10258	0.08252	0.095215	-0.15918	-83.573	-69.507	1086.001	-0.65362	1.39	-0.40303
1.302	-68.5815	69.698	1327.6896	-0.99336	1.6305	-0.55371	-67.208	95.1824	1017.981	-0.7291	1.2936	-0.67051	-18.384	88.938	560.3588	-0.34453	0.57109	-0.23252	-19.607	125.4437	961.0253	-0.49023	1.1934	-0.30371	-43.986	81.9837	162.0329	0.10927	0.17842	-0.046875	-15.963	95.4244	265.30798	0.09082	0.089844	-0.15771	-80.474	-56.746	1108.113	-0.65908	1.3909	-0.41582
1.304	-79.03693	100.94528	1308.83761	-0.98281	1.6089	-0.55293	-50.344	109.25825	1004.7906	-0.70772	1.2536	-0.65654	-10.603	77.786	617.33	-0.39942	0.66953	-0.23897	-22.193	142.2564	928.2059	-0.47588	1.1722	-0.29639	-37.263	66.35677	144.549	0.12647	0.17139	-0.041016	-29.063	104.3665	249.5917	0.10278	0.09082	-0.15625	-84.3908	-50.104	1128.99718	-0.66992	1.3906	-0.42627
1.306	-86.6232	116.675	1294.299	-0.96397	1.5882	-0.54102	-29.193	121.537	1009.494	-0.68272	1.2146	-0.64873	-23.643	65.134	677.1842	-0.45488	0.76797	-0.25068	-51.642	169.4964	927.487	-0.45928	1.1525	-0.28936	-44.683	71.17295	129.962	0.14531	0.16201	-0.035742	-38.298	103.6842	228.246	0.10986	0.089844	-0.1582	-82.3775	-52.761	1162.668	-0.68428	1.4046	-0.44658
1.308	-68.2516	125.334	1277.0571	-0.95117	1.5645	-0.53418	-11.554	125.278	992.141	-0.65664	1.1756	-0.63516	-20.64	57.764	715.4346	-0.50654	0.86573	-0.27647	-52.986	174.2481	891.7609	-0.44482	1.1294	-0.28271	-44.058	76.9143	124.9717	0.16748	0.15576	-0.03125	-40.6169	89.223	223.137	0.125	0.083496	-0.15479	-55.627	-69.433	1175.415	-0.70205	1.4208	-0.46582
1.31	-61.732	133	1258.3507	-0.9331	1.5354	-0.53349	-8.719	130.9848	963.228	-0.63184	1.1411	-0.61963	-2.357	64.48	745.8305	-0.55664	0.95313	-0.29785	-64.0193	162.2663	871.9213	-0.4291	1.1053	-0.27295	-77.49865	67.77314	118.2905	0.18672	0.14804	-0.029101	-37.152	92.2784	209.709	0.13477	0.074219	-0.15625	-72.654	-86.4271	1169.9174	-0.7165	1.4399	-0.48184
1.312	-42.167	125.665	1242.692	-0.91436	1.5064	-0.52607	-3.623	128.9679	937.841	-0.61055	1.1055	-0.60644	-17.314	49.0848	768.3151	-0.60068	1.0206	-0.32227	-72.506	177.4864	841.9447	-0.41406	1.0781	-0.26709	-44.412	63.6755	112.42147	0.20127	0.14053	-0.020704	-41.346	92.1743	209.089	0.15479	0.068848	-0.15771	-85.734	-109.5779	1158.186	-0.74004	1.472	-0.50879
1.314	-35.359	101.2214	1226.353	-0.89677	1.4755	-0.51943	-5.483	121.252	914.1345	-0.58565	1.0794	-0.59131	-19.378	16.7104	774.0624	-0.63252	1.0676	-0.35166	-82.5352	163.1637	834.07367	-0.38994	1.0475	-0.26123	-41.358	59.9601	120.0613	0.21963	0.13037	-0.021094	-35.808	93.578	187.59209	0.17481	0.059082	-0.16016	-76.758	-120.124	1173.939	-0.7666	1.5039	-0.52051
1.316	-31.917	90.9556	1196.472	-0.8792	1.4439	-0.51377	-11.078	127.0957	868.7307	-0.56885	1.054	-0.57608	13.427	5.452	786.26	-0.65595	1.0941	-0.37861	-71.4395	164.27216	814.0727	-0.37647	1.0157	-0.2585	-62.18	63.7691	109.0581	0.23272	0.12041	-0.014356	-41.841	87.32	181.08288	0.18945	0.047852	-0.16211	-58.752	-133.489	1193.7278	-0.7915	1.5343	-0.53692
1.318	-37.481	97.1233	1190.5813	-0.86426	1.416	-0.50488	-1.241	134.6786	836.9946	-0.55381	1.0353	-0.56553	11.465	4.525	807.206	-0.6667	1.0977	-0.4085	-71.897	165.1029	799.38813	-0.35732	0.98799	-0.25029	-82.8705	54.6096	94.657	0.23828	0.11426	-0.011719	-33.883	105.189	161.163	0.21338	0.030273	-0.17041	-66.145	-120.659	1224.0717	-0.81514	1.5661	-0.55059
1.32	-36.701	95.9747	1171.5055	-0.84941	1.3838	-0.49941	-1.501	137.171	785.4613	-0.53857	1.0151	-0.55225	-2.15799999999999	-9.0309	807.949	-0.66748	1.0825	-0.42871	-70.934	176.0369	764.639	-0.33955	0.9583	-0.24327	-55.604	54.9205	99.9392	0.24834	0.10605	-0.006836	-38.511	84.6647	152.4119	0.22754	0.021484	-0.17432	-61.763	-120.597	1245.714	-0.83897	1.5978	-0.56504
1.322	-13.966	100.4956	1157.544	-0.83125	1.3485	-0.49082	10.569	132.163	771.842	-0.52148	0.99413	-0.5334	-10.5	-13.7178	793.519	-0.66094	1.0558	-0.44209	-71.1968	171.8087	740.5411	-0.32471	0.92725	-0.23682	-60.474	72.6443	85.3153	0.25019	0.099318	-0.0054687	-18.718	68.9374	150.1091	0.25293	0.003418	-0.18799	-59.068	-113.85821	1252.6774	-0.85293	1.6295	-0.57246
1.324	4.08	114.845	1138.6148	-0.80937	1.3141	-0.48418	-13.157	143.901	754.6557	-0.49648	0.96856	-0.51406	-0.782000000000004	-11.2843	771.584	-0.65967	1.0304	-0.45625	-86.1688	168.4887	715.5889	-0.30557	0.8957	-0.22646	-68.8512	63.73679	80.5195	0.26074	0.09502	-0.0019531	-10.302	70.5903	146.4019	0.27441	-0.01416	-0.19189	-57.243	-89.6789	1278.753	-0.85596	1.6509	-0.57959
1.326	-8.506	130.898	1128.889	-0.79043	1.2779	-0.47558	-18.85	144.624	735.915	-0.47227	0.94199	-0.49492	-18.438	-7.948	744.6556	-0.65772	1.0089	-0.48242	-54.665	186.3596	690.1947	-0.28652	0.86553	-0.22373	-55.6396	51.44239	75.5233	0.26162	0.09375	-0.0057617	-27.663	79.0396	139.371	0.28564	-0.022949	-0.18555	-64.233	-66.5028	1293.737	-0.8543	1.6672	-0.5832
1.328	6.026	134.3436	1101.614	-0.76953	1.2402	-0.4668	-10.336	149.062	705.785	-0.4458	0.91084	-0.47724	-47.269	-21.51688	745.642	-0.65625	0.99531	-0.50352	-59.591	202.993	678.8374	-0.26621	0.83428	-0.2167	-54.197	56.5457	73.9177	0.25928	0.094727	-0.0068359	-15.611	71.94724	145.56948	0.29346	-0.031738	-0.18652	-50.079	-63.016	1309.922	-0.85283	1.6806	-0.58779
1.33	2.051	134.945468	1081.24	-0.74619	1.2003	-0.45361	-5.195	153.6947	695.731	-0.4209	0.88086	-0.46045	-32.848	-11.6506	737.6819	-0.64893	0.98242	-0.52344	-47.273	199.822	662.1841	-0.24843	0.79785	-0.21357	-60.5282	57.72584	62.801	0.25537	0.097461	-0.0077148	-13.845	64.43871	142.80009	0.29224	-0.034668	-0.18164	-47.365	-64.803	1319.7894	-0.85439	1.6899	-0.5917
1.332	8.322	139.54246	1045.6175	-0.72461	1.1594	-0.44131	-37.97	155.4467	669.581	-0.39609	0.85098	-0.44277	-54.8208	1.1998	727.002	-0.64111	0.9586	-0.55976	-52.5595	195.176	645.8279	-0.22803	0.76807	-0.20752	-31.454	47.2858	72.0082	0.25088	0.10244	-0.011328	-2.707	68.6932	126.5486	0.29053	-0.033203	-0.17822	-86.509	-59.2711	1299.136	-0.85957	1.701	-0.59727
1.334	-3.699	137.67296	1025.6958	-0.70078	1.1254	-0.42998	-35.321	136.596114	647.2119	-0.37373	0.82031	-0.42383	-46.4902	-3.2733	743.004	-0.62002	0.94219	-0.5707	-24.622	186.2677	617.241	-0.20733	0.73154	-0.20107	-20.505	45.06162	49.8332	0.23916	0.10713	-0.014062	-20.502	67.67	113.467	0.27441	-0.019043	-0.17334	-94.197	-63.0576	1292.409	-0.87207	1.709	-0.59766
1.336	19.296	126.7276	994.5824	-0.67949	1.0904	-0.41934	-72.6383	127.75618	622.1362	-0.35146	0.78945	-0.40899	-69.3087	-7.6914	756.695	-0.59814	0.92656	-0.58477	-24.52	162.5516	600.9399	-0.18779	0.70352	-0.1961	-15.565	61.365	51.4749	0.23134	0.11768	-0.020508	-14.095	63.607	111.9665	0.26465	-0.0083008	-0.17236	-91.027	-62.0428	1295.735	-0.89453	1.7176	-0.60625
1.338	19.659	131.9578	962.0246	-0.65332	1.0488	-0.41455	-69.7638	136.39933	592.9683	-0.33135	0.75752	-0.39356	-36.345	-17.771	769.9777	-0.58057	0.9042	-0.59385	2.183	148.287	582.5059	-0.16435	0.67109	-0.19258	-14.164	53.5945	54.1854	0.22021	0.12646	-0.027832	-12.392	70.313	101.302	0.24219	0.0063477	-0.17188	-92.939	-53.5036	1313.2146	-0.91494	1.729	-0.60771
1.34	-6.52200000000001	148.2155	940.3737	-0.62549	1.0112	-0.39678	-86.7099	143.3945	559.5525	-0.31152	0.72266	-0.37695	-30.119	-16.185	782.041	-0.57129	0.87695	-0.60352	10.631	147.55	563.0913	-0.14492	0.64073	-0.18652	-3.738	47.6955	52.5727	0.1959	0.13848	-0.035156	-20.763	66.631	89.585	0.22266	0.030762	-0.17041	-126.8178	-42.8772	1323.1963	-0.9333	1.7434	-0.61045
1.342	-31.788	151.4125	934.5981	-0.60381	0.97392	-0.38525	-62.8423	135.8488	527.6172	-0.28711	0.69394	-0.36446	-33.103	-29.519	811.5674	-0.56592	0.85088	-0.61943	17.554	155.7997	540.51304	-0.12256	0.60986	-0.18066	-5.617	55.2896	50.9082	0.18037	0.15439	-0.040723	-14.482	58.2044	78.751	0.20947	0.046875	-0.16602	-114.981	-53.2626	1347.393	-0.95264	1.7571	-0.61709
1.344	-25.549	147.4801	913.4072	-0.57685	0.93564	-0.37666	-90.4041	136.231	516.10947	-0.26133	0.65156	-0.34873	-41.9415	-41.2714	833.0942	-0.55205	0.82705	-0.6374	0.542999999999999	148.8478	526.2914	-0.1042	0.57588	-0.17725	-3.066	53.1436	51.9425	0.16357	0.16806	-0.046582	-18.237	54.7911	87.6553	0.17578	0.076172	-0.16113	-112.974	-52.7604	1369.283	-0.97412	1.7681	-0.62061
1.346	-27.455	156.516	886.86373	-0.55049	0.89522	-0.36396	-73.5975	129.1704	483.115	-0.23554	0.61328	-0.3331	-14.71	-59.55163	848.1249	-0.53408	0.81533	-0.6499	6.136	152.0879	500.8379	-0.085157	0.54229	-0.17295	-14.349	37.6671	45.16922	0.14346	0.1833	-0.049316	-13.743	63.1105	80.0236	0.1665	0.091797	-0.1543	-111.279	-44.0899	1402.5878	-0.99638	1.786	-0.621
1.348	-53.3686	158.6488	858.96	-0.52295	0.85889	-0.354	-61.8455	113.1169	482.8056	-0.20615	0.57246	-0.31689	-45.374	-87.713	854.8098	-0.51972	0.81543	-0.65899	5.491	146.3572	472.9488	-0.0625	0.50283	-0.16748	5.809	27.7579	44.1727	0.125	0.20117	-0.054199	-21.275	70.6621	83.36424	0.13379	0.11914	-0.15186	-134.85002	-37.7425	1411.993	-1.0313	1.7996	-0.62344
1.35	-30.372	153.8189	820.65	-0.49893	0.8212	-0.34483	-43.045	111.0278	455.6871	-0.17822	0.52979	-0.3042	-12.748	-125.054	869.2753	-0.51318	0.83447	-0.66748	2.922	151.4455	454.153	-0.044433	0.46797	-0.15879	-8.954	35.8982	40.3017	0.10547	0.21924	-0.055371	-32.817	71.047	77.8159	0.11108	0.13794	-0.14404	-116.99	-45.0269	1419.982	-1.0645	1.818	-0.62578
1.352	-36.728	156.6692	794.194	-0.47461	0.78555	-0.33457	-55.1728	115.058	429.3924	-0.14844	0.49111	-0.28779	-14.623	-131.035	882.691	-0.52353	0.86689	-0.68018	-7.005	135.74146	429.1445	-0.027832	0.43115	-0.15723	-9.45999999999999	35.0548	32.0045	0.083399	0.23272	-0.062988	-24.262	68.63	72.8677	0.087891	0.15137	-0.1377	-134.57942	-35.324	1404.60979	-1.0963	1.8342	-0.63477
1.354	-46.3662	166.2958	779.393	-0.4539	0.7543	-0.31817	-37.833	119.5153	401.934	-0.12051	0.44727	-0.27354	2	-116.904	904.45	-0.54268	0.91202	-0.68467	-11.787	144.45062	410.387	-0.0090819	0.39258	-0.14492	-21.706	32.4638	30.3411	0.063867	0.25108	-0.06377	-25.931	64.2206	75.1851	0.0625	0.17285	-0.13086	-139.6234	-38.115	1397.3367	-1.125	1.8496	-0.63672
1.356	-60.893	150.688	768.2239	-0.4335	0.72412	-0.31221	-38.507	120.1345	391.3525	-0.087696	0.39805	-0.25635	-27.266	-108.17	926.2103	-0.5665	0.96474	-0.69287	-15.756	146.4652	399.825	0.012695	0.35468	-0.13662	2.632	33.637	42.2938	0.046192	0.26904	-0.06377	-34.636	54.6599	65.0156	0.054688	0.1792	-0.12695	-126.0693	-31.092	1396.2461	-1.1421	1.8607	-0.6376
1.358	-28.307	135.326	750.4524	-0.42236	0.69385	-0.30273	-26.047	136.456	357.6025	-0.062109	0.35185	-0.24502	14.265	-98.4324	957.2627	-0.58642	1.0114	-0.69463	-31.222	135.195	380.4713	0.032617	0.31484	-0.13154	-37.081	39.55	37.8707	0.02832	0.28711	-0.066895	-35.652	38.4972	63.534	0.036621	0.19385	-0.11963	-99.555	-25.956	1407.004	-1.1551	1.8688	-0.64102
1.36	-27.615	139.978	743.2245	-0.40283	0.66221	-0.29463	-17.898	143.534	342.5707	-0.032715	0.30469	-0.22949	29.3312	-73.992	990.2446	-0.60059	1.0625	-0.70117	-25.136	127.00844	364.3281	0.050977	0.2749	-0.121	-29.926	27.9915	38.4556	0.019532	0.30469	-0.064746	-47.203	45.55099	57.33	0.027099	0.20581	-0.11987	-103.58	-19.2059	1413.7972	-1.1621	1.8773	-0.64414
1.362	-35.39	161.0766	708.23	-0.38105	0.63018	-0.28662	-0.999000000000002	133.996	323.885	-0.0073242	0.2584	-0.22227	36.061	-65.115	1021.282	-0.61602	1.1105	-0.71465	-27.679	128.6879	345.7041	0.069336	0.23828	-0.11328	-32.089	32.593	51.6679	0.010449	0.31777	-0.06416	-51.678	47.70476	43.273	0.018066	0.2124	-0.11377	-101.835	-7.3993	1408.3747	-1.163	1.8778	-0.64092
1.364	-43.2986	160.6879	684.8949	-0.36387	0.59346	-0.28115	12.227	119.167	308.5788	0.020703	0.21455	-0.21035	34.57427	-62.284	1056.4878	-0.62744	1.1609	-0.72099	-63.098	133.113	334.1338	0.088476	0.19902	-0.10899	-37.096	35.9239	48.8868	0.003418	0.33106	-0.061035	-25.575	46.8534	43.2465	0.0073242	0.22949	-0.11377	-102.9936	-8.1857	1396.283	-1.1621	1.873	-0.63574
1.366	-17.123	170.574	645.9211	-0.3377	0.56113	-0.27178	3.646	121.808	299.9004	0.048047	0.17041	-0.19355	45.8032	-42.113	1075.5313	-0.63369	1.2089	-0.72998	-61.9639	125.451	322.0872	0.10527	0.16025	-0.097656	-51.73	35.3647	48.1197	0.0041016	0.34385	-0.058984	-32.874	45.4196	51.6025	0.0068359	0.22998	-0.11182	-81.586	13.2774	1398.541	-1.1608	1.8635	-0.63575
1.368	-40.7251	179.474	609.2924	-0.31396	0.5249	-0.26025	20.814	108.6979	280.0105	0.074414	0.129	-0.18936	33.007	-35.187	1101.39487	-0.64726	1.2545	-0.74394	-62.0586	127.4582	296.7955	0.12012	0.12588	-0.091406	-45.063	26.067	26.4482	0.0048828	0.34717	-0.056641	-41.189	44.6397	47.9261	0.0014648	0.23145	-0.1123	-70.371	30.664	1398.0659	-1.1604	1.8505	-0.6334
1.37	-10.563	173.3294	581.4266	-0.29405	0.49072	-0.25254	18.899	92.7961	247.255	0.10059	0.090332	-0.18066	21.069	-47.235	1107.100392	-0.66992	1.291	-0.75586	-71.5955	121.104	281.129	0.13184	0.091115	-0.084082	-54.7291	22.2988	32.7669	0.0097655	0.35254	-0.048535	-43.562	43.553	37.82	0.0024414	0.22852	-0.1084	-60.795	38.18	1388.7012	-1.1527	1.8357	-0.63418
1.372	-9.4124	146.5098	558.5102	-0.27676	0.45762	-0.24336	37.339	79.9091	249.36917	0.12119	0.049219	-0.17275	24.381	-75.085	1129.3159	-0.69258	1.325	-0.7707	-83.8984	103.5842	263.8334	0.14209	0.056641	-0.075195	-56.975	34.6841	22.637	0.013575	0.35371	-0.040235	-20.781	47.2579	56.446617	0.0043945	0.21875	-0.11523	-56.741	38.39	1399.5687	-1.1471	1.8192	-0.63154
1.374	19.163	158.648	545.359	-0.26035	0.42676	-0.22734	9.061	79.3417	228.141	0.14229	0.010937	-0.16357	24.017	-75.868	1128.388	-0.71347	1.3539	-0.79043	-79.4124	88.037	253.365	0.15225	0.026172	-0.065332	-62.6202	25.74504	44.2708	0.016309	0.35215	-0.035547	-23.017	50.8708	52.7247	0.01416	0.20068	-0.12598	-69.733	42.967	1378.8911	-1.1401	1.8013	-0.62646
1.376	0.757999999999999	162.54732	528.317	-0.24649	0.3958	-0.21553	20.226	78.1008	221.2854	0.16181	-0.025	-0.15732	9.749	-91.4483	1157.5174	-0.72011	1.3832	-0.81152	-78.2032	100.2658	231.734	0.15918	0.0016601	-0.055566	-46.45	27.4589	39.1331	0.020996	0.34541	-0.025293	-6.445	41.54104	40.67457	0.018555	0.18945	-0.12549	-74.686	40.2617	1385.296	-1.1327	1.7838	-0.62558
1.378	19.109	162.9325	514.3837	-0.23291	0.36572	-0.20654	2.39	77.881	230.1756	0.17509	-0.062891	-0.15117	-26.099	-99.88114	1180.0807	-0.71992	1.4049	-0.83457	-59.5258	98.3152	229.6475	0.16699	-0.02998	-0.055176	-42.36	29.8304	47.7528	0.025879	0.34521	-0.019043	-31.832	27.5959	39.4385	0.036621	0.15967	-0.12305	-60.681	46.3227	1357.0087	-1.1205	1.7664	-0.62305
1.38	28.399	161.966	491.218	-0.22325	0.33681	-0.20039	-1.509	85.6925	206.6468	0.18848	-0.10059	-0.14453	-12.383	-112.9122	1200.8318	-0.71289	1.4385	-0.86182	-55.311	91.4489	237.3779	0.17608	-0.058691	-0.051953	-52.686	25.9277	42.1105	0.033105	0.33291	-0.012207	-23.646	20.7827	34.208	0.049072	0.13648	-0.12085	-41.103	48.3341	1349.965	-1.1076	1.7465	-0.6164
1.382	31.8551	173.532	458.7002	-0.20977	0.3	-0.20449	-32.864	85.8277	189.1482	0.21074	-0.13799	-0.14199	-13.903	-113.779	1216.7147	-0.7208	1.4643	-0.87705	-31.153	88.8998	223.0329	0.18408	-0.089844	-0.047852	-47.338	16.5689	48.5942	0.040234	0.32471	-0.0042969	-19.877	38.9282	22.9143	0.061035	0.1123	-0.12305	-62.729	56.9667	1317.918	-1.0929	1.7228	-0.60947
1.384	10.337	147.626	434.89925	-0.18437	0.26993	-0.19277	-15.214	78.8411	182.696	0.225	-0.17129	-0.13955	-33.984	-121.338	1252.046	-0.73867	1.4879	-0.89219	-35.281	98.197	205.5495	0.19258	-0.11709	-0.041211	-37.65	16.2177	50.3638	0.044141	0.30713	0.00039063	-9.3	33.5046	30.9114	0.074707	0.084473	-0.12402	-68.989	38.1851	1320.87	-1.0796	1.6958	-0.604
1.386	8.907	136.06	416.6324	-0.15713	0.23135	-0.18906	-46.362	76.7915	164.6841	0.24063	-0.20293	-0.13369	-36.433	-124.58	1265.1334	-0.76523	1.516	-0.90937	-29.573	85.528	192.8442	0.20049	-0.13985	-0.038574	-1.492	19.6316	61.2021	0.05459	0.29717	0.0074219	-25.109	31.7091	36.4928	0.083984	0.075195	-0.12793	-60.091	36.24702	1292.874	-1.064	1.6798	-0.59795
1.388	21.285	138.56	401.3954	-0.12891	0.19434	-0.18213	-46.038	78.9061	150.273	0.25156	-0.23574	-0.12627	-19.339	-113.3552	1301.8692	-0.79619	1.5417	-0.92881	-33.299	77.959	181.29662	0.20556	-0.16054	-0.032324	-26.433	5.0724	53.265904	0.070313	0.27783	0.01709	-9.39	28.1825	31.4629	0.093262	0.049316	-0.12793	-68.213	52.7038	1299.964	-1.048	1.6619	-0.59405
1.39	7.768	135.791	381.6863	-0.10107	0.15918	-0.18252	-67.1404	61.1215	145.1262	0.26172	-0.25586	-0.12744	-52.7451	-80.6327	1312.4368	-0.83154	1.5747	-0.94678	-8.79900000000001	82.0831	173.057	0.21152	-0.17754	-0.028125	-6.345	-4.7064	60.10056	0.074707	0.27158	0.020117	-19.92	27.5193	29.5286	0.10498	0.030761	-0.13257	-94.503	71.9468	1281.79602	-1.0328	1.6443	-0.58507
1.392	-6.756	112.6841	350.37457	-0.071094	0.11905	-0.17578	-52.693	56.0318	123.35	0.27002	-0.28145	-0.12246	-76.318	-74.6883	1322.636	-0.87168	1.6101	-0.96885	-0.314999999999998	80.0059	158.9687	0.21045	-0.19141	-0.03125	-5.219	1.4872	63.2362	0.082911	0.26231	0.020605	-7.86	12.2645	37.7745	0.1084	0.012695	-0.1333	-91.271	76.389	1276.0242	-1.02	1.6256	-0.58565
1.394	-8.347	107.1548	324.4736	-0.045703	0.08623	-0.16875	-55.9965	60.976	119.55	0.27686	-0.29541	-0.11778	-62.79266	-70.0299	1335.2516	-0.9125	1.6477	-0.9875	-12.307	58.9675	126.862	0.20918	-0.1958	-0.028516	9.295	1.8857	69.74585	0.087207	0.25879	0.025684	-24.011	12.8808	40.6309	0.11719	-0.01123	-0.13818	-102.241	88.403	1249.888	-1.0078	1.6113	-0.58105
1.396	-11.65	115.751	313.9686	-0.022168	0.05586	-0.16308	-65.85758	66.90754	113.1987	0.27998	-0.30478	-0.1209	-45.585	-55.566	1327.483	-0.95117	1.6871	-0.99805	2.483	55.2533	126.363	0.21123	-0.19981	-0.029394	-5.471	-2.7983	84.5942	0.090039	0.25762	0.030859	3.97199999999999	24.2713	41.4826	0.12109	-0.020508	-0.14014	-107.2741	106.599	1241.9455	-0.99091	1.5989	-0.57334
1.398	-39.8667	109.8896	299.8224	-0.0043945	0.029297	-0.15527	-76.7157	56.8659	98.9259	0.28486	-0.30976	-0.11592	-59.8901	-50.863	1347.1766	-0.99101	1.7195	-1.01	10.811	63.127	119.2014	0.20967	-0.20215	-0.022363	20.088	2.272	94.0553	0.094238	0.25586	0.035645	-13.089	26.68809	29.3725	0.12549	-0.030762	-0.1416	-117.59642	110.497	1228.8927	-0.97644	1.5758	-0.56923
1.4	-14.919	104.3264	298.529	0.011133	0.00048826	-0.14844	-65.8074	61.377	94.3099	0.2832	-0.30957	-0.1167	-34.652	-47.436	1348.6615	-1.0273	1.75	-1.0234	10.783	60.26	130.008	0.19932	-0.19522	-0.024414	-8.27	9.4014	117.7063	0.088769	0.25938	0.036719	-16.687	20.7705	23.48	0.12085	-0.031494	-0.13989	-92.2716	114.093	1213.1205	-0.95574	1.5544	-0.56024
1.402	-8.495	107.9301	272.5918	0.018164	-0.024805	-0.13398	-65.4325	62.8465	88.3313	0.28535	-0.30439	-0.12022	-30.669	-47.398	1356.392	-1.0618	1.7814	-1.0329	19.294	62.833	119.712	0.18555	-0.19629	-0.023438	-6.386	22.0228	139.0255	0.088476	0.26289	0.036133	-44.409	20.9218	43.2123	0.10938	-0.030273	-0.13232	-90.198	113.0573	1188.5686	-0.94003	1.53	-0.55195
1.404	-39.377	103.4838	262.7636	0.027148	-0.045899	-0.12852	-58.652	58.37949	92.0408	0.28564	-0.30264	-0.1165	-29.8363	-28.725	1376.634	-1.0886	1.8078	-1.0383	13.442	68.065	110.0012	0.17901	-0.18359	-0.020801	-12.884	23.044	160.8364	0.092383	0.27031	0.036914	-36.83	13.6625	41.2518	0.084473	-0.014648	-0.13965	-97.898	108.3294	1167.218	-0.91748	1.5044	-0.54248
1.406	-54.777	91.72984	235.024	0.033691	-0.066504	-0.1293	-50.641	44.6878	94.5807	0.28135	-0.29366	-0.11533	-32.0057	-42.3724	1401.382	-1.1106	1.8282	-1.0399	5.718	64.23	99.11	0.16416	-0.16826	-0.022461	15.337	49.0544	187.3948	0.096387	0.28174	0.03291	-32.084	6.40069	56.8232	0.076172	-0.0048828	-0.13721	-96.009	88.6912	1145.313	-0.90275	1.476	-0.53067
1.408	-46.872	90.2561	213.054	0.041016	-0.074707	-0.12305	-33.162	56.347	98.471	0.27188	-0.27725	-0.12354	-4.036	-56.91047	1429.4615	-1.1313	1.8398	-1.0469	-12.331	55.8192	107.4561	0.14463	-0.15224	-0.029102	-3.108	62.9082	210.1803	0.10205	0.29883	0.025879	-40.82	5.7752	59.7005	0.050293	0.015137	-0.1416	-75.209	97.7671	1129.7753	-0.8859	1.449	-0.5271
1.41	-48.3565	94.2862	189.516	0.047461	-0.091602	-0.121	-43.823	47.28571	91.1904	0.2627	-0.26221	-0.11816	16.267	-40.845	1464.3049	-1.1426	1.8379	-1.0566	-23.84	53.1321	97.2565	0.13301	-0.13701	-0.02832	-2.275	89.3953	247.5403	0.104	0.32304	0.018066	-30.291	6.0697	56.33	0.037354	0.033447	-0.14502	-69.435	109.3079	1116.6762	-0.86833	1.4236	-0.51885
1.412	-62.89745	91.6252	184.7496	0.061426	-0.10224	-0.11367	-7.89	41.7516	74.757	0.25078	-0.24522	-0.11758	18.085	-26.225	1497.385	-1.1451	1.8358	-1.0576	-23.192	51.9664	85.0137	0.12256	-0.11963	-0.025391	-7.711	110.1971	299.6409	0.099998	0.34336	0.014941	-51.8492	-0.814	66.471	0.017578	0.049805	-0.14893	-81.815	110.4878	1104.8478	-0.84995	1.3946	-0.50511
1.414	-54.25474	81.3946	173.3051	0.071582	-0.1124	-0.10781	9.92	48.412	77.0811	0.23515	-0.22656	-0.11534	22.009	-25.5018	1509.107	-1.1402	1.8219	-1.0543	-50.4925	51.1389	67.8261	0.10381	-0.10342	-0.037695	-18.375	138.789	342.5507	0.090625	0.36094	0.00048832	-33.021	-13.2199	94.7027	-0.0068359	0.08252	-0.1499	-79.044	111.1396	1085.2018	-0.82813	1.3691	-0.49805
1.416	-42.304	86.357	160.8144	0.083105	-0.12715	-0.10625	-0.997	55.582	75.3554	0.21445	-0.19727	-0.12002	27.8962	-14.7173	1507.485	-1.1309	1.7984	-1.0559	-42.408	48.4036	73.9679	0.090625	-0.090137	-0.037109	-29.02	130.939	410.1308	0.074316	0.38584	-0.0099607	-31.906	-2.7852	102.0823	-0.015625	0.094238	-0.15088	-78.7147	129.461	1066.702	-0.81045	1.3387	-0.48938
1.418	-42.533	89.347	147.2873	0.097656	-0.14355	-0.10107	-9.345	40.9315	65.4416	0.19141	-0.1749	-0.11963	26.202	-1.554	1508.252	-1.1138	1.7656	-1.0472	-58.648	59.7937	57.3193	0.07539	-0.07373	-0.0375	-39.807	126.6	459.0602	0.060547	0.41309	-0.026367	-3.483	6.656	125.9356	-0.054199	0.12939	-0.15771	-73.044	143.404	1052.4243	-0.7904	1.315	-0.48385
1.42	-35.659	73.5308	149.0169	0.1082	-0.15703	-0.094531	12.237	26.3805	62.7442	0.16846	-0.14844	-0.11865	15.92	-15.55511	1501.4	-1.0972	1.7368	-1.0386	-49.454	65.896	66.1143	0.056445	-0.056738	-0.039844	-37.628	122.6164	541.913	0.042774	0.45215	-0.052441	-21.277	22.9862	148.5929	-0.095458	0.16748	-0.15552	-52.634	154.874	1022.139	-0.77119	1.2886	-0.4757
1.422	-9.125	58.1604	131.46147	0.11943	-0.17354	-0.088867	16.887	36.8002	61.052	0.14551	-0.11875	-0.11729	14.386	-11.3377	1510.942	-1.0851	1.7042	-1.0263	-68.0819	56.2556	63.3648	0.039063	-0.032227	-0.04248	-48.686	112.132	597.439	0.021289	0.49053	-0.073926	-20.291	37.0175	183.1128	-0.13574	0.21338	-0.16016	-27.869	151.229	999.4235	-0.7529	1.2693	-0.46973
1.424	-5.761	60.22274	128.8052	0.12686	-0.1833	-0.084571	11.958	40.11115	49.1744	0.11289	-0.084863	-0.12266	37.371	-3.8135	1519.3602	-1.0703	1.6699	-1.0156	-51.832	52.185	55.8867	0.025586	-0.0063477	-0.051465	-75.272	88.698	651.21	-0.0056641	0.53193	-0.10049	-20.515	62.3047	205.5114	-0.20996	0.28271	-0.1582	-12.84	158.7609	975.0551	-0.7373	1.2441	-0.45996
1.426	-22.188	60.9703	112.164	0.13535	-0.19297	-0.075879	11.538	39.9342	48.6209	0.088281	-0.050488	-0.11953	18.344	8.5282	1515.6877	-1.0563	1.6355	-1.0032	-67.7735	55.039	53.585	0.0093751	0.0079101	-0.054883	-83.3329	84.664	727.9444	-0.035742	0.5791	-0.13242	11.862	72.0124	245.3691	-0.24756	0.32715	-0.16162	-35.449	149.5172	958.9924	-0.71487	1.2156	-0.45406
1.428	-16.987	40.50943	110.2572	0.14502	-0.20313	-0.068359	13.96	37.566	40.0419	0.062305	-0.016211	-0.11582	9.012	11.5755	1517.1655	-1.0488	1.5902	-0.99414	-59.281	42.0167	46.1	0.0019531	0.027441	-0.052539	-58.555	82.98	784.6282	-0.073242	0.62793	-0.16406	-3.299	71.9227	279.6614	-0.33105	0.42236	-0.1665	-11.558	143.516	937.159	-0.69569	1.1931	-0.44443
1.43	4.775	36.724	117.0107	0.14883	-0.20918	-0.069433	1.87	59.056	32.149	0.030762	0.01709	-0.11182	5.902	26.9849	1523.7381	-1.0366	1.5591	-0.98389	-64.02278	44.36264	51.4752	-0.014356	0.044727	-0.051367	-71.9169	72.1243	820.81	-0.12363	0.68037	-0.19453	11.534	69.8769	321.6074	-0.39307	0.49951	-0.17359	-8.815	139.4387	922.6779	-0.67743	1.1685	-0.4357
1.432	-3.168	42.1592	106.655	0.15186	-0.21328	-0.064844	-6.065	56.037	36.0254	0.0026366	0.047656	-0.11367	3.069	51.715	1519.8543	-1.0344	1.5172	-0.96484	-49.299	46.69653	52.6307	-0.033691	0.074219	-0.057617	-62.4427	44.0373	834.7057	-0.17891	0.72959	-0.22647	24.5351	80.293	355.6316	-0.46191	0.58398	-0.18213	-6.093	158.8361	897.6408	-0.65923	1.1521	-0.42372
1.434	-8.093	40.772	90.6668	0.15342	-0.21328	-0.057422	-25.998	45.643	38.3806	-0.035254	0.0875	-0.11075	-32.463	57.367	1512.8739	-1.0285	1.4906	-0.94922	-48.003	52.23725	45.452	-0.047949	0.10811	-0.062988	-37.2163	24.689	856.6693	-0.24883	0.77842	-0.25186	32.1327	94.166	405.5493	-0.54785	0.71045	-0.18896	-36.14	156.617	865.2907	-0.64648	1.1289	-0.40234
1.436	1.735	44.63	76.62847	0.15156	-0.21572	-0.058692	-17.913	47.535	49.0407	-0.062207	0.12812	-0.10957	-40.509	63.805	1504.5303	-1.0227	1.4621	-0.93711	-53.155	50.1388	35.55919	-0.065821	0.13487	-0.063672	-35.3633	17.487	863.815	-0.32168	0.83369	-0.26885	21.2147	100.255	471.4444	-0.58936	0.77588	-0.19678	-17.254	158.046	833.6364	-0.62671	1.1038	-0.40198
1.438	-10.271	56.001	90.9044	0.15234	-0.2168	-0.054199	-43.33	42.7381	47.1986	-0.088184	0.16357	-0.11425	-42.217	77.351	1508.8476	-1.022	1.4491	-0.92119	-43.824	39.2073	42.5888	-0.080664	0.15947	-0.069532	-40.9879	-1.855	872.795	-0.40039	0.88721	-0.27148	34.8826	114.166	520.4595	-0.66895	0.90332	-0.21338	-51.283	164.349	820.587	-0.60362	1.0732	-0.38826
1.44	-5.099	50.5774	85.5797	0.1541	-0.21553	-0.049902	-45.813	33.5416	33.5393	-0.11719	0.19336	-0.11719	-53.199	73.102	1500.0845	-1.0244	1.4434	-0.90723	-21.971	54.6508	37.9508	-0.096971	0.18193	-0.074121	-7.28	-10.679	839.241	-0.47793	0.93653	-0.28516	30.3363	97.0345	573.5083	-0.72144	0.98949	-0.23852	-56.854	151.74165	811.335048	-0.57967	1.0408	-0.37344
1.442	-0.694999999999997	31.8787	74.32622	0.15576	-0.2081	-0.047266	-56.187	29.5936	42.4182	-0.13838	0.22139	-0.10849	-73.3031	67.527	1498.5019	-1.0328	1.4402	-0.89316	-3.175	43.6563	65.3958	-0.11377	0.20508	-0.07959	26.7454	-20.0119	785.043	-0.55283	0.98603	-0.29062	32.1421	81.8814	638.955	-0.76904	1.0669	-0.26123	-45.172	147.0089	782.5697	-0.55595	1.0069	-0.36506
1.444	11.453	27.9835	65.0415	0.15263	-0.19326	-0.050391	-67	31.7229	34.845	-0.16045	0.2499	-0.1084	-50.2585	55.409	1470.8692	-1.046	1.4364	-0.88076	1.354	29.2852	56.58754	-0.13008	0.22657	-0.085938	12.2335	-12.6205	768.805	-0.61885	1.0263	-0.30195	22.40885	77.05993	703.166	-0.81299	1.1411	-0.2915	-28.542	149.1962	757.2121	-0.52588	0.96729	-0.35205
1.446	-19.567	43.061	50.959	0.14512	-0.17265	-0.048145	-73.6663	26.9173	26.1923	-0.17646	0.27803	-0.1045	-50.55657	60.094	1458.5626	-1.0624	1.4278	-0.86358	7.133	23.3994	46.4283	-0.13897	0.24629	-0.096387	12.1549	-10.435303	756.6758	-0.67217	1.0609	-0.31602	19.9084	84.598	762.038	-0.82764	1.1694	-0.30713	-62.3355	153.7455	742.561933	-0.49874	0.93397	-0.34258
1.448	-24.995	46.5858	49.686	0.1333	-0.15039	-0.047363	-61.468	17.0822	20.2202	-0.19375	0.29805	-0.10527	-59.2204	65.616	1452.62	-1.0749	1.4263	-0.8499	-13.973	27.1478	19.5653	-0.1499	0.26465	-0.094824	29.65516	6.12863	746.256	-0.71191	1.084	-0.3291	16.881	74.4703	809.2144	-0.84326	1.1968	-0.34912	-54.534	156.1629	722.3536	-0.47238	0.9015	-0.33018
1.45	-41.281	45.139	61.4156	0.11699	-0.12695	-0.04873	-62.3746	22.1593	37.315913	-0.20361	0.31885	-0.10693	-66.9259	63.376	1446.6187	-1.0815	1.4224	-0.83545	-2.966	17.3094	27.6832	-0.14971	0.26972	-0.10361	43.6454	12.943	739.678	-0.7331	1.097	-0.33642	16.579	49.2466	846.645	-0.84521	1.2041	-0.37085	-38.965	152.9373	703.2144	-0.4469	0.86954	-0.31601
1.452	-26.651	61.879	49.05	0.09375	-0.096097	-0.050293	-84.7788	37.3541	32.5325	-0.20859	0.32842	-0.1044	-36.628	67.0974	1434.663	-1.0914	1.416	-0.82617	-0.435000000000002	27.0713	47.002	-0.15186	0.27734	-0.10742	25.8076	8.274	745.908	-0.73974	1.1103	-0.34522	1.795	16.7587	871.934	-0.84521	1.2134	-0.38818	-31.19	170.374108	673.6636	-0.42788	0.83763	-0.30549
1.454	-49.5069	57.3692	60.208	0.066406	-0.059375	-0.055371	-72.42735	32.22764	42.4334	-0.20976	0.33359	-0.10059	-25.473	82.7341	1435.4396	-1.0961	1.4105	-0.81504	16.127	34.9129	43.072	-0.15088	0.28486	-0.11875	19.757	-0.314	755.648	-0.72646	1.1165	-0.35225	-26.417	8.94805	885.346	-0.854	1.2212	-0.41162	-74.0122	155.9071	661.126	-0.40332	0.80908	-0.29541
1.456	-54.5145	27.4703	50.9119	0.033887	-0.026661	-0.061328	-45.578	42.8499	40.868	-0.2082	0.33008	-0.09668	-44.4579	80.8048	1398.0932	-1.1027	1.3945	-0.80215	6.05399999999999	35.0269	39.84486	-0.14766	0.28477	-0.12519	37.865	0.225000000000001	785.819	-0.70948	1.1186	-0.35469	-32.846	-13.5956	913.032	-0.85938	1.2207	-0.42383	-58.1755	142.9222	630.84753	-0.38333	0.78	-0.28233
1.458	-58.0082	23.4793	54.2238	0.0039063	0.01416	-0.059082	-41.147	51.9676	37.0697	-0.20547	0.32031	-0.091406	-32.946	86.53007	1382.807	-1.1041	1.3881	-0.7836	2.47	14.9467	44.4897	-0.13945	0.27813	-0.13067	39.674	-0.928999999999995	782.79	-0.68506	1.1226	-0.3501	-22.917	-30.6149	921.441	-0.86133	1.2109	-0.45508	-70.3123	149.97192	599.506	-0.36372	0.74631	-0.27431
1.46	-46.526	42.1369	35.25	-0.023242	0.053516	-0.076953	-61.7358	47.96536	32.1356	-0.19336	0.30957	-0.080078	-28.845	114.8431	1365.346	-1.1079	1.3755	-0.76807	-19.938	16.2823	48.523	-0.13145	0.2584	-0.13311	11.183	-16.482	821.2574	-0.67754	1.1359	-0.35078	-30.147	-46.144	928.448	-0.84497	1.1982	-0.47632	-78.9431	160.1769	568.755	-0.33909	0.71223	-0.25893
1.462	-73.346	34.5561	30.9286	-0.047559	0.098438	-0.080859	-33.855	35.9537	38.27708	-0.1872	0.28965	-0.079395	-16.663	127.6918	1342.7863	-1.1171	1.3622	-0.75713	-8.287	21.7429	50.2189	-0.125	0.23926	-0.13281	4.201	-56.798	836.6926	-0.66836	1.1602	-0.35254	-52.1612	-60.051	909.4031	-0.81641	1.1758	-0.5	-59.085	146.3817	530.2338	-0.31818	0.67727	-0.25444
1.464	-47.776	38.55047	32.1238	-0.070996	0.13555	-0.089453	-17.911	42.061	43.55768	-0.17666	0.27353	-0.07002	-12.567	118.044	1325.46539	-1.1112	1.3481	-0.74483	-23.275	17.7879	56.7735	-0.11651	0.22061	-0.13017	-2.869	-84.201	875.5655	-0.66484	1.1895	-0.35098	-66.9166	-67.132	884.157	-0.78076	1.1392	-0.51807	-46.484	147.0953	507.4089	-0.29004	0.64307	-0.24463
1.466	-34.799	36.5729	33.9392	-0.095607	0.17393	-0.096485	-1.821	45.8888	32.21893	-0.17119	0.2544	-0.065332	20.378	111.825	1303.7531	-1.1077	1.3243	-0.72568	-39.315	3.6337	54.8164	-0.10645	0.20713	-0.1292	-10.063	-110.0366	883.0347	-0.66396	1.2275	-0.35928	-46.058	-69.918	863.508	-0.7583	1.1177	-0.52588	-35.311	152.92	497.4523	-0.26788	0.60656	-0.23454
1.468	-47.193	32.0647	28.5885	-0.11523	0.21533	-0.11133	-13.78	32.706	26.9442	-0.15498	0.2292	-0.056641	15.195	118.53	1282.948	-1.1016	1.3097	-0.71338	-51.519	0.81096	56.18	-0.10098	0.19306	-0.12764	-22.032	-144.15	919.0172	-0.66943	1.272	-0.36572	-53.846	-45.1243	873.5578	-0.71875	1.0664	-0.5332	-49.359	151.8288	482.4611	-0.24699	0.57103	-0.2239
1.47	-61.578	27.8122	41.5255	-0.1332	0.25293	-0.12324	12.679	30.4915	35.3243	-0.14795	0.20215	-0.053223	26.99	110.696	1266.2042	-1.0957	1.2871	-0.7002	-44.272	-4.2852	65.266	-0.097951	0.17793	-0.12559	-24.779	-153.687	932.3348	-0.6711	1.3137	-0.38008	-64.406	-33.363	899.4247	-0.70068	1.0318	-0.54151	-12.75	144.5476	473.1768	-0.22276	0.53358	-0.21333
1.472	-33.985	45.8599	38.07425	-0.14473	0.28681	-0.13408	-10.077	33.0176	37.6898	-0.13223	0.18389	-0.051465	15.135	102.7794	1243.5299	-1.0845	1.2636	-0.68389	-67.967	-12.9679	81.8805	-0.098145	0.16309	-0.12598	-33.703	-150.228	952.46647	-0.66328	1.3504	-0.39375	-33.763	-25.191	916.4108	-0.68359	1.0039	-0.55762	-9.331	144.0147	453.26519	-0.20096	0.49682	-0.20233
1.474	-22.772	58.8749	55.606	-0.15176	0.31611	-0.14267	6.993	36.7525	44.37163	-0.11972	0.16172	-0.044922	38.365	114.40541	1237.1186	-1.0698	1.2396	-0.66475	-61.1278	0.57851	91.9836	-0.098535	0.14873	-0.12285	-74.2606	-158.099	960.1212	-0.66016	1.3785	-0.40937	-35.312	-21.385	923.044	-0.66943	0.97021	-0.5708	-1.628	142.1289	431.7729	-0.17725	0.46729	-0.19482
1.476	-40.791	47.6416	33.5688	-0.15361	0.33516	-0.15644	0.353000000000002	36.2516	41.28782	-0.10371	0.1375	-0.047656	4.889	105.99622	1217.19	-1.053	1.2126	-0.64639	-62.2012	-5.3501	86.6856	-0.091797	0.13731	-0.12852	-51.941	-148.852	975.644	-0.65264	1.4032	-0.42217	-42.916	-15.676	948.72422	-0.65625	0.96094	-0.56738	-18.799	127.827	395.342	-0.15509	0.42718	-0.18478
1.478	-22.542	32.6536	22.8786	-0.14795	0.35205	-0.16895	11.272	35.8743	51.4316	-0.088379	0.11143	-0.043945	2.137	91.383	1197.7572	-1.0396	1.1855	-0.63154	-63.3729	-24.9979	99.725	-0.085547	0.1248	-0.13164	-65.942	-132.729	1009.562	-0.64941	1.4268	-0.44238	-35.942	-35.155	971.5193	-0.64941	0.96484	-0.57422	-3.661	118.1065	375.554	-0.13274	0.39369	-0.1753
1.48	-7.542	38.629	4.634	-0.13897	0.36113	-0.18027	-4.303	29.54142	50.2864	-0.069824	0.087402	-0.040527	-23.401	109.4947	1172.91653	-1.0249	1.1567	-0.61084	-75.3133	-49.2631	112.96	-0.075097	0.1083	-0.13525	-68.074844	-95.2453	1046.252	-0.64951	1.4456	-0.46709	-12.552	-32.538	988.8417	-0.65894	0.97974	-0.58008	-14.881	123.05302	356.056	-0.11086	0.35814	-0.16749
1.482	-7.964	38.4407	19.3902	-0.13145	0.36114	-0.18125	-6.034	20.013	34.017	-0.055664	0.062402	-0.039258	-9.398	143.882	1148.00809	-1.0038	1.1294	-0.60068	-61.375	-50.2557	129.707	-0.063477	0.095215	-0.14014	-90.457	-70.893	1074.57001	-0.65313	1.464	-0.48946	4.294	-49.981	991.025	-0.67578	1.0039	-0.58984	-11.052	108.0331	347.451	-0.090342	0.32032	-0.16368
1.484	-7.27999999999999	30.6756	33.0726	-0.1166	0.34394	-0.18985	0.906999999999996	14.1562	50.8632	-0.045508	0.035449	-0.040722	-49.1521	149.98	1125.3915	-0.98711	1.1047	-0.58047	-39.409	-39.0166	144.6495	-0.055176	0.083203	-0.14971	-53.914	-46.32	1089.2496	-0.65938	1.4891	-0.51367	-30.0977	-78.6308	998.375	-0.70068	1.0435	-0.60303	-22.443	101.6096	323.657	-0.061035	0.29346	-0.14746
1.486	6.545	27.3202	38.1363	-0.099803	0.32529	-0.19707	-10.532	25.0925	59.20776	-0.02793	0.016308	-0.035645	-30.45	145.177	1098.9267	-0.96523	1.075	-0.56719	-40.347	-25.9168	168.0455	-0.050293	0.079297	-0.15762	-71.036	-36.106	1104.726	-0.66846	1.5142	-0.54541	-4.546	-117.9776	1021.092	-0.7251	1.0845	-0.61231	1.357	103.069	312.6949	-0.04433	0.25292	-0.14307
1.488	-10.825	44.821	34.7095	-0.078125	0.2998	-0.20215	-34.318	12.5495	73.777	-0.018555	-0.0090819	-0.033691	-37.036	144.9741	1080.7715	-0.93906	1.0512	-0.55215	-64.1172	-11.0219	186.5747	-0.047559	0.08125	-0.16504	-61.0156	-43.435	1106.9383	-0.68115	1.5474	-0.57568	-0.741	-131.573	1044.178	-0.74951	1.1274	-0.62354	-21.26	115.344	295.189	-0.02646	0.22079	-0.1335
1.49	-6.792	37.1401	35.2698	-0.051562	0.26963	-0.21172	-38.863	11.4523	77.8475	-0.0063477	-0.030762	-0.024902	-46.351	151.9638	1057.0415	-0.90967	1.0259	-0.54248	-41.272	21.858	218.95	-0.053906	0.089942	-0.1708	-63.9726	-68.497	1119.2444	-0.69111	1.5854	-0.60791	15.4	-134.673	1068.9783	-0.78369	1.2046	-0.63818	-30.325	109.7534	281.0635	-0.0065372	0.18837	-0.12333
1.492	-12.794	31.07334	33.5067	-0.02793	0.24014	-0.21269	-38.345	9.3635	71.8635	0.0011719	-0.05664	-0.033887	-62.5444	139.1149	1044.3191	-0.88086	0.99609	-0.52549	-30.876	55.032	257.489	-0.062012	0.10645	-0.18506	-27.014	-84.477	1133.2274	-0.69814	1.6243	-0.63037	29.9552	-144.998	1115.50029	-0.8042	1.2524	-0.64795	-19.356	96.735	265.1929	0.0092799	0.15312	-0.11796
1.494	18.146	37.16844	42.0765	-0.000586	0.20303	-0.21582	-49.358	7.9143	70.865	0.011914	-0.07168	-0.025977	-38.349	139.549	1003.2591	-0.84893	0.95713	-0.51084	-1.55	72.7238	319.7605	-0.074414	0.13545	-0.192	-54.3468	-109.8949	1157.6558	-0.70283	1.6556	-0.64834	35.304	-137.707	1132.483	-0.85449	1.3428	-0.6626	-24.158	100.4601	256.6007	0.030762	0.12207	-0.10791
1.496	-9.861	39.2343	27.4921	0.023242	0.17441	-0.22002	-68.1819	-10.0796	75.429	0.023633	-0.086914	-0.027929	-54.976	143.0747	974.9527	-0.81416	0.92237	-0.49483	17.274	98.8636	374.2803	-0.09248	0.16855	-0.19981	-28.278	-123.5856	1158.5539	-0.70498	1.6778	-0.66357	24.941	-115.736	1164.0483	-0.8872	1.4043	-0.67773	-43.257	93.1172	237.77	0.047069	0.091017	-0.10254
1.498	-22.834	30.9534	24.6447	0.046875	0.14258	-0.21924	-70.0083	-17.2167	92.208	0.030274	-0.097755	-0.036914	-89.61314	144.936	934.68	-0.77793	0.88613	-0.4832	33.633	107.14542	426.993	-0.11748	0.21153	-0.21582	-12.012	-152.347	1187.23119	-0.7124	1.6899	-0.67725	15.99	-84.489	1175.22162	-0.91943	1.4595	-0.69678	-28.357	85.6471	221.382	0.064452	0.061233	-0.093164
1.5	-29.039	27.8205	32.016	0.058106	0.11563	-0.22139	-61.7959	-12.8071	113.808	0.04541	-0.10596	-0.044434	-87.46429	143.724	910.353	-0.74414	0.8457	-0.4707	11.515	120.0609	487.8	-0.14385	0.26611	-0.22158	10.489	-149.172	1195.127	-0.69765	1.6867	-0.68047	34.707	-81.244	1216.488	-0.95117	1.5293	-0.72559	-40.786	96.3206	208.4613	0.081249	0.031154	-0.087696
1.502	-20.923	31.634	39.426	0.070313	0.091113	-0.2211	-67.3644	-9.8093	130.8462	0.055567	-0.10556	-0.047657	-86.2476	161.561	867.153	-0.70254	0.81308	-0.4582	29.999	124.418	546.816	-0.1792	0.32568	-0.23633	1.498	-161.753	1225.6318	-0.67861	1.6689	-0.68389	13.509	-67.82	1238.219	-0.9624	1.5552	-0.73877	-62.551	107.882	200.0258	0.093359	0.0037117	-0.079102
1.504	-42.364	35.051	38.4075	0.082031	0.073535	-0.21485	-53.8726	-12.169	163.7296	0.058594	-0.1044	-0.047363	-90.5748	162.096	856.7346	-0.67178	0.7833	-0.43838	44.391	125.856	597.6443	-0.2252	0.39316	-0.23867	7.502	-150.207	1237.451	-0.65908	1.6423	-0.67529	6.732	-70.963	1235.1842	-0.97461	1.5957	-0.75879	-74.2552	108.242	190.248	0.1084	-0.020996	-0.067383
1.506	-44.732	39.5313	38.2767	0.086914	0.061328	-0.21231	-62.0033	17.2142	194.94055	0.058203	-0.093847	-0.048535	-83.2291	158.4055	831.4773	-0.63857	0.7501	-0.4208	59.7824	116.775	656.8737	-0.28154	0.46924	-0.2374	19.228	-129.1961	1266.277	-0.63857	1.6148	-0.66983	-14.944	-72.978	1238.669	-0.97827	1.6116	-0.77075	-59.995	98.883	166.8047	0.12022	-0.051856	-0.061914
1.508	-34.948	53.527	42.577	0.088379	0.050293	-0.21631	-35.035	46.4832	229.7695	0.049512	-0.078516	-0.059961	-56.039	149.8063	810.5199	-0.60918	0.72031	-0.41816	18.926	103.546	692.2289	-0.34834	0.56416	-0.23936	13.115	-111.1112	1283.46	-0.62744	1.5884	-0.66162	10.439	-94.9341	1266.153	-0.98633	1.6289	-0.78516	-63	102.316	170.1423	0.12471	-0.072559	-0.054395
1.51	-55.4971	54.768	38.534	0.090137	0.038867	-0.20273	-30.448	59.0269	249.413	0.039063	-0.056641	-0.072266	-54.511	167.99469	783.8511	-0.57178	0.68994	-0.39502	-0.234999999999999	80.813	724.9151	-0.42022	0.67607	-0.23818	5.873	-103.583	1290.337	-0.62998	1.5698	-0.65596	-9.14	-99.0827	1277.4359	-1	1.6445	-0.79297	-68.3227	92.558	161.7529	0.13369	-0.094825	-0.050879
1.512	-66.7176	34.91637	34.544	0.088965	0.034961	-0.20196	-21.611	63.8022	289.078	0.030957	-0.034082	-0.082715	-47.12	170.8033	771.06485	-0.54131	0.6626	-0.37764	-14.69	70.404	736.1698	-0.49951	0.80518	-0.24658	15.369	-95.455	1291.124	-0.63399	1.548	-0.65547	5.827	-108.67451	1281.7242	-1.0098	1.6582	-0.79492	-57.635	78.1402	148.2128	0.14336	-0.11474	-0.04873
1.514	-51.616	22.803	42.5602	0.088965	0.029492	-0.19336	0.914000000000001	61.199	343.57	0.017285	-0.00791	-0.10029	-28.03	157.74234	732.02074	-0.51221	0.63428	-0.36456	-25.378	37.634	767.2741	-0.57295	0.9376	-0.26357	17.553	-79.8069	1303.6727	-0.65	1.5449	-0.6586	-18.714	-133.0971	1289.486	-1.0298	1.6743	-0.80615	-36.258	72.3179	137.181	0.15088	-0.13184	-0.042969
1.516	-37.634	11.9436	51.075	0.090234	0.033691	-0.19092	12.564	70.2348	398.03	0.0020508	0.031543	-0.10811	-8.945	157.4275	700.7617	-0.48448	0.60694	-0.34697	-39.137	4.424	773.822	-0.6418	1.0711	-0.29101	-6.877	-66.8403	1282.831	-0.66943	1.5466	-0.65205	-14.766	-132.2662	1295.3911	-1.0474	1.69	-0.80713	-34.972	77.428473	124.524	0.16328	-0.14532	-0.041309
1.518	-54.412	8.5201	53.1737	0.090332	0.040039	-0.18213	11.824	76.1792	445.6898	-0.011426	0.068066	-0.12676	-10.514	164.5841	683.9818	-0.45294	0.58164	-0.32989	-12.641	-18.072	749.574	-0.69844	1.1804	-0.32657	-11.847	-70.820428	1276.915	-0.69873	1.561	-0.65576	-32.59626	-122.1059	1312.7974	-1.0742	1.7109	-0.81055	-46.649	66.8382	112.2273	0.16856	-0.15996	-0.036914
1.52	-53.008	-4.6052	68.4473	0.088086	0.051074	-0.1667	35.3337	83.797	505.9322	-0.036621	0.11523	-0.14502	-14.255	145.9964	658.9264	-0.42578	0.55664	-0.31348	-26.045	-27.6706	738.518	-0.73047	1.2703	-0.36699	-23.827	-59.769	1283.964	-0.73037	1.5887	-0.66123	-29.8256	-122.7443	1331.0489	-1.1113	1.7383	-0.81445	-52.492	61.5676	139.224	0.17636	-0.1752	-0.034961
1.522	-39.619	-4.7563	72.4494	0.079492	0.068652	-0.15254	42.5354	76.719	567.118	-0.06582	0.16718	-0.15732	-4.60599999999999	150.627	620.2507	-0.39764	0.53124	-0.29961	-60.5223	-32.9033	733.6063	-0.75781	1.3164	-0.42285	-27.226	-47.494	1293.793	-0.76621	1.6203	-0.6709	-31.7466	-127.0698	1361.617	-1.1313	1.7583	-0.83057	-21.877	69.2075	125.635	0.1833	-0.18555	-0.033008
1.524	-27.387	12.6087	94.7569	0.056445	0.091309	-0.13496	23.995	71.904	651.6978	-0.10273	0.22539	-0.17187	-14.629	164.369	598.436155	-0.36843	0.50379	-0.27938	-61.2487	-26.9059	743.864	-0.73984	1.3138	-0.46367	-49.843	-51.685	1294.244	-0.80644	1.6551	-0.67051	-32.7508	-111.227	1365.0667	-1.1738	1.7813	-0.82275	-14.402	69.866	126.257	0.19141	-0.19922	-0.032715
1.526	-33.176	7.8148	117.6401	0.027832	0.1208	-0.1289	39.8686584	48.901	739.896	-0.14883	0.28359	-0.18867	-28.506	164.44	567.2036	-0.33913	0.47995	-0.26259	-40.946	-6.432835	719.955	-0.69658	1.2544	-0.49131	-51.575	-60.2042	1325.168	-0.85303	1.6825	-0.66865	-38.6298	-101.763	1377.3148	-1.196	1.7951	-0.83081	-12.739	63.3614	113.9925	0.19815	-0.20557	-0.028906
1.528	-24.179	-1.4138	132.2127	-0.0063477	0.1543	-0.12793	42.9133	39.233	829.7317	-0.19746	0.35772	-0.20567	-24.268	152.1149	536.7935	-0.31247	0.45349	-0.24598	-64.8172	-4.6388	716.508	-0.62979	1.1626	-0.48584	-62.0201	-63.0629	1361.97	-0.89795	1.7075	-0.66943	-31.414	-89.2721	1380.5503	-1.2148	1.8105	-0.83594	-13.149	63.536	106.9055	0.20352	-0.21631	-0.032617
1.53	-1.037	9.0726	141.586	-0.03291	0.18945	-0.13076	30.473	31.672	883.551	-0.24805	0.43506	-0.2251	-13.545	158.6207	510.6494	-0.28076	0.43262	-0.22803	-65.9447	3.12	701.5473	-0.56729	1.0609	-0.48721	-78.2503	-49.0327	1386.0866	-0.93799	1.7319	-0.66943	-23.6786	-81.1234	1398.721	-1.2305	1.8164	-0.83984	-8.663	71.444	102.9879	0.20977	-0.2292	-0.029492
1.532	-7.756	26.8282	171.281	-0.049121	0.22403	-0.12832	18.031	8.568	918.3659	-0.30381	0.52881	-0.24502	-23.648	162.7294	495.57458	-0.25824	0.40727	-0.20766	-72.2499	2.604	719.633	-0.51953	0.98438	-0.49902	-91.7187	-52.814	1402.7891	-0.97999	1.7587	-0.6706	-1.314	-53.882	1385.343	-1.2339	1.8208	-0.83936	-10.735	58.1413	90.0876	0.21289	-0.23028	-0.03457
1.534	-6.459	37.9054	197.658	-0.067481	0.26113	-0.1248	15.96	-17.9117	940.87328	-0.36348	0.63652	-0.26748	-21.729	150.275	475.6171	-0.23397	0.38171	-0.19242	-85.695	22.4649	719.248	-0.49218	0.93965	-0.50957	-90.1368	-47.69	1419.006	-1.019	1.7915	-0.6792	15.445	-62.017	1396.2921	-1.2402	1.8184	-0.84082	0.588000000000001	49.6266	76.2987	0.21094	-0.2334	-0.032715
1.536	25.145	61.4842	241.2066	-0.08457	0.29668	-0.1291	2.969	-26.645	968.342	-0.42597	0.75606	-0.28115	-9.871	146.96757	456.5601	-0.20627	0.35947	-0.17102	-56.9348	-1.795	752.604	-0.48096	0.92861	-0.53652	-91.86739	-36.0979	1412.4995	-1.0508	1.8206	-0.68096	15.089	-60.8106	1388.851	-1.2395	1.8059	-0.84156	2.05	61.461	87.975763	0.20557	-0.23555	-0.033301
1.538	35.276	78.5812	272.0096	-0.11084	0.33887	-0.13184	-23.8	-49.272	988.892	-0.50107	0.88858	-0.3042	-17.04	158.7977	433.5919	-0.1834	0.33436	-0.15601	-55.438	-18.816	754.7703	-0.46963	0.93564	-0.56309	-86.7863	-39.775	1421.7855	-1.0762	1.8359	-0.68652	24.3481	-72.6654	1403.885	-1.2383	1.7871	-0.83984	-4.799	58.937	82.2841	0.20488	-0.23564	-0.035743
1.54	31.502	81.6717	322.969919	-0.14101	0.38477	-0.1333	-41.845	-73.063	1003.67	-0.58105	1.0293	-0.32861	-48.799	149.40265	412.49518	-0.15918	0.3125	-0.1416	-17.811	-33.395	766.6937	-0.45605	0.94414	-0.58789	-71.8999	-35.281	1416.2739	-1.087	1.844	-0.69307	32.2641	-57.2908	1404.16	-1.2305	1.7559	-0.83789	-15.953	56.6844	81.29508	0.19707	-0.22705	-0.041211
1.542	24.6265	99.2039	381.275	-0.17959	0.43466	-0.13271	-55.807	-86.975	1014.788	-0.67041	1.171	-0.35713	-73.212	125.629	396.2275	-0.13376	0.29158	-0.12293	-30.4169	-54.7918	796.1949	-0.43945	0.94727	-0.61133	-74.9248	-20.7008	1432.2905	-1.0953	1.8418	-0.68828	25.883679	-54.682	1413.7932	-1.2227	1.7383	-0.83789	2.113	61.8746	76.6933	0.1873	-0.22207	-0.051563
1.544	48.2475	131.072	459.3286	-0.22959	0.49717	-0.13428	-65.976	-89.406	1010.423	-0.7586	1.3242	-0.404	-68.07	129.05443	369.601	-0.11261	0.27104	-0.10859	17.566	-68.9582	821.6465	-0.41845	0.93936	-0.62685	-66.0361	-16.12615	1433.6379	-1.0942	1.8383	-0.68711	34.9758	-48.488	1427.3572	-1.2046	1.7173	-0.82764	-13.614	65.4401	72.867	0.17529	-0.21631	-0.050293
1.546	47.0005	144.638	522.908	-0.29014	0.57793	-0.13379	-104.924	-91.505	980.5203	-0.83593	1.4555	-0.45674	-81.7869	134.8021	349.95909	-0.087073	0.24866	-0.090123	11.464	-69.57771	854.989	-0.40391	0.92188	-0.63984	-53.0262	-12.00632	1426.069	-1.0938	1.8378	-0.68701	52.803	-41.153	1428.9756	-1.1958	1.7002	-0.83301	-29.156	56.3403	76.776	0.16397	-0.20693	-0.048145
1.548	11.4656	107.883	589.7892	-0.36377	0.66846	-0.13525	-105.944	-100.898	971.997	-0.90518	1.5624	-0.5169	-72.2883	127.1399	325.3706	-0.065846	0.2298	-0.081234	47.5041	-78	875.1194	-0.39375	0.89727	-0.64727	-30.339	-10.7743	1411.082	-1.0918	1.8281	-0.68359	28.572	-42.732	1435.03556	-1.1768	1.6836	-0.83203	-36.707	48.2219	60.1093	0.14189	-0.1958	-0.053125
1.55	11.556	78.801	642.508	-0.4457	0.78007	-0.13985	-107.375	-94.246542	952.769	-0.95264	1.6313	-0.56787	-87.8766	115.6034	304.0447	-0.044922	0.21289	-0.067383	28.3129	-116.026	912.566	-0.37735	0.8752	-0.65254	-18.821	24.274	1405.068	-1.0916	1.8194	-0.68379	41.1324	-39.114	1452.292	-1.1621	1.6582	-0.82324	-26.532	50.453	42.834	0.11533	-0.17978	-0.061719
1.552	15.5889	64.106	705.059	-0.54521	0.90127	-0.14834	-117.1737	-88.2388	951.337	-0.97334	1.6408	-0.59482	-80.3973	114.2598	286.419	-0.025075	0.20153	-0.056069	47.2231	-150.366	926.982	-0.36328	0.8623	-0.66602	-16.422	41.141	1409.1843	-1.0932	1.8136	-0.68086	54.275	-48.7946	1459.1446	-1.1563	1.6387	-0.82422	-29.405	51.4	47.147	0.095408	-0.15654	-0.071289
1.554	-0.273	55.47	774.065	-0.64755	1.0349	-0.16396	-147.441	-66.077	968.1941	-0.96826	1.6145	-0.59854	-95.4891	110.5254	283.526	-0.0051481	0.18166	-0.044354	39.9714	-156.186	956.9722	-0.3541	0.85996	-0.66582	-1.925	59.606	1414.2627	-1.0889	1.807	-0.67578	61.641	-36.1398	1465.6686	-1.1392	1.6118	-0.81982	-76.3424	33.8333	57.0617	0.078125	-0.13574	-0.074219
1.556	-27.927	42.295	844.9942	-0.74131	1.1691	-0.18506	-121.3442	-49.833	969.8327	-0.9667	1.5794	-0.6001	-62.463	95.81	271.4867	0.014373	0.16772	-0.03602	34.9051	-131.7739	988.0331	-0.35342	0.87431	-0.67841	2.741	75.583	1407.293	-1.0804	1.7977	-0.67227	36.9515	-42.287	1460.8768	-1.1216	1.5903	-0.81494	-43.322	37.5626	53.2299	0.053516	-0.11035	-0.07041
1.558	-15.095	28.012	890.4748	-0.82666	1.2896	-0.22217	-114.964	-31.897	995.2612	-0.96436	1.5556	-0.6083	-51.038	101.4581	252.5146	0.030207	0.15159	-0.019249	31.472	-117.694	1024.375	-0.36279	0.90244	-0.68233	9.928	63.812	1408.8289	-1.0698	1.7905	-0.66357	46.184	-50.8311	1437.9197	-1.1133	1.5684	-0.8125	-50.064	46.5988	55.9382	0.029199	-0.083594	-0.07666
1.56	-16.517	-6.551	916.676	-0.89199	1.3842	-0.25967	-111.282	-42.366	1002.2958	-0.95361	1.5435	-0.62305	-47.134	109.8978	246.1575	0.044434	0.14014	-0.0087891	53.8966	-89.67	1037.6658	-0.37968	0.93848	-0.69746	14.786	52.54405	1400.393	-1.0617	1.7737	-0.66123	39.7076	-36.06836	1422.7102	-1.0933	1.5454	-0.80518	-46.516	42.1049	46.5625	0.00068368	-0.057812	-0.075098
1.562	-41.804	-40.175	919.681	-0.92969	1.4438	-0.3039	-105.128	-61.95	1017.9524	-0.9208	1.522	-0.65029	-49.6502	104.6848	232.4889	0.060992	0.12622	-0.0011743	38.264	-86.245	1063.7678	-0.39893	0.97119	-0.70459	33.182	39.7085	1374.68886	-1.0547	1.7586	-0.6541	18.9412	-11.209	1424.0792	-1.0854	1.5376	-0.80225	-74.259	33.1154	55.761	-0.032129	-0.023731	-0.073633
1.564	-29.565	-74.552	937.214	-0.93555	1.4512	-0.35352	-50.505	-69.4747	1032.241	-0.87363	1.5007	-0.67011	-39.175	99.6244	205.067	0.075301	0.12168	0.0042927	20.3575	-81.936	1093.9194	-0.42012	1.0041	-0.71289	25.08	45.6664	1368.3515	-1.0438	1.7539	-0.65176	3.361	-5.185	1431.932	-1.0762	1.5176	-0.80078	-35.049	37.015858	52.8948	-0.067871	0.020508	-0.086426
1.566	-40.289	-72.743	914.802	-0.91152	1.4224	-0.38828	-50.684	-97.8893	1050.887	-0.81426	1.4586	-0.6834	-36.624	108.6415	193.7436	0.092104	0.10421	0.014699	30.022	-92.8133	1105.8318	-0.43037	1.0356	-0.7169	17.103	44.4783	1345.521	-1.0341	1.7456	-0.64541	5.104	1.5135	1425.559	-1.0661	1.508	-0.7937	-43.322	38.6138	41.8029	-0.086621	0.055469	-0.089356
1.568	-51.7714	-76.832	897.988	-0.87256	1.3599	-0.41064	-52.68	-133.707	1066.4206	-0.75254	1.3922	-0.71308	-20.747	93.5442	174.901	0.11032	0.094195	0.023147	32.559	-83.6052	1134.0562	-0.44522	1.0688	-0.72198	7.371	30.74243	1332.84266	-1.0195	1.7324	-0.63965	-15.3762	19.0272	1422.2463	-1.0601	1.5063	-0.78857	-46.371	29.064	28.12	-0.11016	0.086816	-0.093457
1.57	-69.4978	-85.154	865.649	-0.82578	1.2812	-0.41279	-40.124	-165.888	1095.708	-0.69238	1.3149	-0.70068	-36.683	75.1299	167.4097	0.12158	0.087891	0.030762	11.38	-88.91415	1166.6721	-0.45684	1.1034	-0.71768	12.855	25.5155	1309.0029	-1.0099	1.7226	-0.63408	-17.6652	27.8749	1415.7269	-1.0483	1.4966	-0.78369	-50.382	19.5079	37.6181	-0.12656	0.11182	-0.092675
1.572	-41.145	-95.396	835.9828	-0.78789	1.1926	-0.42188	-13.036	-172.095	1082.05	-0.64629	1.2186	-0.70762	-4.546	81.6286	159.5154	0.13576	0.083618	0.036142	-6.365	-103.4118	1158.904	-0.47949	1.1479	-0.72021	-16.278	34.3971	1325.7716	-1.0016	1.7044	-0.62998	-0.758999999999999	25.3884	1417.8914	-1.0391	1.4941	-0.77539	-25.695	27.8358	38.184	-0.14073	0.14336	-0.093847
1.574	-53.326	-80.51	824.256	-0.75235	1.1078	-0.43008	-6.8	-164.086	1102.061	-0.60576	1.1294	-0.70303	-3.742	87.775	146.03	0.1447	0.075669	0.048906	-10.131	-123.3624	1184.2234	-0.50791	1.2112	-0.73262	-20.372	45.6876	1317.4669	-0.9872	1.6891	-0.62178	-2.703	39.9282	1405.5036	-1.0234	1.4863	-0.76855	-41.176	32.1383	42.68	-0.15723	0.16846	-0.095215
1.576	-45.512	-69.2187	821.787	-0.72431	1.0409	-0.44599	11.749	-150.195	1105.1286	-0.56826	1.0454	-0.70576	-2.518	68.407	135.9004	0.15288	0.068141	0.054545	-33.528	-124.5667	1196.051	-0.54951	1.2728	-0.74482	-42.527	59.131	1296.7992	-0.97607	1.6562	-0.61494	-13.165	50.62	1387.527366	-1.0083	1.477	-0.76074	-18.718	33.5439	37.1329	-0.1668	0.19267	-0.094727
1.578	-51.4	-54.759	833.4894	-0.69531	0.9873	-0.46582	28.137	-140.04	1147.2473	-0.52177	0.96103	-0.69678	6.364	54.9085	139.285	0.16404	0.068635	0.059614	-53.4323	-125.3431	1234.0258	-0.59013	1.3477	-0.76201	-44.891	87.103	1267.617	-0.95898	1.6309	-0.61133	-4.421	33.416	1375.146	-0.99561	1.4653	-0.75342	-7.531	32.7236	45.6645	-0.17392	0.21494	-0.09834
1.58	-6.786	-30.498	846.0819	-0.67012	0.95605	-0.48496	5.885	-104.79945	1160.1325	-0.47705	0.90186	-0.69287	10.075	63.4064	119.0771	0.17432	0.0625	0.069824	-47.3968	-135.9983	1272.8528	-0.62948	1.4158	-0.77793	-79.5571	88.8011	1253.4312	-0.93779	1.6028	-0.60263	-0.121	35.7402	1366.8966	-0.97266	1.4492	-0.74219	-14.321	29.4846	40.1236	-0.17783	0.2333	-0.10186
1.582	-30.555	-14.93	854.566	-0.65274	0.94336	-0.49512	26.844	-97.545	1189.481	-0.44629	0.87578	-0.70468	3.953	65.3125	109.2147	0.18297	0.065918	0.072311	-63.2481	-140.7763	1280.326	-0.6626	1.4829	-0.79443	-62.9448	97.3758	1233.1429	-0.92061	1.5724	-0.59678	-0.0495999999999999	35.1901	1364.7098	-0.9624	1.4419	-0.73779	-26.78	15.89654	32.33785	-0.17832	0.24257	-0.10362
1.584	-11.902	-30.922	872.388	-0.64649	0.93242	-0.50761	41.279	-81.627	1197.4088	-0.42393	0.87471	-0.72061	-12.637	50.9329	107.266	0.18985	0.070973	0.07792	-76.262	-131.40068	1276.0037	-0.68361	1.5408	-0.81779	-70.4453	87.2821	1222.8832	-0.89912	1.5376	-0.59248	-10.9802	26.4176	1340.5819	-0.93945	1.4199	-0.72461	-12.14	15.15624	38.841	-0.17285	0.24609	-0.098633
1.586	8.612	-54.107	889.832	-0.64404	0.92393	-0.51924	76.02114	-75.938	1229.2336	-0.40596	0.88681	-0.73975	1.863	50.9802	98.4624	0.19706	0.072159	0.085355	-72.5602	-131.8403	1292.66573	-0.70197	1.5871	-0.83556	-74.3306	96.3326	1199.529	-0.88477	1.5092	-0.5877	2.403	14.4839	1326.94307	-0.92163	1.4084	-0.71533	19.025	23.98211	33.842	-0.1711	0.23476	-0.098535
1.588	37.045	-64.254	908.06	-0.64746	0.91504	-0.52539	51.299	-71.643	1228.4793	-0.39287	0.9083	-0.74775	-10.302	55.2749	89.2638	0.20104	0.0746	0.093047	-65.9547	-138.372	1294.3757	-0.71837	1.6215	-0.85275	-86.2963	87.0345	1197.2375	-0.86719	1.4785	-0.57813	8.8459	35.6912	1287.2678	-0.90625	1.3877	-0.70703	2.75	25.80743	35.8612	-0.16504	0.22266	-0.10127
1.59	23.6881	-86.263	955.1011	-0.65127	0.90108	-0.53106	35.6438	-77.713	1227.827	-0.38818	0.93994	-0.75928	-15.759	41.9394	88.0898	0.2085	0.080566	0.094238	-50.3804	-115.533	1301.3503	-0.72589	1.6539	-0.87472	-66.7251	86.79455	1172.2329	-0.84834	1.452	-0.5711	5.899	39.8687	1267.9383	-0.87451	1.3599	-0.69092	-3.061	20.8074	35.8269	-0.15176	0.21094	-0.096191
1.592	26.28636	-127.7171	982.56233	-0.65879	0.89727	-0.53867	8.434	-87.434	1249.672	-0.37969	0.97451	-0.77265	-41.001	40.8581	77.090208	0.20722	0.088814	0.094251	-42.1393	-117.465	1312.9955	-0.73779	1.688	-0.88428	-49.287	82.4928	1162.7023	-0.83232	1.4228	-0.56611	4.001	47.8936	1243.5313	-0.86377	1.3501	-0.68213	-11.086	19.3971	24.1388	-0.14453	0.19473	-0.099709
1.594	39.797	-156.683	1014.3393	-0.66347	0.90039	-0.5461	5.002	-94.866	1253.937	-0.38164	1.0108	-0.7793	-39.196	47.8201	68.9276	0.21106	0.099672	0.10107	-31.2536	-123.618	1331.329	-0.75563	1.7164	-0.89296	-71.3128	89.2854	1144.5255	-0.81826	1.3962	-0.55752	34.6286	51.0478	1235.2879	-0.84033	1.3208	-0.66357	-7.475	35.089	30.5441	-0.12842	0.17578	-0.10107
1.596	41.2877	-178.948	1026.0232	-0.67022	0.91103	-0.55127	-21.71	-113.0053	1260.2035	-0.39375	1.0502	-0.78516	-53.9375	54.806	69.2251	0.21142	0.1141	0.10146	-6.313	-118.229	1345.346	-0.7824	1.7434	-0.903	-71.5691	74.2022	1123.6925	-0.80371	1.3658	-0.54746	34.6303	49.4945	1233.40388	-0.8208	1.2944	-0.65527	-31.758	35.012	34.7779	-0.12256	0.15381	-0.093066
1.598	32.276916	-205.005	1043.4849	-0.6748	0.91992	-0.56152	-10.55	-131.1189	1276.157	-0.40713	1.0979	-0.79326	-45.049	50.19	62.9715	0.20701	0.1213	0.10215	-0.978000000000002	-98.6157	1355.7106	-0.82064	1.7668	-0.91701	-71.185	88.0216	1091.1633	-0.7876	1.3345	-0.54248	42.2642	52.7318	1214.0752	-0.8042	1.271	-0.63623	-25.181	27.9533	40.7535	-0.11005	0.12754	-0.093457
1.6	48.2817	-212.861	1068.0669	-0.68789	0.92656	-0.56855	-41.6001	-150.631	1289.989	-0.4165	1.1514	-0.81445	-61.6649	52.4864	49.978	0.19775	0.13428	0.098633	8.192	-92.636	1381.9545	-0.85595	1.7805	-0.92287	-33.67	108.474	1091.4067	-0.76983	1.3075	-0.53457	34.0071	56.8888	1199.5149	-0.77197	1.2407	-0.61865	-28.212	27.99	42.4401	-0.098339	0.10215	-0.088379
1.602	50.172	-187.264	1089.3924	-0.68555	0.92422	-0.57871	-49.7243	-139.498	1295.701	-0.42705	1.2097	-0.83291	-40.064	41.92328	40.359	0.18556	0.14463	0.098733	-1.811	-81.733	1387.9929	-0.88623	1.7993	-0.93506	-60.7225	116.1332	1077.938	-0.74961	1.2727	-0.52715	72.0856	76.3627	1174.8116	-0.76563	1.2227	-0.61523	-38.794	19.895	48.834	-0.084668	0.076856	-0.086621
1.604	21.9126	-156.9831	1118.6938	-0.67344	0.91133	-0.58379	-74.525	-162.272	1326.3853	-0.44004	1.2637	-0.84726	-68.88927	27.8288	34.813	0.1801	0.15878	0.086148	14.341	-72.175	1375.488	-0.90981	1.8162	-0.94134	-10.454	109.1687	1046.269	-0.725	1.241	-0.5209	32.585	88.147	1159.4839	-0.73242	1.1885	-0.59375	-68.9614	-1.6287	46.06	-0.078125	0.050293	-0.085938
1.606	13.8385	-155.5832	1133.9186	-0.65879	0.89844	-0.58867	-42.9159	-159.358	1335.6002	-0.46817	1.3105	-0.85977	-68.2274	28.5354	33.5	0.16876	0.1666	0.072862	11.59	-70.532	1388.561	-0.93378	1.8309	-0.94781	3.607	114.0131	1025.5044	-0.69688	1.2051	-0.51465	17.541	94.34	1137.5957	-0.71606	1.1594	-0.57836	-25.166	1.897422	63.976	-0.05625	0.03125	-0.087793
1.608	20.3941	-151.1082	1170.078	-0.64355	0.88672	-0.58594	-44.44886	-152.569	1367.528	-0.50577	1.363	-0.87177	-61.8631	38.5561	38.4363	0.16182	0.18095	0.071584	20.439	-75.009	1403.908	-0.95107	1.8465	-0.95253	17.407	120.3035	994.9437	-0.67578	1.1738	-0.50195	23.0606	83.094	1105.9083	-0.69629	1.1309	-0.56445	-35.72	-4.5492	73.2914	-0.044727	0.0078126	-0.082031
1.61	48.8137	-114.608	1173.636	-0.63731	0.89405	-0.59228	-36.0281	-121.6364	1363.825	-0.54297	1.4258	-0.89258	-39.529	51.2903	31.3056	0.15137	0.19629	0.06543	44.5111	-87.12	1441.6816	-0.96791	1.8598	-0.95487	9.655	122.5224	978.87527	-0.65772	1.1466	-0.50498	16.057	78.342	1074.7505	-0.67578	1.0918	-0.54297	-53.4566	-10.4952	94.0384	-0.029101	-0.00625	-0.082031
1.612	11.0061	-98.882	1189.1247	-0.64619	0.91591	-0.59834	-46.0648	-104.082	1363.2155	-0.57549	1.5028	-0.91162	-45.962	36.5565	25.8107	0.14375	0.20566	0.058494	59.1447	-87.5768	1435.257	-0.98584	1.8794	-0.95264	60.6919	127.6024	954.8497	-0.64121	1.1207	-0.50274	-8.6	83.7552	1065.399	-0.66211	1.0723	-0.53516	-61.7596	-25.5899	94.9007	-0.017871	-0.017676	-0.082715
1.614	13.579	-80.575	1195.90371	-0.6626	0.94131	-0.61084	-59.9885	-79.174	1353.461	-0.60264	1.5618	-0.93193	-45.262	33.2333	30.7745	0.13594	0.2166	0.058884	41.2044	-94.168	1450.9343	-1.0053	1.8901	-0.95285	38.81	142.431	934.9762	-0.61699	1.0984	-0.49766	-1.85	81.6118	1058.0816	-0.63574	1.0332	-0.51367	-29.744	-6.405	113.29	-0.012207	-0.026855	-0.081543
1.616	-4.014	-76.497	1192.8464	-0.67871	0.97949	-0.62109	-55.447	-73.4233	1362.5259	-0.62998	1.5962	-0.94053	-32.999	28.7536	31.7053	0.1293	0.22871	0.051073	40.871	-86.4857	1460.9368	-1.0186	1.8967	-0.9602	34.084	141.531	905.9572	-0.60166	1.0656	-0.48955	-8.914	89.931	1048.9548	-0.60547	0.99807	-0.50781	-44.9872	5.8081	147.573	-0.0055664	-0.023926	-0.081445
1.618	0.0850000000000009	-87.381	1210.0352	-0.70068	1.0278	-0.62842	-43.598	-59.83387	1340.5924	-0.65762	1.606	-0.94863	-38.23	29.265	30.35891	0.11973	0.23506	0.047558	51.2304	-66.3402	1479.0491	-1.0277	1.8961	-0.95746	2.402	131.569	887.9039	-0.58008	1.0332	-0.48291	-19.308	106.1845	1013.1583	-0.5791	0.96875	-0.4873	-41.2923	16.873	171.9291	-0.0029297	-0.019922	-0.082129
1.62	-26.9663	-120.016	1225.4739	-0.7252	1.0844	-0.65	-13.5684	-73.1888	1333.973	-0.69531	1.5938	-0.94727	-24.499	28.6988	33.3319	0.10938	0.24658	0.041016	30.969	-41.27	1482.491	-1.0279	1.8974	-0.95882	15.622	135.311	862.5984	-0.56689	1.0062	-0.47559	-23.954	95.211	1004.7823	-0.54443	0.92725	-0.46826	-22.406	24.5021	209.4592	-0.0017578	-0.015234	-0.083301
1.622	1.073	-152.3697	1243.2496	-0.75107	1.1364	-0.67275	3.967	-78.65061	1342.105	-0.7376	1.5761	-0.94385	-9.182	28.0531	31.266	0.1	0.25772	0.035548	24.301	-37.881	1500.761	-1.0171	1.8833	-0.96436	-0.434000000000005	130.6929	844.501	-0.55088	0.97851	-0.47422	-24.101	97.2781	973.7027	-0.53076	0.90283	-0.4624	-17.128	45.93766	235.252	-0.0087891	-0.017383	-0.090137
1.624	-13.332	-160.035	1250.511	-0.76748	1.1864	-0.69463	6.505	-71.9524	1358.848	-0.78515	1.5731	-0.93847	8.232	27.743	28.2744	0.091797	0.27207	0.028126	-6.554	-32.9383	1491.9799	-1.0059	1.864	-0.97276	-4.066	130.16863	816.3777	-0.52666	0.94414	-0.46875	-34.442	109.8593	975.713	-0.51074	0.86572	-0.43066	-26.734	57.1364	280.27	-0.010742	-0.0053711	-0.09375
1.626	-26.898	-172.567	1268.9035	-0.78594	1.2225	-0.70996	15.881	-65.264	1359.887	-0.83789	1.5836	-0.93574	-14.147	11.107	31.5865	0.085938	0.28183	0.021485	-9.828	-26.07798	1474.4346	-0.98743	1.8407	-0.97278	2.303	134.517	799.7976	-0.50918	0.91758	-0.46699	-42.4107	130.796	941.823684	-0.49048	0.83325	-0.4187	-7.926	74.3451	333.4413	-0.017285	0.0027344	-0.10625
1.628	-45.0789	-167.87	1276.46581	-0.80566	1.2617	-0.71924	61.0921	-60.969	1377.6547	-0.89277	1.6029	-0.93477	3.429	17.46472	21.6633	0.076856	0.28975	0.015039	-53.4539	-14.5067	1465.19	-0.96752	1.8048	-0.97831	-6.809	147.5961	781.6682	-0.48877	0.88428	-0.4585	-49.527075	114.1997	913.3222	-0.47217	0.80322	-0.40381	22.099	89.936	389.6361	-0.021777	0.018554	-0.11386
1.63	-15.202	-158.436	1317.3263	-0.82178	1.2961	-0.73242	66.937	-66.685	1407.0058	-0.94482	1.6294	-0.93408	19.151	38.5313	25.7947	0.071289	0.29883	0.012695	-26.672	2.60641	1472.1611	-0.95125	1.7724	-0.97691	-29.357	142.7067	761.3669	-0.46103	0.85283	-0.45439	-62.0604	112.4327	884.876	-0.45068	0.76416	-0.38232	24.521	105.166	434.7874	-0.026855	0.038086	-0.13222
1.632	-14.2013	-148.83	1341.479	-0.84502	1.3282	-0.7417	56.565	-78.4592	1405.464	-0.98115	1.647	-0.93115	13.486	41.901	37.96	0.065039	0.29619	0.012207	-46.6485	13.8883	1469.0198	-0.94043	1.7402	-0.97852	-28.928	134.7871	723.3397	-0.44444	0.82168	-0.44639	-55.5282	117.042	868.3116	-0.43896	0.74463	-0.37451	8.294	109.914	489.1533	-0.036328	0.065722	-0.1458
1.634	-15.2529	-148.264	1366.726	-0.87041	1.3645	-0.76241	52.1978	-88.6241	1418.1022	-1.0101	1.6606	-0.93203	-2.594	29.8623	39.432	0.064355	0.29473	0.0055665	-32	34.474	1458.85262	-0.92866	1.7131	-0.97883	-21.532	144.3016	715.672	-0.42451	0.79472	-0.44053	-61.8871	110.762	835.3517	-0.41309	0.70313	-0.35352	22.36	112.951	551.496	-0.047852	0.096191	-0.17285
1.636	19.6341	-152.551	1366.548	-0.89912	1.4036	-0.77842	54.4092	-71.2552	1419.56598	-1.0277	1.6664	-0.92812	-7.917	32.252	31.0458	0.067872	0.29277	0.0071289	-74.57	31.001	1462.724153	-0.91814	1.6911	-0.97981	-43.0459	158.1528	706.4577	-0.40244	0.76084	-0.43711	-31.262	115.05708	826.7987	-0.39307	0.67822	-0.34253	17.52	107.624	615.075	-0.066309	0.1456	-0.18369
1.638	33.2762	-135.6345	1382.6596	-0.93311	1.4556	-0.80029	47.2631	-58.693	1406.4116	-1.0393	1.6682	-0.92441	13.571	32.7745	23.40922	0.06875	0.28877	0.0045898	-30.5512	26.1606	1472.0305	-0.90463	1.6699	-0.97843	-53.0472	144.448	684.6568	-0.38232	0.73438	-0.43066	-42.445	137.868	792.8407	-0.37256	0.65039	-0.32617	16.338	100.358	677.7897	-0.09453	0.1998	-0.19423
1.64	5.805	-95.97537	1373.2089	-0.96455	1.5046	-0.81768	47.8773	-50.9542	1395.848	-1.0449	1.6582	-0.92188	-9.696	33.6041	33.96214	0.074219	0.28662	0.0058594	-35.5219	36.418	1476.8411	-0.89398	1.6444	-0.97745	-54.81829	139.602	643.615	-0.35918	0.69922	-0.4248	-34.579	136.181	774.8721	-0.34912	0.61621	-0.31201	16.144	77.964	725.0713	-0.14257	0.26387	-0.21103
1.642	11.8319	-89.2602	1365.1803	-0.99873	1.5575	-0.83584	41.689	-61.2444	1393.565	-1.0487	1.6464	-0.92139	-24.212	34.1453	37.3514	0.078613	0.2795	0.005957	-39.141	41.9827	1469.8688	-0.87988	1.6289	-0.9707	-50.3536	150.7979	620.462	-0.34209	0.67412	-0.4165	-33.736	130.862	749.8329	-0.33203	0.58497	-0.29786	27.066	51.4115	768.9177	-0.19922	0.3375	-0.23301
1.644	37.966956	-86.334	1346.765	-1.0347	1.6099	-0.85303	25.2035	-51.7557	1382.48043	-1.0491	1.6368	-0.91689	-24.804	41.372	34.2619	0.083789	0.28096	0.0070312	-52.2503	19.187	1469.10467	-0.87396	1.6123	-0.96387	-75.5068	155.9408	586.3255	-0.321	0.6417	-0.41065	-9.02	132.4124	740.8153	-0.31934	0.55469	-0.28027	-11.84	39.0001	813.7945	-0.2627	0.42383	-0.25098
1.646	39.935	-80.126	1352.991	-1.0736	1.6621	-0.86836	25.3742	-42.4321	1384.1544	-1.0507	1.6228	-0.91612	-36.051	32.6197	26.4587	0.085352	0.27393	0.0070312	-49.7466	23.973	1437.7268	-0.86831	1.5993	-0.95154	-55.7942	161.9506	566.2456	-0.29893	0.60859	-0.40098	-12.023	131.0249	709.5081	-0.30078	0.52637	-0.25781	-31.059	16.8615	838.6555	-0.3333	0.51338	-0.27237
1.648	41.968	-83.776	1367.823	-1.1069	1.7134	-0.8833	25.03221	-25.75	1382.3636	-1.0482	1.6166	-0.91152	-54.8991	26.6167	32.3885	0.09248	0.26944	0.0079102	-47.3982	25.4341	1415.3909	-0.86365	1.5819	-0.94642	-48.703	176.151	536.8978	-0.2749	0.57861	-0.39551	-2.737	126.9278	695.6685	-0.28955	0.51416	-0.24756	-44.667	-2.5502	886.975	-0.40302	0.62236	-0.29971
1.65	57.413	-86.241	1382.731	-1.1395	1.7577	-0.89775	10.286	1.832	1384.0157	-1.0454	1.606	-0.90674	-34.637	20.5371	34.9764	0.10254	0.26758	0.01123	-40.61827	37.657	1393.3747	-0.85541	1.5662	-0.93158	-42.4961	185.01	517.214	-0.25108	0.54267	-0.38388	-20.027	135.752179	679.2804	-0.27002	0.48242	-0.23291	-29.589	-1.453581	907.872	-0.47061	0.74541	-0.32744
1.652	63.113	-76.144	1403.8913	-1.1682	1.7935	-0.91435	-16.535	20.7701	1387.3212	-1.0432	1.5966	-0.90264	-32.942	34.0174	33.639	0.11025	0.26387	0.012305	-24.6778	35.1159	1400.856	-0.84814	1.5493	-0.92627	-36.1953	166.985	501.3755	-0.22773	0.50986	-0.37568	-0.988	152.4786	650.749	-0.25659	0.45947	-0.22192	-55.863	-22.0882	909.566	-0.53243	0.87871	-0.34942
1.654	56.761	-72.1955	1402.4254	-1.187	1.8185	-0.93155	-39.883	22.3254	1359.1636	-1.0437	1.5827	-0.90068	-61.0618	34.2166	24.719607	0.11748	0.26631	0.015039	7.01	50.9657	1378.7838	-0.84491	1.5255	-0.91344	10.972	148.7738	499.43646	-0.20703	0.4751	-0.36357	-5.34999999999999	150.2619	630.331	-0.23682	0.43701	-0.20947	-93.023	-51.621	893.56	-0.59668	1.0146	-0.37207
1.656	47.1844	-100.82775	1411.0963	-1.2004	1.8356	-0.94786	-54.0927	32.631	1348.3528	-1.0472	1.5651	-0.89716	-69.579	22.9096	25.8027	0.12256	0.2624	0.022461	12.056	47.9569	1361.7507	-0.83826	1.5117	-0.90403	18.418	138.464	484.2447	-0.18457	0.43984	-0.35322	-10.794	147.474	604.364	-0.21533	0.4165	-0.19385	-89.131	-61.136	894.8722	-0.65849	1.1478	-0.38897
1.658	71.763	-108.5358	1420.3511	-1.2051	1.8477	-0.95898	-64.848	38.1971	1340.37915	-1.0462	1.5429	-0.88994	-57.824	25.3295	21.859	0.13105	0.25859	0.031836	20.457	42.3241	1330.581	-0.83436	1.4968	-0.88528	-7.489	143.035	458.6296	-0.16211	0.41064	-0.34229	-11.665	137.478	575.9403	-0.20752	0.40234	-0.18164	-81.052	-59.948	869.2756	-0.72178	1.2579	-0.41475
1.66	46.934	-99.823944	1439.2765	-1.2057	1.8455	-0.96972	-73.384	35.6186	1351.014	-1.0425	1.52	-0.89014	-63.6451	20.7637	44.7064	0.13916	0.25635	0.02832	43.851	50.0998	1332.0957	-0.83233	1.4814	-0.8737	0.932000000000002	130.18	436.8134	-0.14346	0.37012	-0.33145	-15.141	145.4122	554.7797	-0.18311	0.38135	-0.17139	-101.3657	-64.054	848.4371	-0.77256	1.3391	-0.45029
1.662	55.234	-99.2563	1451.832	-1.2089	1.8341	-0.97959	-59.8756	33.5388	1318.8246	-1.0361	1.4972	-0.88467	-53.838	9.7458	47.0523	0.14131	0.25635	0.030957	55.04	78.5343	1306.31763	-0.82813	1.4668	-0.86133	19.964	144.827	402.3034	-0.12431	0.33243	-0.32598	-10.534	144.1553	546.2242	-0.16479	0.36548	-0.15869	-83.9128	-63.159	814.7458	-0.80557	1.3808	-0.48916
1.664	29.613	-107.2882	1452.613	-1.2073	1.8216	-0.98896	-42.1873	33.0959	1309.85874	-1.0318	1.4715	-0.87812	-44.983	17.4648	49.5845	0.14482	0.25811	0.030371	42.8988	74.063	1297.1921	-0.82257	1.4443	-0.84249	15.12	148.009	390.9212	-0.10049	0.30469	-0.31426	-11.034	143.9609	513.281	-0.15039	0.35107	-0.14893	-94.59241	-49.7558	794.6372	-0.82373	1.3833	-0.521
1.666	39.843	-103.813	1433.409	-1.2025	1.8066	-0.99609	-63.0033	25.883	1283.487	-1.0221	1.4414	-0.86679	-43.286	27.9056	45.16	0.14639	0.26592	0.03623	20.7982	84.117	1260.3351	-0.80977	1.4232	-0.82609	20.703	130.506	379.188	-0.087012	0.27246	-0.30176	-11.269	139.6192	504.7524	-0.12891	0.32764	-0.13623	-90.9881	-23.881	782.742	-0.82363	1.3644	-0.54336
1.668	14.2541	-86.64	1411.5737	-1.1929	1.7896	-1.0015	-60.43172	17.81	1279.7476	-1.0108	1.4232	-0.86787	-45.1853	14.8825	59.0396	0.13965	0.27373	0.04043	27.871	86.388	1241.7382	-0.8043	1.4013	-0.81358	25.675	110.396	353.9799	-0.069824	0.24609	-0.29492	-46.282	135.00503	482.2201	-0.11963	0.31299	-0.13037	-102.3807	-17.374	799.6841	-0.81845	1.3485	-0.571
1.67	-1.736	-70.944	1397.5525	-1.1896	1.7639	-1.0075	-39.13	19.1023	1259.6307	-0.99951	1.4067	-0.86279	-39.131	8.6345	69.711066	0.13379	0.28613	0.041992	10.879	98.653	1230.849	-0.79405	1.3773	-0.79522	17.777	117.165	342.7556	-0.048926	0.21572	-0.28037	-46.385	120.4421	473.2812	-0.099121	0.2876	-0.11475	-68.495	-4.396	803.1386	-0.80947	1.3325	-0.5917
1.672	5.849	-37.93187	1411.01702	-1.1732	1.738	-1.0069	1.779	34.47928	1260.8427	-0.99688	1.391	-0.86016	-23.049	-0.7844	72.3322	0.12754	0.29697	0.039551	3.158	90.8456	1222.4719	-0.78271	1.3521	-0.78516	2.708	107.944	333.374	-0.032812	0.18662	-0.26787	-44.383	137.866	435.4037	-0.085694	0.27124	-0.10669	-51.6152	-4.679	827.0482	-0.80039	1.3184	-0.60723
1.674	11.126	-17.3738	1405.822	-1.1564	1.7095	-1.0089	-25.7616	55.681	1229.0568	-0.98535	1.3836	-0.8502	-12.122	-8.0161	64.0576	0.12646	0.31084	0.03877	2.035	95.2951	1199.6403	-0.77832	1.3287	-0.76582	13.609	97.6636	323.1084	-0.01836	0.15616	-0.25459	-64.25	147.379	434.3982	-0.067871	0.25342	-0.09082	-64.55799	-23.3351	833.494	-0.78125	1.291	-0.625
1.676	-8.6444	-16.5773	1412.1003	-1.1367	1.6793	-1.007	-20.349	54.2772	1220.4027	-0.97481	1.3707	-0.84825	-4.391	-24.1782	89.5599	0.12022	0.3249	0.036426	3.477	94.57554	1172.6514	-0.7707	1.3078	-0.75215	14.892	106.37023	295.2013	-0.0072264	0.12979	-0.24492	-72.964	145.593	397.1873	-0.049316	0.22656	-0.082031	-42.2489	-56.82086	831.082	-0.74336	1.2563	-0.63808
1.678	5.5197	-10.8477	1388.3557	-1.127	1.6484	-1.002	-16.854	61.0522	1189.336	-0.96201	1.361	-0.84131	-19.33	-29.9156	102.943	0.1168	0.33779	0.030957	-31.42	86.6282	1160.081	-0.75976	1.2844	-0.73886	2.295	104.0877	289.408	0.0063477	0.10742	-0.23193	-77.4431	121.4416	383.368	-0.040039	0.21826	-0.071777	-6.366	-78.9016	846.896	-0.68027	1.2031	-0.64688
1.68	24.6026	2.8531	1398.5796	-1.1144	1.6222	-0.99297	-7.228	78.6397	1163.2028	-0.94873	1.3472	-0.8374	7.905	-16.9638	109.1425	0.11279	0.354	0.025391	-18.788	76.9838	1133.486	-0.75078	1.2642	-0.72441	-19.465	97.9254	254.8476	0.015137	0.080469	-0.22139	-69.733	120.3255	364.16	-0.025879	0.19775	-0.062012	21.949	-81.9493	876.6053	-0.60879	1.1324	-0.65352
1.682	14.302	19.8997	1398.7703	-1.1035	1.5953	-0.98672	8.016	92.6922	1152.85	-0.92978	1.3406	-0.82979	-5.815	-7.3159	139.2913	0.10645	0.37529	0.015234	-37.945	83.275	1121.8318	-0.74658	1.2437	-0.70752	-26.667	97.989	236.1256	0.028027	0.052832	-0.21084	-74.1715	106.8706	339.9309	-0.01294	0.18066	-0.067139	-0.238000000000003	-104.3771	911.248	-0.54453	1.0504	-0.65937
1.684	-24.5692	35.678	1390.3109	-1.0883	1.573	-0.98242	50.442	89.856	1147.153	-0.91445	1.3293	-0.82285	1.24	2.4924	172.1664	0.097268	0.39922	0.00068358	-44.081	102.7512	1110.0256	-0.74287	1.2308	-0.6919	-52.357	118.823	227.9917	0.037402	0.023144	-0.19873	-57.081	96.918	334.8963	0.0058594	0.16504	-0.060059	24.365	-122.993	917.5148	-0.49219	0.95898	-0.65234
1.686	1.317	37.996	1370.4566	-1.0799	1.5532	-0.96631	35.72	94.771	1133.8812	-0.89648	1.3231	-0.8166	-5.068	25.18	196.4071	0.080469	0.42305	-0.016504	-62.5579	98.8866	1093.4148	-0.73721	1.2146	-0.67881	-46.374	119.503	227.299451	0.049511	-0.0019533	-0.18066	-58.414	101.67469	332.4006	0.033203	0.14014	-0.04834	20.6135	-146.064	940.8424	-0.44561	0.87744	-0.64883
1.688	6.1794	25.0563	1366.0125	-1.0703	1.5293	-0.94922	26.3	97.972	1119.3473	-0.87939	1.3143	-0.80674	18.075	36.531	229.373	0.0625	0.45478	-0.037597	-63.4825	112.9174	1059.02045	-0.72705	1.199	-0.66436	-66.5518	97.2227	212.2084	0.061035	-0.032227	-0.17725	-56.298	110.704	309.0001	0.047852	0.125	-0.043945	35.6149	-153.622	959	-0.40888	0.8044	-0.65147
1.69	-4.4055	8.4138	1368.2497	-1.0548	1.5071	-0.93565	36.187	93.359	1093.5374	-0.86377	1.3032	-0.79541	-7.041	60.8382	289.51	0.040527	0.48682	-0.063477	-80.1496	129.0678	1027.2024	-0.71114	1.1779	-0.65098	-51.025	82.43659	192.234	0.070703	-0.064453	-0.1666	-49.3	105.6157	295.2955	0.072266	0.10889	-0.036621	26.0418	-167.853	979.4356	-0.37021	0.74151	-0.64951
1.692	12.2566	-12.3741	1348.8756	-1.0422	1.4844	-0.9211	57.206	93.97	1070.0366	-0.84453	1.2871	-0.78457	12.025	87.3614	345.1911	0.011816	0.52978	-0.083887	-85.8084	145.1316	997.3794	-0.69238	1.1543	-0.63965	-86.5836	80.1543	176.024	0.086719	-0.091798	-0.15752	-48.288	87.66264	278.6624	0.084717	0.092529	-0.033935	67.6752	-153.718	998.31277	-0.34033	0.696	-0.64385
1.694	39.924	-14.3448	1325.408	-1.025	1.4656	-0.90547	4.551	97.4779	1060.1153	-0.82471	1.2766	-0.77881	10.303	100.91	409.8339	-0.021289	0.57588	-0.11591	-72.9086	140.989	970.106	-0.68066	1.1291	-0.62129	-75.6214	62.6641	168.9875	0.098047	-0.12539	-0.14658	-50.357	93.0648	270.715	0.098633	0.08252	-0.030762	40.377	-131.0316	1007.4033	-0.32227	0.66992	-0.63965
1.696	38.5325	-5.853	1294.402	-1.0067	1.4487	-0.8917	-7.218	85.5326	1034.2663	-0.79932	1.2583	-0.76279	-4.713	121.52036	473.991	-0.059961	0.63682	-0.15186	-73.6753727	140.196	936.834	-0.6626	1.0978	-0.60595	-77.1757	66.41	166.0985	0.11026	-0.15606	-0.14024	-46.643	100.169724	244.4675	0.11719	0.06543	-0.020996	30.32	-121.2146	1031.5782	-0.32617	0.67461	-0.63926
1.698	11.51	-3.621	1285.739	-0.98828	1.4277	-0.87891	-30.37	74.6362	1013.0308	-0.77773	1.2391	-0.74941	-13.341	119.5107	543.647	-0.10381	0.70576	-0.18271	-72.4408	131.9567	912.86	-0.64346	1.074	-0.59228	-43.688	71.6782	139.0567	0.12646	-0.18115	-0.13037	-19.682	99.376	228.5411	0.12842	0.058105	-0.015625	18.693	-113.247	1053.5411	-0.34434	0.70683	-0.6543
1.7	59.5364	-1.547	1277.0988	-0.97363	1.4143	-0.86152	-23.318	95.218	1002.3202	-0.75977	1.2148	-0.73828	-1.437	129.816	615.262	-0.16064	0.77783	-0.21289	-65.0328	116.1683	900.43	-0.63174	1.0452	-0.58135	-58.3876	76.6174	123.2196	0.13564	-0.20977	-0.12637	-24.855	100.778	203.077	0.14893	0.035156	-0.010254	31.891	-96.931	1091.0279	-0.37598	0.75723	-0.66641
1.702	45.4369	30.9709	1272.3825	-0.96328	1.3963	-0.8461	-36.297	105.2369	1006.447	-0.73213	1.1878	-0.71982	-15.733	129.991	699.834	-0.22881	0.8625	-0.24629	-24.538	119.60903	877.961	-0.61523	1.0137	-0.56055	-58.252	51.8448	134.9307	0.14511	-0.22988	-0.12198	-21.493	91.604	192.869	0.16651	0.019287	-0.0065918	21.866	-83.338	1122.5119	-0.41386	0.83144	-0.6877
1.704	61.615	50.988	1277.455	-0.95078	1.3838	-0.8289	-51.26	114.56198	976.941	-0.70742	1.1531	-0.70605	-27.553	111.921	772.478	-0.30654	0.95791	-0.27764	-29.106	142.4068	847.237	-0.59521	0.98408	-0.546	-50.107	57.8539	134.0661	0.15332	-0.25293	-0.11494	-8.144	79.2791	178.7991	0.18164	0.0053711	-0.00048828	9.222	-88.273	1156.6228	-0.45215	0.9082	-0.71387
1.706	36.106	59.386	1258.498	-0.94267	1.3717	-0.81025	-54.366	120.5949	959.54	-0.67695	1.1187	-0.69668	-29.7378	79.458	848.7826	-0.38116	1.0391	-0.30185	-23.963	139.4225	840.5045	-0.57207	0.95117	-0.53086	-31.287	62.71636	129.1845	0.15859	-0.27187	-0.11094	7.689	69.59052	171.2755	0.20117	-0.013184	0.0053711	-18.573	-97.762	1167.9548	-0.50215	0.98398	-0.73887
1.708	55.391	78.692	1226.8896	-0.93359	1.3633	-0.79688	-77.9555	137.7129	924.132	-0.64248	1.0834	-0.68183	-47.5012	62.64	891.3846	-0.46338	1.122	-0.32578	-18.673	134.3253	814.4361	-0.5455	0.91523	-0.51523	-23.251	54.5019	126.7406	0.16357	-0.28516	-0.10498	5.805	70.7631	162.52567	0.20605	-0.020996	0.01123	-37.792	-106.337	1176.875	-0.55459	1.0579	-0.75537
1.71	27.0731	101.864	1190.295	-0.9251	1.3503	-0.77822	-86.5237	134.5233	907.6845	-0.61279	1.0474	-0.66357	-65.2429	35.485	911.3916	-0.53906	1.1895	-0.3457	-23.193	149.185	775.8985969	-0.52481	0.87207	-0.50996	-16.866	39.6968	110.9438	0.16807	-0.30518	-0.10147	1.13200000000001	69.4589	159.8419	0.22168	-0.03418	0.01123	-65.0875	-127.3099	1199.7436	-0.6081	1.1403	-0.77256
1.712	31.1814	88.241	1150.832	-0.9125	1.3352	-0.76113	-77.25231	130.838	885.3444	-0.58369	1.0142	-0.65322	-53.7092	10.9489	931.9914	-0.60791	1.2425	-0.36982	-1.286	156.844	755.6086	-0.49365	0.83252	-0.50098	-13.238	36.3499	111.26868	0.16524	-0.31504	-0.096094	0.716999999999999	64.684	152.8912	0.2378	-0.043213	0.010986	-60.9281	-151.6279	1204.1096	-0.65762	1.2182	-0.79473
1.714	29.8121	64.8173	1123.765	-0.90156	1.3133	-0.74239	-57.648	123.9186	871.07738	-0.55576	0.98164	-0.63847	-33.638	-6.5987	933.142	-0.6666	1.2758	-0.40117	-1.926	149.195	731.7275	-0.46582	0.79473	-0.48555	10.192	50.822	80.441	0.16406	-0.32559	-0.088672	2.89	60.199	136.5272	0.24951	-0.052734	0.010742	-46.029	-160.4304	1219.263	-0.71191	1.293	-0.82031
1.716	47.3091	59.3337	1116.056	-0.88868	1.2969	-0.71924	-98.317	126.6872	825.243	-0.52686	0.94883	-0.6248	-40.0555	-24.1966	924.403	-0.71269	1.2805	-0.42812	9.169	147.171	708.3063	-0.43799	0.76367	-0.47089	11.541	46.008	79.3064	0.16709	-0.32842	-0.090625	-16.427	58.5879	119.4425	0.26758	-0.057129	0.012207	-63.8298	-156.753	1247.005	-0.75312	1.3629	-0.84609
1.718	18.8956	54.4929	1098.672	-0.875	1.2734	-0.70117	-100.625	112.3902	800.526	-0.5081	0.9167	-0.604	-25.024	-38.824	896.694	-0.73711	1.2895	-0.45195	-4.711	143.9429	705.5767	-0.41768	0.73399	-0.45996	23.241	54.458	71.8746	0.16309	-0.32959	-0.087891	-8.274	47.2998	106.6556	0.26953	-0.058594	0.011719	-84.341	-166.712	1268.215	-0.78505	1.419	-0.86474
1.72	15.8876	39.014044	1091.5129	-0.85477	1.2495	-0.67949	-96.622	126.5751	781.497	-0.48193	0.88818	-0.58936	-15.812	-55.507	877.9	-0.75342	1.2993	-0.46191	11.986	130.0557	648.729	-0.39356	0.70879	-0.44727	18.336	47.993	78.8255	0.15439	-0.32959	-0.078906	-34.325	36.3291	103.6811	0.28369	-0.04541	0.01416	-66.4811	-152.709	1288.7158	-0.80537	1.4589	-0.88037
1.722	25.2575	39.9945	1085.15067	-0.83407	1.2251	-0.66121	-78.208	144.972	769.1318	-0.46201	0.86348	-0.57754	-3.541	-41.0527	850.722	-0.76142	1.3149	-0.47139	9.133	124.0748	647.9308	-0.37695	0.68555	-0.4375	4.531	37.8937	72.9692	0.14589	-0.32295	-0.080273	-40.512	45.3311	96.548	0.28223	-0.034912	0.016358	-51.0887	-131.999	1309.76	-0.82773	1.498	-0.90313
1.724	15.3931	66.1717	1075.3334	-0.81179	1.1911	-0.64051	-88.80027	154.062	754.0921	-0.44257	0.84024	-0.5625	23.681	-30.1673	819.666	-0.76836	1.3309	-0.4707	10.996	141.0229	631.432	-0.35107	0.65791	-0.42744	16.296	27.04766	75.9143	0.13848	-0.31123	-0.076368	-57.715	45.3374	96.8501	0.27881	-0.025391	0.016602	-60.7285	-129.563	1324.732	-0.83398	1.5508	-0.92383
1.726	-26.7296	66.4923	1058.4838	-0.78875	1.1582	-0.62283	-32.788	149.175	723.203	-0.42461	0.80899	-0.54531	22.165	-19.8089	806.222	-0.77031	1.3406	-0.47031	-23.388	154.921	604.015	-0.32969	0.63086	-0.41719	8.089	43.6551063	63.4721	0.12871	-0.29658	-0.073242	-25.855	34.34491	90.8533	0.27783	0	0.0092773	-62.0611	-128.6893	1340.101	-0.84678	1.6241	-0.93603
1.728	-24.3004	66.1332	1027.5719	-0.76563	1.125	-0.59961	-28.47	139.0049	700.523	-0.40244	0.77754	-0.52744	21.629	-0.726700000000001	785.5501	-0.7584	1.3395	-0.47969	-22.552	154.317	561.0646	-0.30469	0.60508	-0.40469	22.99	50.5281	71.92878	0.10791	-0.2793	-0.066406	-38.499	27.8008	97.7644	0.271	0.017578	0.0083008	-34.541	-114.167	1335.2863	-0.85976	1.6851	-0.9455
1.73	-8.818	75.5639	1009.63474	-0.74662	1.0972	-0.58742	-36.637	138.7439	695.115	-0.38232	0.74463	-0.50928	40.7147	10.017	782.981	-0.73584	1.3325	-0.48291	-41.556	150.318	533.4386	-0.2709	0.57714	-0.39238	-26.339	46.40229	53.13642	0.081641	-0.25527	-0.064746	-38.172	34.8625	70.82199	0.26123	0.038574	0.0063477	-26.224	-99.916	1347.4419	-0.88125	1.7347	-0.95215
1.732	-33.36584	81.8753	1004.8344	-0.72342	1.0677	-0.56617	-31.184	128.0489	680.5943	-0.36719	0.7207	-0.49766	18.943	12.564	783.689	-0.69512	1.3186	-0.48613	-47.699	157.9469	507.41	-0.24609	0.54883	-0.37891	-2.982	41.9036	39.157	0.057715	-0.22627	-0.061426	-67.10589	32.33418	58.8927	0.24927	0.062012	0.0024414	-30.2822	-95.585	1339.113	-0.91143	1.76	-0.96494
1.734	-29.8767	78.4111	980.627	-0.70154	1.0443	-0.54512	20.661	121.6249	657.8119	-0.34638	0.69814	-0.48525	0.925999999999998	0.687999999999995	808.36615	-0.65185	1.297	-0.48096	-58.048	142.0974	500.42943	-0.21631	0.51972	-0.36778	-18.199	50.951	34.7801	0.030762	-0.20245	-0.05791	-54.36	41.7587	54.2559	0.23438	0.085938	0.0053711	-6.333	-112.863	1352.0368	-0.93945	1.7715	-0.96289
1.736	-11.45	89.002	949.94329	-0.67868	1.0141	-0.52653	24.202	119.8382	644.2498	-0.32764	0.6751	-0.47315	18.591	0.573	809.0381	-0.60459	1.2692	-0.47705	-69.5222	124.123	480.8739	-0.19151	0.49004	-0.35205	-41.006	48.182	46.474	0.0072268	-0.18086	-0.063184	-64.1983	48.8635	50.0179	0.20557	0.125	0.0019531	11.708	-107.061	1333.253	-0.9665	1.7689	-0.96221
1.738	-8.754	101.37013	927.4272	-0.6582	0.98633	-0.50586	-1.14700000000001	117.51054	615.743	-0.31485	0.65879	-0.45957	13.667	-18.776	824.0723	-0.55986	1.2436	-0.46592	-69.014	132.7497	459.5528	-0.16689	0.46152	-0.33916	-58.9605	42.5489	61.406	-0.019531	-0.14941	-0.051758	-45.643	43.5683	38.6915	0.19141	0.14111	0.00048828	6.391	-96.528	1346.694	-0.98858	1.7614	-0.96006
1.74	-19.74	106.5413	909.5791	-0.63738	0.95923	-0.48882	8.47799999999999	109.427	590.7226	-0.30029	0.63818	-0.44043	-22.912	-54.257	845.214	-0.52734	1.2207	-0.46729	-74.672	141.6035	439.273	-0.14306	0.43232	-0.3251	-34.38	42.2667	47.1768	-0.041798	-0.10351	-0.060352	-50.3855	25.2377	41.1358	0.16016	0.1792	-0.0078125	10.619	-80.086	1362.4443	-1.0054	1.7603	-0.95967
1.742	4.328	102.4128	882.2519	-0.61847	0.93304	-0.4735	10.55	132.825	567.504	-0.28447	0.63018	-0.43486	-7.811	-91.0255	865.861	-0.49463	1.2112	-0.46807	-68.4986	130.878	438.3599	-0.12061	0.39941	-0.30908	-65.1942	50.4753	35.1223	-0.067677	-0.064549	-0.064941	-47.891	28.2518273	26.504	0.13477	0.20777	-0.011231	47.8463	-77.628	1392.0525	-1.0202	1.7658	-0.95654
1.744	12.864	109.947	857.4973	-0.59836	0.90264	-0.4551	-15.601	148.155	548.2708	-0.27637	0.61485	-0.42051	-1.57100000000001	-108.085	889.671	-0.47099	1.2013	-0.47217	-80.0377	127.978	401.34199	-0.095898	0.36875	-0.29473	-77.0714	28.241	34.832	-0.09385	-0.036033	-0.06416	-46.761	39.4974	33.714	0.11426	0.2373	-0.012207	62.5931	-84.7197	1406.2828	-1.0327	1.7739	-0.95459
1.746	-3.824	111.634	829.581	-0.5735	0.86991	-0.43813	-3.157	148.661	517.9051	-0.26661	0.60117	-0.40527	-19.481	-130.634	923.4637	-0.46084	1.2032	-0.48076	-72.0057	129.1511	385.168	-0.07461	0.33838	-0.27598	-75.53368	22.31	43.895	-0.11514	-0.010838	-0.057812	-34.737	47.2719	30.8643	0.088867	0.26807	-0.01709	33.4961	-102.886	1423.924	-1.0499	1.7954	-0.95498
1.748	-13.797	102.782	795.365	-0.55029	0.83447	-0.42236	-3.996	129.692	494.5216	-0.25771	0.58643	-0.38818	-33.173	-161.734	951.3992	-0.46026	1.2013	-0.48799	-85.664	126.3756	362.75813	-0.052344	0.31064	-0.25918	-48.439	36.505	35.9886	-0.13818	0.01709	-0.053223	-19.074	47.572	30.489	0.078125	0.28857	-0.018066	36.472	-116.856	1424.7357	-1.062	1.8094	-0.96064
1.75	-4.777	99.873	771.642	-0.52688	0.80013	-0.40912	-22.821	137.644	474.283	-0.25146	0.56885	-0.3667	-41.503	-176.915	993.23206	-0.46387	1.2168	-0.5	-73.62062	114.2866	355.7477	-0.03252	0.28057	-0.24229	-65.5884	38.571	31.7521	-0.16015	0.042966	-0.053516	-16.824	47.015	26.4278038	0.053223	0.31104	-0.019043	43.765	-108.3534	1449.5454	-1.0823	1.8282	-0.96064
1.752	3.755	124.046	760.048	-0.50069	0.76539	-0.39401	-43.334	126.4906	461.202	-0.24277	0.55185	-0.34844	-58.68	-164.561	1027.8434	-0.47715	1.2461	-0.52226	-82.8184	110.15	342.7327	-0.012207	0.24854	-0.23242	-62.3005	31.91753	13.11425	-0.18369	0.071967	-0.055664	-2.931	32.4904	20.0947	0.037354	0.33056	-0.020508	33.864	-73.2556	1463.0704	-1.0946	1.8383	-0.9625
1.754	-6.264	133.888	750.2408	-0.4804	0.72472	-0.38166	-25.672	122.0355	455.8948	-0.22793	0.5332	-0.32959	-77.8212	-157.272	1065.5293	-0.49062	1.2824	-0.54453	-52.53	116.7677	321.7952	0.0018555	0.22168	-0.21699	-68.5238	36.9005	24.5848	-0.20009	0.096967	-0.055664	-7.729	20.19917	15.409	0.02832	0.34375	-0.020508	1.922	-57.332	1475.594	-1.0996	1.8457	-0.96289
1.756	17.191	118.5236	730.7078	-0.45583	0.69419	-0.36886	-30.382	131.058	450.088	-0.20996	0.51172	-0.31357	-85.9163	-146.029	1101.773	-0.51289	1.3258	-0.56563	-48.739	112.0996	293.7972	0.018261	0.19854	-0.19931	-50.998	51.427	33.99	-0.21347	0.11923	-0.053026	1.489	25.93587	35.7015	0.016113	0.35693	-0.018066	9.856	-55.411	1467.524	-1.0995	1.8388	-0.9585
1.758	21.725	121.7481	724.49	-0.43213	0.6626	-0.35449	-70.1524	136.9624	427.982	-0.18965	0.4916	-0.29141	-93.6776	-124.9213	1119.9217	-0.54306	1.3683	-0.59053	-18.488	109.1435	286.3697	0.031933	0.17237	-0.18564	-48.943	46.0706	47.1668	-0.22705	0.14502	-0.056152	-8.829	30.2131	35.40386	0.015137	0.3623	-0.015137	-7.828	-41.135	1448.9593	-1.1018	1.8247	-0.94951
1.76	20.352	131.8522	716.5707	-0.41286	0.62646	-0.34311	-82.512	124.8909	397.6501	-0.17285	0.46582	-0.27393	-124.614	-104.819	1141.72904	-0.57959	1.4146	-0.61768	-38.129	119.8352	272.43262	0.045703	0.15293	-0.16778	-26.545	39.9177	38.6218	-0.24034	0.1713	-0.056449	15.93	26.8872	34.1507	0.003418	0.37158	-0.010742	-45.6681	-41.4102	1447.3181	-1.0906	1.8157	-0.94443
1.762	15.922	119.6761	700.661	-0.39103	0.59025	-0.33337	-64.999	119.597	374.1132	-0.1544	0.44053	-0.25254	-133.559	-93.529	1156.3926	-0.62041	1.4581	-0.63604	-3.119	108.816	264.793	0.058594	0.13232	-0.15625	-9.545	33.81196	36.9166	-0.24728	0.19914	-0.055074	-3.51000000000001	26.5034	28.0668	-0.00097656	0.37011	-0.0058594	-29.824	-39.304	1445.6533	-1.0771	1.8108	-0.94678
1.764	21.915	111.9228	667.4995	-0.36601	0.55839	-0.31528	-90.5298	127.045	360.81129	-0.13682	0.41563	-0.23868	-120.061	-92.263	1178.5235	-0.66787	1.5021	-0.64912	-2.102	103.622	250.416	0.072656	0.11182	-0.13926	-20.745	22.55196	33.678	-0.25352	0.21827	-0.058998	-3.33799999999999	29.6217	25.497	-0.0058594	0.37061	0.003418	-22.413	-18.886	1455.072	-1.0645	1.8066	-0.94824
1.766	3.215	108.391	637.5501	-0.34386	0.52386	-0.30389	-100.2115	113.3032	344.9892	-0.12393	0.39219	-0.21602	-72.691	-86.418	1184.2651	-0.71162	1.5458	-0.66709	21.737	104.487	239.7568	0.08252	0.090234	-0.12558	-23.824	23.0545	29.3591	-0.25918	0.23155	-0.068851	-7.257	35.08	25.48773	-0.0068359	0.36768	0.0043945	-39.59	7.7562	1449.8442	-1.0503	1.796	-0.94346
1.768	-14.202	94.8985	614.364	-0.31885	0.49463	-0.29248	-100.1462	84.4727	319.3294	-0.10859	0.36153	-0.19648	-88.3501	-97.7104	1194.041	-0.75323	1.6007	-0.68017	7.613	104.1316	217.1948	0.098144	0.076172	-0.11855	8.402	34.8592	31.81421	-0.25293	0.23926	-0.071289	-6.526	33.166	26.046	-0.0087891	0.36426	0.012207	-75.301	-1.11807	1445.786	-1.0347	1.7754	-0.93906
1.77	-21.126	77.8088	600.371	-0.29632	0.46557	-0.28106	-89.9012	88.6974	298.467	-0.094238	0.33691	-0.17725	-75.184	-122.8643	1211.025	-0.7832	1.6445	-0.69824	9.117	84.7023	213.421	0.11445	0.063086	-0.10371	20.448	53.808	18.54026	-0.25323	0.23584	-0.070021	-15.482	40.733	32.2472	-0.0087891	0.35742	0.021973	-38.3379	-3.456	1452.4162	-1.0223	1.755	-0.93438
1.772	-20.161	100.874	576.938	-0.27277	0.43798	-0.26916	-106.64	89.959	292.67	-0.081933	0.31279	-0.15694	-74.808	-139.145	1242.0057	-0.79746	1.6996	-0.71758	-12.251	72.84	206.492	0.12305	0.049316	-0.090332	6.879	42.7074	24.8663	-0.24731	0.23284	-0.068156	-4.97	44.1167	30.5765	-0.0043945	0.35571	0.021729	-48.921	19.5761	1457.9192	-1.0087	1.7308	-0.92588
1.774	-34.004	120.92539	573.6151	-0.24771	0.4078	-0.25955	-73.3532	86.953	283.5039	-0.070117	0.28926	-0.14004	-65.274	-149.8633	1265.4996	-0.80938	1.7438	-0.74023	-7.172	74.7077	196.1385	0.13662	0.03916	-0.075781	12.947	18.7681	29.8291	-0.23868	0.22309	-0.071661	-23.901	38.5998	21.1712	-0.0068359	0.34326	0.029297	-60.3285	23.4699	1469.269	-0.99854	1.7056	-0.91846
1.776	-38.546	123.0573	547.1368	-0.22598	0.38325	-0.24514	-49.246	103.6879	289.279	-0.061914	0.26426	-0.12285	-68.231	-166.0574	1297.63	-0.81328	1.7781	-0.75586	0.697000000000003	71.715	184.279	0.14511	0.029199	-0.065235	13.052	26.7297	44.7981	-0.22521	0.20697	-0.072754	-33.356	29.37223	32.2399	-0.0092773	0.33301	0.037598	-76.166	17.6526	1471.77	-0.99326	1.6763	-0.91407
1.778	-35.65	122.363	527.1945	-0.20557	0.35986	-0.23438	-35.99	114.301	268.6922	-0.048535	0.24502	-0.1001	-32.636	-179.3546	1308.128	-0.81592	1.8048	-0.76416	11.156	68.048	177.9645	0.15527	0.013965	-0.055078	1.723	42.9177	52.5575	-0.21631	0.19189	-0.068848	-32.119	37.559	34.9964	-0.0068359	0.32422	0.04541	-41.008	4.48596	1445.8036	-0.98897	1.654	-0.90693
1.78	-31.649	153.434	502.84088	-0.18874	0.33919	-0.22009	-38.863	113.908	246.5801	-0.040527	0.22559	-0.082031	-40.353	-170.8293	1322.7213	-0.82031	1.8164	-0.77734	-1.87	69.479	162.41978	0.1664	0.0075196	-0.048242	4.006	32.1441	52.2548	-0.20327	0.17314	-0.075707	-32.295	40.3525	29.56718	-0.0048828	0.3125	0.050781	-59.8957	-3.6592	1435.9788	-0.98467	1.6365	-0.90263
1.782	-31.124	139.75	489.256	-0.17278	0.31737	-0.21338	-22.392	102.6394	223.6588	-0.033594	0.20312	-0.062696	-50.162	-166.65385	1335.0117	-0.83057	1.821	-0.78291	-25.413	80.908	144.7772	0.17334	-0.00048828	-0.03418	-2.276	35.3262	39.997858	-0.19709	0.1585	-0.079089	-49.6691	34.10665	24.538	-0.003418	0.30542	0.054931	-50.852	-20.7836	1410.07987	-0.97686	1.6217	-0.89268
1.784	-33.529	125.1167	471.140942	-0.15638	0.30125	-0.19892	-27.461	101.554	228.9942	-0.027246	0.18291	-0.046484	-46.869	-171.7943	1366.1239	-0.85449	1.8318	-0.78994	-23.997	60.504	147.89659	0.17939	-0.012891	-0.021875	-18.453	39.732	24.238	-0.18564	0.14203	-0.080507	-60.7403	34.245	33.69689	0.00048828	0.2959	0.056641	-29.014	-28.2915	1400.402	-0.9751	1.606	-0.89209
1.786	-26.172	114.8972	448.0214	-0.14715	0.2849	-0.18621	-5.405	106.7003	207.19457	-0.021387	0.16338	-0.027343	-13.874	-166.064	1369.6199	-0.88067	1.8446	-0.7958	-36.181	57.6968	136.42554	0.18584	-0.028711	-0.011621	-50.8769	39.52	30.831	-0.17106	0.127	-0.085838	-58.0951	42.9106	21.188	0.0039063	0.28955	0.067383	19.101	-12.5547	1380.2453	-0.97119	1.5968	-0.8833
1.788	-50.755	119.892	431.227	-0.13037	0.26611	-0.17432	2.354	86.9345	187.8838	-0.017676	0.14746	-0.015235	-13.552	-145.481	1397.477	-0.91621	1.8643	-0.80293	-52.759	48.034	133.1436	0.19326	-0.040039	-0.0022461	-39.152	21.2101	45.8489	-0.16162	0.11133	-0.091309	-51.354	37.2486	29.8564	0.0068359	0.28564	0.073242	-5.562	-3.3208	1371.9013	-0.96406	1.5855	-0.87969
1.79	-48.131	107.668	410.921	-0.1194	0.25601	-0.16079	4.41	76.9041	170.9578	-0.01123	0.13037	-0.0048828	-7.499	-141.357	1413.1458	-0.95654	1.8853	-0.81299	-63.5291	45.163	127.523	0.20274	-0.049902	0.0027344	-35.338	15.5591	64.6445	-0.14829	0.10103	-0.08634	-49.674	28.9444	29.0509	0.0043945	0.28662	0.074219	20.688	-5.62076	1352.906	-0.96485	1.573	-0.87344
1.792	-54.1477	111.6006	394.909956	-0.10825	0.24235	-0.14878	3.179	82.181	169.1907	-0.003125	0.12373	0.012012	-5.151	-127.6691	1410.6061	-0.99914	1.9095	-0.82022	-64.9913	40.5168	117.785	0.20947	-0.051758	0.015137	-40.586	8.5	70.31289	-0.13637	0.091654	-0.092474	-45.171	24.3103	43.775	0.0039063	0.28711	0.073731	35.611	5.464925	1353.8031	-0.96035	1.5605	-0.87031
1.794	-32.736	127.283	375.994	-0.09694	0.22903	-0.13826	2.072	81.934	162.665	0.0023437	0.11612	0.02998	-3.128	-100.72	1421.882	-1.0367	1.9309	-0.82558	-69.5435	55.9509	113.648	0.21728	-0.050098	0.017187	-58.869	0.4434	75.4614	-0.12467	0.08012	-0.099296	-41.356	8.5505	50.332	0.0014648	0.29297	0.080078	56.2998	27.833	1344.6704	-0.95508	1.5459	-0.8623
1.796	-45.264	125.943	364.7264	-0.083775	0.2158	-0.12499	20.413	75.838	158.198	0.0054688	0.10322	0.044043	-26.511	-71.965	1427.0482	-1.0754	1.9446	-0.82598	-59.516	56.1555	101.54527	0.2169	-0.045605	0.020703	-58.92	-13.214	66.021	-0.11103	0.070181	-0.10626	-47.829	5.3229	64.9212	0.00097656	0.29785	0.085449	31.99	44.025	1328.633	-0.94287	1.5292	-0.85312
1.798	-26.997	114.248	349.6315	-0.075684	0.20166	-0.11719	25.039	80.091	143.586	0.011914	0.091699	0.057617	-51.48	-79.204	1430.086	-1.1052	1.955	-0.82119	-79.3409	52.4275	73.5258	0.22236	-0.044043	0.028125	-65.501	4.5071	88.664	-0.095703	0.058594	-0.11719	-34.889	8.0065	83.64378	0.00048828	0.29932	0.086426	42.1552	52.012	1296.7511	-0.93545	1.5169	-0.84834
1.8	-29.833	106.6154	340.3875	-0.065832	0.1882	-0.10284	18.626	77.7777	130.8882	0.022461	0.07959	0.070801	-54.509	-69.428	1422.088	-1.127	1.9629	-0.82031	-68.6185	38.0735	76.5889	0.21973	-0.035547	0.026562	-70.3021	-17.0221	102.0266	-0.084516	0.055547	-0.12248	-2.625	19.5575	74.2538	-0.00097656	0.30762	0.08252	38.85828	58.318	1274.3857	-0.92724	1.4977	-0.83701
1.802	-13.13	111.6458	322.353	-0.056658	0.16935	-0.092487	-18.209	54.0316	124.4024	0.033398	0.063379	0.083008	-83.142	-66.483	1429.04	-1.1449	1.9658	-0.81425	-70.5844	46.2148	70.898	0.22314	-0.027832	0.027344	-73.8014	-26.4318	118.76599	-0.075478	0.056539	-0.1304	-28.699	18.1136	73.5403	-0.0078125	0.32959	0.083496	8.008	70.132	1237.987	-0.92519	1.4852	-0.82851
1.804	-14.551	97.799	320.3576	-0.0383	0.15373	-0.085456	-7.558	43.295	130.8069	0.03789	0.052832	0.098731	-97.872	-64.599	1455.34	-1.1574	1.9685	-0.81318	-49.541	51.4858	63.131	0.21963	-0.018067	0.023828	-58.6175	-11.5574	124.3126	-0.078381	0.062807	-0.1381	-27.769	-1.0809	70.4995	-0.0092773	0.33984	0.078125	30.856	57.2056	1237.23176	-0.92334	1.4731	-0.81494
1.806	9.276	94.323	290.2726	-0.022078	0.13136	-0.073647	-33.931	60.0893	114.6215	0.049218	0.046191	0.10693	-125.8682	-76.343	1483.891	-1.1632	1.972	-0.81123	-40.56	43.9691	64.72	0.21524	-0.0096679	0.027441	-47.316	8.6614	165.4963	-0.082618	0.07229	-0.14922	-11.918	2.8742	85.962	-0.027344	0.37109	0.074219	44.788	39.3707	1216.7941	-0.90967	1.4544	-0.81006
1.808	2.234	106.4676	285.9807	-0.0019531	0.10938	-0.064453	-35.807	60.039	123.961	0.058984	0.035938	0.12226	-104.727	-73.2403	1486.859	-1.1702	1.981	-0.80694	-46.403	41.14866	73.0352	0.20273	0.0094729	0.024317	-53.7998	23.1535	201.486	-0.085938	0.086914	-0.16455	-6.31	23.5553	117.512	-0.046631	0.39624	0.071289	21.97	40.7246	1200.40311	-0.90039	1.4309	-0.79629
1.81	-9.657	129.103	273.0729	0.016117	0.096286	-0.05703	-61.8849	54.6098	104.8383	0.063965	0.025391	0.13477	-127.3147	-74.496	1502.4757	-1.1699	1.9902	-0.80664	-32.983	45.9684	51.341	0.1916	0.027246	0.024414	-38.245	38.2812	247.4282	-0.090839	0.10373	-0.17464	-7.108	23.58436	148.3517	-0.066895	0.42041	0.061523	-7.513	40.7777	1186.459	-0.89102	1.4074	-0.77754
1.812	-13.683	107.46	271.5199	0.028912	0.075192	-0.045211	-59.038	54.9381	91.3652	0.06416	0.015429	0.15039	-112.3451	-87.955	1510.672	-1.1753	2.0022	-0.80283	-30.245	34.86406	48.8573	0.17627	0.038086	0.022949	-8.538	63.9299	273.0168	-0.092646	0.11843	-0.19337	-4.665	34.3557	167.62458	-0.10352	0.46338	0.050781	-5.682	37.62426	1164.006	-0.87881	1.3837	-0.7665
1.814	-15.181	116.957	256.7735	0.047661	0.057612	-0.034275	-79.0548	65.138	83.2782	0.066993	0.012109	0.16094	-126.11	-79.128	1520.45206	-1.178	2.0091	-0.80381	-25.432	30.5157	57.7835	0.15967	0.06416	0.015137	-2.521	84.2365	314.663	-0.095152	0.13297	-0.2077	-1.652	49.7689	190.0121	-0.11963	0.48486	0.038574	-15.116	52.7045	1169.314	-0.87012	1.3594	-0.75195
1.816	-10.09	119.479	244.764	0.063673	0.040525	-0.026562	-75.3297	55.1821	74.8784	0.069336	0.008984	0.1664	-105.747	-59.5728	1529.4741	-1.1722	2.0118	-0.80029	-13.288	44.655	56.705	0.146	0.09375	0.0069336	4.038	94.42263	389.4895	-0.10186	0.15577	-0.22412	1.029	70.4663	215.5339	-0.14551	0.52344	0.0092773	-31.444	60.0111	1168.6835	-0.85889	1.3374	-0.73681
1.818	-11.704	98.9062	227.2264	0.080078	0.015137	-0.019531	-87.4784	43.83827	76.06317	0.070606	0.0016592	0.17383	-129.7945	-58.59	1536.564	-1.1639	2.008	-0.79824	17.253	44.005	43.0932	0.13116	0.11601	-0.0040039	22.383	114.5984	467.00687	-0.11182	0.17773	-0.2417	7.136	96.8415	253.64304	-0.17017	0.55933	-0.0065919	-61.173	47.822	1137.4949	-0.84502	1.3154	-0.72071
1.82	-17.754	81.1381	213.7556	0.10068	0.0025394	-0.015333	-62.98	44.2512	69.927	0.068848	-0.0092773	0.18359	-119.1455	-57.9158	1527.2587	-1.1558	2.0083	-0.79443	10.665	36.037	42.1217	0.12139	0.14043	-0.014843	10.829	137.271	531.0149	-0.1377	0.21178	-0.25563	23.562	113.193	295.3136	-0.19678	0.6001	-0.024414	-56.90748	61.1406	1107.3399	-0.83526	1.2907	-0.70469
1.822	-29.614	93.4726	190.622	0.11543	-0.017089	-0.0065431	-76.76597	33.435	62.512	0.071094	-0.013183	0.18838	-125.8788	-48.919	1496.348	-1.1473	1.9926	-0.7877	1.10299999999999	25.2485	36.131	0.11084	0.16699	-0.013184	22.546	119.654	595.7452	-0.16997	0.25468	-0.27133	3.906	120.962	327.896	-0.23926	0.65039	-0.063965	-84.523	85.4275	1087.4648	-0.82227	1.2693	-0.69023
1.824	-9.121	86.8276	196.124	0.13144	-0.031932	0.002831	-80.57135	25.279	56.408	0.065041	-0.010448	0.19345	-114.3447	-19.127	1480.248	-1.1347	1.9789	-0.78086	6.262	15.6767	24.953	0.096779	0.18457	-0.023242	26.445	100.608	656.859	-0.20982	0.31174	-0.28741	-10.043	110.971	358.75867	-0.26172	0.68604	-0.07373	-73.4678	101.0892	1076.5054	-0.80859	1.248	-0.67871
1.826	-34.16	80.7204	190.15005	0.14199	-0.043555	0.0070314	-72.2436	37.9354	57.9778	0.060352	-0.0092797	0.19893	-127.7355	-11.8981	1470.8584	-1.1239	1.9555	-0.77461	11.283	22.9506	27.3955	0.082129	0.20577	-0.035058	38.335	82.366	741.721	-0.25865	0.38397	-0.30012	-20.017	88.3832	397.826	-0.32031	0.73438	-0.11084	-75.51549	104.57	1039.34483	-0.78965	1.226	-0.66465
1.828	-32.719	85.3876	183.222	0.15576	-0.048828	0.0092773	-46.007	53.3923	60.3446	0.049314	-0.012113	0.20537	-90.2	19.0925	1478.8527	-1.1151	1.9372	-0.76397	0.416000000000004	19.12591	37.3768	0.067285	0.22334	-0.044824	6.054	64.583	833.856	-0.31836	0.46875	-0.30859	-38.3	100.9827	448.264	-0.37036	0.77369	-0.13428	-57.8386	110.8744	1026.0396	-0.76807	1.1958	-0.64834
1.83	-43.162	95.9042	181.74857	0.16601	-0.047754	0.013672	-50.605	53.9902	54.8312	0.040039	0.003418	0.20459	-70.468	35.989	1469.3685	-1.0918	1.9043	-0.75488	2.609	28.1637	32.8411	0.06211	0.23584	-0.052441	3.011	44.355	903.8311	-0.39419	0.5793	-0.31513	-46.887	102.4597	508.89	-0.43408	0.81494	-0.14795	-60.48196	101.60106	1003.3473	-0.75244	1.1708	-0.63037
1.832	-36.592	84.071	185.5298	0.17256	-0.044043	0.015039	-45.676	48.864	35.79419	0.028025	0.021006	0.20215	-52.258	42.5243	1469.15513	-1.0702	1.8802	-0.74502	-0.887	33.606	31.0866	0.056152	0.25098	-0.056152	-19.123	24.2696	952.2469	-0.47369	0.70099	-0.32457	-33.697	101.1546	558	-0.51611	0.85693	-0.16699	-53.5449	98.6868	979.8669	-0.73584	1.1445	-0.61299
1.834	-65.4024	85.2711	174.7327	0.17842	-0.037793	0.020117	-25.167	45.789	48.6347	0.016099	0.035858	0.19843	-46.311	25.7004	1448.3885	-1.0534	1.8509	-0.73193	-27.376	49.02	29.1504	0.045117	0.26318	-0.060938	5.851	-10.25381	963.1627	-0.56269	0.8314	-0.33862	-33.131	84.0103	618.754	-0.55664	0.87109	-0.17773	-42.0313	113.9657	964.1495	-0.7207	1.1211	-0.59961
1.836	-29.04	89.6916	162.86517	0.17813	-0.028125	0.016504	-23.993	42.403	52.3168	0.0067349	0.052259	0.19688	-18.658	33.732	1439.93067	-1.035	1.8153	-0.7167	-22.795	45.903	23.377756	0.044141	0.26895	-0.065332	-12.983	-54.778	973.787	-0.64848	0.9632	-0.36398	-72.4415	73.2852	674.0264	-0.62354	0.91016	-0.19775	-18.877	138.817	943.382	-0.70547	1.1002	-0.58183
1.838	-40.106	76.90114	146.85142	0.17822	-0.022949	0.02002	-20.384	23.60517	60.7329	-0.010752	0.064852	0.19619	-17.371	43.135	1427.8421	-1.0146	1.7846	-0.7002	-28.111	54.617	36.6429	0.036328	0.27129	-0.069629	-13.637	-76.142	975.317	-0.72998	1.0942	-0.39014	-72.9185	66.9262	711.5612	-0.66138	0.93579	-0.2146	-24.264	118.4629	902.512	-0.69346	1.0806	-0.56651
1.84	-57.5384	61.6621	130.61124	0.18115	-0.010547	0.021973	16.879	27.0979	44.4125	-0.020508	0.080566	0.19043	-34.12	41.496	1422.6338	-0.99365	1.7524	-0.68604	-38.147	38.734	35.0348	0.033789	0.27685	-0.068066	-18.033	-73.39	975.872	-0.79614	1.2117	-0.43052	-56.9158	63.4	772.9018	-0.68896	0.97314	-0.22607	-16.437	110.8742	877.814	-0.679	1.0513	-0.54815
1.842	-52.783	54.4983	121.4834	0.17569	0.0030272	0.024316	24.36	20.1952	31.471	-0.038365	0.10182	0.18781	-34.545	17.3946	1393.3009	-0.971	1.7161	-0.66973	-56.514	28.4151	29.9572	0.027832	0.27539	-0.071777	-30.365	-71.841	962.341	-0.84634	1.3125	-0.48871	-31.122	60.4803	817.0888	-0.7207	1.0215	-0.24609	-7.301	114.92	863.7819	-0.65889	1.0273	-0.53056
1.844	-30.722	68.715	103.422	0.16709	0.023731	0.027051	9.814	21.3379	27.753	-0.055055	0.13194	0.18471	-31.792	19.6251	1363.9648	-0.94775	1.6813	-0.65733	-47.38	17.1001	29.323	0.030566	0.27178	-0.064746	-54.8519	-99.887	938.008	-0.87683	1.3891	-0.54809	-54.2425	52.9168	844.0967	-0.73096	1.0513	-0.25732	-18.175	136.212	854.6489	-0.64014	0.99658	-0.51709
1.846	-55.6111	63.766	110.5528	0.16133	0.050488	0.021191	11.003	17.9387	41.9184	-0.064793	0.15578	0.17416	-51.885	16.7201	1346.5427	-0.92119	1.647	-0.64326	-69.6751	25.4836	25.9443	0.02998	0.26641	-0.066601	-53.4465	-99.04	894.72	-0.88008	1.4176	-0.59559	-21.615	30.178	868.9018	-0.74902	1.1094	-0.28711	-10.32	142.203	852.786	-0.61885	0.96709	-0.50205
1.848	-36.765	58.8189	108.2868	0.15234	0.071777	0.015625	26.703	32.192	36.086	-0.074604	0.17532	0.16994	-50.336	24.6526	1337.136	-0.89189	1.6059	-0.62197	-59.6986	26.7233	25.2139	0.028808	0.25898	-0.054492	-47.574	-71.466	869.4822	-0.86084	1.4058	-0.62451	-40.3593	4.331	881.8936	-0.75195	1.1591	-0.30542	27.672	138.889	830.956	-0.59375	0.93633	-0.48438
1.85	-25.555	58.32	109.4535	0.14697	0.09873	0.012598	25.241	34.939	31.8591	-0.085938	0.19531	0.16357	-38.93	29.4963	1318.7681	-0.86475	1.5698	-0.604	-71.4323	36.65402	27.1818	0.031836	0.25205	-0.052051	-71.96	-43.14078	836.667	-0.83388	1.3391	-0.6378	-8.548	-16.59	898.6444	-0.75195	1.2139	-0.32715	27.023	149.154	808.2924	-0.56875	0.90664	-0.46953
1.852	-22.119	60.0233	100.3502	0.1372	0.12715	0.0079102	-15.891	32.66	26.96848	-0.091844	0.21662	0.16697	-53.249	46.61866	1281.2582	-0.83565	1.5275	-0.58642	-59.9314	42.4126	26.7058	0.035645	0.24414	-0.043945	-72.503	-31.951	847.688	-0.80859	1.2629	-0.64629	-26.696	-36.944	904.683	-0.73389	1.2827	-0.35596	10.003	136.0901	789.1878	-0.54815	0.8751	-0.45733
1.854	-31.479	49.5028	91.273	0.12666	0.15606	0.0051758	-3.541	20.4024	41.3861	-0.098989	0.23516	0.16429	-70.878	50.8892	1270.1394	-0.8081	1.4903	-0.56612	-83.482	39.7152	29.8938	0.041895	0.23496	-0.039453	-60.819	-15.646	858.166	-0.79023	1.2078	-0.66739	18.17	-36.1419	887.243	-0.71826	1.3208	-0.3667	16.342	122.2591	766.4447	-0.52344	0.8457	-0.44336
1.856	-23.309	53.5381	75.8028	0.11484	0.17617	0.0012695	-5.934	35.53	35.034	-0.10708	0.25242	0.16404	-67.473	50.52	1224.972	-0.78193	1.4466	-0.54736	-59.3547	31.099	46.1647	0.04834	0.22549	-0.035254	-40.904	-19.304	858.016	-0.77402	1.1709	-0.69199	-0.394000000000002	-32.2588	867.75	-0.69287	1.3887	-0.38867	35.926	126.4807	733.4902	-0.49648	0.81543	-0.42783
1.858	-5.592	65.852	77.09561	0.10156	0.20264	-0.0083008	-17.514	39.0025	44.7946	-0.11341	0.27257	0.15836	-67.19	81.1875	1213.0033	-0.7586	1.4129	-0.53594	-39.789	34.409	58.0108	0.056543	0.21729	-0.034082	-57.444	-30.529	848.344	-0.74414	1.1523	-0.71484	12.012	-32.385	847.2098	-0.67724	1.4307	-0.40748	-4.067	133.1182	727.3667	-0.47217	0.78701	-0.40947
1.86	-2.551	62.145	68.2708	0.087989	0.2209	-0.017968	-28.418	31.9454	28.4536	-0.11621	0.29102	0.15527	-91.322	103.3885	1188.5176	-0.72119	1.3745	-0.51904	-19.449	35.4218	41.5386	0.063476	0.20879	-0.025488	-19.4588	-41.683	856.658	-0.69688	1.1369	-0.75547	8.379	-42.575	836.3842	-0.64844	1.4688	-0.42188	-23.902	129.948	698.2362	-0.44951	0.76318	-0.4044
1.862	-11.968	36.1694	64.12629	0.079297	0.24336	-0.027343	-36.498	32.0502	31.3364	-0.11723	0.30762	0.15738	-114.5131	98.6317	1166.6198	-0.69004	1.324	-0.50117	-44.2	31.5341	35.0455	0.070313	0.19873	-0.020996	-14.998	-36.114	859.864	-0.6377	1.1234	-0.77383	40.5992	-51.9915	844.542	-0.6123	1.5039	-0.44824	-36.065	125.043	673.3403	-0.42588	0.74209	-0.39199
1.864	-11.422	40.909	64.8993	0.072266	0.26172	-0.030078	-44.753	37.0488	35.6999	-0.11095	0.32189	0.15718	-115.34693	108.3103	1123.739	-0.65674	1.2747	-0.4835	-43.751	27.6056	26.106	0.08125	0.18935	-0.013965	-1.708	-43.977	876.564	-0.5834	1.0981	-0.78594	30.5745	-55.1071	848.156	-0.59033	1.5103	-0.46436	-24.555	149.981	646.8842	-0.40527	0.7168	-0.37939
1.866	-24.307	48.538	74.5338	0.065332	0.28106	-0.034277	-77.896	21.038	41.5681	-0.10702	0.3398	0.15461	-122.2158	119.0038	1104.759	-0.629	1.2353	-0.46904	-15.841	32.54941	20.98	0.091797	0.18389	-0.0075195	-5.678	-70.257	898.1751	-0.54004	1.0647	-0.79717	35.026	-53.2902	862.37	-0.54688	1.5254	-0.49609	-59.981	157.1867	642.5941	-0.38447	0.69248	-0.37031
1.868	-6.958	33.761	73.8524	0.05957	0.30127	-0.038086	-68.4677	20.83	37.8751	-0.095074	0.35572	0.15017	-122.0125	112.3343	1073.3447	-0.60351	1.1908	-0.45723	-11.984	35.9422	38.8669	0.098828	0.17764	-0.0020508	25.3972	-105.67	926.6145	-0.50732	1.0142	-0.79639	21.506	-46.818	885.3394	-0.5232	1.5368	-0.51513	-69.615	144.0889	611.4415	-0.3624	0.66807	-0.35518
1.87	-13.609	29.99742	58.4122	0.05625	0.31172	-0.042188	-66.5039	20.6841	46.3111	-0.085938	0.36963	0.15234	-114.239	108.6809	1059.4787	-0.57568	1.1528	-0.44189	-0.335999999999999	22.923	61.569	0.10498	0.17286	-0.00078125	47.771	-167.073	956.0184	-0.48037	0.94931	-0.79229	38.819	-40.555	924.9566	-0.50342	1.5474	-0.5376	-85.5924	148.7045	606.5631	-0.33974	0.64424	-0.34385
1.872	0.405000000000001	43.9455	32.8007	0.055469	0.32618	-0.046777	-79.7729	16.1245	47.6674	-0.075529	0.38115	0.15517	-87.663	103.8965	1033.0712	-0.54951	1.1165	-0.42646	-4.316	22.0294	61.2817	0.10938	0.1709	-0.00097656	45.06	-204.969	989.0521	-0.45263	0.89443	-0.78389	30.125	-39.503	946.12771	-0.49951	1.5552	-0.56396	-79.416	160.9502	571.5852	-0.31318	0.61446	-0.33047
1.874	-38.997	24.616	33.6739	0.055859	0.33359	-0.04834	-78.5992	12.6603	51.906	-0.064838	0.38772	0.15522	-93.6836	100.411	1005.025	-0.52529	1.0792	-0.41631	17.859	18.0434	60.6224	0.11455	0.16817	0.0065429	39.7328	-214.858	1015.6272	-0.42803	0.85029	-0.7749	18.559	-59.316	962.0685	-0.50977	1.5547	-0.57031	-88.9975	141.984	541.905	-0.29199	0.59375	-0.31738
1.876	-40.334	15.4279	38.8015	0.058789	0.34443	-0.046777	-63.1603	9.83726	56.101	-0.056718	0.39029	0.15607	-88.47397	96.9718	982.541	-0.50303	1.0429	-0.40342	-14.253	13.4633	51.33	0.11777	0.17129	0.0025391	71.176	-179.757	1017.8966	-0.41484	0.83008	-0.76172	-10.793	-96.226	994.7174	-0.52686	1.5786	-0.59131	-80.1164	124.7953	527.6745	-0.26973	0.56602	-0.30781
1.878	-26.737	30.1983	36.7074	0.058594	0.34961	-0.04834	-58.7814	10.0658	58.769	-0.048414	0.39184	0.1589	-58.281	98.2472	979.81742	-0.48145	1.0047	-0.38887	5.415	5.8306	78.5505	0.12129	0.18066	0.0064453	46.5333	-152.3984	1027.0382	-0.41455	0.81934	-0.75293	-19.625	-117.8051	1018.7202	-0.54224	1.5959	-0.61108	-74.218	132.60752	507.3555	-0.25029	0.54316	-0.29306
1.88	-14.404	33.3268	41.2708	0.058789	0.35215	-0.047558	-70.7245	-7.78607	76.2693	-0.041992	0.3999	0.15771	-34.727	112.5934	968.643	-0.45752	0.96826	-0.37842	11.09	-0.89453	89.999	0.12363	0.19355	0.005957	36.3787	-132.1683	1037.1745	-0.42636	0.82891	-0.74902	-44.766	-140.165	1046.6374	-0.56006	1.6196	-0.62646	-87.9674	136.4454	475.811	-0.22998	0.51621	-0.27862
1.882	-43.224	30.35804	42.0855	0.060254	0.35293	-0.041992	-36.058	-7.0577	83.7503	-0.027616	0.41056	0.16063	-42.684	113.7891	952.944	-0.4332	0.93047	-0.35938	9.786	-21.2611	105.9002	0.11426	0.21143	0.0019531	49.1875	-143.2386	1069.4267	-0.44766	0.85898	-0.74688	-55.462	-142.448	1061.9648	-0.58887	1.6621	-0.65234	-103.077	119.94	476.6451	-0.21191	0.49043	-0.26328
1.884	-41.592	25.543	44.5019	0.066894	0.35527	-0.041992	-27.948	1.8524	90.7359	-0.024117	0.42231	0.15861	-44.825	106.9153	909.2661	-0.40527	0.88916	-0.34502	-28.564	-12.5451	114.8599	0.11143	0.23281	0.00019531	64.272	-120.036	1100.7556	-0.47695	0.90703	-0.74492	-53.167	-161.231	1078.021	-0.60352	1.6895	-0.66504	-92.3312	132.1615	456.32838	-0.19189	0.46875	-0.24854
1.886	-31.785	41.1446	38.612	0.066699	0.3584	-0.037989	-31.872	-3.2119	92.8848	-0.020996	0.43471	0.15638	-20.822	124.3598	868.8063	-0.37988	0.85518	-0.33682	-14.99	6.3612	145.8109	0.10762	0.25488	-0.0023437	34.056	-95.911	1133.0032	-0.50371	0.96367	-0.75215	-54.6675	-160.569	1093.39	-0.64453	1.7383	-0.67969	-84.4172	133.1004	445.8519	-0.17295	0.44053	-0.23603
1.888	-59.173	38.9711	25.1122	0.067383	0.35352	-0.036133	-37.585	-20.8197	112.7483	-0.019255	0.45081	0.15723	-18.938	130.8993	841.5767	-0.35049	0.81514	-0.32295	-37.813	45.2286	170.0858	0.09668	0.2748	-0.0082032	30.3524	-80.063	1137.5896	-0.53857	1.022	-0.75928	-64.5454	-157.967	1121.2881	-0.67383	1.7715	-0.6919	-74.848	125.658	415.1381	-0.15108	0.4166	-0.22608
1.89	-66.2991	41.4215	23.9549	0.07373	0.34678	-0.030176	11.253	-16.3672	129.6401	-0.022949	0.46533	0.15918	7.219	142.515	813.274	-0.32324	0.77539	-0.31055	-42.67	61.3058	198.1374	0.084668	0.29981	-0.011914	48.6195	-76.626	1134.269	-0.57363	1.0824	-0.76406	-76.9272	-150.741	1144.51	-0.70459	1.7993	-0.69482	-57.004	125.3754	380.34705	-0.13076	0.3916	-0.21045
1.892	-35.396	30.8098	18.08536	0.07627	0.33925	-0.027441	14.39	8.1044	146.372	-0.028512	0.48232	0.15284	17.235	139.784	781.68931	-0.29892	0.73955	-0.29297	-42.848	69.9334	226.2306	0.078613	0.32471	-0.019043	21.694	-79.083	1149.265	-0.61572	1.1505	-0.77802	-71.7511	-125.1698	1195.0128	-0.72656	1.8359	-0.69727	-57.545	130.6075	353.813	-0.11328	0.36719	-0.20361
1.894	-48.566	29.6866	12.089	0.083301	0.33027	-0.023145	24.495	24.4887	166.002	-0.030874	0.49752	0.15243	33.056	145.151	745.4891	-0.27236	0.70908	-0.28428	-27.563	76.66884	270.848	0.070703	0.35303	-0.028906	-10.009	-96.069	1161.338	-0.65127	1.2134	-0.78779	-72.806	-95.093646	1193.8223	-0.73438	1.8457	-0.68945	-40.656	115.0204	349.132	-0.092773	0.34668	-0.18799
1.896	-53.845	25.18299	11.591	0.089648	0.31758	-0.01836	9.43	27.0475	205.8148	-0.034073	0.51682	0.15093	4.836	144.918	723.396	-0.25205	0.67159	-0.271	-43.9035	90.7231	323.875	0.061328	0.3836	-0.042676	5.769	-124.202	1213.0452	-0.6875	1.2676	-0.80352	-74.67	-91.6819	1211.595	-0.72705	1.8657	-0.68311	-38.621	98.495	339.8253	-0.072754	0.32041	-0.17295
1.898	-37.269	13.8195	27.5697	0.095703	0.3125	-0.012695	42.385	50.7065	243.259	-0.034203	0.53271	0.1473	20.664	139.0323	695.393	-0.22617	0.63643	-0.26494	-48.263	100.491	389.549	0.049219	0.42304	-0.059473	-9.423	-126.069	1238.8529	-0.71631	1.3149	-0.81592	-69.047	-96.1252	1208.1115	-0.71167	1.8596	-0.67309	2.112	95.6794	330.4505	-0.055957	0.29834	-0.16348
1.9	-22.879	22.9224	36.0351	0.096289	0.30449	-0.0088865	24.187	78.7166	305.7853	-0.034668	0.55518	0.14551	9.596	146.0796	680.8475	-0.20215	0.60107	-0.25342	-62.259	119.6406	462.5036	0.031739	0.46846	-0.083008	-30.9921	-141.8065	1271.2482	-0.73789	1.3578	-0.83594	-82.4196	-103.389	1220.342	-0.69092	1.8521	-0.65576	-6.934	104.9849	320.80541	-0.039551	0.27607	-0.15332
1.902	-32.032	25.4305	48.3146	0.098047	0.29843	-0.0055664	41.265	100.9371	385.2899	-0.034668	0.58113	0.13641	19.135	159.0723	658.0793	-0.18027	0.56484	-0.24346	-60.294	119.3162	523.6403	0.015625	0.51807	-0.10645	-50.7155	-156.078	1291.2458	-0.75527	1.398	-0.85078	-86.2362	-98.266	1217.167	-0.66553	1.8364	-0.65479	-0.449999999999996	106.6538	313.5496	-0.022559	0.25869	-0.14394
1.904	-34.241	17.6113	40.95105	0.09375	0.29453	-0.0055664	43.0979	113.829	464.617	-0.037783	0.60167	0.1264	-6.284	141.9624	632.692	-0.15733	0.53018	-0.23233	-69.4481	101.0403	571.502	-0.0061521	0.57197	-0.13887	-39.3111	-171.652	1297.6633	-0.77324	1.4308	-0.86406	-87.0045	-104.014	1247.3364	-0.66162	1.8267	-0.65283	-16.045	106.968	289.6586	-0.0083008	0.24072	-0.13135
1.906	-24.486	12.3018	48.2243	0.098927	0.29365	0.00039062	60.5198	132.52	531.18039	-0.035049	0.62938	0.11197	-5.419	142.0921	593.278	-0.13702	0.49229	-0.22177	-69.8543	89.261	647.229	-0.036133	0.6376	-0.16807	-57.0212	-155.848	1300.4944	-0.78936	1.4685	-0.87061	-66.073	-118.739	1255.71466	-0.67188	1.8203	-0.64551	5.61	117.396	256.73718	0.0042969	0.21904	-0.12109
1.908	-23.984	31.674	43.2618	0.097168	0.29248	-0.00097656	15.0441	122.586	616.1098	-0.039075	0.65796	0.097337	-44.509	156.368	571.159	-0.11367	0.45879	-0.2084	-56.842	79.981	738.658	-0.075977	0.70869	-0.20791	-41.4316	-161.347	1317.9163	-0.81348	1.5176	-0.87695	-63.123	-126.959	1258.012254	-0.6919	1.8213	-0.64306	-25.435	110.042	250.0132	0.023731	0.20381	-0.11025
1.91	-9.861	26.336	52.5526	0.095215	0.29863	0.0026367	10.296	107.994	699.606	-0.044922	0.6875	0.079102	-33.243	159.3	554.6708	-0.09668	0.42969	-0.19727	-53.985	70	826.866	-0.12832	0.78691	-0.24219	-42.9739	-157.8959	1331.3259	-0.84629	1.5881	-0.89785	-58.662	-142.5729	1244.3442	-0.71826	1.8267	-0.646	-26.818	87.0084	231.8222	0.03584	0.18389	-0.10479
1.912	-21.206	12.964	51.7349	0.090429	0.30156	0.0011719	-1.983	106.342	789.256	-0.050578	0.71814	0.054319	-40.401	139.917	538.3784	-0.076855	0.39532	-0.19043	-55.232	50.976	884.856	-0.19141	0.87549	-0.28174	-11.047	-141.9674	1364.5637	-0.8792	1.6552	-0.9124	-39.609	-133.1192	1262.5491	-0.76904	1.8423	-0.64893	-36.329	72.40737	224.8672	0.054004	0.16778	-0.095117
1.914	-3.151	3.40904	50.685	0.088086	0.30586	0.0015625	-12.652	90.634	855.17	-0.064137	0.74918	0.027184	-35.744	149.5889	503.7323	-0.060742	0.36406	-0.18222	-51.51178	13.0182	917.209	-0.26689	0.96641	-0.3125	-22.4684	-127.8447	1368.8238	-0.92061	1.7177	-0.9249	-16.987	-125.381	1282.8129	-0.79248	1.8481	-0.64453	-20.859	76.35235	206.538	0.068848	0.14893	-0.083496
1.916	-24.456	-5.80327	51.082	0.080664	0.31494	-0.00058592	-35.998	66.2838	884.9311	-0.082896	0.78825	-0.0075854	-75.935	134.7196	480.1	-0.04668	0.33516	-0.17363	-38.3764	-16.5813	934.049	-0.35029	1.0657	-0.33858	-26.7237	-131.2521	1371.7871	-0.9624	1.7544	-0.93311	-29.578	-111.061	1299.0614	-0.84131	1.8579	-0.63623	-57.354	73.2096	195.877	0.08164	0.13018	-0.073633
1.918	-17.115	-15.38988	74.3226	0.074219	0.32227	-0.00048828	-49.3571	47.8666	907.2308	-0.10868	0.82176	-0.035628	-56.0862	129.235	464.973	-0.033203	0.30224	-0.1665	-30.615	-41.728	958.6786	-0.44444	1.1576	-0.36084	-8.179	-113.7135	1374.8158	-1.0054	1.7837	-0.93506	-29.641	-117.998	1316.3151	-0.86841	1.8577	-0.63208	-42.544	69.7968	198.1983	0.097753	0.11123	-0.067383
1.92	-20.044	-0.995100000000001	93.1981	0.068066	0.33437	-0.0040039	-69.349	40.1304	925.956	-0.14746	0.85938	-0.073242	-55.26044	126.2619	451.8805	-0.020508	0.27051	-0.1582	4.913	-44.7598	977.519	-0.54277	1.2423	-0.37998	23.777	-94.944	1353.309	-1.0525	1.803	-0.93916	-19.126	-122.3081	1337.187	-0.8999	1.854	-0.62451	-32.74	80.3885	194.0278	0.1126	0.09834	-0.062305
1.922	-0.220000000000006	21.2401	99.673	0.058203	0.34639	-0.0070313	-74.5264	22.5034	921.608	-0.19356	0.89571	-0.11251	-66.4054	143.8927	432.4245	-0.003418	0.24248	-0.15108	31.0093	-44.9662	973.948	-0.63672	1.3115	-0.4043	-4.248	-80.508	1358.441	-1.0984	1.8189	-0.93857	-29.962	-109.7744	1348.377	-0.93164	1.8438	-0.62109	-68.632	93.992	168.3907	0.12432	0.083301	-0.057129
1.924	-31.346	9.887437	102.3846	0.052735	0.36357	-0.011328	-55.8615	2.675	906.176	-0.25187	0.93253	-0.15255	-64.562413	135.2152	407.2816	0.0082031	0.21084	-0.14307	36.8618	-54.788	941.081	-0.7169	1.3577	-0.42022	16.8282	-75.365	1351.909	-1.1354	1.8286	-0.93037	-44.662	-89.1849	1346.369	-0.94727	1.834	-0.61133	-87.2153	68.7034	167.23162	0.13965	0.072266	-0.049316
1.926	-23.383	8.7606	111.996	0.046777	0.38261	-0.019336	-46.079	-0.409000000000006	880.025	-0.31906	0.96534	-0.18497	-63.9942	119.0892	382.296	0.020703	0.17959	-0.13447	49.308	-59.521	899.898	-0.77324	1.3816	-0.43076	44.369	-91.803	1381.522	-1.1716	1.8448	-0.929	-62.004	-80	1353.76	-0.97705	1.8306	-0.59326	-77.7689	61.8578	152.7785	0.14512	0.060644	-0.04043
1.928	-36.794	44.3081	138.839	0.040527	0.40381	-0.027344	-43.2684	-5.61	857.615	-0.39483	1.0095	-0.21045	-60.159	129.5872	350.367	0.037207	0.14541	-0.12793	51.554	-67.771	864.4242	-0.80019	1.3734	-0.42959	26.6951	-100.855	1398.502	-1.209	1.8574	-0.92578	-63.931	-74.487	1337.8096	-0.99879	1.8313	-0.58179	-74.334	64.6675	143.6919	0.15557	0.054297	-0.032812
1.93	-17.716	53.5596	169.359	0.033105	0.42656	-0.033984	-57.071	-3.798	823.6895	-0.48193	1.0542	-0.23193	-53.0833	140.0321	337.437	0.049316	0.11865	-0.11914	61.202	-64.903	828.0397	-0.8082	1.3385	-0.41602	24.7539	-124.2871	1414.4117	-1.2432	1.8693	-0.9209	-90.1972	-80.563	1335.671	-1.0137	1.8223	-0.57617	-99.7803	68.7102	130.1297	0.1665	0.054687	-0.033594
1.932	-38.563	55.8176	227.0228	0.019629	0.45625	-0.041504	-31.5092	-5.25	811.414	-0.56894	1.0965	-0.24775	-27.174	131.721	332.4915	0.060645	0.090138	-0.11875	62.947	-47.153	813.744	-0.80127	1.2993	-0.40479	66.7683	-119.309	1422.5901	-1.2706	1.8751	-0.92295	-73.025	-80.741	1328.725	-1.0298	1.8169	-0.56787	-91.85831	49.0626	120.6819	0.1711	0.053906	-0.019336
1.934	-32.676	78.2465	259.3555	0.0067382	0.48398	-0.059082	-9.029	10.487	804.299	-0.64804	1.1364	-0.26875	-31.392	124.19	303.7725	0.068457	0.060644	-0.11807	67.361	-46.977	810.817	-0.7666	1.2681	-0.4042	76.496	-100.9969	1459.7175	-1.2925	1.872	-0.91513	-95.113	-97.3499	1336.97	-1.0327	1.8091	-0.56201	-87.2919	58.0125	93.946	0.17725	0.056152	-0.020996
1.936	-40.879	88.95287	321.69138	-0.0068358	0.5127	-0.074902	-0.0309999999999988	27.593	805.39	-0.71327	1.1758	-0.2957	-10.628	123.033	288.7597	0.078613	0.03252	-0.10908	50.554	-35.511	807.619	-0.71172	1.2434	-0.40801	31.0727	-91.7278	1464.30343	-1.303	1.8619	-0.91289	-82.131	-94.387	1347.084	-1.043	1.7988	-0.54883	-80.3738	74.13	98.251	0.17724	0.059375	-0.016309
1.938	-48.432	114.34	374.7957	-0.02832	0.55127	-0.091309	-17.034	40.5041	806.7081	-0.7499	1.2136	-0.32851	-7.003	109.667	270.1225	0.08457	0.005664	-0.10537	59.7549	-28.992	817.956	-0.65742	1.2297	-0.41699	55.6101	-102.9652	1477.5342	-1.3047	1.8438	-0.91406	-121.3704	-87.286	1341.931	-1.0415	1.7885	-0.54785	-71.9674	67.932	104.56412	0.18008	0.065723	-0.014355
1.94	-59.326	118.701	466.2672	-0.052735	0.59395	-0.1168	9.4	40.537	824.2276	-0.75879	1.2485	-0.35107	19.651	97.071	263.4619	0.092773	-0.013672	-0.098145	29.35674	-21.733	835.285942	-0.59785	1.2101	-0.40879	46.4688	-100.7555	1463.803	-1.2938	1.8198	-0.9169	-117.378	-79.707	1344.821	-1.0425	1.7759	-0.54102	-40.96	63.54	96.3401	0.17656	0.074707	-0.01084
1.942	-33.726	123.909	534.9841	-0.08213	0.64062	-0.13965	-7.596	41.967	831.765	-0.75059	1.2616	-0.37588	14.786	104.445	251.8829	0.10029	-0.035351	-0.099904	4.9	-45.052	864.1483	-0.54736	1.188	-0.40576	27.5424	-82.804	1473.033	-1.2773	1.7887	-0.91953	-123.7302	-71.591	1366.6583	-1.0347	1.7661	-0.53564	-46.847	65.621	88.84593	0.17598	0.074414	-0.005664
1.944	-36.201	114.532	624.669	-0.11768	0.70156	-0.17012	-0.283999999999999	8.436	863.2954	-0.73086	1.2759	-0.38955	21.987	96.0219	246.8532	0.108	-0.054004	-0.097266	-12.917	-67.56	872.2614	-0.50215	1.1561	-0.41015	-11.876	-76.291	1476.573	-1.2555	1.7574	-0.91797	-108.504	-58.7815	1384.3729	-1.0352	1.7578	-0.53906	-42.495	62.1479	78.989	0.16992	0.086914	-0.0048828
1.946	-55.912	95.56	692.47	-0.16533	0.77568	-0.20215	3.9	-29.3	879.493	-0.71328	1.2895	-0.39697	25.89	80.9839	233.626	0.11348	-0.071972	-0.094922	-6.587	-102.066	872.034	-0.46172	1.1261	-0.41465	17.604	-54.391	1467.9804	-1.2269	1.7263	-0.91943	-128.8829	-55.3101	1401.137	-1.0293	1.7422	-0.5376	-34.507	43.3199	71.266	0.16475	0.095703	-0.0066406
1.948	-72.8462	68.764	755.692	-0.22168	0.85596	-0.23584	32.074	-57.728	903.084	-0.69414	1.2957	-0.4043	17.78	72.0778	216.2046	0.11982	-0.086817	-0.086426	-26.982	-141.9164	886.135	-0.42774	1.0906	-0.41817	-4.311	-21.02278	1465.109	-1.1914	1.6934	-0.92188	-123.0091	-56.622	1390.624	-1.0207	1.7366	-0.53906	-5.344	47.7372	72.2601	0.16338	0.10156	-0.0041992
1.95	-64.1067	52.288	796.385	-0.28955	0.94287	-0.26758	25.292	-103.042	913.613	-0.67529	1.2974	-0.40771	7.97	79.59923	192.5273	0.12451	-0.10498	-0.084961	-26.095	-172.863	923.6176	-0.39971	1.0634	-0.42412	7.192	0.2521	1473.376	-1.1626	1.6601	-0.92471	-134.949	-52.5249	1383.4753	-1.019	1.7329	-0.53467	-8.44600000000001	48.319	79.4866	0.16182	0.11094	-0.0041992
1.952	-59.032	36.957	815.17463	-0.37363	1.0351	-0.29766	17.133	-140.872	949.91	-0.64238	1.2875	-0.41035	23.434	84.156	176.4677	0.12568	-0.11748	-0.082715	-31.984	-186.193	951.116	-0.37451	1.0435	-0.4292	-16.6294	-7.419	1467.3841	-1.128	1.625	-0.91992	-130.8451	-39.2787	1361.8096	-1.0146	1.7227	-0.53125	-7.804	46.6434	72.148	0.15508	0.11602	-0.0054688
1.954	-63.3193	27.5921	815.5088	-0.45996	1.1258	-0.33399	40.842	-163.576	989.8026	-0.59766	1.2832	-0.40674	23.591	77.501	168.742	0.13379	-0.12891	-0.081836	-49.351	-208.751	952.26568	-0.35625	1.0371	-0.43672	-5.999	5.414	1463.3894	-1.1049	1.5887	-0.90625	-130.2783	-37.3301	1345.2768	-1.0093	1.7192	-0.53027	-4.986	43.648	56.2383	0.15137	0.12256	-0.0087891
1.956	-47.98	5.378303	825.657	-0.55635	1.1894	-0.35303	37.746	-153.395	1025.273	-0.54766	1.2707	-0.39306	-5.187	84.487	152.4527	0.13731	-0.14297	-0.075586	-65.1275	-218.247	980.422	-0.35244	1.0401	-0.45088	-41.1375	30.395	1463.6139	-1.0891	1.5507	-0.8958	-91.24	-32.3837	1337.977	-1.0005	1.7134	-0.53076	7.19	60.376	60.443	0.14424	0.12617	-0.0055664
1.958	-42.2136	-4.5773	818.578	-0.65137	1.2402	-0.375	11.656	-141.079	1040.9452	-0.49453	1.2525	-0.38194	-19.97	83.6007	134.9878	0.13818	-0.16231	-0.077441	-60.4977	-215.857	1004.545	-0.36142	1.0617	-0.47861	-57.556	26.5127	1456.0867	-1.0776	1.5142	-0.88721	-97.874	-31.02	1344.836	-0.9751	1.7017	-0.52881	-3.62	59.66	53.1111	0.13877	0.13164	-0.016797
1.96	-11.278	-26.6671	817.191	-0.73047	1.2732	-0.38145	8.177	-132.488	1065.207	-0.44189	1.231	-0.37939	-26.36	70.8924	134.8688	0.13672	-0.1665	-0.077148	-53.247	-188.324	1049.6726	-0.37666	1.0981	-0.49815	-53.93056	16.4401	1464.6059	-1.0726	1.4799	-0.87441	-89.807	-17.5885	1347.67764	-0.96191	1.6895	-0.52832	-3.493	48.528	55.252	0.13135	0.13867	-0.017187
1.962	-6.322	-48.9649	815.575	-0.78769	1.2867	-0.38261	-11.294	-112.468	1093.0611	-0.39863	1.2082	-0.37734	-26.461	63.9313	128.6642	0.1374	-0.17198	-0.07793	-85.6023	-160.36905	1081.643	-0.39795	1.1392	-0.5249	-33.1866	25.6615	1441.187	-1.0706	1.4532	-0.85928	-63.799	-8.8237	1353.9851	-0.93555	1.6738	-0.52539	19.083	41.1691	43.1318	0.11894	0.14541	-0.018067
1.964	20.537	-50.9384	813.856	-0.81777	1.2848	-0.38653	-34.016	-89.0037	1124.83857	-0.35908	1.1818	-0.37841	-25.414	78.3383	126.7999	0.13359	-0.17764	-0.076856	-77.716	-139.382	1097.604	-0.42627	1.1864	-0.54991	-48.986	11.024	1435.2264	-1.0718	1.4333	-0.85029	-49.949	12.1302	1355.4416	-0.91284	1.6526	-0.52075	11.386	38.6	43.2658	0.11133	0.14893	-0.024902
1.966	14.921	-45.0032	801.6106	-0.82256	1.2872	-0.39444	-58.844	-93.153066	1158.363	-0.3376	1.1548	-0.37569	-39.359	76.99177	104.7524	0.13164	-0.18779	-0.072559	-105.4152	-119.433	1080.3077	-0.45713	1.2271	-0.57256	-35.1248	-15.579	1416.9937	-1.0728	1.415	-0.84004	-42.469	30.08	1351.9624	-0.89063	1.6348	-0.51318	-20.924	25.4785	37.126	0.099123	0.15937	-0.027539
1.968	2.31	-51.987	799.06	-0.81006	1.2974	-0.40381	-67.4865	-80.172	1172.1479	-0.33721	1.1282	-0.37422	-69.1987	75.3315	103.258	0.12978	-0.18438	-0.074902	-82.0298	-102.108	1065.946	-0.48604	1.2735	-0.59483	-32.1237	-29.10516	1411.8609	-1.0737	1.4067	-0.8335	-51.834	36.444	1338.3232	-0.86914	1.6094	-0.50439	-28.597	35.81184	50.2272	0.084765	0.16543	-0.029297
1.97	6.732	-39.3932	803.09	-0.78262	1.3103	-0.41035	-72.0113	-63.03	1188.5721	-0.35352	1.1113	-0.38086	-61.0813	69.3192	85.652	0.11865	-0.18018	-0.075684	-92.4762	-93.016	1068.428	-0.51289	1.3137	-0.61172	-7.598	-3.939	1387.9452	-1.067	1.3916	-0.82949	-39.577	29.9219	1325.7723	-0.85693	1.6001	-0.50146	-16.338	56.1644	46.3541	0.072657	0.17441	-0.034766
1.972	13.238	-10.136	819.1095	-0.76016	1.3281	-0.41425	-78.8073	-53.897	1175.457	-0.37353	1.1014	-0.39121	-69.5822	60.52895	84.4518	0.11406	-0.18116	-0.069433	-39.317	-92.864	1088.211	-0.53662	1.3516	-0.62695	-24.0024	-11.9846	1379.1406	-1.057	1.3786	-0.82217	-50.166	37.326	1312.1626	-0.83252	1.5688	-0.49854	-41.058	58.6598	44.686	0.057226	0.18174	-0.042187
1.974	-7.604	-4.24499999999999	862.343	-0.75234	1.3532	-0.4252	-80.7161	-54.943	1200.108	-0.39932	1.1024	-0.40098	-75.0911	46.9949	80.8099	0.10156	-0.1793	-0.070801	-47.263	-95.6	1117.9903	-0.55567	1.3787	-0.64004	27.796	-3.58485	1353.9076	-1.0386	1.3657	-0.81318	-47.332	27.3531	1294.7002	-0.81518	1.551	-0.4856	-58.601	42.0353	38.5278	0.050293	0.18994	-0.046387
1.976	-20.468	-22.305	892.7444	-0.75195	1.3742	-0.43379	-82.2271	-60.463	1203.113	-0.42901	1.1228	-0.42129	-66.2581	40.1076	85.0701	0.091797	-0.16406	-0.070801	-36.411	-117.2836	1148.9862	-0.56445	1.4141	-0.64961	34.087	11.9607	1332.9832	-1.0197	1.351	-0.8039	-58.444	25.28467	1272.3835	-0.79639	1.5269	-0.479	-54.267	36.0448	39.994	0.042871	0.1958	-0.050195
1.978	-24.039	-35.587	917.02275	-0.75049	1.3989	-0.44922	-89.0773	-66.576	1211.439	-0.47129	1.1537	-0.44453	-58.868	58.95769	78.2046	0.074219	-0.14951	-0.074512	-42.203	-141.44019	1152.13607	-0.56406	1.4442	-0.66172	28.0969	22.1646	1325.4148	-1	1.3398	-0.79395	-50.962	27.9471	1266.7058	-0.77148	1.5	-0.46582	-62.811	41.1796	45.3207	0.03291	0.20049	-0.053516
1.98	-32.929	-57.443	943.383	-0.7458	1.4167	-0.46807	-95.9438	-100.705	1230.953	-0.52148	1.1895	-0.46875	-64.9174	58.5905	70.012	0.060547	-0.13086	-0.082031	-2.371	-154.4623	1176.8868	-0.55732	1.4689	-0.66826	18.0666	24.0959	1304.97758	-0.98604	1.3181	-0.78388	-70.632	37.897	1241.7813	-0.76123	1.4888	-0.4585	-66.6822	34.889	50.7531	0.021582	0.20244	-0.051563
1.982	-33.466	-98.737	973.2142	-0.73213	1.4243	-0.47256	-107.395	-125.854	1255.264	-0.57197	1.246	-0.49365	-63.2579872	54.5535	74.2898	0.048145	-0.10479	-0.083594	-3.108	-143.5723	1197.286	-0.54639	1.4849	-0.67529	27.3854	47.61	1281.5321	-0.96797	1.2988	-0.77793	-69.705	39.9191	1227.045	-0.73779	1.4634	-0.44287	-64.52825	29.5535	43.48001	0.0096682	0.20371	-0.051172
1.984	-24.166	-132.938	997.5058	-0.70791	1.4197	-0.47568	-69.551	-144.042	1276.1279	-0.63389	1.2983	-0.51866	-26.13	48.908	76.8732	0.035742	-0.083691	-0.082715	-10	-156.81058	1222.24	-0.53789	1.5076	-0.67832	39.1451	67.892	1269.2967	-0.95078	1.2848	-0.767	-59.939	46.5749	1204.8753	-0.71802	1.4319	-0.43579	-53.916	29.9227	31.3256	-0.0039063	0.20752	-0.052246
1.986	3.862	-145.3	1003.8218	-0.68018	1.4009	-0.48154	-80.7911	-137.745	1293.897	-0.70068	1.3514	-0.53935	-27.034	42	66.3003	0.019727	-0.061426	-0.083106	-26.266	-176.2985	1245.002	-0.53008	1.5321	-0.68916	30.958	74.711	1242.2149	-0.93057	1.2689	-0.75948	-64.899	60.2509	1193.807	-0.69287	1.397	-0.42334	-83.1257	30.319	31.0751	-0.012988	0.20645	-0.046387
1.988	-16.661	-173.104	1033.821	-0.63623	1.3677	-0.49072	-76.512	-141.166	1302.629	-0.76162	1.4025	-0.55898	-8.381	39.9984	58.56297	0.0069336	-0.040137	-0.081445	-21.024	-173.96	1231.8679	-0.525	1.556	-0.69893	50.8381	69.756	1214.8876	-0.91211	1.2461	-0.75488	-97.93	69.0854	1182.44755	-0.67578	1.3652	-0.41357	-70.708	22.101	37.7988	-0.023633	0.20459	-0.044922
1.99	-49.096	-178.556	1057.74	-0.59727	1.3326	-0.49199	-56.521	-130.4978	1315.854	-0.82031	1.457	-0.57227	-10.768	44.5644	61.2061	-0.0073242	-0.01416	-0.083008	-32.884	-186.952	1250.045	-0.52695	1.5703	-0.70937	60.5038	62.42	1190.568	-0.88906	1.2352	-0.73984	-100.687	76.235	1161.7383	-0.66992	1.3545	-0.4082	-51.063	24.7185	52.66	-0.030664	0.20264	-0.042578
1.992	-41.108	-180.15	1102.051	-0.56484	1.2973	-0.49443	-35.124	-120.5497	1326.2224	-0.85898	1.5052	-0.58711	7.934	48.5289	54.9023	-0.023242	0.0097654	-0.088086	-26.811	-160.048	1262.877	-0.53223	1.583	-0.71484	26.651	68.132	1194.3576	-0.87305	1.2133	-0.73086	-111.926	76.176	1149.7615	-0.64795	1.3267	-0.39209	-22.13	38.76592	50.613	-0.038379	0.1999	-0.037402
1.994	-42.129	-145.024	1130.45165	-0.54492	1.2672	-0.50107	-53.4618	-103.05	1333.23	-0.89346	1.5462	-0.59893	7.995	56.758	48.5637	-0.036621	0.034961	-0.090528	-29.586	-155.268	1276.914	-0.54697	1.5792	-0.71885	19.691	51.7722	1185.1652	-0.85508	1.1945	-0.72148	-121.2994	84.735	1137.75605	-0.63745	1.303	-0.38648	-52.8186	40.4776	52.4466	-0.045898	0.19287	-0.036133
1.996	-66.5339	-142.19	1187.914	-0.54434	1.2545	-0.5083	-24.109	-96.103	1339.84	-0.91846	1.5852	-0.61455	11.008	50.1275	33.1075	-0.050293	0.058008	-0.095215	-18.405	-116.342	1273.77436	-0.56885	1.5739	-0.72041	38.794	36.168	1161.5696	-0.8374	1.1784	-0.7085	-136.1794	90.9608	1105.6995	-0.62793	1.2773	-0.38135	-44.734	26.6482	37.4601	-0.045313	0.18643	-0.026855
1.998	-107.3074	-132.0109	1204.989	-0.55762	1.2539	-0.51953	-2.032	-77.963	1343.9761	-0.94053	1.6282	-0.62334	5.618	39.5582	42.8238	-0.059375	0.080664	-0.096777	-31.16	-112.4318	1275.228	-0.6001	1.5728	-0.72002	27.738	48.7782	1146.9056	-0.82373	1.1528	-0.69092	-102.4575	98.063	1089.8445	-0.61279	1.2388	-0.36182	-27.143	30.5176	30.556	-0.048828	0.18125	-0.021387
2	-79.2062	-117.217	1222.91159	-0.57676	1.2635	-0.53672	-6.163	-65.4693	1324.508	-0.96436	1.6646	-0.63721	25.215	46.2312	28.897	-0.069336	0.10107	-0.093262	-41.275	-109.1394	1269.7	-0.63301	1.5834	-0.7168	-18.167	58.4923	1137.8305	-0.81143	1.1382	-0.67998	-122.4445	99.44728	1071.4952	-0.60059	1.2168	-0.35742	-6.363	36.2911	25.024	-0.053125	0.17187	-0.012011
2.002	-97.4687	-95.986	1217.068	-0.60498	1.2868	-0.55635	-17.967	-65.4832	1315.462	-0.99648	1.7008	-0.64824	10.864	39.53	37.9318	-0.077149	0.12324	-0.10342	-43.915	-107.2719	1293.855	-0.67236	1.6055	-0.71777	-37.2686	50.1724	1121.8567	-0.79571	1.1211	-0.66641	-123.4671	102.0286	1047.5135	-0.5791	1.166	-0.34473	-16.53	24.92273	32.33468	-0.05332	0.16748	-0.0041992
2.004	-93.9248	-84.949	1228.214	-0.63311	1.3103	-0.57588	8.252	-52.1187	1318.884	-1.0313	1.7228	-0.66182	13.026	50.449	28.8249	-0.079883	0.14228	-0.10869	-54.166	-90.3801	1288.018	-0.70264	1.6392	-0.71885	-30.437	73.1889	1108.1904	-0.78594	1.1019	-0.65039	-99.8324	84.58882	1030.7122	-0.55591	1.1335	-0.33423	9.506	19.00385	37.8673	-0.054688	0.1626	0
2.006	-65.651	-78.497	1239.1606	-0.6666	1.3459	-0.60137	-2.29000000000001	-30.2839	1333.843	-1.0611	1.7462	-0.6751	17.161	48.8637	31.014	-0.084961	0.15518	-0.099706	-73.355	-92.379	1307.597	-0.73848	1.6719	-0.72852	-56.9027	82.2274	1090.8317	-0.76689	1.0821	-0.63877	-66.923	86.2804	1012.445	-0.53613	1.0957	-0.33008	21.739	28.1876	44.5533	-0.052539	0.15644	0.0036133
2.008	-45.644	-78.872	1229.371	-0.69873	1.3862	-0.6167	-10.893	-14.557	1365.9286	-1.0875	1.767	-0.68379	13.927	42.9386	23.2113	-0.087305	0.17187	-0.11015	-115.8419	-88.326	1310.979	-0.77598	1.7094	-0.73555	-61.1097	79.555	1065.905	-0.75098	1.0645	-0.62695	-64.799	89.8636	1011.2648	-0.50684	1.0508	-0.32227	-1.815	30.0235	28.2051	-0.049902	0.15498	0.013281
2.01	-82.1968	-74.786	1250.474	-0.75284	1.4304	-0.63017	-14.149	-19.74	1391.9957	-1.1099	1.7837	-0.69678	-23.397	21.9738	38.78	-0.087891	0.18994	-0.11328	-109.9578	-77.141	1321.618	-0.80781	1.7359	-0.73672	-34.196	80.3363	1038.35474	-0.73125	1.0445	-0.6127	-73.64	99.21517	987.8386	-0.48877	1.0298	-0.31201	2.77	24.3641	35.7752	-0.045215	0.14951	0.016016
2.012	-57.275	-91.4818	1268.6895	-0.80537	1.4798	-0.64287	-27.224	-19.439	1409.51373	-1.1372	1.8015	-0.70693	-30.332	26.37464	41.781	-0.089649	0.2041	-0.11211	-120.6274	-71.845	1326.165	-0.84521	1.7603	-0.7373	-49.624	109.6346	1019.54785	-0.70977	1.0309	-0.60469	-51.565	99.8698	976.18691	-0.45996	0.98633	-0.30029	14.559	31.9131	47.5866	-0.042969	0.14805	0.025488
2.014	-29.999	-103.991	1282.9575	-0.85693	1.5329	-0.65303	-37.094	-16.051	1422.01331	-1.1671	1.8157	-0.71318	-12.939	32.45161	46.4821	-0.089844	0.20908	-0.11446	-104.5655	-90.81438	1357.9516	-0.87715	1.7764	-0.74629	-66.034	118.8639	989.0456	-0.69258	1.0121	-0.58437	-55.091	110.5577	952.3383	-0.43897	0.95557	-0.29029	12.658	23.0529	57.2736	-0.041992	0.146	0.031738
2.016	-26.351	-109.455	1298.9444	-0.89434	1.5795	-0.66074	-74.326	-24.5738	1424.3654	-1.1948	1.8333	-0.71592	-38.649	36.265	38.2124	-0.085547	0.21377	-0.11836	-99.818	-95.8214	1366.6749	-0.89922	1.7969	-0.75234	-52.5744	107.4605	951.3749	-0.67285	0.99492	-0.57383	-51.889	121.4933	934.694	-0.42383	0.92773	-0.28125	-12.356	-1.995	53.592	-0.039258	0.14698	0.037988
2.018	-62.073	-125.734	1325.1876	-0.92334	1.6274	-0.66553	-72.918	-47.7904	1437.5433	-1.2218	1.8477	-0.72695	-44.289	24.2144	41.7835	-0.08291	0.21679	-0.1168	-93.8668	-103.35	1385.93124	-0.91718	1.8125	-0.75976	-40.211	112.4195	920.9618	-0.64844	0.97363	-0.5625	-30.25	117.0195	904.684	-0.4043	0.88037	-0.27295	-14.446	-14.6306	57.997	-0.037109	0.14844	0.04668
2.02	-28.822	-129.3198	1330.1605	-0.94414	1.6695	-0.66914	-85.7529	-45.082	1433.6627	-1.2466	1.8677	-0.73193	-58.8304	24.2804	18.556	-0.07666	0.21143	-0.11719	-101.0968	-112.682	1399.3192	-0.92763	1.8255	-0.76807	-60.08186	117.66	916.3346	-0.62832	0.95235	-0.54863	-17.511	119.548	886.1379	-0.39209	0.85986	-0.26514	-19.408	0.5968	52.868	-0.037109	0.15	0.049805
2.022	-41.716	-130.4811	1358.5289	-0.9585	1.7017	-0.67021	-99.2175	-45.233	1426.307	-1.2688	1.8796	-0.73877	-76.16127	20.4331	9.6	-0.066601	0.20156	-0.1124	-72.022	-113.048	1403.0652	-0.94238	1.8398	-0.7793	-62.68983	100.4198	894.142	-0.59961	0.93398	-0.53203	-19.031	134.212	857.9589	-0.35889	0.80908	-0.26025	-17.217	0.1008	68.6449	-0.034961	0.14883	0.060059
2.024	-39.764	-111.608	1375.603	-0.97138	1.7395	-0.67139	-115.558	-38.6856	1417.0635	-1.2836	1.8887	-0.74219	-89.716	27.74358	24.276	-0.057227	0.19141	-0.11143	-64.2	-98.226	1406.3307	-0.94316	1.8557	-0.78418	-41.696	109.9093	862.816	-0.57187	0.90782	-0.52422	-19.755	122.829	841.1945	-0.33862	0.77563	-0.24707	-48.579	-1.946	82.1758	-0.037109	0.15039	0.060547
2.026	-51.504	-122.991	1399.827	-0.98506	1.765	-0.67529	-84.997	-34.4905	1418.6134	-1.2914	1.8856	-0.74219	-55.276	28.496	47.76089	-0.047461	0.17734	-0.11104	-52.117	-82.2653	1402.7167	-0.95195	1.8602	-0.78984	-38.274	133.319	840.813	-0.54453	0.88867	-0.50898	19.195	107.5984	815.7061	-0.31689	0.74072	-0.23828	-53.287	-10.9896	76.916	-0.028809	0.15693	0.064941
2.028	-26.252	-101.31	1388.285	-1.0029	1.793	-0.68164	-105.4938	-8.693	1425.0846	-1.2969	1.882	-0.74824	-65.0023	43.3362	39.24989	-0.03418	0.16123	-0.11015	-60.817	-87.4012	1399.1856	-0.95313	1.8629	-0.79882	-35.111	130.04	824.2789	-0.51904	0.86377	-0.49561	1.878	114.3997	795.507137	-0.29004	0.69238	-0.22852	-72.218	1.6535	90.1	-0.019922	0.16914	0.066504
2.03	-31.965	-84.0863	1384.424	-1.028	1.8175	-0.68799	-111.17196	8.9866	1435.8766	-1.2993	1.8716	-0.75146	-59.3322	36.791	39.567	-0.018555	0.14502	-0.10742	-55.718	-54.6494	1390.0369	-0.95527	1.8578	-0.79805	-30.577	122.881	786.7268	-0.49043	0.84219	-0.48555	-12.107	115.8178	760.1389	-0.27197	0.67041	-0.22754	-64.929	1.3875	135.17248	-0.019531	0.18399	0.068066
2.032	-40.066	-73.237	1351.291	-1.0593	1.8407	-0.69678	-116.41	18.1403	1425.7958	-1.2956	1.8655	-0.75088	-66.57327	36.3355	46.1976	-0.00625	0.12236	-0.11113	-63.608	-32.854	1387.2246	-0.95508	1.8477	-0.79688	15.978	126.789	774.9536	-0.46485	0.81797	-0.47441	-5.558	107.96187	740.1714	-0.25	0.62744	-0.21631	-86.72753	14.5052	169.1239	-0.020801	0.20146	0.069141
2.034	-31.817	-81.284	1353.25	-1.0929	1.8751	-0.70459	-86.2105	40.45	1422.792	-1.2897	1.8559	-0.75264	-36.866	38.169008	40.8849	0.0078125	0.10049	-0.11182	-45.224	-12.975	1386.2565	-0.94902	1.8375	-0.79961	0.184999999999999	128.1544	766.30576	-0.44531	0.79766	-0.46504	-12.902	124.662	724.2092	-0.2312	0.59448	-0.21142	-48.78	31.184	173.55196	-0.023926	0.22314	0.064453
2.036	-31.938	-67.115	1346.858	-1.1292	1.9007	-0.71182	-105.7243	53.045	1410.28	-1.2851	1.845	-0.7542	-49.065	40.402707	33.7894	0.01875	0.073144	-0.10948	-23.85	-12.028	1371.9676	-0.94014	1.8278	-0.79268	12.879	111.70324	762.2507	-0.42549	0.77041	-0.44961	-46.771	140.188	716.0473	-0.21436	0.56104	-0.20801	-71.2479	40.299	182.991	-0.02793	0.24775	0.06123
2.038	-42.054	-58.2141	1363.5293	-1.1602	1.9297	-0.71875	-100.074179	52.893	1397.9892	-1.2769	1.8291	-0.75566	-18.19	35.8027	26.2323	0.037988	0.046777	-0.11132	-26.783	0.186	1356.109	-0.93427	1.8181	-0.7915	3.586	104.6904	734.345	-0.40381	0.75146	-0.4375	-39.477	146.708	680.5754	-0.19141	0.52051	-0.19482	-71.6475	60.5826	202.784	-0.031738	0.27295	0.058301
2.04	-52.187	-68.4318	1365.221	-1.1909	1.9528	-0.7249	-75.155	64.72	1391.9404	-1.2632	1.8188	-0.75586	-36.067	27.887	22.202	0.048828	0.027344	-0.1084	-22.609	-5.091	1359.653	-0.93242	1.8076	-0.78887	34.415	102.3997	700.808	-0.38438	0.72735	-0.42618	-47.602	140.1581	664.9425	-0.17822	0.5	-0.19385	-63.55293	84.6025	243.085	-0.034863	0.29873	0.054785
2.042	-48.17	-63.657	1390.153	-1.2183	1.9642	-0.72432	-67.061	78.639	1381.4058	-1.2557	1.7994	-0.75137	-19.188	29.363	33.1357	0.066992	0.0024412	-0.11152	-3.978	-11.95	1362.512	-0.92529	1.7993	-0.78271	-7.669	108.8026	665.1406	-0.35938	0.70586	-0.41055	-65.1779	137.0159	641.027	-0.15967	0.46533	-0.19287	-30.787	112.955	317.4237	-0.038379	0.32314	0.049805
2.044	-72.006	-31.997	1396.236	-1.2468	1.97	-0.72353	-65.113	70.668	1380.7663	-1.2386	1.7806	-0.75303	-15.303	25.0881	38.9024	0.079004	-0.021875	-0.11397	-6.79600000000001	-19.4603	1369.1371	-0.92012	1.7904	-0.77988	-12.117	117.165	635.8144	-0.33359	0.68594	-0.39766	-75.3605	126.2139	623.732	-0.14234	0.43701	-0.19019	-52.389	105.382	378.053	-0.042969	0.354	0.041992
2.046	-92.858	-23.931	1413.762	-1.264	1.97	-0.72803	-26.58	46.3669	1367.4961	-1.2222	1.7587	-0.75224	4.235	22.9777	37.0709	0.093457	-0.039453	-0.1167	-7.251	-10.6358	1367.908	-0.91211	1.7836	-0.78008	-15.571	127.649	622.1065	-0.31075	0.66738	-0.3833	-58.027	125.2763	594.061	-0.12549	0.40723	-0.18848	-34.67	102.551	436.106	-0.049317	0.37607	0.03584
2.048	-102.84502	-19.59	1420.2967	-1.2783	1.9668	-0.72266	3.107	46.582	1370.632	-1.2055	1.7371	-0.74727	8.847	23.9318	32.1959	0.10889	-0.061328	-0.11816	-31.34	-25.13879	1355.4623	-0.90352	1.7711	-0.77617	-16.356	146.058	600.3538	-0.28516	0.646	-0.37354	-49.1249	133.0524	583.4888	-0.098145	0.37109	-0.19043	-39.186	100.647	500.9835	-0.059765	0.40732	0.022754
2.05	-97.5	-18.294	1436.6488	-1.2885	1.9591	-0.71982	1.693	54.0154	1344.3871	-1.1875	1.7168	-0.74219	9.983	28.6704	41.0009	0.12061	-0.080566	-0.12109	-44.133	-21.6985	1351.12712	-0.89688	1.7576	-0.77305	-53.2149	141.389	579.468	-0.2623	0.62363	-0.36465	-55.598	135.48477	554.5813	-0.087891	0.3457	-0.18359	-37.494	101.167	568.701	-0.071875	0.44326	0.0083008
2.052	-117.9919	-25.6554	1438.8884	-1.2942	1.9465	-0.71446	-4.356	38.542	1325.746	-1.1708	1.694	-0.73662	5.677	29.977	48.15027	0.13008	-0.10147	-0.125	-71.965	-7.1302	1329.7842	-0.88623	1.7466	-0.77393	-32.405	135.1247	548.1848	-0.23584	0.60342	-0.35381	-56.185	125.63354	540.487076	-0.06543	0.3042	-0.17676	-24.329	94.569	632.904	-0.0875	0.47891	-0.0097658
2.054	-106.9966	-44.761	1434.084	-1.2984	1.9304	-0.71172	16.622	42.1694	1303.456	-1.1489	1.6692	-0.72812	27.313	18.3014	63.5987	0.13955	-0.11719	-0.13242	-61.759	5.8405	1309.7398	-0.87246	1.7331	-0.7669	-31.96	136.3885	532.9051	-0.21045	0.58271	-0.34443	-73.943	114.8462	521.1401	-0.046875	0.27856	-0.1709	-15.39	90.522	706.851	-0.104	0.52197	-0.036133
2.056	-92.2036	-56.41	1447.1808	-1.3048	1.9152	-0.71045	6.898	52.44771	1299.9493	-1.1238	1.6441	-0.72109	25.975	10.1529	55.2932	0.14932	-0.12305	-0.13711	-75.0747	5.2595	1299.817	-0.85948	1.7208	-0.76377	-52.973	139.24	510.554	-0.18799	0.56162	-0.32705	-56.075	132.675	499.856	-0.035645	0.25732	-0.16943	3.104	83.027	747.154	-0.12148	0.56778	-0.065137
2.058	-67.368	-32.2554	1423.4583	-1.3145	1.8867	-0.69922	-10.312	60.9837	1285.4938	-1.1032	1.6152	-0.71553	1.056	3.388	47.3453	0.15322	-0.1249	-0.14141	-77.607	13.7742	1285.4136	-0.84189	1.7032	-0.75791	-56.127	129.3453	487.0798	-0.16309	0.54102	-0.31543	-69.3772	133.2047	481.669	-0.012207	0.22656	-0.16602	-13.905	52.352	778.529	-0.14903	0.62295	-0.08789
2.06	-79.309	-29.3438	1440.96393	-1.3104	1.8658	-0.69306	6.264	63.123	1276.6544	-1.0801	1.5859	-0.7041	-3.53	2.7051	53.34729	0.15283	-0.12109	-0.14453	-93.7809	29.79756	1273.7797	-0.82559	1.685	-0.75605	-47.786	132.6642	468.1663	-0.13779	0.52559	-0.30156	-48.066	123.5476	462.0558	-0.0058594	0.20703	-0.16455	-10.398	19.8426	808.9255	-0.17754	0.67685	-0.11875
2.062	-53.762	-22.1052	1436.701658	-1.3074	1.8449	-0.69219	-0.829999999999998	87.93	1248.7299	-1.0594	1.5555	-0.69395	-24.415	3.5817	69.6582	0.14228	-0.10205	-0.15	-75.676	38.3418	1268.7715	-0.80908	1.6646	-0.74951	-71.0266	126.30738	457.1531	-0.11953	0.50391	-0.28965	-56.8839	126.1217	451.1229	0.0019531	0.17529	-0.16309	-3.248	24.1637	817.785	-0.21377	0.73232	-0.14394
2.064	-62.601	-0.700899999999999	1431.2304	-1.3027	1.8183	-0.68125	-26.928	114.525	1241.2569	-1.0414	1.5246	-0.675	-27.434	6.0734	78.84929	0.12578	-0.084766	-0.15469	-76.0297	52.419	1262.8261	-0.79258	1.6455	-0.74453	-82.1135	119.5371	440.1169	-0.10039	0.48672	-0.27168	-31.233	134.149	429.5645	0.0085449	0.16699	-0.14038	13.04	35.9504	812.869	-0.26123	0.78369	-0.17041
2.066	-67.966	30.9371	1439.8648	-1.2953	1.7926	-0.675	-47.148	124.983	1187.5333	-1.0242	1.498	-0.66953	-22.278	-7.128	84.0931	0.10352	-0.060547	-0.16133	-57.819	65.9997	1253.91227	-0.77725	1.6181	-0.73662	-94.8257	108.9224	412.7174	-0.079492	0.46367	-0.25908	-33.614	131.857	408.9257	0.01123	0.13916	-0.15137	12.335	19.4396	812.668	-0.30772	0.84287	-0.18848
2.068	-81.105	28.7078	1440.3694	-1.2886	1.7681	-0.66943	-26.966	125.5	1164.1415	-1.0076	1.467	-0.65606	-28.262	-29.5788	108.8121	0.084766	-0.031836	-0.16719	-101.2253	84.964	1235.3279	-0.76201	1.5934	-0.72842	-92.0457	127.9387	388.8218	-0.061523	0.44141	-0.25	15.818	127.944	381.7139	0.039063	0.11279	-0.15869	4.63	3.577	780.969	-0.36875	0.89062	-0.20566
2.07	-70.052	35.7698	1419.674	-1.2722	1.7384	-0.6624	-40.123	122.044	1151.845	-0.98242	1.4346	-0.64063	-42.46	-33.5893	111.5384	0.068359	-0.0019531	-0.18262	-92.0741	81.7839	1223.4251	-0.75156	1.5582	-0.71895	-75.845	131.6603	368.3159	-0.042188	0.42724	-0.23604	6.169	120.862	385.5171	0.056152	0.10547	-0.14893	20.065	-16.326	744.319	-0.43477	0.93555	-0.21817
2.072	-67.332	48.602	1402.6228	-1.2562	1.709	-0.65	-66.925	99.27082	1146.8291	-0.96933	1.4045	-0.6291	-51.1225	-32.9407	130.14136	0.049805	0.033301	-0.19463	-96.6127	75.4203	1202.73	-0.73389	1.5337	-0.69775	-82.8451	121.582	345.7143	-0.023242	0.40849	-0.21992	21.07	119.3589	375.8511	0.083984	0.074219	-0.14697	12.221	-13.49	722.0791	-0.49658	0.96846	-0.22588
2.074	-70.811	53.442	1371.482	-1.2426	1.6773	-0.64258	-67.758	82.8678	1127.122	-0.94814	1.3754	-0.61231	-59.1041	-27.5503	150.1758	0.038574	0.065039	-0.20879	-84.8899	75.3801	1177.7082	-0.72598	1.505	-0.69765	-63.664	106.859	349.35832	-0.005664	0.38936	-0.20859	2.034	106.40876	351.49161	0.10474	0.05542	-0.14184	-5.505	-19.0584	706.0142	-0.55127	0.99268	-0.2373
2.076	-32.891	45.72849	1355.054	-1.2222	1.6528	-0.63311	-61.635	92.4886	1109.277	-0.92783	1.3441	-0.59356	-69.6901	-3.0235	181.1196	0.020996	0.099023	-0.22325	-89.08386	72.1122	1154.3318	-0.72149	1.4902	-0.6873	-55.766	113.8634	330.9208	0.0076171	0.37363	-0.19688	24.627	103.3029	335.8015	0.11914	0.033203	-0.14063	-3.738	-6.86276	683.1566	-0.59385	1.0013	-0.24307
2.078	-18.992	44.0469	1353.9819	-1.2007	1.6255	-0.62305	-87.4691	107.6409	1087.074	-0.9125	1.3125	-0.58115	-51.29	18.3365	216.7163	0.00087888	0.13642	-0.23819	-48.414	66.532	1143.4423	-0.7125	1.4782	-0.68457	-44.526	103.0778	332.0054	0.025391	0.354	-0.18213	11.911	101.7615	308.6833	0.12939	0.0048828	-0.13623	-11.64	2.947	676.023	-0.62178	1.002	-0.24092
2.08	-18.604	48.64602	1361.543	-1.1811	1.5986	-0.61855	-95.1833	102.8632	1070.7116	-0.89502	1.2876	-0.56787	-42.467	38.76	264.718	-0.025879	0.1792	-0.25049	-58.305	69.52197	1131.38995	-0.69785	1.4537	-0.67168	-39.31	103.561553	307.4337	0.042188	0.33857	-0.17031	19.209	106.9488	284.2405	0.13867	-0.0073242	-0.1333	-58.27142	-0.158999999999999	695.537	-0.62998	0.99697	-0.23779
2.082	-16.326	39.18328	1352.858	-1.1598	1.5633	-0.60371	-83.9715	97.6099	1043.0573	-0.88115	1.2589	-0.54932	-50.6656	59.586	300.849	-0.061719	0.22813	-0.26358	-53.095	67.5907	1120.7858	-0.68555	1.4297	-0.65479	-13.787	120.7084	291.9956	0.05332	0.31621	-0.15586	-3.116	98.7748	267.8063	0.15283	-0.032227	-0.12793	-51.03	-9.964	708.118	-0.63242	1.0004	-0.23438
2.084	-1.234	28.1044	1336.475	-1.1367	1.5402	-0.59394	-98.773	129.2661	1032.6695	-0.86748	1.2318	-0.53603	-36.0745	79.7572	354.062	-0.10625	0.28438	-0.28682	-17.4	56.3992	1124.345	-0.68438	1.4094	-0.65117	-23.991	136.637	282.06	0.071679	0.29551	-0.14766	1.478	113.351	247.3556	0.16187	-0.045899	-0.12841	-40.196	-5.07599999999999	745.6027	-0.63086	0.98828	-0.22461
2.086	-14.443	40.4508	1327.2232	-1.1096	1.5115	-0.58652	-107.188	133.177	1030.251	-0.85459	1.2087	-0.51846	-30.6794	101.1957	419.1421	-0.15547	0.34922	-0.30947	-1.471	57.604	1111.958	-0.67881	1.3934	-0.64151	-26.579	115.421	270.5745	0.087988	0.28096	-0.13819	-11.958	116.415	252.8904	0.16943	-0.059082	-0.12891	-52.622	-30.174	767.7456	-0.62861	0.99268	-0.22471
2.088	-52.201	44.5274	1294.3208	-1.0815	1.4868	-0.57373	-71.1205	130.383	1008.351	-0.84541	1.1839	-0.4999	-19.4614	120.5513	494.5969	-0.2041	0.42432	-0.33213	9.24	74.912	1092.391	-0.67099	1.3798	-0.62861	-9.989	101.5645	248.5517	0.10156	0.26758	-0.12549	-18.032	103.489	258.3309	0.17822	-0.072754	-0.12744	-89.3858	-72.141	793.6163	-0.62607	0.99737	-0.23125
2.09	-49.237	44.22443	1269.634	-1.0523	1.4535	-0.56426	-46.681	137.991	977.9114	-0.8335	1.1587	-0.48682	4.533	113.352	543.912	-0.25342	0.51123	-0.3584	5.992	90.13988	1062.8232	-0.6582	1.361	-0.61875	-3.794	97.4274	228.2819	0.11816	0.25947	-0.10977	-8.678	97.3558	248.825	0.18066	-0.079102	-0.12109	-66.87	-102.89	797.875	-0.61474	0.99776	-0.23321
2.092	-67.845	61.4727	1247.8103	-1.0231	1.4199	-0.55019	-40.781	145.7551	958.87	-0.82061	1.129	-0.47295	11.435	102.942	605.48	-0.3128	0.61514	-0.37813	6.639	96.9287	1034.6111	-0.64209	1.3364	-0.60938	-24.265	81.9061	228.54	0.13095	0.24961	-0.10196	-12.82	100.8709	230.4855	0.17529	-0.091309	-0.12354	-52.566	-127.1554	819.855	-0.60821	1.0063	-0.23721
2.094	-79.022	70.6911	1231.6447	-0.99648	1.3871	-0.54394	-31.565	138.6264	928.44	-0.80889	1.1126	-0.458	20.053	90.977	668.014	-0.37539	0.73321	-0.39531	-23.104	112.96	989.9072	-0.61924	1.3144	-0.59346	-12.902	84.278	220.3656	0.14619	0.23867	-0.091797	-28.782	99.17509	216.697	0.17578	-0.096192	-0.12427	-67.879	-152.517	844.8695	-0.59375	1.0195	-0.23828
2.096	-86.7614	74.4244	1215.7167	-0.9708	1.36	-0.53135	3.039	140.5242	891.481	-0.79327	1.0891	-0.44082	27.828	70.453	747.4245	-0.44766	0.86719	-0.40664	-2.215	116.7995	957.1943	-0.60176	1.2868	-0.58203	8.819	96.792	199.7878	0.1585	0.22744	-0.081054	-55.8404	94.4852	193.733	0.1709	-0.099609	-0.12744	-59.151	-179.584	892.311	-0.58555	1.0363	-0.24512
2.098	-73.77	84.0654	1201.6159	-0.93994	1.3306	-0.52197	11.584	158.959	873.9884	-0.78184	1.0736	-0.42734	28	65.939	801.5605	-0.53047	1.0172	-0.40977	4.198	110.0318	923.6622	-0.57949	1.2582	-0.56367	-6.836	101.061	194.688	0.16699	0.21973	-0.068359	-40.552	95.7978	188.523	0.16455	-0.10205	-0.12402	-38.201	-187.133	914.9162	-0.57265	1.0601	-0.25098
2.1	-75.478	118.848	1200.5003	-0.917	1.3029	-0.51309	7.868	170.854	852.271	-0.77148	1.0547	-0.41406	23.7307	46.6299	849.64	-0.62891	1.168	-0.4082	10.191	125.6482	914.9232	-0.56201	1.229	-0.55303	-9.052	78.05967	188.905	0.17227	0.21523	-0.056934	-62.141	92.01256	172.7691	0.16309	-0.10352	-0.12744	-38.071	-182.915	941.782	-0.56914	1.0863	-0.26309
2.102	-54.673	125.095	1176.5165	-0.89365	1.2724	-0.50156	11.01	151.327	840.988	-0.75977	1.0416	-0.39912	13.706	17.653	880.0529	-0.73272	1.3206	-0.43232	-21.02	133.0428	902.447	-0.53857	1.1938	-0.54248	-14.957	61.4088	184.63436	0.17812	0.20557	-0.048047	-71.9552	79.481	155.6588	0.15137	-0.10742	-0.12988	-50.108	-179.462	980.349	-0.5622	1.1167	-0.27412
2.104	-49.265	112.3972	1149.7315	-0.86943	1.2458	-0.49024	38.558	150.364	813.6393	-0.74356	1.0289	-0.38496	21.128	-11.8287	919.25306	-0.83545	1.4638	-0.48232	-8.03299999999999	134.3524	886.74	-0.51465	1.1593	-0.53037	-14.617	75.7877	175.3296	0.18164	0.20127	-0.039453	-64.2305	71.25309	142.6279	0.1416	-0.10767	-0.12524	-23.584	-165.965	1017.0056	-0.55273	1.1406	-0.28809
2.106	-55.993	107.2561	1112.972	-0.84424	1.219	-0.48096	20.367	167.72	789.9587	-0.72597	1.0105	-0.36895	20.316	-25.6526	931.234	-0.92295	1.5638	-0.54014	-16.177	120.9943	866.8016	-0.48984	1.1195	-0.51299	-35.543	74.4494	167.8638	0.18799	0.19522	-0.03125	-59.1344	81.0611	150.757	0.12988	-0.10889	-0.12793	-36.905	-118.1075	1042.749	-0.54834	1.1708	-0.30596
2.108	-73.821	111.4199	1089.432	-0.82764	1.1978	-0.46729	25.532	162.1782	763.888	-0.70859	0.99258	-0.35312	38.735	-53.508	935.453	-0.97793	1.6277	-0.59375	-4.747	119.00114	848.3967	-0.46289	1.0821	-0.49385	-55.552	64.1211	151.61852	0.1958	0.18555	-0.023926	-73.1447	84.4008	146.334	0.11572	-0.10107	-0.13135	-47.611	-98.911	1080.669	-0.55274	1.2032	-0.31904
2.11	-84.8687	105.9492	1078.053	-0.80889	1.1753	-0.45889	32.773	148.0282	746.8771	-0.68604	0.9668	-0.33594	18.833	-78.875	950.089	-1	1.6504	-0.61719	-35.879	123.2245	818.475	-0.43555	1.0355	-0.47852	-52.184	72.8776	133.1784	0.19893	0.18027	-0.010645	-50.4955	81.4491	137.0082	0.10498	-0.10156	-0.12939	-39.075	-97.924	1087.2588	-0.55859	1.2246	-0.34092
2.112	-87.03623	101.0905	1063.3789	-0.79131	1.1542	-0.44756	41.5956	162.2531	724.877	-0.658	0.93457	-0.32871	14.487	-89.56	946.992	-0.99951	1.6417	-0.62744	-38.918	121.7982	801.048	-0.41309	0.99805	-0.46777	-58.741	62.531	119.603	0.20371	0.1751	-0.0023437	-30.337	73.8751	135.545	0.083496	-0.091797	-0.12988	-1.09099999999999	-99.885	1117.262	-0.55976	1.2509	-0.36709
2.114	-84.1056	116.0597	1038.1715	-0.77099	1.137	-0.4374	14.246	159.7296	712.1667	-0.63047	0.90079	-0.32031	-7.048	-87.688	926.079	-0.9835	1.6317	-0.6374	-56.1315	118.7918	774.671	-0.38857	0.95166	-0.45186	-67.2843	63.5926	114.4804	0.20879	0.16533	0.003125	-20.311	70.5474	135.0916	0.056152	-0.07373	-0.12451	-21.678	-85.634	1142.2611	-0.56543	1.2803	-0.3999
2.116	-83.54822	119.9752	1026.893	-0.75	1.1166	-0.42363	36.5727	136.0434	688.0386	-0.60313	0.86407	-0.31015	8.644	-100.3723	909.1383	-0.96358	1.622	-0.66748	-78.4185	128.3479	750.252	-0.36787	0.90986	-0.43545	-84.111	51.7933	129.7474	0.21396	0.16123	0.010937	-25.186	55.69638	117.6767	0.047363	-0.058105	-0.11914	-11.444	-85.943	1160.5355	-0.57608	1.3091	-0.42881
2.118	-68.2158	113.2433	1000.5506	-0.73438	1.0977	-0.41016	31.173	137.3692	673.6428	-0.56778	0.82656	-0.29482	-31.073	-90.2158	886.0973	-0.92695	1.5946	-0.69375	-68.7816	113.2	735.77048	-0.33857	0.86729	-0.41865	-61.271	66.7066	117.8242	0.21729	0.15527	0.018066	-12.926	63.7568	110.8639	0.012207	-0.027344	-0.11523	-14.539	-97.564	1168.0663	-0.58945	1.3392	-0.4581
2.12	-40.731	121.2804	1000.797	-0.71279	1.0741	-0.39346	18.507	159.0257	650.6421	-0.53613	0.78516	-0.28613	-22.008	-74.6245	869.476	-0.86719	1.5635	-0.72266	-60.0049	111.875	717.64246	-0.31767	0.829	-0.40283	-81.8053	56.8119	111.896	0.21465	0.15	0.021192	2.826	77.8156	100.3282	-0.013184	-0.0036623	-0.11719	-4.56	-102.574	1158.7195	-0.60781	1.3833	-0.4874
2.122	-23.932	143.687	976.18	-0.68955	1.0524	-0.38535	-8.514	162.3143	635.0094	-0.51094	0.74414	-0.27539	-47.0115	-75.807	862.572	-0.79111	1.5058	-0.7458	-60.2224	108.423	707.6233	-0.29443	0.7915	-0.39209	-60.952	56.2208	82.9975	0.21396	0.15166	0.023829	1.696	75.5875	87.97667	-0.039551	0.020996	-0.12158	-49.993	-120.0716	1183.88829	-0.63125	1.4266	-0.51934
2.124	-10.957	136.5574	970.881	-0.66963	1.0293	-0.37402	-12.57	157.6466	602.32047	-0.48164	0.70468	-0.26895	-54.5429	-72.694	859.525	-0.71123	1.4225	-0.75811	-62.66	134.5592	686.5868	-0.27412	0.75274	-0.37949	-46.928	57.916	59.354	0.21279	0.15009	0.020703	-2.273	50.2979	88.1583	-0.083008	0.057617	-0.12891	-17.868	-142.3981	1193.0682	-0.66016	1.4766	-0.55469
2.126	-9.746	123.4384	935.5807	-0.64531	0.99922	-0.36612	-53.64599	156.0022	589.4052	-0.45469	0.6668	-0.25918	-70.3965	-69.688	885.411	-0.62568	1.3179	-0.7706	-29.788	136.452	671.1552	-0.24961	0.71797	-0.3664	-49.14	56.9505	59.522	0.2085	0.15625	0.027051	14.519	48.6629	81.88096	-0.097168	0.07373	-0.13135	-23.119	-157.915	1223.5944	-0.69463	1.5312	-0.58252
2.128	12.547	126.189	902.2154	-0.62158	0.97119	-0.35645	-61.98757	160.3138	558.9791	-0.42705	0.62774	-0.25166	-45.1817	-67.612	882.31	-0.55459	1.2126	-0.77334	-29.81	137.539	637.9529	-0.22695	0.68476	-0.35469	-80.422	50.7739	74.823	0.20264	0.16455	0.024902	10.408	58.3901	74.7643	-0.12793	0.10498	-0.13184	-10.677	-155.66	1247.0519	-0.73545	1.5858	-0.61319
2.13	-10.441	134.857	876.173	-0.60078	0.9416	-0.33945	-73.981	142.4589	525.7487	-0.39844	0.58789	-0.24805	-47.5313	-77.615	914.865	-0.50293	1.1055	-0.76465	-31.201	133.0002	610.5043	-0.20537	0.6499	-0.34112	-49.012	42.2535	74.8723	0.19092	0.16865	0.025195	11.467	59.016	76.5778	-0.1499	0.12524	-0.13232	-41.195	-179.611	1272.8367	-0.76553	1.6385	-0.64483
2.132	4.122	130.3387	854.4617	-0.57949	0.90742	-0.33681	-61.0059	167.8135	489.4521	-0.37051	0.55576	-0.23769	-25.165	-73.618	930.196	-0.46035	1.0186	-0.75195	-16.949	127.5429	579.5739	-0.1875	0.61719	-0.33154	-30.54	54.6773	83.6202	0.18291	0.17881	0.029102	30.759	59.406	63.2018	-0.1665	0.14111	-0.1377	-42.339	-175.005	1286.9395	-0.78623	1.6876	-0.66592
2.134	-20.619	144.2127	826.7255	-0.55528	0.86602	-0.33173	-69.3068	182.805	471.754	-0.34551	0.52149	-0.22871	-18.3064	-96.585	959.406	-0.42549	0.94287	-0.75673	-16.397	118.955235	564.3937	-0.16553	0.58565	-0.32197	-29.267	51.3026	79.1456	0.17119	0.19131	0.034179	30.753	61.474	63.9666	-0.18701	0.16602	-0.13721	-52.255	-147.4734	1311.029	-0.79688	1.7207	-0.68555
2.136	11.533	172.623	795.2412	-0.52949	0.83282	-0.32266	-70.1589	169.231	473.614	-0.3252	0.48829	-0.21933	-8.219	-109.519	977.5039	-0.3919	0.8835	-0.74814	-13.946	145.0462	533.751	-0.14336	0.55391	-0.30781	-25.223	36.4541	80.8103	0.15732	0.19863	0.035938	1.921	51.421	50.284	-0.19238	0.17676	-0.14209	-45.154	-105.715	1304.38	-0.79805	1.7453	-0.70157
2.138	-32.007	179.751	770.23586	-0.50391	0.79395	-0.31836	-57.1722	152.3733	448.2179	-0.30078	0.46445	-0.2083	-26.1122	-143.0218	1012.2683	-0.36377	0.83779	-0.74365	1.364	157.322	521.0077	-0.12734	0.52304	-0.29961	10.525	45.361	51.6166	0.13965	0.20996	0.038574	-7.017	32.5957	50.9568	-0.2002	0.19141	-0.15039	-58.243	-99.506	1324.7547	-0.78975	1.7525	-0.70576
2.14	-16.091	162.173	760.0293	-0.48008	0.76035	-0.30957	-37.4094	153.2657	432.9578	-0.28223	0.43457	-0.20557	-27.1129	-175.348	1033.9878	-0.34912	0.80469	-0.74023	10.834	150.357	484.9537	-0.10596	0.49316	-0.28603	-9.27800000000001	42.408	42.039	0.12041	0.22773	0.035156	3.718	39.1525	60.893	-0.20386	0.19165	-0.15527	-61.905	-89.958	1319.8653	-0.77842	1.7559	-0.71475
2.142	-16.585	156.759	739.282	-0.45381	0.72647	-0.29815	-22.212	150.2187	426.4405	-0.25791	0.4128	-0.18623	6.103	-199.802	1058.8964	-0.33135	0.79306	-0.74405	10.422	144.955	471.8428	-0.086914	0.46045	-0.271	-10.469	37.158	32.5679	0.10098	0.24111	0.031348	-0.456000000000003	47.80273	65.2076	-0.20313	0.19092	-0.15723	-63.4455	-77.3379	1327.0419	-0.76992	1.7484	-0.72461
2.144	-2.813	157.169	715.964	-0.43349	0.69326	-0.28838	-57.6975	126.3194	397.7082	-0.2415	0.39619	-0.17363	4.817	-198.817	1046.114	-0.32324	0.79775	-0.7542	15.461	144.842	444.5288	-0.067871	0.42861	-0.26084	-5.794	9.18053	51.189	0.083398	0.254	0.030566	-37.526	45.4574	61.682	-0.20068	0.1875	-0.15771	-75.3889	-72.2304	1317.473	-0.76318	1.7388	-0.73193
2.146	-21.573	143.8733	689.33	-0.41465	0.66582	-0.28271	-30.357	130.9269	376.1197	-0.22588	0.38057	-0.16543	22.209	-199.064	1075.548	-0.3209	0.82002	-0.7624	28.229	125.23	433.1311	-0.049707	0.39707	-0.24541	16.562	17.1242	46.4034	0.066309	0.25908	0.031934	-34.124	39.4723	37.5957	-0.19678	0.18799	-0.1582	-47.576	-70.817	1316.002	-0.75693	1.7326	-0.73897
2.148	-11.072	151.3771	659.071	-0.39063	0.63867	-0.26855	-24.728	141.753	337.569	-0.20694	0.36377	-0.15332	14.415	-184.4438	1100.326	-0.32852	0.84893	-0.77138	35.506	120.6194	420.5658	-0.030957	0.36387	-0.23174	14.196	12.2995	49.4512	0.048828	0.26611	0.027344	-43.257	41.2178	33.413	-0.19043	0.17529	-0.15234	-55.19	-51.5476	1326.186	-0.76319	1.7318	-0.74971
2.15	-24.58	160.112	637.241	-0.36963	0.61201	-0.25967	-5.567	123.0147	330.11943	-0.19092	0.35107	-0.14209	50.7901	-171.4362	1129.5128	-0.33545	0.89111	-0.77295	23.56	129.688	405.4998	-0.014942	0.33115	-0.22236	-8.318	20.8545	41.8943	0.042578	0.27343	0.026953	-54.2327	36.22421	38.568	-0.18432	0.16821	-0.15576	-48.042	-32.698	1334.005	-0.77998	1.7391	-0.75479
2.152	-34.022	154.5112	613.036	-0.34902	0.58662	-0.24961	-12.065	105.2949	313.9002	-0.17148	0.33613	-0.13496	44.386	-157.1361	1163.222	-0.35361	0.94463	-0.77119	21.566	119.8411	383.8374	0.00097656	0.30078	-0.21094	-7.064	36.2011	43.20096	0.029394	0.27734	0.026367	-59.3042	26.1792	44.3912	-0.18115	0.15283	-0.15723	-64.714	-31.249	1360.057	-0.80176	1.7474	-0.7666
2.154	-55.496	140.6	596.8644	-0.32949	0.56006	-0.23789	24.192	94.9572	322.546	-0.1542	0.31934	-0.12578	51.193	-155.039	1179.158	-0.38564	1.0024	-0.77217	15.966	103.8814	360.1723	0.020801	0.2749	-0.20049	-19.94	61.113	38.66539	0.022754	0.28125	0.025195	-36.693	22.4458	41.3647	-0.17529	0.13135	-0.15381	-40.503	-27.375	1395.7041	-0.82959	1.7622	-0.7749
2.156	-46.181	157.3907	570.8142	-0.30723	0.5336	-0.22451	17.118	106.0235	304.6134	-0.13701	0.30293	-0.11953	60.6309	-142.217	1196.39479	-0.42315	1.0696	-0.77842	-2.927	100.0655	338.7896	0.039648	0.24629	-0.19082	-10.509	49.444	43.717	0.015332	0.28066	0.024219	-69.0681	31.0788	47.3596	-0.17188	0.11963	-0.15381	-53.82	-25.481	1425.1612	-0.86651	1.7853	-0.78506
2.158	-46.1856	158.8642	563.99	-0.28662	0.51416	-0.20996	27.065	101.7022	294.4833	-0.11983	0.27998	-0.11455	70.8918	-117.995	1213.3152	-0.45791	1.147	-0.78662	-22.539	110.9983	336.145	0.056055	0.21504	-0.18106	-34.325	29.6275	37.4377	0.011719	0.27832	0.022461	-60.1237	20.584	36.6408	-0.15527	0.099609	-0.1499	-51.645	-23.763	1443.639	-0.89922	1.809	-0.79726
2.16	-58.8668	154.947	539.63054	-0.26602	0.49404	-0.19707	28.376	101.8374	263.3847	-0.09375	0.26221	-0.10791	48.5404	-122.519	1223.3292	-0.48633	1.2295	-0.79492	-20.77	113.6356	314.274	0.072266	0.18731	-0.16709	-18.007	27.3374	30.8451	0.0073243	0.28242	0.01836	-63.6081	19.1526	36.3011	-0.14405	0.078125	-0.15235	-76.6073	-43.102	1451.1862	-0.93711	1.8289	-0.80547
2.162	-52.536	149.315	515.3778	-0.24375	0.47481	-0.18848	50.383	106.3208	248.5812	-0.081445	0.2375	-0.10352	49.20484	-125.058	1221.9003	-0.50918	1.2999	-0.80674	-32.047	110.205	296.8953	0.090332	0.1582	-0.16064	-48.497	31.2783	25.2051	0.0074219	0.27988	0.011133	-52.846	28.6738	31.55106	-0.13477	0.062012	-0.14941	-45.412	-41.1269	1432.3544	-0.97647	1.8509	-0.80596
2.164	-47.426	149.984	488.706	-0.22539	0.45801	-0.17403	25.129	97.5304	224.5145	-0.058594	0.21289	-0.096973	16.502	-133.432	1220.9063	-0.53467	1.3606	-0.81611	-36.56	102.0757	276.334	0.10371	0.12949	-0.15264	-46.076	31.3645	30.1713	0.0078125	0.27754	0.015821	-59.8832	31.8198	27.1295	-0.12354	0.03418	-0.15186	-48.045	-32.234	1425.1605	-1.0093	1.8657	-0.80811
2.166	-41.229	137.1718	477.8998	-0.20967	0.43721	-0.16377	23.962	81.4371	209.2891	-0.041016	0.18945	-0.085645	5.042	-153.0108	1229.04504	-0.56748	1.4216	-0.8208	-53.49	93.4338	254.921	0.11875	0.10059	-0.14258	-60.7938	38.3054	23.2644	0.006836	0.27696	0.019532	-38.585	34.3821	18.5262	-0.11865	0.019531	-0.14453	-39.969	-38.408	1429.0308	-1.0462	1.8725	-0.8044
2.168	-40.879	118.8081	442.824	-0.18945	0.41699	-0.14795	15.018	93.116	197.7623	-0.018261	0.16113	-0.086133	-3.783	-179.3533	1260.7611	-0.60566	1.4909	-0.82637	-40.512	82.6756	235.784	0.13203	0.074414	-0.13477	-49.675	37.2703	20.9959	0.010254	0.27002	0.021973	-36.799	25.3025	35.714	-0.10303	-0.0014648	-0.14941	-48.629	-38.148	1438.964	-1.0711	1.8773	-0.80352
2.17	-16.679	122.8302	423.7469	-0.17646	0.39267	-0.13984	-0.837000000000003	102.939	199.6442	-0.0019531	0.14014	-0.083008	13.689	-186.52	1288.2012	-0.65039	1.5723	-0.8418	-49.8697	90.17636	231.3225	0.14687	0.045313	-0.12812	-74.8143	22.318	32.7567	0.015625	0.2669	0.019629	-23.756	35.3393	24.231	-0.094483	-0.023193	-0.14527	-22.43	-14.8952	1436.5532	-1.0918	1.8785	-0.79922
2.172	-24.73	134.8016	404.6819	-0.15137	0.36914	-0.13203	-19.513	98.67	193.1865	0.013379	0.11826	-0.075098	6.026	-176.663	1306.7163	-0.68975	1.6742	-0.8706	-48.45	99.8715	214.653	0.15723	0.026855	-0.12061	-65.4832	5.815	40.00333	0.02041	0.25567	0.020606	-11.95	19.62802	33.624	-0.085449	-0.042969	-0.14795	-39.529	-0.0934999999999997	1442.4826	-1.1073	1.878	-0.79014
2.174	-35.0502	139.889	397.416	-0.13066	0.34375	-0.12344	-39.648	94.109	188.7171	0.029493	0.10137	-0.067773	-16.678	-191.5531	1334.4968	-0.72998	1.7673	-0.88994	-55.3005	100.948	206.1175	0.16846	-0.0024414	-0.11074	-53.7161	28.4832	33.61675	0.029004	0.25175	0.024512	-0.495999999999995	24.5451	25.1548	-0.066895	-0.059082	-0.14111	-31.489	9.332	1446.81911	-1.1216	1.8716	-0.78369
2.176	-20.327	141.244	362.9383	-0.11406	0.31523	-0.11289	-36.392	99.421	160.252	0.039649	0.079883	-0.066601	-24.1704	-191.802	1345.2757	-0.77295	1.8345	-0.904	-74.3749	99.089	200.505	0.18134	-0.028515	-0.10742	-45.372	42.7828	35.0292	0.039062	0.24365	0.026465	3.403	31.1335	36.525	-0.061035	-0.068848	-0.1416	-19.213	29.062	1448.1225	-1.1362	1.8597	-0.7708
2.178	5.01600000000001	134.6037	338.1547	-0.087402	0.28955	-0.10645	-56.1595	92.101	151.534	0.054297	0.061426	-0.063281	-32.11973	-179.983	1362.088	-0.82588	1.8753	-0.91416	-54.4644	104.76	200.2155	0.18526	-0.046484	-0.10273	-60.4462	34.8284	20.8176	0.049316	0.23486	0.027344	-2.05	31.857	25.9439	-0.051758	-0.086914	-0.14063	-31.852	60.841	1433.1214	-1.152	1.8453	-0.76328
2.18	-5.667	122.1336	315.3953	-0.068164	0.26025	-0.093554	-62.5026	70.6404	142.906	0.06543	0.04248	-0.059082	-35.5276	-163.7105	1375.198	-0.87305	1.8955	-0.92383	-54.1168	107.20389	184.1198	0.19092	-0.067969	-0.099314	-51.66	36.3833	24.8483	0.061719	0.22461	0.027734	2.115	22.4934	27.8408706	-0.042236	-0.092773	-0.13843	-73.4114	69.942	1419.1061	-1.1644	1.8281	-0.75157
2.182	-3.355	110.5489	305.522	-0.045996	0.2253	-0.086914	-60.234	60.7288	135.4701	0.078418	0.018359	-0.052441	-42.4779	-161.25665	1396.27	-0.91768	1.9136	-0.92881	-30.413	90.7932	164.8787	0.19385	-0.082031	-0.097168	-38.09	29.44137	25.9901	0.067383	0.21856	0.029492	3.201	31.741	29.065092	-0.035645	-0.10107	-0.13672	-54.375	63.778	1418.9215	-1.1701	1.8096	-0.74043
2.184	8.104	111.2359	297.2932	-0.02334	0.19638	-0.079102	-63.988	63.23	124.7788	0.091992	-0.0055664	-0.047949	-35.46395	-146.16184	1393.0854	-0.95605	1.9274	-0.93613	-46.215	70.91573	165.1041	0.20371	-0.099709	-0.10137	-31.734	27.3172	27.39	0.076367	0.21074	0.031836	23.361	32.6547	36.4003	-0.021973	-0.11279	-0.13818	-54.34	67.527	1413.8293	-1.1733	1.7974	-0.73193
2.186	10.672	112.817	290.0462	-0.00068358	0.16631	-0.073047	-87.584	46.9459	117.1037	0.10371	-0.022754	-0.044434	-29.9567	-133.099	1382.259	-0.99711	1.9347	-0.93965	-21.575	76.4904	148.043	0.20635	-0.11201	-0.096875	-29.369	34.91606	51.5525	0.085547	0.20234	0.029394	-0.022000000000002	25.66	23.5744	-0.016602	-0.10986	-0.13721	-55.878	72.025	1432.427	-1.1733	1.7821	-0.7208
2.188	1.101	94.874	273.8047	0.025879	0.12939	-0.067871	-81.5153	41.518	118.5629	0.11709	-0.041406	-0.040039	-42.304	-125.5446	1371.578	-1.0325	1.9507	-0.94112	-21.222	78.1324	139.0634	0.21299	-0.12412	-0.095312	-14.564	46.6931	33.95781	0.091797	0.19629	0.029785	5.195	18.2987	17.961	-0.0063477	-0.10693	-0.13965	-53.122	58.75396	1416.322	-1.1793	1.7632	-0.71092
2.19	12.774	83.132	259.7149	0.044238	0.093945	-0.059375	-72.0507	55.159	110.4898	0.12939	-0.062988	-0.04541	-17.5788	-131.931	1388.081	-1.0601	1.9634	-0.94873	-0.518999999999998	61.9042	138.9016	0.20859	-0.13057	-0.091504	-15.983	48.7641	22.2143	0.1043	0.18799	0.029297	-13.043	23.3979	13.45	-0.0095214	-0.092774	-0.13379	-35.974	57.681	1398.9108	-1.1726	1.7433	-0.69647
[truncated: 11,904 more rows]
