# Supplementary material for: Reliability and Validity of Running Cadence and Stance Time Derived from Instrumented Wireless Earbuds
Source: Sensors (Basel). 2021 Nov 30;21(23):7995. doi: 10.3390/s21237995 (PMC8659722; doi:10.3390/s21237995)
Supplement: Supplementary file 1 [file sensors-21-07995-s001.zip › Data_P08_speeds_1.csv]

time	S7kmh_force_plate_1	S7kmh_force_plate_2	S7kmh_force_plate_3	S7kmh_earbuds_1	S7kmh_earbuds_2	S7kmh_earbuds_3	S10kmh_force_plate_1	S10kmh_force_plate_2	S10kmh_force_plate_3	S10kmh_earbuds_1	S10kmh_earbuds_2	S10kmh_earbuds_3	S13kmh_force_plate_1	S13kmh_force_plate_2	S13kmh_force_plate_3	S13kmh_earbuds_1	S13kmh_earbuds_2	S13kmh_earbuds_3	max_force_plate_1	max_force_plate_2	max_force_plate_3	max_earbuds_1	max_earbuds_2	max_earbuds_3
0	44.9992	56.0216	56.394	0.12266	-0.12432	-0.16894	-20.936	130.003	1242.5622	-0.030762	1.4683	-0.76221	NaN	NaN	NaN	NaN	NaN	NaN	NaN	NaN	NaN	NaN	NaN	NaN
0.002	31.036	34.8532	74.5161	0.10986	-0.11377	-0.16797	-53.4689	141.529	1209.9809	-0.024903	1.426	-0.74683	NaN	NaN	NaN	NaN	NaN	NaN	NaN	NaN	NaN	NaN	NaN	NaN
0.004	21.3691	33.4974	81.3816	0.095409	-0.10019	-0.1667	-71.0299	171.824	1195.6755	-0.016602	1.3867	-0.73047	NaN	NaN	NaN	NaN	NaN	NaN	NaN	NaN	NaN	NaN	NaN	NaN
0.006	28.6618	42.3853	76.47032	0.077832	-0.083985	-0.16485	-23.754	170.166	1166.118	-0.0053711	1.3325	-0.70264	NaN	NaN	NaN	NaN	NaN	NaN	NaN	NaN	NaN	NaN	NaN	NaN
0.008	9.906	59.8439	73.21912	0.065332	-0.0625	-0.17226	-47.341	164.4628	1154.2125	-0.00097656	1.3086	-0.69141	NaN	NaN	NaN	NaN	NaN	NaN	NaN	NaN	NaN	NaN	NaN	NaN
0.01	-15.018	48.647	79.5011	0.047265	-0.040039	-0.17061	-50.5467	169.0828	1108.7656	0.0053711	1.2559	-0.66504	NaN	NaN	NaN	NaN	NaN	NaN	NaN	NaN	NaN	NaN	NaN	NaN
0.012	-33.912	53.298	70.7537	0.035645	-0.014648	-0.16895	-33.6514	162.6355	1097.6974	0.010742	1.2151	-0.64185	NaN	NaN	NaN	NaN	NaN	NaN	NaN	NaN	NaN	NaN	NaN	NaN
0.014	-28.5837	65.223	45.5256	0.021875	0.01123	-0.17188	-63.6619	182.4782	1076.6353	0.011719	1.1738	-0.62109	NaN	NaN	NaN	NaN	NaN	NaN	NaN	NaN	NaN	NaN	NaN	NaN
0.016	-39.9977	63.693	27.614	0.0046875	0.034375	-0.17149	-45.8016	191.39535	1031.347	0.012207	1.125	-0.5918	NaN	NaN	NaN	NaN	NaN	NaN	NaN	NaN	NaN	NaN	NaN	NaN
0.018	-49.533	51.0655	45.4784	-0.011328	0.060547	-0.17657	-33.474	184.2632	1001.903	0.012207	1.1011	-0.57764	NaN	NaN	NaN	NaN	NaN	NaN	NaN	NaN	NaN	NaN	NaN	NaN
0.02	-59.4803	27.7242	45.2155	-0.024218	0.087988	-0.18018	-76.376	199.1501	974.1622	0.012207	1.0552	-0.5498	NaN	NaN	NaN	NaN	NaN	NaN	NaN	NaN	NaN	NaN	NaN	NaN
0.022	-53.389	25.149	36.0805	-0.034668	0.11377	-0.18164	-73.491	211.099	951.56454	0.011963	1.0144	-0.53296	NaN	NaN	NaN	NaN	NaN	NaN	NaN	NaN	NaN	NaN	NaN	NaN
0.024	-56.6822	43.203	27.547	-0.043457	0.13769	-0.18555	-41.5042	204.66	938.5788	0.015137	0.97168	-0.50781	NaN	NaN	NaN	NaN	NaN	NaN	NaN	NaN	NaN	NaN	NaN	NaN
0.026	-50.640309	41.6917	37.15486	-0.050977	0.16172	-0.18828	-76.322	215.091	922.685	0.016602	0.92236	-0.47412	NaN	NaN	NaN	NaN	NaN	NaN	NaN	NaN	NaN	NaN	NaN	NaN
0.028	-52.74913	41.0622	32.622	-0.058789	0.18203	-0.18867	-66.973	218.908	888.944	0.023926	0.89209	-0.45654	NaN	NaN	NaN	NaN	NaN	NaN	NaN	NaN	NaN	NaN	NaN	NaN
0.03	-58.4301	49.23	34.3015	-0.062793	0.19697	-0.18652	-9.499	203.0255	886.865	0.021973	0.83447	-0.43262	NaN	NaN	NaN	NaN	NaN	NaN	NaN	NaN	NaN	NaN	NaN	NaN
0.032	-77.007	43.5051	24.8523	-0.068359	0.21387	-0.18311	-36.672	202.514	849.9801	0.027344	0.7959	-0.41162	NaN	NaN	NaN	NaN	NaN	NaN	NaN	NaN	NaN	NaN	NaN	NaN
0.034	-65.01	37.8407	40.8206	-0.072266	0.22539	-0.18389	-17.365	213.327	795.956	0.036133	0.75684	-0.39453	NaN	NaN	NaN	NaN	NaN	NaN	NaN	NaN	NaN	NaN	NaN	NaN
0.036	-37.88444	29.7651	31.5606	-0.073633	0.23536	-0.18311	-3.368	199.3	774.7952	0.039063	0.70752	-0.3667	NaN	NaN	NaN	NaN	NaN	NaN	NaN	NaN	NaN	NaN	NaN	NaN
0.038	-60.9823	20.6961	31.33238	-0.078711	0.24629	-0.17842	-12.366	210.2654	753.3432	0.041992	0.67871	-0.35547	NaN	NaN	NaN	NaN	NaN	NaN	NaN	NaN	NaN	NaN	NaN	NaN
0.04	-37.401	21.4987	28.84376	-0.077734	0.25508	-0.1752	-2.01	213.33624	706.0683	0.040527	0.63135	-0.33057	NaN	NaN	NaN	NaN	NaN	NaN	NaN	NaN	NaN	NaN	NaN	NaN
0.042	-5.328	14.5111	26.6408	-0.070801	0.25977	-0.16846	-7.334	200.8191	692.3312	0.039062	0.60181	-0.31031	NaN	NaN	NaN	NaN	NaN	NaN	NaN	NaN	NaN	NaN	NaN	NaN
0.044	5.862	31.444	19.4935	-0.068652	0.26084	-0.16621	-11.54	215.7368	652.2651	0.034668	0.56592	-0.29639	NaN	NaN	NaN	NaN	NaN	NaN	NaN	NaN	NaN	NaN	NaN	NaN
0.046	-1.237	26.0467	19.3567	-0.065137	0.25625	-0.16162	-6.625	204.9932	621.2341	0.026367	0.52148	-0.27197	NaN	NaN	NaN	NaN	NaN	NaN	NaN	NaN	NaN	NaN	NaN	NaN
0.048	9.781	15.1002	21.3454	-0.059668	0.24336	-0.15302	-4.136	196.6312	629.824	0.023926	0.49951	-0.26025	NaN	NaN	NaN	NaN	NaN	NaN	NaN	NaN	NaN	NaN	NaN	NaN
0.05	26.8821	15.2028	22.23	-0.055762	0.22031	-0.14785	-12.235	210.1584	587.8824	0.01709	0.46143	-0.2373	NaN	NaN	NaN	NaN	NaN	NaN	NaN	NaN	NaN	NaN	NaN	NaN
0.052	12.192	18.5078	20.2824	-0.055176	0.19385	-0.14893	6.583	202.1042	540.964	0.010986	0.42749	-0.22363	NaN	NaN	NaN	NaN	NaN	NaN	NaN	NaN	NaN	NaN	NaN	NaN
0.054	12.549	23.4623	25.1273	-0.049805	0.16836	-0.13838	19.1	199.6647	527.719	0.01123	0.39893	-0.20654	NaN	NaN	NaN	NaN	NaN	NaN	NaN	NaN	NaN	NaN	NaN	NaN
0.056	10.959	12.7205	43.6756	-0.042871	0.13311	-0.13545	-23.3539	193.7081	475.137	0.0092773	0.35645	-0.19141	NaN	NaN	NaN	NaN	NaN	NaN	NaN	NaN	NaN	NaN	NaN	NaN
0.058	-2.506	12.5648	19.6142	-0.0417	0.1042	-0.1378	-10.066	183.8498	457.307	0.0087891	0.33545	-0.18115	NaN	NaN	NaN	NaN	NaN	NaN	NaN	NaN	NaN	NaN	NaN	NaN
0.06	-0.208000000000002	31.356	23.1345	-0.036719	0.077637	-0.14024	-5.073	184.7555	442.935995	0.0068359	0.29492	-0.16162	NaN	NaN	NaN	NaN	NaN	NaN	NaN	NaN	NaN	NaN	NaN	NaN
0.062	-11.934	27.2906	23.7523	-0.034668	0.055664	-0.13867	-22.6396	170.067	401.784	0.010742	0.25	-0.14355	NaN	NaN	NaN	NaN	NaN	NaN	NaN	NaN	NaN	NaN	NaN	NaN
0.064	-20.806	6.243	36.51052	-0.030567	0.037793	-0.14405	-22.5744	150.025	394.9479	0.012207	0.2251	-0.13281	NaN	NaN	NaN	NaN	NaN	NaN	NaN	NaN	NaN	NaN	NaN	NaN
0.066	-19.147	5.031	34.6628	-0.030078	0.022949	-0.14649	-48.802	134.511	380.8438	0.00097656	0.1792	-0.11914	NaN	NaN	NaN	NaN	NaN	NaN	NaN	NaN	NaN	NaN	NaN	NaN
0.068	-29.6484	-0.17293	24.23	-0.026562	0.012793	-0.15273	-43.7534	142.7922	347.691	-0.0026855	0.15283	-0.10645	NaN	NaN	NaN	NaN	NaN	NaN	NaN	NaN	NaN	NaN	NaN	NaN
0.07	-37.5816	-4.323	33.832	-0.024902	0.012207	-0.15615	-31.199	147.7996	321.43	-0.0097656	0.12402	-0.095215	NaN	NaN	NaN	NaN	NaN	NaN	NaN	NaN	NaN	NaN	NaN	NaN
0.072	-45.9337	-22.3828	65.0665	-0.021973	0.013672	-0.1626	-56.4	145.73	330.1272	-0.019043	0.092285	-0.09375	NaN	NaN	NaN	NaN	NaN	NaN	NaN	NaN	NaN	NaN	NaN	NaN
0.074	-66.10462	-20.6221	65.288	-0.024609	0.029297	-0.16426	-59.8369	143.372	286.8997	-0.022461	0.07373	-0.071289	NaN	NaN	NaN	NaN	NaN	NaN	NaN	NaN	NaN	NaN	NaN	NaN
0.076	-69.916	-10.0184	58.0438	-0.0375	0.045508	-0.16446	-36.23734	121.108	264.4245	-0.031738	0.044922	-0.063477	NaN	NaN	NaN	NaN	NaN	NaN	NaN	NaN	NaN	NaN	NaN	NaN
0.078	-69.937	-15.2804	74.1481	-0.048829	0.064258	-0.16953	-37.8737	114.10669	278.11495	-0.042725	0.026611	-0.060791	NaN	NaN	NaN	NaN	NaN	NaN	NaN	NaN	NaN	NaN	NaN	NaN
0.08	-64.758	-36.6596	103.0481	-0.064355	0.084864	-0.1749	-51.5463	116.6024	229.04	-0.04834	0.01123	-0.050781	NaN	NaN	NaN	NaN	NaN	NaN	NaN	NaN	NaN	NaN	NaN	NaN
0.082	-48.4105	-43.5528	98.1354	-0.07373	0.1001	-0.17627	-23.9221	102.607	213.647	-0.052246	-0.01123	-0.046875	NaN	NaN	NaN	NaN	NaN	NaN	NaN	NaN	NaN	NaN	NaN	NaN
0.084	-59.6588	-31.42738	104.9336	-0.081348	0.11348	-0.18877	-26.0377	86.8284	219.5881	-0.049805	-0.030273	-0.047363	NaN	NaN	NaN	NaN	NaN	NaN	NaN	NaN	NaN	NaN	NaN	NaN
0.086	-53.3115	-13.9872	115.1899	-0.079004	0.12715	-0.19394	-28.257	98.6197	156.308	-0.046875	-0.055176	-0.043945	NaN	NaN	NaN	NaN	NaN	NaN	NaN	NaN	NaN	NaN	NaN	NaN
0.088	-40.0302	-5.5164	150.853	-0.073925	0.13926	-0.20879	-17.385	93.7332	151.5292	-0.044433	-0.07251	-0.034424	NaN	NaN	NaN	NaN	NaN	NaN	NaN	NaN	NaN	NaN	NaN	NaN
0.09	-20.951	12.5797	170.084	-0.069336	0.15303	-0.21768	-13.0636	94.118	142.625	-0.038086	-0.090332	-0.032715	NaN	NaN	NaN	NaN	NaN	NaN	NaN	NaN	NaN	NaN	NaN	NaN
0.092	-22.1374	39.9156	207.08	-0.066406	0.1709	-0.22949	5.141	79.693	113.6641	-0.030762	-0.12549	-0.027832	NaN	NaN	NaN	NaN	NaN	NaN	NaN	NaN	NaN	NaN	NaN	NaN
0.094	13.431	56.1159	286.0597	-0.075	0.19668	-0.2461	-13.267	64.071	141.8365	-0.024902	-0.14209	-0.021973	NaN	NaN	NaN	NaN	NaN	NaN	NaN	NaN	NaN	NaN	NaN	NaN
0.096	20.222	85.2548	334.7583	-0.086523	0.22481	-0.2625	-8.837	57.948	128.2745	-0.019531	-0.17822	-0.02832	NaN	NaN	NaN	NaN	NaN	NaN	NaN	NaN	NaN	NaN	NaN	NaN
0.098	35.14	91.0055	406.1585	-0.09668	0.26621	-0.28555	1.814	57.4687	89.329	-0.013916	-0.2041	-0.016358	NaN	NaN	NaN	NaN	NaN	NaN	NaN	NaN	NaN	NaN	NaN	NaN
0.1	62.71	93.089	464.58	-0.11367	0.3249	-0.30313	17.4298	47.5568	98.0443	-0.0092773	-0.22461	-0.016113	NaN	NaN	NaN	NaN	NaN	NaN	NaN	NaN	NaN	NaN	NaN	NaN
0.102	60.136	81.01	578.185	-0.13525	0.40039	-0.32129	3.948	43.6196	75.2781	-0.00097656	-0.25488	-0.016602	NaN	NaN	NaN	NaN	NaN	NaN	NaN	NaN	NaN	NaN	NaN	NaN
0.104	67.182	79.835	682.674	-0.17568	0.49483	-0.34111	-7.96	49.2011	49.6666	0.00048828	-0.26221	-0.014648	NaN	NaN	NaN	NaN	NaN	NaN	NaN	NaN	NaN	NaN	NaN	NaN
0.106	44.409	72.224	795.936	-0.22686	0.60908	-0.36709	-2.132	49.4205	59.3534	0.0019531	-0.27344	-0.01416	NaN	NaN	NaN	NaN	NaN	NaN	NaN	NaN	NaN	NaN	NaN	NaN
0.108	49.659	44.24	883.0852	-0.28662	0.75166	-0.3792	-3.905	44.9014	39.8022	-0.0007324	-0.27612	-0.012207	NaN	NaN	NaN	NaN	NaN	NaN	NaN	NaN	NaN	NaN	NaN	NaN
0.11	65.765	-1.165	953.1842	-0.35967	0.93692	-0.3795	5.084	30.1906	33.3943	-0.012207	-0.26025	-0.01123	NaN	NaN	NaN	NaN	NaN	NaN	NaN	NaN	NaN	NaN	NaN	NaN
0.112	26.0391	-31.2193	992.0605	-0.45166	1.1606	-0.40186	-24.0294	24.0539	64.56	-0.023926	-0.23682	-0.021973	NaN	NaN	NaN	NaN	NaN	NaN	NaN	NaN	NaN	NaN	NaN	NaN
0.114	0.4653	-22.83009	1014.08809	-0.55264	1.3896	-0.42315	-35.6814	30.4335	49.1092	-0.034668	-0.2207	-0.029297	NaN	NaN	NaN	NaN	NaN	NaN	NaN	NaN	NaN	NaN	NaN	NaN
0.116	4.552	-35.71039	1052.952	-0.67129	1.6048	-0.46416	-22.8712	33.7431	9.518	-0.056152	-0.18262	-0.039063	NaN	NaN	NaN	NaN	NaN	NaN	NaN	NaN	NaN	NaN	NaN	NaN
0.118	-21.732	-77.62	1051.341	-0.78848	1.772	-0.51377	-33.1698	36.2248	27.9036	-0.067627	-0.15015	-0.046386	NaN	NaN	NaN	NaN	NaN	NaN	NaN	NaN	NaN	NaN	NaN	NaN
0.12	-57.679	-110.457	1049.165	-0.8794	1.8724	-0.57793	-54.2143	46.311	13.8633	-0.077148	-0.11865	-0.057617	NaN	NaN	NaN	NaN	NaN	NaN	NaN	NaN	NaN	NaN	NaN	NaN
0.122	-60.9	-123.696	1028.368	-0.92432	1.9028	-0.63428	-45.0351	30.6207	-1.1107	-0.084473	-0.07666	-0.066406	NaN	NaN	NaN	NaN	NaN	NaN	NaN	NaN	NaN	NaN	NaN	NaN
0.124	-65.887	-118.106	1027.147	-0.89189	1.8603	-0.66084	-39.2191	29.9783	26.3189	-0.086426	-0.056641	-0.072754	NaN	NaN	NaN	NaN	NaN	NaN	NaN	NaN	NaN	NaN	NaN	NaN
0.126	-97.03517	-116.248	1019.723	-0.81006	1.7614	-0.67177	-42.1054	30.8273	-3.0052	-0.091309	-0.022461	-0.089355	NaN	NaN	NaN	NaN	NaN	NaN	NaN	NaN	NaN	NaN	NaN	NaN
0.128	-89.8026	-91.328	984.8091	-0.70342	1.6376	-0.66826	-22.052	12.395	3.666	-0.093262	-0.0036621	-0.095947	NaN	NaN	NaN	NaN	NaN	NaN	NaN	NaN	NaN	NaN	NaN	NaN
0.13	-110.735	-71.7557	954.524	-0.60049	1.5327	-0.67823	-43.51	7.165	49.937	-0.095703	0.010254	-0.10547	NaN	NaN	NaN	NaN	NaN	NaN	NaN	NaN	NaN	NaN	NaN	NaN
0.132	-92.723	-52.623	952.155	-0.51465	1.4258	-0.69727	-56.573	10.209	9.5887	-0.10107	0.030273	-0.11621	NaN	NaN	NaN	NaN	NaN	NaN	NaN	NaN	NaN	NaN	NaN	NaN
0.134	-105.67	-48.397	958.823	-0.44414	1.3347	-0.71504	-3.305	29.3219	7.812	-0.104	0.041992	-0.11768	NaN	NaN	NaN	NaN	NaN	NaN	NaN	NaN	NaN	NaN	NaN	NaN
0.136	-84.203	-41.092	948.866	-0.38164	1.2535	-0.73242	-21.5383	20.06311	20.04696	-0.11084	0.061523	-0.12891	NaN	NaN	NaN	NaN	NaN	NaN	NaN	NaN	NaN	NaN	NaN	NaN
0.138	-108.807	-49.91	956.7227	-0.32735	1.1766	-0.75664	-31.794	19.0896	15.5534	-0.11328	0.084472	-0.13647	NaN	NaN	NaN	NaN	NaN	NaN	NaN	NaN	NaN	NaN	NaN	NaN
0.14	-103.443	-54.562	982.4471	-0.25645	1.1116	-0.77041	-17.657	14.6948	22.5947	-0.11328	0.104	-0.14209	NaN	NaN	NaN	NaN	NaN	NaN	NaN	NaN	NaN	NaN	NaN	NaN
0.142	-66.4483	-59.619	986.191	-0.1792	1.0474	-0.771	-23.3026	23.2868	34.8685	-0.11523	0.12402	-0.14502	NaN	NaN	NaN	NaN	NaN	NaN	NaN	NaN	NaN	NaN	NaN	NaN
0.144	-50.23791	-98.571	993.98	-0.11445	0.98252	-0.77862	-11.4103	32.5756	-8.909	-0.11182	0.13428	-0.14893	NaN	NaN	NaN	NaN	NaN	NaN	NaN	NaN	NaN	NaN	NaN	NaN
0.146	-40.1316	-139.377	1016.066	-0.053614	0.9167	-0.78271	2.7357	6.191	23.787	-0.11279	0.15283	-0.16357	NaN	NaN	NaN	NaN	NaN	NaN	NaN	NaN	NaN	NaN	NaN	NaN
0.148	-34.0069	-177.371	1036.8794	-0.005957	0.85498	-0.78037	-17.3188	-0.395099999999999	45.3076	-0.10571	0.15845	-0.17041	NaN	NaN	NaN	NaN	NaN	NaN	NaN	NaN	NaN	NaN	NaN	NaN
0.15	-8.647	-208.111	1059.8954	0.032422	0.80723	-0.76699	-1.369	11.1869	5.7755	-0.099609	0.16211	-0.1748	NaN	NaN	NaN	NaN	NaN	NaN	NaN	NaN	NaN	NaN	NaN	NaN
0.152	4.2725	-211.083	1062.8685	0.058594	0.77783	-0.75146	38.3215	24.4594	8.2193	-0.07959	0.15479	-0.1748	NaN	NaN	NaN	NaN	NaN	NaN	NaN	NaN	NaN	NaN	NaN	NaN
0.154	14.708	-202.44	1075.8637	0.059863	0.77051	-0.74668	5.74	28.849	16.6683	-0.070801	0.1499	-0.18311	NaN	NaN	NaN	NaN	NaN	NaN	NaN	NaN	NaN	NaN	NaN	NaN
0.156	53.726	-200.54	1085.044	0.052246	0.77266	-0.74219	-15.708	23.029	11.629	-0.04834	0.13525	-0.18652	NaN	NaN	NaN	NaN	NaN	NaN	NaN	NaN	NaN	NaN	NaN	NaN
0.158	31.0716	-200.884	1114.41163	0.030371	0.79453	-0.74687	17.116	14.353	32.56882	-0.032715	0.11817	-0.18994	NaN	NaN	NaN	NaN	NaN	NaN	NaN	NaN	NaN	NaN	NaN	NaN
0.16	24.40536	-169.215	1124.991	0.0070311	0.84199	-0.74551	-34.6099	19.1677	17.735	-0.01416	0.094238	-0.19043	NaN	NaN	NaN	NaN	NaN	NaN	NaN	NaN	NaN	NaN	NaN	NaN
0.162	29.6206	-138.4161	1151.581	-0.021484	0.91016	-0.74805	3.607	8.73	0.369	0.0068359	0.066406	-0.19043	NaN	NaN	NaN	NaN	NaN	NaN	NaN	NaN	NaN	NaN	NaN	NaN
0.164	42.7437	-126.98	1156.7779	-0.051367	0.9989	-0.75693	-11.72	4.7422	37.6137	0.013184	0.053223	-0.19092	NaN	NaN	NaN	NaN	NaN	NaN	NaN	NaN	NaN	NaN	NaN	NaN
0.166	37.3119	-115.125	1149.7412	-0.090137	1.1055	-0.76221	-36.6636	4.24727	22.4736	0.027344	0.036133	-0.19092	NaN	NaN	NaN	NaN	NaN	NaN	NaN	NaN	NaN	NaN	NaN	NaN
0.168	20.499	-99.231	1145.888	-0.13779	1.2239	-0.77275	-31.2984	12.77379	-4.931	0.039551	0.030518	-0.19824	NaN	NaN	NaN	NaN	NaN	NaN	NaN	NaN	NaN	NaN	NaN	NaN
0.17	27.224	-95.37	1138.099	-0.18632	1.3283	-0.78125	-30.3965	17.8824	3.475	0.043945	0.024414	-0.20557	NaN	NaN	NaN	NaN	NaN	NaN	NaN	NaN	NaN	NaN	NaN	NaN
0.172	2.923	-109.699	1168.255	-0.23242	1.4121	-0.79297	-29.377	25.8808	8.042	0.050293	0.02832	-0.21729	NaN	NaN	NaN	NaN	NaN	NaN	NaN	NaN	NaN	NaN	NaN	NaN
0.174	-3.765	-113.356	1170.379	-0.27431	1.4699	-0.80996	-26.326	15.1308	3.539	0.049316	0.029785	-0.21875	NaN	NaN	NaN	NaN	NaN	NaN	NaN	NaN	NaN	NaN	NaN	NaN
0.176	-29.9097	-130.507	1206.0705	-0.30703	1.5123	-0.82305	-33.4826	3.6823	29.1126	0.055176	0.034668	-0.23438	NaN	NaN	NaN	NaN	NaN	NaN	NaN	NaN	NaN	NaN	NaN	NaN
0.178	-39.3165	-138.3642	1219.7494	-0.32383	1.5389	-0.8293	-53.3942	19.0644	14.0767	0.06543	0.030517	-0.24585	NaN	NaN	NaN	NaN	NaN	NaN	NaN	NaN	NaN	NaN	NaN	NaN
0.18	-41.8763	-145.446	1224.4359	-0.33076	1.5516	-0.8375	-28.411	13.9	4.232	0.074707	0.033203	-0.26172	NaN	NaN	NaN	NaN	NaN	NaN	NaN	NaN	NaN	NaN	NaN	NaN
0.182	-46.7308	-154.224	1245.24608	-0.32861	1.5649	-0.83545	-38.2602	10.9939	32.5485	0.087891	0.024414	-0.28369	NaN	NaN	NaN	NaN	NaN	NaN	NaN	NaN	NaN	NaN	NaN	NaN
0.184	-68.727	-156.632	1268.5253	-0.33731	1.5713	-0.83652	-57.4545	11.3487	11.8969	0.097168	0.020508	-0.29297	NaN	NaN	NaN	NaN	NaN	NaN	NaN	NaN	NaN	NaN	NaN	NaN
0.186	-92.994	-174.45	1290.582	-0.35136	1.5902	-0.84219	-17.002	8.27376	-2.0131	0.1084	0.015625	-0.31641	NaN	NaN	NaN	NaN	NaN	NaN	NaN	NaN	NaN	NaN	NaN	NaN
0.188	-58.516	-173.975	1297.307	-0.3709	1.6149	-0.84883	-32.6172	4.1319	30.64	0.11646	0.0095215	-0.3291	NaN	NaN	NaN	NaN	NaN	NaN	NaN	NaN	NaN	NaN	NaN	NaN
0.19	-56.528	-172.024	1308.0402	-0.39687	1.642	-0.8627	-35.6307	6.1212	25.372	0.12012	0.015625	-0.34912	NaN	NaN	NaN	NaN	NaN	NaN	NaN	NaN	NaN	NaN	NaN	NaN
0.192	-69.247	-141.1105	1308.0591	-0.4209	1.6719	-0.86816	-4.559	-8.6808	32.103	0.12451	0.037109	-0.35986	NaN	NaN	NaN	NaN	NaN	NaN	NaN	NaN	NaN	NaN	NaN	NaN
0.194	-69.438	-127.0226	1297.3212	-0.44824	1.7066	-0.88164	-11.122	-17.626	72.611	0.12451	0.052246	-0.37256	NaN	NaN	NaN	NaN	NaN	NaN	NaN	NaN	NaN	NaN	NaN	NaN
0.196	-47.9121	-119.001	1274.208	-0.47647	1.7435	-0.89092	-14.035	-10.2537	45.2445	0.11377	0.084961	-0.39795	NaN	NaN	NaN	NaN	NaN	NaN	NaN	NaN	NaN	NaN	NaN	NaN
0.198	-43.0058	-89.006	1248.314	-0.50811	1.7728	-0.90068	1.333	-24.5725	62.4364	0.11377	0.11963	-0.4248	NaN	NaN	NaN	NaN	NaN	NaN	NaN	NaN	NaN	NaN	NaN	NaN
0.2	-38.19027	-82.149	1258.6358	-0.53525	1.795	-0.91162	2.3934	-37.5026	92.8953	0.11475	0.13477	-0.44238	NaN	NaN	NaN	NaN	NaN	NaN	NaN	NaN	NaN	NaN	NaN	NaN
0.202	-3.458	-94.9566	1274.029	-0.55566	1.8125	-0.91602	-8.545	-53.7588	84.3253	0.13086	0.16016	-0.46729	NaN	NaN	NaN	NaN	NaN	NaN	NaN	NaN	NaN	NaN	NaN	NaN
0.204	25.7105	-110.5931	1297.713	-0.56689	1.8245	-0.92627	15.2161	-58.4036	123.805	0.13697	0.17212	-0.48828	NaN	NaN	NaN	NaN	NaN	NaN	NaN	NaN	NaN	NaN	NaN	NaN
0.206	35.6663	-92.5866	1288.695	-0.57471	1.829	-0.93389	8.03045	-63.5665	146.375	0.15283	0.18799	-0.51025	NaN	NaN	NaN	NaN	NaN	NaN	NaN	NaN	NaN	NaN	NaN	NaN
0.208	30.429	-82.796	1303.703	-0.57549	1.8239	-0.93584	18.3292	-66.2114	139.719	0.16406	0.20801	-0.53467	NaN	NaN	NaN	NaN	NaN	NaN	NaN	NaN	NaN	NaN	NaN	NaN
0.21	46.21215	-90.848	1311.6674	-0.58301	1.8207	-0.94219	29.0704	-62.5928	192.6444	0.16943	0.22461	-0.55371	NaN	NaN	NaN	NaN	NaN	NaN	NaN	NaN	NaN	NaN	NaN	NaN
0.212	43.00891	-98.271	1321.4495	-0.59229	1.8105	-0.94727	7.0595	-39.72583	243.15	0.16992	0.26025	-0.58545	NaN	NaN	NaN	NaN	NaN	NaN	NaN	NaN	NaN	NaN	NaN	NaN
0.214	23.91	-97.557	1345.46	-0.59512	1.7949	-0.9543	23.1835	-1.37646	296.651	0.16333	0.30005	-0.61181	NaN	NaN	NaN	NaN	NaN	NaN	NaN	NaN	NaN	NaN	NaN	NaN
0.216	39.4386	-103.198	1352.352	-0.59297	1.7629	-0.95547	30.6258	43.5489	382.496	0.15137	0.35547	-0.64355	NaN	NaN	NaN	NaN	NaN	NaN	NaN	NaN	NaN	NaN	NaN	NaN
0.218	36.0368	-119.5119	1361.6811	-0.58672	1.7273	-0.9543	16.6864	70.907	479.391	0.12158	0.46289	-0.6875	NaN	NaN	NaN	NaN	NaN	NaN	NaN	NaN	NaN	NaN	NaN	NaN
0.22	19.0335	-120.706	1339.6957	-0.58438	1.6967	-0.95254	32.1777	88.273	562.825	0.099609	0.53076	-0.70996	NaN	NaN	NaN	NaN	NaN	NaN	NaN	NaN	NaN	NaN	NaN	NaN
0.222	-8.505	-108.245	1338.1363	-0.57764	1.6646	-0.95068	23.65955	95.3002	697.973	0.05127	0.71631	-0.75586	NaN	NaN	NaN	NaN	NaN	NaN	NaN	NaN	NaN	NaN	NaN	NaN
0.224	3.334	-83.955	1328.3711	-0.57451	1.6432	-0.95088	16.2375	119.568	795.6337	-0.004639	0.9065	-0.78296	NaN	NaN	NaN	NaN	NaN	NaN	NaN	NaN	NaN	NaN	NaN	NaN
0.226	-2.264	-60.3107	1335.17508	-0.57695	1.6211	-0.95351	53.663	131.185	887.8133	-0.081055	1.125	-0.80664	NaN	NaN	NaN	NaN	NaN	NaN	NaN	NaN	NaN	NaN	NaN	NaN
0.228	-7.257	-36.471	1337.08346	-0.5789	1.6075	-0.95235	62.628	107.872	996.2447	-0.19678	1.4517	-0.8667	NaN	NaN	NaN	NaN	NaN	NaN	NaN	NaN	NaN	NaN	NaN	NaN
0.23	-30.3508	-16.852	1336.234345	-0.57607	1.5895	-0.95224	-25.514	70.995	1033.5012	-0.26221	1.6196	-0.89697	NaN	NaN	NaN	NaN	NaN	NaN	NaN	NaN	NaN	NaN	NaN	NaN
0.232	-40.6362	-9.917	1346.5375	-0.57031	1.5801	-0.95117	-3.6703	32.607	1041.0599	-0.396	1.9165	-1.0112	NaN	NaN	NaN	NaN	NaN	NaN	NaN	NaN	NaN	NaN	NaN	NaN
0.234	-69.809	2.373	1347.6678	-0.56973	1.5629	-0.94649	0.662025	-29.286	1054.331	-0.42578	2.0439	-1.0586	NaN	NaN	NaN	NaN	NaN	NaN	NaN	NaN	NaN	NaN	NaN	NaN
0.236	-80.922	4.2549	1344.1598	-0.57314	1.5558	-0.94189	1.1924	-78.034	1024.455	-0.42725	2.0571	-1.1001	NaN	NaN	NaN	NaN	NaN	NaN	NaN	NaN	NaN	NaN	NaN	NaN
0.238	-97.46	4.9234	1323.3075	-0.57588	1.5485	-0.9376	-0.7229	-124.554	997.785	-0.34766	1.8965	-1.1523	NaN	NaN	NaN	NaN	NaN	NaN	NaN	NaN	NaN	NaN	NaN	NaN
0.24	-98.679	-9.1151	1323.8873	-0.5794	1.5413	-0.92764	-44.927	-179.442	964.824	-0.27734	1.7578	-1.1689	NaN	NaN	NaN	NaN	NaN	NaN	NaN	NaN	NaN	NaN	NaN	NaN
0.242	-88.176	-13.0762	1315.8254	-0.57764	1.5317	-0.91748	-25.4957	-191.442	911.558	-0.088867	1.4385	-1.1904	NaN	NaN	NaN	NaN	NaN	NaN	NaN	NaN	NaN	NaN	NaN	NaN
0.244	-72.089	-9.0203	1309.2819	-0.58272	1.5306	-0.91279	3.36	-191.818	893.2305	0.077882	1.2063	-1.2019	NaN	NaN	NaN	NaN	NaN	NaN	NaN	NaN	NaN	NaN	NaN	NaN
0.246	-86.007	-20.2596	1301.8034	-0.58457	1.525	-0.90801	-12.769	-171.558	911.6714	0.22656	0.99658	-1.2144	NaN	NaN	NaN	NaN	NaN	NaN	NaN	NaN	NaN	NaN	NaN	NaN
0.248	-59.711	-46.758	1291.0533	-0.58262	1.5254	-0.89511	-3.247	-135.124	896.301	0.38232	0.78125	-1.2402	NaN	NaN	NaN	NaN	NaN	NaN	NaN	NaN	NaN	NaN	NaN	NaN
0.25	-43.351	-60.732	1270.3961	-0.57646	1.5171	-0.88994	38.7314	-113.358	915.664	0.43066	0.71338	-1.2417	NaN	NaN	NaN	NaN	NaN	NaN	NaN	NaN	NaN	NaN	NaN	NaN
0.252	-19.735	-37.1553	1252.251	-0.5708	1.5122	-0.87939	21.9438	-88.341	974.087	0.47168	0.66064	-1.2358	NaN	NaN	NaN	NaN	NaN	NaN	NaN	NaN	NaN	NaN	NaN	NaN
0.254	-24.996	-23.1182	1253.036	-0.56299	1.497	-0.8667	24.2295	-70.769	1015.508	0.46265	0.69214	-1.2283	NaN	NaN	NaN	NaN	NaN	NaN	NaN	NaN	NaN	NaN	NaN	NaN
0.256	-8.672	-9.2591	1235.119	-0.55996	1.482	-0.86289	46.155	-80.714	1072.768	0.43311	0.76123	-1.2319	NaN	NaN	NaN	NaN	NaN	NaN	NaN	NaN	NaN	NaN	NaN	NaN
0.258	-9.38	8.1843	1241.8598	-0.55332	1.4727	-0.85039	-6.4178	-91.921	1111.397	0.36963	0.88965	-1.2559	NaN	NaN	NaN	NaN	NaN	NaN	NaN	NaN	NaN	NaN	NaN	NaN
0.26	-22.154	34.3861	1228.448	-0.54912	1.462	-0.83623	19.206	-104.807	1098.319	0.34326	0.96045	-1.271	NaN	NaN	NaN	NaN	NaN	NaN	NaN	NaN	NaN	NaN	NaN	NaN
0.262	-4.377	36.9231	1212.4357	-0.54297	1.4609	-0.8291	28.4242	-141.769	1121.578	0.31494	1.0806	-1.3003	NaN	NaN	NaN	NaN	NaN	NaN	NaN	NaN	NaN	NaN	NaN	NaN
0.264	30.022	44.172	1186.2598	-0.52871	1.443	-0.81973	5.5684	-186.7438	1161.726	0.30616	1.1338	-1.3204	NaN	NaN	NaN	NaN	NaN	NaN	NaN	NaN	NaN	NaN	NaN	NaN
0.266	26.522	55.262	1156.592	-0.51191	1.4278	-0.80703	52.257	-242.958	1171.729	0.31592	1.1699	-1.335	NaN	NaN	NaN	NaN	NaN	NaN	NaN	NaN	NaN	NaN	NaN	NaN
0.268	11.368	62.416	1139.7056	-0.49863	1.409	-0.79843	73.926	-291.811	1221.116	0.33008	1.207	-1.3594	NaN	NaN	NaN	NaN	NaN	NaN	NaN	NaN	NaN	NaN	NaN	NaN
0.27	24.333	52.5246	1120.1982	-0.49453	1.4009	-0.78262	27.8895	-305.127	1275.90347	0.32959	1.2231	-1.3687	NaN	NaN	NaN	NaN	NaN	NaN	NaN	NaN	NaN	NaN	NaN	NaN
0.272	17.571	36.0703	1094.223	-0.48633	1.3945	-0.76953	25.3605	-282.071	1285.0235	0.31445	1.2471	-1.3887	NaN	NaN	NaN	NaN	NaN	NaN	NaN	NaN	NaN	NaN	NaN	NaN
0.274	7.628	32.368	1078.4435	-0.48145	1.3913	-0.76015	65.777	-267.457	1356.293	0.30273	1.2847	-1.3804	NaN	NaN	NaN	NaN	NaN	NaN	NaN	NaN	NaN	NaN	NaN	NaN
0.276	-25.33	28.092	1074.151	-0.47149	1.3808	-0.74472	17.3823	-233.9767	1385.307	0.27881	1.3423	-1.3921	NaN	NaN	NaN	NaN	NaN	NaN	NaN	NaN	NaN	NaN	NaN	NaN
0.278	-17.241	30.3236	1092.31128	-0.46328	1.3625	-0.73105	34.726	-186.224	1381.575	0.21777	1.4209	-1.4063	NaN	NaN	NaN	NaN	NaN	NaN	NaN	NaN	NaN	NaN	NaN	NaN
0.28	-46.4617	44.6816	1083.2568	-0.44912	1.338	-0.71475	28.1361	-156.913	1415.963	0.18457	1.4609	-1.4121	NaN	NaN	NaN	NaN	NaN	NaN	NaN	NaN	NaN	NaN	NaN	NaN
0.282	-49.465	43.7659	1067.1437	-0.43555	1.3242	-0.70117	-29.3114	-139.965	1409.4375	0.125	1.5176	-1.4297	NaN	NaN	NaN	NaN	NaN	NaN	NaN	NaN	NaN	NaN	NaN	NaN
0.284	-77.317	34.2078	1046.903	-0.42198	1.3006	-0.68789	12.8988	-134.161	1383.0476	0.10181	1.5491	-1.448	NaN	NaN	NaN	NaN	NaN	NaN	NaN	NaN	NaN	NaN	NaN	NaN
0.286	-104.533	27.5478	1028.984	-0.40801	1.279	-0.67666	9.3667	-145.902	1374.624	0.092773	1.5645	-1.4609	NaN	NaN	NaN	NaN	NaN	NaN	NaN	NaN	NaN	NaN	NaN	NaN
0.288	-95.265	50.00827	995.2034	-0.39278	1.2599	-0.65986	3.7654	-142.498	1360.8541	0.10889	1.5562	-1.4624	NaN	NaN	NaN	NaN	NaN	NaN	NaN	NaN	NaN	NaN	NaN	NaN
0.29	-88.9075	70.02437	953.36	-0.38066	1.242	-0.64766	52.775	-159.321	1348.857	0.11182	1.5454	-1.4663	NaN	NaN	NaN	NaN	NaN	NaN	NaN	NaN	NaN	NaN	NaN	NaN
0.292	-97.756	78.68	935.142	-0.36084	1.2153	-0.63818	31.045	-206.4016	1368.013	0.099609	1.5313	-1.4805	NaN	NaN	NaN	NaN	NaN	NaN	NaN	NaN	NaN	NaN	NaN	NaN
0.294	-103.716	67.87	904.489	-0.34707	1.1886	-0.62559	2.7515	-222.198	1382.4071	0.06958	1.5325	-1.4881	NaN	NaN	NaN	NaN	NaN	NaN	NaN	NaN	NaN	NaN	NaN	NaN
0.296	-100.878	73.996	879.86	-0.33116	1.163	-0.6128	34.26	-215.729	1373.217	0.03125	1.5454	-1.4976	NaN	NaN	NaN	NaN	NaN	NaN	NaN	NaN	NaN	NaN	NaN	NaN
0.298	-83.836	74.915	850.262	-0.31162	1.1337	-0.59951	31.6813	-218.258	1441.189	-0.01416	1.5649	-1.521	NaN	NaN	NaN	NaN	NaN	NaN	NaN	NaN	NaN	NaN	NaN	NaN
0.3	-81.2171	78.196684	852.637	-0.2956	1.113	-0.58398	-2.9618	-211.727	1445.9589	-0.038574	1.5811	-1.5371	NaN	NaN	NaN	NaN	NaN	NaN	NaN	NaN	NaN	NaN	NaN	NaN
0.302	-58.3259	84.371	841.7204	-0.28027	1.0825	-0.57178	35.154	-206.177	1448.2619	-0.075195	1.6099	-1.564	NaN	NaN	NaN	NaN	NaN	NaN	NaN	NaN	NaN	NaN	NaN	NaN
0.304	-60.683	90.481	807.2418	-0.26172	1.0529	-0.56172	-8.0016	-213.11	1490.593	-0.091553	1.6245	-1.5786	NaN	NaN	NaN	NaN	NaN	NaN	NaN	NaN	NaN	NaN	NaN	NaN
0.306	-57.5761	104.662	777.718	-0.2417	1.0146	-0.55303	-11.6119	-187.7537	1477.121	-0.10449	1.6387	-1.5898	NaN	NaN	NaN	NaN	NaN	NaN	NaN	NaN	NaN	NaN	NaN	NaN
0.308	-47.546	95.565	760.5218	-0.21787	0.97784	-0.53271	44.4502	-180.292	1490.096	-0.12695	1.6504	-1.6016	NaN	NaN	NaN	NaN	NaN	NaN	NaN	NaN	NaN	NaN	NaN	NaN
0.31	-37.136	87.0812	730.6242	-0.19248	0.94179	-0.5167	26.25	-167.399	1503.484	-0.13623	1.6499	-1.5991	NaN	NaN	NaN	NaN	NaN	NaN	NaN	NaN	NaN	NaN	NaN	NaN
0.312	-14.336	86.3861	713.5638	-0.16455	0.90039	-0.50586	45.891	-141.0061	1450.005	-0.16064	1.6406	-1.5957	NaN	NaN	NaN	NaN	NaN	NaN	NaN	NaN	NaN	NaN	NaN	NaN
0.314	-14.752	89.0337	690.2402	-0.13779	0.86025	-0.49189	63.736	-118.39121	1429.128	-0.18189	1.634	-1.5896	NaN	NaN	NaN	NaN	NaN	NaN	NaN	NaN	NaN	NaN	NaN	NaN
0.316	10.456	93.8211	661.278	-0.11465	0.82197	-0.47295	39.9697	-101.9271	1456.685	-0.19873	1.6274	-1.5757	NaN	NaN	NaN	NaN	NaN	NaN	NaN	NaN	NaN	NaN	NaN	NaN
0.318	26.981	87.4613	645.4845	-0.093552	0.78251	-0.45693	57.784	-71.7253	1441.38	-0.22217	1.6138	-1.5562	NaN	NaN	NaN	NaN	NaN	NaN	NaN	NaN	NaN	NaN	NaN	NaN
0.32	23.504	74.039	625.7605	-0.078124	0.74648	-0.43906	79.66	-70.3923	1455.405	-0.23828	1.6094	-1.5469	NaN	NaN	NaN	NaN	NaN	NaN	NaN	NaN	NaN	NaN	NaN	NaN
0.322	-3.108	79.3322	606.45	-0.064941	0.71143	-0.42041	28.6096	-75.76	1481.4579	-0.25439	1.5942	-1.5229	NaN	NaN	NaN	NaN	NaN	NaN	NaN	NaN	NaN	NaN	NaN	NaN
0.324	8.686	91.8167	591.1262	-0.049025	0.68086	-0.40625	43.28956	-76.488	1481.662	-0.26318	1.594	-1.5115	NaN	NaN	NaN	NaN	NaN	NaN	NaN	NaN	NaN	NaN	NaN	NaN
0.326	-0.77	110.101	566.8529	-0.03389	0.64972	-0.38467	79.604	-62.892	1498.549	-0.2666	1.5879	-1.4951	NaN	NaN	NaN	NaN	NaN	NaN	NaN	NaN	NaN	NaN	NaN	NaN
0.328	-18.939	119.528	541.861	-0.019048	0.61495	-0.37217	37.5237	-68.96	1526.7582	-0.26904	1.5918	-1.4727	NaN	NaN	NaN	NaN	NaN	NaN	NaN	NaN	NaN	NaN	NaN	NaN
0.33	-51.0251	125.228	527.0917	-0.0010772	0.58351	-0.35323	57.783	-68.269	1514.3841	-0.27539	1.5996	-1.4668	NaN	NaN	NaN	NaN	NaN	NaN	NaN	NaN	NaN	NaN	NaN	NaN
0.332	-68.4444	115.925	496.9965	0.019531	0.5459	-0.33984	66.357	-102.4303	1534.942	-0.27295	1.6133	-1.4502	NaN	NaN	NaN	NaN	NaN	NaN	NaN	NaN	NaN	NaN	NaN	NaN
0.334	-61.6205	115.997	465.2671	0.032332	0.51405	-0.32773	31.4359	-95.65	1536.5556	-0.27051	1.6255	-1.4336	NaN	NaN	NaN	NaN	NaN	NaN	NaN	NaN	NaN	NaN	NaN	NaN
0.336	-74.2175	111.7682	447.1108	0.052067	0.47819	-0.30809	67.558	-78.116	1486.44	-0.27686	1.6353	-1.4175	NaN	NaN	NaN	NaN	NaN	NaN	NaN	NaN	NaN	NaN	NaN	NaN
0.338	-75.5263	94.3893	442.5164	0.068474	0.44538	-0.29481	60.972	-81.276	1492.1589	-0.27832	1.6406	-1.4023	NaN	NaN	NaN	NaN	NaN	NaN	NaN	NaN	NaN	NaN	NaN	NaN
0.34	-78.13814	83.044	418.2827	0.082626	0.41208	-0.27509	34.5344	-75.67	1485.889	-0.28321	1.6436	-1.3857	NaN	NaN	NaN	NaN	NaN	NaN	NaN	NaN	NaN	NaN	NaN	NaN
0.342	-79.23874	98.533	393.9809	0.092773	0.38379	-0.26074	52.605	-49.0572	1447.072	-0.28711	1.6465	-1.373	NaN	NaN	NaN	NaN	NaN	NaN	NaN	NaN	NaN	NaN	NaN	NaN
0.344	-78.8938	104.286	364.314	0.10116	0.35346	-0.24437	37.25553	-42.4965	1470.7127	-0.28711	1.6445	-1.3516	NaN	NaN	NaN	NaN	NaN	NaN	NaN	NaN	NaN	NaN	NaN	NaN
0.346	-96.407	98.7793	360.2169	0.10837	0.32555	-0.22584	8.144	-34.3548	1476.00779	-0.28906	1.6377	-1.3379	NaN	NaN	NaN	NaN	NaN	NaN	NaN	NaN	NaN	NaN	NaN	NaN
0.348	-85.988	83.0184	345.9266	0.11695	0.30256	-0.20983	29.6098	-13.299	1443.5804	-0.28125	1.6255	-1.3198	NaN	NaN	NaN	NaN	NaN	NaN	NaN	NaN	NaN	NaN	NaN	NaN
0.35	-99.083	89.6563	321.87288	0.12556	0.27692	-0.20022	31.1302	12.937	1444.7178	-0.2771	1.6038	-1.304	NaN	NaN	NaN	NaN	NaN	NaN	NaN	NaN	NaN	NaN	NaN	NaN
0.352	-93.942	93.711	314.6552	0.13135	0.24805	-0.18408	4.8304	47.3261	1387.7257	-0.26807	1.5825	-1.2788	NaN	NaN	NaN	NaN	NaN	NaN	NaN	NaN	NaN	NaN	NaN	NaN
0.354	-74.452	79.18	313.93417	0.14205	0.22377	-0.17045	38.594	58.685	1354.461	-0.25439	1.5454	-1.2593	NaN	NaN	NaN	NaN	NaN	NaN	NaN	NaN	NaN	NaN	NaN	NaN
0.356	-60.2815	79.3776	299.14797	0.15606	0.20095	-0.16517	2.1793	30.3014	1372.685	-0.24414	1.5273	-1.2461	NaN	NaN	NaN	NaN	NaN	NaN	NaN	NaN	NaN	NaN	NaN	NaN
0.358	-59.2843	85.0599	263.513	0.16648	0.17551	-0.14582	4.3881	10.0414	1349.8767	-0.22412	1.4907	-1.228	NaN	NaN	NaN	NaN	NaN	NaN	NaN	NaN	NaN	NaN	NaN	NaN
0.36	-53.1013	96.6996	235.9067	0.17623	0.153	-0.13622	54.126	-17.8254	1350.5538	-0.20898	1.4712	-1.2124	NaN	NaN	NaN	NaN	NaN	NaN	NaN	NaN	NaN	NaN	NaN	NaN
0.362	1.934	96.4098	218.7258	0.19287	0.12695	-0.12451	29.9404	-29.9503	1370.269	-0.19678	1.4536	-1.1987	NaN	NaN	NaN	NaN	NaN	NaN	NaN	NaN	NaN	NaN	NaN	NaN
0.364	18.595	93.3655	206.851	0.20021	0.10919	-0.11018	5.26119	-5.576	1328.8409	-0.18311	1.4399	-1.1782	NaN	NaN	NaN	NaN	NaN	NaN	NaN	NaN	NaN	NaN	NaN	NaN
0.366	16.139	85.5466	190.1481	0.21157	0.09162	-0.10109	15.7964	13.7529	1279.1347	-0.17529	1.4321	-1.1675	NaN	NaN	NaN	NaN	NaN	NaN	NaN	NaN	NaN	NaN	NaN	NaN
0.368	10.962	77.125	194.733503	0.22068	0.073285	-0.086801	10.15168	46.6833	1257.6236	-0.16162	1.4175	-1.1519	NaN	NaN	NaN	NaN	NaN	NaN	NaN	NaN	NaN	NaN	NaN	NaN
0.37	37.1747	72.5554	183.98694	0.22685	0.061251	-0.07836	7.021	72.097	1229.5532	-0.15356	1.4033	-1.144	NaN	NaN	NaN	NaN	NaN	NaN	NaN	NaN	NaN	NaN	NaN	NaN
0.372	12.27	70.2464	176.8787	0.23633	0.051758	-0.065918	28.8463	88.337	1247.48764	-0.13965	1.3867	-1.125	NaN	NaN	NaN	NaN	NaN	NaN	NaN	NaN	NaN	NaN	NaN	NaN
0.374	7.302	64.4474	181.9318	0.23966	0.049026	-0.059397	11.33172	84.0772	1265.701	-0.11963	1.3618	-1.1069	NaN	NaN	NaN	NaN	NaN	NaN	NaN	NaN	NaN	NaN	NaN	NaN
0.376	-5.008	61.639	190.094	0.24542	0.040218	-0.052759	19.9851	86.1402	1213.66579	-0.10889	1.3423	-1.0991	NaN	NaN	NaN	NaN	NaN	NaN	NaN	NaN	NaN	NaN	NaN	NaN
0.378	5.056	69.501	157.1615	0.24995	0.038857	-0.040092	45.67	91.1533	1195.89	-0.089844	1.2993	-1.0698	NaN	NaN	NaN	NaN	NaN	NaN	NaN	NaN	NaN	NaN	NaN	NaN
0.38	5.962	71.3	130.0045	0.25281	0.039298	-0.032189	-20.6067	115.4814	1169.617	-0.072265	1.2603	-1.0556	NaN	NaN	NaN	NaN	NaN	NaN	NaN	NaN	NaN	NaN	NaN	NaN
0.382	-21.916	71.54	116.4674	0.25	0.044922	-0.026855	24.0623	131.894	1098.4	-0.05127	1.2246	-1.0352	NaN	NaN	NaN	NaN	NaN	NaN	NaN	NaN	NaN	NaN	NaN	NaN
0.384	-22.188	47.28226	130.5353	0.25259	0.048528	-0.027156	41.3411	122.273	1068.905	-0.03418	1.168	-1.0059	NaN	NaN	NaN	NaN	NaN	NaN	NaN	NaN	NaN	NaN	NaN	NaN
0.386	-26.817	31.493	120.8266	0.25368	0.056308	-0.025518	-11.5594	110.0068	1062.295	-0.022949	1.145	-0.99707	NaN	NaN	NaN	NaN	NaN	NaN	NaN	NaN	NaN	NaN	NaN	NaN
0.388	-36.9664	38.096	104.4297	0.25195	0.064609	-0.021737	-2.3176	111.6147	1021.828	0.0039063	1.0869	-0.96289	NaN	NaN	NaN	NaN	NaN	NaN	NaN	NaN	NaN	NaN	NaN	NaN
0.39	-55.4131	35.557	117.8095	0.25318	0.07373	-0.019021	14.59208	107.1715	1040.625	0.016846	1.049	-0.94018	NaN	NaN	NaN	NaN	NaN	NaN	NaN	NaN	NaN	NaN	NaN	NaN
0.392	-55.632	32.192	122.8008	0.25342	0.081055	-0.013184	-12.4835	108.692	1027.0442	0.03125	1.0103	-0.91553	NaN	NaN	NaN	NaN	NaN	NaN	NaN	NaN	NaN	NaN	NaN	NaN
0.394	-62.5957	35.7053	116.2827	0.25134	0.088195	-0.010617	-28.8492	103.745	978.3338	0.047852	0.95898	-0.87891	NaN	NaN	NaN	NaN	NaN	NaN	NaN	NaN	NaN	NaN	NaN	NaN
0.396	-91.821	50.4085	85.3932	0.24371	0.097736	-0.013704	-18.023	93.057	980.489	0.056641	0.92969	-0.86426	NaN	NaN	NaN	NaN	NaN	NaN	NaN	NaN	NaN	NaN	NaN	NaN
0.398	-89.147	57.671	69.0012	0.23599	0.11527	-0.010421	-35.58895	115.3655	951.579	0.074707	0.87939	-0.82568	NaN	NaN	NaN	NaN	NaN	NaN	NaN	NaN	NaN	NaN	NaN	NaN
0.4	-80.029	47.475	62.08	0.23239	0.13189	-0.014648	-29.9126	129.2705	903.415	0.089844	0.83887	-0.80273	NaN	NaN	NaN	NaN	NaN	NaN	NaN	NaN	NaN	NaN	NaN	NaN
0.402	-78.0214	44.234	59.662	0.22363	0.14453	-0.016602	2.713	137.7359	924.44	0.10059	0.80078	-0.77734	NaN	NaN	NaN	NaN	NaN	NaN	NaN	NaN	NaN	NaN	NaN	NaN
0.404	-77.848	39.25772	47.772	0.22255	0.15689	-0.016384	-40.104	143.1851	869.016	0.11523	0.75146	-0.74561	NaN	NaN	NaN	NaN	NaN	NaN	NaN	NaN	NaN	NaN	NaN	NaN
0.406	-59.4323	31.0656	66.6142	0.21686	0.16157	-0.025996	-21.156	132.073	811.987	0.12354	0.72705	-0.72217	NaN	NaN	NaN	NaN	NaN	NaN	NaN	NaN	NaN	NaN	NaN	NaN
0.408	-36.8533	26.109	70.1717	0.21259	0.17171	-0.030286	-17.702	140.026	776.308	0.13525	0.67236	-0.69092	NaN	NaN	NaN	NaN	NaN	NaN	NaN	NaN	NaN	NaN	NaN	NaN
0.41	-39.1898	31.2964	54.1134	0.20937	0.17872	-0.035067	-35.2917	139.131	733.336	0.14087	0.64233	-0.66089	NaN	NaN	NaN	NaN	NaN	NaN	NaN	NaN	NaN	NaN	NaN	NaN
0.412	-23.164	45.2712	39.41529	0.20264	0.18359	-0.041016	-8.817	136.5649	713.1166	0.14453	0.60986	-0.62842	NaN	NaN	NaN	NaN	NaN	NaN	NaN	NaN	NaN	NaN	NaN	NaN
0.414	-5.907	45.5737	38.1141	0.20156	0.19374	-0.042866	-36.506	130.6738	707.727	0.14648	0.56348	-0.58789	NaN	NaN	NaN	NaN	NaN	NaN	NaN	NaN	NaN	NaN	NaN	NaN
0.416	14.471	44.138	44.01449	0.19884	0.20115	-0.04794	-49.068234	133.531	650.903	0.14746	0.53955	-0.5708	NaN	NaN	NaN	NaN	NaN	NaN	NaN	NaN	NaN	NaN	NaN	NaN
0.418	1.879	40.642	25.5959	0.1922	0.21405	-0.051856	-34.4971	146.978	595.217	0.1499	0.48828	-0.53125	NaN	NaN	NaN	NaN	NaN	NaN	NaN	NaN	NaN	NaN	NaN	NaN
0.42	3.325	20.4599	22.8118	0.18779	0.22733	-0.052635	-15.6099	164.514	595.032	0.15308	0.4563	-0.50317	NaN	NaN	NaN	NaN	NaN	NaN	NaN	NaN	NaN	NaN	NaN	NaN
0.422	20.116	4.71076	32.9844	0.18262	0.24463	-0.055176	-29.4083	169.855	553.799	0.1626	0.42041	-0.47998	NaN	NaN	NaN	NaN	NaN	NaN	NaN	NaN	NaN	NaN	NaN	NaN
0.424	22.7998	9.6696	48.0983	0.17695	0.25469	-0.057031	-25.765	161.514	517.16	0.1709	0.37598	-0.43896	NaN	NaN	NaN	NaN	NaN	NaN	NaN	NaN	NaN	NaN	NaN	NaN
0.426	10.898	21.1282	30.7024	0.16875	0.26944	-0.056054	-27.867	139.416	509.932	0.18018	0.35791	-0.41943	NaN	NaN	NaN	NaN	NaN	NaN	NaN	NaN	NaN	NaN	NaN	NaN
0.428	17.675	24.4898	24.8474	0.16484	0.27764	-0.0584	-25.3792	117.7273	456.279	0.19385	0.31787	-0.38428	NaN	NaN	NaN	NaN	NaN	NaN	NaN	NaN	NaN	NaN	NaN	NaN
0.43	32.563	24.9966	20.4557	0.15683	0.29287	-0.058106	-11.876	98.8351	443.5837	0.19922	0.28589	-0.35083	NaN	NaN	NaN	NaN	NaN	NaN	NaN	NaN	NaN	NaN	NaN	NaN
0.432	-11.768	19.0222	10.2903	0.15283	0.29736	-0.063965	-21.621	94.926	440.384	0.20703	0.25244	-0.3208	NaN	NaN	NaN	NaN	NaN	NaN	NaN	NaN	NaN	NaN	NaN	NaN
0.434	1.588	34.8941	0.99367	0.14912	0.29903	-0.065625	-25.326	100.9213	372.3942	0.21484	0.21924	-0.28711	NaN	NaN	NaN	NaN	NaN	NaN	NaN	NaN	NaN	NaN	NaN	NaN
0.436	0.631	21.3049	15.556	0.1497	0.29443	-0.067481	-3.329	107.9245	346.377	0.22461	0.19873	-0.27051	NaN	NaN	NaN	NaN	NaN	NaN	NaN	NaN	NaN	NaN	NaN	NaN
0.438	-5.334	23.5223	23.2618	0.15244	0.28427	-0.065136	-37.56143	105.724	343.9	0.23486	0.16504	-0.23486	NaN	NaN	NaN	NaN	NaN	NaN	NaN	NaN	NaN	NaN	NaN	NaN
0.44	-38.69603	18.32126	13.71	0.15176	0.26836	-0.064941	-45.2241	82.7945	303.501	0.24292	0.1377	-0.20801	NaN	NaN	NaN	NaN	NaN	NaN	NaN	NaN	NaN	NaN	NaN	NaN
0.442	-56.27039	22.25199	25.0357	0.15674	0.25488	-0.059082	-25.906	93.0034	283.355	0.25342	0.11719	-0.18311	NaN	NaN	NaN	NaN	NaN	NaN	NaN	NaN	NaN	NaN	NaN	NaN
0.444	-53.4732	25.9631	23.99389	0.16514	0.23662	-0.053418	-19.627	103.88633	272.8309	0.25928	0.099609	-0.15625	NaN	NaN	NaN	NaN	NaN	NaN	NaN	NaN	NaN	NaN	NaN	NaN
0.446	-65.816	24.6035	26.2313	0.17109	0.21856	-0.047656	-43.8847	104.584	219.2981	0.25928	0.089844	-0.13232	NaN	NaN	NaN	NaN	NaN	NaN	NaN	NaN	NaN	NaN	NaN	NaN
0.448	-73.624	24.5664	12.2152	0.17812	0.21113	-0.037891	-19.542	100.746	218.3456	0.27051	0.072266	-0.11133	NaN	NaN	NaN	NaN	NaN	NaN	NaN	NaN	NaN	NaN	NaN	NaN
0.45	-90.096	25.2771	8.6256	0.18574	0.20039	-0.03125	-36.872	94.67	193.8435	0.27368	0.055908	-0.093751	NaN	NaN	NaN	NaN	NaN	NaN	NaN	NaN	NaN	NaN	NaN	NaN
0.452	-68.838	20.6955	8.027	0.19189	0.19824	-0.022461	-33.859	101.746	159.4871	0.27734	0.041504	-0.078125	NaN	NaN	NaN	NaN	NaN	NaN	NaN	NaN	NaN	NaN	NaN	NaN
0.454	-60.269	19.2569	15.853	0.19463	0.19131	-0.017578	3.722	105.975	172.5319	0.28613	0.022461	-0.055664	NaN	NaN	NaN	NaN	NaN	NaN	NaN	NaN	NaN	NaN	NaN	NaN
0.456	-64.938	21.6	6.254	0.19981	0.18769	-0.0055664	-38.4391	73.8738	148.5715	0.29199	0.015137	-0.042969	NaN	NaN	NaN	NaN	NaN	NaN	NaN	NaN	NaN	NaN	NaN	NaN
0.458	-51.3707	0.794	36.8499	0.20215	0.17636	-0.0016602	-28.621	56.3256	122.4531	0.28955	0.0048828	-0.033203	NaN	NaN	NaN	NaN	NaN	NaN	NaN	NaN	NaN	NaN	NaN	NaN
0.46	-54.68378	4.8536	51.30633	0.19922	0.16563	0.0058594	-22.8073	61.515	95.586	0.29248	-0.0024415	-0.014892	NaN	NaN	NaN	NaN	NaN	NaN	NaN	NaN	NaN	NaN	NaN	NaN
0.462	-30.7055	5.19791	51.0636	0.20215	0.1582	0.0097656	-33.9911	50.4373	70.271	0.29541	-0.013672	0.00097656	NaN	NaN	NaN	NaN	NaN	NaN	NaN	NaN	NaN	NaN	NaN	NaN
0.464	-5.708	13.5558	44.649	0.20235	0.15244	0.016895	-21.6219	47.46	46.7274	0.29346	-0.014648	0.0058594	NaN	NaN	NaN	NaN	NaN	NaN	NaN	NaN	NaN	NaN	NaN	NaN
0.466	1.745	9.73586	56.4584	0.20361	0.14902	0.023535	-20.5412	35.7846	76.219	0.29004	-0.016113	0.011719	NaN	NaN	NaN	NaN	NaN	NaN	NaN	NaN	NaN	NaN	NaN	NaN
0.468	-17.6872	2.0303	62.7426	0.20049	0.14629	0.02666	-29.5203	13.48667	68.006	0.29639	-0.016602	0.023926	NaN	NaN	NaN	NaN	NaN	NaN	NaN	NaN	NaN	NaN	NaN	NaN
0.47	-1.675	-2.962	39.2099	0.19404	0.14824	0.029004	-20.2344	15.999	51.12552	0.2959	-0.011963	0.026611	NaN	NaN	NaN	NaN	NaN	NaN	NaN	NaN	NaN	NaN	NaN	NaN
0.472	1.735	-0.44	58.589	0.18945	0.14941	0.029785	-6.2949	27.25	76.208	0.29736	-0.013672	0.040039	NaN	NaN	NaN	NaN	NaN	NaN	NaN	NaN	NaN	NaN	NaN	NaN
0.474	13.812	9.4495	99.4925	0.18281	0.15069	0.028418	-8.258	28.179	43.888	0.28418	0.003418	0.037109	NaN	NaN	NaN	NaN	NaN	NaN	NaN	NaN	NaN	NaN	NaN	NaN
0.476	40.8264	18.2136	130.8327	0.18467	0.15469	0.023242	9.719	35.2803	30.1022	0.28125	0.011719	0.036621	NaN	NaN	NaN	NaN	NaN	NaN	NaN	NaN	NaN	NaN	NaN	NaN
0.478	41.2705	29.2909	120.24091	0.18115	0.1625	0.014258	15.867	42.9492	16.70268	0.27588	0.025879	0.043457	NaN	NaN	NaN	NaN	NaN	NaN	NaN	NaN	NaN	NaN	NaN	NaN
0.48	42.879	53.5077	105.4181	0.18779	0.17363	0.012012	-33.6511	29.3799	-24.0573	0.26465	0.04248	0.044434	NaN	NaN	NaN	NaN	NaN	NaN	NaN	NaN	NaN	NaN	NaN	NaN
0.482	44.592	65.6529	131.56918	0.18994	0.19189	0.0048828	-4.882	45.024	-16.8797	0.25439	0.054688	0.046387	NaN	NaN	NaN	NaN	NaN	NaN	NaN	NaN	NaN	NaN	NaN	NaN
0.484	45.218	75.896	192.0898	0.18633	0.21143	-0.0048828	-6.941	26.2204	12.8735	0.24707	0.077148	0.04248	NaN	NaN	NaN	NaN	NaN	NaN	NaN	NaN	NaN	NaN	NaN	NaN
0.486	8.846	92.6426	231.4478	0.17871	0.23526	-0.019336	-26.935	10.6416	20.207	0.23852	0.094729	0.043213	NaN	NaN	NaN	NaN	NaN	NaN	NaN	NaN	NaN	NaN	NaN	NaN
0.488	12.157	115.241	241.3283	0.17246	0.26299	-0.041993	-12.135	29.6611	16.0852	0.23242	0.1123	0.047363	NaN	NaN	NaN	NaN	NaN	NaN	NaN	NaN	NaN	NaN	NaN	NaN
0.49	34.964	105.205	255.7942	0.1709	0.29932	-0.065625	-20.1633	16.0778	23.6109	0.22266	0.12744	0.046387	NaN	NaN	NaN	NaN	NaN	NaN	NaN	NaN	NaN	NaN	NaN	NaN
0.492	-12.9372	101.026	309.053	0.16406	0.34473	-0.086426	-18.745	19.24067	8.196	0.22559	0.13184	0.047363	NaN	NaN	NaN	NaN	NaN	NaN	NaN	NaN	NaN	NaN	NaN	NaN
0.494	-48.8875	132.7964	365.861	0.15312	0.39795	-0.10674	-5.254	35.55966	9.3076	0.21777	0.146	0.041016	NaN	NaN	NaN	NaN	NaN	NaN	NaN	NaN	NaN	NaN	NaN	NaN
0.496	-40.4564	136.263	433.818	0.13242	0.46026	-0.13057	-23.281	14.205	31.1094	0.21924	0.15649	0.036621	NaN	NaN	NaN	NaN	NaN	NaN	NaN	NaN	NaN	NaN	NaN	NaN
0.498	-27.4743	133.271	498.4845	0.10313	0.52783	-0.15909	-25.52911	14.749	5.2945	0.21924	0.16016	0.039063	NaN	NaN	NaN	NaN	NaN	NaN	NaN	NaN	NaN	NaN	NaN	NaN
0.5	-52.492	117.85	574.0543	0.070898	0.60029	-0.18916	-15.3503	20.7025	13.803	0.2168	0.17334	0.037598	NaN	NaN	NaN	NaN	NaN	NaN	NaN	NaN	NaN	NaN	NaN	NaN
0.502	-28.2536	90.0424	648.616	0.038574	0.68896	-0.22021	-29.2967	1.718	31.4905	0.21777	0.18066	0.037109	NaN	NaN	NaN	NaN	NaN	NaN	NaN	NaN	NaN	NaN	NaN	NaN
0.504	-43.342	65.825	708.673	-0.0002932	0.78408	-0.25147	-42.0957	8.428	18.69	0.22021	0.19043	0.033691	NaN	NaN	NaN	NaN	NaN	NaN	NaN	NaN	NaN	NaN	NaN	NaN
0.506	-57.191	75.2762	781.3572	-0.040039	0.88447	-0.2875	-17.074	12.5418	48.654	0.22339	0.19776	0.030517	NaN	NaN	NaN	NaN	NaN	NaN	NaN	NaN	NaN	NaN	NaN	NaN
0.508	-40.509	78.6468	809.7239	-0.097459	0.98408	-0.31679	-18.8827	12.3976	23.861	0.22363	0.20605	0.031738	NaN	NaN	NaN	NaN	NaN	NaN	NaN	NaN	NaN	NaN	NaN	NaN
0.51	-33.13	48.1535	828.4907	-0.16279	1.088	-0.33877	-41.9723	24.2405	10.918	0.229	0.20605	0.023438	NaN	NaN	NaN	NaN	NaN	NaN	NaN	NaN	NaN	NaN	NaN	NaN
0.512	-46.76	20.4339	845.7041	-0.24951	1.186	-0.3667	-26.0123	23.7433	19.757	0.23535	0.20996	0.028809	NaN	NaN	NaN	NaN	NaN	NaN	NaN	NaN	NaN	NaN	NaN	NaN
0.514	-44.613	1.1615	850.134	-0.33076	1.2773	-0.40195	-38.02859	2.8643	3.0462	0.23975	0.2085	0.025391	NaN	NaN	NaN	NaN	NaN	NaN	NaN	NaN	NaN	NaN	NaN	NaN
0.516	-10.91369	-2.2603	849.023	-0.41572	1.35	-0.41914	-27.002	33.039	-15.3362	0.24634	0.20849	0.022461	NaN	NaN	NaN	NaN	NaN	NaN	NaN	NaN	NaN	NaN	NaN	NaN
0.518	2.01018	4.234	826.589	-0.49854	1.4043	-0.41602	-15.237	32.378	3.884	0.25439	0.20654	0.017578	NaN	NaN	NaN	NaN	NaN	NaN	NaN	NaN	NaN	NaN	NaN	NaN
0.52	3.4744	-0.684999999999999	810.806	-0.55752	1.4425	-0.40537	-40.0176	14.3132	5.937	0.26074	0.1958	0.028809	NaN	NaN	NaN	NaN	NaN	NaN	NaN	NaN	NaN	NaN	NaN	NaN
0.522	39.641	-7.697	803.0929	-0.59131	1.4634	-0.39502	-8.594	20.9513	16.996	0.26758	0.19189	0.022461	NaN	NaN	NaN	NaN	NaN	NaN	NaN	NaN	NaN	NaN	NaN	NaN
0.524	67.067	-14.398	783.175	-0.57812	1.4578	-0.39736	-13.21969	8.1788	25.0313	0.27002	0.18408	0.023926	NaN	NaN	NaN	NaN	NaN	NaN	NaN	NaN	NaN	NaN	NaN	NaN
0.526	79.95	-8.6367	795.775	-0.53623	1.4294	-0.39287	-13.6318	9.1408	24.8572	0.27588	0.17676	0.027344	NaN	NaN	NaN	NaN	NaN	NaN	NaN	NaN	NaN	NaN	NaN	NaN
0.528	66.954	-11.984	810.8794	-0.46826	1.3872	-0.3917	-6.204	29.75	13.3395	0.27734	0.17139	0.030762	NaN	NaN	NaN	NaN	NaN	NaN	NaN	NaN	NaN	NaN	NaN	NaN
0.53	83.063	-26.817	826.342	-0.39238	1.3459	-0.38691	-5.987	4.9141	9.61993	0.28125	0.1543	0.038086	NaN	NaN	NaN	NaN	NaN	NaN	NaN	NaN	NaN	NaN	NaN	NaN
0.532	66.158	-8.886	810.5791	-0.31592	1.3013	-0.38623	-24.914	11.36817	-1.1593	0.28809	0.14844	0.038086	NaN	NaN	NaN	NaN	NaN	NaN	NaN	NaN	NaN	NaN	NaN	NaN
0.534	40.482	-2.772	813.7189	-0.25332	1.266	-0.38027	-25.388	19.2098	-5.2022	0.29297	0.12939	0.045898	NaN	NaN	NaN	NaN	NaN	NaN	NaN	NaN	NaN	NaN	NaN	NaN
0.536	34.299	-31.67	824.963	-0.20781	1.2437	-0.38027	-2.533	-3.4268	15.47725	0.30029	0.11524	0.053711	NaN	NaN	NaN	NaN	NaN	NaN	NaN	NaN	NaN	NaN	NaN	NaN
0.538	32.0619	-71.361	857.779	-0.18281	1.2375	-0.3709	-3.479	7.60234	23.5959	0.30518	0.10547	0.062988	NaN	NaN	NaN	NaN	NaN	NaN	NaN	NaN	NaN	NaN	NaN	NaN
0.54	26.5403	-104.6916	854.1374	-0.17871	1.2358	-0.36797	-12.648	8.9972	13.9907	0.31348	0.088379	0.066406	NaN	NaN	NaN	NaN	NaN	NaN	NaN	NaN	NaN	NaN	NaN	NaN
0.542	-5.264	-106.558	869.066	-0.18018	1.2339	-0.36377	-19.9374	-3.9627	18.7591	0.31641	0.081055	0.070313	NaN	NaN	NaN	NaN	NaN	NaN	NaN	NaN	NaN	NaN	NaN	NaN
0.544	19.30044	-120.348	886.6809	-0.1665	1.2283	-0.36377	-24.9161	28.404	7.4729	0.32324	0.067871	0.075684	NaN	NaN	NaN	NaN	NaN	NaN	NaN	NaN	NaN	NaN	NaN	NaN
0.546	20.5005	-129.119	892.105	-0.14961	1.2195	-0.36523	-14.379	33.8148	3.1835	0.32324	0.060547	0.085205	NaN	NaN	NaN	NaN	NaN	NaN	NaN	NaN	NaN	NaN	NaN	NaN
0.548	6.579	-138.52	895.441	-0.12149	1.2086	-0.36289	-12.115	29.6904	4.5966	0.31934	0.05127	0.090332	NaN	NaN	NaN	NaN	NaN	NaN	NaN	NaN	NaN	NaN	NaN	NaN
0.55	-12.7602	-144.839	916.6574	-0.10019	1.193	-0.36289	-16.282	41.52	-7.743	0.3125	0.044922	0.09668	NaN	NaN	NaN	NaN	NaN	NaN	NaN	NaN	NaN	NaN	NaN	NaN
0.552	-20.8443	-130.733	969.3959	-0.081543	1.1782	-0.37256	-23.4934	28.4122	6.10088	0.31445	0.042969	0.097168	NaN	NaN	NaN	NaN	NaN	NaN	NaN	NaN	NaN	NaN	NaN	NaN
0.554	-30.6484	-108.218	993.0227	-0.066895	1.1799	-0.38809	-19.5887	24.9181	18.51075	0.30957	0.04541	0.10645	NaN	NaN	NaN	NaN	NaN	NaN	NaN	NaN	NaN	NaN	NaN	NaN
0.556	-88.509	-89.7394	1012.9381	-0.064746	1.1819	-0.39248	-18.944	33.0036	23.4149	0.30664	0.04126	0.10986	NaN	NaN	NaN	NaN	NaN	NaN	NaN	NaN	NaN	NaN	NaN	NaN
0.558	-97.894	-68.368	1024.1587	-0.062012	1.2027	-0.41084	-30.48511	8.588	24.206	0.30371	0.047852	0.11475	NaN	NaN	NaN	NaN	NaN	NaN	NaN	NaN	NaN	NaN	NaN	NaN
0.56	-87.481	-58.208	1043.2769	-0.07959	1.2345	-0.43701	-47.2677	1.8023	29.677	0.29443	0.049316	0.12354	NaN	NaN	NaN	NaN	NaN	NaN	NaN	NaN	NaN	NaN	NaN	NaN
0.562	-77.148	-39.858	1018.88	-0.09668	1.2734	-0.46143	-30.8142	10.72	9.567	0.29443	0.057617	0.12646	NaN	NaN	NaN	NaN	NaN	NaN	NaN	NaN	NaN	NaN	NaN	NaN
0.564	-68.443	-37.256	1027.06	-0.12695	1.319	-0.48643	-9.237	-2.789	9.8066	0.2915	0.065918	0.13379	NaN	NaN	NaN	NaN	NaN	NaN	NaN	NaN	NaN	NaN	NaN	NaN
0.566	-66.262	-54.551	1039.663	-0.16201	1.3669	-0.50166	-54.8826	19.7411	9.23	0.29029	0.073731	0.14014	NaN	NaN	NaN	NaN	NaN	NaN	NaN	NaN	NaN	NaN	NaN	NaN
0.568	-33.369	-96.49532	1084.0318	-0.19873	1.4158	-0.5169	-18.6768	33.0161	4.6928	0.29053	0.083984	0.14795	NaN	NaN	NaN	NaN	NaN	NaN	NaN	NaN	NaN	NaN	NaN	NaN
0.57	-40.3824	-105.245	1090.784	-0.23106	1.4658	-0.53154	-18.902	15.8322	22.1249	0.29346	0.093262	0.15137	NaN	NaN	NaN	NaN	NaN	NaN	NaN	NaN	NaN	NaN	NaN	NaN
0.572	-4.519	-104.834	1107.318	-0.26074	1.5234	-0.54004	-29.4125	29.973	17.1058	0.2959	0.092773	0.15967	NaN	NaN	NaN	NaN	NaN	NaN	NaN	NaN	NaN	NaN	NaN	NaN
0.574	3.762	-117.712	1129.35	-0.28428	1.5681	-0.55019	-1.252	28.8753	14.429	0.30029	0.11035	0.15771	NaN	NaN	NaN	NaN	NaN	NaN	NaN	NaN	NaN	NaN	NaN	NaN
0.576	-2.096	-114.806	1142.2327	-0.30303	1.6111	-0.55693	-14.722	8.1584	32.2385	0.30176	0.12012	0.15747	NaN	NaN	NaN	NaN	NaN	NaN	NaN	NaN	NaN	NaN	NaN	NaN
0.578	-25.216	-118.0973	1148.8822	-0.31045	1.6489	-0.56279	-25.9769	25.49565	23.48424	0.30176	0.13086	0.16016	NaN	NaN	NaN	NaN	NaN	NaN	NaN	NaN	NaN	NaN	NaN	NaN
0.58	-16.822	-94.333	1165.43	-0.30859	1.6671	-0.56026	3.893	19.80045	22.7608	0.30762	0.14648	0.16064	NaN	NaN	NaN	NaN	NaN	NaN	NaN	NaN	NaN	NaN	NaN	NaN
0.582	-5.405	-97.533	1200.378	-0.30518	1.6821	-0.57178	-17.7283	30.0692	0.0991	0.30908	0.15479	0.16455	NaN	NaN	NaN	NaN	NaN	NaN	NaN	NaN	NaN	NaN	NaN	NaN
0.584	1.494	-99.134	1203.559	-0.29912	1.6934	-0.57822	-43.7182	32.936	-18.8175	0.32031	0.17188	0.16016	NaN	NaN	NaN	NaN	NaN	NaN	NaN	NaN	NaN	NaN	NaN	NaN
0.586	10.247	-94.771	1201.4728	-0.29092	1.704	-0.58623	10.499	15.2899	24.529	0.3291	0.17969	0.15259	NaN	NaN	NaN	NaN	NaN	NaN	NaN	NaN	NaN	NaN	NaN	NaN
0.588	-4.714	-83.3831	1198.0878	-0.29483	1.7215	-0.596	-15.225	1.0299	38.16	0.34131	0.18555	0.13281	NaN	NaN	NaN	NaN	NaN	NaN	NaN	NaN	NaN	NaN	NaN	NaN
0.59	11.465	-69.694	1202.7998	-0.31055	1.7438	-0.60566	-26.9725	-13.6404	67.178	0.35791	0.21094	0.1001	NaN	NaN	NaN	NaN	NaN	NaN	NaN	NaN	NaN	NaN	NaN	NaN
0.592	12.836	-58.0893	1208.744	-0.33154	1.7759	-0.61865	12.8999	-4.5074	100.6589	0.3667	0.2251	0.086426	NaN	NaN	NaN	NaN	NaN	NaN	NaN	NaN	NaN	NaN	NaN	NaN
0.594	12.016	-45.3754	1209.562	-0.3585	1.8165	-0.63213	-11.5216	18.22225	116.06	0.37207	0.27588	0.05957	NaN	NaN	NaN	NaN	NaN	NaN	NaN	NaN	NaN	NaN	NaN	NaN
0.596	-10.753	-44.2455	1230.214	-0.38623	1.8521	-0.64834	-15.0437	20.7622	153.065	0.36792	0.32544	0.036621	NaN	NaN	NaN	NaN	NaN	NaN	NaN	NaN	NaN	NaN	NaN	NaN
0.598	-17.693	-41.723	1248.668	-0.41162	1.893	-0.66045	-21.681	27.6635	184.5669	0.35107	0.38574	0.0068359	NaN	NaN	NaN	NaN	NaN	NaN	NaN	NaN	NaN	NaN	NaN	NaN
0.6	-35.615	-50.0951	1262.787	-0.43154	1.9319	-0.67412	-60.1975	32.3104	204.03	0.33203	0.45947	-0.043945	NaN	NaN	NaN	NaN	NaN	NaN	NaN	NaN	NaN	NaN	NaN	NaN
0.602	-83.5267	-40.4183	1290.088	-0.45508	1.9609	-0.68359	-5.727	44.2651	273.6555	0.32324	0.50342	-0.06543	NaN	NaN	NaN	NaN	NaN	NaN	NaN	NaN	NaN	NaN	NaN	NaN
0.604	-78.2701	-41.3793	1324.2714	-0.4708	1.9897	-0.68691	-5.53	64.302	349.2171	0.30762	0.5918	-0.11719	NaN	NaN	NaN	NaN	NaN	NaN	NaN	NaN	NaN	NaN	NaN	NaN
0.606	-92.522	-47.9748	1346.4059	-0.49346	2.0114	-0.69443	-64.0735	83.706	400.899	0.3003	0.65478	-0.16601	NaN	NaN	NaN	NaN	NaN	NaN	NaN	NaN	NaN	NaN	NaN	NaN
0.608	-88.989	-48.3033	1335.7287	-0.51299	2.0278	-0.69756	-8.1357	78.23529	479.669	0.2876	0.71875	-0.22363	NaN	NaN	NaN	NaN	NaN	NaN	NaN	NaN	NaN	NaN	NaN	NaN
0.61	-98.399	-44.8272	1330.6105	-0.52705	2.0386	-0.69824	-10.4654	87.813	563.984	0.26514	0.81689	-0.31396	NaN	NaN	NaN	NaN	NaN	NaN	NaN	NaN	NaN	NaN	NaN	NaN
0.612	-94.544	-32.658	1346.8706	-0.5376	2.0415	-0.69678	-50.6738	82.3648	638.798	0.25488	0.87207	-0.35547	NaN	NaN	NaN	NaN	NaN	NaN	NaN	NaN	NaN	NaN	NaN	NaN
0.614	-87.88	-30.369	1354.7297	-0.5501	2.0382	-0.69112	-10.298	76.861	782.908	0.21924	1.0181	-0.44287	NaN	NaN	NaN	NaN	NaN	NaN	NaN	NaN	NaN	NaN	NaN	NaN
0.616	-82.6337	-34.8316	1354.7044	-0.5543	2.0265	-0.69004	-13.67	83.205	880.925	0.17431	1.147	-0.49732	NaN	NaN	NaN	NaN	NaN	NaN	NaN	NaN	NaN	NaN	NaN	NaN
0.618	-52.4876	-29.469	1349.195	-0.55781	2.0144	-0.68262	-46.8827	63.96	959.1873	0.11133	1.2969	-0.54297	NaN	NaN	NaN	NaN	NaN	NaN	NaN	NaN	NaN	NaN	NaN	NaN
0.62	-50.4007	-46.762	1376.0649	-0.55996	2.0017	-0.67422	1.78963	47.875	1045.01555	-0.0014648	1.5137	-0.59766	NaN	NaN	NaN	NaN	NaN	NaN	NaN	NaN	NaN	NaN	NaN	NaN
0.622	-41.7872	-32.048	1402.3733	-0.56445	1.9844	-0.66504	-38.951	35.8365	1079.633	-0.10645	1.6817	-0.63892	NaN	NaN	NaN	NaN	NaN	NaN	NaN	NaN	NaN	NaN	NaN	NaN
0.624	-47.9154	6.6914	1383.20057	-0.57119	1.962	-0.65244	-36.911	-11.4893	1147.877	-0.20508	1.8364	-0.6709	NaN	NaN	NaN	NaN	NaN	NaN	NaN	NaN	NaN	NaN	NaN	NaN
0.626	-38.414	43.644	1366.4384	-0.58438	1.9457	-0.64571	27.443	-40.634	1160.967	-0.28516	1.9731	-0.65381	NaN	NaN	NaN	NaN	NaN	NaN	NaN	NaN	NaN	NaN	NaN	NaN
0.628	-40.2339	47.37917	1373.5437	-0.59375	1.9293	-0.64414	-6.069	-87.517	1107.427	-0.28613	2.0117	-0.65234	NaN	NaN	NaN	NaN	NaN	NaN	NaN	NaN	NaN	NaN	NaN	NaN
0.63	-41.211	48.068	1377.74915	-0.60459	1.913	-0.63564	26.0932	-157.532	1109.046	-0.22803	1.9648	-0.60059	NaN	NaN	NaN	NaN	NaN	NaN	NaN	NaN	NaN	NaN	NaN	NaN
0.632	-15.575	47.422	1377.7758	-0.60693	1.8931	-0.63428	34.7494	-160.755	1040.361	-0.15528	1.8313	-0.56202	NaN	NaN	NaN	NaN	NaN	NaN	NaN	NaN	NaN	NaN	NaN	NaN
0.634	-4.286	34.752	1384.48902	-0.61094	1.8756	-0.625	25.9839	-197.211	990.99	-0.055176	1.6587	-0.52686	NaN	NaN	NaN	NaN	NaN	NaN	NaN	NaN	NaN	NaN	NaN	NaN
0.636	22.748	17.4712	1375.2478	-0.61524	1.8571	-0.61836	88.75	-182.426	946.687	0.11084	1.4004	-0.4668	NaN	NaN	NaN	NaN	NaN	NaN	NaN	NaN	NaN	NaN	NaN	NaN
0.638	31.8017	11.881	1357.8093	-0.61992	1.8383	-0.6168	66.084	-131.835	868.5163	0.19727	1.2935	-0.43311	NaN	NaN	NaN	NaN	NaN	NaN	NaN	NaN	NaN	NaN	NaN	NaN
0.64	24.881	3.159	1342.979	-0.61963	1.8181	-0.60879	63.8183	-141.661	876.277	0.3208	1.1484	-0.39551	NaN	NaN	NaN	NaN	NaN	NaN	NaN	NaN	NaN	NaN	NaN	NaN
0.642	3.982	18.948	1338.3802	-0.61914	1.7969	-0.60352	85.343	-125.1708	884.87	0.35816	1.1228	-0.38794	NaN	NaN	NaN	NaN	NaN	NaN	NaN	NaN	NaN	NaN	NaN	NaN
0.644	12.958	44.6523	1328.5854	-0.61865	1.7761	-0.60088	44.52	-111.941	879.737	0.36523	1.1538	-0.39404	NaN	NaN	NaN	NaN	NaN	NaN	NaN	NaN	NaN	NaN	NaN	NaN
0.646	17.631	39.266	1337.2573	-0.61641	1.7508	-0.59356	41.316	-119.916	922.7267	0.34277	1.27	-0.43506	NaN	NaN	NaN	NaN	NaN	NaN	NaN	NaN	NaN	NaN	NaN	NaN
0.648	-30.31	41.424	1338.671	-0.61211	1.723	-0.58535	50.2262	-88.298	919.1646	0.32666	1.3477	-0.46094	NaN	NaN	NaN	NaN	NaN	NaN	NaN	NaN	NaN	NaN	NaN	NaN
0.65	-58.599	38.737	1324.4296	-0.60186	1.6993	-0.58125	-2.787	-119.267	927.517	0.30273	1.5024	-0.53125	NaN	NaN	NaN	NaN	NaN	NaN	NaN	NaN	NaN	NaN	NaN	NaN
0.652	-69.085	42.415	1302.852	-0.59229	1.6704	-0.57764	-1.144	-150.585	987.719	0.30469	1.5921	-0.58521	NaN	NaN	NaN	NaN	NaN	NaN	NaN	NaN	NaN	NaN	NaN	NaN
0.654	-55.0299	61.921	1271.841	-0.58223	1.6494	-0.57305	9.264	-147.954	995.063	0.3291	1.6411	-0.63135	NaN	NaN	NaN	NaN	NaN	NaN	NaN	NaN	NaN	NaN	NaN	NaN
0.656	-84.053	74.6485	1261.055	-0.56357	1.6263	-0.56806	-21.114	-209.714	1038.345	0.39453	1.6372	-0.68896	NaN	NaN	NaN	NaN	NaN	NaN	NaN	NaN	NaN	NaN	NaN	NaN
0.658	-77.114	78.7195	1241.2242	-0.55264	1.6028	-0.55713	7.5572	-264.039	1088.5946	0.42969	1.6255	-0.71729	NaN	NaN	NaN	NaN	NaN	NaN	NaN	NaN	NaN	NaN	NaN	NaN
0.66	-71.4062	62.8238	1228.901	-0.54033	1.5753	-0.55254	-18.9814	-304.569	1080.361	0.51465	1.6001	-0.77979	NaN	NaN	NaN	NaN	NaN	NaN	NaN	NaN	NaN	NaN	NaN	NaN
0.662	-60.4153	81.222	1216.147	-0.52832	1.5493	-0.55029	-63.283	-350.198	1098.229	0.55932	1.597	-0.82153	NaN	NaN	NaN	NaN	NaN	NaN	NaN	NaN	NaN	NaN	NaN	NaN
0.664	-59.6593	89.689	1211.7028	-0.51573	1.524	-0.54746	-12.09	-320.998	1138.986	0.58057	1.6152	-0.86035	NaN	NaN	NaN	NaN	NaN	NaN	NaN	NaN	NaN	NaN	NaN	NaN
0.666	-67.5428	85.6288	1214.6874	-0.50528	1.5039	-0.54141	-50.8642	-309.185	1181.6189	0.56299	1.6602	-0.88672	NaN	NaN	NaN	NaN	NaN	NaN	NaN	NaN	NaN	NaN	NaN	NaN
0.668	-60.5421	83.3343	1207.1626	-0.49512	1.4847	-0.53398	-81.412	-304.383	1257.408	0.53906	1.6743	-0.88916	NaN	NaN	NaN	NaN	NaN	NaN	NaN	NaN	NaN	NaN	NaN	NaN
0.67	-69.644	87.85725	1165.818	-0.48584	1.4677	-0.53173	-39.9795	-252.412	1290.367	0.49365	1.7031	-0.9043	NaN	NaN	NaN	NaN	NaN	NaN	NaN	NaN	NaN	NaN	NaN	NaN
0.672	-74.48	83.3773	1140.6885	-0.47754	1.4453	-0.52295	-98.174	-227.6182	1272.5519	0.47485	1.7024	-0.9187	NaN	NaN	NaN	NaN	NaN	NaN	NaN	NaN	NaN	NaN	NaN	NaN
0.674	-78.503	79.938	1153.8641	-0.46699	1.4279	-0.5166	-93.884	-176.696	1298.0972	0.479	1.6953	-0.93164	NaN	NaN	NaN	NaN	NaN	NaN	NaN	NaN	NaN	NaN	NaN	NaN
0.676	-63.6487	82.171	1141.745	-0.46123	1.4059	-0.50821	-61.3533	-118.214	1264.978	0.5332	1.6548	-0.94482	NaN	NaN	NaN	NaN	NaN	NaN	NaN	NaN	NaN	NaN	NaN	NaN
0.678	-26.444	98.111	1108.6137	-0.45498	1.3839	-0.50039	-97.291	-135.047	1259.992	0.57227	1.6255	-0.95654	NaN	NaN	NaN	NaN	NaN	NaN	NaN	NaN	NaN	NaN	NaN	NaN
0.68	-27.4944	111.7985	1082.61759	-0.44404	1.3636	-0.48994	-52.3746	-113.068	1294.1511	0.65088	1.5762	-0.96875	NaN	NaN	NaN	NaN	NaN	NaN	NaN	NaN	NaN	NaN	NaN	NaN
0.682	22.161	119.94541	1070.541	-0.42822	1.3457	-0.479	-58.0106	-146.172	1247.919	0.68433	1.5549	-0.98706	NaN	NaN	NaN	NaN	NaN	NaN	NaN	NaN	NaN	NaN	NaN	NaN
0.684	29.8485	125.5788	1039.955	-0.42207	1.3211	-0.47226	-68.082	-187.062	1298.248	0.70215	1.5474	-1.0015	NaN	NaN	NaN	NaN	NaN	NaN	NaN	NaN	NaN	NaN	NaN	NaN
0.686	40.7413	125.472	1018.381	-0.41162	1.3056	-0.46299	-17.6866	-165.733	1338.1788	0.69141	1.5688	-1.0347	NaN	NaN	NaN	NaN	NaN	NaN	NaN	NaN	NaN	NaN	NaN	NaN
0.688	25.551	120.708	1006.444	-0.40733	1.279	-0.45595	-27.174	-209.6708	1316.599	0.67627	1.5918	-1.0566	NaN	NaN	NaN	NaN	NaN	NaN	NaN	NaN	NaN	NaN	NaN	NaN
0.69	53.3865	131.408	991.232	-0.40107	1.2583	-0.44541	-1.343	-200.821	1377.3208	0.64355	1.6626	-1.103	NaN	NaN	NaN	NaN	NaN	NaN	NaN	NaN	NaN	NaN	NaN	NaN
0.692	32.8755	137.884	971.73656	-0.39111	1.2349	-0.43994	-4.01499999999999	-165.7847	1355.9838	0.62427	1.7229	-1.1335	NaN	NaN	NaN	NaN	NaN	NaN	NaN	NaN	NaN	NaN	NaN	NaN
0.694	11.3478	157.89	940.2578	-0.37608	1.2021	-0.42334	-32.321	-216.253	1381.5676	0.59961	1.7856	-1.1665	NaN	NaN	NaN	NaN	NaN	NaN	NaN	NaN	NaN	NaN	NaN	NaN
0.696	4.674	149.583	932.7917	-0.36045	1.1656	-0.41328	9.551	-208.9654	1454.606	0.57129	1.8696	-1.1968	NaN	NaN	NaN	NaN	NaN	NaN	NaN	NaN	NaN	NaN	NaN	NaN
0.698	5.42	146.82	912.7506	-0.34404	1.1305	-0.40078	-9.331	-220.7454	1451.489	0.55908	1.9023	-1.2109	NaN	NaN	NaN	NaN	NaN	NaN	NaN	NaN	NaN	NaN	NaN	NaN
0.7	0.939000000000002	137.6478	883.1622	-0.32549	1.0972	-0.39287	-29.222	-239.751	1478.621	0.52344	1.9497	-1.2231	NaN	NaN	NaN	NaN	NaN	NaN	NaN	NaN	NaN	NaN	NaN	NaN
0.702	-22.661	139.1672	862.5822	-0.31055	1.0586	-0.38281	25.39	-158.38	1452.939	0.49561	1.9643	-1.2232	NaN	NaN	NaN	NaN	NaN	NaN	NaN	NaN	NaN	NaN	NaN	NaN
0.704	-12.919	132.9614	840.22605	-0.29668	1.0257	-0.37295	-22.818	-153.03	1391.529	0.46973	1.959	-1.2246	NaN	NaN	NaN	NaN	NaN	NaN	NaN	NaN	NaN	NaN	NaN	NaN
0.706	-5.75	129.627406	813.997228	-0.28242	0.99691	-0.36758	-40.826	-124.0164	1404.24	0.4375	1.9302	-1.2104	NaN	NaN	NaN	NaN	NaN	NaN	NaN	NaN	NaN	NaN	NaN	NaN
0.708	-15.8855	148.085	772.0332	-0.26836	0.96094	-0.35469	-21.3	-54.65	1378.205	0.42725	1.9067	-1.2065	NaN	NaN	NaN	NaN	NaN	NaN	NaN	NaN	NaN	NaN	NaN	NaN
0.71	-27.683	145.001	776.6343	-0.25898	0.93086	-0.34532	-37.348	-85.713	1394.533	0.39795	1.8633	-1.1895	NaN	NaN	NaN	NaN	NaN	NaN	NaN	NaN	NaN	NaN	NaN	NaN
0.712	-43.5637	146.666	764.254	-0.25049	0.89697	-0.33838	-3.952	-60.02	1438.34739	0.37744	1.8393	-1.1816	NaN	NaN	NaN	NaN	NaN	NaN	NaN	NaN	NaN	NaN	NaN	NaN
0.714	-52.788	148.4	748.083	-0.23877	0.86621	-0.33008	-43.967806	-61.32	1435.167	0.35645	1.8203	-1.1758	NaN	NaN	NaN	NaN	NaN	NaN	NaN	NaN	NaN	NaN	NaN	NaN
0.716	-76.269	159.1587	726.0143	-0.22549	0.83291	-0.32686	-102.091	-96.4263	1442.812	0.31836	1.8169	-1.1694	NaN	NaN	NaN	NaN	NaN	NaN	NaN	NaN	NaN	NaN	NaN	NaN
0.718	-58.472	168.691	710.27191	-0.21338	0.79658	-0.31865	-80.3404	-27.176	1430.846	0.29834	1.8188	-1.1665	NaN	NaN	NaN	NaN	NaN	NaN	NaN	NaN	NaN	NaN	NaN	NaN
0.72	-57.4879	168.841	693.3008	-0.20039	0.7627	-0.31104	-110.5643	-32.635	1407.23	0.25342	1.8389	-1.168	NaN	NaN	NaN	NaN	NaN	NaN	NaN	NaN	NaN	NaN	NaN	NaN
0.722	-62.69	179.143	647.7448	-0.18652	0.72705	-0.30469	-123.832	-36.4708	1441.8667	0.22437	1.8608	-1.1655	NaN	NaN	NaN	NaN	NaN	NaN	NaN	NaN	NaN	NaN	NaN	NaN
0.724	-61.873	175.968	609.963	-0.17177	0.68994	-0.29922	-77.0223	-2.53	1464.3493	0.1958	1.8774	-1.1675	NaN	NaN	NaN	NaN	NaN	NaN	NaN	NaN	NaN	NaN	NaN	NaN
0.726	-41.3057	163.6846	592.8868	-0.15674	0.65693	-0.29258	-94.848	-71.8834	1487.495	0.1709	1.8945	-1.1699	NaN	NaN	NaN	NaN	NaN	NaN	NaN	NaN	NaN	NaN	NaN	NaN
0.728	-12.8768	151.2619	593.5195	-0.14306	0.62686	-0.28047	-83.328	-55.046	1519.952	0.15967	1.8926	-1.166	NaN	NaN	NaN	NaN	NaN	NaN	NaN	NaN	NaN	NaN	NaN	NaN
0.73	-6.937	150.853	571.9462	-0.14024	0.59023	-0.27685	-63.706	-59.116	1499.28	0.14404	1.8755	-1.1548	NaN	NaN	NaN	NaN	NaN	NaN	NaN	NaN	NaN	NaN	NaN	NaN
0.732	12.98	142.21	555.361	-0.12744	0.55811	-0.27148	-89.687	-109.731	1491.877	0.13452	1.8547	-1.1419	NaN	NaN	NaN	NaN	NaN	NaN	NaN	NaN	NaN	NaN	NaN	NaN
0.734	15.324	144.635	527.116	-0.1208	0.52569	-0.26553	-64.4063	-27.421	1458.0311	0.11963	1.8306	-1.1245	NaN	NaN	NaN	NaN	NaN	NaN	NaN	NaN	NaN	NaN	NaN	NaN
0.736	31.3135	145.3497	517.5968	-0.10986	0.496	-0.26347	-65.6954	-37.1723	1392.363	0.11084	1.7949	-1.1064	NaN	NaN	NaN	NaN	NaN	NaN	NaN	NaN	NaN	NaN	NaN	NaN
0.738	14.89545	154.503	477.282	-0.097754	0.46318	-0.25801	-49.584	-16.0696	1396.5093	0.10547	1.7754	-1.0986	NaN	NaN	NaN	NaN	NaN	NaN	NaN	NaN	NaN	NaN	NaN	NaN
0.74	21.1402	142.359	472.136	-0.083789	0.43067	-0.25468	-26.808	55.262	1411.8284	0.1001	1.7368	-1.0747	NaN	NaN	NaN	NaN	NaN	NaN	NaN	NaN	NaN	NaN	NaN	NaN
0.742	33.4261	132.806	477.8113	-0.071289	0.39697	-0.24756	-85.827	3.3325	1407.486	0.091064	1.707	-1.0581	NaN	NaN	NaN	NaN	NaN	NaN	NaN	NaN	NaN	NaN	NaN	NaN
0.744	21.2838	124.805	457.5423	-0.057812	0.36348	-0.24717	-7.987	72.23	1408.5128	0.086914	1.6914	-1.0459	NaN	NaN	NaN	NaN	NaN	NaN	NaN	NaN	NaN	NaN	NaN	NaN
0.746	24.5254	120.895	415.2841	-0.044824	0.33223	-0.24473	-23.319	94.397	1351.782	0.084473	1.6816	-1.0313	NaN	NaN	NaN	NaN	NaN	NaN	NaN	NaN	NaN	NaN	NaN	NaN
0.748	26.4102	122.9795	388.9047	-0.030762	0.30136	-0.23965	-29.025	46.91411	1342.89	0.076172	1.6758	-1.0215	NaN	NaN	NaN	NaN	NaN	NaN	NaN	NaN	NaN	NaN	NaN	NaN
0.75	32.7558	119.5016	374.7987	-0.020118	0.27002	-0.23535	39.091	125.671	1338.4836	0.070801	1.6465	-1.0039	NaN	NaN	NaN	NaN	NaN	NaN	NaN	NaN	NaN	NaN	NaN	NaN
0.752	0.385999999999999	113.3285	348.1652	-0.012695	0.23975	-0.22803	-14.952	69.523	1304.0925	0.075684	1.624	-0.98975	NaN	NaN	NaN	NaN	NaN	NaN	NaN	NaN	NaN	NaN	NaN	NaN
0.754	-8.9584	122.4621	319.089	-0.0011719	0.21309	-0.21983	-5.128	59.8204	1301.627	0.072266	1.5884	-0.97607	NaN	NaN	NaN	NaN	NaN	NaN	NaN	NaN	NaN	NaN	NaN	NaN
0.756	8.104	103.2939	315.023	0.0029297	0.18184	-0.21748	32.44014	84.707	1296.1937	0.07666	1.5356	-0.95264	NaN	NaN	NaN	NaN	NaN	NaN	NaN	NaN	NaN	NaN	NaN	NaN
0.758	4.3582	104.979664	313.0738	0.011914	0.15644	-0.21084	-35.8449	6.818	1288.3031	0.077636	1.5032	-0.93725	NaN	NaN	NaN	NaN	NaN	NaN	NaN	NaN	NaN	NaN	NaN	NaN
0.76	-19.164	99.349	293.239	0.018457	0.13056	-0.20781	-12.411	55.9213	1259.582	0.078125	1.4746	-0.91797	NaN	NaN	NaN	NaN	NaN	NaN	NaN	NaN	NaN	NaN	NaN	NaN
0.762	-56.9889	109.3835	283.26011	0.025391	0.10693	-0.20117	-12.311	59.795	1219.01	0.075195	1.4492	-0.89258	NaN	NaN	NaN	NaN	NaN	NaN	NaN	NaN	NaN	NaN	NaN	NaN
0.764	-52.918	105.2	275.0645	0.026856	0.085645	-0.19599	-56.7398	33.87	1199.724	0.069824	1.4355	-0.88477	NaN	NaN	NaN	NaN	NaN	NaN	NaN	NaN	NaN	NaN	NaN	NaN
0.766	-69.809	102.422	245.4676	0.037402	0.061914	-0.19121	-31.0414	110.3501	1183.351	0.05957	1.4224	-0.86475	NaN	NaN	NaN	NaN	NaN	NaN	NaN	NaN	NaN	NaN	NaN	NaN
0.768	-76.067	94.7903	224.745	0.041309	0.036133	-0.18574	-65.964	64.63906	1176.9083	0.055908	1.4016	-0.84741	NaN	NaN	NaN	NaN	NaN	NaN	NaN	NaN	NaN	NaN	NaN	NaN
0.77	-68.94	82.3838	214.2447	0.049902	0.013867	-0.17988	-77.962	92.3368	1164	0.05127	1.3887	-0.8291	NaN	NaN	NaN	NaN	NaN	NaN	NaN	NaN	NaN	NaN	NaN	NaN
0.772	-62.193	76.45937	196.3018	0.051758	-0.01123	-0.17432	-36.56497	166.341	1124.2656	0.049805	1.3452	-0.79736	NaN	NaN	NaN	NaN	NaN	NaN	NaN	NaN	NaN	NaN	NaN	NaN
0.774	-33.8051	77.8141	180.883	0.059082	-0.032422	-0.16592	-69.8724	125.3537	1113.2016	0.052734	1.3242	-0.7832	NaN	NaN	NaN	NaN	NaN	NaN	NaN	NaN	NaN	NaN	NaN	NaN
0.776	-61.846	83.19	157.45	0.055566	-0.043848	-0.16328	-57.2423	183.118	1071.574	0.060059	1.2798	-0.74951	NaN	NaN	NaN	NaN	NaN	NaN	NaN	NaN	NaN	NaN	NaN	NaN
0.778	-36.0801	77.9381	158.9721	0.061426	-0.061426	-0.1625	-58.2798	170.3288	1033.615	0.062745	1.2397	-0.72535	NaN	NaN	NaN	NaN	NaN	NaN	NaN	NaN	NaN	NaN	NaN	NaN
0.78	-25.5009	71.1784	172.6347	0.063184	-0.07832	-0.15147	-67.1791	122.463	1022.941	0.067383	1.1958	-0.70264	NaN	NaN	NaN	NaN	NaN	NaN	NaN	NaN	NaN	NaN	NaN	NaN
0.782	-7.265	72.3523	156.664	0.063477	-0.09375	-0.14111	-40.768	181.4	974.411	0.074707	1.1348	-0.66797	NaN	NaN	NaN	NaN	NaN	NaN	NaN	NaN	NaN	NaN	NaN	NaN
0.784	-12.573	78.2759	138.7161	0.061133	-0.11045	-0.13867	-76.989	130.348	970.813298	0.073242	1.1035	-0.646	NaN	NaN	NaN	NaN	NaN	NaN	NaN	NaN	NaN	NaN	NaN	NaN
0.786	-6.908	59.305	146.8475	0.056445	-0.11806	-0.13448	-45.102	150.562	961.108	0.081543	1.0469	-0.61523	NaN	NaN	NaN	NaN	NaN	NaN	NaN	NaN	NaN	NaN	NaN	NaN
0.788	-0.0199999999999996	55.636	135.8456	0.050977	-0.12119	-0.13096	-35.32151	171.15	915.658	0.083496	1.0071	-0.58764	NaN	NaN	NaN	NaN	NaN	NaN	NaN	NaN	NaN	NaN	NaN	NaN
0.79	-6.151	60.191	112.51	0.049121	-0.11982	-0.12744	-51.725384	129.9389	900.8654	0.086426	0.9668	-0.56641	NaN	NaN	NaN	NaN	NaN	NaN	NaN	NaN	NaN	NaN	NaN	NaN
0.792	7.961	61.08	102.3369	0.043457	-0.12158	-0.12646	-0.928000000000001	170.9758	881.9817	0.092773	0.91064	-0.5376	NaN	NaN	NaN	NaN	NaN	NaN	NaN	NaN	NaN	NaN	NaN	NaN
0.794	21.4956	47.5345	95.3693	0.039551	-0.11768	-0.11904	7.6422	133.685	886.191	0.094727	0.88135	-0.521	NaN	NaN	NaN	NaN	NaN	NaN	NaN	NaN	NaN	NaN	NaN	NaN
0.796	23.442	37.3894	108.0695	0.031445	-0.11132	-0.11113	19.8615	127.438	855.622	0.095215	0.82178	-0.49756	NaN	NaN	NaN	NaN	NaN	NaN	NaN	NaN	NaN	NaN	NaN	NaN
0.798	21.613	39.4773	74.9857	0.019727	-0.10273	-0.10801	51.148	179.9905	809.715	0.10156	0.78003	-0.47046	NaN	NaN	NaN	NaN	NaN	NaN	NaN	NaN	NaN	NaN	NaN	NaN
0.8	30.2283	48.7864	67.2953	0.0097656	-0.089844	-0.10664	33.6546	156.0106	778.556	0.104	0.72852	-0.44922	NaN	NaN	NaN	NaN	NaN	NaN	NaN	NaN	NaN	NaN	NaN	NaN
0.802	25.699	46.56	70.5487	-0.00048828	-0.07373	-0.097168	50.585	197.616	739.075	0.104	0.66992	-0.4248	NaN	NaN	NaN	NaN	NaN	NaN	NaN	NaN	NaN	NaN	NaN	NaN
0.804	20.5305	35.7076	77.3198	-0.010547	-0.054199	-0.10371	59.829	196.341	708.2739	0.10547	0.63965	-0.40527	NaN	NaN	NaN	NaN	NaN	NaN	NaN	NaN	NaN	NaN	NaN	NaN
0.806	0.169	46.7484	63.1552	-0.019727	-0.041992	-0.099023	19.6832	165.764	670.213	0.10742	0.57813	-0.38184	NaN	NaN	NaN	NaN	NaN	NaN	NaN	NaN	NaN	NaN	NaN	NaN
0.808	-16.245	55.482	59.9734	-0.02793	-0.026367	-0.099807	41.162	205.926	619.91	0.10571	0.53589	-0.36059	NaN	NaN	NaN	NaN	NaN	NaN	NaN	NaN	NaN	NaN	NaN	NaN
0.81	-16.035	62.055	67.9411	-0.038183	-0.011719	-0.10136	18.0948	168.2136	608.125	0.10303	0.49512	-0.33984	NaN	NaN	NaN	NaN	NaN	NaN	NaN	NaN	NaN	NaN	NaN	NaN
0.812	-49.3834	53.468	72.587	-0.049805	0.003418	-0.10205	21.9014	187.07963	574.9185	0.098633	0.44287	-0.31299	NaN	NaN	NaN	NaN	NaN	NaN	NaN	NaN	NaN	NaN	NaN	NaN
0.814	-60.2558	53.334	49.4817	-0.063965	0.016992	-0.10332	6.352	214.53	530.702	0.098145	0.41748	-0.30078	NaN	NaN	NaN	NaN	NaN	NaN	NaN	NaN	NaN	NaN	NaN	NaN
0.816	-60.303	49.156	32.5774	-0.073144	0.036719	-0.10625	-13.104	170.6109	500.842	0.094238	0.36719	-0.27148	NaN	NaN	NaN	NaN	NaN	NaN	NaN	NaN	NaN	NaN	NaN	NaN
0.818	-48.5299	45.958	37.9072	-0.080175	0.054688	-0.10468	16.53	209.78	461.625	0.091065	0.32544	-0.25367	NaN	NaN	NaN	NaN	NaN	NaN	NaN	NaN	NaN	NaN	NaN	NaN
0.82	-60.1848	33.6451	28.117	-0.090821	0.068164	-0.10879	-33.4814	168.241	473.625	0.087402	0.28809	-0.24121	NaN	NaN	NaN	NaN	NaN	NaN	NaN	NaN	NaN	NaN	NaN	NaN
0.822	-67.961	32.557	26.267	-0.10107	0.081055	-0.11377	-41.0884	153.762	468.4294	0.080078	0.23193	-0.21045	NaN	NaN	NaN	NaN	NaN	NaN	NaN	NaN	NaN	NaN	NaN	NaN
0.824	-48.08419	28.594	31.501	-0.1085	0.096682	-0.11553	-17.7747	161.384	434.645	0.074219	0.20703	-0.1958	NaN	NaN	NaN	NaN	NaN	NaN	NaN	NaN	NaN	NaN	NaN	NaN
0.826	-56.09	30.162	30.37	-0.11435	0.11221	-0.1167	-67.03	111.18	409.42	0.068848	0.15088	-0.16992	NaN	NaN	NaN	NaN	NaN	NaN	NaN	NaN	NaN	NaN	NaN	NaN
0.828	-30.722	43.8517	33.1471	-0.12139	0.12705	-0.12178	-50.355	143.718	369.0737	0.063232	0.11011	-0.14697	NaN	NaN	NaN	NaN	NaN	NaN	NaN	NaN	NaN	NaN	NaN	NaN
0.83	-55.3389	51.5617	37.2634	-0.12607	0.14082	-0.11875	-58.0998	119.8701	336.381	0.055664	0.070801	-0.12695	NaN	NaN	NaN	NaN	NaN	NaN	NaN	NaN	NaN	NaN	NaN	NaN
0.832	-51.7243	46.383	38.771	-0.12451	0.1499	-0.11963	-72.4801	113.41	311.6415	0.046387	0.019531	-0.1001	NaN	NaN	NaN	NaN	NaN	NaN	NaN	NaN	NaN	NaN	NaN	NaN
0.834	-41.6628	37.387	49.1997	-0.13594	0.16396	-0.11807	-56.487	150.411	295.487	0.039063	0.003418	-0.085938	NaN	NaN	NaN	NaN	NaN	NaN	NaN	NaN	NaN	NaN	NaN	NaN
0.836	-33.069	37.453	36.8488	-0.13711	0.17256	-0.1165	-52.6187	97.5683	307.1532	0.025879	-0.037598	-0.068848	NaN	NaN	NaN	NaN	NaN	NaN	NaN	NaN	NaN	NaN	NaN	NaN
0.838	-32.9611	31.8497	22.3383	-0.14062	0.18155	-0.11338	-48.766	124.0436	295.5683	0.017334	-0.063477	-0.052002	NaN	NaN	NaN	NaN	NaN	NaN	NaN	NaN	NaN	NaN	NaN	NaN
0.84	-9.481	18.6459	28.4478	-0.13799	0.18799	-0.11524	-24.2265	111.1619	273.1065	0.013672	-0.093262	-0.040039	NaN	NaN	NaN	NaN	NaN	NaN	NaN	NaN	NaN	NaN	NaN	NaN
0.842	11.165	12.2649	30.39	-0.14307	0.19287	-0.11914	-39.4102	91.804	254.1693	0.0024414	-0.12305	-0.034668	NaN	NaN	NaN	NaN	NaN	NaN	NaN	NaN	NaN	NaN	NaN	NaN
0.844	4.022	35.04889	9.388	-0.13994	0.19854	-0.1168	-12.962	147.2	193.28	-0.0068359	-0.1377	-0.024902	NaN	NaN	NaN	NaN	NaN	NaN	NaN	NaN	NaN	NaN	NaN	NaN
0.846	26.6947	31.86547	15.931	-0.13643	0.19902	-0.11816	2.717	85.706	177.732	-0.015137	-0.15869	-0.015625	NaN	NaN	NaN	NaN	NaN	NaN	NaN	NaN	NaN	NaN	NaN	NaN
0.848	36.298	19.79321	25.1375	-0.13487	0.19746	-0.12012	-11.31	105.823	146.198	-0.018311	-0.18188	-0.0024414	NaN	NaN	NaN	NaN	NaN	NaN	NaN	NaN	NaN	NaN	NaN	NaN
0.85	16.163	14.1095	32.567	-0.12998	0.18731	-0.13008	12.5	108.615	137.177	-0.025879	-0.20068	0.0019531	NaN	NaN	NaN	NaN	NaN	NaN	NaN	NaN	NaN	NaN	NaN	NaN
0.852	-2.221	20.6631	35.106	-0.1167	0.18262	-0.13037	-0.231999999999999	40.8688	156.54977	-0.02832	-0.2207	0.0097656	NaN	NaN	NaN	NaN	NaN	NaN	NaN	NaN	NaN	NaN	NaN	NaN
0.854	12.65	20.3734	15.1662	-0.10918	0.16543	-0.129	28.7644	88.213	137.9811	-0.030273	-0.23486	0.012695	NaN	NaN	NaN	NaN	NaN	NaN	NaN	NaN	NaN	NaN	NaN	NaN
0.856	3.763	18.3523	22.742	-0.096094	0.15507	-0.13731	22.3639	30.2871	147.4565	-0.034668	-0.26025	0.016602	NaN	NaN	NaN	NaN	NaN	NaN	NaN	NaN	NaN	NaN	NaN	NaN
0.858	-25.9989	27.5828	24.9318	-0.089063	0.13515	-0.14199	12.37	27.0675	142.4623	-0.03833	-0.27197	0.015625	NaN	NaN	NaN	NaN	NaN	NaN	NaN	NaN	NaN	NaN	NaN	NaN
0.86	-27.339	24.88	25.8992	-0.080957	0.11914	-0.15049	29.3649	65.807	97.6553	-0.039063	-0.28711	0.016113	NaN	NaN	NaN	NaN	NaN	NaN	NaN	NaN	NaN	NaN	NaN	NaN
0.862	-29.8425	29.113	19.199	-0.075195	0.10449	-0.1543	-1.831	-15.9533	101.855	-0.047852	-0.29443	0.020508	NaN	NaN	NaN	NaN	NaN	NaN	NaN	NaN	NaN	NaN	NaN	NaN
0.864	-25.0256	24.4308	27.4632	-0.062695	0.087793	-0.16406	15.7529	46.41	62.1251	-0.05127	-0.28906	0.018066	NaN	NaN	NaN	NaN	NaN	NaN	NaN	NaN	NaN	NaN	NaN	NaN
0.866	-47.68551	19.46197	19.0517	-0.054199	0.072852	-0.17129	5.547	24.905	55.7666	-0.057129	-0.28076	0.021484	NaN	NaN	NaN	NaN	NaN	NaN	NaN	NaN	NaN	NaN	NaN	NaN
0.868	-45.622	18.5065	10.3602	-0.046777	0.061524	-0.17988	-16.819	4.777	56.90215	-0.072265	-0.26416	0.011719	NaN	NaN	NaN	NaN	NaN	NaN	NaN	NaN	NaN	NaN	NaN	NaN
0.87	-47.3767	8.8465	15.0416	-0.036524	0.04668	-0.18076	-3.103	60.9017	41.807	-0.092285	-0.24805	0.0092773	NaN	NaN	NaN	NaN	NaN	NaN	NaN	NaN	NaN	NaN	NaN	NaN
0.872	-66.255	20.4387	23.3186	-0.03125	0.033203	-0.18994	-22.797	-1.7	69.4554	-0.11914	-0.20264	-0.00048828	NaN	NaN	NaN	NaN	NaN	NaN	NaN	NaN	NaN	NaN	NaN	NaN
0.874	-52.75764	7.3671	37.979	-0.020605	0.025976	-0.19229	-50.9688	51.0413	51.4591	-0.13379	-0.17871	-0.0058594	NaN	NaN	NaN	NaN	NaN	NaN	NaN	NaN	NaN	NaN	NaN	NaN
0.876	-79.444	-1.7734	47.19	-0.016211	0.010742	-0.20156	-49.447	65.856	43.2058	-0.15967	-0.12256	-0.019531	NaN	NaN	NaN	NaN	NaN	NaN	NaN	NaN	NaN	NaN	NaN	NaN
0.878	-73.046	-11.4663	65.4888	-0.011523	0.0013672	-0.20781	-46.76418	13.8145	27.181	-0.17627	-0.087158	-0.028076	NaN	NaN	NaN	NaN	NaN	NaN	NaN	NaN	NaN	NaN	NaN	NaN
0.88	-58.755	-7.076	74.44032	-0.0046875	-0.0082031	-0.21006	-58.701	79.776	-8.2383	-0.18799	-0.049316	-0.036133	NaN	NaN	NaN	NaN	NaN	NaN	NaN	NaN	NaN	NaN	NaN	NaN
0.882	-55.24385	-6.992	78.8233	-0.0019531	-0.0073242	-0.21338	-90.659	18.2004	2.67573	-0.20459	-0.00097656	-0.049316	NaN	NaN	NaN	NaN	NaN	NaN	NaN	NaN	NaN	NaN	NaN	NaN
0.884	-46.0133	-15.0849	76.9457	-0.0058594	-0.003125	-0.2167	-56.0012	19.2089	-10.083	-0.2085	0.021484	-0.057129	NaN	NaN	NaN	NaN	NaN	NaN	NaN	NaN	NaN	NaN	NaN	NaN
0.886	-40.974	-39.6107	82.3496	-0.015528	0.0042969	-0.22324	-54.682	56.4057	-18.823	-0.22266	0.067871	-0.072266	NaN	NaN	NaN	NaN	NaN	NaN	NaN	NaN	NaN	NaN	NaN	NaN
0.888	-21.7795	-30.63187	100.1812	-0.023731	0.016406	-0.22207	-76.278	-24.213	26.721	-0.22924	0.09717	-0.084717	NaN	NaN	NaN	NaN	NaN	NaN	NaN	NaN	NaN	NaN	NaN	NaN
0.89	-2.672	-13.6569	112.1457	-0.036035	0.035937	-0.23145	-28.3499	27.477	19.389	-0.23193	0.125	-0.095215	NaN	NaN	NaN	NaN	NaN	NaN	NaN	NaN	NaN	NaN	NaN	NaN
0.892	8.4308	-5.197	148.0274	-0.041504	0.054688	-0.24316	-52.458	4.937	31.872	-0.23828	0.14746	-0.10254	NaN	NaN	NaN	NaN	NaN	NaN	NaN	NaN	NaN	NaN	NaN	NaN
0.894	23.5661	27.143	181.123	-0.051563	0.084375	-0.24522	-45.9822	-8.399	33.8	-0.23584	0.15527	-0.11377	NaN	NaN	NaN	NaN	NaN	NaN	NaN	NaN	NaN	NaN	NaN	NaN
0.896	2.924	48.6643	226.517	-0.062597	0.11065	-0.25185	8.57	56.438	0.3476	-0.24072	0.17285	-0.11719	NaN	NaN	NaN	NaN	NaN	NaN	NaN	NaN	NaN	NaN	NaN	NaN
0.898	22.4359	77.3673	245.948	-0.071582	0.1419	-0.2585	-18.021	-6.92873	31.6828	-0.23486	0.18164	-0.12109	NaN	NaN	NaN	NaN	NaN	NaN	NaN	NaN	NaN	NaN	NaN	NaN
0.9	65.515	73.765	312.2033	-0.085547	0.18193	-0.27051	-6.843	19.5396	8.2894	-0.23584	0.18213	-0.12256	NaN	NaN	NaN	NaN	NaN	NaN	NaN	NaN	NaN	NaN	NaN	NaN
0.902	59.238	89.285	377.9287	-0.10498	0.22217	-0.27881	0.936	25.28908	10.549	-0.23438	0.17822	-0.12207	NaN	NaN	NaN	NaN	NaN	NaN	NaN	NaN	NaN	NaN	NaN	NaN
0.904	38.025	93.755	432.0177	-0.13115	0.279	-0.28867	9.5	-9.078	27.916	-0.23218	0.1748	-0.11962	NaN	NaN	NaN	NaN	NaN	NaN	NaN	NaN	NaN	NaN	NaN	NaN
0.906	31.492	75.274	487.4261	-0.17207	0.33301	-0.28769	16.61273	39.5542	14.065	-0.23877	0.17285	-0.11572	NaN	NaN	NaN	NaN	NaN	NaN	NaN	NaN	NaN	NaN	NaN	NaN
0.908	37.764	64.01	559.551	-0.21504	0.40644	-0.29199	9.445	14.78735	39.2714	-0.23828	0.17969	-0.12012	NaN	NaN	NaN	NaN	NaN	NaN	NaN	NaN	NaN	NaN	NaN	NaN
0.91	33.1244	65.085	659.926	-0.27178	0.48819	-0.29404	18.803	38.214	3.0052	-0.24365	0.18262	-0.11914	NaN	NaN	NaN	NaN	NaN	NaN	NaN	NaN	NaN	NaN	NaN	NaN
0.912	38.775	49.8116	751.328	-0.34082	0.58447	-0.28906	23.8225	61.782	-13.5532	-0.24609	0.18164	-0.12305	NaN	NaN	NaN	NaN	NaN	NaN	NaN	NaN	NaN	NaN	NaN	NaN
0.914	1.1961	40.19547	836.095	-0.43115	0.71386	-0.29355	24.348	19.6544	17.70264	-0.24292	0.1809	-0.13061	NaN	NaN	NaN	NaN	NaN	NaN	NaN	NaN	NaN	NaN	NaN	NaN
0.916	-10.0917	19.4049	913.646	-0.51914	0.87149	-0.30254	16.058	35.374	0.308	-0.24414	0.16943	-0.13184	NaN	NaN	NaN	NaN	NaN	NaN	NaN	NaN	NaN	NaN	NaN	NaN
0.918	2.4315	-3.2851	982.0231	-0.61211	1.0543	-0.31738	-9.425	6.0586	21.1477	-0.23242	0.15381	-0.13574	NaN	NaN	NaN	NaN	NaN	NaN	NaN	NaN	NaN	NaN	NaN	NaN
0.92	-18.21095	-35.3242	1015.661	-0.70586	1.2541	-0.34112	10.919	6.2897	22.268	-0.2251	0.14453	-0.13232	NaN	NaN	NaN	NaN	NaN	NaN	NaN	NaN	NaN	NaN	NaN	NaN
0.922	-31.1398	-39.0897	1017.277	-0.80225	1.4536	-0.37744	-7.8414	38.219	7.664	-0.20605	0.11865	-0.13574	NaN	NaN	NaN	NaN	NaN	NaN	NaN	NaN	NaN	NaN	NaN	NaN
0.924	-39.8828	-51.36428	1028.313	-0.88516	1.6278	-0.43535	-43.2874	6.4399	31.9171	-0.19263	0.095461	-0.12939	NaN	NaN	NaN	NaN	NaN	NaN	NaN	NaN	NaN	NaN	NaN	NaN
0.926	-57.904	-55.396	1019.994	-0.95117	1.7617	-0.49336	-28.3759	20.9562	19.9262	-0.18408	0.067383	-0.13037	NaN	NaN	NaN	NaN	NaN	NaN	NaN	NaN	NaN	NaN	NaN	NaN
0.928	-63.5026	-76.918	1004.207	-0.97852	1.8304	-0.54571	-57.165	3.391	21.3691	-0.16309	0.038574	-0.12305	NaN	NaN	NaN	NaN	NaN	NaN	NaN	NaN	NaN	NaN	NaN	NaN
0.93	-64.1015	-106.562	996.516	-0.96963	1.8327	-0.56943	-56.3144	1.904462	19.5423	-0.15674	0.024414	-0.1167	NaN	NaN	NaN	NaN	NaN	NaN	NaN	NaN	NaN	NaN	NaN	NaN
0.932	-61.46	-118.882	971.040162	-0.93359	1.7832	-0.58203	-28.8619	6.8366	0.565000000000001	-0.13867	-0.003418	-0.11328	NaN	NaN	NaN	NaN	NaN	NaN	NaN	NaN	NaN	NaN	NaN	NaN
0.934	-57.4049	-112.336	953.539	-0.87129	1.6998	-0.59609	-64.842	-17.8499	29.914496	-0.13525	-0.023926	-0.11426	NaN	NaN	NaN	NaN	NaN	NaN	NaN	NaN	NaN	NaN	NaN	NaN
0.936	-39.34511	-102.52	925.488	-0.80303	1.604	-0.61592	-60.1432	16.178	4.275	-0.12695	-0.038574	-0.11475	NaN	NaN	NaN	NaN	NaN	NaN	NaN	NaN	NaN	NaN	NaN	NaN
0.938	-42.1026	-93.462	932.63	-0.73858	1.5145	-0.64287	-46.9575	17.1712	0.317	-0.1123	-0.056152	-0.11475	NaN	NaN	NaN	NaN	NaN	NaN	NaN	NaN	NaN	NaN	NaN	NaN
0.94	-22.013	-66.096	936.415	-0.67793	1.4215	-0.66347	-63.967	33.70621	9.9527	-0.10352	-0.067871	-0.11621	NaN	NaN	NaN	NaN	NaN	NaN	NaN	NaN	NaN	NaN	NaN	NaN
0.942	-22.0475	-39.14	961.0672	-0.62109	1.3242	-0.69287	-43.7655	39.096	-1.0036	-0.088379	-0.086914	-0.12109	NaN	NaN	NaN	NaN	NaN	NaN	NaN	NaN	NaN	NaN	NaN	NaN
0.944	-16.9537	-34.505	953.9839	-0.55381	1.2517	-0.72685	-57.9884	10.2253	33.723	-0.073486	-0.097414	-0.12744	NaN	NaN	NaN	NaN	NaN	NaN	NaN	NaN	NaN	NaN	NaN	NaN
0.946	-14.6782	-64.955	973.0587	-0.48291	1.1766	-0.75049	-37.7086	32.589	22.3079	-0.059082	-0.1123	-0.13379	NaN	NaN	NaN	NaN	NaN	NaN	NaN	NaN	NaN	NaN	NaN	NaN
0.948	-1.07	-86.846	990.145	-0.4165	1.1017	-0.77471	-17.6967	12.36704	7.5672	-0.040039	-0.13623	-0.13867	NaN	NaN	NaN	NaN	NaN	NaN	NaN	NaN	NaN	NaN	NaN	NaN
0.95	21.3944	-97.7754	994.4382	-0.35527	1.0362	-0.79707	-12.473	5.7882	30.704	-0.02832	-0.1416	-0.14453	NaN	NaN	NaN	NaN	NaN	NaN	NaN	NaN	NaN	NaN	NaN	NaN
0.952	21.5689	-120.5179	996.8906	-0.30615	0.98047	-0.80859	9.97	11.5541	16.6717	-0.01416	-0.14941	-0.15088	NaN	NaN	NaN	NaN	NaN	NaN	NaN	NaN	NaN	NaN	NaN	NaN
0.954	33.295	-141.855	990.773	-0.26739	0.94121	-0.81543	-29.029	-37.16	30.637	-0.0034179	-0.14404	-0.15649	NaN	NaN	NaN	NaN	NaN	NaN	NaN	NaN	NaN	NaN	NaN	NaN
0.956	56.465	-185.875	1010.5438	-0.24492	0.91309	-0.81875	9.878	-1.37759	30.1684	-0.0019531	-0.12207	-0.15527	NaN	NaN	NaN	NaN	NaN	NaN	NaN	NaN	NaN	NaN	NaN	NaN
0.958	34.089	-220.093	1026.734	-0.22852	0.8916	-0.81992	33.50167	-8.173	27.124	-0.0043945	-0.07373	-0.16406	NaN	NaN	NaN	NaN	NaN	NaN	NaN	NaN	NaN	NaN	NaN	NaN
0.96	43.732	-213.279	1063.187	-0.22598	0.87959	-0.82881	1.073	-37.4698	76.243	-0.015625	-0.047852	-0.17041	NaN	NaN	NaN	NaN	NaN	NaN	NaN	NaN	NaN	NaN	NaN	NaN
0.962	63.501	-196.163	1106.9788	-0.22607	0.87939	-0.8335	30.283	-13.068	74.363	-0.038086	0.01416	-0.19336	NaN	NaN	NaN	NaN	NaN	NaN	NaN	NaN	NaN	NaN	NaN	NaN
0.964	44.82	-159.714	1139.8204	-0.23193	0.8792	-0.83721	10.448	-58.4925	86.303	-0.045654	0.058106	-0.21215	NaN	NaN	NaN	NaN	NaN	NaN	NaN	NaN	NaN	NaN	NaN	NaN
0.966	13.282	-154.1871	1151.8047	-0.23936	0.89463	-0.83975	-4.916	-44.843	87.829	-0.052734	0.092773	-0.23633	NaN	NaN	NaN	NaN	NaN	NaN	NaN	NaN	NaN	NaN	NaN	NaN
0.968	-0.559999999999999	-128.584	1138.935	-0.24717	0.92549	-0.8456	12.0988	-44.5361	83.092	-0.051758	0.13281	-0.25293	NaN	NaN	NaN	NaN	NaN	NaN	NaN	NaN	NaN	NaN	NaN	NaN
0.97	14.782	-106.92	1168.19979	-0.26319	0.97432	-0.84062	-9.384	-98.917	140.214	-0.04541	0.1499	-0.26563	NaN	NaN	NaN	NaN	NaN	NaN	NaN	NaN	NaN	NaN	NaN	NaN
0.972	-18.548	-86.139	1210.363	-0.29102	1.0498	-0.8457	-2.571	-46.097	131.1457	-0.038086	0.18555	-0.28418	NaN	NaN	NaN	NaN	NaN	NaN	NaN	NaN	NaN	NaN	NaN	NaN
0.974	-1.6728	-74.014	1212.0437	-0.33173	1.1354	-0.84541	-24.1294	-77.4652	149.244	-0.031738	0.21753	-0.30689	NaN	NaN	NaN	NaN	NaN	NaN	NaN	NaN	NaN	NaN	NaN	NaN
0.976	-6.4213	-105.76	1224.187	-0.38047	1.2196	-0.8582	-21.931	-60.0884	180.433	-0.030762	0.24951	-0.32568	NaN	NaN	NaN	NaN	NaN	NaN	NaN	NaN	NaN	NaN	NaN	NaN
0.978	-2.016	-120.4614	1211.728	-0.42617	1.2965	-0.86953	-25.6049	-23.948	206.65	-0.045898	0.29492	-0.35596	NaN	NaN	NaN	NaN	NaN	NaN	NaN	NaN	NaN	NaN	NaN	NaN
0.98	-18.5585	-124.2896	1243.865	-0.46338	1.3641	-0.88711	-61.4952	-56.654	301.947	-0.055664	0.32764	-0.36963	NaN	NaN	NaN	NaN	NaN	NaN	NaN	NaN	NaN	NaN	NaN	NaN
0.982	-14.8957	-123.464	1245.3855	-0.49414	1.4326	-0.90625	-36.89025	39.615	338.059	-0.069824	0.40625	-0.40283	NaN	NaN	NaN	NaN	NaN	NaN	NaN	NaN	NaN	NaN	NaN	NaN
0.984	-8.2912	-146.823	1263.4428	-0.5125	1.4842	-0.92402	-44.271	62.2092	413.976	-0.088623	0.48339	-0.42676	NaN	NaN	NaN	NaN	NaN	NaN	NaN	NaN	NaN	NaN	NaN	NaN
0.986	-32.6186	-158.354	1276.0536	-0.5331	1.5294	-0.92998	-46.159	65.312	507.838	-0.11426	0.57861	-0.45654	NaN	NaN	NaN	NaN	NaN	NaN	NaN	NaN	NaN	NaN	NaN	NaN
0.988	-40.999	-159.5746	1305.79241	-0.55264	1.5575	-0.93779	-16.7785	135.2087	568.371	-0.14941	0.74219	-0.48389	NaN	NaN	NaN	NaN	NaN	NaN	NaN	NaN	NaN	NaN	NaN	NaN
0.99	-46.231	-168.8016	1329.0996	-0.57871	1.5898	-0.94727	-28.3878	95.0071	674.272	-0.17773	0.83789	-0.5	NaN	NaN	NaN	NaN	NaN	NaN	NaN	NaN	NaN	NaN	NaN	NaN
0.992	-21.4958	-161.721	1356.717	-0.60498	1.6216	-0.95752	-3.38063	143.223	752.17832	-0.24707	1.061	-0.53467	NaN	NaN	NaN	NaN	NaN	NaN	NaN	NaN	NaN	NaN	NaN	NaN
0.994	-12.6868	-149.0379	1384.524	-0.62783	1.6429	-0.97275	11.34515	133.826	804.5326	-0.30933	1.2522	-0.56714	NaN	NaN	NaN	NaN	NaN	NaN	NaN	NaN	NaN	NaN	NaN	NaN
0.996	-14.8303	-132.6511	1367.465	-0.6501	1.6743	-0.98213	-27.308	47.7287	852.9915	-0.38037	1.4497	-0.61084	NaN	NaN	NaN	NaN	NaN	NaN	NaN	NaN	NaN	NaN	NaN	NaN
0.998	-22.7609	-108.7262	1346.2407	-0.66807	1.7102	-0.99541	-13.9477	68.319	854.15489	-0.4707	1.6777	-0.68945	NaN	NaN	NaN	NaN	NaN	NaN	NaN	NaN	NaN	NaN	NaN	NaN
1	-11.3209	-98.5335	1343.4835	-0.7	1.7539	-1.0036	-17.21	-3.9763	852.6153	-0.50146	1.7681	-0.72021	NaN	NaN	NaN	NaN	NaN	NaN	NaN	NaN	NaN	NaN	NaN	NaN
1.002	40.637	-91.2695	1352.7473	-0.73633	1.8027	-1.0156	-32.8316	-10.40905	851.461	-0.51221	1.8774	-0.81787	NaN	NaN	NaN	NaN	NaN	NaN	NaN	NaN	NaN	NaN	NaN	NaN
1.004	34.123	-94.5878	1352.79	-0.77022	1.8534	-1.0315	0.1044	-0.434000000000001	807.3507	-0.4629	1.835	-0.84961	NaN	NaN	NaN	NaN	NaN	NaN	NaN	NaN	NaN	NaN	NaN	NaN
1.006	48.265	-94.1062	1348.679	-0.80293	1.8953	-1.0324	-1.928	-104.176	817.627	-0.37451	1.7251	-0.87646	NaN	NaN	NaN	NaN	NaN	NaN	NaN	NaN	NaN	NaN	NaN	NaN
1.008	32.5259	-96.636514	1358.888	-0.8291	1.9289	-1.048	17.8352	-75.887	777.9928	-0.22949	1.4985	-0.89111	NaN	NaN	NaN	NaN	NaN	NaN	NaN	NaN	NaN	NaN	NaN	NaN
1.01	29.26	-82.484	1371.239	-0.84414	1.9512	-1.0508	10.103	-127.799	774.732482	-0.15088	1.3755	-0.90576	NaN	NaN	NaN	NaN	NaN	NaN	NaN	NaN	NaN	NaN	NaN	NaN
1.012	30.3084	-77.584	1381.148	-0.85693	1.9653	-1.0562	23.557	-129.632	786.679	0.0083008	1.145	-0.91162	NaN	NaN	NaN	NaN	NaN	NaN	NaN	NaN	NaN	NaN	NaN	NaN
1.014	30.13	-74.118	1385.9637	-0.8669	1.971	-1.0532	48.26	-57.4956	763.40055	0.10523	1.009	-0.91968	NaN	NaN	NaN	NaN	NaN	NaN	NaN	NaN	NaN	NaN	NaN	NaN
1.016	33.6497	-92.05	1408.0878	-0.87324	1.9672	-1.0527	45.605	-88.5665	794.354	0.18262	0.89453	-0.92383	NaN	NaN	NaN	NaN	NaN	NaN	NaN	NaN	NaN	NaN	NaN	NaN
1.018	11.8449	-89.683	1428.1274	-0.87793	1.95	-1.0527	28.86626	-15.43	809.512	0.24023	0.79346	-0.92822	NaN	NaN	NaN	NaN	NaN	NaN	NaN	NaN	NaN	NaN	NaN	NaN
1.02	26.624	-85.0836	1421.3681	-0.88115	1.9208	-1.0505	16.2796	-1.99199999999999	842.154	0.25195	0.7666	-0.93555	NaN	NaN	NaN	NaN	NaN	NaN	NaN	NaN	NaN	NaN	NaN	NaN
1.022	4.56348	-97.102	1432.5732	-0.87598	1.8848	-1.043	32.7213	-50.089	880.8217	0.25049	0.75	-0.91797	NaN	NaN	NaN	NaN	NaN	NaN	NaN	NaN	NaN	NaN	NaN	NaN
1.024	19.0687	-100.896	1438.5362	-0.86533	1.8393	-1.0411	46.242	-29.766	897.7133	0.24097	0.78736	-0.92066	NaN	NaN	NaN	NaN	NaN	NaN	NaN	NaN	NaN	NaN	NaN	NaN
1.026	21.46782	-94.21	1441.1041	-0.84881	1.8	-1.0383	-4.7304	-117.736	944.093	0.229	0.83838	-0.9292	NaN	NaN	NaN	NaN	NaN	NaN	NaN	NaN	NaN	NaN	NaN	NaN
1.028	10.0057	-74.065	1417.1378	-0.83593	1.7605	-1.0356	-19.6799	-106.8586	946.095	0.19775	0.90234	-0.93164	NaN	NaN	NaN	NaN	NaN	NaN	NaN	NaN	NaN	NaN	NaN	NaN
1.03	-3.6627	-64.9299	1419.2535	-0.82646	1.7237	-1.0261	6.5546	-103.573	959.893	0.18506	0.9248	-0.93945	NaN	NaN	NaN	NaN	NaN	NaN	NaN	NaN	NaN	NaN	NaN	NaN
1.032	-12.46529	-47.054	1421.19014	-0.82129	1.6934	-1.0234	1.3893	-178.959	991.878	0.16504	0.96533	-0.95654	NaN	NaN	NaN	NaN	NaN	NaN	NaN	NaN	NaN	NaN	NaN	NaN
1.034	-6.73599	-27.808	1424.4831	-0.81582	1.6676	-1.0192	17.7769	-155.046	1031.069	0.16235	1.0005	-0.96826	NaN	NaN	NaN	NaN	NaN	NaN	NaN	NaN	NaN	NaN	NaN	NaN
1.036	-32.8107	-15.3	1409.5777	-0.81212	1.6391	-1.0154	5.8124	-218.556	1099.0867	0.16162	1.0342	-0.98047	NaN	NaN	NaN	NaN	NaN	NaN	NaN	NaN	NaN	NaN	NaN	NaN
1.038	-38.285	-5.034	1398.993	-0.80899	1.6204	-1.0123	-6.544	-222.369	1159.98	0.15527	1.084	-1.002	NaN	NaN	NaN	NaN	NaN	NaN	NaN	NaN	NaN	NaN	NaN	NaN
1.04	-42.706	-3.201	1398.825	-0.79875	1.5998	-1.0074	8.4215	-147.159	1196.6342	0.14771	1.1269	-1.0215	NaN	NaN	NaN	NaN	NaN	NaN	NaN	NaN	NaN	NaN	NaN	NaN
1.042	-23.253	6.5817	1390.5047	-0.79297	1.582	-1.002	-26.9042	-184.45	1237.544	0.12939	1.186	-1.0386	NaN	NaN	NaN	NaN	NaN	NaN	NaN	NaN	NaN	NaN	NaN	NaN
1.044	-11.1977	19.0405	1374.1854	-0.78649	1.5673	-0.99221	-22.5824	-107.8293	1240.8527	0.09668	1.2891	-1.0605	NaN	NaN	NaN	NaN	NaN	NaN	NaN	NaN	NaN	NaN	NaN	NaN
1.046	-7.3906	18.6312	1366.611	-0.78852	1.5541	-0.98494	-33.4503	-94.598	1232.5254	0.077637	1.3599	-1.0688	NaN	NaN	NaN	NaN	NaN	NaN	NaN	NaN	NaN	NaN	NaN	NaN
1.048	9.6489	9.31164	1374.448	-0.78823	1.5373	-0.97434	-25.7245	-106.4382	1260.6157	0.026855	1.4907	-1.105	NaN	NaN	NaN	NaN	NaN	NaN	NaN	NaN	NaN	NaN	NaN	NaN
1.05	8.2802	-22.72	1358.2345	-0.78495	1.5168	-0.96364	-2.995	-31.39	1289.2368	-0.015137	1.5745	-1.1355	NaN	NaN	NaN	NaN	NaN	NaN	NaN	NaN	NaN	NaN	NaN	NaN
1.052	4.2118	-24.8301	1327.9402	-0.77881	1.4966	-0.95264	-15.9963	-112.8075	1343.905	-0.04541	1.647	-1.1636	NaN	NaN	NaN	NaN	NaN	NaN	NaN	NaN	NaN	NaN	NaN	NaN
1.054	2.37	-24.2498	1319.115	-0.77297	1.4838	-0.94344	11.296	-91.438	1352.989	-0.062012	1.7134	-1.189	NaN	NaN	NaN	NaN	NaN	NaN	NaN	NaN	NaN	NaN	NaN	NaN
1.056	38.095	-12.7666	1315.4848	-0.75945	1.4654	-0.93397	38.1788	-86.727	1334.835	-0.066406	1.7329	-1.1968	NaN	NaN	NaN	NaN	NaN	NaN	NaN	NaN	NaN	NaN	NaN	NaN
1.058	29.8057	-6.773	1291.929	-0.75143	1.4503	-0.91814	16.408	-133.818	1356.239	-0.055176	1.7485	-1.2144	NaN	NaN	NaN	NaN	NaN	NaN	NaN	NaN	NaN	NaN	NaN	NaN
1.06	-3.1756	7.9322	1270.4541	-0.74222	1.4323	-0.89881	43.905	-68.323	1327.855	-0.058105	1.7504	-1.2188	NaN	NaN	NaN	NaN	NaN	NaN	NaN	NaN	NaN	NaN	NaN	NaN
1.062	7.0539	4.42	1267.2427	-0.729	1.4146	-0.88623	-1.266	-124.549	1388.7612	-0.057129	1.7446	-1.2241	NaN	NaN	NaN	NaN	NaN	NaN	NaN	NaN	NaN	NaN	NaN	NaN
1.064	30.801	31.7629	1258.006	-0.715	1.3869	-0.86694	-5.5678	-111.0543	1426.397	-0.065918	1.7617	-1.2354	NaN	NaN	NaN	NaN	NaN	NaN	NaN	NaN	NaN	NaN	NaN	NaN
1.066	43.208	39.576	1226.864	-0.69832	1.3674	-0.84449	30.8291	-93.1661	1434.144	-0.07666	1.7788	-1.2437	NaN	NaN	NaN	NaN	NaN	NaN	NaN	NaN	NaN	NaN	NaN	NaN
1.068	26.5499	58.0632	1193.481767	-0.68257	1.3416	-0.82628	10.7246	-161.66	1506.046	-0.10352	1.8301	-1.2578	NaN	NaN	NaN	NaN	NaN	NaN	NaN	NaN	NaN	NaN	NaN	NaN
1.07	34.956	42.1308	1179.0939	-0.66508	1.3253	-0.80577	-0.2481	-100.1494	1495.0591	-0.12964	1.8736	-1.2808	NaN	NaN	NaN	NaN	NaN	NaN	NaN	NaN	NaN	NaN	NaN	NaN
1.072	52.479	36.29917	1144.275	-0.65234	1.3076	-0.78125	-8.422	-119.092	1533.91	-0.15576	1.9189	-1.3027	NaN	NaN	NaN	NaN	NaN	NaN	NaN	NaN	NaN	NaN	NaN	NaN
1.074	28.2274	46.1463	1113.764	-0.63878	1.2957	-0.7664	4.265	-91.4094	1526.628	-0.19336	1.9863	-1.3262	NaN	NaN	NaN	NaN	NaN	NaN	NaN	NaN	NaN	NaN	NaN	NaN
1.076	18.9717	50.8404	1111.2183	-0.62803	1.2792	-0.75416	8.58	-18.967	1498.2067	-0.21045	2.0137	-1.3418	NaN	NaN	NaN	NaN	NaN	NaN	NaN	NaN	NaN	NaN	NaN	NaN
1.078	12.82403	34.7353	1103.3917	-0.61429	1.2618	-0.73682	7.1622	-66.6932	1533.4604	-0.23926	2.0488	-1.3711	NaN	NaN	NaN	NaN	NaN	NaN	NaN	NaN	NaN	NaN	NaN	NaN
1.08	3.84	29.458	1104.9273	-0.59655	1.2463	-0.71569	16.4031	-33.834	1518.198	-0.25391	2.0657	-1.3787	NaN	NaN	NaN	NaN	NaN	NaN	NaN	NaN	NaN	NaN	NaN	NaN
1.082	-24.8102	29.3685	1080.2096	-0.58203	1.2266	-0.69922	15.212	-49.4598	1527.825	-0.26563	2.0654	-1.3867	NaN	NaN	NaN	NaN	NaN	NaN	NaN	NaN	NaN	NaN	NaN	NaN
1.084	-31.013	36.1038	1070.9046	-0.56085	1.2056	-0.68602	-2.651	-55.234	1541.803	-0.27832	2.0508	-1.3887	NaN	NaN	NaN	NaN	NaN	NaN	NaN	NaN	NaN	NaN	NaN	NaN
1.086	-15.9071	41.40569	1057.93921	-0.54694	1.19	-0.66769	-3.7545	21.5077	1534.865	-0.28223	2.0293	-1.3887	NaN	NaN	NaN	NaN	NaN	NaN	NaN	NaN	NaN	NaN	NaN	NaN
1.088	-23.1392	54.0376	1017.4371	-0.52741	1.1733	-0.64846	-19.7963	3.0796	1565.6713	-0.30176	1.9805	-1.3867	NaN	NaN	NaN	NaN	NaN	NaN	NaN	NaN	NaN	NaN	NaN	NaN
1.09	-42.4987	64.111	980.142	-0.51583	1.1519	-0.63182	-1.1938	42.465	1550.853	-0.30591	1.9326	-1.3808	NaN	NaN	NaN	NaN	NaN	NaN	NaN	NaN	NaN	NaN	NaN	NaN
1.092	-38.407	72.328	966.4668	-0.50293	1.1396	-0.61719	5.3851	57.1431	1558.1276	-0.30713	1.8774	-1.3765	NaN	NaN	NaN	NaN	NaN	NaN	NaN	NaN	NaN	NaN	NaN	NaN
1.094	-13.548	72.203	950.7365	-0.48659	1.1164	-0.59987	-22.1498	13.106	1602.55	-0.31348	1.8086	-1.3613	NaN	NaN	NaN	NaN	NaN	NaN	NaN	NaN	NaN	NaN	NaN	NaN
1.096	-17.8301	91.4976	934.5556	-0.47092	1.0954	-0.58421	33.8912	51.463	1597.7985	-0.31201	1.7734	-1.3477	NaN	NaN	NaN	NaN	NaN	NaN	NaN	NaN	NaN	NaN	NaN	NaN
1.098	-2.387	87.4134	920.9532	-0.451	1.0782	-0.56428	19.6996	-11.1753	1602.4146	-0.32422	1.7227	-1.3242	NaN	NaN	NaN	NaN	NaN	NaN	NaN	NaN	NaN	NaN	NaN	NaN
1.1	-14.0642	96.12032	895.09873	-0.43552	1.0515	-0.54977	-7.5061	7.488	1576.4899	-0.33716	1.7034	-1.3103	NaN	NaN	NaN	NaN	NaN	NaN	NaN	NaN	NaN	NaN	NaN	NaN
1.102	-6.153	83.5698	864.394	-0.41602	1.0205	-0.5332	12.6404	5.652	1571.161	-0.36035	1.6875	-1.2852	NaN	NaN	NaN	NaN	NaN	NaN	NaN	NaN	NaN	NaN	NaN	NaN
1.104	-28.6142	75.2592	832.068	-0.38908	0.99435	-0.51378	5.928	-27.202	1580.721	-0.39209	1.6802	-1.2612	NaN	NaN	NaN	NaN	NaN	NaN	NaN	NaN	NaN	NaN	NaN	NaN
1.106	-37.9981	83.566	808.3631	-0.36311	0.95902	-0.49768	30.45	57.1312	1555.081	-0.40625	1.6758	-1.252	NaN	NaN	NaN	NaN	NaN	NaN	NaN	NaN	NaN	NaN	NaN	NaN
1.108	-19.345	96.143	784.678798	-0.34006	0.92815	-0.47775	14.7944	35.5587	1561.325	-0.42139	1.6567	-1.2358	NaN	NaN	NaN	NaN	NaN	NaN	NaN	NaN	NaN	NaN	NaN	NaN
1.11	-2.8581	103.126	756.3164	-0.31886	0.89435	-0.46231	24.8774	63.0648	1554.636	-0.42309	1.643	-1.2207	NaN	NaN	NaN	NaN	NaN	NaN	NaN	NaN	NaN	NaN	NaN	NaN
1.112	-1.822	112.052	723.438	-0.29834	0.85986	-0.44385	12.3843	108.083	1532.5715	-0.41992	1.6211	-1.207	NaN	NaN	NaN	NaN	NaN	NaN	NaN	NaN	NaN	NaN	NaN	NaN
1.114	-20.6	93.6596	714.306	-0.27529	0.82607	-0.42998	3.9224	89.11343	1532.5435	-0.4126	1.5981	-1.1851	NaN	NaN	NaN	NaN	NaN	NaN	NaN	NaN	NaN	NaN	NaN	NaN
1.116	1.114	90.231	715.297	-0.25742	0.79765	-0.41308	37.134	153.929	1484.497	-0.4126	1.5884	-1.1753	NaN	NaN	NaN	NaN	NaN	NaN	NaN	NaN	NaN	NaN	NaN	NaN
1.118	17.687	99.182	695.6077	-0.2375	0.76171	-0.39628	21.3189	120.498	1477.812	-0.40381	1.5688	-1.1519	NaN	NaN	NaN	NaN	NaN	NaN	NaN	NaN	NaN	NaN	NaN	NaN
1.12	15.466	95.871	665.2775	-0.21406	0.73027	-0.37812	6.915	133.682	1471.1766	-0.4021	1.5578	-1.1374	NaN	NaN	NaN	NaN	NaN	NaN	NaN	NaN	NaN	NaN	NaN	NaN
1.122	16.367	92.3622	649.0568	-0.19678	0.69971	-0.35889	-9.7046	171.828	1434.982	-0.40283	1.541	-1.123	NaN	NaN	NaN	NaN	NaN	NaN	NaN	NaN	NaN	NaN	NaN	NaN
1.124	4.435	84.7607	626.5895	-0.17617	0.66875	-0.34238	-13.0716	110.942	1449.49	-0.39453	1.5161	-1.106	NaN	NaN	NaN	NaN	NaN	NaN	NaN	NaN	NaN	NaN	NaN	NaN
1.126	-5.45	109.153	598.0755	-0.15352	0.63848	-0.32656	-0.8735	155.1912	1407.5035	-0.38965	1.5039	-1.0957	NaN	NaN	NaN	NaN	NaN	NaN	NaN	NaN	NaN	NaN	NaN	NaN
1.128	-25.6999	112.938	569.4853	-0.13594	0.60411	-0.31758	4.5419	119.306	1381.624	-0.37939	1.479	-1.0718	NaN	NaN	NaN	NaN	NaN	NaN	NaN	NaN	NaN	NaN	NaN	NaN
1.13	-30.0589	109.82	563.5214	-0.11162	0.57109	-0.29727	-13.716	99.91	1387.4011	-0.3728	1.4602	-1.0505	NaN	NaN	NaN	NaN	NaN	NaN	NaN	NaN	NaN	NaN	NaN	NaN
1.132	-53.395	104.7855	532.6445	-0.088379	0.54639	-0.28174	5.4686	158.9725	1325.378	-0.36865	1.4419	-1.0308	NaN	NaN	NaN	NaN	NaN	NaN	NaN	NaN	NaN	NaN	NaN	NaN
1.134	-71.107	105.3644	506.9912	-0.069433	0.51455	-0.26435	-28.9335	96.646	1358.5397	-0.36133	1.4263	-1.0063	NaN	NaN	NaN	NaN	NaN	NaN	NaN	NaN	NaN	NaN	NaN	NaN
1.136	-50.122	119.3292	470.248	-0.056054	0.48496	-0.24971	-42.5396	146.4965	1325.573	-0.36035	1.4141	-0.99414	NaN	NaN	NaN	NaN	NaN	NaN	NaN	NaN	NaN	NaN	NaN	NaN
1.138	-44.4006	116.3498	467.3554	-0.041992	0.46152	-0.22784	-39.2324	157.55594	1292.8713	-0.35547	1.3945	-0.97363	NaN	NaN	NaN	NaN	NaN	NaN	NaN	NaN	NaN	NaN	NaN	NaN
1.14	-28.684	115.57701	448.69904	-0.029785	0.43603	-0.21347	-50.7914	150.649	1281.138	-0.34546	1.3801	-0.95337	NaN	NaN	NaN	NaN	NaN	NaN	NaN	NaN	NaN	NaN	NaN	NaN
1.142	-32.3487	116.9258	416.0612	-0.015137	0.41699	-0.1958	-14.27759	229.17	1209.954	-0.33252	1.3652	-0.93555	NaN	NaN	NaN	NaN	NaN	NaN	NaN	NaN	NaN	NaN	NaN	NaN
1.144	-48.5437	113.3252	400.399	-0.0047852	0.39238	-0.18037	-51.481908	197.88535	1220.1295	-0.32227	1.3379	-0.9043	NaN	NaN	NaN	NaN	NaN	NaN	NaN	NaN	NaN	NaN	NaN	NaN
1.146	-55.512	123.3771	395.787	0.009375	0.37813	-0.16308	-26.1666	231.1521	1179.9261	-0.31689	1.3164	-0.8916	NaN	NaN	NaN	NaN	NaN	NaN	NaN	NaN	NaN	NaN	NaN	NaN
1.148	-48.6575	117.4769	396.6148	0.018359	0.35821	-0.15254	-9.546	229.3541	1140.597	-0.30322	1.2856	-0.86768	NaN	NaN	NaN	NaN	NaN	NaN	NaN	NaN	NaN	NaN	NaN	NaN
1.15	-53.4664	114.702	371.9385	0.032715	0.34219	-0.14356	-36.3314	180.419	1131.149	-0.28418	1.2525	-0.84522	NaN	NaN	NaN	NaN	NaN	NaN	NaN	NaN	NaN	NaN	NaN	NaN
1.152	-63.702	97.368	357.4951	0.045898	0.3291	-0.1333	-16.428	233.562	1083.164	-0.26855	1.2148	-0.82422	NaN	NaN	NaN	NaN	NaN	NaN	NaN	NaN	NaN	NaN	NaN	NaN
1.154	-59.7034	87.083	333.4443	0.058007	0.31084	-0.11836	-33.846	191.744	1062.627	-0.24316	1.1567	-0.79443	NaN	NaN	NaN	NaN	NaN	NaN	NaN	NaN	NaN	NaN	NaN	NaN
1.156	-68.606	93.672	308.6249	0.069824	0.29463	-0.1044	-29.853	221.138	1035.2751	-0.23193	1.1255	-0.78271	NaN	NaN	NaN	NaN	NaN	NaN	NaN	NaN	NaN	NaN	NaN	NaN
1.158	-49.825	91.4546	298.6081	0.082715	0.2747	-0.090332	-28.9123	260.762	973.625	-0.20898	1.0605	-0.75391	NaN	NaN	NaN	NaN	NaN	NaN	NaN	NaN	NaN	NaN	NaN	NaN
1.16	-25.764	81.634	298.4229	0.09541	0.25918	-0.077344	-54.744	200.796	983.639	-0.18701	1.0068	-0.73242	NaN	NaN	NaN	NaN	NaN	NaN	NaN	NaN	NaN	NaN	NaN	NaN
1.162	-10.429	79.936	272.5037	0.10547	0.24268	-0.068848	-34.841	219.9268	947.986	-0.16748	0.95947	-0.7124	NaN	NaN	NaN	NaN	NaN	NaN	NaN	NaN	NaN	NaN	NaN	NaN
1.164	-10.192	83.418	255.591	0.11894	0.2293	-0.061816	-41.4613	186.0046	926.0267	-0.14209	0.90088	-0.6792	NaN	NaN	NaN	NaN	NaN	NaN	NaN	NaN	NaN	NaN	NaN	NaN
1.166	3.329	83.593	243.724	0.13057	0.21494	-0.055078	-41.3	196.742	920.359	-0.12988	0.87061	-0.67236	NaN	NaN	NaN	NaN	NaN	NaN	NaN	NaN	NaN	NaN	NaN	NaN
1.168	6.317	87.1861	247.9083	0.14541	0.20049	-0.039453	-19.064	247.639	862.0005	-0.11182	0.80859	-0.64063	NaN	NaN	NaN	NaN	NaN	NaN	NaN	NaN	NaN	NaN	NaN	NaN
1.17	-8.915	99.087	242.247	0.15625	0.1916	-0.033106	-26.406	207.1716	854.654	-0.094729	0.76148	-0.61695	NaN	NaN	NaN	NaN	NaN	NaN	NaN	NaN	NaN	NaN	NaN	NaN
1.172	-23.31	105.006	226.7669	0.16602	0.18701	-0.023438	-25.094	237.6714	787.8941	-0.072266	0.71387	-0.60156	NaN	NaN	NaN	NaN	NaN	NaN	NaN	NaN	NaN	NaN	NaN	NaN
1.174	-20.314	91.84	200.187	0.16836	0.18545	-0.015722	-40.8258	208.9454	749.6407	-0.051758	0.65186	-0.56934	NaN	NaN	NaN	NaN	NaN	NaN	NaN	NaN	NaN	NaN	NaN	NaN
1.176	-22.65	79.1521	208.37	0.17862	0.18311	-0.0080078	-36.841	180.975	733.058	-0.034668	0.60913	-0.54712	NaN	NaN	NaN	NaN	NaN	NaN	NaN	NaN	NaN	NaN	NaN	NaN
1.178	-34.448	77.8154	199.8782	0.18642	0.18545	0.0001953	-41.1013	228.722	667.4528	-0.022461	0.55762	-0.52734	NaN	NaN	NaN	NaN	NaN	NaN	NaN	NaN	NaN	NaN	NaN	NaN
1.18	-43.5901	85.043	185.3184	0.19043	0.19756	0.0041016	-52.392	192.9958	642.3726	-0.0014648	0.50635	-0.49561	NaN	NaN	NaN	NaN	NaN	NaN	NaN	NaN	NaN	NaN	NaN	NaN
1.182	-22.283	86.201	161.2887	0.1958	0.2041	0.0068359	-49.8627	218.35	585.9748	0.0063477	0.47803	-0.48193	NaN	NaN	NaN	NaN	NaN	NaN	NaN	NaN	NaN	NaN	NaN	NaN
1.184	-15.231	77.5739	142.245	0.19824	0.21611	0.010937	-63.2864	221.266	547.558	0.019531	0.42627	-0.45264	NaN	NaN	NaN	NaN	NaN	NaN	NaN	NaN	NaN	NaN	NaN	NaN
1.186	-23.274	65.2841	129.376	0.20694	0.22578	0.015234	-78.964	193.559	527.5105	0.028076	0.39062	-0.43579	NaN	NaN	NaN	NaN	NaN	NaN	NaN	NaN	NaN	NaN	NaN	NaN
1.188	-41.9513	58.0441	133.9768	0.21084	0.23321	0.019141	-33.5995	232.757	473.058	0.039063	0.36182	-0.41162	NaN	NaN	NaN	NaN	NaN	NaN	NaN	NaN	NaN	NaN	NaN	NaN
1.19	-24.921	51.592	137.0047	0.21201	0.24375	0.021777	-44.9489	184.2562	483.1132	0.047852	0.31689	-0.37842	NaN	NaN	NaN	NaN	NaN	NaN	NaN	NaN	NaN	NaN	NaN	NaN
1.192	-44.14122	59.329	136.3569835	0.22021	0.25195	0.01709	-49.148	185.1016	462.777	0.053223	0.29688	-0.37012	NaN	NaN	NaN	NaN	NaN	NaN	NaN	NaN	NaN	NaN	NaN	NaN
1.194	-50.7982	65.6129	136.7569	0.22431	0.25605	0.018067	-27.462	188.728	420.2984	0.062988	0.25586	-0.34375	NaN	NaN	NaN	NaN	NaN	NaN	NaN	NaN	NaN	NaN	NaN	NaN
1.196	-67.141	59.39559	121.012	0.2291	0.26123	0.022657	-55.8402	153.65	386.6013	0.068115	0.23487	-0.31739	NaN	NaN	NaN	NaN	NaN	NaN	NaN	NaN	NaN	NaN	NaN	NaN
1.198	-58.0924	47.9912	121.8015	0.23809	0.26006	0.024609	-26.1385	176.2353	337.677	0.074219	0.21143	-0.30127	NaN	NaN	NaN	NaN	NaN	NaN	NaN	NaN	NaN	NaN	NaN	NaN
1.2	-50.5541	62.42	114.3564	0.24073	0.25918	0.026172	-34.081	145.0509	325.7555	0.08252	0.17871	-0.27197	NaN	NaN	NaN	NaN	NaN	NaN	NaN	NaN	NaN	NaN	NaN	NaN
1.202	-52.0439	63.904	91.4764	0.24658	0.25879	0.026367	-50.9466	147.266	311.9466	0.088379	0.1665	-0.25635	NaN	NaN	NaN	NaN	NaN	NaN	NaN	NaN	NaN	NaN	NaN	NaN
1.204	-47.5821	43.1025	89.22697	0.25185	0.25654	0.023047	-36.9123	154.21953	284.261	0.092773	0.13477	-0.23193	NaN	NaN	NaN	NaN	NaN	NaN	NaN	NaN	NaN	NaN	NaN	NaN
1.206	-56.4036	32.91318	77.3171	0.25527	0.25234	0.025781	-36.596	112.008	284.0589	0.098144	0.11353	-0.21484	NaN	NaN	NaN	NaN	NaN	NaN	NaN	NaN	NaN	NaN	NaN	NaN
1.208	-39.9975	31.216	74.48	0.26426	0.25352	0.024609	-8.005	129.1257	257.135	0.10107	0.093262	-0.19482	NaN	NaN	NaN	NaN	NaN	NaN	NaN	NaN	NaN	NaN	NaN	NaN
1.21	-14.407	41.379	58.722	0.27021	0.25254	0.022461	-20.705	110.818	242.1645	0.11182	0.069824	-0.16748	NaN	NaN	NaN	NaN	NaN	NaN	NaN	NaN	NaN	NaN	NaN	NaN
1.212	-13.563	28.29	69.918	0.27148	0.25195	0.021484	-13.686	118.9517	212.073	0.11475	0.058105	-0.15527	NaN	NaN	NaN	NaN	NaN	NaN	NaN	NaN	NaN	NaN	NaN	NaN
1.214	0.175000000000001	38.924	69.0935	0.27764	0.2541	0.019238	11.873	151.01	161.443	0.12109	0.041016	-0.13574	NaN	NaN	NaN	NaN	NaN	NaN	NaN	NaN	NaN	NaN	NaN	NaN
1.216	-15.503	48.3347	56.0333	0.27793	0.25625	0.013867	-27.8755	113.473	151.621	0.12329	0.029541	-0.12012	NaN	NaN	NaN	NaN	NaN	NaN	NaN	NaN	NaN	NaN	NaN	NaN
1.218	-25.3488	50.555	45.86521	0.28145	0.25508	0.012696	-21.645	117.2391	151.417	0.13232	0.01709	-0.10156	NaN	NaN	NaN	NaN	NaN	NaN	NaN	NaN	NaN	NaN	NaN	NaN
1.22	-5.519	33.853	52.1176	0.2876	0.25684	0.014356	-21.295	96.9035	157.653	0.14111	0.0019531	-0.079102	NaN	NaN	NaN	NaN	NaN	NaN	NaN	NaN	NaN	NaN	NaN	NaN
1.222	-10.082	31.597	69.253	0.28955	0.25488	0.012207	-15.8734	83.159	134.2924	0.14746	-0.0063477	-0.07373	NaN	NaN	NaN	NaN	NaN	NaN	NaN	NaN	NaN	NaN	NaN	NaN
1.224	-6.087	31.8661	53.6775	0.29004	0.25566	0.0091796	10.9656	90.695	104.777	0.15576	-0.022949	-0.053223	NaN	NaN	NaN	NaN	NaN	NaN	NaN	NaN	NaN	NaN	NaN	NaN
1.226	-13.057	29.124	36.728	0.29121	0.25556	0.010254	-31.0949	54.1899	116.4734	0.16431	-0.035644	-0.040283	NaN	NaN	NaN	NaN	NaN	NaN	NaN	NaN	NaN	NaN	NaN	NaN
1.228	-8.849	29.0708	34.784	0.29121	0.25517	0.0043945	-23.114	40.5818	88.29359	0.16895	-0.043945	-0.031738	NaN	NaN	NaN	NaN	NaN	NaN	NaN	NaN	NaN	NaN	NaN	NaN
1.23	-9.053	24.4998	39.0721	0.28897	0.25254	0.011621	-4.506	39.494	56.241	0.17627	-0.05127	-0.01709	NaN	NaN	NaN	NaN	NaN	NaN	NaN	NaN	NaN	NaN	NaN	NaN
1.232	-6.367	29.2336	22.1318	0.28564	0.24609	0.0092773	-19.725	33.773	55.63503	0.18213	-0.056641	-0.014648	NaN	NaN	NaN	NaN	NaN	NaN	NaN	NaN	NaN	NaN	NaN	NaN
1.234	-16.27	21.6553	18.2599	0.28438	0.24404	0.0090821	-1.409	36.683	44.349	0.18457	-0.060059	-0.01123	NaN	NaN	NaN	NaN	NaN	NaN	NaN	NaN	NaN	NaN	NaN	NaN
1.236	-12.567	24.6155	16.5347	0.28486	0.24112	0.0077148	-35.8728	11.4151	58.7922	0.18506	-0.055908	-0.0048828	NaN	NaN	NaN	NaN	NaN	NaN	NaN	NaN	NaN	NaN	NaN	NaN
1.238	-22.6685	23.9113	25.4404	0.2833	0.23369	0.006543	-16.629	19.472	49.4887	0.17676	-0.038574	-0.0092773	NaN	NaN	NaN	NaN	NaN	NaN	NaN	NaN	NaN	NaN	NaN	NaN
1.24	-29.868	31.4759	27.1196	0.28555	0.22705	0.0038086	-10.2938	42.1138	22.892	0.16016	-0.0048828	-0.010742	NaN	NaN	NaN	NaN	NaN	NaN	NaN	NaN	NaN	NaN	NaN	NaN
1.242	-42.7933	30.962	28.2099	0.28857	0.22363	0.0019531	-23.12677	24.584	27.1538	0.15479	0.013672	-0.0087891	NaN	NaN	NaN	NaN	NaN	NaN	NaN	NaN	NaN	NaN	NaN	NaN
1.244	-34.371	22.3204	38.1633	0.29326	0.21572	0.0054688	-0.195	28.364	33.007	0.12646	0.05957	-0.014648	NaN	NaN	NaN	NaN	NaN	NaN	NaN	NaN	NaN	NaN	NaN	NaN
1.246	-50.3321	21.5068	25.951534	0.29473	0.20557	0.0017578	-37.3582	7.135	15.484	0.10473	0.097657	-0.018555	NaN	NaN	NaN	NaN	NaN	NaN	NaN	NaN	NaN	NaN	NaN	NaN
1.248	-60.858	16.6969	16.3852	0.29824	0.19815	0.0056641	-36.3198	19.3822	-3.2067	0.085938	0.13672	-0.020996	NaN	NaN	NaN	NaN	NaN	NaN	NaN	NaN	NaN	NaN	NaN	NaN
1.25	-50.4643	20.2127	7.518	0.29864	0.18789	0.0060547	-1.428	28.7789	-9.4845	0.067871	0.18164	-0.030273	NaN	NaN	NaN	NaN	NaN	NaN	NaN	NaN	NaN	NaN	NaN	NaN
1.252	-43.5378	15.9636	11.8798	0.29688	0.18359	0.010254	-40.961939	14.8748	4.212	0.059082	0.20264	-0.033691	NaN	NaN	NaN	NaN	NaN	NaN	NaN	NaN	NaN	NaN	NaN	NaN
1.254	-47.7039	22.3564	19.5254	0.30156	0.16816	0.010449	-19.084	14.482	17.7449	0.055664	0.22803	-0.032227	NaN	NaN	NaN	NaN	NaN	NaN	NaN	NaN	NaN	NaN	NaN	NaN
1.256	-27.8144	15.8728	4.8799	0.30078	0.16094	0.0089844	-17.072	1.968	7.932	0.060059	0.2439	-0.033691	NaN	NaN	NaN	NaN	NaN	NaN	NaN	NaN	NaN	NaN	NaN	NaN
1.258	-43.4456	2.122	-0.227	0.30117	0.15196	0.015234	-31.0303	10.12	4.951	0.070801	0.2583	-0.028809	NaN	NaN	NaN	NaN	NaN	NaN	NaN	NaN	NaN	NaN	NaN	NaN
1.26	-25.925	10.7434	15.7582	0.30547	0.1414	0.01416	-12.098	21.2026	11.5943	0.079102	0.2666	-0.022461	NaN	NaN	NaN	NaN	NaN	NaN	NaN	NaN	NaN	NaN	NaN	NaN
1.262	-20.493	34.3697	15.36288	0.30469	0.13623	0.015625	-11.496	4.554475	26.414	0.086914	0.26807	-0.019043	NaN	NaN	NaN	NaN	NaN	NaN	NaN	NaN	NaN	NaN	NaN	NaN
1.264	-23.696	45.852	28.2558	0.30488	0.13428	0.017285	-10.707	2.1539	20.5686	0.099121	0.26807	-0.015625	NaN	NaN	NaN	NaN	NaN	NaN	NaN	NaN	NaN	NaN	NaN	NaN
1.266	-16.245	31.757	29.7653	0.3043	0.13135	0.020508	-1.77	9.33791	-9.0992	0.11743	0.25684	-0.0058591	NaN	NaN	NaN	NaN	NaN	NaN	NaN	NaN	NaN	NaN	NaN	NaN
1.268	-5.311	18.042	26.8642	0.30117	0.13447	0.022071	-14.14664	14	1.7043	0.13672	0.2373	0.00048828	NaN	NaN	NaN	NaN	NaN	NaN	NaN	NaN	NaN	NaN	NaN	NaN
1.27	-23.4679	23.8105	14.0807	0.30185	0.13555	0.027246	0.972	25.9915	10.131	0.16992	0.20605	0.0092773	NaN	NaN	NaN	NaN	NaN	NaN	NaN	NaN	NaN	NaN	NaN	NaN
1.272	-29.09224	23.6491	14.3475	0.29932	0.13525	0.026367	-16.564	9.965	35.6072	0.19189	0.19189	0.015137	NaN	NaN	NaN	NaN	NaN	NaN	NaN	NaN	NaN	NaN	NaN	NaN
1.274	2.764	10.8525	24.817	0.29531	0.14414	0.027051	-22.893	24.3274	18.8093	0.21973	0.17139	0.024902	NaN	NaN	NaN	NaN	NaN	NaN	NaN	NaN	NaN	NaN	NaN	NaN
1.276	-7.359	7.8855	39.9561	0.29356	0.15029	0.025489	-16.659	23.0085	-10.5114	0.24048	0.15527	0.029785	NaN	NaN	NaN	NaN	NaN	NaN	NaN	NaN	NaN	NaN	NaN	NaN
1.278	-1.247	-0.1821	36.4611	0.29356	0.15342	0.022754	-34.0811	14.8959	10.51989	0.25684	0.14063	0.033691	NaN	NaN	NaN	NaN	NaN	NaN	NaN	NaN	NaN	NaN	NaN	NaN
1.28	-2.825	-2.3605	29.7597	0.29414	0.16552	0.02334	-18.2309	26.2294	5.4848	0.26953	0.12109	0.038086	NaN	NaN	NaN	NaN	NaN	NaN	NaN	NaN	NaN	NaN	NaN	NaN
1.282	5.318	1.201748	60.011	0.29004	0.18408	0.019531	-33.125	10.8468	10.0215	0.27441	0.11572	0.039063	NaN	NaN	NaN	NaN	NaN	NaN	NaN	NaN	NaN	NaN	NaN	NaN
1.284	-8.994	-3.80461	80.80068	0.28027	0.20898	0.017285	-25.9363	18.495	0.9024	0.28418	0.10059	0.044922	NaN	NaN	NaN	NaN	NaN	NaN	NaN	NaN	NaN	NaN	NaN	NaN
1.286	-31.953	-7.6012	86.4743	0.26699	0.23301	0.0087891	-9.647	29.3396	-9.928	0.28931	0.093994	0.051514	NaN	NaN	NaN	NaN	NaN	NaN	NaN	NaN	NaN	NaN	NaN	NaN
1.288	-39.5158	-23.5167	96.00758	0.25644	0.25879	0.0025391	-38.4301	17.851	20.014	0.29688	0.082031	0.052734	NaN	NaN	NaN	NaN	NaN	NaN	NaN	NaN	NaN	NaN	NaN	NaN
1.29	-31.345	-27.41788	114.3685	0.246	0.28125	-0.00087892	-0.195	24.587	10.319	0.3042	0.066406	0.0625	NaN	NaN	NaN	NaN	NaN	NaN	NaN	NaN	NaN	NaN	NaN	NaN
1.292	-24.7781	-8.48627	118.0476	0.23633	0.30615	-0.0043945	-9.995	38.1662	12.067	0.31152	0.057617	0.065918	NaN	NaN	NaN	NaN	NaN	NaN	NaN	NaN	NaN	NaN	NaN	NaN
1.294	-44.01651	17.63433	105.6341	0.2334	0.32715	-0.0094724	-36.7947	29.9807	21.1739	0.32764	0.047363	0.067871	NaN	NaN	NaN	NaN	NaN	NaN	NaN	NaN	NaN	NaN	NaN	NaN
1.296	-51.2043	46.4247	133.9365	0.22754	0.34932	-0.017969	-20.9423	28.762	14.7159	0.33179	0.044189	0.067627	NaN	NaN	NaN	NaN	NaN	NaN	NaN	NaN	NaN	NaN	NaN	NaN
1.298	-39.8731	56.12313	203.259	0.22559	0.36924	-0.027734	-32.9495	4.122	27.5021	0.34375	0.035156	0.070313	NaN	NaN	NaN	NaN	NaN	NaN	NaN	NaN	NaN	NaN	NaN	NaN
1.3	-41.4953	80.8485	255.688	0.22636	0.38506	-0.043946	-29.572	3.028	10.7173	0.3667	0.035156	0.072754	NaN	NaN	NaN	NaN	NaN	NaN	NaN	NaN	NaN	NaN	NaN	NaN
1.302	-25.267	91.969	301.576	0.22412	0.40332	-0.0625	-28.356	15.6199	3.509	0.36719	0.03125	0.074707	NaN	NaN	NaN	NaN	NaN	NaN	NaN	NaN	NaN	NaN	NaN	NaN
1.304	-17.811	85.947	381.1943	0.22978	0.4291	-0.088281	-35.4487	19.4153	20.8964	0.38623	0.034668	0.07666	NaN	NaN	NaN	NaN	NaN	NaN	NaN	NaN	NaN	NaN	NaN	NaN
1.306	-38.273	90.7266	493.3066	0.22735	0.46963	-0.11045	-9.301	42.908	7.812	0.39258	0.038086	0.079102	NaN	NaN	NaN	NaN	NaN	NaN	NaN	NaN	NaN	NaN	NaN	NaN
1.308	-59.0999	108.435	601.587	0.21641	0.52783	-0.14013	-26.0931	28.5721	9.534	0.40332	0.041016	0.078125	NaN	NaN	NaN	NaN	NaN	NaN	NaN	NaN	NaN	NaN	NaN	NaN
1.31	-62.6418	107.333	688.561	0.18516	0.604	-0.17705	-12.895	17.12955	14.1841	0.4165	0.04541	0.080078	NaN	NaN	NaN	NaN	NaN	NaN	NaN	NaN	NaN	NaN	NaN	NaN
1.312	-36.2603	90.063	769.849	0.13818	0.69775	-0.21191	-11.8186	26.133	12.853	0.41846	0.049316	0.080078	NaN	NaN	NaN	NaN	NaN	NaN	NaN	NaN	NaN	NaN	NaN	NaN
1.314	-34.7325	57.995	850.0967	0.06875	0.81885	-0.25459	-19.992	8.784	35.4183	0.42188	0.053711	0.086426	NaN	NaN	NaN	NaN	NaN	NaN	NaN	NaN	NaN	NaN	NaN	NaN
1.316	-53.154	36.537	903.08607	-0.011328	0.95634	-0.29366	-0.479999999999997	13.4698	35.1626	0.42822	0.068848	0.082031	NaN	NaN	NaN	NaN	NaN	NaN	NaN	NaN	NaN	NaN	NaN	NaN
1.318	-67.8457	29.1555	913.5711	-0.10937	1.1079	-0.32412	-17.408	10.0501	29.7703	0.43213	0.069336	0.087402	NaN	NaN	NaN	NaN	NaN	NaN	NaN	NaN	NaN	NaN	NaN	NaN
1.32	-42.6931	17.333	910.917	-0.2292	1.2646	-0.35976	-14.963	12.3987	17.257	0.43115	0.083984	0.085449	NaN	NaN	NaN	NaN	NaN	NaN	NaN	NaN	NaN	NaN	NaN	NaN
1.322	-21.0273	1.95	892.269	-0.35547	1.4185	-0.38818	-12.3594	29.08494	1.868	0.4331	0.1001	0.093994	NaN	NaN	NaN	NaN	NaN	NaN	NaN	NaN	NaN	NaN	NaN	NaN
1.324	8.485113	-11.448	881.852	-0.4918	1.5308	-0.4209	-26.4924	15.3529	26.35456	0.43164	0.11426	0.094727	NaN	NaN	NaN	NaN	NaN	NaN	NaN	NaN	NaN	NaN	NaN	NaN
1.326	8.0282	-23.932	873.192	-0.62989	1.6125	-0.44843	-12.041	11.9968	16.0728	0.43896	0.14453	0.095215	NaN	NaN	NaN	NaN	NaN	NaN	NaN	NaN	NaN	NaN	NaN	NaN
1.328	35.7188	-13.238	859.165	-0.72949	1.6559	-0.46289	-27.1869	8.8811	14.743	0.43359	0.15967	0.09082	NaN	NaN	NaN	NaN	NaN	NaN	NaN	NaN	NaN	NaN	NaN	NaN
1.33	2.0605	-15.656	873.572	-0.76944	1.6552	-0.45733	-30.5092	1.1441	15.9071	0.43555	0.19189	0.089844	NaN	NaN	NaN	NaN	NaN	NaN	NaN	NaN	NaN	NaN	NaN	NaN
1.332	-7.089	-8.278	855.436	-0.76563	1.623	-0.43945	9.964	6.8223	8.4958	0.43604	0.21656	0.084228	NaN	NaN	NaN	NaN	NaN	NaN	NaN	NaN	NaN	NaN	NaN	NaN
1.334	6.9467	-12.9882	835.405	-0.71768	1.5534	-0.42764	-19.014	-1.1553	37.846	0.4375	0.2373	0.071777	NaN	NaN	NaN	NaN	NaN	NaN	NaN	NaN	NaN	NaN	NaN	NaN
1.336	32.5414	-7.554	843.766	-0.64922	1.4703	-0.42149	-4.935	-5.190617	40.376	0.43652	0.27344	0.049805	NaN	NaN	NaN	NaN	NaN	NaN	NaN	NaN	NaN	NaN	NaN	NaN
1.338	18.2464	-1.552	840.402	-0.56875	1.3891	-0.4168	-25.2782	-3.934	32.2935	0.44189	0.29785	0.041016	NaN	NaN	NaN	NaN	NaN	NaN	NaN	NaN	NaN	NaN	NaN	NaN
1.34	-26.7221	-11.406	841.509	-0.49766	1.3075	-0.41221	-52.63	-16.52751	58.9637	0.44727	0.35352	0.011719	NaN	NaN	NaN	NaN	NaN	NaN	NaN	NaN	NaN	NaN	NaN	NaN
1.342	-46.9563	-39.867	863.11832	-0.4292	1.2349	-0.40479	4.096	0.966000000000001	59.2078	0.44922	0.40063	-0.00097655	NaN	NaN	NaN	NaN	NaN	NaN	NaN	NaN	NaN	NaN	NaN	NaN
1.344	-33.81	-57.812	865.8931	-0.37842	1.1853	-0.39346	-23.7683	-14.7816	78.4618	0.44922	0.45557	-0.0083008	NaN	NaN	NaN	NaN	NaN	NaN	NaN	NaN	NaN	NaN	NaN	NaN
1.346	-21.03	-85.236	861.5341	-0.34014	1.1587	-0.38466	-19.657	-49.4314	94.77597	0.44775	0.52539	-0.038574	NaN	NaN	NaN	NaN	NaN	NaN	NaN	NaN	NaN	NaN	NaN	NaN
1.348	-18.977	-106.398	876.419	-0.3163	1.1513	-0.38037	-27.73	-71.6721	98.56	0.44043	0.56348	-0.04834	NaN	NaN	NaN	NaN	NaN	NaN	NaN	NaN	NaN	NaN	NaN	NaN
1.35	-19.058	-138.652	904.274	-0.29961	1.1609	-0.37637	-38.9946	-100.123	143.9177	0.43555	0.63379	-0.078125	NaN	NaN	NaN	NaN	NaN	NaN	NaN	NaN	NaN	NaN	NaN	NaN
1.352	-13.124	-160.29	932.727	-0.28662	1.1836	-0.38379	-4.213	-75.4943	180.0783	0.43945	0.67603	-0.10327	NaN	NaN	NaN	NaN	NaN	NaN	NaN	NaN	NaN	NaN	NaN	NaN
1.354	-10.636	-178.377	969.3475	-0.27383	1.1967	-0.37188	-24.8155	-49.0904	238.6234	0.43799	0.71484	-0.13281	NaN	NaN	NaN	NaN	NaN	NaN	NaN	NaN	NaN	NaN	NaN	NaN
1.356	-19.495	-177.604	981.8496	-0.25615	1.2028	-0.37178	-19.427	5.867	303.0165	0.43945	0.75635	-0.18945	NaN	NaN	NaN	NaN	NaN	NaN	NaN	NaN	NaN	NaN	NaN	NaN
1.358	-28.536	-173.264	1009.54068	-0.23702	1.1966	-0.36943	-12.268	57.3511	363.142	0.43994	0.77734	-0.22314	NaN	NaN	NaN	NaN	NaN	NaN	NaN	NaN	NaN	NaN	NaN	NaN
1.36	-45.223	-165.4358	1043.95938	-0.21963	1.1805	-0.37129	-15.623	81.756	477.143	0.44189	0.82031	-0.30273	NaN	NaN	NaN	NaN	NaN	NaN	NaN	NaN	NaN	NaN	NaN	NaN
1.362	-64.4946	-146.643	1067.0206	-0.20654	1.1724	-0.37891	10.3623	106.562	619.659	0.43457	0.87597	-0.37988	NaN	NaN	NaN	NaN	NaN	NaN	NaN	NaN	NaN	NaN	NaN	NaN
1.364	-89.5184	-122.559	1078.9459	-0.19942	1.1783	-0.38642	28.892	132.7148	783.425	0.41357	0.95508	-0.45996	NaN	NaN	NaN	NaN	NaN	NaN	NaN	NaN	NaN	NaN	NaN	NaN
1.366	-71.525	-100.5038	1083.8831	-0.20029	1.1907	-0.39853	33.773	132.654	923.3412	0.35791	1.1099	-0.56055	NaN	NaN	NaN	NaN	NaN	NaN	NaN	NaN	NaN	NaN	NaN	NaN
1.368	-72.22	-97.297	1096.5783	-0.21162	1.2056	-0.41142	29.229	147.734	1026.9638	0.31836	1.2017	-0.60693	NaN	NaN	NaN	NaN	NaN	NaN	NaN	NaN	NaN	NaN	NaN	NaN
1.37	-76.814	-93.669	1088.525	-0.22656	1.2299	-0.43623	1.5566	125.098	1123.7725	0.19824	1.4282	-0.67285	NaN	NaN	NaN	NaN	NaN	NaN	NaN	NaN	NaN	NaN	NaN	NaN
1.372	-76.2739	-91.376	1094.266	-0.24121	1.2598	-0.45703	29.2008	106.048	1164.819	0.075685	1.6067	-0.71436	NaN	NaN	NaN	NaN	NaN	NaN	NaN	NaN	NaN	NaN	NaN	NaN
1.374	-38.481	-78.024	1119.812	-0.26563	1.3007	-0.47139	5.4038	88.29	1170.531	-0.057129	1.7974	-0.74561	NaN	NaN	NaN	NaN	NaN	NaN	NaN	NaN	NaN	NaN	NaN	NaN
1.376	-32.358	-83.572	1152.244	-0.29932	1.354	-0.49092	8.421	25.869094	1135.24	-0.20459	2.0005	-0.77686	NaN	NaN	NaN	NaN	NaN	NaN	NaN	NaN	NaN	NaN	NaN	NaN
1.378	-47.278	-94.4528	1177.77593	-0.33174	1.4107	-0.5042	27.4246	-43.1527	1071.244	-0.25537	2.061	-0.78174	NaN	NaN	NaN	NaN	NaN	NaN	NaN	NaN	NaN	NaN	NaN	NaN
1.38	-53.03185	-114.4696	1193.7197	-0.36201	1.4717	-0.52168	-16.2083	-118.151	1023.104	-0.26758	2.1016	-0.79688	NaN	NaN	NaN	NaN	NaN	NaN	NaN	NaN	NaN	NaN	NaN	NaN
1.382	-52.064	-141.469	1215.329	-0.38281	1.5137	-0.5332	21.4581	-158.787	955.549	-0.20264	2.0012	-0.76197	NaN	NaN	NaN	NaN	NaN	NaN	NaN	NaN	NaN	NaN	NaN	NaN
1.384	-57.8508	-141.7261	1232.053	-0.38994	1.5462	-0.54082	64.167	-165.974	877.252	-0.10938	1.8364	-0.72803	NaN	NaN	NaN	NaN	NaN	NaN	NaN	NaN	NaN	NaN	NaN	NaN
1.386	-66.061	-130.5418	1234.361	-0.38349	1.5704	-0.54717	56.585	-165.022	856.494	0.06543	1.5625	-0.67383	NaN	NaN	NaN	NaN	NaN	NaN	NaN	NaN	NaN	NaN	NaN	NaN
1.388	-70.9713	-128.18823	1221.8088	-0.371	1.5915	-0.54873	70.1797	-125.956	838.37	0.15137	1.4414	-0.65332	NaN	NaN	NaN	NaN	NaN	NaN	NaN	NaN	NaN	NaN	NaN	NaN
1.39	-61.7903	-127.52855	1228.6899	-0.36416	1.5983	-0.54727	50.1328	-104.745	867.251	0.31641	1.2476	-0.61768	NaN	NaN	NaN	NaN	NaN	NaN	NaN	NaN	NaN	NaN	NaN	NaN
1.392	-67.0595	-141.6053	1248.5256	-0.36865	1.6079	-0.54834	59.239	-84.211	919.615	0.38355	1.2092	-0.61303	NaN	NaN	NaN	NaN	NaN	NaN	NaN	NaN	NaN	NaN	NaN	NaN
1.394	-55.868	-128.123	1257.5777	-0.37314	1.6183	-0.55147	49.561	-52.595	955.265	0.41602	1.2349	-0.62402	NaN	NaN	NaN	NaN	NaN	NaN	NaN	NaN	NaN	NaN	NaN	NaN
1.396	-42.184	-116.296	1278.6335	-0.39151	1.6422	-0.55742	16.5382	-41.036	1007.0046	0.40381	1.3633	-0.64355	NaN	NaN	NaN	NaN	NaN	NaN	NaN	NaN	NaN	NaN	NaN	NaN
1.398	-16.812	-85.3217	1278.0024	-0.40908	1.6785	-0.56953	2.494	-32.71	990.652	0.38574	1.4404	-0.66406	NaN	NaN	NaN	NaN	NaN	NaN	NaN	NaN	NaN	NaN	NaN	NaN
1.4	-45.905	-64.283	1275.3113	-0.43681	1.7241	-0.58584	-33.459	-66.45	976.145	0.34912	1.6001	-0.69678	NaN	NaN	NaN	NaN	NaN	NaN	NaN	NaN	NaN	NaN	NaN	NaN
1.402	-61.488	-47.623	1264.837	-0.4624	1.7681	-0.60156	-64.4903	-110.5	1001.413	0.33764	1.6985	-0.71631	NaN	NaN	NaN	NaN	NaN	NaN	NaN	NaN	NaN	NaN	NaN	NaN
1.404	-71.115	-47.233	1275.754	-0.48613	1.8195	-0.62246	-28.449	-161.746	1038.122	0.34668	1.7563	-0.73975	NaN	NaN	NaN	NaN	NaN	NaN	NaN	NaN	NaN	NaN	NaN	NaN
1.406	-80.557	-47.336	1292.3604	-0.51328	1.8734	-0.64219	-44.4834	-252.781	1094.156	0.39893	1.7617	-0.75781	NaN	NaN	NaN	NaN	NaN	NaN	NaN	NaN	NaN	NaN	NaN	NaN
1.408	-77.4268	-55.148	1312.523	-0.54648	1.9187	-0.6625	-12.588	-311.407	1116.8923	0.43994	1.7363	-0.76563	NaN	NaN	NaN	NaN	NaN	NaN	NaN	NaN	NaN	NaN	NaN	NaN
1.41	-106.5627	-49.911	1317.605	-0.56914	1.9623	-0.68213	2.334	-364.902	1125.294	0.52734	1.6548	-0.79248	NaN	NaN	NaN	NaN	NaN	NaN	NaN	NaN	NaN	NaN	NaN	NaN
1.412	-102.194	-50.0104	1320.059	-0.59326	1.9985	-0.69678	-17.128	-369.73	1180.982	0.56958	1.6016	-0.82154	NaN	NaN	NaN	NaN	NaN	NaN	NaN	NaN	NaN	NaN	NaN	NaN
1.414	-96.851	-49.269	1352.623	-0.6207	2.0332	-0.7127	10.374	-311.81	1217.5441	0.60156	1.5796	-0.85107	NaN	NaN	NaN	NaN	NaN	NaN	NaN	NaN	NaN	NaN	NaN	NaN
1.416	-97.231	-53.46008	1346.9008	-0.63838	2.0637	-0.72334	-28.56	-279.331	1272.766	0.58789	1.6177	-0.88623	NaN	NaN	NaN	NaN	NaN	NaN	NaN	NaN	NaN	NaN	NaN	NaN
1.418	-96.4373	-59.988	1373.7209	-0.65908	2.0845	-0.73076	-55.1601	-235.433	1317.27	0.55225	1.6528	-0.8999	NaN	NaN	NaN	NaN	NaN	NaN	NaN	NaN	NaN	NaN	NaN	NaN
1.42	-76.617	-72.28	1396.1731	-0.67149	2.0973	-0.73711	-61.7	-212.096	1329.594	0.44824	1.75	-0.92676	NaN	NaN	NaN	NaN	NaN	NaN	NaN	NaN	NaN	NaN	NaN	NaN
1.422	-75.4879	-70.933	1412.9888	-0.68164	2.1016	-0.73828	-111.15	-195.197	1376.391	0.35473	1.8135	-0.95264	NaN	NaN	NaN	NaN	NaN	NaN	NaN	NaN	NaN	NaN	NaN	NaN
1.424	-97.9866	-56.226	1431.75822	-0.68399	2.1032	-0.7332	-73.333	-130.94	1376.264	0.28027	1.8535	-0.96094	NaN	NaN	NaN	NaN	NaN	NaN	NaN	NaN	NaN	NaN	NaN	NaN
1.426	-96.3484	-30.822	1413.766	-0.68233	2.0934	-0.73388	-55.2843	-132.242	1343.7111	0.25098	1.8828	-0.95703	NaN	NaN	NaN	NaN	NaN	NaN	NaN	NaN	NaN	NaN	NaN	NaN
1.428	-93.168	-17.999	1431.15174	-0.67959	2.0837	-0.72881	-43.1608	-133.217	1295.795	0.25439	1.877	-0.94238	NaN	NaN	NaN	NaN	NaN	NaN	NaN	NaN	NaN	NaN	NaN	NaN
1.43	-99.0884	4.6377	1424.00239	-0.67793	2.0705	-0.7209	-48.0499	-142.427	1249.227	0.22852	1.8071	-0.97803	NaN	NaN	NaN	NaN	NaN	NaN	NaN	NaN	NaN	NaN	NaN	NaN
1.432	-110.8443	11.388	1404.3188	-0.67188	2.0566	-0.71387	-72.793	-181.9595	1272.831	0.24829	1.77	-0.98975	NaN	NaN	NaN	NaN	NaN	NaN	NaN	NaN	NaN	NaN	NaN	NaN
1.434	-98.8153	26.9045	1401.4362	-0.67324	2.0404	-0.71133	-2.136	-176.7233	1288.052	0.30615	1.7622	-0.979	NaN	NaN	NaN	NaN	NaN	NaN	NaN	NaN	NaN	NaN	NaN	NaN
1.436	-82.12974	28.0146	1412.5723	-0.67813	2.0281	-0.69785	-0.280999999999999	-221.014	1355.751	0.37646	1.7676	-0.99609	NaN	NaN	NaN	NaN	NaN	NaN	NaN	NaN	NaN	NaN	NaN	NaN
1.438	-76.4267	29.493	1419.7331	-0.68477	2.0188	-0.69473	-3.92	-244.181	1401.7478	0.39551	1.7837	-1.0034	NaN	NaN	NaN	NaN	NaN	NaN	NaN	NaN	NaN	NaN	NaN	NaN
1.44	-72.876	20.8684	1403.9415	-0.68692	2.0068	-0.68535	5.88	-220.613	1412.4164	0.38965	1.8071	-1.019	NaN	NaN	NaN	NaN	NaN	NaN	NaN	NaN	NaN	NaN	NaN	NaN
1.442	-60.88	10.184	1381.512	-0.68604	1.9927	-0.6792	-69.1841	-227.614	1442.713	0.36938	1.8382	-1.0349	NaN	NaN	NaN	NaN	NaN	NaN	NaN	NaN	NaN	NaN	NaN	NaN
1.444	-53.27	14.466	1383.33	-0.68682	1.9739	-0.66514	-56.1355	-175.3329	1460.452	0.3374	1.877	-1.0469	NaN	NaN	NaN	NaN	NaN	NaN	NaN	NaN	NaN	NaN	NaN	NaN
1.446	-56.798	24.0758	1393.0855	-0.68125	1.9504	-0.65352	-51.442	-166.958	1484.52	0.30811	1.9282	-1.061	NaN	NaN	NaN	NaN	NaN	NaN	NaN	NaN	NaN	NaN	NaN	NaN
1.448	-58.448	25.4737	1377.4954	-0.67461	1.9305	-0.63868	-65.108	-178.801	1513.036	0.2998	1.9531	-1.0742	NaN	NaN	NaN	NaN	NaN	NaN	NaN	NaN	NaN	NaN	NaN	NaN
1.45	-54.125	14.6897	1397.924	-0.66406	1.8993	-0.62441	-16.703	-144.0503	1485.992	0.28613	1.9829	-1.0796	NaN	NaN	NaN	NaN	NaN	NaN	NaN	NaN	NaN	NaN	NaN	NaN
1.452	-64.3961	6.2793	1368.067	-0.646	1.8735	-0.61279	-18.266	-156.002	1478.877	0.271	1.9866	-1.075	NaN	NaN	NaN	NaN	NaN	NaN	NaN	NaN	NaN	NaN	NaN	NaN
1.454	-78.8383	13.6838	1343.6339	-0.62949	1.8455	-0.59629	-21.435	-122.792	1458.741	0.25537	1.9751	-1.0718	NaN	NaN	NaN	NaN	NaN	NaN	NaN	NaN	NaN	NaN	NaN	NaN
1.456	-90.9414	24.2049	1315.25	-0.60752	1.8243	-0.58282	-25.432	-111.364	1454.833	0.22363	1.9497	-1.0679	NaN	NaN	NaN	NaN	NaN	NaN	NaN	NaN	NaN	NaN	NaN	NaN
1.458	-74.2081	44.6195	1296.709	-0.58642	1.8024	-0.575	-46.092	-99.145	1467.9263	0.20655	1.9326	-1.0665	NaN	NaN	NaN	NaN	NaN	NaN	NaN	NaN	NaN	NaN	NaN	NaN
1.46	-67.593	57.69757	1292.351	-0.5667	1.7761	-0.55752	-21.977	-31.728	1445.524	0.18701	1.9199	-1.0664	NaN	NaN	NaN	NaN	NaN	NaN	NaN	NaN	NaN	NaN	NaN	NaN
1.462	-58.553	67.9293	1274.0593	-0.54248	1.7505	-0.54834	-57.478	-37.518	1463.971	0.15234	1.9087	-1.064	NaN	NaN	NaN	NaN	NaN	NaN	NaN	NaN	NaN	NaN	NaN	NaN
1.464	-69.818	70.46	1258.575	-0.51983	1.7233	-0.5374	-74.4734	-15.401	1470.524	0.13574	1.9067	-1.064	NaN	NaN	NaN	NaN	NaN	NaN	NaN	NaN	NaN	NaN	NaN	NaN
1.466	-48.537	84.8135	1247.9186	-0.49873	1.697	-0.52451	-86.474	14.185	1489.676	0.099121	1.9048	-1.0679	NaN	NaN	NaN	NaN	NaN	NaN	NaN	NaN	NaN	NaN	NaN	NaN
1.468	-64.5641	89.683	1244.0461	-0.48232	1.6731	-0.51943	-124.734	-0.731000000000002	1536.85	0.065918	1.9021	-1.0701	NaN	NaN	NaN	NaN	NaN	NaN	NaN	NaN	NaN	NaN	NaN	NaN
1.47	-82.1556	101.001	1221.5758	-0.46348	1.6502	-0.50605	-95.65	25.3665	1529.916	0.048828	1.894	-1.0718	NaN	NaN	NaN	NaN	NaN	NaN	NaN	NaN	NaN	NaN	NaN	NaN
1.472	-86.3611	91.559	1200.8752	-0.44824	1.6294	-0.49756	-78.8759	-6.365	1540.538	0.029297	1.8833	-1.0659	NaN	NaN	NaN	NaN	NaN	NaN	NaN	NaN	NaN	NaN	NaN	NaN
1.474	-74.604	81.289	1176.663	-0.43418	1.6082	-0.49004	-82.6491	-19.275	1563.353	0.024414	1.8716	-1.0581	NaN	NaN	NaN	NaN	NaN	NaN	NaN	NaN	NaN	NaN	NaN	NaN
1.476	-87.495	77.6059	1152.288	-0.41953	1.5898	-0.48232	-52.107	-11.995	1556.093	0.020508	1.8496	-1.0527	NaN	NaN	NaN	NaN	NaN	NaN	NaN	NaN	NaN	NaN	NaN	NaN
1.478	-89.0733	69.857	1139.3546	-0.40859	1.575	-0.47373	-56.09	-38.528	1574.423	0.016357	1.8372	-1.0413	NaN	NaN	NaN	NaN	NaN	NaN	NaN	NaN	NaN	NaN	NaN	NaN
1.48	-89.464	75.5881	1112.7511	-0.39736	1.5577	-0.46748	-50.9674	-21.066	1532.236	0.012695	1.8208	-1.0288	NaN	NaN	NaN	NaN	NaN	NaN	NaN	NaN	NaN	NaN	NaN	NaN
1.482	-71.5542	81.9819	1110.0936	-0.38574	1.541	-0.4668	-51.721	-46.1659	1509.432	0.0029297	1.8086	-1.0195	NaN	NaN	NaN	NaN	NaN	NaN	NaN	NaN	NaN	NaN	NaN	NaN
1.484	-57.955	89.3846	1086.9991	-0.36855	1.5244	-0.45723	-75.7721	-47.102	1512.2154	0.0014648	1.8145	-1.0137	NaN	NaN	NaN	NaN	NaN	NaN	NaN	NaN	NaN	NaN	NaN	NaN
1.486	-45.793	82.396	1069.9101	-0.35537	1.5036	-0.44853	-39.847	8.919	1459.348	0.0043945	1.8027	-1.002	NaN	NaN	NaN	NaN	NaN	NaN	NaN	NaN	NaN	NaN	NaN	NaN
1.488	-32.139	86.381	1083.614	-0.34482	1.4798	-0.43838	-63.619	35.2542	1487.2085	0.016602	1.7795	-0.99292	NaN	NaN	NaN	NaN	NaN	NaN	NaN	NaN	NaN	NaN	NaN	NaN
1.49	-23.694	100.3401	1058.006	-0.32549	1.4518	-0.42793	-48.065	102.029	1461.104	0.036621	1.7524	-0.97607	NaN	NaN	NaN	NaN	NaN	NaN	NaN	NaN	NaN	NaN	NaN	NaN
1.492	-36.068	119.3234	1017.9593	-0.31201	1.4204	-0.41748	-51.85	105.63	1449.791	0.063965	1.6973	-0.95508	NaN	NaN	NaN	NaN	NaN	NaN	NaN	NaN	NaN	NaN	NaN	NaN
1.494	-45.7082	135.666	985.7521	-0.29209	1.3872	-0.40615	-59.701427	106.872	1442.216	0.083496	1.6699	-0.94043	NaN	NaN	NaN	NaN	NaN	NaN	NaN	NaN	NaN	NaN	NaN	NaN
1.496	-51.594	142.101	963.47789	-0.27734	1.3496	-0.39707	-10.634	129.485	1402.2809	0.1167	1.6055	-0.90723	NaN	NaN	NaN	NaN	NaN	NaN	NaN	NaN	NaN	NaN	NaN	NaN
1.498	-32.022	159.24	923.1341	-0.25547	1.3152	-0.38457	-13.803	111.04	1408.9158	0.14233	1.5757	-0.89257	NaN	NaN	NaN	NaN	NaN	NaN	NaN	NaN	NaN	NaN	NaN	NaN
1.5	-41.937	152.96	894.322	-0.23623	1.2753	-0.379	29.432	122.0615	1374.8319	0.15771	1.5513	-0.87451	NaN	NaN	NaN	NaN	NaN	NaN	NaN	NaN	NaN	NaN	NaN	NaN
1.502	-35.76	143.861	862.1099	-0.21143	1.2388	-0.37256	16.206	90.43	1329.156	0.17188	1.5356	-0.84912	NaN	NaN	NaN	NaN	NaN	NaN	NaN	NaN	NaN	NaN	NaN	NaN
1.504	-27.438	130.69379	867.6114	-0.18936	1.2008	-0.36211	-17.23	61.892	1312.1046	0.17871	1.5273	-0.83496	NaN	NaN	NaN	NaN	NaN	NaN	NaN	NaN	NaN	NaN	NaN	NaN
1.506	-26.373	134.4272	844.0625	-0.16455	1.1607	-0.35654	12.733	83.704	1261.735	0.17383	1.5161	-0.81006	NaN	NaN	NaN	NaN	NaN	NaN	NaN	NaN	NaN	NaN	NaN	NaN
1.508	-27.098	131.499	813.586	-0.14189	1.1236	-0.34521	0.971999999999998	67.445	1268.1946	0.17309	1.501	-0.79492	NaN	NaN	NaN	NaN	NaN	NaN	NaN	NaN	NaN	NaN	NaN	NaN
1.51	-31.599	141.15031	789.9679	-0.12666	1.0868	-0.33926	-19.1373	93.374	1250.652	0.17285	1.4819	-0.77393	NaN	NaN	NaN	NaN	NaN	NaN	NaN	NaN	NaN	NaN	NaN	NaN
1.512	-20.05	142.9769	751.126	-0.11328	1.0469	-0.3335	-18.4952	96.3569	1222.5161	0.17822	1.4434	-0.74414	NaN	NaN	NaN	NaN	NaN	NaN	NaN	NaN	NaN	NaN	NaN	NaN
1.514	-36.83	155.5098	740.6449	-0.09414	1.0087	-0.32285	-55.7142	102.341	1218.30827	0.17773	1.4238	-0.72363	NaN	NaN	NaN	NaN	NaN	NaN	NaN	NaN	NaN	NaN	NaN	NaN
1.516	-54.8944	157.8155	720.155	-0.072656	0.96758	-0.31699	-39.85	136.0991	1168.508	0.17969	1.3813	-0.68701	NaN	NaN	NaN	NaN	NaN	NaN	NaN	NaN	NaN	NaN	NaN	NaN
1.518	-70.148	148.2869	704.0606	-0.055859	0.92578	-0.30645	-37.4739	134.2599	1165.2938	0.18237	1.353	-0.65967	NaN	NaN	NaN	NaN	NaN	NaN	NaN	NaN	NaN	NaN	NaN	NaN
1.52	-50.2042	155.4958	688.6341	-0.038574	0.8831	-0.29795	-33.8496	172.1476	1153.63	0.18213	1.3223	-0.63867	NaN	NaN	NaN	NaN	NaN	NaN	NaN	NaN	NaN	NaN	NaN	NaN
1.522	-52.9028	142.9622	672.2197	-0.016602	0.83838	-0.28857	-37.03017	193.023	1105.0364	0.18359	1.2915	-0.60107	NaN	NaN	NaN	NaN	NaN	NaN	NaN	NaN	NaN	NaN	NaN	NaN
1.524	-53.5456	139.2543	641.8057	9.762e-05	0.79258	-0.28223	-56.161	189.0242	1072.208	0.18311	1.2676	-0.58203	NaN	NaN	NaN	NaN	NaN	NaN	NaN	NaN	NaN	NaN	NaN	NaN
1.526	-52.4239	145.4295	608.7016	0.015137	0.74893	-0.27558	-17.2026	217.954	1003.792	0.17383	1.2173	-0.54346	NaN	NaN	NaN	NaN	NaN	NaN	NaN	NaN	NaN	NaN	NaN	NaN
1.528	-40.992	156.8001	578.8908	0.033106	0.70362	-0.26113	-38.3809	179.1128	991.217	0.17651	1.1704	-0.52295	NaN	NaN	NaN	NaN	NaN	NaN	NaN	NaN	NaN	NaN	NaN	NaN
1.53	-41.37295	159.834	542.7915	0.048242	0.66494	-0.25908	-20.709	176.421	979.1669	0.1748	1.1152	-0.50098	NaN	NaN	NaN	NaN	NaN	NaN	NaN	NaN	NaN	NaN	NaN	NaN
1.532	-35.4817	145.4731	535.038	0.063477	0.62891	-0.25488	-17.607	169.9572	919.644	0.17822	1.0459	-0.47266	NaN	NaN	NaN	NaN	NaN	NaN	NaN	NaN	NaN	NaN	NaN	NaN
1.534	-31.7608	133.687	525.9814	0.074707	0.58975	-0.2459	-45.7065	154.687	901.522	0.18262	1.0063	-0.4541	NaN	NaN	NaN	NaN	NaN	NaN	NaN	NaN	NaN	NaN	NaN	NaN
1.536	-26.309	137.6988	487.698	0.086914	0.54619	-0.23653	-13.7595	185.369	872.877	0.17725	0.92822	-0.42627	NaN	NaN	NaN	NaN	NaN	NaN	NaN	NaN	NaN	NaN	NaN	NaN
1.538	-36.1572	143.5678	480.0208	0.097461	0.50673	-0.23105	-39.315	186.343	870.8532	0.1748	0.87182	-0.40747	NaN	NaN	NaN	NaN	NaN	NaN	NaN	NaN	NaN	NaN	NaN	NaN
1.54	-41.9576	141.3944	454.4895	0.11162	0.46612	-0.22842	-19.8722	209.9699	853.83	0.17529	0.81299	-0.38574	NaN	NaN	NaN	NaN	NaN	NaN	NaN	NaN	NaN	NaN	NaN	NaN
1.542	-32.739	139.268	449.888	0.12061	0.42383	-0.22021	24.4387	205.486	809.1445	0.1748	0.74268	-0.35791	NaN	NaN	NaN	NaN	NaN	NaN	NaN	NaN	NaN	NaN	NaN	NaN
1.544	-10.064	141.004	430.6062	0.13535	0.38476	-0.21211	-11.1178	184.037	800.052	0.17139	0.70557	-0.3374	NaN	NaN	NaN	NaN	NaN	NaN	NaN	NaN	NaN	NaN	NaN	NaN
1.546	-36.5159	131.834	392.0765	0.14942	0.34541	-0.20244	17.8565	182.7627	756.9481	0.16895	0.64111	-0.32861	NaN	NaN	NaN	NaN	NaN	NaN	NaN	NaN	NaN	NaN	NaN	NaN
1.548	-14.608	128.0162	368.6183	0.16152	0.30752	-0.19267	22.4484	164.8235	722.782	0.17652	0.59106	-0.30005	NaN	NaN	NaN	NaN	NaN	NaN	NaN	NaN	NaN	NaN	NaN	NaN
1.55	2.382	119.1476	349.388	0.16738	0.27588	-0.18418	36.4075	174.79	675.005	0.18066	0.53809	-0.28711	NaN	NaN	NaN	NaN	NaN	NaN	NaN	NaN	NaN	NaN	NaN	NaN
1.552	3.052	123.55389	330.6859	0.17432	0.25098	-0.17725	52.307	182.987	601.9071	0.19189	0.47314	-0.26611	NaN	NaN	NaN	NaN	NaN	NaN	NaN	NaN	NaN	NaN	NaN	NaN
1.554	-8.364	107.7037	317.9233	0.18311	0.21973	-0.16973	18.8079	172.024	571.0305	0.19629	0.43994	-0.25488	NaN	NaN	NaN	NaN	NaN	NaN	NaN	NaN	NaN	NaN	NaN	NaN
1.556	-1.812	86.926	304.3018	0.1873	0.19287	-0.16074	7.114	177.306	521.6525	0.21094	0.37354	-0.23535	NaN	NaN	NaN	NaN	NaN	NaN	NaN	NaN	NaN	NaN	NaN	NaN
1.558	6.357	86.091	296.0824	0.19512	0.16553	-0.15215	-9.609	173.944	489.233	0.21778	0.32519	-0.21948	NaN	NaN	NaN	NaN	NaN	NaN	NaN	NaN	NaN	NaN	NaN	NaN
1.56	-23.7121	86.4255	293.7508	0.1999	0.14365	-0.14863	-2.764	181.2382	472.2318	0.22412	0.27734	-0.19971	NaN	NaN	NaN	NaN	NaN	NaN	NaN	NaN	NaN	NaN	NaN	NaN
1.562	-20.396	80.8458	277.6392	0.2041	0.12061	-0.14307	24.6929	172.111	442.244	0.23145	0.20996	-0.18066	NaN	NaN	NaN	NaN	NaN	NaN	NaN	NaN	NaN	NaN	NaN	NaN
1.564	-20.59	89.275	267.8082	0.20928	0.088869	-0.13623	-27.1209	149.4398	418.7334	0.23145	0.17578	-0.16943	NaN	NaN	NaN	NaN	NaN	NaN	NaN	NaN	NaN	NaN	NaN	NaN
1.566	-21.359	102.928	247.02362	0.21104	0.068457	-0.13643	1.232	140.244	372.815	0.23975	0.10938	-0.15332	NaN	NaN	NaN	NaN	NaN	NaN	NaN	NaN	NaN	NaN	NaN	NaN
1.568	-39.6184	104.897	207.054	0.21455	0.044629	-0.13096	-11.072	132.214	321.701	0.24292	0.05835	-0.13989	NaN	NaN	NaN	NaN	NaN	NaN	NaN	NaN	NaN	NaN	NaN	NaN
1.57	-51.59556	84.532	191.861	0.21778	0.021289	-0.13018	-34.7886	144.5799	314.531	0.24463	0.013184	-0.12793	NaN	NaN	NaN	NaN	NaN	NaN	NaN	NaN	NaN	NaN	NaN	NaN
1.572	-40.73188	73.5235	193.226	0.22266	-0.0019531	-0.13135	-8.549	145.243	291.3655	0.24512	-0.038086	-0.11523	NaN	NaN	NaN	NaN	NaN	NaN	NaN	NaN	NaN	NaN	NaN	NaN
1.574	-28.23	74.593	197.1854	0.22149	-0.029101	-0.12891	-34.1846	125.9782	275.65539	0.24121	-0.066406	-0.11328	NaN	NaN	NaN	NaN	NaN	NaN	NaN	NaN	NaN	NaN	NaN	NaN
1.576	-37.2944	69.2416	185.3094	0.22461	-0.052344	-0.13516	-41.0841	108.445	238.9271	0.23193	-0.1167	-0.10059	NaN	NaN	NaN	NaN	NaN	NaN	NaN	NaN	NaN	NaN	NaN	NaN
1.578	-34.6394	56.2847	169.0936	0.22383	-0.071484	-0.13672	-36.1912	87.579	210.697	0.22608	-0.15308	-0.089599	NaN	NaN	NaN	NaN	NaN	NaN	NaN	NaN	NaN	NaN	NaN	NaN
1.58	-21.419	58.4549	157.8785	0.2292	-0.097559	-0.13633	-58.979	74.796	201.7001	0.22119	-0.19092	-0.080078	NaN	NaN	NaN	NaN	NaN	NaN	NaN	NaN	NaN	NaN	NaN	NaN
1.582	-31.917	70.3789	148.2879	0.22949	-0.12207	-0.13184	-44.1287	76.2606	166.719	0.21338	-0.229	-0.067871	NaN	NaN	NaN	NaN	NaN	NaN	NaN	NaN	NaN	NaN	NaN	NaN
1.584	-45.343	80.763	140.6913	0.2336	-0.14336	-0.13487	-45.96465	76.367	153.134	0.21191	-0.24268	-0.066406	NaN	NaN	NaN	NaN	NaN	NaN	NaN	NaN	NaN	NaN	NaN	NaN
1.586	-39.4405	55.8768	137.496	0.23301	-0.16279	-0.13799	-53.3873	81.7802	117.4467	0.20654	-0.27588	-0.050293	NaN	NaN	NaN	NaN	NaN	NaN	NaN	NaN	NaN	NaN	NaN	NaN
1.588	-30.1713	44.8992	125.2758	0.23262	-0.16748	-0.13487	-54.9253	76.481	112.746	0.20166	-0.30103	-0.043701	NaN	NaN	NaN	NaN	NaN	NaN	NaN	NaN	NaN	NaN	NaN	NaN
1.59	-38.3103	43.2746	110.7153	0.22275	-0.17227	-0.13428	-39.4981	77.6238	115.7127	0.19922	-0.31836	-0.036621	NaN	NaN	NaN	NaN	NaN	NaN	NaN	NaN	NaN	NaN	NaN	NaN
1.592	-48.5328	42.6588	113.01078	0.21436	-0.17285	-0.12891	-8.993	69.1701	97.0706	0.19678	-0.34619	-0.02832	NaN	NaN	NaN	NaN	NaN	NaN	NaN	NaN	NaN	NaN	NaN	NaN
1.594	-13.808	45.5922	107.5128	0.20312	-0.16689	-0.1289	-22.9151	53.693	89.412	0.20264	-0.37085	-0.028809	NaN	NaN	NaN	NaN	NaN	NaN	NaN	NaN	NaN	NaN	NaN	NaN
1.596	-20.671	47.3621	100.012054	0.18965	-0.1586	-0.12705	-4.042	45.874	73.2468	0.21338	-0.38525	-0.030273	NaN	NaN	NaN	NaN	NaN	NaN	NaN	NaN	NaN	NaN	NaN	NaN
1.598	-7.834	63.1681	84.6429	0.1791	-0.1418	-0.12236	-13.906	40.502	44.915	0.21924	-0.40967	-0.03125	NaN	NaN	NaN	NaN	NaN	NaN	NaN	NaN	NaN	NaN	NaN	NaN
1.6	-19.357	42.736	80.1293	0.16123	-0.12256	-0.12383	-10.73	44.0129	38.2185	0.21924	-0.42188	-0.032715	NaN	NaN	NaN	NaN	NaN	NaN	NaN	NaN	NaN	NaN	NaN	NaN
1.602	-0.247	35.8809	70.937	0.146	-0.097168	-0.12549	5.284	44.679	19.62085	0.22559	-0.43213	-0.030762	NaN	NaN	NaN	NaN	NaN	NaN	NaN	NaN	NaN	NaN	NaN	NaN
1.604	16.005	45.0481	74.44	0.13252	-0.078027	-0.121	-2.741	38.1885	31.57	0.21924	-0.42895	-0.03418	NaN	NaN	NaN	NaN	NaN	NaN	NaN	NaN	NaN	NaN	NaN	NaN
1.606	-14.998	57.496	62.4462	0.11797	-0.057617	-0.12266	-12.7645	36.2541	40.8011	0.2085	-0.41797	-0.050293	NaN	NaN	NaN	NaN	NaN	NaN	NaN	NaN	NaN	NaN	NaN	NaN
1.608	-16.448	52.429	63.8525	0.10508	-0.038086	-0.12383	9.7376	23.1515	38.409	0.18018	-0.37207	-0.072266	NaN	NaN	NaN	NaN	NaN	NaN	NaN	NaN	NaN	NaN	NaN	NaN
1.61	-20.1422	44.0122	61.924	0.089648	-0.016015	-0.12822	2.432	23.719	44.026	0.16699	-0.33984	-0.071289	NaN	NaN	NaN	NaN	NaN	NaN	NaN	NaN	NaN	NaN	NaN	NaN
1.612	-14.789	48.2622	41.7978	0.078613	0.0048828	-0.13086	6.403	18.6121	35.81576	0.13086	-0.26758	-0.079102	NaN	NaN	NaN	NaN	NaN	NaN	NaN	NaN	NaN	NaN	NaN	NaN
1.614	-31.10785	50.543	50.9501	0.060547	0.022949	-0.13438	10.029	25.765	14.433	0.10205	-0.20337	-0.09375	NaN	NaN	NaN	NaN	NaN	NaN	NaN	NaN	NaN	NaN	NaN	NaN
1.616	-29.733	39.9912	58.9271	0.04873	0.041992	-0.13838	-12.269	21.0148	17.0227	0.06543	-0.12842	-0.11523	NaN	NaN	NaN	NaN	NaN	NaN	NaN	NaN	NaN	NaN	NaN	NaN
1.618	-25.005	41.7047	59.7672	0.037012	0.056054	-0.14463	-16.374	25.5124	-21.6226	0.02002	-0.029297	-0.14746	NaN	NaN	NaN	NaN	NaN	NaN	NaN	NaN	NaN	NaN	NaN	NaN
1.62	-29.673	54.0961	22.707	0.026661	0.067969	-0.14326	-40.74	23.4685	8.597	0.00048828	0.021973	-0.14941	NaN	NaN	NaN	NaN	NaN	NaN	NaN	NaN	NaN	NaN	NaN	NaN
1.622	-19.039	44.8637	21.164	0.013184	0.082031	-0.14355	-17.7086	13.9603	16.9762	-0.026367	0.092285	-0.18262	NaN	NaN	NaN	NaN	NaN	NaN	NaN	NaN	NaN	NaN	NaN	NaN
1.624	-31.261	33.7016	19.805	0.0076173	0.10127	-0.14981	-19.365	21.2469	25.552	-0.036133	0.13452	-0.20459	NaN	NaN	NaN	NaN	NaN	NaN	NaN	NaN	NaN	NaN	NaN	NaN
1.626	-19.25	25.474	43.07392	-0.0075195	0.12129	-0.15703	-37.8971	23.206	30.524	-0.039551	0.1665	-0.22314	NaN	NaN	NaN	NaN	NaN	NaN	NaN	NaN	NaN	NaN	NaN	NaN
1.628	-35.4706	40.6812	41.32779	-0.018848	0.13809	-0.15742	-30.755	17.45913	3.089	-0.028809	0.18701	-0.25293	NaN	NaN	NaN	NaN	NaN	NaN	NaN	NaN	NaN	NaN	NaN	NaN
1.63	-43.75105	49.5986	38.8646	-0.025586	0.15762	-0.16299	-56.5553	27.6989	13.715	-0.01709	0.18652	-0.26123	NaN	NaN	NaN	NaN	NaN	NaN	NaN	NaN	NaN	NaN	NaN	NaN
1.632	-49.99	39.4837	43.0544	-0.039063	0.16992	-0.16455	-53.40253	12.8165	12.5109	0.0019531	0.1875	-0.27686	NaN	NaN	NaN	NaN	NaN	NaN	NaN	NaN	NaN	NaN	NaN	NaN
1.634	-35.714	38.7903	38.6386	-0.04541	0.18017	-0.16191	-35.7535	10.1797	5.3212	0.02002	0.18286	-0.29151	NaN	NaN	NaN	NaN	NaN	NaN	NaN	NaN	NaN	NaN	NaN	NaN
1.636	-52.8901	45.4266	24.161	-0.055469	0.19033	-0.16435	-48.622	16.3148	18.5337	0.03125	0.17822	-0.30371	NaN	NaN	NaN	NaN	NaN	NaN	NaN	NaN	NaN	NaN	NaN	NaN
1.638	-45.5256	40.3862	19.7043	-0.0625	0.19775	-0.16514	-33.2616	-5.5945	21.5106	0.047852	0.15723	-0.30713	NaN	NaN	NaN	NaN	NaN	NaN	NaN	NaN	NaN	NaN	NaN	NaN
1.64	-24.033	31.3079	19.1717	-0.063183	0.20752	-0.16885	-52.4808	7.4898	21.298	0.050781	0.14795	-0.31104	NaN	NaN	NaN	NaN	NaN	NaN	NaN	NaN	NaN	NaN	NaN	NaN
1.642	-32.9284	25.8504	25.3568	-0.065918	0.20996	-0.16895	-24.648	8.4853	25.7407	0.052734	0.13428	-0.30859	NaN	NaN	NaN	NaN	NaN	NaN	NaN	NaN	NaN	NaN	NaN	NaN
1.644	-12.022	38.2846	24.4485	-0.061719	0.20898	-0.17402	-10.948	26.645	6.7093	0.057617	0.13501	-0.30957	NaN	NaN	NaN	NaN	NaN	NaN	NaN	NaN	NaN	NaN	NaN	NaN
1.646	-14.905	21.38831	25.046	-0.061035	0.20381	-0.17558	-28.3049	29.45347	26.503	0.057617	0.1377	-0.30273	NaN	NaN	NaN	NaN	NaN	NaN	NaN	NaN	NaN	NaN	NaN	NaN
1.648	-2.309	23.3263	31.638	-0.054785	0.19639	-0.17754	2.71	7.0454	17.2484	0.049805	0.15039	-0.3042	NaN	NaN	NaN	NaN	NaN	NaN	NaN	NaN	NaN	NaN	NaN	NaN
1.65	-17.688	27.1175	21.4524	-0.049805	0.18604	-0.17939	-14.3931	5.6141	21.0764	0.050293	0.15186	-0.2998	NaN	NaN	NaN	NaN	NaN	NaN	NaN	NaN	NaN	NaN	NaN	NaN
1.652	-29.7474	43.3763	23.24669	-0.041992	0.17236	-0.18506	0.297000000000001	-7.95444	26.4466	0.041992	0.17041	-0.28809	NaN	NaN	NaN	NaN	NaN	NaN	NaN	NaN	NaN	NaN	NaN	NaN
1.654	-4.47	22.7218	28.773805	-0.035937	0.15733	-0.18613	15.165	0.7578	10.5961	0.041015	0.18408	-0.27783	NaN	NaN	NaN	NaN	NaN	NaN	NaN	NaN	NaN	NaN	NaN	NaN
1.656	-20.055	21.0638	30.3178	-0.026758	0.13896	-0.18321	-8.577	14.483	22.997	0.034668	0.19434	-0.26953	NaN	NaN	NaN	NaN	NaN	NaN	NaN	NaN	NaN	NaN	NaN	NaN
1.658	-4.629	23.8566	30.3589	-0.013086	0.12178	-0.1875	17.208	18.9308	3.2745	0.021484	0.20117	-0.25732	NaN	NaN	NaN	NaN	NaN	NaN	NaN	NaN	NaN	NaN	NaN	NaN
1.66	-22.028	22.175	16.5817	-0.0056641	0.10518	-0.18916	-3.656	22.304	-19.508	0.02002	0.20166	-0.25244	NaN	NaN	NaN	NaN	NaN	NaN	NaN	NaN	NaN	NaN	NaN	NaN
1.662	-25.382	16.4007	21.2322	0.0029297	0.087402	-0.19238	5.055	22.9693	-8.9772	0.015625	0.17529	-0.24268	NaN	NaN	NaN	NaN	NaN	NaN	NaN	NaN	NaN	NaN	NaN	NaN
1.664	-12.943	27.0629	24.0193	0.011523	0.068262	-0.1915	4.224	15.8438	0.363	0.019287	0.15308	-0.23731	NaN	NaN	NaN	NaN	NaN	NaN	NaN	NaN	NaN	NaN	NaN	NaN
1.666	-15.585	24.8963	19.8425	0.016601	0.051172	-0.19326	-10.527	33.3402	16.386	0.029297	0.12109	-0.22607	NaN	NaN	NaN	NaN	NaN	NaN	NaN	NaN	NaN	NaN	NaN	NaN
1.668	-5.111	29.49296	22.4003	0.020898	0.039062	-0.196	4.339	13.6623	2.4011	0.040527	0.078613	-0.21777	NaN	NaN	NaN	NaN	NaN	NaN	NaN	NaN	NaN	NaN	NaN	NaN
1.67	-19.152	13.217	18.9753	0.027637	0.024023	-0.20166	-18.372	14.8963	5.931	0.041504	0.058105	-0.21143	NaN	NaN	NaN	NaN	NaN	NaN	NaN	NaN	NaN	NaN	NaN	NaN
1.672	-19.231	17.2604	20.228	0.033691	0.01123	-0.20996	-28.8264	28.394	15.879	0.040527	0.025879	-0.2002	NaN	NaN	NaN	NaN	NaN	NaN	NaN	NaN	NaN	NaN	NaN	NaN
1.674	-34.2853	28.0175	15.3625	0.039844	-0.0024414	-0.21221	-28.991	26.3525	9.131	0.034912	0.0063477	-0.1941	NaN	NaN	NaN	NaN	NaN	NaN	NaN	NaN	NaN	NaN	NaN	NaN
1.676	-36.3223	33.7519	24.825	0.044824	-0.016894	-0.21699	-10.041	32.8238	24.0229	0.024414	-0.0068359	-0.18408	NaN	NaN	NaN	NaN	NaN	NaN	NaN	NaN	NaN	NaN	NaN	NaN
1.678	-37.846	25.5751	26.5542	0.051856	-0.022754	-0.22519	-34.2692	20.6722	6.6348	0.0043945	-0.013184	-0.18652	NaN	NaN	NaN	NaN	NaN	NaN	NaN	NaN	NaN	NaN	NaN	NaN
1.68	-38.9343	1.1104	50.2164	0.059863	-0.029785	-0.22334	-50.907	14.9551	-4.522	-0.0092773	-0.017578	-0.18799	NaN	NaN	NaN	NaN	NaN	NaN	NaN	NaN	NaN	NaN	NaN	NaN
1.682	-48.5118	-11.7564	58.8305	0.061523	-0.033691	-0.23096	-54.773	11.804	4.83	-0.023926	-0.0087891	-0.19434	NaN	NaN	NaN	NaN	NaN	NaN	NaN	NaN	NaN	NaN	NaN	NaN
1.684	-45.0929	-9.8474	71.96778	0.063672	-0.036035	-0.24521	-30.2584	9.173	9.985	-0.027588	-0.00073242	-0.20288	NaN	NaN	NaN	NaN	NaN	NaN	NaN	NaN	NaN	NaN	NaN	NaN
1.686	-25.2585	-20.0666	77.1293	0.062695	-0.027051	-0.25185	-46.1073	21.812	10.303	-0.031738	0.0039063	-0.2085	NaN	NaN	NaN	NaN	NaN	NaN	NaN	NaN	NaN	NaN	NaN	NaN
1.688	-42.581	-17.8857	66.5885	0.059571	-0.013379	-0.25381	-37.6335	19.028	23.3338	-0.03125	0.0039063	-0.21826	NaN	NaN	NaN	NaN	NaN	NaN	NaN	NaN	NaN	NaN	NaN	NaN
1.69	-36.237	-13.3511	70.188	0.054102	0.012598	-0.25811	-56.4098	32.939	19.888	-0.029297	0.0014648	-0.22803	NaN	NaN	NaN	NaN	NaN	NaN	NaN	NaN	NaN	NaN	NaN	NaN
1.692	-42.838	-21.1866	85.287	0.036621	0.038574	-0.26416	-54.295	36.225	30.0123	-0.023926	-0.0043945	-0.24414	NaN	NaN	NaN	NaN	NaN	NaN	NaN	NaN	NaN	NaN	NaN	NaN
1.694	-9.323	-31.995	116.7038	0.024121	0.07002	-0.27441	-2.585	30.2274	30.0394	-0.016846	-0.017334	-0.25611	NaN	NaN	NaN	NaN	NaN	NaN	NaN	NaN	NaN	NaN	NaN	NaN
1.696	-13.293	-8.4172	136.8759	0.005176	0.094239	-0.28067	-26.8062	32.4176	25.2852	-0.0092773	-0.029297	-0.26611	NaN	NaN	NaN	NaN	NaN	NaN	NaN	NaN	NaN	NaN	NaN	NaN
1.698	-11.3948	15.8738	159.66	-0.0088866	0.12198	-0.29199	-20.7207	22.8744	29.3754	0.0019531	-0.044922	-0.29199	NaN	NaN	NaN	NaN	NaN	NaN	NaN	NaN	NaN	NaN	NaN	NaN
1.7	-6.7155	27.8038	182.971322	-0.014941	0.14346	-0.29912	-9.3312	17.693	5.355	0.010742	-0.05127	-0.30566	NaN	NaN	NaN	NaN	NaN	NaN	NaN	NaN	NaN	NaN	NaN	NaN
1.702	-11.95	48.1553	217.127	-0.024902	0.1748	-0.31348	-18.4213	8.0071	29.1606	0.033203	-0.056641	-0.32861	NaN	NaN	NaN	NaN	NaN	NaN	NaN	NaN	NaN	NaN	NaN	NaN
1.704	7.49	70.119	243.924	-0.031152	0.18965	-0.32139	-12.179	2.572	11.7623	0.051026	-0.060547	-0.34375	NaN	NaN	NaN	NaN	NaN	NaN	NaN	NaN	NaN	NaN	NaN	NaN
1.706	15.9163	64.1487	304.282	-0.036622	0.22032	-0.32989	3.319	13.163692	10.8009	0.066406	-0.055176	-0.36182	NaN	NaN	NaN	NaN	NaN	NaN	NaN	NaN	NaN	NaN	NaN	NaN
1.708	31.046	79.543	368.6624	-0.048731	0.25508	-0.34707	6.744	15.0081	20.2924	0.087891	-0.048828	-0.39355	NaN	NaN	NaN	NaN	NaN	NaN	NaN	NaN	NaN	NaN	NaN	NaN
1.71	10.4752	89.721	425.451	-0.064356	0.29795	-0.36035	18.211	16.5197	9.423	0.09668	-0.04248	-0.4043	NaN	NaN	NaN	NaN	NaN	NaN	NaN	NaN	NaN	NaN	NaN	NaN
1.712	31.519	82.938	477.501	-0.083496	0.35693	-0.37598	5.695	16.9555	26.7052	0.11426	-0.026855	-0.43018	NaN	NaN	NaN	NaN	NaN	NaN	NaN	NaN	NaN	NaN	NaN	NaN
1.714	14.3031	72.205	568.046	-0.11913	0.43359	-0.3914	3.475	7.0988	35.576	0.1289	-0.010986	-0.45093	NaN	NaN	NaN	NaN	NaN	NaN	NaN	NaN	NaN	NaN	NaN	NaN
1.716	24.22238	75.113	676.89	-0.15858	0.53279	-0.40352	-6.8512	-6.3191	59.6983	0.13721	0.003418	-0.48047	NaN	NaN	NaN	NaN	NaN	NaN	NaN	NaN	NaN	NaN	NaN	NaN
1.718	30.445	46.6915	790.74	-0.2117	0.6566	-0.41367	-4.529	-38.096	75.6241	0.14795	0.036621	-0.51123	NaN	NaN	NaN	NaN	NaN	NaN	NaN	NaN	NaN	NaN	NaN	NaN
1.72	-11.4966	39.55	864.461	-0.28143	0.81324	-0.41914	-1.093	-37.574	72.0182	0.15039	0.05957	-0.51025	NaN	NaN	NaN	NaN	NaN	NaN	NaN	NaN	NaN	NaN	NaN	NaN
1.722	-19.0307	16.9055	945.3391	-0.37109	0.99609	-0.42285	-14.5	-34.047	69.4307	0.14551	0.13086	-0.52881	NaN	NaN	NaN	NaN	NaN	NaN	NaN	NaN	NaN	NaN	NaN	NaN
1.724	-2.934	-18.4696	995.2065	-0.47319	1.223	-0.44112	0.536999999999999	-37.415	87.1465	0.13525	0.19287	-0.54492	NaN	NaN	NaN	NaN	NaN	NaN	NaN	NaN	NaN	NaN	NaN	NaN
1.726	-10.0369	-21.8724	1042.058	-0.58947	1.4554	-0.46791	-29.1108	-30.27	114.8405	0.12354	0.25244	-0.56641	NaN	NaN	NaN	NaN	NaN	NaN	NaN	NaN	NaN	NaN	NaN	NaN
1.728	-13.8915	-15.7361	1046.444	-0.72075	1.6835	-0.51323	-32.548	-63.4664	152.579	0.11279	0.33154	-0.59424	NaN	NaN	NaN	NaN	NaN	NaN	NaN	NaN	NaN	NaN	NaN	NaN
1.73	-23.6556	-28.8264	1021.385	-0.85079	1.8776	-0.57595	-8.2669	-72.6713	193.183	0.11768	0.36914	-0.61133	NaN	NaN	NaN	NaN	NaN	NaN	NaN	NaN	NaN	NaN	NaN	NaN
1.732	-37.449	-57.43	998.55	-0.95068	2.0103	-0.64404	-37.369	-61.293	261.989	0.12891	0.44043	-0.64209	NaN	NaN	NaN	NaN	NaN	NaN	NaN	NaN	NaN	NaN	NaN	NaN
1.734	-69.6238	-79.021	1010.077	-0.98855	2.0444	-0.69203	-25.3691	-37.698	342.78153	0.13379	0.50977	-0.68359	NaN	NaN	NaN	NaN	NaN	NaN	NaN	NaN	NaN	NaN	NaN	NaN
1.736	-37.365	-91.176	991.157	-0.96565	2.0057	-0.71366	-10.8388	15.6687	415.098	0.13574	0.54297	-0.70605	NaN	NaN	NaN	NaN	NaN	NaN	NaN	NaN	NaN	NaN	NaN	NaN
1.738	-44.2037	-105.051	967.9305	-0.88495	1.8993	-0.70864	-12.1449	55.123	508.545	0.12354	0.63281	-0.75	NaN	NaN	NaN	NaN	NaN	NaN	NaN	NaN	NaN	NaN	NaN	NaN
1.74	-21.37	-96.951	960.115	-0.78394	1.7739	-0.71384	-3.67746	74.725	616.563	0.092774	0.72852	-0.77441	NaN	NaN	NaN	NaN	NaN	NaN	NaN	NaN	NaN	NaN	NaN	NaN
1.742	-53.5572	-76.5447	939.523	-0.68066	1.6504	-0.73047	-1.45	80.2447	747.892	0.05127	0.85596	-0.80029	NaN	NaN	NaN	NaN	NaN	NaN	NaN	NaN	NaN	NaN	NaN	NaN
1.744	-45.1143	-36.742	946.733	-0.58805	1.5238	-0.74589	8.0663	71.6953	905.5059	-0.029785	1.0962	-0.82861	NaN	NaN	NaN	NaN	NaN	NaN	NaN	NaN	NaN	NaN	NaN	NaN
1.746	-40.697	-25.894	964.552	-0.51125	1.3945	-0.75562	14.0018	70.096	1018.948	-0.083984	1.2461	-0.83203	NaN	NaN	NaN	NaN	NaN	NaN	NaN	NaN	NaN	NaN	NaN	NaN
1.748	-34.752	-16.016	964.176	-0.44356	1.2648	-0.76856	15.6068	38.2778	1113.2938	-0.21826	1.5864	-0.83936	NaN	NaN	NaN	NaN	NaN	NaN	NaN	NaN	NaN	NaN	NaN	NaN
1.75	-19.4931	-30.359	976.6093	-0.36732	1.1503	-0.77344	21.9857	17.065	1160.0562	-0.33765	1.8264	-0.8562	NaN	NaN	NaN	NaN	NaN	NaN	NaN	NaN	NaN	NaN	NaN	NaN
1.752	-51.248	-55.02	983.8762	-0.28906	1.041	-0.77148	-1.7102	0.583	1168.949	-0.46436	2.0278	-0.90479	NaN	NaN	NaN	NaN	NaN	NaN	NaN	NaN	NaN	NaN	NaN	NaN
1.754	-16.0998	-59.114	980.6706	-0.22194	0.94488	-0.76034	-0.819000000000001	-48.8819	1188.396	-0.52002	2.1548	-1.0015	NaN	NaN	NaN	NaN	NaN	NaN	NaN	NaN	NaN	NaN	NaN	NaN
1.756	-3.8186	-71.3421	995.702	-0.1581	0.8668	-0.76043	30.3397	-74.1637	1178.953	-0.49902	2.1328	-1.0488	NaN	NaN	NaN	NaN	NaN	NaN	NaN	NaN	NaN	NaN	NaN	NaN
1.758	5.917	-98.621	998.2726	-0.11377	0.79939	-0.7694	-26.3744	-133.549	1183.746	-0.35742	1.9453	-1.0957	NaN	NaN	NaN	NaN	NaN	NaN	NaN	NaN	NaN	NaN	NaN	NaN
1.76	9.4641	-145.941	1005.3636	-0.070284	0.74446	-0.76258	-17.068	-194.133	1138.607	-0.18604	1.7403	-1.1113	NaN	NaN	NaN	NaN	NaN	NaN	NaN	NaN	NaN	NaN	NaN	NaN
1.762	20.5025	-188.352	1025.7494	-0.037109	0.71533	-0.75049	-9.727	-236.517	1075.342	-0.0014648	1.541	-1.1152	NaN	NaN	NaN	NaN	NaN	NaN	NaN	NaN	NaN	NaN	NaN	NaN
1.764	29.3792	-195.676	1034.0893	-0.018561	0.7168	-0.75219	5.803	-255.752	1016.087	0.19971	1.311	-1.1304	NaN	NaN	NaN	NaN	NaN	NaN	NaN	NaN	NaN	NaN	NaN	NaN
1.766	17.72466	-175.847	1056.539	-0.020561	0.74209	-0.75678	22.428	-216.894	952.223	0.26807	1.2134	-1.1401	NaN	NaN	NaN	NaN	NaN	NaN	NaN	NaN	NaN	NaN	NaN	NaN
1.768	33.891	-143.9174	1072.8848	-0.040525	0.77158	-0.75524	-32.0856	-167.565	934.766	0.34863	1.0591	-1.1362	NaN	NaN	NaN	NaN	NaN	NaN	NaN	NaN	NaN	NaN	NaN	NaN
1.77	15.9477	-132.3002	1085.1283	-0.06907	0.82096	-0.76071	0.401	-106.516	899.85	0.37451	0.98314	-1.1257	NaN	NaN	NaN	NaN	NaN	NaN	NaN	NaN	NaN	NaN	NaN	NaN
1.772	1.7428	-115.2698	1110.84322	-0.10059	0.89355	-0.76367	-22.1475	-79.501	914.37	0.38037	0.93213	-1.1226	NaN	NaN	NaN	NaN	NaN	NaN	NaN	NaN	NaN	NaN	NaN	NaN
1.774	-3.2889	-96.975	1113.9036	-0.13834	0.9939	-0.76007	-10.0435	-74.629	975.3269	0.3833	0.92383	-1.125	NaN	NaN	NaN	NaN	NaN	NaN	NaN	NaN	NaN	NaN	NaN	NaN
1.776	-2.8794	-70.42	1136.75066	-0.18534	1.0946	-0.75965	-10.7646	-77.057	1003.521	0.38916	0.93359	-1.1309	NaN	NaN	NaN	NaN	NaN	NaN	NaN	NaN	NaN	NaN	NaN	NaN
1.778	20.5896	-46.465	1157.14183	-0.2427	1.1997	-0.76161	-30.2031	-117.305	1032.9605	0.41895	0.96338	-1.1528	NaN	NaN	NaN	NaN	NaN	NaN	NaN	NaN	NaN	NaN	NaN	NaN
1.78	19.3102	-30.401	1172.19999	-0.29877	1.2861	-0.77223	6.649	-152.308	1007.173	0.44898	0.9856	-1.1678	NaN	NaN	NaN	NaN	NaN	NaN	NaN	NaN	NaN	NaN	NaN	NaN
1.782	29.7903	-22.393	1176.824	-0.34912	1.3618	-0.78271	-28.6089	-176.605	1011.576	0.48096	1.0098	-1.1758	NaN	NaN	NaN	NaN	NaN	NaN	NaN	NaN	NaN	NaN	NaN	NaN
1.784	20.8784	-69.023	1177.909	-0.39008	1.4309	-0.79239	0.474999999999998	-197.7339	1032.286	0.50977	1.0435	-1.189	NaN	NaN	NaN	NaN	NaN	NaN	NaN	NaN	NaN	NaN	NaN	NaN
1.786	26.2498	-90.6519	1205.935	-0.42491	1.5049	-0.80066	37.453	-235.6156	1044.655	0.52002	1.0508	-1.2051	NaN	NaN	NaN	NaN	NaN	NaN	NaN	NaN	NaN	NaN	NaN	NaN
1.788	8.0845	-101.1285	1245.20517	-0.45399	1.5596	-0.80773	-5.9609	-280.475	1113.714	0.51953	1.0728	-1.2183	NaN	NaN	NaN	NaN	NaN	NaN	NaN	NaN	NaN	NaN	NaN	NaN
1.79	-2.0383	-117.183	1274.328	-0.47855	1.6044	-0.81101	22.3432	-316.412	1156.726	0.51221	1.1138	-1.2163	NaN	NaN	NaN	NaN	NaN	NaN	NaN	NaN	NaN	NaN	NaN	NaN
1.792	-11.9415	-129.778	1288.5102	-0.49951	1.6333	-0.81299	23.385	-358.11	1212.153	0.49121	1.1743	-1.2085	NaN	NaN	NaN	NaN	NaN	NaN	NaN	NaN	NaN	NaN	NaN	NaN
1.794	-29.2471	-140.574	1280.9876	-0.52361	1.6534	-0.81593	10.7481	-328.315	1268.749	0.44971	1.2578	-1.2227	NaN	NaN	NaN	NaN	NaN	NaN	NaN	NaN	NaN	NaN	NaN	NaN
1.796	-23.6916	-141.242	1271.0084	-0.5449	1.6697	-0.82262	27.04	-284.782	1288.841	0.42334	1.291	-1.2402	NaN	NaN	NaN	NaN	NaN	NaN	NaN	NaN	NaN	NaN	NaN	NaN
1.798	-16.1534	-130.689	1290.4183	-0.56245	1.6755	-0.83784	30.914	-235.517	1299.544	0.396	1.3384	-1.2437	NaN	NaN	NaN	NaN	NaN	NaN	NaN	NaN	NaN	NaN	NaN	NaN
1.8	-3.5632	-114.766	1311.858	-0.57884	1.685	-0.85013	38.787	-197.991	1285.214	0.38086	1.3286	-1.2481	NaN	NaN	NaN	NaN	NaN	NaN	NaN	NaN	NaN	NaN	NaN	NaN
1.802	1.4911	-101.9679	1325.861	-0.59326	1.6919	-0.86035	28.1939	-181.22	1289.1816	0.375	1.311	-1.2515	NaN	NaN	NaN	NaN	NaN	NaN	NaN	NaN	NaN	NaN	NaN	NaN
1.804	3.91065	-92.0218	1319.9958	-0.60946	1.7106	-0.87138	29.884	-178.463	1321.9168	0.38721	1.2715	-1.252	NaN	NaN	NaN	NaN	NaN	NaN	NaN	NaN	NaN	NaN	NaN	NaN
1.806	14.2348	-110.186	1309.723	-0.628	1.7313	-0.88192	64.614	-157.894	1313.6231	0.38721	1.2461	-1.248	NaN	NaN	NaN	NaN	NaN	NaN	NaN	NaN	NaN	NaN	NaN	NaN
1.808	31.5837	-92.3617	1302.582	-0.64988	1.7548	-0.89598	43.693	-165.956	1314.0976	0.38916	1.2109	-1.2402	NaN	NaN	NaN	NaN	NaN	NaN	NaN	NaN	NaN	NaN	NaN	NaN
1.81	45.349	-87.43678	1303.1678	-0.67079	1.771	-0.90693	51.178	-166.769	1312.018	0.36377	1.2007	-1.2339	NaN	NaN	NaN	NaN	NaN	NaN	NaN	NaN	NaN	NaN	NaN	NaN
1.812	25.6319	-53.051	1285.658	-0.68701	1.7798	-0.91162	53.676	-182.754	1291.209	0.32031	1.2114	-1.2378	NaN	NaN	NaN	NaN	NaN	NaN	NaN	NaN	NaN	NaN	NaN	NaN
1.814	13.9654	-34.109	1280.188	-0.69307	1.7837	-0.92256	29.10219	-193.30241	1292.51649	0.25195	1.2471	-1.248	NaN	NaN	NaN	NaN	NaN	NaN	NaN	NaN	NaN	NaN	NaN	NaN
1.816	0.6856	-46.993	1297.309	-0.68945	1.7804	-0.93125	52.452	-191.1614	1296.2411	0.22021	1.2764	-1.2598	NaN	NaN	NaN	NaN	NaN	NaN	NaN	NaN	NaN	NaN	NaN	NaN
1.818	25.9163	-59.979	1311.011	-0.68242	1.768	-0.93438	27.0934	-215.816	1349.2737	0.15576	1.3477	-1.2754	NaN	NaN	NaN	NaN	NaN	NaN	NaN	NaN	NaN	NaN	NaN	NaN
1.82	39.848	-72.315	1319.4708	-0.67578	1.7531	-0.93711	16.6653	-226.606	1414.177	0.10547	1.4092	-1.2891	NaN	NaN	NaN	NaN	NaN	NaN	NaN	NaN	NaN	NaN	NaN	NaN
1.822	28.0966	-81.7282	1328.6498	-0.67383	1.7344	-0.94238	4.0911	-228.194	1410.2495	0.049805	1.4727	-1.3086	NaN	NaN	NaN	NaN	NaN	NaN	NaN	NaN	NaN	NaN	NaN	NaN
1.824	34.4103	-79.685	1334.9112	-0.67305	1.7053	-0.94199	-34.0678	-226.485	1445.968	-0.015625	1.5454	-1.3286	NaN	NaN	NaN	NaN	NaN	NaN	NaN	NaN	NaN	NaN	NaN	NaN
1.826	33.535	-71.664	1350.0172	-0.66855	1.6774	-0.94404	4.1071	-181.278	1432.618	-0.044434	1.5669	-1.3354	NaN	NaN	NaN	NaN	NaN	NaN	NaN	NaN	NaN	NaN	NaN	NaN
1.828	41.841	-61.641	1356.7966	-0.66582	1.6427	-0.94599	-15.2168	-176.3824	1431.668	-0.090332	1.6016	-1.3574	NaN	NaN	NaN	NaN	NaN	NaN	NaN	NaN	NaN	NaN	NaN	NaN
1.83	28.3705	-73.659	1373.1043	-0.65625	1.6176	-0.94668	5.9595	-148.1779	1433.366	-0.11182	1.6113	-1.3632	NaN	NaN	NaN	NaN	NaN	NaN	NaN	NaN	NaN	NaN	NaN	NaN
1.832	58.035	-66.747	1374.383	-0.64844	1.5996	-0.95117	5.0387	-153.884	1404.2	-0.12695	1.6152	-1.3652	NaN	NaN	NaN	NaN	NaN	NaN	NaN	NaN	NaN	NaN	NaN	NaN
1.834	14.6202	-56.26	1362.33226	-0.64297	1.5814	-0.95098	-12.015	-156.919	1411.53	-0.13867	1.6191	-1.3574	NaN	NaN	NaN	NaN	NaN	NaN	NaN	NaN	NaN	NaN	NaN	NaN
1.836	-9.9628	-32.1689	1341.167	-0.63428	1.5775	-0.95732	19.561	-140.999	1391.535	-0.15137	1.6196	-1.3589	NaN	NaN	NaN	NaN	NaN	NaN	NaN	NaN	NaN	NaN	NaN	NaN
1.838	-15.4275	-26.615	1333.083	-0.6331	1.5771	-0.96162	15.32394	-137.311	1406.424	-0.18701	1.6274	-1.353	NaN	NaN	NaN	NaN	NaN	NaN	NaN	NaN	NaN	NaN	NaN	NaN
1.84	3.856	-8.762	1334.4399	-0.6291	1.5756	-0.96152	16.4439	-90.27	1396.551	-0.2146	1.639	-1.3489	NaN	NaN	NaN	NaN	NaN	NaN	NaN	NaN	NaN	NaN	NaN	NaN
1.842	10.5532	5.12	1321.446625	-0.62061	1.5728	-0.96338	30.314	-53.228	1377.501	-0.24121	1.6528	-1.3472	NaN	NaN	NaN	NaN	NaN	NaN	NaN	NaN	NaN	NaN	NaN	NaN
1.844	-21.5431	10.403	1318.4616	-0.61514	1.5613	-0.95557	27.8096	-38.222	1406.33	-0.26855	1.6699	-1.334	NaN	NaN	NaN	NaN	NaN	NaN	NaN	NaN	NaN	NaN	NaN	NaN
1.846	-6.1085	14.3826	1315.1217	-0.61201	1.5532	-0.95147	31.1047	-37.929	1418.225	-0.28125	1.6816	-1.3359	NaN	NaN	NaN	NaN	NaN	NaN	NaN	NaN	NaN	NaN	NaN	NaN
1.848	-7.61542	16.4826	1320.677	-0.6085	1.5458	-0.94404	56.315	-59.088	1462.9782	-0.31201	1.6997	-1.3169	NaN	NaN	NaN	NaN	NaN	NaN	NaN	NaN	NaN	NaN	NaN	NaN
1.85	-2.7755	41.7746	1309.20284	-0.61074	1.5416	-0.93594	58.2946	-86.7928	1488.932	-0.33764	1.7102	-1.3084	NaN	NaN	NaN	NaN	NaN	NaN	NaN	NaN	NaN	NaN	NaN	NaN
1.852	0.347899999999999	28.3263	1313.48501	-0.61279	1.5356	-0.93213	84.021	-99.34139	1468.9185	-0.35986	1.7212	-1.2983	NaN	NaN	NaN	NaN	NaN	NaN	NaN	NaN	NaN	NaN	NaN	NaN
1.854	23.20805	8.48	1306.8811	-0.60732	1.5356	-0.92607	56.37	-87.382	1493.7345	-0.38281	1.7344	-1.2822	NaN	NaN	NaN	NaN	NaN	NaN	NaN	NaN	NaN	NaN	NaN	NaN
1.856	17.0797	-20.883	1308.6809	-0.60302	1.5309	-0.91943	74.193	-69.269	1478.6503	-0.39307	1.7441	-1.2656	NaN	NaN	NaN	NaN	NaN	NaN	NaN	NaN	NaN	NaN	NaN	NaN
1.858	-34.607	-3.99522	1279.7102	-0.59482	1.5267	-0.91123	103.223	-65.809	1465.5112	-0.40723	1.7441	-1.2441	NaN	NaN	NaN	NaN	NaN	NaN	NaN	NaN	NaN	NaN	NaN	NaN
1.86	-12.0369	-3.0661	1271.9553	-0.58408	1.5214	-0.90713	71.056	-67.149	1487.167	-0.41309	1.7207	-1.2304	NaN	NaN	NaN	NaN	NaN	NaN	NaN	NaN	NaN	NaN	NaN	NaN
1.862	7.9286	-10.1844	1269.2198	-0.57568	1.5122	-0.89307	92.075	-66.924	1475.38	-0.41162	1.6899	-1.2104	NaN	NaN	NaN	NaN	NaN	NaN	NaN	NaN	NaN	NaN	NaN	NaN
1.864	13.6339	4.6268	1231.801359	-0.56387	1.4994	-0.8836	60.6924	-70.9333	1496.116	-0.39697	1.6411	-1.1831	NaN	NaN	NaN	NaN	NaN	NaN	NaN	NaN	NaN	NaN	NaN	NaN
1.866	-7.391	13.826648	1205.544	-0.55147	1.4852	-0.87256	67.545	-64.7823	1481.63	-0.38672	1.6191	-1.1738	NaN	NaN	NaN	NaN	NaN	NaN	NaN	NaN	NaN	NaN	NaN	NaN
1.868	12.0942	21.5418	1173.449	-0.54483	1.474	-0.85733	40.367	-34.95	1454.8868	-0.37061	1.5942	-1.1499	NaN	NaN	NaN	NaN	NaN	NaN	NaN	NaN	NaN	NaN	NaN	NaN
1.87	32.8188	29.9761	1186.33	-0.53428	1.4669	-0.84717	10.279	-3.47	1438.3398	-0.3728	1.581	-1.1333	NaN	NaN	NaN	NaN	NaN	NaN	NaN	NaN	NaN	NaN	NaN	NaN
1.872	23	69.8806	1183.0903	-0.52881	1.4595	-0.8374	48.141	26.926	1399.91328	-0.37891	1.5859	-1.125	NaN	NaN	NaN	NaN	NaN	NaN	NaN	NaN	NaN	NaN	NaN	NaN
1.874	28.3514	81.886	1184.354	-0.52051	1.4502	-0.82754	2.7186	47.395	1393.8581	-0.38477	1.5996	-1.1113	NaN	NaN	NaN	NaN	NaN	NaN	NaN	NaN	NaN	NaN	NaN	NaN
1.876	17.34284	68.106	1159.52226	-0.51279	1.4454	-0.82275	6.955	46.839	1379.931	-0.38745	1.6135	-1.1018	NaN	NaN	NaN	NaN	NaN	NaN	NaN	NaN	NaN	NaN	NaN	NaN
1.878	52.448	64.75	1126.852	-0.5085	1.431	-0.80361	15.4153	26.6945	1366.7912	-0.38281	1.6191	-1.0918	NaN	NaN	NaN	NaN	NaN	NaN	NaN	NaN	NaN	NaN	NaN	NaN
1.88	11.029	82.247	1122.276	-0.50068	1.4233	-0.80127	4.312	24.256	1384.699	-0.3667	1.6128	-1.0776	NaN	NaN	NaN	NaN	NaN	NaN	NaN	NaN	NaN	NaN	NaN	NaN
1.882	5.508	87.46	1114.20284	-0.49121	1.4102	-0.78906	3.6436	4.085	1347.9725	-0.35742	1.5977	-1.0693	NaN	NaN	NaN	NaN	NaN	NaN	NaN	NaN	NaN	NaN	NaN	NaN
1.884	-17.7485	73.653	1104.2171	-0.48672	1.3949	-0.77422	-14.7813	2.965	1338.6611	-0.33984	1.5786	-1.0503	NaN	NaN	NaN	NaN	NaN	NaN	NaN	NaN	NaN	NaN	NaN	NaN
1.886	-4.572	68.856	1079.9625	-0.47617	1.3793	-0.76328	13.7898	0.546999999999997	1306.5399	-0.32813	1.5598	-1.0402	NaN	NaN	NaN	NaN	NaN	NaN	NaN	NaN	NaN	NaN	NaN	NaN
1.888	-20.7864	53.5835	1055.0212	-0.46601	1.3586	-0.75117	-17.7602	7.3514	1265.593	-0.3208	1.5391	-1.0254	NaN	NaN	NaN	NaN	NaN	NaN	NaN	NaN	NaN	NaN	NaN	NaN
1.89	-35.0921	44.1159	1051.1868	-0.45107	1.3351	-0.73711	-27.8015	33.377	1297.561	-0.30371	1.5181	-1.0142	NaN	NaN	NaN	NaN	NaN	NaN	NaN	NaN	NaN	NaN	NaN	NaN
1.892	-10.161	51.99	1037.324	-0.44092	1.3149	-0.72217	16.3759	39.2657	1285.0317	-0.29883	1.5039	-1.0137	NaN	NaN	NaN	NaN	NaN	NaN	NaN	NaN	NaN	NaN	NaN	NaN
1.894	-23.06	67.227	1018.3816	-0.42627	1.2876	-0.70694	11.848	71.6887	1253.018	-0.28271	1.4849	-1.0005	NaN	NaN	NaN	NaN	NaN	NaN	NaN	NaN	NaN	NaN	NaN	NaN
1.896	-29.025821	83.739	1004.208	-0.41065	1.2613	-0.69307	-16.1361	72.263	1245.1367	-0.27075	1.4677	-0.99219	NaN	NaN	NaN	NaN	NaN	NaN	NaN	NaN	NaN	NaN	NaN	NaN
1.898	-29.0365	73.861	996.5756	-0.39346	1.2289	-0.68096	28.2296	79.4443	1215.5	-0.25537	1.4419	-0.98096	NaN	NaN	NaN	NaN	NaN	NaN	NaN	NaN	NaN	NaN	NaN	NaN
1.9	-20.8482	77.793	992.5658	-0.37568	1.2017	-0.66856	22.969	104.569	1204.9318	-0.23584	1.4102	-0.97266	NaN	NaN	NaN	NaN	NaN	NaN	NaN	NaN	NaN	NaN	NaN	NaN
1.902	-19.5221	99.9779	959.297989	-0.35791	1.1685	-0.65186	51.308	113.60869	1192.077	-0.21924	1.3931	-0.96436	NaN	NaN	NaN	NaN	NaN	NaN	NaN	NaN	NaN	NaN	NaN	NaN
1.904	-42.1173	116.559	927.6167	-0.33818	1.13	-0.63545	40.399	139.024	1157.2201	-0.18945	1.3379	-0.95117	NaN	NaN	NaN	NaN	NaN	NaN	NaN	NaN	NaN	NaN	NaN	NaN
1.906	-47.32922	119.128	911.1634	-0.31846	1.0923	-0.61846	47.132	145.837	1133.8661	-0.16699	1.2883	-0.93823	NaN	NaN	NaN	NaN	NaN	NaN	NaN	NaN	NaN	NaN	NaN	NaN
1.908	-44.31474	107.046	891.2293	-0.30166	1.0579	-0.60361	83.052	135.47	1106.062	-0.146	1.2451	-0.92383	NaN	NaN	NaN	NaN	NaN	NaN	NaN	NaN	NaN	NaN	NaN	NaN
1.91	-35.0915	105.409	867.388	-0.28115	1.0242	-0.5873	38.642	159.7295	1078.062	-0.11865	1.1855	-0.9043	NaN	NaN	NaN	NaN	NaN	NaN	NaN	NaN	NaN	NaN	NaN	NaN
1.912	-52.0794	107.60764	826.977	-0.26367	0.99805	-0.57617	45.1055	136.95253	1054.187	-0.10547	1.1567	-0.89014	NaN	NaN	NaN	NaN	NaN	NaN	NaN	NaN	NaN	NaN	NaN	NaN
1.914	-22.8504	105.8857	805.45	-0.2498	0.96309	-0.55957	27.6703	141.2792	1053.109	-0.088867	1.0962	-0.86865	NaN	NaN	NaN	NaN	NaN	NaN	NaN	NaN	NaN	NaN	NaN	NaN
1.916	-11.9	110.7814	790.585	-0.23838	0.93633	-0.54532	22.8908	132.8877	1059.6348	-0.07373	1.053	-0.84936	NaN	NaN	NaN	NaN	NaN	NaN	NaN	NaN	NaN	NaN	NaN	NaN
1.918	-7.0289	122.804	761.948	-0.22002	0.90742	-0.53204	22.137	118.286	1033.1344	-0.059082	1.0156	-0.83398	NaN	NaN	NaN	NaN	NaN	NaN	NaN	NaN	NaN	NaN	NaN	NaN
1.92	-9.178	121.4957	747.42	-0.21397	0.87969	-0.5168	1.2108	153.276	1013.4456	-0.047363	0.95361	-0.79248	NaN	NaN	NaN	NaN	NaN	NaN	NaN	NaN	NaN	NaN	NaN	NaN
1.922	-2.152	112.65824	743.0057	-0.20264	0.85352	-0.50195	11.4195	148.575	997.575	-0.039551	0.92773	-0.78906	NaN	NaN	NaN	NaN	NaN	NaN	NaN	NaN	NaN	NaN	NaN	NaN
1.924	18.762	106.5967	753.882	-0.19151	0.82656	-0.48955	7.837	173.942	951.9783	-0.024414	0.86963	-0.75537	NaN	NaN	NaN	NaN	NaN	NaN	NaN	NaN	NaN	NaN	NaN	NaN
1.926	-9.756	109.1395	736.1684	-0.18515	0.80508	-0.48515	-24.773	166.994	931.8282	-0.01294	0.8313	-0.73462	NaN	NaN	NaN	NaN	NaN	NaN	NaN	NaN	NaN	NaN	NaN	NaN
1.928	-18.259	101.473	719.4045	-0.17539	0.77344	-0.46758	-29.7277	156.7335	888.341	-0.00097656	0.79346	-0.70557	NaN	NaN	NaN	NaN	NaN	NaN	NaN	NaN	NaN	NaN	NaN	NaN
1.93	-26.8562	107.182	694.206	-0.16357	0.75048	-0.44717	-35.17	166.075	858.425	0.0097656	0.73828	-0.67773	NaN	NaN	NaN	NaN	NaN	NaN	NaN	NaN	NaN	NaN	NaN	NaN
1.932	-15.8596	125.986	651.4397	-0.15137	0.72266	-0.42871	-21.6393	131.008	848.1315	0.016602	0.71289	-0.6626	NaN	NaN	NaN	NaN	NaN	NaN	NaN	NaN	NaN	NaN	NaN	NaN
1.934	-23.473	121.2856	614.909	-0.13916	0.70049	-0.4169	-36.1963	154.2641	808.5953	0.029785	0.65723	-0.625	NaN	NaN	NaN	NaN	NaN	NaN	NaN	NaN	NaN	NaN	NaN	NaN
1.936	-38.707	113.2998	584.5504	-0.12568	0.67588	-0.39795	-69.213	172.6212	778.719	0.034913	0.625	-0.59936	NaN	NaN	NaN	NaN	NaN	NaN	NaN	NaN	NaN	NaN	NaN	NaN
1.938	-22.508	107.7825	575.9556	-0.11631	0.65166	-0.38311	-41.564	184.736	724.9044	0.042969	0.58447	-0.57178	NaN	NaN	NaN	NaN	NaN	NaN	NaN	NaN	NaN	NaN	NaN	NaN
1.94	-28.244	116.1926	559.472	-0.10449	0.62549	-0.37099	-40.474	220.408	672.492	0.057129	0.54053	-0.53467	NaN	NaN	NaN	NaN	NaN	NaN	NaN	NaN	NaN	NaN	NaN	NaN
1.942	-19.378	117.127	550.6679	-0.093262	0.59717	-0.354	-68.924	181.727	663.573	0.059082	0.5166	-0.521	NaN	NaN	NaN	NaN	NaN	NaN	NaN	NaN	NaN	NaN	NaN	NaN
1.944	-26.323	117.9674	545.34006	-0.083008	0.57217	-0.34316	-35.8392	180.898	644.937	0.068848	0.47412	-0.48682	NaN	NaN	NaN	NaN	NaN	NaN	NaN	NaN	NaN	NaN	NaN	NaN
1.946	-28.361	113.9224	528.8136	-0.068262	0.54424	-0.33252	-36.6978	166.86831	609.373	0.074462	0.44068	-0.46167	NaN	NaN	NaN	NaN	NaN	NaN	NaN	NaN	NaN	NaN	NaN	NaN
1.948	-44.1303	120.3859	505.09357	-0.057324	0.51846	-0.32158	-33.1311	145.0686	560.3222	0.081055	0.40918	-0.43848	NaN	NaN	NaN	NaN	NaN	NaN	NaN	NaN	NaN	NaN	NaN	NaN
1.95	-67.7001	132.172	481.3671	-0.045996	0.49111	-0.31026	-26.8703	173.949	525.429	0.092773	0.37598	-0.41064	NaN	NaN	NaN	NaN	NaN	NaN	NaN	NaN	NaN	NaN	NaN	NaN
1.952	-60.3683	122.177	459.0769	-0.03418	0.46191	-0.30029	-23.032	144.0981	505.5421	0.092285	0.36035	-0.396	NaN	NaN	NaN	NaN	NaN	NaN	NaN	NaN	NaN	NaN	NaN	NaN
1.954	-61.4772	126.739	432.5693	-0.023828	0.43213	-0.29434	6.451	160.148	481.273	0.10107	0.33203	-0.36133	NaN	NaN	NaN	NaN	NaN	NaN	NaN	NaN	NaN	NaN	NaN	NaN
1.956	-61.3421	126.183	416.12761	-0.0084961	0.40205	-0.28252	-4.623	155.7581	462.4137	0.11084	0.31567	-0.33813	NaN	NaN	NaN	NaN	NaN	NaN	NaN	NaN	NaN	NaN	NaN	NaN
1.958	-64.0341	111.253	389.895	9.762e-05	0.37432	-0.27432	17.423	109.5393	455.7222	0.11719	0.30078	-0.31543	NaN	NaN	NaN	NaN	NaN	NaN	NaN	NaN	NaN	NaN	NaN	NaN
1.96	-52.5775	105.8764	386.3414	0.011035	0.35	-0.26172	-6.6667	126.4787	420.1076	0.12012	0.27441	-0.28613	NaN	NaN	NaN	NaN	NaN	NaN	NaN	NaN	NaN	NaN	NaN	NaN
1.962	-37.007	99.048	375.7035	0.019531	0.32129	-0.24854	-11.904	91.386	411.494	0.12695	0.26563	-0.27051	NaN	NaN	NaN	NaN	NaN	NaN	NaN	NaN	NaN	NaN	NaN	NaN
1.964	-26.12	104.989	361.6461	0.028418	0.30508	-0.23692	9.114	125.857	355.4355	0.13525	0.24756	-0.2417	NaN	NaN	NaN	NaN	NaN	NaN	NaN	NaN	NaN	NaN	NaN	NaN
1.966	-19.847	99.4152	362.8302	0.034277	0.28457	-0.22295	10.167	147.5381	312.9751	0.13867	0.23047	-0.21411	NaN	NaN	NaN	NaN	NaN	NaN	NaN	NaN	NaN	NaN	NaN	NaN
1.968	-25.537	96.8673	340.8855	0.038183	0.26973	-0.20733	0.456	107.5529	290.7247	0.146	0.20947	-0.18848	NaN	NaN	NaN	NaN	NaN	NaN	NaN	NaN	NaN	NaN	NaN	NaN
1.97	-6.65	95.9122	312.5274	0.04043	0.25967	-0.19258	-4.806	133.1229	276.709	0.14795	0.17627	-0.15576	NaN	NaN	NaN	NaN	NaN	NaN	NaN	NaN	NaN	NaN	NaN	NaN
1.972	-44.0781	103.376	297.034	0.043945	0.24854	-0.18213	-11.316	105.397	293.049	0.14844	0.15771	-0.13867	NaN	NaN	NaN	NaN	NaN	NaN	NaN	NaN	NaN	NaN	NaN	NaN
1.974	-32.564	105.772	286.2712	0.051855	0.23535	-0.16455	9.602	118.68544	273.516	0.15674	0.1333	-0.11475	NaN	NaN	NaN	NaN	NaN	NaN	NaN	NaN	NaN	NaN	NaN	NaN
1.976	-31.982	111.3	275.2956	0.059278	0.22168	-0.15595	-19.2596	142.51	246.817	0.16137	0.11524	-0.10059	NaN	NaN	NaN	NaN	NaN	NaN	NaN	NaN	NaN	NaN	NaN	NaN
1.978	-5.892	107.257	275.9606	0.064746	0.21465	-0.14971	-31.9049	101.9216	208.1935	0.16943	0.098145	-0.080566	NaN	NaN	NaN	NaN	NaN	NaN	NaN	NaN	NaN	NaN	NaN	NaN
1.98	-29.317	92.9109	257.7665	0.066601	0.20498	-0.13535	-39.673	125.898	173.77	0.1792	0.07959	-0.061523	NaN	NaN	NaN	NaN	NaN	NaN	NaN	NaN	NaN	NaN	NaN	NaN
1.982	-27.026	79.7364	254.7757	0.070801	0.18896	-0.125	-54.0177	106.4265	138.387	0.18066	0.074219	-0.056641	NaN	NaN	NaN	NaN	NaN	NaN	NaN	NaN	NaN	NaN	NaN	NaN
1.984	1.57	85.3601	239.57402	0.072949	0.1749	-0.11806	-38.0036	88.381	128.919	0.17871	0.072754	-0.030762	NaN	NaN	NaN	NaN	NaN	NaN	NaN	NaN	NaN	NaN	NaN	NaN
1.986	-7.449	92.9745	204.4459	0.081445	0.15098	-0.10664	-61.674	95.05411	143.749	0.17602	0.075928	-0.015869	NaN	NaN	NaN	NaN	NaN	NaN	NaN	NaN	NaN	NaN	NaN	NaN
1.988	-2.902	86.8271	208.168	0.092773	0.13614	-0.10078	-57.9961	32.919	167.119	0.17627	0.07373	-0.003418	NaN	NaN	NaN	NaN	NaN	NaN	NaN	NaN	NaN	NaN	NaN	NaN
1.99	-14.738	74.5659	200.149	0.095215	0.12383	-0.092969	-52.8313	58.6598	133.4129	0.16992	0.077148	0.0097656	NaN	NaN	NaN	NaN	NaN	NaN	NaN	NaN	NaN	NaN	NaN	NaN
1.992	-26.888	67.1579	193.863	0.097656	0.10938	-0.083496	-56.717	49.288	111.8291	0.1709	0.07666	0.020996	NaN	NaN	NaN	NaN	NaN	NaN	NaN	NaN	NaN	NaN	NaN	NaN
1.994	-36.7495	82.7611	181.74	0.10411	0.09414	-0.077832	-38.0902	56.4755	86.179	0.1665	0.078613	0.026367	NaN	NaN	NaN	NaN	NaN	NaN	NaN	NaN	NaN	NaN	NaN	NaN
1.996	-43.55422	83.15	195.2006	0.10918	0.083887	-0.073242	-49.3881	87.786	72.119	0.17066	0.076172	0.041992	NaN	NaN	NaN	NaN	NaN	NaN	NaN	NaN	NaN	NaN	NaN	NaN
1.998	-49.0817	75.47	191.8359	0.11738	0.075684	-0.067774	-35.487	26.566	70.3875	0.17334	0.066895	0.049316	NaN	NaN	NaN	NaN	NaN	NaN	NaN	NaN	NaN	NaN	NaN	NaN
2	-45.7748	68.255	176.1439	0.12149	0.059765	-0.059473	-25.7427	53.644	30.431	0.1875	0.051758	0.055176	NaN	NaN	NaN	NaN	NaN	NaN	NaN	NaN	NaN	NaN	NaN	NaN
2.002	-56.58694	68.587	165.6204	0.12451	0.054688	-0.061035	-22.5133	36.553	48.839	0.19678	0.041504	0.059082	NaN	NaN	NaN	NaN	NaN	NaN	NaN	NaN	NaN	NaN	NaN	NaN
2.004	-63.6455	62.1805	149.9941	0.13183	0.045508	-0.05	2.352	17.7962	60.3338	0.21484	0.021973	0.059082	NaN	NaN	NaN	NaN	NaN	NaN	NaN	NaN	NaN	NaN	NaN	NaN
2.006	-42.9341	50.0357	129.6036	0.13301	0.039551	-0.044824	-5.493	57.0133	51.9388	0.22876	0.019043	0.058837	NaN	NaN	NaN	NaN	NaN	NaN	NaN	NaN	NaN	NaN	NaN	NaN
2.008	-30.899	56.269	119.1182	0.13808	0.031348	-0.035449	-4.277	24.5057	29.66077	0.23877	0.01416	0.053711	NaN	NaN	NaN	NaN	NaN	NaN	NaN	NaN	NaN	NaN	NaN	NaN
2.01	-39.7738	63.9413	113.0992	0.14385	0.026758	-0.03252	1.435	66.707	4.361	0.24219	0.0073242	0.044922	NaN	NaN	NaN	NaN	NaN	NaN	NaN	NaN	NaN	NaN	NaN	NaN
2.012	-30.725	51.1467	114.1012	0.14746	0.029297	-0.032227	-1.1378	49.169	1.903	0.24316	0.0029297	0.048828	NaN	NaN	NaN	NaN	NaN	NaN	NaN	NaN	NaN	NaN	NaN	NaN
2.014	-33.2491	49.5559	103.62	0.15039	0.030273	-0.029785	15.399	4.232	26.417	0.23779	0.020508	0.03418	NaN	NaN	NaN	NaN	NaN	NaN	NaN	NaN	NaN	NaN	NaN	NaN
2.016	-28.168	55.1932	96.2252	0.15156	0.027246	-0.025489	20.49	24.333	5.3858	0.23145	0.037109	0.026855	NaN	NaN	NaN	NaN	NaN	NaN	NaN	NaN	NaN	NaN	NaN	NaN
2.018	-48.6099	64.192	96.3171	0.15352	0.025683	-0.021192	26.975	-20.9379	22.363	0.22656	0.050293	0.02832	NaN	NaN	NaN	NaN	NaN	NaN	NaN	NaN	NaN	NaN	NaN	NaN
2.02	-28.06	43.657	110.6187	0.15527	0.029101	-0.022949	5.269	7.9094	10.191	0.2168	0.078125	0.02002	NaN	NaN	NaN	NaN	NaN	NaN	NaN	NaN	NaN	NaN	NaN	NaN
2.022	-42.2271	45.986	98.9214	0.15771	0.030762	-0.025391	-0.238299999999999	17.6597	24.969	0.21435	0.097655	0.012452	NaN	NaN	NaN	NaN	NaN	NaN	NaN	NaN	NaN	NaN	NaN	NaN
2.024	-20.18	47.4	80.5444	0.16006	0.04375	-0.027148	-3.471	-12.5178	42.7358	0.20898	0.11572	0.0068359	NaN	NaN	NaN	NaN	NaN	NaN	NaN	NaN	NaN	NaN	NaN	NaN
2.026	-25.236	40.64	77.7062	0.1625	0.054297	-0.032129	-8.641	33.1523	20.13504	0.20215	0.13232	-0.00048828	NaN	NaN	NaN	NaN	NaN	NaN	NaN	NaN	NaN	NaN	NaN	NaN
2.028	-6.906	40.0194	63.3299	0.16445	0.064062	-0.027051	-19.4749	-8.3254	45.077	0.20215	0.14453	-0.0063477	NaN	NaN	NaN	NaN	NaN	NaN	NaN	NaN	NaN	NaN	NaN	NaN
2.03	1.666	32.8281	65.5648	0.16426	0.080176	-0.030762	-13.816	8.663	21.3567	0.19727	0.1543	-0.0058594	NaN	NaN	NaN	NaN	NaN	NaN	NaN	NaN	NaN	NaN	NaN	NaN
2.032	-8.579	43.66406	51.6386	0.16309	0.095215	-0.033691	-27.30175	17.3196	22.6855	0.19946	0.1604	-0.010498	NaN	NaN	NaN	NaN	NaN	NaN	NaN	NaN	NaN	NaN	NaN	NaN
2.034	-6.353	30.4651	55.53828	0.15849	0.10976	-0.038574	-34.586	-18.6115	21.6584	0.2002	0.1709	-0.012207	NaN	NaN	NaN	NaN	NaN	NaN	NaN	NaN	NaN	NaN	NaN	NaN
2.036	-5.377	8.41	58.03182	0.15303	0.12353	-0.038379	-39.7575	31.4622	-16.454	0.2002	0.18115	-0.015137	NaN	NaN	NaN	NaN	NaN	NaN	NaN	NaN	NaN	NaN	NaN	NaN
2.038	-0.388999999999999	9.312	54.0537	0.14405	0.14072	-0.041113	-46.5295	-1.201	7.9231	0.20264	0.18213	-0.016602	NaN	NaN	NaN	NaN	NaN	NaN	NaN	NaN	NaN	NaN	NaN	NaN
2.04	-20.599	26.5451	50.63241	0.13828	0.15224	-0.045214	-37.9967	14.8312	5.873	0.20264	0.1875	-0.022461	NaN	NaN	NaN	NaN	NaN	NaN	NaN	NaN	NaN	NaN	NaN	NaN
2.042	-16.458	31.0215	45.2031	0.12793	0.16504	-0.049316	-52.818	28.9956	-3.7277	0.20288	0.18652	-0.016602	NaN	NaN	NaN	NaN	NaN	NaN	NaN	NaN	NaN	NaN	NaN	NaN
2.044	-24.3	35.12	46.1481	0.12695	0.18135	-0.054102	-63.6642	3.050107	18.4971	0.2041	0.19385	-0.018066	NaN	NaN	NaN	NaN	NaN	NaN	NaN	NaN	NaN	NaN	NaN	NaN
2.046	-41.4176	37.448	30.1255	0.12354	0.18828	-0.056934	-35.40717	47.728	-9.0405	0.20166	0.19629	-0.015137	NaN	NaN	NaN	NaN	NaN	NaN	NaN	NaN	NaN	NaN	NaN	NaN
2.048	-37.107	45.59	23.35922	0.12392	0.1961	-0.053809	-48.1139	21.0358	0.0947	0.20313	0.19775	-0.0092773	NaN	NaN	NaN	NaN	NaN	NaN	NaN	NaN	NaN	NaN	NaN	NaN
2.05	-19.817	33.45	38.09132	0.12851	0.20235	-0.048535	-25.141	14.9764	1.1367	0.20947	0.2002	-0.0019531	NaN	NaN	NaN	NaN	NaN	NaN	NaN	NaN	NaN	NaN	NaN	NaN
2.052	-31.292	14.3556	32.6807	0.13037	0.20654	-0.05127	-30.2419	23.76	0.911	0.21704	0.19848	0.003418	NaN	NaN	NaN	NaN	NaN	NaN	NaN	NaN	NaN	NaN	NaN	NaN
2.054	-39.5898	31.5182	16.8693	0.13477	0.21885	-0.050195	-37.6896	-15.129	15.0132	0.22559	0.19482	0.0092773	NaN	NaN	NaN	NaN	NaN	NaN	NaN	NaN	NaN	NaN	NaN	NaN
2.056	-45.27897	28.4942	22.3323	0.1377	0.21924	-0.048144	-32.2395	33.8238	2.858	0.23682	0.18213	0.027344	NaN	NaN	NaN	NaN	NaN	NaN	NaN	NaN	NaN	NaN	NaN	NaN
2.058	-30.7366	16.622	8.917	0.14082	0.22002	-0.041113	-10.051	19.41	26.5442	0.24268	0.16797	0.028809	NaN	NaN	NaN	NaN	NaN	NaN	NaN	NaN	NaN	NaN	NaN	NaN
2.06	-28.399	13.7437	10.4885	0.14707	0.21826	-0.032519	6.59	18.3979	18.5793	0.24756	0.15283	0.053711	NaN	NaN	NaN	NaN	NaN	NaN	NaN	NaN	NaN	NaN	NaN	NaN
2.062	-34.204	18.31534	10.9008	0.15283	0.21631	-0.027344	3.606	42.3242	-0.152699999999999	0.25269	0.13672	0.061279	NaN	NaN	NaN	NaN	NaN	NaN	NaN	NaN	NaN	NaN	NaN	NaN
2.064	-52.9959	14.3639	31.9127	0.15752	0.20606	-0.022754	-9.789	-11.011	17.9666	0.25684	0.11768	0.072266	NaN	NaN	NaN	NaN	NaN	NaN	NaN	NaN	NaN	NaN	NaN	NaN
2.066	-40.7824	4.581	51.6126	0.16045	0.19834	-0.015528	9.788	30.8756	-11.517	0.2666	0.089844	0.088379	NaN	NaN	NaN	NaN	NaN	NaN	NaN	NaN	NaN	NaN	NaN	NaN
2.068	-36.4375	4.8418	39.55299	0.16709	0.18974	-0.010449	9.0911	13.603	12.5345	0.26367	0.07959	0.095215	NaN	NaN	NaN	NaN	NaN	NaN	NaN	NaN	NaN	NaN	NaN	NaN
2.07	-24.956	9.0424	36.9206	0.17383	0.18008	-0.0053711	11.483	13.0783	27.6133	0.27637	0.053223	0.098145	NaN	NaN	NaN	NaN	NaN	NaN	NaN	NaN	NaN	NaN	NaN	NaN
2.072	-38.26929	-8.42438	55.2712	0.17676	0.17871	0.00097656	4.515	50.451	4.37	0.27587	0.040528	0.11524	NaN	NaN	NaN	NaN	NaN	NaN	NaN	NaN	NaN	NaN	NaN	NaN
2.074	-23.522	-13.6183	44.887	0.17744	0.18438	0.0022461	-0.959	25.6383	30.7857	0.27344	0.033203	0.125	NaN	NaN	NaN	NaN	NaN	NaN	NaN	NaN	NaN	NaN	NaN	NaN
2.076	-18.07	-13.4393	39.045	0.17647	0.18858	0.0047852	13.173	59.769	7.087	0.25732	0.024414	0.1333	NaN	NaN	NaN	NaN	NaN	NaN	NaN	NaN	NaN	NaN	NaN	NaN
2.078	-5.374	-8.9902	46.84464	0.17295	0.19443	0.01416	-22.8782	32.0954	25.9364	0.25488	0.025879	0.14014	NaN	NaN	NaN	NaN	NaN	NaN	NaN	NaN	NaN	NaN	NaN	NaN
2.08	5.089	-9.5592	55.63914	0.16699	0.20118	0.013184	-17.167	7.10812	39.4042	0.24463	0.023926	0.14795	NaN	NaN	NaN	NaN	NaN	NaN	NaN	NaN	NaN	NaN	NaN	NaN
2.082	5.139	-15.0003	65.3969	0.16504	0.2085	0.010742	-20.5029	36.485	18.966	0.23242	0.033447	0.15333	NaN	NaN	NaN	NaN	NaN	NaN	NaN	NaN	NaN	NaN	NaN	NaN
2.084	-0.609000000000002	-16.101	60.7892	0.16494	0.2082	0.013281	-32.6831	-6.77078	18.9906	0.22559	0.041504	0.15625	NaN	NaN	NaN	NaN	NaN	NaN	NaN	NaN	NaN	NaN	NaN	NaN
2.086	-12.705	-8.569	74.606	0.16504	0.21387	0.01543	-15.9961	22.3134	12.027	0.21729	0.052246	0.16357	NaN	NaN	NaN	NaN	NaN	NaN	NaN	NaN	NaN	NaN	NaN	NaN
2.088	-5.08	-27.018	96.7001	0.17051	0.2166	0.011133	-41.3961	19.2198	9.353	0.21436	0.057129	0.16113	NaN	NaN	NaN	NaN	NaN	NaN	NaN	NaN	NaN	NaN	NaN	NaN
2.09	-7.35	-44.388	117.3851	0.16758	0.22266	0.010937	-39.091	-1.723	33.156	0.20947	0.070313	0.16748	NaN	NaN	NaN	NaN	NaN	NaN	NaN	NaN	NaN	NaN	NaN	NaN
2.092	-7.7917	-35.0305	122.711	0.16943	0.23926	0.0092773	-39.5567	46.668	14.559	0.20849	0.081787	0.17309	NaN	NaN	NaN	NaN	NaN	NaN	NaN	NaN	NaN	NaN	NaN	NaN
2.094	-19.5338	-24.8005	115.8778	0.16416	0.25254	0.0019531	-49.4075	-6.575	38.019	0.20752	0.09082	0.17285	NaN	NaN	NaN	NaN	NaN	NaN	NaN	NaN	NaN	NaN	NaN	NaN
2.096	-17.1318	-5.5336	137.81609	0.15722	0.27119	-0.002539	-37.111	10.7478	30.6862	0.20605	0.10693	0.17432	NaN	NaN	NaN	NaN	NaN	NaN	NaN	NaN	NaN	NaN	NaN	NaN
2.098	-27.659	23.57115	169.611	0.14941	0.28916	-0.0083985	-47.459	11.8591	31.971	0.21045	0.11475	0.1748	NaN	NaN	NaN	NaN	NaN	NaN	NaN	NaN	NaN	NaN	NaN	NaN
2.1	-40.668	61.9623	221.134	0.14316	0.30732	-0.021289	-48.9038	-5.82269	16.8738	0.21436	0.13623	0.17383	NaN	NaN	NaN	NaN	NaN	NaN	NaN	NaN	NaN	NaN	NaN	NaN
2.102	-8.461	80.7453	294.699	0.13818	0.32666	-0.039063	-41.465	51.355	-16.4679	0.2207	0.15161	0.17676	NaN	NaN	NaN	NaN	NaN	NaN	NaN	NaN	NaN	NaN	NaN	NaN
2.104	-11.797	80.026	372.532	0.13565	0.35547	-0.076562	-48.39	-0.84333	22.633	0.23193	0.17432	0.17969	NaN	NaN	NaN	NaN	NaN	NaN	NaN	NaN	NaN	NaN	NaN	NaN
2.106	-35.283	78.466	467.424	0.1418	0.3999	-0.10957	-27.918	8.5798	31.4238	0.23828	0.18994	0.16992	NaN	NaN	NaN	NaN	NaN	NaN	NaN	NaN	NaN	NaN	NaN	NaN
2.108	-44.16	90.23161	552.2941	0.13789	0.4585	-0.15137	-28.8701	-8.3762	43.3363	0.24414	0.19727	0.16455	NaN	NaN	NaN	NaN	NaN	NaN	NaN	NaN	NaN	NaN	NaN	NaN
2.11	-41.2717	98.353	636.868	0.12461	0.53818	-0.19483	-7.466	-53.41096	66.0791	0.25488	0.2207	0.14258	NaN	NaN	NaN	NaN	NaN	NaN	NaN	NaN	NaN	NaN	NaN	NaN
2.112	-60.2155	105.026	674.6474	0.10205	0.64063	-0.24268	21.7668	8.821	53.767	0.27124	0.24366	0.13134	NaN	NaN	NaN	NaN	NaN	NaN	NaN	NaN	NaN	NaN	NaN	NaN
2.114	-68.109	103.719	691.4678	0.060938	0.77041	-0.29053	14.75567	-18.1729	84.3522	0.27686	0.27295	0.11719	NaN	NaN	NaN	NaN	NaN	NaN	NaN	NaN	NaN	NaN	NaN	NaN
2.116	-76.8256	73.581	724.4003	0.0095706	0.91211	-0.33652	-4.291	-3.599	110.3779	0.27051	0.31689	0.083984	NaN	NaN	NaN	NaN	NaN	NaN	NaN	NaN	NaN	NaN	NaN	NaN
2.118	-91.127	50.372	734.275	-0.061133	1.059	-0.36934	-25.6789	16.68403	134.127	0.26709	0.34521	0.061523	NaN	NaN	NaN	NaN	NaN	NaN	NaN	NaN	NaN	NaN	NaN	NaN
2.12	-67.4274	24.791	740.659	-0.16113	1.2006	-0.39512	2.041	-31.637	194.3091	0.27441	0.41016	0.02002	NaN	NaN	NaN	NaN	NaN	NaN	NaN	NaN	NaN	NaN	NaN	NaN
2.122	-44.5432	3.201	729.73632	-0.26758	1.3423	-0.43164	32.3877	27.4679	240.657	0.28247	0.47364	-0.0095217	NaN	NaN	NaN	NaN	NaN	NaN	NaN	NaN	NaN	NaN	NaN	NaN
2.124	-30.5967	-2.154	711.7073	-0.37988	1.4408	-0.44082	21.5815	35.023	327.679	0.29102	0.53857	-0.041992	NaN	NaN	NaN	NaN	NaN	NaN	NaN	NaN	NaN	NaN	NaN	NaN
2.126	-20.0861	-23.537	730.16	-0.48545	1.5202	-0.44482	23.984	70.7598	379.5731	0.29297	0.62891	-0.097656	NaN	NaN	NaN	NaN	NaN	NaN	NaN	NaN	NaN	NaN	NaN	NaN
2.128	-0.484999999999999	-25.017	730.945	-0.55498	1.5733	-0.43506	15.5952	132.1394	411.632	0.29346	0.67969	-0.12891	NaN	NaN	NaN	NaN	NaN	NaN	NaN	NaN	NaN	NaN	NaN	NaN
2.13	-9.475	-24.9505	741.923	-0.579	1.5868	-0.43125	-11.9636	84.4109	512.184	0.2832	0.78369	-0.20654	NaN	NaN	NaN	NaN	NaN	NaN	NaN	NaN	NaN	NaN	NaN	NaN
2.132	-10.146	-12.2873	748.0742	-0.55469	1.5801	-0.43311	4.37	120.177	601.774	0.26978	0.87133	-0.27051	NaN	NaN	NaN	NaN	NaN	NaN	NaN	NaN	NaN	NaN	NaN	NaN
2.134	-15.62	-21.772	780.2217	-0.47383	1.5257	-0.43916	4.755	90.3128	758.78369	0.24707	0.9707	-0.3418	NaN	NaN	NaN	NaN	NaN	NaN	NaN	NaN	NaN	NaN	NaN	NaN
2.136	-14.435	-17.541	775.879	-0.36631	1.445	-0.44209	8.802	67.045	867.6485	0.18848	1.1255	-0.4292	NaN	NaN	NaN	NaN	NaN	NaN	NaN	NaN	NaN	NaN	NaN	NaN
2.138	-5.927	-24.664	783.219	-0.24443	1.3481	-0.44209	-29.9365	110.215	930.552	0.14111	1.2153	-0.47217	NaN	NaN	NaN	NaN	NaN	NaN	NaN	NaN	NaN	NaN	NaN	NaN
2.14	-29.5269	-38.371	791.818	-0.13281	1.236	-0.43008	-67.583	45.147	1032.1001	0.035156	1.4028	-0.54053	NaN	NaN	NaN	NaN	NaN	NaN	NaN	NaN	NaN	NaN	NaN	NaN
2.142	-25.1479	-53.92	816.2348	-0.032227	1.1387	-0.42383	-59.796	60.758	1068.904	-0.065916	1.5415	-0.58643	NaN	NaN	NaN	NaN	NaN	NaN	NaN	NaN	NaN	NaN	NaN	NaN
2.144	-11.195	-85.098	845.99794	0.034863	1.081	-0.42754	-63.466	12.4941	1094.91	-0.18896	1.6646	-0.62451	NaN	NaN	NaN	NaN	NaN	NaN	NaN	NaN	NaN	NaN	NaN	NaN
2.146	-2.063	-101.3043	852.4259	0.073437	1.0658	-0.43232	-40.8433	-44.0828	1107.737	-0.3457	1.7988	-0.67188	NaN	NaN	NaN	NaN	NaN	NaN	NaN	NaN	NaN	NaN	NaN	NaN
2.148	-4.726	-119.245	904.5588	0.092578	1.0778	-0.43975	-65.258	-41.3481	1074.5025	-0.40527	1.8535	-0.68164	NaN	NaN	NaN	NaN	NaN	NaN	NaN	NaN	NaN	NaN	NaN	NaN
2.15	11.016	-133.253	939.3802	0.091797	1.1067	-0.45127	-60.769	-123.018	1089.886	-0.47949	1.9263	-0.67139	NaN	NaN	NaN	NaN	NaN	NaN	NaN	NaN	NaN	NaN	NaN	NaN
2.152	37.0393	-145.519	958.938	0.088867	1.1431	-0.45459	-51.0128	-127.404	1045.756	-0.43018	1.9712	-0.65674	NaN	NaN	NaN	NaN	NaN	NaN	NaN	NaN	NaN	NaN	NaN	NaN
2.154	22.396	-145.757	997.825	0.084473	1.1957	-0.46738	-50.2397	-129.027	978.855	-0.37988	1.9536	-0.64746	NaN	NaN	NaN	NaN	NaN	NaN	NaN	NaN	NaN	NaN	NaN	NaN
2.156	-14.7198	-131.971	1025.8138	0.079102	1.2384	-0.48077	-19.413	-168.055	952.623	-0.24805	1.8555	-0.625	NaN	NaN	NaN	NaN	NaN	NaN	NaN	NaN	NaN	NaN	NaN	NaN
2.158	-39.0781	-130.9847	1056.9147	0.081445	1.2622	-0.49482	-3.219	-121.69	896.493	-0.12646	1.7415	-0.61377	NaN	NaN	NaN	NaN	NaN	NaN	NaN	NaN	NaN	NaN	NaN	NaN
2.16	-33.6025	-124.507	1092.578	0.089942	1.277	-0.50879	-10.3586	-143.064	889.281	-0.0097656	1.6211	-0.59863	NaN	NaN	NaN	NaN	NaN	NaN	NaN	NaN	NaN	NaN	NaN	NaN
2.162	-54.6413	-114.863	1107.727	0.10645	1.2813	-0.52734	-6.196	-118.09	886.504	0.11328	1.4927	-0.55713	NaN	NaN	NaN	NaN	NaN	NaN	NaN	NaN	NaN	NaN	NaN	NaN
2.164	-84.074	-113.73	1128.736	0.12149	1.2929	-0.5376	-10.4651	-88.367	919.859	0.1543	1.4478	-0.55615	NaN	NaN	NaN	NaN	NaN	NaN	NaN	NaN	NaN	NaN	NaN	NaN
2.166	-53.7042	-121.6472	1134.2661	0.12568	1.3021	-0.55303	-25.206	-130.044	953.8991	0.19092	1.4399	-0.56396	NaN	NaN	NaN	NaN	NaN	NaN	NaN	NaN	NaN	NaN	NaN	NaN
2.168	-63.151	-113.7079	1117.719	0.12529	1.3094	-0.56826	-19.016	-109.722	938.38	0.20533	1.4788	-0.57324	NaN	NaN	NaN	NaN	NaN	NaN	NaN	NaN	NaN	NaN	NaN	NaN
2.17	-61.929	-100.8364	1118.558	0.11758	1.3188	-0.58858	-33.347	-158.7	957.578	0.20264	1.5273	-0.58789	NaN	NaN	NaN	NaN	NaN	NaN	NaN	NaN	NaN	NaN	NaN	NaN
2.172	-52.1671	-117.698	1145.994	0.10938	1.3286	-0.60889	-45.818	-175.205	999.561	0.19922	1.6177	-0.62061	NaN	NaN	NaN	NaN	NaN	NaN	NaN	NaN	NaN	NaN	NaN	NaN
2.174	-21.607	-123.7038	1152.149	0.10791	1.3501	-0.63525	-32.829	-162.353	1049.531	0.19922	1.6606	-0.64014	NaN	NaN	NaN	NaN	NaN	NaN	NaN	NaN	NaN	NaN	NaN	NaN
2.176	-35.909	-128.072	1178.980171	0.10401	1.3848	-0.66836	-13.288	-228.085	1105.321	0.22021	1.6938	-0.68701	NaN	NaN	NaN	NaN	NaN	NaN	NaN	NaN	NaN	NaN	NaN	NaN
2.178	-52.7602	-120.406	1186.138	0.088379	1.4316	-0.69414	-20.881	-233.1272	1109.2524	0.25342	1.6897	-0.72388	NaN	NaN	NaN	NaN	NaN	NaN	NaN	NaN	NaN	NaN	NaN	NaN
2.18	-45.5828	-124.6687	1222.64	0.067871	1.4966	-0.70879	-43.165	-307.256	1143.3334	0.30127	1.6777	-0.76758	NaN	NaN	NaN	NaN	NaN	NaN	NaN	NaN	NaN	NaN	NaN	NaN
2.182	-51.4109	-132.0703	1231.0736	0.035645	1.5566	-0.72168	-32.725	-344.815	1159.541	0.35059	1.6699	-0.83594	NaN	NaN	NaN	NaN	NaN	NaN	NaN	NaN	NaN	NaN	NaN	NaN
2.184	-55.1559	-121.2265	1239.994	-0.0045898	1.6048	-0.73545	-54.2681	-298.319	1203.256	0.3667	1.6836	-0.86328	NaN	NaN	NaN	NaN	NaN	NaN	NaN	NaN	NaN	NaN	NaN	NaN
2.186	-65.11934	-116.998	1234.3809	-0.037696	1.6476	-0.7457	-56.13	-304.862	1290.292	0.34766	1.7349	-0.90576	NaN	NaN	NaN	NaN	NaN	NaN	NaN	NaN	NaN	NaN	NaN	NaN
2.188	-37.155	-128.451	1237.70475	-0.054883	1.668	-0.75742	-71.398	-258.701	1314.658	0.29468	1.7915	-0.92236	NaN	NaN	NaN	NaN	NaN	NaN	NaN	NaN	NaN	NaN	NaN	NaN
2.19	-19.236	-130.7454	1252.8004	-0.056738	1.6769	-0.76641	-110.463	-252.209	1320.488	0.23193	1.8433	-0.93408	NaN	NaN	NaN	NaN	NaN	NaN	NaN	NaN	NaN	NaN	NaN	NaN
2.192	-25.076	-115.4495	1261.1064	-0.049805	1.6738	-0.77539	-128.3901	-245.6731	1320.332	0.16016	1.8892	-0.94678	NaN	NaN	NaN	NaN	NaN	NaN	NaN	NaN	NaN	NaN	NaN	NaN
2.194	4.498	-113.5488	1274.9595	-0.032715	1.6761	-0.77695	-158.735	-176.246	1309.2185	0.14307	1.9082	-0.94141	NaN	NaN	NaN	NaN	NaN	NaN	NaN	NaN	NaN	NaN	NaN	NaN
2.196	6.807	-114.015	1278.6858	-0.033789	1.6832	-0.78164	-121.358	-171.184	1306.696	0.16113	1.9282	-0.94287	NaN	NaN	NaN	NaN	NaN	NaN	NaN	NaN	NaN	NaN	NaN	NaN
2.198	11.954	-106.604	1282.4779	-0.045117	1.6989	-0.78477	-114.505	-139.031	1284.809	0.20142	1.9368	-0.93628	NaN	NaN	NaN	NaN	NaN	NaN	NaN	NaN	NaN	NaN	NaN	NaN
2.2	-11.996	-93.3709	1283.4067	-0.069141	1.7258	-0.79287	-156.24	-146.545	1304.5098	0.24902	1.9321	-0.92529	NaN	NaN	NaN	NaN	NaN	NaN	NaN	NaN	NaN	NaN	NaN	NaN
2.202	-12.737	-71.5558	1290.2485	-0.095703	1.7578	-0.80273	-136.356	-198.4117	1305.874	0.29736	1.9238	-0.91602	NaN	NaN	NaN	NaN	NaN	NaN	NaN	NaN	NaN	NaN	NaN	NaN
2.204	-30.306	-79.315	1305.15218	-0.12061	1.8058	-0.81221	-132.604	-174.1828	1308.484	0.30908	1.9199	-0.91016	NaN	NaN	NaN	NaN	NaN	NaN	NaN	NaN	NaN	NaN	NaN	NaN
2.206	-44.008	-68.407	1306.6476	-0.1461	1.8446	-0.8249	-116.37853	-194.495	1327.8429	0.31592	1.9165	-0.90967	NaN	NaN	NaN	NaN	NaN	NaN	NaN	NaN	NaN	NaN	NaN	NaN
2.208	-51.7483	-71.867	1315.0658	-0.17149	1.8856	-0.83389	-104.788	-168.2318	1356.9509	0.30444	1.9328	-0.92212	NaN	NaN	NaN	NaN	NaN	NaN	NaN	NaN	NaN	NaN	NaN	NaN
2.21	-76.6419	-75.981	1321.932	-0.19346	1.9163	-0.83565	-120.37662	-140.7788	1397.5954	0.28906	1.9551	-0.93848	NaN	NaN	NaN	NaN	NaN	NaN	NaN	NaN	NaN	NaN	NaN	NaN
2.212	-65.1099	-77.74	1325.333	-0.21387	1.938	-0.8374	-104.9687	-175.9369	1399.6536	0.25928	2.022	-0.9624	NaN	NaN	NaN	NaN	NaN	NaN	NaN	NaN	NaN	NaN	NaN	NaN
2.214	-65.7163	-70.9433	1346.853	-0.2375	1.9584	-0.8455	-98.3968	-154.65415	1410.9133	0.24219	2.0645	-0.97656	NaN	NaN	NaN	NaN	NaN	NaN	NaN	NaN	NaN	NaN	NaN	NaN
2.216	-61.8846	-64.5843	1349.2252	-0.26016	1.9731	-0.84541	-104.5871	-187.439	1466.798	0.18311	2.1602	-1.0078	NaN	NaN	NaN	NaN	NaN	NaN	NaN	NaN	NaN	NaN	NaN	NaN
2.218	-73.1338	-74.092	1360.2327	-0.27656	1.9891	-0.8419	-71.891	-201.627	1496.643	0.13037	2.2298	-1.0232	NaN	NaN	NaN	NaN	NaN	NaN	NaN	NaN	NaN	NaN	NaN	NaN
2.22	-60.9875	-81.82	1373.3575	-0.29326	2.0009	-0.84209	-77.968	-147.853	1486.41	0.075195	2.293	-1.0391	NaN	NaN	NaN	NaN	NaN	NaN	NaN	NaN	NaN	NaN	NaN	NaN
2.222	-71.2671	-75.357	1369.0845	-0.30908	2.0083	-0.8374	-69.818	-136.665	1473.2024	0.018066	2.3384	-1.0562	NaN	NaN	NaN	NaN	NaN	NaN	NaN	NaN	NaN	NaN	NaN	NaN
2.224	-88.029	-54.345	1377.2484	-0.31904	2.0122	-0.82823	-76.3	-83.2369	1439.346	-0.003418	2.3521	-1.0562	NaN	NaN	NaN	NaN	NaN	NaN	NaN	NaN	NaN	NaN	NaN	NaN
2.226	-76.0441	-39.5267	1399.4792	-0.32774	2.0154	-0.82578	-73.273	-88.017	1446.55	-0.029785	2.3442	-1.0562	NaN	NaN	NaN	NaN	NaN	NaN	NaN	NaN	NaN	NaN	NaN	NaN
2.228	-84.742	-36.0044	1381.672	-0.33672	2.0064	-0.81758	-59.618	-102.4834	1461.7163	-0.040039	2.3291	-1.0401	NaN	NaN	NaN	NaN	NaN	NaN	NaN	NaN	NaN	NaN	NaN	NaN
2.23	-84.6257	-21.524	1382.7528	-0.34033	2.0005	-0.81318	-68.437	-56.314	1468.274	-0.050781	2.3047	-1.0205	NaN	NaN	NaN	NaN	NaN	NaN	NaN	NaN	NaN	NaN	NaN	NaN
2.232	-90.324	-8.702	1378.5381	-0.34326	1.9907	-0.81006	-61.515	-78.089	1479.231	-0.07373	2.27	-1.0005	NaN	NaN	NaN	NaN	NaN	NaN	NaN	NaN	NaN	NaN	NaN	NaN
2.234	-83.382	-0.0940000000000012	1375.9486	-0.33828	1.9788	-0.80127	-80.391	-37.878	1468.132	-0.092773	2.25	-0.98828	NaN	NaN	NaN	NaN	NaN	NaN	NaN	NaN	NaN	NaN	NaN	NaN
2.236	-45.4589	2.5477	1368.6411	-0.33144	1.9691	-0.7961	-124.2949	-25.963	1479.885	-0.11865	2.2075	-0.96338	NaN	NaN	NaN	NaN	NaN	NaN	NaN	NaN	NaN	NaN	NaN	NaN
2.238	-53.8379	17.5918	1352.8562	-0.33105	1.9535	-0.79141	-125.448	-20.211	1482.5637	-0.13306	2.1662	-0.94409	NaN	NaN	NaN	NaN	NaN	NaN	NaN	NaN	NaN	NaN	NaN	NaN
2.24	-33.328	15.7523	1346.6143	-0.32246	1.947	-0.78535	-135.0626	21.1662	1477.232	-0.1416	2.1309	-0.92773	NaN	NaN	NaN	NaN	NaN	NaN	NaN	NaN	NaN	NaN	NaN	NaN
2.242	-12.778	6.174	1352.028	-0.31396	1.938	-0.77588	-133.987	-30.818143	1495.688858	-0.14551	2.0708	-0.89404	NaN	NaN	NaN	NaN	NaN	NaN	NaN	NaN	NaN	NaN	NaN	NaN
2.244	6.805	5.805	1361.51715	-0.30215	1.9239	-0.77168	-131.4882	-16.002	1506.243	-0.14551	2.0396	-0.87842	NaN	NaN	NaN	NaN	NaN	NaN	NaN	NaN	NaN	NaN	NaN	NaN
2.246	-22.801	16.438	1356.30678	-0.28643	1.9087	-0.77002	-144.693	-24.1061	1528.9049	-0.14648	1.9844	-0.86035	NaN	NaN	NaN	NaN	NaN	NaN	NaN	NaN	NaN	NaN	NaN	NaN
2.248	-14.938	15.4475	1360.4316	-0.27002	1.8919	-0.76026	-111.8935	-57.721	1531.263	-0.14478	1.9445	-0.84497	NaN	NaN	NaN	NaN	NaN	NaN	NaN	NaN	NaN	NaN	NaN	NaN
2.25	-25.575	9.4647	1342.80802	-0.25127	1.8698	-0.754	-120.5785	-17.842274	1503.7533	-0.14648	1.9082	-0.82813	NaN	NaN	NaN	NaN	NaN	NaN	NaN	NaN	NaN	NaN	NaN	NaN
2.252	-34.7546	22.7722	1329.8607	-0.22852	1.8438	-0.74805	-155.512	-68.465	1516.769	-0.14697	1.8774	-0.80322	NaN	NaN	NaN	NaN	NaN	NaN	NaN	NaN	NaN	NaN	NaN	NaN
2.254	-24.39	26.72	1324.61076	-0.20781	1.8144	-0.73945	-145.30643	-38.521	1473.163	-0.14648	1.8652	-0.79297	NaN	NaN	NaN	NaN	NaN	NaN	NaN	NaN	NaN	NaN	NaN	NaN
2.256	-34.205	38.043	1306.9432	-0.1833	1.7876	-0.73311	-141.99	5.3922	1460.5206	-0.14648	1.8379	-0.77344	NaN	NaN	NaN	NaN	NaN	NaN	NaN	NaN	NaN	NaN	NaN	NaN
2.258	-23.49	31.9347	1290.8167	-0.16298	1.761	-0.72373	-132.7695	5.416	1471.868	-0.15161	1.8108	-0.76733	NaN	NaN	NaN	NaN	NaN	NaN	NaN	NaN	NaN	NaN	NaN	NaN
2.26	-32.816	41.528	1273.094	-0.14834	1.7367	-0.7209	-128.121	69.769	1450.6024	-0.15186	1.7876	-0.75537	NaN	NaN	NaN	NaN	NaN	NaN	NaN	NaN	NaN	NaN	NaN	NaN
2.262	-28.826	43.755	1272.6839	-0.13428	1.7173	-0.71826	-117.5686	35.161	1439.304	-0.15527	1.7544	-0.73779	NaN	NaN	NaN	NaN	NaN	NaN	NaN	NaN	NaN	NaN	NaN	NaN
2.264	-28.374	51.614	1270.0564	-0.12422	1.7004	-0.71191	-97.49	52.34	1390.1192	-0.15039	1.7329	-0.72998	NaN	NaN	NaN	NaN	NaN	NaN	NaN	NaN	NaN	NaN	NaN	NaN
2.266	-25.829	63.9021	1248.24853	-0.11289	1.6848	-0.70918	-101.803	73.8226	1375.7782	-0.13965	1.686	-0.71826	NaN	NaN	NaN	NaN	NaN	NaN	NaN	NaN	NaN	NaN	NaN	NaN
2.268	-29.246	79.212	1237.86169	-0.10781	1.6664	-0.7041	-49.931	48.0831	1375.548	-0.12646	1.6457	-0.70776	NaN	NaN	NaN	NaN	NaN	NaN	NaN	NaN	NaN	NaN	NaN	NaN
2.27	-63.4019	86.127	1213.1194	-0.1	1.6458	-0.69795	-23.845	106.701	1334.1325	-0.10986	1.6099	-0.69482	NaN	NaN	NaN	NaN	NaN	NaN	NaN	NaN	NaN	NaN	NaN	NaN
2.272	-71.413	76.797	1202.2635	-0.091797	1.6191	-0.69189	-40.383	71.2714	1346.508	-0.094727	1.5645	-0.69043	NaN	NaN	NaN	NaN	NaN	NaN	NaN	NaN	NaN	NaN	NaN	NaN
2.274	-79.412	62.6288	1175.353	-0.07793	1.5943	-0.68965	-38.038	74.722	1309.2575	-0.081543	1.5474	-0.6792	NaN	NaN	NaN	NaN	NaN	NaN	NaN	NaN	NaN	NaN	NaN	NaN
2.276	-82.618	77.48675	1166.0958	-0.066309	1.5653	-0.68828	-48.5748	95.3668	1272.879	-0.066895	1.5063	-0.68311	NaN	NaN	NaN	NaN	NaN	NaN	NaN	NaN	NaN	NaN	NaN	NaN
2.278	-90.422	87.2145	1138.4137	-0.051074	1.539	-0.67695	-13.225	46.117	1254.2902	-0.057373	1.4746	-0.67578	NaN	NaN	NaN	NaN	NaN	NaN	NaN	NaN	NaN	NaN	NaN	NaN
2.28	-71.2233	86.8499	1130.4517	-0.042187	1.5103	-0.66767	-38.169	99.2775	1210.633	-0.046875	1.4473	-0.66797	NaN	NaN	NaN	NaN	NaN	NaN	NaN	NaN	NaN	NaN	NaN	NaN
2.282	-47.6244	83.45688	1103.6693	-0.032715	1.4849	-0.65967	-57.502	77.065	1235.7605	-0.03418	1.4063	-0.65869	NaN	NaN	NaN	NaN	NaN	NaN	NaN	NaN	NaN	NaN	NaN	NaN
2.284	-46.7894	87.6268	1090.539	-0.028711	1.4579	-0.65068	-46.272	80.6865	1196.6599	-0.024414	1.3833	-0.64746	NaN	NaN	NaN	NaN	NaN	NaN	NaN	NaN	NaN	NaN	NaN	NaN
2.286	-42.23	79.3017	1085.1805	-0.021875	1.4371	-0.64141	-58.1536	132.4061	1153.882	-0.013184	1.3384	-0.63916	NaN	NaN	NaN	NaN	NaN	NaN	NaN	NaN	NaN	NaN	NaN	NaN
2.288	-29.544	86.491	1065.449	-0.016797	1.4074	-0.63282	-69.644	88.0251	1165.339	-0.0031738	1.3078	-0.63257	NaN	NaN	NaN	NaN	NaN	NaN	NaN	NaN	NaN	NaN	NaN	NaN
2.29	-8.462	86.301	1060.4783	-0.012988	1.3807	-0.62715	-54.204	150.3409	1122.2799	0.0087891	1.2778	-0.62061	NaN	NaN	NaN	NaN	NaN	NaN	NaN	NaN	NaN	NaN	NaN	NaN
2.292	-39.6774	99.93104	1017.8713	-0.0039063	1.354	-0.6167	-55.894	136.925	1118.9891	0.028809	1.231	-0.6001	NaN	NaN	NaN	NaN	NaN	NaN	NaN	NaN	NaN	NaN	NaN	NaN
2.294	-37.923	104.441	1000.8225	-0.0011719	1.3178	-0.60439	-79.34	154.5413	1081.7895	0.044434	1.1962	-0.59277	NaN	NaN	NaN	NaN	NaN	NaN	NaN	NaN	NaN	NaN	NaN	NaN
2.296	-24.507	119.952	970.8706	0.010254	1.2871	-0.59141	-85.347	207.679	1037.271	0.054688	1.1641	-0.57813	NaN	NaN	NaN	NaN	NaN	NaN	NaN	NaN	NaN	NaN	NaN	NaN
2.298	-11.685	125.979	946.4253	0.018457	1.2496	-0.58672	-84.6394	137.177	1031.3292	0.069824	1.1226	-0.56201	NaN	NaN	NaN	NaN	NaN	NaN	NaN	NaN	NaN	NaN	NaN	NaN
2.3	-17.695	129.927	928.16171	0.027734	1.2154	-0.57402	-86.2927	182.0346	969.639	0.080078	1.0977	-0.55371	NaN	NaN	NaN	NaN	NaN	NaN	NaN	NaN	NaN	NaN	NaN	NaN
2.302	-18.027	121.299	908.220999	0.032715	1.1816	-0.5625	-111.794	165.24	957.2878	0.099121	1.0415	-0.53076	NaN	NaN	NaN	NaN	NaN	NaN	NaN	NaN	NaN	NaN	NaN	NaN
2.304	-7.018	112.4793	882.114	0.042383	1.1397	-0.55332	-97.8245	161.707	924.545	0.1128	0.99806	-0.51465	NaN	NaN	NaN	NaN	NaN	NaN	NaN	NaN	NaN	NaN	NaN	NaN
2.306	8.349	117.30923	862.52	0.049121	1.104	-0.53759	-103.137	214.314	901.875	0.12598	0.95557	-0.49658	NaN	NaN	NaN	NaN	NaN	NaN	NaN	NaN	NaN	NaN	NaN	NaN
2.308	13.156	124.69276	850.452778	0.053418	1.0755	-0.52705	-101.092	159.4982	907.4785	0.14697	0.89307	-0.47021	NaN	NaN	NaN	NaN	NaN	NaN	NaN	NaN	NaN	NaN	NaN	NaN
2.31	3.678	115.7203	827.3022	0.060937	1.045	-0.51338	-47.4112	210.332	868.69705	0.15234	0.86572	-0.46143	NaN	NaN	NaN	NaN	NaN	NaN	NaN	NaN	NaN	NaN	NaN	NaN
2.312	5.157	122.2342	796.4313	0.061035	1.0142	-0.50049	-42.12038	194.0703	848.7689	0.1626	0.80615	-0.43701	NaN	NaN	NaN	NaN	NaN	NaN	NaN	NaN	NaN	NaN	NaN	NaN
2.314	-17.568	129.555	775.3596	0.06582	0.9833	-0.49013	-41.449	172.6234	823.112	0.17066	0.76392	-0.41821	NaN	NaN	NaN	NaN	NaN	NaN	NaN	NaN	NaN	NaN	NaN	NaN
2.316	-49.2857	140.6209	750.6379	0.071582	0.94844	-0.48008	-37.6038	219.5233	771.8298	0.17236	0.71436	-0.40576	NaN	NaN	NaN	NaN	NaN	NaN	NaN	NaN	NaN	NaN	NaN	NaN
2.318	-44.1166	137.2147	748.9604	0.080176	0.91289	-0.46367	-28.05	149.51	757.4706	0.18408	0.6582	-0.37793	NaN	NaN	NaN	NaN	NaN	NaN	NaN	NaN	NaN	NaN	NaN	NaN
2.32	-41.2482	136.1911	718.88318	0.085938	0.87509	-0.44873	-7.994	198.547	713.1788	0.18799	0.625	-0.37109	NaN	NaN	NaN	NaN	NaN	NaN	NaN	NaN	NaN	NaN	NaN	NaN
2.322	-51.9654	137.3656	687.5813	0.097656	0.82715	-0.44238	-6.132	184.2146	686.7181	0.19824	0.56396	-0.35107	NaN	NaN	NaN	NaN	NaN	NaN	NaN	NaN	NaN	NaN	NaN	NaN
2.324	-63.4361	146.8258	665.60702	0.10567	0.78487	-0.42784	10.763	137.4013	674.675	0.20361	0.51807	-0.33326	NaN	NaN	NaN	NaN	NaN	NaN	NaN	NaN	NaN	NaN	NaN	NaN
2.326	-52.1208	142.1698	648.5744	0.11738	0.73516	-0.42051	12.888	187.244	600.295	0.20508	0.4707	-0.32031	NaN	NaN	NaN	NaN	NaN	NaN	NaN	NaN	NaN	NaN	NaN	NaN
2.328	-35.5895	150.18585	621.2892	0.12715	0.69492	-0.40137	-8.237	125.1588	586.448	0.21436	0.4126	-0.30029	NaN	NaN	NaN	NaN	NaN	NaN	NaN	NaN	NaN	NaN	NaN	NaN
2.33	-51.7119	141.6609	608.6699	0.13125	0.65928	-0.39434	2.394	189.961	521.132	0.2168	0.38672	-0.29395	NaN	NaN	NaN	NaN	NaN	NaN	NaN	NaN	NaN	NaN	NaN	NaN
2.332	-49.4653	136.2361	596.3094	0.13281	0.61963	-0.3877	15.4084	196.705	494.9374	0.22119	0.3252	-0.2749	NaN	NaN	NaN	NaN	NaN	NaN	NaN	NaN	NaN	NaN	NaN	NaN
2.334	-43.7787	130.5749	565.859	0.13926	0.58584	-0.37783	11.635	149.0102	480.7716	0.22363	0.2871	-0.26342	NaN	NaN	NaN	NaN	NaN	NaN	NaN	NaN	NaN	NaN	NaN	NaN
2.336	-24.198	141.5834	542.515	0.14307	0.54434	-0.36953	7.262	188.358	429.697	0.21973	0.24561	-0.25146	NaN	NaN	NaN	NaN	NaN	NaN	NaN	NaN	NaN	NaN	NaN	NaN
2.338	-62.4952	140.7328	516.505	0.15166	0.51035	-0.35898	-22.46	109.779	434.7401	0.22021	0.19629	-0.23438	NaN	NaN	NaN	NaN	NaN	NaN	NaN	NaN	NaN	NaN	NaN	NaN
2.34	-54.3653	145.836	509.633	0.15254	0.47149	-0.34736	-8.628	137.7173	403.5012	0.2168	0.16895	-0.22314	NaN	NaN	NaN	NaN	NaN	NaN	NaN	NaN	NaN	NaN	NaN	NaN
2.342	-28.3007	135.629	483.93045	0.16113	0.43604	-0.34082	-14.0992	167.6191	372.2616	0.21289	0.12354	-0.20801	NaN	NaN	NaN	NaN	NaN	NaN	NaN	NaN	NaN	NaN	NaN	NaN
2.344	-26.1671	138.706	463.6663	0.16514	0.39424	-0.33223	-34.745	116.80668	357.299	0.21216	0.085937	-0.19604	NaN	NaN	NaN	NaN	NaN	NaN	NaN	NaN	NaN	NaN	NaN	NaN
2.346	-29.0461	123.2911	458.8999	0.17354	0.35381	-0.321	-56.9718	171.964	300.49	0.20117	0.05127	-0.18506	NaN	NaN	NaN	NaN	NaN	NaN	NaN	NaN	NaN	NaN	NaN	NaN
2.348	-11.343	112.7134	440.2056	0.17666	0.31631	-0.3081	-71.141	96.6559	285.674	0.2002	0.010742	-0.16943	NaN	NaN	NaN	NaN	NaN	NaN	NaN	NaN	NaN	NaN	NaN	NaN
2.35	-0.776	114.06385	418.781	0.17578	0.28457	-0.29776	-54.5702	98.5183	254.237	0.19824	-0.010742	-0.16406	NaN	NaN	NaN	NaN	NaN	NaN	NaN	NaN	NaN	NaN	NaN	NaN
2.352	6.913	124.8799	389.563	0.17334	0.24316	-0.27734	-87.235	110.8652	242.496	0.19629	-0.052734	-0.14697	NaN	NaN	NaN	NaN	NaN	NaN	NaN	NaN	NaN	NaN	NaN	NaN
2.354	9.871	108.5147	368.1038	0.17637	0.21621	-0.27012	-60.9958	46.577	277.61	0.18823	-0.084961	-0.13941	NaN	NaN	NaN	NaN	NaN	NaN	NaN	NaN	NaN	NaN	NaN	NaN
2.356	10.311	95.869	364.5682	0.17617	0.19024	-0.26211	-64.609	111.9426	211.899	0.18848	-0.11133	-0.13037	NaN	NaN	NaN	NaN	NaN	NaN	NaN	NaN	NaN	NaN	NaN	NaN
2.358	3.033	87.762	344.8734	0.17461	0.16797	-0.24883	-89.626	73.177	204.3888	0.1792	-0.14551	-0.1123	NaN	NaN	NaN	NaN	NaN	NaN	NaN	NaN	NaN	NaN	NaN	NaN
2.36	-6.49	96.7429	322.5843	0.17422	0.15088	-0.23769	-55.54863	92.8986	179.5113	0.17725	-0.16162	-0.1123	NaN	NaN	NaN	NaN	NaN	NaN	NaN	NaN	NaN	NaN	NaN	NaN
2.362	-15.04	105.556	328.345	0.17432	0.1333	-0.23096	-53.666	121.9959	140.158	0.16553	-0.18604	-0.10547	NaN	NaN	NaN	NaN	NaN	NaN	NaN	NaN	NaN	NaN	NaN	NaN
2.364	-12.671	106.498	316.788	0.16494	0.11055	-0.22041	-50.5081	57.438	163.99	0.16113	-0.21558	-0.098145	NaN	NaN	NaN	NaN	NaN	NaN	NaN	NaN	NaN	NaN	NaN	NaN
2.366	-26.117	110.587	287.7913	0.15879	0.093946	-0.20147	-31.5003	107.163	120.114	0.15918	-0.24756	-0.092773	NaN	NaN	NaN	NaN	NaN	NaN	NaN	NaN	NaN	NaN	NaN	NaN
2.368	-27.5059	108.649	265.037	0.15058	0.07832	-0.20029	-47.1932	59.8074	112.073	0.16309	-0.28809	-0.091797	NaN	NaN	NaN	NaN	NaN	NaN	NaN	NaN	NaN	NaN	NaN	NaN
2.37	-33.8914	96.8159	249.6539	0.14355	0.061914	-0.18935	-16.398	42.2248	118.5661	0.16455	-0.30811	-0.08252	NaN	NaN	NaN	NaN	NaN	NaN	NaN	NaN	NaN	NaN	NaN	NaN
2.372	-24.698	97.2948	243.4969	0.13867	0.052246	-0.18018	-1.62	76.7142	94.283	0.16602	-0.34814	-0.082031	NaN	NaN	NaN	NaN	NaN	NaN	NaN	NaN	NaN	NaN	NaN	NaN
2.374	-31.575	84.6154	215.445	0.12705	0.035547	-0.17159	1.648	26.121	93.3465	0.16406	-0.3706	-0.075684	NaN	NaN	NaN	NaN	NaN	NaN	NaN	NaN	NaN	NaN	NaN	NaN
2.376	-51.7393	81.4803	212.365	0.12334	0.028125	-0.15918	-1.027	94.01	43.85	0.15869	-0.39014	-0.070801	NaN	NaN	NaN	NaN	NaN	NaN	NaN	NaN	NaN	NaN	NaN	NaN
2.378	-43.3109	79.043	208.8072	0.12217	0.011719	-0.1541	-1.194	45.8698	51.1885	0.14941	-0.40283	-0.05957	NaN	NaN	NaN	NaN	NaN	NaN	NaN	NaN	NaN	NaN	NaN	NaN
2.38	-37.9985	73.163	182.127	0.1167	-0.0068359	-0.14521	1.648	20.4889	73.7063	0.13965	-0.40137	-0.060059	NaN	NaN	NaN	NaN	NaN	NaN	NaN	NaN	NaN	NaN	NaN	NaN
2.382	-47.9942	83.2479	176.7507	0.11475	-0.021973	-0.13965	20.9886	53.814	48.946	0.11816	-0.39063	-0.054688	NaN	NaN	NaN	NaN	NaN	NaN	NaN	NaN	NaN	NaN	NaN	NaN
2.384	-65.8572	79.2036	196.1691	0.11601	-0.036524	-0.13477	23.6616	-9.6182	76.437	0.094484	-0.3684	-0.059326	NaN	NaN	NaN	NaN	NaN	NaN	NaN	NaN	NaN	NaN	NaN	NaN
2.386	-52.4518	64.805	187.8756	0.11308	-0.048242	-0.13232	36.6065	47.1965	33.425	0.072266	-0.34033	-0.067871	NaN	NaN	NaN	NaN	NaN	NaN	NaN	NaN	NaN	NaN	NaN	NaN
2.388	-49.8413	62.1834	165.5791	0.11387	-0.056836	-0.13155	7.1669	23.5886	41.618	0.047852	-0.30811	-0.067383	NaN	NaN	NaN	NaN	NaN	NaN	NaN	NaN	NaN	NaN	NaN	NaN
2.39	-47.4477	53.391	155.381978	0.11299	-0.061426	-0.12793	1.022	16.2278	50.3655	0.032715	-0.28857	-0.07373	NaN	NaN	NaN	NaN	NaN	NaN	NaN	NaN	NaN	NaN	NaN	NaN
2.392	-43.53679	53.4247	138.4477	0.10889	-0.071289	-0.12256	-5.567	76.963	-4.928	0.00048828	-0.23926	-0.10449	NaN	NaN	NaN	NaN	NaN	NaN	NaN	NaN	NaN	NaN	NaN	NaN
2.394	-21.453	45.7561	135.1222	0.10752	-0.074902	-0.12139	-18.079	8.1973	30.2143	-0.013916	-0.20361	-0.10864	NaN	NaN	NaN	NaN	NaN	NaN	NaN	NaN	NaN	NaN	NaN	NaN
2.396	-24.9739	50.6318	125.7213	0.10322	-0.080078	-0.12041	-6.488	45.243	16.4551	-0.022949	-0.17334	-0.11768	NaN	NaN	NaN	NaN	NaN	NaN	NaN	NaN	NaN	NaN	NaN	NaN
2.398	-22.7399	55.1133	110.0965	0.097754	-0.082422	-0.12197	-41.2295	15.8275	23.7261	-0.032227	-0.14404	-0.12988	NaN	NaN	NaN	NaN	NaN	NaN	NaN	NaN	NaN	NaN	NaN	NaN
2.4	14.418	40.777	110.9523	0.08711	-0.087597	-0.12637	-66.4773	-12.28674	32.009	-0.038086	-0.12549	-0.13477	NaN	NaN	NaN	NaN	NaN	NaN	NaN	NaN	NaN	NaN	NaN	NaN
2.402	21.042	31.7915	111.2399	0.081543	-0.086914	-0.11963	-58.288	52.297	-12.848	-0.056641	-0.08252	-0.13623	NaN	NaN	NaN	NaN	NaN	NaN	NaN	NaN	NaN	NaN	NaN	NaN
2.404	-5.022	40.4517	100.48945	0.079785	-0.075781	-0.11963	-60.112	0.6222	20.7438	-0.078369	-0.041503	-0.14234	NaN	NaN	NaN	NaN	NaN	NaN	NaN	NaN	NaN	NaN	NaN	NaN
2.406	-14.235	58.063	91.134	0.069629	-0.063964	-0.1211	-48.3087	35.5363	23.406	-0.10156	-0.0053711	-0.15283	NaN	NaN	NaN	NaN	NaN	NaN	NaN	NaN	NaN	NaN	NaN	NaN
2.408	4.445	48.219	89.7254	0.065332	-0.054589	-0.12695	-36.8531	20.49451	12.603	-0.12891	0.050781	-0.16162	NaN	NaN	NaN	NaN	NaN	NaN	NaN	NaN	NaN	NaN	NaN	NaN
2.41	-1.613	52.554	74.8509	0.054589	-0.040526	-0.12636	-60.8646	-25.574	24.48285	-0.1416	0.080078	-0.16895	NaN	NaN	NaN	NaN	NaN	NaN	NaN	NaN	NaN	NaN	NaN	NaN
2.412	-5.089	52.385	62.9072	0.047363	-0.024414	-0.12695	-49.118	36.673	7.493	-0.16553	0.13477	-0.17529	NaN	NaN	NaN	NaN	NaN	NaN	NaN	NaN	NaN	NaN	NaN	NaN
2.414	-16.189	47.426	66.2406	0.034474	-0.0055684	-0.13262	-63.736	-15.5329	54.505	-0.18164	0.17382	-0.18188	NaN	NaN	NaN	NaN	NaN	NaN	NaN	NaN	NaN	NaN	NaN	NaN
2.416	-6.342	43.5314	68.9561	0.025295	0.014741	-0.14004	-40.262	11.2555	30.392	-0.19629	0.21436	-0.18408	NaN	NaN	NaN	NaN	NaN	NaN	NaN	NaN	NaN	NaN	NaN	NaN
2.418	-9.085	44.43894	62.6163	0.019044	0.033882	-0.14199	-32.86152	16.2921	12.3072	-0.2168	0.26074	-0.18506	NaN	NaN	NaN	NaN	NaN	NaN	NaN	NaN	NaN	NaN	NaN	NaN
2.42	-3.537	46.3556	40.671	0.013576	0.054192	-0.1456	-45.2904	-32.2007	12.893	-0.22607	0.28564	-0.19092	NaN	NaN	NaN	NaN	NaN	NaN	NaN	NaN	NaN	NaN	NaN	NaN
2.422	-17.514	40.6254	50.02232	0.0087891	0.077637	-0.14893	-4.849	38.92	0.00899999999999679	-0.23828	0.30664	-0.19043	NaN	NaN	NaN	NaN	NaN	NaN	NaN	NaN	NaN	NaN	NaN	NaN
2.424	-15.077	31.3223	50.6374	0.00077823	0.099819	-0.15371	-12.512	-2.1195	29.04115	-0.23999	0.31665	-0.19336	NaN	NaN	NaN	NaN	NaN	NaN	NaN	NaN	NaN	NaN	NaN	NaN
2.426	-33.4145	35.4771	38.3253	-0.0018548	0.11945	-0.16201	8.487	20.5004	16.7644	-0.23828	0.3252	-0.19238	NaN	NaN	NaN	NaN	NaN	NaN	NaN	NaN	NaN	NaN	NaN	NaN
2.428	-37.271	40.7365	33.3493	-0.0026393	0.14525	-0.16789	17.01254	38.206	1.2144	-0.22803	0.3291	-0.19482	NaN	NaN	NaN	NaN	NaN	NaN	NaN	NaN	NaN	NaN	NaN	NaN
2.43	-63.25	44.3187	46.5063	-0.0042982	0.16232	-0.17002	1.637	-23.2856	10.2177	-0.22168	0.32617	-0.19531	NaN	NaN	NaN	NaN	NaN	NaN	NaN	NaN	NaN	NaN	NaN	NaN
2.432	-53.4648	44.113	51.4872	-0.0024414	0.17871	-0.17383	36.6527	32.4082	-9.2474	-0.20898	0.31543	-0.19824	NaN	NaN	NaN	NaN	NaN	NaN	NaN	NaN	NaN	NaN	NaN	NaN
2.434	-48.783	43.4	28.4204	-0.0018579	0.19383	-0.17608	30.1188	4.7867	1.9398	-0.19922	0.2915	-0.19189	NaN	NaN	NaN	NaN	NaN	NaN	NaN	NaN	NaN	NaN	NaN	NaN
2.436	-49.546	45.0028	28.5331	-0.001262	0.20125	-0.17695	34.379	13.46158	5.2944	-0.19678	0.27441	-0.19092	NaN	NaN	NaN	NaN	NaN	NaN	NaN	NaN	NaN	NaN	NaN	NaN
2.438	-50.7549	37.1892	29.1993	0.0002708	0.20169	-0.17967	12.0166	53.032	-13.6696	-0.18213	0.25049	-0.19727	NaN	NaN	NaN	NaN	NaN	NaN	NaN	NaN	NaN	NaN	NaN	NaN
2.44	-43.1115	28.3936	40.75545	0.0033029	0.20451	-0.1789	-20.3224	0.98	30.269	-0.16993	0.21826	-0.19702	NaN	NaN	NaN	NaN	NaN	NaN	NaN	NaN	NaN	NaN	NaN	NaN
2.442	-38.5629	35.8228	22.6798	0.0073242	0.2002	-0.18262	5.2	45.3429	3.035	-0.15869	0.18945	-0.19531	NaN	NaN	NaN	NaN	NaN	NaN	NaN	NaN	NaN	NaN	NaN	NaN
2.444	-26.7375	39.6075	19.3852	0.011004	0.19901	-0.17899	0.191999999999998	9.0287	9.459	-0.14063	0.13574	-0.18848	NaN	NaN	NaN	NaN	NaN	NaN	NaN	NaN	NaN	NaN	NaN	NaN
2.446	-20.003	38.8625	14.4298	0.017304	0.19337	-0.18029	-20.411	3.8067	6.9475	-0.13232	0.10938	-0.19189	NaN	NaN	NaN	NaN	NaN	NaN	NaN	NaN	NaN	NaN	NaN	NaN
2.448	-12.047	27.3733	26.1362	0.024506	0.18592	-0.17946	-23.7405	48.611	-6.9517	-0.11475	0.055176	-0.19092	NaN	NaN	NaN	NaN	NaN	NaN	NaN	NaN	NaN	NaN	NaN	NaN
2.45	-23.668	37.3698	22.8525	0.03216	0.1729	-0.18194	-43.2078	-14.258	26.4419	-0.10572	0.015137	-0.1958	NaN	NaN	NaN	NaN	NaN	NaN	NaN	NaN	NaN	NaN	NaN	NaN
2.452	-26.5916	37.325	20.3514	0.036621	0.1543	-0.17871	-31.8491	30.9207	-7.5544	-0.092285	-0.026855	-0.20557	NaN	NaN	NaN	NaN	NaN	NaN	NaN	NaN	NaN	NaN	NaN	NaN
2.454	-5.799	34.27	34.7135	0.045515	0.13808	-0.17542	-56.844	17.1471	3.59	-0.069336	-0.07959	-0.2168	NaN	NaN	NaN	NaN	NaN	NaN	NaN	NaN	NaN	NaN	NaN	NaN
2.456	-8.951	24.8822	30.54674	0.050844	0.12299	-0.17657	-52.992	-5.453	23.2996	-0.060059	-0.11621	-0.21924	NaN	NaN	NaN	NaN	NaN	NaN	NaN	NaN	NaN	NaN	NaN	NaN
2.458	-19.418	19.42739	30.1227	0.05335	0.10621	-0.17321	-33.7444	59.5585	5.005	-0.039551	-0.16797	-0.22998	NaN	NaN	NaN	NaN	NaN	NaN	NaN	NaN	NaN	NaN	NaN	NaN
2.46	-8.803	15.4025	32.5177	0.05696	0.089928	-0.17139	-65.545	17.785	29.565	-0.021484	-0.19971	-0.2356	NaN	NaN	NaN	NaN	NaN	NaN	NaN	NaN	NaN	NaN	NaN	NaN
2.462	4.358	18.6039	22.2882	0.059082	0.072266	-0.17188	-59.91192	51.736	17.026	-0.010742	-0.22998	-0.24658	NaN	NaN	NaN	NaN	NaN	NaN	NaN	NaN	NaN	NaN	NaN	NaN
2.464	-2.632	21.5177	13.4552	0.061523	0.058773	-0.17859	-73.06	53.59	3.794	0.0087891	-0.25049	-0.26172	NaN	NaN	NaN	NaN	NaN	NaN	NaN	NaN	NaN	NaN	NaN	NaN
2.466	3.038	34.9852	9.1655	0.070081	0.047311	-0.17704	-64.2149	1.6565	31.9271	0.013672	-0.25684	-0.26807	NaN	NaN	NaN	NaN	NaN	NaN	NaN	NaN	NaN	NaN	NaN	NaN
2.468	-8.613	25.246	25.273	0.077354	0.028835	-0.1799	-18.3132	43.302	6.831	0.02832	-0.25977	-0.28711	NaN	NaN	NaN	NaN	NaN	NaN	NaN	NaN	NaN	NaN	NaN	NaN
2.47	-6.571	27.0938	25.4689	0.08137	0.015662	-0.18725	-35.4847	-6.931585	29.4204	0.031006	-0.26197	-0.29761	NaN	NaN	NaN	NaN	NaN	NaN	NaN	NaN	NaN	NaN	NaN	NaN
2.472	-20.06	27.17288	10.273	0.087402	0.0083008	-0.18555	-29.9466	20.0831	31.6973	0.032715	-0.25342	-0.3125	NaN	NaN	NaN	NaN	NaN	NaN	NaN	NaN	NaN	NaN	NaN	NaN
2.474	-27.7348	27.8438	26.6478	0.090868	-0.0036245	-0.19305	-21.4193	44.184	18.794	0.039551	-0.23828	-0.33691	NaN	NaN	NaN	NaN	NaN	NaN	NaN	NaN	NaN	NaN	NaN	NaN
2.476	-47.845	28.0489	33.1911	0.094097	-0.010218	-0.19125	-12.527	-8.3699	40.7821	0.040527	-0.22998	-0.34521	NaN	NaN	NaN	NaN	NaN	NaN	NaN	NaN	NaN	NaN	NaN	NaN
2.478	-39.5318	22.7637	45.181	0.091199	-0.017813	-0.18975	9.307	36.9056	6.529	0.044922	-0.20898	-0.36621	NaN	NaN	NaN	NaN	NaN	NaN	NaN	NaN	NaN	NaN	NaN	NaN
2.48	-38.7655	30.595	19.6893	0.091011	-0.025009	-0.19744	11.275	-3.6628	14.4923	0.050537	-0.18969	-0.37793	NaN	NaN	NaN	NaN	NaN	NaN	NaN	NaN	NaN	NaN	NaN	NaN
2.482	-50.2689	21.3116	21.8473	0.083984	-0.027344	-0.20068	24.379	-10.7435	38.429	0.052734	-0.17139	-0.3916	NaN	NaN	NaN	NaN	NaN	NaN	NaN	NaN	NaN	NaN	NaN	NaN
2.484	-48.19025	4.4095	53.9761	0.086142	-0.032055	-0.20718	16.1217	16.65	39.35	0.050781	-0.13721	-0.40674	NaN	NaN	NaN	NaN	NaN	NaN	NaN	NaN	NaN	NaN	NaN	NaN
2.486	-52.456	-8.9558	58.906	0.08605	-0.035011	-0.22016	6.594	-44.7352	75.4485	0.056152	-0.11963	-0.41064	NaN	NaN	NaN	NaN	NaN	NaN	NaN	NaN	NaN	NaN	NaN	NaN
2.488	-44.7904	-8.9676	50.513	0.089248	-0.035096	-0.22369	23.0448	-10.317	67.9069	0.052246	-0.062988	-0.41162	NaN	NaN	NaN	NaN	NaN	NaN	NaN	NaN	NaN	NaN	NaN	NaN
2.49	-35.8462	-13.8936	56.6156	0.090058	-0.018887	-0.22979	16.676	-33.711	66.265	0.040772	-0.011963	-0.40845	NaN	NaN	NaN	NaN	NaN	NaN	NaN	NaN	NaN	NaN	NaN	NaN
2.492	-41.646	-19.2073	82.983803	0.086426	0.0073242	-0.23389	-7.326	-50.67518	106.617	0.020996	0.040039	-0.41406	NaN	NaN	NaN	NaN	NaN	NaN	NaN	NaN	NaN	NaN	NaN	NaN
2.494	-28.4168	-20.5239	91.3557	0.076032	0.043787	-0.24362	-1.951	-13.327	92.651	-0.018555	0.11719	-0.42773	NaN	NaN	NaN	NaN	NaN	NaN	NaN	NaN	NaN	NaN	NaN	NaN
2.496	-43.3127	-3.47139	108.205	0.060251	0.080135	-0.25444	-23.2691	-54.1027	114.951	-0.037598	0.15771	-0.42725	NaN	NaN	NaN	NaN	NaN	NaN	NaN	NaN	NaN	NaN	NaN	NaN
2.498	-29.1744	11.8292	114.9776	0.039202	0.1176	-0.26812	5.61	-14.7664	132.087	-0.063965	0.24365	-0.4375	NaN	NaN	NaN	NaN	NaN	NaN	NaN	NaN	NaN	NaN	NaN	NaN
2.5	-4.223	21.7887	154.63858	0.032315	0.1524	-0.28312	-5.141	-7.0834	174.1645	-0.083008	0.302	-0.45166	NaN	NaN	NaN	NaN	NaN	NaN	NaN	NaN	NaN	NaN	NaN	NaN
2.502	14.445	38.7879	180.8224	0.027344	0.18311	-0.30713	-52.9814	-31.9526	242.683	-0.10547	0.36084	-0.47021	NaN	NaN	NaN	NaN	NaN	NaN	NaN	NaN	NaN	NaN	NaN	NaN
2.504	-8.54	47.637	209.6041	0.029878	0.2115	-0.31766	-18.9514	35.37	283.933	-0.12012	0.43945	-0.50439	NaN	NaN	NaN	NaN	NaN	NaN	NaN	NaN	NaN	NaN	NaN	NaN
2.506	-15.1264	66.8566	230.363	0.038667	0.24372	-0.33434	-56.598	42.415	347.229	-0.13623	0.4834	-0.52148	NaN	NaN	NaN	NaN	NaN	NaN	NaN	NaN	NaN	NaN	NaN	NaN
2.508	35.831	75.894	276.5165	0.044525	0.27653	-0.35351	-44.522	72.849	433.6281	-0.16455	0.5918	-0.54102	NaN	NaN	NaN	NaN	NaN	NaN	NaN	NaN	NaN	NaN	NaN	NaN
2.51	48.378	86.905	296.242	0.047462	0.32517	-0.3666	-9.9393	107.446	522.7592	-0.2063	0.7019	-0.55786	NaN	NaN	NaN	NaN	NaN	NaN	NaN	NaN	NaN	NaN	NaN	NaN
2.512	24.856	99.227	354.4143	0.04248	0.38672	-0.38428	-55.8082	74.68589	635.637	-0.26318	0.84033	-0.56787	NaN	NaN	NaN	NaN	NaN	NaN	NaN	NaN	NaN	NaN	NaN	NaN
2.514	44.168	89.383	424.5015	0.021478	0.45031	-0.40752	-17.5987	115.66	701.799	-0.36084	1.1021	-0.58789	NaN	NaN	NaN	NaN	NaN	NaN	NaN	NaN	NaN	NaN	NaN	NaN
2.516	49.501	84.586	478.212	-0.0027419	0.53069	-0.4336	-39.942	71.348	792.644	-0.41699	1.2559	-0.60547	NaN	NaN	NaN	NaN	NaN	NaN	NaN	NaN	NaN	NaN	NaN	NaN
2.518	30.581	61.276	536.576	-0.031648	0.62874	-0.4543	-54.508	50.3527	867.801	-0.53271	1.5786	-0.6499	NaN	NaN	NaN	NaN	NaN	NaN	NaN	NaN	NaN	NaN	NaN	NaN
2.52	17.1309	49.6782	599.847	-0.065044	0.73781	-0.46631	-45.939	57.806	934.4825	-0.62256	1.7659	-0.69946	NaN	NaN	NaN	NaN	NaN	NaN	NaN	NaN	NaN	NaN	NaN	NaN
2.522	19.6825	40.3988	703.06	-0.10742	0.87158	-0.49365	-57.1004	5.5622	993.1529	-0.69434	1.9004	-0.75586	NaN	NaN	NaN	NaN	NaN	NaN	NaN	NaN	NaN	NaN	NaN	NaN
2.524	29.0176	33.8942	779.281	-0.14814	1.0079	-0.51787	-30.4213	6.31759	995.4771	-0.72412	1.9829	-0.83252	NaN	NaN	NaN	NaN	NaN	NaN	NaN	NaN	NaN	NaN	NaN	NaN
2.526	-7.90952	18.8913	847.174	-0.20576	1.1528	-0.54151	-44.9978147	-31.5742	982.591862	-0.70898	1.9688	-0.85742	NaN	NaN	NaN	NaN	NaN	NaN	NaN	NaN	NaN	NaN	NaN	NaN
2.528	-12.997	-3.7567	913.7395	-0.26513	1.2993	-0.57041	-29.2549	-85.457	967.879	-0.61328	1.8711	-0.91016	NaN	NaN	NaN	NaN	NaN	NaN	NaN	NaN	NaN	NaN	NaN	NaN
2.53	-4.6499	-32.0573	957.353	-0.33037	1.4348	-0.60654	5.98	-86.224	946.79	-0.49145	1.7473	-0.92945	NaN	NaN	NaN	NaN	NaN	NaN	NaN	NaN	NaN	NaN	NaN	NaN
2.532	-14.8892	-43.4032	994.839	-0.3916	1.541	-0.64941	-2.382	-109.935	920.799	-0.35254	1.6118	-0.95068	NaN	NaN	NaN	NaN	NaN	NaN	NaN	NaN	NaN	NaN	NaN	NaN
2.534	-24.445	-35.7323	980.141	-0.43135	1.6211	-0.69317	-8.187	-124.466	892.503	-0.18555	1.4141	-0.98633	NaN	NaN	NaN	NaN	NaN	NaN	NaN	NaN	NaN	NaN	NaN	NaN
2.536	-58.126	-47.5494	988.569	-0.44483	1.6458	-0.72725	-2.672	-131.712	850.3866	-0.1084	1.3208	-0.99756	NaN	NaN	NaN	NaN	NaN	NaN	NaN	NaN	NaN	NaN	NaN	NaN
2.538	-44.7314	-74.8718	982.361	-0.41865	1.622	-0.74951	-34.833	-150.008	827.036	0.018066	1.1357	-0.99756	NaN	NaN	NaN	NaN	NaN	NaN	NaN	NaN	NaN	NaN	NaN	NaN
2.54	-49.6593	-95.97	931.959	-0.35703	1.5559	-0.76601	16.634	-100.3803	818.995	0.084961	1.0188	-1.0012	NaN	NaN	NaN	NaN	NaN	NaN	NaN	NaN	NaN	NaN	NaN	NaN
2.542	-57.0828	-102.476	896.684	-0.2793	1.4673	-0.78076	23.278	-56.734	839.626	0.13086	0.94336	-0.96875	NaN	NaN	NaN	NaN	NaN	NaN	NaN	NaN	NaN	NaN	NaN	NaN
2.544	-58.627645	-99.478	885.5482	-0.19443	1.3558	-0.7958	5.494	-43.581	846.96	0.15381	0.89551	-0.97266	NaN	NaN	NaN	NaN	NaN	NaN	NaN	NaN	NaN	NaN	NaN	NaN
2.546	-63.0006	-90.216	877.419	-0.11045	1.2427	-0.81289	5.27173	-30.925	858.015	0.14453	0.89258	-0.97266	NaN	NaN	NaN	NaN	NaN	NaN	NaN	NaN	NaN	NaN	NaN	NaN
2.548	-50.2267	-83.87709	877.489	-0.032715	1.1279	-0.82383	-33.64	-70.841	871.021	0.13867	0.90234	-0.97656	NaN	NaN	NaN	NaN	NaN	NaN	NaN	NaN	NaN	NaN	NaN	NaN
2.55	-49.1189	-67.586	876.644	0.031054	1.0286	-0.83701	11.9772	-92.857	899.757	0.14404	0.91431	-0.97192	NaN	NaN	NaN	NaN	NaN	NaN	NaN	NaN	NaN	NaN	NaN	NaN
2.552	-23.4431	-41.585	896.6393	0.083008	0.93652	-0.83594	24.31	-93.742	921.665	0.13428	0.91797	-0.96289	NaN	NaN	NaN	NaN	NaN	NaN	NaN	NaN	NaN	NaN	NaN	NaN
2.554	-10.3768	-38.724	921.5607	0.11856	0.87646	-0.84522	11.0338	-132.0561	948.073	0.12451	0.92578	-0.95313	NaN	NaN	NaN	NaN	NaN	NaN	NaN	NaN	NaN	NaN	NaN	NaN
2.556	-9.94	-47.899	933.335	0.14707	0.8333	-0.8497	25.706	-149.7315	970.645	0.1084	0.94189	-0.95264	NaN	NaN	NaN	NaN	NaN	NaN	NaN	NaN	NaN	NaN	NaN	NaN
2.558	-21.8478	-47.777	942.763	0.16426	0.80439	-0.85986	-12.8263	-169.0083	977.113	0.075195	0.97656	-0.95508	NaN	NaN	NaN	NaN	NaN	NaN	NaN	NaN	NaN	NaN	NaN	NaN
2.56	-12.1629	-59.936	957.6924	0.18515	0.79102	-0.86797	6.2497	-208.947	1010.0752	0.046143	1.0313	-0.95752	NaN	NaN	NaN	NaN	NaN	NaN	NaN	NaN	NaN	NaN	NaN	NaN
2.562	34.361	-95.463	990.713	0.20264	0.80127	-0.87744	21.3614	-220.484	1051.7582	0.0024414	1.1021	-0.96338	NaN	NaN	NaN	NaN	NaN	NaN	NaN	NaN	NaN	NaN	NaN	NaN
2.564	32.297	-142.46	988.2409	0.21543	0.82861	-0.88525	4.3171	-233.617	1088.3428	-0.058594	1.229	-0.98291	NaN	NaN	NaN	NaN	NaN	NaN	NaN	NaN	NaN	NaN	NaN	NaN
2.566	21.3899	-173.876	980.23965	0.22197	0.86914	-0.88906	9.9067	-233.547	1122.8705	-0.085449	1.2935	-1.0015	NaN	NaN	NaN	NaN	NaN	NaN	NaN	NaN	NaN	NaN	NaN	NaN
2.568	18.7992	-185.724	1003.397	0.21181	0.92227	-0.9	-22.6328	-191.105	1133.482	-0.11768	1.4048	-1.0308	NaN	NaN	NaN	NaN	NaN	NaN	NaN	NaN	NaN	NaN	NaN	NaN
2.57	27.0057	-198.619	1022.4514	0.18828	0.97568	-0.91377	5.8868	-170.374	1159.38828	-0.13379	1.4707	-1.0703	NaN	NaN	NaN	NaN	NaN	NaN	NaN	NaN	NaN	NaN	NaN	NaN
2.572	31.398	-182.774	1021.232	0.16748	1.0195	-0.92676	26.762	-108.78	1194.825	-0.12646	1.4849	-1.0854	NaN	NaN	NaN	NaN	NaN	NaN	NaN	NaN	NaN	NaN	NaN	NaN
2.574	45.162	-160.106	1039.126	0.1499	1.048	-0.9415	-4.0085	-65.636	1200.223	-0.10938	1.4712	-1.1001	NaN	NaN	NaN	NaN	NaN	NaN	NaN	NaN	NaN	NaN	NaN	NaN
2.576	39.099	-142.646	1060.1286	0.14062	1.0681	-0.94678	45.949	-75.071	1218.48	-0.084961	1.4329	-1.1101	NaN	NaN	NaN	NaN	NaN	NaN	NaN	NaN	NaN	NaN	NaN	NaN
2.578	16.216	-121.37047	1081.7691	0.13516	1.0899	-0.95693	40.275	-36.874	1223.528	-0.063477	1.3896	-1.1113	NaN	NaN	NaN	NaN	NaN	NaN	NaN	NaN	NaN	NaN	NaN	NaN
2.58	6.2121	-83.315	1109.23634	0.12588	1.1159	-0.95693	14.1087	-52.294	1230.9123	-0.054199	1.3369	-1.1133	NaN	NaN	NaN	NaN	NaN	NaN	NaN	NaN	NaN	NaN	NaN	NaN
2.582	8.7736	-50.198	1152.077	0.11328	1.1504	-0.96289	55.37	-63.838	1250.2044	-0.050293	1.3169	-1.1167	NaN	NaN	NaN	NaN	NaN	NaN	NaN	NaN	NaN	NaN	NaN	NaN
2.584	28.3839	-46.905	1159.1503	0.090527	1.1912	-0.9748	54.542	-58.0829	1251.5024	-0.063965	1.2993	-1.105	NaN	NaN	NaN	NaN	NaN	NaN	NaN	NaN	NaN	NaN	NaN	NaN
2.586	28.0207	-63.115	1149.4621	0.06582	1.2306	-0.98037	45.812	-102.832	1268.1359	-0.091309	1.3074	-1.0974	NaN	NaN	NaN	NaN	NaN	NaN	NaN	NaN	NaN	NaN	NaN	NaN
2.588	-2.1005	-68.804	1146.86	0.039258	1.2615	-0.99561	51.003	-93.6256	1289.5293	-0.12207	1.3325	-1.0952	NaN	NaN	NaN	NaN	NaN	NaN	NaN	NaN	NaN	NaN	NaN	NaN
2.59	-14.43635	-76.14	1149.945	0.021777	1.2858	-1.0034	21.173	-92.8545	1302.779	-0.18164	1.3965	-1.0938	NaN	NaN	NaN	NaN	NaN	NaN	NaN	NaN	NaN	NaN	NaN	NaN
2.592	3.81456	-104.5674	1173.84	0.0087891	1.2954	-1.0073	39.087	-120.768	1351.26	-0.21875	1.4316	-1.0918	NaN	NaN	NaN	NaN	NaN	NaN	NaN	NaN	NaN	NaN	NaN	NaN
2.594	-4.8789	-126.74	1172.094	0.0066406	1.2995	-1.0091	27.3281	-88.6104	1380.007	-0.28174	1.5083	-1.103	NaN	NaN	NaN	NaN	NaN	NaN	NaN	NaN	NaN	NaN	NaN	NaN
2.596	-11.3794	-145.675	1198.3573	0.0042969	1.3095	-1.0079	4.6849	-110.986	1396.912	-0.32984	1.5532	-1.1011	NaN	NaN	NaN	NaN	NaN	NaN	NaN	NaN	NaN	NaN	NaN	NaN
2.598	-25.228	-142.947	1207.0975	-0.0058594	1.322	-1.0032	19.1885	-124.368	1407.818	-0.37109	1.5977	-1.1055	NaN	NaN	NaN	NaN	NaN	NaN	NaN	NaN	NaN	NaN	NaN	NaN
2.6	-7.518374	-151.297	1242.764	-0.026367	1.3489	-1.0003	1.981	-76.435	1387.4797	-0.41797	1.6426	-1.1133	NaN	NaN	NaN	NaN	NaN	NaN	NaN	NaN	NaN	NaN	NaN	NaN
2.602	-19.9407	-149.262	1263.4242	-0.057129	1.3872	-1.0112	27.9887	-86.152	1390.4857	-0.44141	1.6641	-1.1162	NaN	NaN	NaN	NaN	NaN	NaN	NaN	NaN	NaN	NaN	NaN	NaN
2.604	-5.5111	-126.525	1291.943	-0.088867	1.4258	-1.023	27.2737	-21.2272	1401.689	-0.47754	1.6895	-1.123	NaN	NaN	NaN	NaN	NaN	NaN	NaN	NaN	NaN	NaN	NaN	NaN
2.606	-1.0182	-105.7301	1308.823	-0.11865	1.4789	-1.0351	11.662	-5.7218	1378.738	-0.50562	1.6984	-1.116	NaN	NaN	NaN	NaN	NaN	NaN	NaN	NaN	NaN	NaN	NaN	NaN
2.608	15.658487	-89.816	1304.426	-0.14599	1.5301	-1.0473	31.6698	-42.704	1401.601	-0.53076	1.7056	-1.1089	NaN	NaN	NaN	NaN	NaN	NaN	NaN	NaN	NaN	NaN	NaN	NaN
2.61	10.6941	-89.849	1313.9141	-0.16904	1.5837	-1.0605	18.5605	17.9214	1405.641	-0.57227	1.7168	-1.1045	NaN	NaN	NaN	NaN	NaN	NaN	NaN	NaN	NaN	NaN	NaN	NaN
2.612	-5.114	-64.923	1303.532	-0.1958	1.6353	-1.0815	4.304	-11.1594	1417.594	-0.59131	1.729	-1.0991	NaN	NaN	NaN	NaN	NaN	NaN	NaN	NaN	NaN	NaN	NaN	NaN
2.614	14.2194	-66.849	1304.8248	-0.21855	1.6875	-1.0961	23.759	23.939	1452.9903	-0.62305	1.7598	-1.0957	NaN	NaN	NaN	NaN	NaN	NaN	NaN	NaN	NaN	NaN	NaN	NaN
2.616	27.382	-75.997	1287.486	-0.24131	1.7255	-1.1066	13.719	77.531	1430.056	-0.64478	1.7786	-1.0857	NaN	NaN	NaN	NaN	NaN	NaN	NaN	NaN	NaN	NaN	NaN	NaN
2.618	31.8959	-79.5792	1265.968	-0.25849	1.743	-1.1202	7.66687	-4.972	1451.322	-0.6665	1.8071	-1.0776	NaN	NaN	NaN	NaN	NaN	NaN	NaN	NaN	NaN	NaN	NaN	NaN
2.62	24.1761	-87.4556	1275.24	-0.26983	1.754	-1.1312	12.2814	37.548	1467.482	-0.69336	1.8281	-1.0654	NaN	NaN	NaN	NaN	NaN	NaN	NaN	NaN	NaN	NaN	NaN	NaN
2.622	37.293	-92.5382	1280.239	-0.27588	1.7583	-1.1382	-0.3665	4.6301	1472.733	-0.70264	1.8442	-1.0581	NaN	NaN	NaN	NaN	NaN	NaN	NaN	NaN	NaN	NaN	NaN	NaN
2.624	44.30628	-96.5304	1296.963	-0.28008	1.7594	-1.1434	56.76	-12.5551	1513.3547	-0.7207	1.877	-1.0488	NaN	NaN	NaN	NaN	NaN	NaN	NaN	NaN	NaN	NaN	NaN	NaN
2.626	33.596	-84.6438	1319.0875	-0.28389	1.7464	-1.1523	43.9162	41.3391	1503.3014	-0.72803	1.8916	-1.042	NaN	NaN	NaN	NaN	NaN	NaN	NaN	NaN	NaN	NaN	NaN	NaN
2.628	47.693	-84.2696	1342.3422	-0.29053	1.7422	-1.152	31.2203	-21.3341	1507.302	-0.73926	1.9043	-1.0371	NaN	NaN	NaN	NaN	NaN	NaN	NaN	NaN	NaN	NaN	NaN	NaN
2.63	44.556	-95.0906	1373.2622	-0.29483	1.7304	-1.156	58.481	7.5634	1526.672	-0.74023	1.9121	-1.0195	NaN	NaN	NaN	NaN	NaN	NaN	NaN	NaN	NaN	NaN	NaN	NaN
2.632	29.559	-90.3495	1381.3183	-0.2998	1.7188	-1.1592	56.932	16.891	1494.7045	-0.74414	1.9121	-1.0137	NaN	NaN	NaN	NaN	NaN	NaN	NaN	NaN	NaN	NaN	NaN	NaN
2.634	10.6305	-83.5289	1396.48	-0.29658	1.6972	-1.1568	65.714	-18.7259	1504.107	-0.73779	1.9126	-1.0054	NaN	NaN	NaN	NaN	NaN	NaN	NaN	NaN	NaN	NaN	NaN	NaN
2.636	26.1021	-64.03443	1385.482	-0.29531	1.6785	-1.1604	48.418	70.893	1495.3274	-0.73828	1.9063	-0.99219	NaN	NaN	NaN	NaN	NaN	NaN	NaN	NaN	NaN	NaN	NaN	NaN
2.638	6.0892	-68.7876	1389.042	-0.29531	1.668	-1.1584	48	54.149	1478.5771	-0.72852	1.8965	-0.98047	NaN	NaN	NaN	NaN	NaN	NaN	NaN	NaN	NaN	NaN	NaN	NaN
2.64	-9.8137	-62.9872	1350.09128	-0.28633	1.6481	-1.1628	38.786	84.703	1478.79623	-0.71436	1.8833	-0.96045	NaN	NaN	NaN	NaN	NaN	NaN	NaN	NaN	NaN	NaN	NaN	NaN
2.642	-15.27583	-48.8827	1353.2152	-0.27637	1.6348	-1.1621	23.675	154.16	1436.34	-0.70947	1.8696	-0.95068	NaN	NaN	NaN	NaN	NaN	NaN	NaN	NaN	NaN	NaN	NaN	NaN
2.644	2.9406	-31.9092	1344.672	-0.27813	1.6196	-1.1628	56.896	69.677	1450.4748	-0.69287	1.8462	-0.92334	NaN	NaN	NaN	NaN	NaN	NaN	NaN	NaN	NaN	NaN	NaN	NaN
2.646	6.6781	-23.9656	1361.206	-0.27754	1.613	-1.1612	51.435	112.662	1463.07287	-0.6792	1.8193	-0.91699	NaN	NaN	NaN	NaN	NaN	NaN	NaN	NaN	NaN	NaN	NaN	NaN
2.648	-3.4169	-10.495	1359.135	-0.27676	1.6013	-1.1605	24.7062	100.134	1437.055	-0.6582	1.793	-0.90625	NaN	NaN	NaN	NaN	NaN	NaN	NaN	NaN	NaN	NaN	NaN	NaN
2.65	-20.7387	5.0791	1338.572	-0.27353	1.596	-1.163	28.9025	63.7254	1440.323	-0.62598	1.7466	-0.88525	NaN	NaN	NaN	NaN	NaN	NaN	NaN	NaN	NaN	NaN	NaN	NaN
2.652	-18.9939	17.8338	1355.269	-0.26807	1.5903	-1.1587	35.211	139.552	1411.1608	-0.61035	1.7168	-0.87598	NaN	NaN	NaN	NaN	NaN	NaN	NaN	NaN	NaN	NaN	NaN	NaN
2.654	-13.69329	24.1876	1376.2426	-0.26631	1.5843	-1.1579	19.2716	64.294	1377.2231	-0.58496	1.6621	-0.85547	NaN	NaN	NaN	NaN	NaN	NaN	NaN	NaN	NaN	NaN	NaN	NaN
2.656	-18.3734	20.69827	1394.771	-0.26455	1.5774	-1.1577	38.508	79.33	1389.9558	-0.56787	1.6318	-0.83691	NaN	NaN	NaN	NaN	NaN	NaN	NaN	NaN	NaN	NaN	NaN	NaN
2.658	-11.5836	10.0118	1371.057	-0.26377	1.5693	-1.1581	16.4778	86.3625	1362.9841	-0.56445	1.6094	-0.82422	NaN	NaN	NaN	NaN	NaN	NaN	NaN	NaN	NaN	NaN	NaN	NaN
2.66	-7.4585	-12.186	1364.6847	-0.25938	1.5633	-1.1515	-19.3462	25.029	1371.5377	-0.56299	1.6016	-0.80664	NaN	NaN	NaN	NaN	NaN	NaN	NaN	NaN	NaN	NaN	NaN	NaN
2.662	-8.1032	-14.8761	1340.5698	-0.25586	1.5552	-1.147	2.841972	104.0978	1367.5734	-0.5708	1.5996	-0.79883	NaN	NaN	NaN	NaN	NaN	NaN	NaN	NaN	NaN	NaN	NaN	NaN
2.664	-8.08413	-13.9469	1332.645	-0.25254	1.5436	-1.1414	-25.3675	95.9058	1334.4226	-0.58398	1.5977	-0.78662	NaN	NaN	NaN	NaN	NaN	NaN	NaN	NaN	NaN	NaN	NaN	NaN
2.666	11.934	-14.1966	1310.0709	-0.24864	1.5353	-1.137	-1.4732	99.173	1322.522	-0.59327	1.5991	-0.78564	NaN	NaN	NaN	NaN	NaN	NaN	NaN	NaN	NaN	NaN	NaN	NaN
2.668	12.1413	-12.98967	1299.2036	-0.24472	1.527	-1.1296	16.76877	190.062	1272.7372	-0.6001	1.5962	-0.77881	NaN	NaN	NaN	NaN	NaN	NaN	NaN	NaN	NaN	NaN	NaN	NaN
2.67	24.86047	-11.87	1275.9706	-0.24248	1.5181	-1.1202	5.4191	133.187	1253.0842	-0.6001	1.5874	-0.76611	NaN	NaN	NaN	NaN	NaN	NaN	NaN	NaN	NaN	NaN	NaN	NaN
2.672	24.0486	7.207	1269.623	-0.24316	1.5083	-1.1138	5.865	193.308	1267.170452	-0.60254	1.5811	-0.76855	NaN	NaN	NaN	NaN	NaN	NaN	NaN	NaN	NaN	NaN	NaN	NaN
2.674	19.5054	22.9249	1295.6345	-0.24366	1.507	-1.1074	6.8642	219.147	1243.4059	-0.59473	1.563	-0.75537	NaN	NaN	NaN	NaN	NaN	NaN	NaN	NaN	NaN	NaN	NaN	NaN
2.676	32.162	32.823	1294.0873	-0.24131	1.5028	-1.0962	9.109	165.084	1227.5324	-0.58814	1.5393	-0.74487	NaN	NaN	NaN	NaN	NaN	NaN	NaN	NaN	NaN	NaN	NaN	NaN
2.678	34.3351	43.475	1275.4621	-0.24287	1.5028	-1.0806	19.8939	232.062	1190.8295	-0.57568	1.52	-0.73193	NaN	NaN	NaN	NaN	NaN	NaN	NaN	NaN	NaN	NaN	NaN	NaN
2.68	11.2266	63.514	1246.22	-0.24316	1.4975	-1.0712	3.4076	180.75	1138.768	-0.5625	1.4922	-0.71875	NaN	NaN	NaN	NaN	NaN	NaN	NaN	NaN	NaN	NaN	NaN	NaN
2.682	8.4085	73.172	1224.672	-0.24023	1.4922	-1.0615	-3.373	171.0045	1133.069	-0.55176	1.4707	-0.70605	NaN	NaN	NaN	NaN	NaN	NaN	NaN	NaN	NaN	NaN	NaN	NaN
2.684	15.961	70.652	1222.936	-0.23701	1.4791	-1.0504	4.2842	220.259	1100.586	-0.52588	1.4204	-0.69287	NaN	NaN	NaN	NaN	NaN	NaN	NaN	NaN	NaN	NaN	NaN	NaN
2.686	8.5812	65.747	1190.5523	-0.22774	1.4684	-1.0375	-27.847567	151.0263	1110.8959	-0.49878	1.3748	-0.67847	NaN	NaN	NaN	NaN	NaN	NaN	NaN	NaN	NaN	NaN	NaN	NaN
2.688	-10.067	63.1113	1168.1057922	-0.22266	1.4551	-1.0227	4.6062	213.872	1113.337	-0.47754	1.3262	-0.66406	NaN	NaN	NaN	NaN	NaN	NaN	NaN	NaN	NaN	NaN	NaN	NaN
2.69	-5.596	45.719	1170.39295	-0.2208	1.453	-1.0081	-3.1569	195.9294	1087.1976	-0.44434	1.2642	-0.63623	NaN	NaN	NaN	NaN	NaN	NaN	NaN	NaN	NaN	NaN	NaN	NaN
2.692	-7.7667	24.923	1151.3931	-0.21924	1.4517	-0.99561	0.0779999999999994	162.599	1086.859	-0.42969	1.2363	-0.625	NaN	NaN	NaN	NaN	NaN	NaN	NaN	NaN	NaN	NaN	NaN	NaN
2.694	-38.29092	38.803	1133.4503	-0.22207	1.4444	-0.97793	12.1197	239.7026	1048.385	-0.40186	1.1704	-0.59521	NaN	NaN	NaN	NaN	NaN	NaN	NaN	NaN	NaN	NaN	NaN	NaN
2.696	-29.9407	59.494	1130.9167	-0.22178	1.4337	-0.96006	-10.1658	191.36	1011.9364	-0.37744	1.1142	-0.57763	NaN	NaN	NaN	NaN	NaN	NaN	NaN	NaN	NaN	NaN	NaN	NaN
2.698	-19.125	62.6706	1133.2879	-0.21396	1.4153	-0.94091	2.814	217.665	989.372	-0.3501	1.0552	-0.55615	NaN	NaN	NaN	NaN	NaN	NaN	NaN	NaN	NaN	NaN	NaN	NaN
2.7	-25.5696	71.936	1125.6385	-0.20478	1.3853	-0.92207	-15.5336	253.0281	923.769	-0.31348	0.97266	-0.52295	NaN	NaN	NaN	NaN	NaN	NaN	NaN	NaN	NaN	NaN	NaN	NaN
2.702	-50.4993	79.853	1091.7724	-0.19727	1.3477	-0.89844	-34.1615	176.858	904.7141	-0.29932	0.9375	-0.50879	NaN	NaN	NaN	NaN	NaN	NaN	NaN	NaN	NaN	NaN	NaN	NaN
2.704	-60.712	89.106	1069.9268	-0.17451	1.3124	-0.88564	-11.656	246.255	877.9995	-0.26563	0.86719	-0.48145	NaN	NaN	NaN	NaN	NaN	NaN	NaN	NaN	NaN	NaN	NaN	NaN
2.706	-37.1876	83.1992	1061.9808	-0.15654	1.2669	-0.87256	-21.6736	240.777	831.978	-0.24439	0.81519	-0.4541	NaN	NaN	NaN	NaN	NaN	NaN	NaN	NaN	NaN	NaN	NaN	NaN
2.708	-34.94	93.121	1040.1564	-0.14209	1.2314	-0.85498	-52.1523	226.1412	819.9999	-0.22461	0.76953	-0.43359	NaN	NaN	NaN	NaN	NaN	NaN	NaN	NaN	NaN	NaN	NaN	NaN
2.71	-65.23	105.89141	1014.8049	-0.1248	1.2023	-0.84238	-20.622	278.88	785.582	-0.20508	0.71045	-0.40088	NaN	NaN	NaN	NaN	NaN	NaN	NaN	NaN	NaN	NaN	NaN	NaN
2.712	-44.2127	89.69997	977.14555	-0.11621	1.1738	-0.82813	-39.5173	216.831	757.9442	-0.19043	0.66797	-0.37598	NaN	NaN	NaN	NaN	NaN	NaN	NaN	NaN	NaN	NaN	NaN	NaN
2.714	-35.8383	81.4039	943.637	-0.10654	1.1481	-0.81416	-39.1977	229.87	716.124	-0.17578	0.62744	-0.35303	NaN	NaN	NaN	NaN	NaN	NaN	NaN	NaN	NaN	NaN	NaN	NaN
2.716	-25.919	95.0156	917.702	-0.10235	1.1243	-0.80068	-15.2948	234.951	668.78	-0.15234	0.57275	-0.31982	NaN	NaN	NaN	NaN	NaN	NaN	NaN	NaN	NaN	NaN	NaN	NaN
2.718	-19.5355	106.7432	915.03	-0.097656	1.0989	-0.78623	-39.473	172.1275	654.876	-0.14014	0.54346	-0.30566	NaN	NaN	NaN	NaN	NaN	NaN	NaN	NaN	NaN	NaN	NaN	NaN
2.72	-0.873000000000001	104.0588	913.7339	-0.090723	1.0745	-0.77119	-28.606	233.605	624.5241	-0.12695	0.49512	-0.27637	NaN	NaN	NaN	NaN	NaN	NaN	NaN	NaN	NaN	NaN	NaN	NaN
2.722	-6.485	101.922	889.2834	-0.082031	1.0469	-0.75586	-31.3516	190.36005	583.972	-0.11279	0.46411	-0.25244	NaN	NaN	NaN	NaN	NaN	NaN	NaN	NaN	NaN	NaN	NaN	NaN
2.724	-12.104	97.2493	860.7717	-0.068653	1.0079	-0.73877	-34.03437	173.178	579.3444	-0.099609	0.43164	-0.22949	NaN	NaN	NaN	NaN	NaN	NaN	NaN	NaN	NaN	NaN	NaN	NaN
2.726	-19.1884	106.7535	852.3973	-0.055566	0.97217	-0.721	-28.8437	213.223	539.0441	-0.08252	0.3999	-0.20459	NaN	NaN	NaN	NaN	NaN	NaN	NaN	NaN	NaN	NaN	NaN	NaN
2.728	-13.982	109.108	855.079	-0.041894	0.93115	-0.69716	-36.09	132.059	523.5627	-0.075684	0.37939	-0.19336	NaN	NaN	NaN	NaN	NaN	NaN	NaN	NaN	NaN	NaN	NaN	NaN
2.73	-7.487	118.998	834.027	-0.029687	0.89687	-0.6791	-4.182	169.4547	492.565	-0.059082	0.34424	-0.16504	NaN	NaN	NaN	NaN	NaN	NaN	NaN	NaN	NaN	NaN	NaN	NaN
2.732	-9.631	115.282	784.7872	-0.015137	0.8623	-0.66016	-25.7328	186.823	432.987	-0.044678	0.3186	-0.15112	NaN	NaN	NaN	NaN	NaN	NaN	NaN	NaN	NaN	NaN	NaN	NaN
2.734	-30.568	109.5591	746.3528	-0.0035157	0.83174	-0.63994	-31.9564	138.3357	416.7327	-0.031738	0.29395	-0.13574	NaN	NaN	NaN	NaN	NaN	NaN	NaN	NaN	NaN	NaN	NaN	NaN
2.736	-9.014	106.106	725.819	0.0070313	0.80205	-0.6167	5.259	185.246	383.7557	-0.01416	0.27393	-0.11182	NaN	NaN	NaN	NaN	NaN	NaN	NaN	NaN	NaN	NaN	NaN	NaN
2.738	7.338	97.749	725.735	0.015625	0.77744	-0.59795	-17.806	142.0403	355.2262	-0.0024414	0.2583	-0.098145	NaN	NaN	NaN	NaN	NaN	NaN	NaN	NaN	NaN	NaN	NaN	NaN
2.74	-19.816	119.148	694.5072	0.02207	0.75801	-0.57519	-15.304	145.2136	345.2697	0.01123	0.23682	-0.085938	NaN	NaN	NaN	NaN	NaN	NaN	NaN	NaN	NaN	NaN	NaN	NaN
2.742	-39.179312	123.53602	673.3211	0.027344	0.73291	-0.55811	7.391	190.76	321.8475	0.021973	0.21435	-0.062988	NaN	NaN	NaN	NaN	NaN	NaN	NaN	NaN	NaN	NaN	NaN	NaN
2.744	-8.302	114.9861	642.3686	0.031055	0.71094	-0.53623	-37.6836	124.6953	293.3153	0.030273	0.1958	-0.057617	NaN	NaN	NaN	NaN	NaN	NaN	NaN	NaN	NaN	NaN	NaN	NaN
2.746	-12.39	119.1852	622.759	0.036231	0.68164	-0.51953	-13.621	164.4922	260.45317	0.039063	0.16943	-0.026367	NaN	NaN	NaN	NaN	NaN	NaN	NaN	NaN	NaN	NaN	NaN	NaN
2.748	-58.9219	139.553	619.7511	0.04834	0.65117	-0.5	6.651	146.815	227.334	0.046875	0.15576	-0.022461	NaN	NaN	NaN	NaN	NaN	NaN	NaN	NaN	NaN	NaN	NaN	NaN
2.75	-73.551	137.592	601.335	0.052441	0.62227	-0.48125	-24.38	96.1	219.1269	0.05957	0.13818	-0.0087891	NaN	NaN	NaN	NaN	NaN	NaN	NaN	NaN	NaN	NaN	NaN	NaN
2.752	-51.4478	132.223	580.3176	0.060059	0.59229	-0.45215	8.7025	138.523	198.35731	0.068115	0.12915	0.0012207	NaN	NaN	NaN	NaN	NaN	NaN	NaN	NaN	NaN	NaN	NaN	NaN
2.754	-69.148	123.1649	534.605	0.074707	0.55244	-0.44326	-43.2797	68.1986	178.52	0.083496	0.11914	0.012207	NaN	NaN	NaN	NaN	NaN	NaN	NaN	NaN	NaN	NaN	NaN	NaN
2.756	-85.253	131.12892	512.01	0.084472	0.5206	-0.4208	-32.8704	73.449	170.6435	0.090332	0.1084	0.028809	NaN	NaN	NaN	NaN	NaN	NaN	NaN	NaN	NaN	NaN	NaN	NaN
2.758	-54.858	107.6163	497.2098	0.093067	0.48311	-0.39736	-22.0962	110.803	152.0441	0.094238	0.10352	0.034668	NaN	NaN	NaN	NaN	NaN	NaN	NaN	NaN	NaN	NaN	NaN	NaN
2.76	-44.8413	104.8903	480.0213	0.10332	0.45186	-0.38174	-39.76285	54.153	154.5986	0.10059	0.088379	0.047852	NaN	NaN	NaN	NaN	NaN	NaN	NaN	NaN	NaN	NaN	NaN	NaN
2.762	-33.89	112.9559	433.4149	0.11621	0.41943	-0.3623	-30.7986	105.7306	127.0559	0.10669	0.081299	0.050781	NaN	NaN	NaN	NaN	NaN	NaN	NaN	NaN	NaN	NaN	NaN	NaN
2.764	-50.6311	105.9217	432.0832	0.12383	0.39082	-0.3458	-27.3817	69.99104	96.899	0.10938	0.077637	0.058105	NaN	NaN	NaN	NaN	NaN	NaN	NaN	NaN	NaN	NaN	NaN	NaN
2.766	-49.18	94.159	420.7242	0.13242	0.35908	-0.32412	-22.351	32.647	96.223	0.11865	0.07666	0.074219	NaN	NaN	NaN	NaN	NaN	NaN	NaN	NaN	NaN	NaN	NaN	NaN
2.768	-38.9193	89.5418	418.8467	0.14375	0.33135	-0.30889	-23.3262	81.7825	86.0767	0.11963	0.07373	0.068359	NaN	NaN	NaN	NaN	NaN	NaN	NaN	NaN	NaN	NaN	NaN	NaN
2.77	-34.7038	97.90856	389.6091	0.15576	0.30146	-0.29346	-30.08246	32.073	83.7465	0.11523	0.068359	0.078613	NaN	NaN	NaN	NaN	NaN	NaN	NaN	NaN	NaN	NaN	NaN	NaN
2.772	-27.3863	107.671	362.4607	0.1626	0.27686	-0.27783	-8.21	47.861	70.0073	0.11011	0.073486	0.080078	NaN	NaN	NaN	NaN	NaN	NaN	NaN	NaN	NaN	NaN	NaN	NaN
2.774	-33.219	95.882	360.045	0.17032	0.24902	-0.26016	-14.916	74.215	53.145	0.10938	0.075684	0.078125	NaN	NaN	NaN	NaN	NaN	NaN	NaN	NaN	NaN	NaN	NaN	NaN
2.776	-29.6	108.949	326.699	0.1792	0.23213	-0.25	-45.46866	23.0391	36.245	0.096191	0.090332	0.078613	NaN	NaN	NaN	NaN	NaN	NaN	NaN	NaN	NaN	NaN	NaN	NaN
2.778	-30.6778	118.877	289.1585	0.18701	0.21025	-0.22735	-15.0794	88.086	26.83	0.091309	0.097656	0.076172	NaN	NaN	NaN	NaN	NaN	NaN	NaN	NaN	NaN	NaN	NaN	NaN
2.78	-21.568	114.852	282.4097	0.19209	0.18682	-0.21494	-24.6323	50.497	28.266	0.077637	0.11719	0.067383	NaN	NaN	NaN	NaN	NaN	NaN	NaN	NaN	NaN	NaN	NaN	NaN
2.782	-3.996	92.726	274.1889	0.20117	0.16309	-0.19727	-23.2248	26.0221	37.0877	0.075928	0.12183	0.067138	NaN	NaN	NaN	NaN	NaN	NaN	NaN	NaN	NaN	NaN	NaN	NaN
2.784	-3.729	82.8461	266.5118	0.20811	0.14278	-0.1872	11.097	46.814	34.43	0.067871	0.13135	0.070313	NaN	NaN	NaN	NaN	NaN	NaN	NaN	NaN	NaN	NaN	NaN	NaN
2.786	14.14	94.5422	243.017	0.21504	0.12285	-0.16944	-38.1481	-26.391	20.0819	0.067871	0.14111	0.067383	NaN	NaN	NaN	NaN	NaN	NaN	NaN	NaN	NaN	NaN	NaN	NaN
2.788	-8.058	90.3665	217.4809	0.22246	0.09707	-0.15616	-4.905	20.6051	14.7559	0.063965	0.14404	0.064453	NaN	NaN	NaN	NaN	NaN	NaN	NaN	NaN	NaN	NaN	NaN	NaN
2.79	-6.769	85.2006	234.5717	0.23066	0.084473	-0.14853	13.4507	37.252	7.471	0.060547	0.15674	0.061523	NaN	NaN	NaN	NaN	NaN	NaN	NaN	NaN	NaN	NaN	NaN	NaN
2.792	-18.355	84.78905	208.7106	0.24268	0.068359	-0.13623	-3.802	-6.4039	24.5066	0.058106	0.16309	0.062744	NaN	NaN	NaN	NaN	NaN	NaN	NaN	NaN	NaN	NaN	NaN	NaN
2.794	-33.198	85.8039	201.9628	0.24824	0.047754	-0.12236	-13.409	52.407	24.2041	0.057617	0.17334	0.064941	NaN	NaN	NaN	NaN	NaN	NaN	NaN	NaN	NaN	NaN	NaN	NaN
2.796	-44.94	81.271	192.046	0.25254	0.033301	-0.11524	-8.594	-7.0998	24.9099	0.054688	0.17578	0.062012	NaN	NaN	NaN	NaN	NaN	NaN	NaN	NaN	NaN	NaN	NaN	NaN
2.798	-31.4192	74.649	196.05665	0.25137	0.02666	-0.1043	-9.299	-3.9046	23.9815	0.057129	0.17529	0.06543	NaN	NaN	NaN	NaN	NaN	NaN	NaN	NaN	NaN	NaN	NaN	NaN
2.8	-24.33	76.817	189.3058	0.2501	0.023633	-0.098436	-13.0232	30.078	29.2282	0.063477	0.1748	0.062988	NaN	NaN	NaN	NaN	NaN	NaN	NaN	NaN	NaN	NaN	NaN	NaN
2.802	-55.8615	64.4329	174.7719	0.25146	0.024902	-0.08252	-19.671	-32.254	29.8527	0.071533	0.17504	0.067383	NaN	NaN	NaN	NaN	NaN	NaN	NaN	NaN	NaN	NaN	NaN	NaN
2.804	-42.7817	66.6026	161.2781	0.25098	0.019629	-0.079004	-12.781	23.257	15.6829	0.083496	0.16895	0.069336	NaN	NaN	NaN	NaN	NaN	NaN	NaN	NaN	NaN	NaN	NaN	NaN
2.806	-51.2911	57.8731	141.4183	0.25332	0.018164	-0.073242	-19.7815	27.06625	-2.978	0.099121	0.16016	0.071777	NaN	NaN	NaN	NaN	NaN	NaN	NaN	NaN	NaN	NaN	NaN	NaN
2.808	-49.72449	59.389	128.464	0.2498	0.012305	-0.062305	-36.2853	-1.316216	0.754500000000001	0.104	0.15918	0.070313	NaN	NaN	NaN	NaN	NaN	NaN	NaN	NaN	NaN	NaN	NaN	NaN
2.81	-42.7638	54.834	131.3386	0.24785	0.010254	-0.053516	-1.973	53.681	12.93772	0.11865	0.14795	0.076172	NaN	NaN	NaN	NaN	NaN	NaN	NaN	NaN	NaN	NaN	NaN	NaN
2.812	-28.479	50.279	125.8953	0.25146	0.013184	-0.049316	-22.365	-1.3993	13.7573	0.13208	0.1416	0.078857	NaN	NaN	NaN	NaN	NaN	NaN	NaN	NaN	NaN	NaN	NaN	NaN
2.814	-40.036	47.3886	118.862	0.2541	0.015332	-0.046289	-25.425	16.3807	11.2782	0.14648	0.13867	0.077148	NaN	NaN	NaN	NaN	NaN	NaN	NaN	NaN	NaN	NaN	NaN	NaN
2.816	-59.373	56.764419	98.929	0.25312	0.019238	-0.038086	-9.7782	42.162	12.6663	0.16309	0.13916	0.087891	NaN	NaN	NaN	NaN	NaN	NaN	NaN	NaN	NaN	NaN	NaN	NaN
2.818	-35.6277	53.1137	101.2125	0.25625	0.021582	-0.032617	-57.243	-18.9966	13.6167	0.17236	0.13525	0.087402	NaN	NaN	NaN	NaN	NaN	NaN	NaN	NaN	NaN	NaN	NaN	NaN
2.82	-51.6595	48.42	116.35	0.25283	0.025781	-0.027441	-18.719	21.816	10.86183	0.17578	0.13379	0.083008	NaN	NaN	NaN	NaN	NaN	NaN	NaN	NaN	NaN	NaN	NaN	NaN
2.822	-40.6622	56.437	103.5534	0.24805	0.03125	-0.024902	-38.6238	7.3074	1.3046	0.1853	0.12964	0.092041	NaN	NaN	NaN	NaN	NaN	NaN	NaN	NaN	NaN	NaN	NaN	NaN
2.824	-32.252	52.718	86.58345	0.2457	0.040528	-0.027148	-51.7581	-6.5753	-1.5638	0.19287	0.12842	0.091309	NaN	NaN	NaN	NaN	NaN	NaN	NaN	NaN	NaN	NaN	NaN	NaN
2.826	-17.607	56.4197	78.433	0.2418	0.048926	-0.025586	-17.4289	45.483	5.5204	0.20654	0.12939	0.091797	NaN	NaN	NaN	NaN	NaN	NaN	NaN	NaN	NaN	NaN	NaN	NaN
2.828	-8.135	34.2903	79.571	0.23906	0.05752	-0.025195	-47.0641	-16.9021	14.7006	0.21143	0.13232	0.09082	NaN	NaN	NaN	NaN	NaN	NaN	NaN	NaN	NaN	NaN	NaN	NaN
2.83	-18.167	37.2577	69.0843	0.23408	0.070508	-0.027246	-34.637	12.72	9.2574	0.21875	0.13965	0.092285	NaN	NaN	NaN	NaN	NaN	NaN	NaN	NaN	NaN	NaN	NaN	NaN
2.832	5.628	32.465	57.2441	0.229	0.083984	-0.027344	-3.503	35.992	2.716	0.22607	0.14306	0.092529	NaN	NaN	NaN	NaN	NaN	NaN	NaN	NaN	NaN	NaN	NaN	NaN
2.834	4.179	35.8133	63.6222	0.21973	0.097659	-0.035742	-13.121	-17.4605	15.77474	0.23145	0.15039	0.091797	NaN	NaN	NaN	NaN	NaN	NaN	NaN	NaN	NaN	NaN	NaN	NaN
2.836	11.143	40.4705	60.9539	0.21543	0.1126	-0.039356	-4.604	41.4612	12.1587	0.23926	0.16211	0.090332	NaN	NaN	NaN	NaN	NaN	NaN	NaN	NaN	NaN	NaN	NaN	NaN
2.838	-21.311	30.854	53.810842	0.21035	0.12627	-0.044433	-20.4212	15.3364	-2.413	0.24268	0.16797	0.090332	NaN	NaN	NaN	NaN	NaN	NaN	NaN	NaN	NaN	NaN	NaN	NaN
2.84	-11.864	26.1233	46.46098	0.20742	0.14345	-0.047656	-28.134	13.553	0.289852	0.25244	0.17773	0.097168	NaN	NaN	NaN	NaN	NaN	NaN	NaN	NaN	NaN	NaN	NaN	NaN
2.842	-11.622	19.3804	64.4813	0.20313	0.15967	-0.053223	-7.616	63.906	9.4051	0.26001	0.18457	0.10302	NaN	NaN	NaN	NaN	NaN	NaN	NaN	NaN	NaN	NaN	NaN	NaN
2.844	-26.5068	32.174	57.9545	0.19766	0.1708	-0.054981	-14.895	15.51926	20.6239	0.27002	0.19385	0.10498	NaN	NaN	NaN	NaN	NaN	NaN	NaN	NaN	NaN	NaN	NaN	NaN
2.846	-27.4617	32.9376	40.671	0.19522	0.18682	-0.056055	0.440999999999999	40.9087	16.10419	0.28809	0.19434	0.10498	NaN	NaN	NaN	NaN	NaN	NaN	NaN	NaN	NaN	NaN	NaN	NaN
2.848	-26.2303	26.8432	31.302	0.18545	0.19815	-0.05957	-11.3147	43.803	1.608	0.29932	0.19971	0.10547	NaN	NaN	NaN	NaN	NaN	NaN	NaN	NaN	NaN	NaN	NaN	NaN
2.85	-24.692	29.2914	27.7406	0.1791	0.20605	-0.062207	-32.9793	-13.2395	23.9731	0.32275	0.1958	0.11279	NaN	NaN	NaN	NaN	NaN	NaN	NaN	NaN	NaN	NaN	NaN	NaN
2.852	-35.4449	32.1401	24.26108	0.16846	0.21729	-0.054199	5.842	40.8603	30.125234	0.33984	0.19287	0.11475	NaN	NaN	NaN	NaN	NaN	NaN	NaN	NaN	NaN	NaN	NaN	NaN
2.854	-23.719	24.547162	5.8782	0.17334	0.22187	-0.056445	-17.8594	13.9522	13.785	0.35303	0.19141	0.11523	NaN	NaN	NaN	NaN	NaN	NaN	NaN	NaN	NaN	NaN	NaN	NaN
2.856	-36.839	25.43429	24.2382	0.17715	0.22529	-0.055859	-18.702	2.774	23.6777	0.37207	0.19189	0.12256	NaN	NaN	NaN	NaN	NaN	NaN	NaN	NaN	NaN	NaN	NaN	NaN
2.858	-33.9541	21.68893	26.0312	0.17989	0.22646	-0.051172	6.026	45.877	7.791	0.37817	0.19239	0.12378	NaN	NaN	NaN	NaN	NaN	NaN	NaN	NaN	NaN	NaN	NaN	NaN
2.86	-39.444031	14.9849	24.7457	0.18604	0.22187	-0.046972	-45.5896	-5.9915	20.6349	0.38525	0.19727	0.12207	NaN	NaN	NaN	NaN	NaN	NaN	NaN	NaN	NaN	NaN	NaN	NaN
2.862	-57.8853	11.0104	18.9	0.18945	0.21484	-0.041016	-13.1987	31.51994	24.8507	0.39111	0.20898	0.11865	NaN	NaN	NaN	NaN	NaN	NaN	NaN	NaN	NaN	NaN	NaN	NaN
2.864	-34.138	14.4221	36.5099	0.20068	0.20957	-0.038184	-13.9373	41.879	20.1167	0.39258	0.21924	0.11328	NaN	NaN	NaN	NaN	NaN	NaN	NaN	NaN	NaN	NaN	NaN	NaN
2.866	-43.1481	17.6127	22.5817	0.20742	0.20215	-0.030371	-39.8795	-11.4212	31.0222	0.39258	0.23877	0.1084	NaN	NaN	NaN	NaN	NaN	NaN	NaN	NaN	NaN	NaN	NaN	NaN
2.868	-54.2068	20.8696	19.99035	0.21563	0.19395	-0.022949	-27.1106	36.1947	38.1234	0.39477	0.25635	0.095215	NaN	NaN	NaN	NaN	NaN	NaN	NaN	NaN	NaN	NaN	NaN	NaN
2.87	-62.2484	23.881	-4.05	0.22061	0.17901	-0.014063	-31.701	-11.717	49.508	0.39893	0.27734	0.079102	NaN	NaN	NaN	NaN	NaN	NaN	NaN	NaN	NaN	NaN	NaN	NaN
2.872	-23.322	16.9616	22.0271	0.22559	0.16406	-0.0063477	-49.4417	-18.9964	48.171	0.40039	0.31006	0.061035	NaN	NaN	NaN	NaN	NaN	NaN	NaN	NaN	NaN	NaN	NaN	NaN
2.874	-17.801	14.3035	33.4091	0.22558	0.1544	-0.0011719	4.967	6.598	61.3193	0.40625	0.33105	0.052734	NaN	NaN	NaN	NaN	NaN	NaN	NaN	NaN	NaN	NaN	NaN	NaN
2.876	-37.3151	5.3052	29.60442	0.22832	0.14746	0.0064453	-25.3427	-40.6885	66.94104	0.39844	0.37549	0.033691	NaN	NaN	NaN	NaN	NaN	NaN	NaN	NaN	NaN	NaN	NaN	NaN
2.878	-12.018	7.2354	26.729	0.22871	0.14121	0.011523	-11.3018	-11.823	85.3283	0.38721	0.40845	0.019775	NaN	NaN	NaN	NaN	NaN	NaN	NaN	NaN	NaN	NaN	NaN	NaN
2.88	-5.124	6.3625	28.473	0.22578	0.12949	0.019922	-13.6126	-37.927	84.57	0.37695	0.43799	0.00097656	NaN	NaN	NaN	NaN	NaN	NaN	NaN	NaN	NaN	NaN	NaN	NaN
2.882	13.405	15.1455	38.169	0.21973	0.12646	0.023926	-50.4182	-94.334	128.183	0.36768	0.49023	-0.014648	NaN	NaN	NaN	NaN	NaN	NaN	NaN	NaN	NaN	NaN	NaN	NaN
2.884	-13.949	14.952	29.036	0.22226	0.12675	0.02793	2.329	-46.6595	171.8862	0.36328	0.51416	-0.022949	NaN	NaN	NaN	NaN	NaN	NaN	NaN	NaN	NaN	NaN	NaN	NaN
2.886	-0.448999999999998	1.7011	37.55829	0.21738	0.12891	0.030078	-7.473	-57.5962	192.96	0.35986	0.56641	-0.046875	NaN	NaN	NaN	NaN	NaN	NaN	NaN	NaN	NaN	NaN	NaN	NaN
2.888	-12.263	-6.386	48.70656	0.2084	0.1332	0.03125	6.5248	-36.385	263.6429	0.35571	0.60376	-0.061524	NaN	NaN	NaN	NaN	NaN	NaN	NaN	NaN	NaN	NaN	NaN	NaN
2.89	-16.604	-10.838	59.873	0.20039	0.14434	0.03457	11.2875	38.637	303.588	0.34961	0.63525	-0.09082	NaN	NaN	NaN	NaN	NaN	NaN	NaN	NaN	NaN	NaN	NaN	NaN
2.892	-19.803	-7.3402	44.7917	0.19043	0.15625	0.033203	-11.332	25.8861	375.216	0.35205	0.69141	-0.1333	NaN	NaN	NaN	NaN	NaN	NaN	NaN	NaN	NaN	NaN	NaN	NaN
2.894	-15.87	-13.0925	68.5123	0.18828	0.171	0.039942	55.679	86.7917	474.24756	0.34375	0.72852	-0.1709	NaN	NaN	NaN	NaN	NaN	NaN	NaN	NaN	NaN	NaN	NaN	NaN
2.896	0.271000000000001	-15.8852	69.2639	0.18408	0.18252	0.039746	37.211	99.17	559.8375	0.32275	0.80957	-0.24023	NaN	NaN	NaN	NaN	NaN	NaN	NaN	NaN	NaN	NaN	NaN	NaN
2.898	-25.719	-30.6505	83.4124	0.18018	0.19345	0.03584	32.9883	71.1701	690.944	0.28198	0.90478	-0.30444	NaN	NaN	NaN	NaN	NaN	NaN	NaN	NaN	NaN	NaN	NaN	NaN
2.9	-15.861	-27.6582	73.971	0.17969	0.20635	0.031543	65.466	137.554	809.1523	0.22363	1.0239	-0.36865	NaN	NaN	NaN	NaN	NaN	NaN	NaN	NaN	NaN	NaN	NaN	NaN
2.902	-13.057	-22.0561	95.1033	0.18213	0.22656	0.023926	26.924	88.171	884.189	0.11523	1.2207	-0.43311	NaN	NaN	NaN	NaN	NaN	NaN	NaN	NaN	NaN	NaN	NaN	NaN
2.904	-12.825	0.1018	114.5063	0.1875	0.24297	0.022949	25.0934	93.421	970.0138	0.053223	1.3262	-0.45459	NaN	NaN	NaN	NaN	NaN	NaN	NaN	NaN	NaN	NaN	NaN	NaN
2.906	-16.9773	11.665	119.8538	0.19365	0.26729	0.011328	42.19	118.235	999.5655	-0.08252	1.5132	-0.49561	NaN	NaN	NaN	NaN	NaN	NaN	NaN	NaN	NaN	NaN	NaN	NaN
2.908	-43.4267	26.7184	124.7928	0.19561	0.28955	0.0015625	4.8384	40.4103	1009.995	-0.17871	1.6123	-0.52246	NaN	NaN	NaN	NaN	NaN	NaN	NaN	NaN	NaN	NaN	NaN	NaN
2.91	-40.9058	41.3804	168.1158	0.19678	0.3083	-0.0054687	41.205	56.243	1006.075	-0.24512	1.6699	-0.53809	NaN	NaN	NaN	NaN	NaN	NaN	NaN	NaN	NaN	NaN	NaN	NaN
2.912	-37.0477	67.5315	215.583	0.19873	0.32959	-0.017578	-1.0628	-10.6233	959.768	-0.25781	1.6602	-0.55469	NaN	NaN	NaN	NaN	NaN	NaN	NaN	NaN	NaN	NaN	NaN	NaN
2.914	-41.49841	91.3269	270.9287	0.20293	0.34639	-0.037402	-26.995	-72.327	942.911	-0.229	1.6548	-0.57422	NaN	NaN	NaN	NaN	NaN	NaN	NaN	NaN	NaN	NaN	NaN	NaN
2.916	-50.1396	93.4893	312.8729	0.20761	0.36689	-0.063086	28.7969	-62.401	903.884	-0.11133	1.5708	-0.56201	NaN	NaN	NaN	NaN	NaN	NaN	NaN	NaN	NaN	NaN	NaN	NaN
2.918	-32.873	106.3852	375.437	0.21894	0.39737	-0.094336	0.220499999999999	-137.729	849.549	-0.0029295	1.4895	-0.54834	NaN	NaN	NaN	NaN	NaN	NaN	NaN	NaN	NaN	NaN	NaN	NaN
2.92	-32.746	98.8607	460.166	0.22158	0.44482	-0.12988	5.9676	-121.829	804.913	0.10107	1.4043	-0.52148	NaN	NaN	NaN	NaN	NaN	NaN	NaN	NaN	NaN	NaN	NaN	NaN
2.922	-34.312	120.63	522.487	0.22119	0.50977	-0.16455	3.4692	-75.555	766.392	0.21484	1.311	-0.48877	NaN	NaN	NaN	NaN	NaN	NaN	NaN	NaN	NaN	NaN	NaN	NaN
2.924	-39.372	110.117	617.8128	0.20459	0.59199	-0.21348	-13.89302	-98.354	768.566	0.25391	1.2642	-0.47021	NaN	NaN	NaN	NaN	NaN	NaN	NaN	NaN	NaN	NaN	NaN	NaN
2.926	-16.335	86.966	665.0751	0.18115	0.7001	-0.26699	28.0602	0.834	806.002	0.30225	1.209	-0.43945	NaN	NaN	NaN	NaN	NaN	NaN	NaN	NaN	NaN	NaN	NaN	NaN
2.928	-13.987	47.825	719.6511	0.15068	0.83017	-0.3166	12.6281	-11.136	825.285	0.30444	1.1943	-0.4082	NaN	NaN	NaN	NaN	NaN	NaN	NaN	NaN	NaN	NaN	NaN	NaN
2.93	-70.932	42.1981	747.882	0.11065	0.97178	-0.36826	-3.1196	-38.977	864.1576	0.28906	1.1997	-0.39014	NaN	NaN	NaN	NaN	NaN	NaN	NaN	NaN	NaN	NaN	NaN	NaN
2.932	-43.0527	19.4529	761.3781	0.054199	1.1172	-0.4043	-3.0981	-6.093	901.792	0.25684	1.248	-0.37793	NaN	NaN	NaN	NaN	NaN	NaN	NaN	NaN	NaN	NaN	NaN	NaN
2.934	-38.8394	12.99547	766.50324	-0.027832	1.2418	-0.43154	-50.0617	-88.417	910.352	0.24316	1.2813	-0.38086	NaN	NaN	NaN	NaN	NaN	NaN	NaN	NaN	NaN	NaN	NaN	NaN
2.936	-6.505	8.8454	753.717	-0.11299	1.3634	-0.46299	-52.42282	-82.118	943.063	0.22852	1.3462	-0.38623	NaN	NaN	NaN	NaN	NaN	NaN	NaN	NaN	NaN	NaN	NaN	NaN
2.938	-7.137	-6.342	727.5464	-0.19502	1.4415	-0.4747	-18.107	-70.213	936.538	0.23267	1.3909	-0.39746	NaN	NaN	NaN	NaN	NaN	NaN	NaN	NaN	NaN	NaN	NaN	NaN
2.94	2.7085	-26.6145	727.272	-0.25889	1.477	-0.46905	-44.847	-163.9952	951.486	0.24756	1.4219	-0.41699	NaN	NaN	NaN	NaN	NaN	NaN	NaN	NaN	NaN	NaN	NaN	NaN
2.942	9.3662	-35.5525	746.972	-0.2832	1.4805	-0.45752	10.644	-143.3959	990.276	0.28027	1.4517	-0.45166	NaN	NaN	NaN	NaN	NaN	NaN	NaN	NaN	NaN	NaN	NaN	NaN
2.944	-0.561	-28.3365	755.008	-0.25176	1.4486	-0.44932	-17.744	-237.971	1006.02	0.29639	1.4629	-0.47266	NaN	NaN	NaN	NaN	NaN	NaN	NaN	NaN	NaN	NaN	NaN	NaN
2.946	22.8097	-9.022	734.859	-0.1791	1.3867	-0.44316	-14.585	-282.203	1067.299	0.32422	1.4985	-0.50342	NaN	NaN	NaN	NaN	NaN	NaN	NaN	NaN	NaN	NaN	NaN	NaN
2.948	22.5427	-13.8274	742.5139	-0.077929	1.3012	-0.44277	33.6643	-228.21	1127.5549	0.32276	1.5393	-0.53393	NaN	NaN	NaN	NaN	NaN	NaN	NaN	NaN	NaN	NaN	NaN	NaN
2.95	29.6648	1.079	748.575	0.030371	1.202	-0.44014	-3.576	-274.403	1158.9765	0.30762	1.5879	-0.56641	NaN	NaN	NaN	NaN	NaN	NaN	NaN	NaN	NaN	NaN	NaN	NaN
2.952	-16.5843	-11.052	760.306	0.11816	1.0918	-0.43066	-15.601	-190.352	1208.117	0.2627	1.6782	-0.60303	NaN	NaN	NaN	NaN	NaN	NaN	NaN	NaN	NaN	NaN	NaN	NaN
2.954	-22.3645	-28.157	780.106	0.19121	0.9948	-0.40752	-29.065	-133.549	1206.2201	0.23438	1.7275	-0.61914	NaN	NaN	NaN	NaN	NaN	NaN	NaN	NaN	NaN	NaN	NaN	NaN
2.956	-19.4899	-57.006	813.1123	0.2289	0.93828	-0.40313	-75.1985	-172.9694	1244.73	0.1626	1.8379	-0.64551	NaN	NaN	NaN	NaN	NaN	NaN	NaN	NaN	NaN	NaN	NaN	NaN
2.958	-17.246	-74.967	830.0309	0.24805	0.93828	-0.41406	-43.9582	-77.892	1282.1538	0.10327	1.927	-0.65894	NaN	NaN	NaN	NaN	NaN	NaN	NaN	NaN	NaN	NaN	NaN	NaN
2.96	-13.2706	-84.337	825.763	0.24492	0.96963	-0.42754	-60.4838	-114.228	1291.4103	0.05957	2.0044	-0.66943	NaN	NaN	NaN	NaN	NaN	NaN	NaN	NaN	NaN	NaN	NaN	NaN
2.962	-31.9223	-100.1152	840.269	0.23389	1.0234	-0.44141	-44.7684	-123.27	1322.9939	0.030273	2.0801	-0.66406	NaN	NaN	NaN	NaN	NaN	NaN	NaN	NaN	NaN	NaN	NaN	NaN
2.964	-6.773	-119.36	877.258	0.21689	1.0905	-0.45605	-15.6563	-74.637	1302.32	0.026855	2.1001	-0.65771	NaN	NaN	NaN	NaN	NaN	NaN	NaN	NaN	NaN	NaN	NaN	NaN
2.966	8.897	-149.103	909.6058	0.19307	1.1621	-0.47617	-64.9807	-172.532	1272.468	0.052246	2.1079	-0.63916	NaN	NaN	NaN	NaN	NaN	NaN	NaN	NaN	NaN	NaN	NaN	NaN
2.968	8.4273	-160.492	916.8633	0.1751	1.2246	-0.50117	-58.2447	-141.224	1282.852	0.079101	2.0913	-0.62549	NaN	NaN	NaN	NaN	NaN	NaN	NaN	NaN	NaN	NaN	NaN	NaN
2.97	1.2594	-160.418	951.6392	0.1667	1.2663	-0.52275	-19.799	-159.5918	1282.107	0.1167	2.0664	-0.6084	NaN	NaN	NaN	NaN	NaN	NaN	NaN	NaN	NaN	NaN	NaN	NaN
2.972	-5.863	-147.638	1000.7309	0.16992	1.292	-0.54297	-49.82	-228.108	1334.4282	0.13965	2.0332	-0.59375	NaN	NaN	NaN	NaN	NaN	NaN	NaN	NaN	NaN	NaN	NaN	NaN
2.974	-13.348	-128.4129	1023.3862	0.1874	1.3068	-0.55391	-21.9786	-153.5786	1393.022	0.14844	2.0298	-0.59326	NaN	NaN	NaN	NaN	NaN	NaN	NaN	NaN	NaN	NaN	NaN	NaN
2.976	-50.8277	-110.437	1044.4043	0.20117	1.3083	-0.56436	-56.879	-221.443	1425.3863	0.14453	2.0352	-0.60059	NaN	NaN	NaN	NaN	NaN	NaN	NaN	NaN	NaN	NaN	NaN	NaN
2.978	-26.8091	-98.187	1040.5598	0.21211	1.3052	-0.58272	-61.5956	-201.322	1451.67	0.13208	2.0688	-0.61767	NaN	NaN	NaN	NaN	NaN	NaN	NaN	NaN	NaN	NaN	NaN	NaN
2.98	-32.4352	-93.955	1064.9592	0.21758	1.3009	-0.59326	-44.4159	-132.3778	1452.127	0.11133	2.1157	-0.63818	NaN	NaN	NaN	NaN	NaN	NaN	NaN	NaN	NaN	NaN	NaN	NaN
2.982	-40.127	-77.879	1077.6438	0.22217	1.2954	-0.60498	-70.4579	-198.045	1444.548	0.075195	2.1899	-0.67822	NaN	NaN	NaN	NaN	NaN	NaN	NaN	NaN	NaN	NaN	NaN	NaN
2.984	-39.3776	-70.692	1076.108	0.21709	1.2979	-0.62344	-48.635	-99.94	1461.406	0.058105	2.2251	-0.69482	NaN	NaN	NaN	NaN	NaN	NaN	NaN	NaN	NaN	NaN	NaN	NaN
2.986	-17.503	-78.395	1097.3811	0.20967	1.3113	-0.64551	-40.828	-92.842	1449.48229	0.029297	2.2817	-0.72607	NaN	NaN	NaN	NaN	NaN	NaN	NaN	NaN	NaN	NaN	NaN	NaN
2.988	-2.996	-83.8056	1117.50472	0.20185	1.3429	-0.67324	-41.121	-127.444	1462.08939	0.0097656	2.3184	-0.76074	NaN	NaN	NaN	NaN	NaN	NaN	NaN	NaN	NaN	NaN	NaN	NaN
2.99	-9.75	-92.5081	1125.8674	0.19228	1.3836	-0.692	-15.432	-42.4962	1478.912	0.00097656	2.3262	-0.77441	NaN	NaN	NaN	NaN	NaN	NaN	NaN	NaN	NaN	NaN	NaN	NaN
2.992	2.1795	-102.07	1127.689	0.17041	1.4355	-0.70898	-25.099	-106.985	1479.871	0.0019531	2.3184	-0.79395	NaN	NaN	NaN	NaN	NaN	NaN	NaN	NaN	NaN	NaN	NaN	NaN
2.994	-10.463	-112.958	1160.758	0.13975	1.481	-0.72412	-31.87	-60.977	1468.845	0.003418	2.2922	-0.80395	NaN	NaN	NaN	NaN	NaN	NaN	NaN	NaN	NaN	NaN	NaN	NaN
2.996	-0.530000000000001	-118.461	1203.2601	0.11114	1.5208	-0.73408	-9.032	7.495	1453.021	0.0083008	2.2603	-0.81982	NaN	NaN	NaN	NaN	NaN	NaN	NaN	NaN	NaN	NaN	NaN	NaN
2.998	-17.98	-125.07743	1220.935	0.085352	1.5427	-0.74111	-69.075	-49.0726	1458.742	0.0029297	2.2109	-0.83203	NaN	NaN	NaN	NaN	NaN	NaN	NaN	NaN	NaN	NaN	NaN	NaN
3	-22.261	-114.0474	1220.5399	0.071875	1.5519	-0.73916	-48.45	36.4565	1494.308	0	2.1958	-0.8374	NaN	NaN	NaN	NaN	NaN	NaN	NaN	NaN	NaN	NaN	NaN	NaN
3.002	-28.5688	-108.154	1233.881	0.077148	1.5605	-0.73242	-41.397	-8.961	1503.038	-0.0083008	2.1763	-0.85693	NaN	NaN	NaN	NaN	NaN	NaN	NaN	NaN	NaN	NaN	NaN	NaN
3.004	-39.3438	-111.84	1233.046	0.082617	1.5566	-0.73545	-84.6568	-59.975	1526.1018	-0.02295	2.165	-0.86573	NaN	NaN	NaN	NaN	NaN	NaN	NaN	NaN	NaN	NaN	NaN	NaN
3.006	-31.806	-99.258	1229.976	0.091015	1.5516	-0.7333	-60.1107	7.8564	1547.5806	-0.039063	2.166	-0.875	NaN	NaN	NaN	NaN	NaN	NaN	NaN	NaN	NaN	NaN	NaN	NaN
3.008	-30.5987	-84.8351	1242.0834	0.089453	1.5536	-0.73291	-96.3185	-75.63	1541.4557	-0.061035	2.1484	-0.88574	NaN	NaN	NaN	NaN	NaN	NaN	NaN	NaN	NaN	NaN	NaN	NaN
3.01	-0.527999999999999	-67.5594	1248.6791	0.08291	1.5668	-0.73711	-69.218	-8.203	1542.5825	-0.066895	2.1406	-0.8877	NaN	NaN	NaN	NaN	NaN	NaN	NaN	NaN	NaN	NaN	NaN	NaN
3.012	3.231	-77.446	1243.158	0.067383	1.5981	-0.74268	-73.285	16.6238	1532.5712	-0.078613	2.1172	-0.89453	NaN	NaN	NaN	NaN	NaN	NaN	NaN	NaN	NaN	NaN	NaN	NaN
3.014	-8.09	-74.6829	1241.857	0.039746	1.6348	-0.75723	-93.7203	-59.964	1524.7441	-0.084961	2.0967	-0.89942	NaN	NaN	NaN	NaN	NaN	NaN	NaN	NaN	NaN	NaN	NaN	NaN
3.016	-24.711	-63.4264	1249.091	0.011426	1.6786	-0.76631	-50.5999	17.7	1530.7861	-0.091797	2.0762	-0.90625	NaN	NaN	NaN	NaN	NaN	NaN	NaN	NaN	NaN	NaN	NaN	NaN
3.018	-30.234	-47.4004	1288.5371	-0.012402	1.724	-0.78193	-67.9714	-16.649456	1513.476	-0.10547	2.0527	-0.90234	NaN	NaN	NaN	NaN	NaN	NaN	NaN	NaN	NaN	NaN	NaN	NaN
3.02	-11.09	-40.605	1306.88848	-0.038184	1.7689	-0.79629	-84.245	1.494	1511.98757	-0.10889	2.0435	-0.90479	NaN	NaN	NaN	NaN	NaN	NaN	NaN	NaN	NaN	NaN	NaN	NaN
3.022	-59.0859	-46.086	1304.9337	-0.060547	1.813	-0.80713	-66.2985	92.628	1517.3807	-0.12354	2.0234	-0.90723	NaN	NaN	NaN	NaN	NaN	NaN	NaN	NaN	NaN	NaN	NaN	NaN
3.024	-68.0397	-52.081	1322.8742	-0.073437	1.8477	-0.81699	-87.3898	41.3611	1497.043	-0.1333	2.0076	-0.90869	NaN	NaN	NaN	NaN	NaN	NaN	NaN	NaN	NaN	NaN	NaN	NaN
3.026	-67.1373	-55.715	1331.228	-0.087403	1.8731	-0.82549	-83.8491	114.566	1469.846	-0.13818	1.981	-0.90771	NaN	NaN	NaN	NaN	NaN	NaN	NaN	NaN	NaN	NaN	NaN	NaN
3.028	-43.269	-53.579	1351.4389	-0.10303	1.9013	-0.8333	-70.6807	130.507	1453.076	-0.13379	1.9316	-0.9082	NaN	NaN	NaN	NaN	NaN	NaN	NaN	NaN	NaN	NaN	NaN	NaN
3.03	-58.837	-51.95987	1351.4826	-0.11768	1.9218	-0.83721	-83.66279	85.734	1437.9139	-0.13184	1.9048	-0.90283	NaN	NaN	NaN	NaN	NaN	NaN	NaN	NaN	NaN	NaN	NaN	NaN
3.032	-55.6199	-53.326	1351.2898	-0.13477	1.9321	-0.83545	-29.767	152.075	1435.8526	-0.11963	1.8442	-0.89307	NaN	NaN	NaN	NaN	NaN	NaN	NaN	NaN	NaN	NaN	NaN	NaN
3.034	-24.353	-64.787	1361.0272	-0.1419	1.9464	-0.84248	-53.4642	81.384	1415.3725	-0.11523	1.7968	-0.88281	NaN	NaN	NaN	NaN	NaN	NaN	NaN	NaN	NaN	NaN	NaN	NaN
3.036	-20.323	-63.222	1369.418	-0.15693	1.959	-0.84531	-51.556	59.231	1407.5825	-0.1084	1.7466	-0.87451	NaN	NaN	NaN	NaN	NaN	NaN	NaN	NaN	NaN	NaN	NaN	NaN
3.038	-24.9484	-42.553	1378.3792	-0.16592	1.9695	-0.84492	-0.308999999999997	81.9847	1393.517	-0.099121	1.6914	-0.85742	NaN	NaN	NaN	NaN	NaN	NaN	NaN	NaN	NaN	NaN	NaN	NaN
3.04	-23.303	-24.5519	1406.598	-0.17227	1.9729	-0.84541	-38.809	-8.455	1360.072	-0.1001	1.6621	-0.85742	NaN	NaN	NaN	NaN	NaN	NaN	NaN	NaN	NaN	NaN	NaN	NaN
3.042	-19.024	-11.4438	1409.044	-0.17432	1.9712	-0.84131	-19.521	74.118	1341.542	-0.095215	1.6094	-0.8291	NaN	NaN	NaN	NaN	NaN	NaN	NaN	NaN	NaN	NaN	NaN	NaN
3.044	-40.7951	3.311	1395.7728	-0.17539	1.9579	-0.83818	-34.0725	82.39	1313.62492	-0.094971	1.5674	-0.83105	NaN	NaN	NaN	NaN	NaN	NaN	NaN	NaN	NaN	NaN	NaN	NaN
3.046	-58.6499	21.1094	1392.9664	-0.1748	1.9422	-0.83174	-43.0985	70.8277	1289.4523	-0.095703	1.5298	-0.81787	NaN	NaN	NaN	NaN	NaN	NaN	NaN	NaN	NaN	NaN	NaN	NaN
3.048	-35.2618	24.231	1399.5335	-0.16738	1.9235	-0.82197	-18.4833	142.93	1270.737	-0.089355	1.4946	-0.79639	NaN	NaN	NaN	NaN	NaN	NaN	NaN	NaN	NaN	NaN	NaN	NaN
3.05	-31.53	32.0195	1396.6341	-0.15449	1.8973	-0.82187	-38.585	82.9107	1253.3467	-0.089355	1.4707	-0.79102	NaN	NaN	NaN	NaN	NaN	NaN	NaN	NaN	NaN	NaN	NaN	NaN
3.052	-31.5156	33.786	1372.431	-0.14014	1.875	-0.81641	-24.236	112.0191	1242.2666	-0.090332	1.4321	-0.771	NaN	NaN	NaN	NaN	NaN	NaN	NaN	NaN	NaN	NaN	NaN	NaN
3.054	-34.9091	35.9638	1363.5016	-0.13477	1.8574	-0.8125	-7.243	158.827	1220.9729	-0.089356	1.3936	-0.75537	NaN	NaN	NaN	NaN	NaN	NaN	NaN	NaN	NaN	NaN	NaN	NaN
3.056	-7.526	32.2657	1364.0276	-0.12568	1.847	-0.80967	-39.93	109.483	1184.1385	-0.089844	1.3501	-0.73779	NaN	NaN	NaN	NaN	NaN	NaN	NaN	NaN	NaN	NaN	NaN	NaN
3.058	2.944	17.708	1364.0356	-0.11943	1.8407	-0.8042	-24.71	182.161	1148.8696	-0.083008	1.2988	-0.71289	NaN	NaN	NaN	NaN	NaN	NaN	NaN	NaN	NaN	NaN	NaN	NaN
3.06	0.216000000000001	28.936	1360.49474	-0.11631	1.8273	-0.80478	-31.41	166.058	1116.4435	-0.079102	1.2739	-0.69873	NaN	NaN	NaN	NaN	NaN	NaN	NaN	NaN	NaN	NaN	NaN	NaN
3.062	-4.16	23.711	1368.6141	-0.11426	1.8145	-0.7959	-42.1783	146.0933	1076.618	-0.069824	1.2188	-0.6709	NaN	NaN	NaN	NaN	NaN	NaN	NaN	NaN	NaN	NaN	NaN	NaN
3.064	-17.551	34.7043	1377.6511	-0.10957	1.7977	-0.79453	5.189	199.303	1052.213	-0.068116	1.1875	-0.64795	NaN	NaN	NaN	NaN	NaN	NaN	NaN	NaN	NaN	NaN	NaN	NaN
3.066	-12.703	33.9792	1364.7006	-0.10459	1.779	-0.78701	-59.925	136.06	1011.589	-0.064941	1.1489	-0.63428	NaN	NaN	NaN	NaN	NaN	NaN	NaN	NaN	NaN	NaN	NaN	NaN
3.068	-45.2891	38.6187	1339.5943	-0.095996	1.7619	-0.78388	-70.988	148.546	1005.723	-0.057129	1.0942	-0.60303	NaN	NaN	NaN	NaN	NaN	NaN	NaN	NaN	NaN	NaN	NaN	NaN
3.07	-42.3767	50.313	1330.95767	-0.083692	1.7446	-0.77842	-32.5593	164.91092	983.13	-0.050781	1.0703	-0.5918	NaN	NaN	NaN	NaN	NaN	NaN	NaN	NaN	NaN	NaN	NaN	NaN
3.072	-51.4472	58.97	1325.8608	-0.075684	1.7251	-0.77002	-80.601	120.846	967.6309	-0.039063	1.0156	-0.55664	NaN	NaN	NaN	NaN	NaN	NaN	NaN	NaN	NaN	NaN	NaN	NaN
3.074	-36.0892	69.261	1303.5862	-0.069824	1.7123	-0.76641	-21.8384	190.5788	962.432	-0.030517	0.97949	-0.53784	NaN	NaN	NaN	NaN	NaN	NaN	NaN	NaN	NaN	NaN	NaN	NaN
3.076	-46.277	72.0632	1277.32	-0.062207	1.6962	-0.75342	-23.4037	170.4908	927.712	-0.025391	0.93799	-0.51123	NaN	NaN	NaN	NaN	NaN	NaN	NaN	NaN	NaN	NaN	NaN	NaN
3.078	-40.3855	69.3182	1257.0452	-0.0583	1.6845	-0.74326	-34.0654	173.879	901.91	-0.017578	0.88281	-0.48047	NaN	NaN	NaN	NaN	NaN	NaN	NaN	NaN	NaN	NaN	NaN	NaN
3.08	-23.1879	74.628	1254.939	-0.056738	1.6714	-0.73135	-22.8311	233.962	867.318	-0.012695	0.854	-0.46582	NaN	NaN	NaN	NaN	NaN	NaN	NaN	NaN	NaN	NaN	NaN	NaN
3.082	-6.032	86.945	1242.6573	-0.060547	1.6582	-0.7168	-37.688	179.731	832.149	-0.0092773	0.79785	-0.43945	NaN	NaN	NaN	NaN	NaN	NaN	NaN	NaN	NaN	NaN	NaN	NaN
3.084	-20.431	98.2731	1225.073	-0.06123	1.6412	-0.7084	5.112	196.252	793.0793	-0.00097655	0.75171	-0.42065	NaN	NaN	NaN	NaN	NaN	NaN	NaN	NaN	NaN	NaN	NaN	NaN
3.086	-21.807	87.729	1218.302	-0.061719	1.6164	-0.70039	16.1223	194.4441	747.264	0.0053711	0.70508	-0.39746	NaN	NaN	NaN	NaN	NaN	NaN	NaN	NaN	NaN	NaN	NaN	NaN
3.088	-24.395	84.8193	1206.2586	-0.058985	1.591	-0.6914	-16.891	160.439	716.025	0.011719	0.646	-0.37061	NaN	NaN	NaN	NaN	NaN	NaN	NaN	NaN	NaN	NaN	NaN	NaN
3.09	-44.02301	86.924	1182.7763	-0.051855	1.5607	-0.68272	11.0543	227.823	678.8262	0.014648	0.61182	-0.35986	NaN	NaN	NaN	NaN	NaN	NaN	NaN	NaN	NaN	NaN	NaN	NaN
3.092	-44.4934	86.977	1178.59	-0.050293	1.5376	-0.67188	-7.849	210.746	639.524	0.026367	0.55859	-0.32959	NaN	NaN	NaN	NaN	NaN	NaN	NaN	NaN	NaN	NaN	NaN	NaN
3.094	-39.9026	72.118	1161.8324	-0.043164	1.5002	-0.66074	-20.1885	208.412	614.04465	0.034668	0.50562	-0.31689	NaN	NaN	NaN	NaN	NaN	NaN	NaN	NaN	NaN	NaN	NaN	NaN
3.096	-37.27832	78.986	1135.6451	-0.039941	1.4724	-0.65215	7.41	227.383	588.3181	0.050293	0.44727	-0.30615	NaN	NaN	NaN	NaN	NaN	NaN	NaN	NaN	NaN	NaN	NaN	NaN
3.098	-42.7328	87.0301	1092.827	-0.035644	1.4329	-0.63809	-7.1651	176.3429	553.529	0.064941	0.38574	-0.28809	NaN	NaN	NaN	NaN	NaN	NaN	NaN	NaN	NaN	NaN	NaN	NaN
3.1	-21.97	94.484	1072.213	-0.026758	1.4025	-0.62412	27.653848	200.9996	535.865	0.072266	0.35742	-0.27148	NaN	NaN	NaN	NaN	NaN	NaN	NaN	NaN	NaN	NaN	NaN	NaN
3.102	11.165	96.438	1071.1332	-0.015625	1.3755	-0.61865	24.24509	204.972	508.709	0.089844	0.30273	-0.25879	NaN	NaN	NaN	NaN	NaN	NaN	NaN	NaN	NaN	NaN	NaN	NaN
3.104	4.677	99.167	1053.5672	-0.013379	1.351	-0.604	-22.6231	158.5664	482.5777	0.10107	0.25537	-0.24463	NaN	NaN	NaN	NaN	NaN	NaN	NaN	NaN	NaN	NaN	NaN	NaN
3.106	12.906	108.588	1023.2755	-0.012012	1.332	-0.58886	15.3816	187.862	461.896	0.10742	0.21191	-0.23242	NaN	NaN	NaN	NaN	NaN	NaN	NaN	NaN	NaN	NaN	NaN	NaN
3.108	20.369	117.5893	1006.1148	-0.010058	1.3168	-0.57441	-30.4758	151.4959	395.7129	0.11719	0.15479	-0.21191	NaN	NaN	NaN	NaN	NaN	NaN	NaN	NaN	NaN	NaN	NaN	NaN
3.11	16.7468	145.739	986.0163	-0.0083005	1.303	-0.55927	-13.648	140.359	381.6235	0.12451	0.12354	-0.20459	NaN	NaN	NaN	NaN	NaN	NaN	NaN	NaN	NaN	NaN	NaN	NaN
3.112	7.58	150.614	975.03611	-0.010742	1.2856	-0.54004	13.8753	163.788	372.1578	0.1333	0.065918	-0.1875	NaN	NaN	NaN	NaN	NaN	NaN	NaN	NaN	NaN	NaN	NaN	NaN
3.114	-26.9349	146.048	945.6715	-0.011036	1.2659	-0.521	-44.5591	107.984	357.3981	0.13941	0.027099	-0.177	NaN	NaN	NaN	NaN	NaN	NaN	NaN	NaN	NaN	NaN	NaN	NaN
3.116	-28.3604	124.766	923.83852	-0.0082051	1.2438	-0.50352	-5.778	128.9484	336.4711	0.14258	-0.0087891	-0.17285	NaN	NaN	NaN	NaN	NaN	NaN	NaN	NaN	NaN	NaN	NaN	NaN
3.118	-38.4073	125.719	909.6623	-0.0015639	1.2148	-0.48673	-24.968567	123.272	292.742	0.15234	-0.049316	-0.1626	NaN	NaN	NaN	NaN	NaN	NaN	NaN	NaN	NaN	NaN	NaN	NaN
3.12	-13.5299	136.707	870.731	0.0057586	1.1811	-0.46963	-44.177	82.945	274.98763	0.15723	-0.072754	-0.15283	NaN	NaN	NaN	NaN	NaN	NaN	NaN	NaN	NaN	NaN	NaN	NaN
3.122	-22.3428	132.4109	840.453	0.013672	1.1431	-0.45361	-14.897	135.44	251.0638	0.16357	-0.10742	-0.13916	NaN	NaN	NaN	NaN	NaN	NaN	NaN	NaN	NaN	NaN	NaN	NaN
3.124	1.424	129.202	813.558	0.023633	1.1053	-0.43926	-50.984	116.536	208.282	0.16895	-0.13843	-0.13379	NaN	NaN	NaN	NaN	NaN	NaN	NaN	NaN	NaN	NaN	NaN	NaN
3.126	-14.599	125.1198	797.393	0.034861	1.0708	-0.43113	-26.5965	127.808	201.4777	0.16748	-0.16211	-0.13135	NaN	NaN	NaN	NaN	NaN	NaN	NaN	NaN	NaN	NaN	NaN	NaN
3.128	-10.572	138.165	773.5215	0.037998	1.0415	-0.40965	-21.8772	131.152	202.0761	0.16553	-0.19141	-0.125	NaN	NaN	NaN	NaN	NaN	NaN	NaN	NaN	NaN	NaN	NaN	NaN
3.13	-12.9136	140.755	764.7735	0.046297	1.0046	-0.39989	-45.0579	60.813	181.6565	0.16699	-0.20678	-0.12598	NaN	NaN	NaN	NaN	NaN	NaN	NaN	NaN	NaN	NaN	NaN	NaN
3.132	-15.3401	142.223	763.8458	0.057129	0.9707	-0.38477	-12.328	70.437	168.247	0.16504	-0.22266	-0.12305	NaN	NaN	NaN	NaN	NaN	NaN	NaN	NaN	NaN	NaN	NaN	NaN
3.134	-15.3197	149.596	742.8302	0.062678	0.93503	-0.37483	-33.3819	62.5733	126.633	0.16748	-0.25732	-0.11816	NaN	NaN	NaN	NaN	NaN	NaN	NaN	NaN	NaN	NaN	NaN	NaN
3.136	-29.8645	162.558	712.8593	0.070085	0.89397	-0.35835	-18.9249	40.8307	110.0651	0.17041	-0.27734	-0.11182	NaN	NaN	NaN	NaN	NaN	NaN	NaN	NaN	NaN	NaN	NaN	NaN
3.138	-40.2658	162.573	691.9022	0.077907	0.85495	-0.34816	10.563	78.531	96.146	0.16406	-0.29639	-0.11816	NaN	NaN	NaN	NaN	NaN	NaN	NaN	NaN	NaN	NaN	NaN	NaN
3.14	-42.4099	159.633	661.1397	0.08892	0.81721	-0.33149	-43.6073	39.266	71.019	0.16357	-0.31616	-0.11987	NaN	NaN	NaN	NaN	NaN	NaN	NaN	NaN	NaN	NaN	NaN	NaN
3.142	-38.7222	167.557	639.3257	0.098633	0.77588	-0.31982	-6.125	26.4651	70.29	0.16553	-0.32617	-0.12549	NaN	NaN	NaN	NaN	NaN	NaN	NaN	NaN	NaN	NaN	NaN	NaN
3.144	-36.43256	161.376	595.4759	0.11091	0.73666	-0.30988	5.611	40.0919	76.0957	0.16113	-0.34277	-0.1167	NaN	NaN	NaN	NaN	NaN	NaN	NaN	NaN	NaN	NaN	NaN	NaN
3.146	-24.4587	150.2128	583.5973	0.12004	0.69478	-0.2932	-33.1284	8.40199999999999	72.8969	0.1626	-0.3418	-0.125	NaN	NaN	NaN	NaN	NaN	NaN	NaN	NaN	NaN	NaN	NaN	NaN
3.148	1.91	148.0674	568.936	0.12943	0.6543	-0.2869	23.197	47.047	83.308	0.15234	-0.32373	-0.12842	NaN	NaN	NaN	NaN	NaN	NaN	NaN	NaN	NaN	NaN	NaN	NaN
3.15	-9.039	146.8445	537.8381	0.13668	0.6226	-0.27728	-15.084	29.1968	58.6997	0.14257	-0.31006	-0.12353	NaN	NaN	NaN	NaN	NaN	NaN	NaN	NaN	NaN	NaN	NaN	NaN
3.152	-1.086	142.607	505.429	0.14648	0.57813	-0.26367	9.383	17.244	37.7857	0.12891	-0.28271	-0.12402	NaN	NaN	NaN	NaN	NaN	NaN	NaN	NaN	NaN	NaN	NaN	NaN
3.154	-3.653	145.399	500.8146	0.15489	0.54752	-0.24956	23.8617	62.936	30.0252	0.090332	-0.23145	-0.13916	NaN	NaN	NaN	NaN	NaN	NaN	NaN	NaN	NaN	NaN	NaN	NaN
3.156	6.05	151.54089	496.7887	0.16625	0.51362	-0.24088	-24.436	29.6162	0.0343999999999998	0.070801	-0.20703	-0.14453	NaN	NaN	NaN	NaN	NaN	NaN	NaN	NaN	NaN	NaN	NaN	NaN
3.158	-11.446	144.2306	486.8445	0.16802	0.47775	-0.2298	0.382	48.73	9.24964	0.034668	-0.14307	-0.15332	NaN	NaN	NaN	NaN	NaN	NaN	NaN	NaN	NaN	NaN	NaN	NaN
3.16	-21.0491	136.675	461.3708	0.17788	0.44155	-0.22204	-23.086	60.095	4.203	0.011963	-0.093507	-0.16089	NaN	NaN	NaN	NaN	NaN	NaN	NaN	NaN	NaN	NaN	NaN	NaN
3.162	-9.022	130.686	435.7366	0.18311	0.40381	-0.21045	-52.245	24.14	1.744	-0.013672	-0.050293	-0.16309	NaN	NaN	NaN	NaN	NaN	NaN	NaN	NaN	NaN	NaN	NaN	NaN
3.164	-24.2872	137.857	418.2941	0.18898	0.36402	-0.20037	-7.927	43.5017	20.1179	-0.044434	0.0063477	-0.16504	NaN	NaN	NaN	NaN	NaN	NaN	NaN	NaN	NaN	NaN	NaN	NaN
3.166	-2.361	131.102	397.318	0.19876	0.32526	-0.18819	-37.6395	6.83	5.363	-0.054199	0.034668	-0.17188	NaN	NaN	NaN	NaN	NaN	NaN	NaN	NaN	NaN	NaN	NaN	NaN
3.168	-22.9901	121.783	367.1666	0.20376	0.28385	-0.17846	-31.8599	-1.569	14.0899	-0.07666	0.07666	-0.1665	NaN	NaN	NaN	NaN	NaN	NaN	NaN	NaN	NaN	NaN	NaN	NaN
3.17	-9.924	106.0864	349.288	0.21108	0.24613	-0.17188	-20.5792	33.211	19.1676	-0.089356	0.099367	-0.17456	NaN	NaN	NaN	NaN	NaN	NaN	NaN	NaN	NaN	NaN	NaN	NaN
3.172	-19.5913	98.6049	334.2504	0.22314	0.21484	-0.16797	-58.313	14.1046	0.8162	-0.099121	0.12158	-0.17529	NaN	NaN	NaN	NaN	NaN	NaN	NaN	NaN	NaN	NaN	NaN	NaN
3.174	-4.608	91.465	312.31	0.2323	0.18692	-0.16242	-19.2911	34.3126	17.40202	-0.10791	0.14063	-0.17432	NaN	NaN	NaN	NaN	NaN	NaN	NaN	NaN	NaN	NaN	NaN	NaN
3.176	-0.0499999999999972	86.664	308.273	0.2369	0.16363	-0.15628	-25.1197	35.314	13.556	-0.11035	0.15186	-0.17773	NaN	NaN	NaN	NaN	NaN	NaN	NaN	NaN	NaN	NaN	NaN	NaN
3.178	-11.298	97.307	297.731	0.24253	0.14134	-0.14996	-50.4346	-4.326	30.749	-0.11377	0.17383	-0.18604	NaN	NaN	NaN	NaN	NaN	NaN	NaN	NaN	NaN	NaN	NaN	NaN
3.18	-16.266	99.30367	281.5491	0.24301	0.12073	-0.14523	-10.751	37.4028	32.5601	-0.11596	0.18652	-0.1853	NaN	NaN	NaN	NaN	NaN	NaN	NaN	NaN	NaN	NaN	NaN	NaN
3.182	-33.7367	104.442	257.1803	0.23975	0.10498	-0.14111	-53.128	13.0933	28.845	-0.11328	0.19336	-0.18848	NaN	NaN	NaN	NaN	NaN	NaN	NaN	NaN	NaN	NaN	NaN	NaN
3.184	-32.6948	102.42	258.9265	0.2417	0.088939	-0.13524	-34.9766	11.169	35.7833	-0.10645	0.19922	-0.18311	NaN	NaN	NaN	NaN	NaN	NaN	NaN	NaN	NaN	NaN	NaN	NaN
3.186	-47.25031	111.341	244.3706	0.23478	0.068425	-0.12618	-19.2585	34.551	28.4993	-0.10303	0.20068	-0.1792	NaN	NaN	NaN	NaN	NaN	NaN	NaN	NaN	NaN	NaN	NaN	NaN
3.188	-37.4635	103.057	230.0174	0.23323	0.050803	-0.12408	-47.3029	0.3047	11.2127	-0.099609	0.20313	-0.17383	NaN	NaN	NaN	NaN	NaN	NaN	NaN	NaN	NaN	NaN	NaN	NaN
3.19	-54.274	90.98	217.6974	0.22943	0.027224	-0.11851	5.777	32.096	7.41238	-0.10156	0.20361	-0.1687	NaN	NaN	NaN	NaN	NaN	NaN	NaN	NaN	NaN	NaN	NaN	NaN
3.192	-41.6316	79.6891	201.212	0.2251	0.012207	-0.11279	-12.085	32.6104	3.886	-0.10205	0.20557	-0.16553	NaN	NaN	NaN	NaN	NaN	NaN	NaN	NaN	NaN	NaN	NaN	NaN
3.194	-20.354	69.616	188.709	0.22468	-0.0052157	-0.10769	-13.677	12.2548	20.057	-0.1001	0.19824	-0.15674	NaN	NaN	NaN	NaN	NaN	NaN	NaN	NaN	NaN	NaN	NaN	NaN
3.196	-22.0195	68.876	161.32	0.22471	-0.020083	-0.10712	14.965	48.354	39.45006	-0.10059	0.19873	-0.15186	NaN	NaN	NaN	NaN	NaN	NaN	NaN	NaN	NaN	NaN	NaN	NaN
3.198	-14.001	62.131	153.999	0.22471	-0.031764	-0.10281	-13.5046	7.6173	9.529	-0.097656	0.19482	-0.14355	NaN	NaN	NaN	NaN	NaN	NaN	NaN	NaN	NaN	NaN	NaN	NaN
3.2	-17.022	54.9039	150.075	0.22402	-0.041808	-0.10177	9.2404	1.2271	28.0653	-0.093994	0.19238	-0.13574	NaN	NaN	NaN	NaN	NaN	NaN	NaN	NaN	NaN	NaN	NaN	NaN
3.202	-3.22	63.1162	154.7107	0.22168	-0.058594	-0.09668	6.003	16.44801	21.8807	-0.090332	0.18848	-0.13037	NaN	NaN	NaN	NaN	NaN	NaN	NaN	NaN	NaN	NaN	NaN	NaN
3.204	-19.518	61.587	140.8659	0.21534	-0.057906	-0.093355	-29.2558	-7.336	18.357	-0.085938	0.17773	-0.12646	NaN	NaN	NaN	NaN	NaN	NaN	NaN	NaN	NaN	NaN	NaN	NaN
3.206	-33.8549	55.986	148.0429	0.20782	-0.058985	-0.093754	22.31	22.197	19.7116	-0.079102	0.16748	-0.11914	NaN	NaN	NaN	NaN	NaN	NaN	NaN	NaN	NaN	NaN	NaN	NaN
3.208	-20.877	53.6993	156.9947	0.19923	-0.060154	-0.091407	-31.2751	27.3685	4.0988	-0.056641	0.14502	-0.11328	NaN	NaN	NaN	NaN	NaN	NaN	NaN	NaN	NaN	NaN	NaN	NaN
3.21	-33.64852	54.3807	140.5753	0.19903	-0.061327	-0.087502	-19.389	-5.8546	21.7613	-0.039795	0.12647	-0.10449	NaN	NaN	NaN	NaN	NaN	NaN	NaN	NaN	NaN	NaN	NaN	NaN
3.212	-25.198	56.6162	111.643	0.1958	-0.067871	-0.092773	18.4921	16.7567	25.3109	-0.022949	0.10938	-0.099121	NaN	NaN	NaN	NaN	NaN	NaN	NaN	NaN	NaN	NaN	NaN	NaN
3.214	-29.957	50.0173	95.649	0.18955	-0.069044	-0.087109	-34.7602	-9.5958	15.407	-0.0019531	0.077148	-0.094238	NaN	NaN	NaN	NaN	NaN	NaN	NaN	NaN	NaN	NaN	NaN	NaN
3.216	-6.263	46.8692	92.1021	0.18642	-0.070798	-0.090722	-11.631	-4.8523	11.5348	0.00097656	0.063965	-0.096191	NaN	NaN	NaN	NaN	NaN	NaN	NaN	NaN	NaN	NaN	NaN	NaN
3.218	-6.267	44.7091	84.4487	0.18135	-0.068458	-0.088769	-14.519	33.8541	1.919	0.024414	0.035156	-0.099121	NaN	NaN	NaN	NaN	NaN	NaN	NaN	NaN	NaN	NaN	NaN	NaN
3.22	-6.132	44.47742	71.0467	0.17891	-0.069824	-0.088672	-60.196	-1.115	3.41462	0.034424	0.02539	-0.0979	NaN	NaN	NaN	NaN	NaN	NaN	NaN	NaN	NaN	NaN	NaN	NaN
3.222	5.909	38.1158	74.5188	0.17529	-0.06543	-0.091797	-4.269	23.23067	9.27276	0.050293	0.01123	-0.10107	NaN	NaN	NaN	NaN	NaN	NaN	NaN	NaN	NaN	NaN	NaN	NaN
3.224	-4.139	32.5421	75.6454	0.16856	-0.066406	-0.090332	-49.5469	23.84	-5.0573	0.060059	-0.0014648	-0.099609	NaN	NaN	NaN	NaN	NaN	NaN	NaN	NaN	NaN	NaN	NaN	NaN
3.226	-22.213	38.8546	78.8329	0.15967	-0.059669	-0.083007	-48.0235	2.374	14.9139	0.068359	-0.0087891	-0.10205	NaN	NaN	NaN	NaN	NaN	NaN	NaN	NaN	NaN	NaN	NaN	NaN
3.228	-31.128	44.42623	73.1262	0.15146	-0.051856	-0.08418	-9.264	47.182	25.999	0.071777	-0.018066	-0.104	NaN	NaN	NaN	NaN	NaN	NaN	NaN	NaN	NaN	NaN	NaN	NaN
3.23	-26.5997	44.088	69.8393	0.13975	-0.041212	-0.086817	-57.598	14.58436	14.8287	0.078613	-0.030518	-0.1101	NaN	NaN	NaN	NaN	NaN	NaN	NaN	NaN	NaN	NaN	NaN	NaN
3.232	-40.7754	38.506	57.6816	0.12891	-0.03125	-0.085449	-20.26	24.2992	18.6935	0.082031	-0.041992	-0.11279	NaN	NaN	NaN	NaN	NaN	NaN	NaN	NaN	NaN	NaN	NaN	NaN
3.234	-40.0455	55.832	42.0024	0.12109	-0.016211	-0.088769	-44.4916	24.8444	-7.5494	0.089355	-0.053223	-0.125	NaN	NaN	NaN	NaN	NaN	NaN	NaN	NaN	NaN	NaN	NaN	NaN
3.236	-46.9455	49.147	44.9861	0.11397	0.0016605	-0.0917	-30.1305	-6.757	1.8297	0.09375	-0.063477	-0.12891	NaN	NaN	NaN	NaN	NaN	NaN	NaN	NaN	NaN	NaN	NaN	NaN
3.238	-25.2499	45.0611	50.1361	0.10615	0.021192	-0.090918	-5.248	15.8233	11.5222	0.104	-0.070801	-0.13721	NaN	NaN	NaN	NaN	NaN	NaN	NaN	NaN	NaN	NaN	NaN	NaN
3.24	-19.655	40.44834	40.3995	0.10098	0.044727	-0.094727	-42.8398	16.7813	4.5638	0.10938	-0.070313	-0.14624	NaN	NaN	NaN	NaN	NaN	NaN	NaN	NaN	NaN	NaN	NaN	NaN
3.242	-26.1003	42.864	25.8381	0.098145	0.068359	-0.1001	-10.3218	-4.391	25.5187	0.1167	-0.07666	-0.16064	NaN	NaN	NaN	NaN	NaN	NaN	NaN	NaN	NaN	NaN	NaN	NaN
3.244	-27.608	30.113	35.8868	0.090136	0.090234	-0.10586	-2.967	43.733	16.95381	0.12695	-0.072266	-0.16895	NaN	NaN	NaN	NaN	NaN	NaN	NaN	NaN	NaN	NaN	NaN	NaN
3.246	-21.8	37.576	38.3737	0.081933	0.11279	-0.11055	-30.3597	16.3488	8.4006	0.13379	-0.07373	-0.18213	NaN	NaN	NaN	NaN	NaN	NaN	NaN	NaN	NaN	NaN	NaN	NaN
3.248	-11.721	39.6138	40.577	0.079199	0.13506	-0.11875	14.845	33.6315	9.2309	0.14746	-0.069336	-0.19678	NaN	NaN	NaN	NaN	NaN	NaN	NaN	NaN	NaN	NaN	NaN	NaN
3.25	-49.1222	46.598	19.2312	0.078222	0.15918	-0.12402	-8.135	51.478	-0.697700000000001	0.15698	-0.066651	-0.20971	NaN	NaN	NaN	NaN	NaN	NaN	NaN	NaN	NaN	NaN	NaN	NaN
3.252	-37.1187	39.4896	20.3091	0.075684	0.17676	-0.12402	-19.3498	17.293	17.2013	0.16846	-0.060059	-0.22363	NaN	NaN	NaN	NaN	NaN	NaN	NaN	NaN	NaN	NaN	NaN	NaN
3.254	-36.6383	32.102	28.7334	0.070996	0.19326	-0.1289	21.8968	32.972	40.126	0.18018	-0.050293	-0.23828	NaN	NaN	NaN	NaN	NaN	NaN	NaN	NaN	NaN	NaN	NaN	NaN
3.256	-30.2661	41.226	31.3966	0.070313	0.2043	-0.13398	-35.0749	25.7116	8.288	0.18359	-0.040527	-0.24365	NaN	NaN	NaN	NaN	NaN	NaN	NaN	NaN	NaN	NaN	NaN	NaN
3.258	-34.124	45.727	24.7943	0.069922	0.21679	-0.13789	4.823	-5.817	35.1042	0.19336	-0.026367	-0.26416	NaN	NaN	NaN	NaN	NaN	NaN	NaN	NaN	NaN	NaN	NaN	NaN
3.26	-28.1545	26.355	26.4534	0.067676	0.22773	-0.14531	10.936	24.9759	33.352	0.19312	-0.015869	-0.28101	NaN	NaN	NaN	NaN	NaN	NaN	NaN	NaN	NaN	NaN	NaN	NaN
3.262	-1.195	17.69965	38.1404	0.071777	0.23242	-0.15088	-50.7592	-16.0472	34.046	0.19434	0.0029297	-0.29785	NaN	NaN	NaN	NaN	NaN	NaN	NaN	NaN	NaN	NaN	NaN	NaN
3.264	-17.995	22.9677	20.9341	0.07627	0.2336	-0.15498	-3.986	0.389999999999997	59.5922	0.19092	0.056152	-0.31104	NaN	NaN	NaN	NaN	NaN	NaN	NaN	NaN	NaN	NaN	NaN	NaN
3.266	-1.78	24.926	5.539	0.08584	0.23106	-0.16221	-19.4398	-1.46	50.838	0.19141	0.089355	-0.31836	NaN	NaN	NaN	NaN	NaN	NaN	NaN	NaN	NaN	NaN	NaN	NaN
3.268	0.475999999999999	23.736	7.311	0.096387	0.22363	-0.16338	-11.555	-53.501	98.607	0.1709	0.16113	-0.33398	NaN	NaN	NaN	NaN	NaN	NaN	NaN	NaN	NaN	NaN	NaN	NaN
3.27	-12.229	24.023	24.051	0.10947	0.21387	-0.16768	-15.9407	-38.507	144.87	0.14307	0.23682	-0.35596	NaN	NaN	NaN	NaN	NaN	NaN	NaN	NaN	NaN	NaN	NaN	NaN
3.272	-20.13	31.8652	15.546656	0.1167	0.19531	-0.16699	-42.241	-49.3702	158.49	0.13574	0.27148	-0.37109	NaN	NaN	NaN	NaN	NaN	NaN	NaN	NaN	NaN	NaN	NaN	NaN
3.274	-22.5437	27.1675	12.0339	0.12657	0.17549	-0.16709	-2.266	-48.406	211.0854	0.12158	0.33008	-0.40186	NaN	NaN	NaN	NaN	NaN	NaN	NaN	NaN	NaN	NaN	NaN	NaN
3.276	-12.384	22.8058	36.6332	0.13545	0.15117	-0.16377	-15.5864	5.979	251.674	0.12573	0.36768	-0.42895	NaN	NaN	NaN	NaN	NaN	NaN	NaN	NaN	NaN	NaN	NaN	NaN
3.278	-36.6437	25.467	31.7079	0.14053	0.12695	-0.16181	-35.0407	2.071	308.5517	0.12695	0.40576	-0.45166	NaN	NaN	NaN	NaN	NaN	NaN	NaN	NaN	NaN	NaN	NaN	NaN
3.28	-28.4509	27.336	41.0504	0.14668	0.10215	-0.15947	-10.7465	32.0244	384.8393	0.12939	0.47363	-0.48047	NaN	NaN	NaN	NaN	NaN	NaN	NaN	NaN	NaN	NaN	NaN	NaN
3.282	-36.416	30.1082	20.875	0.15039	0.080566	-0.16357	-8.7821	53.7592	430.777	0.12207	0.52197	-0.49609	NaN	NaN	NaN	NaN	NaN	NaN	NaN	NaN	NaN	NaN	NaN	NaN
3.284	-13.337	23.4306	16.142	0.14814	0.061328	-0.16621	-0.8016	37.854	539.282	0.089844	0.6626	-0.52783	NaN	NaN	NaN	NaN	NaN	NaN	NaN	NaN	NaN	NaN	NaN	NaN
3.286	-23.995	27.4227	7.51	0.14883	0.048926	-0.17168	9.1747	88.159	660.42	0.039551	0.8147	-0.54956	NaN	NaN	NaN	NaN	NaN	NaN	NaN	NaN	NaN	NaN	NaN	NaN
3.288	-29.6508	26.8995	9.1266	0.14726	0.031348	-0.17598	-9.7719	70.15	774.317	-0.028809	1.0068	-0.57422	NaN	NaN	NaN	NaN	NaN	NaN	NaN	NaN	NaN	NaN	NaN	NaN
3.29	-25.725	19.856	20.6292	0.15	0.023047	-0.17881	47.624	51.605	922.1047	-0.15332	1.3262	-0.58838	NaN	NaN	NaN	NaN	NaN	NaN	NaN	NaN	NaN	NaN	NaN	NaN
3.292	-28.8283	17.8095	34.3799	0.14453	0.017578	-0.18457	10.1873	70.975	982.937	-0.23438	1.498	-0.59961	NaN	NaN	NaN	NaN	NaN	NaN	NaN	NaN	NaN	NaN	NaN	NaN
3.294	-27.283	16.8051	47.99498	0.14317	0.010937	-0.19502	-39.438	16.4218	1061.2832	-0.41211	1.8262	-0.63281	NaN	NaN	NaN	NaN	NaN	NaN	NaN	NaN	NaN	NaN	NaN	NaN
3.296	-57.024	2.0794	53.9089	0.13847	0.0017578	-0.20752	25.841	18.126	1126.715	-0.55445	1.9983	-0.69898	NaN	NaN	NaN	NaN	NaN	NaN	NaN	NaN	NaN	NaN	NaN	NaN
3.298	-32.5635	-10.5862	70.3145	0.13926	0.00019531	-0.21768	-60.527	-5.914	1116.756	-0.64014	2.1216	-0.78857	NaN	NaN	NaN	NaN	NaN	NaN	NaN	NaN	NaN	NaN	NaN	NaN
3.3	-28.868	-19.7393	75.6862	0.14063	0.0036133	-0.22969	-31.139	-74.1573	1132.059	-0.64404	2.1157	-0.88525	NaN	NaN	NaN	NaN	NaN	NaN	NaN	NaN	NaN	NaN	NaN	NaN
3.302	-38.8992	-5.2654	75.3743	0.14209	0.012695	-0.23633	-7.402	-97.5364	1090.695	-0.58887	2.0566	-0.91406	NaN	NaN	NaN	NaN	NaN	NaN	NaN	NaN	NaN	NaN	NaN	NaN
3.304	-39.677	-19.1137	67.0975	0.13164	0.037402	-0.24609	-53.7186	-189.08	1078.582	-0.37891	1.8574	-0.94336	NaN	NaN	NaN	NaN	NaN	NaN	NaN	NaN	NaN	NaN	NaN	NaN
3.306	-34.15619	-25.1865	71.127	0.12139	0.058789	-0.25684	-13.542	-227.102	1091.888	-0.18823	1.6792	-0.96924	NaN	NaN	NaN	NaN	NaN	NaN	NaN	NaN	NaN	NaN	NaN	NaN
3.308	-10.176	-46.7256	96.1901	0.11162	0.080664	-0.27285	-33.107	-229.756	1034.66	-0.020508	1.519	-1.0073	NaN	NaN	NaN	NaN	NaN	NaN	NaN	NaN	NaN	NaN	NaN	NaN
3.31	-18.9694	-35.2953	100.72104	0.10635	0.09746	-0.28926	-62.639	-268.937	1009.519	0.15869	1.3403	-1.0366	NaN	NaN	NaN	NaN	NaN	NaN	NaN	NaN	NaN	NaN	NaN	NaN
3.312	-3.043	-30.91	126.2325	0.10498	0.11475	-0.29834	-31.247	-218.488	997.4478	0.21826	1.27	-1.0425	NaN	NaN	NaN	NaN	NaN	NaN	NaN	NaN	NaN	NaN	NaN	NaN
3.314	-6.074	-10.5554	154.4267	0.11279	0.13067	-0.31406	-76.646	-208.6403	967.804	0.27734	1.1743	-1.0542	NaN	NaN	NaN	NaN	NaN	NaN	NaN	NaN	NaN	NaN	NaN	NaN
3.316	-20.9	-1.8808	194.9625	0.11982	0.14688	-0.32881	-67.855	-194.794	998.8676	0.27612	1.1504	-1.0513	NaN	NaN	NaN	NaN	NaN	NaN	NaN	NaN	NaN	NaN	NaN	NaN
3.318	-5.216	26.4525	221.177	0.12646	0.16094	-0.34483	-63.414	-129.62	1028.3573	0.25537	1.1563	-1.0552	NaN	NaN	NaN	NaN	NaN	NaN	NaN	NaN	NaN	NaN	NaN	NaN
3.32	-6.059	43.2163	247.133	0.12793	0.18975	-0.3668	-111.217	-146.016	1046.96	0.22656	1.1685	-1.0776	NaN	NaN	NaN	NaN	NaN	NaN	NaN	NaN	NaN	NaN	NaN	NaN
3.322	22.3948	57.8649	310.0525	0.125	0.21924	-0.39014	-59.449	-137.292	1091.355	0.22168	1.1685	-1.0933	NaN	NaN	NaN	NaN	NaN	NaN	NaN	NaN	NaN	NaN	NaN	NaN
3.324	13.6743	80.768	375.5417	0.12412	0.27149	-0.41211	-79.01	-146.758	1081.93	0.23828	1.1899	-1.1167	NaN	NaN	NaN	NaN	NaN	NaN	NaN	NaN	NaN	NaN	NaN	NaN
3.326	-14.98215	89	451.063	0.11699	0.32471	-0.4499	-74.336	-209.0846	1115.257	0.26269	1.2004	-1.1213	NaN	NaN	NaN	NaN	NaN	NaN	NaN	NaN	NaN	NaN	NaN	NaN
3.328	17.3527	85.076	522.546	0.1084	0.40244	-0.48545	-2.706	-192.436	1162.704	0.28564	1.2188	-1.1309	NaN	NaN	NaN	NaN	NaN	NaN	NaN	NaN	NaN	NaN	NaN	NaN
3.33	27.696	78.456	619.744	0.091797	0.5001	-0.51845	-46.7955	-225.6692	1185.558	0.27979	1.2617	-1.1621	NaN	NaN	NaN	NaN	NaN	NaN	NaN	NaN	NaN	NaN	NaN	NaN
3.332	31.634	75.7026	725.536	0.07373	0.62695	-0.5498	-23.806	-259.856	1246.8527	0.26953	1.2856	-1.1772	NaN	NaN	NaN	NaN	NaN	NaN	NaN	NaN	NaN	NaN	NaN	NaN
3.334	17.8353	61.7357	827.987	0.047754	0.79072	-0.57373	-12.931	-264.425	1273.729	0.24365	1.3359	-1.2031	NaN	NaN	NaN	NaN	NaN	NaN	NaN	NaN	NaN	NaN	NaN	NaN
3.336	-12.0068	41.4708	901.495	0.004199	0.98916	-0.58174	-49.4071	-335.264	1305.721	0.21899	1.3804	-1.2066	NaN	NaN	NaN	NaN	NaN	NaN	NaN	NaN	NaN	NaN	NaN	NaN
3.338	-10.9053	20.5345	959.855	-0.059863	1.2325	-0.61181	8.964	-319.262	1348.983	0.19336	1.4321	-1.2085	NaN	NaN	NaN	NaN	NaN	NaN	NaN	NaN	NaN	NaN	NaN	NaN
3.34	-0.304	-2.452	996.91289	-0.15	1.4786	-0.63076	-27.043	-285.908	1354.409	0.16113	1.4922	-1.2197	NaN	NaN	NaN	NaN	NaN	NaN	NaN	NaN	NaN	NaN	NaN	NaN
3.342	-26.7979	-23.165	1017.641	-0.26611	1.7134	-0.66553	-45.081	-299.131	1409.432	0.14551	1.5142	-1.2241	NaN	NaN	NaN	NaN	NaN	NaN	NaN	NaN	NaN	NaN	NaN	NaN
3.344	-34.9608	-44.2569	1032.478	-0.4	1.8928	-0.72989	-32.833	-223.426	1426.277	0.12891	1.5161	-1.23	NaN	NaN	NaN	NaN	NaN	NaN	NaN	NaN	NaN	NaN	NaN	NaN
3.346	-44.3447	-56.3743	1016.186	-0.50996	1.9901	-0.79209	-77.477	-223.704	1397.506	0.13843	1.4794	-1.2207	NaN	NaN	NaN	NaN	NaN	NaN	NaN	NaN	NaN	NaN	NaN	NaN
3.348	-47.122	-76.181	1010.479	-0.54355	1.9745	-0.82646	-18.489	-213.247	1420.194	0.15332	1.4258	-1.2109	NaN	NaN	NaN	NaN	NaN	NaN	NaN	NaN	NaN	NaN	NaN	NaN
3.35	-62.1021	-96.193	989.269	-0.49121	1.8509	-0.83808	28.249	-171.284	1392.6619	0.17676	1.3652	-1.1963	NaN	NaN	NaN	NaN	NaN	NaN	NaN	NaN	NaN	NaN	NaN	NaN
3.352	-61.983	-106.983	965.919	-0.36182	1.6626	-0.82568	-6.337	-207.725	1384.458	0.18262	1.3442	-1.1831	NaN	NaN	NaN	NaN	NaN	NaN	NaN	NaN	NaN	NaN	NaN	NaN
3.354	-31.473	-102.213	935.2886	-0.19033	1.4508	-0.81445	27.612	-169.052	1404.1124	0.16846	1.3306	-1.1597	NaN	NaN	NaN	NaN	NaN	NaN	NaN	NaN	NaN	NaN	NaN	NaN
3.356	-37.955	-85.127	895.958	-0.038086	1.2719	-0.81094	-27.675	-167.885	1363.344	0.12646	1.3555	-1.1514	NaN	NaN	NaN	NaN	NaN	NaN	NaN	NaN	NaN	NaN	NaN	NaN
3.358	-46.028	-71.8722	882.365	0.070899	1.1359	-0.82188	-31.839	-212.513	1381.272	0.084473	1.4063	-1.1563	NaN	NaN	NaN	NaN	NaN	NaN	NaN	NaN	NaN	NaN	NaN	NaN
3.36	-49.1318	-52.321	897.817	0.12432	1.031	-0.83233	-0.775000000000002	-174.539	1400.81212	0.0063477	1.5137	-1.166	NaN	NaN	NaN	NaN	NaN	NaN	NaN	NaN	NaN	NaN	NaN	NaN
3.362	-25.92	-39.82	911.6854	0.146	0.94531	-0.84473	-66.35143	-222.995782	1407.1398	-0.032227	1.5703	-1.1758	NaN	NaN	NaN	NaN	NaN	NaN	NaN	NaN	NaN	NaN	NaN	NaN
3.364	-37.58431	-18.513	919.0887	0.15996	0.89072	-0.85381	-32.111	-202.2568	1454.2765	-0.10059	1.6777	-1.207	NaN	NaN	NaN	NaN	NaN	NaN	NaN	NaN	NaN	NaN	NaN	NaN
3.366	-54.758	-32.382	915.9	0.18515	0.85049	-0.8706	-51.107	-159.904	1442.2669	-0.14014	1.7551	-1.2263	NaN	NaN	NaN	NaN	NaN	NaN	NaN	NaN	NaN	NaN	NaN	NaN
3.368	-55.417	-67.925	928.605	0.2211	0.82822	-0.88272	-103.647	-209.305	1467.996	-0.1748	1.8071	-1.2388	NaN	NaN	NaN	NaN	NaN	NaN	NaN	NaN	NaN	NaN	NaN	NaN
3.37	-38.6823	-77.407	917.086	0.26279	0.81904	-0.89463	-34.0229	-183.6845	1501.692	-0.20996	1.8438	-1.25	NaN	NaN	NaN	NaN	NaN	NaN	NaN	NaN	NaN	NaN	NaN	NaN
3.372	-18.8054	-88.598	925.735	0.2998	0.80615	-0.90576	-60.7537	-200.7806	1490.556	-0.22559	1.8477	-1.2559	NaN	NaN	NaN	NaN	NaN	NaN	NaN	NaN	NaN	NaN	NaN	NaN
3.374	-5.8686	-103.957	937.015	0.33203	0.77597	-0.90791	-29.247	-208.72	1501.003	-0.24854	1.8521	-1.271	NaN	NaN	NaN	NaN	NaN	NaN	NaN	NaN	NaN	NaN	NaN	NaN
3.376	10.0508	-142.49	957.7598	0.36289	0.75479	-0.91006	2.979	-137.74868	1484.45031	-0.26539	1.8437	-1.2715	NaN	NaN	NaN	NaN	NaN	NaN	NaN	NaN	NaN	NaN	NaN	NaN
3.378	18.1374	-186.331	963.706	0.37813	0.75439	-0.9167	-47.127	-151.575	1466.413	-0.28174	1.8364	-1.2749	NaN	NaN	NaN	NaN	NaN	NaN	NaN	NaN	NaN	NaN	NaN	NaN
3.38	20.3482	-198.003	977.2888	0.38056	0.77246	-0.92051	-11.1885	-121.076	1455.311	-0.30322	1.832	-1.2754	NaN	NaN	NaN	NaN	NaN	NaN	NaN	NaN	NaN	NaN	NaN	NaN
3.382	24.52824	-188.766	1012.5304	0.36426	0.80713	-0.92725	-23.8772	-85.8576	1423.109	-0.31494	1.8286	-1.2749	NaN	NaN	NaN	NaN	NaN	NaN	NaN	NaN	NaN	NaN	NaN	NaN
3.384	43.029	-155.657	1046.123	0.34697	0.84297	-0.93301	-51.0494	-109.124	1449.593	-0.3374	1.8203	-1.2656	NaN	NaN	NaN	NaN	NaN	NaN	NaN	NaN	NaN	NaN	NaN	NaN
3.386	26.9357	-132.42896	1070.38	0.31992	0.88467	-0.94717	1.468	-65.989	1463.931	-0.35328	1.8139	-1.2564	NaN	NaN	NaN	NaN	NaN	NaN	NaN	NaN	NaN	NaN	NaN	NaN
3.388	-23.2656	-124.396	1059.0723	0.29726	0.93428	-0.96397	-30.4575	-74.876	1456.705	-0.36621	1.8052	-1.2515	NaN	NaN	NaN	NaN	NaN	NaN	NaN	NaN	NaN	NaN	NaN	NaN
3.39	-18.85234	-123.232	1071.15186	0.27949	0.97881	-0.98447	-26.9706	-65.99	1484.2794	-0.37451	1.8013	-1.2373	NaN	NaN	NaN	NaN	NaN	NaN	NaN	NaN	NaN	NaN	NaN	NaN
3.392	-21.5449	-105.471	1098.0812	0.26904	1.0298	-0.98975	15.5871	-24.166	1472.021	-0.37549	1.7974	-1.2339	NaN	NaN	NaN	NaN	NaN	NaN	NaN	NaN	NaN	NaN	NaN	NaN
3.394	3.225	-79.121	1112.4699	0.25742	1.0682	-0.99307	-22.6026	-52.24	1451.3145	-0.38867	1.791	-1.2207	NaN	NaN	NaN	NaN	NaN	NaN	NaN	NaN	NaN	NaN	NaN	NaN
3.396	4.895	-78.785	1111.27	0.24004	1.1118	-0.99883	44.8626	-55.332	1454.2784	-0.39526	1.7847	-1.2065	NaN	NaN	NaN	NaN	NaN	NaN	NaN	NaN	NaN	NaN	NaN	NaN
3.398	15.5288	-99.013	1113.599	0.21035	1.1614	-1.0141	3.179	-56.037	1436.734	-0.40332	1.772	-1.1987	NaN	NaN	NaN	NaN	NaN	NaN	NaN	NaN	NaN	NaN	NaN	NaN
3.4	6.865	-121.7673	1127.427	0.17334	1.206	-1.0296	0.420999999999999	-87.522	1458.4779	-0.39209	1.731	-1.1948	NaN	NaN	NaN	NaN	NaN	NaN	NaN	NaN	NaN	NaN	NaN	NaN
3.402	-1.675	-114.665	1143.52	0.13818	1.2485	-1.0591	63.5152	-56.96	1488.531	-0.38867	1.709	-1.1855	NaN	NaN	NaN	NaN	NaN	NaN	NaN	NaN	NaN	NaN	NaN	NaN
3.404	19.5473	-130.243	1190.661	0.12002	1.275	-1.075	-17.669	-71.129	1469.8296	-0.36328	1.6641	-1.1699	NaN	NaN	NaN	NaN	NaN	NaN	NaN	NaN	NaN	NaN	NaN	NaN
3.406	-2.387	-150.308	1228.638	0.11006	1.2989	-1.0897	11.4651	-78.56	1490.107	-0.35376	1.6496	-1.1589	NaN	NaN	NaN	NaN	NaN	NaN	NaN	NaN	NaN	NaN	NaN	NaN
3.408	-14.4039	-154.593	1245.767	0.10889	1.3153	-1.0905	14.873	-27.8678	1474.338	-0.35107	1.647	-1.1499	NaN	NaN	NaN	NaN	NaN	NaN	NaN	NaN	NaN	NaN	NaN	NaN
3.41	-54.739	-162.97232	1251.0116	0.094043	1.3384	-1.1007	-37.4377	-14.9756	1432.399	-0.35156	1.6484	-1.1426	NaN	NaN	NaN	NaN	NaN	NaN	NaN	NaN	NaN	NaN	NaN	NaN
3.412	-54.323	-163.227504	1251.1817	0.071777	1.3638	-1.1089	-11.5364	35.4938	1426.1646	-0.35229	1.6565	-1.1365	NaN	NaN	NaN	NaN	NaN	NaN	NaN	NaN	NaN	NaN	NaN	NaN
3.414	-37.5	-170.2945	1283.6161	0.04375	1.3988	-1.1279	-58.7892	75.724	1414.732	-0.35303	1.6567	-1.1245	NaN	NaN	NaN	NaN	NaN	NaN	NaN	NaN	NaN	NaN	NaN	NaN
3.416	-45.1067	-155.5779	1300.44	0.0097659	1.4309	-1.1386	-64.273	42.366	1412.0055	-0.33594	1.6392	-1.1187	NaN	NaN	NaN	NaN	NaN	NaN	NaN	NaN	NaN	NaN	NaN	NaN
3.418	-41.8777	-142.1868	1285.761	-0.012891	1.4758	-1.1554	-17.099	54.741	1409.4353	-0.32422	1.6191	-1.1055	NaN	NaN	NaN	NaN	NaN	NaN	NaN	NaN	NaN	NaN	NaN	NaN
3.42	-38.6612	-143.8122	1283.505	-0.029688	1.5211	-1.1727	-74.737	46.6566	1385.661	-0.2959	1.5781	-1.0938	NaN	NaN	NaN	NaN	NaN	NaN	NaN	NaN	NaN	NaN	NaN	NaN
3.422	-2.981	-124.104	1298.905	-0.039063	1.5781	-1.1934	-45.5608	41.737	1388.3533	-0.26928	1.549	-1.0867	NaN	NaN	NaN	NaN	NaN	NaN	NaN	NaN	NaN	NaN	NaN	NaN
3.424	-3.191	-119.757	1314.6966	-0.051367	1.6365	-1.2049	-11.031	84.4776	1367.1056	-0.25	1.5293	-1.0801	NaN	NaN	NaN	NaN	NaN	NaN	NaN	NaN	NaN	NaN	NaN	NaN
3.426	10.3621	-93.388	1313.0523	-0.067578	1.7001	-1.2199	-71.615	69.281	1320.712	-0.22949	1.5103	-1.0718	NaN	NaN	NaN	NaN	NaN	NaN	NaN	NaN	NaN	NaN	NaN	NaN
3.428	11.9013	-89.224	1295.389	-0.08711	1.7481	-1.2343	-53.142	63.3844	1318.876	-0.21826	1.5039	-1.0703	NaN	NaN	NaN	NaN	NaN	NaN	NaN	NaN	NaN	NaN	NaN	NaN
3.43	-10.7579	-84.838	1317.591	-0.10742	1.7948	-1.2483	-70.248453	90.315	1302.234	-0.2168	1.5059	-1.0664	NaN	NaN	NaN	NaN	NaN	NaN	NaN	NaN	NaN	NaN	NaN	NaN
3.432	-1.253	-86.643	1337.254	-0.12598	1.8267	-1.2554	-76.029	45.987	1301.7627	-0.21215	1.5205	-1.0655	NaN	NaN	NaN	NaN	NaN	NaN	NaN	NaN	NaN	NaN	NaN	NaN
3.434	-31.9413	-75.355	1343.894	-0.13252	1.8453	-1.259	-26.2793	61.7698	1283.70224	-0.21631	1.5259	-1.0581	NaN	NaN	NaN	NaN	NaN	NaN	NaN	NaN	NaN	NaN	NaN	NaN
3.436	3.381	-83.743	1356.9474	-0.14209	1.8559	-1.2687	-100.047	67.9482	1258.069	-0.22119	1.519	-1.0542	NaN	NaN	NaN	NaN	NaN	NaN	NaN	NaN	NaN	NaN	NaN	NaN
3.438	-8.9303	-97.994	1361.078	-0.14248	1.8524	-1.2738	-42.8853	66.094	1253.22	-0.21484	1.5088	-1.0479	NaN	NaN	NaN	NaN	NaN	NaN	NaN	NaN	NaN	NaN	NaN	NaN
3.44	-0.145	-118.251	1368.57111	-0.14189	1.8477	-1.2773	-36.599	112.565	1227.1255	-0.19873	1.4771	-1.0444	NaN	NaN	NaN	NaN	NaN	NaN	NaN	NaN	NaN	NaN	NaN	NaN
3.442	-9.7058	-130.254	1374.7141	-0.14355	1.834	-1.2773	-58.1661	97.4017	1195.7892	-0.17432	1.4368	-1.033	NaN	NaN	NaN	NaN	NaN	NaN	NaN	NaN	NaN	NaN	NaN	NaN
3.444	6.369	-128.644	1386.927427	-0.13975	1.8141	-1.284	13.848	97.0351	1187.376	-0.15283	1.3965	-1.0195	NaN	NaN	NaN	NaN	NaN	NaN	NaN	NaN	NaN	NaN	NaN	NaN
3.446	34.0046	-117.397	1393.4472	-0.13408	1.7914	-1.2832	-36.143	133.856	1133.641	-0.12012	1.3418	-1.002	NaN	NaN	NaN	NaN	NaN	NaN	NaN	NaN	NaN	NaN	NaN	NaN
3.448	20.804	-109.906	1394.264	-0.12666	1.7664	-1.2801	-9.542	103.00725	1114.789	-0.10791	1.3228	-0.99072	NaN	NaN	NaN	NaN	NaN	NaN	NaN	NaN	NaN	NaN	NaN	NaN
3.45	12.167	-105.049	1382.7246	-0.11728	1.745	-1.285	21.792	127.794	1114.0107	-0.083008	1.2759	-0.97217	NaN	NaN	NaN	NaN	NaN	NaN	NaN	NaN	NaN	NaN	NaN	NaN
3.452	-4.596	-94.5582	1391.309	-0.11182	1.7251	-1.2808	-34.449	133.3542	1069.496	-0.066894	1.2393	-0.95752	NaN	NaN	NaN	NaN	NaN	NaN	NaN	NaN	NaN	NaN	NaN	NaN
3.454	0.0996000000000006	-64.691	1402.2726	-0.10733	1.7062	-1.2801	-20.512	92.173	1041.7902	-0.04834	1.1978	-0.94482	NaN	NaN	NaN	NaN	NaN	NaN	NaN	NaN	NaN	NaN	NaN	NaN
3.456	-13.6724	-34.932	1411.0278	-0.10508	1.6844	-1.2672	-33.589	119.011	993.3854	-0.01709	1.1367	-0.92578	NaN	NaN	NaN	NaN	NaN	NaN	NaN	NaN	NaN	NaN	NaN	NaN
3.458	-25.3291	-15.87	1404.1641	-0.10547	1.659	-1.2613	-64.2437	125.3662	947.851	-0.00097656	1.106	-0.90967	NaN	NaN	NaN	NaN	NaN	NaN	NaN	NaN	NaN	NaN	NaN	NaN
3.46	-37.902273	-21.518	1392.5503	-0.097949	1.6275	-1.2511	-23.977	136.256	969.837	0.03125	1.0371	-0.88867	NaN	NaN	NaN	NaN	NaN	NaN	NaN	NaN	NaN	NaN	NaN	NaN
3.462	-50.226	-4.722	1382.104	-0.09375	1.5977	-1.2402	-47.6471	186.919	951.0866	0.059327	0.98584	-0.8623	NaN	NaN	NaN	NaN	NaN	NaN	NaN	NaN	NaN	NaN	NaN	NaN
3.464	-43.571	1.902	1363.581	-0.087402	1.5739	-1.2288	-54.2507	137.77007	930.38	0.083496	0.93408	-0.84131	NaN	NaN	NaN	NaN	NaN	NaN	NaN	NaN	NaN	NaN	NaN	NaN
3.466	-31.5619	-0.6312	1354.3478	-0.083594	1.5553	-1.2191	-25.346	140.673	911.3356	0.10449	0.87744	-0.79932	NaN	NaN	NaN	NaN	NaN	NaN	NaN	NaN	NaN	NaN	NaN	NaN
3.468	3.49	-13.61243	1368.1127	-0.086719	1.5405	-1.2106	-91.034	155.279	867.612639	0.11572	0.84375	-0.78516	NaN	NaN	NaN	NaN	NaN	NaN	NaN	NaN	NaN	NaN	NaN	NaN
3.47	-12.965	-24.5819	1346.39239	-0.094627	1.5365	-1.1994	-52.965	126.022	848.484	0.12793	0.79346	-0.75293	NaN	NaN	NaN	NaN	NaN	NaN	NaN	NaN	NaN	NaN	NaN	NaN
3.472	-28.0059	-18.4308	1330.559	-0.10791	1.5391	-1.1914	-51.13	171.3518	796.4551	0.13672	0.75391	-0.72413	NaN	NaN	NaN	NaN	NaN	NaN	NaN	NaN	NaN	NaN	NaN	NaN
3.474	-23.241	-18.3975	1331.341	-0.11904	1.5404	-1.1756	-91.6508	160.738	742.18435	0.14746	0.71729	-0.69873	NaN	NaN	NaN	NaN	NaN	NaN	NaN	NaN	NaN	NaN	NaN	NaN
3.476	-13.5622	-22.2946	1334.2772	-0.1292	1.5445	-1.1644	-69.826	144.1062	726.2101	0.15234	0.66943	-0.65967	NaN	NaN	NaN	NaN	NaN	NaN	NaN	NaN	NaN	NaN	NaN	NaN
3.478	-12.725	-14.3566	1336.091	-0.13897	1.5395	-1.1578	-97.938	181.471	670.673	0.15625	0.64502	-0.63428	NaN	NaN	NaN	NaN	NaN	NaN	NaN	NaN	NaN	NaN	NaN	NaN
3.48	-40.844	-13.276	1309.315	-0.14414	1.5276	-1.1391	-101.315	139.113	654.6464	0.16602	0.5957	-0.59473	NaN	NaN	NaN	NaN	NaN	NaN	NaN	NaN	NaN	NaN	NaN	NaN
3.482	-23.0704	-8.166	1297.155	-0.146	1.5083	-1.1245	-97.0894	154.406	652.4306	0.17261	0.55932	-0.5603	NaN	NaN	NaN	NaN	NaN	NaN	NaN	NaN	NaN	NaN	NaN	NaN
3.484	-17.9351	9.227	1279.391	-0.14815	1.4923	-1.1036	-117.082	187.003	596.842	0.17676	0.52197	-0.52832	NaN	NaN	NaN	NaN	NaN	NaN	NaN	NaN	NaN	NaN	NaN	NaN
3.486	-2.129	26.857	1267.6591	-0.14922	1.4754	-1.0836	-51.29	141.3434	566.445	0.18506	0.4668	-0.48242	NaN	NaN	NaN	NaN	NaN	NaN	NaN	NaN	NaN	NaN	NaN	NaN
3.488	-8.389	41.3954	1243.039	-0.15781	1.4551	-1.0617	-72.566	181.498	522.04	0.18555	0.44141	-0.46045	NaN	NaN	NaN	NaN	NaN	NaN	NaN	NaN	NaN	NaN	NaN	NaN
3.49	7.241	41.2825	1215.6005	-0.16084	1.4411	-1.0405	-83.7443	177.2706	470.931	0.18652	0.38916	-0.41162	NaN	NaN	NaN	NaN	NaN	NaN	NaN	NaN	NaN	NaN	NaN	NaN
3.492	20.1943	49.9912	1201.17	-0.16895	1.4336	-1.0195	-45.509	153.716	466.43752	0.19067	0.34839	-0.38305	NaN	NaN	NaN	NaN	NaN	NaN	NaN	NaN	NaN	NaN	NaN	NaN
3.494	11.05	59.2934	1201.959	-0.17715	1.4296	-0.99738	-52.8093	196.268	429.363	0.19092	0.3125	-0.3501	NaN	NaN	NaN	NaN	NaN	NaN	NaN	NaN	NaN	NaN	NaN	NaN
3.496	22.6994	46.9181	1208.22044	-0.18525	1.4187	-0.97813	-38.321	143.236	423.8901	0.19482	0.26855	-0.30762	NaN	NaN	NaN	NaN	NaN	NaN	NaN	NaN	NaN	NaN	NaN	NaN
3.498	18.788	50.8709	1190.1251	-0.18955	1.4094	-0.95313	-23.389	136.2501	403.3773	0.1958	0.24609	-0.2832	NaN	NaN	NaN	NaN	NaN	NaN	NaN	NaN	NaN	NaN	NaN	NaN
3.5	10.347	52.9297	1178.7566	-0.19238	1.3998	-0.93457	-57.7126	143.1981	363.48	0.19287	0.20947	-0.24512	NaN	NaN	NaN	NaN	NaN	NaN	NaN	NaN	NaN	NaN	NaN	NaN
3.502	-24.7736	52	1154.2023	-0.18604	1.3872	-0.91162	-21.706	94.1	351.2458	0.19189	0.17896	-0.21729	NaN	NaN	NaN	NaN	NaN	NaN	NaN	NaN	NaN	NaN	NaN	NaN
3.504	-40.1035	44.32	1141.6086	-0.17764	1.3644	-0.89297	-23.49	126.788	312.754	0.19092	0.15771	-0.19043	NaN	NaN	NaN	NaN	NaN	NaN	NaN	NaN	NaN	NaN	NaN	NaN
3.506	-24.4487	39.208	1131.3013	-0.16924	1.3364	-0.87197	-44.7353	110.7221	280.839	0.18457	0.12744	-0.15283	NaN	NaN	NaN	NaN	NaN	NaN	NaN	NaN	NaN	NaN	NaN	NaN
3.508	-28.3394	51.9667	1105.9814	-0.16143	1.3087	-0.85127	-17.441	82.014	277.22	0.18311	0.11279	-0.13965	NaN	NaN	NaN	NaN	NaN	NaN	NaN	NaN	NaN	NaN	NaN	NaN
3.51	-31.5656	54.448694	1084.42	-0.15136	1.2784	-0.83106	-26.254	114.111	239.856	0.18311	0.097168	-0.1167	NaN	NaN	NaN	NaN	NaN	NaN	NaN	NaN	NaN	NaN	NaN	NaN
3.512	-22.6182	51.834	1060.9007	-0.14453	1.2539	-0.81348	-7.04	74.3138	243.0959	0.18383	0.077881	-0.090577	NaN	NaN	NaN	NaN	NaN	NaN	NaN	NaN	NaN	NaN	NaN	NaN
3.514	-24.304	57.791	1051.5473	-0.13095	1.2282	-0.79756	-22.375	86.2101	235.5453	0.18213	0.071777	-0.070313	NaN	NaN	NaN	NaN	NaN	NaN	NaN	NaN	NaN	NaN	NaN	NaN
3.516	-30.5824	79.539	1031.581	-0.12588	1.2026	-0.77852	-37.3828	105.9782	201.9141	0.1709	0.064941	-0.052246	NaN	NaN	NaN	NaN	NaN	NaN	NaN	NaN	NaN	NaN	NaN	NaN
3.518	-29.1196	86.335	994.1193	-0.11885	1.1826	-0.75781	-15.561	57.25	188.8519	0.16504	0.055664	-0.040527	NaN	NaN	NaN	NaN	NaN	NaN	NaN	NaN	NaN	NaN	NaN	NaN
3.52	-14.431	88.664	993.2657	-0.10859	1.1644	-0.74366	-36.6861	87.793	156.6575	0.16113	0.055664	-0.023926	NaN	NaN	NaN	NaN	NaN	NaN	NaN	NaN	NaN	NaN	NaN	NaN
3.522	-18.259	89.0951	987.4436	-0.093262	1.145	-0.72607	-54.853	76.6681	132.9218	0.1582	0.055176	-0.012695	NaN	NaN	NaN	NaN	NaN	NaN	NaN	NaN	NaN	NaN	NaN	NaN
3.524	-43.3674	93.335	959.1767	-0.08291	1.1185	-0.71377	-19.625	41.3272	117.9862	0.1543	0.060059	-0.0048828	NaN	NaN	NaN	NaN	NaN	NaN	NaN	NaN	NaN	NaN	NaN	NaN
3.526	-67.439	102.665	913.579	-0.072558	1.0891	-0.69405	-47.6439	91.086	89.224	0.15381	0.060059	0.0097656	NaN	NaN	NaN	NaN	NaN	NaN	NaN	NaN	NaN	NaN	NaN	NaN
3.528	-46.4886	100.486	893.2976	-0.062012	1.0532	-0.67413	-56.3191	33.57936	79.56	0.15527	0.063965	0.014648	NaN	NaN	NaN	NaN	NaN	NaN	NaN	NaN	NaN	NaN	NaN	NaN
3.53	-46.1825	108.838	873.8249	-0.049023	1.0178	-0.65918	-37.803	32.8249	82.5203	0.15967	0.07373	0.024414	NaN	NaN	NaN	NaN	NaN	NaN	NaN	NaN	NaN	NaN	NaN	NaN
3.532	-27.178	102.154	849.2333	-0.033691	0.98486	-0.64404	-54.536	56.8072	72.9212	0.15552	0.082764	0.028565	NaN	NaN	NaN	NaN	NaN	NaN	NaN	NaN	NaN	NaN	NaN	NaN
3.534	-49.5062	93.6882	818.344	-0.019922	0.95186	-0.62959	-41.7148	-13.1332	85.9115	0.1499	0.087891	0.033203	NaN	NaN	NaN	NaN	NaN	NaN	NaN	NaN	NaN	NaN	NaN	NaN
3.536	-13.66	90.369	808.515	-0.0020508	0.92041	-0.61826	-42.4219	36.2923	65.6679	0.146	0.094727	0.037598	NaN	NaN	NaN	NaN	NaN	NaN	NaN	NaN	NaN	NaN	NaN	NaN
3.538	0.771999999999998	87.446	789.9255	0.0092774	0.89697	-0.59639	-44.124	26.0913	40.5575	0.14502	0.09668	0.042969	NaN	NaN	NaN	NaN	NaN	NaN	NaN	NaN	NaN	NaN	NaN	NaN
3.54	-2.138	91.191	778.5297	0.01875	0.87061	-0.58174	-15.312	9.1086	37.4682	0.15234	0.08252	0.047852	NaN	NaN	NaN	NaN	NaN	NaN	NaN	NaN	NaN	NaN	NaN	NaN
3.542	-1.157	92.254	765.8973	0.028809	0.85205	-0.56592	-30.6064	55.449	6.127	0.15454	0.075439	0.059082	NaN	NaN	NaN	NaN	NaN	NaN	NaN	NaN	NaN	NaN	NaN	NaN
3.544	2.394	92.68	743.5331	0.038379	0.82559	-0.54883	-24.9509	7.927	17.5727	0.15918	0.068848	0.062988	NaN	NaN	NaN	NaN	NaN	NaN	NaN	NaN	NaN	NaN	NaN	NaN
3.546	1.349	104.4201	728.0523	0.046192	0.79775	-0.53222	-3.73	12.0418	14.6154	0.16797	0.048828	0.069824	NaN	NaN	NaN	NaN	NaN	NaN	NaN	NaN	NaN	NaN	NaN	NaN
3.548	-20.5292	108.795	695.4701	0.053613	0.76298	-0.51543	-8.6002	41.6153	3.328	0.17505	0.034423	0.070313	NaN	NaN	NaN	NaN	NaN	NaN	NaN	NaN	NaN	NaN	NaN	NaN
3.55	-24.389	105.073	681.1584	0.062012	0.72764	-0.49131	-12.2868	-8.1925	28.189	0.18408	0.01709	0.074707	NaN	NaN	NaN	NaN	NaN	NaN	NaN	NaN	NaN	NaN	NaN	NaN
3.552	-21.764	111.863	657.7866	0.068359	0.69385	-0.47119	-16.243	31.743	12.1856	0.19141	0.00097656	0.079102	NaN	NaN	NaN	NaN	NaN	NaN	NaN	NaN	NaN	NaN	NaN	NaN
3.554	-44.60694	119.822	621.7766	0.080078	0.65635	-0.45733	15.1105	21.2215	2.2174	0.19824	-0.0097656	0.078613	NaN	NaN	NaN	NaN	NaN	NaN	NaN	NaN	NaN	NaN	NaN	NaN
3.556	-52.0193	118.74	581.641	0.094434	0.62568	-0.43877	2.861	-6.0734	2.6188	0.20361	-0.017578	0.075684	NaN	NaN	NaN	NaN	NaN	NaN	NaN	NaN	NaN	NaN	NaN	NaN
3.558	-26.19	105.6026	566.468	0.1042	0.59404	-0.42041	-23.1408	45.919	-9.00673	0.20337	-0.016114	0.072021	NaN	NaN	NaN	NaN	NaN	NaN	NaN	NaN	NaN	NaN	NaN	NaN
3.56	-8.322	105.927	553.014	0.11464	0.56474	-0.40049	13.483	6.6497	5.488	0.19922	-0.01416	0.070313	NaN	NaN	NaN	NaN	NaN	NaN	NaN	NaN	NaN	NaN	NaN	NaN
3.562	-7.254	108.843	539.5011	0.125	0.54053	-0.38135	5.458	11.4677	5.216	0.18799	0.0063477	0.06543	NaN	NaN	NaN	NaN	NaN	NaN	NaN	NaN	NaN	NaN	NaN	NaN
3.564	-24.933	93.422	517.0855	0.12803	0.51973	-0.36172	-13.3801	48.2905	-2.618	0.17773	0.024902	0.058105	NaN	NaN	NaN	NaN	NaN	NaN	NaN	NaN	NaN	NaN	NaN	NaN
3.566	-29.9747	97.4108	494.7626	0.13243	0.5001	-0.34307	2.842	-6.0138	18.135134	0.15967	0.056641	0.040039	NaN	NaN	NaN	NaN	NaN	NaN	NaN	NaN	NaN	NaN	NaN	NaN
3.568	-41.2088	106.1736	471.5557	0.1375	0.479	-0.32197	-2.956	41.8813	20.3055	0.14233	0.082276	0.034668	NaN	NaN	NaN	NaN	NaN	NaN	NaN	NaN	NaN	NaN	NaN	NaN
3.57	-55.666	125.29	453.2603	0.1418	0.45225	-0.30635	-25.9825	32.4258	22.02302	0.12939	0.10938	0.024414	NaN	NaN	NaN	NaN	NaN	NaN	NaN	NaN	NaN	NaN	NaN	NaN
3.572	-67.496	115.579	440.0817	0.14746	0.43018	-0.2876	-1.28	2.71544	36.768	0.1167	0.12695	0.01416	NaN	NaN	NaN	NaN	NaN	NaN	NaN	NaN	NaN	NaN	NaN	NaN
3.574	-48.84	103.155	428.1064	0.15489	0.40069	-0.26816	-33.16156	49.463	29.347	0.11035	0.13721	0.013184	NaN	NaN	NaN	NaN	NaN	NaN	NaN	NaN	NaN	NaN	NaN	NaN
3.576	-66.099	95.807	407.3219	0.15801	0.37598	-0.23975	-29.239	8.6481	29.1329	0.10742	0.1543	0.0024414	NaN	NaN	NaN	NaN	NaN	NaN	NaN	NaN	NaN	NaN	NaN	NaN
3.578	-63.11822	81.1188	385.8375	0.16855	0.35332	-0.23233	-43.3789	10.3453	21.9197	0.11425	0.16113	-0.0019531	NaN	NaN	NaN	NaN	NaN	NaN	NaN	NaN	NaN	NaN	NaN	NaN
3.58	-59.54801	77.042	370.4169	0.17812	0.33555	-0.20947	-50.1945	36.4512	1	0.12109	0.16162	-0.0039063	NaN	NaN	NaN	NaN	NaN	NaN	NaN	NaN	NaN	NaN	NaN	NaN
3.582	-23.529	78.259	352.138	0.18799	0.30762	-0.18945	-35.7134	-5.166	-6.571	0.1333	0.16064	-0.0092773	NaN	NaN	NaN	NaN	NaN	NaN	NaN	NaN	NaN	NaN	NaN	NaN
3.584	-20.211	82.519	315.04976	0.18652	0.28272	-0.1707	-51.3871	38.789	6.807	0.1416	0.16211	-0.010742	NaN	NaN	NaN	NaN	NaN	NaN	NaN	NaN	NaN	NaN	NaN	NaN
3.586	-22.582	83.2889	293.081	0.18388	0.25908	-0.15185	-43.9721	28.767954	12.875	0.15527	0.1543	-0.010742	NaN	NaN	NaN	NaN	NaN	NaN	NaN	NaN	NaN	NaN	NaN	NaN
3.588	-10.52	84.1552	282.334	0.18388	0.23838	-0.13779	-29.075	0.43079	25.1629	0.1726	0.14648	-0.012451	NaN	NaN	NaN	NaN	NaN	NaN	NaN	NaN	NaN	NaN	NaN	NaN
3.59	-21.407	99.556	282.2385	0.18623	0.21856	-0.12363	-32.1538	47.074	29.0231	0.18994	0.13721	-0.01709	NaN	NaN	NaN	NaN	NaN	NaN	NaN	NaN	NaN	NaN	NaN	NaN
3.592	-11.035	109.571	279.6675	0.1875	0.19727	-0.11572	-36.1918	10.1599	31.7079	0.21289	0.12158	-0.01123	NaN	NaN	NaN	NaN	NaN	NaN	NaN	NaN	NaN	NaN	NaN	NaN
3.594	-28.2491	94.097	258.8375	0.19444	0.17656	-0.10107	-30.778	19.6135	26.6745	0.22559	0.11963	-0.01416	NaN	NaN	NaN	NaN	NaN	NaN	NaN	NaN	NaN	NaN	NaN	NaN
3.596	-38.862	75.3419	257.2367	0.20254	0.1581	-0.088379	-21.6375	52.964	27.208	0.24658	0.1167	-0.016602	NaN	NaN	NaN	NaN	NaN	NaN	NaN	NaN	NaN	NaN	NaN	NaN
3.598	-27.911	82.242	241.375	0.21465	0.13701	-0.081348	-29.4842	7.3741	11.7435	0.25879	0.104	-0.015625	NaN	NaN	NaN	NaN	NaN	NaN	NaN	NaN	NaN	NaN	NaN	NaN
3.6	-19.703	97.784	217.7686	0.21885	0.1292	-0.07207	-13.11	31.643	3.564	0.27344	0.091309	-0.010254	NaN	NaN	NaN	NaN	NaN	NaN	NaN	NaN	NaN	NaN	NaN	NaN
3.602	-21.315	99.15	202.22044	0.22656	0.12354	-0.060547	-6.0669	16.1494	12.015	0.28955	0.078613	-0.0019531	NaN	NaN	NaN	NaN	NaN	NaN	NaN	NaN	NaN	NaN	NaN	NaN
3.604	-3.719	78.734	190.6085	0.22871	0.11699	-0.055176	-10.357	-25.5038	25.8973	0.29785	0.069824	0.003418	NaN	NaN	NaN	NaN	NaN	NaN	NaN	NaN	NaN	NaN	NaN	NaN
3.606	-9.641	68.9216	173.7565	0.23975	0.10596	-0.046973	-7.134	18.5236	26.94987	0.31201	0.047852	0.0092773	NaN	NaN	NaN	NaN	NaN	NaN	NaN	NaN	NaN	NaN	NaN	NaN
3.608	-12.311	66.5035	151.9861	0.24521	0.097753	-0.040723	17.0321	-11.6815	21.69163	0.32129	0.03247	0.018067	NaN	NaN	NaN	NaN	NaN	NaN	NaN	NaN	NaN	NaN	NaN	NaN
3.61	-21.708	64.768	159.6581	0.25196	0.091797	-0.039942	2.396	-0.435099999999999	17.8286	0.33008	0.016602	0.022461	NaN	NaN	NaN	NaN	NaN	NaN	NaN	NaN	NaN	NaN	NaN	NaN
3.612	-2.702	62.644	161.0192	0.25684	0.085938	-0.03418	-6.003	33.412	14.6456	0.3418	-0.0078125	0.03418	NaN	NaN	NaN	NaN	NaN	NaN	NaN	NaN	NaN	NaN	NaN	NaN
3.614	-33.715	59.3079	166.1108	0.26856	0.095801	-0.036719	16.167	-2.5479	19.064	0.34375	-0.015625	0.041504	NaN	NaN	NaN	NaN	NaN	NaN	NaN	NaN	NaN	NaN	NaN	NaN
3.616	-48.1577	56.312	161.89147	0.28232	0.096387	-0.029882	14.51	25.92	3.7879	0.34961	-0.029297	0.041016	NaN	NaN	NaN	NaN	NaN	NaN	NaN	NaN	NaN	NaN	NaN	NaN
3.618	-56.4408	52.6658	147.15304	0.28701	0.08623	-0.022851	12.0704	16.709	4.7899	0.34668	-0.02832	0.049072	NaN	NaN	NaN	NaN	NaN	NaN	NaN	NaN	NaN	NaN	NaN	NaN
3.62	-44.4864	56.861	137.3206	0.28935	0.078711	-0.022266	-18.802	-6.52592	27.124	0.34229	-0.029297	0.055664	NaN	NaN	NaN	NaN	NaN	NaN	NaN	NaN	NaN	NaN	NaN	NaN
3.622	-47.65694	71.053	127.5817	0.29834	0.070801	-0.016113	-29.1491	35.253	25.19419	0.33252	-0.013184	0.058594	NaN	NaN	NaN	NaN	NaN	NaN	NaN	NaN	NaN	NaN	NaN	NaN
3.624	-55.0244	62.353	118.7685	0.30244	0.077832	-0.023437	-8.6159	2.6475	15.9157	0.32861	-0.010742	0.061523	NaN	NaN	NaN	NaN	NaN	NaN	NaN	NaN	NaN	NaN	NaN	NaN
3.626	-50.4183	52.1176	106.744	0.30713	0.089062	-0.024512	-6.20799999999999	3.3028	9.7079	0.30908	0.012207	0.063477	NaN	NaN	NaN	NaN	NaN	NaN	NaN	NaN	NaN	NaN	NaN	NaN
3.628	-27.9534	42.2184	92.82	0.31142	0.086329	-0.017481	-28.9328	35.972	3.747	0.29908	0.027344	0.068359	NaN	NaN	NaN	NaN	NaN	NaN	NaN	NaN	NaN	NaN	NaN	NaN
3.63	-44.7816	42.023	80.44	0.31016	0.075977	-0.016113	-30.904	-7.1642	6.14241	0.28613	0.045898	0.072266	NaN	NaN	NaN	NaN	NaN	NaN	NaN	NaN	NaN	NaN	NaN	NaN
3.632	-38.3511	36.523	86.4718	0.31299	0.066895	-0.023438	-37.9322	28.0163	5.63628	0.27686	0.067383	0.079102	NaN	NaN	NaN	NaN	NaN	NaN	NaN	NaN	NaN	NaN	NaN	NaN
3.634	-24.486	28.498	90.558	0.3166	0.067676	-0.022754	-32.7621	30.6864	-5.389	0.2749	0.075195	0.08252	NaN	NaN	NaN	NaN	NaN	NaN	NaN	NaN	NaN	NaN	NaN	NaN
3.636	-19.202	44.7957	85.2925	0.32138	0.064258	-0.024707	-45.2039	-2.873	-0.4932	0.26904	0.088867	0.087402	NaN	NaN	NaN	NaN	NaN	NaN	NaN	NaN	NaN	NaN	NaN	NaN
3.638	-32.8872	62.154	66.9106	0.3292	0.069336	-0.030566	-51.6251	29.7424	13.5881	0.27564	0.099611	0.087891	NaN	NaN	NaN	NaN	NaN	NaN	NaN	NaN	NaN	NaN	NaN	NaN
3.64	-36.7155	45.589	66.5755	0.34034	0.069726	-0.032422	-30.072	3.902	19.8751	0.28027	0.10742	0.087402	NaN	NaN	NaN	NaN	NaN	NaN	NaN	NaN	NaN	NaN	NaN	NaN
3.642	-24.901	38.122	81.476	0.34473	0.069336	-0.039063	-44.83095	3.4906	20.4454	0.29053	0.11279	0.099609	NaN	NaN	NaN	NaN	NaN	NaN	NaN	NaN	NaN	NaN	NaN	NaN
3.644	-21.757	37.41	78.1444	0.35156	0.083496	-0.044336	-40.898	47.9327	18.4388	0.29736	0.1167	0.10693	NaN	NaN	NaN	NaN	NaN	NaN	NaN	NaN	NaN	NaN	NaN	NaN
3.646	-32.874	45.278	73.7336	0.35293	0.097559	-0.048145	-49.0265	-5.2451	23.23225	0.30225	0.11328	0.10693	NaN	NaN	NaN	NaN	NaN	NaN	NaN	NaN	NaN	NaN	NaN	NaN
3.648	-19.6128	31.175	50.983	0.35723	0.10576	-0.054394	-26.424	7.6105	40.109	0.30884	0.11841	0.10132	NaN	NaN	NaN	NaN	NaN	NaN	NaN	NaN	NaN	NaN	NaN	NaN
3.65	-13.692	18.126	47.451	0.3583	0.11563	-0.052051	-14.508	1.2025	36.492	0.31494	0.12988	0.096191	NaN	NaN	NaN	NaN	NaN	NaN	NaN	NaN	NaN	NaN	NaN	NaN
3.652	-13.364	32.076	38.336	0.35791	0.12109	-0.055664	-3.64	-33.2161	30.173	0.31885	0.1582	0.081543	NaN	NaN	NaN	NaN	NaN	NaN	NaN	NaN	NaN	NaN	NaN	NaN
3.654	-8.812	27.581	34.3992	0.35469	0.1334	-0.058691	3.509	3.1496	61.217	0.31494	0.18213	0.077148	NaN	NaN	NaN	NaN	NaN	NaN	NaN	NaN	NaN	NaN	NaN	NaN
3.656	-8.941	30.4702	38.0898	0.35693	0.13877	-0.060742	-6.1824	-30.1372	99.324	0.29883	0.22754	0.072266	NaN	NaN	NaN	NaN	NaN	NaN	NaN	NaN	NaN	NaN	NaN	NaN
3.658	-3.165	29.542779	28.5017	0.35576	0.14697	-0.062304	-5.975	-43.92361	127.4342	0.28418	0.26636	0.060547	NaN	NaN	NaN	NaN	NaN	NaN	NaN	NaN	NaN	NaN	NaN	NaN
3.66	-18.731	36.072	35.91357	0.3545	0.15537	-0.058789	-11.382	-4.0821	152.157	0.27197	0.30664	0.048828	NaN	NaN	NaN	NaN	NaN	NaN	NaN	NaN	NaN	NaN	NaN	NaN
3.662	-32.8171	43.862	44.013	0.35547	0.15674	-0.054688	17.5591	-21.6965	198.82128	0.26807	0.3584	0.029785	NaN	NaN	NaN	NaN	NaN	NaN	NaN	NaN	NaN	NaN	NaN	NaN
3.664	-25.677	23.656	46.8246	0.3544	0.16064	-0.055469	15.091	23.152	265.1432	0.27051	0.38135	0.013184	NaN	NaN	NaN	NaN	NaN	NaN	NaN	NaN	NaN	NaN	NaN	NaN
3.666	-28.142	26.5094	50.6387	0.35664	0.1627	-0.051953	12.3423	65.422	311.404	0.27148	0.43799	-0.026367	NaN	NaN	NaN	NaN	NaN	NaN	NaN	NaN	NaN	NaN	NaN	NaN
3.668	-51.47852	25.716	27.763	0.35508	0.16426	-0.043359	10.516	61.2998	377.583	0.27051	0.48828	-0.061524	NaN	NaN	NaN	NaN	NaN	NaN	NaN	NaN	NaN	NaN	NaN	NaN
3.67	-58.8951	18.282216	17.2	0.35547	0.1626	-0.039453	36.231	113.6677	445.81	0.26758	0.54443	-0.1123	NaN	NaN	NaN	NaN	NaN	NaN	NaN	NaN	NaN	NaN	NaN	NaN
3.672	-33.1394	16.3019	7.695	0.35205	0.16162	-0.03125	44.216	78.922	568.796	0.25049	0.64746	-0.19727	NaN	NaN	NaN	NaN	NaN	NaN	NaN	NaN	NaN	NaN	NaN	NaN
3.674	-30.224	21.7167	15.1722	0.34814	0.15771	-0.028711	26.5265	85.2091	694.732	0.23438	0.71729	-0.2417	NaN	NaN	NaN	NaN	NaN	NaN	NaN	NaN	NaN	NaN	NaN	NaN
3.676	-39.1569	25.24257	5.9605	0.3419	0.16553	-0.018945	46.288	131.443	805.324	0.19238	0.88916	-0.3291	NaN	NaN	NaN	NaN	NaN	NaN	NaN	NaN	NaN	NaN	NaN	NaN
3.678	-32.898	11.711	10.2982	0.34033	0.16592	-0.011524	16.2041	96.907	891.9559	0.14209	1.043	-0.38477	NaN	NaN	NaN	NaN	NaN	NaN	NaN	NaN	NaN	NaN	NaN	NaN
3.68	-30.1016	8.9446	18.46662	0.33477	0.16435	-0.0051758	-4.6544	112.881	982.63162	0.066895	1.2134	-0.43506	NaN	NaN	NaN	NaN	NaN	NaN	NaN	NaN	NaN	NaN	NaN	NaN
3.682	-38.90062	20.0783	23.9802	0.3335	0.16699	-2.2204e-14	-13.1818	105.216	1047.40801	-0.081543	1.438	-0.48779	NaN	NaN	NaN	NaN	NaN	NaN	NaN	NaN	NaN	NaN	NaN	NaN
3.684	-31.3348	28.2496	36.5709	0.33028	0.16006	0.011817	11.5318	45.713	1086.167	-0.1709	1.5469	-0.50879	NaN	NaN	NaN	NaN	NaN	NaN	NaN	NaN	NaN	NaN	NaN	NaN
3.686	-35.5076	18.6907	32.2108	0.33095	0.15918	0.016113	11.7185	48.556	1081.3893	-0.35938	1.7344	-0.53711	NaN	NaN	NaN	NaN	NaN	NaN	NaN	NaN	NaN	NaN	NaN	NaN
3.688	-35.5309	12.9477	26.3166	0.33018	0.15879	0.020019	-7.703	-14.773	1069.3047	-0.51367	1.8613	-0.56445	NaN	NaN	NaN	NaN	NaN	NaN	NaN	NaN	NaN	NaN	NaN	NaN
3.69	-34.0926	20.8102	4.828	0.32617	0.15586	0.029785	14.0923	-68.61	1048.904	-0.56201	1.9048	-0.58105	NaN	NaN	NaN	NaN	NaN	NaN	NaN	NaN	NaN	NaN	NaN	NaN
3.692	-39.7077	28.593	5.2889	0.32715	0.1543	0.036133	-15.9757	-77.973	999.422	-0.55957	1.9531	-0.61523	NaN	NaN	NaN	NaN	NaN	NaN	NaN	NaN	NaN	NaN	NaN	NaN
3.694	-28.947	26.613	5.2841	0.32803	0.15791	0.039453	12.093	-132.298	952.639	-0.48072	1.9299	-0.61426	NaN	NaN	NaN	NaN	NaN	NaN	NaN	NaN	NaN	NaN	NaN	NaN
3.696	-8.168	15.6876	9.7339	0.32432	0.1582	0.045508	25.39793	-109.287	901.893	-0.35303	1.8696	-0.59424	NaN	NaN	NaN	NaN	NaN	NaN	NaN	NaN	NaN	NaN	NaN	NaN
3.698	-5.182	33.4532	10.78935	0.32276	0.15742	0.049414	26.8686	-81.994	855.3175	-0.16455	1.7173	-0.56348	NaN	NaN	NaN	NaN	NaN	NaN	NaN	NaN	NaN	NaN	NaN	NaN
3.7	-9.97	16.0903	19.5958	0.32305	0.15859	0.054492	46.026	-93.77	826.7235	-0.066406	1.627	-0.55469	NaN	NaN	NaN	NaN	NaN	NaN	NaN	NaN	NaN	NaN	NaN	NaN
3.702	-2.909	23.5016	16.3542	0.32813	0.15869	0.05127	52.2321021	-52.332	812.601	0.095703	1.4521	-0.52783	NaN	NaN	NaN	NaN	NaN	NaN	NaN	NaN	NaN	NaN	NaN	NaN
3.704	1.118	19.5337	22.2527	0.32891	0.16631	0.053223	52.1182	-62.164	825.337	0.1792	1.3663	-0.5127	NaN	NaN	NaN	NaN	NaN	NaN	NaN	NaN	NaN	NaN	NaN	NaN
3.706	-20.692	32.7825	26.0768	0.33262	0.17852	0.052539	43.049	-80.14	849.5326	0.22998	1.3267	-0.50537	NaN	NaN	NaN	NaN	NaN	NaN	NaN	NaN	NaN	NaN	NaN	NaN
3.708	-10.948	12.5934	38.787	0.33183	0.18516	0.057226	42.596	-63.193	830.183	0.25635	1.3516	-0.52051	NaN	NaN	NaN	NaN	NaN	NaN	NaN	NaN	NaN	NaN	NaN	NaN
3.71	-26.203	7.9343	49.9947	0.33037	0.19414	0.053613	21.0486	-111.285	832.551	0.25684	1.3931	-0.53369	NaN	NaN	NaN	NaN	NaN	NaN	NaN	NaN	NaN	NaN	NaN	NaN
3.712	-1.703	0.286	48.81504	0.32324	0.2041	0.046387	18.752	-97.283	862.626	0.2583	1.481	-0.56006	NaN	NaN	NaN	NaN	NaN	NaN	NaN	NaN	NaN	NaN	NaN	NaN
3.714	-20.2581	8.745	45.622701	0.32051	0.21914	0.037305	8.9231	-91.834	890.312	0.26148	1.5403	-0.58765	NaN	NaN	NaN	NaN	NaN	NaN	NaN	NaN	NaN	NaN	NaN	NaN
3.716	-28.2471	6.3207	66.0597	0.31533	0.2418	0.031152	36.8169	-176.706	922.4447	0.27979	1.5859	-0.60742	NaN	NaN	NaN	NaN	NaN	NaN	NaN	NaN	NaN	NaN	NaN	NaN
3.718	-34.7233	8.4733	75.702	0.31182	0.26093	0.024121	27.6291	-204.52	950.23	0.32715	1.6001	-0.64209	NaN	NaN	NaN	NaN	NaN	NaN	NaN	NaN	NaN	NaN	NaN	NaN
3.72	-34.127	17.956	92.042	0.3043	0.28604	0.019922	4.4496	-256.952	993.9606	0.36035	1.5918	-0.66406	NaN	NaN	NaN	NaN	NaN	NaN	NaN	NaN	NaN	NaN	NaN	NaN
3.722	-17.463	27.938	106.091	0.29736	0.30664	0.013672	16.737	-303.687	1040.651	0.43213	1.5547	-0.71387	NaN	NaN	NaN	NaN	NaN	NaN	NaN	NaN	NaN	NaN	NaN	NaN
3.724	-11.43	25.673	118.226	0.29219	0.32881	0.002539	20.1381	-251.086	1069.488	0.48267	1.5173	-0.76099	NaN	NaN	NaN	NaN	NaN	NaN	NaN	NaN	NaN	NaN	NaN	NaN
3.726	-2.9915	42.631	160.7317	0.29033	0.3459	-0.0037109	25.0175	-264.976	1121.6272	0.52979	1.5039	-0.81055	NaN	NaN	NaN	NaN	NaN	NaN	NaN	NaN	NaN	NaN	NaN	NaN
3.728	-23.7974	61.4567	182.286	0.29502	0.36543	-0.014649	-12.1378	-234.777	1168.349	0.54736	1.5371	-0.88574	NaN	NaN	NaN	NaN	NaN	NaN	NaN	NaN	NaN	NaN	NaN	NaN
3.73	-38.35367	89.9254	207.0828	0.29678	0.38584	-0.030664	-28.7991	-199.3888	1205.674	0.53271	1.5605	-0.91602	NaN	NaN	NaN	NaN	NaN	NaN	NaN	NaN	NaN	NaN	NaN	NaN
3.732	-25.4729	84.929	235.4807	0.29492	0.41455	-0.053711	-46.287	-202.4297	1227.915	0.4668	1.6353	-0.97803	NaN	NaN	NaN	NaN	NaN	NaN	NaN	NaN	NaN	NaN	NaN	NaN
3.734	-13.263	90.942	276.38984	0.29297	0.45254	-0.066504	-77.683	-148.9993	1255.738	0.40405	1.687	-1.0132	NaN	NaN	NaN	NaN	NaN	NaN	NaN	NaN	NaN	NaN	NaN	NaN
3.736	-28.6397	98.342	316.4306	0.28369	0.50137	-0.094142	-64.576	-129.973	1255.36449	0.34961	1.7305	-1.0449	NaN	NaN	NaN	NaN	NaN	NaN	NaN	NaN	NaN	NaN	NaN	NaN
3.738	-34.7707	95.459	377.006	0.27041	0.55879	-0.12227	-41.106	-146.098	1253.2532	0.31934	1.7778	-1.0737	NaN	NaN	NaN	NaN	NaN	NaN	NaN	NaN	NaN	NaN	NaN	NaN
3.74	-43.3295	92.0371	447.603	0.25186	0.62441	-0.15117	-57.487	-111.486	1210.976	0.32031	1.8052	-1.0864	NaN	NaN	NaN	NaN	NaN	NaN	NaN	NaN	NaN	NaN	NaN	NaN
3.742	-31.124	92.1285	518.186	0.22754	0.70557	-0.18506	-41.7824	-140.851	1203.334	0.33789	1.8501	-1.1069	NaN	NaN	NaN	NaN	NaN	NaN	NaN	NaN	NaN	NaN	NaN	NaN
3.744	-24.217	89.5611	590.858	0.1959	0.79052	-0.22373	-29.37653	-144.5297	1232.81	0.354	1.8599	-1.1079	NaN	NaN	NaN	NaN	NaN	NaN	NaN	NaN	NaN	NaN	NaN	NaN
3.746	-6.575	80.0841	665.2679	0.16299	0.88398	-0.25927	-61.793	-136.04967	1270.975	0.36523	1.8477	-1.1074	NaN	NaN	NaN	NaN	NaN	NaN	NaN	NaN	NaN	NaN	NaN	NaN
3.748	4.06	78.3815	742.595	0.12861	0.99647	-0.29873	-30.2636	-172.931	1324.173	0.38037	1.8267	-1.1089	NaN	NaN	NaN	NaN	NaN	NaN	NaN	NaN	NaN	NaN	NaN	NaN
3.75	-4.615	63.3306	830.067	0.09092	1.1141	-0.32822	-4.441	-151.03741	1377.211	0.38232	1.8164	-1.1016	NaN	NaN	NaN	NaN	NaN	NaN	NaN	NaN	NaN	NaN	NaN	NaN
3.752	-15.043	53.88	896.28062	0.037598	1.2485	-0.35254	-10.7478	-147.2913	1410.4694	0.38916	1.7988	-1.1055	NaN	NaN	NaN	NaN	NaN	NaN	NaN	NaN	NaN	NaN	NaN	NaN
3.754	-29.9666	31.683	924.8258	-0.019727	1.361	-0.37871	6.672	-171.4296	1445.677	0.38305	1.804	-1.1131	NaN	NaN	NaN	NaN	NaN	NaN	NaN	NaN	NaN	NaN	NaN	NaN
3.756	-22.2118	3.12266	934.08	-0.088184	1.4668	-0.39297	-18.3023	-131.771	1465.654	0.37305	1.8247	-1.1284	NaN	NaN	NaN	NaN	NaN	NaN	NaN	NaN	NaN	NaN	NaN	NaN
3.758	-26.259	-16.6418	905.835	-0.16006	1.5507	-0.40899	-12.597	-130.55368	1469.986	0.33643	1.8848	-1.1465	NaN	NaN	NaN	NaN	NaN	NaN	NaN	NaN	NaN	NaN	NaN	NaN
3.76	-59.802	-29.353	890.69	-0.2042	1.6125	-0.41387	4.997	-120.0018	1489.212	0.30225	1.9282	-1.1558	NaN	NaN	NaN	NaN	NaN	NaN	NaN	NaN	NaN	NaN	NaN	NaN
3.762	-39.679	-33.638	864.989	-0.22412	1.647	-0.42188	10.404	-88.9441	1500.5828	0.22998	2.02	-1.1694	NaN	NaN	NaN	NaN	NaN	NaN	NaN	NaN	NaN	NaN	NaN	NaN
3.764	-21.9641	-42.428	850.019	-0.20635	1.6378	-0.42705	26.758	-126.646	1507.59956	0.1687	2.0922	-1.1782	NaN	NaN	NaN	NaN	NaN	NaN	NaN	NaN	NaN	NaN	NaN	NaN
3.766	-4.02	-50.476	828.3425	-0.15723	1.5943	-0.42646	26.827	-102.564	1499.284	0.10742	2.1504	-1.1895	NaN	NaN	NaN	NaN	NaN	NaN	NaN	NaN	NaN	NaN	NaN	NaN
3.768	-5.1479	-53.581	821.0646	-0.088868	1.518	-0.40849	31.60926	-93.843	1484.548	0.041504	2.2207	-1.1895	NaN	NaN	NaN	NaN	NaN	NaN	NaN	NaN	NaN	NaN	NaN	NaN
3.77	-5.68	-65.278	832.722	-0.0035161	1.4106	-0.39961	14.959	-104.86949	1486.4588	0.010742	2.2461	-1.1865	NaN	NaN	NaN	NaN	NaN	NaN	NaN	NaN	NaN	NaN	NaN	NaN
3.772	-11.6894	-61.7763	838.305	0.077148	1.2896	-0.38623	-1.392	-36.358	1487.221	-0.043945	2.2676	-1.1758	NaN	NaN	NaN	NaN	NaN	NaN	NaN	NaN	NaN	NaN	NaN	NaN
3.774	-23.948	-42.145	848.322	0.1416	1.1785	-0.37197	-2.15	-27.691	1474.3091	-0.088622	2.2744	-1.1602	NaN	NaN	NaN	NaN	NaN	NaN	NaN	NaN	NaN	NaN	NaN	NaN
3.776	-28.105	-20.136	864.0754	0.18613	1.0943	-0.34971	1.599	-16.093	1469.607	-0.1333	2.2778	-1.1421	NaN	NaN	NaN	NaN	NaN	NaN	NaN	NaN	NaN	NaN	NaN	NaN
3.778	-27.092	-25.205	879.0314	0.19356	1.0509	-0.33135	-54.0186	12.489	1468.55	-0.19238	2.2773	-1.1172	NaN	NaN	NaN	NaN	NaN	NaN	NaN	NaN	NaN	NaN	NaN	NaN
3.78	-42.4956	-42.212	904.2741	0.18135	1.0414	-0.31836	-55.2956	-38.7812	1498.961	-0.21582	2.2759	-1.103	NaN	NaN	NaN	NaN	NaN	NaN	NaN	NaN	NaN	NaN	NaN	NaN
3.782	-50.7712	-69.276	917.4895	0.15723	1.0547	-0.32227	-74.024	-16.9284	1508.642	-0.25879	2.2603	-1.0796	NaN	NaN	NaN	NaN	NaN	NaN	NaN	NaN	NaN	NaN	NaN	NaN
3.784	-69.4442	-96.175	921.305	0.13935	1.0698	-0.33721	-81.865	-9.1618	1513.7568	-0.28638	2.2414	-1.0544	NaN	NaN	NaN	NaN	NaN	NaN	NaN	NaN	NaN	NaN	NaN	NaN
3.786	-43.702	-124.453	933.5526	0.13906	1.0876	-0.35615	-53.7829	-27.4839	1541.379	-0.30322	2.2168	-1.0273	NaN	NaN	NaN	NaN	NaN	NaN	NaN	NaN	NaN	NaN	NaN	NaN
3.788	-20.49	-150.013	940.65	0.16328	1.0907	-0.38115	-59.3532	-2.8351	1534.729	-0.31445	2.1689	-1	NaN	NaN	NaN	NaN	NaN	NaN	NaN	NaN	NaN	NaN	NaN	NaN
3.79	-20.177	-161.495	935.758	0.19775	1.0922	-0.40234	-50.432	-21.2924	1532.1	-0.31396	2.1411	-0.98193	NaN	NaN	NaN	NaN	NaN	NaN	NaN	NaN	NaN	NaN	NaN	NaN
3.792	-29.909	-172.802	974.15	0.23096	1.0996	-0.42188	-76.6838	-33.037	1533.951	-0.30713	2.0825	-0.96436	NaN	NaN	NaN	NaN	NaN	NaN	NaN	NaN	NaN	NaN	NaN	NaN
3.794	-26.675	-177.672	995.41	0.25693	1.1223	-0.4498	-94.133	-4.641	1528.4897	-0.30029	2.0334	-0.94018	NaN	NaN	NaN	NaN	NaN	NaN	NaN	NaN	NaN	NaN	NaN	NaN
3.796	-17.148	-169.289	1033.0301	0.26455	1.161	-0.47569	-77.188	-37.8444	1515.0645	-0.2998	1.9922	-0.92578	NaN	NaN	NaN	NaN	NaN	NaN	NaN	NaN	NaN	NaN	NaN	NaN
3.798	-41.65	-141.061	1049.921	0.25869	1.211	-0.50694	-80.921	7.446	1492.0603	-0.30127	1.9551	-0.90234	NaN	NaN	NaN	NaN	NaN	NaN	NaN	NaN	NaN	NaN	NaN	NaN
3.8	-63.61234	-100.9142	1071.8377	0.24151	1.2508	-0.52696	-100.876	41.2087	1464.749	-0.30664	1.9414	-0.89453	NaN	NaN	NaN	NaN	NaN	NaN	NaN	NaN	NaN	NaN	NaN	NaN
3.802	-71.33	-81.673	1083.4464	0.2207	1.2817	-0.5542	-62.1465	42.7188	1463.9335	-0.3208	1.9243	-0.88037	NaN	NaN	NaN	NaN	NaN	NaN	NaN	NaN	NaN	NaN	NaN	NaN
3.804	-79.7287	-63.402	1093.3112	0.21084	1.3223	-0.56845	-46.899	99.377	1442.8029	-0.32056	1.9095	-0.87573	NaN	NaN	NaN	NaN	NaN	NaN	NaN	NaN	NaN	NaN	NaN	NaN
3.806	-86.3435	-45.206	1101.1555	0.2002	1.3648	-0.58691	-52.6329	92.645	1421.726	-0.31641	1.8931	-0.86572	NaN	NaN	NaN	NaN	NaN	NaN	NaN	NaN	NaN	NaN	NaN	NaN
3.808	-81.7078	-50.628	1089.4045	0.18535	1.4136	-0.60449	-13.819	81.598	1427.502	-0.30713	1.8657	-0.85693	NaN	NaN	NaN	NaN	NaN	NaN	NaN	NaN	NaN	NaN	NaN	NaN
3.81	-66.6891	-63.259	1092.6929	0.16963	1.452	-0.62109	3.4	117.3329	1418.6173	-0.29688	1.8457	-0.85059	NaN	NaN	NaN	NaN	NaN	NaN	NaN	NaN	NaN	NaN	NaN	NaN
3.812	-71.0045	-85.6407	1107.083	0.16064	1.481	-0.63428	15.714	87.9185	1399.1544	-0.26123	1.7856	-0.83545	NaN	NaN	NaN	NaN	NaN	NaN	NaN	NaN	NaN	NaN	NaN	NaN
3.814	-70.4481	-89.9935	1123.316	0.15371	1.4967	-0.64307	4.454	117.5768	1364.571	-0.2334	1.7285	-0.82617	NaN	NaN	NaN	NaN	NaN	NaN	NaN	NaN	NaN	NaN	NaN	NaN
3.816	-65.744	-114.439	1144.783	0.16036	1.5016	-0.65049	2.749	101.1121	1337.298	-0.20459	1.6782	-0.81006	NaN	NaN	NaN	NaN	NaN	NaN	NaN	NaN	NaN	NaN	NaN	NaN
3.818	-49.305	-120.948	1166.1557	0.17208	1.495	-0.65714	16.117	58.3801	1323.2501	-0.17188	1.6152	-0.78906	NaN	NaN	NaN	NaN	NaN	NaN	NaN	NaN	NaN	NaN	NaN	NaN
3.82	-52.683	-132.234	1194.6785	0.18516	1.4854	-0.65841	-11.4229	95.3017	1301.814	-0.15771	1.5942	-0.78076	NaN	NaN	NaN	NaN	NaN	NaN	NaN	NaN	NaN	NaN	NaN	NaN
3.822	-83.9702	-131.81	1213.877	0.19141	1.479	-0.66748	-11.677	68.0226	1299.40681	-0.13086	1.5605	-0.76367	NaN	NaN	NaN	NaN	NaN	NaN	NaN	NaN	NaN	NaN	NaN	NaN
3.824	-94.8605	-128.7248	1230.351	0.19668	1.4771	-0.67958	-2.091	69.7766	1304.9457	-0.11181	1.5356	-0.75244	NaN	NaN	NaN	NaN	NaN	NaN	NaN	NaN	NaN	NaN	NaN	NaN
3.826	-100.5342	-113.0164	1256.778	0.1967	1.4855	-0.68679	-15.9597	120.3135	1268.546	-0.09668	1.5015	-0.73779	NaN	NaN	NaN	NaN	NaN	NaN	NaN	NaN	NaN	NaN	NaN	NaN
3.828	-84.8293	-90.773	1245.382	0.18657	1.509	-0.7039	-8.427	98.10783	1255.2835	-0.067383	1.4355	-0.7168	NaN	NaN	NaN	NaN	NaN	NaN	NaN	NaN	NaN	NaN	NaN	NaN
3.83	-87.8672	-75.194	1251.288	0.17473	1.5402	-0.72696	-26.077	140.881	1220.6119	-0.045654	1.3813	-0.69873	NaN	NaN	NaN	NaN	NaN	NaN	NaN	NaN	NaN	NaN	NaN	NaN
3.832	-73.6359	-73.204	1239.7246	0.16211	1.5762	-0.74414	-13.9314	157.8408	1195.4227	-0.020508	1.3306	-0.68506	NaN	NaN	NaN	NaN	NaN	NaN	NaN	NaN	NaN	NaN	NaN	NaN
3.834	-68.0446	-76.26	1254.034	0.15396	1.6173	-0.76644	-16.49	133.4826	1186.2325	0.003418	1.2739	-0.65576	NaN	NaN	NaN	NaN	NaN	NaN	NaN	NaN	NaN	NaN	NaN	NaN
3.836	-64.8369	-60.5946	1249.861	0.14189	1.658	-0.78703	-47.0895	165.6	1150.749	0.016602	1.2446	-0.64697	NaN	NaN	NaN	NaN	NaN	NaN	NaN	NaN	NaN	NaN	NaN	NaN
3.838	-56.309	-47.8152	1267.512	0.13166	1.6924	-0.80909	-46.0083	139.64	1123.2917	0.033203	1.1958	-0.62256	NaN	NaN	NaN	NaN	NaN	NaN	NaN	NaN	NaN	NaN	NaN	NaN
3.84	-42.863	-48.7719	1283.282	0.11883	1.7297	-0.82093	-45.5132	151.3464	1089.825	0.042481	1.1606	-0.60645	NaN	NaN	NaN	NaN	NaN	NaN	NaN	NaN	NaN	NaN	NaN	NaN
3.842	-28.334	-49.9713	1291.633	0.10107	1.7578	-0.83203	-58.928	193.596147	1042.559	0.052734	1.1182	-0.58984	NaN	NaN	NaN	NaN	NaN	NaN	NaN	NaN	NaN	NaN	NaN	NaN
3.844	-60.275	-44.232	1300.645	0.085281	1.7836	-0.84373	-67.1568	152.2517	1017.8957	0.058105	1.0728	-0.56299	NaN	NaN	NaN	NaN	NaN	NaN	NaN	NaN	NaN	NaN	NaN	NaN
3.846	-86.9316	-43.696	1313.906	0.068073	1.8032	-0.84937	-62.2665	183.695	993.362	0.065918	1.0371	-0.54883	NaN	NaN	NaN	NaN	NaN	NaN	NaN	NaN	NaN	NaN	NaN	NaN
3.848	-88.277	-48.221	1347.3391	0.059917	1.8153	-0.85697	-58.018	180.192	980.147	0.077637	0.97852	-0.51953	NaN	NaN	NaN	NaN	NaN	NaN	NaN	NaN	NaN	NaN	NaN	NaN
3.85	-76.1927	-50.903	1359.2315	0.05018	1.8266	-0.86144	-36.3907	153.252	963.56987	0.078857	0.93994	-0.49463	NaN	NaN	NaN	NaN	NaN	NaN	NaN	NaN	NaN	NaN	NaN	NaN
3.852	-85.2621	-51.986	1364.368	0.041016	1.8384	-0.86475	-43.488	190.26	933.7224	0.08252	0.90283	-0.47607	NaN	NaN	NaN	NaN	NaN	NaN	NaN	NaN	NaN	NaN	NaN	NaN
3.854	-88.14882	-63.9664	1351.76258	0.033067	1.8498	-0.87125	-17.0471	155.8177	926.271	0.081543	0.8584	-0.45703	NaN	NaN	NaN	NaN	NaN	NaN	NaN	NaN	NaN	NaN	NaN	NaN
3.856	-69.0163	-70.3031	1354.2751	0.021354	1.856	-0.87161	0.0440000000000005	167.2306	895.94	0.080078	0.83789	-0.44531	NaN	NaN	NaN	NaN	NaN	NaN	NaN	NaN	NaN	NaN	NaN	NaN
3.858	-68.134	-77.512	1366.0523	0.011206	1.8566	-0.87582	-5.3594	189.8598	837.2285	0.082031	0.79102	-0.4209	NaN	NaN	NaN	NaN	NaN	NaN	NaN	NaN	NaN	NaN	NaN	NaN
3.86	-71.376	-65.396	1376.0842	0.00054397	1.8515	-0.87514	9.094	169.16	804.0361	0.077393	0.75097	-0.40136	NaN	NaN	NaN	NaN	NaN	NaN	NaN	NaN	NaN	NaN	NaN	NaN
3.862	-60.244	-75.193	1374.3042	-0.010254	1.8462	-0.87646	18.5276	194.36325	771.033	0.083496	0.70898	-0.38477	NaN	NaN	NaN	NaN	NaN	NaN	NaN	NaN	NaN	NaN	NaN	NaN
3.864	-56.947	-61.041	1382.52451	-0.018743	1.8369	-0.86814	40.036	180.8243	748.556	0.081543	0.66211	-0.36719	NaN	NaN	NaN	NaN	NaN	NaN	NaN	NaN	NaN	NaN	NaN	NaN
3.866	-75.8583	-40.9913	1374.3677	-0.027166	1.8277	-0.86314	34.0795	152.717	717.977	0.074707	0.64111	-0.35498	NaN	NaN	NaN	NaN	NaN	NaN	NaN	NaN	NaN	NaN	NaN	NaN
3.868	-92.2493	-4.004	1380.0401	-0.033565	1.8233	-0.86279	21.6849	186.689	656.2813	0.06543	0.59131	-0.32031	NaN	NaN	NaN	NaN	NaN	NaN	NaN	NaN	NaN	NaN	NaN	NaN
3.87	-90.3195	10.309	1365.3514	-0.043246	1.8189	-0.85825	34.2237	154.6198	624.26834	0.062256	0.55346	-0.30468	NaN	NaN	NaN	NaN	NaN	NaN	NaN	NaN	NaN	NaN	NaN	NaN
3.872	-94.4649	27.9261	1367.84209	-0.057617	1.8149	-0.85498	32.529	173.6794	592.655	0.05957	0.51221	-0.28662	NaN	NaN	NaN	NaN	NaN	NaN	NaN	NaN	NaN	NaN	NaN	NaN
3.874	-98.6772	33.6359	1364.7447	-0.070187	1.8027	-0.84343	27.1228	207.2571	542.881	0.063965	0.4502	-0.26465	NaN	NaN	NaN	NaN	NaN	NaN	NaN	NaN	NaN	NaN	NaN	NaN
3.876	-103.09	25.2584	1369.7834	-0.083807	1.7946	-0.83147	21.367	162.8225	520.6785	0.061523	0.41992	-0.25586	NaN	NaN	NaN	NaN	NaN	NaN	NaN	NaN	NaN	NaN	NaN	NaN
3.878	-85.7673	14.7381	1366.939	-0.098233	1.79	-0.8227	31.2424	195.8462	489.6846	0.069336	0.36084	-0.229	NaN	NaN	NaN	NaN	NaN	NaN	NaN	NaN	NaN	NaN	NaN	NaN
3.88	-59.937	10.763	1379.57476	-0.11213	1.789	-0.81053	-1.4411	181.4282	469.7001	0.07251	0.31323	-0.21265	NaN	NaN	NaN	NaN	NaN	NaN	NaN	NaN	NaN	NaN	NaN	NaN
3.882	-60.12	11.817	1359.7419	-0.125	1.7852	-0.79688	-9.611	153.8187	468.674	0.072754	0.26807	-0.19678	NaN	NaN	NaN	NaN	NaN	NaN	NaN	NaN	NaN	NaN	NaN	NaN
3.884	-61.115	5.728	1352.79147	-0.13371	1.7889	-0.79198	7.8495	198.23	407.2277	0.079102	0.20703	-0.17285	NaN	NaN	NaN	NaN	NaN	NaN	NaN	NaN	NaN	NaN	NaN	NaN
3.886	-52.123	3.355	1355.0998	-0.14906	1.7958	-0.78291	-21.0635	150.3321	383.4347	0.082031	0.1748	-0.16357	NaN	NaN	NaN	NaN	NaN	NaN	NaN	NaN	NaN	NaN	NaN	NaN
3.888	-52.907	0.272	1355.269	-0.15921	1.8005	-0.78133	-52.8714	144.2818	372.0944	0.084961	0.11523	-0.14746	NaN	NaN	NaN	NaN	NaN	NaN	NaN	NaN	NaN	NaN	NaN	NaN
3.89	-67.753	5.1639	1353.84664	-0.16378	1.8071	-0.77997	-45.1821	147.459	344.426	0.097168	0.07666	-0.13746	NaN	NaN	NaN	NaN	NaN	NaN	NaN	NaN	NaN	NaN	NaN	NaN
3.892	-70.8857	15.7152	1341.0278	-0.16602	1.8027	-0.77148	-65.7092	97.284	336.834	0.099609	0.038086	-0.125	NaN	NaN	NaN	NaN	NaN	NaN	NaN	NaN	NaN	NaN	NaN	NaN
3.894	-81.6471	21.0473	1343.629	-0.15908	1.7935	-0.76534	-57.563	132.5694	299.3462	0.10547	-0.02002	-0.10254	NaN	NaN	NaN	NaN	NaN	NaN	NaN	NaN	NaN	NaN	NaN	NaN
3.896	-78.1072	38.477	1303.0746	-0.15186	1.7767	-0.76045	-73.157	119.531	294.4598	0.10693	-0.043945	-0.09375	NaN	NaN	NaN	NaN	NaN	NaN	NaN	NaN	NaN	NaN	NaN	NaN
3.898	-94.3322	53.716	1292.7847	-0.14522	1.7548	-0.75578	-69.5382	114.2741	279.817	0.1084	-0.091309	-0.078125	NaN	NaN	NaN	NaN	NaN	NaN	NaN	NaN	NaN	NaN	NaN	NaN
3.9	-73.795	68.1	1266.8101	-0.13321	1.7313	-0.74854	-54.214	142.801	243.982	0.10986	-0.11939	-0.066406	NaN	NaN	NaN	NaN	NaN	NaN	NaN	NaN	NaN	NaN	NaN	NaN
3.902	-51.789	62.401	1273.34833	-0.11768	1.7051	-0.74268	-53.3826	111.6504	236.4168	0.10547	-0.14355	-0.058594	NaN	NaN	NaN	NaN	NaN	NaN	NaN	NaN	NaN	NaN	NaN	NaN
3.904	-27.94	66.0354	1260.0738	-0.1083	1.6839	-0.73604	-56.7759	116.8233	226.1266	0.10156	-0.1748	-0.050293	NaN	NaN	NaN	NaN	NaN	NaN	NaN	NaN	NaN	NaN	NaN	NaN
3.906	-47.817	59.3587	1256.981	-0.095018	1.6681	-0.7292	-43.505	110.214	204.614	0.092773	-0.18115	-0.042969	NaN	NaN	NaN	NaN	NaN	NaN	NaN	NaN	NaN	NaN	NaN	NaN
3.908	-62.243	57.528	1232.886	-0.090331	1.6473	-0.73271	-20.44	70.103	190.2862	0.09082	-0.20264	-0.033203	NaN	NaN	NaN	NaN	NaN	NaN	NaN	NaN	NaN	NaN	NaN	NaN
3.91	-44.8117	63.9249	1217.382	-0.078319	1.6301	-0.72403	-17.444	111.2611	160.87	0.08789	-0.22241	-0.026123	NaN	NaN	NaN	NaN	NaN	NaN	NaN	NaN	NaN	NaN	NaN	NaN
3.912	-58.883	75.3743	1196.663	-0.064941	1.6157	-0.72021	-17.8514	98.574	140.0109	0.081055	-0.24268	-0.025879	NaN	NaN	NaN	NaN	NaN	NaN	NaN	NaN	NaN	NaN	NaN	NaN
3.914	-72.9401	74.2305	1190.3423	-0.054688	1.5951	-0.71152	1.667	78.671	139.9791	0.088379	-0.27246	-0.027344	NaN	NaN	NaN	NaN	NaN	NaN	NaN	NaN	NaN	NaN	NaN	NaN
3.916	-81.6973	63.073	1181.8608	-0.044142	1.5668	-0.70273	5.9616	101.669	112.2928	0.093262	-0.28467	-0.026367	NaN	NaN	NaN	NaN	NaN	NaN	NaN	NaN	NaN	NaN	NaN	NaN
3.918	-70.8834	61.379	1166.062	-0.030469	1.5398	-0.69141	11.046	52.413	104.0532	0.089355	-0.30957	-0.030762	NaN	NaN	NaN	NaN	NaN	NaN	NaN	NaN	NaN	NaN	NaN	NaN
3.92	-75.594	66.1352	1147.3455	-0.014844	1.5121	-0.68477	3.228	51.7205	127.579	0.090576	-0.32617	-0.02832	NaN	NaN	NaN	NaN	NaN	NaN	NaN	NaN	NaN	NaN	NaN	NaN
3.922	-74.5089	79.9472	1134.6189	-0.0024414	1.4824	-0.68164	2.9865	44.1658	111.344	0.084473	-0.33887	-0.032715	NaN	NaN	NaN	NaN	NaN	NaN	NaN	NaN	NaN	NaN	NaN	NaN
3.924	-38.936	79.075	1108.1855	0.0084963	1.4562	-0.66758	19.823	11.526	101.5275	0.081055	-0.34717	-0.037109	NaN	NaN	NaN	NaN	NaN	NaN	NaN	NaN	NaN	NaN	NaN	NaN
3.926	-35.486	87.914	1079.036	0.020704	1.4328	-0.6582	42.1151	42.9131	82.0539	0.073242	-0.34766	-0.042969	NaN	NaN	NaN	NaN	NaN	NaN	NaN	NaN	NaN	NaN	NaN	NaN
3.928	-24.482	103.6844	1055.811	0.026563	1.4093	-0.64727	20.3904	27.8526	48.246	0.063965	-0.3457	-0.042969	NaN	NaN	NaN	NaN	NaN	NaN	NaN	NaN	NaN	NaN	NaN	NaN
3.93	-51.4291	111.296064	1049.4696	0.033008	1.3834	-0.63731	14.74	26.2275	59.0348	0.050781	-0.34009	-0.047363	NaN	NaN	NaN	NaN	NaN	NaN	NaN	NaN	NaN	NaN	NaN	NaN
3.932	-19.389	122.116	1030.8487	0.039063	1.3555	-0.62988	10.117	55.03	59.11094	0.032715	-0.32373	-0.05127	NaN	NaN	NaN	NaN	NaN	NaN	NaN	NaN	NaN	NaN	NaN	NaN
3.934	-29.861	126.7608	1021.868	0.046582	1.3297	-0.62129	-14.935	22.4186	44.0361	0.0029297	-0.2832	-0.061035	NaN	NaN	NaN	NaN	NaN	NaN	NaN	NaN	NaN	NaN	NaN	NaN
3.936	-43.484	141.179	991.4388	0.054102	1.2978	-0.60849	-22.44	23.8679	57.344	-0.01123	-0.26416	-0.06543	NaN	NaN	NaN	NaN	NaN	NaN	NaN	NaN	NaN	NaN	NaN	NaN
3.938	-57.803	137.736	954.363	0.063867	1.2669	-0.59561	-26.8578	30.9465	37.538	-0.040039	-0.21924	-0.078125	NaN	NaN	NaN	NaN	NaN	NaN	NaN	NaN	NaN	NaN	NaN	NaN
3.94	-39.436	127.215	940.303	0.072559	1.233	-0.58808	-48.5813	3.8749	33.03143	-0.065918	-0.17846	-0.084473	NaN	NaN	NaN	NaN	NaN	NaN	NaN	NaN	NaN	NaN	NaN	NaN
3.942	-28.432	139.09	920.195	0.080566	1.1914	-0.57617	-42.7321	44.475	16.428	-0.089355	-0.13867	-0.10596	NaN	NaN	NaN	NaN	NaN	NaN	NaN	NaN	NaN	NaN	NaN	NaN
3.944	-47.0827	133.908	911.8992	0.091211	1.1539	-0.56894	-53.885	28.843	-4.8903	-0.11768	-0.085449	-0.11963	NaN	NaN	NaN	NaN	NaN	NaN	NaN	NaN	NaN	NaN	NaN	NaN
3.946	-26.651	123.0762	885.5548	0.10205	1.1199	-0.5582	-64.5546	5.9319	9.7518	-0.12988	-0.062988	-0.12939	NaN	NaN	NaN	NaN	NaN	NaN	NaN	NaN	NaN	NaN	NaN	NaN
3.948	-21.377	113.1556	874.0318	0.11142	1.0856	-0.55586	-52.268	29.372	-6.0308	-0.15674	-0.017578	-0.14746	NaN	NaN	NaN	NaN	NaN	NaN	NaN	NaN	NaN	NaN	NaN	NaN
3.95	-19.42	124.5232	854.955	0.11367	1.0495	-0.53906	-52.0067	-5.1206	-2.1024	-0.17774	0.015625	-0.16333	NaN	NaN	NaN	NaN	NaN	NaN	NaN	NaN	NaN	NaN	NaN	NaN
3.952	-28.68	126.302	843.41595	0.12158	1.0156	-0.53418	-60.0894	21.2765	10.7011	-0.19287	0.05127	-0.17432	NaN	NaN	NaN	NaN	NaN	NaN	NaN	NaN	NaN	NaN	NaN	NaN
3.954	-25.43	132.61	819.1189	0.12832	0.97968	-0.52451	-45.782	24.8998	10.279	-0.21729	0.095215	-0.19141	NaN	NaN	NaN	NaN	NaN	NaN	NaN	NaN	NaN	NaN	NaN	NaN
3.956	-10.645	139.326	802.2786	0.1334	0.94346	-0.51475	-56.8587	-5.44	29.93	-0.22559	0.11768	-0.19873	NaN	NaN	NaN	NaN	NaN	NaN	NaN	NaN	NaN	NaN	NaN	NaN
3.958	-35.8876	144.49	774.0048	0.13887	0.90596	-0.50693	-37.6515	23.6749	24.5878	-0.2417	0.15381	-0.2168	NaN	NaN	NaN	NaN	NaN	NaN	NaN	NaN	NaN	NaN	NaN	NaN
3.96	-51.4612	138.4726	764.2208	0.14814	0.86348	-0.49492	-27.5054	4.9901	-3.4167	-0.24976	0.18139	-0.22778	NaN	NaN	NaN	NaN	NaN	NaN	NaN	NaN	NaN	NaN	NaN	NaN
3.962	-43.103	148.056	741.92809	0.14941	0.82422	-0.48438	-32.8673	-0.577900000000001	19.9567	-0.25098	0.20557	-0.23047	NaN	NaN	NaN	NaN	NaN	NaN	NaN	NaN	NaN	NaN	NaN	NaN
3.964	-35.8293	166.8	719.03468	0.15352	0.78877	-0.47539	-3.886	26.8934	20.39	-0.25391	0.23779	-0.22754	NaN	NaN	NaN	NaN	NaN	NaN	NaN	NaN	NaN	NaN	NaN	NaN
3.966	-54.2984	179.778	700.8289674	0.1543	0.75254	-0.4625	-29.953	3.0318	4.3938	-0.25415	0.26171	-0.2334	NaN	NaN	NaN	NaN	NaN	NaN	NaN	NaN	NaN	NaN	NaN	NaN
3.968	-53.9502	167.906	682.8833	0.15976	0.71817	-0.45469	3.356	28.9536	9.0069	-0.25586	0.28125	-0.23486	NaN	NaN	NaN	NaN	NaN	NaN	NaN	NaN	NaN	NaN	NaN	NaN
3.97	-32.2952	147.5636	642.745	0.16396	0.6836	-0.44199	25.14736	33.749	-11.1986	-0.26416	0.28857	-0.2373	NaN	NaN	NaN	NaN	NaN	NaN	NaN	NaN	NaN	NaN	NaN	NaN
3.972	-21.4645	150.9561	613.585	0.1626	0.65479	-0.43457	9.056	3.293	9.4563	-0.25977	0.29199	-0.23535	NaN	NaN	NaN	NaN	NaN	NaN	NaN	NaN	NaN	NaN	NaN	NaN
3.974	-31.6234	155.4444	597.4817	0.16318	0.62129	-0.4252	35.3214	38.6301	32.6091	-0.25977	0.29004	-0.23438	NaN	NaN	NaN	NaN	NaN	NaN	NaN	NaN	NaN	NaN	NaN	NaN
3.976	-34.7815	144.9636	581.0002	0.16123	0.59297	-0.41055	28.1339	27.3327	-2.5269	-0.25659	0.28271	-0.22949	NaN	NaN	NaN	NaN	NaN	NaN	NaN	NaN	NaN	NaN	NaN	NaN
3.978	-9.567	143.4609	559.7339	0.16436	0.5625	-0.40235	18.1	22.4487	15.7242	-0.25293	0.26953	-0.22461	NaN	NaN	NaN	NaN	NaN	NaN	NaN	NaN	NaN	NaN	NaN	NaN
3.98	-35.2431	145.1208	537.4774	0.16406	0.53613	-0.39473	5.488	61.016	4.962	-0.25098	0.24756	-0.21973	NaN	NaN	NaN	NaN	NaN	NaN	NaN	NaN	NaN	NaN	NaN	NaN
3.982	-37.7498	149.535	532.4682	0.16602	0.50439	-0.38086	-8.515	20.00426	0.3488	-0.24609	0.23047	-0.21191	NaN	NaN	NaN	NaN	NaN	NaN	NaN	NaN	NaN	NaN	NaN	NaN
3.984	-39.592	132.323	535.061	0.16651	0.47363	-0.37139	3.342	32.53442	12.772	-0.24268	0.20752	-0.20605	NaN	NaN	NaN	NaN	NaN	NaN	NaN	NaN	NaN	NaN	NaN	NaN
3.986	-5.88	134.3191	521.06479	0.16612	0.44453	-0.35791	9.2124	39.0191	7.746	-0.23974	0.19019	-0.20263	NaN	NaN	NaN	NaN	NaN	NaN	NaN	NaN	NaN	NaN	NaN	NaN
3.988	-23.6627	132.7173	482.1447	0.16768	0.41407	-0.34385	-33.3394	2.2848	20.0228	-0.23193	0.17627	-0.20068	NaN	NaN	NaN	NaN	NaN	NaN	NaN	NaN	NaN	NaN	NaN	NaN
3.99	-34.773	130.1009	463.6752	0.16719	0.38692	-0.33613	-20.5323	27.8061	44.0357	-0.229	0.14697	-0.19385	NaN	NaN	NaN	NaN	NaN	NaN	NaN	NaN	NaN	NaN	NaN	NaN
3.992	-23.7157	114.8018	420.2866	0.16846	0.36328	-0.32422	-25.0232	8.7107	21.0486	-0.21533	0.13086	-0.19482	NaN	NaN	NaN	NaN	NaN	NaN	NaN	NaN	NaN	NaN	NaN	NaN
3.994	-20.706	119.1455	395.2647	0.16787	0.33613	-0.31103	-44.6223	-4.5245	19.037	-0.20361	0.098633	-0.19092	NaN	NaN	NaN	NaN	NaN	NaN	NaN	NaN	NaN	NaN	NaN	NaN
3.996	-1.223	121.6572	384.1668	0.16426	0.31308	-0.30196	-40.4996	30.8563	9.567	-0.18555	0.072021	-0.19336	NaN	NaN	NaN	NaN	NaN	NaN	NaN	NaN	NaN	NaN	NaN	NaN
[truncated: 28,002 more rows]
