# Supplementary material for: Reliability and Validity of Running Cadence and Stance Time Derived from Instrumented Wireless Earbuds
Source: Sensors (Basel). 2021 Nov 30;21(23):7995. doi: 10.3390/s21237995 (PMC8659722; doi:10.3390/s21237995)
Supplement: Supplementary file 1 [file sensors-21-07995-s001.zip › Data_P08_speeds_2.csv]

time	S7kmh_force_plate_1	S7kmh_force_plate_2	S7kmh_force_plate_3	S7kmh_earbuds_1	S7kmh_earbuds_2	S7kmh_earbuds_3	S10kmh_force_plate_1	S10kmh_force_plate_2	S10kmh_force_plate_3	S10kmh_earbuds_1	S10kmh_earbuds_2	S10kmh_earbuds_3	S13kmh_force_plate_1	S13kmh_force_plate_2	S13kmh_force_plate_3	S13kmh_earbuds_1	S13kmh_earbuds_2	S13kmh_earbuds_3	max_force_plate_1	max_force_plate_2	max_force_plate_3	max_earbuds_1	max_earbuds_2	max_earbuds_3
0	-27.3837	-107.157	1343.998	-0.90381	1.3185	-0.90498	10.023	174.432	1118.5732	-0.21777	1.2776	-0.81762	NaN	NaN	NaN	NaN	NaN	NaN	NaN	NaN	NaN	NaN	NaN	NaN
0.002	-52.319	-99.085	1369.399	-0.91787	1.3591	-0.91123	-21.219	157.789	1052.59	-0.19287	1.2383	-0.80273	NaN	NaN	NaN	NaN	NaN	NaN	NaN	NaN	NaN	NaN	NaN	NaN
0.004	-59.295	-85.3496	1364.964	-0.93633	1.395	-0.91992	-10.095	171.529	1051.649	-0.16309	1.1797	-0.7793	NaN	NaN	NaN	NaN	NaN	NaN	NaN	NaN	NaN	NaN	NaN	NaN
0.006	-70.469	-82.3473	1376.046	-0.95264	1.438	-0.93115	20.583	162.3005	1028.805	-0.14209	1.1489	-0.76514	NaN	NaN	NaN	NaN	NaN	NaN	NaN	NaN	NaN	NaN	NaN	NaN
0.008	-46.9293	-64.02	1358.78033	-0.98007	1.4938	-0.9461	-31.376	126.5497	990.439	-0.1084	1.0879	-0.74316	NaN	NaN	NaN	NaN	NaN	NaN	NaN	NaN	NaN	NaN	NaN	NaN
0.01	-62.696	-54.025	1347.5297	-1.0218	1.5586	-0.9582	-22.708	142.1686	990.213	-0.088135	1.0469	-0.72364	NaN	NaN	NaN	NaN	NaN	NaN	NaN	NaN	NaN	NaN	NaN	NaN
0.012	-40.8089	-49.049	1338.8022	-1.077	1.6301	-0.97187	-25.008	142.928	959.7305	-0.062012	0.99951	-0.70459	NaN	NaN	NaN	NaN	NaN	NaN	NaN	NaN	NaN	NaN	NaN	NaN
0.014	-24.29541	-50.9584	1330.2088	-1.1299	1.6994	-0.99513	-11.529	150.542	943.98821	-0.036621	0.9458	-0.68213	NaN	NaN	NaN	NaN	NaN	NaN	NaN	NaN	NaN	NaN	NaN	NaN
0.016	-2.793	-54.845883	1333.914	-1.1753	1.7505	-1.02	16.143	177.79	940.858	-0.022949	0.92188	-0.67383	NaN	NaN	NaN	NaN	NaN	NaN	NaN	NaN	NaN	NaN	NaN	NaN
0.018	0.291	-46.335	1330.214	-1.2164	1.7823	-1.0326	-40.489	170.72	898.1598	0.00097656	0.86914	-0.64258	NaN	NaN	NaN	NaN	NaN	NaN	NaN	NaN	NaN	NaN	NaN	NaN
0.02	20.5144	-56.3662	1348.129	-1.2472	1.8024	-1.0309	-44.893	178.0573	872.1536	0.013916	0.83496	-0.62036	NaN	NaN	NaN	NaN	NaN	NaN	NaN	NaN	NaN	NaN	NaN	NaN
0.022	32.7118	-49.9147	1360.65	-1.2766	1.8168	-1.0383	-12.02	172.9744	848.85	0.027344	0.80518	-0.59912	NaN	NaN	NaN	NaN	NaN	NaN	NaN	NaN	NaN	NaN	NaN	NaN
0.024	43.017	-41.745	1379.1201	-1.3063	1.827	-1.0478	-60.4543	145.907	808.4616	0.036133	0.76758	-0.57422	NaN	NaN	NaN	NaN	NaN	NaN	NaN	NaN	NaN	NaN	NaN	NaN
0.026	38.204	-41.226	1375.279	-1.3281	1.8418	-1.0586	-44.508	152.092	794.4	0.040527	0.75244	-0.56152	NaN	NaN	NaN	NaN	NaN	NaN	NaN	NaN	NaN	NaN	NaN	NaN
0.028	42.656	-45.595	1396.123	-1.3334	1.851	-1.069	-24.05	168.9929	753.473	0.043945	0.71533	-0.53955	NaN	NaN	NaN	NaN	NaN	NaN	NaN	NaN	NaN	NaN	NaN	NaN
0.03	51.7995	-56.454	1413.125	-1.3304	1.8595	-1.0816	-61.0766	177.341	701.3337	0.053467	0.68823	-0.51856	NaN	NaN	NaN	NaN	NaN	NaN	NaN	NaN	NaN	NaN	NaN	NaN
0.032	57.149	-63.621	1404.087	-1.323	1.8537	-1.0905	-39.045	204.769	674.7383	0.059082	0.65625	-0.49805	NaN	NaN	NaN	NaN	NaN	NaN	NaN	NaN	NaN	NaN	NaN	NaN
0.034	60.039	-66.893	1384.5953	-1.3118	1.8339	-1.0892	-67.7097	187.4906	639.2715	0.078125	0.61279	-0.46729	NaN	NaN	NaN	NaN	NaN	NaN	NaN	NaN	NaN	NaN	NaN	NaN
0.036	64.44	-67.271	1374.4451	-1.2988	1.8008	-1.0879	-75.20819	175.3676	624.5607	0.085938	0.59229	-0.45264	NaN	NaN	NaN	NaN	NaN	NaN	NaN	NaN	NaN	NaN	NaN	NaN
0.038	60.648	-60.682	1371.4075	-1.2863	1.7684	-1.0828	-19.755	178.644	614.8193	0.10205	0.5498	-0.41895	NaN	NaN	NaN	NaN	NaN	NaN	NaN	NaN	NaN	NaN	NaN	NaN
0.04	54.656	-52.772	1368.1343	-1.2696	1.7348	-1.0793	-59.1262	170.0268	547.805	0.10743	0.51709	-0.39502	NaN	NaN	NaN	NaN	NaN	NaN	NaN	NaN	NaN	NaN	NaN	NaN
0.042	35.5955	-23.2827	1358.2106	-1.2516	1.7082	-1.0777	-47.457	172.3629	541.9602	0.11475	0.48438	-0.38135	NaN	NaN	NaN	NaN	NaN	NaN	NaN	NaN	NaN	NaN	NaN	NaN
0.044	24.0752	-4.3842	1360.3749	-1.2292	1.6872	-1.0763	-37.321	172.269	512.0378	0.12158	0.44922	-0.354	NaN	NaN	NaN	NaN	NaN	NaN	NaN	NaN	NaN	NaN	NaN	NaN
0.046	25.96958	15.7314	1365.4975	-1.2012	1.6719	-1.0781	-78.31123	165.6882	464.597	0.12451	0.43115	-0.3374	NaN	NaN	NaN	NaN	NaN	NaN	NaN	NaN	NaN	NaN	NaN	NaN
0.048	-1.913	25.0167	1371.84357	-1.1772	1.658	-1.0737	-27.349	163.67168	472.265	0.13428	0.39941	-0.30469	NaN	NaN	NaN	NaN	NaN	NaN	NaN	NaN	NaN	NaN	NaN	NaN
0.05	-36.2699	35.5661	1360.97327	-1.1542	1.6454	-1.0694	-35.485	142.5764	435.0952	0.13135	0.37891	-0.28565	NaN	NaN	NaN	NaN	NaN	NaN	NaN	NaN	NaN	NaN	NaN	NaN
0.052	-47.298	29.429	1366.7639	-1.1362	1.6329	-1.0663	-39.033	128.675	432.9391	0.13525	0.35498	-0.26172	NaN	NaN	NaN	NaN	NaN	NaN	NaN	NaN	NaN	NaN	NaN	NaN
0.054	-40.1001	30.102	1346.64637	-1.1166	1.6115	-1.0595	1.109	122.05	415.38426	0.13184	0.32568	-0.23779	NaN	NaN	NaN	NaN	NaN	NaN	NaN	NaN	NaN	NaN	NaN	NaN
0.056	-44.033	13.7963	1324.1675	-1.0972	1.5962	-1.0503	-35.411	124.0386	363.73473	0.13037	0.30908	-0.2251	NaN	NaN	NaN	NaN	NaN	NaN	NaN	NaN	NaN	NaN	NaN	NaN
0.058	-47.8025	1.636	1298.0662	-1.084	1.5738	-1.0387	-24.912	124.2209	343.3029	0.13184	0.28174	-0.19971	NaN	NaN	NaN	NaN	NaN	NaN	NaN	NaN	NaN	NaN	NaN	NaN
0.06	-39.4487	-8.484	1295.97	-1.0636	1.5556	-1.029	-5.818	128.2921	313.7032	0.13696	0.26171	-0.18652	NaN	NaN	NaN	NaN	NaN	NaN	NaN	NaN	NaN	NaN	NaN	NaN
0.062	-23.044	-5.059	1287.858	-1.0472	1.5321	-1.0181	-47.888	117.55147	282.252	0.14063	0.23828	-0.16748	NaN	NaN	NaN	NaN	NaN	NaN	NaN	NaN	NaN	NaN	NaN	NaN
0.064	-33.081	-4.689	1262.26	-1.0233	1.5169	-1.003	-0.00199999999999534	117.1526	288.526	0.1543	0.20557	-0.14893	NaN	NaN	NaN	NaN	NaN	NaN	NaN	NaN	NaN	NaN	NaN	NaN
0.066	-19.0098	-15.991	1261.1087	-1.0034	1.4966	-0.98779	-2.725	119.9844	285.4788	0.15698	0.19238	-0.12817	NaN	NaN	NaN	NaN	NaN	NaN	NaN	NaN	NaN	NaN	NaN	NaN
0.068	-6.6524	-11.3162	1251.7684	-0.98252	1.4823	-0.98409	-42.158	123.9303	251.752	0.15625	0.17334	-0.11572	NaN	NaN	NaN	NaN	NaN	NaN	NaN	NaN	NaN	NaN	NaN	NaN
0.07	-4.977	18.2114	1240.19597	-0.95869	1.4591	-0.9667	-3.465	130.8159	249.5328	0.1582	0.14893	-0.098633	NaN	NaN	NaN	NaN	NaN	NaN	NaN	NaN	NaN	NaN	NaN	NaN
0.072	-11.3355	47.808	1207.5531	-0.93447	1.4403	-0.94951	-19.585	121.535	190.447	0.15967	0.13721	-0.087402	NaN	NaN	NaN	NaN	NaN	NaN	NaN	NaN	NaN	NaN	NaN	NaN
0.074	-6.61	66.104	1194.457	-0.91621	1.416	-0.9332	-50.7382	110.499	154.168	0.16309	0.1123	-0.064453	NaN	NaN	NaN	NaN	NaN	NaN	NaN	NaN	NaN	NaN	NaN	NaN
0.076	24.1504	60.576	1182.8735	-0.88672	1.3945	-0.91602	-19.248	113.943	177.6036	0.16553	0.095215	-0.049805	NaN	NaN	NaN	NaN	NaN	NaN	NaN	NaN	NaN	NaN	NaN	NaN
0.078	35.1986	64.238	1157.3796	-0.86406	1.3709	-0.89238	-34.208	95.544	147.319	0.17334	0.078125	-0.041504	NaN	NaN	NaN	NaN	NaN	NaN	NaN	NaN	NaN	NaN	NaN	NaN
0.08	44.2913	68.648	1121.8106	-0.83741	1.3486	-0.87432	-30.027	74.249	157.715	0.18311	0.059082	-0.026367	NaN	NaN	NaN	NaN	NaN	NaN	NaN	NaN	NaN	NaN	NaN	NaN
0.082	63.144	74.667	1100.153	-0.81826	1.3247	-0.84971	-28.808	65.1109	153.547	0.18604	0.04541	-0.01709	NaN	NaN	NaN	NaN	NaN	NaN	NaN	NaN	NaN	NaN	NaN	NaN
0.084	67.316	64.173	1095.405	-0.79668	1.2961	-0.83194	-67.11141	51.098	129.016	0.20801	0.025879	-0.0092773	NaN	NaN	NaN	NaN	NaN	NaN	NaN	NaN	NaN	NaN	NaN	NaN
0.086	57.7463	64.2858	1074.9815	-0.77539	1.2715	-0.80469	-38.167	48.5	131.2505	0.21093	0.01123	-0.0068359	NaN	NaN	NaN	NaN	NaN	NaN	NaN	NaN	NaN	NaN	NaN	NaN
0.088	51.1243	53.9895	1041.4392	-0.75586	1.2472	-0.78359	-33.005	64.9565	108.9929	0.20605	0.0029297	0.015137	NaN	NaN	NaN	NaN	NaN	NaN	NaN	NaN	NaN	NaN	NaN	NaN
0.09	52.6798	55.85409	1024.3923	-0.73242	1.2242	-0.76523	-57.9023	64.954	76.9485	0.18652	0.0019531	0.02002	NaN	NaN	NaN	NaN	NaN	NaN	NaN	NaN	NaN	NaN	NaN	NaN
0.092	50.484	55.9426	1032.6699	-0.71446	1.2	-0.74961	-8.314	55.58	88.476	0.18604	-0.0068359	0.029785	NaN	NaN	NaN	NaN	NaN	NaN	NaN	NaN	NaN	NaN	NaN	NaN
0.094	2.777	69.2393	1028.0548	-0.69492	1.1711	-0.71953	-44.4636	58.529	80.343	0.18701	-0.025391	0.040039	NaN	NaN	NaN	NaN	NaN	NaN	NaN	NaN	NaN	NaN	NaN	NaN
0.096	-16.14	74.378	1009.459	-0.67773	1.1406	-0.70313	-51.3822	44.7198	88.1139	0.19776	-0.029541	0.041015	NaN	NaN	NaN	NaN	NaN	NaN	NaN	NaN	NaN	NaN	NaN	NaN
0.098	-9.873	79.281	1001.661	-0.65576	1.1157	-0.67764	-9.559	52.2906	78.4597	0.20605	-0.043457	0.040039	NaN	NaN	NaN	NaN	NaN	NaN	NaN	NaN	NaN	NaN	NaN	NaN
0.1	-16.811	82.926	975.792	-0.63438	1.0875	-0.6539	-32.315	45.7348	56.732	0.22266	-0.044434	0.047852	NaN	NaN	NaN	NaN	NaN	NaN	NaN	NaN	NaN	NaN	NaN	NaN
0.102	-44.1851	86.87	941.3043	-0.6125	1.0539	-0.63906	-22.562	48.1256	70.5135	0.22461	-0.046875	0.050781	NaN	NaN	NaN	NaN	NaN	NaN	NaN	NaN	NaN	NaN	NaN	NaN
0.104	-51.3651	85.4374	910.4314	-0.58936	1.0231	-0.62031	-0.910999999999998	71.51	25.0353	0.23096	-0.048828	0.058105	NaN	NaN	NaN	NaN	NaN	NaN	NaN	NaN	NaN	NaN	NaN	NaN
0.106	-46.1356	92.3871	888.8226	-0.56592	0.99658	-0.59814	-29.539	56.273	17.9771	0.2312	-0.049316	0.062256	NaN	NaN	NaN	NaN	NaN	NaN	NaN	NaN	NaN	NaN	NaN	NaN
0.108	-35.188	102.2279	855.21	-0.54268	0.96787	-0.58213	-0.792000000000002	67.976	30.706	0.22607	-0.043457	0.062988	NaN	NaN	NaN	NaN	NaN	NaN	NaN	NaN	NaN	NaN	NaN	NaN
0.11	-58.4832	96.792	828.124	-0.52061	0.94209	-0.56592	-25.185	49.957	7.4207	0.21729	-0.029297	0.064941	NaN	NaN	NaN	NaN	NaN	NaN	NaN	NaN	NaN	NaN	NaN	NaN
0.112	-61.9735	86.428	813.316	-0.50108	0.91396	-0.54443	-17.438	16.68289	44.085	0.21729	-0.01709	0.066895	NaN	NaN	NaN	NaN	NaN	NaN	NaN	NaN	NaN	NaN	NaN	NaN
0.114	-65.4486	92.0066	792.51	-0.48369	0.88389	-0.52383	14.754	28.546	43.89947	0.20361	0.0019531	0.058594	NaN	NaN	NaN	NaN	NaN	NaN	NaN	NaN	NaN	NaN	NaN	NaN
0.116	-64.7104	115.021	774.741	-0.4624	0.85205	-0.50342	-23.29	16.087	35.917	0.19189	0.019776	0.068115	NaN	NaN	NaN	NaN	NaN	NaN	NaN	NaN	NaN	NaN	NaN	NaN
0.118	-66.2867	127.573	753.4885	-0.44131	0.82412	-0.48428	7.798	12.529	59.4296	0.18115	0.038574	0.066895	NaN	NaN	NaN	NaN	NaN	NaN	NaN	NaN	NaN	NaN	NaN	NaN
0.12	-65.7531	130.34	750.9993	-0.41777	0.79033	-0.46465	11.028	20.4434	39.9612	0.16455	0.060059	0.064941	NaN	NaN	NaN	NaN	NaN	NaN	NaN	NaN	NaN	NaN	NaN	NaN
0.122	-38.8321	128.719	717.9065	-0.38769	0.75947	-0.44785	-45.522	9.399	27.606	0.15918	0.079102	0.05957	NaN	NaN	NaN	NaN	NaN	NaN	NaN	NaN	NaN	NaN	NaN	NaN
0.124	-44.8507	126.303	697.5202	-0.3623	0.72598	-0.43223	3.761	24.8985	23.993	0.14453	0.10303	0.055664	NaN	NaN	NaN	NaN	NaN	NaN	NaN	NaN	NaN	NaN	NaN	NaN
0.126	-36.502	126.2177	672.7511	-0.33496	0.68848	-0.4082	-17.302	32.952	11.4483	0.13721	0.12451	0.048096	NaN	NaN	NaN	NaN	NaN	NaN	NaN	NaN	NaN	NaN	NaN	NaN
0.128	0.687000000000001	118.313	659.3263	-0.308	0.65586	-0.38985	-53.737	18.1765	36.1078	0.12598	0.14746	0.041992	NaN	NaN	NaN	NaN	NaN	NaN	NaN	NaN	NaN	NaN	NaN	NaN
0.13	25.41	113.5227	646.2262	-0.28603	0.6208	-0.37148	0.893999999999998	30.5147	60.011	0.10938	0.18213	0.031738	NaN	NaN	NaN	NaN	NaN	NaN	NaN	NaN	NaN	NaN	NaN	NaN
0.132	29.323	119.4658	621.0789	-0.26533	0.58447	-0.34532	-36.621	20.4578	40.631	0.098145	0.2002	0.028809	NaN	NaN	NaN	NaN	NaN	NaN	NaN	NaN	NaN	NaN	NaN	NaN
0.134	26.211	102.361	590.7124	-0.24268	0.55566	-0.32363	-50.44302	18.428	31.119	0.081543	0.23535	0.023926	NaN	NaN	NaN	NaN	NaN	NaN	NaN	NaN	NaN	NaN	NaN	NaN
0.136	34.947	105.6397	579.6035	-0.21973	0.52637	-0.30566	-5.145	46.2886	37.856	0.066162	0.25537	0.017578	NaN	NaN	NaN	NaN	NaN	NaN	NaN	NaN	NaN	NaN	NaN	NaN
0.138	29.563	107.8746	572.2585	-0.19775	0.50049	-0.28936	-49.1636	24.3894	24.3	0.058594	0.26367	0.020996	NaN	NaN	NaN	NaN	NaN	NaN	NaN	NaN	NaN	NaN	NaN	NaN
0.14	-3.084	116.886	553.7957	-0.1751	0.47324	-0.27569	-28.802	41.6329	29.759	0.05127	0.28223	0.018066	NaN	NaN	NaN	NaN	NaN	NaN	NaN	NaN	NaN	NaN	NaN	NaN
0.142	-4.436	114.923	540.4019	-0.154	0.44004	-0.24287	-35.377	52.527	2.4994	0.050781	0.28711	0.02002	NaN	NaN	NaN	NaN	NaN	NaN	NaN	NaN	NaN	NaN	NaN	NaN
0.144	-11.486	128.341	521.40809	-0.13213	0.41426	-0.23496	-57.045	7.4891	9.665	0.059082	0.29102	0.026367	NaN	NaN	NaN	NaN	NaN	NaN	NaN	NaN	NaN	NaN	NaN	NaN
0.146	-5.27399999999999	129.714	490.632	-0.11035	0.39551	-0.21436	-30.553	25.4927	26.3385	0.057862	0.29541	0.026611	NaN	NaN	NaN	NaN	NaN	NaN	NaN	NaN	NaN	NaN	NaN	NaN
0.148	-32.661	141.993	464.2104	-0.091699	0.3669	-0.20039	-47.9377	7.1981	47.0805	0.058105	0.2915	0.03125	NaN	NaN	NaN	NaN	NaN	NaN	NaN	NaN	NaN	NaN	NaN	NaN
0.15	-24.749	120.6271	448.33122	-0.074023	0.34023	-0.18467	-36.803	-0.344999999999999	50.2559	0.060059	0.29102	0.037109	NaN	NaN	NaN	NaN	NaN	NaN	NaN	NaN	NaN	NaN	NaN	NaN
0.152	-27.538	122.5412	444.5309	-0.046679	0.32227	-0.17334	-11.812	39.8302	25.556	0.060547	0.28955	0.044922	NaN	NaN	NaN	NaN	NaN	NaN	NaN	NaN	NaN	NaN	NaN	NaN
0.154	-33.861	118.223	428.1124	-0.036035	0.30635	-0.16055	-46.595837	7.7468	29.917	0.068848	0.28125	0.047852	NaN	NaN	NaN	NaN	NaN	NaN	NaN	NaN	NaN	NaN	NaN	NaN
0.156	-52.5718	100.359	418.0611	-0.019043	0.29248	-0.13672	0.887	11.1574	32.4705	0.073487	0.27758	0.054688	NaN	NaN	NaN	NaN	NaN	NaN	NaN	NaN	NaN	NaN	NaN	NaN
0.158	-51.861	98.293	395.27891	-0.016602	0.26172	-0.11855	-12.379	31.139	7.2726	0.077148	0.26172	0.067871	NaN	NaN	NaN	NaN	NaN	NaN	NaN	NaN	NaN	NaN	NaN	NaN
0.16	-69.0268	89.821	385.0124	-0.017285	0.23779	-0.09043	-26.152	14.27492	22.0462	0.089355	0.24609	0.075684	NaN	NaN	NaN	NaN	NaN	NaN	NaN	NaN	NaN	NaN	NaN	NaN
0.162	-93.7632	99.2618773	359.7619	-0.0040039	0.2292	-0.079102	19.074	56.851	24.1166	0.097168	0.23438	0.079102	NaN	NaN	NaN	NaN	NaN	NaN	NaN	NaN	NaN	NaN	NaN	NaN
0.164	-102.792	101.8916	328.896	0.014453	0.21845	-0.079297	-18.786	35.343	13.964	0.11133	0.21973	0.091309	NaN	NaN	NaN	NaN	NaN	NaN	NaN	NaN	NaN	NaN	NaN	NaN
0.166	-101.696	95.5711	336.4175	0.037109	0.20264	-0.075195	-17.896	18.511	49.8656	0.12109	0.20459	0.10645	NaN	NaN	NaN	NaN	NaN	NaN	NaN	NaN	NaN	NaN	NaN	NaN
0.168	-89.367	100.9755	307.7594	0.051855	0.18916	-0.061426	7.647	60.231	18.711	0.13623	0.18408	0.11621	NaN	NaN	NaN	NaN	NaN	NaN	NaN	NaN	NaN	NaN	NaN	NaN
0.17	-79.506	89.9525	304.3795	0.072364	0.17979	-0.039258	-42.9687	31.395	18.0919	0.14697	0.15869	0.12549	NaN	NaN	NaN	NaN	NaN	NaN	NaN	NaN	NaN	NaN	NaN	NaN
0.172	-66.2079	91.0778	291.0851	0.081738	0.17236	-0.026367	8.183	37.602	41.2981	0.14941	0.14648	0.1377	NaN	NaN	NaN	NaN	NaN	NaN	NaN	NaN	NaN	NaN	NaN	NaN
0.174	-48.793	92.383	275.3133	0.091016	0.16865	-0.016992	13.508	44.451	12.448	0.15771	0.12109	0.14648	NaN	NaN	NaN	NaN	NaN	NaN	NaN	NaN	NaN	NaN	NaN	NaN
0.176	-26.876	111.3049	251.767	0.099121	0.16895	-0.0087891	-40.143	11.6927	10.35865	0.16553	0.10376	0.1604	NaN	NaN	NaN	NaN	NaN	NaN	NaN	NaN	NaN	NaN	NaN	NaN
0.178	-30.873	114.16367	232.7852	0.10732	0.17578	-0.0039062	5.412	55.5	26.5001	0.17139	0.084961	0.17139	NaN	NaN	NaN	NaN	NaN	NaN	NaN	NaN	NaN	NaN	NaN	NaN
0.18	-17.614	98.7624	229.8763	0.11631	0.17666	0.0060546	-12.226	37.653	18.801	0.18408	0.061523	0.18408	NaN	NaN	NaN	NaN	NaN	NaN	NaN	NaN	NaN	NaN	NaN	NaN
0.182	-0.527000000000001	94.068	219.865	0.12685	0.18291	0.015039	-39.986	-2.698	53.393	0.18994	0.054688	0.19043	NaN	NaN	NaN	NaN	NaN	NaN	NaN	NaN	NaN	NaN	NaN	NaN
0.184	-0.00300000000000011	89.5936	203.8399	0.12754	0.18418	0.025098	-3.97	46.174	56.252	0.20313	0.032227	0.19434	NaN	NaN	NaN	NaN	NaN	NaN	NaN	NaN	NaN	NaN	NaN	NaN
0.186	-12.749	83.555	196.4933	0.13379	0.18799	0.027832	-54.62846	1.0744	26.8491	0.21631	0.016846	0.19947	NaN	NaN	NaN	NaN	NaN	NaN	NaN	NaN	NaN	NaN	NaN	NaN
0.188	-18.526	72.699	208.3771	0.13867	0.18916	0.039063	-31.669	22.2291	41.90414	0.23145	-0.0019531	0.20654	NaN	NaN	NaN	NaN	NaN	NaN	NaN	NaN	NaN	NaN	NaN	NaN
0.19	2.224	72.261	207.7748	0.1456	0.19121	0.045313	-14.51	57.829	13.455	0.25439	-0.0092773	0.20898	NaN	NaN	NaN	NaN	NaN	NaN	NaN	NaN	NaN	NaN	NaN	NaN
0.192	3.76300000000001	73.869	179.5547	0.15068	0.19395	0.043359	-64.0458	1.038	15.2473	0.26074	-0.015625	0.20703	NaN	NaN	NaN	NaN	NaN	NaN	NaN	NaN	NaN	NaN	NaN	NaN
0.194	5.606	72.293	159.8483	0.15596	0.20244	0.042188	-26.77	39.5548	36.6632	0.27246	-0.015137	0.21094	NaN	NaN	NaN	NaN	NaN	NaN	NaN	NaN	NaN	NaN	NaN	NaN
0.196	4.767	63.4515	161.852	0.15918	0.20654	0.049316	-43.4505	40.0826	3.737	0.27832	-0.0095216	0.21215	NaN	NaN	NaN	NaN	NaN	NaN	NaN	NaN	NaN	NaN	NaN	NaN
0.198	-4.724	65.3243	149.688	0.16484	0.21113	0.053808	-52.275	18.2683	39.048	0.28027	0.0029297	0.21387	NaN	NaN	NaN	NaN	NaN	NaN	NaN	NaN	NaN	NaN	NaN	NaN
0.2	-7.024	70.1014	137.23642	0.16103	0.21601	0.052051	-7.741	71.7	43.8369	0.29053	0.029297	0.21777	NaN	NaN	NaN	NaN	NaN	NaN	NaN	NaN	NaN	NaN	NaN	NaN
0.202	-24.894	69.739	126.917	0.15986	0.22109	0.051661	-36.897	22.5404	30.1385	0.29468	0.046875	0.21313	NaN	NaN	NaN	NaN	NaN	NaN	NaN	NaN	NaN	NaN	NaN	NaN
0.204	-9.977	59.717	127.8622	0.16191	0.225	0.05293	-41.689	27.0145	48.104	0.30127	0.069336	0.21289	NaN	NaN	NaN	NaN	NaN	NaN	NaN	NaN	NaN	NaN	NaN	NaN
0.206	-49.0982	57.6213	127.2634	0.15967	0.22754	0.047363	-14.262	57.1904	9.06	0.30908	0.095703	0.21045	NaN	NaN	NaN	NaN	NaN	NaN	NaN	NaN	NaN	NaN	NaN	NaN
0.208	-61.6111	64.2679	121.79666	0.15801	0.23457	0.044726	-32.2778	-0.935000000000002	17.998	0.3125	0.1084	0.20313	NaN	NaN	NaN	NaN	NaN	NaN	NaN	NaN	NaN	NaN	NaN	NaN
0.21	-74.2984	64.94	113.2266	0.15987	0.23575	0.039063	-0.588999999999999	11.588	74.8081	0.32959	0.13721	0.18799	NaN	NaN	NaN	NaN	NaN	NaN	NaN	NaN	NaN	NaN	NaN	NaN
0.212	-79.10173	72.341	109.2169	0.15674	0.2459	0.0375	-32.716	-6.6461	67.054	0.34326	0.1626	0.16674	NaN	NaN	NaN	NaN	NaN	NaN	NaN	NaN	NaN	NaN	NaN	NaN
0.214	-87.801	72.307	97.535	0.15059	0.25254	0.035449	-28.046	-26.481	94.3694	0.35986	0.2002	0.146	NaN	NaN	NaN	NaN	NaN	NaN	NaN	NaN	NaN	NaN	NaN	NaN
0.216	-95.5883	58.823	77.3132	0.14355	0.2583	0.035156	60.437	48.996	103.3788	0.35791	0.24805	0.10938	NaN	NaN	NaN	NaN	NaN	NaN	NaN	NaN	NaN	NaN	NaN	NaN
0.218	-76.3337	47.081836	62.547	0.13477	0.26025	0.031054	-5.204	16.7569	114.8932	0.35596	0.27881	0.091309	NaN	NaN	NaN	NaN	NaN	NaN	NaN	NaN	NaN	NaN	NaN	NaN
0.22	-68.0053	44.7083	65.079	0.12578	0.26221	0.032813	-21.083	12.514	178.101	0.33838	0.33643	0.052246	NaN	NaN	NaN	NaN	NaN	NaN	NaN	NaN	NaN	NaN	NaN	NaN
0.222	-66.0331	55.8752	60.125	0.11914	0.26338	0.022265	-3.246	53.9813	172.635	0.3352	0.37988	0.018066	NaN	NaN	NaN	NaN	NaN	NaN	NaN	NaN	NaN	NaN	NaN	NaN
0.224	-48.7284	53.685	66.4672	0.11484	0.26279	0.021875	-28.301	26.093	199.808	0.33643	0.42383	-0.02002	NaN	NaN	NaN	NaN	NaN	NaN	NaN	NaN	NaN	NaN	NaN	NaN
0.226	-45.5513	51.076	78.079	0.11475	0.26172	0.023438	40.6045	74.468	277.1546	0.34229	0.47852	-0.07373	NaN	NaN	NaN	NaN	NaN	NaN	NaN	NaN	NaN	NaN	NaN	NaN
0.228	-32.179	45.954839	65.8193	0.10576	0.25986	0.025977	7.413	93.2396	291.086	0.34766	0.50928	-0.10205	NaN	NaN	NaN	NaN	NaN	NaN	NaN	NaN	NaN	NaN	NaN	NaN
0.23	-30.289	51.631	61.7627	0.10322	0.25674	0.028613	-9.463	69.891	362.9512	0.35498	0.5752	-0.17627	NaN	NaN	NaN	NaN	NaN	NaN	NaN	NaN	NaN	NaN	NaN	NaN
0.232	-26.601	52.204	66.4913	0.095411	0.25674	0.03252	37.751	145.722	403.503	0.3479	0.63257	-0.23682	NaN	NaN	NaN	NaN	NaN	NaN	NaN	NaN	NaN	NaN	NaN	NaN
0.234	-15.292	47.109	70.2627	0.090527	0.25644	0.037891	10.7745	123.434	460.907	0.33154	0.70703	-0.30078	NaN	NaN	NaN	NaN	NaN	NaN	NaN	NaN	NaN	NaN	NaN	NaN
0.236	-7.537	48.587	56.95813	0.083496	0.25	0.03418	11.58782	124.06	622.3454	0.27979	0.82617	-0.39307	NaN	NaN	NaN	NaN	NaN	NaN	NaN	NaN	NaN	NaN	NaN	NaN
0.238	-1.34	38.864	34.6695	0.080274	0.25273	0.041699	33.1502	146.105	718.53	0.24121	0.89795	-0.44092	NaN	NaN	NaN	NaN	NaN	NaN	NaN	NaN	NaN	NaN	NaN	NaN
0.24	-8.95	33.7154	35.4045	0.080273	0.24717	0.049316	-4.192	66.8817	796.85	0.14063	1.063	-0.53955	NaN	NaN	NaN	NaN	NaN	NaN	NaN	NaN	NaN	NaN	NaN	NaN
0.242	8.516	20.5249	45.4702	0.082617	0.24053	0.05166	8.722	94.0571	916.806	0.033935	1.1928	-0.59326	NaN	NaN	NaN	NaN	NaN	NaN	NaN	NaN	NaN	NaN	NaN	NaN
0.244	14.763	34.8933	53.0184	0.091699	0.23408	0.054395	-23.396	95.518	995.207	-0.088379	1.3267	-0.64404	NaN	NaN	NaN	NaN	NaN	NaN	NaN	NaN	NaN	NaN	NaN	NaN
0.246	29.645	53.9393	39.5944	0.094727	0.22705	0.056641	-9.8732	54.87	1085.597	-0.25732	1.5132	-0.68018	NaN	NaN	NaN	NaN	NaN	NaN	NaN	NaN	NaN	NaN	NaN	NaN
0.248	11.637	48.9778	41.5649	0.10576	0.21738	0.060254	35.701	105.109	1150.31534	-0.32959	1.6001	-0.69092	NaN	NaN	NaN	NaN	NaN	NaN	NaN	NaN	NaN	NaN	NaN	NaN
0.25	23.689	35.3338	42.2198	0.11172	0.20722	0.068652	18.6791	51.333	1119.8886	-0.45703	1.7598	-0.70117	NaN	NaN	NaN	NaN	NaN	NaN	NaN	NaN	NaN	NaN	NaN	NaN
0.252	-13.044	37.0939	46.6644	0.11641	0.19512	0.070606	19.8215	-0.9675	1151.578	-0.49732	1.8421	-0.71704	NaN	NaN	NaN	NaN	NaN	NaN	NaN	NaN	NaN	NaN	NaN	NaN
0.254	-19.229	43.2819	48.4212	0.12265	0.18232	0.07793	0.13988	6.6833	1138.331	-0.48047	1.8813	-0.71924	NaN	NaN	NaN	NaN	NaN	NaN	NaN	NaN	NaN	NaN	NaN	NaN
0.256	-22.247	31.423	57.9421	0.12793	0.17383	0.084961	-28.562	-72.182	1105.378	-0.35596	1.8457	-0.72852	NaN	NaN	NaN	NaN	NaN	NaN	NaN	NaN	NaN	NaN	NaN	NaN
0.258	-38.636	24.8618	57.1775	0.12891	0.15703	0.094043	30.744	-74.788	1078.598	-0.26465	1.8091	-0.71582	NaN	NaN	NaN	NaN	NaN	NaN	NaN	NaN	NaN	NaN	NaN	NaN
0.26	-52.5769	9.27185	63.2431	0.13711	0.14893	0.099706	35.42	-50.169	981.085	-0.12305	1.7607	-0.67969	NaN	NaN	NaN	NaN	NaN	NaN	NaN	NaN	NaN	NaN	NaN	NaN
0.262	-68.8612	0.83368	60.5906	0.14102	0.14307	0.10439	22.928	-105.142	952.4207	-0.050537	1.7544	-0.65235	NaN	NaN	NaN	NaN	NaN	NaN	NaN	NaN	NaN	NaN	NaN	NaN
0.264	-54.9114	2.4108	60.8435	0.1417	0.13965	0.10996	79.178	-68.319	951.345	0.0043945	1.7432	-0.62402	NaN	NaN	NaN	NaN	NaN	NaN	NaN	NaN	NaN	NaN	NaN	NaN
0.266	-70.1312	5.8096	60.1929	0.14063	0.14307	0.1167	22.1779	-89.59	933.997	0.064453	1.7153	-0.59717	NaN	NaN	NaN	NaN	NaN	NaN	NaN	NaN	NaN	NaN	NaN	NaN
0.268	-69.4034	13.4715	50.04683	0.1457	0.15693	0.12334	-6.1208	-110.5121	981.5947	0.081543	1.7036	-0.57764	NaN	NaN	NaN	NaN	NaN	NaN	NaN	NaN	NaN	NaN	NaN	NaN
0.27	-68.5309	-9.27576	64.0587	0.14375	0.1665	0.11992	71.202	-34.561	986.3139	0.097168	1.6782	-0.54932	NaN	NaN	NaN	NaN	NaN	NaN	NaN	NaN	NaN	NaN	NaN	NaN
0.272	-68.5427	-15.17888	85.9523	0.13789	0.18174	0.12383	1.372	-78.45	984.4131	0.09497	1.6694	-0.54199	NaN	NaN	NaN	NaN	NaN	NaN	NaN	NaN	NaN	NaN	NaN	NaN
0.274	-47.098	0.516	106.42259	0.13506	0.20117	0.12451	10.25	-60.573	1018.2804	0.086426	1.6699	-0.54688	NaN	NaN	NaN	NaN	NaN	NaN	NaN	NaN	NaN	NaN	NaN	NaN
0.276	-60.2652	18.827	121.6583	0.12646	0.21875	0.12207	22.929	-46.433	994.047	0.07959	1.6763	-0.56104	NaN	NaN	NaN	NaN	NaN	NaN	NaN	NaN	NaN	NaN	NaN	NaN
0.278	-52.5058	35.0211	129.7762	0.12773	0.24199	0.12139	-27.025	-134.809	1067.4714	0.075195	1.6899	-0.5791	NaN	NaN	NaN	NaN	NaN	NaN	NaN	NaN	NaN	NaN	NaN	NaN
0.28	-49.804	34.6409	152.3669	0.12656	0.25996	0.12071	11.139	-108.577	1119.2521	0.091309	1.7271	-0.62061	NaN	NaN	NaN	NaN	NaN	NaN	NaN	NaN	NaN	NaN	NaN	NaN
0.282	-37.903	60.8996	153.689	0.12383	0.28184	0.11836	-28.8865	-181.387	1108.3425	0.10815	1.7552	-0.66675	NaN	NaN	NaN	NaN	NaN	NaN	NaN	NaN	NaN	NaN	NaN	NaN
0.284	-20.053	79.052	186.2437	0.121	0.30752	0.11504	-33.909	-248.903	1165.17675	0.11182	1.8027	-0.71094	NaN	NaN	NaN	NaN	NaN	NaN	NaN	NaN	NaN	NaN	NaN	NaN
0.286	-4.16	90.468	220.9261	0.11816	0.33008	0.10889	-18.176	-205.734	1167.522	0.049805	1.8828	-0.74609	NaN	NaN	NaN	NaN	NaN	NaN	NaN	NaN	NaN	NaN	NaN	NaN
0.288	17.273	95.7179	272.1627	0.10908	0.35703	0.098731	-25.167	-253.43	1184.249	-0.0068359	1.9341	-0.74463	NaN	NaN	NaN	NaN	NaN	NaN	NaN	NaN	NaN	NaN	NaN	NaN
0.29	-0.492999999999999	102.6891	313.915	0.10137	0.38731	0.086426	-13.409	-216.902	1262.1495	-0.051758	2.0254	-0.87109	NaN	NaN	NaN	NaN	NaN	NaN	NaN	NaN	NaN	NaN	NaN	NaN
0.292	16.925	102.6112	388.877	0.084961	0.42168	0.0708	-33.9585	-164.419	1252.2927	-0.069092	2.0064	-0.83642	NaN	NaN	NaN	NaN	NaN	NaN	NaN	NaN	NaN	NaN	NaN	NaN
0.294	7.823	87.3148	477.892	0.069043	0.46133	0.051953	-67.548	-193.467	1303.61	-0.07373	2.0181	-0.84326	NaN	NaN	NaN	NaN	NaN	NaN	NaN	NaN	NaN	NaN	NaN	NaN
0.296	23.471	77.9684	580.3253	0.050293	0.5083	0.029297	-54.0149	-111.7121	1349.7608	-0.12109	2.0669	-0.84131	NaN	NaN	NaN	NaN	NaN	NaN	NaN	NaN	NaN	NaN	NaN	NaN
0.298	15.746	69.127	651.9119	0.019141	0.57041	0.0014649	-80.617	-102.5609	1355.1361	-0.14258	2.0898	-0.83398	NaN	NaN	NaN	NaN	NaN	NaN	NaN	NaN	NaN	NaN	NaN	NaN
0.3	-2.163	59.684	706.8075	-0.020312	0.63604	-0.030664	-68.784	-90.4815	1397.6769	-0.16895	2.125	-0.82227	NaN	NaN	NaN	NaN	NaN	NaN	NaN	NaN	NaN	NaN	NaN	NaN
0.302	-36.035	41.408	751.6387	-0.068359	0.72237	-0.062305	-17.559	-18.943	1382.6327	-0.16895	2.1262	-0.81054	NaN	NaN	NaN	NaN	NaN	NaN	NaN	NaN	NaN	NaN	NaN	NaN
0.304	-46.607	39.941	774.52796	-0.1249	0.81768	-0.095409	-75.0708	-50.753	1336.636	-0.16455	2.1196	-0.79932	NaN	NaN	NaN	NaN	NaN	NaN	NaN	NaN	NaN	NaN	NaN	NaN
0.306	-39.481	33.115	786.4477	-0.18213	0.9209	-0.12744	-57.04	-42.076	1358.111	-0.14209	2.0918	-0.78516	NaN	NaN	NaN	NaN	NaN	NaN	NaN	NaN	NaN	NaN	NaN	NaN
0.308	-47.618	25.1968	774.7285	-0.24912	1.029	-0.15889	-36.084	-28.324	1370.712	-0.13525	2.0747	-0.77686	NaN	NaN	NaN	NaN	NaN	NaN	NaN	NaN	NaN	NaN	NaN	NaN
0.31	-20.7927	21.036	774.1246	-0.32549	1.1368	-0.18233	-51.6093	-115.3357	1396.662	-0.11182	2.0259	-0.7749	NaN	NaN	NaN	NaN	NaN	NaN	NaN	NaN	NaN	NaN	NaN	NaN
0.312	-18.3701	11.561	767.158	-0.40596	1.238	-0.20381	6.999	-103.1837	1445.7746	-0.099364	2.0049	-0.78125	NaN	NaN	NaN	NaN	NaN	NaN	NaN	NaN	NaN	NaN	NaN	NaN
0.314	-22.7588	21.78	758.455	-0.48535	1.3152	-0.22363	-9.852	-138.527	1442.706	-0.090332	1.981	-0.80029	NaN	NaN	NaN	NaN	NaN	NaN	NaN	NaN	NaN	NaN	NaN	NaN
0.316	-26.7046	21.002	756.303	-0.55469	1.373	-0.24219	-38.834	-168.943	1470.9133	-0.083496	1.9375	-0.81934	NaN	NaN	NaN	NaN	NaN	NaN	NaN	NaN	NaN	NaN	NaN	NaN
0.318	-21.432	25.953	755.146	-0.59981	1.3947	-0.25957	5.373	-90.5892	1471.2988	-0.092285	1.918	-0.83057	NaN	NaN	NaN	NaN	NaN	NaN	NaN	NaN	NaN	NaN	NaN	NaN
0.32	-24.473	38.1508	731.7122	-0.62217	1.3865	-0.26162	-27.555	-116.902	1477.445	-0.12061	1.9048	-0.85498	NaN	NaN	NaN	NaN	NaN	NaN	NaN	NaN	NaN	NaN	NaN	NaN
0.322	-42.33856	46.433	728.873	-0.62177	1.3595	-0.26787	-20.021	-94.4184	1521.679	-0.14795	1.9239	-0.88379	NaN	NaN	NaN	NaN	NaN	NaN	NaN	NaN	NaN	NaN	NaN	NaN
0.324	-50.2233	47.0631	737.741	-0.5961	1.3158	-0.26933	37.8026	-49.627	1532.44	-0.18506	1.9556	-0.91357	NaN	NaN	NaN	NaN	NaN	NaN	NaN	NaN	NaN	NaN	NaN	NaN
0.326	-66.0155	37.682	758.13	-0.56396	1.272	-0.26514	3.703	-102.5874	1542.472	-0.22607	2.0039	-0.96484	NaN	NaN	NaN	NaN	NaN	NaN	NaN	NaN	NaN	NaN	NaN	NaN
0.328	-49.81558	40.026	760.034	-0.52441	1.228	-0.2624	8.361	-35.2436	1547.8523	-0.24414	2.0195	-0.99023	NaN	NaN	NaN	NaN	NaN	NaN	NaN	NaN	NaN	NaN	NaN	NaN
0.33	-56.8758	8.688	759.9	-0.48701	1.1868	-0.26201	-10.526	-31.3266	1526.9599	-0.25342	2.0454	-1.0249	NaN	NaN	NaN	NaN	NaN	NaN	NaN	NaN	NaN	NaN	NaN	NaN
0.332	-44.681	-21.929	772.517	-0.45498	1.154	-0.26787	-24.436	-38.102	1532.8173	-0.25976	2.0484	-1.0493	NaN	NaN	NaN	NaN	NaN	NaN	NaN	NaN	NaN	NaN	NaN	NaN
0.334	-29.094	-38.2987	796.097	-0.42998	1.1388	-0.26865	8.75	40.9611	1494.851	-0.25879	2.0371	-1.0635	NaN	NaN	NaN	NaN	NaN	NaN	NaN	NaN	NaN	NaN	NaN	NaN
0.336	0.921999999999997	-54.8639	831.942	-0.40576	1.1274	-0.27295	-16.446	-1.971	1481.72	-0.26318	2.0259	-1.0757	NaN	NaN	NaN	NaN	NaN	NaN	NaN	NaN	NaN	NaN	NaN	NaN
0.338	30.481	-72.744	852.3821	-0.38252	1.1276	-0.27881	-9.594	14.904	1520.018	-0.26611	2.0259	-1.0815	NaN	NaN	NaN	NaN	NaN	NaN	NaN	NaN	NaN	NaN	NaN	NaN
0.34	17.537	-105.457	902.804	-0.34766	1.1332	-0.29004	-39.9452	41.16168	1506.839	-0.28613	2.0137	-1.0938	NaN	NaN	NaN	NaN	NaN	NaN	NaN	NaN	NaN	NaN	NaN	NaN
0.342	46.8	-113.507	907.2344	-0.30977	1.1383	-0.2959	-70.4078	-11.5795	1542.6405	-0.30322	2.0181	-1.1128	NaN	NaN	NaN	NaN	NaN	NaN	NaN	NaN	NaN	NaN	NaN	NaN
0.344	13.264	-112.085	922.462	-0.27402	1.133	-0.30654	-56.017	38.276	1573.521	-0.31104	2.0137	-1.1191	NaN	NaN	NaN	NaN	NaN	NaN	NaN	NaN	NaN	NaN	NaN	NaN
0.346	13.863	-90.4243	937.1701	-0.25293	1.1191	-0.29736	-65.11944	18.9685	1541.384	-0.31982	2.0142	-1.1323	NaN	NaN	NaN	NaN	NaN	NaN	NaN	NaN	NaN	NaN	NaN	NaN
0.348	-12.027	-73.258	958.31947	-0.23467	1.1362	-0.31895	-64.396	-3.1735	1575.086	-0.31811	2.0122	-1.1372	NaN	NaN	NaN	NaN	NaN	NaN	NaN	NaN	NaN	NaN	NaN	NaN
0.35	-22.929	-65.282	983.596	-0.21192	1.1543	-0.33535	-50.0355	59.108	1576.4322	-0.30811	2.0005	-1.145	NaN	NaN	NaN	NaN	NaN	NaN	NaN	NaN	NaN	NaN	NaN	NaN
0.352	-34.731	-60.798	1010.888	-0.19863	1.1477	-0.33144	-67.4219	29.7667	1578.225	-0.30518	1.9688	-1.1426	NaN	NaN	NaN	NaN	NaN	NaN	NaN	NaN	NaN	NaN	NaN	NaN
0.354	-60.445	-50.732	1013.16289	-0.21426	1.1403	-0.32842	-62.5244	40.731	1589.155	-0.30078	1.9492	-1.1406	NaN	NaN	NaN	NaN	NaN	NaN	NaN	NaN	NaN	NaN	NaN	NaN
0.356	-35.2305	-39.461	1032.5469	-0.24219	1.1484	-0.33984	-40.3937	58.137	1544.9378	-0.29492	1.9141	-1.1367	NaN	NaN	NaN	NaN	NaN	NaN	NaN	NaN	NaN	NaN	NaN	NaN
0.358	-25.047	-39.717	1057.2033	-0.26397	1.1769	-0.36377	-90.1017	10.203	1529.9602	-0.29687	1.8912	-1.1216	NaN	NaN	NaN	NaN	NaN	NaN	NaN	NaN	NaN	NaN	NaN	NaN
0.36	-33.048	-23.01	1056.4893	-0.28447	1.2005	-0.38838	-37.542	69.202	1536.1972	-0.30859	1.877	-1.1172	NaN	NaN	NaN	NaN	NaN	NaN	NaN	NaN	NaN	NaN	NaN	NaN
0.362	-52.608	-38.1614	1067.873	-0.29853	1.2317	-0.40322	-29.8	92.1414	1505.1978	-0.31982	1.8677	-1.105	NaN	NaN	NaN	NaN	NaN	NaN	NaN	NaN	NaN	NaN	NaN	NaN
0.364	-64.996	-54.9795	1084.881	-0.31592	1.2645	-0.41455	-64.5763	87.6081	1494.807	-0.33252	1.8696	-1.1011	NaN	NaN	NaN	NaN	NaN	NaN	NaN	NaN	NaN	NaN	NaN	NaN
0.366	-67.1987	-68.526	1106.60711	-0.34668	1.2969	-0.43359	-29.62	152.789	1496.48	-0.35303	1.8345	-1.0737	NaN	NaN	NaN	NaN	NaN	NaN	NaN	NaN	NaN	NaN	NaN	NaN
0.368	-98.7765	-81.468	1156.017	-0.37588	1.3378	-0.44404	-77.3993	114.13	1460.5988	-0.3606	1.802	-1.0534	NaN	NaN	NaN	NaN	NaN	NaN	NaN	NaN	NaN	NaN	NaN	NaN
0.37	-92.0808	-94.437	1175.426	-0.40899	1.393	-0.45654	-31.289	131.309	1448.5353	-0.36475	1.77	-1.0269	NaN	NaN	NaN	NaN	NaN	NaN	NaN	NaN	NaN	NaN	NaN	NaN
0.372	-116.769	-107.481	1194.865	-0.4418	1.4367	-0.46748	10.185	170.842	1427.967	-0.36816	1.7349	-0.99463	NaN	NaN	NaN	NaN	NaN	NaN	NaN	NaN	NaN	NaN	NaN	NaN
0.374	-114.174	-95.4989	1194.2349	-0.47197	1.4809	-0.47744	-18.683	116.2171	1412.775	-0.3667	1.7202	-0.97803	NaN	NaN	NaN	NaN	NaN	NaN	NaN	NaN	NaN	NaN	NaN	NaN
0.376	-107.231	-103.0406	1194.3533	-0.49902	1.5176	-0.49023	8.979	143.49239	1417.0975	-0.36963	1.6777	-0.94531	NaN	NaN	NaN	NaN	NaN	NaN	NaN	NaN	NaN	NaN	NaN	NaN
0.378	-105.8831	-98.0397	1199.6387	-0.51768	1.5464	-0.50224	-5.31	119.1575	1378.9958	-0.37647	1.643	-0.9126	NaN	NaN	NaN	NaN	NaN	NaN	NaN	NaN	NaN	NaN	NaN	NaN
0.38	-72.283	-90.1411	1202.4484	-0.52617	1.5594	-0.50703	-3.972	86.076	1368.635	-0.37939	1.606	-0.88916	NaN	NaN	NaN	NaN	NaN	NaN	NaN	NaN	NaN	NaN	NaN	NaN
0.382	-57.521	-72.08795	1205.4006	-0.52578	1.5605	-0.51446	17.223	141.9471	1349.515	-0.37842	1.5688	-0.85889	NaN	NaN	NaN	NaN	NaN	NaN	NaN	NaN	NaN	NaN	NaN	NaN
0.384	-41.669	-54.2199	1207.5632	-0.52109	1.5497	-0.51904	-3.931	103.432	1312.0371	-0.37695	1.5508	-0.8457	NaN	NaN	NaN	NaN	NaN	NaN	NaN	NaN	NaN	NaN	NaN	NaN
0.386	-58.616	-61.367	1228.014	-0.51709	1.5376	-0.52686	-3.625	126.0965	1293.25	-0.37598	1.5078	-0.80957	NaN	NaN	NaN	NaN	NaN	NaN	NaN	NaN	NaN	NaN	NaN	NaN
0.388	-21.452	-57.74	1234.5115	-0.51631	1.5286	-0.52715	-19.753	172.0767	1243.615	-0.3728	1.4733	-0.77856	NaN	NaN	NaN	NaN	NaN	NaN	NaN	NaN	NaN	NaN	NaN	NaN
0.39	-35.381	-45.6842	1242.3396	-0.52783	1.5354	-0.53066	-42.8747	144.734	1226.439	-0.37256	1.4468	-0.75537	NaN	NaN	NaN	NaN	NaN	NaN	NaN	NaN	NaN	NaN	NaN	NaN
0.392	-35.269	-19.992	1226.9078	-0.54619	1.5451	-0.5537	1.098	187.8307	1216.886	-0.36719	1.4087	-0.72217	NaN	NaN	NaN	NaN	NaN	NaN	NaN	NaN	NaN	NaN	NaN	NaN
0.394	-38.163	-13.3	1254.4619	-0.57558	1.565	-0.5623	-27.0427	177.58662	1182.0928	-0.36426	1.3872	-0.70459	NaN	NaN	NaN	NaN	NaN	NaN	NaN	NaN	NaN	NaN	NaN	NaN
0.396	-31.481	-17.938	1269.1968	-0.60303	1.5981	-0.57764	-39.355	179.6679	1178.94	-0.34912	1.335	-0.66699	NaN	NaN	NaN	NaN	NaN	NaN	NaN	NaN	NaN	NaN	NaN	NaN
0.398	-46.019	-22.185	1270.9147	-0.63468	1.633	-0.59532	8.012	246.616	1143.116	-0.33276	1.2824	-0.6394	NaN	NaN	NaN	NaN	NaN	NaN	NaN	NaN	NaN	NaN	NaN	NaN
0.4	-59.311	-42.224	1283.6624	-0.67229	1.6711	-0.61524	-40.0676	214.931	1090.459	-0.31396	1.2271	-0.60889	NaN	NaN	NaN	NaN	NaN	NaN	NaN	NaN	NaN	NaN	NaN	NaN
0.402	-35.383	-61.647	1292.1275	-0.70903	1.7087	-0.62853	-20.042	222.698	1076.4485	-0.28711	1.1567	-0.57324	NaN	NaN	NaN	NaN	NaN	NaN	NaN	NaN	NaN	NaN	NaN	NaN
0.404	-52.036	-71.57	1307.6426	-0.74729	1.7423	-0.64571	-28.0745	233.467	1036.1154	-0.27246	1.1196	-0.5542	NaN	NaN	NaN	NaN	NaN	NaN	NaN	NaN	NaN	NaN	NaN	NaN
0.406	-49.667	-52.781	1326.2736	-0.77979	1.7778	-0.6582	-52.95478	182.139	1001.2603	-0.24121	1.0532	-0.51904	NaN	NaN	NaN	NaN	NaN	NaN	NaN	NaN	NaN	NaN	NaN	NaN
0.408	-69.995	-38.136	1322.227	-0.80601	1.8134	-0.67127	-16.73	215.47346	979.675	-0.22314	0.99999	-0.49365	NaN	NaN	NaN	NaN	NaN	NaN	NaN	NaN	NaN	NaN	NaN	NaN
0.41	-56.091	-31.568	1325.7454	-0.83631	1.8465	-0.68488	-34.0638	206.3448	943.285	-0.2041	0.9458	-0.47607	NaN	NaN	NaN	NaN	NaN	NaN	NaN	NaN	NaN	NaN	NaN	NaN
0.412	-52.975	-20.9085	1342.195	-0.86524	1.8747	-0.68872	-38.2148	196.4454	945.437	-0.17773	0.87109	-0.44141	NaN	NaN	NaN	NaN	NaN	NaN	NaN	NaN	NaN	NaN	NaN	NaN
0.414	-105.3607	-4.701	1361.13	-0.89093	1.8997	-0.69977	7.001	231.325	936.051	-0.16797	0.83008	-0.43652	NaN	NaN	NaN	NaN	NaN	NaN	NaN	NaN	NaN	NaN	NaN	NaN
0.416	-117.0004	-1.292	1363.54025	-0.91748	1.9204	-0.70459	-20.271	214.817	894.674	-0.14258	0.74805	-0.4043	NaN	NaN	NaN	NaN	NaN	NaN	NaN	NaN	NaN	NaN	NaN	NaN
0.418	-121.2737	2.19	1351.744	-0.94225	1.9376	-0.71364	1.723	229.304378	874.194	-0.12671	0.69506	-0.38403	NaN	NaN	NaN	NaN	NaN	NaN	NaN	NaN	NaN	NaN	NaN	NaN
0.42	-120.4963	22.12016	1338.618	-0.95207	1.9479	-0.7149	27.22773	231.5626	838.2258	-0.10645	0.64111	-0.36572	NaN	NaN	NaN	NaN	NaN	NaN	NaN	NaN	NaN	NaN	NaN	NaN
0.422	-139.07	30.823	1331.1701	-0.95824	1.943	-0.71881	-10.527	213.9256	797.415	-0.085938	0.56934	-0.3418	NaN	NaN	NaN	NaN	NaN	NaN	NaN	NaN	NaN	NaN	NaN	NaN
0.424	-135.381	27.6343	1317.932	-0.95743	1.9391	-0.71837	47.135	248.5636	766.182	-0.079102	0.53369	-0.33057	NaN	NaN	NaN	NaN	NaN	NaN	NaN	NaN	NaN	NaN	NaN	NaN
0.426	-113.3074	24.89978	1309.958	-0.94873	1.9302	-0.71387	43.079	242.188	706.152	-0.06543	0.479	-0.31396	NaN	NaN	NaN	NaN	NaN	NaN	NaN	NaN	NaN	NaN	NaN	NaN
0.428	-112.5113	34.1562	1317.2005	-0.94627	1.914	-0.7085	18.919	217.0759	676.3793	-0.060059	0.44068	-0.29956	NaN	NaN	NaN	NaN	NaN	NaN	NaN	NaN	NaN	NaN	NaN	NaN
0.43	-87.8838	28.9222	1320.67787	-0.93468	1.8911	-0.70456	26.8828	227.909	655.8832	-0.052734	0.40088	-0.29004	NaN	NaN	NaN	NaN	NaN	NaN	NaN	NaN	NaN	NaN	NaN	NaN
0.432	-75.183	16.247	1334.37572	-0.92866	1.8691	-0.69498	-2.232	211.629	597.5361	-0.046875	0.35498	-0.27246	NaN	NaN	NaN	NaN	NaN	NaN	NaN	NaN	NaN	NaN	NaN	NaN
0.434	-37.792	12.253	1332.4365	-0.9185	1.8486	-0.68411	33.6683	231.218	581.852	-0.044434	0.32422	-0.2666	NaN	NaN	NaN	NaN	NaN	NaN	NaN	NaN	NaN	NaN	NaN	NaN
0.436	-73.907	11.6857	1318.858	-0.91016	1.8164	-0.66797	36.018	260.397	542.604	-0.039551	0.27393	-0.25244	NaN	NaN	NaN	NaN	NaN	NaN	NaN	NaN	NaN	NaN	NaN	NaN
0.438	-67.965	13.6995	1304.48613	-0.89239	1.7891	-0.65762	-0.260999999999999	221.7759	516.5905	-0.035889	0.22656	-0.24292	NaN	NaN	NaN	NaN	NaN	NaN	NaN	NaN	NaN	NaN	NaN	NaN
0.44	-67.812	21.1107	1297.6982	-0.87297	1.7557	-0.64671	30.7896	208.827	499.4617	-0.024414	0.19189	-0.2417	NaN	NaN	NaN	NaN	NaN	NaN	NaN	NaN	NaN	NaN	NaN	NaN
0.442	-54.658	37.334	1279.423	-0.83915	1.7203	-0.63773	-5.348	198.8308	442.758	-0.0073242	0.16064	-0.24023	NaN	NaN	NaN	NaN	NaN	NaN	NaN	NaN	NaN	NaN	NaN	NaN
0.444	-54.207	52.303	1268.2074	-0.81132	1.6752	-0.61408	-17.151	182.7808	439.443	-0.00048828	0.13428	-0.2251	NaN	NaN	NaN	NaN	NaN	NaN	NaN	NaN	NaN	NaN	NaN	NaN
0.446	-56.73	53.278	1238.9649	-0.78076	1.6313	-0.6001	24.4201	190.5355	425.542	-0.010742	0.064941	-0.19922	NaN	NaN	NaN	NaN	NaN	NaN	NaN	NaN	NaN	NaN	NaN	NaN
0.448	-26.823	56.4946	1224.231	-0.75562	1.5892	-0.58572	-36.859	168.323	385.8061	-0.0095214	0.032959	-0.19043	NaN	NaN	NaN	NaN	NaN	NaN	NaN	NaN	NaN	NaN	NaN	NaN
0.45	-18.85	62.04207	1209.7	-0.73496	1.5587	-0.57121	-20.683	155.856	368.3039	-0.0087891	0.012207	-0.19238	NaN	NaN	NaN	NaN	NaN	NaN	NaN	NaN	NaN	NaN	NaN	NaN
0.452	-1.025	93.9924	1194.3183	-0.71315	1.5277	-0.5609	-28.2254	161.6742	317.65	-0.0014648	-0.019043	-0.19971	NaN	NaN	NaN	NaN	NaN	NaN	NaN	NaN	NaN	NaN	NaN	NaN
0.454	-6.742	83.7517	1180.214	-0.69336	1.5051	-0.55392	-50.216	143.688	299.8505	0.0019531	-0.035156	-0.19922	NaN	NaN	NaN	NaN	NaN	NaN	NaN	NaN	NaN	NaN	NaN	NaN
0.456	-4.862	92.768	1180.1957	-0.6792	1.4829	-0.55029	-3.562	140.8453	302.592	0.0073242	-0.060547	-0.18799	NaN	NaN	NaN	NaN	NaN	NaN	NaN	NaN	NaN	NaN	NaN	NaN
0.458	-29.533	98.731	1169.973	-0.66611	1.4555	-0.53563	-50.81212	134.3341	267.1624	0.010986	-0.085205	-0.18482	NaN	NaN	NaN	NaN	NaN	NaN	NaN	NaN	NaN	NaN	NaN	NaN
0.46	-59.36	98.397	1163.251	-0.65651	1.4333	-0.52922	-48.2134	126.4116	247.875	0.013184	-0.098633	-0.18408	NaN	NaN	NaN	NaN	NaN	NaN	NaN	NaN	NaN	NaN	NaN	NaN
0.462	-72.439	84.575	1140.68	-0.64592	1.4078	-0.52007	-11.703	138.898	228.089	0.0068359	-0.10352	-0.18018	NaN	NaN	NaN	NaN	NaN	NaN	NaN	NaN	NaN	NaN	NaN	NaN
0.464	-87.9968	83.8939	1136.0786	-0.63367	1.3803	-0.51457	-60.309	129.4412	199.463	0.0039063	-0.10449	-0.17773	NaN	NaN	NaN	NaN	NaN	NaN	NaN	NaN	NaN	NaN	NaN	NaN
0.466	-81.4518	83.9182	1106.1762	-0.62158	1.3521	-0.50537	-17.819	114.7196	216.76749	-0.0058594	-0.099121	-0.17773	NaN	NaN	NaN	NaN	NaN	NaN	NaN	NaN	NaN	NaN	NaN	NaN
0.468	-110.8411	71.6311	1075.6714	-0.60338	1.3181	-0.5013	-19.506	115.1523	185.72	-0.022461	-0.085205	-0.18213	NaN	NaN	NaN	NaN	NaN	NaN	NaN	NaN	NaN	NaN	NaN	NaN
0.47	-101.2468	73.07466	1060.7131	-0.58782	1.2894	-0.49374	-40.2281	104.7424	158.7994	-0.035156	-0.081543	-0.17822	NaN	NaN	NaN	NaN	NaN	NaN	NaN	NaN	NaN	NaN	NaN	NaN
0.472	-82.4799	70.6735	1041.58554	-0.57379	1.2612	-0.48708	10.324	91.603	143.8055	-0.04541	-0.071289	-0.17578	NaN	NaN	NaN	NaN	NaN	NaN	NaN	NaN	NaN	NaN	NaN	NaN
0.474	-76.4243	80.441	1032.7808	-0.55476	1.233	-0.48281	-21.097	73.589	114.504	-0.053711	-0.064941	-0.17432	NaN	NaN	NaN	NaN	NaN	NaN	NaN	NaN	NaN	NaN	NaN	NaN
0.476	-81.0197	81.37	1027.8629	-0.53906	1.2031	-0.47949	-9.6	52.4707	117.9168	-0.055664	-0.058594	-0.17383	NaN	NaN	NaN	NaN	NaN	NaN	NaN	NaN	NaN	NaN	NaN	NaN
0.478	-81.0542	84.59	1003.91185	-0.52432	1.1806	-0.47061	18.748	66.206	105.0111	-0.056153	-0.0625	-0.16552	NaN	NaN	NaN	NaN	NaN	NaN	NaN	NaN	NaN	NaN	NaN	NaN
0.48	-55.117	104.057	986.3381	-0.51202	1.1607	-0.46104	-26.2414	58.5459	74.581	-0.051758	-0.064941	-0.15967	NaN	NaN	NaN	NaN	NaN	NaN	NaN	NaN	NaN	NaN	NaN	NaN
0.482	-69.1969	128.1596	957.24864	-0.49992	1.1392	-0.45908	18.372	44.3338	102.3538	-0.056152	-0.050293	-0.15332	NaN	NaN	NaN	NaN	NaN	NaN	NaN	NaN	NaN	NaN	NaN	NaN
0.484	-64.1087	139.788	937.6726	-0.49151	1.1146	-0.45528	16.025	38.0982	88.644	-0.062012	-0.046875	-0.14258	NaN	NaN	NaN	NaN	NaN	NaN	NaN	NaN	NaN	NaN	NaN	NaN
0.486	-71.5816	139.982	917.0703	-0.47656	1.0879	-0.45215	-24.888	32.141	82.5339	-0.075195	-0.035645	-0.13428	NaN	NaN	NaN	NaN	NaN	NaN	NaN	NaN	NaN	NaN	NaN	NaN
0.488	-55.2481	136.059	873.5974	-0.45908	1.0587	-0.44356	34.399	48.0459	87.38	-0.092285	-0.018555	-0.12695	NaN	NaN	NaN	NaN	NaN	NaN	NaN	NaN	NaN	NaN	NaN	NaN
0.49	-54.5819	131.146	854.5231	-0.44286	1.0294	-0.4417	6.347	64.672	29.127	-0.10596	-0.0063477	-0.12305	NaN	NaN	NaN	NaN	NaN	NaN	NaN	NaN	NaN	NaN	NaN	NaN
0.492	-30.674	128.336	835.0335	-0.42607	1.004	-0.42919	-11.97	50.878	42.5902	-0.125	0.015625	-0.12207	NaN	NaN	NaN	NaN	NaN	NaN	NaN	NaN	NaN	NaN	NaN	NaN
0.494	9.375	122.0295	834.1812	-0.41074	0.97392	-0.41748	-7.32	48.062	40.0593	-0.14014	0.031983	-0.11719	NaN	NaN	NaN	NaN	NaN	NaN	NaN	NaN	NaN	NaN	NaN	NaN
0.496	14.018	130.1772	799.496	-0.39307	0.95166	-0.41992	-43.605	47.813	17.023	-0.15332	0.056641	-0.10986	NaN	NaN	NaN	NaN	NaN	NaN	NaN	NaN	NaN	NaN	NaN	NaN
0.498	26.999	126.033	775.0943	-0.37793	0.92305	-0.41123	-8.692	51.7554	40.2531	-0.1665	0.091309	-0.11475	NaN	NaN	NaN	NaN	NaN	NaN	NaN	NaN	NaN	NaN	NaN	NaN
0.5	18.538	113.751	763.1608	-0.36465	0.89532	-0.40488	-15.132	45.904	30.465	-0.1709	0.10254	-0.11475	NaN	NaN	NaN	NaN	NaN	NaN	NaN	NaN	NaN	NaN	NaN	NaN
0.502	18.308	115.063	750.474	-0.34629	0.86914	-0.39863	-52.6403	40.2651	28.9339	-0.17139	0.1333	-0.11768	NaN	NaN	NaN	NaN	NaN	NaN	NaN	NaN	NaN	NaN	NaN	NaN
0.504	26.225	119.25458	741.528	-0.33301	0.83808	-0.38701	-39.372	22.097	36.2911	-0.17017	0.14721	-0.12207	NaN	NaN	NaN	NaN	NaN	NaN	NaN	NaN	NaN	NaN	NaN	NaN
0.506	5.271	131.232	732.948	-0.31543	0.80859	-0.37988	-66.9594	38.907	0.250999999999999	-0.16406	0.15967	-0.12402	NaN	NaN	NaN	NaN	NaN	NaN	NaN	NaN	NaN	NaN	NaN	NaN
0.508	-10.796	124.697	712.6824	-0.30069	0.77978	-0.3751	-38.8814	36.2817	17.6002	-0.1543	0.1626	-0.13086	NaN	NaN	NaN	NaN	NaN	NaN	NaN	NaN	NaN	NaN	NaN	NaN
0.51	-7.834	131.983	687.584	-0.28233	0.74892	-0.36572	-16.384	27.257	29.7881	-0.14355	0.16455	-0.13574	NaN	NaN	NaN	NaN	NaN	NaN	NaN	NaN	NaN	NaN	NaN	NaN
0.512	-5.127	132.3143	653.5383	-0.26279	0.72002	-0.35987	-75.503	19.20575	31.7309	-0.12598	0.15723	-0.14014	NaN	NaN	NaN	NaN	NaN	NaN	NaN	NaN	NaN	NaN	NaN	NaN
0.514	-48.083	131.6257	635.2874	-0.24737	0.68887	-0.35107	-35.277	14.85	47.587	-0.1106	0.14819	-0.14672	NaN	NaN	NaN	NaN	NaN	NaN	NaN	NaN	NaN	NaN	NaN	NaN
0.516	-26.247	135.9434	621.837	-0.23389	0.66455	-0.34668	-31.276	25.2149	22.372	-0.094238	0.13818	-0.15723	NaN	NaN	NaN	NaN	NaN	NaN	NaN	NaN	NaN	NaN	NaN	NaN
0.518	-20.305	140.01983	599.5606	-0.22353	0.63594	-0.3375	-49.9039	38.495	38.2585	-0.062988	0.12744	-0.15674	NaN	NaN	NaN	NaN	NaN	NaN	NaN	NaN	NaN	NaN	NaN	NaN
0.52	-30.625	150.28082	561.4077	-0.21026	0.60664	-0.33018	-3.434	24.7392	68.92	-0.058594	0.12402	-0.1626	NaN	NaN	NaN	NaN	NaN	NaN	NaN	NaN	NaN	NaN	NaN	NaN
0.522	-46.6252	143.9305	550.971	-0.19659	0.58047	-0.32588	-52.8912	30.6034	30.113	-0.039063	0.1084	-0.16064	NaN	NaN	NaN	NaN	NaN	NaN	NaN	NaN	NaN	NaN	NaN	NaN
0.524	-39.412	135.925	546.752	-0.18125	0.55352	-0.31699	-21.267	32.1405	20.8368	-0.034424	0.099611	-0.15698	NaN	NaN	NaN	NaN	NaN	NaN	NaN	NaN	NaN	NaN	NaN	NaN
0.526	-41.1029	132.711	538.117	-0.17188	0.52686	-0.3125	6.472	28.6605	23.7443	-0.032227	0.096191	-0.1543	NaN	NaN	NaN	NaN	NaN	NaN	NaN	NaN	NaN	NaN	NaN	NaN
0.528	-68.5501	147.1028	517.8409	-0.15889	0.49931	-0.29834	-52.5125	37.7602	11.9495	-0.030273	0.092285	-0.15381	NaN	NaN	NaN	NaN	NaN	NaN	NaN	NaN	NaN	NaN	NaN	NaN
0.53	-64.1349	146.2839	503.6528	-0.14648	0.46719	-0.28877	10.088	27.9319	52.491	-0.03125	0.085938	-0.15332	NaN	NaN	NaN	NaN	NaN	NaN	NaN	NaN	NaN	NaN	NaN	NaN
0.532	-63.7704	138.779	483.072	-0.13633	0.44571	-0.28057	5.493	24.5411	22.717	-0.029785	0.083984	-0.15088	NaN	NaN	NaN	NaN	NaN	NaN	NaN	NaN	NaN	NaN	NaN	NaN
0.534	-47.5428	145.36	466.1726	-0.125	0.4209	-0.27393	-26.5372	41.541	19.025	-0.021484	0.077148	-0.14502	NaN	NaN	NaN	NaN	NaN	NaN	NaN	NaN	NaN	NaN	NaN	NaN
0.536	-61.7196	147.213	445.215	-0.11621	0.39307	-0.26611	33.4881	18.6141	49.3802	-0.017578	0.067383	-0.13623	NaN	NaN	NaN	NaN	NaN	NaN	NaN	NaN	NaN	NaN	NaN	NaN
0.538	-34.832	132.5456	419.4112	-0.10381	0.37129	-0.26074	-4.857	20.0845	29.586	-0.0048828	0.044922	-0.12891	NaN	NaN	NaN	NaN	NaN	NaN	NaN	NaN	NaN	NaN	NaN	NaN
0.54	-18.196	118.7663	418.5959	-0.095117	0.34688	-0.25117	-3.311	14.438	29.5178	-0.00097656	0.036621	-0.12793	NaN	NaN	NaN	NaN	NaN	NaN	NaN	NaN	NaN	NaN	NaN	NaN
0.542	-6.857	124.038	397.9543	-0.087695	0.325	-0.24492	19.381	16.4638	13.377338	0.017578	0.0039063	-0.11768	NaN	NaN	NaN	NaN	NaN	NaN	NaN	NaN	NaN	NaN	NaN	NaN
0.544	7.311	116.276	383.3751	-0.077442	0.29599	-0.24268	-30.174	35.0882	2.7279	0.027343	-0.021728	-0.11231	NaN	NaN	NaN	NaN	NaN	NaN	NaN	NaN	NaN	NaN	NaN	NaN
0.546	10.15	116.729	362.444	-0.070313	0.26807	-0.23193	-0.972999999999999	19.5973	34.2383	0.039063	-0.047363	-0.10303	NaN	NaN	NaN	NaN	NaN	NaN	NaN	NaN	NaN	NaN	NaN	NaN
0.548	33.5268	113.2775	355.6063	-0.064941	0.24766	-0.22871	-12.819	20.3864	26.346	0.04834	-0.067871	-0.088867	NaN	NaN	NaN	NaN	NaN	NaN	NaN	NaN	NaN	NaN	NaN	NaN
0.55	22.774	127.945	327.9573	-0.055371	0.21982	-0.21699	-40.149	28.537	30.2727	0.054688	-0.078613	-0.080566	NaN	NaN	NaN	NaN	NaN	NaN	NaN	NaN	NaN	NaN	NaN	NaN
0.552	4.063	130.353	318.9962	-0.046386	0.19482	-0.21192	-12.79	17.6888	43.0819	0.058105	-0.093262	-0.071289	NaN	NaN	NaN	NaN	NaN	NaN	NaN	NaN	NaN	NaN	NaN	NaN
0.554	3.016	114.134	316.4073	-0.033106	0.17246	-0.20938	-51.23296	22.70504	25.322	0.05664	-0.10278	-0.066162	NaN	NaN	NaN	NaN	NaN	NaN	NaN	NaN	NaN	NaN	NaN	NaN
0.556	16.776	122.976	304.337	-0.023926	0.15137	-0.20654	-40.694	23.331	32.043	0.050781	-0.10107	-0.064453	NaN	NaN	NaN	NaN	NaN	NaN	NaN	NaN	NaN	NaN	NaN	NaN
0.558	17.159	123.495	292.5599	-0.011231	0.12607	-0.19883	-14.788	19.197	8.638	0.046387	-0.098145	-0.066406	NaN	NaN	NaN	NaN	NaN	NaN	NaN	NaN	NaN	NaN	NaN	NaN
0.56	-9.775	113.464	279.9129	-0.0039062	0.10293	-0.18701	-66.5412	43.871	-12.2255	0.039063	-0.099121	-0.071289	NaN	NaN	NaN	NaN	NaN	NaN	NaN	NaN	NaN	NaN	NaN	NaN
0.562	3.519	106.757	256.6565	0.0027344	0.07793	-0.18232	-22.984	39.326	25.36894	0.036133	-0.086426	-0.07373	NaN	NaN	NaN	NaN	NaN	NaN	NaN	NaN	NaN	NaN	NaN	NaN
0.564	0.52	102.0711	228.6157	0.012012	0.061816	-0.18008	-35.8637	25.794	21.4	0.033936	-0.076904	-0.079346	NaN	NaN	NaN	NaN	NaN	NaN	NaN	NaN	NaN	NaN	NaN	NaN
0.566	-8.026	107.0338	221.8275	0.022461	0.053223	-0.18018	-66.9639	38.91133	29.0529	0.038574	-0.061035	-0.089844	NaN	NaN	NaN	NaN	NaN	NaN	NaN	NaN	NaN	NaN	NaN	NaN
0.568	-17.274	91.8598	214.5934	0.034571	0.036914	-0.17363	-25.46	16.0738	52.2098	0.036621	-0.048828	-0.098145	NaN	NaN	NaN	NaN	NaN	NaN	NaN	NaN	NaN	NaN	NaN	NaN
0.57	-5.729	82.069	222.1715	0.04502	0.020019	-0.1708	-59.8343	34.843	18.029	0.038574	-0.036621	-0.11035	NaN	NaN	NaN	NaN	NaN	NaN	NaN	NaN	NaN	NaN	NaN	NaN
0.572	-23.565	86.9145	213.8699	0.051269	0.0079102	-0.16806	-29.484	30.7464	43.5299	0.041016	-0.028809	-0.12646	NaN	NaN	NaN	NaN	NaN	NaN	NaN	NaN	NaN	NaN	NaN	NaN
0.574	-48.8972	93.5081	208.0921	0.05625	-0.00058594	-0.17402	8.205	25.578	22.536	0.047851	-0.02417	-0.14087	NaN	NaN	NaN	NaN	NaN	NaN	NaN	NaN	NaN	NaN	NaN	NaN
0.576	-57.97952	92.3778	203.3356	0.058105	-0.0039063	-0.17285	-53.683	34.7167	1.977	0.062988	-0.019043	-0.15186	NaN	NaN	NaN	NaN	NaN	NaN	NaN	NaN	NaN	NaN	NaN	NaN
0.578	-61.4318	93.323	192.625	0.063184	-0.01748	-0.16836	-8.031	26.4875	23.5951	0.07959	-0.01709	-0.16504	NaN	NaN	NaN	NaN	NaN	NaN	NaN	NaN	NaN	NaN	NaN	NaN
0.58	-66.0466	95.118	176.223	0.066015	-0.028125	-0.1626	4.22	25.7927	18.9271	0.088379	-0.01709	-0.17432	NaN	NaN	NaN	NaN	NaN	NaN	NaN	NaN	NaN	NaN	NaN	NaN
0.582	-78.3787	98.123	152.91842	0.063672	-0.033593	-0.16299	-26.042	33.74299	48.1513	0.10156	-0.013184	-0.19043	NaN	NaN	NaN	NaN	NaN	NaN	NaN	NaN	NaN	NaN	NaN	NaN
0.584	-52.621	82.3118	142.2493	0.063477	-0.030762	-0.16035	22.352	5.468	71.379	0.1084	-0.0083007	-0.19727	NaN	NaN	NaN	NaN	NaN	NaN	NaN	NaN	NaN	NaN	NaN	NaN
0.586	-48.6522	77.0344	132.24	0.066406	-0.028809	-0.16406	-12.024	11.8984	54.025	0.11719	0.0024414	-0.20898	NaN	NaN	NaN	NaN	NaN	NaN	NaN	NaN	NaN	NaN	NaN	NaN
0.588	-47.5504	88.5976	126.8413	0.063379	-0.028809	-0.15791	-23.067	8.8358	75.8504	0.11963	0.036133	-0.21436	NaN	NaN	NaN	NaN	NaN	NaN	NaN	NaN	NaN	NaN	NaN	NaN
0.59	-25.644	75.3491	130.8702	0.059961	-0.03291	-0.15918	29.047	-2.344	82.8941	0.11621	0.058594	-0.21924	NaN	NaN	NaN	NaN	NaN	NaN	NaN	NaN	NaN	NaN	NaN	NaN
0.592	-10.698	69.909	116.0967	0.058789	-0.030957	-0.15254	-15.846	-4.5765	76.2338	0.10254	0.11523	-0.229	NaN	NaN	NaN	NaN	NaN	NaN	NaN	NaN	NaN	NaN	NaN	NaN
0.594	1.475	68.4899	121.6939	0.057129	-0.02334	-0.16299	-7.95099999999999	-24.6568	108.176	0.088623	0.15747	-0.23926	NaN	NaN	NaN	NaN	NaN	NaN	NaN	NaN	NaN	NaN	NaN	NaN
0.596	-11.667	82.462	113.60245	0.054688	-0.015137	-0.16357	-17.778	-40.164	101.378	0.071777	0.2002	-0.25537	NaN	NaN	NaN	NaN	NaN	NaN	NaN	NaN	NaN	NaN	NaN	NaN
0.598	-7.38	72.648	106.9653	0.047949	-0.0051758	-0.16133	-18.289	-37.3637	133.9741	0.059082	0.24316	-0.28027	NaN	NaN	NaN	NaN	NaN	NaN	NaN	NaN	NaN	NaN	NaN	NaN
0.6	-1.999	64.8	112.796	0.040039	0.0032226	-0.16221	21.226	-50.0321	193.103	0.056641	0.26904	-0.29395	NaN	NaN	NaN	NaN	NaN	NaN	NaN	NaN	NaN	NaN	NaN	NaN
0.602	-4.196	74.309	95.5199	0.033399	0.014551	-0.16026	-22.45	-24.7083	211.6072	0.069336	0.3042	-0.31641	NaN	NaN	NaN	NaN	NaN	NaN	NaN	NaN	NaN	NaN	NaN	NaN
0.604	0.568999999999999	68.575	89.0037	0.026562	0.025879	-0.16357	-3.655	-9.5222	286.6246	0.078125	0.34155	-0.33179	NaN	NaN	NaN	NaN	NaN	NaN	NaN	NaN	NaN	NaN	NaN	NaN
0.606	-14.651	54.6073	104.3844	0.018066	0.040527	-0.16064	-30.2445	2.8704	321.002	0.082031	0.38916	-0.35059	NaN	NaN	NaN	NaN	NaN	NaN	NaN	NaN	NaN	NaN	NaN	NaN
0.608	19.128	41.0913	93.3154	0.0090821	0.054785	-0.16084	-54.1489	45.843	376.983	0.072754	0.48096	-0.37451	NaN	NaN	NaN	NaN	NaN	NaN	NaN	NaN	NaN	NaN	NaN	NaN
0.61	15.674	52.3337	83.3694	-9.77e-05	0.070215	-0.15693	5.909	51.188	481.3863	0.057617	0.54102	-0.39063	NaN	NaN	NaN	NaN	NaN	NaN	NaN	NaN	NaN	NaN	NaN	NaN
0.612	17.704	57.65592	72.0338	-0.012988	0.086621	-0.15849	-25.187	79.50555	566.42	0.010742	0.69336	-0.42188	NaN	NaN	NaN	NaN	NaN	NaN	NaN	NaN	NaN	NaN	NaN	NaN
0.614	5.582	49.9005	69.5212	-0.022656	0.1042	-0.16045	-43.19316	127.7874	688.0301	-0.039795	0.84179	-0.44433	NaN	NaN	NaN	NaN	NaN	NaN	NaN	NaN	NaN	NaN	NaN	NaN
0.616	6.827	47.5513	70.2571	-0.032227	0.12207	-0.14893	10.75	105.684	813.816	-0.10791	1.0259	-0.46631	NaN	NaN	NaN	NaN	NaN	NaN	NaN	NaN	NaN	NaN	NaN	NaN
0.618	-13.552	48.8289	48.9411	-0.04043	0.13877	-0.15947	-49.145	107.988	895.235	-0.22656	1.3203	-0.49023	NaN	NaN	NaN	NaN	NaN	NaN	NaN	NaN	NaN	NaN	NaN	NaN
0.62	-25.02	50.5929	58.2463	-0.046875	0.15273	-0.15664	-39.7119	77.1317	991.91918	-0.2998	1.4688	-0.50586	NaN	NaN	NaN	NaN	NaN	NaN	NaN	NaN	NaN	NaN	NaN	NaN
0.622	-37.022	49.4724	68.6978	-0.054297	0.17461	-0.1543	8.925	46.763	1050.9653	-0.46533	1.7603	-0.56201	NaN	NaN	NaN	NaN	NaN	NaN	NaN	NaN	NaN	NaN	NaN	NaN
0.624	-58.53669	51.7279	64.63861	-0.060254	0.18487	-0.15537	-55.0888	31.919	1070.5464	-0.62305	1.959	-0.63574	NaN	NaN	NaN	NaN	NaN	NaN	NaN	NaN	NaN	NaN	NaN	NaN
0.626	-57.5857	59.5401	64.9096	-0.061523	0.19678	-0.1499	-47.581	-3.296	1107.944	-0.6875	2.0059	-0.67676	NaN	NaN	NaN	NaN	NaN	NaN	NaN	NaN	NaN	NaN	NaN	NaN
0.628	-68.137	48.3039	52.7575	-0.064258	0.2	-0.1542	-67.202	-42.762	1072.4752	-0.72266	2.0039	-0.78174	NaN	NaN	NaN	NaN	NaN	NaN	NaN	NaN	NaN	NaN	NaN	NaN
0.63	-60.51961	40.1168	46.4999	-0.05791	0.19951	-0.14814	-68.2938	-79.603	1041.2765	-0.65966	1.9272	-0.84815	NaN	NaN	NaN	NaN	NaN	NaN	NaN	NaN	NaN	NaN	NaN	NaN
0.632	-53.2667	40.2231	50.867	-0.054785	0.19365	-0.14658	-21.742	-121.044	1052.049	-0.52393	1.8032	-0.88721	NaN	NaN	NaN	NaN	NaN	NaN	NaN	NaN	NaN	NaN	NaN	NaN
0.634	-45.527	41.1046	34.0769	-0.050488	0.1875	-0.14297	-32.1602	-131.172	1005.628	-0.28711	1.606	-0.90381	NaN	NaN	NaN	NaN	NaN	NaN	NaN	NaN	NaN	NaN	NaN	NaN
0.636	-50.9891	28.263	34.518	-0.048828	0.18408	-0.14209	-17.872	-161.33	993.727	-0.1875	1.5039	-0.90234	NaN	NaN	NaN	NaN	NaN	NaN	NaN	NaN	NaN	NaN	NaN	NaN
0.638	-54.6593	20.226	32.1606	-0.042969	0.17636	-0.13819	-18.959	-150.103	957.8558	-0.11865	1.4087	-0.90967	NaN	NaN	NaN	NaN	NaN	NaN	NaN	NaN	NaN	NaN	NaN	NaN
0.64	-50.519	23.957	29.406	-0.04043	0.17217	-0.14014	-47.89	-119.812	909.7128	-0.13037	1.389	-0.93725	NaN	NaN	NaN	NaN	NaN	NaN	NaN	NaN	NaN	NaN	NaN	NaN
0.642	-53.133	37.0421	36.8135	-0.036914	0.16748	-0.13857	-3.039	-118.08451	938.1683	-0.12646	1.3501	-0.97803	NaN	NaN	NaN	NaN	NaN	NaN	NaN	NaN	NaN	NaN	NaN	NaN
0.644	-28.421	31.7637	46.04086	-0.038281	0.15596	-0.13906	11.275	-83.869	903.878	-0.07373	1.2661	-1.021	NaN	NaN	NaN	NaN	NaN	NaN	NaN	NaN	NaN	NaN	NaN	NaN
0.646	-39.031	35.1867	50.01503	-0.031738	0.14893	-0.13672	-7.201	-77.923	927.156	-0.049805	1.2285	-1.0137	NaN	NaN	NaN	NaN	NaN	NaN	NaN	NaN	NaN	NaN	NaN	NaN
0.648	-28.9017	40.074	47.6893	-0.027344	0.13653	-0.14219	25.9609	-98.891	971.002	-0.0063477	1.1113	-0.99805	NaN	NaN	NaN	NaN	NaN	NaN	NaN	NaN	NaN	NaN	NaN	NaN
0.65	-20.607	25.84	33.7696	-0.018066	0.12422	-0.14131	-16.1548	-99.502	962.029	0.0075684	1.0378	-0.9851	NaN	NaN	NaN	NaN	NaN	NaN	NaN	NaN	NaN	NaN	NaN	NaN
0.652	-13.353	24.735	35.4861	-0.0067383	0.10977	-0.14912	15.9738	-119.536	1022.60744	0.010742	0.979	-0.9751	NaN	NaN	NaN	NaN	NaN	NaN	NaN	NaN	NaN	NaN	NaN	NaN
0.654	10.98	22.2493	30.4163	0.00097658	0.094336	-0.14873	61.903	-122.83	1019.4	0.0078125	0.93848	-0.98047	NaN	NaN	NaN	NaN	NaN	NaN	NaN	NaN	NaN	NaN	NaN	NaN
0.656	8.854	27.92404	24.925	0.0078125	0.07959	-0.15137	5.8893	-149.777	1017.471	0.0097656	0.91846	-0.98389	NaN	NaN	NaN	NaN	NaN	NaN	NaN	NaN	NaN	NaN	NaN	NaN
0.658	23.562	23.6424	41.43	0.014453	0.071875	-0.16172	47.4702	-199.0709	1069.322	-0.00097656	0.90283	-0.9917	NaN	NaN	NaN	NaN	NaN	NaN	NaN	NaN	NaN	NaN	NaN	NaN
0.66	-6.34	4.3587	51.933	0.023926	0.063769	-0.17295	39.323	-225.2532	1086.94	-0.0031738	0.89941	-1.0088	NaN	NaN	NaN	NaN	NaN	NaN	NaN	NaN	NaN	NaN	NaN	NaN
0.662	3.242	6.37174	62.3393	0.033301	0.054785	-0.18271	23.9141	-261.604	1162.347	-0.003418	0.90674	-1.0317	NaN	NaN	NaN	NaN	NaN	NaN	NaN	NaN	NaN	NaN	NaN	NaN
0.664	10.381	1.902	71.1195	0.038769	0.055078	-0.19892	64.591	-268.063	1214.6037	-0.01709	0.87646	-1.0366	NaN	NaN	NaN	NaN	NaN	NaN	NaN	NaN	NaN	NaN	NaN	NaN
0.666	-13.68	-0.201000000000001	92.9591	0.047852	0.066406	-0.21143	41.542	-245.184	1231.6008	-0.0029297	0.96582	-1.0859	NaN	NaN	NaN	NaN	NaN	NaN	NaN	NaN	NaN	NaN	NaN	NaN
0.668	-21.736	-4.723	103.2415	0.050195	0.078906	-0.225	18.0909	-251.714	1269.1511	0.022461	1.1182	-1.0986	NaN	NaN	NaN	NaN	NaN	NaN	NaN	NaN	NaN	NaN	NaN	NaN
0.67	-16.266	-1.061	105.576	0.045703	0.094532	-0.24023	46.616	-196.19345	1268.6323	-0.024902	1.1035	-1.0449	NaN	NaN	NaN	NaN	NaN	NaN	NaN	NaN	NaN	NaN	NaN	NaN
0.672	-9.092	5.6349	124.179	0.035157	0.11602	-0.26094	26.12	-153.9979	1262.989	-0.11523	1.0806	-1.0015	NaN	NaN	NaN	NaN	NaN	NaN	NaN	NaN	NaN	NaN	NaN	NaN
0.674	-44.5772	10.12668	142.9979	0.024804	0.13613	-0.27871	23.163	-135.511	1290.89	-0.22314	1.1665	-1.0532	NaN	NaN	NaN	NaN	NaN	NaN	NaN	NaN	NaN	NaN	NaN	NaN
0.676	-19.373	21.4965	150.6297	0.013184	0.15723	-0.30176	50.659	-101.141	1299.327	-0.24561	1.2344	-1.1113	NaN	NaN	NaN	NaN	NaN	NaN	NaN	NaN	NaN	NaN	NaN	NaN
0.678	-26.1987	39.48	197.0258	0.0074219	0.17793	-0.31797	3.0969	-119.185	1310.994	-0.23535	1.3359	-1.1738	NaN	NaN	NaN	NaN	NaN	NaN	NaN	NaN	NaN	NaN	NaN	NaN
0.68	-38.732	69.4608	269.239	0.0035157	0.19619	-0.34082	41.955	-123.281	1309.1354	-0.23902	1.3548	-1.1657	NaN	NaN	NaN	NaN	NaN	NaN	NaN	NaN	NaN	NaN	NaN	NaN
0.682	-68.0511	95.6909	293.458	0.0039062	0.2126	-0.36309	31.878	-99.656	1258.385	-0.25244	1.3477	-1.1621	NaN	NaN	NaN	NaN	NaN	NaN	NaN	NaN	NaN	NaN	NaN	NaN
0.684	0.406000000000001	98.6018	329.3614	0.0050781	0.23838	-0.39278	21.296	-133.3614	1287.047	-0.27441	1.3027	-1.1836	NaN	NaN	NaN	NaN	NaN	NaN	NaN	NaN	NaN	NaN	NaN	NaN
0.686	3.569	94.14931	393.666	0.0039063	0.27246	-0.41406	53.084	-110.181	1270.956	-0.27637	1.2778	-1.1851	NaN	NaN	NaN	NaN	NaN	NaN	NaN	NaN	NaN	NaN	NaN	NaN
0.688	-72.376	120.556	492.3546	-0.0030274	0.32568	-0.43525	-9.1352	-136.2983	1277.568	-0.2832	1.2388	-1.1733	NaN	NaN	NaN	NaN	NaN	NaN	NaN	NaN	NaN	NaN	NaN	NaN
0.69	-18.4906	117.615	573.22	-0.024317	0.38798	-0.46084	17.5541	-151.0091	1351.078	-0.31079	1.2669	-1.1696	NaN	NaN	NaN	NaN	NaN	NaN	NaN	NaN	NaN	NaN	NaN	NaN
0.692	-13.6838	101.332	661.784	-0.064161	0.46142	-0.49013	34.3599	-150.2709	1347.8838	-0.34473	1.3477	-1.1934	NaN	NaN	NaN	NaN	NaN	NaN	NaN	NaN	NaN	NaN	NaN	NaN
0.694	-14.9257	110.207	741.462	-0.11181	0.54746	-0.51231	-4.4242	-192.931	1400.213	-0.4043	1.4961	-1.2402	NaN	NaN	NaN	NaN	NaN	NaN	NaN	NaN	NaN	NaN	NaN	NaN
0.696	11.435	81.593	852.2384	-0.17285	0.63623	-0.53516	34.38	-184.755	1440.493	-0.43408	1.5649	-1.2515	NaN	NaN	NaN	NaN	NaN	NaN	NaN	NaN	NaN	NaN	NaN	NaN
0.698	16.12	54.1278	931.479	-0.24356	0.74219	-0.55508	-5.258	-161.742	1417.79	-0.51611	1.6782	-1.2729	NaN	NaN	NaN	NaN	NaN	NaN	NaN	NaN	NaN	NaN	NaN	NaN
0.7	-29.415	32.5993	998.372	-0.32383	0.85782	-0.57578	20.1966	-178.793	1431.105	-0.57007	1.7373	-1.2837	NaN	NaN	NaN	NaN	NaN	NaN	NaN	NaN	NaN	NaN	NaN	NaN
0.702	-31.997	27.4444	1062.708	-0.4125	0.9879	-0.58945	42.297	-133.1731	1421.39684	-0.61133	1.7832	-1.2949	NaN	NaN	NaN	NaN	NaN	NaN	NaN	NaN	NaN	NaN	NaN	NaN
0.704	48.6469	-11.5259	1095.514	-0.51504	1.1164	-0.59629	25.5681	-122.4488	1403.93	-0.64795	1.8208	-1.3198	NaN	NaN	NaN	NaN	NaN	NaN	NaN	NaN	NaN	NaN	NaN	NaN
0.706	29.0422	-38.3691	1121.056	-0.61914	1.2559	-0.5957	54.948	-116.575	1436.6317	-0.65234	1.8398	-1.3262	NaN	NaN	NaN	NaN	NaN	NaN	NaN	NaN	NaN	NaN	NaN	NaN
0.708	32.672	-37.6991	1117.895	-0.73408	1.3866	-0.59365	60.386	-81.6505	1418.717	-0.6543	1.877	-1.3438	NaN	NaN	NaN	NaN	NaN	NaN	NaN	NaN	NaN	NaN	NaN	NaN
0.71	-9.013	-55.9818	1103.562	-0.83623	1.4962	-0.61045	11.4525	-93.005	1419.411	-0.65112	1.9016	-1.3503	NaN	NaN	NaN	NaN	NaN	NaN	NaN	NaN	NaN	NaN	NaN	NaN
0.712	-29.936	-81.5127	1102.411	-0.92217	1.5587	-0.64326	38.458	-78.380777	1453.771	-0.6499	1.9282	-1.3589	NaN	NaN	NaN	NaN	NaN	NaN	NaN	NaN	NaN	NaN	NaN	NaN
0.714	-44.378	-86.908	1086.721	-0.95196	1.59	-0.68418	51.956	-53.155	1440.813	-0.66748	1.9595	-1.3706	NaN	NaN	NaN	NaN	NaN	NaN	NaN	NaN	NaN	NaN	NaN	NaN
0.716	-15.299	-74.556	1035.144	-0.94336	1.6016	-0.72266	40.324	-53.479	1468.5822	-0.66797	1.9727	-1.373	NaN	NaN	NaN	NaN	NaN	NaN	NaN	NaN	NaN	NaN	NaN	NaN
0.718	-9.499	-65.241	991.4434	-0.89463	1.6056	-0.7542	74.783	-19.469	1468.094	-0.67139	1.979	-1.3774	NaN	NaN	NaN	NaN	NaN	NaN	NaN	NaN	NaN	NaN	NaN	NaN
0.72	-56.345	-62.381	955.126	-0.85264	1.6064	-0.77021	23.1262	-38.152	1457.269	-0.66015	1.9692	-1.3726	NaN	NaN	NaN	NaN	NaN	NaN	NaN	NaN	NaN	NaN	NaN	NaN
0.722	-54.962	-57.5461	955.052	-0.79873	1.6064	-0.77764	22.9354	-69.746	1506.3312	-0.64746	1.9556	-1.3569	NaN	NaN	NaN	NaN	NaN	NaN	NaN	NaN	NaN	NaN	NaN	NaN
0.724	-57.809	-47.268	982.0296	-0.73506	1.57	-0.79326	58.477	-55.077	1486.6166	-0.62891	1.9199	-1.3398	NaN	NaN	NaN	NaN	NaN	NaN	NaN	NaN	NaN	NaN	NaN	NaN
0.726	-39.6494	-0.0420000000000016	986.086	-0.646	1.481	-0.81006	24.3466	-90.129	1497.1939	-0.61963	1.9028	-1.3179	NaN	NaN	NaN	NaN	NaN	NaN	NaN	NaN	NaN	NaN	NaN	NaN
0.728	-30.2754	5.985	983.164	-0.53398	1.342	-0.81484	62.119	-91.941	1529.6205	-0.6123	1.875	-1.2969	NaN	NaN	NaN	NaN	NaN	NaN	NaN	NaN	NaN	NaN	NaN	NaN
0.73	-39.8415	-7.575	991.626	-0.41631	1.1794	-0.79385	34.024	-84.026	1487.7487	-0.60474	1.8548	-1.2835	NaN	NaN	NaN	NaN	NaN	NaN	NaN	NaN	NaN	NaN	NaN	NaN
0.732	-58.5461	-29.114	1016.549	-0.31904	1.0075	-0.75557	5.6846	-97.018	1513.537	-0.59473	1.8379	-1.2695	NaN	NaN	NaN	NaN	NaN	NaN	NaN	NaN	NaN	NaN	NaN	NaN
0.734	-59.2208	-40.757	1035.807	-0.24766	0.86758	-0.71543	24.0727	-35.339227	1507.58	-0.57227	1.8047	-1.2539	NaN	NaN	NaN	NaN	NaN	NaN	NaN	NaN	NaN	NaN	NaN	NaN
0.736	-37.354	-67.195	1038.069	-0.21045	0.77002	-0.68604	7.52	-14.1377	1492.85405	-0.55908	1.7817	-1.2437	NaN	NaN	NaN	NaN	NaN	NaN	NaN	NaN	NaN	NaN	NaN	NaN
0.738	-42.428	-114.752	1040.763	-0.18261	0.7167	-0.6751	45.6258	-8.3825	1515.436	-0.53174	1.7466	-1.2183	NaN	NaN	NaN	NaN	NaN	NaN	NaN	NaN	NaN	NaN	NaN	NaN
0.74	-24.4972	-144.598	1039.0706	-0.16631	0.69189	-0.6709	16.63016	19.585	1495.7942	-0.51171	1.7231	-1.1978	NaN	NaN	NaN	NaN	NaN	NaN	NaN	NaN	NaN	NaN	NaN	NaN
0.742	-39.7197	-185.34	1031.026	-0.16553	0.66728	-0.65957	-23.99094	21.2358	1491.766	-0.50537	1.7095	-1.1772	NaN	NaN	NaN	NaN	NaN	NaN	NaN	NaN	NaN	NaN	NaN	NaN
0.744	-24.4746	-192.576	1036.411	-0.15332	0.69531	-0.67559	27.3094	59.925	1470.5946	-0.51025	1.6997	-1.1558	NaN	NaN	NaN	NaN	NaN	NaN	NaN	NaN	NaN	NaN	NaN	NaN
0.746	17.137	-181.837	1049.3456	-0.15283	0.71289	-0.69727	-16.0353	85.888	1441.773	-0.51611	1.7012	-1.1504	NaN	NaN	NaN	NaN	NaN	NaN	NaN	NaN	NaN	NaN	NaN	NaN
0.748	17.3627	-151.171	1057.9207	-0.14883	0.7665	-0.70381	-26.7652	72.403	1441.006	-0.53076	1.6978	-1.1323	NaN	NaN	NaN	NaN	NaN	NaN	NaN	NaN	NaN	NaN	NaN	NaN
0.75	30.51887	-132.522	1054.3951	-0.14638	0.84971	-0.73819	10.6618	75.787	1452.189	-0.53637	1.698	-1.1218	NaN	NaN	NaN	NaN	NaN	NaN	NaN	NaN	NaN	NaN	NaN	NaN
0.752	8.9915	-123.8047	1070.171	-0.16866	0.9001	-0.73076	-18.2601	65.112	1409.3774	-0.53662	1.6899	-1.1128	NaN	NaN	NaN	NaN	NaN	NaN	NaN	NaN	NaN	NaN	NaN	NaN
0.754	45.5672	-81.768	1104.6284	-0.22744	0.94385	-0.7333	0.602	49.4024	1422.69664	-0.5332	1.6758	-1.0996	NaN	NaN	NaN	NaN	NaN	NaN	NaN	NaN	NaN	NaN	NaN	NaN
0.756	38.2071	-48.088	1136.5566	-0.30127	1.0078	-0.75	26.242	63.8087	1416.998	-0.53076	1.6685	-1.0952	NaN	NaN	NaN	NaN	NaN	NaN	NaN	NaN	NaN	NaN	NaN	NaN
0.758	66.364	-20.094	1139.834	-0.36152	1.101	-0.78379	-30.9219	38.617	1391.1284	-0.52637	1.6504	-1.084	NaN	NaN	NaN	NaN	NaN	NaN	NaN	NaN	NaN	NaN	NaN	NaN
0.76	50.15	-33.434	1123.3944	-0.40381	1.179	-0.81553	2.523	41.22	1385.1843	-0.52246	1.6445	-1.0703	NaN	NaN	NaN	NaN	NaN	NaN	NaN	NaN	NaN	NaN	NaN	NaN
0.762	46.324	-58.159	1114.699	-0.43897	1.2458	-0.83936	-11.834	78.56056	1358.8419	-0.52295	1.6406	-1.0684	NaN	NaN	NaN	NaN	NaN	NaN	NaN	NaN	NaN	NaN	NaN	NaN
0.764	37.6315	-76.027	1128.275	-0.46699	1.2889	-0.85957	-36.249	71.2194	1357.4759	-0.521	1.6274	-1.0562	NaN	NaN	NaN	NaN	NaN	NaN	NaN	NaN	NaN	NaN	NaN	NaN
0.766	18.46	-86.4	1158.9376	-0.49316	1.3262	-0.87793	15.993	96.641	1370.329	-0.51758	1.604	-1.0459	NaN	NaN	NaN	NaN	NaN	NaN	NaN	NaN	NaN	NaN	NaN	NaN
0.768	69.171	-108.8445	1179.0424	-0.51358	1.3452	-0.8831	-17.896	122.031	1305.67	-0.50781	1.582	-1.043	NaN	NaN	NaN	NaN	NaN	NaN	NaN	NaN	NaN	NaN	NaN	NaN
0.77	49.2738	-137.641	1170.5969	-0.53086	1.3614	-0.88633	-15.97	125.5252732	1287.33	-0.48438	1.5332	-1.0273	NaN	NaN	NaN	NaN	NaN	NaN	NaN	NaN	NaN	NaN	NaN	NaN
0.772	4.0665	-157.945	1170.8769	-0.5414	1.3797	-0.89609	1.159	161.309	1243.55	-0.4707	1.5059	-1.0176	NaN	NaN	NaN	NaN	NaN	NaN	NaN	NaN	NaN	NaN	NaN	NaN
0.774	-9.691	-170.661	1211.633	-0.56123	1.4249	-0.90947	-37.4753	143.637	1203.039	-0.43555	1.4458	-0.99561	NaN	NaN	NaN	NaN	NaN	NaN	NaN	NaN	NaN	NaN	NaN	NaN
0.776	8.467	-163.055	1245.6824	-0.58643	1.4985	-0.92432	10.432	150.7641	1205.8075	-0.41577	1.3986	-0.97339	NaN	NaN	NaN	NaN	NaN	NaN	NaN	NaN	NaN	NaN	NaN	NaN
0.778	-15.704	-137.662	1277.088	-0.61573	1.5671	-0.94268	-1.565	168.878	1172.049	-0.39063	1.3486	-0.95313	NaN	NaN	NaN	NaN	NaN	NaN	NaN	NaN	NaN	NaN	NaN	NaN
0.78	-33.5501	-103.35696	1270.471	-0.64014	1.6141	-0.96143	-13.95	145.4415	1160.3936	-0.36523	1.2832	-0.93164	NaN	NaN	NaN	NaN	NaN	NaN	NaN	NaN	NaN	NaN	NaN	NaN
0.782	-21.0196	-110.514	1257.7115	-0.6628	1.627	-0.96728	-1.387	155.338	1142.4795	-0.35693	1.2563	-0.91553	NaN	NaN	NaN	NaN	NaN	NaN	NaN	NaN	NaN	NaN	NaN	NaN
0.784	-58.259	-98.568	1247.037	-0.68037	1.6206	-0.96475	-56.7703	152.461	1099.366	-0.32764	1.1899	-0.88623	NaN	NaN	NaN	NaN	NaN	NaN	NaN	NaN	NaN	NaN	NaN	NaN
0.786	-53.628	-70.186	1258.841	-0.70703	1.5996	-0.95605	-34.847	150.4672	1105.429	-0.30444	1.1431	-0.86426	NaN	NaN	NaN	NaN	NaN	NaN	NaN	NaN	NaN	NaN	NaN	NaN
0.788	-31.8848	-58.913	1250.4589	-0.72529	1.594	-0.95557	-29.832	177.954	1067.6231	-0.28369	1.0942	-0.83936	NaN	NaN	NaN	NaN	NaN	NaN	NaN	NaN	NaN	NaN	NaN	NaN
0.79	-17.0048	-62.46	1237.2193	-0.74209	1.6028	-0.9624	-61.3827	172.0868	1026.5373	-0.25244	1.0415	-0.81006	NaN	NaN	NaN	NaN	NaN	NaN	NaN	NaN	NaN	NaN	NaN	NaN
0.792	-19.7975	-76.0678	1224.56	-0.75068	1.6294	-0.9749	-10.293	146.7226	1019.9019	-0.24414	1.0137	-0.79883	NaN	NaN	NaN	NaN	NaN	NaN	NaN	NaN	NaN	NaN	NaN	NaN
0.794	-30.0731	-80.4085	1225.563	-0.75888	1.6595	-0.98291	-51.0928	152.34874	990.144	-0.21533	0.95313	-0.76563	NaN	NaN	NaN	NaN	NaN	NaN	NaN	NaN	NaN	NaN	NaN	NaN
0.796	-11.086	-78.093	1252.144	-0.76563	1.6855	-0.99805	-63.1635	146.962	979.582	-0.19995	0.91528	-0.73584	NaN	NaN	NaN	NaN	NaN	NaN	NaN	NaN	NaN	NaN	NaN	NaN
0.798	-1.639	-71.15	1280.6118	-0.76767	1.7034	-1.004	-0.954000000000001	160.4974	951.449	-0.18457	0.87939	-0.7085	NaN	NaN	NaN	NaN	NaN	NaN	NaN	NaN	NaN	NaN	NaN	NaN
0.8	34.4745	-82.333	1301.8948	-0.77373	1.7114	-1.0046	-36.8517	183.6261	893.2587	-0.15967	0.82861	-0.67139	NaN	NaN	NaN	NaN	NaN	NaN	NaN	NaN	NaN	NaN	NaN	NaN
0.802	10.36146	-95.469	1308.4174	-0.77569	1.7099	-1.0015	-24.229	175.513	859.23	-0.15332	0.8042	-0.6499	NaN	NaN	NaN	NaN	NaN	NaN	NaN	NaN	NaN	NaN	NaN	NaN
0.804	26.484	-100.951	1314.7855	-0.77764	1.6997	-0.99443	-29.069	195.449	813.612	-0.1333	0.75391	-0.61133	NaN	NaN	NaN	NaN	NaN	NaN	NaN	NaN	NaN	NaN	NaN	NaN
0.806	25.9569	-105.7048	1330.4533	-0.7832	1.6865	-0.98633	-56.0381	208.454	763.918	-0.12085	0.72437	-0.58081	NaN	NaN	NaN	NaN	NaN	NaN	NaN	NaN	NaN	NaN	NaN	NaN
0.808	37.9636	-98.3538	1347.653	-0.78125	1.6672	-0.97774	-11.595	202.726	752.8127	-0.10352	0.68799	-0.55322	NaN	NaN	NaN	NaN	NaN	NaN	NaN	NaN	NaN	NaN	NaN	NaN
0.81	44.0857	-83.3759	1348.732	-0.77451	1.6575	-0.97276	-44.5959	221.078	715.7267	-0.083496	0.64844	-0.51465	NaN	NaN	NaN	NaN	NaN	NaN	NaN	NaN	NaN	NaN	NaN	NaN
0.812	48.9351	-86.5989	1328.386	-0.76514	1.6544	-0.96963	-51.0871	189.687	684.6361	-0.069336	0.62939	-0.49365	NaN	NaN	NaN	NaN	NaN	NaN	NaN	NaN	NaN	NaN	NaN	NaN
0.814	66.588	-94.4912	1309.8067	-0.75899	1.652	-0.96221	-14.977	190.367	655.668	-0.052734	0.58008	-0.45117	NaN	NaN	NaN	NaN	NaN	NaN	NaN	NaN	NaN	NaN	NaN	NaN
0.816	31.25152	-73.7427	1299.11	-0.76025	1.6509	-0.95459	-27.936	224.592	599.107	-0.042236	0.54712	-0.41943	NaN	NaN	NaN	NaN	NaN	NaN	NaN	NaN	NaN	NaN	NaN	NaN
0.818	46.4092	-48.8463	1312.4218	-0.76914	1.6494	-0.94981	-18.324	201.3473	593.547	-0.030762	0.51514	-0.39014	NaN	NaN	NaN	NaN	NaN	NaN	NaN	NaN	NaN	NaN	NaN	NaN
0.82	40.0249	-31.5288	1316.1902	-0.76836	1.6535	-0.9418	-4.879	196.859	574.0537	-0.014648	0.46875	-0.34961	NaN	NaN	NaN	NaN	NaN	NaN	NaN	NaN	NaN	NaN	NaN	NaN
0.822	43.1015	-26.816	1315.48656	-0.76172	1.6477	-0.94297	-34.517	181.2718	526.8041	-0.0029297	0.44092	-0.33057	NaN	NaN	NaN	NaN	NaN	NaN	NaN	NaN	NaN	NaN	NaN	NaN
0.824	-7.204	-18.225	1296.765	-0.75723	1.6404	-0.93164	3.819	137.4118	516.078	0.0097656	0.39307	-0.29541	NaN	NaN	NaN	NaN	NaN	NaN	NaN	NaN	NaN	NaN	NaN	NaN
0.826	-25.7960231	11.218	1297.922	-0.75195	1.6309	-0.92285	-31.5255	172.297	468.3336	0.027344	0.3645	-0.26978	NaN	NaN	NaN	NaN	NaN	NaN	NaN	NaN	NaN	NaN	NaN	NaN
0.828	-17.4956	8.642	1319.5517	-0.74336	1.616	-0.91211	-21.416	153.0472	460.0545	0.044434	0.33594	-0.2417	NaN	NaN	NaN	NaN	NaN	NaN	NaN	NaN	NaN	NaN	NaN	NaN
0.83	-28.8608	4.735	1327.941	-0.74131	1.6048	-0.90069	13.99	137.43238	451.7532	0.061523	0.30078	-0.21045	NaN	NaN	NaN	NaN	NaN	NaN	NaN	NaN	NaN	NaN	NaN	NaN
0.832	-31.8836	-6.4674	1307.021	-0.73779	1.5888	-0.8917	-59.436	158.3158	379.102	0.068848	0.28711	-0.19336	NaN	NaN	NaN	NaN	NaN	NaN	NaN	NaN	NaN	NaN	NaN	NaN
0.834	-53.837	-36.312	1284.533	-0.73808	1.5771	-0.87637	-39.925	129.258	391.054	0.076172	0.26221	-0.16846	NaN	NaN	NaN	NaN	NaN	NaN	NaN	NaN	NaN	NaN	NaN	NaN
0.836	-44.819	-51.419	1256.0772	-0.73584	1.5669	-0.86768	-9.201	148.7165	358.066	0.086426	0.24023	-0.14941	NaN	NaN	NaN	NaN	NaN	NaN	NaN	NaN	NaN	NaN	NaN	NaN
0.838	-42.90244	-60.226	1246.032	-0.73281	1.5584	-0.86153	-28.696	166.4996	335.4852	0.094238	0.21533	-0.12842	NaN	NaN	NaN	NaN	NaN	NaN	NaN	NaN	NaN	NaN	NaN	NaN
0.84	-52.62093	-43.004	1251.9273	-0.73311	1.5475	-0.85225	2.134	146.091	344.449	0.104	0.18555	-0.11328	NaN	NaN	NaN	NaN	NaN	NaN	NaN	NaN	NaN	NaN	NaN	NaN
0.842	-28.886	-44.94	1237.2997	-0.7292	1.5382	-0.84053	-43.8482	182.304	282.807	0.10791	0.18018	-0.1084	NaN	NaN	NaN	NaN	NaN	NaN	NaN	NaN	NaN	NaN	NaN	NaN
0.844	-46.2849	-53.687	1205.4348	-0.72256	1.5247	-0.83252	-33.0501	160.701	253.0741	0.12451	0.15869	-0.091309	NaN	NaN	NaN	NaN	NaN	NaN	NaN	NaN	NaN	NaN	NaN	NaN
0.846	-35.5192	-36.1782	1198.4716	-0.71729	1.5093	-0.82373	-12.923	125.5309	244.4163	0.13526	0.14599	-0.074707	NaN	NaN	NaN	NaN	NaN	NaN	NaN	NaN	NaN	NaN	NaN	NaN
0.848	-60.088	-9.8738	1189.7891	-0.7084	1.4904	-0.81602	-55.7124	140.3415	215.848	0.14648	0.13525	-0.06543	NaN	NaN	NaN	NaN	NaN	NaN	NaN	NaN	NaN	NaN	NaN	NaN
0.85	-22.341	20.1282	1199.173	-0.69766	1.4719	-0.80957	-20.03	92.958	228.6038	0.15869	0.12207	-0.05127	NaN	NaN	NaN	NaN	NaN	NaN	NaN	NaN	NaN	NaN	NaN	NaN
0.852	-5.792	32.902	1175.1126	-0.68047	1.4531	-0.79864	-24.213	99.69715	201.653	0.16309	0.11816	-0.045898	NaN	NaN	NaN	NaN	NaN	NaN	NaN	NaN	NaN	NaN	NaN	NaN
0.854	3.303	39.661	1136.2017	-0.66767	1.4279	-0.79209	-31.573	104.8397	168.556	0.1748	0.095215	-0.031738	NaN	NaN	NaN	NaN	NaN	NaN	NaN	NaN	NaN	NaN	NaN	NaN
0.856	4.028	43.526	1107.165	-0.6582	1.4063	-0.7832	-16.893	50.7095	167.2742	0.19262	0.080566	-0.023926	NaN	NaN	NaN	NaN	NaN	NaN	NaN	NaN	NaN	NaN	NaN	NaN
0.858	16.72	43.184	1085.26	-0.64141	1.3766	-0.77578	-56.47609	77.133	146.0724	0.20605	0.064941	-0.016602	NaN	NaN	NaN	NaN	NaN	NaN	NaN	NaN	NaN	NaN	NaN	NaN
0.86	43.799	34.1099	1084.6235	-0.62461	1.3524	-0.76816	-23.733	62.7845	136.144	0.2373	0.035645	0.0029297	NaN	NaN	NaN	NaN	NaN	NaN	NaN	NaN	NaN	NaN	NaN	NaN
0.862	43.514	37.43528	1073.05208	-0.60898	1.3273	-0.75567	7.476	32.4604	136.972	0.25586	0.031738	-0.0029297	NaN	NaN	NaN	NaN	NaN	NaN	NaN	NaN	NaN	NaN	NaN	NaN
0.864	37.2728	29.2132	1066.2255	-0.58604	1.298	-0.75068	-41.4301	73.4922	97.894	0.26904	0.011719	0.01709	NaN	NaN	NaN	NaN	NaN	NaN	NaN	NaN	NaN	NaN	NaN	NaN
0.866	39.15734	4.2756	1040.025	-0.5708	1.2681	-0.7417	-12.32	20.21	113.4383	0.28369	-0.0007324	0.027588	NaN	NaN	NaN	NaN	NaN	NaN	NaN	NaN	NaN	NaN	NaN	NaN
0.868	46.286	-5.2647	1032.525	-0.55517	1.2374	-0.72705	-11.859	34.193	76.04	0.2832	-0.022949	0.050293	NaN	NaN	NaN	NaN	NaN	NaN	NaN	NaN	NaN	NaN	NaN	NaN
0.87	15.755	14.13333	1032.14308	-0.5378	1.2056	-0.71826	-18.919	63.469	61.6293	0.28662	-0.039063	0.07373	NaN	NaN	NaN	NaN	NaN	NaN	NaN	NaN	NaN	NaN	NaN	NaN
0.872	-3.952	28.4991	1030.059	-0.51865	1.1759	-0.70498	21.16	32.1871	53.0816	0.28906	-0.038086	0.0625	NaN	NaN	NaN	NaN	NaN	NaN	NaN	NaN	NaN	NaN	NaN	NaN
0.874	0.780000000000001	27.06	1013.192	-0.49844	1.1495	-0.69473	-17.971	74.497	26.854	0.31055	-0.036621	0.054688	NaN	NaN	NaN	NaN	NaN	NaN	NaN	NaN	NaN	NaN	NaN	NaN
0.876	-12.91	34.6078	986.111	-0.48438	1.1211	-0.68359	-30.5296	47.502	27.7164	0.32691	-0.040772	0.052735	NaN	NaN	NaN	NaN	NaN	NaN	NaN	NaN	NaN	NaN	NaN	NaN
0.878	-19.187	48.7518	948.7594	-0.46045	1.0878	-0.67432	8.878	25.0834	33.269	0.33838	-0.044922	0.062988	NaN	NaN	NaN	NaN	NaN	NaN	NaN	NaN	NaN	NaN	NaN	NaN
0.88	-41.858	54.4292	925.65259	-0.44219	1.0637	-0.66153	-40.3569	62.61	14.066	0.33936	-0.037598	0.07959	NaN	NaN	NaN	NaN	NaN	NaN	NaN	NaN	NaN	NaN	NaN	NaN
0.882	-22.329	62.0161	920.331	-0.42929	1.0363	-0.64825	-7.61	9.953	31.5029	0.33105	-0.043457	0.081055	NaN	NaN	NaN	NaN	NaN	NaN	NaN	NaN	NaN	NaN	NaN	NaN
0.884	-29.82	71.5932	890.8605	-0.41338	1.0117	-0.63408	-14.973	21.2327	23.321	0.31836	-0.038574	0.086914	NaN	NaN	NaN	NaN	NaN	NaN	NaN	NaN	NaN	NaN	NaN	NaN
0.886	-61.7126	86.69892	855.4157	-0.39795	0.98877	-0.61963	-52.7261	37.68848	11.09	0.30737	-0.035644	0.085693	NaN	NaN	NaN	NaN	NaN	NaN	NaN	NaN	NaN	NaN	NaN	NaN
0.888	-62.7937	67.8638	837.055	-0.38828	0.96426	-0.60293	-13.341	7.2594	22.6518	0.30029	-0.024414	0.083984	NaN	NaN	NaN	NaN	NaN	NaN	NaN	NaN	NaN	NaN	NaN	NaN
0.89	-63.6318	62.841	802.998	-0.37265	0.93672	-0.58438	-16.019	38.444	14.295	0.29443	-0.010742	0.078613	NaN	NaN	NaN	NaN	NaN	NaN	NaN	NaN	NaN	NaN	NaN	NaN
0.892	-52.151	72.0479	797.018	-0.36055	0.90586	-0.57148	-30.103	18.1879	32.2178	0.29541	-0.00097656	0.073242	NaN	NaN	NaN	NaN	NaN	NaN	NaN	NaN	NaN	NaN	NaN	NaN
0.894	-96.746	85.092	781.1573	-0.34238	0.87344	-0.55274	-3.36	-1.697	49.178	0.28857	0.022461	0.074219	NaN	NaN	NaN	NaN	NaN	NaN	NaN	NaN	NaN	NaN	NaN	NaN
0.896	-79.0961	89.373	758.745	-0.32568	0.83984	-0.53125	-50.7615	41.946	24.0619	0.28174	0.039062	0.082275	NaN	NaN	NaN	NaN	NaN	NaN	NaN	NaN	NaN	NaN	NaN	NaN
0.898	-71.313	89.135	741.19	-0.30517	0.80264	-0.51514	-21.633	13.255	38.3429	0.26758	0.057129	0.084473	NaN	NaN	NaN	NaN	NaN	NaN	NaN	NaN	NaN	NaN	NaN	NaN
0.9	-65.2446	89.163	710.884	-0.28584	0.76728	-0.49659	-23.648	33.486	30.077	0.24854	0.076172	0.083008	NaN	NaN	NaN	NaN	NaN	NaN	NaN	NaN	NaN	NaN	NaN	NaN
0.902	-70.13064	92.9084	706.89926	-0.26318	0.73096	-0.47939	-31.875	59.5285	30.0313	0.23535	0.083984	0.08374	NaN	NaN	NaN	NaN	NaN	NaN	NaN	NaN	NaN	NaN	NaN	NaN
0.904	-38.235	86.626	699.8058	-0.2458	0.6958	-0.46064	-15.231	18.0628	38.202	0.22266	0.084961	0.081055	NaN	NaN	NaN	NaN	NaN	NaN	NaN	NaN	NaN	NaN	NaN	NaN
0.906	-13.841	81.193	677.6277	-0.22461	0.65771	-0.44092	-52.8788	54.546	3.634	0.21777	0.088867	0.076172	NaN	NaN	NaN	NaN	NaN	NaN	NaN	NaN	NaN	NaN	NaN	NaN
0.908	-23.37	85.702	645.3027	-0.20821	0.6291	-0.42422	-38.9017	26.9979	21.88541	0.22168	0.086914	0.072754	NaN	NaN	NaN	NaN	NaN	NaN	NaN	NaN	NaN	NaN	NaN	NaN
0.91	-13.397	86.5018	626.7015	-0.18857	0.59883	-0.40274	-19.043	17.7272	28.07034	0.22412	0.091797	0.069336	NaN	NaN	NaN	NaN	NaN	NaN	NaN	NaN	NaN	NaN	NaN	NaN
0.912	14.843	84.5203	613.8125	-0.17295	0.56914	-0.38398	-47.4243	69.021	18.1529	0.22705	0.09375	0.068115	NaN	NaN	NaN	NaN	NaN	NaN	NaN	NaN	NaN	NaN	NaN	NaN
0.914	23.837	95.58	599.7201	-0.15899	0.54043	-0.36455	-4.17	29.2336	30.29	0.23047	0.092285	0.066895	NaN	NaN	NaN	NaN	NaN	NaN	NaN	NaN	NaN	NaN	NaN	NaN
0.916	-2.94	109.01	573.9511	-0.14746	0.51611	-0.34912	-16.708	33.491	25.97321	0.23145	0.084473	0.072266	NaN	NaN	NaN	NaN	NaN	NaN	NaN	NaN	NaN	NaN	NaN	NaN
0.918	-28.545	110.71	555.6977	-0.1252	0.4875	-0.33437	-39.2727	44.79646	27.3507	0.23047	0.081543	0.059082	NaN	NaN	NaN	NaN	NaN	NaN	NaN	NaN	NaN	NaN	NaN	NaN
0.92	-18.669	102.547	540.458	-0.11172	0.46406	-0.31563	15.4	-0.763	49.697	0.2334	0.085449	0.068359	NaN	NaN	NaN	NaN	NaN	NaN	NaN	NaN	NaN	NaN	NaN	NaN
0.922	-13.909	117.737	521.5615	-0.10078	0.43594	-0.29648	-28.214	36.6034	28.7294	0.23242	0.085938	0.072998	NaN	NaN	NaN	NaN	NaN	NaN	NaN	NaN	NaN	NaN	NaN	NaN
0.924	-13.29	128.935	508.3732	-0.091407	0.40801	-0.27549	-19.082	33.8875	43.055	0.23145	0.091797	0.084473	NaN	NaN	NaN	NaN	NaN	NaN	NaN	NaN	NaN	NaN	NaN	NaN
0.926	-19.878	121.658	486.0821	-0.081055	0.37988	-0.25586	-5.949	9.6275	48.411	0.22852	0.097656	0.092285	NaN	NaN	NaN	NaN	NaN	NaN	NaN	NaN	NaN	NaN	NaN	NaN
0.928	-5.76000000000001	110.3564	465.437	-0.06543	0.35771	-0.24629	-39.5436	38.1999	20.658	0.22852	0.104	0.104	NaN	NaN	NaN	NaN	NaN	NaN	NaN	NaN	NaN	NaN	NaN	NaN
0.93	-20.106	112.4489	440.163	-0.045313	0.33525	-0.23174	-7.322	10.868	40.4591	0.22559	0.11963	0.11182	NaN	NaN	NaN	NaN	NaN	NaN	NaN	NaN	NaN	NaN	NaN	NaN
0.932	-26.919	117.4407	440.3823	-0.033594	0.30869	-0.22315	-12.052	20.4925	37.8427	0.22168	0.13355	0.11939	NaN	NaN	NaN	NaN	NaN	NaN	NaN	NaN	NaN	NaN	NaN	NaN
0.934	-35.34	106.58591	441.182	-0.016504	0.28311	-0.20566	-24.3524	43.07781	33.192	0.22021	0.14453	0.13184	NaN	NaN	NaN	NaN	NaN	NaN	NaN	NaN	NaN	NaN	NaN	NaN
0.936	-55.394	94.4695	422.169	-0.0019531	0.2583	-0.19238	-11.041	5.568	32.6244	0.22266	0.16553	0.14063	NaN	NaN	NaN	NaN	NaN	NaN	NaN	NaN	NaN	NaN	NaN	NaN
0.938	-56.835	85.4288	391.27531	0.016406	0.22597	-0.17891	-24.78	47.9187	17.759	0.21875	0.16992	0.14844	NaN	NaN	NaN	NaN	NaN	NaN	NaN	NaN	NaN	NaN	NaN	NaN
0.94	-96.4743	87.6664	377.022	0.033594	0.1999	-0.16826	-25.133	30.618	16.18	0.22559	0.18652	0.15625	NaN	NaN	NaN	NaN	NaN	NaN	NaN	NaN	NaN	NaN	NaN	NaN
0.942	-91.7012	82.1005	366.17006	0.052344	0.17217	-0.15459	-15.871	12.3124	35.38	0.22754	0.19776	0.15845	NaN	NaN	NaN	NaN	NaN	NaN	NaN	NaN	NaN	NaN	NaN	NaN
0.944	-88.963	96.6045	351.9295	0.069434	0.15088	-0.14854	-36.55428	53.5919	28.7302	0.229	0.20508	0.15283	NaN	NaN	NaN	NaN	NaN	NaN	NaN	NaN	NaN	NaN	NaN	NaN
0.946	-90.3527	106.2165	329.4202	0.084473	0.12256	-0.13379	-10.521	17.159	34.4006	0.229	0.22168	0.15479	NaN	NaN	NaN	NaN	NaN	NaN	NaN	NaN	NaN	NaN	NaN	NaN
0.948	-97.964	106.32354	299.1091	0.10576	0.10205	-0.12783	-28.208	28.348	35.0318	0.22852	0.22754	0.15625	NaN	NaN	NaN	NaN	NaN	NaN	NaN	NaN	NaN	NaN	NaN	NaN
0.95	-74.2084	92.5845	278.974	0.12676	0.078223	-0.12471	-57.5938	42.7202	40.9727	0.22803	0.23535	0.14746	NaN	NaN	NaN	NaN	NaN	NaN	NaN	NaN	NaN	NaN	NaN	NaN
0.952	-54.683	102.5295	270.102	0.14707	0.058301	-0.12354	-11.444	3.8909	49.894	0.22998	0.24414	0.14307	NaN	NaN	NaN	NaN	NaN	NaN	NaN	NaN	NaN	NaN	NaN	NaN
0.954	-37.874	111.4145	263.17969	0.16924	0.040528	-0.11846	-43.075	34.8877	31.4679	0.22998	0.25488	0.14014	NaN	NaN	NaN	NaN	NaN	NaN	NaN	NaN	NaN	NaN	NaN	NaN
0.956	-32.514	112.9423	272.714	0.18066	0.02832	-0.11084	-23.492	14.756	22.52	0.23145	0.26025	0.12549	NaN	NaN	NaN	NaN	NaN	NaN	NaN	NaN	NaN	NaN	NaN	NaN
0.958	-30.743	101.57231	243.618	0.1874	0.010938	-0.093556	-21.991	-9.4577	24.132	0.22852	0.26074	0.12744	NaN	NaN	NaN	NaN	NaN	NaN	NaN	NaN	NaN	NaN	NaN	NaN
0.96	-38.228	83.8451	233.3487	0.18711	0.0020508	-0.075879	-57.8132	32.6328	21.497	0.2251	0.26611	0.11426	NaN	NaN	NaN	NaN	NaN	NaN	NaN	NaN	NaN	NaN	NaN	NaN
0.962	-40.113	78.6169	219.2884	0.19297	0.0032227	-0.071191	-0.431000000000001	5.918	34.2872	0.22363	0.26831	0.11279	NaN	NaN	NaN	NaN	NaN	NaN	NaN	NaN	NaN	NaN	NaN	NaN
0.964	-37.98	78.552	228.2968	0.2041	0.01416	-0.080761	-13.261	23.516	24.2115	0.21777	0.26465	0.10938	NaN	NaN	NaN	NaN	NaN	NaN	NaN	NaN	NaN	NaN	NaN	NaN
0.966	-2.53599999999999	69.718	218.47212	0.21436	0.020508	-0.088867	-43.6006	50.8255	15.847	0.22021	0.26855	0.099121	NaN	NaN	NaN	NaN	NaN	NaN	NaN	NaN	NaN	NaN	NaN	NaN
0.968	-6.338	81.838	184.3089	0.22383	0.034864	-0.087598	-1.943	11.2438	32.0192	0.22314	0.26416	0.099121	NaN	NaN	NaN	NaN	NaN	NaN	NaN	NaN	NaN	NaN	NaN	NaN
0.97	-17.532	65.1193	188.516	0.22969	0.039649	-0.078613	-35.3364	53.882	27.837	0.22021	0.26904	0.092285	NaN	NaN	NaN	NaN	NaN	NaN	NaN	NaN	NaN	NaN	NaN	NaN
0.972	-13.115	53.8991	185.32189	0.22891	0.045117	-0.067676	-42.4519	50.6322	36.4751	0.22217	0.27221	0.084961	NaN	NaN	NaN	NaN	NaN	NaN	NaN	NaN	NaN	NaN	NaN	NaN
0.974	20.478	46.904	178.4987	0.2251	0.059082	-0.068164	-0.382000000000005	21.4875	22.9837	0.21973	0.27734	0.080078	NaN	NaN	NaN	NaN	NaN	NaN	NaN	NaN	NaN	NaN	NaN	NaN
0.976	3.644	64.933	163.783	0.21875	0.069824	-0.07373	-17.241	56.501	10.194	0.21729	0.28613	0.077637	NaN	NaN	NaN	NaN	NaN	NaN	NaN	NaN	NaN	NaN	NaN	NaN
0.978	5.59	66.113	163.0727	0.21231	0.088867	-0.076367	-4.661	4.02854	37.7447	0.21387	0.28906	0.071289	NaN	NaN	NaN	NaN	NaN	NaN	NaN	NaN	NaN	NaN	NaN	NaN
0.98	0.200000000000003	67.9303	151.2068	0.2083	0.10996	-0.07666	-18.584	-3.181	60.5108	0.20752	0.29688	0.061523	NaN	NaN	NaN	NaN	NaN	NaN	NaN	NaN	NaN	NaN	NaN	NaN
0.982	-31.858	66.105	137.9675	0.20283	0.13183	-0.085644	-42.1727	10.04812	73.9863	0.20776	0.30738	0.057373	NaN	NaN	NaN	NaN	NaN	NaN	NaN	NaN	NaN	NaN	NaN	NaN
0.984	-34.013	75.5232	118.2434	0.19551	0.15518	-0.085937	17.668	-36.8169	84.388	0.20557	0.31738	0.050293	NaN	NaN	NaN	NaN	NaN	NaN	NaN	NaN	NaN	NaN	NaN	NaN
0.986	-49.588	83.028	115.5896	0.18604	0.17725	-0.092285	2.478	9.943	79.7944	0.19775	0.34277	0.039063	NaN	NaN	NaN	NaN	NaN	NaN	NaN	NaN	NaN	NaN	NaN	NaN
0.988	-57.793	67.522	121.2701	0.17725	0.20127	-0.098341	-44.4155	-0.7263	128.3062	0.18555	0.35205	0.030762	NaN	NaN	NaN	NaN	NaN	NaN	NaN	NaN	NaN	NaN	NaN	NaN
0.99	-79.091	60.994	100.1208	0.1627	0.22275	-0.10068	-27.649	-3.047	156.0647	0.16602	0.37549	0.012695	NaN	NaN	NaN	NaN	NaN	NaN	NaN	NaN	NaN	NaN	NaN	NaN
0.992	-68.1761	59.8517	97.0756	0.15606	0.23955	-0.10537	-36.277	45.664	185.345	0.15332	0.40186	0.0073244	NaN	NaN	NaN	NaN	NaN	NaN	NaN	NaN	NaN	NaN	NaN	NaN
0.994	-66.6061	50.6593	97.6145	0.14444	0.25479	-0.1045	-10.94	18.9964	238.56746	0.1416	0.43506	-0.0058594	NaN	NaN	NaN	NaN	NaN	NaN	NaN	NaN	NaN	NaN	NaN	NaN
0.996	-66.5395	47.2191	79.104	0.13281	0.27344	-0.11084	0.308999999999997	30.8415	305.429	0.11865	0.48486	-0.039063	NaN	NaN	NaN	NaN	NaN	NaN	NaN	NaN	NaN	NaN	NaN	NaN
0.998	-65.213	46.653	78.858	0.12266	0.28994	-0.11055	-2.1478	74.8201	354.2888	0.09668	0.51758	-0.061523	NaN	NaN	NaN	NaN	NaN	NaN	NaN	NaN	NaN	NaN	NaN	NaN
1	-60.344	54.927	68.383	0.11651	0.30391	-0.11611	15.0698	66.3762	421.6291	0.054688	0.57861	-0.104	NaN	NaN	NaN	NaN	NaN	NaN	NaN	NaN	NaN	NaN	NaN	NaN
1.002	-65.463	48.2286	71.0753	0.1083	0.31758	-0.11298	-1.2298	127.928	467.571	0.019776	0.63819	-0.14502	NaN	NaN	NaN	NaN	NaN	NaN	NaN	NaN	NaN	NaN	NaN	NaN
1.004	-51.6424	42.1879	66.508	0.10274	0.32891	-0.11416	-1.9373	110.208	556.2459	-0.022461	0.70361	-0.18701	NaN	NaN	NaN	NaN	NaN	NaN	NaN	NaN	NaN	NaN	NaN	NaN
1.006	-55.6166	43.11523	67.9418	0.09668	0.33789	-0.11133	22.486	73.37	667.0895	-0.086426	0.81592	-0.25342	NaN	NaN	NaN	NaN	NaN	NaN	NaN	NaN	NaN	NaN	NaN	NaN
1.008	-51.3248	51.7036	72.1425	0.085547	0.34326	-0.11328	3.698	114.564	737.963	-0.12451	0.87842	-0.28223	NaN	NaN	NaN	NaN	NaN	NaN	NaN	NaN	NaN	NaN	NaN	NaN
1.01	-45.629	38.545	84.675	0.075098	0.34931	-0.11192	13.8093	57.8168	843.6032	-0.20459	1.022	-0.35498	NaN	NaN	NaN	NaN	NaN	NaN	NaN	NaN	NaN	NaN	NaN	NaN
1.012	-43.574	39.72	60.5004	0.064551	0.35088	-0.108	-10.8103	46.241	919.03	-0.27514	1.1447	-0.39819	NaN	NaN	NaN	NaN	NaN	NaN	NaN	NaN	NaN	NaN	NaN	NaN
1.014	-35.306	41.56	51.5787	0.05918	0.35449	-0.099509	-36.3823	50.854	990.502	-0.354	1.2681	-0.44482	NaN	NaN	NaN	NaN	NaN	NaN	NaN	NaN	NaN	NaN	NaN	NaN
1.016	-16.137	43.873	48.8252	0.054688	0.35059	-0.09375	22.8371	-9.5143	1036.85	-0.47412	1.4028	-0.49268	NaN	NaN	NaN	NaN	NaN	NaN	NaN	NaN	NaN	NaN	NaN	NaN
1.018	-5.799	35.8623	47.5352	0.049805	0.34482	-0.092089	21.501	24.1905	1029.6504	-0.54395	1.4551	-0.53418	NaN	NaN	NaN	NaN	NaN	NaN	NaN	NaN	NaN	NaN	NaN	NaN
1.02	10.437	45.1029	33.569	0.047363	0.33545	-0.086035	25.1129	-13.4652	1047.057	-0.65967	1.5356	-0.54639	NaN	NaN	NaN	NaN	NaN	NaN	NaN	NaN	NaN	NaN	NaN	NaN
1.022	4.479	45.6175	22.829	0.049707	0.32139	-0.078613	22.461	-69.988	1053.119	-0.73023	1.5696	-0.53467	NaN	NaN	NaN	NaN	NaN	NaN	NaN	NaN	NaN	NaN	NaN	NaN
1.024	20.06	49.3732	36.8338	0.051465	0.30791	-0.07334	-9.45	-45.286	1047.947	-0.78076	1.6021	-0.51221	NaN	NaN	NaN	NaN	NaN	NaN	NaN	NaN	NaN	NaN	NaN	NaN
1.026	16.264	39.31	45.6133	0.057129	0.29102	-0.064941	37.4567	-93.226	1026.784	-0.79785	1.6094	-0.49023	NaN	NaN	NaN	NaN	NaN	NaN	NaN	NaN	NaN	NaN	NaN	NaN
1.028	-2.091	45.4347	41.0455	0.060156	0.27246	-0.056446	32.5037	-86.631	961.971	-0.7832	1.5996	-0.49316	NaN	NaN	NaN	NaN	NaN	NaN	NaN	NaN	NaN	NaN	NaN	NaN
1.03	-7.087	44.072	51.1077	0.064161	0.25556	-0.046777	9.1549	-91.15	910.3906	-0.69971	1.5688	-0.49756	NaN	NaN	NaN	NaN	NaN	NaN	NaN	NaN	NaN	NaN	NaN	NaN
1.032	-6.485	39.105	56.6329	0.07002	0.23135	-0.03584	11.935	-130.482	885.3931	-0.64185	1.5628	-0.48608	NaN	NaN	NaN	NaN	NaN	NaN	NaN	NaN	NaN	NaN	NaN	NaN
1.034	-17.39	35.213	52.9098	0.074316	0.21465	-0.023633	-3.999	-84.9085	851.819	-0.61719	1.5762	-0.47266	NaN	NaN	NaN	NaN	NaN	NaN	NaN	NaN	NaN	NaN	NaN	NaN
1.036	-38.45	41.453	44.8525	0.081055	0.19287	-0.012695	3.788	-67.736	851.498	-0.58838	1.6235	-0.4585	NaN	NaN	NaN	NaN	NaN	NaN	NaN	NaN	NaN	NaN	NaN	NaN
1.038	-24.435	31.294	22.5725	0.081934	0.17539	-0.0019531	21.7458	-52.692	851.2707	-0.56592	1.6313	-0.45557	NaN	NaN	NaN	NaN	NaN	NaN	NaN	NaN	NaN	NaN	NaN	NaN
1.04	-40.1208	33.2345	23.0732	0.084961	0.15576	0.0021484	-13.2831	-35.791	850.866	-0.51123	1.6099	-0.45264	NaN	NaN	NaN	NaN	NaN	NaN	NaN	NaN	NaN	NaN	NaN	NaN
1.042	-52.04	16.4402	35.2791	0.09082	0.13936	0.015429	-21.832	-100.27	878.415	-0.45215	1.561	-0.42139	NaN	NaN	NaN	NaN	NaN	NaN	NaN	NaN	NaN	NaN	NaN	NaN
1.044	-59.1196	10.9772	44.577	0.097266	0.11924	0.02207	-43.722	-103.592	881.77	-0.43164	1.5195	-0.39746	NaN	NaN	NaN	NaN	NaN	NaN	NaN	NaN	NaN	NaN	NaN	NaN
1.046	-47.157	7.2448	65.84487	0.10254	0.10303	0.027344	-58.954	-100.88	904.985	-0.38428	1.4673	-0.3667	NaN	NaN	NaN	NaN	NaN	NaN	NaN	NaN	NaN	NaN	NaN	NaN
1.048	-35.8931	17.035	64.6271	0.10508	0.091211	0.033399	-19.344	-146.86	956.788	-0.36108	1.4387	-0.35498	NaN	NaN	NaN	NaN	NaN	NaN	NaN	NaN	NaN	NaN	NaN	NaN
1.05	-46.6334	13.54609	50.6565	0.10703	0.078809	0.034277	-53.379	-167.616	987.924	-0.33447	1.4238	-0.35938	NaN	NaN	NaN	NaN	NaN	NaN	NaN	NaN	NaN	NaN	NaN	NaN
1.052	-64.256	23.6519	75.1527	0.10742	0.07373	0.037011	-98.209	-201.1839	1020.742	-0.30371	1.4141	-0.38477	NaN	NaN	NaN	NaN	NaN	NaN	NaN	NaN	NaN	NaN	NaN	NaN
1.054	-73.28888	24.06	81.062	0.10693	0.077539	0.041504	-75.176	-234.435	1052.702	-0.2959	1.4224	-0.40186	NaN	NaN	NaN	NaN	NaN	NaN	NaN	NaN	NaN	NaN	NaN	NaN
1.056	-61.3314	25.746	102.9497	0.10059	0.081055	0.041992	-99.6134	-202.703	1084.616	-0.2876	1.4473	-0.44531	NaN	NaN	NaN	NaN	NaN	NaN	NaN	NaN	NaN	NaN	NaN	NaN
1.058	-50.3877	29.7369	92.5448	0.093262	0.089551	0.046094	-72.637	-239.386	1139.6248	-0.27832	1.4895	-0.49292	NaN	NaN	NaN	NaN	NaN	NaN	NaN	NaN	NaN	NaN	NaN	NaN
1.06	-55.9059	36.3732	115.8481	0.081641	0.10068	0.047461	-68.239	-235.316	1181.3009	-0.27295	1.5278	-0.53467	NaN	NaN	NaN	NaN	NaN	NaN	NaN	NaN	NaN	NaN	NaN	NaN
1.062	-43.676	43.1334	151.2051	0.069531	0.12178	0.049414	-99.6749	-197.227	1202.53056	-0.29785	1.5938	-0.56689	NaN	NaN	NaN	NaN	NaN	NaN	NaN	NaN	NaN	NaN	NaN	NaN
1.064	-23.767	59.5499	167.7586	0.058886	0.14023	0.053711	-72.0415	-186.7006	1241.64395	-0.29346	1.645	-0.61865	NaN	NaN	NaN	NaN	NaN	NaN	NaN	NaN	NaN	NaN	NaN	NaN
1.066	-19.236	84.5285	186.6011	0.047852	0.16162	0.055176	-94.2297	-152.745	1268.2419	-0.32715	1.6719	-0.61133	NaN	NaN	NaN	NaN	NaN	NaN	NaN	NaN	NaN	NaN	NaN	NaN
1.068	22.8668	101.7261	212.072	0.038086	0.18721	0.04834	-114.1935	-144.3665	1290.171	-0.36182	1.6906	-0.61889	NaN	NaN	NaN	NaN	NaN	NaN	NaN	NaN	NaN	NaN	NaN	NaN
1.07	31.677	89.0582	263.7746	0.026074	0.20577	0.0375	-69.946	-134.062	1294.218	-0.3916	1.7363	-0.63965	NaN	NaN	NaN	NaN	NaN	NaN	NaN	NaN	NaN	NaN	NaN	NaN
1.072	16.06	89.6534	313.7342	0.015527	0.23584	0.022266	-93.41	-78.499	1267.1293	-0.40918	1.8066	-0.67969	NaN	NaN	NaN	NaN	NaN	NaN	NaN	NaN	NaN	NaN	NaN	NaN
1.074	21.03	98.3096	343.0651	0.0044924	0.26914	0.0090826	-87.396	-95.127	1290.893	-0.40234	1.8398	-0.69727	NaN	NaN	NaN	NaN	NaN	NaN	NaN	NaN	NaN	NaN	NaN	NaN
1.076	6.856	102.569	383.6054	-0.0063477	0.3042	-0.0092773	-84.884	-103.056	1321.8377	-0.38379	1.8965	-0.72461	NaN	NaN	NaN	NaN	NaN	NaN	NaN	NaN	NaN	NaN	NaN	NaN
1.078	1.01	99.348	462.5465	-0.032228	0.34463	-0.02295	-108.6782	-123.482	1333.1913	-0.36475	1.9356	-0.74707	NaN	NaN	NaN	NaN	NaN	NaN	NaN	NaN	NaN	NaN	NaN	NaN
1.08	-14.016	85.081	524.8312	-0.056447	0.39004	-0.043361	-61.017	-163.958121	1353.904	-0.34912	1.9653	-0.76904	NaN	NaN	NaN	NaN	NaN	NaN	NaN	NaN	NaN	NaN	NaN	NaN
1.082	-17.455	79.003	603.45	-0.092386	0.45098	-0.070314	-65.999	-161.0504	1344.0909	-0.33008	1.9941	-0.81055	NaN	NaN	NaN	NaN	NaN	NaN	NaN	NaN	NaN	NaN	NaN	NaN
1.084	-9.733	68.295	680.779	-0.13047	0.51895	-0.099709	-90.557	-182.281	1383.406	-0.32568	2.0122	-0.83154	NaN	NaN	NaN	NaN	NaN	NaN	NaN	NaN	NaN	NaN	NaN	NaN
1.086	-38.6956	62.2347	764.148	-0.17139	0.60156	-0.1333	-68.668	-185.4298	1418.045	-0.33008	2.0474	-0.87646	NaN	NaN	NaN	NaN	NaN	NaN	NaN	NaN	NaN	NaN	NaN	NaN
1.088	-21.038	50.2216	828.851	-0.22021	0.6955	-0.17323	-93.008	-148.27995	1418.6179	-0.35328	2.0813	-0.90258	NaN	NaN	NaN	NaN	NaN	NaN	NaN	NaN	NaN	NaN	NaN	NaN
1.09	-28.047	45.8242	852.8297	-0.27411	0.79958	-0.20976	-70.002	-157.115	1449.429	-0.37549	2.1138	-0.91748	NaN	NaN	NaN	NaN	NaN	NaN	NaN	NaN	NaN	NaN	NaN	NaN
1.092	-16.664	34.9532	874.408	-0.33465	0.907	-0.23984	-42.13	-144.607	1446.744	-0.41406	2.1523	-0.94531	NaN	NaN	NaN	NaN	NaN	NaN	NaN	NaN	NaN	NaN	NaN	NaN
1.094	-38.5752	26.68227	883.495	-0.4033	1.012	-0.26688	-84.6139	-134.725	1476.3255	-0.43164	2.1743	-0.9624	NaN	NaN	NaN	NaN	NaN	NaN	NaN	NaN	NaN	NaN	NaN	NaN
1.096	-30.472	8.3171	879.247	-0.48242	1.1191	-0.29492	-73.074	-132.512	1509.205	-0.46533	2.2056	-0.96045	NaN	NaN	NaN	NaN	NaN	NaN	NaN	NaN	NaN	NaN	NaN	NaN
1.098	-47.7085	-0.4329	884.719	-0.56585	1.2039	-0.32374	-72.563	-83.8944	1495.018	-0.49366	2.2119	-0.96045	NaN	NaN	NaN	NaN	NaN	NaN	NaN	NaN	NaN	NaN	NaN	NaN
1.1	-61.425	-18.54491	869.563	-0.65036	1.2834	-0.35677	-94.412	-63.7224	1489.1677	-0.51123	2.2036	-0.95264	NaN	NaN	NaN	NaN	NaN	NaN	NaN	NaN	NaN	NaN	NaN	NaN
1.102	-51.742	-27.8505	840.17	-0.7242	1.3282	-0.38958	-81.073	-69.369	1486.2237	-0.51904	2.1841	-0.94873	NaN	NaN	NaN	NaN	NaN	NaN	NaN	NaN	NaN	NaN	NaN	NaN
1.104	-36.308	-35.40352	812.0818	-0.77445	1.3459	-0.41681	-112.817	-47.06	1464.181	-0.51563	2.1699	-0.9375	NaN	NaN	NaN	NaN	NaN	NaN	NaN	NaN	NaN	NaN	NaN	NaN
1.106	-44.488	-30.0497	795.297	-0.79639	1.3579	-0.42041	-112.557	-64.5385	1472.421	-0.52295	2.1392	-0.92041	NaN	NaN	NaN	NaN	NaN	NaN	NaN	NaN	NaN	NaN	NaN	NaN
1.108	-25.842	-30.863	787.085	-0.8043	1.3442	-0.39818	-101.364	-48.631	1472.264	-0.53418	2.1079	-0.90234	NaN	NaN	NaN	NaN	NaN	NaN	NaN	NaN	NaN	NaN	NaN	NaN
1.11	-5.093	-21.8864	799.278	-0.78831	1.3093	-0.37438	-135.6001	-27.76	1485.506	-0.55078	2.082	-0.88086	NaN	NaN	NaN	NaN	NaN	NaN	NaN	NaN	NaN	NaN	NaN	NaN
1.112	5.397	-11.757	794.492	-0.752	1.2613	-0.35834	-115.78	-59.6594	1519.0553	-0.56494	2.0474	-0.86084	NaN	NaN	NaN	NaN	NaN	NaN	NaN	NaN	NaN	NaN	NaN	NaN
1.114	-1.2636	0.971000000000004	811.49721	-0.69289	1.2061	-0.3577	-132.3165	-53.499	1481.657	-0.57422	2.0391	-0.85547	NaN	NaN	NaN	NaN	NaN	NaN	NaN	NaN	NaN	NaN	NaN	NaN
1.116	6.863	-7.426	845.6715	-0.62646	1.1606	-0.35596	-148.4226	-52.254	1491.29	-0.58984	2.0195	-0.84766	NaN	NaN	NaN	NaN	NaN	NaN	NaN	NaN	NaN	NaN	NaN	NaN
1.118	9.58	-16.459	863.7354	-0.58188	1.1236	-0.34412	-113.023	-42.3131	1504.5196	-0.60938	2.0049	-0.82959	NaN	NaN	NaN	NaN	NaN	NaN	NaN	NaN	NaN	NaN	NaN	NaN
1.12	4.117	-35.177	870.4981	-0.55154	1.1027	-0.34325	-130.511	-20.2214	1515.9767	-0.62891	1.9961	-0.81641	NaN	NaN	NaN	NaN	NaN	NaN	NaN	NaN	NaN	NaN	NaN	NaN
1.122	0.0449999999999946	-58.191	869.746	-0.52448	1.0929	-0.35393	-107.763	-40.414	1546.778	-0.64795	1.9946	-0.79834	NaN	NaN	NaN	NaN	NaN	NaN	NaN	NaN	NaN	NaN	NaN	NaN
1.124	7.096	-105.9221	883.4957	-0.48746	1.0657	-0.37029	-104.738	-34.5173	1522.7024	-0.66553	1.9927	-0.79248	NaN	NaN	NaN	NaN	NaN	NaN	NaN	NaN	NaN	NaN	NaN	NaN
1.126	3.59	-151.2009	892.3219	-0.44531	1.0156	-0.37988	-128.2987	-17.2224	1505.335	-0.68311	2.0063	-0.78076	NaN	NaN	NaN	NaN	NaN	NaN	NaN	NaN	NaN	NaN	NaN	NaN
1.128	3.403	-164.715	893.4083	-0.39655	0.96006	-0.38354	-82.605	-21.1847	1505.835	-0.69385	2.0112	-0.77051	NaN	NaN	NaN	NaN	NaN	NaN	NaN	NaN	NaN	NaN	NaN	NaN
1.13	1.56	-159.366	906.1631	-0.35439	0.90637	-0.38294	-102.163	7.6739	1489.17	-0.70996	2.0215	-0.76563	NaN	NaN	NaN	NaN	NaN	NaN	NaN	NaN	NaN	NaN	NaN	NaN
1.132	12.774	-149.74	933.6463	-0.31976	0.86456	-0.38899	-104.589	29.2181	1479.6803	-0.72803	2.02	-0.75537	NaN	NaN	NaN	NaN	NaN	NaN	NaN	NaN	NaN	NaN	NaN	NaN
1.134	14.029	-152.198	948.682	-0.29971	0.85256	-0.39901	-80.745	34.2727	1469.9759	-0.73193	2.0142	-0.75049	NaN	NaN	NaN	NaN	NaN	NaN	NaN	NaN	NaN	NaN	NaN	NaN
1.136	-15.358	-131.293	974.723	-0.29004	0.84619	-0.41064	-103.8833	56.495	1438.0106	-0.73877	2.0044	-0.7417	NaN	NaN	NaN	NaN	NaN	NaN	NaN	NaN	NaN	NaN	NaN	NaN
1.138	-29.824	-105.045	1014.2009	-0.3157	0.8579	-0.422	-74.662	50.533	1436.0914	-0.73951	1.9947	-0.73145	NaN	NaN	NaN	NaN	NaN	NaN	NaN	NaN	NaN	NaN	NaN	NaN
1.14	-43.333	-78.4599	1055.118	-0.33065	0.95967	-0.48962	-65.124	61.554	1425.0048	-0.7373	1.9766	-0.72168	NaN	NaN	NaN	NaN	NaN	NaN	NaN	NaN	NaN	NaN	NaN	NaN
1.142	-59.123	-53.531	1067.9315	-0.35926	1.0175	-0.49517	-91.174	91.036	1404.6366	-0.72217	1.9536	-0.71045	NaN	NaN	NaN	NaN	NaN	NaN	NaN	NaN	NaN	NaN	NaN	NaN
1.144	-91.3943	-34.66	1073.2427	-0.43219	1.0438	-0.48816	-43.718	79.433	1384.1777	-0.71533	1.9341	-0.70264	NaN	NaN	NaN	NaN	NaN	NaN	NaN	NaN	NaN	NaN	NaN	NaN
1.146	-94.7446	-26.832	1073.3157	-0.5127	1.0938	-0.5	-60.621	84.47	1359.5916	-0.69531	1.8965	-0.68945	NaN	NaN	NaN	NaN	NaN	NaN	NaN	NaN	NaN	NaN	NaN	NaN
1.148	-102.866	-40.43	1078.277	-0.55629	1.171	-0.55149	-84.686	70.72243	1355.0289	-0.67114	1.8549	-0.67285	NaN	NaN	NaN	NaN	NaN	NaN	NaN	NaN	NaN	NaN	NaN	NaN
1.15	-105.6502	-61.794	1088.164	-0.58613	1.2397	-0.58787	-68.795	47.0009	1352.068	-0.64209	1.8149	-0.66162	NaN	NaN	NaN	NaN	NaN	NaN	NaN	NaN	NaN	NaN	NaN	NaN
1.152	-106.9291	-79.5487	1115.3116	-0.61064	1.2945	-0.59534	-73.398	69.3568	1314.7366	-0.60352	1.7539	-0.64258	NaN	NaN	NaN	NaN	NaN	NaN	NaN	NaN	NaN	NaN	NaN	NaN
1.154	-97.871813	-114.4	1122.0587	-0.64162	1.3467	-0.59712	-82.681	68.7765	1293.217	-0.58398	1.7285	-0.63086	NaN	NaN	NaN	NaN	NaN	NaN	NaN	NaN	NaN	NaN	NaN	NaN
1.156	-93.3377	-131.487	1129.7342	-0.67432	1.397	-0.59814	-73.75	72.0786	1275.6686	-0.54199	1.6689	-0.61719	NaN	NaN	NaN	NaN	NaN	NaN	NaN	NaN	NaN	NaN	NaN	NaN
1.158	-84.5394	-142.071	1138.308	-0.70597	1.4411	-0.61517	-112.0268	101.60215	1236.291	-0.5105	1.6223	-0.60474	NaN	NaN	NaN	NaN	NaN	NaN	NaN	NaN	NaN	NaN	NaN	NaN
1.16	-92.3115	-132.508	1169.4532	-0.72926	1.4815	-0.63054	-90.362	87.6545	1228.5765	-0.48242	1.5723	-0.58984	NaN	NaN	NaN	NaN	NaN	NaN	NaN	NaN	NaN	NaN	NaN	NaN
1.162	-60.079	-129.467	1203.239	-0.74073	1.5196	-0.64123	-88.143	130.947	1203.5114	-0.4502	1.5137	-0.58008	NaN	NaN	NaN	NaN	NaN	NaN	NaN	NaN	NaN	NaN	NaN	NaN
1.164	-60.485	-127.241	1207.089	-0.73784	1.5523	-0.64845	-100.9069	138.58072	1196.32352	-0.43311	1.4829	-0.56982	NaN	NaN	NaN	NaN	NaN	NaN	NaN	NaN	NaN	NaN	NaN	NaN
1.166	-53.178	-118.28111	1232.676	-0.73633	1.5742	-0.66211	-63.054	128.8544	1186.443	-0.4082	1.4297	-0.55518	NaN	NaN	NaN	NaN	NaN	NaN	NaN	NaN	NaN	NaN	NaN	NaN
1.168	-61.3239	-92.457	1233.412	-0.72597	1.5859	-0.66525	-98.7312	168.349	1141.5215	-0.38745	1.3891	-0.55517	NaN	NaN	NaN	NaN	NaN	NaN	NaN	NaN	NaN	NaN	NaN	NaN
1.17	-32.334	-74.178	1247.491	-0.732	1.5993	-0.66199	-105.142	163.909	1106.5276	-0.36475	1.3457	-0.54883	NaN	NaN	NaN	NaN	NaN	NaN	NaN	NaN	NaN	NaN	NaN	NaN
1.172	-22.308	-62.813	1238.5846	-0.75036	1.6067	-0.66478	-71.73	164.468	1083.1826	-0.33594	1.2871	-0.5332	NaN	NaN	NaN	NaN	NaN	NaN	NaN	NaN	NaN	NaN	NaN	NaN
1.174	-22.707	-48.979	1217.8671	-0.78101	1.6214	-0.66963	-95.3328	178.4765	1045.623	-0.31982	1.2563	-0.53174	NaN	NaN	NaN	NaN	NaN	NaN	NaN	NaN	NaN	NaN	NaN	NaN
1.176	-13.765	-46.884	1217.2263	-0.81738	1.6445	-0.67871	-45.359	132.454	1046.2467	-0.28857	1.1958	-0.51807	NaN	NaN	NaN	NaN	NaN	NaN	NaN	NaN	NaN	NaN	NaN	NaN
1.178	-1.7	-45.398	1221.1105	-0.85661	1.6669	-0.68651	-72.344	146.2115	1014.984	-0.25586	1.1274	-0.50342	NaN	NaN	NaN	NaN	NaN	NaN	NaN	NaN	NaN	NaN	NaN	NaN
1.18	3.838	-54.7712	1238.644	-0.90063	1.6891	-0.68974	-77.1599	150.05641	991.672	-0.23877	1.0962	-0.49561	NaN	NaN	NaN	NaN	NaN	NaN	NaN	NaN	NaN	NaN	NaN	NaN
1.182	-13.086	-37.4893	1248.752	-0.9483	1.7157	-0.69755	-23.784	136.5631	979.6748	-0.20996	1.0244	-0.47656	NaN	NaN	NaN	NaN	NaN	NaN	NaN	NaN	NaN	NaN	NaN	NaN
1.184	-12.349	-33.7979	1282.1926	-1.002	1.7413	-0.7046	-50.8166	169.6015	955.3187	-0.1836	0.97485	-0.46655	NaN	NaN	NaN	NaN	NaN	NaN	NaN	NaN	NaN	NaN	NaN	NaN
1.186	-15.305	-46.4013	1298.5611	-1.0576	1.7734	-0.71094	-31.685	156.446	941.661	-0.15479	0.92432	-0.45459	NaN	NaN	NaN	NaN	NaN	NaN	NaN	NaN	NaN	NaN	NaN	NaN
1.188	-33.694	-49.1404	1310.9009	-1.1101	1.8145	-0.71611	-7.439	156.9005	912.9927	-0.12012	0.85645	-0.44141	NaN	NaN	NaN	NaN	NaN	NaN	NaN	NaN	NaN	NaN	NaN	NaN
1.19	-65.568	-48.6405	1331.1094	-1.1684	1.8531	-0.7164	-5.095	178.6625	860.8638	-0.10156	0.8208	-0.43115	NaN	NaN	NaN	NaN	NaN	NaN	NaN	NaN	NaN	NaN	NaN	NaN
1.192	-72.317	-31.133	1346.592	-1.22	1.8851	-0.71172	12.77	149.096	861.815	-0.066895	0.75439	-0.41553	NaN	NaN	NaN	NaN	NaN	NaN	NaN	NaN	NaN	NaN	NaN	NaN
1.194	-82.032	-50.6645	1370.03	-1.2552	1.9151	-0.71386	4.865	183.7511	830.0811	-0.040771	0.70386	-0.4043	NaN	NaN	NaN	NaN	NaN	NaN	NaN	NaN	NaN	NaN	NaN	NaN
1.196	-103.7361	-46.4946	1356.538	-1.2769	1.938	-0.71729	5.173	184.7037	777.7298	-0.018555	0.65967	-0.39453	NaN	NaN	NaN	NaN	NaN	NaN	NaN	NaN	NaN	NaN	NaN	NaN
1.198	-98.3349	-42.646	1352.6642	-1.2896	1.9661	-0.72217	38.2526	169.5622	744.7703	0.01123	0.6001	-0.38232	NaN	NaN	NaN	NaN	NaN	NaN	NaN	NaN	NaN	NaN	NaN	NaN
1.2	-101.6369	-46.693	1326.059	-1.305	1.9833	-0.71631	-14.9073	204.889	700.827	0.024902	0.57129	-0.37354	NaN	NaN	NaN	NaN	NaN	NaN	NaN	NaN	NaN	NaN	NaN	NaN
1.202	-117.121	-36.641	1329.0443	-1.3249	1.9853	-0.6917	4.393	179.501	679.522	0.046387	0.51563	-0.36523	NaN	NaN	NaN	NaN	NaN	NaN	NaN	NaN	NaN	NaN	NaN	NaN
1.204	-100.9832	-24.0553	1324.981	-1.3433	1.9743	-0.67158	9.548	185.771	663.48	0.058838	0.4812	-0.35449	NaN	NaN	NaN	NaN	NaN	NaN	NaN	NaN	NaN	NaN	NaN	NaN
1.206	-94.8138	1.0346	1323.6579	-1.355	1.9614	-0.66113	-23.836	207.506	616.104	0.077637	0.43848	-0.34912	NaN	NaN	NaN	NaN	NaN	NaN	NaN	NaN	NaN	NaN	NaN	NaN
1.208	-85.576	5.1552	1331.313	-1.3569	1.9436	-0.65293	-2.152	166.165	598.9329	0.083984	0.38867	-0.33398	NaN	NaN	NaN	NaN	NaN	NaN	NaN	NaN	NaN	NaN	NaN	NaN
1.21	-109.161	15.908	1329.0908	-1.3452	1.9356	-0.64483	-12.644	182.388	559.112	0.092285	0.36768	-0.32715	NaN	NaN	NaN	NaN	NaN	NaN	NaN	NaN	NaN	NaN	NaN	NaN
1.212	-92.6807	26.144	1326.4292	-1.3331	1.929	-0.63116	-19.698	170.9358	524.97	0.1001	0.33301	-0.32422	NaN	NaN	NaN	NaN	NaN	NaN	NaN	NaN	NaN	NaN	NaN	NaN
1.214	-89.918	40.12	1339.8805	-1.317	1.9211	-0.62344	-4.516	157.4512	501.665	0.10962	0.30102	-0.31982	NaN	NaN	NaN	NaN	NaN	NaN	NaN	NaN	NaN	NaN	NaN	NaN
1.216	-81.1286	43.835	1345.858	-1.2983	1.9106	-0.61279	-34.5809	208.237	469.758	0.11572	0.27393	-0.31299	NaN	NaN	NaN	NaN	NaN	NaN	NaN	NaN	NaN	NaN	NaN	NaN
1.218	-67.399	32.109	1324.6778	-1.2845	1.8881	-0.59795	-25.5413	160.908	461.4688	0.12109	0.23291	-0.29004	NaN	NaN	NaN	NaN	NaN	NaN	NaN	NaN	NaN	NaN	NaN	NaN
1.22	-45.172	18.5929	1291.2054	-1.2666	1.857	-0.5833	-33.745	150.4751	435.1015	0.12451	0.20752	-0.28662	NaN	NaN	NaN	NaN	NaN	NaN	NaN	NaN	NaN	NaN	NaN	NaN
1.222	-37.442	3.45097	1280.85381	-1.2451	1.8215	-0.56611	-44.9858	177.8695	392.917	0.12598	0.16064	-0.27783	NaN	NaN	NaN	NaN	NaN	NaN	NaN	NaN	NaN	NaN	NaN	NaN
1.224	-20.342	-1.9	1273.794	-1.2176	1.7793	-0.55078	-27.545	133.53732	383.1507	0.13404	0.13135	-0.27026	NaN	NaN	NaN	NaN	NaN	NaN	NaN	NaN	NaN	NaN	NaN	NaN
1.226	1.649	-13.869	1269.8377	-1.1831	1.7349	-0.53662	-31.159	168.225	365.7078	0.13965	0.10498	-0.25928	NaN	NaN	NaN	NaN	NaN	NaN	NaN	NaN	NaN	NaN	NaN	NaN
1.228	-0.509	4.733	1245.621	-1.1512	1.6947	-0.52382	-42.937	153.042	333.18648	0.14941	0.0625	-0.2417	NaN	NaN	NaN	NaN	NaN	NaN	NaN	NaN	NaN	NaN	NaN	NaN
1.23	-4.474	7.155	1235.724	-1.114	1.6516	-0.51377	-17.806	120.301	322.672	0.1543	0.038086	-0.23682	NaN	NaN	NaN	NaN	NaN	NaN	NaN	NaN	NaN	NaN	NaN	NaN
1.232	3.375	22.4793	1234.2922	-1.0788	1.6157	-0.50595	-36.5009	162.588	268.453	0.15674	-0.0024414	-0.21387	NaN	NaN	NaN	NaN	NaN	NaN	NaN	NaN	NaN	NaN	NaN	NaN
1.234	5.86499999999999	30.1627	1230.1494	-1.0443	1.585	-0.49863	-22.48	112.6428	274.5712	0.1582	-0.027099	-0.20947	NaN	NaN	NaN	NaN	NaN	NaN	NaN	NaN	NaN	NaN	NaN	NaN
1.236	-24.501	63.653	1222.78	-1.0112	1.5513	-0.48779	-0.429000000000002	123.8931	269.0259	0.1626	-0.056641	-0.19727	NaN	NaN	NaN	NaN	NaN	NaN	NaN	NaN	NaN	NaN	NaN	NaN
1.238	-24.018	83.813	1203.1149	-0.98076	1.5208	-0.48457	11.451	153.5966	233.9085	0.17236	-0.09082	-0.18945	NaN	NaN	NaN	NaN	NaN	NaN	NaN	NaN	NaN	NaN	NaN	NaN
1.24	-40.568	85.775	1188.9737	-0.95225	1.4943	-0.48164	2.561	101.9635	231.323	0.16992	-0.11621	-0.18066	NaN	NaN	NaN	NaN	NaN	NaN	NaN	NaN	NaN	NaN	NaN	NaN
1.242	-45.003	76.187	1148.603	-0.92178	1.4669	-0.47188	0.406000000000002	131.03	196.00091	0.17773	-0.15088	-0.16943	NaN	NaN	NaN	NaN	NaN	NaN	NaN	NaN	NaN	NaN	NaN	NaN
1.244	-62.745	83.373	1134.99	-0.89502	1.4401	-0.47158	8.623	107.1333	181.0364	0.17993	-0.18042	-0.1626	NaN	NaN	NaN	NaN	NaN	NaN	NaN	NaN	NaN	NaN	NaN	NaN
1.246	-63.819	70.281	1115.746	-0.86572	1.4126	-0.46582	19.779	65.4854	172.973	0.18848	-0.20215	-0.1582	NaN	NaN	NaN	NaN	NaN	NaN	NaN	NaN	NaN	NaN	NaN	NaN
1.248	-68.257	56.7985	1101.489	-0.8375	1.3916	-0.46035	-2.521	113.257	145.2673	0.19336	-0.23193	-0.14941	NaN	NaN	NaN	NaN	NaN	NaN	NaN	NaN	NaN	NaN	NaN	NaN
1.25	-66.888	58.161	1069.99	-0.81465	1.3688	-0.45977	6.714	64.273	132.147	0.19189	-0.24854	-0.14258	NaN	NaN	NaN	NaN	NaN	NaN	NaN	NaN	NaN	NaN	NaN	NaN
1.252	-98.6007	57.624	1057.304	-0.78848	1.3433	-0.45547	18.03	67.1887	121.7778	0.19434	-0.27832	-0.13574	NaN	NaN	NaN	NaN	NaN	NaN	NaN	NaN	NaN	NaN	NaN	NaN
1.254	-83.275	52.8306	1043.2814	-0.76318	1.3173	-0.45244	-8.226	92.51957	98.308	0.19165	-0.29248	-0.1289	NaN	NaN	NaN	NaN	NaN	NaN	NaN	NaN	NaN	NaN	NaN	NaN
1.256	-95.925	58.5417	1038.4599	-0.73779	1.2876	-0.44482	-2.34200000000001	40.2319	113.535	0.18408	-0.30469	-0.13135	NaN	NaN	NaN	NaN	NaN	NaN	NaN	NaN	NaN	NaN	NaN	NaN
1.258	-99.3937	65.18464	1028.4945	-0.7084	1.2617	-0.44141	-6.681	76.9987	94.0231	0.18018	-0.30518	-0.12451	NaN	NaN	NaN	NaN	NaN	NaN	NaN	NaN	NaN	NaN	NaN	NaN
1.26	-112.691	75.1416	1017.083273	-0.68359	1.2367	-0.43985	-22.845	56.178	80.15931	0.17334	-0.30811	-0.12354	NaN	NaN	NaN	NaN	NaN	NaN	NaN	NaN	NaN	NaN	NaN	NaN
1.262	-104.2713	69.095	1013.996	-0.65742	1.2101	-0.43203	-16.462	30.4322	76.4849	0.16162	-0.30371	-0.11914	NaN	NaN	NaN	NaN	NaN	NaN	NaN	NaN	NaN	NaN	NaN	NaN
1.264	-96.064	86.309	985.9479	-0.62764	1.1866	-0.42685	-40.5523	80.5286	63.192	0.14941	-0.30542	-0.11816	NaN	NaN	NaN	NaN	NaN	NaN	NaN	NaN	NaN	NaN	NaN	NaN
1.266	-80.511362	99.773	947.17814	-0.60303	1.1509	-0.41553	-26.396	31.866	56.0518	0.13916	-0.29492	-0.11865	NaN	NaN	NaN	NaN	NaN	NaN	NaN	NaN	NaN	NaN	NaN	NaN
1.268	-61.0625	118.143	920.2043	-0.57217	1.1212	-0.41319	-34.685	42.3454	58.9714	0.11133	-0.26758	-0.12256	NaN	NaN	NaN	NaN	NaN	NaN	NaN	NaN	NaN	NaN	NaN	NaN
1.27	-42.259	110.8347	895.9429	-0.54883	1.0906	-0.4086	-56.7076	75.4849	41.324	0.09375	-0.23975	-0.12646	NaN	NaN	NaN	NaN	NaN	NaN	NaN	NaN	NaN	NaN	NaN	NaN
1.272	-12.797	111.10143	862.0793	-0.52578	1.0582	-0.39883	-37.91	14.138	42.8171	0.062988	-0.19873	-0.12598	NaN	NaN	NaN	NaN	NaN	NaN	NaN	NaN	NaN	NaN	NaN	NaN
1.274	-9.01	114.0404	839.3867	-0.50107	1.0326	-0.38818	-60.19636	58.5125	36.601	0.038818	-0.16577	-0.12207	NaN	NaN	NaN	NaN	NaN	NaN	NaN	NaN	NaN	NaN	NaN	NaN
1.276	7.574	115.11466	837.48999	-0.48047	1.002	-0.38086	-62.1201	42.5493	30.245	0.010254	-0.12109	-0.14014	NaN	NaN	NaN	NaN	NaN	NaN	NaN	NaN	NaN	NaN	NaN	NaN
1.278	37.337	117.8438	832.0895	-0.4583	0.97119	-0.37237	-33.269	5.0265	32.0748	-0.030273	-0.057129	-0.146	NaN	NaN	NaN	NaN	NaN	NaN	NaN	NaN	NaN	NaN	NaN	NaN
1.28	22.12	115.119	804.0002	-0.43945	0.94219	-0.36719	-49.0969	59.5234	23.214	-0.050781	-0.02832	-0.14893	NaN	NaN	NaN	NaN	NaN	NaN	NaN	NaN	NaN	NaN	NaN	NaN
1.282	-7.007	129.007	777.8529	-0.42031	0.91211	-0.35743	-35.7472	5.298	29.4955	-0.086914	0.01709	-0.15088	NaN	NaN	NaN	NaN	NaN	NaN	NaN	NaN	NaN	NaN	NaN	NaN
1.284	3.04499999999999	137.191	761.5487	-0.40195	0.88066	-0.34844	-31.635	14.45788	24.519	-0.11475	0.055664	-0.15991	NaN	NaN	NaN	NaN	NaN	NaN	NaN	NaN	NaN	NaN	NaN	NaN
1.286	24.186	126.276	767.3684	-0.38477	0.84961	-0.33545	-37.0557	46.0257	19.293	-0.14307	0.097168	-0.16797	NaN	NaN	NaN	NaN	NaN	NaN	NaN	NaN	NaN	NaN	NaN	NaN
1.288	14.892	123.723	750.7607	-0.36865	0.82031	-0.32539	-24.632	2.470413	26.2791	-0.17871	0.14404	-0.17676	NaN	NaN	NaN	NaN	NaN	NaN	NaN	NaN	NaN	NaN	NaN	NaN
1.29	-12.797	114.865	732.63	-0.35069	0.79268	-0.31826	-14.004	52.195	27.656	-0.19678	0.16406	-0.18018	NaN	NaN	NaN	NaN	NaN	NaN	NaN	NaN	NaN	NaN	NaN	NaN
1.292	11.036	110.513	703.4163	-0.3331	0.75869	-0.3124	-13.255	41.581	19.993	-0.22656	0.20605	-0.19434	NaN	NaN	NaN	NaN	NaN	NaN	NaN	NaN	NaN	NaN	NaN	NaN
1.294	14.273	104.101	686.335	-0.31865	0.7374	-0.30459	-0.820999999999998	12.2563	33.2325	-0.23584	0.23633	-0.19751	NaN	NaN	NaN	NaN	NaN	NaN	NaN	NaN	NaN	NaN	NaN	NaN
1.296	-6.384	113.635	650.7249	-0.30273	0.71387	-0.29492	-10.672	52.157	28.781	-0.24756	0.26318	-0.21045	NaN	NaN	NaN	NaN	NaN	NaN	NaN	NaN	NaN	NaN	NaN	NaN
1.298	-23.923	120.453	641.901	-0.28594	0.68936	-0.28242	17.176	-1.67811	32.2097	-0.24609	0.29443	-0.22021	NaN	NaN	NaN	NaN	NaN	NaN	NaN	NaN	NaN	NaN	NaN	NaN
1.3	-15.277	123.6255	627.306	-0.27334	0.66338	-0.27334	6.503	21.337	43.8562	-0.24268	0.30273	-0.22705	NaN	NaN	NaN	NaN	NaN	NaN	NaN	NaN	NaN	NaN	NaN	NaN
1.302	-33.51	124.56003	612.52153	-0.26201	0.63838	-0.26162	6.938	55.743	32.76	-0.23438	0.30615	-0.229	NaN	NaN	NaN	NaN	NaN	NaN	NaN	NaN	NaN	NaN	NaN	NaN
1.304	-59.38543	139.9273	598.55682	-0.2499	0.61143	-0.2541	12.946	2.0339	19.2598	-0.22778	0.29931	-0.22339	NaN	NaN	NaN	NaN	NaN	NaN	NaN	NaN	NaN	NaN	NaN	NaN
1.306	-82.605	132.3387	597.3391	-0.24072	0.5874	-0.24707	0.545999999999999	50.274	10.096	-0.22705	0.28809	-0.22119	NaN	NaN	NaN	NaN	NaN	NaN	NaN	NaN	NaN	NaN	NaN	NaN
1.308	-60.2904	134.153	581.9141	-0.22392	0.56026	-0.24014	-17.774	35.675	12.9273	-0.21973	0.26953	-0.21973	NaN	NaN	NaN	NaN	NaN	NaN	NaN	NaN	NaN	NaN	NaN	NaN
1.31	-73.915	145.634	554.0131	-0.21064	0.53261	-0.23477	-8.209	13.6571	19.1883	-0.21289	0.2627	-0.21826	NaN	NaN	NaN	NaN	NaN	NaN	NaN	NaN	NaN	NaN	NaN	NaN
1.312	-81.6469	155.5163	516.2773	-0.19658	0.5041	-0.22969	-28.203	65.413	27.119	-0.19336	0.23926	-0.21094	NaN	NaN	NaN	NaN	NaN	NaN	NaN	NaN	NaN	NaN	NaN	NaN
1.314	-62.4862	152.4452	500.51	-0.17881	0.47939	-0.22148	-16.128	15.3338	31.2589	-0.18603	0.22217	-0.19995	NaN	NaN	NaN	NaN	NaN	NaN	NaN	NaN	NaN	NaN	NaN	NaN
1.316	-42.6171	141.80907	492.6301	-0.16309	0.44971	-0.21826	-15.746	28.313	34.1224	-0.1709	0.20264	-0.19385	NaN	NaN	NaN	NaN	NaN	NaN	NaN	NaN	NaN	NaN	NaN	NaN
1.318	-31.0814	133.7559	464.00284	-0.15293	0.41963	-0.20528	-40.3075	51.188	33.661	-0.16504	0.17285	-0.17871	NaN	NaN	NaN	NaN	NaN	NaN	NaN	NaN	NaN	NaN	NaN	NaN
1.32	-22.089	132.322	445.1316	-0.14316	0.3918	-0.19883	-37.165	5.6647	34.812	-0.1621	0.15771	-0.17505	NaN	NaN	NaN	NaN	NaN	NaN	NaN	NaN	NaN	NaN	NaN	NaN
1.322	-11.893	132.71	456.60726	-0.13105	0.36875	-0.19023	-33.726	50.3054	26.3244	-0.16113	0.13672	-0.16309	NaN	NaN	NaN	NaN	NaN	NaN	NaN	NaN	NaN	NaN	NaN	NaN
1.324	5.504	122.81	443.9695	-0.12129	0.34014	-0.18486	-46.5544	33.7068	20.3286	-0.15625	0.10693	-0.1543	NaN	NaN	NaN	NaN	NaN	NaN	NaN	NaN	NaN	NaN	NaN	NaN
1.326	2.479	117.0076	428.2952	-0.11084	0.31055	-0.18066	-59.4234	8.93717	28.0665	-0.15723	0.092773	-0.14844	NaN	NaN	NaN	NaN	NaN	NaN	NaN	NaN	NaN	NaN	NaN	NaN
1.328	-2.318	116.0978	421.67	-0.098046	0.28604	-0.17011	-54.67915	59.4907	28.672	-0.1499	0.061035	-0.14307	NaN	NaN	NaN	NaN	NaN	NaN	NaN	NaN	NaN	NaN	NaN	NaN
1.33	12.746	108.65	411.6683	-0.087012	0.25908	-0.16241	-40.817	9.807	25.2857	-0.13819	0.039307	-0.13794	NaN	NaN	NaN	NaN	NaN	NaN	NaN	NaN	NaN	NaN	NaN	NaN
1.332	38.2244	115.261	388.4883	-0.073731	0.23838	-0.15693	-37.645	20.1486	41.846	-0.12891	0.012695	-0.13037	NaN	NaN	NaN	NaN	NaN	NaN	NaN	NaN	NaN	NaN	NaN	NaN
1.334	13.621	122.406	351.5785	-0.064258	0.21055	-0.15498	-42.14514	38.89515	32.8317	-0.11377	-0.012695	-0.11914	NaN	NaN	NaN	NaN	NaN	NaN	NaN	NaN	NaN	NaN	NaN	NaN
1.336	3.435	120.565	343.4551	-0.054688	0.19092	-0.146	-52.9715	-8.2733	38.558	-0.10449	-0.023438	-0.1167	NaN	NaN	NaN	NaN	NaN	NaN	NaN	NaN	NaN	NaN	NaN	NaN
1.338	39.293	108.381	330.1848	-0.038965	0.16162	-0.14541	-23.498	44.6541	45.1524	-0.10303	-0.036133	-0.11719	NaN	NaN	NaN	NaN	NaN	NaN	NaN	NaN	NaN	NaN	NaN	NaN
1.34	30.693	102.5471	319.2824	-0.025195	0.1417	-0.14424	-21.512	44.8855	21.14	-0.10571	-0.042969	-0.12036	NaN	NaN	NaN	NaN	NaN	NaN	NaN	NaN	NaN	NaN	NaN	NaN
1.342	34.7039	109.432	281.318	-0.014258	0.1128	-0.13916	-8.993	9.96524	25.2835	-0.10449	-0.050293	-0.12598	NaN	NaN	NaN	NaN	NaN	NaN	NaN	NaN	NaN	NaN	NaN	NaN
1.344	19.804	98.1114	284.181	0.00058594	0.088672	-0.12978	-20.495	60.064	27.3048	-0.10791	-0.054199	-0.12793	NaN	NaN	NaN	NaN	NaN	NaN	NaN	NaN	NaN	NaN	NaN	NaN
1.346	17.683	97.7824	287.9416	0.01416	0.072266	-0.12646	-0.805999999999997	15.016	26.5511	-0.10791	-0.057129	-0.1333	NaN	NaN	NaN	NaN	NaN	NaN	NaN	NaN	NaN	NaN	NaN	NaN
1.348	-4.142	108.7352	258.167	0.026075	0.053809	-0.1293	3.77	24.3032	42.3664	-0.10547	-0.058105	-0.14258	NaN	NaN	NaN	NaN	NaN	NaN	NaN	NaN	NaN	NaN	NaN	NaN
1.35	-11.245	118.687	245.3206	0.035547	0.036719	-0.12685	-3.068	37.7361	30.916	-0.10572	-0.063477	-0.14624	NaN	NaN	NaN	NaN	NaN	NaN	NaN	NaN	NaN	NaN	NaN	NaN
1.352	-38.2908	101.361	258.6089	0.045312	0.021875	-0.12646	9.343	-14.1388	39.379	-0.10596	-0.064941	-0.15039	NaN	NaN	NaN	NaN	NaN	NaN	NaN	NaN	NaN	NaN	NaN	NaN
1.354	-50.495	97.243	245.0817	0.051563	0.0048828	-0.12548	4.066	37.2364	31.7788	-0.11377	-0.063477	-0.15186	NaN	NaN	NaN	NaN	NaN	NaN	NaN	NaN	NaN	NaN	NaN	NaN
1.356	-55.3067	93.61	234.471	0.062012	-0.015137	-0.12012	-0.902000000000001	27.533246	25.424	-0.11914	-0.056152	-0.15186	NaN	NaN	NaN	NaN	NaN	NaN	NaN	NaN	NaN	NaN	NaN	NaN
1.358	-64.4131	89.7635	208.1266	0.067285	-0.026953	-0.11943	8.485	-11.3472	42.5481	-0.13086	-0.035156	-0.15527	NaN	NaN	NaN	NaN	NaN	NaN	NaN	NaN	NaN	NaN	NaN	NaN
1.36	-66.159	89.3603	198.4961	0.073731	-0.03623	-0.11973	-23.559	23.978	51.054	-0.14673	-0.011963	-0.15283	NaN	NaN	NaN	NaN	NaN	NaN	NaN	NaN	NaN	NaN	NaN	NaN
1.362	-63.0643	78.6075	190.308	0.078808	-0.049512	-0.11933	-23.718	-24.14789	68.7557	-0.1626	0.015137	-0.1543	NaN	NaN	NaN	NaN	NaN	NaN	NaN	NaN	NaN	NaN	NaN	NaN
1.364	-63.5063	83.482	167.422	0.083691	-0.056739	-0.11504	-22.68	-13.9523	81.401	-0.19238	0.071777	-0.16455	NaN	NaN	NaN	NaN	NaN	NaN	NaN	NaN	NaN	NaN	NaN	NaN
1.366	-57.78612	78.098	156.509	0.086914	-0.068848	-0.12012	-22.181	-0.833299999999999	93.921	-0.20264	0.10303	-0.17236	NaN	NaN	NaN	NaN	NaN	NaN	NaN	NaN	NaN	NaN	NaN	NaN
1.368	-30.18	78.3016	164.3858	0.087695	-0.070898	-0.1126	-31.39	-59.491	99.7341	-0.24023	0.14258	-0.17725	NaN	NaN	NaN	NaN	NaN	NaN	NaN	NaN	NaN	NaN	NaN	NaN
1.37	-36.659	77.1574	164.8695	0.08623	-0.075097	-0.11777	-52.3869	-25.986	109.133	-0.25806	0.17505	-0.19239	NaN	NaN	NaN	NaN	NaN	NaN	NaN	NaN	NaN	NaN	NaN	NaN
1.372	-37.612	84.9154	148.6735	0.084278	-0.078223	-0.11504	-50.4211	-37.6852	112.712	-0.27588	0.20459	-0.21191	NaN	NaN	NaN	NaN	NaN	NaN	NaN	NaN	NaN	NaN	NaN	NaN
1.374	-25.407	90.351	142.4858	0.079883	-0.073047	-0.11641	-42.934	-60.5597	147.5477	-0.28906	0.23438	-0.23633	NaN	NaN	NaN	NaN	NaN	NaN	NaN	NaN	NaN	NaN	NaN	NaN
1.376	-30.434	84.052	145.90224	0.072754	-0.074219	-0.11621	-38.682	3.5803	190.757	-0.28906	0.25391	-0.24707	NaN	NaN	NaN	NaN	NaN	NaN	NaN	NaN	NaN	NaN	NaN	NaN
1.378	-16.13	80.865	126.6896	0.062305	-0.067188	-0.11113	-60.38517	-19.5072	226.2024	-0.29248	0.29639	-0.25928	NaN	NaN	NaN	NaN	NaN	NaN	NaN	NaN	NaN	NaN	NaN	NaN
1.38	-2.951	78.272	112.8717	0.049804	-0.063965	-0.10918	-55.291	0.6371	286.447	-0.30737	0.33081	-0.26319	NaN	NaN	NaN	NaN	NaN	NaN	NaN	NaN	NaN	NaN	NaN	NaN
1.382	-2.491	73.666	116.7563	0.037696	-0.056543	-0.10684	-46.0441	49.3916	342.777	-0.32666	0.37744	-0.27197	NaN	NaN	NaN	NaN	NaN	NaN	NaN	NaN	NaN	NaN	NaN	NaN
1.384	3.615	65.478	110.2171	0.019922	-0.040527	-0.11006	-40.44	35.3532	407.542	-0.37061	0.46045	-0.28906	NaN	NaN	NaN	NaN	NaN	NaN	NaN	NaN	NaN	NaN	NaN	NaN
1.386	19.635	60.6478	94.549	0.0083008	-0.021973	-0.10742	-37.357	87.921	507.0118	-0.396	0.51221	-0.29541	NaN	NaN	NaN	NaN	NaN	NaN	NaN	NaN	NaN	NaN	NaN	NaN
1.388	37.0933	59.0737	83.549	-0.0077148	-0.0026368	-0.1042	-40.6409	90.866	574.43181	-0.4585	0.62549	-0.30811	NaN	NaN	NaN	NaN	NaN	NaN	NaN	NaN	NaN	NaN	NaN	NaN
1.39	27.354	49.2046	89.7664	-0.019922	0.016992	-0.1086	-22.43	71.777	659.5639	-0.5122	0.73071	-0.31298	NaN	NaN	NaN	NaN	NaN	NaN	NaN	NaN	NaN	NaN	NaN	NaN
1.392	42.101	49.1373	94.8138	-0.035937	0.032617	-0.10234	-16.795	116.074	738.936	-0.57373	0.83936	-0.30957	NaN	NaN	NaN	NaN	NaN	NaN	NaN	NaN	NaN	NaN	NaN	NaN
1.394	23.395	53.7978	87.5328	-0.045508	0.053418	-0.10186	-1.668	64.267	807.742	-0.66406	1.0059	-0.32422	NaN	NaN	NaN	NaN	NaN	NaN	NaN	NaN	NaN	NaN	NaN	NaN
1.396	13.536	59.3776	76.0247	-0.059082	0.07373	-0.10156	4.704	54.516	890.848	-0.71484	1.084	-0.32959	NaN	NaN	NaN	NaN	NaN	NaN	NaN	NaN	NaN	NaN	NaN	NaN
1.398	-13.087	54.553	84.2672	-0.069629	0.092773	-0.10078	-16.242	69.294	939.0873	-0.80273	1.2588	-0.35059	NaN	NaN	NaN	NaN	NaN	NaN	NaN	NaN	NaN	NaN	NaN	NaN
1.4	-19.681	54.5	89.405	-0.082032	0.11455	-0.097754	-2.27	-0.7058	977.6663	-0.84937	1.3743	-0.37574	NaN	NaN	NaN	NaN	NaN	NaN	NaN	NaN	NaN	NaN	NaN	NaN
1.402	-28.002	64.589	77.1804	-0.0875	0.13526	-0.096582	-1.364	-7.7315	999.126	-0.87988	1.4727	-0.41602	NaN	NaN	NaN	NaN	NaN	NaN	NaN	NaN	NaN	NaN	NaN	NaN
1.404	-47.141	61.033	51.4651	-0.097462	0.14824	-0.095801	-18.333	-29.1146	988.847	-0.87939	1.5474	-0.48682	NaN	NaN	NaN	NaN	NaN	NaN	NaN	NaN	NaN	NaN	NaN	NaN
1.406	-51.8732	54.1802	73.0441	-0.10303	0.1665	-0.093262	4.611	-77.231	996.171	-0.85449	1.5527	-0.52148	NaN	NaN	NaN	NaN	NaN	NaN	NaN	NaN	NaN	NaN	NaN	NaN
1.408	-53.3697	50.208	48.0328	-0.11367	0.17685	-0.090723	-20.713	-32.20295	952.238	-0.77783	1.5044	-0.58057	NaN	NaN	NaN	NaN	NaN	NaN	NaN	NaN	NaN	NaN	NaN	NaN
1.41	-50.8069	49.80905	56.216	-0.11562	0.18095	-0.093261	-19.182	-72.42	901.819	-0.6936	1.426	-0.61011	NaN	NaN	NaN	NaN	NaN	NaN	NaN	NaN	NaN	NaN	NaN	NaN
1.412	-48.0024	46.7896	49.8373	-0.11836	0.18369	-0.088965	-1.216	-95.549	892.333	-0.60645	1.3359	-0.63672	NaN	NaN	NaN	NaN	NaN	NaN	NaN	NaN	NaN	NaN	NaN	NaN
1.414	-52.8362	40.8338	47.6018	-0.11787	0.18203	-0.087012	-9.327	-73.473	854.718	-0.49609	1.1997	-0.67041	NaN	NaN	NaN	NaN	NaN	NaN	NaN	NaN	NaN	NaN	NaN	NaN
1.416	-54.0501	33.0798	57.97407	-0.11621	0.17773	-0.09082	-10.338	-106.946	832.733	-0.43945	1.1328	-0.69238	NaN	NaN	NaN	NaN	NaN	NaN	NaN	NaN	NaN	NaN	NaN	NaN
1.418	-74.09545	27.9412	63.2133	-0.11191	0.1709	-0.08252	9.971	-48.549	800.3246	-0.33105	1.0039	-0.71777	NaN	NaN	NaN	NaN	NaN	NaN	NaN	NaN	NaN	NaN	NaN	NaN
1.42	-72.6237	26.3907	73.6795	-0.10625	0.16094	-0.081738	-10.7047	-17.495	763.694	-0.27808	0.94556	-0.7312	NaN	NaN	NaN	NaN	NaN	NaN	NaN	NaN	NaN	NaN	NaN	NaN
1.422	-64.201045	26.7134	73.3347	-0.10781	0.15234	-0.081738	-19.495	-34.962	782.40119	-0.24805	0.89258	-0.75391	NaN	NaN	NaN	NaN	NaN	NaN	NaN	NaN	NaN	NaN	NaN	NaN
1.424	-54.27331	20.1623	61.68	-0.10791	0.14717	-0.081933	-14.9829	18.85	785.4024	-0.19482	0.85938	-0.78809	NaN	NaN	NaN	NaN	NaN	NaN	NaN	NaN	NaN	NaN	NaN	NaN
1.426	-53.3258	10.7405	54.0954	-0.10986	0.1377	-0.086914	-5.6186	-33.74	762.426	-0.15771	0.83252	-0.8042	NaN	NaN	NaN	NaN	NaN	NaN	NaN	NaN	NaN	NaN	NaN	NaN
1.428	-44.843	5.49373	70.71883	-0.10439	0.13018	-0.083106	-2.3496	-69.218	800.98	-0.075684	0.74854	-0.81982	NaN	NaN	NaN	NaN	NaN	NaN	NaN	NaN	NaN	NaN	NaN	NaN
1.43	-19.151	-4.5761	70.18494	-0.099613	0.11895	-0.082031	3.8668	-67.413	838.516	-0.023682	0.70582	-0.82984	NaN	NaN	NaN	NaN	NaN	NaN	NaN	NaN	NaN	NaN	NaN	NaN
1.432	-7.69	4.9651	63.9123	-0.090625	0.10566	-0.083984	23.59384	-127.7647	876.75	0.0063477	0.72852	-0.8457	NaN	NaN	NaN	NaN	NaN	NaN	NaN	NaN	NaN	NaN	NaN	NaN
1.434	7.396	1.2122	61.5073	-0.083692	0.083984	-0.083301	54.182	-115.2823	900.376	0.0039063	0.71143	-0.81396	NaN	NaN	NaN	NaN	NaN	NaN	NaN	NaN	NaN	NaN	NaN	NaN
1.436	-2.39	-7.9913	85.8646	-0.073242	0.062988	-0.084473	56.0934	-125.5305	911.213	-0.030762	0.6792	-0.78857	NaN	NaN	NaN	NaN	NaN	NaN	NaN	NaN	NaN	NaN	NaN	NaN
1.438	37.272	-15.2281	91.1032	-0.06084	0.039942	-0.082422	60.26	-178.434	962.0783	-0.10303	0.69971	-0.77881	NaN	NaN	NaN	NaN	NaN	NaN	NaN	NaN	NaN	NaN	NaN	NaN
1.44	15.383	-11.8856	82.9024	-0.053125	0.019239	-0.089063	49.203	-170.63	1007.319	-0.14233	0.79053	-0.82422	NaN	NaN	NaN	NaN	NaN	NaN	NaN	NaN	NaN	NaN	NaN	NaN
1.442	17.233	-8.6676	80.2853	-0.046094	-0.0022461	-0.087109	50.628	-190.04	1037.114	-0.1626	0.89014	-0.86572	NaN	NaN	NaN	NaN	NaN	NaN	NaN	NaN	NaN	NaN	NaN	NaN
1.444	4.066	-7.191	106.3709	-0.041211	-0.014649	-0.088184	65.557	-178.7	1093.7534	-0.20068	1.0181	-0.87256	NaN	NaN	NaN	NaN	NaN	NaN	NaN	NaN	NaN	NaN	NaN	NaN
1.446	2.502	-10.906	120.6976	-0.032227	-0.027344	-0.091797	82.347	-134.078	1123.075	-0.23535	1.0801	-0.87695	NaN	NaN	NaN	NaN	NaN	NaN	NaN	NaN	NaN	NaN	NaN	NaN
1.448	-7.683	6.4943	126.4005	-0.031543	-0.035352	-0.094336	71.293	-150.963	1158.4677	-0.3042	1.2192	-0.90771	NaN	NaN	NaN	NaN	NaN	NaN	NaN	NaN	NaN	NaN	NaN	NaN
1.45	-9.12	14.5789	143.9389	-0.028907	-0.044434	-0.097461	67.084	-114.2912	1201.4197	-0.35376	1.3059	-0.94605	NaN	NaN	NaN	NaN	NaN	NaN	NaN	NaN	NaN	NaN	NaN	NaN
1.452	-3.678	31.35814	185.7735	-0.028907	-0.04834	-0.098633	68.54	-74.998	1202.5435	-0.39746	1.3711	-0.9834	NaN	NaN	NaN	NaN	NaN	NaN	NaN	NaN	NaN	NaN	NaN	NaN
1.454	-7.392	59.6206	221.1063	-0.030469	-0.049219	-0.11114	69.045	-85.81	1228.2965	-0.42969	1.4141	-1.0234	NaN	NaN	NaN	NaN	NaN	NaN	NaN	NaN	NaN	NaN	NaN	NaN
1.456	-8.712	88.2935	234.401	-0.037109	-0.042969	-0.11719	69.267	-47.924	1252.1041	-0.43018	1.4243	-1.0347	NaN	NaN	NaN	NaN	NaN	NaN	NaN	NaN	NaN	NaN	NaN	NaN
1.458	-12.053	92.725	273.5875	-0.044238	-0.029102	-0.12881	52.556	-82.199	1245.9414	-0.43311	1.4438	-1.062	NaN	NaN	NaN	NaN	NaN	NaN	NaN	NaN	NaN	NaN	NaN	NaN
1.46	-4.736	99.697	314.9773	-0.054883	-0.0024415	-0.13984	59.7863	-114.753	1292.1561	-0.44287	1.4751	-1.0718	NaN	NaN	NaN	NaN	NaN	NaN	NaN	NaN	NaN	NaN	NaN	NaN
1.462	-15.848	93.6397	356.309	-0.073242	0.027636	-0.15313	36.527	-85.486	1298.595	-0.46094	1.5	-1.0684	NaN	NaN	NaN	NaN	NaN	NaN	NaN	NaN	NaN	NaN	NaN	NaN
1.464	-47.1829	113.7686	411.7545	-0.095607	0.074609	-0.16211	18.2041	-142.3239	1328.376	-0.52344	1.5742	-1.0586	NaN	NaN	NaN	NaN	NaN	NaN	NaN	NaN	NaN	NaN	NaN	NaN
1.466	-37.1966	110.276	478.608	-0.12646	0.12939	-0.18311	17.3761	-145.72475	1366.11394	-0.59424	1.6604	-1.052	NaN	NaN	NaN	NaN	NaN	NaN	NaN	NaN	NaN	NaN	NaN	NaN
1.468	-34.4622	106.332	544.704	-0.1666	0.18662	-0.20488	-16.6946	-137.067	1361.8132	-0.67725	1.7505	-1.061	NaN	NaN	NaN	NaN	NaN	NaN	NaN	NaN	NaN	NaN	NaN	NaN
1.47	-39.1373	83.823	608.483	-0.2084	0.25733	-0.22265	-5.553	-169.01	1403.052	-0.77295	1.8716	-1.0815	NaN	NaN	NaN	NaN	NaN	NaN	NaN	NaN	NaN	NaN	NaN	NaN
1.472	-66.2717	72.1889	682.232	-0.25645	0.33076	-0.23672	-9.4641	-127.00351	1409.7885	-0.82373	1.9243	-1.0923	NaN	NaN	NaN	NaN	NaN	NaN	NaN	NaN	NaN	NaN	NaN	NaN
1.474	-36.7073	65.2185	732.648	-0.30879	0.42227	-0.23926	-34.6481	-137.7438	1431.634	-0.9043	2.0391	-1.1133	NaN	NaN	NaN	NaN	NaN	NaN	NaN	NaN	NaN	NaN	NaN	NaN
1.476	-13.2317	47.37316	768.601	-0.37012	0.51855	-0.24805	-31.5069	-149.9365	1481.357	-0.9458	2.1055	-1.1255	NaN	NaN	NaN	NaN	NaN	NaN	NaN	NaN	NaN	NaN	NaN	NaN
1.478	-25.5178	45.0458	787.9476	-0.44053	0.63291	-0.25772	-34.751	-112.33861	1486.7186	-0.98242	2.1426	-1.1348	NaN	NaN	NaN	NaN	NaN	NaN	NaN	NaN	NaN	NaN	NaN	NaN
1.48	-23.1475	42.6906	806.5696	-0.51279	0.75615	-0.26904	-16.6034	-141.86	1490.8002	-1.0117	2.1328	-1.127	NaN	NaN	NaN	NaN	NaN	NaN	NaN	NaN	NaN	NaN	NaN	NaN
1.482	2.86	13.4776	824.212	-0.58154	0.88272	-0.28623	-22.1102	-110.3541	1510.26785	-1.0352	2.1172	-1.1133	NaN	NaN	NaN	NaN	NaN	NaN	NaN	NaN	NaN	NaN	NaN	NaN
1.484	8.96899999999999	7.10751	805.784	-0.65293	1.0084	-0.3127	-45.709	-95.4262	1497.632	-1.064	2.0728	-1.0903	NaN	NaN	NaN	NaN	NaN	NaN	NaN	NaN	NaN	NaN	NaN	NaN
1.486	-24.741	-1.2451	795.531	-0.71045	1.1255	-0.34521	0.911000000000001	-103.7773	1494.23537	-1.0813	2.0432	-1.0759	NaN	NaN	NaN	NaN	NaN	NaN	NaN	NaN	NaN	NaN	NaN	NaN
1.488	-13.858	-10.4994	784.684	-0.76065	1.2159	-0.38437	-20.8078	-51.374	1487.626	-1.104	2.0181	-1.0601	NaN	NaN	NaN	NaN	NaN	NaN	NaN	NaN	NaN	NaN	NaN	NaN
1.49	-13.183	-24.9761	796.411	-0.79912	1.2829	-0.41562	-7.1437	-49.313	1478.744	-1.1289	2.0039	-1.0449	NaN	NaN	NaN	NaN	NaN	NaN	NaN	NaN	NaN	NaN	NaN	NaN
1.492	-3.768	-10.3381	781.9449	-0.81865	1.3134	-0.45195	27.4409	-71.6	1524.135	-1.1353	1.9868	-1.0249	NaN	NaN	NaN	NaN	NaN	NaN	NaN	NaN	NaN	NaN	NaN	NaN
1.494	-8.177	-3.28093	763.281	-0.8249	1.3099	-0.47588	12.0487	-42.33	1535.518	-1.1367	1.9727	-1.0176	NaN	NaN	NaN	NaN	NaN	NaN	NaN	NaN	NaN	NaN	NaN	NaN
1.496	3.627	-13.768	773.192	-0.81592	1.2876	-0.49658	41.4692	-85.7892	1560.6791	-1.1367	1.9521	-1	NaN	NaN	NaN	NaN	NaN	NaN	NaN	NaN	NaN	NaN	NaN	NaN
1.498	10.309	-20.482	786.658	-0.79668	1.2416	-0.50703	38.5494	-75.31883	1569.2317	-1.1323	1.9341	-0.97998	NaN	NaN	NaN	NaN	NaN	NaN	NaN	NaN	NaN	NaN	NaN	NaN
1.5	-9.401	-3.547	794.3092	-0.76719	1.1973	-0.51006	37.3083	-42.9583	1563.50488	-1.1265	1.9204	-0.95459	NaN	NaN	NaN	NaN	NaN	NaN	NaN	NaN	NaN	NaN	NaN	NaN
1.502	-3.378	15.891	804.1908	-0.72578	1.1535	-0.51865	47.7861	-68.0262	1571.472	-1.1255	1.9165	-0.94775	NaN	NaN	NaN	NaN	NaN	NaN	NaN	NaN	NaN	NaN	NaN	NaN
1.504	-17.369	18.066	835.3711	-0.68613	1.119	-0.53477	48.914	-32.7803	1580.9205	-1.1304	1.9028	-0.92041	NaN	NaN	NaN	NaN	NaN	NaN	NaN	NaN	NaN	NaN	NaN	NaN
1.506	2.835	3.933	866.9607	-0.64258	1.0996	-0.5459	56.051	-42.104	1568.8044	-1.1314	1.8911	-0.90234	NaN	NaN	NaN	NaN	NaN	NaN	NaN	NaN	NaN	NaN	NaN	NaN
1.508	-9.641	-29.9267	872.0733	-0.63242	1.1031	-0.55234	46.616	-68.361	1612.331	-1.1387	1.8789	-0.88477	NaN	NaN	NaN	NaN	NaN	NaN	NaN	NaN	NaN	NaN	NaN	NaN
1.51	-18.0781	-56.581	876.9011	-0.62266	1.1176	-0.56289	50.654	-17.8934	1606.78581	-1.1406	1.8828	-0.86719	NaN	NaN	NaN	NaN	NaN	NaN	NaN	NaN	NaN	NaN	NaN	NaN
1.512	-17.7388	-68.777	904.5685	-0.5918	1.1164	-0.58047	28.5207	-39.349	1592.47857	-1.1387	1.8887	-0.85938	NaN	NaN	NaN	NaN	NaN	NaN	NaN	NaN	NaN	NaN	NaN	NaN
1.514	-29.7947	-89.985	923.4081	-0.53418	1.079	-0.59619	33.8019	-3.9325	1592.2993	-1.1392	1.8892	-0.83936	NaN	NaN	NaN	NaN	NaN	NaN	NaN	NaN	NaN	NaN	NaN	NaN
1.516	-36.3529	-91.994	927.552	-0.47656	1.0273	-0.58789	15.8318	42.243	1561.7818	-1.1258	1.8938	-0.83179	NaN	NaN	NaN	NaN	NaN	NaN	NaN	NaN	NaN	NaN	NaN	NaN
1.518	-43.97008	-111.858	949.4219	-0.43125	0.96953	-0.56836	6.015	16.1743	1576.434	-1.1108	1.8989	-0.82861	NaN	NaN	NaN	NaN	NaN	NaN	NaN	NaN	NaN	NaN	NaN	NaN
1.52	-9.735	-111.941	972.0049	-0.40801	0.92822	-0.54912	7.177	61.069	1571.10475	-1.103	1.9067	-0.80811	NaN	NaN	NaN	NaN	NaN	NaN	NaN	NaN	NaN	NaN	NaN	NaN
1.522	-16.6466	-103.7221	1005.05	-0.40645	0.91143	-0.54131	-14.183	69.751	1534.959	-1.0957	1.9063	-0.79688	NaN	NaN	NaN	NaN	NaN	NaN	NaN	NaN	NaN	NaN	NaN	NaN
1.524	-13.8832	-83.5989	1032.3052	-0.425	0.8959	-0.53027	-23.6507	53.2333	1547.5978	-1.0952	1.8911	-0.76807	NaN	NaN	NaN	NaN	NaN	NaN	NaN	NaN	NaN	NaN	NaN	NaN
1.526	-8.3893	-69.61037	1062.68526	-0.43262	0.95313	-0.56836	-54.799	88.4082	1516.228	-1.0936	1.8801	-0.7517	NaN	NaN	NaN	NaN	NaN	NaN	NaN	NaN	NaN	NaN	NaN	NaN
1.528	-17.425	-53.239	1094.2809	-0.42636	0.98974	-0.5749	-43.404372	44.111	1513.6907	-1.0874	1.8638	-0.7417	NaN	NaN	NaN	NaN	NaN	NaN	NaN	NaN	NaN	NaN	NaN	NaN
1.53	9.26	-49.214	1106.5082	-0.43906	0.97656	-0.54824	-31.264	43.755	1513.362	-1.0625	1.8457	-0.72754	NaN	NaN	NaN	NaN	NaN	NaN	NaN	NaN	NaN	NaN	NaN	NaN
1.532	11.347	-46.747	1110.10465	-0.46797	0.97031	-0.5334	-54.8196	66.5316	1482.641	-1.0488	1.834	-0.7207	NaN	NaN	NaN	NaN	NaN	NaN	NaN	NaN	NaN	NaN	NaN	NaN
1.534	28.667	-45.735	1125.6715	-0.49268	0.99894	-0.54941	-21.855	29.122	1494.2795	-1.0254	1.8105	-0.70508	NaN	NaN	NaN	NaN	NaN	NaN	NaN	NaN	NaN	NaN	NaN	NaN
1.536	9.25	-53.227	1156.0263	-0.50195	1.0439	-0.58789	-42.1941	86.6219	1470.1922	-1.0066	1.7922	-0.69898	NaN	NaN	NaN	NaN	NaN	NaN	NaN	NaN	NaN	NaN	NaN	NaN
1.538	25.135	-65.841	1172.5797	-0.50966	1.0925	-0.61563	-34.093	94.368	1448.559	-0.98828	1.7793	-0.69043	NaN	NaN	NaN	NaN	NaN	NaN	NaN	NaN	NaN	NaN	NaN	NaN
1.54	13.6299	-72.3499	1175.6931	-0.52109	1.1344	-0.62187	-20.338	91.0648	1436.2265	-0.9668	1.7539	-0.67969	NaN	NaN	NaN	NaN	NaN	NaN	NaN	NaN	NaN	NaN	NaN	NaN
1.542	17.988	-95.6551	1192.852	-0.53711	1.1801	-0.63398	-27.883	130.06988	1403.225	-0.95898	1.7441	-0.67285	NaN	NaN	NaN	NaN	NaN	NaN	NaN	NaN	NaN	NaN	NaN	NaN
1.544	28.59848	-99.552	1210.1502	-0.56846	1.2146	-0.63662	-11.114	94.1458	1390.3888	-0.93359	1.7246	-0.66602	NaN	NaN	NaN	NaN	NaN	NaN	NaN	NaN	NaN	NaN	NaN	NaN
1.546	17.412	-117.194	1230.9222	-0.60889	1.2593	-0.64795	-1.069	131.856	1390.1246	-0.91479	1.7043	-0.6604	NaN	NaN	NaN	NaN	NaN	NaN	NaN	NaN	NaN	NaN	NaN	NaN
1.548	9.199	-99.459	1240.62855	-0.65341	1.3067	-0.67139	-3.111	173.744	1349.5944	-0.88818	1.6821	-0.65479	NaN	NaN	NaN	NaN	NaN	NaN	NaN	NaN	NaN	NaN	NaN	NaN
1.55	5.759	-90.4117	1272.2988	-0.68955	1.361	-0.68994	16.482	139.489	1329.81092	-0.85547	1.6426	-0.64453	NaN	NaN	NaN	NaN	NaN	NaN	NaN	NaN	NaN	NaN	NaN	NaN
1.552	16.6935	-85.6651	1297.609	-0.71885	1.4138	-0.70908	27.71785	179.947	1307.2443	-0.84375	1.623	-0.64258	NaN	NaN	NaN	NaN	NaN	NaN	NaN	NaN	NaN	NaN	NaN	NaN
1.554	25.9692	-92.4288	1306.852	-0.74473	1.4648	-0.72793	22.4394	155.478	1271.162	-0.80811	1.5825	-0.63037	NaN	NaN	NaN	NaN	NaN	NaN	NaN	NaN	NaN	NaN	NaN	NaN
1.556	6.938	-76.2919	1317.368	-0.76318	1.5083	-0.74561	32.826	136.1445	1259.3441	-0.78833	1.554	-0.61841	NaN	NaN	NaN	NaN	NaN	NaN	NaN	NaN	NaN	NaN	NaN	NaN
1.558	-13.7565	-67.7621	1312.406	-0.79063	1.5363	-0.7584	22.92	179.165	1225.174	-0.76221	1.5181	-0.61768	NaN	NaN	NaN	NaN	NaN	NaN	NaN	NaN	NaN	NaN	NaN	NaN
1.56	-25.2783	-65.6717	1321.8213	-0.81299	1.5668	-0.775	9.754	149.7743	1210.0836	-0.73096	1.4692	-0.60303	NaN	NaN	NaN	NaN	NaN	NaN	NaN	NaN	NaN	NaN	NaN	NaN
1.562	-18.4614	-69.5703	1298.701	-0.82862	1.5856	-0.7875	7.388	166.622	1204.761	-0.70752	1.4419	-0.59521	NaN	NaN	NaN	NaN	NaN	NaN	NaN	NaN	NaN	NaN	NaN	NaN
1.564	-37.6158	-62.8032	1311.6924	-0.85019	1.6041	-0.80234	-3.082	180.206	1154.3719	-0.66602	1.3828	-0.58447	NaN	NaN	NaN	NaN	NaN	NaN	NaN	NaN	NaN	NaN	NaN	NaN
1.566	-14.8925	-62.7817	1312.925	-0.86523	1.627	-0.81641	2.755	147.8314	1145.26	-0.62939	1.3354	-0.56982	NaN	NaN	NaN	NaN	NaN	NaN	NaN	NaN	NaN	NaN	NaN	NaN
1.568	-16.36529	-66.75874	1319.734	-0.88965	1.658	-0.83926	-22.945	199.6451	1117.3878	-0.60107	1.2876	-0.55518	NaN	NaN	NaN	NaN	NaN	NaN	NaN	NaN	NaN	NaN	NaN	NaN
1.57	-22.8664	-61.4786	1325.52	-0.91983	1.6876	-0.85225	-24.815	178.904	1100.4787	-0.55615	1.229	-0.53662	NaN	NaN	NaN	NaN	NaN	NaN	NaN	NaN	NaN	NaN	NaN	NaN
1.572	-25.1521	-51.6895	1347.599	-0.95303	1.7208	-0.87217	-35.292	179.648	1091.456	-0.53369	1.1973	-0.52637	NaN	NaN	NaN	NaN	NaN	NaN	NaN	NaN	NaN	NaN	NaN	NaN
1.574	1.336	-55.54749	1385.2749	-0.98457	1.7619	-0.88926	-33.505	220.3127	1027.2657	-0.49414	1.1323	-0.50928	NaN	NaN	NaN	NaN	NaN	NaN	NaN	NaN	NaN	NaN	NaN	NaN
1.576	25.7927	-57.540218	1397.8529	-1.0068	1.7988	-0.90918	-42.229	186.4637	1000.443	-0.45899	1.086	-0.49609	NaN	NaN	NaN	NaN	NaN	NaN	NaN	NaN	NaN	NaN	NaN	NaN
1.578	5.115	-54.4505	1399.9911	-1.0309	1.8317	-0.93242	-51.3347	200.3106	975.962	-0.42432	1.0376	-0.47998	NaN	NaN	NaN	NaN	NaN	NaN	NaN	NaN	NaN	NaN	NaN	NaN
1.58	7.8176	-44.9573	1402.7651	-1.0437	1.8582	-0.9461	-64.5529	214.0926	928.6151	-0.38281	0.97266	-0.45996	NaN	NaN	NaN	NaN	NaN	NaN	NaN	NaN	NaN	NaN	NaN	NaN
1.582	12.250308	-43.5763	1407.129751	-1.059	1.8757	-0.96055	-67.1661	191.8355	897.5526	-0.35938	0.9375	-0.44922	NaN	NaN	NaN	NaN	NaN	NaN	NaN	NaN	NaN	NaN	NaN	NaN
1.584	21.13132	-37.634	1405.9322	-1.0642	1.8835	-0.97471	-79.0934	236.4852	855.504	-0.31787	0.87354	-0.4248	NaN	NaN	NaN	NaN	NaN	NaN	NaN	NaN	NaN	NaN	NaN	NaN
1.586	14.136	-41.5096	1399.0597	-1.0659	1.8872	-0.98486	-85.733	200.461	809.827	-0.28491	0.82471	-0.40454	NaN	NaN	NaN	NaN	NaN	NaN	NaN	NaN	NaN	NaN	NaN	NaN
1.588	19.58	-47.264	1383.7888	-1.0607	1.8777	-0.99268	-58.98	186.928	793.033	-0.25342	0.77686	-0.38623	NaN	NaN	NaN	NaN	NaN	NaN	NaN	NaN	NaN	NaN	NaN	NaN
1.59	43.6952	-50.5253	1386.804	-1.0497	1.8685	-1.0019	-63.4072	216.13702	750.611	-0.20654	0.72314	-0.36719	NaN	NaN	NaN	NaN	NaN	NaN	NaN	NaN	NaN	NaN	NaN	NaN
1.592	42.2855	-36.5237	1387.683	-1.0388	1.8529	-1.0081	-48.372	193.0591	723.914	-0.19482	0.69385	-0.35156	NaN	NaN	NaN	NaN	NaN	NaN	NaN	NaN	NaN	NaN	NaN	NaN
1.594	35.95	0.453000000000001	1381.2932	-1.0288	1.8368	-1.0065	-28.213	218.246	683.53	-0.16113	0.62158	-0.32129	NaN	NaN	NaN	NaN	NaN	NaN	NaN	NaN	NaN	NaN	NaN	NaN
1.596	55.305	18.8974	1391.7903	-1.0195	1.8145	-1.0059	-45.7533	218.513	644.545	-0.13134	0.57031	-0.30102	NaN	NaN	NaN	NaN	NaN	NaN	NaN	NaN	NaN	NaN	NaN	NaN
1.598	61.131	16.5676	1391.7128	-1.0075	1.7938	-1.0054	-30.879	180.2542	631.9898	-0.098633	0.52197	-0.28369	NaN	NaN	NaN	NaN	NaN	NaN	NaN	NaN	NaN	NaN	NaN	NaN
1.6	32.309	19.9299	1395.39142	-0.99326	1.7759	-1.0063	-25.731	210.1008	588.7932	-0.054199	0.46533	-0.26318	NaN	NaN	NaN	NaN	NaN	NaN	NaN	NaN	NaN	NaN	NaN	NaN
1.602	16.244	27.969	1393.6369	-0.97412	1.7544	-1.0028	-1.98	177.093	555.001	-0.023437	0.41601	-0.23974	NaN	NaN	NaN	NaN	NaN	NaN	NaN	NaN	NaN	NaN	NaN	NaN
1.604	20.0624	37.068	1384.06663	-0.95576	1.7407	-0.9958	-7.764	175.895	524.7033	0.0019531	0.36865	-0.21436	NaN	NaN	NaN	NaN	NaN	NaN	NaN	NaN	NaN	NaN	NaN	NaN
1.606	10.0186	31.26	1390.6165	-0.93945	1.7148	-0.98828	-0.416999999999998	195.5759	485.503	0.029297	0.30273	-0.18262	NaN	NaN	NaN	NaN	NaN	NaN	NaN	NaN	NaN	NaN	NaN	NaN
1.608	0.2576	30.2468	1351.81847	-0.92666	1.6966	-0.97686	-14.472	157.5995	463.258	0.04834	0.27588	-0.16895	NaN	NaN	NaN	NaN	NaN	NaN	NaN	NaN	NaN	NaN	NaN	NaN
1.61	-13.7267	14.36409	1334.322	-0.90937	1.6735	-0.96445	3.907	173.699	443.2394	0.076172	0.21777	-0.13867	NaN	NaN	NaN	NaN	NaN	NaN	NaN	NaN	NaN	NaN	NaN	NaN
1.612	6.7739	3.1763	1316.9489	-0.89961	1.6465	-0.95	6.014	170.285	396.552	0.09253	0.18433	-0.11963	NaN	NaN	NaN	NaN	NaN	NaN	NaN	NaN	NaN	NaN	NaN	NaN
1.614	-11.6886	-9.9069	1315.7838	-0.8876	1.6257	-0.93057	-9.966	136.0388	382.2183	0.11133	0.14697	-0.10059	NaN	NaN	NaN	NaN	NaN	NaN	NaN	NaN	NaN	NaN	NaN	NaN
1.616	-8.563	14.003	1292.508	-0.88037	1.5942	-0.90576	-0.683	166.511	359.2108	0.13623	0.10449	-0.078613	NaN	NaN	NaN	NaN	NaN	NaN	NaN	NaN	NaN	NaN	NaN	NaN
1.618	-18.2778	26.8516	1289.4262	-0.87578	1.5734	-0.89121	-22.157	147.4967	341.2275	0.14795	0.084961	-0.062012	NaN	NaN	NaN	NaN	NaN	NaN	NaN	NaN	NaN	NaN	NaN	NaN
1.62	-15.98	45.8025	1280.2243	-0.86474	1.5509	-0.87256	-9.019	156.6631	311.113	0.18115	0.041016	-0.038574	NaN	NaN	NaN	NaN	NaN	NaN	NaN	NaN	NaN	NaN	NaN	NaN
1.622	-1.3074	43.7896	1258.5793	-0.86162	1.5274	-0.85381	-17.1347	177.318	283.244	0.1919	0.0070802	-0.020996	NaN	NaN	NaN	NaN	NaN	NaN	NaN	NaN	NaN	NaN	NaN	NaN
1.624	-17.006	62.966	1234.1252	-0.84942	1.5096	-0.84062	-27.791	121.1086	262.7	0.20166	-0.023926	-0.0014648	NaN	NaN	NaN	NaN	NaN	NaN	NaN	NaN	NaN	NaN	NaN	NaN
1.626	-16.21315	68.104	1230.469	-0.8418	1.4795	-0.82227	-18.966	126.144	247.9173	0.21436	-0.055176	0.016602	NaN	NaN	NaN	NaN	NaN	NaN	NaN	NaN	NaN	NaN	NaN	NaN
1.628	-10.185	72.168	1224.8172	-0.82422	1.4554	-0.80078	-53.4062	127.038	218.7907	0.2207	-0.0625	0.024414	NaN	NaN	NaN	NaN	NaN	NaN	NaN	NaN	NaN	NaN	NaN	NaN
1.63	-2.37	73.341	1187.9365	-0.8083	1.4259	-0.78819	-54.941	105.285	207.27491	0.23145	-0.085449	0.043457	NaN	NaN	NaN	NaN	NaN	NaN	NaN	NaN	NaN	NaN	NaN	NaN
1.632	-11.0694	82.401	1177.1274	-0.79424	1.3962	-0.76709	-49.29767	124.853	183.619	0.23681	-0.097659	0.062012	NaN	NaN	NaN	NaN	NaN	NaN	NaN	NaN	NaN	NaN	NaN	NaN
1.634	9.198	66.9711	1161.35623	-0.77783	1.3698	-0.75049	-57.3	71.9903	168.1948	0.24658	-0.10938	0.075684	NaN	NaN	NaN	NaN	NaN	NaN	NaN	NaN	NaN	NaN	NaN	NaN
1.636	37.724	63.5751	1133.4186	-0.76318	1.3403	-0.73389	-53.495	64.2169	153.1091	0.25781	-0.13477	0.092773	NaN	NaN	NaN	NaN	NaN	NaN	NaN	NaN	NaN	NaN	NaN	NaN
1.638	23.885	67.5419	1100.09103	-0.75107	1.311	-0.71748	-50.3289	93.1958	115.574	0.26123	-0.14502	0.089844	NaN	NaN	NaN	NaN	NaN	NaN	NaN	NaN	NaN	NaN	NaN	NaN
1.64	14.7018	82.7873	1073.2849	-0.73916	1.2853	-0.70322	-49.7418	63.7953	110.01664	0.27197	-0.15625	0.099609	NaN	NaN	NaN	NaN	NaN	NaN	NaN	NaN	NaN	NaN	NaN	NaN
1.642	25.985	75.01359	1069.6649	-0.72588	1.259	-0.67393	-35.553	70.107	112.987	0.2832	-0.16748	0.12573	NaN	NaN	NaN	NaN	NaN	NaN	NaN	NaN	NaN	NaN	NaN	NaN
1.644	36.3334	74.2673	1080.8798	-0.71602	1.2336	-0.66309	-50.452	61.588	91.6302	0.28223	-0.18896	0.12354	NaN	NaN	NaN	NaN	NaN	NaN	NaN	NaN	NaN	NaN	NaN	NaN
1.646	14.092	78.4221	1058.987	-0.70801	1.2051	-0.64648	-51.372	30.73	85.8307	0.30469	-0.19824	0.11816	NaN	NaN	NaN	NaN	NaN	NaN	NaN	NaN	NaN	NaN	NaN	NaN
1.648	12.08	90.3287	1044.514	-0.69395	1.1847	-0.62813	5.703	67.7886	70.457	0.31006	-0.19824	0.11328	NaN	NaN	NaN	NaN	NaN	NaN	NaN	NaN	NaN	NaN	NaN	NaN
1.65	17.87	75.2284	1029.6533	-0.68193	1.1595	-0.61357	-4.712	38.2743	64.911	0.33154	-0.20703	0.13135	NaN	NaN	NaN	NaN	NaN	NaN	NaN	NaN	NaN	NaN	NaN	NaN
1.652	5.869	99.425	1002.5818	-0.66631	1.1368	-0.59482	-10.373	36.5567	80.41	0.34277	-0.21265	0.12939	NaN	NaN	NaN	NaN	NaN	NaN	NaN	NaN	NaN	NaN	NaN	NaN
1.654	-1.603	110.969	979.4397	-0.65322	1.1116	-0.57646	-3.148	65.96	35.968	0.34863	-0.2124	0.12646	NaN	NaN	NaN	NaN	NaN	NaN	NaN	NaN	NaN	NaN	NaN	NaN
1.656	-8.329	116.922	931.1086	-0.63428	1.0864	-0.56494	-5.474	25.5034	33.098	0.34766	-0.20215	0.12207	NaN	NaN	NaN	NaN	NaN	NaN	NaN	NaN	NaN	NaN	NaN	NaN
1.658	0.663000000000004	110.2361	902.6838	-0.62002	1.0573	-0.54775	22.501	47.116	37.5961	0.34375	-0.20313	0.12354	NaN	NaN	NaN	NaN	NaN	NaN	NaN	NaN	NaN	NaN	NaN	NaN
1.66	-34.447	97.7916	881.8809	-0.6042	1.0369	-0.53095	19.811	33.1429	21.48145	0.34863	-0.18213	0.11426	NaN	NaN	NaN	NaN	NaN	NaN	NaN	NaN	NaN	NaN	NaN	NaN
1.662	-27.543	87.489	844.939	-0.59248	1.0087	-0.51494	-4.677	-7.7224	38.4665	0.33935	-0.17285	0.10108	NaN	NaN	NaN	NaN	NaN	NaN	NaN	NaN	NaN	NaN	NaN	NaN
1.664	-35.9543	88.954	849.708	-0.57451	0.98135	-0.49678	15.623	41.46612	36.0839	0.33447	-0.1665	0.098633	NaN	NaN	NaN	NaN	NaN	NaN	NaN	NaN	NaN	NaN	NaN	NaN
1.666	-28.868	103.063	832.1009	-0.55713	0.95068	-0.48389	1.634	5.334	28.81	0.31885	-0.14502	0.086426	NaN	NaN	NaN	NaN	NaN	NaN	NaN	NaN	NaN	NaN	NaN	NaN
1.668	-36.1197	109.3557	809.9797	-0.53926	0.92383	-0.46464	-1.514	14.176	37.4402	0.30664	-0.14014	0.07959	NaN	NaN	NaN	NaN	NaN	NaN	NaN	NaN	NaN	NaN	NaN	NaN
1.67	-54.9204	115.5468	775.4521	-0.5207	0.89434	-0.44678	-0.379999999999999	36.372	34.6157	0.28174	-0.10742	0.05957	NaN	NaN	NaN	NaN	NaN	NaN	NaN	NaN	NaN	NaN	NaN	NaN
1.672	-50.4402	115.311	768.906	-0.50118	0.86308	-0.4331	-20.222	5.2292	20.8589	0.25952	-0.073975	0.04419	NaN	NaN	NaN	NaN	NaN	NaN	NaN	NaN	NaN	NaN	NaN	NaN
1.674	-61.8057	123.854	746.6059	-0.47627	0.83486	-0.41094	0.423000000000002	42.036	25.7267	0.23389	-0.033691	0.031738	NaN	NaN	NaN	NaN	NaN	NaN	NaN	NaN	NaN	NaN	NaN	NaN
1.676	-45.0415	130.429	719.9396	-0.45557	0.80518	-0.39697	-22.369	50.631	12.787	0.1875	0.023926	0.015137	NaN	NaN	NaN	NaN	NaN	NaN	NaN	NaN	NaN	NaN	NaN	NaN
1.678	-54.3192	129.8019	693.0289	-0.43028	0.77461	-0.38145	-38.6614	13.0297	37.0696	0.16406	0.053711	0.0083008	NaN	NaN	NaN	NaN	NaN	NaN	NaN	NaN	NaN	NaN	NaN	NaN
1.68	-44.4821	126.387	664.6114	-0.40801	0.74658	-0.36142	-29.0403	41.7165	51.0297	0.11377	0.10303	-0.012207	NaN	NaN	NaN	NaN	NaN	NaN	NaN	NaN	NaN	NaN	NaN	NaN
1.682	-34.639	109.267	639.718	-0.38301	0.71689	-0.34385	-46.48551	6.488	35.519	0.081054	0.14014	-0.0271	NaN	NaN	NaN	NaN	NaN	NaN	NaN	NaN	NaN	NaN	NaN	NaN
1.684	-31.026	115.429	605.161	-0.35752	0.68779	-0.32764	-41.562	12.222	37.2748	0.055176	0.16748	-0.038574	NaN	NaN	NaN	NaN	NaN	NaN	NaN	NaN	NaN	NaN	NaN	NaN
1.686	-31.109	118.421	600.7133	-0.33252	0.65869	-0.31592	-44.172	44.895	19.339	0.013184	0.21289	-0.062012	NaN	NaN	NaN	NaN	NaN	NaN	NaN	NaN	NaN	NaN	NaN	NaN
1.688	-15.928	120.7694	590.6783	-0.30732	0.62979	-0.30029	-75.499	15.3009	20.4719	0.00048828	0.23877	-0.070313	NaN	NaN	NaN	NaN	NaN	NaN	NaN	NaN	NaN	NaN	NaN	NaN
1.69	-4.206	121.713	584.6695	-0.28642	0.60205	-0.28702	-52.563	43.958	30.9172	-0.030273	0.27588	-0.084961	NaN	NaN	NaN	NaN	NaN	NaN	NaN	NaN	NaN	NaN	NaN	NaN
1.692	-10.12	119.593	547.9743	-0.26103	0.56806	-0.26553	-56.9418	41.648	-1.76	-0.041992	0.30396	-0.093994	NaN	NaN	NaN	NaN	NaN	NaN	NaN	NaN	NaN	NaN	NaN	NaN
1.694	-16.879	122.411	527.699	-0.23711	0.54014	-0.24853	-60.7358	2.7823	2.959	-0.055664	0.33643	-0.104	NaN	NaN	NaN	NaN	NaN	NaN	NaN	NaN	NaN	NaN	NaN	NaN
1.696	-6.237	124.818	525.03	-0.21045	0.50928	-0.24121	-30.587	32.19026	23.535	-0.066406	0.37061	-0.12256	NaN	NaN	NaN	NaN	NaN	NaN	NaN	NaN	NaN	NaN	NaN	NaN
1.698	-11.939	129.295	499.05996389	-0.18223	0.4791	-0.23027	-43.864	-0.5253	37.6719	-0.069336	0.38037	-0.12549	NaN	NaN	NaN	NaN	NaN	NaN	NaN	NaN	NaN	NaN	NaN	NaN
1.7	-27.706	124.5901	463.5304	-0.15381	0.44551	-0.21504	-23.781	30.84776	45.0436	-0.058105	0.39697	-0.13525	NaN	NaN	NaN	NaN	NaN	NaN	NaN	NaN	NaN	NaN	NaN	NaN
1.702	-32.446	115.7321	459.2722	-0.13506	0.41582	-0.1998	-15.391	58.976	22.279	-0.049316	0.40503	-0.14233	NaN	NaN	NaN	NaN	NaN	NaN	NaN	NaN	NaN	NaN	NaN	NaN
1.704	-17.446	104.1169	436.8079	-0.10693	0.3876	-0.18916	-12.335	17.5075	19.7355	-0.030273	0.40381	-0.146	NaN	NaN	NaN	NaN	NaN	NaN	NaN	NaN	NaN	NaN	NaN	NaN
1.706	-29.048	105.7354	415.1015	-0.084961	0.35742	-0.17529	5.892	46.329	39.72	0.0014648	0.39697	-0.15039	NaN	NaN	NaN	NaN	NaN	NaN	NaN	NaN	NaN	NaN	NaN	NaN
1.708	-1.16099999999999	111.8243	392.384	-0.058594	0.33213	-0.16602	-19.041	42.948	14.6727	0.018555	0.39258	-0.14844	NaN	NaN	NaN	NaN	NaN	NaN	NaN	NaN	NaN	NaN	NaN	NaN
1.71	-37.148	109.3639	387.12218	-0.03584	0.30664	-0.15595	-4.535	25.2775	12.6471	0.058105	0.36816	-0.14111	NaN	NaN	NaN	NaN	NaN	NaN	NaN	NaN	NaN	NaN	NaN	NaN
1.712	-26.046	110.1936	371.9113	-0.013574	0.28516	-0.14463	31.68	55.012	28.53	0.090578	0.3413	-0.13696	NaN	NaN	NaN	NaN	NaN	NaN	NaN	NaN	NaN	NaN	NaN	NaN
1.714	-42.34	95.779971	349.159	0.0041017	0.26396	-0.1335	-9.908	8.1452	25.3424	0.12012	0.31152	-0.12646	NaN	NaN	NaN	NaN	NaN	NaN	NaN	NaN	NaN	NaN	NaN	NaN
1.716	-63.485	92.3882	338.441	0.019043	0.23877	-0.12158	-1.633	10.9213	51.514	0.15869	0.28174	-0.10791	NaN	NaN	NaN	NaN	NaN	NaN	NaN	NaN	NaN	NaN	NaN	NaN
1.718	-61.382	92.4042	332.59634	0.035644	0.21699	-0.11738	18.238	31.727	22.3173	0.18652	0.26563	-0.094727	NaN	NaN	NaN	NaN	NaN	NaN	NaN	NaN	NaN	NaN	NaN	NaN
1.72	-68.8086	97.072	327.127	0.056738	0.19981	-0.11025	-0.422000000000001	11.7916	12.1987	0.21826	0.23438	-0.070313	NaN	NaN	NaN	NaN	NaN	NaN	NaN	NaN	NaN	NaN	NaN	NaN
1.722	-66.4601	106.352	292.6828	0.072754	0.18574	-0.098144	14.02	53.599	51.649	0.2461	0.21143	-0.048828	NaN	NaN	NaN	NaN	NaN	NaN	NaN	NaN	NaN	NaN	NaN	NaN
1.724	-90.8878	117.044	261.699	0.086914	0.16533	-0.088086	-4.219	42.619	32.9829	0.27686	0.18555	-0.027344	NaN	NaN	NaN	NaN	NaN	NaN	NaN	NaN	NaN	NaN	NaN	NaN
1.726	-63.515	95.405	256.3901	0.095703	0.14551	-0.077148	-30.797	18.4943	36.677	0.30762	0.15088	0.0097656	NaN	NaN	NaN	NaN	NaN	NaN	NaN	NaN	NaN	NaN	NaN	NaN
1.728	-67.0345	100.13735	248.4463	0.10947	0.1332	-0.072852	9.027	52.095	31.4803	0.3208	0.13965	0.029297	NaN	NaN	NaN	NaN	NaN	NaN	NaN	NaN	NaN	NaN	NaN	NaN
1.73	-53.302	94.0873	229.7938	0.12266	0.12207	-0.07168	-39.8968	17.0129	21.1257	0.33789	0.1167	0.067871	NaN	NaN	NaN	NaN	NaN	NaN	NaN	NaN	NaN	NaN	NaN	NaN
1.732	-35.117	90.8083	214.5707	0.13125	0.10527	-0.060742	-39.449	15.98	46.5429	0.34644	0.10498	0.10254	NaN	NaN	NaN	NaN	NaN	NaN	NaN	NaN	NaN	NaN	NaN	NaN
1.734	-41.504	88.0899	210.1119	0.13682	0.095117	-0.055468	-24.381	36.9658	47.074	0.35205	0.10107	0.125	NaN	NaN	NaN	NaN	NaN	NaN	NaN	NaN	NaN	NaN	NaN	NaN
1.736	-41.804	81.9578	211.7595	0.146	0.09082	-0.044922	-60.2633	17.7989	25.6034	0.35742	0.10889	0.16113	NaN	NaN	NaN	NaN	NaN	NaN	NaN	NaN	NaN	NaN	NaN	NaN
1.738	-36.852	80.7108	194.1494	0.15195	0.090918	-0.039356	-37.5009	46.9795	36.6339	0.35523	0.11353	0.19117	NaN	NaN	NaN	NaN	NaN	NaN	NaN	NaN	NaN	NaN	NaN	NaN
1.74	-37.388	80.349	195.368	0.14922	0.092578	-0.031347	-55.9574	31.6713	17.7316	0.35498	0.12842	0.21924	NaN	NaN	NaN	NaN	NaN	NaN	NaN	NaN	NaN	NaN	NaN	NaN
1.742	-34.142	77.561	187.918	0.14961	0.097657	-0.02627	-75.213	8.812	26.174	0.34424	0.14307	0.26758	NaN	NaN	NaN	NaN	NaN	NaN	NaN	NaN	NaN	NaN	NaN	NaN
1.744	-25.654	76.611	174.3865	0.1455	0.10693	-0.014453	-37.999	46.1422	31.4903	0.33594	0.14844	0.28857	NaN	NaN	NaN	NaN	NaN	NaN	NaN	NaN	NaN	NaN	NaN	NaN
1.746	-35.118	70.112	160.5787	0.13672	0.11328	-0.003418	-66.945	21.7396	10.407	0.31787	0.16797	0.31592	NaN	NaN	NaN	NaN	NaN	NaN	NaN	NaN	NaN	NaN	NaN	NaN
1.748	-27.934	62.8421	155.834	0.13174	0.11534	0.0041015	-45.4986	24.0379	39.7653	0.30322	0.1792	0.34277	NaN	NaN	NaN	NaN	NaN	NaN	NaN	NaN	NaN	NaN	NaN	NaN
1.75	14.25	53.7088	137.4639	0.12666	0.11631	0.011133	-34.9627	32.7755	41.47	0.29443	0.19092	0.37354	NaN	NaN	NaN	NaN	NaN	NaN	NaN	NaN	NaN	NaN	NaN	NaN
1.752	-2.007	55.7834	121.3919	0.1247	0.11905	0.018555	-47.9691	-9.091	31.4424	0.27393	0.21387	0.40576	NaN	NaN	NaN	NaN	NaN	NaN	NaN	NaN	NaN	NaN	NaN	NaN
1.754	-7.241	57.52385	116.0046	0.12305	0.11631	0.025488	-20.261	19.083	41.8138	0.26123	0.22119	0.41406	NaN	NaN	NaN	NaN	NaN	NaN	NaN	NaN	NaN	NaN	NaN	NaN
1.756	-21.98	56.0641	131.9181	0.125	0.11279	0.033203	-18.683	30.28992	5.398	0.23779	0.24609	0.43555	NaN	NaN	NaN	NaN	NaN	NaN	NaN	NaN	NaN	NaN	NaN	NaN
1.758	2.491	51.69443	128.4589	0.12881	0.10918	0.04043	-15.657	14.7263	37.523	0.22729	0.26416	0.44702	NaN	NaN	NaN	NaN	NaN	NaN	NaN	NaN	NaN	NaN	NaN	NaN
1.76	-28.833	58.9912	110.0227	0.1333	0.10264	0.047754	8.125	33.808	60.445	0.21582	0.28857	0.45117	NaN	NaN	NaN	NaN	NaN	NaN	NaN	NaN	NaN	NaN	NaN	NaN
1.762	-31.317	60.3799	106.4215	0.13408	0.098731	0.057129	-21.941	-8.3772	27.17	0.20947	0.3208	0.46533	NaN	NaN	NaN	NaN	NaN	NaN	NaN	NaN	NaN	NaN	NaN	NaN
1.764	-35.399	51.2166	106.3535	0.13389	0.093066	0.063867	21.393	-10.4753	63.1126	0.19922	0.33154	0.4668	NaN	NaN	NaN	NaN	NaN	NaN	NaN	NaN	NaN	NaN	NaN	NaN
1.766	-52.192	59.473	99.04284	0.12939	0.088867	0.070313	45.71	17.5287	57.661	0.18115	0.3501	0.47266	NaN	NaN	NaN	NaN	NaN	NaN	NaN	NaN	NaN	NaN	NaN	NaN
1.768	-48.4538	68.353	72.9839	0.1292	0.07793	0.069141	-16.544	-2.15647	92.2795	0.15357	0.36767	0.46753	NaN	NaN	NaN	NaN	NaN	NaN	NaN	NaN	NaN	NaN	NaN	NaN
1.77	-54.011	55.471	66.0811	0.12354	0.078125	0.07832	19.384	34.3696	126.971	0.12598	0.38916	0.45361	NaN	NaN	NaN	NaN	NaN	NaN	NaN	NaN	NaN	NaN	NaN	NaN
1.772	-42.731	44.57763	78.6449	0.12315	0.072656	0.077148	-1.505	36.3811	118.367	0.10059	0.43018	0.43848	NaN	NaN	NaN	NaN	NaN	NaN	NaN	NaN	NaN	NaN	NaN	NaN
1.774	-51.661	36.4073	75.57037	0.11924	0.069629	0.079297	1.194	22.4293	166.9321	0.091309	0.44971	0.4248	NaN	NaN	NaN	NaN	NaN	NaN	NaN	NaN	NaN	NaN	NaN	NaN
1.776	-54.497	37.487	68.3801	0.11572	0.066406	0.08252	27.274	75.861	207.59618	0.074707	0.50098	0.39893	NaN	NaN	NaN	NaN	NaN	NaN	NaN	NaN	NaN	NaN	NaN	NaN
1.778	-55.6839	38.91	57.5437	0.10352	0.068848	0.076074	7.277	51.889799	225.5806	0.059326	0.54102	0.37427	NaN	NaN	NaN	NaN	NaN	NaN	NaN	NaN	NaN	NaN	NaN	NaN
1.78	-46.205	39.4955	63.8986	0.095116	0.068554	0.072071	16.441	75.63678	283.7243	0.040039	0.58691	0.34277	NaN	NaN	NaN	NaN	NaN	NaN	NaN	NaN	NaN	NaN	NaN	NaN
1.782	-40.294	43.2366	54.2165	0.088476	0.068554	0.068554	1.476	104.787	306.411	0.023438	0.66504	0.29248	NaN	NaN	NaN	NaN	NaN	NaN	NaN	NaN	NaN	NaN	NaN	NaN
1.784	-50.284	41.27921	40.5914	0.082031	0.068457	0.062695	-26.4714	71.1299	366.075	0.020508	0.71143	0.26904	NaN	NaN	NaN	NaN	NaN	NaN	NaN	NaN	NaN	NaN	NaN	NaN
1.786	-50.3393	36.2255	53.87674	0.076172	0.071289	0.064453	3.494	85.9975	444.236	0.00097656	0.81445	0.21045	NaN	NaN	NaN	NaN	NaN	NaN	NaN	NaN	NaN	NaN	NaN	NaN
1.788	-52.0468	35.1486	54.3985	0.074317	0.075098	0.065136	-28.288	84.857	503.611	-0.041504	0.88989	0.15796	NaN	NaN	NaN	NaN	NaN	NaN	NaN	NaN	NaN	NaN	NaN	NaN
1.79	-34.55	30.954	49.70721	0.065725	0.080274	0.067873	-29.53	75.2793	597.2069	-0.10059	0.96924	0.10938	NaN	NaN	NaN	NaN	NaN	NaN	NaN	NaN	NaN	NaN	NaN	NaN
1.792	-32.284	32.0151	43.64107	0.056351	0.077931	0.061622	-35.1847	100.986	695.41	-0.2041	1.0786	0.038574	NaN	NaN	NaN	NaN	NaN	NaN	NaN	NaN	NaN	NaN	NaN	NaN
1.794	-12.511	35.8648	41.4645	0.052932	0.080761	0.056739	-67.966	78.262	773.912	-0.25537	1.1372	0.003418	NaN	NaN	NaN	NaN	NaN	NaN	NaN	NaN	NaN	NaN	NaN	NaN
1.796	2.475	31.26746	43.658	0.041992	0.085938	0.053223	-60.3143	69.86	878.3703	-0.36865	1.2681	-0.049316	NaN	NaN	NaN	NaN	NaN	NaN	NaN	NaN	NaN	NaN	NaN	NaN
1.798	-17.616	38.0483	30.084	0.040234	0.094341	0.048533	-31.022	72.909	960.483	-0.44092	1.3694	-0.08911	NaN	NaN	NaN	NaN	NaN	NaN	NaN	NaN	NaN	NaN	NaN	NaN
1.8	-7.279	33.0649	21.6809	0.032711	0.10704	0.043844	-47.7175	30.0769	1039.302	-0.50488	1.4648	-0.13184	NaN	NaN	NaN	NaN	NaN	NaN	NaN	NaN	NaN	NaN	NaN	NaN
1.802	2.732	30.4272	33.04016	0.028804	0.11525	0.039155	-14.755	20.8958	1116.9619	-0.55371	1.5801	-0.19482	NaN	NaN	NaN	NaN	NaN	NaN	NaN	NaN	NaN	NaN	NaN	NaN
1.804	22.765	30.666	42.9494	0.028324	0.12208	0.033691	-24.9197	7.6574	1100.0097	-0.56445	1.6172	-0.22852	NaN	NaN	NaN	NaN	NaN	NaN	NaN	NaN	NaN	NaN	NaN	NaN
1.806	-19.817	26.9267	36.5137	0.026855	0.12793	0.032227	-54.1503	-45.0803	1100.084	-0.53906	1.6641	-0.28418	NaN	NaN	NaN	NaN	NaN	NaN	NaN	NaN	NaN	NaN	NaN	NaN
1.808	-7.64	25.5511	28.463	0.027819	0.13544	0.028416	-20.58	-34.9846	1080.118	-0.49902	1.6738	-0.30786	NaN	NaN	NaN	NaN	NaN	NaN	NaN	NaN	NaN	NaN	NaN	NaN
1.81	-9.434	14.1113	52.5124	0.033178	0.14206	0.025772	-48.612	-71.664	1014.512	-0.4375	1.6533	-0.3291	NaN	NaN	NaN	NaN	NaN	NaN	NaN	NaN	NaN	NaN	NaN	NaN
1.812	-17.026	24.035	45.1211	0.039047	0.14677	0.026569	-21.44	-92.711	1005.992	-0.35156	1.6152	-0.35742	NaN	NaN	NaN	NaN	NaN	NaN	NaN	NaN	NaN	NaN	NaN	NaN
1.814	-27.721	21.692	57.2557	0.042956	0.15192	0.020623	9.2776	-87.515	959.2306	-0.30811	1.5845	-0.36279	NaN	NaN	NaN	NaN	NaN	NaN	NaN	NaN	NaN	NaN	NaN	NaN
1.816	-23.846	6.9773	55.1451	0.055176	0.15771	0.01709	-7.6753	-144.734	943.25023	-0.22314	1.5083	-0.37256	NaN	NaN	NaN	NaN	NaN	NaN	NaN	NaN	NaN	NaN	NaN	NaN
1.818	-18.197	-0.0631000000000004	63.8981	0.070002	0.16294	0.011695	39.8301	-142.028	969.7487	-0.18164	1.4739	-0.37476	NaN	NaN	NaN	NaN	NaN	NaN	NaN	NaN	NaN	NaN	NaN	NaN
1.82	-51.568	5.5033	64.7566	0.076755	0.17071	0.0080866	30.37769	-116.65	934.325	-0.16064	1.4492	-0.37061	NaN	NaN	NaN	NaN	NaN	NaN	NaN	NaN	NaN	NaN	NaN	NaN
1.822	-50.8108	4.7864	49.692	0.084994	0.18596	0.0093365	12.865	-137.5542	960.0343	-0.16602	1.4297	-0.36914	NaN	NaN	NaN	NaN	NaN	NaN	NaN	NaN	NaN	NaN	NaN	NaN
1.824	-50.338	-0.7763	71.015	0.089243	0.1952	0.0063016	31.141	-81.012	984.372	-0.18359	1.4355	-0.36719	NaN	NaN	NaN	NaN	NaN	NaN	NaN	NaN	NaN	NaN	NaN	NaN
1.826	-43.819	-1.40396	88.69856	0.09375	0.2085	0.010254	-24.288	-76.928	985.069	-0.229	1.4868	-0.39063	NaN	NaN	NaN	NaN	NaN	NaN	NaN	NaN	NaN	NaN	NaN	NaN
1.828	-55.9242	-5.31931	88.7511	0.089568	0.22433	0.0068995	-6.452	-83.51	1058.993	-0.2544	1.5503	-0.42676	NaN	NaN	NaN	NaN	NaN	NaN	NaN	NaN	NaN	NaN	NaN	NaN
1.83	-64.5809	1.78199	101.8279	0.088459	0.24173	0.0023151	-13.973	-64.463	1092.1072	-0.27539	1.6118	-0.47754	NaN	NaN	NaN	NaN	NaN	NaN	NaN	NaN	NaN	NaN	NaN	NaN
1.832	-48.339	19.9897	130.4755	0.092285	0.25582	0.0007713	-57.5289	-141.922	1126.3642	-0.28857	1.6602	-0.52734	NaN	NaN	NaN	NaN	NaN	NaN	NaN	NaN	NaN	NaN	NaN	NaN
1.834	-53.279	47.1813	137.804	0.095018	0.2735	-0.0063102	-32.192	-179.22	1173.422	-0.29785	1.6641	-0.53711	NaN	NaN	NaN	NaN	NaN	NaN	NaN	NaN	NaN	NaN	NaN	NaN
1.836	-43.73	67.8878	163.971	0.092773	0.29492	-0.012695	-45.033	-192.095	1176.746	-0.33887	1.6895	-0.56445	NaN	NaN	NaN	NaN	NaN	NaN	NaN	NaN	NaN	NaN	NaN	NaN
1.838	-33.184	80.3462	174.752	0.10084	0.3213	-0.018846	-69.649	-235.202	1220.79907	-0.37793	1.7622	-0.60693	NaN	NaN	NaN	NaN	NaN	NaN	NaN	NaN	NaN	NaN	NaN	NaN
1.84	-20.9412	98.6073	229.40776	0.10189	0.35033	-0.032845	-37.477	-209.72	1258.251	-0.42334	1.8423	-0.66943	NaN	NaN	NaN	NaN	NaN	NaN	NaN	NaN	NaN	NaN	NaN	NaN
1.842	-9.451	107.8204	261.48059	0.099017	0.38073	-0.043044	-61.609	-230.046	1252.551	-0.48828	1.9551	-0.74219	NaN	NaN	NaN	NaN	NaN	NaN	NaN	NaN	NaN	NaN	NaN	NaN
1.844	-25.277	118.9104	298.2419815	0.088218	0.41981	-0.059496	-86.1054	-260.045	1320.84601	-0.52344	2.0059	-0.75879	NaN	NaN	NaN	NaN	NaN	NaN	NaN	NaN	NaN	NaN	NaN	NaN
1.846	-8.519	127.7951	342.4937	0.071777	0.4624	-0.072754	-93.2556	-208.647	1365.68	-0.5918	2.1094	-0.79395	NaN	NaN	NaN	NaN	NaN	NaN	NaN	NaN	NaN	NaN	NaN	NaN
1.848	-14.618	130.588	392.7011	0.05019	0.50409	-0.08991	-111.4752	-204.427	1394.3172	-0.63428	2.1924	-0.82471	NaN	NaN	NaN	NaN	NaN	NaN	NaN	NaN	NaN	NaN	NaN	NaN
1.85	7.928	128.544	447.276	0.026142	0.55489	-0.10753	-108.5277	-163.038	1449.1002	-0.67725	2.272	-0.85107	NaN	NaN	NaN	NaN	NaN	NaN	NaN	NaN	NaN	NaN	NaN	NaN
1.852	-18.823	110.482	501.921	-0.0044999	0.60959	-0.12269	-136.126	-95.431	1426.47	-0.72754	2.3477	-0.86426	NaN	NaN	NaN	NaN	NaN	NaN	NaN	NaN	NaN	NaN	NaN	NaN
1.854	-13.637	97.488	592.8799	-0.046286	0.66802	-0.13609	-139.9823	-122.977	1432.9846	-0.75391	2.3828	-0.86719	NaN	NaN	NaN	NaN	NaN	NaN	NaN	NaN	NaN	NaN	NaN	NaN
1.856	-21.005	85.66	673.8401	-0.095703	0.73047	-0.15527	-137.9425	-71.391	1425.0266	-0.79883	2.4414	-0.87891	NaN	NaN	NaN	NaN	NaN	NaN	NaN	NaN	NaN	NaN	NaN	NaN
1.858	-21.671	76.878	745.8231	-0.15007	0.8028	-0.17481	-132.2242	-57.132	1399.658	-0.8164	2.4751	-0.87622	NaN	NaN	NaN	NaN	NaN	NaN	NaN	NaN	NaN	NaN	NaN	NaN
1.86	-26.961	70.209	786.068	-0.21456	0.87192	-0.2013	-110.0079	-84.529	1441.9613	-0.84961	2.4941	-0.86719	NaN	NaN	NaN	NaN	NaN	NaN	NaN	NaN	NaN	NaN	NaN	NaN
1.862	-33.019	54.6342	830.9446	-0.28263	0.94713	-0.22557	-83.964	-70.484	1467.593	-0.89209	2.5181	-0.8667	NaN	NaN	NaN	NaN	NaN	NaN	NaN	NaN	NaN	NaN	NaN	NaN
1.864	-19.607	31.0871	867.9202	-0.35523	1.0121	-0.25574	-107.2044	-134.5096	1461.625	-0.90186	2.5259	-0.8667	NaN	NaN	NaN	NaN	NaN	NaN	NaN	NaN	NaN	NaN	NaN	NaN
1.866	-27.157	26.8593	880.625	-0.43018	1.0737	-0.27832	-89.913	-154.101	1495.811	-0.92627	2.5337	-0.85889	NaN	NaN	NaN	NaN	NaN	NaN	NaN	NaN	NaN	NaN	NaN	NaN
1.868	-24.8547	22.8619	888.121	-0.50729	1.1138	-0.3026	-71.955	-115.4416	1490.224	-0.93921	2.5491	-0.85522	NaN	NaN	NaN	NaN	NaN	NaN	NaN	NaN	NaN	NaN	NaN	NaN
1.87	-24.7024	16.0491	882.412	-0.5791	1.1506	-0.31416	-93.017	-161.525	1513.709	-0.9585	2.561	-0.84912	NaN	NaN	NaN	NaN	NaN	NaN	NaN	NaN	NaN	NaN	NaN	NaN
1.872	-9.9161	9.5355	860.588	-0.64816	1.1728	-0.31141	-72.683	-120.1773	1555.765	-0.98975	2.5669	-0.82568	NaN	NaN	NaN	NaN	NaN	NaN	NaN	NaN	NaN	NaN	NaN	NaN
1.874	-7.371	-3.941	834.7	-0.70828	1.1873	-0.29843	-94.098	-127.529	1531.232	-1.0078	2.5664	-0.81543	NaN	NaN	NaN	NaN	NaN	NaN	NaN	NaN	NaN	NaN	NaN	NaN
1.876	-20.2027	-5.46	800.06	-0.74951	1.1997	-0.28271	-80.023	-149.5319	1583.567	-1.0405	2.5493	-0.80225	NaN	NaN	NaN	NaN	NaN	NaN	NaN	NaN	NaN	NaN	NaN	NaN
1.878	-13.0418	-12.827	797.9645	-0.76298	1.1864	-0.26963	-62.736	-103.965	1576.4117	-1.0547	2.5137	-0.79541	NaN	NaN	NaN	NaN	NaN	NaN	NaN	NaN	NaN	NaN	NaN	NaN
1.88	-32.9116	-8.9643	792.0901	-0.76408	1.1688	-0.2584	-73.361	-133.958	1573.012	-1.0605	2.4863	-0.78223	NaN	NaN	NaN	NaN	NaN	NaN	NaN	NaN	NaN	NaN	NaN	NaN
1.882	-9.2266	-3.1453	773.229	-0.73792	1.1465	-0.25606	-69.749	-110.3037	1582.466	-1.0645	2.416	-0.75488	NaN	NaN	NaN	NaN	NaN	NaN	NaN	NaN	NaN	NaN	NaN	NaN
1.884	-12.0056	0.641999999999999	774.346	-0.69846	1.1223	-0.2543	-80.128	-53.026	1515.5289	-1.0583	2.3645	-0.73803	NaN	NaN	NaN	NaN	NaN	NaN	NaN	NaN	NaN	NaN	NaN	NaN
1.886	-4.159	19.7988	780.6421	-0.64893	1.0977	-0.25293	-82.254	-76.978	1493.888	-1.0439	2.3242	-0.73242	NaN	NaN	NaN	NaN	NaN	NaN	NaN	NaN	NaN	NaN	NaN	NaN
1.888	-11.351	15.218	799.40062	-0.6038	1.0747	-0.2502	-71.777	-30.704	1505.572	-1.0259	2.272	-0.71631	NaN	NaN	NaN	NaN	NaN	NaN	NaN	NaN	NaN	NaN	NaN	NaN
1.89	-3.573	14.841	805.0615	-0.56806	1.0591	-0.24951	-98.06	-32.633	1499.482	-1.0161	2.2495	-0.71729	NaN	NaN	NaN	NaN	NaN	NaN	NaN	NaN	NaN	NaN	NaN	NaN
1.892	-9.443	-9.892	827.52924	-0.53837	1.0497	-0.24522	-93.909	-68.0055	1532.3787	-1.0063	2.2056	-0.7085	NaN	NaN	NaN	NaN	NaN	NaN	NaN	NaN	NaN	NaN	NaN	NaN
1.894	-3.324	-36.346	851.8504	-0.51757	1.0392	-0.24502	-110.326	-27.112	1517.975	-1.0112	2.1733	-0.69385	NaN	NaN	NaN	NaN	NaN	NaN	NaN	NaN	NaN	NaN	NaN	NaN
1.896	26.796	-74.9311	868.3613	-0.49707	1.0234	-0.24805	-152.5282	-45.0623	1504.699	-1.0156	2.1367	-0.68555	NaN	NaN	NaN	NaN	NaN	NaN	NaN	NaN	NaN	NaN	NaN	NaN
1.898	2.754	-101.139	866.0416	-0.4751	1.0058	-0.24951	-153.2945	-33.9646	1531.3615	-0.98828	2.0957	-0.69824	NaN	NaN	NaN	NaN	NaN	NaN	NaN	NaN	NaN	NaN	NaN	NaN
1.9	8.986	-128.502	873.5513	-0.44873	0.99151	-0.25713	-147.8051	10.28	1507.0576	-0.96631	2.0747	-0.68359	NaN	NaN	NaN	NaN	NaN	NaN	NaN	NaN	NaN	NaN	NaN	NaN
1.902	-12.325	-135.183	882.373	-0.42607	0.98213	-0.26767	-149.6159	-35.0404	1509.442	-0.9292	2.0571	-0.68115	NaN	NaN	NaN	NaN	NaN	NaN	NaN	NaN	NaN	NaN	NaN	NaN
1.904	0.0750000000000028	-132.024	885.4391	-0.39346	0.99355	-0.29922	-136.0331	1.677	1536.635	-0.9209	2.0362	-0.67822	NaN	NaN	NaN	NaN	NaN	NaN	NaN	NaN	NaN	NaN	NaN	NaN
1.906	-3.478	-116.45	907.4265	-0.37256	1.0083	-0.31299	-159.646	-13.8364	1529.1187	-0.91016	2.0078	-0.66357	NaN	NaN	NaN	NaN	NaN	NaN	NaN	NaN	NaN	NaN	NaN	NaN
1.908	-4.636	-108.564	938.37366	-0.37285	1.0189	-0.32266	-163.1245	-66.334	1536.365	-0.875	1.9697	-0.6543	NaN	NaN	NaN	NaN	NaN	NaN	NaN	NaN	NaN	NaN	NaN	NaN
1.91	-0.949999999999999	-93.904	976.4099	-0.39932	1.0435	-0.3417	-143.5611	-12.878	1505.9585	-0.84766	1.9512	-0.65137	NaN	NaN	NaN	NaN	NaN	NaN	NaN	NaN	NaN	NaN	NaN	NaN
1.912	-25.894	-80.9435	995.69998	-0.44033	1.0778	-0.36748	-142.958	-39.252	1466.3056	-0.78955	1.9028	-0.64404	NaN	NaN	NaN	NaN	NaN	NaN	NaN	NaN	NaN	NaN	NaN	NaN
1.914	-30.382	-47.7858	994.6047	-0.47949	1.1183	-0.39443	-120.399	-12.386	1464.53284	-0.74243	1.8684	-0.62866	NaN	NaN	NaN	NaN	NaN	NaN	NaN	NaN	NaN	NaN	NaN	NaN
1.916	-50.273	-34.469	1009.2431	-0.51123	1.1548	-0.42139	-125.4074	50.24	1430.1052	-0.69678	1.8286	-0.62061	NaN	NaN	NaN	NaN	NaN	NaN	NaN	NaN	NaN	NaN	NaN	NaN
1.918	-32.161	-23.426	1029.40707	-0.53672	1.1902	-0.45664	-147.2477	17.6779	1421.0379	-0.64111	1.7798	-0.60645	NaN	NaN	NaN	NaN	NaN	NaN	NaN	NaN	NaN	NaN	NaN	NaN
1.92	-54.3419	-33.779	1028.3279	-0.55654	1.2395	-0.48389	-112.909	80.257	1408.3981	-0.61768	1.7485	-0.59912	NaN	NaN	NaN	NaN	NaN	NaN	NaN	NaN	NaN	NaN	NaN	NaN
1.922	-72.0665	-46.117	1029.219	-0.5753	1.2935	-0.51279	-105.783	92.53	1366.711	-0.56055	1.6895	-0.57813	NaN	NaN	NaN	NaN	NaN	NaN	NaN	NaN	NaN	NaN	NaN	NaN
1.924	-65.5742	-80.745	1050.891	-0.60166	1.3564	-0.53701	-98.387	74.0529	1378.1849	-0.52514	1.6433	-0.56006	NaN	NaN	NaN	NaN	NaN	NaN	NaN	NaN	NaN	NaN	NaN	NaN
1.926	-72.6932	-96.4627	1072.6301	-0.62842	1.4204	-0.56396	-91.066	119.996	1342.755	-0.4917	1.6001	-0.54248	NaN	NaN	NaN	NaN	NaN	NaN	NaN	NaN	NaN	NaN	NaN	NaN
1.928	-81.6809	-114.362	1072.3843	-0.65576	1.4808	-0.58662	-94.776	94.1312	1308.537	-0.45166	1.5513	-0.52295	NaN	NaN	NaN	NaN	NaN	NaN	NaN	NaN	NaN	NaN	NaN	NaN
1.93	-92.1438	-127.597	1070.1706	-0.67481	1.5297	-0.6039	-69.153	103.143	1291.0363	-0.43115	1.5234	-0.51953	NaN	NaN	NaN	NaN	NaN	NaN	NaN	NaN	NaN	NaN	NaN	NaN
1.932	-63.476	-141.712	1095.40983	-0.67637	1.5617	-0.61718	-61.58	112.627	1259.616	-0.39014	1.4751	-0.50635	NaN	NaN	NaN	NaN	NaN	NaN	NaN	NaN	NaN	NaN	NaN	NaN
1.934	-70.453	-146.848	1116.3993	-0.6666	1.5822	-0.63223	-68.964	53.4672	1262.44	-0.3523	1.4356	-0.49316	NaN	NaN	NaN	NaN	NaN	NaN	NaN	NaN	NaN	NaN	NaN	NaN
1.936	-62.591	-129.286	1128.2178	-0.65479	1.5923	-0.64648	-44.685	84.8337	1236.00857	-0.31543	1.397	-0.47803	NaN	NaN	NaN	NaN	NaN	NaN	NaN	NaN	NaN	NaN	NaN	NaN
1.938	-47.319	-114.432	1143.2255	-0.63213	1.5926	-0.65498	-71.355	96.27132	1183.713	-0.2749	1.356	-0.46045	NaN	NaN	NaN	NaN	NaN	NaN	NaN	NaN	NaN	NaN	NaN	NaN
1.94	-49.523	-98.3205	1155.7015	-0.61093	1.5828	-0.65762	-71.882	76.267	1169.196	-0.26514	1.3325	-0.45068	NaN	NaN	NaN	NaN	NaN	NaN	NaN	NaN	NaN	NaN	NaN	NaN
1.942	-39.828	-87.923	1175.635	-0.60157	1.5812	-0.65918	-65.67	128.2081	1131.13	-0.24121	1.2798	-0.43506	NaN	NaN	NaN	NaN	NaN	NaN	NaN	NaN	NaN	NaN	NaN	NaN
1.944	-64.239	-78.808	1175.1698	-0.59561	1.5843	-0.67216	-86.612	100.4006	1116.7964	-0.21509	1.2403	-0.42407	NaN	NaN	NaN	NaN	NaN	NaN	NaN	NaN	NaN	NaN	NaN	NaN
1.946	-29.645	-71.538	1176.3965	-0.60498	1.5923	-0.68408	-89.049	109.90507	1097.079	-0.18994	1.2017	-0.40967	NaN	NaN	NaN	NaN	NaN	NaN	NaN	NaN	NaN	NaN	NaN	NaN
1.948	-40.007	-70.245	1178.195	-0.61904	1.6071	-0.70068	-92.3378	147.457	1062.0356	-0.14893	1.1406	-0.39648	NaN	NaN	NaN	NaN	NaN	NaN	NaN	NaN	NaN	NaN	NaN	NaN
1.95	-16.723	-63.368	1171.372	-0.64775	1.631	-0.71475	-98.3608	129.0523	1036.6079	-0.13184	1.1094	-0.38623	NaN	NaN	NaN	NaN	NaN	NaN	NaN	NaN	NaN	NaN	NaN	NaN
1.952	-49.185	-61.778	1167.769	-0.67862	1.6611	-0.7292	-67.238	186.984	1004.284	-0.092285	1.0527	-0.37988	NaN	NaN	NaN	NaN	NaN	NaN	NaN	NaN	NaN	NaN	NaN	NaN
1.954	-37.525	-60.187	1189.658	-0.70918	1.6951	-0.73867	-97.4418	197.196	952.7936	-0.058838	0.99998	-0.36474	NaN	NaN	NaN	NaN	NaN	NaN	NaN	NaN	NaN	NaN	NaN	NaN
1.956	-22.234	-65.2041	1215.508	-0.74658	1.7349	-0.75146	-91.515	180.546	922.0943	-0.025879	0.94727	-0.35547	NaN	NaN	NaN	NaN	NaN	NaN	NaN	NaN	NaN	NaN	NaN	NaN
1.958	-38.411	-70.9023	1213.649	-0.7919	1.7753	-0.75948	-68.392	199.655	888.787	0.01123	0.87305	-0.33398	NaN	NaN	NaN	NaN	NaN	NaN	NaN	NaN	NaN	NaN	NaN	NaN
1.96	-40.59	-68.40322	1247.9156	-0.83028	1.8137	-0.76465	-99.5941	161.381	855.019	0.026367	0.83936	-0.32275	NaN	NaN	NaN	NaN	NaN	NaN	NaN	NaN	NaN	NaN	NaN	NaN
1.962	-53.166	-72.28742	1274.2273	-0.87051	1.8477	-0.76894	-83.9428	164.398	842.6332	0.053711	0.77588	-0.30859	NaN	NaN	NaN	NaN	NaN	NaN	NaN	NaN	NaN	NaN	NaN	NaN
1.964	-42.524	-69.66952	1315.739	-0.90791	1.873	-0.77041	-73.6297	190.056	796.81	0.067383	0.72705	-0.29346	NaN	NaN	NaN	NaN	NaN	NaN	NaN	NaN	NaN	NaN	NaN	NaN
1.966	-68.529	-72.5885	1310.575	-0.93115	1.897	-0.76514	-95.7686	168.53	769.2583	0.081055	0.67627	-0.27979	NaN	NaN	NaN	NaN	NaN	NaN	NaN	NaN	NaN	NaN	NaN	NaN
1.968	-81.4155	-60.95148	1305.508	-0.94825	1.8986	-0.76309	-61.791	191.176	738.9716	0.090332	0.6123	-0.26758	NaN	NaN	NaN	NaN	NaN	NaN	NaN	NaN	NaN	NaN	NaN	NaN
1.97	-76.9	-58.7266	1317.0196	-0.95732	1.9013	-0.75595	-70.9071	170.2577	711.4478	0.097168	0.58057	-0.26221	NaN	NaN	NaN	NaN	NaN	NaN	NaN	NaN	NaN	NaN	NaN	NaN
1.972	-82.995	-53.9128	1323.59821	-0.96358	1.8982	-0.74815	-60.592	155.641	699.305	0.10938	0.52051	-0.25244	NaN	NaN	NaN	NaN	NaN	NaN	NaN	NaN	NaN	NaN	NaN	NaN
1.974	-84.425	-41.20364	1318.6985	-0.97334	1.8907	-0.73741	-35.265	189.8901	658.4764	0.11938	0.47828	-0.24121	NaN	NaN	NaN	NaN	NaN	NaN	NaN	NaN	NaN	NaN	NaN	NaN
1.976	-108.4726	-29.7979	1303.9456	-0.97852	1.8789	-0.72266	-15.787	171.8645	640.98	0.12402	0.43604	-0.23145	NaN	NaN	NaN	NaN	NaN	NaN	NaN	NaN	NaN	NaN	NaN	NaN
1.978	-83.8041	-26.8402	1315.5733	-0.9835	1.8634	-0.71084	3.812	161.569	616.694	0.13135	0.38916	-0.21436	NaN	NaN	NaN	NaN	NaN	NaN	NaN	NaN	NaN	NaN	NaN	NaN
1.98	-84.3052	-24.3471	1314.3004	-0.9875	1.8457	-0.70117	-5.563	165.5763	553.6305	0.125	0.36328	-0.21045	NaN	NaN	NaN	NaN	NaN	NaN	NaN	NaN	NaN	NaN	NaN	NaN
1.982	-89.225535	-2.0639	1304.2946	-0.99414	1.8265	-0.68906	-26.951	132.258	512.062	0.12256	0.30566	-0.19336	NaN	NaN	NaN	NaN	NaN	NaN	NaN	NaN	NaN	NaN	NaN	NaN
1.984	-76.2391	1.3231	1309.5515	-0.99219	1.8039	-0.67969	2.739	161.708	461.2384	0.12354	0.2644	-0.18774	NaN	NaN	NaN	NaN	NaN	NaN	NaN	NaN	NaN	NaN	NaN	NaN
1.986	-71.022	13.8003	1324.1648	-0.99561	1.7896	-0.66553	-14.162	163.20889	417.07	0.12891	0.22217	-0.18506	NaN	NaN	NaN	NaN	NaN	NaN	NaN	NaN	NaN	NaN	NaN	NaN
1.988	-58.935	4.284	1339.389	-0.99834	1.7722	-0.65127	-12.306	156.3041	404.8612	0.13818	0.16016	-0.16846	NaN	NaN	NaN	NaN	NaN	NaN	NaN	NaN	NaN	NaN	NaN	NaN
1.99	-79.8697	4.2782	1333.7	-1.0003	1.7595	-0.6419	-12.748	166.284	371.4158	0.13672	0.13086	-0.16846	NaN	NaN	NaN	NaN	NaN	NaN	NaN	NaN	NaN	NaN	NaN	NaN
1.992	-50.493	-3.586448	1330.839	-0.99639	1.7532	-0.63447	-52.3554	155.688	336.676	0.14502	0.067383	-0.14355	NaN	NaN	NaN	NaN	NaN	NaN	NaN	NaN	NaN	NaN	NaN	NaN
1.994	-59.463	-10.884356	1335.327	-0.99248	1.744	-0.62725	0.929000000000002	150.158	319.2346	0.15039	0.020996	-0.14673	NaN	NaN	NaN	NaN	NaN	NaN	NaN	NaN	NaN	NaN	NaN	NaN
1.996	-38.983	-6.3255	1303.7061	-0.99023	1.7363	-0.62109	-25.865	147.787	301.281	0.1582	-0.025391	-0.1377	NaN	NaN	NaN	NaN	NaN	NaN	NaN	NaN	NaN	NaN	NaN	NaN
1.998	-46.008	-6.2302	1297.4269	-0.98613	1.7233	-0.6127	-51.875	121.1904	297.3277	0.16553	-0.076172	-0.11865	NaN	NaN	NaN	NaN	NaN	NaN	NaN	NaN	NaN	NaN	NaN	NaN
2	-32.248	-5.2263	1282.6406	-0.98067	1.7082	-0.60586	-10.245	132.46925	272.3849	0.16357	-0.097168	-0.11035	NaN	NaN	NaN	NaN	NaN	NaN	NaN	NaN	NaN	NaN	NaN	NaN
2.002	-15.518	-5.5889	1267.2483	-0.97793	1.7	-0.59648	-48.9463	105.8117	232.681	0.16162	-0.15674	-0.089355	NaN	NaN	NaN	NaN	NaN	NaN	NaN	NaN	NaN	NaN	NaN	NaN
2.004	-30.618	7.49	1256.1291	-0.97285	1.6889	-0.59394	-52.648	75.449	231.6922	0.1582	-0.19605	-0.083496	NaN	NaN	NaN	NaN	NaN	NaN	NaN	NaN	NaN	NaN	NaN	NaN
2.006	-27.197	19.2573	1256.0839	-0.96875	1.6758	-0.59375	-45.0897	81.1479	207.532	0.15625	-0.229	-0.083496	NaN	NaN	NaN	NaN	NaN	NaN	NaN	NaN	NaN	NaN	NaN	NaN
2.008	-31.758	40.269	1265.8042	-0.95586	1.668	-0.58574	-70.1775	70.329	176.3652	0.16504	-0.26953	-0.078613	NaN	NaN	NaN	NaN	NaN	NaN	NaN	NaN	NaN	NaN	NaN	NaN
2.01	-15.194	64.081	1253.8883	-0.94258	1.657	-0.58359	-54.7455	68.6102	172.1837	0.16455	-0.28906	-0.079102	NaN	NaN	NaN	NaN	NaN	NaN	NaN	NaN	NaN	NaN	NaN	NaN
2.012	-41.238	68.013	1235.0754	-0.93047	1.6492	-0.57695	-60.3296	83.024	149.042	0.16553	-0.31836	-0.07666	NaN	NaN	NaN	NaN	NaN	NaN	NaN	NaN	NaN	NaN	NaN	NaN
2.014	-50.356	79.278	1217.9703	-0.91875	1.6377	-0.57695	-76.4034	58.115	152.62	0.16919	-0.33838	-0.066163	NaN	NaN	NaN	NaN	NaN	NaN	NaN	NaN	NaN	NaN	NaN	NaN
2.016	-50.904	69.651	1218.9035	-0.9043	1.623	-0.57031	-27.46	55.937	148.5693	0.16797	-0.35693	-0.05957	NaN	NaN	NaN	NaN	NaN	NaN	NaN	NaN	NaN	NaN	NaN	NaN
2.018	-58.931	56.697	1210.4534	-0.88594	1.607	-0.56289	-55.177	56.4394	112.6	0.16016	-0.37012	-0.063477	NaN	NaN	NaN	NaN	NaN	NaN	NaN	NaN	NaN	NaN	NaN	NaN
2.02	-72.127	54.818	1186.7107	-0.86866	1.5857	-0.55576	-42.602	62.0404	106.8932	0.14795	-0.3689	-0.062988	NaN	NaN	NaN	NaN	NaN	NaN	NaN	NaN	NaN	NaN	NaN	NaN
2.022	-82.17934	48.704	1160.4306	-0.85068	1.5653	-0.54717	-6.775	82.612	84.582	0.14014	-0.35693	-0.060547	NaN	NaN	NaN	NaN	NaN	NaN	NaN	NaN	NaN	NaN	NaN	NaN
2.024	-63.8969	46.898	1141.472	-0.83232	1.5425	-0.54072	-41.321	81.041	68.0662	0.11719	-0.34277	-0.061035	NaN	NaN	NaN	NaN	NaN	NaN	NaN	NaN	NaN	NaN	NaN	NaN
2.026	-75.2769	42.534	1133.07	-0.81396	1.5142	-0.52686	-9.122	78.64	62.4986	0.11328	-0.33203	-0.061523	NaN	NaN	NaN	NaN	NaN	NaN	NaN	NaN	NaN	NaN	NaN	NaN
2.028	-71.499	49.139	1114.7373	-0.80186	1.4872	-0.51943	-15.65	76.046	28.434	0.078125	-0.28662	-0.066406	NaN	NaN	NaN	NaN	NaN	NaN	NaN	NaN	NaN	NaN	NaN	NaN
2.03	-76.5536	49.863	1115.2553	-0.78877	1.4598	-0.51211	-23.035	45.2839	51.3313	0.050293	-0.24902	-0.062011	NaN	NaN	NaN	NaN	NaN	NaN	NaN	NaN	NaN	NaN	NaN	NaN
2.032	-70.2286	59.7058	1117.371	-0.76885	1.4351	-0.50312	9.763	33.1584	65.2131	0.01123	-0.19873	-0.064453	NaN	NaN	NaN	NaN	NaN	NaN	NaN	NaN	NaN	NaN	NaN	NaN
2.034	-67.4739	68.2719	1104.6697	-0.74736	1.4062	-0.49385	-24.935	35.1419	42.09	-0.045898	-0.11719	-0.074707	NaN	NaN	NaN	NaN	NaN	NaN	NaN	NaN	NaN	NaN	NaN	NaN
2.036	-89.64781	76.05751	1083.7429	-0.72607	1.3813	-0.48193	-4.678	33.6076	51.798	-0.072266	-0.086426	-0.069336	NaN	NaN	NaN	NaN	NaN	NaN	NaN	NaN	NaN	NaN	NaN	NaN
2.038	-52.547	86.5044	1063.4953	-0.70449	1.3543	-0.48086	19.798	39.5683	30.27964	-0.12256	-0.0087891	-0.077148	NaN	NaN	NaN	NaN	NaN	NaN	NaN	NaN	NaN	NaN	NaN	NaN
2.04	-63.8676	98.131	1034.44829	-0.6794	1.3282	-0.46729	-7.133	34.708	27.64	-0.1626	0.045166	-0.087647	NaN	NaN	NaN	NaN	NaN	NaN	NaN	NaN	NaN	NaN	NaN	NaN
2.042	-43.94	110.884	987.029	-0.65479	1.297	-0.45713	25.124	22.5341	39.945	-0.19922	0.085938	-0.084961	NaN	NaN	NaN	NaN	NaN	NaN	NaN	NaN	NaN	NaN	NaN	NaN
2.044	-57.6383	120.731	950.219	-0.63115	1.2697	-0.44619	-2.79	28.515	15.5361	-0.22949	0.14453	-0.1123	NaN	NaN	NaN	NaN	NaN	NaN	NaN	NaN	NaN	NaN	NaN	NaN
2.046	-34.068	115.303	950.7803	-0.6084	1.2363	-0.43945	-41.9009	24.5976	32.6572	-0.2417	0.16748	-0.11963	NaN	NaN	NaN	NaN	NaN	NaN	NaN	NaN	NaN	NaN	NaN	NaN
2.048	-18.598	106.0231	933.98	-0.58037	1.2038	-0.42822	10.036	27.1007	47.3784	-0.25391	0.2002	-0.12988	NaN	NaN	NaN	NaN	NaN	NaN	NaN	NaN	NaN	NaN	NaN	NaN
2.05	-13.43	106.7212	890.056	-0.55869	1.1759	-0.42022	-27.957	20.9291	40.2982	-0.25634	0.22095	-0.13867	NaN	NaN	NaN	NaN	NaN	NaN	NaN	NaN	NaN	NaN	NaN	NaN
2.052	5.593	103.09487	894.015	-0.53174	1.1419	-0.40771	-25.829	17.212	38.8202	-0.24805	0.23779	-0.14844	NaN	NaN	NaN	NaN	NaN	NaN	NaN	NaN	NaN	NaN	NaN	NaN
2.054	17.894	105.6776	885.9564	-0.51094	1.1074	-0.39531	-15.531	35.994	11.8616	-0.24854	0.24902	-0.16016	NaN	NaN	NaN	NaN	NaN	NaN	NaN	NaN	NaN	NaN	NaN	NaN
2.056	13.33	114.126	878.5152	-0.48926	1.0703	-0.38379	-63.4244	50.758	-1.0235	-0.24951	0.25586	-0.16016	NaN	NaN	NaN	NaN	NaN	NaN	NaN	NaN	NaN	NaN	NaN	NaN
2.058	-13.232	120.776	855.0285	-0.46631	1.0376	-0.37744	-26.72	45.688	32	-0.24658	0.25781	-0.16992	NaN	NaN	NaN	NaN	NaN	NaN	NaN	NaN	NaN	NaN	NaN	NaN
2.06	-17.616	113.515	838.8012	-0.44375	1.0109	-0.36494	-55.89891	51.981	17.7436	-0.23657	0.25293	-0.16772	NaN	NaN	NaN	NaN	NaN	NaN	NaN	NaN	NaN	NaN	NaN	NaN
2.062	-10.057	101.339	826.0463	-0.41953	0.97813	-0.35556	-72.3418	31.206	26.286	-0.22461	0.24023	-0.16553	NaN	NaN	NaN	NaN	NaN	NaN	NaN	NaN	NaN	NaN	NaN	NaN
2.064	-22.804	105.946	801.9793	-0.39659	0.95049	-0.34853	-27.85	18.1829	43.9794	-0.20557	0.20703	-0.16846	NaN	NaN	NaN	NaN	NaN	NaN	NaN	NaN	NaN	NaN	NaN	NaN
2.066	-25.687	114.5167	761.7515	-0.36914	0.91406	-0.34473	-49.185	13.279	39.959	-0.19824	0.18359	-0.16504	NaN	NaN	NaN	NaN	NaN	NaN	NaN	NaN	NaN	NaN	NaN	NaN
2.068	-31.658	120.4837	740.2293	-0.34473	0.8748	-0.32236	-46.624	15.173	57.2928	-0.18018	0.13428	-0.1499	NaN	NaN	NaN	NaN	NaN	NaN	NaN	NaN	NaN	NaN	NaN	NaN
2.07	-11.118	120.0283	724.639	-0.31895	0.83554	-0.31152	-29.841	30.9685	38.340694	-0.16626	0.10059	-0.14453	NaN	NaN	NaN	NaN	NaN	NaN	NaN	NaN	NaN	NaN	NaN	NaN
2.072	-35.788	120.0331	712.64121	-0.29472	0.79922	-0.29824	-51.0505	29.4316	19.83604	-0.15186	0.074707	-0.1333	NaN	NaN	NaN	NaN	NaN	NaN	NaN	NaN	NaN	NaN	NaN	NaN
2.074	-34.285	123.8017	686.61142	-0.26778	0.75694	-0.28506	-9.403	18.3841	36.108	-0.14209	0.037109	-0.12256	NaN	NaN	NaN	NaN	NaN	NaN	NaN	NaN	NaN	NaN	NaN	NaN
2.076	-38.518	122.1057	675.92747	-0.24463	0.71582	-0.26953	-15.773	12.9603	23.576	-0.13232	0.020508	-0.12305	NaN	NaN	NaN	NaN	NaN	NaN	NaN	NaN	NaN	NaN	NaN	NaN
2.078	-27.983	141.462	654.3162	-0.22324	0.67832	-0.25898	-30.913	4.716	30.0664	-0.11816	-0.0043945	-0.11035	NaN	NaN	NaN	NaN	NaN	NaN	NaN	NaN	NaN	NaN	NaN	NaN
2.08	-53.4852	156.354	622.8977	-0.19834	0.64541	-0.2503	4.658	14.856	51.8142	-0.10986	-0.02417	-0.10181	NaN	NaN	NaN	NaN	NaN	NaN	NaN	NaN	NaN	NaN	NaN	NaN
2.082	-68.6706	157.207	608.7069	-0.17802	0.60635	-0.23935	-30.084	34.3772	31.211	-0.10352	-0.043457	-0.097168	NaN	NaN	NaN	NaN	NaN	NaN	NaN	NaN	NaN	NaN	NaN	NaN
2.084	-51.2556	145.102	597.6152	-0.15654	0.56934	-0.22578	-2.107	30.1183	49.6628	-0.083008	-0.073242	-0.084473	NaN	NaN	NaN	NaN	NaN	NaN	NaN	NaN	NaN	NaN	NaN	NaN
2.086	-73.667	146.625	576.24505	-0.13477	0.53223	-0.21045	22.144	33.596	27.579	-0.07959	-0.093262	-0.085938	NaN	NaN	NaN	NaN	NaN	NaN	NaN	NaN	NaN	NaN	NaN	NaN
2.088	-47.993	142.333	549.0657	-0.11679	0.50146	-0.19717	-14.327	31.8577	9.866	-0.060059	-0.12793	-0.077148	NaN	NaN	NaN	NaN	NaN	NaN	NaN	NaN	NaN	NaN	NaN	NaN
2.09	-54.259117	138.7637	524.0283	-0.099118	0.46846	-0.18701	19.466	34.158	25.4495	-0.051026	-0.16162	-0.071778	NaN	NaN	NaN	NaN	NaN	NaN	NaN	NaN	NaN	NaN	NaN	NaN
2.092	-26.643	131.1241	511.2788	-0.084278	0.4372	-0.18194	-1.848	40.691	7.5	-0.036621	-0.19482	-0.062012	NaN	NaN	NaN	NaN	NaN	NaN	NaN	NaN	NaN	NaN	NaN	NaN
2.094	-25.91	137.3829	495.92067	-0.062403	0.40537	-0.17061	-20.963	34.7707	22.9264	-0.019043	-0.23584	-0.056641	NaN	NaN	NaN	NaN	NaN	NaN	NaN	NaN	NaN	NaN	NaN	NaN
2.096	-9.747	130.0207	463.48216	-0.048828	0.37598	-0.16309	17.963	30.016	22.6499	-0.012695	-0.24951	-0.055664	NaN	NaN	NaN	NaN	NaN	NaN	NaN	NaN	NaN	NaN	NaN	NaN
2.098	1.896	118.481	451.2332	-0.030078	0.34541	-0.15313	-24.812	27.3431	4.659	-0.00097656	-0.27881	-0.051758	NaN	NaN	NaN	NaN	NaN	NaN	NaN	NaN	NaN	NaN	NaN	NaN
2.1	6.376	111.868	452.0471	-0.01289	0.3168	-0.1459	-16.15	16.8634	38.826	0.0073243	-0.29077	-0.049316	NaN	NaN	NaN	NaN	NaN	NaN	NaN	NaN	NaN	NaN	NaN	NaN
2.102	2.887	115.1233	444.4849	0.0019532	0.28867	-0.1416	7.797	25.292	36.488	0.0078125	-0.30127	-0.045898	NaN	NaN	NaN	NaN	NaN	NaN	NaN	NaN	NaN	NaN	NaN	NaN
2.104	-7.473	126.568	413.191	0.016699	0.25879	-0.13203	-48.9183	22.47239	31.4859	0.013184	-0.30518	-0.046875	NaN	NaN	NaN	NaN	NaN	NaN	NaN	NaN	NaN	NaN	NaN	NaN
2.106	-6.564	131.433	399.1316	0.032715	0.22998	-0.12256	-27.867	19.2427	41.6899	0.01416	-0.3125	-0.047363	NaN	NaN	NaN	NaN	NaN	NaN	NaN	NaN	NaN	NaN	NaN	NaN
2.108	1.48	133.482	370.278	0.048047	0.20508	-0.1168	-53.04695	21.4012	15.92	0.0097656	-0.31348	-0.054199	NaN	NaN	NaN	NaN	NaN	NaN	NaN	NaN	NaN	NaN	NaN	NaN
2.11	1.033	127.582	357.2936	0.064355	0.1792	-0.11445	-57.0418	18.0257	26.4088	0.0083005	-0.31299	-0.060059	NaN	NaN	NaN	NaN	NaN	NaN	NaN	NaN	NaN	NaN	NaN	NaN
2.112	-3.811	117.718	331.064	0.078027	0.15302	-0.11328	-10.809	26.0221	26.4945	0.0039063	-0.31201	-0.067383	NaN	NaN	NaN	NaN	NaN	NaN	NaN	NaN	NaN	NaN	NaN	NaN
2.114	-3.643	110.9851	325.38176	0.095312	0.12881	-0.10674	-68.6927	36.419	0.791	0.0024414	-0.30908	-0.081543	NaN	NaN	NaN	NaN	NaN	NaN	NaN	NaN	NaN	NaN	NaN	NaN
2.116	12.001	115.5086	306.6569	0.10938	0.104	-0.098633	-44.338	38.3629	33.0964	0.0048828	-0.30078	-0.084473	NaN	NaN	NaN	NaN	NaN	NaN	NaN	NaN	NaN	NaN	NaN	NaN
2.118	8.374	109.848273	277.7512	0.12578	0.076953	-0.09541	-22.352	47.762	27.9037	-0.0014648	-0.28271	-0.10645	NaN	NaN	NaN	NaN	NaN	NaN	NaN	NaN	NaN	NaN	NaN	NaN
2.12	-7.14	99.9615	277.762	0.14102	0.055762	-0.094922	-66.6049	39.05989	35.661	-0.010254	-0.2605	-0.11963	NaN	NaN	NaN	NaN	NaN	NaN	NaN	NaN	NaN	NaN	NaN	NaN
2.122	-20.801	95.965	265.7954	0.15351	0.032324	-0.093359	-22.722	32.6521	53.353	-0.017578	-0.23828	-0.13379	NaN	NaN	NaN	NaN	NaN	NaN	NaN	NaN	NaN	NaN	NaN	NaN
2.124	-13.904	97.8038	266.34454	0.16035	0.017285	-0.090723	-36.594	41.559	18.0716	-0.041504	-0.20068	-0.15381	NaN	NaN	NaN	NaN	NaN	NaN	NaN	NaN	NaN	NaN	NaN	NaN
2.126	-36.1921	94.52701	245.1631	0.17139	0.0048828	-0.09082	-43.8862	48.6299	21.0095	-0.049805	-0.17871	-0.16699	NaN	NaN	NaN	NaN	NaN	NaN	NaN	NaN	NaN	NaN	NaN	NaN
2.128	-56.6515	81.70743	243.4833	0.17734	-0.012598	-0.087402	-2.383	36.93	35.4736	-0.05957	-0.14063	-0.19531	NaN	NaN	NaN	NaN	NaN	NaN	NaN	NaN	NaN	NaN	NaN	NaN
2.13	-54.5057	83.7041	240.3023	0.18359	-0.024316	-0.08916	-43.6726	34.462	23.7014	-0.05957	-0.11255	-0.2185	NaN	NaN	NaN	NaN	NaN	NaN	NaN	NaN	NaN	NaN	NaN	NaN
2.132	-46.1245	95.4944	220.23903	0.1832	-0.031739	-0.087988	-9.301	3.0009	56.168	-0.056152	-0.08252	-0.2417	NaN	NaN	NaN	NaN	NaN	NaN	NaN	NaN	NaN	NaN	NaN	NaN
2.134	-47.445	94.6165	190.167	0.18916	-0.035938	-0.088672	19.778	-12.5882	65.5848	-0.05957	-0.043457	-0.26855	NaN	NaN	NaN	NaN	NaN	NaN	NaN	NaN	NaN	NaN	NaN	NaN
2.136	-69.7192	87.1176	188.8736	0.18555	-0.041016	-0.086426	-37.517	-16.3408	80.1592	-0.061035	-0.020996	-0.28027	NaN	NaN	NaN	NaN	NaN	NaN	NaN	NaN	NaN	NaN	NaN	NaN
2.138	-36.005	75.6328	177.4755	0.18066	-0.040625	-0.083887	20.853	-24.414	107.318	-0.071777	0.032715	-0.30078	NaN	NaN	NaN	NaN	NaN	NaN	NaN	NaN	NaN	NaN	NaN	NaN
2.14	-45.0145	71.3113	168.596	0.16983	-0.042383	-0.075293	-1.16	-11.389	89.80706	-0.088624	0.078613	-0.3208	NaN	NaN	NaN	NaN	NaN	NaN	NaN	NaN	NaN	NaN	NaN	NaN
2.142	-29.594	75.939	159.6062	0.15928	-0.041992	-0.072559	-20.445	-16.477	111.645	-0.10889	0.12695	-0.34229	NaN	NaN	NaN	NaN	NaN	NaN	NaN	NaN	NaN	NaN	NaN	NaN
2.144	-36.4936	76.8947	152.2491	0.14365	-0.031836	-0.077734	14.006	-28.1826	145.9583	-0.1377	0.18994	-0.37354	NaN	NaN	NaN	NaN	NaN	NaN	NaN	NaN	NaN	NaN	NaN	NaN
2.146	-13.505	76.6767	144.7444	0.12646	-0.016602	-0.07959	-22.335	-23.2382	154.37	-0.15332	0.22021	-0.38623	NaN	NaN	NaN	NaN	NaN	NaN	NaN	NaN	NaN	NaN	NaN	NaN
2.148	-13.931	73.1352	130.7635	0.10986	-0.0062499	-0.084277	-5.492	-12.4326	212.941	-0.17871	0.29785	-0.41406	NaN	NaN	NaN	NaN	NaN	NaN	NaN	NaN	NaN	NaN	NaN	NaN
2.15	-36.039	68.0689	113.982	0.093359	0.0083985	-0.081641	-5.928	15.9277	268.6098	-0.19409	0.35938	-0.43775	NaN	NaN	NaN	NaN	NaN	NaN	NaN	NaN	NaN	NaN	NaN	NaN
2.152	-17.78	60.3261	130.64673	0.07461	0.027929	-0.081641	-27.454	46.39	314.533	-0.2085	0.42969	-0.46484	NaN	NaN	NaN	NaN	NaN	NaN	NaN	NaN	NaN	NaN	NaN	NaN
2.154	-6.867	61.737	122.7055	0.058203	0.046191	-0.086719	-12.156	55.24	392.229	-0.24365	0.53711	-0.48828	NaN	NaN	NaN	NaN	NaN	NaN	NaN	NaN	NaN	NaN	NaN	NaN
2.156	-16.61	66.056	117.9904	0.038574	0.0625	-0.083496	-3.547	65.6506	442.603	-0.27002	0.60205	-0.50342	NaN	NaN	NaN	NaN	NaN	NaN	NaN	NaN	NaN	NaN	NaN	NaN
2.158	-11.932	64.293	91.5135	0.02041	0.082618	-0.087891	-27.1219	77.566	547.639	-0.33252	0.75244	-0.51807	NaN	NaN	NaN	NaN	NaN	NaN	NaN	NaN	NaN	NaN	NaN	NaN
2.16	6.759	56.15	96.1199	0.0033203	0.09912	-0.08877	3.823	87.061	671.7663	-0.42676	0.94189	-0.54053	NaN	NaN	NaN	NaN	NaN	NaN	NaN	NaN	NaN	NaN	NaN	NaN
2.162	20.576	54.4196	94.0548	-0.0099606	0.11396	-0.088379	-12.8879	91	759.485	-0.4834	1.0552	-0.55029	NaN	NaN	NaN	NaN	NaN	NaN	NaN	NaN	NaN	NaN	NaN	NaN
2.164	-0.361000000000001	51.5017	77.106	-0.023535	0.12109	-0.08164	-9.551	66.36	884.849	-0.62109	1.2949	-0.56836	NaN	NaN	NaN	NaN	NaN	NaN	NaN	NaN	NaN	NaN	NaN	NaN
2.166	12.451	41.5603	83.0478	-0.03125	0.12695	-0.07959	-18.8278	54.639	962.541	-0.74145	1.4798	-0.59888	NaN	NaN	NaN	NaN	NaN	NaN	NaN	NaN	NaN	NaN	NaN	NaN
2.168	0.157	36.3335	88.39754	-0.041015	0.13672	-0.074316	-51.514	27.7921	1041.733	-0.86133	1.6523	-0.62695	NaN	NaN	NaN	NaN	NaN	NaN	NaN	NaN	NaN	NaN	NaN	NaN
2.17	1.939	51.9687	78.2906	-0.046094	0.14873	-0.070898	5.1119	-5.55498	1119.2527	-1.0073	1.8442	-0.68115	NaN	NaN	NaN	NaN	NaN	NaN	NaN	NaN	NaN	NaN	NaN	NaN
2.172	-15.903	53.8833	62.8269	-0.057031	0.15459	-0.067383	-13.150631	-18.753	1129.1491	-1.0679	1.9302	-0.71924	NaN	NaN	NaN	NaN	NaN	NaN	NaN	NaN	NaN	NaN	NaN	NaN
2.174	-30.194	57.579	62.9392	-0.064941	0.16299	-0.061621	-49.785	-52.2055	1145.608	-1.1289	2.0117	-0.79492	NaN	NaN	NaN	NaN	NaN	NaN	NaN	NaN	NaN	NaN	NaN	NaN
2.176	-27.203	55.928	61.174	-0.07959	0.16797	-0.053711	30.2267	-100.76	1146.502	-1.1098	2.0136	-0.85205	NaN	NaN	NaN	NaN	NaN	NaN	NaN	NaN	NaN	NaN	NaN	NaN
2.178	-34.0352	57.998	59.6845	-0.084961	0.17901	-0.050391	-4.11462	-130.662	1092.918	-1.0371	1.9961	-0.92578	NaN	NaN	NaN	NaN	NaN	NaN	NaN	NaN	NaN	NaN	NaN	NaN
2.18	-44.127	53.85	42.5209	-0.089648	0.17793	-0.042383	33.454	-171.122	1081.158	-0.92773	1.9531	-1.0098	NaN	NaN	NaN	NaN	NaN	NaN	NaN	NaN	NaN	NaN	NaN	NaN
2.182	-63.1212	52.3768	47.6805	-0.095898	0.18106	-0.038476	64.835	-169.606	1035.594	-0.90039	1.9746	-1.0508	NaN	NaN	NaN	NaN	NaN	NaN	NaN	NaN	NaN	NaN	NaN	NaN
2.184	-30.036	41.2471	57.7298	-0.099123	0.1751	-0.032715	15.68669	-175.181	1012.9606	-0.87744	2.0181	-1.1235	NaN	NaN	NaN	NaN	NaN	NaN	NaN	NaN	NaN	NaN	NaN	NaN
2.186	-57.1056	45.4558	43.6624	-0.10107	0.16943	-0.028809	56.782	-169.463	1013.6597	-0.81689	1.9643	-1.1582	NaN	NaN	NaN	NaN	NaN	NaN	NaN	NaN	NaN	NaN	NaN	NaN
2.188	-50.9016	43.78	23.9373	-0.099804	0.15683	-0.017773	53.438	-147.4633	981.272	-0.72998	1.813	-1.1851	NaN	NaN	NaN	NaN	NaN	NaN	NaN	NaN	NaN	NaN	NaN	NaN
2.19	-41.0827	48.5834	33.5107	-0.10049	0.14453	-0.016113	43.049	-145.757	1002.731	-0.58594	1.502	-1.1836	NaN	NaN	NaN	NaN	NaN	NaN	NaN	NaN	NaN	NaN	NaN	NaN
2.192	-34.354	47.7172	42.1497	-0.098145	0.13594	-0.010254	90.763	-128.686	1039.2275	-0.51172	1.3242	-1.1445	NaN	NaN	NaN	NaN	NaN	NaN	NaN	NaN	NaN	NaN	NaN	NaN
2.194	-44.032	46.2375	45.7207	-0.095508	0.12158	-0.0032227	64.966	-107.496	1049.17	-0.3667	1.0122	-1.0845	NaN	NaN	NaN	NaN	NaN	NaN	NaN	NaN	NaN	NaN	NaN	NaN
2.196	-53.178	32.9311	36.2629	-0.09082	0.10596	-0.00048828	61.729	-129.41	1099.95	-0.302	0.86548	-1.053	NaN	NaN	NaN	NaN	NaN	NaN	NaN	NaN	NaN	NaN	NaN	NaN
2.198	-38.626	28.5398	41.353	-0.086133	0.088867	0.0022461	88.751	-119.468	1128.29	-0.2749	0.76904	-1.0327	NaN	NaN	NaN	NaN	NaN	NaN	NaN	NaN	NaN	NaN	NaN	NaN
2.2	-32.808	30.414	39.59741	-0.081934	0.071484	0.0052734	62.7057	-149.505	1176.572	-0.27979	0.729	-1.0327	NaN	NaN	NaN	NaN	NaN	NaN	NaN	NaN	NaN	NaN	NaN	NaN
2.202	-41.0858	37.342	45.06009	-0.077246	0.058203	0.011523	95.43	-181.345	1209.4001	-0.29492	0.73438	-1.0313	NaN	NaN	NaN	NaN	NaN	NaN	NaN	NaN	NaN	NaN	NaN	NaN
2.204	-25.935	23.3846	51.7211	-0.072949	0.042578	0.012305	81.875	-183.07333	1205.133	-0.354	0.7373	-1.0195	NaN	NaN	NaN	NaN	NaN	NaN	NaN	NaN	NaN	NaN	NaN	NaN
2.206	-8.772	14.3482	47.6966	-0.064453	0.028809	0.014648	60.482	-228.553	1215.7922	-0.35352	0.90869	-1.1108	NaN	NaN	NaN	NaN	NaN	NaN	NaN	NaN	NaN	NaN	NaN	NaN
2.208	-7.354	13.8214	50.2945	-0.061621	0.01416	0.0087891	58.001	-253.069	1257.6661	-0.3042	1.0566	-1.1758	NaN	NaN	NaN	NaN	NaN	NaN	NaN	NaN	NaN	NaN	NaN	NaN
2.21	-13.635	20.3569	50.874	-0.055567	9.762e-05	0.013086	49.271	-248.964	1262.381	-0.29541	0.99561	-1.0581	NaN	NaN	NaN	NaN	NaN	NaN	NaN	NaN	NaN	NaN	NaN	NaN
2.212	0.908000000000001	6.2081	64.1232	-0.05166	-0.014356	0.017773	48.452	-268.662	1313.773	-0.32959	0.94971	-1.0093	NaN	NaN	NaN	NaN	NaN	NaN	NaN	NaN	NaN	NaN	NaN	NaN
2.214	3.08499999999999	10.6083	65.947114	-0.049902	-0.014746	0.022363	79.512	-223.617	1356.0609	-0.42285	1.0029	-0.99023	NaN	NaN	NaN	NaN	NaN	NaN	NaN	NaN	NaN	NaN	NaN	NaN
2.216	-6.676	10.6092	66.1829	-0.053223	-0.016113	0.025391	16.8069	-228.492	1355.3186	-0.44776	1.1243	-1.051	NaN	NaN	NaN	NaN	NaN	NaN	NaN	NaN	NaN	NaN	NaN	NaN
2.218	-7.352	3.8459	63.9372	-0.062988	-0.015527	0.021387	18.7965	-213.859	1404.683	-0.44189	1.252	-1.0938	NaN	NaN	NaN	NaN	NaN	NaN	NaN	NaN	NaN	NaN	NaN	NaN
2.22	-3.748	-17.0559	115.1137	-0.071192	-0.012695	0.02041	24.0332	-131.331	1379.3598	-0.46387	1.3809	-1.0752	NaN	NaN	NaN	NaN	NaN	NaN	NaN	NaN	NaN	NaN	NaN	NaN
2.222	-12.245	-12.0656	112.7332	-0.079004	-0.010742	0.016894	-3.9227	-116.347	1366.98937	-0.49609	1.4199	-1.0537	NaN	NaN	NaN	NaN	NaN	NaN	NaN	NaN	NaN	NaN	NaN	NaN
2.224	-17.475	1.5057	121.2457	-0.083301	-0.0083984	0.014551	60.348	-70.952	1395.5762	-0.58643	1.4946	-1.0659	NaN	NaN	NaN	NaN	NaN	NaN	NaN	NaN	NaN	NaN	NaN	NaN
2.226	-34.609	25.9166	114.5212	-0.078125	-0.0043945	0.0087891	25.704264	-72.132	1348.5028	-0.6438	1.5344	-1.0852	NaN	NaN	NaN	NaN	NaN	NaN	NaN	NaN	NaN	NaN	NaN	NaN
2.228	-34.0701	30.6958	130.6163	-0.074609	-0.0036133	-0.0010742	13.0356	-119.107	1371.7925	-0.68945	1.563	-1.0854	NaN	NaN	NaN	NaN	NaN	NaN	NaN	NaN	NaN	NaN	NaN	NaN
2.23	-18.883	42.7519	160.5884	-0.067774	-0.0024414	-0.013477	58.169	-87.999	1359.004	-0.71484	1.5918	-1.083	NaN	NaN	NaN	NaN	NaN	NaN	NaN	NaN	NaN	NaN	NaN	NaN
2.232	-25.559	62.3125	180.1624	-0.062305	0.0022461	-0.02168	37.5784	-145.655	1333.401	-0.72461	1.6055	-1.0938	NaN	NaN	NaN	NaN	NaN	NaN	NaN	NaN	NaN	NaN	NaN	NaN
2.234	-32.753	63.432	206.9691	-0.062891	0.014355	-0.034082	54.766	-175.62	1382.02	-0.73242	1.6523	-1.1172	NaN	NaN	NaN	NaN	NaN	NaN	NaN	NaN	NaN	NaN	NaN	NaN
2.236	-29.957	74.677	242.21785	-0.06543	0.029297	-0.04541	75.952	-159.5082	1374.847	-0.77002	1.7402	-1.1446	NaN	NaN	NaN	NaN	NaN	NaN	NaN	NaN	NaN	NaN	NaN	NaN
2.238	-29.544	82.1392	276.9669	-0.078223	0.052539	-0.063379	60.862	-196.367	1379.6294	-0.82178	1.8481	-1.1763	NaN	NaN	NaN	NaN	NaN	NaN	NaN	NaN	NaN	NaN	NaN	NaN
2.24	-48.8401	98.2503	296.03758	-0.093848	0.083008	-0.074609	86.201	-161.49113	1406.4885	-0.88086	1.9414	-1.2129	NaN	NaN	NaN	NaN	NaN	NaN	NaN	NaN	NaN	NaN	NaN	NaN
2.242	-28.0992	95.812	316.8099	-0.11885	0.12051	-0.091797	67.9339	-150.42968	1407.7149	-0.9043	1.959	-1.2207	NaN	NaN	NaN	NaN	NaN	NaN	NaN	NaN	NaN	NaN	NaN	NaN
2.244	-27.7472	79.953	370.473	-0.14648	0.15762	-0.11026	75.406	-172.547	1452.468	-0.91602	1.9121	-1.2207	NaN	NaN	NaN	NaN	NaN	NaN	NaN	NaN	NaN	NaN	NaN	NaN
2.246	-34.7731	91.467	413.998	-0.17529	0.20508	-0.12842	100.614	-136.757	1445.4984	-0.92261	1.8391	-1.2029	NaN	NaN	NaN	NaN	NaN	NaN	NaN	NaN	NaN	NaN	NaN	NaN
2.248	-28.3419	86.341	467.205	-0.20801	0.25644	-0.14189	63.719	-145.323	1434.9344	-0.91992	1.7598	-1.1934	NaN	NaN	NaN	NaN	NaN	NaN	NaN	NaN	NaN	NaN	NaN	NaN
2.25	-15.7211	65.3336	520.56	-0.24336	0.31523	-0.15967	93.856	-111.908	1447.1656	-0.92676	1.6758	-1.1758	NaN	NaN	NaN	NaN	NaN	NaN	NaN	NaN	NaN	NaN	NaN	NaN
2.252	-12.731	59.5942	581.0258	-0.28125	0.38399	-0.17451	116.592	-60.325	1421.028	-0.93359	1.6484	-1.1738	NaN	NaN	NaN	NaN	NaN	NaN	NaN	NaN	NaN	NaN	NaN	NaN
2.254	1.378	65.877	651.727	-0.32285	0.45937	-0.18896	90.206	-56.396	1412.5964	-0.93701	1.6235	-1.1675	NaN	NaN	NaN	NaN	NaN	NaN	NaN	NaN	NaN	NaN	NaN	NaN
2.256	5.871	60.7922	708.0581	-0.36572	0.54736	-0.20996	116.646	-18.699	1425.584	-0.9441	1.6262	-1.1735	NaN	NaN	NaN	NaN	NaN	NaN	NaN	NaN	NaN	NaN	NaN	NaN
2.258	10.056	38.858	765.356	-0.41182	0.63516	-0.23105	116.876	-17.835	1394.47	-0.95313	1.6455	-1.1787	NaN	NaN	NaN	NaN	NaN	NaN	NaN	NaN	NaN	NaN	NaN	NaN
2.26	-2.008	36.4595	809.6189	-0.45703	0.73359	-0.2541	77.658	-60.6461	1421.684	-0.97266	1.666	-1.1816	NaN	NaN	NaN	NaN	NaN	NaN	NaN	NaN	NaN	NaN	NaN	NaN
2.262	23.8701	19.9883	832.936	-0.5082	0.83789	-0.27012	83.234	-30.567	1437.088	-0.97998	1.6821	-1.1802	NaN	NaN	NaN	NaN	NaN	NaN	NaN	NaN	NaN	NaN	NaN	NaN
2.264	11.836	-2.694	842.472	-0.5627	0.94062	-0.29004	54.132	-57.499	1417.873	-0.99414	1.6924	-1.1846	NaN	NaN	NaN	NaN	NaN	NaN	NaN	NaN	NaN	NaN	NaN	NaN
2.266	13.229	-26.3168	861.511	-0.61523	1.0317	-0.31152	70.474	-65.2	1440.1125	-1.0005	1.6972	-1.1719	NaN	NaN	NaN	NaN	NaN	NaN	NaN	NaN	NaN	NaN	NaN	NaN
2.268	-2.239	-35.451	853.163	-0.66465	1.109	-0.34219	65.9721	-34.357	1429.6022	-1.0034	1.6899	-1.1714	NaN	NaN	NaN	NaN	NaN	NaN	NaN	NaN	NaN	NaN	NaN	NaN
2.27	-19.826	-37.424	830.4177	-0.70225	1.1736	-0.37422	21.212	-85.1482	1443.1221	-1.0117	1.6758	-1.1592	NaN	NaN	NaN	NaN	NaN	NaN	NaN	NaN	NaN	NaN	NaN	NaN
2.272	-31.106	-48.4936	814.5676	-0.72881	1.2095	-0.40274	78.9397	-68.0105	1477.9692	-1.0117	1.668	-1.1504	NaN	NaN	NaN	NaN	NaN	NaN	NaN	NaN	NaN	NaN	NaN	NaN
2.274	-22.609	-50.418	805.3358	-0.74121	1.235	-0.42539	57.322	-49.56	1448.0711	-1.0112	1.6743	-1.1499	NaN	NaN	NaN	NaN	NaN	NaN	NaN	NaN	NaN	NaN	NaN	NaN
2.276	-13.99	-52.143	798.4139	-0.75	1.2324	-0.45117	44.679	-59.61	1460.448	-1.0164	1.6828	-1.1473	NaN	NaN	NaN	NaN	NaN	NaN	NaN	NaN	NaN	NaN	NaN	NaN
2.278	-25.285	-45.772	780.0716	-0.74717	1.2212	-0.46357	70.871	-24.93	1475.246	-1.0195	1.7012	-1.1426	NaN	NaN	NaN	NaN	NaN	NaN	NaN	NaN	NaN	NaN	NaN	NaN
2.28	-27.3	-32.8569	782.723	-0.73897	1.2017	-0.47998	31.099	-47.095	1440.0208	-1.0215	1.7246	-1.1348	NaN	NaN	NaN	NaN	NaN	NaN	NaN	NaN	NaN	NaN	NaN	NaN
2.282	-34.654	-14.6554	786.924	-0.71748	1.1739	-0.49756	66.355	-26.3349	1446.37	-1.0225	1.7363	-1.1289	NaN	NaN	NaN	NaN	NaN	NaN	NaN	NaN	NaN	NaN	NaN	NaN
2.284	-19.305	-5.301	811.7352	-0.68857	1.1468	-0.51201	63.7033	23.795	1432.77351	-1.0181	1.7446	-1.1245	NaN	NaN	NaN	NaN	NaN	NaN	NaN	NaN	NaN	NaN	NaN	NaN
2.286	-28.6332	1.373	829.901	-0.66406	1.1191	-0.53906	35.1041	-0.795999999999999	1413.3173	-0.99977	1.7346	-1.114	NaN	NaN	NaN	NaN	NaN	NaN	NaN	NaN	NaN	NaN	NaN	NaN
2.288	-40.2146	-8.986	842.9938	-0.64063	1.0918	-0.55762	65.387	33.6782	1424.0878	-0.97998	1.7114	-1.0962	NaN	NaN	NaN	NaN	NaN	NaN	NaN	NaN	NaN	NaN	NaN	NaN
2.29	-42.6567	-34.822	869.743	-0.62275	1.0575	-0.56807	35.67222	52.555	1381.539	-0.94824	1.6836	-1.0684	NaN	NaN	NaN	NaN	NaN	NaN	NaN	NaN	NaN	NaN	NaN	NaN
2.292	-41.492	-53.921	870.1955	-0.5915	1.0224	-0.58369	33.803	34.1669	1371.1501	-0.9375	1.6641	-1.0576	NaN	NaN	NaN	NaN	NaN	NaN	NaN	NaN	NaN	NaN	NaN	NaN
2.294	-40.7339	-74.194	871.3503	-0.54854	0.97373	-0.60654	85.718	70.657	1385.647	-0.92383	1.6426	-1.0371	NaN	NaN	NaN	NaN	NaN	NaN	NaN	NaN	NaN	NaN	NaN	NaN
2.296	-35.7541	-93.239	869.0684	-0.49902	0.91602	-0.63135	77.223	49.6556	1364.5797	-0.90918	1.625	-1.0234	NaN	NaN	NaN	NaN	NaN	NaN	NaN	NaN	NaN	NaN	NaN	NaN
2.298	-15.0983	-114.932	883.8462	-0.44336	0.85801	-0.64316	70.41	37.4552	1405.272	-0.90234	1.6191	-1.0117	NaN	NaN	NaN	NaN	NaN	NaN	NaN	NaN	NaN	NaN	NaN	NaN
2.3	-12.423	-140.181	881.465	-0.40332	0.81153	-0.64258	101.797	76.485	1380.228	-0.88281	1.6064	-0.99023	NaN	NaN	NaN	NaN	NaN	NaN	NaN	NaN	NaN	NaN	NaN	NaN
2.302	-16.3125	-142.666	895.425	-0.37832	0.77676	-0.64453	43.1138	37.511	1336.5494	-0.87011	1.5976	-0.97509	NaN	NaN	NaN	NaN	NaN	NaN	NaN	NaN	NaN	NaN	NaN	NaN
2.304	20.167	-136.144	931.912	-0.35196	0.80859	-0.68184	70.379	63.097	1350.189	-0.85449	1.5864	-0.9624	NaN	NaN	NaN	NaN	NaN	NaN	NaN	NaN	NaN	NaN	NaN	NaN
2.306	39.594	-116.879	971.9739	-0.33154	0.82813	-0.68945	50.488	76.488	1302.85	-0.83203	1.5693	-0.94141	NaN	NaN	NaN	NaN	NaN	NaN	NaN	NaN	NaN	NaN	NaN	NaN
2.308	38.4233	-100.48798	991.2493	-0.34649	0.82578	-0.67149	33.111	57.938	1305.7605	-0.8208	1.5552	-0.92725	NaN	NaN	NaN	NaN	NaN	NaN	NaN	NaN	NaN	NaN	NaN	NaN
2.31	33.871	-82.25	1001.0049	-0.37978	0.8294	-0.66748	66.636	112.4575	1283.065	-0.79688	1.5352	-0.91211	NaN	NaN	NaN	NaN	NaN	NaN	NaN	NaN	NaN	NaN	NaN	NaN
2.312	40.6635	-64.956	1023.5568	-0.41338	0.87861	-0.6917	-14.535	96.4685	1252.712	-0.77734	1.512	-0.89526	NaN	NaN	NaN	NaN	NaN	NaN	NaN	NaN	NaN	NaN	NaN	NaN
2.314	36.7999	-47.227	1042.4733	-0.42813	0.93536	-0.73457	23.4687	105.1845	1277.6488	-0.76318	1.4878	-0.88428	NaN	NaN	NaN	NaN	NaN	NaN	NaN	NaN	NaN	NaN	NaN	NaN
2.316	29.1972	-39.696	1059.2947	-0.4375	0.98828	-0.75195	40.842	138.511	1249.9481	-0.73389	1.4556	-0.86084	NaN	NaN	NaN	NaN	NaN	NaN	NaN	NaN	NaN	NaN	NaN	NaN
2.318	31.7858	-43.598	1071.19932487	-0.45186	1.0405	-0.75322	-6.3458	122.8903	1208.4976	-0.72461	1.4375	-0.84961	NaN	NaN	NaN	NaN	NaN	NaN	NaN	NaN	NaN	NaN	NaN	NaN
2.32	34.9414	-72.4	1091.8918	-0.46855	1.0899	-0.76601	25.413	167.2581	1166.9063	-0.69727	1.4082	-0.83008	NaN	NaN	NaN	NaN	NaN	NaN	NaN	NaN	NaN	NaN	NaN	NaN
2.322	42.8318	-93.4573	1101.201	-0.49434	1.1332	-0.78047	-14.171	169.467	1147.014	-0.68433	1.387	-0.81128	NaN	NaN	NaN	NaN	NaN	NaN	NaN	NaN	NaN	NaN	NaN	NaN
2.324	38.2975	-92.7384	1120.108	-0.5251	1.1879	-0.79609	-5.78	154.2101	1133.477	-0.66943	1.3696	-0.79443	NaN	NaN	NaN	NaN	NaN	NaN	NaN	NaN	NaN	NaN	NaN	NaN
2.326	26.4595	-97.347	1144.2382	-0.56055	1.248	-0.80664	10.5859	157.0112	1130.817	-0.65088	1.3306	-0.76904	NaN	NaN	NaN	NaN	NaN	NaN	NaN	NaN	NaN	NaN	NaN	NaN
2.328	33.7035	-101.6256	1170.2413	-0.59385	1.3107	-0.8167	-21.0632	142.0674	1092.796	-0.63379	1.3105	-0.75781	NaN	NaN	NaN	NaN	NaN	NaN	NaN	NaN	NaN	NaN	NaN	NaN
2.33	30.246	-110.131	1199.3989	-0.62334	1.3747	-0.83389	-12.5229	122.633	1103.7525	-0.6084	1.2598	-0.7373	NaN	NaN	NaN	NaN	NaN	NaN	NaN	NaN	NaN	NaN	NaN	NaN
2.332	-9.7813	-112.3377	1223.7138	-0.64522	1.4317	-0.85264	-10.5769	138.2821	1068.481	-0.58056	1.2234	-0.72046	NaN	NaN	NaN	NaN	NaN	NaN	NaN	NaN	NaN	NaN	NaN	NaN
2.334	-20.58189	-108.7213	1236.859	-0.66103	1.4667	-0.87041	-48.9367	138.67	1022.2406	-0.5542	1.1802	-0.70264	NaN	NaN	NaN	NaN	NaN	NaN	NaN	NaN	NaN	NaN	NaN	NaN
2.336	-15.9835	-106.833	1276.427	-0.67041	1.4829	-0.87646	-7.267	173.7489	1018.7942	-0.5166	1.1172	-0.67969	NaN	NaN	NaN	NaN	NaN	NaN	NaN	NaN	NaN	NaN	NaN	NaN
2.338	-31.519	-91.1716	1274.959	-0.67285	1.5016	-0.88125	-7.007	189.911	985.2658	-0.49854	1.0874	-0.66748	NaN	NaN	NaN	NaN	NaN	NaN	NaN	NaN	NaN	NaN	NaN	NaN
2.34	-55.754	-81.58719	1282.311	-0.67656	1.5133	-0.89336	-4.214	158.9924	971.6411	-0.46338	1.0239	-0.63623	NaN	NaN	NaN	NaN	NaN	NaN	NaN	NaN	NaN	NaN	NaN	NaN
2.342	-48.3472	-68.26295	1257.4571	-0.68281	1.5226	-0.89961	20.3738	166.3222	960.9044	-0.4336	0.9751	-0.61597	NaN	NaN	NaN	NaN	NaN	NaN	NaN	NaN	NaN	NaN	NaN	NaN
2.344	-46.2102	-75.4882	1273.3989	-0.70723	1.5455	-0.90742	-27.8947	161.84828	922.49416	-0.41406	0.92383	-0.59766	NaN	NaN	NaN	NaN	NaN	NaN	NaN	NaN	NaN	NaN	NaN	NaN
2.346	-22.772	-80.403	1287.5597	-0.74072	1.5728	-0.91162	17.714	159.444	898.646886	-0.37256	0.86182	-0.57178	NaN	NaN	NaN	NaN	NaN	NaN	NaN	NaN	NaN	NaN	NaN	NaN
2.348	-14.2186	-78.909	1284.4837	-0.78311	1.6046	-0.92432	37.0748	194.136	857.135	-0.35645	0.82715	-0.5625	NaN	NaN	NaN	NaN	NaN	NaN	NaN	NaN	NaN	NaN	NaN	NaN
2.35	-18.683	-83.7371	1288.812	-0.81992	1.6477	-0.9336	-35.954	181.3462	812.9078	-0.31641	0.75732	-0.5293	NaN	NaN	NaN	NaN	NaN	NaN	NaN	NaN	NaN	NaN	NaN	NaN
2.352	-4.8302	-71.89155	1298.352	-0.86211	1.6867	-0.9586	29.829	199.899	790.6316	-0.29053	0.71338	-0.50635	NaN	NaN	NaN	NaN	NaN	NaN	NaN	NaN	NaN	NaN	NaN	NaN
2.354	-7.519	-61.8999	1322.93	-0.90098	1.7264	-0.96426	3.767	206.313	728.373	-0.26025	0.66357	-0.48486	NaN	NaN	NaN	NaN	NaN	NaN	NaN	NaN	NaN	NaN	NaN	NaN
2.356	-14.6888	-50.1	1325.1371	-0.93994	1.7656	-0.97266	-21.552	186.305	712.8037	-0.23096	0.60498	-0.45459	NaN	NaN	NaN	NaN	NaN	NaN	NaN	NaN	NaN	NaN	NaN	NaN
2.358	16.708	-55.954	1364.1439	-0.97784	1.8013	-0.9835	9.964	200.05	709.5414	-0.20947	0.57959	-0.44092	NaN	NaN	NaN	NaN	NaN	NaN	NaN	NaN	NaN	NaN	NaN	NaN
2.36	11.7932	-64.378	1375.1866	-1.0112	1.8302	-0.99443	-15.603	193.778	677.896	-0.1875	0.53223	-0.41211	NaN	NaN	NaN	NaN	NaN	NaN	NaN	NaN	NaN	NaN	NaN	NaN
2.362	7.774	-59.153	1389.189	-1.0421	1.8603	-1.0018	-5.305	169.8157	646.491	-0.17016	0.50073	-0.3916	NaN	NaN	NaN	NaN	NaN	NaN	NaN	NaN	NaN	NaN	NaN	NaN
2.364	9.1909	-61.72521	1394.1271	-1.0646	1.875	-1.0137	-13.361	189.855	573.377	-0.16016	0.46924	-0.37256	NaN	NaN	NaN	NaN	NaN	NaN	NaN	NaN	NaN	NaN	NaN	NaN
2.366	43.8875	-67.643	1413.2551	-1.0801	1.8828	-1.0156	-37.811	179.0211	551.468	-0.13379	0.43164	-0.34863	NaN	NaN	NaN	NaN	NaN	NaN	NaN	NaN	NaN	NaN	NaN	NaN
2.368	56.251	-80.933	1398.25032	-1.0828	1.884	-1.0238	-13.592	173.5726	551.2022	-0.12158	0.41211	-0.33447	NaN	NaN	NaN	NaN	NaN	NaN	NaN	NaN	NaN	NaN	NaN	NaN
2.37	43.8193	-65.477	1388.9786	-1.0842	1.8781	-1.0278	-38.2586	199.695	517.4625	-0.097168	0.37354	-0.31201	NaN	NaN	NaN	NaN	NaN	NaN	NaN	NaN	NaN	NaN	NaN	NaN
2.372	43.2627	-52.453	1402.9096	-1.0776	1.8621	-1.0313	-46.2762	167.6537	484.405	-0.083252	0.34595	-0.29638	NaN	NaN	NaN	NaN	NaN	NaN	NaN	NaN	NaN	NaN	NaN	NaN
2.374	39.1725	-40.0344	1412.894	-1.0699	1.8432	-1.0369	-24.704	151.03	457.8251	-0.06543	0.31445	-0.27881	NaN	NaN	NaN	NaN	NaN	NaN	NaN	NaN	NaN	NaN	NaN	NaN
2.376	36.1217	-25.2854	1430.7721	-1.0664	1.8184	-1.0371	-68.0609	140.16262	429.4848	-0.037109	0.27539	-0.25146	NaN	NaN	NaN	NaN	NaN	NaN	NaN	NaN	NaN	NaN	NaN	NaN
2.378	17.688	-13.516	1436.2022	-1.0537	1.7935	-1.0369	-59.265	118.119	414.399	-0.023926	0.25342	-0.23828	NaN	NaN	NaN	NaN	NaN	NaN	NaN	NaN	NaN	NaN	NaN	NaN
2.38	6.766	-2.86	1426.4046	-1.0401	1.7677	-1.0382	-29.929	155.7961	364.1612	-0.0024414	0.20947	-0.21582	NaN	NaN	NaN	NaN	NaN	NaN	NaN	NaN	NaN	NaN	NaN	NaN
2.382	-5.065	4.066	1424.708	-1.032	1.7391	-1.0425	-76.409	141.2384	332.9547	0.013916	0.17846	-0.19824	NaN	NaN	NaN	NaN	NaN	NaN	NaN	NaN	NaN	NaN	NaN	NaN
2.384	-13.1036	26.0531	1422.4561	-1.0111	1.7072	-1.0455	-38.8346	119.90433	329.36235	0.027344	0.1499	-0.17969	NaN	NaN	NaN	NaN	NaN	NaN	NaN	NaN	NaN	NaN	NaN	NaN
2.386	-27.376	33.256	1411.2624	-0.99414	1.6797	-1.0459	-71.0785	129.332	297.142	0.052734	0.10107	-0.15625	NaN	NaN	NaN	NaN	NaN	NaN	NaN	NaN	NaN	NaN	NaN	NaN
2.388	-24.4662	26.915	1399.4768	-0.98545	1.6485	-1.0333	-51.724	115.8561	286.7218	0.067383	0.080078	-0.14648	NaN	NaN	NaN	NaN	NaN	NaN	NaN	NaN	NaN	NaN	NaN	NaN
2.39	-11.5709	16.48321	1405.7143	-0.97002	1.615	-1.0288	-2.749	126.201	280.77	0.097168	0.029297	-0.12402	NaN	NaN	NaN	NaN	NaN	NaN	NaN	NaN	NaN	NaN	NaN	NaN
2.392	-28.7922	2.664	1395.12	-0.95908	1.5884	-1.0351	-49.8028	136.893	237.02171	0.13256	0.011475	-0.11987	NaN	NaN	NaN	NaN	NaN	NaN	NaN	NaN	NaN	NaN	NaN	NaN
2.394	-33.8407	-6.487	1390.924	-0.94678	1.57	-1.0288	-20.173	99.7362	240.152	0.14746	-0.014648	-0.10156	NaN	NaN	NaN	NaN	NaN	NaN	NaN	NaN	NaN	NaN	NaN	NaN
2.396	-21.691	-6.746	1374.384	-0.93701	1.5474	-1.0269	-11.394	101.4966	195.476	0.1665	-0.036133	-0.079102	NaN	NaN	NaN	NaN	NaN	NaN	NaN	NaN	NaN	NaN	NaN	NaN
2.398	-33.7956	2.304	1372.0647	-0.93144	1.5244	-1.0135	-27.86	95.77	166.584	0.15967	-0.065918	-0.056641	NaN	NaN	NaN	NaN	NaN	NaN	NaN	NaN	NaN	NaN	NaN	NaN
2.4	-24.8925	14.1335	1375.9322	-0.92881	1.5047	-1.003	14.479	62.674	172.4081	0.16162	-0.10352	-0.022949	NaN	NaN	NaN	NaN	NaN	NaN	NaN	NaN	NaN	NaN	NaN	NaN
2.402	-48.063	22.6615	1339.6047	-0.92412	1.4891	-0.99835	-7.979	85.448	154.4289	0.17944	-0.1106	-0.023438	NaN	NaN	NaN	NaN	NaN	NaN	NaN	NaN	NaN	NaN	NaN	NaN
2.404	-25.2242	26.769	1337.3165	-0.9126	1.4784	-0.99072	-12.915	59.4268	144.0021	0.20215	-0.12207	-0.029297	NaN	NaN	NaN	NaN	NaN	NaN	NaN	NaN	NaN	NaN	NaN	NaN
2.406	-33.6582	47.878	1316.6402	-0.90674	1.4653	-0.97998	19.087	58.8	125.8335	0.22949	-0.14648	-0.018066	NaN	NaN	NaN	NaN	NaN	NaN	NaN	NaN	NaN	NaN	NaN	NaN
2.408	-4.667	61.756	1312.9462	-0.89854	1.4503	-0.96455	-25.2168	89.51	107.716	0.24365	-0.16016	-0.0053711	NaN	NaN	NaN	NaN	NaN	NaN	NaN	NaN	NaN	NaN	NaN	NaN
2.41	15.3586	71.468	1279.0916	-0.89209	1.4314	-0.95127	-1.412	36.289	120.5727	0.25195	-0.17139	0.015625	NaN	NaN	NaN	NaN	NaN	NaN	NaN	NaN	NaN	NaN	NaN	NaN
2.412	22.1046	60.18571	1262.8679	-0.88154	1.4154	-0.94229	16.517	41.13453	101.329	0.25489	-0.18628	0.024903	NaN	NaN	NaN	NaN	NaN	NaN	NaN	NaN	NaN	NaN	NaN	NaN
2.414	33.301441	62.8281	1239.0309	-0.87227	1.4006	-0.93262	-31.851	41.842	76.457	0.26025	-0.20068	0.030762	NaN	NaN	NaN	NaN	NaN	NaN	NaN	NaN	NaN	NaN	NaN	NaN
2.416	41.1758	66.3972	1216.5	-0.86719	1.3809	-0.90771	5.824	20.9731	72.888	0.26025	-0.21289	0.050293	NaN	NaN	NaN	NaN	NaN	NaN	NaN	NaN	NaN	NaN	NaN	NaN
2.418	45.5424	73.258	1207.3179	-0.86367	1.3719	-0.88867	-27.261	70.356	49.59	0.25391	-0.21826	0.054199	NaN	NaN	NaN	NaN	NaN	NaN	NaN	NaN	NaN	NaN	NaN	NaN
2.42	61.295	71.142	1191.4876	-0.8499	1.3533	-0.87373	-25.33	45.9046	63.25242	0.25586	-0.21045	0.052246	NaN	NaN	NaN	NaN	NaN	NaN	NaN	NaN	NaN	NaN	NaN	NaN
2.422	53.9683	60.984	1181.1482	-0.83935	1.3341	-0.85069	1.523	40.65	64.8083	0.25659	-0.19629	0.054932	NaN	NaN	NaN	NaN	NaN	NaN	NaN	NaN	NaN	NaN	NaN	NaN
2.424	36.0078	62.386	1145.9718	-0.82549	1.3128	-0.83213	-49.9602	67.518	49.5447	0.25928	-0.18896	0.059082	NaN	NaN	NaN	NaN	NaN	NaN	NaN	NaN	NaN	NaN	NaN	NaN
2.426	16.9116	53.4732	1148.2675	-0.81201	1.2856	-0.81396	-22.784	27.0746	48.3721	0.26172	-0.17432	0.060547	NaN	NaN	NaN	NaN	NaN	NaN	NaN	NaN	NaN	NaN	NaN	NaN
2.428	19.3794	57.39	1133.1204	-0.79551	1.2611	-0.79121	-46.6318	42.137	27.099	0.25342	-0.15723	0.058105	NaN	NaN	NaN	NaN	NaN	NaN	NaN	NaN	NaN	NaN	NaN	NaN
2.43	25.6295	69.4206	1120.8841	-0.77969	1.2338	-0.77051	-59.2819	51.4458	31.581	0.23389	-0.12354	0.060059	NaN	NaN	NaN	NaN	NaN	NaN	NaN	NaN	NaN	NaN	NaN	NaN
2.432	13.676	66.5197	1091.4457	-0.76719	1.2088	-0.74863	-31.748	7.2886	30.8375	0.22144	-0.095947	0.062012	NaN	NaN	NaN	NaN	NaN	NaN	NaN	NaN	NaN	NaN	NaN	NaN
2.434	-4.119	77.6148	1056.4532	-0.74853	1.1835	-0.72901	-52.7198	43.009	-5.058	0.20508	-0.070801	0.05957	NaN	NaN	NaN	NaN	NaN	NaN	NaN	NaN	NaN	NaN	NaN	NaN
2.436	0.875	78.69555	1052.7629	-0.73486	1.1606	-0.70654	-35.2168	27.19495	11.1501	0.18359	-0.041016	0.060547	NaN	NaN	NaN	NaN	NaN	NaN	NaN	NaN	NaN	NaN	NaN	NaN
2.438	3.247	87.5238	1026.305	-0.7206	1.1337	-0.68506	-23.202	13.3355	16.5455	0.16577	-0.012695	0.057129	NaN	NaN	NaN	NaN	NaN	NaN	NaN	NaN	NaN	NaN	NaN	NaN
2.44	-13.248	104.6474	1001.677199	-0.70693	1.1134	-0.66553	-54.90848	54.935	32.6884	0.14307	0.01123	0.046875	NaN	NaN	NaN	NaN	NaN	NaN	NaN	NaN	NaN	NaN	NaN	NaN
2.442	-19.182	105.3335	985.64178	-0.69091	1.0887	-0.64599	-25.108	24.9294	64.517	0.11621	0.047852	0.047363	NaN	NaN	NaN	NaN	NaN	NaN	NaN	NaN	NaN	NaN	NaN	NaN
2.444	-36.2839	112.3894	952.2209	-0.67891	1.0629	-0.6248	-19.249	40.395	42.5616	0.10791	0.063477	0.040527	NaN	NaN	NaN	NaN	NaN	NaN	NaN	NaN	NaN	NaN	NaN	NaN
2.446	-42.0671	111.4214	945.6327	-0.65967	1.0396	-0.60107	-43.7199	41.5834	37.5717	0.089844	0.087891	0.036621	NaN	NaN	NaN	NaN	NaN	NaN	NaN	NaN	NaN	NaN	NaN	NaN
2.448	-76.449	115.301	902.5714	-0.64228	1.0116	-0.59131	4.239	-3.0484	33.6859	0.079101	0.1084	0.034424	NaN	NaN	NaN	NaN	NaN	NaN	NaN	NaN	NaN	NaN	NaN	NaN
2.45	-61.422	104.336	873.844	-0.61572	0.97744	-0.57256	-33.53	41.691	18.8764	0.066895	0.125	0.028809	NaN	NaN	NaN	NaN	NaN	NaN	NaN	NaN	NaN	NaN	NaN	NaN
2.452	-51.248	116.318	849.2265	-0.59111	0.95088	-0.55303	-21.647	33.6122	25.1688	0.047363	0.15234	0.021973	NaN	NaN	NaN	NaN	NaN	NaN	NaN	NaN	NaN	NaN	NaN	NaN
2.454	-62.0515	129.832	821.3494	-0.56689	0.91768	-0.53633	25.291	24.1062	26.7119	0.039063	0.1626	0.012695	NaN	NaN	NaN	NaN	NaN	NaN	NaN	NaN	NaN	NaN	NaN	NaN
2.456	-60.7019	136.6485	806.993	-0.5459	0.87891	-0.52539	-31.435	43.235	24.9337	0.02002	0.1875	0.0068359	NaN	NaN	NaN	NaN	NaN	NaN	NaN	NaN	NaN	NaN	NaN	NaN
2.458	-30.646	122.8349	797.0318	-0.51856	0.85322	-0.50537	3.163	-0.4512	48.999	0.0095213	0.20533	-0.0021972	NaN	NaN	NaN	NaN	NaN	NaN	NaN	NaN	NaN	NaN	NaN	NaN
2.46	-21.502	128.677	760.4023	-0.49414	0.82031	-0.48828	15.498	25.08	18.358	0.0043945	0.22314	-0.0097656	NaN	NaN	NaN	NaN	NaN	NaN	NaN	NaN	NaN	NaN	NaN	NaN
2.462	-14.695	120.295	753.6105	-0.47422	0.78945	-0.4707	-12.576	43.9187	21.0201	-0.00048828	0.2373	-0.018555	NaN	NaN	NaN	NaN	NaN	NaN	NaN	NaN	NaN	NaN	NaN	NaN
2.464	-9.538	121.3754	743.7968	-0.45488	0.76192	-0.45234	19.484	17.0388	41.635	0.00097656	0.24805	-0.021484	NaN	NaN	NaN	NaN	NaN	NaN	NaN	NaN	NaN	NaN	NaN	NaN
2.466	-8.405	130.09071	715.4934	-0.43115	0.73193	-0.43701	-22.5229	43.052	21.387	0.0024414	0.25439	-0.032715	NaN	NaN	NaN	NaN	NaN	NaN	NaN	NaN	NaN	NaN	NaN	NaN
2.468	-0.609000000000002	128.426	699.1889	-0.40996	0.69942	-0.42598	-28.75	33.6517	28.2604	-0.0019531	0.2605	-0.027343	NaN	NaN	NaN	NaN	NaN	NaN	NaN	NaN	NaN	NaN	NaN	NaN
2.47	-9.765	127.813	658.2559	-0.38809	0.66836	-0.41133	0.408000000000001	16.9231	21.6169	-0.0083008	0.26709	-0.025879	NaN	NaN	NaN	NaN	NaN	NaN	NaN	NaN	NaN	NaN	NaN	NaN
2.472	-5.832	117.446	655.4463	-0.36699	0.63672	-0.39609	-36.869	54.2442	17.659	-0.010254	0.27246	-0.024902	NaN	NaN	NaN	NaN	NaN	NaN	NaN	NaN	NaN	NaN	NaN	NaN
2.474	3.862	125.7986	624.732	-0.3418	0.60839	-0.38105	-23.254	14.938	45.239	-0.0097656	0.26807	-0.024902	NaN	NaN	NaN	NaN	NaN	NaN	NaN	NaN	NaN	NaN	NaN	NaN
2.476	3.836	130.4297	599.2073	-0.31836	0.57617	-0.36426	-38.547	27.2438	38.98	-0.0073242	0.26367	-0.025391	NaN	NaN	NaN	NaN	NaN	NaN	NaN	NaN	NaN	NaN	NaN	NaN
2.478	-16.915	135.6782	573.3884	-0.29639	0.54805	-0.34844	-49.9825	43.438	29.0586	-0.001709	0.25415	-0.017578	NaN	NaN	NaN	NaN	NaN	NaN	NaN	NaN	NaN	NaN	NaN	NaN
2.48	-15.834	136.2048	543.6994	-0.271	0.52158	-0.33076	-15.863	-2.57	30.2699	0.0092773	0.23877	-0.013184	NaN	NaN	NaN	NaN	NaN	NaN	NaN	NaN	NaN	NaN	NaN	NaN
2.482	7.134	138.7223	538.2019	-0.25069	0.49541	-0.3163	-48.333	22.6187	19.7782	0.033691	0.21387	-0.0048828	NaN	NaN	NaN	NaN	NaN	NaN	NaN	NaN	NaN	NaN	NaN	NaN
2.484	-2.569	136.0272	518.7707	-0.23232	0.47002	-0.30312	-54.6469	10.16	31.5698	0.04541	0.19971	-0.0019531	NaN	NaN	NaN	NaN	NaN	NaN	NaN	NaN	NaN	NaN	NaN	NaN
2.486	-22	128.9828	502.5092	-0.21338	0.4458	-0.28467	-21.772	3.8117	10.742	0.066895	0.16895	0.010254	NaN	NaN	NaN	NaN	NaN	NaN	NaN	NaN	NaN	NaN	NaN	NaN
2.488	-16.493	135.7993	490.4882	-0.19258	0.41661	-0.27646	-67.7725	58.6021	4.51	0.080322	0.14746	0.022949	NaN	NaN	NaN	NaN	NaN	NaN	NaN	NaN	NaN	NaN	NaN	NaN
2.49	-26.09	138.3556	475.2427	-0.16915	0.39043	-0.25742	-33.705	16.725	38.558	0.096191	0.12646	0.035645	NaN	NaN	NaN	NaN	NaN	NaN	NaN	NaN	NaN	NaN	NaN	NaN
2.492	-53.701	135.1058	450.7257	-0.14806	0.36622	-0.2461	-50.9854	26.9943	26.2785	0.11328	0.10791	0.046875	NaN	NaN	NaN	NaN	NaN	NaN	NaN	NaN	NaN	NaN	NaN	NaN
2.494	-76.492763	128.5248	430.0798	-0.12813	0.33878	-0.22881	-34.38	36.2543	34.646	0.12158	0.09082	0.058105	NaN	NaN	NaN	NaN	NaN	NaN	NaN	NaN	NaN	NaN	NaN	NaN
2.496	-62.452	117.8094	419.1642	-0.10938	0.31201	-0.21045	-3.81	16.6092	38.7671	0.14014	0.076172	0.066406	NaN	NaN	NaN	NaN	NaN	NaN	NaN	NaN	NaN	NaN	NaN	NaN
2.498	-73.357	117.6801	385.6879	-0.090422	0.28622	-0.19071	-33.3345	57.521	20.952	0.14771	0.059326	0.075684	NaN	NaN	NaN	NaN	NaN	NaN	NaN	NaN	NaN	NaN	NaN	NaN
2.5	-91.0786	118.871	363.2244	-0.074985	0.26843	-0.17841	-18.017	34.9383	33.6917	0.16211	0.041016	0.084473	NaN	NaN	NaN	NaN	NaN	NaN	NaN	NaN	NaN	NaN	NaN	NaN
2.502	-92.94	114.5622	343.415	-0.063666	0.24461	-0.16512	-10.774	11.6214	22.7142	0.18652	0.024902	0.099121	NaN	NaN	NaN	NaN	NaN	NaN	NaN	NaN	NaN	NaN	NaN	NaN
2.504	-65.394	110.262	340.697	-0.050778	0.22508	-0.1452	-40.227	51.5942	3.73	0.19824	0.016113	0.10547	NaN	NaN	NaN	NaN	NaN	NaN	NaN	NaN	NaN	NaN	NaN	NaN
2.506	-62.905	121.492	323.357	-0.043945	0.20947	-0.13135	16.716	17.2453	25.999	0.21289	0.01123	0.11328	NaN	NaN	NaN	NaN	NaN	NaN	NaN	NaN	NaN	NaN	NaN	NaN
2.508	-67.3459	116.079	301.889	-0.02884	0.19348	-0.11818	3.202	27.731	11.177	0.22558	0.010254	0.12353	NaN	NaN	NaN	NaN	NaN	NaN	NaN	NaN	NaN	NaN	NaN	NaN
2.51	-45.168	116.431	305.168	-0.010887	0.17956	-0.10593	-22.881	43.1594	29.5618	0.2334	0.012207	0.12793	NaN	NaN	NaN	NaN	NaN	NaN	NaN	NaN	NaN	NaN	NaN	NaN
2.512	-33.866	116.775	303.049	0.001619	0.15655	-0.089116	11.21	7.9851	51.4657	0.23926	0.024902	0.13574	NaN	NaN	NaN	NaN	NaN	NaN	NaN	NaN	NaN	NaN	NaN	NaN
2.514	-45.978	122.539	291.4978	0.013043	0.14329	-0.078676	-14.993	47.737	17.38	0.24023	0.027832	0.14404	NaN	NaN	NaN	NaN	NaN	NaN	NaN	NaN	NaN	NaN	NaN	NaN
2.516	-40.881	111.421	261.913	0.023926	0.13672	-0.058594	4.571	19.8393	44.9863	0.24609	0.052734	0.14307	NaN	NaN	NaN	NaN	NaN	NaN	NaN	NaN	NaN	NaN	NaN	NaN
2.518	-33.822	100.173	264.9453	0.032083	0.1204	-0.051092	9.796	-13.959	69.4721	0.24781	0.077881	0.14648	NaN	NaN	NaN	NaN	NaN	NaN	NaN	NaN	NaN	NaN	NaN	NaN
2.52	-39.625	104.27	244.0142	0.038467	0.10459	-0.035456	-35.366	19.7623	70.1651	0.25684	0.10547	0.14355	NaN	NaN	NaN	NaN	NaN	NaN	NaN	NaN	NaN	NaN	NaN	NaN
2.522	-37.639	99.603	228.5763	0.042915	0.085529	-0.016563	-7.912	-22.9778	80.33241	0.25293	0.1582	0.14014	NaN	NaN	NaN	NaN	NaN	NaN	NaN	NaN	NaN	NaN	NaN	NaN
2.524	-18.544	91.1325	210.498	0.045898	0.074206	-0.0077665	19.7633	15.134	55.528	0.25098	0.19141	0.13623	NaN	NaN	NaN	NaN	NaN	NaN	NaN	NaN	NaN	NaN	NaN	NaN
2.526	-9.164	81.4474	205.261	0.046387	0.063477	0.0019531	-36.0977	30.922	82.2962	0.24463	0.25293	0.12305	NaN	NaN	NaN	NaN	NaN	NaN	NaN	NaN	NaN	NaN	NaN	NaN
2.528	5.041	85.7922	197.1413	0.053562	0.045964	0.01106	-30.173	-4.1621	126.258	0.23828	0.29712	0.11719	NaN	NaN	NaN	NaN	NaN	NaN	NaN	NaN	NaN	NaN	NaN	NaN
2.53	6.81	76.77516	188.1495	0.055538	0.03314	0.023328	-66.91963	41.638	150.452	0.23145	0.34619	0.10596	NaN	NaN	NaN	NaN	NaN	NaN	NaN	NaN	NaN	NaN	NaN	NaN
2.532	2.603	77.0198	183.1967	0.059195	0.033408	0.029693	-45.3147	34.6269	189.396	0.22412	0.41553	0.085938	NaN	NaN	NaN	NaN	NaN	NaN	NaN	NaN	NaN	NaN	NaN	NaN
2.534	5.545	84.0284	171.7832	0.063646	0.028827	0.037579	1.448	38.3085	237.1829	0.22852	0.4541	0.078613	NaN	NaN	NaN	NaN	NaN	NaN	NaN	NaN	NaN	NaN	NaN	NaN
2.536	-15.767	89.306	164.9573	0.062012	0.021973	0.046875	-30.1771	76.3277	295.258	0.23291	0.54688	0.043457	NaN	NaN	NaN	NaN	NaN	NaN	NaN	NaN	NaN	NaN	NaN	NaN
2.538	-19.814	82.4279	169.9681	0.065566	0.020761	0.054199	-0.702000000000002	64.056	352.586	0.23023	0.61719	0.018066	NaN	NaN	NaN	NaN	NaN	NaN	NaN	NaN	NaN	NaN	NaN	NaN
2.54	-43.0634	75.084	150.1627	0.067306	0.02475	0.058594	-6.646	115.474	378.3108	0.22266	0.69971	-0.0019531	NaN	NaN	NaN	NaN	NaN	NaN	NaN	NaN	NaN	NaN	NaN	NaN
2.542	-40.507	73.42	140.4435	0.067794	0.033486	0.056537	-33.0491	139.802	426.427	0.18945	0.81787	-0.047363	NaN	NaN	NaN	NaN	NaN	NaN	NaN	NaN	NaN	NaN	NaN	NaN
2.544	-53.9672	89.847	120.5795	0.068514	0.034062	0.0625	1.893	94.918	521.8019	0.16602	0.88525	-0.065918	NaN	NaN	NaN	NaN	NaN	NaN	NaN	NaN	NaN	NaN	NaN	NaN
2.546	-64.87	76.845	113.9064	0.064941	0.038574	0.063965	-23.5734	111.378	606.285	0.090332	1.022	-0.11865	NaN	NaN	NaN	NaN	NaN	NaN	NaN	NaN	NaN	NaN	NaN	NaN
2.548	-64.3921	73.1089	110.6125	0.063617	0.043795	0.060209	-9.436	90.2928	730.281	0.004639	1.1399	-0.14942	NaN	NaN	NaN	NaN	NaN	NaN	NaN	NaN	NaN	NaN	NaN	NaN
2.55	-49.482	58.49838	95.6791	0.061806	0.047094	0.059931	-0.988	60.1726	804.748	-0.10254	1.2446	-0.18799	NaN	NaN	NaN	NaN	NaN	NaN	NaN	NaN	NaN	NaN	NaN	NaN
2.552	-51.6375	59.9242	87.366	0.0625	0.050528	0.062862	-34.7097	77.7182	873.824	-0.26563	1.4038	-0.23291	NaN	NaN	NaN	NaN	NaN	NaN	NaN	NaN	NaN	NaN	NaN	NaN
2.554	-57.9153	58.4454	89.246	0.063711	0.050613	0.061375	-25.97	41.5571	963.3175	-0.34033	1.4829	-0.26172	NaN	NaN	NaN	NaN	NaN	NaN	NaN	NaN	NaN	NaN	NaN	NaN
2.556	-55.5112	59.8471	95.0329	0.066895	0.061035	0.061523	4.877	65.056	986.4281	-0.47412	1.6353	-0.3252	NaN	NaN	NaN	NaN	NaN	NaN	NaN	NaN	NaN	NaN	NaN	NaN
2.558	-48.9	63.1255	87.669	0.068518	0.066927	0.059854	3.857	81.81	1027.92344	-0.54321	1.7249	-0.35645	NaN	NaN	NaN	NaN	NaN	NaN	NaN	NaN	NaN	NaN	NaN	NaN
2.56	-64.352	67.7827	78.4432	0.073473	0.072201	0.056298	22.27	18.2384	1068.2515	-0.60498	1.7993	-0.37207	NaN	NaN	NaN	NaN	NaN	NaN	NaN	NaN	NaN	NaN	NaN	NaN
2.562	-65.9523	51.9685	68.8631	0.074934	0.084867	0.053163	-6.7491	19.8618	1073.717	-0.64453	1.8711	-0.3877	NaN	NaN	NaN	NaN	NaN	NaN	NaN	NaN	NaN	NaN	NaN	NaN
2.564	-47.838	51.304	76.63699	0.084115	0.091559	0.051055	-12.6576	-44.0638	1074.569	-0.64648	1.8945	-0.4043	NaN	NaN	NaN	NaN	NaN	NaN	NaN	NaN	NaN	NaN	NaN	NaN
2.566	-38.749	59.9286	76.631	0.081543	0.10254	0.047852	20.152	-65.36	1038.921	-0.61621	1.9238	-0.44531	NaN	NaN	NaN	NaN	NaN	NaN	NaN	NaN	NaN	NaN	NaN	NaN
2.568	-44.6309	55.202	76.4448	0.075491	0.11061	0.047248	-24.3113	-40.1873	965.994	-0.57325	1.9234	-0.46973	NaN	NaN	NaN	NaN	NaN	NaN	NaN	NaN	NaN	NaN	NaN	NaN
2.57	-31.036	44.3053	65.722038	0.070886	0.12172	0.045107	13.048	-80.427	935.456	-0.51563	1.8809	-0.48926	NaN	NaN	NaN	NaN	NaN	NaN	NaN	NaN	NaN	NaN	NaN	NaN
2.572	-11.005	38.82605	53.4433	0.070908	0.13108	0.040014	-1.557	-66.3599	867.2793	-0.40869	1.7563	-0.47607	NaN	NaN	NaN	NaN	NaN	NaN	NaN	NaN	NaN	NaN	NaN	NaN
2.574	-1.813	46.5915	48.2052	0.067878	0.14132	0.038378	-35.958	-51.5308	826.403	-0.35547	1.6802	-0.46533	NaN	NaN	NaN	NaN	NaN	NaN	NaN	NaN	NaN	NaN	NaN	NaN
2.576	-0.744999999999997	38.675	45.6376	0.069824	0.14648	0.032715	33.9778	-80.8586	816.689	-0.2373	1.5488	-0.42871	NaN	NaN	NaN	NaN	NaN	NaN	NaN	NaN	NaN	NaN	NaN	NaN
2.578	9.154	40.51753	55.0964	0.068848	0.15585	0.034276	-1.3661	-50.266	809.424	-0.15234	1.4551	-0.39941	NaN	NaN	NaN	NaN	NaN	NaN	NaN	NaN	NaN	NaN	NaN	NaN
2.58	14.694	36.9422	54.0922	0.067673	0.1662	0.030176	-20.8126	-81.5242	857.256	-0.11865	1.4263	-0.38916	NaN	NaN	NaN	NaN	NaN	NaN	NaN	NaN	NaN	NaN	NaN	NaN
2.582	-2.788	49.4896	38.5147	0.066118	0.17401	0.028615	-14.797	-97.301	852.745	-0.043945	1.375	-0.37842	NaN	NaN	NaN	NaN	NaN	NaN	NaN	NaN	NaN	NaN	NaN	NaN
2.584	4.458	41.505	49.5242	0.062693	0.18554	0.025294	-47.312	-92.23	862.643	0.022705	1.3438	-0.38232	NaN	NaN	NaN	NaN	NaN	NaN	NaN	NaN	NaN	NaN	NaN	NaN
2.586	-15.079	29.1247	62.3437	0.060547	0.19482	0.026855	-35.449	-110.187	914.5911	0.079102	1.311	-0.38037	NaN	NaN	NaN	NaN	NaN	NaN	NaN	NaN	NaN	NaN	NaN	NaN
2.588	-5.349	37.918	55.067	0.068263	0.20157	0.02158	-27.789	-100.974	929.9024	0.13135	1.2661	-0.37695	NaN	NaN	NaN	NaN	NaN	NaN	NaN	NaN	NaN	NaN	NaN	NaN
2.59	-24.208	40.111	45.3947	0.071483	0.21035	0.020216	-49.922	-115.446	958.3808	0.15869	1.3105	-0.41748	NaN	NaN	NaN	NaN	NaN	NaN	NaN	NaN	NaN	NaN	NaN	NaN
2.592	-14.572	37.99	37.9831	0.072658	0.21661	0.019042	-30.899	-162.963	973.9422	0.19482	1.3125	-0.44141	NaN	NaN	NaN	NaN	NaN	NaN	NaN	NaN	NaN	NaN	NaN	NaN
2.594	-31.131	31.003	34.248	0.079199	0.22519	0.014355	-55.5403	-171.2913	987.76	0.17773	1.249	-0.4231	NaN	NaN	NaN	NaN	NaN	NaN	NaN	NaN	NaN	NaN	NaN	NaN
2.596	-23.261	26.876	41.60061	0.085449	0.23047	0.010742	-30.018	-220.853	1041.349	0.13086	1.2036	-0.4165	NaN	NaN	NaN	NaN	NaN	NaN	NaN	NaN	NaN	NaN	NaN	NaN
2.598	-20.326	23.226	28.8168	0.093847	0.23623	0.0092773	-9.938	-241.185	1075.5565	0.045898	1.2422	-0.46094	NaN	NaN	NaN	NaN	NaN	NaN	NaN	NaN	NaN	NaN	NaN	NaN
2.6	-42.285	19.4	35.2395	0.099219	0.23594	0.0010741	-50.0588	-225.876	1116.2169	0.013184	1.2856	-0.51123	NaN	NaN	NaN	NaN	NaN	NaN	NaN	NaN	NaN	NaN	NaN	NaN
2.602	-55.9333	26.91	31.345	0.10117	0.23594	0.0030272	-13.413	-224.069	1134.2002	-0.04834	1.3755	-0.57813	NaN	NaN	NaN	NaN	NaN	NaN	NaN	NaN	NaN	NaN	NaN	NaN
2.604	-52.9421	32.3201	26.883	0.1084	0.23437	0.00068345	-15.376	-172.738	1150.805	-0.1062	1.4434	-0.60059	NaN	NaN	NaN	NaN	NaN	NaN	NaN	NaN	NaN	NaN	NaN	NaN
2.606	-53.5366	42.8161	41.565843	0.11426	0.22949	-0.0048828	-39.6713	-128.593	1188.636	-0.18262	1.5059	-0.61914	NaN	NaN	NaN	NaN	NaN	NaN	NaN	NaN	NaN	NaN	NaN	NaN
2.608	-71.4366	33.2989	39.5537	0.12246	0.22305	-0.0043945	-28.957	-105.705	1216.668	-0.2749	1.5845	-0.65381	NaN	NaN	NaN	NaN	NaN	NaN	NaN	NaN	NaN	NaN	NaN	NaN
2.61	-55.88211	27.8962	60.1765	0.13213	0.21592	-0.0019532	-34.004	-71.431	1222.3405	-0.31787	1.6235	-0.67334	NaN	NaN	NaN	NaN	NaN	NaN	NaN	NaN	NaN	NaN	NaN	NaN
2.612	-39.843	22.4725	47.687	0.13877	0.2085	-0.0011718	-50.574	-83.132	1230.1449	-0.38867	1.709	-0.70703	NaN	NaN	NaN	NaN	NaN	NaN	NaN	NaN	NaN	NaN	NaN	NaN
2.614	-77.4214	12.9595	57.0587	0.14199	0.19892	-0.0027344	-26.152	-92.347	1247.7803	-0.43652	1.7769	-0.72901	NaN	NaN	NaN	NaN	NaN	NaN	NaN	NaN	NaN	NaN	NaN	NaN
2.616	-50.175	7.2808	54.937	0.15234	0.19775	-0.0019531	-46.98	-98.658	1248.7239	-0.47656	1.8481	-0.73779	NaN	NaN	NaN	NaN	NaN	NaN	NaN	NaN	NaN	NaN	NaN	NaN
2.618	-13.523	-4.02076	55.5003	0.15664	0.19219	-0.0049805	-38.928	-126.8	1272.873	-0.5293	1.9219	-0.7627	NaN	NaN	NaN	NaN	NaN	NaN	NaN	NaN	NaN	NaN	NaN	NaN
2.62	-22.041	9.421	49.1054	0.15957	0.19737	-0.00039063	-2.528	-107.646	1256.2108	-0.5498	1.9609	-0.76953	NaN	NaN	NaN	NaN	NaN	NaN	NaN	NaN	NaN	NaN	NaN	NaN
2.622	-36.5752	5.04059	57.2336	0.15293	0.19971	0.003125	-58.0163	-119.11	1264.8436	-0.5791	2.0117	-0.78906	NaN	NaN	NaN	NaN	NaN	NaN	NaN	NaN	NaN	NaN	NaN	NaN
2.624	-21.892	-11.0434	64.176	0.14551	0.2042	0.00097656	-21.16	-143.8113	1311.592	-0.59253	2.0413	-0.80395	NaN	NaN	NaN	NaN	NaN	NaN	NaN	NaN	NaN	NaN	NaN	NaN
2.626	-0.451999999999998	-25.2151	83.219	0.13623	0.2085	0.0053711	-28.211	-131.1582	1320.4517	-0.59326	2.0649	-0.81104	NaN	NaN	NaN	NaN	NaN	NaN	NaN	NaN	NaN	NaN	NaN	NaN
2.628	-3.608	-15.57459	106.564474	0.12627	0.22324	0.0099608	-54.0428	-148.217	1358.144	-0.59229	2.0962	-0.82178	NaN	NaN	NaN	NaN	NaN	NaN	NaN	NaN	NaN	NaN	NaN	NaN
2.63	6.814	-23.872011	115.0789	0.11592	0.23057	0.011035	1.454	-150.301	1391.395	-0.60254	2.1016	-0.82227	NaN	NaN	NaN	NaN	NaN	NaN	NaN	NaN	NaN	NaN	NaN	NaN
2.632	-4.699	-13.9135	140.9979	0.10771	0.24228	0.013379	-64.0199	-145.87	1402.988	-0.62646	2.1255	-0.81885	NaN	NaN	NaN	NaN	NaN	NaN	NaN	NaN	NaN	NaN	NaN	NaN
2.634	2.187	11.73403	147.8675	0.099998	0.25772	0.014062	-48.532	-139.675	1427.914	-0.65894	2.1458	-0.82007	NaN	NaN	NaN	NaN	NaN	NaN	NaN	NaN	NaN	NaN	NaN	NaN
2.636	-12.121	42.078	166.4696	0.090332	0.27881	0.0097656	-40.661	-84.766	1420.303	-0.70068	2.1685	-0.81982	NaN	NaN	NaN	NaN	NaN	NaN	NaN	NaN	NaN	NaN	NaN	NaN
2.638	5.413	63.289	211.5085	0.079004	0.30254	0.012598	-75.8652	-58.597	1417.5024	-0.75	2.1914	-0.8252	NaN	NaN	NaN	NaN	NaN	NaN	NaN	NaN	NaN	NaN	NaN	NaN
2.64	9.982	76.8548	269.7862	0.068653	0.32237	-0.00039063	-22.038	-55.3199	1429.654	-0.77344	2.2012	-0.82422	NaN	NaN	NaN	NaN	NaN	NaN	NaN	NaN	NaN	NaN	NaN	NaN
2.642	9.948	92.0401	331.7513	0.054981	0.34853	-0.010156	-45.744	-58.247	1438.6632	-0.80957	2.2188	-0.83398	NaN	NaN	NaN	NaN	NaN	NaN	NaN	NaN	NaN	NaN	NaN	NaN
2.644	-7.11	112.269	405.601	0.037793	0.38193	-0.030566	-67.419	-70.9271	1434.009	-0.81763	2.2454	-0.84204	NaN	NaN	NaN	NaN	NaN	NaN	NaN	NaN	NaN	NaN	NaN	NaN
2.646	-21.357	108.2606	500.824	0.01416	0.42529	-0.054688	-31.69	-67.5334	1427.322	-0.82178	2.2524	-0.84717	NaN	NaN	NaN	NaN	NaN	NaN	NaN	NaN	NaN	NaN	NaN	NaN
2.648	-31.987	121.1837	611.607	-0.01377	0.47842	-0.082422	-49.338	-50.7848	1414.578	-0.84961	2.2461	-0.83594	NaN	NaN	NaN	NaN	NaN	NaN	NaN	NaN	NaN	NaN	NaN	NaN
2.65	-27.059	110.506	722.798	-0.056152	0.53955	-0.11611	-46.356	-58.5461	1427.349	-0.8667	2.2466	-0.83057	NaN	NaN	NaN	NaN	NaN	NaN	NaN	NaN	NaN	NaN	NaN	NaN
2.652	-42.742	92.592	809.1787	-0.11592	0.61728	-0.14385	-36.097	-53.517	1435.234	-0.90234	2.209	-0.81445	NaN	NaN	NaN	NaN	NaN	NaN	NaN	NaN	NaN	NaN	NaN	NaN
2.654	-89.6504	64.987	880.20364	-0.20273	0.70576	-0.18096	-67.1604	-62.3492	1442.333	-0.92456	2.1838	-0.80835	NaN	NaN	NaN	NaN	NaN	NaN	NaN	NaN	NaN	NaN	NaN	NaN
2.656	-98.2885	40.025	926.4845	-0.30078	0.81055	-0.21924	-45.778	-62.5684	1466.179	-0.92969	2.1465	-0.7998	NaN	NaN	NaN	NaN	NaN	NaN	NaN	NaN	NaN	NaN	NaN	NaN
2.658	-101.5908	29.267	945.5504	-0.41787	0.93174	-0.25293	-52.9032	-30.6518	1498.2642	-0.93555	2.0996	-0.78711	NaN	NaN	NaN	NaN	NaN	NaN	NaN	NaN	NaN	NaN	NaN	NaN
2.66	-119.0874	24.3528	958.9629	-0.55234	1.0715	-0.26553	-51.9945	-30.371	1534.189	-0.93164	2.0762	-0.78711	NaN	NaN	NaN	NaN	NaN	NaN	NaN	NaN	NaN	NaN	NaN	NaN
2.662	-103.842	-2.50932	940.925	-0.69844	1.2215	-0.27138	-8.113	-38.1647	1531.449	-0.91699	2.0391	-0.7832	NaN	NaN	NaN	NaN	NaN	NaN	NaN	NaN	NaN	NaN	NaN	NaN
2.664	-65.266	-31.2717	911.318	-0.85332	1.3662	-0.27197	-53.665	-18.5748	1513.33402	-0.90722	2.0185	-0.77441	NaN	NaN	NaN	NaN	NaN	NaN	NaN	NaN	NaN	NaN	NaN	NaN
2.666	-16.8539	-41.1629	871.996	-0.99561	1.4868	-0.29736	-36.536	-25.0141	1510.50234	-0.89941	1.998	-0.7793	NaN	NaN	NaN	NaN	NaN	NaN	NaN	NaN	NaN	NaN	NaN	NaN
2.668	-31.186	-33.326	866.476	-1.0926	1.5614	-0.325	-19.125	-8.762	1505.909	-0.89795	1.9731	-0.77588	NaN	NaN	NaN	NaN	NaN	NaN	NaN	NaN	NaN	NaN	NaN	NaN
2.67	-8.859	-18.66	859.352	-1.1355	1.5988	-0.35166	-49.1902	-9.0561	1491.519	-0.89648	1.959	-0.7793	NaN	NaN	NaN	NaN	NaN	NaN	NaN	NaN	NaN	NaN	NaN	NaN
2.672	3.086	-12.255	841.123	-1.1164	1.589	-0.37939	-13.255	0.5462	1501.7963	-0.88037	1.9263	-0.771	NaN	NaN	NaN	NaN	NaN	NaN	NaN	NaN	NaN	NaN	NaN	NaN
2.674	9.936	14.016	817.5512	-1.0496	1.5469	-0.39336	-31.302	31.461	1483.444	-0.86962	1.8999	-0.76611	NaN	NaN	NaN	NaN	NaN	NaN	NaN	NaN	NaN	NaN	NaN	NaN
2.676	29.4933	19.2778	792.734	-0.94922	1.4766	-0.39502	-52.6624	39.792	1479.658	-0.8457	1.877	-0.76172	NaN	NaN	NaN	NaN	NaN	NaN	NaN	NaN	NaN	NaN	NaN	NaN
2.678	18.161	16.5	812.3322	-0.82051	1.39	-0.4	-2.78	50.661	1470.9888	-0.81396	1.8325	-0.75439	NaN	NaN	NaN	NaN	NaN	NaN	NaN	NaN	NaN	NaN	NaN	NaN
2.68	26.6101	29.127	815.8586	-0.69277	1.2906	-0.39805	-53.344	84.79	1443.1851	-0.8042	1.8188	-0.75342	NaN	NaN	NaN	NaN	NaN	NaN	NaN	NaN	NaN	NaN	NaN	NaN
2.682	-16.862	38.697	809.9015	-0.58496	1.1922	-0.38594	-26.359	75.271	1450.057	-0.77686	1.7817	-0.74756	NaN	NaN	NaN	NaN	NaN	NaN	NaN	NaN	NaN	NaN	NaN	NaN
2.684	-6.532	16.293	798.3952	-0.52412	1.1083	-0.36768	-0.539999999999999	78.343	1430.6405	-0.75806	1.7561	-0.73999	NaN	NaN	NaN	NaN	NaN	NaN	NaN	NaN	NaN	NaN	NaN	NaN
2.686	-10.657	-42.623	795.942	-0.48047	1.0571	-0.34912	-52.8472	65.9494	1403.7481	-0.73096	1.7271	-0.73584	NaN	NaN	NaN	NaN	NaN	NaN	NaN	NaN	NaN	NaN	NaN	NaN
2.688	5.38	-88.1156	809.078	-0.41963	1.0306	-0.34854	-16.115	49.2659	1407.9737	-0.7002	1.689	-0.72803	NaN	NaN	NaN	NaN	NaN	NaN	NaN	NaN	NaN	NaN	NaN	NaN
2.69	24.361	-94.438	836.893	-0.3541	0.99454	-0.34297	-21.136	67.9283	1380.1017	-0.68506	1.6704	-0.72021	NaN	NaN	NaN	NaN	NaN	NaN	NaN	NaN	NaN	NaN	NaN	NaN
2.692	34.895	-116.039	874.8371	-0.28496	0.9457	-0.33633	-24.445	68.903	1356.7829	-0.64893	1.6255	-0.70947	NaN	NaN	NaN	NaN	NaN	NaN	NaN	NaN	NaN	NaN	NaN	NaN
2.694	43.985	-122.305	893.0647	-0.22959	0.88877	-0.31279	-4.898	58.4284	1350.7265	-0.62012	1.584	-0.70313	NaN	NaN	NaN	NaN	NaN	NaN	NaN	NaN	NaN	NaN	NaN	NaN
2.696	9.738	-145.34	911.9165	-0.18066	0.8457	-0.29932	-50.6811	84.8407	1327.9482	-0.59229	1.5454	-0.68896	NaN	NaN	NaN	NaN	NaN	NaN	NaN	NaN	NaN	NaN	NaN	NaN
2.698	-18.838	-152.844	922.0337	-0.15078	0.82832	-0.29531	-26.376	68.7217	1325.654	-0.55078	1.4883	-0.67969	NaN	NaN	NaN	NaN	NaN	NaN	NaN	NaN	NaN	NaN	NaN	NaN
2.7	-42.346	-152.995	936.9111	-0.13819	0.83819	-0.29385	-15.244	93.668	1294.78358	-0.53271	1.4634	-0.67334	NaN	NaN	NaN	NaN	NaN	NaN	NaN	NaN	NaN	NaN	NaN	NaN
2.702	-78.346	-136.607	979.197	-0.1499	0.85068	-0.29073	-56.7917	111.0337	1263.4271	-0.50195	1.4199	-0.66113	NaN	NaN	NaN	NaN	NaN	NaN	NaN	NaN	NaN	NaN	NaN	NaN
2.704	-100.4126	-113.1646	990.894	-0.15976	0.95937	-0.35928	-19.649	117.1213	1258.2	-0.47876	1.3889	-0.65112	NaN	NaN	NaN	NaN	NaN	NaN	NaN	NaN	NaN	NaN	NaN	NaN
2.706	-141.067	-99.044	1005.54973	-0.18311	1.0386	-0.37842	-20.896	152.236	1218.06	-0.45703	1.3594	-0.63965	NaN	NaN	NaN	NaN	NaN	NaN	NaN	NaN	NaN	NaN	NaN	NaN
2.708	-136.233	-83.574	982.189	-0.2498	1.0623	-0.36797	-41.6883	159.402	1184.502	-0.4375	1.3262	-0.62695	NaN	NaN	NaN	NaN	NaN	NaN	NaN	NaN	NaN	NaN	NaN	NaN
2.71	-132.384	-88.321	1002.066	-0.32978	1.0919	-0.36416	-13.061	151.826	1189.4927	-0.42871	1.3066	-0.62012	NaN	NaN	NaN	NaN	NaN	NaN	NaN	NaN	NaN	NaN	NaN	NaN
2.712	-106.1085	-74.843	1013.038	-0.39737	1.1591	-0.40674	-21.164	171.276	1161.4522	-0.40527	1.2598	-0.60938	NaN	NaN	NaN	NaN	NaN	NaN	NaN	NaN	NaN	NaN	NaN	NaN
2.714	-108.15347	-80.817	1042.622	-0.42637	1.2356	-0.47676	2.198	140.4159	1140.946	-0.38404	1.2303	-0.59741	NaN	NaN	NaN	NaN	NaN	NaN	NaN	NaN	NaN	NaN	NaN	NaN
2.716	-106.837	-84.4109	1058.143	-0.43652	1.2988	-0.51953	-3.908	156.639	1093.9936	-0.3623	1.1899	-0.58447	NaN	NaN	NaN	NaN	NaN	NaN	NaN	NaN	NaN	NaN	NaN	NaN
2.718	-110.423	-94.2416	1069.6748	-0.45205	1.3563	-0.53389	-46.5259	174.3117	1058.272	-0.32959	1.1372	-0.56592	NaN	NaN	NaN	NaN	NaN	NaN	NaN	NaN	NaN	NaN	NaN	NaN
2.72	-117.056	-100.6917	1094.5686	-0.4792	1.4126	-0.54541	12.808	152.812	1054.59825	-0.31103	1.0923	-0.55273	NaN	NaN	NaN	NaN	NaN	NaN	NaN	NaN	NaN	NaN	NaN	NaN
2.722	-96.7701	-120.47	1118.7555	-0.52373	1.4755	-0.56142	-7.571	176.3375	1023.734	-0.28906	1.0527	-0.53906	NaN	NaN	NaN	NaN	NaN	NaN	NaN	NaN	NaN	NaN	NaN	NaN
2.724	-95.5968	-144.292	1140.2208	-0.56739	1.5244	-0.5794	-18.977	179.37	994.09782	-0.27197	1.0039	-0.51367	NaN	NaN	NaN	NaN	NaN	NaN	NaN	NaN	NaN	NaN	NaN	NaN
2.726	-89.865	-148.188	1134.2513	-0.60449	1.5742	-0.59766	14.145	160.6087	992.8545	-0.26074	0.97852	-0.50391	NaN	NaN	NaN	NaN	NaN	NaN	NaN	NaN	NaN	NaN	NaN	NaN
2.728	-98.0222	-131.1586	1157.4923	-0.63271	1.6141	-0.61904	-10.8293	190.5602	963.0106	-0.24609	0.92773	-0.48438	NaN	NaN	NaN	NaN	NaN	NaN	NaN	NaN	NaN	NaN	NaN	NaN
2.73	-72.279	-134.386	1161.0768	-0.6457	1.6433	-0.63321	5.538	172.1636	943.022	-0.23511	0.89722	-0.47193	NaN	NaN	NaN	NaN	NaN	NaN	NaN	NaN	NaN	NaN	NaN	NaN
2.732	-42.568	-142.5506	1195.559	-0.64297	1.6688	-0.64922	13.057	196.59	911.561	-0.21826	0.85791	-0.46143	NaN	NaN	NaN	NaN	NaN	NaN	NaN	NaN	NaN	NaN	NaN	NaN
2.734	-8.046	-148.517	1207.015	-0.63535	1.6896	-0.66738	-16.252	211.6354	859.8387	-0.19873	0.81104	-0.43994	NaN	NaN	NaN	NaN	NaN	NaN	NaN	NaN	NaN	NaN	NaN	NaN
2.736	4.643	-128.4618	1202.1468	-0.63477	1.7051	-0.67578	37.43	180.693	847.38578	-0.18799	0.78809	-0.43555	NaN	NaN	NaN	NaN	NaN	NaN	NaN	NaN	NaN	NaN	NaN	NaN
2.738	8.64400000000001	-110.397	1201.605	-0.65439	1.7202	-0.68271	9.998	215.9438	794.844	-0.16846	0.74463	-0.40479	NaN	NaN	NaN	NaN	NaN	NaN	NaN	NaN	NaN	NaN	NaN	NaN
2.74	11.651	-82.588	1211.43	-0.67998	1.7395	-0.69365	-15.020046	198.5368	757.903	-0.15503	0.698	-0.39087	NaN	NaN	NaN	NaN	NaN	NaN	NaN	NaN	NaN	NaN	NaN	NaN
2.742	-11.276	-73.6112	1229.21	-0.70381	1.7611	-0.7085	35.023	188.2534	747.6649	-0.14404	0.66406	-0.37695	NaN	NaN	NaN	NaN	NaN	NaN	NaN	NaN	NaN	NaN	NaN	NaN
2.744	-15.324	-57.227	1239.3037	-0.72754	1.7832	-0.72304	-8.8582	228.29	697.381	-0.1333	0.61572	-0.35107	NaN	NaN	NaN	NaN	NaN	NaN	NaN	NaN	NaN	NaN	NaN	NaN
2.746	-20.217	-57.344	1246.811	-0.74951	1.7993	-0.72803	1.987	186.747	664.64229	-0.12549	0.5957	-0.34766	NaN	NaN	NaN	NaN	NaN	NaN	NaN	NaN	NaN	NaN	NaN	NaN
2.748	-29.913	-63.724	1266.6699	-0.77725	1.8196	-0.7292	14.347	206.994	622.735	-0.1123	0.54395	-0.32373	NaN	NaN	NaN	NaN	NaN	NaN	NaN	NaN	NaN	NaN	NaN	NaN
2.75	-61.85	-66.933	1277.385	-0.81397	1.8283	-0.72725	-19.4307	222.467	587.413	-0.10352	0.50659	-0.3059	NaN	NaN	NaN	NaN	NaN	NaN	NaN	NaN	NaN	NaN	NaN	NaN
2.752	-92.8611	-54.03	1306.3226	-0.84717	1.8451	-0.7292	15.872	189.7257	572.889	-0.092285	0.47021	-0.28906	NaN	NaN	NaN	NaN	NaN	NaN	NaN	NaN	NaN	NaN	NaN	NaN
2.754	-81.759	-53.644	1306.601	-0.87344	1.8604	-0.73076	-17.082	225.894	531.276	-0.075684	0.42041	-0.26953	NaN	NaN	NaN	NaN	NaN	NaN	NaN	NaN	NaN	NaN	NaN	NaN
2.756	-98.9511	-76.051	1326.3652	-0.90186	1.8716	-0.72705	-6.6719	198.8826	514.3134	-0.063965	0.38916	-0.25537	NaN	NaN	NaN	NaN	NaN	NaN	NaN	NaN	NaN	NaN	NaN	NaN
2.758	-96.06	-92.242	1335.2158	-0.91621	1.8851	-0.73633	14.538	173.986	493.7433	-0.050781	0.3374	-0.23389	NaN	NaN	NaN	NaN	NaN	NaN	NaN	NaN	NaN	NaN	NaN	NaN
2.76	-122.7755	-102.745	1349.0691	-0.93682	1.8813	-0.72881	-14.697	205.484	457.5753	-0.039795	0.29419	-0.21875	NaN	NaN	NaN	NaN	NaN	NaN	NaN	NaN	NaN	NaN	NaN	NaN
2.762	-127.778	-99.056	1359.2068	-0.95088	1.8735	-0.72412	-10.486	160.1096	420.4338	-0.025391	0.25537	-0.20996	NaN	NaN	NaN	NaN	NaN	NaN	NaN	NaN	NaN	NaN	NaN	NaN
2.764	-128.667	-72.921	1374.4362	-0.975	1.8641	-0.71601	-2.693	171.036	387.0443	-0.01123	0.20605	-0.18457	NaN	NaN	NaN	NaN	NaN	NaN	NaN	NaN	NaN	NaN	NaN	NaN
2.766	-138.871	-53.611	1389.218	-1.0059	1.8477	-0.69531	-42.0481	176.8251	363.9176	-0.0039063	0.17969	-0.17725	NaN	NaN	NaN	NaN	NaN	NaN	NaN	NaN	NaN	NaN	NaN	NaN
2.768	-140.22	-52.5689	1390.9392	-1.0367	1.8379	-0.68457	-9.851	120.2519	359.1792	0.0058594	0.13086	-0.15674	NaN	NaN	NaN	NaN	NaN	NaN	NaN	NaN	NaN	NaN	NaN	NaN
2.77	-144.845	-52.6695	1395.2931	-1.0605	1.8251	-0.67314	-14.349	156.217	312.034	0.015136	0.090334	-0.14283	NaN	NaN	NaN	NaN	NaN	NaN	NaN	NaN	NaN	NaN	NaN	NaN
2.772	-131.156	-20.431	1378.386	-1.0737	1.8142	-0.67002	-22.1989	126.6671	307.756416	0.022461	0.053711	-0.12695	NaN	NaN	NaN	NaN	NaN	NaN	NaN	NaN	NaN	NaN	NaN	NaN
2.774	-122.824	13.642	1380.4574	-1.082	1.7988	-0.66602	-1.27800000000001	115.188	297.18	0.03418	0.00048828	-0.10693	NaN	NaN	NaN	NaN	NaN	NaN	NaN	NaN	NaN	NaN	NaN	NaN
2.776	-111.347	28.7444	1386.2207	-1.082	1.7891	-0.66016	-32.3855	164.18	270.3161	0.039551	-0.022461	-0.096191	NaN	NaN	NaN	NaN	NaN	NaN	NaN	NaN	NaN	NaN	NaN	NaN
2.778	-99.4613	30.5443	1380.53471	-1.0865	1.7871	-0.66211	0.0689999999999955	112.32219	247.321	0.044434	-0.071777	-0.07959	NaN	NaN	NaN	NaN	NaN	NaN	NaN	NaN	NaN	NaN	NaN	NaN
2.78	-80.026	21.946	1375.4393	-1.0863	1.7851	-0.65996	-6.202	121.5184	208.3942	0.053467	-0.1023	-0.068115	NaN	NaN	NaN	NaN	NaN	NaN	NaN	NaN	NaN	NaN	NaN	NaN
2.782	-44.904	10.8782	1376.4118	-1.093	1.7801	-0.65254	-31.0983	125.3253	181.3609	0.06543	-0.125	-0.055176	NaN	NaN	NaN	NaN	NaN	NaN	NaN	NaN	NaN	NaN	NaN	NaN
2.784	-22.637	-0.187899999999999	1382.40781	-1.1012	1.7764	-0.6501	8.185	65.693	195.03	0.06543	-0.15479	-0.044434	NaN	NaN	NaN	NaN	NaN	NaN	NaN	NaN	NaN	NaN	NaN	NaN
2.786	-0.796999999999997	9.6431	1395.433	-1.1069	1.7681	-0.646	-19.539	107.8608	165.4214	0.070313	-0.17139	-0.033203	NaN	NaN	NaN	NaN	NaN	NaN	NaN	NaN	NaN	NaN	NaN	NaN
2.788	-1.96700000000001	12.8883	1403.398	-1.1111	1.7647	-0.63965	-11.357	89.3531	144.5687	0.074707	-0.19482	-0.019043	NaN	NaN	NaN	NaN	NaN	NaN	NaN	NaN	NaN	NaN	NaN	NaN
2.79	-14.376	16.5619	1387.203	-1.1077	1.7575	-0.6335	9.463	70.602	138.5499	0.076416	-0.21656	0.0012207	NaN	NaN	NaN	NaN	NaN	NaN	NaN	NaN	NaN	NaN	NaN	NaN
2.792	-1.947	0.1906	1368.96904	-1.0968	1.7528	-0.63467	-26.0466	90.4639	105.6897	0.079102	-0.2207	0.0048828	NaN	NaN	NaN	NaN	NaN	NaN	NaN	NaN	NaN	NaN	NaN	NaN
2.794	1.321	-6.8584	1363.4592	-1.0833	1.7433	-0.62666	-15.78	31.77	117.933	0.073242	-0.23389	0.012207	NaN	NaN	NaN	NaN	NaN	NaN	NaN	NaN	NaN	NaN	NaN	NaN
2.796	-17.584	0.6125	1345.9161	-1.0659	1.729	-0.62451	-22.169	56.1682	96.8713	0.074219	-0.23242	0.015625	NaN	NaN	NaN	NaN	NaN	NaN	NaN	NaN	NaN	NaN	NaN	NaN
2.798	-38.585	14.7394	1351.026	-1.0412	1.7189	-0.62159	-23.676	72.8757	75.984	0.070313	-0.23926	0.029785	NaN	NaN	NaN	NaN	NaN	NaN	NaN	NaN	NaN	NaN	NaN	NaN
2.8	-27.883	32.391	1318.7779	-1.0164	1.7067	-0.62032	-8.954	6.289	100.0943	0.064453	-0.24194	0.038086	NaN	NaN	NaN	NaN	NaN	NaN	NaN	NaN	NaN	NaN	NaN	NaN
2.802	-48.817	35.72681	1302.1531	-0.99571	1.6907	-0.61914	-29.669	60.0008	79.0164	0.058594	-0.24365	0.043457	NaN	NaN	NaN	NaN	NaN	NaN	NaN	NaN	NaN	NaN	NaN	NaN
2.804	-42.261	54.5883	1278.677	-0.97168	1.6697	-0.61758	-26.948	42.487	71.45482	0.046875	-0.24121	0.048828	NaN	NaN	NaN	NaN	NaN	NaN	NaN	NaN	NaN	NaN	NaN	NaN
2.806	-60.821	60.1246	1284.9737	-0.94482	1.6489	-0.6167	-13.179	32.6683	53.7174	0.036621	-0.23047	0.052734	NaN	NaN	NaN	NaN	NaN	NaN	NaN	NaN	NaN	NaN	NaN	NaN
2.808	-53.03	74.6082	1271.8915	-0.91806	1.6276	-0.60772	-24.9486	84.2681	49.112	0.0063477	-0.19189	0.057129	NaN	NaN	NaN	NaN	NaN	NaN	NaN	NaN	NaN	NaN	NaN	NaN
2.81	-81.8171	85.281	1254.3191	-0.89727	1.6024	-0.60723	-29.566	22.22	59.6216	-0.010254	-0.16919	0.057617	NaN	NaN	NaN	NaN	NaN	NaN	NaN	NaN	NaN	NaN	NaN	NaN
2.812	-106.8186	98.296	1244.4499	-0.87266	1.5808	-0.60215	-28.416	44.0626	49.3758	-0.03418	-0.12988	0.053223	NaN	NaN	NaN	NaN	NaN	NaN	NaN	NaN	NaN	NaN	NaN	NaN
2.814	-127.915	80.3074	1221.4	-0.84941	1.549	-0.59853	-30.719	64.2309	31.388	-0.067383	-0.082031	0.056641	NaN	NaN	NaN	NaN	NaN	NaN	NaN	NaN	NaN	NaN	NaN	NaN
2.816	-126.0183	60.75706	1214.5304	-0.82227	1.5195	-0.58496	-18.612	7.0346	20.4769	-0.07959	-0.053223	0.058105	NaN	NaN	NaN	NaN	NaN	NaN	NaN	NaN	NaN	NaN	NaN	NaN
2.818	-126.927	69.8151	1196.673	-0.80185	1.4925	-0.58125	-26.181	44.8819	29.6816	-0.12744	0.012207	0.047363	NaN	NaN	NaN	NaN	NaN	NaN	NaN	NaN	NaN	NaN	NaN	NaN
2.82	-144.566	71.0114	1175.0178	-0.77959	1.4696	-0.57822	-51.2148	26.1714	29.1311	-0.15601	0.062012	0.034668	NaN	NaN	NaN	NaN	NaN	NaN	NaN	NaN	NaN	NaN	NaN	NaN
2.822	-135.474	65.4841	1161.8329	-0.75655	1.4442	-0.56611	-20.982	11.9942	22.9587	-0.18262	0.10742	0.032715	NaN	NaN	NaN	NaN	NaN	NaN	NaN	NaN	NaN	NaN	NaN	NaN
2.824	-127.901	62.536	1152.4923	-0.73516	1.418	-0.56231	-29.1389	66.998	11.473	-0.20996	0.16602	0.03125	NaN	NaN	NaN	NaN	NaN	NaN	NaN	NaN	NaN	NaN	NaN	NaN
2.826	-99.84899	70.528	1135.8467	-0.71094	1.3867	-0.55078	-24.576	11.7286	34.0533	-0.22217	0.19141	0.028809	NaN	NaN	NaN	NaN	NaN	NaN	NaN	NaN	NaN	NaN	NaN	NaN
2.828	-85.0543	70.95	1121.3313	-0.69697	1.362	-0.54737	-30.019	21.63	36.5787	-0.25439	0.23877	0.02002	NaN	NaN	NaN	NaN	NaN	NaN	NaN	NaN	NaN	NaN	NaN	NaN
2.83	-51.445	66.859	1105.3767	-0.67695	1.3371	-0.54141	-33.184	48.5664	24.0486	-0.27539	0.26831	0.011963	NaN	NaN	NaN	NaN	NaN	NaN	NaN	NaN	NaN	NaN	NaN	NaN
2.832	-40.405	82.897	1091.3047	-0.6582	1.3121	-0.53555	-8.944	-6.72602	25.3004	-0.29297	0.2959	-0.00097656	NaN	NaN	NaN	NaN	NaN	NaN	NaN	NaN	NaN	NaN	NaN	NaN
2.834	-38.688	107.7673	1064.4362	-0.64356	1.2881	-0.52031	-22.672	50.025	22.89	-0.30225	0.31934	-0.0083008	NaN	NaN	NaN	NaN	NaN	NaN	NaN	NaN	NaN	NaN	NaN	NaN
2.836	-27.189	118.932	1049.0298	-0.62646	1.2661	-0.51318	-17.656	32.8273	44.1479	-0.30273	0.3291	-0.0087891	NaN	NaN	NaN	NaN	NaN	NaN	NaN	NaN	NaN	NaN	NaN	NaN
2.838	-25.211	114.329	1018.9439	-0.61084	1.2385	-0.5082	1.035	-2.1705	40.7139	-0.30225	0.34229	-0.015137	NaN	NaN	NaN	NaN	NaN	NaN	NaN	NaN	NaN	NaN	NaN	NaN
2.84	-1.806	125.142	990.4023	-0.59532	1.2125	-0.49424	-24.493	64.214	21.514	-0.30786	0.34985	-0.018799	NaN	NaN	NaN	NaN	NaN	NaN	NaN	NaN	NaN	NaN	NaN	NaN
2.842	-2.551	131.224	960.1737	-0.58047	1.1875	-0.4833	-4.319	12.1067	31.87711	-0.30518	0.3501	-0.023926	NaN	NaN	NaN	NaN	NaN	NaN	NaN	NaN	NaN	NaN	NaN	NaN
2.844	-8.049	135.244	938.278	-0.56328	1.1684	-0.4711	-20.89	34.606	39.7737	-0.30322	0.33447	-0.031738	NaN	NaN	NaN	NaN	NaN	NaN	NaN	NaN	NaN	NaN	NaN	NaN
2.846	17.528	128.719	922.83	-0.54541	1.145	-0.46582	-35.0523	58.071	20.8702	-0.29932	0.32764	-0.030273	NaN	NaN	NaN	NaN	NaN	NaN	NaN	NaN	NaN	NaN	NaN	NaN
2.848	22.718	117.2571	909.5015	-0.52891	1.1188	-0.4544	10.206	-4.8566	28.2013	-0.28613	0.30273	-0.030273	NaN	NaN	NaN	NaN	NaN	NaN	NaN	NaN	NaN	NaN	NaN	NaN
2.85	24.664	112.178	877.6318	-0.5128	1.0958	-0.44697	-27.3887	56.56	12.1327	-0.27124	0.27587	-0.029785	NaN	NaN	NaN	NaN	NaN	NaN	NaN	NaN	NaN	NaN	NaN	NaN
2.852	10.114	102.9011	872.8061	-0.49717	1.0645	-0.43916	-24.839	27.215	26.8055	-0.25537	0.25732	-0.029297	NaN	NaN	NaN	NaN	NaN	NaN	NaN	NaN	NaN	NaN	NaN	NaN
2.854	16.812	105.3952	846.7453	-0.47774	1.0323	-0.42793	-6.94	5.7405	34.3835	-0.23047	0.22803	-0.026855	NaN	NaN	NaN	NaN	NaN	NaN	NaN	NaN	NaN	NaN	NaN	NaN
2.856	-9.702	115.7576	828.3969	-0.4585	1.0054	-0.4209	-36.073	61.417	19.4346	-0.2085	0.20947	-0.027344	NaN	NaN	NaN	NaN	NaN	NaN	NaN	NaN	NaN	NaN	NaN	NaN
2.858	-45.465	135.7668	809.9226	-0.43672	0.97627	-0.40947	-18.295	23.08105	28.937	-0.18896	0.18408	-0.027344	NaN	NaN	NaN	NaN	NaN	NaN	NaN	NaN	NaN	NaN	NaN	NaN
2.86	-56.544	124.8769	795.6037	-0.41524	0.93945	-0.40254	-15.336	40.327	31.9808	-0.1582	0.14795	-0.020508	NaN	NaN	NaN	NaN	NaN	NaN	NaN	NaN	NaN	NaN	NaN	NaN
2.862	-69.8012	128.2957	768.34468	-0.39258	0.90586	-0.39473	-29.617	64.7822	34.397	-0.14307	0.12988	-0.019531	NaN	NaN	NaN	NaN	NaN	NaN	NaN	NaN	NaN	NaN	NaN	NaN
2.864	-76.526	131.8796	742.6796	-0.37187	0.87275	-0.38662	-21.863	-3.6615	46.013	-0.11865	0.09082	-0.013672	NaN	NaN	NaN	NaN	NaN	NaN	NaN	NaN	NaN	NaN	NaN	NaN
2.866	-100.1506	146.2739	713.084	-0.34521	0.83447	-0.37451	-35.6979	42.645	32.3646	-0.090332	0.059814	-0.0075684	NaN	NaN	NaN	NaN	NaN	NaN	NaN	NaN	NaN	NaN	NaN	NaN
2.868	-87.6288	148.8415	685.438	-0.32725	0.79971	-0.36338	-37.8168	15.065	31.7857	-0.065918	0.030762	-0.0068359	NaN	NaN	NaN	NaN	NaN	NaN	NaN	NaN	NaN	NaN	NaN	NaN
2.87	-84.2357	149.44634	658.731	-0.30547	0.76211	-0.35547	-34.165	-10.2834	33.9155	-0.032227	-0.014648	-0.0019531	NaN	NaN	NaN	NaN	NaN	NaN	NaN	NaN	NaN	NaN	NaN	NaN
2.872	-77.099	153.8957	637.4521	-0.28359	0.72109	-0.34297	-40.015	45.4191	35.9113	-0.01416	-0.039063	0.0029297	NaN	NaN	NaN	NaN	NaN	NaN	NaN	NaN	NaN	NaN	NaN	NaN
2.874	-86.503	142.0932	618.127	-0.26367	0.68809	-0.33437	-35.102	-0.592000000000001	29.9116	0.01709	-0.087891	0.0063477	NaN	NaN	NaN	NaN	NaN	NaN	NaN	NaN	NaN	NaN	NaN	NaN
2.876	-66.2202	141.7022	603.29	-0.24316	0.66016	-0.32471	-13.477	33.1777	8.961	0.040283	-0.11939	0.011719	NaN	NaN	NaN	NaN	NaN	NaN	NaN	NaN	NaN	NaN	NaN	NaN
2.878	-55.3999	154.1548	585.2177	-0.22207	0.62822	-0.31123	-29.2485	67.9437	31.0571	0.061523	-0.15381	0.013672	NaN	NaN	NaN	NaN	NaN	NaN	NaN	NaN	NaN	NaN	NaN	NaN
2.88	-67.0965	159.823	555.5773	-0.20303	0.59531	-0.30391	-33.147	-3.563	40.0463	0.092285	-0.18457	0.018066	NaN	NaN	NaN	NaN	NaN	NaN	NaN	NaN	NaN	NaN	NaN	NaN
2.882	-63.17142	156.336	551.1777341	-0.18623	0.56133	-0.29609	-13.666	43.69295	39.0275	0.099609	-0.19629	0.02002	NaN	NaN	NaN	NaN	NaN	NaN	NaN	NaN	NaN	NaN	NaN	NaN
2.884	-48.766	143.34	520.575	-0.16826	0.53486	-0.28575	-24.441	17.7211	37.4708	0.11865	-0.22119	0.022949	NaN	NaN	NaN	NaN	NaN	NaN	NaN	NaN	NaN	NaN	NaN	NaN
2.886	-28.201	141.736	504.4986	-0.15137	0.50098	-0.27588	-18.731	7.0579	33.644	0.12549	-0.23755	0.023682	NaN	NaN	NaN	NaN	NaN	NaN	NaN	NaN	NaN	NaN	NaN	NaN
2.888	-16.781	137.114	491.190124	-0.13047	0.46914	-0.26211	-16.675	53.377	31.34	0.12744	-0.24756	0.02832	NaN	NaN	NaN	NaN	NaN	NaN	NaN	NaN	NaN	NaN	NaN	NaN
2.89	7.976	131.656	479.769	-0.10967	0.43242	-0.25254	-4.98	12.4298	26.5748	0.12256	-0.2627	0.023926	NaN	NaN	NaN	NaN	NaN	NaN	NaN	NaN	NaN	NaN	NaN	NaN
2.892	41.671	117.786	456.5704	-0.090917	0.40313	-0.24668	-24.925	41.122	14.7299	0.11914	-0.2583	0.029785	NaN	NaN	NaN	NaN	NaN	NaN	NaN	NaN	NaN	NaN	NaN	NaN
2.894	27.703	118.60245	432.9547	-0.072558	0.3708	-0.23662	-32.3316	65.3771	9.74	0.104	-0.25439	0.029297	NaN	NaN	NaN	NaN	NaN	NaN	NaN	NaN	NaN	NaN	NaN	NaN
2.896	41.868	108.6261	406.8669	-0.058105	0.34375	-0.22656	-13.998	-1.2172	37.892	0.095945	-0.24634	0.024902	NaN	NaN	NaN	NaN	NaN	NaN	NaN	NaN	NaN	NaN	NaN	NaN
2.898	46.0477	109.9187	398.6508	-0.038965	0.31377	-0.21201	-7.459	28.6013	36.7831	0.086426	-0.23535	0.015625	NaN	NaN	NaN	NaN	NaN	NaN	NaN	NaN	NaN	NaN	NaN	NaN
2.9	57.637	105.78652	366.7665	-0.024707	0.28096	-0.20381	-9.876	4.845	33.805	0.075195	-0.22168	0.0024414	NaN	NaN	NaN	NaN	NaN	NaN	NaN	NaN	NaN	NaN	NaN	NaN
2.902	30.198	110.5089	351.62477	-0.01455	0.25361	-0.19678	-15.948	-4.1071	33.1299	0.070801	-0.21533	-0.0019531	NaN	NaN	NaN	NaN	NaN	NaN	NaN	NaN	NaN	NaN	NaN	NaN
2.904	22.886	122.889	327.9195	0.0040038	0.22559	-0.18926	-34.4289	51.577	30.407	0.064941	-0.19971	-0.019531	NaN	NaN	NaN	NaN	NaN	NaN	NaN	NaN	NaN	NaN	NaN	NaN
2.906	-6.399	119.5	320.8971	0.022461	0.19727	-0.18359	-8.574	10.1818	48.688	0.057861	-0.19311	-0.033448	NaN	NaN	NaN	NaN	NaN	NaN	NaN	NaN	NaN	NaN	NaN	NaN
2.908	-0.0519999999999996	129.97	296.6735	0.037988	0.1707	-0.17188	-13.861	8.8933	62.569	0.055176	-0.17969	-0.042969	NaN	NaN	NaN	NaN	NaN	NaN	NaN	NaN	NaN	NaN	NaN	NaN
2.91	-15.918	131.615	282.2745	0.050098	0.14795	-0.16475	-47.8872	22.063	50.797	0.04834	-0.15234	-0.048828	NaN	NaN	NaN	NaN	NaN	NaN	NaN	NaN	NaN	NaN	NaN	NaN
2.912	-34.05	129.884	280.968	0.069239	0.11943	-0.15498	-26.872	-38.133	76.2785	0.035645	-0.13574	-0.056152	NaN	NaN	NaN	NaN	NaN	NaN	NaN	NaN	NaN	NaN	NaN	NaN
2.914	-36.32	114.0666	268.9789	0.083106	0.091406	-0.14844	-24.594	13.979	86.489	0.0019531	-0.084961	-0.066895	NaN	NaN	NaN	NaN	NaN	NaN	NaN	NaN	NaN	NaN	NaN	NaN
2.916	-43.176	108.9197	252.1541	0.097656	0.064941	-0.13965	-31.545	-10.518	97.4872	-0.037109	-0.045655	-0.082032	NaN	NaN	NaN	NaN	NaN	NaN	NaN	NaN	NaN	NaN	NaN	NaN
2.918	-56.1299	100.6171	224.9991	0.1126	0.036133	-0.12998	-27.072	-43.166	115.6179	-0.071289	-0.0014648	-0.10156	NaN	NaN	NaN	NaN	NaN	NaN	NaN	NaN	NaN	NaN	NaN	NaN
2.92	-75.8118	86.924	228.25796	0.12471	0.0095701	-0.12676	-56.531	0.835999999999999	138.435	-0.10645	0.052246	-0.12744	NaN	NaN	NaN	NaN	NaN	NaN	NaN	NaN	NaN	NaN	NaN	NaN
2.922	-58.0663	76.205	209.5345	0.14112	-0.015039	-0.11816	-25.61	-31.0049	168.9099	-0.12061	0.080566	-0.14258	NaN	NaN	NaN	NaN	NaN	NaN	NaN	NaN	NaN	NaN	NaN	NaN
2.924	-74.6192	72.024	201.748	0.15606	-0.040234	-0.10947	-10.394	4.2605	220.0665	-0.1416	0.13184	-0.16895	NaN	NaN	NaN	NaN	NaN	NaN	NaN	NaN	NaN	NaN	NaN	NaN
2.926	-87.433	80.0562	183.6141	0.16699	-0.061035	-0.10107	-35.92	43.4444	260.911	-0.1565	0.16992	-0.19092	NaN	NaN	NaN	NaN	NaN	NaN	NaN	NaN	NaN	NaN	NaN	NaN
2.928	-89.857	70.7968	196.9001	0.1711	-0.075195	-0.094336	-33.654	17.5639	309.7635	-0.16992	0.21338	-0.20947	NaN	NaN	NaN	NaN	NaN	NaN	NaN	NaN	NaN	NaN	NaN	NaN
2.93	-75.054	66.84064	186.97724	0.17295	-0.09248	-0.089941	-21.793	85.325	358.268	-0.20313	0.28369	-0.23633	NaN	NaN	NaN	NaN	NaN	NaN	NaN	NaN	NaN	NaN	NaN	NaN
2.932	-58.0368	72.7569	186.1848	0.16944	-0.10029	-0.084473	-19.993	81.5751	422.898	-0.22559	0.32422	-0.24219	NaN	NaN	NaN	NaN	NaN	NaN	NaN	NaN	NaN	NaN	NaN	NaN
2.934	-64.8993	81.5768	159.8171	0.17197	-0.10478	-0.087305	7.294	62.55026	509.2728	-0.28174	0.43213	-0.26563	NaN	NaN	NaN	NaN	NaN	NaN	NaN	NaN	NaN	NaN	NaN	NaN
2.936	-37.245	75.8756	148.44168	0.17334	-0.11377	-0.085449	-8.611	111.304	598.633	-0.33155	0.53882	-0.28467	NaN	NaN	NaN	NaN	NaN	NaN	NaN	NaN	NaN	NaN	NaN	NaN
2.938	-14.389	73.67996	137.1006	0.17588	-0.11855	-0.089258	-13.056	78.308	679.489	-0.38672	0.66797	-0.29883	NaN	NaN	NaN	NaN	NaN	NaN	NaN	NaN	NaN	NaN	NaN	NaN
2.94	-10.115	75.2301	128.1232	0.17431	-0.12099	-0.086426	-18.359	98.335	758.7039	-0.48242	0.89063	-0.32813	NaN	NaN	NaN	NaN	NaN	NaN	NaN	NaN	NaN	NaN	NaN	NaN
2.942	13.123	63.2818	125.507	0.17354	-0.12373	-0.084863	-21.043	103.759	830.634	-0.53662	1.0142	-0.35352	NaN	NaN	NaN	NaN	NaN	NaN	NaN	NaN	NaN	NaN	NaN	NaN
2.944	15.166	57.0856	116.0546	0.16992	-0.12871	-0.086621	-11.348	58.625	883.7283	-0.64404	1.2681	-0.40479	NaN	NaN	NaN	NaN	NaN	NaN	NaN	NaN	NaN	NaN	NaN	NaN
2.946	44.565	58.0496	95.3491	0.1665	-0.12988	-0.087402	-21.003	93.904	918.074	-0.72681	1.4328	-0.46069	NaN	NaN	NaN	NaN	NaN	NaN	NaN	NaN	NaN	NaN	NaN	NaN
2.948	11.821	62.844	94.886	0.16592	-0.1333	-0.086914	-17.083	75.5417	964.147	-0.80078	1.5684	-0.52148	NaN	NaN	NaN	NaN	NaN	NaN	NaN	NaN	NaN	NaN	NaN	NaN
2.95	38.654	55.834	111.595	0.16162	-0.13116	-0.081933	-38.315	7.7548	1018.4367	-0.85986	1.688	-0.61084	NaN	NaN	NaN	NaN	NaN	NaN	NaN	NaN	NaN	NaN	NaN	NaN
2.952	32.872	47.012	107.735	0.15381	-0.12647	-0.081153	-76.5964	9.9051	1032.165	-0.87598	1.709	-0.65039	NaN	NaN	NaN	NaN	NaN	NaN	NaN	NaN	NaN	NaN	NaN	NaN
2.954	37.851	46.7244	98.7495	0.14326	-0.11992	-0.078711	-16.47	-68.13	1023.527	-0.85889	1.686	-0.73096	NaN	NaN	NaN	NaN	NaN	NaN	NaN	NaN	NaN	NaN	NaN	NaN
2.956	14.191	45.0706	83.8679	0.13037	-0.1123	-0.076172	-9.456	-66.504	996.376	-0.81641	1.6392	-0.78418	NaN	NaN	NaN	NaN	NaN	NaN	NaN	NaN	NaN	NaN	NaN	NaN
2.958	4.373	48.8122	87.7521	0.11846	-0.10225	-0.07168	-13.3242	-46.67	973.575	-0.74707	1.5684	-0.83008	NaN	NaN	NaN	NaN	NaN	NaN	NaN	NaN	NaN	NaN	NaN	NaN
2.96	-3.527	45.3521	77.3358	0.10342	-0.086816	-0.066407	-12.131	-99.565	951.178	-0.63672	1.4316	-0.87891	NaN	NaN	NaN	NaN	NaN	NaN	NaN	NaN	NaN	NaN	NaN	NaN
2.962	-10.732	46.7666	68.6933	0.083496	-0.075488	-0.066015	-29.8401	-80.51	911.7516	-0.58008	1.3535	-0.90039	NaN	NaN	NaN	NaN	NaN	NaN	NaN	NaN	NaN	NaN	NaN	NaN
2.964	-10.064	49.4059	51.4581	0.070703	-0.057813	-0.061133	-55.3974	-96.267	861.058	-0.4541	1.1836	-0.93555	NaN	NaN	NaN	NaN	NaN	NaN	NaN	NaN	NaN	NaN	NaN	NaN
2.966	-38.3204	42.7565	61.2873	0.054199	-0.048828	-0.053223	-12.692	-140.157	873.1466	-0.3894	1.0966	-0.94629	NaN	NaN	NaN	NaN	NaN	NaN	NaN	NaN	NaN	NaN	NaN	NaN
2.968	-40.3863	45.9143	60.811	0.042774	-0.033301	-0.05293	-19.579	-104.864	855.3	-0.36914	1.0645	-0.96582	NaN	NaN	NaN	NaN	NaN	NaN	NaN	NaN	NaN	NaN	NaN	NaN
2.97	-55.0732	50.77408	59.381	0.026172	-0.019726	-0.050879	-30.716	-130.3152	866.442	-0.35303	1.0688	-1.0054	NaN	NaN	NaN	NaN	NaN	NaN	NaN	NaN	NaN	NaN	NaN	NaN
2.972	-76.63925	58.6465	56.87679	0.018359	-0.0017578	-0.048535	-0.790000000000003	-85.823	888.78	-0.32422	1.0454	-1.0269	NaN	NaN	NaN	NaN	NaN	NaN	NaN	NaN	NaN	NaN	NaN	NaN
2.974	-71.7218	56.019	60.5095	0.0070313	0.0051758	-0.050781	-2.37964	-58.274	893.432	-0.2583	0.94336	-1.0469	NaN	NaN	NaN	NaN	NaN	NaN	NaN	NaN	NaN	NaN	NaN	NaN
2.976	-82.6359	47.1421	53.177	-0.0087891	0.01709	-0.052734	19.4303	-104.169	955.6583	-0.22168	0.86255	-1.0281	NaN	NaN	NaN	NaN	NaN	NaN	NaN	NaN	NaN	NaN	NaN	NaN
2.978	-81.8715	45.7201	40.677	-0.022363	0.031543	-0.049902	38.864	-95.312	993.33	-0.19775	0.8125	-1.0039	NaN	NaN	NaN	NaN	NaN	NaN	NaN	NaN	NaN	NaN	NaN	NaN
2.98	-97.96	43.4952	33.574	-0.046875	0.042871	-0.048243	42.088	-123.5301	1020.86	-0.22852	0.77148	-0.95508	NaN	NaN	NaN	NaN	NaN	NaN	NaN	NaN	NaN	NaN	NaN	NaN
2.982	-79.119	38.8848	47.926	-0.060156	0.063574	-0.050586	45.004	-156.4087	1043.411	-0.26221	0.76221	-0.93799	NaN	NaN	NaN	NaN	NaN	NaN	NaN	NaN	NaN	NaN	NaN	NaN
2.984	-63.8888	39.316774	38.4791	-0.078222	0.081739	-0.04873	40.411	-143.803	1087.667	-0.32275	0.92236	-0.99951	NaN	NaN	NaN	NaN	NaN	NaN	NaN	NaN	NaN	NaN	NaN	NaN
2.986	-54.0925	44.9027	37.1608	-0.09668	0.10498	-0.046875	36.94	-172.5503	1130.5379	-0.37158	1.0093	-0.99265	NaN	NaN	NaN	NaN	NaN	NaN	NaN	NaN	NaN	NaN	NaN	NaN
2.988	-31.449	28.5451	32.4389	-0.11416	0.12529	-0.041601	57.181	-182.367	1146.9232	-0.44971	1.0142	-0.94678	NaN	NaN	NaN	NaN	NaN	NaN	NaN	NaN	NaN	NaN	NaN	NaN
2.99	-30.261	26.55614	29.9259	-0.12568	0.14052	-0.046191	46.786	-175.523	1177.697	-0.55811	1.063	-0.91748	NaN	NaN	NaN	NaN	NaN	NaN	NaN	NaN	NaN	NaN	NaN	NaN
2.992	-2.56	37.025	46.56973	-0.13974	0.16201	-0.045019	47.417	-215.244	1195.566	-0.58887	1.1348	-0.94531	NaN	NaN	NaN	NaN	NaN	NaN	NaN	NaN	NaN	NaN	NaN	NaN
2.994	-8.175	49.497	44.0029	-0.14736	0.17871	-0.041113	41.993	-186.114	1263.0598	-0.60059	1.2832	-1.0439	NaN	NaN	NaN	NaN	NaN	NaN	NaN	NaN	NaN	NaN	NaN	NaN
2.996	16.347	36.598	52.4355	-0.15771	0.19678	-0.043945	42.03	-158.6041	1304.2185	-0.59863	1.3789	-1.0605	NaN	NaN	NaN	NaN	NaN	NaN	NaN	NaN	NaN	NaN	NaN	NaN
2.998	10.391	24.362	44.8995	-0.16152	0.20918	-0.03877	39.4856	-157.401	1325.949	-0.61084	1.4263	-1.0522	NaN	NaN	NaN	NaN	NaN	NaN	NaN	NaN	NaN	NaN	NaN	NaN
3	19.567	23.466	24.94319	-0.16953	0.21807	-0.029199	16.3566	-110.014	1335.991	-0.64355	1.4854	-1.0625	NaN	NaN	NaN	NaN	NaN	NaN	NaN	NaN	NaN	NaN	NaN	NaN
3.002	3.174	34.743	23.38388	-0.16719	0.22392	-0.026465	28.4476	-111.306	1338.5905	-0.65308	1.4992	-1.0739	NaN	NaN	NaN	NaN	NaN	NaN	NaN	NaN	NaN	NaN	NaN	NaN
3.004	23.978	40.014	33.2915	-0.16562	0.22324	-0.021582	28.6253	-106.255	1349.4378	-0.66162	1.4927	-1.0698	NaN	NaN	NaN	NaN	NaN	NaN	NaN	NaN	NaN	NaN	NaN	NaN
3.006	26.263	39.876	26.1618	-0.16064	0.21973	-0.022461	-12.2966	-58.522	1364.0883	-0.67041	1.4712	-1.061	NaN	NaN	NaN	NaN	NaN	NaN	NaN	NaN	NaN	NaN	NaN	NaN
3.008	21.275	42.353	19.1285	-0.15791	0.21211	-0.019531	-3.209	-87.49	1374.8519	-0.67188	1.4707	-1.0605	NaN	NaN	NaN	NaN	NaN	NaN	NaN	NaN	NaN	NaN	NaN	NaN
3.01	18.113	29.8027	20.3782	-0.15137	0.20439	-0.02002	-7.197	-81.566	1405.4867	-0.68311	1.4849	-1.061	NaN	NaN	NaN	NaN	NaN	NaN	NaN	NaN	NaN	NaN	NaN	NaN
3.012	12.383	25.3928	42.3522	-0.14004	0.19306	-0.018848	-28.9735	-107.5597	1395.7914	-0.69483	1.5091	-1.0682	NaN	NaN	NaN	NaN	NaN	NaN	NaN	NaN	NaN	NaN	NaN	NaN
3.014	1.052	30.682	44.6709	-0.1331	0.17558	-0.015625	-24.566	-165.4585	1425.6367	-0.72021	1.5532	-1.0718	NaN	NaN	NaN	NaN	NaN	NaN	NaN	NaN	NaN	NaN	NaN	NaN
3.016	-23.565	37.3956	32.511	-0.12207	0.15381	-0.015137	-23.617	-127.8719	1449.1431	-0.77344	1.625	-1.0723	NaN	NaN	NaN	NaN	NaN	NaN	NaN	NaN	NaN	NaN	NaN	NaN
3.018	-30.094	45.861	35.9787	-0.11113	0.13243	-0.013476	-11.096	-131.12	1466.7262	-0.80811	1.6704	-1.0806	NaN	NaN	NaN	NaN	NaN	NaN	NaN	NaN	NaN	NaN	NaN	NaN
3.02	-46.2727	28.3744	42.0417	-0.10098	0.11201	-0.01582	1.272	-127.5499	1497.738	-0.88232	1.7739	-1.0933	NaN	NaN	NaN	NaN	NaN	NaN	NaN	NaN	NaN	NaN	NaN	NaN
3.022	-69.6634	13.0104	54.7823	-0.087695	0.094042	-0.01582	-43.493	-117.6876	1505.5424	-0.93921	1.8498	-1.1081	NaN	NaN	NaN	NaN	NaN	NaN	NaN	NaN	NaN	NaN	NaN	NaN
3.024	-69.5644	7.3294	55.931	-0.078711	0.072461	-0.019824	-13.246	-156.422	1528.773	-1	1.9277	-1.1211	NaN	NaN	NaN	NaN	NaN	NaN	NaN	NaN	NaN	NaN	NaN	NaN
3.026	-85.0092	6.9428	61.1858	-0.068359	0.052246	-0.026367	5.9838	-118.912	1538.1842	-1.0679	2.0181	-1.1362	NaN	NaN	NaN	NaN	NaN	NaN	NaN	NaN	NaN	NaN	NaN	NaN
3.028	-83.046	1.9104	74.7668	-0.060839	0.041407	-0.031836	-20.0011	-97.7715	1538.0338	-1.0908	2.0605	-1.1523	NaN	NaN	NaN	NaN	NaN	NaN	NaN	NaN	NaN	NaN	NaN	NaN
3.03	-84.611	-5.9303	75.2	-0.054199	0.033593	-0.035547	16.5299	-107.536	1560.957	-1.1323	2.1021	-1.1675	NaN	NaN	NaN	NaN	NaN	NaN	NaN	NaN	NaN	NaN	NaN	NaN
3.032	-66.744602	-9.4425	81.677	-0.053418	0.033985	-0.041015	4.381129	-64.443	1555.4593	-1.1511	2.1164	-1.1726	NaN	NaN	NaN	NaN	NaN	NaN	NaN	NaN	NaN	NaN	NaN	NaN
3.034	-58.7719	-24.0022	84.651	-0.059277	0.037207	-0.049219	13.633	-82.0162	1521.9936	-1.168	2.1211	-1.1699	NaN	NaN	NaN	NaN	NaN	NaN	NaN	NaN	NaN	NaN	NaN	NaN
3.036	-52.77463	-26.5276	107.8015	-0.062012	0.041504	-0.058105	46.858	-80.3925	1521.234	-1.1812	2.1216	-1.1753	NaN	NaN	NaN	NaN	NaN	NaN	NaN	NaN	NaN	NaN	NaN	NaN
3.038	-47.8755	-20.6307	117.4871	-0.070019	0.052832	-0.069824	36.8457	-49.2989	1529.068	-1.1851	2.1216	-1.1831	NaN	NaN	NaN	NaN	NaN	NaN	NaN	NaN	NaN	NaN	NaN	NaN
3.04	-48.1149	1.3271	136.0514	-0.074121	0.050879	-0.074902	62.799	-59.7805	1539.674	-1.1836	2.1191	-1.1875	NaN	NaN	NaN	NaN	NaN	NaN	NaN	NaN	NaN	NaN	NaN	NaN
3.042	-10.714	13.2368	156.6509	-0.074511	0.058301	-0.084668	44.5389	-24.44	1563.517	-1.1787	2.124	-1.1915	NaN	NaN	NaN	NaN	NaN	NaN	NaN	NaN	NaN	NaN	NaN	NaN
3.044	-13.257	14.7208	162.9086	-0.075195	0.063476	-0.093652	37.506	-4.703	1566.455	-1.1621	2.1191	-1.1934	NaN	NaN	NaN	NaN	NaN	NaN	NaN	NaN	NaN	NaN	NaN	NaN
3.046	12.602	37.185733	179.8202	-0.07373	0.068848	-0.10254	42.834	-42.6179	1579.0709	-1.146	2.1001	-1.189	NaN	NaN	NaN	NaN	NaN	NaN	NaN	NaN	NaN	NaN	NaN	NaN
3.048	0.996000000000002	47.5689	230.957	-0.072754	0.078223	-0.1167	46.496	-20.5262	1606.0855	-1.1323	2.0845	-1.189	NaN	NaN	NaN	NaN	NaN	NaN	NaN	NaN	NaN	NaN	NaN	NaN
3.05	31.289	63.374492	278.6814	-0.078613	0.091114	-0.12676	36.238	-29.345	1589.18	-1.1084	2.0547	-1.1846	NaN	NaN	NaN	NaN	NaN	NaN	NaN	NaN	NaN	NaN	NaN	NaN
3.052	42.5402	77.4622	322.8443	-0.08291	0.11182	-0.14238	42.7949	-36.947	1602.53343	-1.0791	2.041	-1.1836	NaN	NaN	NaN	NaN	NaN	NaN	NaN	NaN	NaN	NaN	NaN	NaN
3.054	53.5484	96.2584	350.75932	-0.097951	0.13877	-0.15742	15.7485	4.8498	1587.376	-1.0513	2.0239	-1.1772	NaN	NaN	NaN	NaN	NaN	NaN	NaN	NaN	NaN	NaN	NaN	NaN
3.056	66.718	102.857	424.2573	-0.11523	0.16895	-0.17334	27.659	-26.256	1584.9593	-1.019	1.9927	-1.1733	NaN	NaN	NaN	NaN	NaN	NaN	NaN	NaN	NaN	NaN	NaN	NaN
3.058	70.291	107.901	492.9607	-0.14179	0.2165	-0.18994	24.5414	-2.40956	1614.8364	-1.0039	1.9785	-1.1641	NaN	NaN	NaN	NaN	NaN	NaN	NaN	NaN	NaN	NaN	NaN	NaN
3.06	74.315	103.339	562.281	-0.1792	0.27099	-0.20849	10.7173	7.9434	1581.8351	-0.97363	1.9473	-1.1563	NaN	NaN	NaN	NaN	NaN	NaN	NaN	NaN	NaN	NaN	NaN	NaN
3.062	54.101	103.583	643.008	-0.22607	0.34327	-0.22334	34.4221	-19.699	1579.7786	-0.94385	1.9297	-1.1503	NaN	NaN	NaN	NaN	NaN	NaN	NaN	NaN	NaN	NaN	NaN	NaN
3.064	33.767	92.078	740.8964	-0.28906	0.42051	-0.23476	3.4436	33.7812	1557.807	-0.91162	1.9126	-1.1392	NaN	NaN	NaN	NaN	NaN	NaN	NaN	NaN	NaN	NaN	NaN	NaN
3.066	26.0838	46.155	833.2533	-0.35791	0.51221	-0.24805	-26.1467	35.08903	1548.7948	-0.86426	1.8809	-1.1309	NaN	NaN	NaN	NaN	NaN	NaN	NaN	NaN	NaN	NaN	NaN	NaN
3.068	-1.899	28.2692	887.543	-0.44502	0.61259	-0.25713	0.129	52.1137	1541.3819	-0.8457	1.8613	-1.1191	NaN	NaN	NaN	NaN	NaN	NaN	NaN	NaN	NaN	NaN	NaN	NaN
3.07	-12.685	21.329	909.634	-0.52813	0.73555	-0.27441	-23.9506	102.2445	1502.126	-0.8042	1.811	-1.0913	NaN	NaN	NaN	NaN	NaN	NaN	NaN	NaN	NaN	NaN	NaN	NaN
3.072	-23.2232	12.2842	939.1514	-0.60821	0.87187	-0.29824	10.3029	85.3229	1480.9737	-0.78516	1.7744	-1.0767	NaN	NaN	NaN	NaN	NaN	NaN	NaN	NaN	NaN	NaN	NaN	NaN
3.074	-36.0709	-6.6317	954.8883	-0.68145	1.0082	-0.33418	-16.166496	106.17	1490.5214	-0.76221	1.7388	-1.0601	NaN	NaN	NaN	NaN	NaN	NaN	NaN	NaN	NaN	NaN	NaN	NaN
3.076	-57.442	-18.2572	973.756	-0.73779	1.1353	-0.37549	-1.2973	115.234	1482.887	-0.73389	1.6899	-1.0317	NaN	NaN	NaN	NaN	NaN	NaN	NaN	NaN	NaN	NaN	NaN	NaN
3.078	-72.0755	-40.32	980.339	-0.77627	1.2419	-0.42139	23.9786	88.555	1482.6881	-0.7207	1.6738	-1.0195	NaN	NaN	NaN	NaN	NaN	NaN	NaN	NaN	NaN	NaN	NaN	NaN
3.08	-89.59169	-69.113	978.842	-0.79297	1.3293	-0.45713	3.3464	118.355	1465.94	-0.70605	1.6465	-0.99414	NaN	NaN	NaN	NaN	NaN	NaN	NaN	NaN	NaN	NaN	NaN	NaN
3.082	-92.328	-78.523	957.474	-0.80234	1.3777	-0.49384	21.64904	79.4104	1440.0798	-0.70728	1.6359	-0.97436	NaN	NaN	NaN	NaN	NaN	NaN	NaN	NaN	NaN	NaN	NaN	NaN
3.084	-90.8938	-68.098	921.989541	-0.80469	1.3988	-0.52344	30.159	60.4952	1413.9078	-0.71094	1.627	-0.96289	NaN	NaN	NaN	NaN	NaN	NaN	NaN	NaN	NaN	NaN	NaN	NaN
3.086	-99.8539	-36.803	896.154	-0.80811	1.4028	-0.54834	-5.07726	119.6312	1370.196	-0.71484	1.6279	-0.94141	NaN	NaN	NaN	NaN	NaN	NaN	NaN	NaN	NaN	NaN	NaN	NaN
3.088	-85.1214	-36.398	886.598	-0.80498	1.3852	-0.56211	6.5647	108.2855	1349.4928	-0.71387	1.6309	-0.92578	NaN	NaN	NaN	NaN	NaN	NaN	NaN	NaN	NaN	NaN	NaN	NaN
3.09	-92.8873	-33.617	872.35	-0.80381	1.3466	-0.57431	36.091	140.514	1346.999	-0.71826	1.6274	-0.90771	NaN	NaN	NaN	NaN	NaN	NaN	NaN	NaN	NaN	NaN	NaN	NaN
3.092	-64.7719	-30.315	880.3255	-0.79404	1.3056	-0.58018	29.2734	137.119	1326.9666	-0.71264	1.6233	-0.88648	NaN	NaN	NaN	NaN	NaN	NaN	NaN	NaN	NaN	NaN	NaN	NaN
3.094	-71.2875	-23.164	899.58406	-0.76631	1.2595	-0.60215	30.3085	104.618	1316.158	-0.70459	1.6138	-0.8667	NaN	NaN	NaN	NaN	NaN	NaN	NaN	NaN	NaN	NaN	NaN	NaN
3.096	-18.732	-15.131	913.1934	-0.72217	1.2202	-0.62842	28.66303	160.687	1282.6784	-0.69922	1.584	-0.83984	NaN	NaN	NaN	NaN	NaN	NaN	NaN	NaN	NaN	NaN	NaN	NaN
3.098	-25.846	-18.834	908.449	-0.68711	1.1934	-0.64961	36.3667	151.7577	1242.9539	-0.69141	1.5645	-0.83008	NaN	NaN	NaN	NaN	NaN	NaN	NaN	NaN	NaN	NaN	NaN	NaN
3.1	-10.526	-28.589	907.964	-0.66201	1.1852	-0.66729	41.4941	164.338	1222.178	-0.6665	1.5161	-0.79736	NaN	NaN	NaN	NaN	NaN	NaN	NaN	NaN	NaN	NaN	NaN	NaN
3.102	12.813	-60.884	935.805	-0.6292	1.1775	-0.6876	15.0425	195.147	1183.3961	-0.64453	1.4697	-0.7749	NaN	NaN	NaN	NaN	NaN	NaN	NaN	NaN	NaN	NaN	NaN	NaN
3.104	33.8463	-101.5762	954.8331	-0.5748	1.1471	-0.70762	23.6023	153.6267	1167.697	-0.61914	1.4199	-0.75195	NaN	NaN	NaN	NaN	NaN	NaN	NaN	NaN	NaN	NaN	NaN	NaN
3.106	42.1404	-130.853	964.4688	-0.50488	1.0859	-0.7168	11.986	180.441	1131.8714	-0.5835	1.3599	-0.72412	NaN	NaN	NaN	NaN	NaN	NaN	NaN	NaN	NaN	NaN	NaN	NaN
3.108	24.254	-140.249	965.8744	-0.4417	1.0175	-0.71279	-19.72264	181.668	1089.611	-0.56348	1.3267	-0.70654	NaN	NaN	NaN	NaN	NaN	NaN	NaN	NaN	NaN	NaN	NaN	NaN
3.11	47.6915	-150.68	997.7659	-0.39785	0.94932	-0.6917	-8.455	149.766	1075.3167	-0.52637	1.2559	-0.67969	NaN	NaN	NaN	NaN	NaN	NaN	NaN	NaN	NaN	NaN	NaN	NaN
3.112	47.0685	-163.721	1008.0412	-0.37793	0.91221	-0.68037	-27.626	197.646	1048.77489	-0.50024	1.2007	-0.65283	NaN	NaN	NaN	NaN	NaN	NaN	NaN	NaN	NaN	NaN	NaN	NaN
3.114	51.922	-154.844	1026.4613	-0.38174	0.89053	-0.66758	-30.1639	181.1	1021.638	-0.46143	1.1372	-0.63428	NaN	NaN	NaN	NaN	NaN	NaN	NaN	NaN	NaN	NaN	NaN	NaN
3.116	49.7739	-137.423	1040.7831	-0.39355	0.89648	-0.66992	-24.284	168.99026	990.4299	-0.41553	1.0601	-0.60205	NaN	NaN	NaN	NaN	NaN	NaN	NaN	NaN	NaN	NaN	NaN	NaN
3.118	34.4083	-125.9939	1062.17867	-0.38477	0.98554	-0.73457	-31.1146	197.86039	960.9832	-0.38818	1.0151	-0.58496	NaN	NaN	NaN	NaN	NaN	NaN	NaN	NaN	NaN	NaN	NaN	NaN
3.12	22.6001	-106.641	1091.8951	-0.36982	1.0138	-0.72929	-21.167	155.93	958.711	-0.34326	0.93604	-0.54639	NaN	NaN	NaN	NaN	NaN	NaN	NaN	NaN	NaN	NaN	NaN	NaN
3.122	-5.277	-89.031	1107.3151	-0.39287	0.99619	-0.70313	-38.7024	196.2417	924.699	-0.30957	0.87622	-0.51904	NaN	NaN	NaN	NaN	NaN	NaN	NaN	NaN	NaN	NaN	NaN	NaN
3.124	5.521	-65.085	1123.50213	-0.43486	1.004	-0.6874	-51.8477	206.967	866.4538	-0.27881	0.81689	-0.4917	NaN	NaN	NaN	NaN	NaN	NaN	NaN	NaN	NaN	NaN	NaN	NaN
3.126	2.359	-77.151	1130.639	-0.45947	1.063	-0.71533	-33.026	175.342	852.6128	-0.24219	0.74805	-0.45264	NaN	NaN	NaN	NaN	NaN	NaN	NaN	NaN	NaN	NaN	NaN	NaN
3.128	-9.638	-84.862	1147.516	-0.475	1.1396	-0.76426	-45.8242	212.1521	793.667	-0.229	0.71094	-0.43652	NaN	NaN	NaN	NaN	NaN	NaN	NaN	NaN	NaN	NaN	NaN	NaN
3.13	-33.2146	-93.815	1162.609	-0.49082	1.2086	-0.78526	-31.651	171.719	761.2135	-0.19434	0.64551	-0.39551	NaN	NaN	NaN	NaN	NaN	NaN	NaN	NaN	NaN	NaN	NaN	NaN
3.132	-44.046	-93.567	1180.342	-0.517	1.2637	-0.77939	-20.087	189.3528	723.8138	-0.16529	0.60791	-0.37354	NaN	NaN	NaN	NaN	NaN	NaN	NaN	NaN	NaN	NaN	NaN	NaN
3.134	-49.228	-116.6172	1214.7399	-0.5543	1.3144	-0.78223	-36.593	217.5891	666.303	-0.13916	0.56348	-0.34961	NaN	NaN	NaN	NaN	NaN	NaN	NaN	NaN	NaN	NaN	NaN	NaN
3.136	-70.747	-129.1217	1235.335	-0.60059	1.3613	-0.7959	-7.359	164.9977	654.1821	-0.10742	0.51025	-0.31934	NaN	NaN	NaN	NaN	NaN	NaN	NaN	NaN	NaN	NaN	NaN	NaN
3.138	-51.694687	-145.139	1248.547	-0.64151	1.4136	-0.80771	-15.286	196.7077	620.852	-0.074951	0.46777	-0.30078	NaN	NaN	NaN	NaN	NaN	NaN	NaN	NaN	NaN	NaN	NaN	NaN
3.14	-61.36	-147.86	1276.5165	-0.67392	1.4669	-0.81591	-23.716	196.8758	595.892	-0.040039	0.43896	-0.28076	NaN	NaN	NaN	NaN	NaN	NaN	NaN	NaN	NaN	NaN	NaN	NaN
3.142	-57.3983	-140.02	1283.3416	-0.70518	1.5106	-0.82686	15.955	177.33	567.6307	-0.0068359	0.4043	-0.25684	NaN	NaN	NaN	NaN	NaN	NaN	NaN	NaN	NaN	NaN	NaN	NaN
3.144	-73.092	-135.921	1309.0048	-0.73203	1.5568	-0.83857	4.308	221.985	522.921	0.0063477	0.38184	-0.23828	NaN	NaN	NaN	NaN	NaN	NaN	NaN	NaN	NaN	NaN	NaN	NaN
3.146	-34.583	-114.885	1334.493	-0.75635	1.5903	-0.85303	-2.799	182.1335	495.992	0.020996	0.32422	-0.19238	NaN	NaN	NaN	NaN	NaN	NaN	NaN	NaN	NaN	NaN	NaN	NaN
3.148	-18.727	-109.598	1355.088	-0.78252	1.6294	-0.86885	-5.587	187.211	475.3265	0.028564	0.29346	-0.16651	NaN	NaN	NaN	NaN	NaN	NaN	NaN	NaN	NaN	NaN	NaN	NaN
3.15	-13.937	-108.4884	1343.96	-0.80674	1.6724	-0.8876	-5.889	201.12	426.21	0.044922	0.27148	-0.15674	NaN	NaN	NaN	NaN	NaN	NaN	NaN	NaN	NaN	NaN	NaN	NaN
3.152	4.542	-96.5045	1347.4514	-0.83955	1.7021	-0.89697	-2.001	141.82084	412.82611	0.083008	0.25537	-0.14648	NaN	NaN	NaN	NaN	NaN	NaN	NaN	NaN	NaN	NaN	NaN	NaN
3.154	-3.699	-76.768	1349.0676	-0.8834	1.7283	-0.90313	3.102	162.487	402.752	0.097656	0.24854	-0.13379	NaN	NaN	NaN	NaN	NaN	NaN	NaN	NaN	NaN	NaN	NaN	NaN
3.156	21.1872	-64.99	1353.1066	-0.92529	1.7524	-0.91748	-0.384	152.8523	380.8518	0.12549	0.22754	-0.11621	NaN	NaN	NaN	NaN	NaN	NaN	NaN	NaN	NaN	NaN	NaN	NaN
3.158	17.5551	-80.692	1351.6564	-0.9543	1.7809	-0.93476	-13.097	121.47023	366.3949	0.14282	0.21533	-0.096923	NaN	NaN	NaN	NaN	NaN	NaN	NaN	NaN	NaN	NaN	NaN	NaN
3.16	39.0425	-78.835	1337.721	-0.97881	1.7927	-0.95166	-13.617	166.427	321.964	0.1543	0.2002	-0.081543	NaN	NaN	NaN	NaN	NaN	NaN	NaN	NaN	NaN	NaN	NaN	NaN
3.162	42.2925	-88.72	1339.564	-0.99795	1.7954	-0.96299	-26.614	120.39569	302.2017	0.16748	0.18896	-0.0625	NaN	NaN	NaN	NaN	NaN	NaN	NaN	NaN	NaN	NaN	NaN	NaN
3.164	35.86207	-82.453	1351.87	-1.0237	1.7951	-0.96748	-25.91	126.4548	293.90664	0.1792	0.17969	-0.051758	NaN	NaN	NaN	NaN	NaN	NaN	NaN	NaN	NaN	NaN	NaN	NaN
3.166	38.52492	-76.2763	1364.559	-1.0483	1.7896	-0.96436	-28.103	149.063	246.579	0.18262	0.16553	-0.036133	NaN	NaN	NaN	NaN	NaN	NaN	NaN	NaN	NaN	NaN	NaN	NaN
3.168	34.392	-81.8435	1377.7798	-1.0713	1.7854	-0.9705	-47.945	107.3898	233.9207	0.19141	0.15893	-0.027344	NaN	NaN	NaN	NaN	NaN	NaN	NaN	NaN	NaN	NaN	NaN	NaN
3.17	60.605	-86.0327	1392.231	-1.0892	1.7812	-0.97891	-33.746	147.151	229.2037	0.20215	0.1543	-0.016113	NaN	NaN	NaN	NaN	NaN	NaN	NaN	NaN	NaN	NaN	NaN	NaN
3.172	41.2324	-105.228	1415.172	-1.1064	1.7766	-0.98828	-39.0491	124.927	217.3664	0.2124	0.14648	-0.00048828	NaN	NaN	NaN	NaN	NaN	NaN	NaN	NaN	NaN	NaN	NaN	NaN
3.174	40.30444	-107.084	1426.424	-1.1146	1.7689	-0.98887	-41.955	92.9803	223.062	0.21875	0.13623	0.0043945	NaN	NaN	NaN	NaN	NaN	NaN	NaN	NaN	NaN	NaN	NaN	NaN
3.176	21.8469	-99.514	1429.564	-1.1138	1.7485	-0.99561	-42.9353	137.085	177.1582	0.22607	0.12988	0.01709	NaN	NaN	NaN	NaN	NaN	NaN	NaN	NaN	NaN	NaN	NaN	NaN
3.178	-0.987000000000002	-74.207	1412.4047	-1.1134	1.7318	-0.99795	-37.015	94.9461	149.057	0.22779	0.12549	0.03125	NaN	NaN	NaN	NaN	NaN	NaN	NaN	NaN	NaN	NaN	NaN	NaN
3.18	-11.106	-72.8301	1400.0672	-1.1078	1.7063	-0.99531	-36.581	98.299	143.1362	0.23047	0.1167	0.047363	NaN	NaN	NaN	NaN	NaN	NaN	NaN	NaN	NaN	NaN	NaN	NaN
3.182	-37.794037	-73.9571	1396.2746	-1.0992	1.6859	-1.0016	-47.8196	96.231	115.8854	0.22705	0.11914	0.055176	NaN	NaN	NaN	NaN	NaN	NaN	NaN	NaN	NaN	NaN	NaN	NaN
3.184	-24.4353	-62.5162	1384.454	-1.084	1.6676	-1.002	-38.947	39.19	115.147	0.22656	0.12158	0.064453	NaN	NaN	NaN	NaN	NaN	NaN	NaN	NaN	NaN	NaN	NaN	NaN
3.186	-46.6989	-43.76542	1394.643	-1.0718	1.6489	-1.0015	-20.607	76.2256	95.0022	0.22119	0.11768	0.075684	NaN	NaN	NaN	NaN	NaN	NaN	NaN	NaN	NaN	NaN	NaN	NaN
3.188	-28.8143	-33.6678	1387.7636	-1.0688	1.6395	-1.002	-27.4715	55.3157	88.9802	0.21973	0.12037	0.079101	NaN	NaN	NaN	NaN	NaN	NaN	NaN	NaN	NaN	NaN	NaN	NaN
3.19	-49.502	-22.87756	1390.338	-1.0567	1.6304	-0.99532	-25.151	28.181	110.876	0.22168	0.11719	0.081055	NaN	NaN	NaN	NaN	NaN	NaN	NaN	NaN	NaN	NaN	NaN	NaN
3.192	-38.6194	-2.41199	1387.5685	-1.0524	1.6223	-0.99101	-0.537000000000003	68.6488	94.6441	0.22119	0.10645	0.087402	NaN	NaN	NaN	NaN	NaN	NaN	NaN	NaN	NaN	NaN	NaN	NaN
3.194	-39.7053	1.1642	1398.759	-1.0445	1.6129	-0.98945	-18.553	35.4506	71.885	0.2251	0.10205	0.089355	NaN	NaN	NaN	NaN	NaN	NaN	NaN	NaN	NaN	NaN	NaN	NaN
3.196	-25.075	-6.8295	1392.6573	-1.0405	1.6079	-0.98584	3.88	49.4004	65.682	0.23193	0.09668	0.098145	NaN	NaN	NaN	NaN	NaN	NaN	NaN	NaN	NaN	NaN	NaN	NaN
3.198	-11.5712	-10.2572	1393.32701	-1.0346	1.6014	-0.98027	12.784	60.7522	36.6811	0.23462	0.098389	0.10498	NaN	NaN	NaN	NaN	NaN	NaN	NaN	NaN	NaN	NaN	NaN	NaN
3.2	-16.857	5.8553	1392.4847	-1.0284	1.5957	-0.97254	-1.193	5.698	40.0177	0.23242	0.10059	0.10645	NaN	NaN	NaN	NaN	NaN	NaN	NaN	NaN	NaN	NaN	NaN	NaN
3.202	-32.0371	9.4407	1394.7573	-1.0202	1.5829	-0.95966	3.914	54.2898	38.7729	0.22412	0.10449	0.10645	NaN	NaN	NaN	NaN	NaN	NaN	NaN	NaN	NaN	NaN	NaN	NaN
3.204	-25.2801	-13.801233	1367.6439	-1.0131	1.5728	-0.94881	-0.0620000000000012	44.5571	16.071	0.21729	0.11133	0.11084	NaN	NaN	NaN	NaN	NaN	NaN	NaN	NaN	NaN	NaN	NaN	NaN
3.206	-1.9569	-37.469	1347.1497	-1.0083	1.5688	-0.93506	-13.158	16.7313	33.2936	0.19971	0.13428	0.10596	NaN	NaN	NaN	NaN	NaN	NaN	NaN	NaN	NaN	NaN	NaN	NaN
3.208	-0.622999999999998	-33.223	1327.7185	-1.0057	1.5533	-0.91818	-1.702	46.9645	28.9799	0.17945	0.16113	0.10547	NaN	NaN	NaN	NaN	NaN	NaN	NaN	NaN	NaN	NaN	NaN	NaN
3.21	15.091	-25.3325	1327.0277	-1.0016	1.5438	-0.90394	-29.287	16.875	25.3125	0.16064	0.18945	0.10254	NaN	NaN	NaN	NaN	NaN	NaN	NaN	NaN	NaN	NaN	NaN	NaN
3.212	43.435	-14.2003	1302.6802	-0.9938	1.5313	-0.89224	-15.511	34.036	20.2768	0.13428	0.22705	0.10645	NaN	NaN	NaN	NaN	NaN	NaN	NaN	NaN	NaN	NaN	NaN	NaN
3.214	34.8235	0.8707	1277.052	-0.98252	1.5193	-0.88315	-16.46	64.262	7.521	0.12402	0.25146	0.10645	NaN	NaN	NaN	NaN	NaN	NaN	NaN	NaN	NaN	NaN	NaN	NaN
3.216	45.666	24.993	1271.0692	-0.97412	1.5063	-0.85889	-28.825	11.8705	19.3082	0.098633	0.28955	0.091309	NaN	NaN	NaN	NaN	NaN	NaN	NaN	NaN	NaN	NaN	NaN	NaN
3.218	46.3718	21.1177	1264.4302	-0.96664	1.493	-0.84045	-16.075	38.0704	44.5776	0.081299	0.31299	0.082276	NaN	NaN	NaN	NaN	NaN	NaN	NaN	NaN	NaN	NaN	NaN	NaN
3.22	64.008	29.536	1259.9612	-0.9589	1.4758	-0.82426	-34.418	14.187	29.518	0.068359	0.33252	0.08252	NaN	NaN	NaN	NaN	NaN	NaN	NaN	NaN	NaN	NaN	NaN	NaN
3.222	40.6333	47.618	1237.9306	-0.95287	1.463	-0.80793	-38.416	-13.4858	37.0791	0.05957	0.34814	0.079102	NaN	NaN	NaN	NaN	NaN	NaN	NaN	NaN	NaN	NaN	NaN	NaN
3.224	14.7	61.764	1213.1362	-0.94098	1.4456	-0.79266	-34.9199	38.7301	37.9983	0.057129	0.35352	0.082031	NaN	NaN	NaN	NaN	NaN	NaN	NaN	NaN	NaN	NaN	NaN	NaN
3.226	21.2446	48.757	1207.4495	-0.92725	1.4302	-0.77393	-37.9758	16.7707	34.8781	0.049805	0.36963	0.081055	NaN	NaN	NaN	NaN	NaN	NaN	NaN	NaN	NaN	NaN	NaN	NaN
3.228	-0.601999999999997	39.636	1180.5945	-0.91504	1.4146	-0.76211	-45.713	33.7827	35.0326	0.050293	0.37232	0.081787	NaN	NaN	NaN	NaN	NaN	NaN	NaN	NaN	NaN	NaN	NaN	NaN
3.23	1.012	40.299	1153.6254	-0.89963	1.3991	-0.75037	-36.0867	56.116	10.978	0.056641	0.36865	0.080078	NaN	NaN	NaN	NaN	NaN	NaN	NaN	NaN	NaN	NaN	NaN	NaN
3.232	-20.986	52.1594	1139.8783	-0.88968	1.3826	-0.7342	-42.8386	10.54479	10.7489	0.068359	0.36035	0.084961	NaN	NaN	NaN	NaN	NaN	NaN	NaN	NaN	NaN	NaN	NaN	NaN
3.234	-2.672	36.2292	1113.6591	-0.87426	1.3629	-0.72257	-43.7278	36.542	32.2818	0.077637	0.34961	0.086914	NaN	NaN	NaN	NaN	NaN	NaN	NaN	NaN	NaN	NaN	NaN	NaN
3.236	-27.93738	33.478	1108.827	-0.86035	1.3379	-0.70605	-41.661	26.6874	28.8676	0.094238	0.33594	0.094238	NaN	NaN	NaN	NaN	NaN	NaN	NaN	NaN	NaN	NaN	NaN	NaN
3.238	-35.0836	49.391	1101.1162	-0.8461	1.3149	-0.68392	-38.463	15.0879	41.57516	0.10913	0.32348	0.099856	NaN	NaN	NaN	NaN	NaN	NaN	NaN	NaN	NaN	NaN	NaN	NaN
3.24	-37.7053	46.883	1103.1421	-0.83499	1.2925	-0.67858	-8.109	69.125	22.674	0.11816	0.31396	0.10547	NaN	NaN	NaN	NaN	NaN	NaN	NaN	NaN	NaN	NaN	NaN	NaN
3.242	-33.405	43.529	1082.776	-0.819	1.268	-0.66327	-14.076	29.762	9.7429	0.13086	0.30469	0.11426	NaN	NaN	NaN	NaN	NaN	NaN	NaN	NaN	NaN	NaN	NaN	NaN
3.244	-42.0995	55.70464	1061.251	-0.80109	1.2433	-0.64898	-18.516	39.407	27.49401	0.13281	0.30029	0.11816	NaN	NaN	NaN	NaN	NaN	NaN	NaN	NaN	NaN	NaN	NaN	NaN
3.246	-66.806	81.914	1026.28901	-0.78271	1.2153	-0.63721	-10.442	63.898	14.171	0.13574	0.28516	0.12646	NaN	NaN	NaN	NaN	NaN	NaN	NaN	NaN	NaN	NaN	NaN	NaN
3.248	-58.69	90.934	1017.3544	-0.75854	1.1908	-0.62807	-19.343	16.1112	23.3282	0.14575	0.27465	0.13256	NaN	NaN	NaN	NaN	NaN	NaN	NaN	NaN	NaN	NaN	NaN	NaN
3.25	-42.8724	87.479	993.3395	-0.73396	1.1589	-0.6133	4.114	44.666	42.3149	0.15283	0.26367	0.1416	NaN	NaN	NaN	NaN	NaN	NaN	NaN	NaN	NaN	NaN	NaN	NaN
3.252	-47.761	95.0987	966.0162	-0.71069	1.1258	-0.6003	-19.09	18.0563	34.8281	0.16357	0.24951	0.14941	NaN	NaN	NaN	NaN	NaN	NaN	NaN	NaN	NaN	NaN	NaN	NaN
3.254	-43.861	85.5762	937.27305	-0.68677	1.0925	-0.58666	-1.917	-8.7567	46.777	0.16846	0.24268	0.15576	NaN	NaN	NaN	NaN	NaN	NaN	NaN	NaN	NaN	NaN	NaN	NaN
3.256	-28.817	85.0788	917.2624	-0.66553	1.0669	-0.57373	3.655	44.843	36.7555	0.17383	0.2168	0.16016	NaN	NaN	NaN	NaN	NaN	NaN	NaN	NaN	NaN	NaN	NaN	NaN
3.258	-13.912	88.3861	887.584	-0.6444	1.0336	-0.56104	-3.906	21.5951	21.8951	0.18408	0.20728	0.16504	NaN	NaN	NaN	NaN	NaN	NaN	NaN	NaN	NaN	NaN	NaN	NaN
3.26	-8.497	105.2828	861.6424	-0.62217	1.0051	-0.54806	-1.751	28.28	40.697	0.19092	0.19727	0.17383	NaN	NaN	NaN	NaN	NaN	NaN	NaN	NaN	NaN	NaN	NaN	NaN
3.262	14.096	109.095	842.9651	-0.59707	0.974	-0.53414	-18.786	47.306	28.8683	0.19287	0.18359	0.17822	NaN	NaN	NaN	NaN	NaN	NaN	NaN	NaN	NaN	NaN	NaN	NaN
3.264	6.499	98.1921	844.5303	-0.57669	0.94686	-0.52353	-17.725	3.1268	30.183	0.19629	0.17285	0.19092	NaN	NaN	NaN	NaN	NaN	NaN	NaN	NaN	NaN	NaN	NaN	NaN
3.266	25.947	90.2873	837.6696	-0.54736	0.91357	-0.50732	-1.437	30.90248	31.878	0.19922	0.17432	0.20313	NaN	NaN	NaN	NaN	NaN	NaN	NaN	NaN	NaN	NaN	NaN	NaN
3.268	8.084	90.9338	810.2452	-0.52749	0.88096	-0.49212	-20.412	34.73691	20.99792	0.19775	0.17334	0.20948	NaN	NaN	NaN	NaN	NaN	NaN	NaN	NaN	NaN	NaN	NaN	NaN
3.27	5.341	102.5021	798.4528	-0.50086	0.84946	-0.48333	-47.1654	9.5072	37.007	0.19336	0.17334	0.21631	NaN	NaN	NaN	NaN	NaN	NaN	NaN	NaN	NaN	NaN	NaN	NaN
3.272	13.749	104.8574	792.5667	-0.47393	0.81945	-0.46851	-16.874	61.155	42.1751	0.18506	0.17822	0.22412	NaN	NaN	NaN	NaN	NaN	NaN	NaN	NaN	NaN	NaN	NaN	NaN
3.274	15.195	109.319	766.962	-0.44771	0.78812	-0.45359	-37.9408	32.3839	10.1861	0.18066	0.1792	0.23145	NaN	NaN	NaN	NaN	NaN	NaN	NaN	NaN	NaN	NaN	NaN	NaN
3.276	4.383	104.676	725.185	-0.4248	0.75391	-0.44141	-35.726	46.4977	21.384	0.17627	0.18359	0.2417	NaN	NaN	NaN	NaN	NaN	NaN	NaN	NaN	NaN	NaN	NaN	NaN
3.278	-26.938	107.5719	695.4894	-0.39738	0.72337	-0.42472	-22.185	53.668	29.8772	0.16992	0.18799	0.25146	NaN	NaN	NaN	NaN	NaN	NaN	NaN	NaN	NaN	NaN	NaN	NaN
3.28	12.146	102.9958	675.2109	-0.37833	0.69183	-0.41311	-58.4328	-6.431	36.887	0.16943	0.18945	0.25537	NaN	NaN	NaN	NaN	NaN	NaN	NaN	NaN	NaN	NaN	NaN	NaN
3.282	-34.037	114.3518	665.8734	-0.35998	0.66213	-0.39591	-21.949	29.552	39.18	0.16504	0.18848	0.26172	NaN	NaN	NaN	NaN	NaN	NaN	NaN	NaN	NaN	NaN	NaN	NaN
3.284	-14.931	120.929	656.602	-0.34092	0.63253	-0.38165	-49.7701	24.235	10.773	0.16407	0.1853	0.2666	NaN	NaN	NaN	NaN	NaN	NaN	NaN	NaN	NaN	NaN	NaN	NaN
3.286	-30.618	111.7829	646.6014	-0.32422	0.60742	-0.36914	-48.6634	-4.719	41.5429	0.16797	0.18066	0.26709	NaN	NaN	NaN	NaN	NaN	NaN	NaN	NaN	NaN	NaN	NaN	NaN
3.288	-38.6502	109.9474	610.598	-0.2999	0.57245	-0.354	-33.2759	38.4895	37.6683	0.17236	0.17773	0.27344	NaN	NaN	NaN	NaN	NaN	NaN	NaN	NaN	NaN	NaN	NaN	NaN
3.29	-63.817	125.2753	594.068	-0.27782	0.54452	-0.34189	-40.598	0.183	25.1249	0.17041	0.18213	0.27344	NaN	NaN	NaN	NaN	NaN	NaN	NaN	NaN	NaN	NaN	NaN	NaN
3.292	-68.6387	137.695	575.6394	-0.25791	0.51796	-0.329	-19.697	15.8638	33.8389	0.17188	0.18848	0.27783	NaN	NaN	NaN	NaN	NaN	NaN	NaN	NaN	NaN	NaN	NaN	NaN
3.294	-60.5413	124.703	582.4001	-0.23652	0.4875	-0.31504	-24.4807	54.858	10.048	0.17676	0.19898	0.27759	NaN	NaN	NaN	NaN	NaN	NaN	NaN	NaN	NaN	NaN	NaN	NaN
3.296	-78.0159	121.07	547.6624	-0.21582	0.4624	-0.29736	-24.239	8.4356	27.6779	0.17969	0.20605	0.27734	NaN	NaN	NaN	NaN	NaN	NaN	NaN	NaN	NaN	NaN	NaN	NaN
3.298	-82.8394	115.8976	517.7144	-0.19268	0.42862	-0.2877	-10.002	41.508164	32.888	0.17969	0.21533	0.27832	NaN	NaN	NaN	NaN	NaN	NaN	NaN	NaN	NaN	NaN	NaN	NaN
3.3	-83.3442	108.3248	488.434	-0.17295	0.40801	-0.27891	-10.605	36.6474	11.7	0.18799	0.21875	0.27637	NaN	NaN	NaN	NaN	NaN	NaN	NaN	NaN	NaN	NaN	NaN	NaN
3.302	-73.015	104.2116	480.636	-0.15693	0.38574	-0.26328	-5.858	2.856	36.2831	0.19287	0.22217	0.27783	NaN	NaN	NaN	NaN	NaN	NaN	NaN	NaN	NaN	NaN	NaN	NaN
3.304	-52.186	105.863	466.881	-0.14824	0.36172	-0.24521	3.873	28.363	54.802	0.20557	0.21802	0.27173	NaN	NaN	NaN	NaN	NaN	NaN	NaN	NaN	NaN	NaN	NaN	NaN
3.306	-54.6233	103.2	447.4541	-0.13916	0.33984	-0.22949	-33.212	-11.5955	56.021	0.21924	0.21436	0.26709	NaN	NaN	NaN	NaN	NaN	NaN	NaN	NaN	NaN	NaN	NaN	NaN
3.308	-43.287	94.018	442.7531	-0.12617	0.32012	-0.21885	-6.024	12.2086	87.6712	0.22949	0.22559	0.25635	NaN	NaN	NaN	NaN	NaN	NaN	NaN	NaN	NaN	NaN	NaN	NaN
3.31	-27.844	95.8433	429.0649	-0.1083	0.30616	-0.21572	30.76362	57.025	75.522	0.23145	0.23584	0.24805	NaN	NaN	NaN	NaN	NaN	NaN	NaN	NaN	NaN	NaN	NaN	NaN
3.312	-11.452	97.3174	412.1675	-0.092675	0.28975	-0.20479	-13.957	26.4575	120.2475	0.22363	0.25732	0.22314	NaN	NaN	NaN	NaN	NaN	NaN	NaN	NaN	NaN	NaN	NaN	NaN
3.314	-26.303	101.1705	404.7696	-0.07334	0.27051	-0.19404	-15.477	56.4476	183.859	0.21582	0.28199	0.19458	NaN	NaN	NaN	NaN	NaN	NaN	NaN	NaN	NaN	NaN	NaN	NaN
3.316	-10.72	103.379	402.3149	-0.06543	0.24609	-0.17139	-38.352	47.429	201.379	0.19922	0.30957	0.18213	NaN	NaN	NaN	NaN	NaN	NaN	NaN	NaN	NaN	NaN	NaN	NaN
3.318	-21.662	104.654	374.0341	-0.056738	0.22764	-0.15615	-0.0339999999999989	30.643	261.164	0.18506	0.36719	0.15625	NaN	NaN	NaN	NaN	NaN	NaN	NaN	NaN	NaN	NaN	NaN	NaN
3.32	-13.962	106.071	336.808	-0.04707	0.21045	-0.14678	25.2118	87.2294	314.5386	0.16748	0.38916	0.13281	NaN	NaN	NaN	NaN	NaN	NaN	NaN	NaN	NaN	NaN	NaN	NaN
3.322	-14.553	107.454	320.904	-0.033789	0.19795	-0.13974	-23.595	74.0555	386.831	0.13916	0.45654	0.096191	NaN	NaN	NaN	NaN	NaN	NaN	NaN	NaN	NaN	NaN	NaN	NaN
3.324	-15.543	102.929	312.1021	-0.023047	0.17676	-0.12969	-15.846	118.1695	462.726	0.11084	0.5127	0.066162	NaN	NaN	NaN	NaN	NaN	NaN	NaN	NaN	NaN	NaN	NaN	NaN
3.326	10.826	91.5283	316.1472	-0.0092773	0.1626	-0.11865	-12.934	149.361	507.705	0.07959	0.57178	0.03125	NaN	NaN	NaN	NaN	NaN	NaN	NaN	NaN	NaN	NaN	NaN	NaN
3.328	-7.055	102.642139	274.962	0.0083983	0.15742	-0.1125	-40.449	111.604	586.841	0.03125	0.67529	-0.019043	NaN	NaN	NaN	NaN	NaN	NaN	NaN	NaN	NaN	NaN	NaN	NaN
3.33	2.301	94.9053	267.217	0.023926	0.14443	-0.098922	-35.23	135.913	721.394	0	0.729	-0.05127	NaN	NaN	NaN	NaN	NaN	NaN	NaN	NaN	NaN	NaN	NaN	NaN
3.332	-16.788	92.3472	266.0448	0.041504	0.12998	-0.08291	-40.7415	110.196	838.731	-0.064941	0.86328	-0.11133	NaN	NaN	NaN	NaN	NaN	NaN	NaN	NaN	NaN	NaN	NaN	NaN
3.334	-12.911	85.7039	266.5242	0.048145	0.12227	-0.072657	-36.924	64.91838	941.433	-0.13012	0.97657	-0.15844	NaN	NaN	NaN	NaN	NaN	NaN	NaN	NaN	NaN	NaN	NaN	NaN
3.336	-16.369	92.6085	249.5936	0.063477	0.11523	-0.069824	-41.862	77.32	1013.036	-0.20801	1.0962	-0.20068	NaN	NaN	NaN	NaN	NaN	NaN	NaN	NaN	NaN	NaN	NaN	NaN
3.338	-40.002	88.288	244.74493	0.072852	0.10606	-0.060645	-76.87	49.861	1057.9484	-0.3291	1.2559	-0.24609	NaN	NaN	NaN	NaN	NaN	NaN	NaN	NaN	NaN	NaN	NaN	NaN
3.34	-58.7719	81.692	244.7611	0.083008	0.091504	-0.053906	-53.04776	45.579	1122.792	-0.40283	1.3306	-0.26855	NaN	NaN	NaN	NaN	NaN	NaN	NaN	NaN	NaN	NaN	NaN	NaN
3.342	-71.195	79.706	208.921	0.095898	0.075098	-0.042578	-31.5224	59.512	1134.802	-0.54443	1.4497	-0.29639	NaN	NaN	NaN	NaN	NaN	NaN	NaN	NaN	NaN	NaN	NaN	NaN
3.344	-77.8718	77.886	202.1596	0.10752	0.05791	-0.037012	-31.6093	-5.9796	1115.478	-0.63355	1.5149	-0.31128	NaN	NaN	NaN	NaN	NaN	NaN	NaN	NaN	NaN	NaN	NaN	NaN
3.346	-84.2158	75.1374	195.5576	0.12012	0.043457	-0.037109	-33.82698	-26.0689	1103.292	-0.71045	1.5688	-0.31885	NaN	NaN	NaN	NaN	NaN	NaN	NaN	NaN	NaN	NaN	NaN	NaN
3.348	-66.7577	63.8873	191.9792	0.13721	0.027832	-0.033691	-47.4338	-77.591	1075.456	-0.76855	1.6035	-0.31836	NaN	NaN	NaN	NaN	NaN	NaN	NaN	NaN	NaN	NaN	NaN	NaN
3.35	-61.4182	63.5772	168.8099	0.15127	0.010547	-0.028027	-48.654	-140.47	1043.892	-0.77197	1.6099	-0.31299	NaN	NaN	NaN	NaN	NaN	NaN	NaN	NaN	NaN	NaN	NaN	NaN
3.352	-62.91	66.6307	156.7571	0.16299	-0.0027344	-0.022168	-8.132	-103.184	963.353	-0.74609	1.625	-0.31348	NaN	NaN	NaN	NaN	NaN	NaN	NaN	NaN	NaN	NaN	NaN	NaN
3.354	-48.75	64.6609	162.48736	0.175	-0.013379	-0.015332	9.189	-101.672	874.1714	-0.69897	1.6213	-0.30713	NaN	NaN	NaN	NaN	NaN	NaN	NaN	NaN	NaN	NaN	NaN	NaN
3.356	-44.7068	67.49457	159.75	0.1792	-0.018555	-0.0063477	6.971	-89.969	858.3959	-0.64795	1.6001	-0.30811	NaN	NaN	NaN	NaN	NaN	NaN	NaN	NaN	NaN	NaN	NaN	NaN
3.358	-42.023	69.6694	134.913	0.18125	-0.015137	-0.0047852	14.5623	-53.6428	833.934	-0.55908	1.5532	-0.31104	NaN	NaN	NaN	NaN	NaN	NaN	NaN	NaN	NaN	NaN	NaN	NaN
3.36	-65.7621	75.1052	130.3583	0.18555	-0.0086913	-0.0013672	10.614	-87.2282	848.7388	-0.50781	1.5332	-0.31494	NaN	NaN	NaN	NaN	NaN	NaN	NaN	NaN	NaN	NaN	NaN	NaN
3.362	-38.922	73.011	139.6222	0.18086	0.0053711	-0.00097656	12.143	-66.002	874.2054	-0.41748	1.5044	-0.31787	NaN	NaN	NaN	NaN	NaN	NaN	NaN	NaN	NaN	NaN	NaN	NaN
3.364	-39.647	65.289	139.4273	0.17314	0.020996	0.0048828	4.539	-71.098	865.5278	-0.38306	1.4983	-0.31592	NaN	NaN	NaN	NaN	NaN	NaN	NaN	NaN	NaN	NaN	NaN	NaN
3.366	-19.532	72.075	124.5561	0.16309	0.035645	0.0053711	-14.856	-110.347	883.8534	-0.36279	1.5098	-0.3125	NaN	NaN	NaN	NaN	NaN	NaN	NaN	NaN	NaN	NaN	NaN	NaN
3.368	-21.889	66.593	117.6722	0.1622	0.052441	0.0085936	-13.039	-90.119	900.096	-0.33154	1.5181	-0.3335	NaN	NaN	NaN	NaN	NaN	NaN	NaN	NaN	NaN	NaN	NaN	NaN
3.37	-11.157	62.056	105.3643	0.15127	0.067871	0.0089844	-62.232	-105.138	894.612	-0.30322	1.5122	-0.34619	NaN	NaN	NaN	NaN	NaN	NaN	NaN	NaN	NaN	NaN	NaN	NaN
3.372	6.552	44.8633	94.61113	0.13916	0.08584	0.012109	-39.577	-127.268	955.565	-0.23877	1.4868	-0.36963	NaN	NaN	NaN	NaN	NaN	NaN	NaN	NaN	NaN	NaN	NaN	NaN
3.374	3.178	57.9878	81.16235	0.12988	0.10654	0.013867	-28.039	-140.295	968.883	-0.19263	1.4612	-0.3811	NaN	NaN	NaN	NaN	NaN	NaN	NaN	NaN	NaN	NaN	NaN	NaN
3.376	17.649	56.28099	84.0362	0.11768	0.12695	0.01123	-57.354	-234.688	1021.1275	-0.15869	1.4302	-0.38818	NaN	NaN	NaN	NaN	NaN	NaN	NaN	NaN	NaN	NaN	NaN	NaN
3.378	19.024	44.8285	94.5547	0.10528	0.1458	0.010449	-56.506	-245.304	1073.8289	-0.096191	1.5	-0.4751	NaN	NaN	NaN	NaN	NaN	NaN	NaN	NaN	NaN	NaN	NaN	NaN
3.38	11.302	42.3664	91.9093	0.093457	0.16601	0.0084961	-69.673	-246.45	1086.679	-0.066895	1.5063	-0.50049	NaN	NaN	NaN	NaN	NaN	NaN	NaN	NaN	NaN	NaN	NaN	NaN
3.382	-12.902	49.6476	65.007	0.08291	0.18867	0.0077148	-78.629	-272.155	1129.1648	-0.057617	1.5298	-0.51758	NaN	NaN	NaN	NaN	NaN	NaN	NaN	NaN	NaN	NaN	NaN	NaN
3.384	-22.693	50.1278	70.6004	0.071387	0.20791	0.0045898	-56.053	-214.5	1155.783	-0.10181	1.564	-0.53955	NaN	NaN	NaN	NaN	NaN	NaN	NaN	NaN	NaN	NaN	NaN	NaN
3.386	-15.755	57.83	83.9106	0.062988	0.22314	0.0024414	-96.8224	-217.46	1164.7694	-0.16357	1.6191	-0.56738	NaN	NaN	NaN	NaN	NaN	NaN	NaN	NaN	NaN	NaN	NaN	NaN
3.388	-30.546	55.238	65.0722	0.055469	0.23554	-0.0044922	-129.775	-209.133	1193.62281	-0.22314	1.6973	-0.62305	NaN	NaN	NaN	NaN	NaN	NaN	NaN	NaN	NaN	NaN	NaN	NaN
3.39	-33.476	57.928	57.4746	0.048242	0.2415	-0.0033203	-116.6059	-125.218	1211.182	-0.24023	1.7349	-0.64795	NaN	NaN	NaN	NaN	NaN	NaN	NaN	NaN	NaN	NaN	NaN	NaN
3.392	-54.5065	52.706	46.3995	0.049024	0.24424	-0.0052734	-137.25503	-130.6143	1239.0647	-0.26563	1.8066	-0.68213	NaN	NaN	NaN	NaN	NaN	NaN	NaN	NaN	NaN	NaN	NaN	NaN
3.394	-46.593	48.4319	54.19854	0.052832	0.24297	-0.0048829	-132.6592	-96.24	1271.6025	-0.27563	1.8594	-0.69971	NaN	NaN	NaN	NaN	NaN	NaN	NaN	NaN	NaN	NaN	NaN	NaN
3.396	-39.306	47.099	38.332	0.058594	0.24121	-0.003418	-127.2536	-69.352	1253.759	-0.28271	1.9165	-0.72217	NaN	NaN	NaN	NaN	NaN	NaN	NaN	NaN	NaN	NaN	NaN	NaN
3.398	-52.5207	47.055	57.04369	0.059668	0.2378	-0.0082031	-117.0082	-113.187	1248.0619	-0.29688	1.9985	-0.74561	NaN	NaN	NaN	NaN	NaN	NaN	NaN	NaN	NaN	NaN	NaN	NaN
3.4	-52.5698	43.452	51.5288	0.063965	0.2376	-0.0091798	-99.9231	-88.887	1258.271	-0.30176	2.0332	-0.75879	NaN	NaN	NaN	NaN	NaN	NaN	NaN	NaN	NaN	NaN	NaN	NaN
3.402	-54.1066	32.637	37.562	0.06709	0.23291	-0.0041016	-122.57447	-116.962	1262.265	-0.3125	2.0879	-0.77344	NaN	NaN	NaN	NaN	NaN	NaN	NaN	NaN	NaN	NaN	NaN	NaN
3.404	-53.283	29.1246	38.5904	0.07168	0.23125	-0.0056641	-116.693	-153.2908	1304.413	-0.30933	2.1011	-0.77563	NaN	NaN	NaN	NaN	NaN	NaN	NaN	NaN	NaN	NaN	NaN	NaN
3.406	-80.507	37.3363	44.4567	0.07373	0.22754	-0.0048828	-110.814	-127.703	1321.93	-0.29346	2.0981	-0.78174	NaN	NaN	NaN	NaN	NaN	NaN	NaN	NaN	NaN	NaN	NaN	NaN
3.408	-44.613	31.6208	60.113	0.082617	0.22266	-0.0069336	-88.496	-184.946	1351.44798	-0.26367	2.0806	-0.78857	NaN	NaN	NaN	NaN	NaN	NaN	NaN	NaN	NaN	NaN	NaN	NaN
3.41	-44.802	35.1366	32.1371	0.089062	0.2164	-0.0057617	-89.056	-177.182	1384.6017	-0.25146	2.0708	-0.78857	NaN	NaN	NaN	NaN	NaN	NaN	NaN	NaN	NaN	NaN	NaN	NaN
3.412	-54.9275	40.1598	24.9584	0.094922	0.2082	0.002832	-90.722	-156.1599	1400.3076	-0.24463	2.0684	-0.79785	NaN	NaN	NaN	NaN	NaN	NaN	NaN	NaN	NaN	NaN	NaN	NaN
3.414	-51.7371	30.6306	35.416	0.10362	0.19444	0.0032226	-81.059	-196.136	1438.972	-0.25635	2.0884	-0.81201	NaN	NaN	NaN	NaN	NaN	NaN	NaN	NaN	NaN	NaN	NaN	NaN
3.416	-14.802	25.2324	51.1602	0.11328	0.18213	0.0058594	-66.17	-148.4716	1454.516	-0.27881	2.0962	-0.81396	NaN	NaN	NaN	NaN	NaN	NaN	NaN	NaN	NaN	NaN	NaN	NaN
3.418	-10.464	23.7653	46.7378	0.12334	0.17207	0.0076172	-75.744	-147.2136	1441.522	-0.33057	2.1172	-0.81836	NaN	NaN	NaN	NaN	NaN	NaN	NaN	NaN	NaN	NaN	NaN	NaN
3.42	-15.029	40.9853	14.4561	0.12802	0.16299	0.013379	-69.41	-148.7695	1451.322	-0.37793	2.1399	-0.83033	NaN	NaN	NaN	NaN	NaN	NaN	NaN	NaN	NaN	NaN	NaN	NaN
3.422	11.041	35.7015	31.1781	0.13467	0.15518	0.014941	-84.824	-71.323	1450.115	-0.42334	2.1587	-0.8374	NaN	NaN	NaN	NaN	NaN	NaN	NaN	NaN	NaN	NaN	NaN	NaN
3.424	-0.898	30.3965	30.9679	0.13868	0.14385	0.022265	-89.193	-85.8327	1445.5639	-0.48633	2.1855	-0.84375	NaN	NaN	NaN	NaN	NaN	NaN	NaN	NaN	NaN	NaN	NaN	NaN
3.426	4.186	35.4027	26.7775	0.14502	0.13477	0.02832	-77.167	-56.279	1455.3405	-0.51123	2.1919	-0.84131	NaN	NaN	NaN	NaN	NaN	NaN	NaN	NaN	NaN	NaN	NaN	NaN
3.428	-1.826	42.81	27.6943	0.14619	0.13115	0.037207	-106.373	-23.923	1454.215	-0.56689	2.2114	-0.8374	NaN	NaN	NaN	NaN	NaN	NaN	NaN	NaN	NaN	NaN	NaN	NaN
3.43	8.887	31.851	47.45899	0.14541	0.12295	0.038965	-103.684	-72.527	1464.2318	-0.60986	2.2246	-0.84375	NaN	NaN	NaN	NaN	NaN	NaN	NaN	NaN	NaN	NaN	NaN	NaN
3.432	-0.325000000000003	12.8478	63.4628	0.14541	0.1167	0.044043	-112.776	-21.673	1475.638	-0.65234	2.2383	-0.8418	NaN	NaN	NaN	NaN	NaN	NaN	NaN	NaN	NaN	NaN	NaN	NaN
3.434	-19.252	11.2143	53.8925	0.14668	0.10918	0.04375	-130.559	-18.724	1453.917	-0.69922	2.2422	-0.84668	NaN	NaN	NaN	NaN	NaN	NaN	NaN	NaN	NaN	NaN	NaN	NaN
3.436	-4.414	9.1534	47.08	0.14746	0.10693	0.044922	-147.784	-48.128	1488.26	-0.72607	2.2427	-0.84326	NaN	NaN	NaN	NaN	NaN	NaN	NaN	NaN	NaN	NaN	NaN	NaN
3.438	-4.998	11.52659	54.7755	0.14883	0.10469	0.04707	-173.67398	-9.575	1498.091	-0.76123	2.229	-0.84814	NaN	NaN	NaN	NaN	NaN	NaN	NaN	NaN	NaN	NaN	NaN	NaN
3.44	-21.08	9.709	77.1416	0.14824	0.10733	0.048828	-172.7118	-50.354	1497.3698	-0.76953	2.2188	-0.854	NaN	NaN	NaN	NaN	NaN	NaN	NaN	NaN	NaN	NaN	NaN	NaN
3.442	-39.71	22.14311	60.772	0.14472	0.11904	0.046485	-163.293	-43.162	1519.2826	-0.77197	2.2031	-0.86133	NaN	NaN	NaN	NaN	NaN	NaN	NaN	NaN	NaN	NaN	NaN	NaN
3.444	-35.225	18.5878	81.3582	0.1374	0.12969	0.042188	-150.3762	-16.6602	1540.2506	-0.76465	2.1777	-0.86621	NaN	NaN	NaN	NaN	NaN	NaN	NaN	NaN	NaN	NaN	NaN	NaN
3.446	-36.728	27.1755	109.8565	0.12891	0.1416	0.043457	-172.3522	-72.575	1555.108	-0.75928	2.1626	-0.87451	NaN	NaN	NaN	NaN	NaN	NaN	NaN	NaN	NaN	NaN	NaN	NaN
3.448	-53.9892	46.441	129.8204	0.12343	0.15508	0.037012	-153.4275	-29.3417	1558.672	-0.74414	2.1328	-0.87695	NaN	NaN	NaN	NaN	NaN	NaN	NaN	NaN	NaN	NaN	NaN	NaN
3.45	-50.874	65.5604	155.0102	0.11357	0.17031	0.030761	-160.9508	-22.3691	1527.1	-0.73145	2.1089	-0.875	NaN	NaN	NaN	NaN	NaN	NaN	NaN	NaN	NaN	NaN	NaN	NaN
3.452	-59.9613	83.8379	182.6456	0.10772	0.18399	0.022168	-170.1585	-36.2833	1527.951	-0.71826	2.0923	-0.88037	NaN	NaN	NaN	NaN	NaN	NaN	NaN	NaN	NaN	NaN	NaN	NaN
3.454	-52.623	94.0229	199.0232	0.10029	0.20723	0.013379	-132.0851	28.2953	1511.1013	-0.7124	2.0688	-0.87842	NaN	NaN	NaN	NaN	NaN	NaN	NaN	NaN	NaN	NaN	NaN	NaN
3.456	-64.586	109.368	215.038	0.088379	0.23291	0	-142.3576	12.872	1491.8833	-0.71484	2.0566	-0.87305	NaN	NaN	NaN	NaN	NaN	NaN	NaN	NaN	NaN	NaN	NaN	NaN
3.458	-54.7977	116.493	248.414	0.075195	0.26484	-0.0054687	-131.46	51.8911	1489.5093	-0.7124	2.0239	-0.86475	NaN	NaN	NaN	NaN	NaN	NaN	NaN	NaN	NaN	NaN	NaN	NaN
3.46	-51.2201	114.028	294.91953	0.056739	0.30146	-0.019434	-125.0819	115.128	1460.843	-0.71093	2.0039	-0.86621	NaN	NaN	NaN	NaN	NaN	NaN	NaN	NaN	NaN	NaN	NaN	NaN
3.462	-40.233	112.613	330.5743	0.028223	0.34443	-0.036231	-107.792	81.36	1457.573	-0.70459	1.9829	-0.86084	NaN	NaN	NaN	NaN	NaN	NaN	NaN	NaN	NaN	NaN	NaN	NaN
3.464	-56.3317	105.954	364.724	0.00097666	0.38652	-0.055664	-86.047	118.745	1461.0176	-0.69141	1.9434	-0.86328	NaN	NaN	NaN	NaN	NaN	NaN	NaN	NaN	NaN	NaN	NaN	NaN
3.466	-51.077	101.0913	411.313	-0.030762	0.43555	-0.075684	-79.584	104.371	1448.1368	-0.68311	1.9302	-0.85693	NaN	NaN	NaN	NaN	NaN	NaN	NaN	NaN	NaN	NaN	NaN	NaN
3.468	-38.389	77.9487	485.656	-0.063672	0.48682	-0.10468	-71.448	83.828	1446.83933	-0.66748	1.8872	-0.84912	NaN	NaN	NaN	NaN	NaN	NaN	NaN	NaN	NaN	NaN	NaN	NaN
3.47	-37.966	80.8432	547.7582	-0.098144	0.5501	-0.12968	-55.377	134.59	1429.581	-0.65258	1.8577	-0.8435	NaN	NaN	NaN	NaN	NaN	NaN	NaN	NaN	NaN	NaN	NaN	NaN
3.472	-21.012	79.0906	603.6614	-0.14033	0.62119	-0.15703	-70.567	91.52812	1414.2171	-0.63623	1.8267	-0.8374	NaN	NaN	NaN	NaN	NaN	NaN	NaN	NaN	NaN	NaN	NaN	NaN
3.474	-24.384	82.356	655.8364	-0.18506	0.6958	-0.18584	-62.368	85.3067	1395.1022	-0.61426	1.793	-0.82324	NaN	NaN	NaN	NaN	NaN	NaN	NaN	NaN	NaN	NaN	NaN	NaN
3.476	-7.877	77.993	738.7407	-0.23633	0.77637	-0.2207	-51.282	113.3411	1348.158	-0.6084	1.7715	-0.81836	NaN	NaN	NaN	NaN	NaN	NaN	NaN	NaN	NaN	NaN	NaN	NaN
3.478	-2.679	74.294	804.0456	-0.29062	0.85801	-0.25	-59.787	68.805	1335.4894	-0.58936	1.7251	-0.81201	NaN	NaN	NaN	NaN	NaN	NaN	NaN	NaN	NaN	NaN	NaN	NaN
3.48	1.213	70.653	830.1612	-0.35156	0.93906	-0.27383	-67.75	105.3534	1327.396	-0.57203	1.6907	-0.80054	NaN	NaN	NaN	NaN	NaN	NaN	NaN	NaN	NaN	NaN	NaN	NaN
3.482	6.317	60.2142	869.689	-0.41523	1.0152	-0.29414	-81.296	103.5001863	1301.177	-0.55225	1.6567	-0.7915	NaN	NaN	NaN	NaN	NaN	NaN	NaN	NaN	NaN	NaN	NaN	NaN
3.484	4.019	42.9909	888.818	-0.4834	1.0852	-0.31904	-90.019	89.8979	1288.501	-0.52686	1.6079	-0.77295	NaN	NaN	NaN	NaN	NaN	NaN	NaN	NaN	NaN	NaN	NaN	NaN
3.486	-2.714	17.9041	906.001	-0.54053	1.147	-0.34717	-87.6307	163.293	1251.7799	-0.50977	1.584	-0.76855	NaN	NaN	NaN	NaN	NaN	NaN	NaN	NaN	NaN	NaN	NaN	NaN
3.488	-9.128	13.2655	888.773	-0.59267	1.195	-0.37178	-114.6748	149.9832	1232.0166	-0.48877	1.5391	-0.74805	NaN	NaN	NaN	NaN	NaN	NaN	NaN	NaN	NaN	NaN	NaN	NaN
3.49	7.208	1.0666	879.324	-0.62929	1.2313	-0.38906	-93.571	177.337	1220.4739	-0.47461	1.5039	-0.72754	NaN	NaN	NaN	NaN	NaN	NaN	NaN	NaN	NaN	NaN	NaN	NaN
3.492	7.527	-6.7916	871.188	-0.64805	1.2594	-0.40547	-104.2504	223.545	1180.375	-0.46338	1.4731	-0.71338	NaN	NaN	NaN	NaN	NaN	NaN	NaN	NaN	NaN	NaN	NaN	NaN
3.494	10.5287	-16.0988	860.4188	-0.65977	1.2709	-0.41231	-123.1467	188.839	1166.6932	-0.44531	1.4316	-0.69629	NaN	NaN	NaN	NaN	NaN	NaN	NaN	NaN	NaN	NaN	NaN	NaN
3.496	3.53	-14.4578	823.4695	-0.66699	1.2725	-0.41113	-74.6519	228.515	1140.635	-0.43555	1.4063	-0.68945	NaN	NaN	NaN	NaN	NaN	NaN	NaN	NaN	NaN	NaN	NaN	NaN
3.498	-10.4219	-19.4381	837.125	-0.66611	1.2813	-0.40615	-105.5223	195.096	1100.1659	-0.41357	1.3521	-0.66113	NaN	NaN	NaN	NaN	NaN	NaN	NaN	NaN	NaN	NaN	NaN	NaN
3.5	4.278	-8.54511	851.8512	-0.66709	1.2907	-0.3959	-105.996	163.4826	1074.6986	-0.39257	1.3059	-0.64819	NaN	NaN	NaN	NaN	NaN	NaN	NaN	NaN	NaN	NaN	NaN	NaN
3.502	-18.7285	-4.4726	847.8667	-0.66592	1.2896	-0.38379	-99.7976	203.634	1039.818	-0.37354	1.2583	-0.62549	NaN	NaN	NaN	NaN	NaN	NaN	NaN	NaN	NaN	NaN	NaN	NaN
3.504	-3.521	-3.8143	859.2071	-0.66269	1.2932	-0.36934	-124.3311	164.3304	1014.5692	-0.34473	1.1919	-0.60498	NaN	NaN	NaN	NaN	NaN	NaN	NaN	NaN	NaN	NaN	NaN	NaN
3.506	-20.2127	-14.172	875.2172	-0.65527	1.293	-0.36523	-83.953	180.5449	1011.644	-0.33154	1.1606	-0.59473	NaN	NaN	NaN	NaN	NaN	NaN	NaN	NaN	NaN	NaN	NaN	NaN
3.508	-11.568	-10.892	886.8398	-0.63379	1.3052	-0.36601	-79.7544	193.804	994.7003	-0.30908	1.0957	-0.57031	NaN	NaN	NaN	NaN	NaN	NaN	NaN	NaN	NaN	NaN	NaN	NaN
3.51	-20.973	-23.458	905.7186	-0.59765	1.2996	-0.36289	-64.174	147.265	990.949	-0.29566	1.0508	-0.55273	NaN	NaN	NaN	NaN	NaN	NaN	NaN	NaN	NaN	NaN	NaN	NaN
3.512	-27.671	-33.693	908.9707	-0.56562	1.284	-0.35352	-43.326	180.4415	960.167	-0.27637	1.0039	-0.54297	NaN	NaN	NaN	NaN	NaN	NaN	NaN	NaN	NaN	NaN	NaN	NaN
3.514	-31.456	-64.293	918.3941	-0.53496	1.2607	-0.33887	-48.248	182.772	917.1018	-0.25586	0.94434	-0.51318	NaN	NaN	NaN	NaN	NaN	NaN	NaN	NaN	NaN	NaN	NaN	NaN
3.516	-26.389	-105.09011	936.9629	-0.5127	1.2441	-0.32959	-25.694	173.706	881.622	-0.24951	0.9082	-0.50293	NaN	NaN	NaN	NaN	NaN	NaN	NaN	NaN	NaN	NaN	NaN	NaN
3.518	-26.802	-121.212	941.5489	-0.48907	1.2256	-0.32744	-4.124	223.6722	832.20066	-0.23242	0.84961	-0.4707	NaN	NaN	NaN	NaN	NaN	NaN	NaN	NaN	NaN	NaN	NaN	NaN
3.52	-33.111	-115.373	950.533	-0.4669	1.2095	-0.32666	-20.212	199.5185	800.495	-0.21607	0.80371	-0.45411	NaN	NaN	NaN	NaN	NaN	NaN	NaN	NaN	NaN	NaN	NaN	NaN
3.522	-25.709	-129.374	979.106	-0.44502	1.2075	-0.33564	6.007	207.49526	772.757	-0.20215	0.75977	-0.44043	NaN	NaN	NaN	NaN	NaN	NaN	NaN	NaN	NaN	NaN	NaN	NaN
3.524	-37.215	-140.436	997.724	-0.44248	1.2104	-0.33525	20.104	220.504	725.75251	-0.18555	0.69775	-0.40869	NaN	NaN	NaN	NaN	NaN	NaN	NaN	NaN	NaN	NaN	NaN	NaN
3.526	-22.887	-131.143	1003.843	-0.43311	1.2349	-0.36572	-4.214	188.8007	696.3638	-0.1748	0.66406	-0.39795	NaN	NaN	NaN	NaN	NaN	NaN	NaN	NaN	NaN	NaN	NaN	NaN
3.528	-31.943	-105.346	1033.1508	-0.41914	1.2481	-0.38398	-3.155	225.666	667.0799	-0.15137	0.59668	-0.37646	NaN	NaN	NaN	NaN	NaN	NaN	NaN	NaN	NaN	NaN	NaN	NaN
3.53	-17.623	-87.1623	1064.454	-0.41924	1.2578	-0.39424	-13.131	223.425	608.67	-0.13525	0.54346	-0.3623	NaN	NaN	NaN	NaN	NaN	NaN	NaN	NaN	NaN	NaN	NaN	NaN
3.532	-23.166	-78.881	1084.4175	-0.43955	1.2676	-0.41299	-26.659	208.3247	585.417	-0.11084	0.48682	-0.34082	NaN	NaN	NaN	NaN	NaN	NaN	NaN	NaN	NaN	NaN	NaN	NaN
3.534	-33.935	-66.314	1094.5268	-0.47109	1.283	-0.4252	-12.043	214.848	536.501	-0.081055	0.41113	-0.32422	NaN	NaN	NaN	NaN	NaN	NaN	NaN	NaN	NaN	NaN	NaN	NaN
3.536	-49.723	-53.325	1108.3439	-0.50195	1.2993	-0.43896	-37.77	147.1189	515.031	-0.062012	0.36963	-0.30664	NaN	NaN	NaN	NaN	NaN	NaN	NaN	NaN	NaN	NaN	NaN	NaN
3.538	-40.072	-62.533	1113.0314	-0.52305	1.3197	-0.46601	-24.665	169.13088	511.9479	-0.030273	0.29639	-0.28174	NaN	NaN	NaN	NaN	NaN	NaN	NaN	NaN	NaN	NaN	NaN	NaN
3.54	-43.938	-65.541	1126.353	-0.54101	1.3551	-0.48653	-34.0508	186.216	475.0261	-0.0051271	0.23828	-0.27002	NaN	NaN	NaN	NaN	NaN	NaN	NaN	NaN	NaN	NaN	NaN	NaN
3.542	-53.646	-80.1085	1128.893	-0.56016	1.3984	-0.50254	-47.4109	152.023	456.7135	0.020508	0.17969	-0.24902	NaN	NaN	NaN	NaN	NaN	NaN	NaN	NaN	NaN	NaN	NaN	NaN
3.544	-68.6803	-86.4642	1151.05	-0.5877	1.444	-0.51602	-41.093	166.0621	432.349	0.047852	0.11035	-0.22754	NaN	NaN	NaN	NaN	NaN	NaN	NaN	NaN	NaN	NaN	NaN	NaN
3.546	-55.025	-94.7995	1169.9213	-0.61719	1.4863	-0.5332	-82.7835	135.074	381.288	0.060059	0.07373	-0.21582	NaN	NaN	NaN	NaN	NaN	NaN	NaN	NaN	NaN	NaN	NaN	NaN
3.548	-70.88293	-104.1518	1175.443	-0.64424	1.5221	-0.54541	-73.0268	124.04	351.456	0.080078	0.0048828	-0.19629	NaN	NaN	NaN	NaN	NaN	NaN	NaN	NaN	NaN	NaN	NaN	NaN
3.55	-53.976	-101.621	1193.1955	-0.65918	1.5496	-0.55313	-44.8764	147.3579	323.747	0.097657	-0.046386	-0.17993	NaN	NaN	NaN	NaN	NaN	NaN	NaN	NaN	NaN	NaN	NaN	NaN
3.552	-63.3497	-99.659	1222.4325	-0.66817	1.5687	-0.5668	-80.0747	125.2867	314.399	0.11133	-0.092285	-0.1665	NaN	NaN	NaN	NaN	NaN	NaN	NaN	NaN	NaN	NaN	NaN	NaN
3.554	-50.123	-97.592	1235.0011	-0.68252	1.5804	-0.57002	-47.0405	141.5427	303.592	0.13428	-0.14648	-0.15186	NaN	NaN	NaN	NaN	NaN	NaN	NaN	NaN	NaN	NaN	NaN	NaN
3.556	-68.994	-85.2821	1251.8773	-0.69531	1.5977	-0.57617	-53.8513	140.527	259.104	0.14306	-0.18384	-0.13697	NaN	NaN	NaN	NaN	NaN	NaN	NaN	NaN	NaN	NaN	NaN	NaN
3.558	-72.454	-62.8647	1264.50897	-0.71299	1.6085	-0.59082	-68.9393	131.6899	249.3605	0.15381	-0.21875	-0.12646	NaN	NaN	NaN	NaN	NaN	NaN	NaN	NaN	NaN	NaN	NaN	NaN
3.56	-61.419	-64.89691	1277.56565	-0.73789	1.627	-0.60488	-25.357	151.038	239.375	0.17041	-0.26758	-0.10596	NaN	NaN	NaN	NaN	NaN	NaN	NaN	NaN	NaN	NaN	NaN	NaN
3.562	-63.246	-62.2351	1295.4649	-0.75938	1.6484	-0.61777	-35.646	131.642	208.9587	0.16992	-0.28271	-0.10352	NaN	NaN	NaN	NaN	NaN	NaN	NaN	NaN	NaN	NaN	NaN	NaN
3.564	-65.0439	-65.716	1307.95025	-0.7916	1.676	-0.63106	-34.666	110.152	201.7719	0.17578	-0.30908	-0.083496	NaN	NaN	NaN	NaN	NaN	NaN	NaN	NaN	NaN	NaN	NaN	NaN
3.566	-76.389	-50.571	1300.993	-0.82568	1.7056	-0.64893	-16.623	120.842	154.6	0.18139	-0.33179	-0.08252	NaN	NaN	NaN	NaN	NaN	NaN	NaN	NaN	NaN	NaN	NaN	NaN
3.568	-53.209	-50.226	1316.257	-0.8666	1.7373	-0.66348	-14.242	77.0204	135.62	0.18799	-0.35107	-0.076172	NaN	NaN	NaN	NaN	NaN	NaN	NaN	NaN	NaN	NaN	NaN	NaN
3.57	-55.283	-54.393	1322.733	-0.90234	1.7693	-0.67852	22.695	74.5064	137.7493	0.19385	-0.38867	-0.071777	NaN	NaN	NaN	NaN	NaN	NaN	NaN	NaN	NaN	NaN	NaN	NaN
3.572	-42.82	-48.9691	1318.983	-0.93789	1.7971	-0.68828	15.109	71.152	114.784	0.19629	-0.39941	-0.064941	NaN	NaN	NaN	NaN	NaN	NaN	NaN	NaN	NaN	NaN	NaN	NaN
3.574	-59.496	-48.0067	1326.155	-0.96367	1.8256	-0.69785	-10.066	53.8412	118.313	0.20801	-0.43164	-0.056152	NaN	NaN	NaN	NaN	NaN	NaN	NaN	NaN	NaN	NaN	NaN	NaN
3.576	-58.434	-46.2618	1348.3045	-0.98584	1.856	-0.71045	21.352	65.537	123.0573	0.20581	-0.44385	-0.0625	NaN	NaN	NaN	NaN	NaN	NaN	NaN	NaN	NaN	NaN	NaN	NaN
3.578	-55.098	-47.9085	1366.5941	-1.0019	1.8735	-0.71592	13.916	50.8952	122.294	0.20947	-0.46338	-0.056641	NaN	NaN	NaN	NaN	NaN	NaN	NaN	NaN	NaN	NaN	NaN	NaN
3.58	-47.785	-41.4324	1372.84207	-1.0153	1.8931	-0.72236	4.427	42.6712	124.423	0.21924	-0.48291	-0.046387	NaN	NaN	NaN	NaN	NaN	NaN	NaN	NaN	NaN	NaN	NaN	NaN
3.582	-50.369	-35.2894	1412.362	-1.0313	1.902	-0.72119	14.221	47.5045	83.7678	0.2207	-0.49561	-0.048828	NaN	NaN	NaN	NaN	NaN	NaN	NaN	NaN	NaN	NaN	NaN	NaN
3.584	-44.022	-40.4603	1409.039	-1.0425	1.9056	-0.71728	-5.016	39.7072	59.3822	0.21924	-0.49121	-0.046387	NaN	NaN	NaN	NaN	NaN	NaN	NaN	NaN	NaN	NaN	NaN	NaN
3.586	-40.893	-34.602	1409.0348	-1.0488	1.9063	-0.71289	0.481000000000002	55.3465	58.7422	0.20215	-0.48657	-0.047363	NaN	NaN	NaN	NaN	NaN	NaN	NaN	NaN	NaN	NaN	NaN	NaN
3.588	-68.637	-33.0822	1405.6424	-1.0512	1.9076	-0.71972	-13.564	65.36	33.041	0.18311	-0.46045	-0.056641	NaN	NaN	NaN	NaN	NaN	NaN	NaN	NaN	NaN	NaN	NaN	NaN
3.59	-78.0285	-23.082	1409.4851	-1.0488	1.9047	-0.71387	-33.361	44.9713	49.0612	0.15186	-0.40967	-0.05957	NaN	NaN	NaN	NaN	NaN	NaN	NaN	NaN	NaN	NaN	NaN	NaN
3.592	-44.785	-27.6193	1418.879	-1.0438	1.8957	-0.70879	-9.482	55.403	53.4083	0.14258	-0.39209	-0.050293	NaN	NaN	NaN	NaN	NaN	NaN	NaN	NaN	NaN	NaN	NaN	NaN
3.594	-58.3006	-19.0372	1404.1673	-1.0389	1.8809	-0.69912	-51.6743	52.3391	32.6263	0.10889	-0.34717	-0.05957	NaN	NaN	NaN	NaN	NaN	NaN	NaN	NaN	NaN	NaN	NaN	NaN
3.596	-61.264	-0.1401	1381.9803	-1.0371	1.8672	-0.69336	-40.327	55.5923	49.867	0.076661	-0.29834	-0.070312	NaN	NaN	NaN	NaN	NaN	NaN	NaN	NaN	NaN	NaN	NaN	NaN
3.598	-69.155	5.4375	1383.9068	-1.0251	1.8538	-0.68808	-35.224	57.899	24.8854	0.043457	-0.24707	-0.073242	NaN	NaN	NaN	NaN	NaN	NaN	NaN	NaN	NaN	NaN	NaN	NaN
3.6	-47.679	12.6457	1388.6442	-1.0211	1.8371	-0.67969	-94.471	43.1133	10.9386	0.0024414	-0.15576	-0.083496	NaN	NaN	NaN	NaN	NaN	NaN	NaN	NaN	NaN	NaN	NaN	NaN
3.602	-73.3768	27.7572	1375.2274	-1.0188	1.8262	-0.66875	-43.0392	27.594	35.5244	-0.025879	-0.11768	-0.085938	NaN	NaN	NaN	NaN	NaN	NaN	NaN	NaN	NaN	NaN	NaN	NaN
3.604	-59.357	42.5828	1386.7832	-1.0161	1.8155	-0.66504	-54.7521	10.742	23.635	-0.072266	-0.024414	-0.081543	NaN	NaN	NaN	NaN	NaN	NaN	NaN	NaN	NaN	NaN	NaN	NaN
3.606	-61.634	37.707	1393.9494	-1.0137	1.7969	-0.65527	-75.2966	-12.038	37.1182	-0.11474	0.043701	-0.075928	NaN	NaN	NaN	NaN	NaN	NaN	NaN	NaN	NaN	NaN	NaN	NaN
3.608	-71.835	39.637	1396.6749	-1.0109	1.7892	-0.64561	-41.3002	11.283	41.6711	-0.15771	0.10791	-0.078613	NaN	NaN	NaN	NaN	NaN	NaN	NaN	NaN	NaN	NaN	NaN	NaN
3.61	-69.109	42.12	1397.8013	-1.0055	1.777	-0.63526	-67.0855	20.6469	13.743	-0.21436	0.18896	-0.089355	NaN	NaN	NaN	NaN	NaN	NaN	NaN	NaN	NaN	NaN	NaN	NaN
3.612	-73.13	48.085	1373.5548	-0.9997	1.7689	-0.62705	-44.501	20.679	49.291	-0.23535	0.2207	-0.097168	NaN	NaN	NaN	NaN	NaN	NaN	NaN	NaN	NaN	NaN	NaN	NaN
3.614	-67.442	45.1623	1359.1866	-0.98613	1.76	-0.61738	-21.95	27.1526	35.5597	-0.27393	0.28711	-0.10352	NaN	NaN	NaN	NaN	NaN	NaN	NaN	NaN	NaN	NaN	NaN	NaN
3.616	-74.595	37.2648	1333.2035	-0.97852	1.748	-0.61133	-30.292	13.188	25.28007	-0.29175	0.3335	-0.10913	NaN	NaN	NaN	NaN	NaN	NaN	NaN	NaN	NaN	NaN	NaN	NaN
3.618	-83.672	36.164	1311.3021	-0.96172	1.736	-0.60195	4.444	9.089	41.9599	-0.30322	0.37939	-0.11621	NaN	NaN	NaN	NaN	NaN	NaN	NaN	NaN	NaN	NaN	NaN	NaN
3.62	-72.702	42.603	1298.9219	-0.94639	1.7212	-0.59443	-9.54	25.429	15.174	-0.31299	0.4375	-0.12451	NaN	NaN	NaN	NaN	NaN	NaN	NaN	NaN	NaN	NaN	NaN	NaN
3.622	-69.37	49.0311	1300.2712	-0.92724	1.7028	-0.58779	-27.083	35.4671	39.35074	-0.31445	0.46191	-0.12988	NaN	NaN	NaN	NaN	NaN	NaN	NaN	NaN	NaN	NaN	NaN	NaN
3.624	-51.884	55.0056	1286.4576	-0.90283	1.6897	-0.57588	27.409	49.066	30.7216	-0.31006	0.49609	-0.13232	NaN	NaN	NaN	NaN	NaN	NaN	NaN	NaN	NaN	NaN	NaN	NaN
3.626	-59.158	69.4408	1265.4228	-0.88379	1.668	-0.56934	-0.902000000000001	53.101	0.370999999999999	-0.30566	0.50757	-0.13477	NaN	NaN	NaN	NaN	NaN	NaN	NaN	NaN	NaN	NaN	NaN	NaN
3.628	-56.28	71.4192	1271.3594	-0.86367	1.6469	-0.55898	2.743	42.65	10.108	-0.30273	0.50977	-0.13721	NaN	NaN	NaN	NaN	NaN	NaN	NaN	NaN	NaN	NaN	NaN	NaN
3.63	-46.452	85.2947	1247.1794	-0.84444	1.6204	-0.55069	22.218	45.526	11.252	-0.29199	0.49219	-0.13672	NaN	NaN	NaN	NaN	NaN	NaN	NaN	NaN	NaN	NaN	NaN	NaN
3.632	-47.381	88.568	1235.22987	-0.82256	1.5923	-0.53818	-8.315	29.722	25.2557	-0.28125	0.48389	-0.13477	NaN	NaN	NaN	NaN	NaN	NaN	NaN	NaN	NaN	NaN	NaN	NaN
3.634	-64.649	96.546	1202.8994	-0.80352	1.5647	-0.52852	16.504	27.4608	42.3667	-0.26465	0.44727	-0.12842	NaN	NaN	NaN	NaN	NaN	NaN	NaN	NaN	NaN	NaN	NaN	NaN
3.636	-72.683	95.21	1195.086	-0.78076	1.5396	-0.52197	-5.58	26.9651	9.817	-0.23706	0.41333	-0.12183	NaN	NaN	NaN	NaN	NaN	NaN	NaN	NaN	NaN	NaN	NaN	NaN
3.638	-56.946	83.241	1178.6696	-0.7543	1.5178	-0.50879	-9.835	12.75	30.5022	-0.21094	0.37402	-0.11475	NaN	NaN	NaN	NaN	NaN	NaN	NaN	NaN	NaN	NaN	NaN	NaN
3.64	-75.91612	86.1141	1146.6427	-0.73692	1.4883	-0.50342	18.84	20.88696	36.308	-0.16943	0.30859	-0.11475	NaN	NaN	NaN	NaN	NaN	NaN	NaN	NaN	NaN	NaN	NaN	NaN
3.642	-58.686	87.9934	1123.2626	-0.71426	1.4617	-0.48935	-33.185	15.5035	21.548	-0.14795	0.27588	-0.10889	NaN	NaN	NaN	NaN	NaN	NaN	NaN	NaN	NaN	NaN	NaN	NaN
3.644	-52.526	89.2954	1103.934	-0.69942	1.4405	-0.4834	-25.266	22.51775	39.029	-0.10693	0.2041	-0.10156	NaN	NaN	NaN	NaN	NaN	NaN	NaN	NaN	NaN	NaN	NaN	NaN
3.646	-32.908	90.8603	1093.0714	-0.68164	1.4199	-0.47266	-27.9725	32.53	29.0451	-0.068847	0.14746	-0.095215	NaN	NaN	NaN	NaN	NaN	NaN	NaN	NaN	NaN	NaN	NaN	NaN
3.648	-62.9764	100.576	1064.901	-0.6667	1.402	-0.46162	-67.1633	24.0763	26.2088	-0.031738	0.089844	-0.094238	NaN	NaN	NaN	NaN	NaN	NaN	NaN	NaN	NaN	NaN	NaN	NaN
3.65	-40.471	104.513	1055.4596	-0.65127	1.3826	-0.45224	-34.2694	22.1858	46.2361	0.0087891	0.024414	-0.088379	NaN	NaN	NaN	NaN	NaN	NaN	NaN	NaN	NaN	NaN	NaN	NaN
3.652	-45.196	109.68869	1045.8055	-0.64112	1.3602	-0.44248	-53.60864	32.657	6.151	0.035645	-0.0014648	-0.087402	NaN	NaN	NaN	NaN	NaN	NaN	NaN	NaN	NaN	NaN	NaN	NaN
3.654	-37.908	113.8423	1035.471	-0.63105	1.3363	-0.43476	-74.196	35.73894	21.1457	0.075684	-0.058105	-0.08252	NaN	NaN	NaN	NaN	NaN	NaN	NaN	NaN	NaN	NaN	NaN	NaN
3.656	-50.857	118.6263	1006.7106	-0.62109	1.3184	-0.4165	-31.668	49.247	29.9547	0.10156	-0.097659	-0.08374	NaN	NaN	NaN	NaN	NaN	NaN	NaN	NaN	NaN	NaN	NaN	NaN
3.658	-63.3904	123.6567	987.01181	-0.60469	1.2891	-0.4084	-65.4085	50.95	17.8672	0.12061	-0.13281	-0.084961	NaN	NaN	NaN	NaN	NaN	NaN	NaN	NaN	NaN	NaN	NaN	NaN
3.66	-54.676	120.604	967.172	-0.59209	1.263	-0.3959	-63.1727	42.3918	47.285	0.1416	-0.18066	-0.083984	NaN	NaN	NaN	NaN	NaN	NaN	NaN	NaN	NaN	NaN	NaN	NaN
3.662	-52.635	125.946	924.7655	-0.56905	1.2314	-0.38613	-29.002	50.212	27.1288	0.14844	-0.2002	-0.089355	NaN	NaN	NaN	NaN	NaN	NaN	NaN	NaN	NaN	NaN	NaN	NaN
3.664	-45.872	130.2414	892.1157	-0.54287	1.1962	-0.3753	-48.6305	31.2177	28.2645	0.15186	-0.23291	-0.086914	NaN	NaN	NaN	NaN	NaN	NaN	NaN	NaN	NaN	NaN	NaN	NaN
3.666	-53.536	135.843	865.69	-0.521	1.1587	-0.36475	-17.583	22.9905	44.411	0.15063	-0.24952	-0.079101	NaN	NaN	NaN	NaN	NaN	NaN	NaN	NaN	NaN	NaN	NaN	NaN
3.668	-34.785	131.2007	849.068	-0.5	1.1215	-0.34805	-25.8739	23.2428	33.48178	0.13623	-0.25684	-0.083496	NaN	NaN	NaN	NaN	NaN	NaN	NaN	NaN	NaN	NaN	NaN	NaN
3.67	-20.851	127.9278	818.021	-0.47968	1.0861	-0.33692	-47.0126	10.374	39.4542	0.1084	-0.25195	-0.084473	NaN	NaN	NaN	NaN	NaN	NaN	NaN	NaN	NaN	NaN	NaN	NaN
3.672	-27.879	126.5908	806.933	-0.45976	1.0533	-0.32364	15.185	14.8989	34.2021	0.090332	-0.23926	-0.084961	NaN	NaN	NaN	NaN	NaN	NaN	NaN	NaN	NaN	NaN	NaN	NaN
3.674	-28.528	133.6568	813.7352	-0.43945	1.0164	-0.31465	-12.514	8.7954	21.7264	0.053711	-0.21924	-0.084961	NaN	NaN	NaN	NaN	NaN	NaN	NaN	NaN	NaN	NaN	NaN	NaN
3.676	-17.773	137.388955	791.9234	-0.41602	0.979	-0.30566	-12.854	3.7514	60.528	0.023437	-0.19629	-0.091065	NaN	NaN	NaN	NaN	NaN	NaN	NaN	NaN	NaN	NaN	NaN	NaN
3.678	-19.894	146.1152	757.1082	-0.39649	0.94297	-0.29639	27.793	29.084	35.6522	-0.0043945	-0.16797	-0.099121	NaN	NaN	NaN	NaN	NaN	NaN	NaN	NaN	NaN	NaN	NaN	NaN
3.68	-46.075	153.091	731.3988	-0.37354	0.90713	-0.2833	-7.98	28.5664	16.63075	-0.032715	-0.13525	-0.10938	NaN	NaN	NaN	NaN	NaN	NaN	NaN	NaN	NaN	NaN	NaN	NaN
3.682	-46.4697	156.511	724.0215	-0.35713	0.86611	-0.27588	19.429	31.38281	38.947	-0.040527	-0.12598	-0.11328	NaN	NaN	NaN	NaN	NaN	NaN	NaN	NaN	NaN	NaN	NaN	NaN
3.684	-17.971	149.934	702.5925	-0.33604	0.8291	-0.26348	6.11	29.1577	27.02874	-0.056152	-0.104	-0.12598	NaN	NaN	NaN	NaN	NaN	NaN	NaN	NaN	NaN	NaN	NaN	NaN
3.686	-25.311	153.706	666.8827	-0.31445	0.78906	-0.26514	-1.395	12.521	50.296	-0.066163	-0.097169	-0.13745	NaN	NaN	NaN	NaN	NaN	NaN	NaN	NaN	NaN	NaN	NaN	NaN
3.688	-37.615	136.702	639.327	-0.28877	0.75303	-0.25234	28.168	5.7461	61.4883	-0.070313	-0.08252	-0.15137	NaN	NaN	NaN	NaN	NaN	NaN	NaN	NaN	NaN	NaN	NaN	NaN
3.69	-27.279	134.875	632.337	-0.26855	0.71679	-0.24238	-28.245	15.3169	41.779	-0.073242	-0.057617	-0.15869	NaN	NaN	NaN	NaN	NaN	NaN	NaN	NaN	NaN	NaN	NaN	NaN
3.692	-3.98099999999999	130.0027	615.1995	-0.24981	0.68399	-0.23652	-10.368	11.2334	85.4201	-0.071777	-0.03418	-0.17139	NaN	NaN	NaN	NaN	NaN	NaN	NaN	NaN	NaN	NaN	NaN	NaN
3.694	-22.414	150.0956	575.3485	-0.22744	0.64609	-0.22705	-4.568	13.1565	81.1228	-0.083008	0.0063477	-0.18799	NaN	NaN	NaN	NaN	NaN	NaN	NaN	NaN	NaN	NaN	NaN	NaN
3.696	-7.927	157.4457	558.3703	-0.21289	0.61133	-0.21973	-50.1682	16.8864	107.0003	-0.094238	0.046387	-0.21045	NaN	NaN	NaN	NaN	NaN	NaN	NaN	NaN	NaN	NaN	NaN	NaN
3.698	-10.182	159.918	553.7783	-0.19648	0.57978	-0.21006	-24.61	26.7677	155.504	-0.10205	0.067383	-0.22314	NaN	NaN	NaN	NaN	NaN	NaN	NaN	NaN	NaN	NaN	NaN	NaN
3.7	-17.679	152.327	536.13205	-0.17822	0.54814	-0.19658	-37.38026	29.2115	179.061	-0.11572	0.11475	-0.24463	NaN	NaN	NaN	NaN	NaN	NaN	NaN	NaN	NaN	NaN	NaN	NaN
3.702	-34.5726	160.317	521.7309	-0.16416	0.5169	-0.19541	-52.7062	22.653	233.078	-0.12793	0.15552	-0.25928	NaN	NaN	NaN	NaN	NaN	NaN	NaN	NaN	NaN	NaN	NaN	NaN
3.704	-33.52	153.212	503.5132	-0.14844	0.49053	-0.18603	-22.247	40.516	289.2504	-0.1416	0.19336	-0.27344	NaN	NaN	NaN	NaN	NaN	NaN	NaN	NaN	NaN	NaN	NaN	NaN
3.706	-34.636	145.649	504.2181	-0.13428	0.46143	-0.17725	-61.40769	72.632	308.4312	-0.16162	0.24854	-0.30029	NaN	NaN	NaN	NaN	NaN	NaN	NaN	NaN	NaN	NaN	NaN	NaN
3.708	-36.41	138.9617	468.6134	-0.12002	0.4373	-0.16767	-38.2675	89.651	374.0881	-0.17188	0.28418	-0.31396	NaN	NaN	NaN	NaN	NaN	NaN	NaN	NaN	NaN	NaN	NaN	NaN
3.71	-35.977	130.8554	439.0731	-0.10439	0.40635	-0.16455	-35.6114	109.14	420.405	-0.20264	0.3667	-0.33447	NaN	NaN	NaN	NaN	NaN	NaN	NaN	NaN	NaN	NaN	NaN	NaN
3.712	-31.326	129.1068	406.3185	-0.083691	0.37627	-0.15244	-75.016	93.0544	481.788	-0.23706	0.46142	-0.34277	NaN	NaN	NaN	NaN	NaN	NaN	NaN	NaN	NaN	NaN	NaN	NaN
3.714	-19.993	127.8589	408.5857	-0.071289	0.34717	-0.1503	3.318	90.6759	571.49	-0.28662	0.56494	-0.35693	NaN	NaN	NaN	NaN	NaN	NaN	NaN	NaN	NaN	NaN	NaN	NaN
3.716	-18.868	127.467433	371.9344	-0.058105	0.31934	-0.14551	-15.7923	92.439	633.475	-0.37305	0.76416	-0.38623	NaN	NaN	NaN	NaN	NaN	NaN	NaN	NaN	NaN	NaN	NaN	NaN
3.718	-24.946	119.9135	364.2096	-0.045605	0.28681	-0.1374	-33.4726	91.0094	739.2513	-0.42627	0.87354	-0.39697	NaN	NaN	NaN	NaN	NaN	NaN	NaN	NaN	NaN	NaN	NaN	NaN
3.72	-10.689	110.5297	364.1144	-0.031445	0.2542	-0.13076	-1.069	78.529	815.922	-0.53662	1.106	-0.44434	NaN	NaN	NaN	NaN	NaN	NaN	NaN	NaN	NaN	NaN	NaN	NaN
3.722	-8.817	103.8917	351.5597	-0.020898	0.22217	-0.1292	-52.4548	67.665	850.041	-0.62012	1.27	-0.48487	NaN	NaN	NaN	NaN	NaN	NaN	NaN	NaN	NaN	NaN	NaN	NaN
3.724	-33.554	113.2537	337.0056	-0.0097656	0.1876	-0.12695	-19.558	65.713	919.5429	-0.69727	1.418	-0.53418	NaN	NaN	NaN	NaN	NaN	NaN	NaN	NaN	NaN	NaN	NaN	NaN
3.726	-29.075	116.1073	319.5726	0.003418	0.15967	-0.12354	33.547	57.645	947.509	-0.76807	1.5601	-0.60693	NaN	NaN	NaN	NaN	NaN	NaN	NaN	NaN	NaN	NaN	NaN	NaN
3.728	-28.461	118.664	318.2861	0.022558	0.12383	-0.11562	-29.834	37.218	993.35	-0.78809	1.6025	-0.64453	NaN	NaN	NaN	NaN	NaN	NaN	NaN	NaN	NaN	NaN	NaN	NaN
3.73	-18.719	121.996	287.3565	0.037695	0.092188	-0.10801	-5.322	-5.4317	1059.597	-0.7832	1.6392	-0.72803	NaN	NaN	NaN	NaN	NaN	NaN	NaN	NaN	NaN	NaN	NaN	NaN
3.732	-38.5984	115.033	265.9286	0.051758	0.061719	-0.10059	-33.956	-39.3743	1024.8975	-0.74414	1.6106	-0.7771	NaN	NaN	NaN	NaN	NaN	NaN	NaN	NaN	NaN	NaN	NaN	NaN
3.734	-25.6	110.244	251.3247	0.060839	0.035937	-0.096485	-30.945	-88.169	1011.844	-0.68408	1.5493	-0.81201	NaN	NaN	NaN	NaN	NaN	NaN	NaN	NaN	NaN	NaN	NaN	NaN
3.736	-17.027	98.4924	249.43034	0.072754	0.0092773	-0.089844	29.099	-94.519	994.007	-0.57764	1.4556	-0.84912	NaN	NaN	NaN	NaN	NaN	NaN	NaN	NaN	NaN	NaN	NaN	NaN
3.738	-5.117	95.4775	228.8768	0.082422	-0.015137	-0.080762	-6.494	-88.809	972.217	-0.52197	1.4028	-0.85303	NaN	NaN	NaN	NaN	NaN	NaN	NaN	NaN	NaN	NaN	NaN	NaN
3.74	-20.007	101.534	214.4916	0.095996	-0.041601	-0.075586	-9.022	-98.428	969.596	-0.41699	1.2637	-0.89453	NaN	NaN	NaN	NaN	NaN	NaN	NaN	NaN	NaN	NaN	NaN	NaN
3.742	-8.582	79.996	211.9375	0.11279	-0.065429	-0.066601	-16.405	-79.0051	926.996	-0.33105	1.1506	-0.91088	NaN	NaN	NaN	NaN	NaN	NaN	NaN	NaN	NaN	NaN	NaN	NaN
3.744	-13.804	80.0967	216.169	0.12246	-0.087012	-0.06084	-67.7243	-83.9316	917.1908	-0.26758	1.0684	-0.92969	NaN	NaN	NaN	NaN	NaN	NaN	NaN	NaN	NaN	NaN	NaN	NaN
3.746	-17.504	86.63814	191.9042	0.12939	-0.10889	-0.057129	-19.171	-93.7658	959.2306	-0.2666	1.0879	-0.95703	NaN	NaN	NaN	NaN	NaN	NaN	NaN	NaN	NaN	NaN	NaN	NaN
3.748	-43.8844	94.8835	179.34628	0.13574	-0.12432	-0.042969	-24.496	-86.68	964.1156	-0.27881	1.1431	-0.98486	NaN	NaN	NaN	NaN	NaN	NaN	NaN	NaN	NaN	NaN	NaN	NaN
3.75	-20.967	89.417	190.6182	0.1377	-0.14004	-0.036425	-36.498	-95.8583	976.937	-0.25391	1.1934	-1.0586	NaN	NaN	NaN	NaN	NaN	NaN	NaN	NaN	NaN	NaN	NaN	NaN
3.752	-29.734	75.43	194.2282	0.13965	-0.15176	-0.031348	-18.637	-85.348	994.699	-0.21363	1.1636	-1.0752	NaN	NaN	NaN	NaN	NaN	NaN	NaN	NaN	NaN	NaN	NaN	NaN
3.754	-39.4544	76.5749	162.383	0.13818	-0.15742	-0.031641	-31.01939	-86.799	1008.451	-0.17236	1.1138	-1.0737	NaN	NaN	NaN	NaN	NaN	NaN	NaN	NaN	NaN	NaN	NaN	NaN
3.756	-32.83	74.18942	152.823	0.14209	-0.16846	-0.029297	-50.8874	-103.375	1086.303	-0.15283	1.0435	-1.0562	NaN	NaN	NaN	NaN	NaN	NaN	NaN	NaN	NaN	NaN	NaN	NaN
3.758	-26.843	71.928	135.0945	0.14541	-0.17793	-0.026465	11.0126	-88.137	1095.3443	-0.16797	1.0234	-1.0488	NaN	NaN	NaN	NaN	NaN	NaN	NaN	NaN	NaN	NaN	NaN	NaN
3.76	-31.612	68.085	139.8531	0.14844	-0.18643	-0.030176	-15.2138	-134.1494	1108.504	-0.23633	1.0278	-1.0444	NaN	NaN	NaN	NaN	NaN	NaN	NaN	NaN	NaN	NaN	NaN	NaN
3.762	-29.297	65.7459	121.5149	0.15	-0.1876	-0.037598	-10.512	-175.948	1178.106	-0.30323	1.0676	-1.0437	NaN	NaN	NaN	NaN	NaN	NaN	NaN	NaN	NaN	NaN	NaN	NaN
3.764	-37.607	54.2975	114.3627	0.15234	-0.19629	-0.035938	-37.2125	-202.67	1185.264	-0.36133	1.1387	-1.0762	NaN	NaN	NaN	NaN	NaN	NaN	NaN	NaN	NaN	NaN	NaN	NaN
3.766	-11.64	59.0882	114.1616	0.15283	-0.19873	-0.032227	-48.1008	-250.233	1237.1066	-0.4126	1.2051	-1.0879	NaN	NaN	NaN	NaN	NaN	NaN	NaN	NaN	NaN	NaN	NaN	NaN
3.768	-24.287	57.05133	108.7913	0.14668	-0.19795	-0.033203	6.732	-225.904	1273.322	-0.41943	1.2974	-1.1206	NaN	NaN	NaN	NaN	NaN	NaN	NaN	NaN	NaN	NaN	NaN	NaN
3.77	-33.472	60.4483	98.6143	0.14209	-0.18711	-0.040722	-11.6129	-213.041	1264.8752	-0.41406	1.5176	-1.1836	NaN	NaN	NaN	NaN	NaN	NaN	NaN	NaN	NaN	NaN	NaN	NaN
3.772	-36.923	59.1556	106.5994	0.13584	-0.17187	-0.041894	17.269	-222.633	1315.1649	-0.44507	1.5386	-1.1587	NaN	NaN	NaN	NaN	NaN	NaN	NaN	NaN	NaN	NaN	NaN	NaN
3.774	-30.341	60.649	113.5822	0.12402	-0.16113	-0.041309	37.9609	-166.238	1333.012	-0.50049	1.5317	-1.1323	NaN	NaN	NaN	NaN	NaN	NaN	NaN	NaN	NaN	NaN	NaN	NaN
3.776	-28.479	67.333	87.4276	0.11719	-0.14307	-0.041992	-12.689	-139.8905	1357.5264	-0.52246	1.6094	-1.1836	NaN	NaN	NaN	NaN	NaN	NaN	NaN	NaN	NaN	NaN	NaN	NaN
3.778	-44.19	61.4814	76.5398	0.10098	-0.11533	-0.053027	29.7246	-115.76251	1408.343	-0.50586	1.6504	-1.2363	NaN	NaN	NaN	NaN	NaN	NaN	NaN	NaN	NaN	NaN	NaN	NaN
3.78	-23.889	55.6038	77.0046	0.082226	-0.088769	-0.057715	23.5868	-96.967	1383.4165	-0.44092	1.6548	-1.2788	NaN	NaN	NaN	NaN	NaN	NaN	NaN	NaN	NaN	NaN	NaN	NaN
3.782	-31.012	56.3161	86.3941	0.072852	-0.069629	-0.062403	6.019	-138.9411	1408.669	-0.40235	1.6241	-1.2559	NaN	NaN	NaN	NaN	NaN	NaN	NaN	NaN	NaN	NaN	NaN	NaN
3.784	-18.229	60.5831	56.211	0.065527	-0.047656	-0.07041	24.302	-114.662	1407.8529	-0.38232	1.5903	-1.2319	NaN	NaN	NaN	NaN	NaN	NaN	NaN	NaN	NaN	NaN	NaN	NaN
3.786	-23.655	60.4249	44.939	0.049805	-0.018555	-0.063965	15.29	-108.38	1397.833	-0.38672	1.542	-1.2363	NaN	NaN	NaN	NaN	NaN	NaN	NaN	NaN	NaN	NaN	NaN	NaN
3.788	-11.323	45.511	67.2728	0.032617	0.0076169	-0.070313	-1.837	-127.516	1420.7282	-0.40771	1.5259	-1.2339	NaN	NaN	NaN	NaN	NaN	NaN	NaN	NaN	NaN	NaN	NaN	NaN
3.79	-11.279	40.7656	71.99997	0.012793	0.032031	-0.072461	30.9783	-104.278	1433.655	-0.47656	1.5137	-1.2227	NaN	NaN	NaN	NaN	NaN	NaN	NaN	NaN	NaN	NaN	NaN	NaN
3.792	-19.878	45.5595	60.4763	-0.002832	0.048047	-0.070508	-21.0515	-148.8269	1445.603	-0.54444	1.5393	-1.2072	NaN	NaN	NaN	NaN	NaN	NaN	NaN	NaN	NaN	NaN	NaN	NaN
3.794	-35.446	57.998	52.0029	-0.016211	0.066406	-0.074805	-9.782	-163.147	1479.45	-0.61523	1.5879	-1.2109	NaN	NaN	NaN	NaN	NaN	NaN	NaN	NaN	NaN	NaN	NaN	NaN
3.796	-39.816	54.017	52.7845	-0.025879	0.08252	-0.07666	19.268	-135.9745	1488.649	-0.70264	1.6724	-1.23	NaN	NaN	NaN	NaN	NaN	NaN	NaN	NaN	NaN	NaN	NaN	NaN
3.798	-32.538	49.258	72.8421	-0.035547	0.095117	-0.077832	-26.9217	-170.319	1516.563	-0.75098	1.7148	-1.2383	NaN	NaN	NaN	NaN	NaN	NaN	NaN	NaN	NaN	NaN	NaN	NaN
3.8	-37.878	49.7309	42.443	-0.046289	0.11163	-0.080566	-6.788	-133.1951	1542.295	-0.81982	1.7876	-1.2388	NaN	NaN	NaN	NaN	NaN	NaN	NaN	NaN	NaN	NaN	NaN	NaN
3.802	-44.646	45.3151	41.5735	-0.054102	0.12647	-0.081348	-16.83985	-129.9228	1523.441	-0.86084	1.8306	-1.2329	NaN	NaN	NaN	NaN	NaN	NaN	NaN	NaN	NaN	NaN	NaN	NaN
3.804	-26.02	42.2829	47.8481	-0.058887	0.14365	-0.079004	-34.5062	-148.816	1542.228	-0.8999	1.8638	-1.23	NaN	NaN	NaN	NaN	NaN	NaN	NaN	NaN	NaN	NaN	NaN	NaN
3.806	-36.557	42.7871	50.80744	-0.064941	0.15771	-0.07959	-3.982	-85.4829	1537.85	-0.94678	1.8911	-1.23	NaN	NaN	NaN	NaN	NaN	NaN	NaN	NaN	NaN	NaN	NaN	NaN
3.808	-31.595	43.60893	37.76	-0.068848	0.16289	-0.082227	-39.772	-87.15669	1539.278	-0.96631	1.9067	-1.2202	NaN	NaN	NaN	NaN	NaN	NaN	NaN	NaN	NaN	NaN	NaN	NaN
3.81	-31.411	37.8781	34.28909	-0.072657	0.16308	-0.082617	-9.189	-67.9185	1569.8235	-1.0029	1.9297	-1.21	NaN	NaN	NaN	NaN	NaN	NaN	NaN	NaN	NaN	NaN	NaN	NaN
3.812	-14.441	31.7309	40.4064	-0.071094	0.16231	-0.07832	-7.9442	-24.343	1531.097	-1.0173	1.9426	-1.2	NaN	NaN	NaN	NaN	NaN	NaN	NaN	NaN	NaN	NaN	NaN	NaN
3.814	-35.565	30.7645	36.6452	-0.06709	0.16172	-0.07998	-27.4099	-54.007	1541.654	-1.0269	1.9575	-1.1929	NaN	NaN	NaN	NaN	NaN	NaN	NaN	NaN	NaN	NaN	NaN	NaN
3.816	-40.74	34.429	35.602	-0.060547	0.15967	-0.07666	1.84	-19.063	1548.795	-1.0278	1.9653	-1.1929	NaN	NaN	NaN	NaN	NaN	NaN	NaN	NaN	NaN	NaN	NaN	NaN
3.818	-41.088	35.1003	40.4998	-0.057617	0.14814	-0.082325	1.173	-38.577	1536.17	-1.0249	1.9634	-1.1909	NaN	NaN	NaN	NaN	NaN	NaN	NaN	NaN	NaN	NaN	NaN	NaN
3.82	-32.497	41.401	36.25862	-0.051172	0.13516	-0.08711	5.899	-50.158	1561.068198	-1.0054	1.9536	-1.1772	NaN	NaN	NaN	NaN	NaN	NaN	NaN	NaN	NaN	NaN	NaN	NaN
3.822	-38.6544	41.479	26.6486	-0.039844	0.12031	-0.091016	43.635	-8.489	1552.3572	-0.99514	1.9395	-1.168	NaN	NaN	NaN	NaN	NaN	NaN	NaN	NaN	NaN	NaN	NaN	NaN
3.824	-43.687	33.531	34.66361	-0.028027	0.10019	-0.094922	-15.3764	-39.0854	1544.8114	-0.98145	1.9297	-1.1543	NaN	NaN	NaN	NaN	NaN	NaN	NaN	NaN	NaN	NaN	NaN	NaN
3.826	-21.61	27.41	35.4085	-0.012207	0.083984	-0.09375	21.6708	-34.2033	1583.543	-0.97656	1.9248	-1.1445	NaN	NaN	NaN	NaN	NaN	NaN	NaN	NaN	NaN	NaN	NaN	NaN
3.828	-27.442	34.0697	39.06604	-0.0014648	0.063086	-0.093359	17.705	-8.035	1571.3239	-0.96826	1.9263	-1.144	NaN	NaN	NaN	NaN	NaN	NaN	NaN	NaN	NaN	NaN	NaN	NaN
3.83	-14.133	38.289	30.03658	0.0023437	0.046777	-0.094042	6.253	-47.096	1579.101	-0.95996	1.9258	-1.1328	NaN	NaN	NaN	NaN	NaN	NaN	NaN	NaN	NaN	NaN	NaN	NaN
3.832	-22.935	32.6335	29.0162	0.0078125	0.033105	-0.10498	50.972	-22.9203	1590.989	-0.94751	1.927	-1.1291	NaN	NaN	NaN	NaN	NaN	NaN	NaN	NaN	NaN	NaN	NaN	NaN
3.834	-13.82	26.2382	44.74438	0.015137	0.020605	-0.10898	31.759	-26.5589	1550.7211	-0.93506	1.9204	-1.1245	NaN	NaN	NaN	NaN	NaN	NaN	NaN	NaN	NaN	NaN	NaN	NaN
3.836	-5.056	11.091	53.0887	0.013672	0.010254	-0.11621	5.728	-44.589	1563.546	-0.90967	1.9028	-1.1079	NaN	NaN	NaN	NaN	NaN	NaN	NaN	NaN	NaN	NaN	NaN	NaN
3.838	-21.364	6.59463	43.8956	0.020215	0.0019531	-0.12324	50.809	18.28459	1539.4829	-0.89184	1.8957	-1.0984	NaN	NaN	NaN	NaN	NaN	NaN	NaN	NaN	NaN	NaN	NaN	NaN
3.84	-34.961	9.25819	56.6927	0.021094	-0.0033203	-0.13135	5.539	16.6712	1510.3	-0.875	1.8789	-1.0898	NaN	NaN	NaN	NaN	NaN	NaN	NaN	NaN	NaN	NaN	NaN	NaN
3.842	-26.102	3.174	84.2599	0.023438	-0.0095704	-0.14385	20.087	34.7358	1528.514	-0.854	1.8638	-1.0796	NaN	NaN	NaN	NaN	NaN	NaN	NaN	NaN	NaN	NaN	NaN	NaN
3.844	-34.433	-0.984	103.0204	0.025781	-0.0042969	-0.14639	25.3695	87.186	1491.415	-0.83984	1.8594	-1.0723	NaN	NaN	NaN	NaN	NaN	NaN	NaN	NaN	NaN	NaN	NaN	NaN
3.846	-41.976	-3.8813	85.665	0.024902	0.0039063	-0.15625	-35.1649	75.242	1487.942	-0.82031	1.8379	-1.0625	NaN	NaN	NaN	NaN	NaN	NaN	NaN	NaN	NaN	NaN	NaN	NaN
3.848	-46.3942	-13.9924	95.4865	0.018262	0.017187	-0.16826	11.981	115.516	1482.0446	-0.80664	1.8115	-1.0474	NaN	NaN	NaN	NaN	NaN	NaN	NaN	NaN	NaN	NaN	NaN	NaN
3.85	-14.898	0.113731	120.9424	-0.0012696	0.038086	-0.17763	-14.982	119.648	1452.712	-0.79297	1.7891	-1.0391	NaN	NaN	NaN	NaN	NaN	NaN	NaN	NaN	NaN	NaN	NaN	NaN
3.852	-18.999	11.7193	156.95132	-0.014942	0.057227	-0.18467	-40.8185	81.53	1439.2188	-0.76904	1.7544	-1.019	NaN	NaN	NaN	NaN	NaN	NaN	NaN	NaN	NaN	NaN	NaN	NaN
3.854	-18.513	33.307	163.939	-0.028711	0.074512	-0.19765	2.019	116.4808	1409.688	-0.75879	1.7344	-1.0059	NaN	NaN	NaN	NaN	NaN	NaN	NaN	NaN	NaN	NaN	NaN	NaN
3.856	-21.369	45.091	176.3525	-0.041992	0.095703	-0.21094	-57.3137	78.013	1378.057	-0.73389	1.6919	-0.9917	NaN	NaN	NaN	NaN	NaN	NaN	NaN	NaN	NaN	NaN	NaN	NaN
3.858	-14.767	58.005	224.0212	-0.061132	0.12207	-0.22246	-32.347	83.688	1399.3254	-0.7124	1.6661	-0.97558	NaN	NaN	NaN	NaN	NaN	NaN	NaN	NaN	NaN	NaN	NaN	NaN
3.86	-16.429	74.8585	257.006	-0.072656	0.15137	-0.24219	-38.8897	112.2925	1366.7983	-0.69629	1.6406	-0.96191	NaN	NaN	NaN	NaN	NaN	NaN	NaN	NaN	NaN	NaN	NaN	NaN
3.862	-16.959	95.27473	307.3772	-0.084375	0.18183	-0.25352	-56.1314	72.952	1333.9548	-0.68115	1.6099	-0.94482	NaN	NaN	NaN	NaN	NaN	NaN	NaN	NaN	NaN	NaN	NaN	NaN
3.864	-0.199999999999999	101.4626	357.6357	-0.098436	0.2169	-0.2752	-27.485	91.367	1316.38596	-0.67139	1.5845	-0.93311	NaN	NaN	NaN	NaN	NaN	NaN	NaN	NaN	NaN	NaN	NaN	NaN
3.866	0.209000000000003	114.619	412.8898	-0.12061	0.25342	-0.28955	-53.2906	116.6542	1249.616	-0.65674	1.5513	-0.91162	NaN	NaN	NaN	NaN	NaN	NaN	NaN	NaN	NaN	NaN	NaN	NaN
3.868	-11.61061	116.947	460.473	-0.14844	0.30459	-0.30947	-44.8984	108.503	1240.3818	-0.64111	1.52	-0.89551	NaN	NaN	NaN	NaN	NaN	NaN	NaN	NaN	NaN	NaN	NaN	NaN
3.87	-13.748	113.796	519.358	-0.18447	0.36407	-0.32988	-16.502	160.387	1227.902	-0.62451	1.4888	-0.88232	NaN	NaN	NaN	NaN	NaN	NaN	NaN	NaN	NaN	NaN	NaN	NaN
3.872	9.211	98.0946	606.468	-0.21768	0.43321	-0.35957	-51.191	145.7276	1198.8005	-0.59961	1.4443	-0.86328	NaN	NaN	NaN	NaN	NaN	NaN	NaN	NaN	NaN	NaN	NaN	NaN
3.874	16.0991	99.7545	682.121	-0.25713	0.51338	-0.38564	-22.995	157.51858	1185.8649	-0.5835	1.4233	-0.8501	NaN	NaN	NaN	NaN	NaN	NaN	NaN	NaN	NaN	NaN	NaN	NaN
3.876	21.1916	87.0569	743.61	-0.30127	0.59668	-0.39893	-9.63	191.562	1139.122	-0.55713	1.3696	-0.82959	NaN	NaN	NaN	NaN	NaN	NaN	NaN	NaN	NaN	NaN	NaN	NaN
3.878	13.9111	78.495	827.705	-0.34999	0.7036	-0.41621	-27.389	168.599	1112.73304	-0.54053	1.3225	-0.80835	NaN	NaN	NaN	NaN	NaN	NaN	NaN	NaN	NaN	NaN	NaN	NaN
3.88	20.9459	56.7797	924.2982	-0.4077	0.81687	-0.43857	19.443	192.622	1095.8118	-0.51904	1.2778	-0.7915	NaN	NaN	NaN	NaN	NaN	NaN	NaN	NaN	NaN	NaN	NaN	NaN
3.882	12.5076	35.2517	981.0765	-0.47371	0.93288	-0.45302	-10.769	201.327	1035.03	-0.47998	1.2173	-0.76025	NaN	NaN	NaN	NaN	NaN	NaN	NaN	NaN	NaN	NaN	NaN	NaN
3.884	13.152	20.3243	991.4044	-0.55418	1.0509	-0.46943	-9.764	173.3419	997.129	-0.46436	1.1841	-0.75244	NaN	NaN	NaN	NaN	NaN	NaN	NaN	NaN	NaN	NaN	NaN	NaN
3.886	13.8002	8.1721	1007.786	-0.63916	1.1704	-0.47314	5.138	190.262	965.932	-0.42969	1.1191	-0.73242	NaN	NaN	NaN	NaN	NaN	NaN	NaN	NaN	NaN	NaN	NaN	NaN
3.888	-2.265	-23.6125	1035.601	-0.72836	1.2745	-0.47442	-56.3969	158.648	939.081	-0.3977	1.0703	-0.70654	NaN	NaN	NaN	NaN	NaN	NaN	NaN	NaN	NaN	NaN	NaN	NaN
3.89	2.462	-31.9296	1021.195	-0.81902	1.3649	-0.48498	-5.217	161.3587	945.45	-0.36719	1.0195	-0.67969	NaN	NaN	NaN	NaN	NaN	NaN	NaN	NaN	NaN	NaN	NaN	NaN
3.892	-12.573	-52.87	996.528	-0.89754	1.4254	-0.50842	1.963	190.665	917.163	-0.32959	0.95361	-0.646	NaN	NaN	NaN	NaN	NaN	NaN	NaN	NaN	NaN	NaN	NaN	NaN
3.894	-25.941	-54.051	976.435	-0.96597	1.4661	-0.54447	-26.711	168.2557	888.833	-0.31201	0.91846	-0.63623	NaN	NaN	NaN	NaN	NaN	NaN	NaN	NaN	NaN	NaN	NaN	NaN
3.896	-13.237	-55.234	941.6375	-1.0029	1.4863	-0.57715	-5.045	170.7868	873.198	-0.27979	0.85205	-0.59033	NaN	NaN	NaN	NaN	NaN	NaN	NaN	NaN	NaN	NaN	NaN	NaN
3.898	-17.867	-59.794	915.5871	-1.0081	1.4747	-0.5983	-27.215	189.564	819.9208	-0.25952	0.79956	-0.56617	NaN	NaN	NaN	NaN	NaN	NaN	NaN	NaN	NaN	NaN	NaN	NaN
3.9	-31.838	-53.116	876.804	-0.98572	1.4372	-0.61691	-38.142	180.732	779.154	-0.24072	0.75488	-0.53906	NaN	NaN	NaN	NaN	NaN	NaN	NaN	NaN	NaN	NaN	NaN	NaN
3.902	-30.614	-48.7025	885.602	-0.93148	1.397	-0.64422	2.89	197.8151	744.4631	-0.20996	0.69141	-0.50439	NaN	NaN	NaN	NaN	NaN	NaN	NaN	NaN	NaN	NaN	NaN	NaN
3.904	-3.607	-31.559	902.7344	-0.87584	1.3565	-0.67404	-63.0148	186.8329	700.1634	-0.19434	0.6626	-0.48193	NaN	NaN	NaN	NaN	NaN	NaN	NaN	NaN	NaN	NaN	NaN	NaN
3.906	-18.3941	-24.032	914.1933	-0.83594	1.3203	-0.68945	-42.504	167.6496	673.14	-0.16895	0.5957	-0.44238	NaN	NaN	NaN	NaN	NaN	NaN	NaN	NaN	NaN	NaN	NaN	NaN
3.908	-19.368	-15.726	917.759	-0.80267	1.2889	-0.70913	-29.633	187.833	631.3806	-0.14477	0.55371	-0.41284	NaN	NaN	NaN	NaN	NaN	NaN	NaN	NaN	NaN	NaN	NaN	NaN
3.91	-30.126	-16.439	946.843	-0.73593	1.2413	-0.7354	-74.322	180.9673	581.6998	-0.12012	0.51514	-0.38379	NaN	NaN	NaN	NaN	NaN	NaN	NaN	NaN	NaN	NaN	NaN	NaN
3.912	-23.482	-25.89	960.269	-0.64437	1.164	-0.75494	-30.003	174.7703	563.9111	-0.080078	0.46436	-0.34814	NaN	NaN	NaN	NaN	NaN	NaN	NaN	NaN	NaN	NaN	NaN	NaN
3.914	-26.32446	-48.079	962.223	-0.55796	1.0566	-0.75363	-63.2999	180.226	503.271	-0.062988	0.43555	-0.33301	NaN	NaN	NaN	NaN	NaN	NaN	NaN	NaN	NaN	NaN	NaN	NaN
3.916	-28.7401	-75.604	973.3024	-0.4873	0.92822	-0.75146	-72.8513	148.0053	464.8058	-0.028809	0.37598	-0.29541	NaN	NaN	NaN	NaN	NaN	NaN	NaN	NaN	NaN	NaN	NaN	NaN
3.918	-3.8428	-101.777	982.4305	-0.43443	0.81648	-0.73075	-29.349	168.898	437.079	-0.0012207	0.34521	-0.27221	NaN	NaN	NaN	NaN	NaN	NaN	NaN	NaN	NaN	NaN	NaN	NaN
3.92	-4.927	-133.227	995.9935	-0.39215	0.73088	-0.71782	-60.01869	166.396	391.366	0.01416	0.31787	-0.25146	NaN	NaN	NaN	NaN	NaN	NaN	NaN	NaN	NaN	NaN	NaN	NaN
3.922	-6.4329	-144.221	995.528	-0.35061	0.69127	-0.71727	-20.909	136.4881	397.8933	0.029297	0.28906	-0.20654	NaN	NaN	NaN	NaN	NaN	NaN	NaN	NaN	NaN	NaN	NaN	NaN
3.924	-1.576	-158.028	1001.422	-0.34546	0.66275	-0.70598	-34.353	152.87	368.6628	0.029297	0.2627	-0.18604	NaN	NaN	NaN	NaN	NaN	NaN	NaN	NaN	NaN	NaN	NaN	NaN
3.926	16.878	-162.262	1041.799	-0.35352	0.68994	-0.72314	-67.187	127.835	347.421	0.028809	0.21582	-0.14258	NaN	NaN	NaN	NaN	NaN	NaN	NaN	NaN	NaN	NaN	NaN	NaN
3.928	26.9263	-143.774	1078.03458	-0.34485	0.78342	-0.77555	-18.847	115.524	324.003	0.041015	0.19433	-0.12671	NaN	NaN	NaN	NaN	NaN	NaN	NaN	NaN	NaN	NaN	NaN	NaN
3.93	12.756	-120.8368	1082.3955	-0.37141	0.79564	-0.73622	-36.381	123.9219	283.2722	0.053711	0.17578	-0.1123	NaN	NaN	NaN	NaN	NaN	NaN	NaN	NaN	NaN	NaN	NaN	NaN
3.932	21.949	-93.687	1109.9709	-0.44366	0.80114	-0.70495	-20.389	93.425	265.9967	0.083984	0.14844	-0.10352	NaN	NaN	NaN	NaN	NaN	NaN	NaN	NaN	NaN	NaN	NaN	NaN
3.934	11.052	-70.909	1143.0193	-0.51398	0.87395	-0.71695	5.599	87.9943	241.5082	0.098633	0.13525	-0.089844	NaN	NaN	NaN	NaN	NaN	NaN	NaN	NaN	NaN	NaN	NaN	NaN
3.936	23.82	-51.434	1149.188	-0.55469	0.97168	-0.78711	-39.586	101.2071	205.217	0.11182	0.11182	-0.056152	NaN	NaN	NaN	NaN	NaN	NaN	NaN	NaN	NaN	NaN	NaN	NaN
3.938	20.488	-44.594	1144.7611	-0.57265	1.0443	-0.80567	5.603	81.248	206.2597	0.10962	0.089844	-0.036377	NaN	NaN	NaN	NaN	NaN	NaN	NaN	NaN	NaN	NaN	NaN	NaN
3.94	5.287	-53.289	1153.49489	-0.59003	1.1121	-0.80998	-8.205	94.26	175.168	0.10889	0.068359	-0.013184	NaN	NaN	NaN	NaN	NaN	NaN	NaN	NaN	NaN	NaN	NaN	NaN
3.942	23.6407	-63.716	1160.9625	-0.61083	1.1796	-0.81157	-39.044	80.2525	165.222	0.10205	0.041504	0.012695	NaN	NaN	NaN	NaN	NaN	NaN	NaN	NaN	NaN	NaN	NaN	NaN
3.944	21.8041	-96.6172	1190.03	-0.63549	1.2362	-0.83047	7.282	72.0265	160.3634	0.095215	0.032227	0.021484	NaN	NaN	NaN	NaN	NaN	NaN	NaN	NaN	NaN	NaN	NaN	NaN
3.946	28.0578	-105.44	1200.0488	-0.66309	1.293	-0.84961	-14.612	106.55	121.831	0.087402	0.010254	0.045898	NaN	NaN	NaN	NaN	NaN	NaN	NaN	NaN	NaN	NaN	NaN	NaN
3.948	19.5045	-114.548	1231.4638	-0.69194	1.3471	-0.86431	-27.831	85.1788	115.8715	0.080322	-0.001709	0.059082	NaN	NaN	NaN	NaN	NaN	NaN	NaN	NaN	NaN	NaN	NaN	NaN
3.95	49.025	-124.204	1242.8482	-0.71687	1.3969	-0.88151	-1.656	74.298	103.515	0.083008	-0.021484	0.075684	NaN	NaN	NaN	NaN	NaN	NaN	NaN	NaN	NaN	NaN	NaN	NaN
3.952	9.3043	-144.515	1273.6703	-0.73365	1.4325	-0.904	-55.8625	71.8322	77.7759	0.078125	-0.050293	0.09375	NaN	NaN	NaN	NaN	NaN	NaN	NaN	NaN	NaN	NaN	NaN	NaN
3.954	-18.291	-141.181	1283.6876	-0.74271	1.4586	-0.92007	-17.594	46.4149	87.9878	0.07959	-0.05957	0.10449	NaN	NaN	NaN	NaN	NaN	NaN	NaN	NaN	NaN	NaN	NaN	NaN
3.956	-22.6958	-136.1773	1315.446	-0.74805	1.4883	-0.9375	-19.684	69.088	72.219	0.077148	-0.088379	0.12305	NaN	NaN	NaN	NaN	NaN	NaN	NaN	NaN	NaN	NaN	NaN	NaN
3.958	-10.062	-128.2774	1343.476	-0.75041	1.5173	-0.952	-43.713	54.4501	59.063	0.071533	-0.10303	0.12695	NaN	NaN	NaN	NaN	NaN	NaN	NaN	NaN	NaN	NaN	NaN	NaN
3.96	-20.7124	-112.9935	1342.63	-0.77008	1.5581	-0.96062	-17.03	36.6789	74.4242	0.069824	-0.11768	0.13623	NaN	NaN	NaN	NaN	NaN	NaN	NaN	NaN	NaN	NaN	NaN	NaN
3.962	-35.19507	-100.1541	1337.8306	-0.81069	1.6237	-0.97307	-51.7877	59.626	42.557	0.062988	-0.14014	0.14551	NaN	NaN	NaN	NaN	NaN	NaN	NaN	NaN	NaN	NaN	NaN	NaN
3.964	-22.70707	-86.8693	1326.7794	-0.8568	1.6898	-0.99585	-47.2993	28.999	56.8701	0.06543	-0.15527	0.15088	NaN	NaN	NaN	NaN	NaN	NaN	NaN	NaN	NaN	NaN	NaN	NaN
3.966	-12.687	-74.7438	1341.1814	-0.8916	1.7402	-1.0195	-18.7	29.5111	40.4201	0.069336	-0.17188	0.15381	NaN	NaN	NaN	NaN	NaN	NaN	NaN	NaN	NaN	NaN	NaN	NaN
3.968	-7.307	-53.5289	1336.2789	-0.92078	1.7655	-1.0325	-61.308	37.8103	20.493	0.076416	-0.17871	0.15894	NaN	NaN	NaN	NaN	NaN	NaN	NaN	NaN	NaN	NaN	NaN	NaN
3.97	4.414	-66.85902	1343.713	-0.95543	1.7813	-1.036	-42.083	8.83	45.89918	0.07666	-0.17529	0.15137	NaN	NaN	NaN	NaN	NaN	NaN	NaN	NaN	NaN	NaN	NaN	NaN
3.972	19.529	-74.09448	1350.862	-0.9906	1.7875	-1.0344	-39.822	35.263	21.651	0.07373	-0.15332	0.146	NaN	NaN	NaN	NaN	NaN	NaN	NaN	NaN	NaN	NaN	NaN	NaN
3.974	9.4552	-72.1862	1360.988	-1.0219	1.7922	-1.0352	-30.704	56.8686	17.189	0.077393	-0.14576	0.14746	NaN	NaN	NaN	NaN	NaN	NaN	NaN	NaN	NaN	NaN	NaN	NaN
3.976	-9.414	-70.8967	1366.086	-1.0508	1.8086	-1.0449	9.387	29.307	30.5428	0.077637	-0.13867	0.14941	NaN	NaN	NaN	NaN	NaN	NaN	NaN	NaN	NaN	NaN	NaN	NaN
3.978	-4.6465	-52.511	1368.9759	-1.0676	1.8278	-1.0578	-38.4248	56.963	13.4585	0.05957	-0.11133	0.13623	NaN	NaN	NaN	NaN	NaN	NaN	NaN	NaN	NaN	NaN	NaN	NaN
3.98	0.687999999999999	-50.601	1384.674	-1.0778	1.8519	-1.0715	-35.332	31.2387	37.2802	0.050781	-0.09375	0.13574	NaN	NaN	NaN	NaN	NaN	NaN	NaN	NaN	NaN	NaN	NaN	NaN
3.982	5.288	-69.57	1392.78035	-1.0883	1.8718	-1.0851	3.944	28.4929	31.9391	0.036133	-0.062988	0.12744	NaN	NaN	NaN	NaN	NaN	NaN	NaN	NaN	NaN	NaN	NaN	NaN
3.984	13.6735	-84.45009	1399.1525	-1.0926	1.8891	-1.096	-22.291	54.793	11.5171	0.025146	-0.028808	0.11889	NaN	NaN	NaN	NaN	NaN	NaN	NaN	NaN	NaN	NaN	NaN	NaN
3.986	18.1967	-86.2521	1428.5877	-1.103	1.8911	-1.103	-4.02	9.2422	44.027	0.01123	-0.0014648	0.10352	NaN	NaN	NaN	NaN	NaN	NaN	NaN	NaN	NaN	NaN	NaN	NaN
3.988	29.6255	-79.823	1429.2942	-1.1073	1.8786	-1.1022	-25.223	20.957	29.3907	0.0024414	0.039063	0.10107	NaN	NaN	NaN	NaN	NaN	NaN	NaN	NaN	NaN	NaN	NaN	NaN
3.99	30.88975	-89.607	1427.813	-1.1089	1.8628	-1.1011	-34.504	36.7941	31.0769	0.00048828	0.064941	0.09082	NaN	NaN	NaN	NaN	NaN	NaN	NaN	NaN	NaN	NaN	NaN	NaN
3.992	39.8275	-86.197	1405.0865	-1.1132	1.8491	-1.0991	29.357	15.9758	34.3841	-0.0063477	0.089355	0.081543	NaN	NaN	NaN	NaN	NaN	NaN	NaN	NaN	NaN	NaN	NaN	NaN
3.994	24.4945	-75.934	1410.3992	-1.1116	1.8364	-1.1022	-31.3829	52.55	14.87	-0.0090332	0.11084	0.072265	NaN	NaN	NaN	NaN	NaN	NaN	NaN	NaN	NaN	NaN	NaN	NaN
3.996	41.5347	-65.0956	1407.4565	-1.1108	1.8169	-1.0962	-12.065	27.291	50.423	-0.0097656	0.12695	0.063477	NaN	NaN	NaN	NaN	NaN	NaN	NaN	NaN	NaN	NaN	NaN	NaN
[truncated: 28,002 more rows]
