# Supplementary material for: Reliability and Validity of Running Cadence and Stance Time Derived from Instrumented Wireless Earbuds
Source: Sensors (Basel). 2021 Nov 30;21(23):7995. doi: 10.3390/s21237995 (PMC8659722; doi:10.3390/s21237995)
Supplement: Supplementary file 1 [file sensors-21-07995-s001.zip › Data_P09_HeadMovements.csv]

time	up_force_plate_1	up_force_plate_2	up_force_plate_3	up_earbuds_1	up_earbuds_2	up_earbuds_3	down_force_plate_1	down_force_plate_2	down_force_plate_3	down_earbuds_1	down_earbuds_2	down_earbuds_3	shake_force_plate_1	shake_force_plate_2	shake_force_plate_3	shake_earbuds_1	shake_earbuds_2	shake_earbuds_3	nod_force_plate_1	nod_force_plate_2	nod_force_plate_3	nod_earbuds_1	nod_earbuds_2	nod_earbuds_3	bird_L_force_plate_1	bird_L_force_plate_2	bird_L_force_plate_3	bird_L_earbuds_1	bird_L_earbuds_2	bird_L_earbuds_3	bird_R_force_plate_1	bird_R_force_plate_2	bird_R_force_plate_3	bird_R_earbuds_1	bird_R_earbuds_2	bird_R_earbuds_3	check_watch_force_plate_1	check_watch_force_plate_2	check_watch_force_plate_3	check_watch_earbuds_1	check_watch_earbuds_2	check_watch_earbuds_3
0	-16.3038	-27.343	731.284	-0.70234	0.25977	-0.16279	-0.255000000000003	100.279	499.7969	-0.51709	0.1793	-0.22548	29.9195	123.9408	863.695	-1.1631	0.27683	-0.12774	-12.11	24.382	30.9082	0.082813	-0.063379	0.076074	-24.428	104.072	248.70578	-0.078125	0.055664	0.037109	34.252	-40.77515	1305.39	-2.3525	0.68779	-0.96182	-17.657	16.5688	35.6261	0.10703	-0.15371	0.20742
0.002	-80.214	4.032	856.7215	-0.86328	0.23086	-0.17998	-5.376	118.5004	475.4337	-0.47734	0.16924	-0.20938	36.7665	135.743	833.9953	-1.1318	0.26861	-0.12371	-17.676	13.6066	27.4804	0.043945	-0.04248	0.065918	-26.157	85.65	228.30906	-0.034864	0.050293	0.031836	36.741	-50.56	1293.891	-2.293	0.70508	-0.98047	-2.685	16.4792	18.1068	0.089844	-0.13067	0.20108
0.004	-43.193	11.44	884.368	-1.0395	0.19111	-0.20059	-27.222	117.1475	467.1903	-0.43867	0.16181	-0.19961	9.234	148.047	808.94406	-1.1	0.26429	-0.11987	-28.705	12.8106	30.0491	0.012598	-0.016601	0.058691	-26.196	74.7621	204.6761	0.0068359	0.046582	0.039355	43.983	-45.13	1312.35079	-2.2247	0.72178	-0.99307	-11.797	15.526	14.6057	0.069336	-0.11523	0.19385
0.006	-19.72699	3.7473	923.3667	-1.2305	0.14746	-0.2251	-14.243	107.7794	439.62256	-0.39834	0.15127	-0.18516	-1.3896	132.137	773.022	-1.0693	0.25732	-0.11232	-26.602	28.5965	20.4226	-0.019239	0.0090822	0.046777	-18.833	71.8005	180.192	0.037696	0.037988	0.036231	53.752	-29.4991	1317.05	-2.1492	0.73398	-0.99962	-24.18	17.0636	4.0403	0.052539	-0.095605	0.18838
0.008	-13.46217	-2.23	980.959	-1.4174	0.13115	-0.24453	-13.071	99.98974	412.6974	-0.35938	0.14502	-0.16943	29.2811	122.9342	746.456	-1.0366	0.25244	-0.11133	-19.084	34.271	21.1525	-0.042285	0.034863	0.045605	-5.352	72.793	157.6824	0.066602	0.022949	0.036523	46.729	-40.696	1328.471	-2.0762	0.72657	-0.99453	-23.4036	13.995	18.6181	0.033008	-0.078613	0.17822
0.01	7.4067	-46.995	1006.816	-1.5901	0.14649	-0.26924	-12.948	108.2762	381.0229	-0.32168	0.13184	-0.15068	13.034	126.54106	728.746	-1.0019	0.24792	-0.10271	-5.159	36.562	0.4597	-0.067969	0.059277	0.039453	-12.43	57.402	154.9726	0.091309	0.011719	0.037598	48.125	-27.58412	1311.149	-1.9991	0.71572	-0.98506	-17.515	20.522	29.4593	0.013086	-0.053613	0.16924
0.012	15.5728	-84.6809	995.113	-1.7378	0.18477	-0.28799	-27.013	101.2263	359.4898	-0.28018	0.12217	-0.13545	14.49	117.3008	707.7317	-0.9642	0.25095	-0.093037	-22.677	31.297	6.5204	-0.088379	0.081543	0.026855	7.935	55.3487	148.64084	0.10957	-0.002832	0.040137	27.557	-33.705	1288.94712	-1.9214	0.6958	-0.97217	-21.8156	29.9608	27.901	-0.0072267	-0.03457	0.16289
0.014	-13.4516	-71.0167	995.465	-1.8399	0.24336	-0.29678	-16.552	100.144	330.2936	-0.23995	0.11123	-0.12139	26.566643	112.48408	688.2874	-0.92457	0.24625	-0.087402	-9.351	13.4607	9.9749	-0.11035	0.10098	0.033496	-19.487	64.627	127.8865	0.1289	-0.017969	0.0417	48.709	-14.4279	1271.691	-1.8603	0.68183	-0.94785	-25.004	31.212	17.0762	-0.027832	-0.01416	0.15576
0.016	32.012	-70.894	986.955	-1.9077	0.29541	-0.31738	-24.7827	110.3901	303.4413	-0.19775	0.10381	-0.093458	3.845	108.5093	669.4334	-0.87681	0.24259	-0.074052	-14.282	12.5356	19.6725	-0.12607	0.11875	0.028809	-37.18	63.8383	108.9285	0.14414	-0.035547	0.043652	48.143	19.92048	1266.201	-1.8021	0.67041	-0.93584	-12.388	18.727	20.1104	-0.04502	0.0033203	0.14609
0.018	44.2128	-82.831	968.041	-1.923	0.3374	-0.33115	-23.409	117.8742	273.0589	-0.15527	0.093262	-0.073242	-15.1095	115.9709	635.2164	-0.84131	0.23633	-0.074707	-8.971	14.129	21.071	-0.12959	0.13047	0.027637	-23.632	61.0947	98.2283	0.15527	-0.043457	0.045312	34.613	48.814	1267.4704	-1.7536	0.65791	-0.92178	-2.674	10.2052	15.85582	-0.06289	0.023144	0.14072
0.02	3.556	-67.847	958.4374	-1.9023	0.36738	-0.34219	-24.838	111.9392	255.5395	-0.11055	0.083496	-0.053613	-24.886	114.6293	609.87	-0.79291	0.22799	-0.070648	-34.4611	20.2702	14.2861	-0.13604	0.13653	0.028125	-35.6	65.604	96.9438	0.16455	-0.055176	0.043457	19.1812	64.671	1256.9286	-1.7199	0.65351	-0.9	-13.438	18.4226	2.141601	-0.079297	0.040332	0.12705
0.022	40.8673	-51.515	884.876	-1.8508	0.38808	-0.33985	-21.567	97.7037	234.4795	-0.067188	0.069824	-0.03418	-16.43	110.2113	606.0442	-0.7463	0.21929	-0.057485	-36.228	30.579	24.6446	-0.13721	0.146	0.027344	-47.13503	73.848	95.1163	0.17217	-0.069336	0.041601	13.8242	52.01	1243.3146	-1.6855	0.64844	-0.87695	-37.472	24.1233	15.7769	-0.090722	0.059473	0.13106
0.024	20.8968	-61.783	891.761	-1.7808	0.40508	-0.32588	-8.449	104.2093	200.0684	-0.026562	0.058496	-0.016992	-25.2188	123.01806	581.6276	-0.70613	0.20719	-0.047325	-26.855	32.287	28.259	-0.13457	0.15127	0.031543	-48.0804	65.433	85.652	0.17783	-0.084082	0.040723	18.83718	43.811	1217.9135	-1.6546	0.65069	-0.86289	-5.482	20.55785	22.4768	-0.10205	0.077148	0.12744
0.026	-6.3342	-60.93	951.83282	-1.6968	0.42432	-0.30811	-12.584	106.074	188.2373	0.012305	0.045215	0.0024412	-34.3115	130.246	554.4515	-0.66469	0.19677	-0.040724	-8.99	26.5432	17.1717	-0.12988	0.15879	0.030176	-37.4066	69.254	83.2197	0.18408	-0.094629	0.037597	12.8688	48.0865	1203.702	-1.6253	0.65127	-0.84522	-16.976	9.6871	25.2647	-0.10889	0.092187	0.11933
0.028	-26.3643	-48.484	961.792	-1.5952	0.44873	-0.27861	-13.824	93.825	183.3704	0.054199	0.032715	0.021973	-37.93234	119.6797	518.4305	-0.62549	0.19092	-0.041992	-18.062	15.6215	16.0738	-0.12519	0.16387	0.03291	-48.6806	68.262	55.967	0.19199	-0.10664	0.036817	30.3909	45.2663	1191.0334	-1.594	0.65517	-0.82491	-29.31	12.0496	18.2033	-0.11719	0.10088	0.1122
0.03	22.7706	-22.302	945.83547	-1.4863	0.45508	-0.25176	-17.138	87.16297	152.191	0.08584	0.01455	0.04209	-24.1698	107.9564	505.34	-0.58324	0.17949	-0.043557	-34.8293	11.0168	30.946	-0.12441	0.17041	0.031055	-37.225	69.2466	45.0576	0.19775	-0.12061	0.030273	41.8637	33.8302	1177.4268	-1.5674	0.65196	-0.79903	-38.9517	1.6678	27.2812	-0.1168	0.1126	0.1083
0.032	31.697	-51.6	917.252	-1.3879	0.46289	-0.2252	-10.328	72.9613	135.4376	0.11719	0.0006836	0.060156	-10.575	114.3621	465.9935	-0.53541	0.17189	-0.040536	-15.012	19.327	31.76534	-0.11816	0.17969	0.033203	-31.404	45.6097	35.4639	0.19756	-0.13623	0.026855	32.2399	26.8874	1160.2652	-1.5449	0.64453	-0.77734	-23.663	2.9853	22.5154	-0.11973	0.1249	0.10235
0.034	29.677	-75.802	928.215	-1.3071	0.475	-0.20058	-33.5065	66.56375	134.6123	0.13985	-0.016113	0.082031	-31.915	108.74256	441.2835	-0.48852	0.15627	-0.030772	-2.943	25.85454	4.479	-0.10596	0.18623	0.034375	-35.9472	42.318	31.9157	0.19639	-0.14834	0.026758	28.5713	15.922	1154.4694	-1.5237	0.64053	-0.7499	-28.2011	25.595	13.0178	-0.11963	0.13428	0.095703
0.036	36.349	-82.2038	973.9183	-1.2476	0.48877	-0.18018	-23.045	62.9489	141.2038	0.15576	-0.035254	0.10078	-22.216	102.3808	417.2021	-0.44406	0.14795	-0.026759	-16.913	31.5492022	16.4109	-0.094141	0.19345	0.031641	-21.674	38.956	33.9847	0.19209	-0.16045	0.019336	12.0388	18.953	1139.5757	-1.5062	0.63643	-0.72803	-21.692	28.2799	1.2684	-0.11308	0.14131	0.094238
0.038	16.945	-101.264	1001.766	-1.2053	0.51699	-0.15889	-29.0478	66.4027	130.27849	0.17871	-0.049316	0.12012	-14.879	96.496	398.033	-0.39404	0.13916	-0.021973	-11.624	14.5948	16.3603	-0.084766	0.1958	0.030078	-39.3974	35.0013	34.5807	0.1832	-0.17617	0.018164	21.736	18.468	1130.6246	-1.4827	0.63174	-0.70616	-16.44	21.5887	2.564	-0.10752	0.15127	0.088184
0.04	15.821	-130.188	1016.559	-1.1688	0.55303	-0.14229	-17.333	66.4526	117.334	0.18974	-0.064453	0.13369	-14	109.4959	377.63	-0.34364	0.13379	-0.022949	9.68	3.412	12.2839	-0.072559	0.19746	0.033106	-29.468	26.1333	44.9842	0.17188	-0.18408	0.010742	9.2337	51.8006	1112.8587	-1.4555	0.62363	-0.68086	-14.795	10.1412	24.1686	-0.10362	0.15791	0.088965
0.042	-1.684	-180.613	1008.5689	-1.1372	0.58467	-0.13369	-27.595	56.6455	89.4899	0.20108	-0.082422	0.15136	-12.312	105.4087	345.215	-0.28983	0.12998	-0.020213	-16.675	12.4745	16.4175	-0.064941	0.19824	0.037109	-24.873	32.0624	60.664	0.1624	-0.19531	0.0091797	7.5401	73.9796	1090.69	-1.4253	0.60986	-0.64893	-12.295	17.4029	23.2496	-0.099513	0.16201	0.082031
0.044	-37.459	-207.811	977.377	-1.1099	0.63858	-0.12002	-32.098	37.50021	83.7815	0.2081	-0.096094	0.16582	-4.061	93.1058	332.14907	-0.23866	0.12841	-0.016308	-22.515	35.5282	23.0633	-0.057519	0.19814	0.03877	-13.539	45.2492	54.862	0.14805	-0.20469	-0.00029297	-1.247	75.68	1061.6033	-1.4003	0.59385	-0.62207	-12.867	24.2473	14.2296	-0.098633	0.16455	0.084473
0.046	-52.2988	-185.171	981.621	-1.0874	0.6958	-0.13086	-14.431	33.0154	68.328	0.21133	-0.10713	0.18018	-6.751	105.255	300.9168	-0.18847	0.12862	-0.012304	-15.788	25.6557	43.506	-0.055566	0.196	0.034375	-36.885	45.672	35.7404	0.13242	-0.2125	-0.0014648	17.4565	65.9874	1047.6686	-1.3753	0.57715	-0.5999	-30.394	27.0628	22.7625	-0.10098	0.17315	0.084766
0.048	-72.809	-154.835	997.2669	-1.0542	0.73311	-0.15244	-6.129	42.774	55.603	0.2124	-0.11719	0.19092	-22.102	119.702	293.4417	-0.13867	0.12402	-0.011719	-18.885	16.9155	29.7138	-0.055566	0.19326	0.035547	-23.999	36.985	38.1139	0.11064	-0.21611	-0.0047851	10.7989	64.03456	1035.168	-1.3468	0.55723	-0.5753	-16.571	30.0455	14.875	-0.099805	0.17637	0.076074
0.05	-107.626	-151.560026	1005.4154	-1.0106	0.75	-0.16435	-4.778	42.9113	64.1365	0.20849	-0.12715	0.1956	-8.357	110.402	276.8987	-0.094828	0.11924	-0.0077144	-18.801	18.5931	16.8825	-0.062598	0.19424	0.038086	-17.732	28.6572	36.279	0.086426	-0.21973	-0.0078125	13.231	96.9263	1022.7693	-1.327	0.53711	-0.55254	-21.102	28.6773	17.769	-0.10176	0.17715	0.071387
0.052	-130.745	-156.3941	1023.2346	-0.98554	0.73907	-0.18155	-16.65	43.9023	61.8264	0.2082	-0.13486	0.20175	3.469	89.703	259.819	-0.055472	0.11055	-0.0010744	-18.019	17.909763	9.6296	-0.071777	0.19189	0.039063	-9.026	36.9705	29.9574	0.063769	-0.21787	-0.018262	12.2865	108.175	997.152	-1.2964	0.52002	-0.53174	-17.031	22.05752	9.428	-0.10127	0.18271	0.070801
0.054	-78.2357	-145.173	999.712	-0.97636	0.70683	-0.19775	-14.421	45.64544	56.7125	0.19883	-0.13916	0.21074	15.554	69.6004	247.9326	-0.020705	0.099221	0.00166	-19.0759	15.1045	48.7619	-0.086523	0.19483	0.034473	-0.693999999999999	25.12623	18.9653	0.039551	-0.21386	-0.021289	12.042	116.508	971.915	-1.2733	0.49893	-0.51045	-24.892	12.3328	28.1939	-0.10547	0.18848	0.066895
0.056	-65.6888	-117.1829	1032.819	-0.98486	0.67432	-0.21582	-18.614	54.5757	46.0344	0.19414	-0.14307	0.21416	0.93	69.743	217.4222	0.010546	0.087891	0.0041992	-18.068	17.3497	77.463	-0.094727	0.20166	0.03252	-19.966	17.8509	16.6312	0.017285	-0.20254	-0.031055	13.959	115.615	940.766	-1.2425	0.48037	-0.49326	-16.322	3.96485	37.7636	-0.11172	0.19541	0.064453
0.058	-50.448	-88.3302	1066.915	-1.01	0.63946	-0.23867	-27.935	43.821	63.5391	0.18359	-0.14453	0.21729	-0.0629999999999953	61.285	202.879	0.039551	0.080078	0.0083008	-34.6905	15.337	98.752	-0.10527	0.20674	0.023145	-1.332	20.341	18.7038	-9.766e-05	-0.1916	-0.0375	-9.369	105.012	911.728	-1.2081	0.4624	-0.47139	-27.7257	-9.713	58.9936	-0.11621	0.2044	0.062012
0.06	-60.197	-63.0231	1070.45	-1.0371	0.61153	-0.25205	-23.935	42.744	57.6305	0.16582	-0.14688	0.21504	-1.541	66.961	176.243	0.063672	0.066016	0.018359	-3.39	6.501	110.0622	-0.11807	0.2125	0.018164	-6.847	34.0902	13.351	-0.01416	-0.1748	-0.045898	-15.271	99.6999	906.1788	-1.1844	0.44355	-0.4543	-22.236	4.73853	105.0585	-0.13223	0.21611	0.055762
0.062	-75.458	-46.736	1058.47	-1.0578	0.59238	-0.26807	-23.1972	42.9329	30.6736	0.14804	-0.14336	0.22656	-9.184	76.66863	143.49971	0.086329	0.051757	0.019043	-18.937	7.1144	149.7974	-0.14453	0.21387	0.019531	-6.548	33.7625	21.7284	-0.028028	-0.1627	-0.048145	-16.945	97.8487	886.03137	-1.1602	0.41797	-0.43115	-23.82	12.8973	137.1318	-0.14843	0.22305	0.047754
0.064	-90.2102	-78.0389	1067.0079	-1.074	0.58066	-0.29668	-38.281	39.746	35.508	0.13476	-0.13907	0.22656	-9.623	65.6938	135.75	0.11055	0.043164	0.026074	-47.477	9.13333	217.27435	-0.19199	0.21739	0.004785	-14.446	26.05137	39.4701	-0.040821	-0.15068	-0.052344	-10.597	101.4382	877.5651	-1.1421	0.40078	-0.41142	-47.241	26.8441	168.234	-0.1709	0.22559	0.040527
0.066	-76.6979	-110.1898	1095.3456	-1.0884	0.56787	-0.31982	-24.201	29.3311	36.01	0.11513	-0.13516	0.21904	-12.336	49.2962	130.22288	0.12549	0.026661	0.028711	-89.615	5.4776	274.987	-0.24902	0.21015	-0.0094726	-10.664	30.1969	36.2753	-0.049805	-0.13662	-0.058984	-35.5676	98.5358	865.92923	-1.1238	0.3833	-0.39795	-49.122	48.7866	271.478	-0.20586	0.23349	0.026562
0.068	-44.9169	-130.7083	1132.454	-1.1045	0.5502	-0.33867	-6.982	11.146	28.7739	0.095215	-0.12354	0.21924	-11.25	44.4521	147.37088	0.13867	0.017578	0.034668	-58.682	-2.773	315.8342	-0.31738	0.19805	-0.023535	-20.501	21.9218	25.0906	-0.058398	-0.12568	-0.063086	-23.449	103.2603	846.5936	-1.1038	0.36885	-0.38193	-50.178	18.194	371.132	-0.25527	0.23154	0.011817
0.07	-65.471	-142.5088	1135.57127	-1.1453	0.52559	-0.34951	-10.121	19.7373	9.6036	0.081445	-0.11807	0.21485	-25.319	54.6289	135.52476	0.154	0.0051758	0.039551	-33.712	-10.372	367.247	-0.39883	0.18994	-0.044532	-48.5844	18.3599	18.2924	-0.059082	-0.11035	-0.068359	1.413	113.3079	838.3115	-1.081	0.3502	-0.36289	-89.928	-1.81	466.098	-0.31621	0.23232	0.0016601
0.072	-70.206	-159.904	1139.5611	-1.2219	0.50527	-0.3581	-19.567	30.235	28.8015	0.065137	-0.10723	0.21113	-34.1152	63.266	115.0267	0.16132	-0.0041013	0.042773	-51.57782	-16.6808	463.395	-0.48926	0.18164	-0.066406	-25.928	10.7047	24.2662	-0.059961	-0.098145	-0.073438	-30.742	110.1579	823.3376	-1.0581	0.33838	-0.3457	-12.891	4.8283	548.237	-0.39834	0.22148	-0.020508
0.074	-72.5196	-172.24	1138.693	-1.3278	0.4919	-0.36065	-10.083	26.9113	47.2167	0.049512	-0.09707	0.20879	-27.4266	60.068	97.364	0.16875	-0.017774	0.044727	-75.5239	-15.0134	580.378	-0.58975	0.16748	-0.085742	-32.306	19.618437	19.0919	-0.05752	-0.08457	-0.080273	-41.654	99.5182	802.1765	-1.0347	0.32588	-0.32588	26.1402	-3.154	627.8073	-0.49756	0.20752	-0.038574
0.076	-44.163	-171.916	1128.4483	-1.4663	0.49463	-0.36328	-21.5078	16.8814	49.1306	0.036719	-0.081348	0.20771	-31.399	54.4107	86.062	0.17324	-0.024219	0.047461	-67.8554	8.908	650.494	-0.71231	0.14297	-0.095704	-42.0614	28.0082	12.468	-0.054004	-0.063867	-0.080664	-25.031	105.5114	783.74418	-1.0098	0.31386	-0.30469	-47.654	21.465	765.0965	-0.62109	0.18613	-0.048438
0.078	-15.642	-164.338	1145.956	-1.6244	0.51445	-0.36328	-22.908	16.706	36.676	0.023438	-0.069336	0.20557	-34.5916	70.8177	56.533	0.18408	-0.030762	0.04541	-23.415	34.069	711.082	-0.86387	0.11172	-0.11172	-39.6627	12.636	14.838	-0.04502	-0.053223	-0.082129	-18.642	125.2746	743.00691	-0.9836	0.30801	-0.29297	-55.726	41.2967	843.6385	-0.77256	0.15401	-0.061817
0.08	0.180999999999997	-149.111	1182.009	-1.7882	0.55323	-0.36709	-28.7097	9.7302	26.76262	0.020019	-0.060644	0.204	-27.3886	61.664	55.4975	0.18857	-0.037305	0.04668	-16.1802	64.1458	787.092	-1.0386	0.066113	-0.14443	-26.868	6.2	30.7193	-0.030762	-0.042969	-0.093262	-45.5575	122.59583	715.2364	-0.95429	0.30039	-0.27304	-25.7998	37.377	835.821	-0.94716	0.10557	-0.084082
0.082	5.33600000000001	-137.4556	1202.7698	-1.953	0.60947	-0.36787	-12.909	7.9185	25.2407	0.013379	-0.040234	0.20234	-25.103	62.646	47.1814	0.19648	-0.044043	0.046094	-7.3114	49.5658	885.4675	-1.2227	0.022461	-0.17969	-21.719	18.9096	28.6823	-0.018555	-0.025391	-0.098047	-50.7149	109.0403	677.8821	-0.92383	0.28711	-0.2583	-11.9519	19.7251	894.5493	-1.1326	0.066797	-0.11035
0.084	-10.823	-115.1513	1193.6029	-2.1104	0.67314	-0.37842	-24.9041	26.1716	13.536	0.0075195	-0.027344	0.19727	-31.4228	56.4617	46.7459	0.20391	-0.054981	0.042969	7.509	33.8642	952.602	-1.3973	-0.00048828	-0.2084	-36.262	25.0291	25.6829	-0.0003906	-0.014844	-0.10185	-33.224	105.102	652.4344	-0.8878	0.27334	-0.23955	1.8535	17.473	954.583	-1.312	0.049316	-0.14209
0.086	-41.144	-82.6038	1163.3421	-2.2598	0.73926	-0.39111	-32.278	34.883	8.0725	0.0060547	-0.014844	0.19277	-19.115	58.1636	52.4122	0.2042	-0.064648	0.043652	4.421	14.27917	982.543	-1.5588	-0.0028321	-0.24277	-21.367	29.16462	20.1282	0.012109	-0.0066406	-0.10576	-45.8716	128.746	619.9102	-0.85195	0.25947	-0.2209	37.847	-6.58900000000001	971.441	-1.4712	0.059082	-0.1709
0.088	-42.87	-79.348	1157.5914	-2.4003	0.80479	-0.40488	-29.195	30.102	5.8309	0.0014648	0.0014648	0.18164	-15.816	42.496	56.0884	0.20215	-0.077637	0.039063	-22.436	26.4467	995.408	-1.6884	0.032324	-0.27441	-38.222	24.5732	30.7357	0.028027	0.0038086	-0.10889	-40.9855	130.851	607.1266	-0.8125	0.24697	-0.19551	18.9587	-19.318	988.504	-1.6148	0.092187	-0.20938
0.09	-38.416	-65.90679	1167.5326	-2.5164	0.86406	-0.41836	-20.888	14.9471	19.53553	-0.0017578	0.008887	0.18574	-21.547	25.801	61.5885	0.19277	-0.087402	0.035645	-20.2057	9.3156	997.472	-1.7848	0.088768	-0.30371	-24.491	26.8707	14.0232	0.044922	0.012695	-0.11719	-44.375	136.613	581.123	-0.7748	0.23105	-0.18535	12.34912	-9.466	957.942	-1.732	0.14609	-0.24766
0.092	-45.841	-58.097	1147.179	-2.6102	0.90937	-0.43515	-19.197	15.61	18.7481	-0.0057617	0.02041	0.18477	-16.672	28.7539	40.6345	0.1792	-0.10147	0.03584	-18.995	-11.2737	986.42	-1.8574	0.15186	-0.31982	-46.53763	14.692	21.1881	0.063477	0.017871	-0.12178	-9.371	131.118	568.099	-0.73633	0.21777	-0.17871	27.524	-25.31825	958.883	-1.8105	0.21807	-0.27139
0.094	-65.198	-45.758	1145.884	-2.6718	0.94893	-0.4458	-17.148	23.1363	14.7558	-0.010058	0.030566	0.18086	-11.842	38.2214	42.65388	0.16553	-0.11123	0.032325	4.328	-51.156	952.5826	-1.8981	0.2085	-0.32227	-32.121	10.8372	31.2708	0.07998	0.024805	-0.13135	-19.97	130.235	540.7488	-0.69072	0.20518	-0.15576	48.7337	-32.257	960.172	-1.8667	0.28662	-0.29443
0.096	-70.1222	-55.049	1154.658	-2.7031	0.98047	-0.45508	-15.245	18.4545	28.4475	-0.016504	0.043946	0.17256	-2.557	38.269	33.5231	0.15049	-0.12334	0.035156	15.8526	-90.939	941.065	-1.9061	0.26377	-0.31709	-19.194	10.8627	47.353	0.10029	0.029492	-0.13994	-37.1413	116.653	502.537	-0.65107	0.19278	-0.13359	38.20605	-29.5181	920.10245	-1.8832	0.33555	-0.31035
0.098	-84.4818	-67.749	1163.8	-2.7004	1.0062	-0.46016	-14.838	13.7179	14.1549	-0.018555	0.056152	0.17188	-16.148	38.414	23.7276	0.13086	-0.12891	0.037598	2.6783	-117.191	943.4159	-1.8796	0.32002	-0.3085	-9.097	17.3333	53.133	0.11885	0.032813	-0.15342	-25.865	111.8264	485.8545	-0.6163	0.18106	-0.11367	50.4547	-16.131	889.221	-1.8754	0.36601	-0.32071
0.1	-76.54	-74.1317	1171.635	-2.6809	1.0285	-0.46289	-14.55	18.492	7.739	-0.027539	0.063184	0.16777	-5.753	35.256	20.9145	0.11289	-0.13321	0.033105	17.5381	-117.168	944.5727	-1.8139	0.37304	-0.29073	-16.392	5.4122	49.65	0.13281	0.034668	-0.16064	-17.835	115.1456	458.5396	-0.58692	0.16523	-0.094531	13.0704	-12.49	908.8713	-1.8395	0.38555	-0.32812
0.102	-104.782	-91.787	1190.4306	-2.6407	1.0437	-0.47344	-20.687	27.13801	-3.829	-0.029785	0.076953	0.16377	-12.333	21.6092	26.1397	0.091895	-0.13887	0.0292	39.2067	-92.0968	922.065	-1.7168	0.41357	-0.2666	-3.269	-7.5854	51.5819	0.13652	0.033691	-0.1666	-24.987	124.3512	428.90099	-0.55029	0.15479	-0.078125	-2.4121	-15.65	930.5817	-1.7766	0.3873	-0.31895
0.104	-97.3017	-85.777	1212.0646	-2.5932	1.0533	-0.47812	-19.789	15.2318	13.5203	-0.036817	0.082031	0.16377	7.191	3.396	36.1784	0.071972	-0.13965	0.026074	40.0051	-51.476	921.358	-1.5957	0.43613	-0.23916	26.203	-13.614973	65.2577	0.14043	0.02998	-0.18223	-24.098	109.0993	391.564	-0.51777	0.14707	-0.05791	11.4228	14.492	916.6173	-1.7051	0.38281	-0.30664
0.106	-89.2398	-84.017	1221.942	-2.5352	1.0586	-0.47607	-20.846	8.9405	20.6362	-0.044922	0.088281	0.16103	8.72	18.846	38.67601	0.05791	-0.13565	0.023731	52.5102	-30.589	935.287	-1.4757	0.44765	-0.20782	-13.455	-14.005171	67.8891	0.13222	0.025293	-0.18808	-2.543	97.5536	379.0682	-0.47881	0.14092	-0.040528	24.7615	9.434	899.8998	-1.6128	0.37607	-0.28311
0.108	-88.5666	-63.969	1220.0394	-2.4614	1.0547	-0.47735	-23.838	15.2797	22.13987	-0.046875	0.092285	0.15918	-1.462	35.5257	29.0107	0.041504	-0.13477	0.015137	30.9155	-23.409	956.276	-1.3809	0.44883	-0.18008	-14.688	-26.85188	73.8012	0.11846	0.019922	-0.19482	-12.413	103.732	354.2954	-0.43037	0.13349	-0.019824	25.550516	-19.087	879.41	-1.5139	0.36924	-0.26348
0.11	-111.113	-63.164	1243.724	-2.3906	1.0547	-0.47939	-37.9044	31.0466	26.4082	-0.053125	0.10078	0.16279	1.023	38.9988	19.3377	0.027246	-0.12978	0.017676	31.2959	-38.437	982.6313	-1.3162	0.45801	-0.16006	-4.354	-42.595	91.21	0.098633	0.018066	-0.20313	-10.739	111.2818	327.3701	-0.38076	0.13623	-0.00097658	25.152	-31.2955	908.108	-1.4155	0.36963	-0.24707
0.112	-110.71897	-66.132	1252.599	-2.3156	1.0516	-0.48057	-14.518	20.5668	30.6282	-0.05586	0.11221	0.16377	-4.068	29.8498	15.654	0.01709	-0.12549	0.011328	-2.974	-45.008	994.7267	-1.2852	0.48047	-0.14453	1.65	-41.0552	119.4622	0.07041	0.017871	-0.20928	-8.274	105.0931	312.2592	-0.3291	0.13721	0.010254	33.3766	-38.6674	928.7707	-1.3311	0.37861	-0.23975
0.114	-88.9896	-62.932	1241.3457	-2.2311	1.0451	-0.47988	-19.172	17.4034	21.5803	-0.058984	0.11611	0.1665	-10.567	34.6815	5.4088	0.0041992	-0.11924	0.0066407	-1.223	-54.8	1010.033	-1.2711	0.50781	-0.13848	-6.824	-22.9929	145.7767	0.037793	0.022657	-0.21894	0.149999999999999	94.009	307.41925	-0.27646	0.12549	0.029102	27.63	-43.3	953.574	-1.2632	0.39258	-0.23242
0.116	-117.494	-42.1098	1222.4467	-2.1343	1.0386	-0.4751	-17.281	24.018	3.8263	-0.059961	0.11953	0.1626	-15.983	38.868	5.4257	-0.0032226	-0.11172	0.00048826	-13.628	-73.549	997.745	-1.2595	0.53916	-0.12285	-37.717	8.0139	239.976	-0.002832	0.026953	-0.23027	0.667999999999999	91.4756	288.0031	-0.2291	0.11914	0.046094	15.505	-75.317	956.697	-1.2201	0.41758	-0.22265
0.118	-99.2857	-25.801	1213.493	-2.0364	1.0241	-0.46963	-31.313	28.6953	15.8396	-0.063965	0.12842	0.16602	-26.342	34.401	12.2019	-0.0063477	-0.10645	-0.0068359	-8.595	-108.187	987.7683	-1.2399	0.5712	-0.11035	-5.538	54.6707	366.502	-0.054492	0.031445	-0.24619	-21.396	89.9729	250.9231	-0.18027	0.11055	0.061719	4.92	-111.873	947.2384	-1.1879	0.44043	-0.20733
0.12	-74.396	-4.397	1234.656	-1.9401	1.0107	-0.4584	-7.148	28.7794	17.0393	-0.067969	0.13408	0.16611	-42.7148	23.1184	30.6098	-0.011816	-0.10039	-0.0076172	-6.51	-138.0927	976.596	-1.2094	0.60547	-0.10821	-83.0336	69.076	468.163	-0.11475	0.035156	-0.25781	-20.7	89.6152	225.9494	-0.1335	0.096678	0.075489	-50.5272	-140.595	938.058	-1.166	0.47324	-0.19287
0.122	-66.427	5.789	1224.8282	-1.8515	0.98369	-0.44629	-21.759	30.6657	9.9278	-0.071875	0.14033	0.16533	-37.1135	20.8595	36.0103	-0.011035	-0.09795	-0.013574	-40.438	-163.414	980.907	-1.1753	0.63916	-0.11328	-65.705	65.951	556.588	-0.20215	0.033789	-0.26289	-29.4222	99.9567	195.577	-0.088379	0.078613	0.086914	-57.7332	-126.7595	961.941	-1.1567	0.50811	-0.17979
0.124	-92.6652	-7.378	1202.6424	-1.7741	0.96533	-0.43047	-31.435	26.54359	6.279	-0.079688	0.14853	0.16455	-19.985	24.6771	17.6669	-0.0075195	-0.094434	-0.018262	-27.335	-173.198	995.04	-1.1386	0.64541	-0.13047	-4.58300000000001	27.733	605.283	-0.32032	0.024707	-0.26494	-16.133	107.074	163.8741	-0.045899	0.065723	0.10449	-66.7529	-130.0725	989.9114	-1.1489	0.55322	-0.17285
0.126	-71.102	-13.37892	1196.5429	-1.7183	0.94287	-0.41357	-20.4677	24.3427	12.9374	-0.0875	0.15537	0.16484	-41.7486	13.3276	8.7273	2.0024e-08	-0.090039	-0.023047	-31.568	-172.335	1016.471	-1.1079	0.63535	-0.15215	-1.26	5.55	710.708	-0.47696	0.0012695	-0.26455	-48.1602	99.514	158.68526	-0.0044922	0.052832	0.11709	-88.749	-114.663	1002.4862	-1.1414	0.59687	-0.16162
0.128	-35.887	-6.96015	1197.881	-1.6749	0.92197	-0.39912	-8.841	13.8045	33.2127	-0.09082	0.16064	0.1665	-31.963	16.5545	5.5038	0.0087891	-0.083008	-0.029297	-37.3563	-165.666	1053.377	-1.0907	0.60293	-0.18066	-43.9601	9.276	800.886	-0.65888	-0.024317	-0.2544	-31.488	87.7611	145.9521	0.036523	0.035254	0.12686	-90.624	-119.1508	1003.558	-1.1359	0.6292	-0.16465
0.13	-32.819	13.8486	1205.6551	-1.6492	0.90782	-0.38574	-27.0453	31.4829	35.2762	-0.097363	0.17198	0.16299	-30.543	13.4954	9.3152	0.022461	-0.079297	-0.034668	-70.423	-158.841	1084.7736	-1.0996	0.55937	-0.20781	-89.5	40.888	833.2752	-0.86133	-0.05127	-0.24316	5.282	70.5322	136.1493	0.074121	0.020117	0.14346	-81.778	-113.7648	997.18	-1.1285	0.64599	-0.17324
0.132	-18.06	19.479	1220.7505	-1.6289	0.88594	-0.36856	-29.416	17.4019	45.6711	-0.10537	0.18018	0.16152	-29.093	21.17505	11.3696	0.034082	-0.078808	-0.035645	-56.284	-127.175	1109.1551	-1.1216	0.51611	-0.23389	-49.1109	36.528	850.66538	-1.0904	-0.094335	-0.22715	-15.615	74.6169	129.0565	0.10791	0.003418	0.15381	-60.9907	-95.36	1022.175	-1.1359	0.64356	-0.18614
0.134	-8.162	3.026	1212.72051	-1.6164	0.86484	-0.35488	-32.534	2.2937	52.0602	-0.11435	0.1876	0.16426	-34.6015	10.5497	7.098	0.048926	-0.074512	-0.042285	-54.903	-90.0191	1116.4262	-1.1552	0.48466	-0.25879	-40.73596	25.839	862.3731	-1.3258	-0.1251	-0.22246	-29.9613	70.0304	119.2769	0.13457	-0.011328	0.16806	-60.275	-69.7431	1054.16	-1.1455	0.63281	-0.2002
0.136	-25.284	-8.0512	1212.199	-1.603	0.84131	-0.34326	-6.489	-11.1938	53.8209	-0.12471	0.20303	0.16182	-28.626	8.4748	28.2775	0.059863	-0.06582	-0.049023	-79.337	-59.811	1146.358	-1.1929	0.46601	-0.27392	-38.3677	6.307	873.8106	-1.5539	-0.13213	-0.23145	-30.9489	68.27237	100.2535	0.15938	-0.027246	0.17861	-47.167	-38.81913	1065.3124	-1.1555	0.60811	-0.21436
0.138	-35.701	-22.2812	1194.425	-1.5895	0.81123	-0.32627	-1.87	-4.7101	59.45381	-0.1377	0.20996	0.1543	-8.967	8.7902	24.4862	0.069336	-0.066406	-0.054199	-76.0939	-61.815	1180.961	-1.2398	0.47148	-0.2872	-46.1931	-30.217	869.369	-1.7575	-0.086818	-0.25479	-11.918	66.45942	80.6572	0.17969	-0.037402	0.19072	-43.65	-40.575	1089.454	-1.1657	0.58438	-0.2332
0.14	-30.707	-7.8876	1193.433	-1.5718	0.77822	-0.31416	-18.895	4.2207	68.4632	-0.14746	0.22187	0.15245	-29.5784	26.239	21.2251	0.081934	-0.06289	-0.059277	-71.0431	-73.178	1173.265	-1.2902	0.48427	-0.30147	-13.929	-41.44	895.23	-1.9253	0.010742	-0.27295	-37.098	66.2198	64.642	0.19541	-0.057226	0.19736	-38.669	-84.4166	1095.3164	-1.175	0.57031	-0.2543
0.142	-21.67	11.3403	1179.904	-1.553	0.74463	-0.29931	-23.027	10.5657	118.1312	-0.16298	0.22685	0.15244	-29.0689	33.0231	16.2422	0.088282	-0.061523	-0.059179	-59.529	-73.867	1174.0298	-1.3394	0.49268	-0.32178	-31.899	-28.919	888.612	-2.0642	0.14248	-0.30439	-24.719	50.151	64.72599	0.21045	-0.063965	0.20313	-45.6297	-95.4097	1120.7996	-1.182	0.55791	-0.27646
0.144	-40.6	20.76961	1146.6053	-1.5336	0.70547	-0.28477	-28.646	5.2441	153.886	-0.17939	0.22881	0.14815	-29.479	31.256	24.5644	0.093359	-0.056445	-0.060351	-61.312	-86.175	1169.548	-1.4072	0.49219	-0.3291	-19.873	-21.674	865.1	-2.1683	0.28291	-0.33555	-32.7403	35.5377	55.73142	0.22002	-0.077734	0.21367	-46.265	-110.3626	1131.0638	-1.1851	0.54541	-0.29736
0.146	-41.131	19.002	1110.932	-1.5107	0.66895	-0.27148	-43.03	16.425	250.664	-0.2042	0.23154	0.14179	-2.023	33.72	19.5919	0.099123	-0.049707	-0.066992	-55.28	-98.3209	1169.907	-1.4941	0.48437	-0.33408	16.803	-2.91	849.151	-2.2339	0.41416	-0.36211	-21.149	41.8152	53.7549	0.22764	-0.086426	0.21963	-44.496	-113.1078	1133.8508	-1.1913	0.52168	-0.30703
0.148	-60.1591	16.822	1111.619	-1.4966	0.63096	-0.25498	-11.892	19.2034	377.919	-0.22803	0.24268	0.12744	-2.913	24.414	19.9116	0.10254	-0.047852	-0.071289	-52.115	-117.3879	1185.483	-1.6093	0.47773	-0.33174	14.826	12.509	834.0726	-2.2878	0.52529	-0.38252	-25.424	44.5244	57.5068	0.22998	-0.095019	0.22158	-50.484	-117.1477	1143.84914	-1.2203	0.49297	-0.3166
0.15	-29.27	39.392	1102.951	-1.4743	0.5915	-0.23916	-54.574	23.2776	493.126	-0.26982	0.24492	0.10928	-2.154	20.3741	4.5003	0.10586	-0.042969	-0.072754	-77.3541	-108.093	1202.2243	-1.7472	0.47354	-0.33789	1.881	29.057	830.104	-2.3179	0.59814	-0.40479	-25.047	34.0872	57.1205	0.23047	-0.10108	0.22324	-46.93495	-129.9675	1148.3919	-1.2676	0.46523	-0.3209
0.152	-36.411	64.2075	1094.608282	-1.4594	0.56104	-0.22236	-6.546	23.7041	559.842	-0.33301	0.25352	0.085937	11.487	20.7813	25.5004	0.11074	-0.03623	-0.079297	-52.965	-116.573	1243.3767	-1.9043	0.48535	-0.33789	-37.357	15.529	855.878	-2.2845	0.62998	-0.43984	-5.231	29.9888	49.6412	0.23193	-0.11035	0.22754	-35.086	-138.636	1156.6517	-1.3487	0.44521	-0.32441
0.154	-41.276	87.01	1075.871	-1.4406	0.53545	-0.21211	52.923	6.244	609.283	-0.41933	0.25078	0.064453	0.744	20.9435	28.25905	0.11426	-0.029981	-0.08086	-48.676	-125.733	1273.232	-2.0586	0.50528	-0.34189	-42.018	16.732	860.5007	-2.1777	0.64394	-0.4623	7.168	38.37293	30.0648	0.22705	-0.11172	0.22559	-20.948	-138.715	1181.7379	-1.4629	0.43652	-0.32227
0.156	-55.6728	88.049	1081.9524	-1.4233	0.51074	-0.20068	29.893	23.7	730.9868	-0.53399	0.23574	0.036816	-6.037	10.9298	44.4154	0.11592	-0.026563	-0.087598	-25.605	-127.142	1297.199	-2.2113	0.54072	-0.34716	-8.0363	11.69	872.0073	-1.9906	0.64668	-0.48066	-4.028	42.9261	28.6854	0.22334	-0.11572	0.2208	19.907	-122.527	1200.25	-1.5956	0.44111	-0.31631
0.158	-55.343	100.014	1061.5246	-1.4022	0.49365	-0.19229	23.572	30.2509	842.33592	-0.67236	0.21484	0.019043	2.384	-11.0608	50.1601	0.11572	-0.018066	-0.091309	-54.577	-89.45574	1300.673	-2.3601	0.59659	-0.3585	11.2412	-25.822	873.947	-1.7799	0.646	-0.48935	-4.886	40.923	22.286	0.21787	-0.11494	0.21729	-4.953	-89.686	1203.557	-1.7464	0.45732	-0.31103
0.16	-62.5795	92.131	1028.63665	-1.3777	0.47392	-0.18008	1.3446	19.33917	870.5494	-0.84258	0.18174	-0.0016602	2.447	-16.7195	51.578	0.11406	-0.0099611	-0.093164	-45.855	-61.866	1310.341	-2.4926	0.66201	-0.37979	-1.747	-50.086	868.718	-1.582	0.63281	-0.50293	-1.717	34.0821	29.3578	0.21182	-0.11162	0.21162	-0.772000000000006	-52.468	1204.8094	-1.9073	0.49014	-0.30713
0.162	-76.5684	74.7835	1011.4452	-1.3573	0.45595	-0.1668	13.5891	20.50032	917.5342	-1.0424	0.13926	-0.028613	-10.269	-16.0507	47.6538	0.10762	-0.0057618	-0.10186	-69.567	-58.908	1319.9061	-2.6113	0.74023	-0.40039	1.491	-79.89334	884.802	-1.4019	0.60713	-0.51416	-11.394	37.5301	17.7536	0.20459	-0.10596	0.2002	-18.795	-36.3763	1184.9895	-2.0641	0.5376	-0.30478
0.164	-55.0731	61.533	1006.97768	-1.3339	0.43369	-0.15625	35.804	21.4	960.913	-1.2486	0.099414	-0.062207	-33.479	-14.4647	58.408	0.092774	-0.003418	-0.10381	-60.314	-68.092	1314.995	-2.72	0.80322	-0.41298	55.582	-97.704	937.3331	-1.259	0.58067	-0.52832	-19.48	29.1673	17.0502	0.1959	-0.096779	0.19825	-13.541	-40.5652	1203.48083	-2.2163	0.59229	-0.31201
0.166	-70.0938	64.653	975.802	-1.3145	0.4165	-0.14746	79.299	-14.827	993.608	-1.4525	0.072168	-0.10342	-22.963	-13.8797	69.3094	0.075977	0.00029295	-0.10713	-51.637	-88.5892	1300.5207	-2.8137	0.86485	-0.42813	42.2144	-117.725	970.1968	-1.1407	0.56074	-0.54355	3.698	14.0443	41.6597	0.18779	-0.09082	0.1919	-19.009	-41.6221	1221.685	-2.3664	0.64902	-0.32793
0.168	-49.211	67.547	962.496	-1.2933	0.40225	-0.13633	50.2224	-8.98500000000001	987.644	-1.6406	0.081055	-0.1416	-23.391	-11.4807	81.7017	0.062988	0.0043945	-0.11133	-59.174	-89.6836	1289.4105	-2.8758	0.89961	-0.43789	51.19	-122.128	1010.7167	-1.0444	0.54863	-0.56621	-25.2943	25.172	47.8612416	0.1792	-0.081445	0.18682	-53.439	-41.329	1217.8695	-2.5163	0.71025	-0.34053
0.17	-46.0829	65.26	955.115	-1.2734	0.38955	-0.13418	62.337	-14.378	1001.796	-1.788	0.12881	-0.19004	-16.066	-24.4752	87.9236	0.040527	0.008789	-0.11827	-72.713	-74.256	1286.321	-2.9044	0.9249	-0.44414	47.551	-142.32	1035.7987	-0.97461	0.53906	-0.58301	-9.706	31.7637	32.9884	0.16641	-0.07334	0.17627	-67.2327	-46.972	1212.84	-2.6616	0.76885	-0.34951
0.172	-19.362	58.434	957.05	-1.2523	0.37783	-0.11856	73.238	-24.563	1013.108	-1.9026	0.21202	-0.22647	-40.0389	-15.5818	124.4884	0.015625	0.010938	-0.12646	-75.77	-49.5892	1263.836	-2.8921	0.93604	-0.44287	23.155	-133.368	1061.4938	-0.9249	0.52803	-0.59072	-18.41	18.8167	29.4593	0.15576	-0.061035	0.17041	-95.894	-55.093	1206.417	-2.7943	0.8334	-0.36309
0.174	-0.306999999999999	61.917	947.153	-1.2374	0.36319	-0.11435	40.5262	-33.435	1016.93	-1.9718	0.30264	-0.26514	9.45	18.5224	260.987	-0.015625	0.014844	-0.13779	-79.799	-38.8932	1276.286	-2.8572	0.93692	-0.44824	6.3991	-129.638	1069.6123	-0.90069	0.52314	-0.58867	-8.342	14.7097	15.0939	0.14727	-0.055078	0.15694	-92.4177	-45.74	1192.179	-2.894	0.89111	-0.37842
0.176	-25.347	80.331	906.6604	-1.2207	0.35352	-0.10693	59.009	-25.8364	978.26	-2.0022	0.38477	-0.29512	-24.401	62.3931	369.317	-0.062793	0.016211	-0.14101	-94.699	-55.49754	1290.379	-2.7992	0.92735	-0.4543	-18.62961	-114.2085	1085.601	-0.89756	0.52236	-0.59883	-12.112	12.6863	12.3332	0.13633	-0.045898	0.15136	-96.1657	-49.2132	1208.9	-2.9446	0.93955	-0.38799
0.178	-21.3567	99.93511	886.1552	-1.2	0.35039	-0.10117	87.47	-4.562	918.756	-2.0059	0.45215	-0.32031	-61.287	93.3283	480.93	-0.14209	0.014648	-0.14941	-60.704	-58.4148	1306.3915	-2.732	0.90859	-0.44727	-10.4628	-109.347	1085.206	-0.91348	0.50743	-0.60625	-11.438	24.2113	1.942	0.12617	-0.030664	0.13926	-82.152	-57.214	1210.61	-2.9477	0.98517	-0.38926
0.18	1.886	112.641	869.725	-1.1805	0.34384	-0.093164	66.781	26.524	929.298	-1.9766	0.49824	-0.33945	-24.173	54.9322	538.368	-0.26523	-0.0043946	-0.14619	-61.988	-58.4575	1326.4768	-2.6628	0.88564	-0.43858	-21.3082	-99.585	1092.025	-0.94141	0.49512	-0.60059	-17.297	11.142	21.4641	0.11787	-0.018262	0.13076	-74.134	-52.551	1237.252	-2.9101	1.0133	-0.38457
0.182	15.3	123.3407	848.7374	-1.1523	0.3415	-0.09043	17.4666	33.573	957.5246	-1.9231	0.52344	-0.34961	-11.003	0.8639	631.71	-0.41777	-0.036133	-0.14922	-106.8801	-41.7042	1335.5403	-2.5957	0.86523	-0.42773	23.3038	-106.791	1108.164	-0.9952	0.48935	-0.5999	-24.065	6.793	33.6017	0.10596	-0.0043945	0.12109	-75.89664	-47.424	1239.541	-2.8428	1.0239	-0.38516
0.184	-0.248999999999999	120.392	800.4983	-1.121	0.33467	-0.086035	9.5547	37.0045	949.0399	-1.8227	0.53242	-0.34453	-37.882	-12.363	745.3232	-0.59863	-0.072461	-0.13633	-120.6103	-37.7093	1351.7778	-2.5281	0.8539	-0.4208	10.78381	-120.41	1125.82	-1.0725	0.49199	-0.59033	-19.139	9.444	22.8544	0.088575	0.0058594	0.10821	-83.1269	-56.295	1265.2805	-2.7656	1.0234	-0.38867
0.186	7.766	117.1335	787.43505	-1.0894	0.3335	-0.07959	30.8758	30.224	943.155	-1.6821	0.53232	-0.32217	-80.2793	-0.380000000000003	831.299	-0.80468	-0.1167	-0.12676	-91.489	-37.6654	1326.166	-2.4624	0.84854	-0.41123	41.6879	-102.53495	1145.64	-1.1647	0.49902	-0.58409	-34.8459	25.8859	29.2365	0.074512	0.023828	0.10049	-82.4618	-34.608	1272.804	-2.6689	1.019	-0.39316
0.188	8.938	128.884	745.927	-1.0526	0.33047	-0.077344	23.5605	-12.6702	935.901	-1.5254	0.52539	-0.28857	-61.248	36.817	879.717	-1.0415	-0.16113	-0.11621	-88.6262	-28.397	1312.6382	-2.3983	0.8501	-0.39014	48.17	-75.4128	1164.469	-1.2561	0.50723	-0.58906	-21.757	22.9858	27.659068	0.059668	0.035937	0.084082	-63.231	-19.838	1280.444	-2.5675	1.0093	-0.39267
0.19	-2.325	145.951	733.8378	-1.0132	0.32256	-0.071582	42.3046	-34.8955	931.574	-1.3732	0.51592	-0.26035	-53.846	29.946	906.6039	-1.2899	-0.18897	-0.12012	-109.6567	-34.251	1299.8448	-2.3339	0.84697	-0.38789	18.3958	-63.8636	1178.9925	-1.3462	0.51807	-0.59521	-27.715	24.536	18.6029	0.041211	0.048438	0.087402	-75.981	0.731300000000001	1266.1016	-2.4655	1.0003	-0.38603
0.192	14.709	137.061	706.662	-0.97178	0.32256	-0.069629	41.404	-41.156	950.7204	-1.2542	0.50801	-0.23623	-62.9811	-2.3095	898.53782	-1.5393	-0.17832	-0.14033	-83.14951	-48.607	1317.40298	-2.2769	0.84229	-0.37646	18.8024	-87.3808	1208.1906	-1.4237	0.52851	-0.59502	-17.631	30.244	-2.6523	0.022461	0.067383	0.077637	-109.023	2.183	1254.217	-2.354	0.99248	-0.38682
0.194	24.355	119.4134	690.678	-0.93076	0.32451	-0.065821	28.699	-28.7215	961.6102	-1.1734	0.51074	-0.22334	-65.002	-42.238	893.0453	-1.7597	-0.13183	-0.18018	-75.378	-39.379	1314.9296	-2.2251	0.83096	-0.36817	11.038	-115.9334	1239.241	-1.4945	0.542	-0.59268	-34.868	34.761	-5.7919	0.0056639	0.07793	0.07373	-95.6169	9.238	1246.407	-2.25	0.98633	-0.38184
0.196	22.775	112.455	671.151577	-0.89014	0.3208	-0.05957	5.621	-65.8129	969.2495	-1.116	0.52265	-0.20576	-30.685	-63.047	924.013	-1.9488	-0.036035	-0.22188	-88.5667	-15.1833	1301.0807	-2.1772	0.81885	-0.35556	33.2446	-138.932	1267.061	-1.5567	0.54707	-0.60166	-27.55	12.5271	2.9568	-0.009375	0.090625	0.071093	-80.454	15.486	1243.253	-2.1447	0.96592	-0.37705
0.198	-14.503	99.1392	633.4219	-0.85283	0.31358	-0.055469	-31.623	-118.975	959.0754	-1.0723	0.53516	-0.18555	-6.03	-63.281	937.824	-2.1108	0.097656	-0.25293	-63.72	-6.4646	1288.1416	-2.1316	0.80439	-0.34502	23.0219	-152.912	1253.9105	-1.6035	0.54356	-0.61602	-27.5728	2.528	32.3498	-0.024219	0.099606	0.065625	-58.108	19.5138	1248.5731	-2.0511	0.94228	-0.36865
0.2	-21.525	90.7138	609.773	-0.81425	0.31201	-0.055566	-32.9853	-142.496	962.1985	-1.0406	0.55566	-0.16221	-33.342	-46.886	923.898	-2.2351	0.24023	-0.30156	-58.394	-7.80091	1269.923	-2.0938	0.78906	-0.33408	18.4437	-140.6027	1262.8784	-1.6538	0.53564	-0.63672	-15.768	15.61	7.043	-0.035644	0.10605	0.064746	-73.7764	20.8579	1231.9774	-1.9694	0.91612	-0.35693
0.202	-36.7307	86.9551	621.772	-0.7709	0.30654	-0.056348	-35.654	-124.433	985.0812	-1.0099	0.58486	-0.13828	-37.3058	-38.153	899.583	-2.3081	0.36885	-0.34287	-47.724	5.4786	1272.759	-2.0586	0.77539	-0.32373	-4.3594	-143.7437	1263.7307	-1.715	0.50596	-0.65429	-15.283	15.9793	20.8207	-0.041504	0.11279	0.063477	-28.216	14.2376	1216.154	-1.902	0.89101	-0.34199
0.204	-18.381	103.9196	597.8053	-0.72471	0.29766	-0.045801	-66.626	-110.631	995.261	-0.99033	0.6208	-0.12266	20.222	-13.284	862.1198	-2.3257	0.46768	-0.3792	-73.494	38.096	1281.25	-2.0248	0.76348	-0.31875	-6.461	-144.365	1266.3301	-1.7831	0.46934	-0.66153	-16.151	26.0122	9.7089	-0.04834	0.11807	0.062305	-14.28	36.6811	1189.962	-1.8574	0.87207	-0.33301
0.206	-27.6551	110.71469	540.861	-0.67725	0.28955	-0.044922	-85.3778	-101.1601	998.729	-0.98691	0.65537	-0.11543	17.639	4.181	854.413	-2.302	0.51934	-0.40918	-62.065	52.757	1302.595	-1.9893	0.74698	-0.31036	47.083	-136.209	1279.2291	-1.8612	0.4459	-0.67402	-4.573	19.9718	26.4039	-0.053515	0.12177	0.060156	-3.71700000000001	50.6436	1220.032	-1.8144	0.85859	-0.32451
0.208	-56.918	109.6173	507.751	-0.62334	0.28281	-0.048535	-71.6851	-100.9553	980.871	-0.98633	0.68555	-0.11133	-26.556	34.952	864.946	-2.2495	0.53174	-0.43066	-66.1587	42.924	1308.151	-1.9499	0.73955	-0.30488	43.974	-138.144	1257.6966	-1.9412	0.43887	-0.6832	-13.734	34.8881	20.07851	-0.058203	0.12373	0.059766	4.854	54.0041	1247.113	-1.7847	0.84736	-0.3167
0.21	-36.2664	94.8789	505.3106	-0.56933	0.27207	-0.049317	-66.0635	-97.31588	988.262	-0.9971	0.70215	-0.11319	-74.5236	17.411	881.1839	-2.1428	0.51094	-0.45772	-39.965	45.5043	1287.559	-1.9112	0.72393	-0.29678	66.607	-127.287	1251.255	-2.0176	0.45801	-0.69385	-18.856	22.3092	9.8016	-0.052246	0.12402	0.058203	13.296	41.0436	1259.082	-1.7581	0.84111	-0.31397
0.212	-49.0924	107.9952	481.7983	-0.51621	0.26192	-0.040332	-54.1245	-89.2551	1011.805	-1.0171	0.70986	-0.11436	-59.6329	32.843	880.4762	-1.9739	0.48086	-0.47832	-48.302	38.5209	1250.2485	-1.8726	0.70947	-0.28467	41.915	-109.891	1242.3106	-2.0966	0.49912	-0.70908	-17.611	6.2882	7.0169	-0.050293	0.12256	0.052246	-14.762	23.8829	1233.1096	-1.7367	0.83496	-0.30899
0.214	-26.9055	101.98651	459.151	-0.46514	0.2501	-0.03584	-40.289	-78.2191	1055.1786	-1.0483	0.71143	-0.12881	-67.5066	13.587	878.749	-1.743	0.43593	-0.47246	-60.657	37.8675	1218.5431	-1.8284	0.69229	-0.27725	28.7566	-80.337	1234.049	-2.177	0.53594	-0.74004	-1.132	3.0883	12.3901	-0.043457	0.12431	0.055078	-44.592	22.44659	1214.8092	-1.7148	0.82715	-0.30371
0.216	-37.1126	105.5905	429.6752	-0.41602	0.23438	-0.035156	-39.055	-53.927	1084.3011	-1.0858	0.70322	-0.13574	-41.2582	-0.843000000000004	876.303	-1.5197	0.39121	-0.4586	-41.839	34.6427	1195.106	-1.7894	0.67774	-0.26914	21.0995	-65.638	1243.51	-2.2488	0.56641	-0.77871	-11.915	18.3818	22.2753	-0.0375	0.12354	0.050196	-47.428	31.8932	1200.3196	-1.6823	0.81435	-0.29795
0.218	-8.025	100.39805	390.981	-0.36631	0.22149	-0.030957	-64.315	-26.984	1097.8964	-1.1191	0.70117	-0.15039	-44.4566	-40.253	877.809	-1.3457	0.36621	-0.46143	-34.771	43.1275	1183.37	-1.7457	0.65899	-0.25508	39.557	-50.7152	1271.971	-2.2915	0.5581	-0.83291	-25.068	29.099	19.915	-0.033594	0.12393	0.049414	-43.287	43.89	1181.2742	-1.6436	0.79346	-0.29444
0.22	-35.2161	99.3551	363.852	-0.31748	0.20938	-0.025976	-46.8	-46.509	1096.2031	-1.1495	0.69033	-0.16905	-10.64	-70.2105	904.74	-1.2165	0.36748	-0.48027	-36.396	41.7989	1191.9396	-1.6991	0.63877	-0.24639	66.477	-40.9	1272.328	-2.3105	0.5293	-0.87695	-9.27	24.8231	23.09	-0.030469	0.1249	0.051172	-49.167	42.8	1167.6559	-1.6035	0.77197	-0.27724
0.222	-42.905	107.8169	322.177	-0.27139	0.19805	-0.018945	-38.419	-74.249	1101.6384	-1.1742	0.67852	-0.1916	-6.246	-100.876	940.2956	-1.1173	0.37744	-0.49863	-50.236	23.048	1185.1354	-1.6558	0.61572	-0.23535	29.6227	-33.731	1270.496	-2.3031	0.48926	-0.90605	-20.575	25.11293	14.9495	-0.027344	0.12793	0.052734	-69.8492	40.4522	1143.0173	-1.5557	0.74033	-0.27159
0.224	-32.48	114.9295	323.4626	-0.21866	0.18672	-0.020703	-45.167	-100.08982	1108.712	-1.1926	0.66016	-0.21856	16.838	-120.456	962.8919	-1.0439	0.39385	-0.50879	-39.633	20.613	1168.2235	-1.6091	0.5875	-0.22061	24.4556	-23.627	1282.533	-2.2918	0.44805	-0.92578	-17.523	40.5371	15.782435	-0.026465	0.12783	0.052246	-54.9576	34.8674	1142.4065	-1.5112	0.70752	-0.26025
0.226	-32.466	113.989	293.4947	-0.17041	0.17432	-0.016113	-62.6287	-116.1972	1125.779	-1.2182	0.63438	-0.23887	14.3838	-145.685	995.5744	-0.98662	0.41201	-0.5253	-52.346	39.424	1150.7127	-1.5651	0.55713	-0.21192	-5.118	-31.429	1316.6596	-2.2902	0.42461	-0.93985	-7.541	16.216	29.8324	-0.030469	0.12822	0.050879	-29.542	57.9741	1136.876	-1.4732	0.67403	-0.24395
0.228	-37.582	113.83	280.7947	-0.12138	0.16123	-0.0088867	-48.594	-141.137	1145.6444	-1.2495	0.59912	-0.26416	28.24	-162.468	1022.7957	-0.9541	0.42969	-0.53711	-81.9619	79.4202	1137.512	-1.5261	0.53369	-0.19902	30.503	-30.936	1309.8104	-2.301	0.42402	-0.97012	-11.174	12.7932	44.069	-0.030859	0.13096	0.049707	-32.813	85.6215	1126.5404	-1.4466	0.6376	-0.23086
0.23	-25.919	102.746	248.5237	-0.076953	0.15146	-0.0012695	-36.054	-150.36	1153.356	-1.2999	0.55645	-0.28135	-7.742	-161.526	1033.4604	-0.94551	0.45273	-0.54687	-79.9584	112.762	1125.1986	-1.4945	0.51347	-0.18623	22.8295	-63.694	1306.202	-2.3218	0.44824	-0.9917	-3.77	2.1617	33.1725	-0.033203	0.13193	0.047656	-43.726	107.2866	1117.8801	-1.422	0.60596	-0.22266
0.232	-2.779	96.039	239.8349	-0.03125	0.13506	0.00029296	-18.686	-151.432	1169.1822	-1.3687	0.51416	-0.2959	-27.047	-149.819	1037.4248	-0.95156	0.47813	-0.55547	-68.11014	131.361	1102.2378	-1.4658	0.48828	-0.1748	53.162	-75.631	1289.9982	-2.3408	0.4959	-1.0229	-39.3595	-0.4869	48.612	-0.036621	0.13916	0.047363	-38.201	116.1802	1109.808	-1.4018	0.57324	-0.20771
0.234	11.094	95.737	217.6515	0.016211	0.12978	0.011719	-21.894	-145.418	1174.5328	-1.4534	0.48408	-0.3123	-54.995	-126.143687	1049.8591	-0.97695	0.4836	-0.56602	-49.5586	125.879	1082.5358	-1.4434	0.46191	-0.16338	61.991	-79.806	1305.695	-2.3523	0.55195	-1.05	-15.293	-7.02879	106.661	-0.046191	0.13936	0.041407	-41.829	116.1354	1088.9414	-1.3823	0.54346	-0.19775
0.236	9.978	82.604	202.5992	0.058105	0.11328	0.019043	-5.712	-131.468	1175.8879	-1.5607	0.46709	-0.3167	-39.6319	-109.6964	1071.721	-1.0169	0.48721	-0.5622	-62.33934	103.255	1059.6937	-1.4195	0.44004	-0.15479	39.486	-59.661	1329.27653	-2.3395	0.6	-1.0715	-38.151	10.60248	142.026	-0.05918	0.14082	0.03545	-62.9441	104.8502	1071.57314	-1.3722	0.52354	-0.18731
0.238	1.66	72.938	177.3025	0.088965	0.095995	0.023145	-17.946	-108.852	1191.712	-1.6792	0.45313	-0.30908	-44.166	-105.042	1088.9679	-1.0747	0.48877	-0.56201	-50.9836	100.406	1040.5481	-1.394	0.42364	-0.14346	41.1977	-44.24	1323.6411	-2.3056	0.64072	-1.088	-60.946	51.8444	198.925	-0.08418	0.1373	0.030762	-65.1746	89.0408	1071.521	-1.3632	0.49795	-0.17539
0.24	5.222	66.068	178.9274	0.12002	0.080176	0.028613	-38.788	-62.494	1186.9	-1.8269	0.475	-0.30742	-16.8207	-102.562	1101.007	-1.1535	0.49082	-0.56231	-37.014	112.321	1015.367	-1.3737	0.40537	-0.13662	36.859	-28.959	1322.2955	-2.2554	0.66846	-1.0933	-59.7511	51.6251	320.872	-0.11982	0.13232	0.01582	-53.2456	92.4357	1064.557	-1.3534	0.48115	-0.16367
0.242	17.582	63.172	148.643	0.14853	0.065723	0.035254	-43.088	-45.779	1188.841	-1.9824	0.51016	-0.30039	18.702	-101.894	1127.01	-1.2353	0.50205	-0.56377	-41.268	132.1903	989.3	-1.3594	0.38281	-0.12646	76.415	-20.6176	1316.3446	-2.1888	0.68545	-1.0931	-71.786	0.8416	411.602	-0.16992	0.12549	0.0043945	-50.1476	106.8814	1032.9433	-1.3486	0.4623	-0.15752
0.244	-10.514	70.3461	131.4909	0.17461	0.053125	0.040918	-29.17	-50.816	1165.7032	-2.1488	0.55664	-0.29766	38.1285	-73.102	1146.389	-1.3021	0.51807	-0.56455	-44.208	120.734	977.277	-1.3439	0.36963	-0.11602	36.027	5.32	1296.3875	-2.1253	0.69326	-1.0882	-87.734	-3.0228	493.671	-0.24639	0.12354	-0.010254	-48.1349	109.8203	999.418	-1.3423	0.45166	-0.15137
0.246	-13.628	61.8018	133.2109	0.19678	0.036621	0.044922	-44.26	-56.24	1171.893	-2.3146	0.6211	-0.30664	39.182	-53.13	1167.241	-1.3546	0.54443	-0.56064	-33.489	109.4787	959.5818	-1.3315	0.35635	-0.10918	34.31	26.897	1305.37783	-2.0577	0.69678	-1.0792	5.194	-9.508	548.6088	-0.34531	0.11543	-0.035547	-45.504	99.7834	962.951	-1.3377	0.42773	-0.14336
0.248	-20.3805	55.5745	107.7858	0.2123	0.021582	0.047657	-65.632	-48.07	1167.875	-2.4746	0.70313	-0.32324	21.757	-60.686	1181.8742	-1.4004	0.56543	-0.56055	-3.158	102.828	951.7199	-1.3179	0.34775	-0.099804	14.807	40.8068	1311.0432	-2.0014	0.6998	-1.0615	24.7939	-14.84	641.7642	-0.45859	0.097852	-0.054297	-3.724	98.83	949.3346	-1.3308	0.41211	-0.13144
0.25	-11.634	57.3835	103.2571	0.23799	0.0066407	0.057617	-64.6752	-33.026	1165.811	-2.6148	0.79599	-0.34951	11.242	-86.4148	1219.123	-1.4509	0.57198	-0.5626	-28.9998	119.082	931.3814	-1.3008	0.34258	-0.095703	18.8155	39.088	1282.393	-1.9468	0.7041	-1.0444	-57.101	23.873	760.53352	-0.59414	0.075488	-0.07168	9.262	112.689	944.9918	-1.3246	0.39258	-0.1248
0.252	-42.17133	49.4858	89.5718	0.25009	-0.010547	0.059961	-74.84	-34.599	1171.474	-2.723	0.88906	-0.36973	8.565	-109.1185	1246.548	-1.5069	0.56612	-0.56279	-27.827	126.067	930.6316	-1.2749	0.33057	-0.089844	31.061233	41.1	1250.678	-1.902	0.70938	-1.0285	-32.299	37.972	796.017	-0.74365	0.043457	-0.094238	14.466	119.3093	947.489	-1.3124	0.37744	-0.11905
0.254	-23.889	43.05652	82.9111	0.26084	-0.02461	0.067773	-70.5114	-21.43	1176.474	-2.7969	0.96914	-0.39043	-6.083	-113.2151	1265.208	-1.5831	0.54072	-0.56474	-29.3696	138.061	909.71405	-1.2503	0.32344	-0.08252	26.868	21.499	1210.962	-1.8597	0.71055	-1.0106	-25.9073	32.7963	810.982	-0.92197	0.0029296	-0.12129	23.6765	123.2369	925.9295	-1.3008	0.36523	-0.1123
0.256	-7.212	52.8233	86.4845	0.26904	-0.041504	0.069336	-61.158	-23.123	1192.865	-2.8297	1.0297	-0.39961	-13.64	-119.983	1264.291	-1.6883	0.51719	-0.57031	-9.598	143.835	878.7021	-1.2181	0.31924	-0.079785	44.386	19.67	1224.094	-1.8207	0.70508	-0.98789	-9.6541	27.709	888.7668	-1.0969	-0.022754	-0.15566	38.672	130.8765	907.6757	-1.2816	0.34678	-0.10185
0.258	-31.35	69.62863	56.8245	0.27783	-0.05293	0.07666	-74.326	-47.0065	1207.278	-2.8262	1.0635	-0.41113	-23.9104	-118.1867	1261.9298	-1.8057	0.50098	-0.57031	-9.607	135.4849	859.145	-1.1825	0.30752	-0.074316	51.45	25.4507	1215.335	-1.7856	0.6961	-0.96152	15.0049	17.018	903.79	-1.2578	-0.028613	-0.19473	32.3648	141.1466	877.4587	-1.2542	0.33135	-0.096484
0.26	-32.7487	71.4497	33.2136	0.28623	-0.068848	0.074121	-76.6913	-57.592	1231.2308	-2.7919	1.088	-0.41377	-22.304	-124.7051	1274.0501	-1.9301	0.50703	-0.57598	6.261	118.9398	837.443	-1.1488	0.29219	-0.068262	46.741	36.8644	1210.79372	-1.7515	0.68408	-0.94092	28.336	-6.29799999999999	910.037	-1.3886	-0.0080078	-0.22764	8.983	145.4125	869.246	-1.2257	0.31768	-0.092969
0.262	-38.5327	66.1993	31.1066	0.2917	-0.079394	0.076464	-81.4179	-60.622	1241.4978	-2.7362	1.1114	-0.41377	-20.452	-132.33747	1297.904	-2.0426	0.52715	-0.58418	24.049	120.2979	805.1994	-1.1147	0.27783	-0.062012	38.007	13.163	1198.7292	-1.7158	0.67461	-0.92012	-0.242000000000001	12.569	909.925	-1.4995	0.03418	-0.27148	22.892	146.403	842.8849	-1.1937	0.30225	-0.087793
0.264	-16.104	62.1462	43.4004	0.28984	-0.090137	0.074512	-88.285	-46.385	1240.1565	-2.6706	1.1223	-0.42588	2.486	-142.047	1313.343	-2.1446	0.55722	-0.59317	22.9268	134.158	773.7245	-1.0734	0.26865	-0.059961	43.927	-2.88	1211.572	-1.689	0.66816	-0.88965	-8.499	15.651	883.548	-1.5852	0.10323	-0.31172	17.3829	151.962	799.1047	-1.1577	0.29248	-0.084473
0.266	-37.9128	56.2788	45.2352	0.28857	-0.10156	0.07373	-79.136	-46.328	1253.3805	-2.5914	1.134	-0.43594	17.201	-131.918	1305.0606	-2.2368	0.58447	-0.62099	16.578	132.6066	761.0582	-1.0352	0.25391	-0.051855	36.918	0.58	1196.0393	-1.6676	0.66074	-0.85957	45.17541	3.3383	893.011	-1.6422	0.17149	-0.32832	-5.543	142.165	771.39551	-1.1215	0.27988	-0.077148
0.268	-33.6704	36.1832	42.69561	0.27803	-0.10791	0.072949	-79.5082	-36.558	1246.11236	-2.502	1.1465	-0.44336	24.4027	-111.454	1297.8	-2.3198	0.61035	-0.6626	14.847	132.85454	721.875	-0.99454	0.24179	-0.046387	3.1765	25.3036	1171.5314	-1.6532	0.64834	-0.82978	27.5931	-4.3659	870.28544	-1.6778	0.23359	-0.34161	-15.0843	120.822	741.9404	-1.0836	0.26973	-0.072266
0.27	-33.2335	26.3145	44.2196	0.26367	-0.11494	0.069531	-59.222	-22.61594	1238.77022	-2.3913	1.1501	-0.45264	13.969	-80.716	1285.0844	-2.3977	0.62334	-0.71533	20.915	119.848	700.9603	-0.95664	0.23106	-0.045801	10.4215	27.262	1162.3059	-1.6348	0.63281	-0.79688	42.079	15.0144	829.674	-1.6978	0.27783	-0.34268	18.29	103.5584	720.3156	-1.041	0.2627	-0.066406
0.272	-30.9928	28.9628	29.7515	0.24531	-0.12237	0.064453	-71.887	-6.614	1222.003	-2.2741	1.1477	-0.45986	-28.4105	-62.614	1266.524	-2.4594	0.63359	-0.77481	11.288	122.8246	669.9939	-0.90771	0.21924	-0.041992	-3.644	42.061	1149.039	-1.6211	0.62343	-0.76484	25.88959	7.249	847.145	-1.7046	0.31396	-0.34424	20.9393	116.303	689.833	-0.99841	0.25508	-0.061035
0.274	-26.4658	28.231	22.3404	0.22725	-0.12354	0.060352	-63.076	-0.387	1226.0939	-2.1444	1.1384	-0.45869	-18.502	-58.5548	1283.6164	-2.5008	0.63281	-0.82637	-9.465	117.0607	648.5375	-0.86426	0.20762	-0.036914	3.4714	58.697	1109.0174	-1.6035	0.61445	-0.73555	-19.5357	4.748	885.2003	-1.6889	0.33213	-0.33867	-8.3611	112.212	663.678	-0.95508	0.24854	-0.055664
0.276	-26.066	31.6784	25.2242	0.19922	-0.12891	0.062988	-57.4892	18.5747	1223.0379	-2.0182	1.1166	-0.44668	0.121700000000001	-48.626	1273.8565	-2.5065	0.62949	-0.8627	-20.803	133.553	624.6124	-0.81309	0.19961	-0.030469	-13.5728	69.066	1084.8626	-1.5863	0.6082	-0.70976	-21.5803	9.452	885.0716	-1.6512	0.34258	-0.32969	-5.442	108.198	647.173	-0.90791	0.23604	-0.054004
0.278	-1.583	29.0043	33.26178	0.16846	-0.12666	0.057226	-39.5997	29.255	1221.1033	-1.8965	1.0898	-0.43359	-3.566	-43.36	1280.7989	-2.4902	0.61816	-0.88281	-14.3441	141.362	603.1086	-0.76699	0.18984	-0.02539	13.91895	70.2848	1071.257	-1.5657	0.60107	-0.67666	-17.7394	21.913	877.5595	-1.5883	0.35078	-0.31016	-5.111	113.28	629.614	-0.85693	0.22548	-0.047364
0.28	-3.439	26.7232	30.8841	0.13828	-0.12803	0.045605	-45.168	17.5855	1217.9077	-1.7997	1.0608	-0.41123	-18.667	-43.735	1287.021	-2.4674	0.60752	-0.89795	-23.9	141.149	579.1714	-0.71738	0.17519	-0.030762	12.6599	75.958	1060.733	-1.5405	0.58252	-0.65381	29.827	-24.326	865.299	-1.5119	0.35488	-0.28418	-15.031	137.149	611.4568	-0.80693	0.21846	-0.043457
0.282	-12.021	28.3272	33.05	0.11094	-0.12646	0.04209	-20.394	16.60747	1184.428	-1.7198	1.0298	-0.38886	-14.5753	-33.455	1284.604	-2.4445	0.59346	-0.92138	-31.3721	129.161	552.9287	-0.65186	0.16357	-0.022461	23.186	101.2006	1039.559	-1.5118	0.56612	-0.63076	-3.531	-48.7204	876.49	-1.4282	0.36133	-0.25732	-17.271	139.3913	581.428	-0.75283	0.20869	-0.036133
0.284	-6.73800000000001	9.894	40.9106	0.083887	-0.12754	0.038184	-14.371	19.56	1189.6162	-1.6589	1.0009	-0.37481	-17.208	-40.9	1300.902	-2.4308	0.59463	-0.9374	-19.077	107.9946	532.2911	-0.6	0.15273	-0.018457	19.0663	105.71075	1014.359	-1.4781	0.54669	-0.60489	-2.79	-56.9994	901.5824	-1.3733	0.37402	-0.24062	-31.114	134.122	559.201	-0.7041	0.19971	-0.026367
0.286	12.219	8.765	44.016	0.056152	-0.12549	0.032227	-24.954	40.215	1192.4967	-1.6109	0.97012	-0.35479	-3.5091	-48.88008	1296.308	-2.4295	0.61211	-0.94629	-10.647	114.917	493.37	-0.55	0.13985	-0.016309	3.224	99.431	999.982	-1.4422	0.53028	-0.58692	-2.92	-69.476	925.416	-1.3406	0.39922	-0.22334	-47.1133	142.762	518.8076	-0.65518	0.19091	-0.038575
0.288	11.081	26.0695	14.2163	0.024609	-0.11651	0.027637	-19.021	41.613	1201.081	-1.5742	0.94336	-0.33887	16.9692	-76.783	1318.5896	-2.4277	0.64258	-0.9668	-27.7167	123.729	471.53	-0.5	0.13125	-0.018653	12.2127	104.8972	991.92214	-1.403	0.50508	-0.56993	2.553	-89.213	959.256	-1.3344	0.43594	-0.22295	-61.072	144.352	483.9	-0.59414	0.18828	-0.030469
0.29	-16.2098	33.9068	4.628	0.0032227	-0.1127	0.025098	-20.062	23.6049	1201.2795	-1.5349	0.92988	-0.3252	46.797	-77.922	1335.4923	-2.4146	0.68858	-0.98135	-18.305	116.827	439.8534	-0.45186	0.11533	-0.016504	-24.3112	98.2621	973.4373	-1.3535	0.4834	-0.54688	-3.315	-111.662	942.8522	-1.3447	0.47676	-0.21113	-33.83578	125.1674	450.041	-0.54297	0.17109	-0.023437
0.292	4.217	35.055	-2.068	-0.022168	-0.10645	0.017676	-24.279	10.018	1192.045	-1.5055	0.91719	-0.30967	32.7235	-68.674	1352.708	-2.3897	0.72393	-0.99679	-27.55426	110.197	393.9868	-0.40381	0.10547	-0.013672	-36.9857	97.8449	962.286	-1.3148	0.45507	-0.52577	-37.982	-131.487	918.215	-1.3608	0.52588	-0.20752	-29.8378	108.925	434.567	-0.49629	0.16084	-0.019043
0.294	1.834	26.2548	19.242	-0.042578	-0.10068	0.012988	-21.427	-0.803999999999998	1183.998	-1.4816	0.9082	-0.29795	12.5005	-54.007	1332.1865	-2.348	0.75791	-1.0034	-13.704	108.7477	362.4209	-0.35849	0.097266	-0.010254	-24.5308	102.921	959.8162	-1.2733	0.43327	-0.50057	-50.5254	-125.538	940.534	-1.3694	0.57823	-0.19756	-25.922	108.82	396.184	-0.4458	0.1499	-0.016113
0.296	1.41999999999999	32.0922	6.4376	-0.058594	-0.093262	0.003418	-21.597	6.461	1157.522	-1.4553	0.89355	-0.28984	24.9418	-54.43	1338	-2.2857	0.76934	-1.0062	-29.7564	107.818	345.9558	-0.30938	0.090625	-0.0076172	-25.8706	118.537	933.1816	-1.2311	0.40593	-0.47634	-59.7295	-121.0405	969.368	-1.368	0.63467	-0.1917	-20.7199	112.195	356.5	-0.39307	0.13662	-0.016113
0.298	-28.6427	15.8944	11.7742	-0.074902	-0.087598	-0.00029296	-43.752	7.442	1130.7929	-1.4243	0.87744	-0.27588	10.4407	-38.977	1309.8568	-2.2065	0.77002	-1.0034	-35.988	100.222	351.3685	-0.26016	0.087891	-0.0060547	-36.6289	121.4294	900.3706	-1.1938	0.3786	-0.4573	-76.6661	-123.1469	1003.0349	-1.3626	0.68936	-0.19053	-14.264	111.61749	335.865	-0.33799	0.12276	-0.013867
0.3	-22.426	16.2951	16.5169	-0.089844	-0.081934	-0.0095703	-40.565	34.264	1099.4145	-1.3948	0.85089	-0.26807	21.039	-21.6549	1301.1051	-2.128	0.76221	-0.99834	-39.6528	106.7914	338.3586	-0.20986	0.091602	-0.0074219	-34.687	105.127	900.3159	-1.1504	0.36328	-0.43115	-110.221	-120.6486	1004.629	-1.3496	0.73711	-0.19297	-0.260000000000002	119.8563	316.708	-0.28252	0.11025	-0.0095703
0.302	-10.306	14.9876	23.9002	-0.10156	-0.070996	-0.006836	-48.689	29.0926	1101.36623	-1.3629	0.81915	-0.25469	4.194	1.512	1295.4957	-2.0436	0.74854	-0.98662	-18.986	111.3373	306.91165	-0.15869	0.090332	0.0014648	-9.183	89.209	883.846	-1.1066	0.34184	-0.41301	-87.6349	-115.4245	1016.121	-1.3223	0.77539	-0.2041	12.122	119.144	305.3338	-0.23095	0.096386	-0.0026367
0.304	-16.504	33.8617	8.4527	-0.10625	-0.063867	-0.015234	-45.036	42.2196	1087.6906	-1.3289	0.78204	-0.2379	5.462	15.282	1309.6489	-1.9667	0.73642	-0.97216	-33.3787	107.71831	279.1012	-0.11367	0.093457	0.0011719	-16.008	106.915	842.4267	-1.0645	0.31716	-0.38395	-56.523	-106.0786	1023.339	-1.305	0.79482	-0.21143	-0.822000000000003	116.862	286.8049	-0.17871	0.083496	0.00048828
0.306	-21.003	17.9522	4.4702	-0.10742	-0.054688	-0.017578	-30.658	59.0509	1073.4636	-1.2999	0.73936	-0.22275	23.4173	30.8007	1311.1132	-1.9001	0.71943	-0.95596	-15.437	87.5387	251.9457	-0.072559	0.089844	0.0041016	-12.259	114.142	820.39323	-1.0246	0.29259	-0.36366	-77.514	-73.603	1054.616	-1.2937	0.79492	-0.23096	-15.649	101.5314	284.1514	-0.12725	0.065332	0.0044922
0.308	-27.122	21.9456	3.591	-0.10293	-0.043945	-0.026074	-30.105	81.99	1069.0179	-1.2725	0.70117	-0.20703	-1.2935	38.052	1289.325	-1.8413	0.7085	-0.94092	12.841	97.85868	208.542	-0.02998	0.087109	0.0076172	-15.353	118.075	787.731	-0.98587	0.26743	-0.34286	-67.33	-35.169	1060.951	-1.2902	0.78515	-0.24931	-10.571	100.1928	262.9838	-0.081055	0.052344	0.01416
0.31	-14.645	13.2233	16.2015	-0.094238	-0.030469	-0.034082	-63.8491	89.131	1062.834	-1.2466	0.65868	-0.19325	-4.272	35.2482	1263.7412	-1.7941	0.70801	-0.92617	4.75	107.6477	175.804	0.0052734	0.076465	0.015723	-6.12	116.112	778.4462	-0.95068	0.24854	-0.3208	-70.5567	-32.156	1093.1153	-1.29	0.75645	-0.27129	-5.338	96.623	242.8601	-0.032227	0.039453	0.015723
0.312	-51.4744	11.517	6.773	-0.08252	-0.01914	-0.04502	-63.193	95.566	1054.2332	-1.2277	0.62575	-0.18485	12.515	34.8002	1237.63	-1.7608	0.70283	-0.90967	-2.234	100.985	170.74351	0.034668	0.062012	0.026367	-36.455	123.1832	760.3689	-0.91211	0.22938	-0.29656	-38.348	-62.9561	1101.824	-1.3047	0.73047	-0.29492	-10.419	87.834	218.8667	0.011816	0.021875	0.024121
0.314	-43.5768	5.3936	2.087	-0.061621	-0.0086914	-0.054297	-53.4822	106.987	1032.0521	-1.2027	0.58512	-0.17157	20.3312	39.73267	1242.4459	-1.728	0.69814	-0.89092	12.538	87.1218	166.9295	0.062598	0.05	0.023926	-51.0527	123.5669	724.7162	-0.87557	0.21568	-0.28058	-47.2375	-109.77	1125.1571	-1.3201	0.70918	-0.31357	-9.299	77.979	186.8469	0.051758	0.0058594	0.029297
0.316	-19.113	17.45395	19.489	-0.037598	0.0039063	-0.056641	-49.313	99.4771	1003.5807	-1.1903	0.5532	-0.16025	13.566	43.6856	1248.3225	-1.703	0.69092	-0.86982	7.021	72.834	153.5102	0.086915	0.038379	0.019922	-35.142	128.507	706.2032	-0.83546	0.20352	-0.25666	-45.556	-106.369	1156.4379	-1.3344	0.69843	-0.33984	-0.626000000000005	67.055	162.1345	0.086524	-0.0093752	0.036231
0.318	-10.902	27.768	21.4676	-0.015039	0.010937	-0.067383	-45.79046	82.50102	986.355	-1.1792	0.52686	-0.15381	-4.3041	26.1157	1248.6029	-1.6772	0.68408	-0.84717	-2.522	68.346	142.6363	0.11387	0.027051	0.023438	-45.7685	141.366	679.5386	-0.79498	0.19612	-0.23667	-47.94	-120.424	1173.69	-1.3387	0.70507	-0.3625	5.602	65.18129	142.733	0.1163	-0.023633	0.037012
0.32	-24.518	23.57393	21.9359	0.011719	0.013965	-0.077637	-39.8772	80.9082	976.532	-1.1742	0.50375	-0.1463	5.487	5.2265	1233.62342	-1.6573	0.67627	-0.82529	6.834	71.7826	144.5472	0.14141	0.015528	0.03125	-20.489	138.223	657.2004	-0.75537	0.18848	-0.2168	-48.713	-113.1697	1176.8299	-1.339	0.71162	-0.38574	-14.053	59.8107	142.79413	0.14561	-0.04043	0.044043
0.322	-38.8547	16.743226	1.1102	0.037109	0.015918	-0.087012	-37.6123	82.5611	968.3282	-1.1675	0.47752	-0.14346	-12.2171	9.79	1209.3554	-1.6325	0.66279	-0.80029	1.389	75.3894	116.122	0.16309	0.0024414	0.03418	-34.3318	131.63	603.874	-0.71865	0.18375	-0.19967	-55.8298	-112.76413	1173.6438	-1.3398	0.70605	-0.40625	-8.691	36.63	147.2683	0.17295	-0.057324	0.051269
0.324	-30.0042	19.0258	8.8477	0.063672	0.01748	-0.094629	-14.654	84.309	959.5808	-1.1628	0.45565	-0.13725	-30.8131	21.855	1192.89205	-1.6079	0.64834	-0.77412	-24.5379	84.1092	98.2163	0.18203	-0.0078125	0.04375	-13.944	121.8646	580.653	-0.68008	0.17203	-0.18052	-60.9313	-108.718	1174.9936	-1.3579	0.68623	-0.41729	0.259	33.75	118.95892	0.19775	-0.068359	0.058594
0.326	-26.755	32.912	8.2601	0.083984	0.019043	-0.10547	-25.331	84.356	950.1459	-1.1593	0.43317	-0.12981	-30.5334	27.2453	1172.398	-1.588	0.63408	-0.74424	-12.544	80.83	87.01793	0.19375	-0.024317	0.047364	-23.297	107.803	549.951	-0.64302	0.15679	-0.17489	-45.236	-118.4936	1203.7531	-1.4065	0.65596	-0.41768	-18.421	45.854	115.0815	0.21699	-0.082227	0.063965
0.328	-15.273	34.623	17.8381	0.10635	0.019922	-0.1042	-3.947	82.58	928.6488	-1.1523	0.41504	-0.12793	-28.377	32.9693	1173.46083	-1.5659	0.61279	-0.71777	-0.945999999999998	54.211	64.4463	0.21172	-0.042285	0.050879	-5.12	108.901	516.424	-0.59587	0.14389	-0.1637	-37.88	-120.0109	1233.341	-1.4913	0.61807	-0.4212	-31.123	53.4582	104.162	0.23252	-0.095508	0.068555
0.33	-3.969	29.2823	2.265	0.12656	0.022071	-0.11084	12.441	90.8034	919.50654	-1.143	0.39558	-0.12555	-14.641	58.26628	1143.2622	-1.5445	0.59356	-0.68887	-13.439	40.374	64.833	0.2249	-0.062989	0.051856	-11.975	104.817	504.634	-0.55225	0.12988	-0.14014	-9.606	-104.4172	1245.337	-1.6185	0.59824	-0.42207	-37.801	60.148	96.3993	0.2458	-0.10605	0.070508
0.332	9.352	21.7006	6.724	0.14492	0.024414	-0.11631	9.552	98.5948	911.6611	-1.1328	0.38007	-0.12224	-25.073	64.8653	1126.958	-1.5238	0.57402	-0.66407	-13.713	57.7356	51.558	0.23242	-0.081543	0.055176	-16.838	114.416	493.3676	-0.50615	0.11329	-0.10897	-43.095	-78.3148	1225.872	-1.7813	0.59082	-0.42139	-33.3187	75.54	90.06656	0.25703	-0.11455	0.073925
0.334	-3.599	21.6091	7.079	0.16475	0.025488	-0.12432	3.242	105.609	900.1189	-1.1192	0.36442	-0.11908	-26.4645	68.687	1113.6146	-1.5	0.55176	-0.64179	-26.66	70.7041	55.986	0.24004	-0.098045	0.057227	3.499	119.7365	479.959	-0.46235	0.10159	-0.095393	-41.685	-60.134	1201.2668	-1.9672	0.60781	-0.41484	-56.7745	77.278	80.993	0.26758	-0.12793	0.076172
0.336	-22.2609	15.6568	30.0308	0.18555	0.026367	-0.13135	31.70825	117.208	869.5502	-1.1095	0.35701	-0.11828	-14.881	87.0936	1100.2867	-1.4768	0.53281	-0.61679	-15.724	75.7567	56.837	0.24776	-0.1122	0.05791	-29.3615	114.164	451.1051	-0.41704	0.092415	-0.075248	-48.859	-46.253	1193.176	-2.1557	0.64385	-0.40517	-41.5356	63.83	83.7661	0.27295	-0.13477	0.073926
0.338	15.155	5.7308	45.5783	0.19278	0.026269	-0.13877	17.9303	115.7235	844.3552	-1.0952	0.35303	-0.12256	-4.871	113.6831	1075.489	-1.4473	0.51172	-0.5918	-30.6587	66.828	44.849	0.24776	-0.12861	0.061035	-28.298	110.545	422.8108	-0.37379	0.085721	-0.055776	-48.488	-41.7212	1214.215	-2.3464	0.70088	-0.4083	-53.82601	49.2083	68.567	0.26924	-0.14863	0.07041
0.34	8.635	6.4245	39.8975	0.2044	0.028223	-0.1459	11.405	122.5693	806.774	-1.0836	0.34972	-0.11717	-24.02	129.663	1034.435	-1.4196	0.4877	-0.56806	-17.565	58.9098	38.6962	0.24316	-0.14326	0.05791	-33.5393	106.715	400.1876	-0.33154	0.083496	-0.036133	-43.388	-38.752	1232.0603	-2.5027	0.77226	-0.41484	-32.52	46.9258	52.8681	0.27197	-0.1584	0.069629
0.342	-1.58799999999999	3.755	38.2452	0.21025	0.032129	-0.15762	15.1676	129.0031	793.8783	-1.0731	0.34394	-0.11695	-20.343	125.026	1032.1704	-1.3858	0.46377	-0.54716	-38.62556	42.7789	46.02136	0.23193	-0.1543	0.060547	-22.373	107.551	373.2909	-0.28727	0.084135	-0.019128	-67.453	-40.691	1231.133	-2.6421	0.8501	-0.42871	-29.863	42.8389	49.1166	0.26934	-0.16631	0.06582
0.344	-15.493	-7.32	31.67	0.20908	0.029981	-0.16524	21.7209	146.4101	762.015	-1.0607	0.34209	-0.12038	-13.585	129.453	1012.4345	-1.353	0.44502	-0.52256	-20.887	48.414	42.9895	0.22441	-0.17168	0.06543	-26.287	97.362	331.436	-0.25144	0.084473	-0.0058173	-71.3136	-41.874	1249.358	-2.743	0.92207	-0.45215	-18.978	33.6318	43.0562	0.26123	-0.17676	0.06543
0.346	-3.417	-23.0547	50.297	0.20508	0.022461	-0.16846	21.0563	150.6513	734.7203	-1.0426	0.34488	-0.12793	-18.831	120.212	984.3245	-1.3165	0.42891	-0.50264	-36.1334	62.177	19.1339	0.21015	-0.1793	0.072559	-23.937	83.60361	307.902	-0.21628	0.086173	0.0086923	-111.4536	-45.273	1244.555	-2.8155	0.98173	-0.47002	-23.0725	27.5868	33.0296	0.25234	-0.1751	0.056738
0.348	-14.813	-5.4719	51.369	0.18809	0.019043	-0.175	18.4311	146.0617	732.3851	-1.0186	0.3418	-0.1333	-47.4682	111.26	962.8943	-1.2788	0.40967	-0.479	-52.3254	57.889	12.642	0.18907	-0.18008	0.072559	-21.036	87.9976	279.191	-0.17637	0.083582	0.020127	-110.7201	-35.847	1258.4664	-2.8671	1.0309	-0.47276	-22.662	28.2778	30.1483	0.2374	-0.1792	0.056348
0.35	-31.6842	-7.7494	68.33983	0.16211	0.021875	-0.18809	20.88164	125.5789	717.4175	-0.98802	0.34387	-0.13194	-34.214	94.959	950.3337	-1.2419	0.39131	-0.4585	-41.8424	37.4079	28.999	0.1711	-0.18457	0.070703	-12.458	96.3123	242.25	-0.1377	0.084961	0.041504	-109.6735	-53.30139	1269.8699	-2.8903	1.0698	-0.47354	-29.9755	18.4516	41.8151	0.22178	-0.18037	0.050879
0.352	-23.076	-33.5382	85.4172	0.12735	0.017969	-0.18535	13.6224	117.4415	690.4175	-0.95222	0.34147	-0.1315	-19.609	105.4645	933.156	-1.2033	0.37246	-0.43486	-26.155	23.202	46.063	0.15137	-0.18262	0.070801	-7.096	90.3783	227.9163	-0.10068	0.09216	0.051996	-105.622	-43.7216	1267.7247	-2.8945	1.0957	-0.47314	-16.583	13.6485	61.1175	0.20176	-0.18154	0.049805
0.354	-15.131	-32.0647	110.133	0.09092	0.029785	-0.19297	9.281	125.9099	676.213	-0.91792	0.33728	-0.13695	-24.803	119.271	906.5565	-1.1705	0.35449	-0.41533	-11.615	19.367	34.733	0.12773	-0.17217	0.069531	-21.236	93.4091	209.2856	-0.061165	0.091223	0.060053	-92.19	-35.065	1283.0624	-2.8738	1.1102	-0.47402	-3.611	22.4494	55.3677	0.17676	-0.17773	0.050293
0.356	2.367	-7.05844	145.2675	0.051758	0.035156	-0.19678	-21.0086	115.379	662.959	-0.88474	0.33046	-0.13963	-30.148	109.229	896.8907	-1.1332	0.3293	-0.39218	-11.53	31.8097	30.6519	0.10625	-0.16387	0.069239	-7.436	95.982	208.4586	-0.024017	0.093488	0.071088	-106.171	-28.523	1286.0502	-2.827	1.1138	-0.4706	-16.632	32.4012	33.96924	0.15019	-0.17022	0.046875
0.358	-8.113	28.3551	184.45804	0.002832	0.044238	-0.20635	-13.347	110.7049	644.9843	-0.84619	0.32813	-0.14258	-8.35700000000001	107.829	879.7279	-1.1016	0.30469	-0.37305	-8.143	31.7997	51.027	0.082812	-0.15449	0.064942	-18.029	98.167	190.9074	0.010554	0.093476	0.083569	-92.4434	-25.507	1290.1198	-2.7583	1.1091	-0.47217	-24.899	31.323	35.8557	0.12519	-0.16719	0.044629
0.36	-31.79	62.3101	282.878	-0.048438	0.049707	-0.22041	-17.31629	106.37622	615.649	-0.80472	0.32582	-0.14095	-25.954	104.9657	870.866	-1.0658	0.29307	-0.34863	0.75	34.242	30.3702	0.062403	-0.14258	0.059375	-38.6624	78.8258	176.981	0.045898	0.09082	0.095703	-97.8169	-18.174	1300.7783	-2.664	1.0934	-0.47392	-4.541	22.775	32.4391	0.097852	-0.16484	0.040332
0.362	-34.6234	85.0665	428.028	-0.11407	0.056739	-0.23721	-40.6127	110.9678	585.0847	-0.76608	0.32121	-0.15142	-21.799	121.5715	845.163	-1.0285	0.27559	-0.32539	-6.427	30.6921	11.3973	0.046875	-0.13086	0.055664	-30.8276	69.6309	152.0587	0.071274	0.086709	0.10833	-77.627	-3.392	1287.5059	-2.5542	1.0688	-0.45947	-4.944	26.0992	32.808	0.068945	-0.16514	0.037988
0.364	-64.506	84.6784	536.945	-0.2	0.062109	-0.25371	-39.8832	113.0504	561.89937	-0.72552	0.31218	-0.15432	-34.6654	117.7538	810.7795	-0.99376	0.26661	-0.30469	-10.344	33.1433	5.2542	0.038672	-0.12109	0.044824	-25.8557	70.798	135.8844	0.094116	0.083093	0.11643	-90.568	-6.99	1285.6147	-2.4436	1.0497	-0.4542	7.805	32.0185	19.2699	0.042969	-0.15967	0.039551
0.366	-79.587	62.2706	646.072	-0.31152	0.06543	-0.26855	-29.2911	118.2707	549.0166	-0.68881	0.30488	-0.1557	-20.366	118.126	775.6476	-0.95283	0.25341	-0.28858	3.179	14.1433	25.9855	0.034473	-0.10782	0.043653	-28.553	73.58	130.5032	0.11207	0.078004	0.12386	-93.13	11.60503	1278.664	-2.3347	1.0267	-0.45225	-0.0579999999999998	21.93036	17.1447	0.019629	-0.15313	0.030371
0.368	-22.604	36.523	723.969	-0.45215	0.064355	-0.28427	-18.3865	123.85698	514.0761	-0.6543	0.29395	-0.15918	-50.7381	116.7874	743.8177	-0.9082	0.24512	-0.26855	3.935	13.0294	40.3588	0.027441	-0.098438	0.038965	-37.8222	65.575	120.4795	0.12697	0.068937	0.13752	-82.729	34.0041	1292.7632	-2.2187	1.0107	-0.4417	0.782999999999998	18.6757	11.357	-0.0030274	-0.14815	0.026367
0.37	-26.093	21.107	826.605	-0.6211	0.053028	-0.29336	-26.594	115.0772	492.1622	-0.61275	0.28355	-0.1632	-54.842	113.8387	710.1846	-0.86611	0.23936	-0.26074	-15.966	23.506	28.8793	0.022852	-0.083398	0.03125	-2.298	57.873	106.2328	0.14307	0.05957	0.14502	-89.048	55.946	1299.5556	-2.1179	0.98428	-0.42646	-10.377	22.843	12.148	-0.022168	-0.13955	0.026757
0.372	-79.5853	12.803	906.072	-0.82695	0.032715	-0.28907	-8.301	107.644	478.856	-0.57493	0.27338	-0.16461	-48.899	119.7043	678.5372	-0.81602	0.23301	-0.2459	-20.2597	38.835	24.5684	0.017578	-0.07373	0.023926	-22.747	52.33325	92.0726	0.15234	0.04454	0.15283	-88.932	43.422	1285.629	-2.0249	0.95557	-0.40918	-6.372	26.8626	22.7908	-0.040918	-0.13281	0.021875
0.374	-95.446	8.602	915.613	-1.0665	0.013574	-0.28584	-8.903	105.404	455.044	-0.52829	0.26398	-0.16374	-40.017	136.99399	637.9145	-0.76563	0.22949	-0.23028	6.316	30.232	17.821	0.01543	-0.059961	0.018847	-6.975	43.252	77.00263	0.1661	0.035366	0.1621	-106.4562	28.25	1266.2058	-1.9426	0.93086	-0.3961	-12.691	18.2177	29.83	-0.061035	-0.12256	0.015625
0.376	-53.5008	-24.268	921.893	-1.3398	-0.0053711	-0.28711	-15.689	108.924	432.16785	-0.48317	0.25502	-0.16469	-35.4264	144.299	605.7487	-0.71348	0.22178	-0.21504	-17.67	25.377	9.33843	0.016211	-0.053809	0.016699	-13.803	27.965	77.7639	0.17548	0.020522	0.16524	-58.329	27.98475	1244.223	-1.8739	0.90352	-0.38076	-29.814	18.9885	20.0282	-0.070703	-0.11074	0.011621
0.378	-36.4207	-44.848	924.715	-1.624	0.0013672	-0.29004	-16.393	114.2645	413.0571	-0.43018	0.24951	-0.16113	-26.019	137.008	583.08	-0.66113	0.21631	-0.19824	-15.52	36.2561	-6.4055	0.016992	-0.044434	0.0081054	-21.659	30.46	71.6848	0.18613	0.0082074	0.17051	-60.365	34.8834	1235.608	-1.8187	0.88047	-0.36006	-32.817	24.2019	-1.4402	-0.082911	-0.09834	0.010547
0.38	-58.6326	-87.365	927.268	-1.9047	0.03291	-0.30195	-14.886	129.615	383.9495	-0.38578	0.24177	-0.15771	-39.2836	125.958	557.6402	-0.621	0.20274	-0.18652	-5.104	34.913	9.0826	0.028906	-0.039062	-0.0013672	-7.666	42.155	60.4337	0.19775	-0.0024414	0.1792	-43.963	35.76	1246.1924	-1.7706	0.85811	-0.3458	-52.2313	25.4074	16.53395	-0.083301	-0.087012	0.0085938
0.382	-57.791	-108.3328	915.737	-2.1594	0.11689	-0.29648	-7.674	135.924	340.607	-0.3378	0.23179	-0.15624	-23.353	127.8352	543.8336	-0.57139	0.1916	-0.18213	-4.822	25.4342	29.1556	0.040527	-0.02832	-0.0058594	-25.769	50.6953	44.017	0.20987	-0.01563	0.18203	-37.615	39.946	1266.376	-1.7319	0.83447	-0.33252	-29.76	18.8178	21.358	-0.086035	-0.078516	-0.000293
0.384	-26.067	-123.4694	932.805	-2.3834	0.22061	-0.32461	-9.944	133.03	320.9911	-0.29332	0.21851	-0.1484	-31.508	115.8186	514.4766	-0.52021	0.17559	-0.16377	-32.6023	17.2452	28.31343	0.053516	-0.019238	-0.0098633	-27.08	42.623	57.9353	0.21807	-0.027349	0.1833	-34.348	34.926	1246.06	-1.7	0.8082	-0.31875	-32.544	3.23	25.847	-0.083008	-0.068359	-0.0043945
0.386	-18.343	-102.82	918.289	-2.5371	0.34766	-0.375	-24.642	132.502	306.3381	-0.24896	0.20992	-0.14512	-29.208	102.4709	478.3381	-0.47207	0.16445	-0.15097	-11.448	3.311	31.7001	0.066602	-0.010938	-0.016113	-22.984	48.571	57.24	0.2251	-0.044145	0.1876	-26.637	15.323	1240.714	-1.6699	0.78213	-0.30459	-24.971	10.462	10.714	-0.075098	-0.06123	-0.0091797
0.388	3.289	-78.613	902.162	-2.5865	0.47881	-0.40664	-0.652000000000001	109.5418	300.964	-0.20703	0.18945	-0.13184	-37.9	96.638	457.0162	-0.4248	0.15625	-0.13623	-34.0243	3.9027	29.9463	0.07832	-0.0074219	-0.02627	-17.379	56.907	52.2515	0.23125	-0.058693	0.18994	-51.099	19.487	1227.5090029	-1.6382	0.76065	-0.2878	-43.2764	8.121	16.928	-0.063574	-0.051856	-0.01123
0.39	-12.189	-43.745	901.397	-2.5706	0.5876	-0.43291	23.664	88.285	269.7424	-0.16703	0.17424	-0.13048	-15.817	115.22533	417.5413	-0.37842	0.14483	-0.12558	-30.349	10.7078	35.0061	0.095801	0.0022461	-0.027832	-40.0448	56.303	47.7855	0.23486	-0.07373	0.19043	-54.269	43.4763	1226.5176	-1.6069	0.73486	-0.27187	-29.082	16.0981	22.1678	-0.051074	-0.044043	-0.014355
0.392	19.52	-15.864	897.9037	-2.494	0.6501	-0.45635	9.687	84.018	252.7397	-0.1267	0.15783	-0.12462	-29.616	120.4809	396.2125	-0.32842	0.13897	-0.11172	-25.6084	23.4336	9.1304	0.11182	0.0039063	-0.03418	-29.381	48.8317	35.8727	0.23447	-0.09082	0.19004	-57.657	56.674	1202.14206	-1.5718	0.71729	-0.26221	-17.1243	18.59111	20.42393	-0.03916	-0.0375	-0.02539
0.394	-24.101	19.866	901.283	-2.3821	0.66552	-0.48603	2.997	89.7357	233.4922	-0.090365	0.1383	-0.11719	-24.707	116.3848	365.3895	-0.28349	0.13037	-0.098048	-43.108	19.6451	5.2035	0.12617	0.0095705	-0.041992	-5.872	40.4161	41.3254	0.22979	-0.10556	0.19004	-84.9349	56.771	1172.8843	-1.5383	0.6875	-0.24883	-28.457	22.7757	4.835	-0.02002	-0.027832	-0.023926
0.396	-70.2992	33.193	914.9621	-2.2378	0.65381	-0.51807	29.765	87.5719	226.2943	-0.055776	0.11963	-0.10967	-20.969	98.0729	328.5063	-0.23194	0.12217	-0.081055	-45.9247	14.4215	19.4976	0.13955	0.012891	-0.043066	-15.29	34.8936	16.6485	0.22158	-0.11533	0.18653	-101.0908	55.4027	1144.912	-1.5062	0.66005	-0.23672	-31.618	34.453	2.7171	-0.0079103	-0.024414	-0.0375
0.398	-57.0666	8.765	915.4141	-2.0111	0.6209	-0.54687	6.187	92.7881	206.9594	-0.021484	0.097656	-0.099609	-12.936	96.77018	312.0303	-0.18311	0.11523	-0.063965	-31.564	3.86975	23.9993	0.15127	0.014844	-0.054394	-14.382	18.027	21.5001	0.21191	-0.12119	0.18574	-73.1299	67.7627	1133.018	-1.478	0.63271	-0.22383	-31.157	21.2035	13.969	0.00048832	-0.023828	-0.043945
0.4	-25.458	-20.226	931.08	-1.7504	0.58242	-0.53321	-6.696	91.0021	187.4592	0.01192	0.073334	-0.087009	-14.099	79.5495	295.8484	-0.13223	0.1126	-0.047461	-13.636	12.2501	12.4829	0.1623	0.017871	-0.05625	-18.268	19.688	27.9702	0.19873	-0.12646	0.18652	-61.8114	90.5372	1112.8678	-1.4532	0.60381	-0.20644	-23.8299	22.7377	20.649	0.016895	-0.017969	-0.048242
0.402	-8.657	-79.998	937.23	-1.5238	0.54727	-0.50821	-28.3913	72.0866	188.4507	0.042391	0.04433	-0.079978	-10.399	70.507	275.1011	-0.079688	0.10957	-0.029297	-25.678	24.1377	17.208	0.17139	0.01709	-0.060547	-28.741	20.027	29.58046	0.18779	-0.12773	0.17529	-81.3778	111.9194	1115.486	-1.4355	0.57422	-0.19775	-25.843	21.0767	24.997	0.026074	-0.011718	-0.05586
0.404	-18.9668	-98.7936	928.394	-1.3681	0.52432	-0.51455	-18.782	62.4008	163.0366	0.067387	0.020892	-0.072557	13.482	77.265	234.551	-0.029297	0.10175	-0.015234	-7.516	28.17659	25.4667	0.1748	0.018555	-0.061328	-28.966	36.33126	33.0933	0.16582	-0.12813	0.17207	-53.428	125.6083	1096.8345	-1.417	0.54805	-0.1876	-24.177	18.3832	25.31878	0.039063	0	-0.059082
0.406	-0.375	-129.9182	954.495	-1.252	0.51514	-0.53711	-30.831	67.7717	140.7728	0.091701	-0.0032259	-0.062206	-9.566	97.0856	203.716	0.017774	0.094238	0.0027342	-15.581	24.07572	29.71559	0.17822	0.020019	-0.066797	-12.308	36.6149	44.3838	0.14825	-0.12031	0.17012	-50.163	128.362	1072.463	-1.3996	0.52471	-0.17949	-3.518	19.3687	24.7145	0.050195	0.0051758	-0.067285
0.408	9.847	-164.628	979.6659	-1.1533	0.51992	-0.55215	-37.335	66.1965	128.30251	0.11377	-0.025879	-0.054199	-8.833	105.856	174.2613	0.067871	0.083984	0.023438	-28.56	29.8083	28.0749	0.17471	0.022363	-0.071485	-21.486	23.6806	43.3474	0.12598	-0.11094	0.16426	-44.145	131.218	1049.43	-1.3836	0.50284	-0.16816	7.845	28.723	10.9198	0.063379	0.011816	-0.066308
0.41	17.98	-193.762	1007.2685	-1.0699	0.5209	-0.56524	-32.6032	54.4793	121.4423	0.1332	-0.046873	-0.049512	-17.457	98.735	159.3174	0.10234	0.067774	0.029102	-9.1	20.6584	21.018	0.17715	0.02539	-0.075488	-18.363	25.9619	39.0393	0.10205	-0.10205	0.16357	-71.0746	105.143	1033.9475	-1.3703	0.48731	-0.15801	-0.250999999999998	36.436	-2.582	0.073535	0.014942	-0.071777
0.412	27.4472	-209.774	1034.37274	-1.0039	0.5166	-0.58281	-28.25	56.8728	99.362	0.15166	-0.066209	-0.046289	-4.881	91.336	153.4075	0.13349	0.055859	0.051465	-5.906	16.6748	20.7576	0.17871	0.027344	-0.087891	-27.152	14.61016	22.80518	0.07998	-0.092285	0.15596	-43.715	101.1887	1036.4731	-1.3516	0.46289	-0.15137	-5.47	28.139	16.29071	0.080566	0.020606	-0.077148
0.414	21.45001	-206.237	1046.651	-0.9419	0.51045	-0.60127	-22.0508	56.96648	94.489	0.1669	-0.093553	-0.04082	-11.15	95.965	129.4486	0.16201	0.039453	0.070215	-0.965	12.5657	15.7823	0.18125	0.031153	-0.089062	-47.0856	17.5367	22.8638	0.060938	-0.081152	0.14931	-49.165	107.8858	1020.5061	-1.3359	0.44413	-0.13242	13.371	6.4078	38.7218	0.085449	0.027832	-0.08252
0.416	12.7289	-195.147	1103.7392	-0.88818	0.50635	-0.62061	-31.515	46.7949	103.5325	0.17656	-0.11611	-0.031348	-18.871	76.993	129.9502	0.18418	0.024121	0.084277	-11.153	12.0339	7.0399	0.18301	0.036133	-0.092871	-10.112	14.562	26.6556	0.039453	-0.065136	0.1458	-83.443	113.248	994.7862	-1.3194	0.42128	-0.1287	10.198	0.234999999999999	39.4791	0.09043	0.035938	-0.090332
0.418	-22.4037	-176.76	1119.6703	-0.85469	0.50879	-0.62676	-21.156	50.3532	104.39961	0.18359	-0.13721	-0.027832	-28.0651	61.5198	109.3643	0.2002	0.0083008	0.098145	-10.87	20.5387	6.9872	0.18418	0.04082	-0.09834	-19.194	24.1325	10.95	0.024121	-0.057422	0.14257	-68.697	102.939	984.634	-1.3002	0.40839	-0.12089	-11.916	-8.2513	50.512	0.094629	0.044238	-0.09707
0.42	-38.1672	-143.7645	1123.137	-0.83477	0.50625	-0.6334	-17.021	53.5019	89.0167	0.1876	-0.16084	-0.020508	-27.976	54.7278	94.1431	0.21015	-0.0048828	0.11045	-1.93	2.5762	20.9512	0.18926	0.042676	-0.099707	-21.869	38.99873	13.1905	0.0043945	-0.044434	0.13477	-64.524	105.1455	958.6202	-1.2833	0.39091	-0.11357	-25.407	-15.781	58.373	0.099316	0.054004	-0.10918
0.422	-33.6848	-132.4285	1119.723	-0.84805	0.50234	-0.62949	-40.7365	60.9833	61.3048	0.19102	-0.18057	-0.013184	-13.956	52.8906	69.071	0.22285	-0.018848	0.12373	-4.039	-0.0257000000000005	17.0679	0.18311	0.046875	-0.10986	-6.851	23.1335	10.284	-0.0024414	-0.030567	0.12988	-29.175	113.0029	943.3452	-1.2637	0.375	-0.10596	-12.828	-9.6224	63.79	0.098926	0.061719	-0.11631
0.424	-19.4353	-107.243	1126.1812	-0.89834	0.4958	-0.61787	-38.5875	57.9103	57.4925	0.19102	-0.19737	-0.01084	-18.147	39.0651	67.973	0.23496	-0.029785	0.14248	1.685	4.501	23.8062	0.18281	0.047168	-0.11221	-2.68	24.3207	26.0389	-0.018652	-0.018457	0.12969	-31.083	118.0341	922.339	-1.2442	0.36066	-0.096591	-23.588	4.003	54.1296	0.096191	0.06543	-0.12939
0.426	-6.244	-108.953	1149.241	-0.98779	0.50049	-0.60889	-31.8417	55.1005	67.919	0.1874	-0.21455	-0.005371	-18.685	40.7933	59.8144	0.23623	-0.043066	0.15205	-19.636	16.6404	30.5072	0.17412	0.049609	-0.11827	-28.911	33.3977	29.4254	-0.027637	-0.0051758	0.12656	-12.275	115.724	905.90513	-1.2289	0.34196	-0.093325	-35.33	11.047	77.6048	0.081445	0.074219	-0.13672
0.428	12.6377	-88.698	1158.942	-1.1032	0.51787	-0.5958	-30.5111	45.3967	49.364	0.17871	-0.22705	-0.0039063	-18.834	49.39511	51.7287	0.23682	-0.052734	0.16357	2.638	30.7041	25.48119	0.16709	0.052343	-0.12295	-37.451	25.55515	23.1945	-0.037305	0.0010742	0.12207	10.094	118.348	891.2098	-1.2132	0.32865	-0.083496	-31.0968	-2.902	82.1641	0.061426	0.079492	-0.14444
0.43	44.4808	-96.618	1176.683	-1.2223	0.5457	-0.57969	-35.7916	37.8265	59.5955	0.17168	-0.23789	-0.003711	-17.744	55.97981	47.8892	0.23476	-0.066895	0.175	-16.093	24.30728	30.8762	0.15752	0.058008	-0.12891	-9.844	11.0309	25.7896	-0.045898	0.011719	0.11816	14.254	121.03	857.5693	-1.1916	0.31429	-0.075786	-39.5591	8.3887	159.904	0.039942	0.083789	-0.15654
0.432	28.6604	-94.938	1200.74	-1.3273	0.57344	-0.56485	-12.055	30.38844	64.3278	0.16357	-0.24492	0.00039063	-26.9936	44.8236	52.26283	0.22373	-0.086914	0.18379	-18.03	13.6566	41.2825	0.14209	0.060547	-0.13672	-22.652	9.0962	16.1038	-0.054785	0.01709	0.11846	19.065	118.238	834.8589	-1.1753	0.30078	-0.070313	-4.089	46.00932	285.949	0.013965	0.08584	-0.16787
0.434	26.6948	-100.94579	1201.308	-1.4217	0.59414	-0.55566	-13.175	22.0801	66.156	0.14912	-0.25156	0.0011718	-28.2594	28.95	56.0625	0.21396	-0.10058	0.19356	-30.9596	-7.9776	88.271	0.12715	0.069238	-0.14268	-26.796	18.045	16.2695	-0.066211	0.022949	0.11553	3.305	123.422	807.1582	-1.1509	0.28763	-0.065002	-66.5022	60.3807	384.352	-0.021973	0.091309	-0.18115
0.436	-2.464	-140.879	1216.5951	-1.5156	0.6084	-0.55469	-2.954	43.9967	40.331	0.13359	-0.25879	-0.0011719	-18.204	32.6982	40.0342	0.20234	-0.11757	0.20567	-15.594	-24.7704	116.761	0.10371	0.071973	-0.14668	-22.067	15.94933	24.888	-0.074414	0.031153	0.11357	14.654	145.0988	785.9772	-1.1258	0.28077	-0.059	-31.002	87.5906	507.159	-0.079101	0.095703	-0.19453
0.438	19.273	-155.584	1246.7439	-1.6189	0.61103	-0.55156	4.52	42.20798	37.7476	0.11377	-0.25977	-0.00097656	-31.516	31.74	29.1509	0.19043	-0.12305	0.21729	-24.0208	-3.1877	140.233	0.069336	0.072754	-0.14668	-15.171	9.7683	21.912	-0.08125	0.036914	0.11484	-4.109	159.297	750.8406	-1.0949	0.27533	-0.050953	-6.873	38.5992	557.441	-0.15947	0.098439	-0.20088
0.44	16.377	-144.679	1268.949	-1.7383	0.60352	-0.55058	12.612	38.0353	30.3849	0.09043	-0.25986	0.0041992	-22.165	37.7168	16.918	0.1789	-0.13516	0.22305	-0.398	8.16378	226.99	0.019336	0.068262	-0.1544	-22.874	26.8285	28.4354	-0.086914	0.049316	0.11035	-27.9726	155.881	735.4835	-1.0644	0.26522	-0.048373	-53.658	-8.73	676.2538	-0.279	0.081641	-0.21143
0.442	9.8771	-143.9333	1286.572	-1.8789	0.60508	-0.5541	5.826	22.3068	33.4858	0.065918	-0.25225	0.0015625	-19.358	41.48	22.266	0.17129	-0.14092	0.23145	5.7654	3.1496	317.693	-0.050781	0.055176	-0.15381	-19.951	32.1937	16.613	-0.086035	0.05459	0.11025	-18.41	145.257	700.729	-1.0308	0.26221	-0.042969	-69.6208	-33.46	820.868	-0.43545	0.050488	-0.21611
0.444	3.2037	-157.3128	1291.216	-2.0196	0.6125	-0.55664	-28.8082	23.83788	21.0221	0.039356	-0.24951	0.0011718	-8.118	41.987	12.497	0.1623	-0.14482	0.2334	-22.6033	-28.6416	379.399	-0.15068	0.036621	-0.15518	-26.752	17.304	20.4283	-0.091407	0.057813	0.11143	-7.384	130.153	687.2291	-0.99015	0.25384	-0.037449	-49.206	-1.529	881.709	-0.61865	0.01123	-0.21777
0.446	-12.708	-178.7432	1297.209	-2.166	0.63086	-0.56836	-15.164	20.9297	26.5228	0.014844	-0.24248	-0.0029297	-22.15	31.7996	10.263	0.15693	-0.14971	0.23506	2.503	-55.19627	425.323	-0.27569	0.013575	-0.15019	-2.376	19.3848	32.2802	-0.094531	0.063672	0.11299	-23.076	116.8564	655.7524	-0.95199	0.25126	-0.030446	-39.806	40.307	938.276	-0.8541	-0.042676	-0.18926
0.448	4.462	-186.5181	1301.099	-2.2964	0.65166	-0.60498	-13.541	29.45226	38.4472	-0.010742	-0.23535	-0.0058594	-10.091	28.33733	13.768	0.15381	-0.14697	0.23633	10.0257	-87.9259	529.4926	-0.41513	-0.008691	-0.15019	-13.458	24.13694	27.404	-0.098634	0.071289	0.11279	-34.7103	115.72	623.043	-0.91416	0.24623	-0.030401	-66.7741	37.7158	932.5324	-1.1176	-0.089259	-0.18027
0.45	15.096	-171.5981	1311.058	-2.4136	0.68476	-0.65215	-2.488	36.2229	32.88266	-0.033398	-0.22871	-0.0079101	6.898	18.9154	10.689	0.14981	-0.14541	0.23409	-11.926	-55.2054	675.759	-0.57471	-0.031445	-0.14531	-35.476	22.5446	10.38567	-0.10352	0.082031	0.11426	-5.577	113.362	605.64	-0.87015	0.2351	-0.032086	-90.478	-26.419	926.0476	-1.4063	-0.11309	-0.1748
0.452	35.9558	-146.6265	1282.0985	-2.514	0.7164	-0.71191	-31.469	38.1553	17.6619	-0.051855	-0.21582	-0.010937	-19.645	35.6232	23.54601	0.14414	-0.14502	0.23399	-24.231	-6.148	767.1581	-0.76367	-0.060059	-0.13281	-40.0383	11.4505	30.2631	-0.11436	0.085058	0.11299	-15.768	134.138	572.304	-0.81934	0.22559	-0.025879	-78.1675	-67.123	959.7157	-1.6894	-0.10215	-0.18418
0.454	28.552	-128.5422	1266.435	-2.5945	0.75586	-0.77227	-29.611	31.6633	20.2093	-0.066309	-0.20605	-0.019141	-5.265	23.666	36.376	0.13789	-0.13486	0.23399	-58.312	37.9	784.745	-0.9919	-0.10547	-0.11914	-20.987	21.0193	23.126	-0.11914	0.087891	0.1168	-13.965	141.381	549.0795	-0.76717	0.20766	-0.021583	-30.422	-86.613	1014.206	-1.9468	-0.047363	-0.21094
0.456	27.226	-114.202	1254.034	-2.6387	0.79102	-0.82422	-18.745	29.662	24.293	-0.07168	-0.19209	-0.02334	-24.089	9.1941	22.1108	0.13271	-0.13008	0.23105	-25.964	45.6077	816.053	-1.2436	-0.14063	-0.11377	-29.7619	34.125	17.829	-0.12774	0.095312	0.11562	-44.2957	141.7132	525.19723	-0.71111	0.20124	-0.017013	2.22	-77.088	1006.805	-2.1827	0.073147	-0.23447
0.458	10.8937	-102.255	1259.657	-2.6398	0.81035	-0.8543	-34.583	39.028	5.9322	-0.076172	-0.17725	-0.03125	5.453	12.0617	11.4697	0.12305	-0.12158	0.22412	-19.848	27.803	868.936	-1.5124	-0.15781	-0.11807	-20.277	24.195	18.1302	-0.13008	0.10341	0.11768	-33.5986	124.8681	515.3192	-0.65806	0.18508	-0.017117	-8.745	-72.065	1010.183	-2.3938	0.21699	-0.29278
0.46	-0.841999999999999	-80.524	1270.5876	-2.6097	0.80977	-0.87734	-28.752	31.9211	23.421	-0.073438	-0.16611	-0.037012	-24.6875	24.1289	15.5649	0.11396	-0.10185	0.22705	-12.034	24.527	925.749	-1.772	-0.12412	-0.1375	-27.763	17.7489	31.737	-0.13623	0.10986	0.11865	-57.59906	127.4209	493.39617	-0.597	0.17494	-0.012046	3.988	-50.2791	970.977	-2.5359	0.37246	-0.35293
0.462	33.5838	-71.5805	1294.9648	-2.5657	0.79766	-0.89258	-30.004	12.4011	18.5239	-0.073242	-0.1583	-0.038672	-9.888	21.415	15.6891	0.10312	-0.091113	0.22676	-24.2	42.727	968.021	-2.0151	-0.051758	-0.17041	-27.79	3.1702	55.0384	-0.13711	0.12217	0.11026	-61.6769	127.152	471.4052	-0.53809	0.17041	-0.0068359	15.969	-3.318	917.3156	-2.5968	0.50986	-0.39395
0.464	19.849	-33.047	1291.028	-2.511	0.77491	-0.90947	-22.433	6.66	16.224	-0.063867	-0.14658	-0.049219	-7.074	22.2377	30.802	0.090234	-0.071973	0.22051	-21.968	24.971	976.937	-2.2204	0.09463	-0.1876	-30.554	-5.1479	48.6683	-0.1418	0.12832	0.10899	-56.01806	102.302	454.8742	-0.48335	0.15673	-0.0045448	-6.843	27.214	924.572	-2.5977	0.60645	-0.42578
0.466	12.3506	-20.587	1295.632	-2.4648	0.76563	-0.92383	-48.9973	15.39	6.422	-0.055371	-0.13818	-0.055664	-3.92	21.9112	13.5596	0.078223	-0.055371	0.21934	-32.019	6.8099	969.967	-2.4062	0.23769	-0.22754	-4.534	-7.8179	64.9728	-0.14414	0.13848	0.1086	-59.9781	104.3155	425.097	-0.4299	0.15194	-0.0034817	-25.978	13.633	946.6487	-2.534	0.65352	-0.44492
0.468	2.1065	-38.407	1295.729	-2.4232	0.77012	-0.94063	-52.6271	21.089	18.9203	-0.04541	-0.12988	-0.0625	-11.849	17.75758	5.4751	0.062012	-0.04248	0.21436	-36.169	-4.798	946.093	-2.5473	0.38184	-0.2834	-15.1816	-3.9365	79.2199	-0.1501	0.14863	0.10283	-52.0546	98.8127	380.642	-0.38093	0.15077	0.00053461	-51.579	-3.016	962.1324	-2.4296	0.65283	-0.47558
0.47	18.725	-42.825	1334.535	-2.3879	0.77852	-0.95723	-28.423	24.7241	28.1177	-0.035938	-0.12158	-0.068555	-25.935	3.7523	12.7654	0.046191	-0.020117	0.21113	1.591	11.8253	908.071	-2.6065	0.50478	-0.34677	-5.173	2.2565	136.04104	-0.15967	0.1582	0.094727	-61.2184	95.7449	347.625	-0.34069	0.14268	0.0049047	-58.1993	-4.535	967.0317	-2.2671	0.60361	-0.48691
0.472	24.889	-63.788	1347.136	-2.3477	0.79219	-0.97637	-27.325	29.928	39.326	-0.022754	-0.11553	-0.07334	-10.346	8.9478	23.897	0.031934	-0.0056641	0.20596	-1.715	-4.085	905.892	-2.5952	0.60205	-0.41309	-33.736	35.8451	166.321	-0.17598	0.15821	0.09043	-20.896	103.33765	330.0331	-0.30176	0.13428	0.0083008	-84.124	-15.453	939.031	-2.0428	0.54629	-0.4792
0.474	16.0484	-77.488	1342.7906	-2.2883	0.80039	-0.99494	-32.541	35.579	9.5546	-0.0079101	-0.1081	-0.078809	-17.939	22.34393	8.3469	0.010449	0.011914	0.19697	-25.239	-39.005	931.262	-2.5009	0.65694	-0.47382	-63.19	41.5685	293.417	-0.20137	0.16289	0.083301	-20.22	117.7653	307.9952	-0.26284	0.12984	0.0096864	-46.9121	-20.216	944.965	-1.7612	0.50049	-0.47607
0.476	28.179	-96.268	1334.732	-2.2065	0.80029	-1.0015	-43.9964	22.855	2.7566	-0.0018555	-0.097556	-0.082032	-22.871	44.154	5.5973	-0.0048828	0.031153	0.19482	-94.278	-73.4635	953.264	-2.3551	0.69043	-0.51582	-34.296	36.748	383.869	-0.23965	0.16406	0.075488	-14.45	126.797	286.0943	-0.21865	0.12851	0.008354	-24.361	-53.943	944.707	-1.4912	0.46953	-0.47422
0.478	19.9907	-99.305	1337.1428	-2.1157	0.78174	-1.0118	-17.217	16.8182	11.3877	0.003418	-0.088379	-0.086914	-30.333	30.7101	8.164	-0.022949	0.046875	0.19238	-91.9151	-71.7496	968.688	-2.1539	0.69786	-0.53965	-34.638	35.243	501.964	-0.29687	0.15577	0.057031	-7.611	109.0833	277.7035	-0.17206	0.12284	0.01204	9.05	-83.0764	953.8538	-1.278	0.45498	-0.47588
0.48	38.3132	-78.537	1344.766	-2.0164	0.75938	-1.0137	-22.609	17.746	24.7027	0.011719	-0.076953	-0.096192	-24.0833	34.7641	19.1146	-0.046289	0.068555	0.18916	-68.4158	-63.102	986.0491	-1.9149	0.69639	-0.55214	-3.142	9.66	574.819	-0.37988	0.14893	0.041016	-7.391	87.687	268.3255	-0.11991	0.1208	0.021758	11.037	-110.317	995.4597	-1.1327	0.44756	-0.48291
0.482	17.9183	-75.401	1332.312	-1.918	0.73594	-1.0106	-9.835	27.686	19.3124	0.019336	-0.070801	-0.10332	-21.199	31.4157	13.4159	-0.066211	0.08418	0.18164	-35.911	-61.738	1001.5502	-1.6655	0.69385	-0.56104	36.202	1.097	648.4615	-0.48662	0.12353	0.021485	-3.28	80.353	249.566	-0.07373	0.12451	0.018555	31.2636	-137.096	1050.9965	-1.035	0.45108	-0.49053
0.484	28.65	-60.884	1318.064	-1.8275	0.71093	-1.0047	-11.527	21.9435	18.727	0.024805	-0.058301	-0.10449	-43.1996	26.6387	17.8386	-0.077539	0.097461	0.17578	-31.312	-53.487	1015.56796	-1.445	0.67373	-0.57139	19.2703	17.345	756.36119	-0.61894	0.10108	0.0041015	-27.134	83.6275	229.6377	-0.033476	0.11993	0.024902	40.272	-166.035	1091.6493	-0.9707	0.45898	-0.50342
0.486	35.593	-39.4051	1304.00567	-1.7476	0.68994	-0.99561	-4.086	32.6578	26.8194	0.035645	-0.049805	-0.11318	-21.096	17.7896	17.091	-0.095702	0.11436	0.17578	-43.601	-58.8	1035.53891	-1.2766	0.6459	-0.57813	-20.91905	34.857	817.5042	-0.76933	0.06084	-0.015039	-13.262	78.6621	218.2195	0.0018783	0.11022	0.027152	27.6915	-178.067	1101.5694	-0.93291	0.47334	-0.51982
0.488	11.8156	-13.426	1303.2444	-1.6856	0.67139	-0.9833	-15.163	31.3159	10.336	0.04541	-0.035645	-0.11426	-22.404	7.8977	23.936	-0.11377	0.12793	0.16992	-21.4172	-68.8201	1067.6791	-1.1625	0.61933	-0.58281	-49.5773	13.9008	857.2565	-0.93808	0.010156	-0.044238	-6.661	81.043	190.2924	0.035472	0.097702	0.03444	-2.5531	-175.735	1078.038	-0.91817	0.48613	-0.53554
0.49	16.1011	9.628	1307.314	-1.6382	0.66182	-0.971	-8.208	36.719	9.4924	0.045899	-0.028613	-0.12314	-23.377	20.19864	17.72351	-0.12705	0.13838	0.16641	-4.5092	-111.867	1092.2599	-1.0825	0.59511	-0.5876	14.199	3.0172	895.201	-1.1055	-0.035156	-0.077148	-7.479	90.393	172.6434	0.061954	0.088341	0.032328	-40.171434	-172.782	1063.3844	-0.91973	0.49863	-0.54882
0.492	17.398	21.5224	1303.7366	-1.5925	0.6544	-0.95889	12.278	31.393	30.033	0.056934	-0.021094	-0.13388	-31.06	16.9627	17.3223	-0.1375	0.15117	0.16133	7.1315	-135.192	1112.52	-1.0391	0.57422	-0.59766	40.605	-0.687000000000001	919.195	-1.2577	-0.063672	-0.11152	-21.628	89.824	146.2415	0.085938	0.072754	0.037109	-54.62	-149.6009	1051.471	-0.92617	0.50898	-0.55332
0.494	28.1473	21.13885	1275.4921	-1.556	0.65107	-0.94893	-18.806	21.0157	55.5527	0.065527	-0.010547	-0.14131	-17.262	11.387	15.8065	-0.14805	0.15937	0.16211	17.393	-139.341	1102.32715	-1.0265	0.55577	-0.60986	34.4605	-9.143	923.084	-1.3945	-0.067383	-0.14072	-13.965	74.62	128.3562	0.10721	0.060942	0.03964	-48.819	-123.001	1072.6969	-0.93506	0.52002	-0.54834
0.496	-9.5516	18.9573	1251.4681	-1.5313	0.64551	-0.93555	-1.682	8.0806	51.2433	0.072754	-0.0010742	-0.14922	-9.386	9.12	19.839	-0.15898	0.16631	0.15957	1.099	-142.3476	1090.599	-1.0214	0.54345	-0.61435	-5.4472	-13.985	943.707	-1.5015	-0.037305	-0.17901	0.695	56.879	115.0269	0.12693	0.051282	0.044038	-29.673	-111.235	1124.1368	-0.95871	0.52412	-0.54129
0.498	4.3776	10.47752	1226.4616	-1.5075	0.64131	-0.91611	-20.134	-18.3024	47.133	0.081055	0.0087891	-0.15576	-40.345	19.30758	10.0424	-0.17383	0.17383	0.16016	-6.783	-130.1686	1083.997	-1.0311	0.5376	-0.62256	3.947	-26.114	949.777	-1.5928	0.022461	-0.20469	-28.665	49.944	130.6554	0.14296	0.04268	0.047166	17.5675	-124.009	1146.1688	-1.0038	0.52696	-0.53104
0.5	19.0828	7.71956	1236.7092	-1.4984	0.64023	-0.89727	-1.838	-24.0451	58.1729	0.081934	0.019531	-0.16573	-24.154	23.4397	19.691	-0.18223	0.17989	0.15459	-25.3813	-126.0081	1112.128	-1.0296	0.53154	-0.61963	42.8169	-29.6766	949.557	-1.6558	0.098633	-0.21729	-17.808	37.302	127.1514	0.15878	0.031448	0.046095	42.2978	-116.416	1154.684	-1.0686	0.5293	-0.51971
0.502	30.7346	2.1333	1231.6977	-1.5008	0.63398	-0.87617	-39.007	-13.8948	86.6863	0.081934	0.028321	-0.17158	-2.725	19.4488	28.3525	-0.18643	0.18799	0.15156	9.274	-129.2089	1148.4966	-1.0283	0.51563	-0.60938	21.8674	-34.533	928.342	-1.7098	0.16074	-0.2168	-7.737	34.735	110.2998	0.17188	0.018555	0.047363	41.046	-78.3948	1152.329	-1.1468	0.53273	-0.50575
0.504	29.20528	-12.4967	1216.6187	-1.5061	0.63711	-0.8584	-38.614	5.73815	71.749	0.072168	0.038086	-0.17705	7.577	25.427	20.7409	-0.19228	0.1958	0.1461	-0.7704	-134.6374	1193.2836	-1.0513	0.50107	-0.59189	36.1577	-14.8191	885.4308	-1.7483	0.21309	-0.22441	-4.344	48.2057	90.2446	0.18692	0.0092747	0.046291	35.361	-58.7526	1156.236	-1.2188	0.53711	-0.49609
0.506	10.629	-39.4796	1190.6294	-1.5176	0.64355	-0.83203	-24.778	14.9981	70.421	0.060742	0.044336	-0.18271	-24.831	23.78639	19.332	-0.19423	0.20625	0.14619	18.539	-136.2525	1205.9405	-1.0877	0.47978	-0.56719	21.849	-7.686	855.797	-1.769	0.25058	-0.22207	-40.93	72.114	71.0721	0.19658	-0.00010015	0.048045	52.588	-63.6239	1182.1552	-1.2849	0.54305	-0.48586
0.508	3.3019	-51.308	1173.6376	-1.531	0.65498	-0.81279	-25.734	10.2565	92.518	0.04541	0.052246	-0.18945	-14.051	18.0198	12.0365	-0.19629	0.2168	0.14502	36.3433	-107.786	1230.719	-1.1408	0.45088	-0.55117	17.849	12.791	886.3665	-1.7583	0.27666	-0.22334	-42.163	73.169	76.7992	0.20049	-0.0094749	0.045703	39.10423	-84.7978	1232.609	-1.3388	0.54542	-0.46734
0.51	0.7511	-16.4756	1163.065	-1.5457	0.65605	-0.79024	-8.234	15.32861	137.3545	0.027637	0.060059	-0.20196	-11.39	11.4824	24.2177	-0.19834	0.22461	0.13741	35.0702	-66.144	1240.226	-1.1976	0.41455	-0.53359	-32.301	29.075	881.1727	-1.7183	0.30127	-0.21436	-57.0873	72.231	64.6952	0.20605	-0.018849	0.043263	26.8211	-110.8172	1247.207	-1.4023	0.5419	-0.44862
0.512	-3.2996	16.1334	1146.7926	-1.5531	0.65645	-0.76484	-14.138	42.8783	275.057	-0.00087884	0.068262	-0.21035	-13.452	29.07422	19.94534	-0.19834	0.23613	0.13672	35.7555	-56.439	1261.4268	-1.2651	0.36377	-0.50146	-8.2368	26.092	871.3113	-1.644	0.31231	-0.19805	-47.8614	66.858	58.3318	0.2085	-0.027344	0.041016	11.3298	-134.2031	1268.99	-1.4949	0.52398	-0.43979
0.514	-4.269	23.22201	1139.9322	-1.5536	0.65205	-0.73604	-29.6632	68.829	383.797	-0.034863	0.076074	-0.21895	-6.631	28.2249	19.5094	-0.19756	0.24316	0.13007	34.9639	-74.5826	1270.3516	-1.3742	0.31465	-0.48457	-0.859999999999999	-12.217	863.273	-1.5507	0.32119	-0.17793	-58.9333	50.341	57.2256	0.20703	-0.036523	0.035157	-5.048	-155.066	1273.6265	-1.6128	0.51221	-0.43506
0.516	21.2287	27.1065	1134.1133	-1.5469	0.64648	-0.71484	-76.76	67.2326	489.197	-0.087598	0.08291	-0.23213	-0.57	18.3646	12.3978	-0.19453	0.25196	0.12637	36.598	-97.796	1279.014	-1.5332	0.27765	-0.46875	6.452	-45.6588	852.287	-1.4464	0.32314	-0.15332	-63.518	25.22	73.0429	0.20782	-0.049217	0.031544	-8.7369	-153.2837	1251.59	-1.7561	0.50361	-0.43902
0.518	-1.912	30.5302	1104.8526	-1.5268	0.64014	-0.69034	-26.395	66.611	556.446	-0.16748	0.088867	-0.23535	-1.983	11.9323	19.9564	-0.18896	0.26025	0.12549	7.1803	-115.656	1299.688	-1.7237	0.25342	-0.47539	-5.219	-69.6188	869.98	-1.3614	0.32412	-0.13916	-34.347	14.93	58.7844	0.20469	-0.059765	0.027637	-14.008	-137.6261	1267.512	-1.8986	0.50995	-0.448
0.52	-17.2932	50.0547	1088.9252	-1.5063	0.63223	-0.66777	-34.907	35.041	649.241	-0.28516	0.088086	-0.23711	-19.95	4.9133	25.607	-0.18984	0.26367	0.12256	14.908	-121.498	1312.0737	-1.9295	0.26464	-0.47285	-2.962	-70.7787	891.527	-1.2964	0.3335	-0.13184	-26.6871	29.711	23.104	0.20127	-0.078808	0.024805	27.4012	-144.06762	1271.01	-2.0392	0.52684	-0.46618
0.522	-3.363	56.2592	1079.452	-1.4762	0.61894	-0.64317	-75.2917	12.209	768.0293	-0.43086	0.071387	-0.23564	-29.894	-7.5793	57.959	-0.18565	0.27187	0.11631	9.415	-114.3923	1321.365	-2.1328	0.30078	-0.47363	-5.965	-79.8591	912.202	-1.2661	0.35557	-0.12412	-24.161	48.3053	20.3901	0.18945	-0.087402	0.021973	35.58661	-153.912	1266.2318	-2.1575	0.55142	-0.50561
0.524	12.3408	80.4373	1065.4593	-1.448	0.60078	-0.62226	-41.491	8.353	860.324	-0.60039	0.04873	-0.22783	-10.767	-28.035	101.315	-0.19033	0.27539	0.10849	3.361	-111.05026	1322.626	-2.308	0.3722	-0.48996	-13.5	-107.267	904.3085	-1.2578	0.37949	-0.1165	-11.689	39.83085	29.301	0.18633	-0.097169	0.022363	50.024	-136.998	1255.956	-2.2573	0.57666	-0.56592
0.526	17.8102	99.607	1030.121	-1.418	0.58008	-0.6001	-92.8843	45.60598	879.2717	-0.80449	0.025683	-0.21328	-0.811	-28.6651	128.8665	-0.1961	0.27539	0.10107	-10.0416	-114.0887	1321.7665	-2.4513	0.45202	-0.5266	-33.608	-157.227	899.896	-1.2692	0.40957	-0.10752	-3.477	34.6913	33.4099	0.17324	-0.10303	0.020899	37.768	-116.44	1251.2358	-2.3298	0.59368	-0.62637
0.528	-15.4281	93.329	994.908	-1.3832	0.55449	-0.57363	-55.2356	39.4664	897.3996	-1.0249	0.01416	-0.2124	-23.23	-8.2913	141.299	-0.21338	0.27979	0.088379	-24.8947	-132.8664	1331.6893	-2.5564	0.52664	-0.58054	-61.5509	-174.996	909.328	-1.2798	0.45361	-0.094922	-7.256	33.6802	39.667	0.16035	-0.11162	0.016602	29.691	-91.268	1254.58	-2.3981	0.61984	-0.68069
0.53	6.657	79.2559	981.512	-1.3561	0.53251	-0.55127	-69.7613	11.6378	916.0095	-1.2431	0.022461	-0.21572	-61.3385	24.8551	222.1365	-0.24317	0.27432	0.073828	2.872	-135.072	1345.527	-2.6318	0.58549	-0.64195	-52.205	-152.466	952.7559	-1.2891	0.50879	-0.089355	-22.797	27.609	29.86268	0.14678	-0.11846	0.017383	25.766	-54.692	1270.2752	-2.4587	0.65053	-0.72675
0.532	-14.259	78.0403	973.01	-1.3241	0.50205	-0.53018	-51.831	-15.547	928.079	-1.4575	0.051367	-0.22754	-44.351	3.0784	381.689	-0.28847	0.25849	0.05166	15.254	-115.595	1358.7418	-2.6797	0.62402	-0.70313	-62.852	-133.51	971.7143	-1.2985	0.56065	-0.086035	-13.438	17.906732	54.3863	0.12988	-0.12256	0.018555	19.1905	-32.2126	1241.62	-2.5116	0.68412	-0.75766
0.534	-29.751	87.6505	971.9834	-1.2962	0.48096	-0.51006	-28.021	-41.807	946.089	-1.6641	0.093947	-0.24551	-94.286	-45.5251	481.652	-0.35606	0.24248	0.024316	3.4811	-75.294	1345.4479	-2.7087	0.65055	-0.74768	-95.2363	-122.4353	974.4044	-1.2952	0.60889	-0.091016	-7.974	16.7806	62.3954	0.10937	-0.12412	0.014941	22.017	-11.408	1230.677	-2.5527	0.71973	-0.79102
0.536	-25.322	84.4867	971.2454	-1.269	0.45752	-0.48584	-7.834	-52.12	967.605	-1.8478	0.15537	-0.27285	-64.212	-37.7473	583.222	-0.44736	0.22774	-0.011914	-9.674	-59.432	1342.4567	-2.712	0.67154	-0.7772	-97.0639	-128.2315	963.133	-1.2983	0.6456	-0.10352	-13.717	36.5398	31.2022	0.088281	-0.12764	0.0088868	9.4706	-33.021	1250.003	-2.554	0.7473	-0.81913
0.538	-19.858	81.2972	958.9428	-1.2438	0.4376	-0.4669	-22.104	-46.591	966.185	-2.0112	0.23389	-0.30518	46.036	-54.804	654.521	-0.55908	0.20068	-0.051758	-3.212	-48.698	1340.0396	-2.6992	0.68597	-0.80482	-62.1427	-125.8818	994.161	-1.2963	0.66582	-0.11924	-16.773	33.657	4.8118	0.071094	-0.1206	0.012402	1.75287	-20.975	1250.956	-2.5194	0.75272	-0.84334
0.54	2.566	82.5605	954.6002	-1.2157	0.41768	-0.44649	-22.36	-31.9128	949.6	-2.1467	0.32998	-0.32764	29.3779	-43.21	782.7255	-0.7002	0.1666	-0.076074	-1.7583	-43.833	1334.73073	-2.6656	0.69891	-0.82545	-52.386	-102.382	1040.176	-1.2998	0.66895	-0.13184	-4.407	22.463	8.831	0.054394	-0.11504	0.0051758	2.5588	-20.821	1270.4429	-2.4489	0.74332	-0.853
0.542	-23.3469	86.5473	934.3979	-1.1875	0.39893	-0.42696	35.6153	7.0508	917.228	-2.2452	0.42588	-0.37325	-54.122	10.351	929.0829	-0.87266	0.11445	-0.097656	4.7334	-53.4821	1345.961	-2.605	0.70068	-0.83936	-75.7603	-93.735	1067.291	-1.3148	0.65214	-0.14707	1.565	23.7038	15.859	0.041016	-0.10742	-0.00097656	-2.6126	-41.966	1259.909	-2.356	0.72199	-0.86469
0.544	-17.58	83.1932	921.6684	-1.1565	0.37911	-0.40235	-0.856999999999999	28.1387	887.43	-2.2827	0.51338	-0.4123	-43.601	35.989	934.853	-1.0793	0.048438	-0.1293	35.493	-47.29	1338.0792	-2.5339	0.68698	-0.84299	-58.503	-79.251	1084.258	-1.332	0.62773	-0.1625	0.404	29.2085	17.643168	0.022265	-0.10381	-0.003125	16.3919	-76.1044	1245.368	-2.2607	0.70703	-0.86719
0.546	-19.256	88.9766	898.4218	-1.1289	0.36621	-0.38037	-19.526	43.942	903.7	-2.2645	0.56866	-0.44521	-6.3151	10.897	970.8049	-1.2973	-0.0095705	-0.16035	24.077	-44.89	1343.69	-2.4617	0.65935	-0.8457	-57.816	-94.2161	1105.74	-1.3496	0.60273	-0.18125	12.377	18.9559	17.89761	0.00625	-0.095996	-0.0070313	38.117	-105.792	1264.302	-2.1869	0.69788	-0.88782
0.548	-23.451	92.2485	858.6501	-1.0951	0.35156	-0.35273	-58.7074	10.886	919.466	-2.2202	0.58252	-0.46826	3.43977	4.41	1034.747	-1.5117	-0.036621	-0.19189	13.14048	-42.98	1320.934	-2.4007	0.62648	-0.84892	-59.238	-97.8355	1119.9554	-1.3691	0.5835	-0.20674	3.113	21.118	10.5165	-0.0078125	-0.088965	-0.012109	63.577	-88.423	1273.293	-2.1328	0.6843	-0.89634
0.55	-33.624	90.5218	819.049	-1.0635	0.33622	-0.33172	-55.794	10.8	914.624	-2.167	0.55996	-0.48086	57.095	-34.64	1062.61	-1.7025	-0.011426	-0.22305	-5.1648	-55.886	1330.854	-2.35	0.60117	-0.8552	-57.783	-118.4805	1148.333	-1.3794	0.57861	-0.23291	-9.486	18.7903	14.0724	-0.016211	-0.086426	-0.018555	38.4984	-71.984	1298.2397	-2.0847	0.68051	-0.90323
0.552	-37.884	93.372	790.098	-1.0303	0.31941	-0.31063	-32.34518	5.017	915.399	-2.0876	0.52998	-0.49903	34.176	-50.691	1080.051	-1.8703	0.053906	-0.25606	4.949	-60.9308	1329.524	-2.3066	0.58398	-0.86914	-52.261	-139.092	1157.4999	-1.3834	0.57363	-0.26075	-37.7489	26.5968	26.4204	-0.025391	-0.081055	-0.022949	53.631	-66.351	1304.831	-2.0411	0.67438	-0.9071
0.554	-21.768	102.533	773.1376	-0.99448	0.30457	-0.28651	-18.366	-23.373	934.3994	-1.9559	0.50693	-0.50801	42.0371	-44.911	1086.963	-1.9981	0.1457	-0.28262	43.182	-53.511	1336.9559	-2.2544	0.58829	-0.87723	-55.986	-148.195	1173.7606	-1.3823	0.57393	-0.29004	-24.192	21.7493	34.3622	-0.024512	-0.071289	-0.027051	44.37	-51.523	1301.237	-1.998	0.66602	-0.9082
0.556	-32.286	122.9917	753.545	-0.96045	0.28564	-0.26416	-16.86	-45.062	937.441	-1.7809	0.48946	-0.51211	41.4282	-48.1944	1052.544	-2.0853	0.24248	-0.30635	37.945	-42.374	1367.7853	-2.2003	0.58825	-0.88377	-74.6621	-152.9961	1202.604	-1.3843	0.56494	-0.31465	-38.352	27.634	17.1563	-0.028027	-0.065332	-0.028222	42.701	-32.6368	1303.299	-1.9518	0.65696	-0.90368
0.558	-50.1392	130.842	731.2479	-0.92349	0.27345	-0.24475	-23.362	-77.2304	948.461	-1.5938	0.47266	-0.5127	48.9345	-61.066	1037.29	-2.1421	0.34131	-0.31152	37.212	-37.974	1362.0787	-2.1482	0.58775	-0.88349	-52.1776	-151.6848	1209.8741	-1.4006	0.54785	-0.33418	-45.4326	24.7516	10.2901	-0.020996	-0.05791	-0.036035	40.747	-17.57	1294.8153	-1.8997	0.64144	-0.89793
0.56	-31.087	127.942	706.7827	-0.88762	0.2604	-0.23003	18.41	-105.281	973.9987	-1.4401	0.47588	-0.51406	35.161	-52.42557	996.1548	-2.1708	0.41553	-0.31631	35.255	-26.2459	1342.83494	-2.1051	0.58383	-0.87749	-60.6458	-164.8314	1224.9993	-1.4331	0.51514	-0.34424	-43.2314	16.0882	7.716	-0.020606	-0.052832	-0.037403	46.919	7.828	1291.0571	-1.8452	0.62693	-0.88715
0.562	-21.765	125.99	697.0421	-0.84783	0.24789	-0.21287	24.4199	-117.816	1009.50746	-1.318	0.4919	-0.52734	53.6094	-43.438	945.497	-2.1707	0.46914	-0.31396	53.131	-8.078	1335.5279	-2.0698	0.57861	-0.86377	-13.092	-171.994	1242.5958	-1.5005	0.4835	-0.35059	-47.5377	15.2954	15.284	-0.0092773	-0.047363	-0.041992	31.436	39.1538	1272.9183	-1.795	0.61552	-0.87667
0.564	-39.746	130.91	669.253	-0.80619	0.24004	-0.19049	34.803	-132.372	1053.8234	-1.2266	0.50752	-0.54141	56.318	-28.369	978.777	-2.1254	0.51289	-0.30732	35.64954	5.7156	1331.4143	-2.0444	0.57287	-0.85225	-22.454	-153.061	1251.9141	-1.6066	0.45518	-0.346	-31.5107	14.0179	13.531	0.0012695	-0.040136	-0.056348	7.6113	49.778	1248.163	-1.7534	0.60498	-0.87061
0.566	-43.2918	129.344	645.266	-0.76758	0.2334	-0.17773	49.069	-153.293	1074.7049	-1.1657	0.52646	-0.55615	-31.945	-24.021	1024.656	-2.0212	0.54092	-0.28379	51.0181	6.9699	1336.7546	-2.0183	0.57116	-0.84172	-56.298	-127.667	1246.5929	-1.7491	0.44385	-0.33857	-20.095	21.6123	2.6925	0.016211	-0.03584	-0.05586	-0.13	30.056	1231.0918	-1.7199	0.58784	-0.85601
0.568	-22.944	114.034	614.651	-0.72966	0.22242	-0.16521	-9.8886	-169.483	1088.6772	-1.1279	0.54541	-0.56836	-22.987	0.702999999999996	1017.159	-1.877	0.56641	-0.24902	37.798	6.514	1320.18	-1.9995	0.5709	-0.82651	-50.9839	-99.4689	1252.1392	-1.9137	0.45596	-0.33428	-34.313	17.8342	11.4577	0.028711	-0.033496	-0.065625	31.209	22.4556	1222.669	-1.6913	0.57932	-0.8452
0.57	-35.1515	108.434	577.5055	-0.68332	0.21949	-0.1449	-13.4944	-157.402	1085.564	-1.1205	0.55508	-0.5793	28.00008	-2.291	1002.151	-1.6977	0.58603	-0.21827	17.9022	16.614	1310.526	-1.9806	0.56912	-0.8131	-45.285	-83.1715	1241.2221	-2.0977	0.49219	-0.33203	-23.611	10.551	22.7437	0.046289	-0.029883	-0.069629	50.336	37.9061	1227.6472	-1.6756	0.56372	-0.83422
0.572	-52.0983	96.8414	551.0094	-0.6423	0.20594	-0.13427	-21.0885	-142.055	1089.0091	-1.1196	0.56484	-0.58594	37.2562	-34.4476	976.375	-1.5351	0.59453	-0.19531	2.6835	27.5847	1321.2806	-1.9551	0.56641	-0.79199	-38.963	-80.1932	1249.5697	-2.2845	0.53506	-0.33379	-23.087	13.4446	20.3255	0.0625	-0.033203	-0.076172	66.144	42.1293	1231.7549	-1.6576	0.55466	-0.81909
0.574	-50.642	88.324	520.1567	-0.59735	0.20218	-0.11113	-19.0852	-104.83426	1085.2366	-1.1273	0.56875	-0.59297	24.092	-27.0953	971.606	-1.4106	0.60117	-0.18047	6.7022	24.5298	1304.7616	-1.9399	0.56557	-0.78428	-72.734	-87.9124	1246.3921	-2.4695	0.60381	-0.34385	-28.849	27.22479	15.23403	0.080078	-0.034278	-0.077637	56.042	28.9732	1227.13271	-1.6465	0.54883	-0.79883
0.576	-16.33	86.303	510.33968	-0.55664	0.19287	-0.092773	-31.0713	-84.427	1129.6578	-1.142	0.57481	-0.59668	1.285	-34.182	1019.13323	-1.3148	0.61328	-0.16954	2.1346	28.2902	1274.5534	-1.9257	0.57374	-0.77404	-58.317	-83.7817	1245.004	-2.6409	0.6792	-0.36377	-33.7887	45.387	16.0193	0.096386	-0.038086	-0.083301	38.238	15.341	1217.0425	-1.6382	0.54619	-0.78566
0.578	-21.431	98.0092	481.19828	-0.51971	0.18673	-0.076067	0.0860000000000003	-91.882	1160.605	-1.166	0.58008	-0.6001	24.421	-56.7922	1040.866	-1.2441	0.62451	-0.15674	-2.399	32.7431	1253.0664	-1.9147	0.57319	-0.76485	-69.79	-62.782	1237.182	-2.7909	0.77022	-0.39131	-13.92	29.022	18.794	0.11084	-0.042773	-0.087988	38.2113	12.3223	1212.3374	-1.6354	0.55009	-0.77005
0.58	-33.773	106.4955	460.5608	-0.48688	0.18183	-0.065034	37.774	-100.388	1193.532	-1.2108	0.59502	-0.60928	-16.626	-99.715	1060.205	-1.1764	0.64433	-0.14541	3.397	35.3686	1252.1717	-1.8976	0.57815	-0.75095	-95.1949	-49.324	1244.233	-2.9077	0.85596	-0.41553	-7.191	24.0487	24.4041	0.12656	-0.044922	-0.09375	16.3854	10.7035	1200.761	-1.6249	0.55439	-0.75245
0.582	-24.123	91.0108	433.9276	-0.44945	0.17617	-0.052494	40.5076	-70.951	1197.173	-1.2668	0.60586	-0.61914	-21.534	-133.041	1031.73	-1.1148	0.67666	-0.13028	9.1352	19.147	1270.7688	-1.8789	0.58008	-0.73828	-100.7822	-47.83	1268.131	-2.985	0.93184	-0.43164	-14.505	11.71637	37.9849	0.13867	-0.04541	-0.099121	1.6186	8.5735	1204.267	-1.6148	0.56026	-0.7296
0.584	-26.405	83.31295	422.4925	-0.41293	0.17029	-0.03326	66.226	-41.586	1210.36	-1.3277	0.62226	-0.62656	-49.4892	-163.889	990.018	-1.0616	0.70791	-0.12364	21.2205	26.473	1278.4043	-1.855	0.58679	-0.72899	-86.296	-57.861	1301.505	-3.0191	0.98408	-0.44365	-19.784	3.189	41.89344	0.14775	-0.049414	-0.10322	12.252817	24.9675	1178.1849	-1.5952	0.56689	-0.70752
0.586	-10.563	92.2819	398.464249	-0.37646	0.16797	-0.018555	38.709	-53.24	1236.4668	-1.3817	0.64697	-0.63467	-68.871	-172.272	986.009	-1.0186	0.74326	-0.13252	19.32683	41.764	1254.6111	-1.8259	0.58487	-0.71373	-55.439	-68.7588	1318.53403	-3.0253	1.0028	-0.44678	0.830000000000002	-5.195	55.3135	0.15849	-0.047754	-0.10684	-1.4199	37.1844	1152.8483	-1.5804	0.56572	-0.68896
0.588	-26.636	94.0226	374.162	-0.33181	0.16408	-0.00016057	22.64003	-63.365	1248.1326	-1.4277	0.66357	-0.63867	-79.6324	-164.165	1007.015	-0.98633	0.7627	-0.14551	3.6639	51.1434	1240.5129	-1.786	0.58637	-0.70431	-100.2705	-60.4858	1319.6677	-3.0003	1.0036	-0.44971	21.912	1.653	52.53651	0.16318	-0.05166	-0.12012	-7.9304	35.6164	1131.0688	-1.5621	0.56133	-0.66777
0.59	-19.047	94.214	334.8994	-0.28225	0.17	0.016732	15.074	-80.5219	1266.3458	-1.4729	0.67471	-0.64092	-136.762	-148.4637	1034.517	-0.96601	0.75391	-0.17031	-6.6829	64.6616	1204.948	-1.7465	0.58093	-0.68955	-113.3968	-71.237	1337.9382	-2.9604	1.0005	-0.44629	12.324	-1.3823	49.962	0.16445	-0.053516	-0.12334	-5.9288	33.513	1104.5064	-1.5429	0.55703	-0.6455
0.592	-32.3863	104.557	298.0075	-0.23379	0.17493	0.032251	14.992	-109.621	1300.592	-1.5215	0.6711	-0.65	-119.058	-152.8844	1048.12868	-0.95654	0.73135	-0.19883	-30.808	78.358	1197.285	-1.7051	0.57422	-0.67383	-94.79	-72.389	1335.2169	-2.8979	0.99434	-0.4416	-7.007	-18.011	59.9068	0.15918	-0.054688	-0.13135	3.747	49.322	1093.9018	-1.5218	0.55029	-0.62373
0.594	-35.6828	110.284	269.2876	-0.18895	0.18166	0.049749	28.227	-133.572	1316.478	-1.5821	0.65586	-0.66289	-90.8329	-152.069	1035.366	-0.96279	0.69932	-0.22461	-26.384	83.281	1183.8542	-1.665	0.55826	-0.65785	-85.241	-45.038	1348.015	-2.8218	0.98838	-0.43174	-11.29	-32.038	73.5407	0.14912	-0.053223	-0.13428	21.4447	74.32	1077.3408	-1.5	0.54004	-0.60547
0.596	-23.946	101.6901	242.18	-0.14844	0.17773	0.061523	16.1766	-133.95	1323.686	-1.6629	0.63047	-0.67373	-66.972	-125.701	1074.809	-0.98759	0.66162	-0.24863	-26.7736	67.248	1186.9076	-1.6292	0.544	-0.64348	-100.1656	-51.531	1327.335	-2.7358	0.98213	-0.42744	7.512	-41.965	82.824	0.13867	-0.050781	-0.14111	9.921	93.9064	1063.4013	-1.4804	0.52822	-0.58271
0.598	-4.745	80.9712	236.3598	-0.10955	0.18005	0.073091	-1.3027	-123.2274	1311.6325	-1.7656	0.61523	-0.68506	-90.2161	-90.224	1098.834	-1.0083	0.62939	-0.26611	-9.9316	78.3537	1159.1368	-1.5885	0.52835	-0.62554	-111.9487	-48.3467	1310.4259	-2.6388	0.9792	-0.42432	-17.661	-33.4147	106.5015	0.12227	-0.046875	-0.14463	28.5334	106.732	1031.941	-1.4593	0.51435	-0.56358
0.6	-8.245	86.774	208.5747	-0.075713	0.18145	0.091209	-13.7012	-125.1879	1325.00246	-1.8766	0.60967	-0.69346	-65.906	-52.757	1108.6012	-1.0351	0.60088	-0.28389	-13.2123	97.7174	1122.8795	-1.5567	0.51062	-0.61395	-61.358	-51.8801	1305.228	-2.5313	0.97461	-0.41309	-9.443	-15.8633	156.46	0.10332	-0.045215	-0.15029	19.227	108.598	1025.349	-1.4343	0.50342	-0.54951
0.602	-16.562	82.8972	180.0459	-0.03921	0.1782	0.096869	34.7666	-125.067	1341.26058	-1.9823	0.60996	-0.70654	-67.984	-49.4483	1114.865	-1.0554	0.57891	-0.31172	-7.397	115.2233	1099.51	-1.5151	0.49658	-0.59912	-95.5263	-4.759	1303.034	-2.427	0.96055	-0.40625	-28.9615	13.2445	192.0369	0.074707	-0.041992	-0.1543	-4.35	115.925	999.2099	-1.4125	0.48223	-0.53125
0.604	-14.821	70.4999	180.206	-0.0044761	0.17001	0.10831	43.2652	-124.927	1320.4535	-2.0714	0.60996	-0.71904	-79.949	-88.8636	1123.8391	-1.0789	0.5664	-0.33047	3.265	127.3297	1075.287	-1.4779	0.48194	-0.58018	-88.078	19.8531	1323.3671	-2.3129	0.94063	-0.39609	-38.6	60.885	285.334	0.03418	-0.035645	-0.16533	-27.2356	96.4653	986.980337	-1.3901	0.46094	-0.51416
0.606	-13.166	65.2328	159.5992	0.03125	0.15918	0.12695	45.895	-109.796	1325.2434	-2.1355	0.60957	-0.73887	-68.8716	-128.4891	1158.1136	-1.1084	0.55244	-0.35235	8.592	144.5782	1049.483	-1.4442	0.46643	-0.56428	-86.026	22.4955	1327.11	-2.2082	0.92031	-0.38281	-31.204	74.0168	413.988	-0.02041	-0.035352	-0.17666	-22.491	86.65548	974.6286	-1.3671	0.44795	-0.49776
0.608	-23.567	63.64665	151.647	0.063155	0.15272	0.13584	41.023	-86.01	1312.9915	-2.1929	0.59814	-0.76904	-68.555	-162.7381	1187.311	-1.1621	0.53027	-0.37109	1.711	145.91	1041.5731	-1.4063	0.44962	-0.54669	-75.73	12.823	1293.3258	-2.1141	0.89336	-0.35976	-99.154	73.5937	519.78	-0.093845	-0.039648	-0.18994	-25.6564	89.4034	949.5693	-1.3411	0.43437	-0.48174
0.61	-18.825	67.0015	130.33405	0.092015	0.14491	0.14663	-5.6121	-65.813	1326.587	-2.2471	0.57852	-0.81211	-61.848	-168.8391	1196.5134	-1.2353	0.5086	-0.39013	-2.077	142.804	1047.6601	-1.3716	0.43321	-0.53291	-65.665	9.87358	1285.4638	-2.0313	0.86523	-0.33887	-61.905	66.9525	616.75	-0.19121	-0.049707	-0.19492	-35.8509	98.759	947.8387	-1.3203	0.41836	-0.45947
0.612	-28.7705	48.8077	134.9574	0.11974	0.13752	0.15338	-1.45961	-31.3271	1314.571	-2.3112	0.54697	-0.84834	-65.751	-161.5551	1205.0283	-1.3359	0.48946	-0.40508	1.875	117.618	1040.3923	-1.3359	0.41846	-0.51758	-64.946	12.7504	1290.4594	-1.9615	0.84297	-0.31787	-6.328	50.563	670.7671	-0.32275	-0.070801	-0.20605	-16.0598	93.9341	935.4669	-1.2902	0.40801	-0.44102
0.614	-25.93	53.5027	116.5418	0.14488	0.12418	0.16105	18.92551	-15.8261	1303.8169	-2.3769	0.51416	-0.89209	-73.995	-163.2947	1207.7587	-1.464	0.4793	-0.41054	-13.025	109.84443	1013.123	-1.3021	0.40459	-0.49892	-64.471	24.68	1294.1263	-1.8985	0.81875	-0.30332	-55.6377	27.435	768.31	-0.48672	-0.091113	-0.20625	5.185	87.237	912.0816	-1.2676	0.39404	-0.42188
0.616	-28.2349	47.70465	104.1994	0.1665	0.10889	0.16797	34.8199	-1.036	1289.937	-2.4357	0.49238	-0.92051	-57.734	-180.5841	1196.4776	-1.6155	0.47705	-0.41494	-35.8156	112.21671	983.9296	-1.2667	0.38779	-0.48965	-39.991	29.627	1288.008	-1.8437	0.8	-0.28418	-99.098	20.342	835.113	-0.67852	-0.12275	-0.20362	-5.092	83.667	881.7427	-1.2354	0.38096	-0.40303
0.618	-19.13	38.5145	87.3402	0.19099	0.095768	0.17054	16.0019	-3.921	1305.942	-2.4805	0.48047	-0.9375	-52.816	-185.102	1231.174	-1.7813	0.49414	-0.42188	-44.5529	120.3117	959.3501	-1.23	0.37607	-0.47285	-44.514	20.906	1267.7301	-1.8002	0.78379	-0.26836	-80.3536	14.467	836.614	-0.90508	-0.17275	-0.19033	-17.251	89.481	855.6279	-1.205	0.37353	-0.38174
0.62	-34.7712	23.5503	83.7206	0.21102	0.075822	0.17939	11.1214	3.757	1308.773	-2.5049	0.48125	-0.95606	-20.373	-165.892	1244.877	-1.9539	0.53547	-0.43155	-16.681	125.1323	922.831	-1.1954	0.36055	-0.4543	-69.831	4.871	1242.6897	-1.7598	0.76758	-0.25732	-60.64581	17.6293	857.4254	-1.157	-0.20186	-0.18184	-8.666	91.477	845.9932	-1.1772	0.36494	-0.37275
0.622	-15.469	23.752	69.1326	0.23014	0.060985	0.17861	-1.7631	-2.86	1333.211	-2.5167	0.48779	-0.98037	-33.651	-133.246	1243.802	-2.1281	0.60134	-0.44874	-35.6488	124.5694	910.5015	-1.1572	0.34668	-0.44287	-45.552	-4.728	1251.7715	-1.7189	0.74717	-0.24902	-86.917	-0.000999999999999446	880.459	-1.4155	-0.20605	-0.19092	-16.104	114.509	822.88419	-1.1437	0.35713	-0.35117
0.624	-19.008	37.2646	39.258	0.24797	0.045575	0.18447	9.4615	-26.315	1348.4507	-2.5179	0.50771	-1.012	-19.338	-104.72	1228.143	-2.2981	0.68769	-0.46946	-34.559	114.6705	882.125	-1.118	0.33125	-0.42637	-32.107	13.174	1233.2766	-1.6764	0.73096	-0.24112	-80.315	-40.412	893.0077	-1.663	-0.15937	-0.21943	-19.14	119.413	807.0001	-1.106	0.34473	-0.32861
0.626	-19.013	40.35093	40.6	0.25342	0.021484	0.19287	39.259	-55.466	1352.3369	-2.4996	0.51993	-1.0375	-40.555	-77.05	1201.0863	-2.456	0.77547	-0.49115	-14.875	108.7921	871.714	-1.0762	0.31904	-0.41279	-63.849	44.9881	1224.636	-1.6374	0.7083	-0.23096	-56.8382	-75.205	887.094	-1.8754	-0.066601	-0.25547	-38.6604	114.668	783.585	-1.0703	0.33789	-0.30957
0.628	-12.405	43.50579	44.448	0.26493	0.0098788	0.18867	40.934	-62.45	1334.2821	-2.4727	0.53906	-1.0518	-50.242	-59.9396	1195.0075	-2.5918	0.86328	-0.53564	-6.107	113.7858	842.512	-1.0357	0.30889	-0.39834	-70.049	27.0955	1193.6482	-1.5926	0.67969	-0.22129	-44.871	-78.418	899.918	-2.0551	0.070507	-0.27578	-49.8537	116.889	741.4579	-1.0281	0.33066	-0.29062
0.63	-12.578	43.9203	49.3041	0.26748	-0.0057457	0.19228	35.593	-53.0057	1340.8547	-2.4253	0.55088	-1.064	-55.323	-57.6151	1209.6664	-2.6866	0.9286	-0.5687	-17.203	122.198	797.12276	-0.99211	0.29677	-0.38388	-55.799	24.5893	1181.1133	-1.5483	0.64795	-0.21631	-33.184	-63.8665	887.746	-2.2027	0.22851	-0.30351	-51.4599	127.384	720.1014	-0.98868	0.32246	-0.27422
0.632	-19.533	38.3429	35.1658	0.26943	-0.019033	0.19424	12.4646	-34.9298	1349.6994	-2.3659	0.56885	-1.0765	-74.616	-65.1	1222.3569	-2.737	0.99294	-0.6069	-36.099	127.332	780.2411	-0.9541	0.28711	-0.36328	-60.839	37.686311	1167.5107	-1.5109	0.61602	-0.20342	-6.77	-47.719	870.385	-2.2969	0.36621	-0.3584	-68.177	141.348	685.897	-0.9416	0.31797	-0.25762
0.634	-28.336	36.1101	27.8812	0.26035	-0.030954	0.19267	33.089	-22.0993	1351.318	-2.2921	0.57705	-1.0792	-69.645	-67.954	1217.464	-2.739	1.037	-0.62287	-22.326	129.973	747.9767	-0.90938	0.27715	-0.34736	-68.9341	63.0395	1151.2831	-1.4729	0.58174	-0.19111	2.253	0.4912	846.7616	-2.319	0.48223	-0.42031	-43.428	135.213	660.211	-0.89453	0.3125	-0.24023
0.636	-22.001	28.7562	22.5678	0.25537	-0.043457	0.18701	42.974	-9.7712	1340.562	-2.2024	0.58027	-1.0743	-88.4508	-70.674	1217.119	-2.7088	1.0651	-0.62791	-25.506	121.931	706.5326132	-0.86524	0.2707	-0.32617	-67.53	76.7331	1147.5543	-1.4354	0.55049	-0.17978	-3.94	37.3749	817.257	-2.2811	0.5415	-0.47764	-29.548	112.3101	619.576	-0.84326	0.30195	-0.22353
0.638	-18.171	39.4884	34.9423	0.2417	-0.051955	0.1874	42.09	-14.6978	1320.372	-2.1108	0.57764	-1.0718	-120.756	-78.306	1206.295	-2.6582	1.0879	-0.63086	-39.1075	134.56774	678.5163	-0.82149	0.25977	-0.31016	-67.7705	85.3637	1123.067	-1.4052	0.52217	-0.1668	-25.932	43.525	836.003	-2.1983	0.5665	-0.5042	-25.539	117.7286	569.198	-0.79385	0.2958	-0.20869
0.64	-11.611	45.22	37.6773	0.22969	-0.06006	0.18731	19.9526	-6.028	1310.5361	-2.0213	0.56269	-1.0553	-134.7942	-87.115	1202.369	-2.6123	1.1039	-0.62844	-36.024	131.404	655.6325	-0.77559	0.25762	-0.29228	-71.3653	112.332	1104.101	-1.3789	0.49609	-0.1582	-37.838	33.756	871.8938	-2.1012	0.56758	-0.50977	-26.707	103.6612	548.926	-0.74229	0.28408	-0.18955
0.642	-8.867	34.5382	18.596	0.21719	-0.063185	0.18027	17.77582	13.191	1277.981	-1.939	0.55273	-1.0363	-123.8099	-99.102	1204.511	-2.5589	1.1146	-0.63215	-37.505	135.634	632.8535	-0.7334	0.25391	-0.27344	-68.4821	115.5912	1071.079	-1.3519	0.46748	-0.14453	-24.024	25.079	875.3238	-1.9604	0.55518	-0.51709	-36.33	110.5063	543.1714	-0.69414	0.27363	-0.17109
0.644	-8.525	15.0591	17.834	0.19639	-0.063672	0.17217	21.9419	36.581	1271.687	-1.8687	0.54961	-1.0175	-119.6281	-93.265	1210.688	-2.5133	1.1223	-0.6327	-25.0868	148.711	570.8	-0.68379	0.24199	-0.25986	-60.071	90.6281	1048.63	-1.334	0.44609	-0.13672	-27.7859	11.675	874.381	-1.7601	0.53613	-0.51563	-26.039	117.7867	530.5069	-0.64355	0.26172	-0.15332
0.646	-12.37	21.2158	14.76	0.17578	-0.064453	0.16895	-0.317	45.768	1254.7961	-1.806	0.55576	-1.0001	-105.3272	-89.158	1225.7667	-2.4639	1.1268	-0.6357	-41.8858	139.531	520.335	-0.63223	0.23565	-0.23594	-41.644	79.976	1043.49315	-1.3235	0.42461	-0.12656	-10.724	-38.87	866.633	-1.539	0.51797	-0.51289	-41.77	131.5086	514.8216	-0.59063	0.25058	-0.1336
0.648	-12.132	23.1554	23.808	0.14942	-0.063183	0.16572	24.856	33.8969	1247.5472	-1.7554	0.56104	-0.97705	-88.6072	-74.274	1249.7394	-2.3999	1.1294	-0.63574	-33.509	126.65879	506.2605	-0.58106	0.22939	-0.21836	-68.6919	82.886	1025.0836	-1.3124	0.40732	-0.1166	-8.577	-82.894	876.031	-1.3418	0.50039	-0.50547	-34.867	127.122	483.3656	-0.54219	0.23438	-0.12852
0.65	-6.419	20.4396	39.7931	0.12344	-0.059181	0.16162	18.166	26.87257	1215.8192	-1.7123	0.56894	-0.95566	-96.381	-65.36	1258.119	-2.3235	1.1251	-0.63426	-13.589	100.381	483.158	-0.53447	0.2206	-0.19726	-61.3161	81.507	1010.3197	-1.3081	0.39307	-0.1084	13.018	-107.1198	898.1579	-1.1977	0.48545	-0.50684	-44.677	106.9406	462.2472	-0.48672	0.2211	-0.11289
0.652	-4.89	13.7151	22.584019	0.098048	-0.051368	0.15771	29.415	25.65954	1201.38858	-1.6811	0.57588	-0.93428	-101.8275	-52.56	1265.85	-2.2319	1.1144	-0.62242	-18.022	99.774	446.3017	-0.48535	0.20996	-0.17627	-49.6376	86.2504	991.105	-1.2959	0.38144	-0.097462	18.429	-134.101	927.0192	-1.0918	0.47656	-0.51074	-30.48	115.9874	430.4732	-0.42813	0.20937	-0.092383
0.654	-14.512	14.5481	7.983	0.070704	-0.040625	0.15166	36.342	28.5235	1205.5197	-1.6483	0.58213	-0.91397	-92.699	-50.5149	1254.637	-2.1328	1.0894	-0.61192	-15.63	107.447	413.5363	-0.43135	0.20049	-0.15869	-27.291	90.1445	985.7182	-1.2829	0.37588	-0.09248	28.807	-165.953	941.3228	-1.0231	0.47539	-0.52578	-43.3572	128.384	395.4069	-0.37939	0.19873	-0.074219
0.656	-29.168	10.2293	7.5467	0.04834	-0.026367	0.14453	27.4863	41.1653	1193.5184	-1.6261	0.58643	-0.89209	-97.7603	-34.1433	1236.341	-2.0394	1.0581	-0.59319	-10.028	116.8364	387.7805	-0.37959	0.18887	-0.13643	-43.271	96.8803	972.2485	-1.2689	0.36963	-0.085059	29.3239	-182.21	968.0209	-0.97227	0.47763	-0.54102	-24.924	128.206	373.2921	-0.33184	0.18545	-0.056348
0.658	-15.359	8.878	23.4716	0.026952	-0.016113	0.1376	29.578	29.7289	1163.73848	-1.6011	0.58789	-0.87256	-95.46	-17.914	1216.637	-1.9468	1.0259	-0.57178	1.699	116.9279	362.5527	-0.32646	0.17715	-0.11416	-24.357	101.6722	950.9776	-1.2487	0.36533	-0.078809	1.3933	-169.715	993.9903	-0.93086	0.49092	-0.55039	-26.908	113.039	339.0613	-0.28789	0.17402	-0.041992
0.66	-6.352	23.3698	20.0007	0.012011	-0.0046871	0.12969	15.1458	21.6	1140.7386	-1.5804	0.58916	-0.84463	-90.9218	6.221	1215.947	-1.8652	0.99185	-0.55449	-15.324	118.1215	333.511	-0.2752	0.1625	-0.08916	-29.145	103.8821	925.51433	-1.2324	0.35693	-0.070801	19.4979	-161.907	1027.9106	-0.91123	0.50732	-0.56787	-19.507	92.9921	306.8728	-0.24336	0.16309	-0.026368
0.662	-21.294	39.505	-0.831000000000001	-0.0067386	0.014844	0.12461	5.931	7.789	1131.6411	-1.557	0.58799	-0.82148	-104.4944	-3.206	1214.147	-1.7942	0.96942	-0.52981	-14.574	99.744	308.2848	-0.21729	0.15967	-0.069336	-27.0668	118.1053	888.2308	-1.211	0.34678	-0.065332	-1.116	-165.098	1030.2392	-0.90869	0.51318	-0.57471	-21.932	89.121	289.216	-0.19942	0.15654	-0.019727
0.664	-15.089	32.905	7.601	-0.025098	0.027636	0.11631	-14.90032	16.756	1126.4764	-1.5316	0.59151	-0.79063	-95.9503	-7.284	1199.908	-1.7336	0.95117	-0.50769	-19.14	83.199	292.53	-0.16963	0.14961	-0.044727	-17.597	112.3881	884.277	-1.1848	0.33662	-0.057813	-26.03355	-149.692	1051.365	-0.91689	0.51611	-0.59375	-16.586	89.255	274.4421	-0.1543	0.146	-0.003418
0.666	-25.8218	30.397	3.367	-0.039063	0.040527	0.10791	17.359	57.2383	1112.129	-1.5027	0.5876	-0.76436	-78.826	-8.5008	1170.3959	-1.6878	0.93619	-0.49385	-0.985999999999999	76.7941	265.2172	-0.11748	0.14277	-0.026075	-0.469999999999999	109.0519	846.5181	-1.1633	0.32803	-0.05039	-43.6049	-138.8929	1053.0939	-0.93808	0.51426	-0.60137	-2.465	99.428	259.5387	-0.11162	0.14492	0.010547
0.668	-8.63	28.7842	15.6327	-0.053515	0.050586	0.10556	-5.8091	75.0332	1108.8193	-1.4702	0.58154	-0.73779	-50.046	-2.67937	1178.58382	-1.6499	0.92432	-0.47803	-24.2511	69.88439	232.8463	-0.06748	0.13262	-0.006543	11.413	103.579	821.0386	-1.1331	0.31377	-0.043262	-26.0339	-114.388	1056.3202	-0.98027	0.51113	-0.59434	-20.309	108.473	238.3339	-0.068359	0.13994	0.025488
0.67	-14.981	32.2228	2.4008	-0.064746	0.058594	0.10049	-10.488	102.061	1088.4127	-1.4419	0.56982	-0.7126	-23.079	11.4944	1175.7823	-1.622	0.90192	-0.46937	-23.794	72.4849	201.2084	-0.021289	0.12568	0.0079103	9.336	122.9969	781.246	-1.1006	0.30078	-0.035645	-14.8001	-105.762	1089.853	-1.0417	0.5124	-0.5876	-20.725	106.577	201.116	-0.027734	0.13487	0.033301
0.672	-25.117	20.2786	6.711	-0.070606	0.070703	0.1001	-4.724	87.8237	1054.0862	-1.4079	0.56084	-0.68233	-6.683	18.6367	1190.5069	-1.5931	0.88206	-0.45949	-12.008	73.81867	174.5997	0.024414	0.11328	0.014648	-1.518	142.1595	763.414	-1.065	0.29121	-0.03164	4.145	-84.557	1090.077	-1.1191	0.51367	-0.58447	-20.637	89.004	195.576	0.010547	0.12841	0.042676
0.674	-29.9611	17.3189	9.298	-0.07832	0.074414	0.10244	4.236	99.3228	1020.261	-1.3817	0.54561	-0.65615	-3.131	27.8352	1181.835	-1.565	0.85519	-0.44267	-13.742	77.2357	138.316	0.069433	0.10508	0.030664	-8.879	140.71	735.97	-1.0246	0.27871	-0.026953	35.8314	-74.976	1112.105	-1.2058	0.51045	-0.57724	-9.981	85.606	167.2597	0.054688	0.12158	0.051758
0.676	-3.284	10.2063	17.7583	-0.083008	0.080566	0.097168	2.598	108.6083	1017.8434	-1.3541	0.53213	-0.63106	-30.649	2.9129	1181.153	-1.5375	0.83332	-0.43102	-1.107	78.5712	109.709	0.11358	0.094922	0.04873	6.346	135.405	721.053	-0.98086	0.26582	-0.024219	9.1	-74.06	1118.418	-1.2786	0.51006	-0.56748	-7.972	88.568	154.59675	0.085059	0.11279	0.066992
0.678	-4.619	17.72398	8.1422	-0.088867	0.087696	0.09082	-11.341	115.906	1014.09242	-1.334	0.51367	-0.60547	-32.405	-6.4304	1179.7803	-1.5015	0.79932	-0.41895	-0.136000000000003	72.3523	105.158	0.14756	0.082031	0.062402	12.069	132.8	693.9811	-0.93945	0.25166	-0.02168	1.8728	-90.6699	1129.286	-1.3439	0.51357	-0.56474	-28.772	96.675	165.176	0.11953	0.10469	0.075879
0.68	-26.569	14.8681	13.0506	-0.092285	0.09209	0.087793	7.58	120.486	965.9473	-1.31	0.50059	-0.58437	-31.69	8.9893	1167.2382	-1.4688	0.77245	-0.40383	4.455	69.293	116.8679	0.18272	0.07334	0.075	-30.4091	124.039	670.5867	-0.89258	0.23975	-0.023926	-4.058	-109.562	1165.8392	-1.4007	0.51592	-0.56611	-26.6268	83.078	150.5102	0.14961	0.093359	0.086426
0.682	-13.586	14.3636	18.5364	-0.095019	0.10029	0.081543	-13.425	123.181	938.981	-1.2852	0.4832	-0.56621	-51.285	27.5399	1149.689	-1.4411	0.73749	-0.38818	-5.402	68.5535	108.8021	0.21338	0.062012	0.092773	-15.646	105.7625	643.944	-0.84355	0.22783	-0.016699	17.265	-117.1217	1196.738	-1.4546	0.5083	-0.56396	-16.953	63.547	118.013	0.18008	0.079882	0.094531
0.684	-12.757	20.2155	9.7547	-0.094727	0.1041	0.078711	-21.6873	121.345	922.18	-1.2601	0.46758	-0.5459	-70.122	27.4196	1133.1778	-1.4124	0.70177	-0.38247	-20.903	60.1615	93.9805	0.23555	0.048731	0.11055	-17.089	104.01921	606.757	-0.79336	0.21524	-0.011426	5.056	-130.68	1224.235	-1.5253	0.48603	-0.56045	-10.111	54.139	101.9003	0.20703	0.066406	0.10645
0.686	-29.216	27.5046	21.3885	-0.10059	0.11035	0.074219	-37.25716	109.4527	912.084	-1.2385	0.45254	-0.52715	-79.904	17.4352	1109.3167	-1.3887	0.66907	-0.36541	-17.524	48.218	90.6773	0.25059	0.038183	0.12959	-34.2493	112.93079	589.5629	-0.74648	0.20586	-0.0079102	9.44	-137.9359	1235.382	-1.6229	0.45986	-0.5665	-14.158	38.961	94.707	0.23076	0.05957	0.1166
0.688	-17.142	14.2528	11.8367	-0.10196	0.11338	0.067871	-10.373	108.3873	892.0242	-1.2124	0.43408	-0.49854	-75.82908	39.6709	1073.7569	-1.3672	0.6333	-0.3501	-21.151	56.619	82.5304	0.26153	0.023731	0.13779	-39.425	116.5363973	576.1875	-0.69326	0.19775	-0.0086914	14.1349	-145.5646	1247.521	-1.7456	0.44189	-0.57119	-13.171	43.3567	93.1593	0.2542	0.044141	0.12344
0.69	-14.966	9.9926	35.0602	-0.10439	0.11787	0.063379	-34.6095	113.4612	885.9455	-1.1866	0.42256	-0.48018	-72.2483	52.8742	1069.65	-1.3515	0.59715	-0.33833	-20.539	59.858	49.3195	0.27197	0.015332	0.15166	-40.9077	106.4698	545.8502	-0.63916	0.19873	-0.0024414	-6.4793	-138.3083	1238.9546	-1.8795	0.44043	-0.58106	-9.621	47.8052	69.4496	0.27216	0.033203	0.13398
0.692	-15.862	23.5521	20.64225	-0.10752	0.12646	0.059082	-35.475	107.48837	878.4195	-1.1687	0.40459	-0.46104	-58.0764	66.6534	1048.619	-1.3327	0.56854	-0.32698	-46.02997	57.328	52.3253	0.27881	0.0039063	0.16455	-22.347	105.5478	516.2735	-0.5958	0.18877	-0.0088869	5.67	-133.9908	1266.858	-2.002	0.44971	-0.58691	-34.631	52.2194	42.098	0.28623	0.017774	0.14219
0.694	-15.78	20.6761	7.9627	-0.11016	0.12881	0.05664	-5.274	103.9444	873.1881	-1.1448	0.38857	-0.43369	-44.726	79.78304	1046.771	-1.3163	0.53729	-0.31531	-32.3565	53.8821	56.372	0.27666	-0.0092773	0.17471	-46.54073	109.5545	494.5186	-0.5456	0.17715	-0.012891	17.9246	-147.8441	1272.5144	-2.1195	0.46367	-0.59746	-24.33	40.467	59.9292	0.30078	0.0053711	0.14648
0.696	-11.934	26.3229	5.0421	-0.11426	0.13818	0.055664	-19.321	98.9894	843.529	-1.1227	0.37324	-0.41719	-42.302	101.3843	1033.328	-1.296	0.51236	-0.30137	-6.724	40.8695	34.404	0.27471	-0.020019	0.18428	-44.336	109.5072	472.2317	-0.49248	0.17051	-0.012109	47.335	-135.09	1251.1535	-2.2179	0.47969	-0.63008	-29.905	32.3404	75.4219	0.30273	-0.015039	0.15254
0.698	-3.63	25.5628	10.555	-0.10947	0.14219	0.049023	-19.818	99.256	817.547	-1.1016	0.3584	-0.3999	-57.2858	101.1682	1022.194	-1.2734	0.48633	-0.29541	0.16	23.99	19.81	0.27002	-0.034082	0.19014	-39.65858	99.70048	450.0827	-0.45039	0.15899	-0.012891	29.4811	-125.528	1227.3346	-2.3023	0.4961	-0.67929	-16.967	47.97579	70.21481	0.30381	-0.027636	0.15713
0.7	-8.52	27.3117	21.5864	-0.10899	0.14912	0.048828	-25.53	106.929357	782.6074	-1.0749	0.34111	-0.37852	-56.121	93.1344	999.466	-1.25	0.46047	-0.28215	-17.123	11.92	20.238	0.27022	-0.038575	0.1998	-34.587	98.5905	419.1898	-0.40039	0.14648	-0.018066	11.9526	-114.19	1223.1605	-2.3769	0.50977	-0.73857	-25.176	54.3447	59.2912	0.30303	-0.040918	0.15986
0.702	-15.768	25.5466	13.98026	-0.10938	0.15615	0.045703	-24.6095	120.73498	748.8672	-1.0527	0.32783	-0.35733	-57.4445	79.4615	986.1363	-1.2189	0.43156	-0.2757	-1.461	23.6753	38.8588	0.26514	-0.05127	0.20508	-50.4136	88.066	394.287	-0.34531	0.13584	-0.030664	20.5571	-100.773	1233.177	-2.4277	0.52051	-0.79395	-21.352	56.096	50.649	0.29278	-0.057422	0.1668
0.704	-18.067	11.2114	21.3221	-0.10684	0.16084	0.043262	-36.778	131.7542	717.776	-1.023	0.31455	-0.3417	-80.3911	81.5774	980.539	-1.1861	0.40462	-0.26943	0.0690000000000026	37.6001	35.61017	0.26221	-0.058594	0.20948	-47.658	81.5683	377.5653	-0.29267	0.12676	-0.02832	26.2684	-58.7165	1242.6796	-2.4632	0.53135	-0.83427	-39.49938	46.6858	33.32955	0.2832	-0.069336	0.17188
0.706	-6.279	15.3368	19.1555	-0.10547	0.16211	0.041016	-46.3868	130.6286	699.5844	-0.99492	0.30195	-0.31973	-78.724	83.721	958.4794	-1.1564	0.38068	-0.25958	-19.684	48.342	31.317842	0.25937	-0.066211	0.21289	-41.198	92.8534	355.15313	-0.23291	0.11699	-0.030274	41.931	-39.501	1253.8343	-2.4784	0.53994	-0.86474	-9.141	45.4039	25.07682	0.26895	-0.079883	0.17314
0.708	-26.6307	18.5775	26.0032	-0.099513	0.16611	0.039649	-15.648	121.9705	671.4736	-0.96094	0.28906	-0.29834	-57.2272	71.266	947.656	-1.1313	0.35303	-0.26074	-16.559	40.827	28.64385	0.25313	-0.075586	0.21211	-38.6001	119.971	313.5857	-0.18428	0.10117	-0.02666	24.6479	-30.186	1257.832	-2.4738	0.54893	-0.8835	-5.572	33.4413	14.3079	0.25215	-0.08457	0.16778
0.71	-24.969	17.0718	24.1561	-0.09375	0.1707	0.039063	-44.666	125.5511	624.767	-0.92744	0.28057	-0.27822	-44.3665	77.783	934.6634	-1.1061	0.32548	-0.24707	-24.5033	34.83	27.7361	0.25195	-0.081933	0.21016	-35.979	121.444	294.7104	-0.13818	0.092285	-0.027832	24.4303	-40.324	1267.879	-2.4617	0.54961	-0.90078	-5.389	29.7968	24.4401	0.23926	-0.090039	0.16191
0.712	-9.141	13.7665	29.391	-0.089453	0.17734	0.036328	-22.087	140.7187	589.9011	-0.89014	0.2667	-0.25537	-44.851	77.2948	911.7055	-1.0834	0.30654	-0.24004	-13.08	33.574	20.4428	0.24756	-0.09668	0.20117	-34.409	111.217	274.22662	-0.093751	0.076953	-0.027539	0.837	-38.67	1283.788	-2.4487	0.54736	-0.9165	-8.299	19.8454	21.2385	0.22461	-0.090625	0.16104
0.714	0.794	9.0071	15.0467	-0.081446	0.18457	0.034765	-27.793	146.549	584.0295	-0.84717	0.25459	-0.23584	-31.873	81.5338	889.8268	-1.0611	0.28075	-0.23066	-35.6662	31.9664	9.991	0.23662	-0.10615	0.20196	-24.576	89.6553	251.363071	-0.051758	0.064746	-0.024414	-0.3956	-42.456	1302.6164	-2.4394	0.54824	-0.93194	-27.283	24.3978	36.4284	0.20898	-0.086426	0.15576
0.716	-26.116	6.7099	21.394	-0.075684	0.18945	0.03125	-21.913	142.528	556.3845	-0.80107	0.2417	-0.21084	-1.221	80.912	859.5755	-1.0467	0.25927	-0.22774	-22.559	28.6663	20.4786	0.22754	-0.11318	0.196	-8.119	96.811	218.9058	-0.012695	0.055371	-0.020898	7.831	-64.266	1314.6544	-2.4297	0.56407	-0.94687	-11.041	19.9637	42.13032	0.19384	-0.084863	0.15186
0.718	-19.065	-3.42476	46.3669	-0.06875	0.19492	0.02207	-24.197	138.632	525.3685	-0.75928	0.21826	-0.19141	4.91	97.808	850.5057	-1.0293	0.24414	-0.2207	-14.855	19.84	18.6075	0.21543	-0.12021	0.19209	-8.449	86.2959	221.4662	0.022851	0.044727	-0.020313	2.3186	-80.017	1311.7758	-2.4121	0.59571	-0.96367	-3.655	17.3695	50.8299	0.17959	-0.077344	0.14492
0.72	-0.898	-11.4163	83.3652	-0.068066	0.19668	0.01709	-29.633	127.582	488.8651	-0.704	0.19786	-0.18095	29.4123	109.862	835.7611	-1.0091	0.23496	-0.21865	-3.918	17.29468	9.0659	0.19854	-0.12422	0.18545	4.263	84.066	209.1206	0.054688	0.033691	-0.018066	23.4911	-87.334	1303.0994	-2.3886	0.63213	-0.97978	-10.328	19.54369	41.365	0.16162	-0.071094	0.13593
0.722	3.088	3.39319	104.15021	-0.072754	0.20098	0.0049804	-26.029	115.7268	469.829	-0.64414	0.18389	-0.15468	18.272	104.5658	815.964	-0.99102	0.22969	-0.21309	2.981	8.8214	7.640625	0.18457	-0.12549	0.17773	3.612	79.3238	194.39582	0.083008	0.019922	-0.013965	16.3803	-90.64	1317.171	-2.355	0.66064	-0.99756	-23.9855	22.77493	17.023	0.14463	-0.065528	0.13291
0.724	-18.8788	33.5359	125.18507	-0.087402	0.20703	-0.0014648	-36.434	121.3654	449.337	-0.58867	0.16631	-0.13437	33.7421	106.8794	795.765	-0.96914	0.22813	-0.20801	-4.677	7.4467	21.76823	0.16416	-0.1247	0.17256	-12.786	85.031	169.8052	0.11006	0.0081054	-0.011133	21.4765	-66.145	1312.985	-2.3138	0.68428	-1.004	-24.581	18.85742	18.00277	0.12646	-0.059082	0.12891
0.726	-29.177	41.6537	167.3953	-0.11035	0.20947	-0.020508	-40.9514	117.5953	409.6211	-0.5373	0.15049	-0.11338	20.712	112.5364	769.678	-0.94844	0.22959	-0.2042	-0.573	18.0346	38.9845	0.14482	-0.12432	0.16797	-16.798	79.948	154.6611	0.13076	-0.0024414	-0.0029296	19.3478	-51.509	1313.0695	-2.2648	0.69404	-1.0066	-7.722	12.8837	27.9398	0.11113	-0.050683	0.12207
0.728	-44.108	46.8948	295.009	-0.14922	0.20215	-0.041211	-46.37	113.8004	380.4383	-0.48584	0.13721	-0.092773	2.193	132.822	744.7833	-0.93115	0.23486	-0.19971	-14.139	31.2489	26.5183	0.12451	-0.11963	0.15703	-11.826	71.6527	152.3194	0.1541	-0.018359	-0.0078125	23.049	-16.5681	1311.775	-2.2085	0.68936	-1.005	-22.557	9.8304	14.681	0.090527	-0.040723	0.11436
0.73	-71.128	29.9595	399.116	-0.20742	0.20039	-0.07002	-20.948	99.244	357.7543	-0.43291	0.12412	-0.071094	-20.722	121.885	728.5422	-0.91162	0.23428	-0.20078	-16.338	31.24797	20.6646	0.10352	-0.10742	0.15166	-15.167	66.6687	144.0936	0.17236	-0.032227	-0.0073242	11.5499	-20.613	1316.127	-2.1505	0.68447	-0.99934	-4.826	14.3819	14.9763	0.072559	-0.030957	0.11045
0.732	-92.946	30.1412	503.282	-0.28789	0.19258	-0.104	-24.101	94.452	355.5294	-0.38311	0.10342	-0.055469	-13.271	118.519	689.3726	-0.8877	0.2418	-0.19941	-25.089	10.460333	40.8225	0.083984	-0.095215	0.146	-36.472	69.7167	125.3827	0.1835	-0.049805	-0.0021484	11.2953	-5.348	1318.0658	-2.0913	0.67627	-0.98779	-8.7	15.827	9.881	0.058496	-0.019531	0.10137
0.734	13.397	23.269	581.761	-0.38476	0.18896	-0.13145	-20.349	89.28	319.20997	-0.32842	0.088574	-0.03789	-4.612	118.321	647.018	-0.86504	0.24727	-0.19238	-29.2533	8.3683	32.0456	0.062891	-0.084961	0.13496	-24.287	56.37112	98.6953	0.19502	-0.061621	-0.0011718	40.2806	12.313	1332.3219	-2.0319	0.66884	-0.97724	-10.506	24.93761	18.471	0.040039	-0.0097656	0.094238
0.736	63.871	-11.736	663.9633	-0.50488	0.17383	-0.15967	-20.217	83.6972	303.9122	-0.27705	0.070313	-0.02334	-23.566	103.721	616.703	-0.83731	0.25029	-0.18692	-22.643	18.6284	13.7932	0.036328	-0.069824	0.12861	-18.887	42.1166	95.071	0.20517	-0.075293	-0.00078125	-7.3148	40.9859	1319.37667	-1.9793	0.65918	-0.96992	-17.563	37.1317	12.0539	0.027734	0.003125	0.088183
0.738	-2.948	27.6671	791.0886	-0.66533	0.1458	-0.18809	-20.059	101.3588	286.0997	-0.2207	0.053223	-0.0058594	-24.131	82.0037	596.094	-0.80469	0.24805	-0.1792	-32.3676	26.112	18.4147	0.016016	-0.053418	0.11963	-16.161	46.9119	84.9315	0.21016	-0.091211	0.0013672	-15.04174	39.0679	1298.0339	-1.9246	0.65722	-0.95196	-28.822	35.1529	18.7671	0.017285	0.014062	0.075
0.74	-10.109	56.47	862.904	-0.84307	0.11689	-0.21591	-10.948	106.293	266.6911	-0.16963	0.044824	0.014258	-20.688	76.956	583.3468	-0.77685	0.24893	-0.17129	-14.929	34.123	22.7781	-0.010352	-0.039941	0.11729	-19.338	51.429	85.2877	0.21582	-0.10156	-0.00048828	-31.0657	36.108	1264.903	-1.876	0.64473	-0.94141	-18.286	23.0014	22.4968	0.0051758	0.028515	0.072657
0.742	7.3838	40.4089	892.337	-1.038	0.1083	-0.24873	-30.948	99.89	224.964	-0.12139	0.032715	0.035156	-6.594	90.73	559.7238	-0.74404	0.24541	-0.16777	-13.878	23.368	15.0411	-0.039063	-0.029297	0.10596	-24.917	54.4282	76.6196	0.21982	-0.11514	0.0073242	23.0996	25.7304	1254.9143	-1.8276	0.63721	-0.92139	-29.082	14.83991	18.2677	-0.0038086	0.037793	0.070019
0.744	31.694	23.0796	956.605	-1.2325	0.11494	-0.28135	-33.0427	84.5729	215.4378	-0.07334	0.015918	0.053515	-34.5686	91.893	558.8717	-0.70888	0.24268	-0.1666	-5.771	15.7527	7.079	-0.056347	-0.00791	0.10303	-27.5038	58.9614	73.4909	0.21934	-0.12031	0.0070312	2.549	31.07778	1248.6093	-1.7857	0.62842	-0.90283	-17.315	15.2907	8.274	-0.012695	0.045898	0.061035
0.746	9.72	27.083	993.781	-1.4063	0.12598	-0.30273	-27.026	77.1259	194.618	-0.033593	0.0041992	0.075391	-27.194	95.86	526.98108	-0.66826	0.23828	-0.16435	-22.044	7.611	14.4898	-0.068457	0.0091798	0.095312	-35.459	65.66132	58.7217	0.22324	-0.12852	0.0050781	21.1845	6.009	1247.627	-1.7544	0.61475	-0.88272	-30.444	15.8629	-5.177	-0.01875	0.055469	0.059961
0.748	41.564	-9.791	987.367	-1.5743	0.14375	-0.32627	-25.3485	85.093	182.3821	0.0073242	-0.0073242	0.094238	-36.4255	107.0846	509.3055	-0.62451	0.23877	-0.15576	0.265000000000001	16.591	11.4936	-0.076269	0.026367	0.090234	-58.3198	61.5787	67.00197	0.21651	-0.13447	0.01084	33.6774	3.931	1239.6797	-1.7274	0.59873	-0.86357	-24.797	18.4081	16.5681	-0.022657	0.058106	0.057617
0.75	37.272	-4.08200000000001	993.222	-1.7179	0.16797	-0.33828	-34.02	89.29351	144.5541	0.044629	-0.025781	0.11025	-51.0666	121.089	492.2125	-0.57822	0.23125	-0.15391	-13.224	16.337	16.3639	-0.082227	0.048828	0.086328	-38.237	53.1323	59.36259	0.21191	-0.14355	0.0097656	18.5567	-9.279	1229.0599	-1.7055	0.58282	-0.8375	-39.98592	19.8414	12.996	-0.028125	0.065918	0.056054
0.752	35.4234	8.209	986.051	-1.8309	0.20664	-0.34102	-27.031	82.8155	133.4248	0.080274	-0.040527	0.12442	-57.4904	102.654	461.3826	-0.5335	0.22471	-0.15069	-31.9608	28.08079	9.9199	-0.087402	0.066895	0.079102	-31.2987	59.5589	42.937	0.20664	-0.15	0.0046875	1.9355	-10.475	1225.8099	-1.6841	0.57275	-0.81201	-12.141	19.8707	12.4927	-0.029101	0.067383	0.052539
0.754	34.239	0.556999999999999	994.74	-1.9071	0.2541	-0.34326	2.977	68.5388	117.8312	0.11621	-0.057324	0.14043	-80.746	90.626	426.7169	-0.49521	0.21299	-0.14404	-17.804	15.6527	17.8186	-0.088281	0.077929	0.078711	-46.9927	60.4228	27.8303	0.19717	-0.16269	0.0070312	-6.429	-11.9196	1217.1723	-1.6644	0.55879	-0.78838	-15.297	11.24	14.099	-0.029785	0.071777	0.05127
0.756	39.614	-17.9152	981.656	-1.9395	0.29492	-0.34717	-24.306	70.0339	101.7044	0.15029	-0.074707	0.14883	-52.0346	85.0999	407.0592	-0.44981	0.19834	-0.14199	-20.679	17.5401	23.7987	-0.088867	0.090625	0.07666	-60.5571	43.6417	42.389	0.18818	-0.16894	0.0042969	12.101	6.1327	1215.102	-1.6475	0.54306	-0.7585	-20.119	20.0959	26.4041	-0.032129	0.078516	0.05127
0.758	65.051	-6.4844	933.167	-1.9184	0.3253	-0.34609	-17.018	65.9719	90.2551	0.18018	-0.089355	0.16357	-68.7068	88.6891	375.363	-0.40527	0.18115	-0.13965	-15.307	17.3272	20.2495	-0.084961	0.10469	0.07666	-27.183	30.9976	47.6899	0.17646	-0.17529	0.0069336	-11.188	40.413	1192.1851	-1.6382	0.529	-0.73115	-15.33	15.8713	23.7762	-0.033496	0.085742	0.050391
0.76	65.146	-9.161	925.955	-1.8831	0.35244	-0.34307	-6.416	58.0015	96.813212	0.2042	-0.099608	0.17051	-59.27775	83.9979	346.62	-0.35996	0.17285	-0.1292	-31.957	15.9818	23.99431	-0.081348	0.11816	0.074121	-20.383	30.8239	54.5391	0.16016	-0.18115	0.0073242	-27.6144	49.048	1177.9032	-1.6155	0.51904	-0.70185	-17.054	31.9411	14.7736	-0.033496	0.094336	0.043359
0.762	29.128	17.223	946.509	-1.8257	0.36807	-0.33252	-10.182	47.78086	105.0289	0.23077	-0.10596	0.17852	-33.914	76.3476	325.109	-0.30771	0.16494	-0.12705	-9.933	7.25814	36.4552	-0.080078	0.12402	0.07666	-23.043	39.6937	37.5252	0.13798	-0.18203	0.0056641	-18.6001	50.278	1138.92	-1.603	0.50928	-0.68701	-20.268	34.2058	12.1558	-0.026172	0.10215	0.04082
0.764	-9.9934	18.044	970.84	-1.769	0.36904	-0.32266	-39.8516	39.8014	84.1749	0.24717	-0.11221	0.18789	-25.995	87.3483	304.0152	-0.2581	0.16103	-0.12041	-25.05	6.5827	29.9834	-0.071875	0.13603	0.069727	-15.164	37.7559	46.4286	0.1168	-0.17803	0.0027344	-18.3683	63.0276	1125.9779	-1.5774	0.49815	-0.66181	-26.962	24.6785	12.178	-0.025879	0.10742	0.04248
0.766	12.7758	42.3626	943.0686	-1.7065	0.37354	-0.30811	-26.898	32.5679	75.935	0.26338	-0.11992	0.19619	-18.527	90.4667	270.5321	-0.20215	0.1499	-0.11377	-7.96	20.7441	-4.4781	-0.062695	0.14952	0.071778	-9.735	29.0789	38.0368	0.089845	-0.17256	0.0039063	-7.285	66.5223	1104.76063	-1.5514	0.48711	-0.64052	-0.0139999999999993	19.3407	22.5999	-0.022363	0.11435	0.038476
0.768	39.747	7.6146	913.771	-1.642	0.37656	-0.29414	-20.018	27.6279	79.9133	0.27734	-0.12402	0.20313	-16.872	90.1522	258.4547	-0.14941	0.14014	-0.10596	5.17	13.7334	0.329000000000001	-0.057227	0.15693	0.065918	-4.437	24.23	34.5725	0.060351	-0.16729	0.003418	-3.092	78.8765	1070.794	-1.5202	0.46914	-0.621	-29.438	21.1164	21.0903	-0.023145	0.12383	0.044238
0.77	5.4949	-16.6417	909.55	-1.5719	0.38847	-0.27891	-19.79	38.6034	53.0365	0.28623	-0.13047	0.20918	5.529	103.5994	243.6049	-0.10195	0.12988	-0.10264	-11.854	9.475	11.0059	-0.04834	0.16553	0.062891	-7.268	32.8784	33.3648	0.029785	-0.16309	0.0024414	11.493	85.7477	1055.259	-1.4865	0.45449	-0.60137	-22.057	34.392	25.0185	-0.022754	0.1289	0.037598
0.772	7.93	-36.67562	940.382	-1.5074	0.41152	-0.26445	-21.112	39.7141	38.351	0.2874	-0.13603	0.21084	-9.927	96.961	235.5239	-0.054981	0.11592	-0.095507	-6.11	13.5941	19.2447	-0.040527	0.16992	0.060059	-19.559	20.220671	41.8468	-0.0030274	-0.15547	-0.0020508	-6.169	103.5814	1029.234	-1.4507	0.43262	-0.58154	-0.965999999999998	31.843	23.532	-0.023926	0.13633	0.037109
0.774	18.905	-49.6638	972.3101	-1.4437	0.43584	-0.25908	-31.056	32.1029	44.0191	0.28779	-0.14151	0.21592	-12.809	75.6583	222.31844	-0.013965	0.09834	-0.088867	-25.996	21.5422	16.0846	-0.031445	0.17832	0.060644	-10.417	19.38161	32.5276	-0.022754	-0.15049	-0.0076172	-18.871	113.381	1018.648	-1.4199	0.41231	-0.56485	-20.832	20.6066	19.201	-0.030273	0.14404	0.037598
0.776	20.807	-42.0542	984.753	-1.3804	0.46826	-0.24902	-6.485	25.882	35.354	0.28399	-0.14746	0.21933	-15.079	54.2502	218.0963	0.023535	0.080957	-0.076953	-18.3079	25.04107	19.2891	-0.027637	0.17949	0.059179	-3.691	22.06682	23.923	-0.047363	-0.13877	-0.010742	-18.434	96.4377	1009.0802	-1.396	0.39209	-0.5457	-12.136	23.6428	5.768	-0.02832	0.15596	0.034863
0.778	-6.927	-59.074	1001.758	-1.3209	0.49922	-0.22617	-20.359	33.971	42.884	0.2793	-0.15527	0.22168	-17.649	68.654	199.1856	0.056152	0.062988	-0.071777	-14.986	20.0077	37.55334	-0.025684	0.18613	0.060742	-26.012	29.9474	28.3387	-0.068262	-0.1251	-0.014942	-38.862	86.0141	997.859	-1.3663	0.37646	-0.5293	-12.658	18.5538	19.4412	-0.029981	0.16377	0.034082
0.78	-18.0641	-99.161	980.242	-1.262	0.52041	-0.20635	-21.344	27.984	38.4558	0.26719	-0.15722	0.22744	-11.79	71.044	178.0894	0.085645	0.041406	-0.070996	-14.473	23.629	28.53189	-0.020898	0.18633	0.053125	-16.198	34.4399	30.0522	-0.087402	-0.11719	-0.023926	-27.413	86.3675	987.1083	-1.3388	0.36152	-0.50752	3.546	20.5423	38.55534	-0.03623	0.17431	0.034473
0.782	-33.1501	-124.141	974.933	-1.2147	0.54736	-0.19697	-15.097	25.5428	42.8919	0.2583	-0.15899	0.22451	-15.668	62.299	155.71739	0.10645	0.020019	-0.061719	-18.757	19.5856	11.9962	-0.019531	0.18896	0.057129	-12.395	27.5812	34.7954	-0.10215	-0.10634	-0.026562	-62.5249	84.4774	978.3152	-1.3105	0.34668	-0.48877	-14.507	13.33214	47.5852	-0.042285	0.18486	0.029883
0.784	-51.1993	-110.868	994.661	-1.1804	0.57822	-0.19131	-18.838	32.7247	33.9326	0.24541	-0.15625	0.22139	-21.694	56.0711	126.584	0.1295	0.0012695	-0.045312	-28.131	16.5448	19.778	-0.02539	0.18857	0.052441	-4.444	31.8203	8.5948	-0.11445	-0.094824	-0.034961	-46.8182	78.568	973.8599	-1.2835	0.33838	-0.47119	-25.532	-0.4633	72.8946	-0.052246	0.18896	0.027832
0.786	-73.43525	-84.5822	1015.307	-1.1523	0.60889	-0.18945	-34.8046	32.4705	31.3255	0.23281	-0.15303	0.21397	-28.583	56.9927	98.893	0.14893	-0.013574	-0.042481	-9.447	1.32672	48.117	-0.030469	0.19795	0.051758	-18.555	32.1689	13.166	-0.12695	-0.08584	-0.035743	-45.6473	93.0398	935.02809	-1.2562	0.33057	-0.44834	-31.069	-13.6954	80.94666	-0.064649	0.19541	0.02666
0.788	-90.5705	-85.2228	1030.834	-1.1249	0.63242	-0.1999	-28.065	40.638	0.626000000000001	0.21875	-0.15283	0.21289	3.758	48.242	83.525	0.16553	-0.029297	-0.030273	-30.8163	-7.152	65.489	-0.038672	0.20459	0.049805	-21.299	28.0452	25.0376	-0.13574	-0.081055	-0.041894	-25.685	94.8979	918.141	-1.2234	0.3251	-0.43466	-14.789	13.8694	98.8888	-0.090431	0.2	0.020312
0.79	-69.3719	-80.8778	1026.161	-1.1117	0.63496	-0.21367	-16.685	32.666	23.6028	0.20703	-0.14746	0.20771	-9.836	34.678	92.9331	0.1789	-0.048926	-0.025781	-17.624	-2.312	77.003	-0.052149	0.20664	0.044238	-23.3279	27.7801	19.839	-0.13965	-0.068848	-0.048828	-47.26	91.6785	896.212	-1.189	0.3206	-0.41572	-38.355	39.6695	137.427	-0.11699	0.2039	0.014453
0.792	-57.8099	-80.2358	1042.281	-1.1055	0.63184	-0.23672	-19.995	29.359	17.7476	0.19023	-0.13838	0.20039	-15.939	22.086	106.3729	0.1916	-0.066016	-0.014844	-9.995	7.3913	116.9417	-0.075195	0.20996	0.039551	-21.246	24.902	11.8048	-0.14473	-0.059472	-0.051465	-46.711	81.282	862.3857	-1.1514	0.31836	-0.39551	-70.246	75.4502	223.467	-0.1542	0.2003	0.0077148
0.794	-56.5791	-60.167	1070.924	-1.1058	0.61367	-0.26592	-10.649	29.425	21.5313	0.17617	-0.13135	0.19297	-27.8454	47.234	110.3767	0.19864	-0.08125	-0.0082032	-15.24	13.66566	170.6632	-0.10967	0.20957	0.033203	-40.33978	13.1821	22.7385	-0.14326	-0.047949	-0.058496	-37.187	94.506	837.2658	-1.1155	0.30752	-0.375	-40.12	73.174	358.637	-0.20264	0.19531	-0.0014648
0.796	-63.3117	-36.076	1105.56	-1.1069	0.59814	-0.30127	-24.9593	17.5924	20.335	0.16289	-0.12598	0.18554	-28.3239	69.7497	90.9833	0.20195	-0.097266	-0.0019531	-46.819	1.2533	225.786	-0.15557	0.20293	0.022168	-50.9961	-0.0428000000000002	23.909	-0.14014	-0.033106	-0.062402	-37.443	115.344	808.944	-1.0745	0.29863	-0.35361	-52.184	52.7295	430.58	-0.26836	0.18691	-0.031347
0.798	-42.478	-12.122	1114.89876	-1.1098	0.58281	-0.33438	-25.2562	8.336	42.2104	0.14697	-0.11914	0.1792	-46.376	72.682	81.246	0.20117	-0.10938	0.0039063	-74.391	-15.78441	252.517	-0.21494	0.19239	0.0053712	-38.0506	8.29491	35.7447	-0.13174	-0.022265	-0.066699	-49.429	115.887	799.9283	-1.0394	0.28535	-0.33565	-34.248	48.2062	545.618	-0.35147	0.17969	-0.048828
0.8	-57.844	-8.229	1129.3225	-1.1121	0.56328	-0.3668	-6.616	4.75	42.42123	0.13134	-0.11045	0.17149	-53.4357	69.652	65.39207	0.20137	-0.12432	0.0095702	-34.568	-36.4245	305.532	-0.28232	0.18096	-0.013477	-33.271	15.4834	29.8588	-0.11768	-0.012207	-0.072754	-48.377	110.333	773.4367	-1.0004	0.27813	-0.31836	12.473	11.0167	645.087	-0.46123	0.16406	-0.064453
0.802	-56.429	-43.784	1121.602	-1.1195	0.55429	-0.39258	-14.295	14.2236	27.1705	0.11035	-0.10527	0.16357	-53.5896	68.05	51.9598	0.19561	-0.13633	0.010449	8.077	-25.621	366.92265	-0.35303	0.1665	-0.039063	-41.3045	18.6298	22.5338	-0.10019	-0.002832	-0.079785	-40.521	117.6137	740.1554	-0.95654	0.27002	-0.30225	2.826	22.0873	765.214	-0.60312	0.13389	-0.084375
0.804	-42.84	-81.2802	1140.85766	-1.1525	0.54805	-0.40703	-11.422	15.593	7.6715	0.091602	-0.095116	0.1542	-60.8408	67.536	34.9097	0.19092	-0.14883	0.015137	-21.54979	-11.554	446.1932	-0.43174	0.15557	-0.055762	-29.576	20.9883	15.0497	-0.077734	0.0067383	-0.089062	-60.3774	131.614	707.411	-0.91963	0.26905	-0.28428	-36.1389	39.8446	864.2614	-0.77734	0.091797	-0.10791
0.806	-30.864	-99.687	1143.882	-1.2104	0.54688	-0.42041	-13.843	16.5357	8.8158	0.074023	-0.083594	0.14941	-47.8013	59.6028	41.861	0.18233	-0.16279	0.020117	-85.921	3.6818	531.382	-0.51924	0.13525	-0.075195	-33.589	21.9654	16.7991	-0.057422	0.01416	-0.095313	-69.551	137.354	696.1215	-0.87451	0.26416	-0.26592	-60.6507	29.0376	887.512	-0.9635	0.058008	-0.12988
0.808	-49.076	-95.904	1173.9655	-1.2929	0.54404	-0.43564	-12.704	21.941	11.769902	0.060059	-0.073242	0.13574	-29.7249	41.6176	19.701	0.17041	-0.1792	0.02002	-40.489	21.1297	577.69	-0.63486	0.10674	-0.092383	-31.8018	31.66223	5.159	-0.03916	0.020117	-0.10391	-46.051	139.359	672.2545	-0.82959	0.26221	-0.25225	-62.8845	-10.367	936.9681	-1.1586	0.035254	-0.14589
0.81	-50.6836	-93.08	1201.5237	-1.3975	0.54697	-0.44912	-47.7362	28.0031	3.9223	0.048926	-0.061719	0.13047	-25.7787	36.501	23.8174	0.15293	-0.18604	0.028125	-4.857	27.72422	635.809	-0.775	0.05791	-0.11934	-20.064	23.3733	31.8034	-0.022461	0.026855	-0.10938	-39.669	146.484	645.796	-0.77861	0.26035	-0.23828	-36.2955	-24.3822	982.113	-1.3492	0.023535	-0.16582
0.812	-51.0234	-104.7747	1208.4421	-1.5226	0.56182	-0.46201	-16.017	18.89606	19.8407	0.036328	-0.053222	0.12373	-16.514	22.731	33.6679	0.13027	-0.19326	0.033301	8.4374	42.6693	726.475	-0.92822	0.01123	-0.14746	-14.496	18.1442	31.18938	-0.0060547	0.029395	-0.11319	-42.878	118.4211	601.0363	-0.729	0.25879	-0.22803	2.4666	-41.81583	1005.282	-1.5409	0.022168	-0.18486
0.814	-38.606	-120.2763	1206.589	-1.6511	0.58271	-0.47119	-9.418	24.5074	21.7723	0.023828	-0.037207	0.12021	-18.5	33.289	36.077	0.10996	-0.19951	0.034472	21.62044	47.578	816.667	-1.0898	-0.024414	-0.18155	-26.234	20.48685	29.9594	0.011816	0.036035	-0.11992	-47.2371	96.547	561.332	-0.67334	0.25137	-0.20283	-28.697	-38.482	1006.799	-1.7144	0.041504	-0.20313
0.816	-29.835	-99.4636	1215.282	-1.7915	0.61572	-0.47803	-21.54	26.4896	30.3949	0.015235	-0.02627	0.11026	-6.27	46.18782	24.6003	0.084082	-0.19853	0.036035	30.696	27.022	872.8325	-1.2461	-0.043555	-0.20996	-15.479	27.1241	14.8176	0.027832	0.033691	-0.125	-24.951	90.625	540.544	-0.62715	0.24746	-0.19375	-27.4927	-44.255	1013.552	-1.8723	0.096095	-0.22509
0.818	-3.515	-85.2057	1234.114	-1.9259	0.66357	-0.48418	-27.118	41.0977	18.344	0.0048828	-0.01416	0.10742	-17.7165	58.025	36.1919	0.060547	-0.1958	0.036133	5.624	29.5716	905.649	-1.393	-0.036132	-0.24512	-20.543	24.808	23.0045	0.046875	0.040723	-0.13008	-24.576	118.736	512.754	-0.57988	0.23808	-0.18594	8.368	-54.606	1005.069	-2.0023	0.16172	-0.25762
0.82	-20.275	-68.1588	1229.593	-2.0632	0.71865	-0.49268	-23.792	30.8533	15.1954	-0.0063477	-0.0026368	0.10381	-3.769	41.246	44.0314	0.038476	-0.19502	0.032324	-16.541	29.734	921.394	-1.5208	0.0051756	-0.27842	-24.652	33.887	23.7429	0.06543	0.041504	-0.13428	-20.091	135.1283	500.97962	-0.53174	0.22539	-0.16983	27.349	-52.46705	992.846	-2.0867	0.23672	-0.28652
0.822	-29.592	-34.5463	1216.2399	-2.2007	0.78662	-0.50244	-9.684	27.3939	14.3958	-0.015039	0.010156	0.10381	-12.335	25.104	38.35762	0.016309	-0.18721	0.030274	13.2366	11.0911	936.334	-1.6284	0.061523	-0.30811	4.458	35.688	9.3559	0.079102	0.042383	-0.13818	-16.725	128.7483	483.5346	-0.48633	0.21973	-0.15527	18.648	-33.14363	959.072	-2.1428	0.31191	-0.3043
0.824	-39.567	-27.7584	1200.6232	-2.3284	0.85381	-0.5124	-24.668	29.5995	5.8274	-0.025586	0.019141	0.10225	-6.805	28.5093	39.1004	-0.0032227	-0.18174	0.023633	21.6705	-2.9595	926.396	-1.7109	0.12422	-0.32598	-9.65	18.8621	23.7019	0.088086	0.047656	-0.14023	-19.11	110.5553	468.6611	-0.44502	0.21172	-0.1374	27.085	-2.312	941.19234	-2.1621	0.37109	-0.31445
0.826	-45.34	-33.553	1191.4536	-2.4487	0.91455	-0.51611	-18.427	15.509848	1.1824	-0.03623	0.030469	0.10215	-24.3697	24.3039	22.33431	-0.021289	-0.17588	0.024317	23.7834	-13.3735	910.149	-1.7839	0.18389	-0.32803	-2.304	6.6094	18.9463	0.099416	0.051563	-0.15	-22.726	107.1482	435.9809	-0.40381	0.20733	-0.12246	21.9734	13.741	950.2907	-2.1342	0.41446	-0.31328
0.828	-34.959	-34.064	1212.0406	-2.5691	0.96914	-0.52813	-29.5218	14.946	8.684	-0.047363	0.038086	0.10205	-7.097	17.5375	25.893991	-0.032715	-0.16943	0.015625	7.25592	-49.676	913.1812	-1.8354	0.2417	-0.32451	-14.554	-2.2641	31.4245	0.10879	0.050488	-0.15205	-44.684	104.559	411.6999	-0.36631	0.20225	-0.10684	-36.453	33.857	963.2068	-2.0758	0.43633	-0.30508
0.83	-49.192	-16.0212	1195.817	-2.6632	1.02	-0.53272	-19.282	23.1264	9.379	-0.057325	0.043066	0.10322	3.421	20.8245	21.533	-0.049903	-0.16133	0.0084959	-13.6133	-81.301	938.4127	-1.8613	0.30977	-0.31074	0.411999999999999	5.7507	39.3403	0.11719	0.053711	-0.15283	-24.524	106.15	400.2688	-0.33047	0.20078	-0.092285	-55.2334	38.656	949.2087	-1.9699	0.44297	-0.28594
0.832	-64.757	3.03900000000001	1189.359	-2.7237	1.0704	-0.53701	-22.546	26.8071	19.0375	-0.064844	0.048047	0.099121	-3.82	30.9673	17.89	-0.061621	-0.15215	0.00019531	12.8169	-102.396	934.085	-1.8569	0.37549	-0.29492	-29.439	-7.2653	58.6832	0.12637	0.051953	-0.16016	-24.326	108.464	355.815	-0.29297	0.20117	-0.080078	-17.177	9.627	931.716	-1.8392	0.43662	-0.25927
0.834	-86.2531	-0.109999999999999	1195.116	-2.7476	1.1157	-0.54131	-30.842	22.456	23.1525	-0.072265	0.054687	0.1085	10.963	34.56	12.433	-0.072168	-0.14746	0.00097653	26.9416	-97.173	915.6575	-1.8071	0.43838	-0.271	-3.277	-3.4289	57.974	0.12832	0.054883	-0.16426	-26.536	108.4394	323.675	-0.25752	0.19727	-0.064062	-25.995	-23.087	892.189	-1.689	0.42676	-0.22998
0.836	-79.5514	-17.75	1215.807	-2.7378	1.147	-0.54639	-24.823	9.9665	40.24863	-0.073535	0.05918	0.10195	3.791	12.9598	23.1839	-0.079004	-0.1377	-0.0030274	49.5511	-70.3161	900.662	-1.7235	0.50029	-0.24629	-6.3	-2.0491	61.81678	0.12481	0.054492	-0.16778	-34.8923	93.5337	292.688	-0.22666	0.19785	-0.048145	-25.218	-42.569	878	-1.5451	0.41778	-0.20703
0.838	-81.859	-30.3022	1225.6616	-2.7005	1.1663	-0.55049	-33.502	23.2634	27.33218	-0.075684	0.05957	0.10596	-4.515	14.67	12.7866	-0.08252	-0.12598	-0.0043945	28.6967	-39.318	931.429	-1.6293	0.5374	-0.2209	-26.5	14.3666	64.3803	0.11592	0.053321	-0.175	-9.8	77.0415	266.393	-0.19189	0.19707	-0.030957	-41.198	-69.7793	897.528	-1.4297	0.41973	-0.19424
0.84	-87.541	-38.6597	1224.24359	-2.6444	1.1767	-0.55576	-16.262	24.317	16.49489	-0.078906	0.071485	0.10752	-17.526	31.2923	3.456	-0.084277	-0.11972	-0.01123	33.2625	-9.894	977.783	-1.531	0.56983	-0.19483	-29.544	27.686	95.9568	0.097168	0.052246	-0.17676	-7.969	94.0177	245.4503	-0.15948	0.196	-0.017187	0.436999999999998	-81.711	920.4704	-1.3402	0.42871	-0.18017
0.842	-87.64	-36.268	1235.9526	-2.5753	1.1701	-0.55615	-25.151	24.8215	7.0101	-0.080273	0.080468	0.10615	-24.631	42.49	11.201	-0.077734	-0.11065	-0.018359	17.1918	-15.359	1001.293	-1.4512	0.59473	-0.17773	-27.958	19.926	109.347	0.078711	0.049121	-0.17978	-7.342	94.2811	230.6097	-0.12207	0.2002	-0.0029297	-13.759	-106.788	949.883	-1.2768	0.4375	-0.17041
0.844	-89.3048	-30.3558	1234.563	-2.4928	1.1545	-0.55449	-20.467	32.1515	25.54	-0.077539	0.086719	0.10459	-35.62547	37.833	31.2232	-0.069141	-0.10478	-0.02539	-6.732	-31.217	1014.6019	-1.3917	0.62236	-0.16494	-23.5569	23.7699	123.278	0.051953	0.048047	-0.18535	-14.591	85.3127	215.3118	-0.086717	0.19834	0.013379	-9.555	-136.142	952.7305	-1.2358	0.45654	-0.14209
0.846	-102.8629	-10.779	1241.42997	-2.3984	1.1289	-0.55078	-12.527	23.25106	24.3427	-0.080957	0.090332	0.10244	-34.7201	18.2708	27.819	-0.057617	-0.093946	-0.032324	8.3	-61.56241	1027.301	-1.3684	0.64883	-0.15791	-30.991	45.6364	203.2698	0.01875	0.047265	-0.18535	-12.234	74.6986	192.5938	-0.049414	0.19453	0.028613	-39.462	-163.073	961.846	-1.2015	0.47754	-0.13564
0.848	-92.1644	-4.992	1239.865	-2.2935	1.095	-0.53984	-16.332	24.571	30.379	-0.087402	0.09668	0.09668	-30.047	8.1153	18.2967	-0.041016	-0.084473	-0.039551	-25.318	-77.8235	1025.695	-1.348	0.67929	-0.1626	4.43	74.347	357.697	-0.027441	0.04375	-0.1959	-4.875	70.3006	174.7502	-0.014258	0.19023	0.04541	-60.21	-150.013	998.0519	-1.1851	0.51182	-0.12246
0.85	-76.7146	-17.6221	1243.079	-2.1777	1.064	-0.5293	-21.995	8.6882	42.609	-0.091113	0.10244	0.091992	-54.257	6.6534	19.5559	-0.024316	-0.074219	-0.049023	-16.234	-86.658	1021.6432	-1.3279	0.70273	-0.15859	-31.587	97.298	455.838	-0.082031	0.040039	-0.20703	-18.5	63.8921	154.55453	0.016406	0.18037	0.059571	-88.2928	-133.269	1006.6943	-1.1718	0.55791	-0.11855
0.852	-60.522	-22.2542	1242.777	-2.0656	1.0277	-0.51797	-30.353	-6.6275	68.8191	-0.096973	0.1082	0.089746	-41.8836	9.29867	27.0176	-0.0006836	-0.064746	-0.056836	-58.3079	-100.805	1019.095	-1.2891	0.72656	-0.15918	-60.61	109.1087	570.995	-0.15791	0.040723	-0.20439	-38.421	57.0648	163.4643	0.04834	0.16846	0.074219	-115.3519	-118.0321	1025.662	-1.1746	0.60684	-0.1167
0.854	-81.32695	-8.0395	1215.1199	-1.9544	0.99483	-0.50849	-2.31	0.934799999999999	80.3973	-0.10048	0.11367	0.08584	-34.9315	29.967	17.93762	0.020801	-0.054199	-0.063086	-36.474	-133.1603	1023.495	-1.226	0.73574	-0.16953	-34.443	78.773	634.449	-0.25566	0.034375	-0.20586	-33.2135	61.8758	135.76643	0.078516	0.15586	0.091407	-120.613	-117.038	1034.1661	-1.1733	0.646	-0.11865
0.856	-78.843	16.6531	1211.0256	-1.8589	0.95752	-0.49951	-26.907	8.3524	84.7412	-0.11416	0.12119	0.082324	-21.686	32.1479	4.7544	0.039649	-0.052149	-0.069727	-33.948	-167.994	1041.955	-1.1483	0.72793	-0.18125	-29.288	45.9	734.0846	-0.39004	0.013672	-0.20469	-34.9275	59.9269	112.5867	0.10771	0.14346	0.10556	-116.028721	-135.684	1013.29	-1.1806	0.67275	-0.11338
0.858	-67.01	35.506	1204.823	-1.7744	0.92403	-0.4832	-40.205	16.2499	135.0707	-0.13037	0.12695	0.078613	-23.498	9.325	2.205	0.058105	-0.038574	-0.078125	-33.8835	-189.628	1050.723	-1.0769	0.7127	-0.19766	-25.331	28.379	849.516	-0.55938	-0.021973	-0.19121	-26.32	55.1869	91.9601	0.12842	0.12588	0.11885	-114.859	-123.284	1036.592	-1.2011	0.67568	-0.11914
0.86	-53.163	28.547	1201.58	-1.7039	0.89571	-0.46953	-45.445	24.665	249.055	-0.14687	0.1289	0.065918	-28.7288	1.725	15.055	0.076465	-0.032226	-0.088867	-30.7302	-175.008	1092.92	-1.0247	0.67939	-0.21846	-65.4505	24.112	927.21	-0.76172	-0.070801	-0.17383	-22.733	38.835308	86.0396	0.15449	0.11367	0.13974	-108.1309	-89.871	1056.12	-1.2304	0.66904	-0.13399
0.862	-78.8837	33.86	1188.2438	-1.6468	0.87148	-0.45898	-45.843	27.2956	346.175	-0.1707	0.12852	0.052637	-18.9465	7.463	15.3935	0.096776	-0.023438	-0.096777	-54.914	-153.891	1135.4511	-1	0.64063	-0.24658	-56.376	31.265	932.7435	-0.99802	-0.11963	-0.16094	-8.18	33.545	72.3278	0.17676	0.093262	0.15527	-96.6811	-62.354	1085.764	-1.25	0.65703	-0.15488
0.864	-59.007	25.5875	1178.73967	-1.5972	0.85283	-0.45068	-40.306	8.9846	424.381	-0.20547	0.13906	0.035058	-38.594	25.525	22.01108	0.11748	-0.016406	-0.10264	-45.957	-126.921	1164.89	-1.0139	0.59102	-0.25625	-43.3066	-16.996	946.773	-1.2579	-0.16015	-0.15976	-13.404	36.218	54.85424	0.19707	0.077051	0.16045	-65.597	-57.0598	1100.837	-1.2612	0.63818	-0.17139
0.866	-45.367	36.6707	1170.185	-1.5522	0.83838	-0.44385	2.507	-27.2436	513.295	-0.25781	0.14102	0.013476	-18.47	23.8186	40.62	0.13428	-0.0074219	-0.11152	-60.303	-112.3371	1146.3547	-1.0518	0.53838	-0.26631	-69.5763	-34.1129	950.246	-1.5095	-0.16641	-0.17773	-14.404	44.6506	44.1183	0.21104	0.061231	0.16602	-73.606	-84.3981	1110.0755	-1.2648	0.62978	-0.20078
0.868	-28.324	50.1131	1164.7877	-1.5101	0.81543	-0.43301	12.3561	-27.4656	622.2847	-0.31836	0.14014	-0.0053711	-27.354	21.5533	29.0659	0.14795	-0.0014648	-0.11816	-56.10814	-103.8786	1164.999	-1.1179	0.49423	-0.26826	-57.75965	-51.621	947.15	-1.731	-0.13213	-0.21524	-18.773	47.7929	46.105	0.22705	0.04248	0.17422	-55.736	-95.526	1136.5436	-1.2612	0.61807	-0.225
0.87	-37.031	61.2632	1168.601	-1.4761	0.79112	-0.41709	-7.167	10.983	675.4477	-0.40713	0.13525	-0.025098	1.491	24.979	15.44763	0.16172	9.764e-05	-0.129	-68.6985	-110.456	1186.366	-1.1981	0.47451	-0.26972	-26.974	-58.146	967.819	-1.9336	-0.055176	-0.25391	-13.146	49.54696	49.1597	0.2375	0.024121	0.18545	-68.305	-108.2414	1180.0889	-1.2507	0.6083	-0.25352
0.872	-27.968	44.2184	1156.918	-1.4464	0.7708	-0.40498	-20.9101	23.3913	743.1714	-0.51416	0.11963	-0.043946	-6.628	28.209	-0.4697	0.17392	0.0051758	-0.13525	-77.801385	-97.151	1208.7749	-1.2905	0.4751	-0.27588	-1.526	-58.3	942.4	-2.0986	0.079101	-0.26329	-9.189	55.9458	42.5565	0.24072	0.003418	0.19238	-70.419	-109.3307	1195.0715	-1.2414	0.58027	-0.27422
0.874	-16.802	16.682	1150.4676	-1.4263	0.746	-0.38955	-51.7098	9.006	776.1309	-0.64619	0.097362	-0.063867	-9.65	20.6346	19.6889	0.18564	0.0094726	-0.14385	-53.208	-87.753	1208.9319	-1.3915	0.49385	-0.28603	-10.15	-43.6007	934.595	-2.2358	0.2294	-0.29346	-17.299	54.154	43.757	0.24473	-0.012988	0.1999	-96.9744	-114.7463	1215.2533	-1.2417	0.55127	-0.28857
0.876	-13.058	27.235	1134.3409	-1.4097	0.71533	-0.37256	-7.382	3.808	825.552	-0.78183	0.07959	-0.092775	-3.465	8.9141	31.3956	0.19404	0.015625	-0.15303	-73.8868	-87.363	1215.566	-1.4961	0.50488	-0.29492	6.511	-7.7277	906.598	-2.3202	0.37041	-0.32471	-24.443	39.387	33.9883	0.2419	-0.030762	0.20547	-95.9324	-125.6825	1232.2023	-1.2843	0.51767	-0.30078
0.878	-34.321	45.372	1137.10809	-1.397	0.68897	-0.36475	34.566	3.088	851.8104	-0.91992	0.065918	-0.11523	0.663	14.9568	13.5803	0.19873	0.022461	-0.16064	-36.816	-108.8443	1213.559	-1.6089	0.51465	-0.31211	5.153	21.7513	903.3361	-2.3519	0.48096	-0.36689	-43.5234	41.9	27.0727	0.24306	-0.043652	0.21406	-83.445239	-154.8182	1238.7904	-1.359	0.48477	-0.30781
0.88	-38.92	52.7977	1127.4531	-1.3843	0.66426	-0.35469	13.41323	0.0790000000000006	865.369	-1.0496	0.061914	-0.13955	10.342	19.5747	7.3982	0.20371	0.025	-0.17285	-57.15	-133.6677	1210.426	-1.7434	0.51865	-0.33076	2.039	32.656	894.844	-2.3301	0.54688	-0.41016	-28.57	33.2714	29.2164	0.23623	-0.054687	0.21475	-83.922	-151.69916	1256.288	-1.468	0.46718	-0.32071
0.882	-31.811	59.6617	1113.2092	-1.3735	0.6377	-0.3375	-8.5789	-1.543	879.121	-1.1775	0.062207	-0.1627	7.422	6.619	11.782	0.20869	0.029785	-0.17656	-46.164	-141.866	1232.605	-1.894	0.52588	-0.34912	-37.772	42.872	884.113	-2.2422	0.54453	-0.43525	-17.202	26.4212	25.7044	0.22949	-0.063965	0.2124	-39.731	-137.953	1249.879	-1.6005	0.46475	-0.33096
0.884	-51.669	72.929	1086.501	-1.3644	0.61426	-0.32461	1.0335	9.84	895.985	-1.2943	0.064551	-0.18809	10.991	-5.812	25.8249	0.20127	0.037988	-0.17968	-57.491	-128.035	1269.735	-2.0645	0.55107	-0.36787	-61.9234	17.144	900.0324	-2.1152	0.52227	-0.44414	-3.853	9.70029	20.4719	0.21914	-0.071192	0.21113	-52.964	-99.8442	1241.137	-1.7441	0.48242	-0.33984
0.886	-81.7425	85.8629	1072.5708	-1.3574	0.58691	-0.31543	22.064	10.764	886.153	-1.4021	0.081152	-0.20322	-13.112	9.4617	25.929	0.19522	0.042285	-0.18565	-38.218	-129.729	1309.256	-2.236	0.58887	-0.38398	-58.561	23.767	891.3288	-1.9543	0.48868	-0.44805	-18.092	15.364	10.208	0.21172	-0.075	0.2085	-57.688	-80.5827	1235.9035	-1.8959	0.52305	-0.34492
0.888	-67.6079	81.5685	1086.8422	-1.353	0.55791	-0.30332	9.461	12.257	846.072	-1.4976	0.10107	-0.21729	-23.152	7.5137	40.5247	0.18701	0.049805	-0.19189	-35.047	-126.832	1309.226	-2.4	0.6459	-0.40586	-56.8639	-0.231999999999999	893.728	-1.7558	0.45352	-0.4541	-9.557	16.179	31.2802	0.20234	-0.075391	0.20732	-63.173	-75.941	1220.9881	-2.0491	0.57783	-0.35615
0.89	-33.494	103.2251	1076.877	-1.35	0.53594	-0.29336	38.8833	13.6921	819.95385	-1.5772	0.12813	-0.22891	-19.049	-6.816	55.5734	0.17256	0.060157	-0.1959	-56.998	-105.4749	1301.2352	-2.5504	0.71523	-0.43086	-25.028	-20.583	884.361	-1.5361	0.42822	-0.45703	-7.22	17.97	45.43204	0.18975	-0.074902	0.19922	-36.47	-77.269	1213.129	-2.2116	0.64345	-0.371
0.892	-51.64837	130.755	1060.8261	-1.35	0.51172	-0.28125	23.8657	22.4992	808.22	-1.6386	0.15986	-0.23897	-11.665	-16.4173	60.52	0.14824	0.06416	-0.20284	-74.068	-86.6746	1315.25237	-2.6738	0.78613	-0.45605	-26.499	-67.145	876.368	-1.3531	0.40508	-0.45566	-12.621	20.431	38.6744	0.17773	-0.077637	0.19678	-40.974	-80.087	1231.94	-2.3704	0.72373	-0.39463
0.894	-54.8779	140.2626	1037.37	-1.3513	0.48799	-0.27305	8.7534	47.0229	814.6635	-1.6761	0.18525	-0.23936	-28.855	-8.046	69.86822	0.1166	0.06416	-0.20556	-75.459	-81.3531	1341.5195	-2.7669	0.86006	-0.48076	-5.003	-95.181	893.254	-1.2203	0.39551	-0.45547	-6.782	30.0633	26.2843	0.16436	-0.074805	0.19209	-65.167	-57.1775	1258.8414	-2.5098	0.79883	-0.42871
0.896	-44.395	132.499	1012.674	-1.3491	0.46729	-0.26904	-12.979	42.2472	814.2259	-1.6854	0.20811	-0.23174	-29.986	12.3791	121.791	0.076855	0.064551	-0.21367	-51.395	-74.417	1325.6584	-2.828	0.92432	-0.50381	7.858	-147.436	923.297	-1.1332	0.39512	-0.46563	-16.366	15.6409	23.355	0.15146	-0.070801	0.1875	-70.593	-25.607	1257.344	-2.6223	0.86943	-0.46084
0.898	-21.365	134.721	990.587	-1.347	0.44873	-0.26084	-15.3248	24.5429	827.4068	-1.6699	0.22559	-0.22266	-5.018	30.0417	224.067	0.032715	0.060059	-0.2251	-76.8237	-74.981	1315.7605	-2.8511	0.97627	-0.52061	30.5795	-173.985	948.897	-1.062	0.41064	-0.48037	-28.97	13.0375	36.93423	0.13975	-0.070019	0.18086	-95.602	-2.235	1255.652	-2.7042	0.93389	-0.49229
0.9	-51.0278	138.3141	980.9975	-1.3431	0.4291	-0.24892	11.543	13.453	810.696	-1.6298	0.24453	-0.21211	-44.102	34.1321	327.006	-0.029004	0.06084	-0.23418	-69.427	-89.17338	1321.35772	-2.8363	1.0114	-0.53252	38.4806	-169.284	981.931	-1.0015	0.43506	-0.50342	-19.905	8.7822477	6.6607	0.12774	-0.066601	0.1752	-118.4384	1.626	1254.527	-2.7522	0.98741	-0.52041
0.902	-50.995	117.16606	973.3264	-1.3365	0.41152	-0.24463	-25.768	-9.165	796.49	-1.5723	0.25684	-0.19766	-50.3498	39.0698	431.404	-0.11426	0.060351	-0.23457	-68.148	-101.774	1316.602	-2.7969	1.0273	-0.53809	7.6514	-174.584	1035.5874	-0.96045	0.45557	-0.50693	-26.8662	23.619	9.84717	0.11475	-0.061035	0.17432	-132.0947	-30.426	1274.7522	-2.7705	1.0275	-0.53867
0.904	-41.3629	112.8971	975.2095	-1.322	0.39307	-0.23496	-10.551	-35.3103	805.151	-1.5094	0.26543	-0.18594	10.145	8.5584	518.369	-0.23847	0.048633	-0.23535	-72.557	-85.643	1300.512	-2.7344	1.0285	-0.53525	3.871	-174.105	1056.6893	-0.93203	0.46778	-0.52198	-29.1871	36.472	3.9317	0.10137	-0.055371	0.16553	-116.7445	-52.404	1275.5526	-2.7642	1.0522	-0.54346
0.906	-34.9099	111.4896	967.3597	-1.3105	0.37598	-0.22607	-14.46	-54.1269	844.7489	-1.4396	0.27559	-0.16963	23.984	-36.044885	620.5837	-0.4041	0.033008	-0.23389	-84.919	-65.89	1296.151	-2.6671	1.0157	-0.52734	-16.6976	-152.2528	1057.872	-0.91758	0.46504	-0.52862	-24.987	29.7582	22.663	0.090137	-0.053418	0.15938	-110.8701	-62.6936	1284.3293	-2.7319	1.0709	-0.5502
0.908	-53.9413	119.7356	954.25	-1.2995	0.36318	-0.22207	-7.041	-48.9568	860.654	-1.3828	0.2832	-0.16016	-42.7065	-56.398	745.356	-0.59326	0.0014648	-0.23438	-87.263	-52.3922	1313.99	-2.6061	0.99384	-0.52149	-32.94739	-116.091	1062.821	-0.92754	0.45664	-0.53106	-5.961	29.70164	15.281	0.078027	-0.044824	0.15391	-111.7867	-62.908	1278.818	-2.6905	1.0798	-0.55029
0.91	-33.836	108.6491	943.1661	-1.2831	0.35205	-0.2167	-10.201	-84.929	860.0088	-1.3359	0.30127	-0.14756	-76.0152	-8.3	836.46	-0.82021	-0.034278	-0.21826	-82.7902	-51.5582	1328.422	-2.5425	0.97099	-0.51289	-46.84	-99.262	1076.0291	-0.96777	0.43945	-0.5332	-10.91	26.6862	5.627	0.064941	-0.038769	0.14609	-113.8327	-68.65	1276.225	-2.6452	1.0837	-0.55263
0.912	-12.619	119.0007	918.9227	-1.2616	0.33525	-0.21084	-32.921	-125.841	843.066	-1.305	0.32666	-0.14326	-17.021	31.647	900.5101	-1.0731	-0.080273	-0.2125	-104.5665	-45.139	1326.677	-2.4819	0.95557	-0.49707	-26.6039	-98.013	1106.774	-1.0321	0.4251	-0.533	-13.866	33.9883	11.30271	0.053711	-0.028809	0.13867	-121.333	-62.9846	1282.5404	-2.5914	1.0851	-0.55429
0.914	-14.214	139.4049	886.5845	-1.2467	0.32324	-0.20605	-37.304	-145.099	868.756	-1.2863	0.36768	-0.1378	-14.0833	43.1655	919.429	-1.3449	-0.10411	-0.21367	-108.8915	-31.33	1336.9859	-2.4261	0.94971	-0.49092	7.865	-104.326	1120.724	-1.116	0.41406	-0.53008	-5.377	25.54421	13.57043	0.041601	-0.018848	0.13281	-90.174	-52.696	1287.502	-2.5313	1.0762	-0.55469
0.916	-7.979	145.3515	874.46627	-1.2246	0.30908	-0.19971	-67.125	-124.009	886.097	-1.2831	0.41397	-0.13154	-27.6458	20.259	922.3182	-1.6133	-0.088183	-0.23535	-97.696	-39.753	1361.9349	-2.3718	0.94385	-0.48623	31.5029	-106.782	1123.656	-1.1961	0.41836	-0.52422	-20.049	11.4453	19.520244	0.029883	-0.012793	0.13037	-104.705	-39.202	1295.7084	-2.4464	1.0732	-0.54697
0.918	20.369	137.5112	857.5694	-1.2044	0.30225	-0.19473	-75.4544	-95.1331	895.7241	-1.2852	0.4624	-0.13672	-46.305	-37.725	936.4539	-1.853	-0.026367	-0.26904	-97.742	-35.4395	1355.1563	-2.3104	0.94111	-0.47881	47.283	-88.7323	1133.054	-1.2618	0.42842	-0.52315	-24.1723	17.7482	12.7132	0.018164	-0.0049805	0.12724	-96.139	-24.8208	1302.1427	-2.3625	1.0631	-0.5375
0.92	27.585	128.0375	842.2199	-1.1819	0.29258	-0.19024	-101.16149	-83.1209	897.0322	-1.2915	0.51748	-0.1372	-11.213	-70.316	964.678	-2.0663	0.090136	-0.29209	-94.5446	-36.7275	1343.3211	-2.2534	0.93389	-0.46924	37.3569	-83.6936	1151.024	-1.3101	0.4458	-0.5249	-34.448	4.90589	30.7388	0.0012695	0.0046875	0.1249	-112.0548	-7.563	1301.6239	-2.2641	1.0522	-0.52383
0.922	32.2212	144.0964	814.7413	-1.1572	0.28516	-0.18594	-89.2306	-90.573	902.158	-1.2973	0.57617	-0.14082	-10.299	-68.956	982	-2.2624	0.22676	-0.33867	-104.733	-32.693	1319.857	-2.2104	0.92627	-0.45557	38.281	-81.3297	1184.68059	-1.3397	0.45166	-0.51963	-16.55	9.5675	24.7795	-0.0058594	0.0083008	0.12354	-119.3354	27.153	1296.3753	-2.1749	1.0403	-0.51748
0.924	20.9456	154.4722	798.7703	-1.132	0.28193	-0.18018	-96.6896	-92.729	907.918	-1.3031	0.63672	-0.15176	5.67	-52.6813	961.956	-2.4108	0.38145	-0.37812	-83.7825	-28.788	1338.2562	-2.1707	0.91055	-0.44805	26.44	-92.30317	1233.333	-1.38	0.44932	-0.51358	-16.523	26.854635	15.282	-0.02373	0.019434	0.12149	-129.8264	29.154	1290.1584	-2.0874	1.02	-0.50146
0.926	24.2134	158.0955	772.7202	-1.1133	0.27881	-0.17529	-98.893291	-77.953	936.568	-1.3072	0.69239	-0.1668	40.9919	-27.6607	945.541	-2.5246	0.51719	-0.40098	-79.126	-27.636	1347.82275	-2.1387	0.89453	-0.4332	19.557	-112.74624	1264.086	-1.4487	0.43213	-0.50381	-29.719	32.7127	16.641	-0.036523	0.025586	0.12031	-118.764	20.7191	1261.7839	-2.0175	0.99035	-0.47842
0.928	-1.742	153.863	760.861	-1.08	0.27812	-0.17714	-78.529	-66.433	977.125	-1.3125	0.73828	-0.17969	47.9559	-12.528	909.894	-2.6133	0.62988	-0.41797	-67.02	-12.2789	1320.7731	-2.1121	0.87969	-0.42305	24.15071	-121.5239	1284.185	-1.5551	0.40322	-0.50371	-27.553	29.9587	23.9366	-0.047071	0.037305	0.11719	-91.86	20.3217	1230.3621	-1.952	0.96054	-0.45079
0.93	-4.382	154.509	730.7566	-1.0518	0.27705	-0.17354	-81.786	-56.411	1006.209	-1.3245	0.77276	-0.19521	35.961	-7.454	910.34	-2.6781	0.71094	-0.43086	-78.441	-7.2346	1311.9984	-2.0899	0.86416	-0.40459	21.3125	-142.4992	1291.047	-1.6758	0.38477	-0.5127	-19.688	12.97345	15.3868	-0.057227	0.048438	0.11562	-104.2704	33.968	1219.5231	-1.8953	0.92969	-0.42851
0.932	-1.39	137.881	710.4768	-1.0217	0.27354	-0.17275	-85.226	-59.689	1034.6594	-1.3417	0.78838	-0.20752	-9.998	-26.321	921.549	-2.6856	0.75918	-0.44688	-55.783	6.3368	1297.038	-2.0659	0.85205	-0.39404	-15.2866	-149.9941	1290.321	-1.812	0.38701	-0.52217	-13.415	16.2845	7.3223	-0.064941	0.061035	0.10986	-71.901	38.9739	1226.52338	-1.8484	0.90117	-0.40859
0.934	-6.294	128.136	683.151	-0.98652	0.27598	-0.16992	-82.921	-76.47867	1027.7296	-1.3577	0.79424	-0.22744	-35.079	-30.308	958.9752	-2.5856	0.77558	-0.46719	-70.312	15.0693	1298.06	-2.043	0.8419	-0.37959	-39.3253	-155.261	1291.925	-1.9385	0.40625	-0.52784	-5.545	17.70173	12.9064	-0.07041	0.070215	0.11025	-44.834	30.4573	1233.98912	-1.8042	0.87939	-0.39209
0.936	-3.405	135.853	650.5939	-0.95068	0.27734	-0.16699	-61.261	-89.96	1054.9164	-1.3733	0.79629	-0.25391	-28.94486	-21.635	979.758	-2.3896	0.78496	-0.47559	-71.497	32.782	1306.6422	-2.0187	0.82588	-0.37256	-9.9651	-145.78	1286.4128	-2.0511	0.43594	-0.54268	-13.558	19.7887	27.5873	-0.073535	0.081738	0.10889	-18.804	18.195	1230.607	-1.7636	0.86377	-0.37177
0.938	-26.446	133.6338	627.245	-0.91572	0.27422	-0.16182	-68.516	-101.313	1069.9803	-1.3789	0.79492	-0.28076	-45.7236	-40.803	959.2718	-2.1387	0.78027	-0.479	-68.017	37.22	1314.045	-1.9886	0.81377	-0.35771	25.67922	-128.99985	1285.7621	-2.1394	0.46484	-0.57637	-8.755	27.9539	18.0537	-0.079004	0.085645	0.10694	-53.368	1.568	1213.7381	-1.7307	0.84892	-0.35498
0.94	-11.039	125.3758	601.921	-0.87627	0.27315	-0.15869	-84.586	-96.2739	1102.4275	-1.3778	0.80235	-0.30293	-33.063	-56.434	930.665	-1.8822	0.76475	-0.4834	-62.666	42.761	1301.494	-1.955	0.79932	-0.34639	31.8603	-123.687	1275.2654	-2.2119	0.48535	-0.63379	-29.8196	36.106	20.2888	-0.085352	0.092773	0.10615	-43.839	-9.133	1213.0867	-1.6929	0.82744	-0.34092
0.942	-29.0288	109.09	608.5597	-0.83525	0.26533	-0.15205	-85.5065	-106.9763	1111.987	-1.3641	0.8086	-0.32832	-32.2732	-61.06	951.12	-1.6518	0.72197	-0.48389	-47.351	49.386	1294.965	-1.9199	0.78125	-0.33594	36.408	-119.169	1271.7796	-2.287	0.5083	-0.69639	-20.042	38.6683	18.445	-0.081543	0.10254	0.099609	-46.961	7.52	1197.92046	-1.6564	0.80371	-0.3252
0.944	-11.837	119.67	576.802	-0.79238	0.26651	-0.14678	-87.42184	-124.5577	1139.73026	-1.3386	0.8125	-0.34043	14.9253	-79.0828	1000.3165	-1.4675	0.65947	-0.48271	-64.27	56.078	1266.6745	-1.8808	0.76299	-0.32197	29.7095	-93.965	1277.7433	-2.3641	0.5249	-0.75508	-14.085	23.2504	35.8505	-0.083692	0.10762	0.098341	-66.176	30.6816	1193.6587	-1.6152	0.77344	-0.30127
0.946	-22.4026	126.4494	555.407	-0.74902	0.25977	-0.14355	-62.323	-133.3397	1158.3033	-1.3289	0.79785	-0.35625	24.9703	-124.937	1024.10269	-1.3347	0.59268	-0.4874	-56.812	55.8725	1261.7356	-1.8413	0.74346	-0.30909	20.9607	-54.807	1270.3551	-2.4465	0.55186	-0.80625	-15.504	24.605	24.2285	-0.079688	0.11201	0.10107	-87.6983	39.808	1190.759	-1.5781	0.74072	-0.29639
0.948	-37.966	127.332	530.65581	-0.70137	0.25215	-0.14014	-70.167	-129.5802	1182.4712	-1.333	0.77246	-0.36914	49.244	-148.453	1067.4853	-1.2358	0.55029	-0.50635	-37.683	39.201	1242.5306	-1.7991	0.72236	-0.29658	-3.9182	-29.2256	1286.7865	-2.5151	0.56973	-0.84473	-30.31	6.9406	33.4132	-0.080078	0.11748	0.097168	-104.5467	19.6498	1155.3111	-1.5316	0.70547	-0.28672
0.95	-36.3642	126.8496	495.697	-0.65	0.24707	-0.1289	-42.198	-112.0901	1193.69	-1.3686	0.73711	-0.3749	49.203	-173.393	1093.1903	-1.1598	0.53545	-0.52744	-38.473	30.674	1220.033	-1.7564	0.69707	-0.27939	36.349	-23.74	1284.186	-2.5601	0.58643	-0.87842	-17.754	-3.6078	37.6201	-0.08457	0.12744	0.096875	-92.3842	36.8898	1115.9186	-1.491	0.66953	-0.27461
0.952	-31.154	117.4738	480.7424	-0.60078	0.23886	-0.125	-66.901	-91.5573	1184.2771	-1.4331	0.70557	-0.38554	25.3146	-180.512	1115.8813	-1.0965	0.52929	-0.54258	-50.713	29.261	1216.996	-1.7168	0.66895	-0.26074	35.9468	-28.931	1302.707	-2.5728	0.5917	-0.89033	-13.039	-15.9656	54.52442	-0.088379	0.13525	0.09082	-83.4377	58.6351	1088.253	-1.4455	0.6334	-0.25859
0.954	-47.7049	115.7895	450.7574	-0.55147	0.22744	-0.11856	-60.609	-61.121	1183.5102	-1.5284	0.68213	-0.38789	31.0755	-174.825	1112.39566	-1.0481	0.52226	-0.55703	-56.458	32.08	1212.5221	-1.6751	0.63819	-0.24912	3.1787	-22.102	1305.759	-2.5644	0.59189	-0.90185	6.697	-3.6226	48.43754	-0.099122	0.13965	0.090234	-88.3553	80.4978	1091.5004	-1.4063	0.59277	-0.24512
0.956	-44.2288	94.4631	427.9252	-0.49561	0.21582	-0.10791	-50.957	-56.9721	1185.5625	-1.6516	0.67392	-0.38594	-8.085	-166.325	1095.6365	-1.0114	0.51856	-0.56348	-47.557	45.0032	1198.41138	-1.6379	0.60781	-0.23233	-19.6821	-29.842	1325.43	-2.5269	0.5872	-0.91045	-5.796	8.9414	71.5447	-0.11162	0.14521	0.087305	-71.302	88.7134	1085.915	-1.372	0.55723	-0.22754
0.958	-32.7135	99.26983	400.4849	-0.44609	0.19707	-0.099608	-62.185	-57.6693	1197.56452	-1.791	0.68066	-0.38184	-5.12614	-149.5166	1112.1222	-0.98633	0.50488	-0.55225	-85.0695	66.5263	1184.5043	-1.5989	0.575	-0.21709	-6.8827	-45.663	1332.627	-2.4875	0.58262	-0.91777	-15.619	16.36418	121.3202	-0.12998	0.1499	0.083398	-51.041	94.885	1071.1083	-1.3413	0.51807	-0.21211
0.96	-36.095	110.7464	366.5232	-0.39883	0.18027	-0.08584	-51.605	-68.398	1202.8346	-1.9494	0.69043	-0.37627	-44.8006	-138.519	1141.6382	-0.97412	0.49502	-0.54326	-71.643	89.878	1173.762	-1.5618	0.54345	-0.20302	8.0853	-49.39678	1331.1309	-2.4512	0.58301	-0.92773	-28.206	23.716	149.394	-0.15234	0.14726	0.077539	-51.908	96.229	1047.949	-1.3097	0.48018	-0.19961
0.962	-30.491	120.527	348.36	-0.35469	0.16738	-0.075293	-78.61	-57.02427	1194.432	-2.1053	0.71299	-0.36719	-9.0353	-132.413	1181.3062	-0.98829	0.48115	-0.53437	-60.475	103.875	1158.8027	-1.5269	0.51221	-0.18408	20.68955	-65.155	1333.4762	-2.4046	0.59775	-0.94052	-32.279	45.674	233.973	-0.18701	0.14941	0.07666	-63.933	88.473	1036.045	-1.289	0.44307	-0.18408
0.964	-13.261	107.9543	311.9093	-0.30322	0.15313	-0.071191	-76.326	-36.695	1198.722	-2.2589	0.74072	-0.36875	16.1171	-130.202	1219.442	-1.0336	0.47451	-0.52227	-69.3899	116.338	1127.1809	-1.4975	0.48662	-0.16934	47.3471	-74.39	1334.26768	-2.3712	0.6082	-0.95556	-32.119	35.4298	338.669	-0.23164	0.14883	0.052832	-59.564	86.144	1028.191	-1.2642	0.41162	-0.17285
0.966	-6.59	108.1077	275.783	-0.25049	0.14453	-0.063965	-107.1234	-33.287	1212.68	-2.3985	0.77412	-0.37197	52.7114	-117.822	1233.252	-1.1034	0.47226	-0.50801	-59.5739	108.5751	1097.2054	-1.4688	0.45605	-0.15908	59.52	-79.57	1341.2647	-2.3305	0.62227	-0.97353	-43.989	34.7075	440.217	-0.28721	0.14345	0.03418	-76.8463	104.4086	1013.3664	-1.245	0.3794	-0.15986
0.968	-3.931	111.2396	259.856	-0.19512	0.12715	-0.052442	-92.658	-33.509	1225.346	-2.5254	0.80469	-0.37891	72.746	-84.298	1216.962	-1.1792	0.48486	-0.4917	-64.359	101.0469	1092.3929	-1.4398	0.43652	-0.14932	42.957	-61.823	1352.0687	-2.2888	0.6294	-0.97823	9.133	39.782	525.459	-0.35986	0.13486	0.0072266	-104.975	121.298	992.6673	-1.2231	0.35254	-0.14609
0.97	-13.78	96.9256	261.5022	-0.14053	0.11758	-0.043555	-93.875	-53.442	1252.2467	-2.6317	0.84482	-0.38174	87.058	-76.643	1214.117	-1.2536	0.49795	-0.47325	-53.007	93.25	1073.4951	-1.4155	0.41944	-0.13682	38.482	-39.7459	1357.132	-2.2285	0.63184	-0.97949	65.986	21.3714	565.98	-0.45459	0.11651	-0.011719	-96.9715	106.851	979.3961	-1.2035	0.33144	-0.14101
0.972	11.452	79.77	252.67389	-0.08623	0.10196	-0.034961	-101.176	-58.6123	1258.1072532	-2.7175	0.88319	-0.39121	69.045	-86.6722	1246.7781	-1.3335	0.50303	-0.4624	-47.848	108.652	1041.5869	-1.394	0.39893	-0.12646	35.282	-25.141	1350.585	-2.1797	0.62695	-0.97266	19.749	32.2705	680.2109	-0.57471	0.083984	-0.033203	-87.2182	96.664	954.955	-1.1879	0.30566	-0.13223
0.974	4.258	76.6048	227.7101	-0.040235	0.085254	-0.030859	-115.3111	-69.45	1288.079	-2.7957	0.92538	-0.40019	43.008	-111.723952	1285.6577	-1.4081	0.50108	-0.46201	-24.578	111.4411	994.888	-1.3685	0.37783	-0.11885	21.2438	-11.5079	1343.38759	-2.1304	0.62694	-0.96484	-0.501000000000001	42.0668	803.465	-0.72754	0.04541	-0.063965	-75.6047	87.0433	934.5752	-1.1675	0.28564	-0.12549
0.976	1.743	83.5712	212.0965	0.0058594	0.071289	-0.018066	-122.4463	-70.652	1297.5163	-2.848	0.96884	-0.4124	57.64	-141.833	1326.181	-1.4826	0.48555	-0.46289	-53.9646	108.30591	975.106	-1.3394	0.36143	-0.10772	23.3762	22.902	1346.148	-2.082	0.61914	-0.95936	-8.5015	16.6902	810.0602	-0.89365	-0.00058592	-0.093848	-72.5472	89.0283	946.207	-1.1452	0.26826	-0.11689
0.978	-11.683	69.951	202.2701	0.042676	0.049121	-0.0079103	-114.5929	-47.084	1297.5029	-2.877	1.002	-0.41309	43.258	-153.254	1322.582	-1.5757	0.45361	-0.46338	-21.937	113.7721	969.6557	-1.3085	0.34541	-0.099122	6.5512	44.613	1352.1647	-2.0388	0.6162	-0.94355	14.531	13.7491	859.3922	-1.0698	-0.04668	-0.12158	-21.074	91.663	918.5641	-1.1239	0.25117	-0.10752
0.98	-18.931	62.228	173.31438	0.076172	0.027148	-0.0022461	-111.263	-33.62072	1276.319	-2.8789	1.0219	-0.41602	14.1262	-149.337	1315.444	-1.6896	0.41748	-0.46709	-12.641	115.1681	962.3717	-1.2772	0.33506	-0.094629	1.682	51.538	1335.0559	-1.9917	0.60986	-0.93799	48.116	3.795	900.5507	-1.2407	-0.080078	-0.14541	-17.113	105.556	887.7079	-1.1027	0.23008	-0.1001
0.982	-26.221	70.4019	160.6609	0.10625	0.006836	0.0051758	-93.604	-26.496	1285.4476	-2.8503	1.0356	-0.417	10.9683	-159.718671	1315.3549	-1.8155	0.41104	-0.46943	-45.7929	112.8254	930.4435	-1.2422	0.32178	-0.084473	-12.2303	58.818	1288.084	-1.9525	0.60929	-0.9261	69.124	-26.497	911.6946	-1.4048	-0.094727	-0.16846	-1.054	118.855	856.0063	-1.0824	0.21465	-0.097461
0.984	-25.539	58.41251	142.5394	0.13183	-0.011426	0.013672	-107.143	-21.8569	1276.7476	-2.7941	1.0426	-0.41972	-10.04374	-152.465	1316.8527	-1.9359	0.42861	-0.47959	-37.4902	104.5454	928.1855	-1.2101	0.30351	-0.076465	1.9771	52.561	1267.86672	-1.9142	0.60977	-0.91762	28.2274	-29.725	913.69	-1.5575	-0.063965	-0.20107	-13.391	111.982	841.3266	-1.0649	0.2002	-0.089844
0.986	-16.342	31.255	129.9591	0.15625	-0.029785	0.020508	-112.536	-2.2961	1279.0889	-2.7151	1.0407	-0.42216	22.9603	-150.43	1339.037	-2.0434	0.46895	-0.48672	-23.269	111.8072	891.6046	-1.1711	0.29307	-0.072949	10.37517	33.6275	1255.8688	-1.8755	0.60782	-0.90551	26.3268	-31.698	934.986	-1.6909	-0.0064454	-0.23819	12.086	121.838	813.8609	-1.0501	0.19053	-0.086817
0.988	-27.806	29.786	111.565	0.18272	-0.05293	0.026172	-108.5138	16.57999	1299.7821	-2.6206	1.0259	-0.41113	45.436	-149.5895	1343.3749	-2.1445	0.5293	-0.49805	-13.492	116.2125	861.1332	-1.134	0.27939	-0.069824	38.5739	20.564	1249.629	-1.8371	0.60246	-0.89021	42.0372	-39.0347	937.138	-1.7874	0.072461	-0.26553	-0.335999999999999	131.06441	793.3203	-1.0331	0.17754	-0.082519
0.99	-17.094	35.844	98.398	0.20176	-0.069336	0.031153	-117.9837	28.6359	1307.7983	-2.5164	1.0144	-0.4012	66.546	-147.828	1339.5346	-2.2389	0.58926	-0.51933	-15.672	126.40591	848.24065	-1.0869	0.27168	-0.061133	46.4311	23.741	1258.616	-1.8066	0.59961	-0.875	35.9631	-48.449	948.826	-1.8649	0.16728	-0.28272	-23.35	148.179	771.8162	-1.0159	0.17051	-0.079394
0.992	-21.9541	42.328	97.811	0.22012	-0.092383	0.038965	-91.737	26.5818	1318.0479	-2.4162	0.99273	-0.39079	41.236	-142.164	1326.956	-2.3308	0.64004	-0.55879	7.139	130.03166	821.1526	-1.0449	0.26074	-0.054199	41.7244	21.125	1244.4183	-1.7743	0.59164	-0.8556	53.326	-28.6378	910.337	-1.918	0.25488	-0.30078	-30.3046	141.536	762.3866	-1.0028	0.17119	-0.083496
0.994	-15.932	53.97226	95.0201	0.23701	-0.11347	0.040137	-114.1068	28.233	1287.635	-2.3241	0.97169	-0.37438	37.335	-104.654	1307.34	-2.4121	0.67051	-0.61035	11.444	117.5402	786.596	-1.0001	0.25537	-0.053418	10.9665	8.863	1252.254	-1.7485	0.586	-0.83245	62.363	4.455	841.971	-1.9377	0.32324	-0.31299	-29.075	136.194	745.2777	-0.98389	0.17041	-0.081055
0.996	-25.6829	55.5388	79.746	0.24756	-0.13086	0.044434	-94.667	26.228	1277.175	-2.2416	0.94696	-0.36276	22.5116	-68.622	1315.0325	-2.4618	0.67705	-0.66534	12.004	111.165	738.6535	-0.95527	0.24805	-0.049414	13.997	13.323	1246.1699	-1.7286	0.58407	-0.81091	51.107	32.4652	858.706	-1.9335	0.37998	-0.32803	-24.338	133.485	695.814	-0.96504	0.17188	-0.075293
0.998	-39.933	62.765	76.289	0.26025	-0.15439	0.044434	-105.11	36.3243	1290.3388	-2.166	0.92578	-0.34082	17.63991	-32.1053	1317.2073	-2.4878	0.66162	-0.71436	-2.082	111.606	710.1436	-0.90879	0.24687	-0.043946	1.0997	16.923	1247.0137	-1.7088	0.57885	-0.78639	4.9469	31.321	886.1945	-1.8928	0.42451	-0.33037	-12.649	119.146	664.005	-0.9374	0.17236	-0.078223
1	-48.7254	58.46	74.6179	0.26631	-0.17988	0.050683	-71.253	34.5263	1302.584	-2.1003	0.9086	-0.32895	39.832	-27.302	1318.1026	-2.485	0.63047	-0.74356	7.994	108.948	690.7845	-0.87129	0.24346	-0.048047	-14.0842	46.3777	1218.6306	-1.6914	0.58105	-0.76172	-4.1525	26.6079	855.8912	-1.8154	0.44297	-0.31699	-6.99299999999999	107.8466	659.8121	-0.91123	0.1794	-0.079785
1.002	-54.3155	51.9705	70.1407	0.26319	-0.19824	0.053809	-77.53	26.68777	1299.058	-2.0509	0.89125	-0.31486	26.4945	-40.197	1320.111	-2.4797	0.60039	-0.75469	11.455	116.8942	667.41808	-0.8208	0.24023	-0.052246	-23.07547	41.594	1183.24246	-1.6754	0.57916	-0.73499	11.728	18.25221	847.11	-1.6992	0.45215	-0.29297	-14.057	103.7618	622.398	-0.88096	0.18311	-0.081543
1.004	-41.4874	56.5253	50.627	0.2624	-0.21416	0.056055	-65.675	11.041	1290.8294	-2.0008	0.8739	-0.30117	16.6124	-50.516	1323.449	-2.4812	0.5918	-0.77578	-16.93	115.0305	617.963	-0.77198	0.24131	-0.047754	-1.768	47.494	1160.445	-1.6605	0.57649	-0.71581	30.0855	-13.89	846.121	-1.5536	0.44736	-0.26064	-19.964	105.592	588.146	-0.84863	0.19238	-0.082031
1.006	-48.4976	49.6725	46.14	0.25146	-0.22607	0.056641	-53.547	-3.541	1279.8701	-1.9607	0.85886	-0.28645	-12.79531	-60.537	1330.828	-2.4891	0.60713	-0.79804	-26.5218	111.6915	599.673	-0.72607	0.23584	-0.041504	0.875999999999999	57.1205	1142.1566	-1.6416	0.57584	-0.69362	24.953	-19.44	872.451	-1.4098	0.44258	-0.23877	-8.484	108.335	572.2279	-0.81026	0.19746	-0.081152
1.008	-44.0832	40.9876	30.261	0.24014	-0.23682	0.059082	-64.712	11.386	1273.8538	-1.9214	0.84229	-0.27783	26.003	-58.565	1328.986	-2.4956	0.64307	-0.82568	-31.0325	112.7595	580.2046	-0.68428	0.22959	-0.03916	-18.646	75.2806	1123.2983	-1.6144	0.56869	-0.67082	13.309	-17.469	880.8827	-1.2871	0.44649	-0.22588	-23.893	105.356	555.30667	-0.76689	0.20401	-0.079395
1.01	-25.742	29.487	28.028	0.21797	-0.24316	0.060156	-60.947	29.279	1261.2106	-1.8813	0.82927	-0.26717	20.972	-72.8244	1308.976	-2.4912	0.6918	-0.85449	-24.5906	128.408	564.1272	-0.63975	0.22705	-0.037207	11.2916	77.3877	1106.587	-1.584	0.55566	-0.64551	10.345	-23.177	892.151	-1.2031	0.45771	-0.2166	-26.584	114.303	528.6046	-0.72197	0.20635	-0.077832
1.012	-8.481	31.1615	28.6424	0.19922	-0.24785	0.063281	-73.813	40.68687	1239.9512	-1.8463	0.8115	-0.25159	39.705	-82.664	1312.756	-2.4664	0.74219	-0.87891	-38.6273	134.94	511.2252	-0.60693	0.21631	-0.031738	30.4154	78.516	1093.119	-1.5439	0.54104	-0.62354	-7.016	-59.846	903.73534	-1.1445	0.4707	-0.19385	-54.2456	122.8036	506.8911	-0.68223	0.20527	-0.079199
1.014	-7.64	39.508	28.0661	0.17402	-0.25234	0.064551	-73.21	37.8279	1236.8439	-1.8098	0.78244	-0.2344	59.38	-83.165	1328.771	-2.409	0.78086	-0.90508	-32.215	125.868	495.1722	-0.55889	0.21846	-0.034375	14.165	101.9849	1068.243	-1.5124	0.52202	-0.60117	-40.7452	-115.025	905.56	-1.1148	0.49023	-0.18906	-65.718	121.1835	483.9174	-0.64111	0.20801	-0.07666
1.016	-15.372	40.979	51.038	0.14551	-0.25342	0.062012	-90.323	32.3995	1227.53507	-1.7703	0.7537	-0.21844	63.997	-67.966	1343.8495	-2.3306	0.80889	-0.91845	-9.84	115.8976	456.736	-0.51591	0.21093	-0.032129	8.376	114.5231	1045.109	-1.4783	0.49884	-0.57605	-52.9666	-152.241	919.023	-1.0979	0.51338	-0.17764	-75.388	115.92	462.777	-0.5999	0.2083	-0.079199
1.018	14.259	24.81851	49.3274	0.10976	-0.25225	0.062598	-86.874	53.9807	1204.0098	-1.7212	0.72119	-0.20557	67.029	-41.463	1347.13	-2.2383	0.81836	-0.92773	-44.3782	118.8336	399.779	-0.46904	0.20429	-0.029004	-2.873	109.3748	1034.521	-1.4489	0.47472	-0.55796	-47.301	-134.87	933.6523	-1.0905	0.55166	-0.16826	-53.68	118.216	438.3205	-0.55761	0.20928	-0.085547
1.02	-8.976	28.9925	41.0105	0.076953	-0.24746	0.060058	-77.588	59.8585	1197.7589	-1.6704	0.68954	-0.19022	43.624	-37.29	1354.544	-2.1482	0.80801	-0.92744	-31.161	107.265	392.6496	-0.42022	0.19375	-0.023926	-29.503	119.017	1023.8504	-1.4219	0.44922	-0.53711	-61.1247	-122.027	956.12529	-1.0938	0.59414	-0.16514	-51.1256	116.88	397.6456	-0.51074	0.2085	-0.083985
1.022	-13.294	20.134	41.1436	0.039063	-0.2455	0.06123	-84.046	80.824	1170.864	-1.6145	0.65543	-0.17141	52.307	-41.939	1331.33	-2.0671	0.79971	-0.91865	-38.1903	105.595	381.5592	-0.37109	0.18604	-0.016113	-32.062	105.141	994.6009	-1.3884	0.42977	-0.51603	-80.0114	-113.82768	976.9411	-1.0952	0.63721	-0.15967	-58.3705	112.79	366.456	-0.46006	0.20166	-0.086035
1.024	-12.237	7.5468	39.664585	0.0059572	-0.23926	0.056055	-82.4122	100.882	1149.493	-1.5627	0.61635	-0.15573	59.607	-31.73	1307.0538	-2.0034	0.79307	-0.91435	-12.54	98.332	369.3777	-0.31953	0.17842	-0.012207	-34.4837	100.365	993.0908	-1.3621	0.41052	-0.50512	-78.285	-115.639	953.921	-1.0934	0.67949	-0.16895	-42.584	95.5928	335.601	-0.40527	0.19727	-0.087891
1.026	-1.273	25.3552	24.129	-0.024414	-0.23242	0.056641	-92.7309	111.9538	1121.733	-1.5139	0.58208	-0.13922	47.667	5.826	1289.75	-1.9496	0.78594	-0.90625	-49.36608	97.4317	335.778	-0.27178	0.17022	-0.0061523	-31.568	93.654	979.366	-1.3326	0.39718	-0.4726	-59.48793	-111.0012	962.742	-1.0902	0.71084	-0.17549	-46.0104	111.2118	300.167	-0.35303	0.18887	-0.080566
1.028	2.021	42.357	-0.0648999999999997	-0.052539	-0.22344	0.052637	-76.5779	117.36551	1114.891	-1.4766	0.55273	-0.12646	43.761	19.38	1306.232	-1.8901	0.78174	-0.89209	-44.922	89.9531	307.185	-0.22099	0.15615	-0.003418	-24.4227	107.679	962.948	-1.3029	0.37793	-0.46756	-50.8111	-88.0035	1001.601	-1.0999	0.73076	-0.1915	-24.756	106.7696	274.308	-0.30175	0.1832	-0.076855
1.03	-30.636	46.223	6.9903	-0.07539	-0.21318	0.05166	-61.994	112.4108	1111.2019	-1.4421	0.52415	-0.11275	34.686	25.088	1297.99977	-1.8328	0.78125	-0.8836	-32.872	94.148	295.7176	-0.17558	0.14551	0.0016601	-37.6342	115.5269	946.87754	-1.269	0.36377	-0.44873	-56.488	-80.062	1025.237	-1.112	0.7292	-0.21045	-29.757	103.831	275.9995	-0.24668	0.175	-0.075683
1.032	0.268000000000001	26.7811	14.6371	-0.088281	-0.19912	0.046973	-73.2275	109.2664	1096.8352	-1.4133	0.50191	-0.097203	21.0746	25.8429	1258.7207	-1.7738	0.78291	-0.86787	-41.417	104.493	277.3355	-0.13281	0.13232	0.0063477	-34.391	104.3435	932.349	-1.2333	0.3491	-0.42911	-47.816	-58.887	1053.415	-1.126	0.71484	-0.22998	-6.6	96.9253	268.5022	-0.1958	0.1665	-0.06875
1.034	9.731	9.4987	8.99	-0.10332	-0.18584	0.038574	-71.246	103.0983	1090.2642	-1.3904	0.4823	-0.088333	11.59252	20.1021	1224.4671	-1.7187	0.78174	-0.85654	-42.6698	104.133	243.44765	-0.09502	0.12353	0.01084	-22.005	102.134	898.7097	-1.2013	0.3344	-0.41168	-62.941	-42.103	1053.396	-1.1298	0.68721	-0.24707	-17.774	92.4964	240.6854	-0.1543	0.14844	-0.06543
1.036	-8.746	34.3697	15.8984	-0.11133	-0.17334	0.037598	-70.1304	99.15	1086.2656	-1.3658	0.46584	-0.069314	30.135	7.959	1212.262	-1.667	0.77695	-0.83809	-40.8158	86.4202	211.975	-0.060645	0.11103	0.008496	-11.69	112.687	862.3745	-1.1638	0.31877	-0.39216	-54.048	-65.692	1052.762	-1.1309	0.66445	-0.27519	-20.459	87.6406	219.2592	-0.11152	0.13457	-0.057226
1.038	-10.357	30.1418	33.4099	-0.1126	-0.15957	0.029297	-58.162	99.4851	1071.4344	-1.3413	0.44971	-0.056152	55.085	9.973	1219.8613	-1.623	0.76758	-0.82227	-11.654	73.32	197.6665	-0.029394	0.10439	0.015528	-23.957	118.477	837.8845	-1.1278	0.30226	-0.37393	-44.6712	-76.56	1072.8099	-1.1274	0.64766	-0.29824	-10.353	78.11	220.8056	-0.07168	0.12031	-0.051465
1.04	-5.376	25.15866	26.325	-0.11426	-0.14785	0.022657	-94.3912	99.082	1048.31247	-1.3205	0.43378	-0.048637	51.55	35.9154	1214.30515	-1.5848	0.76123	-0.80009	-15.169	71.0743	184.7175	-0.0027344	0.096289	0.023535	-27.174	131.7611	821.046	-1.0864	0.2876	-0.35449	-46.486	-91.7212	1111.9	-1.1147	0.62676	-0.33106	-14.926	74.324	206.5876	-0.035352	0.10156	-0.045996
1.042	-16.766	29.6715	16.433	-0.11387	-0.13457	0.01289	-55.158	90.0982	1028.5358	-1.2996	0.41643	-0.040303	42.986	15.156	1219.0099	-1.5554	0.74541	-0.77647	-2.728	84.0011	164.7741	0.027832	0.087402	0.029785	-36.346	123.6148	803.2846	-1.0483	0.27183	-0.33843	-61.584	-100.2167	1136.567	-1.0952	0.60205	-0.35205	-0.829999999999998	72.118	194.706	-0.0041014	0.08916	-0.03916
1.044	-39.622	23.7742	7.5799	-0.10586	-0.11944	0.0087892	-62.7621	102.6662	1010.2642	-1.2756	0.40194	-0.031237	41.108	-2.971	1193.6283	-1.5292	0.7333	-0.75108	-8.215	89.0688	144.2772	0.050488	0.076367	0.033984	-48.8208	128.2982	778.5615	-1.0076	0.25964	-0.32017	-53.1732	-119.62987	1149.6239	-1.0921	0.57158	-0.36592	-20.184	64.856	153.7484	0.022461	0.071289	-0.03418
1.046	-31.6231	17.3282	13.69	-0.10156	-0.10791	0.0019531	-46.8673	119.123	984.5238	-1.2527	0.38416	-0.023187	31.58262	-4.74	1180.2543	-1.509	0.72314	-0.72216	-0.0130000000000017	89.2899	141.94675	0.070411	0.066016	0.041797	-48.856	129.795	747.922	-0.96421	0.25222	-0.30807	-33.018	-133.6082	1148.069	-1.1194	0.52979	-0.3752	4.759	59.9137	139.5678	0.047168	0.060254	-0.027734
1.048	-31.419	11.0653	20.0636	-0.085058	-0.099511	-0.0078124	-46.092	126.527	961.1832	-1.23	0.37305	-0.010254	6.4675	18.417	1170.2774	-1.4956	0.71143	-0.69287	7.28	82.0326	112.0839	0.08877	0.053125	0.044141	-58.9407	125.487	721.3924	-0.91858	0.23835	-0.2861	-28.703	-136.817	1148.8459	-1.178	0.48448	-0.39082	-4.932	50.5034	122.3611	0.07041	0.043066	-0.02041
1.05	-36.39292	23.255	19.6227	-0.075684	-0.090527	-0.011328	-28.025	132.76	935.4205	-1.2066	0.3604	-0.0037538	3.8286	36.6	1158.4019	-1.4807	0.70537	-0.66231	-7.252	76.1078	92.605	0.10723	0.033594	0.046973	-45.6908	135.958	694.851	-0.875	0.22949	-0.26563	-32.322	-142.599	1189.815	-1.2678	0.43848	-0.40547	-3.293	42.373	113.3538	0.089942	0.024317	-0.01377
1.052	-53.1385	19.5503	14.7156	-0.062012	-0.07959	-0.021484	-5.709	131.8613	924.3592	-1.1855	0.35103	0.0034338	-14.462	41.612	1133.3385	-1.4629	0.70078	-0.63594	-8.442	69.6768	105.3366	0.12598	0.023438	0.047363	-35.462	147.662	673.5424	-0.82933	0.22276	-0.255	-20.733	-122.881	1206.198	-1.373	0.4043	-0.41602	-5.654	36.248	107.4734	0.10479	0.011621	-0.011231
1.054	-40.96474	-3.53333	28.15	-0.046973	-0.067383	-0.028125	-19.028	141.179	901.7052	-1.1667	0.34011	0.010482	5.3523	50.154	1094.0809	-1.4406	0.69101	-0.6043	-9.314	61.617	98.22282	0.14599	0.0056641	0.056348	-37.474	149.286	629.982	-0.78159	0.21271	-0.23536	-12.813	-109.843	1200.6578	-1.5046	0.39873	-0.40888	-4.663	33.677	99.5558	0.11768	-0.0048828	-0.003418
1.056	-14.43	-7.9259	17.813	-0.03125	-0.0625	-0.03418	-16.73	137.7764	885.50845	-1.142	0.32665	0.020406	-25.6885	31.9785	1069.1639	-1.4178	0.68106	-0.57402	-9.294	56.448	89.13342	0.16387	-0.011035	0.062402	-23.5185	128.8303	606.4	-0.73588	0.19903	-0.21935	-50.7949	-76.5914	1207.285	-1.6445	0.41484	-0.4084	-0.907	37.369	77.811	0.12822	-0.016113	-0.00068359
1.058	-18.228	10.825	7.3678	-0.017773	-0.054492	-0.041797	-9.381	142.65879	857.2871	-1.1152	0.31543	0.026855	-3.6276	21.031	1064.2093	-1.3853	0.66162	-0.55615	-28.426	61.375	72.8488	0.17793	-0.025098	0.064746	-19.05	109.129	573.172	-0.68869	0.18604	-0.19884	-55.489	-65.1105	1213.307	-1.7969	0.4539	-0.39981	-32.3703	38.1918	81.3857	0.14023	-0.032031	0.00068358
1.06	-25.772	18.3362	2.0138	0.0020508	-0.041504	-0.051953	7.213	153.618	845.4859	-1.0804	0.3086	0.026556	5.5964	45.286	1053.0374	-1.3596	0.64473	-0.52246	-13.16	55.1328	68.42635	0.18623	-0.039551	0.07041	-14.785	100.598	542.3847	-0.64453	0.1748	-0.17188	-51.413	-67.0164	1217.4968	-1.9624	0.5043	-0.39756	-20.173	45.0237	89.5476	0.15156	-0.044141	0.0057617
1.062	-24.874	22.6934	29.91861	0.015723	-0.037598	-0.057422	-6.504	160.295	809.98807	-1.0538	0.2999	0.030556	30.7254	84.2403	1019.077	-1.3277	0.61611	-0.49297	-0.216000000000001	55.0916	50.6544	0.19629	-0.048828	0.068359	-26.171	102.486	527.2014	-0.60565	0.15146	-0.17286	-51.118	-60.3105	1206.4359	-2.1343	0.56104	-0.40039	-40.1833	61.058	77.0124	0.15908	-0.053613	0.0049805
1.064	-5.128	13.4071	32.6482	0.030762	-0.02959	-0.066992	-15.028	145.726	783.3011	-1.0152	0.29327	0.036424	17.7275	108.156	990.496	-1.2938	0.58994	-0.46758	-25.474	53.0046	47.6331	0.20303	-0.058106	0.070703	-5.132	119.2702	512.3221	-0.55545	0.13261	-0.15361	-73.118	-60.428	1192.014	-2.3089	0.62705	-0.40391	-38.3368	71.442	55.79763	0.16602	-0.070801	0.0068359
1.066	-25.677	14.696	29.4954	0.045898	-0.027344	-0.076172	-9.284	132.135	756.193	-0.97756	0.28457	0.038473	3.285	112.786	971.244	-1.2667	0.56787	-0.44639	-20.597	52.921	41.0529	0.20996	-0.069824	0.066797	-17.384	131.8148	497.502	-0.50741	0.11582	-0.1372	-86.71205	-38.883	1187.548	-2.4663	0.69268	-0.41552	-52.5124	61.828	38.5738	0.16924	-0.08457	0.0063477
1.068	-10.203	8.5764	35.0681	0.054394	-0.024609	-0.083105	-25.564	131.3816	726.601	-0.94189	0.27832	0.038574	22.852	105.592	966.774	-1.2422	0.54004	-0.42578	-17.5797	52.3305	50.0771	0.21582	-0.076856	0.067187	-22.207	119.652	471.438	-0.46093	0.10205	-0.11953	-78.733	-47.791	1213.592	-2.6097	0.75088	-0.42959	-61.816995	56.912	51.034	0.17364	-0.10469	0.010254
1.07	-7.079	-8.639	66.885	0.065234	-0.020703	-0.091309	-34.3788	131.83084	689.438	-0.89638	0.27705	0.036427	-5.681	106.421	951.4153	-1.2114	0.51523	-0.40547	-10.204	46.9403	41.115	0.22266	-0.083398	0.060254	-31.6346	106.241	442.6584	-0.41357	0.094727	-0.1001	-85.4273	-39.961	1215.581	-2.7201	0.80254	-0.45215	-42.7654	39.1519	48.1225	0.1709	-0.11055	0.0094726
1.072	-11.275	-12.731	71.2233	0.067968	-0.019922	-0.10224	-30.02	124.5357	675.3701	-0.85145	0.27392	0.037305	-29.568	98.6466	953.286	-1.1812	0.49033	-0.38731	-43.65549	46.4026	31.1926	0.22754	-0.084961	0.056152	-26.773	108.668	416.0184	-0.36983	0.086036	-0.09043	-78.808	-38.7957	1234.4735	-2.7827	0.85498	-0.47168	-42.16833	28.2	27.584	0.17032	-0.12334	0.0066407
1.074	-8.293	-13.305	56.0898	0.06709	-0.016211	-0.10927	-13.396	120.8347	667.4752	-0.80458	0.26377	0.040822	-24.5426	87.3182	945.398	-1.1476	0.46338	-0.36621	-24.839	37.4735	46.727	0.22617	-0.087305	0.05039	-21.636	116.064	393.46367	-0.32989	0.075879	-0.073927	-83.87	-55.247	1243.5861	-2.7943	0.89023	-0.48242	-25.486	13.646	29.348	0.16064	-0.13721	0.0024414
1.076	-16.4372	-8.765	45.615	0.066895	-0.01416	-0.11816	-23.414	123.6857	636.6178	-0.76171	0.25693	0.044239	-22.018	88.68	927.2362	-1.1089	0.44033	-0.3497	-16.618	34.7556	40.2354	0.22666	-0.08916	0.045605	-26.749	110.0485	358.3974	-0.28223	0.068458	-0.054005	-87.561	-54.615	1255.321	-2.7773	0.91797	-0.4836	-43.5089	16.232	36.42	0.15635	-0.15488	0.0034179
1.078	24.3267	-34.5925	73.0968	0.057617	-0.0025391	-0.12725	-31.1021	123.3422	605.0351	-0.71582	0.24805	0.04248	-22.9984	103.465	876.5063	-1.0762	0.41211	-0.32861	-38.2138	52.321	31.4829	0.2208	-0.093066	0.03584	-24.514	98.8395	322.059	-0.24395	0.068848	-0.045899	-95.1343	-50.379	1268.3115	-2.7375	0.94141	-0.47891	-14.831	23.021	31.8476	0.14971	-0.1669	0.0039063
1.08	10.15	-39.02	94.2595	0.053711	0.0033202	-0.13809	-37.802	130.835	582.3057	-0.67032	0.24297	0.045898	-28.743	106.3224	848.8154	-1.0418	0.38906	-0.31191	-62.828	45.301	21.853	0.21328	-0.094824	0.031933	-16.292	91.851	274.477	-0.20508	0.063477	-0.029297	-96.1617	-42.807	1284.416	-2.6982	0.9502	-0.47051	-11.735	34.73295	30.7624	0.14307	-0.18252	0.0039063
1.082	6.262	-29.241	123.9372	0.047461	0.018555	-0.15058	-32.8755	139.1425	570.544	-0.61671	0.23291	0.041308	3.5	91.286	834.2625	-1.0097	0.36338	-0.29014	-41.949059	24.927	23.0439	0.20361	-0.098633	0.029785	2.291	96.466	250.4077	-0.16563	0.064063	-0.015136	-97.6012	-52.696	1305.205	-2.6523	0.96094	-0.46875	-16.748	39.232	43.261	0.13028	-0.19004	0.0046875
1.084	-17.761	4.492	158.8859	0.033008	0.031836	-0.16172	-27.479	142.4428	534.8756	-0.571	0.23017	0.040138	-7.712	88.044	822.85	-0.98037	0.34267	-0.26826	-2.7	4.4058	40.1727	0.18818	-0.099416	0.026855	-8.359	92.667	243.7586	-0.13115	0.061719	-0.0062497	-89.0945	-54.219	1287.2721	-2.6015	0.96992	-0.47305	-31.8263	27.11	44.351	0.11865	-0.19971	0.0039063
1.086	4.261	33.9842	216.976	0.0092773	0.040039	-0.1709	-65.372	133.893	492.3051	-0.51904	0.22139	0.04707	-5.17	102.785	792.0464	-0.95273	0.31817	-0.24785	-25.186	9.6716	20.361	0.1789	-0.10293	0.015234	-8.971	99.5994	246.013	-0.088574	0.058593	0.0074221	-82.9377	-40.199	1281.6299	-2.5434	0.96875	-0.46953	-24.548	16.0524	34.231	0.10517	-0.20576	0.0074219
1.088	-26.48	56.1617	318.1	-0.029101	0.050195	-0.18809	-47.7824	115.582	469.0964	-0.46826	0.21631	0.042969	-12.407	102.9117	785.0344	-0.9292	0.29736	-0.22949	-24.571	14.12	11.67822	0.16718	-0.098633	0.015625	-6.805	105.439	217.9879	-0.050879	0.053809	0.021191	-94.496	-22.49	1258.409	-2.4836	0.96446	-0.47031	-25.67	14.0064	29.3345	0.095508	-0.2084	0.0020508
1.09	-26.263	74.0518	442.867	-0.085546	0.048633	-0.19551	-48.9368	111.213	428.323	-0.41934	0.20752	0.045117	-0.745000000000001	108.1566	768.666	-0.90293	0.27549	-0.21191	-1.23	24.425	21.3196	0.15049	-0.095996	0.016406	-34.033	111.62	199.1382	-0.013672	0.056152	0.035156	-82.182	-7.4279	1240.847	-2.4145	0.9541	-0.46152	-27.653	20.97605	32.9037	0.074023	-0.21465	0.0016601
1.092	-73.777	85.3393	552.971	-0.16602	0.048242	-0.20528	-45.5079	115.537	407.37085	-0.37431	0.2001	0.044336	-16.851	111.3623	747.172	-0.87812	0.25977	-0.1916	-12.363	34.0677	20.5625	0.13379	-0.092285	0.01709	-17.462	83.307	185.734	0.019531	0.049609	0.047656	-63.227	27.191	1254.798	-2.3374	0.95557	-0.45947	1.972	22.3166	33.3957	0.060254	-0.21855	-0.0025391
1.094	-50.524	83.899	610.565	-0.27598	0.044043	-0.21426	-64.9354	114.996	375.6325	-0.33057	0.19111	0.045508	-37.364	127.6757	708.376	-0.85976	0.24375	-0.17285	-18.543	34.3344	23.7291	0.10947	-0.081738	0.013672	-33.8913	74.0634	174.111	0.051563	0.043457	0.059472	-66.3511	30.397	1252.4141	-2.251	0.95322	-0.45889	9.877	31.5051	-3.568	0.046875	-0.21973	-0.011719
1.096	-26.299	81.207	656.661	-0.41064	0.035645	-0.21973	-34.192	108.6158	356.831	-0.28779	0.18369	0.04873	-45.8175	118.971	680.80243	-0.83125	0.23272	-0.154	-4.293	13.9235	30.58618	0.089746	-0.07041	0.0097655	-24.197	72.19844	144.426	0.078515	0.038379	0.071972	-75.003	17.1858	1256.6704	-2.1592	0.95165	-0.44892	2.204	31.9857	-1.842	0.033008	-0.2207	-0.010645
1.098	-65.479	49.856	735.3603	-0.57012	0.01416	-0.22149	-20.712	104.6207	345.2478	-0.24707	0.16797	0.052734	-67.37	130.751	651.688	-0.80811	0.22217	-0.13721	-1.036	-1.9761	51.896	0.064356	-0.061426	0.0039063	-37.8438	65.5881	115.3224	0.10459	0.035059	0.082031	-67.391	9.0486	1240.41249	-2.0728	0.93484	-0.44345	3.518	30.4792	4.8771	0.020898	-0.21328	-0.017871
1.1	-65.685	27.1568	801.72	-0.74258	-0.0013672	-0.2164	-25.454	100.8594	306.8528	-0.20166	0.16563	0.056153	-38.07355	131.758	617.614	-0.77617	0.2082	-0.11846	-6.032	2.6149	33.8982	0.045019	-0.051563	0.0019531	-27.329	57.9887	120.2478	0.12598	0.024414	0.087891	-30.259	17.8898	1234.68717	-1.9876	0.91541	-0.43769	11.067	33.545	24.6777	0.011523	-0.20742	-0.022168
1.102	-37.1531	10.2174	801.3183	-0.9293	-0.0041016	-0.21602	-17.709	100.4188	290.13228	-0.1582	0.16123	0.063867	-43.7961	127.411	601.186	-0.74317	0.19961	-0.10332	-5.794	18.5077	14.2328	0.02832	-0.041992	-0.0024414	-35.949	50.4201	113.1915	0.14473	0.014551	0.10625	-53.823	46.618	1232.43419	-1.9136	0.89746	-0.42725	6.528	39.657	16.7115	0.0041992	-0.19727	-0.026172
1.104	-33.587	1.3499	808.7574	-1.1237	0.0032226	-0.22295	-3.717	97.69	278.2116	-0.11328	0.15811	0.073633	-26.088	114.759	557.565	-0.70684	0.19531	-0.086524	-12.808	28.046	-2.0501	0.016211	-0.031543	-0.0061524	-5.287	48.277	83.73467	0.16446	0.010059	0.11777	-51.814	55.95	1240.1811	-1.8433	0.88332	-0.42218	-15.227	34.9038	8.5242	-0.00048828	-0.18604	-0.027832
1.106	-66.657	-17.985	807.3059	-1.3159	0.01709	-0.22998	-4.717	98.429	260.621	-0.071191	0.14834	0.075488	-35.5033	104.7307	520.222	-0.67597	0.18408	-0.066797	-10.782	23.171	10.8082	0.0083007	-0.021289	-0.011328	1.046	51.987	85.185	0.17266	0.0026367	0.12988	-42.745	42.376	1237.868	-1.7845	0.86976	-0.4145	-11.534	18.2964	30.5985	-0.0038086	-0.17666	-0.036328
1.108	-69.806	-35.706	828.2806	-1.496	0.049707	-0.24189	-24.489	92.159	229.9545	-0.027832	0.14795	0.077637	-27.745	100.092	496.8234	-0.64502	0.17236	-0.063477	-8.894	14.9366	7.36587	-0.0014649	-0.008789	-0.014844	-22.278	49.655	83.49196	0.18525	-0.0092773	0.13769	-35.154	14.2313	1223.4937	-1.7361	0.85418	-0.40433	-36.7928	7.2421	31.924	-0.0042969	-0.16758	-0.039649
1.11	-37.142	-51.115	809.611	-1.6671	0.095021	-0.26035	-26.656	66.793	218.0556	0.011426	0.14551	0.088086	-28.4418	87.971	482.5743	-0.60772	0.15264	-0.050879	-24.403	20.0595	7.5147	-0.0049805	-0.0006836	-0.019824	-1.381	48.7731	77.301	0.19531	-0.018555	0.15088	-53.533	-7.1732	1222.8298	-1.6918	0.84451	-0.39234	-32.5571	15.4767	10.388	-0.0085938	-0.15977	-0.043164
1.112	-35.211	-45.634	818.93	-1.8135	0.16182	-0.27832	-16.33	54.591303	205.9299	0.038672	0.13418	0.096679	-24.362	93.955	474.9046	-0.57051	0.1376	-0.037305	-16.042	12.5748	14.39	-0.011719	0.0078125	-0.027832	-16.757	54.1899	63.664	0.19658	-0.028125	0.15674	-63.961	1.436	1206.1521	-1.6523	0.82422	-0.37598	-48.8609	16.3609	11.561	-0.011035	-0.14903	-0.047656
1.114	-11.982	-33.822	816.159	-1.9415	0.23574	-0.30557	-10.618	65.480114	187.8296	0.064063	0.11934	0.097071	-7.624	104.866	450.6012	-0.53223	0.11924	-0.024024	-4.401	15.0702	30.6218	-0.0049805	0.015625	-0.030078	-19.639	52.9147	63.7161	0.19981	-0.040918	0.16143	-46.404	9.409	1198.6912	-1.6176	0.80631	-0.36907	-28.2818	17.7609	22.1234	-0.0097656	-0.13721	-0.053711
1.116	-11.527	-31.355	802.303	-2.0234	0.31836	-0.34473	-17.405	62.7724	165.8875	0.083691	0.10274	0.099023	-16.722	102.8645	418.8719	-0.49404	0.11338	-0.0091796	-8.683	21.2892	33.499	-0.0032227	0.018457	-0.038477	-24.198	49.038	57.7593	0.19942	-0.052246	0.16846	-57.116	25.306	1153.3632	-1.5804	0.78721	-0.35799	-26.908	18.9473	10.3166	-0.0066406	-0.13174	-0.051269
1.118	10.132	6.095	790.1829	-2.0387	0.383	-0.38232	-18.902	58.65422	138.1379	0.10742	0.081543	0.1001	-22.897	101.0496	403.7166	-0.44971	0.10449	0.0024414	-42.31026	23.4474	13.9348	0.0014648	0.022754	-0.041601	-19.824	37.942	39.42533	0.2002	-0.063379	0.17715	-82.718	23.639	1144.2798	-1.5432	0.75929	-0.34196	-26.557	30.702	5.7335	0.0015625	-0.12265	-0.063574
1.12	-4.669	37.083	768.8667	-2.0137	0.43086	-0.40976	-9.016	57.0662	122.0421	0.12979	0.0625	0.099121	-49.3909	100.092	359.089	-0.39834	0.097951	0.015234	-12.977	13.8107	9.1766	0.01084	0.024023	-0.046094	-42.2239	44.9026	40.0881	0.19971	-0.071777	0.18018	-67.935	32.4042	1124.306	-1.5047	0.73177	-0.3321	-22.127	24.2448	12.3047	0.0089844	-0.10821	-0.057324
1.122	-16.861	58.506	783.343	-1.9469	0.45781	-0.43828	-18.872	61.9285	91.8072	0.14961	0.047949	0.09707	-28.0759	98.191	344.77473	-0.35225	0.093066	0.029492	-15.759	0.4831	13.6829	0.018555	0.028809	-0.052246	-32.644	48.3785	36.2611	0.19258	-0.088379	0.1832	-58.907	51.2257	1117.9276	-1.4688	0.69922	-0.31836	-28.299	25.3445	27.3418	0.022754	-0.094629	-0.069043
1.124	-6.389	44.658	791.8858	-1.8439	0.47158	-0.4585	-14.15	49.4775	87.275	0.1711	0.032324	0.099808	-19.6	102.581	310.4354	-0.30107	0.089941	0.041211	-32.797	17.8352	18.4169	0.028223	0.030566	-0.053418	-10.625	34.4022	44.8399	0.18721	-0.098144	0.18467	-74.478	81.4277	1110.4256	-1.4371	0.67203	-0.30517	-24.143	14.428	29.7775	0.036133	-0.086914	-0.075195
1.126	-4.341	15.443	797.36	-1.7202	0.46924	-0.4624	-10.857	49.2449	93.5921	0.1917	0.012305	0.10313	-19.1091	88.4129	292.9601	-0.25498	0.085059	0.052051	-37.55613	18.6273	28.4029	0.035254	0.028222	-0.059766	-22.962	40.7438	31.724	0.17939	-0.10127	0.18193	-83.2277	97.207	1107.052	-1.4035	0.64054	-0.28781	-54.2936	19.357	23.335	0.048633	-0.078027	-0.086426
1.128	20.9474	7.3	798.634	-1.5791	0.46758	-0.46719	-26.337	43.8227	100.3476	0.20313	-0.0024414	0.10107	-11.567	73.4341	259.6683	-0.21289	0.077148	0.056641	-36.0981	19.3774	23.1759	0.051269	0.029394	-0.059766	5.471	34.954	34.369	0.17032	-0.1122	0.18486	-87.8331	98.389	1098.3348	-1.3694	0.61209	-0.27508	-30.596	24.33902	29.7266	0.061426	-0.068066	-0.09453
1.13	11.6766	-34.302	817.599	-1.4269	0.47071	-0.47334	-25.779	51.1409	83.5072	0.21631	-0.015136	0.10127	-9.424	79.193	229.3735	-0.16436	0.074414	0.062012	-15.301	10.06135	8.285	0.064356	0.030957	-0.070313	-9.444	15.958	32.6159	0.15869	-0.11816	0.18213	-80.4077	100.505	1044.167	-1.3413	0.58085	-0.25787	-25.2026	33.249	39.7979	0.073535	-0.063379	-0.10234
1.132	41.1687	-56.8218	844.429	-1.28	0.47969	-0.48154	-48.5391	47.6517	70.581	0.22236	-0.02959	0.098145	-6.958	92.0319	207.648	-0.12207	0.07334	0.06875	-28.431	14.1009	-1.675	0.072266	0.026367	-0.071289	-12.323	11.336	31.0338	0.14356	-0.12032	0.17871	-72.085	96.3411	1016.863	-1.314	0.54834	-0.23779	-24.186	33.777	16.8478	0.089063	-0.056934	-0.11524
1.134	24.4378	-83.3845	862.082	-1.1623	0.48828	-0.49394	-40.915	53.0157	66.8257	0.22627	-0.044043	0.098535	-17.611	96.4822	185.4964	-0.070508	0.068262	0.080859	-41.398	7.589	2.592	0.086621	0.026953	-0.080469	-14.809	19.6886	19.3623	0.13369	-0.11885	0.17519	-76.7531	84.33911	1011.097	-1.2811	0.51159	-0.22315	-30.162	42.478	5.3601	0.098145	-0.054199	-0.12109
1.136	35.4291	-120.352	899.3266	-1.0762	0.5	-0.50684	-48.905	65.827	55.6127	0.23438	-0.055469	0.098146	2.155	92.2262	165.2432	-0.022656	0.06416	0.089844	-21.323	13.3653	19.8247	0.097266	0.028809	-0.084961	-25.99	36.0875	25.7072	0.12159	-0.11924	0.16934	-70.1302	72.9324	1009.8023	-1.2482	0.47435	-0.21132	-29.754	37.993	5.7907	0.11143	-0.049414	-0.12851
1.138	44.9455	-156.458	939.5733	-1.0168	0.51172	-0.52304	-41.963	58.69	38.6118	0.23535	-0.067871	0.089355	-7.433	94.8548	153.555	0.017578	0.064453	0.10107	-5.146	29.4775	22.6786	0.11054	0.028809	-0.085742	-21.305	37.566	44.5755	0.10859	-0.11484	0.16611	-63.9437	80.1154	1004.6014	-1.215	0.44064	-0.18902	-10.175	22.3212	23.0698	0.12295	-0.043359	-0.13105
1.14	39.1712	-159.631	962.9423	-0.97481	0.52363	-0.54023	-48.8135	39.4067	26.8015	0.23779	-0.07959	0.08623	-8.651	82.523	148.5433	0.058789	0.063574	0.10762	-28.4293	32.7395	8.3884	0.11865	0.025781	-0.092383	-26.5572	28.291	46.00131	0.096191	-0.11084	0.16406	-57.7953	97.3367	983.0799	-1.1807	0.40667	-0.17671	-2.446	9.4848	24.5447	0.13037	-0.03711	-0.14277
1.142	38.925	-140.621	993.20003	-0.94981	0.53223	-0.55977	-42.053	19.791	39.6923	0.23974	-0.093847	0.083887	-24.285	65.966	139.4633	0.09629	0.059668	0.1167	-12.899	23.3659	14.7957	0.125	0.025391	-0.095215	-20.145	17.2227	31.0098	0.080957	-0.10439	0.15586	-46.211	93.5106	959.378	-1.1528	0.37158	-0.16406	8.453	-0.764000000000001	54.3964	0.13653	-0.030176	-0.15069
1.144	-5.08011	-126.8161	1031.9824	-0.95049	0.54521	-0.57666	-31.6171	14.805	38.1386	0.23545	-0.1044	0.077636	-31.8699	73.66	123.5639	0.12598	0.051465	0.12217	-3.692	18.1142	33.5294	0.1336	0.023145	-0.095508	-34.897	19.4969	31.1503	0.06582	-0.096191	0.15537	-39.8178	89.9021	959.0711	-1.1251	0.34251	-0.14986	9.604	-12.9069	50.9574	0.14209	-0.024902	-0.16113
1.146	-1.469	-122.6658	1039.138	-0.96484	0.55664	-0.59766	-24.141	27.181	38.7268	0.23115	-0.11582	0.073633	-24.796	68.1194	108.0423	0.15596	0.041895	0.12627	8.04	22.5225	24.1746	0.13867	0.024512	-0.096777	-16.74	23.0314	37.6195	0.050195	-0.08916	0.14717	-14.258	93.7104	948.5179	-1.1025	0.3158	-0.14068	12.814	-21.282	62.3909	0.14765	-0.012402	-0.16406
1.148	-19.1603	-127.5236	1040.2842	-1.0026	0.56846	-0.61279	-20.627	20.202	40.0021	0.22607	-0.13037	0.066406	-37.984	58.768	108.998	0.18701	0.031738	0.12988	-18.518	29.3213	4.0218	0.1457	0.022558	-0.097559	-14.214	17.3918	20.918	0.039062	-0.080664	0.14394	-31.268	103.57524	933.2054	-1.0775	0.29523	-0.13338	-15.367	-7.06153	42.5031	0.14561	-0.0031243	-0.17148
1.15	-18.94833	-112.8465	1037.3863	-1.0543	0.58125	-0.63007	-17.541	23.946	38.6681	0.21172	-0.14151	0.0625	-15.002	41.7191	80.9919	0.20791	0.016602	0.13877	-23.8494	18.2411	7.722	0.1543	0.023535	-0.10732	-7.249	30.7343	-6.398	0.026367	-0.070313	0.14209	-23.292	102.8666	928.0414	-1.0585	0.27012	-0.12345	-25.43	5.4594	52.4044	0.14561	0.0023438	-0.17891
1.152	-2.2382	-98.028	1052.883	-1.1199	0.59219	-0.63789	-15.091	33.17712	42.0373	0.19902	-0.14775	0.058887	-16.8	43.0515	63.399	0.22939	0.0022461	0.14443	-10.91	9.9562	23.276	0.16943	0.023926	-0.1123	-20.625	26.7531	-0.385	0.01455	-0.058399	0.13262	-17.638	104.4902	906.1963	-1.0391	0.25488	-0.11426	-7.055	3.03	80.886	0.13095	0.0095713	-0.1836
1.154	-2.891	-102.569	1099.759	-1.2009	0.61035	-0.64228	-22.573	37.0085	25.4522	0.17949	-0.15361	0.056152	-4.314	42.5377	52.5914	0.24424	-0.015723	0.14873	-3.205	4.3164	12.9695	0.17949	0.021191	-0.11592	-17.267	22.5963	12.5123	0.0021484	-0.04707	0.12578	3.535	106.5611	877.691	-1.0265	0.24448	-0.10808	-14.209	-14.587	98.4855	0.11084	0.01709	-0.18945
1.156	28.1	-103.574	1119.754	-1.2866	0.63135	-0.64111	-21.642	34.442	33.376	0.15673	-0.15791	0.051465	-20.837	32.212	53.8603	0.25566	-0.029395	0.15655	-3.142	16.5243	3.1921	0.19062	0.017969	-0.12275	-10.16	18.75825	21.1595	-0.0095705	-0.036914	0.12305	-1.22	116.2893	850.7264	-1.0115	0.23312	-0.10504	-22.818	-15.846	90.4087	0.082523	0.024511	-0.19482
1.158	32.1364	-94.408	1142.391	-1.3623	0.65176	-0.64102	-7.301	29.485	29.175	0.13135	-0.16357	0.047363	-12.977	26.953	49.5307	0.26416	-0.048828	0.15332	-10.922	30.0172	4.1553	0.19961	0.014453	-0.12861	-34.964	33.1986	18.8854	-0.017871	-0.026269	0.11983	-8.242	127.3985	815.3501	-1.0019	0.22034	-0.095429	-31.398	-11.74905	180.5755	0.051278	0.028025	-0.20029
1.16	29.167	-68.797	1144.611	-1.4324	0.67305	-0.63945	-15.17	27.536	17.0441	0.10752	-0.16641	0.038769	-21.244	34.3379	32.679	0.26943	-0.065039	0.15771	-0.619	34.422	17.3627	0.21016	0.010547	-0.13565	-32.068	30.2329	31.37733	-0.026855	-0.01709	0.11768	7.792	149.036	778.983	-0.98447	0.21077	-0.097001	3.657	33.4935	321.017	0.013391	0.035448	-0.20928
1.162	7.6539	-88.173	1190.069	-1.491	0.69336	-0.63399	-25.371	28.7479	19.178	0.082715	-0.15644	0.038672	-25.172	44.9474	34.083	0.27207	-0.076953	0.1584	-0.680999999999997	31.7752	33.7087	0.21143	0.0043945	-0.13818	-29.248	17.1342	37.0365	-0.040527	-0.0089845	0.11533	12.334	144.927	754.534	-0.96631	0.20605	-0.091309	-39.2938	80.2	426.873	-0.032116	0.037304	-0.21846
1.164	1.654	-108.198	1218.234	-1.5402	0.71035	-0.6293	3.026	16.29622	13.764	0.055371	-0.15176	0.038281	-12.857	54.831	54.27301	0.27441	-0.091797	0.15723	-35.5622	17.4656	38.3358	0.2125	0.0070312	-0.14238	-20.178	7.9539	21.8181	-0.053223	0.0027344	0.11397	-12.038	133.0938	747.5208	-0.95432	0.2004	-0.092659	-41.614	97.743	526.868	-0.098633	0.040527	-0.22217
1.166	-3.2328	-115.404	1235.995	-1.584	0.71875	-0.625	2.822	26.78698	12.164	0.036133	-0.14482	0.033789	-21.134	48.276	53.8176	0.27168	-0.099511	0.15274	-10.924	-12.8044	62.50649	0.20332	0.003125	-0.14922	-24.654	26.5005	8.577	-0.066504	0.010547	0.1124	-2.016	109.25762	749.5425	-0.936	0.19893	-0.090147	-12.408	55.8408	590.48	-0.19399	0.044437	-0.22109
1.168	0.469000000000001	-127.2913	1245.308	-1.632	0.71132	-0.62617	-18.161	36.4328	13.4291	0.016113	-0.13428	0.029297	-30.5616	54.95	47.632	0.26807	-0.104	0.15332	-2.759	-25.16656	68.995	0.1877	0.0042968	-0.15157	-22.624	17.5105	12.0829	-0.077051	0.013281	0.11055	12.684	107.5193	717.587	-0.92545	0.19696	-0.090915	-31.239	21.2661	706.644	-0.32786	0.040422	-0.22129
1.17	28.683	-162.041	1249.432	-1.6932	0.69775	-0.62334	-8.664	20.2023	16.465	-0.0011719	-0.12324	0.024707	-32.745	50.475	20.7931	0.26504	-0.11162	0.1497	-15.082	-11.33585	84.498	0.16094	0.00058609	-0.16055	-18.016	17.2757	20.1982	-0.086426	0.021484	0.11523	-10.17	118.809	705.1643	-0.90905	0.20059	-0.089647	-36.55	-0.917000000000002	828.456	-0.48886	0.020474	-0.22402
1.172	12.204815	-179.434	1268.0133	-1.7604	0.68682	-0.62646	7.599	19.9713	12.045	-0.010938	-0.11172	0.018555	-16.438	36.5686	25.065	0.2583	-0.11299	0.14219	-22.1898	13.1955	127.415	0.12842	-0.0043945	-0.16895	-33.3642	9.876	15.3184	-0.092969	0.027734	0.11182	-30.702	128.5459	685.0376	-0.88916	0.20068	-0.086426	-77.6766	0.313000000000002	919.888	-0.68309	-0.0032454	-0.21816
1.174	30.011	-167.157	1260.339	-1.8459	0.68731	-0.62675	-17.833	30.8883	7.0873	-0.026172	-0.10196	0.011914	-8.248	27.03071	15.667	0.24385	-0.11299	0.13906	-27.1409	28.976	235.414	0.088083	-0.0086917	-0.17725	-8.457	25.310505	12.6625	-0.096289	0.037695	0.10937	-16.336	130.3114	664.4931	-0.86828	0.20313	-0.088083	-51.4067	16.474	959.681	-0.89893	-0.031738	-0.21338
1.176	25.5113	-161.7227	1271.315	-1.9336	0.69141	-0.62695	-20.569	39.004	13.628	-0.034668	-0.091797	0.0090821	-7.382	28.69373	9.0097	0.22383	-0.11367	0.13731	-7.548	22.3038	339.814	0.040133	-0.014355	-0.18633	-18.387	26.9928	16.7592	-0.095508	0.049805	0.11406	-23.9576	143.8528	631.9981	-0.84886	0.20741	-0.088189	-53.947	-14.885	956.994	-1.1418	-0.04763	-0.21454
1.178	57.651	-161.4374	1285.997	-2.0265	0.70381	-0.64326	-23.84	22.7307	13.1872	-0.041504	-0.079102	0.0039063	-7.4	33.5945	16.4321	0.20166	-0.11377	0.13184	-12.7708	11.3976	421.418	-0.027057	-0.019825	-0.1914	-19.356	27.6041	40.3435	-0.1001	0.058301	0.11064	-45.9818	141.9234	604.435964	-0.82111	0.21367	-0.087399	-75.737	-58.195	946.2716	-1.3906	-0.046057	-0.2226
1.18	45.974	-139.489	1294.1016	-2.1141	0.70654	-0.66504	-25.197	7.97693	26.5226	-0.048926	-0.070312	0.0018555	-21.5981	25.35772	20.8543	0.17422	-0.11455	0.13848	11.7834	-16.5382	538.768	-0.12208	-0.025489	-0.19082	-23.351	28.1285	22.78764	-0.10205	0.067871	0.10938	-38.6169	132.9846	584.264	-0.79367	0.21923	-0.082716	-82.794	-84.723	962.9353	-1.626	-0.012211	-0.24171
1.182	51.578	-131.5306	1286.968	-2.2	0.71514	-0.70176	-64.351	20.8635	23.4788	-0.049414	-0.05957	-0.0033203	1.137	15.8225	37.3919	0.14678	-0.11592	0.12754	13.5185	-53.727	634.6999	-0.25146	-0.038086	-0.18896	-34.315	33.4669	20.5095	-0.10049	0.074219	0.11347	-39.6694	111.6452	570.0679	-0.75977	0.22461	-0.083008	-38.244	-102.182	988.834	-1.85	0.052743	-0.2677
1.184	43.548	-115.6112	1263.6256	-2.2837	0.72803	-0.75127	-32.912	22.8045	17.1168	-0.049414	-0.047461	-0.015429	-17.466	18.251	38.3745	0.11787	-0.10849	0.12519	-31.2868	-57.544	733.389	-0.41717	-0.063181	-0.18194	-19.246	23.983	26.1431	-0.104	0.082031	0.10771	-33.309	116.922	543.2067	-0.72294	0.2251	-0.07939	8.607	-98.754	1003.971	-2.0586	0.1543	-0.28711
1.186	29.7054	-114.8969	1261.025	-2.3555	0.74023	-0.80273	-39.1246	19.8318	23.024	-0.04668	-0.037696	-0.010059	-19.984	18.8357794	36.531	0.089258	-0.098436	0.12021	-52.89	-9.983	837.3326	-0.61791	-0.098526	-0.16456	-33.457	22.698	28.60611	-0.10323	0.091016	0.10811	-39.1618	111.185	524.9519	-0.68456	0.22558	-0.082721	-19.879	-81.136	980.624	-2.2372	0.26175	-0.3444
1.188	20.7509	-74.2223	1260.289	-2.3931	0.73662	-0.84072	-27.457	17.9482	28.1556	-0.046387	-0.031738	-0.017578	-18.009	15.0421	31.4153	0.071777	-0.088379	0.11914	-6.024	35.3342	871.6821	-0.87101	-0.13759	-0.13214	-11.594	17.8144	12.0824	-0.10254	0.10166	0.11123	-10.008	110.269	510.378	-0.64706	0.21778	-0.088181	3.86	-52.215	943.086	-2.3702	0.38872	-0.39409
1.19	9.8972	-52.033	1267.359	-2.4069	0.73232	-0.86982	-32.89	29.0449	10.6877	-0.038477	-0.02041	-0.016894	-9.252	25.1494	24.8908	0.051172	-0.068945	0.11269	2.598	41.776	896.044	-1.1696	-0.16885	-0.11709	-34.206	20.8653	13.04471	-0.10205	0.10938	0.10986	-27.3917	101.1384	493.7086	-0.61338	0.20674	-0.083204	13.959	-18.971	928.981	-2.4517	0.50525	-0.42812
1.192	34.1377	-32.703	1270.077	-2.4007	0.71983	-0.8917	-29.516	27.6889	2.416	-0.031153	-0.012305	-0.021387	-13.209	21.362	10.71	0.035059	-0.058106	0.11016	-24.5096	38.47	893.1994	-1.478	-0.16455	-0.11865	-16.748	24.1164	25.616	-0.10576	0.11865	0.11025	-23.863	119.28091	453.9256	-0.58203	0.19434	-0.081055	14.494	34.693	923.424	-2.4965	0.60557	-0.44298
1.194	37.787	-53.023	1275.867	-2.3825	0.70293	-0.91494	-22.895	24.0799	10.4992	-0.022558	-0.011523	-0.024121	-30.4901	15.3726	17.93625	0.014746	-0.04209	0.10625	-20.9322	6.61	933.319	-1.768	-0.12039	-0.1424	-20.912	27.2026	27.9391	-0.11152	0.12949	0.10879	-35.2238	122.406	433.4771	-0.54961	0.18604	-0.083886	-12.815	49.385	930.192	-2.5093	0.66455	-0.44971
1.196	17.9805	-64.3	1296.9438	-2.3652	0.69336	-0.93359	-33.9092	27.9249	28.6944	-0.010449	-0.0064453	-0.030566	0.400000000000002	10.9808	21.4913	-0.0027344	-0.02959	0.098634	-13.731	-14.739	977.07	-2.0275	-0.027727	-0.18294	-24.771	15.9459	32.3076	-0.11895	0.13457	0.10879	-15.144	131.516	412.86622	-0.50704	0.17744	-0.088281	-41.5473	39.249	943.74474	-2.4993	0.68588	-0.46291
1.198	33.806	-58.9039	1307.1158	-2.3529	0.69756	-0.95205	-25.378	31.2224	32.5515	0.0039063	0.0014648	-0.03125	-11.609	22.6105	10.4967	-0.024414	-0.01709	0.097656	-10.672	-30.048	1005.919	-2.2381	0.11336	-0.21731	-13.534	-1.0716	62.13742	-0.1207	0.14512	0.10557	-30.7784	131.824	384.1907	-0.45821	0.17276	-0.085547	-55.0398	19.611	944.6058	-2.4194	0.68166	-0.48178
1.2	20.2314	-52.83535	1326.95395	-2.3425	0.7083	-0.97334	-15.593	21.6084	26.8223	0.015332	0.0042969	-0.037891	-17.655	30.9707	17.5948	-0.041015	-0.0040039	0.093359	1.016	-22.269	964.763	-2.4068	0.27483	-0.26462	-16.694	-4.58882	89.5378	-0.12744	0.15625	0.1084	-19.631	119.223	375.7163	-0.4085	0.16543	-0.08584	-64.4418	0.988	930.048	-2.2483	0.6594	-0.4873
1.202	44.985	-66.033	1333.2098	-2.3327	0.73526	-0.99798	-31.378	17.037819	30.7703	0.029102	0.0075195	-0.046093	-23.766	23.71355	27.507	-0.057031	0.0066407	0.090137	16.327	-9.399	906.475	-2.5054	0.43018	-0.3335	-10.755	-2.430979	104.8836	-0.13838	0.16572	0.09834	-8.329	105.4098	349.048	-0.35986	0.15967	-0.081543	-25.89	-31.838	920.592	-2.0041	0.61945	-0.49382
1.204	35.456	-82.204	1338.8026	-2.3088	0.76738	-1.0246	-21.121	32.6878	35.1678	0.043555	0.0047852	-0.049219	-9.97	19.5681	12.7841	-0.073047	0.016016	0.088183	15.609	-1.343	891.484	-2.5018	0.56465	-0.38897	-38.333	21.0282	137.2321	-0.15459	0.17998	0.094531	3.389	95.5905	335.1713	-0.31035	0.1543	-0.072949	-26.91	-55.708	909.786	-1.7397	0.57959	-0.49365
1.206	37.964	-96.737	1334.2845	-2.2715	0.79102	-1.041	-17.924	40.562	28.3845	0.056445	0.0013672	-0.054297	-18.058	20.7241	0.1753	-0.083594	0.024024	0.080468	-4.936	-3.855	900.637	-2.4423	0.66198	-0.44416	-43.173	45.9945	184.506	-0.18193	0.18467	0.086328	14.387	90.146	313.67798	-0.26123	0.14981	-0.071386	12.954	-82.065	927.1126	-1.5028	0.53661	-0.5064
1.208	1.9297	-91.638	1341.1109	-2.2169	0.81396	-1.0634	-21.13	16.323	34.5722	0.067871	-0.00048828	-0.063477	-25.385	21.0946	7.0437	-0.096191	0.031738	0.083496	-44.7968	-24.493	926.247	-2.3406	0.70472	-0.49802	-37.193	28.2214	317.986	-0.21689	0.19306	0.073828	18.971	93.0605	279.96449	-0.21905	0.14004	-0.067481	18.252	-128.037	941.002	-1.2953	0.49277	-0.5076
1.21	27.233	-82.859	1340.518	-2.1515	0.82314	-1.0706	-1.684	-8.3247	51.3999	0.078613	-0.0025391	-0.066699	-10.545	11.4473	23.1792	-0.099805	0.042578	0.076758	-75.146	-36.668	962.7535	-2.2064	0.68963	-0.54629	-66.481	7.034244	413.678	-0.26367	0.19482	0.061035	18.725	99.7057	279.9932	-0.17657	0.13164	-0.059375	23.1813	-161.367	964.055	-1.1443	0.4584	-0.51421
1.212	27.9078	-39.6768	1319.697	-2.0703	0.82158	-1.0799	0.648999999999994	-9.8147	41.2108	0.086621	-0.0053711	-0.080664	-11.48	10.96411	28.1729	-0.10743	0.049804	0.076758	-49.3546	-57.37	970.926	-2.0679	0.65869	-0.5708	-61.167	1.1239	496.373	-0.33271	0.19072	0.047754	14.388	92.8628	242.3562	-0.13916	0.12842	-0.056152	27.9493	-174.2	1034.3147	-1.0308	0.45039	-0.52376
1.214	7.2945	-12.334	1302.31643	-1.9883	0.81328	-1.084	-12.145	-7.0506	43.6341	0.093262	-0.0026367	-0.081445	-32.6803	22.9265	12.4031	-0.11484	0.054102	0.072461	-55.2727	-55.835	954.9179	-1.8944	0.61009	-0.57641	31.7245	-7.061	550.62	-0.41875	0.1835	0.030273	14.573	85.2753	216.5312	-0.10986	0.11465	-0.046582	25.2661	-184.172	1079.912	-0.94727	0.4541	-0.54688
1.216	12.83186	-7.014	1297.5713	-1.9023	0.80273	-1.084	-8.784	-10.9964	51.03532	0.094531	-0.0064453	-0.091113	-30.667	27.841	4.3719	-0.11797	0.059277	0.070215	-60.245	-54.904	960.9796	-1.6865	0.57759	-0.5824	22.5355	-13.732	656.9193	-0.52813	0.16748	0.011914	5.628	79.2553	207.6774	-0.08125	0.10645	-0.039843	9.96	-179.903	1075.758	-0.89371	0.46875	-0.57304
1.218	41.2753	-8.429	1290.153	-1.8178	0.79072	-1.0741	12.819	-9.6768	75.3108	0.092773	-0.0087891	-0.098145	-18.104	17.2179	28.02886	-0.12402	0.0625	0.069336	-60.0416	-52.798	953.5294	-1.4844	0.54074	-0.59189	-58.9	33.489	765.4225	-0.65918	0.13887	-0.008789	-14.022	64.7942	207.131	-0.051172	0.0959	-0.034766	-34.4373	-150.418	1061.9008	-0.86395	0.47379	-0.57069
1.22	43.687	14.101	1282.6366	-1.7448	0.78174	-1.0679	-27.991	-12.749	82.5866	0.082617	-0.0066406	-0.10508	-26.079	5.7957	34.1167	-0.12607	0.069434	0.072656	-5.004	-73.3066	989.8026	-1.3287	0.50415	-0.59672	-43.467	48.433	782.916	-0.81201	0.095215	-0.027832	-7.58	65.5677	185.3499	-0.028515	0.083105	-0.029688	-48.431	-117.709	1070.3861	-0.85372	0.46933	-0.56882
1.222	23.1821	11.1304	1277.0678	-1.6803	0.77822	-1.0596	-21.2951	-18.5104	87.2648	0.07666	-0.0059571	-0.11025	-28.1519	8.8651	27.2153	-0.13047	0.076563	0.067968	-2.887	-125.907	1033.7881	-1.2129	0.47852	-0.60938	-5.261	19.68997	801.542	-0.96856	0.065332	-0.054687	-25.8086	65.574	170.1048	-0.00048828	0.067871	-0.021484	-67.439	-107.292	1093.4948	-0.86309	0.46592	-0.5646
1.224	36.617	2.7988	1257.5582	-1.6329	0.77646	-1.045	-13.07	-29.2055	100.7031	0.066113	-0.0055664	-0.12276	-17.271	2.6244	2.194	-0.13008	0.085547	0.064063	4.3828	-161.171	1070.4968	-1.1287	0.46782	-0.62075	6.36	10.908	885.0809	-1.1235	0.04248	-0.076172	-33.7645	81.05697	149.61205	0.01914	0.054297	-0.011914	-36.1405	-100.793	1131.8981	-0.89063	0.46094	-0.57031
1.226	39.848	2.1825	1233.32	-1.5854	0.77002	-1.0322	-4.07	-12.9688	153.63298	0.049512	-0.0013672	-0.13447	-9.425	13.4761	5.158	-0.13076	0.093652	0.059082	31.507	-157.266	1096.6333	-1.0644	0.46032	-0.63219	33.786	6.999	924.531	-1.2676	0.031152	-0.11172	-14.578	78.3182	135.156	0.042578	0.041992	-0.0089844	-3.336	-99.046	1131.186	-0.93539	0.45711	-0.56885
1.228	21.8944	19.8346	1220.814	-1.5609	0.76241	-1.0128	-40.0846	32.305	237.0769	0.03125	-0.00097656	-0.14502	-10.292	17.6309	11.6671	-0.12354	0.1001	0.049805	6.107	-168.227	1114.1074	-1.0247	0.46433	-0.64562	27.2712	-0.194000000000003	951.464	-1.3981	0.040527	-0.1376	-14.003	78.369	106.7775	0.06211	0.029102	-0.0015625	26.8471	-98.064	1145.917	-0.99451	0.45898	-0.5576
1.23	35.599	6.053	1227.0808	-1.5406	0.75678	-0.98865	-22.864	80.549	352.636	0.0093751	0.0041992	-0.16348	-26.819	27.8155	3.9825	-0.11972	0.11026	0.045215	-20.11	-155.567	1098.279	-1.0137	0.47297	-0.65574	-0.548999999999999	9.398	961.035	-1.5195	0.069336	-0.16016	-22.32	93.732	87.8762	0.076465	0.01582	0.0053711	33.4591	-92.7366	1168.433	-1.0729	0.47459	-0.55289
1.232	47.4403	-11.0147	1212.8197	-1.5269	0.75165	-0.96716	-71.3596	77.0547	439.047	-0.028809	0.0078125	-0.17666	-9.466	20.7007	19.8643	-0.1122	0.12119	0.037305	-32.873	-153.1441	1084.333	-1.0195	0.48242	-0.6543	-3.003	-0.0159999999999982	945.79	-1.6232	0.11348	-0.18906	-34.105	78.3184	96.2872	0.091797	0.00097656	0.0092773	10.8928	-69.7911	1161.955	-1.1616	0.49794	-0.54353
1.234	34.4941	-12.7647	1191.4853	-1.5228	0.75068	-0.9418	-71.691	38.8583	529.872	-0.09092	0.0082032	-0.20127	-7.579	20.8594	20.6035	-0.10713	0.13291	0.031836	-16.4515	-133.3775	1088.3805	-1.053	0.4892	-0.64912	28.7443	-22.2653	937.665	-1.707	0.16885	-0.19385	-22.737	68.54371	82.76	0.10137	-0.014258	0.016308	19.6298	-63.3717	1192.3368	-1.2495	0.52979	-0.53418
1.236	2.7327	-11.8031	1186.7961	-1.5195	0.74316	-0.91406	-43.813	4.8505	600.635	-0.18496	0.015234	-0.20879	-7.6226	25.868	20.6251	-0.10322	0.14278	0.029492	-23.1461	-136.0584	1136.3161	-1.115	0.48779	-0.65021	3.344	-24.8174	924.4433	-1.7819	0.21143	-0.20127	-29.0766	58.4404	77.738	0.11377	-0.029101	0.022071	28.6451	-90.6624	1220.2626	-1.3425	0.5524	-0.53809
1.238	20.6301	-10.1111	1172.9224	-1.5156	0.73828	-0.88419	-26.702	-12.863	699.227	-0.30078	0.0053711	-0.22217	-22.9451	23.1475	33.8683	-0.1001	0.15283	0.027832	-19.5738	-128.787	1177.77	-1.2019	0.48188	-0.64682	52.2458	-6.5418	873.797	-1.8328	0.24326	-0.20772	-29.5382	55.019	73.8345	0.12393	-0.041601	0.022071	34.252	-119.8894	1266.493	-1.4289	0.56447	-0.54399
1.24	32.1253	-6.392	1149.9629	-1.5086	0.7288	-0.85361	-57.6217	-4.236	812.03	-0.45215	-0.010059	-0.23086	-29.399	19.9685	34.0165	-0.09414	0.15527	0.018652	19.62	-117.839	1214.492	-1.2822	0.47836	-0.63726	34.418	1.341	879.576	-1.8574	0.28027	-0.20996	-38.43794	41.0568	83.2848	0.12774	-0.060254	0.025781	16.039	-140.612	1280.5888	-1.5199	0.56326	-0.55374
1.242	29.1239	16.773	1126.0406	-1.5043	0.71817	-0.82329	-76.332	24.908	833.2097	-0.62578	-0.03291	-0.22949	-11.785	3.4665	46.19	-0.090625	0.16435	0.0067383	33.8022	-82.646	1223.215	-1.3491	0.46582	-0.63037	-15.6869	1.411	911.116	-1.8494	0.30508	-0.21074	-28.392	39.8589	77.2968	0.1333	-0.077148	0.033691	-18.9808	-146.7432	1291.18	-1.6156	0.55407	-0.56292
1.244	36.2413	32.8523	1114.4998	-1.4953	0.7082	-0.79704	-76.536	16.322	847.4148	-0.82578	-0.051269	-0.23574	-24.45	-12.2846	51.114	-0.085938	0.17022	9.7654e-05	62.4054	-44.169	1224.445	-1.4145	0.45781	-0.61635	-27.4455	0.704000000000001	922.2125	-1.8121	0.32324	-0.19571	-37.2321	53.7513	40.4821	0.12363	-0.09414	0.033301	-16.7423	-145.9473	1299.68	-1.7285	0.53906	-0.58008
1.246	10.1909	52.9467	1111.0058	-1.4902	0.69922	-0.76367	-57.4905	-11.7063	836.5174	-1.0364	-0.054199	-0.24209	-13.147	-20.8259	71.866	-0.086621	0.17422	-0.0037109	40.6998	-24.558	1233.258	-1.4951	0.44499	-0.60882	16.3336	7.215	926.5719	-1.7438	0.33848	-0.18438	-38.987	60.456	39.8352	0.12266	-0.10791	0.03545	-16.98312	-149.708	1310.333	-1.8478	0.53116	-0.58486
1.248	23.3433	65.3607	1099.6768	-1.4713	0.68655	-0.74289	-67.93992	-51.2359	882.1967	-1.2559	-0.040527	-0.25244	-22.175	0.6028	116.52	-0.095703	0.18262	-0.012207	45.674	-28.35	1242.9248	-1.6068	0.43446	-0.60731	46.3524	-25.3369	896.656	-1.6582	0.34873	-0.16914	-19.791	35.458	58.9544	0.11367	-0.12119	0.03584	14.1934	-153.5519	1308.378	-1.9643	0.53533	-0.58808
1.25	10.0369	80.173	1095.8603	-1.4526	0.67116	-0.71741	-81.9403	-59.115	889.005	-1.4807	-0.0065429	-0.26142	-3.658	17.7528	154.00689	-0.11563	0.1832	-0.024805	27.5803	-79.4828	1298.0055	-1.7504	0.42625	-0.60527	6.425	-28.2257	905.009	-1.5645	0.3584	-0.16113	-18.831	36.7905	59.64123	0.10274	-0.13076	0.038379	11.543	-150.9469	1298.877	-2.0788	0.56305	-0.58926
1.252	22.5008	92.89	1076.1862	-1.4298	0.65546	-0.6926	-51.067	-59.042	902.505	-1.6948	0.039356	-0.27685	-48.875	23.3834	221.4092	-0.15059	0.17998	-0.034375	24.3147	-109.9694	1330.945	-1.9063	0.4292	-0.60596	14.88	-23.536	952.0476	-1.4782	0.35782	-0.14258	-10.493	39.8149	40.096	0.088867	-0.13623	0.041016	29.3626	-136.839	1272.075	-2.1936	0.61453	-0.60028
1.254	8.8959	86.355	1047.056	-1.3974	0.6373	-0.66887	-27.644	-41.988	891.618	-1.8917	0.11319	-0.30303	-69.782	-7.6855	344.304	-0.20136	0.16787	-0.050781	34.4861	-125.3	1352.595	-2.0716	0.4554	-0.61026	2.499	-38.5019	965.103	-1.4139	0.36436	-0.13477	6.716	36.401	34.159	0.083105	-0.14551	0.040137	37.4087	-142.72	1267.328	-2.3198	0.67236	-0.62354
1.256	16.3758	92.816	1008.736	-1.3647	0.61963	-0.64648	-28.059	-41.083	872.992	-2.0651	0.20928	-0.32471	-79.185	-47.0235	419.056	-0.2665	0.15908	-0.066601	6.8394	-124.411	1329.042	-2.2296	0.49137	-0.62608	-5.903	-65.128	955.654	-1.3749	0.37139	-0.12695	16.828	29.146	54.6469	0.063965	-0.14599	0.041992	26.9983	-106.96	1256.229	-2.4376	0.72921	-0.66729
1.258	-9.1668	99.32	966.033	-1.3304	0.59387	-0.62196	-7.329	-8.893	860.865	-2.2144	0.30811	-0.36719	-54.978	-27.0486	496.485	-0.35352	0.14453	-0.087402	-11.2101	-121.57	1310.7429	-2.3603	0.53176	-0.66392	-0.807000000000002	-98.768	944.2194	-1.3529	0.38662	-0.12148	0.73	31.5575	47.3498	0.047558	-0.14522	0.040039	12.0191	-70.141	1271.5882	-2.5246	0.76524	-0.72248
1.26	-25.6746	102.087	966.499	-1.2953	0.56379	-0.59601	13.268	21.3233	823.542	-2.291	0.39883	-0.41757	13.0266	-16	558.123	-0.45498	0.13545	-0.10869	-20.1157	-127.0222	1319.179	-2.4626	0.56752	-0.71212	-24.365	-143.211	936.099	-1.3394	0.41455	-0.11475	-5.541	39.04832	27.59812	0.026465	-0.14385	0.039649	14.821	-45.2539	1275.3262	-2.5605	0.77305	-0.78498
1.262	-16.4026	92.827	985.707318	-1.2539	0.53711	-0.56908	-37.196	27.619	837.701	-2.3065	0.47012	-0.45654	-7.163	-2.366	640.1435	-0.58105	0.11416	-0.12197	7.398	-111.4543	1333.2368	-2.5562	0.58838	-0.75732	-31.884	-128.452	941.371	-1.3324	0.44922	-0.10429	7.639	46.366	22.4844	0.0058594	-0.14063	0.035645	34.7	-36.578	1268.292	-2.5505	0.74697	-0.82393
1.264	9.637	75.4097	960.3478	-1.2142	0.51488	-0.54465	-69.913372	24.277	860.385	-2.2643	0.51856	-0.49482	-21.412	37.64	765.934	-0.7291	0.090723	-0.13213	11.7961	-104.2144	1343.8832	-2.6232	0.61541	-0.8043	-59.343	-109.0134	954.93	-1.3182	0.49541	-0.10049	-8.106	41.906	20.956	-0.013965	-0.13838	0.035254	-0.300999999999998	-24.503	1284.794	-2.5117	0.70068	-0.83789
1.266	0.247999999999999	72.5085	951.62149	-1.1733	0.4917	-0.52295	-65.3801	3.544	885.525155	-2.1836	0.53897	-0.50762	11.195	59.51	789.501	-0.9081	0.046777	-0.1417	46.53	-97.1509	1349.76	-2.6759	0.63966	-0.83989	-69.7576	-84.0322	965.364	-1.2995	0.5501	-0.10244	-1.52	43.286	22.7449	-0.038379	-0.13018	0.031934	-3.3875	-19.448	1296.767	-2.4733	0.65909	-0.84014
1.268	-15.0773	82.2162	921.6025	-1.1348	0.47356	-0.49649	-33.897	-1.842	870.5785	-2.1055	0.53809	-0.50781	14.257	58.284	836.616	-1.105	0.00048828	-0.16064	39.908	-99.39	1354.1653	-2.718	0.66855	-0.86794	-81.422	-95.365	990.4953	-1.2761	0.59854	-0.10664	-8.682	33.631	17.5929	-0.054394	-0.12784	0.028418	-23.8972	-24.233	1329.7066	-2.4436	0.63233	-0.84599
1.27	-3.008	80.9964	921.49771	-1.098	0.4528	-0.47397	-34.4808	-30.264	865.421	-1.9969	0.52158	-0.51416	39.783	61.0187	911.359	-1.3114	-0.032129	-0.18096	-4.6844	-81.634	1338.621	-2.7389	0.68813	-0.89672	-59.0446	-98.209	1001.2979	-1.2598	0.63281	-0.11035	-18.004	37.3195	24.0456	-0.071484	-0.12266	0.025293	-16.8335	-38.347	1311.253	-2.4374	0.62138	-0.86318
1.272	-5.663	96.912	911.4524	-1.0618	0.43207	-0.44684	2.385	-59.69	878.533	-1.8426	0.50351	-0.52246	65.755	34.885	962.701	-1.4991	-0.037891	-0.21318	6.029	-50.688	1324.758	-2.7339	0.70557	-0.91748	-44.976	-102.023	1014.125	-1.2526	0.65215	-0.11602	-17.566	26.2703	27.066	-0.084473	-0.11328	0.019531	-14.6634	-65.5438	1305.8749	-2.4454	0.64209	-0.88564
1.274	-5.878	91.157	876.59	-1.0289	0.41374	-0.42716	-23.256	-83.464	904.833	-1.6406	0.4875	-0.51973	69.612	18.877	968.353	-1.6643	-0.0085947	-0.24287	9.1167	-21.6545	1323.681	-2.6969	0.70948	-0.93347	-62.876	-71.457	1038.767	-1.2575	0.65313	-0.1291	-25.541	24.9256	32.5345	-0.091406	-0.10586	0.017578	8.5483	-102.142	1293.251	-2.4551	0.68164	-0.90625
1.276	-16.2876	83.4593	853.767	-0.99609	0.39355	-0.40625	-9.968	-104.5726	934.1157	-1.4527	0.47129	-0.51387	32.1574	19.965	967.765	-1.7864	0.057714	-0.2791	25.131	-9.864	1330.864	-2.6399	0.70081	-0.94902	-66.409	-53.564	1072.0857	-1.2731	0.64219	-0.13652	-22.164	25.6713	18.6163	-0.088282	-0.095508	0.011914	24.52873	-106.86	1312.404	-2.443	0.72344	-0.93144
1.278	-5.784	78.5458	815.9516	-0.96387	0.3728	-0.38247	4.662	-140.832	972.883	-1.2925	0.45166	-0.51611	54.903	12.923	945.82	-1.8711	0.14648	-0.29883	13.51481	-13.868	1331.645	-2.5708	0.68166	-0.95098	-80.2833	-40.572	1076.986	-1.2809	0.62285	-0.15918	-19.11	23.1578	19.3205	-0.08789	-0.08418	0.0072265	32.3172	-85.697	1310.45885	-2.4077	0.7626	-0.95498
1.28	-22.3817	93.7274	790.5654	-0.93134	0.3574	-0.36274	33.606	-166.405	1026.727	-1.1618	0.44317	-0.52744	60.996	-6.0665	935.885	-1.911	0.2294	-0.308	16.436	-24.699	1349.277	-2.5062	0.65265	-0.94717	-41.157	-66.7116	1078.2866	-1.2773	0.60547	-0.17822	-12.792	22.8944	16.5941	-0.084375	-0.075391	0.0026367	42.014	-65.496	1310.858	-2.3511	0.78955	-0.96865
1.282	-47.583	116.4209	769.0078	-0.89485	0.33823	-0.33888	16.5794	-177.062	1032.34879	-1.073	0.43887	-0.54062	77.23	-2.8191	921.3829	-1.9289	0.2961	-0.30928	21.6373	-31.79	1351.119	-2.4512	0.62109	-0.94531	-57.64096	-94.404	1089.0828	-1.2659	0.59775	-0.20264	-38.9027	23.0941	10.516	-0.075684	-0.060059	-0.0039063	18.8348	-65.837	1312.299	-2.2739	0.78564	-0.98311
1.284	-19.609	118.2998	733.0342	-0.85731	0.32266	-0.32308	3.697	-173.726	1050.6109	-1.0137	0.43575	-0.55	61.353	-9.2832	879.497	-1.9129	0.35508	-0.31358	15.9562	-35.633	1355.7153	-2.4001	0.5917	-0.94951	-54.563	-110.4629	1103.1168	-1.2394	0.59815	-0.22988	-43.0234	21.1336	17.3963	-0.0625	-0.047851	-0.0125	28.7762	-68.091	1324.998	-2.1831	0.77783	-0.97607
1.286	-15.334	108.5623	693.3594	-0.82227	0.30273	-0.29785	-12.7701	-156.621	1040.947	-0.98564	0.43974	-0.56025	50.7448	-12.305	889.483	-1.8702	0.40264	-0.31397	24.2186	-46.4663	1342.4562	-2.3549	0.56806	-0.9542	-58.645	-122.5009	1143.5637	-1.2143	0.59815	-0.25371	-44.7203	20.4694	28.3399	-0.04541	-0.035742	-0.016016	34.9726	-48.1083	1308.8912	-2.1059	0.76045	-0.97334
1.288	-20.3008	122.1282	656.759	-0.78111	0.28746	-0.28296	-32.46731	-129.2002	1057.1905	-0.98926	0.44189	-0.56836	39.2353	-15.921	919.4031	-1.7944	0.44482	-0.30957	26.85955	-48.46	1335.569	-2.3038	0.54424	-0.95068	-53.418	-111.46718	1163.566	-1.194	0.58262	-0.271	-24.237	15.1412	41.399	-0.02666	-0.027539	-0.024219	12.1609	2.267	1305.5472	-2.0218	0.74502	-0.96709
1.29	-32.1555	108.1398	653.821	-0.74907	0.26711	-0.26536	-57.625	-124.892	1085.049	-1.0034	0.44404	-0.57549	34.3851	-6.748	925.101	-1.6948	0.4667	-0.29658	55.955	-38.9165	1353.7927	-2.2471	0.52226	-0.95313	-56.8871	-116.2288	1168.2866	-1.188	0.56299	-0.28662	-27.8072	23.1183	17.2308	-0.0062499	-0.021777	-0.037305	14.6923	26.37	1307.3059	-1.9468	0.73565	-0.95771
1.292	-1.633	116.456	649.33763	-0.71199	0.2527	-0.24308	-24.7393	-126.248	1084.6305	-1.028	0.45557	-0.57373	79.286	9.745	915.818	-1.5764	0.47559	-0.2795	54.867	-27.7937	1370.3748	-2.1953	0.50879	-0.95508	-45.158	-134.846	1159.6804	-1.2284	0.53213	-0.30186	-48.747	25.2076	19.7181	0.014648	-0.017578	-0.042969	-16.7311	31.524	1281.616	-1.8806	0.73193	-0.94561
1.294	-2.127	116.196	610.6816	-0.67562	0.23405	-0.22772	4.401	-140.161	1118.719	-1.0542	0.46181	-0.57568	59.724	-2.463	900.4095	-1.4577	0.47325	-0.26387	47.4467	-4.873	1382.197	-2.1393	0.49258	-0.9459	-34.484	-141.6304	1170.0927	-1.2943	0.49922	-0.32012	-44.81978	24.7229	19.2387	0.037793	-0.010449	-0.045899	-15.7036	33.472	1250.6841	-1.8008	0.72803	-0.9375
1.296	-26.849	118.989	575.5041	-0.64063	0.20801	-0.21973	-2.408	-115.798	1137.6	-1.097	0.47217	-0.57539	62.992	3.5115	897.928	-1.3526	0.471	-0.25703	70.842	2.587	1373.77	-2.0867	0.47403	-0.93633	-42.314	-126.799	1189.2697	-1.3939	0.46953	-0.33106	-37.1155	24.9985	8.5699	0.058203	-0.008789	-0.049902	-19.4995	24.6102	1222.9955	-1.7347	0.72041	-0.92978
1.298	-11.25	100.3096	534.197	-0.60442	0.19074	-0.20226	6.8734	-87.982	1154.629	-1.1563	0.48438	-0.57617	41.1648	-7.7758	920.672	-1.2715	0.47168	-0.25342	53.648	15.2831	1376.5289	-2.0446	0.45723	-0.92539	-25.736	-90.7535	1204.846	-1.504	0.46319	-0.34014	-18.391	31.1515	11.4122	0.083984	-0.0041016	-0.055371	32.8176	20.7967	1219.0895	-1.671	0.70713	-0.92373
1.3	-26.667	86.9448	521.108	-0.56371	0.17453	-0.18762	14.723	-56.616	1146.113	-1.2272	0.49433	-0.57881	40.853	-28.64686	931.063	-1.2221	0.47647	-0.25683	58.05	27.723	1363.1261	-2.0109	0.44629	-0.91485	-41.632	-77.4854	1218.611	-1.6367	0.4668	-0.35156	-19.62	23.8728	16.0282	0.099024	-0.0020508	-0.065234	37.4575	12.956	1228.1422	-1.6116	0.68525	-0.9081
1.302	-16.708	92.604	491.8583	-0.52894	0.15695	-0.17471	28.3937	-67.8129	1167.2053	-1.2874	0.50517	-0.58349	17.337	-44.6076	944.71	-1.1803	0.49035	-0.25205	22.9587	50.012	1354.1252	-1.9702	0.43506	-0.89697	-44.324	-53.6471	1198.691	-1.7674	0.48604	-0.35606	-0.574999999999999	12.848	28.9973	0.11914	-0.00097656	-0.070313	46.8557	17.598	1216.0258	-1.5677	0.65928	-0.88526
1.304	-28.8967	92.6101	469.8746	-0.48693	0.14512	-0.15411	2.244	-98.8525	1210.6847	-1.3327	0.50478	-0.58818	8.182	-77.926	917.3894	-1.1471	0.50636	-0.2411	31.191	54.713	1352.67327	-1.9318	0.42071	-0.8958	-38.88	-46.80041	1183.04537	-1.9083	0.51943	-0.36006	-1.887	19.43912	17.1794	0.13428	0.0017578	-0.077441	30.9502	8.698	1211.9816	-1.5327	0.63525	-0.86182
1.306	-18.884	94.2739	444.4217	-0.44775	0.13477	-0.13818	11.224	-111.4847	1246.1914	-1.3653	0.51201	-0.60059	-0.637	-109.545	883.135	-1.1212	0.53186	-0.2326	18.105	62.163	1331.4127	-1.884	0.40469	-0.88437	-44.862	-44.7547	1190.4744	-2.0556	0.56123	-0.36279	-7.909	31.8878	21.5131	0.14776	0.00078125	-0.086523	23.84892	-11	1201.3867	-1.5094	0.6164	-0.83398
1.308	-33.2652	79.334	426.3424	-0.39999	0.12675	-0.12509	15.819	-129.7166	1286.654	-1.4004	0.50977	-0.61035	-71.4231	-112.906	881.952	-1.1035	0.56445	-0.21826	34.703	63.667	1307.2787	-1.8356	0.38828	-0.87265	-33.905	-43.8467	1193.5509	-2.2088	0.61289	-0.37246	-4.788	31.5956	28.5966	0.1626	0.0015625	-0.097071	7.478	-17.3815	1190.8787	-1.4987	0.604	-0.80889
1.31	-17.949	83.588	378.0283	-0.35507	0.11582	-0.11132	6.483	-135.357	1283.66	-1.4466	0.5001	-0.61377	-65.8159	-109.54658	903.456	-1.0828	0.60619	-0.20803	5.2912	60.6032	1284.8377	-1.7893	0.37305	-0.8542	-59.725	-34.158	1181.012	-2.3594	0.67383	-0.37891	1.825	17.3074	50.4779	0.17656	0.0066406	-0.10186	-13.296	-1.584	1181.41805	-1.4909	0.59385	-0.77842
1.312	-15.175	81.409	362.40358	-0.30312	0.10996	-0.092183	10.0953	-135.5598	1297.874	-1.5124	0.47022	-0.62998	-60.9967	-107.845	923.4046	-1.0617	0.64706	-0.19874	13.60294	52.1253	1254.1045	-1.7515	0.3667	-0.84717	-68.533	-28.204	1182.775	-2.5017	0.7377	-0.39395	6.99	6.9537	32.5967	0.19092	0.0078125	-0.10791	-18.6066	15.7001	1170.6934	-1.4813	0.58828	-0.7502
1.314	-9.019	84.8146	342.0226	-0.25361	0.099216	-0.07998	-0.894900000000001	-140.9354	1291.1735	-1.6077	0.45537	-0.63545	-61.468	-98.045	935.1443	-1.0515	0.67365	-0.1929	33.6568	45.031	1265.8072	-1.7241	0.35537	-0.82607	-90.6179	-45.059	1193.256	-2.6241	0.79931	-0.41064	-5.257	-7.6137	34.0593	0.20234	0.0069336	-0.11621	-38.99789	24.522	1161.7898	-1.4766	0.58398	-0.72266
1.316	1.426	84.8683	319.52816	-0.20166	0.095215	-0.061035	-22.3731	-139.3279	1285.582	-1.7233	0.44267	-0.63916	-57.3775	-103.564	940.287	-1.05	0.68171	-0.19696	39.6599	52.997	1251.544	-1.7034	0.35596	-0.81397	-75.462	-50.854	1219.7	-2.7194	0.85869	-0.43096	-15.545	-21.82659	53.3321	0.21143	0.0072266	-0.12364	-27.4796	36.891	1117.7413	-1.4713	0.57852	-0.69746
1.318	-18.951	94.4548	299.6041	-0.15108	0.084766	-0.046193	8.711	-144.1749	1306.304	-1.8472	0.4458	-0.64453	-65.2715	-91.7048	981.28	-1.0537	0.68359	-0.20215	29.945	36.913	1265.7635	-1.6897	0.35205	-0.79717	-84.09	-56.9065	1229.4922	-2.7706	0.90791	-0.44599	-18.549	-19.5247	53.39512	0.21338	0.0060547	-0.12871	-28.3925	45.8591	1094.06347	-1.4609	0.57109	-0.67237
1.32	-18.157	86.6054	270.8946	-0.10401	0.074708	-0.033595	23.4532	-136.07752	1306.4584	-1.9721	0.45527	-0.65606	-43.37	-74.9178	1009.325	-1.0647	0.66926	-0.21084	22.1334	38.701	1257.3157	-1.677	0.35176	-0.77832	-101.8953	-48.1525	1238.7326	-2.7886	0.94189	-0.45361	-2.201	-0.6518	45.0428	0.20957	0.0088867	-0.13916	-22.225	55.867	1080.143	-1.4426	0.55976	-0.64697
1.322	-21.262	80.7777	250.2054	-0.059476	0.064551	-0.017188	26.8917	-136.415	1281.2821	-2.0773	0.47793	-0.68311	-51.577	-35.3601	1015.29186	-1.0698	0.64464	-0.2223	34.7775	35.5559	1249.008	-1.6616	0.35791	-0.76514	-92.7053	-38.114	1240.7366	-2.7717	0.95879	-0.45273	-4.763	-0.1537	51.7254	0.19971	0.0097656	-0.14551	4.637	52.93	1059.5127	-1.4244	0.55156	-0.6168
1.324	-10.579	87.696	218.4849	-0.017677	0.054883	-0.00039116	-0.8178	-120.953	1271.7456	-2.1862	0.50723	-0.72803	-33.366	-26.192	1040.928	-1.0783	0.61652	-0.2399	-1.91604	60.3564	1228.0525	-1.6481	0.3625	-0.7415	-109.9344	-37.487	1262.834	-2.7297	0.95899	-0.4498	-23.5762	2.0683	71.6944	0.18457	0.0073243	-0.15381	1.021	75.6458	1030.296	-1.4014	0.5332	-0.59473
1.326	-23.792	93.935	203.08919	0.014648	0.045898	0.015137	26.4408	-97.876	1279.7021	-2.2947	0.54229	-0.77988	-61.2492	-69.047	1049.8335	-1.0848	0.59669	-0.26013	-22.8942	71.117	1213.2948	-1.632	0.37109	-0.72305	-93.423	-27.6812	1259.7185	-2.6719	0.94961	-0.4416	-5.598	2.3587	88.8582	0.16807	0.0084961	-0.15859	13.125	91.2839	1013.671	-1.3766	0.51211	-0.57188
1.328	-28.028	97.173	185.376	0.04795	0.033886	0.025781	20.2056	-81.442	1277.948	-2.4058	0.57861	-0.8374	-40.404	-94.9428	1054.7311	-1.0918	0.57813	-0.28125	-1.981	76.815	1185.2007	-1.6152	0.37656	-0.70703	-101.1827	-28.1309	1261.536	-2.607	0.93281	-0.43399	-9.174	3.9207	108.802	0.13994	0.0045898	-0.16172	-12.302	102.499	999.095	-1.352	0.49317	-0.54336
1.33	-7.1982	76.0951	164.618	0.074024	0.019727	0.042969	22.6369	-46.6878	1277.302	-2.4899	0.60342	-0.89072	-51.413	-104.1837	1067.7179	-1.0959	0.55229	-0.30148	-8.792	84.4692	1150.74435	-1.6008	0.38027	-0.68691	-66.021	-29.466	1255.728	-2.5308	0.91748	-0.42432	-9.289	16.166	184.251	0.10322	0.0017578	-0.17217	-12.666	98.1444	985.419	-1.3273	0.47363	-0.51914
1.332	-14.4473	63.3477	136.029	0.097849	0.011914	0.0625	13.2896	-35.087	1291.448	-2.5311	0.61963	-0.92802	-39.448	-105.5151	1094.662	-1.1094	0.51933	-0.32258	-21.3097	93.8566	1119.4273	-1.5801	0.38281	-0.66992	-84.813	-23.206	1245.9704	-2.4519	0.90625	-0.41172	-2.412	46.93	280.892	0.064941	-0.0019531	-0.18652	-39.374	102.0312	957.934	-1.3021	0.45361	-0.49873
1.334	-5.762	57.606	123.831	0.11836	0.0026366	0.075879	26.5904	-17.51	1310.642	-2.5299	0.61768	-0.9503	-12.937	-115.7847	1109.7716	-1.1407	0.48442	-0.34725	-16.20704	84.83	1102.6066	-1.5657	0.3831	-0.6499	-93.237	2.8723	1240.8935	-2.3769	0.89453	-0.39932	-14.429	64.2421	376.155	0.010449	0.0025391	-0.20322	-66.7396	101.7932	950.2064	-1.2749	0.43408	-0.47461
1.336	-2.349	41.355	124.9134	0.14014	-0.0083008	0.086914	5.5453	-22.151	1326.0695	-2.5034	0.5999	-0.9667	-17.598	-120.576	1112.7939	-1.1845	0.44335	-0.3637	12.223	114.544	1089.6355	-1.5461	0.3788	-0.63643	-93.4896	26.3186	1225.855	-2.3	0.87383	-0.38369	-27.9066	80.7322	469.438	-0.065136	0.0039062	-0.21045	-54.0522	86.293	949.9457	-1.2522	0.41377	-0.4542
1.338	-1.414	54.911	118.5455	0.15166	-0.020118	0.10351	-23.3795	-44.094	1327.2984	-2.4702	0.58057	-0.97998	-9.154	-129.323	1099.119	-1.2515	0.40137	-0.37646	18.403	131.1426	1065.855	-1.5305	0.37256	-0.6083	-97.5046	31.171	1237.722	-2.2252	0.85645	-0.36015	0.918000000000003	74.993	551.331	-0.17998	-0.0058594	-0.21709	-52.2885	91.919	938.8463	-1.2271	0.396	-0.43008
1.34	-1.905	58.8243	98.982	0.17109	-0.026074	0.11465	-4.8489	-74.4079	1322.729171	-2.4396	0.57149	-0.99433	-24.01	-136.176	1132.5499	-1.3402	0.36528	-0.38231	10.679	146.1301	1044.253	-1.5129	0.36192	-0.59297	-67.507	29.0263	1238.6816	-2.1577	0.83838	-0.34326	-8.04112	33.1869	654.6596	-0.33282	-0.025098	-0.22275	-28.209	98.8064	921.0001	-1.2001	0.37451	-0.40469
1.342	-20.1379	61.2699	87.866	0.18438	-0.04209	0.12676	2.1637	-88.129	1322.321	-2.4191	0.57022	-1.0087	15.9	-121.069	1178.7683	-1.4604	0.3494	-0.38402	20.627	141.8226	1017.992	-1.4961	0.35352	-0.57813	-78.366	30.5962	1225.7319	-2.0968	0.81719	-0.32334	-45.685	-11.134	765.761	-0.51025	-0.054199	-0.2251	-43.06	92.323	903.0027	-1.1791	0.35957	-0.38398
1.344	-15.484	43.3727	93.87221	0.19209	-0.04834	0.13555	14.8075	-75.329	1310.5276	-2.407	0.58232	-1.0247	14.694	-95.645	1181.048	-1.5993	0.36091	-0.39258	6.39	144.7853	1028.5751	-1.4698	0.34755	-0.56279	-67.123	33.5798	1223.9688	-2.0402	0.80234	-0.30498	-55.7835	2.028	825.9526	-0.71826	-0.10136	-0.20704	-24.338	84.548	874.3255	-1.1558	0.34424	-0.36426
1.346	-16.232	35.8806	93.9751	0.19971	-0.057129	0.14697	21.1145	-67.505	1316.091	-2.3972	0.60986	-1.0425	7.083	-69.0988	1175.699	-1.7495	0.39954	-0.39075	-8.888	142.992	1007.1668	-1.4406	0.34649	-0.54765	-58.705	37.861	1218.535	-1.9953	0.79102	-0.28818	-21.201	13.706	877.8654	-0.95976	-0.14853	-0.1876	-30.365	81.172	840.358	-1.1305	0.32412	-0.33154
1.348	-12.484	37.8799	66.898	0.19912	-0.074805	0.15752	26.89684	-75.681	1331.0193	-2.377	0.625	-1.0664	-8.722	-66.1527	1168.798	-1.8979	0.4541	-0.39307	-46.435	143.8203	976.057	-1.4117	0.34336	-0.52813	-47.066	45.169	1214.1193	-1.9479	0.77598	-0.27666	-22.842	0.939	897.79307	-1.2207	-0.18799	-0.17861	-25.999	100.766	813.456	-1.1059	0.30937	-0.30977
1.35	-34.067	37.2468	49.3678	0.20127	-0.087207	0.16494	34.91426	-67.904	1342.286	-2.3327	0.64776	-1.0776	-21.466	-57.6751	1158.0817	-2.0465	0.52029	-0.39878	-22.558	130.0682	958.5336	-1.3728	0.34287	-0.51348	-31.986	41.6202	1213.73723	-1.9058	0.76221	-0.26318	-48.2025	-25.4012	881.5827	-1.4819	-0.19668	-0.18799	-44.52	118.837	797.9618	-1.0746	0.29609	-0.28906
1.352	-21.34	41.869	34.532	0.1958	-0.10401	0.17783	28.44	-45.535	1342.784	-2.2831	0.65401	-1.0921	-16.365	-39.9603	1166.1808	-2.1885	0.59122	-0.40509	-41.788	141.921	927.305	-1.3335	0.33252	-0.49365	-36.623	32.13	1216.028	-1.8584	0.75254	-0.24853	-50.224582	-50.134	891.8486	-1.7246	-0.1626	-0.21582	-25.538	125.6641	793.4365	-1.043	0.28437	-0.26827
1.354	-19.403	42.2616	36.706	0.18789	-0.1165	0.18125	43.596	-18.0736	1338.9646	-2.2144	0.65088	-1.0874	-42.526	-38.625	1149.3958	-2.3243	0.66617	-0.42595	-18.661	136.948	920.6113	-1.2969	0.32822	-0.47705	-19.176	17.54	1202.1198	-1.8137	0.73828	-0.23896	2.945	-80.6	918.866	-1.9137	-0.057713	-0.2417	-37.771	112.1472	759.87867	-1.0073	0.27686	-0.24658
1.356	-4.337	46.3725	23.895	0.18506	-0.12158	0.18457	25.785	4.689	1336.0227	-2.1488	0.64893	-1.0776	-36.119	-52.245	1144.405	-2.4528	0.73449	-0.44347	-37.308	129.17684	888.0326	-1.2588	0.32109	-0.46094	-23.241	38.801	1181.0643	-1.7625	0.71679	-0.22607	1.496	-81.749	953.149	-2.0714	0.09756	-0.26435	-76.79397	113.1015	727.2414	-0.97285	0.26611	-0.22861
1.358	-5.879	35.7732	29.937	0.17646	-0.12783	0.19053	19.24443	35.2811	1338.3334	-2.0835	0.64111	-1.0688	-46.031	-63.681	1152.113	-2.5605	0.79199	-0.45898	-25.403	115.609	882.5828	-1.2182	0.3168	-0.44024	-42.841	60.1243	1177.1918	-1.7071	0.696	-0.21914	4.196	-55.634	928.375	-2.1995	0.25771	-0.29912	-74.6207	111.483	712.2773	-0.93789	0.26065	-0.21035
1.36	-12.035	39.7138	41.8652	0.16797	-0.13155	0.19063	8.515	47.9849	1314.0557	-2.0251	0.63936	-1.0594	-71.186	-59.632	1162.629	-2.6388	0.83876	-0.47269	-16.885	123.682	866.6748	-1.1774	0.31221	-0.41943	-55.589	66.4605	1182.4898	-1.6523	0.66797	-0.21338	10.3128	-24.9985	900.21	-2.2792	0.41631	-0.33682	-71.0891	139.828	681.5072	-0.89883	0.24853	-0.19317
1.362	-3.619	35.2357	33.6006	0.15664	-0.13311	0.19179	-5.9264	40.0597	1291.2137	-1.9692	0.63398	-1.0383	-65.58026	-54.53196	1188.315	-2.6852	0.88113	-0.48225	-9.528	134.922	823.6425819	-1.1348	0.31055	-0.39746	-33.463	55.25105	1167.5904	-1.5952	0.63994	-0.1999	43.8573	-0.843	873.5505	-2.3281	0.53809	-0.36328	-55.695	150.151	647.2878	-0.85938	0.24512	-0.17793
1.364	-22.909	45.061	30.5143	0.14228	-0.13017	0.19024	-14.4062	23.6506	1272.2884	-1.9148	0.63516	-1.0293	-63.403	-51.5693	1192.851	-2.6969	0.91521	-0.49018	-5.689	125.858	806.5741	-1.0923	0.30557	-0.38506	-38.505	51.5296	1136.146	-1.5413	0.6122	-0.18642	14.776	18.226	871.115	-2.3599	0.62803	-0.40166	-59.5077	152.916	615.715	-0.81934	0.23926	-0.16016
1.366	-1.678	37.507	32.51976	0.12939	-0.12061	0.18896	-2.43639	30.994	1258.3389	-1.8676	0.63574	-1.0133	-48.174	-40.69	1201.3832	-2.6824	0.9412	-0.49742	-28.567	133.291	774.731	-1.0472	0.30371	-0.37041	-58.8202	72.667	1122.6249	-1.4944	0.58486	-0.17939	-22.863	10.907	879.448	-2.366	0.68672	-0.42324	-53.316	127.532	581.685	-0.78105	0.225	-0.14483
1.368	-23.262	37.832	34.7263	0.11201	-0.11631	0.18877	19.2246	24.9781	1242.005	-1.8184	0.63867	-0.99805	-75.527	-23.086	1213.9654	-2.6519	0.96143	-0.50684	-19.138	143.6177	744.7911	-1.0051	0.3041	-0.35049	-52.295	82.7401	1110.274	-1.4522	0.55537	-0.17012	-19.9913	0.0459999999999994	905.625	-2.2879	0.72266	-0.44278	-44.466	100.1591	556.067	-0.73926	0.21856	-0.12715
1.37	-10.208	28.6506	13.9916	0.098441	-0.1126	0.18691	13.3254	24.1682	1227.855	-1.7663	0.63252	-0.98779	-68.1503	-28.595	1229.6785	-2.6169	0.97249	-0.51271	-47.8747	143.1896	707.5492	-0.95488	0.3039	-0.3335	-52.49	105.129	1116.167	-1.4136	0.52783	-0.15869	-20.4134	1.624	921.7378	-2.1271	0.74238	-0.45244	-53.019	95.661	524.47	-0.6959	0.20684	-0.11934
1.372	-33.5094	23.0136	5.277	0.079297	-0.10596	0.18613	28.3299	10.701	1240.5367	-1.7202	0.6251	-0.96787	-93.3201	-36.334	1238.6171	-2.5678	0.97777	-0.50958	-62.057	144.4313	679.00532	-0.91162	0.30322	-0.31494	-44.036	126.307	1088.067	-1.3787	0.49922	-0.14707	-6.355	-25.47	917.9573	-1.8965	0.74805	-0.45215	-39.22	102.693	518.1492	-0.65303	0.19658	-0.10791
1.374	-18.048	11.3648	20.2	0.06289	-0.096775	0.18408	36.9881	-8.352	1222.10151	-1.6784	0.61338	-0.95108	-57.734	-35.155	1245.967	-2.5127	0.98753	-0.5127	-47.1244	151.534	664.5924	-0.86592	0.30137	-0.29502	-64.0961	129.0908	1062.4283	-1.3499	0.47549	-0.13613	-25.069	-48.346	909.967	-1.6545	0.74355	-0.45508	-46.495	110.955	486.24218	-0.60938	0.18652	-0.087402
1.376	-6.575	15.11356	35.5849	0.047852	-0.08252	0.18066	16.7093	-29.7417	1211.5735	-1.6401	0.60058	-0.92989	-70.0295	-29.973	1241.7557	-2.4459	0.99504	-0.50438	-34.8089	165.257	625.5598	-0.82149	0.29834	-0.27832	-39.987	125.0533	1047.209	-1.3194	0.44815	-0.13536	-9.852	-53.284	906.52	-1.444	0.72354	-0.46475	-40.605	116.3982	465.7709	-0.57217	0.17842	-0.08291
1.378	-5.309	25.33955	28.5945	0.035547	-0.07334	0.1711	-8.6422	-8.801	1202.479	-1.6094	0.58984	-0.90088	-75.2607	-12.1538	1229.6445	-2.3735	1.0024	-0.49707	-31.468	170.794	585.057	-0.77227	0.29444	-0.25528	-51.2979	110.1411	1033.672	-1.292	0.42822	-0.12422	8.9514	-80.2044	932.925	-1.2753	0.68526	-0.47334	-49.135	112.7988	437.2355	-0.52735	0.16582	-0.08086
1.38	-9.544	22.8011	27.9204	0.019238	-0.06211	0.17578	5.7896	24.4799	1199.372	-1.5864	0.57412	-0.87569	-67.2326	-14.0994	1209.059	-2.2882	1.0026	-0.49122	-22.413	158.862	543.822	-0.72139	0.29541	-0.2374	-40.489	108.3754	1016.0498	-1.2695	0.41016	-0.11719	26.6653	-141.153	962.8897	-1.153	0.63877	-0.47842	-47.368	110.6961	416.069	-0.47656	0.15293	-0.067188
1.382	-14.714	13.8834	14.4834	0.0047852	-0.051953	0.16993	3.589	43.118	1175.7412	-1.5644	0.56426	-0.84844	-57.429	6.7528	1200.16	-2.1985	0.99846	-0.48166	-13.222	140.40188	512.217	-0.67627	0.28857	-0.22021	-45.1846	99.8317	1016.859	-1.2484	0.39463	-0.11221	40.007	-175.799	986.85302	-1.0503	0.59229	-0.48486	-33.231	103.409	401.842	-0.4249	0.14277	-0.050293
1.384	-7.625	8.01936	17.82128	-0.0066406	-0.038868	0.16582	-20.2719	39.624	1142.918711	-1.5457	0.54824	-0.82422	-49.602	18.0383	1220.7044	-2.1172	0.98438	-0.46759	-18.74	132.1623	479.2641	-0.61953	0.28769	-0.19316	-48.779	100.0119	995.5199	-1.2288	0.37823	-0.10684	46.163	-195.015	1023.8566	-0.98418	0.56465	-0.49063	-39.095	105.398	376.9948	-0.37158	0.12842	-0.040527
1.386	-2.601	18.9425	3.7847	-0.015625	-0.024902	0.16211	-30.0555	34.5761	1121.4276	-1.5235	0.53994	-0.7876	-42.003	18.6356	1228.0691	-2.0387	0.9672	-0.45313	-27.983	128.087	457.5059	-0.57109	0.27568	-0.18115	-33.6029	99.84105	977.139	-1.2116	0.3669	-0.099805	47.24	-190.475	1059.4935	-0.93554	0.5417	-0.50761	-40.318	104.243	333.1565	-0.32187	0.12256	-0.029687
1.388	-28.1901	27.6609	9.28966	-0.025	-0.013769	0.15761	-22.0887	51.118	1099.3595	-1.5039	0.5332	-0.76367	-8.674	16.7301	1228.595	-1.9702	0.95166	-0.43701	4.958	126.825	430.3176	-0.51953	0.26748	-0.17568	-41.7514	103.37244	942.699	-1.1984	0.35488	-0.099612	23.5669	-188.133	1055.4508	-0.91172	0.53116	-0.5252	-47.4835	103.906	299.313	-0.26836	0.11377	-0.017676
1.39	-8.576	24.6234	20.4019	-0.032422	-0.003418	0.15195	-11.0027	77.6841	1084.7706	-1.479	0.52686	-0.73838	6.035	27.4668	1218.2762	-1.9093	0.9333	-0.42285	-7.024	132.681795	419.4524	-0.45655	0.25791	-0.15166	-39.1645	104.8428	943.61837	-1.1875	0.34277	-0.092773	9.333	-157.849	1057.4733	-0.89355	0.52265	-0.54043	-8.15	89.3918	274.183	-0.21289	0.10869	-0.0079102
1.392	-20.978	26.743	17.834	-0.038672	0.013379	0.14726	-11.623	90.0623	1057.86	-1.4591	0.51435	-0.71709	-14.364	41.5678	1216.3242	-1.8574	0.91992	-0.40556	-14.624	148.453	387.8419	-0.40088	0.25049	-0.13379	-21.214	117.206	941.3491	-1.1743	0.32978	-0.090527	26.082	-138.7976	1068.497	-0.88477	0.51367	-0.54883	-18.523	92.947	227.7443	-0.15547	0.097363	0.0083984
1.394	-21.289	24.1097	4.924	-0.045898	0.025781	0.1415	4.173	94.2837	1034.224	-1.436	0.50068	-0.68935	-5.21599999999999	40.737	1239.3843	-1.8101	0.90937	-0.38798	-45.663	128.173	364.7377	-0.34511	0.2331	-0.11426	-13.277	131.819	903.6608	-1.1616	0.32392	-0.089746	1.4002	-121.29	1090.832	-0.89248	0.50889	-0.54483	-8.169	87.365	211.13267	-0.10107	0.090332	0.013184
1.396	-38.7342	31.52	11.13451	-0.054199	0.037109	0.14111	15.844	98.9966	1010.516	-1.4077	0.48408	-0.66787	-4.254	38.6913	1212.3154	-1.7654	0.89824	-0.37812	-16.677	122.541	344.103	-0.29483	0.22207	-0.097754	-14.029	139.0375	864.9551	-1.1424	0.31064	-0.086231	-4.76	-115.757	1114.78055	-0.92227	0.51094	-0.53994	-12.568	89.525	209.4342	-0.045508	0.076758	0.034863
1.398	1.307	28.18	28.0169	-0.063672	0.050976	0.13779	-6.168	106.6997	975.455	-1.3794	0.46582	-0.64404	-6.046	36.7242	1199.221	-1.7241	0.88037	-0.35889	-15.373	115.475	321.0541	-0.24248	0.20449	-0.083301	-2.115	133.8143	842.070211	-1.1222	0.30342	-0.07793	15.7532	-128.202	1133.64	-0.97969	0.51836	-0.52784	-2.065	89.0407	188.49711	0.0082031	0.064257	0.049512
1.4	-9.854	25.075	19.7843	-0.069238	0.062305	0.13653	-20.081	108.4614	962.712	-1.3605	0.44883	-0.62607	-25.888	37.3056	1198.3778	-1.6826	0.86172	-0.34951	-23.802	97.379	297.8723	-0.18867	0.19189	-0.066797	12.107	132.7877	815.5936	-1.0972	0.29346	-0.070313	66.587	-112.689	1134.64	-1.0625	0.53252	-0.51231	-12.283	106.371	166.8096	0.056641	0.048633	0.058496
1.402	-11.727	10.70169	16.481828	-0.071972	0.068164	0.13301	-34.679	119.1132	966.2484	-1.3359	0.42823	-0.60674	-3.589	36.8233	1184.815	-1.6418	0.83985	-0.33418	-18.9423	83.9576	258.01837	-0.13672	0.18213	-0.047852	11.829	135.2645	795.3855	-1.0732	0.28877	-0.075879	78.832	-92.412	1150.341	-1.1563	0.54102	-0.50293	-19.785	100.332	147.4468	0.10205	0.035645	0.069433
1.404	-18.267	3.9008	4.1385	-0.082129	0.079882	0.13164	-45.501	122.724	961.478	-1.312	0.41455	-0.58681	-20.287	38.7248	1165.1412	-1.5976	0.80899	-0.31973	-4.191	76.8329	222.144	-0.079787	0.17188	-0.031543	23.843	144.776	776.7651	-1.0461	0.28554	-0.07168	58.427	-77.407	1137.735	-1.2453	0.55176	-0.49639	-16.759	86.225	143.1598	0.1416	0.015625	0.080078
1.406	-17.011	-1.4137	8.2663	-0.080566	0.086914	0.12402	-39.178	121.458	944.1789	-1.2872	0.39678	-0.57276	-22.368	44.184	1150.4723	-1.5586	0.77657	-0.30283	-7.168	95.562	193.399	-0.029493	0.1583	-0.01875	14.589	149.698	754.6025	-1.0176	0.2793	-0.070118	38.699	-77.022	1155.861	-1.33	0.5665	-0.49365	-30.8579	71.0848	133.70553	0.18154	0.0069336	0.094141
1.408	-14.817	4.078	11.2321	-0.082227	0.094726	0.12735	-53.61095	105.209	942.4748	-1.2593	0.38623	-0.55225	-32.602	33.99	1129.558	-1.521	0.74268	-0.29541	-19.683	103.6469	182.7378	0.020899	0.14853	-0.0027344	22.3715	140.45	738.599	-0.99014	0.27627	-0.065332	38.179	-96.0882	1205.0026	-1.4128	0.57588	-0.49365	-33.61478	58.7903	111.611	0.21524	-0.0085938	0.10537
1.41	-22.553	13.345	19.4608	-0.087011	0.10176	0.12354	-41.679	92.1554	916.2178	-1.2381	0.37226	-0.53672	-38.032	49.951	1121.328	-1.4824	0.7084	-0.28496	-12.102	99.8367	160.2488	0.063672	0.13594	0.0062499	7.363	135.379	688.872	-0.9624	0.27246	-0.061523	45.051	-116.4809	1257.078	-1.497	0.57881	-0.49737	-42.655995	46.57079	105.1517	0.24297	-0.023047	0.11631
1.412	-17.281	19.8065	20.8882	-0.085059	0.10879	0.12354	-35.075	92.10576	908.3735	-1.2129	0.35801	-0.50918	-24.101	62.4378	1114.221	-1.4503	0.67207	-0.26709	-5.912	97.17624	149.1245	0.11035	0.11084	0.021484	2.369	136.387	666.3692	-0.92852	0.27441	-0.059961	35.357	-134.942	1283.052	-1.5938	0.56885	-0.5	-20.812	37.0728	106.8915	0.26729	-0.037696	0.12295
1.414	-21.4214	17.6373	21.5475	-0.083203	0.11133	0.12168	-34.512	97.2295	863.6201	-1.1883	0.34551	-0.49004	-31.976	99.053	1118.6442	-1.4206	0.63691	-0.25537	-11.264	100.108	145.05783	0.14492	0.1001	0.041406	-10.294	130.156	652.4872	-0.89551	0.27148	-0.057226	38.961	-138.486	1292.228	-1.6997	0.55381	-0.52197	-2.471	35.9443	79.1488	0.28271	-0.054199	0.13086
1.416	-15.11	18.5696	34.9786	-0.08252	0.11768	0.12354	-48.9394	94.835	846.7636	-1.1605	0.33662	-0.46817	-19.679	114.733	1135.194	-1.3976	0.6002	-0.2416	-24.145	82.625	124.6292	0.18291	0.090821	0.058203	-19.2541	124.205	626.5556	-0.85644	0.2707	-0.054492	23.021	-149.141	1279.57	-1.8178	0.53447	-0.53604	-30.847	46.573	50.5575	0.29726	-0.071582	0.14316
1.418	-24.631	15.067	24.6333	-0.077832	0.11982	0.12168	-21.81	100.463	810.3711	-1.1323	0.32666	-0.44775	-44.7895	113.467	1116.1124	-1.3828	0.56836	-0.22949	-19.04	64.053	126.9873	0.21142	0.074805	0.072266	-18.409	110.0685	596.0656	-0.81963	0.26836	-0.049024	5.0293	-154.524	1268.3248	-1.9413	0.51963	-0.55088	-29.475	42.894	40.4759	0.30576	-0.089843	0.15039
1.42	-16.945	13.0462	28.362	-0.079297	0.12216	0.11827	-29.977	102.537	774.9092	-1.1044	0.31475	-0.42861	-33.0658	119.5724	1086.7165	-1.3745	0.53486	-0.21357	-14.575	64.664	106.7047	0.23662	0.061035	0.089063	-41.5501	104.3844	573.8251	-0.77881	0.26807	-0.047363	13.24955	-154.4283	1298.1807	-2.0482	0.50996	-0.56387	-17.267	43.496	36.908	0.31006	-0.10859	0.16054
1.422	-5.924	12.2508	9.0114	-0.078907	0.1249	0.11865	-39.319	100.147	753.9276	-1.0754	0.30254	-0.40625	-59.116	108.9742	1057.192	-1.3681	0.50127	-0.2003	-33.7006	64.983	93.2995	0.26123	0.042969	0.10596	-13.674	105.4331	561.151794	-0.74033	0.26494	-0.041797	36.285	-137.7391	1298.621	-2.1387	0.52051	-0.57764	-10.904	37.46	54.2547	0.31113	-0.12276	0.16826
1.424	-25.9335	17.772	-2.6613	-0.080469	0.12979	0.11367	-50.0056	114.7943	734.9724	-1.0414	0.28652	-0.38398	-49.098801	97.472	1050.5707	-1.3638	0.47705	-0.18545	-30.153	67.685	68.639	0.2748	0.028809	0.12051	-23.454	110.553	535.66407	-0.69521	0.2625	-0.038282	50.172	-124.5345	1296.816	-2.1885	0.55019	-0.58965	-25.5846	28.918	48.6192	0.30762	-0.14111	0.17383
1.426	-18.4327	18.9595	4.713	-0.078125	0.13574	0.11865	-46.8455	128.514	723.182	-1.006	0.27422	-0.36475	-31.2987	92.441	1033.7565	-1.3592	0.45039	-0.17383	-16.809	52.5916	70.3502	0.2875	0.01084	0.13555	-18.491	119.701	504.2523	-0.64795	0.26445	-0.036328	28.426	-110.4776	1281.23944	-2.2359	0.59189	-0.60479	-11.03	34.31895	70.5109	0.30469	-0.15342	0.18262
1.428	-14.978	19.3905	16.477	-0.075	0.14258	0.11465	-49.5878	136.398	701.5712	-0.96387	0.26416	-0.34717	-26.222	94.232	1015.8234	-1.355	0.43311	-0.1626	-17.078	63.6061	55.0545	0.29024	-0.0051758	0.14844	-29.471	118.9052	483.0368	-0.60039	0.2584	-0.038184	27.7082	-105.068	1259.14	-2.2796	0.6333	-0.61884	-5.882	42.9095	48.1185	0.29912	-0.16523	0.18867
1.43	0.932000000000002	21.0069	21.1224	-0.071484	0.13984	0.11064	-60.2619	128.227	668.1223	-0.91963	0.25429	-0.33603	-17.291	93.3624	1005.3349	-1.3507	0.41142	-0.15137	-15.261	56.7718	38.84417	0.29287	-0.018164	0.16328	-32.2663	119.6906	453.277	-0.55176	0.25098	-0.038574	28.7023	-86.058	1262.2139	-2.3356	0.65586	-0.65234	-50.1943	49.21	26.3923	0.29131	-0.17226	0.18711
1.432	-16.678	21.2848	15.8416	-0.070704	0.14727	0.10948	-47.502	128.685	642.501	-0.87139	0.242	-0.32119	-17.5486	88.9023	989.2992	-1.3359	0.39726	-0.14511	-12.055	31.539	60.9132	0.29248	-0.032715	0.1709	-36.8791	111.4402	436.05731	-0.50078	0.24492	-0.035156	16.7489	-55.832	1269.9711	-2.3945	0.65625	-0.69531	-44.5704	55.924	14.9309	0.28017	-0.18066	0.19072
1.434	-28.925	5.41053	42.1108	-0.068359	0.14941	0.10361	-24.588	134.777	596.499	-0.8206	0.23418	-0.30948	14.4136	107.3094	981.2917	-1.3172	0.37969	-0.13262	-1.583	23.416	47.23148	0.29385	-0.051074	0.18867	-44.9203	103.9406	415.8769	-0.46055	0.22842	-0.026757	30.975	-46.89099	1267.9187	-2.4347	0.6208	-0.74521	-32.1925	45.271	16.7237	0.26611	-0.18311	0.19287
1.436	-14.29	-14.9242	67.11093	-0.072266	0.1543	0.10156	-27.704	132.031	558.1297	-0.76436	0.22334	-0.28662	-1.685	126.9352	976.6584	-1.2989	0.36533	-0.12002	-16.231	20.601	42.9797	0.29756	-0.069043	0.19307	-37.9707	93.9046	392.4039	-0.42148	0.2167	-0.024024	28.7795	-43.249	1256.052	-2.4449	0.57207	-0.78398	4.027	32.7945	19.52	0.25468	-0.18535	0.18857
1.438	-15.461	-4.0543	68.6997	-0.074609	0.15772	0.092481	-46.783	125.9803	526.207	-0.71777	0.21484	-0.27783	0.0130000000000017	132.009	966.649	-1.2734	0.35059	-0.11084	-4.214	33.3921	38.2719	0.29756	-0.083106	0.20557	-57.4458	93.7552	356.2309	-0.37774	0.20156	-0.02539	23.8742	-49.61	1269.146	-2.4257	0.53223	-0.80859	-22.5485	32.4977	1.869	0.2377	-0.18574	0.19082
1.44	-5.088	12.907	70.8922	-0.084766	0.15615	0.08623	-32.737	115.3112	495.7916	-0.65947	0.20362	-0.27451	10.453	121.6774	956.6138	-1.2555	0.33496	-0.10215	-24.701	31.66	46.8706	0.29366	-0.088086	0.21465	-46.6403	104.50233	319.184	-0.33154	0.18896	-0.026367	12.9547	-50.694	1296.021	-2.4	0.50781	-0.8334	-14.513	13.569	10.528	0.22207	-0.18028	0.18496
1.442	-43.6506	36.6828	126.669	-0.10157	0.15615	0.076855	-14.675	107.956	475.2857	-0.59678	0.19638	-0.25996	18.9318	116.5752	916.35104	-1.2308	0.31513	-0.087011	-1.109	42.171	35.4156	0.29053	-0.094238	0.2251	-58.6294	106.08938	292.265	-0.27803	0.17784	-0.028613	49.081	-56.975	1294.909	-2.3765	0.49951	-0.85889	-6.858	17.284	35.2907	0.20137	-0.17168	0.18018
1.444	-24.085	52.584	191.847	-0.12754	0.1501	0.064257	-26.451	107.143	454.871982	-0.53974	0.18428	-0.24278	13.1723	129.2769	893.9242	-1.212	0.2999	-0.078418	-19.9139	54.96	23.9282	0.29033	-0.1042	0.23115	-23.639	96.0645	287.16211	-0.22149	0.16475	-0.026367	45.317	-72.8599	1309.8048	-2.3616	0.5083	-0.8835	8.187	18.7326	43.4579	0.18359	-0.16309	0.17627
1.446	-38.898	56.046	307.194	-0.16064	0.15381	0.044922	-8.561	92.387	439.52848	-0.4831	0.17168	-0.22637	19.1991	136.0679	865.2101	-1.1864	0.2875	-0.071679	-38.7659	44.479	7.5575	0.28486	-0.11386	0.23701	-18.261	99.0413	258.06445	-0.16757	0.15108	-0.025976	16.143	-75.412	1294.66574	-2.3562	0.53301	-0.91211	-11.817	30.072	26.0292	0.16406	-0.1502	0.17012
1.448	-39.292	62.086	378.469	-0.2124	0.1497	0.022168	-14.366	96.249	427.4888	-0.42969	0.16553	-0.21094	44.7493	133.3996	846.51	-1.1577	0.27686	-0.061523	-27.71075	28.83	24.7163	0.28252	-0.12715	0.23428	-18.951	98.99415	236.2899	-0.11113	0.14326	-0.025293	22.7843	-93.094	1294.5134	-2.3504	0.57246	-0.92969	-4.929	27.8785	27.6332	0.14726	-0.13467	0.16611
1.45	-33.055	54.4355	510.378	-0.28789	0.14589	-0.0023438	-22.319	103.0738	400.1265	-0.38144	0.1503	-0.1999	28.6781	139.4377	815.5391	-1.1335	0.26885	-0.054297	-2.87	5.8259	31.8522	0.28281	-0.13877	0.23223	-6.958	91.2974093	232.404	-0.059082	0.13086	-0.021973	42.865	-86.51	1294.449772	-2.3307	0.61309	-0.9498	-7.373	19.3943	39.7634	0.12266	-0.12178	0.15088
1.452	25.137	42.492	603.0731	-0.37891	0.13848	-0.019922	-30.587	99.946	358.2324	-0.32676	0.1375	-0.1835	25.14745	137.5111	796.2622	-1.1073	0.258	-0.047949	-8.254	9.356	21.4388	0.28418	-0.14844	0.22803	-2.473	84.5189	211.4264	-0.0089842	0.11963	-0.021192	44.764	-66.448	1307.242	-2.2905	0.65576	-0.96143	-23.3211	23.7549	37.1622	0.11123	-0.10235	0.14931
1.454	30.6644	30.2961	682.4268	-0.49443	0.11553	-0.035743	-24.431	87.051	347.5745	-0.28066	0.12383	-0.16865	26.4435	124.2805	779.5326	-1.0792	0.24707	-0.045996	-14.474	9.522	19.0716	0.28857	-0.15557	0.21894	-11.987	80.47772	203.9861	0.035156	0.1083	-0.014941	44.554	-60.809	1307.255	-2.2402	0.68242	-0.97539	-14.854	27.08	19.9952	0.096191	-0.086426	0.1416
1.456	-8.049	44.883	751.7643	-0.63525	0.094727	-0.059082	-10.397	84.718	316.9962	-0.22793	0.11211	-0.15322	24.3827	117.3499	766.7597	-1.0527	0.23545	-0.046387	-5.11	1.921	12.499	0.29141	-0.16123	0.21025	-17.574	69.8236	183.09845	0.07461	0.092286	-0.01416	53.289	-51.021	1302.2947	-2.1745	0.69873	-0.9748	-12.794	21.1312	13.8444	0.082031	-0.064356	0.13135
1.458	-23.5862	19.498	817.004	-0.79209	0.076855	-0.081836	-26.366	80.669	274.0606	-0.17969	0.10156	-0.13135	21.7708	118.9621	738.8063	-1.0215	0.22314	-0.038574	-11.436	14.2809	8.0157	0.29687	-0.16514	0.20361	-11.057	67.2238	183.33259	0.10694	0.074316	-0.0094726	47.305	-24.8198	1279.607	-2.1031	0.70459	-0.96816	-11.983	23.5587	13.9537	0.067481	-0.045703	0.12539
1.46	-31.491	0.474999999999998	836.1715	-0.96044	0.061621	-0.10654	-24.679	85.102	243.0025	-0.12969	0.09082	-0.11563	-12.5689	128.2409	719.836	-0.98643	0.21953	-0.038867	-12.858	27.1387	16.4704	0.29463	-0.17002	0.19746	-18.737	61.9045	155.6024	0.13281	0.055176	-0.0083008	48.011	13.96054	1282.905	-2.0372	0.69873	-0.95947	-12.387	18.3477	3.656	0.054199	-0.023828	0.11289
1.462	10.283	-0.7176	874.8778	-1.1304	0.064746	-0.12803	-31.4828	72.6915	225.9354	-0.08125	0.076074	-0.10127	-11.133	121.1887	700.713	-0.95029	0.21006	-0.037207	-5.302	25.274	33.0342	0.29395	-0.17139	0.19336	-23.9379	68.59	135.829	0.15263	0.035937	-0.0043945	39.61	35.06968	1303.88	-1.9741	0.69385	-0.94189	-18.416	26.18522	-1.739	0.039063	-0.0060546	0.10693
1.464	6.4143	-10.49	898.6972	-1.299	0.078418	-0.15527	-10.468	75.576	207.6997	-0.034766	0.065918	-0.082129	-23.4234	131.1924	666.988	-0.91592	0.20459	-0.031739	-19.786	20.7426	33.4342	0.28086	-0.17187	0.18467	-13.132	65.0808	114.945	0.16875	0.015332	0.0016601	30.493	36.17698	1302.3473	-1.9188	0.69336	-0.92344	-19.077	26.1255	20.439	0.027832	0.01416	0.095703
1.466	6.6477	-27.139	882.566	-1.4565	0.1001	-0.18701	-11.755	65.781	190.3783	0.0063477	0.050489	-0.065137	1.524	138.8385	647.422	-0.87715	0.19473	-0.030859	-14.783	13.7061	25.23979	0.26699	-0.16953	0.1751	-30.747	51.7259	123.0683	0.17734	-0.0053711	0.0063476	25.2416	38.6784	1274.761	-1.8746	0.69805	-0.90762	-10.863	34.9324	37.1581	0.011426	0.032031	0.092578
1.468	2.0266	-48.573	877.348	-1.5939	0.1414	-0.21367	-9.617	59.139	173.51375	0.044922	0.039063	-0.04541	-29.1282	129.41463	634.873	-0.83838	0.18311	-0.036133	-36.267	14.5443	15.83994	0.24941	-0.16719	0.16494	-5.21100000000001	40.3117	113.69097	0.18779	-0.027246	0.009668	18.6932	34.669	1237.9725	-1.8418	0.70586	-0.88731	-8.796	29.2264	19.4596	-0.0047852	0.047461	0.084375
1.47	9.5994	-50.742	863.501	-1.7066	0.1915	-0.23955	0.212	67.8754	138.572	0.085058	0.025781	-0.030566	-26.5045	128.3562	626.173	-0.79268	0.17031	-0.025488	-38.6457	-0.540500000000002	23.9618	0.2291	-0.16562	0.15586	-22.51	39.2944	97.0492	0.19482	-0.04541	0.012695	7.3416	22.3139	1234.6254	-1.8136	0.71377	-0.86709	-38.259535	30.32036	7.9431	-0.019238	0.061914	0.086719
1.472	36.5744	-42.5043	867.533	-1.7852	0.24775	-0.2544	-8.284	76.0269	132.6422	0.1209	0.01416	-0.017481	-26.3004	125.7607	594.6944	-0.74453	0.1543	-0.017188	-18.734	-1.1769	19.2411	0.20264	-0.16211	0.13916	-13.036	33.206	80.589	0.19853	-0.060254	0.013476	19.1236	22.7216	1237.3674	-1.7827	0.72314	-0.84717	-23.56	18.1213	18.1553	-0.035645	0.072656	0.075293
1.474	34.1404	-35.234	859.548	-1.8139	0.29629	-0.27051	-41.2191	79.708	115.2341	0.15567	0.002832	0.0024414	-10.562	128.6704	550.2947	-0.69922	0.14102	-0.014063	-10.286	28.06646	12.5667	0.18174	-0.14776	0.13623	-33.6919	46.4161	91.766	0.19795	-0.073633	0.017188	43.197	27.2085	1229.106	-1.76	0.725	-0.82959	-22.521	23.443	22.062	-0.050293	0.087402	0.068359
1.476	60.591	-3.311	827.1372	-1.7949	0.33203	-0.28516	-27.773	61.939	111.5396	0.18477	-0.0023438	0.022461	-27.0139	119.7247	529.671	-0.65401	0.13018	-0.0125	-10.449	35.4581	-3.684	0.1502	-0.1374	0.12149	-19.948	49.141	92.8525	0.196	-0.085742	0.024609	34.0234	21.452	1208.3405	-1.7313	0.72207	-0.80976	-28.684	25.0799	14.352	-0.062305	0.095117	0.066211
1.478	30.52305	10.836	788.826	-1.7339	0.35263	-0.28681	-16.965	49.5458	118.677	0.20313	-0.012207	0.039551	-18.146	107.0301	511.5895	-0.61133	0.12012	-0.0083008	-22.894	24.662	3.314	0.11973	-0.1206	0.11093	-43.6166	65.9098	56.113	0.19404	-0.096191	0.019141	40.161	-5.363	1201.6056	-1.7066	0.71387	-0.7914	-49.757	24.2413	23.41241	-0.070117	0.10616	0.0625
1.48	10.3293	19.503	817.4066	-1.6507	0.36748	-0.27822	-27.539	38.5931	107.9242	0.22315	-0.022071	0.053808	-3.228	105.8319	484.174	-0.56289	0.11045	-0.009082	-1.415	29.217	12.7447	0.095116	-0.10703	0.10039	-42.949	64.1474	54.3085	0.19336	-0.11133	0.013184	30.914	-16.894	1199.4661	-1.6867	0.70117	-0.76895	-23.7565	13.2532	31.1173	-0.079882	0.11865	0.061718
1.482	-15.9124	14.925	809.31101	-1.539	0.37842	-0.27158	-35.82	36.8293	95.48298	0.23457	-0.031445	0.066211	-33.5275	117.5831	456.232	-0.51396	0.1002	-0.00625	-19.323	19.5651	14.2401	0.07666	-0.089844	0.092773	-55.6483	56.4746	57.3185	0.19189	-0.12051	0.012988	21.0734	9.604	1188.7112	-1.6636	0.68994	-0.74463	-2.08	7.560425	27.4262	-0.088965	0.12686	0.05918
1.484	-14.3597	29.009	798.5822	-1.4189	0.37822	-0.25068	-24.584	40.66632	72.387	0.242	-0.043945	0.088867	-27.7866	113.7916	456.6073	-0.47334	0.091993	-0.0042969	-10.161	23.4841	11.3844	0.052832	-0.071973	0.08584	-61.1757	56.067	50.447	0.1877	-0.12939	0.0083008	22.6506	26.7734	1189.888	-1.6397	0.67646	-0.72607	-36.7406	16.0823	14.782	-0.098145	0.13672	0.057617
1.486	5.304	9.228	757.812	-1.3047	0.37402	-0.22705	-28.195	48.1947	59.772	0.2457	-0.060156	0.10479	-10.813	112.8595	422.9686	-0.4376	0.077441	-0.0024414	-30.3679	8.268	26.5184	0.032227	-0.054688	0.07666	-35.675	55.543	50.8001	0.18496	-0.13838	0.0036133	14.36301	45.8592	1176.437	-1.6167	0.65928	-0.70303	-24.875	21.91162	26.3497	-0.10478	0.14121	0.058106
1.488	-26.161	-28.96	745.583	-1.1956	0.3707	-0.20674	-20.479	55.6381	39.7372	0.24023	-0.064941	0.11719	5.738	122.987	401.424	-0.40039	0.067871	-0.0068359	-26.841	6.3993	14.7759	0.013867	-0.040625	0.069239	-40.9372	37.1896	55.5902	0.18018	-0.15039	0.00048826	18.219	41.93876	1138.3379	-1.5921	0.6503	-0.67607	-10.234	34.7425	19.31456	-0.10996	0.15	0.055957
1.49	0.696999999999996	-60.56	765.786	-1.1073	0.37783	-0.18975	-17.16	29.495	32.209	0.24072	-0.079004	0.12764	-0.858999999999998	132.224	372.4908	-0.36377	0.058985	-0.006543	-22.0029	20.3072	15.1942	-0.0046876	-0.020117	0.06416	-25.859	27.75339	48.0375	0.17139	-0.16016	-0.0029297	3.4195	50.7557	1113.8915	-1.5654	0.63233	-0.64756	-0.0480000000000018	32.0684	11.3782	-0.11192	0.15547	0.056348
1.492	-6.827	-85.5318	791.9418	-1.0319	0.39931	-0.17725	1.725	19.892	37.896	0.23428	-0.087403	0.14161	3.185	128.866	349.6544	-0.31709	0.053711	-0.011426	-28.585	25.99	13.5077	-0.026367	-0.0014648	0.059082	-17.15	25.0671	45.075	0.1584	-0.17119	-0.0051758	-10.3177	64.482	1095.776	-1.5347	0.61377	-0.62354	-42.2319	31.8091	6.6764	-0.11357	0.15967	0.050293
1.494	22.559	-91.424	804.687	-0.98213	0.42978	-0.16728	-0.347999999999999	25.4809	40.9391	0.23155	-0.096777	0.15293	18.013	113.1321	337.6182	-0.27139	0.046289	-0.011426	-31.4644	22.8796	3.4138	-0.041699	0.014844	0.049024	-31.753	33.9814	19.276	0.14385	-0.17871	-0.0068359	4.5964	80.317	1082.2828	-1.51	0.59639	-0.59815	-18.59	13.504398	31.917	-0.11426	0.16797	0.053223
1.496	-0.788	-122.264	823.1221	-0.94092	0.46436	-0.1582	-12.446	51.9278	47.8473	0.21885	-0.10821	0.16445	18.2859	118.0938	306.2402	-0.225	0.042871	-0.0043946	-11.517	18.0503	18.3653	-0.052344	0.035059	0.047266	-23.635	28.9306	32.485	0.12588	-0.18692	-0.011914	20.4777	110.209	1063.657	-1.4801	0.5752	-0.57656	-2.338	15.0725	45.7323	-0.11563	0.16826	0.05293
1.498	-19.333	-150.891	837.229	-0.92051	0.49786	-0.14307	-32.1625	48.129	49.0752	0.2085	-0.12158	0.1748	19.6377	106.723943	286.7112	-0.17773	0.040527	-0.0024414	-10.924	23.5234	6.794	-0.064063	0.051856	0.045313	-7.792	34.84559	39.0803	0.10186	-0.19092	-0.01543	12.336	105.237	1037.1	-1.4519	0.55644	-0.55	-2.7	27.6399	35.2503	-0.1127	0.17198	0.054297
1.5	-43.0297	-154.721	844.063	-0.90498	0.53838	-0.13291	-23.215	38.8815	40.8425	0.19434	-0.12988	0.18164	15.912	93.8102	276.735	-0.13877	0.037598	-0.0046875	-17.896	16.6399	11.128	-0.076855	0.066016	0.039453	-24.43	28.0716	35.9922	0.07959	-0.19678	-0.024414	3.511	92.8402	1006.272	-1.4235	0.53281	-0.52969	-20.455	36.118	21.2518	-0.10918	0.17588	0.055859
1.502	-69.625	-135.059	871.8007	-0.90459	0.58096	-0.13525	-15.956	40.4237	18.3217	0.18291	-0.13614	0.18662	6.399	91.9229	262.856	-0.1044	0.03418	-0.0051758	1.327	15.9727	26.3227	-0.09082	0.083496	0.03125	-28.288	28.28794	22.5655	0.051367	-0.19531	-0.019336	12.392	84.4975	995.561	-1.394	0.51221	-0.50439	-18.782	27.8857	15.266	-0.11269	0.17949	0.058789
1.504	-59.851	-120.7938	901.577	-0.91387	0.62344	-0.12266	-45.077	37.8702	15.086	0.17158	-0.14434	0.19405	3.47	99.5408	230.445	-0.073926	0.025977	0.003418	-1.286	10.19	25.2171	-0.095703	0.10186	0.029199	-2.188	21.1707	42.51749	0.027344	-0.18877	-0.021777	12.692	94.4697	978.997	-1.3638	0.496	-0.48369	-10.619	14.5044	31.3756	-0.11621	0.18311	0.058105
1.506	-100.76938	-126.105	913.2418	-0.92188	0.6582	-0.13086	-16.218	27.6867	20.9591	0.15664	-0.15205	0.20049	-14.461	95.6055	204.272	-0.043066	0.029688	0.00097655	-27.783	31.2663	16.9859	-0.098535	0.11699	0.027735	-5.714	28.039	41.8418	0.00078128	-0.18291	-0.029981	-22.771	113.076	972.799	-1.3339	0.4794	-0.46553	-12.646	11.2676	20.8944	-0.1125	0.18711	0.058496
1.508	-96.03	-128.542	913.1942	-0.93164	0.68398	-0.13945	-7.712	21.2063	25.416	0.14795	-0.15723	0.20508	-3.822	80.2595	199.2222	-0.01416	0.01709	0.003418	-28.666	24.412	14.2008	-0.097363	0.13184	0.021484	-10.957	31.78	34.41044	-0.022266	-0.17803	-0.033984	-3.957	108.7314	979.876	-1.3042	0.46299	-0.44834	-9.766	7.80228	34.7208	-0.11338	0.19277	0.06045
1.51	-96.085	-106.127	918.344	-0.954	0.69853	-0.15136	-13.519	24.42392	7.799	0.13516	-0.1625	0.21045	-16.654	77.9482	191.4104	0.0076169	0.0065428	0.0033203	-17.322	26.95	14.3372	-0.095019	0.14551	0.016113	-14.968	28.1147	17.3222	-0.040039	-0.16748	-0.035156	0.334000000000003	89.6896	957.5401	-1.2699	0.44746	-0.42597	-8.151	-5.784	56.8782	-0.1126	0.19356	0.06123
1.512	-76.3687	-90.755	947.34	-0.98408	0.70284	-0.16621	-12.851	26.5675	12.2491	0.12686	-0.16816	0.20117	-15.931	66.7659	174.57327	0.026172	-0.0026367	0.0055664	-13.341	37.519	7.0016	-0.094727	0.16016	0.02002	-16.939	20.824	20.317	-0.061328	-0.1581	-0.041309	-25.178	100.4019	919.5109	-1.2378	0.43213	-0.40381	-8.097	-4.5202	106.347	-0.1125	0.19883	0.056445
1.514	-48.501	-79.6439	987.001	-1.025	0.70117	-0.18584	-9.307	14.7847	16.2041	0.11709	-0.16816	0.20859	-34.3583	75.1918	153.1058	0.045313	-0.0084961	0.0075195	-36.337	41.097	18.4607	-0.090234	0.17617	0.014551	-1.03599999999999	24.6039	18.668	-0.07334	-0.14697	-0.041699	-28.0776	102.4992	917.3677	-1.2007	0.4208	-0.39151	-7.851	18.68	118.51	-0.11719	0.20117	0.057617
1.516	-47.551	-70.891	996.469	-1.0625	0.69141	-0.20068	-1.969	23.5087	22.5054	0.11143	-0.16894	0.20674	-17.219	80.0188	149.8098	0.06123	-0.019727	0.0093751	-19.69	25.382	19.7145	-0.090625	0.18867	0.012305	-22.832	29.5039	1.916	-0.087402	-0.13525	-0.049121	-28.694	101.6968	915.3945	-1.1645	0.40898	-0.375	-31.6351	37.6201	149.3545	-0.13027	0.20459	0.050782
1.518	-30.188	-73.5311	1024.8516	-1.0973	0.67929	-0.22139	-15.391	35.4138	21.6864	0.1001	-0.16943	0.20313	-33.1459	90.074	116.758	0.072266	-0.030273	0.013184	-9.888	10.414742	14.996	-0.0875	0.20039	0.015429	-6.543	35.235	25.91398	-0.094238	-0.12207	-0.051562	-24.814	105.0218	892.3028	-1.1321	0.39609	-0.35742	-49.988	43.47491	214.9082	-0.15762	0.19981	0.045801
1.52	-53.598	-88.4621	1055.4599	-1.1284	0.67256	-0.24512	-14.154	32.2441	26.8912	0.091992	-0.17119	0.20273	-27.5262	83.6211	109.695	0.085743	-0.04336	0.015722	-9.883	8.8963	33.0005	-0.091602	0.21152	0.018262	-26.4639	30.8997	14.1613	-0.099121	-0.11133	-0.05957	-39.8824	111.43381	845.59922	-1.0936	0.38037	-0.33907	-61.916	33.571	331.912	-0.19981	0.19942	0.039551
1.522	-40.84	-100.2992	1100.77	-1.1577	0.66357	-0.2666	-23.727	16.6849	31.8498	0.083692	-0.16504	0.20039	-23.799	62.407	119.1877	0.096484	-0.053906	0.020215	-25.571	0.5751	44.2348	-0.10059	0.22266	0.012695	-9.316	26.5144	20.53642	-0.098633	-0.10137	-0.062305	-27.568	112.8153	811.2958	-1.0625	0.37109	-0.31836	-55.438	8.42843	417.226	-0.25937	0.19375	0.026856
1.524	-44.704	-108.59	1117.472	-1.1794	0.6498	-0.28681	-21.214	9.5234	31.57	0.077441	-0.16035	0.19648	-27.8661	50.4736	99.4809	0.10977	-0.069922	0.02334	-16.152	-17.5447	57.2189	-0.11396	0.23174	0.015332	-37.174	26.6283	15.3091	-0.093262	-0.092969	-0.070703	-26.874	102.594	798.4411	-1.0274	0.36084	-0.30117	-68.371	29.349	503.474	-0.33838	0.18457	0.015137
1.526	-55.0578	-109.9384	1143.341	-1.1987	0.62549	-0.30518	-31.648	21.7752	14.7475	0.074219	-0.15703	0.19258	-25.8717	53.6256	95.4198	0.1207	-0.07959	0.021777	5.849	-8.6765	58.4717	-0.1333	0.24062	0.013477	-44.054	11.7505	27.4678	-0.085449	-0.086719	-0.074219	-32.694	110.873	770.6561	-0.99218	0.3461	-0.28496	30.7489	24.666	598.9322	-0.4375	0.16963	-0.00791
1.528	-51.2411	-140.152	1156.7257	-1.2264	0.59092	-0.32608	-47.4093	29.56	4.2373	0.065918	-0.14893	0.18799	-32.4321	58.5091	80.3518	0.13477	-0.090332	0.021973	-7.35	7.1751	55.3568	-0.15401	0.2539	0.012695	-23.822	9.7315	37.7599	-0.071484	-0.083106	-0.079004	-35.43	131.4452	747.2556	-0.96172	0.33398	-0.26308	32.3286	11.417	674.402	-0.55859	0.15234	-0.029785
1.53	-66.8953	-158.3953	1156.5681	-1.2693	0.54941	-0.33907	-25.421	29.99	1.978	0.065625	-0.14043	0.18105	-28.867	55.472	87.32349	0.14482	-0.098241	0.027344	-22.989	18.78926	78.0312	-0.17891	0.26738	0.0098632	-35.913	19.2619	36.4258	-0.056152	-0.075195	-0.078613	-37.018	130.1597	719.727	-0.93028	0.31973	-0.24316	-38.45	33.978	798.329	-0.69883	0.12773	-0.048144
1.532	-33.99	-165.88	1164.1534	-1.3424	0.51543	-0.3543	-14.81	32.27	15.6709	0.061621	-0.13203	0.17861	-29.51	60.4629	69.7715	0.15722	-0.10596	0.020606	-36.3105	9.6741	131.5493	-0.20605	0.27148	0.0043945	-39.8156	14.9902	15.6279	-0.046289	-0.070605	-0.089258	-44.7406	137.704	698.522	-0.89941	0.30615	-0.22168	-14.717	52.0849	873.003	-0.86806	0.091111	-0.056836
1.534	-50.85	-150.6599	1175.022	-1.4409	0.49444	-0.35439	-20.347	34.9445	11.8139	0.056934	-0.12149	0.17353	-25.491	56.9025	54.269	0.15918	-0.11924	0.022559	-44.718	21.366	175.952	-0.24004	0.27929	-0.0041015	-38.2447	18.5631	11.11	-0.023828	-0.06582	-0.095508	-40.391	131.195	682.6663	-0.86406	0.29629	-0.21104	-2.9261	34.618	904.191	-1.0679	0.039063	-0.078125
1.536	-7.84	-144.697	1193.265	-1.5737	0.49268	-0.354	-23.519	20.47181	31.7087	0.047559	-0.10898	0.16055	-24.414	56.6182	50.573	0.15801	-0.13408	0.020703	-28.034	36.21831	324.563	-0.27812	0.28799	-0.017481	-30.969	19.9329	25.6013	-0.0054688	-0.060351	-0.10137	-38.8321	131.059	648.3191	-0.82744	0.28633	-0.18555	15.17441	6.789	976.114	-1.2807	-0.010938	-0.10498
1.538	-18.837	-135.77	1189.1928	-1.7297	0.51484	-0.34629	2.089	20.532	25.2924	0.039551	-0.097656	0.15674	-16.123	47.1453	69.29451	0.15332	-0.14307	0.025391	-36.567	18.3208	419.711	-0.32539	0.29306	-0.038574	-39.6373	29.4031	4.4224	0.010938	-0.053809	-0.10879	-37.258	129.404	640.62745	-0.79424	0.27383	-0.17422	22.168	0.0609999999999999	990.717	-1.4938	-0.033106	-0.13652
1.54	-7.538	-121.011	1171.36957	-1.9069	0.55244	-0.34541	-17.224	20.702	16.6631	0.027539	-0.080274	0.15605	1.043	36.3619	62.9482	0.14541	-0.15234	0.021875	-63.909	13.6058	548.435	-0.39551	0.29434	-0.06123	-30.485	23.1922	24.6982	0.030762	-0.047852	-0.11426	-36.7287	135.689	615.46	-0.75742	0.26728	-0.15469	67.965	-17.671	1009.31	-1.6863	-0.022168	-0.18067
1.542	-23.076	-109.059	1176.832	-2.0956	0.60088	-0.3458	-28.397	35.8955	13.7566	0.01289	-0.066406	0.14834	4.165	42.4542	47.1013	0.13105	-0.16016	0.022558	46.5413	-6.722	612.349	-0.48047	0.28809	-0.08252	-32.293	27.78508	18.8847	0.050488	-0.045606	-0.11777	-40.0685	127.5415	563.722	-0.71729	0.25488	-0.13525	67.554	-9.41	1006.734	-1.8388	0.041602	-0.22451
1.544	-24.043	-87.4288	1198.7991	-2.2821	0.66445	-0.35322	-34.2639	24.3391	14.0744	-0.0003906	-0.052344	0.14522	7.318	43.8154	48.6246	0.12051	-0.16289	0.019043	57.538	-3.397	677.6239	-0.60439	0.27099	-0.11201	-37.4638	21.281	31.8985	0.064746	-0.037988	-0.12344	-43.9315	114.9091	535.001	-0.68379	0.24678	-0.11621	44.149	-23.981	995.197	-1.9453	0.13477	-0.2666
1.546	-34.286	-80.4476	1200.7129	-2.4546	0.73389	-0.36475	-37.5015	22.6183	29.56	-0.018652	-0.035352	0.13975	13.777	39.9021	44.0964	0.10566	-0.16524	0.016699	-9.265	22.072	810.5028	-0.74922	0.25078	-0.14658	-10.879	23.3104	39.6943	0.073731	-0.032129	-0.12539	-18.957	107.202	510.5846	-0.64873	0.23301	-0.10371	44.773	-41.347	998.222	-1.9993	0.23711	-0.30459
1.548	-73.005	-62.742	1200.75326	-2.6088	0.80664	-0.38291	-9.165	32.6834	14.9159	-0.03125	-0.020508	0.13281	17.33	39.2265	37.2121	0.088867	-0.16162	0.0087891	-12.8222	23.742	868.3812	-0.90235	0.22734	-0.18252	-16.835	12.03215	40.6193	0.089941	-0.029492	-0.13487	-4.46299999999999	107.23	491.0241	-0.60615	0.22129	-0.086133	54.478	-51.217	978.5874	-2.0249	0.329	-0.33564
1.55	-79.80877	-62.334	1213.5617	-2.7388	0.88291	-0.40557	-39.2024	22.2268	25.6187	-0.042871	-0.0040039	0.12832	4.561	43.5748	26.4033	0.073145	-0.15821	0.0081054	-16.0871	-5.919	908.917	-1.0508	0.21465	-0.21123	-9.9	7.5857	57.4876	0.10303	-0.02832	-0.14844	13.831	105.08	447.3716	-0.5667	0.2126	-0.069531	85.645	-54.05	941.131	-2.0202	0.39072	-0.35752
1.552	-90.86654	-79.973	1211.326	-2.831	0.95635	-0.43213	-19.632	14.504	31.65613	-0.055566	0.0091798	0.12432	-15.567	47.179	40.5335	0.054981	-0.15039	0.0012695	0.238	-3.45641	955.133	-1.2046	0.19141	-0.23584	-14.585	6.2475	52.186	0.11425	-0.023633	-0.14678	-22.44	113.802	440.94587	-0.52539	0.2041	-0.055176	48.245	-36.399	915.245	-1.9813	0.43652	-0.36777
1.554	-88.3481	-66.908	1214.254	-2.8833	1.0159	-0.46182	-26.443	10.4716	36.7559	-0.066894	0.024804	0.11846	-3.23	27.0035	43.181	0.038574	-0.14648	-0.0081054	42.224	-40.0205	982.632	-1.3561	0.17764	-0.26866	-17.188	3.7807	45.98	0.11778	-0.019629	-0.15606	-5.585	117.5826	426.71503	-0.48057	0.19599	-0.038965	38.469	10.694	923.5391	-1.9121	0.46094	-0.36133
1.556	-103.6897	-66.43379	1225.05	-2.894	1.0728	-0.47607	-8.938	26.7596	21.6028	-0.075	0.037109	0.11416	-12.336	18.9695	26.6171	0.024707	-0.13799	-0.011035	39.0422	-66.9041	1003.337	-1.5002	0.16797	-0.29316	-8.895	-2.5228	52.9489	0.11816	-0.02002	-0.16113	0.792999999999999	109.2889	400.8033	-0.43359	0.18965	-0.029297	34.557	21.326	933.1529	-1.7936	0.467	-0.34453
1.558	-90.111	-65.398	1245.7742	-2.8649	1.1147	-0.49072	-10.768	26.3244	17.4687	-0.082031	0.054199	0.1084	-13.754	16.8143	14.3887	0.01416	-0.13379	-0.012207	14.08841	-59.815	1015.747	-1.6358	0.15625	-0.30098	-7.399	-19.652	82.8087	0.11192	-0.015918	-0.16943	-5.974	109.177	391.0613	-0.38789	0.18653	-0.014844	44.0925	34.139	927.3516	-1.6448	0.4583	-0.31817
1.56	-79.539	-82.27	1254.573	-2.8149	1.1375	-0.49824	-15	12.746	15.68689	-0.086914	0.069238	0.10664	-32.1835	18.4854	11.9741	0.0026367	-0.12393	-0.01709	20.67	-47.16	1000.986	-1.7583	0.1497	-0.29707	-0.661000000000001	-37.4522	85.7078	0.10205	-0.013672	-0.17773	-25.8635	100.939	356.0454	-0.34317	0.18594	0.00078126	36.79	8.206	918.689	-1.4792	0.44502	-0.28457
1.562	-91.838	-88.243	1276.235	-2.7554	1.1531	-0.50528	-5.912	12.96	28.48346	-0.086621	0.073536	0.097558	-13.929	22.5434	16.66	-0.0078125	-0.11738	-0.027929	59.4664	-53.904	985.675	-1.8667	0.16309	-0.28857	-12.131	-37.5948	78.106	0.088281	-0.011523	-0.18985	-20.086	99.802	336.3529	-0.29248	0.18652	0.0068359	53.32	-15.932	925.508	-1.3371	0.43672	-0.25781
1.564	-70.676	-71.838	1288.3592	-2.6968	1.1587	-0.51982	-19.24	26.3355	16.6856	-0.085059	0.091504	0.09209	-21.278	37.69067	27.941	-0.014844	-0.10723	-0.030664	33.4343	-62.344	966.777	-1.9442	0.18779	-0.28408	-8.713	-46.803	114.561	0.069238	-0.0055664	-0.19463	-13.788	97.458	283.71	-0.24912	0.18584	0.023145	61.1832	-24.262	947.287	-1.2305	0.43164	-0.24219
1.566	-80.699	-67.29	1309.896	-2.6348	1.1582	-0.53125	-21.402	30.5422	25.9177	-0.079883	0.10586	0.09043	-24.211	28.97778	30.2205	-0.018848	-0.099706	-0.033399	42.98813	-37.274	910.3359	-2.0019	0.22256	-0.27783	-9.743	-23.0037	178.2245	0.043457	0.0057617	-0.20283	-29.386	95.3157	232.497	-0.20039	0.18428	0.036036	43.3347	-46.1261	973.752	-1.1587	0.44561	-0.22724
1.568	-70.6725	-57.232	1313.733	-2.5686	1.1619	-0.54746	-15.499	29.7811	35.5003	-0.077637	0.11621	0.088379	-21.475	18.4548	30.7194	-0.019531	-0.093262	-0.041016	39.4857	-22.668	898.335	-2.0335	0.2667	-0.26534	-6.127	18.1761	282.1754	0.014746	0.016211	-0.21445	-9.004	94.72776	229.4919	-0.16055	0.17646	0.043067	33.8442	-53.422	976.481	-1.1115	0.46524	-0.20947
1.57	-99.9289	-40.3731	1300.392	-2.4902	1.157	-0.55351	-26.9535	24.434	29.12	-0.069336	0.12256	0.086914	-22.703	13.4664	24.7385	-0.019141	-0.087402	-0.044922	-3.99	-6.759	931.812	-2.0466	0.30928	-0.24541	-17.664	64.0727	391.61	-0.022461	0.020508	-0.22559	4.61	71.5961	218.1588	-0.11113	0.17227	0.056934	0.595999999999998	-87.369	957.2754	-1.074	0.48633	-0.19189
1.572	-110.4052	-22.0891	1285.118	-2.409	1.1508	-0.55664	-25.919	21.4247	34.32313	-0.065039	0.12735	0.087891	-41.2242	20.8861	18.0637	-0.018945	-0.08252	-0.049414	-26.5058	15.836	946.1592	-2.0425	0.34863	-0.22852	-61.031	67.3338	508.934	-0.07998	0.026953	-0.23789	11.4	67.478	187.9888	-0.067871	0.16602	0.066406	-19.44224	-117.494	940.388	-1.05	0.51035	-0.17441
1.574	-97.11	-15.833	1300.639	-2.3233	1.1381	-0.55801	-30.988	15.0899	37.2516	-0.058789	0.14023	0.085938	-47.3551	22.0843	16.577	-0.016211	-0.078613	-0.058789	-20.2982	7.82700000000001	961.2421	-2.0131	0.38584	-0.21563	-54.465	57.742	594.649	-0.15928	0.022656	-0.24483	-9.004	69.742	184.7514	-0.022559	0.16006	0.074219	-46.3472	-145.329	954.101	-1.0327	0.55029	-0.1543
1.576	-105.5266	-6.38	1304.2714	-2.23	1.1255	-0.55762	-10.374	-1.2265	43.237	-0.049218	0.14756	0.084278	-37.311	17.09463	21.7362	-0.0085937	-0.069824	-0.0625	4.046	-11.049	942.416	-1.9675	0.41768	-0.2043	-27.917	34.305	670.121	-0.28154	-0.00039062	-0.24287	-11.191	65.6162	176.957	0.019434	0.14853	0.08711	-48.1647	-141.343	1008.131	-1.031	0.59668	-0.13418
1.578	-76.619	7.357	1295.41385	-2.1464	1.104	-0.55342	-30.035	-8.9638	63.171	-0.040527	0.15381	0.081543	-44.8429	12.4979	3.975	-0.0024414	-0.064453	-0.066406	-1.312	-46.583	937.573	-1.8929	0.44307	-0.19297	-26.328	6.567	758.4057	-0.43994	-0.032519	-0.23955	-4.094	80.9739	165.2002	0.066309	0.13604	0.097266	-53.2484	-131.6807	1033.1159	-1.0429	0.64414	-0.12617
1.58	-86.6094	16.4408	1288.5539	-2.0605	1.077	-0.54434	-6.487	-11.96799	57.52767	-0.038086	0.15772	0.084668	-36.5862	6.545	-1.8645	0.0092772	-0.056738	-0.07334	-8.536	-76.149	976.9	-1.8218	0.46865	-0.17862	-71.4784	4.634	863.282	-0.62891	-0.077148	-0.2334	-11.453	70.03422	131.4844	0.10342	0.12393	0.1082	-85.891	-117.6485	1046.1565	-1.0715	0.68047	-0.12968
1.582	-46.157	17.7376	1271.7363	-1.9906	1.0531	-0.53067	-18.821	-20.0525	76.9973	-0.035352	0.16826	0.082617	-29.985	8.9245	17.2497	0.022754	-0.05293	-0.083887	-3.032	-78.6509	1012.226	-1.752	0.48926	-0.1709	-75.2703	14.157	899.384	-0.84609	-0.12744	-0.22275	-25.514	56.45985	117.041	0.13574	0.10645	0.11963	-45.2871	-115.8544	1032.128	-1.102	0.69922	-0.14336
1.584	-55.267	5.6402	1269.773	-1.9317	1.0324	-0.51689	-8.251	-16.8511	109.3571	-0.044336	0.17607	0.087305	-27.116	17.3663	27.4119	0.034863	-0.05293	-0.088574	-6.002	-93.243	1039.922	-1.6832	0.51934	-0.15889	-75.311	5.1814	887.7462	-1.0835	-0.17099	-0.21806	-23.541	45.7234	105.867	0.16963	0.088868	0.12529	-65.114	-90.249	1036.252	-1.1421	0.70166	-0.16357
1.586	-16.697	7.856	1260.0542	-1.877	1.0078	-0.50391	-54.9118	-1.1187	167.248	-0.062695	0.18232	0.084863	-20.728	19.5408	12.223	0.051269	-0.050781	-0.091894	-11.831	-142.241	1055.28608	-1.6305	0.54346	-0.15	-55.2693	-4.465	884.0616	-1.3319	-0.19522	-0.22744	-37.3896	39.9949	101.858	0.19453	0.073145	0.13897	-37.8191	-65.258	1075.891	-1.191	0.69219	-0.18399
1.588	-29.201	-1.981	1267.0811	-1.8414	0.99121	-0.49219	-33.962	31.745	303.816	-0.091309	0.1875	0.082031	-6.436	36.7744	-6.0153	0.059082	-0.051758	-0.097168	-43.9436	-182.493	1022.998	-1.5672	0.58096	-0.15	-59.6725	-33.492	914.4909	-1.5661	-0.18106	-0.25068	-30.3894	48.3464	91.5558	0.2168	0.057129	0.14287	-37.316	-53.204	1111.56	-1.2231	0.67891	-0.20508
1.59	-30.748	-6.1546	1265.20145	-1.8042	0.97412	-0.47764	-32.432	-3.8987	414.221	-0.13399	0.19228	0.068066	-6.898	23.9148	16.7332	0.068946	-0.048144	-0.10283	-45.4515	-188.776	1055.462	-1.5016	0.61191	-0.16524	-44.9288	-48.357	923.048	-1.7695	-0.13232	-0.28516	-28.422	51.7346	81.2546	0.23711	0.034375	0.15264	-41.71	-43.875	1121.3907	-1.2547	0.66445	-0.23437
1.592	-28.961	-23.098	1265.6303	-1.7733	0.9542	-0.46006	-48.626	-28.4087	506.835	-0.19218	0.19922	0.054395	3.065	16.9033	27.8092	0.08252	-0.042481	-0.10801	-45.071	-160.618	1081.903	-1.437	0.64893	-0.17871	-11.29	-60.229	943.488	-1.9447	-0.024121	-0.31465	-8.319	45.4491	72.5921	0.25537	0.017578	0.16064	-39.9029	-45.876	1133.9318	-1.2809	0.65732	-0.26319
1.594	-54.785	-3.61785	1257.3162	-1.7406	0.93028	-0.44541	35.8491	-53.5186	576.151	-0.26758	0.2043	0.032519	1.048	2.894	22.9637	0.092676	-0.040527	-0.10879	-83.2179	-147.269	1125.484	-1.3814	0.69004	-0.19161	-37.3642	-42.802	921.965	-2.0961	0.11113	-0.34492	-21.762	46.6606	53.364	0.26758	-0.0019531	0.16621	-26.476	-80.0429	1154.11012	-1.3081	0.65869	-0.29346
1.596	-55.245	-3.7535	1252.121	-1.707	0.89941	-0.42188	37.1912	-47.127	654.95226	-0.36797	0.20586	0.013379	-10.49	12.6155	11.5859	0.1002	-0.036133	-0.11025	-99.9639	-131.567	1139.182	-1.3369	0.71679	-0.21065	-29.857	-39.03	904.561	-2.2117	0.24941	-0.38984	0.237000000000002	35.697	25.62	0.279	-0.011914	0.17324	-6.208	-102.2244	1180.9213	-1.3372	0.65127	-0.32588
1.598	-56.941	-4.649	1220.0499	-1.6767	0.86426	-0.40156	-3.275	5.099	778	-0.49072	0.19482	-0.0083008	-5.109	24.8246	22.7013	0.10107	-0.032227	-0.11572	-81.3706	-141.279	1118.79	-1.299	0.725	-0.23408	-12.356	-13.398	882.8351	-2.2909	0.36377	-0.41455	-17.583	42.948	39.337	0.29072	-0.025586	0.17714	-15.789	-121.4191	1181.2587	-1.3726	0.62949	-0.35527
1.6	-53.072	9.443775	1189.8133	-1.6434	0.82227	-0.37783	-25.953	39.902	820.293	-0.64102	0.18262	-0.028223	17.915	14.9693	31.8598	0.097852	-0.021582	-0.11934	-56.1284	-129.174	1127.647	-1.2787	0.71113	-0.25274	-1.288	25.148	856.967	-2.3477	0.43994	-0.44141	-2.309	52.89144	38.8131	0.3	-0.038672	0.18174	-2.892	-114.8084	1186.3219	-1.4145	0.60254	-0.37754
1.602	-89.6252	20.058	1165.889	-1.6195	0.78594	-0.36377	-16.7	20.42395	835.395	-0.80586	0.16651	-0.058398	-10.624	11.0916	27.465	0.096192	-0.014746	-0.12627	-54.0283	-109.601	1176.253	-1.2573	0.68994	-0.2749	-27.978	46.685	855.992	-2.3592	0.47598	-0.45605	-13.3568	36.0344	25.5068	0.30615	-0.055664	0.18604	-14.8295	-126.0416	1215.8038	-1.4661	0.56895	-0.39951
1.604	-71.171	25.91928	1162.9878	-1.5878	0.74697	-0.34444	22.0363	6.6784	893.2838	-0.97813	0.14971	-0.08418	-9.726	1.3312	26.6262	0.089551	-0.0069336	-0.13291	-41.885	-82.629	1191.117	-1.2362	0.66221	-0.30019	-51.63094	43.35	882.137	-2.3395	0.48164	-0.4664	-18.415	41.5452	26.6615	0.31094	-0.068457	0.18555	-12.389	-137.102	1237.00093	-1.5313	0.53906	-0.41895
1.606	-50.806	39.4233	1148.232	-1.5591	0.7124	-0.3252	63.131	-18.224	930.08	-1.1477	0.14804	-0.11308	-13.862	-17.3418	30.5769	0.078418	0.0057617	-0.13349	-34.074	-60.628	1195.533	-1.214	0.64307	-0.30713	-40.1122	23.571	895.879	-2.241	0.4668	-0.48047	-30.8323	39.835	34.6037	0.31084	-0.080566	0.18681	-8.938	-148.6433	1248.574	-1.6116	0.51064	-0.42471
1.608	-60.83	61.6249	1118.092	-1.5258	0.67773	-0.30625	65.8594	-22.563	946.523	-1.312	0.15137	-0.13965	-11.759	-24.57239	49.5718	0.062012	0.010742	-0.14014	-65.102	-58.052	1182.448	-1.1995	0.62939	-0.31142	-28.0024	22.245	875.59	-2.0528	0.45508	-0.49121	-15.919	43.823	36.3851	0.31123	-0.096973	0.18838	9.555	-133.8477	1260.715	-1.7116	0.4959	-0.41846
1.61	-50.058	78.99713	1119.623	-1.4991	0.64346	-0.28858	17.3316	-16.054	982.481	-1.468	0.16347	-0.16738	-25.105	-12.2573	61.597	0.043066	0.02041	-0.14756	-40.073	-77.8815	1187.2419	-1.2041	0.61973	-0.32002	9.87	-20.351	878.925	-1.8159	0.4458	-0.49072	-12.632	46.133	30.64992	0.30859	-0.11035	0.18428	38.461	-119.025	1279.131	-1.8397	0.49746	-0.4126
1.612	-60.434	84.0451	1105.645	-1.4698	0.60948	-0.27099	25.6128	-11.459	974.513	-1.6188	0.18466	-0.18848	-16.089	-13.5787	65.264105	0.02334	0.027539	-0.14893	-34.16	-100.17424	1230.4241	-1.2441	0.61719	-0.33594	6.831	-50.221	886.789	-1.5799	0.43642	-0.49561	-29.084	38.035	36.5586	0.29932	-0.12109	0.18359	-4.203	-96.153	1261.369	-1.9867	0.52481	-0.42109
1.614	-63.578	84.578	1100.66	-1.4485	0.58076	-0.25595	46.5723	-38.299	952.482	-1.7535	0.21865	-0.22637	-13.421	-15.5889	67.9646	0.0014648	0.038477	-0.15283	-16.871	-107.9987	1251.261	-1.3264	0.61543	-0.35801	22.566	-83.7034	909.097	-1.3803	0.42441	-0.50215	-19.405	20.0853	37.78716	0.28662	-0.13867	0.1835	-1.944	-62.6186	1256.021	-2.1387	0.57568	-0.43066
1.616	-76.8094	86.182	1088.5914	-1.4238	0.54688	-0.23633	45.476	-21.1819	920.7644	-1.868	0.26425	-0.26123	-19.228	-16.1246	72.6748	-0.020312	0.047949	-0.15859	-47.514	-123.6656	1271.6916	-1.4242	0.61963	-0.38467	22.4488	-105.1768	915.661	-1.2155	0.41113	-0.50527	-14.058	5.9612	26.7087	0.26855	-0.14834	0.18261	-9.902	-45.6451	1236.5218	-2.283	0.6459	-0.44668
1.618	-84.5618	67.73	1082.6079	-1.4063	0.51289	-0.22276	61.357	10.887	868.753	-1.9585	0.31104	-0.29541	-44.0313	20.3639	150.356	-0.045898	0.05957	-0.1665	-53.241	-142.8822	1275.93465	-1.5382	0.63369	-0.3917	36.5557	-147.312	958.1117	-1.09	0.39629	-0.50918	1.839	7.961	15.794	0.24981	-0.15498	0.17481	7.07400000000001	-43.8562	1248.093	-2.423	0.72618	-0.46856
1.62	-89.549	49.195	1082.3544	-1.3856	0.48242	-0.21094	38.105	37.806	879.074	-1.9989	0.36191	-0.31465	-13.218	45.0004	272.234	-0.078907	0.069336	-0.18066	-38.643	-167.22412	1285.1973	-1.6749	0.65557	-0.39189	37.145	-170.823	1009.7752	-0.98779	0.39551	-0.521	-0.863	16.514	1.7593	0.23379	-0.1623	0.17344	-8.783	-54.6489	1253.7517	-2.5422	0.79766	-0.48926
1.622	-87.9082	53.004	1057.8652	-1.3656	0.45976	-0.19687	10.3304	25.418	917.5411	-2.0039	0.40761	-0.32481	-62.0372	51.036	388.539	-0.12696	0.077343	-0.19131	-49.475	-156.8752	1281.2813	-1.832	0.68164	-0.39844	35.3	-170.229	1013.6303	-0.90898	0.40274	-0.54688	-5.627	24.439	19.7278	0.21387	-0.16553	0.16992	-23.908	-59.007	1239.466	-2.6398	0.85401	-0.50615
1.624	-74.26109	55.5726	1033.752	-1.3368	0.43457	-0.18213	-32.276	19.147	916.3786	-1.9851	0.44004	-0.32324	-50.66	55.5989	473.914	-0.21132	0.072656	-0.19521	-50.947	-143.2514	1309.848	-2.0013	0.71211	-0.41621	14.320575	-164.548	1028.275492	-0.85898	0.40703	-0.56836	-6.512	22.1039	23.8723	0.1916	-0.16621	0.1624	-32.115	-56.223	1243.114	-2.708	0.89453	-0.52539
1.626	-87.118	80.77738	1020.9969	-1.312	0.40723	-0.17236	-8.2143	26.2824	905.057	-1.9435	0.46367	-0.31455	-19.206	16.9524	524.825	-0.33105	0.05293	-0.19238	-31.38	-132.0761	1306.849	-2.1667	0.75244	-0.43818	-18.5721	-149.783	1017.2972	-0.82929	0.40937	-0.57617	-23.05	30.06916	13.9628	0.17314	-0.16455	0.15645	-75.677	-47.355	1251.112	-2.7466	0.92764	-0.53721
1.628	-41.443	76.7008	1020.1297	-1.2883	0.39053	-0.16543	20.6393	-5.5406	889.262	-1.8848	0.47266	-0.29785	-63.6732	-15.5137	645.317	-0.48975	0.019531	-0.18945	-48.968	-109.7369	1299.5347	-2.3277	0.79228	-0.45537	-31.7517	-132.5914	1035.264	-0.81729	0.40694	-0.58193	-25.9862	25.5263	40.129	0.1501	-0.1626	0.15254	-48.19	-41.835	1252.539	-2.7616	0.94736	-0.55225
1.63	-39.332	79.913	993.2037	-1.2669	0.36514	-0.15078	26.893	-27.2739	898.367	-1.8046	0.47451	-0.27276	-77.158	-13.396	764.736	-0.67598	-0.02168	-0.1832	-64.091	-87.425	1284.7812	-2.4807	0.84551	-0.47109	-29.6595	-126.9871	1034.891	-0.81982	0.41113	-0.59033	-16.341	15.2629	45.732	0.12451	-0.15762	0.14873	-82.2836	-32.828	1253.593	-2.7597	0.96026	-0.55889
1.632	-17.043	83.288	982.369	-1.2513	0.3456	-0.14765	15.002	-37.2815	923.801	-1.707	0.4793	-0.24346	-81.987	33.3327	797.6919	-0.88897	-0.067187	-0.16611	-71.24298	-78.691	1274.5585	-2.6304	0.90283	-0.48486	2.0815	-110.831	1025.922	-0.83857	0.40869	-0.59717	0.670999999999999	25.999	24.19898	0.10107	-0.14746	0.14014	-63.0712	-43.803	1275.813	-2.7458	0.97529	-0.56377
1.634	-26.003	88.68	980.049	-1.2287	0.32803	-0.13477	0.0949999999999989	-31.207	949.724	-1.6004	0.48242	-0.2165	-73.8841	67.884	846.918	-1.1276	-0.11289	-0.14892	-44.995	-77.697	1290.133	-2.7613	0.95791	-0.49892	14.3451	-111.301	1068.683	-0.87734	0.41016	-0.59492	-37.6865	37.299	8.516	0.076953	-0.13877	0.13477	-70.5427	-54.8688	1285.9374	-2.728	0.99072	-0.56006
1.636	-0.678000000000004	101.5413	968.801	-1.2139	0.31152	-0.12549	-6.119	-53.6871	979.505	-1.5053	0.49609	-0.20332	-67.2746	54.769	849.0745	-1.3778	-0.13477	-0.13525	-72.005	-68.6446	1286.8458	-2.8793	1.017	-0.51211	10.93403	-109.374	1099.855	-0.93826	0.41562	-0.58477	-36.5891	42.009	9.4081	0.058496	-0.13164	0.12901	-74.8347	-62.203	1291.182	-2.697	1.0112	-0.56709
1.638	6.004	109.7211	931.4133	-1.1944	0.29853	-0.11904	-29.814	-114.802	977.5636	-1.4258	0.5127	-0.19434	-72.5512	-6.9628	866.03805	-1.625	-0.12744	-0.13721	-78.362	-46.856	1272.843	-2.9664	1.0666	-0.52188	32.8071	-100.432	1114.713	-1.0259	0.42666	-0.57275	-10.608	26.935	-0.813000000000001	0.036621	-0.12149	0.12666	-75.7618	-56.831	1292.144	-2.6551	1.034	-0.57383
1.64	-19.654	118.871	896.833	-1.1745	0.28769	-0.11084	-30.652	-163.272	958.856	-1.3738	0.54395	-0.19101	-58.1091	-21.349	878.624	-1.8371	-0.066504	-0.16094	-94.943	-34.075	1285.319	-3.0028	1.1066	-0.5289	31.542	-68.745	1109.094	-1.123	0.43848	-0.56641	-19.932	13.9954	5.7354	0.016406	-0.11494	0.12354	-64.0626	-43.384	1308.54	-2.591	1.0559	-0.58125
1.642	-19.06	117.056	891.9922	-1.1526	0.27988	-0.10615	-60.9562	-147.213	972.4043	-1.337	0.57276	-0.18193	-40.95	-32.493	896.566	-2.0176	0.039062	-0.18672	-99.36	-18.249	1289.355	-2.9883	1.1387	-0.53516	5.3062	-71.875	1135.4019	-1.2275	0.4544	-0.55107	-13.258	14.19	7.085	-0.00048828	-0.10254	0.12012	-35.853	-42.217	1313.775	-2.5133	1.0707	-0.58867
1.644	-25.577	116.013	854.721	-1.1306	0.27549	-0.10049	-62.7252	-119.4774	986.39	-1.3151	0.60713	-0.18115	-42.583	-35.19	904.332	-2.1629	0.16797	-0.21055	-108.8353	-21.947	1314.2828	-2.919	1.1505	-0.52802	2.4682	-95.033	1170.0684	-1.329	0.4674	-0.54236	-25.8113	20.1859	32.8809	-0.012891	-0.093652	0.12139	-57.5802	-46.936	1274.598	-2.418	1.0723	-0.58203
1.646	-14.117	125.115	833.4722	-1.1108	0.26611	-0.098145	-81.2005	-103.2183	1009.074	-1.3011	0.64327	-0.17744	-49.2865	-41.2107	892.382	-2.2629	0.29746	-0.25722	-113.51724	-52.4453	1305.6609	-2.8187	1.1391	-0.5209	15.5426	-114.364	1210.553	-1.424	0.48733	-0.53496	-7.674	24.5709	40.1831	-0.027735	-0.082519	0.1169	-58.0492	-21.5172	1256.894	-2.312	1.0634	-0.57266
1.648	-24.139	134.147	801.852	-1.0878	0.26318	-0.098437	-92.736	-118.89924	1027.1476	-1.292	0.68652	-0.17578	-18.147	-17.9944	850.379	-2.3008	0.41992	-0.28906	-119.0241	-78.517	1316.3198	-2.7082	1.1152	-0.50293	4.901	-137.3359	1218.771	-1.5068	0.49679	-0.5331	-32.8999	18.0222	19.9847	-0.041406	-0.070801	0.11221	-59.418	-1.486	1264.909	-2.2098	1.0418	-0.55586
1.65	-18.419	119.314	792.441808	-1.0644	0.26299	-0.089648	-76.236	-131.6052	1029.164	-1.2854	0.7291	-0.18076	11.033	11.418	816.762	-2.2867	0.50039	-0.32403	-110.6446	-75.891	1319.678	-2.5975	1.0829	-0.48232	2.6871	-148.056	1219.057	-1.5796	0.49707	-0.53857	-20.017	19.4966	12.6909	-0.047558	-0.060742	0.11152	-41.475	5.374	1283.5305	-2.1113	1.0183	-0.53789
1.652	-12.689	114.2684	763.7111	-1.0397	0.2665	-0.098242	-40.173	-129.486	1046.744	-1.2761	0.75732	-0.18916	-22.12	28.97	836.326	-2.2339	0.53642	-0.34756	-101.6454	-68.588	1323.71792	-2.4922	1.0488	-0.47266	9.6751	-179.068	1250.703	-1.6473	0.48263	-0.55634	-28.684	8.78277	30.5042	-0.053223	-0.05127	0.1084	-40.617	12.1186	1270.7379	-2.0261	0.99219	-0.52383
1.654	-0.373000000000001	104.913	741.482	-1.0151	0.26514	-0.087012	-28.861	-96.169	1090.429	-1.2741	0.7585	-0.19932	-33.011	21.531	846.786	-2.1546	0.529	-0.36084	-106.6613	-47.696	1313.5327	-2.3877	1.0201	-0.45918	1.54645	-178.014	1232.435	-1.7267	0.46178	-0.56055	-25.669	14.9337	25.7548	-0.061133	-0.040234	0.1044	-57.1641	10.5067	1257.3878	-1.9492	0.9668	-0.50195
1.656	9.244	95.367	727.2595	-0.98975	0.26318	-0.087891	-54.013	-51.66	1122.768	-1.2768	0.75215	-0.2082	-74.8513	19.746	851.5484	-2.0314	0.50615	-0.38076	-91.2245	-47.919	1328.119	-2.287	1.0013	-0.44209	18.0076	-167.561	1230.6376	-1.8145	0.44073	-0.5621	-18.2552	15.0674	9.677	-0.061718	-0.030957	0.1041	-7.479	1.0729	1231.875	-1.8847	0.94365	-0.48526
1.658	0.00500000000000256	102.667	732.958	-0.96192	0.26534	-0.089844	-41.076	-34.535	1152.7463	-1.2866	0.73486	-0.21436	-57.0178	11.789	852.84224	-1.8452	0.48975	-0.396	-75.984	-42.021	1325.024	-2.1878	0.97939	-0.41865	32.216	-148.0898	1249.029	-1.9024	0.42668	-0.56671	-44.2587	21.0567	13.5207	-0.061718	-0.021192	0.099414	-12.404	16.1859	1221.752	-1.8277	0.91875	-0.46699
1.66	-11.801	109.869	707.812	-0.93418	0.2666	-0.087891	-35.491	-67.691	1149.17892	-1.3003	0.72294	-0.23096	-59.3259	-27.626	842.042	-1.6118	0.46075	-0.40137	-82.787	-18.80743	1307.3372	-2.0998	0.95371	-0.40098	52.187	-132.8146	1246.1111	-1.9897	0.42822	-0.56787	-18.785	22.1719	25.74293	-0.060352	-0.012402	0.095215	0.670999999999999	41.8441	1235.982	-1.7793	0.89531	-0.44981
1.662	-27.931	127.2	670.4727	-0.89902	0.26699	-0.086719	-49.14344	-103.3888	1164.621	-1.307	0.7078	-0.24884	-32.313	-40.343	852.141	-1.3836	0.43399	-0.39902	-95.297	-6.605	1300.2853	-2.0195	0.93262	-0.38867	34.393	-115.965	1232.01538	-2.0779	0.44133	-0.57189	-9.682	20.336	26.1068	-0.060547	-0.00048828	0.084961	-5.864	48.2831	1237.8571	-1.7356	0.87217	-0.43447
1.664	-45.6859	126.7586	666.5938	-0.86191	0.26895	-0.086914	-41.2005	-117.7314	1186.8127	-1.2988	0.70117	-0.2719	-19.689	-51.3077	864.8	-1.1977	0.41055	-0.40059	-82.526	15.9463	1298.453	-1.9436	0.9001	-0.36572	32.495	-112.117	1215.0392	-2.1806	0.46913	-0.58546	-12.838	24.7273	17.668	-0.05625	0.0051758	0.086035	21.034	29.8321	1232.215	-1.7007	0.84912	-0.41553
1.666	-61.9655	115.669	643.1186	-0.82031	0.27539	-0.083008	-47.996	-125.1584	1207.8138	-1.2803	0.6956	-0.29484	-3.985	-60.48736	880.3941	-1.0609	0.40488	-0.41289	-77.294	25.2917	1307.1258	-1.8866	0.87197	-0.34775	23.1101	-99.675	1207.5554	-2.2936	0.49645	-0.61939	-17.334	22.1385	11.209	-0.054883	0.015821	0.086816	2.652	7.058	1214.0959	-1.6711	0.82539	-0.3961
1.668	-49.6886	113.372	608.51974	-0.78018	0.27783	-0.076856	-52.882	-127.9802	1218.8564	-1.2578	0.68457	-0.31445	1.054	-94.88	925.7828	-0.95557	0.40576	-0.42871	-99.6034	28.2599	1288.054	-1.8323	0.84502	-0.33135	19.7945	-76.71	1211.1909	-2.3995	0.52274	-0.67331	-6.471	10.7114	27.80128	-0.053711	0.027539	0.083301	-15.123	10.951	1194.6321	-1.6395	0.80117	-0.38525
1.67	-56.0244	107.8433	578.29959	-0.74756	0.27822	-0.077832	-65.8732	-133.5847	1221.1677	-1.2496	0.65903	-0.32908	17.18984	-120.113	950.6172	-0.88613	0.41387	-0.44375	-113.079	12.4891	1265.5174	-1.795	0.81983	-0.31875	28.262	-47.155	1223.2516	-2.4741	0.5415	-0.73584	-5.917	13.1575	26.1523	-0.053027	0.038086	0.08125	-0.878999999999998	16.714	1198.5607	-1.6133	0.77812	-0.37197
1.672	-68.655	107.8292	563.5052	-0.71396	0.27783	-0.083691	-14.771	-133.2366	1211.2255	-1.265	0.62756	-0.34242	35.3185	-133.433	995.38692	-0.84258	0.41524	-0.45898	-61.698	3.6367	1240.0386	-1.7656	0.7998	-0.30664	24.1344	-41.463	1224.285	-2.4913	0.54603	-0.78303	-20.785	28.18276	15.9225	-0.057129	0.047852	0.079102	-25.896	31.3139	1181.97801	-1.584	0.75039	-0.35723
1.674	-33.692	103.8336	545.938	-0.67285	0.27617	-0.090234	-24.521	-152.727	1238.2581	-1.3195	0.59087	-0.35804	24.2829	-137.537	1009.618	-0.82696	0.41367	-0.46719	-56.763	23.3147	1238.0104	-1.7442	0.77998	-0.29199	49.506	-44.079	1235.165	-2.4647	0.53354	-0.80248	-10.558	27.5049	20.8961	-0.062012	0.057812	0.075586	-34.046	43.0887	1147.1438	-1.5581	0.7251	-0.34521
1.676	-38.72	104.183	505.587	-0.63037	0.26904	-0.089844	-6.624	-154.435	1282.1673	-1.4102	0.56004	-0.3655	-6.312	-141.03	1015.97408	-0.83477	0.42012	-0.47539	-45.216	41.7409	1235.5365	-1.7202	0.76143	-0.27959	23.815	-44.106	1233.656	-2.4162	0.50537	-0.8202	-12.974	14.3242	17.0397	-0.068067	0.065332	0.077442	-58.4004	50.52	1105.806	-1.5242	0.69082	-0.32929
1.678	-13.505	103.867	473.636	-0.58174	0.26475	-0.086426	-6.718	-140.441	1303.567	-1.5254	0.54395	-0.36523	-32.7038	-134.813	1015.7783	-0.86279	0.42627	-0.48389	-40.548	32.9328	1233.6302	-1.6999	0.73799	-0.26904	13.3188	-37.472	1252.1318	-2.371	0.47665	-0.82902	-19.423	15.2023	18.279	-0.077441	0.073926	0.073926	-46.2565	49.912	1118.949	-1.4925	0.65635	-0.31162
1.68	-19.241	116.305	455.146	-0.53047	0.25703	-0.085059	-29.989	-100.65	1281.165	-1.6707	0.5418	-0.35976	-28.271	-108.23287	1008.1707	-0.89512	0.41982	-0.48867	-47.917	10.124	1218.59442	-1.6721	0.70859	-0.26025	27.116	-49.7048	1279.9403	-2.3335	0.45947	-0.84912	-31.288	16.07366	38.5104	-0.089746	0.087597	0.067774	-41.7685	56.468	1135.5972	-1.4643	0.62041	-0.29756
1.682	-5.112	122.4946	453.4904	-0.48047	0.25273	-0.086621	-46.0984	-64.9598	1268.133	-1.8336	0.55091	-0.36311	-31.413	-91.436	1042.5934	-0.93711	0.42051	-0.47754	-62.643	-7.361	1190.297	-1.6367	0.68066	-0.25049	16.8028	-62.61	1302.2098	-2.3164	0.44992	-0.86851	-29.4518	8.8551	71.3094	-0.097168	0.098145	0.061523	-20.104	82.9392	1125.3832	-1.4359	0.58144	-0.28203
1.684	-25.865	128.3076	428.9463	-0.42529	0.24942	-0.083301	-52.14	-65.8764	1261.7062	-2.0094	0.57736	-0.37151	-19.2244	-96.975	1083.50521	-0.99024	0.4252	-0.47246	-54.478	-15.518	1198.7789	-1.6012	0.6498	-0.2414	54.422	-86.609	1302.9257	-2.3108	0.46548	-0.88988	-13.159	-3.37869	89.5574	-0.10674	0.11357	0.058301	-33.38002	105.369	1099.92	-1.4116	0.54834	-0.26416
1.686	-28.456	131.063	414.4176	-0.37988	0.24756	-0.083984	-46.595	-71.5902	1260.2042	-2.1822	0.61725	-0.38415	10.939	-112.347	1101.707	-1.0596	0.43633	-0.46231	-60.585	1.879	1191.348	-1.5619	0.62617	-0.23437	51.538	-86.487	1293.3765	-2.3104	0.4991	-0.90771	-10.013	5.0988	95.375	-0.11533	0.12754	0.043555	-47.8625	113.5316	1079.416	-1.3914	0.5125	-0.24785
1.688	-9.653	112.187	397.7669	-0.32774	0.24434	-0.078906	-62.219	-67.433	1253.248	-2.3491	0.6665	-0.40771	35.0012	-94.772	1106.715	-1.1362	0.45361	-0.45068	-69.319	24.0994	1175.228	-1.5244	0.59024	-0.22461	38.507	-80.413	1318.136	-2.2989	0.5355	-0.93281	-22.035	35.605	111.812	-0.13252	0.13496	0.037695	-33.5062	103.916	1053.27	-1.3735	0.47891	-0.23164
1.69	-25.935	101.2441	364.36423	-0.27754	0.23936	-0.076172	-66.3622	-59.169	1245.88	-2.5073	0.73027	-0.43009	31.518	-71.692	1112.1	-1.2184	0.46133	-0.44258	-84.89	41.512	1136.25393	-1.4866	0.56143	-0.20674	16.3832	-63.113	1315.138	-2.2651	0.57861	-0.94678	-39.129	62.1574	152.905	-0.15967	0.1458	0.028027	-27.5378	95.656	1024.684	-1.3535	0.45195	-0.21562
1.692	-25.051	97.1666	341.484172	-0.23066	0.23467	-0.06914	-80.9336	-54.501	1256.185	-2.6551	0.79927	-0.45416	30.299	-80.5664	1138.255	-1.2808	0.46631	-0.44316	-105.4006	35.646	1100.571	-1.4434	0.52832	-0.19727	28.463	-42.126	1311.184	-2.2155	0.59739	-0.96395	-36.627	52.3977	192.3962	-0.19873	0.15283	0.018066	-30.4183	94.9396	1036.2728	-1.3411	0.42334	-0.20157
1.694	-18.728	94.6804	314.5494	-0.18399	0.23223	-0.064063	-78.921	-55.772	1273.976	-2.7897	0.87201	-0.47823	28.3733	-86.0694	1163.0906	-1.3281	0.47216	-0.44043	-103.1005	43.71413	1101.466	-1.4032	0.50264	-0.18838	27.808	-23.0018	1294.1361	-2.1493	0.60651	-0.96645	-81.145	39.801	301.125	-0.24677	0.15	0.0001953	-35.9501	100.6666	1016.9553	-1.3271	0.40771	-0.18848
1.696	-1.318	98.0859	292.174	-0.13965	0.22412	-0.057617	-78.993	-49.7887	1286.754	-2.8905	0.94231	-0.51144	15.189	-106.0577	1182.826	-1.3649	0.4707	-0.43311	-72.6707	67.33073	1091.855	-1.364	0.47432	-0.17227	19.8849	3.992	1300.9904	-2.083	0.6059	-0.96637	-65.134	24.4808	399.689	-0.3043	0.14599	-0.016797	-24.1652	98.642	1009.4464	-1.3144	0.38877	-0.18525
1.698	7.445	100.7988	254.7658	-0.099998	0.21895	-0.052148	-85.314	-67.199	1284.219	-2.9629	0.99902	-0.54297	-4.325	-120.5231	1203.496	-1.416	0.45996	-0.41797	-75.9205	84.2523	1069.0753	-1.3257	0.454	-0.15547	48.977	24.2834	1300.29	-2.0173	0.60445	-0.96425	-68.231	38.281	512.585	-0.37148	0.13896	-0.03711	-31.0326	109.746	976.195	-1.2976	0.37363	-0.1749
1.7	2.828	85.5037	236.0207	-0.058398	0.20879	-0.045898	-68.137	-63.488	1298.5755	-2.9759	1.0428	-0.56003	-3.105	-136.407	1221.335	-1.5032	0.44463	-0.41299	-72.738	84.8264	1040.243	-1.2938	0.43437	-0.14688	24.286	36.29	1291.468	-1.9507	0.59473	-0.96826	-0.591999999999999	40.086	579.967	-0.45029	0.13682	-0.060254	-39.9045	107.546	960.1495	-1.2851	0.35957	-0.16397
1.702	15.329	75.577	229.021	-0.023633	0.19746	-0.037305	-85.3234	-58.089	1326.38714	-2.9345	1.0706	-0.56635	2.624	-125.942	1222.5462	-1.6216	0.43662	-0.41651	-64.145	81.7698	1017.029	-1.2651	0.41064	-0.13672	12.5982	38.86	1283.7701	-1.8903	0.59087	-0.95661	-2.813	23.70251	625.225	-0.54346	0.13037	-0.082031	-2.908	102.2818	961.02611	-1.2698	0.34893	-0.15537
1.704	8.395	77.673	212.5047	0.0096682	0.18018	-0.03125	-96.8419	-45.475	1341.1732	-2.8615	1.0878	-0.56869	6.0719	-123.9929	1230.2859	-1.7642	0.43896	-0.42471	-62.764	96.8845	983.165	-1.2368	0.38633	-0.129	7.9821	47.076	1276.3758	-1.8402	0.58725	-0.94428	-30.285	26.848	722.322	-0.65683	0.10752	-0.10254	13.985	102.0402	942.6721	-1.2539	0.3335	-0.14893
1.706	-7.254	83.7378	189.9701	0.038574	0.1709	-0.024414	-96.18857	-47.713	1343.5337	-2.772	1.0947	-0.57104	-38.0324	-140.3515	1244.6671	-1.9064	0.45615	-0.43574	-58.754	100.068	975.2584	-1.2042	0.36553	-0.11944	41.671	34.112	1265.2274	-1.7962	0.5881	-0.93488	-12.994	43.4929	807.76	-0.78965	0.076465	-0.12539	20.536	107.1364	920.4269	-1.2328	0.31875	-0.14023
1.708	-16.641	88.44808	173.056	0.067383	0.15332	-0.011621	-90.3846	-46.369	1331.995	-2.6772	1.1021	-0.57178	9.071	-144.1115	1253.5498	-2.0288	0.48633	-0.45654	-67.6084	91.9045	967.8357	-1.1807	0.34912	-0.11162	30.649	38.5896	1244.8758	-1.7616	0.59069	-0.92829	-16.5528	36.95637	835.361	-0.94316	0.049121	-0.15313	17.1409	118.5654	893.3194	-1.2089	0.30635	-0.13018
1.71	-26.233	87.024	191.651	0.097462	0.14033	-0.0059571	-85.5137	-39.297	1309.5758	-2.5859	1.0908	-0.56998	30.9341	-152.9581	1250.8324	-2.1214	0.52861	-0.48564	-54.069	96.7235	956.6678	-1.1558	0.32832	-0.1	33.8109	33.3488	1251.6541	-1.7319	0.59229	-0.91357	3.40935	24.7938	880.775	-1.1	0.019531	-0.1748	40.796	122.7431	877.9751	-1.1796	0.29111	-0.12197
1.712	-31.06	88.802	171.1836	0.11934	0.12783	-0.0008789	-93.0797	-25.3437	1297.8352	-2.4923	1.0836	-0.56009	25.5904	-129.8597	1251.2832	-2.1941	0.56758	-0.5248	-68.5244	98.6699	943.273	-1.1411	0.31494	-0.094238	37.757	7.5913	1262.01864	-1.7117	0.58668	-0.89875	12.11286	-0.470000000000001	908.265	-1.2612	0.0063477	-0.20264	47.269	133.5546	842.4775	-1.1561	0.27705	-0.11016
1.714	-30.473	87.042	135.509	0.13994	0.11045	0.0096678	-83.898	-8.914	1272.036	-2.3963	1.0664	-0.5491	16.6126	-111.2166	1246.4385	-2.2469	0.59609	-0.57519	-67.9527	100.396	942.808	-1.1189	0.29668	-0.093067	29.695	-2.467	1239.7821	-1.6863	0.58102	-0.88511	38.553	-10.333	924.174	-1.3998	0.01084	-0.22422	37.3659	145.2719	810.6692	-1.1289	0.26514	-0.10449
1.716	-39.158	81.825	117.721	0.15625	0.095215	0.018555	-81.4978	14.156	1289.884	-2.2959	1.0515	-0.53299	6.478	-94.429	1229.75	-2.296	0.60791	-0.6249	-53.5328	84.8647	931.7278	-1.0992	0.28388	-0.087305	1.9824	-0.407	1228.6192	-1.666	0.57951	-0.8679	33.89	-5.864	923.967	-1.5195	0.042578	-0.24619	28.254	131.82272	781.5295	-1.1037	0.2541	-0.098927
1.718	-53.1133	80.514	116.677	0.16905	0.077539	0.028418	-59.279	25.312	1290.1399	-2.1973	1.0332	-0.51172	-1.4529	-68.051	1224.321	-2.3413	0.60889	-0.67432	-10.408	72.9512	902.0314	-1.082	0.271	-0.077929	7.6644	19.855	1219.3214	-1.6445	0.57363	-0.84391	17.7057	-8.583	915.116	-1.607	0.098825	-0.26494	26.8998	146.872	767.0588	-1.0736	0.24258	-0.094238
1.72	-31.368	66.5978	113.777	0.17607	0.059082	0.036523	-73.2116	12.5799	1298.2428	-2.1033	1.0021	-0.49339	-20.6385	-58.966	1205.652	-2.3802	0.60879	-0.71269	-22.155	78.7186	873.2036	-1.0598	0.26094	-0.073926	33.027	19.617	1218.8978	-1.6279	0.57031	-0.82031	44.8566	-33.4865	922.238	-1.6696	0.16211	-0.27071	29.60205	138.993	756.5934	-1.04	0.23711	-0.087988
1.722	-36.9135	57.9392	84.894	0.18389	0.03955	0.041992	-69.277	0.894299999999999	1279.4506	-2.018	0.96808	-0.46844	3.5022	-41.0724	1221.331	-2.4094	0.61367	-0.74492	-33.487	85.043	828.1816	-1.0366	0.25244	-0.072266	22.05516	31.4042	1192.9907	-1.6191	0.55987	-0.79718	16.666	-52.588	911.079	-1.7109	0.22168	-0.26953	2.048	135.479	738.0995	-1.0126	0.23154	-0.082617
1.724	-14.86	41.829	84.7236	0.18711	0.025391	0.046094	-38.462	14.2099	1270.4878	-1.9395	0.93287	-0.44604	13.2347	-49.962	1232.865	-2.4187	0.61523	-0.76679	-12.351	94.1644	823.9386	-1.0142	0.2499	-0.063672	17.2653	37.8969	1176.7686	-1.6105	0.54668	-0.76507	28.8179	-53.2475	858.156	-1.7316	0.26523	-0.26875	9.426	107.854	717.9331	-0.97656	0.22217	-0.076172
1.726	-32.4351	38.96	84.7945	0.18604	0.0087891	0.04834	-43.791	50.087	1260.9329	-1.8725	0.89716	-0.42093	6.730223	-26.77	1242.839	-2.4113	0.60899	-0.78282	21.265	104.8896	800.83417	-0.98828	0.24776	-0.06084	15.2865	43.22552	1177.6911	-1.6032	0.54004	-0.73889	16.186	-30.319	819.915	-1.7305	0.29805	-0.26094	-5.342	108.156	689.4155	-0.94482	0.22256	-0.073925
1.728	-8.709	32.929	90.26368	0.18027	-0.00957	0.051269	-50.925	48.623	1261.0593	-1.8179	0.86377	-0.39795	-3.844	-15.777	1260.88	-2.3984	0.59473	-0.79785	15.381	112.1502	771.7358	-0.96172	0.24619	-0.061621	20.741	77.0141	1160.3185	-1.5914	0.5336	-0.71407	27.9645	20.298	845.352	-1.7051	0.32188	-0.26094	-1.036	100.11882	637.347	-0.90351	0.21523	-0.072461
1.73	-38.9354	45.7477	85.5225	0.17071	-0.02627	0.050879	-42.102	34.707	1271.145	-1.7732	0.83851	-0.38189	-6.8003	-41.987	1273.6827	-2.3812	0.59248	-0.80889	4.71	104.6294	758.4435	-0.93349	0.24092	-0.057227	13.741	95.773	1137.3064	-1.5781	0.52344	-0.68945	14.6465	22.447	857.1616	-1.6483	0.34043	-0.25957	-7.6094	113.2813	605.167	-0.86446	0.21641	-0.068945
1.732	-39.2521	51.8038	78.7177	0.15899	-0.038379	0.057519	-34.492	1.38	1259.0255	-1.7314	0.81349	-0.36964	28.7152	-62.2848	1281.095	-2.3625	0.59258	-0.82852	0.579000000000001	110.6411	728.3339	-0.90625	0.23633	-0.056641	12.7878	112.172	1108.28	-1.564	0.51494	-0.66904	1.236	17.422	835.354	-1.5781	0.35645	-0.25	-7.3733	112.7404	587.492	-0.8209	0.21484	-0.063184
1.734	-23.7257	53.614	76.079	0.14297	-0.048633	0.060254	-62.118	-5.7233	1246.47	-1.6951	0.78967	-0.3525	22.889	-65.036	1285.3422	-2.3434	0.5961	-0.84922	-3.824	128.487	699.4968	-0.87666	0.23262	-0.053613	26.5687	106.127	1114.762	-1.5453	0.50215	-0.64999	9.9513	-2.797	844.862	-1.4923	0.371	-0.23769	-2.138	117.3933	572.2901	-0.77197	0.21436	-0.056152
1.736	-21.8841	45.817	78.2204	0.12744	-0.060059	0.060059	-60.407	5.818	1219.94	-1.6579	0.76196	-0.33211	22.869	-50.501	1291.9762	-2.317	0.6123	-0.86738	-16.5	135.346	684.9068	-0.84571	0.23174	-0.055859	2.606	109.339	1089.825	-1.5195	0.4873	-0.6289	-1.922	-21.7454	864.713	-1.4066	0.37617	-0.22969	-18.4031	114.626	536.4946	-0.72256	0.21015	-0.058887
1.738	-21.061	42.439	61.2042	0.10283	-0.074707	0.057715	-59.196	17.883	1202.226	-1.6211	0.72852	-0.31885	21.848155	-50.809	1296.054	-2.2852	0.63086	-0.88086	-13.577	122.742	660.8617	-0.81484	0.22822	-0.058984	0.685	99.961	1051.83	-1.4975	0.47519	-0.6041	34.495	-31.1099	891.771	-1.3367	0.38516	-0.22734	-13.386	105.9433	525.821	-0.66983	0.20693	-0.062012
1.74	-10.941	44.354	59.5741	0.080664	-0.080762	0.058203	-56.305	31.744	1171.584	-1.5797	0.69964	-0.30138	19.2765	-45.614	1287.6885	-2.2295	0.64043	-0.89082	-14.066	118.974	638.0299	-0.78301	0.22724	-0.061816	-16.9368	100.5012	1042.991	-1.4712	0.45557	-0.5835	4.274	-53.904	904.378	-1.2911	0.4124	-0.22998	-34.2079	109.4972	494.5741	-0.6128	0.20381	-0.060059
1.742	6.114	44.028	53.4384	0.057227	-0.095215	0.058985	-67.435	24.5069	1163.2113	-1.5348	0.66684	-0.28478	18.9474	-36	1281.3415	-2.1707	0.64521	-0.89824	-9.976	115.529	590.817	-0.75391	0.22461	-0.058105	-22.0523	84.2808	1036.1357	-1.448	0.43848	-0.56113	-7.288	-57.3276	909.717	-1.2671	0.43799	-0.22803	-13.6762	119.6423	481.4376	-0.55986	0.19736	-0.061816
1.744	-0.228999999999999	54.2113	15.465	0.036719	-0.10088	0.052051	-64.392	24.0649	1143.403	-1.5004	0.63088	-0.26837	22.0321	-28.549	1271.251	-2.1004	0.64365	-0.89512	-35.8774	105.1076	554.395	-0.72383	0.22207	-0.066992	0.0579999999999998	79.26442	1021.7042	-1.428	0.41905	-0.54209	-26.728	-86.8375	902.9921	-1.2536	0.47432	-0.22422	-15.943	116.2439	448.1663	-0.50684	0.19189	-0.055664
1.746	1.265	40.833	40.8842	0.016602	-0.10791	0.050781	-52.597	43.9327	1148.5681	-1.4572	0.59289	-0.25391	35.0913	-22.5202	1278.34935	-2.0377	0.63418	-0.88691	-30.126	102.2006	534.087	-0.68916	0.22237	-0.067871	-5.136	80.10208	995.3868	-1.3995	0.40303	-0.52139	-44.0213	-122.595	894.135	-1.2532	0.51251	-0.21435	-35.55784	102.8144	428.2125	-0.46533	0.18252	-0.046484
1.748	16.921	32.5979	37.965	-0.007422	-0.11319	0.049121	-55.148	75.2309	1142.23849	-1.4199	0.55664	-0.23828	13.0827	13.3316	1282.666	-1.98	0.62354	-0.88232	-27.991	101.506	533.1637	-0.65283	0.22041	-0.069434	-17.177	87.8235	997.58413	-1.3678	0.38652	-0.49746	-69.9873	-148.846	929.337	-1.2621	0.5582	-0.20263	-34.096	88.7324	399.1319	-0.42305	0.17549	-0.044922
1.75	26.329	26.40311	38.6298	-0.027051	-0.12187	0.045215	-69.5067	91.038	1134.97942	-1.3844	0.52089	-0.21708	30.3647	33.87022	1289.616	-1.9282	0.61514	-0.86865	-11.77	112.03	496.06885	-0.61445	0.21856	-0.065137	-22.539	90.5087	989.1927	-1.333	0.37305	-0.4834	-77.996	-154.174	964.80843	-1.269	0.60938	-0.19287	-29.0928	88.6299	351.237	-0.38125	0.16572	-0.042187
1.752	13.848	43.1762	24.7145	-0.048144	-0.12656	0.043261	-77.418	99.883	1106.1544	-1.3533	0.48397	-0.19863	4.4163	43.0046	1286.8948	-1.8855	0.61055	-0.85274	-39.9044	99.915	467.0164	-0.57617	0.21777	-0.062988	-12.758	85.4894	987.964	-1.2977	0.36367	-0.45625	-80.23297	-148.863	973.5806	-1.2671	0.66357	-0.18896	-20.818	90.4122	312.7991	-0.32832	0.15742	-0.040235
1.754	-13.0225	38.3975	19.9077	-0.065528	-0.13086	0.039356	-65.3635	108.012	1068.891	-1.3236	0.4496	-0.18691	5.97	34.121	1258.415	-1.8434	0.61055	-0.84414	-31.4076	93.625	449.408	-0.54365	0.20918	-0.066113	-42.03117	98.242722	939.85	-1.2629	0.35605	-0.4376	-106.7958	-135.191	979.239	-1.2535	0.7125	-0.1918	-28.8228	100.3876	289.63138	-0.27441	0.15137	-0.037109
1.756	-9.747	30.8014	33.7204	-0.081543	-0.13525	0.033203	-63.4564	119.869	1038.049	-1.2977	0.41796	-0.17265	8.3903	42.074	1238.0278	-1.8067	0.61103	-0.82432	-24.9824	100.4421	438.09627	-0.50781	0.20937	-0.069141	-28.884	97.694802	924.5714	-1.2235	0.34707	-0.42158	-96.881	-113.65189	962.475	-1.2395	0.74628	-0.20234	-1.998	101.4031	263.5118	-0.21582	0.14395	-0.034277
1.758	-13.571	24.2556	40.0079	-0.094629	-0.13838	0.033008	-66.49301	108.9122	1023.335	-1.2769	0.39111	-0.15381	-7.9908	46.8415	1219.6578	-1.7695	0.6123	-0.8125	-39.6382	121.113	415.8867	-0.46797	0.20703	-0.066797	-19.997	104.5582	887.5922	-1.1769	0.34014	-0.40058	-88.7276	-93.5068	993.933	-1.225	0.76699	-0.21523	8.576	105.8302	244.6982	-0.15742	0.13213	-0.027148
1.76	-29.935	19.5689	10.54767	-0.1082	-0.13838	0.029589	-59.8342	86.1781	1019.3097	-1.2511	0.36914	-0.14551	1.717	26.2274	1224.837	-1.7369	0.61484	-0.80059	-35.3973	119.143	382.6364	-0.42246	0.20488	-0.063574	-43.626	120.5359	848.7877	-1.1387	0.32813	-0.37744	-69.9833	-73.318	1055.4203	-1.2187	0.7707	-0.23476	4.917	79.108	246.042	-0.1082	0.11846	-0.020117
1.762	-25.809	11.8426	14.80963	-0.11641	-0.13994	0.030761	-61.6632	87.2954	1014.8922	-1.2304	0.34834	-0.13848	11.9136	22.3218	1211.0282	-1.7105	0.62109	-0.7836	-31.781	106.779	372.248775	-0.38232	0.20068	-0.057617	-52.5231	136.4947	810.7971	-1.0885	0.31093	-0.35918	-56.04	-64.863	1065.9118	-1.2129	0.75488	-0.25293	17.043	65.216	223.8785	-0.059961	0.10586	-0.012402
1.764	-16.202	8.0869	36.5694	-0.12266	-0.13262	0.019824	-41.946	95.9996	988.027	-1.2089	0.32764	-0.12754	18.35329	11.52	1214.2028	-1.6852	0.62305	-0.7707	-34.082	101.4334	331.6817	-0.34073	0.19434	-0.059375	-42.323	133.0887	787.7194	-1.0446	0.29599	-0.33858	-62.331	-57.0136	1086.158	-1.2084	0.73671	-0.27344	8.765	64.834	226.809	-0.01709	0.084961	-0.0097656
1.766	-15.422	10.2265	37.7172	-0.12012	-0.12549	0.019043	-43.0087	89.797	982.4944	-1.1873	0.31025	-0.11699	-4.607	2.402	1192.5687	-1.6584	0.62285	-0.75078	-48.78903	90.8117	308.1078	-0.29961	0.18955	-0.059961	-33.122	126.2379	775.698	-0.99892	0.27842	-0.31748	-56.328	-61.0298	1100.009	-1.2122	0.71688	-0.29602	8.15	77.0418	196.1549	0.024219	0.067383	-0.003418
1.768	-42.1763	23.0398	8.5368	-0.1164	-0.11768	0.012304	-18.073	100.595	951.1868	-1.1694	0.29346	-0.10742	9.0437	5.831	1180.5918	-1.6382	0.62061	-0.72998	-17.788	97.0626	280.8899	-0.25352	0.17939	-0.057227	-44.502	132.0057	741.8917	-0.94785	0.26572	-0.29853	-68.076	-76.556	1120.34111	-1.2137	0.70595	-0.31868	-13.365	85.692	171.1884	0.060937	0.049512	0.0082031
1.77	-23.78	16.423	5.1989	-0.10234	-0.11396	0.0072266	-17.95	110.6618	934.399	-1.1511	0.28057	-0.097167	-8.6	15.196	1159.7967	-1.613	0.6126	-0.70791	-14.826	94.49502	268.2036	-0.20996	0.17002	-0.056543	-29.401	143.479	714.9216	-0.9043	0.25391	-0.28027	-49.609	-85.158	1136.4043	-1.2163	0.69169	-0.33917	-13.575	80.465	149.0029	0.092969	0.027636	0.010938
1.772	-30.925	15.698	16.82	-0.087109	-0.11006	0.0048828	-15.374	127.701	916.0553	-1.1362	0.26328	-0.090723	-16.6532	37.0583	1150.63552	-1.5867	0.60283	-0.68545	-11.972	97.54786	247.4242	-0.15967	0.16357	-0.05127	-16.586	150.602	686.842	-0.85722	0.24521	-0.26738	-38.73	-99.9076	1150.24	-1.2261	0.67725	-0.35645	-20.039	67.597	122.8997	0.12451	0.0061523	0.017383
1.774	-16.357	15.035	15.8037	-0.067578	-0.10508	0.0010742	-21.289	120.816	909.44	-1.1186	0.25195	-0.085254	-12.353	49.152	1149.26656	-1.5647	0.59502	-0.66279	3.342	86.96511	225.377	-0.11787	0.15069	-0.047949	-6.181	151.052	679.579	-0.80605	0.23281	-0.24844	-41.289	-98.9353	1166.147	-1.2415	0.66038	-0.37557	-18.455	50.6461	114.721	0.14844	-0.0092773	0.019043
1.776	-45.23	21.0274	18.3787	-0.044434	-0.10205	-0.00048828	-1.966	112.074	903.997	-1.1	0.24258	-0.077539	-9.8923	48.70298	1130.3623	-1.5413	0.58213	-0.63779	-10.551	83.523	196.764	-0.086914	0.1334	-0.04336	-43.415	142.792	637.098	-0.75996	0.22578	-0.23984	-46.79464	-126.4977	1183.92445	-1.263	0.63226	-0.39479	-32.0073	29.356	121.31001	0.17725	-0.03584	0.026465
1.778	-29.355	18.2751	19.8228	-0.01875	-0.097852	-0.0036133	-0.903000000000002	113.547	864.115	-1.0801	0.2334	-0.07373	-8.145	51.3989	1108.5735	-1.5195	0.56934	-0.61621	15.982	86.7661	184.1786	-0.054102	0.12285	-0.038672	-46.0117	107.077	619.2022	-0.71006	0.22285	-0.22275	-50.05	-147.089	1188.376	-1.3114	0.59205	-0.3999	-22.972	16.871	121.78164	0.20039	-0.057129	0.032519
1.78	-26.6805	26.305	14.5069	0.0019532	-0.095215	-0.0047852	-7.767	114.0719	834.5517	-1.0622	0.22422	-0.069727	-26.0546	60.8973	1093.6418	-1.4978	0.55664	-0.59258	15.417	86.6106	185.973	-0.031445	0.11299	-0.033496	-24.976	92.2673	605.221	-0.66357	0.21729	-0.21045	-38.361	-137.697	1208.9956	-1.3822	0.55082	-0.40489	-24.099	24.35	107.4066	0.2207	-0.079395	0.037988
1.782	-47.1329	25.8971	18.7896	0.020703	-0.09209	-0.012988	6.229	116.2745	809.287	-1.0381	0.21572	-0.065332	-7.231	72.5182	1090.8881	-1.4759	0.54502	-0.56728	-4.968	79.039	173.019	-0.010742	0.099121	-0.03125	-30.2229	101.3159	573.3267	-0.61719	0.21484	-0.18867	-34.472	-123.476	1244.586	-1.4824	0.51367	-0.396	-16.337	38.6193	72.397	0.24131	-0.10147	0.036914
1.784	-43.3203	17.5383	15.3599	0.044922	-0.088672	-0.01709	-3.055	131.4474	779.38	-1.0142	0.2169	-0.068457	-7.737	88.563	1068.2672	-1.4532	0.53525	-0.54463	-11.832	61.7607	166.1936	0.0083985	0.082227	-0.026172	-30.136	116.3286	536.2447	-0.57949	0.20879	-0.18818	-1.499	-109.03	1251.926	-1.6122	0.496	-0.38703	-16.682	50.69175	63.721	0.25586	-0.11914	0.039063
1.786	-24.853	5.5883	8.2496	0.068359	-0.085449	-0.020508	4.317	135.5525	745.6957	-0.98984	0.21445	-0.062988	11.601	100.479	1046.2582	-1.4349	0.51953	-0.52217	0.332999999999998	59.3174	135.0889	0.025976	0.071289	-0.015332	-15.75	123.8291	521.526	-0.52559	0.20136	-0.17256	-25.576	-98.722	1246.4714	-1.7678	0.49191	-0.3747	-13.451	53.8661	60.4234	0.27178	-0.13466	0.041894
1.788	-13.491	8.08163	12.7688	0.088086	-0.079688	-0.025879	-7.757	124.6406	719.6149	-0.96045	0.21631	-0.057129	2.029	102.688	1016.615	-1.4121	0.50586	-0.49902	-6.334	63.0605	119.4015	0.049024	0.050976	-0.010644	-19.532	127.06838	500.3127	-0.47588	0.19385	-0.1585	-32.059	-78.9409	1256.58	-1.9322	0.50113	-0.37153	-44.8361	66.603	53.4427	0.28028	-0.15078	0.044531
1.79	-14.502	15.6636	2.1621	0.10732	-0.075488	-0.033399	6.342	114.1119	692.9305	-0.93516	0.21689	-0.05459	-9.921	98.2985	1004.73	-1.3946	0.4917	-0.48252	-30.72	67.84294	116.6898	0.066504	0.038769	-0.0053711	-17.035	113.7022	466.4668	-0.42871	0.18164	-0.1377	-42.269	-58.7404	1278.185	-2.1041	0.53212	-0.37525	-43.4522	65.6404	42.276	0.28613	-0.16758	0.044531
1.792	-14.786	17.0843	9.6036	0.12724	-0.068066	-0.037305	9.434	119.5956	674.0152	-0.90732	0.22402	-0.055176	-4.74	85.0609	996.656	-1.3757	0.47315	-0.46748	-10.688	56.1284	94.3755	0.085449	0.015625	-0.00097656	-14.144	100.093	430.5971	-0.38564	0.17558	-0.12295	-39.031	-58.4541	1281.444	-2.2651	0.57666	-0.38428	-35.6306	47.3755	69.8897	0.28955	-0.18369	0.04541
1.794	15.576	13.8156	16.4313	0.14531	-0.060937	-0.043066	-12.568	131.757	647.4501	-0.87568	0.22715	-0.055176	-24.863	91.693	977.296	-1.3514	0.45205	-0.44756	-19.538	54.008	70.099	0.10068	-0.000293	0.0050782	2.351	93.385	415.1307	-0.34385	0.16924	-0.10762	-61.544	-52.7467	1248.376	-2.4177	0.64682	-0.39508	-32.012	41.1762	75.5936	0.28711	-0.19434	0.049316
1.796	18.307	14.2412	10.3282	0.15967	-0.058594	-0.049805	-24.22	128.2369	634.065	-0.84629	0.22969	-0.051562	-2.502	83.72	982.58534	-1.3281	0.43516	-0.42891	-17.8397	51.647	52.7785	0.11474	-0.019433	0.011719	-10.595	101.06571	398.3319	-0.30205	0.16416	-0.094336	-90.447	-55.471	1223.641	-2.5501	0.72623	-0.40984	-38.8422	38.3615	53.7549	0.2794	-0.20987	0.049902
1.798	2.834	15.2074	3.3809	0.17617	-0.052344	-0.054199	-39.389	114.9645	610.4645	-0.80469	0.22705	-0.051758	-19.809	91.0218	977.5335	-1.3062	0.41455	-0.40869	-25.464	35.5687	51.2954	0.12881	-0.034668	0.014453	-12.342	119.4796	359.2831	-0.26074	0.1623	-0.079687	-95.152912	-59.201	1227.97	-2.6731	0.8047	-0.42714	-31.386	41.49464	33.7404	0.26836	-0.22178	0.054297
1.8	-7.417	9.3157	19.78799	0.18603	-0.049512	-0.058008	-30.4338	109.9418	598.182155	-0.7711	0.22764	-0.048828	-13.561	93.5312	965.0217	-1.282	0.39678	-0.39141	-1.089	35.7125	58.221771	0.14258	-0.049902	0.021973	-26.0725	116.8524	317.3353	-0.21533	0.15918	-0.06543	-104.22908	-62.903	1239.561	-2.782	0.87199	-0.44512	-40.3144	39.5777	28.5554	0.25117	-0.22881	0.053125
1.802	6.318	13.06638	34.4982407	0.19307	-0.047168	-0.05918	-48.6561	126.93453	567.0527	-0.72969	0.23125	-0.047266	-10.079	105.053	953.638	-1.261	0.37969	-0.37168	-15.181	48.3164	52.2009	0.15186	-0.062012	0.023926	-22.971	110.6726	295.1627	-0.17198	0.15371	-0.047851	-104.54183	-53.834	1258.956	-2.8726	0.92725	-0.45801	-15.372	33.7661	28.549	0.23867	-0.23848	0.056445
1.804	-6.06	16.2414	16.930812	0.20293	-0.047559	-0.073242	-55.9976	123.0711	531.8117	-0.69024	0.23008	-0.042188	-19.697	102.853	935.469	-1.2406	0.36875	-0.35059	-29.992	61.7235	45.8088	0.16269	-0.079297	0.028711	-15.6525	108.1865	262.2357	-0.13603	0.14941	-0.030957	-100.3462	-58.48666	1265.175	-2.9369	0.96982	-0.46791	-16.104	30.7359	7.031	0.21631	-0.24121	0.057617
1.806	-22.595	19.2846	8.9892	0.21289	-0.04541	-0.075684	-38.993	109.794	505.4473	-0.65039	0.22373	-0.036328	-27.761	100.348	917.819	-1.2188	0.35147	-0.33682	-46.9749	49.3193	44.7585	0.17217	-0.095802	0.031543	-17.945	109.6608	244.01	-0.091895	0.14317	-0.016895	-105.4604	-73.39	1284.185	-2.9752	1.0096	-0.47744	-5.368	23.3466	29.877	0.19609	-0.24111	0.058106
1.808	-14.203	10.3312	14.52	0.21113	-0.044043	-0.081641	-53.30343	122.4665	465.4269	-0.60449	0.22363	-0.04248	-22.694	103.7238	868.13227	-1.1948	0.34814	-0.31543	-54.9055	53.3728	38.9971	0.17412	-0.10869	0.03545	-22.29	106.8984	238.8377	-0.054883	0.13564	-0.00058592	-96.2795	-69.887	1304.997	-2.967	1.0455	-0.48548	0.779	28.61283	38.88235	0.17334	-0.23994	0.057812
1.81	-12.124	9.64661	44.407	0.21152	-0.045996	-0.086719	-46.627	112.66293	430.107	-0.55938	0.21533	-0.043457	-26.672	109.663	831.754	-1.1701	0.3332	-0.29756	-33.525	54.0885	31.0367	0.17861	-0.12422	0.038476	-11.844	98.4771	226.9843	-0.01709	0.12939	0.010742	-110.934	-55.426	1314.8664	-2.93	1.0903	-0.48544	-3.173	25.0227	36.89952	0.14561	-0.23643	0.05625
1.812	-3.212	17.7473	39.531	0.20254	-0.04209	-0.095312	-41.9194	94.935	420.242	-0.50713	0.20869	-0.035742	-32.72	105.295	821.971	-1.1441	0.31992	-0.27949	-43.6035	46.0236	30.282	0.17676	-0.13428	0.035645	-8.584	79.2756	205.0691	0.017481	0.11992	0.022851	-95.6664	-32.32	1333.448	-2.8589	1.1196	-0.49512	-18.857	29.4482	27.9419	0.121	-0.23047	0.054492
1.814	-20.801	28.9133	25.194	0.18604	-0.037207	-0.10176	-26.203	76.229	401.301	-0.45283	0.20401	-0.029101	-48.526	108.261	806.70216	-1.1175	0.30664	-0.26153	-27.949	32.8516	21.9493	0.17266	-0.1459	0.040137	-10.155	72.128	149.489	0.051562	0.10791	0.03623	-101.549	-37.308	1345.762	-2.7777	1.1499	-0.49677	-28.502	31.6413	39.162	0.089844	-0.22607	0.054688
1.816	-13.127	25.751	61.6829	0.16211	-0.039063	-0.1123	-37.235	77.966	389.1581	-0.39981	0.18916	-0.028125	-43.597	127.551	771.3726	-1.0884	0.2997	-0.24912	-37.2927	23.5856	17.768	0.16455	-0.15567	0.041309	-9.245	54.059	146.0112	0.086328	0.097362	0.057324	-97.8284	-35.0391	1338.064	-2.6824	1.1704	-0.50099	6.289	32.4918	48.01	0.058496	-0.21738	0.047852
1.818	-22.783	30.9512	94.5457	0.13115	-0.035742	-0.1207	-40.4297	95.7218	366.1507	-0.35107	0.17383	-0.020996	-46.636	137.5407	749.9152	-1.0542	0.28955	-0.23096	-10.487	20.6793	11.517	0.15283	-0.16387	0.040137	-14.658	63.804	136.4794	0.11699	0.087402	0.071191	-100.1572	-33.2236	1314.8018	-2.5772	1.1793	-0.50385	-13.374	31.1043	36.8356	0.033985	-0.20225	0.04707
1.82	-9.946	32.1565	100.5199	0.094531	-0.03457	-0.12422	-36.543	95.3207	336.898	-0.30312	0.16846	-0.019824	-53.7804	137.5336	727.6205	-1.017	0.28164	-0.21318	-17.667	14.482	31.87156	0.14101	-0.17129	0.044238	-24.828	60.494	129.5567	0.14844	0.070313	0.085938	-103.3984	-23.718	1279.183	-2.4698	1.1804	-0.50172	-21.452	25.8244	16.478	0.010547	-0.19326	0.049024
1.822	-21.1251	44.547	132.5	0.053125	-0.033789	-0.13672	-28.95	117.517	302.1551	-0.25889	0.15644	-0.016602	-46.997	138.406	721.3218	-0.98115	0.2752	-0.19776	-5.946	4.629	41.0882	0.12549	-0.1792	0.041016	-22.679	69.9186	119.3652	0.1751	0.059473	0.10371	-87.535	-9.076	1288.906	-2.3613	1.1699	-0.49902	-13.052	24.936	11.264	-0.013867	-0.17657	0.04502
1.824	-2.2835	66.5051	250.317	0.0039064	-0.031543	-0.14892	-38.765	113.337	269.9935	-0.21474	0.14121	-0.013868	-37.531	129.91	698.2608	-0.9417	0.26933	-0.18291	12.587	12.779	45.07141	0.11279	-0.17978	0.037402	-21.904	56.5537	112.02624	0.19609	0.040039	0.11631	-84.996	15.41136	1298.526	-2.2519	1.1507	-0.48578	-13.845	26.969	14.3337	-0.029297	-0.16162	0.035645
1.826	-25.4162	111.5761	378.375	-0.055664	-0.034668	-0.1626	-40.251	102.454	259.1928	-0.17373	0.1292	-0.0064453	-64.22076	129.769	665.939	-0.90205	0.2667	-0.16982	-11.803	23.3998	29.7636	0.097559	-0.18418	0.034375	-16.994	48.1103	111.4729	0.21289	0.022851	0.13076	-81.4965	25.9582	1304.8181	-2.1563	1.12	-0.4689	-13.401	34.6008	7.382	-0.040235	-0.1459	0.029785
1.828	-65.0953	119.7275	463.745	-0.12783	-0.030859	-0.1792	-13.471	90.037	244.6286	-0.1333	0.11719	-0.0024414	-51.948	116.089	643.626	-0.86279	0.25635	-0.15527	1.238	23.6118	31.873428	0.087793	-0.18691	0.033203	-20.066	48.41349	86.8661	0.23155	0.0027344	0.14404	-70.357	21.7637	1300.688	-2.0747	1.0903	-0.45016	-31.0967	37.2952	-2.5841	-0.051856	-0.13164	0.024804
1.83	-47.812	85.248	530.658	-0.22715	-0.03164	-0.20254	-11.378	81.7918	228.2613	-0.094729	0.11191	0.0011719	-50.875	108.4274	609.521	-0.82422	0.25586	-0.13848	-10.725	9.6295	22.1108	0.077441	-0.18652	0.03252	-32.181	45.602179	70.548	0.24023	-0.013672	0.15576	-21.987	9.0889	1293.7337	-2.0038	1.0606	-0.43087	-23.425	29.1661	15.5315	-0.059669	-0.1207	0.017773
1.832	-38.805	45.677	600.048	-0.34512	-0.034375	-0.2166	3.4	74.458	208.3211	-0.057227	0.10205	0.0048828	-43.014	110.4666	576.795	-0.78408	0.24209	-0.11846	-5.04	20.0494	11.1501	0.064453	-0.18115	0.027344	-29.946	42.2025	62.301	0.24726	-0.033594	0.1664	-30.46	25.0696	1309.5154	-1.9473	1.0313	-0.41211	-17.955	18.6054	22.8651	-0.062402	-0.10908	0.0060543
1.834	-53.853	21.2571	717.7144	-0.49189	-0.048926	-0.22471	-8.331	64.352	188.5848	-0.020117	0.094238	0.0080077	-50.2714	112.2637	559.425	-0.7419	0.22686	-0.11026	-12.426	24.388	7.1758	0.056347	-0.17988	0.019922	-17.914	53.8157	60.731	0.25684	-0.050977	0.18135	-35.47	53.5398	1304.062	-1.9052	1.009	-0.38539	-37.0003	19.0272	31.3824	-0.061035	-0.10254	-0.0014648
1.836	-56.895	17.855	799.0766	-0.66406	-0.063477	-0.23145	6.758	64.7665	166.6293	0.011621	0.078613	0.0067384	-41.545	120.3084	539.3848	-0.69853	0.21416	-0.095117	-18.964	24.8089	8.82	0.045605	-0.17422	0.024609	-2.75	59.307	31.465	0.25176	-0.069726	0.1919	-48.823	52.746	1299.5309	-1.8663	0.97703	-0.37354	-38.7858	18.2875	27.7249	-0.059961	-0.091602	-0.0066401
1.838	-36.505	24.678	839.6762	-0.86416	-0.073145	-0.25	-5.589	74.10584	139.518	0.041992	0.065918	0.01709	-22.618	111.5744	522.84078	-0.66064	0.20361	-0.08252	-2.935	18.7847	9.55	0.037012	-0.17227	0.021875	-17.117	42.6199	28.9077	0.25029	-0.089746	0.20537	-43.346	44.438	1277.3084	-1.8327	0.94815	-0.35169	-23.259	12.3219	33.4441	-0.052051	-0.086331	-0.015623
1.84	-37.1583	25.7227	850.9973	-1.0883	-0.07666	-0.2624	-15.748	79.2017	121.877	0.068359	0.049707	0.01914	-25.369	113.9783	492.33887	-0.61972	0.18975	-0.077832	-0.165999999999997	27.92398	16.2512	0.02998	-0.16866	0.017676	-5.496	36.90046	30.5857	0.24609	-0.10107	0.21631	-51.084	19.358051	1263.2105	-1.8029	0.92037	-0.33689	-25.439	23.4429	23.1662	-0.046195	-0.075784	-0.021483
1.842	-56.2125	2.52701	854.854	-1.3324	-0.068848	-0.28271	-16.72	77.977	122.9173	0.092578	0.031055	0.025977	-29.687	102.4147	476.6832	-0.57188	0.18428	-0.066601	-2.075	37.6127	16.9226	0.02002	-0.16553	0.017578	-26.581	49.667	35.509	0.23926	-0.11094	0.2293	-64.213	10.962	1253.2597	-1.769	0.89209	-0.32373	-46.9062	24.494	17.8582	-0.038479	-0.068458	-0.027149
1.844	-57.7003	-30.805	848.0371	-1.5793	-0.038379	-0.30645	-34.278	63.58916	109.8933	0.1125	0.016601	0.028711	-26.247	100.4819	453.4008	-0.52578	0.16983	-0.052148	-19.587	32.0332	20.24042	0.018262	-0.15576	0.010547	-22.177	60.368	34.0234	0.22822	-0.12041	0.23799	-58.931	20.48	1258.7867	-1.7326	0.86634	-0.31027	-24.805	17.8004	17.6357	-0.027832	-0.062012	-0.032227
1.846	-23.988	-41.475	860.042	-1.8242	0.013184	-0.32959	-15.89	54.4546	104.1142	0.12988	-0.0040038	0.029297	-9.698	103.4347	419.7317	-0.47441	0.16386	-0.042871	-8.939	25.9376	13.259	0.018946	-0.14882	0.0060548	-23.228	53.641	32.891	0.21728	-0.12783	0.24619	-74.821	35.4131	1231.94407	-1.6945	0.83138	-0.29542	-6.961	9.4757	25.35828	-0.015527	-0.056444	-0.042972
1.848	-6.383	-33.065	878.567	-2.0572	0.096872	-0.33594	-36.371	49.1579	88.5936	0.14648	-0.023926	0.036133	-13.595	119.748	383.345	-0.4292	0.15918	-0.029785	-19.78	27.78632	-0.841999999999999	0.024023	-0.14297	0.0013673	-17.058	27.9443	40.645	0.1998	-0.13506	0.25391	-70.122	53.97693	1200.1183	-1.6519	0.79661	-0.2759	-12.238	16.6808	29.7103	-0.0075073	-0.053609	-0.049225
1.85	8.2109	-30.726	883.042	-2.2745	0.18877	-0.37158	-39.9835	52.3126	84.2022	0.15586	-0.043946	0.039551	-23.654	125.74	370.5904	-0.37178	0.15694	-0.019922	-34.2407	26.7792	0.6729	0.028027	-0.13555	-0.0020507	-13.127	14.84861	38.2286	0.18066	-0.13525	0.25195	-83.125	42.1813	1193.945	-1.6125	0.75636	-0.25724	-40.86528	27.7078	10.3547	0.0046009	-0.04853	-0.058998
1.852	2.7406	-29.145	875.203	-2.4288	0.29775	-0.42275	-28.186	59.9543	71.1019	0.16592	-0.062696	0.045703	-17.182	126.976	341.562	-0.3207	0.15498	-0.0090821	-30.804	1.86951	8.8274	0.033203	-0.12793	-0.0078125	-22.959	5.1407	35.8896	0.15918	-0.13672	0.2541	-68.278	56.20431	1193.843	-1.5801	0.71875	-0.23828	-26.898	13.7387	20.0708	0.013094	-0.048347	-0.066609
1.854	15.0984	-7.6134	864.6698	-2.5035	0.40664	-0.44941	-25.2461	79.406	56.6985	0.1749	-0.081055	0.044922	-12.726	115.8248	317.3563	-0.27422	0.15342	-0.0012695	-35.378	-0.1231	25.3849	0.033203	-0.11817	-0.013184	-29.44	18.2077	30.2517	0.13955	-0.13027	0.25322	-46.314	69.41083	1181.3294	-1.5491	0.67899	-0.22002	-22.252	16.7294	30.82784	0.020508	-0.046875	-0.070313
1.856	30.546	11.499	870.29	-2.4937	0.49561	-0.46924	-34.888	67.1412	55.4731	0.18926	-0.088672	0.045117	-25.75	111.6765	290.4349	-0.22276	0.15205	0.0040039	-30.9986	10.8885	32.12368	0.039551	-0.11084	-0.01836	-22.18	28.892	45.815	0.12353	-0.12051	0.25478	-68.416	96.9298	1169.1178	-1.518	0.64413	-0.20283	-19.033	19.9704	25.6695	0.028511	-0.041022	-0.077434
1.858	7.299	25.053	875.743	-2.415	0.53848	-0.47285	-41.1821	55.5175	48.283	0.19727	-0.095215	0.042969	-23.586	101.25865	268.5227	-0.17285	0.14063	0.014648	-52.0728	18.8559	26.2808	0.04502	-0.10146	-0.023047	-14.811	44.164	39.238	0.1002	-0.11211	0.24912	-73.2618	110.506	1172.3873	-1.4945	0.60936	-0.18173	-8.685	25.0206	16.1888	0.04236	-0.035752	-0.08621
1.86	-31.7083	36.112	879.441	-2.296	0.55635	-0.47432	-22.762	48.6811	31.734	0.21445	-0.11191	0.038477	-0.433999999999997	95.6838	247.0029	-0.12461	0.13721	0.029883	-18.365	21.3917	25.8907	0.054297	-0.091992	-0.029981	-19.696	22.98397	8.382	0.075684	-0.098145	0.25	-90.0977	122.172	1151.7042	-1.4718	0.57392	-0.16475	7.018	25.4943	22.6628	0.05171	-0.029918	-0.09323
1.862	-14.876	12.779	899.98	-2.1362	0.54189	-0.48486	-46.3718	59.843	19.471	0.22657	-0.12403	0.040918	-4.046	90.6821	206.008	-0.080274	0.13135	0.038867	-26.4165	27.8228	18.8629	0.062988	-0.085938	-0.03418	-21.586	2.515	24.922	0.058008	-0.0875	0.24258	-67.8433	132.897	1103.051	-1.4507	0.54736	-0.15186	6.776	23.3934	33.4053	0.062655	-0.027652	-0.10182
1.864	-17.5546	-0.643000000000001	904.649	-1.9361	0.51367	-0.48984	-35.949	53.8358	29.3234	0.23437	-0.13496	0.044043	-17.168	82.47168	192.8716	-0.033007	0.12471	0.054492	-10.123	34.1652	16.8505	0.07451	-0.074903	-0.040526	-18.473	3.137	28.5746	0.036426	-0.07461	0.23399	-76.1566	123.6735	1071.6764	-1.4319	0.525	-0.13115	-12.896	22.7189	30.0956	0.071777	-0.021484	-0.1123
1.866	-14.8361	-30.877	909.2969	-1.7222	0.48779	-0.48975	-38.0897	41.5684	37.7561	0.23711	-0.14863	0.04707	-9.548	84.7515	182.5075	0.0081056	0.11856	0.063769	-23.19	27.72802	7.3536	0.083885	-0.065821	-0.04619	-18.567	14.3173	27.19011	0.015332	-0.060156	0.22968	-81.111444	115.373	1060.8593	-1.4113	0.50264	-0.11787	-18.251	23.7608	18.8094	0.079613	-0.010969	-0.11691
1.868	-5.1963	-52.092	891.437	-1.5296	0.45879	-0.47744	-27.546	38.6867	23.71589	0.23535	-0.16455	0.043945	0.722000000000001	75.3929	174.869	0.047363	0.11475	0.075684	-25.812	17.49148	8.0889	0.091696	-0.06621	-0.055953	-14.958	28.7613	18.7057	0.0022461	-0.042969	0.22646	-62.6229	93.3268	1065.8613	-1.3897	0.48819	-0.10342	-1.195	16.7566	15.2625	0.090975	-0.0040858	-0.13292
1.87	14.629	-87.3209	900.7936	-1.3696	0.43779	-0.47627	-31.374	39.1837	20.8147	0.2291	-0.17988	0.047168	-12.268	73.5875345	158.3977	0.087793	0.10713	0.08584	-13.053	18.3815	10.3253	0.10497	-0.058692	-0.061228	-28.6357	30.411	11.8903	-0.0092773	-0.027344	0.22021	-51.427	95.9115	1031.26	-1.3739	0.46768	-0.088575	-5.584	7.1074	36.9992	0.096884	0.0041105	-0.13612
1.872	19.437	-123.804	921.7558	-1.2364	0.42334	-0.48565	-37.422	39.52	37.647	0.22383	-0.19297	0.050683	-43.9275	69.2543	152.3628	0.12471	0.10186	0.090723	-21.756	30.2889	20.2152	0.11426	-0.050781	-0.064453	-15.342	33.447	18.1697	-0.023535	-0.012988	0.20937	-47.7409	96.1171	1016.453	-1.3535	0.45264	-0.077637	-19.963	9.6234	16.9009	0.099086	0.015196	-0.14311
1.874	39.4209	-147.829	941.795	-1.1174	0.41582	-0.48867	-16.28	36.3769	43.8007	0.20703	-0.20625	0.050683	-24.959	69.292	141.81527	0.15869	0.097559	0.10283	-4.879	34.851	35.6228	0.12149	-0.045508	-0.070509	-26.326	30.373	6.7694	-0.034473	0.00097656	0.20547	-37.777	106.2578	1006.032	-1.3336	0.42871	-0.065722	-31.362	3.03	15.6363	0.10156	0.023438	-0.15039
1.876	44.675	-153.758	979.9366	-1.0117	0.41162	-0.49121	-6.441	43.7971	42.418	0.18701	-0.21494	0.053027	-24.42522	56.45	113.4261	0.1874	0.082617	0.1124	-6.164	27.6295	20.164	0.12931	-0.037886	-0.07882	-45.755	33.582	15.8296	-0.045801	0.013086	0.19687	2.789	96.8831	994.6887	-1.3058	0.41006	-0.059863	-18.6	8.0091	22.2838	0.10617	0.03386	-0.15733
1.878	57.772	-151.1	1002.8528	-0.92744	0.42217	-0.4961	-10.05	34.0781	34.8874	0.17822	-0.22705	0.050781	-36.0413	48.3028	94.12	0.21191	0.071289	0.12109	-6.751	30.222	23.5644	0.14063	-0.030459	-0.09093	-33.3104	40.3858	20.09798	-0.055957	0.028125	0.18799	-24.745	110.3392	977.8896	-1.2784	0.39014	-0.046192	-15.611	6.63874	41.641	0.1084	0.046403	-0.16531
1.88	51.69	-154.344	1032.72	-0.8668	0.42441	-0.5082	-6.486	18.6614	26.9743	0.16348	-0.23125	0.050586	-45.425	37.724	83.2073	0.23574	0.061133	0.12803	-22.364	34.921	22.6151	0.15138	-0.020013	-0.094444	-22.306	32.0157	30.54353	-0.067383	0.041504	0.18213	-22.794	123.9545	952.0655	-1.2498	0.3751	-0.035351	-29.44	-0.00578000000000001	49.0698	0.1091	0.055353	-0.17353
1.882	16.7273	-145.032	1021.70462	-0.81757	0.43301	-0.51992	11.837	14.8714	20.7057	0.14492	-0.23272	0.051856	-27.166	34.99701	69.3052	0.26084	0.049414	0.13759	-7.365	21.9802	23.6711	0.16211	-0.0068359	-0.096191	-9.644	19.2045	17.2483	-0.074903	0.053516	0.17129	-16.004	128.288	941.681	-1.2197	0.36279	-0.029297	-35.358	-6.5558	44.1812	0.10582	0.068284	-0.18601
1.884	-3.6246	-112.197	1022.1925	-0.79219	0.44062	-0.52881	-10.145	29.2155	7.8534	0.13203	-0.23311	0.051074	-12.78	41.4058	46.679	0.27685	0.033398	0.15049	20.147	3.42603	37.551	0.16776	0.0031075	-0.10967	-26.222	2.8794	9.559	-0.086133	0.06543	0.16231	6.795	133.526	910.935	-1.1923	0.34726	-0.0094727	-27.231	2.131	59.0644	0.10059	0.079102	-0.19434
1.886	-10.6791	-95.011	1034.6436	-0.78467	0.44482	-0.53516	-17.505	39.675	12.878	0.11553	-0.22998	0.043359	-14.838	48.8337	53.365	0.28799	0.020313	0.15596	7.805	-8.801	41.20767	0.16914	0.012885	-0.11833	0.273	-2.7431	11.1914	-0.094726	0.079492	0.15449	-0.657999999999998	128.8896	878.691	-1.1601	0.33017	-0.0064454	-19.113	5.83222	81.06778	0.083014	0.086173	-0.20194
1.888	-5.813	-94.166	1065.3368	-0.7957	0.44141	-0.53808	-4.157	32.229	29.996	0.10205	-0.22363	0.044922	-21.03	48.4008	55.671	0.29248	0.0029297	0.1626	-8.439	-19.5559	41.9649	0.16953	0.021033	-0.12382	-20.722	10.04	22.1365	-0.10293	0.088281	0.14941	5.941	128.7045	849.5043	-1.1284	0.31494	0.0017578	-54.7653	10.29653	114.211	0.059926	0.091693	-0.20911
1.89	7.55493	-107.784	1080.77	-0.81942	0.44111	-0.53779	-14.537	22.3727	26.388	0.087598	-0.21435	0.039941	-10.338	41.8174	55.6409168	0.29765	-0.0088867	0.17051	-19.484	-20.0532	65.2827	0.16635	0.027499	-0.13007	-21.445	27.97281	23.579	-0.1084	0.10303	0.14258	2.617	126.077185	825.19	-1.0919	0.29951	0.0090822	-28.6653	33.1408	211.289	0.023185	0.092542	-0.22247
1.892	38.904	-104.444	1101.353	-0.86746	0.44931	-0.54443	-10.748	26.9861	22.639	0.074805	-0.2084	0.034277	-4.547	40.9456	37.2436	0.29365	-0.021875	0.17519	2.727	-4.13517	72.3349	0.15479	0.038086	-0.13867	-39.28371	24.6282	28.9262	-0.11221	0.11074	0.13701	-4.676	125.6615	789.098	-1.061	0.28271	0.016113	-17.1632	38.6136	318.985	-0.022263	0.093886	-0.23352
1.894	62.827	-91.316	1109.285	-0.94324	0.46103	-0.54814	-25.266	27.0073	26.2494	0.06543	-0.20136	0.02998	-18.3179	43.8624	29.68814	0.29131	-0.038281	0.17754	-10.677	4.67292	82.6025	0.1418	0.046541	-0.14438	-16.253	18.4389	34.2288	-0.11484	0.12383	0.13145	9.461	124.9128	769.2266	-1.018	0.27246	0.017774	-43.862	68.85	434.952	-0.093262	0.09375	-0.24951
1.896	49.7	-74.394	1115.721	-1.0269	0.48779	-0.54932	-15.836	23.1492	41.2447	0.053613	-0.18809	0.028125	-15.066	40.395	44.332	0.2833	-0.048828	0.17959	-26.1932	-0.246	94.5567	0.11898	0.05745	-0.15461	-18.414	23.4177	27.2908	-0.11836	0.12969	0.12871	-9.578	122.93383	737.3923	-0.97695	0.25722	0.030371	-24.1074	91.1106	528.495	-0.1827	0.088839	-0.25488
1.898	51.761	-66.4795	1124.5956	-1.1206	0.50909	-0.5457	-24.828	26.1018	17.8698	0.041504	-0.18018	0.023438	-5.96	40.791	46.3668	0.27197	-0.061523	0.18066	-26.392	-25.0999	112.6794	0.090003	0.062619	-0.16079	-21.69	24.26324	26.19828	-0.12041	0.13213	0.13027	-4.375	121.3959	719.5824	-0.93008	0.24707	0.030762	12.273	40.143	640.117	-0.30841	0.074524	-0.26495
1.9	34.6587	-79.764	1161.5721	-1.2181	0.52579	-0.55343	-20.071	42.816	8.7583	0.036914	-0.17051	0.015918	-18.636	41.4315	15.848	0.26055	-0.069629	0.18057	-3.421	-9.6866	215.555	0.057203	0.069019	-0.1662	-28.6243	30.2863	22.5458	-0.11621	0.13916	0.12695	-13.384	123.0618	675.029	-0.88701	0.23779	0.034668	-48.611	-4.011	778.0896	-0.46311	0.053715	-0.26764
1.902	47.569	-106.186	1194.801	-1.3196	0.53751	-0.57688	-21.65	31.073	-2.0281	0.026074	-0.15576	0.013379	-15.755	33.113	20.043	0.24414	-0.077734	0.18145	20.9111	27.0294	321.073	0.016113	0.072266	-0.17578	-29.306	25.8003	19.775	-0.11729	0.14307	0.12324	-34.082	122.1124	646.446	-0.8418	0.22949	0.041016	-79.551	-9.2	875.378	-0.64124	0.022647	-0.26414
1.904	41.932	-141.018	1236.188	-1.4162	0.54091	-0.60305	-35.0624	15.4676	17.1836	0.018262	-0.14756	0.002832	-4.022	20.42857	32.7117	0.22891	-0.078906	0.17558	-65.0969	64.3	443.165	-0.036359	0.076851	-0.19011	-20.138	34.393	14.8466	-0.11602	0.15	0.12236	-40.939	116.0656	635.4115	-0.79785	0.22168	0.045605	-41.262	28.749	935.8244	-0.86426	-0.030273	-0.24414
1.906	33.6151	-134.253	1231.2175	-1.5098	0.53076	-0.62744	-23.055	12.271	30.6237	0.01416	-0.13115	-0.0021485	4.259	15.9883	32.5038	0.20303	-0.084375	0.16699	-17.543	54.4061	522.862	-0.10078	0.08627	-0.20112	-20.125	25.8036	10.3514	-0.11406	0.15312	0.12353	-57.9801	124.54558	628.0189	-0.75498	0.21347	0.053125	-12.9	37.59188	1003.776	-1.1326	-0.090161	-0.22695
1.908	30.26623	-128.11	1242.8638	-1.6107	0.52238	-0.64032	-56.4289	14.821	34.6485	0.016602	-0.12158	-0.0063477	-1.977	17.376	23.7976	0.18311	-0.083496	0.16846	-12.385	19.353	599.211	-0.19853	0.093531	-0.21069	-14.216	16.945	26.2025	-0.11016	0.16094	0.12197	-38.6725	130.1733	590.0719	-0.71201	0.20411	0.053906	-64.9927	26.638	998.347	-1.43	-0.14038	-0.22036
1.91	12.2397	-111.2187	1251.9536	-1.7304	0.51367	-0.64958	-36.7942	16.7567	39.9962	0.018262	-0.10156	-0.016504	-3.167	13.0327	40.3465	0.15694	-0.085645	0.16524	-14.317	-13.56	718.9473	-0.32707	0.085787	-0.22084	3.859	22.6814	37.4376	-0.10791	0.16797	0.11719	-55.6624	129.2252	564.8097	-0.66709	0.18838	0.043262	-90.068	-18.664	973.951	-1.7277	-0.15756	-0.23436
1.912	15.1627	-102.7948	1260.2682	-1.8631	0.5191	-0.65042	-31.9551	13.8057	38.502	0.025683	-0.081641	-0.02461	2.099	11.6336	31.0461	0.13262	-0.08418	0.16035	-11.512	-28.004	829.165	-0.48877	0.075195	-0.22021	-14.856	31.3361	25.6841	-0.10283	0.17773	0.12412	-44.7455	116.6429	537.1293	-0.61523	0.18018	0.054199	-60.7674	-58.758	995.733	-2.0018	-0.12285	-0.26547
1.914	13.7084	-95.579	1256.7491	-2.0088	0.53039	-0.65274	-11.141	20.3796	21.1351	0.033106	-0.063672	-0.035938	-5.676	1.9521	29.7829	0.11348	-0.083398	0.15762	0.861000000000001	-10.536	908.001	-0.68278	0.052233	-0.22606	-40.95093	34.2309	13.3896	-0.10732	0.18174	0.12402	-42.843	115.91972	508.1112	-0.5542	0.16436	0.058887	-26.111	-51.944	1035.626	-2.2285	-0.021484	-0.29102
1.916	53.707	-90.83	1252.5117	-2.1504	0.56006	-0.6582	-32.492	18.8961	10.67667	0.043847	-0.046094	-0.044824	-25.512	16.027	14.0794	0.094531	-0.075879	0.15439	-0.4422	20.362	934.46	-0.91563	0.035053	-0.22908	-40.53727	20.9122	33.774	-0.11084	0.19229	0.11933	-32.501	125.7596	452.3653	-0.50156	0.15342	0.059668	-24.401	-45.56	1042.082	-2.4262	0.12348	-0.34864
1.918	49.362	-98.7646	1255.5847	-2.2773	0.59785	-0.67354	-37.994	26.7	21.4286	0.057129	-0.026855	-0.058105	-30.535	15.0856	17.211	0.07373	-0.072266	0.15479	-39.797	5.5157	905.6372	-1.1728	0.032047	-0.23956	-16.778	4.22	55.5617	-0.11348	0.19805	0.12236	-44.1196	117.4941	432.334	-0.44102	0.14677	0.060449	-10.497	-40.0489	994.937	-2.5627	0.29806	-0.39972
1.92	51.592	-78.017	1244.6276	-2.3931	0.63595	-0.70764	-21.671	16.3838	18.644	0.066113	-0.013867	-0.067578	-9.884	21.1544	27.6732	0.055371	-0.066406	0.1502	-32.2961	-40.9618	918.5029	-1.438	0.036509	-0.24932	-22.281	-21.3758	53.542	-0.11719	0.20459	0.12207	-41.5343	110.67749	425.44296	-0.39102	0.13115	0.063184	1.643	-7.097	954.824321	-2.6297	0.47018	-0.44259
1.922	33.604	-49.831	1234.5856	-2.484	0.6612	-0.75818	-40.3581	21.30982	18.4688	0.071485	-0.0059571	-0.075098	-25.3647	31.747	8.239	0.038281	-0.060742	0.14766	-16.815	-90.811	941.282	-1.7061	0.058594	-0.26074	-28.497	-27.7493	65.2167	-0.12373	0.21182	0.11719	-43.3831	98.8418	402.6679	-0.34131	0.12061	0.066406	-5.093	30.428	953.469	-2.6539	0.58528	-0.48033
1.924	29.186	-41.898	1227.3808	-2.5293	0.6729	-0.81335	-21.575	19.5587	26.87626	0.075391	-0.0032227	-0.086426	-35.477	33.388	6.657	0.021484	-0.056445	0.14219	31.4	-119.2992	974.84	-1.9407	0.099641	-0.27303	-19.72	-21.47904	82.7234	-0.12881	0.21758	0.12021	-46.31	88.95	374.576	-0.296	0.10225	0.062012	-41.479	47.444	987.543	-2.6284	0.63525	-0.50342
1.926	50.376	-36.871	1221.328	-2.5254	0.66602	-0.86133	-17.793	12.6627	37.1641	0.078906	-0.0024414	-0.093457	-37.4965	18.67	17.703	0.0039063	-0.04961	0.1375	30.5965	-103.704	971.242	-2.1635	0.1671	-0.28701	-24.363	-5.7028	111.157	-0.14092	0.22265	0.11709	-34.73	94.5038	358.9602	-0.24834	0.086328	0.060449	-72.3592	35.756	987.426	-2.5665	0.62658	-0.51912
1.928	34.4907	-20.0098	1209.313	-2.4762	0.64748	-0.88869	9.481	12.6959	26.259	0.078613	-0.0048828	-0.10205	-18.929	9.95019	26.8237	-0.0078125	-0.044434	0.13281	26.9486	-77.276	961.544	-2.3612	0.2402	-0.33572	-51.483	32.0914	182.2607	-0.1625	0.21768	0.11299	-33.458	102.8921	341.7907	-0.19678	0.072656	0.05459	-70.32523	40.605	970.3196	-2.4518	0.60989	-0.54217
1.93	52.643	-8.113	1245.673	-2.4085	0.62168	-0.90202	-18.075	24.5964	20.5971	0.073438	-0.0037109	-0.11015	-21.98	12.241	12.8985	-0.016406	-0.040136	0.13252	25.32926	-42.896	914.4137	-2.4859	0.33682	-0.37519	-47.377	19.8834	294.035	-0.18994	0.21875	0.1001	-12.909	110.644	310.0539	-0.14327	0.059473	0.061621	-78.4252	21.277	977.03	-2.2373	0.58527	-0.55507
1.932	30.15	-2.183	1267.008	-2.3446	0.59451	-0.90302	-18.055	36.03	13.5795	0.067871	-0.0044922	-0.11787	-29.5798	16.8801	5.40448	-0.023535	-0.032715	0.12617	16.497	-8.89	899.262	-2.5488	0.42578	-0.40332	-28.511	-27.1918	402.166	-0.23965	0.21504	0.093066	-30.236	109.142	285.0885	-0.088379	0.04541	0.0625	-83.4146	-3.326	961.524	-1.9594	0.56612	-0.55225
1.934	33.8472	-12.776	1281.0444	-2.3069	0.58156	-0.91417	-1.308	20.8397	20.0531	0.059277	-0.0056641	-0.12647	-15.367	13.7945	11.1836	-0.036816	-0.029199	0.1293	21.203	18.547	896.718	-2.5375	0.48609	-0.42251	-51.895	-37.58032	493.114	-0.30625	0.20371	0.075488	-16.534	103.267	262.1401	-0.038965	0.039844	0.06582	-80.8163	-2.627	974.277	-1.7031	0.55469	-0.53906
1.936	20.8832	-31.637	1269.9752	-2.291	0.58105	-0.93164	-2.989	17.4463	24.5636	0.052051	-0.00039062	-0.13731	-25.224	17.3067	11.52	-0.041016	-0.027442	0.11934	-8.338	-11.488	922.719	-2.4748	0.51303	-0.43301	5.857	-45.201	553.178	-0.40078	0.18262	0.05127	-6.326	86.793	249.65872	0.0085938	0.034766	0.062891	-35.235	-24.162	964.597	-1.5099	0.5459	-0.52705
1.938	23.9076	-48.6206	1250.671	-2.2894	0.60722	-0.94675	-7.056	11.6487	22.6951	0.045898	0.0087891	-0.15137	-23.626	22.4908	-1.992	-0.049805	-0.020508	0.11768	0.433999999999999	-23.147	956.369	-2.3805	0.53251	-0.44327	11.4906	-44.084	662.521	-0.52139	0.15	0.02832	4.314	85.7233	229.978	0.048438	0.025781	0.06914	-6.195	-69.5454	989.7552	-1.3658	0.54131	-0.5336
1.94	55.551	-61.303	1263.183	-2.2722	0.64667	-0.96548	-14.218	1.1956	24.3174	0.042969	0.01875	-0.16543	-22.336	22.42367	6.403	-0.056055	-0.014746	0.11494	-32.823	-21.65	971.749	-2.2701	0.53331	-0.45335	-25.0513	-1.066	801.3931	-0.64746	0.11182	0.0097656	0.0420000000000016	82.9469	208.3023	0.085742	0.020117	0.072558	13.524	-125.577	1028.5568	-1.2701	0.54326	-0.54962
1.942	37.546	-57.257	1268.466	-2.2371	0.69233	-0.98622	-6.74	-4.4488	42.5725	0.044629	0.028125	-0.17901	-24.128	8.4128	15.9267	-0.06084	-0.0073244	0.11328	-24.2946	-19.275	973.267	-2.1401	0.52783	-0.46045	-62.524	18.922	831.7626	-0.80293	0.071289	-0.0035156	-5.134	75.7739	196.4999	0.11719	0.013672	0.070801	13.7814	-146.623	1066.8914	-1.1897	0.55948	-0.5624
1.944	38.018	-46.983	1263.0859	-2.1805	0.72458	-1.0052	-34.6378	-1.657	42.481	0.044629	0.037891	-0.1915	-16.054	5.20464	19.0484	-0.063575	-0.0018554	0.1082	-5.3392	-51.017	976.33	-1.9831	0.52871	-0.45934	-50.0117	-16.3895	845.37	-0.97998	0.01709	-0.020996	-6.176	62.3811	181.5699	0.14873	0.0093748	0.070605	28.6127	-160.413	1094.986	-1.1211	0.57031	-0.5791
1.946	39.239	-37.9402	1250.08292	-2.1055	0.74414	-1.0098	-28.362	0.5312	46.4069	0.046387	0.046777	-0.20605	-25.675	7.9333	20.8859	-0.066211	0.0076171	0.10625	-1.586	-97.563	968.0154	-1.8163	0.53647	-0.46191	12.061	-13.6768	905.1834	-1.1718	-0.044629	-0.044043	-24.078	64.514	150.763	0.17305	0.0013672	0.068457	13.1472	-148.866	1115.1279	-1.0592	0.58252	-0.59092
1.948	53.629	-26.616	1250.6889	-2.0253	0.74335	-1.0073	-15.03	-13.99983	62.2767	0.041504	0.054688	-0.21973	-8.393	19.9783	19.7692	-0.066406	0.022949	0.10205	40.5037	-134.482	983.426	-1.6677	0.55094	-0.46388	27.9836	-2.091	953.088	-1.3578	-0.082422	-0.078906	-15.374	62.575	158.582	0.19023	-0.006836	0.068457	-8.582	-149.955	1115.3561	-1.006	0.58857	-0.5918
1.95	50.096	-14.5746	1245.0963956	-1.9516	0.73968	-0.99951	-23.543	-8.2301	51.1215	0.035547	0.059082	-0.23506	-0.146000000000001	20.21	23.4507	-0.069238	0.034864	0.095605	25.300656	-170.418	1018.221	-1.5444	0.57073	-0.48236	32.2735	9.39700000000001	990.995	-1.5273	-0.079102	-0.11768	-13.83	62.6958	138.0543	0.20723	-0.015039	0.059961	-31.5993	-140.644	1104.235	-0.9627	0.59013	-0.58477
1.952	32.15	9.459	1231.363	-1.8871	0.73349	-0.98962	-20.891	-2.544	48.9559	0.018945	0.061718	-0.24434	-18.851	22.6622	6.886974	-0.072949	0.046681	0.085937	25.8048	-197.226	1066.7636	-1.4409	0.58838	-0.50635	24.6571	-10.464	988.38	-1.6644	-0.037793	-0.15752	-38.6339	69.4857	117.0495	0.22607	-0.026367	0.056152	-29.863	-119.5212	1110.1464	-0.93574	0.57598	-0.58105
1.954	38.8393	27.156	1237.173	-1.835	0.73026	-0.97707	-40.848	-3.295	80.0067	0.00058598	0.060156	-0.25801	-9.971	23.8069	-4.7932	-0.074902	0.062306	0.083594	25.8916	-216.958	1114.7013	-1.3508	0.60068	-0.53152	13.399	-22.464	969.479	-1.7637	0.041113	-0.19512	-32.278	72.758	100.145	0.23584	-0.03916	0.053027	-37.914	-102.659	1145.23915	-0.93359	0.55469	-0.57422
1.956	32.4098	44.5359	1236.753	-1.7886	0.729	-0.96436	-25.302	-19.4619	108.2163	-0.024023	0.061523	-0.26563	-9.347	26.3307	12.8783	-0.073437	0.068262	0.078125	38.864	-226.862	1123.2831	-1.2797	0.60703	-0.55672	52.4728	-44.7086	957.708	-1.8336	0.13486	-0.22363	-44.5259	62.714	92.437	0.24932	-0.051953	0.046973	-17.6316	-96.334	1169.5281	-0.96035	0.52715	-0.5668
1.958	20.6697	43.4984	1232.8085	-1.7487	0.73014	-0.95559	-40.4392	-19.3327	156.894	-0.049316	0.068359	-0.27051	3.023	29.5169	15.8712	-0.075195	0.082031	0.071289	-0.3678	-216.974	1105.1707	-1.2255	0.60118	-0.56806	16.506	-41.763	951.223	-1.8763	0.22061	-0.25352	-30.187	56.7123	94.1026	0.26104	-0.066015	0.047363	30.993	-91.777	1188.896	-1.0063	0.51055	-0.55722
1.96	7.8771	46.445	1209.2843	-1.7089	0.73569	-0.94216	-6.129	15.113	301.398	-0.08418	0.079102	-0.29541	-12.836	22.5242	16.1369	-0.081738	0.10068	0.071289	-11.459	-185.692	1103.8785	-1.178	0.592	-0.58632	27.6739	-10.355	883.565	-1.9082	0.29297	-0.2749	-37.4967	55.77609	73.2012	0.26563	-0.074414	0.042285	58.1196	-69.551	1189.353	-1.0734	0.50703	-0.54004
1.962	39.558	35.869	1201.5122	-1.6771	0.73845	-0.927	-41.1685	51.607	424.511	-0.12383	0.087403	-0.30781	-8.503	18.28273	7.536	-0.086326	0.11093	0.066701	-2.8497	-137.924	1119.3794	-1.1445	0.57422	-0.60547	29.6173	8.852	900.535	-1.911	0.34531	-0.28623	-42.2952	63.14	70.2636	0.26758	-0.083984	0.036133	60.846	-63.687	1192.895	-1.1484	0.51367	-0.52617
1.964	36.172	41.9372	1186.9243	-1.6458	0.73758	-0.90781	-70.2382	67.0353	564.984	-0.17578	0.098732	-0.32266	-11.759	11.4953	20.0582	-0.092967	0.13203	0.061621	-20.5877	-96.276	1155.9532	-1.1213	0.56875	-0.60996	-6.1641	9.96099999999999	929.0703	-1.8917	0.3792	-0.28603	-59.7405	64.01724	65.4704	0.26856	-0.096192	0.036328	47.022	-71.0281	1205.724	-1.2246	0.51953	-0.51172
1.966	50.818	42.5327	1184.5108	-1.6191	0.73438	-0.89844	-46.824	45.7278	626.155	-0.26201	0.10605	-0.33047	-11.05	17.0784	29.1791	-0.10147	0.14638	0.059571	23.4841	-88.932	1199.8972	-1.1029	0.55517	-0.60615	-43.22	3.85	916.6519	-1.8281	0.40576	-0.28018	-29.0039	58.4272	58.3804	0.26485	-0.1081	0.034472	37.613	-68.07365	1234.8935	-1.3046	0.52236	-0.49853
1.968	29.575	43.0037	1178.661	-1.5942	0.72859	-0.87933	-44.622	16.479	691.671	-0.38525	0.10107	-0.3291	-17.9773	31.6513	18.87562	-0.10693	0.16113	0.053223	52.293	-117.56	1215.187	-1.09	0.54306	-0.58857	-19.6387	8.657	903.271	-1.7278	0.42695	-0.26269	-33.055	67.175	45.7769	0.26172	-0.11631	0.030957	27.304	-94.1221	1280.018	-1.395	0.51875	-0.4836
1.97	50.941	30.474	1177.88128	-1.5768	0.72839	-0.85916	-28.235	-5.33	815.66	-0.56103	0.081738	-0.3165	-18.05	13.5547	35.6563	-0.1166	0.17628	0.04355	72.421	-106.328	1204.945	-1.1079	0.54444	-0.5667	24.9841	-13.285	880.711	-1.5913	0.4458	-0.23682	-37.357	65.46479	33.3632	0.2543	-0.12812	0.028027	26.929	-116.19	1307.285	-1.5149	0.50742	-0.48008
1.972	52.16	16.246	1166.7899	-1.5588	0.71585	-0.8342	-41.183	-2.839	941.861	-0.77334	0.04209	-0.29131	-22.327	-2.6412	47.3958	-0.1211	0.19298	0.034465	56.26	-74.097	1189.094	-1.1528	0.55713	-0.54443	3.933	-17.452	903.962	-1.4561	0.45147	-0.2082	-20.301	47.3926	34.756	0.24463	-0.13525	0.019531	0.887	-136.055	1319.085	-1.6509	0.4917	-0.47881
1.974	41.791	30.359	1148.54305	-1.5458	0.70788	-0.80708	-40.261	29.327	972.316	-1.0374	-0.017676	-0.27021	-17.866	-7.8118	78.727	-0.13165	0.20744	0.027828	41.007	-54.941	1201.199	-1.2133	0.57998	-0.54336	1.92	-25.2219	925.0937	-1.3526	0.44971	-0.18437	-29.39	42.0666	41.2588	0.22871	-0.13945	0.016406	-8.5682	-140.706	1307.4765	-1.8042	0.48096	-0.47803
1.976	34.8058	41.356	1164.0784	-1.5352	0.69678	-0.7832	-44.742	25.3632	985.3726	-1.3425	-0.082518	-0.2585	-21.823	9.0295	90.758	-0.14718	0.2174	0.014539	39.5757	-57.058	1235.851	-1.2714	0.58994	-0.54776	15.026	-42.79909	956.747	-1.2866	0.454	-0.16524	-26.753	41.2828	41.5045	0.21025	-0.14522	0.010449	-20.2943	-144.6664	1322.774	-1.9663	0.4794	-0.48877
1.978	40.767	60.4598	1158.1899	-1.5223	0.6882	-0.75189	-54.3241	-6.158	981.4634	-1.6484	-0.11719	-0.25879	-37.2288	24.1979	129.814	-0.17285	0.22559	0.00097656	47.2815	-94.528	1275.088	-1.339	0.59385	-0.55244	8.277	-73.919	966.744	-1.2588	0.46621	-0.15166	-36.271	35.5047	38.5919	0.18681	-0.14404	0.0053711	-20.942	-144.4837	1341.441	-2.1105	0.49854	-0.50351
1.98	29.486	77.991	1141.2637	-1.5128	0.6755	-0.72571	-38.4434	-53.363	997.581	-1.9167	-0.085741	-0.28369	-50.248	43.64982	213.39	-0.20727	0.23204	-0.011497	65.116	-128.8285	1289.508	-1.4321	0.58379	-0.55254	-7.356	-110.812	983.958	-1.2461	0.48047	-0.13867	1.341	30.1058	50.8257	0.16016	-0.14795	0.0012695	7.2254	-124.7508	1342.603	-2.2234	0.53408	-0.53672
1.982	11.74755	96.133	1102.871	-1.4921	0.66339	-0.70032	-14.029	-80.43	1000.273	-2.1336	0.0083983	-0.30654	-53.286	29.7201	338.802	-0.25351	0.23303	-0.03184	35.992	-172.572	1307.251	-1.5503	0.57666	-0.55615	-33.06	-135.393	946.2742	-1.2294	0.51123	-0.12676	-9.421	32.3329	48.5997	0.12939	-0.14795	-0.0063477	14.7248	-117.2437	1317.2756	-2.3122	0.57334	-0.58623
1.984	14.40673	95.399	1107.576	-1.4727	0.64883	-0.67657	6.264	-67.425	1002.459	-2.3136	0.15137	-0.33662	-83.244	0.555899999999999	452.612	-0.31867	0.22988	-0.05801	47.87	-181.154	1317.4615	-1.6864	0.58135	-0.56103	-66.8263	-135.045	945.434	-1.2171	0.55312	-0.10684	-4.404	43.3798	25.5424	0.10274	-0.14356	-0.0086915	23.2401	-104.123	1297.1782	-2.3926	0.62207	-0.64844
1.986	21.6842	95.017	1101.7153	-1.4502	0.63281	-0.65039	4.228	-67.81	989.86	-2.4386	0.31494	-0.37451	-66.489	3.106	562.198	-0.40837	0.22237	-0.091312	19.6968	-166.493	1334.729	-1.8269	0.58486	-0.56748	-68.489	-120.7011	966.2927	-1.203	0.60312	-0.093164	4.762	27.94595	24.681	0.073731	-0.1375	-0.010742	22.3785	-102.921	1289.737	-2.4738	0.66094	-0.71367
1.988	17.7419	104.919	1086.1979	-1.424	0.6123	-0.62324	6.786	-46.6179	961.64	-2.5093	0.49072	-0.3999	34.8597	-16.529	639.7764	-0.51465	0.20703	-0.11328	6.5328	-124.556	1331.429	-1.9566	0.60049	-0.57842	-86.55672	-118.283	979.1102	-1.1863	0.65176	-0.085742	-5.663	20.6966	40.6396	0.043262	-0.13164	-0.017774	1.88	-77.258	1294.4389	-2.5397	0.68799	-0.77021
1.99	24.1762	115.11	1061.1488	-1.4004	0.58847	-0.59697	10.517	0.944000000000003	931.7932	-2.5301	0.61895	-0.4207	4.6881	-10.698	742.6091	-0.64974	0.18147	-0.1286	34.8473	-125.944	1325.222	-2.0768	0.61045	-0.58633	-114.369	-140.4472	956.479	-1.1675	0.69775	-0.087891	14.432	31.7213182	41.2217	0.012305	-0.11924	-0.025879	13.0908	-41.869	1291.4426	-2.5835	0.70205	-0.81474
1.992	21.21	111.7087	1024.841	-1.3695	0.56894	-0.57079	19.718	38.841	906.134	-2.5476	0.70283	-0.43779	-52.972	26.8349	830.152	-0.8113	0.1392	-0.14237	66.885	-148.6032	1305.0822	-2.1953	0.61719	-0.61133	-85.1657	-139.7932	963.937	-1.1576	0.72353	-0.094629	-0.934000000000001	30.7026	16.5243	-0.016113	-0.10938	-0.027832	0.3246	-21.6506	1288.3602	-2.5918	0.70938	-0.84629
1.994	28.0074	109.4341	1014.182	-1.3414	0.54824	-0.54785	-12.842	44.797	930.974	-2.5432	0.74619	-0.47803	-33.068	34.496	861.185	-1.0063	0.089938	-0.16427	75.757	-147.472	1312.1025	-2.3203	0.6207	-0.65196	-58.9843	-119.7193	973.243	-1.1541	0.74063	-0.10352	-1.036	28.4289	23.966675	-0.038867	-0.097951	-0.03418	25.6865	-18.191	1295.688	-2.5718	0.69971	-0.87354
1.996	22.4905	114.7138	984.937	-1.312	0.52783	-0.5249	-62.87589	11.039	953.503	-2.4663	0.76573	-0.52295	0.858000000000001	7.90308	929.317	-1.2019	0.048335	-0.18431	37.571	-117.633	1313.7387	-2.4445	0.6293	-0.70391	-69.7761	-81.6225	1001.812	-1.1572	0.7414	-0.11758	-11.163	27.322	22.0817	-0.060352	-0.088574	-0.037695	-11.0627	-22.802	1286.861	-2.5288	0.69209	-0.90127
1.998	2.262	101.015	986.33307	-1.2829	0.50401	-0.49903	-56.9717	-1.719	957.7244	-2.2852	0.76953	-0.54297	3.5309	15.467	964.564	-1.3901	0.027344	-0.2002	33.6518	-80.64	1288.6976	-2.5512	0.6375	-0.75899	-59.181	-52.592	1036.675	-1.1674	0.72558	-0.1334	-7.638	31.919	26.57786	-0.075586	-0.07959	-0.041211	7.374	-11.294	1294.7594	-2.4711	0.67422	-0.92031
2	-1.138	91.467	979.6775	-1.2555	0.48672	-0.47735	-52.9598	0.25	967.3176	-2.0346	0.75332	-0.53047	29.5977	-10.836	985.102	-1.5536	0.034454	-0.22098	30.507	-56.639	1273.472	-2.6239	0.6415	-0.79697	-57.259	-36.268	1064.8642	-1.1797	0.70117	-0.14355	-30.718	28.02447	12.6397	-0.091992	-0.069141	-0.046191	2.8777	-13.503	1296.0104	-2.4082	0.66367	-0.93711
2.002	-5.0988	98.7789	969.664	-1.2238	0.46133	-0.45352	-10.401	-10.348	964.198	-1.7757	0.72744	-0.50674	34.0705	-17.829	997.867	-1.6973	0.067926	-0.24103	40.548	-31.9218	1275.297	-2.6519	0.64209	-0.81787	-41.119	-44.982	1070.3219	-1.1925	0.68096	-0.16494	-28.3388	25.3419	29.4928	-0.10107	-0.062012	-0.052246	5.5779	-34.915	1299.4432	-2.3454	0.66318	-0.95322
2.004	-9.427	114.213	962.695	-1.1943	0.44239	-0.42939	-39.4635	-50.66	962.517	-1.5386	0.70127	-0.51963	35.9035	-10.682	1002.643	-1.8076	0.12183	-0.25779	49.584	-29.16	1288.42	-2.6428	0.62363	-0.83496	-44.092	-70.826	1109.706	-1.2046	0.66338	-0.19112	-11.015	21.81923	34.6883	-0.10508	-0.054883	-0.05625	17.4896	-58.227	1276.364	-2.2827	0.6626	-0.97412
2.006	-15.7997	119.345	945.4396	-1.1641	0.4209	-0.40918	10.881	-87.9995	960.735	-1.3277	0.66768	-0.5374	31.9351	-9.376	978.893	-1.8896	0.18218	-0.26005	38.168	-41.277	1303.487	-2.6167	0.60049	-0.8503	-62.9667	-92.06	1120.864	-1.2065	0.65439	-0.21846	-41.51815	24.1514	23.468	-0.11035	-0.04668	-0.063769	24.2039	-73.759	1278.264	-2.2185	0.66152	-0.99082
2.008	-6.516	111.1147	942.435	-1.1324	0.39746	-0.38047	11.013	-149.965	992.155	-1.1479	0.62646	-0.55518	52.5958	-25.9588	956.639	-1.939	0.25342	-0.26221	49.5178	-30.147	1317.4194	-2.5854	0.58955	-0.87217	-80.62187	-113.6732	1137.464	-1.2038	0.64814	-0.24209	-27.997	25.0928	11.2053	-0.10957	-0.037695	-0.062989	56.784	-71.076	1301.75824	-2.1522	0.66182	-1.0015
2.01	-14.234	114.5333	900.31919	-1.1027	0.37724	-0.36035	29.15218	-178.386	1039.9243	-1.0109	0.58496	-0.56231	34.1367	-34.949	929.57753	-1.9524	0.33047	-0.26545	26.7959	-35.615	1321.1819	-2.5526	0.58623	-0.88428	-66.548	-133.6677	1151.4862	-1.2007	0.63232	-0.27197	-25.1358	23.4075	17.1626	-0.10576	-0.032617	-0.069629	47.4844	-57.8344	1293.745	-2.0804	0.65713	-0.99835
2.012	-24.121	108.8419	862.6676	-1.0741	0.35811	-0.33809	36.7	-184.163	1086.3035	-0.90117	0.55996	-0.57588	60.489	-41.2146	893.316	-1.932	0.40333	-0.27025	29.394	-53.749	1322.2437	-2.5151	0.59619	-0.89014	-68.8033	-147.954	1146.698	-1.2105	0.61055	-0.29766	-21.634	24.28449	27.0234	-0.099609	-0.024902	-0.075684	40.257	-50.665	1298.605	-2.0047	0.65117	-0.99785
2.014	-26.4035	113.987	834.483	-1.0492	0.33887	-0.31748	36.069	-191.049	1103.33153	-0.82812	0.5416	-0.58721	36.21	-30.86	896.029	-1.8665	0.45796	-0.27359	38.607	-89.545	1321.597	-2.4773	0.6167	-0.91162	-64.4153	-173.677	1135.75184	-1.2398	0.58135	-0.31221	-40.8233	9.1808	16.79625	-0.091113	-0.025195	-0.084082	48.913	-35.1925	1296.3027	-1.9297	0.63379	-0.99414
2.016	-5.014	122.421	816.4137	-1.0195	0.32373	-0.29688	15.0623	-186.025	1116.08	-0.77441	0.52832	-0.59765	-5.9298	-12.849	913.5868	-1.7599	0.49305	-0.26773	50.42	-96.597	1309.4709	-2.4285	0.64375	-0.92422	-49.991	-173.036	1152.78369	-1.2956	0.54268	-0.32509	-51.9781	4.685	19.7397	-0.07959	-0.019727	-0.0875	47.654	-26.3041	1286.4499	-1.8528	0.62187	-0.97509
2.018	-2.095	127.559	789.5737	-0.98848	0.30537	-0.27881	-41.0904	-185.639	1118.672	-0.75391	0.51709	-0.60742	-24.2108	21.578	906.523	-1.623	0.51367	-0.26172	70.022	-98.461	1291.80446	-2.3602	0.66914	-0.94024	-36.298	-156.521	1173.3663	-1.3835	0.51064	-0.33262	-38.287	-2.3026	36.1964	-0.068262	-0.016601	-0.093359	35.398	2.774	1272.34	-1.7906	0.61172	-0.95781
2.02	-4.469	130.321	751.2644	-0.95224	0.29043	-0.26084	-43.6817	-154.39997	1130.494	-0.73858	0.49619	-0.61377	10.6682	26.045	893.159	-1.4824	0.51025	-0.24422	48.87	-94.564	1312.204	-2.2839	0.68018	-0.94443	-10.052	-125.123	1184.5796	-1.5039	0.4834	-0.33789	-28.0308	9.045	36.4533	-0.056445	-0.012109	-0.10039	16.7599	34.6303	1270.7712	-1.7355	0.60312	-0.94336
2.022	-21.979	126.2015	740.452	-0.91983	0.27402	-0.24326	-20.994	-124.738	1137.1487	-0.74912	0.47295	-0.61397	24.0647	-14.75	857.845	-1.3543	0.50457	-0.23529	63.829	-86.444	1319.664	-2.1987	0.67236	-0.94482	-18.529	-99.592	1202.526	-1.6452	0.48427	-0.33526	-17.73	21.6785	24.29828	-0.037598	-0.010254	-0.10693	12.958	50.0078	1268.1447	-1.6841	0.59365	-0.9249
2.024	-27.795	139.4788	729.39579	-0.88682	0.26455	-0.22998	-3.9269	-94.366	1172.3035	-0.7792	0.44834	-0.60733	17.568	-33.3176	868.559	-1.2555	0.4952	-0.23421	44.1328	-62.83	1334.281	-2.1114	0.65752	-0.93604	-30.575	-77.798	1184.758	-1.7987	0.50673	-0.33818	-49.5798	24.26094	7.6142	-0.021192	-0.0071289	-0.11319	-3.5575	59.467	1234.3334	-1.644	0.58447	-0.90674
2.026	-24.413	147.41	711.09	-0.85254	0.25293	-0.21045	19.659	-107.802	1207.421	-0.84932	0.43867	-0.60166	14.896	-45.7027	905.6805	-1.1865	0.48418	-0.22945	61.75	-30.8655	1299.726	-2.0289	0.64649	-0.92148	-29.552	-70.927	1188.789	-1.9487	0.53955	-0.35577	-12.079	22.3556	11.0897	-0.00048826	-0.0050781	-0.11699	-6.8578	51.322	1201.8702	-1.6157	0.57725	-0.89365
2.028	-30.286	152.115	680.381	-0.81436	0.24209	-0.19473	46.572	-122.396	1207.676	-0.95752	0.44678	-0.59912	25.055	-65.014	926.714	-1.1367	0.47412	-0.21338	44.817	-29.3335	1281.6022	-1.9496	0.63203	-0.90625	-35.28	-61.565488	1186.8845	-2.093	0.59453	-0.36465	-16.976	24.5386	17.6199	0.015137	0.0011719	-0.12051	-12.8385	56.8457	1189.441	-1.5934	0.57266	-0.87657
2.03	-31.191	143.987	652.637	-0.77783	0.2333	-0.18926	74.508	-101.825	1202.802	-1.0774	0.47178	-0.59306	-5.777	-90.02	933.982	-1.1086	0.47502	-0.20924	68.89	-1.937	1273.857	-1.8865	0.6292	-0.88877	-73.137	-52.326	1184.334	-2.2324	0.65625	-0.38379	-21.946	30.4517	17.0959	0.028907	0.0015625	-0.12588	5.6733	54.5545	1188.5683	-1.5778	0.56836	-0.85625
2.032	-24.812	128.835	628.445	-0.75088	0.229	-0.17715	35.84	-76.7155	1207.137	-1.1922	0.50429	-0.58086	-23.182	-107.123	918.7138	-1.0887	0.49254	-0.19681	47.258	21.684	1280.395	-1.832	0.62695	-0.875	-71.259	-46.453	1173.4503	-2.3567	0.73038	-0.40752	-12.236	16.5753	27.8018	0.05127	0.0043945	-0.13037	32.23613	51.513	1189.7931	-1.5664	0.56777	-0.83379
2.034	-26.9494	130.0104	589.028	-0.71826	0.22227	-0.16104	43.992	-75.8563	1249.053	-1.3	0.52539	-0.58711	-36.971	-141.336	903.53	-1.0824	0.52741	-0.18934	28.2136	43.837629	1265.117	-1.7897	0.63477	-0.86348	-71.65134	-41.888	1166.313	-2.4738	0.79082	-0.43007	8.133	12.9021	25.10119	0.066992	0.0042969	-0.13652	30.6289	60.176	1181.122	-1.5586	0.56445	-0.81641
2.036	-18.592	125.715	555.436	-0.68555	0.21289	-0.1582	27.496	-101.0168	1271.953	-1.4057	0.54111	-0.58106	-58.2893	-140.905	911.803	-1.0858	0.56473	-0.18292	23.8256	33.865	1247.1223	-1.7526	0.6376	-0.85576	-95.26176	-50.245	1152.514	-2.5703	0.84434	-0.44766	9.873	5.3634	34.8964	0.079199	0.0063477	-0.14092	21.20852	28.12	1186.1178	-1.5516	0.56396	-0.79385
2.038	-16.088	120.961	535.2231	-0.64932	0.20869	-0.15029	30.4392	-111.9479	1291.64	-1.5059	0.53711	-0.58496	-80.6255	-127.7375	925.919	-1.082	0.59766	-0.17871	48.931	11.05089	1232.3061	-1.7214	0.64229	-0.84248	-112.355	-61.237	1159.266	-2.649	0.88223	-0.46094	-15.019	2.0206	27.333	0.091699	0.0043946	-0.14912	2.3306	32.663	1181.52876	-1.546	0.56982	-0.77451
2.04	-9.838	109.36	529.696	-0.61015	0.20489	-0.13858	19.5661	-143.0897	1317.669	-1.6243	0.51377	-0.58096	-123.684	-127.3232	947.402445	-1.0902	0.63007	-0.18022	55.607	6.6046	1223.5036	-1.6911	0.6374	-0.83799	-84.531	-74.1716	1186.921	-2.7012	0.91016	-0.46875	2.316	-5.12394	37.046	0.098926	0.0038086	-0.15596	0.108000000000001	39.7685	1157.1122	-1.5347	0.57412	-0.7538
2.042	-16.341	109.797	489.0936	-0.56875	0.19785	-0.12451	16.7507	-172.199	1321.2473	-1.7637	0.48399	-0.58086	-109.788	-134.3859	957.1949	-1.1121	0.64702	-0.18412	42.1368	24.294	1206.5386	-1.6699	0.62891	-0.82617	-95.734	-69.009	1192.474	-2.7194	0.92002	-0.48467	0.749000000000002	-0.4155	48.141	0.099121	0.0039063	-0.15771	-23.8263	54.7691	1152.4097	-1.5257	0.57373	-0.73369
2.044	-17.219	117.684	480.9797	-0.53096	0.19551	-0.11142	19.5369	-177.125	1333.571	-1.9219	0.47109	-0.58554	-82.3017	-132.5375	950.779	-1.1324	0.65087	-0.1931	56.874	25.964	1199.232	-1.6447	0.62148	-0.81484	-83.1	-65.083	1208.2685	-2.7121	0.93398	-0.49024	5.7	-6.124	49.5271	0.10029	0.0026367	-0.16289	-25.5019	60.951	1151.1161	-1.5156	0.56934	-0.70801
2.046	-1.274	122.8643	460.4027	-0.48584	0.18994	-0.098145	-24.498	-157.63038	1321.87	-2.0705	0.48838	-0.59512	-72.9897	-96.268	948.969	-1.1538	0.64383	-0.20266	44.124	8.537	1185.443	-1.6226	0.60986	-0.79736	-82.535	-70.811	1243.266	-2.6836	0.94844	-0.49492	-16.513	-14.643	41.2018	0.090429	0.0026367	-0.1625	-55.353	66.734	1133.4893	-1.5029	0.56777	-0.68906
2.048	-9.108	122.7535	429.782	-0.44639	0.18974	-0.087989	2.718	-155.174	1331.38	-2.2202	0.54053	-0.60791	-65.757	-73.4628	996.443	-1.1685	0.62842	-0.21436	48.257	-9.384	1171.9692	-1.6018	0.59736	-0.78056	-87.1142	-65.931	1252.2792	-2.6408	0.96445	-0.49473	-13.291	-25.4689	65.92077	0.082226	0.0018554	-0.16836	-33.855	78.816	1086.7426	-1.4788	0.55791	-0.66631
2.05	-18.761	120.891	411.2567	-0.40498	0.18496	-0.071289	8.6784	-163.22	1353.27463	-2.3576	0.61934	-0.63262	-41.441	-51.8274	1040.415	-1.1796	0.61378	-0.23767	36.922	-31.6708	1178.5062	-1.5888	0.58721	-0.7626	-94.948	-52.443	1276.616	-2.5957	0.97266	-0.49609	-6.486	-39.4272	79.5304	0.070117	0.0033203	-0.17109	-32.04668	79.90456	1066.4442	-1.4565	0.54424	-0.64717
2.052	-33.72795	117.456	379.4526	-0.35771	0.18301	-0.055273	56.825	-154.034	1344.94547	-2.4726	0.69824	-0.67207	-45.616	-27.587	1051.3474	-1.1819	0.59816	-0.26452	21.0401	-20.5486	1159.8444	-1.5757	0.58154	-0.74756	-104.0006	-30.5795	1262.336	-2.5281	0.9875	-0.49902	-15.184	-32.6101	84.662	0.056152	0.0087891	-0.17383	-22.197	94.807	1055.0924	-1.431	0.52822	-0.62451
2.054	-25.755	107.0499	368.1681	-0.31426	0.17061	-0.041113	41.568	-132.128	1328.9097	-2.5593	0.76856	-0.72832	-70.5292	-47.994	1063.1072	-1.1882	0.58565	-0.2868	37.509	9.5805	1163.7912	-1.5542	0.57588	-0.72744	-105.9126	-16.422	1251.0915	-2.459	0.99414	-0.49766	-4.011	-33.769	96.8601	0.041797	0.016699	-0.17627	6.764	120.49474	1045.7855	-1.3989	0.50928	-0.60693
2.056	-10.6	107.5179	333.581	-0.26807	0.16162	-0.03125	26.973	-104.623	1294.3628	-2.5926	0.78867	-0.79805	-47.8739	-79.768	1093.349	-1.1845	0.57042	-0.30624	3.3793	48.091	1131.9515	-1.5363	0.56797	-0.7082	-112.2874	-0.309999999999999	1238.071	-2.3793	0.98867	-0.49687	-23.1948	-20.1994	112.4851	0.023047	0.023731	-0.1835	16.701	121.9661	1009.63	-1.3768	0.49385	-0.58818
2.058	-6.833	104.2038	306.3538	-0.22549	0.15225	-0.014551	14.0492	-88.427	1293.992	-2.5776	0.77783	-0.85791	-40.03	-107.735	1112.5429	-1.1968	0.54346	-0.33105	-4.253	61.332	1112.7008	-1.5148	0.56445	-0.68828	-112.5031	13.656	1237.8946	-2.2824	0.97598	-0.49121	-20.53	10.85214	151.778	-0.003125	0.032715	-0.19131	13.389	122.5184	991.589	-1.3488	0.47705	-0.57139
2.06	-15.704	114.0725	273.97613	-0.18076	0.14072	-0.00087894	-16.3724	-60.374	1304.278	-2.5213	0.71933	-0.89746	-57.423	-117.0643	1116.0758	-1.2252	0.508	-0.35118	-0.549900000000001	67.358	1092.4297	-1.4887	0.55078	-0.6668	-105.5202	7.059	1220.05	-2.1816	0.95898	-0.479	-43.9873	29.87326	201.674	-0.030566	0.039258	-0.19052	10.528	129.9508	968.282	-1.3268	0.46221	-0.55107
2.062	-1.702	119.4824	255.6096	-0.13545	0.129	0.01709	12.3486	-41.839	1295.069	-2.4636	0.64541	-0.91933	-62.761	-125.3464	1124.1713	-1.2676	0.47967	-0.35645	18.6069	79.2402	1065.13295	-1.4683	0.5415	-0.64697	-95.8236	-1.0991	1226.17	-2.0826	0.93652	-0.46855	-40.035	60.7192	309.995	-0.064941	0.046875	-0.20068	-6.038	125.049	967.798537	-1.3023	0.44697	-0.53887
2.064	1.303	114.4621	228.997	-0.09072	0.11846	0.031933	24.44506	-50.138	1299.034	-2.426	0.58994	-0.93887	-73.275	-136.5097	1130.1489	-1.3434	0.44609	-0.35722	17.99227	90.89028	1048.573	-1.4367	0.52656	-0.62461	-73.667	-6.0211	1217.4015	-1.9851	0.90713	-0.44932	-46.574	87.317	419.648	-0.1167	0.046973	-0.21025	-34.087	128.751	937.592	-1.2808	0.43115	-0.51514
2.066	-7.777	98.4427	202.208	-0.04834	0.10254	0.044922	39.453	-52.172	1314.954	-2.4155	0.5667	-0.96279	-34.894	-157.266	1136.173	-1.4354	0.42187	-0.36016	1.913	90.4425	1023.681	-1.4064	0.51065	-0.60069	-56.897	9.094	1200.249	-1.8976	0.87901	-0.42588	-42.075	88.363	509.054	-0.18652	0.044922	-0.2125	-48.6057	114.794	915.9366	-1.2544	0.42237	-0.50479
2.068	-8.004	80.5791	191.4335	-0.0094726	0.087402	0.060449	8.0032	-53.514	1340.5977	-2.4214	0.58545	-0.99561	-42.962	-162.679	1163.08976	-1.5469	0.40918	-0.36426	23.2119	90.69559	993.159	-1.3786	0.49385	-0.57959	-41.788	17.126	1202.322	-1.8282	0.85039	-0.40703	-39.28	69.062	590.43	-0.29278	0.029687	-0.21328	-37.256	114.068	909.7655	-1.2352	0.4082	-0.48301
2.07	5.884	75.1516	179.6711	0.031348	0.068555	0.072949	-3.6185	-55.847	1343.3737	-2.433	0.63496	-1.0221	4.867	-139.415	1194.331	-1.6562	0.42959	-0.371	20.7081	103.5864	967.955	-1.3483	0.47432	-0.55771	-32.833	25.6978	1213.479	-1.7671	0.82373	-0.38574	-47.285	38.398	694.0629	-0.42568	0.0072264	-0.21436	-34.865	110.614	883.9524	-1.2133	0.39609	-0.47051
2.072	-5.702	82.0161	172.0081	0.068457	0.051757	0.083887	-4.3362	-79.1137	1331.931	-2.4342	0.70166	-1.0507	5.45	-107.068	1197.396	-1.7711	0.45293	-0.37383	9.506	101.36109	950.51	-1.3164	0.4624	-0.5332	-34.256	34.413	1227.8706	-1.7248	0.80176	-0.37696	-55.718	19.246	780.072	-0.58789	-0.026367	-0.21094	-49.3617	113.193	873.6031	-1.1898	0.38105	-0.45469
2.074	-8.242	85.769	151.81	0.10479	0.029687	0.096387	19.5093	-87.67	1320.196	-2.4151	0.75908	-1.073	2.755	-78.9941	1196.819	-1.88	0.4955	-0.37656	-8.773	91.483	951.1611	-1.2852	0.44531	-0.51543	-35.475	28.418	1222.046	-1.6905	0.78408	-0.35303	-82.2752	25.6983	811.2921	-0.77734	-0.069824	-0.2	-28.569	109.1095	858.6377	-1.1655	0.36572	-0.43506
2.076	-14.677	73.669	149.1748	0.13623	0.0043945	0.10303	69.855	-80.281	1337.15839	-2.371	0.79853	-1.0893	-32.448	-56.9395	1177.2075	-1.993	0.55391	-0.38926	-4.147	91.2691	941.98491	-1.2504	0.43614	-0.49473	-59.0929	11.5061	1226.373	-1.6597	0.76572	-0.33467	-64.3615	30.426	807.1358	-0.99248	-0.1168	-0.18487	-16.821	107.2375	833.645	-1.1377	0.35215	-0.41367
2.078	-9.436	76.912	132.9116	0.16289	-0.011621	0.11778	44.4021	-72.847	1342.5939	-2.3042	0.81592	-1.0991	-39.331	-54.1347	1185.155	-2.103	0.62549	-0.40381	-8.0011	90.544	923.4548	-1.2227	0.42051	-0.47481	-51.036	9.5931	1219.639	-1.633	0.75137	-0.32129	-52.2433	15.1326	808.4697	-1.235	-0.15313	-0.17666	-21.183	109.265	805.6203	-1.1086	0.33867	-0.39688
2.08	-20.565	72.841	118.9368	0.18604	-0.035059	0.13369	34.7771	-68.446	1347.766	-2.2152	0.81445	-1.0949	-39.387	-67.83252	1199.4203	-2.2134	0.68848	-0.41992	-18.9865	107.25	911.661	-1.1909	0.4082	-0.45244	-60.918	23.336	1200.08342	-1.6152	0.73633	-0.31055	-65.5997	-3.369	827.3235	-1.4783	-0.16387	-0.17929	-25.592	107.199	771.4523	-1.0777	0.32539	-0.38164
2.082	-11.941	56.8022	103.6252	0.20596	-0.055371	0.14111	33.255	-63.768	1329.0252	-2.1225	0.80322	-1.0827	-58.669	-58.7123	1190.9458	-2.3202	0.74815	-0.4417	-24.1964	88.939	913.09072	-1.1587	0.39502	-0.43311	-76.372	19.2523	1159.8407	-1.5872	0.72353	-0.29873	-56.4673	-39.08	833.455	-1.7129	-0.13965	-0.19043	-26.561	111.067	748.9299	-1.0412	0.31485	-0.36504
2.084	-8.862	35.8136	94.952	0.21572	-0.075977	0.15205	35.2688	-26.38	1319.9477	-2.046	0.78916	-1.0655	-56.691	-41.704	1172.93	-2.414	0.79424	-0.46553	5.759	76.7653	889.4506	-1.1323	0.3836	-0.41865	-67.675	10.0038	1132.957	-1.5629	0.70508	-0.28476	-52.501	-65.052	827.99	-1.9124	-0.063965	-0.22491	-26.545	123.129	732.6472	-1.0034	0.30908	-0.34863
2.086	-11.021	40.86265	78.0159	0.22266	-0.09668	0.16455	40.003	-12.2617	1308.056	-1.9821	0.76963	-1.0503	-87.67862	-38.58	1162.974	-2.4878	0.82959	-0.48154	-11.279	73.24	846.28871	-1.1007	0.36983	-0.39209	-49.038	17.567	1130.33	-1.5348	0.68321	-0.27227	-12.783	-81.345	846.155	-2.0711	0.054004	-0.24961	-32.458	113.54891	703.61	-0.95742	0.29941	-0.33271
2.088	-14.093	41.9417	51.1384	0.22695	-0.11484	0.17549	34.7246	13.124	1313.2801	-1.9233	0.75635	-1.0249	-100.6965	-44.016	1173.767	-2.543	0.85547	-0.50195	-33.323	78.225	810.0214	-1.0667	0.35928	-0.37568	-46.588	42.804	1118.628	-1.5073	0.65029	-0.26074	-5.231	-48.1954	843.628	-2.1894	0.20049	-0.28321	-71.2301	120.819	668.9946	-0.91201	0.29072	-0.31709
2.09	-7.727	36.8013	53.456	0.22265	-0.13106	0.1832	34.2422	30.625	1310.604	-1.8845	0.74697	-1.0079	-91.9409	-47.198	1181.846	-2.5726	0.88291	-0.51435	-0.985000000000001	83.466	794.63497	-1.0329	0.34853	-0.35557	-52.3776	69.2999	1107.159	-1.4824	0.61328	-0.24805	-6.546	-1.2966	824.386	-2.2443	0.33965	-0.31973	-78.4727	118.646	652.894	-0.85888	0.28018	-0.30108
2.092	10.426	38.6045	64.7603	0.21914	-0.14903	0.19297	-6.0212	58.096	1300.487	-1.844	0.74111	-0.98916	-84.7615	-51.2939	1182.8811	-2.5839	0.904	-0.5249	3.001	104.795	767.617	-1.0015	0.33447	-0.3335	-38.002	85.3731	1121.9499	-1.4596	0.57793	-0.23057	-9.419	33.8591	803.8705	-2.2456	0.45068	-0.33936	-68.6525	135.745	612.0075	-0.81113	0.26797	-0.27852
2.094	-15.487	51.377	62.35972	0.21064	-0.16113	0.2001	8.91419	45.188	1287.8404	-1.803	0.7415	-0.96846	-78.799	-65.513	1218.1769	-2.5725	0.93096	-0.53076	6.51	118.0708	728.5132	-0.9583	0.32129	-0.31924	-29.079	106.151	1114.6718	-1.4402	0.5419	-0.21768	-6.262	45.993	803.131	-2.1969	0.50312	-0.3625	-49.5348	141.683	574.023	-0.7583	0.25732	-0.26221
2.096	-28.4182	54.026	49.1907	0.20215	-0.17188	0.20068	0.0503	22.7169	1273.628	-1.7589	0.7376	-0.94873	-73.75	-73.419	1246.5112	-2.557	0.95127	-0.54151	-31.441	121.7507	708.3823	-0.91865	0.30674	-0.29981	-61.132	110.459	1095.7033	-1.4218	0.50791	-0.20674	-22.233	55.291	821.212	-2.1148	0.52461	-0.38681	-54.752	123.661	540.798	-0.70899	0.24736	-0.24316
2.098	-17.609	40.57	61.4971	0.1918	-0.17695	0.208	23.7422	11.083	1243.8937	-1.7202	0.72998	-0.92529	-78.725	-58.639	1250.009	-2.5234	0.96875	-0.54297	-23.349	111.7472	679.9051	-0.88154	0.29229	-0.28261	-65.3402	115.754	1067.8597	-1.4003	0.47549	-0.19658	-60.1515	52.747	843.1863	-1.9965	0.51328	-0.40205	-54.81	118.4001	511.02	-0.65909	0.23174	-0.22275
2.1	-14.14	36.2317	54.3073	0.17881	-0.17696	0.21153	18.6608	15.8923	1224.469	-1.6955	0.72051	-0.90371	-109.6774	-32.0674	1248.9905	-2.4831	0.98017	-0.54688	-13.889	125.142	647.1905	-0.83935	0.28232	-0.26582	-75.5402	94.473	1061.1473	-1.3867	0.44336	-0.19141	-35.683	46.6144	840.678	-1.8399	0.49814	-0.40811	-31.14	105.1479	489.3822	-0.61065	0.21885	-0.19775
2.102	-22.606	40.095	36.9222	0.16084	-0.16992	0.21035	31.2189	23.5093	1214.154	-1.6773	0.70273	-0.87812	-98.46184	-20.0604	1252.752	-2.4273	0.98877	-0.54521	-45.5085	139.595	612.8499	-0.79883	0.26758	-0.24707	-86.4971	87.296	1038.9667	-1.3738	0.41484	-0.1751	-38.1682	11.637	843.867	-1.6445	0.47168	-0.4082	-23.633	99.339	445.0467	-0.57012	0.19707	-0.19951
2.104	-21.925	21.1449	31.1075	0.14199	-0.16729	0.21524	25.6647	5.295	1214.585	-1.6637	0.68516	-0.85195	-88.637	-36.026	1266.8748	-2.3636	0.99776	-0.54248	-32.9085	127.747	601.072	-0.75996	0.25713	-0.23154	-89.743	86.697	1032.94526	-1.3566	0.40039	-0.1626	-25.424	-27.47	852.305	-1.4384	0.44404	-0.40596	-26.113	98.111	443.4393	-0.50977	0.18359	-0.17188
2.106	-13.5084	21.5324	20.515	0.12012	-0.15527	0.20996	22.52	5.616	1207.3879	-1.6498	0.67012	-0.82285	-109.5482	-26.9667	1251.11125	-2.2875	0.99394	-0.53369	-26.892	123.348	558.674	-0.71631	0.24912	-0.21162	-73.9077	78.3873	1015.4084	-1.35	0.38399	-0.15518	-31.632	-70.4973	859.638	-1.2589	0.41631	-0.40244	-17.47	104.733	412.7691	-0.45078	0.16816	-0.15225
2.108	-7.104	18.5538	30.008	0.10088	-0.14033	0.20733	10.8162	1.285	1199.561	-1.6406	0.66016	-0.79297	-98.5851	-18.757	1233.1617	-2.2051	0.99023	-0.52051	-16.953	135.372	527.867	-0.67608	0.24209	-0.19365	-45.5424	75.1152	1001.937	-1.3347	0.37275	-0.14648	5.859	-96.255	882.3283	-1.1155	0.39639	-0.40556	-16.449	107.5034	402.3065	-0.39463	0.15449	-0.13155
2.11	-6.179	21.2604	22.7314	0.079395	-0.12715	0.20703	-4.837	3.148	1184.5027	-1.6247	0.65049	-0.77178	-80.0312	2.331	1230.691	-2.1297	0.97481	-0.50723	-33.6529	123.693	504.747	-0.62881	0.23565	-0.18545	-36.46	78.6991	997.6089	-1.3223	0.3584	-0.14063	19.8671	-127.244	907.0629	-1.026	0.39053	-0.41591	-32.287	114.8776	372.9195	-0.34189	0.14199	-0.11163
2.112	-16.296	17.5129	32.1033	0.054785	-0.11309	0.20664	7.4844	15.4134	1167.1174	-1.612	0.63565	-0.7417	-74.013	-6.127	1243.3356	-2.0605	0.95752	-0.48642	-24.083	109.88526	481.6265	-0.57861	0.2251	-0.1709	-33.577	81.528	964.06484	-1.3075	0.34326	-0.12832	14.347	-146.136	947.6112	-0.95508	0.38867	-0.43457	-36.4102	96.821	353.6666	-0.29014	0.13135	-0.092969
2.114	2.164	22.2146	46.162	0.033203	-0.097166	0.20283	-16.3524	28.9622	1142.3471	-1.5917	0.62471	-0.7081	-88.7387	1.5163	1222.03712	-1.9975	0.94307	-0.4665	-24.695	108.0352	453.44526	-0.52412	0.21436	-0.15068	-18.077	80.15	949.7982	-1.2965	0.32968	-0.11582	18.0173	-147.459	962.31	-0.91045	0.39678	-0.44658	-33.372	97.402	335.1444	-0.24365	0.11963	-0.077637
2.116	-4.825	16.98635	39.7478	0.010254	-0.084961	0.19971	-20.662	52.499	1125.4968	-1.5705	0.60859	-0.67774	-55.934	7.4389	1212.0587	-1.9477	0.9292	-0.44619	-15.186	121.6541	414.1922	-0.47275	0.20507	-0.13349	-7.793	98.645	949.237	-1.2821	0.31836	-0.11035	-13.279	-151.673	996.4422	-0.88281	0.41328	-0.46152	-19.149	89.174	309.8848	-0.19873	0.10693	-0.053418
2.118	-11.015	26.80658	23.6652	-0.0090823	-0.066992	0.19541	-2.374	50.493	1103.8681	-1.5503	0.59424	-0.65381	-43.523	12.1743	1196.004	-1.8999	0.91846	-0.42529	-1.179	103.329	397.521	-0.41963	0.19766	-0.12139	-13.336	117.20686	933.71	-1.2673	0.3044	-0.10293	12.384	-144.346	1021.3439	-0.8793	0.42929	-0.47207	-30.45	86.293	263.1107	-0.15342	0.091895	-0.042188
2.12	-11.174	12.8823	17.8985	-0.024024	-0.054004	0.19043	-12.1886	63.3234	1080.9798	-1.5289	0.57891	-0.62734	-38.367	22.55054	1214.8003	-1.865	0.90449	-0.40293	-12.471	97.6317	397.8446	-0.36914	0.18945	-0.1043	-0.611999999999998	121.5554	901.5865	-1.2559	0.29199	-0.09375	-25.5795	-133.353	1025.671	-0.89717	0.43965	-0.48115	-18.667	83.86383	237.5635	-0.11592	0.079004	-0.022656
2.122	-8.861	7.4267	29.92791	-0.041211	-0.03916	0.18965	6.1207	79.1192	1056.441	-1.5034	0.56533	-0.60469	-26.341	39.4086	1226.3604	-1.8281	0.89141	-0.38301	-6.862	87.4646	367.41678	-0.31299	0.18604	-0.088867	-12.997	118.375	884.3587	-1.2378	0.27549	-0.084473	-33.9918	-112.2857	1026.011	-0.91748	0.44092	-0.48584	-17.271	81.6315	226.3699	-0.075683	0.068653	-0.0093748
2.124	-7.26	5.6472	28.2283	-0.055566	-0.027051	0.18545	2.019	85.2663	1043.28	-1.4757	0.54775	-0.58086	-17.244	33.2349	1224.654	-1.7953	0.87734	-0.36738	-24.8011	101.7079	344.0658	-0.25957	0.17549	-0.069531	-21.677	130.426	874.754	-1.2196	0.26465	-0.079394	-28.3118	-108.541	1040.5377	-0.95937	0.4332	-0.48379	4.316	84.241	185.844	-0.040039	0.05957	0.0083008
2.126	-25.302	14.9729	10.0346	-0.068359	-0.01123	0.18018	1.219	99.467	1019.973	-1.4443	0.52969	-0.55996	-40.304	7.0097	1229.257	-1.7565	0.86182	-0.34678	-13.678	102.406	327.5151	-0.21142	0.16572	-0.056836	0.674999999999997	140.092	848.0065	-1.1976	0.26152	-0.078222	-27.2581	-91.736	1059.7279	-1.0132	0.4333	-0.48467	-23.242	80.772	175.8396	-0.0028321	0.04961	0.02168
2.128	-6.758	23.134	3.5463	-0.080664	-0.00039066	0.17236	4.218	115.6187	972.161	-1.4136	0.51611	-0.54199	-54.082	-2.92676	1192.5961	-1.7222	0.84229	-0.32568	-24.1933	87.445	313.1597	-0.15869	0.15557	-0.041602	2.727	137.982	817.4359	-1.1708	0.25342	-0.069922	-3.142	-80.302	1083.476	-1.0854	0.43603	-0.47881	4.315	85.307	169.4962	0.031738	0.039551	0.034765
2.13	-14.03	18.9699	17.1694	-0.091992	0.010156	0.1665	3.256	120.487	947.981	-1.3843	0.49307	-0.52061	-35.946	8.9652	1184.0862	-1.6852	0.81328	-0.30996	0.495999999999999	90.139	274.5077	-0.10918	0.14111	-0.031836	-6.423	134.352	789.6278	-1.1421	0.25244	-0.059082	6.396	-76.753	1074.228	-1.1653	0.43926	-0.47149	6.877	95.5886	154.8854	0.065332	0.029394	0.053516
2.132	-6.017	28.7826	14.7334	-0.09707	0.024219	0.1626	-28.017	105.4687	942.16	-1.3511	0.46709	-0.50517	-54.553	25.48091	1153.4298	-1.6477	0.78926	-0.292	-20.3838	86.065	245.5242	-0.056641	0.1333	-0.018066	3.185	127.9299	754.8342	-1.1107	0.25293	-0.061914	33.3081	-83.301	1097.389	-1.2422	0.44336	-0.46973	-12.45	97.9883	143.861	0.098145	0.020313	0.065918
2.134	-19.916	27.57897	12.2551	-0.10537	0.033985	0.15762	-40.2476	85.9487	951.6815	-1.3221	0.44521	-0.4833	-65.312	31.0942	1157.445	-1.6071	0.75644	-0.27988	-5.754	85.02619	208.4433	-0.00791	0.11973	-0.0077147	16.183	132.2281	707.8207	-1.0766	0.25605	-0.057715	9.5736	-84.942	1118.928	-1.299	0.45254	-0.4705	-42.10019	81.972	125.645	0.12695	0.0092773	0.07666
2.136	-5.461	12.462	5.573	-0.10986	0.044922	0.15381	-13.214	84.9081	954.645	-1.2827	0.42666	-0.46426	-63.224	27.6204	1135.9037	-1.5726	0.71621	-0.26094	5.739	80.857	191.0146	0.04209	0.11113	0.011133	-1.784	114.4663	674.547	-1.0403	0.25371	-0.05498	13.36574	-91.4616	1157.6315	-1.3414	0.45586	-0.47227	-24.383	74.215	104.772	0.15537	-0.0014649	0.090918
2.138	-5.19	3.794	11.9743	-0.11387	0.05127	0.14785	-31.82	98.405	942.7585	-1.2539	0.40625	-0.44531	-64.1642	35.093	1103.04	-1.5425	0.67725	-0.24414	-4.78	76.103	170.9752	0.083887	0.10449	0.033008	2.118	105.265	677.4051	-0.99835	0.24912	-0.053808	16.5916	-100.4871	1169.673376	-1.3695	0.45976	-0.47304	-19.573	70.195	117.4669	0.17617	-0.014258	0.10586
2.14	-27.07	9.4087	8.1712	-0.11357	0.056055	0.14805	-24.734	97.3048	929.7006	-1.2168	0.39473	-0.42656	-71.9139	45.03	1093.4029	-1.511	0.63897	-0.22852	3.531	75.1181	151.0279	0.12657	0.092383	0.043555	8.434	104.259	679.0579	-0.9585	0.24902	-0.052734	-1.462	-117.636	1210.826	-1.4082	0.44297	-0.46386	-44.016	59.358	96.0321	0.19688	-0.023242	0.11211
2.142	-21.406	10.1812	0.4617	-0.11553	0.062695	0.14258	-36.39	109.0004	892.2514	-1.1809	0.37998	-0.4041	-54.912	60.0632	1090.1	-1.4824	0.60156	-0.21475	5.407	66.1443	145.4316	0.16602	0.080566	0.055664	-29.098	121.447	673.22424	-0.91582	0.24238	-0.04873	13.691	-134.79	1230.276	-1.4727	0.42236	-0.46094	-31.0645	44.0793	95.0233	0.21386	-0.040527	0.12051
2.144	-18.749	4.1418	18.26273	-0.11064	0.065332	0.14424	-34.733	99.2775	867.7319	-1.1539	0.36319	-0.38418	-42.709	81.5431	1087.992	-1.459	0.5625	-0.20185	19.7354	67.127	139.81833	0.2081	0.069043	0.066504	-20.851	123.1372	638.1016	-0.86875	0.23604	-0.044434	-15.1564	-135.092	1227.199	-1.5803	0.40214	-0.47129	-20.794	36.004485	82.376	0.22412	-0.049805	0.13184
2.146	-6.766	14.3814	15.3024	-0.10938	0.068848	0.14258	-45.993	102.8059	849.923	-1.1208	0.3458	-0.3628	-56.941	103.046	1087.965	-1.4326	0.52481	-0.18574	-11.348	73.44	122.3187	0.24444	0.06084	0.082813	-37.918	125.9483	635.3928	-0.82031	0.2333	-0.041308	-10.1083	-128.472	1226.4614	-1.7117	0.38662	-0.49063	-28.5457	48.2041	65.7139	0.23115	-0.063282	0.13848
2.148	-29.1431	26.8184	12.726	-0.10537	0.076172	0.14121	-20.669	101.5203	825.503	-1.0938	0.33398	-0.33984	-77.5299	108.541	1086.6629	-1.4121	0.49023	-0.17334	-16.661	69.432	124.7353	0.27724	0.049512	0.092969	-42.8981	132.785	606.018	-0.77031	0.23164	-0.036524	-18.0933	-124.9044	1256.394	-1.8492	0.39678	-0.50235	-25.413	51.59	48.05	0.23633	-0.074121	0.14482
2.15	-36.2507	25.8488	7.5318	-0.10449	0.079101	0.13662	-23.874	97.306	802.0722	-1.0603	0.3208	-0.32393	-62.8564	96.906	1062.69	-1.3914	0.45996	-0.16181	-20.346	56.927	109.78392	0.30605	0.034766	0.10537	-52.27781	129.311	568.105	-0.72021	0.229	-0.023438	14.323	-122.6857	1268.982	-1.9804	0.4209	-0.51836	-21.525	37.541	52.163	0.23477	-0.089746	0.15537
2.152	-20.785	19.4214	11.4586	-0.10371	0.084961	0.13193	-24.408	102.528	764.3034	-1.0274	0.31094	-0.30586	-72.302	83.3923	1042.9349	-1.373	0.42402	-0.15147	-21.626	36.3954	84.9501	0.33057	0.022949	0.11328	-43.7502	125.988	527.3033	-0.6708	0.22364	-0.02373	14.3495	-119.8315	1263.5189	-2.0957	0.45898	-0.53516	-6.906	31.464	50.404	0.23301	-0.097168	0.16025
2.154	-14.819	13.626	19.6087	-0.098731	0.087305	0.13291	-31.393	91.53	764.6659	-0.99296	0.3	-0.28086	-72.02026	81.5649	1021.2472	-1.3515	0.4002	-0.13857	-12.457	33.204659	77.2467	0.34815	0.0058594	0.12461	-50.7671	109.7334	488.2178	-0.62588	0.22041	-0.024316	18.782	-111.2139	1241.9297	-2.1854	0.49599	-0.5751	-18.042	32.5115	50.6671	0.22559	-0.11328	0.16553
2.156	-19.91	23.3938	8.605	-0.097656	0.086914	0.13232	-56.343	104.343	734.2445	-0.94912	0.28877	-0.26142	-77.074	96.16898	1000.4369	-1.3319	0.37656	-0.13125	-32.128	30.80677	69.0107	0.35977	-0.0064452	0.13007	-35.7285	101.161	453.808	-0.56963	0.21104	-0.030567	7.0537	-115.371	1234.915	-2.2602	0.53086	-0.63427	-18.369	36.6435	44.0322	0.22168	-0.12334	0.16787
2.158	-29.76	2.263	0.923	-0.10254	0.091993	0.13418	-36.21	115.97136	701.7992	-0.91016	0.2832	-0.23975	-49.539	90.67251	981.935	-1.3125	0.35547	-0.12402	-23.611	20.4783	59.6494	0.36836	-0.02207	0.13399	-38.3746	87.756	445.783	-0.51513	0.20244	-0.027539	-3.31	-100.906	1247.718	-2.3223	0.56094	-0.69404	-23.724	42.836	60.66498	0.21221	-0.13271	0.1667
2.16	-6.74	14.6794	14.244	-0.10293	0.095508	0.12959	-41.398	128.829	672.1413	-0.86445	0.27353	-0.22568	-48.3468	92.8371	951.643	-1.2887	0.33183	-0.11494	-9.615	31.902	34.2704	0.37032	-0.035938	0.14717	-44.98	84.778	433.245	-0.4624	0.19385	-0.023438	4.9206	-81.946	1245.5131	-2.3783	0.58418	-0.75683	-20.006	58.045	52.9006	0.2044	-0.13506	0.1706
2.162	-9.627	25.3487	6.9312	-0.1041	0.099807	0.12881	-53.93002	137.101	646.47286	-0.82432	0.2668	-0.20879	-38.152	75.869	947.9006	-1.2698	0.31055	-0.11065	-7.435	41.347	30.2951	0.375	-0.046875	0.15234	-14.433	107.419	402.008	-0.40967	0.1832	-0.01709	-8.8246	-54.7925	1244.0554	-2.4175	0.60693	-0.79248	-29.0597	55.79	29.0434	0.19248	-0.14112	0.17148
2.164	-20.311	44.312	7.0909	-0.10732	0.10801	0.12774	-42.9443	126.041	617.503	-0.77783	0.2582	-0.19082	-18.675	74.009	957.034	-1.2479	0.28867	-0.10205	-21.292	27.622	47.6879	0.37452	-0.05957	0.1582	-22.976	128.56611	381.4733	-0.36328	0.17343	-0.015527	10.7988	-36.815	1238.57	-2.4489	0.62578	-0.82461	-38.747	51.418	25.2113	0.17676	-0.14404	0.16895
2.166	-16.606	33.1025	16.591	-0.11035	0.11816	0.12695	-32.9882	132.026	587.265	-0.73886	0.25117	-0.175	9.553	84.885	952.213	-1.2291	0.26816	-0.093945	-13.488	23.84	44.63	0.36972	-0.069336	0.16367	-41.02	121.397	352.6214	-0.31641	0.16133	-0.013184	5.2794	-39.953	1258.446	-2.4578	0.63945	-0.8459	-12.071	38.652	26.843	0.17011	-0.14492	0.17305
2.168	-18.38	6.49587	55.0572	-0.11601	0.12568	0.12178	-33.419	121.9057	555.6177	-0.69482	0.24609	-0.15869	1.414	108.29163	924.1692	-1.207	0.24756	-0.088867	-12.136	27.2583	41.1816	0.358	-0.077539	0.1668	-32.592	122.898	346.665731	-0.26895	0.15674	-0.011621	8.512	-41.804	1258.717	-2.4516	0.64101	-0.86152	-6.492	36.39713	34.526	0.15996	-0.14941	0.16445
2.17	-11.398	-12.4036	58.1266	-0.11934	0.1332	0.11836	-40.967	107.504	528.92	-0.65918	0.23643	-0.14795	-7.956	129.432	902.5202	-1.188	0.23311	-0.084668	-36.8173	53.133	18.3819	0.34258	-0.081152	0.16602	-27.099	121.818	333.1767	-0.21729	0.1499	-0.0097656	-6.4627	-43.125	1288.9238	-2.4383	0.63516	-0.87343	-8.377	32.5506	23.689	0.14746	-0.14902	0.16367
2.172	-26.554	-12.6394	57.5189	-0.12715	0.14414	0.11172	-18.5	93.243	518.1823	-0.62138	0.22881	-0.13994	-5.699	128.734	886.11503	-1.1667	0.21943	-0.076855	-14.229	46.962	26.5543	0.32568	-0.087402	0.17041	-29.169	117.802	298.9515	-0.16387	0.14844	-0.0064453	10.5033	-43.405	1290.69303	-2.4136	0.63135	-0.88135	-12.857	21.1852	26.1408	0.13682	-0.14551	0.16133
2.174	-9.909	0.4892	57.0132	-0.14033	0.1501	0.10566	-27.513	93.483	478.666	-0.57725	0.22569	-0.12314	4.47	127.1109	852.6009	-1.1475	0.20615	-0.072558	-39.9791	42.013	25.2259	0.30547	-0.092578	0.16445	-21.052	95.4106	273.4104	-0.11319	0.14649	-0.0061523	16.5495	-71.08767	1314.0363	-2.3877	0.62402	-0.89864	7.986	19.6629	27.9051	0.12354	-0.14551	0.15381
2.176	-16.733	18.7709	104.0598	-0.16211	0.15869	0.095703	-13.483	103.475	462.06119	-0.53741	0.2251	-0.10557	3.166	126.8416	831.1554	-1.1241	0.19619	-0.06875	-29.116	43.0518	0.453999999999999	0.28164	-0.098828	0.16191	-17.085	83.2564	248.3728	-0.065527	0.13789	0.00048829	6.1551	-88.943	1309.4341	-2.3565	0.63467	-0.90459	-5.322	28.11188	18.0322	0.12012	-0.14551	0.15498
2.178	-17.403	47.7272	155.757	-0.19082	0.1624	0.08916	-6.322	111.5269	445.7296	-0.49609	0.22363	-0.094238	-11.958	124.459	794.61209	-1.1035	0.18896	-0.067871	-28.973	27.6739	2.643	0.25781	-0.10313	0.16074	-19.033	78.278	225.8277	-0.019043	0.13027	0.0055664	16.89988	-89.129	1318.4678	-2.33	0.64795	-0.91474	-4.514	40.6228	18.4319	0.1084	-0.14102	0.15332
2.18	-33.475	54.4653	264.571	-0.22207	0.16309	0.061426	-10.248	114.411	426.103	-0.45341	0.22568	-0.076563	5.821	130.092	785.54375	-1.0756	0.18653	-0.058008	-13.968	20.22083	21.487	0.23476	-0.10264	0.15771	4.533	78.1012	214.8183	0.021973	0.12012	0.0092773	8.457	-78.169	1321.7432	-2.2934	0.66045	-0.92471	-24.705	31.977	46.082	0.10098	-0.13398	0.14863
2.182	-26.03	41.9204	381.4	-0.27168	0.17051	0.040723	-16.223	118.122	381.529	-0.41455	0.22695	-0.062793	9.514	131.864	761.935	-1.0507	0.18066	-0.06084	-15.442	12.2575	33.9105	0.21289	-0.10352	0.15674	-3.379	63.9854	192.1949	0.055664	0.10224	0.018067	26.79	-52.195	1313.5185	-2.2515	0.67432	-0.92334	-9.901	20.721	67.528	0.094824	-0.12637	0.14521
2.184	-0.472000000000001	30.0579	512.04	-0.3458	0.17734	0.0080076	-42.8064	101.586	363.6749	-0.37276	0.23125	-0.04209	12.531	132.3355	724.03	-1.0229	0.17793	-0.056153	0.244	17.34	21.6764	0.18593	-0.1042	0.15293	-2.873	63.3482	181.5236	0.087501	0.087305	0.022168	15.2115	-36.09	1306.47701	-2.2044	0.68115	-0.93291	-8.742	17.3162	40.1962	0.083984	-0.11523	0.13916
2.186	14.801	13.7328	600.981	-0.43457	0.18018	-0.02002	-27.205	85.6826	354.5852	-0.32696	0.23418	-0.030273	19.215	122.70894	711.791	-0.99894	0.17568	-0.057617	6.445	13.5119	18.6125	0.16514	-0.10518	0.14229	5.195	61.8607	165.3985	0.11523	0.065039	0.033105	8.5185	-28.3428	1306.9058	-2.1512	0.68594	-0.92657	-29.076	20.7004	23.9021	0.075879	-0.10674	0.13584
2.188	27.9387	17.2433	688.9641	-0.53897	0.17803	-0.045313	-30.0095	78.7108	328.8782	-0.2915	0.23242	-0.010742	-8.515	113.4375	695.1388	-0.96875	0.17188	-0.053711	-4.896	12.89829	10.8927	0.14365	-0.10362	0.13994	-10.487	67.6424	148.3829	0.14365	0.049414	0.037695	25.3164	-12.277	1320.7878	-2.0968	0.68633	-0.9207	-34.4589	17.6556	17.1982	0.063867	-0.093555	0.13467
2.19	17.9918	22.765	758.9122	-0.66914	0.16309	-0.073535	-12.979	75.563	302.6881	-0.24756	0.2331	0.0008789	-2.318	108.605	666.127	-0.94229	0.17412	-0.045606	0.709000000000003	18.0562	13.9463	0.11699	-0.098535	0.13145	-27.198	55.1609	143.804	0.16797	0.030273	0.044434	14.8441	21.2594	1301.558	-2.0431	0.68067	-0.90684	-16.725	15.6815	17.9223	0.054102	-0.078711	0.12959
2.192	-14.48	27.208	803.724	-0.82344	0.14629	-0.10283	-33.1046	83.564	268.581	-0.20693	0.23018	0.01582	-24.398	112.88	652.4953	-0.91485	0.17354	-0.041113	-12.778	28.6143	15.1108	0.10156	-0.094238	0.12744	-32.754	63.6195	144.3809	0.18399	0.012012	0.04707	32.9733	50.557	1299.328	-1.9937	0.67627	-0.896	-16.607	28.9251	17.485767	0.038769	-0.063379	0.13194
2.194	-49.9187	11.208	838.0862	-0.99718	0.13154	-0.12646	-19.127	90.47959	228.9637	-0.16591	0.22862	0.026367	-35.7781	118.0983	647.03635	-0.88711	0.17198	-0.040332	-12.765	24.4598	24.6749	0.084375	-0.090136	0.12598	-14.444	62.4861	123.6735	0.19961	-0.0052734	0.055176	-13.524	60.377	1306.0918	-1.9483	0.66875	-0.8832	-22.732	28.6123	4.0999	0.024902	-0.052734	0.13037
2.196	-15.683	3.426	873.4327	-1.1772	0.13135	-0.15332	-5.967	91.9446	193.123	-0.12549	0.22637	0.040039	-26.203	122.9409	624.44994	-0.85273	0.17031	-0.048535	-7.393	9.6213	33.3036	0.064844	-0.083301	0.11709	-52.59687	69.923	101.9106	0.21133	-0.023633	0.053613	-4.994	50.742	1306.802	-1.9043	0.66289	-0.86953	-11.678	14.7841	12.9114	0.010156	-0.042187	0.12666
2.198	36.966	-6.872	917.299	-1.3552	0.14394	-0.18174	-3.927	101.9287	175.55426	-0.084961	0.2251	0.054199	-47.91618	127.237	582.2752	-0.80762	0.16895	-0.048828	-26.2568	3.2592	30.2772	0.051172	-0.077051	0.11084	-42.6595	69.489	107.2094	0.21982	-0.040332	0.060058	-5.0798	40.665	1287.4976	-1.8602	0.66093	-0.85664	-7.506	16.2688	26.8973	-0.0058594	-0.037109	0.12461
[truncated: 11,900 more rows]
