# Supplementary material for: Reliability and Validity of Running Cadence and Stance Time Derived from Instrumented Wireless Earbuds
Source: Sensors (Basel). 2021 Nov 30;21(23):7995. doi: 10.3390/s21237995 (PMC8659722; doi:10.3390/s21237995)
Supplement: Supplementary file 1 [file sensors-21-07995-s001.zip › Data_P09_speeds_1.csv]

time	S7kmh_force_plate_1	S7kmh_force_plate_2	S7kmh_force_plate_3	S7kmh_earbuds_1	S7kmh_earbuds_2	S7kmh_earbuds_3	S10kmh_force_plate_1	S10kmh_force_plate_2	S10kmh_force_plate_3	S10kmh_earbuds_1	S10kmh_earbuds_2	S10kmh_earbuds_3	S13kmh_force_plate_1	S13kmh_force_plate_2	S13kmh_force_plate_3	S13kmh_earbuds_1	S13kmh_earbuds_2	S13kmh_earbuds_3	max_force_plate_1	max_force_plate_2	max_force_plate_3	max_earbuds_1	max_earbuds_2	max_earbuds_3
0	-19.251	-36.382	263.373	-0.68096	0.27256	-0.0088868	-30.5865	83.551	105.084	0.28116	0.016309	-0.013769	NaN	NaN	NaN	NaN	NaN	NaN	NaN	NaN	NaN	NaN	NaN	NaN
0.002	-6.093	-39.226	298.664	-0.72158	0.28154	-0.016699	-63.4865	47.9714	112.967	0.29443	-0.022949	-0.0053711	NaN	NaN	NaN	NaN	NaN	NaN	NaN	NaN	NaN	NaN	NaN	NaN
0.004	10.201	-30.36547	327.139	-0.76133	0.28662	-0.023828	-27.1861	76.975	91.4733	0.30156	-0.06709	-0.003711	NaN	NaN	NaN	NaN	NaN	NaN	NaN	NaN	NaN	NaN	NaN	NaN
0.006	20.6502	-6.719	361.0554	-0.80029	0.2876	-0.029297	-40.72909	48.36068	55.396	0.30527	-0.1084	-0.00029297	NaN	NaN	NaN	NaN	NaN	NaN	NaN	NaN	NaN	NaN	NaN	NaN
0.008	39.566	9.138	410.2137	-0.84834	0.28564	-0.040722	-37.551	28.885	56.8132	0.3002	-0.14629	0.0024414	NaN	NaN	NaN	NaN	NaN	NaN	NaN	NaN	NaN	NaN	NaN	NaN
0.01	0.834999999999997	26.5598	445.9258	-0.89677	0.27803	-0.0583	5.753	50.2169	51.1124	0.29912	-0.18037	-0.0023437	NaN	NaN	NaN	NaN	NaN	NaN	NaN	NaN	NaN	NaN	NaN	NaN
0.012	-16.521	42.0216	467.1172	-0.94248	0.28115	-0.069629	-31.3052	18.066	52.3162	0.29053	-0.2085	-0.0043945	NaN	NaN	NaN	NaN	NaN	NaN	NaN	NaN	NaN	NaN	NaN	NaN
0.014	-19.869	47.5762	507.7164	-0.9962	0.27803	-0.080567	7.478	41.1779	38.8638	0.28233	-0.23858	-0.0066406	NaN	NaN	NaN	NaN	NaN	NaN	NaN	NaN	NaN	NaN	NaN	NaN
0.016	-18.207	48.966	550.305	-1.0547	0.28516	-0.098633	1.9196	55.1584	3.88	0.26728	-0.26377	-0.0092773	NaN	NaN	NaN	NaN	NaN	NaN	NaN	NaN	NaN	NaN	NaN	NaN
0.018	-6.464	31.2929	614.382	-1.1166	0.2918	-0.1124	-25.7331	28.5039	23.6599	0.2501	-0.2876	-0.010449	NaN	NaN	NaN	NaN	NaN	NaN	NaN	NaN	NaN	NaN	NaN	NaN
0.02	-38.3649	7.821	677.455	-1.189	0.30391	-0.12949	11.941	60.3776	29.5065	0.23027	-0.30273	-0.012207	NaN	NaN	NaN	NaN	NaN	NaN	NaN	NaN	NaN	NaN	NaN	NaN
0.022	-45.8924	0.2213	731.48	-1.269	0.31993	-0.14746	-13.349	42.035	20.6107	0.20361	-0.31641	-0.018555	NaN	NaN	NaN	NaN	NaN	NaN	NaN	NaN	NaN	NaN	NaN	NaN
0.024	-37.428	0.60473	784.473	-1.3456	0.34209	-0.16016	5.034	21.2647	25.4448	0.17783	-0.3253	-0.021484	NaN	NaN	NaN	NaN	NaN	NaN	NaN	NaN	NaN	NaN	NaN	NaN
0.026	6.09669	-10.406	847.566	-1.4155	0.37061	-0.16699	23.093	34.821	15.06701	0.14785	-0.33047	-0.022168	NaN	NaN	NaN	NaN	NaN	NaN	NaN	NaN	NaN	NaN	NaN	NaN
0.028	30.2321	-11.6782	887.356	-1.484	0.39121	-0.1711	-19.1997	2.7196	16.0224	0.11504	-0.33359	-0.024512	NaN	NaN	NaN	NaN	NaN	NaN	NaN	NaN	NaN	NaN	NaN	NaN
0.03	-3.9829	-11.491	938.763	-1.5324	0.41074	-0.18457	15.382	23.602	23.292	0.085938	-0.33154	-0.027051	NaN	NaN	NaN	NaN	NaN	NaN	NaN	NaN	NaN	NaN	NaN	NaN
0.032	10.8001	-29.9816	1011.703	-1.5649	0.43301	-0.18496	14.4614	49.936	12.391	0.056641	-0.32568	-0.031738	NaN	NaN	NaN	NaN	NaN	NaN	NaN	NaN	NaN	NaN	NaN	NaN
0.034	-0.6269	-20.7132	1032.353	-1.5753	0.45322	-0.18564	-5.33	22.425	19.7669	0.03252	-0.31387	-0.03125	NaN	NaN	NaN	NaN	NaN	NaN	NaN	NaN	NaN	NaN	NaN	NaN
0.036	-2.0001	-9.979	1051.321	-1.5552	0.47168	-0.18311	12.7669	34.2991	23.9162	0.012207	-0.2959	-0.037793	NaN	NaN	NaN	NaN	NaN	NaN	NaN	NaN	NaN	NaN	NaN	NaN
0.038	10.8281	-9.63	1037.865	-1.5192	0.48906	-0.18564	-12.2724	1.235	4.2805	-0.00068358	-0.27715	-0.040527	NaN	NaN	NaN	NaN	NaN	NaN	NaN	NaN	NaN	NaN	NaN	NaN
0.04	21.4553	-14.775	1021.097	-1.4612	0.51123	-0.18721	-11.222	-12.92	14.70633	-0.0073243	-0.25469	-0.049317	NaN	NaN	NaN	NaN	NaN	NaN	NaN	NaN	NaN	NaN	NaN	NaN
0.042	22.6597	-9.9064	1022.0863	-1.3882	0.53975	-0.19073	5.702	21.7302	1.8702	-0.0097656	-0.23145	-0.056152	NaN	NaN	NaN	NaN	NaN	NaN	NaN	NaN	NaN	NaN	NaN	NaN
0.044	20.3833	-1.2813	1020.2179	-1.3115	0.56074	-0.19258	-33.3608	2.8716	15.343955	-0.0066406	-0.21494	-0.062695	NaN	NaN	NaN	NaN	NaN	NaN	NaN	NaN	NaN	NaN	NaN	NaN
0.046	38.927	-19.166	1034.26656	-1.2324	0.58594	-0.2002	-10.922	18.6574	27.5533	-0.0029297	-0.19805	-0.065429	NaN	NaN	NaN	NaN	NaN	NaN	NaN	NaN	NaN	NaN	NaN	NaN
0.048	40.075	-27.8963	1032.6225	-1.1619	0.61289	-0.21387	-38.538	40.852	-7.945	0.0044922	-0.18515	-0.069727	NaN	NaN	NaN	NaN	NaN	NaN	NaN	NaN	NaN	NaN	NaN	NaN
0.05	49.602	-39.7478	1036.3665	-1.0895	0.64746	-0.23574	-56.3057	15.9369	7.965	0.0075195	-0.17354	-0.076367	NaN	NaN	NaN	NaN	NaN	NaN	NaN	NaN	NaN	NaN	NaN	NaN
0.052	46.643	-19.893	1041.329	-1.0258	0.67285	-0.26035	-11.442	36.1175	25.419	0.0043945	-0.16602	-0.081543	NaN	NaN	NaN	NaN	NaN	NaN	NaN	NaN	NaN	NaN	NaN	NaN
0.054	32.072	-1.935	1064.335	-0.97666	0.69677	-0.29268	-53.8425	19.32545	26.6379	0.0066406	-0.15771	-0.086621	NaN	NaN	NaN	NaN	NaN	NaN	NaN	NaN	NaN	NaN	NaN	NaN
0.056	26.1513	-11.339	1089.7114	-0.94189	0.71924	-0.32178	-35.1481	2.0031	30.157	0.0063477	-0.1503	-0.09043	NaN	NaN	NaN	NaN	NaN	NaN	NaN	NaN	NaN	NaN	NaN	NaN
0.058	26.7281	-25.473	1093.558	-0.92676	0.7291	-0.35332	-9.0405	31.099	-10.6909	0.010644	-0.13974	-0.096289	NaN	NaN	NaN	NaN	NaN	NaN	NaN	NaN	NaN	NaN	NaN	NaN
0.06	19.1931	-48.6878	1071.32	-0.92266	0.73477	-0.37812	-33.2045	-0.428599999999999	-11.1164	0.020898	-0.12696	-0.10235	NaN	NaN	NaN	NaN	NaN	NaN	NaN	NaN	NaN	NaN	NaN	NaN
0.062	21.97	-71.6688	1099.95	-0.93008	0.73828	-0.39336	-0.914	10.5611	12.0338	0.030762	-0.11133	-0.10742	NaN	NaN	NaN	NaN	NaN	NaN	NaN	NaN	NaN	NaN	NaN	NaN
0.064	25.601	-81.364	1118.493	-0.95098	0.74238	-0.40674	-17.7204	21.01	11.075	0.04375	-0.096484	-0.11543	NaN	NaN	NaN	NaN	NaN	NaN	NaN	NaN	NaN	NaN	NaN	NaN
0.066	4.287	-95.465	1140.459	-0.99121	0.75586	-0.42188	-27.3416	-6.8532	24.8456	0.055469	-0.081446	-0.12188	NaN	NaN	NaN	NaN	NaN	NaN	NaN	NaN	NaN	NaN	NaN	NaN
0.068	15.8928	-99.553	1147.0476	-1.0443	0.77647	-0.42354	13.436	15.1656	33.7595	0.067578	-0.070508	-0.13164	NaN	NaN	NaN	NaN	NaN	NaN	NaN	NaN	NaN	NaN	NaN	NaN
0.07	14.4993	-124.983	1136.0651	-1.1129	0.78115	-0.42617	-24.1296	7.661	15.773	0.07832	-0.058594	-0.14004	NaN	NaN	NaN	NaN	NaN	NaN	NaN	NaN	NaN	NaN	NaN	NaN
0.072	-2.0892	-122.684	1146.2703	-1.1926	0.77725	-0.4207	-3.128	-5.33171	37.2957	0.085449	-0.04834	-0.14795	NaN	NaN	NaN	NaN	NaN	NaN	NaN	NaN	NaN	NaN	NaN	NaN
0.074	-14.822	-90.537	1159.188	-1.2833	0.76397	-0.41592	21.6064	18.1737	18.3742	0.09336	-0.042676	-0.15782	NaN	NaN	NaN	NaN	NaN	NaN	NaN	NaN	NaN	NaN	NaN	NaN
0.076	-49.5754	-64.1461774	1161.923	-1.3945	0.74609	-0.39844	-15.68471	-10.9289	6.7807	0.099999	-0.033106	-0.16709	NaN	NaN	NaN	NaN	NaN	NaN	NaN	NaN	NaN	NaN	NaN	NaN
0.078	-46.893	-47.307	1176.2765	-1.523	0.73594	-0.37969	11.237	-14.797	19.2988	0.10313	-0.021778	-0.171	NaN	NaN	NaN	NaN	NaN	NaN	NaN	NaN	NaN	NaN	NaN	NaN
0.08	-46.0356	-37.4069	1189.116	-1.6699	0.73672	-0.36241	8.7151	5.07533	-2.272	0.10166	-0.013672	-0.18115	NaN	NaN	NaN	NaN	NaN	NaN	NaN	NaN	NaN	NaN	NaN	NaN
0.082	-21.228	-28.7321	1192.337	-1.8351	0.7543	-0.34053	7.935	-12.1132	19.3999	0.099121	-0.0058594	-0.18799	NaN	NaN	NaN	NaN	NaN	NaN	NaN	NaN	NaN	NaN	NaN	NaN
0.084	-55.792	-30.02954	1208.1433	-2.0252	0.77559	-0.31524	29.782	35.309	16.6689	0.096289	0.011328	-0.19639	NaN	NaN	NaN	NaN	NaN	NaN	NaN	NaN	NaN	NaN	NaN	NaN
0.086	-57.0797	-29.1856	1229.7694	-2.2339	0.81787	-0.30029	0.210999999999999	37.838	-17.16344	0.087012	0.030664	-0.20068	NaN	NaN	NaN	NaN	NaN	NaN	NaN	NaN	NaN	NaN	NaN	NaN
0.088	-46.643	-12.121	1236.31	-2.4507	0.86807	-0.30586	9.858	15.0597	14.2321	0.074512	0.044336	-0.20537	NaN	NaN	NaN	NaN	NaN	NaN	NaN	NaN	NaN	NaN	NaN	NaN
0.09	-39.007	-3.194	1221.493	-2.6562	0.92558	-0.3124	1.3389	27.3847	-3.21377	0.062988	0.058594	-0.20957	NaN	NaN	NaN	NaN	NaN	NaN	NaN	NaN	NaN	NaN	NaN	NaN
0.092	-44.7836	-17.557	1236.05	-2.8379	0.9971	-0.33779	-37.2597	-5.0734	-2.2821	0.046387	0.069336	-0.21924	NaN	NaN	NaN	NaN	NaN	NaN	NaN	NaN	NaN	NaN	NaN	NaN
0.094	-61.2217	-45.29	1238.268	-2.9743	1.0616	-0.35986	-6.613	1.042	40.1193	0.036621	0.086133	-0.2253	NaN	NaN	NaN	NaN	NaN	NaN	NaN	NaN	NaN	NaN	NaN	NaN
0.096	-41.744	-74.838	1267.107	-3.0488	1.1309	-0.38135	-11.016	-4.075	28.713	0.018555	0.10332	-0.22656	NaN	NaN	NaN	NaN	NaN	NaN	NaN	NaN	NaN	NaN	NaN	NaN
0.098	-59.6135	-74.846	1269.016	-3.0504	1.2027	-0.38642	-62.1302	-31.389	51.2359	-0.009961	0.10996	-0.22226	NaN	NaN	NaN	NaN	NaN	NaN	NaN	NaN	NaN	NaN	NaN	NaN
0.1	-60.27518	-56.956	1285.8917	-2.989	1.2607	-0.39346	-2.257	-3.5124	33.28	-0.047949	0.11133	-0.22744	NaN	NaN	NaN	NaN	NaN	NaN	NaN	NaN	NaN	NaN	NaN	NaN
0.102	-39.565	-54.0469	1283.70736	-2.8745	1.2954	-0.4001	-35.4716	-12.0912	12.153	-0.098633	0.10254	-0.22559	NaN	NaN	NaN	NaN	NaN	NaN	NaN	NaN	NaN	NaN	NaN	NaN
0.104	-38.63	-40.4512	1262.9013	-2.7485	1.3094	-0.40655	-61.8158	-23.5286	73.7642	-0.14834	0.09883	-0.2293	NaN	NaN	NaN	NaN	NaN	NaN	NaN	NaN	NaN	NaN	NaN	NaN
0.106	-35.33	-25.653	1260.934	-2.6226	1.311	-0.40967	-5.077	-17.624	97.0798	-0.20723	0.099807	-0.2295	NaN	NaN	NaN	NaN	NaN	NaN	NaN	NaN	NaN	NaN	NaN	NaN
0.108	-39.105	-16.441	1259.1252	-2.5099	1.3069	-0.42393	-42.7153	-60.9208	126.784	-0.26699	0.097461	-0.23379	NaN	NaN	NaN	NaN	NaN	NaN	NaN	NaN	NaN	NaN	NaN	NaN
0.11	-33.953	-21.3311	1261.61003	-2.4069	1.3075	-0.43056	-14.752	-64.15	210.7155	-0.33233	0.10411	-0.23809	NaN	NaN	NaN	NaN	NaN	NaN	NaN	NaN	NaN	NaN	NaN	NaN
0.112	-40.325	-7.16903	1235.98	-2.3007	1.3138	-0.43448	-59.5317	-6.59	304.715	-0.41699	0.1167	-0.24951	NaN	NaN	NaN	NaN	NaN	NaN	NaN	NaN	NaN	NaN	NaN	NaN
0.114	-36.975	12.1293	1210.141	-2.1926	1.327	-0.43164	-38.3512	20.869	512.757	-0.5336	0.13018	-0.25137	NaN	NaN	NaN	NaN	NaN	NaN	NaN	NaN	NaN	NaN	NaN	NaN
0.116	-43.71	9.6835	1200.571	-2.0742	1.3398	-0.43848	-80.329	75.8693	667.511	-0.6918	0.1247	-0.25586	NaN	NaN	NaN	NaN	NaN	NaN	NaN	NaN	NaN	NaN	NaN	NaN
0.118	-28.212	9.2434	1193.687	-1.9447	1.3465	-0.43691	-145.5318	61.091	716.71	-0.89453	0.098144	-0.25234	NaN	NaN	NaN	NaN	NaN	NaN	NaN	NaN	NaN	NaN	NaN	NaN
0.12	-36.85	2.629	1202.632825	-1.8226	1.343	-0.43867	-24.874	-31.401	798.6	-1.1503	0.071582	-0.2458	NaN	NaN	NaN	NaN	NaN	NaN	NaN	NaN	NaN	NaN	NaN	NaN
0.122	-71.4075	9.027	1191.4922	-1.7093	1.3306	-0.43242	21.719	-67.05	887.4628	-1.4355	0.047363	-0.24219	NaN	NaN	NaN	NaN	NaN	NaN	NaN	NaN	NaN	NaN	NaN	NaN
0.124	-63.1434	-7.795	1190.578	-1.6214	1.3107	-0.42412	-63.466	-51.747	1046.646	-1.7189	0.060547	-0.24834	NaN	NaN	NaN	NaN	NaN	NaN	NaN	NaN	NaN	NaN	NaN	NaN
0.126	-69.516	-10.345	1181.5609	-1.5581	1.2798	-0.41699	-14.2957	-9.22300000000001	1101.273	-1.9913	0.12881	-0.22559	NaN	NaN	NaN	NaN	NaN	NaN	NaN	NaN	NaN	NaN	NaN	NaN
0.128	-45.728	-5.90766	1169.681	-1.5255	1.2307	-0.40537	-8.795	-0.190000000000005	1041.7668	-2.2866	0.20889	-0.24512	NaN	NaN	NaN	NaN	NaN	NaN	NaN	NaN	NaN	NaN	NaN	NaN
0.13	-67.369	-8.2097	1155.032	-1.5045	1.1809	-0.39531	-74.03	-52.0752	1023.285	-2.5741	0.31591	-0.25019	NaN	NaN	NaN	NaN	NaN	NaN	NaN	NaN	NaN	NaN	NaN	NaN
0.132	-67.342	-6.974	1135.4932	-1.4963	1.1281	-0.38359	10.1746	-97.9081	1052.609	-2.8022	0.48096	-0.29932	NaN	NaN	NaN	NaN	NaN	NaN	NaN	NaN	NaN	NaN	NaN	NaN
0.134	-69.587	4.564	1128.771	-1.4859	1.0793	-0.36914	46.895	-139.4904	1030.175	-2.87	0.6749	-0.37275	NaN	NaN	NaN	NaN	NaN	NaN	NaN	NaN	NaN	NaN	NaN	NaN
0.136	-53.8656	21.9924	1131.76836	-1.4761	1.0298	-0.35889	38.3795	-158.805	1068.782	-2.8215	0.83086	-0.42207	NaN	NaN	NaN	NaN	NaN	NaN	NaN	NaN	NaN	NaN	NaN	NaN
0.138	-71.416	18.0567	1143.088	-1.4601	0.98992	-0.34326	27.4715	-130.05	1030.873	-2.6867	0.91406	-0.45449	NaN	NaN	NaN	NaN	NaN	NaN	NaN	NaN	NaN	NaN	NaN	NaN
0.14	-64.25	13.5579	1127.601	-1.4379	0.94414	-0.33183	-15.3163	-131.134	1003.662	-2.4975	0.93994	-0.48584	NaN	NaN	NaN	NaN	NaN	NaN	NaN	NaN	NaN	NaN	NaN	NaN
0.142	-49.648	14.4239	1110.6063	-1.4117	0.89844	-0.31699	30.4552	-79.304	1024.82	-2.2534	0.90479	-0.51367	NaN	NaN	NaN	NaN	NaN	NaN	NaN	NaN	NaN	NaN	NaN	NaN
0.144	-61.8905	42.325	1082.89	-1.3817	0.84727	-0.30147	40.7228	-0.935000000000002	943.591	-1.9769	0.84033	-0.5375	NaN	NaN	NaN	NaN	NaN	NaN	NaN	NaN	NaN	NaN	NaN	NaN
0.146	-76.41422	56.833	1082.1501	-1.3472	0.79541	-0.28613	18.229	-33.916	954.474	-1.705	0.76846	-0.56416	NaN	NaN	NaN	NaN	NaN	NaN	NaN	NaN	NaN	NaN	NaN	NaN
0.148	-60.1718	62.97	1055.017	-1.3156	0.74922	-0.27051	-29.6172	-47.36	999.293	-1.4542	0.6997	-0.58057	NaN	NaN	NaN	NaN	NaN	NaN	NaN	NaN	NaN	NaN	NaN	NaN
0.15	-43.5008	62.513	1049.4709	-1.2867	0.70508	-0.25235	-94.442	-50.232	1016.8397	-1.2492	0.6627	-0.58633	NaN	NaN	NaN	NaN	NaN	NaN	NaN	NaN	NaN	NaN	NaN	NaN
0.152	-56.914	62.678	1044.2788	-1.259	0.66563	-0.24179	-35.4592	-73.176	1047.05	-1.0996	0.65137	-0.59229	NaN	NaN	NaN	NaN	NaN	NaN	NaN	NaN	NaN	NaN	NaN	NaN
0.154	-39.7189	53.3396	1046.4127	-1.2357	0.62803	-0.22617	24.071	-68.359	1006.2176	-0.97481	0.66016	-0.59844	NaN	NaN	NaN	NaN	NaN	NaN	NaN	NaN	NaN	NaN	NaN	NaN
0.156	-13.525	56.9172	1035.0162	-1.2065	0.59033	-0.2168	27.8998	-128.592	959.986	-0.86709	0.68096	-0.60967	NaN	NaN	NaN	NaN	NaN	NaN	NaN	NaN	NaN	NaN	NaN	NaN
0.158	-22.7415	70.5376	1020.237	-1.1821	0.56338	-0.20361	55.047	-189.5629	988.682	-0.78896	0.7083	-0.63076	NaN	NaN	NaN	NaN	NaN	NaN	NaN	NaN	NaN	NaN	NaN	NaN
0.16	-13.613	81.021	1018.743	-1.1477	0.53701	-0.19531	60.901	-211.369	1015.586	-0.75039	0.72617	-0.63789	NaN	NaN	NaN	NaN	NaN	NaN	NaN	NaN	NaN	NaN	NaN	NaN
0.162	-1.666	61.151	997.3248	-1.1117	0.50654	-0.18281	21.8908	-272.69	1094.62	-0.74512	0.72949	-0.63086	NaN	NaN	NaN	NaN	NaN	NaN	NaN	NaN	NaN	NaN	NaN	NaN
0.164	9.767	53.352	986.925	-1.076	0.48144	-0.17686	76.015	-249.834	1173.791	-0.76494	0.72002	-0.62373	NaN	NaN	NaN	NaN	NaN	NaN	NaN	NaN	NaN	NaN	NaN	NaN
0.166	-3.793	65.2293	973.4273	-1.0386	0.45459	-0.16455	34.353	-254.765	1170.182	-0.80596	0.70264	-0.6124	NaN	NaN	NaN	NaN	NaN	NaN	NaN	NaN	NaN	NaN	NaN	NaN
0.168	-18.4531	84.0192	949.7977	-0.99669	0.42803	-0.15976	4.5074	-301.54	1200.001	-0.86182	0.69678	-0.60303	NaN	NaN	NaN	NaN	NaN	NaN	NaN	NaN	NaN	NaN	NaN	NaN
0.17	-1.712	89.7183	918.374	-0.95898	0.39922	-0.15323	3.3868	-212.43447	1172.4767	-0.94541	0.69639	-0.59746	NaN	NaN	NaN	NaN	NaN	NaN	NaN	NaN	NaN	NaN	NaN	NaN
0.172	-18.3226	98.048	888.456	-0.92461	0.36641	-0.14736	-43	-179.81	1145.465	-1.0488	0.70313	-0.59082	NaN	NaN	NaN	NaN	NaN	NaN	NaN	NaN	NaN	NaN	NaN	NaN
0.174	-6.058	92.19297	875.05	-0.90078	0.33389	-0.14805	-21.59019	-147.843	1206.037	-1.1696	0.71787	-0.57881	NaN	NaN	NaN	NaN	NaN	NaN	NaN	NaN	NaN	NaN	NaN	NaN
0.176	-18.2759	86.17	860.9717	-0.87451	0.30615	-0.1499	17.19	-101.344	1192.4541	-1.2996	0.73906	-0.57422	NaN	NaN	NaN	NaN	NaN	NaN	NaN	NaN	NaN	NaN	NaN	NaN
0.178	-9.472	84.9306	845.32	-0.84707	0.27363	-0.14492	38.147	-173.6512	1236.03129	-1.4309	0.74922	-0.58438	NaN	NaN	NaN	NaN	NaN	NaN	NaN	NaN	NaN	NaN	NaN	NaN
0.18	-1.46	117.45564	814.49552	-0.82578	0.25039	-0.13906	80.948	-146.236	1261.316	-1.5588	0.74473	-0.60762	NaN	NaN	NaN	NaN	NaN	NaN	NaN	NaN	NaN	NaN	NaN	NaN
0.182	10.6856	127.0864	792.8967	-0.81172	0.23555	-0.13711	96.172	-106.684	1236.234	-1.6797	0.73047	-0.63965	NaN	NaN	NaN	NaN	NaN	NaN	NaN	NaN	NaN	NaN	NaN	NaN
0.184	12.6696	117.76132	783.52	-0.80205	0.2251	-0.13935	83.899	-94.3263	1245.6044	-1.8021	0.71386	-0.67246	NaN	NaN	NaN	NaN	NaN	NaN	NaN	NaN	NaN	NaN	NaN	NaN
0.186	1.751	116.7526	749.808	-0.79883	0.22314	-0.14014	83.697	-21.074	1220.066	-1.9335	0.70401	-0.69639	NaN	NaN	NaN	NaN	NaN	NaN	NaN	NaN	NaN	NaN	NaN	NaN
0.188	14.4722	113.8267	721.987	-0.78818	0.22148	-0.14053	31.2217	-78.928	1228.8992	-2.0722	0.70127	-0.72256	NaN	NaN	NaN	NaN	NaN	NaN	NaN	NaN	NaN	NaN	NaN	NaN
0.19	0.185600000000001	116.2651	697.169	-0.78203	0.22139	-0.14238	47.225	-118.6977	1281.833	-2.2181	0.72285	-0.74023	NaN	NaN	NaN	NaN	NaN	NaN	NaN	NaN	NaN	NaN	NaN	NaN
0.192	-5.0849	104.4106	697.3907	-0.76914	0.22256	-0.14433	38.4189	-130.588	1295.508	-2.3296	0.75732	-0.76123	NaN	NaN	NaN	NaN	NaN	NaN	NaN	NaN	NaN	NaN	NaN	NaN
0.194	-16.66853	94.2058	674.6861	-0.75743	0.22334	-0.13955	26.67281	-210.44	1336.808	-2.3795	0.79648	-0.77617	NaN	NaN	NaN	NaN	NaN	NaN	NaN	NaN	NaN	NaN	NaN	NaN
0.196	0.4628	95.8221	653.879	-0.74609	0.22363	-0.14111	56.434	-167.112	1379.004	-2.3793	0.82578	-0.80313	NaN	NaN	NaN	NaN	NaN	NaN	NaN	NaN	NaN	NaN	NaN	NaN
0.198	-10.81128	92.296	604.4824	-0.72402	0.225	-0.13584	22.96	-136.1133	1341.297	-2.3531	0.83555	-0.85196	NaN	NaN	NaN	NaN	NaN	NaN	NaN	NaN	NaN	NaN	NaN	NaN
0.2	-7.8952	92.3237	579.4938	-0.69599	0.22724	-0.13076	34.3181	-146.689289	1335.208	-2.3094	0.8377	-0.91523	NaN	NaN	NaN	NaN	NaN	NaN	NaN	NaN	NaN	NaN	NaN	NaN
0.202	21.1922	93.356	545.43	-0.65771	0.23311	-0.13428	71.455	-78.075	1317.539	-2.2651	0.84131	-0.98193	NaN	NaN	NaN	NaN	NaN	NaN	NaN	NaN	NaN	NaN	NaN	NaN
0.204	16.4384	106.213	524.484	-0.61396	0.23506	-0.13213	73.217	-120.226	1307.9033	-2.2172	0.84356	-1.0209	NaN	NaN	NaN	NaN	NaN	NaN	NaN	NaN	NaN	NaN	NaN	NaN
0.206	17.4407	117.4813	516.6752	-0.56299	0.23389	-0.12988	95.665	-132.694	1328.424	-2.1718	0.85869	-1.0359	NaN	NaN	NaN	NaN	NaN	NaN	NaN	NaN	NaN	NaN	NaN	NaN
0.208	32.8301	100.2374	480.563	-0.51192	0.2336	-0.12724	66.749	-91.132	1286.217	-2.1499	0.88135	-1.0405	NaN	NaN	NaN	NaN	NaN	NaN	NaN	NaN	NaN	NaN	NaN	NaN
0.21	40.789	91.1641	448.333281	-0.46201	0.22959	-0.12236	27.214	-116.634	1269.577	-2.1341	0.90596	-1.0501	NaN	NaN	NaN	NaN	NaN	NaN	NaN	NaN	NaN	NaN	NaN	NaN
0.212	26.1312	95.4148	418.737	-0.41748	0.21592	-0.11884	8.606	-64.79	1268.894	-2.1206	0.93115	-1.0698	NaN	NaN	NaN	NaN	NaN	NaN	NaN	NaN	NaN	NaN	NaN	NaN
0.214	4.7835	109.277	393.5829	-0.36914	0.20078	-0.11006	45.8369	-19.004	1229.757	-2.0801	0.96856	-1.0836	NaN	NaN	NaN	NaN	NaN	NaN	NaN	NaN	NaN	NaN	NaN	NaN
0.216	21.6321	119.677	362.9335	-0.32324	0.18018	-0.10059	59.398	-32.662	1222.723	-2.0274	1.0027	-1.0832	NaN	NaN	NaN	NaN	NaN	NaN	NaN	NaN	NaN	NaN	NaN	NaN
0.218	3.7375	119.607	324.876	-0.28076	0.16055	-0.088379	83.987	56.034	1220.071	-1.9691	1.0336	-1.0719	NaN	NaN	NaN	NaN	NaN	NaN	NaN	NaN	NaN	NaN	NaN	NaN
0.22	6.7908	107.7004	290.799	-0.24141	0.13936	-0.075	25.852	15.468	1211.871	-1.9086	1.0586	-1.0601	NaN	NaN	NaN	NaN	NaN	NaN	NaN	NaN	NaN	NaN	NaN	NaN
0.222	2.4158	97.8137	270.638	-0.20625	0.11436	-0.064453	35.0159	-22.279	1260.936	-1.8511	1.0767	-1.0474	NaN	NaN	NaN	NaN	NaN	NaN	NaN	NaN	NaN	NaN	NaN	NaN
0.224	19.1287	85.0816	240.669	-0.16866	0.085645	-0.05	62.0459	-3.6695	1254.844	-1.7898	1.0813	-1.0309	NaN	NaN	NaN	NaN	NaN	NaN	NaN	NaN	NaN	NaN	NaN	NaN
0.226	4.9062	105.8988	212.032	-0.12549	0.056641	-0.033203	37.7592	-74.459	1264.8586	-1.7288	1.0732	-1.0079	NaN	NaN	NaN	NaN	NaN	NaN	NaN	NaN	NaN	NaN	NaN	NaN
0.228	20.2988	90.1943	201.9033	-0.087794	0.026172	-0.018848	140.242	-36.482	1262.2766	-1.6663	1.0528	-0.98135	NaN	NaN	NaN	NaN	NaN	NaN	NaN	NaN	NaN	NaN	NaN	NaN
0.23	-1.199	69.4754	207.2467	-0.050977	-0.0070314	-0.0054687	94.609	-26.7588	1227.257	-1.6055	1.0391	-0.95293	NaN	NaN	NaN	NaN	NaN	NaN	NaN	NaN	NaN	NaN	NaN	NaN
0.232	5.891	60.6914	179.9894	-0.013477	-0.044532	0.0066406	49.298	-27.5105	1234.0521	-1.5508	1.0186	-0.92676	NaN	NaN	NaN	NaN	NaN	NaN	NaN	NaN	NaN	NaN	NaN	NaN
0.234	-1.109	65.6244	151.9413	0.018848	-0.083203	0.016699	60.5753	61.903	1228.7765	-1.5028	1.0046	-0.89991	NaN	NaN	NaN	NaN	NaN	NaN	NaN	NaN	NaN	NaN	NaN	NaN
0.236	-20.82955	68.859	137.892	0.045898	-0.12354	0.02832	53.3207	23.6866	1245.053	-1.4546	0.98408	-0.88271	NaN	NaN	NaN	NaN	NaN	NaN	NaN	NaN	NaN	NaN	NaN	NaN
0.238	-29.68394	65.6941	141.5819	0.07002	-0.16035	0.027734	91.497	3.5469	1252.501	-1.4042	0.95479	-0.85498	NaN	NaN	NaN	NaN	NaN	NaN	NaN	NaN	NaN	NaN	NaN	NaN
0.24	-39.4731	67.785	110.295	0.092871	-0.2001	0.030859	57.12	28.397	1214.4382	-1.3574	0.93047	-0.8293	NaN	NaN	NaN	NaN	NaN	NaN	NaN	NaN	NaN	NaN	NaN	NaN
0.242	-25.5042	76.58	88.589	0.11006	-0.23877	0.035547	53.309	9.5315	1185.02	-1.3203	0.89941	-0.80664	NaN	NaN	NaN	NaN	NaN	NaN	NaN	NaN	NaN	NaN	NaN	NaN
0.244	-18.805	54.4773	76.247	0.12676	-0.26992	0.033106	57.646	75.862	1166.376	-1.2868	0.87236	-0.78681	NaN	NaN	NaN	NaN	NaN	NaN	NaN	NaN	NaN	NaN	NaN	NaN
0.246	-10.427	33.39466	79.0603	0.13428	-0.30225	0.029785	45.0345	131.399	1137.865	-1.2566	0.83858	-0.7665	NaN	NaN	NaN	NaN	NaN	NaN	NaN	NaN	NaN	NaN	NaN	NaN
0.248	-2.416	12.9888	78.0866	0.13603	-0.33027	0.02959	25.01139	104.2637	1130.149	-1.2331	0.80966	-0.7501	NaN	NaN	NaN	NaN	NaN	NaN	NaN	NaN	NaN	NaN	NaN	NaN
0.25	-12.3535	19.8759	62.15	0.13321	-0.35713	0.027637	83.823	141.105	1082.0958	-1.2039	0.78086	-0.72187	NaN	NaN	NaN	NaN	NaN	NaN	NaN	NaN	NaN	NaN	NaN	NaN
0.252	0.472000000000001	40.5493	67.2064	0.12188	-0.37432	0.028027	47.438	108.99363	1064.0069	-1.1772	0.75537	-0.69727	NaN	NaN	NaN	NaN	NaN	NaN	NaN	NaN	NaN	NaN	NaN	NaN
0.254	3.6025	46.4348	49.207	0.1082	-0.38721	0.020312	43.646	109.994	1096.2817	-1.1469	0.73135	-0.679	NaN	NaN	NaN	NaN	NaN	NaN	NaN	NaN	NaN	NaN	NaN	NaN
0.256	0.693000000000001	47.3065	33.723	0.092773	-0.40283	0.028809	76.573	167.468	1082.2652	-1.1168	0.70703	-0.65644	NaN	NaN	NaN	NaN	NaN	NaN	NaN	NaN	NaN	NaN	NaN	NaN
0.258	-11.136	42.5071	14.24	0.072363	-0.41211	0.024707	12.5959	113.102	1058.0807	-1.0852	0.68007	-0.63731	NaN	NaN	NaN	NaN	NaN	NaN	NaN	NaN	NaN	NaN	NaN	NaN
0.26	-11.694	34.448	31.4572	0.046387	-0.41621	0.026172	45.686	121.63	1014.951	-1.055	0.65733	-0.61201	NaN	NaN	NaN	NaN	NaN	NaN	NaN	NaN	NaN	NaN	NaN	NaN
0.262	-3.431	35.271	33.8364	0.018261	-0.40918	0.025	6.194	118.5458	957.477	-1.0215	0.625	-0.58008	NaN	NaN	NaN	NaN	NaN	NaN	NaN	NaN	NaN	NaN	NaN	NaN
0.264	-7.8968	26.7565	38.2102	-0.0087889	-0.40098	0.021778	-19.1942	88.778	969.676	-0.99357	0.59395	-0.55722	NaN	NaN	NaN	NaN	NaN	NaN	NaN	NaN	NaN	NaN	NaN	NaN
0.266	-5.072	18.1852	52.118	-0.029785	-0.38721	0.01416	11.12538	161.132	952.8872	-0.96709	0.56651	-0.53037	NaN	NaN	NaN	NaN	NaN	NaN	NaN	NaN	NaN	NaN	NaN	NaN
0.268	0.77	12.159	39.531	-0.052246	-0.36435	0.0088865	-21.4974	160.895	936.2501	-0.95146	0.53916	-0.50225	NaN	NaN	NaN	NaN	NaN	NaN	NaN	NaN	NaN	NaN	NaN	NaN
0.27	12.917	7.98655	20.6052	-0.065332	-0.34444	0.0033203	29.3338	153.3698	914.903	-0.94063	0.51406	-0.4707	NaN	NaN	NaN	NaN	NaN	NaN	NaN	NaN	NaN	NaN	NaN	NaN
0.272	7.09	27.7656	3.2917	-0.077051	-0.3206	-0.0068359	-4.475962	172.0569	883.468	-0.93945	0.48047	-0.44141	NaN	NaN	NaN	NaN	NaN	NaN	NaN	NaN	NaN	NaN	NaN	NaN
0.274	-9.33	26.8008	4.7351	-0.084863	-0.29746	-0.013672	-5.7114	132.912	856.262	-0.9334	0.45254	-0.41387	NaN	NaN	NaN	NaN	NaN	NaN	NaN	NaN	NaN	NaN	NaN	NaN
0.276	0.541999999999998	23.7982655	14.8403	-0.085449	-0.27246	-0.022949	11.9392	156.396	839.0598	-0.93086	0.42266	-0.38613	NaN	NaN	NaN	NaN	NaN	NaN	NaN	NaN	NaN	NaN	NaN	NaN
0.278	3.803	2.6795	4.892	-0.088965	-0.24687	-0.024902	13.6807	194.0495	806.7391	-0.92539	0.40196	-0.36543	NaN	NaN	NaN	NaN	NaN	NaN	NaN	NaN	NaN	NaN	NaN	NaN
0.28	-18.0683	3.918	-2.3739	-0.085743	-0.22891	-0.033399	-3.333	187.7116	772.2524	-0.90665	0.38418	-0.34102	NaN	NaN	NaN	NaN	NaN	NaN	NaN	NaN	NaN	NaN	NaN	NaN
0.282	-19.2349	1.9252	12.88343	-0.081055	-0.21172	-0.038867	20.29	226.479	747.568	-0.8833	0.36963	-0.31885	NaN	NaN	NaN	NaN	NaN	NaN	NaN	NaN	NaN	NaN	NaN	NaN
0.284	-20.285	3.3656	25.546	-0.071387	-0.1917	-0.045215	-30.011	200.608	705.138	-0.85946	0.35009	-0.29266	NaN	NaN	NaN	NaN	NaN	NaN	NaN	NaN	NaN	NaN	NaN	NaN
0.286	-25.0085	15.5743	6.65459	-0.062988	-0.1792	-0.047363	-32.18466	169.21392	702.2867	-0.83591	0.33632	-0.27938	NaN	NaN	NaN	NaN	NaN	NaN	NaN	NaN	NaN	NaN	NaN	NaN
0.288	-31.6699	32.982	7.3834	-0.052637	-0.15674	-0.053125	4.1798	186.898	691.1487	-0.80935	0.32616	-0.26101	NaN	NaN	NaN	NaN	NaN	NaN	NaN	NaN	NaN	NaN	NaN	NaN
0.29	-19.5799	18.3892	9.1457	-0.040235	-0.13604	-0.064063	-39.1584	135.372	666.0981	-0.77927	0.31884	-0.24265	NaN	NaN	NaN	NaN	NaN	NaN	NaN	NaN	NaN	NaN	NaN	NaN
0.292	-16.9413	0.7055	7.4577	-0.023438	-0.12237	-0.066797	5.443	147.071118	649.7866	-0.74805	0.31689	-0.21484	NaN	NaN	NaN	NaN	NaN	NaN	NaN	NaN	NaN	NaN	NaN	NaN
0.294	-8.903	-2.449	-10.6485	-0.0085938	-0.10596	-0.077246	-14.5108	168.292	591.11	-0.7191	0.30792	-0.20578	NaN	NaN	NaN	NaN	NaN	NaN	NaN	NaN	NaN	NaN	NaN	NaN
0.296	-29.7576	9.969	-19.707	0.0078125	-0.086426	-0.07959	-25.843	134.496	557.57213	-0.66864	0.30304	-0.19098	NaN	NaN	NaN	NaN	NaN	NaN	NaN	NaN	NaN	NaN	NaN	NaN
0.298	-10.814	15.3832	-9.9717	0.024512	-0.070409	-0.082422	30.7324	171.5485	534.6178	-0.6132	0.29758	-0.17224	NaN	NaN	NaN	NaN	NaN	NaN	NaN	NaN	NaN	NaN	NaN	NaN
0.3	-0.484999999999999	6.8944	-1.6473	0.03838	-0.05537	-0.087891	1.863	156.7056	498.67587	-0.55304	0.29288	-0.15416	NaN	NaN	NaN	NaN	NaN	NaN	NaN	NaN	NaN	NaN	NaN	NaN
0.302	-11.996	-0.0259	8.3902	0.052442	-0.040917	-0.091016	21.2191	138.326	490.589	-0.48242	0.28809	-0.13525	NaN	NaN	NaN	NaN	NaN	NaN	NaN	NaN	NaN	NaN	NaN	NaN
0.304	-11.0804	0.0106000000000002	-2.8423	0.059962	-0.031445	-0.097363	3.31895	157.7405	447.9572	-0.41432	0.2801	-0.11561	NaN	NaN	NaN	NaN	NaN	NaN	NaN	NaN	NaN	NaN	NaN	NaN
0.306	-17.918	-1.4685	15.0461	0.070313	-0.023438	-0.10303	-30.95617	124.129	410.8741799	-0.34318	0.26266	-0.098064	NaN	NaN	NaN	NaN	NaN	NaN	NaN	NaN	NaN	NaN	NaN	NaN
0.308	-12.3438	17.6246	24.16	0.083495	-0.015138	-0.10302	-5.415	114.2076	379.972	-0.27188	0.24686	-0.084381	NaN	NaN	NaN	NaN	NaN	NaN	NaN	NaN	NaN	NaN	NaN	NaN
0.31	-6.9305	24.6764	5.325	0.085643	-0.01172	-0.1081	-15.354	140.413	329.2484	-0.20557	0.22352	-0.063926	NaN	NaN	NaN	NaN	NaN	NaN	NaN	NaN	NaN	NaN	NaN	NaN
0.312	2.527	15.6735	-5.2216	0.096579	-0.0046905	-0.11553	-33.2001	127.671	287.548	-0.1416	0.19727	-0.049316	NaN	NaN	NaN	NaN	NaN	NaN	NaN	NaN	NaN	NaN	NaN	NaN
0.314	3.04	0.3609	-9.7978	0.10234	0.0020493	-0.11845	12.6192	153.1	240.724	-0.086858	0.1654	-0.015139	NaN	NaN	NaN	NaN	NaN	NaN	NaN	NaN	NaN	NaN	NaN	NaN
0.316	0.490000000000002	-6.9418	-16.9035	0.1084	0.0048828	-0.12109	-20.108	145.647	205.319	-0.038141	0.13646	0.0099759	NaN	NaN	NaN	NaN	NaN	NaN	NaN	NaN	NaN	NaN	NaN	NaN
0.318	17.7565	6.7413	-10.8397	0.10781	0.0098654	-0.12813	-16.5373	105.531	203.645	0.0061716	0.10355	0.035114	NaN	NaN	NaN	NaN	NaN	NaN	NaN	NaN	NaN	NaN	NaN	NaN
0.32	8.899	9.8525	11.7463	0.10458	0.014167	-0.13184	7.059	107.5404	178.902	0.049814	0.066077	0.057523	NaN	NaN	NaN	NaN	NaN	NaN	NaN	NaN	NaN	NaN	NaN	NaN
0.322	10.5666	14.1189	15.5797	0.097555	0.020415	-0.13809	-17.245	85.344	137.7256	0.085938	0.026367	0.081543	NaN	NaN	NaN	NaN	NaN	NaN	NaN	NaN	NaN	NaN	NaN	NaN
0.324	11.0206	14.801	-7.24512	0.085732	0.025879	-0.13829	22.326	73.648	114.6432	0.11744	-0.014129	0.10478	NaN	NaN	NaN	NaN	NaN	NaN	NaN	NaN	NaN	NaN	NaN	NaN
0.326	2.12	17.8357	1.16799	0.075195	0.025879	-0.14209	-19.1005	86.241	68.622	0.14517	-0.054307	0.12089	NaN	NaN	NaN	NaN	NaN	NaN	NaN	NaN	NaN	NaN	NaN	NaN
0.328	-8.217	15.18702	7.0448	0.062633	0.031041	-0.14561	-41.2297	68.3181	80.0795	0.16167	-0.090303	0.14132	NaN	NaN	NaN	NaN	NaN	NaN	NaN	NaN	NaN	NaN	NaN	NaN
0.33	-2.134	13.44279	14.003	0.045365	0.033191	-0.15076	2.336	90.347	86.9874	0.17447	-0.12499	0.16227	NaN	NaN	NaN	NaN	NaN	NaN	NaN	NaN	NaN	NaN	NaN	NaN
0.332	-9.493	17.46839	23.867	0.024323	0.038256	-0.15933	-37.1782	87.598	86.13265	0.18311	-0.1499	0.17578	NaN	NaN	NaN	NaN	NaN	NaN	NaN	NaN	NaN	NaN	NaN	NaN
0.334	-12.3895	15.6728	51.161	-0.0034987	0.043342	-0.16338	-5.658	48.202	86.8495	0.18506	-0.16805	0.19551	NaN	NaN	NaN	NaN	NaN	NaN	NaN	NaN	NaN	NaN	NaN	NaN
0.336	-13.8846	9.1519	96.489	-0.04248	0.046875	-0.18018	-7.4	37.877	67.533	0.17967	-0.18483	0.2058	NaN	NaN	NaN	NaN	NaN	NaN	NaN	NaN	NaN	NaN	NaN	NaN
0.338	17.05271	-2.9115	159.03	-0.10498	0.045959	-0.17272	-42.6706	31.097	42.638	0.17385	-0.1981	0.21634	NaN	NaN	NaN	NaN	NaN	NaN	NaN	NaN	NaN	NaN	NaN	NaN
0.34	24.5407	2.1101	177.9139	-0.18133	0.033455	-0.17561	-0.489999999999998	23.406	45.3331	0.16338	-0.2078	0.23017	NaN	NaN	NaN	NaN	NaN	NaN	NaN	NaN	NaN	NaN	NaN	NaN
0.342	-13.7385	-8.6765	193.6659	-0.26971	0.019096	-0.18138	-9.263	61.695	13.4106	0.14893	-0.21875	0.23975	NaN	NaN	NaN	NaN	NaN	NaN	NaN	NaN	NaN	NaN	NaN	NaN
0.344	12.7081	-41.034	191.0418	-0.35587	0.0090728	-0.18821	-12.0303	21.623	11.1017	0.13093	-0.22976	0.24933	NaN	NaN	NaN	NaN	NaN	NaN	NaN	NaN	NaN	NaN	NaN	NaN
0.346	-2.275628	-70.3616	212.5063	-0.44092	0.011719	-0.19531	15.9076	5.879	20.2423	0.11511	-0.24044	0.25867	NaN	NaN	NaN	NaN	NaN	NaN	NaN	NaN	NaN	NaN	NaN	NaN
0.348	-11.951	-70.1651	273.6011	-0.52608	0.024412	-0.20147	-20.1646	31.926	15.3324	0.09388	-0.24365	0.2646	NaN	NaN	NaN	NaN	NaN	NaN	NaN	NaN	NaN	NaN	NaN	NaN
0.35	0.745999999999999	-59.4316	323.788	-0.61279	0.044421	-0.21086	2.082	28.916	34.0232	0.07928	-0.24837	0.27221	NaN	NaN	NaN	NaN	NaN	NaN	NaN	NaN	NaN	NaN	NaN	NaN
0.352	2.621	-57.2009	365.017	-0.70233	0.065295	-0.22507	14.4383	71.378	32.6368	0.064941	-0.24902	0.27344	NaN	NaN	NaN	NaN	NaN	NaN	NaN	NaN	NaN	NaN	NaN	NaN
0.354	-0.1767	-31.014	404.851	-0.79482	0.088454	-0.23466	-23.239	64.279	25.5601	0.057002	-0.24441	0.27549	NaN	NaN	NaN	NaN	NaN	NaN	NaN	NaN	NaN	NaN	NaN	NaN
0.356	19.1689	-25.8069	494.783	-0.9043	0.11084	-0.24658	11.911	13.4257	23.6077	0.054873	-0.23739	0.27898	NaN	NaN	NaN	NaN	NaN	NaN	NaN	NaN	NaN	NaN	NaN	NaN
0.358	35.478	-10.504	591.441831	-1.0393	0.12788	-0.2581	-21.6628	30.1772	-16.5767	0.052531	-0.2268	0.27077	NaN	NaN	NaN	NaN	NaN	NaN	NaN	NaN	NaN	NaN	NaN	NaN
0.36	9.6892	24.3181	666.476	-1.198	0.14705	-0.26532	-31.0019	3.9302	11.9529	0.058207	-0.21649	0.2699	NaN	NaN	NaN	NaN	NaN	NaN	NaN	NaN	NaN	NaN	NaN	NaN
0.362	27.3766	58.825	711.3327	-1.375	0.16619	-0.28045	19.1113	12.2333	24.9793	0.063965	-0.20166	0.26074	NaN	NaN	NaN	NaN	NaN	NaN	NaN	NaN	NaN	NaN	NaN	NaN
0.364	40.561	102.479	774.6818	-1.5732	0.20763	-0.28648	-26.497	31.1045	28.6216	0.07089	-0.19074	0.24903	NaN	NaN	NaN	NaN	NaN	NaN	NaN	NaN	NaN	NaN	NaN	NaN
0.366	27.567	111.268	863.64404	-1.7676	0.25586	-0.29248	-12.106	-6.247	28.16457	0.080558	-0.17286	0.23878	NaN	NaN	NaN	NaN	NaN	NaN	NaN	NaN	NaN	NaN	NaN	NaN
0.368	11.922	82.991	906.23	-1.9439	0.32601	-0.28325	-6.217	22.6324	-6.425	0.086812	-0.15412	0.22471	NaN	NaN	NaN	NaN	NaN	NaN	NaN	NaN	NaN	NaN	NaN	NaN
0.37	21.943	20.6146	904.6855	-2.1286	0.40105	-0.27086	-27.4293	22.772	-4.8936	0.090917	-0.13341	0.2129	NaN	NaN	NaN	NaN	NaN	NaN	NaN	NaN	NaN	NaN	NaN	NaN
0.372	1.203	-6.813	933.724	-2.2972	0.47099	-0.26668	8.43	-5.9584	27.5786	0.092773	-0.10889	0.20068	NaN	NaN	NaN	NaN	NaN	NaN	NaN	NaN	NaN	NaN	NaN	NaN
0.374	-12.22116	-47.31	965.643	-2.3953	0.54332	-0.2838	-22.7574	19.7666	22.45099	0.085348	-0.093452	0.18652	NaN	NaN	NaN	NaN	NaN	NaN	NaN	NaN	NaN	NaN	NaN	NaN
0.376	-20.9832	-68.2994	978.322	-2.4175	0.62354	-0.31934	-17.3353	-0.4384	10.2682	0.077341	-0.073333	0.17617	NaN	NaN	NaN	NaN	NaN	NaN	NaN	NaN	NaN	NaN	NaN	NaN
0.378	-14.405	-75.55747	932.6728	-2.3412	0.67869	-0.34534	12.3731	1.6611	6.004	0.067576	-0.054196	0.17031	NaN	NaN	NaN	NaN	NaN	NaN	NaN	NaN	NaN	NaN	NaN	NaN
0.38	-20.3328	-89.2678	926.1514	-2.1913	0.70416	-0.36942	-39.4469	35.519	0.533000000000001	0.051658	-0.035154	0.16309	NaN	NaN	NaN	NaN	NaN	NaN	NaN	NaN	NaN	NaN	NaN	NaN
0.382	-22.603	-111.933	952.998	-1.9812	0.70784	-0.38789	-16.38	9.1237	41.136	0.036621	-0.015625	0.15918	NaN	NaN	NaN	NaN	NaN	NaN	NaN	NaN	NaN	NaN	NaN	NaN
0.384	-38.6377	-124.428	993.0792	-1.7632	0.68159	-0.39106	0.324999999999999	37.885	15.2194	0.022364	-9.8302e-05	0.14893	NaN	NaN	NaN	NaN	NaN	NaN	NaN	NaN	NaN	NaN	NaN	NaN
0.386	-32.6057	-101.831	996.9331	-1.5684	0.64551	-0.40625	-47.558	44.1139	-1.6869	0.012306	0.019139	0.15254	NaN	NaN	NaN	NaN	NaN	NaN	NaN	NaN	NaN	NaN	NaN	NaN
0.388	-0.6128	-58.367	1007.1288	-1.4198	0.61054	-0.41694	-4.3017	7.414	14.434	0.0076173	0.038671	0.14629	NaN	NaN	NaN	NaN	NaN	NaN	NaN	NaN	NaN	NaN	NaN	NaN
0.39	-5.738	-41.057	1028.6514	-1.2929	0.58328	-0.4309	-15.9746	24.3614	-7.364	0.0043948	0.056054	0.13994	NaN	NaN	NaN	NaN	NaN	NaN	NaN	NaN	NaN	NaN	NaN	NaN
0.392	-15.5346	-44.809	1051.959	-1.1927	0.56266	-0.43987	-16.457	-15.2152	13.0349	-0.00097656	0.070801	0.13672	NaN	NaN	NaN	NaN	NaN	NaN	NaN	NaN	NaN	NaN	NaN	NaN
0.394	-7.664	-58.543	1038.689	-1.1167	0.54962	-0.45394	17.341	-17.6818	11.3478	0.00087892	0.089747	0.13545	NaN	NaN	NaN	NaN	NaN	NaN	NaN	NaN	NaN	NaN	NaN	NaN
0.396	-29.84797	-71.413	1028.068	-1.0508	0.55469	-0.45996	-28.5675	18.2904	-5.9463	-0.00087897	0.10723	0.12998	NaN	NaN	NaN	NaN	NaN	NaN	NaN	NaN	NaN	NaN	NaN	NaN
0.398	-39.497	-84.98	1043.8174	-0.98656	0.5621	-0.4784	-2.8184	-28.155	29.6927	-0.0024414	0.11816	0.12686	NaN	NaN	NaN	NaN	NaN	NaN	NaN	NaN	NaN	NaN	NaN	NaN
0.4	-24.9551	-122.56	1052.926	-0.94095	0.57155	-0.49013	-5.2864	15.7361	28.5099	-0.0090822	0.13184	0.12373	NaN	NaN	NaN	NaN	NaN	NaN	NaN	NaN	NaN	NaN	NaN	NaN
0.402	-7.8149	-153.557	1052.277	-0.91593	0.58096	-0.5034	-31.22527	22.8046	22.552	-0.013672	0.14307	0.12158	NaN	NaN	NaN	NaN	NaN	NaN	NaN	NaN	NaN	NaN	NaN	NaN
0.404	-1.337	-168.459	1048.345	-0.90401	0.57822	-0.51513	9.591	-1.3308	34.894	-0.025684	0.15303	0.11631	NaN	NaN	NaN	NaN	NaN	NaN	NaN	NaN	NaN	NaN	NaN	NaN
0.406	20.6287	-184.797	1072.222	-0.91406	0.57031	-0.52344	-16.535	25.8897	3.4112	-0.039062	0.16621	0.1124	NaN	NaN	NaN	NaN	NaN	NaN	NaN	NaN	NaN	NaN	NaN	NaN
0.408	24.6717	-188.819	1109.244	-0.95421	0.55166	-0.52881	-13.242	-12.6878	0.1444	-0.054688	0.18183	0.10615	NaN	NaN	NaN	NaN	NaN	NaN	NaN	NaN	NaN	NaN	NaN	NaN
0.41	24.5242	-164.067	1149.454	-1.0316	0.54307	-0.52432	11.053	-16.7061	-1.9384	-0.072852	0.19942	0.10371	NaN	NaN	NaN	NaN	NaN	NaN	NaN	NaN	NaN	NaN	NaN	NaN
0.412	28.0956	-138.173	1207.662	-1.1476	0.53564	-0.51454	-31.5982	29.1409	-18.4022	-0.097656	0.22119	0.10059	NaN	NaN	NaN	NaN	NaN	NaN	NaN	NaN	NaN	NaN	NaN	NaN
0.414	31.276	-137.2706	1243.577	-1.2908	0.5374	-0.5001	7.3845	2.8532	14.7757	-0.1168	0.24043	0.093652	NaN	NaN	NaN	NaN	NaN	NaN	NaN	NaN	NaN	NaN	NaN	NaN
0.416	40.44	-121.638	1256.7338	-1.4492	0.53516	-0.49707	17.7943	30.106	8.4539	-0.14629	0.25937	0.086328	NaN	NaN	NaN	NaN	NaN	NaN	NaN	NaN	NaN	NaN	NaN	NaN
0.418	32	-83.0923	1254.27978	-1.6075	0.53428	-0.50322	-37.8073	34.1836	19.7243	-0.17363	0.27813	0.075	NaN	NaN	NaN	NaN	NaN	NaN	NaN	NaN	NaN	NaN	NaN	NaN
0.42	17.6592	-62.8402	1274.0523	-1.7686	0.53564	-0.51709	12.005	-19.5266	48.2381	-0.20186	0.29043	0.065137	NaN	NaN	NaN	NaN	NaN	NaN	NaN	NaN	NaN	NaN	NaN	NaN
0.422	11.7636	-81.6963	1278.82015	-1.9327	0.54776	-0.51865	-35.394	1.48	32.647	-0.23584	0.30225	0.055176	NaN	NaN	NaN	NaN	NaN	NaN	NaN	NaN	NaN	NaN	NaN	NaN
0.424	7.4937	-87.216	1254.965	-2.1083	0.56143	-0.5206	-25.8891	-17.74488	64.8937	-0.26934	0.30576	0.037305	NaN	NaN	NaN	NaN	NaN	NaN	NaN	NaN	NaN	NaN	NaN	NaN
0.426	19.3745	-81.874	1279.999	-2.2852	0.58887	-0.5293	29.622605	-49.4856	71.6995	-0.31035	0.30273	0.015723	NaN	NaN	NaN	NaN	NaN	NaN	NaN	NaN	NaN	NaN	NaN	NaN
0.428	40.494	-90.6286	1304.97	-2.4289	0.62812	-0.54532	-49.056	-33.1051	87.2265	-0.36191	0.30391	-0.01123	NaN	NaN	NaN	NaN	NaN	NaN	NaN	NaN	NaN	NaN	NaN	NaN
0.43	54.678	-102.6417	1323.106	-2.5292	0.64892	-0.55674	-41.3076	-69.342	220.426	-0.42851	0.31172	-0.044336	NaN	NaN	NaN	NaN	NaN	NaN	NaN	NaN	NaN	NaN	NaN	NaN
0.432	34.394	-82.827	1323.2333	-2.5949	0.66533	-0.58096	-40.265	-32.5268	321.655	-0.5249	0.30713	-0.088867	NaN	NaN	NaN	NaN	NaN	NaN	NaN	NaN	NaN	NaN	NaN	NaN
0.434	-5.744	-63.605	1335.5884	-2.6276	0.67061	-0.61884	-43.914	-0.2243	540.942	-0.65537	0.28574	-0.14112	NaN	NaN	NaN	NaN	NaN	NaN	NaN	NaN	NaN	NaN	NaN	NaN
0.436	14.9351	-42.2083	1373.4784	-2.6504	0.66016	-0.67383	9.165	-27.189	712.497	-0.83447	0.23994	-0.17803	NaN	NaN	NaN	NaN	NaN	NaN	NaN	NaN	NaN	NaN	NaN	NaN
0.438	27.403	-42.559	1402.54859	-2.647	0.6501	-0.7415	0.567699999999999	-40.019	820.272	-1.0497	0.18486	-0.22451	NaN	NaN	NaN	NaN	NaN	NaN	NaN	NaN	NaN	NaN	NaN	NaN
0.44	29.611	-42.6506	1406.596	-2.612	0.63525	-0.79443	25.867	-85.496	916.384	-1.2777	0.14414	-0.25264	NaN	NaN	NaN	NaN	NaN	NaN	NaN	NaN	NaN	NaN	NaN	NaN
0.442	23.75591	-47.9081	1394.2982	-2.548	0.61806	-0.82647	60.55	-85.742	1028.6807	-1.5059	0.12451	-0.27051	NaN	NaN	NaN	NaN	NaN	NaN	NaN	NaN	NaN	NaN	NaN	NaN
0.444	15.1483	-61.9079	1386.6738	-2.4728	0.59941	-0.85019	-43.465	-23.048	1115.814	-1.709	0.15293	-0.27481	NaN	NaN	NaN	NaN	NaN	NaN	NaN	NaN	NaN	NaN	NaN	NaN
0.446	6.5347	-65.9959	1388.8251	-2.4077	0.58154	-0.87451	-51.9504	-47.723	1192.037	-1.8788	0.21787	-0.27012	NaN	NaN	NaN	NaN	NaN	NaN	NaN	NaN	NaN	NaN	NaN	NaN
0.448	14.427	-49.602	1384.36731	-2.3717	0.56534	-0.89756	-13.377	-39.055	1152.127	-2.0144	0.3124	-0.25449	NaN	NaN	NaN	NaN	NaN	NaN	NaN	NaN	NaN	NaN	NaN	NaN
0.45	23.5441	-49.4036	1359.749823	-2.3476	0.56494	-0.91963	1.53512	-57.432	1120.464	-2.1151	0.39365	-0.25097	NaN	NaN	NaN	NaN	NaN	NaN	NaN	NaN	NaN	NaN	NaN	NaN
0.452	41.979	-39.3902	1344.722	-2.3245	0.5708	-0.94033	63.4803	-131.517	1124.789	-2.1421	0.47021	-0.24609	NaN	NaN	NaN	NaN	NaN	NaN	NaN	NaN	NaN	NaN	NaN	NaN
0.454	46.069	-47.9747	1339.404	-2.2921	0.59092	-0.95459	27.33	-136.5847	1093.496	-2.0913	0.52295	-0.2331	NaN	NaN	NaN	NaN	NaN	NaN	NaN	NaN	NaN	NaN	NaN	NaN
0.456	32.30685	-22.41616	1333.731	-2.2441	0.61133	-0.96875	27.2242	-147.5785	1077.688	-1.977	0.55664	-0.2166	NaN	NaN	NaN	NaN	NaN	NaN	NaN	NaN	NaN	NaN	NaN	NaN
0.458	27.8236	-21.5125	1334.754	-2.1769	0.63271	-0.98349	82.999	-139.963	1027.854	-1.7918	0.5582	-0.18496	NaN	NaN	NaN	NaN	NaN	NaN	NaN	NaN	NaN	NaN	NaN	NaN
0.46	34.864	-0.4525	1340.5132	-2.1011	0.64287	-0.9874	35.7601	-90.2475	929.4491	-1.5887	0.53691	-0.1458	NaN	NaN	NaN	NaN	NaN	NaN	NaN	NaN	NaN	NaN	NaN	NaN
0.462	52.577	2.7307	1335.1035	-2.021	0.64638	-0.98389	32.8454	-90.53	915.697	-1.3887	0.51172	-0.10156	NaN	NaN	NaN	NaN	NaN	NaN	NaN	NaN	NaN	NaN	NaN	NaN
0.464	40.634	-6.831	1335.198	-1.9358	0.64619	-0.97569	55.362	-11.012	876.208	-1.2141	0.49131	-0.078516	NaN	NaN	NaN	NaN	NaN	NaN	NaN	NaN	NaN	NaN	NaN	NaN
0.466	50.195	-7.309	1329.4185	-1.8672	0.64746	-0.96484	5.008	20.691	888.5275	-1.0744	0.47803	-0.049414	NaN	NaN	NaN	NaN	NaN	NaN	NaN	NaN	NaN	NaN	NaN	NaN
0.468	43.135	-15.406	1341.6574	-1.8042	0.64229	-0.95185	-20.671	21.869	917.555	-0.97832	0.48115	-0.022852	NaN	NaN	NaN	NaN	NaN	NaN	NaN	NaN	NaN	NaN	NaN	NaN
0.47	56.74	-12.993	1310.95	-1.7598	0.6461	-0.93321	-63.666	36.619	870.896	-0.92559	0.50664	-9.77e-05	NaN	NaN	NaN	NaN	NaN	NaN	NaN	NaN	NaN	NaN	NaN	NaN
0.472	37.9624	-7.9366	1288.413	-1.7297	0.65274	-0.91562	-65.812	-20.22	840.682	-0.8999	0.5415	0.020996	NaN	NaN	NaN	NaN	NaN	NaN	NaN	NaN	NaN	NaN	NaN	NaN
0.474	38.59	-27.3841	1240.61	-1.7138	0.66621	-0.89199	4.996	-59.778	792.972	-0.9002	0.58281	0.037695	NaN	NaN	NaN	NaN	NaN	NaN	NaN	NaN	NaN	NaN	NaN	NaN
0.476	37.598	-55.157	1227.228	-1.7124	0.68604	-0.87256	-9.119	-92.83	785.535	-0.91054	0.64571	0.045898	NaN	NaN	NaN	NaN	NaN	NaN	NaN	NaN	NaN	NaN	NaN	NaN
0.478	41.768	-46.019	1217.254	-1.7191	0.70449	-0.85117	-0.542000000000002	-152.947	854.071	-0.93125	0.7211	0.037304	NaN	NaN	NaN	NaN	NaN	NaN	NaN	NaN	NaN	NaN	NaN	NaN
0.48	43.632	-19.9913	1233.0272	-1.718	0.7209	-0.83281	4.605	-157.469	876.612	-0.94385	0.79951	0.015235	NaN	NaN	NaN	NaN	NaN	NaN	NaN	NaN	NaN	NaN	NaN	NaN
0.482	54.306	0.4029	1227.9433	-1.7113	0.73379	-0.81601	-46.233	-212.38	877.177	-0.94824	0.86523	-0.023438	NaN	NaN	NaN	NaN	NaN	NaN	NaN	NaN	NaN	NaN	NaN	NaN
0.484	52.0959	5.8265	1222.698	-1.6898	0.74179	-0.80117	-50.1689	-252.855	903.049	-0.94433	0.90488	-0.070215	NaN	NaN	NaN	NaN	NaN	NaN	NaN	NaN	NaN	NaN	NaN	NaN
0.486	38.0358	20.9888	1219.795	-1.6655	0.73779	-0.78271	-71.8228	-231.665	906.944	-0.95508	0.92422	-0.11884	NaN	NaN	NaN	NaN	NaN	NaN	NaN	NaN	NaN	NaN	NaN	NaN
0.488	28.14705	49.419	1189.245	-1.6325	0.74052	-0.7583	-94.136	-235.634	957.1952	-0.97891	0.92148	-0.1708	NaN	NaN	NaN	NaN	NaN	NaN	NaN	NaN	NaN	NaN	NaN	NaN
0.49	37.101	68.496	1179.0612	-1.6039	0.72969	-0.73242	-116.8439	-192.9865	976.131	-1.0249	0.90322	-0.20732	NaN	NaN	NaN	NaN	NaN	NaN	NaN	NaN	NaN	NaN	NaN	NaN
0.492	38.373	72.107	1143.0109	-1.5758	0.71719	-0.71524	-186.511	-173.211	957.361	-1.084	0.88672	-0.23975	NaN	NaN	NaN	NaN	NaN	NaN	NaN	NaN	NaN	NaN	NaN	NaN
0.494	30.6941	46.6121	1132.3076	-1.5519	0.69795	-0.69092	-154.59	-190.3234	988.3014	-1.1547	0.88633	-0.26279	NaN	NaN	NaN	NaN	NaN	NaN	NaN	NaN	NaN	NaN	NaN	NaN
0.496	22.1605	24.313	1113.808	-1.5352	0.67383	-0.66602	-70.188	-135.903	998.039	-1.2251	0.91611	-0.28838	NaN	NaN	NaN	NaN	NaN	NaN	NaN	NaN	NaN	NaN	NaN	NaN
0.498	8.6427	26.441	1106.472	-1.5113	0.65508	-0.63906	-62.6731	-106.123	1027.736	-1.2857	0.94931	-0.3208	NaN	NaN	NaN	NaN	NaN	NaN	NaN	NaN	NaN	NaN	NaN	NaN
0.5	39.063	41.88	1089.965	-1.4929	0.63291	-0.61631	-45.777	-89.22	1082.498	-1.3232	0.98047	-0.35683	NaN	NaN	NaN	NaN	NaN	NaN	NaN	NaN	NaN	NaN	NaN	NaN
0.502	47.07	79.68	1073.704	-1.4722	0.60674	-0.59873	-53.323	-50.072	1059.434	-1.3418	1.0078	-0.39014	NaN	NaN	NaN	NaN	NaN	NaN	NaN	NaN	NaN	NaN	NaN	NaN
0.504	16.6228	95.8362	1079.423	-1.4427	0.58232	-0.57705	-76.367	-71.3313	1044.903	-1.3485	1.0254	-0.4125	NaN	NaN	NaN	NaN	NaN	NaN	NaN	NaN	NaN	NaN	NaN	NaN
0.506	11.4931	109.506	1055.451	-1.4102	0.55859	-0.55273	-49.69	-73.436	1070.49	-1.3761	1.0333	-0.42412	NaN	NaN	NaN	NaN	NaN	NaN	NaN	NaN	NaN	NaN	NaN	NaN
0.508	38.506	108.53	1043.6779	-1.371	0.53955	-0.52676	-70.144	-93.757	1107.473	-1.4421	1.0384	-0.41592	NaN	NaN	NaN	NaN	NaN	NaN	NaN	NaN	NaN	NaN	NaN	NaN
0.51	37.138	110.166	1039.443	-1.33	0.51924	-0.5085	-58.739	-143.661	1153.236	-1.5655	1.0407	-0.4042	NaN	NaN	NaN	NaN	NaN	NaN	NaN	NaN	NaN	NaN	NaN	NaN
0.512	19.2313	113.9199	1026.075	-1.2835	0.49229	-0.4956	-54.282	-139.0073	1165.44588	-1.748	1.0596	-0.38281	NaN	NaN	NaN	NaN	NaN	NaN	NaN	NaN	NaN	NaN	NaN	NaN
0.514	10.621	102.3618	993.7974	-1.2362	0.46455	-0.46436	-124.924	-160.0201	1163.4694	-1.976	1.098	-0.36699	NaN	NaN	NaN	NaN	NaN	NaN	NaN	NaN	NaN	NaN	NaN	NaN
0.516	25.5157	103.863	940.529	-1.1851	0.43311	-0.44287	-76.742	-178.51	1197.421	-2.2343	1.1536	-0.33682	NaN	NaN	NaN	NaN	NaN	NaN	NaN	NaN	NaN	NaN	NaN	NaN
0.518	4.3484	111.913	900.056	-1.1427	0.40166	-0.41201	-55.551	-137.76	1222.026	-2.4952	1.227	-0.31026	NaN	NaN	NaN	NaN	NaN	NaN	NaN	NaN	NaN	NaN	NaN	NaN
0.52	3.0532	107.818	903.71691	-1.1097	0.38037	-0.3874	-68.524	-162.136	1238.298	-2.6981	1.323	-0.30537	NaN	NaN	NaN	NaN	NaN	NaN	NaN	NaN	NaN	NaN	NaN	NaN
0.522	18.926	102.12992	892.452	-1.0734	0.35655	-0.3667	-33.579	-142.7986	1235.422	-2.8022	1.4146	-0.31104	NaN	NaN	NaN	NaN	NaN	NaN	NaN	NaN	NaN	NaN	NaN	NaN
0.524	31.41374	118.72	858.138	-1.0389	0.3334	-0.34121	-48.857	-125.243	1216.553	-2.7982	1.4886	-0.32129	NaN	NaN	NaN	NaN	NaN	NaN	NaN	NaN	NaN	NaN	NaN	NaN
0.526	20.9081	129.157	830.1645	-1.0088	0.31543	-0.31641	-59.602	-124.166	1212.0171	-2.7336	1.532	-0.33262	NaN	NaN	NaN	NaN	NaN	NaN	NaN	NaN	NaN	NaN	NaN	NaN
0.528	5.239	120.5408	809.732	-0.97939	0.30928	-0.29395	-53.683	-63.113	1216.8021	-2.6226	1.5383	-0.33574	NaN	NaN	NaN	NaN	NaN	NaN	NaN	NaN	NaN	NaN	NaN	NaN
0.53	-7.2782	112.8779	794.727	-0.94952	0.30098	-0.26689	-95.392	-58.093	1217.27949	-2.5114	1.5026	-0.32637	NaN	NaN	NaN	NaN	NaN	NaN	NaN	NaN	NaN	NaN	NaN	NaN
0.532	-0.632	116.995	764.4628	-0.91865	0.29277	-0.23448	-112.349	-54.57	1225.605	-2.4121	1.4512	-0.31934	NaN	NaN	NaN	NaN	NaN	NaN	NaN	NaN	NaN	NaN	NaN	NaN
0.534	-2.9748	118.9682	727.4811	-0.89453	0.27969	-0.22657	-105.123	-2.328	1209.211	-2.3451	1.3889	-0.31289	NaN	NaN	NaN	NaN	NaN	NaN	NaN	NaN	NaN	NaN	NaN	NaN
0.536	-3.872	126.1937	700.942	-0.85693	0.27002	-0.21631	-147.112	-17.558	1199.412	-2.294	1.3478	-0.30772	NaN	NaN	NaN	NaN	NaN	NaN	NaN	NaN	NaN	NaN	NaN	NaN
0.538	-7.7028	137.2662	676.0844	-0.804	0.25439	-0.19414	-111.6256	15.368	1215.777	-2.2413	1.3192	-0.30889	NaN	NaN	NaN	NaN	NaN	NaN	NaN	NaN	NaN	NaN	NaN	NaN
0.54	-4.595	140.3457	647.2426	-0.75703	0.24356	-0.17784	-129.715	17.496	1209.722	-2.1754	1.3023	-0.3167	NaN	NaN	NaN	NaN	NaN	NaN	NaN	NaN	NaN	NaN	NaN	NaN
0.542	4.41	129.7239	612.084	-0.70664	0.23223	-0.15948	-136.2088	-20.4056	1233.944	-2.0977	1.3008	-0.31836	NaN	NaN	NaN	NaN	NaN	NaN	NaN	NaN	NaN	NaN	NaN	NaN
0.544	-18.428	116.4437	572.641	-0.65508	0.22558	-0.14844	-118.72738	-16.6881	1229.754	-2.0029	1.3076	-0.31953	NaN	NaN	NaN	NaN	NaN	NaN	NaN	NaN	NaN	NaN	NaN	NaN
0.546	-7.345	110.793	541.4079	-0.60596	0.21924	-0.13867	-131.4121	-57.22	1238.644	-1.904	1.3153	-0.32138	NaN	NaN	NaN	NaN	NaN	NaN	NaN	NaN	NaN	NaN	NaN	NaN
0.548	6.8131	104.283	509.407	-0.55752	0.21123	-0.12168	-93.57	-58.5308	1265.4707	-1.8102	1.3169	-0.31435	NaN	NaN	NaN	NaN	NaN	NaN	NaN	NaN	NaN	NaN	NaN	NaN
0.55	-19.0988	108.997	474.324	-0.51231	0.20117	-0.1043	-106.0282	-16.325	1259.874	-1.7222	1.3087	-0.30478	NaN	NaN	NaN	NaN	NaN	NaN	NaN	NaN	NaN	NaN	NaN	NaN
0.552	-4.007	116.1439	429.903	-0.46738	0.1875	-0.086328	-137.7027	-23.3818	1256.849	-1.6543	1.2871	-0.28223	NaN	NaN	NaN	NaN	NaN	NaN	NaN	NaN	NaN	NaN	NaN	NaN
0.554	-3.855	124.7285	397.324	-0.41836	0.17578	-0.069629	-105.1913	-1.26512	1243.822	-1.6035	1.2601	-0.26368	NaN	NaN	NaN	NaN	NaN	NaN	NaN	NaN	NaN	NaN	NaN	NaN
0.556	-8.097	133.197	377.7682	-0.36328	0.16309	-0.050293	-115.161	1.408	1211.069	-1.5652	1.2247	-0.24805	NaN	NaN	NaN	NaN	NaN	NaN	NaN	NaN	NaN	NaN	NaN	NaN
0.558	-26.0009	124.745	372.33792	-0.30937	0.15449	-0.031152	-107.1711	-23.4098	1211.2719	-1.5386	1.1966	-0.23477	NaN	NaN	NaN	NaN	NaN	NaN	NaN	NaN	NaN	NaN	NaN	NaN
0.56	-23.46237	131.054	349.3979	-0.24815	0.1413	-0.0083984	-65.173	14.7094	1229.6842	-1.5174	1.157	-0.21846	NaN	NaN	NaN	NaN	NaN	NaN	NaN	NaN	NaN	NaN	NaN	NaN
0.562	5.0891	119.229	296.9803	-0.18877	0.12607	0.0052734	-101.091	20.2373	1207.618	-1.498	1.123	-0.21045	NaN	NaN	NaN	NaN	NaN	NaN	NaN	NaN	NaN	NaN	NaN	NaN
0.564	-14.057	101.9511	280.7841	-0.12891	0.10889	0.028222	-100.3587	37.066	1210.6325	-1.479	1.0864	-0.20127	NaN	NaN	NaN	NaN	NaN	NaN	NaN	NaN	NaN	NaN	NaN	NaN
0.566	10.428	93.1502	240.229	-0.070801	0.089355	0.044922	-80.392	78.257	1192.9708	-1.4539	1.0523	-0.19092	NaN	NaN	NaN	NaN	NaN	NaN	NaN	NaN	NaN	NaN	NaN	NaN
0.568	-13.6325	67.912	203.095	-0.01582	0.061133	0.070996	-92.3355	74.4199	1161.087	-1.4215	1.0114	-0.17881	NaN	NaN	NaN	NaN	NaN	NaN	NaN	NaN	NaN	NaN	NaN	NaN
0.57	-4.0877	78.326	168.968	0.034473	0.037402	0.089355	-0.285000000000004	101.693	1144.452	-1.3899	0.96787	-0.1709	NaN	NaN	NaN	NaN	NaN	NaN	NaN	NaN	NaN	NaN	NaN	NaN
0.572	-12.332	74.2446	151.95	0.078223	0.005371	0.10889	-27.038	127.402	1130.676	-1.3516	0.91992	-0.1626	NaN	NaN	NaN	NaN	NaN	NaN	NaN	NaN	NaN	NaN	NaN	NaN
0.574	13.048	75.0454	145.4323	0.11894	-0.020703	0.12871	-39.01	88.443	1140.94487	-1.317	0.87031	-0.14756	NaN	NaN	NaN	NaN	NaN	NaN	NaN	NaN	NaN	NaN	NaN	NaN
0.576	3.9085	66.9538	152.7756	0.15723	-0.047363	0.14355	-21.571	87.3948	1151.0826	-1.2832	0.82539	-0.13028	NaN	NaN	NaN	NaN	NaN	NaN	NaN	NaN	NaN	NaN	NaN	NaN
0.578	-20.5792	72.361	138.125	0.19248	-0.074023	0.16191	-78.2818	64.489	1127.9031	-1.2547	0.78984	-0.12012	NaN	NaN	NaN	NaN	NaN	NaN	NaN	NaN	NaN	NaN	NaN	NaN
0.58	-14.100095	61.2494	119.8677	0.22139	-0.099317	0.17783	-55.091	66.108	1113.236	-1.235	0.74932	-0.11006	NaN	NaN	NaN	NaN	NaN	NaN	NaN	NaN	NaN	NaN	NaN	NaN
0.582	0.487000000000002	54.041	92.069	0.24209	-0.11924	0.19385	-18.699	120.841	1094.218	-1.2202	0.72021	-0.10107	NaN	NaN	NaN	NaN	NaN	NaN	NaN	NaN	NaN	NaN	NaN	NaN
0.584	-14.011	56.2786	82.0842	0.25654	-0.13652	0.2085	-79.5743	135.574	1068.0482	-1.21	0.68789	-0.096092	NaN	NaN	NaN	NaN	NaN	NaN	NaN	NaN	NaN	NaN	NaN	NaN
0.586	-19.152	55.6556	74.35987	0.26123	-0.16016	0.22852	-95.1145	138.338	1061.89598	-1.2035	0.66602	-0.081543	NaN	NaN	NaN	NaN	NaN	NaN	NaN	NaN	NaN	NaN	NaN	NaN
0.588	-8.582	46.989	52.6352	0.26377	-0.18438	0.23877	-88.7017	144.015	1031.271	-1.1996	0.64336	-0.078028	NaN	NaN	NaN	NaN	NaN	NaN	NaN	NaN	NaN	NaN	NaN	NaN
0.59	-1.271	40.8436	37.739	0.25479	-0.20176	0.25254	-83.6599	98.793	1032.818	-1.1942	0.62217	-0.07041	NaN	NaN	NaN	NaN	NaN	NaN	NaN	NaN	NaN	NaN	NaN	NaN
0.592	-0.747999999999999	47.26141	14.024	0.24619	-0.21699	0.25996	-39.441	112.847	1027.609	-1.189	0.604	-0.063965	NaN	NaN	NaN	NaN	NaN	NaN	NaN	NaN	NaN	NaN	NaN	NaN
0.594	-4.963	43.8847	33.8968	0.23896	-0.22685	0.27012	-77.8241	128.98	994.8149	-1.1771	0.5833	-0.054394	NaN	NaN	NaN	NaN	NaN	NaN	NaN	NaN	NaN	NaN	NaN	NaN
0.596	-4.774	40.09151	44.7774	0.22266	-0.23975	0.27344	-49.328	141.351	975.088	-1.166	0.55859	-0.046484	NaN	NaN	NaN	NaN	NaN	NaN	NaN	NaN	NaN	NaN	NaN	NaN
0.598	-9.522	27.24405	34.52	0.21279	-0.23467	0.27988	-49.328	205.127	923.405	-1.1555	0.53946	-0.037891	NaN	NaN	NaN	NaN	NaN	NaN	NaN	NaN	NaN	NaN	NaN	NaN
0.6	-19.158	29.8865	9.612	0.20264	-0.23457	0.28291	-83.559	217.261	883.175	-1.1416	0.5168	-0.028516	NaN	NaN	NaN	NaN	NaN	NaN	NaN	NaN	NaN	NaN	NaN	NaN
0.602	-7.439	19.3506	11.6887	0.19052	-0.23613	0.28056	-37.483	192.791	902.4597	-1.1289	0.49219	-0.021484	NaN	NaN	NaN	NaN	NaN	NaN	NaN	NaN	NaN	NaN	NaN	NaN
0.604	-20.581	20.395	19.5042	0.17666	-0.23496	0.27588	-89.016	199.591	872.18785	-1.1115	0.47519	-0.015625	NaN	NaN	NaN	NaN	NaN	NaN	NaN	NaN	NaN	NaN	NaN	NaN
0.606	2.356	28.645	9.2968	0.16064	-0.22803	0.27393	-69.612	155.128	863.859	-1.0909	0.45186	-0.011231	NaN	NaN	NaN	NaN	NaN	NaN	NaN	NaN	NaN	NaN	NaN	NaN
0.608	-11.0722	22.6271	-0.1774	0.14765	-0.22607	0.26973	-25.5151	160.8842	860.733	-1.0624	0.43194	-0.0057617	NaN	NaN	NaN	NaN	NaN	NaN	NaN	NaN	NaN	NaN	NaN	NaN
0.61	-20.3256	16.3732	8.442	0.13438	-0.21807	0.26426	-56.6289	182.6033	824.453	-1.0287	0.41192	-0.0035156	NaN	NaN	NaN	NaN	NaN	NaN	NaN	NaN	NaN	NaN	NaN	NaN
0.612	1.685	1.5493	21.8964	0.11758	-0.21494	0.25528	-22.953	168.3781	805.9453	-0.9873	0.38965	0.00048828	NaN	NaN	NaN	NaN	NaN	NaN	NaN	NaN	NaN	NaN	NaN	NaN
0.614	-6.596	8.8233	18.3475	0.10674	-0.21435	0.25352	10.979	193.83	771.1546	-0.94404	0.37822	0.0039063	NaN	NaN	NaN	NaN	NaN	NaN	NaN	NaN	NaN	NaN	NaN	NaN
0.616	-3.5788	15.278	7.3929	0.087891	-0.20313	0.25244	-24.516	185.5432	735.8628	-0.89766	0.36641	-0.00078126	NaN	NaN	NaN	NaN	NaN	NaN	NaN	NaN	NaN	NaN	NaN	NaN
0.618	-15.571	6.3194	2.86045	0.070801	-0.19853	0.24414	25.3825	164.8741	745.6562	-0.84648	0.35351	-0.010156	NaN	NaN	NaN	NaN	NaN	NaN	NaN	NaN	NaN	NaN	NaN	NaN
0.62	1.358	9.6877	2.80514	0.058399	-0.1875	0.23789	20.4333	179.112	721.0335	-0.79638	0.34521	-0.019433	NaN	NaN	NaN	NaN	NaN	NaN	NaN	NaN	NaN	NaN	NaN	NaN
0.622	-21.96833	6.56205	-11.7521	0.041602	-0.18086	0.23125	20.0936	137.605	691.52	-0.74072	0.33057	-0.03125	NaN	NaN	NaN	NaN	NaN	NaN	NaN	NaN	NaN	NaN	NaN	NaN
0.624	-2.898	6.0947	-6.2245	0.03291	-0.16787	0.22353	62.7825	145.6047	652.986	-0.68994	0.31826	-0.036133	NaN	NaN	NaN	NaN	NaN	NaN	NaN	NaN	NaN	NaN	NaN	NaN
0.626	5.399	2.51676	6.4433	0.020508	-0.15674	0.21484	-5.595	151.2662	584.029	-0.63272	0.30889	-0.046192	NaN	NaN	NaN	NaN	NaN	NaN	NaN	NaN	NaN	NaN	NaN	NaN
0.628	1.905	1.63783	16.298	0.012012	-0.13525	0.20781	17.6376	108.659	571.8477	-0.57216	0.29599	-0.05166	NaN	NaN	NaN	NaN	NaN	NaN	NaN	NaN	NaN	NaN	NaN	NaN
0.63	-12.29768	16.3691	10.1307	0.0038086	-0.11836	0.20284	8.256	161.493	537.0775	-0.50586	0.28613	-0.045996	NaN	NaN	NaN	NaN	NaN	NaN	NaN	NaN	NaN	NaN	NaN	NaN
0.632	-10.533	17.1488	11.8162	-0.0047852	-0.10195	0.19384	-13.2429	178.345	489.4398	-0.43652	0.27734	-0.047363	NaN	NaN	NaN	NaN	NaN	NaN	NaN	NaN	NaN	NaN	NaN	NaN
0.634	6.673	17.1566	6.70958	-0.013476	-0.07959	0.19043	42.5835	162.503	465.4971	-0.35996	0.27051	-0.037207	NaN	NaN	NaN	NaN	NaN	NaN	NaN	NaN	NaN	NaN	NaN	NaN
0.636	-10.426	19.995	3.3139	-0.022949	-0.057129	0.16992	0.593599999999999	197.624	422.078	-0.28633	0.26016	-0.032227	NaN	NaN	NaN	NaN	NaN	NaN	NaN	NaN	NaN	NaN	NaN	NaN
0.638	1.31	19.2807	-1.6669	-0.026856	-0.042481	0.16992	5.231	152.816557	388.9009	-0.21133	0.24493	-0.028321	NaN	NaN	NaN	NaN	NaN	NaN	NaN	NaN	NaN	NaN	NaN	NaN
0.64	-2.831	5.4455	-2.5589	-0.033301	-0.019043	0.16084	20.7223	131.923545	345.356	-0.13789	0.22295	-0.02168	NaN	NaN	NaN	NaN	NaN	NaN	NaN	NaN	NaN	NaN	NaN	NaN
0.642	-1.454	-4.4221	6.049	-0.039942	0.00048828	0.15225	-24.3358	143.8723	302.301	-0.074219	0.19434	-0.01709	NaN	NaN	NaN	NaN	NaN	NaN	NaN	NaN	NaN	NaN	NaN	NaN
0.644	-6.287	-7.9947	2.2138	-0.04375	0.024707	0.14639	5.92	84.022	287.9239	-0.017383	0.17216	-0.0090822	NaN	NaN	NaN	NaN	NaN	NaN	NaN	NaN	NaN	NaN	NaN	NaN
0.646	-10.643	3.759	-8.3589	-0.051758	0.047363	0.1416	-10.4021	113.3331	264.194	0.02959	0.14092	-0.0057617	NaN	NaN	NaN	NaN	NaN	NaN	NaN	NaN	NaN	NaN	NaN	NaN
0.648	14.782	1.7413	9.7339	-0.058398	0.071289	0.1333	-70.474	117.6192	235.5901	0.07334	0.11123	0.0040039	NaN	NaN	NaN	NaN	NaN	NaN	NaN	NaN	NaN	NaN	NaN	NaN
0.65	-9.342	2.82839	25.3201	-0.063379	0.092187	0.12656	-39.383	106.163	216.8547	0.11065	0.076172	0.01123	NaN	NaN	NaN	NaN	NaN	NaN	NaN	NaN	NaN	NaN	NaN	NaN
0.652	-16.9022	12.3221	0.9214	-0.066894	0.11641	0.12226	-46.2602	144.238	160.164	0.13672	0.044434	0.018066	NaN	NaN	NaN	NaN	NaN	NaN	NaN	NaN	NaN	NaN	NaN	NaN
0.654	-21.794	14.9016	-4.5286	-0.074804	0.13232	0.11445	-60.065	91.08385	167.9873	0.1623	0.012305	0.022266	NaN	NaN	NaN	NaN	NaN	NaN	NaN	NaN	NaN	NaN	NaN	NaN
0.656	-7.626	12.0687	-6.32818	-0.083496	0.14844	0.10791	-19.15	67.6508	167.6212	0.18262	-0.015332	0.023828	NaN	NaN	NaN	NaN	NaN	NaN	NaN	NaN	NaN	NaN	NaN	NaN
0.658	-6.2829	-2.2044	12.15	-0.087402	0.16064	0.095605	-51.757	77.4337	119.317	0.20137	-0.046973	0.028125	NaN	NaN	NaN	NaN	NaN	NaN	NaN	NaN	NaN	NaN	NaN	NaN
0.66	-16.4671	10.4528	-0.437999999999999	-0.091894	0.17402	0.094238	-19.1507	29.829	128.2095	0.21484	-0.073437	0.032422	NaN	NaN	NaN	NaN	NaN	NaN	NaN	NaN	NaN	NaN	NaN	NaN
0.662	2.297	8.4759	-20.0556	-0.098925	0.1834	0.090723	-8.619	66.3964	101.1978	0.2251	-0.099121	0.033691	NaN	NaN	NaN	NaN	NaN	NaN	NaN	NaN	NaN	NaN	NaN	NaN
0.664	-22.16	18.56094	-11.517	-0.10469	0.19512	0.086231	-18.0738	76.167	70.4011	0.23662	-0.11934	0.030859	NaN	NaN	NaN	NaN	NaN	NaN	NaN	NaN	NaN	NaN	NaN	NaN
0.666	-0.0370000000000026	25.1966	3.48652	-0.11035	0.20947	0.083984	19.981	55.271	70.1211	0.24258	-0.13896	0.029394	NaN	NaN	NaN	NaN	NaN	NaN	NaN	NaN	NaN	NaN	NaN	NaN
0.668	-4.74	20.9388	9.1924	-0.11767	0.21924	0.077051	-4.717	101.804	36.365	0.24609	-0.15967	0.025879	NaN	NaN	NaN	NaN	NaN	NaN	NaN	NaN	NaN	NaN	NaN	NaN
0.67	-3.495	6.855	36.5566	-0.13272	0.23438	0.068066	11.0309	76.2684	47.8861	0.24639	-0.17871	0.021094	NaN	NaN	NaN	NaN	NaN	NaN	NaN	NaN	NaN	NaN	NaN	NaN
0.672	-26.6721	-5.2546	43.6343	-0.15108	0.24531	0.062597	25.2211	52.465	78.4281	0.2417	-0.19141	0.018066	NaN	NaN	NaN	NaN	NaN	NaN	NaN	NaN	NaN	NaN	NaN	NaN
0.674	-9.059	-12.9854	70.176	-0.18184	0.25449	0.049903	0.9194	78.921	45.3246	0.23037	-0.20908	0.016406	NaN	NaN	NaN	NaN	NaN	NaN	NaN	NaN	NaN	NaN	NaN	NaN
0.676	6.316	2.7857	68.51	-0.22021	0.26611	0.041016	27.7	12.0445	49.175	0.21045	-0.22158	0.015722	NaN	NaN	NaN	NaN	NaN	NaN	NaN	NaN	NaN	NaN	NaN	NaN
0.678	-9.295	1.587	126.848	-0.2748	0.26914	0.026953	22.3728	35.366	20.5098	0.1835	-0.22861	0.01455	NaN	NaN	NaN	NaN	NaN	NaN	NaN	NaN	NaN	NaN	NaN	NaN
0.68	-26.427	-11.351324	181.651	-0.33594	0.27949	0.012598	-16.057	44.0702	5.35	0.15059	-0.22793	0.014551	NaN	NaN	NaN	NaN	NaN	NaN	NaN	NaN	NaN	NaN	NaN	NaN
0.682	-39.571	-50.42152	196.31	-0.41054	0.28184	9.768e-05	23.128	9.0104	41.9327	0.11719	-0.229	0.011719	NaN	NaN	NaN	NaN	NaN	NaN	NaN	NaN	NaN	NaN	NaN	NaN
0.684	-15.996	-64.7436	210.979	-0.48164	0.29434	-0.0064454	7.684	67.0039	25.1429	0.084082	-0.2167	0.012988	NaN	NaN	NaN	NaN	NaN	NaN	NaN	NaN	NaN	NaN	NaN	NaN
0.686	27.224	-65.543	230.996	-0.55371	0.29443	-0.019531	14.2925	30.871	32.1283	0.051269	-0.20156	0.0011718	NaN	NaN	NaN	NaN	NaN	NaN	NaN	NaN	NaN	NaN	NaN	NaN
0.688	20.3359	-53.12	280.665	-0.61289	0.31973	-0.021777	36.63173	9.1316	30.1685	0.02041	-0.18516	-0.00039062	NaN	NaN	NaN	NaN	NaN	NaN	NaN	NaN	NaN	NaN	NaN	NaN
0.69	-24.5255	-42.866	317.062	-0.66592	0.33389	-0.03291	-22.7986	41.7157	4.17	-0.0058593	-0.16953	-9.7656e-05	NaN	NaN	NaN	NaN	NaN	NaN	NaN	NaN	NaN	NaN	NaN	NaN
0.692	-36.0937	-45.6488	321.688	-0.7124	0.35146	-0.042676	-5.494	-12.8697	25.00774	-0.031738	-0.14893	-0.0039063	NaN	NaN	NaN	NaN	NaN	NaN	NaN	NaN	NaN	NaN	NaN	NaN
0.694	-15.172	-61.569	324.996	-0.75928	0.35889	-0.050488	-12.033	22.841	1.897	-0.048633	-0.13193	-0.010449	NaN	NaN	NaN	NaN	NaN	NaN	NaN	NaN	NaN	NaN	NaN	NaN
0.696	-7.7	-60.579	379.09	-0.81445	0.36035	-0.061035	-42.4034	40.0394	6.6895	-0.057226	-0.1165	-0.019141	NaN	NaN	NaN	NaN	NaN	NaN	NaN	NaN	NaN	NaN	NaN	NaN
0.698	17.63678	-45.863	416.688	-0.86993	0.35469	-0.071289	-14.2832	-11.0434	32.7615	-0.051367	-0.096974	-0.023828	NaN	NaN	NaN	NaN	NaN	NaN	NaN	NaN	NaN	NaN	NaN	NaN
0.7	20.30645	-23.81981	471.2887	-0.93203	0.34336	-0.083008	-60.118	46.309	18.5709	-0.048047	-0.083105	-0.027148	NaN	NaN	NaN	NaN	NaN	NaN	NaN	NaN	NaN	NaN	NaN	NaN
0.702	-5.235	7.2464	509.0732	-0.99768	0.33594	-0.095899	-54.578	16.8756	21.5849	-0.030762	-0.068359	-0.030273	NaN	NaN	NaN	NaN	NaN	NaN	NaN	NaN	NaN	NaN	NaN	NaN
0.704	-21.2213	19.672	553.3732	-1.0688	0.32539	-0.10782	-29.177	7.1751	17.9303	-0.014551	-0.053613	-0.041797	NaN	NaN	NaN	NaN	NaN	NaN	NaN	NaN	NaN	NaN	NaN	NaN
0.706	-20.071	19.804	591.6423	-1.1426	0.3252	-0.12305	-47.1415	64.546	-5.164	0.0036133	-0.038769	-0.050782	NaN	NaN	NaN	NaN	NaN	NaN	NaN	NaN	NaN	NaN	NaN	NaN
0.708	1.387	7.004	630.8756	-1.2141	0.32998	-0.12383	-32.0398	-7.1819	15.91237	0.021192	-0.023535	-0.060938	NaN	NaN	NaN	NaN	NaN	NaN	NaN	NaN	NaN	NaN	NaN	NaN
0.71	-6.253	-9.761	690.2281	-1.2792	0.35303	-0.13985	-26.632	7.9425	-8.589	0.039551	-0.018848	-0.06709	NaN	NaN	NaN	NaN	NaN	NaN	NaN	NaN	NaN	NaN	NaN	NaN
0.712	-17.109	-31.4715	742.729	-1.3452	0.37608	-0.14765	-48.867	14.248	-0.364999999999998	0.058105	-0.015625	-0.072266	NaN	NaN	NaN	NaN	NaN	NaN	NaN	NaN	NaN	NaN	NaN	NaN
0.714	-68.42	-64.603	792.617	-1.4037	0.40214	-0.15683	-11.672	-40.861	45.493	0.074414	-0.013867	-0.072363	NaN	NaN	NaN	NaN	NaN	NaN	NaN	NaN	NaN	NaN	NaN	NaN
0.716	-56.8554	-79.807	842.654	-1.4585	0.42773	-0.15771	-24.9766	29.3353	26.8522	0.083691	-0.013672	-0.080566	NaN	NaN	NaN	NaN	NaN	NaN	NaN	NaN	NaN	NaN	NaN	NaN
0.718	-30.2367	-82.351	881.066	-1.5044	0.44961	-0.15938	-13.9734	4.025	45.651	0.096191	-0.013672	-0.08291	NaN	NaN	NaN	NaN	NaN	NaN	NaN	NaN	NaN	NaN	NaN	NaN
0.72	22.528	-72.892	895.646	-1.5398	0.4707	-0.16006	0.0339999999999989	5.4877	33.0053	0.10615	-0.01416	-0.088379	NaN	NaN	NaN	NaN	NaN	NaN	NaN	NaN	NaN	NaN	NaN	NaN
0.722	15.50692	-60.5654	936.243	-1.5598	0.48906	-0.16084	-21.4984	59.015	-5.821	0.1167	-0.011719	-0.093262	NaN	NaN	NaN	NaN	NaN	NaN	NaN	NaN	NaN	NaN	NaN	NaN
0.724	-22.6584	-54.086	1009.08	-1.5606	0.50234	-0.16142	24.056	-28.3063	30.4118	0.121	-0.0083006	-0.096973	NaN	NaN	NaN	NaN	NaN	NaN	NaN	NaN	NaN	NaN	NaN	NaN
0.726	-27.5238	-45.0044	1073.031	-1.5332	0.51855	-0.1626	6.275	-11.61725	18.0688	0.12119	-0.0012695	-0.10303	NaN	NaN	NaN	NaN	NaN	NaN	NaN	NaN	NaN	NaN	NaN	NaN
0.728	-3.371	-44.149	1099.806	-1.4811	0.53487	-0.16562	3.676	-5.3622	0.2785	0.12197	0.0045898	-0.10342	NaN	NaN	NaN	NaN	NaN	NaN	NaN	NaN	NaN	NaN	NaN	NaN
0.73	17.5251	-39.581	1081.396	-1.4146	0.55313	-0.17353	59.518	-43.616	4.91226	0.12353	0.010351	-0.10947	NaN	NaN	NaN	NaN	NaN	NaN	NaN	NaN	NaN	NaN	NaN	NaN
0.732	16.51414	-45.8336	1056.2486	-1.3432	0.56367	-0.17822	-3.931	38.387	-6.554	0.12598	0.018066	-0.11426	NaN	NaN	NaN	NaN	NaN	NaN	NaN	NaN	NaN	NaN	NaN	NaN
0.734	-9.5487	-48.312	1070.6808	-1.2635	0.57637	-0.18213	7.924	28.33	5.9506	0.12373	0.022461	-0.11641	NaN	NaN	NaN	NaN	NaN	NaN	NaN	NaN	NaN	NaN	NaN	NaN
0.736	-13.744	-42.5	1074.782	-1.1909	0.58252	-0.19971	45.6568	12.79948	10.2937	0.12432	0.026953	-0.12002	NaN	NaN	NaN	NaN	NaN	NaN	NaN	NaN	NaN	NaN	NaN	NaN
0.738	-17.2767	-40.166	1084.60609	-1.1238	0.58935	-0.21162	-13.783	66.004	-1.3106	0.12392	0.029687	-0.12627	NaN	NaN	NaN	NaN	NaN	NaN	NaN	NaN	NaN	NaN	NaN	NaN
0.74	25.852	-61.325	1075.6204	-1.0616	0.59658	-0.22529	8.191	-7.4722	20.1075	0.12031	0.033301	-0.13115	NaN	NaN	NaN	NaN	NaN	NaN	NaN	NaN	NaN	NaN	NaN	NaN
0.742	23.304	-77.319	1093.1785	-1.0206	0.60166	-0.24443	1.517	8.3479	14.12845	0.11035	0.036621	-0.14063	NaN	NaN	NaN	NaN	NaN	NaN	NaN	NaN	NaN	NaN	NaN	NaN
0.744	14.49683	-89.692	1103.368	-0.98594	0.6082	-0.26582	-31.6971	16.5283	5.752	0.10596	0.042773	-0.14248	NaN	NaN	NaN	NaN	NaN	NaN	NaN	NaN	NaN	NaN	NaN	NaN
0.746	1.824	-89.5615	1102.258	-0.97412	0.61572	-0.28369	-5.547	-30.4934	21.0946	0.095703	0.05127	-0.1459	NaN	NaN	NaN	NaN	NaN	NaN	NaN	NaN	NaN	NaN	NaN	NaN
0.748	6.974	-73.3734	1126.6759	-0.9876	0.61552	-0.30127	-17.138	15.4436	21.48	0.076562	0.058691	-0.14863	NaN	NaN	NaN	NaN	NaN	NaN	NaN	NaN	NaN	NaN	NaN	NaN
0.75	14.3807	-73.549	1148.354	-1.0152	0.6124	-0.32061	-40.64094	-22.8925	29.3191	0.046094	0.057813	-0.15263	NaN	NaN	NaN	NaN	NaN	NaN	NaN	NaN	NaN	NaN	NaN	NaN
0.752	4.5271	-98.573	1155.22	-1.0573	0.60771	-0.33271	-19.014	-44.5353	36.4246	0.013184	0.061035	-0.14307	NaN	NaN	NaN	NaN	NaN	NaN	NaN	NaN	NaN	NaN	NaN	NaN
0.754	30.287	-107.125	1160.6675	-1.1071	0.6085	-0.34805	-41.875	12.8045	31.929	-0.028222	0.064063	-0.1374	NaN	NaN	NaN	NaN	NaN	NaN	NaN	NaN	NaN	NaN	NaN	NaN
0.756	2.7225	-105.1975	1194.0854	-1.168	0.61523	-0.35547	-62.476	-46.191	86.783	-0.071289	0.063672	-0.13145	NaN	NaN	NaN	NaN	NaN	NaN	NaN	NaN	NaN	NaN	NaN	NaN
0.758	30.33238	-91.347	1220.9126	-1.2225	0.62168	-0.36816	-40.2733	-16.981	91.293	-0.11816	0.064453	-0.12832	NaN	NaN	NaN	NaN	NaN	NaN	NaN	NaN	NaN	NaN	NaN	NaN
0.76	12.9712	-102.7518	1220.5516	-1.2746	0.61953	-0.37764	-12.7089	-21.5711	89.82	-0.17197	0.062012	-0.12686	NaN	NaN	NaN	NaN	NaN	NaN	NaN	NaN	NaN	NaN	NaN	NaN
0.762	-5.827	-112.7356	1190.5072	-1.3301	0.61406	-0.37529	-19.405	-72.557	154.54557	-0.23145	0.063477	-0.13965	NaN	NaN	NaN	NaN	NaN	NaN	NaN	NaN	NaN	NaN	NaN	NaN
0.764	-18.919	-127.4401	1199.8598	-1.3985	0.61289	-0.3668	-42.4732	8.2668	215.068	-0.31074	0.066992	-0.14619	NaN	NaN	NaN	NaN	NaN	NaN	NaN	NaN	NaN	NaN	NaN	NaN
0.766	-26.6181	-128.9549	1190.193	-1.4839	0.61865	-0.35498	-26.9787	42.7609	396.064	-0.4126	0.065625	-0.15068	NaN	NaN	NaN	NaN	NaN	NaN	NaN	NaN	NaN	NaN	NaN	NaN
0.768	-36.3293	-113.26	1198.377	-1.6064	0.63506	-0.33916	-1.13	72.8418	559.116	-0.56728	0.060547	-0.15147	NaN	NaN	NaN	NaN	NaN	NaN	NaN	NaN	NaN	NaN	NaN	NaN
0.77	-18.232	-99.29	1203.524	-1.7538	0.65909	-0.32881	-131.412	113.972	676.51	-0.77432	0.034277	-0.14688	NaN	NaN	NaN	NaN	NaN	NaN	NaN	NaN	NaN	NaN	NaN	NaN
0.772	-27.744	-72.7277	1209.337	-1.9225	0.68955	-0.31904	-45.621	8.5576	781.179	-1.0229	0.00048828	-0.1377	NaN	NaN	NaN	NaN	NaN	NaN	NaN	NaN	NaN	NaN	NaN	NaN
0.774	-45.9342	-60.3669	1216.809	-2.1078	0.73477	-0.31562	25.956	-27.02	845.738	-1.3139	-0.025488	-0.12432	NaN	NaN	NaN	NaN	NaN	NaN	NaN	NaN	NaN	NaN	NaN	NaN
0.776	-31.7111	-55.6666	1215.809	-2.293	0.78125	-0.33203	-25.2832	-33.012	946.8815	-1.6206	-0.0089842	-0.11924	NaN	NaN	NaN	NaN	NaN	NaN	NaN	NaN	NaN	NaN	NaN	NaN
0.778	-27.068	-53.47689	1244.22	-2.4565	0.82939	-0.34365	-16.6401	-58.389	1067.745	-1.9097	0.055469	-0.12041	NaN	NaN	NaN	NaN	NaN	NaN	NaN	NaN	NaN	NaN	NaN	NaN
0.78	-45.903	-53.535	1283.886	-2.6039	0.87695	-0.36055	-32.219	16.11	1055.647	-2.1868	0.18018	-0.099707	NaN	NaN	NaN	NaN	NaN	NaN	NaN	NaN	NaN	NaN	NaN	NaN
0.782	-34.598	-58.054	1287.185	-2.7352	0.93477	-0.37422	3.7108	-26.923	1058.689	-2.4746	0.30078	-0.12939	NaN	NaN	NaN	NaN	NaN	NaN	NaN	NaN	NaN	NaN	NaN	NaN
0.784	-35.4272	-60.068	1263.6142	-2.8379	0.99844	-0.38633	4.094	-80.087	1038.323	-2.7017	0.42217	-0.16094	NaN	NaN	NaN	NaN	NaN	NaN	NaN	NaN	NaN	NaN	NaN	NaN
0.786	-52.9226	-73.6287	1245.926	-2.9116	1.063	-0.39307	-17.4897	-106.3224	1028.468	-2.8066	0.57119	-0.25078	NaN	NaN	NaN	NaN	NaN	NaN	NaN	NaN	NaN	NaN	NaN	NaN
0.788	-87.7343	-93.849	1260.106	-2.9421	1.1106	-0.39492	-2.841	-189.308	1031.579	-2.7272	0.71768	-0.34727	NaN	NaN	NaN	NaN	NaN	NaN	NaN	NaN	NaN	NaN	NaN	NaN
0.79	-62.014	-96.091	1253.15	-2.935	1.1438	-0.40615	-4.562	-166.999	1020.82	-2.5156	0.80469	-0.41621	NaN	NaN	NaN	NaN	NaN	NaN	NaN	NaN	NaN	NaN	NaN	NaN
0.792	-60.825	-91.684	1255.0222	-2.8788	1.161	-0.40771	-12.485	-126.542	969.901	-2.2539	0.83398	-0.44971	NaN	NaN	NaN	NaN	NaN	NaN	NaN	NaN	NaN	NaN	NaN	NaN
0.794	-42.791	-61.153	1244.2702	-2.7942	1.1645	-0.41055	2.043	-130.2553	941.093	-1.9997	0.80732	-0.45596	NaN	NaN	NaN	NaN	NaN	NaN	NaN	NaN	NaN	NaN	NaN	NaN
0.796	-42.7064	-57.4113	1261.4856	-2.6929	1.1704	-0.41455	12.2	-11.904	929.253	-1.7444	0.73564	-0.4665	NaN	NaN	NaN	NaN	NaN	NaN	NaN	NaN	NaN	NaN	NaN	NaN
0.798	-48.231	-52.5955	1261.6609	-2.5848	1.1719	-0.41621	3.264	2.899	906.445	-1.4839	0.65557	-0.4872	NaN	NaN	NaN	NaN	NaN	NaN	NaN	NaN	NaN	NaN	NaN	NaN
0.8	-41.71	-40.793	1252.3861	-2.4742	1.175	-0.42207	-36.332	8.67400000000001	923.141	-1.2427	0.59629	-0.51192	NaN	NaN	NaN	NaN	NaN	NaN	NaN	NaN	NaN	NaN	NaN	NaN
0.802	-44.647	-25.6513	1253.3151	-2.3633	1.1734	-0.42559	-119.084	6.49300000000001	975.892	-1.0229	0.56201	-0.53516	NaN	NaN	NaN	NaN	NaN	NaN	NaN	NaN	NaN	NaN	NaN	NaN
0.804	-19.498	-17.8869	1235.2981	-2.2432	1.1681	-0.42529	-78.972	-53.58	1016.3637	-0.83047	0.55996	-0.55313	NaN	NaN	NaN	NaN	NaN	NaN	NaN	NaN	NaN	NaN	NaN	NaN
0.806	-59.57	-23.1833	1211.483	-2.1284	1.1587	-0.42627	-15.4969	-57.278	1024.01564	-0.67519	0.58682	-0.58408	NaN	NaN	NaN	NaN	NaN	NaN	NaN	NaN	NaN	NaN	NaN	NaN
0.808	-61.973	-18.983	1190.627	-2.012	1.1462	-0.42568	-25.1826	-90.469	978.501	-0.5916	0.62002	-0.60127	NaN	NaN	NaN	NaN	NaN	NaN	NaN	NaN	NaN	NaN	NaN	NaN
0.81	-75.0764	-4.328	1189.956	-1.898	1.1293	-0.42754	18.9563	-151.368	955.366	-0.58203	0.63985	-0.61357	NaN	NaN	NaN	NaN	NaN	NaN	NaN	NaN	NaN	NaN	NaN	NaN
0.812	-38.165	-4.686	1192.78565	-1.7965	1.109	-0.42285	-17.4223	-171.7999	979.897	-0.62842	0.64893	-0.62646	NaN	NaN	NaN	NaN	NaN	NaN	NaN	NaN	NaN	NaN	NaN	NaN
0.814	-53.59772	-20.542	1177.845	-1.7164	1.0868	-0.41807	-7.78952	-235.132	1033.692	-0.72627	0.65127	-0.63408	NaN	NaN	NaN	NaN	NaN	NaN	NaN	NaN	NaN	NaN	NaN	NaN
0.816	-65.633	-39.5138	1163.561	-1.6504	1.0645	-0.41016	41.9809	-277.808	1101.3381	-0.83857	0.65049	-0.63858	NaN	NaN	NaN	NaN	NaN	NaN	NaN	NaN	NaN	NaN	NaN	NaN
0.818	-55.5404	-31.3111	1158.707	-1.5986	1.0299	-0.40664	25.819	-275.278	1150.0991	-0.93506	0.65322	-0.62724	NaN	NaN	NaN	NaN	NaN	NaN	NaN	NaN	NaN	NaN	NaN	NaN
0.82	-47.111	-22.3325	1153.562	-1.5597	0.99638	-0.39658	31.447	-304.87	1192.164	-1.0294	0.66846	-0.61885	NaN	NaN	NaN	NaN	NaN	NaN	NaN	NaN	NaN	NaN	NaN	NaN
0.822	-33.184	-5.176	1150.846	-1.5264	0.96943	-0.38721	26.0286	-262.016	1188.561	-1.1226	0.68018	-0.6167	NaN	NaN	NaN	NaN	NaN	NaN	NaN	NaN	NaN	NaN	NaN	NaN
0.824	-52.044	-3.603	1151.8544	-1.5034	0.93994	-0.37217	-29.6615	-208.318	1166.8746	-1.2181	0.70283	-0.60791	NaN	NaN	NaN	NaN	NaN	NaN	NaN	NaN	NaN	NaN	NaN	NaN
0.826	-51.821	9.7501	1136.7489	-1.4883	0.91016	-0.35742	-16.4004	-168.3955	1184.189	-1.3234	0.71787	-0.60068	NaN	NaN	NaN	NaN	NaN	NaN	NaN	NaN	NaN	NaN	NaN	NaN
0.828	-32.379	24.4377	1119.3333	-1.4707	0.87285	-0.34131	-3.8984	-122.283	1197.159	-1.4315	0.73467	-0.5999	NaN	NaN	NaN	NaN	NaN	NaN	NaN	NaN	NaN	NaN	NaN	NaN
0.83	-56.8881	38.971	1125.1994	-1.4558	0.83964	-0.32187	10.8413	-117.086	1225.6412	-1.5344	0.75215	-0.60664	NaN	NaN	NaN	NaN	NaN	NaN	NaN	NaN	NaN	NaN	NaN	NaN
0.832	-56.6064	43.878	1138.712	-1.4437	0.79629	-0.3082	58.622	-121.838	1252.637	-1.6382	0.76221	-0.62061	NaN	NaN	NaN	NaN	NaN	NaN	NaN	NaN	NaN	NaN	NaN	NaN
0.834	-54.199	38.614	1123.346	-1.4235	0.75713	-0.28838	41.952	-96.919	1272.556	-1.7416	0.77188	-0.65059	NaN	NaN	NaN	NaN	NaN	NaN	NaN	NaN	NaN	NaN	NaN	NaN
0.836	-37.565	33.805	1070.0363	-1.4067	0.71729	-0.27393	68.678	-68.156	1247.219	-1.8398	0.76855	-0.68867	NaN	NaN	NaN	NaN	NaN	NaN	NaN	NaN	NaN	NaN	NaN	NaN
0.838	-53.29423	34.5941	1045.823	-1.3803	0.67676	-0.26035	73.712	-38.085	1216.805	-1.9496	0.76504	-0.73828	NaN	NaN	NaN	NaN	NaN	NaN	NaN	NaN	NaN	NaN	NaN	NaN
0.84	-55.6744	53.2553	1027.245	-1.3516	0.6374	-0.24278	17.4777	-51.72	1209.2266	-2.0688	0.77187	-0.7793	NaN	NaN	NaN	NaN	NaN	NaN	NaN	NaN	NaN	NaN	NaN	NaN
0.842	-33.5038	54.4282	1033.385	-1.3285	0.6042	-0.22481	41.273	-111.996	1240.981	-2.2012	0.78906	-0.80762	NaN	NaN	NaN	NaN	NaN	NaN	NaN	NaN	NaN	NaN	NaN	NaN
0.844	-15.907	63.2827	1006.206	-1.2985	0.56934	-0.20449	29.5812	-138.8942	1304.2794	-2.3337	0.81787	-0.81729	NaN	NaN	NaN	NaN	NaN	NaN	NaN	NaN	NaN	NaN	NaN	NaN
0.846	-25.129	67.024	997.0365	-1.2759	0.53369	-0.18945	-5.28761	-163.163	1335.404	-2.4323	0.85107	-0.82959	NaN	NaN	NaN	NaN	NaN	NaN	NaN	NaN	NaN	NaN	NaN	NaN
0.848	-20.889	65.7538	1008.3472	-1.248	0.50508	-0.16934	24.3833	-186.354	1360.857	-2.4889	0.86631	-0.85654	NaN	NaN	NaN	NaN	NaN	NaN	NaN	NaN	NaN	NaN	NaN	NaN
0.85	7.751	67.9285	988.3579	-1.2164	0.47656	-0.15332	-11.809	-154.928	1361.429	-2.4861	0.85498	-0.91338	NaN	NaN	NaN	NaN	NaN	NaN	NaN	NaN	NaN	NaN	NaN	NaN
0.852	-12.119	74.0226	977.956	-1.1859	0.45938	-0.14238	-23.3284	-159.328	1340.063	-2.437	0.83447	-0.97998	NaN	NaN	NaN	NaN	NaN	NaN	NaN	NaN	NaN	NaN	NaN	NaN
0.854	-28.481	73.168	967.048	-1.1486	0.43887	-0.13496	-0.263	-138.2034	1325.373	-2.3755	0.81084	-1.0356	NaN	NaN	NaN	NaN	NaN	NaN	NaN	NaN	NaN	NaN	NaN	NaN
0.856	-28.7618	77.29	953.792	-1.1143	0.42773	-0.12744	12.781	-120.0096	1311.00712	-2.325	0.80547	-1.0648	NaN	NaN	NaN	NaN	NaN	NaN	NaN	NaN	NaN	NaN	NaN	NaN
0.858	4.501	81.271	914.2931	-1.0756	0.40703	-0.12051	48.383	-144.608	1311.954	-2.2953	0.82188	-1.0773	NaN	NaN	NaN	NaN	NaN	NaN	NaN	NaN	NaN	NaN	NaN	NaN
0.86	-18.3412	76.8487	866.356	-1.0371	0.38887	-0.11484	36.535	-123.253	1310.9578	-2.2801	0.83926	-1.0906	NaN	NaN	NaN	NaN	NaN	NaN	NaN	NaN	NaN	NaN	NaN	NaN
0.862	-25.6455	80.132	843.813	-1.007	0.36699	-0.1082	-32.5734	-101.817	1292.112	-2.2773	0.85938	-1.1035	NaN	NaN	NaN	NaN	NaN	NaN	NaN	NaN	NaN	NaN	NaN	NaN
0.864	-2.555	88.28	832.6137	-0.97363	0.34668	-0.10147	19.777	-62.032	1269.001	-2.2631	0.86894	-1.1092	NaN	NaN	NaN	NaN	NaN	NaN	NaN	NaN	NaN	NaN	NaN	NaN
0.866	10.55	99.133	814.8734	-0.94141	0.32617	-0.094238	-2.39756	-4.4937	1257.484	-2.2488	0.87666	-1.1151	NaN	NaN	NaN	NaN	NaN	NaN	NaN	NaN	NaN	NaN	NaN	NaN
0.868	18.2397	103.083	789.9299	-0.91943	0.30576	-0.093262	15.2623	17.256	1247.807	-2.2187	0.89189	-1.1101	NaN	NaN	NaN	NaN	NaN	NaN	NaN	NaN	NaN	NaN	NaN	NaN
0.87	-2.516	96.196	773.3221	-0.89571	0.28789	-0.09502	39.5637	45.965	1252.165	-2.1742	0.9084	-1.1041	NaN	NaN	NaN	NaN	NaN	NaN	NaN	NaN	NaN	NaN	NaN	NaN
0.872	8.9456	104.5085	776.348	-0.86875	0.27109	-0.092285	10.742	48.716	1247.319	-2.1206	0.93213	-1.0952	NaN	NaN	NaN	NaN	NaN	NaN	NaN	NaN	NaN	NaN	NaN	NaN
0.874	9.111	112.2022	738.8694	-0.84433	0.25996	-0.08789	38.5273	7.487	1260.749	-2.053	0.94521	-1.0822	NaN	NaN	NaN	NaN	NaN	NaN	NaN	NaN	NaN	NaN	NaN	NaN
0.876	-6.1357	121.61	703.7404	-0.82227	0.26074	-0.085449	15.4529	-9.142	1276.446	-1.9737	0.95225	-1.0679	NaN	NaN	NaN	NaN	NaN	NaN	NaN	NaN	NaN	NaN	NaN	NaN
0.878	-17.439	112.5311	682.011	-0.79658	0.25615	-0.083106	25.55514	-34.3731	1277.8829	-1.8945	0.95264	-1.0433	NaN	NaN	NaN	NaN	NaN	NaN	NaN	NaN	NaN	NaN	NaN	NaN
0.88	-22.676	103.1578	655.863	-0.76728	0.25635	-0.084668	74.857	-51.2487	1279.816	-1.8143	0.9418	-1.0197	NaN	NaN	NaN	NaN	NaN	NaN	NaN	NaN	NaN	NaN	NaN	NaN
0.882	-7.7518	105.8764	614.994	-0.7376	0.25909	-0.088574	67.725	-9.154	1259.375	-1.7397	0.92822	-0.99365	NaN	NaN	NaN	NaN	NaN	NaN	NaN	NaN	NaN	NaN	NaN	NaN
0.884	-21.0026	99.475	593.701	-0.70762	0.26563	-0.089063	59.167	-3.846	1260.3663	-1.6755	0.90869	-0.97002	NaN	NaN	NaN	NaN	NaN	NaN	NaN	NaN	NaN	NaN	NaN	NaN
0.886	-1.228	91.5957	584.5365	-0.67871	0.26172	-0.083008	43.658	-22.1924	1275.09	-1.6128	0.87978	-0.94404	NaN	NaN	NaN	NaN	NaN	NaN	NaN	NaN	NaN	NaN	NaN	NaN
0.888	-9.546	83.77857	574.565	-0.64502	0.25889	-0.084863	57.267	0.365	1240.014	-1.5538	0.85049	-0.91319	NaN	NaN	NaN	NaN	NaN	NaN	NaN	NaN	NaN	NaN	NaN	NaN
0.89	-2.7793	80.1262	533.175	-0.60313	0.25528	-0.083008	54.409	-16.7263	1229.214	-1.5042	0.81728	-0.88721	NaN	NaN	NaN	NaN	NaN	NaN	NaN	NaN	NaN	NaN	NaN	NaN
0.892	-3.8621	81.84	506.0139	-0.56054	0.24941	-0.073633	63.027	17.8483305	1206.49343	-1.4546	0.79248	-0.86084	NaN	NaN	NaN	NaN	NaN	NaN	NaN	NaN	NaN	NaN	NaN	NaN
0.894	-2.6134	94.985	478.403	-0.51113	0.24561	-0.071875	28.4737	36.2456	1175.136	-1.4088	0.76426	-0.84043	NaN	NaN	NaN	NaN	NaN	NaN	NaN	NaN	NaN	NaN	NaN	NaN
0.896	27.55585	90.507	457.203	-0.46289	0.23779	-0.069336	34.703	58.614	1156.753	-1.3674	0.73946	-0.82569	NaN	NaN	NaN	NaN	NaN	NaN	NaN	NaN	NaN	NaN	NaN	NaN
0.898	-4.408	97.173	419.624	-0.41143	0.22832	-0.060839	6.1077	121.739	1136.899	-1.3222	0.72031	-0.80537	NaN	NaN	NaN	NaN	NaN	NaN	NaN	NaN	NaN	NaN	NaN	NaN
0.9	-4.819	98.3762	390.4427	-0.36211	0.22031	-0.054883	11.44018	119.434	1127.8298	-1.2846	0.69512	-0.78301	NaN	NaN	NaN	NaN	NaN	NaN	NaN	NaN	NaN	NaN	NaN	NaN
0.902	-18.0919	100.978	383.1756	-0.30937	0.20899	-0.048633	43.466	119.024	1124.322	-1.252	0.66895	-0.7627	NaN	NaN	NaN	NaN	NaN	NaN	NaN	NaN	NaN	NaN	NaN	NaN
0.904	4.462	106.955	341.6691	-0.2585	0.19727	-0.048242	-21.9862	145.617	1078.24668	-1.2172	0.64336	-0.73926	NaN	NaN	NaN	NaN	NaN	NaN	NaN	NaN	NaN	NaN	NaN	NaN
0.906	-6.6293	104.7689	329.488	-0.20996	0.17969	-0.041992	15.8841	117.959	1056.13112	-1.1879	0.62109	-0.7125	NaN	NaN	NaN	NaN	NaN	NaN	NaN	NaN	NaN	NaN	NaN	NaN
0.908	-10.907	100.58	302.405	-0.16299	0.16474	-0.041308	23.0055	136.9039	1043.341	-1.1613	0.60547	-0.68047	NaN	NaN	NaN	NaN	NaN	NaN	NaN	NaN	NaN	NaN	NaN	NaN
0.91	5.4219	97.5867	264.0687	-0.11963	0.14541	-0.027832	-10.7001	140.437	1013.62	-1.1443	0.58262	-0.65429	NaN	NaN	NaN	NaN	NaN	NaN	NaN	NaN	NaN	NaN	NaN	NaN
0.912	14.892	101.7654	233.055	-0.079395	0.1251	-0.027832	7.897	66.112	1018.242	-1.1289	0.56641	-0.625	NaN	NaN	NaN	NaN	NaN	NaN	NaN	NaN	NaN	NaN	NaN	NaN
0.914	10.4917	96.4598	206.786	-0.040918	0.10117	-0.024023	-49.905	94.913	987.2295	-1.1152	0.55127	-0.59824	NaN	NaN	NaN	NaN	NaN	NaN	NaN	NaN	NaN	NaN	NaN	NaN
0.916	1.815	94.9402	185.983	-0.0068359	0.074707	-0.01709	-33.9997	104.741	965.9387	-1.0991	0.53819	-0.57139	NaN	NaN	NaN	NaN	NaN	NaN	NaN	NaN	NaN	NaN	NaN	NaN
0.918	4.6213	102.8978	177.297	0.026074	0.052734	-0.013379	-37.127	142.21	958.2878	-1.0811	0.52647	-0.54326	NaN	NaN	NaN	NaN	NaN	NaN	NaN	NaN	NaN	NaN	NaN	NaN
0.92	9.627	99.0001	162.915	0.054199	0.029688	-0.0071289	-42.3062	196.223	924.8179	-1.058	0.51757	-0.51328	NaN	NaN	NaN	NaN	NaN	NaN	NaN	NaN	NaN	NaN	NaN	NaN
0.922	0.270999999999999	75.973	163.5296	0.084668	0.0066406	-0.0055664	-32.163	143.3645	912.748	-1.0347	0.51221	-0.48486	NaN	NaN	NaN	NaN	NaN	NaN	NaN	NaN	NaN	NaN	NaN	NaN
0.924	-18.224	62.3944	164.777	0.10908	-0.014649	-0.0011719	-21.671	157.9589	874.3821	-1.0139	0.5043	-0.45723	NaN	NaN	NaN	NaN	NaN	NaN	NaN	NaN	NaN	NaN	NaN	NaN
0.926	-23.0907	79.608	147.996	0.13232	-0.036133	0.0019531	-42.5504	150.501	830.919	-0.99209	0.49356	-0.42754	NaN	NaN	NaN	NaN	NaN	NaN	NaN	NaN	NaN	NaN	NaN	NaN
0.928	-3.278	89	114.8704	0.15439	-0.058691	0.0033203	-19.334	125.94	843.37	-0.97022	0.47871	-0.40215	NaN	NaN	NaN	NaN	NaN	NaN	NaN	NaN	NaN	NaN	NaN	NaN
0.93	-9.7101	71.0566	100.642	0.1748	-0.080273	0.0029297	-8.007	203.496	812.1693	-0.94951	0.46572	-0.36856	NaN	NaN	NaN	NaN	NaN	NaN	NaN	NaN	NaN	NaN	NaN	NaN
0.932	-10.706	54.8794	90.498	0.19668	-0.10215	0.0041016	-24.631	191.225	772.9938	-0.9292	0.45166	-0.34326	NaN	NaN	NaN	NaN	NaN	NaN	NaN	NaN	NaN	NaN	NaN	NaN
0.934	-23.5332	46.3594	71.564	0.21123	-0.12119	0.0027344	-3.282	205.44	718.145	-0.9083	0.44521	-0.32139	NaN	NaN	NaN	NaN	NaN	NaN	NaN	NaN	NaN	NaN	NaN	NaN
0.936	0.569000000000001	46.4519	59.904	0.22412	-0.13965	0.0043945	-56.0557	236.267	671.016	-0.88281	0.43438	-0.30293	NaN	NaN	NaN	NaN	NaN	NaN	NaN	NaN	NaN	NaN	NaN	NaN
0.938	3.825	45.21	61.761	0.22519	-0.15342	-0.0033203	-32.892	162.8595	684.658	-0.85625	0.4289	-0.28731	NaN	NaN	NaN	NaN	NaN	NaN	NaN	NaN	NaN	NaN	NaN	NaN
0.94	4.2725	42.4045	82.2653	0.22666	-0.16709	-0.0076172	-34.2444	161.8105	673.9734	-0.82685	0.42471	-0.26689	NaN	NaN	NaN	NaN	NaN	NaN	NaN	NaN	NaN	NaN	NaN	NaN
0.942	-7.2045	39.6252	67.7084	0.22315	-0.1792	-0.010351	-60.5883	152.5994	646.9484	-0.79102	0.41895	-0.24805	NaN	NaN	NaN	NaN	NaN	NaN	NaN	NaN	NaN	NaN	NaN	NaN
0.944	-23.939	50.508	39.3968	0.21338	-0.18809	-0.013672	-10.875	103.5823	628.313	-0.75127	0.41504	-0.22627	NaN	NaN	NaN	NaN	NaN	NaN	NaN	NaN	NaN	NaN	NaN	NaN
0.946	5.66	57.12	34.1756	0.19727	-0.19629	-0.01709	-47.7268	155.224	585.565	-0.70742	0.41328	-0.2122	NaN	NaN	NaN	NaN	NaN	NaN	NaN	NaN	NaN	NaN	NaN	NaN
0.948	-15.9059	59.266	34.0857	0.18203	-0.19463	-0.01748	-35.547	139.1644	553.3813	-0.65039	0.40703	-0.19268	NaN	NaN	NaN	NaN	NaN	NaN	NaN	NaN	NaN	NaN	NaN	NaN
0.95	-7.792	56.605	36.7614	0.15723	-0.19805	-0.022363	-32.82	146.9651	518.551	-0.58681	0.40547	-0.17499	NaN	NaN	NaN	NaN	NaN	NaN	NaN	NaN	NaN	NaN	NaN	NaN
0.952	-34.0092	45.092	23.548	0.13184	-0.19297	-0.02627	-28.247	176.6625	459.2959	-0.5166	0.40625	-0.14893	NaN	NaN	NaN	NaN	NaN	NaN	NaN	NaN	NaN	NaN	NaN	NaN
0.954	-4.767	30.2787	17.04	0.10479	-0.18867	-0.022754	-19.73	124.491	450.438	-0.44903	0.39043	-0.15059	NaN	NaN	NaN	NaN	NaN	NaN	NaN	NaN	NaN	NaN	NaN	NaN
0.956	2.8685	35.6506	24.803	0.077637	-0.18359	-0.022949	-42.7049	150.1448	418.677	-0.36291	0.37705	-0.13487	NaN	NaN	NaN	NaN	NaN	NaN	NaN	NaN	NaN	NaN	NaN	NaN
0.958	6.7103	36.20473	20.4224	0.051758	-0.17647	-0.033985	-40.8165	135.805	354.44	-0.28362	0.35479	-0.11417	NaN	NaN	NaN	NaN	NaN	NaN	NaN	NaN	NaN	NaN	NaN	NaN
0.96	11.379	24.18202	27.1318	0.028418	-0.17178	-0.029394	-23.802	94.474	327.8113	-0.20763	0.33194	-0.093069	NaN	NaN	NaN	NaN	NaN	NaN	NaN	NaN	NaN	NaN	NaN	NaN
0.962	3.765	18.1228	31.064	0.012402	-0.16201	-0.03291	-38.087	153.562	262.8309	-0.13623	0.30518	-0.073242	NaN	NaN	NaN	NaN	NaN	NaN	NaN	NaN	NaN	NaN	NaN	NaN
0.964	-0.829000000000001	13.4954	15.7306	-0.0040039	-0.1541	-0.03877	-51.7807	131.677	233.157	-0.073897	0.26913	-0.053604	NaN	NaN	NaN	NaN	NaN	NaN	NaN	NaN	NaN	NaN	NaN	NaN
0.966	-11.859	13.60692	11.4185	-0.016113	-0.14258	-0.039551	-29.363	132.425	220.6264	-0.011084	0.2359	-0.028591	NaN	NaN	NaN	NaN	NaN	NaN	NaN	NaN	NaN	NaN	NaN	NaN
0.968	-8.604	9.5884	27.3476	-0.025	-0.13672	-0.047754	-55.564	170.227	167.63	0.044005	0.19956	-0.004369	NaN	NaN	NaN	NaN	NaN	NaN	NaN	NaN	NaN	NaN	NaN	NaN
0.97	-5.609	9.404	22.5406	-0.033887	-0.12949	-0.050195	-30.7739	95.642	172.124	0.091051	0.16033	0.019946	NaN	NaN	NaN	NaN	NaN	NaN	NaN	NaN	NaN	NaN	NaN	NaN
0.972	-9.7904	10.8077	7.5763	-0.037793	-0.12207	-0.053321	-30.571	126.135	125.899	0.12402	0.12451	0.042969	NaN	NaN	NaN	NaN	NaN	NaN	NaN	NaN	NaN	NaN	NaN	NaN
0.974	-20.9585	10.4877	-9.3659	-0.035254	-0.1125	-0.054785	-25.7635	106.8919	96.485	0.15181	0.095083	0.067656	NaN	NaN	NaN	NaN	NaN	NaN	NaN	NaN	NaN	NaN	NaN	NaN
0.976	-25.813088	16.9073	7.185	-0.027344	-0.10547	-0.062988	-8.905	50.476	82.1575	0.17475	0.058897	0.091829	NaN	NaN	NaN	NaN	NaN	NaN	NaN	NaN	NaN	NaN	NaN	NaN
0.978	-6.297	18.7111	35.749	-0.018066	-0.099805	-0.068262	-45.5827	94.0365	42.357	0.18959	0.028431	0.11251	NaN	NaN	NaN	NaN	NaN	NaN	NaN	NaN	NaN	NaN	NaN	NaN
0.98	-2.624	18.8992	20.15406	-0.0081049	-0.094433	-0.069532	-28.248	38.781	62.4217	0.19346	0.0048671	0.13463	NaN	NaN	NaN	NaN	NaN	NaN	NaN	NaN	NaN	NaN	NaN	NaN
0.982	-0.690000000000001	15.3361	-2.8387	0.0024424	-0.088965	-0.074609	-3.376	26.187	75.122	0.18506	-0.020996	0.15088	NaN	NaN	NaN	NaN	NaN	NaN	NaN	NaN	NaN	NaN	NaN	NaN
0.984	-14.3991	9.7165	2.5089	0.018653	-0.082421	-0.077636	-5.636	69.1053	70.0036	0.18509	-0.041431	0.16822	NaN	NaN	NaN	NaN	NaN	NaN	NaN	NaN	NaN	NaN	NaN	NaN
0.986	-4.412	7.837	6.311	0.033203	-0.077637	-0.086914	-7.001	22.038	69.772	0.17437	-0.062808	0.18233	NaN	NaN	NaN	NaN	NaN	NaN	NaN	NaN	NaN	NaN	NaN	NaN
0.988	-18.704	10.307	-1.233	0.046287	-0.072364	-0.092675	-22.121	73.293	39.531	0.16762	-0.077445	0.1978	NaN	NaN	NaN	NaN	NaN	NaN	NaN	NaN	NaN	NaN	NaN	NaN
0.99	-26.7637	8.911	-14.0656	0.061812	-0.068261	-0.099218	-24.4165	61.651	15.507	0.1547	-0.093494	0.21559	NaN	NaN	NaN	NaN	NaN	NaN	NaN	NaN	NaN	NaN	NaN	NaN
0.992	-1.738	6.0785	-9.7501	0.07978	-0.069044	-0.099219	-27.338	0.3542	26.39426	0.14404	-0.10693	0.2334	NaN	NaN	NaN	NaN	NaN	NaN	NaN	NaN	NaN	NaN	NaN	NaN
0.994	-15.7854	1.4205	4.4465	0.096872	-0.064259	-0.10791	3.742	49.015	13.6998	0.13655	-0.12041	0.24439	NaN	NaN	NaN	NaN	NaN	NaN	NaN	NaN	NaN	NaN	NaN	NaN
0.996	-8.008	-2.7582	15.3009	0.11279	-0.05957	-0.11328	-3.06	0.6033	20.507	0.13178	-0.13425	0.25839	NaN	NaN	NaN	NaN	NaN	NaN	NaN	NaN	NaN	NaN	NaN	NaN
0.998	-22.3519	8.2401	5.28443	0.12423	-0.054491	-0.11543	-3.573	8.2865	23.2274	0.13065	-0.14861	0.27152	NaN	NaN	NaN	NaN	NaN	NaN	NaN	NaN	NaN	NaN	NaN	NaN
1	3.197	8.7603	9.2065	0.13623	-0.053128	-0.12002	-23.0433	70.5614	-3.53	0.13215	-0.1583	0.27862	NaN	NaN	NaN	NaN	NaN	NaN	NaN	NaN	NaN	NaN	NaN	NaN
1.002	-5.6431	8.42369	8.95837	0.14719	-0.055079	-0.12589	-7.827	28.7796	22.7633	0.13525	-0.16895	0.28662	NaN	NaN	NaN	NaN	NaN	NaN	NaN	NaN	NaN	NaN	NaN	NaN
1.004	-7.601	10.804	6.5086	0.15372	-0.046094	-0.13096	-9.097	73.781	8.9965	0.15388	-0.17472	0.28947	NaN	NaN	NaN	NaN	NaN	NaN	NaN	NaN	NaN	NaN	NaN	NaN
1.006	-1.698	1.227	-9.907	0.16309	-0.047852	-0.13867	0.716999999999999	54.4415	-1.709	0.17437	-0.18496	0.28965	NaN	NaN	NaN	NaN	NaN	NaN	NaN	NaN	NaN	NaN	NaN	NaN
1.008	9.424	9.787	-5.7951	0.16728	-0.042499	-0.149	18.096	-5.60105	28.7745	0.20194	-0.19135	0.28839	NaN	NaN	NaN	NaN	NaN	NaN	NaN	NaN	NaN	NaN	NaN	NaN
1.01	3.887	13.992	-11.4717	0.17158	-0.039919	-0.14909	-35.7217	25.9018	29.2584	0.23008	-0.18818	0.28104	NaN	NaN	NaN	NaN	NaN	NaN	NaN	NaN	NaN	NaN	NaN	NaN
1.012	-7.544	15.916	-3.6219	0.17353	-0.04152	-0.15846	-15.1811	-16.3242	27.412	0.25488	-0.19336	0.27734	NaN	NaN	NaN	NaN	NaN	NaN	NaN	NaN	NaN	NaN	NaN	NaN
1.014	4.041	14.4574	11.424368	0.17306	-0.037122	-0.16734	-26.9155	-8.6946	31.545	0.27678	-0.19205	0.27077	NaN	NaN	NaN	NaN	NaN	NaN	NaN	NaN	NaN	NaN	NaN	NaN
1.016	5.7332	3.6045	1.3906	0.16797	-0.033691	-0.1748	-35.3518	45.375595	4.2523	0.29322	-0.18994	0.26336	NaN	NaN	NaN	NaN	NaN	NaN	NaN	NaN	NaN	NaN	NaN	NaN
1.018	-16.7038	10.2551	4.3133	0.16204	-0.029654	-0.18434	-13.683	-16.0411	15.7646	0.30831	-0.18484	0.25441	NaN	NaN	NaN	NaN	NaN	NaN	NaN	NaN	NaN	NaN	NaN	NaN
1.02	-25.0823	10.0624	-10.7501	0.15073	-0.025617	-0.19414	-13.485	18.3267	10.874	0.31369	-0.17854	0.24526	NaN	NaN	NaN	NaN	NaN	NaN	NaN	NaN	NaN	NaN	NaN	NaN
1.022	-3.869	8.3305	16.771	0.142	-0.01812	-0.20738	-25.1277	28.9046	2.461	0.31152	-0.16602	0.23438	NaN	NaN	NaN	NaN	NaN	NaN	NaN	NaN	NaN	NaN	NaN	NaN
1.024	13.182	8.0981	44.453	0.12627	-0.0093895	-0.22438	-6.425	-8.6692	28.0718	0.30369	-0.15534	0.22503	NaN	NaN	NaN	NaN	NaN	NaN	NaN	NaN	NaN	NaN	NaN	NaN
1.026	-24.7521	-5.20697	46.262	0.10791	0.0024414	-0.23682	-6.5033	46.32	15.1446	0.28514	-0.14468	0.21781	NaN	NaN	NaN	NaN	NaN	NaN	NaN	NaN	NaN	NaN	NaN	NaN
1.028	-9.086	-12.7577	77.544	0.075434	0.011187	-0.25588	-14.2699	2.4477	4.78525	0.26483	-0.12899	0.20881	NaN	NaN	NaN	NaN	NaN	NaN	NaN	NaN	NaN	NaN	NaN	NaN
1.03	19.31993	-11.68866	148.083	0.03061	0.018382	-0.26761	-7.726	0.6683	6.1926	0.24409	-0.10833	0.20315	NaN	NaN	NaN	NaN	NaN	NaN	NaN	NaN	NaN	NaN	NaN	NaN
1.032	29.0591	-15.89	219.131	-0.033636	0.025015	-0.27962	-28.9078	65.602	-11.924	0.21631	-0.09375	0.19727	NaN	NaN	NaN	NaN	NaN	NaN	NaN	NaN	NaN	NaN	NaN	NaN
1.034	-15.68946	-29.406	236.2929	-0.11828	0.029785	-0.28206	-2.059	9.8622	23.3481	0.19953	-0.070521	0.18691	NaN	NaN	NaN	NaN	NaN	NaN	NaN	NaN	NaN	NaN	NaN	NaN
1.036	-20.2715	-64.249	203.554	-0.21777	0.034668	-0.29004	-13.9551	42.841	33.5023	0.18392	-0.050888	0.17867	NaN	NaN	NaN	NaN	NaN	NaN	NaN	NaN	NaN	NaN	NaN	NaN
1.038	-12.1465	-110.2065	227.1275	-0.33092	0.044606	-0.3001	-36.698	31.981	15.3572	0.17146	-0.026279	0.1701	NaN	NaN	NaN	NaN	NaN	NaN	NaN	NaN	NaN	NaN	NaN	NaN
1.04	-21.323	-115.6624	295.401	-0.44833	0.063043	-0.30878	-16.0831	-26.164	10.5153	0.1619	-0.0014146	0.15869	NaN	NaN	NaN	NaN	NaN	NaN	NaN	NaN	NaN	NaN	NaN	NaN
1.042	-12.094	-91.9174	358.6301	-0.57533	0.094929	-0.32185	1.693	21.6415	-22.2079	0.1543	0.026855	0.15381	NaN	NaN	NaN	NaN	NaN	NaN	NaN	NaN	NaN	NaN	NaN	NaN
1.044	-35.496	-42.7558	381.201	-0.70926	0.13575	-0.33529	6.863	-16.0077	-3.7583	0.14366	0.048709	0.14522	NaN	NaN	NaN	NaN	NaN	NaN	NaN	NaN	NaN	NaN	NaN	NaN
1.046	-14.405	-21.098	417.38	-0.84766	0.17725	-0.34668	-22.679	-18.7284	15.332	0.13527	0.068915	0.13467	NaN	NaN	NaN	NaN	NaN	NaN	NaN	NaN	NaN	NaN	NaN	NaN
1.048	7.808	-17.798	477.316	-0.99175	0.22363	-0.3604	7.099	20.3596	23.2877	0.1216	0.090806	0.12726	NaN	NaN	NaN	NaN	NaN	NaN	NaN	NaN	NaN	NaN	NaN	NaN
1.05	29.378	-7.931	571.998	-1.1491	0.2628	-0.37811	12.80688	-38.785	35.419	0.10899	0.10693	0.12344	NaN	NaN	NaN	NaN	NaN	NaN	NaN	NaN	NaN	NaN	NaN	NaN
1.052	24.0063	25.723	697.354	-1.309	0.29764	-0.39382	-12.239	-0.8399	23.8432	0.094238	0.12256	0.11523	NaN	NaN	NaN	NaN	NaN	NaN	NaN	NaN	NaN	NaN	NaN	NaN
1.054	30.0737	64.277	771.58	-1.4809	0.33466	-0.41526	-5.7811	16.80231	29.5015	0.073042	0.14023	0.11103	NaN	NaN	NaN	NaN	NaN	NaN	NaN	NaN	NaN	NaN	NaN	NaN
1.056	-1.053	67.36	833.401	-1.6616	0.37354	-0.42822	-7.253	-3.4402	28.296	0.05634	0.15821	0.10498	NaN	NaN	NaN	NaN	NaN	NaN	NaN	NaN	NaN	NaN	NaN	NaN
1.058	-33.121	68.8075	878.2055	-1.8463	0.41322	-0.44815	-12.074	58.734	-11.23214	0.034077	0.17696	0.095603	NaN	NaN	NaN	NaN	NaN	NaN	NaN	NaN	NaN	NaN	NaN	NaN
1.06	-3.30399999999999	69.31	933.7308	-2.035	0.46077	-0.45144	-18.4531	14.8877	-25.3752	0.014939	0.19649	0.095311	NaN	NaN	NaN	NaN	NaN	NaN	NaN	NaN	NaN	NaN	NaN	NaN
1.062	12.275	24.0345	956.7783	-2.2249	0.51297	-0.43934	-14.899	-11.423231	-4.204	-0.0058594	0.21875	0.086426	NaN	NaN	NaN	NaN	NaN	NaN	NaN	NaN	NaN	NaN	NaN	NaN
1.064	-18.7368	-22.6212	979.2068	-2.417	0.5487	-0.42424	-22.9076	30.577	5.3027	-0.022264	0.24062	0.078906	NaN	NaN	NaN	NaN	NaN	NaN	NaN	NaN	NaN	NaN	NaN	NaN
1.066	-52.669	-74.73	999.0833	-2.5645	0.59961	-0.41895	-6.951	-20.1382	28.714	-0.042381	0.25684	0.071972	NaN	NaN	NaN	NaN	NaN	NaN	NaN	NaN	NaN	NaN	NaN	NaN
1.068	-48.017	-106.402	1016.008	-2.618	0.6574	-0.43775	-2.353	34.372	17.24	-0.058788	0.27715	0.066114	NaN	NaN	NaN	NaN	NaN	NaN	NaN	NaN	NaN	NaN	NaN	NaN
1.07	-27.237	-121.167	1013.23	-2.5757	0.7065	-0.45623	-12.7483	55.158	-10.9831	-0.078808	0.29473	0.062793	NaN	NaN	NaN	NaN	NaN	NaN	NaN	NaN	NaN	NaN	NaN	NaN
1.072	-16.128	-120.82	993.828	-2.4557	0.7365	-0.46356	-24.451	-3.3654	-4.2895	-0.095703	0.30957	0.055664	NaN	NaN	NaN	NaN	NaN	NaN	NaN	NaN	NaN	NaN	NaN	NaN
1.074	1.415	-112.104	990.2178	-2.2844	0.74355	-0.4621	-22.987	45.0033	-0.964	-0.1166	0.3252	0.047851	NaN	NaN	NaN	NaN	NaN	NaN	NaN	NaN	NaN	NaN	NaN	NaN
1.076	-22.278	-115.293	1022.3044	-2.0859	0.73828	-0.45508	-5.774	-21.1318	27.4339	-0.13575	0.33672	0.040039	NaN	NaN	NaN	NaN	NaN	NaN	NaN	NaN	NaN	NaN	NaN	NaN
1.078	-16.9693	-101.937	1064.76714	-1.889	0.70999	-0.46669	-16.007	-64.651	55.2303	-0.16347	0.34414	0.029882	NaN	NaN	NaN	NaN	NaN	NaN	NaN	NaN	NaN	NaN	NaN	NaN
1.08	-26.1463	-86.511	1066.2811	-1.7149	0.68041	-0.47762	-16.4722	-22.448	61.4264	-0.20059	0.34238	0.018066	NaN	NaN	NaN	NaN	NaN	NaN	NaN	NaN	NaN	NaN	NaN	NaN
1.082	-2.1868	-61.882	1079.589	-1.5715	0.64407	-0.48271	8.099933	-52.7158	68.1172	-0.24219	0.34131	0.0043945	NaN	NaN	NaN	NaN	NaN	NaN	NaN	NaN	NaN	NaN	NaN	NaN
1.084	2.712	-48.419	1101.378	-1.4563	0.61564	-0.4793	-4.7649	8.3558	104.4983	-0.29551	0.33398	-0.019922	NaN	NaN	NaN	NaN	NaN	NaN	NaN	NaN	NaN	NaN	NaN	NaN
1.086	-30.256	-40.436	1085.7405	-1.3667	0.59229	-0.48193	-29.1844	48.225	184.281	-0.35849	0.33633	-0.053711	NaN	NaN	NaN	NaN	NaN	NaN	NaN	NaN	NaN	NaN	NaN	NaN
1.088	-14.938	-58.132	1072.8015	-1.2974	0.58222	-0.48223	-26.627	-3.22414	326.339	-0.44912	0.33437	-0.088867	NaN	NaN	NaN	NaN	NaN	NaN	NaN	NaN	NaN	NaN	NaN	NaN
1.09	-50.257	-84.374	1058.5887	-1.2393	0.58116	-0.48682	-26.73	52.9825	500.865	-0.58379	0.317	-0.13184	NaN	NaN	NaN	NaN	NaN	NaN	NaN	NaN	NaN	NaN	NaN	NaN
1.092	-24.6389	-115.522	1084.0496	-1.1937	0.5878	-0.48799	24.6878	26.0554	671.717	-0.76758	0.27734	-0.17822	NaN	NaN	NaN	NaN	NaN	NaN	NaN	NaN	NaN	NaN	NaN	NaN
1.094	9.0915	-161.023	1104.224	-1.1591	0.5916	-0.49619	41.812	-29.6637	800.814	-0.99626	0.2375	-0.21777	NaN	NaN	NaN	NaN	NaN	NaN	NaN	NaN	NaN	NaN	NaN	NaN
1.096	32.5266	-191.695	1117.549	-1.1382	0.60303	-0.50439	79.9721	-4.206	914.204	-1.2467	0.20986	-0.24199	NaN	NaN	NaN	NaN	NaN	NaN	NaN	NaN	NaN	NaN	NaN	NaN
1.098	34.983	-194.206	1143.257	-1.128	0.60762	-0.50361	100.447	-54.666	1020.271	-1.5015	0.20947	-0.25137	NaN	NaN	NaN	NaN	NaN	NaN	NaN	NaN	NaN	NaN	NaN	NaN
1.1	40.132	-178.264	1184.177	-1.1335	0.61025	-0.50498	9.93	-2.18000000000001	1132.199	-1.7413	0.25352	-0.2418	NaN	NaN	NaN	NaN	NaN	NaN	NaN	NaN	NaN	NaN	NaN	NaN
1.102	45.884	-172.561	1225.2645	-1.1647	0.60869	-0.50147	-3.813	23.082	1183.894	-1.9917	0.30908	-0.24756	NaN	NaN	NaN	NaN	NaN	NaN	NaN	NaN	NaN	NaN	NaN	NaN
1.104	41.687	-157.408	1260.674	-1.233	0.60283	-0.50146	33.912	-60.3	1176.875	-2.2291	0.36523	-0.22695	NaN	NaN	NaN	NaN	NaN	NaN	NaN	NaN	NaN	NaN	NaN	NaN
1.106	48.38	-135.25086	1309.14	-1.3301	0.59766	-0.50635	85.898	-64.683	1169.167	-2.4148	0.43477	-0.22432	NaN	NaN	NaN	NaN	NaN	NaN	NaN	NaN	NaN	NaN	NaN	NaN
1.108	41.09	-120.308	1339.726	-1.4457	0.59082	-0.51563	85.69842	-141.257	1148.121	-2.4945	0.53282	-0.24346	NaN	NaN	NaN	NaN	NaN	NaN	NaN	NaN	NaN	NaN	NaN	NaN
1.11	31.51	-105.606	1337.782	-1.5815	0.59932	-0.51631	56.1084	-203.097	1145.463	-2.4444	0.60557	-0.24248	NaN	NaN	NaN	NaN	NaN	NaN	NaN	NaN	NaN	NaN	NaN	NaN
1.112	30.8453	-102.9049	1322.8293	-1.7471	0.61455	-0.521	69.163	-139.161	1109.11	-2.3218	0.63916	-0.21826	NaN	NaN	NaN	NaN	NaN	NaN	NaN	NaN	NaN	NaN	NaN	NaN
1.114	22.421	-87.7209	1319.0662	-1.9295	0.64238	-0.51543	70.302	-182.017	1056.571	-2.1414	0.64492	-0.18164	NaN	NaN	NaN	NaN	NaN	NaN	NaN	NaN	NaN	NaN	NaN	NaN
1.116	42.576	-98.3871	1322.689	-2.1206	0.68213	-0.5083	89.813	-100.26	1032.908	-1.9207	0.61836	-0.1418	NaN	NaN	NaN	NaN	NaN	NaN	NaN	NaN	NaN	NaN	NaN	NaN
1.118	37.2653	-105.6305	1298.992	-2.2971	0.72266	-0.51192	88.703	-19.171	977.6615	-1.702	0.57461	-0.11641	NaN	NaN	NaN	NaN	NaN	NaN	NaN	NaN	NaN	NaN	NaN	NaN
1.12	60.908	-98.9483	1315.478	-2.4262	0.75195	-0.52685	109.503	4.517	964.3006	-1.4907	0.52608	-0.091699	NaN	NaN	NaN	NaN	NaN	NaN	NaN	NaN	NaN	NaN	NaN	NaN
1.122	75.316	-115.7873	1349.017	-2.5125	0.75703	-0.56436	49.9236	77.875	973.2855	-1.3203	0.49219	-0.067871	NaN	NaN	NaN	NaN	NaN	NaN	NaN	NaN	NaN	NaN	NaN	NaN
1.124	95.323	-112.2033	1368.9154	-2.5731	0.74404	-0.61904	-22.6315	61.729	955.7093	-1.1886	0.47939	-0.049219	NaN	NaN	NaN	NaN	NaN	NaN	NaN	NaN	NaN	NaN	NaN	NaN
1.126	40.151	-107.864	1379.062	-2.6309	0.72656	-0.67773	-28.0846	14.435	951.1636	-1.0942	0.49101	-0.028808	NaN	NaN	NaN	NaN	NaN	NaN	NaN	NaN	NaN	NaN	NaN	NaN
1.128	6.322	-98.248	1380.671	-2.6743	0.71045	-0.72334	-26.1368	25.558	907.552	-1.0176	0.51836	-0.0057618	NaN	NaN	NaN	NaN	NaN	NaN	NaN	NaN	NaN	NaN	NaN	NaN
1.13	18.6222	-97.9886	1391.1154	-2.6927	0.70244	-0.75986	5.645	-64.195	876.123	-0.96582	0.56113	0.014453	NaN	NaN	NaN	NaN	NaN	NaN	NaN	NaN	NaN	NaN	NaN	NaN
1.132	33.7411	-104.91161	1397.1756	-2.6743	0.69658	-0.78955	7.198	-102.468	872.44	-0.92285	0.62305	0.015625	NaN	NaN	NaN	NaN	NaN	NaN	NaN	NaN	NaN	NaN	NaN	NaN
1.134	45.199	-107.1203	1389.8093	-2.6173	0.68232	-0.81924	5.203	-112.933	902.468	-0.88252	0.69326	-0.0096678	NaN	NaN	NaN	NaN	NaN	NaN	NaN	NaN	NaN	NaN	NaN	NaN
1.136	15.165	-101.5006	1371.8057	-2.5547	0.66602	-0.84082	4.741	-187.931	929.138	-0.86045	0.76982	-0.042871	NaN	NaN	NaN	NaN	NaN	NaN	NaN	NaN	NaN	NaN	NaN	NaN
1.138	44.341	-101.0753	1359.2197	-2.4969	0.64141	-0.85019	-20.3484	-189.173	945.522	-0.84834	0.83193	-0.083496	NaN	NaN	NaN	NaN	NaN	NaN	NaN	NaN	NaN	NaN	NaN	NaN
1.14	15.9956	-97.984	1350.69	-2.4496	0.62773	-0.86093	-47.816	-246.771	958.075	-0.84541	0.87178	-0.13955	NaN	NaN	NaN	NaN	NaN	NaN	NaN	NaN	NaN	NaN	NaN	NaN
1.142	17.0158	-85.458	1340.596	-2.4063	0.61797	-0.87149	-36.862	-300.991	985.593	-0.86084	0.8833	-0.19238	NaN	NaN	NaN	NaN	NaN	NaN	NaN	NaN	NaN	NaN	NaN	NaN
1.144	53.1671	-75.8636	1341.384	-2.3544	0.61592	-0.88037	-54.366	-225.099	1035.811	-0.90879	0.87109	-0.22998	NaN	NaN	NaN	NaN	NaN	NaN	NaN	NaN	NaN	NaN	NaN	NaN
1.146	65.289	-61.186	1334.9132	-2.291	0.62305	-0.89258	-105.053	-201.995	1067.021	-0.98232	0.86221	-0.26474	NaN	NaN	NaN	NaN	NaN	NaN	NaN	NaN	NaN	NaN	NaN	NaN
1.148	71.383	-42.1126	1342.582	-2.2153	0.62568	-0.89853	-100.176	-163.1415	1087.418	-1.0745	0.85283	-0.29522	NaN	NaN	NaN	NaN	NaN	NaN	NaN	NaN	NaN	NaN	NaN	NaN
1.15	32.482	-36.3242	1312.934	-2.1266	0.62363	-0.90078	-105.813	-114.092	1062.728	-1.1594	0.86328	-0.33398	NaN	NaN	NaN	NaN	NaN	NaN	NaN	NaN	NaN	NaN	NaN	NaN
1.152	27.414	-18.053	1316.7576	-2.0332	0.60996	-0.89726	-72.211	-127.324	1052.118	-1.25	0.89063	-0.36914	NaN	NaN	NaN	NaN	NaN	NaN	NaN	NaN	NaN	NaN	NaN	NaN
1.154	39.281	-12.853	1324.6446	-1.9435	0.59619	-0.88721	-48.45712	-63.424	1083.645	-1.3161	0.92686	-0.42041	NaN	NaN	NaN	NaN	NaN	NaN	NaN	NaN	NaN	NaN	NaN	NaN
1.156	53.23	-9.655	1317.0996	-1.8633	0.5835	-0.87305	-25.184	-42.884	1103.622	-1.3795	0.95117	-0.46269	NaN	NaN	NaN	NaN	NaN	NaN	NaN	NaN	NaN	NaN	NaN	NaN
1.158	55.222	-21.18	1305.546	-1.7974	0.57939	-0.85556	-6.552	-73.756	1129.699	-1.4342	0.96836	-0.50527	NaN	NaN	NaN	NaN	NaN	NaN	NaN	NaN	NaN	NaN	NaN	NaN
1.16	51.4637	-26.947	1309.1971	-1.7519	0.58008	-0.83477	-18.914	-37.899	1128.178	-1.4997	0.96826	-0.53096	NaN	NaN	NaN	NaN	NaN	NaN	NaN	NaN	NaN	NaN	NaN	NaN
1.162	70.779	-28.6118	1301.8119	-1.7219	0.59219	-0.82344	-30.2279	-86.8645	1114.336	-1.5854	0.96924	-0.54248	NaN	NaN	NaN	NaN	NaN	NaN	NaN	NaN	NaN	NaN	NaN	NaN
1.164	57.7135	-29.8293	1289.8076	-1.7007	0.60811	-0.8044	-22.9794	-116.61368	1166.3801	-1.72	0.96445	-0.53906	NaN	NaN	NaN	NaN	NaN	NaN	NaN	NaN	NaN	NaN	NaN	NaN
1.166	67.99	-24.1406	1257.1823	-1.6973	0.61914	-0.78906	-22.864	-80.744	1189.7395	-1.8976	0.96221	-0.51445	NaN	NaN	NaN	NaN	NaN	NaN	NaN	NaN	NaN	NaN	NaN	NaN
1.168	59.782	-35.649	1260.8149	-1.7001	0.63994	-0.77236	-44.561	-131.698	1223.229	-2.119	0.97666	-0.48086	NaN	NaN	NaN	NaN	NaN	NaN	NaN	NaN	NaN	NaN	NaN	NaN
1.17	80.775	-28.375	1251.855	-1.7012	0.66172	-0.75977	-58.043	-104.179	1237.045	-2.355	1.0184	-0.45654	NaN	NaN	NaN	NaN	NaN	NaN	NaN	NaN	NaN	NaN	NaN	NaN
1.172	57.936	-24.3944	1240.885	-1.7008	0.67461	-0.74375	-71.517	-117.8724	1233.979	-2.5742	1.0879	-0.44531	NaN	NaN	NaN	NaN	NaN	NaN	NaN	NaN	NaN	NaN	NaN	NaN
1.174	57.284	7.04047	1232.9247	-1.6901	0.68447	-0.72607	-51.472	-181.928	1280.802	-2.7246	1.1766	-0.45186	NaN	NaN	NaN	NaN	NaN	NaN	NaN	NaN	NaN	NaN	NaN	NaN
1.176	48.4685	18.46415	1229.7473	-1.6719	0.69043	-0.71484	-20.263	-140.603	1285.059	-2.8059	1.2738	-0.47187	NaN	NaN	NaN	NaN	NaN	NaN	NaN	NaN	NaN	NaN	NaN	NaN
1.178	38.4148	32.959	1223.933	-1.6443	0.68731	-0.70098	-23.283	-150.774	1257.046	-2.7973	1.3645	-0.48515	NaN	NaN	NaN	NaN	NaN	NaN	NaN	NaN	NaN	NaN	NaN	NaN
1.18	34.2155	43.821	1183.8561	-1.6093	0.6832	-0.68476	-11.973	-137.981	1259.94	-2.7305	1.416	-0.50215	NaN	NaN	NaN	NaN	NaN	NaN	NaN	NaN	NaN	NaN	NaN	NaN
1.182	12.4739	51.651	1152.6776	-1.5613	0.67656	-0.6707	-46.0148	-62.572	1218.035	-2.6211	1.4336	-0.50879	NaN	NaN	NaN	NaN	NaN	NaN	NaN	NaN	NaN	NaN	NaN	NaN
1.184	41.67	47.58	1149.539	-1.5197	0.66738	-0.64785	-54.6834	-78.977	1215.5059	-2.5064	1.4088	-0.48945	NaN	NaN	NaN	NaN	NaN	NaN	NaN	NaN	NaN	NaN	NaN	NaN
1.186	37.831	47.2855	1141.665	-1.4761	0.65283	-0.63037	-81.809	-41.8494	1233.851	-2.4136	1.3567	-0.4707	NaN	NaN	NaN	NaN	NaN	NaN	NaN	NaN	NaN	NaN	NaN	NaN
1.188	44.31	38.401	1121.4648	-1.4337	0.6417	-0.61064	-82.078	-20.353	1226.279	-2.3445	1.3071	-0.4543	NaN	NaN	NaN	NaN	NaN	NaN	NaN	NaN	NaN	NaN	NaN	NaN
1.19	16.30731	39.893	1097.2249	-1.3971	0.62354	-0.58809	-74.047	-30.426	1233.285	-2.2911	1.262	-0.44229	NaN	NaN	NaN	NaN	NaN	NaN	NaN	NaN	NaN	NaN	NaN	NaN
1.192	19.0113	45.645	1088.0736	-1.362	0.60166	-0.56465	-101.44	38.557	1212.14	-2.2422	1.2402	-0.42822	NaN	NaN	NaN	NaN	NaN	NaN	NaN	NaN	NaN	NaN	NaN	NaN
1.194	31.587	64.60919	1074.324	-1.3254	0.58613	-0.53926	-112.785	24.967	1198.842	-2.173	1.2329	-0.42725	NaN	NaN	NaN	NaN	NaN	NaN	NaN	NaN	NaN	NaN	NaN	NaN
1.196	15.7917	77.9864	1053.665	-1.2881	0.56641	-0.50684	-119.93	-4.955	1213.793	-2.0866	1.2376	-0.41865	NaN	NaN	NaN	NaN	NaN	NaN	NaN	NaN	NaN	NaN	NaN	NaN
1.198	14.0053	76.533	1058.817	-1.2611	0.54981	-0.48535	-115.6116	31.859	1193.34	-1.9804	1.2469	-0.41513	NaN	NaN	NaN	NaN	NaN	NaN	NaN	NaN	NaN	NaN	NaN	NaN
1.2	-18.7325	75.546	1052.899	-1.2324	0.53066	-0.46055	-81.361	-25.3959	1205.263	-1.8657	1.2472	-0.40478	NaN	NaN	NaN	NaN	NaN	NaN	NaN	NaN	NaN	NaN	NaN	NaN
1.202	-7.47578	84.18	1024.168	-1.2027	0.50996	-0.43593	-59.259	-16.4235	1235.9856	-1.7568	1.2422	-0.3916	NaN	NaN	NaN	NaN	NaN	NaN	NaN	NaN	NaN	NaN	NaN	NaN
1.204	2.7275	86.5289	975.91	-1.1713	0.48555	-0.40908	-90.346	-11.8287	1236.3008	-1.6635	1.216	-0.37159	NaN	NaN	NaN	NaN	NaN	NaN	NaN	NaN	NaN	NaN	NaN	NaN
1.206	0.119	94.036	956.2951	-1.1465	0.46094	-0.38135	-78.0097	-58.583	1243.136	-1.593	1.1797	-0.35107	NaN	NaN	NaN	NaN	NaN	NaN	NaN	NaN	NaN	NaN	NaN	NaN
1.208	2.539	88.874	939.2541	-1.1252	0.44141	-0.35879	-67.8872	-3.967	1221.954	-1.5426	1.1348	-0.32217	NaN	NaN	NaN	NaN	NaN	NaN	NaN	NaN	NaN	NaN	NaN	NaN
1.21	-3.153	103.0458	884.601	-1.1044	0.41709	-0.32803	-81.123	-25.0989	1206.518	-1.5073	1.0732	-0.2999	NaN	NaN	NaN	NaN	NaN	NaN	NaN	NaN	NaN	NaN	NaN	NaN
1.212	6.557	106.7004	866.98	-1.0829	0.39482	-0.29639	-62.207	-37.715	1225.13	-1.4844	1.0195	-0.27344	NaN	NaN	NaN	NaN	NaN	NaN	NaN	NaN	NaN	NaN	NaN	NaN
1.214	-11.1774	108.4957	856.7774	-1.0639	0.379	-0.27549	-55.059	28.2583	1194.7875	-1.4645	0.96758	-0.25469	NaN	NaN	NaN	NaN	NaN	NaN	NaN	NaN	NaN	NaN	NaN	NaN
1.216	5.86	104.8508	852.424	-1.0425	0.36182	-0.25244	-63.996	25.453	1184.8655	-1.4421	0.91651	-0.24053	NaN	NaN	NaN	NaN	NaN	NaN	NaN	NaN	NaN	NaN	NaN	NaN
1.218	3.685	113.8212	821.5068	-1.021	0.35274	-0.22998	-63.5387	83.386	1192.1988	-1.4105	0.87158	-0.22412	NaN	NaN	NaN	NaN	NaN	NaN	NaN	NaN	NaN	NaN	NaN	NaN
1.22	-17.13	121.863	765.8647	-0.99799	0.34424	-0.20996	-34.4577	117.867	1184.34659	-1.376	0.83301	-0.21348	NaN	NaN	NaN	NaN	NaN	NaN	NaN	NaN	NaN	NaN	NaN	NaN
1.222	-26.8251	126.3972	746.581	-0.96475	0.33603	-0.18965	-28.324	79.631	1173.369	-1.3354	0.79932	-0.20361	NaN	NaN	NaN	NaN	NaN	NaN	NaN	NaN	NaN	NaN	NaN	NaN
1.224	-21.261	136.8185	733.067	-0.93701	0.3294	-0.17392	-27.981	131.47	1122.5229	-1.3055	0.76152	-0.19141	NaN	NaN	NaN	NaN	NaN	NaN	NaN	NaN	NaN	NaN	NaN	NaN
1.226	-36.3176	124.9632	701.9726	-0.90967	0.32666	-0.1543	-19.142	108.698	1094.5187	-1.2774	0.72002	-0.17862	NaN	NaN	NaN	NaN	NaN	NaN	NaN	NaN	NaN	NaN	NaN	NaN
1.228	-35.2348	126.6176	669.9199	-0.87432	0.32041	-0.13418	6.245	99.1127	1098.1639	-1.2523	0.67861	-0.16533	NaN	NaN	NaN	NaN	NaN	NaN	NaN	NaN	NaN	NaN	NaN	NaN
1.23	-8.928	120.7288	635.8178	-0.84873	0.30752	-0.11514	-13.761	151.909	1094.7082	-1.2342	0.63496	-0.14931	NaN	NaN	NaN	NaN	NaN	NaN	NaN	NaN	NaN	NaN	NaN	NaN
1.232	-23.9686	128.0945	611.279	-0.81162	0.30088	-0.11084	-25.448	90.0369	1111.074	-1.2173	0.59229	-0.1416	NaN	NaN	NaN	NaN	NaN	NaN	NaN	NaN	NaN	NaN	NaN	NaN
1.234	-14.2	122.5582	588.0722	-0.77255	0.28955	-0.086426	-13.121	99.5056	1102.4879	-1.1978	0.54892	-0.12373	NaN	NaN	NaN	NaN	NaN	NaN	NaN	NaN	NaN	NaN	NaN	NaN
1.236	-41.7453	112.5493	564.14176	-0.73486	0.28076	-0.067383	-37.2107	119.66833	1066.0608	-1.1758	0.51485	-0.11319	NaN	NaN	NaN	NaN	NaN	NaN	NaN	NaN	NaN	NaN	NaN	NaN
1.238	-15.914	113.6887	524.5413	-0.68574	0.2748	-0.054786	-43.50347	87.002	1072.9505	-1.1547	0.48711	-0.10889	NaN	NaN	NaN	NaN	NaN	NaN	NaN	NaN	NaN	NaN	NaN	NaN
1.24	-17.858	102.881	493.4744	-0.63506	0.26572	-0.036914	-32.303	161.79	1035.3986	-1.134	0.4625	-0.1041	NaN	NaN	NaN	NaN	NaN	NaN	NaN	NaN	NaN	NaN	NaN	NaN
1.242	-36.6541	87.104	454.1033	-0.58506	0.26221	-0.025586	-44.0524	139.88393	993.9731	-1.1108	0.44189	-0.10156	NaN	NaN	NaN	NaN	NaN	NaN	NaN	NaN	NaN	NaN	NaN	NaN
1.244	-47.32277	86.3037	430.0026	-0.53047	0.25293	-0.0076173	-42.724	117.167	1000.355	-1.0916	0.42715	-0.098242	NaN	NaN	NaN	NaN	NaN	NaN	NaN	NaN	NaN	NaN	NaN	NaN
1.246	-50.4901	108.61	381.587	-0.46729	0.25	0.0068359	-43.5193	155.06	946.818	-1.0772	0.41143	-0.097071	NaN	NaN	NaN	NaN	NaN	NaN	NaN	NaN	NaN	NaN	NaN	NaN
1.248	-30.1987	126.966	361.0173	-0.3999	0.24306	0.023535	-20.0226	122.266	959.682	-1.0706	0.39776	-0.10137	NaN	NaN	NaN	NaN	NaN	NaN	NaN	NaN	NaN	NaN	NaN	NaN
1.25	-37.0997	116.172	323.681	-0.33223	0.23926	0.038476	-15.5877	179.58	957.8899	-1.0624	0.38584	-0.10186	NaN	NaN	NaN	NaN	NaN	NaN	NaN	NaN	NaN	NaN	NaN	NaN
1.252	-21.397	102.1642	310.7579	-0.25918	0.23145	0.058008	-20.37969	221.264	921.434	-1.0601	0.37158	-0.10645	NaN	NaN	NaN	NaN	NaN	NaN	NaN	NaN	NaN	NaN	NaN	NaN
1.254	-12.81	86.8926	276.5438	-0.18945	0.21621	0.073438	-14.417	197.2964	901.21	-1.0562	0.36416	-0.10898	NaN	NaN	NaN	NaN	NaN	NaN	NaN	NaN	NaN	NaN	NaN	NaN
1.256	-17.0613	90.45619	232.7689	-0.11768	0.20068	0.090332	-17.2994	240.957	861.834	-1.0519	0.35743	-0.10938	NaN	NaN	NaN	NaN	NaN	NaN	NaN	NaN	NaN	NaN	NaN	NaN
1.258	-1.548	96.9238	210.415	-0.050879	0.18076	0.10205	-38.239	193.297	821.988	-1.0519	0.35977	-0.11016	NaN	NaN	NaN	NaN	NaN	NaN	NaN	NaN	NaN	NaN	NaN	NaN
1.26	-3.697	90.8205	178.862	0.014746	0.15478	0.11455	-28.289	174.04	805.0574	-1.0543	0.35312	-0.10762	NaN	NaN	NaN	NaN	NaN	NaN	NaN	NaN	NaN	NaN	NaN	NaN
1.262	11.05	85.4785	145.781	0.076074	0.13135	0.12861	-15.8773	200.277	781.428	-1.0562	0.35791	-0.10547	NaN	NaN	NaN	NaN	NaN	NaN	NaN	NaN	NaN	NaN	NaN	NaN
1.264	-16.172	70.3032	102.563	0.13975	0.10488	0.14307	-11.0258	147.1349	794.7607	-1.0467	0.36553	-0.11104	NaN	NaN	NaN	NaN	NaN	NaN	NaN	NaN	NaN	NaN	NaN	NaN
1.266	-3.644	55.0174	108.4622	0.19531	0.081543	0.15332	-0.98	179.903	790.6333	-1.0225	0.36797	-0.11504	NaN	NaN	NaN	NaN	NaN	NaN	NaN	NaN	NaN	NaN	NaN	NaN
1.268	-11.477	61.4976	106.618	0.25069	0.05293	0.16279	12.17714	191.23	758.0245	-0.98496	0.37227	-0.1209	NaN	NaN	NaN	NaN	NaN	NaN	NaN	NaN	NaN	NaN	NaN	NaN
1.27	4.5024	65.4888	94.5767	0.30469	0.029395	0.1749	13.313	147.838	736.6435	-0.94014	0.3668	-0.12441	NaN	NaN	NaN	NaN	NaN	NaN	NaN	NaN	NaN	NaN	NaN	NaN
1.272	-14.415	54.567	88.54634	0.35	0.0040038	0.17647	39.8323	196.295	704.8718	-0.88867	0.36865	-0.12744	NaN	NaN	NaN	NaN	NaN	NaN	NaN	NaN	NaN	NaN	NaN	NaN
1.274	-20.2055	43.492	66.5826	0.38965	-0.026562	0.18838	36.025	151.802	681.028	-0.84072	0.36025	-0.13028	NaN	NaN	NaN	NaN	NaN	NaN	NaN	NaN	NaN	NaN	NaN	NaN
1.276	1.527	29.8674	44.342	0.42773	-0.054688	0.19727	38.912	131.811	653.526	-0.7961	0.3541	-0.12862	NaN	NaN	NaN	NaN	NaN	NaN	NaN	NaN	NaN	NaN	NaN	NaN
1.278	0.0279999999999987	45.0345	34.961	0.45683	-0.08291	0.2041	47.494	173.5277	596.12473	-0.74961	0.34746	-0.12862	NaN	NaN	NaN	NaN	NaN	NaN	NaN	NaN	NaN	NaN	NaN	NaN
1.28	-5.017	40.73636	30.5347	0.47861	-0.11064	0.21338	19.8182	117.7299	573.2286	-0.70166	0.33721	-0.1292	NaN	NaN	NaN	NaN	NaN	NaN	NaN	NaN	NaN	NaN	NaN	NaN
1.282	-7.091	48.13429	24.2191	0.48564	-0.13877	0.21963	29.1349	148.2192	536.6963	-0.64746	0.3335	-0.12842	NaN	NaN	NaN	NaN	NaN	NaN	NaN	NaN	NaN	NaN	NaN	NaN
1.284	4.8289	44.8193	16.4745	0.48916	-0.16445	0.22519	7.5968	169.619	513.131	-0.5876	0.32393	-0.13349	NaN	NaN	NaN	NaN	NaN	NaN	NaN	NaN	NaN	NaN	NaN	NaN
1.286	-1.59	39.1467	10.208	0.48486	-0.18799	0.23242	-0.43	147.3335	476.59956	-0.51631	0.32314	-0.1288	NaN	NaN	NaN	NaN	NaN	NaN	NaN	NaN	NaN	NaN	NaN	NaN
1.288	-11.795	25.1507	19.5727	0.47442	-0.20449	0.23145	10.5905	208.6	421.519	-0.43857	0.31963	-0.1288	NaN	NaN	NaN	NaN	NaN	NaN	NaN	NaN	NaN	NaN	NaN	NaN
1.29	-5.052	16.5724	35.991	0.45508	-0.21758	0.23047	-1.58633	168.738	381.617	-0.35703	0.30879	-0.12246	NaN	NaN	NaN	NaN	NaN	NaN	NaN	NaN	NaN	NaN	NaN	NaN
1.292	-13.0631	21.7774	22.137	0.43399	-0.22891	0.22969	8.193	146.5193	358.4263	-0.27295	0.29492	-0.12744	NaN	NaN	NaN	NaN	NaN	NaN	NaN	NaN	NaN	NaN	NaN	NaN
1.294	-26.4136	32.925	3.7917	0.41123	-0.23565	0.22802	0.868599999999999	158.463	309.108	-0.18848	0.2793	-0.12471	NaN	NaN	NaN	NaN	NaN	NaN	NaN	NaN	NaN	NaN	NaN	NaN
1.296	-26.7825	22.7593	-3.9725	0.38672	-0.24023	0.22412	-5.045	99.239	288.35333	-0.11465	0.24873	-0.12363	NaN	NaN	NaN	NaN	NaN	NaN	NaN	NaN	NaN	NaN	NaN	NaN
1.298	-17.2177	9.1054	5.969	0.36992	-0.24444	0.21768	-1.258	124.0298	257.665	-0.052539	0.21943	-0.10957	NaN	NaN	NaN	NaN	NaN	NaN	NaN	NaN	NaN	NaN	NaN	NaN
1.3	-13.4318	1.7394	-4.601	0.34844	-0.24394	0.21016	-7.703	116.076	224.91	-0.0003906	0.18672	-0.099022	NaN	NaN	NaN	NaN	NaN	NaN	NaN	NaN	NaN	NaN	NaN	NaN
1.302	-19.1544	7.8481	-8.4092	0.32539	-0.23965	0.20703	-18.995	76.531	232.1089	0.040039	0.14844	-0.088867	NaN	NaN	NaN	NaN	NaN	NaN	NaN	NaN	NaN	NaN	NaN	NaN
1.304	2.995	8.2421	4.049	0.30283	-0.23389	0.20117	-27.2135	133.1699	188.581	0.07334	0.10967	-0.076758	NaN	NaN	NaN	NaN	NaN	NaN	NaN	NaN	NaN	NaN	NaN	NaN
1.306	4.364	13.5962	25.9042	0.27881	-0.22461	0.19141	-34.4651	102.1605	166.166	0.09834	0.075488	-0.066993	NaN	NaN	NaN	NaN	NaN	NaN	NaN	NaN	NaN	NaN	NaN	NaN
1.308	6.686	15.16416	25.942	0.24785	-0.21514	0.17441	-32.7787	82.616	144.7165	0.11943	0.037598	-0.05957	NaN	NaN	NaN	NaN	NaN	NaN	NaN	NaN	NaN	NaN	NaN	NaN
1.31	-24.7694	15.2167	-1.2918	0.21748	-0.20772	0.1752	-28.7309	97.547	118.948	0.14004	0.0062497	-0.049609	NaN	NaN	NaN	NaN	NaN	NaN	NaN	NaN	NaN	NaN	NaN	NaN
1.312	4.502	6.10191	4.99962	0.18623	-0.19873	0.16153	-42.92262	46.0971	106.96885	0.15137	-0.024902	-0.041016	NaN	NaN	NaN	NaN	NaN	NaN	NaN	NaN	NaN	NaN	NaN	NaN
1.314	9.1442	9.8009	7.22972	0.15361	-0.18281	0.15108	-17.686	82.5086	101.6307	0.15762	-0.059082	-0.034473	NaN	NaN	NaN	NaN	NaN	NaN	NaN	NaN	NaN	NaN	NaN	NaN
1.316	-9.261	13.5224	1.7821	0.12256	-0.1709	0.14307	4.0434	89.2689	87.076	0.16289	-0.089746	-0.031543	NaN	NaN	NaN	NaN	NaN	NaN	NaN	NaN	NaN	NaN	NaN	NaN
1.318	-25.5523	8.1957	3.3955	0.092286	-0.15488	0.13281	-0.820999999999998	50.435	89.9675	0.16328	-0.11983	-0.028809	NaN	NaN	NaN	NaN	NaN	NaN	NaN	NaN	NaN	NaN	NaN	NaN
1.32	1.112	2.05914	-2.888	0.064161	-0.13819	0.1252	13.2948	92.85714	78.4412	0.16396	-0.14804	-0.025391	NaN	NaN	NaN	NaN	NaN	NaN	NaN	NaN	NaN	NaN	NaN	NaN
1.322	11.2447	5.10054	-1.603	0.042676	-0.12295	0.11777	14.561	63.90833	61.0677	0.15576	-0.17383	-0.025391	NaN	NaN	NaN	NaN	NaN	NaN	NaN	NaN	NaN	NaN	NaN	NaN
1.324	1.045	11.7923	4.7775	0.026465	-0.10645	0.11084	13.006	73.5811	49.3364	0.14307	-0.19463	-0.024707	NaN	NaN	NaN	NaN	NaN	NaN	NaN	NaN	NaN	NaN	NaN	NaN
1.326	0.602	10.9422	2.73	0.0053711	-0.09375	0.10254	26.982	104.005	30.2572	0.13076	-0.22373	-0.020996	NaN	NaN	NaN	NaN	NaN	NaN	NaN	NaN	NaN	NaN	NaN	NaN
1.328	6.842	19.186	5.8956	-0.0089845	-0.073828	0.098047	-1.12	50.736	38.1044	0.11318	-0.2417	-0.021387	NaN	NaN	NaN	NaN	NaN	NaN	NaN	NaN	NaN	NaN	NaN	NaN
1.33	-0.41	13.298	8.91387	-0.022265	-0.059179	0.095019	0.608999999999998	56.5959	36.77127	0.089941	-0.2584	-0.026465	NaN	NaN	NaN	NaN	NaN	NaN	NaN	NaN	NaN	NaN	NaN	NaN
1.332	-5.396	14.2673	2.26783	-0.033203	-0.043555	0.090723	10.828	33.0924	31.98	0.071289	-0.26904	-0.026367	NaN	NaN	NaN	NaN	NaN	NaN	NaN	NaN	NaN	NaN	NaN	NaN
1.334	-4.15	0.4755	6.7699	-0.043359	-0.025097	0.084082	-3.238	-6.407	47.3193	0.051368	-0.27393	-0.020606	NaN	NaN	NaN	NaN	NaN	NaN	NaN	NaN	NaN	NaN	NaN	NaN
1.336	4.683	-4.8508	8.8267	-0.046875	-0.0073242	0.080566	14.7251	45.741	51.4718	0.032715	-0.27724	-0.024414	NaN	NaN	NaN	NaN	NaN	NaN	NaN	NaN	NaN	NaN	NaN	NaN
1.338	-15.5684	3.1578	-2.0565	-0.053906	0.012012	0.078516	-12.4289	31.00238	37.3331	0.0096679	-0.27139	-0.024023	NaN	NaN	NaN	NaN	NaN	NaN	NaN	NaN	NaN	NaN	NaN	NaN
1.34	-33.6939	7.69814	3.187	-0.0542	0.031152	0.072656	6.261	27.0622	36.8964	-0.0030273	-0.25938	-0.024707	NaN	NaN	NaN	NaN	NaN	NaN	NaN	NaN	NaN	NaN	NaN	NaN
1.342	-25.381455	4.9635	4.8807	-0.052246	0.04834	0.066797	20.4206	55.554	-1.667	-0.015625	-0.24512	-0.026855	NaN	NaN	NaN	NaN	NaN	NaN	NaN	NaN	NaN	NaN	NaN	NaN
1.344	-2.92	3.33229	11.4144	-0.055176	0.068457	0.059766	-1.074	1.238	4.91839	-0.024707	-0.22988	-0.034375	NaN	NaN	NaN	NaN	NaN	NaN	NaN	NaN	NaN	NaN	NaN	NaN
1.346	-3.693	8.1657	-4.5809	-0.054199	0.083496	0.057617	-4.403	13.978	27.3844	-0.030273	-0.21348	-0.041113	NaN	NaN	NaN	NaN	NaN	NaN	NaN	NaN	NaN	NaN	NaN	NaN
1.348	-19.9246	8.638434	-10.5338	-0.054395	0.10088	0.054883	-25.9079	13.7167	22.4897	-0.02793	-0.19394	-0.047363	NaN	NaN	NaN	NaN	NaN	NaN	NaN	NaN	NaN	NaN	NaN	NaN
1.35	-6.9	4.3829	1.2172	-0.049512	0.11651	0.053028	-49.4912	-1.25	35.4344	-0.017382	-0.17578	-0.056055	NaN	NaN	NaN	NaN	NaN	NaN	NaN	NaN	NaN	NaN	NaN	NaN
1.352	-5.561	11.8996	12.4434	-0.051074	0.13095	0.051465	-19.1079	49.828	17.024	-0.0039063	-0.15527	-0.065918	NaN	NaN	NaN	NaN	NaN	NaN	NaN	NaN	NaN	NaN	NaN	NaN
1.354	-15.0998	23.1926	-7.0171	-0.056152	0.13886	0.047265	-41.0603	26.5001	8.505	0.013477	-0.14043	-0.076856	NaN	NaN	NaN	NaN	NaN	NaN	NaN	NaN	NaN	NaN	NaN	NaN
1.356	-25.1055	16.1875	-7.7707	-0.058105	0.14941	0.049805	-56.5546	29.267	24.0331	0.034375	-0.12177	-0.092578	NaN	NaN	NaN	NaN	NaN	NaN	NaN	NaN	NaN	NaN	NaN	NaN
1.358	2.566	8.3444	1.109	-0.065234	0.16172	0.04668	-17.1	37.772	-1.76	0.064453	-0.10498	-0.099219	NaN	NaN	NaN	NaN	NaN	NaN	NaN	NaN	NaN	NaN	NaN	NaN
1.36	-8.245	13.573	17.8265	-0.075196	0.16719	0.054297	-32.1459	-2.7923	-9.0283	0.090334	-0.09375	-0.10967	NaN	NaN	NaN	NaN	NaN	NaN	NaN	NaN	NaN	NaN	NaN	NaN
1.362	-6.354	9.3112	17.36262	-0.089648	0.17656	0.050391	-23.414	17.0735	20.530442	0.11768	-0.079102	-0.12012	NaN	NaN	NaN	NaN	NaN	NaN	NaN	NaN	NaN	NaN	NaN	NaN
1.364	-21.8163	7.8812	20.4543	-0.10703	0.19013	0.04541	-30.6109	-2.998453	1.992	0.1373	-0.07002	-0.13027	NaN	NaN	NaN	NaN	NaN	NaN	NaN	NaN	NaN	NaN	NaN	NaN
1.366	-5.656	-0.021433	50.7576	-0.13525	0.19824	0.035156	-25.271	-28.4831	18.80144	0.15664	-0.063476	-0.13555	NaN	NaN	NaN	NaN	NaN	NaN	NaN	NaN	NaN	NaN	NaN	NaN
1.368	-7.539	5.6792	79.1504	-0.17188	0.20781	0.027832	5.75	17.2866	22.7356	0.17383	-0.056445	-0.14765	NaN	NaN	NaN	NaN	NaN	NaN	NaN	NaN	NaN	NaN	NaN	NaN
1.37	-12.06	7.92079	85.032	-0.21494	0.21846	0.017383	-25.8187	6.34472	6.631	0.18476	-0.055274	-0.15097	NaN	NaN	NaN	NaN	NaN	NaN	NaN	NaN	NaN	NaN	NaN	NaN
1.372	-15.597	-4.4908	135.072	-0.27393	0.22393	0.005664	-8.403	10.3022	42.578	0.19238	-0.057129	-0.15283	NaN	NaN	NaN	NaN	NaN	NaN	NaN	NaN	NaN	NaN	NaN	NaN
1.374	-25.732	-16.4493	169.415	-0.33584	0.22422	0.00058594	9.6053	27.13	25.4988	0.20498	-0.055176	-0.16201	NaN	NaN	NaN	NaN	NaN	NaN	NaN	NaN	NaN	NaN	NaN	NaN
1.376	-19.258	-22.715	201.73	-0.41113	0.22461	-0.0039063	-17.6052	-0.7954	14.0132	0.21025	-0.053223	-0.17031	NaN	NaN	NaN	NaN	NaN	NaN	NaN	NaN	NaN	NaN	NaN	NaN
1.378	-21.3723	-39.6913	210.4033	-0.48467	0.22295	-0.008789	13.919	10.1109	11.8772	0.21221	-0.047754	-0.17813	NaN	NaN	NaN	NaN	NaN	NaN	NaN	NaN	NaN	NaN	NaN	NaN
1.38	2.64901	-63.4396	217.875	-0.55586	0.22461	-0.017481	17.5798	-3.2856	6.0862	0.21513	-0.044141	-0.18593	NaN	NaN	NaN	NaN	NaN	NaN	NaN	NaN	NaN	NaN	NaN	NaN
1.382	-8.9081	-64.1143	263.602	-0.62695	0.22852	-0.02295	-5.247	-26.008	9.5906	0.21777	-0.032715	-0.20117	NaN	NaN	NaN	NaN	NaN	NaN	NaN	NaN	NaN	NaN	NaN	NaN
1.384	-41.4203	-45.2288	286.888	-0.69629	0.23984	-0.033399	36.02232	21.953	15.31	0.21592	-0.026758	-0.20615	NaN	NaN	NaN	NaN	NaN	NaN	NaN	NaN	NaN	NaN	NaN	NaN
1.386	-35.847	-38.4612	323.7755	-0.76563	0.24756	-0.031738	5.581	12.8147	-1.095	0.20781	-0.016211	-0.20557	NaN	NaN	NaN	NaN	NaN	NaN	NaN	NaN	NaN	NaN	NaN	NaN
1.388	-14.311	-30.1217	335.469	-0.83164	0.25371	-0.039844	7.142	13.26482	23.4014	0.19453	-0.006836	-0.21689	NaN	NaN	NaN	NaN	NaN	NaN	NaN	NaN	NaN	NaN	NaN	NaN
1.39	-0.427000000000001	-26.8468	375.518	-0.90273	0.25898	-0.05	21.68	38.354	12.9595	0.1794	0.0006836	-0.22539	NaN	NaN	NaN	NaN	NaN	NaN	NaN	NaN	NaN	NaN	NaN	NaN
1.392	-19.2782	-15.1423	405.58	-0.97461	0.26445	-0.057031	-17.74	-4.596	-10.1633	0.16162	0.013184	-0.23242	NaN	NaN	NaN	NaN	NaN	NaN	NaN	NaN	NaN	NaN	NaN	NaN
1.394	-12.728	-8.6508	464.424	-1.0564	0.26289	-0.066015	5.689	18.7469	-4.8116	0.13711	0.028321	-0.24023	NaN	NaN	NaN	NaN	NaN	NaN	NaN	NaN	NaN	NaN	NaN	NaN
1.396	-20.485	12.7143	518.1606	-1.1348	0.26465	-0.075195	-13.5504	21.874	-14.9449	0.11562	0.04375	-0.24873	NaN	NaN	NaN	NaN	NaN	NaN	NaN	NaN	NaN	NaN	NaN	NaN
1.398	-24.62	29.309	574.403	-1.2215	0.26543	-0.085352	-43.0788	-2.71894	32.0904	0.091798	0.064844	-0.2585	NaN	NaN	NaN	NaN	NaN	NaN	NaN	NaN	NaN	NaN	NaN	NaN
1.4	-30.128	20.886	612.72	-1.3066	0.27285	-0.097852	-1.268	14.7394	57.4754	0.062305	0.079102	-0.26133	NaN	NaN	NaN	NaN	NaN	NaN	NaN	NaN	NaN	NaN	NaN	NaN
1.402	-48.9793	6.66	659.0671	-1.3942	0.28222	-0.11347	-39.5113	-26.0012	53.2519	0.02002	0.096191	-0.26367	NaN	NaN	NaN	NaN	NaN	NaN	NaN	NaN	NaN	NaN	NaN	NaN
1.404	-40.33	-15.558	710.2683	-1.4814	0.29512	-0.12197	-29.858	-32.2333	56.6884	-0.024121	0.1123	-0.26348	NaN	NaN	NaN	NaN	NaN	NaN	NaN	NaN	NaN	NaN	NaN	NaN
1.406	-47.46229	-35.0097	765.067	-1.564	0.31787	-0.12793	-6.082	-7.0925	35.403	-0.084278	0.12519	-0.25889	NaN	NaN	NaN	NaN	NaN	NaN	NaN	NaN	NaN	NaN	NaN	NaN
1.408	-63.9062	-63.4855	817.725	-1.6436	0.34385	-0.14043	-65.4634	-31.715	47.5095	-0.15224	0.1334	-0.25772	NaN	NaN	NaN	NaN	NaN	NaN	NaN	NaN	NaN	NaN	NaN	NaN
1.41	-90.597	-80.071	856.734	-1.7129	0.37452	-0.14414	-52.0254	-28.0634	95.785	-0.22285	0.13692	-0.25254	NaN	NaN	NaN	NaN	NaN	NaN	NaN	NaN	NaN	NaN	NaN	NaN
1.412	-14.85	-86.416	896.737	-1.777	0.40967	-0.14218	-24.7751	-42.0996	83.783	-0.29932	0.1499	-0.25635	NaN	NaN	NaN	NaN	NaN	NaN	NaN	NaN	NaN	NaN	NaN	NaN
1.414	0.731999999999999	-76.7042	929.135	-1.8092	0.44844	-0.16172	-41.6308	-86.811	151.257	-0.38037	0.15635	-0.2586	NaN	NaN	NaN	NaN	NaN	NaN	NaN	NaN	NaN	NaN	NaN	NaN
1.416	-14.8605	-70.7861	991.5558	-1.8145	0.48682	-0.17969	-18.614	-29.05021	253.6016	-0.46738	0.16777	-0.2584	NaN	NaN	NaN	NaN	NaN	NaN	NaN	NaN	NaN	NaN	NaN	NaN
1.418	-18.123	-85.1422	1052.619	-1.7894	0.51631	-0.19737	-50.9678	-11.6423	333.222	-0.58261	0.17363	-0.25566	NaN	NaN	NaN	NaN	NaN	NaN	NaN	NaN	NaN	NaN	NaN	NaN
1.42	-17.8603	-88.465	1104.627	-1.7402	0.53935	-0.21143	-57.485	42.3168	516.685	-0.72803	0.17295	-0.25439	NaN	NaN	NaN	NaN	NaN	NaN	NaN	NaN	NaN	NaN	NaN	NaN
1.422	-11.7206	-78.244	1119.82	-1.68	0.56592	-0.22431	-39.95	102.983	658.772	-0.91162	0.15332	-0.24365	NaN	NaN	NaN	NaN	NaN	NaN	NaN	NaN	NaN	NaN	NaN	NaN
1.424	-16.0791	-82.921	1126.72	-1.6172	0.59062	-0.23359	-162.1428	56.679	808.097	-1.1494	0.11113	-0.23232	NaN	NaN	NaN	NaN	NaN	NaN	NaN	NaN	NaN	NaN	NaN	NaN
1.426	2.314	-77.416	1114.2432	-1.5464	0.61572	-0.23486	-34.082	19.6552	923.928	-1.4281	0.055567	-0.2251	NaN	NaN	NaN	NaN	NaN	NaN	NaN	NaN	NaN	NaN	NaN	NaN
1.428	-21.0859	-85.8936	1107.9821	-1.4735	0.64736	-0.24931	8.927	-40.162	961.106	-1.7293	0.03877	-0.20244	NaN	NaN	NaN	NaN	NaN	NaN	NaN	NaN	NaN	NaN	NaN	NaN
1.43	-4.127	-84.279	1097.5825	-1.3984	0.68047	-0.26377	-36.0603	-99.614	1063.1	-2.0578	0.063672	-0.15566	NaN	NaN	NaN	NaN	NaN	NaN	NaN	NaN	NaN	NaN	NaN	NaN
1.432	-5.5181	-96.252	1096.054	-1.3246	0.71601	-0.29151	-39.689	-33.976	1180.212	-2.4395	0.095703	-0.13232	NaN	NaN	NaN	NaN	NaN	NaN	NaN	NaN	NaN	NaN	NaN	NaN
1.434	4.7073	-110.276	1103.813	-1.2533	0.75195	-0.29707	-48.51	-9.899	1166.033	-2.7159	0.26455	-0.20674	NaN	NaN	NaN	NaN	NaN	NaN	NaN	NaN	NaN	NaN	NaN	NaN
1.436	30.503	-117.8716	1126.1296	-1.2026	0.78613	-0.30713	-28.336	-28.5271	1152.473	-2.8284	0.48057	-0.304	NaN	NaN	NaN	NaN	NaN	NaN	NaN	NaN	NaN	NaN	NaN	NaN
1.438	13.436	-125.0358	1143.9312	-1.1758	0.80918	-0.32461	-8.3384	-50.726	1083.192	-2.771	0.66611	-0.35518	NaN	NaN	NaN	NaN	NaN	NaN	NaN	NaN	NaN	NaN	NaN	NaN
1.44	5.9128	-120.76167	1150.1835	-1.1651	0.82549	-0.34433	-2.8299	-176.075	1062.255	-2.65	0.81641	-0.37149	NaN	NaN	NaN	NaN	NaN	NaN	NaN	NaN	NaN	NaN	NaN	NaN
1.442	6.473	-108.3799	1163.9489	-1.1667	0.83174	-0.35645	17.186	-202.087	1079.288	-2.5078	0.91211	-0.38086	NaN	NaN	NaN	NaN	NaN	NaN	NaN	NaN	NaN	NaN	NaN	NaN
1.444	16.9181	-102.5136	1184.3518	-1.1751	0.83174	-0.36719	9.4508	-166.399	1040.642	-2.3193	0.9209	-0.40674	NaN	NaN	NaN	NaN	NaN	NaN	NaN	NaN	NaN	NaN	NaN	NaN
1.446	9.538	-115.8678	1210.259	-1.1851	0.83154	-0.37549	-4.023	-163.169	982.889	-2.0625	0.87031	-0.43437	NaN	NaN	NaN	NaN	NaN	NaN	NaN	NaN	NaN	NaN	NaN	NaN
1.448	-4.76734	-131.4005	1222.328	-1.2057	0.84229	-0.38584	22.967	-82.3	970.797	-1.7562	0.78594	-0.45781	NaN	NaN	NaN	NaN	NaN	NaN	NaN	NaN	NaN	NaN	NaN	NaN
1.45	12.9596	-143.559	1231.72921	-1.2185	0.8419	-0.39433	8.059	0.780000000000001	930.898	-1.449	0.71016	-0.47149	NaN	NaN	NaN	NaN	NaN	NaN	NaN	NaN	NaN	NaN	NaN	NaN
1.452	-8.5275	-159.0319	1253.89865	-1.2423	0.83369	-0.39902	-3.011	14.185	934.292	-1.1675	0.65674	-0.48193	NaN	NaN	NaN	NaN	NaN	NaN	NaN	NaN	NaN	NaN	NaN	NaN
1.454	-0.141999999999999	-157.159	1248.992	-1.2669	0.8167	-0.40576	-17.406	70.059	938.467	-0.93027	0.63594	-0.51396	NaN	NaN	NaN	NaN	NaN	NaN	NaN	NaN	NaN	NaN	NaN	NaN
1.456	-34.8777	-160.044	1222.5032	-1.3125	0.78516	-0.40039	-74.664	-11.442	956.129	-0.74238	0.61523	-0.5375	NaN	NaN	NaN	NaN	NaN	NaN	NaN	NaN	NaN	NaN	NaN	NaN
1.458	-20.969	-153.293	1211.8471	-1.3868	0.73848	-0.37774	-49.633	-48.9	1003.3885	-0.58496	0.61093	-0.56719	NaN	NaN	NaN	NaN	NaN	NaN	NaN	NaN	NaN	NaN	NaN	NaN
1.46	-26.244	-149.91	1234.75	-1.4984	0.70635	-0.35654	-14.1983	-64.463	974.9901	-0.43858	0.6169	-0.5792	NaN	NaN	NaN	NaN	NaN	NaN	NaN	NaN	NaN	NaN	NaN	NaN
1.462	-40.1893	-122.712	1241.205	-1.6534	0.68564	-0.3292	18.98502	-139.034	944.7624	-0.35107	0.604	-0.59912	NaN	NaN	NaN	NaN	NaN	NaN	NaN	NaN	NaN	NaN	NaN	NaN
1.464	-39.8573	-113.376	1262.316	-1.8368	0.67724	-0.30127	44.0729	-139.485	924.005	-0.3294	0.579	-0.60537	NaN	NaN	NaN	NaN	NaN	NaN	NaN	NaN	NaN	NaN	NaN	NaN
1.466	-37.345	-98.927	1281.068	-2.0469	0.67578	-0.28418	37.566	-177.2026	920.505	-0.34433	0.56504	-0.60703	NaN	NaN	NaN	NaN	NaN	NaN	NaN	NaN	NaN	NaN	NaN	NaN
1.468	-26.499	-94.2705	1296.8221	-2.2558	0.69375	-0.27422	43.704	-268.408	998.22	-0.40371	0.54668	-0.60195	NaN	NaN	NaN	NaN	NaN	NaN	NaN	NaN	NaN	NaN	NaN	NaN
1.47	-69.8424	-77.8592	1303.22	-2.4694	0.71563	-0.27207	61.924	-247.782	1061.1906	-0.47451	0.5292	-0.58408	NaN	NaN	NaN	NaN	NaN	NaN	NaN	NaN	NaN	NaN	NaN	NaN
1.472	-60.9723	-67.156	1314.6403	-2.6725	0.75235	-0.27715	41.015	-300.9	1089.482	-0.56836	0.52539	-0.56934	NaN	NaN	NaN	NaN	NaN	NaN	NaN	NaN	NaN	NaN	NaN	NaN
1.474	-68.4888	-68.999	1331.2359	-2.8666	0.79317	-0.28691	43.054	-301.498	1134.169	-0.68838	0.54883	-0.56592	NaN	NaN	NaN	NaN	NaN	NaN	NaN	NaN	NaN	NaN	NaN	NaN
1.476	-78.7359	-72.476	1332.465	-3.0308	0.8501	-0.30029	9.52165	-237.181	1102.00095	-0.83711	0.58486	-0.56269	NaN	NaN	NaN	NaN	NaN	NaN	NaN	NaN	NaN	NaN	NaN	NaN
1.478	-75.1367	-85.4193	1323.8626	-3.1409	0.90986	-0.31084	-30.9465	-242.516	1107.68	-1.0055	0.63096	-0.55449	NaN	NaN	NaN	NaN	NaN	NaN	NaN	NaN	NaN	NaN	NaN	NaN
1.48	-72.053	-106.27	1318.285	-3.1875	0.96523	-0.3164	4.7023	-154.912	1141.857	-1.1795	0.68965	-0.54258	NaN	NaN	NaN	NaN	NaN	NaN	NaN	NaN	NaN	NaN	NaN	NaN
1.482	-77.1019	-113.476	1318.3	-3.1761	1.0094	-0.3164	6.007	-115.202	1113.4185	-1.3555	0.75195	-0.53174	NaN	NaN	NaN	NaN	NaN	NaN	NaN	NaN	NaN	NaN	NaN	NaN
1.484	-84.762	-106.508	1319.333	-3.128	1.0395	-0.32295	32.8095	-144.99	1159.557	-1.5385	0.80918	-0.54785	NaN	NaN	NaN	NaN	NaN	NaN	NaN	NaN	NaN	NaN	NaN	NaN
1.486	-59.51	-82.733	1319.714	-3.0522	1.063	-0.32471	65.158	-91.934	1179.272	-1.6906	0.85605	-0.5625	NaN	NaN	NaN	NaN	NaN	NaN	NaN	NaN	NaN	NaN	NaN	NaN
1.488	-52.431	-80.98	1346.833	-2.96	1.0819	-0.32597	51.876	-121.236	1171.338	-1.8246	0.88692	-0.59102	NaN	NaN	NaN	NaN	NaN	NaN	NaN	NaN	NaN	NaN	NaN	NaN
1.49	-48.644	-72.8633	1357.375	-2.8597	1.1091	-0.32471	101.905	-88.909	1188.377	-1.946	0.89912	-0.61787	NaN	NaN	NaN	NaN	NaN	NaN	NaN	NaN	NaN	NaN	NaN	NaN
1.492	-57.397	-68.289	1357.697	-2.7577	1.1345	-0.32666	56.704	-41.006	1138.572	-2.0562	0.90674	-0.64648	NaN	NaN	NaN	NaN	NaN	NaN	NaN	NaN	NaN	NaN	NaN	NaN
1.494	-86.893	-55.239	1339.624	-2.6483	1.161	-0.32656	48.058	-136.5796	1170.4624	-2.1558	0.91563	-0.67266	NaN	NaN	NaN	NaN	NaN	NaN	NaN	NaN	NaN	NaN	NaN	NaN
1.496	-66.712	-44.574	1319.3736	-2.5269	1.1802	-0.33398	48.417	-151.1275	1220.132	-2.2351	0.93056	-0.69209	NaN	NaN	NaN	NaN	NaN	NaN	NaN	NaN	NaN	NaN	NaN	NaN
1.498	-74.771	-21.8906	1302.195	-2.3998	1.1826	-0.33418	26.0546	-164.373	1228.4259	-2.298	0.95361	-0.71748	NaN	NaN	NaN	NaN	NaN	NaN	NaN	NaN	NaN	NaN	NaN	NaN
1.5	-69.112	-18.6492	1278.531	-2.2617	1.1817	-0.3375	25.3498	-193.55	1280.203	-2.3409	0.98643	-0.72939	NaN	NaN	NaN	NaN	NaN	NaN	NaN	NaN	NaN	NaN	NaN	NaN
1.502	-87.9215	-24.4162	1235.293	-2.1308	1.1641	-0.33476	30.3748	-122.4192	1281.8599	-2.3535	1.0117	-0.74219	NaN	NaN	NaN	NaN	NaN	NaN	NaN	NaN	NaN	NaN	NaN	NaN
1.504	-51.447	-28.52806	1243.524	-2.0091	1.1406	-0.32979	13.0944	-142.0616	1292.938	-2.3438	1.0128	-0.76103	NaN	NaN	NaN	NaN	NaN	NaN	NaN	NaN	NaN	NaN	NaN	NaN
1.506	-61.326	-37.6578	1255.5349	-1.9082	1.1113	-0.3208	4.7005	-148.5806	1327.945	-2.3238	0.99571	-0.78652	NaN	NaN	NaN	NaN	NaN	NaN	NaN	NaN	NaN	NaN	NaN	NaN
1.508	-51.203	-34.0683	1254.6764	-1.8274	1.0809	-0.31445	36.732	-109.849	1315.231	-2.3149	0.95469	-0.81817	NaN	NaN	NaN	NaN	NaN	NaN	NaN	NaN	NaN	NaN	NaN	NaN
1.51	-45.053	-32.8034	1232.8966	-1.7722	1.0486	-0.3123	51.65	-166.187	1326.099	-2.3223	0.90371	-0.84883	NaN	NaN	NaN	NaN	NaN	NaN	NaN	NaN	NaN	NaN	NaN	NaN
1.512	-59.692	-28.13535	1214.5588	-1.7242	1.0224	-0.30097	54.14	-140.414	1330.871	-2.3237	0.85693	-0.87939	NaN	NaN	NaN	NaN	NaN	NaN	NaN	NaN	NaN	NaN	NaN	NaN
1.514	-55.734	-27.0638	1209.16	-1.6807	0.9916	-0.28721	40.959	-99.206	1273.7661	-2.2995	0.84131	-0.90478	NaN	NaN	NaN	NaN	NaN	NaN	NaN	NaN	NaN	NaN	NaN	NaN
1.516	-85.947	-28.9698	1198.446	-1.644	0.95557	-0.27881	27.74	-120.741	1237.629	-2.2492	0.83662	-0.92412	NaN	NaN	NaN	NaN	NaN	NaN	NaN	NaN	NaN	NaN	NaN	NaN
1.518	-86.888319	-24.7117	1208.80395	-1.6035	0.92187	-0.26455	13.842	-4.76748	1196.602	-2.1894	0.84014	-0.95107	NaN	NaN	NaN	NaN	NaN	NaN	NaN	NaN	NaN	NaN	NaN	NaN
1.52	-81.3828	-13.2675	1190.1601	-1.5607	0.88457	-0.25508	4.1833	-19.463	1194.226	-2.1368	0.84326	-0.96689	NaN	NaN	NaN	NaN	NaN	NaN	NaN	NaN	NaN	NaN	NaN	NaN
1.522	-59.0059	6.5819	1158.5686	-1.5186	0.84863	-0.24101	46.229	-37.835	1258.1244	-2.0991	0.85791	-0.98584	NaN	NaN	NaN	NaN	NaN	NaN	NaN	NaN	NaN	NaN	NaN	NaN
1.524	-71.3523	14.9461	1150.8856	-1.4738	0.81543	-0.22852	38.1331	9.75899999999999	1233.207	-2.0747	0.88623	-0.99874	NaN	NaN	NaN	NaN	NaN	NaN	NaN	NaN	NaN	NaN	NaN	NaN
1.526	-68.1663	10.6245	1129.3301	-1.4272	0.78174	-0.21631	20.042	-65.874	1243.76828	-2.0504	0.92061	-1.0055	NaN	NaN	NaN	NaN	NaN	NaN	NaN	NaN	NaN	NaN	NaN	NaN
1.528	-35.352	18.54298	1121.8482	-1.38	0.74717	-0.20401	35.2696	-19.822	1252.821	-2.0254	0.95889	-1.0055	NaN	NaN	NaN	NaN	NaN	NaN	NaN	NaN	NaN	NaN	NaN	NaN
1.53	-54.982	34.5749	1091.2733	-1.3328	0.71601	-0.19248	23.49362	-5.921	1209.067	-1.9772	0.97666	-0.99758	NaN	NaN	NaN	NaN	NaN	NaN	NaN	NaN	NaN	NaN	NaN	NaN
1.532	-48.9845	34.9946	1078.0646	-1.2828	0.68711	-0.17334	39.6458	-50.515	1230.572	-1.9155	0.979	-0.98535	NaN	NaN	NaN	NaN	NaN	NaN	NaN	NaN	NaN	NaN	NaN	NaN
1.534	-31.838	44.8921	1061.693	-1.2385	0.65527	-0.15898	69.908	15.524	1225.695	-1.8455	0.96836	-0.96699	NaN	NaN	NaN	NaN	NaN	NaN	NaN	NaN	NaN	NaN	NaN	NaN
1.536	-40.41	52.4553	1038.932	-1.1963	0.62891	-0.13916	51.018	-32.6438	1241.6233	-1.7652	0.95468	-0.95156	NaN	NaN	NaN	NaN	NaN	NaN	NaN	NaN	NaN	NaN	NaN	NaN
1.538	-44.742	60.74	1022.457	-1.1575	0.60654	-0.12715	72.316	-44.13506	1287.918	-1.6883	0.93711	-0.92851	NaN	NaN	NaN	NaN	NaN	NaN	NaN	NaN	NaN	NaN	NaN	NaN
1.54	-44.866	57.822	994.381	-1.1179	0.58203	-0.11504	54.2662	7.6448	1279.217	-1.6131	0.91728	-0.9003	NaN	NaN	NaN	NaN	NaN	NaN	NaN	NaN	NaN	NaN	NaN	NaN
1.542	-40.112	55.9818	985.5855124	-1.0758	0.55586	-0.095898	53.336	-42.086	1257.616	-1.5508	0.88672	-0.87695	NaN	NaN	NaN	NaN	NaN	NaN	NaN	NaN	NaN	NaN	NaN	NaN
1.544	-52.5065	65.946	966.1624	-1.0416	0.53281	-0.081347	74.096	23.2919	1238.694	-1.5012	0.86387	-0.84844	NaN	NaN	NaN	NaN	NaN	NaN	NaN	NaN	NaN	NaN	NaN	NaN
1.546	-24.089	63.336	963.3	-1	0.51367	-0.071289	48.856	55.644	1180.405	-1.4559	0.83731	-0.81797	NaN	NaN	NaN	NaN	NaN	NaN	NaN	NaN	NaN	NaN	NaN	NaN
1.548	-32.6849	56.0065	938.437	-0.9581	0.49356	-0.058008	31.1548	27.935	1194.185	-1.4289	0.80644	-0.79492	NaN	NaN	NaN	NaN	NaN	NaN	NaN	NaN	NaN	NaN	NaN	NaN
1.55	-19.876	50.491	911.1288	-0.91494	0.4708	-0.047949	29.9376	94.917	1203.429	-1.4049	0.77715	-0.76973	NaN	NaN	NaN	NaN	NaN	NaN	NaN	NaN	NaN	NaN	NaN	NaN
1.552	-1.536	56.801	869.07	-0.87471	0.45322	-0.040137	11.924	68.5	1210.478	-1.3828	0.75195	-0.75	NaN	NaN	NaN	NaN	NaN	NaN	NaN	NaN	NaN	NaN	NaN	NaN
1.554	-2.182	70	834.94	-0.83437	0.43184	-0.026758	16.4811	79.2902	1211.511	-1.3647	0.73535	-0.72627	NaN	NaN	NaN	NaN	NaN	NaN	NaN	NaN	NaN	NaN	NaN	NaN
1.556	-34.7691	65.978	802.058	-0.79688	0.40723	-0.036133	44.4287	138.194	1155.20981	-1.3476	0.71289	-0.70293	NaN	NaN	NaN	NaN	NaN	NaN	NaN	NaN	NaN	NaN	NaN	NaN
1.558	-14.605	78.452	793.7398	-0.74912	0.38604	-0.031055	23.18908	97.8648	1105.315	-1.3336	0.68946	-0.67871	NaN	NaN	NaN	NaN	NaN	NaN	NaN	NaN	NaN	NaN	NaN	NaN
1.56	-4.914	72.6466	787.8209	-0.71045	0.3584	-0.017676	26.3497732	135.6019	1089.313	-1.3233	0.66563	-0.64824	NaN	NaN	NaN	NaN	NaN	NaN	NaN	NaN	NaN	NaN	NaN	NaN
1.562	-21.6765	71.6206	759.5795	-0.68389	0.34121	-0.01416	35.8076	153.5735	1066.411	-1.3066	0.6377	-0.62305	NaN	NaN	NaN	NaN	NaN	NaN	NaN	NaN	NaN	NaN	NaN	NaN
1.564	-27.3522	71.851	752.713	-0.65927	0.32012	-0.015332	-0.138	78.789	1107.069	-1.2928	0.61055	-0.59775	NaN	NaN	NaN	NaN	NaN	NaN	NaN	NaN	NaN	NaN	NaN	NaN
1.566	-34.5959	83.3	713.831	-0.64014	0.30469	-0.0097656	36.58	113.336	1107.156	-1.2667	0.58134	-0.57568	NaN	NaN	NaN	NaN	NaN	NaN	NaN	NaN	NaN	NaN	NaN	NaN
1.568	-29.962	103.354	675.8273	-0.621	0.29209	-0.011231	-22.0816	82.445	1081.7307	-1.2417	0.55869	-0.5503	NaN	NaN	NaN	NaN	NaN	NaN	NaN	NaN	NaN	NaN	NaN	NaN
1.57	-37.577	93.249	640.69	-0.60068	0.28174	-0.0073242	1.0904	119.6787	1067.9608	-1.2183	0.53994	-0.52295	NaN	NaN	NaN	NaN	NaN	NaN	NaN	NaN	NaN	NaN	NaN	NaN
1.572	-37.6458	74.0919	608.166	-0.58467	0.27588	-0.0092773	-23.1457	195.235	996.708	-1.1914	0.52734	-0.50195	NaN	NaN	NaN	NaN	NaN	NaN	NaN	NaN	NaN	NaN	NaN	NaN
1.574	-14.827	69.745	574.784	-0.56845	0.27705	-0.0076172	-46.439633	161.8959	981.704	-1.1748	0.51289	-0.47832	NaN	NaN	NaN	NaN	NaN	NaN	NaN	NaN	NaN	NaN	NaN	NaN
1.576	-20.9379	69.885	541.928	-0.54883	0.27881	-0.003418	-9.19	172.5841	964.225	-1.1578	0.49785	-0.45664	NaN	NaN	NaN	NaN	NaN	NaN	NaN	NaN	NaN	NaN	NaN	NaN
1.578	-27.6721	68.909	534.357	-0.52754	0.28076	-0.010937	-30.0936	152.0036	935.3127	-1.1453	0.48965	-0.43594	NaN	NaN	NaN	NaN	NaN	NaN	NaN	NaN	NaN	NaN	NaN	NaN
1.58	-24.6777	68.387	522.1929	-0.50108	0.2833	-0.010058	-14.6333	104.932	950.087	-1.1338	0.47442	-0.41396	NaN	NaN	NaN	NaN	NaN	NaN	NaN	NaN	NaN	NaN	NaN	NaN
1.582	-13.128	75.0099	506.368	-0.47764	0.28838	-0.009668	7.4274	165.18207	936.8236	-1.1172	0.45898	-0.40625	NaN	NaN	NaN	NaN	NaN	NaN	NaN	NaN	NaN	NaN	NaN	NaN
1.584	-24.935	74.0254	472.661	-0.44278	0.29043	-0.010352	-12.964	185.80411	903.761	-1.1047	0.45351	-0.38594	NaN	NaN	NaN	NaN	NaN	NaN	NaN	NaN	NaN	NaN	NaN	NaN
1.586	-28.7711	66.9529	432.2502	-0.40723	0.28906	-0.013672	-0.558	194.3603	871.2982	-1.0887	0.44336	-0.37754	NaN	NaN	NaN	NaN	NaN	NaN	NaN	NaN	NaN	NaN	NaN	NaN
1.588	-12.501	72.013	420.6864	-0.36368	0.28808	-0.010351	-12.662	243.357	799.4	-1.0668	0.43789	-0.36777	NaN	NaN	NaN	NaN	NaN	NaN	NaN	NaN	NaN	NaN	NaN	NaN
1.59	-14.4828	88.769	395.9297	-0.31953	0.28711	-0.0088867	-38.622	189.4129	768.339	-1.0388	0.43662	-0.3581	NaN	NaN	NaN	NaN	NaN	NaN	NaN	NaN	NaN	NaN	NaN	NaN
1.592	-23.723	89.946	357.8225	-0.27617	0.28203	-0.0084961	-31.0459	194.488	774.387	-1.0137	0.43945	-0.34424	NaN	NaN	NaN	NaN	NaN	NaN	NaN	NaN	NaN	NaN	NaN	NaN
1.594	-24.705	83.3512	315.079	-0.23203	0.28164	-0.012793	-25.9553	185.294	762.7897	-0.98272	0.44502	-0.3333	NaN	NaN	NaN	NaN	NaN	NaN	NaN	NaN	NaN	NaN	NaN	NaN
1.596	-6.038	65.3287	291.975	-0.18945	0.27246	-0.014648	-52.5434	142.0118	765.392	-0.94726	0.45195	-0.32109	NaN	NaN	NaN	NaN	NaN	NaN	NaN	NaN	NaN	NaN	NaN	NaN
1.598	3.612	66.892	274.083	-0.1458	0.25967	-0.012793	-9.632	180.039	746.3133	-0.9125	0.45313	-0.30859	NaN	NaN	NaN	NaN	NaN	NaN	NaN	NaN	NaN	NaN	NaN	NaN
1.6	13.039	59.495	270.0388	-0.10576	0.246	-0.017382	-40.0177	153.41638	697.7273	-0.87139	0.4583	-0.29775	NaN	NaN	NaN	NaN	NaN	NaN	NaN	NaN	NaN	NaN	NaN	NaN
1.602	0.414	74.2355	250.5369	-0.062793	0.2335	-0.016602	-22.217	150.089	670.1221	-0.81836	0.46387	-0.28516	NaN	NaN	NaN	NaN	NaN	NaN	NaN	NaN	NaN	NaN	NaN	NaN
1.604	1.173	84.81091	210.0615	-0.024902	0.22129	-0.021973	-6.01	194.7127	628.6872	-0.7668	0.46963	-0.26738	NaN	NaN	NaN	NaN	NaN	NaN	NaN	NaN	NaN	NaN	NaN	NaN
1.606	11.036	88.0043	190.422	0.012207	0.20459	-0.020508	-47.27187	149.513	588.2284	-0.70996	0.47422	-0.25039	NaN	NaN	NaN	NaN	NaN	NaN	NaN	NaN	NaN	NaN	NaN	NaN
1.608	-0.591999999999999	83.817	167.309	0.043946	0.19228	-0.021778	6.635	167.5389	554.751	-0.6459	0.47656	-0.2332	NaN	NaN	NaN	NaN	NaN	NaN	NaN	NaN	NaN	NaN	NaN	NaN
1.61	-18.954	74.5	166.184	0.080957	0.16435	-0.01748	-11.5606	155.1659	503.6792	-0.57988	0.47802	-0.20284	NaN	NaN	NaN	NaN	NaN	NaN	NaN	NaN	NaN	NaN	NaN	NaN
1.612	0.783000000000001	85.551	145.217	0.10518	0.14209	-0.020215	-34.619	118.363	471.5291	-0.50586	0.47705	-0.17383	NaN	NaN	NaN	NaN	NaN	NaN	NaN	NaN	NaN	NaN	NaN	NaN
1.614	-11.816	79.408	138.547	0.12988	0.11729	-0.014746	-26.952	138.138	437.7242	-0.43535	0.47285	-0.15625	NaN	NaN	NaN	NaN	NaN	NaN	NaN	NaN	NaN	NaN	NaN	NaN
1.616	-24.3654	51.4348	124.226	0.15137	0.094727	-0.011719	-45.80403	132.9017	403.9068	-0.34834	0.4585	-0.15244	NaN	NaN	NaN	NaN	NaN	NaN	NaN	NaN	NaN	NaN	NaN	NaN
1.618	-13.368	37.2791	123.8621	0.17256	0.067676	-0.0091797	-15.766	125.3353	381.848	-0.24717	0.43584	-0.12666	NaN	NaN	NaN	NaN	NaN	NaN	NaN	NaN	NaN	NaN	NaN	NaN
1.62	2.988	43.9558	100.8701	0.18848	0.043457	-0.0076172	-17.2836	173.291	339.9687	-0.15557	0.40303	-0.1	NaN	NaN	NaN	NaN	NaN	NaN	NaN	NaN	NaN	NaN	NaN	NaN
1.622	-10.866	56.67338	73.2244	0.20371	0.021191	-0.0091798	-32.2435	151.758	285.012	-0.078125	0.36523	-0.067383	NaN	NaN	NaN	NaN	NaN	NaN	NaN	NaN	NaN	NaN	NaN	NaN
1.624	-8.376	58.3248	57.419	0.21758	-0.00039064	-0.0043945	5.935	147.695	244.657	-0.0039041	0.32558	-0.042284	NaN	NaN	NaN	NaN	NaN	NaN	NaN	NaN	NaN	NaN	NaN	NaN
1.626	-5.463	50.3854	57.245	0.22705	-0.029297	-0.0073242	-9.412	143.643	183.322	0.060355	0.28447	-0.016795	NaN	NaN	NaN	NaN	NaN	NaN	NaN	NaN	NaN	NaN	NaN	NaN
1.628	1.667	57.0588	44.835	0.22949	-0.058008	-0.0073242	-31.867	89.6049	166.0168	0.11426	0.23837	0.013674	NaN	NaN	NaN	NaN	NaN	NaN	NaN	NaN	NaN	NaN	NaN	NaN
1.63	-9.5142	43.4667	33.543	0.22871	-0.085058	-0.0064453	12.71	99.7014	142.648	0.16221	0.19794	0.044533	NaN	NaN	NaN	NaN	NaN	NaN	NaN	NaN	NaN	NaN	NaN	NaN
1.632	-7.893	30.7937	44.789	0.22403	-0.10927	-0.0064453	-28.30146	85.452	132.815	0.19678	0.16016	0.064941	NaN	NaN	NaN	NaN	NaN	NaN	NaN	NaN	NaN	NaN	NaN	NaN
1.634	-4.887	28.69889	47.0757	0.21572	-0.12862	-0.005957	-19.4982	70.542	143.2861	0.23017	0.11065	0.099313	NaN	NaN	NaN	NaN	NaN	NaN	NaN	NaN	NaN	NaN	NaN	NaN
1.636	-22.5051	45.949	48.8951	0.20264	-0.15137	-0.0083008	7.6039	94.9884	103.859	0.2537	0.071103	0.1246	NaN	NaN	NaN	NaN	NaN	NaN	NaN	NaN	NaN	NaN	NaN	NaN
1.638	-26.0958	51.816	31.12	0.18486	-0.17109	-0.0054688	-28.92	72.8908	84.39252	0.26582	0.033214	0.14843	NaN	NaN	NaN	NaN	NaN	NaN	NaN	NaN	NaN	NaN	NaN	NaN
1.64	-23.003	55.17	15.68872	0.16279	-0.18613	-0.006543	3.397	89.22	84.677	0.27198	-0.0057541	0.17031	NaN	NaN	NaN	NaN	NaN	NaN	NaN	NaN	NaN	NaN	NaN	NaN
1.642	-3.349	41.823	8.6306	0.14014	-0.19903	-0.0049804	-15.063	91.447	53.985	0.27393	-0.043457	0.18896	NaN	NaN	NaN	NaN	NaN	NaN	NaN	NaN	NaN	NaN	NaN	NaN
1.644	-9.663	31.8448	6.543	0.11865	-0.20928	-0.010352	-29.1532	47.6965	61.2699	0.26943	-0.077455	0.20948	NaN	NaN	NaN	NaN	NaN	NaN	NaN	NaN	NaN	NaN	NaN	NaN
1.646	-0.313000000000002	20.7353	5.825	0.092285	-0.21582	-0.012695	9.816	40.428	58.3878	0.2577	-0.11449	0.22657	NaN	NaN	NaN	NaN	NaN	NaN	NaN	NaN	NaN	NaN	NaN	NaN
1.648	6.9187	15.89	12.346	0.072168	-0.21396	-0.013086	-22.3143	16.016	52.714	0.24246	-0.15004	0.24534	NaN	NaN	NaN	NaN	NaN	NaN	NaN	NaN	NaN	NaN	NaN	NaN
1.65	14.3106	17.8509	24.5325	0.044824	-0.2082	-0.015332	3.16	3.798	53.6623	0.22889	-0.17698	0.26115	NaN	NaN	NaN	NaN	NaN	NaN	NaN	NaN	NaN	NaN	NaN	NaN
1.652	5.179	30.8805	20.3156	0.022168	-0.19961	-0.018847	-23.92185	45.8197	36.7545	0.20703	-0.20215	0.27686	NaN	NaN	NaN	NaN	NaN	NaN	NaN	NaN	NaN	NaN	NaN	NaN
1.654	1.748	9.5643	30.801	0.00078117	-0.1878	-0.021875	-25.1876	50.0877	8.87878	0.18617	-0.22156	0.28925	NaN	NaN	NaN	NaN	NaN	NaN	NaN	NaN	NaN	NaN	NaN	NaN
1.656	-5.63	8.4715	34.138	-0.012695	-0.17334	-0.030762	3.733	52.6416	15.0469	0.16323	-0.23503	0.30028	NaN	NaN	NaN	NaN	NaN	NaN	NaN	NaN	NaN	NaN	NaN	NaN
1.658	1.893	12.9459	14.4239	-0.025781	-0.1585	-0.032129	-15.7854	68.746	1.4699	0.1422	-0.23626	0.31116	NaN	NaN	NaN	NaN	NaN	NaN	NaN	NaN	NaN	NaN	NaN	NaN
1.66	-21.9328	22.0303	12.2828	-0.03291	-0.14698	-0.045801	-14.3077	32.845602	17.21432	0.11316	-0.24265	0.31376	NaN	NaN	NaN	NaN	NaN	NaN	NaN	NaN	NaN	NaN	NaN	NaN
1.662	-11.292	17.1224	6.714	-0.042285	-0.13369	-0.044238	26.0394	29.9998	26.4225	0.092285	-0.24414	0.31396	NaN	NaN	NaN	NaN	NaN	NaN	NaN	NaN	NaN	NaN	NaN	NaN
1.664	-0.811	-0.2593	15.6019	-0.040625	-0.1251	-0.051856	-25.8639	7.7434	24.68	0.076864	-0.24195	0.31326	NaN	NaN	NaN	NaN	NaN	NaN	NaN	NaN	NaN	NaN	NaN	NaN
1.666	-11.167	3.615	-12.7438	-0.040039	-0.11426	-0.055176	-18.828	-10.064	39.7516	0.062846	-0.23205	0.31282	NaN	NaN	NaN	NaN	NaN	NaN	NaN	NaN	NaN	NaN	NaN	NaN
1.668	-14.9238	5.7434	-13.41836	-0.034961	-0.10342	-0.06416	-13.4103	35.4645	32.12	0.051897	-0.22538	0.31316	NaN	NaN	NaN	NaN	NaN	NaN	NaN	NaN	NaN	NaN	NaN	NaN
1.67	5.367	1.0309	-0.5967	-0.031152	-0.09414	-0.067383	-48.7993	38.2698	9.1344	0.050781	-0.21748	0.3074	NaN	NaN	NaN	NaN	NaN	NaN	NaN	NaN	NaN	NaN	NaN	NaN
1.672	10.7436	16.7366	22.101	-0.024121	-0.083984	-0.069726	13.559	27.6896	28.474	0.052246	-0.20557	0.30029	NaN	NaN	NaN	NaN	NaN	NaN	NaN	NaN	NaN	NaN	NaN	NaN
1.674	-8.5106	22.739	22.909	-0.018066	-0.07539	-0.07129	-22.8167	27.3033	-1.729	0.057849	-0.18824	0.29598	NaN	NaN	NaN	NaN	NaN	NaN	NaN	NaN	NaN	NaN	NaN	NaN
1.676	-16.243	22.608	2.9199	-0.0039063	-0.065918	-0.069824	-28.784	-5.2803	4.6488	0.06354	-0.17444	0.28984	NaN	NaN	NaN	NaN	NaN	NaN	NaN	NaN	NaN	NaN	NaN	NaN
1.678	-20.6693	6.75616	9.1182	0.006053	-0.056739	-0.077441	12.1811	7.9322	10.239	0.069166	-0.15587	0.28238	NaN	NaN	NaN	NaN	NaN	NaN	NaN	NaN	NaN	NaN	NaN	NaN
1.68	-6.534	6.5027	9.183	0.020797	-0.050393	-0.08037	-22.8647	1.991	5.139	0.078754	-0.13825	0.27187	NaN	NaN	NaN	NaN	NaN	NaN	NaN	NaN	NaN	NaN	NaN	NaN
1.682	-19.266	6.0075	0.298999999999999	0.038765	-0.042189	-0.079592	3.276	-16.18	31.56794	0.081543	-0.12012	0.26123	NaN	NaN	NaN	NaN	NaN	NaN	NaN	NaN	NaN	NaN	NaN	NaN
1.684	-17.886	3.2404	-10.67	0.056538	-0.041504	-0.088671	1.212	12.5931	14.918	0.085548	-0.1012	0.25097	NaN	NaN	NaN	NaN	NaN	NaN	NaN	NaN	NaN	NaN	NaN	NaN
1.686	-11.8959	3.35765	-7.0573	0.078125	-0.037109	-0.09375	-23.5983	19.4874	18.88865	0.081568	-0.081181	0.24024	NaN	NaN	NaN	NaN	NaN	NaN	NaN	NaN	NaN	NaN	NaN	NaN
1.688	-4.513	-3.54038	10.80178	0.1005	-0.036818	-0.099317	7.934	29.676	28.6516	0.072908	-0.05911	0.22731	NaN	NaN	NaN	NaN	NaN	NaN	NaN	NaN	NaN	NaN	NaN	NaN
1.69	-12.7415	-3.7585	9.4242	0.11994	-0.036719	-0.10508	-16.3476	47.486	0.641	0.063884	-0.032529	0.21709	NaN	NaN	NaN	NaN	NaN	NaN	NaN	NaN	NaN	NaN	NaN	NaN
1.692	-8.61	-7.35818	13.60479	0.13869	-0.038284	-0.10821	-37.14608	19.3968	10.6982	0.054688	-0.0048828	0.21143	NaN	NaN	NaN	NaN	NaN	NaN	NaN	NaN	NaN	NaN	NaN	NaN
1.694	1.878	8.98689	7.6371	0.16232	-0.040242	-0.11485	-1.244	16.8718	0.870000000000001	0.046199	0.022404	0.20082	NaN	NaN	NaN	NaN	NaN	NaN	NaN	NaN	NaN	NaN	NaN	NaN
1.696	-3.035	19.4681	4.3508	0.17773	-0.04541	-0.12207	-20.233	3.9639	-11.73	0.04086	0.04715	0.19139	NaN	NaN	NaN	NaN	NaN	NaN	NaN	NaN	NaN	NaN	NaN	NaN
1.698	-10.522	28.33582	10.4282	0.19255	-0.049019	-0.12811	1.665	-17.2155	13.223	0.036386	0.074324	0.18726	NaN	NaN	NaN	NaN	NaN	NaN	NaN	NaN	NaN	NaN	NaN	NaN
1.7	2.7	10.5962	-8.472	0.20719	-0.050578	-0.13894	7.844	7.6902	9.55	0.038702	0.094112	0.17726	NaN	NaN	NaN	NaN	NaN	NaN	NaN	NaN	NaN	NaN	NaN	NaN
1.702	-0.219999999999999	1.2902	3.976	0.21927	-0.051371	-0.15063	-30.9605	-0.0125000000000011	8.972	0.039063	0.11572	0.16602	NaN	NaN	NaN	NaN	NaN	NaN	NaN	NaN	NaN	NaN	NaN	NaN
1.704	2.8354	4.0673	-8.59747	0.23218	-0.049998	-0.15602	15.4701	3.04686	33.412	0.03903	0.14007	0.15975	NaN	NaN	NaN	NaN	NaN	NaN	NaN	NaN	NaN	NaN	NaN	NaN
1.706	-12.175	7.0581	4.1455	0.23828	-0.051758	-0.16162	-20.2811	19.54156	12.2504	0.039175	0.15326	0.15525	NaN	NaN	NaN	NaN	NaN	NaN	NaN	NaN	NaN	NaN	NaN	NaN
1.708	1.094	12.0585	3.309799	0.24243	-0.046946	-0.17394	-25.07	1.2816	13.5934	0.037037	0.17011	0.14445	NaN	NaN	NaN	NaN	NaN	NaN	NaN	NaN	NaN	NaN	NaN	NaN
1.71	-1.56	5.758358	7.8206	0.24106	-0.040848	-0.18342	14.935	8.0945	18.0348	0.029916	0.18509	0.13837	NaN	NaN	NaN	NaN	NaN	NaN	NaN	NaN	NaN	NaN	NaN	NaN
1.712	-2.01	14.9471	-8.2351	0.23274	-0.039175	-0.19483	-38.9612	6.3825	-12.776323	0.01709	0.19531	0.13867	NaN	NaN	NaN	NaN	NaN	NaN	NaN	NaN	NaN	NaN	NaN	NaN
1.714	-11.9917	7.11638	-7.70099	0.22129	-0.037235	-0.20582	-6.923	-15.968	15.6912	0.0042545	0.2063	0.13651	NaN	NaN	NaN	NaN	NaN	NaN	NaN	NaN	NaN	NaN	NaN	NaN
1.716	0.367000000000001	6.4163	0.177	0.20264	-0.03418	-0.21289	-1.493	2.8011	7.351	-0.012254	0.21567	0.1358	NaN	NaN	NaN	NaN	NaN	NaN	NaN	NaN	NaN	NaN	NaN	NaN
1.718	4.713	15.1361	-2.5991	0.1816	-0.025837	-0.21854	-41.1013	12.1568	-2.97149	-0.029074	0.227	0.13391	NaN	NaN	NaN	NaN	NaN	NaN	NaN	NaN	NaN	NaN	NaN	NaN
1.72	-11.747	17.7732	-6.697	0.15799	-0.020175	-0.22535	6.358	18.8919	17.7174	-0.048657	0.23917	0.12685	NaN	NaN	NaN	NaN	NaN	NaN	NaN	NaN	NaN	NaN	NaN	NaN
1.722	-14.576	10.7165	4.674	0.12211	-0.011181	-0.23364	-18.782	49.479	-2.6024	-0.062988	0.24658	0.125	NaN	NaN	NaN	NaN	NaN	NaN	NaN	NaN	NaN	NaN	NaN	NaN
1.724	8.494	4.4743	62.19	0.084642	0.00074193	-0.2428	-20.01	36.7615	-1.0558	-0.084453	0.25458	0.12236	NaN	NaN	NaN	NaN	NaN	NaN	NaN	NaN	NaN	NaN	NaN	NaN
1.726	1.785	-4.4386	93.293	0.028809	0.016602	-0.24951	20.5828	24.284	-2.72881	-0.099201	0.2622	0.12032	NaN	NaN	NaN	NaN	NaN	NaN	NaN	NaN	NaN	NaN	NaN	NaN
1.728	-26.0249	22.503	168.939	-0.052494	0.018555	-0.25771	-27.9522	23.38558	-14.1661	-0.11249	0.26845	0.11407	NaN	NaN	NaN	NaN	NaN	NaN	NaN	NaN	NaN	NaN	NaN	NaN
1.73	-8.283	17.7875	185.834	-0.15732	0.010457	-0.26771	-14.8979	4.209	9.5575	-0.12822	0.2706	0.11094	NaN	NaN	NaN	NaN	NaN	NaN	NaN	NaN	NaN	NaN	NaN	NaN
1.732	-19.6884	1.879	212.1243	-0.27597	0.00061838	-0.28115	10.6806	9.1214525	3.958	-0.14209	0.27148	0.11084	NaN	NaN	NaN	NaN	NaN	NaN	NaN	NaN	NaN	NaN	NaN	NaN
1.734	20.935	-32.96	212.1871	-0.40009	-0.0045491	-0.28353	-27.4934	12.3369	3.0811	-0.1501	0.27519	0.10498	NaN	NaN	NaN	NaN	NaN	NaN	NaN	NaN	NaN	NaN	NaN	NaN
1.736	8.7792	-80.671	221.6526	-0.52979	0.0019531	-0.2876	-4.305	8.0984	49.6063	-0.16084	0.28086	0.10088	NaN	NaN	NaN	NaN	NaN	NaN	NaN	NaN	NaN	NaN	NaN	NaN
1.738	-33.4845	-93.8917	308.568	-0.66573	0.020752	-0.29315	-18.8539	2.95	38.332	-0.17608	0.28242	0.089549	NaN	NaN	NaN	NaN	NaN	NaN	NaN	NaN	NaN	NaN	NaN	NaN
1.74	-6.1951	-53.7083	413.39	-0.80753	0.037343	-0.30541	-32.5355	-30.7487	68.4513	-0.20147	0.28106	0.076268	NaN	NaN	NaN	NaN	NaN	NaN	NaN	NaN	NaN	NaN	NaN	NaN
1.742	15.2806	-19.2359	493.03	-0.96604	0.043629	-0.31339	35.6914	-18.3598	72.6693	-0.24023	0.27344	0.060547	NaN	NaN	NaN	NaN	NaN	NaN	NaN	NaN	NaN	NaN	NaN	NaN
1.744	33.953	-6.1139	555.47	-1.1516	0.040781	-0.32745	-2.0862	2.3543	65.4629	-0.27734	0.26865	0.041506	NaN	NaN	NaN	NaN	NaN	NaN	NaN	NaN	NaN	NaN	NaN	NaN
1.746	38.8553	-19.659	638.949	-1.3589	0.039063	-0.34668	-16.9144	-5.6896	147.1107	-0.32607	0.27119	0.012015	NaN	NaN	NaN	NaN	NaN	NaN	NaN	NaN	NaN	NaN	NaN	NaN
1.748	60.8696	-0.0139999999999958	765.3227	-1.5944	0.046803	-0.36841	-21.472	20.7343	263.65	-0.40028	0.27158	-0.032516	NaN	NaN	NaN	NaN	NaN	NaN	NaN	NaN	NaN	NaN	NaN	NaN
1.75	36.088	38.433	867.9801	-1.8531	0.070433	-0.38478	-31.898	32.14	404.195	-0.50986	0.25537	-0.088671	NaN	NaN	NaN	NaN	NaN	NaN	NaN	NaN	NaN	NaN	NaN	NaN
1.752	-2.573	71.443	974.549	-2.1428	0.12478	-0.3807	28.7351	44.519	655.98	-0.65625	0.23145	-0.13672	NaN	NaN	NaN	NaN	NaN	NaN	NaN	NaN	NaN	NaN	NaN	NaN
1.754	29.0559	107.662	1023.121	-2.4977	0.18903	-0.3043	35.511	65.271	790.384	-0.85108	0.17959	-0.18242	NaN	NaN	NaN	NaN	NaN	NaN	NaN	NaN	NaN	NaN	NaN	NaN
1.756	43.56	97.368	1049.712	-2.8706	0.29346	-0.31299	49.957	19.9377	915.391	-1.0851	0.11631	-0.2291	NaN	NaN	NaN	NaN	NaN	NaN	NaN	NaN	NaN	NaN	NaN	NaN
1.758	32.7771	58.269	1060.725	-3.0859	0.44666	-0.34179	140.7917	-36.259	1014.75	-1.3492	0.062011	-0.26543	NaN	NaN	NaN	NaN	NaN	NaN	NaN	NaN	NaN	NaN	NaN	NaN
1.76	3.1918	6.8692	1078.518	-3.1447	0.57906	-0.36204	48.684	-62.962	1102.48677	-1.6228	0.04834	-0.30196	NaN	NaN	NaN	NaN	NaN	NaN	NaN	NaN	NaN	NaN	NaN	NaN
1.762	1.658	-42.273	1118.571	-3.0825	0.68952	-0.37064	-29.5096	-76.593	1247.734	-1.9004	0.092285	-0.28906	NaN	NaN	NaN	NaN	NaN	NaN	NaN	NaN	NaN	NaN	NaN	NaN
1.764	5.3039	-86.191	1121.849	-2.9561	0.79182	-0.36924	4.642	-84.312	1258.658	-2.2115	0.16699	-0.29463	NaN	NaN	NaN	NaN	NaN	NaN	NaN	NaN	NaN	NaN	NaN	NaN
1.766	-18.402	-102.097	1098.085	-2.7734	0.85156	-0.36719	8.817	-110.566873	1225.504	-2.4211	0.31679	-0.34571	NaN	NaN	NaN	NaN	NaN	NaN	NaN	NaN	NaN	NaN	NaN	NaN
1.768	-8.749	-121.229	1055.525	-2.5048	0.87538	-0.38602	76.637	-169.67	1244.465	-2.4871	0.45703	-0.3832	NaN	NaN	NaN	NaN	NaN	NaN	NaN	NaN	NaN	NaN	NaN	NaN
1.77	19.486	-123.124	1047.393	-2.1804	0.86448	-0.41454	69.444	-190.125	1218.727	-2.4392	0.56338	-0.3791	NaN	NaN	NaN	NaN	NaN	NaN	NaN	NaN	NaN	NaN	NaN	NaN
1.772	-9.177	-116.085	1067.181	-1.8823	0.83596	-0.41885	37.879	-248.809	1240.424	-2.3433	0.6543	-0.35449	NaN	NaN	NaN	NaN	NaN	NaN	NaN	NaN	NaN	NaN	NaN	NaN
1.774	-41.7792	-73.26264	1091.3017	-1.6524	0.78635	-0.40664	81.285	-224.163	1201.464	-2.2128	0.70908	-0.31318	NaN	NaN	NaN	NaN	NaN	NaN	NaN	NaN	NaN	NaN	NaN	NaN
1.776	-36.008	-44.8299	1097.1332	-1.4609	0.73047	-0.39844	76.019	-185.29	1133.349	-2.0546	0.7167	-0.26181	NaN	NaN	NaN	NaN	NaN	NaN	NaN	NaN	NaN	NaN	NaN	NaN
1.778	1.2799	-31.6341	1132.164	-1.2968	0.67636	-0.40977	79.009	-163.03437	1091.225	-1.862	0.67959	-0.21377	NaN	NaN	NaN	NaN	NaN	NaN	NaN	NaN	NaN	NaN	NaN	NaN
1.78	-2.825	-29.58	1128.1843	-1.1558	0.6288	-0.40732	95.092	-39.927	1030.732	-1.6636	0.62568	-0.1751	NaN	NaN	NaN	NaN	NaN	NaN	NaN	NaN	NaN	NaN	NaN	NaN
1.782	-28.6271	-24.568	1122.783	-1.0315	0.58426	-0.40185	59.411	38.502	1007.435	-1.4688	0.58691	-0.13623	NaN	NaN	NaN	NaN	NaN	NaN	NaN	NaN	NaN	NaN	NaN	NaN
1.784	-13.834	-46.821	1120.871	-0.92948	0.5498	-0.41484	41.7292	32.93	1043.0494	-1.3167	0.57393	-0.11338	NaN	NaN	NaN	NaN	NaN	NaN	NaN	NaN	NaN	NaN	NaN	NaN
1.786	-21.4179	-66.867	1120.783	-0.86328	0.52051	-0.41406	-3.491	47.612	1004.354	-1.196	0.58799	-0.080762	NaN	NaN	NaN	NaN	NaN	NaN	NaN	NaN	NaN	NaN	NaN	NaN
1.788	-8.3194	-99.177	1100.687	-0.82549	0.49756	-0.41318	-63.978	-30.403	989.9982	-1.101	0.62275	-0.04834	NaN	NaN	NaN	NaN	NaN	NaN	NaN	NaN	NaN	NaN	NaN	NaN
1.79	-2.6751	-153.475	1096.791	-0.8167	0.47861	-0.43242	-14.736	-40.2	929.972	-1.0191	0.65899	-0.013867	NaN	NaN	NaN	NaN	NaN	NaN	NaN	NaN	NaN	NaN	NaN	NaN
1.792	24.7612	-192.691	1118.946	-0.80967	0.46689	-0.45351	-34.429	-65.89	831.214	-0.95703	0.69238	0.0083008	NaN	NaN	NaN	NaN	NaN	NaN	NaN	NaN	NaN	NaN	NaN	NaN
1.794	25.8229	-202.8	1164.968	-0.82627	0.44776	-0.47197	-7.90200000000001	-166.614	877.77	-0.90722	0.73145	0.01084	NaN	NaN	NaN	NaN	NaN	NaN	NaN	NaN	NaN	NaN	NaN	NaN
1.796	17.0486	-191.33	1204.3	-0.88428	0.42432	-0.47803	15.45	-176.168	892.687	-0.87803	0.779	-0.0035156	NaN	NaN	NaN	NaN	NaN	NaN	NaN	NaN	NaN	NaN	NaN	NaN
1.798	11.8353	-160.579	1224.799	-0.99275	0.39023	-0.48418	-34.9739	-255.09	920.3842	-0.86084	0.82666	-0.029297	NaN	NaN	NaN	NaN	NaN	NaN	NaN	NaN	NaN	NaN	NaN	NaN
1.8	12.3363	-128.225	1244.558	-1.1398	0.35107	-0.49228	-21.014	-298.256	987.804	-0.86084	0.86455	-0.071875	NaN	NaN	NaN	NaN	NaN	NaN	NaN	NaN	NaN	NaN	NaN	NaN
1.802	46.017	-109.4576	1285.946	-1.3151	0.31045	-0.50127	-42.461	-272.108	968.68	-0.88232	0.90283	-0.11865	NaN	NaN	NaN	NaN	NaN	NaN	NaN	NaN	NaN	NaN	NaN	NaN
1.804	34.9707	-95.6171	1331.485	-1.5156	0.28565	-0.50195	-79.3042	-293.182	1029.7559	-0.92246	0.91778	-0.16875	NaN	NaN	NaN	NaN	NaN	NaN	NaN	NaN	NaN	NaN	NaN	NaN
1.806	62.851	-66.7153	1342.035	-1.7378	0.27393	-0.50195	-81.315	-205.383	1079.469	-0.97715	0.92695	-0.2212	NaN	NaN	NaN	NaN	NaN	NaN	NaN	NaN	NaN	NaN	NaN	NaN
1.808	73.065	-56.935	1347.96833	-1.9487	0.31279	-0.50957	-119.852	-162.359	1048.279	-1.0475	0.93789	-0.2501	NaN	NaN	NaN	NaN	NaN	NaN	NaN	NaN	NaN	NaN	NaN	NaN
1.81	63.087	-55.3189	1332.9481	-2.1351	0.36152	-0.52597	-117.985	-198.692	1074.473	-1.1198	0.94306	-0.29092	NaN	NaN	NaN	NaN	NaN	NaN	NaN	NaN	NaN	NaN	NaN	NaN
1.812	47.968	-62.375	1312.426	-2.2766	0.42207	-0.53613	-104.127	-154.018	1059.8327	-1.1968	0.95361	-0.32471	NaN	NaN	NaN	NaN	NaN	NaN	NaN	NaN	NaN	NaN	NaN	NaN
1.814	35.8106	-67.563	1308.024	-2.393	0.48135	-0.56104	-95.514	-164.63659	1056.2292	-1.2707	0.97578	-0.36016	NaN	NaN	NaN	NaN	NaN	NaN	NaN	NaN	NaN	NaN	NaN	NaN
1.816	68.567	-84.714	1339.076	-2.4961	0.53906	-0.60547	-54.884	-134.9328	1103.709	-1.3472	0.98906	-0.39727	NaN	NaN	NaN	NaN	NaN	NaN	NaN	NaN	NaN	NaN	NaN	NaN
1.818	61.749	-89.5501	1351.555	-2.5935	0.58076	-0.66377	-49.883	-59.597	1078.7	-1.4113	0.99219	-0.43633	NaN	NaN	NaN	NaN	NaN	NaN	NaN	NaN	NaN	NaN	NaN	NaN
1.82	52.5747	-87.9799	1353.17181	-2.6725	0.60909	-0.72647	-46.602	-63.9391	1069.637	-1.4757	0.98125	-0.46445	NaN	NaN	NaN	NaN	NaN	NaN	NaN	NaN	NaN	NaN	NaN	NaN
1.822	27.7975	-85.816	1353.0449	-2.7065	0.62588	-0.77881	-4.55199999999999	-43.407	1070.513	-1.5469	0.96875	-0.48145	NaN	NaN	NaN	NaN	NaN	NaN	NaN	NaN	NaN	NaN	NaN	NaN
1.824	25.3843	-80.286	1362.597	-2.6879	0.62851	-0.8252	-62.7097	-78.072	1079.944	-1.6426	0.95469	-0.48828	NaN	NaN	NaN	NaN	NaN	NaN	NaN	NaN	NaN	NaN	NaN	NaN
1.826	44.433	-72.668	1393.6065	-2.6152	0.61523	-0.86523	-52.8576	-143.967	1176.995	-1.7659	0.94424	-0.4831	NaN	NaN	NaN	NaN	NaN	NaN	NaN	NaN	NaN	NaN	NaN	NaN
1.828	44.067	-58.64	1407.5908	-2.5027	0.60117	-0.89414	-42.72644	-110.798	1215.72	-1.9081	0.95361	-0.47021	NaN	NaN	NaN	NaN	NaN	NaN	NaN	NaN	NaN	NaN	NaN	NaN
1.83	60.081	-75.729	1402.675	-2.397	0.58135	-0.91905	-89.346	-136.885	1225.704	-2.0635	0.9833	-0.45166	NaN	NaN	NaN	NaN	NaN	NaN	NaN	NaN	NaN	NaN	NaN	NaN
1.832	52.8917	-65.3565	1388.3545	-2.3204	0.57354	-0.93857	-97.975	-154.393	1247.033	-2.2227	1.043	-0.43457	NaN	NaN	NaN	NaN	NaN	NaN	NaN	NaN	NaN	NaN	NaN	NaN
1.834	42.3621	-55.3705	1376.2933	-2.2709	0.5752	-0.95801	-81.118	-112.9442	1207.7202	-2.3637	1.1128	-0.43018	NaN	NaN	NaN	NaN	NaN	NaN	NaN	NaN	NaN	NaN	NaN	NaN
1.836	15.6629225	-35.2234	1363.27259	-2.2324	0.59473	-0.98047	-59.763	-145.065	1237.817	-2.4758	1.1934	-0.44111	NaN	NaN	NaN	NaN	NaN	NaN	NaN	NaN	NaN	NaN	NaN	NaN
1.838	9.9789	-36.7856	1346.8961	-2.1968	0.61455	-0.99482	-37.17	-114.0455	1270.832	-2.5367	1.2637	-0.46221	NaN	NaN	NaN	NaN	NaN	NaN	NaN	NaN	NaN	NaN	NaN	NaN
1.84	37.244	-55.0324	1338.8272	-2.1573	0.63223	-1.005	-31.358	-115.30383	1266.587	-2.5508	1.3144	-0.47607	NaN	NaN	NaN	NaN	NaN	NaN	NaN	NaN	NaN	NaN	NaN	NaN
1.842	34.74813	-40.3414	1307.417	-2.1136	0.65723	-1.0089	-36.678	-183.161	1292.929	-2.5254	1.3477	-0.47266	NaN	NaN	NaN	NaN	NaN	NaN	NaN	NaN	NaN	NaN	NaN	NaN
1.844	33.114	-33.8583	1292.156	-2.0641	0.68838	-1.0051	-44.3803	-143.161	1220.089	-2.4674	1.3576	-0.46152	NaN	NaN	NaN	NaN	NaN	NaN	NaN	NaN	NaN	NaN	NaN	NaN
1.846	30.3137	-32.844	1286.731	-2.0142	0.71729	-0.98975	-86.323	-137.219	1170.748	-2.4012	1.3498	-0.44238	NaN	NaN	NaN	NaN	NaN	NaN	NaN	NaN	NaN	NaN	NaN	NaN
1.848	25.9827	-13.7981	1289.623	-1.966	0.73828	-0.97403	-78.201	-97.735	1173.886	-2.3282	1.3338	-0.43027	NaN	NaN	NaN	NaN	NaN	NaN	NaN	NaN	NaN	NaN	NaN	NaN
1.85	34.57	-5.4811	1283.6909	-1.927	0.74844	-0.95762	-85.234	-6.058	1150.969	-2.2563	1.3216	-0.41826	NaN	NaN	NaN	NaN	NaN	NaN	NaN	NaN	NaN	NaN	NaN	NaN
1.852	68.925	2.01648	1275.76	-1.9004	0.75937	-0.93575	-128.53	-9.935	1173.685	-2.189	1.3091	-0.40479	NaN	NaN	NaN	NaN	NaN	NaN	NaN	NaN	NaN	NaN	NaN	NaN
1.854	74.56	-7.5945	1276.807	-1.8862	0.76709	-0.9081	-84.781	32.083	1182.24	-2.1113	1.298	-0.38779	NaN	NaN	NaN	NaN	NaN	NaN	NaN	NaN	NaN	NaN	NaN	NaN
1.856	65.9202	-7.116	1304.5649	-1.875	0.77539	-0.88281	-101.953	33.594	1167.603	-2.0293	1.2891	-0.37002	NaN	NaN	NaN	NaN	NaN	NaN	NaN	NaN	NaN	NaN	NaN	NaN
1.858	64.393	2.7218	1305.136	-1.8698	0.78857	-0.8624	-116.722	-25.396	1212.0235	-1.9355	1.2906	-0.34814	NaN	NaN	NaN	NaN	NaN	NaN	NaN	NaN	NaN	NaN	NaN	NaN
1.86	45.7379	4.6279	1270.775	-1.8538	0.80127	-0.8415	-89.559	9.76	1186.908	-1.8374	1.2919	-0.34131	NaN	NaN	NaN	NaN	NaN	NaN	NaN	NaN	NaN	NaN	NaN	NaN
1.862	57.124	-8.8671	1235.1617	-1.8394	0.80947	-0.82314	-105.648	-22.15902	1131.846	-1.7383	1.2852	-0.33984	NaN	NaN	NaN	NaN	NaN	NaN	NaN	NaN	NaN	NaN	NaN	NaN
1.864	58.046	-24.0125	1187.738	-1.8261	0.81767	-0.79892	-83.119	-38.951	1151.732	-1.6473	1.2597	-0.32686	NaN	NaN	NaN	NaN	NaN	NaN	NaN	NaN	NaN	NaN	NaN	NaN
1.866	56.194	-18.8705	1183.828	-1.8101	0.81592	-0.7749	-69.2497	-19.01863	1158.537	-1.5664	1.2172	-0.31269	NaN	NaN	NaN	NaN	NaN	NaN	NaN	NaN	NaN	NaN	NaN	NaN
1.868	37.506	4.24517	1171.364	-1.7948	0.80381	-0.75342	-80.805186	-77.366	1189.421	-1.4961	1.1578	-0.2959	NaN	NaN	NaN	NaN	NaN	NaN	NaN	NaN	NaN	NaN	NaN	NaN
1.87	55.5442	19.20987	1181.0191	-1.775	0.79492	-0.73203	-76.572	-58.328	1193.486	-1.4356	1.0855	-0.27539	NaN	NaN	NaN	NaN	NaN	NaN	NaN	NaN	NaN	NaN	NaN	NaN
1.872	75.094	24.2673	1183.2867	-1.7441	0.78907	-0.71407	-89.6511	-42.875	1160.2657	-1.3789	1.0166	-0.25781	NaN	NaN	NaN	NaN	NaN	NaN	NaN	NaN	NaN	NaN	NaN	NaN
1.874	50.7651	40.2397	1161.199	-1.7158	0.77187	-0.6959	-81.9169	-57.465	1150.9803	-1.3301	0.95937	-0.2414	NaN	NaN	NaN	NaN	NaN	NaN	NaN	NaN	NaN	NaN	NaN	NaN
1.876	45.724	52.59	1154.248	-1.6855	0.75391	-0.67578	-50.803	9.5011	1139.8244	-1.2897	0.90322	-0.22666	NaN	NaN	NaN	NaN	NaN	NaN	NaN	NaN	NaN	NaN	NaN	NaN
1.878	48.72	87.489	1126.5399	-1.643	0.7291	-0.64297	-81.024	2.895	1119.411	-1.2491	0.86104	-0.21338	NaN	NaN	NaN	NaN	NaN	NaN	NaN	NaN	NaN	NaN	NaN	NaN
1.88	51.944	103.084	1118.2434	-1.6013	0.69043	-0.61895	-57.691	1.4322	1140.617	-1.2222	0.83018	-0.20635	NaN	NaN	NaN	NaN	NaN	NaN	NaN	NaN	NaN	NaN	NaN	NaN
1.882	37.418	98.818	1108.1046	-1.5549	0.66191	-0.58574	-31.486	57.127	1137.9736	-1.1934	0.79688	-0.19385	NaN	NaN	NaN	NaN	NaN	NaN	NaN	NaN	NaN	NaN	NaN	NaN
1.884	20.1006	55.5477	1090.3136	-1.5026	0.62207	-0.56934	-66.567	53.3832	1138.064	-1.1804	0.76924	-0.18711	NaN	NaN	NaN	NaN	NaN	NaN	NaN	NaN	NaN	NaN	NaN	NaN
1.886	24.32868	33.908	1071.85929	-1.4448	0.58447	-0.54736	-10.131	116.77	1105.62	-1.1671	0.73916	-0.17744	NaN	NaN	NaN	NaN	NaN	NaN	NaN	NaN	NaN	NaN	NaN	NaN
1.888	16.83542	46.649	1044.1317	-1.3861	0.54795	-0.52402	-15.493	144.623	1039.003	-1.1636	0.71143	-0.17354	NaN	NaN	NaN	NaN	NaN	NaN	NaN	NaN	NaN	NaN	NaN	NaN
1.89	4.3584	63.9566	1027.453	-1.3308	0.51572	-0.49834	-7.506	126.9533	1035.245	-1.1674	0.68555	-0.1668	NaN	NaN	NaN	NaN	NaN	NaN	NaN	NaN	NaN	NaN	NaN	NaN
1.892	5.3623	79.9127319	998.7596	-1.2756	0.48018	-0.47529	12.275	153.628	1027.865	-1.1587	0.65674	-0.16113	NaN	NaN	NaN	NaN	NaN	NaN	NaN	NaN	NaN	NaN	NaN	NaN
1.894	6.6697	93.3547	976.42481	-1.2263	0.43467	-0.45225	-41.706	94.698	1029.615	-1.1506	0.63457	-0.15596	NaN	NaN	NaN	NaN	NaN	NaN	NaN	NaN	NaN	NaN	NaN	NaN
1.896	15.1369	94.2871	949.7108	-1.1733	0.39502	-0.42529	-29.6881	54.806	1051.481	-1.1292	0.61338	-0.14658	NaN	NaN	NaN	NaN	NaN	NaN	NaN	NaN	NaN	NaN	NaN	NaN
1.898	5.8644	86.7091	937.3888	-1.1292	0.35342	-0.40264	-27.5948	87.2653	1026.4607	-1.1135	0.59306	-0.14424	NaN	NaN	NaN	NaN	NaN	NaN	NaN	NaN	NaN	NaN	NaN	NaN
1.9	28.3025	83.238	934.4984	-1.0891	0.31367	-0.37657	-48.0166	83.7518	1016.016	-1.0914	0.5711	-0.1376	NaN	NaN	NaN	NaN	NaN	NaN	NaN	NaN	NaN	NaN	NaN	NaN
1.902	11.35335	102.041	924.5075	-1.0516	0.27695	-0.35469	-26.524	120.0887	1003.7426	-1.0659	0.55127	-0.13281	NaN	NaN	NaN	NaN	NaN	NaN	NaN	NaN	NaN	NaN	NaN	NaN
1.904	20.6864	131.0664	891.0757	-1.0134	0.25303	-0.33018	-47.399	137.983	957.146	-1.0462	0.52549	-0.12861	NaN	NaN	NaN	NaN	NaN	NaN	NaN	NaN	NaN	NaN	NaN	NaN
1.906	6.3155	139.091	853.82	-0.97998	0.229	-0.30664	-56.7452	99.642	949.4903	-1.0209	0.50625	-0.11777	NaN	NaN	NaN	NaN	NaN	NaN	NaN	NaN	NaN	NaN	NaN	NaN
1.908	10.7419	133.1287	823.299	-0.94521	0.22012	-0.28232	-14.269	124.6336	934.8488	-0.99668	0.47969	-0.1209	NaN	NaN	NaN	NaN	NaN	NaN	NaN	NaN	NaN	NaN	NaN	NaN
1.91	-0.8073	120.7837	810.7574	-0.91748	0.20703	-0.27041	-43.947	130.905	917.9306	-0.97578	0.46367	-0.12432	NaN	NaN	NaN	NaN	NaN	NaN	NaN	NaN	NaN	NaN	NaN	NaN
1.912	10.9854	118.606	790.435	-0.88975	0.19766	-0.25127	-35.6861	117.074	916.2968	-0.95459	0.4458	-0.12256	NaN	NaN	NaN	NaN	NaN	NaN	NaN	NaN	NaN	NaN	NaN	NaN
1.914	-3.3453	125.966	739.68717	-0.86465	0.18604	-0.23389	-11.354	162.509771	878.494	-0.93144	0.43027	-0.12471	NaN	NaN	NaN	NaN	NaN	NaN	NaN	NaN	NaN	NaN	NaN	NaN
1.916	13.5232	118.6693	712.197	-0.83936	0.18408	-0.20996	-47.513	160.7284	837.849	-0.91259	0.41748	-0.12871	NaN	NaN	NaN	NaN	NaN	NaN	NaN	NaN	NaN	NaN	NaN	NaN
1.918	25.0295	111.7023	680.01	-0.82862	0.179	-0.20606	-2.485	177.04	812.4001	-0.89931	0.40811	-0.12598	NaN	NaN	NaN	NaN	NaN	NaN	NaN	NaN	NaN	NaN	NaN	NaN
1.92	9.633	106.478	660.349	-0.80733	0.18614	-0.19463	-28.75343	204.359	779.989	-0.89258	0.39981	-0.12851	NaN	NaN	NaN	NaN	NaN	NaN	NaN	NaN	NaN	NaN	NaN	NaN
1.922	7.443	107.627	645.4933	-0.78584	0.1873	-0.17119	-21.4999	172.2542	783.6977	-0.88184	0.39648	-0.1333	NaN	NaN	NaN	NaN	NaN	NaN	NaN	NaN	NaN	NaN	NaN	NaN
1.924	13.4153	118.357	638.5172	-0.76523	0.19092	-0.15645	-7.4002	181.957	763.0705	-0.85869	0.40361	-0.14648	NaN	NaN	NaN	NaN	NaN	NaN	NaN	NaN	NaN	NaN	NaN	NaN
1.926	28.5726	133.8911	623.926	-0.74414	0.19922	-0.14258	-43.361	171.005	711.129	-0.83154	0.40459	-0.15127	NaN	NaN	NaN	NaN	NaN	NaN	NaN	NaN	NaN	NaN	NaN	NaN
1.928	13.3108	136.711	600.696	-0.71592	0.20791	-0.13008	1.731	149.10913	713.467	-0.80107	0.40849	-0.15713	NaN	NaN	NaN	NaN	NaN	NaN	NaN	NaN	NaN	NaN	NaN	NaN
1.93	-1.193	124.425	574.265	-0.69092	0.21201	-0.11397	3.635	164.651	700.96	-0.7707	0.41065	-0.15752	NaN	NaN	NaN	NaN	NaN	NaN	NaN	NaN	NaN	NaN	NaN	NaN
1.932	11.3629	118.79	518.0843	-0.65811	0.23076	-0.10342	-7.045	129.064	683.7286	-0.74219	0.4082	-0.15723	NaN	NaN	NaN	NaN	NaN	NaN	NaN	NaN	NaN	NaN	NaN	NaN
1.934	-4.217	108.4081	474.6549	-0.62031	0.23741	-0.091406	28.33919	113.57	694.19	-0.71113	0.40469	-0.16191	NaN	NaN	NaN	NaN	NaN	NaN	NaN	NaN	NaN	NaN	NaN	NaN
1.936	-29.7989	104.5061	453.302	-0.57422	0.25049	-0.07959	14.76062	127.7007	657.754	-0.67373	0.40088	-0.16534	NaN	NaN	NaN	NaN	NaN	NaN	NaN	NaN	NaN	NaN	NaN	NaN
1.938	-22.1408	82.118	411.475	-0.52285	0.26387	-0.071094	23.156	106.391	638.04	-0.63779	0.40088	-0.16142	NaN	NaN	NaN	NaN	NaN	NaN	NaN	NaN	NaN	NaN	NaN	NaN
1.94	-2.4848	90.619	393.214	-0.46552	0.26972	-0.055566	61.21	125.516	588.4987	-0.59815	0.39912	-0.1626	NaN	NaN	NaN	NaN	NaN	NaN	NaN	NaN	NaN	NaN	NaN	NaN
1.942	-4.0938	101.2926	352.566	-0.40537	0.27364	-0.048145	15.703	138.5962	505.801	-0.54883	0.40527	-0.16357	NaN	NaN	NaN	NaN	NaN	NaN	NaN	NaN	NaN	NaN	NaN	NaN
1.944	-7.157	101.4334	347.6287	-0.3418	0.27041	-0.032324	8.489	105.083	484.784	-0.49775	0.40352	-0.15625	NaN	NaN	NaN	NaN	NaN	NaN	NaN	NaN	NaN	NaN	NaN	NaN
1.946	16.391	112.1723	322.61	-0.27979	0.25732	-0.020508	15.432	125.0763	464.43	-0.43926	0.40703	-0.15703	NaN	NaN	NaN	NaN	NaN	NaN	NaN	NaN	NaN	NaN	NaN	NaN
1.948	-3.232	115.7687	301.7135	-0.22227	0.24551	-0.0022461	-16.5188	98.928	447.5932	-0.37715	0.40196	-0.15117	NaN	NaN	NaN	NaN	NaN	NaN	NaN	NaN	NaN	NaN	NaN	NaN
1.95	-10.888	123.674	266.3164	-0.16592	0.23282	0.011523	39.789	99.477	441.322	-0.30186	0.39677	-0.15078	NaN	NaN	NaN	NaN	NaN	NaN	NaN	NaN	NaN	NaN	NaN	NaN
1.952	-10.9483	108.805	243.1874	-0.11436	0.21446	0.031055	-0.9724	145.592	381.5584	-0.22705	0.39014	-0.15234	NaN	NaN	NaN	NaN	NaN	NaN	NaN	NaN	NaN	NaN	NaN	NaN
1.954	6.4837	85.2329	230.607	-0.066113	0.19765	0.044238	-5.2735	145.897	335.6512	-0.15654	0.37861	-0.14424	NaN	NaN	NaN	NaN	NaN	NaN	NaN	NaN	NaN	NaN	NaN	NaN
1.956	-5.2739	88.0078	201.425	-0.019531	0.18359	0.059082	32.2629	154.452	295.054	-0.089942	0.36455	-0.13799	NaN	NaN	NaN	NaN	NaN	NaN	NaN	NaN	NaN	NaN	NaN	NaN
1.958	-13.825	87.9672	159.588	0.022168	0.15987	0.077246	-26.421	167.306	233.358	-0.034473	0.33369	-0.12627	NaN	NaN	NaN	NaN	NaN	NaN	NaN	NaN	NaN	NaN	NaN	NaN
1.96	-8.305	87.963	127.424	0.062207	0.14688	0.098047	-6.803	109.0492	226.331	0.015918	0.30176	-0.1167	NaN	NaN	NaN	NaN	NaN	NaN	NaN	NaN	NaN	NaN	NaN	NaN
1.962	-8.7263	88.8266	119.117	0.098537	0.13281	0.11328	9.126	97.3287	210.283	0.062988	0.26563	-0.10938	NaN	NaN	NaN	NaN	NaN	NaN	NaN	NaN	NaN	NaN	NaN	NaN
1.964	12.391	84.9101	123.7424	0.13193	0.11436	0.12754	-32.3222	71.709	204.243	0.1001	0.22988	-0.093946	NaN	NaN	NaN	NaN	NaN	NaN	NaN	NaN	NaN	NaN	NaN	NaN
1.966	13.5085	61.8544	131.2896	0.16064	0.098633	0.14063	-28.635	53.328	209.4419	0.12988	0.19775	-0.079492	NaN	NaN	NaN	NaN	NaN	NaN	NaN	NaN	NaN	NaN	NaN	NaN
1.968	13.182	50.456	108.0214	0.18349	0.080664	0.15351	-35.6969	97.677	158.2431	0.15801	0.16338	-0.065821	NaN	NaN	NaN	NaN	NaN	NaN	NaN	NaN	NaN	NaN	NaN	NaN
1.97	13.90919	44.948	97.4138	0.20557	0.061914	0.16836	-45.3501	83.2963	139.1096	0.18379	0.12842	-0.053223	NaN	NaN	NaN	NaN	NaN	NaN	NaN	NaN	NaN	NaN	NaN	NaN
1.972	14.993	51.53449	63.958	0.22471	0.044336	0.18164	-28.551	78.385	122.1978	0.20313	0.09668	-0.043945	NaN	NaN	NaN	NaN	NaN	NaN	NaN	NaN	NaN	NaN	NaN	NaN
1.974	-6.479	42.6719	62.2931	0.23936	0.020312	0.19522	-52.9035	103.969	88.1811	0.21601	0.059863	-0.033887	NaN	NaN	NaN	NaN	NaN	NaN	NaN	NaN	NaN	NaN	NaN	NaN
1.976	-17.098	54.8357	58.2621	0.25635	-0.0014648	0.20752	-2.714	50.5307	91.80836	0.22588	0.021875	-0.027637	NaN	NaN	NaN	NaN	NaN	NaN	NaN	NaN	NaN	NaN	NaN	NaN
1.978	3.595	61.86	41.272	0.26553	-0.029395	0.22158	-5.6894	68.2105	93.963	0.23252	-0.017188	-0.022168	NaN	NaN	NaN	NaN	NaN	NaN	NaN	NaN	NaN	NaN	NaN	NaN
1.98	-6.7797	56.639	39.131	0.27207	-0.05127	0.23271	-30.0634	56.117	82.766	0.23116	-0.051758	-0.01582	NaN	NaN	NaN	NaN	NaN	NaN	NaN	NaN	NaN	NaN	NaN	NaN
1.982	-6.7187	52.114	48.0893	0.27988	-0.080957	0.24522	27.3664	20.685	101.3849	0.22656	-0.091797	-0.0092773	NaN	NaN	NaN	NaN	NaN	NaN	NaN	NaN	NaN	NaN	NaN	NaN
1.984	2.612	42.4535	48.2026	0.28154	-0.098535	0.24746	-1.824	69.054	56.8874	0.21827	-0.12764	-0.018164	NaN	NaN	NaN	NaN	NaN	NaN	NaN	NaN	NaN	NaN	NaN	NaN
1.986	-5.319	43.8973	38.8	0.28027	-0.11768	0.25488	4.291	71.8779	46.701	0.20117	-0.16172	-0.016406	NaN	NaN	NaN	NaN	NaN	NaN	NaN	NaN	NaN	NaN	NaN	NaN
1.988	-10.607	39.9373	19.9684	0.27988	-0.12705	0.2583	16.394	81.641	48.631	0.18125	-0.19492	-0.01914	NaN	NaN	NaN	NaN	NaN	NaN	NaN	NaN	NaN	NaN	NaN	NaN
1.99	-17.251	11.6223	15.6981	0.27412	-0.13711	0.25908	-39.0806	112.71	25.3926	0.15996	-0.22149	-0.012793	NaN	NaN	NaN	NaN	NaN	NaN	NaN	NaN	NaN	NaN	NaN	NaN
1.992	22.29	6.6739	10.6	0.27295	-0.14336	0.25518	-5.297	41.997	37.0035	0.13281	-0.23975	-0.013184	NaN	NaN	NaN	NaN	NaN	NaN	NaN	NaN	NaN	NaN	NaN	NaN
1.994	-7.722	15.6826	12.3068	0.25781	-0.14668	0.2542	22.6019	31.82	26.286	0.1084	-0.25157	-0.014356	NaN	NaN	NaN	NaN	NaN	NaN	NaN	NaN	NaN	NaN	NaN	NaN
1.996	-20.706	31.1755	1.3014	0.24609	-0.15186	0.24854	-36.8682	8.52	23.244	0.083008	-0.26406	-0.016308	NaN	NaN	NaN	NaN	NaN	NaN	NaN	NaN	NaN	NaN	NaN	NaN
1.998	-13.6773	21.7262	16.084	0.23115	-0.15312	0.24561	22.309	-19.9251	48.467	0.060351	-0.26914	-0.01748	NaN	NaN	NaN	NaN	NaN	NaN	NaN	NaN	NaN	NaN	NaN	NaN
2	-3.73	16.2676	24.0917	0.21114	-0.15157	0.2418	-5.023	39.36579	36.525	0.041504	-0.27256	-0.019531	NaN	NaN	NaN	NaN	NaN	NaN	NaN	NaN	NaN	NaN	NaN	NaN
2.002	-22.2522	19.2969	14.0731	0.1873	-0.15	0.23282	-6.67	27.2368	33.6836	0.020508	-0.27686	-0.018066	NaN	NaN	NaN	NaN	NaN	NaN	NaN	NaN	NaN	NaN	NaN	NaN
2.004	-26.619	16.0296	11.9578	0.16865	-0.14463	0.22812	26.0227	22.2776	43.417	0.0032227	-0.27568	-0.025097	NaN	NaN	NaN	NaN	NaN	NaN	NaN	NaN	NaN	NaN	NaN	NaN
2.006	-2.783	10.393	11.7222	0.14453	-0.1416	0.21924	-19.871786	55.324	14.3149	-0.015039	-0.27217	-0.025489	NaN	NaN	NaN	NaN	NaN	NaN	NaN	NaN	NaN	NaN	NaN	NaN
2.008	-9.925	13.9463	10.6894	0.12265	-0.13574	0.21406	2.1873	-14.4762	36.506	-0.026367	-0.27177	-0.036035	NaN	NaN	NaN	NaN	NaN	NaN	NaN	NaN	NaN	NaN	NaN	NaN
2.01	-3.834	17.72805	-1.14526	0.10557	-0.13008	0.20693	2.133	-0.6372	20.443	-0.038672	-0.26894	-0.03418	NaN	NaN	NaN	NaN	NaN	NaN	NaN	NaN	NaN	NaN	NaN	NaN
2.012	-1.478	-0.778	-4.761	0.088379	-0.12149	0.20108	-54.3048	14.441	12.876	-0.043457	-0.26563	-0.036621	NaN	NaN	NaN	NaN	NaN	NaN	NaN	NaN	NaN	NaN	NaN	NaN
2.014	1.38	-1.3383	-4.065	0.069531	-0.10859	0.19531	-16.149	-23.3469	36.0581	-0.055078	-0.25625	-0.047949	NaN	NaN	NaN	NaN	NaN	NaN	NaN	NaN	NaN	NaN	NaN	NaN
2.016	12.038	14.3791	-1.492	0.053223	-0.093262	0.18652	-42.0273	35.142	5.027	-0.054688	-0.24502	-0.053711	NaN	NaN	NaN	NaN	NaN	NaN	NaN	NaN	NaN	NaN	NaN	NaN
2.018	2.656	24.1477	5.472	0.044336	-0.080761	0.18018	-28.1736	5.9056	5.4554	-0.051954	-0.2333	-0.061523	NaN	NaN	NaN	NaN	NaN	NaN	NaN	NaN	NaN	NaN	NaN	NaN
2.02	-6.077	13.0513	11.7122	0.037109	-0.063867	0.17373	-11.493	6.768	6.05743	-0.049219	-0.21914	-0.06875	NaN	NaN	NaN	NaN	NaN	NaN	NaN	NaN	NaN	NaN	NaN	NaN
2.022	-15.442	2.276	10.65129	0.032031	-0.04668	0.16748	-47.185	55.492	-14.4482	-0.041016	-0.20654	-0.074219	NaN	NaN	NaN	NaN	NaN	NaN	NaN	NaN	NaN	NaN	NaN	NaN
2.024	3.6973	-0.1381	2.373	0.027344	-0.032129	0.16025	-12.9322	7.4189	18.9353	-0.032422	-0.19541	-0.078027	NaN	NaN	NaN	NaN	NaN	NaN	NaN	NaN	NaN	NaN	NaN	NaN
2.026	-7.689	5.0579	4.1326	0.024414	-0.012207	0.15527	-18.4125	23.6647	7.6406	-0.023828	-0.1915	-0.083301	NaN	NaN	NaN	NaN	NaN	NaN	NaN	NaN	NaN	NaN	NaN	NaN
2.028	2.296	10.3347	9.2169	0.021387	-0.00087892	0.14883	-40.2573	6.902	2.629	-0.011719	-0.18604	-0.087207	NaN	NaN	NaN	NaN	NaN	NaN	NaN	NaN	NaN	NaN	NaN	NaN
2.03	1.147	5.1465	17.5797	0.020898	0.010059	0.14219	14.512	-40.783	16.421	-0.0032227	-0.17871	-0.094434	NaN	NaN	NaN	NaN	NaN	NaN	NaN	NaN	NaN	NaN	NaN	NaN
2.032	-5.912	8.2569	8.951	0.015429	0.02959	0.13985	-36.44256	1.603	0.567	0.0073242	-0.16846	-0.10205	NaN	NaN	NaN	NaN	NaN	NaN	NaN	NaN	NaN	NaN	NaN	NaN
2.034	1.123	5.5469	-3.8844	0.013965	0.041895	0.13926	-17.3914	1.731	20.6889	0.019922	-0.16299	-0.10918	NaN	NaN	NaN	NaN	NaN	NaN	NaN	NaN	NaN	NaN	NaN	NaN
2.036	-6.95	4.276	7.8643	0.010742	0.057129	0.13281	10.6754	11.7059	30.847	0.0375	-0.15283	-0.11328	NaN	NaN	NaN	NaN	NaN	NaN	NaN	NaN	NaN	NaN	NaN	NaN
2.038	15.8702	-1.025	4.1708	0.0062498	0.069824	0.13115	-30.4914	50.335	5.0696	0.050781	-0.14072	-0.12265	NaN	NaN	NaN	NaN	NaN	NaN	NaN	NaN	NaN	NaN	NaN	NaN
2.04	-17.5083	2.20482	0.7836	-0.002832	0.082129	0.1292	9.504	-5.817	28.6635	0.071192	-0.12881	-0.13223	NaN	NaN	NaN	NaN	NaN	NaN	NaN	NaN	NaN	NaN	NaN	NaN
2.042	-13.693	23.3935	-16.831	-0.0071289	0.094238	0.12647	15.801	-8.634	11.5293	0.085938	-0.11719	-0.14355	NaN	NaN	NaN	NaN	NaN	NaN	NaN	NaN	NaN	NaN	NaN	NaN
2.044	-23.27194	8.8788	-7.71767	-0.015625	0.10859	0.1249	-1.098	-3.4671	-3.2539	0.10547	-0.10156	-0.15459	NaN	NaN	NaN	NaN	NaN	NaN	NaN	NaN	NaN	NaN	NaN	NaN
2.046	-9.366	3.4609	5.2331	-0.02832	0.12061	0.12354	28.1593	-38.863	16.28596	0.11651	-0.084375	-0.16446	NaN	NaN	NaN	NaN	NaN	NaN	NaN	NaN	NaN	NaN	NaN	NaN
2.048	-25.6324	6.3954	6.682	-0.033399	0.13525	0.12197	-17.144	31.30837	-14.1806	0.12979	-0.069531	-0.17618	NaN	NaN	NaN	NaN	NaN	NaN	NaN	NaN	NaN	NaN	NaN	NaN
2.05	-32.8801	10.645755	2.3271	-0.039355	0.14492	0.11924	-5.1151	26.0274	-3.6545	0.1377	-0.055273	-0.18389	NaN	NaN	NaN	NaN	NaN	NaN	NaN	NaN	NaN	NaN	NaN	NaN
2.052	-5.9505	15.5971	5.299	-0.04873	0.15352	0.1165	32.042	29.554	0.0785	0.14063	-0.039063	-0.19287	NaN	NaN	NaN	NaN	NaN	NaN	NaN	NaN	NaN	NaN	NaN	NaN
2.054	-10.526	21.9451	16.919	-0.057324	0.16377	0.11221	-21.6237	71.859	-14.5558	0.14063	-0.029492	-0.20371	NaN	NaN	NaN	NaN	NaN	NaN	NaN	NaN	NaN	NaN	NaN	NaN
2.056	-7.9538	18.67758	32.2157	-0.070313	0.17285	0.10205	9.78	26.094	25.4072	0.12988	-0.01582	-0.20889	NaN	NaN	NaN	NaN	NaN	NaN	NaN	NaN	NaN	NaN	NaN	NaN
2.058	-11.829	-11.3486	33.72746	-0.09043	0.17764	0.096779	5.043	16.4718	53.1503	0.11895	0.00058594	-0.22725	NaN	NaN	NaN	NaN	NaN	NaN	NaN	NaN	NaN	NaN	NaN	NaN
2.06	-9.117	-33.4848	45.28067	-0.11689	0.18115	0.087598	-57.674	5.5094	45.73	0.10185	0.011426	-0.23496	NaN	NaN	NaN	NaN	NaN	NaN	NaN	NaN	NaN	NaN	NaN	NaN
2.062	-15.516	-12.9067	54.559	-0.16025	0.18389	0.078614	-5.778	-50.382	68.7579	0.074219	0.027344	-0.24121	NaN	NaN	NaN	NaN	NaN	NaN	NaN	NaN	NaN	NaN	NaN	NaN
2.064	-27.991	-0.33023	98.975	-0.21016	0.1835	0.066406	-12.3466	-21.3445	39.907	0.037989	0.033496	-0.23838	NaN	NaN	NaN	NaN	NaN	NaN	NaN	NaN	NaN	NaN	NaN	NaN
2.066	-24.175	-16.3825	149.128	-0.26904	0.18506	0.062012	-25.141	-50.434	62.88	-0.0098632	0.042774	-0.24551	NaN	NaN	NaN	NaN	NaN	NaN	NaN	NaN	NaN	NaN	NaN	NaN
2.068	-32.509	-38.72941	161.511	-0.33603	0.18584	0.052832	-32.051	-55.205	87.563	-0.058692	0.058789	-0.24824	NaN	NaN	NaN	NaN	NaN	NaN	NaN	NaN	NaN	NaN	NaN	NaN
2.07	-16.682	-36.6307	205.703	-0.41035	0.18867	0.046094	-58.367	-14.1296	74.553	-0.1085	0.079297	-0.25058	NaN	NaN	NaN	NaN	NaN	NaN	NaN	NaN	NaN	NaN	NaN	NaN
2.072	-16.854	-42.812	227.5622	-0.48731	0.19102	0.040625	-21.43712	-58.48	153.0302	-0.16406	0.094727	-0.25244	NaN	NaN	NaN	NaN	NaN	NaN	NaN	NaN	NaN	NaN	NaN	NaN
2.074	-10.068	-57.238	244.443	-0.56377	0.19678	0.034863	-43.1998	-37.7876	227.3857	-0.23935	0.10166	-0.25517	NaN	NaN	NaN	NaN	NaN	NaN	NaN	NaN	NaN	NaN	NaN	NaN
2.076	-19.435	-48.315	246.339	-0.63477	0.20703	0.026367	-32.3499	-0.9478	306.9519	-0.33721	0.1086	-0.2626	NaN	NaN	NaN	NaN	NaN	NaN	NaN	NaN	NaN	NaN	NaN	NaN
2.078	-5.3315	-24.174	274.257	-0.70264	0.22226	0.021777	-20.002	-14.091	467.269	-0.46182	0.1082	-0.26103	NaN	NaN	NaN	NaN	NaN	NaN	NaN	NaN	NaN	NaN	NaN	NaN
2.08	-16.1119	-26.3992	293.8293	-0.76875	0.23672	0.0095703	-61.091	55.8578	584.837	-0.62178	0.10127	-0.26416	NaN	NaN	NaN	NaN	NaN	NaN	NaN	NaN	NaN	NaN	NaN	NaN
2.082	-19.3206	-32.6049	320.81	-0.82969	0.25195	0.006836	-125.2569	63.4022	735.591	-0.81787	0.076172	-0.26709	NaN	NaN	NaN	NaN	NaN	NaN	NaN	NaN	NaN	NaN	NaN	NaN
2.084	21.8447	-37.4631	332.126	-0.89502	0.26748	-0.0029297	-56.467	47.24	823.519	-1.0551	0.048633	-0.25381	NaN	NaN	NaN	NaN	NaN	NaN	NaN	NaN	NaN	NaN	NaN	NaN
2.086	2.4794	-23.63	366.779	-0.96094	0.2832	-0.012695	-30.203	37.7659	881.75	-1.3302	0.010156	-0.24502	NaN	NaN	NaN	NaN	NaN	NaN	NaN	NaN	NaN	NaN	NaN	NaN
2.088	2.674	4.17	436.7628	-1.0361	0.29102	-0.025684	-17.492	-64.167	990.621	-1.6204	-0.003125	-0.24267	NaN	NaN	NaN	NaN	NaN	NaN	NaN	NaN	NaN	NaN	NaN	NaN
2.09	-21.633	17.3907	502.7129	-1.1097	0.3001	-0.03955	-49.069	-49.726	1075.751	-1.8958	0.027734	-0.24033	NaN	NaN	NaN	NaN	NaN	NaN	NaN	NaN	NaN	NaN	NaN	NaN
2.092	-9.858	58.175	546.4802	-1.1929	0.30752	-0.058301	-64.188	-9.415	1071.81	-2.1616	0.10449	-0.2085	NaN	NaN	NaN	NaN	NaN	NaN	NaN	NaN	NaN	NaN	NaN	NaN
2.094	-23.652	82.195	593.461881	-1.2757	0.31377	-0.079004	-5.3421	-70.1335	1046.59	-2.4551	0.19404	-0.20635	NaN	NaN	NaN	NaN	NaN	NaN	NaN	NaN	NaN	NaN	NaN	NaN
2.096	-38.234	71.238	639.259	-1.3574	0.32666	-0.097656	-44.9346	-66.813	1005.0715	-2.6604	0.37588	-0.25645	NaN	NaN	NaN	NaN	NaN	NaN	NaN	NaN	NaN	NaN	NaN	NaN
2.098	-46.9725	42.007	702.3719	-1.4401	0.33447	-0.11182	-18.97782	-157.862	1017.882	-2.7136	0.57276	-0.33145	NaN	NaN	NaN	NaN	NaN	NaN	NaN	NaN	NaN	NaN	NaN	NaN
2.1	-43.777	25.7426	757.125	-1.5128	0.35811	-0.12529	44.3669	-200.285	1015.975	-2.645	0.72099	-0.37022	NaN	NaN	NaN	NaN	NaN	NaN	NaN	NaN	NaN	NaN	NaN	NaN
2.102	-31.4277	17.0122	790.181	-1.5784	0.37451	-0.13311	6.95	-152.516	987.473	-2.5293	0.81641	-0.39648	NaN	NaN	NaN	NaN	NaN	NaN	NaN	NaN	NaN	NaN	NaN	NaN
2.104	-37.2089	-23.474	844.097	-1.623	0.39649	-0.14765	23.924	-153.35	986.863	-2.3695	0.8583	-0.42344	NaN	NaN	NaN	NaN	NaN	NaN	NaN	NaN	NaN	NaN	NaN	NaN
2.106	-1.0263	-41.942	858.842	-1.6504	0.4248	-0.16162	17.892	-73.95	938.116	-2.1637	0.84883	-0.45586	NaN	NaN	NaN	NaN	NaN	NaN	NaN	NaN	NaN	NaN	NaN	NaN
2.108	15.349	-35.1858	869.32	-1.6461	0.44434	-0.16445	-15.978	9.822	918.64	-1.9133	0.79922	-0.47656	NaN	NaN	NaN	NaN	NaN	NaN	NaN	NaN	NaN	NaN	NaN	NaN
2.11	3.3084	-23.5753	904.7204	-1.6155	0.47002	-0.17607	25.002	12.192	901.15	-1.6497	0.74697	-0.51211	NaN	NaN	NaN	NaN	NaN	NaN	NaN	NaN	NaN	NaN	NaN	NaN
2.112	-2.7118	-46.7505	954.117	-1.5651	0.48642	-0.18232	-17.258	34.639	885.696	-1.4077	0.69385	-0.53857	NaN	NaN	NaN	NaN	NaN	NaN	NaN	NaN	NaN	NaN	NaN	NaN
2.114	-9.50185	-61.429	999.254	-1.4958	0.5042	-0.18535	-63.175	-49.727	958.511	-1.2105	0.65488	-0.55937	NaN	NaN	NaN	NaN	NaN	NaN	NaN	NaN	NaN	NaN	NaN	NaN
2.116	2.4958	-53.829	1012.451	-1.4199	0.50977	-0.19238	-18.8221	-68.451	993.3579	-1.0643	0.64873	-0.58184	NaN	NaN	NaN	NaN	NaN	NaN	NaN	NaN	NaN	NaN	NaN	NaN
2.118	13.6841	-46.169	1001.506	-1.3334	0.51289	-0.19619	-32.783	-47.566	948.903	-0.96278	0.66357	-0.60449	NaN	NaN	NaN	NaN	NaN	NaN	NaN	NaN	NaN	NaN	NaN	NaN
2.12	20.743	-35.638	994.2709	-1.2526	0.51631	-0.19795	7.1795	-91.111	948.685	-0.88779	0.69688	-0.63047	NaN	NaN	NaN	NaN	NaN	NaN	NaN	NaN	NaN	NaN	NaN	NaN
2.122	7.4849	-34.8812	990.9689	-1.1765	0.51904	-0.20068	38.481	-105.905	921.566	-0.82861	0.7334	-0.66797	NaN	NaN	NaN	NaN	NaN	NaN	NaN	NaN	NaN	NaN	NaN	NaN
2.124	18.4542	-11.991	991.5734	-1.1085	0.52705	-0.20557	5.513	-174.8695	925.807	-0.80586	0.76836	-0.69766	NaN	NaN	NaN	NaN	NaN	NaN	NaN	NaN	NaN	NaN	NaN	NaN
2.126	29.4203	-6.916	992.8053	-1.0503	0.55127	-0.21582	51.765	-253.795	984.44	-0.81162	0.78447	-0.71582	NaN	NaN	NaN	NaN	NaN	NaN	NaN	NaN	NaN	NaN	NaN	NaN
2.128	28.9329	-36.141	1017.7565	-1.0106	0.56846	-0.21719	49.622	-262.664	1049.5186	-0.84599	0.79111	-0.71699	NaN	NaN	NaN	NaN	NaN	NaN	NaN	NaN	NaN	NaN	NaN	NaN
2.13	51.293	-62.867	1038.38706	-0.98457	0.58946	-0.22911	34.1266	-304.4	1137.308	-0.89756	0.79404	-0.7128	NaN	NaN	NaN	NaN	NaN	NaN	NaN	NaN	NaN	NaN	NaN	NaN
2.132	23.7548	-70.081	1052.1341	-0.97363	0.60664	-0.24473	37.9998	-303.756	1159.926	-0.95752	0.79736	-0.69775	NaN	NaN	NaN	NaN	NaN	NaN	NaN	NaN	NaN	NaN	NaN	NaN
2.134	32.9563	-62.598	1059.1355	-0.98144	0.61191	-0.25977	-25.3188	-245.109	1146.765	-1.0286	0.80029	-0.68213	NaN	NaN	NaN	NaN	NaN	NaN	NaN	NaN	NaN	NaN	NaN	NaN
2.136	6.5344	-91.5062	1070.239	-1.0034	0.61963	-0.26611	-17.44322	-191.891	1126.506	-1.1135	0.80351	-0.66367	NaN	NaN	NaN	NaN	NaN	NaN	NaN	NaN	NaN	NaN	NaN	NaN
2.138	24.1225	-101.644	1079.173	-1.0445	0.61846	-0.27998	-2.4447	-111.398	1131.142	-1.2069	0.81016	-0.6375	NaN	NaN	NaN	NaN	NaN	NaN	NaN	NaN	NaN	NaN	NaN	NaN
2.14	16.5614	-109.066	1094.846993	-1.098	0.62227	-0.29981	5.3509	-83.19	1151.4592	-1.2986	0.81699	-0.61699	NaN	NaN	NaN	NaN	NaN	NaN	NaN	NaN	NaN	NaN	NaN	NaN
2.142	-6.224	-119.496	1121.345	-1.1512	0.62774	-0.31855	13.4129	-108.934	1199.2482	-1.3823	0.82959	-0.60107	NaN	NaN	NaN	NaN	NaN	NaN	NaN	NaN	NaN	NaN	NaN	NaN
2.144	5.2167	-129.436	1158.7768	-1.2037	0.63496	-0.34238	46.653	-111.368	1218.88	-1.4621	0.83867	-0.59297	NaN	NaN	NaN	NaN	NaN	NaN	NaN	NaN	NaN	NaN	NaN	NaN
2.146	19.836	-131.492	1190.10089	-1.2515	0.63525	-0.36572	56.354	-143.4845	1243.116	-1.5368	0.84023	-0.59434	NaN	NaN	NaN	NaN	NaN	NaN	NaN	NaN	NaN	NaN	NaN	NaN
2.148	17.0424	-117.65	1206.803	-1.2907	0.62139	-0.3876	95.786	-111.9005	1227.06	-1.6136	0.82813	-0.61269	NaN	NaN	NaN	NaN	NaN	NaN	NaN	NaN	NaN	NaN	NaN	NaN
2.15	-21.1558	-107.688	1207.497	-1.3369	0.60157	-0.39746	35.848	-50.574	1161.891	-1.6984	0.80625	-0.63906	NaN	NaN	NaN	NaN	NaN	NaN	NaN	NaN	NaN	NaN	NaN	NaN
2.152	-9.9573	-104.7338	1199.3471	-1.4017	0.58906	-0.39863	23.14066	-71.471	1200.633	-1.8022	0.77783	-0.66162	NaN	NaN	NaN	NaN	NaN	NaN	NaN	NaN	NaN	NaN	NaN	NaN
2.154	-8.509	-100.2777	1207.163	-1.4913	0.56709	-0.39483	56.27	-72.01	1219.35785	-1.9277	0.75723	-0.68476	NaN	NaN	NaN	NaN	NaN	NaN	NaN	NaN	NaN	NaN	NaN	NaN
2.156	-48.93498	-79.7493	1226.427	-1.6167	0.55518	-0.38721	7.791	-127.692	1253.6435	-2.0557	0.75049	-0.70967	NaN	NaN	NaN	NaN	NaN	NaN	NaN	NaN	NaN	NaN	NaN	NaN
2.158	-51.95895	-61.7412	1242.855	-1.7731	0.55918	-0.36631	33.4317	-188.624	1332.45	-2.1667	0.76572	-0.73155	NaN	NaN	NaN	NaN	NaN	NaN	NaN	NaN	NaN	NaN	NaN	NaN
2.16	-43.0874	-65.4173	1253.748	-1.9573	0.57939	-0.35059	32.5343	-200.194	1313.941	-2.2402	0.78399	-0.75254	NaN	NaN	NaN	NaN	NaN	NaN	NaN	NaN	NaN	NaN	NaN	NaN
2.162	-32.246	-58.0831	1243.805	-2.1476	0.629	-0.33731	-0.1539	-220.806	1338.945	-2.2734	0.80273	-0.77832	NaN	NaN	NaN	NaN	NaN	NaN	NaN	NaN	NaN	NaN	NaN	NaN
2.164	-67.2753	-63.5476	1262.203	-2.3508	0.69472	-0.32813	40.863	-168.038	1336.35	-2.2817	0.81201	-0.82725	NaN	NaN	NaN	NaN	NaN	NaN	NaN	NaN	NaN	NaN	NaN	NaN
2.166	-58.1929	-54.812	1280.1894	-2.5586	0.76855	-0.32275	-0.09879	-116.18	1307.0566	-2.2674	0.80362	-0.8917	NaN	NaN	NaN	NaN	NaN	NaN	NaN	NaN	NaN	NaN	NaN	NaN
2.168	-35.081	-62.7729	1304.3673	-2.7483	0.84873	-0.33086	48.117	-118.449	1343.948	-2.2538	0.78447	-0.96084	NaN	NaN	NaN	NaN	NaN	NaN	NaN	NaN	NaN	NaN	NaN	NaN
2.17	-37.766	-63.1388	1306.801	-2.9151	0.92246	-0.3416	78.189	-104.3218	1319.029	-2.2326	0.77129	-1.0084	NaN	NaN	NaN	NaN	NaN	NaN	NaN	NaN	NaN	NaN	NaN	NaN
2.172	-43.3993	-70.9035	1312.11845	-3.046	0.98691	-0.35605	25.3669	-104.822	1315.6634	-2.2183	0.76221	-1.0356	NaN	NaN	NaN	NaN	NaN	NaN	NaN	NaN	NaN	NaN	NaN	NaN
2.174	-59.094	-99.067	1325.117	-3.1194	1.042	-0.36973	29.605	-81.728	1310.0449	-2.2103	0.76826	-1.0485	NaN	NaN	NaN	NaN	NaN	NaN	NaN	NaN	NaN	NaN	NaN	NaN
2.176	-43.3876	-105.072	1341.557	-3.146	1.0933	-0.36768	30.134	-49.361	1279.011	-2.2008	0.78809	-1.0648	NaN	NaN	NaN	NaN	NaN	NaN	NaN	NaN	NaN	NaN	NaN	NaN
2.178	-64.0961	-87.677	1362.5389	-3.1202	1.1399	-0.35986	10.1234	-31.39772	1263.947	-2.1894	0.81816	-1.0864	NaN	NaN	NaN	NaN	NaN	NaN	NaN	NaN	NaN	NaN	NaN	NaN
2.18	-35.662	-59.0694	1337.13724	-3.0655	1.1802	-0.35098	33.41	-27.716	1259.341	-2.1678	0.85635	-1.0988	NaN	NaN	NaN	NaN	NaN	NaN	NaN	NaN	NaN	NaN	NaN	NaN
2.182	-38.338	-54.115	1347.5809	-2.9968	1.2193	-0.35527	40.556	-3.803	1229.881	-2.1348	0.89355	-1.1113	NaN	NaN	NaN	NaN	NaN	NaN	NaN	NaN	NaN	NaN	NaN	NaN
2.184	-36.991	-56.491	1342.9864	-2.9058	1.2509	-0.36153	20.522	-15.339	1257.228	-2.0876	0.93779	-1.1099	NaN	NaN	NaN	NaN	NaN	NaN	NaN	NaN	NaN	NaN	NaN	NaN
2.186	-45.8593	-51.311	1343.0924	-2.8086	1.2637	-0.36914	43.9051	-11.929	1295.6938	-2.0385	0.96963	-1.1028	NaN	NaN	NaN	NaN	NaN	NaN	NaN	NaN	NaN	NaN	NaN	NaN
2.188	-57.759	-42.318	1336.145	-2.6914	1.2769	-0.37754	15.8691	-12.045	1273.99	-1.9889	0.98486	-1.0955	NaN	NaN	NaN	NaN	NaN	NaN	NaN	NaN	NaN	NaN	NaN	NaN
2.19	-21.462	-36.85935	1310.929	-2.5703	1.274	-0.38096	35.22	-46.557	1287.5757	-1.9264	0.99277	-1.0838	NaN	NaN	NaN	NaN	NaN	NaN	NaN	NaN	NaN	NaN	NaN	NaN
2.192	-21.685	-32.834	1306.13	-2.4422	1.2662	-0.38252	71.483	-36.824	1248.722	-1.8647	0.98682	-1.0581	NaN	NaN	NaN	NaN	NaN	NaN	NaN	NaN	NaN	NaN	NaN	NaN
2.194	-40.5697	-10.5637	1286.443	-2.3246	1.2515	-0.3877	51.214	-67.6099	1253.711	-1.8003	0.97783	-1.0355	NaN	NaN	NaN	NaN	NaN	NaN	NaN	NaN	NaN	NaN	NaN	NaN
2.196	-55.098	-12.9502	1274.067	-2.2104	1.2388	-0.38232	84.609	-64.077	1266.518	-1.7363	0.96407	-1.0037	NaN	NaN	NaN	NaN	NaN	NaN	NaN	NaN	NaN	NaN	NaN	NaN
2.198	-36.851	-8.9471	1280.929	-2.1062	1.2216	-0.3751	25.169	-37.997	1249.052	-1.6769	0.94687	-0.9709	NaN	NaN	NaN	NaN	NaN	NaN	NaN	NaN	NaN	NaN	NaN	NaN
2.2	-32.401	-8.269	1299.352	-2.0132	1.1962	-0.36729	45.8622	-29.2018	1268.789	-1.6215	0.92812	-0.93945	NaN	NaN	NaN	NaN	NaN	NaN	NaN	NaN	NaN	NaN	NaN	NaN
2.202	-58.6257	-15.854	1303.131	-1.9366	1.1642	-0.35908	79.703	21.176	1261.062	-1.5718	0.91064	-0.9126	NaN	NaN	NaN	NaN	NaN	NaN	NaN	NaN	NaN	NaN	NaN	NaN
2.204	-45.4778	-26.259	1296.484	-1.8678	1.1352	-0.35391	27.338	51.623	1226.0025	-1.5263	0.88974	-0.87744	NaN	NaN	NaN	NaN	NaN	NaN	NaN	NaN	NaN	NaN	NaN	NaN
2.206	-63.0597	-42.6499	1282.992	-1.812	1.1138	-0.35303	48.871	61.543	1218.3224	-1.4824	0.8709	-0.84922	NaN	NaN	NaN	NaN	NaN	NaN	NaN	NaN	NaN	NaN	NaN	NaN
2.208	-63.5623	-31.2038	1258.752	-1.7701	1.0797	-0.33691	24.74843	96.68	1181.277	-1.4527	0.84433	-0.82344	NaN	NaN	NaN	NaN	NaN	NaN	NaN	NaN	NaN	NaN	NaN	NaN
2.21	-70.629	-29.798	1261.999	-1.7316	1.0513	-0.32588	9.943	102.033	1181.3813	-1.4149	0.8251	-0.80538	NaN	NaN	NaN	NaN	NaN	NaN	NaN	NaN	NaN	NaN	NaN	NaN
2.212	-65.375	-24.0118	1245.8421	-1.7019	1.013	-0.32275	40.0607	102.682	1187.111	-1.3862	0.80518	-0.78076	NaN	NaN	NaN	NaN	NaN	NaN	NaN	NaN	NaN	NaN	NaN	NaN
2.214	-54.675	-11.0202	1230.923	-1.6657	0.96748	-0.30596	16.6667	108.157	1150.6785	-1.3542	0.7835	-0.75498	NaN	NaN	NaN	NaN	NaN	NaN	NaN	NaN	NaN	NaN	NaN	NaN
2.216	-61.757	4.9929	1232.1838	-1.6284	0.92822	-0.28271	22.4334	92.8048	1134.7481	-1.3309	0.75664	-0.72812	NaN	NaN	NaN	NaN	NaN	NaN	NaN	NaN	NaN	NaN	NaN	NaN
2.218	-50.8886	12.423856	1221.70899	-1.5904	0.88652	-0.26817	39.8795	104.3014	1118.14	-1.3086	0.73125	-0.69805	NaN	NaN	NaN	NaN	NaN	NaN	NaN	NaN	NaN	NaN	NaN	NaN
2.22	-54.403	15.388	1235.0405	-1.5555	0.84648	-0.25078	9.4186	132.70294	1086.591	-1.2893	0.70137	-0.6709	NaN	NaN	NaN	NaN	NaN	NaN	NaN	NaN	NaN	NaN	NaN	NaN
2.222	-30.68	27.9079	1215.173	-1.5211	0.80742	-0.23203	15.0888	116.339	1111.3541	-1.269	0.67627	-0.64209	NaN	NaN	NaN	NaN	NaN	NaN	NaN	NaN	NaN	NaN	NaN	NaN
2.224	-54.462	41.54	1189.0284	-1.4908	0.76748	-0.20928	19.6861	123.2382	1099.57521	-1.2499	0.6501	-0.61514	NaN	NaN	NaN	NaN	NaN	NaN	NaN	NaN	NaN	NaN	NaN	NaN
2.226	-53.559	54.981	1158.2635	-1.4604	0.729	-0.18848	-21.4882	89.794	1050.8409	-1.2258	0.62793	-0.59023	NaN	NaN	NaN	NaN	NaN	NaN	NaN	NaN	NaN	NaN	NaN	NaN
2.228	-70.1862	49.995	1161.298	-1.4287	0.69258	-0.16836	10.65137	64.427	1064.0639	-1.1941	0.60683	-0.55938	NaN	NaN	NaN	NaN	NaN	NaN	NaN	NaN	NaN	NaN	NaN	NaN
2.23	-39.584	50.094	1144.113	-1.3939	0.66113	-0.15234	-37.775	110.53029	1029.447989	-1.1661	0.58916	-0.53173	NaN	NaN	NaN	NaN	NaN	NaN	NaN	NaN	NaN	NaN	NaN	NaN
2.232	-47.408598	61.1249	1126.5731	-1.3611	0.63261	-0.13554	-40.3002	121.937	1017.7737	-1.1309	0.56982	-0.50391	NaN	NaN	NaN	NaN	NaN	NaN	NaN	NaN	NaN	NaN	NaN	NaN
2.234	-35.97	64.6587	1113.0551	-1.3224	0.59844	-0.11768	6.77	171.5783	978.2508	-1.1052	0.55752	-0.47471	NaN	NaN	NaN	NaN	NaN	NaN	NaN	NaN	NaN	NaN	NaN	NaN
2.236	-16.8109	54.5265	1100.3746	-1.2832	0.57129	-0.11182	-46.2105	195.6468	931.658	-1.0798	0.53721	-0.44991	NaN	NaN	NaN	NaN	NaN	NaN	NaN	NaN	NaN	NaN	NaN	NaN
2.238	-21.63	67.467	1089.5989	-1.2423	0.54951	-0.10157	-14.7297	167.044	931.1173	-1.061	0.51611	-0.42256	NaN	NaN	NaN	NaN	NaN	NaN	NaN	NaN	NaN	NaN	NaN	NaN
2.24	-8.206	62.4511	1081.477	-1.2079	0.5209	-0.092286	-0.946000000000002	186.0688	908.7768	-1.0473	0.49219	-0.39365	NaN	NaN	NaN	NaN	NaN	NaN	NaN	NaN	NaN	NaN	NaN	NaN
2.242	-13.628	64.2623	1069.54	-1.1658	0.49433	-0.084473	-20.659	192.9447	887.2498	-1.0352	0.47021	-0.36719	NaN	NaN	NaN	NaN	NaN	NaN	NaN	NaN	NaN	NaN	NaN	NaN
2.244	9.056	69.7546	1057.969	-1.1273	0.46758	-0.074902	4.192	182.7538	848.0276	-1.0259	0.4497	-0.34004	NaN	NaN	NaN	NaN	NaN	NaN	NaN	NaN	NaN	NaN	NaN	NaN
2.246	-0.143999999999998	76.567	1040.33358	-1.084	0.44238	-0.065918	-29.685	209.602	811.466	-1.0128	0.44111	-0.32002	NaN	NaN	NaN	NaN	NaN	NaN	NaN	NaN	NaN	NaN	NaN	NaN
2.248	-15.4296	87.485	1010.9749	-1.0525	0.41163	-0.061133	-42.28	188.0742	781.096	-0.99327	0.43486	-0.30205	NaN	NaN	NaN	NaN	NaN	NaN	NaN	NaN	NaN	NaN	NaN	NaN
2.25	-29.3742	87.5679	980.275	-1.0172	0.38379	-0.058105	-20.435	180.316	760.503	-0.96719	0.43145	-0.28243	NaN	NaN	NaN	NaN	NaN	NaN	NaN	NaN	NaN	NaN	NaN	NaN
2.252	-26.748	98.4441	957.7825	-0.98867	0.35449	-0.053809	-49.763	199.886	723.584	-0.93555	0.43213	-0.26221	NaN	NaN	NaN	NaN	NaN	NaN	NaN	NaN	NaN	NaN	NaN	NaN
2.254	-11.116	102.9179	935.46439	-0.95684	0.32852	-0.04834	-34.1698	153.36	736.398	-0.90029	0.42959	-0.246	NaN	NaN	NaN	NaN	NaN	NaN	NaN	NaN	NaN	NaN	NaN	NaN
2.256	-27.1378	102.4667	918.0888	-0.93604	0.30957	-0.054688	-40.3907	171.891	725.0025	-0.86416	0.43369	-0.23096	NaN	NaN	NaN	NaN	NaN	NaN	NaN	NaN	NaN	NaN	NaN	NaN
2.258	-18.7959	94.85	887.86353	-0.91269	0.28535	-0.043946	-57.7252	163.4483	694.121	-0.82158	0.42939	-0.21455	NaN	NaN	NaN	NaN	NaN	NaN	NaN	NaN	NaN	NaN	NaN	NaN
2.26	-8.6881	91.2168	864.071	-0.89639	0.27295	-0.049121	-11.838	131.4536	660.576	-0.77744	0.42764	-0.20205	NaN	NaN	NaN	NaN	NaN	NaN	NaN	NaN	NaN	NaN	NaN	NaN
2.262	0.8432	111.96949	837.518	-0.88076	0.26748	-0.056934	-45.022	159.9476	598.028	-0.72412	0.42188	-0.17725	NaN	NaN	NaN	NaN	NaN	NaN	NaN	NaN	NaN	NaN	NaN	NaN
2.264	4.443	109.9652	819.4553	-0.85684	0.26201	-0.056152	-13.284	105.182	570.7017	-0.66533	0.41826	-0.15879	NaN	NaN	NaN	NaN	NaN	NaN	NaN	NaN	NaN	NaN	NaN	NaN
2.266	3.927	108.8052	792.836	-0.83057	0.26025	-0.05957	-0.338000000000001	109.791	544.2226	-0.60235	0.41484	-0.13838	NaN	NaN	NaN	NaN	NaN	NaN	NaN	NaN	NaN	NaN	NaN	NaN
2.268	10.974	108.2841	760.426	-0.81153	0.26563	-0.061621	-46.0926	160.146	479.978	-0.52851	0.41602	-0.1083	NaN	NaN	NaN	NaN	NaN	NaN	NaN	NaN	NaN	NaN	NaN	NaN
2.27	-9.6445	115.3723	733.837	-0.7914	0.26972	-0.070117	-27.7464	138.081	458.6094	-0.46299	0.40019	-0.11406	NaN	NaN	NaN	NaN	NaN	NaN	NaN	NaN	NaN	NaN	NaN	NaN
2.272	-3.454	115.9396	717.1139	-0.7664	0.2748	-0.072461	-32.522	166.796	410.9668	-0.36377	0.39209	-0.097168	NaN	NaN	NaN	NaN	NaN	NaN	NaN	NaN	NaN	NaN	NaN	NaN
2.274	-21.024	100.8063	711.3899	-0.73935	0.27676	-0.078125	-42.84	161.599	362.4579	-0.28223	0.36836	-0.075098	NaN	NaN	NaN	NaN	NaN	NaN	NaN	NaN	NaN	NaN	NaN	NaN
2.276	11.0222	102.5022	690.755	-0.71973	0.28027	-0.080566	-30.487	135.617	341.79	-0.20235	0.34082	-0.050586	NaN	NaN	NaN	NaN	NaN	NaN	NaN	NaN	NaN	NaN	NaN	NaN
2.278	-2.4311	102.2296	654.224	-0.6876	0.27539	-0.083789	-48.74644	171.288	276.565	-0.13086	0.3166	-0.023243	NaN	NaN	NaN	NaN	NaN	NaN	NaN	NaN	NaN	NaN	NaN	NaN
2.28	-3.373	100.544	605.0412	-0.65654	0.27275	-0.079981	-26.9186	140.0075	256.243	-0.063379	0.28506	0.0037109	NaN	NaN	NaN	NaN	NaN	NaN	NaN	NaN	NaN	NaN	NaN	NaN
2.282	4.9019	100.42	564.719	-0.61904	0.27275	-0.088574	5.139	124.374	253.665	-0.0019531	0.25342	0.025391	NaN	NaN	NaN	NaN	NaN	NaN	NaN	NaN	NaN	NaN	NaN	NaN
2.284	20.6095	101.779	537.502	-0.58135	0.26729	-0.082324	-32.5675	132.205	197.651	0.051758	0.21738	0.052832	NaN	NaN	NaN	NaN	NaN	NaN	NaN	NaN	NaN	NaN	NaN	NaN
2.286	20.8667	106.366	516.2075	-0.54053	0.26611	-0.080078	-9.077	77.906	176.7573	0.10166	0.18281	0.078614	NaN	NaN	NaN	NaN	NaN	NaN	NaN	NaN	NaN	NaN	NaN	NaN
2.288	11.076	94.0174	487.0695	-0.4961	0.26162	-0.082031	-2.954	109.662	134.298	0.14697	0.14609	0.1001	NaN	NaN	NaN	NaN	NaN	NaN	NaN	NaN	NaN	NaN	NaN	NaN
2.29	25.789	87.169	453.7907	-0.44043	0.25967	-0.083301	-23.432	116.84	98.041	0.1794	0.11143	0.12442	NaN	NaN	NaN	NaN	NaN	NaN	NaN	NaN	NaN	NaN	NaN	NaN
2.292	25.9751	101.6491	428.1494	-0.37676	0.25771	-0.087988	-11.33	61.2948	116.042	0.21289	0.073242	0.14258	NaN	NaN	NaN	NaN	NaN	NaN	NaN	NaN	NaN	NaN	NaN	NaN
2.294	18.1031	107.972	415.8931	-0.31504	0.25547	-0.084961	-47.296	95.0262	89.2887	0.23379	0.047168	0.16299	NaN	NaN	NaN	NaN	NaN	NaN	NaN	NaN	NaN	NaN	NaN	NaN
2.296	14.546	103.153	388.89829	-0.25342	0.24756	-0.080566	-10.416	41.387	90.4419	0.24931	0.014161	0.17901	NaN	NaN	NaN	NaN	NaN	NaN	NaN	NaN	NaN	NaN	NaN	NaN
2.298	-7.6127	104.876	356.5915	-0.20478	0.23486	-0.076953	-2.593	23.833	87.5574	0.26807	-0.010839	0.19385	NaN	NaN	NaN	NaN	NaN	NaN	NaN	NaN	NaN	NaN	NaN	NaN
2.3	-3.92133	111.32	316.616	-0.1622	0.21719	-0.068067	-29.6392	67.0843	58.43	0.2793	-0.036035	0.20576	NaN	NaN	NaN	NaN	NaN	NaN	NaN	NaN	NaN	NaN	NaN	NaN
2.302	-12.8982	97.2978	277.008	-0.12353	0.19414	-0.061426	-4.368	23.9169	73.955	0.28564	-0.056641	0.21582	NaN	NaN	NaN	NaN	NaN	NaN	NaN	NaN	NaN	NaN	NaN	NaN
2.304	6.7917	84.3973	252.243	-0.09258	0.1665	-0.052246	-12.527	75.94	55.5427	0.28418	-0.073633	0.22773	NaN	NaN	NaN	NaN	NaN	NaN	NaN	NaN	NaN	NaN	NaN	NaN
2.306	11.346	84.359	238.452	-0.062012	0.13379	-0.047852	-14.4616	81.527	24.9317	0.28242	-0.089454	0.23829	NaN	NaN	NaN	NaN	NaN	NaN	NaN	NaN	NaN	NaN	NaN	NaN
2.308	1.755	95.29053	211.3025	-0.038379	0.10439	-0.031738	5.366	26.2499	27.7421	0.275	-0.10274	0.25313	NaN	NaN	NaN	NaN	NaN	NaN	NaN	NaN	NaN	NaN	NaN	NaN
2.31	3.375	87.32	203.169	-0.016308	0.076758	-0.022559	-31.09082	64.9499	5.523	0.26523	-0.11162	0.25713	NaN	NaN	NaN	NaN	NaN	NaN	NaN	NaN	NaN	NaN	NaN	NaN
2.312	7.797	71.261	186.527	0.0040039	0.051758	-0.009668	-22.1763	24.51	20.0881	0.25635	-0.11865	0.26807	NaN	NaN	NaN	NaN	NaN	NaN	NaN	NaN	NaN	NaN	NaN	NaN
2.314	-1.144	59.658	173.51993	0.021777	0.02959	-9.7638e-05	6.14	21.051	27.5746	0.2502	-0.12442	0.27285	NaN	NaN	NaN	NaN	NaN	NaN	NaN	NaN	NaN	NaN	NaN	NaN
2.316	-25.42	71.4299	170.6351	0.041992	0.010254	0.003418	-30.1548	69.7668	4.224	0.23731	-0.12656	0.27568	NaN	NaN	NaN	NaN	NaN	NaN	NaN	NaN	NaN	NaN	NaN	NaN
2.318	-15.4915	68.772	153.6835	0.053906	-0.0080079	0.010254	-0.555	11.8357	26.918	0.22637	-0.12578	0.28037	NaN	NaN	NaN	NaN	NaN	NaN	NaN	NaN	NaN	NaN	NaN	NaN
2.32	-20.8317	83.041	116.4	0.067481	-0.032226	0.014648	-14.437	32.793	21.2049	0.21777	-0.12607	0.27617	NaN	NaN	NaN	NaN	NaN	NaN	NaN	NaN	NaN	NaN	NaN	NaN
2.322	1.206	81.813	82.95	0.083887	-0.04668	0.016211	-11.89	35.8936	25.7196	0.21729	-0.12305	0.26758	NaN	NaN	NaN	NaN	NaN	NaN	NaN	NaN	NaN	NaN	NaN	NaN
2.324	-33.4666	79.475	73.41	0.10224	-0.06836	0.025488	4.283	-15.9102	40.172	0.20889	-0.11748	0.26192	NaN	NaN	NaN	NaN	NaN	NaN	NaN	NaN	NaN	NaN	NaN	NaN
2.326	0.353999999999999	61.6617	80.4228	0.11963	-0.090332	0.030762	-32.8753	42.466	17.0066	0.20742	-0.10859	0.25244	NaN	NaN	NaN	NaN	NaN	NaN	NaN	NaN	NaN	NaN	NaN	NaN
2.328	7.6487	49.0936	84.9807	0.12519	-0.11221	0.031738	-15.8237	-6.0508	23.89843	0.20274	-0.098423	0.24384	NaN	NaN	NaN	NaN	NaN	NaN	NaN	NaN	NaN	NaN	NaN	NaN
2.33	13.0744	45.5686	82.142	0.13447	-0.13428	0.033985	-12.004	-33.1	22.46	0.19599	-0.089628	0.23447	NaN	NaN	NaN	NaN	NaN	NaN	NaN	NaN	NaN	NaN	NaN	NaN
2.332	7.9937	36.24494	77.272	0.13955	-0.16084	0.034765	-23.8867	25.623	-1.457	0.18896	-0.067871	0.22168	NaN	NaN	NaN	NaN	NaN	NaN	NaN	NaN	NaN	NaN	NaN	NaN
2.334	2.483	47.6434	40.9518	0.14248	-0.18028	0.039355	3.761	-22.7445	13.5114	0.18341	-0.051402	0.20958	NaN	NaN	NaN	NaN	NaN	NaN	NaN	NaN	NaN	NaN	NaN	NaN
2.336	26.0704	58.5724	17.625	0.14404	-0.20264	0.042969	-10.7123	29.1556	23.8041	0.1715	-0.038219	0.20093	NaN	NaN	NaN	NaN	NaN	NaN	NaN	NaN	NaN	NaN	NaN	NaN
2.338	2.101	68.4237	12.806	0.13389	-0.22177	0.045899	-31.8522	37.0914	13.217153	0.15597	-0.023803	0.18688	NaN	NaN	NaN	NaN	NaN	NaN	NaN	NaN	NaN	NaN	NaN	NaN
2.34	-14.822	49.1179	24.307	0.12178	-0.24072	0.048144	3.012	-5.5134	24.935	0.13737	-0.014403	0.17298	NaN	NaN	NaN	NaN	NaN	NaN	NaN	NaN	NaN	NaN	NaN	NaN
2.342	-7.513	24.8997	29.39	0.10772	-0.2501	0.052441	-12.661	55.384	-2.164	0.11768	-0.0019531	0.1626	NaN	NaN	NaN	NaN	NaN	NaN	NaN	NaN	NaN	NaN	NaN	NaN
2.344	11.161	19.9805	35.6042	0.091113	-0.25752	0.053516	-4.197	10.1588	1.9942	0.090823	0.016375	0.152	NaN	NaN	NaN	NaN	NaN	NaN	NaN	NaN	NaN	NaN	NaN	NaN
2.346	11.7041	25.3296	42.663	0.068359	-0.2627	0.051758	6.497	-8.9786	17.1019	0.065742	0.030891	0.14412	NaN	NaN	NaN	NaN	NaN	NaN	NaN	NaN	NaN	NaN	NaN	NaN
2.348	-1.218	35.977	54.457	0.047265	-0.25937	0.056738	-25.7467	34.2011	-6.968	0.038186	0.050503	0.13554	NaN	NaN	NaN	NaN	NaN	NaN	NaN	NaN	NaN	NaN	NaN	NaN
2.35	14.65	22.8301	33.088	0.026073	-0.2501	0.056543	3.426	-13.84205	4.2822	0.019334	0.070463	0.12776	NaN	NaN	NaN	NaN	NaN	NaN	NaN	NaN	NaN	NaN	NaN	NaN
2.352	-10.031	34.5055	0.25	0.0041972	-0.24541	0.054199	-25.20277	24.8772	4.005	0.00097656	0.089355	0.12012	NaN	NaN	NaN	NaN	NaN	NaN	NaN	NaN	NaN	NaN	NaN	NaN
2.354	-13.571	38.1619	-7.7839	-0.015626	-0.23164	0.05293	-20.131	28.4013	0.7179	-0.0083208	0.10712	0.11511	NaN	NaN	NaN	NaN	NaN	NaN	NaN	NaN	NaN	NaN	NaN	NaN
2.356	-3.417	21.3246	4.908	-0.035156	-0.21729	0.04834	9.395	-27.0778	17.4572	-0.022006	0.12776	0.11181	NaN	NaN	NaN	NaN	NaN	NaN	NaN	NaN	NaN	NaN	NaN	NaN
2.358	3.296	0.540000000000001	24.9704	-0.052243	-0.2083	0.045702	-20.321	34.699	-3.742	-0.030543	0.13925	0.10557	NaN	NaN	NaN	NaN	NaN	NaN	NaN	NaN	NaN	NaN	NaN	NaN
2.36	-12.221	0.240000000000002	4.353	-0.06484	-0.19483	0.039554	-2.432	-13.9733	15.5894	-0.036124	0.14937	0.095431	NaN	NaN	NaN	NaN	NaN	NaN	NaN	NaN	NaN	NaN	NaN	NaN
2.362	-27.2956	11.0556	4.493	-0.076169	-0.18272	0.029396	0.808	-30.865	21.6321	-0.038574	0.16016	0.087891	NaN	NaN	NaN	NaN	NaN	NaN	NaN	NaN	NaN	NaN	NaN	NaN
2.364	-8.091	19.4298	8.2497	-0.079003	-0.16973	0.029396	-19.4541	24.85106	15.1896	-0.04203	0.15869	0.079398	NaN	NaN	NaN	NaN	NaN	NaN	NaN	NaN	NaN	NaN	NaN	NaN
2.366	-23.4522	23.033	22.7429	-0.077637	-0.1582	0.024902	-8.251	-28.0129	16.1982	-0.040527	0.15882	0.072368	NaN	NaN	NaN	NaN	NaN	NaN	NaN	NaN	NaN	NaN	NaN	NaN
2.368	-16.383	25.393	20.0122	-0.080465	-0.14316	0.017967	-6.699	19.6905	1.354	-0.043534	0.15902	0.069055	NaN	NaN	NaN	NaN	NaN	NaN	NaN	NaN	NaN	NaN	NaN	NaN
2.37	-36.2813	3.9027	16.026	-0.078121	-0.13153	0.013668	-13.7117	49.041	-10.1663	-0.047524	0.16113	0.06166	NaN	NaN	NaN	NaN	NaN	NaN	NaN	NaN	NaN	NaN	NaN	NaN
2.372	-16.069	-4.2291	14.73168	-0.071083	-0.11824	0.0062382	-16.005	8.3986	6.9653	-0.058594	0.16699	0.057129	NaN	NaN	NaN	NaN	NaN	NaN	NaN	NaN	NaN	NaN	NaN	NaN
2.374	-17.8586	0.8153	-3.016	-0.064154	-0.10419	-0.0018602	-36.51099	69.069	-1.86735	-0.06465	0.17699	0.051889	NaN	NaN	NaN	NaN	NaN	NaN	NaN	NaN	NaN	NaN	NaN	NaN
2.376	-5.625	18.213	-13.8435	-0.047363	-0.086426	-0.0053711	-7.212	11.37531	6.4341	-0.071792	0.1904	0.040655	NaN	NaN	NaN	NaN	NaN	NaN	NaN	NaN	NaN	NaN	NaN	NaN
2.378	-5.843	8.781	-10.5026	-0.03333	-0.073356	-0.017071	-9.399	-11.0475	12.5969	-0.080596	0.20225	0.033473	NaN	NaN	NaN	NaN	NaN	NaN	NaN	NaN	NaN	NaN	NaN	NaN
2.38	-6.892	2.8327	-11.8186	-0.018225	-0.060109	-0.027389	-20.0657	41.8464	-9.558	-0.08613	0.21758	0.026176	NaN	NaN	NaN	NaN	NaN	NaN	NaN	NaN	NaN	NaN	NaN	NaN
2.382	-2.7575	6.103	-9.6138	0.0028347	-0.042947	-0.039132	6.443	-9.25033	12.9616	-0.091309	0.22803	0.02002	NaN	NaN	NaN	NaN	NaN	NaN	NaN	NaN	NaN	NaN	NaN	NaN
2.384	-12.5017	7.95066	9.1661	0.018505	-0.035271	-0.041852	-19.006	34.0524	7.6285	-0.10049	0.23501	0.010346	NaN	NaN	NaN	NaN	NaN	NaN	NaN	NaN	NaN	NaN	NaN	NaN
2.386	4.496	-2.6883	30.0873	0.041016	-0.026855	-0.048828	-20.7076	56.9	-7.5343	-0.10756	0.24416	0.0049094	NaN	NaN	NaN	NaN	NaN	NaN	NaN	NaN	NaN	NaN	NaN	NaN
2.388	4.336	-4.63332	27.694	0.055949	-0.019936	-0.05433	8.179	-6.0005	15.2452	-0.11584	0.25115	0.0042748	NaN	NaN	NaN	NaN	NaN	NaN	NaN	NaN	NaN	NaN	NaN	NaN
2.39	6.867	14.2266	-1.076	0.070287	-0.015424	-0.059069	-29.3486	43.695	12.29829	-0.12489	0.25944	-0.004538	NaN	NaN	NaN	NaN	NaN	NaN	NaN	NaN	NaN	NaN	NaN	NaN
2.392	-4.582	19.8884	-19.70108	0.083588	-0.010426	-0.065317	-3.0657	-10.4471	43.1477	-0.13428	0.26318	-0.013184	NaN	NaN	NaN	NaN	NaN	NaN	NaN	NaN	NaN	NaN	NaN	NaN
2.394	-7.511	16.3688	-12.8556	0.094727	-0.0097195	-0.067099	3.284	-53.434	71.8405	-0.15122	0.27434	-0.022691	NaN	NaN	NaN	NaN	NaN	NaN	NaN	NaN	NaN	NaN	NaN	NaN
2.396	7.904	1.7855	-17.8348	0.10303	-0.0058594	-0.07666	-29.0596	-8.1532	54.64	-0.17346	0.27764	-0.032762	NaN	NaN	NaN	NaN	NaN	NaN	NaN	NaN	NaN	NaN	NaN	NaN
2.398	2.658	5.1105	-9.71322	0.11101	-0.0036304	-0.075661	6.0405	-55.38	56.97933	-0.20744	0.2737	-0.047223	NaN	NaN	NaN	NaN	NaN	NaN	NaN	NaN	NaN	NaN	NaN	NaN
2.4	7.947	14.696	8.0451	0.12111	-0.0030392	-0.083261	7.551	-10.3338	77.7961	-0.25211	0.27267	-0.069177	NaN	NaN	NaN	NaN	NaN	NaN	NaN	NaN	NaN	NaN	NaN	NaN
2.402	7.4419	4.78105	-0.2715	0.12937	0.00055201	-0.090509	-18.3405	33.667	132.208	-0.30566	0.2749	-0.092773	NaN	NaN	NaN	NaN	NaN	NaN	NaN	NaN	NaN	NaN	NaN	NaN
2.404	8.131	7.0294	3.5498	0.13734	0.002432	-0.094567	-16.423	-11.3654	257.495	-0.38869	0.27354	-0.12282	NaN	NaN	NaN	NaN	NaN	NaN	NaN	NaN	NaN	NaN	NaN	NaN
2.406	-10.267	15.1395	0.5141	0.14746	0.0063477	-0.094238	-31.237	67.516	431.683	-0.50765	0.25953	-0.14811	NaN	NaN	NaN	NaN	NaN	NaN	NaN	NaN	NaN	NaN	NaN	NaN
2.408	-5.087	16.9091	-2.9762	0.15592	0.011521	-0.11616	-15.436	31.1448	612.583	-0.68108	0.20327	-0.18561	NaN	NaN	NaN	NaN	NaN	NaN	NaN	NaN	NaN	NaN	NaN	NaN
2.41	7.243	9.9855	20.315	0.15931	0.017117	-0.12148	-1.585	-35.0295	762.727	-0.90273	0.13645	-0.22255	NaN	NaN	NaN	NaN	NaN	NaN	NaN	NaN	NaN	NaN	NaN	NaN
2.412	-12.4008	0.1945	24.567	0.15152	0.022486	-0.12878	7.74797	-37.067	859.356	-1.146	0.081543	-0.25342	NaN	NaN	NaN	NaN	NaN	NaN	NaN	NaN	NaN	NaN	NaN	NaN
2.414	-30.8784	-8.4742	35.946	0.12944	0.020372	-0.14275	81.7081	-108.527	962.362	-1.3908	0.062303	-0.28047	NaN	NaN	NaN	NaN	NaN	NaN	NaN	NaN	NaN	NaN	NaN	NaN
2.416	-23.6322	-11.5646	56.459	0.089355	0.019531	-0.15283	36.587	-51.65	1078.3038	-1.6133	0.084391	-0.30079	NaN	NaN	NaN	NaN	NaN	NaN	NaN	NaN	NaN	NaN	NaN	NaN
2.418	5.543	-13.4132	94.298	0.037016	0.019043	-0.15853	-15.971	2.92	1145.404	-1.8036	0.14924	-0.31211	NaN	NaN	NaN	NaN	NaN	NaN	NaN	NaN	NaN	NaN	NaN	NaN
2.42	-13.6681	1.2808	139.7178	-0.029763	0.017564	-0.16366	0.1066	-39.813	1161.659	-1.953	0.23907	-0.2875	NaN	NaN	NaN	NaN	NaN	NaN	NaN	NaN	NaN	NaN	NaN	NaN
2.422	10.15413	-11.93	177.2267	-0.10622	0.013861	-0.16419	34.478	-12.0096	1126.336	-2.0815	0.31787	-0.27539	NaN	NaN	NaN	NaN	NaN	NaN	NaN	NaN	NaN	NaN	NaN	NaN
2.424	-8.901	-46.12216	196.125	-0.18791	0.014521	-0.17035	76.912	-119.48	1145.819	-2.1375	0.39668	-0.26777	NaN	NaN	NaN	NaN	NaN	NaN	NaN	NaN	NaN	NaN	NaN	NaN
2.426	-23.4476	-75.7651	215.752	-0.26807	0.015625	-0.17871	65.87153	-184.033	1132.571	-2.1039	0.46084	-0.26465	NaN	NaN	NaN	NaN	NaN	NaN	NaN	NaN	NaN	NaN	NaN	NaN
2.428	-15.187	-96.9779	232.697	-0.34202	0.026751	-0.18599	68.2875	-160.058	1119.893	-1.993	0.49443	-0.24903	NaN	NaN	NaN	NaN	NaN	NaN	NaN	NaN	NaN	NaN	NaN	NaN
2.43	0.91	-75.75293	254.022	-0.41331	0.042356	-0.19796	101.729	-179.584	1086.329	-1.8183	0.49736	-0.21426	NaN	NaN	NaN	NaN	NaN	NaN	NaN	NaN	NaN	NaN	NaN	NaN
2.432	-5.24	-53.0917	280.5123	-0.48683	0.062371	-0.2088	91.576	-134.852	1013.474	-1.6265	0.46924	-0.1792	NaN	NaN	NaN	NaN	NaN	NaN	NaN	NaN	NaN	NaN	NaN	NaN
2.434	-34.9174	-31.666	278.748	-0.5626	0.077412	-0.21957	74.013	-66.755	944.293	-1.4516	0.43321	-0.15352	NaN	NaN	NaN	NaN	NaN	NaN	NaN	NaN	NaN	NaN	NaN	NaN
2.436	-21.0539	-17.1052	299.46	-0.63818	0.093262	-0.23486	94.426	-36.546	889.328	-1.302	0.39697	-0.13496	NaN	NaN	NaN	NaN	NaN	NaN	NaN	NaN	NaN	NaN	NaN	NaN
2.438	1.145	-27.2554	331.364	-0.72253	0.10746	-0.24379	46.652	67.826	859.948	-1.197	0.37705	-0.12363	NaN	NaN	NaN	NaN	NaN	NaN	NaN	NaN	NaN	NaN	NaN	NaN
2.44	23.462	-24.3679	393.246	-0.80881	0.12085	-0.25346	19.6569	67.191	888.805	-1.1162	0.37559	-0.10879	NaN	NaN	NaN	NaN	NaN	NaN	NaN	NaN	NaN	NaN	NaN	NaN
2.442	20.35759	-13.6337	424.666	-0.89356	0.13452	-0.26164	19.0623	25.414	927.7164	-1.0679	0.39795	-0.090332	NaN	NaN	NaN	NaN	NaN	NaN	NaN	NaN	NaN	NaN	NaN	NaN
2.444	7.3181	20.7191	434.593	-0.9901	0.14738	-0.27014	-19.9668	22.024	912.887	-1.0419	0.43789	-0.083886	NaN	NaN	NaN	NaN	NaN	NaN	NaN	NaN	NaN	NaN	NaN	NaN
2.446	2.028	42.9637	457.6643	-1.0879	0.16504	-0.27588	31.531	-59.395	865.606	-1.0231	0.48711	-0.073437	NaN	NaN	NaN	NaN	NaN	NaN	NaN	NaN	NaN	NaN	NaN	NaN
2.448	-12.509	49.19895	488.2425	-1.1837	0.18728	-0.29042	44.7342	-121.6014	818.913	-0.99571	0.54492	-0.065234	NaN	NaN	NaN	NaN	NaN	NaN	NaN	NaN	NaN	NaN	NaN	NaN
2.45	14.435	42.1737	507.976	-1.2849	0.21968	-0.29754	1.681	-121.2072	831.806	-0.96836	0.6041	-0.06748	NaN	NaN	NaN	NaN	NaN	NaN	NaN	NaN	NaN	NaN	NaN	NaN
2.452	6.387	6.452	537.473	-1.3737	0.25486	-0.31161	15.444	-168.729	870.873	-0.9375	0.66699	-0.08252	NaN	NaN	NaN	NaN	NaN	NaN	NaN	NaN	NaN	NaN	NaN	NaN
2.454	-15.36715	-32.763	593.043	-1.454	0.29081	-0.31856	20.539	-150.97	901.361	-0.90752	0.72529	-0.10996	NaN	NaN	NaN	NaN	NaN	NaN	NaN	NaN	NaN	NaN	NaN	NaN
2.456	-24.0366	-73.0554	632.9804	-1.5215	0.32227	-0.32568	-13.8506	-209.973	918.033	-0.88321	0.77578	-0.15215	NaN	NaN	NaN	NaN	NaN	NaN	NaN	NaN	NaN	NaN	NaN	NaN
2.458	-37.2773	-77.4109	649.5488	-1.5676	0.36642	-0.33829	-6.4925	-290.825	955.458	-0.88203	0.79727	-0.19238	NaN	NaN	NaN	NaN	NaN	NaN	NaN	NaN	NaN	NaN	NaN	NaN
2.46	-21.6138	-73.7305	680.075	-1.5984	0.41407	-0.34766	-28.9716	-250.432	996.591	-0.91778	0.78926	-0.22656	NaN	NaN	NaN	NaN	NaN	NaN	NaN	NaN	NaN	NaN	NaN	NaN
2.462	-17.0624	-56.2299	685.2755	-1.6152	0.45274	-0.35469	-81.162	-252.317	1032.803	-0.97852	0.77051	-0.24658	NaN	NaN	NaN	NaN	NaN	NaN	NaN	NaN	NaN	NaN	NaN	NaN
2.464	13.399	-59.0116	731.561	-1.6101	0.4875	-0.36308	-112.355	-189.678	1044.037	-1.0741	0.75478	-0.2709	NaN	NaN	NaN	NaN	NaN	NaN	NaN	NaN	NaN	NaN	NaN	NaN
2.466	2.0131	-62.026	778.772	-1.5972	0.51416	-0.3667	-119.304	-126.86	1025.362	-1.1699	0.75859	-0.29688	NaN	NaN	NaN	NaN	NaN	NaN	NaN	NaN	NaN	NaN	NaN	NaN
2.468	-7.6251	-56.435	851.47811	-1.5744	0.53262	-0.37315	-65.0655	-152.693	1039.719	-1.2656	0.79023	-0.32852	NaN	NaN	NaN	NaN	NaN	NaN	NaN	NaN	NaN	NaN	NaN	NaN
2.47	-7.414	-47.025	929.111	-1.5452	0.54971	-0.38135	-37.2292	-86.5	1043.85	-1.3494	0.84512	-0.36153	NaN	NaN	NaN	NaN	NaN	NaN	NaN	NaN	NaN	NaN	NaN	NaN
2.472	18.5176	-47.693	963.424	-1.5081	0.55322	-0.38877	-11.5588	-69.547	1083.965	-1.4082	0.90234	-0.39453	NaN	NaN	NaN	NaN	NaN	NaN	NaN	NaN	NaN	NaN	NaN	NaN
2.474	10.0633	-37.732107	988.806	-1.4799	0.55879	-0.3957	7.423	-70.197	1119.683	-1.4465	0.94453	-0.43145	NaN	NaN	NaN	NaN	NaN	NaN	NaN	NaN	NaN	NaN	NaN	NaN
2.476	-2.629	-29.189	1001.0311	-1.4565	0.56494	-0.40283	-32.849	-31.232	1115.549	-1.4702	0.96631	-0.46006	NaN	NaN	NaN	NaN	NaN	NaN	NaN	NaN	NaN	NaN	NaN	NaN
2.478	-9.8504	-32.115	1032.1018	-1.4515	0.56865	-0.41279	-22.813	-75.5025	1108.776	-1.5022	0.97255	-0.47647	NaN	NaN	NaN	NaN	NaN	NaN	NaN	NaN	NaN	NaN	NaN	NaN
2.48	-17.7363	-38.308	1056.3575	-1.459	0.56973	-0.43086	-11.888	-109.8898	1112	-1.5572	0.96074	-0.46533	NaN	NaN	NaN	NaN	NaN	NaN	NaN	NaN	NaN	NaN	NaN	NaN
2.482	-2.9635	-37.371	1083.3635	-1.4668	0.56973	-0.44023	-8.577	-116.151	1147.2047	-1.6582	0.95313	-0.44824	NaN	NaN	NaN	NaN	NaN	NaN	NaN	NaN	NaN	NaN	NaN	NaN
2.484	-0.269	-63.1107	1091.554	-1.4825	0.56924	-0.43486	-2.928	-157.1201	1204.539	-1.8191	0.96172	-0.43116	NaN	NaN	NaN	NaN	NaN	NaN	NaN	NaN	NaN	NaN	NaN	NaN
2.486	-0.501999999999999	-80.642	1119.527	-1.5073	0.57373	-0.42725	-37.8009	-136.133	1210.539	-2.023	0.98134	-0.40068	NaN	NaN	NaN	NaN	NaN	NaN	NaN	NaN	NaN	NaN	NaN	NaN
2.488	8.626	-88.899	1125.122	-1.5256	0.58652	-0.42139	-49.58	-145.1154	1234.539	-2.2527	1.0368	-0.38545	NaN	NaN	NaN	NaN	NaN	NaN	NaN	NaN	NaN	NaN	NaN	NaN
2.49	24.1824	-74.071	1138.13	-1.546	0.60518	-0.4292	-24.6615	-173.394	1242.233	-2.4745	1.1245	-0.37646	NaN	NaN	NaN	NaN	NaN	NaN	NaN	NaN	NaN	NaN	NaN	NaN
2.492	43.965	-61.9217	1170.4192	-1.5557	0.62119	-0.43741	-12.622	-140.8	1256.4351	-2.6519	1.2271	-0.37061	NaN	NaN	NaN	NaN	NaN	NaN	NaN	NaN	NaN	NaN	NaN	NaN
2.494	6.41	-75.9047	1216.634	-1.5534	0.63389	-0.44629	29.18	-165.464	1258.493	-2.7629	1.3305	-0.37813	NaN	NaN	NaN	NaN	NaN	NaN	NaN	NaN	NaN	NaN	NaN	NaN
2.496	11.4032	-74.1222	1229.963	-1.5386	0.63721	-0.45459	28.151	-157.676	1274.487	-2.809	1.4147	-0.37851	NaN	NaN	NaN	NaN	NaN	NaN	NaN	NaN	NaN	NaN	NaN	NaN
2.498	-2.9635	-93.006	1253.799	-1.5232	0.64433	-0.46738	-13.167	-108.15	1251.7164	-2.7899	1.4697	-0.37735	NaN	NaN	NaN	NaN	NaN	NaN	NaN	NaN	NaN	NaN	NaN	NaN
2.5	-7.6858	-83.0357	1267.257	-1.5156	0.65039	-0.47715	-8.988	-115.066	1233.866	-2.7152	1.476	-0.36562	NaN	NaN	NaN	NaN	NaN	NaN	NaN	NaN	NaN	NaN	NaN	NaN
2.502	-11.542	-91.0823	1257.1019	-1.5218	0.65195	-0.48496	-32.418	-58.8557	1233.234	-2.605	1.4517	-0.35205	NaN	NaN	NaN	NaN	NaN	NaN	NaN	NaN	NaN	NaN	NaN	NaN
2.504	-28.605	-97.7843	1254.3258	-1.5469	0.64883	-0.49297	-49.578	-34.6973	1223.718	-2.4853	1.3909	-0.31992	NaN	NaN	NaN	NaN	NaN	NaN	NaN	NaN	NaN	NaN	NaN	NaN
2.506	-35.7873	-87.2201	1247.8	-1.5854	0.64209	-0.50537	-33.592	-47.2842	1227.225	-2.3788	1.3341	-0.30694	NaN	NaN	NaN	NaN	NaN	NaN	NaN	NaN	NaN	NaN	NaN	NaN
2.508	-58.486	-90.6008	1255.807	-1.6321	0.62139	-0.5251	-64.4143	9.262	1185.398	-2.2901	1.2814	-0.29951	NaN	NaN	NaN	NaN	NaN	NaN	NaN	NaN	NaN	NaN	NaN	NaN
2.51	9.003	-98.313	1269.8466	-1.6901	0.60752	-0.54287	-98.324	2.525	1179.79	-2.2189	1.2463	-0.29472	NaN	NaN	NaN	NaN	NaN	NaN	NaN	NaN	NaN	NaN	NaN	NaN
2.512	-3.262	-102.888	1296.562	-1.7558	0.59346	-0.56474	-95.788	-12.145	1205.723	-2.1401	1.2173	-0.29834	NaN	NaN	NaN	NaN	NaN	NaN	NaN	NaN	NaN	NaN	NaN	NaN
2.514	2.662	-72.901	1301.6864	-1.8208	0.59483	-0.58369	-87.819	-14.669	1214.111	-2.0483	1.197	-0.29893	NaN	NaN	NaN	NaN	NaN	NaN	NaN	NaN	NaN	NaN	NaN	NaN
2.516	-23.88716	-54.0903	1319.6496	-1.8823	0.60791	-0.59131	-65.1068	-65.5347	1222.86652	-1.9453	1.1836	-0.30137	NaN	NaN	NaN	NaN	NaN	NaN	NaN	NaN	NaN	NaN	NaN	NaN
2.518	-16.158	-42.0661	1325.499	-1.9546	0.63282	-0.58593	-61.681	-46.006	1223.024	-1.8324	1.1715	-0.30566	NaN	NaN	NaN	NaN	NaN	NaN	NaN	NaN	NaN	NaN	NaN	NaN
2.52	-5.106	-34.6788	1340.653	-2.0125	0.65879	-0.58555	-64.8466	-28.8486	1216.256	-1.7179	1.1599	-0.30225	NaN	NaN	NaN	NaN	NaN	NaN	NaN	NaN	NaN	NaN	NaN	NaN
2.522	-27.258	-35.659	1355.4181	-2.0688	0.67051	-0.59492	-49.902	-46.6945	1237.105	-1.6074	1.1406	-0.29688	NaN	NaN	NaN	NaN	NaN	NaN	NaN	NaN	NaN	NaN	NaN	NaN
2.524	3.3967	-37.726	1361.825	-2.1401	0.67822	-0.61846	-80.1638	7.247	1212.469	-1.5206	1.1204	-0.2833	NaN	NaN	NaN	NaN	NaN	NaN	NaN	NaN	NaN	NaN	NaN	NaN
2.526	-19.2732	-49.993	1358.5539	-2.2222	0.68408	-0.65967	-87.955	-17.552	1214.182	-1.4491	1.09	-0.26895	NaN	NaN	NaN	NaN	NaN	NaN	NaN	NaN	NaN	NaN	NaN	NaN
2.528	-16.4535	-55.5048	1356.6339	-2.3012	0.68271	-0.71416	-37.03	-37.629	1205.12	-1.4003	1.0653	-0.25488	NaN	NaN	NaN	NaN	NaN	NaN	NaN	NaN	NaN	NaN	NaN	NaN
2.53	-0.494999999999999	-58.3986	1359.552	-2.3631	0.68594	-0.75937	-55.9477	-2.601	1193.0709	-1.3729	1.0362	-0.23975	NaN	NaN	NaN	NaN	NaN	NaN	NaN	NaN	NaN	NaN	NaN	NaN
2.532	17.513	-56.95	1351.4687	-2.3861	0.67149	-0.79805	-54.7303	-7.87	1198.0372	-1.3574	1.0078	-0.22461	NaN	NaN	NaN	NaN	NaN	NaN	NaN	NaN	NaN	NaN	NaN	NaN
2.534	34.7043	-45.661	1353.3782	-2.3821	0.66475	-0.83057	-55.6442	50.267	1188.9812	-1.3459	0.98105	-0.2125	NaN	NaN	NaN	NaN	NaN	NaN	NaN	NaN	NaN	NaN	NaN	NaN
2.536	23.7028	-33.478	1364.479	-2.3789	0.66211	-0.85547	-46.4597	89.972	1158.372	-1.3387	0.95547	-0.2042	NaN	NaN	NaN	NaN	NaN	NaN	NaN	NaN	NaN	NaN	NaN	NaN
2.538	54.556	-31.675	1363.031	-2.3785	0.65879	-0.87266	-26.335	47.6635	1162.1794	-1.3265	0.92851	-0.19912	NaN	NaN	NaN	NaN	NaN	NaN	NaN	NaN	NaN	NaN	NaN	NaN
2.54	39.913	-29.0729	1380.45	-2.3913	0.66983	-0.89288	-17.282	94.39	1133.4455	-1.309	0.89434	-0.19395	NaN	NaN	NaN	NaN	NaN	NaN	NaN	NaN	NaN	NaN	NaN	NaN
2.542	35.32	-10.6042	1388.200713	-2.4097	0.68662	-0.9128	-0.826999999999998	88.33	1111.467	-1.2886	0.85107	-0.18701	NaN	NaN	NaN	NaN	NaN	NaN	NaN	NaN	NaN	NaN	NaN	NaN
2.544	35.719	9.7425	1387.453	-2.4213	0.70195	-0.92286	30.117	94.616	1117.028	-1.2647	0.80556	-0.17793	NaN	NaN	NaN	NaN	NaN	NaN	NaN	NaN	NaN	NaN	NaN	NaN
2.546	45.744	26.1972	1377.5691	-2.4106	0.72021	-0.93115	10.62	146.609	1101.98242	-1.2518	0.7583	-0.16377	NaN	NaN	NaN	NaN	NaN	NaN	NaN	NaN	NaN	NaN	NaN	NaN
2.548	27.527	11.147	1379.613	-2.371	0.72822	-0.93545	-3.295	81.104	1127.022	-1.2398	0.71416	-0.15361	NaN	NaN	NaN	NaN	NaN	NaN	NaN	NaN	NaN	NaN	NaN	NaN
2.55	7.9813	17.9047	1376.3248	-2.3074	0.7375	-0.93438	-20.589	84.634	1100.3959	-1.2344	0.67373	-0.13926	NaN	NaN	NaN	NaN	NaN	NaN	NaN	NaN	NaN	NaN	NaN	NaN
2.552	27.7371	21.25189	1367.2521	-2.2265	0.74336	-0.92695	-8.952	87.306	1059.004	-1.2349	0.63916	-0.12549	NaN	NaN	NaN	NaN	NaN	NaN	NaN	NaN	NaN	NaN	NaN	NaN
2.554	26.4548	23.948	1350.458	-2.143	0.74297	-0.91602	-5.918	64.558	1078.9849	-1.2369	0.6084	-0.12197	NaN	NaN	NaN	NaN	NaN	NaN	NaN	NaN	NaN	NaN	NaN	NaN
2.556	42.257	8.28152	1326.4266	-2.064	0.73584	-0.90283	-2.1	153.4	1064.8045	-1.2378	0.57666	-0.11377	NaN	NaN	NaN	NaN	NaN	NaN	NaN	NaN	NaN	NaN	NaN	NaN
2.558	14.1349	-1.716	1311.017	-1.995	0.73018	-0.8872	-38.1071	156.296	1044.8763	-1.2347	0.55635	-0.11455	NaN	NaN	NaN	NaN	NaN	NaN	NaN	NaN	NaN	NaN	NaN	NaN
2.56	45.509	2.869	1302.164	-1.941	0.72813	-0.86797	-23.2456	134.747	1031.249	-1.2262	0.54004	-0.11172	NaN	NaN	NaN	NaN	NaN	NaN	NaN	NaN	NaN	NaN	NaN	NaN
2.562	19.6234	19.62	1303.904	-1.8942	0.72539	-0.85234	-35.0453	149.6795	983.722	-1.2144	0.51758	-0.10791	NaN	NaN	NaN	NaN	NaN	NaN	NaN	NaN	NaN	NaN	NaN	NaN
2.564	30.9935	37.827	1318.8015	-1.8528	0.73018	-0.83487	-9.1481	94.185	998.1108	-1.198	0.50332	-0.10215	NaN	NaN	NaN	NaN	NaN	NaN	NaN	NaN	NaN	NaN	NaN	NaN
2.566	30.0751	37.8295	1322.409	-1.8164	0.72949	-0.81348	-13.8513	156.419	992.709	-1.1832	0.48545	-0.10048	NaN	NaN	NaN	NaN	NaN	NaN	NaN	NaN	NaN	NaN	NaN	NaN
2.568	7.26762	36.551	1310.606	-1.7841	0.7331	-0.7917	-16.2564	192.738	955.144	-1.1625	0.47022	-0.097754	NaN	NaN	NaN	NaN	NaN	NaN	NaN	NaN	NaN	NaN	NaN	NaN
2.57	-3.7884	46.707	1305.33	-1.761	0.73418	-0.77051	-0.0940000000000012	173.4209	942.795	-1.1462	0.44971	-0.094238	NaN	NaN	NaN	NaN	NaN	NaN	NaN	NaN	NaN	NaN	NaN	NaN
2.572	-5.457	74.136	1281.9822	-1.7371	0.73222	-0.75137	-28.3452	222.155	898.908	-1.1289	0.4292	-0.092773	NaN	NaN	NaN	NaN	NaN	NaN	NaN	NaN	NaN	NaN	NaN	NaN
2.574	22.5428	85.546	1259.5477	-1.7196	0.72802	-0.72783	-28.3	174.043	886.5172	-1.11	0.40645	-0.092871	NaN	NaN	NaN	NaN	NaN	NaN	NaN	NaN	NaN	NaN	NaN	NaN
2.576	-9.7841	73.2163	1222.296	-1.7031	0.72168	-0.70703	1.1805	154.795	869.4545	-1.0948	0.38721	-0.098536	NaN	NaN	NaN	NaN	NaN	NaN	NaN	NaN	NaN	NaN	NaN	NaN
2.578	-11.4517	61.4581	1203.07	-1.688	0.71631	-0.68291	-25.3045	198.361	842.605	-1.0729	0.36533	-0.10791	NaN	NaN	NaN	NaN	NaN	NaN	NaN	NaN	NaN	NaN	NaN	NaN
2.58	3.8307	54.699	1180.88	-1.6718	0.71562	-0.65469	-12.6245	137.6736	849.248	-1.0455	0.34727	-0.1167	NaN	NaN	NaN	NaN	NaN	NaN	NaN	NaN	NaN	NaN	NaN	NaN
2.582	19.7727	74.808	1174.286	-1.6547	0.70782	-0.64414	-1.1773	172.901	834.726	-1.0195	0.32422	-0.12109	NaN	NaN	NaN	NaN	NaN	NaN	NaN	NaN	NaN	NaN	NaN	NaN
2.584	17.6291	88.3861	1183.889	-1.6302	0.70947	-0.61729	10.34647	175.718	804.997	-0.98359	0.30859	-0.12774	NaN	NaN	NaN	NaN	NaN	NaN	NaN	NaN	NaN	NaN	NaN	NaN
2.586	6.544	93.7573	1167.695	-1.603	0.70752	-0.59717	16.2487	143.827	793.707	-0.95	0.30137	-0.13174	NaN	NaN	NaN	NaN	NaN	NaN	NaN	NaN	NaN	NaN	NaN	NaN
2.588	9.596	96.097	1145.01	-1.566	0.69727	-0.57617	59.231	201.4897	760.521	-0.91562	0.29824	-0.14033	NaN	NaN	NaN	NaN	NaN	NaN	NaN	NaN	NaN	NaN	NaN	NaN
2.59	-9.9147	101.99	1115.5	-1.5217	0.68613	-0.55576	58.376	175.468	746.625	-0.88105	0.29375	-0.15332	NaN	NaN	NaN	NaN	NaN	NaN	NaN	NaN	NaN	NaN	NaN	NaN
2.592	-14.2844	111.338	1099.4711	-1.4761	0.66933	-0.53505	66.353	176.101	742.356	-0.83545	0.28857	-0.15527	NaN	NaN	NaN	NaN	NaN	NaN	NaN	NaN	NaN	NaN	NaN	NaN
2.594	-21.3055	93.6996	1111.0008	-1.4297	0.64766	-0.51778	63.388	198.341	700.61462	-0.79844	0.28155	-0.15996	NaN	NaN	NaN	NaN	NaN	NaN	NaN	NaN	NaN	NaN	NaN	NaN
2.596	-14.043	102.4788	1074.7628	-1.3809	0.62598	-0.49707	63.011	119.43	670.1563	-0.76006	0.27842	-0.16631	NaN	NaN	NaN	NaN	NaN	NaN	NaN	NaN	NaN	NaN	NaN	NaN
2.598	-16.124	103.4124	1025.1939	-1.3311	0.60332	-0.4709	47.171	138.802	615.341	-0.7167	0.27139	-0.16592	NaN	NaN	NaN	NaN	NaN	NaN	NaN	NaN	NaN	NaN	NaN	NaN
2.6	-42.042	120.793	985.476	-1.2823	0.579	-0.44756	42.091	140.689	564.412	-0.66973	0.26738	-0.16836	NaN	NaN	NaN	NaN	NaN	NaN	NaN	NaN	NaN	NaN	NaN	NaN
2.602	-32.788	127.4707	967.282	-1.2311	0.56064	-0.42295	34.017	137.5537	549.5745	-0.61523	0.27002	-0.16992	NaN	NaN	NaN	NaN	NaN	NaN	NaN	NaN	NaN	NaN	NaN	NaN
2.604	-16.192	126.4734	951.9621	-1.1885	0.54033	-0.39492	22.8712	223.211	509.688	-0.55205	0.26523	-0.16748	NaN	NaN	NaN	NaN	NaN	NaN	NaN	NaN	NaN	NaN	NaN	NaN
2.606	10.543	123.721	925.08	-1.144	0.52002	-0.37598	45.4698	190.844	477.7061	-0.4917	0.26416	-0.16338	NaN	NaN	NaN	NaN	NaN	NaN	NaN	NaN	NaN	NaN	NaN	NaN
2.608	-19.601	121.151	900.7514	-1.1056	0.4958	-0.35049	32.419	152.349	455.797	-0.41826	0.26885	-0.16533	NaN	NaN	NaN	NaN	NaN	NaN	NaN	NaN	NaN	NaN	NaN	NaN
2.61	-28.7335	125.8386	873.1962	-1.0643	0.4751	-0.32607	33.532	166.516	405.8339	-0.34824	0.2709	-0.16807	NaN	NaN	NaN	NaN	NaN	NaN	NaN	NaN	NaN	NaN	NaN	NaN
2.612	-35.916	131.30986	845.041	-1.0187	0.45596	-0.30459	37.3392	96.464	391.86134	-0.28125	0.26855	-0.1626	NaN	NaN	NaN	NaN	NaN	NaN	NaN	NaN	NaN	NaN	NaN	NaN
2.614	-35.773	140.4854	811.222	-0.97608	0.43682	-0.2831	22.9353	149.5	353.052	-0.21856	0.25605	-0.15117	NaN	NaN	NaN	NaN	NaN	NaN	NaN	NaN	NaN	NaN	NaN	NaN
2.616	-56.398	151.064	777.981	-0.93555	0.41602	-0.25977	18.4964	159.416	298.999	-0.16397	0.23594	-0.1375	NaN	NaN	NaN	NaN	NaN	NaN	NaN	NaN	NaN	NaN	NaN	NaN
2.618	-45.6335	146.132	745.4482	-0.89102	0.39981	-0.24258	10.7383	109.85	280.615	-0.11905	0.20976	-0.12266	NaN	NaN	NaN	NaN	NaN	NaN	NaN	NaN	NaN	NaN	NaN	NaN
2.62	-25.0343	143.886	706.332	-0.84326	0.38154	-0.21924	-7.35098	159.064	238.931	-0.078515	0.18457	-0.10654	NaN	NaN	NaN	NaN	NaN	NaN	NaN	NaN	NaN	NaN	NaN	NaN
2.622	-54.3289	134.6049	679.4639	-0.79639	0.3624	-0.19893	-16.6143	117.852	215.7785	-0.041992	0.15527	-0.089355	NaN	NaN	NaN	NaN	NaN	NaN	NaN	NaN	NaN	NaN	NaN	NaN
2.624	-54.9958	129.2976	666.784	-0.75029	0.34834	-0.17783	-4.609	115.017	202.474	-0.0041015	0.12422	-0.072949	NaN	NaN	NaN	NaN	NaN	NaN	NaN	NaN	NaN	NaN	NaN	NaN
2.626	-22.177	117.283	619.1656	-0.70459	0.32275	-0.17188	-24.8816	142.867	166.1899	0.031641	0.0959	-0.058691	NaN	NaN	NaN	NaN	NaN	NaN	NaN	NaN	NaN	NaN	NaN	NaN
2.628	-10.294	121.479	581.02699	-0.6461	0.30772	-0.15039	-31.1556	57.6311	174.4733	0.061719	0.06582	-0.040332	NaN	NaN	NaN	NaN	NaN	NaN	NaN	NaN	NaN	NaN	NaN	NaN
2.63	-24.823	116.83	538.124	-0.58877	0.29053	-0.13877	-22.1343	84.483	145.498	0.095215	0.037012	-0.027637	NaN	NaN	NaN	NaN	NaN	NaN	NaN	NaN	NaN	NaN	NaN	NaN
2.632	-26.5366	111.515	511.742	-0.52783	0.27725	-0.1169	-14.0099	82.658	107.805	0.12109	0.00097656	-0.019531	NaN	NaN	NaN	NaN	NaN	NaN	NaN	NaN	NaN	NaN	NaN	NaN
2.634	-12.966	121.3317	484.953	-0.47431	0.26201	-0.10263	13.8268	50.126	116.525	0.1458	-0.028809	-0.0040039	NaN	NaN	NaN	NaN	NaN	NaN	NaN	NaN	NaN	NaN	NaN	NaN
2.636	-26.1535	125.5327	451.5003	-0.41455	0.24072	-0.088379	16.4818	115.8899	85.534	0.15615	-0.059472	0.0037109	NaN	NaN	NaN	NaN	NaN	NaN	NaN	NaN	NaN	NaN	NaN	NaN
2.638	-20.964	135.483	414.7248	-0.36631	0.22451	-0.071093	5.296	85.395	74.7502	0.16435	-0.086035	0.0076172	NaN	NaN	NaN	NaN	NaN	NaN	NaN	NaN	NaN	NaN	NaN	NaN
2.64	-22.367	116.268	385.32152	-0.31875	0.2083	-0.053711	-9.341	82.912	84.793	0.16807	-0.11826	0.012305	NaN	NaN	NaN	NaN	NaN	NaN	NaN	NaN	NaN	NaN	NaN	NaN
2.642	-21.689	109.725	348.1465	-0.26641	0.19229	-0.039648	38.2823	102.339	69.1481	0.16602	-0.14502	0.013184	NaN	NaN	NaN	NaN	NaN	NaN	NaN	NaN	NaN	NaN	NaN	NaN
2.644	-22.546	122.599	310.8573	-0.21728	0.17715	-0.024512	24.7197	22.4457	86.283	0.16269	-0.16953	0.018262	NaN	NaN	NaN	NaN	NaN	NaN	NaN	NaN	NaN	NaN	NaN	NaN
2.646	-19.145	118.882	272.6204	-0.16309	0.16064	-0.011719	9.606	44.136	89.8828	0.15606	-0.19551	0.021484	NaN	NaN	NaN	NaN	NaN	NaN	NaN	NaN	NaN	NaN	NaN	NaN
2.648	9.374	106.6503	240.5577	-0.10947	0.14199	0.0019531	12.5244	37.8517	53.514	0.14746	-0.21231	0.020312	NaN	NaN	NaN	NaN	NaN	NaN	NaN	NaN	NaN	NaN	NaN	NaN
2.65	6.7552	108.0599	200.983	-0.057617	0.12588	0.013574	-0.617999999999999	-0.121	39.666	0.13438	-0.22803	0.019043	NaN	NaN	NaN	NaN	NaN	NaN	NaN	NaN	NaN	NaN	NaN	NaN
2.652	20.9723	82.256	176.406	-0.0052734	0.10947	0.027637	2.574	60.615	26.98	0.12158	-0.23193	0.017578	NaN	NaN	NaN	NaN	NaN	NaN	NaN	NaN	NaN	NaN	NaN	NaN
2.654	-6.264	91.6507	149.49	0.049512	0.090039	0.047168	-16.167	21.7604	39.4922	0.10596	-0.2377	0.019824	NaN	NaN	NaN	NaN	NaN	NaN	NaN	NaN	NaN	NaN	NaN	NaN
2.656	5.972	86.203	125.005	0.099121	0.063477	0.067383	2.104	20.5365	44.363	0.088379	-0.22646	0.023731	NaN	NaN	NaN	NaN	NaN	NaN	NaN	NaN	NaN	NaN	NaN	NaN
2.658	2.435	102.2928	114.9741	0.14121	0.050391	0.075098	16.1415	50.581	18.16347	0.07041	-0.22138	0.016699	NaN	NaN	NaN	NaN	NaN	NaN	NaN	NaN	NaN	NaN	NaN	NaN
2.66	-8.9315	90.752	109.0176	0.18398	0.027344	0.088184	-12.204	-3.1651	19.3562	0.047168	-0.20703	0.015918	NaN	NaN	NaN	NaN	NaN	NaN	NaN	NaN	NaN	NaN	NaN	NaN
2.662	-16.4438	62.172	107.2201	0.22695	0.013672	0.09834	-11.309	25.8155	31.4482	0.029785	-0.19482	0.012695	NaN	NaN	NaN	NaN	NaN	NaN	NaN	NaN	NaN	NaN	NaN	NaN
2.664	-21.5026	61.632	79.9101	0.26338	-0.0038086	0.10693	-12.72	21.8804	28.364	0.0044921	-0.18135	0.012305	NaN	NaN	NaN	NaN	NaN	NaN	NaN	NaN	NaN	NaN	NaN	NaN
2.666	-2.607	52.948	78.4982	0.29395	-0.020508	0.12061	-9.439	-15.045	32.2291	-0.010644	-0.1707	0.0091797	NaN	NaN	NaN	NaN	NaN	NaN	NaN	NaN	NaN	NaN	NaN	NaN
2.668	-28.318	51.8179	64.4429	0.32002	-0.041406	0.12852	-20.567	32.8271	11.29	-0.023535	-0.14883	0.0056641	NaN	NaN	NaN	NaN	NaN	NaN	NaN	NaN	NaN	NaN	NaN	NaN
2.67	-11.199	50.7353	49.9576	0.33692	-0.06123	0.13614	-39.64	6.9006	11.65	-0.029297	-0.1293	0.0022461	NaN	NaN	NaN	NaN	NaN	NaN	NaN	NaN	NaN	NaN	NaN	NaN
2.672	-8.084	47.7409	17.168	0.34082	-0.080371	0.14238	-57.7417	17.0494	26.293	-0.025391	-0.10742	-0.00097656	NaN	NaN	NaN	NaN	NaN	NaN	NaN	NaN	NaN	NaN	NaN	NaN
2.674	-11.7666	43.2635	0.155999999999999	0.34482	-0.095801	0.15107	-43.706	60.699	-0.484	-0.0167	-0.086231	-0.0079101	NaN	NaN	NaN	NaN	NaN	NaN	NaN	NaN	NaN	NaN	NaN	NaN
2.676	-0.363999999999999	26.682	23.848	0.33838	-0.11377	0.16064	-37.2268	3.7327	-2.0489	-0.00058592	-0.066895	-0.010937	NaN	NaN	NaN	NaN	NaN	NaN	NaN	NaN	NaN	NaN	NaN	NaN
2.678	4.7766	17.81	37.6458	0.33428	-0.12002	0.16738	-19.715	7.1519	-4.069	0.013086	-0.048535	-0.016406	NaN	NaN	NaN	NaN	NaN	NaN	NaN	NaN	NaN	NaN	NaN	NaN
2.68	1.765	23.9809	21.2093	0.32364	-0.12363	0.17939	-10.518	-11.59405	-8.074	0.026562	-0.035352	-0.021387	NaN	NaN	NaN	NaN	NaN	NaN	NaN	NaN	NaN	NaN	NaN	NaN
2.682	-14.0198	32.6856	19.1009	0.31308	-0.13106	0.17705	-32.893	-54.739	21.6774	0.037598	-0.024902	-0.024414	NaN	NaN	NaN	NaN	NaN	NaN	NaN	NaN	NaN	NaN	NaN	NaN
2.684	-13.745	38.203	22.8517	0.30439	-0.12881	0.18262	-6.788	15.22	15.3622	0.044629	-0.014649	-0.028711	NaN	NaN	NaN	NaN	NaN	NaN	NaN	NaN	NaN	NaN	NaN	NaN
2.686	-11.572	36.644	10.642	0.29639	-0.12988	0.18262	-12.1584	4.0404	10.46412	0.049511	-0.0048828	-0.036425	NaN	NaN	NaN	NaN	NaN	NaN	NaN	NaN	NaN	NaN	NaN	NaN
2.688	-10.649	30.695	6.527	0.28535	-0.12832	0.18154	-2.771	12.3142	25.357	0.049903	0.0052734	-0.038379	NaN	NaN	NaN	NaN	NaN	NaN	NaN	NaN	NaN	NaN	NaN	NaN
2.69	-9.531	26.796	-7.913	0.27568	-0.12266	0.17461	1.073	54.321	5.6448	0.060254	0.014453	-0.042285	NaN	NaN	NaN	NaN	NaN	NaN	NaN	NaN	NaN	NaN	NaN	NaN
2.692	-2.5723	18.2232	5.5749	0.26553	-0.11679	0.17031	-13.244	7.0726	3.33852	0.059082	0.023926	-0.045898	NaN	NaN	NaN	NaN	NaN	NaN	NaN	NaN	NaN	NaN	NaN	NaN
2.694	1.532	9.30146	14.2802	0.25576	-0.11094	0.15986	1.601	34.742	9.5521	0.068262	0.033789	-0.054199	NaN	NaN	NaN	NaN	NaN	NaN	NaN	NaN	NaN	NaN	NaN	NaN
2.696	-3.5428	13.7268	6.1891	0.24609	-0.10059	0.15088	-2.345	26.541	9.0745	0.071289	0.043555	-0.059473	NaN	NaN	NaN	NaN	NaN	NaN	NaN	NaN	NaN	NaN	NaN	NaN
2.698	3.398	6.5305	10.9501	0.23603	-0.085547	0.14228	-14.867	-30.931	24.594	0.075977	0.054102	-0.065332	NaN	NaN	NaN	NaN	NaN	NaN	NaN	NaN	NaN	NaN	NaN	NaN
2.7	12.428	3.3246	7.5989	0.22568	-0.073926	0.13135	25.3646	12.9304	11.95318	0.077832	0.064941	-0.07041	NaN	NaN	NaN	NaN	NaN	NaN	NaN	NaN	NaN	NaN	NaN	NaN
2.702	8.133	2.1867	10.1744	0.21201	-0.061426	0.11807	22.7745	-4.9898	-16.004732	0.080566	0.067383	-0.075684	NaN	NaN	NaN	NaN	NaN	NaN	NaN	NaN	NaN	NaN	NaN	NaN
2.704	-5.5556	15.3175	-0.131	0.19951	-0.045313	0.10469	0.859999999999999	16.5151	-7.3696	0.082422	0.073731	-0.080176	NaN	NaN	NaN	NaN	NaN	NaN	NaN	NaN	NaN	NaN	NaN	NaN
2.706	-1.952	4.3628	7.8109	0.18701	-0.023926	0.092773	9.647	67.998	-2.515	0.084571	0.074512	-0.084375	NaN	NaN	NaN	NaN	NaN	NaN	NaN	NaN	NaN	NaN	NaN	NaN
2.708	-5.12	-2.2486	19.32381	0.17441	-0.0067382	0.07295	-10.618	22.6852	7.43368	0.084961	0.074121	-0.094141	NaN	NaN	NaN	NaN	NaN	NaN	NaN	NaN	NaN	NaN	NaN	NaN
2.71	-15.709	7.2605	7.4209	0.15967	0.013379	0.057813	-6.168	34.3807	25.5129	0.082324	0.076562	-0.10332	NaN	NaN	NaN	NaN	NaN	NaN	NaN	NaN	NaN	NaN	NaN	NaN
2.712	-11.474	10.0183	4.6059	0.13701	0.032129	0.046485	-4.2866	20.3947	-0.68229	0.082031	0.07666	-0.11084	NaN	NaN	NaN	NaN	NaN	NaN	NaN	NaN	NaN	NaN	NaN	NaN
2.714	-6.412	7.15837	5.0692	0.11611	0.052051	0.031738	-19.0921	-33.63	15.0179	0.079101	0.079687	-0.11699	NaN	NaN	NaN	NaN	NaN	NaN	NaN	NaN	NaN	NaN	NaN	NaN
2.716	-11.127	10.6749	11.8703	0.09082	0.073242	0.020508	-21.2513	24.4071	32.4736	0.077734	0.087403	-0.12539	NaN	NaN	NaN	NaN	NaN	NaN	NaN	NaN	NaN	NaN	NaN	NaN
2.718	-13.1248	18.0687	-6.2238	0.069629	0.090722	0.0058595	-32.3299	13.1719	5.899	0.07461	0.098732	-0.12539	NaN	NaN	NaN	NaN	NaN	NaN	NaN	NaN	NaN	NaN	NaN	NaN
2.72	-8.1972	20.245094	4.595044	0.04707	0.11426	-0.0035157	-30.115	10.0646	29.058	0.06709	0.10908	-0.12939	NaN	NaN	NaN	NaN	NaN	NaN	NaN	NaN	NaN	NaN	NaN	NaN
2.722	-5.702	9.8931	4.061	0.024414	0.1416	-0.011328	-25.2983	41.556	20.716	0.055176	0.10986	-0.12695	NaN	NaN	NaN	NaN	NaN	NaN	NaN	NaN	NaN	NaN	NaN	NaN
2.724	-3.913	0.274000000000001	-0.524000000000001	0.0056641	0.16787	-0.019531	-58.339	-30.5069	40.3022	0.025586	0.095703	-0.12891	NaN	NaN	NaN	NaN	NaN	NaN	NaN	NaN	NaN	NaN	NaN	NaN
2.726	0.795999999999999	1.155	-4.5889	-0.0043945	0.1958	-0.026855	-32.559	-14.6355	62.90318	-0.003711	0.086621	-0.12715	NaN	NaN	NaN	NaN	NaN	NaN	NaN	NaN	NaN	NaN	NaN	NaN
2.728	-20.377	0.00200000000000067	-12.0669	-0.017871	0.22041	-0.035547	-7.854	-4.846	50.1295	-0.041992	0.076465	-0.12051	NaN	NaN	NaN	NaN	NaN	NaN	NaN	NaN	NaN	NaN	NaN	NaN
2.73	-3.311	7.51218	13.78317	-0.028028	0.24072	-0.037012	-46.8455	-38.909	81.4574	-0.08838	0.066406	-0.11738	NaN	NaN	NaN	NaN	NaN	NaN	NaN	NaN	NaN	NaN	NaN	NaN
2.732	-12.9581	9.605	19.8929	-0.033105	0.25362	-0.051465	-13.6396	0.9864	118.747	-0.13135	0.055176	-0.12354	NaN	NaN	NaN	NaN	NaN	NaN	NaN	NaN	NaN	NaN	NaN	NaN
2.734	-32.8183	4.0854	3.9273	-0.034277	0.26514	-0.04375	-36.5965	-55.373	124.24	-0.18828	0.049023	-0.12402	NaN	NaN	NaN	NaN	NaN	NaN	NaN	NaN	NaN	NaN	NaN	NaN
2.736	-24.2303	-1.3821	0.79089	-0.031738	0.271	-0.046875	-26.318	-61.383	194.4353	-0.25205	0.038379	-0.12812	NaN	NaN	NaN	NaN	NaN	NaN	NaN	NaN	NaN	NaN	NaN	NaN
2.738	1.106	3.37662	10.4168	-0.030957	0.27461	-0.040235	-10.362	-7.2799	250.63	-0.33174	0.028613	-0.13594	NaN	NaN	NaN	NaN	NaN	NaN	NaN	NaN	NaN	NaN	NaN	NaN
2.74	-6.113	6.921	-2.9519	-0.027832	0.27695	-0.041015	-48.5395	6.5625	337.736	-0.4459	0.012988	-0.14004	NaN	NaN	NaN	NaN	NaN	NaN	NaN	NaN	NaN	NaN	NaN	NaN
2.742	-7.5738	10.034	-11.0917	-0.027832	0.27422	-0.034766	-17.474	97.552	545.02	-0.59912	-0.0083008	-0.14063	NaN	NaN	NaN	NaN	NaN	NaN	NaN	NaN	NaN	NaN	NaN	NaN
2.744	0.236000000000001	4.389	-9.6058	-0.021485	0.27578	-0.03252	-49.069	99.452	656.029	-0.80195	-0.05166	-0.13389	NaN	NaN	NaN	NaN	NaN	NaN	NaN	NaN	NaN	NaN	NaN	NaN
2.746	4.0559	5.0309	5.5459	-0.024902	0.27637	-0.030762	-119.659	30.3256	811.786	-1.0527	-0.11006	-0.12471	NaN	NaN	NaN	NaN	NaN	NaN	NaN	NaN	NaN	NaN	NaN	NaN
2.748	9.646	14.6982	-6.9734	-0.018555	0.27539	-0.025488	-23.573	47.752	900.355	-1.346	-0.16748	-0.10556	NaN	NaN	NaN	NaN	NaN	NaN	NaN	NaN	NaN	NaN	NaN	NaN
2.75	7.3315	23.1393	-1.03883	-0.016602	0.27207	-0.018262	-9.393	-26.316	977.3325	-1.6638	-0.19385	-0.092871	NaN	NaN	NaN	NaN	NaN	NaN	NaN	NaN	NaN	NaN	NaN	NaN
2.752	-2.611	16.5309	16.3704	-0.017774	0.27129	-0.012012	-47.2004	-62.449	1109.402	-1.9844	-0.17676	-0.079102	NaN	NaN	NaN	NaN	NaN	NaN	NaN	NaN	NaN	NaN	NaN	NaN
2.754	-10.527	10.0603	14.518	-0.020801	0.26455	-0.0093751	-37.452	-15.018	1144.622	-2.3324	-0.099708	-0.028906	NaN	NaN	NaN	NaN	NaN	NaN	NaN	NaN	NaN	NaN	NaN	NaN
2.756	-6.798	10.479	-11.33448	-0.021484	0.26172	-0.017578	-64.517	-34.613	1090.324	-2.6636	0.045507	-0.088672	NaN	NaN	NaN	NaN	NaN	NaN	NaN	NaN	NaN	NaN	NaN	NaN
2.758	-23.1738	9.8791	-1.446	-0.027148	0.25606	-0.0074219	-43.392	-34.8065	1087.736	-2.8094	0.27481	-0.21328	NaN	NaN	NaN	NaN	NaN	NaN	NaN	NaN	NaN	NaN	NaN	NaN
2.76	-6.931	-7.94507	25.611	-0.040723	0.25352	-0.010938	-42.7335	-74.673	1039.406	-2.7419	0.46631	-0.2999	NaN	NaN	NaN	NaN	NaN	NaN	NaN	NaN	NaN	NaN	NaN	NaN
2.762	-6.542	-31.3546	57.792	-0.059863	0.25234	-0.017578	-48.404	-178.146	1027.907	-2.5508	0.60547	-0.34375	NaN	NaN	NaN	NaN	NaN	NaN	NaN	NaN	NaN	NaN	NaN	NaN
2.764	-20.51	-19.3718	66.206	-0.097168	0.24746	-0.020996	-34.166	-155.0258	1023.296	-2.2891	0.67305	-0.37793	NaN	NaN	NaN	NaN	NaN	NaN	NaN	NaN	NaN	NaN	NaN	NaN
2.766	-10.737	-4.8207	97.621	-0.14746	0.2417	-0.03125	-42.3324	-163.509	977.879	-2.0031	0.68438	-0.40449	NaN	NaN	NaN	NaN	NaN	NaN	NaN	NaN	NaN	NaN	NaN	NaN
2.768	-30.467	-13.172	176.842935	-0.21914	0.23369	-0.038086	-14.949	-163.661	964.055	-1.7223	0.64492	-0.42989	NaN	NaN	NaN	NaN	NaN	NaN	NaN	NaN	NaN	NaN	NaN	NaN
2.77	-47.771	-38.864	218.2249	-0.29599	0.22022	-0.03916	-12.511	-57.258	930.789	-1.4472	0.58349	-0.44492	NaN	NaN	NaN	NaN	NaN	NaN	NaN	NaN	NaN	NaN	NaN	NaN
2.772	-47.408	-76.3201	237.93	-0.38311	0.20537	-0.035254	-27.32	14.251	882.7218	-1.1797	0.52881	-0.46436	NaN	NaN	NaN	NaN	NaN	NaN	NaN	NaN	NaN	NaN	NaN	NaN
2.774	-35.888	-89.2278	245.97	-0.48115	0.18652	-0.033203	-27.9	81.083	877.098	-0.9505	0.5085	-0.48174	NaN	NaN	NaN	NaN	NaN	NaN	NaN	NaN	NaN	NaN	NaN	NaN
2.776	-10.0828	-90.987	271.3566	-0.58398	0.1709	-0.032227	-73.2603	113.452	871.185	-0.75732	0.51905	-0.51357	NaN	NaN	NaN	NaN	NaN	NaN	NaN	NaN	NaN	NaN	NaN	NaN
2.778	-41.977	-80.0747	303.711045	-0.67578	0.17509	-0.03457	-106.694	9.03400000000001	922.407	-0.59717	0.55264	-0.53311	NaN	NaN	NaN	NaN	NaN	NaN	NaN	NaN	NaN	NaN	NaN	NaN
2.78	-51.9654	-60.0369	323.0384	-0.75938	0.18388	-0.039844	-48.842	-5.535	967.4883	-0.48018	0.58066	-0.58769	NaN	NaN	NaN	NaN	NaN	NaN	NaN	NaN	NaN	NaN	NaN	NaN
2.782	-51.0279	-38.956	338.855	-0.8293	0.19756	-0.051563	-15.35767	-70.666	946.8382	-0.42529	0.61572	-0.604	NaN	NaN	NaN	NaN	NaN	NaN	NaN	NaN	NaN	NaN	NaN	NaN
2.784	-18.71	-31.623	382.537	-0.89677	0.22354	-0.053809	-7.3173	-130.455	918.229	-0.44414	0.61933	-0.62578	NaN	NaN	NaN	NaN	NaN	NaN	NaN	NaN	NaN	NaN	NaN	NaN
2.786	18.4813	-24.0693	425.743	-0.9585	0.24854	-0.065918	-1.547	-108.629	884.798	-0.51982	0.62783	-0.64033	NaN	NaN	NaN	NaN	NaN	NaN	NaN	NaN	NaN	NaN	NaN	NaN
2.788	15.7714	-6.016	475.34138	-1.0285	0.27227	-0.074219	6.344	-178.2747	897.528	-0.62803	0.62744	-0.64815	NaN	NaN	NaN	NaN	NaN	NaN	NaN	NaN	NaN	NaN	NaN	NaN
2.79	19.5893	15.225	546.8	-1.1	0.29375	-0.088184	20.144	-220.558	946.6333	-0.74844	0.6248	-0.6543	NaN	NaN	NaN	NaN	NaN	NaN	NaN	NaN	NaN	NaN	NaN	NaN
2.792	6.4731	34.745	595.344	-1.1871	0.3125	-0.10381	53.406	-239.38	999.131	-0.87061	0.63525	-0.65381	NaN	NaN	NaN	NaN	NaN	NaN	NaN	NaN	NaN	NaN	NaN	NaN
2.794	-14.812	33.9916	618.26409	-1.2771	0.33008	-0.11738	55.105	-309.12	1079.2055	-0.99295	0.67168	-0.65508	NaN	NaN	NaN	NaN	NaN	NaN	NaN	NaN	NaN	NaN	NaN	NaN
2.796	-29.297	29.832	645.791	-1.3672	0.33984	-0.12988	40.9299	-269.319	1137.879	-1.1144	0.71308	-0.65234	NaN	NaN	NaN	NaN	NaN	NaN	NaN	NaN	NaN	NaN	NaN	NaN
2.798	-6.264	6.738	682.965	-1.4625	0.36582	-0.14219	-7.0574	-239.458	1123.0222	-1.2328	0.75879	-0.63789	NaN	NaN	NaN	NaN	NaN	NaN	NaN	NaN	NaN	NaN	NaN	NaN
2.8	-5.299	-31.232	736.316	-1.5461	0.38516	-0.15107	-28.61376	-221.987	1119.281	-1.3534	0.804	-0.61846	NaN	NaN	NaN	NaN	NaN	NaN	NaN	NaN	NaN	NaN	NaN	NaN
2.802	-27.6254	-55.325	775.878	-1.618	0.40703	-0.15732	-27.7554	-112.894	1128.55	-1.4805	0.83984	-0.61133	NaN	NaN	NaN	NaN	NaN	NaN	NaN	NaN	NaN	NaN	NaN	NaN
2.804	-48.0286	-86.132	831.376	-1.6764	0.43438	-0.15957	3.7399	-116.642	1122.449	-1.5926	0.87871	-0.60644	NaN	NaN	NaN	NaN	NaN	NaN	NaN	NaN	NaN	NaN	NaN	NaN
2.806	-31.8845	-119.8001	869.732	-1.7261	0.45361	-0.15918	44.1859	-110.182	1153.996	-1.6902	0.91679	-0.59766	NaN	NaN	NaN	NaN	NaN	NaN	NaN	NaN	NaN	NaN	NaN	NaN
2.808	-16.466	-153.3	894.941	-1.749	0.46426	-0.1709	16.7636	-71.537	1162.671	-1.7742	0.94375	-0.60039	NaN	NaN	NaN	NaN	NaN	NaN	NaN	NaN	NaN	NaN	NaN	NaN
2.81	1.951	-155.809	892.284	-1.7452	0.47393	-0.18408	39.18	-114.22	1173.846	-1.8594	0.95781	-0.60205	NaN	NaN	NaN	NaN	NaN	NaN	NaN	NaN	NaN	NaN	NaN	NaN
2.812	2.162	-141.368	947.1727	-1.712	0.48526	-0.19541	59.174	-64.7387	1190.067	-1.9434	0.96289	-0.60938	NaN	NaN	NaN	NaN	NaN	NaN	NaN	NaN	NaN	NaN	NaN	NaN
2.814	-4.9	-120.574	1011.541	-1.6517	0.4832	-0.20225	23.906	-63.0093	1158.244	-2.0391	0.95859	-0.62422	NaN	NaN	NaN	NaN	NaN	NaN	NaN	NaN	NaN	NaN	NaN	NaN
2.816	-10.2468	-119.85	1070.505	-1.5796	0.48291	-0.20557	-3.933	-134.224	1181.1625	-2.1394	0.95479	-0.64405	NaN	NaN	NaN	NaN	NaN	NaN	NaN	NaN	NaN	NaN	NaN	NaN
2.818	-28.6024	-117.375	1082.538	-1.5009	0.47783	-0.21142	10.958	-99.824	1224.6993	-2.2355	0.97353	-0.67373	NaN	NaN	NaN	NaN	NaN	NaN	NaN	NaN	NaN	NaN	NaN	NaN
2.82	-16.4495	-105.013	1081.097	-1.4214	0.47207	-0.21465	1.626	-130.927	1245.616	-2.3115	0.99863	-0.6998	NaN	NaN	NaN	NaN	NaN	NaN	NaN	NaN	NaN	NaN	NaN	NaN
2.822	4.4613	-85.9441	1089.2	-1.3433	0.47324	-0.21816	-12.4158	-141.0013	1317.195	-2.3511	1.019	-0.71631	NaN	NaN	NaN	NaN	NaN	NaN	NaN	NaN	NaN	NaN	NaN	NaN
2.824	-14.146	-81.248	1095.052	-1.2709	0.47852	-0.21953	-10.672	-104.7564	1321.275	-2.3639	1.027	-0.74112	NaN	NaN	NaN	NaN	NaN	NaN	NaN	NaN	NaN	NaN	NaN	NaN
2.826	-33.112	-81.814	1086.1332	-1.2007	0.49658	-0.21338	-38.152	-189.044	1322.841	-2.3402	1.0176	-0.77676	NaN	NaN	NaN	NaN	NaN	NaN	NaN	NaN	NaN	NaN	NaN	NaN
2.828	-29.8257	-94.725	1063.0399	-1.1348	0.52959	-0.21172	6.2588	-161.907	1318.445	-2.3	0.98516	-0.83808	NaN	NaN	NaN	NaN	NaN	NaN	NaN	NaN	NaN	NaN	NaN	NaN
2.83	-2.33429	-113.7479	1045.887	-1.0762	0.56289	-0.22188	-22.7597	-158.026	1285.974	-2.2565	0.93037	-0.88896	NaN	NaN	NaN	NaN	NaN	NaN	NaN	NaN	NaN	NaN	NaN	NaN
2.832	9.7808	-132.363	1054.849	-1.0172	0.5875	-0.24024	16.983	-179.572	1313.861	-2.2246	0.88379	-0.92676	NaN	NaN	NaN	NaN	NaN	NaN	NaN	NaN	NaN	NaN	NaN	NaN
2.834	3.1949	-124.328	1072.287	-0.96943	0.61103	-0.24726	35.662	-102.0096	1296.11	-2.2114	0.85576	-0.95049	NaN	NaN	NaN	NaN	NaN	NaN	NaN	NaN	NaN	NaN	NaN	NaN
2.836	2.624	-114.516	1089.881	-0.93359	0.62305	-0.25098	8.5707	-122.085	1269.399	-2.212	0.85127	-0.95537	NaN	NaN	NaN	NaN	NaN	NaN	NaN	NaN	NaN	NaN	NaN	NaN
2.838	9.624	-104.2054	1124.742	-0.92715	0.6209	-0.25762	3.11668	-112.8	1251.1274	-2.2026	0.86534	-0.971	NaN	NaN	NaN	NaN	NaN	NaN	NaN	NaN	NaN	NaN	NaN	NaN
2.84	15.607	-114.02267	1149.3198	-0.93897	0.61533	-0.25596	-11.3302	-35.6119	1206.508	-2.1778	0.88115	-0.98916	NaN	NaN	NaN	NaN	NaN	NaN	NaN	NaN	NaN	NaN	NaN	NaN
2.842	4.255	-129.8643	1185.703	-0.971	0.60908	-0.25478	26.481	-50.124	1207.006	-2.1367	0.89648	-1.0078	NaN	NaN	NaN	NaN	NaN	NaN	NaN	NaN	NaN	NaN	NaN	NaN
2.844	18.5494	-137.4994	1215.359	-1.0248	0.61445	-0.2625	19.183	18.615	1200.486	-2.0864	0.91592	-1.0204	NaN	NaN	NaN	NaN	NaN	NaN	NaN	NaN	NaN	NaN	NaN	NaN
2.846	-3.7364	-145.3466	1215.96	-1.0859	0.62305	-0.26563	13.4551	43.728	1193.482	-2.0297	0.93359	-1.0262	NaN	NaN	NaN	NaN	NaN	NaN	NaN	NaN	NaN	NaN	NaN	NaN
2.848	3.791	-132.5592	1200.4618	-1.1544	0.64287	-0.26855	12.4351	-29.562	1224.12	-1.9687	0.95625	-1.0316	NaN	NaN	NaN	NaN	NaN	NaN	NaN	NaN	NaN	NaN	NaN	NaN
2.85	-13.1413	-133.7402	1194.083	-1.2254	0.65625	-0.26807	32.9874	1.288	1241.147	-1.9044	0.97529	-1.0305	NaN	NaN	NaN	NaN	NaN	NaN	NaN	NaN	NaN	NaN	NaN	NaN
2.852	-19.043	-138.6	1176.192	-1.2961	0.6668	-0.27197	30.8642	-23.851	1235.71746	-1.832	0.98828	-1.0176	NaN	NaN	NaN	NaN	NaN	NaN	NaN	NaN	NaN	NaN	NaN	NaN
2.854	-6.916	-144.953	1170.795	-1.3871	0.66641	-0.2667	29.251	-35.7357	1257.208	-1.7721	0.98223	-1.0041	NaN	NaN	NaN	NaN	NaN	NaN	NaN	NaN	NaN	NaN	NaN	NaN
2.856	-12.489	-153.208	1176.257	-1.4917	0.66455	-0.25928	50.626	36.6081	1232.256	-1.7128	0.9708	-0.98506	NaN	NaN	NaN	NaN	NaN	NaN	NaN	NaN	NaN	NaN	NaN	NaN
2.858	0.785999999999998	-141.263	1202.7321	-1.6187	0.65723	-0.25869	28.1929	-24.59	1235.8371	-1.6643	0.94971	-0.96006	NaN	NaN	NaN	NaN	NaN	NaN	NaN	NaN	NaN	NaN	NaN	NaN
2.86	-15.422	-122.3551	1231.51858	-1.7663	0.65801	-0.25176	39.1158	-12.02	1247.1403	-1.6315	0.92754	-0.92832	NaN	NaN	NaN	NaN	NaN	NaN	NaN	NaN	NaN	NaN	NaN	NaN
2.862	-11.016	-98.0938	1243.1862	-1.9366	0.67519	-0.24394	16.764	-22.163	1239.473	-1.6055	0.90234	-0.89941	NaN	NaN	NaN	NaN	NaN	NaN	NaN	NaN	NaN	NaN	NaN	NaN
2.864	-19.767	-81.588	1234.8907	-2.1111	0.69853	-0.2375	30.278	-84.461	1266.15	-1.5785	0.86953	-0.87031	NaN	NaN	NaN	NaN	NaN	NaN	NaN	NaN	NaN	NaN	NaN	NaN
2.866	-40.506	-73.744	1246.908	-2.2827	0.74268	-0.23389	60.312	8.6392	1251.236	-1.5465	0.84414	-0.84043	NaN	NaN	NaN	NaN	NaN	NaN	NaN	NaN	NaN	NaN	NaN	NaN
2.868	-52.823	-76.494	1273.3649	-2.4438	0.78994	-0.23965	-6.1818	16.6769	1234.815	-1.509	0.81446	-0.81856	NaN	NaN	NaN	NaN	NaN	NaN	NaN	NaN	NaN	NaN	NaN	NaN
2.87	-81.88309	-82.032	1270.2558	-2.5949	0.83926	-0.25117	7.1035	53.369	1228.6906	-1.4653	0.79092	-0.79561	NaN	NaN	NaN	NaN	NaN	NaN	NaN	NaN	NaN	NaN	NaN	NaN
2.872	-58.9055	-80.7971	1273.52	-2.7262	0.89239	-0.26133	2.3142	140.05	1171.462	-1.4272	0.76611	-0.76904	NaN	NaN	NaN	NaN	NaN	NaN	NaN	NaN	NaN	NaN	NaN	NaN
2.874	-85.337	-84.2601	1263.963	-2.8341	0.93545	-0.2665	-1.4192	97.579	1176.6571	-1.3887	0.7418	-0.74483	NaN	NaN	NaN	NaN	NaN	NaN	NaN	NaN	NaN	NaN	NaN	NaN
2.876	-66.9615	-92.246	1275.375	-2.9116	0.97314	-0.27393	8.8596	131	1175.025	-1.3609	0.70967	-0.71553	NaN	NaN	NaN	NaN	NaN	NaN	NaN	NaN	NaN	NaN	NaN	NaN
2.878	-65.6909	-117.127	1274.047	-2.9353	1.0019	-0.28056	-7.3084	139.316	1139.3329	-1.3437	0.68388	-0.68662	NaN	NaN	NaN	NaN	NaN	NaN	NaN	NaN	NaN	NaN	NaN	NaN
2.88	-67.349	-109.822	1280.1985	-2.9187	1.0195	-0.27774	-12.4343	96.4312	1116.3447	-1.3291	0.65938	-0.65742	NaN	NaN	NaN	NaN	NaN	NaN	NaN	NaN	NaN	NaN	NaN	NaN
2.882	-60.355	-102.495	1297.7893	-2.873	1.0324	-0.27383	-3.721	157.111	1110.312	-1.312	0.6333	-0.62842	NaN	NaN	NaN	NaN	NaN	NaN	NaN	NaN	NaN	NaN	NaN	NaN
2.884	-62.815	-82.49	1312.4287	-2.8095	1.036	-0.26006	13.768	132.1035	1093.521	-1.2916	0.61016	-0.60488	NaN	NaN	NaN	NaN	NaN	NaN	NaN	NaN	NaN	NaN	NaN	NaN
2.886	-51.321	-65.4536	1313.2033	-2.7437	1.0356	-0.25146	5.224	95.69	1102.4925	-1.2663	0.59073	-0.57373	NaN	NaN	NaN	NaN	NaN	NaN	NaN	NaN	NaN	NaN	NaN	NaN
2.888	-80.233	-42.3333	1302.818	-2.68	1.0302	-0.24844	-2.1438	134.789	1074.227	-1.2378	0.58017	-0.55068	NaN	NaN	NaN	NaN	NaN	NaN	NaN	NaN	NaN	NaN	NaN	NaN
2.89	-79.787	-33.449	1309.8761	-2.6172	1.0344	-0.24483	-39.059	91.483	1064.834	-1.2054	0.56631	-0.52666	NaN	NaN	NaN	NaN	NaN	NaN	NaN	NaN	NaN	NaN	NaN	NaN
2.892	-79.172	-26.369	1300.1234	-2.5426	1.0371	-0.24248	-24.9365	135.96	1077.00241	-1.1772	0.55029	-0.50342	NaN	NaN	NaN	NaN	NaN	NaN	NaN	NaN	NaN	NaN	NaN	NaN
2.894	-71.241	-28.003	1292.34224	-2.4619	1.031	-0.23623	-52.557	155.326	1047.41224	-1.151	0.53721	-0.48389	NaN	NaN	NaN	NaN	NaN	NaN	NaN	NaN	NaN	NaN	NaN	NaN
2.896	-71.6374	-17.049	1287.936	-2.373	1.0195	-0.23389	-32.223	101.119	1037.832	-1.1246	0.52129	-0.45996	NaN	NaN	NaN	NaN	NaN	NaN	NaN	NaN	NaN	NaN	NaN	NaN
2.898	-73.7217	-13.245	1280.60007	-2.2851	1.0072	-0.23389	-3.74	153.6649	982.855	-1.1055	0.50879	-0.43066	NaN	NaN	NaN	NaN	NaN	NaN	NaN	NaN	NaN	NaN	NaN	NaN
2.9	-59.297	-22.888	1285.6096	-2.1918	0.99102	-0.23516	-35.982	112.56	952.69	-1.0941	0.49033	-0.40449	NaN	NaN	NaN	NaN	NaN	NaN	NaN	NaN	NaN	NaN	NaN	NaN
2.902	-40.181	-32.4883	1256.545	-2.1015	0.975	-0.22696	-24.459	125.414	959.8424	-1.0923	0.47314	-0.37842	NaN	NaN	NaN	NaN	NaN	NaN	NaN	NaN	NaN	NaN	NaN	NaN
2.904	-23.361	-30.631	1242.147	-2.0193	0.96113	-0.21641	-18.6796	202.88054	936.187	-1.0929	0.46221	-0.35576	NaN	NaN	NaN	NaN	NaN	NaN	NaN	NaN	NaN	NaN	NaN	NaN
2.906	-33.278	-31.711	1235.737	-1.9546	0.95459	-0.21484	-11.217	183.6442	932.885	-1.093	0.45488	-0.33477	NaN	NaN	NaN	NaN	NaN	NaN	NaN	NaN	NaN	NaN	NaN	NaN
2.908	-30.119	-27.354	1251.572	-1.8981	0.94414	-0.20391	6.451	219.114	890.9077	-1.0863	0.45215	-0.32266	NaN	NaN	NaN	NaN	NaN	NaN	NaN	NaN	NaN	NaN	NaN	NaN
2.91	-39.155	-23.6688	1255.1983	-1.8605	0.94219	-0.19531	-35.912	211.269	829.967	-1.0791	0.45352	-0.3043	NaN	NaN	NaN	NaN	NaN	NaN	NaN	NaN	NaN	NaN	NaN	NaN
2.912	-68.0375	-17.6659	1259.871	-1.8262	0.93125	-0.19609	-29.954	168.04	814.71	-1.062	0.45459	-0.28809	NaN	NaN	NaN	NaN	NaN	NaN	NaN	NaN	NaN	NaN	NaN	NaN
2.914	-44.269	-13.9159	1264.639	-1.7944	0.92519	-0.19219	-39.042	212.167	787.515	-1.0451	0.46113	-0.27383	NaN	NaN	NaN	NaN	NaN	NaN	NaN	NaN	NaN	NaN	NaN	NaN
2.916	-59.607	0.349	1234.391	-1.7612	0.92041	-0.18848	-55.5925	174.4088	765.645	-1.0269	0.46924	-0.2626	NaN	NaN	NaN	NaN	NaN	NaN	NaN	NaN	NaN	NaN	NaN	NaN
2.918	-54.1127	22.3202	1206.5135	-1.7231	0.90567	-0.17842	-43.5119	147.941	769.2206	-0.99794	0.47549	-0.2501	NaN	NaN	NaN	NaN	NaN	NaN	NaN	NaN	NaN	NaN	NaN	NaN
2.92	-66.014	37.614	1179.345	-1.684	0.88984	-0.17148	-34.3064	173.917	741.565	-0.96269	0.47891	-0.24414	NaN	NaN	NaN	NaN	NaN	NaN	NaN	NaN	NaN	NaN	NaN	NaN
2.922	-43.343	39.865	1174.039	-1.6469	0.87304	-0.16094	-65.54029	130.9862	721.14683	-0.91602	0.48633	-0.23242	NaN	NaN	NaN	NaN	NaN	NaN	NaN	NaN	NaN	NaN	NaN	NaN
2.924	-31.592	28.4306	1140.153	-1.6122	0.85342	-0.14795	-31.784	169.147	697.048	-0.86806	0.49033	-0.22002	NaN	NaN	NaN	NaN	NaN	NaN	NaN	NaN	NaN	NaN	NaN	NaN
2.926	-32.053	27.749	1117.143	-1.5723	0.83008	-0.1333	-43.9968	197.324	643.844	-0.8164	0.49492	-0.21074	NaN	NaN	NaN	NaN	NaN	NaN	NaN	NaN	NaN	NaN	NaN	NaN
2.928	-31.344	28.659	1117.5881	-1.534	0.81113	-0.11933	-42.653	148.6814	621.542	-0.75781	0.50195	-0.20137	NaN	NaN	NaN	NaN	NaN	NaN	NaN	NaN	NaN	NaN	NaN	NaN
2.93	-41.894	41.627	1111.0441	-1.4847	0.78242	-0.10723	-8.489	167.3051	576.2137	-0.69531	0.50322	-0.18242	NaN	NaN	NaN	NaN	NaN	NaN	NaN	NaN	NaN	NaN	NaN	NaN
2.932	-24.459	47.6905	1105.6142	-1.441	0.75586	-0.087696	-60.3122	120.05	533.667	-0.62842	0.50879	-0.16895	NaN	NaN	NaN	NaN	NaN	NaN	NaN	NaN	NaN	NaN	NaN	NaN
2.934	-50.2133	73.094	1078.3809	-1.3938	0.73438	-0.071484	-39.28	110.292	491.664	-0.55039	0.50664	-0.15616	NaN	NaN	NaN	NaN	NaN	NaN	NaN	NaN	NaN	NaN	NaN	NaN
2.936	-58.4124	70.371	1074.26	-1.3438	0.70703	-0.058594	-21.03	159.62	440.44	-0.46182	0.50674	-0.1418	NaN	NaN	NaN	NaN	NaN	NaN	NaN	NaN	NaN	NaN	NaN	NaN
2.938	-40.7672	55.532	1056.0486	-1.2897	0.67744	-0.048926	-54.655	133.262	417.485	-0.3747	0.49776	-0.13594	NaN	NaN	NaN	NaN	NaN	NaN	NaN	NaN	NaN	NaN	NaN	NaN
2.94	-52.7602	51.7089	1026.6907	-1.2374	0.6501	-0.036914	-50.82	199.234	369.723	-0.27647	0.48877	-0.11826	NaN	NaN	NaN	NaN	NaN	NaN	NaN	NaN	NaN	NaN	NaN	NaN
2.942	-58.2583	51.3541	1013.8719	-1.189	0.61416	-0.025586	-26.4142	212.171	322.351	-0.17773	0.45801	-0.091309	NaN	NaN	NaN	NaN	NaN	NaN	NaN	NaN	NaN	NaN	NaN	NaN
2.944	-31.606	62.411	988.4894	-1.1326	0.58066	-0.011914	-21.252	150.295	301.9829	-0.09258	0.43105	-0.069629	NaN	NaN	NaN	NaN	NaN	NaN	NaN	NaN	NaN	NaN	NaN	NaN
2.946	-5.474	55.905	978.9747	-1.0854	0.54736	-0.00097656	-12.392	157.763	277.577	-0.012988	0.39375	-0.047559	NaN	NaN	NaN	NaN	NaN	NaN	NaN	NaN	NaN	NaN	NaN	NaN
2.948	-1.147	60.041	939.071	-1.0418	0.51465	0.012109	-13.974	112.5935	232.858	0.055371	0.35703	-0.01748	NaN	NaN	NaN	NaN	NaN	NaN	NaN	NaN	NaN	NaN	NaN	NaN
2.95	-3.632	58.762	925.2595	-1.0011	0.48526	0.02207	-9.71	95.269	193.835	0.11973	0.3169	0.0098631	NaN	NaN	NaN	NaN	NaN	NaN	NaN	NaN	NaN	NaN	NaN	NaN
2.952	0.423000000000002	67.934	917.992	-0.9624	0.45362	0.033789	-16.996	136.5099	140.521	0.17188	0.27295	0.036133	NaN	NaN	NaN	NaN	NaN	NaN	NaN	NaN	NaN	NaN	NaN	NaN
2.954	-6.229	75.3124	897.01	-0.92236	0.42569	0.036621	-31.456	91.061	125.962	0.22578	0.23838	0.063282	NaN	NaN	NaN	NaN	NaN	NaN	NaN	NaN	NaN	NaN	NaN	NaN
2.956	-15.808	90.0511	853.0551	-0.89014	0.40283	0.039551	-2.256	112.9083	122.5741	0.27246	0.20195	0.087598	NaN	NaN	NaN	NaN	NaN	NaN	NaN	NaN	NaN	NaN	NaN	NaN
2.958	-30.8387	96.073	829.0066	-0.85322	0.3792	0.046777	-0.619000000000002	106.368	113.9168	0.3045	0.16054	0.11299	NaN	NaN	NaN	NaN	NaN	NaN	NaN	NaN	NaN	NaN	NaN	NaN
2.96	-14.652	92.552	800.18	-0.82315	0.35908	0.047266	-3.211	71.919	121.439	0.3334	0.12432	0.13203	NaN	NaN	NaN	NaN	NaN	NaN	NaN	NaN	NaN	NaN	NaN	NaN
2.962	-21.0391	97.333	768.475	-0.79151	0.34189	0.051172	6.7542	90.7838	122.0959	0.35498	0.084473	0.15332	NaN	NaN	NaN	NaN	NaN	NaN	NaN	NaN	NaN	NaN	NaN	NaN
2.964	-17.281	94.1358	745.953	-0.76358	0.32236	0.048926	-48.8386	56.0662	118.0797	0.36309	0.049121	0.17256	NaN	NaN	NaN	NaN	NaN	NaN	NaN	NaN	NaN	NaN	NaN	NaN
2.966	-34.909	104.17906	714.987	-0.72998	0.30518	0.050293	-11.481	20.613	106.4174	0.3667	0.01543	0.18965	NaN	NaN	NaN	NaN	NaN	NaN	NaN	NaN	NaN	NaN	NaN	NaN
2.968	-12.317	98.61766	710.076	-0.7002	0.28652	0.056153	6.624	55.18951	56.044	0.35967	-0.015039	0.20918	NaN	NaN	NaN	NaN	NaN	NaN	NaN	NaN	NaN	NaN	NaN	NaN
2.97	-9.805	99.738	660.2271	-0.67451	0.2751	0.062598	-14.319	28.821	32.611	0.34522	-0.045605	0.22676	NaN	NaN	NaN	NaN	NaN	NaN	NaN	NaN	NaN	NaN	NaN	NaN
2.972	-6.156	98.2866	631.9362	-0.64639	0.26064	0.067675	-3.628	58.0066	38.129	0.31934	-0.070313	0.24658	NaN	NaN	NaN	NaN	NaN	NaN	NaN	NaN	NaN	NaN	NaN	NaN
2.974	-6.113	91.2169	609.00483	-0.61787	0.25273	0.070019	-27.3778	67.456	25.168	0.28819	-0.092773	0.26094	NaN	NaN	NaN	NaN	NaN	NaN	NaN	NaN	NaN	NaN	NaN	NaN
2.976	-10.351	81.14	576.8216	-0.58691	0.25244	0.069336	-45.9932	38.9723	41.437	0.25156	-0.11201	0.2752	NaN	NaN	NaN	NaN	NaN	NaN	NaN	NaN	NaN	NaN	NaN	NaN
2.978	-15.234	85.206	547.204	-0.55313	0.25605	0.072168	1.899	58.498	29.8751	0.21484	-0.12139	0.28418	NaN	NaN	NaN	NaN	NaN	NaN	NaN	NaN	NaN	NaN	NaN	NaN
2.98	-36.795	82.661	519.233	-0.51591	0.26025	0.076953	-14.9844	24.6221	27.8943	0.17549	-0.12841	0.28779	NaN	NaN	NaN	NaN	NaN	NaN	NaN	NaN	NaN	NaN	NaN	NaN
2.982	-43.3348	82.4945	509.895	-0.47217	0.27236	0.078515	-14.437	20.11	47.73535	0.14307	-0.13232	0.29395	NaN	NaN	NaN	NaN	NaN	NaN	NaN	NaN	NaN	NaN	NaN	NaN
2.984	-28.37958	91.9891	480.6524	-0.42412	0.27978	0.070996	-3.5862	42.199	28.353	0.11094	-0.12832	0.29981	NaN	NaN	NaN	NaN	NaN	NaN	NaN	NaN	NaN	NaN	NaN	NaN
2.986	-21.325	89.897	439.7135	-0.37354	0.28906	0.065918	-28.59329	11.9706	12.203	0.090137	-0.12637	0.29384	NaN	NaN	NaN	NaN	NaN	NaN	NaN	NaN	NaN	NaN	NaN	NaN
2.988	-27.7049	87.29	423.2692	-0.32285	0.28945	0.066016	-17.5838	25.3009	24.8583	0.074512	-0.11855	0.28799	NaN	NaN	NaN	NaN	NaN	NaN	NaN	NaN	NaN	NaN	NaN	NaN
2.99	-26.3291	82.0706	391.546	-0.27334	0.28584	0.067774	-18.0131	25.5123	21.2427	0.06836	-0.11152	0.28106	NaN	NaN	NaN	NaN	NaN	NaN	NaN	NaN	NaN	NaN	NaN	NaN
2.992	-24.1033	83.0094	359.711702	-0.22256	0.28232	0.071289	-19.778	-13.7224	30.141	0.062988	-0.10449	0.27539	NaN	NaN	NaN	NaN	NaN	NaN	NaN	NaN	NaN	NaN	NaN	NaN
2.994	-6.469	78.094	312.429	-0.17334	0.27715	0.073633	-6.782	8.2221	15.4357	0.061328	-0.098437	0.26612	NaN	NaN	NaN	NaN	NaN	NaN	NaN	NaN	NaN	NaN	NaN	NaN
2.996	-10.482	71.211	298.518	-0.12158	0.27197	0.080566	-28.44	-7.8052	2.502	0.066309	-0.092968	0.26172	NaN	NaN	NaN	NaN	NaN	NaN	NaN	NaN	NaN	NaN	NaN	NaN
2.998	1.493	80.467	266.131	-0.077051	0.26084	0.075781	-16.323	-27.651	21.2831	0.068653	-0.086327	0.24844	NaN	NaN	NaN	NaN	NaN	NaN	NaN	NaN	NaN	NaN	NaN	NaN
3	-2.575	84.25	248.429	-0.028028	0.25019	0.075781	3.196	3.0751	13.3122	0.070801	-0.086816	0.24433	NaN	NaN	NaN	NaN	NaN	NaN	NaN	NaN	NaN	NaN	NaN	NaN
3.002	-11.323	96.8687	216.226	0.018457	0.23379	0.072266	-12.144	-15.5997	6.4778	0.071777	-0.078613	0.2373	NaN	NaN	NaN	NaN	NaN	NaN	NaN	NaN	NaN	NaN	NaN	NaN
3.004	-24.0415	94.658	224.7136	0.066016	0.221	0.069336	23.639	2.0611	-3.3788	0.069043	-0.070508	0.22715	NaN	NaN	NaN	NaN	NaN	NaN	NaN	NaN	NaN	NaN	NaN	NaN
3.006	-18.809	94.873	223.862	0.10938	0.20508	0.064941	-5.604	27.8723	-15.5007	0.067873	-0.060842	0.2208	NaN	NaN	NaN	NaN	NaN	NaN	NaN	NaN	NaN	NaN	NaN	NaN
3.008	-8.526	85.383	194.127	0.146	0.18554	0.06377	-21.128	21.0729	9.6642	0.060451	-0.055372	0.20987	NaN	NaN	NaN	NaN	NaN	NaN	NaN	NaN	NaN	NaN	NaN	NaN
3.01	-5.832	71.172	162.2308	0.18144	0.16524	0.054688	9.156	57.644	11.9299	0.044633	-0.046096	0.20762	NaN	NaN	NaN	NaN	NaN	NaN	NaN	NaN	NaN	NaN	NaN	NaN
3.012	-14.0558	65.7332	140.596	0.20723	0.14258	0.054297	-12.1381	37.419	-10.602544	0.032227	-0.034668	0.20068	NaN	NaN	NaN	NaN	NaN	NaN	NaN	NaN	NaN	NaN	NaN	NaN
3.014	-9.148	70.0481	115.582	0.2291	0.12558	0.050098	-7.1011	3.1514	19.1891	0.018355	-0.021282	0.19873	NaN	NaN	NaN	NaN	NaN	NaN	NaN	NaN	NaN	NaN	NaN	NaN
3.016	-4.7707	85.4682	83.601	0.24902	0.10498	0.044434	-5.5922	10.0065	2.455	0.0096568	-0.0059408	0.1954	NaN	NaN	NaN	NaN	NaN	NaN	NaN	NaN	NaN	NaN	NaN	NaN
3.018	4.954	72.894	68.2	0.26719	0.08252	0.037012	-24.6792	-10.1562	-7.6459	0.0010691	0.012814	0.18603	NaN	NaN	NaN	NaN	NaN	NaN	NaN	NaN	NaN	NaN	NaN	NaN
3.02	13.154	63.748	59.41	0.28506	0.058691	0.032715	7.692	13.6091	7.7528	0.00019598	0.029503	0.17792	NaN	NaN	NaN	NaN	NaN	NaN	NaN	NaN	NaN	NaN	NaN	NaN
3.022	2.278	53.9945	70.1912	0.30069	0.036426	0.028808	-18.125	32.51	-10.7047	-0.0039063	0.046387	0.16895	NaN	NaN	NaN	NaN	NaN	NaN	NaN	NaN	NaN	NaN	NaN	NaN
3.024	7.2397	52.9514	70.5512	0.31025	0.016016	0.020215	-21.621	-0.232900000000001	9.5942	-0.0074194	0.064618	0.16368	NaN	NaN	NaN	NaN	NaN	NaN	NaN	NaN	NaN	NaN	NaN	NaN
3.026	-6.7836	54.2826	70.363	0.31689	-0.0053711	0.014648	11.82	1.7226	9.2184	-0.0089416	0.077884	0.15587	NaN	NaN	NaN	NaN	NaN	NaN	NaN	NaN	NaN	NaN	NaN	NaN
3.028	-23.2644	59.972	75.207	0.32373	-0.029493	0.0092772	-39.1683	2.2659	6.8634	-0.014075	0.090385	0.15198	NaN	NaN	NaN	NaN	NaN	NaN	NaN	NaN	NaN	NaN	NaN	NaN
3.03	-19.0692	67.988	34.2923	0.32002	-0.056936	0.00019566	-16.2829	-2.36	36.4	-0.023605	0.10503	0.14552	NaN	NaN	NaN	NaN	NaN	NaN	NaN	NaN	NaN	NaN	NaN	NaN
3.032	-22.231	61.111	16.818	0.3169	-0.085842	-0.0013679	-7.2041	24.9787	23.2762	-0.03125	0.11914	0.12744	NaN	NaN	NaN	NaN	NaN	NaN	NaN	NaN	NaN	NaN	NaN	NaN
3.034	-18.409	43.7347	12.721	0.30752	-0.11553	-0.0092778	-38.92589	0.727999999999998	23.949	-0.038073	0.13397	0.13249	NaN	NaN	NaN	NaN	NaN	NaN	NaN	NaN	NaN	NaN	NaN	NaN
3.036	-24.157	36.5161	13.115	0.29248	-0.14893	-0.020508	-18.967	9.011	26.02	-0.046683	0.15032	0.12196	NaN	NaN	NaN	NaN	NaN	NaN	NaN	NaN	NaN	NaN	NaN	NaN
3.038	-5.22	41.275	20.343	0.27032	-0.16894	-0.024121	-16.6384	33.503	-19.3847	-0.061127	0.16292	0.11876	NaN	NaN	NaN	NaN	NaN	NaN	NaN	NaN	NaN	NaN	NaN	NaN
3.04	-7.211	33.0642	13.0017	0.24366	-0.19121	-0.034863	-32.9157	26.27139	6.3675	-0.072938	0.17841	0.11075	NaN	NaN	NaN	NaN	NaN	NaN	NaN	NaN	NaN	NaN	NaN	NaN
3.042	-3.998	23.2628	29.203	0.21592	-0.20566	-0.038768	2.097	61.789	2.5811	-0.087402	0.19385	0.10498	NaN	NaN	NaN	NaN	NaN	NaN	NaN	NaN	NaN	NaN	NaN	NaN
3.044	9.307	10.2287	29.177	0.1838	-0.22187	-0.047459	-12.099	51.329	-3.5082	-0.1019	0.20962	0.098104	NaN	NaN	NaN	NaN	NaN	NaN	NaN	NaN	NaN	NaN	NaN	NaN
3.046	-11.392	8.7836	16.4046	0.15527	-0.22998	-0.050781	-18.748	21.17315	11.94531	-0.11652	0.22668	0.087306	NaN	NaN	NaN	NaN	NaN	NaN	NaN	NaN	NaN	NaN	NaN	NaN
3.048	-5.684	21.1778	18.77156	0.12948	-0.2291	-0.062211	-1.2718	29.105	6.1027	-0.13327	0.24181	0.076957	NaN	NaN	NaN	NaN	NaN	NaN	NaN	NaN	NaN	NaN	NaN	NaN
3.05	-8.521	23.91365	23.649	0.10974	-0.22695	-0.067674	-40.2043	-3.647	10.0629	-0.14286	0.25968	0.068876	NaN	NaN	NaN	NaN	NaN	NaN	NaN	NaN	NaN	NaN	NaN	NaN
3.052	-6.522	18.7271	19.6075	0.086699	-0.2207	-0.073158	15.686	-2.25	40.3698	-0.15479	0.27197	0.060059	NaN	NaN	NaN	NaN	NaN	NaN	NaN	NaN	NaN	NaN	NaN	NaN
3.054	-28.4377	7.9982	8.9526	0.062577	-0.21327	-0.073531	-6.929	21.2605	13.4074	-0.17209	0.28769	0.052228	NaN	NaN	NaN	NaN	NaN	NaN	NaN	NaN	NaN	NaN	NaN	NaN
3.056	-20.7921	6.3662	-2.0316	0.040039	-0.21045	-0.07959	-25.575	11.9183	20.7598	-0.18105	0.29477	0.030965	NaN	NaN	NaN	NaN	NaN	NaN	NaN	NaN	NaN	NaN	NaN	NaN
3.058	-4.247	0.67057	11.771	0.016157	-0.20032	-0.0833	4.602	23.121	28.734	-0.19287	0.30283	0.019584	NaN	NaN	NaN	NaN	NaN	NaN	NaN	NaN	NaN	NaN	NaN	NaN
3.06	6.17	14.6847	17.003	-0.0025436	-0.1891	-0.080732	-28.3215	-3.5442	29.363	-0.20774	0.31196	0.002868	NaN	NaN	NaN	NaN	NaN	NaN	NaN	NaN	NaN	NaN	NaN	NaN
3.062	7.752	17.6509	-2.1404	-0.029489	-0.17972	-0.082737	0.239000000000001	-61.812	74.5987	-0.23145	0.31885	-0.01416	NaN	NaN	NaN	NaN	NaN	NaN	NaN	NaN	NaN	NaN	NaN	NaN
3.064	-13.815	13.14832	8.1948	-0.051876	-0.16714	-0.083303	17.638	-36.3988	63.004	-0.26301	0.31377	-0.038508	NaN	NaN	NaN	NaN	NaN	NaN	NaN	NaN	NaN	NaN	NaN	NaN
3.066	9.285	5.8225	3.5541	-0.072754	-0.15527	-0.081055	2.1298	-8.2141	92.8729	-0.30592	0.3043	-0.070283	NaN	NaN	NaN	NaN	NaN	NaN	NaN	NaN	NaN	NaN	NaN	NaN
3.068	2.565	7.5887	9.7079	-0.092999	-0.13858	-0.079971	6.3395	24.5733	204.8289	-0.36309	0.28801	-0.10892	NaN	NaN	NaN	NaN	NaN	NaN	NaN	NaN	NaN	NaN	NaN	NaN
3.07	-0.669	18.011	-5.714	-0.11033	-0.11868	-0.080793	-35.7354	58.979	344.51	-0.45435	0.26823	-0.14889	NaN	NaN	NaN	NaN	NaN	NaN	NaN	NaN	NaN	NaN	NaN	NaN
3.072	-4.256	16.0375	-1.7826	-0.12363	-0.10256	-0.07893	-53.045	33.745	518.962	-0.58789	0.22656	-0.18506	NaN	NaN	NaN	NaN	NaN	NaN	NaN	NaN	NaN	NaN	NaN	NaN
3.074	-3.661	6.5198	6.8096	-0.13876	-0.085173	-0.080646	0.527999999999999	39.0403	677.03	-0.78433	0.16047	-0.22826	NaN	NaN	NaN	NaN	NaN	NaN	NaN	NaN	NaN	NaN	NaN	NaN
3.076	-13.9941	1.3632	6.9164	-0.14258	-0.067871	-0.081055	5.941	3.978	794.03	-1.0199	0.089927	-0.25631	NaN	NaN	NaN	NaN	NaN	NaN	NaN	NaN	NaN	NaN	NaN	NaN
3.078	-29.3521	-7.3617	-0.5326	-0.13907	-0.044946	-0.079504	56.705	-57.592	973.4	-1.2881	0.03882	-0.26872	NaN	NaN	NaN	NaN	NaN	NaN	NaN	NaN	NaN	NaN	NaN	NaN
3.08	-11.6727	-6.1467	18.8327	-0.12912	-0.023955	-0.08518	89.273	-35.666	1074.053	-1.5599	0.019758	-0.28439	NaN	NaN	NaN	NaN	NaN	NaN	NaN	NaN	NaN	NaN	NaN	NaN
3.082	-8.588	-0.4495	10.2713	-0.11744	-0.011336	-0.082852	-19.819	-46.993	1171.3634	-1.8276	0.066406	-0.25635	NaN	NaN	NaN	NaN	NaN	NaN	NaN	NaN	NaN	NaN	NaN	NaN
3.084	3.066	10.1426	-11.9276	-0.10212	0.0074557	-0.080379	-30.3577	-58.13	1240.017	-2.1158	0.12149	-0.23857	NaN	NaN	NaN	NaN	NaN	NaN	NaN	NaN	NaN	NaN	NaN	NaN
3.086	-7.463	10.0403	-22.56218	-0.079102	0.017578	-0.085449	8.42164	-73.553	1220.199	-2.3671	0.22129	-0.23308	NaN	NaN	NaN	NaN	NaN	NaN	NaN	NaN	NaN	NaN	NaN	NaN
3.088	-10.69	16.4774	-8.2371	-0.056078	0.032752	-0.087402	35.744	-152.507	1249.3	-2.4998	0.36845	-0.28309	NaN	NaN	NaN	NaN	NaN	NaN	NaN	NaN	NaN	NaN	NaN	NaN
3.09	6.347	9.25	6.542	-0.019349	0.03783	-0.088533	61.738	-171.019	1229.307	-2.4767	0.49753	-0.31553	NaN	NaN	NaN	NaN	NaN	NaN	NaN	NaN	NaN	NaN	NaN	NaN
3.092	-9.935	5.918	-1.32857	0.011047	0.046053	-0.090769	15.595	-189.144	1182.562	-2.3555	0.58984	-0.31006	NaN	NaN	NaN	NaN	NaN	NaN	NaN	NaN	NaN	NaN	NaN	NaN
3.094	-5.563	3.948	3.5862	0.044637	0.050819	-0.094257	52.538	-216.177	1219.009	-2.1606	0.64225	-0.28488	NaN	NaN	NaN	NaN	NaN	NaN	NaN	NaN	NaN	NaN	NaN	NaN
3.096	-6.8741	8.2676	15.6217	0.07373	0.049316	-0.097656	105.797	-171.524	1156.487	-1.9416	0.63911	-0.25159	NaN	NaN	NaN	NaN	NaN	NaN	NaN	NaN	NaN	NaN	NaN	NaN
3.098	5.4465	17.0312	19.0039	0.10182	0.047533	-0.1032	66.923	-173.665	1089.958	-1.7158	0.59145	-0.22581	NaN	NaN	NaN	NaN	NaN	NaN	NaN	NaN	NaN	NaN	NaN	NaN
3.1	-22.222	22.822	-13.3716	0.12946	0.044561	-0.10687	107.395	-137.2217	1052.267	-1.5026	0.53928	-0.19864	NaN	NaN	NaN	NaN	NaN	NaN	NaN	NaN	NaN	NaN	NaN	NaN
3.102	-20.527	19.5273	-19.4652	0.15393	0.039505	-0.11769	83.113	-19.385	970.698	-1.3193	0.48828	-0.17969	NaN	NaN	NaN	NaN	NaN	NaN	NaN	NaN	NaN	NaN	NaN	NaN
3.104	0.66	8.3922	-18.7743	0.17812	0.041057	-0.12453	31.3171	-11.192	1014.839563	-1.1778	0.47168	-0.15908	NaN	NaN	NaN	NaN	NaN	NaN	NaN	NaN	NaN	NaN	NaN	NaN
3.106	-6.713	-1.5883	-10.2334	0.20264	0.038574	-0.13135	16.5928	36.691	1033.921	-1.0753	0.47637	-0.14892	NaN	NaN	NaN	NaN	NaN	NaN	NaN	NaN	NaN	NaN	NaN	NaN
3.108	-11.3219	12.4563	-10.5022	0.21857	0.036825	-0.14416	-32.495	34.394	990.21618	-0.99569	0.50724	-0.12509	NaN	NaN	NaN	NaN	NaN	NaN	NaN	NaN	NaN	NaN	NaN	NaN
3.11	5.02	6.6548	1.043	0.23563	0.035473	-0.15504	-0.843599999999999	-27.329	968.336	-0.93652	0.55098	-0.1042	NaN	NaN	NaN	NaN	NaN	NaN	NaN	NaN	NaN	NaN	NaN	NaN
3.112	18.886	10.5336	7.3373	0.24116	0.035049	-0.16804	38.67	-44.605	892.919	-0.89648	0.60547	-0.090332	NaN	NaN	NaN	NaN	NaN	NaN	NaN	NaN	NaN	NaN	NaN	NaN
3.114	-5.702	7.7361	16.5787	0.24577	0.039146	-0.18011	6.052	-139.8023	899.291	-0.86524	0.66816	-0.096484	NaN	NaN	NaN	NaN	NaN	NaN	NaN	NaN	NaN	NaN	NaN	NaN
3.116	-10.4905	14.9541	15.1844	0.24658	0.044922	-0.19336	11.657	-193.611	956.13604	-0.85	0.73007	-0.11611	NaN	NaN	NaN	NaN	NaN	NaN	NaN	NaN	NaN	NaN	NaN	NaN
3.118	-6.989	15.7111	6.0383	0.2401	0.046206	-0.20356	14.911	-188.944	965.3876	-0.84727	0.78164	-0.14111	NaN	NaN	NaN	NaN	NaN	NaN	NaN	NaN	NaN	NaN	NaN	NaN
3.12	-4.134	17.5361	6.2838	0.23079	0.04886	-0.21342	13.484	-274.688	989.9858	-0.85166	0.81592	-0.17978	NaN	NaN	NaN	NaN	NaN	NaN	NaN	NaN	NaN	NaN	NaN	NaN
3.122	-7.478	27.097	-3.4079	0.20732	0.052734	-0.22317	-6.265	-279.129	1018.368	-0.87842	0.82861	-0.21436	NaN	NaN	NaN	NaN	NaN	NaN	NaN	NaN	NaN	NaN	NaN	NaN
3.124	-11.486	6.4596	37.014	0.17035	0.059189	-0.23704	-46.5713	-267.692	1023.744	-0.92852	0.81562	-0.24951	NaN	NaN	NaN	NaN	NaN	NaN	NaN	NaN	NaN	NaN	NaN	NaN
3.126	-7.767	-31.49086	63.737	0.11572	0.07373	-0.24463	-59.574	-270.656	1086.275	-1.0008	0.80313	-0.27735	NaN	NaN	NaN	NaN	NaN	NaN	NaN	NaN	NaN	NaN	NaN	NaN
3.128	-15.309	-35.7841	135.447	0.045381	0.08505	-0.25946	-95.266	-173.1053	1113.764	-1.0868	0.79531	-0.30547	NaN	NaN	NaN	NaN	NaN	NaN	NaN	NaN	NaN	NaN	NaN	NaN
3.13	23.2259	-18.725	167.228	-0.040039	0.088774	-0.26483	-144.868	-188.91	1110.546	-1.1672	0.79727	-0.33545	NaN	NaN	NaN	NaN	NaN	NaN	NaN	NaN	NaN	NaN	NaN	NaN
3.132	-2.8594	-25.401	220.387	-0.13575	0.087986	-0.27421	-126.954	-207.517	1108.878	-1.2422	0.80859	-0.36621	NaN	NaN	NaN	NaN	NaN	NaN	NaN	NaN	NaN	NaN	NaN	NaN
3.134	14.8753	-39.406	263.176	-0.24868	0.086424	-0.27421	-92.207	-148.6689	1086.831	-1.3046	0.82998	-0.40635	NaN	NaN	NaN	NaN	NaN	NaN	NaN	NaN	NaN	NaN	NaN	NaN
3.136	24.3909	-94.516	245.5151	-0.36719	0.089355	-0.2793	-65.9046	-149.9872	1109.4	-1.3515	0.85225	-0.44228	NaN	NaN	NaN	NaN	NaN	NaN	NaN	NaN	NaN	NaN	NaN	NaN
3.138	-39.756	-126.2972	289.4262	-0.49788	0.093166	-0.28047	-17.224	-61.934	1150.279	-1.3964	0.86123	-0.4872	NaN	NaN	NaN	NaN	NaN	NaN	NaN	NaN	NaN	NaN	NaN	NaN
3.14	-22.814	-116.82303	364.1221	-0.62504	0.11016	-0.28535	-38.389	-27.953	1144.803	-1.4424	0.86153	-0.5209	NaN	NaN	NaN	NaN	NaN	NaN	NaN	NaN	NaN	NaN	NaN	NaN
3.142	-3.197	-89.9367	440.175	-0.75003	0.13204	-0.29121	-65.624	-67.04	1162.8096	-1.4941	0.85742	-0.5459	NaN	NaN	NaN	NaN	NaN	NaN	NaN	NaN	NaN	NaN	NaN	NaN
3.144	37.7155	-58.2503	464.386	-0.88537	0.15371	-0.29873	-34.148	-55.504	1134.783	-1.5717	0.85606	-0.55801	NaN	NaN	NaN	NaN	NaN	NaN	NaN	NaN	NaN	NaN	NaN	NaN
3.146	-3.4815	-36.257	502.73	-1.0361	0.17578	-0.31055	-85.1477	-123.69796	1144.087	-1.6761	0.85478	-0.55029	NaN	NaN	NaN	NaN	NaN	NaN	NaN	NaN	NaN	NaN	NaN	NaN
3.148	23.4169	-20.359	577.774	-1.2034	0.18701	-0.32354	-51.017	-149.12	1209.2059	-1.8195	0.85752	-0.53584	NaN	NaN	NaN	NaN	NaN	NaN	NaN	NaN	NaN	NaN	NaN	NaN
3.15	39.3778	-0.0919999999999987	706.368	-1.3976	0.20195	-0.33886	-70.1958	-114.359	1222.64525	-2.0024	0.88438	-0.50781	NaN	NaN	NaN	NaN	NaN	NaN	NaN	NaN	NaN	NaN	NaN	NaN
3.152	27.9046	34.294	826.458	-1.6113	0.22969	-0.35488	-85.92616	-190.908	1251.151	-2.2104	0.9292	-0.49268	NaN	NaN	NaN	NaN	NaN	NaN	NaN	NaN	NaN	NaN	NaN	NaN
3.154	19.4099	79.125	881.538	-1.8391	0.26523	-0.36797	-71.8865	-163.893	1264.487	-2.4091	1.0042	-0.49131	NaN	NaN	NaN	NaN	NaN	NaN	NaN	NaN	NaN	NaN	NaN	NaN
3.156	17.313	74.6491	952.177	-2.0605	0.3291	-0.35156	-55.9	-159.8095	1255.937	-2.5825	1.0891	-0.48526	NaN	NaN	NaN	NaN	NaN	NaN	NaN	NaN	NaN	NaN	NaN	NaN
3.158	32.5325	74.5073	996.991	-2.3339	0.37764	-0.3501	-28.023	-197.201	1323.006	-2.7078	1.1856	-0.49854	NaN	NaN	NaN	NaN	NaN	NaN	NaN	NaN	NaN	NaN	NaN	NaN
3.16	3.606	37.6985	1015.244	-2.6	0.43848	-0.31758	16.854	-122.097	1298.663	-2.7634	1.2776	-0.50713	NaN	NaN	NaN	NaN	NaN	NaN	NaN	NaN	NaN	NaN	NaN	NaN
3.162	-14.9478	-9.039	1046.916	-2.8141	0.54863	-0.3375	-14.378	-128.802	1246.744	-2.7593	1.3433	-0.51807	NaN	NaN	NaN	NaN	NaN	NaN	NaN	NaN	NaN	NaN	NaN	NaN
3.164	-28.0336	-69.668	1093.8722	-2.9203	0.66153	-0.36426	-27.568	-122.728	1220.2307	-2.6943	1.3861	-0.51836	NaN	NaN	NaN	NaN	NaN	NaN	NaN	NaN	NaN	NaN	NaN	NaN
3.166	-42.9499	-90.19	1105.432	-2.9233	0.75244	-0.38232	-27.851	-75.557	1179.424	-2.5914	1.3907	-0.50595	NaN	NaN	NaN	NaN	NaN	NaN	NaN	NaN	NaN	NaN	NaN	NaN
3.168	-33.12201	-113.195	1088.9367	-2.8272	0.82627	-0.3878	-48.746	-125.788	1202.6403	-2.4789	1.3687	-0.4919	NaN	NaN	NaN	NaN	NaN	NaN	NaN	NaN	NaN	NaN	NaN	NaN
3.17	-33.5829	-134.816	1068.44	-2.6581	0.87861	-0.39756	-53.782	-67.5992	1204.9124	-2.3748	1.3338	-0.47656	NaN	NaN	NaN	NaN	NaN	NaN	NaN	NaN	NaN	NaN	NaN	NaN
3.172	-22.049	-135.455	1111.063	-2.4488	0.89424	-0.40342	-74.325	-24.501	1188.596	-2.2891	1.2988	-0.4585	NaN	NaN	NaN	NaN	NaN	NaN	NaN	NaN	NaN	NaN	NaN	NaN
3.174	-29.108	-126.976	1129.682	-2.2323	0.88994	-0.40801	-78.4945	-21.546	1176.837	-2.221	1.2723	-0.44092	NaN	NaN	NaN	NaN	NaN	NaN	NaN	NaN	NaN	NaN	NaN	NaN
3.176	-27.092	-122.845	1149.643	-2.019	0.86182	-0.41748	-102.316	52.474	1146.265	-2.1601	1.251	-0.42217	NaN	NaN	NaN	NaN	NaN	NaN	NaN	NaN	NaN	NaN	NaN	NaN
3.178	-16.0689	-95.34	1159.2711	-1.8182	0.80986	-0.42412	-143.283	13.799	1142.226	-2.0887	1.2358	-0.40537	NaN	NaN	NaN	NaN	NaN	NaN	NaN	NaN	NaN	NaN	NaN	NaN
3.18	-18.4281	-72.836	1189.5107	-1.6304	0.74072	-0.41611	-104.665	-12.679	1168.277	-2.0079	1.227	-0.39951	NaN	NaN	NaN	NaN	NaN	NaN	NaN	NaN	NaN	NaN	NaN	NaN
3.182	-20.06733	-58.758	1181.2031	-1.4882	0.68682	-0.4083	-63.27	4.884	1162.158	-1.9097	1.2231	-0.3916	NaN	NaN	NaN	NaN	NaN	NaN	NaN	NaN	NaN	NaN	NaN	NaN
3.184	-45.9492	-57.011	1159.91218	-1.3766	0.64101	-0.40879	-61.08	-81.328	1177.238	-1.8023	1.2083	-0.38193	NaN	NaN	NaN	NaN	NaN	NaN	NaN	NaN	NaN	NaN	NaN	NaN
3.186	-35.137	-62.313	1133.13243	-1.2852	0.60547	-0.41992	-81.8784	-53.514	1192.023	-1.6921	1.1939	-0.36455	NaN	NaN	NaN	NaN	NaN	NaN	NaN	NaN	NaN	NaN	NaN	NaN
3.188	-37.8822	-76.898	1147.3554	-1.2088	0.57676	-0.42891	-85.326	-44.3731	1173.9198	-1.5901	1.1669	-0.35127	NaN	NaN	NaN	NaN	NaN	NaN	NaN	NaN	NaN	NaN	NaN	NaN
3.19	-44.0053	-107.359	1141.4452	-1.1448	0.54033	-0.42431	-101.561	-60.346	1159.962	-1.4992	1.1254	-0.33691	NaN	NaN	NaN	NaN	NaN	NaN	NaN	NaN	NaN	NaN	NaN	NaN
3.192	-40.679	-135.733	1134.85	-1.1116	0.51494	-0.42002	-93.226	6.429	1141.269	-1.4209	1.0781	-0.31152	NaN	NaN	NaN	NaN	NaN	NaN	NaN	NaN	NaN	NaN	NaN	NaN
3.194	-6.424	-170.228	1159.356	-1.0894	0.4999	-0.43154	-103.9429	-17.3978	1149.965	-1.3697	1.0303	-0.29101	NaN	NaN	NaN	NaN	NaN	NaN	NaN	NaN	NaN	NaN	NaN	NaN
3.196	10.061	-192.323	1202.289	-1.0776	0.48291	-0.45654	-65.7605	-16.9931	1168.206	-1.3254	0.98164	-0.2666	NaN	NaN	NaN	NaN	NaN	NaN	NaN	NaN	NaN	NaN	NaN	NaN
3.198	17.974	-187.086	1213.329	-1.0903	0.45772	-0.4831	-45.5538	39.55996	1147.4511	-1.2957	0.93164	-0.2498	NaN	NaN	NaN	NaN	NaN	NaN	NaN	NaN	NaN	NaN	NaN	NaN
3.2	12.0379	-160.449	1222.132	-1.1281	0.42627	-0.51484	-98.133	1.5259	1146.419	-1.2692	0.88887	-0.23496	NaN	NaN	NaN	NaN	NaN	NaN	NaN	NaN	NaN	NaN	NaN	NaN
3.202	23.1958	-132.716	1261.8303	-1.1898	0.3876	-0.54609	-42.055	39.8421	1154.5913	-1.2461	0.84766	-0.22363	NaN	NaN	NaN	NaN	NaN	NaN	NaN	NaN	NaN	NaN	NaN	NaN
3.204	20.1616	-116.9682	1314.436	-1.2781	0.34141	-0.5709	-60.4272	62.0885	1111.685	-1.2218	0.80322	-0.20772	NaN	NaN	NaN	NaN	NaN	NaN	NaN	NaN	NaN	NaN	NaN	NaN
3.206	32.766	-120.3337	1359.517	-1.3887	0.29639	-0.60156	-51.237	67.975	1071.26592	-1.1976	0.76436	-0.1876	NaN	NaN	NaN	NaN	NaN	NaN	NaN	NaN	NaN	NaN	NaN	NaN
3.208	32.146	-111.8845	1365.865	-1.521	0.27051	-0.62764	8.493	152.171	1041.986	-1.1749	0.71904	-0.17783	NaN	NaN	NaN	NaN	NaN	NaN	NaN	NaN	NaN	NaN	NaN	NaN
3.21	15.3363	-102.1283	1353.978	-1.6577	0.25869	-0.64638	-9.741	134.493	1054.1754	-1.1519	0.6751	-0.16338	NaN	NaN	NaN	NaN	NaN	NaN	NaN	NaN	NaN	NaN	NaN	NaN
3.212	15.2893	-95.835	1348.3779	-1.7925	0.27353	-0.66553	11.878	128.849	1097.662	-1.1343	0.6333	-0.14502	NaN	NaN	NaN	NaN	NaN	NaN	NaN	NaN	NaN	NaN	NaN	NaN
3.214	8.95425	-83.849	1320.869	-1.9124	0.30068	-0.67177	2.661	133.352	1083.07	-1.1172	0.59414	-0.13369	NaN	NaN	NaN	NaN	NaN	NaN	NaN	NaN	NaN	NaN	NaN	NaN
3.216	0.26	-80.75	1320.71	-2.021	0.33301	-0.68115	-19.632	52.084	1047.81854	-1.0952	0.56436	-0.12178	NaN	NaN	NaN	NaN	NaN	NaN	NaN	NaN	NaN	NaN	NaN	NaN
3.218	33.992	-75.846	1335.285	-2.1192	0.36201	-0.69248	3.616	79.805	1031.457	-1.0745	0.53272	-0.11045	NaN	NaN	NaN	NaN	NaN	NaN	NaN	NaN	NaN	NaN	NaN	NaN
3.22	61.15	-73.0865	1344.368	-2.223	0.41445	-0.68984	-8.39	105.5019	1000.121	-1.0569	0.50772	-0.10439	NaN	NaN	NaN	NaN	NaN	NaN	NaN	NaN	NaN	NaN	NaN	NaN
3.222	46.0887	-76.706	1364.091	-2.3676	0.45352	-0.73672	-17.331	88.5786	997.4142	-1.0332	0.48145	-0.10059	NaN	NaN	NaN	NaN	NaN	NaN	NaN	NaN	NaN	NaN	NaN	NaN
3.224	39.1738	-66.906	1382.03292	-2.493	0.4792	-0.82744	-13.846	132.766	967.7787	-1.0137	0.45224	-0.094531	NaN	NaN	NaN	NaN	NaN	NaN	NaN	NaN	NaN	NaN	NaN	NaN
3.226	22.7537	-60.121	1409.702	-2.564	0.48682	-0.90381	-53.8589	107.5014	946.0287	-0.99847	0.42657	-0.091699	NaN	NaN	NaN	NaN	NaN	NaN	NaN	NaN	NaN	NaN	NaN	NaN
3.228	20.2829	-56.4306	1421.03	-2.5567	0.48935	-0.95283	-34.1798	99.284	945.434	-0.98008	0.39961	-0.088574	NaN	NaN	NaN	NaN	NaN	NaN	NaN	NaN	NaN	NaN	NaN	NaN
3.23	12.9166	-55.9592	1417.064	-2.516	0.49824	-0.97461	2.6227	131.8028	926.6843	-0.96123	0.37822	-0.088477	NaN	NaN	NaN	NaN	NaN	NaN	NaN	NaN	NaN	NaN	NaN	NaN
3.232	38.077	-50.786	1405.6279	-2.4731	0.51621	-0.9918	-49.043	120.946	906.081	-0.95068	0.35986	-0.090332	NaN	NaN	NaN	NaN	NaN	NaN	NaN	NaN	NaN	NaN	NaN	NaN
3.234	4.2037	-65.941	1404.3732	-2.4498	0.54824	-1.0123	3.402	160.203	883.346	-0.93848	0.34629	-0.088867	NaN	NaN	NaN	NaN	NaN	NaN	NaN	NaN	NaN	NaN	NaN	NaN
3.236	6.9195	-74.278	1395.69285	-2.4473	0.58301	-1.0313	-10.831	169.2414	835.982	-0.92676	0.34248	-0.085156	NaN	NaN	NaN	NaN	NaN	NaN	NaN	NaN	NaN	NaN	NaN	NaN
3.238	1.419	-85.8948	1376.1013	-2.4503	0.61026	-1.0354	-40.9264	148.7351	815.4135	-0.92246	0.34248	-0.084375	NaN	NaN	NaN	NaN	NaN	NaN	NaN	NaN	NaN	NaN	NaN	NaN
3.24	3.2709	-78.494	1336.975	-2.4499	0.6376	-1.0268	-7.0531	183.567	787.0586	-0.9209	0.34551	-0.091406	NaN	NaN	NaN	NaN	NaN	NaN	NaN	NaN	NaN	NaN	NaN	NaN
3.242	19.7275	-77.707	1326.527	-2.4378	0.67158	-1.0179	-44.387	162.066	760.4006	-0.90967	0.35596	-0.098145	NaN	NaN	NaN	NaN	NaN	NaN	NaN	NaN	NaN	NaN	NaN	NaN
3.244	51.9009	-69.456	1334.598	-2.4013	0.70869	-1.0142	-34.9568	152.643	750.6153	-0.89629	0.37051	-0.1081	NaN	NaN	NaN	NaN	NaN	NaN	NaN	NaN	NaN	NaN	NaN	NaN
3.246	34.911	-34.005	1307.9704	-2.3413	0.74072	-1.0112	-14.8537	169.379	740.765	-0.8668	0.38946	-0.12188	NaN	NaN	NaN	NaN	NaN	NaN	NaN	NaN	NaN	NaN	NaN	NaN
3.248	26.203	-20.9608	1324.1342	-2.2673	0.76748	-0.99738	-46.3802	126.9069	710.308	-0.82891	0.4043	-0.13242	NaN	NaN	NaN	NaN	NaN	NaN	NaN	NaN	NaN	NaN	NaN	NaN
3.25	39.3045	-7.909	1319.3355	-2.1932	0.7874	-0.97295	0.7967	123.798	693.6471	-0.79277	0.41426	-0.14316	NaN	NaN	NaN	NaN	NaN	NaN	NaN	NaN	NaN	NaN	NaN	NaN
3.252	43.506	-1.318	1326.0813	-2.1261	0.80537	-0.94795	0.8242	138.0312	643.5801	-0.75391	0.4209	-0.14941	NaN	NaN	NaN	NaN	NaN	NaN	NaN	NaN	NaN	NaN	NaN	NaN
3.254	29.59	11.916	1295.884	-2.0747	0.81924	-0.9165	6.5346	121.669	636.379	-0.71397	0.42666	-0.1582	NaN	NaN	NaN	NaN	NaN	NaN	NaN	NaN	NaN	NaN	NaN	NaN
3.256	35.679	2.089	1283.219	-2.0391	0.83594	-0.89355	44.863	147.637	623.828	-0.6792	0.42324	-0.16045	NaN	NaN	NaN	NaN	NaN	NaN	NaN	NaN	NaN	NaN	NaN	NaN
3.258	16.4646	-3.179	1280.009	-2.0143	0.84668	-0.87109	13.0093	151.781	602.376	-0.63858	0.42598	-0.16435	NaN	NaN	NaN	NaN	NaN	NaN	NaN	NaN	NaN	NaN	NaN	NaN
3.26	36.562	-6.139	1264.8032	-2.003	0.85596	-0.85342	47.033	133.6585	570.129	-0.59678	0.4252	-0.17246	NaN	NaN	NaN	NaN	NaN	NaN	NaN	NaN	NaN	NaN	NaN	NaN
3.262	29.4156	-21.7502	1257.1324	-1.9921	0.86846	-0.83779	66.625	135.136	525.1122	-0.54883	0.42285	-0.17236	NaN	NaN	NaN	NaN	NaN	NaN	NaN	NaN	NaN	NaN	NaN	NaN
3.264	44.971	-34.8852	1238.853	-1.9782	0.88272	-0.82783	-1.2841	107.599	496.9602	-0.49521	0.42705	-0.17451	NaN	NaN	NaN	NaN	NaN	NaN	NaN	NaN	NaN	NaN	NaN	NaN
3.266	45.29	-37.523	1226.1426	-1.959	0.88672	-0.81934	47.454	108.291	468.333	-0.43476	0.42842	-0.1751	NaN	NaN	NaN	NaN	NaN	NaN	NaN	NaN	NaN	NaN	NaN	NaN
3.268	54.153	-23.3919	1204.862	-1.9299	0.88047	-0.81016	27.606	140.842	409.141	-0.37422	0.42217	-0.17588	NaN	NaN	NaN	NaN	NaN	NaN	NaN	NaN	NaN	NaN	NaN	NaN
3.27	55.358	-2.77	1198.163	-1.8995	0.87041	-0.7956	6.8222	142.2748	368.3971	-0.31104	0.42324	-0.18281	NaN	NaN	NaN	NaN	NaN	NaN	NaN	NaN	NaN	NaN	NaN	NaN
3.272	49.528	9.987	1204.875	-1.8636	0.854	-0.78388	35.2043	167.571	332.583	-0.24463	0.4126	-0.17871	NaN	NaN	NaN	NaN	NaN	NaN	NaN	NaN	NaN	NaN	NaN	NaN
3.274	38.496	28.1302	1191.7681	-1.8265	0.83408	-0.76983	9.881	157.499	293.013	-0.18301	0.38994	-0.17373	NaN	NaN	NaN	NaN	NaN	NaN	NaN	NaN	NaN	NaN	NaN	NaN
3.276	27.3865	38.239	1186.936	-1.7813	0.80859	-0.75781	17.155	119.5955	291.5566	-0.12695	0.36094	-0.16504	NaN	NaN	NaN	NaN	NaN	NaN	NaN	NaN	NaN	NaN	NaN	NaN
3.278	22.64141	63.958	1177.944	-1.7393	0.78008	-0.73574	21.5414	137.031	263.0737	-0.075391	0.33125	-0.15371	NaN	NaN	NaN	NaN	NaN	NaN	NaN	NaN	NaN	NaN	NaN	NaN
3.28	17.4007	84.752	1176.03	-1.6909	0.74541	-0.71865	-11.492	86.979	236.4686	-0.028028	0.29736	-0.1372	NaN	NaN	NaN	NaN	NaN	NaN	NaN	NaN	NaN	NaN	NaN	NaN
3.282	20.03417	91.427	1149.225	-1.6397	0.71455	-0.70498	23.95062	75.736	224.0564	0.01123	0.25635	-0.13525	NaN	NaN	NaN	NaN	NaN	NaN	NaN	NaN	NaN	NaN	NaN	NaN
3.284	0.0194000000000001	87.836	1092.7311	-1.5887	0.67929	-0.68496	-6.0495	115.6579	176.861	0.047949	0.22266	-0.12344	NaN	NaN	NaN	NaN	NaN	NaN	NaN	NaN	NaN	NaN	NaN	NaN
3.286	15.8864	67.4624	1055.0146	-1.5313	0.63965	-0.66797	-41.663	97.7226	141.5206	0.084278	0.19082	-0.10859	NaN	NaN	NaN	NaN	NaN	NaN	NaN	NaN	NaN	NaN	NaN	NaN
3.288	15.1509	54.218	1042.629	-1.4731	0.60068	-0.64502	-13.5902	122.693	123.973	0.11084	0.15488	-0.099999	NaN	NaN	NaN	NaN	NaN	NaN	NaN	NaN	NaN	NaN	NaN	NaN
3.29	5.991683	52.85	1030.487	-1.418	0.56621	-0.61621	-62.299	123.869	119.487	0.1372	0.12012	-0.086816	NaN	NaN	NaN	NaN	NaN	NaN	NaN	NaN	NaN	NaN	NaN	NaN
3.292	20.0784	68.56	1002.711	-1.3578	0.53183	-0.5959	-43.4614	80.3749	134.3606	0.15967	0.083496	-0.081543	NaN	NaN	NaN	NaN	NaN	NaN	NaN	NaN	NaN	NaN	NaN	NaN
3.294	18.62357	69.0309	983.048	-1.302	0.49941	-0.57188	-15.1715	89.9511	130.2365	0.17588	0.048047	-0.073242	NaN	NaN	NaN	NaN	NaN	NaN	NaN	NaN	NaN	NaN	NaN	NaN
3.296	12.4623	80.84842	973.1309	-1.2461	0.47754	-0.55078	-55.391	54.304	110.7052	0.18545	0.012695	-0.066797	NaN	NaN	NaN	NaN	NaN	NaN	NaN	NaN	NaN	NaN	NaN	NaN
3.298	7.6809	91.9267	971.5585	-1.184	0.45274	-0.5249	2.8035	40.126	98.269	0.18819	-0.030274	-0.063672	NaN	NaN	NaN	NaN	NaN	NaN	NaN	NaN	NaN	NaN	NaN	NaN
3.3	0.8056	109.1312	943.555	-1.1258	0.43516	-0.50078	-23.3484	58.4233	75.538	0.18955	-0.06875	-0.058789	NaN	NaN	NaN	NaN	NaN	NaN	NaN	NaN	NaN	NaN	NaN	NaN
3.302	-20.8437	99.6683	930.874	-1.0711	0.41758	-0.47695	-22.7479	48.182	64.3202	0.1792	-0.10205	-0.054199	NaN	NaN	NaN	NaN	NaN	NaN	NaN	NaN	NaN	NaN	NaN	NaN
3.304	-6.88	109.4304	916.646	-1.014	0.39941	-0.44805	15.6333	72.15	54.43955	0.16612	-0.13565	-0.049219	NaN	NaN	NaN	NaN	NaN	NaN	NaN	NaN	NaN	NaN	NaN	NaN
3.306	7.2095	104.4346	871.61783	-0.9624	0.3833	-0.41504	-26.4166	93.505	33.589	0.14629	-0.16787	-0.051758	NaN	NaN	NaN	NaN	NaN	NaN	NaN	NaN	NaN	NaN	NaN	NaN
3.308	8.0892	101.1864	837.985	-0.91631	0.36494	-0.39561	2.203	60.0752	66.1085	0.12442	-0.18935	-0.044727	NaN	NaN	NaN	NaN	NaN	NaN	NaN	NaN	NaN	NaN	NaN	NaN
3.31	6.156	100.184	793.563	-0.87559	0.34805	-0.36455	-2.249	67.648	65.983	0.097069	-0.20937	-0.04336	NaN	NaN	NaN	NaN	NaN	NaN	NaN	NaN	NaN	NaN	NaN	NaN
3.312	8.43	101.5263	766.931	-0.83965	0.33125	-0.3419	-13.1584	29.787	59.66068	0.068359	-0.22021	-0.038574	NaN	NaN	NaN	NaN	NaN	NaN	NaN	NaN	NaN	NaN	NaN	NaN
3.314	-4.719	102.731	725.4308	-0.80469	0.31621	-0.3125	24.5816	-1.163	55.297	0.041602	-0.22891	-0.036426	NaN	NaN	NaN	NaN	NaN	NaN	NaN	NaN	NaN	NaN	NaN	NaN
3.316	16.3553	100.707	710.546	-0.77686	0.30322	-0.2998	15.2134	16.1387	29.1806	0.013184	-0.22744	-0.035352	NaN	NaN	NaN	NaN	NaN	NaN	NaN	NaN	NaN	NaN	NaN	NaN
3.318	28.6632	103.408	697.6148	-0.73691	0.29404	-0.28281	-1.605	-14.2246	38.9814	-0.015332	-0.22354	-0.038868	NaN	NaN	NaN	NaN	NaN	NaN	NaN	NaN	NaN	NaN	NaN	NaN
3.32	17.2619	111.1631	677.3347	-0.6957	0.28515	-0.2625	36.3811	18.751	25.1392	-0.039941	-0.21758	-0.036523	NaN	NaN	NaN	NaN	NaN	NaN	NaN	NaN	NaN	NaN	NaN	NaN
3.322	-2.141	118.6827	649.7976	-0.65	0.28086	-0.24531	2.136	50.432	2.48	-0.066895	-0.2085	-0.041016	NaN	NaN	NaN	NaN	NaN	NaN	NaN	NaN	NaN	NaN	NaN	NaN
3.324	1.269	120.9436	622.0409	-0.60351	0.27315	-0.22627	21.9263	25.0604	17.3825	-0.082715	-0.19424	-0.04248	NaN	NaN	NaN	NaN	NaN	NaN	NaN	NaN	NaN	NaN	NaN	NaN
3.326	-21.9953	125.682	603.677731	-0.56445	0.27051	-0.21094	31.1392	32.3742	23.6674	-0.090918	-0.17998	-0.049902	NaN	NaN	NaN	NaN	NaN	NaN	NaN	NaN	NaN	NaN	NaN	NaN
3.328	5.97	132.0184	566.32728	-0.52286	0.26972	-0.19258	-27.9857	-4.121	20.8784	-0.093653	-0.15889	-0.055371	NaN	NaN	NaN	NaN	NaN	NaN	NaN	NaN	NaN	NaN	NaN	NaN
3.33	-13.1014	127.6541	533.767	-0.47695	0.26201	-0.1752	10.742	-27.0692	35.5786	-0.086621	-0.14326	-0.062109	NaN	NaN	NaN	NaN	NaN	NaN	NaN	NaN	NaN	NaN	NaN	NaN
3.332	12.332	128.23982	515.6145	-0.43789	0.25381	-0.15879	-23.9419	9.5121	8.799	-0.069824	-0.12695	-0.063965	NaN	NaN	NaN	NaN	NaN	NaN	NaN	NaN	NaN	NaN	NaN	NaN
3.334	-2.5974	121.37039	490.9328	-0.40235	0.24521	-0.14336	-39.9893	-6.3994	16.5876	-0.049023	-0.11035	-0.069629	NaN	NaN	NaN	NaN	NaN	NaN	NaN	NaN	NaN	NaN	NaN	NaN
3.336	-1.59	119.3156	461.2404	-0.36133	0.23926	-0.125	5.33	1.268	7.4391	-0.031836	-0.094238	-0.075781	NaN	NaN	NaN	NaN	NaN	NaN	NaN	NaN	NaN	NaN	NaN	NaN
3.338	-7.2601	102.56	429.9029	-0.32441	0.23604	-0.10879	-60.674	37.8423	-28.299	-0.0083985	-0.080566	-0.08086	NaN	NaN	NaN	NaN	NaN	NaN	NaN	NaN	NaN	NaN	NaN	NaN
3.34	-1.868	96.437	403.6515	-0.29023	0.2289	-0.094043	-32.4706	24.6231	-5.4318	0.016699	-0.069336	-0.086133	NaN	NaN	NaN	NaN	NaN	NaN	NaN	NaN	NaN	NaN	NaN	NaN
3.342	1.897	88.609	390.3357	-0.25507	0.22031	-0.076855	-18.0258	37.425	-1.207	0.035645	-0.061035	-0.089355	NaN	NaN	NaN	NaN	NaN	NaN	NaN	NaN	NaN	NaN	NaN	NaN
3.344	-17.002	96.8094	351.577	-0.22119	0.2124	-0.059571	-51.1866	30.812	14.233	0.053125	-0.053711	-0.094629	NaN	NaN	NaN	NaN	NaN	NaN	NaN	NaN	NaN	NaN	NaN	NaN
3.346	-22.19241	103.75908	332.012	-0.19043	0.20654	-0.046875	-17.456	-9.6731	25.6926	0.066894	-0.04541	-0.095117	NaN	NaN	NaN	NaN	NaN	NaN	NaN	NaN	NaN	NaN	NaN	NaN
3.348	-20.2397	114.397	317.068	-0.15449	0.19649	-0.028418	-36.0322	6.4335	-8.31326	0.079785	-0.038379	-0.10215	NaN	NaN	NaN	NaN	NaN	NaN	NaN	NaN	NaN	NaN	NaN	NaN
3.35	-18.5653	122.934	295.4497	-0.12187	0.18759	-0.013477	-24.4671	-20.7529	-9.47683	0.090234	-0.031738	-0.10713	NaN	NaN	NaN	NaN	NaN	NaN	NaN	NaN	NaN	NaN	NaN	NaN
3.352	-11.9835	125.224	265.5448	-0.085548	0.179	0.0033203	-9.799	-10.5591	0.8988	0.099609	-0.023926	-0.11377	NaN	NaN	NaN	NaN	NaN	NaN	NaN	NaN	NaN	NaN	NaN	NaN
3.354	-17.1077	100.762	254.70167	-0.050195	0.16924	0.017871	-53.7384	37.311	-6.7759	0.10782	-0.014942	-0.12383	NaN	NaN	NaN	NaN	NaN	NaN	NaN	NaN	NaN	NaN	NaN	NaN
3.356	6.742	84.8098	238.8545	-0.014648	0.16455	0.035645	-10.012	25.5457	24.627	0.11474	-0.018555	-0.12216	NaN	NaN	NaN	NaN	NaN	NaN	NaN	NaN	NaN	NaN	NaN	NaN
3.358	-0.676	82.0054	213.1024	0.019043	0.15468	0.05498	-6.084	48.895	0.808	0.1253	-0.013867	-0.12724	NaN	NaN	NaN	NaN	NaN	NaN	NaN	NaN	NaN	NaN	NaN	NaN
3.36	0.966999999999999	88.497	182.687	0.05166	0.14834	0.068652	-35.4479	44.4877	18.7992	0.13193	-0.0083007	-0.1335	NaN	NaN	NaN	NaN	NaN	NaN	NaN	NaN	NaN	NaN	NaN	NaN
3.362	-3.446	78.782	153.433	0.075879	0.13701	0.077637	28.7408	-6.38536	36.8882	0.14453	-0.0053711	-0.13965	NaN	NaN	NaN	NaN	NaN	NaN	NaN	NaN	NaN	NaN	NaN	NaN
3.364	10.5242	74.8549	136.866	0.10664	0.12422	0.092481	1.366	12.1815	8.0824	0.15762	-9.7656e-05	-0.14893	NaN	NaN	NaN	NaN	NaN	NaN	NaN	NaN	NaN	NaN	NaN	NaN
3.366	-7.225	80.2217	125.5502	0.125	0.11426	0.10205	-10.641	-7.042	18.1628	0.16631	0.0038086	-0.15488	NaN	NaN	NaN	NaN	NaN	NaN	NaN	NaN	NaN	NaN	NaN	NaN
3.368	0.837	84.0387	117.326	0.14922	0.093263	0.11211	41.1399	-4.6441	2.2629	0.17803	0.0081055	-0.16777	NaN	NaN	NaN	NaN	NaN	NaN	NaN	NaN	NaN	NaN	NaN	NaN
3.37	2.207	79.057	123.516	0.16904	0.072949	0.12061	-12.9657	38.1518	-10.2598	0.18213	0.011133	-0.17051	NaN	NaN	NaN	NaN	NaN	NaN	NaN	NaN	NaN	NaN	NaN	NaN
3.372	-13.711	86.061	130.3113	0.18779	0.052246	0.13193	15.8919	18.769	15.5256	0.18652	0.014648	-0.17725	NaN	NaN	NaN	NaN	NaN	NaN	NaN	NaN	NaN	NaN	NaN	NaN
3.374	-0.0449999999999999	66.184	107.127	0.2045	0.040527	0.14121	28.7131	32.96	10.4491	0.18213	0.01914	-0.18242	NaN	NaN	NaN	NaN	NaN	NaN	NaN	NaN	NaN	NaN	NaN	NaN
3.376	-30.9261	48.7461	89.0502	0.22168	0.023438	0.15381	-17.819	48.3928	14.7393	0.17246	0.020117	-0.18721	NaN	NaN	NaN	NaN	NaN	NaN	NaN	NaN	NaN	NaN	NaN	NaN
3.378	-8.438	47.0815	83.995	0.23662	0.0090822	0.16474	13.885	16.7931	33.09343	0.16504	0.027539	-0.18681	NaN	NaN	NaN	NaN	NaN	NaN	NaN	NaN	NaN	NaN	NaN	NaN
3.38	-10.359	56.10861	61.551	0.24795	0.0006836	0.17666	-10.809	48.144	14.705	0.15205	0.030859	-0.20078	NaN	NaN	NaN	NaN	NaN	NaN	NaN	NaN	NaN	NaN	NaN	NaN
3.382	3.228	69.5955	35.694	0.2585	-0.016113	0.18252	-27.3571	10.0589	31.0114	0.1333	0.040039	-0.19336	NaN	NaN	NaN	NaN	NaN	NaN	NaN	NaN	NaN	NaN	NaN	NaN
3.384	-17.0798	67.7818	28.598	0.26436	-0.028906	0.18447	4.824	-32.2463	57.22687	0.11494	0.047949	-0.19443	NaN	NaN	NaN	NaN	NaN	NaN	NaN	NaN	NaN	NaN	NaN	NaN
3.386	-3.97	62.81192	42.6853	0.26514	-0.045898	0.19189	-36.3701	-22.8637	43.524	0.088379	0.056347	-0.19853	NaN	NaN	NaN	NaN	NaN	NaN	NaN	NaN	NaN	NaN	NaN	NaN
3.388	-4.786	46.6216	42.5781	0.26982	-0.055468	0.19727	-31.4406	-62.784	64.4805155	0.05127	0.05791	-0.19619	NaN	NaN	NaN	NaN	NaN	NaN	NaN	NaN	NaN	NaN	NaN	NaN
3.39	-23.6418	38.1991	43.8041	0.26729	-0.066113	0.2003	-17.562	-15.022	45.628	0.0073242	0.058691	-0.19199	NaN	NaN	NaN	NaN	NaN	NaN	NaN	NaN	NaN	NaN	NaN	NaN
3.392	-17.3059	25.4536	57.451	0.2665	-0.078223	0.20186	-57.18	13.8277	60.484	-0.045898	0.053223	-0.19092	NaN	NaN	NaN	NaN	NaN	NaN	NaN	NaN	NaN	NaN	NaN	NaN
3.394	-25.115	25.6396	49.8369	0.26192	-0.088183	0.20185	-42.719	-25.5911	112.536	-0.10664	0.051172	-0.19219	NaN	NaN	NaN	NaN	NaN	NaN	NaN	NaN	NaN	NaN	NaN	NaN
3.396	-17.8744	28.459	41.5376	0.26025	-0.092285	0.20068	-41.29552	5.234	123.975	-0.17568	0.051367	-0.19023	NaN	NaN	NaN	NaN	NaN	NaN	NaN	NaN	NaN	NaN	NaN	NaN
3.398	-23.423	32.2306	14.6013	0.25332	-0.09883	0.1998	-43.8037	-56.28	196.286	-0.25615	0.048243	-0.19297	NaN	NaN	NaN	NaN	NaN	NaN	NaN	NaN	NaN	NaN	NaN	NaN
3.4	-30.7681	33.2679	2.424	0.25117	-0.10078	0.20088	-20.332	-67.734	276.8635	-0.35576	0.043164	-0.19834	NaN	NaN	NaN	NaN	NaN	NaN	NaN	NaN	NaN	NaN	NaN	NaN
3.402	-5.2571	21.5601	8	0.24531	-0.10156	0.1958	-60.6322	8.216	357.913	-0.47998	0.029785	-0.20459	NaN	NaN	NaN	NaN	NaN	NaN	NaN	NaN	NaN	NaN	NaN	NaN
3.404	-8.8428	21.6126	12.1573	0.2375	-0.098923	0.19336	-64.1932	28.848	509.3996	-0.62431	0.016602	-0.21797	NaN	NaN	NaN	NaN	NaN	NaN	NaN	NaN	NaN	NaN	NaN	NaN
3.406	-9.292	25.9471	18.0298	0.22705	-0.094727	0.19287	-66.106	91.473	661.267	-0.80771	-0.0028322	-0.2252	NaN	NaN	NaN	NaN	NaN	NaN	NaN	NaN	NaN	NaN	NaN	NaN
3.408	1.654	5.491	37.565	0.21631	-0.086621	0.18564	-141.0444	101.837	812.247	-1.0308	-0.040332	-0.21933	NaN	NaN	NaN	NaN	NaN	NaN	NaN	NaN	NaN	NaN	NaN	NaN
3.41	10.298	0.0389999999999997	33.831	0.20108	-0.079004	0.18506	-67.542	57.341	943.766	-1.2965	-0.075391	-0.21934	NaN	NaN	NaN	NaN	NaN	NaN	NaN	NaN	NaN	NaN	NaN	NaN
3.412	-7.899	-2.0547	26.645	0.18623	-0.073145	0.18037	-52.573	36.476	989.546	-1.5894	-0.084961	-0.21729	NaN	NaN	NaN	NaN	NaN	NaN	NaN	NaN	NaN	NaN	NaN	NaN
3.414	-11.659	10.8651	-1.74264	0.17061	-0.063672	0.17226	-44.9148	-58.472	1105.932	-1.8912	-0.046582	-0.18682	NaN	NaN	NaN	NaN	NaN	NaN	NaN	NaN	NaN	NaN	NaN	NaN
3.416	7.071	19.5252	0.311999999999999	0.15332	-0.055176	0.17041	-56.8599	-90.766	1229.428	-2.2656	-0.002051	-0.15205	NaN	NaN	NaN	NaN	NaN	NaN	NaN	NaN	NaN	NaN	NaN	NaN
3.418	-1.5654	31.906	3.709	0.13555	-0.044336	0.16172	-79.826	-40.943	1218.392	-2.6277	0.12412	-0.18486	NaN	NaN	NaN	NaN	NaN	NaN	NaN	NaN	NaN	NaN	NaN	NaN
3.42	4.403	28.003	0.321599999999998	0.11953	-0.030859	0.15781	-13.7095	-90.526	1206.55	-2.8554	0.33799	-0.27343	NaN	NaN	NaN	NaN	NaN	NaN	NaN	NaN	NaN	NaN	NaN	NaN
3.422	-10.771	13.8944	-6.6105	0.098437	-0.019531	0.15351	-19.4878	-107.619	1104.454	-2.9141	0.54883	-0.34131	NaN	NaN	NaN	NaN	NaN	NaN	NaN	NaN	NaN	NaN	NaN	NaN
3.424	12.481	-7.8452	0.3104	0.088769	-0.0071286	0.1501	-62.984	-150.36	1105.155	-2.8442	0.72432	-0.36982	NaN	NaN	NaN	NaN	NaN	NaN	NaN	NaN	NaN	NaN	NaN	NaN
3.426	1.941	2.6424	11.7565	0.07666	0.0063477	0.14307	2.924	-178.167	1125.887	-2.7164	0.86719	-0.38145	NaN	NaN	NaN	NaN	NaN	NaN	NaN	NaN	NaN	NaN	NaN	NaN
3.428	11.1036	11.4252	12.3609	0.065039	0.020605	0.13604	-2.067	-129.364	1083.754	-2.5356	0.93711	-0.4084	NaN	NaN	NaN	NaN	NaN	NaN	NaN	NaN	NaN	NaN	NaN	NaN
3.43	-3.595	8.47573	1.50378	0.048242	0.027539	0.13995	-28.886	-135.352	1056.989	-2.2724	0.93994	-0.43799	NaN	NaN	NaN	NaN	NaN	NaN	NaN	NaN	NaN	NaN	NaN	NaN
3.432	10.683	8.9712	14.4483	0.036914	0.039649	0.13564	35.291	-110.2816	1022.796	-1.937	0.89307	-0.46924	NaN	NaN	NaN	NaN	NaN	NaN	NaN	NaN	NaN	NaN	NaN	NaN
3.434	14.0811	6.2631	-3.7404	0.025879	0.0542	0.13183	-16.156	-6.583	980.8435	-1.594	0.82236	-0.49209	NaN	NaN	NaN	NaN	NaN	NaN	NaN	NaN	NaN	NaN	NaN	NaN
3.436	-22.0752	5.2247	-10.576	0.014648	0.064453	0.12695	-0.0889999999999986	19.501	953.835	-1.296	0.75479	-0.51358	NaN	NaN	NaN	NaN	NaN	NaN	NaN	NaN	NaN	NaN	NaN	NaN
3.438	-12.301	0.270999999999999	-1.7179	0.0083008	0.074414	0.12939	-43.645	80.789	918.587	-1.0417	0.70284	-0.55302	NaN	NaN	NaN	NaN	NaN	NaN	NaN	NaN	NaN	NaN	NaN	NaN
3.44	-11.407	-1.2952	7.258	0.0041015	0.085351	0.12636	-103.436	39.766	953.974	-0.84336	0.65273	-0.57725	NaN	NaN	NaN	NaN	NaN	NaN	NaN	NaN	NaN	NaN	NaN	NaN
3.442	-12.7508	10.3518	0.0939999999999994	0.0013672	0.093555	0.12364	-56.9736	-36.496	1006.176	-0.69336	0.625	-0.60254	NaN	NaN	NaN	NaN	NaN	NaN	NaN	NaN	NaN	NaN	NaN	NaN
3.444	-29.9394	2.4743	-6.2491	-0.00039062	0.10303	0.11953	-28.3913	-41.492	981.8731	-0.56397	0.62548	-0.63369	NaN	NaN	NaN	NaN	NaN	NaN	NaN	NaN	NaN	NaN	NaN	NaN
3.446	-12.7673	4.5681	-0.9231	0	0.10986	0.11719	-27.2895	-109.424	938.425	-0.46016	0.62109	-0.64336	NaN	NaN	NaN	NaN	NaN	NaN	NaN	NaN	NaN	NaN	NaN	NaN
3.448	-5.937	8.41256	-2.4863	-0.0035156	0.11729	0.11777	37.843	-130.732	906.842	-0.41602	0.59765	-0.66836	NaN	NaN	NaN	NaN	NaN	NaN	NaN	NaN	NaN	NaN	NaN	NaN
3.45	-25.6964	14.5903	0.4957	-0.0074219	0.12275	0.11767	-13.7435	-167.8257	893.525	-0.4208	0.59131	-0.67002	NaN	NaN	NaN	NaN	NaN	NaN	NaN	NaN	NaN	NaN	NaN	NaN
3.452	-17.849	25.5335	-5.8153	-0.013281	0.13134	0.11729	11.494	-259.829	950.541	-0.46484	0.58789	-0.67285	NaN	NaN	NaN	NaN	NaN	NaN	NaN	NaN	NaN	NaN	NaN	NaN
3.454	-12.6339	24.3947	-4.983	-0.018848	0.13408	0.10986	36.930771	-279.686	1009.362	-0.53184	0.58535	-0.66309	NaN	NaN	NaN	NaN	NaN	NaN	NaN	NaN	NaN	NaN	NaN	NaN
3.456	3.315	25.8179	-1.814	-0.025391	0.13818	0.10498	23.3484	-317.07	1095.63823	-0.62539	0.58946	-0.64278	NaN	NaN	NaN	NaN	NaN	NaN	NaN	NaN	NaN	NaN	NaN	NaN
3.458	-12.054	14.604	-1.122	-0.040234	0.14316	0.11231	44.33	-315.664	1161.211	-0.75625	0.61836	-0.61738	NaN	NaN	NaN	NaN	NaN	NaN	NaN	NaN	NaN	NaN	NaN	NaN
3.46	-14.287	4.33	-5.5235	-0.055371	0.15185	0.11055	3.5061	-242.727	1168.2	-0.9207	0.65469	-0.58906	NaN	NaN	NaN	NaN	NaN	NaN	NaN	NaN	NaN	NaN	NaN	NaN
3.462	-8.0575	-2.4801	12.8792	-0.074512	0.16005	0.099219	-50.912	-217.276	1173.33	-1.1055	0.69824	-0.55664	NaN	NaN	NaN	NaN	NaN	NaN	NaN	NaN	NaN	NaN	NaN	NaN
3.464	-3.709	-5.582	31.1236	-0.094336	0.16856	0.10156	-6.0852	-142.824	1143.884	-1.2978	0.7542	-0.54121	NaN	NaN	NaN	NaN	NaN	NaN	NaN	NaN	NaN	NaN	NaN	NaN
3.466	-15.797	-12.843	34.9587	-0.11963	0.17627	0.089355	-28.2566	-114.674	1131.7641	-1.4827	0.81064	-0.5456	NaN	NaN	NaN	NaN	NaN	NaN	NaN	NaN	NaN	NaN	NaN	NaN
3.468	-13.0141	-8.722	42.7212	-0.15781	0.1832	0.081641	5.2253	-154.325	1166.04	-1.637	0.86807	-0.56006	NaN	NaN	NaN	NaN	NaN	NaN	NaN	NaN	NaN	NaN	NaN	NaN
3.47	32.71623	-9.688	67.684	-0.19902	0.18877	0.072656	47.003	-138.104	1186.573	-1.7566	0.90381	-0.58779	NaN	NaN	NaN	NaN	NaN	NaN	NaN	NaN	NaN	NaN	NaN	NaN
3.472	-19.4165	15.079	99.851	-0.25489	0.19659	0.063281	39.701	-159.022	1233.447	-1.8574	0.92383	-0.61914	NaN	NaN	NaN	NaN	NaN	NaN	NaN	NaN	NaN	NaN	NaN	NaN
3.474	-21.913	-7.2204	130.215	-0.31299	0.20322	0.052051	71.637	-139.0784	1225.765	-1.941	0.92617	-0.64766	NaN	NaN	NaN	NaN	NaN	NaN	NaN	NaN	NaN	NaN	NaN	NaN
3.476	-39.323	-35.4596	163.555	-0.37256	0.20557	0.039551	61.228	-95.783	1172.102	-2.0199	0.9164	-0.67608	NaN	NaN	NaN	NaN	NaN	NaN	NaN	NaN	NaN	NaN	NaN	NaN
3.478	-4.251	-40.1368	228.2529	-0.43984	0.21631	0.031055	20.05505	-115.718	1163.06	-2.0969	0.89492	-0.70889	NaN	NaN	NaN	NaN	NaN	NaN	NaN	NaN	NaN	NaN	NaN	NaN
3.48	0.083000000000002	-42.1918	274.0997	-0.50302	0.21846	0.02002	60.072	-119.1702	1193.8225	-2.1677	0.89336	-0.73447	NaN	NaN	NaN	NaN	NaN	NaN	NaN	NaN	NaN	NaN	NaN	NaN
3.482	-5.932	-66.5059	268.9868	-0.56514	0.23603	0.0079102	22.9147	-114.871	1238.6907	-2.2344	0.89258	-0.75	NaN	NaN	NaN	NaN	NaN	NaN	NaN	NaN	NaN	NaN	NaN	NaN
3.484	-19.9012	-80.4966	267.914	-0.62353	0.25068	-0.0035156	6.9495	-161.6567	1308.739	-2.285	0.90869	-0.75928	NaN	NaN	NaN	NaN	NaN	NaN	NaN	NaN	NaN	NaN	NaN	NaN
3.486	-25.7126	-69.551	287.85	-0.67822	0.271	-0.011719	14.2854	-161.4532	1353.865	-2.3234	0.92813	-0.76836	NaN	NaN	NaN	NaN	NaN	NaN	NaN	NaN	NaN	NaN	NaN	NaN
3.488	-8.2784	-37.179	316.46717	-0.73095	0.29326	-0.023437	-20.201	-188.162	1358.934	-2.3566	0.94101	-0.79687	NaN	NaN	NaN	NaN	NaN	NaN	NaN	NaN	NaN	NaN	NaN	NaN
3.49	-29.2206	-31.2187	342.038	-0.78428	0.31416	-0.033887	6.8256	-197.199	1370.716	-2.379	0.94639	-0.83525	NaN	NaN	NaN	NaN	NaN	NaN	NaN	NaN	NaN	NaN	NaN	NaN
3.492	-13.53635	-31.0194	373.914	-0.83701	0.33369	-0.04248	11.1892	-141.378	1323.1186	-2.4043	0.94531	-0.88477	NaN	NaN	NaN	NaN	NaN	NaN	NaN	NaN	NaN	NaN	NaN	NaN
3.494	13.8346	-45.727	415.243	-0.89375	0.34863	-0.058398	8.1634	-152.9936	1300.6753	-2.4065	0.93809	-0.92598	NaN	NaN	NaN	NaN	NaN	NaN	NaN	NaN	NaN	NaN	NaN	NaN
3.496	-6.4027	-14.4263	487.687	-0.95605	0.36328	-0.069824	56.702	-116.07675	1287.7633	-2.3807	0.93349	-0.95186	NaN	NaN	NaN	NaN	NaN	NaN	NaN	NaN	NaN	NaN	NaN	NaN
3.498	-25.2662	27.092	574.6934	-1.031	0.36787	-0.091016	17.7756	-111.4143	1255.021	-2.3195	0.93077	-0.96319	NaN	NaN	NaN	NaN	NaN	NaN	NaN	NaN	NaN	NaN	NaN	NaN
3.5	-2.216	59.271	637.0511	-1.1176	0.37022	-0.10625	-6.326	-153.055	1259.4926	-2.2462	0.92959	-0.97353	NaN	NaN	NaN	NaN	NaN	NaN	NaN	NaN	NaN	NaN	NaN	NaN
3.502	3.874	69.741	681.4326	-1.2195	0.37138	-0.12344	33.0941	-108.678	1241.737	-2.168	0.93164	-0.98828	NaN	NaN	NaN	NaN	NaN	NaN	NaN	NaN	NaN	NaN	NaN	NaN
3.504	-36.119	67.641	735.5665	-1.3217	0.37715	-0.14561	-6.7367	-96.075	1236.296	-2.1138	0.93271	-1.0034	NaN	NaN	NaN	NaN	NaN	NaN	NaN	NaN	NaN	NaN	NaN	NaN
3.506	-3.16	45.062	811.577	-1.4277	0.38379	-0.15186	12.8857	-46.4532	1232.39	-2.0667	0.94385	-1.0132	NaN	NaN	NaN	NaN	NaN	NaN	NaN	NaN	NaN	NaN	NaN	NaN
3.508	16.39004	17.9714	888.715	-1.5343	0.40049	-0.16435	21.1801	26.309	1198.313	-2.0401	0.96572	-1.0179	NaN	NaN	NaN	NaN	NaN	NaN	NaN	NaN	NaN	NaN	NaN	NaN
3.51	9.4893	25.159	941.0611	-1.6367	0.42031	-0.17041	-14.5283	2.98	1186.847	-2.0116	1.004	-1.0186	NaN	NaN	NaN	NaN	NaN	NaN	NaN	NaN	NaN	NaN	NaN	NaN
3.512	-7.7682	3.46926	961.92161	-1.734	0.43867	-0.17822	17.3193	15.221	1204.8763	-1.9785	1.0391	-1.0098	NaN	NaN	NaN	NaN	NaN	NaN	NaN	NaN	NaN	NaN	NaN	NaN
3.514	7.889	-33.375	967.6449	-1.8036	0.45479	-0.1913	-9.2555	-14.7	1227.919	-1.9318	1.0634	-1.0044	NaN	NaN	NaN	NaN	NaN	NaN	NaN	NaN	NaN	NaN	NaN	NaN
3.516	36.702	-38.47	986.61039	-1.8413	0.4751	-0.20264	28.279	-60.432	1231.7041	-1.8687	1.0684	-0.99756	NaN	NaN	NaN	NaN	NaN	NaN	NaN	NaN	NaN	NaN	NaN	NaN
3.518	45.299	-33.304	1010.5052	-1.8301	0.49502	-0.21885	51.82	-39.979	1212.636	-1.7956	1.0618	-0.97842	NaN	NaN	NaN	NaN	NaN	NaN	NaN	NaN	NaN	NaN	NaN	NaN
3.52	80.75	-38.48	1039.728	-1.7828	0.51035	-0.23174	36.0062	-38.0474	1221.165	-1.7265	1.0448	-0.95068	NaN	NaN	NaN	NaN	NaN	NaN	NaN	NaN	NaN	NaN	NaN	NaN
3.522	50.5286	-59.995	1072.455	-1.709	0.52637	-0.23174	52.934	-32.875	1223.0407	-1.6616	1.0278	-0.92139	NaN	NaN	NaN	NaN	NaN	NaN	NaN	NaN	NaN	NaN	NaN	NaN
3.524	79.411	-60.535	1089.18	-1.616	0.53027	-0.23145	48.694	-12.288	1208.1339	-1.6109	1.0051	-0.88535	NaN	NaN	NaN	NaN	NaN	NaN	NaN	NaN	NaN	NaN	NaN	NaN
3.526	73.371	-59.553	1089.045	-1.5332	0.53711	-0.23438	21.9677	-24.4938	1209.73	-1.5714	0.98095	-0.85186	NaN	NaN	NaN	NaN	NaN	NaN	NaN	NaN	NaN	NaN	NaN	NaN
3.528	57.891	-38.449	1067.135	-1.4612	0.54551	-0.23613	54.085	-4.1539	1224.475	-1.5421	0.95713	-0.81865	NaN	NaN	NaN	NaN	NaN	NaN	NaN	NaN	NaN	NaN	NaN	NaN
3.53	61.971	-35.3006	1058.125	-1.3888	0.55244	-0.23389	45.262	25.5055	1228.4862	-1.5131	0.92597	-0.7873	NaN	NaN	NaN	NaN	NaN	NaN	NaN	NaN	NaN	NaN	NaN	NaN
3.532	54.806	-33.925	1061.661	-1.3341	0.56338	-0.23233	-6.9816	26.5664	1230.5423	-1.4844	0.89844	-0.7627	NaN	NaN	NaN	NaN	NaN	NaN	NaN	NaN	NaN	NaN	NaN	NaN
3.534	60.411	-25.204	1059.861	-1.2853	0.57988	-0.24356	26.71	77.43	1205.4564	-1.4551	0.8749	-0.73506	NaN	NaN	NaN	NaN	NaN	NaN	NaN	NaN	NaN	NaN	NaN	NaN
3.536	37.5311	-28.476	1069.43145	-1.2363	0.60059	-0.25488	-15.9386	83.5696	1176.836	-1.4289	0.85313	-0.70898	NaN	NaN	NaN	NaN	NaN	NaN	NaN	NaN	NaN	NaN	NaN	NaN
3.538	52.6132	-47.077	1089.4617	-1.2004	0.62266	-0.26435	13.6296	96.0982	1153.7078	-1.4035	0.83008	-0.68437	NaN	NaN	NaN	NaN	NaN	NaN	NaN	NaN	NaN	NaN	NaN	NaN
3.54	55.833	-86.8298	1108.0424	-1.178	0.64375	-0.27129	1.369	139.003	1126.2916	-1.3735	0.80674	-0.66357	NaN	NaN	NaN	NaN	NaN	NaN	NaN	NaN	NaN	NaN	NaN	NaN
3.542	54.556	-98.067	1114.644	-1.1706	0.65625	-0.28652	-29.3975	129.344	1102.96	-1.3315	0.78369	-0.63965	NaN	NaN	NaN	NaN	NaN	NaN	NaN	NaN	NaN	NaN	NaN	NaN
3.544	78.059	-106.916	1119.485	-1.1723	0.65703	-0.30752	49.255	130.214	1104.193	-1.2923	0.74854	-0.61807	NaN	NaN	NaN	NaN	NaN	NaN	NaN	NaN	NaN	NaN	NaN	NaN
3.546	62.075	-107.97	1140.699	-1.1758	0.65039	-0.3291	-16.6577	134.256	1075.538	-1.2464	0.71241	-0.59502	NaN	NaN	NaN	NaN	NaN	NaN	NaN	NaN	NaN	NaN	NaN	NaN
3.548	61.053	-111.565	1164.1016	-1.186	0.6419	-0.3459	-6.166	88.423	1066.2173	-1.2027	0.67569	-0.56455	NaN	NaN	NaN	NaN	NaN	NaN	NaN	NaN	NaN	NaN	NaN	NaN
3.55	34.34	-130.427	1183.1113	-1.1964	0.6374	-0.35947	13.5119	82.031	1067.461	-1.1676	0.64004	-0.53789	NaN	NaN	NaN	NaN	NaN	NaN	NaN	NaN	NaN	NaN	NaN	NaN
3.552	33.2232	-133.44	1187.064	-1.212	0.63271	-0.36846	-42.652	84.213	1022.69	-1.1289	0.60938	-0.50586	NaN	NaN	NaN	NaN	NaN	NaN	NaN	NaN	NaN	NaN	NaN	NaN
3.554	18.8548	-145.619	1218.45	-1.2366	0.63369	-0.38349	-28.2315	93.994	1008.8558	-1.0956	0.58818	-0.47881	NaN	NaN	NaN	NaN	NaN	NaN	NaN	NaN	NaN	NaN	NaN	NaN
3.556	15.21256	-119.9174	1232.4678	-1.2754	0.62109	-0.38721	-35.1829	132.141	999.297	-1.0672	0.56055	-0.44844	NaN	NaN	NaN	NaN	NaN	NaN	NaN	NaN	NaN	NaN	NaN	NaN
3.558	-5.0253	-98.7437	1226.5627	-1.33	0.6123	-0.40078	-61.3225	142.938	984.2079	-1.0457	0.54024	-0.41914	NaN	NaN	NaN	NaN	NaN	NaN	NaN	NaN	NaN	NaN	NaN	NaN
3.56	-19.5236	-91.5063	1218.844	-1.4068	0.60684	-0.39648	-28.838	137.072	970.904	-1.0301	0.52031	-0.38848	NaN	NaN	NaN	NaN	NaN	NaN	NaN	NaN	NaN	NaN	NaN	NaN
3.562	13.8466	-89.6273	1223.215	-1.5221	0.60176	-0.38789	-34.9731	146.182	919.623	-1.0215	0.5	-0.36621	NaN	NaN	NaN	NaN	NaN	NaN	NaN	NaN	NaN	NaN	NaN	NaN
3.564	-2.432	-74.281	1237.811	-1.6687	0.61533	-0.36748	-63.509	104.171	902.19784	-1.0134	0.48974	-0.34209	NaN	NaN	NaN	NaN	NaN	NaN	NaN	NaN	NaN	NaN	NaN	NaN
3.566	20.3029	-41.5839	1247.703	-1.8477	0.64453	-0.34766	-0.195	125.307	901.944	-1.0062	0.47676	-0.32256	NaN	NaN	NaN	NaN	NaN	NaN	NaN	NaN	NaN	NaN	NaN	NaN
3.568	7.6175	-25.3412	1267.43	-2.0469	0.69229	-0.33877	-25.671	153.005	860.052	-0.99218	0.46855	-0.30459	NaN	NaN	NaN	NaN	NaN	NaN	NaN	NaN	NaN	NaN	NaN	NaN
3.57	12.6421	-20.6639	1293.63	-2.2507	0.75166	-0.33066	-12.876	146.471	826.946	-0.9792	0.45791	-0.28603	NaN	NaN	NaN	NaN	NaN	NaN	NaN	NaN	NaN	NaN	NaN	NaN
3.572	10.8595	-32.4875	1320.6247	-2.4573	0.8122	-0.32598	2.046	183.641	772.172	-0.96094	0.45313	-0.27002	NaN	NaN	NaN	NaN	NaN	NaN	NaN	NaN	NaN	NaN	NaN	NaN
3.574	-4.725	-44.736	1325.2978	-2.6558	0.87031	-0.32657	-42.6983	176.456	735.9067	-0.93965	0.46465	-0.25996	NaN	NaN	NaN	NaN	NaN	NaN	NaN	NaN	NaN	NaN	NaN	NaN
3.576	-9.0445	-44.1545	1323.235	-2.8335	0.92529	-0.32764	-5.095	175.955	732.7845	-0.91768	0.47471	-0.25127	NaN	NaN	NaN	NaN	NaN	NaN	NaN	NaN	NaN	NaN	NaN	NaN
3.578	-9.8548	-53.1778	1331.6894	-2.9693	0.97598	-0.3376	-53.8472	203.333	702.776	-0.8915	0.48291	-0.24229	NaN	NaN	NaN	NaN	NaN	NaN	NaN	NaN	NaN	NaN	NaN	NaN
3.58	-1.4256	-58.5653	1340.2263	-3.0523	1.0282	-0.34639	-35.9536	151.4123	698.4685	-0.86397	0.4915	-0.22568	NaN	NaN	NaN	NaN	NaN	NaN	NaN	NaN	NaN	NaN	NaN	NaN
3.582	-23.2238	-67.462	1326.149	-3.0699	1.0607	-0.36084	-10.795	128.7578	694.68133	-0.83398	0.49756	-0.2168	NaN	NaN	NaN	NaN	NaN	NaN	NaN	NaN	NaN	NaN	NaN	NaN
3.584	-8.9365	-64.25	1326.3913	-3.0274	1.0909	-0.36328	-50.7734	124.065	652.7077	-0.79082	0.49434	-0.20088	NaN	NaN	NaN	NaN	NaN	NaN	NaN	NaN	NaN	NaN	NaN	NaN
3.586	9.4509	-72.143	1332.6443	-2.9487	1.1021	-0.35889	-11.288	103.873	623.0438	-0.74385	0.49854	-0.18877	NaN	NaN	NaN	NaN	NaN	NaN	NaN	NaN	NaN	NaN	NaN	NaN
3.588	19.565	-72.916	1336.00428	-2.858	1.1092	-0.3584	-28.049	158.112	578.9127	-0.68877	0.50283	-0.16846	NaN	NaN	NaN	NaN	NaN	NaN	NaN	NaN	NaN	NaN	NaN	NaN
3.59	25.3551	-58.553	1312.3699	-2.764	1.1075	-0.36221	-41.7092	176.821	543.157	-0.62813	0.49297	-0.15713	NaN	NaN	NaN	NaN	NaN	NaN	NaN	NaN	NaN	NaN	NaN	NaN
3.592	20.5122	-47.5229	1316.9588	-2.6734	1.095	-0.36611	-2.449	148.192	525.105	-0.56055	0.48438	-0.14063	NaN	NaN	NaN	NaN	NaN	NaN	NaN	NaN	NaN	NaN	NaN	NaN
3.594	24.5752	-17.375	1309.0645	-2.5788	1.0848	-0.3668	-23.8846	168.37	470.1022	-0.48691	0.47012	-0.12119	NaN	NaN	NaN	NaN	NaN	NaN	NaN	NaN	NaN	NaN	NaN	NaN
3.596	-2.979	1.552	1302.7182	-2.48	1.0757	-0.36475	-39.93658	108.039	443.6437	-0.41895	0.45683	-0.096973	NaN	NaN	NaN	NaN	NaN	NaN	NaN	NaN	NaN	NaN	NaN	NaN
3.598	-11.8928	12.6319	1272.9484	-2.3766	1.0664	-0.36699	-7.449	95.985	419.5119	-0.34707	0.44121	-0.08916	NaN	NaN	NaN	NaN	NaN	NaN	NaN	NaN	NaN	NaN	NaN	NaN
3.6	-11.8934	-2.505	1271.456	-2.2581	1.0564	-0.36357	-48.7994	111.86	370.7684	-0.25371	0.41767	-0.084668	NaN	NaN	NaN	NaN	NaN	NaN	NaN	NaN	NaN	NaN	NaN	NaN
3.602	-9.44	3.643	1254.389	-2.1358	1.0412	-0.36123	-41.597	97.665	349.957	-0.15039	0.39307	-0.058105	NaN	NaN	NaN	NaN	NaN	NaN	NaN	NaN	NaN	NaN	NaN	NaN
3.604	-3.746	12.134	1241.871	-2.0195	1.0258	-0.36133	-32.246	154.351	284.5595	-0.066211	0.35723	-0.034277	NaN	NaN	NaN	NaN	NaN	NaN	NaN	NaN	NaN	NaN	NaN	NaN
3.606	-30.6393	1.252	1241.481	-1.9097	1.0132	-0.354	-58.371	165.461	237.242	0.011524	0.32246	-0.010449	NaN	NaN	NaN	NaN	NaN	NaN	NaN	NaN	NaN	NaN	NaN	NaN
3.608	-3.86	-1.8852	1231.443	-1.8254	1.0051	-0.35098	14.894	124.961	246.536	0.077149	0.27442	0.022363	NaN	NaN	NaN	NaN	NaN	NaN	NaN	NaN	NaN	NaN	NaN	NaN
3.61	-5.442	-16.2677	1238.0321	-1.761	0.99844	-0.34141	-25.5431	154.111	208.298	0.12812	0.22656	0.05459	NaN	NaN	NaN	NaN	NaN	NaN	NaN	NaN	NaN	NaN	NaN	NaN
3.612	-9.3608	-19.5302	1220.3112	-1.7129	0.99101	-0.3332	-42.6967	98.4433	197.763066	0.17188	0.17432	0.078125	NaN	NaN	NaN	NaN	NaN	NaN	NaN	NaN	NaN	NaN	NaN	NaN
3.614	-21.82866	-29.3921	1215.2829	-1.6859	0.97539	-0.33066	-10.414	91.279	167.5168	0.21006	0.12813	0.10527	NaN	NaN	NaN	NaN	NaN	NaN	NaN	NaN	NaN	NaN	NaN	NaN
3.616	-11.61	-19.782	1223.76404	-1.6719	0.95996	-0.32227	-32.3729	104.676	126.865	0.23926	0.078809	0.12822	NaN	NaN	NaN	NaN	NaN	NaN	NaN	NaN	NaN	NaN	NaN	NaN
3.618	-12.5713	-1.323	1212.4395	-1.6514	0.94395	-0.31231	2.865	48.864	105.144	0.26074	0.031934	0.15127	NaN	NaN	NaN	NaN	NaN	NaN	NaN	NaN	NaN	NaN	NaN	NaN
3.62	-26.7025	15.9331	1199.7542	-1.6348	0.9207	-0.29961	-14.754	69.7553	93.4758	0.28144	-0.0060545	0.17217	NaN	NaN	NaN	NaN	NaN	NaN	NaN	NaN	NaN	NaN	NaN	NaN
3.622	-37.0133	23.0487	1179.7435	-1.6035	0.90742	-0.28789	-28.0646	81.49258	85.1194	0.29492	-0.04248	0.19043	NaN	NaN	NaN	NaN	NaN	NaN	NaN	NaN	NaN	NaN	NaN	NaN
3.624	-31.7925	21.2026	1166.39931	-1.5677	0.8877	-0.27929	18.221	49.66422	105.7079	0.29707	-0.081152	0.20322	NaN	NaN	NaN	NaN	NaN	NaN	NaN	NaN	NaN	NaN	NaN	NaN
3.626	-6.643	21.8482	1168.977	-1.5234	0.86523	-0.27295	-21.477	100.134	100.998	0.29844	-0.11416	0.21797	NaN	NaN	NaN	NaN	NaN	NaN	NaN	NaN	NaN	NaN	NaN	NaN
3.628	-23.6508	31.149	1152.5018	-1.47	0.83545	-0.26514	-40.527	48.3813	97.0131	0.29218	-0.14111	0.23203	NaN	NaN	NaN	NaN	NaN	NaN	NaN	NaN	NaN	NaN	NaN	NaN
3.63	-23.8679	47.4976	1137.921	-1.4217	0.80478	-0.25537	-0.930999999999997	20.9857	105.0557	0.27441	-0.16152	0.24834	NaN	NaN	NaN	NaN	NaN	NaN	NaN	NaN	NaN	NaN	NaN	NaN
3.632	-4.183	51.0495	1104.8125	-1.3717	0.77041	-0.24561	-16.888	51.8591	58.815	0.25977	-0.18018	0.25781	NaN	NaN	NaN	NaN	NaN	NaN	NaN	NaN	NaN	NaN	NaN	NaN
3.634	5.074	57.0702	1073.884	-1.3278	0.73233	-0.23135	14.52	-15.2407	61.4646	0.23946	-0.19727	0.26885	NaN	NaN	NaN	NaN	NaN	NaN	NaN	NaN	NaN	NaN	NaN	NaN
3.636	-10.595	54.145	1061.02	-1.2871	0.69336	-0.22021	-4.568	32.7	31.9239	0.21895	-0.20928	0.27705	NaN	NaN	NaN	NaN	NaN	NaN	NaN	NaN	NaN	NaN	NaN	NaN
3.638	-11.347	60.729	1064.598	-1.2501	0.65303	-0.20684	-47.406	40.7235	24.1109	0.19629	-0.21866	0.28643	NaN	NaN	NaN	NaN	NaN	NaN	NaN	NaN	NaN	NaN	NaN	NaN
3.64	33.93586	61.3377	1064.2665	-1.2124	0.60684	-0.19522	10.821	9.5058	41.483	0.16651	-0.22793	0.29141	NaN	NaN	NaN	NaN	NaN	NaN	NaN	NaN	NaN	NaN	NaN	NaN
3.642	5.3088	69.29	1050.7132	-1.1827	0.56777	-0.18467	-18.254	69.496	17.32	0.13916	-0.22998	0.29395	NaN	NaN	NaN	NaN	NaN	NaN	NaN	NaN	NaN	NaN	NaN	NaN
3.644	2.3487	59.4174	1050.565	-1.1537	0.52793	-0.18047	1.956	28.053	38.872	0.11484	-0.23057	0.29385	NaN	NaN	NaN	NaN	NaN	NaN	NaN	NaN	NaN	NaN	NaN	NaN
3.646	-2.7137	51.7076	1047.107	-1.1265	0.4873	-0.17285	19.248	25.0629	46.5072	0.091894	-0.22617	0.29609	NaN	NaN	NaN	NaN	NaN	NaN	NaN	NaN	NaN	NaN	NaN	NaN
3.648	7.346	70.3188	1025.395	-1.1083	0.45224	-0.16533	-26.6985	48.727	20.315	0.075488	-0.22032	0.29727	NaN	NaN	NaN	NaN	NaN	NaN	NaN	NaN	NaN	NaN	NaN	NaN
3.65	-2.4223	86.1263	992.1561	-1.0898	0.4167	-0.16133	-18.95142	-21.6722	26.3287	0.060547	-0.20439	0.2961	NaN	NaN	NaN	NaN	NaN	NaN	NaN	NaN	NaN	NaN	NaN	NaN
3.652	-7.9087	93.5601	955.5814	-1.0758	0.3878	-0.16289	-36.1517	15.79	8.3853	0.046387	-0.19141	0.29395	NaN	NaN	NaN	NaN	NaN	NaN	NaN	NaN	NaN	NaN	NaN	NaN
3.654	19.2477	92.1717	940.05	-1.0628	0.35889	-0.16426	-36.8309	15.583	10.777	0.044336	-0.17744	0.29072	NaN	NaN	NaN	NaN	NaN	NaN	NaN	NaN	NaN	NaN	NaN	NaN
3.656	12.9206	104.218	918.234	-1.0464	0.33984	-0.16553	-2.192	-26.1639	16.3877	0.040429	-0.1708	0.28261	NaN	NaN	NaN	NaN	NaN	NaN	NaN	NaN	NaN	NaN	NaN	NaN
3.658	25.5696	105.7	900.4557	-1.0355	0.31553	-0.16855	-39.3113	35.228	-5.836	0.038477	-0.16181	0.27715	NaN	NaN	NaN	NaN	NaN	NaN	NaN	NaN	NaN	NaN	NaN	NaN
3.66	18.0528	99.484	881.2841	-1.0177	0.29532	-0.16953	-34.008	11.969	2.425	0.044336	-0.15781	0.26641	NaN	NaN	NaN	NaN	NaN	NaN	NaN	NaN	NaN	NaN	NaN	NaN
3.662	37.015	110.381	869.6827	-1.0045	0.27891	-0.17227	7.475	-6.0414	18.9127	0.055176	-0.1499	0.25879	NaN	NaN	NaN	NaN	NaN	NaN	NaN	NaN	NaN	NaN	NaN	NaN
3.664	13.9125	118.13296	853.9963	-0.99199	0.26631	-0.17363	-27.7085	29.072	15.0727	0.06084	-0.14541	0.25088	NaN	NaN	NaN	NaN	NaN	NaN	NaN	NaN	NaN	NaN	NaN	NaN
3.666	9.00764	128.556	826.024	-0.97266	0.25293	-0.17578	2.972	-36.096	19.6515	0.072168	-0.14101	0.24492	NaN	NaN	NaN	NaN	NaN	NaN	NaN	NaN	NaN	NaN	NaN	NaN
3.668	4.9262	133.27	818.5021	-0.95566	0.24453	-0.18223	-3.877	3.9704	-11.6133	0.078418	-0.13633	0.24023	NaN	NaN	NaN	NaN	NaN	NaN	NaN	NaN	NaN	NaN	NaN	NaN
3.67	7.2521	144.423	792.879	-0.93945	0.24033	-0.18945	-14.0412	16.6794	-28.758	0.076465	-0.13701	0.2334	NaN	NaN	NaN	NaN	NaN	NaN	NaN	NaN	NaN	NaN	NaN	NaN
3.672	14.9055	127.657	769.514	-0.91406	0.23682	-0.19258	4.967	-4.5692	8.2905	0.068848	-0.13428	0.23242	NaN	NaN	NaN	NaN	NaN	NaN	NaN	NaN	NaN	NaN	NaN	NaN
3.674	-8.4617	113.7271	721.498	-0.89229	0.23428	-0.19541	-43.142	63.428	-3.6476	0.057519	-0.12842	0.22803	NaN	NaN	NaN	NaN	NaN	NaN	NaN	NaN	NaN	NaN	NaN	NaN
3.676	3.3656	112.273	706.907	-0.87451	0.23682	-0.20117	-20.7594	28.89448	8.27206	0.038671	-0.12198	0.2295	NaN	NaN	NaN	NaN	NaN	NaN	NaN	NaN	NaN	NaN	NaN	NaN
3.678	28.209	120.604	691.629	-0.85899	0.2373	-0.20859	15.3834	18.1006	12.9647	0.022264	-0.11104	0.22988	NaN	NaN	NaN	NaN	NaN	NaN	NaN	NaN	NaN	NaN	NaN	NaN
3.68	31.772	116.81	675.08667	-0.84043	0.24356	-0.20947	-10.532	57.074	-9.108	0.0077137	-0.095606	0.22383	NaN	NaN	NaN	NaN	NaN	NaN	NaN	NaN	NaN	NaN	NaN	NaN
3.682	32.9221	101.236	674.6305	-0.82637	0.24863	-0.22119	13.785	-7.6175	22.2518	-0.0019531	-0.07666	0.22363	NaN	NaN	NaN	NaN	NaN	NaN	NaN	NaN	NaN	NaN	NaN	NaN
3.684	42.104	103.539	651.794	-0.80527	0.25703	-0.22734	0.227	23.494	9.3336	-0.0075192	-0.057131	0.21875	NaN	NaN	NaN	NaN	NaN	NaN	NaN	NaN	NaN	NaN	NaN	NaN
3.686	50.316	115.87888	624.733	-0.77832	0.26367	-0.229	-25.7872	35.3379	-0.2547	-0.011329	-0.037504	0.21367	NaN	NaN	NaN	NaN	NaN	NaN	NaN	NaN	NaN	NaN	NaN	NaN
3.688	27.7135	130.6135	602.6265	-0.75596	0.27197	-0.23526	21.8833	-14.0309	13.4687	-0.010546	-0.02188	0.2086	NaN	NaN	NaN	NaN	NaN	NaN	NaN	NaN	NaN	NaN	NaN	NaN
3.69	20.0646	127.7655	580.8728	-0.72686	0.28135	-0.24483	-10.955	15.9504	2.1095	-0.007228	-0.00039387	0.2004	NaN	NaN	NaN	NaN	NaN	NaN	NaN	NaN	NaN	NaN	NaN	NaN
3.692	18.93281	115.8684	542.579	-0.68935	0.28682	-0.24834	-22.3751	1.266	21.9476	-0.0043945	0.013672	0.18945	NaN	NaN	NaN	NaN	NaN	NaN	NaN	NaN	NaN	NaN	NaN	NaN
3.694	24.6824	121.6559	502.196	-0.64755	0.29179	-0.25078	7.935	5.7125	42.65843	-0.0042979	0.032622	0.18662	NaN	NaN	NaN	NaN	NaN	NaN	NaN	NaN	NaN	NaN	NaN	NaN
3.696	13.5986	124.6841	460.623	-0.61084	0.29736	-0.25488	-21.5489	59.4886	13.151	-0.0017598	0.042002	0.1832	NaN	NaN	NaN	NaN	NaN	NaN	NaN	NaN	NaN	NaN	NaN	NaN
3.698	23.1065	119.0563	450.0822	-0.56728	0.29073	-0.25137	-9.345	-9.7439	26.577	-0.0068444	0.054898	0.17929	NaN	NaN	NaN	NaN	NaN	NaN	NaN	NaN	NaN	NaN	NaN	NaN
3.7	34.893	106.4187	443.39004	-0.52129	0.28779	-0.25127	-29.604	-1.5494	16.6606	-0.010656	0.068176	0.17305	NaN	NaN	NaN	NaN	NaN	NaN	NaN	NaN	NaN	NaN	NaN	NaN
3.702	33.752	125.523	415.85243	-0.48614	0.27568	-0.24971	-42.7331	17.9987	1.97719	-0.020508	0.086426	0.16943	NaN	NaN	NaN	NaN	NaN	NaN	NaN	NaN	NaN	NaN	NaN	NaN
3.704	39.81	127.1239	393.36035	-0.44629	0.2581	-0.24004	18.048	-12.6906	10.1504	-0.029082	0.10592	0.16037	NaN	NaN	NaN	NaN	NaN	NaN	NaN	NaN	NaN	NaN	NaN	NaN
3.706	40.158	121.2452	352.877	-0.40137	0.23828	-0.24023	-16.1381	55.892	9.302	-0.043014	0.12131	0.15666	NaN	NaN	NaN	NaN	NaN	NaN	NaN	NaN	NaN	NaN	NaN	NaN
3.708	42.659	122.944	334.991	-0.35176	0.21856	-0.23496	-26.6675	45.099	18.9684	-0.059019	0.14627	0.14808	NaN	NaN	NaN	NaN	NaN	NaN	NaN	NaN	NaN	NaN	NaN	NaN
3.71	14.94958	120.5072	308.941	-0.30449	0.19385	-0.22451	-15.935	18.643	20.9629	-0.073668	0.17472	0.13851	NaN	NaN	NaN	NaN	NaN	NaN	NaN	NaN	NaN	NaN	NaN	NaN
3.712	4.5208	108.2611	291.2656	-0.25605	0.16611	-0.21748	-22.78749	63.4697	0.134	-0.092285	0.19775	0.12744	NaN	NaN	NaN	NaN	NaN	NaN	NaN	NaN	NaN	NaN	NaN	NaN
3.714	1.401987	109.59	279.5938	-0.20839	0.13281	-0.20674	-16.291	-16.7985	35.3919	-0.11691	0.23234	0.11451	NaN	NaN	NaN	NaN	NaN	NaN	NaN	NaN	NaN	NaN	NaN	NaN
3.716	5.9972	115.762	251.9399	-0.16357	0.10205	-0.19434	-18.8158	-23.2783	58.628	-0.14263	0.26135	0.10076	NaN	NaN	NaN	NaN	NaN	NaN	NaN	NaN	NaN	NaN	NaN	NaN
3.718	4.55311	108.975	238.1644	-0.11963	0.072757	-0.18428	-26.6424	-30.3564	67.886	-0.17566	0.28761	0.084519	NaN	NaN	NaN	NaN	NaN	NaN	NaN	NaN	NaN	NaN	NaN	NaN
3.72	-8.2373	87.9977	216.1012	-0.080574	0.041608	-0.17197	34.9816	-71.8098	70.5351	-0.2184	0.30454	0.063576	NaN	NaN	NaN	NaN	NaN	NaN	NaN	NaN	NaN	NaN	NaN	NaN
3.722	2.799	77.6818	201.3882	-0.047374	0.011922	-0.16143	-3.5959	10.916	43.2844	-0.26563	0.31494	0.040039	NaN	NaN	NaN	NaN	NaN	NaN	NaN	NaN	NaN	NaN	NaN	NaN
3.724	5.8436	85.5981	181.7311	-0.010847	-0.01474	-0.14737	-15.9341	-19.3306	137.3472	-0.31582	0.32231	0.0078803	NaN	NaN	NaN	NaN	NaN	NaN	NaN	NaN	NaN	NaN	NaN	NaN
3.726	18.5698	87.3863	161.6455	0.017578	-0.040039	-0.13721	-8.942	-49.018	258.149	-0.37257	0.32961	-0.023934	NaN	NaN	NaN	NaN	NaN	NaN	NaN	NaN	NaN	NaN	NaN	NaN
3.728	10.4423	78.2725	134.371	0.047377	-0.064071	-0.12284	-41.306	10.0789	402.482	-0.45545	0.33336	-0.063123	NaN	NaN	NaN	NaN	NaN	NaN	NaN	NaN	NaN	NaN	NaN	NaN
3.73	18.139	61.8864	126.104	0.074439	-0.092793	-0.12333	14.108	-25.5513	583.024	-0.57319	0.31992	-0.10985	NaN	NaN	NaN	NaN	NaN	NaN	NaN	NaN	NaN	NaN	NaN	NaN
3.732	15.2413	67.3391	105.5892	0.101	-0.11819	-0.11317	36.922	-25.3114	702.542	-0.73438	0.2832	-0.15674	NaN	NaN	NaN	NaN	NaN	NaN	NaN	NaN	NaN	NaN	NaN	NaN
3.734	-16.3462	78.1299	101.9464	0.12424	-0.14474	-0.10048	55.8349	-43.51	832.614	-0.95162	0.2372	-0.20003	NaN	NaN	NaN	NaN	NaN	NaN	NaN	NaN	NaN	NaN	NaN	NaN
3.736	-7.386	74.3829	112.3846	0.14502	-0.16797	-0.092773	105.8874	-89.861	939.66402	-1.2066	0.19492	-0.23345	NaN	NaN	NaN	NaN	NaN	NaN	NaN	NaN	NaN	NaN	NaN	NaN
3.738	-12.1979	65.814	110.4383	0.15954	-0.19575	-0.082925	48.7	-2.41699999999999	1005.9826	-1.485	0.16858	-0.26166	NaN	NaN	NaN	NaN	NaN	NaN	NaN	NaN	NaN	NaN	NaN	NaN
3.74	-2.6858	64.62	97.7638	0.17066	-0.21712	-0.074257	4.748	-6.16	1097.558	-1.7554	0.18972	-0.2638	NaN	NaN	NaN	NaN	NaN	NaN	NaN	NaN	NaN	NaN	NaN	NaN
3.742	1.961	52.182	77.6781	0.18161	-0.23431	-0.064872	15.6546	-33.022	1131.237	-2.0366	0.2251	-0.24854	NaN	NaN	NaN	NaN	NaN	NaN	NaN	NaN	NaN	NaN	NaN	NaN
3.744	15.3771	39.7989	70.6134	0.18562	-0.24733	-0.05804	70.153	-14.655	1117.831	-2.2387	0.31798	-0.26561	NaN	NaN	NaN	NaN	NaN	NaN	NaN	NaN	NaN	NaN	NaN	NaN
3.746	13.1623	34.38073	46.769	0.18359	-0.2583	-0.052246	73.87	-121.053	1113.538	-2.3081	0.43338	-0.29957	NaN	NaN	NaN	NaN	NaN	NaN	NaN	NaN	NaN	NaN	NaN	NaN
3.748	-2.344	50.0193	31.674	0.18807	-0.267	-0.044172	74.4745	-140.204	1083.796	-2.2635	0.52998	-0.30147	NaN	NaN	NaN	NaN	NaN	NaN	NaN	NaN	NaN	NaN	NaN	NaN
3.75	1.747	33.3164	38.6263	0.18904	-0.27691	-0.035216	51.49262	-139.6652	1091.129	-2.1654	0.60076	-0.28307	NaN	NaN	NaN	NaN	NaN	NaN	NaN	NaN	NaN	NaN	NaN	NaN
3.752	6.7745	28.698	51.8357	0.18006	-0.28022	-0.029264	87.699	-175.38	1053.164	-2.041	0.65234	-0.26025	NaN	NaN	NaN	NaN	NaN	NaN	NaN	NaN	NaN	NaN	NaN	NaN
3.754	19.9045	20.013	51.5286	0.17194	-0.28424	-0.022052	67.054	-102.584	986.477	-1.8927	0.6599	-0.21672	NaN	NaN	NaN	NaN	NaN	NaN	NaN	NaN	NaN	NaN	NaN	NaN
3.756	-4.0895	20.9828	52.5101	0.15918	-0.28564	-0.020996	59.332	-88.237	947.3205	-1.7264	0.64308	-0.18702	NaN	NaN	NaN	NaN	NaN	NaN	NaN	NaN	NaN	NaN	NaN	NaN
3.758	-15.582	17.89304	50.363	0.14012	-0.28335	-0.014394	73.598	-34.033	928.4771	-1.5539	0.61414	-0.16534	NaN	NaN	NaN	NaN	NaN	NaN	NaN	NaN	NaN	NaN	NaN	NaN
3.76	-15.8605	24.6374	35.8788	0.12404	-0.27898	-0.0078588	31.6922	42.228	920.813	-1.3936	0.58171	-0.13748	NaN	NaN	NaN	NaN	NaN	NaN	NaN	NaN	NaN	NaN	NaN	NaN
3.762	-6.06	33.692	23.3537	0.10732	-0.27304	-0.0055764	17.97914	17.899	935.3405	-1.2632	0.55518	-0.11621	NaN	NaN	NaN	NaN	NaN	NaN	NaN	NaN	NaN	NaN	NaN	NaN
3.764	-25.6174	31.846	-1.064	0.08743	-0.271	-0.0056904	-33.59327	20.503	908.954	-1.1725	0.56149	-0.096809	NaN	NaN	NaN	NaN	NaN	NaN	NaN	NaN	NaN	NaN	NaN	NaN
3.766	-19.811	14.2125	0.122000000000003	0.068848	-0.26074	-0.0078125	-49.905	7.067	865.559	-1.1098	0.57947	-0.076193	NaN	NaN	NaN	NaN	NaN	NaN	NaN	NaN	NaN	NaN	NaN	NaN
3.768	0.0269999999999975	14.4355	15.382	0.060998	-0.24905	-0.0082391	3.391	-63.2959	835.538	-1.0579	0.60567	-0.060211	NaN	NaN	NaN	NaN	NaN	NaN	NaN	NaN	NaN	NaN	NaN	NaN
3.77	-10.6163	18.4752	7.963	0.050883	-0.23458	-0.010382	-23.115	-57.241	799.916	-1.0273	0.64735	-0.047452	NaN	NaN	NaN	NaN	NaN	NaN	NaN	NaN	NaN	NaN	NaN	NaN
3.772	-9.2866	28.3819	16.0869	0.047441	-0.21477	-0.009843	-13.637	-106.6397	848.5847	-0.99609	0.69922	-0.052734	NaN	NaN	NaN	NaN	NaN	NaN	NaN	NaN	NaN	NaN	NaN	NaN
3.774	-12.6515	19.276	11.7562	0.046485	-0.20039	-0.015489	22.768	-131.0473	885.681	-0.97063	0.75571	-0.064051	NaN	NaN	NaN	NaN	NaN	NaN	NaN	NaN	NaN	NaN	NaN	NaN
3.776	-11.371	12.913	15.9535	0.049316	-0.18311	-0.02002	-22.3537	-133.777	906.0466	-0.94456	0.81597	-0.084918	NaN	NaN	NaN	NaN	NaN	NaN	NaN	NaN	NaN	NaN	NaN	NaN
3.778	-18.259	12.1713	8.91749	0.050631	-0.17495	-0.02632	-33.711	-209.814	933.735	-0.91956	0.86129	-0.11853	NaN	NaN	NaN	NaN	NaN	NaN	NaN	NaN	NaN	NaN	NaN	NaN
3.78	-20.476	10.65747	2.2338	0.054136	-0.16315	-0.025893	-25.9748	-243.143	933.163	-0.908	0.89003	-0.15204	NaN	NaN	NaN	NaN	NaN	NaN	NaN	NaN	NaN	NaN	NaN	NaN
3.782	-9.289	4.083528	3.312	0.056026	-0.15615	-0.032997	-90.0926	-234.386	949.102	-0.91992	0.89648	-0.19141	NaN	NaN	NaN	NaN	NaN	NaN	NaN	NaN	NaN	NaN	NaN	NaN
3.784	-18.0581	10.9253	10.767	0.059379	-0.14298	-0.039106	-76.755	-219.71	988.45	-0.95079	0.88711	-0.23487	NaN	NaN	NaN	NaN	NaN	NaN	NaN	NaN	NaN	NaN	NaN	NaN
3.786	-14.326	13.9931	6.9292	0.063477	-0.13672	-0.041504	-123.5763	-145.507	1002.23	-1.0027	0.86259	-0.27052	NaN	NaN	NaN	NaN	NaN	NaN	NaN	NaN	NaN	NaN	NaN	NaN
3.788	-21.927	5.9701	-6.1902	0.07148	-0.12933	-0.049145	-141.648	-141.626	1026.36	-1.0663	0.83798	-0.30137	NaN	NaN	NaN	NaN	NaN	NaN	NaN	NaN	NaN	NaN	NaN	NaN
3.79	-5.793	-4.4479	-7.0048	0.07321	-0.11924	-0.051752	-63.2423	-145.12	1045.908	-1.1397	0.83301	-0.33496	NaN	NaN	NaN	NaN	NaN	NaN	NaN	NaN	NaN	NaN	NaN	NaN
3.792	6.9352	-0.497800000000001	-1.2152	0.08183	-0.11203	-0.058594	-52.965	-99.667	1053.057	-1.2051	0.8457	-0.37012	NaN	NaN	NaN	NaN	NaN	NaN	NaN	NaN	NaN	NaN	NaN	NaN
3.794	-14.3611	6.9904	9.5028	0.087569	-0.10512	-0.063429	-39.5655	-99.3927	1094.93	-1.251	0.86611	-0.39873	NaN	NaN	NaN	NaN	NaN	NaN	NaN	NaN	NaN	NaN	NaN	NaN
3.796	-4.032	15.1624	-2.83583	0.094727	-0.094727	-0.068359	-26.182	-82.2148	1104.09	-1.2851	0.88213	-0.43623	NaN	NaN	NaN	NaN	NaN	NaN	NaN	NaN	NaN	NaN	NaN	NaN
3.798	5.2188	14.18315	-9.588325	0.10561	-0.085001	-0.075413	-29.336	-53.7864	1069.372	-1.3112	0.88799	-0.47021	NaN	NaN	NaN	NaN	NaN	NaN	NaN	NaN	NaN	NaN	NaN	NaN
3.8	12.624	17.912	-12.16149	0.11166	-0.073567	-0.081862	-36.533	-89.6922	1073.699	-1.3362	0.88565	-0.50186	NaN	NaN	NaN	NaN	NaN	NaN	NaN	NaN	NaN	NaN	NaN	NaN
3.802	-11.6927	23.2746	-8.6809	0.11709	-0.058746	-0.085354	-53.862	-67.099	1086.7758	-1.3647	0.87549	-0.52979	NaN	NaN	NaN	NaN	NaN	NaN	NaN	NaN	NaN	NaN	NaN	NaN
3.804	2.021	9.7244	3.497	0.12138	-0.049113	-0.087909	-42.678	-100.202	1160.03	-1.4159	0.84951	-0.52764	NaN	NaN	NaN	NaN	NaN	NaN	NaN	NaN	NaN	NaN	NaN	NaN
3.806	4.862	14.8592	-2.2656	0.12207	-0.038086	-0.097656	-34.9013	-134.6084	1200.615	-1.4849	0.8207	-0.521	NaN	NaN	NaN	NaN	NaN	NaN	NaN	NaN	NaN	NaN	NaN	NaN
3.808	-2.621	16.0503	-6.7816	0.11875	-0.028719	-0.10351	-70.648	-123.3746	1208.2446	-1.5967	0.79258	-0.50069	NaN	NaN	NaN	NaN	NaN	NaN	NaN	NaN	NaN	NaN	NaN	NaN
3.81	-25.3064	8.3483	9.0591	0.117	-0.018277	-0.1117	-95.166	-155.84	1219.461	-1.7396	0.78301	-0.47012	NaN	NaN	NaN	NaN	NaN	NaN	NaN	NaN	NaN	NaN	NaN	NaN
3.812	-5.647	0.0608000000000002	6.4527	0.11855	-0.0046012	-0.12266	-67.669	-155.2609	1206.482	-1.9063	0.79688	-0.44629	NaN	NaN	NaN	NaN	NaN	NaN	NaN	NaN	NaN	NaN	NaN	NaN
3.814	0.548999999999999	4.3635	8.88311	0.11807	0.0055644	-0.12841	-62.46	-135.7262	1204.126	-2.0835	0.83877	-0.42725	NaN	NaN	NaN	NaN	NaN	NaN	NaN	NaN	NaN	NaN	NaN	NaN
3.816	-1.601	26.0176	-21.948	0.12158	0.011719	-0.13965	-28.682	-154.111	1202.557	-2.2483	0.8997	-0.41689	NaN	NaN	NaN	NaN	NaN	NaN	NaN	NaN	NaN	NaN	NaN	NaN
3.818	-22.9369	23.8052	-9.9611	0.12041	0.02637	-0.14951	-32.428	-127.1636	1194.1096	-2.3968	0.97314	-0.41768	NaN	NaN	NaN	NaN	NaN	NaN	NaN	NaN	NaN	NaN	NaN	NaN
3.82	-9.994	6.3968	-4.696	0.11904	0.038089	-0.16035	-51.9226	-121.286	1197.63	-2.5081	1.0481	-0.42334	NaN	NaN	NaN	NaN	NaN	NaN	NaN	NaN	NaN	NaN	NaN	NaN
3.822	-0.109999999999999	5.9966	25.465	0.10693	0.048244	-0.16739	-26.418	-120.649	1219.358	-2.584	1.1172	-0.42822	NaN	NaN	NaN	NaN	NaN	NaN	NaN	NaN	NaN	NaN	NaN	NaN
3.824	4.933	9.9817	37.936	0.08154	0.059277	-0.17832	-94.5761	-69.418	1222.98815	-2.6055	1.1683	-0.42744	NaN	NaN	NaN	NaN	NaN	NaN	NaN	NaN	NaN	NaN	NaN	NaN
3.826	-12.4134	-1.2841	58.19	0.041992	0.064453	-0.18652	-90.617	-67.245	1206.622	-2.5933	1.2028	-0.41592	NaN	NaN	NaN	NaN	NaN	NaN	NaN	NaN	NaN	NaN	NaN	NaN
3.828	-10.719	-2.7976	86.284	-0.014059	0.06709	-0.18408	-84.032	-26.345	1178.776	-2.5483	1.2275	-0.40889	NaN	NaN	NaN	NaN	NaN	NaN	NaN	NaN	NaN	NaN	NaN	NaN
3.83	-7.891	7.1096	111.5171	-0.087102	0.073242	-0.18506	-126.0626	12.41	1162.144	-2.4874	1.2415	-0.39414	NaN	NaN	NaN	NaN	NaN	NaN	NaN	NaN	NaN	NaN	NaN	NaN
3.832	2.068	14.7157	164.094173	-0.18319	0.068165	-0.1874	-103.155	1.182	1166.1	-2.416	1.252	-0.38135	NaN	NaN	NaN	NaN	NaN	NaN	NaN	NaN	NaN	NaN	NaN	NaN
3.834	-12.9883	1.703	212.959	-0.28388	0.07168	-0.18388	-95.511	2.432	1169.396	-2.3439	1.2538	-0.36924	NaN	NaN	NaN	NaN	NaN	NaN	NaN	NaN	NaN	NaN	NaN	NaN
3.836	-0.4069	-24.0419	231.072	-0.38818	0.078613	-0.18506	-109.7	-13.354	1189.835	-2.2734	1.252	-0.36338	NaN	NaN	NaN	NaN	NaN	NaN	NaN	NaN	NaN	NaN	NaN	NaN
3.838	8.24664	-53.9576	247.704	-0.49648	0.090918	-0.18486	-89.8091	-60.97	1212.136	-2.1902	1.2492	-0.35205	NaN	NaN	NaN	NaN	NaN	NaN	NaN	NaN	NaN	NaN	NaN	NaN
3.84	-8.4919	-83.0529	266.6223	-0.60176	0.10567	-0.1917	-81.319	-32.1229	1203.266	-2.0986	1.2447	-0.33887	NaN	NaN	NaN	NaN	NaN	NaN	NaN	NaN	NaN	NaN	NaN	NaN
3.842	-8.238	-99.9971	318.022	-0.70215	0.12598	-0.20615	-79.476	-30.203	1198.9077	-1.998	1.2393	-0.32324	NaN	NaN	NaN	NaN	NaN	NaN	NaN	NaN	NaN	NaN	NaN	NaN
3.844	-3.759	-81.866	366.334	-0.79639	0.16084	-0.21826	-68.135	-1.598	1203.301	-1.9061	1.2386	-0.31338	NaN	NaN	NaN	NaN	NaN	NaN	NaN	NaN	NaN	NaN	NaN	NaN
3.846	-5.23	-56.6491	376.765	-0.88428	0.19629	-0.23291	-83.3101	28.2694	1202.518	-1.821	1.2283	-0.30381	NaN	NaN	NaN	NaN	NaN	NaN	NaN	NaN	NaN	NaN	NaN	NaN
3.848	-3.639	-51.656	395.783	-0.96719	0.23222	-0.25752	-71.8618	-17.8962	1214.478	-1.7413	1.2048	-0.2917	NaN	NaN	NaN	NaN	NaN	NaN	NaN	NaN	NaN	NaN	NaN	NaN
3.85	21.9353	-57.45	434.958	-1.0535	0.26465	-0.27969	-78.188	-16.0949	1210.966	-1.6749	1.1739	-0.27452	NaN	NaN	NaN	NaN	NaN	NaN	NaN	NaN	NaN	NaN	NaN	NaN
3.852	28.8019	-34.948	501.45525	-1.1351	0.2916	-0.29805	-90.6484	-11.6441	1197.616	-1.6211	1.1299	-0.25879	NaN	NaN	NaN	NaN	NaN	NaN	NaN	NaN	NaN	NaN	NaN	NaN
3.854	20.636	9.655	563.36366	-1.2296	0.30303	-0.32509	-59.168	-9.02305	1202.835	-1.5788	1.097	-0.23467	NaN	NaN	NaN	NaN	NaN	NaN	NaN	NaN	NaN	NaN	NaN	NaN
3.856	5.43562	17.6962	644.979441	-1.3374	0.31592	-0.33545	-73.225	63.218	1180.454	-1.5473	1.0563	-0.22754	NaN	NaN	NaN	NaN	NaN	NaN	NaN	NaN	NaN	NaN	NaN	NaN
3.858	10.8716	27.8383	688.713186	-1.4617	0.32978	-0.35146	-70.544	76.486	1166.3391	-1.5141	1.016	-0.2127	NaN	NaN	NaN	NaN	NaN	NaN	NaN	NaN	NaN	NaN	NaN	NaN
3.86	32.5785	44.323	758.58513	-1.5893	0.34522	-0.36348	-63.0656	88.896	1173.911	-1.4813	0.97461	-0.19472	NaN	NaN	NaN	NaN	NaN	NaN	NaN	NaN	NaN	NaN	NaN	NaN
3.862	54.297	54.02	809.091	-1.7221	0.36553	-0.36973	-63.1023	114.469	1151.683	-1.4497	0.93604	-0.1792	NaN	NaN	NaN	NaN	NaN	NaN	NaN	NaN	NaN	NaN	NaN	NaN
3.864	21.0632	26.2068	872.59	-1.8523	0.40107	-0.36933	-14.699	85.41989	1145.304	-1.4185	0.89287	-0.1665	NaN	NaN	NaN	NaN	NaN	NaN	NaN	NaN	NaN	NaN	NaN	NaN
3.866	-10.6297	-1.106	937.9507	-1.9858	0.43994	-0.36572	-31.142	97.8277	1149.223	-1.3879	0.84961	-0.15234	NaN	NaN	NaN	NaN	NaN	NaN	NaN	NaN	NaN	NaN	NaN	NaN
3.868	-5.8594	-34.826	989.372	-2.1171	0.47236	-0.3669	-26.545	114.363	1122.108	-1.3539	0.80156	-0.1375	NaN	NaN	NaN	NaN	NaN	NaN	NaN	NaN	NaN	NaN	NaN	NaN
3.87	-33.5965	-51.4331	987.209	-2.2195	0.49883	-0.36582	-18.242	83.16	1124.76	-1.3171	0.75674	-0.12735	NaN	NaN	NaN	NaN	NaN	NaN	NaN	NaN	NaN	NaN	NaN	NaN
3.872	-9.0704	-65.1307	991.2281	-2.2934	0.52383	-0.36855	-56.54	111.241	1091.525	-1.2754	0.71484	-0.11865	NaN	NaN	NaN	NaN	NaN	NaN	NaN	NaN	NaN	NaN	NaN	NaN
3.874	14.056	-72.84	1000.248	-2.3201	0.5502	-0.38672	-58.9809	88.254	1078.994	-1.2433	0.67256	-0.104	NaN	NaN	NaN	NaN	NaN	NaN	NaN	NaN	NaN	NaN	NaN	NaN
3.876	-11.6531	-81.912	1019.59	-2.2769	0.57471	-0.41309	-31.282	98.606	1100.129	-1.2112	0.63447	-0.096289	NaN	NaN	NaN	NaN	NaN	NaN	NaN	NaN	NaN	NaN	NaN	NaN
3.878	-10.1343	-82.184	1068.6041	-2.1682	0.58379	-0.43545	-67.721	147.679	1074.0252	-1.1796	0.60049	-0.07832	NaN	NaN	NaN	NaN	NaN	NaN	NaN	NaN	NaN	NaN	NaN	NaN
3.88	-20.7226	-92.851	1091.793	-2.0441	0.58164	-0.43516	-48.988	119.428	1067.481	-1.1467	0.57734	-0.070313	NaN	NaN	NaN	NaN	NaN	NaN	NaN	NaN	NaN	NaN	NaN	NaN
3.882	21.317	-99.685	1135.247	-1.9289	0.58281	-0.45429	-52.908	128.743	1042.861	-1.1152	0.55762	-0.069336	NaN	NaN	NaN	NaN	NaN	NaN	NaN	NaN	NaN	NaN	NaN	NaN
3.884	28.1808	-77.672	1150.938	-1.8214	0.57275	-0.471	-80.1806	113.561	1003.536	-1.0881	0.53877	-0.06377	NaN	NaN	NaN	NaN	NaN	NaN	NaN	NaN	NaN	NaN	NaN	NaN
3.886	18.8472	-47.0919	1145.438	-1.7222	0.55322	-0.4834	-30.35	82.653	1003.5714	-1.0636	0.51943	-0.056836	NaN	NaN	NaN	NaN	NaN	NaN	NaN	NaN	NaN	NaN	NaN	NaN
3.888	0.858999999999998	-39.599	1129.9545	-1.6412	0.53574	-0.49316	-26.6977	134.328	962.821	-1.037	0.49912	-0.052149	NaN	NaN	NaN	NaN	NaN	NaN	NaN	NaN	NaN	NaN	NaN	NaN
3.89	6.8905	-30.484	1120.79	-1.562	0.52344	-0.4999	-26.0516	140.608	953.228	-1.0205	0.4795	-0.051074	NaN	NaN	NaN	NaN	NaN	NaN	NaN	NaN	NaN	NaN	NaN	NaN
3.892	2.20865	-55.993	1116.453	-1.4921	0.52617	-0.50342	-31.5242	168.792	950.392	-1.002	0.45508	-0.050293	NaN	NaN	NaN	NaN	NaN	NaN	NaN	NaN	NaN	NaN	NaN	NaN
3.894	-29.207	-89.622	1118.145	-1.4258	0.5418	-0.51036	-45.5032	213.388	897.126	-0.9914	0.43828	-0.046972	NaN	NaN	NaN	NaN	NaN	NaN	NaN	NaN	NaN	NaN	NaN	NaN
3.896	0.7581	-124.1798	1119.993	-1.3628	0.55762	-0.52344	-16.36	168.331	874.7714	-0.98008	0.42149	-0.04502	NaN	NaN	NaN	NaN	NaN	NaN	NaN	NaN	NaN	NaN	NaN	NaN
3.898	7.6866	-127.56914168	1159.324	-1.3159	0.56729	-0.52452	-29.875	185.016	852.035	-0.96914	0.41289	-0.044238	NaN	NaN	NaN	NaN	NaN	NaN	NaN	NaN	NaN	NaN	NaN	NaN
3.9	24.4176	-109.7279	1188.181	-1.282	0.58144	-0.52813	-36.6351	167.82946	837.139	-0.96386	0.39668	-0.042578	NaN	NaN	NaN	NaN	NaN	NaN	NaN	NaN	NaN	NaN	NaN	NaN
3.902	37.288	-102.424639	1207.6178	-1.2801	0.60449	-0.51367	-21.07814	122.853	854.7857	-0.95703	0.39063	-0.046387	NaN	NaN	NaN	NaN	NaN	NaN	NaN	NaN	NaN	NaN	NaN	NaN
3.904	41.634	-113.188	1228.7957	-1.3108	0.6251	-0.49795	-10.8427	158.7865	814.375	-0.95693	0.38291	-0.053418	NaN	NaN	NaN	NaN	NaN	NaN	NaN	NaN	NaN	NaN	NaN	NaN
3.906	60.284	-123.96	1248.8454	-1.3848	0.64844	-0.48438	-2.0261	152.4834	793.3602	-0.94639	0.37353	-0.065527	NaN	NaN	NaN	NaN	NaN	NaN	NaN	NaN	NaN	NaN	NaN	NaN
3.908	39.82	-137.469	1282.1952	-1.483	0.67324	-0.47364	33.7166	167.993	774.8656	-0.92451	0.36689	-0.065918	NaN	NaN	NaN	NaN	NaN	NaN	NaN	NaN	NaN	NaN	NaN	NaN
3.91	45.578	-130.03	1312.3515	-1.5956	0.68818	-0.46279	11.7805	204.665	731.83584	-0.89355	0.3666	-0.074511	NaN	NaN	NaN	NaN	NaN	NaN	NaN	NaN	NaN	NaN	NaN	NaN
3.912	28.60976	-122.834	1328.1001	-1.7085	0.70108	-0.45303	26.0403	153.7651	730.913	-0.86133	0.36914	-0.083984	NaN	NaN	NaN	NaN	NaN	NaN	NaN	NaN	NaN	NaN	NaN	NaN
3.914	45.527	-105.1027	1330.6038	-1.8171	0.71904	-0.45215	15.0268	167.37	717.8814	-0.8207	0.36426	-0.088672	NaN	NaN	NaN	NaN	NaN	NaN	NaN	NaN	NaN	NaN	NaN	NaN
3.916	33.7944	-92.1569	1316.4954	-1.9199	0.73047	-0.45313	20.084	149.062	676.694	-0.77656	0.35742	-0.096582	NaN	NaN	NaN	NaN	NaN	NaN	NaN	NaN	NaN	NaN	NaN	NaN
3.918	10.944	-89.986	1309.7811	-2.0235	0.74326	-0.46201	50.05	91.357	667.793	-0.73594	0.35118	-0.10048	NaN	NaN	NaN	NaN	NaN	NaN	NaN	NaN	NaN	NaN	NaN	NaN
3.92	29.3946	-80.184	1330.4802	-2.1245	0.75478	-0.46045	21.9971	138.713	616.1119	-0.69278	0.33926	-0.10674	NaN	NaN	NaN	NaN	NaN	NaN	NaN	NaN	NaN	NaN	NaN	NaN
3.922	34.435	-79.228	1345.0404	-2.2104	0.77354	-0.46397	-1.4	133.1409	567.0317	-0.65186	0.32471	-0.11182	NaN	NaN	NaN	NaN	NaN	NaN	NaN	NaN	NaN	NaN	NaN	NaN
3.924	70.572	-63.612	1331.7827	-2.2792	0.77861	-0.46552	-0.588999999999999	159.035	539.1903	-0.59746	0.31562	-0.11387	NaN	NaN	NaN	NaN	NaN	NaN	NaN	NaN	NaN	NaN	NaN	NaN
3.926	49.564	-55.0992	1318.975	-2.3242	0.77246	-0.48926	-6.0366	211.866	480.978	-0.53828	0.31192	-0.11894	NaN	NaN	NaN	NaN	NaN	NaN	NaN	NaN	NaN	NaN	NaN	NaN
3.928	61.283	-52.4007	1320.806	-2.3382	0.74014	-0.53545	20.00731	166.39	487.463	-0.47227	0.31231	-0.12207	NaN	NaN	NaN	NaN	NaN	NaN	NaN	NaN	NaN	NaN	NaN	NaN
3.93	62.74	-56.981	1333.457	-2.352	0.68398	-0.58262	6.1466	175.8123	460.8183	-0.40254	0.31269	-0.12578	NaN	NaN	NaN	NaN	NaN	NaN	NaN	NaN	NaN	NaN	NaN	NaN
3.932	41.5922	-41.374	1368.3871	-2.3711	0.62109	-0.64238	10.0953	158.214	424.5911	-0.33203	0.31152	-0.12061	NaN	NaN	NaN	NaN	NaN	NaN	NaN	NaN	NaN	NaN	NaN	NaN
3.934	50.0844	-46.3946	1372.84936	-2.4059	0.56309	-0.67334	15.632257	105.435	395.5509	-0.26035	0.30098	-0.1292	NaN	NaN	NaN	NaN	NaN	NaN	NaN	NaN	NaN	NaN	NaN	NaN
3.936	50.37802	-55.4963	1395.024	-2.439	0.53564	-0.68506	-2.629	159.142	332.338	-0.19512	0.28945	-0.13662	NaN	NaN	NaN	NaN	NaN	NaN	NaN	NaN	NaN	NaN	NaN	NaN
3.938	75.284	-53.959	1399.431	-2.4759	0.52432	-0.68916	-13.4311	139.886	296.4119	-0.13379	0.26484	-0.12998	NaN	NaN	NaN	NaN	NaN	NaN	NaN	NaN	NaN	NaN	NaN	NaN
3.94	26.0501	-50.903	1384.5289	-2.4862	0.52471	-0.69795	-6.697	128.617	280.9561	-0.083594	0.24121	-0.12617	NaN	NaN	NaN	NaN	NaN	NaN	NaN	NaN	NaN	NaN	NaN	NaN
3.942	22.5739	-53.128	1367.5393	-2.4612	0.52549	-0.7206	-20.9523	169.38	242.175	-0.041992	0.20703	-0.12109	NaN	NaN	NaN	NaN	NaN	NaN	NaN	NaN	NaN	NaN	NaN	NaN
3.944	31.38	-65.9346	1347.772	-2.4147	0.52031	-0.73965	-22.3242	110.34	245.8058	-0.0058594	0.18222	-0.11299	NaN	NaN	NaN	NaN	NaN	NaN	NaN	NaN	NaN	NaN	NaN	NaN
3.946	54.8356	-64.535	1336.506	-2.3452	0.51807	-0.75537	-38.6833	130.2109	231.5553	0.027539	0.15371	-0.10879	NaN	NaN	NaN	NaN	NaN	NaN	NaN	NaN	NaN	NaN	NaN	NaN
3.948	63.4845	-61.309	1326.861	-2.2604	0.51846	-0.75967	-39.703	119.4438	199.369	0.057617	0.12949	-0.1045	NaN	NaN	NaN	NaN	NaN	NaN	NaN	NaN	NaN	NaN	NaN	NaN
3.95	57.364	-64.929	1322.064	-2.1722	0.51787	-0.76396	-15.814	58.087	200.0496	0.090041	0.10498	-0.10088	NaN	NaN	NaN	NaN	NaN	NaN	NaN	NaN	NaN	NaN	NaN	NaN
3.952	64.363	-35.393	1314.499	-2.0804	0.52334	-0.77217	-42.621	101.5238	151.446	0.11865	0.083984	-0.09082	NaN	NaN	NaN	NaN	NaN	NaN	NaN	NaN	NaN	NaN	NaN	NaN
3.954	53.646	-2.3859	1290.4417	-1.9847	0.52588	-0.76592	-11.001	57.4034	138.3434	0.14765	0.055273	-0.095995	NaN	NaN	NaN	NaN	NaN	NaN	NaN	NaN	NaN	NaN	NaN	NaN
3.956	65.181	10.5283	1297.8313	-1.8926	0.51758	-0.76074	5.03	57.5095	144.36316	0.17373	0.029199	-0.087891	NaN	NaN	NaN	NaN	NaN	NaN	NaN	NaN	NaN	NaN	NaN	NaN
3.958	59.786	10.4417	1285.98151	-1.8058	0.50811	-0.74717	-18.2549	103.6198	108.628	0.18662	-0.00048824	-0.087891	NaN	NaN	NaN	NaN	NaN	NaN	NaN	NaN	NaN	NaN	NaN	NaN
3.96	65.1976	10.922	1293.6385	-1.7247	0.4999	-0.72881	3.296	48.869	101.5132	0.19912	-0.034668	-0.088379	NaN	NaN	NaN	NaN	NaN	NaN	NaN	NaN	NaN	NaN	NaN	NaN
3.962	45.0299	10.391	1260.0665	-1.6559	0.49209	-0.70849	12.782	88.6081	87.972	0.20361	-0.066406	-0.089355	NaN	NaN	NaN	NaN	NaN	NaN	NaN	NaN	NaN	NaN	NaN	NaN
3.964	41.9163	2.16	1251.8607	-1.6094	0.49746	-0.68633	4.251	65.6166	81.724	0.19873	-0.099999	-0.085352	NaN	NaN	NaN	NaN	NaN	NaN	NaN	NaN	NaN	NaN	NaN	NaN
3.966	54.548	-9.6209	1235.541	-1.5718	0.50342	-0.66553	16.229	6.2468	93.285	0.1874	-0.13223	-0.082715	NaN	NaN	NaN	NaN	NaN	NaN	NaN	NaN	NaN	NaN	NaN	NaN
3.968	36.446	-14.0197	1197.6729	-1.5508	0.51446	-0.65117	17.1861	68.565	73.0113	0.17139	-0.16035	-0.075683	NaN	NaN	NaN	NaN	NaN	NaN	NaN	NaN	NaN	NaN	NaN	NaN
3.97	54.525	-14.3493	1173.984	-1.5382	0.52793	-0.63115	16.6854	30.6034	60.205	0.14356	-0.18819	-0.069922	NaN	NaN	NaN	NaN	NaN	NaN	NaN	NaN	NaN	NaN	NaN	NaN
3.972	50.462	-7.5466	1163.321	-1.5335	0.54316	-0.61514	11.9067	39.313	58.1456	0.12012	-0.21387	-0.065918	NaN	NaN	NaN	NaN	NaN	NaN	NaN	NaN	NaN	NaN	NaN	NaN
3.974	82.265	-5.018	1186.3605	-1.5407	0.55469	-0.60352	-20.8035	69.338	42.551	0.088183	-0.22881	-0.060937	NaN	NaN	NaN	NaN	NaN	NaN	NaN	NaN	NaN	NaN	NaN	NaN
3.976	76.872	8.806	1197.5531	-1.5449	0.56543	-0.58594	-11.556	13.521	48.6739	0.058887	-0.23847	-0.058203	NaN	NaN	NaN	NaN	NaN	NaN	NaN	NaN	NaN	NaN	NaN	NaN
3.978	71.449	18.774	1186.356	-1.5447	0.57207	-0.56718	2.207	52.0543	27.408	0.036621	-0.23575	-0.06211	NaN	NaN	NaN	NaN	NaN	NaN	NaN	NaN	NaN	NaN	NaN	NaN
3.98	48.157	26.3329	1160.819	-1.5394	0.58086	-0.55312	15.4624	32.021	29.307	0.015234	-0.22813	-0.064844	NaN	NaN	NaN	NaN	NaN	NaN	NaN	NaN	NaN	NaN	NaN	NaN
3.982	57.648	46.8978	1134.9992	-1.525	0.58438	-0.53867	16.888	-24.7024	39.3299	-0.0058594	-0.21777	-0.062988	NaN	NaN	NaN	NaN	NaN	NaN	NaN	NaN	NaN	NaN	NaN	NaN
3.984	62.639	51.954	1116.931	-1.5035	0.58398	-0.52383	-15.348	35.884	18.9502	-0.021484	-0.20654	-0.067676	NaN	NaN	NaN	NaN	NaN	NaN	NaN	NaN	NaN	NaN	NaN	NaN
3.986	31.4972	77.64	1117.2287	-1.4722	0.58252	-0.50781	-0.3126	3.4888	8.2685	-0.038965	-0.19815	-0.069238	NaN	NaN	NaN	NaN	NaN	NaN	NaN	NaN	NaN	NaN	NaN	NaN
3.988	36.0222	63.202	1105.0517	-1.4359	0.57764	-0.49033	-23.9617	4.8423	2.90847	-0.045606	-0.19072	-0.071972	NaN	NaN	NaN	NaN	NaN	NaN	NaN	NaN	NaN	NaN	NaN	NaN
3.99	40.33645	54.098	1083.6806	-1.4012	0.57149	-0.47461	-34.7282	43.338	-0.0820000000000007	-0.058984	-0.18535	-0.076562	NaN	NaN	NaN	NaN	NaN	NaN	NaN	NaN	NaN	NaN	NaN	NaN
3.992	38.8237	56.5251	1054.4791	-1.366	0.55898	-0.45508	-21.2624	-13.4808	23.216	-0.067383	-0.17871	-0.080078	NaN	NaN	NaN	NaN	NaN	NaN	NaN	NaN	NaN	NaN	NaN	NaN
3.994	11.0946	57.5141	1017.3733	-1.331	0.55195	-0.43769	-28.0126	43.694	22.5581	-0.073242	-0.17158	-0.078613	NaN	NaN	NaN	NaN	NaN	NaN	NaN	NaN	NaN	NaN	NaN	NaN
3.996	35.923	62.163	987.519	-1.3022	0.54199	-0.41455	-38.886	34.7167	17.161	-0.074609	-0.17061	-0.080371	NaN	NaN	NaN	NaN	NaN	NaN	NaN	NaN	NaN	NaN	NaN	NaN
[truncated: 28,002 more rows]
