# Supplementary material for: Reliability and Validity of Running Cadence and Stance Time Derived from Instrumented Wireless Earbuds
Source: Sensors (Basel). 2021 Nov 30;21(23):7995. doi: 10.3390/s21237995 (PMC8659722; doi:10.3390/s21237995)
Supplement: Supplementary file 1 [file sensors-21-07995-s001.zip › Data_P09_speeds_2.csv]

time	S7kmh_force_plate_1	S7kmh_force_plate_2	S7kmh_force_plate_3	S7kmh_earbuds_1	S7kmh_earbuds_2	S7kmh_earbuds_3	S10kmh_force_plate_1	S10kmh_force_plate_2	S10kmh_force_plate_3	S10kmh_earbuds_1	S10kmh_earbuds_2	S10kmh_earbuds_3	S13kmh_force_plate_1	S13kmh_force_plate_2	S13kmh_force_plate_3	S13kmh_earbuds_1	S13kmh_earbuds_2	S13kmh_earbuds_3	max_force_plate_1	max_force_plate_2	max_force_plate_3	max_earbuds_1	max_earbuds_2	max_earbuds_3
0	-34.634	12.165	13.129	-0.030762	-0.0092771	0.10718	30.797	-105.505	1028.936	-1.1628	0.61084	-0.16822	NaN	NaN	NaN	NaN	NaN	NaN	NaN	NaN	NaN	NaN	NaN	NaN
0.002	-35.13	20.009	21.785	-0.044922	-0.0063477	0.10205	-4.424	-137.1579	985.682	-1.1357	0.6543	-0.19971	NaN	NaN	NaN	NaN	NaN	NaN	NaN	NaN	NaN	NaN	NaN	NaN
0.004	-24.949	15.6391	17.0971	-0.058105	0.00048828	0.09668	-8.864	-161.6702	986.842	-1.1211	0.7207	-0.25977	NaN	NaN	NaN	NaN	NaN	NaN	NaN	NaN	NaN	NaN	NaN	NaN
0.006	-37.024	20.1132	5.8271	-0.064453	0.0019531	0.099121	2.485	-114.442	1016.313	-1.1182	0.75	-0.29297	NaN	NaN	NaN	NaN	NaN	NaN	NaN	NaN	NaN	NaN	NaN	NaN
0.008	-27.201	16.0784	21.1458	-0.071289	0.013184	0.092773	-36.8081	-190.7822	1024.461	-1.1265	0.78564	-0.35498	NaN	NaN	NaN	NaN	NaN	NaN	NaN	NaN	NaN	NaN	NaN	NaN
0.01	-20.837	18.9169	16.2201	-0.074707	0.022217	0.091064	-28.6751	-198.667	1081.819	-1.1479	0.81396	-0.40967	NaN	NaN	NaN	NaN	NaN	NaN	NaN	NaN	NaN	NaN	NaN	NaN
0.012	-26.165	36.081	17.4976	-0.075684	0.032715	0.09082	-11.3527	-158.44	1111.1207	-1.1636	0.8208	-0.43311	NaN	NaN	NaN	NaN	NaN	NaN	NaN	NaN	NaN	NaN	NaN	NaN
0.014	-30.814	34.069	25.0952	-0.076172	0.045898	0.088379	-41.7408	-194.672	1155.2165	-1.2104	0.8501	-0.47607	NaN	NaN	NaN	NaN	NaN	NaN	NaN	NaN	NaN	NaN	NaN	NaN
0.016	-34.661	22.2084	26.417	-0.081055	0.053711	0.088867	-53.404	-108.4239	1202.1541	-1.2627	0.87793	-0.51123	NaN	NaN	NaN	NaN	NaN	NaN	NaN	NaN	NaN	NaN	NaN	NaN
0.018	-5.422	20.3062	26.206	-0.083008	0.068848	0.080566	-43.101	-58.226	1202.7565	-1.3145	0.91406	-0.55078	NaN	NaN	NaN	NaN	NaN	NaN	NaN	NaN	NaN	NaN	NaN	NaN
0.02	-13.097	24.4782	16.8249	-0.079346	0.075928	0.083008	-34.007	-64.712	1210.241	-1.3867	0.95703	-0.59473	NaN	NaN	NaN	NaN	NaN	NaN	NaN	NaN	NaN	NaN	NaN	NaN
0.022	-21.805	29.9735	2.23	-0.076172	0.083984	0.079102	-33.625	-4.899	1241.688	-1.4214	0.97314	-0.60498	NaN	NaN	NaN	NaN	NaN	NaN	NaN	NaN	NaN	NaN	NaN	NaN
0.024	-35.576	25.1424	4.4381	-0.071777	0.098145	0.080566	-11.67627	-70.118	1254.404	-1.5015	0.99463	-0.62061	NaN	NaN	NaN	NaN	NaN	NaN	NaN	NaN	NaN	NaN	NaN	NaN
0.026	-10.682	30.6681	22.62	-0.072266	0.104	0.073242	-40.17002	-109.253	1291.917	-1.5789	1.0022	-0.62085	NaN	NaN	NaN	NaN	NaN	NaN	NaN	NaN	NaN	NaN	NaN	NaN
0.028	-13.194	30.9174	23.3384	-0.066406	0.11621	0.067383	-31.113	-74.7403	1286.5547	-1.6733	0.99268	-0.60693	NaN	NaN	NaN	NaN	NaN	NaN	NaN	NaN	NaN	NaN	NaN	NaN
0.03	-34.298	31.3267	20.6735	-0.057617	0.11963	0.062988	-38.065	-148.936	1270.462	-1.8418	0.98633	-0.59082	NaN	NaN	NaN	NaN	NaN	NaN	NaN	NaN	NaN	NaN	NaN	NaN
0.032	-5.838	15.891	34.927	-0.054688	0.12354	0.062012	-22.505	-93.2873	1283.6316	-1.9331	0.98486	-0.57178	NaN	NaN	NaN	NaN	NaN	NaN	NaN	NaN	NaN	NaN	NaN	NaN
0.034	-20.48	24.8151	27.3393	-0.050293	0.12988	0.055176	-29.655	-82.9966	1264.206	-2.1582	0.99414	-0.54395	NaN	NaN	NaN	NaN	NaN	NaN	NaN	NaN	NaN	NaN	NaN	NaN
0.036	-26.141	32.746	21.5327	-0.051026	0.13427	0.056153	-41.099	-140.882	1296.748	-2.3298	1.0267	-0.5271	NaN	NaN	NaN	NaN	NaN	NaN	NaN	NaN	NaN	NaN	NaN	NaN
0.038	-53.4631	40.436	14.8397	-0.047363	0.13867	0.048828	-26.362	-80.8966	1344.0442	-2.4961	1.0654	-0.51758	NaN	NaN	NaN	NaN	NaN	NaN	NaN	NaN	NaN	NaN	NaN	NaN
0.04	-14.959	21.8082	29.9613	-0.054199	0.15039	0.048828	-42.6118	-121.859	1325.167	-2.6772	1.1177	-0.50537	NaN	NaN	NaN	NaN	NaN	NaN	NaN	NaN	NaN	NaN	NaN	NaN
0.042	-16.132	26.4723	60.42405	-0.053711	0.15332	0.047363	-22.355	-117.071	1351.422	-2.7554	1.145	-0.50342	NaN	NaN	NaN	NaN	NaN	NaN	NaN	NaN	NaN	NaN	NaN	NaN
0.044	-31.51	22.869	56.9643	-0.061523	0.16748	0.034668	-19.277	-26.6628	1326.8366	-2.8784	1.1724	-0.50537	NaN	NaN	NaN	NaN	NaN	NaN	NaN	NaN	NaN	NaN	NaN	NaN
0.046	-33.101	32.177	80.7888	-0.067383	0.17236	0.027587	-20.864	-92.519	1319.4516	-2.9255	1.1809	-0.50854	NaN	NaN	NaN	NaN	NaN	NaN	NaN	NaN	NaN	NaN	NaN	NaN
0.048	-17.835	48.4991	101.0283	-0.075684	0.18066	0.019531	-18.258	-32.0807	1342.00941	-2.9468	1.1841	-0.50732	NaN	NaN	NaN	NaN	NaN	NaN	NaN	NaN	NaN	NaN	NaN	NaN
0.05	-27.738	51.3123	123.073	-0.10352	0.19336	0.0092773	-42.344	-16.447	1308.31139	-2.9194	1.186	-0.50439	NaN	NaN	NaN	NaN	NaN	NaN	NaN	NaN	NaN	NaN	NaN	NaN
0.052	-50.571	38.4683	153.323	-0.12012	0.20117	-0.0019531	-27.227	-72.7347	1297.8865	-2.8887	1.1904	-0.49902	NaN	NaN	NaN	NaN	NaN	NaN	NaN	NaN	NaN	NaN	NaN	NaN
0.054	-44.788	20.7844	210.0713	-0.1665	0.21338	-0.018555	-30.784	10.519	1282.152	-2.8179	1.1997	-0.48975	NaN	NaN	NaN	NaN	NaN	NaN	NaN	NaN	NaN	NaN	NaN	NaN
0.056	-42.82	-4.493	250.4645	-0.21338	0.21875	-0.026612	-66.7432	-23.7754	1243.744	-2.7612	1.1997	-0.48389	NaN	NaN	NaN	NaN	NaN	NaN	NaN	NaN	NaN	NaN	NaN	NaN
0.058	-55.516	3.872	287.5284	-0.26514	0.22461	-0.04834	-79.608	-37.5513	1249.977	-2.6948	1.1987	-0.47217	NaN	NaN	NaN	NaN	NaN	NaN	NaN	NaN	NaN	NaN	NaN	NaN
0.06	-52.613	-3.29	329.2154	-0.3418	0.23096	-0.078125	-47.998	32.3301	1254.029	-2.5859	1.2051	-0.46924	NaN	NaN	NaN	NaN	NaN	NaN	NaN	NaN	NaN	NaN	NaN	NaN
0.062	-43.278	-6.2216	417.81	-0.37744	0.24658	-0.094727	-71.9803	-40.205	1263.054	-2.5273	1.2168	-0.46729	NaN	NaN	NaN	NaN	NaN	NaN	NaN	NaN	NaN	NaN	NaN	NaN
0.064	-50.186	-6.2149	509.105	-0.46533	0.26172	-0.12158	-52.246	3.0938	1298.8203	-2.3823	1.2251	-0.4624	NaN	NaN	NaN	NaN	NaN	NaN	NaN	NaN	NaN	NaN	NaN	NaN
0.066	-42.498	12.783	585.454	-0.55175	0.26611	-0.13696	-43.4154	37.955	1299.769	-2.2631	1.2197	-0.45288	NaN	NaN	NaN	NaN	NaN	NaN	NaN	NaN	NaN	NaN	NaN	NaN
0.068	-6.253	23.1699	689.774	-0.65234	0.26758	-0.17773	-82.57441	1.8611	1304.787	-2.1445	1.209	-0.43555	NaN	NaN	NaN	NaN	NaN	NaN	NaN	NaN	NaN	NaN	NaN	NaN
0.07	25.7921	35.339	793.628	-0.81836	0.2666	-0.20996	-74.156	106.019	1304.349	-1.9956	1.1724	-0.41162	NaN	NaN	NaN	NaN	NaN	NaN	NaN	NaN	NaN	NaN	NaN	NaN
0.072	7.5454	47.9262	885.7111	-0.91064	0.26172	-0.229	-51.946	74.091	1281.0762	-1.9272	1.1489	-0.39746	NaN	NaN	NaN	NaN	NaN	NaN	NaN	NaN	NaN	NaN	NaN	NaN
0.074	-27.0265	49.9109	925.055	-1.1074	0.26074	-0.26758	-63.843	36.1794	1282.2218	-1.8179	1.1079	-0.3667	NaN	NaN	NaN	NaN	NaN	NaN	NaN	NaN	NaN	NaN	NaN	NaN
0.076	-23.767	48.706	957.239	-1.2585	0.26391	-0.29174	-77.5318	92.921	1257.9646	-1.7517	1.0774	-0.34741	NaN	NaN	NaN	NaN	NaN	NaN	NaN	NaN	NaN	NaN	NaN	NaN
0.078	7.64	41.838	995.889	-1.4058	0.26807	-0.31396	-68.2301	14.099	1257.6648	-1.6929	1.0444	-0.33154	NaN	NaN	NaN	NaN	NaN	NaN	NaN	NaN	NaN	NaN	NaN	NaN
0.08	-5.51	30.6397	1012.103	-1.5972	0.28076	-0.33594	-54.931	54.3335	1282.131325	-1.6255	0.99658	-0.31494	NaN	NaN	NaN	NaN	NaN	NaN	NaN	NaN	NaN	NaN	NaN	NaN
0.082	-5.651	21.419	1007.876	-1.6812	0.29053	-0.34619	-58.7081	103.158	1253.2811	-1.5972	0.97705	-0.30908	NaN	NaN	NaN	NaN	NaN	NaN	NaN	NaN	NaN	NaN	NaN	NaN
0.084	-9.5206	5.722	993.893	-1.812	0.3335	-0.33643	-68.267	54.4658	1240.5936	-1.5327	0.9165	-0.28662	NaN	NaN	NaN	NaN	NaN	NaN	NaN	NaN	NaN	NaN	NaN	NaN
0.086	17.9245	-24.446	1006.175	-1.8823	0.36499	-0.34058	-33.008	150.655	1213.1105	-1.4988	0.86841	-0.27051	NaN	NaN	NaN	NaN	NaN	NaN	NaN	NaN	NaN	NaN	NaN	NaN
0.088	16.7808	-46.51	1010.3859	-1.9175	0.39111	-0.33984	-33.044	153.937	1186.582	-1.4595	0.82275	-0.25879	NaN	NaN	NaN	NaN	NaN	NaN	NaN	NaN	NaN	NaN	NaN	NaN
0.09	26.1014	-50.794	982.255	-1.9063	0.43555	-0.31836	-25.078	130.8351	1243.268	-1.4141	0.75977	-0.23389	NaN	NaN	NaN	NaN	NaN	NaN	NaN	NaN	NaN	NaN	NaN	NaN
0.092	42.991	-37.762	972.873	-1.8901	0.46143	-0.31396	-0.901	190.651	1241.822	-1.4004	0.72852	-0.22656	NaN	NaN	NaN	NaN	NaN	NaN	NaN	NaN	NaN	NaN	NaN	NaN
0.094	40.6535	-17.142	984.546	-1.8379	0.49902	-0.30713	-25.83	104.978	1221.342	-1.3672	0.66699	-0.20313	NaN	NaN	NaN	NaN	NaN	NaN	NaN	NaN	NaN	NaN	NaN	NaN
0.096	8.175	-11.713	1008.28196	-1.7976	0.52076	-0.30054	7.806	145.3065	1211.064	-1.3418	0.6289	-0.18994	NaN	NaN	NaN	NaN	NaN	NaN	NaN	NaN	NaN	NaN	NaN	NaN
0.098	-8.561	-0.181000000000001	1017.1512	-1.7559	0.54492	-0.29297	-15.111	193.902	1140.5898	-1.3179	0.59033	-0.17432	NaN	NaN	NaN	NaN	NaN	NaN	NaN	NaN	NaN	NaN	NaN	NaN
0.1	16.9422	-9.077	1033.69	-1.6943	0.56348	-0.28467	-26.983	130.441	1120.8537	-1.2749	0.54053	-0.15332	NaN	NaN	NaN	NaN	NaN	NaN	NaN	NaN	NaN	NaN	NaN	NaN
0.102	-0.0259999999999998	-6.953	1035.1835	-1.6523	0.56836	-0.2793	-2.408	183.76	1113.5946	-1.2534	0.51807	-0.14648	NaN	NaN	NaN	NaN	NaN	NaN	NaN	NaN	NaN	NaN	NaN	NaN
0.104	-11.911	-17.5857	1036.43713	-1.5527	0.58398	-0.26611	0.692999999999998	148.5642	1074.1002	-1.2104	0.4751	-0.12549	NaN	NaN	NaN	NaN	NaN	NaN	NaN	NaN	NaN	NaN	NaN	NaN
0.106	-6.175	-28.866	1030.6272	-1.4673	0.59839	-0.26465	-7.743	120.837	1072.905	-1.168	0.44067	-0.11841	NaN	NaN	NaN	NaN	NaN	NaN	NaN	NaN	NaN	NaN	NaN	NaN
0.108	-25.568	-56.8163	1037.1442	-1.3921	0.60596	-0.26465	12.4308	185.0192	1040.66	-1.1318	0.41309	-0.11426	NaN	NaN	NaN	NaN	NaN	NaN	NaN	NaN	NaN	NaN	NaN	NaN
0.11	-16.898	-92.3355	1052.6588	-1.3091	0.63721	-0.26074	-10.5653	117.339	1012.5725	-1.084	0.38525	-0.099609	NaN	NaN	NaN	NaN	NaN	NaN	NaN	NaN	NaN	NaN	NaN	NaN
0.112	-17.965	-133.309	1066.132	-1.2827	0.65674	-0.26123	-14.791	158.107	987.2255	-1.0635	0.37109	-0.091797	NaN	NaN	NaN	NaN	NaN	NaN	NaN	NaN	NaN	NaN	NaN	NaN
0.114	-2.431	-141.166	1068.051	-1.25	0.6875	-0.27197	7.177	203.1326	942.0338	-1.0283	0.34375	-0.091797	NaN	NaN	NaN	NaN	NaN	NaN	NaN	NaN	NaN	NaN	NaN	NaN
0.116	-20.546	-135.327	1091.137	-1.2363	0.70606	-0.29492	-16.417	158.701	927.1137	-0.99779	0.32471	-0.084717	NaN	NaN	NaN	NaN	NaN	NaN	NaN	NaN	NaN	NaN	NaN	NaN
0.118	-34.487	-108.846	1122.436	-1.2271	0.72705	-0.30811	6.88923	231.519	898.6037	-0.97656	0.3125	-0.08252	NaN	NaN	NaN	NaN	NaN	NaN	NaN	NaN	NaN	NaN	NaN	NaN
0.12	-54.413	-101.286	1146.3834	-1.2163	0.74072	-0.32568	11.9946	204.468	870.416	-0.94287	0.29785	-0.081543	NaN	NaN	NaN	NaN	NaN	NaN	NaN	NaN	NaN	NaN	NaN	NaN
0.122	-66.6582	-82.65	1162.8721	-1.2109	0.7373	-0.33887	-23.2588	175.1802	839.5657	-0.93018	0.29541	-0.080566	NaN	NaN	NaN	NaN	NaN	NaN	NaN	NaN	NaN	NaN	NaN	NaN
0.124	-49.858	-66.907	1189.107	-1.1953	0.74414	-0.36426	-5.735	239.858	795.135	-0.89648	0.29199	-0.079102	NaN	NaN	NaN	NaN	NaN	NaN	NaN	NaN	NaN	NaN	NaN	NaN
0.126	-58.7774	-54.452	1204.74	-1.1939	0.74561	-0.38794	-4.955	156.76	760.503	-0.85889	0.29394	-0.073974	NaN	NaN	NaN	NaN	NaN	NaN	NaN	NaN	NaN	NaN	NaN	NaN
0.128	-46.455	-46.667	1209.3952	-1.2012	0.74414	-0.41064	15.646	155.132	725.7371	-0.82227	0.29639	-0.067383	NaN	NaN	NaN	NaN	NaN	NaN	NaN	NaN	NaN	NaN	NaN	NaN
0.13	-64.4082	-39.988	1215.158	-1.2227	0.73242	-0.43848	-13.1815	169.13669	666.293	-0.76367	0.29883	-0.065918	NaN	NaN	NaN	NaN	NaN	NaN	NaN	NaN	NaN	NaN	NaN	NaN
0.132	-43.235	-35.087	1220.4969	-1.2383	0.72461	-0.45117	-11.815	121.227	646.2975	-0.73242	0.2959	-0.066406	NaN	NaN	NaN	NaN	NaN	NaN	NaN	NaN	NaN	NaN	NaN	NaN
0.134	-42.074	-54.6993	1220.043	-1.2944	0.70361	-0.47607	34.6533	181.511	626.129	-0.65967	0.29395	-0.057129	NaN	NaN	NaN	NaN	NaN	NaN	NaN	NaN	NaN	NaN	NaN	NaN
0.136	-39.941	-65.5502	1216.053	-1.3422	0.68799	-0.49463	3.7954	168.942	575.2646	-0.60254	0.29688	-0.053467	NaN	NaN	NaN	NaN	NaN	NaN	NaN	NaN	NaN	NaN	NaN	NaN
0.138	-48.537	-63.7021	1238.256	-1.4063	0.66797	-0.50781	-11.5573	142.6416	553.109	-0.53809	0.29443	-0.05127	NaN	NaN	NaN	NaN	NaN	NaN	NaN	NaN	NaN	NaN	NaN	NaN
0.14	-67.784	-70.2821	1280.982	-1.5249	0.65479	-0.521	26.2574	197.842	496.438	-0.45215	0.29199	-0.046387	NaN	NaN	NaN	NaN	NaN	NaN	NaN	NaN	NaN	NaN	NaN	NaN
0.142	-42.74	-66.1379	1314.292	-1.5996	0.65234	-0.52637	-1.708	149.7707	455.549	-0.40527	0.29004	-0.04248	NaN	NaN	NaN	NaN	NaN	NaN	NaN	NaN	NaN	NaN	NaN	NaN
0.144	-67.834	-75.7881	1314.7839	-1.7676	0.66211	-0.53174	28.1324	166.8289	447.63167	-0.32031	0.28809	-0.030762	NaN	NaN	NaN	NaN	NaN	NaN	NaN	NaN	NaN	NaN	NaN	NaN
0.146	-63.6471	-76.1832	1316.671	-1.9074	0.68872	-0.54126	40.4269	182.717	400.88747	-0.23828	0.27344	-0.015625	NaN	NaN	NaN	NaN	NaN	NaN	NaN	NaN	NaN	NaN	NaN	NaN
0.148	-59.589	-82.01868	1325.3036	-2.0552	0.7251	-0.55029	3.898	118.5409	378.79	-0.20313	0.26123	-0.01416	NaN	NaN	NaN	NaN	NaN	NaN	NaN	NaN	NaN	NaN	NaN	NaN
0.15	-53.071	-63.3897	1331.08077	-2.2515	0.79248	-0.55615	17.2204	175.202	328.452	-0.12354	0.24756	-0.013672	NaN	NaN	NaN	NaN	NaN	NaN	NaN	NaN	NaN	NaN	NaN	NaN
0.152	-53.711	-45.3581	1331.0953	-2.4092	0.84521	-0.56201	0.382999999999999	154.832	256.137	-0.06128	0.22681	-0.005127	NaN	NaN	NaN	NaN	NaN	NaN	NaN	NaN	NaN	NaN	NaN	NaN
0.154	-67.754	-34.2397	1329.8951	-2.5659	0.90137	-0.56885	0.201000000000001	126.2232	228.613	-0.00097656	0.20703	0.00097656	NaN	NaN	NaN	NaN	NaN	NaN	NaN	NaN	NaN	NaN	NaN	NaN
0.156	-41.943	-32.74079	1320.1022	-2.7358	0.98291	-0.57373	4.93	171.025	206.293	0.07666	0.17383	0.0073242	NaN	NaN	NaN	NaN	NaN	NaN	NaN	NaN	NaN	NaN	NaN	NaN
0.158	-69.1884	-40.209	1315.9277	-2.7983	1.02	-0.57764	-37.729	101.6987	190.1257	0.11328	0.15479	0.017578	NaN	NaN	NaN	NaN	NaN	NaN	NaN	NaN	NaN	NaN	NaN	NaN
0.16	-60.599	-32.529	1294.7911	-2.8691	1.0938	-0.57715	-12.156	107.6895	172.7046	0.18018	0.1123	0.022461	NaN	NaN	NaN	NaN	NaN	NaN	NaN	NaN	NaN	NaN	NaN	NaN
0.162	-76.042	-26.623	1297.352	-2.8777	1.1423	-0.57373	5.868	116.409	142.466	0.22485	0.079102	0.024902	NaN	NaN	NaN	NaN	NaN	NaN	NaN	NaN	NaN	NaN	NaN	NaN
0.164	-64.296	-9.7446	1282.888	-2.855	1.1763	-0.57568	-30.437	77.86781	133.6425	0.25977	0.042969	0.024414	NaN	NaN	NaN	NaN	NaN	NaN	NaN	NaN	NaN	NaN	NaN	NaN
0.166	-73.156	-9.533	1282.613	-2.7847	1.1978	-0.58057	-27.438	122.982	135.3811	0.30322	0.0019531	0.03125	NaN	NaN	NaN	NaN	NaN	NaN	NaN	NaN	NaN	NaN	NaN	NaN
0.168	-93.114	-5.168	1295.8001	-2.7441	1.209	-0.58008	-36.286	115.826	109.1397	0.31885	-0.019531	0.030273	NaN	NaN	NaN	NaN	NaN	NaN	NaN	NaN	NaN	NaN	NaN	NaN
0.17	-86.3817	-7.328	1302.2979	-2.6328	1.2148	-0.57031	-27.557	97.20639	108.177	0.33252	-0.059082	0.02832	NaN	NaN	NaN	NaN	NaN	NaN	NaN	NaN	NaN	NaN	NaN	NaN
0.172	-89.9846	-3.919	1312.0099	-2.5486	1.2122	-0.56225	0.450000000000003	113.755	91.745	0.34766	-0.080323	0.026123	NaN	NaN	NaN	NaN	NaN	NaN	NaN	NaN	NaN	NaN	NaN	NaN
0.174	-80.6659	2.5978	1297.0356	-2.4526	1.2095	-0.5542	-40.8817	37.954	92.8278	0.354	-0.10693	0.023926	NaN	NaN	NaN	NaN	NaN	NaN	NaN	NaN	NaN	NaN	NaN	NaN
0.176	-104.0093	11.119	1290.5039	-2.3203	1.1982	-0.54883	-11.842	47.837	92.69	0.35986	-0.13428	0.020996	NaN	NaN	NaN	NaN	NaN	NaN	NaN	NaN	NaN	NaN	NaN	NaN
0.178	-66.289	5.279	1287.1748	-2.2422	1.1855	-0.5498	-19.23	75.9699	66.08579	0.36133	-0.14746	0.018066	NaN	NaN	NaN	NaN	NaN	NaN	NaN	NaN	NaN	NaN	NaN	NaN
0.18	-82.46	-9.798	1277.79846	-2.0957	1.1504	-0.52734	-52.3603	44.959	50.902	0.35938	-0.17334	0.0083008	NaN	NaN	NaN	NaN	NaN	NaN	NaN	NaN	NaN	NaN	NaN	NaN
0.182	-90.212	-14.821	1264.9148	-1.9958	1.1321	-0.50025	-11.592	52.3984	57.9344	0.35473	-0.1875	0.001709	NaN	NaN	NaN	NaN	NaN	NaN	NaN	NaN	NaN	NaN	NaN	NaN
0.184	-68.24	-15.68	1267.16908	-1.9219	1.1152	-0.48389	-40.925	27.6924	48.0058	0.34473	-0.20313	-2.0817e-14	NaN	NaN	NaN	NaN	NaN	NaN	NaN	NaN	NaN	NaN	NaN	NaN
0.186	-65.17	-10.8854	1265.8623	-1.8394	1.0933	-0.47803	-30.384	10.834	67.588	0.32666	-0.22607	-0.0058594	NaN	NaN	NaN	NaN	NaN	NaN	NaN	NaN	NaN	NaN	NaN	NaN
0.188	-57.523	5.541	1266.695	-1.8066	1.084	-0.47266	17.927	49.7775	77.0209	0.31494	-0.2373	-0.0063477	NaN	NaN	NaN	NaN	NaN	NaN	NaN	NaN	NaN	NaN	NaN	NaN
0.19	-80.702	30.387	1235.089	-1.7495	1.0571	-0.4624	-16.925	12.976	60.64299	0.28613	-0.25293	-0.01123	NaN	NaN	NaN	NaN	NaN	NaN	NaN	NaN	NaN	NaN	NaN	NaN
0.192	-69.48	39.897	1227.713	-1.7185	1.0432	-0.44629	-23.67	20.0713	56.236	0.2627	-0.25781	-0.017334	NaN	NaN	NaN	NaN	NaN	NaN	NaN	NaN	NaN	NaN	NaN	NaN
0.194	-77.983	39.687	1228.7122	-1.687	1.0239	-0.44287	-5.911	37.235	18.4548	0.23975	-0.25732	-0.025391	NaN	NaN	NaN	NaN	NaN	NaN	NaN	NaN	NaN	NaN	NaN	NaN
0.196	-92.5808	52.884	1224.683	-1.6479	0.99463	-0.43555	-30.754	25.8459	20.4268	0.21289	-0.25293	-0.039063	NaN	NaN	NaN	NaN	NaN	NaN	NaN	NaN	NaN	NaN	NaN	NaN
0.198	-69.142	57.5293	1206.569	-1.6284	0.98096	-0.42676	20.381	39.7987	38.7102	0.20117	-0.24902	-0.039551	NaN	NaN	NaN	NaN	NaN	NaN	NaN	NaN	NaN	NaN	NaN	NaN
0.2	-70.187	52.8995	1190.721	-1.5957	0.95117	-0.41309	-4.626	6.7612	47.244	0.18213	-0.23975	-0.043945	NaN	NaN	NaN	NaN	NaN	NaN	NaN	NaN	NaN	NaN	NaN	NaN
0.202	-46.617	60.1945	1171.5381	-1.5781	0.92382	-0.40136	-25.5667	-9.9287	52.167	0.16382	-0.2251	-0.054443	NaN	NaN	NaN	NaN	NaN	NaN	NaN	NaN	NaN	NaN	NaN	NaN
0.204	-56.465	57.5923	1154.417	-1.5488	0.89258	-0.38477	1.423	13.2672536	40.34732	0.14551	-0.21582	-0.061035	NaN	NaN	NaN	NaN	NaN	NaN	NaN	NaN	NaN	NaN	NaN	NaN
0.206	-44.654	48.302	1147.9767	-1.5132	0.84912	-0.36621	-31.5218	1.724	5.063	0.12207	-0.19873	-0.067871	NaN	NaN	NaN	NaN	NaN	NaN	NaN	NaN	NaN	NaN	NaN	NaN
0.208	-41.879	42.813	1133.9297	-1.498	0.83008	-0.3584	5.374	1.048	21.6901	0.11572	-0.19336	-0.074219	NaN	NaN	NaN	NaN	NaN	NaN	NaN	NaN	NaN	NaN	NaN	NaN
0.21	-47.311	49.1047	1147.4068858	-1.4487	0.78564	-0.3374	-19.261	8.5365	-3.336	0.096191	-0.1792	-0.07666	NaN	NaN	NaN	NaN	NaN	NaN	NaN	NaN	NaN	NaN	NaN	NaN
0.212	-62.183	54.3439	1123.7955	-1.4143	0.75269	-0.32056	-50.1181	-14.13616	-11.1037	0.078125	-0.16675	-0.07837	NaN	NaN	NaN	NaN	NaN	NaN	NaN	NaN	NaN	NaN	NaN	NaN
0.214	-75.1785	57.3443	1114.3767	-1.3804	0.71924	-0.30811	-7.023	14.8991	15.6626	0.062988	-0.15332	-0.08252	NaN	NaN	NaN	NaN	NaN	NaN	NaN	NaN	NaN	NaN	NaN	NaN
0.216	-58.944	63.6441	1099.0275	-1.3394	0.68018	-0.28467	-27.5524	18.0309	9.125	0.046387	-0.13672	-0.090332	NaN	NaN	NaN	NaN	NaN	NaN	NaN	NaN	NaN	NaN	NaN	NaN
0.218	-77.986	90.4183	1066.2965	-1.3203	0.65918	-0.27148	-27.045	5.77	29.6724	0.039063	-0.12695	-0.095215	NaN	NaN	NaN	NaN	NaN	NaN	NaN	NaN	NaN	NaN	NaN	NaN
0.22	-70.6096	103.8394	1046.6955	-1.2847	0.62158	-0.25537	-7.398	29.7058	30.0396	0.020996	-0.11279	-0.09668	NaN	NaN	NaN	NaN	NaN	NaN	NaN	NaN	NaN	NaN	NaN	NaN
0.222	-71.5124	107.336	1019.6623	-1.2578	0.59571	-0.2439	-58.1724	26.9889	4.052	0.0058594	-0.099366	-0.10181	NaN	NaN	NaN	NaN	NaN	NaN	NaN	NaN	NaN	NaN	NaN	NaN
0.224	-35.721	103.067	1013.2856	-1.2349	0.56494	-0.23682	-14.01	39.0444	6.7072	-0.0048828	-0.083984	-0.10645	NaN	NaN	NaN	NaN	NaN	NaN	NaN	NaN	NaN	NaN	NaN	NaN
0.226	-40.881	111.3845	993.0363	-1.1982	0.53369	-0.22705	-6.255	55.89	-7.43	-0.017578	-0.060059	-0.11426	NaN	NaN	NaN	NaN	NaN	NaN	NaN	NaN	NaN	NaN	NaN	NaN
0.228	-28.699	125.2652	968.3548	-1.1812	0.51807	-0.21729	-61.4131	24.1105	0.8782	-0.02002	-0.047363	-0.12158	NaN	NaN	NaN	NaN	NaN	NaN	NaN	NaN	NaN	NaN	NaN	NaN
0.23	-27.578	127.8134	942.639	-1.1426	0.48438	-0.20996	-7.621	36.186	19.0103	-0.015137	-0.025391	-0.12939	NaN	NaN	NaN	NaN	NaN	NaN	NaN	NaN	NaN	NaN	NaN	NaN
0.232	-24.124	122.65877	925.1937	-1.121	0.45947	-0.20386	-26.61144	26.3322	0.503999999999998	-0.008545	-0.011719	-0.13281	NaN	NaN	NaN	NaN	NaN	NaN	NaN	NaN	NaN	NaN	NaN	NaN
0.234	-36.542	115.4862	902.5052	-1.0977	0.43359	-0.19922	-42.1788	20.795	18.779	-0.0014648	-0.0014648	-0.1377	NaN	NaN	NaN	NaN	NaN	NaN	NaN	NaN	NaN	NaN	NaN	NaN
0.236	-52.9814	113.309739	870.884	-1.0605	0.39844	-0.19238	7.071	39.192	20.146	0.015137	0.0092773	-0.15088	NaN	NaN	NaN	NaN	NaN	NaN	NaN	NaN	NaN	NaN	NaN	NaN
0.238	-41.1415	106.0988	865.7697	-1.0425	0.39014	-0.19043	-46.438	38.0411	18.1708	0.02002	0.011719	-0.15088	NaN	NaN	NaN	NaN	NaN	NaN	NaN	NaN	NaN	NaN	NaN	NaN
0.24	-31.059	116.377	840.845	-1.0093	0.36426	-0.18018	-31.683	38.3592	39.464	0.032715	0.013672	-0.15967	NaN	NaN	NaN	NaN	NaN	NaN	NaN	NaN	NaN	NaN	NaN	NaN
0.242	-37.0787	136.661	825.00722	-0.98804	0.34595	-0.17724	13.667	46.63	17.9462	0.038819	0.015381	-0.16016	NaN	NaN	NaN	NaN	NaN	NaN	NaN	NaN	NaN	NaN	NaN	NaN
0.244	-26.122	132.844	795.913	-0.96484	0.3374	-0.17285	-24.3916	13.9455	25.925	0.045898	0.018555	-0.16455	NaN	NaN	NaN	NaN	NaN	NaN	NaN	NaN	NaN	NaN	NaN	NaN
0.246	-9.908	119.81158	790.8614	-0.9292	0.3208	-0.16406	-5.815	26.2134	39.19	0.057617	0.02832	-0.17529	NaN	NaN	NaN	NaN	NaN	NaN	NaN	NaN	NaN	NaN	NaN	NaN
0.248	13.99	117.9557	780.792	-0.91162	0.3125	-0.16162	-5.909	48.968	37.0749	0.062012	0.03418	-0.17627	NaN	NaN	NaN	NaN	NaN	NaN	NaN	NaN	NaN	NaN	NaN	NaN
0.25	-1.528	119.801	754.513	-0.87451	0.30469	-0.15381	-19.482	45.9503	51.451	0.073242	0.043945	-0.1875	NaN	NaN	NaN	NaN	NaN	NaN	NaN	NaN	NaN	NaN	NaN	NaN
0.252	19.802	107.849	723.0937	-0.84522	0.29566	-0.15161	12.759	53.681	48.2666	0.07959	0.052979	-0.18799	NaN	NaN	NaN	NaN	NaN	NaN	NaN	NaN	NaN	NaN	NaN	NaN
0.254	4.64	110.98	689.2145	-0.81396	0.2876	-0.14893	-32.775	32.455957	24.1784	0.082031	0.062012	-0.19678	NaN	NaN	NaN	NaN	NaN	NaN	NaN	NaN	NaN	NaN	NaN	NaN
0.256	0.901	123.9738	646.0464	-0.77002	0.28369	-0.1416	-12.791	4.899	46.7	0.075195	0.077148	-0.20557	NaN	NaN	NaN	NaN	NaN	NaN	NaN	NaN	NaN	NaN	NaN	NaN
0.258	-10.727	125.716	608.98	-0.74609	0.27734	-0.13525	-10.571	31.05	25.48619	0.069336	0.089355	-0.20166	NaN	NaN	NaN	NaN	NaN	NaN	NaN	NaN	NaN	NaN	NaN	NaN
0.26	-6.525	121.316	590.1319	-0.69678	0.271	-0.13281	-43.5322	26.8251	23.8983	0.061035	0.091309	-0.20752	NaN	NaN	NaN	NaN	NaN	NaN	NaN	NaN	NaN	NaN	NaN	NaN
0.262	-25.107	114.667	571.4632	-0.65576	0.26807	-0.12695	12.642	46.956	33.55846	0.056885	0.10327	-0.21655	NaN	NaN	NaN	NaN	NaN	NaN	NaN	NaN	NaN	NaN	NaN	NaN
0.264	-23.773	123.132	548.6003	-0.61475	0.26416	-0.12158	-34.1984	29.6077	27.033	0.048828	0.11621	-0.21875	NaN	NaN	NaN	NaN	NaN	NaN	NaN	NaN	NaN	NaN	NaN	NaN
0.266	-17.277	117.382	521.6394	-0.56055	0.25781	-0.11279	-36.785	-4.544	63.5566	0.032715	0.12646	-0.22119	NaN	NaN	NaN	NaN	NaN	NaN	NaN	NaN	NaN	NaN	NaN	NaN
0.268	-36.1776	126.263	493.1024	-0.52979	0.25	-0.11475	-2.29	-5.15	85.96908	0.02002	0.13232	-0.22217	NaN	NaN	NaN	NaN	NaN	NaN	NaN	NaN	NaN	NaN	NaN	NaN
0.27	0.506	115.8134	472.1345	-0.47461	0.2373	-0.10742	-35.572	-12.16096	82.6509	-0.018066	0.13428	-0.22949	NaN	NaN	NaN	NaN	NaN	NaN	NaN	NaN	NaN	NaN	NaN	NaN
0.272	-6.018	126.26568	419.2302	-0.43677	0.22778	-0.09912	-16.27	-10.5215	109.96	-0.054199	0.13061	-0.22949	NaN	NaN	NaN	NaN	NaN	NaN	NaN	NaN	NaN	NaN	NaN	NaN
0.274	-16.515	118.8284	380.0745	-0.3916	0.2168	-0.093262	-30.017	-13.471	87.3456	-0.086426	0.12646	-0.23193	NaN	NaN	NaN	NaN	NaN	NaN	NaN	NaN	NaN	NaN	NaN	NaN
0.276	-27.328	119.7064	364.52	-0.3374	0.19971	-0.080566	-76.8935	-42.876	93.9044	-0.14307	0.12305	-0.23779	NaN	NaN	NaN	NaN	NaN	NaN	NaN	NaN	NaN	NaN	NaN	NaN
0.278	-18.61	115.2457	350.178	-0.29932	0.18481	-0.077148	-17.804	-42.5882	110.087	-0.17041	0.12158	-0.24219	NaN	NaN	NaN	NaN	NaN	NaN	NaN	NaN	NaN	NaN	NaN	NaN
0.28	-24.8	111.1762	335.1741	-0.25586	0.17236	-0.06543	-27.455	-30.27	174.855	-0.25586	0.12256	-0.25879	NaN	NaN	NaN	NaN	NaN	NaN	NaN	NaN	NaN	NaN	NaN	NaN
0.282	-37.306	103.9921	305.8881	-0.19287	0.15576	-0.058105	-24.8439	-17.354	367.281	-0.396	0.12451	-0.27197	NaN	NaN	NaN	NaN	NaN	NaN	NaN	NaN	NaN	NaN	NaN	NaN
0.284	-32.494	97.8836	303.6354	-0.16699	0.1499	-0.052734	-36.915	49.2106	558.225	-0.49561	0.12549	-0.28369	NaN	NaN	NaN	NaN	NaN	NaN	NaN	NaN	NaN	NaN	NaN	NaN
0.286	-40.391	100.56	262.91735	-0.10791	0.12988	-0.039551	-75.1614	74.1949	708.266	-0.7417	0.10498	-0.2959	NaN	NaN	NaN	NaN	NaN	NaN	NaN	NaN	NaN	NaN	NaN	NaN
0.288	-39.496	115.812	251.0899	-0.070557	0.11548	-0.036865	-41.371	19.7371	790.852	-0.98733	0.074707	-0.29614	NaN	NaN	NaN	NaN	NaN	NaN	NaN	NaN	NaN	NaN	NaN	NaN
0.29	-33.677	104.356	226.8152	-0.027832	0.10254	-0.034668	-9.693	-49.305	889.956	-1.2651	0.056152	-0.29932	NaN	NaN	NaN	NaN	NaN	NaN	NaN	NaN	NaN	NaN	NaN	NaN
0.292	-28.205	87.7697	206.5838	0.017578	0.078613	-0.022461	-108.525	-92.292	1024.836	-1.6621	0.078125	-0.32617	NaN	NaN	NaN	NaN	NaN	NaN	NaN	NaN	NaN	NaN	NaN	NaN
0.294	-14.796	80.8721	186.3846	0.041992	0.062012	-0.018066	-68.535	-57.912	1152.049	-1.8511	0.10693	-0.34912	NaN	NaN	NaN	NaN	NaN	NaN	NaN	NaN	NaN	NaN	NaN	NaN
0.296	-20.534	73.388	161.762	0.079102	0.037598	-0.015625	-56.582	10.209	1162.157	-2.2046	0.21973	-0.38623	NaN	NaN	NaN	NaN	NaN	NaN	NaN	NaN	NaN	NaN	NaN	NaN
0.298	-18.451	72.52	145.615	0.10083	0.018066	-0.010986	-84.883	-33.263	1127.631	-2.4238	0.33203	-0.4248	NaN	NaN	NaN	NaN	NaN	NaN	NaN	NaN	NaN	NaN	NaN	NaN
0.3	-3.121	83.1538	144.9807	0.12012	-0.0014648	-0.003418	-71.565	-92.453	1118.68	-2.5811	0.43848	-0.48242	NaN	NaN	NaN	NaN	NaN	NaN	NaN	NaN	NaN	NaN	NaN	NaN
0.302	-0.0870000000000033	95.3329	142.244	0.14502	-0.023438	0.0058594	-81.824	-163.071	1083.6504	-2.6577	0.58447	-0.5542	NaN	NaN	NaN	NaN	NaN	NaN	NaN	NaN	NaN	NaN	NaN	NaN
0.304	-24.034	94.19	101.857	0.15576	-0.041504	0.003418	-36.571	-219.34	1119.656	-2.6514	0.64648	-0.58496	NaN	NaN	NaN	NaN	NaN	NaN	NaN	NaN	NaN	NaN	NaN	NaN
0.306	-15.558	73.899	108.3047	0.17383	-0.061035	0.0097656	-33.839	-189.988	1092.46	-2.5625	0.71777	-0.61719	NaN	NaN	NaN	NaN	NaN	NaN	NaN	NaN	NaN	NaN	NaN	NaN
0.308	-16.425	70.7007	102.8365	0.18995	-0.076905	0.017578	-48.084	-193.343	1075.234	-2.4786	0.73096	-0.63038	NaN	NaN	NaN	NaN	NaN	NaN	NaN	NaN	NaN	NaN	NaN	NaN
0.31	-21.246	68.2477	100.6337	0.20605	-0.092773	0.021973	-8.811	-137.299	1081.409	-2.3672	0.73633	-0.65625	NaN	NaN	NaN	NaN	NaN	NaN	NaN	NaN	NaN	NaN	NaN	NaN
0.312	-26.319	60.0624	82.0616	0.22705	-0.10889	0.029785	-14.095	-45.721	1020.192	-2.1128	0.71533	-0.69092	NaN	NaN	NaN	NaN	NaN	NaN	NaN	NaN	NaN	NaN	NaN	NaN
0.314	-24.747	49.6256	82.2848	0.23486	-0.11523	0.027344	-35.113	-38.174	1044.793	-1.9429	0.69189	-0.69189	NaN	NaN	NaN	NaN	NaN	NaN	NaN	NaN	NaN	NaN	NaN	NaN
0.316	-6.698	43.968	46.549	0.24072	-0.13281	0.022461	-35.036	9.12299999999999	1072.209	-1.6011	0.64893	-0.68994	NaN	NaN	NaN	NaN	NaN	NaN	NaN	NaN	NaN	NaN	NaN	NaN
0.318	-11.246	51.254	41.6915	0.23633	-0.15137	0.032715	-117.299	-9.779	1095.445	-1.4067	0.63623	-0.68164	NaN	NaN	NaN	NaN	NaN	NaN	NaN	NaN	NaN	NaN	NaN	NaN
0.32	-26.053	49.1118	42.9792	0.22656	-0.17041	0.037109	-108.548	-34.424	1163.21	-1.2656	0.63867	-0.68066	NaN	NaN	NaN	NaN	NaN	NaN	NaN	NaN	NaN	NaN	NaN	NaN
0.322	-28.645	51.9905	53.8297	0.20654	-0.18604	0.037109	-60.6551	-32.477	1104.171	-1.1538	0.66064	-0.69873	NaN	NaN	NaN	NaN	NaN	NaN	NaN	NaN	NaN	NaN	NaN	NaN
0.324	-18.727	53.9807	49.3366	0.19824	-0.18896	0.041016	-43.654	-107.678	1092.7448	-1.1206	0.6792	-0.70654	NaN	NaN	NaN	NaN	NaN	NaN	NaN	NaN	NaN	NaN	NaN	NaN
0.326	-24.398	49.3911	40.7802	0.17676	-0.19678	0.040039	5.072	-165.16	1113.3111	-1.0718	0.70459	-0.72021	NaN	NaN	NaN	NaN	NaN	NaN	NaN	NaN	NaN	NaN	NaN	NaN
0.328	-37.123	35.6391	34.437	0.15649	-0.20166	0.043701	7.171	-213.9711	1094.838	-1.0466	0.71192	-0.7273	NaN	NaN	NaN	NaN	NaN	NaN	NaN	NaN	NaN	NaN	NaN	NaN
0.33	-25.088	27.4963	48.6807	0.1377	-0.2041	0.041992	-1.933	-313.708	1162.7136	-1.0332	0.70703	-0.72656	NaN	NaN	NaN	NaN	NaN	NaN	NaN	NaN	NaN	NaN	NaN	NaN
0.332	-38.723	37.4957	38.1631	0.10986	-0.20068	0.043457	62.77	-297.639	1215.159	-1.0337	0.68799	-0.72314	NaN	NaN	NaN	NaN	NaN	NaN	NaN	NaN	NaN	NaN	NaN	NaN
0.334	-56.8777	48.7636	31.062	0.09082	-0.19873	0.042969	43.068	-300.274	1251.133	-1.0483	0.68408	-0.71826	NaN	NaN	NaN	NaN	NaN	NaN	NaN	NaN	NaN	NaN	NaN	NaN
0.336	-35.833	39.5063	12.243	0.053711	-0.19482	0.043457	35.152	-317.105	1330.156	-1.0894	0.68311	-0.72803	NaN	NaN	NaN	NaN	NaN	NaN	NaN	NaN	NaN	NaN	NaN	NaN
0.338	-39.1698	33.7179	32.9222	0.023926	-0.18897	0.036133	20.324	-268.004	1303.337	-1.1311	0.677	-0.73022	NaN	NaN	NaN	NaN	NaN	NaN	NaN	NaN	NaN	NaN	NaN	NaN
0.34	-32.676	27.7562	27.7272	-0.0019531	-0.18018	0.030273	-52.0266	-267.878	1301.092	-1.1992	0.6875	-0.7207	NaN	NaN	NaN	NaN	NaN	NaN	NaN	NaN	NaN	NaN	NaN	NaN
0.342	-28.79	19.1572	28.6547	-0.030273	-0.17139	0.023438	-49.8189	-204.102	1325.521	-1.3257	0.71338	-0.71338	NaN	NaN	NaN	NaN	NaN	NaN	NaN	NaN	NaN	NaN	NaN	NaN
0.344	-14.673	19.59	26.135	-0.045898	-0.1626	0.024902	-23.5869	-114.963	1318.997	-1.3999	0.71924	-0.7124	NaN	NaN	NaN	NaN	NaN	NaN	NaN	NaN	NaN	NaN	NaN	NaN
0.346	-20.053	24.809	12.25	-0.068359	-0.15137	0.019043	-9.9209	-136.521	1357.91	-1.564	0.73682	-0.71826	NaN	NaN	NaN	NaN	NaN	NaN	NaN	NaN	NaN	NaN	NaN	NaN
0.348	-22.029	37.61136	21.3895	-0.083497	-0.13794	0.012939	47.34	-119.674	1382.586	-1.7129	0.74317	-0.72265	NaN	NaN	NaN	NaN	NaN	NaN	NaN	NaN	NaN	NaN	NaN	NaN
0.35	-25.982	29.6787	27.2878	-0.09668	-0.125	0.0087891	50.1691	-125.622	1346.983	-1.8745	0.75146	-0.73584	NaN	NaN	NaN	NaN	NaN	NaN	NaN	NaN	NaN	NaN	NaN	NaN
0.352	-24.519	11.152	34.58897	-0.10596	-0.11035	0.003418	63.1801	-145.33944	1364.098	-2.0957	0.77344	-0.74805	NaN	NaN	NaN	NaN	NaN	NaN	NaN	NaN	NaN	NaN	NaN	NaN
0.354	-1.801	17.53921	32.6226	-0.10791	-0.10059	-0.00097656	56.214	-78.248	1335.114	-2.2012	0.7959	-0.75586	NaN	NaN	NaN	NaN	NaN	NaN	NaN	NaN	NaN	NaN	NaN	NaN
0.356	-21.581	30.7243	22.1688	-0.11182	-0.085938	-0.012207	8.6299	-123.21202	1335.3201	-2.3633	0.84375	-0.78027	NaN	NaN	NaN	NaN	NaN	NaN	NaN	NaN	NaN	NaN	NaN	NaN
0.358	-45.132	29.536	15.952	-0.11158	-0.076172	-0.014892	23.1096	-152.024	1405.625	-2.4402	0.8606	-0.79664	NaN	NaN	NaN	NaN	NaN	NaN	NaN	NaN	NaN	NaN	NaN	NaN
0.36	-24.992	28.06	35.0462	-0.10498	-0.062988	-0.018555	24.915	-148.62456	1385.1217	-2.4819	0.85596	-0.8374	NaN	NaN	NaN	NaN	NaN	NaN	NaN	NaN	NaN	NaN	NaN	NaN
0.362	-4.231	23.47094	22.6908	-0.097656	-0.055664	-0.026855	-4.7426	-235.883	1435.309	-2.4937	0.81885	-0.90771	NaN	NaN	NaN	NaN	NaN	NaN	NaN	NaN	NaN	NaN	NaN	NaN
0.364	-23.813	24.6066	2.796	-0.093262	-0.051758	-0.025391	8.16	-198.494	1452.4667	-2.4897	0.79346	-0.94678	NaN	NaN	NaN	NaN	NaN	NaN	NaN	NaN	NaN	NaN	NaN	NaN
0.366	-18.864	10.5756	16.4095	-0.071289	-0.033691	-0.039551	-23.2141	-209.105	1441.027	-2.4858	0.75098	-1.0107	NaN	NaN	NaN	NaN	NaN	NaN	NaN	NaN	NaN	NaN	NaN	NaN
0.368	-19.33	21.9218	12.22	-0.051757	-0.028809	-0.039307	-18.3564	-231.375	1493.938	-2.4868	0.73828	-1.0454	NaN	NaN	NaN	NaN	NaN	NaN	NaN	NaN	NaN	NaN	NaN	NaN
0.37	-12.186	41.1799	17.206	-0.032227	-0.021973	-0.049316	26.0912	-148.641	1460.465	-2.4937	0.73877	-1.0737	NaN	NaN	NaN	NaN	NaN	NaN	NaN	NaN	NaN	NaN	NaN	NaN
0.372	-27.196	50.311	12.7418	-0.0043945	-0.020508	-0.060059	22.543	-170.1979	1443.9488	-2.4824	0.75391	-1.1113	NaN	NaN	NaN	NaN	NaN	NaN	NaN	NaN	NaN	NaN	NaN	NaN
0.374	-30.109	25.6764	22.7968	0.0078125	-0.02002	-0.062988	77.968	-151.965	1430.9963	-2.4648	0.76563	-1.125	NaN	NaN	NaN	NaN	NaN	NaN	NaN	NaN	NaN	NaN	NaN	NaN
0.376	-22.863	18.74939	38.969	0.032227	-0.015137	-0.071289	44.396	-108.52	1346.829	-2.4233	0.78174	-1.147	NaN	NaN	NaN	NaN	NaN	NaN	NaN	NaN	NaN	NaN	NaN	NaN
0.378	-24.824	17.75143	37.7997	0.05249	-0.013672	-0.074219	0.86565	-123.29	1348.21	-2.3869	0.80787	-1.1584	NaN	NaN	NaN	NaN	NaN	NaN	NaN	NaN	NaN	NaN	NaN	NaN
0.38	-44.0914	21.8042	30.9813	0.069336	-0.012695	-0.081055	21.3564	-44.879	1339.599	-2.3472	0.84033	-1.1733	NaN	NaN	NaN	NaN	NaN	NaN	NaN	NaN	NaN	NaN	NaN	NaN
0.382	-35.753	13.53297	17.467	0.091797	-0.010254	-0.089355	-4.7625	-41.5471	1314.559	-2.2729	0.88721	-1.1909	NaN	NaN	NaN	NaN	NaN	NaN	NaN	NaN	NaN	NaN	NaN	NaN
0.384	-35.774	14.87835	22.2007	0.104	-0.010742	-0.095215	27.958	-62.263	1349.62765	-2.2339	0.91064	-1.189	NaN	NaN	NaN	NaN	NaN	NaN	NaN	NaN	NaN	NaN	NaN	NaN
0.386	-25.379	33.5303	7.671	0.12354	-0.0083008	-0.099609	23.96724	8.459	1316.991	-2.1245	0.94189	-1.1763	NaN	NaN	NaN	NaN	NaN	NaN	NaN	NaN	NaN	NaN	NaN	NaN
0.388	-28.657	28.83281	0.762999999999998	0.14014	-0.01123	-0.1062	21.724	-0.0969999999999942	1296.032	-2.0425	0.94873	-1.1597	NaN	NaN	NaN	NaN	NaN	NaN	NaN	NaN	NaN	NaN	NaN	NaN
0.39	-14.316	21.8972	12.551	0.15625	-0.0073242	-0.10986	24.8252	18.682	1311.231	-1.959	0.95703	-1.1406	NaN	NaN	NaN	NaN	NaN	NaN	NaN	NaN	NaN	NaN	NaN	NaN
0.392	-27.5413	23.23766	33.3897	0.17383	-0.0043945	-0.12012	8.6197	37.327	1282.601	-1.8418	0.94336	-1.1162	NaN	NaN	NaN	NaN	NaN	NaN	NaN	NaN	NaN	NaN	NaN	NaN
0.394	-32.798	36.5835	40.557	0.18408	-0.003418	-0.12598	-8.46951	-46.0488	1292.528	-1.7832	0.93555	-1.1035	NaN	NaN	NaN	NaN	NaN	NaN	NaN	NaN	NaN	NaN	NaN	NaN
0.396	-23.76	34.289	36.281	0.20166	-0.0019531	-0.13281	61.019	-31.6804	1316.0113	-1.6655	0.9165	-1.0698	NaN	NaN	NaN	NaN	NaN	NaN	NaN	NaN	NaN	NaN	NaN	NaN
0.398	-15.721	26.0382	26.7224	0.20727	0.0019531	-0.13598	71.61	-41.0786	1297.8803	-1.5866	0.89575	-1.032	NaN	NaN	NaN	NaN	NaN	NaN	NaN	NaN	NaN	NaN	NaN	NaN
0.4	-23.387	26.1302	18.726	0.21045	0.0063477	-0.14404	22.5735	-63.8449	1332.74	-1.5229	0.8833	-0.99756	NaN	NaN	NaN	NaN	NaN	NaN	NaN	NaN	NaN	NaN	NaN	NaN
0.402	-32.827	27.4617	18.175	0.21484	0.01416	-0.15381	44.237	15.99	1310.329	-1.4473	0.86328	-0.95313	NaN	NaN	NaN	NaN	NaN	NaN	NaN	NaN	NaN	NaN	NaN	NaN
0.404	-33.827	17.29809	24.806	0.21509	0.014649	-0.15698	17.2827	-0.962999999999999	1278.461	-1.4194	0.85986	-0.93506	NaN	NaN	NaN	NaN	NaN	NaN	NaN	NaN	NaN	NaN	NaN	NaN
0.406	-15.762	14.24385	41.0524	0.20801	0.020508	-0.16357	55.985	47.6524	1267.25	-1.3691	0.86328	-0.89355	NaN	NaN	NaN	NaN	NaN	NaN	NaN	NaN	NaN	NaN	NaN	NaN
0.408	-11.259	5.9294	58.36129	0.19238	0.03125	-0.16895	42.649	83.881	1242.571	-1.3405	0.8479	-0.86548	NaN	NaN	NaN	NaN	NaN	NaN	NaN	NaN	NaN	NaN	NaN	NaN
0.41	-20.635	10.9399	62.2748	0.18701	0.033203	-0.17285	17.0221	27.222	1238.149	-1.3164	0.83203	-0.83594	NaN	NaN	NaN	NaN	NaN	NaN	NaN	NaN	NaN	NaN	NaN	NaN
0.412	-17.512	5.1581	73.777	0.15967	0.037109	-0.18018	50.366	89.295	1227.8806	-1.2813	0.80859	-0.80078	NaN	NaN	NaN	NaN	NaN	NaN	NaN	NaN	NaN	NaN	NaN	NaN
0.414	-15.809	30.7616	101.8304	0.12696	0.040527	-0.18725	-18.6626	115.006	1194.62151	-1.2651	0.79736	-0.78174	NaN	NaN	NaN	NaN	NaN	NaN	NaN	NaN	NaN	NaN	NaN	NaN
0.416	-0.840999999999998	54.39341	169.8666	0.092285	0.046875	-0.19873	-14.6112	121.9624	1190.847	-1.2324	0.7666	-0.74609	NaN	NaN	NaN	NaN	NaN	NaN	NaN	NaN	NaN	NaN	NaN	NaN
0.418	-23.8739	67.1592	242.216	0.044434	0.04834	-0.20752	40.665	167.819	1148.2812	-1.1934	0.73926	-0.70898	NaN	NaN	NaN	NaN	NaN	NaN	NaN	NaN	NaN	NaN	NaN	NaN
0.42	-13.996	57.442	374.871	0.014648	0.053223	-0.21826	10.788	133.8355	1107.1283	-1.1733	0.7251	-0.6958	NaN	NaN	NaN	NaN	NaN	NaN	NaN	NaN	NaN	NaN	NaN	NaN
0.422	18.351	46.3456	468.54	-0.065918	0.058105	-0.23828	9.603	135.47683	1108.4581	-1.1357	0.69727	-0.66016	NaN	NaN	NaN	NaN	NaN	NaN	NaN	NaN	NaN	NaN	NaN	NaN
0.424	16.2085	59.0518	537.286	-0.14917	0.063964	-0.25	38.5968	154.563	1082.6743	-1.1082	0.67456	-0.62866	NaN	NaN	NaN	NaN	NaN	NaN	NaN	NaN	NaN	NaN	NaN	NaN
0.426	-0.870999999999999	32.4835	625.7249	-0.26074	0.0625	-0.25488	-6.187	104.806	1090.8	-1.0796	0.65039	-0.59912	NaN	NaN	NaN	NaN	NaN	NaN	NaN	NaN	NaN	NaN	NaN	NaN
0.428	-45.086	-17.359	713.389	-0.44873	0.055176	-0.26855	11.558	117.516	1071.963	-1.0479	0.62305	-0.5625	NaN	NaN	NaN	NaN	NaN	NaN	NaN	NaN	NaN	NaN	NaN	NaN
0.43	-78.909	-8.649	819.632	-0.55615	0.050293	-0.27783	-24.33637	96.034	1020.54	-1.0288	0.60693	-0.54443	NaN	NaN	NaN	NaN	NaN	NaN	NaN	NaN	NaN	NaN	NaN	NaN
0.432	-42.735	17.628	868.7947	-0.80029	0.04248	-0.28271	-39.9131	81.727	1000.4852	-1.0039	0.58105	-0.50293	NaN	NaN	NaN	NaN	NaN	NaN	NaN	NaN	NaN	NaN	NaN	NaN
0.434	-41.11	14.4381	879.4083	-1.0149	0.043457	-0.28809	-14.239	140.18	958.96	-0.98413	0.56274	-0.4812	NaN	NaN	NaN	NaN	NaN	NaN	NaN	NaN	NaN	NaN	NaN	NaN
0.436	-58.3555	-12.994	875.879	-1.2559	0.04834	-0.30469	-63.83018	133.1039	920.962	-0.96533	0.5459	-0.45215	NaN	NaN	NaN	NaN	NaN	NaN	NaN	NaN	NaN	NaN	NaN	NaN
0.438	-66.5045	-41.012	880.6914	-1.5806	0.087891	-0.30615	-31.821	131.817	927.584	-0.94727	0.52051	-0.41602	NaN	NaN	NaN	NaN	NaN	NaN	NaN	NaN	NaN	NaN	NaN	NaN
0.44	-56.749	-52.419	896.275	-1.7495	0.1084	-0.31592	-47.16648	146.9573	882.824	-0.94043	0.50977	-0.40332	NaN	NaN	NaN	NaN	NaN	NaN	NaN	NaN	NaN	NaN	NaN	NaN
0.442	-57.9059	-43.333	908.373	-2.0698	0.15967	-0.34521	-55.1379	123.026	849.857	-0.92139	0.48389	-0.37109	NaN	NaN	NaN	NaN	NaN	NaN	NaN	NaN	NaN	NaN	NaN	NaN
0.444	-39.515	-53.266	909.767	-2.2576	0.24805	-0.35132	6.375	165.096	812.607	-0.90015	0.46704	-0.34863	NaN	NaN	NaN	NaN	NaN	NaN	NaN	NaN	NaN	NaN	NaN	NaN
0.446	7.387	-43.6111	880.453	-2.4097	0.34521	-0.37598	-26.531	195.7067	770.788	-0.87842	0.45264	-0.32861	NaN	NaN	NaN	NaN	NaN	NaN	NaN	NaN	NaN	NaN	NaN	NaN
0.448	-2.675	-20.315	892.592	-2.4897	0.50635	-0.39795	-9.849	184.217	755.64	-0.84424	0.43652	-0.30811	NaN	NaN	NaN	NaN	NaN	NaN	NaN	NaN	NaN	NaN	NaN	NaN
0.45	-42.378	-2.696	872.802	-2.4858	0.57764	-0.41992	-6.371	195.691	697.313	-0.82227	0.42578	-0.29883	NaN	NaN	NaN	NaN	NaN	NaN	NaN	NaN	NaN	NaN	NaN	NaN
0.452	-58.422	-13.587	877.003	-2.4233	0.68213	-0.45752	-58.5436	178.911	641.028	-0.7793	0.41309	-0.27197	NaN	NaN	NaN	NaN	NaN	NaN	NaN	NaN	NaN	NaN	NaN	NaN
0.454	-50.104	-25.375	879.861	-2.3562	0.73022	-0.47387	-57.3069	159.192	628.2362	-0.74781	0.40943	-0.25684	NaN	NaN	NaN	NaN	NaN	NaN	NaN	NaN	NaN	NaN	NaN	NaN
0.456	-65.6814	-31.321	866.614	-2.2695	0.74414	-0.48926	-41.379	160.888	603.053	-0.71533	0.40869	-0.24512	NaN	NaN	NaN	NaN	NaN	NaN	NaN	NaN	NaN	NaN	NaN	NaN
0.458	-53.251	-46.646	870.562	-2.0659	0.71924	-0.48584	-71.29502	131.6729	575.208	-0.65576	0.40869	-0.23438	NaN	NaN	NaN	NaN	NaN	NaN	NaN	NaN	NaN	NaN	NaN	NaN
0.46	-35.522	-67.472	878.868	-1.9272	0.70361	-0.48486	-17.295	147.227	539.284	-0.62207	0.40576	-0.21973	NaN	NaN	NaN	NaN	NaN	NaN	NaN	NaN	NaN	NaN	NaN	NaN
0.462	-26.186	-82.083	902.224	-1.6382	0.6709	-0.48389	-44.2274	158.12	489.939	-0.53906	0.40771	-0.20215	NaN	NaN	NaN	NaN	NaN	NaN	NaN	NaN	NaN	NaN	NaN	NaN
0.464	-20.684	-122.138	943.2758	-1.449	0.65698	-0.48145	-58.0534	117.56	485.5431	-0.47657	0.40479	-0.18433	NaN	NaN	NaN	NaN	NaN	NaN	NaN	NaN	NaN	NaN	NaN	NaN
0.466	5.634	-170.352	959.3091	-1.2988	0.63965	-0.48145	1.353	140.925	471.5194	-0.40918	0.40234	-0.16895	NaN	NaN	NaN	NaN	NaN	NaN	NaN	NaN	NaN	NaN	NaN	NaN
0.468	16.298	-199.889	990.6804	-1.1504	0.62012	-0.48535	-48.082	145.304	425.234	-0.31641	0.39258	-0.14844	NaN	NaN	NaN	NaN	NaN	NaN	NaN	NaN	NaN	NaN	NaN	NaN
0.47	45.496	-191.447	1016.608	-1.0918	0.61133	-0.49268	9.244	137.8679	368.589	-0.26709	0.38477	-0.13379	NaN	NaN	NaN	NaN	NaN	NaN	NaN	NaN	NaN	NaN	NaN	NaN
0.472	30.6879	-197.303	1028.315	-1.0078	0.57813	-0.51074	6.81	165.149	313.113	-0.17334	0.375	-0.10889	NaN	NaN	NaN	NaN	NaN	NaN	NaN	NaN	NaN	NaN	NaN	NaN
0.474	11.775	-199.677	1044.338	-0.98778	0.54931	-0.51465	-54.2056	138.723	283.8655	-0.10742	0.35669	-0.085205	NaN	NaN	NaN	NaN	NaN	NaN	NaN	NaN	NaN	NaN	NaN	NaN
0.476	2.408	-192.105	1069.0883	-0.95801	0.5293	-0.5	-25.108	135.6985	260.5326	-0.04248	0.34033	-0.064453	NaN	NaN	NaN	NaN	NaN	NaN	NaN	NaN	NaN	NaN	NaN	NaN
0.478	14.0963	-185.054	1081.1715	-0.94678	0.51025	-0.52979	-60.3317	156.104	215.0798	0.038574	0.30713	-0.03418	NaN	NaN	NaN	NaN	NaN	NaN	NaN	NaN	NaN	NaN	NaN	NaN
0.48	1.1962	-160.2248	1120.4909	-0.93994	0.51807	-0.52881	-51.54299	123.315	199.418	0.074219	0.2876	-0.01416	NaN	NaN	NaN	NaN	NaN	NaN	NaN	NaN	NaN	NaN	NaN	NaN
0.482	-7.0488	-162.0633	1162.13636	-0.93115	0.52051	-0.5415	-26.948	151.785	159.416	0.14453	0.24951	0.020508	NaN	NaN	NaN	NaN	NaN	NaN	NaN	NaN	NaN	NaN	NaN	NaN
0.484	23.94075	-146.516	1205.727	-0.93921	0.51856	-0.52027	-39.657	163.442	138.364	0.18873	0.21313	0.032959	NaN	NaN	NaN	NaN	NaN	NaN	NaN	NaN	NaN	NaN	NaN	NaN
0.486	45.847	-127.233	1225.541	-0.98047	0.50781	-0.52148	-7.968	155.654	124.45	0.22998	0.18652	0.052734	NaN	NaN	NaN	NaN	NaN	NaN	NaN	NaN	NaN	NaN	NaN	NaN
0.488	46.2532	-105.721	1222.508	-1.0776	0.52783	-0.51904	-17.188	165.282	69.864	0.28125	0.14355	0.07373	NaN	NaN	NaN	NaN	NaN	NaN	NaN	NaN	NaN	NaN	NaN	NaN
0.49	41.75	-102.954	1228.407	-1.1387	0.53516	-0.51953	-35.799	115.6807	66.924	0.29883	0.12549	0.086914	NaN	NaN	NaN	NaN	NaN	NaN	NaN	NaN	NaN	NaN	NaN	NaN
0.492	20.9298	-116.013	1227.251	-1.2695	0.55859	-0.5	12.15	66.4137	84.5888	0.33203	0.088379	0.11182	NaN	NaN	NaN	NaN	NaN	NaN	NaN	NaN	NaN	NaN	NaN	NaN
0.494	7.8646	-122.0167	1265.12241	-1.3643	0.56934	-0.50489	-52.561	73.311	65.735	0.35132	0.06372	0.12573	NaN	NaN	NaN	NaN	NaN	NaN	NaN	NaN	NaN	NaN	NaN	NaN
0.496	-8.508	-136.6645	1302.7274	-1.4722	0.58057	-0.50977	-31.258	58.001	82.3576	0.36426	0.038574	0.14014	NaN	NaN	NaN	NaN	NaN	NaN	NaN	NaN	NaN	NaN	NaN	NaN
0.498	3.831	-148.502	1323.921	-1.6133	0.58203	-0.5293	19.484	63.2726	76.5274	0.36719	0.0063477	0.16309	NaN	NaN	NaN	NaN	NaN	NaN	NaN	NaN	NaN	NaN	NaN	NaN
0.5	14.598	-163.452	1333.8509	-1.6992	0.58496	-0.52832	-58.2151	70.7719	61.3075	0.36914	-0.0073242	0.17188	NaN	NaN	NaN	NaN	NaN	NaN	NaN	NaN	NaN	NaN	NaN	NaN
0.502	-18.5268	-166.973	1334.053	-1.8813	0.59424	-0.53857	-28.23	33.0129	78.12	0.35938	-0.036133	0.18896	NaN	NaN	NaN	NaN	NaN	NaN	NaN	NaN	NaN	NaN	NaN	NaN
0.504	-26.99906	-165.9403	1342.579	-2.0369	0.61206	-0.54029	-24.337	48.958	49.839	0.34423	-0.058838	0.20069	NaN	NaN	NaN	NaN	NaN	NaN	NaN	NaN	NaN	NaN	NaN	NaN
0.506	-20.5399	-148.295	1373.155	-2.1836	0.63477	-0.55078	-40.8792	18.0559	45.2443	0.32764	-0.076172	0.21289	NaN	NaN	NaN	NaN	NaN	NaN	NaN	NaN	NaN	NaN	NaN	NaN
0.508	17.617	-135.006	1382.929	-2.3398	0.68066	-0.57227	15.577	-9.498	72.875	0.30762	-0.10352	0.23389	NaN	NaN	NaN	NaN	NaN	NaN	NaN	NaN	NaN	NaN	NaN	NaN
0.51	6.4386	-133.38	1375.8165	-2.4058	0.70752	-0.59424	-38.2934	10.7166	68.0634	0.29297	-0.11426	0.23828	NaN	NaN	NaN	NaN	NaN	NaN	NaN	NaN	NaN	NaN	NaN	NaN
0.512	15.4852	-134.4288	1355.178	-2.5308	0.74463	-0.66553	-22.567	-2.356	53.7164	0.27197	-0.12598	0.25	NaN	NaN	NaN	NaN	NaN	NaN	NaN	NaN	NaN	NaN	NaN	NaN
0.514	-10.058	-139.933	1363.543	-2.6082	0.76685	-0.72534	14.629	26.006	24.2166	0.2561	-0.13428	0.25318	NaN	NaN	NaN	NaN	NaN	NaN	NaN	NaN	NaN	NaN	NaN	NaN
0.516	-22.6819	-116.91	1364.2708	-2.666	0.78711	-0.78418	-42.14604	61.5341	1.681	0.24414	-0.13379	0.25488	NaN	NaN	NaN	NaN	NaN	NaN	NaN	NaN	NaN	NaN	NaN	NaN
0.518	-6.464	-93.5	1353.84829	-2.6929	0.81201	-0.84326	-6.408	27.5087	29.985	0.23486	-0.12891	0.25537	NaN	NaN	NaN	NaN	NaN	NaN	NaN	NaN	NaN	NaN	NaN	NaN
0.52	12.2527	-88.2214	1357.4536	-2.687	0.81885	-0.86475	1.735	49.121	48.6662	0.23242	-0.12891	0.25146	NaN	NaN	NaN	NaN	NaN	NaN	NaN	NaN	NaN	NaN	NaN	NaN
0.522	27.5605	-84.636	1367.7495	-2.6621	0.82031	-0.90234	-19.548	39.7827	46.3441	0.22998	-0.11816	0.25391	NaN	NaN	NaN	NaN	NaN	NaN	NaN	NaN	NaN	NaN	NaN	NaN
0.524	14.3961	-74.074	1375.391	-2.627	0.8125	-0.92383	12.611	2.3036	44.75189	0.23023	-0.1167	0.25098	NaN	NaN	NaN	NaN	NaN	NaN	NaN	NaN	NaN	NaN	NaN	NaN
0.526	30.854	-67.708	1372.124	-2.6055	0.80078	-0.94434	-32.49072	22.2639	17.655	0.23438	-0.10938	0.24414	NaN	NaN	NaN	NaN	NaN	NaN	NaN	NaN	NaN	NaN	NaN	NaN
0.528	24.28	-81.323	1384.84	-2.5737	0.79834	-0.97217	-40.139	-26.391	30.9092	0.23193	-0.099609	0.23975	NaN	NaN	NaN	NaN	NaN	NaN	NaN	NaN	NaN	NaN	NaN	NaN
0.53	22.4761	-87.8482	1410.0806	-2.5537	0.80273	-0.9956	-13.637	-9.4698	38.0825	0.22998	-0.10156	0.23682	NaN	NaN	NaN	NaN	NaN	NaN	NaN	NaN	NaN	NaN	NaN	NaN
0.532	35.7419	-84.871	1406.39765	-2.521	0.8208	-1.019	-27.622	15.9731	9.844	0.22461	-0.09375	0.23438	NaN	NaN	NaN	NaN	NaN	NaN	NaN	NaN	NaN	NaN	NaN	NaN
0.534	28.577	-89.29	1397.364	-2.4565	0.84619	-1.0483	-6.524	-27.5154	31.965	0.2146	-0.093262	0.22192	NaN	NaN	NaN	NaN	NaN	NaN	NaN	NaN	NaN	NaN	NaN	NaN
0.536	47.128	-85.994	1413.9338	-2.4102	0.85352	-1.0625	-34.7506	1.7353	8.09	0.20361	-0.089844	0.21631	NaN	NaN	NaN	NaN	NaN	NaN	NaN	NaN	NaN	NaN	NaN	NaN
0.538	25.079	-76.0317	1420.587	-2.3042	0.86182	-1.0728	-31.519	-4.084	20.2113	0.18555	-0.083008	0.21289	NaN	NaN	NaN	NaN	NaN	NaN	NaN	NaN	NaN	NaN	NaN	NaN
0.54	29.98824	-55.2635	1408.332	-2.2148	0.85889	-1.0756	17.814	-6.7943	23.8893	0.17236	-0.08252	0.20996	NaN	NaN	NaN	NaN	NaN	NaN	NaN	NaN	NaN	NaN	NaN	NaN
0.542	25.2453	-48.2649	1392.79	-2.1343	0.84229	-1.0669	-34.928	40.0186	-15.5593	0.15137	-0.07373	0.20654	NaN	NaN	NaN	NaN	NaN	NaN	NaN	NaN	NaN	NaN	NaN	NaN
0.544	13.985	-38.1913	1383.8379	-2.0313	0.81738	-1.0508	-13.15	9.5865	-1.512	0.13769	-0.071533	0.19946	NaN	NaN	NaN	NaN	NaN	NaN	NaN	NaN	NaN	NaN	NaN	NaN
0.546	27.54012	-33.28141	1389.945	-1.9839	0.81104	-1.0425	8.155	20.0272	10.339	0.12207	-0.067383	0.19434	NaN	NaN	NaN	NaN	NaN	NaN	NaN	NaN	NaN	NaN	NaN	NaN
0.548	29.5268	-13.6135	1392.966	-1.9063	0.79004	-1.0313	-71.4646	50.412	12.1117	0.10547	-0.061035	0.19141	NaN	NaN	NaN	NaN	NaN	NaN	NaN	NaN	NaN	NaN	NaN	NaN
0.55	17.5953	-3.324	1388.4228	-1.8505	0.78174	-1.0166	-13.004	33.516	29.8076	0.091064	-0.056152	0.18823	NaN	NaN	NaN	NaN	NaN	NaN	NaN	NaN	NaN	NaN	NaN	NaN
0.552	9.0875	16.7871	1375.2959	-1.8062	0.77393	-1.0063	-23.781	64.748	7.1149	0.079102	-0.050781	0.1875	NaN	NaN	NaN	NaN	NaN	NaN	NaN	NaN	NaN	NaN	NaN	NaN
0.554	0.706	6.512	1369.424	-1.7617	0.75391	-0.98828	-62.0896	58.905	-1.2293	0.075684	-0.043945	0.18115	NaN	NaN	NaN	NaN	NaN	NaN	NaN	NaN	NaN	NaN	NaN	NaN
0.556	-20.8121	15.1318	1346.8118	-1.7578	0.73438	-0.98047	0.755000000000003	25.9343	8.787	0.067383	-0.040527	0.18164	NaN	NaN	NaN	NaN	NaN	NaN	NaN	NaN	NaN	NaN	NaN	NaN
0.558	-21.56189	1.92373	1347.0391	-1.7378	0.74072	-0.92529	-26.634	36.683	-25.764	0.065918	-0.031738	0.17969	NaN	NaN	NaN	NaN	NaN	NaN	NaN	NaN	NaN	NaN	NaN	NaN
0.56	2.021	1.1956	1340.2975	-1.7078	0.73218	-0.93628	-16.245	12.616	3.5037	0.055908	-0.028808	0.17212	NaN	NaN	NaN	NaN	NaN	NaN	NaN	NaN	NaN	NaN	NaN	NaN
0.562	11.5159	-5.87812	1321.2512	-1.6714	0.73877	-0.92529	5.086	14.1919	25.9586	0.052246	-0.023926	0.1709	NaN	NaN	NaN	NaN	NaN	NaN	NaN	NaN	NaN	NaN	NaN	NaN
0.564	-13.1247	-15.9029	1293.012	-1.6401	0.74268	-0.88818	-32.651	26.3872	30.5243	0.041992	-0.021484	0.16162	NaN	NaN	NaN	NaN	NaN	NaN	NaN	NaN	NaN	NaN	NaN	NaN
0.566	0.2089	-18.5941	1258.646	-1.6367	0.74023	-0.86572	4.461	-6.5407	57.685	0.032227	-0.01709	0.15869	NaN	NaN	NaN	NaN	NaN	NaN	NaN	NaN	NaN	NaN	NaN	NaN
0.568	5.485	-26.0172	1263.037	-1.6289	0.72168	-0.83398	-10.934	41.769	37.0109	0.019043	-0.0078125	0.15674	NaN	NaN	NaN	NaN	NaN	NaN	NaN	NaN	NaN	NaN	NaN	NaN
0.57	11.271	-3.9338	1230.2726	-1.625	0.71436	-0.81787	-25.713	55.8672	37.847	0.0080566	0.003418	0.15454	NaN	NaN	NaN	NaN	NaN	NaN	NaN	NaN	NaN	NaN	NaN	NaN
0.572	3.6204	13.9575	1221.8993	-1.6191	0.71094	-0.79688	-4.29	37.8668	66.773	-0.003418	0.01709	0.1499	NaN	NaN	NaN	NaN	NaN	NaN	NaN	NaN	NaN	NaN	NaN	NaN
0.574	8.556	11.5591	1210.983	-1.6089	0.70166	-0.75928	-42.6093	67.55	46.7397	-0.025879	0.030273	0.14893	NaN	NaN	NaN	NaN	NaN	NaN	NaN	NaN	NaN	NaN	NaN	NaN
0.576	16.881	19.3169	1205.5322	-1.6011	0.69385	-0.74072	-26.991	21.5084	37.6635	-0.038086	0.04248	0.146	NaN	NaN	NaN	NaN	NaN	NaN	NaN	NaN	NaN	NaN	NaN	NaN
0.578	13.478	36.3918	1182.0347	-1.5835	0.67822	-0.70752	4.901	13.4166	13.9728	-0.057129	0.058594	0.14258	NaN	NaN	NaN	NaN	NaN	NaN	NaN	NaN	NaN	NaN	NaN	NaN
0.58	-1.6896	61.123	1151.8326	-1.5691	0.66138	-0.69116	-55.6298	36.144	9.5517	-0.069336	0.074707	0.13745	NaN	NaN	NaN	NaN	NaN	NaN	NaN	NaN	NaN	NaN	NaN	NaN
0.582	26.1935	66.696	1141.176	-1.5405	0.64307	-0.66846	0.259	12.0237	39.9042	-0.080078	0.092773	0.12939	NaN	NaN	NaN	NaN	NaN	NaN	NaN	NaN	NaN	NaN	NaN	NaN
0.584	25.0443	82.613	1107.663	-1.5073	0.60889	-0.63721	-2.458	57.918	22.517	-0.10107	0.10938	0.12988	NaN	NaN	NaN	NaN	NaN	NaN	NaN	NaN	NaN	NaN	NaN	NaN
0.586	18.983	88.07	1088.481	-1.4849	0.59424	-0.62061	-29.321	65.3762	19.818	-0.11035	0.11816	0.12646	NaN	NaN	NaN	NaN	NaN	NaN	NaN	NaN	NaN	NaN	NaN	NaN
0.588	-4.268	86.8775	1065.723	-1.4375	0.55664	-0.59473	4.182	24.5858	39.198	-0.1333	0.13623	0.11865	NaN	NaN	NaN	NaN	NaN	NaN	NaN	NaN	NaN	NaN	NaN	NaN
0.59	16.657	75.7917	1068.29	-1.403	0.53711	-0.56861	-45.2095	36.5713	43.5396	-0.15454	0.14649	0.11548	NaN	NaN	NaN	NaN	NaN	NaN	NaN	NaN	NaN	NaN	NaN	NaN
0.592	15.796	75.332	1040.1048	-1.3726	0.52002	-0.54248	-20.793	-3.548	72.134	-0.17383	0.16211	0.10938	NaN	NaN	NaN	NaN	NaN	NaN	NaN	NaN	NaN	NaN	NaN	NaN
0.594	-1.899	86.2926	1019.0606	-1.3354	0.4917	-0.51904	-4.61	0.6073	49.752	-0.20264	0.17822	0.10059	NaN	NaN	NaN	NaN	NaN	NaN	NaN	NaN	NaN	NaN	NaN	NaN
0.596	-14.531	86.74414	1002.2151	-1.3198	0.48096	-0.50732	-46.4584	30.274	19.7539	-0.21484	0.1875	0.097168	NaN	NaN	NaN	NaN	NaN	NaN	NaN	NaN	NaN	NaN	NaN	NaN
0.598	-8.246	101.6269	985.4466	-1.2808	0.46533	-0.48193	-26.123	-17.6545	37.3705	-0.23291	0.21533	0.085938	NaN	NaN	NaN	NaN	NaN	NaN	NaN	NaN	NaN	NaN	NaN	NaN
0.6	-18.188	100.2915	958.2862	-1.2522	0.44751	-0.46167	-38.826	1.34587	30.864	-0.24805	0.23804	0.080811	NaN	NaN	NaN	NaN	NaN	NaN	NaN	NaN	NaN	NaN	NaN	NaN
0.602	-37.541	97.3142	947.063	-1.2246	0.42969	-0.44336	-31.463	0.975000000000001	30.5439	-0.2627	0.25391	0.07373	NaN	NaN	NaN	NaN	NaN	NaN	NaN	NaN	NaN	NaN	NaN	NaN
0.604	-43.885	80.9841	939.3326	-1.1797	0.41016	-0.41992	8.49	-25.3781	43.2253	-0.27734	0.28516	0.057617	NaN	NaN	NaN	NaN	NaN	NaN	NaN	NaN	NaN	NaN	NaN	NaN
0.606	-29.402	85.3983	923.2419	-1.1538	0.3999	-0.40869	-24.9136	3.8176	55.879	-0.29004	0.29834	0.053223	NaN	NaN	NaN	NaN	NaN	NaN	NaN	NaN	NaN	NaN	NaN	NaN
0.608	-34.31	103.3836	886.78092	-1.1035	0.37744	-0.38281	-38.583	-32.197	118.893	-0.31592	0.31738	0.037109	NaN	NaN	NaN	NaN	NaN	NaN	NaN	NaN	NaN	NaN	NaN	NaN
0.61	-58.8648	110.21966	853.075	-1.0676	0.35962	-0.36108	-3.771	-21.087	140.029	-0.35449	0.32861	0.016846	NaN	NaN	NaN	NaN	NaN	NaN	NaN	NaN	NaN	NaN	NaN	NaN
0.612	-54.5363	108.626	816.7584	-1.0269	0.34863	-0.34033	-32.568	45.938	152.781	-0.41016	0.3291	-0.0087891	NaN	NaN	NaN	NaN	NaN	NaN	NaN	NaN	NaN	NaN	NaN	NaN
0.614	-44.495	103.1428	795.5413	-0.98584	0.3291	-0.31494	-6.047	56.5724	312.3398	-0.51514	0.32568	-0.056641	NaN	NaN	NaN	NaN	NaN	NaN	NaN	NaN	NaN	NaN	NaN	NaN
0.616	-40.417	116.5821	743.2342	-0.96094	0.32373	-0.30713	-51.077	45.12	501.648	-0.58203	0.32129	-0.081543	NaN	NaN	NaN	NaN	NaN	NaN	NaN	NaN	NaN	NaN	NaN	NaN
0.618	-61.181004	122.43374	717.713	-0.91162	0.31006	-0.28223	-127.363	-59.3293	640.45	-0.76563	0.29199	-0.11768	NaN	NaN	NaN	NaN	NaN	NaN	NaN	NaN	NaN	NaN	NaN	NaN
0.62	-40.425	119.4627	711.512	-0.87866	0.30566	-0.26562	-34.993	-98.573	763.467	-0.94436	0.26318	-0.1587	NaN	NaN	NaN	NaN	NaN	NaN	NaN	NaN	NaN	NaN	NaN	NaN
0.622	-30.111	122.9109	685.8652	-0.84131	0.29736	-0.24561	43.0052	-75.28	819.448	-1.1519	0.24512	-0.18896	NaN	NaN	NaN	NaN	NaN	NaN	NaN	NaN	NaN	NaN	NaN	NaN
0.624	-35.335	132.584	647.463	-0.78467	0.2876	-0.22412	-13.0799	-71.3	1015.791	-1.4473	0.25488	-0.24268	NaN	NaN	NaN	NaN	NaN	NaN	NaN	NaN	NaN	NaN	NaN	NaN
0.626	-32.966	124.6377	613.7975	-0.7583	0.2832	-0.20557	-50.4071	-14.04	1149.8037	-1.5874	0.26514	-0.26123	NaN	NaN	NaN	NaN	NaN	NaN	NaN	NaN	NaN	NaN	NaN	NaN
0.628	-18.556	111.9057	601.4966	-0.71289	0.27051	-0.20605	-81.763	14.6746	1087.015	-1.8516	0.29199	-0.29297	NaN	NaN	NaN	NaN	NaN	NaN	NaN	NaN	NaN	NaN	NaN	NaN
0.63	-18.586	122.204	569.60744	-0.66578	0.26392	-0.18799	2.1447	-71.712	1123.556	-2.0144	0.3108	-0.32471	NaN	NaN	NaN	NaN	NaN	NaN	NaN	NaN	NaN	NaN	NaN	NaN
0.632	-30.237	130.113	535.3018	-0.62305	0.25439	-0.17285	17.6641	-70.908	1190.579	-2.1284	0.34424	-0.36182	NaN	NaN	NaN	NaN	NaN	NaN	NaN	NaN	NaN	NaN	NaN	NaN
0.634	-14.066	121.4753	497.686	-0.5752	0.24756	-0.15332	20.298	-125.429	1257.119	-2.1836	0.40137	-0.40137	NaN	NaN	NaN	NaN	NaN	NaN	NaN	NaN	NaN	NaN	NaN	NaN
0.636	8.34099999999999	109.0505	473.4807	-0.54492	0.24365	-0.1377	44.99788	-143.194	1290.45	-2.1733	0.43018	-0.41553	NaN	NaN	NaN	NaN	NaN	NaN	NaN	NaN	NaN	NaN	NaN	NaN
0.638	-3.607	107.857	433.7328	-0.48926	0.2334	-0.12207	13.67	-73.831	1199.634	-2.105	0.48877	-0.41357	NaN	NaN	NaN	NaN	NaN	NaN	NaN	NaN	NaN	NaN	NaN	NaN
0.64	-20.939	101.629	407.2791	-0.44947	0.22681	-0.10767	8.307	-98.794	1162.803	-2.0437	0.52124	-0.39331	NaN	NaN	NaN	NaN	NaN	NaN	NaN	NaN	NaN	NaN	NaN	NaN
0.642	-0.907000000000004	100.5422	388.6356	-0.4043	0.21875	-0.088379	38.662	-81.535	1118.5416	-1.98	0.54541	-0.36133	NaN	NaN	NaN	NaN	NaN	NaN	NaN	NaN	NaN	NaN	NaN	NaN
0.644	2.443	98.45946	371.09363	-0.35449	0.20264	-0.063965	16.293	-59.197	1061.146	-1.8828	0.55811	-0.32129	NaN	NaN	NaN	NaN	NaN	NaN	NaN	NaN	NaN	NaN	NaN	NaN
0.646	-13.237	110.964	358.633	-0.32373	0.19287	-0.055176	62.5526	-93.208	1067.887	-1.8359	0.56445	-0.31006	NaN	NaN	NaN	NaN	NaN	NaN	NaN	NaN	NaN	NaN	NaN	NaN
0.648	-5.609	98.148	325.0989	-0.26221	0.18555	-0.025391	14.288	-58.282	1099.26	-1.7222	0.59131	-0.28467	NaN	NaN	NaN	NaN	NaN	NaN	NaN	NaN	NaN	NaN	NaN	NaN
0.65	-14.046	92.5888	303.7912	-0.2146	0.17822	-0.0056153	-87.745	-77.137	1124.6568	-1.6314	0.62695	-0.27759	NaN	NaN	NaN	NaN	NaN	NaN	NaN	NaN	NaN	NaN	NaN	NaN
0.652	-24.663	99.4664	270.7432	-0.16943	0.16895	0.013184	-31.0904	-64.257	1112.632	-1.5435	0.67236	-0.27734	NaN	NaN	NaN	NaN	NaN	NaN	NaN	NaN	NaN	NaN	NaN	NaN
0.654	-27.687	110.859	246.7217	-0.098145	0.15771	0.031738	21.574	-10.241	1057.238	-1.4277	0.75879	-0.30078	NaN	NaN	NaN	NaN	NaN	NaN	NaN	NaN	NaN	NaN	NaN	NaN
0.656	-30.843	110.6756	220.5771	-0.04956	0.15258	0.050782	48.198	-83.202	1057.58	-1.3765	0.80127	-0.31738	NaN	NaN	NaN	NaN	NaN	NaN	NaN	NaN	NaN	NaN	NaN	NaN
0.658	-20.462	86.7666	197.4662	-0.0048828	0.14209	0.064941	37.6455	-78.193	1076.799	-1.2729	0.86963	-0.35303	NaN	NaN	NaN	NaN	NaN	NaN	NaN	NaN	NaN	NaN	NaN	NaN
0.66	-39.3989	78.8052	175.4844	0.052246	0.12305	0.087402	-18.624	-115.2	1127.4787	-1.2094	0.91211	-0.38916	NaN	NaN	NaN	NaN	NaN	NaN	NaN	NaN	NaN	NaN	NaN	NaN
0.662	-29.97	61.647	149.1807	0.070801	0.11719	0.097168	-7.209	-194.452	1206.255	-1.1523	0.94727	-0.42236	NaN	NaN	NaN	NaN	NaN	NaN	NaN	NaN	NaN	NaN	NaN	NaN
0.664	-38.621	64.982	133.1078	0.12256	0.12061	0.11133	11.144	-199.932	1210.878	-1.1035	0.96484	-0.46191	NaN	NaN	NaN	NaN	NaN	NaN	NaN	NaN	NaN	NaN	NaN	NaN
0.666	-26.82	73.9936	133.9223	0.14819	0.094238	0.12207	0.896000000000001	-237.75	1197.565	-1.0942	0.96924	-0.46924	NaN	NaN	NaN	NaN	NaN	NaN	NaN	NaN	NaN	NaN	NaN	NaN
0.668	-41.35	82.5772	118.31009	0.18115	0.084473	0.14014	-7.642	-232.637	1184.6934	-1.0874	0.96924	-0.49951	NaN	NaN	NaN	NaN	NaN	NaN	NaN	NaN	NaN	NaN	NaN	NaN
0.67	-35.156	73.3279	107.0269	0.21191	0.07373	0.16016	-44.824	-181.0991	1170.388	-1.1072	0.96411	-0.51318	NaN	NaN	NaN	NaN	NaN	NaN	NaN	NaN	NaN	NaN	NaN	NaN
0.672	-46.9757	49.4871	100.825	0.22705	0.068359	0.16406	-98.012	-217.493	1205.987	-1.1465	0.96289	-0.53467	NaN	NaN	NaN	NaN	NaN	NaN	NaN	NaN	NaN	NaN	NaN	NaN
0.674	-43.26	43.9485	89.8023	0.24707	0.061035	0.17529	-113.934	-194.179	1254.6753	-1.2354	0.9707	-0.56934	NaN	NaN	NaN	NaN	NaN	NaN	NaN	NaN	NaN	NaN	NaN	NaN
0.676	-35.141	53.05077	65.1493	0.26196	0.050293	0.1836	-130.835	-179.411	1245.321	-1.2891	0.97461	-0.58691	NaN	NaN	NaN	NaN	NaN	NaN	NaN	NaN	NaN	NaN	NaN	NaN
0.678	-37.93	49.5878	57.3183	0.27393	0.032227	0.19482	-63.1943	-178.308	1291.3882	-1.3828	0.9834	-0.60938	NaN	NaN	NaN	NaN	NaN	NaN	NaN	NaN	NaN	NaN	NaN	NaN
0.68	-40.2348	44.4021	54.0561	0.28662	0.016602	0.20557	-3.96	-87.506	1272.276	-1.4587	0.97534	-0.61059	NaN	NaN	NaN	NaN	NaN	NaN	NaN	NaN	NaN	NaN	NaN	NaN
0.682	-17.376	41.3805	38.747	0.28613	0.0087891	0.21094	-82.426	-67.418	1259.131	-1.5469	0.95898	-0.60449	NaN	NaN	NaN	NaN	NaN	NaN	NaN	NaN	NaN	NaN	NaN	NaN
0.684	-3.403	48.882	40.61	0.2915	-0.011719	0.21924	-65.403	-24.843	1290.244	-1.707	0.94141	-0.58203	NaN	NaN	NaN	NaN	NaN	NaN	NaN	NaN	NaN	NaN	NaN	NaN
0.686	-21.045	32.6759	41.8072	0.28906	-0.030274	0.22266	-44.444	-5.268	1273.7383	-1.8603	0.9375	-0.57691	NaN	NaN	NaN	NaN	NaN	NaN	NaN	NaN	NaN	NaN	NaN	NaN
0.688	-1.635	29.3652	37.09579	0.28516	-0.048828	0.22705	-89.916	-90.3	1311.201	-2.0234	0.94531	-0.57422	NaN	NaN	NaN	NaN	NaN	NaN	NaN	NaN	NaN	NaN	NaN	NaN
0.69	-17.098	40.3201	34.39288	0.27734	-0.064941	0.23291	-46.542	-118.2862	1354.201	-2.2383	0.98633	-0.58203	NaN	NaN	NaN	NaN	NaN	NaN	NaN	NaN	NaN	NaN	NaN	NaN
0.692	-19.295	48.6077	28.3896	0.27295	-0.069336	0.22949	-87.82	-139.2142	1346.965	-2.3374	1.0073	-0.57764	NaN	NaN	NaN	NaN	NaN	NaN	NaN	NaN	NaN	NaN	NaN	NaN
0.694	-5.8	32.491	26.188	0.25879	-0.088867	0.22754	-92.035	-146.987	1368.2952	-2.519	1.0542	-0.58154	NaN	NaN	NaN	NaN	NaN	NaN	NaN	NaN	NaN	NaN	NaN	NaN
0.696	-18.203	22.0273	28.5474	0.24511	-0.091064	0.22949	-88.578	-109.0778	1348.3628	-2.6287	1.0989	-0.58081	NaN	NaN	NaN	NaN	NaN	NaN	NaN	NaN	NaN	NaN	NaN	NaN
0.698	-20.76	28.0733	24.731695	0.23291	-0.1001	0.22363	-111.0326	-135.388	1333.334	-2.7202	1.1421	-0.58936	NaN	NaN	NaN	NaN	NaN	NaN	NaN	NaN	NaN	NaN	NaN	NaN
0.7	-21.149	26.8196	25.3792	0.2041	-0.10498	0.21924	-85.4216	-141.981	1354.132	-2.812	1.188	-0.60791	NaN	NaN	NaN	NaN	NaN	NaN	NaN	NaN	NaN	NaN	NaN	NaN
0.702	-22.585	23.2896	30.8909	0.19385	-0.10205	0.21338	-70.8126	-128.4811	1361.06994	-2.834	1.2012	-0.61133	NaN	NaN	NaN	NaN	NaN	NaN	NaN	NaN	NaN	NaN	NaN	NaN
0.704	-19.733	14.68436	33.2682	0.1709	-0.10352	0.20752	-52.089	-139.994	1398.5476	-2.8394	1.229	-0.61475	NaN	NaN	NaN	NaN	NaN	NaN	NaN	NaN	NaN	NaN	NaN	NaN
0.706	-14.22	31.5756	23.70575	0.15649	-0.10034	0.20142	-8.56100000000001	-92.151	1384.86	-2.8015	1.2483	-0.61255	NaN	NaN	NaN	NaN	NaN	NaN	NaN	NaN	NaN	NaN	NaN	NaN
0.708	-4.646	31.706	18.15291	0.13818	-0.096191	0.19434	-61.077	-43.8503	1330.07906	-2.7437	1.2603	-0.60059	NaN	NaN	NaN	NaN	NaN	NaN	NaN	NaN	NaN	NaN	NaN	NaN
0.71	-26.588	17.1599	16.1799	0.12256	-0.092285	0.18506	-66.185	-26.445	1304.5497	-2.6392	1.272	-0.60107	NaN	NaN	NaN	NaN	NaN	NaN	NaN	NaN	NaN	NaN	NaN	NaN
0.712	-18.909	15.586	17.785	0.11182	-0.089844	0.18213	-59.066	21.108	1281.047	-2.5776	1.2798	-0.59717	NaN	NaN	NaN	NaN	NaN	NaN	NaN	NaN	NaN	NaN	NaN	NaN
0.714	-38.1434	19.6357	31.8504	0.09375	-0.076172	0.17578	-103.9132	9.1822	1275.42	-2.4453	1.2988	-0.60352	NaN	NaN	NaN	NaN	NaN	NaN	NaN	NaN	NaN	NaN	NaN	NaN
0.716	-34.522	22.9699	17.7872	0.079346	-0.070313	0.16675	-64.647	18.902	1297.64638	-2.3296	1.3076	-0.60205	NaN	NaN	NaN	NaN	NaN	NaN	NaN	NaN	NaN	NaN	NaN	NaN
0.718	-46.9645	16.13965	40.29837	0.069336	-0.058594	0.15723	-63.303	50.739	1267.278	-2.2109	1.3066	-0.59668	NaN	NaN	NaN	NaN	NaN	NaN	NaN	NaN	NaN	NaN	NaN	NaN
0.72	-25.204	28.8275	35.7961	0.055176	-0.04248	0.14453	-124.293	4.589	1281.0631	-2.0483	1.3013	-0.5835	NaN	NaN	NaN	NaN	NaN	NaN	NaN	NaN	NaN	NaN	NaN	NaN
0.722	-37.136	35.801	15.2922	0.047363	-0.039063	0.13623	-100.0267	11.712	1241.203	-1.9722	1.2876	-0.57373	NaN	NaN	NaN	NaN	NaN	NaN	NaN	NaN	NaN	NaN	NaN	NaN
0.724	-45.355	38.631	12.8352	0.030273	-0.020996	0.12354	-133.3534	-1.817	1204.115	-1.8496	1.2539	-0.55078	NaN	NaN	NaN	NaN	NaN	NaN	NaN	NaN	NaN	NaN	NaN	NaN
0.726	-42.41	33.11	13.8197	0.018066	-0.0085451	0.11938	-101.781	-35.324	1232.677	-1.7781	1.218	-0.5271	NaN	NaN	NaN	NaN	NaN	NaN	NaN	NaN	NaN	NaN	NaN	NaN
0.728	-22.553	22.6931	15.4932	0.0078125	0.0043945	0.11426	-49.745	-5.8686	1259.823	-1.7183	1.1821	-0.50684	NaN	NaN	NaN	NaN	NaN	NaN	NaN	NaN	NaN	NaN	NaN	NaN
0.73	-9.011	18.03	13.5161	-0.0087891	0.018066	0.10645	-77.042	-20.775	1261.6566	-1.6558	1.1392	-0.48682	NaN	NaN	NaN	NaN	NaN	NaN	NaN	NaN	NaN	NaN	NaN	NaN
0.732	-27.831	7.912	20.7841	-0.016113	0.027832	0.10254	-56.293	3.09	1271.552	-1.6309	1.1172	-0.47363	NaN	NaN	NaN	NaN	NaN	NaN	NaN	NaN	NaN	NaN	NaN	NaN
0.734	-22.56	20.7874	20.872	-0.028809	0.04248	0.099121	-99.2199	48.354	1266.969	-1.5757	1.0728	-0.45459	NaN	NaN	NaN	NaN	NaN	NaN	NaN	NaN	NaN	NaN	NaN	NaN
0.736	-17.813	29.2385	24.2188	-0.041993	0.057861	0.096191	-115.9541	34.391	1259.295	-1.5317	1.0449	-0.44165	NaN	NaN	NaN	NaN	NaN	NaN	NaN	NaN	NaN	NaN	NaN	NaN
0.738	-33.163	39.9933	23.64746	-0.049805	0.072754	0.094238	-61.57	76.29662	1260.656	-1.4941	1.0098	-0.4248	NaN	NaN	NaN	NaN	NaN	NaN	NaN	NaN	NaN	NaN	NaN	NaN
0.74	-33.43	35.1513	27.2976	-0.053711	0.092285	0.088867	-80.524	99.316	1224.2641	-1.4395	0.96191	-0.40918	NaN	NaN	NaN	NaN	NaN	NaN	NaN	NaN	NaN	NaN	NaN	NaN
0.742	-20.589	16.0212	36.5664	-0.051758	0.10156	0.087891	-74.518	82.785	1222.02173	-1.4219	0.94141	-0.40039	NaN	NaN	NaN	NaN	NaN	NaN	NaN	NaN	NaN	NaN	NaN	NaN
0.744	-12.768	20.5425	20.5079	-0.060547	0.11621	0.089355	-44.928	114.227	1200.512	-1.3799	0.89551	-0.38184	NaN	NaN	NaN	NaN	NaN	NaN	NaN	NaN	NaN	NaN	NaN	NaN
0.746	-28.935	24.1929	19.9355	-0.0625	0.12988	0.081787	-85.081	105.573	1168.9589	-1.3535	0.86523	-0.36792	NaN	NaN	NaN	NaN	NaN	NaN	NaN	NaN	NaN	NaN	NaN	NaN
0.748	-11.496	18.8804	21.47602	-0.061523	0.13428	0.07959	-69.40901	117.9885	1164.842	-1.3281	0.83398	-0.35352	NaN	NaN	NaN	NaN	NaN	NaN	NaN	NaN	NaN	NaN	NaN	NaN
0.75	-13.839	11.1611	32.19722	-0.061523	0.14844	0.080566	-37.16	138.547	1140.892	-1.2939	0.78711	-0.33496	NaN	NaN	NaN	NaN	NaN	NaN	NaN	NaN	NaN	NaN	NaN	NaN
0.752	-23.295	27.3962	18.7456	-0.060059	0.14893	0.075195	-30.476	128.1436	1118.75942	-1.2729	0.77002	-0.32959	NaN	NaN	NaN	NaN	NaN	NaN	NaN	NaN	NaN	NaN	NaN	NaN
0.754	-15.989	22.7453	24.1758	-0.055176	0.15479	0.078125	-0.699000000000005	145.8596	1120.4404	-1.228	0.73193	-0.31543	NaN	NaN	NaN	NaN	NaN	NaN	NaN	NaN	NaN	NaN	NaN	NaN
0.756	-15.677	28.6698	22.3181	-0.050048	0.15723	0.075195	-21.756	148.2489	1112.7312	-1.1972	0.70313	-0.30273	NaN	NaN	NaN	NaN	NaN	NaN	NaN	NaN	NaN	NaN	NaN	NaN
0.758	-8.82	28.7234	27.7217	-0.046387	0.16064	0.074707	-16.467	100.967	1117.358	-1.1597	0.67236	-0.28467	NaN	NaN	NaN	NaN	NaN	NaN	NaN	NaN	NaN	NaN	NaN	NaN
0.76	-30.047	44.562	35.9527	-0.043457	0.1626	0.07373	-3.89	101.382	1087.724	-1.1118	0.62939	-0.27393	NaN	NaN	NaN	NaN	NaN	NaN	NaN	NaN	NaN	NaN	NaN	NaN
0.762	-28.937	32.736	24.5513	-0.043457	0.1626	0.07373	-48.5828	101.394	1035.5286	-1.0913	0.60596	-0.26465	NaN	NaN	NaN	NaN	NaN	NaN	NaN	NaN	NaN	NaN	NaN	NaN
0.764	-34.45	19.2729	24.797	-0.044434	0.16748	0.078613	-7.509	120.0472	1019.9186	-1.0527	0.56445	-0.25195	NaN	NaN	NaN	NaN	NaN	NaN	NaN	NaN	NaN	NaN	NaN	NaN
0.766	-4.25	12.8265	17.9841	-0.041748	0.16602	0.070801	2.824	148.699	1008.441	-1.0266	0.53394	-0.24902	NaN	NaN	NaN	NaN	NaN	NaN	NaN	NaN	NaN	NaN	NaN	NaN
0.768	-32.998	12.4425	46.70842	-0.040527	0.16553	0.064941	-33.123	130.4548	983.69526	-1.0039	0.50781	-0.24023	NaN	NaN	NaN	NaN	NaN	NaN	NaN	NaN	NaN	NaN	NaN	NaN
0.77	-49.419	9.14363	65.11566	-0.040039	0.1665	0.06543	-14.827	132.7633	963.264	-0.97168	0.47266	-0.23877	NaN	NaN	NaN	NaN	NaN	NaN	NaN	NaN	NaN	NaN	NaN	NaN
0.772	-12.096	8.9672	83.6046	-0.043457	0.16162	0.061523	-32.2391	144.031	923.9369	-0.95752	0.45361	-0.23535	NaN	NaN	NaN	NaN	NaN	NaN	NaN	NaN	NaN	NaN	NaN	NaN
0.774	-11.277	19.409	87.9406	-0.053711	0.16602	0.057617	-23.2534	125.731	891.127	-0.93555	0.41797	-0.23535	NaN	NaN	NaN	NaN	NaN	NaN	NaN	NaN	NaN	NaN	NaN	NaN
0.776	-33.3221	28.7957	101.538	-0.065674	0.16577	0.053955	12.832	150.4836	855.368	-0.91577	0.39722	-0.23047	NaN	NaN	NaN	NaN	NaN	NaN	NaN	NaN	NaN	NaN	NaN	NaN
0.778	-42.185	12.1924	140.5989	-0.083008	0.15918	0.048828	-29.34	188.6308	797.726	-0.8999	0.37646	-0.22852	NaN	NaN	NaN	NaN	NaN	NaN	NaN	NaN	NaN	NaN	NaN	NaN
0.78	-43.703	1.7832	192.3606	-0.1167	0.15039	0.043457	17.594	171.8882	795.432	-0.87256	0.36768	-0.23291	NaN	NaN	NaN	NaN	NaN	NaN	NaN	NaN	NaN	NaN	NaN	NaN
0.782	-32.711	-6.3312	207.0616	-0.14941	0.14747	0.035156	10.155	188.796	774.356	-0.86328	0.35986	-0.23242	NaN	NaN	NaN	NaN	NaN	NaN	NaN	NaN	NaN	NaN	NaN	NaN
0.784	-20.041	-14.431	224.6335	-0.18799	0.14307	0.021484	-49.295	166.9473	741.1088	-0.84082	0.35107	-0.22803	NaN	NaN	NaN	NaN	NaN	NaN	NaN	NaN	NaN	NaN	NaN	NaN
0.786	-14.465	-37.1306	231.7399	-0.24365	0.13721	0.0048828	-16.9863	155.237	729.6867	-0.82129	0.34913	-0.22827	NaN	NaN	NaN	NaN	NaN	NaN	NaN	NaN	NaN	NaN	NaN	NaN
0.788	-24.261	-39.907264	248.9447	-0.27246	0.13184	0.0019531	-39.5235	196.73	686.06	-0.81055	0.34912	-0.22363	NaN	NaN	NaN	NaN	NaN	NaN	NaN	NaN	NaN	NaN	NaN	NaN
0.79	-29.901	-19.0409	287.5785	-0.33789	0.13477	-0.018066	-20.314	163.6776	663.6516	-0.78271	0.34912	-0.22705	NaN	NaN	NaN	NaN	NaN	NaN	NaN	NaN	NaN	NaN	NaN	NaN
0.792	-53.619	-8.3888	315.613	-0.38281	0.13574	-0.020508	22.085	162.928	632.142	-0.7666	0.34961	-0.22754	NaN	NaN	NaN	NaN	NaN	NaN	NaN	NaN	NaN	NaN	NaN	NaN
0.794	-32.573	-23.665	353.077	-0.43408	0.14209	-0.026855	-34.7819	159.822	575.043	-0.7168	0.36035	-0.229	NaN	NaN	NaN	NaN	NaN	NaN	NaN	NaN	NaN	NaN	NaN	NaN
0.796	2.402	-29.1802	374.585	-0.51025	0.13867	-0.041504	-11.427	124.754	570.592	-0.66309	0.3667	-0.22852	NaN	NaN	NaN	NaN	NaN	NaN	NaN	NaN	NaN	NaN	NaN	NaN
0.798	-5.55	-16.9222	421.65216	-0.55566	0.146	-0.04834	10.5224	155.5957	546.76629	-0.60693	0.36963	-0.22412	NaN	NaN	NaN	NaN	NaN	NaN	NaN	NaN	NaN	NaN	NaN	NaN
0.8	-17.863	-10.1362	474.83157	-0.6499	0.15088	-0.062012	5.5299	143.617	514.6266	-0.5293	0.35742	-0.2168	NaN	NaN	NaN	NaN	NaN	NaN	NaN	NaN	NaN	NaN	NaN	NaN
0.802	-44.063	4.44407	546.50586	-0.72437	0.15992	-0.077393	48.413	140.1252	493.831	-0.48633	0.35107	-0.21338	NaN	NaN	NaN	NaN	NaN	NaN	NaN	NaN	NaN	NaN	NaN	NaN
0.804	-40.765	24.3381	596.7673	-0.80469	0.16846	-0.09082	20.342	175.855	432.293	-0.41064	0.33301	-0.20361	NaN	NaN	NaN	NaN	NaN	NaN	NaN	NaN	NaN	NaN	NaN	NaN
0.806	-44.059	46.997	645.0275	-0.92188	0.18652	-0.11865	18.199	142.2799	403.2564	-0.35351	0.3125	-0.19775	NaN	NaN	NaN	NaN	NaN	NaN	NaN	NaN	NaN	NaN	NaN	NaN
0.808	-20.749	26.0235	704.605	-0.98828	0.19727	-0.12939	36.3384	157.066	379.28832	-0.30078	0.30176	-0.18066	NaN	NaN	NaN	NaN	NaN	NaN	NaN	NaN	NaN	NaN	NaN	NaN
0.81	-48.193	2.864	760.579	-1.1216	0.22314	-0.15674	-15.4655	174.081	337.099	-0.22754	0.28564	-0.16748	NaN	NaN	NaN	NaN	NaN	NaN	NaN	NaN	NaN	NaN	NaN	NaN
0.812	-49.972	-10.25285	819.3133	-1.2234	0.24243	-0.18409	23.3299	117.662	318.954	-0.19141	0.271	-0.16211	NaN	NaN	NaN	NaN	NaN	NaN	NaN	NaN	NaN	NaN	NaN	NaN
0.814	-61.98104	-17.2718	864.7332	-1.3237	0.271	-0.20605	-11.995	144.078	274.3535	-0.12061	0.24707	-0.14502	NaN	NaN	NaN	NaN	NaN	NaN	NaN	NaN	NaN	NaN	NaN	NaN
0.816	-52.385	-26.8476	880.382	-1.4434	0.30957	-0.24023	-27.929	135.7119	238.316	-0.073974	0.22314	-0.12915	NaN	NaN	NaN	NaN	NaN	NaN	NaN	NaN	NaN	NaN	NaN	NaN
0.818	-34.5607	-40.7243	875.7621	-1.5029	0.32129	-0.25684	24.574	122.632	219.346	-0.02002	0.20068	-0.1167	NaN	NaN	NaN	NaN	NaN	NaN	NaN	NaN	NaN	NaN	NaN	NaN
0.82	-17.315	-53.907	894.1455	-1.6074	0.35498	-0.28516	3.169	162.839	180.754	0.036621	0.1626	-0.10059	NaN	NaN	NaN	NaN	NaN	NaN	NaN	NaN	NaN	NaN	NaN	NaN
0.822	-12.905	-44.542	917.62	-1.6602	0.38282	-0.29858	-30.482	93.6106	174.168	0.073975	0.12793	-0.082031	NaN	NaN	NaN	NaN	NaN	NaN	NaN	NaN	NaN	NaN	NaN	NaN
0.824	-38.864	-51.559	960.9265	-1.7007	0.4126	-0.30957	-3.259	72.1428	164.0058	0.11328	0.097168	-0.068359	NaN	NaN	NaN	NaN	NaN	NaN	NaN	NaN	NaN	NaN	NaN	NaN
0.826	-33.8657	-46.025	999.4	-1.7188	0.45215	-0.32715	-15.288	89.2537	140.9226	0.15625	0.050781	-0.045898	NaN	NaN	NaN	NaN	NaN	NaN	NaN	NaN	NaN	NaN	NaN	NaN
0.828	-17.2569	-32.8339	1009.337	-1.7148	0.46875	-0.33203	-10.555	61.019	150.8867	0.1748	0.032227	-0.041992	NaN	NaN	NaN	NaN	NaN	NaN	NaN	NaN	NaN	NaN	NaN	NaN
0.83	-8.134	-18.6321	1002.105	-1.6812	0.49951	-0.34131	-26.469	107.211	131.0299	0.21338	-0.0048828	-0.017578	NaN	NaN	NaN	NaN	NaN	NaN	NaN	NaN	NaN	NaN	NaN	NaN
0.832	-9.061	-16.7665	1005.0376	-1.6395	0.51904	-0.33545	-35.1395	80.0396	103.7264	0.2312	-0.036621	-0.013428	NaN	NaN	NaN	NaN	NaN	NaN	NaN	NaN	NaN	NaN	NaN	NaN
0.834	-31.777	-12.549	1030.00485	-1.5894	0.53564	-0.3291	-33.655	38.144	117.4333	0.25439	-0.069336	-0.0073242	NaN	NaN	NaN	NaN	NaN	NaN	NaN	NaN	NaN	NaN	NaN	NaN
0.836	-10.662	6.05	1038.23903	-1.5073	0.5415	-0.32471	-68.938	68.3152	85.43	0.27783	-0.11816	-0.0019531	NaN	NaN	NaN	NaN	NaN	NaN	NaN	NaN	NaN	NaN	NaN	NaN
0.838	-12.105	6.294	1048.8753	-1.4609	0.54688	-0.31445	-21.0899	23.94	92.4271	0.28613	-0.14355	0.0039063	NaN	NaN	NaN	NaN	NaN	NaN	NaN	NaN	NaN	NaN	NaN	NaN
0.84	5.3987	-12.998	1042.3534	-1.3589	0.55713	-0.30762	2.641	31.1674	105.522	0.2915	-0.18506	0.0087891	NaN	NaN	NaN	NaN	NaN	NaN	NaN	NaN	NaN	NaN	NaN	NaN
0.842	1.454	-30.755	1047.631	-1.281	0.56274	-0.31836	-48.1064	72.763	64.3598	0.29736	-0.22119	0.0095216	NaN	NaN	NaN	NaN	NaN	NaN	NaN	NaN	NaN	NaN	NaN	NaN
0.844	4.158	-41.758	1062.977	-1.2051	0.56348	-0.33301	-19.317	23.6462	66.3805	0.30225	-0.25537	0.0092773	NaN	NaN	NaN	NaN	NaN	NaN	NaN	NaN	NaN	NaN	NaN	NaN
0.846	15.289	-51.55185	1090.715	-1.127	0.56641	-0.33887	-26.022	51.9583	41.478	0.29443	-0.29541	0.012207	NaN	NaN	NaN	NaN	NaN	NaN	NaN	NaN	NaN	NaN	NaN	NaN
0.848	-17.284	-71.8868	1112.1497	-1.0913	0.57471	-0.33545	-41.157	31.401	32.111	0.28906	-0.31006	0.0063477	NaN	NaN	NaN	NaN	NaN	NaN	NaN	NaN	NaN	NaN	NaN	NaN
0.85	18.932	-86.397	1129.335	-1.0464	0.58838	-0.34375	-6.684	-17.5444	60.627	0.28174	-0.34668	0.0073242	NaN	NaN	NaN	NaN	NaN	NaN	NaN	NaN	NaN	NaN	NaN	NaN
0.852	-1.245	-94.552	1137.689	-1.0388	0.59302	-0.35401	-25.546	49.9981	41.9066	0.26196	-0.36426	0.0080565	NaN	NaN	NaN	NaN	NaN	NaN	NaN	NaN	NaN	NaN	NaN	NaN
0.854	-4.592	-98.9875	1150.881	-1.0371	0.5918	-0.3623	-1.618	24.7299	42.56	0.23877	-0.38086	0.0019531	NaN	NaN	NaN	NaN	NaN	NaN	NaN	NaN	NaN	NaN	NaN	NaN
0.856	-30.409	-104.3295	1169.4161	-1.0488	0.58887	-0.36328	25.984	31.8356	39.106	0.21289	-0.39697	-0.00097656	NaN	NaN	NaN	NaN	NaN	NaN	NaN	NaN	NaN	NaN	NaN	NaN
0.858	-14.74	-97.6089	1175.249	-1.0605	0.58984	-0.36523	-36.1679	52.664	16.431	0.19678	-0.39355	0.0058594	NaN	NaN	NaN	NaN	NaN	NaN	NaN	NaN	NaN	NaN	NaN	NaN
0.86	-38.795	-77.2735	1175.2443	-1.0996	0.59375	-0.37207	-6.154	-31.7562	34.09	0.15967	-0.40381	0.0058594	NaN	NaN	NaN	NaN	NaN	NaN	NaN	NaN	NaN	NaN	NaN	NaN
0.862	-47.345	-62.1192	1157.77	-1.1382	0.6045	-0.37964	-4.99100000000001	21.8339	34.8392	0.13306	-0.39746	0.003418	NaN	NaN	NaN	NaN	NaN	NaN	NaN	NaN	NaN	NaN	NaN	NaN
0.864	-42.0525	-62.3408	1183.5134	-1.1885	0.60645	-0.38672	-16	12.126	36.1108	0.10791	-0.38232	-0.00097656	NaN	NaN	NaN	NaN	NaN	NaN	NaN	NaN	NaN	NaN	NaN	NaN
0.866	-47.604	-68.60891	1213.6062	-1.2593	0.60303	-0.39453	12.301	-13.8859	35.09722	0.083008	-0.36621	0.00048828	NaN	NaN	NaN	NaN	NaN	NaN	NaN	NaN	NaN	NaN	NaN	NaN
0.868	-49.779	-43.7989	1232.7401	-1.3008	0.60156	-0.3916	-20.037	52.272	0.778000000000002	0.069336	-0.35449	0.0019531	NaN	NaN	NaN	NaN	NaN	NaN	NaN	NaN	NaN	NaN	NaN	NaN
0.87	-46.228	-36.9023	1229.1221	-1.3965	0.58691	-0.38525	-13.229	10.2802	2.694	0.053223	-0.32959	-0.003418	NaN	NaN	NaN	NaN	NaN	NaN	NaN	NaN	NaN	NaN	NaN	NaN
0.872	-50.603	-30.6191	1229.7103	-1.4961	0.58544	-0.3872	13.664	4.8671	-9.119	0.046875	-0.31225	-0.0056152	NaN	NaN	NaN	NaN	NaN	NaN	NaN	NaN	NaN	NaN	NaN	NaN
0.874	-56.136	-31.9477	1240.974	-1.6069	0.58594	-0.38428	-27.185	42.11301	-10.335	0.033203	-0.29248	-0.0073242	NaN	NaN	NaN	NaN	NaN	NaN	NaN	NaN	NaN	NaN	NaN	NaN
0.876	-82.492	-32.734	1259.113	-1.7734	0.60547	-0.38379	-11.006	-14.4324	22.2985	0.025879	-0.27197	-0.0078125	NaN	NaN	NaN	NaN	NaN	NaN	NaN	NaN	NaN	NaN	NaN	NaN
0.878	-90.076	-36.621	1266.324	-1.8589	0.62158	-0.3833	-29.1524	41.2	24.724	0.022949	-0.26367	-0.010254	NaN	NaN	NaN	NaN	NaN	NaN	NaN	NaN	NaN	NaN	NaN	NaN
0.88	-85.2136	-59.39408	1289.64189	-2.0215	0.66016	-0.38672	-35.3783	50.377	24.3519	0.016113	-0.2417	-0.021973	NaN	NaN	NaN	NaN	NaN	NaN	NaN	NaN	NaN	NaN	NaN	NaN
0.882	-59.634	-54.649	1291.8427	-2.1441	0.69434	-0.39844	-22.631	23.0777	30.5882	0.013184	-0.22998	-0.015625	NaN	NaN	NaN	NaN	NaN	NaN	NaN	NaN	NaN	NaN	NaN	NaN
0.884	-91.0293	-51.5242	1294.9934	-2.2671	0.73096	-0.41064	-34.218	87.637	-3.9711	0.016113	-0.21729	-0.025391	NaN	NaN	NaN	NaN	NaN	NaN	NaN	NaN	NaN	NaN	NaN	NaN
0.886	-91.6295	-58.305	1288.001	-2.4258	0.7793	-0.43359	-31.6849	30.3494	0.0910000000000002	0.021973	-0.19629	-0.036133	NaN	NaN	NaN	NaN	NaN	NaN	NaN	NaN	NaN	NaN	NaN	NaN
0.888	-78.163	-63.691	1293.6961	-2.5015	0.80518	-0.44336	-48.268	37.884	8.625	0.026855	-0.18457	-0.040527	NaN	NaN	NaN	NaN	NaN	NaN	NaN	NaN	NaN	NaN	NaN	NaN
0.89	-61.096	-49.054	1298.1223	-2.6416	0.84766	-0.46387	-38.207	73.329	3.187	0.036133	-0.16162	-0.050781	NaN	NaN	NaN	NaN	NaN	NaN	NaN	NaN	NaN	NaN	NaN	NaN
0.892	-64.831	-41.857	1295.51	-2.718	0.88208	-0.47046	6.656	-7.9961	45.2583	0.045655	-0.14673	-0.056885	NaN	NaN	NaN	NaN	NaN	NaN	NaN	NaN	NaN	NaN	NaN	NaN
0.894	-52.703	-43.2722	1295.717498	-2.7671	0.90674	-0.48242	-27.167	34.8951	42.709	0.052246	-0.13037	-0.060059	NaN	NaN	NaN	NaN	NaN	NaN	NaN	NaN	NaN	NaN	NaN	NaN
0.896	-34.692	-26.0291	1273.46	-2.769	0.93896	-0.48926	-40.1089	20.229	19.729	0.055664	-0.10938	-0.072266	NaN	NaN	NaN	NaN	NaN	NaN	NaN	NaN	NaN	NaN	NaN	NaN
0.898	-70.426	-9.3476	1275.667	-2.7539	0.94922	-0.49902	-6.502	4.4111	40.232	0.057617	-0.099609	-0.074707	NaN	NaN	NaN	NaN	NaN	NaN	NaN	NaN	NaN	NaN	NaN	NaN
0.9	-69.07	7.6531	1275.9588	-2.6914	0.96777	-0.50977	-34.8754	80.698	17.409	0.062012	-0.081055	-0.085449	NaN	NaN	NaN	NaN	NaN	NaN	NaN	NaN	NaN	NaN	NaN	NaN
0.902	-77.618	3.82	1282.3531	-2.6363	0.97705	-0.5205	-22.545	46.321	37.211	0.061279	-0.067871	-0.095459	NaN	NaN	NaN	NaN	NaN	NaN	NaN	NaN	NaN	NaN	NaN	NaN
0.904	-53.944	8.5352	1270.0396	-2.5757	0.98291	-0.5249	-13.376	36.308	67.052	0.063477	-0.048828	-0.10693	NaN	NaN	NaN	NaN	NaN	NaN	NaN	NaN	NaN	NaN	NaN	NaN
0.906	-63.95	19.0027	1260.5793	-2.4785	0.98828	-0.54346	-23.553	44.0816	48.6232	0.068359	-0.033203	-0.11963	NaN	NaN	NaN	NaN	NaN	NaN	NaN	NaN	NaN	NaN	NaN	NaN
0.908	-79.529	15.9801	1260.5126	-2.397	0.98975	-0.54931	10.089	-31.55294	52.3081	0.070313	-0.025879	-0.1167	NaN	NaN	NaN	NaN	NaN	NaN	NaN	NaN	NaN	NaN	NaN	NaN
0.91	-68.563	2.90467	1251.5929	-2.3062	0.98291	-0.55127	-9.009	20.1356	37.0095	0.07373	-0.012695	-0.13037	NaN	NaN	NaN	NaN	NaN	NaN	NaN	NaN	NaN	NaN	NaN	NaN
0.912	-53.664	-2.0675	1261.0153	-2.1821	0.98291	-0.55127	-23.5687	37.0132	31.9693	0.070312	-0.0012207	-0.13965	NaN	NaN	NaN	NaN	NaN	NaN	NaN	NaN	NaN	NaN	NaN	NaN
0.914	-53.025	6.375	1233.6117	-2.1187	0.98291	-0.55029	-1.023	28.5866	43.156	0.066895	0.0073242	-0.14941	NaN	NaN	NaN	NaN	NaN	NaN	NaN	NaN	NaN	NaN	NaN	NaN
0.916	-71.021	-5.27	1226.551	-1.9917	0.97705	-0.54834	-8.811	78.236	41.0009	0.066895	0.021484	-0.15576	NaN	NaN	NaN	NaN	NaN	NaN	NaN	NaN	NaN	NaN	NaN	NaN
0.918	-56.619	-10.4369	1235.943	-1.9067	0.96387	-0.54468	-6.805	16.6519	34.7877	0.063965	0.026855	-0.1626	NaN	NaN	NaN	NaN	NaN	NaN	NaN	NaN	NaN	NaN	NaN	NaN
0.92	-67.032	-0.626000000000001	1247.1058	-1.8286	0.94971	-0.53467	8.529	-11.3613	40.5603	0.062012	0.043945	-0.16895	NaN	NaN	NaN	NaN	NaN	NaN	NaN	NaN	NaN	NaN	NaN	NaN
0.922	-86.847	18.2271	1255.065	-1.7539	0.93359	-0.51807	-38.29357	24.5968	29.0488	0.049804	0.051514	-0.17676	NaN	NaN	NaN	NaN	NaN	NaN	NaN	NaN	NaN	NaN	NaN	NaN
0.924	-78.2669	24.1681	1238.099	-1.7363	0.91895	-0.51172	-34.011	-29.6255	41.419	0.044434	0.064941	-0.18359	NaN	NaN	NaN	NaN	NaN	NaN	NaN	NaN	NaN	NaN	NaN	NaN
0.926	-87.9187	27.2495	1222.8252	-1.7046	0.90869	-0.48389	-6.705	33.6969	35.513	0.02832	0.077148	-0.18604	NaN	NaN	NaN	NaN	NaN	NaN	NaN	NaN	NaN	NaN	NaN	NaN
0.928	-77.8945	48.4182	1190.245	-1.6782	0.89306	-0.50049	-12.859	21.2391	33.855	0.01416	0.081055	-0.19092	NaN	NaN	NaN	NaN	NaN	NaN	NaN	NaN	NaN	NaN	NaN	NaN
0.93	-90.755	59.197	1185.5	-1.6445	0.89648	-0.49805	-10.09	-47.797	57.3601	-0.01123	0.09375	-0.20313	NaN	NaN	NaN	NaN	NaN	NaN	NaN	NaN	NaN	NaN	NaN	NaN
0.932	-82.65	61.8378	1179.833	-1.6128	0.88916	-0.46533	-46.6101	-12.0661	63.8072	-0.050049	0.097656	-0.20459	NaN	NaN	NaN	NaN	NaN	NaN	NaN	NaN	NaN	NaN	NaN	NaN
0.934	-64.052	57.221	1176.326	-1.6055	0.88477	-0.45166	-23.334	-39.6061	88.75	-0.083984	0.096191	-0.21143	NaN	NaN	NaN	NaN	NaN	NaN	NaN	NaN	NaN	NaN	NaN	NaN
0.936	-52.166	76.976739	1153.3401	-1.5977	0.86523	-0.42969	-33.84	-1.74	89.5545	-0.13379	0.098633	-0.22314	NaN	NaN	NaN	NaN	NaN	NaN	NaN	NaN	NaN	NaN	NaN	NaN
0.938	-61.6382	82.1858	1148.0774	-1.5955	0.85767	-0.42212	-45.6185	55.845	96.834	-0.16016	0.1001	-0.22656	NaN	NaN	NaN	NaN	NaN	NaN	NaN	NaN	NaN	NaN	NaN	NaN
0.94	-50.21	85.198	1153.9464	-1.5933	0.84033	-0.40771	-25.446	-21.4122	136.465	-0.21582	0.10596	-0.23682	NaN	NaN	NaN	NaN	NaN	NaN	NaN	NaN	NaN	NaN	NaN	NaN
0.942	-29.369	85.7689	1149.16544	-1.5762	0.8125	-0.37842	-34.909	6.413	169.839	-0.27465	0.10938	-0.24878	NaN	NaN	NaN	NaN	NaN	NaN	NaN	NaN	NaN	NaN	NaN	NaN
0.944	-62.012	92.9883	1145.5491	-1.562	0.79541	-0.36279	-16.495	24.009	241.351	-0.34863	0.11084	-0.26025	NaN	NaN	NaN	NaN	NaN	NaN	NaN	NaN	NaN	NaN	NaN	NaN
0.946	-49.542	78.0509	1118.7705	-1.541	0.75977	-0.3457	21.539	56.397	464.144	-0.49414	0.099609	-0.26953	NaN	NaN	NaN	NaN	NaN	NaN	NaN	NaN	NaN	NaN	NaN	NaN
0.948	-36.168	60.618	1104.0329	-1.5193	0.73462	-0.32373	-81.682	150.945	613.918	-0.58789	0.09082	-0.27441	NaN	NaN	NaN	NaN	NaN	NaN	NaN	NaN	NaN	NaN	NaN	NaN
0.95	-39.258	73.3239	1092.0674	-1.498	0.70508	-0.30469	-131.9249	106.845	757.489	-0.81787	0.071289	-0.2749	NaN	NaN	NaN	NaN	NaN	NaN	NaN	NaN	NaN	NaN	NaN	NaN
0.952	-55.491	93.55937	1074.1345	-1.4629	0.66895	-0.27441	-32.91	66.786	784.109	-1.0127	0.061524	-0.29175	NaN	NaN	NaN	NaN	NaN	NaN	NaN	NaN	NaN	NaN	NaN	NaN
0.954	-21.051	106.9433	1062.1524	-1.4492	0.64941	-0.26709	-3.262	51.026	824.04	-1.2227	0.066406	-0.30713	NaN	NaN	NaN	NaN	NaN	NaN	NaN	NaN	NaN	NaN	NaN	NaN
0.956	-18.12	115.8218	1043.1087	-1.4097	0.61035	-0.24316	-46.361	-32.269	959.051	-1.5	0.083008	-0.34131	NaN	NaN	NaN	NaN	NaN	NaN	NaN	NaN	NaN	NaN	NaN	NaN
0.958	-24.969	123.98218	1020.06605	-1.3843	0.5835	-0.22851	-64.1543	6.714	1048.133	-1.6911	0.12548	-0.36645	NaN	NaN	NaN	NaN	NaN	NaN	NaN	NaN	NaN	NaN	NaN	NaN
0.96	-16.183	130.54868	1005.4854	-1.3555	0.55469	-0.20996	-64.847	7.616	1015.271	-1.8706	0.18311	-0.39014	NaN	NaN	NaN	NaN	NaN	NaN	NaN	NaN	NaN	NaN	NaN	NaN
0.962	-30.147	120.0677	991.7275	-1.3218	0.52588	-0.19775	-45.623	-42.2711	972.258	-2.0718	0.2915	-0.42041	NaN	NaN	NaN	NaN	NaN	NaN	NaN	NaN	NaN	NaN	NaN	NaN
0.964	-23.524	129.6874	977.0343	-1.3062	0.51221	-0.18359	-68.039	-45.2951	941.1005	-2.1558	0.35107	-0.43994	NaN	NaN	NaN	NaN	NaN	NaN	NaN	NaN	NaN	NaN	NaN	NaN
0.966	-18.728	144.8038	949.343	-1.2739	0.48877	-0.16748	-28.775	-123.6841	935.621	-2.2593	0.47119	-0.47217	NaN	NaN	NaN	NaN	NaN	NaN	NaN	NaN	NaN	NaN	NaN	NaN
0.968	-31.216	150.002	926.2195	-1.2539	0.46436	-0.16114	-6.58	-119.819	972.225	-2.3015	0.54712	-0.4917	NaN	NaN	NaN	NaN	NaN	NaN	NaN	NaN	NaN	NaN	NaN	NaN
0.97	-36.071	139.138	903.704	-1.231	0.44775	-0.14697	-30.461	-47.112	949.525	-2.3164	0.59375	-0.50781	NaN	NaN	NaN	NaN	NaN	NaN	NaN	NaN	NaN	NaN	NaN	NaN
0.972	-36.5	139.527	895.761	-1.2031	0.42969	-0.13867	-16.817	-82.613	945.945	-2.2891	0.62598	-0.52246	NaN	NaN	NaN	NaN	NaN	NaN	NaN	NaN	NaN	NaN	NaN	NaN
0.974	-34.55	142.658	874.4468	-1.189	0.41943	-0.12744	-20.92	-31.086	953.535	-2.25	0.62695	-0.53906	NaN	NaN	NaN	NaN	NaN	NaN	NaN	NaN	NaN	NaN	NaN	NaN
0.976	-51.9515	134.7994	852.43041	-1.1641	0.40723	-0.11914	-17.725	17.243	938.6118	-2.0957	0.60938	-0.57324	NaN	NaN	NaN	NaN	NaN	NaN	NaN	NaN	NaN	NaN	NaN	NaN
0.978	-30.541	123.05121	831.5083	-1.1411	0.39014	-0.10962	12.368	3.57899999999999	923.111	-1.9119	0.59009	-0.58764	NaN	NaN	NaN	NaN	NaN	NaN	NaN	NaN	NaN	NaN	NaN	NaN
0.98	-34.1011	119.2265	800.9272	-1.1152	0.37793	-0.104	-37.913	55.718	915.989	-1.7104	0.56885	-0.59131	NaN	NaN	NaN	NaN	NaN	NaN	NaN	NaN	NaN	NaN	NaN	NaN
0.982	-20.019	128.4719	780.2561	-1.0835	0.36328	-0.099121	-110.218	3.70400000000001	963.977	-1.4688	0.5376	-0.61914	NaN	NaN	NaN	NaN	NaN	NaN	NaN	NaN	NaN	NaN	NaN	NaN
0.984	-17.931	126.177	770.1631	-1.0703	0.35791	-0.09668	-67.494	-11.6	980.56466	-1.3633	0.52539	-0.63281	NaN	NaN	NaN	NaN	NaN	NaN	NaN	NaN	NaN	NaN	NaN	NaN
0.986	-17.723	124.909	748.6971	-1.0332	0.34521	-0.086914	-43.559	-38.649	988.4915	-1.2051	0.50391	-0.64648	NaN	NaN	NaN	NaN	NaN	NaN	NaN	NaN	NaN	NaN	NaN	NaN
0.988	-4.85	129.399	724.74508	-1.0005	0.33667	-0.089356	5.063	-131.5228	1010.1196	-1.1257	0.49682	-0.65307	NaN	NaN	NaN	NaN	NaN	NaN	NaN	NaN	NaN	NaN	NaN	NaN
0.99	-21.406	142.09873	700.1511	-0.97314	0.32861	-0.089355	26.564	-173.851	1006.998	-1.0684	0.50195	-0.66406	NaN	NaN	NaN	NaN	NaN	NaN	NaN	NaN	NaN	NaN	NaN	NaN
0.992	-18.714	140.181	687.8237	-0.92383	0.31543	-0.073242	4.845	-207.93	1016.067	-1.0195	0.5127	-0.67969	NaN	NaN	NaN	NaN	NaN	NaN	NaN	NaN	NaN	NaN	NaN	NaN
0.994	-23.125	144.178	663.7554	-0.896	0.30908	-0.072754	24.116	-257.954	1070.7345	-1.0132	0.53076	-0.68506	NaN	NaN	NaN	NaN	NaN	NaN	NaN	NaN	NaN	NaN	NaN	NaN
0.996	0.0659999999999989	142.707	633.9794	-0.83789	0.30029	-0.066895	16.3416	-231.68	1108.645	-1.0068	0.55566	-0.69336	NaN	NaN	NaN	NaN	NaN	NaN	NaN	NaN	NaN	NaN	NaN	NaN
0.998	-36.0813	139.245	594.6267	-0.7937	0.29297	-0.061768	40.333	-238.108	1200.7733	-1.031	0.57739	-0.69605	NaN	NaN	NaN	NaN	NaN	NaN	NaN	NaN	NaN	NaN	NaN	NaN
1	-22.135	126.1668	564.1908	-0.74658	0.28076	-0.066895	54.577	-238.213	1257.858	-1.0757	0.60205	-0.70264	NaN	NaN	NaN	NaN	NaN	NaN	NaN	NaN	NaN	NaN	NaN	NaN
1.002	-17.234	110.7162	539.482	-0.6792	0.26221	-0.062012	13.9529	-204.262	1272.11	-1.1519	0.63916	-0.7124	NaN	NaN	NaN	NaN	NaN	NaN	NaN	NaN	NaN	NaN	NaN	NaN
1.004	0.252000000000002	127.279	502.008	-0.64941	0.26611	-0.04248	-21.718	-194.952	1293.552	-1.2041	0.66016	-0.71289	NaN	NaN	NaN	NaN	NaN	NaN	NaN	NaN	NaN	NaN	NaN	NaN
1.006	11.752	127.5997	484.7011	-0.59082	0.24854	-0.047363	-25.86061	-131.885	1290.482	-1.314	0.71143	-0.70459	NaN	NaN	NaN	NaN	NaN	NaN	NaN	NaN	NaN	NaN	NaN	NaN
1.008	9.963	128.71327	465.83587	-0.53833	0.23438	-0.049073	-39.61	-76.699	1274.6467	-1.4033	0.75001	-0.70605	NaN	NaN	NaN	NaN	NaN	NaN	NaN	NaN	NaN	NaN	NaN	NaN
1.01	3.961	127.6997	447.7058	-0.4873	0.2251	-0.043457	27.0902	-102.403	1297.122	-1.4976	0.78564	-0.69678	NaN	NaN	NaN	NaN	NaN	NaN	NaN	NaN	NaN	NaN	NaN	NaN
1.012	-9.32	129.1433	425.39929	-0.41357	0.21826	-0.033691	46.7621	-110.95	1306.239	-1.6348	0.80664	-0.70801	NaN	NaN	NaN	NaN	NaN	NaN	NaN	NaN	NaN	NaN	NaN	NaN
1.014	-8.983	118.6751	424.0233	-0.38281	0.21191	-0.028809	57.494	-129.5617	1305.343	-1.7012	0.8125	-0.7168	NaN	NaN	NaN	NaN	NaN	NaN	NaN	NaN	NaN	NaN	NaN	NaN
1.016	-29.362	102.29306	402.7556	-0.31592	0.20117	-0.014648	88.071	-102.3114	1298.834	-1.8452	0.79736	-0.73682	NaN	NaN	NaN	NaN	NaN	NaN	NaN	NaN	NaN	NaN	NaN	NaN
1.018	-23.65	98.2724	370.7859	-0.27759	0.19092	-0.013184	13.0657	-52.6116	1306.528	-1.9624	0.78955	-0.76123	NaN	NaN	NaN	NaN	NaN	NaN	NaN	NaN	NaN	NaN	NaN	NaN
1.02	-31.803	107.317	325.5018	-0.22852	0.18848	-0.0043945	35.413	-102.481	1339.3152	-2.0854	0.7876	-0.79053	NaN	NaN	NaN	NaN	NaN	NaN	NaN	NaN	NaN	NaN	NaN	NaN
1.022	-41.705	108.3648	298.519	-0.17334	0.17725	0.0024414	26.3399	-106.7389	1357.007	-2.2261	0.7915	-0.83154	NaN	NaN	NaN	NaN	NaN	NaN	NaN	NaN	NaN	NaN	NaN	NaN
1.024	-34.652	104.8122	272.417	-0.14307	0.17139	0.0043945	-5.178	-126.3787	1384.977	-2.2798	0.80127	-0.84912	NaN	NaN	NaN	NaN	NaN	NaN	NaN	NaN	NaN	NaN	NaN	NaN
1.026	-29.758	100.0705	251.8448	-0.082031	0.15918	0.012695	44.969	-167.7041	1410.826	-2.3472	0.81934	-0.87939	NaN	NaN	NaN	NaN	NaN	NaN	NaN	NaN	NaN	NaN	NaN	NaN
1.028	-13.641	101.9835	229.631	-0.04541	0.15137	0.015625	26.3043	-140.633	1411.7868	-2.3681	0.82422	-0.89453	NaN	NaN	NaN	NaN	NaN	NaN	NaN	NaN	NaN	NaN	NaN	NaN
1.03	-25.23	90.61509	221.0566	-0.017578	0.13477	0.020508	-19.396	-139.6789	1431.895	-2.3765	0.80908	-0.92334	NaN	NaN	NaN	NaN	NaN	NaN	NaN	NaN	NaN	NaN	NaN	NaN
1.032	-8.832	78.5534	215.9625	0.016602	0.11328	0.029785	4.09963	-135.1198	1415.437	-2.3926	0.75586	-0.97852	NaN	NaN	NaN	NaN	NaN	NaN	NaN	NaN	NaN	NaN	NaN	NaN
1.034	-24.814	73.526	210.6472	0.041016	0.094482	0.029053	14.2514	-106.2133	1392.051	-2.4004	0.72461	-1.0156	NaN	NaN	NaN	NaN	NaN	NaN	NaN	NaN	NaN	NaN	NaN	NaN
1.036	-47.553	91.729	188.1483	0.063965	0.07666	0.03125	36.3822	-125.828	1393.453	-2.4077	0.66846	-1.0854	NaN	NaN	NaN	NaN	NaN	NaN	NaN	NaN	NaN	NaN	NaN	NaN
1.038	-21.331	87.4664	167.2594	0.094238	0.054199	0.034668	91.958	-98.32	1383.567	-2.3931	0.6372	-1.1187	NaN	NaN	NaN	NaN	NaN	NaN	NaN	NaN	NaN	NaN	NaN	NaN
1.04	-40.5835	93.9714	128.226	0.10303	0.038086	0.04248	46.363	-64.095	1370.8306	-2.3706	0.62354	-1.1421	NaN	NaN	NaN	NaN	NaN	NaN	NaN	NaN	NaN	NaN	NaN	NaN
1.042	-19.651	89.1425	121.101	0.12842	0.013672	0.043457	37.7308	-45.658	1387.772	-2.3394	0.63428	-1.1675	NaN	NaN	NaN	NaN	NaN	NaN	NaN	NaN	NaN	NaN	NaN	NaN
1.044	-42.521	90.022	113.064	0.14697	0.0019532	0.049072	34.9683	20.594	1355.222	-2.332	0.66016	-1.1875	NaN	NaN	NaN	NaN	NaN	NaN	NaN	NaN	NaN	NaN	NaN	NaN
1.046	-19.829	69.596	118.4413	0.15918	-0.01416	0.045898	9.6733	39.9671	1362.136	-2.3237	0.71924	-1.2212	NaN	NaN	NaN	NaN	NaN	NaN	NaN	NaN	NaN	NaN	NaN	NaN
1.048	-15.011	64.1979	117.2501	0.17578	-0.04248	0.048828	60.734	45.72	1362.605	-2.3203	0.7666	-1.2539	NaN	NaN	NaN	NaN	NaN	NaN	NaN	NaN	NaN	NaN	NaN	NaN
1.05	10.555	59.6836	100.1449	0.18066	-0.051758	0.049805	36.5344	81.895	1354.565	-2.3003	0.81201	-1.2729	NaN	NaN	NaN	NaN	NaN	NaN	NaN	NaN	NaN	NaN	NaN	NaN
1.052	-7.651	39.922	106.16913	0.19287	-0.070313	0.050781	37.968	83.403	1372.742	-2.2417	0.85596	-1.2866	NaN	NaN	NaN	NaN	NaN	NaN	NaN	NaN	NaN	NaN	NaN	NaN
1.054	-8.361	42.409	94.3475	0.19189	-0.085449	0.046631	34.2395	85.619	1397.7055	-2.1973	0.87891	-1.2891	NaN	NaN	NaN	NaN	NaN	NaN	NaN	NaN	NaN	NaN	NaN	NaN
1.056	5.949	56.1395	66.897	0.19531	-0.10693	0.041992	19.324	68.679	1390.758	-2.0859	0.89453	-1.2813	NaN	NaN	NaN	NaN	NaN	NaN	NaN	NaN	NaN	NaN	NaN	NaN
1.058	-8.77	66.73431	60.616	0.19482	-0.12939	0.040039	43.4272	0.0939999999999994	1402.694	-2.0008	0.90161	-1.2688	NaN	NaN	NaN	NaN	NaN	NaN	NaN	NaN	NaN	NaN	NaN	NaN
1.06	-27.531	66.0535	70.975171	0.19043	-0.13916	0.038086	65.234	0.832999999999998	1373.6192	-1.9121	0.91211	-1.248	NaN	NaN	NaN	NaN	NaN	NaN	NaN	NaN	NaN	NaN	NaN	NaN
1.062	-18.975	47.4802	53.3169	0.18311	-0.15967	0.033203	68.653	12.569	1360.8047	-1.7905	0.92432	-1.2144	NaN	NaN	NaN	NaN	NaN	NaN	NaN	NaN	NaN	NaN	NaN	NaN
1.064	-20.544	50.755	47.639	0.17041	-0.17603	0.024902	81.157	17.899	1361.6745	-1.7383	0.92773	-1.1982	NaN	NaN	NaN	NaN	NaN	NaN	NaN	NaN	NaN	NaN	NaN	NaN
1.066	-34.106	54.3082	51.3916	0.15381	-0.18506	0.024902	46.765	57.869	1334.4198	-1.6382	0.93799	-1.1519	NaN	NaN	NaN	NaN	NaN	NaN	NaN	NaN	NaN	NaN	NaN	NaN
1.068	-31.111	50.053	73.0698	0.12646	-0.19922	0.02002	36.4636	31.106	1342.613	-1.5757	0.93945	-1.1172	NaN	NaN	NaN	NaN	NaN	NaN	NaN	NaN	NaN	NaN	NaN	NaN
1.07	-11.39	49.6141	58.9228	0.10742	-0.20264	0.01709	79.084	37.111	1342.891	-1.5254	0.93945	-1.0879	NaN	NaN	NaN	NaN	NaN	NaN	NaN	NaN	NaN	NaN	NaN	NaN
1.072	-27.939	51.0691	38.42648	0.074219	-0.20996	0.01123	38.3367	54.2175	1295.5476	-1.4644	0.93408	-1.0386	NaN	NaN	NaN	NaN	NaN	NaN	NaN	NaN	NaN	NaN	NaN	NaN
1.074	-36.948	52.0309	21.367	0.052246	-0.21216	0.0056152	56.642	51.1548	1295.72	-1.4414	0.92773	-1.0195	NaN	NaN	NaN	NaN	NaN	NaN	NaN	NaN	NaN	NaN	NaN	NaN
1.076	-40.649	39.39193	22.274	0.023926	-0.21387	0.00048828	33.707	128.675	1267.6664	-1.3926	0.9082	-0.97656	NaN	NaN	NaN	NaN	NaN	NaN	NaN	NaN	NaN	NaN	NaN	NaN
1.078	-13.155	38.6412	32.964	-0.0073242	-0.21094	-0.0043945	-0.6297	167.736	1252.66674	-1.364	0.87671	-0.93677	NaN	NaN	NaN	NaN	NaN	NaN	NaN	NaN	NaN	NaN	NaN	NaN
1.08	-27.884	37.6688	24.7197	-0.025391	-0.20654	-0.0048828	53.144	149.778	1234.485	-1.334	0.84961	-0.91016	NaN	NaN	NaN	NaN	NaN	NaN	NaN	NaN	NaN	NaN	NaN	NaN
1.082	-44.889	40.2618	29.9127	-0.061523	-0.19824	-0.0073242	35.75	158.4764	1193.3323	-1.2813	0.81445	-0.87109	NaN	NaN	NaN	NaN	NaN	NaN	NaN	NaN	NaN	NaN	NaN	NaN
1.084	-39.32	27.0625	40.9589	-0.081787	-0.18652	-0.01001	47.546	125.301	1186.287	-1.2656	0.80078	-0.8457	NaN	NaN	NaN	NaN	NaN	NaN	NaN	NaN	NaN	NaN	NaN	NaN
1.086	-43.931	18.1512	48.5392	-0.1001	-0.17969	-0.015625	76.693	127.6377	1188.2451	-1.2437	0.76025	-0.7959	NaN	NaN	NaN	NaN	NaN	NaN	NaN	NaN	NaN	NaN	NaN	NaN
1.088	-32.443	26.7274	44.765	-0.11475	-0.1709	-0.0092773	19.4331	170.064	1151.692	-1.2261	0.71924	-0.74658	NaN	NaN	NaN	NaN	NaN	NaN	NaN	NaN	NaN	NaN	NaN	NaN
1.09	-53.425	36.9803	40.5031	-0.11865	-0.1665	-0.024902	25.6661	133.007	1153.1014	-1.2183	0.69775	-0.72412	NaN	NaN	NaN	NaN	NaN	NaN	NaN	NaN	NaN	NaN	NaN	NaN
1.092	-23.103	33.847	29.0391	-0.12598	-0.15332	-0.027832	23.815	139.4219	1118.18	-1.2031	0.65967	-0.68164	NaN	NaN	NaN	NaN	NaN	NaN	NaN	NaN	NaN	NaN	NaN	NaN
1.094	-20.347	34.9488	15.929	-0.12329	-0.14917	-0.03247	11.9988	129.144	1082.4021	-1.1829	0.63013	-0.65307	NaN	NaN	NaN	NaN	NaN	NaN	NaN	NaN	NaN	NaN	NaN	NaN
1.096	-18.008	35.93081	9.225	-0.11816	-0.14453	-0.037109	1.037	101.836	1087.1476	-1.1621	0.5918	-0.62598	NaN	NaN	NaN	NaN	NaN	NaN	NaN	NaN	NaN	NaN	NaN	NaN
1.098	-33.633	26.0753	19.738	-0.10498	-0.13672	-0.041992	-28.746	176.224	1055.691	-1.1245	0.54346	-0.57959	NaN	NaN	NaN	NaN	NaN	NaN	NaN	NaN	NaN	NaN	NaN	NaN
1.1	-18.871	18.2779	31.2641	-0.097168	-0.13232	-0.041016	-12.1276	159.3262	1050.6168	-1.1069	0.51807	-0.55908	NaN	NaN	NaN	NaN	NaN	NaN	NaN	NaN	NaN	NaN	NaN	NaN
1.102	-6.323	21.2755	28.1521	-0.075684	-0.12646	-0.046387	8.271	169.851	1028.21778	-1.0737	0.46582	-0.51855	NaN	NaN	NaN	NaN	NaN	NaN	NaN	NaN	NaN	NaN	NaN	NaN
1.104	-26.229	33.1569	28.9573	-0.056641	-0.12231	-0.047608	-30.1122	188.7287	964.1031	-1.0576	0.4292	-0.48706	NaN	NaN	NaN	NaN	NaN	NaN	NaN	NaN	NaN	NaN	NaN	NaN
1.106	-14.31	27.4761	39.773	-0.040039	-0.12061	-0.048828	-19.048	136.788	959.0999	-1.0439	0.39941	-0.45313	NaN	NaN	NaN	NaN	NaN	NaN	NaN	NaN	NaN	NaN	NaN	NaN
1.108	-17.064	24.787	29.1729	-0.0078125	-0.12012	-0.053223	9.709	188.963	905.728	-1.0225	0.35791	-0.42773	NaN	NaN	NaN	NaN	NaN	NaN	NaN	NaN	NaN	NaN	NaN	NaN
1.11	-21.593	32.0611	14.9071	0.0063477	-0.11963	-0.052734	3.831	203.4527	882.159	-1.0093	0.34424	-0.41357	NaN	NaN	NaN	NaN	NaN	NaN	NaN	NaN	NaN	NaN	NaN	NaN
1.112	-11.58	25.1031	13.4221	0.033691	-0.11865	-0.056641	12.03	191.1068	876.6768	-0.97656	0.3125	-0.37109	NaN	NaN	NaN	NaN	NaN	NaN	NaN	NaN	NaN	NaN	NaN	NaN
1.114	-20.242	15.9564	28.7962	0.051758	-0.11743	-0.054199	-23.187	242.085	822.143	-0.95996	0.29102	-0.34473	NaN	NaN	NaN	NaN	NaN	NaN	NaN	NaN	NaN	NaN	NaN	NaN
1.116	-24.441	3.9699	26.2585	0.072266	-0.11768	-0.063965	-8.011	203.407	795.2626	-0.93945	0.27344	-0.31445	NaN	NaN	NaN	NaN	NaN	NaN	NaN	NaN	NaN	NaN	NaN	NaN
1.118	-28.237	15.6493	25.1473	0.095703	-0.12305	-0.062988	-29.255	212.506	754.1139	-0.91016	0.25537	-0.28418	NaN	NaN	NaN	NaN	NaN	NaN	NaN	NaN	NaN	NaN	NaN	NaN
1.12	-12.846	17.8236	22.1016	0.10693	-0.11865	-0.063965	-52.99667	234.817	701.958	-0.89209	0.25342	-0.26904	NaN	NaN	NaN	NaN	NaN	NaN	NaN	NaN	NaN	NaN	NaN	NaN
1.122	-23.776	13.7899	44.122	0.12793	-0.12061	-0.066895	-20.683	179.5338	719.529	-0.84131	0.24512	-0.24072	NaN	NaN	NaN	NaN	NaN	NaN	NaN	NaN	NaN	NaN	NaN	NaN
1.124	-21.713	18.3654	39.2448	0.13867	-0.11841	-0.069336	-26.899	215.265	686.253	-0.80005	0.24048	-0.22192	NaN	NaN	NaN	NaN	NaN	NaN	NaN	NaN	NaN	NaN	NaN	NaN
1.126	-39.361	26.1068	19.3305	0.14941	-0.11914	-0.069336	-28.8848	202.4254	638.9133	-0.74805	0.23877	-0.19971	NaN	NaN	NaN	NaN	NaN	NaN	NaN	NaN	NaN	NaN	NaN	NaN
1.128	-26.067	21.7244	22.209	0.16553	-0.11865	-0.072266	-4.568	167.0647	627.0998	-0.66748	0.24072	-0.17285	NaN	NaN	NaN	NaN	NaN	NaN	NaN	NaN	NaN	NaN	NaN	NaN
1.13	-25.58	10.3714	31.967	0.16895	-0.11816	-0.073242	-21.304	218.6334	575.4114	-0.62158	0.24316	-0.15674	NaN	NaN	NaN	NaN	NaN	NaN	NaN	NaN	NaN	NaN	NaN	NaN
1.132	-36.645	8.8941	42.084	0.17334	-0.12061	-0.080078	-24.662	178.5019	553.847	-0.53467	0.24609	-0.13232	NaN	NaN	NaN	NaN	NaN	NaN	NaN	NaN	NaN	NaN	NaN	NaN
1.134	-35.486	3.6233	47.8075	0.17139	-0.11719	-0.081299	-7.948	197.422	498.282	-0.45971	0.24707	-0.11938	NaN	NaN	NaN	NaN	NaN	NaN	NaN	NaN	NaN	NaN	NaN	NaN
1.136	-52.0818	1.1255	43.2649	0.16748	-0.11523	-0.087402	-29.1813	230.115	426.376	-0.3833	0.24219	-0.10107	NaN	NaN	NaN	NaN	NaN	NaN	NaN	NaN	NaN	NaN	NaN	NaN
1.138	-38.729	1.3384	59.63624	0.15869	-0.10254	-0.096191	-30.7831	159.8107	432.2761	-0.27783	0.23193	-0.066895	NaN	NaN	NaN	NaN	NaN	NaN	NaN	NaN	NaN	NaN	NaN	NaN
1.14	-42.4243	13.862184	63.5397	0.15039	-0.10645	-0.099121	-19.492	177.3765	389.0826	-0.23193	0.21777	-0.050293	NaN	NaN	NaN	NaN	NaN	NaN	NaN	NaN	NaN	NaN	NaN	NaN
1.142	-21.549	11.814	86.1223	0.12646	-0.093262	-0.10498	-47.1715	146.382	327.1435	-0.1377	0.1958	-0.020508	NaN	NaN	NaN	NaN	NaN	NaN	NaN	NaN	NaN	NaN	NaN	NaN
1.144	-29	26.0391	139.491	0.10815	-0.084961	-0.11231	-22.719	132.099	287.4787	-0.065674	0.17359	0.0063477	NaN	NaN	NaN	NaN	NaN	NaN	NaN	NaN	NaN	NaN	NaN	NaN
1.146	-0.122999999999998	46.046	204.459	0.080078	-0.07373	-0.12744	-40.234	203.259	252.8713	-0.0043945	0.14648	0.027832	NaN	NaN	NaN	NaN	NaN	NaN	NaN	NaN	NaN	NaN	NaN	NaN
1.148	-11.563	60.624	309.303	0.04248	-0.057129	-0.146	-27.873	163.715	243.1801	0.07373	0.11328	0.060059	NaN	NaN	NaN	NaN	NaN	NaN	NaN	NaN	NaN	NaN	NaN	NaN
1.15	-44.677	64.9048	371.776	0.012207	-0.047363	-0.1582	-14.657	157.098	222.33998	0.10938	0.090332	0.078125	NaN	NaN	NaN	NaN	NaN	NaN	NaN	NaN	NaN	NaN	NaN	NaN
1.152	7.976	39.8605	471.125	-0.072754	-0.03125	-0.18213	-33.1439	171.365	159.629	0.17041	0.057129	0.10742	NaN	NaN	NaN	NaN	NaN	NaN	NaN	NaN	NaN	NaN	NaN	NaN
1.154	-14.881	26.62	535.9217	-0.19336	-0.029297	-0.19971	-1.346	89.6168	159.261	0.20557	0.026611	0.12842	NaN	NaN	NaN	NaN	NaN	NaN	NaN	NaN	NaN	NaN	NaN	NaN
1.156	-63.917	8.964	630.504	-0.27344	-0.02832	-0.20996	-29.267	114.8963	133.985	0.24023	0.0043945	0.15088	NaN	NaN	NaN	NaN	NaN	NaN	NaN	NaN	NaN	NaN	NaN	NaN
1.158	-70.854	11.855	699.7104	-0.44531	-0.02002	-0.23682	-30.22	95.927	105.646	0.27002	-0.032715	0.17969	NaN	NaN	NaN	NaN	NaN	NaN	NaN	NaN	NaN	NaN	NaN	NaN
1.16	-53.557	33.243	761.6994	-0.60279	-0.01001	-0.2478	-36.729	54.007	99.195	0.28223	-0.053223	0.18994	NaN	NaN	NaN	NaN	NaN	NaN	NaN	NaN	NaN	NaN	NaN	NaN
1.162	-53.209	23.3571	783.8351	-0.77295	0.0053711	-0.24902	-36.5124	92.2323	56.8	0.29639	-0.088867	0.21582	NaN	NaN	NaN	NaN	NaN	NaN	NaN	NaN	NaN	NaN	NaN	NaN
1.164	-82.2278	12.0024	754.28	-1.0498	0.015137	-0.28076	6.672	26.095	90.6087	0.29614	-0.10986	0.23584	NaN	NaN	NaN	NaN	NaN	NaN	NaN	NaN	NaN	NaN	NaN	NaN
1.166	-52.673	-28.903	781.338	-1.1987	0.018066	-0.28857	-10.509	26.7515	118.431	0.28711	-0.13086	0.25293	NaN	NaN	NaN	NaN	NaN	NaN	NaN	NaN	NaN	NaN	NaN	NaN
1.168	-50.991	-37.5	815.7406	-1.5059	0.038086	-0.29102	-26.9272	64.6277	81.6476	0.2666	-0.16309	0.2793	NaN	NaN	NaN	NaN	NaN	NaN	NaN	NaN	NaN	NaN	NaN	NaN
1.17	-25.888	-30.035	839.711	-1.7439	0.083252	-0.27906	-25.025	6.1116	81.12	0.25049	-0.17139	0.28564	NaN	NaN	NaN	NaN	NaN	NaN	NaN	NaN	NaN	NaN	NaN	NaN
1.172	-47.41888	-21.204	840.281	-1.9824	0.13428	-0.28516	-28.379	43.896	47.786	0.20508	-0.19922	0.30371	NaN	NaN	NaN	NaN	NaN	NaN	NaN	NaN	NaN	NaN	NaN	NaN
1.174	-30.0669	-9.8262	835.627	-2.248	0.24951	-0.29395	-26.515	0.947999999999999	39.497	0.1731	-0.21924	0.31543	NaN	NaN	NaN	NaN	NaN	NaN	NaN	NaN	NaN	NaN	NaN	NaN
1.176	-26.361	-18.684	835.011	-2.3574	0.30811	-0.32813	-3.229	-25.4314	45.943	0.13721	-0.2334	0.32715	NaN	NaN	NaN	NaN	NaN	NaN	NaN	NaN	NaN	NaN	NaN	NaN
1.178	-43.145	-10.235	835.9866	-2.4839	0.45752	-0.37793	-6.083	38.8946	11.221	0.092285	-0.23975	0.33252	NaN	NaN	NaN	NaN	NaN	NaN	NaN	NaN	NaN	NaN	NaN	NaN
1.18	-72.1163	-3.117	837.893	-2.4929	0.55347	-0.40161	-3.247	-0.333	29.5391	0.069336	-0.24219	0.33105	NaN	NaN	NaN	NaN	NaN	NaN	NaN	NaN	NaN	NaN	NaN	NaN
1.182	-77.2214	-12.918	855.263	-2.4683	0.62354	-0.40869	-21.038	26.8311	45.467	0.041992	-0.23584	0.32959	NaN	NaN	NaN	NaN	NaN	NaN	NaN	NaN	NaN	NaN	NaN	NaN
1.184	-54.8835	-23.468	854.714	-2.3984	0.66211	-0.41895	-37.449	67.269	19.435	0.025879	-0.22607	0.33422	NaN	NaN	NaN	NaN	NaN	NaN	NaN	NaN	NaN	NaN	NaN	NaN
1.186	-62.69117	-41.77	859.22	-2.3433	0.65674	-0.42334	8.48099999999999	20.7768	29.2695	0.016602	-0.21582	0.33301	NaN	NaN	NaN	NaN	NaN	NaN	NaN	NaN	NaN	NaN	NaN	NaN
1.188	-29.779	-39.121	874.709	-2.1636	0.62256	-0.43018	6.323	56.645	7.659	0.010254	-0.1958	0.33008	NaN	NaN	NaN	NaN	NaN	NaN	NaN	NaN	NaN	NaN	NaN	NaN
1.19	-44.2075	-51.159	904.9312	-1.976	0.58545	-0.44165	-22.045	20.55276	14.0126	0.0078125	-0.1875	0.3252	NaN	NaN	NaN	NaN	NaN	NaN	NaN	NaN	NaN	NaN	NaN	NaN
1.192	-15.644	-76.853	941.1676	-1.7729	0.54541	-0.45068	-19.667	-17.4805	42.2345	0.0073242	-0.16602	0.32178	NaN	NaN	NaN	NaN	NaN	NaN	NaN	NaN	NaN	NaN	NaN	NaN
1.194	12.519	-109.204	952.18131	-1.5269	0.49951	-0.43652	-36.1345	27.334	19.572	0.014404	-0.16089	0.31567	NaN	NaN	NaN	NaN	NaN	NaN	NaN	NaN	NaN	NaN	NaN	NaN
1.196	21.105	-116.582	983.56435	-1.4219	0.47656	-0.43066	-31.9582	-17.2657	5.8753	0.01709	-0.14893	0.30811	NaN	NaN	NaN	NaN	NaN	NaN	NaN	NaN	NaN	NaN	NaN	NaN
1.198	34.0355	-118.746	1017.80002	-1.2612	0.45068	-0.43701	-34.514	-4.1687	13.9785	0.026855	-0.13721	0.2876	NaN	NaN	NaN	NaN	NaN	NaN	NaN	NaN	NaN	NaN	NaN	NaN
1.2	24.3567	-132.135	1039.009	-1.1584	0.448	-0.45532	-15.063	35.4851	-5.064	0.028809	-0.13232	0.2793	NaN	NaN	NaN	NaN	NaN	NaN	NaN	NaN	NaN	NaN	NaN	NaN
1.202	31.5472	-136.24	1063.0817	-1.0796	0.45166	-0.47217	-20.017	-3.9896	12.7582	0.040039	-0.12305	0.26465	NaN	NaN	NaN	NaN	NaN	NaN	NaN	NaN	NaN	NaN	NaN	NaN
1.204	-9.997	-134.1265	1051.3544	-0.99805	0.45508	-0.48145	-10.145	59.185	9.8461	0.045899	-0.11133	0.26074	NaN	NaN	NaN	NaN	NaN	NaN	NaN	NaN	NaN	NaN	NaN	NaN
1.206	9.13	-117.5362	1070.8859	-0.97266	0.45898	-0.48779	-32.0254	44.862	6.7447	0.047852	-0.10156	0.25195	NaN	NaN	NaN	NaN	NaN	NaN	NaN	NaN	NaN	NaN	NaN	NaN
1.208	19.4089	-105.3427	1088.0002	-0.94385	0.46387	-0.49463	-19.528	0.0414000000000003	46.721	0.041016	-0.079102	0.23926	NaN	NaN	NaN	NaN	NaN	NaN	NaN	NaN	NaN	NaN	NaN	NaN
1.21	-3.6909	-103.368	1127.804	-0.93506	0.47363	-0.49756	-1.395	48.459	26.0093	0.036133	-0.067871	0.2334	NaN	NaN	NaN	NaN	NaN	NaN	NaN	NaN	NaN	NaN	NaN	NaN
1.212	21.7998	-104.472	1165.28393	-0.93311	0.48096	-0.49756	-23.245	12.1272	6.166	0.022949	-0.043457	0.22998	NaN	NaN	NaN	NaN	NaN	NaN	NaN	NaN	NaN	NaN	NaN	NaN
1.214	25.0414	-120.456	1185.591	-0.95264	0.48096	-0.48926	-25.263	47.947	16.6742	0.01416	-0.023194	0.22217	NaN	NaN	NaN	NaN	NaN	NaN	NaN	NaN	NaN	NaN	NaN	NaN
1.216	49.693	-101.58	1186.534	-0.97021	0.4834	-0.4917	-30.491	96.336	-8.352	0.01123	-0.0078125	0.21777	NaN	NaN	NaN	NaN	NaN	NaN	NaN	NaN	NaN	NaN	NaN	NaN
1.218	30.974	-87.9932	1193.296	-1.0425	0.49268	-0.49463	-36.451	40.378	31.39	0.0058594	0.015625	0.20557	NaN	NaN	NaN	NaN	NaN	NaN	NaN	NaN	NaN	NaN	NaN	NaN
1.22	35.067	-72.604	1212.6249	-1.1126	0.50903	-0.49316	-22.642	66.118	25.4307	0.0024414	0.026855	0.2041	NaN	NaN	NaN	NaN	NaN	NaN	NaN	NaN	NaN	NaN	NaN	NaN
1.222	10.192	-97.989	1249.6824	-1.1914	0.5332	-0.48633	-0.151	29.8905	6.9272	-0.0019531	0.048828	0.19141	NaN	NaN	NaN	NaN	NaN	NaN	NaN	NaN	NaN	NaN	NaN	NaN
1.224	-2.965	-107.0796	1259.66979	-1.3105	0.56445	-0.48438	-7.22	-6.0198	33.6343	-0.0078125	0.063965	0.18457	NaN	NaN	NaN	NaN	NaN	NaN	NaN	NaN	NaN	NaN	NaN	NaN
1.226	1.722	-114.3682	1281.882	-1.3633	0.56836	-0.49414	-30.757	55.5883	43.5552	-0.013672	0.071289	0.18018	NaN	NaN	NaN	NaN	NaN	NaN	NaN	NaN	NaN	NaN	NaN	NaN
1.228	-20.4772	-117.687	1297.546	-1.478	0.57861	-0.51123	-2.877	13.053	49.8078	-0.025879	0.087891	0.17676	NaN	NaN	NaN	NaN	NaN	NaN	NaN	NaN	NaN	NaN	NaN	NaN
1.23	-2.3632	-124.671	1307.007	-1.5669	0.57861	-0.53711	-5.052	9.781	57.31	-0.04126	0.099124	0.17285	NaN	NaN	NaN	NaN	NaN	NaN	NaN	NaN	NaN	NaN	NaN	NaN
1.232	-30.9796	-128.367	1317.3674	-1.6621	0.58203	-0.56055	-18.089	36.5306	34.2153	-0.052246	0.11035	0.16943	NaN	NaN	NaN	NaN	NaN	NaN	NaN	NaN	NaN	NaN	NaN	NaN
1.234	-14.681	-117.6374	1311.6907	-1.8003	0.57764	-0.58643	-28.4231	-6.1327	57.743	-0.071289	0.12793	0.15332	NaN	NaN	NaN	NaN	NaN	NaN	NaN	NaN	NaN	NaN	NaN	NaN
1.236	3.614	-112.7223	1330.40243	-1.875	0.57227	-0.59326	-9.508	39.5337	62.5253	-0.078613	0.13525	0.14795	NaN	NaN	NaN	NaN	NaN	NaN	NaN	NaN	NaN	NaN	NaN	NaN
1.238	19.7495	-114.369	1316.53076	-2.0234	0.57715	-0.60156	-17.9006	42.22	37.8179	-0.09375	0.1582	0.13428	NaN	NaN	NaN	NaN	NaN	NaN	NaN	NaN	NaN	NaN	NaN	NaN
1.24	20.6589	-104.437	1319.0201	-2.1329	0.58936	-0.60449	-21.068	-2.2098	56.287	-0.10205	0.17383	0.12622	NaN	NaN	NaN	NaN	NaN	NaN	NaN	NaN	NaN	NaN	NaN	NaN
1.242	5.677	-86.2297	1326.5591	-2.2417	0.61279	-0.61426	-39.4121	37.132	30.855877	-0.11084	0.18994	0.11621	NaN	NaN	NaN	NaN	NaN	NaN	NaN	NaN	NaN	NaN	NaN	NaN
1.244	5.2181	-77.2968	1332.6341	-2.4058	0.64893	-0.65771	-27.632	-11.8197	19.1081	-0.12402	0.20947	0.10059	NaN	NaN	NaN	NaN	NaN	NaN	NaN	NaN	NaN	NaN	NaN	NaN
1.246	-6.696	-73.4113	1327.9431	-2.4819	0.67041	-0.69092	-4.224	2.212	40.7264	-0.13623	0.21777	0.09082	NaN	NaN	NaN	NaN	NaN	NaN	NaN	NaN	NaN	NaN	NaN	NaN
1.248	29.224	-52.2595	1328.2853	-2.5781	0.67578	-0.77148	-5.697	48.652	6.843	-0.15234	0.2334	0.080566	NaN	NaN	NaN	NaN	NaN	NaN	NaN	NaN	NaN	NaN	NaN	NaN
1.25	26.73114	-53.903	1309.2046	-2.5932	0.65674	-0.81885	-16.886	5.291175	29.3259	-0.15845	0.24366	0.06958	NaN	NaN	NaN	NaN	NaN	NaN	NaN	NaN	NaN	NaN	NaN	NaN
1.252	5.142	-57.671	1315.6561	-2.564	0.62744	-0.8501	-26.484	52.923	45.9148	-0.1665	0.25244	0.064941	NaN	NaN	NaN	NaN	NaN	NaN	NaN	NaN	NaN	NaN	NaN	NaN
1.254	20.2491	-52.619	1329.549	-2.5039	0.58594	-0.87305	-36.8024	33.96359	16.5514	-0.17139	0.27051	0.052734	NaN	NaN	NaN	NaN	NaN	NaN	NaN	NaN	NaN	NaN	NaN	NaN
1.256	18.4977	-38.286	1345.2357	-2.48	0.57373	-0.88232	-27.723	-19.6971	32.1927	-0.1709	0.27734	0.047363	NaN	NaN	NaN	NaN	NaN	NaN	NaN	NaN	NaN	NaN	NaN	NaN
1.258	33.7	-41.42234	1326.768	-2.4609	0.57129	-0.9209	-26.483	25.1056	30.407	-0.16309	0.2876	0.031738	NaN	NaN	NaN	NaN	NaN	NaN	NaN	NaN	NaN	NaN	NaN	NaN
1.26	44.867	-56.468	1336.013	-2.4575	0.58252	-0.95166	-25.5341	-21.2396	41.1679	-0.15454	0.29467	0.020752	NaN	NaN	NaN	NaN	NaN	NaN	NaN	NaN	NaN	NaN	NaN	NaN
1.262	57.002	-58.138	1343.304	-2.4609	0.60059	-0.97852	-10.524	-34.043	68.3795	-0.14502	0.2998	0.013672	NaN	NaN	NaN	NaN	NaN	NaN	NaN	NaN	NaN	NaN	NaN	NaN
1.264	45.583	-56.188	1365.74463	-2.4453	0.64355	-1.0156	-21.7	-14.4192	77.866	-0.13965	0.30615	0.003418	NaN	NaN	NaN	NaN	NaN	NaN	NaN	NaN	NaN	NaN	NaN	NaN
1.266	39.1324	-34.847	1367.493	-2.4136	0.65625	-1.0229	-41.656	-58.078	115.234	-0.14502	0.30664	-0.003418	NaN	NaN	NaN	NaN	NaN	NaN	NaN	NaN	NaN	NaN	NaN	NaN
1.268	30.2977	-32.8326	1357.14	-2.3413	0.69385	-1.0483	-30.323	7.0742	152.278	-0.18115	0.29883	-0.023926	NaN	NaN	NaN	NaN	NaN	NaN	NaN	NaN	NaN	NaN	NaN	NaN
1.27	37.055	-20.6578	1348.2605	-2.2617	0.71044	-1.0566	-49.641	52.806	224.112	-0.23877	0.29077	-0.033448	NaN	NaN	NaN	NaN	NaN	NaN	NaN	NaN	NaN	NaN	NaN	NaN
1.272	30.559	-14.4103	1332.3763	-2.1694	0.71631	-1.0581	-42.419	26.8209	424.625	-0.32471	0.28076	-0.047363	NaN	NaN	NaN	NaN	NaN	NaN	NaN	NaN	NaN	NaN	NaN	NaN
1.274	20.0771	7.5333	1328.9201	-2.0488	0.71484	-1.0527	-48.427	26.2685	549.784	-0.49756	0.24658	-0.085938	NaN	NaN	NaN	NaN	NaN	NaN	NaN	NaN	NaN	NaN	NaN	NaN
1.276	31.5518	9.6687	1317.107	-1.9878	0.71729	-1.0483	-75.97	-47.7056	689.196	-0.60254	0.22754	-0.10156	NaN	NaN	NaN	NaN	NaN	NaN	NaN	NaN	NaN	NaN	NaN	NaN
1.278	19.9478	20.229	1301.646	-1.8921	0.71143	-1.0347	19.176	-80.925	785.101	-0.82568	0.1748	-0.11816	NaN	NaN	NaN	NaN	NaN	NaN	NaN	NaN	NaN	NaN	NaN	NaN
1.28	19.4449	31.7214	1287.9918	-1.8159	0.71436	-1.0171	13.3112	-42.556	868.0837	-1.0171	0.12769	-0.1455	NaN	NaN	NaN	NaN	NaN	NaN	NaN	NaN	NaN	NaN	NaN	NaN
1.282	-1.22	20.2948	1277.5701	-1.7813	0.71387	-1.0078	-64.897	-18.699	1037.729	-1.2148	0.087402	-0.17871	NaN	NaN	NaN	NaN	NaN	NaN	NaN	NaN	NaN	NaN	NaN	NaN
1.284	20.9041	8.1917	1270.0424	-1.7319	0.71582	-0.98975	-57.6465	50.862	1040.664	-1.459	0.069824	-0.22949	NaN	NaN	NaN	NaN	NaN	NaN	NaN	NaN	NaN	NaN	NaN	NaN
1.286	22.5251	25.91698	1262.738	-1.7058	0.719	-0.97388	-47.1128	21.045	1004.54	-1.5625	0.087402	-0.25195	NaN	NaN	NaN	NaN	NaN	NaN	NaN	NaN	NaN	NaN	NaN	NaN
1.288	20.9824	33.679	1262.72293	-1.6812	0.7251	-0.95654	-5.5207	-64.818	1062.618	-1.7202	0.14404	-0.28516	NaN	NaN	NaN	NaN	NaN	NaN	NaN	NaN	NaN	NaN	NaN	NaN
1.29	15.56322	27.3242	1265.2266	-1.6523	0.73145	-0.93164	40.003	-84.668	1075.621	-1.7902	0.20044	-0.28784	NaN	NaN	NaN	NaN	NaN	NaN	NaN	NaN	NaN	NaN	NaN	NaN
1.292	3.146	10.5247	1238.984	-1.6362	0.72705	-0.92236	10.5417	-160.53	1091.906	-1.8315	0.25146	-0.29395	NaN	NaN	NaN	NaN	NaN	NaN	NaN	NaN	NaN	NaN	NaN	NaN
1.294	23.198	14.9546	1213.5149	-1.6108	0.72803	-0.89209	-5.325	-147.671	1082.66	-1.8184	0.30322	-0.2959	NaN	NaN	NaN	NaN	NaN	NaN	NaN	NaN	NaN	NaN	NaN	NaN
1.296	-5.0263	22.8376	1193.5	-1.5945	0.72387	-0.8728	-12.032	-92.436	1003.943	-1.7871	0.31445	-0.29102	NaN	NaN	NaN	NaN	NaN	NaN	NaN	NaN	NaN	NaN	NaN	NaN
1.298	-3.645	34.40896	1185.81879	-1.5781	0.7207	-0.85156	6.22199999999999	-100.7916	969.264	-1.6816	0.32031	-0.26563	NaN	NaN	NaN	NaN	NaN	NaN	NaN	NaN	NaN	NaN	NaN	NaN
1.3	13.79	43.1342	1171.3579	-1.5605	0.7168	-0.82227	16.765	-55.91	950.8575	-1.5749	0.31079	-0.23706	NaN	NaN	NaN	NaN	NaN	NaN	NaN	NaN	NaN	NaN	NaN	NaN
1.302	8.559	52.4102	1147.3006	-1.5537	0.70898	-0.80566	35.4708	-13.367	881.902	-1.457	0.2959	-0.20996	NaN	NaN	NaN	NaN	NaN	NaN	NaN	NaN	NaN	NaN	NaN	NaN
1.304	19.1409	55.8751	1128.4062	-1.5313	0.70313	-0.7793	43.163	-59.271	943.0385	-1.2949	0.28223	-0.17383	NaN	NaN	NaN	NaN	NaN	NaN	NaN	NaN	NaN	NaN	NaN	NaN
1.306	0.201000000000001	63.1174	1135.0945	-1.5105	0.69556	-0.75659	-67.519	-22.901	975.455	-1.2188	0.28516	-0.15918	NaN	NaN	NaN	NaN	NaN	NaN	NaN	NaN	NaN	NaN	NaN	NaN
1.308	29.6764	73.2692	1132.7938	-1.4917	0.68115	-0.73193	-84.9	-41.811	967.089	-1.1016	0.32324	-0.15283	NaN	NaN	NaN	NaN	NaN	NaN	NaN	NaN	NaN	NaN	NaN	NaN
1.31	18.45	109.016	1113.8687	-1.4648	0.66211	-0.70313	-14.806	-59.41	933.0541	-1.0407	0.37207	-0.14795	NaN	NaN	NaN	NaN	NaN	NaN	NaN	NaN	NaN	NaN	NaN	NaN
1.312	25.578	121.595	1086.1314	-1.4507	0.65283	-0.68701	24.671	-52.187	871.046	-0.99561	0.43799	-0.14502	NaN	NaN	NaN	NaN	NaN	NaN	NaN	NaN	NaN	NaN	NaN	NaN
1.314	13.568	110.702	1056.892	-1.4194	0.62744	-0.65967	8.416	-103.207	852.344	-0.94678	0.52686	-0.146	NaN	NaN	NaN	NaN	NaN	NaN	NaN	NaN	NaN	NaN	NaN	NaN
1.316	5.149	105.186	1032.141	-1.3925	0.60547	-0.63135	-14.391	-118.069	900.9205	-0.92334	0.57275	-0.1543	NaN	NaN	NaN	NaN	NaN	NaN	NaN	NaN	NaN	NaN	NaN	NaN
1.318	-2.433	108.5983	1021.7803	-1.3647	0.58643	-0.60889	-2.649	-125.8822	936.675	-0.89014	0.65088	-0.17529	NaN	NaN	NaN	NaN	NaN	NaN	NaN	NaN	NaN	NaN	NaN	NaN
1.32	-29.895	122.8923	1006.9839	-1.3223	0.55762	-0.58008	-18.753	-227.769	1002.282	-0.87695	0.70215	-0.1997	NaN	NaN	NaN	NaN	NaN	NaN	NaN	NaN	NaN	NaN	NaN	NaN
1.322	1.999	110.915	997.808	-1.3027	0.54492	-0.56543	-11.701	-237.088	1021.095	-0.87793	0.75391	-0.22314	NaN	NaN	NaN	NaN	NaN	NaN	NaN	NaN	NaN	NaN	NaN	NaN
1.324	-10.632	112.1849	955.925	-1.2612	0.52002	-0.53564	-23.474	-273.894	980.915	-0.91895	0.80469	-0.26465	NaN	NaN	NaN	NaN	NaN	NaN	NaN	NaN	NaN	NaN	NaN	NaN
1.326	-25.275	113.6544	927.3774	-1.2268	0.49488	-0.51172	-24.925	-279.739	996.601	-0.94873	0.82275	-0.28955	NaN	NaN	NaN	NaN	NaN	NaN	NaN	NaN	NaN	NaN	NaN	NaN
1.328	-29.5	112.7043	937.5993	-1.2012	0.47656	-0.49023	-71.2923	-184.52761	1004.667	-1.0391	0.83789	-0.33496	NaN	NaN	NaN	NaN	NaN	NaN	NaN	NaN	NaN	NaN	NaN	NaN
1.33	0.611999999999995	116.1207	918.6257	-1.1597	0.44287	-0.46338	-135.713	-205.29168	1058.7694	-1.1206	0.85937	-0.37744	NaN	NaN	NaN	NaN	NaN	NaN	NaN	NaN	NaN	NaN	NaN	NaN
1.332	-25.063	116.6293	903.8674	-1.1382	0.43213	-0.4458	-109.866	-189.805	1100.475	-1.2163	0.87939	-0.41309	NaN	NaN	NaN	NaN	NaN	NaN	NaN	NaN	NaN	NaN	NaN	NaN
1.334	-35.421	117.5391	878.9678	-1.1011	0.40283	-0.42139	-72.271	-153.669	1093.7857	-1.3374	0.91748	-0.47803	NaN	NaN	NaN	NaN	NaN	NaN	NaN	NaN	NaN	NaN	NaN	NaN
1.336	-47.1815	113.8754	858.8397	-1.0759	0.3811	-0.39673	-32.519	-177.3634	1120.084	-1.396	0.94385	-0.50342	NaN	NaN	NaN	NaN	NaN	NaN	NaN	NaN	NaN	NaN	NaN	NaN
1.338	-51.1005	120.2595	814.4153	-1.0508	0.36914	-0.37695	-34.137	-109.791	1131.032	-1.5083	0.99268	-0.55225	NaN	NaN	NaN	NaN	NaN	NaN	NaN	NaN	NaN	NaN	NaN	NaN
1.34	-56.1405	133.93798	786.4339	-1.0156	0.35156	-0.35352	-48.223	-80.789	1132.971	-1.5926	1.0237	-0.58374	NaN	NaN	NaN	NaN	NaN	NaN	NaN	NaN	NaN	NaN	NaN	NaN
1.342	-61.519	141.3844	756.7822	-0.99414	0.33984	-0.3374	-50.59	-85.6513	1144.531	-1.6733	1.0435	-0.60791	NaN	NaN	NaN	NaN	NaN	NaN	NaN	NaN	NaN	NaN	NaN	NaN
1.344	-56.8577	134.3367	723.1655	-0.95117	0.32373	-0.31934	-69.52318	-50.46	1147.84387	-1.7808	1.0522	-0.62451	NaN	NaN	NaN	NaN	NaN	NaN	NaN	NaN	NaN	NaN	NaN	NaN
1.346	-47.307	117.747	691.2547	-0.9187	0.31055	-0.30224	-42.6916	-140.8352	1203.347	-1.8433	1.0552	-0.62842	NaN	NaN	NaN	NaN	NaN	NaN	NaN	NaN	NaN	NaN	NaN	NaN
1.348	-47.283	126.5941	659.139	-0.88086	0.29883	-0.28223	-33.35	-169.7655	1244.9795	-1.9546	1.0483	-0.62451	NaN	NaN	NaN	NaN	NaN	NaN	NaN	NaN	NaN	NaN	NaN	NaN
1.35	-29.261	115.0853	640.276	-0.82813	0.28369	-0.26855	-61.194	-135.089	1262.889	-2.043	1.0293	-0.60742	NaN	NaN	NaN	NaN	NaN	NaN	NaN	NaN	NaN	NaN	NaN	NaN
1.352	-28.447	115.088	630.6496	-0.80469	0.27441	-0.26074	-68.394	-160.5813	1287.0147	-2.1387	1.0137	-0.5918	NaN	NaN	NaN	NaN	NaN	NaN	NaN	NaN	NaN	NaN	NaN	NaN
1.354	-11.75	123.9915	593.0619	-0.74658	0.26416	-0.23193	-76.9442	-121.256	1270.9683	-2.2886	1.0122	-0.57373	NaN	NaN	NaN	NaN	NaN	NaN	NaN	NaN	NaN	NaN	NaN	NaN
1.356	-42.02	134.8556	553.4222	-0.71827	0.25586	-0.22387	-91.559	-147.3448	1252.3806	-2.3711	1.0137	-0.56348	NaN	NaN	NaN	NaN	NaN	NaN	NaN	NaN	NaN	NaN	NaN	NaN
1.358	-21.233	139.701	523.222	-0.6875	0.24707	-0.21729	-50.017	-212.339	1271.21	-2.5288	1.0327	-0.54639	NaN	NaN	NaN	NaN	NaN	NaN	NaN	NaN	NaN	NaN	NaN	NaN
1.36	-32.339	124.351	494.52336	-0.62744	0.23486	-0.19385	-39.766	-167.4834	1284.91838	-2.6602	1.0703	-0.54004	NaN	NaN	NaN	NaN	NaN	NaN	NaN	NaN	NaN	NaN	NaN	NaN
1.362	-23.002	125.4559	453.1961	-0.604	0.22656	-0.1792	-9.869	-155.483	1303.502	-2.7026	1.0864	-0.53662	NaN	NaN	NaN	NaN	NaN	NaN	NaN	NaN	NaN	NaN	NaN	NaN
1.364	-25.45	124.4743	430.5917	-0.55273	0.21582	-0.15674	-14.998	-103.5442	1305.38	-2.7559	1.1055	-0.51758	NaN	NaN	NaN	NaN	NaN	NaN	NaN	NaN	NaN	NaN	NaN	NaN
1.366	-30.364	121.5966	407.238	-0.50757	0.21021	-0.14453	-66.801	-19.1775	1252.3651	-2.7634	1.1038	-0.50659	NaN	NaN	NaN	NaN	NaN	NaN	NaN	NaN	NaN	NaN	NaN	NaN
1.368	-20.531	112.188	361.338	-0.45898	0.20996	-0.12842	-66.122	-54.152	1232.8718	-2.7554	1.105	-0.50244	NaN	NaN	NaN	NaN	NaN	NaN	NaN	NaN	NaN	NaN	NaN	NaN
1.37	-14.972	101.149	334.956	-0.38916	0.20947	-0.104	-61.365	-27.436	1242.261	-2.7202	1.1079	-0.5	NaN	NaN	NaN	NaN	NaN	NaN	NaN	NaN	NaN	NaN	NaN	NaN
1.372	0.942999999999998	94.986	318.66709	-0.34668	0.21045	-0.09668	-72.865	-17.191	1254.6188	-2.6929	1.1099	-0.50146	NaN	NaN	NaN	NaN	NaN	NaN	NaN	NaN	NaN	NaN	NaN	NaN
1.374	-8.217	99.093	295.7195	-0.2749	0.20166	-0.068359	-57.245	-39.634	1283.2797	-2.6245	1.1216	-0.49365	NaN	NaN	NaN	NaN	NaN	NaN	NaN	NaN	NaN	NaN	NaN	NaN
1.376	6.127	93.1112	265.52911	-0.2124	0.19262	-0.055176	-54.377	28.263	1284.415	-2.5652	1.1213	-0.49243	NaN	NaN	NaN	NaN	NaN	NaN	NaN	NaN	NaN	NaN	NaN	NaN
1.378	-15.316	108.44	226.296	-0.15723	0.18262	-0.036133	-107.992	-16.299	1272.757	-2.498	1.123	-0.49414	NaN	NaN	NaN	NaN	NaN	NaN	NaN	NaN	NaN	NaN	NaN	NaN
1.38	-32.212	103.005	197.3509	-0.086426	0.16504	-0.010742	-114.058	-31.85	1268.843	-2.4004	1.1211	-0.49072	NaN	NaN	NaN	NaN	NaN	NaN	NaN	NaN	NaN	NaN	NaN	NaN
1.382	-40.243	86.391	201.6911	-0.04834	0.15967	0.0019531	-125.2207	-4.18965	1240.162	-2.3398	1.1094	-0.50098	NaN	NaN	NaN	NaN	NaN	NaN	NaN	NaN	NaN	NaN	NaN	NaN
1.384	-30.329	76.42109	169.46332	0.016113	0.146	0.026367	-81.828	-57.217	1257.349	-2.2153	1.1001	-0.48389	NaN	NaN	NaN	NaN	NaN	NaN	NaN	NaN	NaN	NaN	NaN	NaN
1.386	-35.0355	70.6747	155.938417	0.062256	0.13159	0.051513	-54.975	-4.688	1294.8087	-2.1101	1.0999	-0.48047	NaN	NaN	NaN	NaN	NaN	NaN	NaN	NaN	NaN	NaN	NaN	NaN
1.388	-39.9549	71.6997	131.8414	0.10449	0.11816	0.072754	-84.7813	0.575000000000001	1304.752	-2.0156	1.1025	-0.46875	NaN	NaN	NaN	NaN	NaN	NaN	NaN	NaN	NaN	NaN	NaN	NaN
1.39	-22.599	65.355	115.171	0.16064	0.098145	0.096191	-69.025	-50.293	1324.277	-1.9033	1.0898	-0.45215	NaN	NaN	NaN	NaN	NaN	NaN	NaN	NaN	NaN	NaN	NaN	NaN
1.392	-38.507	79.8638	80.882	0.17871	0.084473	0.11328	-94.2547	1.397	1307.425	-1.855	1.0815	-0.43701	NaN	NaN	NaN	NaN	NaN	NaN	NaN	NaN	NaN	NaN	NaN	NaN
1.394	-25.81	70.7088	74.4823	0.21777	0.064453	0.1377	-86.362	-35.9504	1310.184	-1.7695	1.0527	-0.41602	NaN	NaN	NaN	NaN	NaN	NaN	NaN	NaN	NaN	NaN	NaN	NaN
1.396	-13.545	53.69424	71.5507	0.24609	0.04834	0.15625	-83.075	-13.444	1291.97	-1.7214	1.0208	-0.39868	NaN	NaN	NaN	NaN	NaN	NaN	NaN	NaN	NaN	NaN	NaN	NaN
1.398	-30.445	34.93	67.196	0.2749	0.033203	0.17139	-81.925	70.61	1255.055	-1.6807	0.99219	-0.38086	NaN	NaN	NaN	NaN	NaN	NaN	NaN	NaN	NaN	NaN	NaN	NaN
1.4	-30.746	35.0979	57.8774	0.30615	0.0092773	0.18457	-65.971	62.997	1273.945	-1.6421	0.95752	-0.35889	NaN	NaN	NaN	NaN	NaN	NaN	NaN	NaN	NaN	NaN	NaN	NaN
1.402	-37.2477	44.7429	61.186	0.32275	-0.0019531	0.19336	-79.368	121.15	1258.389	-1.6245	0.93604	-0.35303	NaN	NaN	NaN	NaN	NaN	NaN	NaN	NaN	NaN	NaN	NaN	NaN
1.404	-25.712	52.3701	56.7919	0.34863	-0.02832	0.20508	-57.098	113.115	1254.0315	-1.6025	0.8877	-0.3291	NaN	NaN	NaN	NaN	NaN	NaN	NaN	NaN	NaN	NaN	NaN	NaN
1.406	-32.206	50.6537	44.462	0.36377	-0.055664	0.22314	-56.541	48.997	1259.487	-1.5791	0.85352	-0.31201	NaN	NaN	NaN	NaN	NaN	NaN	NaN	NaN	NaN	NaN	NaN	NaN
1.408	-30.724	51.98774	33.4704	0.37061	-0.067871	0.22314	-36.152	95.4356	1215.102	-1.5625	0.82227	-0.29297	NaN	NaN	NaN	NaN	NaN	NaN	NaN	NaN	NaN	NaN	NaN	NaN
1.41	-31.866	33.7899	19.0944	0.36572	-0.094727	0.23291	-12.106	79.56	1206.17991	-1.5347	0.76611	-0.271	NaN	NaN	NaN	NaN	NaN	NaN	NaN	NaN	NaN	NaN	NaN	NaN
1.412	-21.865	31.743	37.3038	0.36035	-0.11377	0.23413	-9.872	100.701	1198.333	-1.5171	0.74268	-0.25439	NaN	NaN	NaN	NaN	NaN	NaN	NaN	NaN	NaN	NaN	NaN	NaN
1.414	-0.599	46.82	36.9982	0.354	-0.12451	0.24463	-15.898	153.2953	1192.2253	-1.4922	0.69434	-0.23633	NaN	NaN	NaN	NaN	NaN	NaN	NaN	NaN	NaN	NaN	NaN	NaN
1.416	-5.558	44.5473	26.1247	0.33643	-0.14941	0.2417	-6.58000000000001	69.529	1204.119	-1.4694	0.65991	-0.21923	NaN	NaN	NaN	NaN	NaN	NaN	NaN	NaN	NaN	NaN	NaN	NaN
1.418	-17.344	32.4388	27.1852	0.32178	-0.15576	0.24902	-17.084	89.9826	1156.0746	-1.4414	0.62891	-0.2041	NaN	NaN	NaN	NaN	NaN	NaN	NaN	NaN	NaN	NaN	NaN	NaN
1.42	-14.991	24.5232	20.885	0.29297	-0.16211	0.24561	-37.452	101.1073	1119.474	-1.4082	0.58496	-0.18701	NaN	NaN	NaN	NaN	NaN	NaN	NaN	NaN	NaN	NaN	NaN	NaN
1.422	-13.815	15.359	10.557	0.26904	-0.16699	0.2417	-41.61	80.4377	1132.255	-1.3896	0.56445	-0.17969	NaN	NaN	NaN	NaN	NaN	NaN	NaN	NaN	NaN	NaN	NaN	NaN
1.424	-18.505	35.9675	22.2557	0.24854	-0.1626	0.23633	-37.541	143.522	1114.565	-1.3511	0.52979	-0.16113	NaN	NaN	NaN	NaN	NaN	NaN	NaN	NaN	NaN	NaN	NaN	NaN
1.426	-22.655	23.9619	45.882	0.22607	-0.16357	0.23633	-36.813	95.824	1080.4322	-1.3247	0.49951	-0.14942	NaN	NaN	NaN	NaN	NaN	NaN	NaN	NaN	NaN	NaN	NaN	NaN
1.428	-23.696	28.448	35.1238	0.2085	-0.16211	0.22803	-19.693	94.52	1036.5797	-1.2964	0.479	-0.146	NaN	NaN	NaN	NaN	NaN	NaN	NaN	NaN	NaN	NaN	NaN	NaN
1.43	-11.53	24.934	14.7069	0.18848	-0.15088	0.22412	-41.10826	146.539	990.818	-1.2539	0.44922	-0.13525	NaN	NaN	NaN	NaN	NaN	NaN	NaN	NaN	NaN	NaN	NaN	NaN
1.432	-25.974	19.1269	11.2562	0.16748	-0.14477	0.2146	-31.8819	120.039	991.8851	-1.2378	0.44043	-0.13135	NaN	NaN	NaN	NaN	NaN	NaN	NaN	NaN	NaN	NaN	NaN	NaN
1.434	-37.767	20.9987	14.7776	0.15088	-0.13867	0.20752	-10.922	216.128	970.9	-1.1948	0.42432	-0.12891	NaN	NaN	NaN	NaN	NaN	NaN	NaN	NaN	NaN	NaN	NaN	NaN
1.436	-30.892	18.0542	39.0545	0.13477	-0.13232	0.19873	-12.97	241.336	941.086	-1.1706	0.40796	-0.12768	NaN	NaN	NaN	NaN	NaN	NaN	NaN	NaN	NaN	NaN	NaN	NaN
1.438	-23.36	24.846	24.4687	0.12256	-0.12891	0.19727	-22.058	192.458	927.044	-1.144	0.3916	-0.12646	NaN	NaN	NaN	NaN	NaN	NaN	NaN	NaN	NaN	NaN	NaN	NaN
1.44	-38.2647	24.362	26.8003	0.10693	-0.12256	0.18555	0.511000000000003	215.584	879.527	-1.1099	0.37256	-0.12549	NaN	NaN	NaN	NaN	NaN	NaN	NaN	NaN	NaN	NaN	NaN	NaN
1.442	-14.482	15.9949	32.2376	0.090576	-0.11572	0.17871	-50.27	150.4836	851.581	-1.0908	0.36621	-0.12158	NaN	NaN	NaN	NaN	NaN	NaN	NaN	NaN	NaN	NaN	NaN	NaN
1.444	-20.878	23.1325	29.2234	0.078613	-0.10938	0.16797	-56.0447	157.646	823.5844	-1.0479	0.35742	-0.12305	NaN	NaN	NaN	NaN	NaN	NaN	NaN	NaN	NaN	NaN	NaN	NaN
1.446	-33.02	42.23026	1.967	0.058594	-0.099121	0.16211	-31.4658	228.835	792.93	-1.0029	0.35352	-0.12451	NaN	NaN	NaN	NaN	NaN	NaN	NaN	NaN	NaN	NaN	NaN	NaN
1.448	-40.303	43.6737	13.74002	0.049805	-0.09375	0.15674	-22.852	165.71	809.157	-0.9624	0.35889	-0.12305	NaN	NaN	NaN	NaN	NaN	NaN	NaN	NaN	NaN	NaN	NaN	NaN
1.45	-16.549	32.047	33.7054	0.029785	-0.081543	0.15234	-25.352	206.333	760.304	-0.89844	0.36475	-0.12793	NaN	NaN	NaN	NaN	NaN	NaN	NaN	NaN	NaN	NaN	NaN	NaN
1.452	-32.517	13.1342	30.5387	0.015625	-0.067871	0.1455	-17.6824	188.037	722.337	-0.86865	0.37012	-0.12646	NaN	NaN	NaN	NaN	NaN	NaN	NaN	NaN	NaN	NaN	NaN	NaN
1.454	-18.789	18.0775	29.3154	-0.003418	-0.056641	0.14209	0.100000000000001	145.619	726.114	-0.79688	0.37402	-0.13135	NaN	NaN	NaN	NaN	NaN	NaN	NaN	NaN	NaN	NaN	NaN	NaN
1.456	-27.429	9.4496	22.741	-0.022949	-0.038086	0.13281	2.6788	193.8128	687.6992	-0.74341	0.37817	-0.1289	NaN	NaN	NaN	NaN	NaN	NaN	NaN	NaN	NaN	NaN	NaN	NaN
1.458	-32.09	18.84875	24.3186	-0.032227	-0.025879	0.12695	11.031	153.004	667.107	-0.68945	0.37695	-0.13379	NaN	NaN	NaN	NaN	NaN	NaN	NaN	NaN	NaN	NaN	NaN	NaN
1.46	-34.725	28.7967	23.408	-0.049316	-0.0078125	0.12207	12.1688	164.7025	626.704	-0.62256	0.36768	-0.13037	NaN	NaN	NaN	NaN	NaN	NaN	NaN	NaN	NaN	NaN	NaN	NaN
1.462	-27.938	32.8212	6.282	-0.060059	0.008789	0.11694	26.8229	202.792	556.277	-0.58789	0.36475	-0.13672	NaN	NaN	NaN	NaN	NaN	NaN	NaN	NaN	NaN	NaN	NaN	NaN
1.464	-15.358	23.2369	13.1837	-0.072266	0.024414	0.11816	21.755	137.1084	540.8305	-0.50342	0.36279	-0.14307	NaN	NaN	NaN	NaN	NaN	NaN	NaN	NaN	NaN	NaN	NaN	NaN
1.466	-16.333	18.0776	26.9451	-0.080078	0.046387	0.11084	24.288	196.056	508.011	-0.43433	0.35547	-0.13794	NaN	NaN	NaN	NaN	NaN	NaN	NaN	NaN	NaN	NaN	NaN	NaN
1.468	3.517	12.0806	33.2623	-0.079102	0.052734	0.10254	-2.378	203.058	471.793	-0.36523	0.34961	-0.13623	NaN	NaN	NaN	NaN	NaN	NaN	NaN	NaN	NaN	NaN	NaN	NaN
1.47	-23.521	21.731049	31.0183	-0.078613	0.075195	0.099121	0.328999999999997	177.695	460.492	-0.26465	0.34229	-0.12256	NaN	NaN	NaN	NaN	NaN	NaN	NaN	NaN	NaN	NaN	NaN	NaN
1.472	-31.69	27.8142	36.6518	-0.077148	0.081055	0.099852	6.3222	218.401	398.536	-0.22021	0.33105	-0.12012	NaN	NaN	NaN	NaN	NaN	NaN	NaN	NaN	NaN	NaN	NaN	NaN
1.474	-16.457	28.9675	28.16589	-0.078613	0.084961	0.094727	-3.37	148.1656	357.101	-0.12695	0.30762	-0.10596	NaN	NaN	NaN	NaN	NaN	NaN	NaN	NaN	NaN	NaN	NaN	NaN
1.476	-18.193	24.4112	9.522	-0.08252	0.095215	0.093262	15.254	141.77361	343.5019	-0.059083	0.29053	-0.10132	NaN	NaN	NaN	NaN	NaN	NaN	NaN	NaN	NaN	NaN	NaN	NaN
1.478	-32.379	21.2966	22.7763	-0.08252	0.099121	0.094238	13.331	157.4534	282.5049	0.00048828	0.26904	-0.092773	NaN	NaN	NaN	NaN	NaN	NaN	NaN	NaN	NaN	NaN	NaN	NaN
1.48	-37.577	17.9744	21.1285	-0.086914	0.10596	0.088867	-20.679	90.85	278.807	0.083008	0.2373	-0.072754	NaN	NaN	NaN	NaN	NaN	NaN	NaN	NaN	NaN	NaN	NaN	NaN
1.482	-17.514	9.7201	22.3849	-0.083252	0.11499	0.092529	-28.4996	136.37996	251.7117	0.12256	0.21191	-0.071289	NaN	NaN	NaN	NaN	NaN	NaN	NaN	NaN	NaN	NaN	NaN	NaN
1.484	-31.053	26.7751	10.1741	-0.083496	0.12158	0.089844	-20.92711	118.3076	235.4995	0.18945	0.17383	-0.052246	NaN	NaN	NaN	NaN	NaN	NaN	NaN	NaN	NaN	NaN	NaN	NaN
1.486	-28.234	28.5152	17.9939	-0.083008	0.12744	0.087402	-17.482	75.246	225.5665	0.23315	0.14428	-0.040771	NaN	NaN	NaN	NaN	NaN	NaN	NaN	NaN	NaN	NaN	NaN	NaN
1.488	-17.084	21.2974	27.8465	-0.077637	0.13184	0.094727	-4.665	116.5405	195.0595	0.26904	0.1084	-0.031738	NaN	NaN	NaN	NaN	NaN	NaN	NaN	NaN	NaN	NaN	NaN	NaN
1.49	-15.299	16.2468	34.119	-0.078613	0.13184	0.084473	-47.5131	73.08	178.2816	0.31348	0.064453	-0.02002	NaN	NaN	NaN	NaN	NaN	NaN	NaN	NaN	NaN	NaN	NaN	NaN
1.492	-22.097	21.5827	28.7736	-0.080078	0.14087	0.086426	-53.0892	81.829	157.4493	0.33057	0.044922	-0.0092773	NaN	NaN	NaN	NaN	NaN	NaN	NaN	NaN	NaN	NaN	NaN	NaN
1.494	-42.2411	24.9819	28.8234	-0.078125	0.14746	0.088379	-43.4438	100.6008	119.768	0.35791	0.00048828	0.0019531	NaN	NaN	NaN	NaN	NaN	NaN	NaN	NaN	NaN	NaN	NaN	NaN
1.496	-19.619	30.9948	61.2241	-0.081055	0.15674	0.083496	-49.2084	29.583	117.8356	0.37354	-0.042969	0.011719	NaN	NaN	NaN	NaN	NaN	NaN	NaN	NaN	NaN	NaN	NaN	NaN
1.498	-32.124	25.639	75.724	-0.083008	0.15723	0.083496	-16.816	59.829	123.87529	0.37793	-0.064453	0.019531	NaN	NaN	NaN	NaN	NaN	NaN	NaN	NaN	NaN	NaN	NaN	NaN
1.5	-49.619	21.4115	97.765	-0.085938	0.16797	0.074707	-1.207	47.36138	112.4216	0.37891	-0.10254	0.023926	NaN	NaN	NaN	NaN	NaN	NaN	NaN	NaN	NaN	NaN	NaN	NaN
1.502	-54.566	14.7795	120.902	-0.099366	0.17724	0.069336	-23.727	39.31	116.4764	0.3767	-0.13111	0.03003	NaN	NaN	NaN	NaN	NaN	NaN	NaN	NaN	NaN	NaN	NaN	NaN
1.504	-43.752	25.9248	160.359	-0.12305	0.18555	0.061035	5.315	96.3088	68.386	0.37012	-0.15723	0.029297	NaN	NaN	NaN	NaN	NaN	NaN	NaN	NaN	NaN	NaN	NaN	NaN
1.506	-68.243	41.531	243.4375	-0.16406	0.18506	0.048828	-32.9296	59.20969	55.209	0.36182	-0.19287	0.033691	NaN	NaN	NaN	NaN	NaN	NaN	NaN	NaN	NaN	NaN	NaN	NaN
1.508	-87.17	45.611	317.3431946	-0.19238	0.18945	0.040527	-16.197	62.71965	53.9659	0.35449	-0.20996	0.032715	NaN	NaN	NaN	NaN	NaN	NaN	NaN	NaN	NaN	NaN	NaN	NaN
1.51	-64.293	18.3442	370.2821	-0.26953	0.18652	0.023438	13.229	71.127	34.867	0.33398	-0.23877	0.030762	NaN	NaN	NaN	NaN	NaN	NaN	NaN	NaN	NaN	NaN	NaN	NaN
1.512	-49.546	-14.6694	428.874	-0.34912	0.19018	-0.00097655	11.371	14.4305	54.3841	0.31568	-0.26025	0.026611	NaN	NaN	NaN	NaN	NaN	NaN	NaN	NaN	NaN	NaN	NaN	NaN
1.514	-62.64	-33.2883	509.03	-0.43066	0.18799	-0.027832	1.16	37.08	43.123	0.29443	-0.27637	0.024414	NaN	NaN	NaN	NaN	NaN	NaN	NaN	NaN	NaN	NaN	NaN	NaN
1.516	-70.4644	-5.22642	614.836	-0.54639	0.19043	-0.047852	-19.4732	35.203	38.1455	0.25684	-0.29297	0.013672	NaN	NaN	NaN	NaN	NaN	NaN	NaN	NaN	NaN	NaN	NaN	NaN
1.518	-51.298	17.7965	722.4786	-0.6084	0.18799	-0.063965	-18.304	13.18263	65.466	0.2373	-0.29883	0.012695	NaN	NaN	NaN	NaN	NaN	NaN	NaN	NaN	NaN	NaN	NaN	NaN
1.52	-59.2802	22.062	778.413	-0.77686	0.16846	-0.087402	11.507	60.805	38.982	0.19727	-0.31152	0.0058594	NaN	NaN	NaN	NaN	NaN	NaN	NaN	NaN	NaN	NaN	NaN	NaN
1.522	-38.6793	11.534	823.104	-0.91529	0.1604	-0.11768	6.348	22.21993	32.602	0.17017	-0.31055	-0.00048828	NaN	NaN	NaN	NaN	NaN	NaN	NaN	NaN	NaN	NaN	NaN	NaN
1.524	-39.0859	-0.837800000000001	890.865	-1.0601	0.16064	-0.14355	7.312	25.7171	17.409	0.14111	-0.31396	-0.0019531	NaN	NaN	NaN	NaN	NaN	NaN	NaN	NaN	NaN	NaN	NaN	NaN
1.526	-33.564	-8.6387	940.83	-1.2593	0.16699	-0.18506	10.215	43.747	-14.9389	0.10205	-0.30713	-0.0092773	NaN	NaN	NaN	NaN	NaN	NaN	NaN	NaN	NaN	NaN	NaN	NaN
1.528	-28.183	-8.321	976.636	-1.354	0.17627	-0.20947	-18.357	8.547	15.2176	0.084473	-0.30518	-0.011719	NaN	NaN	NaN	NaN	NaN	NaN	NaN	NaN	NaN	NaN	NaN	NaN
1.53	-31.23	-10.1064	970.459	-1.5366	0.19873	-0.25488	-14.006	43.92837	31.4011	0.04541	-0.29736	-0.025391	NaN	NaN	NaN	NaN	NaN	NaN	NaN	NaN	NaN	NaN	NaN	NaN
1.532	-42.91	-28.6796	965.812	-1.6934	0.23145	-0.29346	-21.155	23.8849	20.3554	0.020019	-0.29737	-0.020508	NaN	NaN	NaN	NaN	NaN	NaN	NaN	NaN	NaN	NaN	NaN	NaN
1.534	-24.655	-58.742	958.723	-1.7593	0.25244	-0.31055	-25.397	4.8422	24.4867	-0.0019531	-0.29443	-0.026855	NaN	NaN	NaN	NaN	NaN	NaN	NaN	NaN	NaN	NaN	NaN	NaN
1.536	0.826000000000001	-76.107	939.4841	-1.8594	0.30518	-0.33984	-21.2936	55.302	17.51	-0.027344	-0.29199	-0.037109	NaN	NaN	NaN	NaN	NaN	NaN	NaN	NaN	NaN	NaN	NaN	NaN
1.538	9.197	-79.922	923.878	-1.8955	0.34546	-0.34912	-34.869	43.61	11.5747	-0.040527	-0.28662	-0.036133	NaN	NaN	NaN	NaN	NaN	NaN	NaN	NaN	NaN	NaN	NaN	NaN
1.54	-12.6461	-84.8514	941.92124	-1.896	0.37646	-0.35986	-33.375	62.48	32.8129	-0.057617	-0.27539	-0.04248	NaN	NaN	NaN	NaN	NaN	NaN	NaN	NaN	NaN	NaN	NaN	NaN
1.542	2.536	-95.459	947.7385	-1.853	0.41064	-0.37646	-42.7182	66.035	13.7545	-0.065918	-0.26319	-0.04541	NaN	NaN	NaN	NaN	NaN	NaN	NaN	NaN	NaN	NaN	NaN	NaN
1.544	-9.697	-94.513	923.782	-1.8179	0.41699	-0.37354	-66.5114	15.8129	9.9562	-0.072754	-0.25	-0.04541	NaN	NaN	NaN	NaN	NaN	NaN	NaN	NaN	NaN	NaN	NaN	NaN
1.546	15.072	-74.174	924.0894	-1.7422	0.42773	-0.35449	-11.823	24.863	15.5614	-0.070801	-0.22852	-0.054688	NaN	NaN	NaN	NaN	NaN	NaN	NaN	NaN	NaN	NaN	NaN	NaN
1.548	10.795	-57.661	937.6036	-1.6836	0.42822	-0.33765	-7.776	21.2363	10.347	-0.070313	-0.2207	-0.057129	NaN	NaN	NaN	NaN	NaN	NaN	NaN	NaN	NaN	NaN	NaN	NaN
1.55	24.049	-44.369	953.3508	-1.6211	0.43066	-0.32324	-30.861	23.152	38.38199	-0.062012	-0.20068	-0.066406	NaN	NaN	NaN	NaN	NaN	NaN	NaN	NaN	NaN	NaN	NaN	NaN
1.552	0.699999999999999	-57.411	965.2552	-1.5366	0.45752	-0.30176	-16.374	65.8667	54.516	-0.050293	-0.18701	-0.073731	NaN	NaN	NaN	NaN	NaN	NaN	NaN	NaN	NaN	NaN	NaN	NaN
1.554	-11.868	-69.456	986.7729	-1.4922	0.47852	-0.2998	-66.963	28.29	39.4673	-0.041016	-0.17725	-0.083008	NaN	NaN	NaN	NaN	NaN	NaN	NaN	NaN	NaN	NaN	NaN	NaN
1.556	-1.374	-93.998	999.9826	-1.4082	0.53711	-0.28662	-23.087	11.8182	59.831	-0.018066	-0.15576	-0.087402	NaN	NaN	NaN	NaN	NaN	NaN	NaN	NaN	NaN	NaN	NaN	NaN
1.558	8.52999999999999	-119.109	1014.876	-1.3554	0.58692	-0.28247	-3.709	30.182	33.4664	-0.0068359	-0.14893	-0.09082	NaN	NaN	NaN	NaN	NaN	NaN	NaN	NaN	NaN	NaN	NaN	NaN
1.56	-4.075	-127.5697	1018.304	-1.3159	0.63525	-0.27783	-34.084	14.118	37.3994	0.019043	-0.13379	-0.10303	NaN	NaN	NaN	NaN	NaN	NaN	NaN	NaN	NaN	NaN	NaN	NaN
1.562	-33.106	-137.339	1017.416	-1.2632	0.68896	-0.27686	14.233	49.694	52.09543	0.03418	-0.12524	-0.11328	NaN	NaN	NaN	NaN	NaN	NaN	NaN	NaN	NaN	NaN	NaN	NaN
1.564	-32.721	-151.273	1033.747	-1.2437	0.71533	-0.28418	-4.924	34.78	29.577	0.044434	-0.11523	-0.12549	NaN	NaN	NaN	NaN	NaN	NaN	NaN	NaN	NaN	NaN	NaN	NaN
1.566	-59.4929	-159.97907	1057.618	-1.2217	0.7666	-0.29199	-40.9	-7.72	51.9132	0.062012	-0.096191	-0.13965	NaN	NaN	NaN	NaN	NaN	NaN	NaN	NaN	NaN	NaN	NaN	NaN
1.568	-63.8104	-160.088	1078.78	-1.2188	0.79004	-0.30469	11.513	19.718	34.0825	0.061523	-0.083496	-0.14502	NaN	NaN	NaN	NaN	NaN	NaN	NaN	NaN	NaN	NaN	NaN	NaN
1.57	-42.279	-164.92	1103.0517	-1.2124	0.80127	-0.31396	-11.117	-3.897	33.7503	0.069336	-0.061035	-0.15381	NaN	NaN	NaN	NaN	NaN	NaN	NaN	NaN	NaN	NaN	NaN	NaN
1.572	-71.566	-147.943	1136.8614	-1.2197	0.80664	-0.32715	7.72	15.592	61.678	0.069824	-0.043945	-0.16577	NaN	NaN	NaN	NaN	NaN	NaN	NaN	NaN	NaN	NaN	NaN	NaN
1.574	-86.212	-116.4828	1158.7433	-1.2266	0.80078	-0.33105	19.828	46.142	28.8672	0.063477	-0.022949	-0.17334	NaN	NaN	NaN	NaN	NaN	NaN	NaN	NaN	NaN	NaN	NaN	NaN
1.576	-77.6781	-85.0304	1155.113	-1.2573	0.79736	-0.34521	-26.56	16.2479	27.2839	0.060059	-0.0029297	-0.18604	NaN	NaN	NaN	NaN	NaN	NaN	NaN	NaN	NaN	NaN	NaN	NaN
1.578	-45.809	-69.63	1191.625	-1.2893	0.80298	-0.35303	-21.346	19.8191	35.82019	0.055176	0.013672	-0.19043	NaN	NaN	NaN	NaN	NaN	NaN	NaN	NaN	NaN	NaN	NaN	NaN
1.58	-66.4433	-86.8	1211	-1.3198	0.80811	-0.36475	-19.655	1.0207	1.717	0.042969	0.036133	-0.20605	NaN	NaN	NaN	NaN	NaN	NaN	NaN	NaN	NaN	NaN	NaN	NaN
1.582	-66.321	-114.596	1230.421	-1.3667	0.80713	-0.3877	-23.313	-13.711	43.3184	0.036377	0.049316	-0.20239	NaN	NaN	NaN	NaN	NaN	NaN	NaN	NaN	NaN	NaN	NaN	NaN
1.584	-65.83	-120.71317	1219.984	-1.3882	0.79736	-0.39795	-11.046	33.5908	33.405	0.025879	0.062012	-0.20898	NaN	NaN	NaN	NaN	NaN	NaN	NaN	NaN	NaN	NaN	NaN	NaN
1.586	-79.504	-115.4259	1227.906	-1.4297	0.7666	-0.41309	-28.891	13.378	19.549	0.01709	0.081543	-0.21729	NaN	NaN	NaN	NaN	NaN	NaN	NaN	NaN	NaN	NaN	NaN	NaN
1.588	-56.829	-119.8422	1233.917	-1.4707	0.73145	-0.42847	-24.196	9.3419	34.8471	0.011719	0.089355	-0.2207	NaN	NaN	NaN	NaN	NaN	NaN	NaN	NaN	NaN	NaN	NaN	NaN
1.59	-75.6434	-128.85651	1246.464908	-1.5176	0.70117	-0.42676	-32.7174	15.913	7.567	0.0043945	0.10156	-0.22461	NaN	NaN	NaN	NaN	NaN	NaN	NaN	NaN	NaN	NaN	NaN	NaN
1.592	-69.672	-134.397	1256.916	-1.6182	0.66211	-0.4209	-37.6607	-14.6762	6.731894	-0.0031738	0.10816	-0.22607	NaN	NaN	NaN	NaN	NaN	NaN	NaN	NaN	NaN	NaN	NaN	NaN
1.594	-67.0981	-131.457	1269.1787	-1.6812	0.64795	-0.42432	0.240000000000002	6.935	26.4835	-0.01123	0.10889	-0.22803	NaN	NaN	NaN	NaN	NaN	NaN	NaN	NaN	NaN	NaN	NaN	NaN
1.596	-45.677	-128.965	1303.341	-1.8379	0.64648	-0.42773	-50.0184	13.0847	15.646	-0.031738	0.10938	-0.23584	NaN	NaN	NaN	NaN	NaN	NaN	NaN	NaN	NaN	NaN	NaN	NaN
1.598	-53.013	-123.9012	1307.7297	-1.9644	0.66553	-0.4231	-48.821	-9.4436	51.562	-0.04248	0.11084	-0.23633	NaN	NaN	NaN	NaN	NaN	NaN	NaN	NaN	NaN	NaN	NaN	NaN
1.6	-25.839	-97.485	1321.015	-2.0957	0.68945	-0.41553	-4.62	25.1415	63.683	-0.070801	0.10596	-0.23486	NaN	NaN	NaN	NaN	NaN	NaN	NaN	NaN	NaN	NaN	NaN	NaN
1.602	-19.877	-88.1248	1323.4754	-2.2832	0.74609	-0.41992	-51.0357	-1.6184	34.683	-0.096194	0.10571	-0.23682	NaN	NaN	NaN	NaN	NaN	NaN	NaN	NaN	NaN	NaN	NaN	NaN
1.604	-51.367	-81.7003	1307.968	-2.3765	0.78369	-0.42725	-43.928	-12.3883	80.637	-0.12451	0.10889	-0.24365	NaN	NaN	NaN	NaN	NaN	NaN	NaN	NaN	NaN	NaN	NaN	NaN
1.606	-42.816	-82.3074	1318.0327	-2.5625	0.85352	-0.44238	-36.471	7.071	95.7908	-0.18164	0.11426	-0.24707	NaN	NaN	NaN	NaN	NaN	NaN	NaN	NaN	NaN	NaN	NaN	NaN
1.608	-47.267	-78.268	1317.4435	-2.6833	0.90844	-0.45191	-59.7861	-1.491	111.2553	-0.21191	0.1123	-0.25977	NaN	NaN	NaN	NaN	NaN	NaN	NaN	NaN	NaN	NaN	NaN	NaN
1.61	-58.05	-69.704	1312.5797	-2.7832	0.95898	-0.46289	7.224	32.782	163.532	-0.2832	0.11621	-0.2749	NaN	NaN	NaN	NaN	NaN	NaN	NaN	NaN	NaN	NaN	NaN	NaN
1.612	-71.679	-72.081	1311.1157	-2.8647	1.0122	-0.48779	2.807	49.079	276.75	-0.36425	0.11914	-0.28393	NaN	NaN	NaN	NaN	NaN	NaN	NaN	NaN	NaN	NaN	NaN	NaN
1.614	-79.443	-83.6085	1291.065	-2.8843	1.0356	-0.48193	-18.428	53.507	482.793	-0.4873	0.10742	-0.29346	NaN	NaN	NaN	NaN	NaN	NaN	NaN	NaN	NaN	NaN	NaN	NaN
1.616	-99.85	-87.1809	1276.015	-2.8706	1.0649	-0.48926	-12.229	109.764	678.076	-0.72266	0.067383	-0.29248	NaN	NaN	NaN	NaN	NaN	NaN	NaN	NaN	NaN	NaN	NaN	NaN
1.618	-103.282	-83.13174	1286.845	-2.8318	1.0833	-0.48828	-38.782	77.8279	780.129	-0.87109	0.031738	-0.29297	NaN	NaN	NaN	NaN	NaN	NaN	NaN	NaN	NaN	NaN	NaN	NaN
1.62	-84.309	-73.4513	1306.4411	-2.7793	1.1016	-0.49902	-34.57	16.8327	897.81	-1.2383	-0.043945	-0.29297	NaN	NaN	NaN	NaN	NaN	NaN	NaN	NaN	NaN	NaN	NaN	NaN
1.622	-77.298	-59.821	1296.945	-2.6973	1.125	-0.50586	-29.517	-20.639	1002.9592	-1.5552	-0.075439	-0.30078	NaN	NaN	NaN	NaN	NaN	NaN	NaN	NaN	NaN	NaN	NaN	NaN
1.624	-80.9292	-56.991	1317.545	-2.6479	1.1274	-0.51563	-92.475	-59.965	1140.317	-1.8687	-0.067383	-0.32373	NaN	NaN	NaN	NaN	NaN	NaN	NaN	NaN	NaN	NaN	NaN	NaN
1.626	-98.348	-62.783	1315.6688	-2.5371	1.1387	-0.51855	-89.855	-13.28	1191.874	-2.2437	0.037598	-0.36865	NaN	NaN	NaN	NaN	NaN	NaN	NaN	NaN	NaN	NaN	NaN	NaN
1.628	-104.878	-61.956	1327.8756	-2.4441	1.136	-0.52099	-86.5	7.107	1136.711	-2.4772	0.1853	-0.38721	NaN	NaN	NaN	NaN	NaN	NaN	NaN	NaN	NaN	NaN	NaN	NaN
1.63	-89.175	-47.693	1307.8427	-2.3394	1.1294	-0.521	-140.003	-71.0299	1115.429	-2.668	0.34277	-0.42578	NaN	NaN	NaN	NaN	NaN	NaN	NaN	NaN	NaN	NaN	NaN	NaN
1.632	-115.6732	-36.399	1300.257	-2.1929	1.1118	-0.52002	-107.219	-94.586	1102.306	-2.7891	0.56445	-0.49023	NaN	NaN	NaN	NaN	NaN	NaN	NaN	NaN	NaN	NaN	NaN	NaN
1.634	-104.1737	-39.2413	1295.5524	-2.1206	1.1021	-0.51514	-113.2061	-146.5691	1086.068	-2.7866	0.65283	-0.52295	NaN	NaN	NaN	NaN	NaN	NaN	NaN	NaN	NaN	NaN	NaN	NaN
1.636	-115.5525	-43.15	1274.515	-1.9824	1.0781	-0.50635	-57.833	-166.1464	1121.389	-2.6655	0.76416	-0.56006	NaN	NaN	NaN	NaN	NaN	NaN	NaN	NaN	NaN	NaN	NaN	NaN
1.638	-96.3678	-30.551	1255.221	-1.8967	1.0588	-0.49829	-44.4	-126.735	1089.492	-2.5047	0.77515	-0.59008	NaN	NaN	NaN	NaN	NaN	NaN	NaN	NaN	NaN	NaN	NaN	NaN
1.64	-108.6857	-18.475	1237.611	-1.8203	1.0371	-0.48828	-79.253	-140.122	1067.106	-2.291	0.74805	-0.62012	NaN	NaN	NaN	NaN	NaN	NaN	NaN	NaN	NaN	NaN	NaN	NaN
1.642	-68.998	-16.6092	1229.3784	-1.7378	1.0161	-0.47412	-43.068	-79.959	1077.125	-1.9038	0.68213	-0.64014	NaN	NaN	NaN	NaN	NaN	NaN	NaN	NaN	NaN	NaN	NaN	NaN
1.644	-66.969	-11.5566	1212.43	-1.7051	1.0039	-0.4707	-48.9	0.228000000000009	1024.435	-1.6855	0.63379	-0.6543	NaN	NaN	NaN	NaN	NaN	NaN	NaN	NaN	NaN	NaN	NaN	NaN
1.646	-67.874	5.9935	1217.279	-1.6563	0.9873	-0.44531	-72.599	6.584	1081.409	-1.2969	0.54492	-0.63281	NaN	NaN	NaN	NaN	NaN	NaN	NaN	NaN	NaN	NaN	NaN	NaN
1.648	-48.823	4.7164	1232.3314	-1.6277	0.969	-0.43066	-105.3948	38.092	1102.428	-1.1208	0.51929	-0.6228	NaN	NaN	NaN	NaN	NaN	NaN	NaN	NaN	NaN	NaN	NaN	NaN
1.65	-25.917	2.3044	1234.307	-1.5996	0.95117	-0.41309	-169.983	-4.82300000000001	1101.284	-1.0112	0.52393	-0.6333	NaN	NaN	NaN	NaN	NaN	NaN	NaN	NaN	NaN	NaN	NaN	NaN
1.652	-22.842	-0.9894	1219.887	-1.5679	0.92822	-0.39307	-131.464	-66.816	1118.0683	-0.92822	0.55811	-0.65381	NaN	NaN	NaN	NaN	NaN	NaN	NaN	NaN	NaN	NaN	NaN	NaN
1.654	-55.201	28.679	1182.903	-1.5498	0.91602	-0.38379	-102.746	-63.648	1070.17	-0.896	0.58447	-0.65527	NaN	NaN	NaN	NaN	NaN	NaN	NaN	NaN	NaN	NaN	NaN	NaN
1.656	-53.951	19.9024	1170.9163	-1.5166	0.88086	-0.36084	-72.66454	-139.1566	1048.503	-0.84814	0.62012	-0.65283	NaN	NaN	NaN	NaN	NaN	NaN	NaN	NaN	NaN	NaN	NaN	NaN
1.658	-52.885	16.80016	1143.033	-1.4727	0.83984	-0.33643	-2.193	-184.004	1064.421	-0.83716	0.6416	-0.6543	NaN	NaN	NaN	NaN	NaN	NaN	NaN	NaN	NaN	NaN	NaN	NaN
1.66	-50.933	21.5841	1119.408	-1.4492	0.81445	-0.32324	10.631	-237.29	1069.377	-0.84521	0.64697	-0.66162	NaN	NaN	NaN	NaN	NaN	NaN	NaN	NaN	NaN	NaN	NaN	NaN
1.662	-58.118	16.4613	1108.226	-1.4043	0.76758	-0.31006	17.045	-327.3	1117.307	-0.89355	0.66016	-0.66211	NaN	NaN	NaN	NaN	NaN	NaN	NaN	NaN	NaN	NaN	NaN	NaN
1.664	-52.313	7.292	1083.103	-1.3709	0.72778	-0.28443	73.017	-282.956	1205.391	-0.92529	0.66846	-0.66553	NaN	NaN	NaN	NaN	NaN	NaN	NaN	NaN	NaN	NaN	NaN	NaN
1.666	-56.289	18.058	1090.6556	-1.3433	0.69385	-0.26123	51.278	-247.591	1253.6888	-1.0151	0.67139	-0.66455	NaN	NaN	NaN	NaN	NaN	NaN	NaN	NaN	NaN	NaN	NaN	NaN
1.668	-63.57	41.5278	1058.8727	-1.2983	0.64893	-0.23779	18.509	-242.771	1304.388	-1.1074	0.68017	-0.65357	NaN	NaN	NaN	NaN	NaN	NaN	NaN	NaN	NaN	NaN	NaN	NaN
1.67	-54.746	58.3411	1069.773	-1.2813	0.62012	-0.22266	-9.536	-170.8408	1279.455	-1.2319	0.68994	-0.646	NaN	NaN	NaN	NaN	NaN	NaN	NaN	NaN	NaN	NaN	NaN	NaN
1.672	-39.323	70.8086	1061.2716	-1.25	0.57275	-0.19775	-67.48975	-175.8733	1250.986	-1.4409	0.72998	-0.63818	NaN	NaN	NaN	NaN	NaN	NaN	NaN	NaN	NaN	NaN	NaN	NaN
1.674	-54.113	81.7255	1043.3072	-1.2283	0.54419	-0.17993	-73.8623	-123.97	1253.774	-1.5503	0.75146	-0.64404	NaN	NaN	NaN	NaN	NaN	NaN	NaN	NaN	NaN	NaN	NaN	NaN
1.676	-60.142	93.0394	1015.303	-1.2109	0.51465	-0.16699	-38.5137	-71.697	1249.141	-1.772	0.7876	-0.65576	NaN	NaN	NaN	NaN	NaN	NaN	NaN	NaN	NaN	NaN	NaN	NaN
1.678	-89.831	90.6336	999.7263	-1.1831	0.48389	-0.14795	-6.2	-130.971	1294.7351	-1.9253	0.80786	-0.68164	NaN	NaN	NaN	NaN	NaN	NaN	NaN	NaN	NaN	NaN	NaN	NaN
1.68	-78.3904	81.6026	988.3637	-1.1714	0.46729	-0.14209	28.47	-106.77	1317.368	-2.0488	0.82227	-0.69434	NaN	NaN	NaN	NaN	NaN	NaN	NaN	NaN	NaN	NaN	NaN	NaN
1.682	-75.641	89.5646	963.1274	-1.1499	0.43701	-0.13037	45.2995	-101.297	1284.417	-2.1836	0.82813	-0.72754	NaN	NaN	NaN	NaN	NaN	NaN	NaN	NaN	NaN	NaN	NaN	NaN
1.684	-68.8598	88.0381	932.3235	-1.1323	0.41797	-0.11914	34.86171	-104.157	1273.921	-2.23	0.82666	-0.74561	NaN	NaN	NaN	NaN	NaN	NaN	NaN	NaN	NaN	NaN	NaN	NaN
1.686	-71.13547	87.9747	910.588	-1.1147	0.39893	-0.11426	25.3985	-27.278	1254.036	-2.3003	0.81494	-0.79053	NaN	NaN	NaN	NaN	NaN	NaN	NaN	NaN	NaN	NaN	NaN	NaN
1.688	-34.946	81.438	906.0492	-1.0952	0.37646	-0.093262	-8.009	-67.4784	1292.1001	-2.3328	0.79565	-0.81421	NaN	NaN	NaN	NaN	NaN	NaN	NaN	NaN	NaN	NaN	NaN	NaN
1.69	-38.6371	88.036	882.4313	-1.0859	0.36914	-0.10156	-28.259	-71.777	1346.991	-2.3516	0.77441	-0.82813	NaN	NaN	NaN	NaN	NaN	NaN	NaN	NaN	NaN	NaN	NaN	NaN
1.692	-44.8304	106.726	860.8403	-1.062	0.34229	-0.091797	-46.8677	-72.662	1376.055	-2.3496	0.72461	-0.85449	NaN	NaN	NaN	NaN	NaN	NaN	NaN	NaN	NaN	NaN	NaN	NaN
1.694	-17.438	111.4028	857.168	-1.0437	0.32544	-0.085205	-72.273	-166.271	1398.926	-2.3374	0.68848	-0.88037	NaN	NaN	NaN	NaN	NaN	NaN	NaN	NaN	NaN	NaN	NaN	NaN
1.696	3.04	104.8275	835.89046	-1.0234	0.31543	-0.084473	-47.272	-151.925	1430.667	-2.3125	0.62402	-0.93945	NaN	NaN	NaN	NaN	NaN	NaN	NaN	NaN	NaN	NaN	NaN	NaN
1.698	-12.629	109.333	814.2366	-0.99609	0.30273	-0.072266	-82.334	-135.9504	1404.562	-2.2879	0.5935	-0.9773	NaN	NaN	NaN	NaN	NaN	NaN	NaN	NaN	NaN	NaN	NaN	NaN
1.7	-23.173	113.411	795.8176	-0.97656	0.29541	-0.080078	-76.296	-122.149	1423.54	-2.2671	0.57373	-1.0034	NaN	NaN	NaN	NaN	NaN	NaN	NaN	NaN	NaN	NaN	NaN	NaN
1.702	-7.438	107.753	783.6194	-0.94531	0.29004	-0.080566	-15.021	-27.418	1387.66077	-2.2534	0.59424	-1.0327	NaN	NaN	NaN	NaN	NaN	NaN	NaN	NaN	NaN	NaN	NaN	NaN
1.704	-6.861	97.5572	746.3648	-0.91577	0.27979	-0.081299	3.162	-70.802	1350.427	-2.2476	0.60986	-1.0464	NaN	NaN	NaN	NaN	NaN	NaN	NaN	NaN	NaN	NaN	NaN	NaN
1.706	-14.018	102.2444	722.391	-0.88916	0.27393	-0.079102	11.983	-85.005	1373.0659	-2.2227	0.65039	-1.0762	NaN	NaN	NaN	NaN	NaN	NaN	NaN	NaN	NaN	NaN	NaN	NaN
1.708	4.95	98.4122	692.32358	-0.85156	0.2749	-0.082031	9.603	-68.948	1336.0902	-2.2009	0.67163	-1.0915	NaN	NaN	NaN	NaN	NaN	NaN	NaN	NaN	NaN	NaN	NaN	NaN
1.71	12.914	95.7987	649.196	-0.83203	0.26563	-0.077148	-15.328	-106.299	1333.8661	-2.1733	0.69385	-1.103	NaN	NaN	NaN	NaN	NaN	NaN	NaN	NaN	NaN	NaN	NaN	NaN
1.712	3.504	101.91306	621.247	-0.79199	0.26367	-0.079102	-5.365	-22.559	1327.143	-2.1309	0.72363	-1.1152	NaN	NaN	NaN	NaN	NaN	NaN	NaN	NaN	NaN	NaN	NaN	NaN
1.714	13.311	99.3226	590.663	-0.76294	0.25464	-0.077881	-53.1235	12.6629	1284.634	-2.1094	0.73926	-1.1152	NaN	NaN	NaN	NaN	NaN	NaN	NaN	NaN	NaN	NaN	NaN	NaN
1.716	2.572	91.978	593.0404	-0.7334	0.24609	-0.074707	-25.924	11.955	1292.7805	-2.041	0.76855	-1.1133	NaN	NaN	NaN	NaN	NaN	NaN	NaN	NaN	NaN	NaN	NaN	NaN
1.718	2.664	92.439	585.2268	-0.6875	0.23926	-0.077637	16.674	95.23377	1281.11	-1.9961	0.79736	-1.0947	NaN	NaN	NaN	NaN	NaN	NaN	NaN	NaN	NaN	NaN	NaN	NaN
1.72	-25.8782	99.491	553.5045	-0.66699	0.23633	-0.076172	-25.0668	63.393	1286.0273	-1.9414	0.81836	-1.084	NaN	NaN	NaN	NaN	NaN	NaN	NaN	NaN	NaN	NaN	NaN	NaN
1.722	-9.127	109.3422	520.87644	-0.62207	0.23633	-0.077148	-7.772	50.068	1324.1282	-1.8672	0.83984	-1.0508	NaN	NaN	NaN	NaN	NaN	NaN	NaN	NaN	NaN	NaN	NaN	NaN
1.724	-38.356	115.255	514.67944	-0.5874	0.23486	-0.073487	-1.9578	39.8213	1326.3217	-1.8257	0.84619	-1.0366	NaN	NaN	NaN	NaN	NaN	NaN	NaN	NaN	NaN	NaN	NaN	NaN
1.726	-37.358	121.006	478.5246	-0.5498	0.23096	-0.077637	-9.644	-63.725	1318.1305	-1.748	0.85254	-1.0059	NaN	NaN	NaN	NaN	NaN	NaN	NaN	NaN	NaN	NaN	NaN	NaN
1.728	-46.0429	123.069	437.1243	-0.49268	0.2334	-0.069824	48.3531	-39.276	1302.0222	-1.6879	0.85547	-0.97998	NaN	NaN	NaN	NaN	NaN	NaN	NaN	NaN	NaN	NaN	NaN	NaN
1.73	-38.377	107.3674	400.917	-0.46484	0.23389	-0.065918	24.76	-32.796	1252.624	-1.6328	0.84766	-0.9541	NaN	NaN	NaN	NaN	NaN	NaN	NaN	NaN	NaN	NaN	NaN	NaN
1.732	-62.323	90.8656	377.93	-0.40967	0.22607	-0.063477	24.497	-59.834	1255.675	-1.5625	0.8418	-0.91211	NaN	NaN	NaN	NaN	NaN	NaN	NaN	NaN	NaN	NaN	NaN	NaN
1.734	-48.483	87.941	356.399	-0.3689	0.22071	-0.057861	-8.327	23.026	1253.505	-1.5371	0.83398	-0.89063	NaN	NaN	NaN	NaN	NaN	NaN	NaN	NaN	NaN	NaN	NaN	NaN
1.736	-30.538	101.333	324.458	-0.32813	0.21533	-0.059082	-31.2239	8.288	1245.823	-1.4878	0.81201	-0.85693	NaN	NaN	NaN	NaN	NaN	NaN	NaN	NaN	NaN	NaN	NaN	NaN
1.738	-23.202	100.3	302.941	-0.26758	0.20898	-0.05127	-1.2397	18.8281	1261.166	-1.45	0.79517	-0.83277	NaN	NaN	NaN	NaN	NaN	NaN	NaN	NaN	NaN	NaN	NaN	NaN
1.74	-24.75	105.5877	291.6039	-0.2373	0.20117	-0.046387	2.5905	61.353	1239.9985	-1.416	0.77148	-0.80273	NaN	NaN	NaN	NaN	NaN	NaN	NaN	NaN	NaN	NaN	NaN	NaN
1.742	-35.2245	105.9882	279.8755	-0.17676	0.19434	-0.043457	-29.419	16.8898	1222.4995	-1.3706	0.73486	-0.76514	NaN	NaN	NaN	NaN	NaN	NaN	NaN	NaN	NaN	NaN	NaN	NaN
1.744	-32.109	118.7954	257.478	-0.13574	0.1831	-0.036621	-36.829	95.99	1180.331	-1.3535	0.7207	-0.74805	NaN	NaN	NaN	NaN	NaN	NaN	NaN	NaN	NaN	NaN	NaN	NaN
1.746	-33.221	122.394	237.752	-0.10205	0.16797	-0.028809	-57.3718	122.856	1141.947	-1.314	0.68994	-0.70654	NaN	NaN	NaN	NaN	NaN	NaN	NaN	NaN	NaN	NaN	NaN	NaN
1.748	-30.152	106.743	239.0493	-0.062988	0.14551	-0.019531	-60.9986	107.1294	1133.3717	-1.2903	0.67138	-0.677	NaN	NaN	NaN	NaN	NaN	NaN	NaN	NaN	NaN	NaN	NaN	NaN
1.75	-21.578	101.916	207.5143	-0.047363	0.1333	-0.011719	-17.0164	163.509	1112.2746	-1.271	0.65283	-0.646	NaN	NaN	NaN	NaN	NaN	NaN	NaN	NaN	NaN	NaN	NaN	NaN
1.752	-8.392	88.9274	178.12	-0.011719	0.10449	-0.00048828	-40.87486	105.0294	1105.4529	-1.2529	0.62891	-0.59766	NaN	NaN	NaN	NaN	NaN	NaN	NaN	NaN	NaN	NaN	NaN	NaN
1.754	-8.537	80.1621	159.7237	0.0097656	0.085937	0.0043945	-16.073	115.695	1087.7331	-1.25	0.61914	-0.58105	NaN	NaN	NaN	NaN	NaN	NaN	NaN	NaN	NaN	NaN	NaN	NaN
1.756	-16.772	73.0438	147.6	0.030762	0.070801	0.0087891	-12.034	166.4075	1061.035	-1.2266	0.59082	-0.55176	NaN	NaN	NaN	NaN	NaN	NaN	NaN	NaN	NaN	NaN	NaN	NaN
1.758	-0.295000000000002	70.32678	148.1329	0.066406	0.047852	0.020508	-48.19	119.559	1038.593	-1.2087	0.57006	-0.51782	NaN	NaN	NaN	NaN	NaN	NaN	NaN	NaN	NaN	NaN	NaN	NaN
1.76	4.998	68.9696	130.5637	0.083008	0.036133	0.024902	-25.645	140.1635	1022.5355	-1.1929	0.55713	-0.48193	NaN	NaN	NaN	NaN	NaN	NaN	NaN	NaN	NaN	NaN	NaN	NaN
1.762	-3.281	70.7044	125.0901	0.11719	0.01709	0.027832	-55.734	119.78	982.17618	-1.1694	0.54395	-0.4502	NaN	NaN	NaN	NaN	NaN	NaN	NaN	NaN	NaN	NaN	NaN	NaN
1.764	6.552	63.2461	105.465	0.13428	0.001709	0.037842	-60.4266	85.9382	976.0401	-1.1523	0.53955	-0.41943	NaN	NaN	NaN	NaN	NaN	NaN	NaN	NaN	NaN	NaN	NaN	NaN
1.766	-7.665	61.4483	101.6603	0.1499	-0.011719	0.043457	-29.069	154.549	957.064	-1.1401	0.53369	-0.39404	NaN	NaN	NaN	NaN	NaN	NaN	NaN	NaN	NaN	NaN	NaN	NaN
1.768	-8.255	65.2333	89.877	0.16797	-0.032227	0.048828	-61.2645	138.01	949.4579	-1.1328	0.5293	-0.36182	NaN	NaN	NaN	NaN	NaN	NaN	NaN	NaN	NaN	NaN	NaN	NaN
1.77	-29.429	64.9463	99.7238	0.16992	-0.047363	0.053711	-62.691	161.0533	933.3333	-1.125	0.52148	-0.34473	NaN	NaN	NaN	NaN	NaN	NaN	NaN	NaN	NaN	NaN	NaN	NaN
1.772	-17.641	74.422	93.97264	0.17871	-0.072266	0.061035	-38.333	190.0594	878.9051	-1.1187	0.51025	-0.30957	NaN	NaN	NaN	NaN	NaN	NaN	NaN	NaN	NaN	NaN	NaN	NaN
1.774	-32.031	72.971	72.2334	0.17798	-0.083984	0.067383	-55.079	156.099	834.2237	-1.113	0.50244	-0.28931	NaN	NaN	NaN	NaN	NaN	NaN	NaN	NaN	NaN	NaN	NaN	NaN
1.776	-38.593	76.278	70.2791	0.17383	-0.094238	0.068359	-5.879	197.829	812.919	-1.105	0.49854	-0.27295	NaN	NaN	NaN	NaN	NaN	NaN	NaN	NaN	NaN	NaN	NaN	NaN
1.778	-45.4611	70.843	72.59191	0.16504	-0.10645	0.069336	-26.211	204.794	786.783	-1.0952	0.49463	-0.25293	NaN	NaN	NaN	NaN	NaN	NaN	NaN	NaN	NaN	NaN	NaN	NaN
1.78	-43.057	67.3309	51.239	0.15771	-0.10889	0.072754	-29.554	178.511	770.421	-1.0859	0.49707	-0.24219	NaN	NaN	NaN	NaN	NaN	NaN	NaN	NaN	NaN	NaN	NaN	NaN
1.782	-40.9746	63.296	37.558	0.13965	-0.12598	0.074219	0.834000000000003	232.581	717.7644	-1.0601	0.49658	-0.22607	NaN	NaN	NaN	NaN	NaN	NaN	NaN	NaN	NaN	NaN	NaN	NaN
1.784	-44.178	49.028	35.203	0.12207	-0.13525	0.074219	-67.294	200.006	665.096	-1.0281	0.50122	-0.21802	NaN	NaN	NaN	NaN	NaN	NaN	NaN	NaN	NaN	NaN	NaN	NaN
1.786	-27.829	41.474	36.631	0.10889	-0.13818	0.077148	-53.544	199.951	657.4505	-0.99023	0.50195	-0.21094	NaN	NaN	NaN	NaN	NaN	NaN	NaN	NaN	NaN	NaN	NaN	NaN
1.788	-17.768	35.709	39.1959	0.086426	-0.14453	0.073242	-56.9366	209.268	628.767	-0.91748	0.51123	-0.19189	NaN	NaN	NaN	NaN	NaN	NaN	NaN	NaN	NaN	NaN	NaN	NaN
1.79	-35.51	41.4522	41.15884	0.072754	-0.14087	0.071289	-77.483	168.799	608.0247	-0.88281	0.5127	-0.18945	NaN	NaN	NaN	NaN	NaN	NaN	NaN	NaN	NaN	NaN	NaN	NaN
1.792	-43.985	47.5821	35.7926	0.051758	-0.13818	0.0625	-21.828	194.026	580.9976	-0.79248	0.51807	-0.16699	NaN	NaN	NaN	NaN	NaN	NaN	NaN	NaN	NaN	NaN	NaN	NaN
1.794	-33.57	47.371	55.8207	0.035156	-0.13965	0.063477	-59.6268	195.788	546.0309	-0.72387	0.52172	-0.1455	NaN	NaN	NaN	NaN	NaN	NaN	NaN	NaN	NaN	NaN	NaN	NaN
1.796	-37.775	47.61	42.929	0.026855	-0.13281	0.055664	-74.5638	159.0215	533.356	-0.65186	0.52588	-0.12842	NaN	NaN	NaN	NaN	NaN	NaN	NaN	NaN	NaN	NaN	NaN	NaN
1.798	-43.002	33.8442	42.8087	0.0063477	-0.13184	0.051758	-33.35	178.8366	485.215	-0.55078	0.52539	-0.099609	NaN	NaN	NaN	NaN	NaN	NaN	NaN	NaN	NaN	NaN	NaN	NaN
1.8	-27.574	24.2463	52.198	-0.0075684	-0.12524	0.04541	-48.416	143.436	437.219	-0.5	0.52393	-0.077148	NaN	NaN	NaN	NaN	NaN	NaN	NaN	NaN	NaN	NaN	NaN	NaN
1.802	-15.9	22.2568	40.2769	-0.022461	-0.12012	0.040039	-45.24	145.383	398.6546	-0.40186	0.50977	-0.054688	NaN	NaN	NaN	NaN	NaN	NaN	NaN	NaN	NaN	NaN	NaN	NaN
1.804	-9.992	30.3695	20.456	-0.037598	-0.11182	0.032715	-25.109	159.995	359.929	-0.32129	0.49756	-0.030273	NaN	NaN	NaN	NaN	NaN	NaN	NaN	NaN	NaN	NaN	NaN	NaN
1.806	-8.274	34.7987	12.445	-0.041504	-0.11182	0.026367	-49.5551	121.251	343.7087	-0.24512	0.47803	-0.0048828	NaN	NaN	NaN	NaN	NaN	NaN	NaN	NaN	NaN	NaN	NaN	NaN
1.808	-5.496	30.803	18.27333	-0.047852	-0.10156	0.019043	-41.231	136.6556	301.4433	-0.14355	0.44189	0.029297	NaN	NaN	NaN	NaN	NaN	NaN	NaN	NaN	NaN	NaN	NaN	NaN
1.81	7.588	21.8551	23.0499	-0.050293	-0.090088	0.012939	-61.99274	137.5636	241.3482	-0.088867	0.42432	0.045898	NaN	NaN	NaN	NaN	NaN	NaN	NaN	NaN	NaN	NaN	NaN	NaN
1.812	-14.545	25.7332	32.17	-0.055664	-0.080566	0.0073242	-56.343	104.89467	215.931	0.0083008	0.38428	0.081055	NaN	NaN	NaN	NaN	NaN	NaN	NaN	NaN	NaN	NaN	NaN	NaN
1.814	-10.322	20.3746	33.17894	-0.051758	-0.074219	-0.0024414	-24.542	136.289	201.8576	0.072266	0.35572	0.11157	NaN	NaN	NaN	NaN	NaN	NaN	NaN	NaN	NaN	NaN	NaN	NaN
1.816	-20.428	28.6494	43.2276	-0.050293	-0.068359	-0.0048828	-46.0805	139.787	170.896	0.13477	0.32031	0.14014	NaN	NaN	NaN	NaN	NaN	NaN	NaN	NaN	NaN	NaN	NaN	NaN
1.818	-10.064	32.6821	32.4502	-0.041016	-0.062012	-0.0097656	9.602	127.2383	152.911	0.2085	0.27637	0.16846	NaN	NaN	NaN	NaN	NaN	NaN	NaN	NaN	NaN	NaN	NaN	NaN
1.82	-46.0157	28.668	10.938	-0.033691	-0.05957	-0.01709	-10.34	117.468	114.895	0.24121	0.25391	0.18848	NaN	NaN	NaN	NaN	NaN	NaN	NaN	NaN	NaN	NaN	NaN	NaN
1.822	-43.284	32.713	12.4131	-0.023926	-0.057617	-0.024414	-35.773	55.802	110.103	0.29883	0.20361	0.22412	NaN	NaN	NaN	NaN	NaN	NaN	NaN	NaN	NaN	NaN	NaN	NaN
1.824	-29.927	24.5434	27.8196	-0.0087891	-0.054688	-0.030762	15.129	47.887	94.8714	0.32934	0.16382	0.24463	NaN	NaN	NaN	NaN	NaN	NaN	NaN	NaN	NaN	NaN	NaN	NaN
1.826	-15.642	24.00355	16.544	-0.0019531	-0.04834	-0.040039	-34.806	69.6812	42.701	0.36035	0.12451	0.26611	NaN	NaN	NaN	NaN	NaN	NaN	NaN	NaN	NaN	NaN	NaN	NaN
1.828	-37.4185	13.731	12.8184	0.014648	-0.040527	-0.048828	-13.883	62.3004	43.677	0.38818	0.072754	0.29199	NaN	NaN	NaN	NaN	NaN	NaN	NaN	NaN	NaN	NaN	NaN	NaN
1.83	-33.441	3.981	27.8879	0.028565	-0.042236	-0.052002	6.638	67.886	61.1577	0.39648	0.040039	0.30811	NaN	NaN	NaN	NaN	NaN	NaN	NaN	NaN	NaN	NaN	NaN	NaN
1.832	-31.944	6.717	40.7147	0.04248	-0.041992	-0.058105	-53.2664	50.9532	79.6143	0.40869	-0.01709	0.32471	NaN	NaN	NaN	NaN	NaN	NaN	NaN	NaN	NaN	NaN	NaN	NaN
1.834	-28.936	16.753	18.8825	0.055664	-0.035156	-0.061035	-6.088	22.277	82.5025	0.41309	-0.068115	0.33716	NaN	NaN	NaN	NaN	NaN	NaN	NaN	NaN	NaN	NaN	NaN	NaN
1.836	-37.087	26.0519	1.236	0.067871	-0.037109	-0.062988	-0.832999999999998	32.8762	56.793	0.41064	-0.11523	0.34912	NaN	NaN	NaN	NaN	NaN	NaN	NaN	NaN	NaN	NaN	NaN	NaN
1.838	-30.734	25.1939	2.986	0.075195	-0.03418	-0.070313	-50.9317	6.6323	44.738	0.40283	-0.17139	0.35303	NaN	NaN	NaN	NaN	NaN	NaN	NaN	NaN	NaN	NaN	NaN	NaN
1.84	-33.315	23.8694	22.5551	0.085449	-0.03711	-0.072753	5.031	12.258	47.5078	0.39404	-0.19287	0.3584	NaN	NaN	NaN	NaN	NaN	NaN	NaN	NaN	NaN	NaN	NaN	NaN
1.842	-49.8519	25.9572	22.6593	0.097656	-0.034668	-0.07666	-20.462	47.37	24.103	0.37158	-0.23242	0.36279	NaN	NaN	NaN	NaN	NaN	NaN	NaN	NaN	NaN	NaN	NaN	NaN
1.844	-54.2249	22.4391	15.8137	0.10303	-0.037598	-0.081543	-29.668	31.2695	4.2693	0.35694	-0.25049	0.3645	NaN	NaN	NaN	NaN	NaN	NaN	NaN	NaN	NaN	NaN	NaN	NaN
1.846	-30.206	17.2778	20.771	0.10742	-0.036133	-0.086914	29.4389	38.6378	1.2499	0.33594	-0.26221	0.36621	NaN	NaN	NaN	NaN	NaN	NaN	NaN	NaN	NaN	NaN	NaN	NaN
1.848	-16.708	20.2354	38.3344	0.11865	-0.035645	-0.087402	-50.916	27.7522	10.6506	0.30176	-0.26514	0.3667	NaN	NaN	NaN	NaN	NaN	NaN	NaN	NaN	NaN	NaN	NaN	NaN
1.85	-18.999	28.3633	25.7572	0.12353	-0.035156	-0.093261	-30.079	10.469	50.293	0.29102	-0.26221	0.36279	NaN	NaN	NaN	NaN	NaN	NaN	NaN	NaN	NaN	NaN	NaN	NaN
1.852	-13.358	24.3696	11.52	0.12695	-0.035156	-0.1001	15.482	64.604	31.35	0.27393	-0.25195	0.36035	NaN	NaN	NaN	NaN	NaN	NaN	NaN	NaN	NaN	NaN	NaN	NaN
1.854	6.596	27.2125	18.0268	0.13574	-0.023926	-0.10742	-37.073	62.665	30.2587	0.25708	-0.24634	0.3562	NaN	NaN	NaN	NaN	NaN	NaN	NaN	NaN	NaN	NaN	NaN	NaN
1.856	-12.877	19.3302	14.9371	0.13867	-0.023438	-0.11035	-18.912	47.277	22.3867	0.24561	-0.23877	0.35107	NaN	NaN	NaN	NaN	NaN	NaN	NaN	NaN	NaN	NaN	NaN	NaN
1.858	-30.165	23.3221	8.878	0.14404	-0.018555	-0.11279	-36.02883	38.1022	-7.4637	0.229	-0.22803	0.3457	NaN	NaN	NaN	NaN	NaN	NaN	NaN	NaN	NaN	NaN	NaN	NaN
1.86	-0.109000000000002	5.5621	33.6759	0.14258	-0.015136	-0.12183	-39.0657	-0.88748	14.7468	0.21875	-0.22266	0.34326	NaN	NaN	NaN	NaN	NaN	NaN	NaN	NaN	NaN	NaN	NaN	NaN
1.862	-21.29	-2.228	53.974	0.14209	-0.0097656	-0.12109	-15.246	21.7297	-0.605	0.20313	-0.2085	0.33301	NaN	NaN	NaN	NaN	NaN	NaN	NaN	NaN	NaN	NaN	NaN	NaN
1.864	-18.281	-0.8047	53.703	0.13916	-0.0048828	-0.14307	-37.8143	35.4507	26.6472	0.18847	-0.19897	0.32348	NaN	NaN	NaN	NaN	NaN	NaN	NaN	NaN	NaN	NaN	NaN	NaN
1.866	-27.76	0.7078	62.76924	0.13623	2.7756e-14	-0.14014	-1.685	16.179	56.066	0.17822	-0.19238	0.31885	NaN	NaN	NaN	NaN	NaN	NaN	NaN	NaN	NaN	NaN	NaN	NaN
1.868	-16.252	5.39355	75.6636	0.12158	0.00097656	-0.15381	-12.737	35.746	43.0963	0.1543	-0.17969	0.30957	NaN	NaN	NaN	NaN	NaN	NaN	NaN	NaN	NaN	NaN	NaN	NaN
1.87	-30.107	16.7056	116.4876	0.10034	0.00048827	-0.15625	-20.733	25.852	24.2853	0.14551	-0.17627	0.30273	NaN	NaN	NaN	NaN	NaN	NaN	NaN	NaN	NaN	NaN	NaN	NaN
1.872	-21.542	41.3143	163.282	0.07959	0.00048828	-0.17285	23.939	23.66002	12.702	0.11963	-0.1709	0.29443	NaN	NaN	NaN	NaN	NaN	NaN	NaN	NaN	NaN	NaN	NaN	NaN
1.874	-12.766	53.9969	261.242	0.038574	0.00048828	-0.18408	-46.5421	62.855	13.5783	0.10327	-0.16528	0.29004	NaN	NaN	NaN	NaN	NaN	NaN	NaN	NaN	NaN	NaN	NaN	NaN
1.876	-45.922	80.064	379.635	0.0087891	0.0029297	-0.19434	-25.419	20.1854	42.103	0.083984	-0.15918	0.28516	NaN	NaN	NaN	NaN	NaN	NaN	NaN	NaN	NaN	NaN	NaN	NaN
1.878	-10.68	75.409	511.346	-0.071777	0.0043945	-0.21484	5.701	30.07	32.4979	0.071777	-0.15088	0.26855	NaN	NaN	NaN	NaN	NaN	NaN	NaN	NaN	NaN	NaN	NaN	NaN
1.88	-17.058	46.1246	582.946	-0.16284	-0.0026856	-0.22925	-43.0322	40.7093	8.524	0.058594	-0.13867	0.27588	NaN	NaN	NaN	NaN	NaN	NaN	NaN	NaN	NaN	NaN	NaN	NaN
1.882	-75.1144	23.9114	687.44134	-0.27393	-0.015625	-0.24463	-12.862	17.803	30.9101	0.039551	-0.12598	0.27246	NaN	NaN	NaN	NaN	NaN	NaN	NaN	NaN	NaN	NaN	NaN	NaN
1.884	-60.434	3.962	757.3603	-0.46094	-0.037109	-0.25488	-19.148	51.976	42.30043	0.030274	-0.11426	0.2627	NaN	NaN	NaN	NaN	NaN	NaN	NaN	NaN	NaN	NaN	NaN	NaN
1.886	-62.849	14.141	816.6682	-0.56641	-0.04834	-0.25635	-48.0493	40.342	56.801	0.017578	-0.104	0.25684	NaN	NaN	NaN	NaN	NaN	NaN	NaN	NaN	NaN	NaN	NaN	NaN
1.888	-62.415	60.8449	857.529	-0.81396	-0.078125	-0.24609	23.375	31.6305	51.0979	0.0029297	-0.089844	0.24756	NaN	NaN	NaN	NaN	NaN	NaN	NaN	NaN	NaN	NaN	NaN	NaN
1.89	-54.476	49.2602	871.715	-1.0386	-0.099363	-0.25	-16.355	47.114	4.955	-0.0048828	-0.083984	0.24658	NaN	NaN	NaN	NaN	NaN	NaN	NaN	NaN	NaN	NaN	NaN	NaN
1.892	-71.7283	19.1275	866.2885	-1.2734	-0.10693	-0.25879	-21.845	-11.8444	28.582	-0.020508	-0.070313	0.23438	NaN	NaN	NaN	NaN	NaN	NaN	NaN	NaN	NaN	NaN	NaN	NaN
1.894	-91.4572	-7.703	852.4395	-1.5879	-0.071289	-0.28174	21.683	-5.0411	38.2638	-0.033935	-0.057861	0.2312	NaN	NaN	NaN	NaN	NaN	NaN	NaN	NaN	NaN	NaN	NaN	NaN
1.896	-74.8605	-35.483	853.5107	-1.7319	-0.033203	-0.30029	-38.165	2.202	26.7723	-0.04834	-0.045898	0.22412	NaN	NaN	NaN	NaN	NaN	NaN	NaN	NaN	NaN	NaN	NaN	NaN
1.898	-39.17	-40.314	863.539	-1.9824	0.099121	-0.34131	-26.438	-4.139	45.111	-0.067383	-0.03125	0.22021	NaN	NaN	NaN	NaN	NaN	NaN	NaN	NaN	NaN	NaN	NaN	NaN
1.9	-24.974	-17.518	884.988	-2.1377	0.22901	-0.35352	-16.5034	33.067	33.983	-0.076172	-0.018066	0.21338	NaN	NaN	NaN	NaN	NaN	NaN	NaN	NaN	NaN	NaN	NaN	NaN
1.902	-4.657	9.2111	875.88	-2.2769	0.35791	-0.36475	-34.1388	16.4293	59.92339	-0.089355	0	0.20313	NaN	NaN	NaN	NaN	NaN	NaN	NaN	NaN	NaN	NaN	NaN	NaN
1.904	-13.275	28.6805	853.2147	-2.3887	0.50928	-0.41797	-3.202	2.7816	63.9712	-0.10107	0.013672	0.18652	NaN	NaN	NaN	NaN	NaN	NaN	NaN	NaN	NaN	NaN	NaN	NaN
1.906	-23.596	26.24	868.143	-2.4038	0.56299	-0.43652	-34.469	28.679	38.4318	-0.10986	0.027344	0.18896	NaN	NaN	NaN	NaN	NaN	NaN	NaN	NaN	NaN	NaN	NaN	NaN
1.908	-48.986	44.2191	913.8035	-2.3828	0.62305	-0.4668	-30.171	-8.4691	23.954	-0.12061	0.054688	0.17236	NaN	NaN	NaN	NaN	NaN	NaN	NaN	NaN	NaN	NaN	NaN	NaN
1.91	-29.554	43.427	912.96307	-2.2969	0.63281	-0.49219	-14.171	-6.94394	6.763	-0.12964	0.07544	0.16186	NaN	NaN	NaN	NaN	NaN	NaN	NaN	NaN	NaN	NaN	NaN	NaN
1.912	-46.1423	32.437	909.04274	-2.2324	0.62305	-0.49805	-45.514	13.4042	-12.052	-0.14111	0.098145	0.15527	NaN	NaN	NaN	NaN	NaN	NaN	NaN	NaN	NaN	NaN	NaN	NaN
1.914	-50.7997	19.702	902.4221	-2.064	0.58447	-0.49756	-1.07	-3.459	7.017	-0.1582	0.125	0.13721	NaN	NaN	NaN	NaN	NaN	NaN	NaN	NaN	NaN	NaN	NaN	NaN
1.916	-44.9273	-18.963	899.044	-1.8845	0.56372	-0.5	1.159	37.995	-5.774	-0.1748	0.13916	0.13037	NaN	NaN	NaN	NaN	NaN	NaN	NaN	NaN	NaN	NaN	NaN	NaN
1.918	-27.076	-57.4398	905.943	-1.709	0.54492	-0.50244	-42.6008	31.50061	30.1379	-0.19922	0.16602	0.11621	NaN	NaN	NaN	NaN	NaN	NaN	NaN	NaN	NaN	NaN	NaN	NaN
1.92	-15.521	-72.55	919.01523	-1.502	0.52734	-0.50195	-9.027	10.0709	70.1073	-0.22168	0.18945	0.10376	NaN	NaN	NaN	NaN	NaN	NaN	NaN	NaN	NaN	NaN	NaN	NaN
1.922	17.409	-112.985	940.1129	-1.4141	0.51563	-0.50293	-42.5556	14.3081	70.482	-0.25195	0.21094	0.086914	NaN	NaN	NaN	NaN	NaN	NaN	NaN	NaN	NaN	NaN	NaN	NaN
1.924	30.0698	-128.09	970.796	-1.2671	0.50439	-0.50684	-28.484	-17.6368	124.6128	-0.29102	0.2373	0.058105	NaN	NaN	NaN	NaN	NaN	NaN	NaN	NaN	NaN	NaN	NaN	NaN
1.926	26.382	-138.222	1004.579	-1.1719	0.50293	-0.52099	28.3158	1.065	115.333	-0.31982	0.24268	0.043457	NaN	NaN	NaN	NaN	NaN	NaN	NaN	NaN	NaN	NaN	NaN	NaN
1.928	28.7693	-123.392	1032.16	-1.0781	0.50195	-0.5293	-41.25121	27.106	164.723	-0.39404	0.25146	0.0073242	NaN	NaN	NaN	NaN	NaN	NaN	NaN	NaN	NaN	NaN	NaN	NaN
1.93	7.028	-107.4366	1048.5464	-0.9873	0.48828	-0.54297	6.157	9.0443	341.06	-0.46973	0.24683	-0.031494	NaN	NaN	NaN	NaN	NaN	NaN	NaN	NaN	NaN	NaN	NaN	NaN
1.932	-14.383	-110.4968	1056.998	-0.95459	0.47998	-0.53662	-46.605	-23.1987	450.47	-0.57031	0.24219	-0.063965	NaN	NaN	NaN	NaN	NaN	NaN	NaN	NaN	NaN	NaN	NaN	NaN
1.934	-23.6524	-91.6647	1041.1717	-0.90771	0.46143	-0.54834	-115.7253	-57.806	581.962	-0.73975	0.22217	-0.12402	NaN	NaN	NaN	NaN	NaN	NaN	NaN	NaN	NaN	NaN	NaN	NaN
1.936	-61.765	-81.992	1070.621	-0.89135	0.44995	-0.55518	42.392	-69.8139	702.244	-0.83789	0.20605	-0.15332	NaN	NaN	NaN	NaN	NaN	NaN	NaN	NaN	NaN	NaN	NaN	NaN
1.938	-39.251036	-63.96	1100.2002	-0.88818	0.43408	-0.56494	62.545	-41.661	804.399	-1.0503	0.17676	-0.2124	NaN	NaN	NaN	NaN	NaN	NaN	NaN	NaN	NaN	NaN	NaN	NaN
1.94	-23.951	-61.333	1142.329	-0.9043	0.41211	-0.56934	-1.75	7.703	974.538	-1.2144	0.15405	-0.24561	NaN	NaN	NaN	NaN	NaN	NaN	NaN	NaN	NaN	NaN	NaN	NaN
1.942	26.329	-53.497	1154.108	-0.92822	0.40479	-0.57178	-1.866	56.7707	1002.1166	-1.3784	0.13867	-0.27686	NaN	NaN	NaN	NaN	NaN	NaN	NaN	NaN	NaN	NaN	NaN	NaN
1.944	37.7073	-60.7168	1162.447	-1.0073	0.40967	-0.57178	-49.347	47.867	963.817	-1.584	0.14355	-0.29785	NaN	NaN	NaN	NaN	NaN	NaN	NaN	NaN	NaN	NaN	NaN	NaN
1.946	23.6293	-60.5566	1183.129	-1.0933	0.41113	-0.57276	20.8478	-4.1276	1030.972	-1.6792	0.15967	-0.29736	NaN	NaN	NaN	NaN	NaN	NaN	NaN	NaN	NaN	NaN	NaN	NaN
1.948	16.3141	-61.6234	1209.9675	-1.1826	0.41162	-0.57715	52.541	-17.5154	1069.762	-1.8374	0.20557	-0.29541	NaN	NaN	NaN	NaN	NaN	NaN	NaN	NaN	NaN	NaN	NaN	NaN
1.95	-0.175000000000001	-73.1633	1241.11158	-1.2969	0.41016	-0.57715	15.0362	-70.5191	1089.89	-1.9287	0.25415	-0.28222	NaN	NaN	NaN	NaN	NaN	NaN	NaN	NaN	NaN	NaN	NaN	NaN
1.952	6.012	-85.647	1273.33	-1.353	0.40576	-0.57373	49.0545	-57.205	1085.965	-1.998	0.30469	-0.27637	NaN	NaN	NaN	NaN	NaN	NaN	NaN	NaN	NaN	NaN	NaN	NaN
1.954	-22.666	-93.69	1299.129	-1.4858	0.39697	-0.56396	34.178	-24.291	1004.266	-2.0234	0.37402	-0.26709	NaN	NaN	NaN	NaN	NaN	NaN	NaN	NaN	NaN	NaN	NaN	NaN
1.956	-11.985	-98.331	1286.5489	-1.6064	0.39111	-0.56494	1.361	-64.932	1005.253	-2.0156	0.39844	-0.25586	NaN	NaN	NaN	NaN	NaN	NaN	NaN	NaN	NaN	NaN	NaN	NaN
1.958	-41.1163	-83.4141	1290.379	-1.7422	0.38965	-0.57227	27.3089	-60.0761	977.5716	-1.9668	0.4375	-0.24609	NaN	NaN	NaN	NaN	NaN	NaN	NaN	NaN	NaN	NaN	NaN	NaN
1.96	-46.836	-69.6894	1304.829	-1.9351	0.4165	-0.58936	8.739	-53.0905	912.116	-1.9211	0.4646	-0.23316	NaN	NaN	NaN	NaN	NaN	NaN	NaN	NaN	NaN	NaN	NaN	NaN
1.962	-14.5365	-62.0869	1329.101	-2.0249	0.43945	-0.60693	42.2633	-82.372	943.2128	-1.8672	0.49121	-0.22021	NaN	NaN	NaN	NaN	NaN	NaN	NaN	NaN	NaN	NaN	NaN	NaN
1.964	32.008	-67.0979	1325.1798	-2.1616	0.479	-0.6333	-29.6368	-38.913	968.18654	-1.793	0.53906	-0.20898	NaN	NaN	NaN	NaN	NaN	NaN	NaN	NaN	NaN	NaN	NaN	NaN
1.966	30.3105	-51.3822	1298.4458	-2.2378	0.52099	-0.67041	-100.053	-54.134	1007.446	-1.7456	0.56299	-0.20654	NaN	NaN	NaN	NaN	NaN	NaN	NaN	NaN	NaN	NaN	NaN	NaN
1.968	20.154	-47.86	1293.97	-2.3086	0.56934	-0.71387	-25.437	-18.118	1018.6902	-1.6558	0.61572	-0.19678	NaN	NaN	NaN	NaN	NaN	NaN	NaN	NaN	NaN	NaN	NaN	NaN
1.97	41.0972	-36.32	1315.996	-2.4199	0.63281	-0.78125	-1.017	-14.764	956.774	-1.5879	0.66504	-0.19482	NaN	NaN	NaN	NaN	NaN	NaN	NaN	NaN	NaN	NaN	NaN	NaN
1.972	14.722	-20.2188	1317.03	-2.4702	0.66064	-0.81396	-15.393	-98.817	962.395	-1.5127	0.72217	-0.20117	NaN	NaN	NaN	NaN	NaN	NaN	NaN	NaN	NaN	NaN	NaN	NaN
1.974	7.3547	3.6806	1315.63385	-2.5347	0.6958	-0.87842	-19.568	-103.963	986.658	-1.4077	0.7915	-0.20752	NaN	NaN	NaN	NaN	NaN	NaN	NaN	NaN	NaN	NaN	NaN	NaN
1.976	16.598851	14.3717	1310.306	-2.5322	0.69336	-0.91065	-33.309	-135.44	1008.906	-1.3608	0.82373	-0.22266	NaN	NaN	NaN	NaN	NaN	NaN	NaN	NaN	NaN	NaN	NaN	NaN
1.978	7.5332	5.327	1328.153	-2.5039	0.67383	-0.93359	-26.098	-179.092	1074.489	-1.2788	0.88428	-0.25244	NaN	NaN	NaN	NaN	NaN	NaN	NaN	NaN	NaN	NaN	NaN	NaN
1.98	-9.7795	5.892	1331.523	-2.4565	0.64502	-0.94385	-29.758	-174.002	1076.8013	-1.2419	0.91821	-0.27368	NaN	NaN	NaN	NaN	NaN	NaN	NaN	NaN	NaN	NaN	NaN	NaN
1.982	-2.196	6.214	1344.425	-2.4468	0.6333	-0.95264	-56.848	-242.455	1055.808	-1.2124	0.9458	-0.30371	NaN	NaN	NaN	NaN	NaN	NaN	NaN	NaN	NaN	NaN	NaN	NaN
1.984	14.32913	-0.856999999999999	1328.4943	-2.4355	0.63867	-0.97266	-38.398	-241.932	1072.862	-1.1895	0.95508	-0.34229	NaN	NaN	NaN	NaN	NaN	NaN	NaN	NaN	NaN	NaN	NaN	NaN
1.986	22.6727	-18.835	1339.8686	-2.448	0.66236	-0.98706	-62.735	-186.621	1074.227	-1.1812	0.94971	-0.36133	NaN	NaN	NaN	NaN	NaN	NaN	NaN	NaN	NaN	NaN	NaN	NaN
1.988	27.1073	-35.312	1331.184	-2.4531	0.69727	-1.0039	-140.128	-188.745	1133.493	-1.1855	0.93945	-0.4043	NaN	NaN	NaN	NaN	NaN	NaN	NaN	NaN	NaN	NaN	NaN	NaN
1.99	37.199	-43.4279	1343.802	-2.4414	0.74414	-1.0273	-122.857	-131.117	1168.761	-1.198	0.93726	-0.43872	NaN	NaN	NaN	NaN	NaN	NaN	NaN	NaN	NaN	NaN	NaN	NaN
1.992	55.763	-34.8534	1350.69063	-2.4194	0.76221	-1.0425	-93.18127	-132.223	1157.0186	-1.2188	0.93945	-0.47168	NaN	NaN	NaN	NaN	NaN	NaN	NaN	NaN	NaN	NaN	NaN	NaN
1.994	52.8	-19.635	1358.791	-2.3418	0.78271	-1.0537	-54.922	-139.462	1174.07285	-1.2539	0.95605	-0.51855	NaN	NaN	NaN	NaN	NaN	NaN	NaN	NaN	NaN	NaN	NaN	NaN
1.996	32.919	9.085	1336.485	-2.2634	0.78442	-1.0564	-34.675	-93.696	1190.18	-1.2656	0.96289	-0.53955	NaN	NaN	NaN	NaN	NaN	NaN	NaN	NaN	NaN	NaN	NaN	NaN
1.998	18.0017	17.3423	1302.9864	-2.1733	0.7749	-1.0503	-47.399	-105.451	1211.88	-1.3018	0.9707	-0.58643	NaN	NaN	NaN	NaN	NaN	NaN	NaN	NaN	NaN	NaN	NaN	NaN
2	21.40524	22.0273	1317.77	-2.062	0.7583	-1.0366	-27.799	-63.3445	1236.052	-1.3325	0.96631	-0.61573	NaN	NaN	NaN	NaN	NaN	NaN	NaN	NaN	NaN	NaN	NaN	NaN
2.002	22.5504	37.3206	1307.0628	-2.0151	0.75049	-1.021	-44.756	-27.414	1218.327	-1.3745	0.95947	-0.63184	NaN	NaN	NaN	NaN	NaN	NaN	NaN	NaN	NaN	NaN	NaN	NaN
2.004	4.2889	57.356	1298.5635	-1.9312	0.74268	-1.0015	-72.515	-106.741	1229.1429	-1.4565	0.92627	-0.63232	NaN	NaN	NaN	NaN	NaN	NaN	NaN	NaN	NaN	NaN	NaN	NaN
2.006	21.3961	59.192	1281.562	-1.8764	0.7417	-0.98584	-36.365	-93.525	1252.8944	-1.5098	0.89844	-0.63379	NaN	NaN	NaN	NaN	NaN	NaN	NaN	NaN	NaN	NaN	NaN	NaN
2.008	1.5577	56.86	1255.644	-1.8237	0.74072	-0.97217	-87.102	-105.879	1245.8253	-1.6519	0.85791	-0.60889	NaN	NaN	NaN	NaN	NaN	NaN	NaN	NaN	NaN	NaN	NaN	NaN
2.01	16.8328	58.3669	1238.896	-1.7544	0.73682	-0.94678	-87.902	-126.7418	1298.971	-1.7817	0.82862	-0.59326	NaN	NaN	NaN	NaN	NaN	NaN	NaN	NaN	NaN	NaN	NaN	NaN
2.012	14.5144	53.3889	1241.6071	-1.7183	0.73486	-0.93701	-72.3143	-86.821	1298.1933	-1.9297	0.81836	-0.57813	NaN	NaN	NaN	NaN	NaN	NaN	NaN	NaN	NaN	NaN	NaN	NaN
2.014	33.4577	47.181	1252.6399	-1.6641	0.72266	-0.91797	-104.678	-133.573	1304.61	-2.1479	0.84424	-0.56396	NaN	NaN	NaN	NaN	NaN	NaN	NaN	NaN	NaN	NaN	NaN	NaN
2.016	54.217	43.916	1262.445	-1.6316	0.71899	-0.89672	-64.172	-138.476	1332.048	-2.2534	0.8667	-0.56201	NaN	NaN	NaN	NaN	NaN	NaN	NaN	NaN	NaN	NaN	NaN	NaN
2.018	35.2371	32.65	1248.7072	-1.6079	0.71338	-0.87646	-61.683	-97.9504	1302.6869	-2.4551	0.91797	-0.56055	NaN	NaN	NaN	NaN	NaN	NaN	NaN	NaN	NaN	NaN	NaN	NaN
2.02	15.1891	29.562	1223.70537	-1.5835	0.70947	-0.84521	-59.128	-109.024	1306.4902	-2.5816	0.95947	-0.56763	NaN	NaN	NaN	NaN	NaN	NaN	NaN	NaN	NaN	NaN	NaN	NaN
2.022	1.3718	23.1715	1201.6006	-1.5801	0.70605	-0.83203	-30.958	-24.318	1294.63342	-2.6719	0.99414	-0.57227	NaN	NaN	NaN	NaN	NaN	NaN	NaN	NaN	NaN	NaN	NaN	NaN
2.024	7.892	39.9331	1190.3112	-1.5659	0.70166	-0.80225	-81.55	3.433	1266.3515	-2.7495	1.0269	-0.58887	NaN	NaN	NaN	NaN	NaN	NaN	NaN	NaN	NaN	NaN	NaN	NaN
2.026	-2.157	56.3459	1164.2598	-1.5515	0.70044	-0.78344	-92.099	-17.2026	1282.6643	-2.752	1.043	-0.59082	NaN	NaN	NaN	NaN	NaN	NaN	NaN	NaN	NaN	NaN	NaN	NaN
2.028	-15.4569	65.3147	1145.559	-1.5327	0.69775	-0.75928	-68.917	2.1832	1291.8838	-2.7241	1.0708	-0.59326	NaN	NaN	NaN	NaN	NaN	NaN	NaN	NaN	NaN	NaN	NaN	NaN
2.03	8.9907	72.2941	1136.5718	-1.5156	0.68359	-0.7334	-112.4091	-49.992	1299.828918	-2.6795	1.0959	-0.59986	NaN	NaN	NaN	NaN	NaN	NaN	NaN	NaN	NaN	NaN	NaN	NaN
2.032	8.0644	72.1796	1142.3824	-1.5024	0.67627	-0.72021	-100.026	-17.035	1292.3364	-2.6265	1.1216	-0.60303	NaN	NaN	NaN	NaN	NaN	NaN	NaN	NaN	NaN	NaN	NaN	NaN
2.034	14.8877	85.588	1115.0005	-1.4707	0.6543	-0.68945	-115.4806	33.426	1247.331	-2.5308	1.1567	-0.60693	NaN	NaN	NaN	NaN	NaN	NaN	NaN	NaN	NaN	NaN	NaN	NaN
2.036	31.2854	96.181	1111.0966	-1.437	0.62744	-0.66455	-146.5067	9.493	1236.681	-2.4512	1.1738	-0.61133	NaN	NaN	NaN	NaN	NaN	NaN	NaN	NaN	NaN	NaN	NaN	NaN
2.038	31.3995	124.1865	1089.1658	-1.4238	0.61426	-0.6543	-116.8624	47.2161	1247.469	-2.3589	1.1802	-0.60303	NaN	NaN	NaN	NaN	NaN	NaN	NaN	NaN	NaN	NaN	NaN	NaN
2.04	24.0238	130.561	1063.971	-1.3984	0.58594	-0.625	-126.629	10.0439	1236.401	-2.2261	1.1821	-0.59131	NaN	NaN	NaN	NaN	NaN	NaN	NaN	NaN	NaN	NaN	NaN	NaN
2.042	12.236	135.964	1043.58	-1.3843	0.56714	-0.60694	-85.343	-55.054	1273.3093	-2.1563	1.1836	-0.58203	NaN	NaN	NaN	NaN	NaN	NaN	NaN	NaN	NaN	NaN	NaN	NaN
2.044	7.746	132.728	1028.735	-1.3745	0.54736	-0.58936	-64.005	-25.168	1284.6972	-2.0215	1.1836	-0.56055	NaN	NaN	NaN	NaN	NaN	NaN	NaN	NaN	NaN	NaN	NaN	NaN
2.046	-9.213	123.522	1029.7878	-1.3594	0.52539	-0.56543	-91.526	-34.864	1285.697	-1.9217	1.1761	-0.54517	NaN	NaN	NaN	NaN	NaN	NaN	NaN	NaN	NaN	NaN	NaN	NaN
2.048	-1.899	123.368	1006.4724	-1.3472	0.51318	-0.55615	-86.173	8.721	1279.642	-1.8262	1.1621	-0.53174	NaN	NaN	NaN	NaN	NaN	NaN	NaN	NaN	NaN	NaN	NaN	NaN
2.05	-34.984	118.6792	987.94963	-1.3257	0.49268	-0.53564	-100.028	57.6932	1247.7594	-1.7202	1.1313	-0.51416	NaN	NaN	NaN	NaN	NaN	NaN	NaN	NaN	NaN	NaN	NaN	NaN
2.052	-23.336	118.6618	959.0848	-1.3061	0.479	-0.51855	-104.222	27.0375	1247.564	-1.6655	1.104	-0.50244	NaN	NaN	NaN	NaN	NaN	NaN	NaN	NaN	NaN	NaN	NaN	NaN
2.054	-23.569	125.07768	965.5038	-1.2847	0.46533	-0.50635	-67.221	62.403	1253.139	-1.5703	1.0586	-0.47998	NaN	NaN	NaN	NaN	NaN	NaN	NaN	NaN	NaN	NaN	NaN	NaN
2.056	-4.197	136.4813	932.82352	-1.25	0.44336	-0.48438	-97.047	47.933	1226.6796	-1.5092	1.02	-0.46338	NaN	NaN	NaN	NaN	NaN	NaN	NaN	NaN	NaN	NaN	NaN	NaN
2.058	-12.233	129.8482	920.6556	-1.23	0.43018	-0.46973	-112.7889	43.105	1217.0456	-1.4546	0.98193	-0.45166	NaN	NaN	NaN	NaN	NaN	NaN	NaN	NaN	NaN	NaN	NaN	NaN
2.06	-3.76900000000001	121.855	913.5712	-1.1909	0.40186	-0.44971	-57.747	93.135	1207.978	-1.394	0.92627	-0.43604	NaN	NaN	NaN	NaN	NaN	NaN	NaN	NaN	NaN	NaN	NaN	NaN
2.062	-9.106	124.0172	891.16843	-1.1667	0.38403	-0.43042	-102.7048	68.409	1170.271	-1.3667	0.89502	-0.42529	NaN	NaN	NaN	NaN	NaN	NaN	NaN	NaN	NaN	NaN	NaN	NaN
2.064	-35.058	134.9977	847.4847	-1.1387	0.36816	-0.41797	-71.611	75.792	1164.69213	-1.3179	0.82764	-0.40576	NaN	NaN	NaN	NaN	NaN	NaN	NaN	NaN	NaN	NaN	NaN	NaN
2.066	-33.736	148.8708	833.5727	-1.1016	0.35352	-0.39063	-35.037	94.8897	1144.6755	-1.2868	0.77661	-0.39428	NaN	NaN	NaN	NaN	NaN	NaN	NaN	NaN	NaN	NaN	NaN	NaN
2.068	-52.98	139.686859	810.9595	-1.084	0.34375	-0.37988	-68.717	71.313	1135.55021	-1.2578	0.72852	-0.38379	NaN	NaN	NaN	NaN	NaN	NaN	NaN	NaN	NaN	NaN	NaN	NaN
2.07	-56.9726	141.2004	779.3275	-1.0391	0.32813	-0.35742	-12.729	119.7169	1173.296	-1.23	0.66357	-0.36279	NaN	NaN	NaN	NaN	NaN	NaN	NaN	NaN	NaN	NaN	NaN	NaN
2.072	-56.5237	134.5399	742.8053	-1.002	0.31543	-0.34033	-55.237	123.4461	1148.67858	-1.2148	0.63281	-0.35547	NaN	NaN	NaN	NaN	NaN	NaN	NaN	NaN	NaN	NaN	NaN	NaN
2.074	-63.2448	144.4983	710.8394	-0.95508	0.30664	-0.32275	-61.054	95.192	1129.6569	-1.189	0.5708	-0.34277	NaN	NaN	NaN	NaN	NaN	NaN	NaN	NaN	NaN	NaN	NaN	NaN
2.076	-44.777	151.781	684.17	-0.89746	0.28613	-0.30273	-38.596	111.915	1095.977	-1.1638	0.52612	-0.32495	NaN	NaN	NaN	NaN	NaN	NaN	NaN	NaN	NaN	NaN	NaN	NaN
2.078	-42.474	152.2292	666.258	-0.86621	0.27832	-0.29297	-52.163	92.965	1045.199	-1.1465	0.49219	-0.31641	NaN	NaN	NaN	NaN	NaN	NaN	NaN	NaN	NaN	NaN	NaN	NaN
2.08	-23.768	148.9717	625.927	-0.80664	0.26367	-0.2666	-57.509	114.2351	1041.148	-1.1089	0.4458	-0.29395	NaN	NaN	NaN	NaN	NaN	NaN	NaN	NaN	NaN	NaN	NaN	NaN
2.082	-31.417	132.303	601.158	-0.76783	0.24854	-0.25537	-63.3131	162.993	1041.7593	-1.0957	0.41992	-0.28711	NaN	NaN	NaN	NaN	NaN	NaN	NaN	NaN	NaN	NaN	NaN	NaN
2.084	-24.689	127.162	575.066	-0.72266	0.23096	-0.24756	-79.3806	144.3	1028.9355	-1.064	0.38037	-0.271	NaN	NaN	NaN	NaN	NaN	NaN	NaN	NaN	NaN	NaN	NaN	NaN
2.086	-29.69	131.1646	546.8484	-0.66211	0.2207	-0.21826	-29.08	155.221	999.2795	-1.0432	0.35523	-0.26343	NaN	NaN	NaN	NaN	NaN	NaN	NaN	NaN	NaN	NaN	NaN	NaN
2.088	-32.228	146.2391	525.8089	-0.63623	0.21484	-0.20947	-58.005	163.4289	950.813	-1.0298	0.3335	-0.25879	NaN	NaN	NaN	NaN	NaN	NaN	NaN	NaN	NaN	NaN	NaN	NaN
2.09	-35.48	142.7745	518.423	-0.58154	0.19385	-0.18701	-55.697	145.276	930.078	-1.0078	0.30615	-0.25977	NaN	NaN	NaN	NaN	NaN	NaN	NaN	NaN	NaN	NaN	NaN	NaN
2.092	-40.141	137.388	488.0361	-0.54711	0.18311	-0.17505	7.892	182.73178	898.587	-0.99512	0.29248	-0.26221	NaN	NaN	NaN	NaN	NaN	NaN	NaN	NaN	NaN	NaN	NaN	NaN
2.094	-27.595	130.5664	441.0499	-0.51025	0.17285	-0.15674	-32.82	184.046609	869.95	-0.97266	0.26465	-0.26367	NaN	NaN	NaN	NaN	NaN	NaN	NaN	NaN	NaN	NaN	NaN	NaN
2.096	-45.469	128.0846	400.633	-0.45654	0.15479	-0.1416	-18.218	185.348	881.4864	-0.95166	0.2456	-0.26782	NaN	NaN	NaN	NaN	NaN	NaN	NaN	NaN	NaN	NaN	NaN	NaN
2.098	-20.268	116.8646	384.2636	-0.42725	0.14893	-0.12598	-24.4241	217.622	854.4781	-0.93115	0.22607	-0.26904	NaN	NaN	NaN	NaN	NaN	NaN	NaN	NaN	NaN	NaN	NaN	NaN
2.1	-24.51	120.96901	356.0609	-0.36279	0.13086	-0.104	-38.1529	191.819	832.7598	-0.89893	0.2002	-0.26855	NaN	NaN	NaN	NaN	NaN	NaN	NaN	NaN	NaN	NaN	NaN	NaN
2.102	-3.532	120.3026	316.5101	-0.31055	0.1228	-0.083984	1.002	203.987	811.0257	-0.88623	0.19385	-0.26904	NaN	NaN	NaN	NaN	NaN	NaN	NaN	NaN	NaN	NaN	NaN	NaN
2.104	-25.628	113.1421	285.322	-0.25684	0.11084	-0.062988	-58.3173	218.909	755.796	-0.85156	0.18408	-0.27832	NaN	NaN	NaN	NaN	NaN	NaN	NaN	NaN	NaN	NaN	NaN	NaN
2.106	-9.236	108.9406	267.2936	-0.18506	0.091797	-0.038086	-10.259	180.0772	761.408	-0.82032	0.18212	-0.28076	NaN	NaN	NaN	NaN	NaN	NaN	NaN	NaN	NaN	NaN	NaN	NaN
2.108	-4.608	109.9806	262.4316	-0.146	0.083984	-0.023438	28.1011	200.234	736.7485	-0.78906	0.18506	-0.28223	NaN	NaN	NaN	NaN	NaN	NaN	NaN	NaN	NaN	NaN	NaN	NaN
2.11	-22.956	116.14817	235.8743	-0.078613	0.067871	-0.0019531	-25.77145	187.9697	683.0874	-0.73291	0.19287	-0.28516	NaN	NaN	NaN	NaN	NaN	NaN	NaN	NaN	NaN	NaN	NaN	NaN
2.112	-26.935	108.0827	225.3179	-0.027588	0.05542	0.0092772	44.2492	152.276	674.969	-0.70264	0.19971	-0.28662	NaN	NaN	NaN	NaN	NaN	NaN	NaN	NaN	NaN	NaN	NaN	NaN
2.114	-31.19	96.1325	196.9736	0.021973	0.036621	0.030762	37.28155	178.388	645.19156	-0.65283	0.21338	-0.28418	NaN	NaN	NaN	NaN	NaN	NaN	NaN	NaN	NaN	NaN	NaN	NaN
2.116	-29.831	91.7122	166.473	0.079102	0.02002	0.054199	3.083	169.2625	625.453	-0.61841	0.22143	-0.2898	NaN	NaN	NaN	NaN	NaN	NaN	NaN	NaN	NaN	NaN	NaN	NaN
2.118	-45.045	92.13	134.174	0.10791	0.0097656	0.070313	32.6585	184.3673	596.803	-0.58984	0.229	-0.28809	NaN	NaN	NaN	NaN	NaN	NaN	NaN	NaN	NaN	NaN	NaN	NaN
2.12	-40.9	83.414	133.2249	0.15625	-0.012207	0.093262	0.876000000000001	214.549	538.986	-0.53809	0.24219	-0.29004	NaN	NaN	NaN	NaN	NaN	NaN	NaN	NaN	NaN	NaN	NaN	NaN
2.122	-24.22	76.339	124.2543	0.18457	-0.029541	0.11377	7.058	168.364	513.993	-0.50439	0.25244	-0.29248	NaN	NaN	NaN	NaN	NaN	NaN	NaN	NaN	NaN	NaN	NaN	NaN
2.124	-34.077	62.5717	108.7164	0.21338	-0.041016	0.12891	41.2688	170.588	482.715	-0.43848	0.25537	-0.28027	NaN	NaN	NaN	NaN	NaN	NaN	NaN	NaN	NaN	NaN	NaN	NaN
2.126	-22	50.7493	98.2685	0.24609	-0.058105	0.14697	-19.96352	162.3522	420.171	-0.38672	0.2583	-0.27099	NaN	NaN	NaN	NaN	NaN	NaN	NaN	NaN	NaN	NaN	NaN	NaN
2.128	-17.794	44.841	95.8247	0.26025	-0.068848	0.15674	2.585	149.3369	388.95	-0.33887	0.2627	-0.26172	NaN	NaN	NaN	NaN	NaN	NaN	NaN	NaN	NaN	NaN	NaN	NaN
2.13	-3.753	47.824	93.2986	0.28271	-0.086914	0.1748	28.80597	177.261	348.45	-0.28369	0.25586	-0.24609	NaN	NaN	NaN	NaN	NaN	NaN	NaN	NaN	NaN	NaN	NaN	NaN
2.132	-24.114	50.8556	70.9825	0.29981	-0.097167	0.18652	-11.768	151.8806	328.127	-0.25342	0.25635	-0.24268	NaN	NaN	NaN	NaN	NaN	NaN	NaN	NaN	NaN	NaN	NaN	NaN
2.134	-29.427	53.8282	57.9931	0.31104	-0.1123	0.19629	14.378	143.7572	300.0607	-0.19678	0.23926	-0.22998	NaN	NaN	NaN	NaN	NaN	NaN	NaN	NaN	NaN	NaN	NaN	NaN
2.136	-34.4073	46.4457	52.3042	0.31934	-0.125	0.20508	-9.739	167.4744	245.373	-0.15527	0.2312	-0.21802	NaN	NaN	NaN	NaN	NaN	NaN	NaN	NaN	NaN	NaN	NaN	NaN
2.138	-32.361	53.865	48.9668	0.32129	-0.13135	0.20459	14.548	113.423	233.4605	-0.1084	0.22021	-0.20361	NaN	NaN	NaN	NaN	NaN	NaN	NaN	NaN	NaN	NaN	NaN	NaN
2.14	-19.394	51.522	41.9397	0.32373	-0.15381	0.21875	0.0289999999999999	112.1411	207.6492	-0.055176	0.1958	-0.1875	NaN	NaN	NaN	NaN	NaN	NaN	NaN	NaN	NaN	NaN	NaN	NaN
2.142	-40.451	49.453	49.5776	0.32056	-0.16284	0.21704	-54.6186	111.0582	173.1932	-0.022949	0.18408	-0.18066	NaN	NaN	NaN	NaN	NaN	NaN	NaN	NaN	NaN	NaN	NaN	NaN
2.144	-21.749	40.4119	62.2122	0.30859	-0.1748	0.21875	-18.154	64.2293	151.88634	0.025391	0.15967	-0.16309	NaN	NaN	NaN	NaN	NaN	NaN	NaN	NaN	NaN	NaN	NaN	NaN
2.146	-15.368	44.3811	47.8446	0.29346	-0.18262	0.21729	-31.512	89.021	117.397	0.065673	0.13867	-0.14746	NaN	NaN	NaN	NaN	NaN	NaN	NaN	NaN	NaN	NaN	NaN	NaN
2.148	-3.04	40.6328	25.7697	0.27979	-0.18652	0.21289	-48.2344	77.8196	126.143	0.095703	0.11523	-0.13379	NaN	NaN	NaN	NaN	NaN	NaN	NaN	NaN	NaN	NaN	NaN	NaN
2.15	-18.634	25.8994	22.515	0.25488	-0.19287	0.21436	-4.557	51.884	133.114	0.13184	0.078125	-0.11719	NaN	NaN	NaN	NaN	NaN	NaN	NaN	NaN	NaN	NaN	NaN	NaN
2.152	4.011	22.2852	22.4314	0.23169	-0.19946	0.21631	-53.4808	90.9443	102.16	0.14893	0.061035	-0.11182	NaN	NaN	NaN	NaN	NaN	NaN	NaN	NaN	NaN	NaN	NaN	NaN
2.154	-3.284	23.9639	25.9493	0.20166	-0.20264	0.21924	-21.1164	55.402	93.284	0.17871	0.021484	-0.098145	NaN	NaN	NaN	NaN	NaN	NaN	NaN	NaN	NaN	NaN	NaN	NaN
2.156	-29.03	30.74283	22.1486	0.16357	-0.20117	0.21436	23.4143	43.6269	87.8463	0.19263	-0.011475	-0.093994	NaN	NaN	NaN	NaN	NaN	NaN	NaN	NaN	NaN	NaN	NaN	NaN
2.158	-17.2	24.9576	32.2776	0.14209	-0.19531	0.21143	-41.2478	54.42191	66.3592	0.20215	-0.03418	-0.085938	NaN	NaN	NaN	NaN	NaN	NaN	NaN	NaN	NaN	NaN	NaN	NaN
2.16	-20.739	25.0303	47.0676	0.099609	-0.18555	0.20703	14.184	11.9923	69.9994	0.20703	-0.07373	-0.074707	NaN	NaN	NaN	NaN	NaN	NaN	NaN	NaN	NaN	NaN	NaN	NaN
2.162	-31.7962	29.2008	38.1995	0.06543	-0.17578	0.20068	8.774	51.443	34.657	0.2085	-0.092285	-0.072754	NaN	NaN	NaN	NaN	NaN	NaN	NaN	NaN	NaN	NaN	NaN	NaN
2.164	-31.137	21.1267	37.7241	0.047363	-0.17383	0.20264	-48.77855	47.037	19.308	0.20166	-0.12549	-0.068848	NaN	NaN	NaN	NaN	NaN	NaN	NaN	NaN	NaN	NaN	NaN	NaN
2.166	-26.844	15.01005	30.921	0.014648	-0.15576	0.19336	12.268	19.6166	46.666	0.18945	-0.16162	-0.060059	NaN	NaN	NaN	NaN	NaN	NaN	NaN	NaN	NaN	NaN	NaN	NaN
2.168	-22.532	19.8079	21.48323	-0.0012207	-0.14355	0.18896	-19.92	67.889	30.959	0.18457	-0.17529	-0.055664	NaN	NaN	NaN	NaN	NaN	NaN	NaN	NaN	NaN	NaN	NaN	NaN
2.17	-31.458	22.00611	14.9249	-0.019043	-0.13232	0.18506	-18.743	28.6675	56.373903	0.16602	-0.19629	-0.054688	NaN	NaN	NaN	NaN	NaN	NaN	NaN	NaN	NaN	NaN	NaN	NaN
2.172	-16.879	12.7155	-3.5679	-0.040527	-0.11768	0.17627	7.423	39.9385	42.0483	0.15112	-0.20483	-0.051513	NaN	NaN	NaN	NaN	NaN	NaN	NaN	NaN	NaN	NaN	NaN	NaN
2.174	-24.872	12.787	13.8676	-0.053711	-0.11426	0.1748	-23.7522	60.679	19.5934	0.13037	-0.21191	-0.044922	NaN	NaN	NaN	NaN	NaN	NaN	NaN	NaN	NaN	NaN	NaN	NaN
2.176	-21.013	27.8575	24.771	-0.063477	-0.091797	0.17139	0.184000000000001	15.0741	28.23	0.10352	-0.21582	-0.041016	NaN	NaN	NaN	NaN	NaN	NaN	NaN	NaN	NaN	NaN	NaN	NaN
2.178	-47.4535	30.6379	16.0642	-0.068116	-0.082275	0.16675	-4.817	54.302	10.9129	0.092773	-0.2168	-0.041992	NaN	NaN	NaN	NaN	NaN	NaN	NaN	NaN	NaN	NaN	NaN	NaN
2.18	-37.777	30.23488	20.0535	-0.075195	-0.075195	0.16113	-40.525	34.4902	3.886	0.075684	-0.21143	-0.033691	NaN	NaN	NaN	NaN	NaN	NaN	NaN	NaN	NaN	NaN	NaN	NaN
2.182	-32.219	24.8064	32.5522	-0.076172	-0.0625	0.15723	13.189	-2.631	37.675	0.063965	-0.20215	-0.031006	NaN	NaN	NaN	NaN	NaN	NaN	NaN	NaN	NaN	NaN	NaN	NaN
2.184	-30.919	23.64	29.5389	-0.083984	-0.059082	0.15332	-9.666	49.4097	16.846	0.056641	-0.19141	-0.027832	NaN	NaN	NaN	NaN	NaN	NaN	NaN	NaN	NaN	NaN	NaN	NaN
2.186	-38.011	18.6281	19.7015	-0.088867	-0.04541	0.15186	-12.859	13.451	45.766	0.05127	-0.19238	-0.025391	NaN	NaN	NaN	NaN	NaN	NaN	NaN	NaN	NaN	NaN	NaN	NaN
2.188	-36.58	16.25757	4.497	-0.090088	-0.036133	0.14502	-9.076	22.7739	42.66	0.050293	-0.18652	-0.021484	NaN	NaN	NaN	NaN	NaN	NaN	NaN	NaN	NaN	NaN	NaN	NaN
2.19	-20.105	17.655	19.0184	-0.089355	-0.025391	0.13965	-43.2714	63.372	2.81105	0.058594	-0.17822	-0.022949	NaN	NaN	NaN	NaN	NaN	NaN	NaN	NaN	NaN	NaN	NaN	NaN
2.192	-20.56	25.5374	6.7531	-0.088379	-0.012695	0.13965	-23.072	16.14071	25.9908	0.06543	-0.17212	-0.026856	NaN	NaN	NaN	NaN	NaN	NaN	NaN	NaN	NaN	NaN	NaN	NaN
2.194	-23.364	19.6425	14.87087	-0.087402	-0.003418	0.14014	-45.166	48.141	5.1872	0.078125	-0.17041	-0.027344	NaN	NaN	NaN	NaN	NaN	NaN	NaN	NaN	NaN	NaN	NaN	NaN
2.196	-31.362	13.092	25.4753	-0.086426	0.0087891	0.13281	-49.3943	38.1113	16.3739	0.093262	-0.16309	-0.028809	NaN	NaN	NaN	NaN	NaN	NaN	NaN	NaN	NaN	NaN	NaN	NaN
2.198	-0.295999999999999	13.616	29.2481	-0.084961	0.021728	0.12867	-21.63	4.0566	34.8558	0.099609	-0.1582	-0.03418	NaN	NaN	NaN	NaN	NaN	NaN	NaN	NaN	NaN	NaN	NaN	NaN
2.2	-9.563	20.59452	25.6882	-0.07959	0.02832	0.12354	-44.59345	60.8576	33.964	0.11279	-0.15186	-0.033691	NaN	NaN	NaN	NaN	NaN	NaN	NaN	NaN	NaN	NaN	NaN	NaN
2.202	-40.519	26.2055	14.9642	-0.074707	0.047852	0.11768	-31.1681	14.848	53.2957	0.12329	-0.14722	-0.040283	NaN	NaN	NaN	NaN	NaN	NaN	NaN	NaN	NaN	NaN	NaN	NaN
2.204	-21.893	18.2056	24.3824	-0.07373	0.050781	0.12207	-6.163	25.6049	34.2881	0.13086	-0.13672	-0.036621	NaN	NaN	NaN	NaN	NaN	NaN	NaN	NaN	NaN	NaN	NaN	NaN
2.206	-11.608	27.1911	14.612	-0.068359	0.06543	0.11133	-44.997	64.4188	24.185	0.13281	-0.12598	-0.047363	NaN	NaN	NaN	NaN	NaN	NaN	NaN	NaN	NaN	NaN	NaN	NaN
2.208	-28.685	39.175	10.729	-0.06665	0.073486	0.11084	-10.861	24.0978	30.424	0.13867	-0.12012	-0.05127	NaN	NaN	NaN	NaN	NaN	NaN	NaN	NaN	NaN	NaN	NaN	NaN
2.21	-39.818	27.6027	12.568	-0.067383	0.080078	0.11182	-12.406	45.17	16.4374	0.13818	-0.10547	-0.057129	NaN	NaN	NaN	NaN	NaN	NaN	NaN	NaN	NaN	NaN	NaN	NaN
2.212	-2.714	25.5039	23.58466	-0.072754	0.094727	0.10986	-44.7251	19.2199	41.3341	0.13647	-0.093017	-0.06543	NaN	NaN	NaN	NaN	NaN	NaN	NaN	NaN	NaN	NaN	NaN	NaN
2.214	-12.614	17.5763	31.26534	-0.072266	0.10205	0.11426	-5.012	-21.23	53.042	0.13037	-0.086914	-0.073242	NaN	NaN	NaN	NaN	NaN	NaN	NaN	NaN	NaN	NaN	NaN	NaN
2.216	-30.24	29.18628	20.1786	-0.076172	0.11328	0.10059	-27.866	29.56743	38.297	0.12207	-0.064453	-0.08252	NaN	NaN	NaN	NaN	NaN	NaN	NaN	NaN	NaN	NaN	NaN	NaN
2.218	-17.812	17.6583	10.579	-0.07788	0.12646	0.097412	-14.183	10.289	52.5382	0.12109	-0.056641	-0.084473	NaN	NaN	NaN	NaN	NaN	NaN	NaN	NaN	NaN	NaN	NaN	NaN
2.22	-29.4	21.4985	50.8051	-0.083984	0.13721	0.093262	1.245	16.539728	51.0131	0.11182	-0.037109	-0.095215	NaN	NaN	NaN	NaN	NaN	NaN	NaN	NaN	NaN	NaN	NaN	NaN
2.222	-16.23	26.981	70.5295	-0.089355	0.15332	0.083984	-32.9897	45.684	26.5427	0.10351	-0.022705	-0.10694	NaN	NaN	NaN	NaN	NaN	NaN	NaN	NaN	NaN	NaN	NaN	NaN
2.224	-37.489	36.49838	81.84	-0.10156	0.15918	0.079102	0.497	-14.0042	40.853	0.099121	-0.010742	-0.11377	NaN	NaN	NaN	NaN	NaN	NaN	NaN	NaN	NaN	NaN	NaN	NaN
2.226	-19.575	39.3615	92.507	-0.11523	0.17871	0.068848	-15.305	13.4563	28.6652	0.082031	0.010742	-0.12402	NaN	NaN	NaN	NaN	NaN	NaN	NaN	NaN	NaN	NaN	NaN	NaN
2.228	-30.676	46.7358	141.177	-0.13379	0.19067	0.057373	-17.121	9.964	32.0314	0.075195	0.024414	-0.12988	NaN	NaN	NaN	NaN	NaN	NaN	NaN	NaN	NaN	NaN	NaN	NaN
2.23	-40.007	44.346	206.1419	-0.15723	0.1958	0.047852	21.656	-18.0681	40.8903	0.053223	0.047363	-0.13867	NaN	NaN	NaN	NaN	NaN	NaN	NaN	NaN	NaN	NaN	NaN	NaN
2.232	-57.129	27.9318	234.4464	-0.20166	0.20313	0.031738	-17.169	44.0411	16.851	0.039307	0.062012	-0.14672	NaN	NaN	NaN	NaN	NaN	NaN	NaN	NaN	NaN	NaN	NaN	NaN
2.234	-60.712	14.9932	254.2867	-0.22852	0.21045	0.023926	-19.023	5.898	20.969	0.019531	0.075195	-0.1543	NaN	NaN	NaN	NaN	NaN	NaN	NaN	NaN	NaN	NaN	NaN	NaN
2.236	-20.025	-5.6344	309.6118	-0.2998	0.20898	-0.0083008	-1.845	13.4563	21.934	0	0.09668	-0.15625	NaN	NaN	NaN	NaN	NaN	NaN	NaN	NaN	NaN	NaN	NaN	NaN
2.238	-47.8216	9.1648	365.611	-0.35474	0.21118	-0.027832	-48.80426	45.376	16.553	-0.012695	0.10547	-0.16162	NaN	NaN	NaN	NaN	NaN	NaN	NaN	NaN	NaN	NaN	NaN	NaN
2.24	-42.31	16.7082	449.172	-0.41895	0.21484	-0.041992	-15.899	-18.6531	35.4559	-0.02832	0.12354	-0.1626	NaN	NaN	NaN	NaN	NaN	NaN	NaN	NaN	NaN	NaN	NaN	NaN
2.242	-29.886	22.261	523.431	-0.51709	0.2168	-0.063477	-32.231	32.344	18.0576	-0.03418	0.13892	-0.16821	NaN	NaN	NaN	NaN	NaN	NaN	NaN	NaN	NaN	NaN	NaN	NaN
2.244	11.748	28.836	599.433	-0.57813	0.21387	-0.075195	-46.0472	23.1403	7.777	-0.044922	0.14844	-0.17236	NaN	NaN	NaN	NaN	NaN	NaN	NaN	NaN	NaN	NaN	NaN	NaN
2.246	6.524	49.0704	692.066	-0.72266	0.20703	-0.1123	6.538	-11.4176	14.84273	-0.055664	0.14648	-0.17676	NaN	NaN	NaN	NaN	NaN	NaN	NaN	NaN	NaN	NaN	NaN	NaN
2.248	-2.2825	47.8958	772.9801	-0.83936	0.20337	-0.13892	-43.2547	40.862	19.758	-0.067383	0.14453	-0.17969	NaN	NaN	NaN	NaN	NaN	NaN	NaN	NaN	NaN	NaN	NaN	NaN
2.25	-7.249	47.97418	834.5006	-0.96094	0.19971	-0.16846	-21.243	-11.8897	44.044	-0.077637	0.1416	-0.18408	NaN	NaN	NaN	NaN	NaN	NaN	NaN	NaN	NaN	NaN	NaN	NaN
2.252	-1.83300000000001	66.836	868.141	-1.125	0.20605	-0.19922	-13.221	-18.41668	54.218	-0.090088	0.13623	-0.18603	NaN	NaN	NaN	NaN	NaN	NaN	NaN	NaN	NaN	NaN	NaN	NaN
2.254	-10.35	59.89	883.601	-1.2031	0.21191	-0.21436	-42.9669	9.6136	47.978	-0.10742	0.13232	-0.18848	NaN	NaN	NaN	NaN	NaN	NaN	NaN	NaN	NaN	NaN	NaN	NaN
2.256	-16.173	38.919	882.469	-1.3667	0.22656	-0.25	-17.469	-37.35295	70.0783	-0.13916	0.12061	-0.19629	NaN	NaN	NaN	NaN	NaN	NaN	NaN	NaN	NaN	NaN	NaN	NaN
2.258	6.661	34.6961	890.473	-1.4805	0.2439	-0.26782	-41.573	14.7751	72.6883	-0.16309	0.11475	-0.20166	NaN	NaN	NaN	NaN	NaN	NaN	NaN	NaN	NaN	NaN	NaN	NaN
2.26	10.024	8.312	877.5271	-1.5815	0.26611	-0.27783	-64.5729	28.763	120.9161	-0.22412	0.104	-0.20703	NaN	NaN	NaN	NaN	NaN	NaN	NaN	NaN	NaN	NaN	NaN	NaN
2.262	7.76438	-16.8957	880.7296	-1.6895	0.30176	-0.29053	-17.72	2.1614	214.009	-0.29883	0.10229	-0.20703	NaN	NaN	NaN	NaN	NaN	NaN	NaN	NaN	NaN	NaN	NaN	NaN
2.264	9.9568	-57.837	888.6805	-1.7285	0.32715	-0.29395	-6.518	76.921	401.029	-0.41211	0.086914	-0.21094	NaN	NaN	NaN	NaN	NaN	NaN	NaN	NaN	NaN	NaN	NaN	NaN
2.266	15.8534	-83.37	884.9378	-1.7847	0.37939	-0.28662	-53.4215	80.2277	636.231	-0.63867	0.053223	-0.21973	NaN	NaN	NaN	NaN	NaN	NaN	NaN	NaN	NaN	NaN	NaN	NaN
2.268	36.0415	-75.867	887.612	-1.7911	0.41406	-0.28272	-30.988	67.685	777.606	-0.77393	0.02002	-0.21045	NaN	NaN	NaN	NaN	NaN	NaN	NaN	NaN	NaN	NaN	NaN	NaN
2.27	8.926	-60.2465	888.972	-1.7808	0.44385	-0.28271	-11.843	32.914	880.184	-1.1201	-0.058594	-0.20215	NaN	NaN	NaN	NaN	NaN	NaN	NaN	NaN	NaN	NaN	NaN	NaN
2.272	27.305	-27.776	915.6264	-1.7397	0.46729	-0.28271	-3.728	-82.211	976.9421	-1.4277	-0.10547	-0.20971	NaN	NaN	NaN	NaN	NaN	NaN	NaN	NaN	NaN	NaN	NaN	NaN
2.274	-4.534	-17.448	947.4137	-1.7109	0.47754	-0.28467	-78.375	-55.407	1084.773	-1.7456	-0.12061	-0.22803	NaN	NaN	NaN	NaN	NaN	NaN	NaN	NaN	NaN	NaN	NaN	NaN
2.276	-3.507	-16.395	964.571	-1.6592	0.48633	-0.28418	-99.1602	-27.491	1168.176	-2.144	-0.054688	-0.27002	NaN	NaN	NaN	NaN	NaN	NaN	NaN	NaN	NaN	NaN	NaN	NaN
2.278	-12.568	-31.34	967.64266	-1.6094	0.49707	-0.28222	-22.472	-16.367	1189.446	-2.3179	0.025391	-0.27637	NaN	NaN	NaN	NaN	NaN	NaN	NaN	NaN	NaN	NaN	NaN	NaN
2.28	-16.263	-40.951	969.7742	-1.5566	0.51074	-0.28125	-51.0461	4.229	1125.399	-2.6211	0.20703	-0.31836	NaN	NaN	NaN	NaN	NaN	NaN	NaN	NaN	NaN	NaN	NaN	NaN
2.282	-4.443	-49.924	983.7699	-1.4824	0.53125	-0.28711	-64.746	-92.648	1154.196	-2.7754	0.36548	-0.36255	NaN	NaN	NaN	NaN	NaN	NaN	NaN	NaN	NaN	NaN	NaN	NaN
2.284	-24.92	-53.7465	997.3724	-1.4258	0.55615	-0.28564	-38.079	-148.418	1146.659	-2.8496	0.521	-0.40381	NaN	NaN	NaN	NaN	NaN	NaN	NaN	NaN	NaN	NaN	NaN	NaN
2.286	-1.621	-76.9959	980.093	-1.3706	0.58057	-0.29004	-57.4764	-157.281	1135.941	-2.8242	0.67432	-0.45313	NaN	NaN	NaN	NaN	NaN	NaN	NaN	NaN	NaN	NaN	NaN	NaN
2.288	-28.636	-104.403	992.026	-1.2944	0.61279	-0.30127	-34.576	-185.901	1128.658	-2.7612	0.72314	-0.47412	NaN	NaN	NaN	NaN	NaN	NaN	NaN	NaN	NaN	NaN	NaN	NaN
2.29	-10.067	-127.261	1024.3589	-1.2676	0.62695	-0.2959	0.728000000000002	-136.259	1080.896	-2.5586	0.75293	-0.52148	NaN	NaN	NaN	NaN	NaN	NaN	NaN	NaN	NaN	NaN	NaN	NaN
2.292	-21.523	-129.199	1047.566	-1.2241	0.65869	-0.31396	-15.554	-73.671	1062.99	-2.3218	0.74121	-0.54736	NaN	NaN	NaN	NaN	NaN	NaN	NaN	NaN	NaN	NaN	NaN	NaN
2.294	-39.325	-123.118	1077.351	-1.2098	0.67602	-0.32642	39.317	3.813	1032.896	-2.0195	0.69922	-0.56445	NaN	NaN	NaN	NaN	NaN	NaN	NaN	NaN	NaN	NaN	NaN	NaN
2.296	-57.1258	-120.3186	1099.862	-1.2017	0.69189	-0.3374	-8.265	68.874	1007.036	-1.5879	0.60938	-0.55859	NaN	NaN	NaN	NaN	NaN	NaN	NaN	NaN	NaN	NaN	NaN	NaN
2.298	-64.927	-105.0042	1109.476	-1.2026	0.69287	-0.35205	-93.797	28.683	1055.327	-1.4102	0.5752	-0.55664	NaN	NaN	NaN	NaN	NaN	NaN	NaN	NaN	NaN	NaN	NaN	NaN
2.3	-51.426	-81.298	1140.6088	-1.209	0.69141	-0.36426	-84.001	-7.928	1095.7837	-1.1694	0.5376	-0.57373	NaN	NaN	NaN	NaN	NaN	NaN	NaN	NaN	NaN	NaN	NaN	NaN
2.302	-66.8214	-78.4216	1140.7233	-1.228	0.68604	-0.37793	-108.229	-9.283	1091.5525	-1.0098	0.53223	-0.61133	NaN	NaN	NaN	NaN	NaN	NaN	NaN	NaN	NaN	NaN	NaN	NaN
2.304	-52.936	-70.53	1165.016	-1.2412	0.68555	-0.39648	-53.4748	-68.732	1072.559	-0.95068	0.53955	-0.62256	NaN	NaN	NaN	NaN	NaN	NaN	NaN	NaN	NaN	NaN	NaN	NaN
2.306	-45.231	-64.573	1188.9873	-1.2632	0.69385	-0.4126	12.918	-94.854	1033.517	-0.84131	0.54346	-0.64941	NaN	NaN	NaN	NaN	NaN	NaN	NaN	NaN	NaN	NaN	NaN	NaN
2.308	-34.01	-62.551	1211.9867	-1.2847	0.68799	-0.43506	-8.609	-160.6842	1010.537	-0.76489	0.54834	-0.66016	NaN	NaN	NaN	NaN	NaN	NaN	NaN	NaN	NaN	NaN	NaN	NaN
2.31	-33.358	-69.0053	1201.916	-1.293	0.67578	-0.44336	43.2569	-234.672	1042.7406	-0.69727	0.55664	-0.66406	NaN	NaN	NaN	NaN	NaN	NaN	NaN	NaN	NaN	NaN	NaN	NaN
2.312	-34.793	-88.357	1212.398	-1.3218	0.64893	-0.44873	49.17	-257.462	1088.026	-0.65771	0.5708	-0.68115	NaN	NaN	NaN	NaN	NaN	NaN	NaN	NaN	NaN	NaN	NaN	NaN
2.314	-22.967	-105.861	1226.8199	-1.3599	0.61767	-0.44996	55.896	-292.622	1179.007	-0.65771	0.57861	-0.68604	NaN	NaN	NaN	NaN	NaN	NaN	NaN	NaN	NaN	NaN	NaN	NaN
2.316	-71.0763	-97.7727	1235.7073	-1.4136	0.58252	-0.44678	88.579	-294.34	1238.5917	-0.68018	0.57764	-0.69678	NaN	NaN	NaN	NaN	NaN	NaN	NaN	NaN	NaN	NaN	NaN	NaN
2.318	-56.607	-94.2852	1260.37707	-1.5249	0.55811	-0.43408	25.7043	-274.57	1248.4505	-0.72632	0.56665	-0.69263	NaN	NaN	NaN	NaN	NaN	NaN	NaN	NaN	NaN	NaN	NaN	NaN
2.32	-60.3958	-94.7574	1277.9288	-1.5957	0.55273	-0.4292	3.937	-273.388	1254.493	-0.79883	0.55273	-0.68701	NaN	NaN	NaN	NaN	NaN	NaN	NaN	NaN	NaN	NaN	NaN	NaN
2.322	-43.984	-80.839	1286.716	-1.7593	0.55713	-0.43115	0.712999999999999	-201.2287	1207.54	-0.96875	0.56055	-0.68652	NaN	NaN	NaN	NaN	NaN	NaN	NaN	NaN	NaN	NaN	NaN	NaN
2.324	-51.059	-70.8792	1287.5334	-1.9024	0.57203	-0.42895	-36.199	-154.37	1209.999	-1.0781	0.57422	-0.68262	NaN	NaN	NaN	NaN	NaN	NaN	NaN	NaN	NaN	NaN	NaN	NaN
2.326	-57.641	-63.5993	1295.8818	-2.0425	0.58887	-0.42871	-0.227	-113.766	1248.501	-1.3198	0.62158	-0.66553	NaN	NaN	NaN	NaN	NaN	NaN	NaN	NaN	NaN	NaN	NaN	NaN
2.328	-40.088	-57.595	1304.7549	-2.2319	0.63135	-0.43701	30.967	-78.76	1267.046	-1.5205	0.65527	-0.66797	NaN	NaN	NaN	NaN	NaN	NaN	NaN	NaN	NaN	NaN	NaN	NaN
2.33	-47.44	-36.67549	1303.5175	-2.3296	0.65283	-0.44092	80.313	-111.428	1296.498	-1.7188	0.6875	-0.68164	NaN	NaN	NaN	NaN	NaN	NaN	NaN	NaN	NaN	NaN	NaN	NaN
2.332	-34.653	-32.9877	1294.84209	-2.5254	0.70996	-0.45508	131.121	-98.14	1303.364	-1.9702	0.74072	-0.70215	NaN	NaN	NaN	NaN	NaN	NaN	NaN	NaN	NaN	NaN	NaN	NaN
2.334	-42.406	-45.2918	1297.2826	-2.6696	0.76782	-0.4602	72.697	-61.097	1275.883	-2.0835	0.7583	-0.71436	NaN	NaN	NaN	NaN	NaN	NaN	NaN	NaN	NaN	NaN	NaN	NaN
2.336	-37.466	-45.729	1300.3948	-2.8042	0.82959	-0.47803	78.293	-80.6271	1259.847	-2.2651	0.79932	-0.76025	NaN	NaN	NaN	NaN	NaN	NaN	NaN	NaN	NaN	NaN	NaN	NaN
2.338	-62.879	-48.3272	1300.185	-2.9492	0.90283	-0.47852	78.617	-54.209	1255.4373	-2.367	0.83325	-0.79956	NaN	NaN	NaN	NaN	NaN	NaN	NaN	NaN	NaN	NaN	NaN	NaN
2.34	-85.373	-35.0863	1286.68	-2.9917	0.93701	-0.4917	15.5425	-83.93	1283.5174	-2.4351	0.854	-0.8374	NaN	NaN	NaN	NaN	NaN	NaN	NaN	NaN	NaN	NaN	NaN	NaN
2.342	-93.1773	-23.803	1300.907	-3.0073	1.0005	-0.50146	59.744	-115.913	1352.593	-2.478	0.86182	-0.87451	NaN	NaN	NaN	NaN	NaN	NaN	NaN	NaN	NaN	NaN	NaN	NaN
2.344	-88.115	-17.223	1309.801	-2.9744	1.028	-0.50781	32.6863	-142.83025	1372.301	-2.4839	0.85693	-0.89209	NaN	NaN	NaN	NaN	NaN	NaN	NaN	NaN	NaN	NaN	NaN	NaN
2.346	-69.541	-8.854	1299.0011	-2.9058	1.0405	-0.51123	-9.6446	-190.399	1394.851	-2.4629	0.82422	-0.95117	NaN	NaN	NaN	NaN	NaN	NaN	NaN	NaN	NaN	NaN	NaN	NaN
2.348	-92.0673	-21.87	1294.3753	-2.7905	1.0474	-0.50342	27.92656	-168.365	1406.381	-2.4344	0.79419	-1.0036	NaN	NaN	NaN	NaN	NaN	NaN	NaN	NaN	NaN	NaN	NaN	NaN
2.35	-86.518	-17.02102	1313.5741	-2.73	1.0532	-0.50732	-1.2838	-141.4441	1377.492	-2.4102	0.77344	-1.0527	NaN	NaN	NaN	NaN	NaN	NaN	NaN	NaN	NaN	NaN	NaN	NaN
2.352	-73.224	-23.8352	1313.4763	-2.5952	1.0454	-0.50342	22.4859	-112.4103	1390.36	-2.373	0.76758	-1.1055	NaN	NaN	NaN	NaN	NaN	NaN	NaN	NaN	NaN	NaN	NaN	NaN
2.354	-72.997	-15.1492	1292.05983	-2.4985	1.0381	-0.49512	92.194	-68.259	1379.745	-2.3472	0.77002	-1.1206	NaN	NaN	NaN	NaN	NaN	NaN	NaN	NaN	NaN	NaN	NaN	NaN
2.356	-75.547	-14.813	1286.8104	-2.3965	1.0293	-0.48486	52.147	-76.9473	1351.1383	-2.2754	0.78027	-1.1563	NaN	NaN	NaN	NaN	NaN	NaN	NaN	NaN	NaN	NaN	NaN	NaN
2.358	-78.172	-9.6267	1300.16925	-2.2656	1.0186	-0.47363	53.39	-71.009	1327.1689	-2.2214	0.78051	-1.1687	NaN	NaN	NaN	NaN	NaN	NaN	NaN	NaN	NaN	NaN	NaN	NaN
2.36	-59.678	-11.387	1305.9873	-2.2007	1.0112	-0.46631	17.7722	-56.0481	1306.296	-2.1758	0.77734	-1.1816	NaN	NaN	NaN	NaN	NaN	NaN	NaN	NaN	NaN	NaN	NaN	NaN
2.362	-87.959	1.2143	1286.4324	-2.084	0.99316	-0.46094	-12.607253	-44.71	1288.2432	-2.1343	0.78564	-1.1909	NaN	NaN	NaN	NaN	NaN	NaN	NaN	NaN	NaN	NaN	NaN	NaN
2.364	-89.7325	4.828	1262.7453	-2.0019	0.97119	-0.44092	16.8582	-2.457	1287.245	-2.1167	0.79346	-1.2007	NaN	NaN	NaN	NaN	NaN	NaN	NaN	NaN	NaN	NaN	NaN	NaN
2.366	-82.16	9.155	1268.1051	-1.9277	0.94727	-0.42871	32.86412	54.343	1268.739	-2.0762	0.83496	-1.2109	NaN	NaN	NaN	NaN	NaN	NaN	NaN	NaN	NaN	NaN	NaN	NaN
2.368	-65.01	21.2546	1255.3742	-1.853	0.92041	-0.40576	31.5841	67.952	1271.864	-2.031	0.86646	-1.2136	NaN	NaN	NaN	NaN	NaN	NaN	NaN	NaN	NaN	NaN	NaN	NaN
2.37	-89.162	30.1334	1232.53	-1.8184	0.9043	-0.39893	57.242	80.049	1291.19	-1.9897	0.90674	-1.2085	NaN	NaN	NaN	NaN	NaN	NaN	NaN	NaN	NaN	NaN	NaN	NaN
2.372	-65.374	39.76469	1225.4716	-1.7632	0.87549	-0.38818	-0.161000000000001	63.553	1289.4558	-1.9043	0.93848	-1.1992	NaN	NaN	NaN	NaN	NaN	NaN	NaN	NaN	NaN	NaN	NaN	NaN
2.374	-45.185	45.0969	1224.3813	-1.7342	0.85083	-0.37427	26.28682	14.28199	1297.3604	-1.8511	0.95166	-1.1909	NaN	NaN	NaN	NaN	NaN	NaN	NaN	NaN	NaN	NaN	NaN	NaN
2.376	-48.544	61.47817	1222.177	-1.7026	0.83154	-0.36279	30.9618	-6.586	1274.728	-1.7437	0.95557	-1.1558	NaN	NaN	NaN	NaN	NaN	NaN	NaN	NaN	NaN	NaN	NaN	NaN
2.378	-45.237	77.8717	1212.425	-1.6665	0.79541	-0.34521	37.0908	-38.323	1277.145	-1.6563	0.94727	-1.128	NaN	NaN	NaN	NaN	NaN	NaN	NaN	NaN	NaN	NaN	NaN	NaN
2.38	-50.992	61.4472	1210.6063	-1.6445	0.78125	-0.33496	100.871	-33.489	1284.5133	-1.5815	0.93799	-1.0835	NaN	NaN	NaN	NaN	NaN	NaN	NaN	NaN	NaN	NaN	NaN	NaN
2.382	-27.591	50.3135	1207.4032	-1.6133	0.75195	-0.31445	44.071	-23.43	1262.7958	-1.4961	0.91992	-1.04	NaN	NaN	NaN	NaN	NaN	NaN	NaN	NaN	NaN	NaN	NaN	NaN
2.384	-43.583	37.0296	1191.0644	-1.5876	0.72973	-0.2998	42.794	-16.752	1266.239	-1.4644	0.9126	-1.019	NaN	NaN	NaN	NaN	NaN	NaN	NaN	NaN	NaN	NaN	NaN	NaN
2.386	-72.753	47.4524	1166.9916	-1.5586	0.71094	-0.29541	75.258	2.052	1270.518	-1.4116	0.89111	-0.97021	NaN	NaN	NaN	NaN	NaN	NaN	NaN	NaN	NaN	NaN	NaN	NaN
2.388	-71.5904	52.8737	1161.861	-1.5132	0.68018	-0.25928	21.143	21.3004	1238.894	-1.3836	0.8733	-0.93823	NaN	NaN	NaN	NaN	NaN	NaN	NaN	NaN	NaN	NaN	NaN	NaN
2.39	-58.656	68.884	1145.4034	-1.4897	0.66455	-0.25537	57.405	31.3737	1241.498	-1.3633	0.85352	-0.9082	NaN	NaN	NaN	NaN	NaN	NaN	NaN	NaN	NaN	NaN	NaN	NaN
2.392	-60.6566	79.82	1126.8445	-1.4434	0.63477	-0.23486	41.935	72.939	1194.178	-1.3237	0.81494	-0.87061	NaN	NaN	NaN	NaN	NaN	NaN	NaN	NaN	NaN	NaN	NaN	NaN
2.394	-79.207	85.5789	1103.86805	-1.4099	0.60864	-0.22387	9.6924	96.415	1155.794	-1.3042	0.79541	-0.84814	NaN	NaN	NaN	NaN	NaN	NaN	NaN	NaN	NaN	NaN	NaN	NaN
2.396	-55.276	98.867	1103.54377	-1.3823	0.58252	-0.20459	36.8536	108.729	1170.9651	-1.2676	0.75586	-0.80664	NaN	NaN	NaN	NaN	NaN	NaN	NaN	NaN	NaN	NaN	NaN	NaN
2.398	-35.897	107.7776	1085.4581	-1.3457	0.55469	-0.19043	-24.9265	141.413	1146.4546	-1.2468	0.71997	-0.77172	NaN	NaN	NaN	NaN	NaN	NaN	NaN	NaN	NaN	NaN	NaN	NaN
2.4	-50.7084	121.297	1061.1041	-1.3271	0.54004	-0.17578	-0.1753	119.3041	1130.586	-1.2305	0.68652	-0.73438	NaN	NaN	NaN	NaN	NaN	NaN	NaN	NaN	NaN	NaN	NaN	NaN
2.402	-59.537	121.785	1061.083293	-1.2964	0.51514	-0.15967	26.1813	122.1152	1106.5362	-1.2085	0.64307	-0.69678	NaN	NaN	NaN	NaN	NaN	NaN	NaN	NaN	NaN	NaN	NaN	NaN
2.404	-31.172	108.909	1032.54765	-1.2771	0.49975	-0.14893	3.618	154.5678	1066.643	-1.1948	0.62158	-0.67529	NaN	NaN	NaN	NaN	NaN	NaN	NaN	NaN	NaN	NaN	NaN	NaN
2.406	-14.814	113.9505	1017.929	-1.2554	0.47754	-0.14355	29.301	132.4992	1070.825	-1.1641	0.58789	-0.63086	NaN	NaN	NaN	NaN	NaN	NaN	NaN	NaN	NaN	NaN	NaN	NaN
2.408	-54.974	130.6228	984.959	-1.2305	0.45264	-0.12451	17.357	149.3614	1057.135	-1.1345	0.56323	-0.60083	NaN	NaN	NaN	NaN	NaN	NaN	NaN	NaN	NaN	NaN	NaN	NaN
2.41	-42.597	125.574	968.2579	-1.2068	0.43286	-0.11694	-30.99	112.849	1005.0463	-1.1064	0.53906	-0.56738	NaN	NaN	NaN	NaN	NaN	NaN	NaN	NaN	NaN	NaN	NaN	NaN
2.412	-52.5825	125.983	957.2538	-1.1855	0.41113	-0.10938	-15.23	85.1182	1011.4968	-1.0615	0.50977	-0.52197	NaN	NaN	NaN	NaN	NaN	NaN	NaN	NaN	NaN	NaN	NaN	NaN
2.414	-42.8956	131.018	921.31735	-1.1543	0.38574	-0.10156	-65.861	119.9217	988.095	-1.0464	0.49658	-0.50146	NaN	NaN	NaN	NaN	NaN	NaN	NaN	NaN	NaN	NaN	NaN	NaN
2.416	-60.065117	128.9512	886.8653	-1.1382	0.37549	-0.096191	-70.767	112.9263	997.0274	-1.0161	0.46338	-0.46045	NaN	NaN	NaN	NaN	NaN	NaN	NaN	NaN	NaN	NaN	NaN	NaN
2.418	-19.501	118.1966	868.1136	-1.1113	0.34766	-0.09082	-19.512	148.061	973.1022	-0.99902	0.44434	-0.42554	NaN	NaN	NaN	NaN	NaN	NaN	NaN	NaN	NaN	NaN	NaN	NaN
2.42	-14.122	113.7066	856.4056	-1.0899	0.33277	-0.082276	-70.93932	178.839	914.537	-0.98047	0.42432	-0.39844	NaN	NaN	NaN	NaN	NaN	NaN	NaN	NaN	NaN	NaN	NaN	NaN
2.422	-8.924	140.4432	843.41485	-1.0664	0.32031	-0.077637	-50.684	157.347	893.944	-0.96973	0.40039	-0.35645	NaN	NaN	NaN	NaN	NaN	NaN	NaN	NaN	NaN	NaN	NaN	NaN
2.424	12.331	142.0567	825.7002	-1.0308	0.30664	-0.071777	-34.692	189.37765	859.4858	-0.9668	0.39355	-0.33691	NaN	NaN	NaN	NaN	NaN	NaN	NaN	NaN	NaN	NaN	NaN	NaN
2.426	-2.379	143.009	799.40371	-1.0156	0.29736	-0.072266	-38.001	196.348	833.4988	-0.95264	0.38037	-0.30908	NaN	NaN	NaN	NaN	NaN	NaN	NaN	NaN	NaN	NaN	NaN	NaN
2.428	24.645	138.5897	787.757	-0.98438	0.28223	-0.064941	-6.598	206.497	822.93	-0.94629	0.36865	-0.28369	NaN	NaN	NaN	NaN	NaN	NaN	NaN	NaN	NaN	NaN	NaN	NaN
2.43	4.419	138.5669	748.4142	-0.95678	0.28149	-0.062012	-29.582	246.213	784.002	-0.93945	0.35938	-0.26758	NaN	NaN	NaN	NaN	NaN	NaN	NaN	NaN	NaN	NaN	NaN	NaN
2.432	-9.228	136.4564	712.8413	-0.92725	0.27686	-0.056152	-28.476	201.489	755.8571	-0.92334	0.34229	-0.24316	NaN	NaN	NaN	NaN	NaN	NaN	NaN	NaN	NaN	NaN	NaN	NaN
2.434	-6.095	138.602	692.9698	-0.88623	0.27148	-0.058105	-37.55	204.219	734.3101	-0.91406	0.33398	-0.2334	NaN	NaN	NaN	NaN	NaN	NaN	NaN	NaN	NaN	NaN	NaN	NaN
2.436	-16.084	141.242	646.31434	-0.86133	0.2749	-0.063477	-87.791	219.715	679.2864	-0.88672	0.32227	-0.21631	NaN	NaN	NaN	NaN	NaN	NaN	NaN	NaN	NaN	NaN	NaN	NaN
2.438	-24.043	128.272	624.7495	-0.80225	0.27197	-0.053711	-55.7027	161.66522	666.2327	-0.84717	0.32422	-0.2002	NaN	NaN	NaN	NaN	NaN	NaN	NaN	NaN	NaN	NaN	NaN	NaN
2.44	-31.109	109.2704	603.6988	-0.75854	0.27466	-0.047119	-53.511	195.715	636.347	-0.81982	0.32275	-0.18994	NaN	NaN	NaN	NaN	NaN	NaN	NaN	NaN	NaN	NaN	NaN	NaN
2.442	-12.03	105.405	579.611	-0.71436	0.27393	-0.04541	-63.3175	196.55	622.4802	-0.76318	0.33105	-0.17529	NaN	NaN	NaN	NaN	NaN	NaN	NaN	NaN	NaN	NaN	NaN	NaN
2.444	-13.86	119.292	548.372	-0.65039	0.27148	-0.048828	-19.117	162.878	609.7873	-0.70996	0.33765	-0.16748	NaN	NaN	NaN	NaN	NaN	NaN	NaN	NaN	NaN	NaN	NaN	NaN
2.446	2.335	132.4301	528.859	-0.61865	0.26709	-0.046875	-61.281	198.5536	563.8017	-0.65186	0.34033	-0.15186	NaN	NaN	NaN	NaN	NaN	NaN	NaN	NaN	NaN	NaN	NaN	NaN
2.448	1.671	128.9303	500.1573	-0.56543	0.25928	-0.042969	-51.356	146.23	544.917	-0.55518	0.3501	-0.13818	NaN	NaN	NaN	NaN	NaN	NaN	NaN	NaN	NaN	NaN	NaN	NaN
2.45	-12.846	124.5146	476.3671	-0.51636	0.24878	-0.040039	-22.714	154.16	509.035	-0.51318	0.3501	-0.12646	NaN	NaN	NaN	NaN	NaN	NaN	NaN	NaN	NaN	NaN	NaN	NaN
2.452	-17.362	126.1823	451.4639	-0.47461	0.24023	-0.037109	-48.3143	179.433	444.2975	-0.40918	0.34229	-0.10547	NaN	NaN	NaN	NaN	NaN	NaN	NaN	NaN	NaN	NaN	NaN	NaN
2.454	-35.609	124.6883	419.1853	-0.41357	0.2251	-0.036133	-11.157	137.785	407.5298	-0.32983	0.33301	-0.081298	NaN	NaN	NaN	NaN	NaN	NaN	NaN	NaN	NaN	NaN	NaN	NaN
2.456	-35.043	114.5728	406.2198	-0.38281	0.21973	-0.035156	-41.841	171.996	347.084	-0.25732	0.31689	-0.061523	NaN	NaN	NaN	NaN	NaN	NaN	NaN	NaN	NaN	NaN	NaN	NaN
2.458	-57.1048	126.7993	384.6275	-0.31885	0.20264	-0.029785	-67.59826	146.705	304.2025	-0.15771	0.29785	-0.031738	NaN	NaN	NaN	NaN	NaN	NaN	NaN	NaN	NaN	NaN	NaN	NaN
2.46	-39.403	128.6303	350.5281	-0.27075	0.19629	-0.029785	-40.194	113.1107	278.015	-0.11572	0.2832	-0.015137	NaN	NaN	NaN	NaN	NaN	NaN	NaN	NaN	NaN	NaN	NaN	NaN
2.462	-49.1126	113.22047	316.11	-0.22656	0.18555	-0.021973	-84.6032	158.151	231.50166	-0.026367	0.25293	0.0048828	NaN	NaN	NaN	NaN	NaN	NaN	NaN	NaN	NaN	NaN	NaN	NaN
2.464	-33.948	100.5294	290.513	-0.16162	0.1792	-0.019531	-59.3487	116.9566	217.0535	0.041259	0.22925	0.025146	NaN	NaN	NaN	NaN	NaN	NaN	NaN	NaN	NaN	NaN	NaN	NaN
2.466	-32.884	101.9443	269.9931	-0.12598	0.16602	-0.011719	-19.59	135.24	207.084	0.10352	0.19678	0.044922	NaN	NaN	NaN	NaN	NaN	NaN	NaN	NaN	NaN	NaN	NaN	NaN
2.468	-21.622	118.7006	246.5015	-0.061035	0.1543	-0.0073242	-28.169	145.697	159.651	0.17725	0.15381	0.076172	NaN	NaN	NaN	NaN	NaN	NaN	NaN	NaN	NaN	NaN	NaN	NaN
2.47	-11.224	105.4268	227.3496	-0.016601	0.14282	-0.0012207	-8.007	61.066	143.018	0.20996	0.13086	0.09082	NaN	NaN	NaN	NaN	NaN	NaN	NaN	NaN	NaN	NaN	NaN	NaN
2.472	-18.574	103.4305	218.477	0.025879	0.13232	0	-37.216	90.697	92.34	0.27686	0.084961	0.11621	NaN	NaN	NaN	NaN	NaN	NaN	NaN	NaN	NaN	NaN	NaN	NaN
2.474	-11.414	98.7971	205.03967	0.071289	0.10742	0.0068359	-52.5486	64.691	72.664	0.31055	0.04956	0.13306	NaN	NaN	NaN	NaN	NaN	NaN	NaN	NaN	NaN	NaN	NaN	NaN
2.476	-24.052	93.2943	184.6555	0.088379	0.10107	0.0058594	-13.394	23.945	75.02961	0.33984	0.013672	0.15137	NaN	NaN	NaN	NaN	NaN	NaN	NaN	NaN	NaN	NaN	NaN	NaN
2.478	-29.104	88.06216	175.45118	0.12549	0.079102	0.0083008	-42.744	73.4867	59.756	0.36621	-0.029297	0.17627	NaN	NaN	NaN	NaN	NaN	NaN	NaN	NaN	NaN	NaN	NaN	NaN
2.48	-33.555	94.025	165.28077	0.1477	0.064941	0.0078125	-18.047	15.0173	73.1324	0.36426	-0.055664	0.1875	NaN	NaN	NaN	NaN	NaN	NaN	NaN	NaN	NaN	NaN	NaN	NaN
2.482	-13.382	106.645	144.4486	0.16846	0.050293	0.0087891	-4.399	32.8355	73.2535	0.36182	-0.10498	0.20361	NaN	NaN	NaN	NaN	NaN	NaN	NaN	NaN	NaN	NaN	NaN	NaN
2.484	-30.442	92.615	121.7153	0.19189	0.032227	0.012207	-53.6871	68.0714	53.626	0.35279	-0.14282	0.21386	NaN	NaN	NaN	NaN	NaN	NaN	NaN	NaN	NaN	NaN	NaN	NaN
2.486	-26.686	65.0612	103.7	0.20557	0.024902	0.0083008	-29.0887	-2.695	59.576	0.33105	-0.17773	0.22461	NaN	NaN	NaN	NaN	NaN	NaN	NaN	NaN	NaN	NaN	NaN	NaN
2.488	-1.098	50.6445	106.0264	0.22363	0.0092773	0.013672	-16.247	36.3774	33.877	0.30078	-0.20605	0.23828	NaN	NaN	NaN	NaN	NaN	NaN	NaN	NaN	NaN	NaN	NaN	NaN
2.49	-1.614	54.048	93.08289	0.23559	-0.00048825	0.012207	-22.352	7.7695	33.4653	0.28369	-0.21973	0.24414	NaN	NaN	NaN	NaN	NaN	NaN	NaN	NaN	NaN	NaN	NaN	NaN
2.492	-15.95	57.575	94.5727	0.24756	-0.013672	0.013672	8.103	-7.35	25.8888	0.24023	-0.23633	0.25146	NaN	NaN	NaN	NaN	NaN	NaN	NaN	NaN	NaN	NaN	NaN	NaN
2.494	-11.839	55.255	87.7713	0.2627	-0.021484	0.010254	-12.824	68.333	5.082	0.21289	-0.23877	0.2539	NaN	NaN	NaN	NaN	NaN	NaN	NaN	NaN	NaN	NaN	NaN	NaN
2.496	-5.279	57.9007	79.2344	0.26514	-0.023926	0.010742	-5.383	27.51656	17.55224	0.18213	-0.23828	0.25391	NaN	NaN	NaN	NaN	NaN	NaN	NaN	NaN	NaN	NaN	NaN	NaN
2.498	-20.98	61.7376	60.6846	0.27246	-0.043457	0.0053711	-20.317	46.2468	12.7478	0.14941	-0.23145	0.25586	NaN	NaN	NaN	NaN	NaN	NaN	NaN	NaN	NaN	NaN	NaN	NaN
2.5	-34.1449	62.0177	49.0752	0.27002	-0.056153	0.0029297	-43.91511	67.7658	3.871	0.13525	-0.21631	0.25391	NaN	NaN	NaN	NaN	NaN	NaN	NaN	NaN	NaN	NaN	NaN	NaN
2.502	-35.452	65.0238	51.2357	0.26611	-0.073242	0.0043945	7.246	4.1233	33.8343	0.1167	-0.19678	0.24756	NaN	NaN	NaN	NaN	NaN	NaN	NaN	NaN	NaN	NaN	NaN	NaN
2.504	-46.8713	72.179	55.438	0.25244	-0.092773	0.0014648	-1.752	58.087	30.846	0.099854	-0.18457	0.24267	NaN	NaN	NaN	NaN	NaN	NaN	NaN	NaN	NaN	NaN	NaN	NaN
2.506	-29.266	62.824	66.0742	0.24609	-0.104	0.0019531	-5.51	40.143	28.0673	0.094238	-0.17627	0.24219	NaN	NaN	NaN	NaN	NaN	NaN	NaN	NaN	NaN	NaN	NaN	NaN
2.508	-49.256	47.2901	57.0678	0.22119	-0.12109	-0.0014648	-5.687	-2.121	32.131	0.090332	-0.16309	0.24023	NaN	NaN	NaN	NaN	NaN	NaN	NaN	NaN	NaN	NaN	NaN	NaN
2.51	-35.429	35.5736	43.1249	0.20019	-0.13013	-0.0063477	-50.7752	53.407	-2.0012	0.092285	-0.16406	0.23193	NaN	NaN	NaN	NaN	NaN	NaN	NaN	NaN	NaN	NaN	NaN	NaN
2.512	-21.334	37.457	28.4609	0.17188	-0.13965	-0.0097656	-36.4999	5.635	23.2355	0.092285	-0.16553	0.22754	NaN	NaN	NaN	NaN	NaN	NaN	NaN	NaN	NaN	NaN	NaN	NaN
2.514	-36.486	44.6634	16.938	0.13916	-0.14453	-0.0068359	-9.106	11.87	43.3287	0.095459	-0.16919	0.22143	NaN	NaN	NaN	NaN	NaN	NaN	NaN	NaN	NaN	NaN	NaN	NaN
2.516	-42.706	38.2076	23.3765	0.12158	-0.14648	-0.012207	-25.734	41.68	35.0426	0.096191	-0.16553	0.22217	NaN	NaN	NaN	NaN	NaN	NaN	NaN	NaN	NaN	NaN	NaN	NaN
2.518	-29.197	28.0552	35.7152	0.080078	-0.15039	-0.010254	-22.012	-12.28	48.0289	0.098633	-0.16211	0.2085	NaN	NaN	NaN	NaN	NaN	NaN	NaN	NaN	NaN	NaN	NaN	NaN
2.52	-15.695	19.0249	25.4191	0.052978	-0.14795	-0.011231	-14.434	54.7277	26.4784	0.09668	-0.15869	0.20313	NaN	NaN	NaN	NaN	NaN	NaN	NaN	NaN	NaN	NaN	NaN	NaN
2.522	-30.823	17.5165	35.6062	0.027832	-0.14307	-0.013184	-24.1182	47.0792	4.6191	0.089844	-0.1626	0.18896	NaN	NaN	NaN	NaN	NaN	NaN	NaN	NaN	NaN	NaN	NaN	NaN
2.524	-36.03	11.865	39.0283	0.00048828	-0.14014	-0.015137	-18.243	14.4436	23.9728	0.084717	-0.15235	0.18238	NaN	NaN	NaN	NaN	NaN	NaN	NaN	NaN	NaN	NaN	NaN	NaN
2.526	-22.119	33.9097	40.9673	-0.012207	-0.13818	-0.02002	-32.208	69.051	9.591	0.07373	-0.13428	0.17139	NaN	NaN	NaN	NaN	NaN	NaN	NaN	NaN	NaN	NaN	NaN	NaN
2.528	-20.69	43.737	30.2206	-0.035645	-0.12842	-0.028809	-6.699	6.2698	14.20149	0.048828	-0.11914	0.16357	NaN	NaN	NaN	NaN	NaN	NaN	NaN	NaN	NaN	NaN	NaN	NaN
2.53	-24.347	39.242	21.4684	-0.053955	-0.1272	-0.025879	-11.058	28.135	37.2002	0.035645	-0.10254	0.1582	NaN	NaN	NaN	NaN	NaN	NaN	NaN	NaN	NaN	NaN	NaN	NaN
2.532	-29.831	15.0228	24.7458	-0.067383	-0.12207	-0.02832	-61.0901	78.188	43.0592	0.0019531	-0.08252	0.14014	NaN	NaN	NaN	NaN	NaN	NaN	NaN	NaN	NaN	NaN	NaN	NaN
2.534	-6.757	3.657	36.6295	-0.083496	-0.11768	-0.032715	-26.666	14.728	49.1158	-0.021484	-0.062745	0.1416	NaN	NaN	NaN	NaN	NaN	NaN	NaN	NaN	NaN	NaN	NaN	NaN
2.536	-4.781	16.7575	22.2896	-0.093262	-0.10572	-0.033692	-20.963	57.9859	29.3419	-0.044434	-0.041504	0.13037	NaN	NaN	NaN	NaN	NaN	NaN	NaN	NaN	NaN	NaN	NaN	NaN
2.538	-32.069	24.0581	15.475	-0.095703	-0.1001	-0.040039	-24.719	41.82094	12.842	-0.070313	-0.015625	0.12012	NaN	NaN	NaN	NaN	NaN	NaN	NaN	NaN	NaN	NaN	NaN	NaN
2.54	-20.987	31.6967	9.937	-0.09082	-0.09375	-0.042969	-1.374	-12.2127	10.2709	-0.083496	-0.0048828	0.11768	NaN	NaN	NaN	NaN	NaN	NaN	NaN	NaN	NaN	NaN	NaN	NaN
2.542	-8.243	32.8788	14.7976	-0.087891	-0.086426	-0.045898	-11.684	29.2947	17.769	-0.10205	0.026855	0.10498	NaN	NaN	NaN	NaN	NaN	NaN	NaN	NaN	NaN	NaN	NaN	NaN
2.544	-12.376	29.8269	12.7578	-0.068359	-0.07959	-0.047363	-6.773	-23.086	42.0581	-0.11426	0.047119	0.096437	NaN	NaN	NaN	NaN	NaN	NaN	NaN	NaN	NaN	NaN	NaN	NaN
2.546	-33.985	22.7059	14.4071	-0.058838	-0.078613	-0.052247	-10.392	-9.7945	48.902	-0.12549	0.069336	0.094727	NaN	NaN	NaN	NaN	NaN	NaN	NaN	NaN	NaN	NaN	NaN	NaN
2.548	-20.982	16.5452	36.1036	-0.046875	-0.071289	-0.054199	-25.8411	28.834	45.60601	-0.15283	0.092285	0.083984	NaN	NaN	NaN	NaN	NaN	NaN	NaN	NaN	NaN	NaN	NaN	NaN
2.55	-27.864	20.9682	32.6865	-0.023926	-0.072266	-0.05957	-13.008	-22.8785	59.7882	-0.16357	0.10254	0.078125	NaN	NaN	NaN	NaN	NaN	NaN	NaN	NaN	NaN	NaN	NaN	NaN
2.552	-27.569	24.8158	32.282	-0.0073242	-0.067871	-0.060059	-0.159000000000002	42.6932	46.251	-0.18262	0.12842	0.068359	NaN	NaN	NaN	NaN	NaN	NaN	NaN	NaN	NaN	NaN	NaN	NaN
2.554	-45.8878	18.3212	25.2412	0.01709	-0.068848	-0.061035	-23.9378	42.8738	21.618	-0.18823	0.14112	0.062256	NaN	NaN	NaN	NaN	NaN	NaN	NaN	NaN	NaN	NaN	NaN	NaN
2.556	-13.49	10.078	22.822	0.038331	-0.066162	-0.066407	-20.836	2.5477	34.2051	-0.19873	0.15381	0.050781	NaN	NaN	NaN	NaN	NaN	NaN	NaN	NaN	NaN	NaN	NaN	NaN
2.558	-26.252	16.6222	16.214	0.056641	-0.06543	-0.074219	-39.6936	44.136	28.6071	-0.2124	0.16748	0.044434	NaN	NaN	NaN	NaN	NaN	NaN	NaN	NaN	NaN	NaN	NaN	NaN
2.56	-37.875	28.041237	15.3031	0.078613	-0.061523	-0.076172	-16.458	-20.7414	23.13631	-0.21436	0.17627	0.038574	NaN	NaN	NaN	NaN	NaN	NaN	NaN	NaN	NaN	NaN	NaN	NaN
2.562	-36.486	22.5874	17.22271	0.089844	-0.059082	-0.076172	-9.757	-14.8429	13.516	-0.22656	0.19238	0.032227	NaN	NaN	NaN	NaN	NaN	NaN	NaN	NaN	NaN	NaN	NaN	NaN
2.564	-21.354	22.2688	10.9792	0.10742	-0.050293	-0.081543	-28.717	38.4412	-13.029	-0.23218	0.19825	0.026856	NaN	NaN	NaN	NaN	NaN	NaN	NaN	NaN	NaN	NaN	NaN	NaN
2.566	-19.087	22.8906	15.756	0.125	-0.056152	-0.089111	0.675000000000001	2.65251	18.022	-0.23438	0.20898	0.022461	NaN	NaN	NaN	NaN	NaN	NaN	NaN	NaN	NaN	NaN	NaN	NaN
2.568	-47.103	26.0847	15.6548	0.13574	-0.052246	-0.095215	-19.632	69.581	27.917	-0.23096	0.22217	0.01416	NaN	NaN	NaN	NaN	NaN	NaN	NaN	NaN	NaN	NaN	NaN	NaN
2.57	-24.339	14.9099	24.0286	0.15381	-0.055664	-0.099609	-26.071	43.158	46.021	-0.2312	0.23413	0.010498	NaN	NaN	NaN	NaN	NaN	NaN	NaN	NaN	NaN	NaN	NaN	NaN
2.572	-24.857	29.2935	36.9657	0.15576	-0.057129	-0.10156	-15.882	-40.174	65.1759	-0.23535	0.24707	0.0043945	NaN	NaN	NaN	NaN	NaN	NaN	NaN	NaN	NaN	NaN	NaN	NaN
2.574	-32.551	39.1776	24.2559	0.17432	-0.053223	-0.11035	-44.0197	-17.81	70.0177	-0.25146	0.25586	-0.011719	NaN	NaN	NaN	NaN	NaN	NaN	NaN	NaN	NaN	NaN	NaN	NaN
2.576	-33.144	31.0326	26.8302	0.17456	-0.054443	-0.11767	-18.1828	-52.8696	70.3589	-0.26318	0.25684	-0.012695	NaN	NaN	NaN	NaN	NaN	NaN	NaN	NaN	NaN	NaN	NaN	NaN
2.578	-20.645	11.4299	40.0124	0.18066	-0.050781	-0.125	-2.38	-23.8048	94.2323	-0.29932	0.24365	-0.038574	NaN	NaN	NaN	NaN	NaN	NaN	NaN	NaN	NaN	NaN	NaN	NaN
2.58	-13.741	8.5164	32.022	0.18262	-0.044434	-0.13525	-41.771	46.002	173.873	-0.34082	0.23731	-0.060547	NaN	NaN	NaN	NaN	NaN	NaN	NaN	NaN	NaN	NaN	NaN	NaN
2.582	-27.25	18.7184	33.7705	0.18604	-0.040039	-0.1416	-59.224	7.1195	298.988	-0.3999	0.23389	-0.087891	NaN	NaN	NaN	NaN	NaN	NaN	NaN	NaN	NaN	NaN	NaN	NaN
2.584	-23.13	1.1311	46.6722	0.17676	-0.033691	-0.15283	-49.177	57.698	490.623	-0.5332	0.21582	-0.13037	NaN	NaN	NaN	NaN	NaN	NaN	NaN	NaN	NaN	NaN	NaN	NaN
2.586	-24.382	-5.6191	58.9251	0.16943	-0.029053	-0.16138	4.573	38.8115	653.188	-0.61719	0.19629	-0.14453	NaN	NaN	NaN	NaN	NaN	NaN	NaN	NaN	NaN	NaN	NaN	NaN
2.588	-21.313	-3.4338	84.5754	0.15234	-0.016602	-0.1665	34.5176	-23.65558	776.042	-0.83203	0.14746	-0.17529	NaN	NaN	NaN	NaN	NaN	NaN	NaN	NaN	NaN	NaN	NaN	NaN
2.59	-29.252	2.6244	76.1355	0.12354	-0.014648	-0.17822	63.736	26.282	891.287	-1.0249	0.10987	-0.20142	NaN	NaN	NaN	NaN	NaN	NaN	NaN	NaN	NaN	NaN	NaN	NaN
2.592	-23.807	14.872	94.9942	0.104	-0.0092773	-0.18115	57.7774	-15.106	988.561	-1.228	0.07666	-0.23779	NaN	NaN	NaN	NaN	NaN	NaN	NaN	NaN	NaN	NaN	NaN	NaN
2.594	-14.774	42.11988	169.8863	0.056152	0.00048828	-0.19238	-10.5128	-8.15700000000001	1084.757	-1.4902	0.065918	-0.2793	NaN	NaN	NaN	NaN	NaN	NaN	NaN	NaN	NaN	NaN	NaN	NaN
2.596	-17.408	84.6647	276.053	0.016113	0.0061036	-0.20605	-48.3758	11.27	1126.853	-1.6108	0.078613	-0.29639	NaN	NaN	NaN	NaN	NaN	NaN	NaN	NaN	NaN	NaN	NaN	NaN
2.598	-47.935	123.859	374.202	-0.03418	0.013672	-0.21973	-9.566	-75.774	1134.059	-1.8066	0.12402	-0.3252	NaN	NaN	NaN	NaN	NaN	NaN	NaN	NaN	NaN	NaN	NaN	NaN
2.6	-76.5036	92.5749	475.653	-0.12744	0.026367	-0.23486	42.8561	-74.175	1160.001	-1.9129	0.18457	-0.32934	NaN	NaN	NaN	NaN	NaN	NaN	NaN	NaN	NaN	NaN	NaN	NaN
2.602	-43.208	41.3023	532.472	-0.19092	0.030273	-0.23779	59.1394	-100.474	1166.36	-1.9897	0.2417	-0.34131	NaN	NaN	NaN	NaN	NaN	NaN	NaN	NaN	NaN	NaN	NaN	NaN
2.604	-39.847	22.2826	626.7682	-0.35547	0.03125	-0.25293	53.206	-172.976	1155.519	-2.019	0.31592	-0.33008	NaN	NaN	NaN	NaN	NaN	NaN	NaN	NaN	NaN	NaN	NaN	NaN
2.606	-54.833	26.5408	725.931	-0.50757	0.023926	-0.26465	47.145	-150.875	1121.774	-2.0078	0.33789	-0.32031	NaN	NaN	NaN	NaN	NaN	NaN	NaN	NaN	NaN	NaN	NaN	NaN
2.608	-76.131	39.0166	799.743	-0.67822	0.01416	-0.26514	59.8629	-188.229	1102.841	-1.9243	0.3584	-0.29736	NaN	NaN	NaN	NaN	NaN	NaN	NaN	NaN	NaN	NaN	NaN	NaN
2.61	-66.4297	50.3821	812.879	-0.94873	-0.00097656	-0.26025	88.4725	-156.34	1072.664	-1.8357	0.3523	-0.26636	NaN	NaN	NaN	NaN	NaN	NaN	NaN	NaN	NaN	NaN	NaN	NaN
2.612	-64.3724	15.062	823.499	-1.0996	0	-0.26074	57.2933	-57.998	1013.0673	-1.7305	0.33594	-0.2334	NaN	NaN	NaN	NaN	NaN	NaN	NaN	NaN	NaN	NaN	NaN	NaN
2.614	-78.5594	-21.1622	829.6625	-1.4136	0.024902	-0.28271	54.601	-21.51	1003.8874	-1.5776	0.31104	-0.19189	NaN	NaN	NaN	NaN	NaN	NaN	NaN	NaN	NaN	NaN	NaN	NaN
2.616	-57.9867	-44.121	852.0333	-1.6482	0.064698	-0.29712	46.999	42.614	1017.1749	-1.498	0.30957	-0.17627	NaN	NaN	NaN	NaN	NaN	NaN	NaN	NaN	NaN	NaN	NaN	NaN
2.618	-54.0132	-40.901	878.751	-1.8745	0.11768	-0.31787	-19.9128	41.612	1043.8444	-1.3433	0.32178	-0.16113	NaN	NaN	NaN	NaN	NaN	NaN	NaN	NaN	NaN	NaN	NaN	NaN
2.62	-54.7233	-28.515	888.358	-2.1348	0.21777	-0.35596	-12.308653	-14.238	1036.838	-1.2534	0.35254	-0.14648	NaN	NaN	NaN	NaN	NaN	NaN	NaN	NaN	NaN	NaN	NaN	NaN
2.622	-43.3079	-39.9529	886.415	-2.2402	0.28516	-0.36426	-34.165	-22.608	971.135	-1.1899	0.40967	-0.13965	NaN	NaN	NaN	NaN	NaN	NaN	NaN	NaN	NaN	NaN	NaN	NaN
2.624	-9.478	-32.0653	877.967	-2.3979	0.40967	-0.42188	8.404	-71.69	915.825	-1.1309	0.51367	-0.13477	NaN	NaN	NaN	NaN	NaN	NaN	NaN	NaN	NaN	NaN	NaN	NaN
2.626	5.218	-5.6447	892.69	-2.4351	0.49463	-0.45874	2.10100000000001	-132.383	904.076	-1.1089	0.56982	-0.13428	NaN	NaN	NaN	NaN	NaN	NaN	NaN	NaN	NaN	NaN	NaN	NaN
2.628	13.66	24.4254	885.3195	-2.4253	0.55518	-0.48535	-29.434	-153.584	928.927	-1.0757	0.66846	-0.1499	NaN	NaN	NaN	NaN	NaN	NaN	NaN	NaN	NaN	NaN	NaN	NaN
2.63	-31.353	28.289	886.921	-2.3613	0.58008	-0.50781	24.973	-226.392	982.367	-1.0622	0.73413	-0.16211	NaN	NaN	NaN	NaN	NaN	NaN	NaN	NaN	NaN	NaN	NaN	NaN
2.632	-49.53	7.542	884.201	-2.3101	0.58154	-0.51611	26.0613	-261.636	1004.6416	-1.0547	0.79297	-0.19043	NaN	NaN	NaN	NaN	NaN	NaN	NaN	NaN	NaN	NaN	NaN	NaN
2.634	-42.366	-11.674	904.9624	-2.1602	0.54883	-0.53223	-32.4038	-288.639	1012.775	-1.0659	0.86279	-0.23682	NaN	NaN	NaN	NaN	NaN	NaN	NaN	NaN	NaN	NaN	NaN	NaN
2.636	-26.524	-26.16	894.8187	-1.9834	0.51611	-0.52246	-40.9331	-317.536	1032.604	-1.0781	0.88477	-0.2583	NaN	NaN	NaN	NaN	NaN	NaN	NaN	NaN	NaN	NaN	NaN	NaN
2.638	1.118	-56.852	906.313	-1.7827	0.49072	-0.50928	-71.084	-251.884	1069.427	-1.1035	0.91211	-0.30615	NaN	NaN	NaN	NaN	NaN	NaN	NaN	NaN	NaN	NaN	NaN	NaN
2.64	-9.236	-92.176	914.659	-1.5273	0.4707	-0.51074	-117.6725	-194.968	1099.7948	-1.1382	0.92236	-0.34521	NaN	NaN	NaN	NaN	NaN	NaN	NaN	NaN	NaN	NaN	NaN	NaN
2.642	-15.551	-98.0288	945.199	-1.4238	0.4707	-0.50684	-102.1179	-196.53	1122.331	-1.1816	0.92383	-0.37891	NaN	NaN	NaN	NaN	NaN	NaN	NaN	NaN	NaN	NaN	NaN	NaN
2.644	29.09	-107.05	963.9505	-1.2554	0.47754	-0.50732	-97.951	-160.354	1121.9096	-1.2476	0.93994	-0.42725	NaN	NaN	NaN	NaN	NaN	NaN	NaN	NaN	NaN	NaN	NaN	NaN
2.646	42.2839	-120.706	973.7624	-1.1629	0.48828	-0.51098	-67.169	-188.7045	1120.4293	-1.2773	0.94922	-0.44336	NaN	NaN	NaN	NaN	NaN	NaN	NaN	NaN	NaN	NaN	NaN	NaN
2.648	59.7051	-140.669	1038.5299	-1.0923	0.4917	-0.5127	-29.686	-138.434	1147.92	-1.3354	0.96338	-0.48975	NaN	NaN	NaN	NaN	NaN	NaN	NaN	NaN	NaN	NaN	NaN	NaN
2.65	42.7814	-152.183	1062.6816	-1.0273	0.49609	-0.51953	-44.715	-71.132	1153.759	-1.3903	0.97388	-0.52319	NaN	NaN	NaN	NaN	NaN	NaN	NaN	NaN	NaN	NaN	NaN	NaN
2.652	35.4483	-148.234	1085.16734	-1.0098	0.49707	-0.52051	-17.762	-82.822	1184.577	-1.4375	0.9707	-0.5498	NaN	NaN	NaN	NaN	NaN	NaN	NaN	NaN	NaN	NaN	NaN	NaN
2.654	-1.0257	-119.6963	1098.5543	-0.99365	0.49072	-0.52686	-17.115	-69.23	1169.951	-1.519	0.95557	-0.56689	NaN	NaN	NaN	NaN	NaN	NaN	NaN	NaN	NaN	NaN	NaN	NaN
2.656	0.56481	-96.2895	1111.456	-0.98877	0.49658	-0.52979	-32.876	-101.207	1154.635	-1.5742	0.9375	-0.5708	NaN	NaN	NaN	NaN	NaN	NaN	NaN	NaN	NaN	NaN	NaN	NaN
2.658	8.1315	-94.107	1134.6965	-0.99805	0.49609	-0.5332	-27.936	-152.456	1216.241	-1.6973	0.90039	-0.57129	NaN	NaN	NaN	NaN	NaN	NaN	NaN	NaN	NaN	NaN	NaN	NaN
2.66	-17.8623	-101.192	1151.7263	-1.0137	0.47803	-0.52881	-52.4462	-116.875	1255.2494	-1.8216	0.88012	-0.5686	NaN	NaN	NaN	NaN	NaN	NaN	NaN	NaN	NaN	NaN	NaN	NaN
2.662	-26.9429	-105.604	1159.787	-1.052	0.45972	-0.52539	-49.74723	-144.1065	1295.305	-1.9644	0.87549	-0.56201	NaN	NaN	NaN	NaN	NaN	NaN	NaN	NaN	NaN	NaN	NaN	NaN
2.664	16.4819	-86.802	1187.687	-1.1113	0.46289	-0.521	-45.996	-143.0642	1300.464	-2.1758	0.90527	-0.56445	NaN	NaN	NaN	NaN	NaN	NaN	NaN	NaN	NaN	NaN	NaN	NaN
2.666	51.389	-69.541	1212.822	-1.2109	0.47656	-0.51953	-81.60528	-138.0078	1276.5595	-2.293	0.93164	-0.56445	NaN	NaN	NaN	NaN	NaN	NaN	NaN	NaN	NaN	NaN	NaN	NaN
2.668	32.618	-64.85197	1218.787	-1.2554	0.48682	-0.51318	-33.111	-179.6908	1297.205	-2.5112	1.0063	-0.57617	NaN	NaN	NaN	NaN	NaN	NaN	NaN	NaN	NaN	NaN	NaN	NaN
2.67	32.5389	-81.377	1247.14492	-1.3472	0.50146	-0.51025	-10.767	-155.4152	1310.211	-2.6551	1.0726	-0.58838	NaN	NaN	NaN	NaN	NaN	NaN	NaN	NaN	NaN	NaN	NaN	NaN
2.672	33.41115	-107.817	1269.6951	-1.4199	0.50439	-0.52051	-34.657	-135.0858	1316.232	-2.771	1.1362	-0.60107	NaN	NaN	NaN	NaN	NaN	NaN	NaN	NaN	NaN	NaN	NaN	NaN
2.674	14.916	-98.334	1280.4081	-1.502	0.50586	-0.53027	2.188	-143.2504	1331.567	-2.8691	1.207	-0.60547	NaN	NaN	NaN	NaN	NaN	NaN	NaN	NaN	NaN	NaN	NaN	NaN
2.676	12.176	-95.399	1323.636	-1.6401	0.4917	-0.54834	-34.9006	-88.738	1268.8159	-2.8926	1.2305	-0.60986	NaN	NaN	NaN	NaN	NaN	NaN	NaN	NaN	NaN	NaN	NaN	NaN
2.678	17.0135	-100.2699	1328.726	-1.7188	0.48193	-0.55176	-21.552	-84.072	1228.281	-2.8809	1.2578	-0.6123	NaN	NaN	NaN	NaN	NaN	NaN	NaN	NaN	NaN	NaN	NaN	NaN
2.68	27.4544	-101.9148	1327.08	-1.8999	0.49512	-0.57178	-39.67	-72.732	1245.349	-2.8357	1.2679	-0.6023	NaN	NaN	NaN	NaN	NaN	NaN	NaN	NaN	NaN	NaN	NaN	NaN
2.682	-4.14513	-104.81	1329.2187	-2.0332	0.51758	-0.58789	-93.632	-18.4665	1237.964	-2.7651	1.27	-0.59717	NaN	NaN	NaN	NaN	NaN	NaN	NaN	NaN	NaN	NaN	NaN	NaN
2.684	-17.9835	-104.249	1322.2029	-2.1499	0.54346	-0.60107	-60.568	-26.668	1267.895	-2.6582	1.2734	-0.58008	NaN	NaN	NaN	NaN	NaN	NaN	NaN	NaN	NaN	NaN	NaN	NaN
2.686	15.4038	-113.6846	1327.4612	-2.2632	0.57471	-0.62695	-80.67	18.036	1268.0417	-2.6016	1.2754	-0.57324	NaN	NaN	NaN	NaN	NaN	NaN	NaN	NaN	NaN	NaN	NaN	NaN
2.688	33.3741	-100.9407	1330.6988	-2.312	0.59229	-0.646	-83.203	25.982	1263.326	-2.4858	1.2866	-0.56396	NaN	NaN	NaN	NaN	NaN	NaN	NaN	NaN	NaN	NaN	NaN	NaN
2.69	41.4708	-96.472	1314.2475	-2.3999	0.62061	-0.69971	-77.2366	-36.197	1286.0228	-2.396	1.2945	-0.56446	NaN	NaN	NaN	NaN	NaN	NaN	NaN	NaN	NaN	NaN	NaN	NaN
2.692	17.1653	-85.563	1300.827	-2.4842	0.64136	-0.75562	-103.0477	-8.061	1245.973	-2.2852	1.2969	-0.56055	NaN	NaN	NaN	NaN	NaN	NaN	NaN	NaN	NaN	NaN	NaN	NaN
2.694	47.6953	-78.517	1320.08	-2.564	0.66455	-0.81201	-94.474	-32.3707	1241.965	-2.1265	1.2856	-0.54248	NaN	NaN	NaN	NaN	NaN	NaN	NaN	NaN	NaN	NaN	NaN	NaN
2.696	38.437	-57.763	1319.403	-2.625	0.68359	-0.87012	-79.307	-34.0782	1250.109	-2.0405	1.2759	-0.52881	NaN	NaN	NaN	NaN	NaN	NaN	NaN	NaN	NaN	NaN	NaN	NaN
2.698	28.4248	-14.37447	1310.3604	-2.6265	0.68799	-0.88721	-88.4053	-10.895	1263.5065	-1.8901	1.2515	-0.50049	NaN	NaN	NaN	NaN	NaN	NaN	NaN	NaN	NaN	NaN	NaN	NaN
2.7	22.1505	-6.81	1330.584	-2.605	0.67627	-0.9126	-69.026	-65.55	1294.925	-1.7937	1.2278	-0.47534	NaN	NaN	NaN	NaN	NaN	NaN	NaN	NaN	NaN	NaN	NaN	NaN
2.702	40.718	-0.893000000000001	1338.405	-2.5781	0.66308	-0.93164	-71.2368	-50.332	1280.976	-1.7085	1.1958	-0.44189	NaN	NaN	NaN	NaN	NaN	NaN	NaN	NaN	NaN	NaN	NaN	NaN
2.704	24.9071	-8.311	1354.978	-2.5581	0.65283	-0.95068	-84.7178	-39.4768	1264.243	-1.6191	1.1406	-0.41309	NaN	NaN	NaN	NaN	NaN	NaN	NaN	NaN	NaN	NaN	NaN	NaN
2.706	0.1173	-15.18	1348.6991	-2.5366	0.66553	-0.97607	-51.984	-47.359	1258.159	-1.5696	1.1047	-0.38696	NaN	NaN	NaN	NaN	NaN	NaN	NaN	NaN	NaN	NaN	NaN	NaN
2.708	18.6409	-25.386	1351.8556	-2.5273	0.68213	-0.99219	-92.7238	23.7506	1208.969	-1.521	1.0649	-0.36475	NaN	NaN	NaN	NaN	NaN	NaN	NaN	NaN	NaN	NaN	NaN	NaN
2.71	27.959	-36.5822	1349.7152	-2.4844	0.72266	-1.0176	-92.4895	33.4037	1188.139	-1.4585	1.0103	-0.33643	NaN	NaN	NaN	NaN	NaN	NaN	NaN	NaN	NaN	NaN	NaN	NaN
2.712	36.642	-26.709	1347.90517	-2.4314	0.75464	-1.0266	-46.289	46.206	1181.359	-1.4316	0.98145	-0.32715	NaN	NaN	NaN	NaN	NaN	NaN	NaN	NaN	NaN	NaN	NaN	NaN
2.714	28.2853	-28.0954	1335.88	-2.3667	0.78369	-1.0327	-65.2375	86.632	1174.403	-1.3882	0.92432	-0.29834	NaN	NaN	NaN	NaN	NaN	NaN	NaN	NaN	NaN	NaN	NaN	NaN
2.716	50.404	-31.979	1327.883	-2.2515	0.80127	-1.0366	-51.4022	41.1055	1201.496	-1.3581	0.87915	-0.28515	NaN	NaN	NaN	NaN	NaN	NaN	NaN	NaN	NaN	NaN	NaN	NaN
2.718	62.277	-24.34	1345.26721	-2.1895	0.79688	-1.0273	-52.097	76.611	1186.532	-1.3359	0.83789	-0.26953	NaN	NaN	NaN	NaN	NaN	NaN	NaN	NaN	NaN	NaN	NaN	NaN
2.72	52.322	-1.419	1339.433	-2.0664	0.7832	-1.0117	-30.552	105.976	1139.3154	-1.3081	0.77783	-0.25244	NaN	NaN	NaN	NaN	NaN	NaN	NaN	NaN	NaN	NaN	NaN	NaN
2.722	38.148	13.60242	1338.6008	-1.9868	0.76905	-0.99072	-0.986999999999995	82.95874	1118.0306	-1.2925	0.75049	-0.24365	NaN	NaN	NaN	NaN	NaN	NaN	NaN	NaN	NaN	NaN	NaN	NaN
2.724	30.741	31.0602	1329.1127	-1.9175	0.76123	-0.97021	-10.739	117.4335	1091.758	-1.2617	0.69336	-0.22266	NaN	NaN	NaN	NaN	NaN	NaN	NaN	NaN	NaN	NaN	NaN	NaN
2.726	39.192	47.4577	1337.0043	-1.8379	0.75	-0.94727	2.415	62.139	1097.9	-1.2312	0.65259	-0.20166	NaN	NaN	NaN	NaN	NaN	NaN	NaN	NaN	NaN	NaN	NaN	NaN
2.728	17.33607	60.991	1312.6155	-1.8066	0.74805	-0.9375	-10.487	40.299	1093.7896	-1.2041	0.61133	-0.19336	NaN	NaN	NaN	NaN	NaN	NaN	NaN	NaN	NaN	NaN	NaN	NaN
2.73	17.2071	57.638	1292.591	-1.7344	0.74023	-0.90918	-28.0939	81.5346	1065.9917	-1.1665	0.56494	-0.16895	NaN	NaN	NaN	NaN	NaN	NaN	NaN	NaN	NaN	NaN	NaN	NaN
2.732	32.3607	40.727	1264.0331	-1.6902	0.74048	-0.89233	-13.1434	59.236	1083.0331	-1.1504	0.5459	-0.1582	NaN	NaN	NaN	NaN	NaN	NaN	NaN	NaN	NaN	NaN	NaN	NaN
2.734	16.8702	29.7178	1236.9198	-1.6465	0.7373	-0.87109	-16.005	118.894	1055.94776	-1.1133	0.50293	-0.14209	NaN	NaN	NaN	NaN	NaN	NaN	NaN	NaN	NaN	NaN	NaN	NaN
2.736	15.0517	36.5149	1218.2967	-1.5913	0.72998	-0.84912	-44.8025	125.149	1002.168	-1.0881	0.47754	-0.1311	NaN	NaN	NaN	NaN	NaN	NaN	NaN	NaN	NaN	NaN	NaN	NaN
2.738	39.032	27.575	1202.495	-1.5679	0.729	-0.83447	-18.912	93.9452	979.585	-1.062	0.45264	-0.12061	NaN	NaN	NaN	NaN	NaN	NaN	NaN	NaN	NaN	NaN	NaN	NaN
2.74	79.99	22.001	1195.45792	-1.5288	0.71826	-0.81006	-23.033	137.6392	923.589	-1.0313	0.42725	-0.1084	NaN	NaN	NaN	NaN	NaN	NaN	NaN	NaN	NaN	NaN	NaN	NaN
2.742	53.785	19.007	1168.4249	-1.5046	0.71216	-0.78198	-12.486	118.493	928.7591	-1.0176	0.41309	-0.099609	NaN	NaN	NaN	NaN	NaN	NaN	NaN	NaN	NaN	NaN	NaN	NaN
2.744	29.3069	33.863	1158.8234	-1.4844	0.70605	-0.75586	7.627	136.45805	930.0125	-0.98633	0.38477	-0.090332	NaN	NaN	NaN	NaN	NaN	NaN	NaN	NaN	NaN	NaN	NaN	NaN
2.746	21.2873	36.3128	1149.9765	-1.457	0.6875	-0.72363	-20.1129	194.852	883.75	-0.96948	0.36255	-0.082275	NaN	NaN	NaN	NaN	NaN	NaN	NaN	NaN	NaN	NaN	NaN	NaN
2.748	36.396	47.2115	1147.66	-1.4434	0.68164	-0.71289	13.993	167.967	878.124	-0.95557	0.34033	-0.072754	NaN	NaN	NaN	NaN	NaN	NaN	NaN	NaN	NaN	NaN	NaN	NaN
2.75	19.88	59.17	1137.965	-1.4141	0.66992	-0.68164	2.462	207.45	833.279	-0.93213	0.32129	-0.070801	NaN	NaN	NaN	NaN	NaN	NaN	NaN	NaN	NaN	NaN	NaN	NaN
2.752	11.78953	74.501	1104.3591	-1.3875	0.6565	-0.65942	-11.8957	202.499	787.95	-0.92139	0.31494	-0.075684	NaN	NaN	NaN	NaN	NaN	NaN	NaN	NaN	NaN	NaN	NaN	NaN
2.754	14.9529	57.264	1092.7408	-1.3594	0.64063	-0.63281	-31.5422	170.363	778.96786	-0.89014	0.30957	-0.079102	NaN	NaN	NaN	NaN	NaN	NaN	NaN	NaN	NaN	NaN	NaN	NaN
2.756	4.9129	83.359	1055.134	-1.3218	0.61865	-0.6001	-25.8901	204.796	751.6307	-0.86059	0.31738	-0.073731	NaN	NaN	NaN	NaN	NaN	NaN	NaN	NaN	NaN	NaN	NaN	NaN
2.758	8.0458	94.4923	1040.712	-1.3071	0.60107	-0.58936	-11.6732	149.496	743.7217	-0.8252	0.3291	-0.083984	NaN	NaN	NaN	NaN	NaN	NaN	NaN	NaN	NaN	NaN	NaN	NaN
2.76	21.5466	94.1328	1023.0886	-1.2695	0.57715	-0.56396	-13.084	139.0154	737.9348	-0.77539	0.35352	-0.083984	NaN	NaN	NaN	NaN	NaN	NaN	NaN	NaN	NaN	NaN	NaN	NaN
2.762	44.4677	88.8858	1005.0008	-1.2429	0.55493	-0.53345	-8.7037	174.7502	706.6414	-0.75391	0.35449	-0.088379	NaN	NaN	NaN	NaN	NaN	NaN	NaN	NaN	NaN	NaN	NaN	NaN
2.764	33.9949	99.8678	985.245	-1.2139	0.53223	-0.51855	12.979	122.339	702.713	-0.71484	0.36426	-0.095703	NaN	NaN	NaN	NaN	NaN	NaN	NaN	NaN	NaN	NaN	NaN	NaN
2.766	17.9625	118.1585	966.445	-1.1826	0.50391	-0.48828	28.0963	176.318	684.348	-0.68506	0.36182	-0.10376	NaN	NaN	NaN	NaN	NaN	NaN	NaN	NaN	NaN	NaN	NaN	NaN
2.768	2.418	120.3044	954.298	-1.1675	0.48633	-0.47217	20.7428	166.657	662.429	-0.6416	0.36133	-0.11426	NaN	NaN	NaN	NaN	NaN	NaN	NaN	NaN	NaN	NaN	NaN	NaN
2.77	-4.573	112.5174	945.5267	-1.1377	0.45605	-0.44629	27.1774	130.507	626.888	-0.57568	0.36475	-0.11865	NaN	NaN	NaN	NaN	NaN	NaN	NaN	NaN	NaN	NaN	NaN	NaN
2.772	-13.348	123.9679	947.467	-1.1223	0.43774	-0.43091	32.6412	165.4819	567.917	-0.53955	0.36719	-0.11816	NaN	NaN	NaN	NaN	NaN	NaN	NaN	NaN	NaN	NaN	NaN	NaN
2.774	-19.27	122.02	938.774	-1.1035	0.41699	-0.40869	18.2358	121.3098	522.372	-0.46484	0.36865	-0.11377	NaN	NaN	NaN	NaN	NaN	NaN	NaN	NaN	NaN	NaN	NaN	NaN
2.776	-25.4644	128.971	925.22301	-1.0796	0.39258	-0.3833	15.566	131.333658	480.702	-0.40381	0.36816	-0.10791	NaN	NaN	NaN	NaN	NaN	NaN	NaN	NaN	NaN	NaN	NaN	NaN
2.778	-22.5128	132.684	897.3589	-1.0645	0.38281	-0.37109	5.234	161.351	430.014	-0.34668	0.36328	-0.094238	NaN	NaN	NaN	NaN	NaN	NaN	NaN	NaN	NaN	NaN	NaN	NaN
2.78	-24.454	131.436	878.4562	-1.041	0.36279	-0.35156	4.954	122.7753	429.0733	-0.27051	0.34668	-0.091797	NaN	NaN	NaN	NaN	NaN	NaN	NaN	NaN	NaN	NaN	NaN	NaN
2.782	-21.626	122.5133	840.7616	-1.0181	0.3457	-0.33154	-13.8344	183.76	393.591	-0.23242	0.33594	-0.083496	NaN	NaN	NaN	NaN	NaN	NaN	NaN	NaN	NaN	NaN	NaN	NaN
2.784	-17.922	113.377	812.7778	-1.0015	0.32764	-0.31689	32.983	165.5948	364.3798	-0.16504	0.31543	-0.070313	NaN	NaN	NaN	NaN	NaN	NaN	NaN	NaN	NaN	NaN	NaN	NaN
2.786	-3.97499999999999	107.287	773.1852	-0.96973	0.30469	-0.29102	24.918	129.0895	339.542	-0.1145	0.29321	-0.055664	NaN	NaN	NaN	NaN	NaN	NaN	NaN	NaN	NaN	NaN	NaN	NaN
2.788	-20.136	129.032	751.621	-0.94995	0.29517	-0.28002	17.111	171.238	276.71	-0.063477	0.271	-0.042969	NaN	NaN	NaN	NaN	NaN	NaN	NaN	NaN	NaN	NaN	NaN	NaN
2.79	-18.58	136.747	749.68908	-0.92627	0.27979	-0.26367	10.817	100.1987	248.434	-0.0019531	0.23926	-0.024902	NaN	NaN	NaN	NaN	NaN	NaN	NaN	NaN	NaN	NaN	NaN	NaN
2.792	-28.905	156.4437	725.96023	-0.88818	0.26514	-0.24805	-14.199	104.8972	216.7075	0.029785	0.22314	-0.015625	NaN	NaN	NaN	NaN	NaN	NaN	NaN	NaN	NaN	NaN	NaN	NaN
2.794	-19.285	155.2892	712.601	-0.86865	0.26074	-0.23682	-15.1826	110.9125	180.176	0.077148	0.18604	0.0039063	NaN	NaN	NaN	NaN	NaN	NaN	NaN	NaN	NaN	NaN	NaN	NaN
2.796	-47.0944	161.948	670.6319	-0.8374	0.25244	-0.22119	-20.4785	33.159	187.3002	0.10693	0.14795	0.016113	NaN	NaN	NaN	NaN	NaN	NaN	NaN	NaN	NaN	NaN	NaN	NaN
2.798	-45.6417	148.988	653.3952	-0.80957	0.25	-0.20459	-17.918	68.652	171.42	0.13818	0.11426	0.028809	NaN	NaN	NaN	NaN	NaN	NaN	NaN	NaN	NaN	NaN	NaN	NaN
2.8	-42.926	143.454	643.3122	-0.79102	0.24512	-0.19873	-49.181	58.331	143.899	0.16406	0.060547	0.044434	NaN	NaN	NaN	NaN	NaN	NaN	NaN	NaN	NaN	NaN	NaN	NaN
2.802	-20.536	151.95	600.553	-0.75342	0.24268	-0.18896	-29.001	59.1469	137.021	0.17383	0.035645	0.059082	NaN	NaN	NaN	NaN	NaN	NaN	NaN	NaN	NaN	NaN	NaN	NaN
2.804	-21.014	143.496	566.9753	-0.73828	0.23633	-0.18506	-31.272	125.837	107.058	0.19189	-0.020508	0.063477	NaN	NaN	NaN	NaN	NaN	NaN	NaN	NaN	NaN	NaN	NaN	NaN
2.806	-35.861	124.4582	510.336	-0.69482	0.23047	-0.16846	-45.5138	64.2815	94.5414	0.20117	-0.05835	0.073486	NaN	NaN	NaN	NaN	NaN	NaN	NaN	NaN	NaN	NaN	NaN	NaN
2.808	-21.718	109.857	490.1342	-0.66406	0.22461	-0.1582	-8.428	55.1413	80.2299	0.20752	-0.097656	0.080078	NaN	NaN	NaN	NaN	NaN	NaN	NaN	NaN	NaN	NaN	NaN	NaN
2.81	-11.128	120.477	469.0664	-0.62744	0.2251	-0.14893	-21.4565	47.3353	77.215	0.20703	-0.14355	0.08252	NaN	NaN	NaN	NaN	NaN	NaN	NaN	NaN	NaN	NaN	NaN	NaN
2.812	-7.129	138.309	445.85823	-0.57324	0.21777	-0.13867	-14.397	-3.997	88.21993	0.21045	-0.15918	0.083984	NaN	NaN	NaN	NaN	NaN	NaN	NaN	NaN	NaN	NaN	NaN	NaN
2.814	-16.734	133.1519	442.2044	-0.54053	0.22021	-0.12598	2.547	57.7664	89.382	0.20361	-0.20557	0.088379	NaN	NaN	NaN	NaN	NaN	NaN	NaN	NaN	NaN	NaN	NaN	NaN
2.816	-14.305	132.0145	414.78711	-0.47119	0.21826	-0.10205	-21.844	65.33365	64.83	0.18921	-0.23047	0.084228	NaN	NaN	NaN	NaN	NaN	NaN	NaN	NaN	NaN	NaN	NaN	NaN
2.818	-23.674	124.89595	372.0021	-0.41968	0.21655	-0.087158	-28.306	66.0187	40.546	0.17529	-0.25293	0.08252	NaN	NaN	NaN	NaN	NaN	NaN	NaN	NaN	NaN	NaN	NaN	NaN
2.82	-33.943	126.8598	350.8335	-0.36328	0.21582	-0.074219	0.831	115.093	7.949	0.15527	-0.28662	0.074707	NaN	NaN	NaN	NaN	NaN	NaN	NaN	NaN	NaN	NaN	NaN	NaN
2.822	-31.792	129.447	336.11032	-0.29639	0.20898	-0.053223	-26.541	48.14	25.374	0.13721	-0.29492	0.071289	NaN	NaN	NaN	NaN	NaN	NaN	NaN	NaN	NaN	NaN	NaN	NaN
2.824	-17.523	134.28	307.2855	-0.26465	0.20801	-0.040039	-20.136	41.355	37.1323	0.11816	-0.31641	0.069336	NaN	NaN	NaN	NaN	NaN	NaN	NaN	NaN	NaN	NaN	NaN	NaN
2.826	-26.728	145.962	266.1543	-0.19287	0.19971	-0.01709	2.648	41.902	36.4926	0.092285	-0.32861	0.066162	NaN	NaN	NaN	NaN	NaN	NaN	NaN	NaN	NaN	NaN	NaN	NaN
2.828	-30.503	123.494	234.2822	-0.14794	0.18896	-0.0043945	-18.68	-21.6891	58.027	0.06543	-0.3291	0.063477	NaN	NaN	NaN	NaN	NaN	NaN	NaN	NaN	NaN	NaN	NaN	NaN
2.83	-24.309	110.5025	224.4207	-0.10156	0.17969	0.0092773	-21.55	38.8059	56.7325	0.039551	-0.32959	0.055176	NaN	NaN	NaN	NaN	NaN	NaN	NaN	NaN	NaN	NaN	NaN	NaN
2.832	-8.46599999999999	91.723	195.6733	-0.035645	0.16797	0.031738	6.568	29.7617	39.8554	0.026367	-0.33008	0.053223	NaN	NaN	NaN	NaN	NaN	NaN	NaN	NaN	NaN	NaN	NaN	NaN
2.834	-19.25	86.965	175.2251	-0.0078125	0.15918	0.041992	-4.284	17.26	31.1246	0.0048828	-0.32617	0.044922	NaN	NaN	NaN	NaN	NaN	NaN	NaN	NaN	NaN	NaN	NaN	NaN
2.836	-23.438	88.8992	162.3562	0.044434	0.14355	0.068359	2.113	83.016	4.49	-0.0021973	-0.31739	0.039551	NaN	NaN	NaN	NaN	NaN	NaN	NaN	NaN	NaN	NaN	NaN	NaN
2.838	-25.284	90.53573	130.152	0.081543	0.13477	0.074707	-4.509	34.4301	17.71	-0.0078125	-0.31299	0.029785	NaN	NaN	NaN	NaN	NaN	NaN	NaN	NaN	NaN	NaN	NaN	NaN
2.84	-9.204	91.1381	119.457	0.1123	0.11963	0.084961	-7.447	41.436	37.084	-0.0078125	-0.30273	0.027832	NaN	NaN	NaN	NaN	NaN	NaN	NaN	NaN	NaN	NaN	NaN	NaN
2.842	-30.737	88.2403	110.3802	0.15137	0.10059	0.10205	-22.1413	48.862	27.93095	-0.0075683	-0.29468	0.023926	NaN	NaN	NaN	NaN	NaN	NaN	NaN	NaN	NaN	NaN	NaN	NaN
2.844	-46.085	70.809	106.661	0.16797	0.090332	0.10596	-37.407	-17.0491	31.2617	-0.0043945	-0.28271	0.02002	NaN	NaN	NaN	NaN	NaN	NaN	NaN	NaN	NaN	NaN	NaN	NaN
2.846	-33.248	66.294	107.3838	0.20313	0.075195	0.12354	-22.232	38.951	27.5441	-0.0063477	-0.26709	0.01416	NaN	NaN	NaN	NaN	NaN	NaN	NaN	NaN	NaN	NaN	NaN	NaN
2.848	-25.032	64.4992	105.242	0.22852	0.056152	0.13013	-27.921	36.752	16.0476	-0.0039063	-0.25928	0.013672	NaN	NaN	NaN	NaN	NaN	NaN	NaN	NaN	NaN	NaN	NaN	NaN
2.85	-25.561	62.8703	88.0958	0.24951	0.038086	0.14502	-32.216	32.0915	39.4047	0.0068359	-0.24023	0.0078125	NaN	NaN	NaN	NaN	NaN	NaN	NaN	NaN	NaN	NaN	NaN	NaN
2.852	-26.532	49.3617	64.7395	0.2666	0.018555	0.15771	-25.674	85.488	32.6754	0.016602	-0.22851	0.0063476	NaN	NaN	NaN	NaN	NaN	NaN	NaN	NaN	NaN	NaN	NaN	NaN
2.854	-18.141	35.2921	46.3118	0.27686	0.00097656	0.16211	-43.2738	24.72486	13.848	0.028809	-0.20752	0.0063477	NaN	NaN	NaN	NaN	NaN	NaN	NaN	NaN	NaN	NaN	NaN	NaN
2.856	-22.288	36.259	22.235	0.28564	-0.025391	0.17236	-32.91	23.9212	36.4361	0.050293	-0.18604	-0.0058594	NaN	NaN	NaN	NaN	NaN	NaN	NaN	NaN	NaN	NaN	NaN	NaN
2.858	-30.571	33.137	16.6366	0.29199	-0.045655	0.18799	-24.899	43.1988	26.9539	0.060547	-0.17529	-0.0053711	NaN	NaN	NaN	NaN	NaN	NaN	NaN	NaN	NaN	NaN	NaN	NaN
2.86	-17.33	28.422	28.049	0.29297	-0.069336	0.19385	-28.462	-17.853	28.4888	0.083496	-0.15479	-0.016113	NaN	NaN	NaN	NaN	NaN	NaN	NaN	NaN	NaN	NaN	NaN	NaN
2.862	-9.076	32.9621	29.8742	0.28418	-0.095703	0.21045	-9.684	29.914	31.7056	0.095459	-0.13989	-0.020996	NaN	NaN	NaN	NaN	NaN	NaN	NaN	NaN	NaN	NaN	NaN	NaN
2.864	-18.228	45.134	43.1468	0.28564	-0.1084	0.21094	-38.9651	17.2877	35.7833	0.104	-0.125	-0.023926	NaN	NaN	NaN	NaN	NaN	NaN	NaN	NaN	NaN	NaN	NaN	NaN
2.866	-21.702	43.96	41.54872	0.26855	-0.12793	0.21484	-40.181	-6.7729	62.663	0.12354	-0.10645	-0.036621	NaN	NaN	NaN	NaN	NaN	NaN	NaN	NaN	NaN	NaN	NaN	NaN
2.868	-23.78	34.8704	47.20638	0.25464	-0.13916	0.21533	2.472	42.697	59.8244	0.12842	-0.099609	-0.043457	NaN	NaN	NaN	NaN	NaN	NaN	NaN	NaN	NaN	NaN	NaN	NaN
2.87	-10.355	40.9367	23.3924	0.23779	-0.14795	0.21631	-35.6702	1.6924	44.2641	0.1377	-0.077637	-0.04834	NaN	NaN	NaN	NaN	NaN	NaN	NaN	NaN	NaN	NaN	NaN	NaN
2.872	-41.478	40.2175	29.653517	0.22119	-0.15381	0.21338	-21.245	30.7882	36.6645	0.14233	-0.061524	-0.060791	NaN	NaN	NaN	NaN	NaN	NaN	NaN	NaN	NaN	NaN	NaN	NaN
2.874	-19.521	35.3883	30.3413	0.20654	-0.1543	0.20752	8.649	45.398	20.039	0.14893	-0.045898	-0.067871	NaN	NaN	NaN	NaN	NaN	NaN	NaN	NaN	NaN	NaN	NaN	NaN
2.876	-16.27	16.71572	29.1535	0.18506	-0.1499	0.2041	-35.9696	-13.7587	26.036	0.14502	-0.023926	-0.088867	NaN	NaN	NaN	NaN	NaN	NaN	NaN	NaN	NaN	NaN	NaN	NaN
2.878	-0.698	16.7416	7.1159	0.16772	-0.13892	0.19848	-9.69	23.6251	36.2118	0.14893	-0.015137	-0.09082	NaN	NaN	NaN	NaN	NaN	NaN	NaN	NaN	NaN	NaN	NaN	NaN
2.88	-20.876	23.5811	7.7499	0.14795	-0.13037	0.19238	-7.75	-2.7259	20.777	0.14502	0.00097656	-0.104	NaN	NaN	NaN	NaN	NaN	NaN	NaN	NaN	NaN	NaN	NaN	NaN
2.882	-31.545	14.2566	26.14669	0.12305	-0.11523	0.18408	-7.312	-16.3134	32.8891	0.14282	0.017578	-0.11182	NaN	NaN	NaN	NaN	NaN	NaN	NaN	NaN	NaN	NaN	NaN	NaN
2.884	-28.156	15.624	21.8995	0.11133	-0.10742	0.17773	-10.513	43.092	40.1305	0.14063	0.035156	-0.12354	NaN	NaN	NaN	NaN	NaN	NaN	NaN	NaN	NaN	NaN	NaN	NaN
2.886	-24.738	10.49	18.2802	0.086426	-0.092773	0.16699	-10.798	18.1002	10.344	0.13232	0.058105	-0.13672	NaN	NaN	NaN	NaN	NaN	NaN	NaN	NaN	NaN	NaN	NaN	NaN
2.888	-36.203	10.1289	27.3516	0.070312	-0.077881	0.16186	-4.794	36.095	20.7903	0.12256	0.068359	-0.13965	NaN	NaN	NaN	NaN	NaN	NaN	NaN	NaN	NaN	NaN	NaN	NaN
2.89	-28.975	0.9442	38.0439	0.053711	-0.065918	0.15381	-10.473	50.505	5.094	0.10938	0.086914	-0.1499	NaN	NaN	NaN	NaN	NaN	NaN	NaN	NaN	NaN	NaN	NaN	NaN
2.892	-17.496	14.6146	35.0899	0.030762	-0.047852	0.14502	-34.35	-10.4612	31.5158	0.092285	0.10034	-0.15454	NaN	NaN	NaN	NaN	NaN	NaN	NaN	NaN	NaN	NaN	NaN	NaN
2.894	-28.536	40.393	14.70963	0.022949	-0.037598	0.14453	-17.301	12.6817	47.3806	0.073242	0.10791	-0.16113	NaN	NaN	NaN	NaN	NaN	NaN	NaN	NaN	NaN	NaN	NaN	NaN
2.896	-48.9216	52.509	4.3384	0.0024414	-0.022949	0.13672	-24.5035	0.4816	7.47	0.049316	0.12109	-0.16602	NaN	NaN	NaN	NaN	NaN	NaN	NaN	NaN	NaN	NaN	NaN	NaN
2.898	-37.018	32.3132	18.9422	-0.010498	-0.0090334	0.13232	-33.094	-17.1906	23.9245	0.042969	0.12744	-0.1665	NaN	NaN	NaN	NaN	NaN	NaN	NaN	NaN	NaN	NaN	NaN	NaN
2.9	-16.882	16.7562	24.048	-0.02002	0.00048828	0.12744	-16.332	40.263	24.206	0.017578	0.14209	-0.17432	NaN	NaN	NaN	NaN	NaN	NaN	NaN	NaN	NaN	NaN	NaN	NaN
2.902	-19.513	23.1935	19.845	-0.038574	0.012695	0.12793	-30.9987	2.3948	19.264	-0.0048826	0.1455	-0.18652	NaN	NaN	NaN	NaN	NaN	NaN	NaN	NaN	NaN	NaN	NaN	NaN
2.904	-24.161	21.7335	12.689	-0.046875	0.021973	0.12305	-16.942	1.54126	50.1	-0.031738	0.146	-0.18311	NaN	NaN	NaN	NaN	NaN	NaN	NaN	NaN	NaN	NaN	NaN	NaN
2.906	-19.452	22.7526	17.7776	-0.058105	0.035645	0.12061	-14.304	26.0457	37.994	-0.076172	0.14648	-0.19482	NaN	NaN	NaN	NaN	NaN	NaN	NaN	NaN	NaN	NaN	NaN	NaN
2.908	-27.881	22.4686	22.8779	-0.069092	0.047852	0.11987	-39.026	-16.9629	63.5831	-0.10156	0.14258	-0.19336	NaN	NaN	NaN	NaN	NaN	NaN	NaN	NaN	NaN	NaN	NaN	NaN
2.91	-34.945	28.5527	6.5989	-0.077148	0.062012	0.12109	-17.734	36.921	116.2374	-0.16016	0.13867	-0.20508	NaN	NaN	NaN	NaN	NaN	NaN	NaN	NaN	NaN	NaN	NaN	NaN
2.912	-26.105	14.0841	13.5648	-0.081055	0.078613	0.12061	-37.93	43.803	137.1927	-0.21509	0.14184	-0.20874	NaN	NaN	NaN	NaN	NaN	NaN	NaN	NaN	NaN	NaN	NaN	NaN
2.914	-14.061	16.3276	18.4897	-0.085693	0.083496	0.11499	-21.523	30.0199	175.8919	-0.28223	0.13818	-0.21533	NaN	NaN	NaN	NaN	NaN	NaN	NaN	NaN	NaN	NaN	NaN	NaN
2.916	-21.09	21.7105	21.9317	-0.089355	0.094238	0.11572	-5.7512	86.898	227.438	-0.38818	0.12842	-0.23145	NaN	NaN	NaN	NaN	NaN	NaN	NaN	NaN	NaN	NaN	NaN	NaN
2.918	-44.064	34.0061	35.6934	-0.09082	0.10449	0.11816	-32.3599	83.4446	374.116	-0.45264	0.12451	-0.23877	NaN	NaN	NaN	NaN	NaN	NaN	NaN	NaN	NaN	NaN	NaN	NaN
2.92	-20.267	23.22906	27.9913	-0.094238	0.10889	0.1167	25.2908	121.3324	587.903	-0.63818	0.11133	-0.25146	NaN	NaN	NaN	NaN	NaN	NaN	NaN	NaN	NaN	NaN	NaN	NaN
2.922	-24.436	12.0358	32.8528	-0.098633	0.11426	0.11768	-73.003	129.4371	706.365	-0.81714	0.089111	-0.25928	NaN	NaN	NaN	NaN	NaN	NaN	NaN	NaN	NaN	NaN	NaN	NaN
2.924	-7.613	27.5311	12.297	-0.098632	0.12451	0.12134	-97.483	56.1299	805.428	-1.0273	0.054199	-0.26758	NaN	NaN	NaN	NaN	NaN	NaN	NaN	NaN	NaN	NaN	NaN	NaN
2.926	-26.817	29.9316	10.6201	-0.097656	0.13428	0.11963	2.506	33.868	867.8	-1.3594	0.027344	-0.28516	NaN	NaN	NaN	NaN	NaN	NaN	NaN	NaN	NaN	NaN	NaN	NaN
2.928	-7.321	31.6693	24.1505	-0.092285	0.14453	0.11865	-21.252	-10.569	967.62736	-1.5391	0.018555	-0.30176	NaN	NaN	NaN	NaN	NaN	NaN	NaN	NaN	NaN	NaN	NaN	NaN
2.93	-22.542	34.72	23.8372	-0.089355	0.14648	0.11963	-83.4332	-41.792	1123.494	-1.8979	0.065918	-0.3374	NaN	NaN	NaN	NaN	NaN	NaN	NaN	NaN	NaN	NaN	NaN	NaN
2.932	-31.609	37.2677	21.9715	-0.083984	0.15674	0.11621	-43.0821	8.068	1132.049	-2.1433	0.14942	-0.36792	NaN	NaN	NaN	NaN	NaN	NaN	NaN	NaN	NaN	NaN	NaN	NaN
2.934	-23.739	33.5044	19.4251	-0.079101	0.16748	0.11963	-41.408	-37.588	1121.058	-2.3652	0.24854	-0.41016	NaN	NaN	NaN	NaN	NaN	NaN	NaN	NaN	NaN	NaN	NaN	NaN
2.936	-30.653	15.4884	25.752	-0.078613	0.17188	0.1167	-84.989	-61.55	1125.419	-2.5776	0.42236	-0.4624	NaN	NaN	NaN	NaN	NaN	NaN	NaN	NaN	NaN	NaN	NaN	NaN
2.938	-25.135	20.64802	32.0569	-0.083008	0.17969	0.12061	-80.218	-97.2443	1099.762	-2.6479	0.52002	-0.48096	NaN	NaN	NaN	NaN	NaN	NaN	NaN	NaN	NaN	NaN	NaN	NaN
2.94	-24.435	26.5595	68.6989	-0.086426	0.18799	0.12109	-49.834	-166.5225	1052.321	-2.7109	0.68555	-0.51514	NaN	NaN	NaN	NaN	NaN	NaN	NaN	NaN	NaN	NaN	NaN	NaN
2.942	-36.578	16.0797	95.4997	-0.10449	0.20264	0.12061	-12.471	-148.4962	1052.381	-2.7022	0.79346	-0.52661	NaN	NaN	NaN	NaN	NaN	NaN	NaN	NaN	NaN	NaN	NaN	NaN
2.944	-42.586	0.6479	123.2475	-0.11841	0.21558	0.1189	6.40499999999999	-109.68	1017.087	-2.6499	0.87744	-0.54053	NaN	NaN	NaN	NaN	NaN	NaN	NaN	NaN	NaN	NaN	NaN	NaN
2.946	-20.105	19.5733	147.3855	-0.1416	0.229	0.11182	-11.078	-136.206	1039.263	-2.4312	0.90869	-0.56592	NaN	NaN	NaN	NaN	NaN	NaN	NaN	NaN	NaN	NaN	NaN	NaN
2.948	-34.82	10.731	208.7874	-0.18555	0.2417	0.10156	4.433	-36.364	1055.4508	-2.2495	0.89502	-0.57471	NaN	NaN	NaN	NaN	NaN	NaN	NaN	NaN	NaN	NaN	NaN	NaN
2.95	-72.017	-10.1604	255.689	-0.21484	0.24756	0.094238	10.352	18.945	1005.913	-1.8042	0.79541	-0.58643	NaN	NaN	NaN	NaN	NaN	NaN	NaN	NaN	NaN	NaN	NaN	NaN
2.952	-55.251	-40.744	302.235	-0.28857	0.25439	0.070313	-15.991	25.489	1014.537	-1.4888	0.70923	-0.58033	NaN	NaN	NaN	NaN	NaN	NaN	NaN	NaN	NaN	NaN	NaN	NaN
2.954	-30.753	-42.879	350.9789	-0.36157	0.25757	0.04834	-81.023	35.35	1012.576	-1.2417	0.63135	-0.57471	NaN	NaN	NaN	NaN	NaN	NaN	NaN	NaN	NaN	NaN	NaN	NaN
2.956	-55.559	-26.7624	456.4287	-0.43701	0.25928	0.020996	-106.997	-41.951	994.136	-1.0308	0.57471	-0.59131	NaN	NaN	NaN	NaN	NaN	NaN	NaN	NaN	NaN	NaN	NaN	NaN
2.958	-88.9967	-11.6205	582.5731	-0.54639	0.26807	-0.0024414	-52.5807	-60.56	1033.289	-0.96094	0.56055	-0.60059	NaN	NaN	NaN	NaN	NaN	NaN	NaN	NaN	NaN	NaN	NaN	NaN
2.96	-85.337	-3.7264	660.999	-0.61377	0.27051	-0.021484	-20.7096	-92.161	1001.684	-0.8584	0.55566	-0.62695	NaN	NaN	NaN	NaN	NaN	NaN	NaN	NaN	NaN	NaN	NaN	NaN
2.962	-32.122	16.671	725.74	-0.77295	0.27295	-0.0625	1.543	-179.4068	1021.321	-0.79053	0.55225	-0.63452	NaN	NaN	NaN	NaN	NaN	NaN	NaN	NaN	NaN	NaN	NaN	NaN
2.964	-19.061	33.1577	808.681	-0.91187	0.26928	-0.093752	17.5127	-194.424	1040.604	-0.73828	0.54297	-0.63477	NaN	NaN	NaN	NaN	NaN	NaN	NaN	NaN	NaN	NaN	NaN	NaN
2.966	-21.985	41.833	891.028	-1.0596	0.2666	-0.125	22.0649	-253.993	1016.229	-0.69727	0.53516	-0.6416	NaN	NaN	NaN	NaN	NaN	NaN	NaN	NaN	NaN	NaN	NaN	NaN
2.968	-34.41	41.8752	955.0466	-1.2666	0.27734	-0.16357	47.334	-294.271	1090.212	-0.69189	0.5376	-0.64404	NaN	NaN	NaN	NaN	NaN	NaN	NaN	NaN	NaN	NaN	NaN	NaN
2.97	-9.379	44.2816	994.069	-1.3765	0.28564	-0.18408	64.063	-243.061	1136.299	-0.72607	0.53955	-0.65381	NaN	NaN	NaN	NaN	NaN	NaN	NaN	NaN	NaN	NaN	NaN	NaN
2.972	-59.687	30.982	1026.413	-1.5859	0.31641	-0.22266	43.352	-276.332	1186.1437	-0.78101	0.53638	-0.64526	NaN	NaN	NaN	NaN	NaN	NaN	NaN	NaN	NaN	NaN	NaN	NaN
2.974	-63.637	15.44251	1039.807	-1.7319	0.34473	-0.25171	44.659	-257.764	1256.24	-0.85742	0.53516	-0.63965	NaN	NaN	NaN	NaN	NaN	NaN	NaN	NaN	NaN	NaN	NaN	NaN
2.976	-38.1021	-1.4347	1018.7627	-1.8628	0.38135	-0.27295	-4.0104	-217.7749	1231.4215	-1.0039	0.54102	-0.6416	NaN	NaN	NaN	NaN	NaN	NaN	NaN	NaN	NaN	NaN	NaN	NaN
2.978	-23.365	-28.1084	1020.0884	-2.0073	0.43408	-0.29932	-45.52	-228.478	1272.071	-1.1418	0.56421	-0.64404	NaN	NaN	NaN	NaN	NaN	NaN	NaN	NaN	NaN	NaN	NaN	NaN
2.98	-34.393	-58.162	1041.7377	-2.0566	0.45703	-0.31299	-45.471	-121.977	1281.17	-1.2915	0.5874	-0.64307	NaN	NaN	NaN	NaN	NaN	NaN	NaN	NaN	NaN	NaN	NaN	NaN
2.982	-56.672	-92.94	1063.7347	-2.0996	0.50977	-0.33496	-13.7595	-86.79	1245.0385	-1.4937	0.61768	-0.66162	NaN	NaN	NaN	NaN	NaN	NaN	NaN	NaN	NaN	NaN	NaN	NaN
2.984	-61.2856	-115.594	1053.5305	-2.0869	0.5415	-0.34155	29.1348	-98.371	1278.354	-1.5933	0.62939	-0.68506	NaN	NaN	NaN	NaN	NaN	NaN	NaN	NaN	NaN	NaN	NaN	NaN
2.986	-15.595	-96.63	1036.762	-2.0503	0.56396	-0.33643	34.1668	-59.048	1264.727	-1.8066	0.63867	-0.73047	NaN	NaN	NaN	NaN	NaN	NaN	NaN	NaN	NaN	NaN	NaN	NaN
2.988	-3.566	-84.069	1053.135	-1.9805	0.58789	-0.3125	68.177	-100.365	1260.24	-1.9656	0.64819	-0.76245	NaN	NaN	NaN	NaN	NaN	NaN	NaN	NaN	NaN	NaN	NaN	NaN
2.99	-18.707	-61.937	1061.53048	-1.9331	0.59424	-0.30518	78.819	-102.253	1286.448	-2.1191	0.66016	-0.7832	NaN	NaN	NaN	NaN	NaN	NaN	NaN	NaN	NaN	NaN	NaN	NaN
2.992	-47.247	-40.705	1105.38	-1.8262	0.5957	-0.28369	47.257	-93.7993	1288.6032	-2.3047	0.68555	-0.81445	NaN	NaN	NaN	NaN	NaN	NaN	NaN	NaN	NaN	NaN	NaN	NaN
2.994	-24.956	-22.99	1118.789	-1.7439	0.60523	-0.2727	23.3491	-156.097	1316.238	-2.3745	0.70166	-0.82373	NaN	NaN	NaN	NaN	NaN	NaN	NaN	NaN	NaN	NaN	NaN	NaN
2.996	-49.597	-49.9161	1141.012	-1.6563	0.61523	-0.25928	21.51	-97.9037	1342.4658	-2.4761	0.72217	-0.84521	NaN	NaN	NaN	NaN	NaN	NaN	NaN	NaN	NaN	NaN	NaN	NaN
2.998	-57.004	-87.459	1127.7316	-1.5449	0.64844	-0.24512	13.2849	-73.97673	1342.4876	-2.5242	0.72192	-0.87183	NaN	NaN	NaN	NaN	NaN	NaN	NaN	NaN	NaN	NaN	NaN	NaN
3	-38.359	-101.277	1106.8304	-1.4907	0.67432	-0.24316	0.9244	-111.9909	1396.055	-2.543	0.71094	-0.9082	NaN	NaN	NaN	NaN	NaN	NaN	NaN	NaN	NaN	NaN	NaN	NaN
3.002	-31.402	-99.46	1095.5722	-1.3887	0.73242	-0.23389	19.6123	-73.247	1411.025	-2.5371	0.67969	-0.98242	NaN	NaN	NaN	NaN	NaN	NaN	NaN	NaN	NaN	NaN	NaN	NaN
3.004	-63.737	-106.083	1093.494	-1.3318	0.77857	-0.24073	5.9006	-134.242	1418.942	-2.5176	0.6582	-1.0156	NaN	NaN	NaN	NaN	NaN	NaN	NaN	NaN	NaN	NaN	NaN	NaN
3.006	-82.209	-138.039	1100.048	-1.2754	0.8125	-0.24756	6.105831	-145.0662	1446.449	-2.4409	0.61768	-1.0776	NaN	NaN	NaN	NaN	NaN	NaN	NaN	NaN	NaN	NaN	NaN	NaN
3.008	-56.766	-166.751	1103.661	-1.2266	0.84375	-0.26367	49.913	-103.6766	1409.696	-2.3735	0.59912	-1.0904	NaN	NaN	NaN	NaN	NaN	NaN	NaN	NaN	NaN	NaN	NaN	NaN
3.01	-57.84	-166.554	1117.549	-1.2104	0.85205	-0.27197	26.0255	-152.686	1389.4197	-2.3086	0.59863	-1.0996	NaN	NaN	NaN	NaN	NaN	NaN	NaN	NaN	NaN	NaN	NaN	NaN
3.012	-84.307	-153.432	1151.8024	-1.1929	0.85205	-0.28955	59.465	-82.289	1352.6282	-2.2246	0.62109	-1.1084	NaN	NaN	NaN	NaN	NaN	NaN	NaN	NaN	NaN	NaN	NaN	NaN
3.014	-95.5461	-139.396	1173.268	-1.1816	0.84034	-0.30005	41.161	-61.518	1293.814	-2.1992	0.63574	-1.1191	NaN	NaN	NaN	NaN	NaN	NaN	NaN	NaN	NaN	NaN	NaN	NaN
3.016	-94.501	-110.485	1178.2591	-1.1836	0.82227	-0.31055	48.352	-73.327	1304.5703	-2.1582	0.68164	-1.1348	NaN	NaN	NaN	NaN	NaN	NaN	NaN	NaN	NaN	NaN	NaN	NaN
3.018	-121.7942	-67.1333	1189.8751	-1.1973	0.80664	-0.32617	7.7333	15.2035	1307.466	-2.1345	0.71997	-1.1442	NaN	NaN	NaN	NaN	NaN	NaN	NaN	NaN	NaN	NaN	NaN	NaN
3.02	-103.35	-68.659	1205.7814	-1.2026	0.8042	-0.33545	5.3558	-11.3315	1306.67274	-2.1055	0.75391	-1.1504	NaN	NaN	NaN	NaN	NaN	NaN	NaN	NaN	NaN	NaN	NaN	NaN
3.022	-75.082	-83.747	1239.4103	-1.2241	0.80518	-0.35205	40.5159	9.863	1339.4461	-2.0605	0.80859	-1.1484	NaN	NaN	NaN	NaN	NaN	NaN	NaN	NaN	NaN	NaN	NaN	NaN
3.024	-90.221	-97.1006	1253.1646	-1.2456	0.79883	-0.37084	24.0957	43.02	1307.16	-2.0215	0.83203	-1.1445	NaN	NaN	NaN	NaN	NaN	NaN	NaN	NaN	NaN	NaN	NaN	NaN
3.026	-122.0096	-87.916	1257.8569	-1.269	0.78955	-0.39111	26.1652	-18.347	1303.08067	-1.9526	0.8667	-1.146	NaN	NaN	NaN	NaN	NaN	NaN	NaN	NaN	NaN	NaN	NaN	NaN
3.028	-114.946	-91.824	1248.503	-1.3169	0.76514	-0.41357	33.992	22.2928	1279.399	-1.8943	0.89282	-1.1179	NaN	NaN	NaN	NaN	NaN	NaN	NaN	NaN	NaN	NaN	NaN	NaN
3.03	-100.988	-97.761	1242.504	-1.3574	0.74902	-0.41602	12.6391	13.7934	1253.399	-1.8301	0.9082	-1.1074	NaN	NaN	NaN	NaN	NaN	NaN	NaN	NaN	NaN	NaN	NaN	NaN
3.032	-114.114	-94.1315	1235.15246	-1.4727	0.71973	-0.42285	24.3519	-22.679	1272.61091	-1.7402	0.92578	-1.0742	NaN	NaN	NaN	NaN	NaN	NaN	NaN	NaN	NaN	NaN	NaN	NaN
3.034	-120.947	-104.0832	1251.4249	-1.5982	0.70703	-0.42334	56.377	24.553	1277.8557	-1.6914	0.92676	-1.0605	NaN	NaN	NaN	NaN	NaN	NaN	NaN	NaN	NaN	NaN	NaN	NaN
3.036	-120.054	-122.921	1251.8796	-1.7539	0.71094	-0.42383	49.828	-23.603	1274.374	-1.6069	0.92822	-1.0249	NaN	NaN	NaN	NaN	NaN	NaN	NaN	NaN	NaN	NaN	NaN	NaN
3.038	-117.515	-124.985	1278.2213	-1.9644	0.73389	-0.43799	53.127	-41.182	1297.931	-1.5525	0.92456	-0.99342	NaN	NaN	NaN	NaN	NaN	NaN	NaN	NaN	NaN	NaN	NaN	NaN
3.04	-114.473	-96.756	1296.9605	-2.1219	0.7688	-0.448	56.763	-9.47	1234.812	-1.5078	0.91797	-0.96191	NaN	NaN	NaN	NaN	NaN	NaN	NaN	NaN	NaN	NaN	NaN	NaN
3.042	-95.839	-80.434	1302.69	-2.2671	0.81494	-0.45557	23.5309	-57.6979	1229.1922	-1.4785	0.91016	-0.93164	NaN	NaN	NaN	NaN	NaN	NaN	NaN	NaN	NaN	NaN	NaN	NaN
3.044	-83.965	-71.682	1295.25482	-2.4487	0.88525	-0.47021	61.633	35.4282	1232.9427	-1.459	0.90625	-0.92188	NaN	NaN	NaN	NaN	NaN	NaN	NaN	NaN	NaN	NaN	NaN	NaN
3.046	-90.234	-55.002	1283.4718	-2.5308	0.92236	-0.48047	35.238	64.898	1198.5455	-1.4141	0.89063	-0.89258	NaN	NaN	NaN	NaN	NaN	NaN	NaN	NaN	NaN	NaN	NaN	NaN
3.048	-103.13	-31.843	1295.853	-2.6851	0.99658	-0.49658	20.9232	58.926	1219.5002	-1.3843	0.87647	-0.86865	NaN	NaN	NaN	NaN	NaN	NaN	NaN	NaN	NaN	NaN	NaN	NaN
3.05	-107.652	-29.854	1271.4429	-2.7769	1.0503	-0.50928	23.2933	132.154	1188.715	-1.3535	0.86035	-0.84277	NaN	NaN	NaN	NaN	NaN	NaN	NaN	NaN	NaN	NaN	NaN	NaN
3.052	-103.477	-43.494	1265.7361	-2.8374	1.0981	-0.52588	4.80031	86.86	1184.6926	-1.3081	0.83838	-0.81201	NaN	NaN	NaN	NaN	NaN	NaN	NaN	NaN	NaN	NaN	NaN	NaN
3.054	-118.42	-51.9972	1239.859	-2.8472	1.145	-0.5293	9.6613	104.2836	1169.573	-1.2871	0.82715	-0.79883	NaN	NaN	NaN	NaN	NaN	NaN	NaN	NaN	NaN	NaN	NaN	NaN
3.056	-125.618	-43.4451	1224	-2.8242	1.165	-0.53027	15.7884	139.9495	1099.135	-1.2573	0.7915	-0.76416	NaN	NaN	NaN	NaN	NaN	NaN	NaN	NaN	NaN	NaN	NaN	NaN
3.058	-127.721	-40.2479	1205.338	-2.7417	1.1821	-0.52002	11.235	89.715	1078.8664	-1.2399	0.76587	-0.74097	NaN	NaN	NaN	NaN	NaN	NaN	NaN	NaN	NaN	NaN	NaN	NaN
3.06	-119.778	-34.9631	1216.31	-2.656	1.1839	-0.52319	35.4609	132.7671	1049.237	-1.2168	0.74219	-0.71289	NaN	NaN	NaN	NaN	NaN	NaN	NaN	NaN	NaN	NaN	NaN	NaN
3.062	-115.741	-22.7458	1219.689	-2.564	1.1763	-0.51709	28.4474	122.0036	1031.973	-1.189	0.70166	-0.67334	NaN	NaN	NaN	NaN	NaN	NaN	NaN	NaN	NaN	NaN	NaN	NaN
3.064	-121.0088	-4.307	1236.0856	-2.4292	1.1675	-0.5249	4.904	84.851	1042.35	-1.1748	0.68359	-0.64941	NaN	NaN	NaN	NaN	NaN	NaN	NaN	NaN	NaN	NaN	NaN	NaN
3.066	-122.184	-10.3573	1246.2603	-2.3594	1.1543	-0.52832	13.0438	142.7425	1022.5387	-1.1406	0.64258	-0.6084	NaN	NaN	NaN	NaN	NaN	NaN	NaN	NaN	NaN	NaN	NaN	NaN
3.068	-124.111	-18.8502	1249.8919	-2.2188	1.123	-0.50977	-20.9929	123.1027	1019.2187	-1.1135	0.61352	-0.58545	NaN	NaN	NaN	NaN	NaN	NaN	NaN	NaN	NaN	NaN	NaN	NaN
3.07	-117.361	-23.531	1252.3173	-2.1088	1.0996	-0.49756	-25.466	151.317	1013.7188	-1.0796	0.57764	-0.55615	NaN	NaN	NaN	NaN	NaN	NaN	NaN	NaN	NaN	NaN	NaN	NaN
3.072	-151.917	-10.3586	1232.8065	-2.0034	1.0718	-0.48779	-23.5917	194.134	963.372	-1.0425	0.53662	-0.52344	NaN	NaN	NaN	NaN	NaN	NaN	NaN	NaN	NaN	NaN	NaN	NaN
3.074	-139.545	-6.5993	1208.5189	-1.875	1.0273	-0.46338	-42.725	144.047	935.5195	-1.0239	0.51416	-0.50537	NaN	NaN	NaN	NaN	NaN	NaN	NaN	NaN	NaN	NaN	NaN	NaN
3.076	-137.8525	-4.29088	1206.39105	-1.8164	1.0059	-0.45313	-8.501	177.168	911.292	-0.98682	0.4707	-0.46875	NaN	NaN	NaN	NaN	NaN	NaN	NaN	NaN	NaN	NaN	NaN	NaN
3.078	-156.1007	2.7999	1192.8882	-1.7163	0.96533	-0.43115	-36.0448	165.9308	872.84391	-0.9646	0.44067	-0.44409	NaN	NaN	NaN	NaN	NaN	NaN	NaN	NaN	NaN	NaN	NaN	NaN
3.08	-147.0017	0.1186	1173.4731	-1.647	0.93408	-0.41455	-46.2538	148.408	885.593	-0.94189	0.41455	-0.40967	NaN	NaN	NaN	NaN	NaN	NaN	NaN	NaN	NaN	NaN	NaN	NaN
3.082	-132.689	-2.99447	1155.0453	-1.5908	0.90332	-0.39844	-0.270000000000003	212.142	855.209	-0.91357	0.38525	-0.37842	NaN	NaN	NaN	NaN	NaN	NaN	NaN	NaN	NaN	NaN	NaN	NaN
3.084	-117.866	12.2691	1144.918	-1.5229	0.86572	-0.38232	-15.338	176.0658	824.825	-0.90625	0.37109	-0.36328	NaN	NaN	NaN	NaN	NaN	NaN	NaN	NaN	NaN	NaN	NaN	NaN
3.086	-103.565	36.321	1137.53	-1.499	0.84766	-0.37695	-6.166	198.60778	801.19306	-0.87842	0.34717	-0.33057	NaN	NaN	NaN	NaN	NaN	NaN	NaN	NaN	NaN	NaN	NaN	NaN
3.088	-103.841	37.24522	1152.1516	-1.4448	0.81787	-0.35742	-13.137	218.869	750.068	-0.86573	0.32983	-0.31518	NaN	NaN	NaN	NaN	NaN	NaN	NaN	NaN	NaN	NaN	NaN	NaN
3.09	-108.509	29.3984	1147.423	-1.4099	0.79566	-0.34546	-54.431	174.6192	718.4709	-0.84766	0.31396	-0.29932	NaN	NaN	NaN	NaN	NaN	NaN	NaN	NaN	NaN	NaN	NaN	NaN
3.092	-88.554	34.658	1141.3554	-1.375	0.77148	-0.33105	-49.5286	210.583	696.2593	-0.81494	0.29346	-0.27588	NaN	NaN	NaN	NaN	NaN	NaN	NaN	NaN	NaN	NaN	NaN	NaN
3.094	-84.498	56.2048	1136.032	-1.3413	0.74365	-0.31494	-89.231	187.272	671.5587	-0.79688	0.28711	-0.26221	NaN	NaN	NaN	NaN	NaN	NaN	NaN	NaN	NaN	NaN	NaN	NaN
3.096	-92.19	64.751	1122.888	-1.3242	0.72656	-0.29932	-57.1771	142.216	681.45	-0.76123	0.27734	-0.24658	NaN	NaN	NaN	NaN	NaN	NaN	NaN	NaN	NaN	NaN	NaN	NaN
3.098	-89.42	67.662	1102.0955	-1.2988	0.69531	-0.28418	-25.591	183.452	670.9121	-0.72705	0.27539	-0.23071	NaN	NaN	NaN	NaN	NaN	NaN	NaN	NaN	NaN	NaN	NaN	NaN
3.1	-86.905	68.642	1076.6889	-1.2781	0.67261	-0.27076	-51.427	164.8352	628.7119	-0.68555	0.28125	-0.2168	NaN	NaN	NaN	NaN	NaN	NaN	NaN	NaN	NaN	NaN	NaN	NaN
3.102	-79.784	60.54578	1045.62	-1.2554	0.64893	-0.25928	-37.552	182.711	589.6298	-0.62012	0.28125	-0.19922	NaN	NaN	NaN	NaN	NaN	NaN	NaN	NaN	NaN	NaN	NaN	NaN
3.104	-69.838	56.218	1026.924	-1.2183	0.61377	-0.23975	-24.283	208.5054	538.2782	-0.58789	0.28906	-0.18701	NaN	NaN	NaN	NaN	NaN	NaN	NaN	NaN	NaN	NaN	NaN	NaN
3.106	-64.438	56.011	1020.4911	-1.2031	0.60156	-0.23145	-63.606	156.812	503.578	-0.50781	0.29883	-0.16309	NaN	NaN	NaN	NaN	NaN	NaN	NaN	NaN	NaN	NaN	NaN	NaN
3.108	-53.544	59.434	1001.8884	-1.1699	0.56982	-0.22461	-16.059	170.122	464.813	-0.41455	0.29932	-0.14355	NaN	NaN	NaN	NaN	NaN	NaN	NaN	NaN	NaN	NaN	NaN	NaN
3.11	-70.18	78.4485	985.6617	-1.143	0.5498	-0.20556	-22.284	139.122	409.46369	-0.3667	0.2959	-0.12842	NaN	NaN	NaN	NaN	NaN	NaN	NaN	NaN	NaN	NaN	NaN	NaN
3.112	-71.25	99.29272	981.9402	-1.1147	0.52783	-0.19434	-41.119	91.245	390.6537	-0.27051	0.2793	-0.097656	NaN	NaN	NaN	NaN	NaN	NaN	NaN	NaN	NaN	NaN	NaN	NaN
3.114	-69.438	110.3041	962.14508	-1.0835	0.49756	-0.18896	-23.85	135.2889	367.5591	-0.20263	0.26001	-0.074951	NaN	NaN	NaN	NaN	NaN	NaN	NaN	NaN	NaN	NaN	NaN	NaN
3.116	-40.679	109.8986	949.0401	-1.0698	0.48291	-0.17871	-79.3875	125.133	325.3959	-0.13916	0.23779	-0.053711	NaN	NaN	NaN	NaN	NaN	NaN	NaN	NaN	NaN	NaN	NaN	NaN
3.118	-76.1382	115.897	925.98267	-1.0439	0.46289	-0.16992	-43.055	147.8432	300.0169	-0.060547	0.20996	-0.023438	NaN	NaN	NaN	NaN	NaN	NaN	NaN	NaN	NaN	NaN	NaN	NaN
3.12	-95.4024	106.31	919.5984	-1.018	0.4397	-0.15918	-20.284	169.868	239.944	-0.022949	0.19189	-0.0073242	NaN	NaN	NaN	NaN	NaN	NaN	NaN	NaN	NaN	NaN	NaN	NaN
3.122	-70.546	109.381	890.3501	-0.99609	0.41797	-0.1499	-33.556	112.444	208.02	0.049316	0.15918	0.015625	NaN	NaN	NaN	NaN	NaN	NaN	NaN	NaN	NaN	NaN	NaN	NaN
3.124	-76.7499	107.7475	861.771	-0.96729	0.39648	-0.14209	-14.563	119.645	188.978	0.10401	0.12915	0.036865	NaN	NaN	NaN	NaN	NaN	NaN	NaN	NaN	NaN	NaN	NaN	NaN
3.126	-87.2066	102.0547	832.5158	-0.95508	0.38184	-0.1333	-35.53	101.371	151.98	0.15234	0.1001	0.050781	NaN	NaN	NaN	NaN	NaN	NaN	NaN	NaN	NaN	NaN	NaN	NaN
3.128	-65.876	82.846	807.927	-0.93457	0.35547	-0.12744	-22.004	86.6993	131.3592	0.21191	0.057129	0.074219	NaN	NaN	NaN	NaN	NaN	NaN	NaN	NaN	NaN	NaN	NaN	NaN
3.13	-56.036	84.981	790.869	-0.9187	0.34351	-0.12134	-12.064	106.14678	109.945	0.23926	0.037598	0.085938	NaN	NaN	NaN	NaN	NaN	NaN	NaN	NaN	NaN	NaN	NaN	NaN
3.132	-50.53	104.25	775.376	-0.90625	0.3335	-0.11523	-40.083	61.551	96.448	0.27832	-0.0068359	0.1123	NaN	NaN	NaN	NaN	NaN	NaN	NaN	NaN	NaN	NaN	NaN	NaN
3.134	-53.034	117.4278	768.0229	-0.88623	0.31494	-0.11865	-15.592	57.077	89.506	0.30444	-0.033447	0.12671	NaN	NaN	NaN	NaN	NaN	NaN	NaN	NaN	NaN	NaN	NaN	NaN
3.136	-33.64	113.5608	754.788	-0.87939	0.30762	-0.11182	-12.018	78.2522	69.939	0.32422	-0.062012	0.14258	NaN	NaN	NaN	NaN	NaN	NaN	NaN	NaN	NaN	NaN	NaN	NaN
3.138	-47.292	111.3828	732.3822	-0.85889	0.29736	-0.098633	-30.198	49.1438	76.3731	0.3291	-0.1001	0.1665	NaN	NaN	NaN	NaN	NaN	NaN	NaN	NaN	NaN	NaN	NaN	NaN
3.14	-46.766	117.2875	704.8253	-0.84742	0.29004	-0.095948	-20.027	69.828	85.17	0.32617	-0.12012	0.17432	NaN	NaN	NaN	NaN	NaN	NaN	NaN	NaN	NaN	NaN	NaN	NaN
3.142	-49.858	106.4734	700.2153	-0.82617	0.28906	-0.085449	-36.859	48.374	57.0994	0.30859	-0.15039	0.19727	NaN	NaN	NaN	NaN	NaN	NaN	NaN	NaN	NaN	NaN	NaN	NaN
3.144	-39.239	126.579	662.7806	-0.79834	0.28711	-0.086914	-42.784	15.5591	50.7292	0.28931	-0.17212	0.20971	NaN	NaN	NaN	NaN	NaN	NaN	NaN	NaN	NaN	NaN	NaN	NaN
3.146	-31.318	126.982	630.50404	-0.78369	0.28955	-0.083496	-1.204	35.642	36.417	0.26025	-0.19189	0.22559	NaN	NaN	NaN	NaN	NaN	NaN	NaN	NaN	NaN	NaN	NaN	NaN
3.148	-29.461	118.663	600.078143	-0.74414	0.29102	-0.080566	-34.7765	22.5806	38.168	0.22461	-0.21582	0.23096	NaN	NaN	NaN	NaN	NaN	NaN	NaN	NaN	NaN	NaN	NaN	NaN
3.15	-26.726	102.5325	551.338	-0.70434	0.29541	-0.079346	-19.72	33.279	68.2256	0.20557	-0.22266	0.23682	NaN	NaN	NaN	NaN	NaN	NaN	NaN	NaN	NaN	NaN	NaN	NaN
3.152	-17.657	97.1121	528.264	-0.66016	0.3042	-0.074707	-5.357	50.1355	46.3276	0.16504	-0.23096	0.24463	NaN	NaN	NaN	NaN	NaN	NaN	NaN	NaN	NaN	NaN	NaN	NaN
3.154	-5.012	104.4695	503.4001	-0.60791	0.30322	-0.068848	-38.82	35.554	22.6412	0.1455	-0.23682	0.24268	NaN	NaN	NaN	NaN	NaN	NaN	NaN	NaN	NaN	NaN	NaN	NaN
3.156	-21.593	108.7247	484.12244	-0.58008	0.2998	-0.06543	12.591	56.94	6.1475	0.12549	-0.2334	0.24756	NaN	NaN	NaN	NaN	NaN	NaN	NaN	NaN	NaN	NaN	NaN	NaN
3.158	-6.749	105.2473	471.95053	-0.53613	0.28711	-0.058594	-18.648	48.763	-2.81998	0.10156	-0.23242	0.24707	NaN	NaN	NaN	NaN	NaN	NaN	NaN	NaN	NaN	NaN	NaN	NaN
3.16	-11.792	111.7455	434.172	-0.4978	0.28174	-0.063476	-15.831	33.294	23.6146	0.097168	-0.22852	0.24854	NaN	NaN	NaN	NaN	NaN	NaN	NaN	NaN	NaN	NaN	NaN	NaN
3.162	-13.052	109.08986	413.2592	-0.45947	0.27783	-0.054688	14.508	53.413	34.0887	0.086426	-0.22217	0.24902	NaN	NaN	NaN	NaN	NaN	NaN	NaN	NaN	NaN	NaN	NaN	NaN
3.164	-33.533	111.2938	404.3822	-0.39697	0.26953	-0.047852	-43.2899	33.284	27.1046	0.07666	-0.22143	0.24268	NaN	NaN	NaN	NaN	NaN	NaN	NaN	NaN	NaN	NaN	NaN	NaN
3.166	-38.327	100.3175	400.1593	-0.35132	0.2688	-0.04834	-20.598	24.8826	58.674	0.069824	-0.21924	0.2417	NaN	NaN	NaN	NaN	NaN	NaN	NaN	NaN	NaN	NaN	NaN	NaN
3.168	-39.981	107.586	359.8626	-0.29932	0.25635	-0.046875	-27.265	41.789	57.0519	0.058594	-0.21729	0.2417	NaN	NaN	NaN	NaN	NaN	NaN	NaN	NaN	NaN	NaN	NaN	NaN
3.17	-46.331	99.3763	325.4715	-0.23682	0.25195	-0.043945	-41.79	25.617	29.0951	0.054199	-0.22119	0.24219	NaN	NaN	NaN	NaN	NaN	NaN	NaN	NaN	NaN	NaN	NaN	NaN
3.172	-57.5058	91.7232	298.7101	-0.20459	0.24609	-0.038086	11.963	35.4334	15.0699	0.046875	-0.21533	0.23779	NaN	NaN	NaN	NaN	NaN	NaN	NaN	NaN	NaN	NaN	NaN	NaN
3.174	-38.853	69.9228	263.664	-0.13916	0.2334	-0.03418	-27.753	45.543	-14.2036	0.041016	-0.21363	0.22925	NaN	NaN	NaN	NaN	NaN	NaN	NaN	NaN	NaN	NaN	NaN	NaN
3.176	-39.37	89.3549	240.3732	-0.1001	0.22583	-0.026856	-39.09	6.2	23.894	0.036133	-0.20654	0.23047	NaN	NaN	NaN	NaN	NaN	NaN	NaN	NaN	NaN	NaN	NaN	NaN
3.178	-50.501	92.4175	215.3545	-0.060547	0.21436	-0.020996	12.754	14.229	36.4579	0.03125	-0.19922	0.22314	NaN	NaN	NaN	NaN	NaN	NaN	NaN	NaN	NaN	NaN	NaN	NaN
3.18	-52.911	93.6018	205.5381	-0.015137	0.19727	-0.016113	-25.216	-2.535	32.0969	0.020508	-0.19385	0.21924	NaN	NaN	NaN	NaN	NaN	NaN	NaN	NaN	NaN	NaN	NaN	NaN
3.182	-36.523	87.513	181.01	0.0073242	0.18799	-0.016113	2.645	2.354	56.253	0.011719	-0.18555	0.21094	NaN	NaN	NaN	NaN	NaN	NaN	NaN	NaN	NaN	NaN	NaN	NaN
3.184	-46.862	86.03352	178.2651	0.041504	0.1665	-0.013184	-8.501	43.003	36.7003	0.0053711	-0.17285	0.20679	NaN	NaN	NaN	NaN	NaN	NaN	NaN	NaN	NaN	NaN	NaN	NaN
3.186	-51.192	81.838	173.54182	0.069825	0.15454	0.00073241	-45.885	44.4218	43.3703	-0.0043945	-0.15918	0.2002	NaN	NaN	NaN	NaN	NaN	NaN	NaN	NaN	NaN	NaN	NaN	NaN
3.188	-51.395	77.7971	163.1216	0.09082	0.13281	-0.0029297	-10.677	60.894	30.4919	-0.0092773	-0.13477	0.19727	NaN	NaN	NaN	NaN	NaN	NaN	NaN	NaN	NaN	NaN	NaN	NaN
3.19	-37.687	90.6899	132.2327	0.11865	0.11182	0.0073242	-40.68125	56.288	-6.337	-0.0092773	-0.12354	0.19775	NaN	NaN	NaN	NaN	NaN	NaN	NaN	NaN	NaN	NaN	NaN	NaN
3.192	-52.2319	98.3662	104.0901	0.12695	0.099121	0.010254	-28.501	6.705	27.2075	-0.015625	-0.1001	0.19043	NaN	NaN	NaN	NaN	NaN	NaN	NaN	NaN	NaN	NaN	NaN	NaN
3.194	-51.975	100.688	97.63867	0.14111	0.077637	0.019531	-13.228	14.3107	32.0674	-0.016113	-0.073974	0.18652	NaN	NaN	NaN	NaN	NaN	NaN	NaN	NaN	NaN	NaN	NaN	NaN
3.196	-23.491	74.334	88.5772	0.15357	0.057129	0.02295	-41.3691	-1.7368	27.8357	-0.022461	-0.059082	0.18262	NaN	NaN	NaN	NaN	NaN	NaN	NaN	NaN	NaN	NaN	NaN	NaN
3.198	-15.937	61.9595	70.9943	0.15869	0.041992	0.027344	6.301	16.4843	46.4046	-0.027832	-0.02832	0.17285	NaN	NaN	NaN	NaN	NaN	NaN	NaN	NaN	NaN	NaN	NaN	NaN
3.2	-6.353	56.1221	65.3718	0.17041	0.019043	0.03418	-8.931	41.989	25.04	-0.029785	-0.019531	0.1748	NaN	NaN	NaN	NaN	NaN	NaN	NaN	NaN	NaN	NaN	NaN	NaN
3.202	-20.546	50.845	69.9084	0.17627	0.010742	0.033203	-40.0489	13.307	34.6375	-0.04541	0.003418	0.1709	NaN	NaN	NaN	NaN	NaN	NaN	NaN	NaN	NaN	NaN	NaN	NaN
3.204	10.584	47.416	62.8451	0.18408	-0.0058594	0.037109	11.491	1.0841	53.1195	-0.053955	0.024658	0.16822	NaN	NaN	NaN	NaN	NaN	NaN	NaN	NaN	NaN	NaN	NaN	NaN
3.206	-7.938	48.261	55.9972	0.18213	-0.024414	0.036621	-29.705	5.557	17.962	-0.065918	0.040527	0.15918	NaN	NaN	NaN	NaN	NaN	NaN	NaN	NaN	NaN	NaN	NaN	NaN
3.208	-12.499	44.0895	48.006	0.18555	-0.043945	0.037109	-28.573	-8.146	41.0921	-0.081543	0.066895	0.15039	NaN	NaN	NaN	NaN	NaN	NaN	NaN	NaN	NaN	NaN	NaN	NaN
3.21	-13.527	45.5791	56.0123	0.17871	-0.067383	0.041016	2.843	8.57737	38.7614	-0.091797	0.07959	0.14893	NaN	NaN	NaN	NaN	NaN	NaN	NaN	NaN	NaN	NaN	NaN	NaN
3.212	-13.134	51.133	44.6666	0.17529	-0.081055	0.03125	-64.2891	1.8673	29.1725214	-0.10938	0.10107	0.1416	NaN	NaN	NaN	NaN	NaN	NaN	NaN	NaN	NaN	NaN	NaN	NaN
3.214	-17.612	58.221	32.45028	0.15918	-0.10889	0.040039	-11.757	-1.2422	45.4206	-0.12622	0.12085	0.13648	NaN	NaN	NaN	NaN	NaN	NaN	NaN	NaN	NaN	NaN	NaN	NaN
3.216	-36.494	54.608	42.5657	0.15283	-0.12573	0.040772	-7.222	29.7007	10.904	-0.13379	0.1333	0.12842	NaN	NaN	NaN	NaN	NaN	NaN	NaN	NaN	NaN	NaN	NaN	NaN
3.218	-32.096	34.5472	40.2586	0.13867	-0.1416	0.037109	-53.1941	29.087	19.5126	-0.15234	0.15869	0.12256	NaN	NaN	NaN	NaN	NaN	NaN	NaN	NaN	NaN	NaN	NaN	NaN
3.22	-35.763	24.803	25.295	0.12402	-0.15869	0.035645	11.739	30.9031	38.4769	-0.15918	0.16943	0.12158	NaN	NaN	NaN	NaN	NaN	NaN	NaN	NaN	NaN	NaN	NaN	NaN
3.222	-25.754	32.4744	23.868	0.10938	-0.16748	0.035645	-18.21	45.224	0.585000000000001	-0.1709	0.19043	0.11328	NaN	NaN	NaN	NaN	NaN	NaN	NaN	NaN	NaN	NaN	NaN	NaN
3.224	-20.741	24.2257	20.641	0.090332	-0.17725	0.032227	-45.0432	19.1544	6.293	-0.1858	0.19995	0.10962	NaN	NaN	NaN	NaN	NaN	NaN	NaN	NaN	NaN	NaN	NaN	NaN
3.226	-29.495	23.5476	39.3642	0.073242	-0.17627	0.028808	19.183	37.4565	1.887	-0.19922	0.21191	0.11328	NaN	NaN	NaN	NaN	NaN	NaN	NaN	NaN	NaN	NaN	NaN	NaN
3.228	-24.586	29.68377	24.546	0.061523	-0.17627	0.023438	-25.562	14.254	-2.47	-0.22363	0.21777	0.094238	NaN	NaN	NaN	NaN	NaN	NaN	NaN	NaN	NaN	NaN	NaN	NaN
3.23	-46.666	35.20149	22.936	0.039551	-0.18262	0.014648	-15.045	-6.7878	52.606	-0.22998	0.22705	0.09082	NaN	NaN	NaN	NaN	NaN	NaN	NaN	NaN	NaN	NaN	NaN	NaN
3.232	-35.195	30.393866	22.8349	0.030273	-0.18115	0.013184	-16.433	18.3059	55.95949	-0.2583	0.23486	0.083008	NaN	NaN	NaN	NaN	NaN	NaN	NaN	NaN	NaN	NaN	NaN	NaN
3.234	-46.744	18.11373	28.6351	0.017578	-0.17676	0.0053711	-43.283	-2.171	106.3828	-0.28467	0.24463	0.070801	NaN	NaN	NaN	NaN	NaN	NaN	NaN	NaN	NaN	NaN	NaN	NaN
3.236	-47.515	19.2155	33.967	0.0097658	-0.17432	0.0070801	-11.416	11.271	153.9694	-0.31836	0.25146	0.054199	NaN	NaN	NaN	NaN	NaN	NaN	NaN	NaN	NaN	NaN	NaN	NaN
3.238	-45.2015	20.2698	20.154	-0.0039063	-0.17383	0.00097656	-42.005	50.809	178.96	-0.38379	0.25977	0.022461	NaN	NaN	NaN	NaN	NaN	NaN	NaN	NaN	NaN	NaN	NaN	NaN
3.24	-43.253	18.50801	31.4013	-0.0073242	-0.16699	-0.0068359	-16.773	51.3108	328.745	-0.42334	0.26074	0.0073242	NaN	NaN	NaN	NaN	NaN	NaN	NaN	NaN	NaN	NaN	NaN	NaN
3.242	-43.2443	15.4365	36.23977	-0.011719	-0.16064	-0.0019531	-30.775	26.561	433.349	-0.52686	0.27002	-0.036621	NaN	NaN	NaN	NaN	NaN	NaN	NaN	NaN	NaN	NaN	NaN	NaN
3.244	-32.44	26.6454	21.1435	-0.018066	-0.14941	-0.012695	-105.4347	-30.8556	541.153	-0.65479	0.27002	-0.073242	NaN	NaN	NaN	NaN	NaN	NaN	NaN	NaN	NaN	NaN	NaN	NaN
3.246	-14.114	30.7862	7.8386	-0.013184	-0.14624	-0.013184	14.675	-51.4288	691.913	-0.72998	0.26611	-0.096191	NaN	NaN	NaN	NaN	NaN	NaN	NaN	NaN	NaN	NaN	NaN	NaN
3.248	-16.533	38.4761	14.1902	-0.015137	-0.13525	-0.02002	68.323	-24.131	789.169	-0.90771	0.25684	-0.14111	NaN	NaN	NaN	NaN	NaN	NaN	NaN	NaN	NaN	NaN	NaN	NaN
3.25	1.404	25.4803	15.8528	-0.00097656	-0.12695	-0.026367	-22.7191	18.38	965.897	-1.0574	0.24438	-0.18115	NaN	NaN	NaN	NaN	NaN	NaN	NaN	NaN	NaN	NaN	NaN	NaN
3.252	-21.65	27.2107	19.476	0.0058594	-0.11865	-0.032227	-13.9614	60.4118	1038.804	-1.2051	0.23486	-0.20996	NaN	NaN	NaN	NaN	NaN	NaN	NaN	NaN	NaN	NaN	NaN	NaN
3.254	-17.839	9.544	33.7718	0.018555	-0.10156	-0.041504	-43.067	70.879	978.444	-1.3931	0.23779	-0.24561	NaN	NaN	NaN	NaN	NaN	NaN	NaN	NaN	NaN	NaN	NaN	NaN
3.256	-16.405	-2.298	30.6425	0.036377	-0.094971	-0.049317	8.3239	10.9202	1055.604	-1.4858	0.24512	-0.25635	NaN	NaN	NaN	NaN	NaN	NaN	NaN	NaN	NaN	NaN	NaN	NaN
3.258	-4.919	4.8754	22.3638	0.046875	-0.084473	-0.058105	56.763	-9.582	1072.398	-1.6538	0.26709	-0.25732	NaN	NaN	NaN	NaN	NaN	NaN	NaN	NaN	NaN	NaN	NaN	NaN
3.26	-21.112	33.102	3.932	0.066895	-0.07373	-0.067383	11.7627	-78.239	1049.454	-1.7588	0.2876	-0.25659	NaN	NaN	NaN	NaN	NaN	NaN	NaN	NaN	NaN	NaN	NaN	NaN
3.262	-25.159	40.269	15.0275	0.074219	-0.066895	-0.070801	16.965	-113.482	1078.096	-1.8315	0.31201	-0.25195	NaN	NaN	NaN	NaN	NaN	NaN	NaN	NaN	NaN	NaN	NaN	NaN
3.264	-20.816	43.223	27.31218	0.092285	-0.056152	-0.083008	43.3847	-68.129	1022.168	-1.875	0.35059	-0.23633	NaN	NaN	NaN	NaN	NaN	NaN	NaN	NaN	NaN	NaN	NaN	NaN
3.266	-26.366	27.4791	19.1648	0.10181	-0.048828	-0.087891	5.193	-87.718	995.94	-1.8667	0.37109	-0.22217	NaN	NaN	NaN	NaN	NaN	NaN	NaN	NaN	NaN	NaN	NaN	NaN
3.268	-11.832	23.2996	19.6578	0.11719	-0.042969	-0.096191	30.7985	-66.534	1004.678	-1.8198	0.40186	-0.19043	NaN	NaN	NaN	NaN	NaN	NaN	NaN	NaN	NaN	NaN	NaN	NaN
3.27	-11.734	5.819	28.8063	0.13232	-0.032227	-0.10107	40.861	-27.592	906.584	-1.7634	0.41528	-0.16723	NaN	NaN	NaN	NaN	NaN	NaN	NaN	NaN	NaN	NaN	NaN	NaN
3.272	-19.651	12.94	37.012	0.14209	-0.032227	-0.10449	55.7479	-65.1747	919.503	-1.6909	0.42041	-0.14307	NaN	NaN	NaN	NaN	NaN	NaN	NaN	NaN	NaN	NaN	NaN	NaN
3.274	-9.593	14.36	21.893	0.16602	-0.025391	-0.11279	19.0037	-37.564	961.7184	-1.5854	0.42627	-0.12354	NaN	NaN	NaN	NaN	NaN	NaN	NaN	NaN	NaN	NaN	NaN	NaN
3.276	-34.54	34.686	4.821	0.17798	-0.021972	-0.12011	-72.544	-47.078	937.6021	-1.5308	0.43018	-0.11328	NaN	NaN	NaN	NaN	NaN	NaN	NaN	NaN	NaN	NaN	NaN	NaN
3.278	-36.866	31.6754	14.396	0.19043	-0.014648	-0.12793	-37.6677	-46.126	948.4649	-1.4292	0.43994	-0.095215	NaN	NaN	NaN	NaN	NaN	NaN	NaN	NaN	NaN	NaN	NaN	NaN
3.28	-44.6252	25.9267	20.371	0.20752	-0.014648	-0.13525	40.6347	-24.565	911.002	-1.3728	0.45508	-0.09082	NaN	NaN	NaN	NaN	NaN	NaN	NaN	NaN	NaN	NaN	NaN	NaN
3.282	-29.403	24.9312	24.52424	0.21924	-0.010742	-0.13623	8.772	-98.439	898.52	-1.3291	0.4873	-0.091309	NaN	NaN	NaN	NaN	NaN	NaN	NaN	NaN	NaN	NaN	NaN	NaN
3.284	-51.2965	18.2417	39.6443	0.23486	-0.0043945	-0.14307	-0.754000000000001	-102.44765	937.419	-1.2813	0.52637	-0.10693	NaN	NaN	NaN	NaN	NaN	NaN	NaN	NaN	NaN	NaN	NaN	NaN
3.286	-34.463	14.3848	45.8181	0.23828	-0.0014648	-0.15137	4.01	-89.6587	933.0334	-1.2476	0.54736	-0.11182	NaN	NaN	NaN	NaN	NaN	NaN	NaN	NaN	NaN	NaN	NaN	NaN
3.288	-32.277	-6.0115	64.5276	0.24072	0.00097656	-0.15625	-16.016	-165.466	979.434	-1.1753	0.60498	-0.11621	NaN	NaN	NaN	NaN	NaN	NaN	NaN	NaN	NaN	NaN	NaN	NaN
3.29	-32.644	2.1718	53.109	0.22607	0.0058594	-0.1665	-9.535	-172.346	1007.3197	-1.1287	0.65845	-0.13354	NaN	NaN	NaN	NaN	NaN	NaN	NaN	NaN	NaN	NaN	NaN	NaN
3.292	-26.634	-4.9818	66.4407	0.20704	0.0070801	-0.17017	-43.262	-220.484	971.127	-1.0957	0.70215	-0.17578	NaN	NaN	NaN	NaN	NaN	NaN	NaN	NaN	NaN	NaN	NaN	NaN
3.294	-38.0855	2.373295	88.3233	0.18457	0.012207	-0.17383	-31.045	-255.76	993.843	-1.0757	0.74268	-0.21875	NaN	NaN	NaN	NaN	NaN	NaN	NaN	NaN	NaN	NaN	NaN	NaN
3.296	-16.573	-5.69501	104.40413	0.13428	0.015625	-0.18555	-33.879	-177.9691	1003.383	-1.0728	0.75244	-0.24512	NaN	NaN	NaN	NaN	NaN	NaN	NaN	NaN	NaN	NaN	NaN	NaN
3.298	-24.399	2.5656	111.2994	0.11279	0.020996	-0.18701	-113.616	-188.2707	1060.155	-1.0972	0.76025	-0.29785	NaN	NaN	NaN	NaN	NaN	NaN	NaN	NaN	NaN	NaN	NaN	NaN
3.3	-1.914	26.33822	152.2902	0.055664	0.027344	-0.19971	-106.428	-159.6316	1136.8649	-1.1294	0.76709	-0.33692	NaN	NaN	NaN	NaN	NaN	NaN	NaN	NaN	NaN	NaN	NaN	NaN
3.302	-0.675999999999998	49.7984	233.73	0.014892	0.038086	-0.21119	-84.527	-110.939	1103.0475	-1.1699	0.7793	-0.37109	NaN	NaN	NaN	NaN	NaN	NaN	NaN	NaN	NaN	NaN	NaN	NaN
3.304	-0.937000000000001	92.3642	373.963	-0.036133	0.045898	-0.22266	-64.152	-130.64	1129.1831	-1.2319	0.80713	-0.42529	NaN	NaN	NaN	NaN	NaN	NaN	NaN	NaN	NaN	NaN	NaN	NaN
3.306	-46.106	104.7322	503.128	-0.1333	0.064453	-0.24561	-38.225	-69.339	1163.718	-1.2632	0.82764	-0.45459	NaN	NaN	NaN	NaN	NaN	NaN	NaN	NaN	NaN	NaN	NaN	NaN
3.308	-48.727	80.1119	617.531	-0.18994	0.075195	-0.25098	-45.211	-60.418	1165.709	-1.3296	0.86572	-0.5083	NaN	NaN	NaN	NaN	NaN	NaN	NaN	NaN	NaN	NaN	NaN	NaN
3.31	4.946	57.095	704.056	-0.36182	0.081543	-0.25684	-32.955	-74.587	1204.25902	-1.3868	0.89405	-0.54761	NaN	NaN	NaN	NaN	NaN	NaN	NaN	NaN	NaN	NaN	NaN	NaN
3.312	7.669	27.995	797.473	-0.5254	0.076172	-0.271	-44.72	-36.797	1195.1038	-1.4429	0.9126	-0.57568	NaN	NaN	NaN	NaN	NaN	NaN	NaN	NaN	NaN	NaN	NaN	NaN
3.314	-35.458	22.625	885.253	-0.71484	0.060547	-0.26953	-69.5269	-102.577	1200	-1.5308	0.91455	-0.58643	NaN	NaN	NaN	NaN	NaN	NaN	NaN	NaN	NaN	NaN	NaN	NaN
3.316	-63.658	25.565	931.663	-1.0137	0.040039	-0.26758	-34.273	-115.18	1240.86422	-1.5815	0.91846	-0.58447	NaN	NaN	NaN	NaN	NaN	NaN	NaN	NaN	NaN	NaN	NaN	NaN
3.318	-50.7666	16.879	941.4207	-1.1797	0.037109	-0.26855	-44.866	-83.3583	1220.326	-1.7227	0.91406	-0.57324	NaN	NaN	NaN	NaN	NaN	NaN	NaN	NaN	NaN	NaN	NaN	NaN
3.32	-44.9748	-30.0509	920.6891	-1.5234	0.052734	-0.27246	-77.602	-123.9172	1258.73	-1.8531	0.91748	-0.56103	NaN	NaN	NaN	NaN	NaN	NaN	NaN	NaN	NaN	NaN	NaN	NaN
3.322	-80.968	-76.381	939.2952	-1.781	0.088623	-0.28101	-59.605	-76.283	1281.877	-2.0015	0.92627	-0.54736	NaN	NaN	NaN	NaN	NaN	NaN	NaN	NaN	NaN	NaN	NaN	NaN
3.324	-52.499	-126.695	962.848	-2.019	0.15576	-0.29883	-70.913	-103.21	1260.78	-2.2319	0.96143	-0.53857	NaN	NaN	NaN	NaN	NaN	NaN	NaN	NaN	NaN	NaN	NaN	NaN
3.326	-39.285	-129.845	974.81	-2.2827	0.30908	-0.30664	-65.5165	-154.182	1309.287	-2.3472	0.98877	-0.53076	NaN	NaN	NaN	NaN	NaN	NaN	NaN	NaN	NaN	NaN	NaN	NaN
3.328	-24.881	-97.9019	960.158	-2.3945	0.38574	-0.33643	-31.545	-112.7896	1312.447	-2.5742	1.0625	-0.53906	NaN	NaN	NaN	NaN	NaN	NaN	NaN	NaN	NaN	NaN	NaN	NaN
3.33	-46.863	-67.985	937.88	-2.5273	0.56445	-0.38379	-37.392	-136.086	1294.593	-2.7124	1.1201	-0.5542	NaN	NaN	NaN	NaN	NaN	NaN	NaN	NaN	NaN	NaN	NaN	NaN
3.332	-26.234	-26.18347	923.027	-2.561	0.67334	-0.40649	-34.417	-70.908	1308.857	-2.8159	1.1782	-0.56592	NaN	NaN	NaN	NaN	NaN	NaN	NaN	NaN	NaN	NaN	NaN	NaN
3.334	6.465	-4.912	922.8717	-2.5698	0.75244	-0.42725	-51.283	10.4611	1256.239	-2.8945	1.2295	-0.58203	NaN	NaN	NaN	NaN	NaN	NaN	NaN	NaN	NaN	NaN	NaN	NaN
3.336	-33.105	21.451	922.177	-2.5425	0.78955	-0.45264	-75.127	-23.1172	1265.36462	-2.9077	1.2427	-0.58057	NaN	NaN	NaN	NaN	NaN	NaN	NaN	NaN	NaN	NaN	NaN	NaN
3.338	-52.0666	32.187	926.717	-2.4946	0.77979	-0.45459	-56.3	4.967	1278.2263	-2.8848	1.252	-0.58447	NaN	NaN	NaN	NaN	NaN	NaN	NaN	NaN	NaN	NaN	NaN	NaN
3.34	-80.399	10.824	952.2003	-2.3125	0.73242	-0.48828	-80.3965	-26.245	1273.1188	-2.8335	1.2465	-0.58056	NaN	NaN	NaN	NaN	NaN	NaN	NaN	NaN	NaN	NaN	NaN	NaN
3.342	-53.2397	2.32100000000001	923.8839	-2.0876	0.68872	-0.49121	-74.462	-59.5735	1301.542	-2.7656	1.2324	-0.57373	NaN	NaN	NaN	NaN	NaN	NaN	NaN	NaN	NaN	NaN	NaN	NaN
3.344	-60.62461	-31.651	894.986	-1.8491	0.6333	-0.48193	-69.9075	-1.807	1274.959	-2.6577	1.2075	-0.56982	NaN	NaN	NaN	NaN	NaN	NaN	NaN	NaN	NaN	NaN	NaN	NaN
3.346	-15.513	-69.528	898.128	-1.5815	0.58838	-0.46631	-115.1986	-33.884	1251.887	-2.6035	1.1914	-0.56934	NaN	NaN	NaN	NaN	NaN	NaN	NaN	NaN	NaN	NaN	NaN	NaN
3.348	-11.738	-118.594	919.801	-1.4707	0.56934	-0.46484	-126.0723	-4.5633262	1246.953	-2.4878	1.1782	-0.56299	NaN	NaN	NaN	NaN	NaN	NaN	NaN	NaN	NaN	NaN	NaN	NaN
3.35	4.817	-154.0922	958.3481	-1.2754	0.54688	-0.4873	-114.163	31.2979	1233.402	-2.3936	1.1689	-0.56275	NaN	NaN	NaN	NaN	NaN	NaN	NaN	NaN	NaN	NaN	NaN	NaN
3.352	27.7923	-180.257	981.5089	-1.1472	0.52808	-0.49926	-82.979	-31.2047	1260.0733	-2.2949	1.1563	-0.56348	NaN	NaN	NaN	NaN	NaN	NaN	NaN	NaN	NaN	NaN	NaN	NaN
3.354	41.6621	-204.186	1005.6523	-1.0352	0.51563	-0.50879	-52.337	0.413	1301.1414	-2.1543	1.1465	-0.5498	NaN	NaN	NaN	NaN	NaN	NaN	NaN	NaN	NaN	NaN	NaN	NaN
3.356	41.05633	-206.665	1030.9592	-0.91895	0.49854	-0.5332	-91.7061	-10.504	1289.0242	-2.0835	1.1313	-0.54053	NaN	NaN	NaN	NaN	NaN	NaN	NaN	NaN	NaN	NaN	NaN	NaN
3.358	21.531	-208.505	1055.822	-0.87451	0.49463	-0.53857	-97.6184	-25.618	1299.017	-1.957	1.1035	-0.50977	NaN	NaN	NaN	NaN	NaN	NaN	NaN	NaN	NaN	NaN	NaN	NaN
3.36	17.6867	-182.376	1080.2822	-0.81592	0.48291	-0.56299	-82.0496	30.273	1268.2587	-1.8738	1.0774	-0.49195	NaN	NaN	NaN	NaN	NaN	NaN	NaN	NaN	NaN	NaN	NaN	NaN
3.362	7.5854	-158.087	1095.083	-0.78344	0.47583	-0.57056	-114.335	-3.243	1254.9769	-1.7983	1.0513	-0.46826	NaN	NaN	NaN	NaN	NaN	NaN	NaN	NaN	NaN	NaN	NaN	NaN
3.364	-16.0048	-136.5393	1119.14	-0.75977	0.46875	-0.58203	-94.347	19.52	1256.48159	-1.7168	1.0176	-0.43848	NaN	NaN	NaN	NaN	NaN	NaN	NaN	NaN	NaN	NaN	NaN	NaN
3.366	-7.2156	-125.773	1130.051	-0.75342	0.44678	-0.59131	-81.508	60.631	1211.385	-1.6792	0.99463	-0.42139	NaN	NaN	NaN	NaN	NaN	NaN	NaN	NaN	NaN	NaN	NaN	NaN
3.368	-13.237	-118.864	1160.4307	-0.76172	0.43457	-0.58789	-91.517	40.05	1233.818	-1.6157	0.95459	-0.39014	NaN	NaN	NaN	NaN	NaN	NaN	NaN	NaN	NaN	NaN	NaN	NaN
3.37	33.2327	-111.733	1153.322	-0.81494	0.42529	-0.59033	-78.2001	102.411	1250.765	-1.5691	0.92163	-0.36914	NaN	NaN	NaN	NaN	NaN	NaN	NaN	NaN	NaN	NaN	NaN	NaN
3.372	39.2386	-101.748	1170.838	-0.8982	0.43287	-0.59156	-73.1275	87.809	1222.8686	-1.5254	0.88477	-0.3501	NaN	NaN	NaN	NaN	NaN	NaN	NaN	NaN	NaN	NaN	NaN	NaN
3.374	55.446	-81.664	1172.868	-0.99805	0.44531	-0.58789	-77.651	49.288	1202.571	-1.4648	0.83398	-0.32715	NaN	NaN	NaN	NaN	NaN	NaN	NaN	NaN	NaN	NaN	NaN	NaN
3.376	12.6591	-75.67	1205.537	-1.1484	0.47412	-0.58594	-41.201	94.3705	1156.483	-1.4355	0.80469	-0.2998	NaN	NaN	NaN	NaN	NaN	NaN	NaN	NaN	NaN	NaN	NaN	NaN
3.378	4.858	-93.8598	1231.89623	-1.2202	0.48291	-0.58545	-56.518	64.36	1155.201	-1.3882	0.74854	-0.28662	NaN	NaN	NaN	NaN	NaN	NaN	NaN	NaN	NaN	NaN	NaN	NaN
3.38	0.928000000000001	-119.79	1269.267	-1.377	0.5	-0.59961	-19.726	101.4421	1187.1969	-1.3452	0.68701	-0.2583	NaN	NaN	NaN	NaN	NaN	NaN	NaN	NaN	NaN	NaN	NaN	NaN
3.382	1.697	-127.091	1287.777	-1.4939	0.50806	-0.61011	-11.373	147.485	1177.3658	-1.3301	0.6582	-0.24707	NaN	NaN	NaN	NaN	NaN	NaN	NaN	NaN	NaN	NaN	NaN	NaN
3.384	7.181	-120.778	1284.327	-1.6172	0.50586	-0.63379	-60.623	104.6461	1160.79	-1.3008	0.59863	-0.22559	NaN	NaN	NaN	NaN	NaN	NaN	NaN	NaN	NaN	NaN	NaN	NaN
3.386	-20.4664	-121.9686	1287.8291	-1.7852	0.51465	-0.65625	-10.046	127.3633	1146.7886	-1.2741	0.54834	-0.20703	NaN	NaN	NaN	NaN	NaN	NaN	NaN	NaN	NaN	NaN	NaN	NaN
3.388	-13.79259	-133.47465	1307.1248	-1.8687	0.52588	-0.66846	-43.763	120.473	1102.185	-1.2466	0.50635	-0.18896	NaN	NaN	NaN	NaN	NaN	NaN	NaN	NaN	NaN	NaN	NaN	NaN
3.39	-24.7132	-155.9585	1317.2827	-2.0352	0.55957	-0.69531	-48.551	115.6172	1095.09	-1.2109	0.45508	-0.17285	NaN	NaN	NaN	NaN	NaN	NaN	NaN	NaN	NaN	NaN	NaN	NaN
3.392	-3.427	-152.8259	1322.013	-2.143	0.5913	-0.7041	-31.154	164.406	1070.393	-1.1992	0.42773	-0.16992	NaN	NaN	NaN	NaN	NaN	NaN	NaN	NaN	NaN	NaN	NaN	NaN
3.394	9.864	-155.782	1339.214	-2.2476	0.63037	-0.71826	-77.6307	127.682	1036.8791	-1.1543	0.38672	-0.15576	NaN	NaN	NaN	NaN	NaN	NaN	NaN	NaN	NaN	NaN	NaN	NaN
3.396	15.9798	-145.8302	1310.1257	-2.3887	0.69336	-0.75977	-44.437	123.2064	1042.624	-1.1272	0.35938	-0.14893	NaN	NaN	NaN	NaN	NaN	NaN	NaN	NaN	NaN	NaN	NaN	NaN
3.398	16.52	-111.2173	1290.173	-2.4688	0.72461	-0.78613	-43.6955	163.873	1000.8485	-1.0957	0.32813	-0.13721	NaN	NaN	NaN	NaN	NaN	NaN	NaN	NaN	NaN	NaN	NaN	NaN
3.4	-11.251	-85.208	1287.948	-2.603	0.78564	-0.86475	-59.9261	149.057	978.3968	-1.0522	0.29395	-0.13037	NaN	NaN	NaN	NaN	NaN	NaN	NaN	NaN	NaN	NaN	NaN	NaN
3.402	-7.098	-72.345	1290.561	-2.6365	0.80981	-0.92163	-5.326	195.4271	960.542	-1.0386	0.28076	-0.12842	NaN	NaN	NaN	NaN	NaN	NaN	NaN	NaN	NaN	NaN	NaN	NaN
3.404	13.7188	-71.918	1297.8851	-2.6152	0.80859	-0.95508	-14.162	223.258	932.917	-1.0054	0.25098	-0.12744	NaN	NaN	NaN	NaN	NaN	NaN	NaN	NaN	NaN	NaN	NaN	NaN
3.406	29.325	-58.9535	1315.64289	-2.5405	0.77588	-0.97217	-37.374	196.3846	922.9875	-0.99243	0.2334	-0.1289	NaN	NaN	NaN	NaN	NaN	NaN	NaN	NaN	NaN	NaN	NaN	NaN
3.408	25.8644	-41.302	1313.473	-2.5054	0.74951	-0.97607	-13.377	208.307	899.8458	-0.97998	0.21729	-0.12793	NaN	NaN	NaN	NaN	NaN	NaN	NaN	NaN	NaN	NaN	NaN	NaN
3.41	21.7155	-30.553	1334.005	-2.4824	0.72754	-0.98633	-48.0824	179.3893	865.5414	-0.9668	0.19531	-0.13574	NaN	NaN	NaN	NaN	NaN	NaN	NaN	NaN	NaN	NaN	NaN	NaN
3.412	29.2112	-28.029	1345.126	-2.5015	0.73877	-1.0151	-29.463	178.1436	844.701	-0.95898	0.19238	-0.1333	NaN	NaN	NaN	NaN	NaN	NaN	NaN	NaN	NaN	NaN	NaN	NaN
3.414	22.2076	-43.003	1350.44286	-2.5137	0.75977	-1.0273	-28.683	208.97	826.8022	-0.94092	0.18604	-0.1377	NaN	NaN	NaN	NaN	NaN	NaN	NaN	NaN	NaN	NaN	NaN	NaN
3.416	31.009	-65.1977	1344.0226	-2.5313	0.81055	-1.0547	-53.8717	189.09474	819.059	-0.91992	0.19385	-0.13867	NaN	NaN	NaN	NaN	NaN	NaN	NaN	NaN	NaN	NaN	NaN	NaN
3.418	18.1395	-92.323	1361.1417	-2.5236	0.85376	-1.0691	1.122	215.96	797.5666	-0.89746	0.20117	-0.14258	NaN	NaN	NaN	NaN	NaN	NaN	NaN	NaN	NaN	NaN	NaN	NaN
3.42	40.1992	-90.708	1358.6364	-2.4849	0.89111	-1.0835	-20.5547	213.175	746.986	-0.86328	0.22803	-0.14111	NaN	NaN	NaN	NaN	NaN	NaN	NaN	NaN	NaN	NaN	NaN	NaN
3.422	20.7416	-77.033	1368.78	-2.3901	0.9165	-1.0874	1.572	173.296	732.487	-0.84912	0.24268	-0.13916	NaN	NaN	NaN	NaN	NaN	NaN	NaN	NaN	NaN	NaN	NaN	NaN
3.424	34.3465	-57.536	1360.858	-2.334	0.92188	-1.0811	18.874	183.8611	703.4765	-0.82422	0.2627	-0.14258	NaN	NaN	NaN	NaN	NaN	NaN	NaN	NaN	NaN	NaN	NaN	NaN
3.426	41.973	-50.275	1330.9596	-2.2148	0.9043	-1.064	-0.901	157.594	672.068	-0.80053	0.27832	-0.14698	NaN	NaN	NaN	NaN	NaN	NaN	NaN	NaN	NaN	NaN	NaN	NaN
3.428	50.7254	-36.98	1326.288	-2.1226	0.89551	-1.0473	37.8072	151.201	649.981	-0.76758	0.29297	-0.1626	NaN	NaN	NaN	NaN	NaN	NaN	NaN	NaN	NaN	NaN	NaN	NaN
3.43	33.6145	-14.082	1313.9188	-2.0366	0.88623	-1.0288	17.263	186.9789	600.01	-0.70068	0.31104	-0.15771	NaN	NaN	NaN	NaN	NaN	NaN	NaN	NaN	NaN	NaN	NaN	NaN
3.432	-5.748	16.691	1336.9666	-1.9414	0.86914	-1.002	-8.661	157.626	588.461	-0.66504	0.31641	-0.15723	NaN	NaN	NaN	NaN	NaN	NaN	NaN	NaN	NaN	NaN	NaN	NaN
3.434	22.899	23.711	1352.3201	-1.8965	0.86816	-0.99219	43.8844	155.1062	574.072	-0.57129	0.33691	-0.15479	NaN	NaN	NaN	NaN	NaN	NaN	NaN	NaN	NaN	NaN	NaN	NaN
3.436	9.081	31.9615	1328.6281	-1.8066	0.86328	-0.9707	-5.137	171.9797	508.2594	-0.50366	0.34644	-0.1482	NaN	NaN	NaN	NaN	NaN	NaN	NaN	NaN	NaN	NaN	NaN	NaN
3.438	-34.97383	26.0628	1297.905	-1.7498	0.86206	-0.95288	-24.4964	156.2921	465.2664	-0.4375	0.34863	-0.14063	NaN	NaN	NaN	NaN	NaN	NaN	NaN	NaN	NaN	NaN	NaN	NaN
3.44	-29.4925	16.3483	1278.1072	-1.6987	0.85889	-0.93115	36.7187	175.962	422.1197	-0.34473	0.34814	-0.12939	NaN	NaN	NaN	NaN	NaN	NaN	NaN	NaN	NaN	NaN	NaN	NaN
3.442	-4.804	19.5865	1263.675	-1.6484	0.84766	-0.90234	-22.2398	161.4639	351.268	-0.30029	0.34473	-0.12207	NaN	NaN	NaN	NaN	NaN	NaN	NaN	NaN	NaN	NaN	NaN	NaN
3.444	-2.391	30.3146	1258.8429	-1.6289	0.84668	-0.88477	16.495	133.7114	339.574	-0.22119	0.32568	-0.104	NaN	NaN	NaN	NaN	NaN	NaN	NaN	NaN	NaN	NaN	NaN	NaN
3.446	-17.03	19.9684	1245.6307	-1.6016	0.83008	-0.85156	18.528	141.1633	304.833	-0.16162	0.30786	-0.088135	NaN	NaN	NaN	NaN	NaN	NaN	NaN	NaN	NaN	NaN	NaN	NaN
3.448	0.805999999999997	-11.2857	1233.4098	-1.5889	0.8252	-0.82617	-36.10219	106.899	279.3791	-0.10547	0.28467	-0.072754	NaN	NaN	NaN	NaN	NaN	NaN	NaN	NaN	NaN	NaN	NaN	NaN
3.45	-0.150000000000002	-39.0527	1203.528	-1.5835	0.8208	-0.79541	28.274	109.129	280.5898	-0.030762	0.24609	-0.055176	NaN	NaN	NaN	NaN	NaN	NaN	NaN	NaN	NaN	NaN	NaN	NaN
3.452	-14.0535	-26.4304	1186.8389	-1.5776	0.80713	-0.76318	-28.9852	135.0992	235.795	0.0048828	0.22852	-0.04248	NaN	NaN	NaN	NaN	NaN	NaN	NaN	NaN	NaN	NaN	NaN	NaN
3.454	-24.8181	0.323	1180.3437	-1.5737	0.79932	-0.74951	-29.534	121.5055	194.948	0.066406	0.18213	-0.020508	NaN	NaN	NaN	NaN	NaN	NaN	NaN	NaN	NaN	NaN	NaN	NaN
3.456	-13.075	10.112	1157.9951	-1.5659	0.77979	-0.72217	-24.002	138.096	158.914	0.11206	0.14892	-0.0075682	NaN	NaN	NaN	NaN	NaN	NaN	NaN	NaN	NaN	NaN	NaN	NaN
3.458	-6.756	25.50902	1140.3394	-1.553	0.7605	-0.69848	-40.925	116.618	133.747	0.15039	0.11182	0.0073242	NaN	NaN	NaN	NaN	NaN	NaN	NaN	NaN	NaN	NaN	NaN	NaN
3.46	-22.1677	46.0673	1130.23099	-1.5391	0.7373	-0.66602	-39.856	73.1578	135.017	0.19043	0.063965	0.022949	NaN	NaN	NaN	NaN	NaN	NaN	NaN	NaN	NaN	NaN	NaN	NaN
3.462	-14.5316	46.0831	1129.9063	-1.5171	0.70947	-0.64404	-45.1684	75.129	117.088	0.21094	0.039551	0.027832	NaN	NaN	NaN	NaN	NaN	NaN	NaN	NaN	NaN	NaN	NaN	NaN
3.464	-14.367	59.3682	1119.67478	-1.5044	0.69189	-0.62842	-55.8906	52.765	118.2793	0.23486	-0.0053711	0.038574	NaN	NaN	NaN	NaN	NaN	NaN	NaN	NaN	NaN	NaN	NaN	NaN
3.466	13.506	86.806	1077.9447	-1.4663	0.66748	-0.604	-15.77	53.891	131.8117	0.25586	-0.03418	0.044677	NaN	NaN	NaN	NaN	NaN	NaN	NaN	NaN	NaN	NaN	NaN	NaN
3.468	2.444	109.892	1042.054	-1.4348	0.64722	-0.58472	-20.281	90.7534	102.075	0.26953	-0.064453	0.052734	NaN	NaN	NaN	NaN	NaN	NaN	NaN	NaN	NaN	NaN	NaN	NaN
3.47	30.463	115.894	1018.545	-1.4023	0.62109	-0.56641	-13.27	54.783	92.41095	0.28369	-0.10254	0.047852	NaN	NaN	NaN	NaN	NaN	NaN	NaN	NaN	NaN	NaN	NaN	NaN
3.472	17.814	95.9332	996.778	-1.355	0.58887	-0.54443	1.48	66.714	64.3645	0.28271	-0.11914	0.052734	NaN	NaN	NaN	NaN	NaN	NaN	NaN	NaN	NaN	NaN	NaN	NaN
3.474	8.985	110.4563	977.716	-1.3354	0.56885	-0.53467	-21.8529	65.8139	29.7298	0.28223	-0.15576	0.050293	NaN	NaN	NaN	NaN	NaN	NaN	NaN	NaN	NaN	NaN	NaN	NaN
3.476	-6.684	94.0531	968.1737	-1.2964	0.52783	-0.51025	8.958	47.4161	53.2625	0.27368	-0.18115	0.052002	NaN	NaN	NaN	NaN	NaN	NaN	NaN	NaN	NaN	NaN	NaN	NaN
3.478	-21.217	98.3468	962.9809	-1.2693	0.50464	-0.49146	2.244	65.069	53.912	0.26563	-0.21289	0.047363	NaN	NaN	NaN	NaN	NaN	NaN	NaN	NaN	NaN	NaN	NaN	NaN
3.48	-6.055	105.9947	960.0942	-1.2397	0.48096	-0.47119	-30.5624	54.3317	48.913	0.24219	-0.23877	0.044434	NaN	NaN	NaN	NaN	NaN	NaN	NaN	NaN	NaN	NaN	NaN	NaN
3.482	-19.508	109.5973	952.4012	-1.1992	0.45703	-0.4502	24.131	36.221	67.3436	0.229	-0.25146	0.046387	NaN	NaN	NaN	NaN	NaN	NaN	NaN	NaN	NaN	NaN	NaN	NaN
3.484	-24.839	109.664	938.5376	-1.1792	0.44775	-0.44287	-26.029	65.056	42.074	0.19971	-0.27686	0.040039	NaN	NaN	NaN	NaN	NaN	NaN	NaN	NaN	NaN	NaN	NaN	NaN
3.486	-39.089	94.4981	921.4308	-1.1328	0.4248	-0.41943	5.29	41.11474	56.915	0.17822	-0.28687	0.037598	NaN	NaN	NaN	NaN	NaN	NaN	NaN	NaN	NaN	NaN	NaN	NaN
3.488	-38.083	86.5237	897.008	-1.0966	0.40625	-0.39673	7.787	66.879	58.076	0.15186	-0.29736	0.036133	NaN	NaN	NaN	NaN	NaN	NaN	NaN	NaN	NaN	NaN	NaN	NaN
3.49	-39.505	96.3784	865.849	-1.0586	0.3916	-0.37598	-37.056	79.575	30.751	0.11035	-0.30615	0.036621	NaN	NaN	NaN	NaN	NaN	NaN	NaN	NaN	NaN	NaN	NaN	NaN
3.492	-47.128	99.7112	833.2398	-1.0073	0.37158	-0.35107	9.243	31.7904	29.561	0.091797	-0.30762	0.031738	NaN	NaN	NaN	NaN	NaN	NaN	NaN	NaN	NaN	NaN	NaN	NaN
3.494	-45.932	105.856	793.4267	-0.98096	0.36572	-0.33887	13.208	35.545	16.53	0.052246	-0.30029	0.025391	NaN	NaN	NaN	NaN	NaN	NaN	NaN	NaN	NaN	NaN	NaN	NaN
3.496	-58.987	114.737	758.86	-0.92725	0.3457	-0.31299	-24.688	23.021	14.3467	0.025879	-0.29272	0.026367	NaN	NaN	NaN	NaN	NaN	NaN	NaN	NaN	NaN	NaN	NaN	NaN
3.498	-63.9544	127.165	739.5152	-0.88549	0.33105	-0.28979	9.619	4.492	39.23483	0.00048828	-0.27686	0.01709	NaN	NaN	NaN	NaN	NaN	NaN	NaN	NaN	NaN	NaN	NaN	NaN
3.5	-69.7968	121.411	720.3206	-0.84131	0.32324	-0.26904	-39.4516	35.054	48.0119	-0.019043	-0.26514	0.01123	NaN	NaN	NaN	NaN	NaN	NaN	NaN	NaN	NaN	NaN	NaN	NaN
3.502	-62.3324	120.3559	710.92093	-0.79102	0.31006	-0.24072	-36.033	13.064	59.904	-0.030273	-0.25781	0.0019531	NaN	NaN	NaN	NaN	NaN	NaN	NaN	NaN	NaN	NaN	NaN	NaN
3.504	-64.271	127.1332	680.72403	-0.76123	0.30469	-0.22949	-7.178	31.659	49.0865	-0.044922	-0.23291	0.0014648	NaN	NaN	NaN	NaN	NaN	NaN	NaN	NaN	NaN	NaN	NaN	NaN
3.506	-64.3668	140.951	651.33122	-0.70752	0.29004	-0.20215	-56.4854	58.066	10.6382	-0.04834	-0.21607	-0.0056153	NaN	NaN	NaN	NaN	NaN	NaN	NaN	NaN	NaN	NaN	NaN	NaN
3.508	-45.812	131.961	630.7579	-0.66577	0.27563	-0.19726	-22.944	26.2241	13.3713	-0.048828	-0.19971	-0.013184	NaN	NaN	NaN	NaN	NaN	NaN	NaN	NaN	NaN	NaN	NaN	NaN
3.51	-55.571	141.89	579.349	-0.62109	0.26855	-0.17188	-27.91	38.678	12.4898	-0.046387	-0.18213	-0.015625	NaN	NaN	NaN	NaN	NaN	NaN	NaN	NaN	NaN	NaN	NaN	NaN
3.512	-33.639	133.699	533.988	-0.55908	0.24707	-0.14404	-56.0902	16.622	20.6379	-0.041992	-0.17188	-0.016602	NaN	NaN	NaN	NaN	NaN	NaN	NaN	NaN	NaN	NaN	NaN	NaN
3.514	-51.394	128.2988	516.572	-0.52686	0.24268	-0.13135	-17.087	-9.524	47.0559	-0.025391	-0.15479	-0.029297	NaN	NaN	NaN	NaN	NaN	NaN	NaN	NaN	NaN	NaN	NaN	NaN
3.516	-24.257	120.602	494.1618	-0.47852	0.22314	-0.11377	-50.2472	29.842	29.562	-0.0058594	-0.13965	-0.032227	NaN	NaN	NaN	NaN	NaN	NaN	NaN	NaN	NaN	NaN	NaN	NaN
3.518	-37.567	110.954	476.8095	-0.44214	0.20777	-0.095215	-21.265	7.847	49.1783	0.0053711	-0.13379	-0.035645	NaN	NaN	NaN	NaN	NaN	NaN	NaN	NaN	NaN	NaN	NaN	NaN
3.52	-7.55099999999999	116.884	445.7033	-0.40674	0.19629	-0.07959	8.757	27.6316	45.6915	0.027344	-0.12256	-0.041504	NaN	NaN	NaN	NaN	NaN	NaN	NaN	NaN	NaN	NaN	NaN	NaN
3.522	-13.089	111.587	427.84428	-0.35889	0.18311	-0.063477	-52.7812	51.5423	12.3862	0.041015	-0.11353	-0.046631	NaN	NaN	NaN	NaN	NaN	NaN	NaN	NaN	NaN	NaN	NaN	NaN
3.524	-14.08	117.41072	407.9683	-0.33691	0.17773	-0.055664	-22.855	18.9232	23.119	0.050293	-0.10693	-0.053711	NaN	NaN	NaN	NaN	NaN	NaN	NaN	NaN	NaN	NaN	NaN	NaN
3.526	-12.934	112.974	378.8193	-0.29395	0.16797	-0.036133	-19.408	27.0763	10.093	0.064941	-0.10205	-0.0625	NaN	NaN	NaN	NaN	NaN	NaN	NaN	NaN	NaN	NaN	NaN	NaN
3.528	-11.637	119.57	354.69745	-0.26391	0.16333	-0.024658	-30.717	12.2859	33.2986	0.068359	-0.092773	-0.067871	NaN	NaN	NaN	NaN	NaN	NaN	NaN	NaN	NaN	NaN	NaN	NaN
3.53	-12.398	116.07	346.5056	-0.23438	0.16064	-0.012207	21.889	-19.8558	57.8251	0.07666	-0.080078	-0.071777	NaN	NaN	NaN	NaN	NaN	NaN	NaN	NaN	NaN	NaN	NaN	NaN
3.532	-29.285	111.453	323.5729	-0.19678	0.15186	0	-25.708	13.394	36.667	0.076661	-0.075684	-0.079346	NaN	NaN	NaN	NaN	NaN	NaN	NaN	NaN	NaN	NaN	NaN	NaN
3.534	-11.304	117.498	276.7257	-0.17627	0.14844	0.0039063	-11.784	-10.4952	39.2316	0.076172	-0.064941	-0.087891	NaN	NaN	NaN	NaN	NaN	NaN	NaN	NaN	NaN	NaN	NaN	NaN
3.536	-38.729	108.6831	245.831	-0.14355	0.14648	0.024414	3.834	11.6974	40.8531	0.078613	-0.055664	-0.099121	NaN	NaN	NaN	NaN	NaN	NaN	NaN	NaN	NaN	NaN	NaN	NaN
3.538	-35.112	102.7579	233.2973	-0.098633	0.14502	0.036621	-33.6953	47.381	14.809	0.080078	-0.055176	-0.10352	NaN	NaN	NaN	NaN	NaN	NaN	NaN	NaN	NaN	NaN	NaN	NaN
3.54	-32.455	91.7086	220.947	-0.077637	0.146	0.042969	11.378	8.5995	22.5883	0.07666	-0.04248	-0.10938	NaN	NaN	NaN	NaN	NaN	NaN	NaN	NaN	NaN	NaN	NaN	NaN
3.542	-23.377	91.5046	192.3779	-0.035156	0.14844	0.060547	8.085	30.3054	0.584	0.072998	-0.036865	-0.11865	NaN	NaN	NaN	NaN	NaN	NaN	NaN	NaN	NaN	NaN	NaN	NaN
3.544	-14.462	86.236	171.24	-0.0034181	0.14673	0.067383	-28.524	11.8063	9.23	0.062988	-0.030762	-0.12842	NaN	NaN	NaN	NaN	NaN	NaN	NaN	NaN	NaN	NaN	NaN	NaN
3.546	-22.694	86.6498	158.1089	0.031738	0.14551	0.083008	11.56	-21.6922	34.1785	0.053223	-0.030273	-0.13867	NaN	NaN	NaN	NaN	NaN	NaN	NaN	NaN	NaN	NaN	NaN	NaN
3.548	-37.1768	94.2677	159.6842	0.06543	0.13623	0.094727	-24.943	34.7468	12.153	0.045898	-0.03125	-0.14355	NaN	NaN	NaN	NaN	NaN	NaN	NaN	NaN	NaN	NaN	NaN	NaN
3.55	-46.006	96.89	127.5059	0.085449	0.13281	0.10156	-35.1853	16.1299	45.4154	0.02002	-0.024902	-0.14355	NaN	NaN	NaN	NaN	NaN	NaN	NaN	NaN	NaN	NaN	NaN	NaN
3.552	-44.182	87.9355	131.6378	0.11963	0.12012	0.12158	-8.93	16.406	56.862	0.003418	-0.011231	-0.15918	NaN	NaN	NaN	NaN	NaN	NaN	NaN	NaN	NaN	NaN	NaN	NaN
3.554	-51	60.4479	121.8988	0.14282	0.10913	0.13232	-42.8415	26.9263	44.003	-0.016602	-0.0063477	-0.16895	NaN	NaN	NaN	NaN	NaN	NaN	NaN	NaN	NaN	NaN	NaN	NaN
3.556	-57.3304	49.0425	112.9647	0.16211	0.099609	0.14404	0.136000000000003	-18.098	65.5679	-0.047363	-0.0014648	-0.17871	NaN	NaN	NaN	NaN	NaN	NaN	NaN	NaN	NaN	NaN	NaN	NaN
3.558	-44.891	50.4284	101.0441	0.18994	0.081543	0.15918	-25.1623	4.252	59.9492	-0.059082	0.0058594	-0.18408	NaN	NaN	NaN	NaN	NaN	NaN	NaN	NaN	NaN	NaN	NaN	NaN
3.56	-64.1693	55.492	82.638	0.20361	0.071289	0.16162	-62.4084	-7.7943	69.442	-0.10107	0.01123	-0.19336	NaN	NaN	NaN	NaN	NaN	NaN	NaN	NaN	NaN	NaN	NaN	NaN
3.562	-28.389	57.4172	62.4228	0.22949	0.057129	0.17725	-13.199	-42.297	97.178	-0.13697	0.02124	-0.20361	NaN	NaN	NaN	NaN	NaN	NaN	NaN	NaN	NaN	NaN	NaN	NaN
3.564	-31.774	60.2642	40.194	0.24536	0.03833	0.18946	-44.208	-7.1886	111.471	-0.17188	0.030762	-0.21582	NaN	NaN	NaN	NaN	NaN	NaN	NaN	NaN	NaN	NaN	NaN	NaN
3.566	-12.14	59.407	19.508	0.26123	0.021484	0.19727	-4.036	-30.5258	173.0516	-0.2334	0.044922	-0.23926	NaN	NaN	NaN	NaN	NaN	NaN	NaN	NaN	NaN	NaN	NaN	NaN
3.568	-6.506	55.8949	36.579	0.27783	0.00048828	0.20654	1.119	5.2492	248.8618	-0.26807	0.046875	-0.24707	NaN	NaN	NaN	NaN	NaN	NaN	NaN	NaN	NaN	NaN	NaN	NaN
3.57	-4.082	55.4172	51.0812	0.28613	-0.011719	0.2085	-41.5712	83.5761	331.3109	-0.36084	0.056641	-0.26025	NaN	NaN	NaN	NaN	NaN	NaN	NaN	NaN	NaN	NaN	NaN	NaN
3.572	-15.652	47.636	53.3276	0.29688	-0.029785	0.21924	-13.521	90.183098	517.122	-0.46192	0.065186	-0.26319	NaN	NaN	NaN	NaN	NaN	NaN	NaN	NaN	NaN	NaN	NaN	NaN
3.574	-28.511	44.3435	54.9694	0.3064	-0.043701	0.21656	-80.391	119.537	625.095	-0.5957	0.07373	-0.26367	NaN	NaN	NaN	NaN	NaN	NaN	NaN	NaN	NaN	NaN	NaN	NaN
3.576	-13.699	32.0408	44.8357	0.31494	-0.054688	0.21729	-122.3918	106.089	749.65	-0.81641	0.0625	-0.27344	NaN	NaN	NaN	NaN	NaN	NaN	NaN	NaN	NaN	NaN	NaN	NaN
3.578	-24.604	40.3258	26.7181	0.32373	-0.072266	0.21338	-6.04899999999999	53.247	810.307	-0.9541	0.046387	-0.26758	NaN	NaN	NaN	NaN	NaN	NaN	NaN	NaN	NaN	NaN	NaN	NaN
3.58	-20.866	41.5221	10.77	0.32617	-0.078613	0.20654	17.314	49.51089	866.7737	-1.2422	0.021484	-0.27637	NaN	NaN	NaN	NaN	NaN	NaN	NaN	NaN	NaN	NaN	NaN	NaN
3.582	-30.579	43.595	19.665	0.32764	-0.091309	0.19971	-44.094	-23.202	979.873	-1.4653	0.033691	-0.28614	NaN	NaN	NaN	NaN	NaN	NaN	NaN	NaN	NaN	NaN	NaN	NaN
3.584	-17.301	39.41	18.4658	0.32349	-0.10595	0.19165	-57.098	-18.975	1019.897	-1.6655	0.07373	-0.30811	NaN	NaN	NaN	NaN	NaN	NaN	NaN	NaN	NaN	NaN	NaN	NaN
3.586	-7.641	23.4817	19.2425	0.31152	-0.11475	0.17773	-53.461	11.611	989.705	-1.894	0.16846	-0.34033	NaN	NaN	NaN	NaN	NaN	NaN	NaN	NaN	NaN	NaN	NaN	NaN
3.588	-7.108	13.024	23.9536	0.2998	-0.12744	0.17236	-10.293	-58.082	974.562	-1.9819	0.22803	-0.3457	NaN	NaN	NaN	NaN	NaN	NaN	NaN	NaN	NaN	NaN	NaN	NaN
3.59	-24.632	6.569	43.2666	0.28711	-0.12793	0.16455	-28.925	-71.3073	936.027	-2.105	0.34131	-0.38232	NaN	NaN	NaN	NaN	NaN	NaN	NaN	NaN	NaN	NaN	NaN	NaN
3.592	-18.82	9.782	50.719	0.25928	-0.13428	0.15576	-44.5906	-120.189	902.55	-2.1374	0.43335	-0.41943	NaN	NaN	NaN	NaN	NaN	NaN	NaN	NaN	NaN	NaN	NaN	NaN
3.594	-19.867	19.7767	40.0278	0.2378	-0.13111	0.15064	23.721	-151.7108	914.533	-2.1226	0.5083	-0.45557	NaN	NaN	NaN	NaN	NaN	NaN	NaN	NaN	NaN	NaN	NaN	NaN
3.596	-26.395	26.2875	13.6887	0.21045	-0.12158	0.13965	-17.901	-88.018	869.2384	-2.0176	0.55371	-0.49219	NaN	NaN	NaN	NaN	NaN	NaN	NaN	NaN	NaN	NaN	NaN	NaN
3.598	-29.681	21.9504	27.33169	0.17773	-0.10742	0.12207	3.2938	-95.06	875.08	-1.9395	0.55469	-0.50977	NaN	NaN	NaN	NaN	NaN	NaN	NaN	NaN	NaN	NaN	NaN	NaN
3.6	-28.054	17.8218	30.4562	0.1626	-0.093262	0.11963	30.808	-44.908	882.039	-1.7549	0.5332	-0.53516	NaN	NaN	NaN	NaN	NaN	NaN	NaN	NaN	NaN	NaN	NaN	NaN
3.602	-46.0071	23.5492	9.1403	0.12549	-0.072266	0.10742	-3.269	23.57	839.6598	-1.5739	0.50854	-0.55298	NaN	NaN	NaN	NaN	NaN	NaN	NaN	NaN	NaN	NaN	NaN	NaN
3.604	-50.965	31.8831	-3.333	0.093261	-0.057861	0.099366	21.868	36.84	848.304	-1.3784	0.47803	-0.56982	NaN	NaN	NaN	NaN	NaN	NaN	NaN	NaN	NaN	NaN	NaN	NaN
3.606	-48.6096	38.1131	19.0331	0.069824	-0.040039	0.089844	-23.043	84.307	827.209	-1.1191	0.4375	-0.58691	NaN	NaN	NaN	NaN	NaN	NaN	NaN	NaN	NaN	NaN	NaN	NaN
3.608	-22.23	28.6329	35.9979	0.038574	-0.018555	0.080566	-79.146	19.736	857.733	-1.0156	0.4209	-0.59766	NaN	NaN	NaN	NaN	NaN	NaN	NaN	NaN	NaN	NaN	NaN	NaN
3.61	-26.958	30.6335	21.188	0.024902	-0.0053711	0.082031	2.7996	-17.913	893.727	-0.85693	0.40283	-0.61865	NaN	NaN	NaN	NaN	NaN	NaN	NaN	NaN	NaN	NaN	NaN	NaN
3.612	-18.809	30.2626	23.3805	-0.0039063	0.011719	0.075684	6.1049	-67.115	866.708	-0.78418	0.39721	-0.6377	NaN	NaN	NaN	NaN	NaN	NaN	NaN	NaN	NaN	NaN	NaN	NaN
3.614	-28.954	22.2221	19.8441	-0.02417	0.020752	0.070556	18.8777	-141.76	882.272	-0.73975	0.40479	-0.66162	NaN	NaN	NaN	NaN	NaN	NaN	NaN	NaN	NaN	NaN	NaN	NaN
3.616	-21.339	23.3445	30.0265	-0.047852	0.029297	0.068359	42.196	-160.0179	907.673	-0.71094	0.38184	-0.67676	NaN	NaN	NaN	NaN	NaN	NaN	NaN	NaN	NaN	NaN	NaN	NaN
3.618	-19.829	31.9309	16.10997	-0.063965	0.041504	0.065918	21.2768	-183.043	928.613	-0.72266	0.37598	-0.67188	NaN	NaN	NaN	NaN	NaN	NaN	NaN	NaN	NaN	NaN	NaN	NaN
3.62	-30.425	25.8379	-2.3818	-0.07373	0.047363	0.067383	37.6174	-245.221	981.87	-0.8042	0.38916	-0.67529	NaN	NaN	NaN	NaN	NaN	NaN	NaN	NaN	NaN	NaN	NaN	NaN
3.622	-9.625	17.3335	12.8534	-0.086426	0.05957	0.063477	71.602	-227.297	993.3901	-0.88794	0.41992	-0.68872	NaN	NaN	NaN	NaN	NaN	NaN	NaN	NaN	NaN	NaN	NaN	NaN
3.624	-20.854	7.05487	18.574	-0.092774	0.06958	0.060791	42.154	-250.501	1044.2624	-0.97412	0.46826	-0.6958	NaN	NaN	NaN	NaN	NaN	NaN	NaN	NaN	NaN	NaN	NaN	NaN
3.626	-39.341	8.1636	32.0232	-0.099121	0.08252	0.061035	64.888	-252.959	1118.9807	-1.0996	0.52734	-0.7085	NaN	NaN	NaN	NaN	NaN	NaN	NaN	NaN	NaN	NaN	NaN	NaN
3.628	-34.38	25.6139	34.9885	-0.1001	0.09375	0.057617	22.2885	-217.512	1139.9978	-1.1675	0.55615	-0.70459	NaN	NaN	NaN	NaN	NaN	NaN	NaN	NaN	NaN	NaN	NaN	NaN
3.63	-12.328	22.69465	37.158	-0.10547	0.10352	0.057129	-32.0224	-212.518	1160.444	-1.2959	0.62109	-0.72852	NaN	NaN	NaN	NaN	NaN	NaN	NaN	NaN	NaN	NaN	NaN	NaN
3.632	-18.761	23.9371	16.6866	-0.10107	0.11963	0.046387	8.3139	-156.485	1158.178	-1.3875	0.66529	-0.73999	NaN	NaN	NaN	NaN	NaN	NaN	NaN	NaN	NaN	NaN	NaN	NaN
3.634	-19.441	35.9261	11.3093	-0.096925	0.12964	0.036377	12.8241	-115.775	1114.246	-1.479	0.70557	-0.74658	NaN	NaN	NaN	NaN	NaN	NaN	NaN	NaN	NaN	NaN	NaN	NaN
3.636	-9.439	31.0777	13.5982	-0.085449	0.1416	0.038086	13.6896	-110.294	1151.145	-1.6172	0.76563	-0.74707	NaN	NaN	NaN	NaN	NaN	NaN	NaN	NaN	NaN	NaN	NaN	NaN
3.638	-9.156	31.2553	20.4417	-0.071777	0.14893	0.034668	55.045	-65.039	1171.409	-1.689	0.79541	-0.74756	NaN	NaN	NaN	NaN	NaN	NaN	NaN	NaN	NaN	NaN	NaN	NaN
3.64	-13.462	32.0896	24.92975	-0.065918	0.1543	0.037598	44.94	-85.669	1195.807	-1.8242	0.83691	-0.74023	NaN	NaN	NaN	NaN	NaN	NaN	NaN	NaN	NaN	NaN	NaN	NaN
3.642	-42.5815	29.0475	18.2551	-0.067383	0.16113	0.031738	83.049	-82.338	1211.052	-1.9209	0.85157	-0.74854	NaN	NaN	NaN	NaN	NaN	NaN	NaN	NaN	NaN	NaN	NaN	NaN
3.644	-28.915	23.71336	30.2944	-0.062255	0.1709	0.030517	41.548	-76.695	1204.914	-2.0059	0.84961	-0.75977	NaN	NaN	NaN	NaN	NaN	NaN	NaN	NaN	NaN	NaN	NaN	NaN
3.646	-16.679	13.16896	43.194	-0.059082	0.17236	0.027344	11.5134	-135.832	1263.2366	-2.1167	0.84326	-0.77881	NaN	NaN	NaN	NaN	NaN	NaN	NaN	NaN	NaN	NaN	NaN	NaN
3.648	-19.848	29.081	29.90272	-0.055664	0.1792	0.026367	58.5	-111.4442	1285.873	-2.1961	0.84399	-0.80786	NaN	NaN	NaN	NaN	NaN	NaN	NaN	NaN	NaN	NaN	NaN	NaN
3.65	-30.324	30.0228	10.4272	-0.060547	0.18408	0.022461	23.4139	-111.582	1274.002	-2.2729	0.84912	-0.83545	NaN	NaN	NaN	NaN	NaN	NaN	NaN	NaN	NaN	NaN	NaN	NaN
3.652	-41.3028	28.6728	20.5405	-0.0625	0.19141	0.012207	20.8106	-122.8083	1324.131	-2.3418	0.86719	-0.88867	NaN	NaN	NaN	NaN	NaN	NaN	NaN	NaN	NaN	NaN	NaN	NaN
3.654	-11.481	23.76892	47.269282	-0.068603	0.19873	0.0065918	42.8684	-105.95	1326.109	-2.3633	0.88477	-0.91016	NaN	NaN	NaN	NaN	NaN	NaN	NaN	NaN	NaN	NaN	NaN	NaN
3.656	-40.4914	25.0487	65.4588	-0.072754	0.20703	0	-2.901	-151.4504	1345.485	-2.377	0.89551	-0.94531	NaN	NaN	NaN	NaN	NaN	NaN	NaN	NaN	NaN	NaN	NaN	NaN
3.658	-27.569	14.86	91.5097	-0.084961	0.22021	-0.0078125	19.57425	-159.506	1374.658	-2.3598	0.88037	-0.97168	NaN	NaN	NaN	NaN	NaN	NaN	NaN	NaN	NaN	NaN	NaN	NaN
3.66	-28.399	19.6249	114.314	-0.09375	0.21826	-0.017578	25.5711	-158.183	1369.042	-2.3335	0.8501	-1.0181	NaN	NaN	NaN	NaN	NaN	NaN	NaN	NaN	NaN	NaN	NaN	NaN
3.662	-8.09399999999999	28.66852	149.534	-0.11719	0.22656	-0.02832	55.301	-174.511	1368.237	-2.2949	0.77344	-1.0859	NaN	NaN	NaN	NaN	NaN	NaN	NaN	NaN	NaN	NaN	NaN	NaN
3.664	-51.423	42.8881	185.164	-0.16504	0.2334	-0.043457	84.108	-124.571	1332.288	-2.271	0.73096	-1.1187	NaN	NaN	NaN	NaN	NaN	NaN	NaN	NaN	NaN	NaN	NaN	NaN
3.666	-73.236	39.4606	277.0193	-0.19775	0.23047	-0.05127	29.8937	-73.698	1289.764	-2.2266	0.65918	-1.1484	NaN	NaN	NaN	NaN	NaN	NaN	NaN	NaN	NaN	NaN	NaN	NaN
3.668	-58.25	13.1403	326.1984	-0.27637	0.21777	-0.074219	31.989	-34.3287	1299.888	-2.1921	0.62378	-1.1628	NaN	NaN	NaN	NaN	NaN	NaN	NaN	NaN	NaN	NaN	NaN	NaN
3.67	-67.409	-8.853	390.9612	-0.35156	0.20898	-0.098876	54.365	13.441	1304.188	-2.1777	0.60156	-1.1758	NaN	NaN	NaN	NaN	NaN	NaN	NaN	NaN	NaN	NaN	NaN	NaN
3.672	-21.713	-25.526	446.182	-0.43311	0.20459	-0.12744	-2.10608	7.136	1322.42177	-2.168	0.60156	-1.207	NaN	NaN	NaN	NaN	NaN	NaN	NaN	NaN	NaN	NaN	NaN	NaN
3.674	-35.2438	-10.392	559.435	-0.5498	0.20117	-0.15527	41.323	4.114	1358.112	-2.168	0.61914	-1.2227	NaN	NaN	NaN	NaN	NaN	NaN	NaN	NaN	NaN	NaN	NaN	NaN
3.676	-14.909	31.421	689.62	-0.62793	0.19238	-0.16455	52.084	21.258	1320.806	-2.1641	0.67188	-1.2422	NaN	NaN	NaN	NaN	NaN	NaN	NaN	NaN	NaN	NaN	NaN	NaN
3.678	-4.9508	43.0394	783.593	-0.81787	0.15576	-0.19629	0.9604	-25.167	1325.043	-2.1533	0.72119	-1.2574	NaN	NaN	NaN	NaN	NaN	NaN	NaN	NaN	NaN	NaN	NaN	NaN
3.68	-5.1622	46.1808	861.641	-0.99539	0.12378	-0.22925	42.919	11.54	1329.423	-2.1284	0.76514	-1.2651	NaN	NaN	NaN	NaN	NaN	NaN	NaN	NaN	NaN	NaN	NaN	NaN
3.682	14.2319	29.36	959.437	-1.1772	0.10889	-0.25977	21.0473	13.396	1314.713	-2.0601	0.80322	-1.2612	NaN	NaN	NaN	NaN	NaN	NaN	NaN	NaN	NaN	NaN	NaN	NaN
3.684	38.298	13.174	1015.5408	-1.4292	0.11035	-0.29785	38.821	-11.611	1342.1333	-2.0176	0.80469	-1.2578	NaN	NaN	NaN	NaN	NaN	NaN	NaN	NaN	NaN	NaN	NaN	NaN
3.686	39.591	8.6398	1072.178	-1.5522	0.11621	-0.31152	90.415	7.6217	1332.819	-1.9097	0.79932	-1.2349	NaN	NaN	NaN	NaN	NaN	NaN	NaN	NaN	NaN	NaN	NaN	NaN
3.688	23.433	14.6467	1105.673	-1.7773	0.1582	-0.354	28.768	-20.531	1353.1978	-1.8266	0.7876	-1.2104	NaN	NaN	NaN	NaN	NaN	NaN	NaN	NaN	NaN	NaN	NaN	NaN
3.69	41.89771	-2.642	1105.601	-1.9256	0.20948	-0.37817	69.592	-32.853	1393.116	-1.7476	0.771	-1.1782	NaN	NaN	NaN	NaN	NaN	NaN	NaN	NaN	NaN	NaN	NaN	NaN
3.692	32.75384	-34.158	1088.34	-2.0464	0.26855	-0.39404	52.877	-11.641	1366.366	-1.6597	0.75732	-1.1265	NaN	NaN	NaN	NaN	NaN	NaN	NaN	NaN	NaN	NaN	NaN	NaN
3.694	36.086	-60.634	1057.875	-2.1382	0.35205	-0.41846	31.0626	-21.039	1325.472	-1.623	0.75391	-1.1025	NaN	NaN	NaN	NaN	NaN	NaN	NaN	NaN	NaN	NaN	NaN	NaN
3.696	45.451	-96.679	1033.9288	-2.1563	0.38379	-0.42578	64.554	19.6071	1307.098	-1.5659	0.74854	-1.0522	NaN	NaN	NaN	NaN	NaN	NaN	NaN	NaN	NaN	NaN	NaN	NaN
3.698	42.821	-105.116	1024.703	-2.1348	0.44922	-0.43359	24.6788	56.523	1279.652	-1.5369	0.74439	-1.0198	NaN	NaN	NaN	NaN	NaN	NaN	NaN	NaN	NaN	NaN	NaN	NaN
3.7	38.389	-113.606	1039.3461	-2.0737	0.48291	-0.42383	35.397	88.278	1298.6747	-1.5073	0.74463	-0.99072	NaN	NaN	NaN	NaN	NaN	NaN	NaN	NaN	NaN	NaN	NaN	NaN
3.702	36.964	-86.2149	1010.9407	-1.9902	0.50146	-0.4082	41.83	140.949	1278.437	-1.4761	0.73486	-0.95264	NaN	NaN	NaN	NaN	NaN	NaN	NaN	NaN	NaN	NaN	NaN	NaN
3.704	77.795	-56.324	1006.2373	-1.8496	0.52051	-0.36719	18.2889	141.76	1270.838	-1.4595	0.73096	-0.93701	NaN	NaN	NaN	NaN	NaN	NaN	NaN	NaN	NaN	NaN	NaN	NaN
3.706	55.047	-39.533	1011.274	-1.771	0.52783	-0.35303	53.586	124.692	1265.9017	-1.4292	0.71045	-0.8999	NaN	NaN	NaN	NaN	NaN	NaN	NaN	NaN	NaN	NaN	NaN	NaN
3.708	67.594	-29.118	1035.42	-1.625	0.53516	-0.32031	48.295	123.385	1214.597	-1.4151	0.69678	-0.87403	NaN	NaN	NaN	NaN	NaN	NaN	NaN	NaN	NaN	NaN	NaN	NaN
3.71	43.349	-30.415	1055.204	-1.5303	0.54468	-0.3086	26.8861	97.0977	1201.1446	-1.4004	0.68359	-0.84668	NaN	NaN	NaN	NaN	NaN	NaN	NaN	NaN	NaN	NaN	NaN	NaN
3.712	45.9354	-35.076	1080.5609	-1.4492	0.56348	-0.30078	49.44	120.709	1196.4441	-1.3804	0.66455	-0.81787	NaN	NaN	NaN	NaN	NaN	NaN	NaN	NaN	NaN	NaN	NaN	NaN
3.714	22.3329	-42.763	1077.323	-1.3564	0.60547	-0.29102	9.3059	137.448	1173.6994	-1.3784	0.6499	-0.80029	NaN	NaN	NaN	NaN	NaN	NaN	NaN	NaN	NaN	NaN	NaN	NaN
3.716	9.781	-74.8296	1067.931	-1.3125	0.625	-0.28467	-1.483	103.7908	1182.09723	-1.3647	0.6333	-0.76025	NaN	NaN	NaN	NaN	NaN	NaN	NaN	NaN	NaN	NaN	NaN	NaN
3.718	12.977	-99.8269	1030.2335	-1.2266	0.66016	-0.28223	33.8646	120.4518	1160.6899	-1.3542	0.61548	-0.73901	NaN	NaN	NaN	NaN	NaN	NaN	NaN	NaN	NaN	NaN	NaN	NaN
3.72	-24.236	-143.0396	1025.926	-1.1565	0.68189	-0.28295	-37.179	119.62	1136.939	-1.3394	0.60205	-0.71338	NaN	NaN	NaN	NaN	NaN	NaN	NaN	NaN	NaN	NaN	NaN	NaN
3.722	-18.217	-171.721	1051.012	-1.0933	0.7085	-0.28955	10.0871	131.573	1139.9337	-1.3179	0.58789	-0.67725	NaN	NaN	NaN	NaN	NaN	NaN	NaN	NaN	NaN	NaN	NaN	NaN
3.724	-34.2137	-209.863	1050.044	-1.0195	0.74023	-0.30859	-0.692	172.352	1103.6151	-1.3057	0.5791	-0.66406	NaN	NaN	NaN	NaN	NaN	NaN	NaN	NaN	NaN	NaN	NaN	NaN
3.726	-25.6608	-207.133	1057.902	-0.98877	0.74414	-0.31934	-36.4603	157.3437	1090.966	-1.2715	0.55371	-0.63281	NaN	NaN	NaN	NaN	NaN	NaN	NaN	NaN	NaN	NaN	NaN	NaN
3.728	-23.169	-190.999	1078.429	-0.93164	0.72754	-0.34863	15.351	171.351	1069.94	-1.2434	0.52832	-0.60718	NaN	NaN	NaN	NaN	NaN	NaN	NaN	NaN	NaN	NaN	NaN	NaN
3.73	-45.659	-168.605	1106.939	-0.90112	0.70483	-0.37256	-29.344	196.284	1009.97354	-1.2148	0.51074	-0.57617	NaN	NaN	NaN	NaN	NaN	NaN	NaN	NaN	NaN	NaN	NaN	NaN
3.732	-41.105	-134.7196	1116.479	-0.89404	0.68408	-0.39941	-22.2379	186.6189	1014.387	-1.1753	0.49561	-0.54541	NaN	NaN	NaN	NaN	NaN	NaN	NaN	NaN	NaN	NaN	NaN	NaN
3.734	-55.427	-95.6395	1124.55962	-0.90186	0.66064	-0.43896	17.229	216.3632	1009.1704	-1.1621	0.48438	-0.5293	NaN	NaN	NaN	NaN	NaN	NaN	NaN	NaN	NaN	NaN	NaN	NaN
3.736	-49.7142	-57.766	1151.699	-0.90527	0.65723	-0.45117	-27.026	247.1199	964.466	-1.1362	0.47607	-0.49365	NaN	NaN	NaN	NaN	NaN	NaN	NaN	NaN	NaN	NaN	NaN	NaN
3.738	-48.9364	-63.945	1168.043	-0.92676	0.66016	-0.49023	-15.848	238.4033	927.25	-1.1172	0.46534	-0.46729	NaN	NaN	NaN	NaN	NaN	NaN	NaN	NaN	NaN	NaN	NaN	NaN
3.74	-49.7798	-74.647	1169.9031	-0.95947	0.67334	-0.51758	-20.201	258.223	865.959	-1.0957	0.45801	-0.44238	NaN	NaN	NaN	NaN	NaN	NaN	NaN	NaN	NaN	NaN	NaN	NaN
3.742	-57.154	-79.576	1163.175	-1.0098	0.67969	-0.54492	-46.1354	226.397	847.356	-1.0659	0.44873	-0.4126	NaN	NaN	NaN	NaN	NaN	NaN	NaN	NaN	NaN	NaN	NaN	NaN
3.744	-56.096	-76.784	1160.933	-1.104	0.66846	-0.57178	-41.734	206.053	857.456	-1.0425	0.44385	-0.39502	NaN	NaN	NaN	NaN	NaN	NaN	NaN	NaN	NaN	NaN	NaN	NaN
3.746	-12.136	-95.743	1164.951	-1.1616	0.65723	-0.57031	-52.9912	222.054	812.7273	-1.0015	0.43018	-0.36865	NaN	NaN	NaN	NaN	NaN	NaN	NaN	NaN	NaN	NaN	NaN	NaN
3.748	-43.329	-117.5703	1182.565	-1.3081	0.63721	-0.56201	-39.262	176.2284	815.137	-0.96435	0.4253	-0.34301	NaN	NaN	NaN	NaN	NaN	NaN	NaN	NaN	NaN	NaN	NaN	NaN
3.75	-28.205	-131.956	1203.51735	-1.4507	0.62988	-0.55811	-14.296	188.0193	817.5064	-0.92432	0.4165	-0.31738	NaN	NaN	NaN	NaN	NaN	NaN	NaN	NaN	NaN	NaN	NaN	NaN
3.752	-36.035	-155.145	1241.6245	-1.6128	0.63135	-0.55811	-55.6072	195.684	787.8862	-0.87109	0.40332	-0.28711	NaN	NaN	NaN	NaN	NaN	NaN	NaN	NaN	NaN	NaN	NaN	NaN
3.754	-17.643	-156.126	1260.845	-1.8286	0.66064	-0.56006	-16.743	183.509	747.563	-0.83838	0.40283	-0.27832	NaN	NaN	NaN	NaN	NaN	NaN	NaN	NaN	NaN	NaN	NaN	NaN
3.756	-29.26	-146.997	1278.497	-1.9316	0.68164	-0.56348	-18.213	219.701	683.829	-0.77344	0.39258	-0.25391	NaN	NaN	NaN	NaN	NaN	NaN	NaN	NaN	NaN	NaN	NaN	NaN
3.758	-34.492	-113.414	1270.403	-2.1362	0.73877	-0.57861	-54.4031	188.311	629.861	-0.72192	0.3894	-0.23193	NaN	NaN	NaN	NaN	NaN	NaN	NaN	NaN	NaN	NaN	NaN	NaN
3.76	-31.671	-99.3927	1269.202	-2.2866	0.79883	-0.58692	-18.559	155.6222	598.2	-0.66162	0.38379	-0.20801	NaN	NaN	NaN	NaN	NaN	NaN	NaN	NaN	NaN	NaN	NaN	NaN
3.762	-41.538	-95.4338	1272.8644	-2.4312	0.8667	-0.604	-55.2358	183.9541	539.5377	-0.57422	0.38477	-0.1748	NaN	NaN	NaN	NaN	NaN	NaN	NaN	NaN	NaN	NaN	NaN	NaN
3.764	-35.143	-82.182	1277.3921	-2.5933	0.96533	-0.62744	-20.67	156.122	503.4621	-0.52637	0.37695	-0.16797	NaN	NaN	NaN	NaN	NaN	NaN	NaN	NaN	NaN	NaN	NaN	NaN
3.766	-47.491	-78.012	1262.246	-2.6694	1.0161	-0.63574	-16.686	165.9913	480.91	-0.42383	0.37109	-0.1416	NaN	NaN	NaN	NaN	NaN	NaN	NaN	NaN	NaN	NaN	NaN	NaN
3.768	-33.828	-71.178	1251.2611	-2.7715	1.1191	-0.65625	-58.1137	179.065	430.6035	-0.3396	0.35767	-0.11865	NaN	NaN	NaN	NaN	NaN	NaN	NaN	NaN	NaN	NaN	NaN	NaN
3.77	-52.727	-72.2738	1232.778	-2.7949	1.1816	-0.66748	-18.586	157.313	398.34461	-0.25439	0.34082	-0.095215	NaN	NaN	NaN	NaN	NaN	NaN	NaN	NaN	NaN	NaN	NaN	NaN
3.772	-64.82	-65.5592	1213.229	-2.7813	1.2266	-0.6748	-19.226	208.366	323.907	-0.15186	0.30713	-0.06543	NaN	NaN	NaN	NaN	NaN	NaN	NaN	NaN	NaN	NaN	NaN	NaN
3.774	-60.904	-67.7236	1220.446	-2.7026	1.2554	-0.67041	-42.39232	196.363	267.148	-0.10449	0.29248	-0.054199	NaN	NaN	NaN	NaN	NaN	NaN	NaN	NaN	NaN	NaN	NaN	NaN
3.776	-75.32	-67.1513	1234.571	-2.6543	1.2607	-0.66699	-3.014	153.002	264.752	-0.01123	0.25586	-0.012695	NaN	NaN	NaN	NaN	NaN	NaN	NaN	NaN	NaN	NaN	NaN	NaN
3.778	-58.482	-70.7212	1246.841	-2.5566	1.2539	-0.66211	-20.837	162.412	215.42	0.045166	0.21607	-0.0036622	NaN	NaN	NaN	NaN	NaN	NaN	NaN	NaN	NaN	NaN	NaN	NaN
3.78	-74.3122	-66.5307	1246.6368	-2.4764	1.2493	-0.66479	-6.144	80.548	192.343	0.10986	0.19287	0.024414	NaN	NaN	NaN	NaN	NaN	NaN	NaN	NaN	NaN	NaN	NaN	NaN
3.782	-78.742	-56.4356	1257.5377	-2.3926	1.2422	-0.66602	3.105	74.9753	172.267	0.17676	0.15137	0.048828	NaN	NaN	NaN	NaN	NaN	NaN	NaN	NaN	NaN	NaN	NaN	NaN
3.784	-95.9954	-58.9092	1264.8645	-2.2734	1.2324	-0.66113	-49.752	105.07	140.162	0.229	0.12354	0.074707	NaN	NaN	NaN	NaN	NaN	NaN	NaN	NaN	NaN	NaN	NaN	NaN
3.786	-92.8464	-60.8789	1257.77433	-2.2124	1.2329	-0.65771	-1.669	55.093	158.81012	0.27295	0.088867	0.096191	NaN	NaN	NaN	NaN	NaN	NaN	NaN	NaN	NaN	NaN	NaN	NaN
3.788	-80.48	-60.119	1259.7654	-2.0737	1.2251	-0.65381	-13.657	96.919	122	0.31787	0.044434	0.12549	NaN	NaN	NaN	NaN	NaN	NaN	NaN	NaN	NaN	NaN	NaN	NaN
3.79	-84.3187	-58.595	1270.287	-1.9331	1.1997	-0.64404	-30.669	70.7055	82.8752	0.33496	0.021484	0.1377	NaN	NaN	NaN	NaN	NaN	NaN	NaN	NaN	NaN	NaN	NaN	NaN
3.792	-54.262	-63.675	1270.736	-1.8691	1.1836	-0.63867	-0.0660000000000025	34.398	83.2278	0.36572	-0.018066	0.16797	NaN	NaN	NaN	NaN	NaN	NaN	NaN	NaN	NaN	NaN	NaN	NaN
3.794	-83.17596	-51.944	1260.336	-1.748	1.1523	-0.61719	-40.2183	63.37	49.918	0.37769	-0.051514	0.1853	NaN	NaN	NaN	NaN	NaN	NaN	NaN	NaN	NaN	NaN	NaN	NaN
3.796	-60.177	-32.939	1235.483	-1.6816	1.1323	-0.60351	-21.885	12.4375	70.4814	0.38281	-0.080566	0.20215	NaN	NaN	NaN	NaN	NaN	NaN	NaN	NaN	NaN	NaN	NaN	NaN
3.798	-57.359	-14.62115	1221.136	-1.6309	1.1074	-0.59375	-11.035	33.9647	76.2772	0.38867	-0.11572	0.22119	NaN	NaN	NaN	NaN	NaN	NaN	NaN	NaN	NaN	NaN	NaN	NaN
3.8	-41.692	-5.8359	1208.421	-1.5874	1.0864	-0.58154	-35.6305	57.87979	37.717	0.38672	-0.13232	0.23486	NaN	NaN	NaN	NaN	NaN	NaN	NaN	NaN	NaN	NaN	NaN	NaN
3.802	-55.805	-1.223	1213.258	-1.5723	1.0762	-0.56836	-0.75	9.9855	37.343	0.36914	-0.16553	0.25586	NaN	NaN	NaN	NaN	NaN	NaN	NaN	NaN	NaN	NaN	NaN	NaN
3.804	-51.346	16.6445	1218.0456	-1.5562	1.0591	-0.55615	-14.797	67.119	34.681	0.34961	-0.18311	0.25928	NaN	NaN	NaN	NaN	NaN	NaN	NaN	NaN	NaN	NaN	NaN	NaN
3.806	-26.54	14.6854	1247.0567	-1.5483	1.0434	-0.54297	-23.943	68.45	15.0643	0.33203	-0.20313	0.27246	NaN	NaN	NaN	NaN	NaN	NaN	NaN	NaN	NaN	NaN	NaN	NaN
3.808	-39.739	24.8828	1228.591	-1.5366	1.0259	-0.53271	3.194	51.719	22.3839	0.29346	-0.22363	0.28076	NaN	NaN	NaN	NaN	NaN	NaN	NaN	NaN	NaN	NaN	NaN	NaN
3.81	-30.987	22.2602	1210.16	-1.5332	0.99609	-0.51123	-27.921	107.643	2.4806	0.27295	-0.2251	0.28271	NaN	NaN	NaN	NaN	NaN	NaN	NaN	NaN	NaN	NaN	NaN	NaN
3.812	-45.243	27.28928	1182.22	-1.5293	0.97852	-0.50488	-27.1632	39.2098	17.2521	0.22656	-0.22852	0.2876	NaN	NaN	NaN	NaN	NaN	NaN	NaN	NaN	NaN	NaN	NaN	NaN
3.814	-22.129	18.27069	1188.813	-1.5151	0.93896	-0.48877	-4.865	12.3504	40.205	0.19678	-0.22901	0.29175	NaN	NaN	NaN	NaN	NaN	NaN	NaN	NaN	NaN	NaN	NaN	NaN
3.816	-31.004	12.4334	1177.3223	-1.5049	0.90722	-0.47217	-31.5237	20.507	35.703	0.16455	-0.2207	0.2876	NaN	NaN	NaN	NaN	NaN	NaN	NaN	NaN	NaN	NaN	NaN	NaN
3.818	-23.612	-1.033	1164.8365	-1.4941	0.87891	-0.44922	-4.783	-32.1696	58.102	0.12891	-0.21289	0.28906	NaN	NaN	NaN	NaN	NaN	NaN	NaN	NaN	NaN	NaN	NaN	NaN
3.82	-19.156	-16.476	1163.2823	-1.4702	0.8335	-0.42432	-36.1438	43.177	56.28	0.11475	-0.20459	0.28369	NaN	NaN	NaN	NaN	NaN	NaN	NaN	NaN	NaN	NaN	NaN	NaN
3.822	-30.045	-5.202	1145.5924	-1.4648	0.81641	-0.41406	-52.5602	45.762	34.619	0.082031	-0.19385	0.28271	NaN	NaN	NaN	NaN	NaN	NaN	NaN	NaN	NaN	NaN	NaN	NaN
3.824	-37.267	19.748	1130.7239	-1.4448	0.77588	-0.39209	5.635	5.93355	20.5583	0.064209	-0.18116	0.27246	NaN	NaN	NaN	NaN	NaN	NaN	NaN	NaN	NaN	NaN	NaN	NaN
3.826	-61.3845	47.6167	1089.262	-1.4339	0.7522	-0.37769	-27.856	59.226	-10.3839	0.050293	-0.16162	0.26758	NaN	NaN	NaN	NaN	NaN	NaN	NaN	NaN	NaN	NaN	NaN	NaN
3.828	-42.74	71.628	1091.5637	-1.4214	0.729	-0.35693	-18.366	-5.893	22.55918	0.034668	-0.14893	0.25635	NaN	NaN	NaN	NaN	NaN	NaN	NaN	NaN	NaN	NaN	NaN	NaN
3.83	-54.155	76.704	1080.0333	-1.4063	0.69629	-0.34033	-6.972	3.753	53.8035	0.021973	-0.14697	0.25342	NaN	NaN	NaN	NaN	NaN	NaN	NaN	NaN	NaN	NaN	NaN	NaN
3.832	-51.26	95.197	1069.25858	-1.3965	0.68555	-0.33398	-39.0356	33.198	46.68435	0.0078125	-0.1377	0.23682	NaN	NaN	NaN	NaN	NaN	NaN	NaN	NaN	NaN	NaN	NaN	NaN
3.834	-43.49	94.6484	1053.25352	-1.3687	0.66064	-0.31104	-8.563	-12.138	71.218	-0.0083007	-0.12842	0.22729	NaN	NaN	NaN	NaN	NaN	NaN	NaN	NaN	NaN	NaN	NaN	NaN
3.836	-61.2605	100.6429	1030.563	-1.3481	0.6372	-0.30225	-25.261	59.696	32.323	-0.021484	-0.11719	0.2168	NaN	NaN	NaN	NaN	NaN	NaN	NaN	NaN	NaN	NaN	NaN	NaN
3.838	-30.759	93.5596	996.859	-1.3237	0.6123	-0.28711	-16.598	59.365	16.1432	-0.03125	-0.1084	0.20215	NaN	NaN	NaN	NaN	NaN	NaN	NaN	NaN	NaN	NaN	NaN	NaN
3.84	-41.9045	97.8155	954.269	-1.2925	0.5835	-0.26807	4.737	39.993	27.43	-0.032715	-0.098633	0.19531	NaN	NaN	NaN	NaN	NaN	NaN	NaN	NaN	NaN	NaN	NaN	NaN
3.842	-25.678	87.7736	931.241	-1.2754	0.56494	-0.26074	-46.0878	83.08	1.812	-0.044922	-0.081055	0.18213	NaN	NaN	NaN	NaN	NaN	NaN	NaN	NaN	NaN	NaN	NaN	NaN
3.844	-36.6427	89.327	917.386	-1.2378	0.53076	-0.24512	-32.052	12.652	1.651	-0.047607	-0.064209	0.17139	NaN	NaN	NaN	NaN	NaN	NaN	NaN	NaN	NaN	NaN	NaN	NaN
3.846	-17.249	85.2762	914.2846	-1.2077	0.51049	-0.23364	-29.301	-7.3036	37.52	-0.05127	-0.050293	0.16113	NaN	NaN	NaN	NaN	NaN	NaN	NaN	NaN	NaN	NaN	NaN	NaN
3.848	-41.1536	88.793	889.7626	-1.1758	0.48438	-0.22266	-30.6073	15.144	26.99	-0.05127	-0.030273	0.15137	NaN	NaN	NaN	NaN	NaN	NaN	NaN	NaN	NaN	NaN	NaN	NaN
3.85	-42.475	85.895803	887.0474	-1.1348	0.46094	-0.20361	15.969	-40.1694	61.947	-0.056152	-0.020996	0.14648	NaN	NaN	NaN	NaN	NaN	NaN	NaN	NaN	NaN	NaN	NaN	NaN
3.852	-17.39	90.9849	880.7603	-1.1113	0.44922	-0.19824	-8.09	23.5626	58.312	-0.052734	0.0053711	0.13721	NaN	NaN	NaN	NaN	NaN	NaN	NaN	NaN	NaN	NaN	NaN	NaN
3.854	-5.646	90.06242	851.97467	-1.0586	0.42725	-0.18799	-32.8581	27.7919	31.1684	-0.052734	0.013916	0.12793	NaN	NaN	NaN	NaN	NaN	NaN	NaN	NaN	NaN	NaN	NaN	NaN
3.856	-1.818	100.60195	825.8412	-1.0283	0.41358	-0.17676	-1.136	-10.8075	28.6435	-0.05127	0.029297	0.12354	NaN	NaN	NaN	NaN	NaN	NaN	NaN	NaN	NaN	NaN	NaN	NaN
3.858	-9.737	104.5662	811.3025	-0.99414	0.39941	-0.17285	-38.014	45.778	18.2216	-0.053711	0.039551	0.10986	NaN	NaN	NaN	NaN	NaN	NaN	NaN	NaN	NaN	NaN	NaN	NaN
3.86	16.486	109.2835	795.567	-0.94629	0.37891	-0.16406	-29.452	-9.7142	42.808	-0.054199	0.047852	0.1084	NaN	NaN	NaN	NaN	NaN	NaN	NaN	NaN	NaN	NaN	NaN	NaN
3.862	15.167	98.0468	747.463	-0.92383	0.375	-0.15527	-7.554	2.4428	38.041	-0.062012	0.064941	0.099121	NaN	NaN	NaN	NaN	NaN	NaN	NaN	NaN	NaN	NaN	NaN	NaN
3.864	8.173	105.3276	705.14047	-0.87256	0.35938	-0.1377	-11.414	24.3593	16.563	-0.075684	0.073731	0.092041	NaN	NaN	NaN	NaN	NaN	NaN	NaN	NaN	NaN	NaN	NaN	NaN
3.866	3.537	103.796	677.1806	-0.83789	0.34253	-0.14111	-20.631	-21.9242	18.296	-0.087891	0.091797	0.084961	NaN	NaN	NaN	NaN	NaN	NaN	NaN	NaN	NaN	NaN	NaN	NaN
3.868	3.692	110.6731	658.1791	-0.7959	0.32764	-0.12939	-39.6391	44.333	31.068	-0.1084	0.11182	0.072754	NaN	NaN	NaN	NaN	NaN	NaN	NaN	NaN	NaN	NaN	NaN	NaN
3.87	5.422	104.37524	628.6389	-0.73242	0.30859	-0.11328	-34.1572	50.402	22.9403	-0.11963	0.12646	0.068848	NaN	NaN	NaN	NaN	NaN	NaN	NaN	NaN	NaN	NaN	NaN	NaN
3.872	-25.168	92.3326	594.8467	-0.7041	0.30371	-0.10645	4.759	25.1964	22.8734	-0.14209	0.15674	0.057617	NaN	NaN	NaN	NaN	NaN	NaN	NaN	NaN	NaN	NaN	NaN	NaN
3.874	-24.953	83.42942	588.04463	-0.63916	0.27979	-0.098145	-26.815	70.622	-5.492	-0.16162	0.18018	0.048584	NaN	NaN	NaN	NaN	NaN	NaN	NaN	NaN	NaN	NaN	NaN	NaN
3.876	-29.433	96.397	556.8549	-0.59057	0.26855	-0.093506	-14.476	4.795	12.1042	-0.18066	0.19727	0.038086	NaN	NaN	NaN	NaN	NaN	NaN	NaN	NaN	NaN	NaN	NaN	NaN
3.878	-29.2057	113.401	532.4567	-0.54248	0.25488	-0.090332	-19.35	12.9423	22.8834	-0.19775	0.2251	0.034668	NaN	NaN	NaN	NaN	NaN	NaN	NaN	NaN	NaN	NaN	NaN	NaN
3.88	-27.795	117.255	498.446	-0.4751	0.24365	-0.07373	-45.8953	46.825	3.068	-0.20898	0.23828	0.029785	NaN	NaN	NaN	NaN	NaN	NaN	NaN	NaN	NaN	NaN	NaN	NaN
3.882	-37.0783	113.822	480.342	-0.44727	0.23145	-0.069336	4.192	-8.785	29.6114	-0.22363	0.25977	0.023438	NaN	NaN	NaN	NaN	NaN	NaN	NaN	NaN	NaN	NaN	NaN	NaN
3.884	-23.403	106.1357	447.8444	-0.39893	0.2085	-0.061523	-31.084	18.8458	29.473	-0.22876	0.27735	0.014405	NaN	NaN	NaN	NaN	NaN	NaN	NaN	NaN	NaN	NaN	NaN	NaN
3.886	-40.715	95.577	404.3292	-0.35913	0.19532	-0.061035	-28.039	8.5601	41.5303	-0.24023	0.28809	0.012207	NaN	NaN	NaN	NaN	NaN	NaN	NaN	NaN	NaN	NaN	NaN	NaN
3.888	-38.903	84.295	399.3667	-0.31836	0.18408	-0.062012	2.293	-29.3956	59.9246	-0.24609	0.30762	-0.0029297	NaN	NaN	NaN	NaN	NaN	NaN	NaN	NaN	NaN	NaN	NaN	NaN
3.89	-46.0669	85.778	372.6891	-0.25146	0.16797	-0.058105	-25.414	26.59482	41.0831	-0.25195	0.31934	-0.010742	NaN	NaN	NaN	NaN	NaN	NaN	NaN	NaN	NaN	NaN	NaN	NaN
3.892	-25.621	87.3759	341.3646	-0.21777	0.16455	-0.057617	-15.215	-9.513	75.288	-0.26807	0.33594	-0.030762	NaN	NaN	NaN	NaN	NaN	NaN	NaN	NaN	NaN	NaN	NaN	NaN
3.894	-40.4465	96.8984	317.806	-0.14014	0.13867	-0.049316	7.136	-4.747	128.0636	-0.29687	0.33789	-0.048584	NaN	NaN	NaN	NaN	NaN	NaN	NaN	NaN	NaN	NaN	NaN	NaN
3.896	-48.3061	98.6253	298.0871	-0.092284	0.12671	-0.041992	-48.9543	50.764	148.17	-0.34082	0.33789	-0.078125	NaN	NaN	NaN	NaN	NaN	NaN	NaN	NaN	NaN	NaN	NaN	NaN
3.898	-35.7128	95.5202	291.5044	-0.041016	0.11182	-0.033203	-35.82	23.16	297.544	-0.43115	0.32471	-0.11572	NaN	NaN	NaN	NaN	NaN	NaN	NaN	NaN	NaN	NaN	NaN	NaN
3.9	-31.213	93.0888	267.866	0.014648	0.086914	-0.029297	-11.407	46.776	458.224	-0.49365	0.31494	-0.14404	NaN	NaN	NaN	NaN	NaN	NaN	NaN	NaN	NaN	NaN	NaN	NaN
3.902	-51.163	96.4177	248.9113	0.041016	0.075684	-0.024414	-97.388	3.86829	603.902	-0.65088	0.271	-0.19873	NaN	NaN	NaN	NaN	NaN	NaN	NaN	NaN	NaN	NaN	NaN	NaN
3.904	-30.166	98.9471	218.832	0.085938	0.053223	-0.018555	-15.922	-47.5133	748.5647	-0.79322	0.22973	-0.23072	NaN	NaN	NaN	NaN	NaN	NaN	NaN	NaN	NaN	NaN	NaN	NaN
3.906	-10.899	96.9972	200.30319	0.1167	0.039551	-0.016113	60.83	-19.388	796.1902	-0.96826	0.17139	-0.27051	NaN	NaN	NaN	NaN	NaN	NaN	NaN	NaN	NaN	NaN	NaN	NaN
3.908	-20.516	101.5583	160.008	0.14063	0.024902	-0.022949	34.3914	-41.381	905.391	-1.2241	0.085449	-0.31494	NaN	NaN	NaN	NaN	NaN	NaN	NaN	NaN	NaN	NaN	NaN	NaN
3.91	-22.856	91.639	155.2605	0.1748	0.012695	-0.0097656	-23.5911	-2.126	1043.994	-1.3491	0.049805	-0.32764	NaN	NaN	NaN	NaN	NaN	NaN	NaN	NaN	NaN	NaN	NaN	NaN
3.912	-3.898	85.2205	149.19346	0.18604	0.0039063	-0.00097656	-61.862	12.481	1031.864	-1.5879	0.034668	-0.34766	NaN	NaN	NaN	NaN	NaN	NaN	NaN	NaN	NaN	NaN	NaN	NaN
3.914	-13.557	89.1724	135.35809	0.20605	-0.01416	-0.0029297	-2.222	-71.108	1074.289	-1.738	0.057129	-0.3523	NaN	NaN	NaN	NaN	NaN	NaN	NaN	NaN	NaN	NaN	NaN	NaN
3.916	-8.611	85.726216	115.0755	0.22021	-0.03125	0.0063477	31.628	-45.4459	1106.843	-1.8589	0.094238	-0.35107	NaN	NaN	NaN	NaN	NaN	NaN	NaN	NaN	NaN	NaN	NaN	NaN
3.918	-16.961	86.5304	97.4774	0.22803	-0.042969	0.0058594	65.5971	-107.936	1113.587	-1.9473	0.17969	-0.32422	NaN	NaN	NaN	NaN	NaN	NaN	NaN	NaN	NaN	NaN	NaN	NaN
3.92	-9.065	72.2389	88.5834	0.23486	-0.063965	0.017578	28.4099	-143.864	1135.83	-1.9609	0.24585	-0.29956	NaN	NaN	NaN	NaN	NaN	NaN	NaN	NaN	NaN	NaN	NaN	NaN
3.922	-17.945	74.1213	72.9519	0.23779	-0.08374	0.027344	33.881	-83.528	1088.015	-1.9453	0.31055	-0.27734	NaN	NaN	NaN	NaN	NaN	NaN	NaN	NaN	NaN	NaN	NaN	NaN
3.924	-22.346	64.6353	62.674	0.24512	-0.10693	0.033203	56.7734	-99.869	1038.38	-1.8667	0.38525	-0.23975	NaN	NaN	NaN	NaN	NaN	NaN	NaN	NaN	NaN	NaN	NaN	NaN
3.926	-18.809	50.3977	57.0289	0.24072	-0.13232	0.040039	41.12802	-86.6036	999.1885	-1.812	0.40869	-0.22021	NaN	NaN	NaN	NaN	NaN	NaN	NaN	NaN	NaN	NaN	NaN	NaN
3.928	-30.436	52.36012	75.38265	0.23828	-0.14795	0.044922	10.901	-56.818	960.036	-1.6968	0.42627	-0.18408	NaN	NaN	NaN	NaN	NaN	NaN	NaN	NaN	NaN	NaN	NaN	NaN
3.93	-21.876	61.3797	64.834	0.23584	-0.1748	0.049316	70.089	-83.438	946.39	-1.6062	0.43384	-0.15698	NaN	NaN	NaN	NaN	NaN	NaN	NaN	NaN	NaN	NaN	NaN	NaN
3.932	-35.37	59.2449	47.552	0.22754	-0.19116	0.049561	31.109	-44.01	983.356	-1.5215	0.44141	-0.13672	NaN	NaN	NaN	NaN	NaN	NaN	NaN	NaN	NaN	NaN	NaN	NaN
3.934	-19.275	57.7726	41.753	0.21729	-0.20752	0.044434	-61.22	-36.32	1003.259	-1.4297	0.46582	-0.1123	NaN	NaN	NaN	NaN	NaN	NaN	NaN	NaN	NaN	NaN	NaN	NaN
3.936	-36.4337	48.3725	38.8823	0.20508	-0.22363	0.051758	-7.7	-29.729	996.0608	-1.3901	0.48779	-0.11084	NaN	NaN	NaN	NaN	NaN	NaN	NaN	NaN	NaN	NaN	NaN	NaN
3.938	-33.265	50.6872	32.9665	0.19238	-0.22803	0.04834	4.7054	-5.72199999999999	956.918	-1.3159	0.54541	-0.10498	NaN	NaN	NaN	NaN	NaN	NaN	NaN	NaN	NaN	NaN	NaN	NaN
3.94	-39.181	42.8996	33.1316	0.16748	-0.23975	0.055176	8.571	-73.447	914.233	-1.2639	0.59717	-0.1023	NaN	NaN	NaN	NaN	NaN	NaN	NaN	NaN	NaN	NaN	NaN	NaN
3.942	-45.125	36.7309	46.5851	0.14282	-0.24415	0.045898	13.654	-115.055	927.166	-1.1982	0.64648	-0.10938	NaN	NaN	NaN	NaN	NaN	NaN	NaN	NaN	NaN	NaN	NaN	NaN
3.944	-38.677	48.3223	41.1804	0.11816	-0.24902	0.042969	-6.92	-134.15307	976.4123	-1.1191	0.69629	-0.12646	NaN	NaN	NaN	NaN	NaN	NaN	NaN	NaN	NaN	NaN	NaN	NaN
3.946	-42.524	32.25325	17.148	0.083496	-0.24609	0.038574	7.209	-203.003	1051.001	-1.0854	0.72314	-0.14697	NaN	NaN	NaN	NaN	NaN	NaN	NaN	NaN	NaN	NaN	NaN	NaN
3.948	-46	30.3047	28.646	0.061523	-0.24414	0.03418	-0.475000000000001	-220.276	1078.6391	-1.0391	0.76855	-0.19482	NaN	NaN	NaN	NaN	NaN	NaN	NaN	NaN	NaN	NaN	NaN	NaN
3.95	-31.108	28.3963	43.9314	0.032715	-0.23633	0.027344	-20.9	-249.865	1034.746	-1.0197	0.78638	-0.24073	NaN	NaN	NaN	NaN	NaN	NaN	NaN	NaN	NaN	NaN	NaN	NaN
3.952	-18.828	31.431	40.3588	0.0065916	-0.2229	0.019775	-22.985	-268.365	1014.892	-1.0078	0.79297	-0.28906	NaN	NaN	NaN	NaN	NaN	NaN	NaN	NaN	NaN	NaN	NaN	NaN
3.954	-31.3195	37.7755	25.017822	-0.011719	-0.21143	0.01123	-43.196	-191.039	1009.615	-1.019	0.77979	-0.34521	NaN	NaN	NaN	NaN	NaN	NaN	NaN	NaN	NaN	NaN	NaN	NaN
3.956	-27.406	22.3568	33.0799	-0.036621	-0.19238	0.0048828	-127.61	-172.7086	1054.83835	-1.0396	0.77002	-0.37061	NaN	NaN	NaN	NaN	NaN	NaN	NaN	NaN	NaN	NaN	NaN	NaN
3.958	-16.043	22.8882	15.4777	-0.049316	-0.18799	-0.0019531	-126.4376	-161.952	1126.416	-1.1172	0.77148	-0.42188	NaN	NaN	NaN	NaN	NaN	NaN	NaN	NaN	NaN	NaN	NaN	NaN
3.96	-13.861	24.9013	21.759	-0.06543	-0.16748	-0.011719	-119.528	-149.647	1126.9294	-1.1767	0.79174	-0.45264	NaN	NaN	NaN	NaN	NaN	NaN	NaN	NaN	NaN	NaN	NaN	NaN
3.962	-23.198	37.52624	19.1933	-0.077393	-0.15723	-0.022461	-46.4807	-172.6205	1131.179	-1.2402	0.81641	-0.48291	NaN	NaN	NaN	NaN	NaN	NaN	NaN	NaN	NaN	NaN	NaN	NaN
3.964	-29.798	28.3679	26.0926	-0.083496	-0.146	-0.028809	-15.601	-125.223	1154.519	-1.3198	0.87549	-0.52979	NaN	NaN	NaN	NaN	NaN	NaN	NaN	NaN	NaN	NaN	NaN	NaN
3.966	-12.809	19.6101	47.55349	-0.094727	-0.13037	-0.037109	-70.9884	-66.933	1168.785	-1.3516	0.89551	-0.54639	NaN	NaN	NaN	NaN	NaN	NaN	NaN	NaN	NaN	NaN	NaN	NaN
3.968	-20.354	17.90844	27.383	-0.093262	-0.12305	-0.042969	-30.942	-31.068	1172.4799	-1.4141	0.92871	-0.57031	NaN	NaN	NaN	NaN	NaN	NaN	NaN	NaN	NaN	NaN	NaN	NaN
3.97	-24.808	23.0615	18.8714	-0.093262	-0.104	-0.054199	-64.316	18.928	1149.052	-1.4646	0.92896	-0.57617	NaN	NaN	NaN	NaN	NaN	NaN	NaN	NaN	NaN	NaN	NaN	NaN
3.972	-17.969	19.8415	13.3699	-0.087647	-0.089356	-0.061523	-71.5548	-38.17	1177.912	-1.5269	0.92041	-0.57178	NaN	NaN	NaN	NaN	NaN	NaN	NaN	NaN	NaN	NaN	NaN	NaN
3.974	-13.577	24.382	18.8905	-0.082031	-0.071777	-0.066406	-4.35700000000001	-103.385	1231.248	-1.6543	0.90625	-0.56348	NaN	NaN	NaN	NaN	NaN	NaN	NaN	NaN	NaN	NaN	NaN	NaN
3.976	-21.729	40.365	2.4238	-0.064453	-0.049805	-0.078125	-50.1327	-126.9539	1263.671	-1.7383	0.90234	-0.55518	NaN	NaN	NaN	NaN	NaN	NaN	NaN	NaN	NaN	NaN	NaN	NaN
3.978	-42.171	34.0886	3.471	-0.058105	-0.043945	-0.081055	-47.303	-167.244	1286.361	-1.9351	0.90771	-0.55518	NaN	NaN	NaN	NaN	NaN	NaN	NaN	NaN	NaN	NaN	NaN	NaN
3.98	-10.302	19.0395	20.953	-0.031738	-0.029785	-0.089844	-63.2162	-156.849	1286.086	-2.0928	0.93506	-0.55029	NaN	NaN	NaN	NaN	NaN	NaN	NaN	NaN	NaN	NaN	NaN	NaN
3.982	-23.0484	23.1442	47.9703	-0.01123	-0.011475	-0.092285	-97.896	-150.352	1262.994	-2.2495	0.97412	-0.54346	NaN	NaN	NaN	NaN	NaN	NaN	NaN	NaN	NaN	NaN	NaN	NaN
3.984	-33.102	28.535	33.1186	0.0053711	-0.0087891	-0.10303	-69.445	-156.807	1272.161	-2.4492	1.0449	-0.53125	NaN	NaN	NaN	NaN	NaN	NaN	NaN	NaN	NaN	NaN	NaN	NaN
3.986	-40.918	22.2991	20.7417	0.033203	0.0043945	-0.097168	-48.534	-112.9733	1279.63	-2.5352	1.084	-0.52344	NaN	NaN	NaN	NaN	NaN	NaN	NaN	NaN	NaN	NaN	NaN	NaN
3.988	-22.903	20.5063	27.9144	0.042969	0.0078125	-0.10352	-14.022	-96.1533	1307.213	-2.6816	1.1621	-0.51611	NaN	NaN	NaN	NaN	NaN	NaN	NaN	NaN	NaN	NaN	NaN	NaN
3.99	-33.9	29.9054	21.7394	0.064941	0.019043	-0.1001	-2.004	-93.0279	1329.686	-2.7515	1.2115	-0.51513	NaN	NaN	NaN	NaN	NaN	NaN	NaN	NaN	NaN	NaN	NaN	NaN
3.992	-29.367	30.8392	11.114	0.075196	0.021729	-0.10254	-56.4542	-42.009	1303.1615	-2.7847	1.2505	-0.51416	NaN	NaN	NaN	NaN	NaN	NaN	NaN	NaN	NaN	NaN	NaN	NaN
3.994	-28.4536	13.72029	17.4743	0.087402	0.029297	-0.10352	-52.8715	-52.4168	1274.505	-2.7808	1.2798	-0.50928	NaN	NaN	NaN	NaN	NaN	NaN	NaN	NaN	NaN	NaN	NaN	NaN
3.996	-28.538	8.7876	19.432	0.10303	0.037109	-0.10449	-39.491	-37.5979	1238.335	-2.7598	1.2891	-0.50781	NaN	NaN	NaN	NaN	NaN	NaN	NaN	NaN	NaN	NaN	NaN	NaN
[truncated: 28,002 more rows]
