# Supplementary material for: Reliability and Validity of Running Cadence and Stance Time Derived from Instrumented Wireless Earbuds
Source: Sensors (Basel). 2021 Nov 30;21(23):7995. doi: 10.3390/s21237995 (PMC8659722; doi:10.3390/s21237995)
Supplement: Supplementary file 1 [file sensors-21-07995-s001.zip › Data_P10_HeadMovements.csv]

time	up_force_plate_1	up_force_plate_2	up_force_plate_3	up_earbuds_1	up_earbuds_2	up_earbuds_3	down_force_plate_1	down_force_plate_2	down_force_plate_3	down_earbuds_1	down_earbuds_2	down_earbuds_3	shake_force_plate_1	shake_force_plate_2	shake_force_plate_3	shake_earbuds_1	shake_earbuds_2	shake_earbuds_3	nod_force_plate_1	nod_force_plate_2	nod_force_plate_3	nod_earbuds_1	nod_earbuds_2	nod_earbuds_3	bird_L_force_plate_1	bird_L_force_plate_2	bird_L_force_plate_3	bird_L_earbuds_1	bird_L_earbuds_2	bird_L_earbuds_3	bird_R_force_plate_1	bird_R_force_plate_2	bird_R_force_plate_3	bird_R_earbuds_1	bird_R_earbuds_2	bird_R_earbuds_3	check_watch_force_plate_1	check_watch_force_plate_2	check_watch_force_plate_3	check_watch_earbuds_1	check_watch_earbuds_2	check_watch_earbuds_3
0	-35.767	20.3359	37.5815	0.051758	0.20801	0.15283	-16.642	113.1165	308.337	-0.23975	0.2876	-0.020996	-0.354000000000006	132.8945	483.4541	-0.57422	0.48194	-0.016846	37.4308	41.5496	480.279	-1.1719	0.8457	-0.18506	-6.33300000000001	58.433	863.3866	-2.236	1.2476	0.13418	-72.543	-77.9184	1268.896	-2.3237	1.1978	0.039063	51.484	-29.816	1258.419	-2.2881	0.87158	-0.46289
0.002	-24.677	24.1717	45.2929	0.042236	0.20849	0.16064	24.101	103.1619	292.4202	-0.20859	0.27197	-0.023828	-29.877	116.1851	430.584	-0.5459	0.44873	-0.011719	23.5066	38.526	520.845	-1.1987	0.89404	-0.20361	30.253	54.586	861.8581	-2.1612	1.3222	0.11865	-49.986	-73.478	1297.5773	-2.4058	1.272	0.03125	61.588	-20.2529	1251.618	-2.2695	0.8584	-0.45996
0.004	-44.973	47.5968	42.3094	0.03418	0.21338	0.16406	4.20800000000001	99.999	254.0974	-0.17988	0.25625	-0.016113	-27.402	103.3903	410.348	-0.50781	0.42188	0.012207	36.8324	35.748	582.1097	-1.2188	0.92773	-0.21777	15.806	70.307	862.064	-2.0315	1.3378	0.086618	-35.859	-21.3171	1315.391	-2.4763	1.322	0.024902	33.89	-3.7033	1252.6745	-2.2417	0.85205	-0.44678
0.006	-47.1656	48.757	14.085	0.011719	0.21924	0.17139	0.370999999999995	84.971	232.3351	-0.14551	0.24218	-0.021972	12.589	106.5161	407.8611	-0.47998	0.40186	0.017578	63.7796	36.08	681.859	-1.2754	0.98438	-0.23584	-26.5364	75.099	883.922	-1.8551	1.2891	0.056444	-36.307	6.0643	1294.505	-2.543	1.3682	0.021484	40.5	-3.9536	1269.2334	-2.2339	0.85986	-0.44092
0.008	-45.19	30.2975	12.232	0.0073242	0.22168	0.17676	-21.41	82.121	220.136	-0.12012	0.22773	-0.022949	-3.045	122.8304	394.3034	-0.44287	0.37158	0.030273	38.80866	65.1886	739.951	-1.3335	1.02	-0.24121	-38.688	15.403	891.0321	-1.6602	1.2051	0.035645	-57.096	1.702	1284.2635	-2.6152	1.416	0.022461	49.354	-0.866	1258.7562	-2.1909	0.8833	-0.43262
0.01	-32.134	23.6731	5.666	-0.01123	0.22217	0.19238	-36.3924	87.3243	219.3137	-0.093262	0.21338	-0.02002	-23.2	111.20513	373.1184	-0.41041	0.34522	0.036377	6.334	91.478	798.098	-1.5366	1.1138	-0.2251	-45.9459	-58.58442	882.4882	-1.4837	1.128	0.023438	-69.31	-23.4569	1286.543	-2.6343	1.4429	0.027832	43.125	8.908	1257.4992	-2.1492	0.89868	-0.42676
0.012	-46.107	34.9035	22.87825	-0.03125	0.22851	0.20043	-40.46	114.355	213.7283	-0.070117	0.19902	-0.021289	-18.819	89.6923	344.0178	-0.37842	0.32129	0.039551	5.505	83.009	813.9931	-1.7341	1.1937	-0.20483	-22.87	-109.326	877.4694	-1.3445	1.0642	0.019434	-88.253	-30.45078	1298.15032	-2.623	1.4766	0.034668	19.7098	18.489	1253.6633	-2.103	0.90088	-0.42139
0.014	-45.473	23.2222	35.2031	-0.047363	0.22607	0.20996	-34.72	113.169	230.087	-0.05	0.18184	-0.024121	-31.284	104.347	305.3936	-0.34863	0.29297	0.046387	48.6265	51.526	810.026	-1.9292	1.2847	-0.18066	-6.46	-119.334	869.0639	-1.269	1.0208	0.019433	-53.332	-14.423	1310.459	-2.5606	1.4825	0.035157	26.031	11.367	1243.97668	-2.0249	0.89307	-0.41943
0.016	-22.003	20.14626	38.0893	-0.064941	0.2334	0.22656	-29.238	104.295	201.15	-0.032812	0.17168	-0.026465	-50.547	118.614	286.485	-0.3335	0.27734	0.05127	8.662	-2.194	842.764	-2.1035	1.4102	-0.15381	28.315	-103.799	897.4566	-1.2466	0.99598	0.031736	-54.396	-3.983	1316.079	-2.4629	1.4746	0.03125	18.4039	5.004	1252.959	-1.9736	0.87598	-0.4126
0.018	-25.947	10.734119	40.784	-0.070801	0.23438	0.23242	-31.939	97.135	159.5913	-0.021094	0.15586	-0.029785	-46.218	127.855	264.354	-0.30664	0.25	0.063477	-50.2147	-54.868	888.354	-2.1401	1.4731	-0.14844	41.054	-80.525	936.6621	-1.2339	0.97705	0.049316	-65.653	6.594	1289.7425	-2.2988	1.4375	0.019531	53.587	-5.714	1237.762	-1.9272	0.85791	-0.40918
0.02	-49.3453	-14.958	61.202	-0.080078	0.24365	0.24609	-39.315	95.745	143.688	-0.010254	0.14502	-0.035156	-39.829	117.506	261.156	-0.27832	0.23096	0.070068	-85.9453	-116.4903	937.629	-2.0776	1.5825	-0.15967	38.2	-74.4992	959.0167	-1.2072	0.95487	0.074808	-98.1519	3.938	1254.695	-2.209	1.4082	0.0068359	44.983	-20.5169	1209.3371	-1.8789	0.83594	-0.4043
0.022	-31.811	-39.17262	125.125	-0.076416	0.24585	0.25708	-58.0031	82.5717	134.065	-0.0020508	0.13574	-0.032324	-54.103	114.0284	230.342	-0.24902	0.20996	0.077637	-109.905	-140.929	943.5673	-1.9295	1.634	-0.1831	17.773	-86.88	979.027	-1.169	0.9196	0.09258	-109.471	-12.7102	1231.263	-2.0474	1.3286	-0.0097656	78.303	-33.3846	1198.5192	-1.8589	0.82764	-0.39795
0.024	-22.188	-23.1496	194.466	-0.063965	0.24707	0.25732	-34.579	63.084	129.38298	0.0077148	0.12529	-0.034375	-36.22	89.188	197.355	-0.20801	0.1875	0.083008	-81.996	-146.056	940.226	-1.7324	1.6582	-0.2085	-18.858	-92.233	993.8503	-1.1252	0.88208	0.098056	-99.295	-2.006	1245.4231	-1.9471	1.2786	-0.022949	64.547	-23.841	1173.97	-1.8354	0.81104	-0.39209
0.026	-58.02	2.662	249.915	-0.044922	0.25195	0.25586	-29.378	51.145	100.6099	0.013965	0.12177	-0.030078	-55.702	71.322	195.604	-0.18359	0.17383	0.078613	-68.311	-138.087	943.6571	-1.4507	1.6431	-0.23486	-13.107	-73.515	1033.6711	-1.0882	0.85457	0.098437	-103.438	16.205	1256.324	-1.8706	1.2319	-0.03418	61.867	-4.865	1151.9636	-1.8272	0.80078	-0.38404
0.028	-88.22	-32.217	305.884	-0.036133	0.25146	0.25244	-39.801	46.546	72.4099	0.020703	0.12061	-0.02832	-44.48	71.666	161.0449	-0.14355	0.14355	0.080078	-25.013	-121.966	980.564	-1.3198	1.6177	-0.25049	-81.044	-47.331	1047.3718	-1.062	0.82959	0.092285	-95.834	51.61	1239.7713	-1.7983	1.1763	-0.043457	42.113	5.755	1135.1023	-1.8164	0.79688	-0.37695
0.03	-92.381	-103.293	288.8022	-0.021973	0.25586	0.22021	-31.36	48.9819	74.6973	0.027344	0.10645	-0.024902	-54.723	84.2402	151.3508	-0.11597	0.11939	0.082764	-38.827	-93.346	1035.8727	-1.1191	1.5527	-0.27197	-115.15069	-22.556	1054.0585	-1.0592	0.81564	0.076882	-108.8131715	64.9361	1217.717	-1.7671	1.1509	-0.046387	47.3028	14.5229	1133.8571	-1.7944	0.7915	-0.36621
0.032	-53.4	-147.118	302.171	-0.040039	0.26855	0.16846	-28.095	57.9408	85.7861	0.039844	0.10977	-0.029102	-61.395	80.5889	125.5019	-0.092773	0.1001	0.080078	-45.9984	-64.526	1088.407	-1.0112	1.5053	-0.28125	-134.714	-39.587	1067.946	-1.08	0.79808	0.054002	-124.9018	86.0675	1217.03	-1.7222	1.1157	-0.047363	49.915	24.722	1118.684	-1.7769	0.7915	-0.35693
0.034	-48.178	-110.792	301.021	-0.081055	0.29883	0.11475	-34.978	71.384	78.3202	0.048339	0.098734	-0.035351	-69.1638	75.987	110.6992	-0.064453	0.071777	0.08252	-58.002	-75.586	1172.272	-0.92871	1.4692	-0.28223	-107.281	-68.169	1070.043	-1.124	0.78445	0.028601	-114.827	92.451	1213.48749	-1.6973	1.0908	-0.04834	27.829	41.9238	1099.829	-1.7324	0.78711	-0.34912
0.036	-71.102	-62.677	348.396	-0.21436	0.34473	0.064453	-32.1178	83.236	75.0998	0.061621	0.092871	-0.035743	-56.51	81.595	115.81141	-0.054688	0.064453	0.083984	-53.2729	-69.43415	1213.06	-0.84424	1.438	-0.28174	-96.141	-92.527	1088.516	-1.1877	0.77718	0.014661	-124.663	104.356	1202.297	-1.6758	1.0664	-0.046387	14.8963	67.923	1075.5874	-1.6804	0.7815	-0.3418
0.038	-97.432	-28.6687	371.1851	-0.35644	0.38891	0.055419	-23.562	51.386	72.2443	0.074023	0.087598	-0.034668	-51.595	74.6829	115.68107	-0.033203	0.046387	0.086914	-26.057	-65.519	1205.584	-0.81396	1.4282	-0.27686	-91.7548	-76.65	1115.001	-1.2534	0.77295	0.011719	-125.9411	97.629	1187.567	-1.6392	1.0347	-0.037109	-2.0912	70.998	1074.1367	-1.6245	0.77588	-0.33691
0.04	-86.606	-19.585	379.768	-0.51025	0.43213	0.067871	-49.2163	24.6779	55.84573	0.084961	0.083008	-0.043945	-69.338	76.33413	93.6517	-0.023438	0.027588	0.089599	-63.507	-55.894	1173.016	-0.79102	1.416	-0.2832	-72.817	-62.834	1151.847	-1.3275	0.77607	0.010909	-148.621	99.965	1167.868	-1.6152	1.0176	-0.037109	-5.2288	61.987	1043.2358	-1.5483	0.74658	-0.31885
0.042	-67.07	-20.931	402.144	-0.69238	0.50342	0.10547	-45.749	34.9103	53.8595	0.099026	0.064649	-0.04375	-50.566	74.4795	95.3302	-0.0092773	0.017578	0.089844	-79.529	-51.826	1161.941	-0.80591	1.4094	-0.28466	-70.011	-60.34	1190.387	-1.3915	0.78698	0.016828	-117.7701	80.658	1154.861	-1.562	0.98193	-0.035156	-8.0896	50.7491	1008.5038	-1.5132	0.73096	-0.31592
0.044	-65.788	-8.697	441.262	-0.75342	0.54346	0.125	-44.249	44.9917	57.5938	0.1082	0.050586	-0.051855	-54.787	70.4487	70.849	0.0019531	0.0039063	0.089844	-100.329	-59.684	1155.937	-0.85303	1.4028	-0.27979	-64.547	-68.098	1210.01607	-1.432	0.8003	0.014562	-130.0405	76.0638	1118.693	-1.5134	0.94653	-0.030273	22.9284	31.193	968.70324	-1.4551	0.69727	-0.30762
0.046	-36.71	34.073	520.086	-0.82324	0.61914	0.14697	-19.634	44.6927	39.8637	0.11484	0.038086	-0.059668	-31.926	66.3335	52.107	0.013184	-0.0014648	0.09082	-66.1447	-73.432	1178.118	-0.95996	1.3848	-0.26611	-89.8319	-101.447	1210.7178	-1.4531	0.81554	0.012557	-95.77	57.249	1102.611	-1.4663	0.9126	-0.030273	49.083	27.339	949.714	-1.419	0.67041	-0.29492
0.048	-43.606	111.9987	588.771	-0.83399	0.67187	0.14087	-18.167	43.54506	23.8284	0.11757	0.027441	-0.063379	-25.223	53.73169	54.9903	0.033691	-0.011719	0.09375	-43.9126	-108.9243	1229.1534	-1.021	1.3843	-0.26318	-72.7487	-122.798	1235.312	-1.4648	0.83398	0.0024414	-66.64	63.609	1077.2145	-1.4058	0.86182	-0.024902	28.3125	41.742	936.8301	-1.3906	0.64453	-0.28809
0.05	-66.352	174.074	642.422	-0.83691	0.71484	0.12646	-27.785	36.7398	10.2595	0.12305	0.018066	-0.071289	-9.155	52.1931	47.7461	0.048584	-0.014404	0.099123	-35.107	-133.504	1270.6785	-1.1328	1.3594	-0.25195	-85.7011	-122.089	1249.975	-1.4743	0.85483	-0.010061	-52.564	87.215	1050.7607	-1.373	0.83398	-0.023926	9.1002	59.378	915.1524	-1.3608	0.61377	-0.26904
0.052	-92.2682	161.52	703.50721	-0.83545	0.76221	0.097656	-29.807	28.877	26.416	0.12558	0.011523	-0.068848	-6.36	44.9788	34.984	0.061523	-0.021973	0.094238	21.003	-141.791	1301.8086	-1.1961	1.3489	-0.24487	-115.7259	-81.27	1275.473	-1.4941	0.87921	-0.028526	-70.582	111.1179	1028.789	-1.3286	0.7876	-0.022461	-9.847	62.804	917.8649	-1.3496	0.60352	-0.26563
0.054	-91.741	118.714	785.026	-0.84668	0.78711	0.067383	-16.728	23.205	35.1331	0.12568	0.0039063	-0.069531	-31.51	52.1377	39.138033	0.080078	-0.030762	0.087402	27.776	-110.45	1322.904	-1.2461	1.334	-0.24072	-100.9839	-66.006	1273.283	-1.5317	0.90151	-0.03459	-42.006	120.16139	1034.3709	-1.2998	0.75781	-0.023438	10.4331	57.1284	892.16344	-1.3198	0.58545	-0.24756
0.056	-103.698	59.639	841.426	-0.89893	0.82764	-0.0029297	-24.701	22.5559	46.77	0.12529	0.0027344	-0.078515	-46.895	48.3032	40.4649	0.082031	-0.041992	0.084961	34.203	-62.232	1325.3777	-1.269	1.3286	-0.23975	-87.368	-72.621	1269.1958	-1.5981	0.92096	-0.033823	-35.164	122.1648	1039.633	-1.271	0.73486	-0.024414	-12.636	63.08975	882.8084	-1.3006	0.57251	-0.23609
0.058	-115.392	13.3478	924.195	-0.99172	0.86572	-0.056885	-23.802	31.107	17.85202	0.12109	0.00058594	-0.077539	-12.861	37.83	36.134	0.095215	-0.055176	0.07959	8.424	-59.1772	1361.5	-1.271	1.3159	-0.24463	-41.585	-88.158	1259.7318	-1.6948	0.95752	-0.039063	-39.527	123.6634	1000.73	-1.2378	0.7085	-0.017578	-17.4685	88.991	864.849	-1.2734	0.56738	-0.22607
0.06	-139.1481	-21.224	994.2615	-1.1187	0.90869	-0.10596	-26.004	24.5246	26.9373	0.11426	-0.0083008	-0.078125	6.71599999999999	30.5619	44.1632	0.10156	-0.061523	0.081299	18.1387	-66.192	1397.306	-1.2676	1.2969	-0.26758	-55.07	-88.465	1254.511	-1.8159	1.0097	-0.03303	-46.566	133.002	963.174	-1.2188	0.70117	-0.013184	-21.7497	82.545	843.7608	-1.23	0.55322	-0.21436
0.062	-151.918	-33.063	1035.3685	-1.3511	0.99072	-0.13867	-24.614	29.14	35.7915	0.1042	-0.01416	-0.08252	-25.191	30.996	23.6613	0.104	-0.063965	0.078125	11.3028	-97.5646	1415.361	-1.2766	1.2922	-0.27662	-28.6	-65.225	1263.485	-1.9457	1.0848	-0.022819	-64.347	138.482	917.1155	-1.1719	0.6875	-0.0073242	-16.98	103.41	809.9565	-1.2031	0.5459	-0.20996
0.064	-88.8026	-42.049	1052.265	-1.4824	1.0371	-0.14404	-36.9917	45.115	30.3173	0.098242	-0.021191	-0.081543	-23.942	34.069	23.7971	0.10938	-0.063965	0.080078	-1.323	-78.94	1413.092	-1.3066	1.2969	-0.28516	-34.381	-39.41226	1264.653	-2.0746	1.1667	-0.0061686	-58.333	130.696	895.2039	-1.1294	0.67188	-0.003418	-6.452	108.107	770.777	-1.1543	0.52344	-0.19727
0.066	-67.584	-60.0694	1061.961	-1.7344	1.1641	-0.13086	-24.724	41.5155	40.0547	0.090039	-0.022363	-0.080371	-12.216	40.793	32.0757	0.1123	-0.06543	0.07959	-0.306000000000001	-73.332	1404.012	-1.4136	1.3149	-0.29736	-30.92	-8.17529	1270.9103	-2.1822	1.243	0.0033191	-33.345	129.837	880.0196	-1.0815	0.65576	0.0024414	-17.964	100.1754	747.4025	-1.1148	0.5061	-0.18848
0.068	-29.226	-103.204	1089.063	-1.8918	1.2659	-0.10547	-29.378	37.9565	29.2989	0.082324	-0.021973	-0.078027	-32.715	54.215	28.7849	0.11914	-0.061523	0.083984	-14.683	-59.245	1354.2637	-1.4844	1.332	-0.29932	-32.909	-6.9488	1264.47	-2.2695	1.3066	0.0063477	-34.797	121.741	859.3097	-1.0156	0.63623	0.0078125	36.2456	87.9656	712.526	-1.0835	0.48584	-0.17334
0.07	-16.272	-112.881	1144.09	-2.0083	1.3716	-0.073242	-31.189	19.1753	25.9781	0.081543	-0.021484	-0.07666	-14.285	54.4472	25.6733	0.11816	-0.052734	0.086426	8.033	-41.55	1333.178	-1.6504	1.3887	-0.29785	-43.115	-24.2914	1266.698	-2.3466	1.3644	-0.0039344	-32.103	109.0654	830.123	-0.979	0.625	0.0073242	21.729	94.4704	710.566	-1.0308	0.46436	-0.16699
0.072	-31.622	-83.487	1193.872	-2.0605	1.5	-0.027344	-18.068	23.8715	25.4478	0.078809	-0.014843	-0.072559	-12.64	28.8132	30.9035	0.12256	-0.047852	0.092285	-10.651	-49.5052	1314.217	-1.7858	1.4455	-0.29126	-26.938	-20.3063	1277.7712	-2.411	1.4096	-0.013417	-34.547	120.56643	781.572	-0.91602	0.60352	0.010742	20.176	108.4163	689.113	-1.0093	0.44971	-0.15234
0.074	-39.0558	-43.97	1230.851	-2.0503	1.5649	-0.010254	-12.267	28.5043	27.4432	0.081543	-0.0088867	-0.070508	-1.834	24.2289	24.018	0.12988	-0.03418	0.094727	9.894	-68.136	1332.372	-1.9214	1.5142	-0.28467	-70.253	-3.058	1284.1261	-2.4663	1.4461	-0.020979	-37.876	131.28568	753.168	-0.87208	0.58741	0.014404	0.503999999999998	104.3185	683.5842	-0.95898	0.42969	-0.14258
0.076	-14.189	-24.244	1267.407	-1.9785	1.6602	0.024902	-23.166	28.6104	24.4867	0.083105	-0.0084961	-0.070508	-33.167	36.9841	12.287	0.12451	-0.036133	0.084961	40.095	-69.106	1349.589	-2.0601	1.6196	-0.28125	-59.075	14.686	1298.441	-2.4988	1.4879	-0.026326	-47.126	157.3519	735.5876	-0.82764	0.57129	0.01416	9.302	96.4318	664.8425	-0.92236	0.41895	-0.13086
0.078	14.518	-16.7793	1291.305	-1.8992	1.7151	0.032715	-24.316	25.4507	27.98542	0.0875	0.0047852	-0.070605	-36.371	36.2019	20.2571	0.12793	-0.040527	0.089355	37.2225	-44.309	1353.9677	-2.1108	1.6626	-0.29248	-74.8409	-0.875999999999998	1315.0511	-2.5112	1.5181	-0.030762	-33.617	155.475	741.876	-0.7793	0.55078	0.01123	-10.763	103.7375	622.8407	-0.88818	0.40381	-0.11768
0.08	-5.121	-25.328	1279.418	-1.8164	1.7344	0.043457	-33.938	24.44734	15.3095	0.086426	0.0029297	-0.068848	-41.143	33.1539	27.9019	0.12573	-0.036133	0.09082	14.7337	-5.9574	1382.8839	-2.1914	1.7402	-0.31055	-62.895	-14.972	1301.8985	-2.4908	1.5465	-0.032761	-38.291	141.5184	706.1528	-0.75439	0.53857	0.014648	-20.068	99.405	610.6442	-0.8374	0.38525	-0.10889
0.082	0.280000000000001	-17.49	1262.949	-1.7129	1.7031	0.047852	-61.46748	34.7809	36.7938	0.089746	0.0071289	-0.069434	-55.521	35.1437	26.5409	0.12598	-0.033203	0.088867	-18.064	3.72	1380.5082	-2.228	1.79	-0.31787	-99.605	-28.7132	1279.6529	-2.4412	1.5679	-0.038086	-60.9943	133.21592	670.5827	-0.7041	0.51367	0.011719	-24.326	103.277	623.0539	-0.81396	0.37646	-0.10645
0.084	-31.791	-24.423	1267.655	-1.6694	1.6763	0.049316	-37.545	39.921	42.5516	0.083203	0.0091797	-0.071582	-50.383	33.88	18.6435	0.12695	-0.030273	0.088379	-0.853999999999999	9.77092	1391.0523	-2.2554	1.8364	-0.32178	-106.132	-28.127	1255.9695	-2.3645	1.5713	-0.04266	-72.6168	128.6045	656.0704	-0.67041	0.49317	0.010742	-30.647	102.295	595.29029	-0.76953	0.35791	-0.092773
0.086	-41.0356	-26.519	1283.5539	-1.5879	1.6035	0.041992	-36.05	38.163	43.4075	0.078906	0.012695	-0.069238	-71.5038	32.659	24.416	0.12891	-0.025879	0.087891	-24.333	-2.859	1378.694	-2.2573	1.8813	-0.31543	-91.297	-26.915	1275.586	-2.2759	1.5428	-0.054212	-75.0615	140.3668	646.727	-0.63184	0.4707	0.011719	-25.091	118.093	565.5122	-0.74146	0.33789	-0.080567
0.088	-43.631	-43.331	1298.428	-1.5352	1.5513	0.038086	-27.552	46.0123	17.6931	0.070703	0.012597	-0.067871	-37.674	45.042	38.3298	0.13672	-0.017578	0.084961	-21.106	-12.323	1378.563	-2.2397	1.8892	-0.31006	-110.9391	8.807	1274.1688	-2.1792	1.4927	-0.064453	-66.828	152.6595	638.094	-0.58643	0.4458	0.0092773	-15.481	114.6577	526.8168	-0.71875	0.32227	-0.076172
0.09	-36.272	-71.399	1298.836	-1.4985	1.5044	0.034668	-49.0266	32.5811	23.0622	0.064453	0.019043	-0.071289	-37.229	57.577	42.15129	0.14624	-0.0095214	0.086182	-38.5404	-27.861	1375.6789	-2.1733	1.895	-0.30811	-79.502	31.838	1276.93	-2.0916	1.4349	-0.076607	-74.407	157.67	599.826	-0.55908	0.43408	0.012207	-30.987	105.6673	523.8795	-0.69287	0.30518	-0.052246
0.092	-11.072	-96.0124	1296.529	-1.4644	1.4478	0.035156	-36.4639	20.5604	19.257	0.057617	0.027539	-0.070117	-40.868	48.738	28.3907	0.15869	0.0043945	0.084473	-30.793	-24.2158	1356.8538	-2.0964	1.8811	-0.30591	-99.717	32.321	1264.52	-2.0122	1.3704	-0.085179	-79.829	128.467	557.5629	-0.51709	0.40381	0.013184	-5.562	98.32	495.4855	-0.67627	0.29541	-0.054688
0.094	-4.563	-99.355	1321.669	-1.459	1.416	0.036621	-42.885	24.8786	25.574	0.050293	0.038476	-0.070801	-40.214	17.5405	22.2549	0.16602	0.016602	0.082031	-34.305	-23.943	1324.337	-2.002	1.8574	-0.2998	-96.7447	32.154	1248.9909	-1.9467	1.3049	-0.090643	-65.7865	115.637	521.277	-0.48829	0.38037	0.0087891	-3.933	114.502	469.5889	-0.65186	0.28418	-0.044922
0.096	-3.237	-67.758	1364.511	-1.4683	1.3599	0.02832	-35.362	37.0253	30.5947	0.039746	0.05293	-0.073535	-24.33	21.484	25.8498	0.17993	0.02124	0.076172	-18.618	-14.693	1296.622	-1.8628	1.8149	-0.28955	-115.289	51.541	1243.9183	-1.8971	1.252	-0.091315	-48.239	121.7469	499.5801	-0.46191	0.35693	0.003418	-11.144	107.9832	430.3661	-0.62891	0.27808	-0.037842
0.098	-42.319	-56.516	1389.514	-1.4902	1.315	0.021241	-32.465	27.7219	46.0401	0.034766	0.068555	-0.075488	-36.836	31.515	9.9065	0.19385	0.023926	0.074219	12.034	-17.064	1266.499	-1.7746	1.7727	-0.2854	-127.4013	89.456	1240.1719	-1.8672	1.1973	-0.09082	-63.72	117.5258	469.2101	-0.4292	0.32861	-0.00048828	-35.136	112.24937	407.9678	-0.59619	0.27441	-0.031738
0.1	-44.662	-67.058	1407.895	-1.5244	1.2676	0.013672	-34.602	28.1228	33.5038	0.02832	0.084473	-0.074219	-48.464	41.7682	34.2854	0.20459	0.03125	0.076172	23.622	11.821	1276.8	-1.6948	1.7368	-0.28271	-111.6451	106.626	1233.7954	-1.8446	1.1546	-0.093846	-43.554	93.706	451.3409	-0.41016	0.31055	-0.0019531	-19.408	96.4989	398.394	-0.55859	0.26855	-0.025879
0.102	-32.909	-99.914	1427.54	-1.5542	1.2192	0.01123	-23.405	31.10424	32.0905	0.028027	0.098337	-0.074512	-39.401	49.954	50.6051	0.2124	0.043945	0.073242	28.6764	54.0132	1289.679	-1.626	1.6797	-0.26074	-122.7039	110.354	1225.26663	-1.8316	1.1134	-0.093653	-41.828	102.886	426.2738	-0.37988	0.28857	-0.0048828	-51.876	115.442	381.138	-0.53906	0.2627	-0.023926
0.104	-71.551	-110.284	1422.904	-1.5781	1.1992	0.012207	-46.6613	36.1563	14.639	0.023731	0.11572	-0.075976	-30.019	42.087	39.4285	0.22607	0.053711	0.070801	-2.4168	80.393	1295.1966	-1.5972	1.6587	-0.25342	-98.4597	85.505	1208.3592	-1.8202	1.0825	-0.091702	-32.803	120.7799	391.594	-0.35816	0.27076	-0.010986	-39.5754	118.085	353.0588	-0.49512	0.25391	-0.016602
0.106	-71.397	-99.3646	1422.6747	-1.605	1.1743	0.0068359	-44.273	31.886	29.1039	0.021777	0.12666	-0.074804	-17.979	33.758	32.750675	0.23144	0.062256	0.064698	21.15577	83.85	1303.722	-1.5684	1.6191	-0.23438	-107.7223	58.9655	1188.5184	-1.8003	1.0527	-0.083696	-20.719	127.4608	386.1126	-0.33496	0.24805	-0.0097656	-38.779	111.293	344.9257	-0.45972	0.25024	-0.012451
0.108	-118.1148	-80.094	1423.609515	-1.6179	1.1678	-0.0056152	-24.73	31.604	43.562	0.019043	0.13691	-0.07832	-35.797	21.6938	28.5093	0.24023	0.072754	0.060059	22.057	88.616	1270.493	-1.5523	1.5874	-0.21948	-71.755	52.677	1170.983	-1.7769	1.0298	-0.078125	-17.051	135.027	383.206	-0.3042	0.22217	-0.021973	-46.3926	119.576	328.3486	-0.41748	0.24219	-0.010254
0.11	-123.409	-72.951	1408.4124	-1.6304	1.1704	-0.016113	-27.627	27.8421	27.49854	0.017578	0.15234	-0.07959	-30.709	22.788	31.8806	0.24756	0.083008	0.055176	4.916	92.463	1238.0722	-1.5381	1.5557	-0.21289	-48.841	68.093	1148.9362	-1.7437	1.0076	-0.073826	-23.723	137.139	388.357	-0.29102	0.21143	-0.023926	-31.777	121.469	302.0614	-0.35889	0.22998	-0.0024414
0.112	-179.022	-76.9524	1401.702	-1.6538	1.188	-0.025391	-20.706	24.7843	21.8026	0.019727	0.17021	-0.075879	-6.01	30.7759	42.6805	0.24658	0.088379	0.050293	14.705	92.598	1213.22	-1.5039	1.5117	-0.20508	-36.477	93.6705	1128.3054	-1.7019	0.98281	-0.06914	-45.439	109.498	344.833	-0.25781	0.18066	-0.022949	-38.483	118.526	288.5732	-0.3335	0.22412	-1.7347e-14
0.114	-141.8802	-84.9472	1381.331	-1.6719	1.1934	-0.028809	-35.754	19.3103	28.6271	0.019531	0.18623	-0.080274	-8.604	42.6967	25.8044	0.23877	0.10156	0.043945	0.359000000000002	92.559	1189.06	-1.4785	1.4961	-0.19922	-29.16	89.3073	1105.9203	-1.6472	0.95468	-0.063279	-45.468	96.384	304.0428	-0.23731	0.16553	-0.026856	-17.079	96.3726	263.2789	-0.28564	0.19336	0.003418
0.116	-118.557	-81.183	1367.839	-1.7188	1.2188	-0.026367	-9.306	31.2979	34.8762	0.017969	0.19248	-0.080274	-11.472	24.5525	25.770989	0.23242	0.11035	0.036133	19.1471	91.04	1169.714	-1.4355	1.4453	-0.19043	-39.087	81.372	1100.5213	-1.5975	0.92246	-0.063772	-44.539	82.1189	286.6248	-0.21143	0.14697	-0.027344	-17.41	84.157	254.80404	-0.25538	0.18238	0.0021972
0.118	-97.403	-46.4318	1356.622	-1.7645	1.2395	-0.022949	-5.819	54.5178	20.3531	0.017871	0.19434	-0.0875	-11.382	15.5053	34.2884	0.21484	0.11572	0.028809	6.6859	75.0195	1153.09943	-1.3901	1.4117	-0.18238	-16.253	74.182	1085.5965	-1.5503	0.89697	-0.064941	-23.931	89.82	246.4943	-0.17969	0.12451	-0.031738	5.131	88.1704	237.2431	-0.2251	0.16406	0.003418
0.12	-110.997	-7.7938	1386.4725	-1.8184	1.2656	-0.020996	-5.768	60.6177	41.0105	0.01416	0.19775	-0.093262	6.176	22.46781	46.4603	0.18701	0.13281	0.029297	34.8815	46.428	1120.7046	-1.3413	1.3794	-0.17139	-39.606	91.55	1065.3177	-1.5143	0.87002	-0.063867	-22.439	78.851	249.57486	-0.16406	0.10938	-0.034668	-34.239	80.423	229.07	-0.18311	0.14551	0.0014648
0.122	-122.468	17.3288	1395.312	-1.8926	1.3047	-0.017578	-16.042	32.7972	33.5002	0.014551	0.19394	-0.095508	-26.659	48.1862	35.7912	0.16504	0.13867	0.032227	30.313832	50.612	1091.448	-1.2734	1.3281	-0.1582	-43.915	113.5471	1038.2105	-1.4848	0.84336	-0.061035	-39.168	68.378	225.7875	-0.13428	0.092773	-0.039551	-11.608	92.7816	213.8373	-0.16211	0.13672	0.01123
0.124	-95.8488	9.32196	1427.0348	-1.9336	1.3281	-0.0053711	-14.011	11.3114	37.13677	0.026172	0.19776	-0.098438	-9.888	47.566	38.7038	0.12939	0.14746	0.031738	38.4411	85.913	1061.212	-1.2437	1.3091	-0.15625	-62.947	127.313	1015.1817	-1.457	0.81954	-0.061426	-27.599	73.9905	201.2982	-0.1189	0.080567	-0.039551	-21.957	94.4883	203.599	-0.125	0.12549	0.012207
0.126	-90.251	-5.2445	1434.59805	-2.0254	1.373	-0.02832	-26.075	14.72164	20.448911	0.029297	0.20205	-0.1	-21.099	31.875	38.8522	0.098146	0.15673	0.036377	16.587	102.747	1069.132	-1.1816	1.2598	-0.14844	-43.131	141.459	997.57273	-1.4253	0.8003	-0.056153	-18.798	94.229	179.5057	-0.099609	0.070801	-0.038574	-35.818	93.104	194.1388	-0.097899	0.12158	0.017822
0.128	-83.685	6.1549	1423.9688	-2.1088	1.4174	-0.041259	-44.0157	24.431	39.7183	0.041308	0.20937	-0.11132	-34.488	16.7858	19.9339	0.071777	0.16553	0.040039	26.152	117.2732	1055.7265	-1.1343	1.229	-0.13794	-50.362	136.819	949.469	-1.3906	0.7793	-0.051758	-29.29	96.7834	172.8025	-0.075684	0.061523	-0.044922	-36.154	77.615	197.4027	-0.073242	0.11426	0.020508
0.13	-100.152	6.861	1425.817	-2.2148	1.459	-0.058594	-15.923	9.56	61.6074	0.049316	0.21289	-0.10889	-41.209	6.2987	22.5827	0.038574	0.18311	0.051758	7.066	101.6736	1047.199	-1.0952	1.1919	-0.12744	-34.999	124.008	932.1167	-1.3488	0.7582	-0.049023	-15.567	99.088	180.3139	-0.067383	0.058594	-0.04541	-37.954	73.344	182.4081	-0.043945	0.10596	0.021484
0.132	-121.662	16.021	1426.4475	-2.3809	1.5293	-0.06543	-36.8213	-1.04	72.921	0.061426	0.21963	-0.12197	-41.737	6.7434	20.9168	0.020996	0.18994	0.051758	-11.678	117.538	1011.773	-1.0371	1.1465	-0.1123	-36.745	115.0669	920.79794	-1.2953	0.73906	-0.048047	-21.119	79.531	176.981	-0.046387	0.046875	-0.053711	-23.613	86	153.9729	-0.035156	0.10498	0.027344
0.134	-123.276	6.233	1416.81023	-2.457	1.5684	-0.064453	-40.685	-11.588	68.6767	0.066993	0.22461	-0.13652	-31.396	22.79436	28.57043	-0.0024414	0.20508	0.066406	-28.19	127.028	980.073	-1.0132	1.1235	-0.1167	-30.702	134.7836	887.6308	-1.2422	0.71406	-0.046484	-46.327	68.851	137.3895	-0.031983	0.040527	-0.047363	-30.284	85.066	140.7963	-0.0078125	0.095703	0.035645
0.136	-126.59	-16.8882	1401.4066	-2.5742	1.6484	-0.0625	-26.796	-29.812	75.7393	0.066993	0.23008	-0.15488	-48.195	42.9389	25.5404	-0.013916	0.21362	0.079101	-41.7995	147.152	933.9178	-0.9624	1.0688	-0.10303	-39.884	140.5168	867.23	-1.1847	0.68838	-0.044531	-46.029	56.25022	121.7294	-0.018555	0.032227	-0.047363	-14.679	74.4047	136.7885	0.010742	0.090088	0.039307
0.138	-72.896	-52.591	1391.527	-2.6072	1.6926	-0.060059	-24.019	-41.4033	128.4956	0.053613	0.23486	-0.16885	-47.7983	45.1509	25.6303	-0.024902	0.2207	0.094238	-22.5568	162.34	890.737	-0.92798	1.032	-0.094726	-39.356	134.8864	834.35	-1.1265	0.66455	-0.044922	-34.241	55.979	131.1673	-0.003418	0.020508	-0.05127	-29.632	71.426	108.4984	0.028809	0.079102	0.038086
0.14	-57.969	-59.722	1379.4718	-2.5879	1.7266	-0.058594	-43.09	-35.03387	163.451	0.016113	0.23389	-0.1875	-49.719	27.3655	28.4948	-0.030273	0.23145	0.10742	-37.16	144.443	853.076	-0.89111	0.98877	-0.085938	-35.582	115.042	816.378	-1.0738	0.64062	-0.046387	-42.0153	65.1627	103.11082	0.010986	0.018311	-0.046875	-15.359	75.296	90.5934	0.053223	0.08252	0.053223
0.142	-59.705	-16.5843	1355.689	-2.4878	1.7251	-0.067383	-26.379	-28.2512	187.6771	-0.041015	0.23613	-0.19903	-32.978	21.1561	33.9395	-0.032227	0.23389	0.12158	-28.3727	108.702	821.2062	-0.85645	0.93945	-0.070313	-37.089	113.38	783.8721	-1.0233	0.61914	-0.046973	-48.92	60.6823	83.63557	0.023926	0.015625	-0.04541	-20.128	73.7868	84.2891	0.067383	0.07959	0.054199
0.144	-74.49	32.2096	1336.522	-2.4219	1.709	-0.07959	2.682	-36.5023	228.792	-0.11406	0.24053	-0.21162	-42.861	29.849	24.84872	-0.033203	0.24268	0.13574	-16.96	75.592	781.994	-0.83984	0.91504	-0.063965	-64.9072	118.3828	763.1582	-0.97012	0.59102	-0.045019	-52.511	42.6037	63.6531	0.041992	0.0092773	-0.049316	-39.303	70.01099	91.8086	0.092773	0.070313	0.057129
0.146	-69.302	75.961	1306.019	-2.2813	1.6504	-0.10352	-8.87	-17.5559	284.789	-0.19297	0.25302	-0.22256	-58.5325	28.47874	30.5412	-0.035889	0.24805	0.15234	-21.388	89.667	750.593	-0.80078	0.86426	-0.045898	-84.6311	133.5244	760.7347	-0.92549	0.56591	-0.044922	-46.53	32.1441	52.712	0.057129	0.0063477	-0.048828	-28.095	70.467	104.671	0.10913	0.066651	0.054443
0.148	-60.097	80.745	1302.5281	-2.1743	1.603	-0.11719	-14.885	16.4987	365.3626	-0.27627	0.26875	-0.22637	-40.129	11.20557	41.0511	-0.037109	0.25146	0.16699	-14.485	123.571	730.6558	-0.77075	0.82422	-0.036377	-82.893	139.7774	763.441	-0.87646	0.54541	-0.044434	-40.791	35.5763	45.4024	0.069336	-0.0078125	-0.052734	-37.078	71.045	85.6901	0.125	0.06543	0.056641
0.15	-69.55	81.615	1298.271	-2.0894	1.5493	-0.12598	-28.823	43.7784	429.1	-0.36426	0.28418	-0.2334	-37.571	17.4058	32.8986	-0.046875	0.24951	0.17432	-18.525	145.299	713.3742	-0.73438	0.78516	-0.029785	-58.103	143.465	745.6102	-0.8334	0.525	-0.042285	-22.225	38.1963	48.40908	0.08374	-0.015136	-0.056153	-49.6939	47.036	57.0681	0.13672	0.058105	0.061035
0.152	-72.68	74.49	1289.0343	-2.0054	1.4985	-0.12695	-22.316	53.2197	523.087	-0.46026	0.31005	-0.25361	-34.15	21.0177	17.5259	-0.055664	0.25488	0.19531	-12.111	148.591	686.4973	-0.68555	0.73242	-0.018555	-65.594	141.47	706.12931	-0.79287	0.504	-0.04707	-19.05	25.321	48.0329	0.096191	-0.025879	-0.05957	-56.536	38.41	53.8616	0.14209	0.055176	0.061523
0.154	-100.91	88.919	1273.4104	-1.9622	1.4602	-0.12037	-12.511	73.0076	618.688	-0.57539	0.32676	-0.27207	-43.062	24.3619	20.37057	-0.061523	0.26514	0.2168	-21.248	144.894	648.8778	-0.65479	0.70508	-0.0073242	-60.415	138.472	680.6911	-0.75225	0.48134	-0.042773	-21.737	20.6786	42.3909	0.11279	-0.032715	-0.063477	-51.6907	42.252	56.9844	0.14258	0.049316	0.0625
0.156	-98.851	104.898	1260.9908	-1.9316	1.4258	-0.11523	-16.642	73.655	718.5115	-0.72227	0.34785	-0.28379	-32.143	32.3393	17.610314	-0.064941	0.27392	0.23413	-31.412	138.015	653.057	-0.59863	0.65039	0.0014648	-49.263	147.4731	643.5881	-0.71631	0.46455	-0.044141	-35.614	38.2341	38.4468	0.12061	-0.037598	-0.062012	-50.156	41.8297	57.6007	0.13477	0.042969	0.062988
0.158	-113.25	105.325	1219.5363	-1.894	1.3833	-0.09668	-13.796	72.841	794.8087	-0.89629	0.36484	-0.30488	-28.706	39.7129	32.0176	-0.071289	0.28467	0.24561	-23.078	127.819	624.675	-0.55761	0.60791	0.0075684	-30.569	151.9928	608.4812	-0.67773	0.44727	-0.044434	-33.283	47.7311	33.9088	0.125	-0.051758	-0.074707	-54.6009	39.2518	48.5883	0.12939	0.042969	0.058594
0.16	-109.857	77.169	1164.7024	-1.877	1.3633	-0.09082	13.263	66.648	858.832	-1.1167	0.38623	-0.31592	-19.233	47.741	42.7868	-0.072266	0.30469	0.25928	-36.152	130.596	589.744	-0.51074	0.56055	0.014648	-41.147	134.9104	583.59	-0.64883	0.43359	-0.042773	-25.352	44.75	42.1261	0.12793	-0.052978	-0.070801	-24.69	29.9429	37.1524	0.12451	0.038086	0.064941
0.162	-97.263	45.3474	1132.376	-1.8296	1.3228	-0.080078	6.96299999999999	55.217	908.492	-1.388	0.41084	-0.31123	-17.23	3.19909	92.874	-0.070801	0.31494	0.2583	-14.711	128.267	537.5956	-0.45801	0.50537	0.023438	-15.028	131.56214	549.1854	-0.61709	0.42119	-0.045117	-32.767	38.984	47.58	0.12842	-0.057129	-0.076172	-33.458	32.439	37.6433	0.11841	0.038086	0.067138
0.164	-101.159	38.2394	1111.5	-1.7837	1.2891	-0.072022	-17.7718	45.204	908.937	-1.6983	0.45439	-0.29717	-30.044	-26.2081	158.161	-0.063965	0.32959	0.25781	-32.606	115.9634	490.2565	-0.4292	0.47314	0.024414	-5.35	115.6731	509.136	-0.58584	0.40596	-0.042383	-45.0467	40.986	27.78004	0.12549	-0.065918	-0.077637	-21.409	31.793	46.6387	0.10889	0.037109	0.065918
0.166	-102.1506	61.113	1110.669	-1.7358	1.2563	-0.05957	-23.582	35.52	908.416	-2.028	0.51534	-0.28076	-9.48699999999999	-6.9959	215.052	-0.058106	0.33935	0.23829	-7.62	105.2321	447.172	-0.37354	0.41504	0.031738	-23.024	133.0978	495.491	-0.55781	0.38965	-0.045801	-45.264	29.425	-0.0949999999999989	0.11816	-0.070313	-0.083008	-33.582	28.442	44.8632	0.10938	0.043457	0.067871
0.168	-106.4014	70.837	1094.351	-1.6602	1.1992	-0.054688	-7.954	-4.5663	879.922	-2.3215	0.59004	-0.25107	-54.388	23.509	288.703	-0.052246	0.35547	0.20166	-9.517	109.8116	411.526	-0.33886	0.38038	0.033936	-44.428	129.41097	491.931	-0.53125	0.38086	-0.04541	-31.361	21.5874	7.666	0.11182	-0.072266	-0.083984	-18.221	40.0598	26.0526	0.11084	0.049805	0.067871
0.17	-82.98	83.505	1075.5261	-1.623	1.1699	-0.049316	-2.86	-27.0599	864.668	-2.5293	0.67773	-0.18652	-85.329	-6.055	359.891	-0.074219	0.375	0.13867	19.067	99.787	385.0601	-0.29834	0.34766	0.040527	-53.875	149.622	472.1096	-0.50674	0.36944	-0.04502	-16.224	14.222	13.9444	0.10254	-0.075683	-0.08667	-30.653	35.2314	29.70369	0.11914	0.052734	0.068848
0.172	-97.684	95.006	1031.1391	-1.5566	1.1074	-0.046875	-31.664	-30.1831	865.422	-2.6521	0.84453	-0.064357	-116.86	-84.116	398.905	-0.098145	0.38721	0.11035	-7.523	97.4816	386.5672	-0.25586	0.30811	0.048828	-25.237	144.964	456.597	-0.48008	0.35273	-0.047071	-21.836	15.4796	10.5722	0.1001	-0.075684	-0.083984	-41.005	23.4725	45.1124	0.12183	0.057128	0.06836
0.174	-86.813	109.2709	1013.9149	-1.5115	1.0618	-0.048584	-33.424	-22.641	849.194	-2.7523	1.0692	-0.006543	-89.461	-108.424	427.58314	-0.21875	0.39844	0.044434	-3.741	101.74849	363.6258	-0.23535	0.28613	0.053711	-43.152	146.328	426.9975	-0.45195	0.34492	-0.047071	-26.611	14.30175	21.3726	0.097168	-0.073242	-0.094238	-29.951	14.9223	37.31605	0.12451	0.060059	0.067383
0.176	-89.527	128.5953	999.7901	-1.4683	1.0142	-0.047852	-16.89	-29.323	842.9693	-2.7519	1.2743	-0.012012	-77.84	-78.549	484.375	-0.3518	0.41504	0.0063479	-9.164	110.2574	341.8181	-0.18994	0.24463	0.070313	-32.153	118.844	397.8542	-0.42237	0.33154	-0.052637	-11.154	34.5816	22.0186	0.095703	-0.070313	-0.096191	-20.633	25.938	22.5878	0.13184	0.067383	0.066406
0.178	-69.83	147.555	991.204	-1.4077	0.96045	-0.040039	-16.134	-23.852	834.975	-2.5707	1.3633	-0.029688	-123.479	-17.046	581.2229	-0.51514	0.43604	-0.019531	-25.321	117.628	301.8012	-0.15942	0.21045	0.065918	-23.709	109.147	391.817	-0.39014	0.31836	-0.051758	-21.499	47.448	36.082	0.10352	-0.068359	-0.1001	-28.551	39.972	20.59884	0.13818	0.068359	0.066406
0.18	-62.956	156.578	959.937	-1.3867	0.93555	-0.038574	-13.305	-20.5344	865.7677	-2.2515	1.3384	-0.070313	-128.688	16.9836	657.718	-0.77148	0.49609	-0.037598	-30.607	110.308	306.694	-0.13281	0.18066	0.072266	-19.795	110.518	356.8449	-0.36045	0.3041	-0.050684	-24.523	58.467	38.9981	0.1084	-0.067383	-0.10473	-45.453	39.746	25.5585	0.14893	0.070313	0.068359
0.182	-81.99492	153.353	925.628	-1.3276	0.88965	-0.028809	-13.104	-6.48	881.008	-1.8589	1.2063	-0.11816	-138.83	51.34	691.332	-0.90723	0.54688	-0.039551	-31.076	116.953	274.263	-0.09668	0.14795	0.080566	-25.76	107.69213	337.7881	-0.32705	0.28994	-0.058789	-26.127	40.0705	40.593	0.11279	-0.068359	-0.11475	-22.32	19.3714	53.6639	0.15527	0.082031	0.067872
0.184	-66.316	127.507	883.1802	-1.2788	0.86622	-0.027588	18.121	-3.55399999999999	886.3144	-1.5059	1.0508	-0.16348	-104.5806	62.953	765.926	-1.2085	0.6665	-0.045898	-37.087	107.176	244.401	-0.085449	0.13135	0.083496	-35.452	85.369	314.154	-0.29541	0.27119	-0.059961	-23.411	27.1243	40.9606	0.1167	-0.071777	-0.11621	-5.593	16.542	38.4024	0.16406	0.087402	0.063965
0.186	-50.782	127.8052	814.045	-1.228	0.83838	-0.021973	-14.855	11.138	900.3336	-1.2508	0.91758	-0.2123	-64.531	45.149	862.012	-1.4392	0.76294	-0.054443	-51.0144	104.652	221.5622	-0.057129	0.10303	0.092285	-23.623	82.246	307.0527	-0.26338	0.2541	-0.064649	-30.653	22.0661	37.2575	0.11523	-0.072754	-0.11621	-1.288	16.085	19.34896	0.1709	0.091309	0.066406
0.188	-51.956	129.8173	768.188	-1.1587	0.79248	-0.020508	-30.0309	15.149	900.4133	-1.1128	0.8458	-0.25498	-5.473	47.583	1012.802	-1.6577	0.85791	-0.067871	-34.693	83.8202	191.2399	-0.032471	0.076416	0.096436	-27.397	97.2664	279.8263	-0.23389	0.23535	-0.070801	-30.945	27.2607	24.237	0.11279	-0.068848	-0.12354	-15.647	7.9	23.3376	0.17578	0.09668	0.062988
0.19	-48.099	129.885	739.228	-1.127	0.76758	-0.017578	-42.22128	-18.264	903.7979	-1.0444	0.80908	-0.2749	-43.73	94.8829	1099.375	-1.9121	0.97949	-0.064941	-29.662	69.122	173.087	-0.01709	0.05957	0.091797	-31.648	104.513	267.9784	-0.20517	0.2126	-0.073828	-17.16	32.227	21.908	0.11158	-0.065674	-0.1294	-8.312	16.4585	34.7284	0.17871	0.10254	0.061523
0.192	-12.497	116.316	730.0037	-1.0522	0.72314	-0.01123	-26.572	-69.213	883.239	-1.0181	0.81407	-0.26699	-58.4133	132.581	1112.383	-2.0288	1.0581	-0.066895	-30.364	56.666	141.118	0.014648	0.03125	0.083984	-29.918	103.75	240.6746	-0.18154	0.19668	-0.07666	-17.221	40.353	22.8163	0.10693	-0.060547	-0.13037	-27.212	41.852	27.1162	0.17725	0.10717	0.05957
0.194	-18.271	125.86	708.2362	-0.99586	0.68677	-0.010498	-14.061	-123.711	907.453	-0.99052	0.82783	-0.25205	-20.0272	102.94	1098.7117	-2.2656	1.2383	-0.068848	-36.594	48.792	139.6327	0.025391	0.02002	0.084961	-34.298	95.502	230.279	-0.16006	0.18262	-0.075488	-18.822	29.024	22.5777	0.09668	-0.049316	-0.13721	-34.672	50.315	16.7633	0.1709	0.11523	0.057617
0.196	-45.292	128.0544	693.925	-0.93701	0.65039	-0.0053711	-7.861	-159.407	925.208	-0.94795	0.83447	-0.24658	-27.5034	44.044	1105.7798	-2.4138	1.3948	-0.062744	-48.5456	52.335	124.6651	0.040039	0.0073242	0.081055	-44.11	92.424	212.07707	-0.14433	0.16592	-0.079688	-28.232	35.3519	23.4062	0.092285	-0.037598	-0.1377	-32.982	26.402	36.34563	0.16553	0.11426	0.060547
0.198	-26.114	126.0818	681.918	-0.85889	0.60986	-0.01123	1.48	-177.644	972.9531	-0.90078	0.83027	-0.25322	-48.55894	-2.493	1127.3827	-2.5273	1.5469	-0.05957	-48.2605	60.15141	118.0648	0.041259	-0.0007324	0.078125	-75.8161	78.0013	214.07173	-0.125	0.15088	-0.077637	-35.729	24.2326	47.8424	0.080078	-0.021484	-0.14063	-39.762	17.6264	41.5899	0.15723	0.12158	0.056641
0.2	-26.139	136.03345	665.501	-0.82227	0.5918	-0.00097656	11.873	-179.154	985.2862	-0.86865	0.81689	-0.271	-25.835	-82.6139	1144.7866	-2.5308	1.6782	-0.06543	-57.4875	67.7109	119.6374	0.041992	-0.0087891	0.072266	-50.794	68.7953	210.9387	-0.1124	0.14053	-0.083398	-22.266	35.0213	49.9381	0.075195	-0.0080569	-0.13867	-27.457	25.74574	40.6218	0.14258	0.13184	0.061035
0.202	-28.319	153.044	624.58	-0.74609	0.54297	-0.0019531	25.1755	-167.322	1005.8777	-0.84902	0.80235	-0.29434	-26.6662	-113.669	1142.159	-2.4683	1.7231	-0.069336	-53.55	81.068	112.2907	0.031738	-0.012695	0.087402	-29.377	82.2115	197.43732	-0.096289	0.12656	-0.085645	-20.655	42.984	44.377	0.066406	0.0063477	-0.13965	-43.692	25.7073	27.337	0.13062	0.14013	0.061036
0.204	-39.159	157.272	586.27787	-0.6875	0.51538	-0.0019531	29.03	-166.871	1038.626	-0.86133	0.79179	-0.31172	-20.5527	-111.561	1145.6874	-2.2319	1.7866	-0.073242	-44.727	80.342	90.3212	0.031738	-0.016602	0.086426	-35.475	91.0495	167.96	-0.079883	0.12071	-0.084473	-21.597	44.8476	24.6761	0.063477	0.025391	-0.14209	-52.7299	29.076	15.605	0.12549	0.15137	0.058105
0.206	-38.067	135.298	552.889	-0.625	0.48633	-0.0024414	26.1513	-150.932	1088.185	-0.90625	0.79297	-0.31211	41.051	-96.731	1144.7898	-1.9942	1.795	-0.06543	-62.108	83.029	79.1111	0.021484	-0.015137	0.081055	-36.051	91.0498	131.7781	-0.066993	0.11241	-0.086133	-24.239	23.0563	25.196	0.0625	0.031738	-0.13623	-40.102	28.9668	13.1588	0.11865	0.17285	0.062012
0.208	-63.3866	125.48	519.7086	-0.55078	0.44043	-0.0092773	27.0519	-118.5777	1139.4268	-0.96934	0.80195	-0.30781	86.31	-113.547	1147.908	-1.7769	1.7739	-0.060059	-60.195	78.62	63.8664	0.025391	-0.016113	0.08545	-43.777	77.9888	116.8457	-0.049316	0.10742	-0.088379	-55.0713	26.2103	20.7741	0.053711	0.045898	-0.14404	-32.444	35.03339	-5.99	0.10986	0.18555	0.064453
0.21	-44.084	123.2921	476.4272	-0.50977	0.42725	-0.01123	-5.9142	-72.482	1169.699	-1.0503	0.81885	-0.29443	71.245	-115.788	1166.9395	-1.562	1.6743	-0.051758	-45.989	68.9761	71.0903	0.025879	-0.016602	0.091309	-25.295	75.6717	102.60488	-0.038379	0.099121	-0.087403	-52.2753	34.7108	28.8168	0.054688	0.063477	-0.14966	-15.714	26.3755	13.5313	0.10303	0.20068	0.062012
0.212	-61.827	115.485	432.2403	-0.43555	0.39307	-0.01416	14.30619	-41.138	1204.879	-1.1275	0.83574	-0.28223	86.1561	-90.617	1217.9866	-1.4717	1.5723	-0.04834	-6.278	48.983	69.88903	0.028809	-0.024414	0.084473	-25.122	69.7393	110.3381	-0.021972	0.092578	-0.0875	-49.753	40.2751	33.4642	0.048828	0.074707	-0.14893	-42.949	29.063	19.2916	0.097657	0.208	0.066162
0.214	-58.568	110.885	385.4568	-0.39283	0.3711	-0.013916	-13.1496	-41.101	1209.0496	-1.2008	0.85527	-0.2708	53.8207	-54.0227	1285.72	-1.4214	1.4692	-0.030273	-21.021	49.8315	38.0811	0.028809	-0.025391	0.088379	-21.498	44.5242	115.7004	-0.0055663	0.084375	-0.089453	-19.973	28.4001	49.0355	0.04248	0.092773	-0.15771	-28.069	29.4282	34.167	0.094238	0.21484	0.067383
0.216	-32.808	107.066	377.35	-0.35645	0.35059	-0.01416	8.665	-39.595	1182.222	-1.2648	0.86153	-0.26181	69.6347	-22.82	1328.438	-1.3901	1.3706	-0.003418	-12.286	40.3162	36.8203	0.02832	-0.027832	0.074219	-17.891	36.0566	101.4795	0.0099608	0.080273	-0.095703	-24.623	18.0437	43.1386	0.039063	0.10205	-0.15381	-53.822	42.1552	37.5355	0.081055	0.22168	0.070801
0.218	-36.562	117.619	360.72	-0.29932	0.32227	-0.01416	13.86	-57.349	1179.684	-1.3176	0.86133	-0.25625	65.7653	-0.350999999999999	1333.319	-1.3828	1.3418	0.016602	-27.093	45.3797	33.7	0.025879	-0.027588	0.072754	-35.569	37.5798	99.406	0.027832	0.068359	-0.095703	-28.793	23.5286	17.4577	0.03125	0.11914	-0.15869	-52.367	44.809	33.3323	0.074707	0.21973	0.074707
0.22	-43.255	113.7819	356.1077	-0.27441	0.30859	-0.012207	28.396	-60.969	1180.846	-1.3589	0.85791	-0.25	74.345	-18.49	1305.299	-1.3804	1.2896	0.060547	-24.176	36.4256	33.9776	0.022949	-0.03125	0.065918	-37.096	45.4603	95.7916	0.051172	0.054981	-0.098926	-51.4984	25.158693	27.0414	0.02295	0.13183	-0.16259	-20.305	37.419	26.045	0.066406	0.23096	0.080078
0.222	-29.239	121.5589	333.7366	-0.2168	0.27881	-0.014648	27.2422	-78.736	1201.16	-1.3811	0.84199	-0.25019	14.138	-36.892	1279.2953	-1.3935	1.2578	0.090088	-22.686	52.8902	31.7282	0.014648	-0.024902	0.062988	-53.254	48.0716	90.682	0.070996	0.045898	-0.099805	-22.259	28.1227	33.575	0.01709	0.14648	-0.16748	-31.953	29.9548	22.0712	0.059327	0.23242	0.081543
0.224	-32.782	117.572	319.425	-0.17188	0.25953	-0.021485	22.9735	-90.9603	1230.9688	-1.4061	0.82452	-0.26348	-27.625	-57.081	1249.194	-1.4253	1.2388	0.1084	-20.647	35.3959	38.3615	0.0078125	-0.024902	0.061035	-34.248	57.5861	76.894	0.087793	0.037695	-0.10567	-25.672	42.021	36.0848	0.0083008	0.16748	-0.17334	-33.474	24.2636	17.0288	0.050781	0.23682	0.085938
0.226	-67.8218	131.429	292.5904	-0.12598	0.23535	-0.022461	37.1791	-108.929	1240.5014	-1.4507	0.8206	-0.27676	-16.366	-76.429	1259.415	-1.4858	1.2114	0.10645	-14.325	24.0584	60.2295	0.0048828	-0.01123	0.063477	-22.78	61.941	49.3827	0.10498	0.026758	-0.10703	-31.397	39.3586	23.4955	0.0068359	0.18115	-0.17578	-47.988	20.914	28.7929	0.042969	0.24463	0.094727
0.228	-76.25715	126.203	277.5209	-0.078125	0.21533	-0.014648	4.5649	-112.397	1246.51707	-1.5156	0.82588	-0.29013	-25.836	-100.46	1272.798	-1.5156	1.2012	0.09375	-13.974	21.7955	43.7884	-0.0029297	0.0014648	0.060547	-44.218	50.68	46.1173	0.11914	0.018066	-0.10645	-33.258	21.2721	29.7826	0.003418	0.20361	-0.17773	-6.249	21.9281	23.5552	0.04248	0.24463	0.099609
0.23	-29.729	118.918	255.429	-0.053711	0.20605	-0.02002	12.377	-98.271	1254.5064	-1.5991	0.83057	-0.29736	-6.892	-114.9299	1301.2091	-1.543	1.1602	0.066895	-20.038	41.371	37.85433	-0.011719	0.0092773	0.058594	-28.11	29.9807	31.832	0.12715	0.0070313	-0.11054	-10.25	19.7502	29.7077	0.0036622	0.22094	-0.1853	-29.143	38.509	23.75	0.027344	0.25098	0.10645
0.232	-30.254	109.7025	222.7626	-0.0043945	0.17773	-0.020996	-18.416	-81.165	1274.04	-1.7158	0.86006	-0.29854	-4.857	-149.138	1316.234	-1.5271	1.1047	0.042724	-33.691	50.524	38.9625	-0.015137	0.019043	0.056641	-18.934	24.027	49.913	0.1335	-0.0041015	-0.11299	-18.401	28.4602	48.4546	0.0058594	0.23438	-0.18555	-7.508	44.6893	28.4981	0.018555	0.25854	0.1145
0.234	-20.326	89.4278	208.92499	0.020019	0.15796	-0.027344	-38.6037	-62.2386	1277.372	-1.8578	0.90547	-0.2961	-4.569	-151.371	1355.26	-1.4917	1.0396	0.012207	-11.233	37.9414	54.9232	-0.014648	0.028809	0.057861	-21.244	38.22	18.7249	0.13233	-0.014649	-0.11768	-36.267	45.2078	39.0331	0.0029297	0.24561	-0.19238	-9.55399999999999	29.6695	28.608	0.0073242	0.26758	0.12402
0.236	-23.042	63.609	182.0084	0.039063	0.14502	-0.029297	-26.928	-55.14	1295.042	-2.0047	0.97344	-0.29961	-14.57	-108.768	1388.7033	-1.4414	0.95117	-0.026367	-0.0569999999999951	28.3065	28.3338	-0.013184	0.034668	0.05957	-28.952	36.8557	33.9947	0.13281	-0.027344	-0.11933	-10.864	42.6393	26.36329	-0.00048828	0.25537	-0.19434	-6.951	34.7885	41.9874	-0.013672	0.2749	0.13428
0.238	-21.72	52.899	166.5535	0.062012	0.12939	-0.039063	-25.6566	-65.89	1292.327	-2.1362	1.0497	-0.30479	-60.1058	-45.898	1392.884	-1.4253	0.92139	-0.039063	-14.588	19.0589	13.702	0.00048828	0.033203	0.062012	-16.413	37.6357	37.70499	0.13281	-0.033691	-0.12549	-8.232	17.00758	35.95085	-0.0073242	0.26758	-0.19678	-16.621	48.313	31.5186	-0.022949	0.28125	0.146
0.24	1.682	74.5523	131.1365	0.078613	0.12549	-0.040039	21.9756	-69.1477	1292.112	-2.2495	1.1333	-0.31982	-87.335	-36.70101	1412.465	-1.4272	0.89307	-0.056152	-15.08	21.3497	17.393	0.010254	0.036133	0.059082	-22.819	44.253	37.9834	0.13125	-0.037598	-0.12852	-10.296	12.389	28.2856	-0.01123	0.27563	-0.2041	-35.997	51.976	33.6837	-0.040039	0.28711	0.14941
0.242	-0.694000000000003	78.7725	120.3016	0.094238	0.11963	-0.041016	7.273	-59.76277	1289.672	-2.3284	1.1986	-0.33145	-105.02	-51.764	1439.807	-1.4668	0.89648	-0.057374	-19.402	36.8451	17.603	0.038086	0.035156	0.058594	-29.04	56.457	30.6458	0.13028	-0.032617	-0.12197	-5.717	0.7997	51.0089	-0.014648	0.28125	-0.20898	-33.632	36.237	48.0754	-0.04541	0.29517	0.16138
0.244	-2.121	73.5608	112.857	0.10107	0.11866	-0.042969	9.136	-32.9053	1271.975	-2.3746	1.2477	-0.34141	-112.43398	-70.551	1429.437	-1.5347	0.90869	-0.046387	-40.712	38.90375	10.11	0.059815	0.038574	0.055908	-34.803	42.101	27.3425	0.12598	-0.039258	-0.12744	-24.437	-11.4301	71.927	-0.015625	0.29443	-0.21973	-22.691	22.6138	35.5467	-0.05127	0.30566	0.1626
0.246	-12.161	67.9038	119.0903	0.11084	0.11621	-0.04248	7.568	-19.7823	1239.077	-2.3778	1.2883	-0.34062	-137.966	-79.478	1399.0881	-1.6753	0.94189	-0.020508	-52.7673	33.99042	16.7777	0.086914	0.035156	0.050293	-29.625	16.7474	27.6141	0.12041	-0.03877	-0.13106	-19.757	-3.7575	69.765	-0.022949	0.30029	-0.22607	-22.209	30.5688	24.2605	-0.049805	0.31738	0.17871
0.248	-21.365	68.5842	99.4495	0.12402	0.11084	-0.041504	10.3882	-8.3567	1229.345	-2.3556	1.317	-0.34775	-117.7218	-65.41	1369.0183	-1.7617	0.9707	-0.0097656	-43.308	23.6435	30.43688	0.12109	0.028809	0.04248	-32.373	32.0196	24.889	0.11084	-0.039551	-0.13281	-7.639	-6.2332	84.8553	-0.04541	0.30811	-0.23682	-28.434	30.7104	26.4428	-0.047363	0.32471	0.17969
0.25	-41.48635	71.065	83.98709	0.12842	0.10645	-0.045898	18.383	-1.6012	1221.3469	-2.3008	1.3281	-0.35742	-106.121	-58.156	1344.393	-1.9312	1.0454	0.015137	-37.309	20.6178	36.5454	0.13965	0.025879	0.035645	-30.329	27.6581	22.2616	0.10039	-0.032129	-0.13193	-19.6027	-31.4585	97.0406	-0.085447	0.31396	-0.24462	-26.415	7.7564	80.4014	-0.045898	0.34229	0.17871
0.252	-26.645	64.802	93.3217	0.13965	0.11182	-0.046387	10.75813	-14.2663	1233.1913	-2.2221	1.3306	-0.35947	-85.3616	-42.292	1342.555	-2.0476	1.0998	0.038574	-50.2231	33.314	44.61184	0.17578	0.026855	0.030273	-41.654	15.632	27.349	0.08584	-0.026074	-0.13232	-23.737	-69.4789	147.4074	-0.14648	0.32178	-0.25195	-27.396	-27.7728	144.902	-0.041504	0.34887	0.16943
0.254	-17.86	78.771	62.8548	0.14941	0.11084	-0.051513	35.8592	-22.544	1239.1758	-2.1277	1.3227	-0.35742	-70.5407	-64.0521	1341.148	-2.1519	1.1528	0.045898	-30.56	44.31	38.4759	0.19775	0.025879	0.0271	-22.765	8.8348	44.3657	0.071777	-0.013965	-0.1335	-22.232	-59.3492	176.0892	-0.25	0.33398	-0.25928	-62.169	-19.1311	168.818	-0.04248	0.35352	0.14404
0.256	-16.897	71.068	40.0445	0.15576	0.10791	-0.054688	-0.5031	-1.472	1225.103	-2.037	1.304	-0.36289	-45.601	-77.681	1343.012	-2.2773	1.2324	0.050293	-37.109	46.213	41.4559	0.22607	0.032227	0.023926	-23.07	26.8965	35.215	0.063574	-0.00068358	-0.13135	-16.573	-35.6923	195.38	-0.30518	0.34277	-0.26904	-20.263	16.8654	237.8021	-0.077637	0.3418	0.11279
0.258	-18.26	56.081	16.594	0.15869	0.10107	-0.058594	20.68289	15.2779	1228.742	-1.9461	1.2782	-0.36172	17.071	-81.262	1346.53477	-2.3394	1.27	0.050293	-41.299	24.44918	21.3299	0.25537	0.037109	0.022461	-29.071	44.9529	28.976	0.052734	0.01709	-0.13037	-18.131	-16.2847	245.7408	-0.41211	0.37451	-0.27539	-51.178	11.62214	321.0647	-0.12305	0.3252	0.092773
0.26	-18.046	35.5022	31.4068	0.1665	0.09668	-0.059082	30.318814	6.154	1233.8858	-1.8574	1.2559	-0.36523	-16.714	-56.295	1370.177	-2.48	1.3481	0.041016	-39.8514	22.517	5.124	0.26318	0.039063	0.022949	-20.985	39.666	20.9582	0.045605	0.038769	-0.12656	17.5448	-9.3808	322.0846	-0.49755	0.39477	-0.28784	-123.08	-63.007	446.29	-0.2749	0.27783	0.041504
0.262	-26.727	36.4432	42.82121	0.16064	0.1001	-0.057129	27.9789	-12.3739	1239.884	-1.7814	1.2296	-0.3624	-37.223	-20.9829	1371.073	-2.581	1.4096	0.038819	-28.45	12.32	25.2751	0.28076	0.039063	0.017578	-42.1635	42.6212	38.1369	0.040039	0.052051	-0.1249	-5.838	15.987	407.891	-0.59326	0.42236	-0.30029	-171.967	-101.557	520.653	-0.44482	0.2378	0.0007325
0.264	-7.525	33.606	26.7972	0.16259	0.099123	-0.062012	32.848	-7.4618	1219.496	-1.72	1.2047	-0.36211	-58.502	-7.9731	1370.3194	-2.6675	1.4771	0.035645	-24.451	18.6163	40.3044	0.28784	0.043457	0.017334	-43.296	40.7992	29.065	0.033398	0.068067	-0.12138	11.9984	51.14	496.197	-0.73877	0.44385	-0.32861	-98.108	-116.469	583.539	-0.64014	0.20215	-0.027832
0.266	-25.91	18.723	30.946	0.15527	0.099121	-0.065918	43.806	-3.5602	1211.556	-1.6668	1.1812	-0.36445	-40.864	-11.6672	1356.97	-2.7319	1.5747	0.025391	-15.697	27.0887	39.564	0.29395	0.048828	0.018066	-34.079	24.4843	38.1216	0.032032	0.077148	-0.12207	-13.291	58.03	617.936	-0.83154	0.43994	-0.34033	-91.896	-87.496	658.447	-0.95508	0.19678	-0.069824
0.268	-34.06	15.4907	14.454	0.14551	0.10547	-0.068848	45.152	5.1946	1190.8732	-1.6273	1.1646	-0.3623	-44.441	-17.6613	1352.942	-2.7285	1.6152	0.024414	-31.375	40.615	26.85338	0.29492	0.057129	0.019043	-34.692	21.0721	33.0347	0.027832	0.084961	-0.12109	-8.158	65.9554	707.685	-1.0913	0.43604	-0.35303	-108.625	-27.429	734.288	-1.1279	0.21289	-0.086426
0.27	-47.135	24.5189	19.9558	0.13135	0.10986	-0.069336	39.259	14.705	1172.29274	-1.6055	1.1445	-0.36133	-31.946	-24.7394	1328.873	-2.6421	1.6685	0.0087891	-31.436	29.213	18.93842	0.29541	0.063477	0.017578	-49.3305	30.9776	23.91524	0.029199	0.089551	-0.11797	4.003	69.892	803.902	-1.363	0.42993	-0.35596	-135.6664	32.7997	758.115	-1.5	0.2998	-0.11475
0.272	-42.935	38.366	21.1299	0.10693	0.12402	-0.068848	35.8599	10.486	1152.664	-1.5895	1.1297	-0.35762	-5.48	-7.292	1319	-2.5174	1.6673	-0.014649	-12.544	25.922	39.86829	0.2876	0.072266	0.022949	-48.584	45.461	23.0962	0.028418	0.092285	-0.11553	17.798	78.348	846.756	-1.6851	0.45166	-0.35107	-125.212	54.455	741.839	-1.77	0.40869	-0.12622
0.274	-70.2897	34.919	41.068	0.071777	0.13574	-0.079102	9.32	3.025	1116.1132	-1.5784	1.1154	-0.35556	-37.946	17.8781	1278.184	-2.3594	1.6328	-0.045898	-22.013	26.59	34.5121	0.27905	0.081543	0.02417	-51.433	49.641	32.8208	0.031934	0.09541	-0.11279	0.626000000000001	64.739	877.293	-2.1362	0.52783	-0.33594	-44.7123	58.825	812.883	-2.021	0.53955	-0.13428
0.276	-33.359	40.927	31.7895	0.05957	0.13672	-0.064453	27.7597	5.545	1110.1565	-1.571	1.0946	-0.3501	-36.393	27.151	1256.129	-2.1401	1.5493	-0.074707	-29.834	38.203	29.2453	0.27148	0.088379	0.029297	-43.186	39.5297	16.8603	0.031738	0.10205	-0.11602	0.332999999999998	53.8524	883.827	-2.4009	0.60596	-0.33154	-2.3898	57.625	905.07817	-2.3008	0.73633	-0.146
0.278	-35.341	34.366	35.3953	0.040527	0.14355	-0.069336	24.2069	28.2409	1099.4613	-1.5629	1.0869	-0.35185	-29.922	3.071	1238.473	-2.043	1.498	-0.088379	-5.701	35.694	24.21891	0.25439	0.092773	0.027344	-13.664	34.4149	33.2796	0.028809	0.1123	-0.11084	-15.7046	37.2735	866.849	-2.5566	0.69238	-0.31836	39.065	56.37	994.235	-2.3984	0.82031	-0.15967
0.28	-37.67	39.223	23.703	0.026123	0.1499	-0.06665	6.8949	66.936	1098.99	-1.5522	1.0728	-0.34521	-10.743	-3.233	1218.724	-1.8823	1.4087	-0.1123	-3.791	23.6473	34.1593	0.24805	0.099121	0.025879	-17.642	30.7897	28.5365	0.031738	0.12266	-0.11084	-19.628	13.14	847.305	-2.5801	0.91602	-0.23438	27.8015	55.956	1037.562	-2.4976	1.0181	-0.060059
0.282	-26.712	41.5803	25.3889	0.020996	0.15039	-0.064453	0.702999999999999	83.753	1085.403	-1.5333	1.062	-0.3377	-23.876	19.786	1222.1086	-1.7976	1.3528	-0.12182	-17.083	24.6804	28.05186	0.22607	0.104	0.024414	-41.348	22.3855	41.1401	0.027734	0.13144	-0.11172	-12.807	-6.113	842.92	-2.5605	1.0586	-0.23145	-1.013	64.4923	1032.876	-2.6296	1.2346	-0.015136
0.284	-20.919	31.1909	20.6973	0.032227	0.14648	-0.066895	19.587	87.084	1050.92005	-1.5136	1.0496	-0.33028	-52.373	79.1349	1210.2802	-1.7344	1.3125	-0.12158	-15.515	36.8304	27.7141	0.20605	0.11353	0.021973	-22.074	25.6211	41.5876	0.030078	0.13652	-0.11328	-10.101	-19.796	836.7032	-2.3901	1.2798	-0.271	-34.8652	67.369	1021.3	-2.7754	1.4082	-0.038086
0.286	-22.803	32.0696	-1.0275	0.043457	0.14404	-0.062988	7.839	73.9	1050.912	-1.4945	1.0375	-0.32441	-74.466	102.949	1203.3512	-1.6816	1.2773	-0.11133	-8.997	34.999	27.1358	0.18359	0.12256	0.022949	-24.971	27.734	34.0314	0.027539	0.13896	-0.11318	-18.941	-15.935	819.1242	-2.1306	1.323	-0.32397	-18.511	60.651	1013.764	-2.7441	1.4395	-0.097656
0.288	-46.843	19.7762	16.12561	0.070801	0.13867	-0.067383	-20.541	59.9746	1019.6697	-1.4716	1.0298	-0.31358	-78.9802	122.08	1189.8308	-1.6597	1.2642	-0.10645	-9.126	35.8846	32.9085	0.14697	0.13281	0.022949	-31.439	35.0905	20.896	0.032715	0.14551	-0.11768	-12.931	-25.113	823.5164	-1.7988	1.2793	-0.37109	30.281	14.237	1038.722	-2.4968	1.3416	-0.12524
0.29	-23.925	19.972	14.9397	0.094237	0.12769	-0.068115	-14.196	42.948	1021.1364	-1.4429	1.0142	-0.30127	-67.22	103.316	1166.696	-1.6245	1.2388	-0.09668	-17.148	27.564	34.6567	0.1333	0.13623	0.027832	-27.939	25.7207	36.6831	0.036133	0.15039	-0.1249	6.985	-40.224	837.84857	-1.3599	1.1138	-0.40527	31.8504	-41.322	1052.763	-2.1636	1.2153	-0.1333
0.292	-25.911	29.0297	33.1081	0.11963	0.11914	-0.069824	-5.037	54.735	989.565	-1.4099	0.99797	-0.29775	-101.0232	88.483	1143.0466	-1.6026	1.2168	-0.095215	-33.523	12.5554	29.066	0.092773	0.14697	0.033203	-6.928	31.108	40.96992	0.043652	0.15195	-0.12763	36.9497	-18.714	848.7693	-1.1855	1.0254	-0.42285	6.0845	-90.664	1064.3537	-1.7422	1.0957	-0.13672
0.294	-26.507	44.5956	26.7572	0.14502	0.10205	-0.070313	5.9689	59.57	962.7223	-1.3735	0.98281	-0.28887	-92.5277	77.5565	1125.0429	-1.5894	1.1919	-0.087891	-17.376	5.1628	38.2427	0.064697	0.15674	0.043457	-27.171	42.017	26.7367	0.05459	0.15703	-0.13155	20.393	-0.497999999999998	874.441	-0.97217	0.89111	-0.4585	-41.75	-116.03419	1075.6424	-1.5933	1.0688	-0.13818
0.296	-46.757	46.9049	33.9712	0.15186	0.10059	-0.069336	-18.6306	68.2944	940.2052	-1.3418	0.96524	-0.28183	-117.7737	76.89994	1106.388	-1.5566	1.1504	-0.07959	-36.399	15.4937	24.0424	0.036621	0.16553	0.050781	-22.291	51.978	34.0939	0.062305	0.15967	-0.13633	1.6805	9.22	899.70797	-0.92774	0.84815	-0.45508	-26.5636	-121.37	1069.2646	-1.4521	1.041	-0.13135
0.298	-35.95	30.4824	42.268	0.16309	0.087891	-0.064941	-30.34696	63.4183	904.6357	-1.3163	0.94405	-0.27784	-110.32	101.9963	1084.456	-1.5444	1.1235	-0.07666	-47.395	28.4408	30.7542	0.0097656	0.17383	0.06543	-27.495	31.9142	43.3395	0.073242	0.16699	-0.14209	-23.0965	-3.745	904.165	-0.93799	0.84619	-0.42041	47.331	-140.694	1073.7478	-1.4839	1.0595	-0.10327
0.3	-25.124	25.99	40.4343	0.16504	0.083741	-0.067871	-12.936	65.9305	901.0683	-1.2935	0.92432	-0.27979	-82.9694	85.5461	1060.6206	-1.5103	1.0669	-0.069824	-44.658	30.7802	20.7712	0	0.18359	0.07666	-15.165	23.82261	39.6925	0.076367	0.17031	-0.15137	-13.788	-15.579	906.927	-0.9834	0.88867	-0.35156	74.069	-118.276	1069.3987	-1.5522	1.0942	-0.05957
0.302	-25.433	38.256	25.6003	0.1626	0.079102	-0.067383	-18.43	89.8895	886.4261	-1.275	0.90332	-0.26699	-62.664	71.181	1010.2957	-1.4753	1.0208	-0.058106	-42.7037	33.5347	34.409144	-0.0097656	0.18164	0.083008	-11.807	34.2876	24.8663	0.079492	0.17549	-0.15577	-15.3002	-28.23	894.585	-1	0.91602	-0.32129	85.6671	-88.312	1095.7006	-1.6089	1.1255	0.003418
0.304	-22.083	37.703	35.0335	0.15723	0.077148	-0.061035	-25.617	92.24013	876.4977	-1.2598	0.88907	-0.26367	-63.256	64.691	973.097	-1.4351	0.97119	-0.050781	-29.159	31.9901	27.0453	-0.014893	0.18872	0.091064	-20.682	37.0158	26.4172	0.078711	0.18838	-0.16436	-28.0505	-82.773	886.884	-0.99854	0.95752	-0.27588	61.9878	-66.55	1168.125	-1.6089	1.1235	0.025391
0.306	1.23699999999999	23.32354	32.4268	0.15527	0.078613	-0.057129	-26.969	92.5684	868.2735	-1.2324	0.87031	-0.24726	-86.0202	89.993	966.931	-1.3765	0.90527	-0.041016	-31.705	36.43375	23.27829	-0.014648	0.1958	0.094727	-40.218	31.983	28.5262	0.078809	0.19951	-0.16914	8.499	-130.587	910.156	-0.98584	0.97754	-0.27173	71.155	-54.688	1233.604	-1.5874	1.0923	0.042969
0.308	-16.304	27.477	33.2958	0.14453	0.082031	-0.054688	1.871	92.305	842.8378	-1.1949	0.85234	-0.23809	-66.658	121.2063	959.0102	-1.3413	0.87354	-0.036133	-19.409	33.0193	38.7429	-0.0083008	0.20557	0.10352	-36.123	32.5217	45.8973	0.076172	0.20947	-0.17969	7.837	-160.688	950.18503	-0.97607	0.99854	-0.2876	2.42	-50.869	1244.662	-1.5613	1.0554	0.041748
0.31	-27.82	33.016	14.4015	0.14039	0.08667	-0.05249	-18.197	104.642	794.9693	-1.1582	0.82813	-0.22754	-58.205	141.901	937.0116	-1.2793	0.81934	-0.032715	-40.217	37.17402	37.7068	-0.0019531	0.2085	0.10645	-25.573	28.5247	46.5012	0.084082	0.22344	-0.18311	19.3591	-159.738	971.9336	-0.98242	1.0117	-0.30811	4.671	-50.491	1220.511	-1.5308	1.0181	0.028809
0.312	-26.561	24.6592	18.5416	0.13672	0.092773	-0.049805	-9.74	121.994	773.61881	-1.1179	0.80674	-0.21202	-11.272	150.706	910.114	-1.2281	0.77978	-0.026611	-33.545	30.05543	14.1496	0.0048828	0.21387	0.10986	-39.8252	8.54677	47.3949	0.084864	0.23955	-0.18936	47.007	-160.719	999.479	-1.0098	1.0225	-0.32324	-36.243	-61.612	1175.618	-1.4966	0.95557	-0.0019531
0.314	-8.31	26.0106	28.3189	0.13818	0.09668	-0.04834	6.274	121.146	755.7735	-1.0806	0.78281	-0.20362	-38.39	141.835	877.819	-1.1777	0.74219	-0.026855	-32.014	31.6085	10.8317	0.014404	0.22046	0.11303	-49.92	-20.2941	66.7846	0.09502	0.25479	-0.196	69.574	-170.975	1034.983	-1.1011	1.0366	-0.35889	-71.868	-72.23	1156.306	-1.4844	0.92578	-0.01416
0.316	-27.894	44.2356	40.518	0.13574	0.10498	-0.049316	-3.051	133.042	741.6594	-1.0443	0.7543	-0.1915	-36.544	136.488	840.82	-1.1191	0.69922	-0.025391	-44.391	22.3455	33.8307	0.023926	0.22803	0.11768	-44.2924	-6.406	73.9009	0.09668	0.26758	-0.20684	58.874	-148.127	1078.324	-1.1992	1.0459	-0.3728	-100.8491	-72.367	1165.646	-1.4629	0.84375	-0.050781
0.318	-13.707	51.736	34.4596	0.13672	0.10791	-0.049805	-1.384	127.7477	711.872	-1.0079	0.7249	-0.18369	-16.663	157.474	816.535	-1.0923	0.6792	-0.027344	-32.728	18.6929	43.2287	0.032227	0.23389	0.12207	-34.701	0.474	92.2434796	0.087891	0.27783	-0.20898	27.41811	-115.807766	1127.8316	-1.2935	1.0649	-0.37646	-106.2603	-88.145	1175.198	-1.4575	0.78174	-0.070556
0.32	-33.639	25.479	36.1736	0.1316	0.11621	-0.051026	-15.617	108.2088	703.6281	-0.97998	0.70166	-0.17432	-26.358	172.948	777.7529	-1.0288	0.65283	-0.029297	-34.774	23.1568	19.9214	0.039551	0.24121	0.125	-24.66	-14.486	130.5325	0.060938	0.28809	-0.21308	13.4033	-72.707	1171.819	-1.3813	1.0903	-0.37061	-54.2773	-102.6231	1192.32991	-1.4624	0.71924	-0.088867
0.322	-43.708	33.2102	23.9	0.12646	0.11621	-0.053711	20.262	99.4528	678.5322	-0.94404	0.67002	-0.16396	-2.679	159.205	752.964	-0.97827	0.63306	-0.025146	-35.7	28.7379	23.00082	0.051758	0.25049	0.13037	-27.949	-29.7781	149.0809	0.00791	0.29024	-0.22148	-2.71	-56.335	1207.702	-1.4023	1.0986	-0.36328	-46.64435	-119.362	1194.468	-1.478	0.65479	-0.10254
0.324	-51.088	35.6433	20.4225	0.11426	0.11865	-0.046387	-7.525	107.0654	647.9601	-0.91015	0.64375	-0.15547	1.819	120.0235	714.689	-0.92529	0.60986	-0.029785	-28.338	25.8244	33.0794	0.063965	0.25952	0.13306	-37.834	-37.6157	170.01	-0.063574	0.28945	-0.22813	-2.8943	-29.1	1221.185	-1.4102	1.1006	-0.36523	-59.6797	-111.698	1232.512	-1.4932	0.63672	-0.10352
0.326	-28.416	43.2028	30.7995	0.1167	0.12695	-0.04834	-6.857	115.8901	638.8725	-0.88086	0.6168	-0.14414	5.35599999999999	100.673	688.7321	-0.85156	0.56641	-0.02832	-18.191	-6.3657	83.36	0.075684	0.27051	0.12354	-6.045	-24.0977	215.719	-0.15703	0.29609	-0.23008	5.479	-22.708	1218.95	-1.3855	1.0784	-0.37427	-70.574	-86.006	1244.245	-1.5254	0.62012	-0.10938
0.328	-25.984	38.4783	44.73475	0.10547	0.13916	-0.052734	-33.74	115.707	615.0976	-0.85303	0.59267	-0.13487	-6.594	108.571	644.729	-0.80811	0.54834	-0.033691	-6.313	-41.9363	115.38	0.084473	0.28662	0.11084	-10.747	-0.2297	299.7591	-0.25391	0.31055	-0.23096	-3.386	-17.207	1196.2	-1.3511	1.0435	-0.38721	-43.91	-49.276	1287.9434	-1.5569	0.61939	-0.11352
0.33	-15.666	31.4253	38.0275	0.10669	0.15015	-0.052979	-15.416	112.504	608.93729	-0.81934	0.56982	-0.12451	-0.494	120.7527	640.9579	-0.73291	0.51123	-0.041992	-20.018	-59.16975	177.8576	0.086426	0.29688	0.079102	-6.516	42.8811	369.192	-0.34951	0.3331	-0.23155	43.1602	-33.156	1213.673	-1.3271	0.99219	-0.41602	-43.976	-36.7022	1318.849	-1.6055	0.62598	-0.10791
0.332	-28.048	21.675	21.7184	0.11133	0.15234	-0.054199	-26.888	119.922	597.0516	-0.78174	0.55088	-0.11914	12.398	129.798	618.4895	-0.65625	0.47266	-0.049805	-12.028	-54.853	255.1337	0.047363	0.33789	-0.0048828	3.378	65.9545	443.2206	-0.45088	0.35908	-0.23701	39.91459	-69.6664	1236.99	-1.3286	0.96143	-0.42139	-100.7064	-68.5577	1326.819	-1.7109	0.64844	-0.10254
0.334	-44.214	17.248	27.8556	0.12305	0.16016	-0.056641	-30.879	113.0153	575.1597	-0.74795	0.52979	-0.10811	-5.453	142.106	604.204	-0.61719	0.45605	-0.050781	-53.327	-64.611	329.699	-0.03125	0.39477	-0.066406	-11.744	68.6839	525.72	-0.55752	0.38721	-0.24639	55.98	-82.893	1226.362	-1.3906	0.91016	-0.43604	-113.545	-97.4884	1310.529	-1.7813	0.66797	-0.10156
0.336	-33.939	19.416	32.38576	0.12842	0.16211	-0.05957	-31.327	106.648439	565.7537	-0.71787	0.50674	-0.10459	-16.839	144.218	583.4275	-0.54834	0.42334	-0.05957	-103.916	-109.161	350.235	-0.15723	0.45801	-0.11816	-16.698	63.7118	643.705	-0.68496	0.41396	-0.25254	48.5083	-109.001	1253.7913	-1.4868	0.8916	-0.44628	-129.371	-103.8098	1293.125186	-1.918	0.72168	-0.09375
0.338	-32.071	23.2881	32.3545	0.14746	0.16309	-0.062012	-22.326	117.7652	517.54079	-0.68652	0.48643	-0.09502	-43.763	145.421	544.42885	-0.50562	0.39893	-0.065185	-101.178	-179.514	349.4625	-0.37744	0.54932	-0.13623	-16.992	63.3	766.336	-0.84814	0.43311	-0.25146	55.23	-106.438	1275.0849	-1.6206	0.88916	-0.4585	-109.9772	-68.259	1288.4636	-2.0036	0.7771	-0.088135
0.34	-39.092	30.8512	16.6129	0.15893	0.16553	-0.063232	-37.991	125.0758	481.2938	-0.66016	0.46289	-0.089355	-34.267	133.555	514.7003	-0.46436	0.37842	-0.068359	-57.859	-203.334	387.8566	-0.50684	0.60107	-0.12744	-4.215	64.966	861.6598	-1.0692	0.45654	-0.26338	16.9855	-94.4865	1296.9251	-1.853	0.93604	-0.47119	-91.4317	-51.738	1281.265	-2.0933	0.83154	-0.079102
0.342	-47.361	27.405	31.423	0.17236	0.16748	-0.063965	-39.624	120.6862	452.0304	-0.62969	0.44199	-0.085742	-26.152	140.0444	483.283	-0.41748	0.34863	-0.073242	-63.466	-146.0379	456.9323	-0.74902	0.70703	-0.085938	-4.093	58.019	925.0009	-1.3484	0.48555	-0.26523	-9.9276	-76.5707	1307.138	-1.9722	0.9751	-0.479	-71.453	-47.675	1262.507	-2.1914	0.91602	-0.083984
0.344	-36.607	20.6988	35.7814	0.18213	0.16309	-0.069336	-46.696	107.299	425.8691	-0.59755	0.42236	-0.078514	-24.43	131.2692	462.956	-0.39844	0.33252	-0.080078	-99.6695	-53.0714	540.6462	-0.90625	0.78907	-0.056153	-8.641	34.1164	964.0287	-1.6977	0.53555	-0.26679	-6.9875	-71.194	1315.674	-2.1792	1.0825	-0.49951	-57.619	-81.1461	1243.025	-2.23	0.95361	-0.08252
0.346	-35.8744	33.2898	33.8218	0.18115	0.16211	-0.070801	-19.489	108.2162	415.1212	-0.56904	0.40283	-0.068359	-46.117	117.7457	435.10776	-0.36523	0.31055	-0.082031	-118.6341	5.899	579.889	-1.041	0.85938	-0.047363	-13.456	1.051	993.538	-2.0904	0.62481	-0.25371	-3.9671	-63.583	1310.395	-2.2695	1.1626	-0.50976	-57.455	-90.589	1250.186	-2.3198	1.0298	-0.094238
0.348	-55.5	44.9687	41.296	0.18115	0.16406	-0.085938	-35.93	107.19123	383.6424	-0.53769	0.38379	-0.064258	-39.604	101.419	401.784	-0.34497	0.30298	-0.077637	-101.005	16.537	618.075	-1.1777	0.93555	-0.062988	-25.196	-5.3498	961.412	-2.4531	0.72852	-0.25488	-7.0922	-57.92	1315.046	-2.3081	1.2368	-0.51855	-6.263	-87.062	1269.8339	-2.4111	1.0786	-0.10132
0.35	-35.337	44.5379	28.0516	0.18213	0.16895	-0.077881	-47.406	119.225	371.5575	-0.50684	0.37549	-0.057129	-51.88	96.802	365.578	-0.31836	0.29395	-0.081055	-63.909	25.062	701.385	-1.2461	0.97266	-0.07666	-23.191	-22.2048	938.153	-2.6972	0.86807	-0.22099	-23.9573	-53.7403	1299.4346	-2.2925	1.2837	-0.5415	-18.655	-55.045	1303.59	-2.5034	1.1274	-0.11426
0.352	-24.824	32.3417	30.109	0.1792	0.17188	-0.081543	-45.978	121.807	357.716	-0.47422	0.36329	-0.048145	-63.581	102.3227	349.2218	-0.27393	0.26953	-0.082031	-16.697	65.327	817.91	-1.4136	1.0415	-0.1333	-21.692	-44.429	918.015	-2.8339	1.0946	-0.10293	6.025	-50.2076	1289.69066	-2.2651	1.2935	-0.54834	21.012	-19.8228	1302.138	-2.6226	1.2056	-0.11279
0.354	-15.168	39.815	12.4124	0.17578	0.18213	-0.084473	-36.929	129.23	343.6613	-0.44337	0.35274	-0.037897	-41.704	107.067	335.4893	-0.25098	0.26172	-0.084473	-5.966	90.525	944.8409	-1.5843	1.1116	-0.16748	-27.576	-57.5262	908.52	-2.8944	1.4294	-0.038477	58.113	-46.207	1289.5023	-2.207	1.2891	-0.56445	-24.559	-8.61501	1289.4343	-2.6597	1.2505	-0.11768
0.356	-3.485	24.7402	27.68089	0.17383	0.18555	-0.086426	-41.298	122.554	324.8564	-0.39884	0.34219	-0.019534	-51.607	114.879	309.3691	-0.20068	0.23291	-0.092285	-30.3	127.187	1042.977	-1.8027	1.1855	-0.18115	-30.981	-59.8268	883.158	-2.8032	1.7194	-0.061328	51.111	-26.912	1262.27	-2.1648	1.2747	-0.57056	-61.575	-13.178	1269.1652	-2.6694	1.3286	-0.12158
0.358	-10.121	17.7192	33.4796	0.16992	0.18799	-0.092773	-36.284	100.578	308.0484	-0.35645	0.32754	-0.015333	-41.268	115.562	273.568	-0.16748	0.21167	-0.096923	-30.743	124.054	1076.99	-2.1406	1.3057	-0.15625	-26.163	-55.712	850.3319	-2.48	1.8735	-0.10986	47.242	-12.97584	1253.771	-2.1289	1.25	-0.57031	-69.297	-20.817	1280.7645	-2.614	1.3742	-0.12597
0.36	-6.627	16.5852	20.5724	0.16504	0.19141	-0.096436	-21.503	92.1825	288.5878	-0.31494	0.31104	-0.011719	-61.151	98.249	263.0075	-0.13281	0.19141	-0.10059	-52.16	81.256	1099.4024	-2.3105	1.373	-0.12695	-11.301	-66.417	838.6966	-1.9673	1.823	-0.16973	48.12	-5.573	1257.683	-2.0898	1.2383	-0.56299	-39.621	-19.66	1281.176	-2.5234	1.3984	-0.12939
0.362	-31.549	31.91369	22.4224	0.15918	0.19385	-0.098633	-32.281	101.2396	269.8732	-0.27391	0.29453	-0.0012682	-38.578	90.862676	265.81	-0.091797	0.1626	-0.10742	-39.4886	30.727	1117.974	-2.5796	1.5181	-0.052734	-14.839	-48.258	845.252	-1.4183	1.6516	-0.21768	39.736	1.077	1263.7616	-2.0737	1.2329	-0.56104	-45.812	-10.565	1274.016	-2.3594	1.3926	-0.14551
0.364	-15.713	30.9868	20.8826	0.1582	0.20068	-0.10303	-36.805	93.3477	252.2858	-0.23346	0.28046	-0.0001899	-19.158	94.4034	247.067	-0.075684	0.14941	-0.10547	-59.56083	-41.938	1126.941	-2.6709	1.6445	-0.0051268	-3.024	-15.555	853.0371	-0.96485	1.4184	-0.26064	21.9216	11.6985	1268.79597	-2.0308	1.23	-0.54834	-65.906	-7.482	1232.348	-2.271	1.3657	-0.14697
0.366	-19.796	19.3948	47.2039	0.15332	0.20166	-0.10254	-21.7	93.181	236.369	-0.19479	0.2656	0.00567	-15.692	116.31231	210.604	-0.044434	0.12354	-0.10693	-46.021	-101.1078	1133.336	-2.6655	1.7681	0.025391	-17.4919	5.235	866.4951	-0.69013	1.2231	-0.30839	9.2156	11.464	1248.9431	-1.9956	1.229	-0.53467	-55.033	-15.728	1208.187	-2.1172	1.3027	-0.15967
0.368	-18.659	-2.579	84.0008	0.15137	0.20752	-0.10547	-8.754	82.3651	215.8376	-0.15974	0.24744	0.011529	-30.896	109.6561	185.4006	-0.028565	0.11231	-0.10938	-52.15	-135.8639	1161.4053	-2.4702	1.895	0.078125	-31.0593	23.865	875.541	-0.55664	1.0801	-0.32227	24.5888	-1.767	1250.9647	-1.9551	1.2246	-0.52539	-66.016	-27.8279	1204.512	-2.0237	1.2425	-0.16431
0.37	-29.509	-8.174	104.3296	0.14673	0.2146	-0.10156	-16.519	83.8029	197.1585	-0.12744	0.23486	0.015137	-28.558	86.7062	156.126	-0.01123	0.09375	-0.10449	-37.41	-142.406	1159.878	-2.2632	1.9307	0.11157	-48.3463	4.745	888.4042	-0.54658	0.9878	-0.2876	23.646	-0.59	1262.4548	-1.9063	1.2207	-0.51465	-52.706	-16.984	1219.42	-1.9473	1.1973	-0.16699
0.372	-1.518	-20.8797	148.7928	0.14307	0.2168	-0.10107	-28.201	75.5149	200.5864	-0.095251	0.21849	0.01572	-6.78	67.3015	142.6499	0.0092773	0.083984	-0.10645	21.31335	-148.313	1151.1189	-2.064	1.9185	0.13672	-45.408	-12.534	857.899	-0.58115	0.9458	-0.24521	13.58268	-0.151	1257.0482	-1.8789	1.2168	-0.50781	-50.418	-3.811	1226.123	-1.8809	1.1504	-0.16406
0.374	20.7719	-15.1582	200.702	0.13867	0.21533	-0.10449	-18.05	81.4845	198.2363	-0.066494	0.20514	0.020806	-8.225	61.7294	111.2742	0.021973	0.074707	-0.11328	68.194	-178.696	1143.239	-1.8359	1.8203	0.15283	-42.5019	-77.443	841.099	-0.62256	0.92158	-0.2124	43.419	11.1925	1246.26347	-1.8452	1.2075	-0.49854	-42.873	29.978	1222.265	-1.853	1.1304	-0.15918
0.376	18.3374	-18.4712	263.861	0.12939	0.21436	-0.10498	-14.939	85.315	181.799	-0.043436	0.18834	0.019632	-19.967	43.677	99.8693	0.041992	0.062988	-0.11133	72.191	-171.259	1186.831	-1.7417	1.7563	0.14551	-20.155	-133.395	845.476	-0.64629	0.89766	-0.19668	56.887	-3.154	1238.6393	-1.8221	1.1927	-0.48804	-64.14	60.59625	1225.905	-1.8301	1.0996	-0.15527
0.378	23.838	-42.7664	267.443	0.098633	0.2124	-0.12891	-31.523	90.577	161.9428	-0.019221	0.17447	0.025736	-15.871	33.504	77.7495	0.058105	0.046143	-0.10864	50.777	-136.309	1250.104	-1.5938	1.6309	0.15967	-8.064	-175.481	888.603	-0.6543	0.86426	-0.20117	68.683	-3.581	1219.8489	-1.8042	1.1763	-0.48389	-103.9868	89.562	1223.1818	-1.8152	1.0735	-0.15284
0.38	43.383	-92.625	249.244	0.054931	0.22729	-0.14404	-19.419	77.37	149.1823	0.0024414	0.16748	0.024414	-45.084	40.4725	62.5252	0.071289	0.035645	-0.10352	72.304	-82.3636	1305.267	-1.5153	1.551	0.16529	-0.0129999999999981	-197.616	914.6036	-0.64502	0.83447	-0.20761	55.579	-13.814	1198.6427	-1.7866	1.145	-0.46973	-107.8425	88.91	1210.9975	-1.8081	1.0454	-0.14502
0.382	36.025	-110.23875	266.111	-0.011719	0.2417	-0.16016	-18.91	80.336	144.78698	0.021709	0.15811	0.02427	-39.904	55.845	48.216	0.091797	0.020996	-0.10986	61.1188	-48.597	1343.98	-1.4536	1.4907	0.15576	12.88	-208.887	946.8277	-0.64102	0.80312	-0.22754	44.803	-16.6494	1181.3256	-1.7788	1.1333	-0.46436	-99.4184	86.444	1192.931	-1.7886	1.0083	-0.13721
0.384	-9.64	-84.5574	321.453	-0.18018	0.27002	-0.15479	-18.429	82.3531	117.98898	0.040704	0.15291	0.026427	-29.245	56.652	52.3316	0.097168	0.012695	-0.10938	28.8619	-47.283	1326.988	-1.3828	1.416	0.12939	45.6659	-211.764	975.4793	-0.65859	0.78476	-0.2541	56.934	9.2688	1155.19289	-1.7578	1.1133	-0.45703	-103.73403	76.215	1154.686	-1.7734	0.99023	-0.1377
0.386	-32.762	-34.61	365.2185	-0.29639	0.29395	-0.15576	-37.429	82.2985	110.53936	0.059002	0.14755	0.029732	-8.273	49.823	50.1554	0.11328	-0.0068359	-0.11426	46.4863	-71.458	1310.6457	-1.3511	1.3813	0.10889	44.4575	-185.283	1006.986	-0.70195	0.78516	-0.2792	40.945	28.167	1155.26477	-1.7361	1.1023	-0.44898	-129.109	62.669	1143.9891	-1.7417	0.95166	-0.12744
0.388	-24.124	-7.454	373.222	-0.56787	0.35156	-0.13623	-34.926	64.5022	103.784	0.067726	0.1392	0.032352	-20.774	52.1409	38.4784	0.11914	-0.021972	-0.11401	14.229	-91.798	1281.017	-1.2925	1.3013	0.053223	26.653	-129.0374	1062.6083	-0.77832	0.79297	-0.29004	31.08	38.711	1114.62721	-1.7046	1.0903	-0.44287	-93.6935	52.3474	1119.271	-1.7095	0.91504	-0.12475
0.39	6.38	-2.2415	366.838	-0.81982	0.44629	-0.10547	-53.4984	57.18662	106.9936	0.07959	0.13086	0.037109	-33.102	51.007	34.11533	0.12598	-0.029297	-0.11768	-25.497	-83.367	1256.343	-1.2651	1.2319	0.0058592	12.4529	-102.28	1107.625	-0.87373	0.82178	-0.29356	11.02336	47.452	1117.34757	-1.6538	1.0767	-0.43506	-77.796	46.958	1106.4891	-1.6675	0.88135	-0.11426
0.392	48.843	-14.019	393.053	-0.92188	0.50977	-0.083008	-28.253	56.3514	82.66478	0.087593	0.12578	0.040825	-40.331	39.6837	32.2975	0.12549	-0.038574	-0.11816	-42.952	-86.512	1246.893	-1.2593	1.1626	-0.041016	10.307	-75.588	1153.53	-0.97627	0.85908	-0.28105	1.5479	56.696	1093.7997	-1.6187	1.063	-0.4292	-37.843	55.211	1067.2586	-1.6206	0.83838	-0.10986
0.394	43.967	13.374	475.671862	-1.0508	0.63281	-0.057129	-30.099	58.1884	63.1813	0.093106	0.12188	0.045427	-18.764	44.149421	31.3312	0.125	-0.041504	-0.12012	-26.274	-113.765	1259.759	-1.2661	1.0825	-0.083008	-13.7934	-72.209	1162.408	-1.07	0.90205	-0.26933	7.3754	78.888	1076.6991	-1.5469	1.0391	-0.42285	-28.197	50.232	1054.64	-1.5957	0.81055	-0.10645
0.396	15.4053	61.866	556.739	-1.0752	0.7041	-0.052734	-49.286	57.3827	72.1932	0.1021	0.11853	0.050562	-10.811	34.553	14.446	0.11719	-0.049805	-0.12695	4.863	-151.072	1285.766	-1.2827	1.0474	-0.097168	-12.5957	-64.083	1159.3224	-1.14	0.93652	-0.26191	-5.176	94.522	1072.17	-1.492	1.0188	-0.41358	-41.94	70.132	1039.62208	-1.5405	0.76318	-0.104
0.398	17.569	103.196	625.568	-1.0547	0.76172	-0.057617	-52.431	52.815	64.1436	0.10755	0.1133	0.052734	-27.381	20.0508	3.126	0.10987	-0.058838	-0.1289	16.816	-169.223	1325.399	-1.334	1.0088	-0.11133	0.530999999999999	-67.475	1136.267	-1.2017	0.96533	-0.25342	17.6538	85.4356	1046.3157	-1.4429	0.99658	-0.40771	-16.553	87.84268	1028.2641	-1.5024	0.72998	-0.097412
0.4	24.917	131.88	678.4446	-0.98828	0.7832	-0.081543	-47.016	44.2873	60.7561	0.11426	0.10889	0.056152	-38.554	11.3722	13.238	0.093262	-0.066895	-0.12842	37.141	-157.043	1354.868	-1.3921	1.0127	-0.10572	33.019	-49.602	1143.646	-1.2451	0.98184	-0.24853	16.5585	76.2867	1023.1974	-1.3882	0.96143	-0.39551	-48.336	109.466	1025.0827	-1.4604	0.70166	-0.094238
0.402	49.62	120.87	740.54784	-0.95459	0.78125	-0.10449	-54.4166	51.4905	65.4142	0.12373	0.10203	0.053556	-56.3305	22.4022	19.2014	0.072266	-0.066895	-0.13379	-3.114	-129.585	1395.3601	-1.457	1.0459	-0.097656	39.565	-45.518	1162.131	-1.2824	0.97676	-0.24473	33.9624	68.116	988.6298	-1.3652	0.94727	-0.39453	-31.259	105.859	1016.861	-1.4023	0.66016	-0.095703
0.404	60.45	85.953	807.863	-0.94482	0.78369	-0.13623	-62.4237	39.7365	69.293	0.12965	0.093595	0.056616	-47.575	39.631	20.4798	0.0625	-0.063477	-0.13477	-15.99	-86.708	1430.347	-1.5391	1.0938	-0.066895	16.0053	-55.875	1150.231	-1.318	0.9709	-0.24355	12.098	54.203	970.917	-1.3223	0.91602	-0.37207	-37.111	96.3376	989.414	-1.3765	0.63818	-0.095215
0.406	50.486	44.314	874.521	-1.0239	0.7998	-0.15869	-32.184	37.235	51.993	0.14101	0.091002	0.057334	-66.7559	39.7712	41.367	0.047852	-0.056152	-0.13818	-76.598	-84.0821	1436.029	-1.5737	1.1255	-0.050781	31.5431	-91.35035	1174.4918	-1.3697	0.95332	-0.24883	8.562	68.759	956.151	-1.2947	0.89136	-0.35376	-36.966	104.7194	950.6495	-1.312	0.59814	-0.095215
0.408	-35.09429	14.6746	952.7253	-1.1787	0.83008	-0.16699	-32.913	46.75954	34.163	0.14648	0.080857	0.056974	-25.391	24.4166	26.8967	0.041748	-0.047852	-0.13769	-96.3405	-95.087	1448.479	-1.623	1.1855	-0.023926	23.6574	-119.562	1198.8354	-1.4312	0.94189	-0.25635	-5.885	80.5496	956.3478	-1.2734	0.87305	-0.33643	-47.1869	115.181	907.795	-1.271	0.57178	-0.09497
0.41	-52.5596	0.825999999999997	1021.943	-1.5034	0.90186	-0.16943	-47.921	50.3937	27.3496	0.14746	0.075684	0.056152	-28.592	21.7423	24.43	0.036133	-0.043945	-0.14014	-108.5872	-131.354	1450.945	-1.6531	1.2229	-0.016601	23.1977	-125.017	1215.797	-1.5221	0.9459	-0.2623	-22.542	95.9997	928.364	-1.2363	0.85156	-0.32227	-43.262	117.198	869.1142	-1.2246	0.54297	-0.093262
0.412	-57.5013	-23.86	1032.285	-1.7002	0.94922	-0.16211	-28.183	48.6535	32.9333	0.1481	0.066218	0.056171	-33.014	31.7659	15.99	0.046875	-0.036133	-0.14453	-110.952	-124.543	1419.3051	-1.6914	1.2617	-0.0078125	1.306	-123.76	1232.654	-1.6332	0.9625	-0.26406	-33.69908	82.623	913.2212	-1.2068	0.83277	-0.30738	17.784	119.458	853.1807	-1.1577	0.50928	-0.094238
0.414	-28.634	-37.517	1010.522	-2.0835	1.0747	-0.12646	-37.393	36.97762	24.9105	0.1441	0.056393	0.055601	-43.279	37.3568	38.5037	0.05127	-0.032715	-0.14648	-120.207	-109.857	1390.491	-1.7554	1.311	0.0029297	-22.9042	-118.2204	1220.06	-1.7711	1.0106	-0.26758	-21.946	88.885	889.7561	-1.1777	0.81445	-0.29004	13.375	116.7854	817.0296	-1.1362	0.48486	-0.089844
0.416	-20.483	-47.941	1026.2929	-2.3101	1.189	-0.087403	-34.008	31.9938	33.7816	0.14105	0.054057	0.060042	-26.124	45.7401	40.8758	0.072754	-0.030273	-0.14941	-128.4	-80.326	1366.453	-1.7866	1.3345	0.0087891	-43.7641	-124.3696	1225.2594	-1.9165	1.0765	-0.27432	-21.9772	114.196	873.4188	-1.1362	0.78564	-0.27393	14.771	101.651	813.8972	-1.0742	0.45605	-0.087402
0.418	-42.161	-49.396	1071.591	-2.4551	1.3115	-0.0625	-19.552	24.89316	40.51426	0.13663	0.054368	0.061736	-20.187	37.0061	37.007	0.085937	-0.032959	-0.15551	-89.852	-80.2378	1365.194	-1.8481	1.3833	-0.0048828	-48.729	-112.2995	1223.601	-2.0605	1.1621	-0.29395	-10.762	118.496	845.9374	-1.1069	0.76221	-0.26758	-1.73	81.198	782.293	-1.032	0.43409	-0.08667
0.42	-75.626	-44.8807	1134.333	-2.4683	1.4712	-0.050293	-14	24.9128	29.9984	0.13086	0.049805	0.0625	-38.776	46.798	4.4462	0.099121	-0.041992	-0.16064	-70.62	-85.1662	1367.332	-1.9028	1.4252	-0.024658	-18.157	-113.9253	1240.624	-2.1659	1.2427	-0.30069	-12.809	121.5379	809.5039	-1.0718	0.72803	-0.25049	19.913	80.631	754.926	-0.98584	0.41064	-0.084473
0.422	-69.7854	-48.1853	1178.86	-2.4038	1.5435	-0.05127	-27.794	32.7838	22.1761	0.13061	0.043754	0.062704	-39.255	44.993	20.549	0.11475	-0.042969	-0.16309	-28.349	-94.225	1375.6187	-1.98	1.4849	-0.040527	-14.696	-97.9365	1232.011	-2.2296	1.3107	-0.31054	4.847	113.3669	780.1906	-1.0425	0.69776	-0.23609	-19.047	119.3909	740.8223	-0.92969	0.38379	-0.085449
0.424	-51.2224	-40.2099	1183.127	-2.1577	1.6431	-0.068848	-17.263	42.0243	23.21686	0.12939	0.04762	0.066492	-28.73	44.406	27.718	0.12402	-0.048828	-0.16113	-16.132	-85.361	1388.0326	-2.1304	1.5806	-0.044922	26.3693	-74.721	1219.5639	-2.2526	1.3532	-0.3289	18.998	125.302649	755.7494	-1.0151	0.66846	-0.21826	-28.035	136.173	730.447	-0.89331	0.35864	-0.088134
0.426	-39.124	-45.698	1193.607	-1.9168	1.6614	-0.10181	-22.371	28.2881	35.471	0.12902	0.048447	0.067276	-34.276	45.2239	22.3148	0.13623	-0.052734	-0.16797	-18.385	-60.862	1393.0634	-2.2144	1.6333	-0.025879	14.657	-52.6351	1192.258	-2.2312	1.3797	-0.34629	14.887	123.7339	735.332	-0.97998	0.6333	-0.19775	-30.952	123.504	715.9428	-0.85742	0.33594	-0.087891
0.428	-49.333	-39.4892	1201.4475	-1.6602	1.6309	-0.14355	-19.291	27.237914	42.0243	0.13493	0.049697	0.063048	-35.135	30.6901	21.23448	0.13745	-0.056153	-0.16406	-45.43	-19.8285	1417.201	-2.3691	1.7461	-0.019531	0.740600000000001	-56.5227	1159.361	-2.1831	1.3892	-0.35498	13.624	121.1069	731.4144	-0.96484	0.61523	-0.18506	-37.7658	130.019	675.504	-0.81201	0.31348	-0.088867
0.43	-77.105	-21.736	1209.6508	-1.3711	1.5234	-0.19043	-6.01	26.3248	28.37947	0.14307	0.053711	0.067383	-51.2777	6.5475	17.1409	0.14209	-0.061523	-0.16406	-67.5456	-12.1959	1421.632	-2.4383	1.8235	-0.011231	17.53	-61.533	1168.063	-2.123	1.3883	-0.36777	17.539	140.202	724.6683	-0.92529	0.58447	-0.16602	-67.1871	125.969	649.1604	-0.7876	0.29932	-0.088867
0.432	-118.8562	3.92299999999999	1205.012	-1.2632	1.4692	-0.20752	-24.945	33.605	28.163	0.15147	0.06115	0.067576	-30.662	5.7339	35.9853	0.15039	-0.0625	-0.1626	-64.34	-30.39	1422.736	-2.4629	1.873	-0.013184	15.6938	-44.317	1164.3668	-2.0601	1.3743	-0.36846	-3.23	132.664	697.7044	-0.89697	0.55909	-0.14942	-68.8885	121.033	636.557	-0.74414	0.27734	-0.089355
0.434	-114.746	-0.679000000000002	1207.2426	-1.1245	1.3677	-0.22656	-15.291	34.114	35.4549	0.15999	0.073157	0.069809	-17.773	40.5828	28.6669	0.15186	-0.06543	-0.16455	-39.318	-52.459	1399.658	-2.4043	1.8955	-0.026367	23.2949	-20.34192	1169.2431	-1.9991	1.3508	-0.36612	-21.3655	120.657	668.2542	-0.86719	0.5293	-0.13477	-40.46	111.513	624.982	-0.70898	0.25416	-0.091309
0.436	-103.075	-30.701	1215.423	-1.0698	1.3111	-0.22632	-30.931	27.707	35.028	0.16741	0.079031	0.067085	-6.619	61.598	37.693	0.15576	-0.062012	-0.16406	-37.473	-44.323	1383.581	-2.3379	1.8809	-0.035156	4.3902	-6.168	1167.314	-1.9398	1.327	-0.36523	-27.268	106.2827	649.8426	-0.82617	0.49609	-0.1167	-42.707	118.3019	579.8544	-0.67725	0.23486	-0.09375
0.438	-73.6557	-64.1965	1239.319	-1.0332	1.2725	-0.21973	-6.066	37.3852	20.9019	0.17393	0.085646	0.063273	-16.201	55.264	28.93806	0.15894	-0.059326	-0.16138	-54.391	-35.454	1356.12737	-2.1753	1.8267	-0.056641	20.3841	12.789	1182.0903	-1.8882	1.2974	-0.36279	-18.659	107.2846	630.38542	-0.80859	0.47363	-0.10742	-38.419	117.9464	526.077	-0.62891	0.2124	-0.10645
0.44	-60.359	-73.44406	1277.785	-1.0034	1.2388	-0.21875	-27.089	29.6557	25.2223	0.18457	0.089844	0.060547	-11.81	37.696	31.2371	0.16211	-0.051758	-0.16016	-37.647	-18.152	1342.9466	-2.0415	1.7681	-0.075196	8.486	16.457	1172.763	-1.8271	1.2783	-0.35957	-12.198	120.389	608.3739	-0.77197	0.43457	-0.093262	-31.743	103.7349	507.483	-0.60938	0.20605	-0.097656
0.442	-65.141	-60.784	1301.494	-1.0073	1.2231	-0.21924	-20.443	24.9695	37.5736	0.18886	0.096769	0.055575	-30.072	38.82231	18.6751	0.16016	-0.041992	-0.15527	-28.95	-31.953	1305.079	-1.9121	1.6914	-0.094238	19.3113	19.19	1181.6622	-1.7765	1.2528	-0.34599	-24.607	123.3779	575.2661	-0.74683	0.40528	-0.081787	-30.063	92.822	500.7769	-0.56689	0.18408	-0.104
0.444	-44.048	-55.562	1323.4434	-1.0342	1.1914	-0.22412	-30.965	29.09598	32.0654	0.18964	0.10214	0.049422	-38.76	26.63927	40.69931	0.15771	-0.032715	-0.15869	-23.953	-37.205	1292.226	-1.7808	1.5981	-0.11328	18.356	-0.189	1193.059	-1.7389	1.2325	-0.34756	-17.91	113.9617	557.0209	-0.72217	0.37842	-0.068359	-9.999	105.297	478.3041	-0.53492	0.16821	-0.10425
0.446	-26.518	-53.685	1331.2703	-1.0774	1.1653	-0.22827	-39.598	36.5528	24.7382	0.19238	0.11151	0.046289	-14.332	29.0488	51.1917	0.15088	-0.011719	-0.15918	16.282	-40.569	1290.793	-1.7202	1.561	-0.11621	33.3559	-25.9582	1182.3377	-1.7076	1.2086	-0.33828	-18.732	126.956	543.2355	-0.69531	0.34619	-0.05127	-43.5915	111.5927	455.4356	-0.50488	0.15723	-0.10156
0.448	-9.4957	-61.114	1356.347	-1.1362	1.1489	-0.23096	-45.588	43.232	31.9746	0.19336	0.12392	0.039162	-14.809	34.8567	45.5955	0.14014	0.0078125	-0.16113	-4.742	2.267	1297.8038	-1.6362	1.5044	-0.11865	56.303	-40.609	1188.4676	-1.687	1.1782	-0.32959	-10.843	127.773	515.5137	-0.67822	0.33252	-0.04248	-42.992	109.275	437.8106	-0.46338	0.14014	-0.10303
0.45	-15.578	-89.779	1393.98	-1.2339	1.1255	-0.22852	-54.034	41.479	29.7024	0.19141	0.13477	0.038086	-18.066	39.028	12.8204	0.1333	0.02002	-0.15771	-18.554	52.21654	1296.1494	-1.5867	1.469	-0.12378	24.4498	-25.3443	1169.23	-1.6598	1.1515	-0.32197	-25.314	125.633	502.006	-0.64453	0.31445	-0.032227	-53.3542	118.111	418.461	-0.44189	0.13574	-0.11035
0.452	6.072	-83.538	1418.0233	-1.2847	1.1226	-0.23389	-40.384	29.2205	10.915	0.18417	0.14854	0.037988	-42.078	32.996	13.154	0.11768	0.043457	-0.15869	-59.755	98.415	1280.137	-1.5469	1.4316	-0.11963	30.7995	-25.9657	1156.4545	-1.6398	1.1224	-0.31982	-2.733	125.3844	458.03597	-0.61768	0.30079	-0.019288	-41.385	136.901	396.1239	-0.39453	0.11865	-0.10938
0.454	-13.922	-58.1052	1425.2087	-1.394	1.1235	-0.2251	-37.343	23.4471	22.65	0.18037	0.16153	0.039355	-30.865	28.3882	30.0566	0.10742	0.053955	-0.15991	-68.9484	103.88	1267.634	-1.5059	1.3906	-0.12158	40.30165	-1.685	1139.6623	-1.6167	1.0907	-0.31748	-22.543	122.5627	437.2134	-0.58301	0.28027	-0.0087891	-43.567	129.686	384.9291	-0.35693	0.10401	-0.11255
0.456	-21.343	-28.117	1413.696	-1.4604	1.1309	-0.22144	-46.611	25.21845	33.17779	0.16904	0.16856	0.034275	-47.99	29.7237	36.72571	0.10107	0.07373	-0.15967	-100.7416	85.687	1250.0434	-1.4839	1.3716	-0.11865	14.6628	20.512	1118.113	-1.5918	1.0635	-0.31758	-37.154	120.234	408.979	-0.54248	0.26123	-1.5959e-13	-31.451	121.917	363.141	-0.32324	0.09082	-0.11279
0.458	-28.821	-29.793	1405.109	-1.5073	1.1489	-0.22607	-33.42	17.34914	34.08683	0.15469	0.18409	0.035156	-27.18	38.2101	44.3623	0.092773	0.096191	-0.16162	-96.6006	66.828	1202.4331	-1.4468	1.3306	-0.11816	3.9905	36.7281	1097.2941	-1.5645	1.0313	-0.31787	-53.657	100.228	399.6494	-0.51563	0.25586	-0.00048828	-11.175	100.869	332.5321	-0.28174	0.070801	-0.11963
0.46	-21.474	-43.8596	1401.2027	-1.5684	1.1719	-0.24316	-40.817	31.6597	36.0801	0.13965	0.19482	0.038574	-32.319	31.5542	34.816	0.09082	0.1084	-0.16064	-108.6487	67.566	1179.779	-1.4268	1.2993	-0.10938	10.1735	38.889	1090.7536	-1.538	1.0091	-0.31709	-31.895	108.008	364.0268	-0.4668	0.22754	0.01123	-15.138	104.1826	297.857	-0.26465	0.067871	-0.12012
0.462	-12.179	-42.864795	1394.535	-1.5981	1.186	-0.25732	-48.632	45.8458	12.0913	0.12617	0.20586	0.040039	-27.121	24.5445	16.502	0.083496	0.12793	-0.16553	-108.351	76.129	1162.794	-1.4023	1.2637	-0.10156	12.5864	49.839	1088.6554	-1.5182	0.99063	-0.31289	-47.5976	108.869	340.18	-0.42993	0.21265	0.015381	-6.741	93.5723	294.7156	-0.22607	0.055664	-0.12109
0.464	18.588	-31.5005	1382.101	-1.6616	1.2065	-0.27637	-45.215	41.2018	34.2807	0.11319	0.21445	0.044922	-34.773	23.2443	25.545	0.083496	0.14429	-0.16578	-100.605	69.5707	1136.392	-1.3706	1.2153	-0.09668	-0.758000000000001	70.109	1057.2684	-1.4947	0.97344	-0.30859	-49.077	109.779	317.6769	-0.39404	0.19629	0.02002	4.19	95.3439	269	-0.20704	0.049805	-0.11963
0.466	21.4304	-15.4764	1373.517	-1.7254	1.222	-0.28882	-15.638	38.063	34.4828	0.097559	0.22617	0.047266	-50.887	36.3385	40.1869	0.08252	0.16309	-0.1709	-82.8817	51.51	1099.898	-1.3511	1.1909	-0.086426	-9.175	60.882	1041.6061	-1.475	0.9709	-0.30332	-49.4999	101.9951	297.066	-0.3457	0.17725	0.029785	16.867	84.567	254.2668	-0.18457	0.044434	-0.12354
0.468	33.581	7.9386	1366.441	-1.7925	1.2446	-0.29346	-43.309	26.3416	38.4385	0.086719	0.23193	0.056347	-43.567	42.6762	50.769	0.088379	0.18506	-0.17236	-70.947	22.802	1051.4643	-1.3105	1.1279	-0.083008	-15.358	58.6143	1013.6486	-1.4487	0.96533	-0.29053	-33.781	101.5139	293.262	-0.32275	0.16602	0.036621	4.692	84.3009	227.8314	-0.15967	0.030762	-0.11865
0.47	13.804	20.0169	1382.5355	-1.9097	1.2837	-0.3042	-33.569	31.0196	28.1044	0.072754	0.2373	0.0625	-20.919	36.1093	43.0738	0.087402	0.19043	-0.17676	-64.241	29.845	1049.3321	-1.2766	1.0852	-0.085205	-20.252	57.2737	996.4632	-1.4168	0.9664	-0.27793	-13.982	100.4489	262.9414	-0.27148	0.14453	0.047363	-29.453	81.2004	232.4012	-0.14697	0.025879	-0.12109
0.472	4.293	15.2979	1391.9167	-1.9624	1.313	-0.31152	-27.916	12.9584	40.0986	0.059863	0.24258	0.07334	-28.256	25.3672	35.8177	0.09082	0.20557	-0.17725	-55.307	75.716	1039.9328	-1.2432	1.041	-0.079102	-10.632	66.2454	974.48624	-1.3797	0.95918	-0.26972	-23.111	84.418	254.977	-0.2273	0.13306	0.046875	-26.82	84.393	235.4216	-0.12598	0.01709	-0.12109
0.474	5.398	-4.37793	1404.5623	-2.0645	1.3682	-0.33594	-31.207	15.91555	30.9351	0.050781	0.24717	0.078809	-60.136	16.8782	27.1235	0.091797	0.2185	-0.18189	-55.9	118.6881	1037.024	-1.1929	0.98291	-0.086426	-7.373	57.6081	972.6651	-1.336	0.94433	-0.26074	-6.377	70.605	234.6243	-0.18457	0.11963	0.057129	-12.992	103.332	223.714	-0.11035	0.0097656	-0.11841
0.476	24.272	-10.7362	1423.414	-2.1386	1.4297	-0.33789	-28.915	28.1588	11.1574	0.041796	0.24834	0.082715	-42.401	9.3564	37.4063	0.092285	0.22754	-0.18262	-73.636	138.654	1019.63	-1.1641	0.95508	-0.088867	-2.62	50.4676	955.78149	-1.2856	0.91934	-0.25254	-21.212	71.145	230.6309	-0.13135	0.098633	0.056152	-9.406	111.496	208.893	-0.097656	0.0058594	-0.11914
0.478	-10.5609	7.9435	1414.972	-2.2109	1.4922	-0.34717	-22.156	33.836	21.126806	0.036524	0.25283	0.095702	-23.535	17.9905	18.944	0.083984	0.24219	-0.19141	-85.5498	118.404	998.703	-1.1108	0.90283	-0.092285	-11.9998	53.6401	922.1265	-1.2324	0.89648	-0.24609	-32.239	86.6724	211.7965	-0.11572	0.086914	0.060547	-31.761	95.868	172.0664	-0.07666	0.0053711	-0.11768
0.48	-27.9842	8.9175	1403.677	-2.3081	1.5708	-0.35107	-2.027	32.424	28.9999	0.030273	0.26123	0.10352	-54.2269	27.3346	-0.4692	0.077637	0.24756	-0.19092	-73.9114	115.309	948.4482	-1.066	0.86719	-0.098632	-33.833	51.125	892.0983	-1.1842	0.86894	-0.24043	-29.584	80.393	200.31844	-0.073242	0.071777	0.066895	-29.934	74.776	161.3207	-0.066406	0.0078125	-0.11719
0.482	-31.117	-2.759	1381.6992	-2.3394	1.6099	-0.34717	-22.677	44.205	36.0454	0.022071	0.26523	0.11162	-30.944	24.593	19.1019	0.073242	0.26221	-0.19238	-45.039	138.201	909.3066	-1.021	0.83057	-0.096191	-37.9533	48.744	864.704	-1.1385	0.84131	-0.23125	-22.262	69.702	196.1034	-0.047608	0.057862	0.073487	-23.618	72.6796	142.8832	-0.041992	0.014648	-0.11133
0.484	-42.563	-12.4996	1353.8913	-2.3804	1.6782	-0.33594	-9.091	47.549	41.1655	0.015821	0.26768	0.11514	-31.662	17.2568	28.4774	0.058106	0.27881	-0.19726	-47.116	155.912	874.8067	-0.9624	0.78857	-0.10352	-14.818	57.123	864.2934	-1.096	0.80811	-0.22539	-17.898	75.598	171.78115	-0.020996	0.04541	0.070313	-26.013	76.1264	139.48724	-0.031006	0.026367	-0.11426
0.486	-33.127	-15.20168	1338.53	-2.3738	1.7102	-0.3335	-11.967	39.4628	49.7668	0.0064453	0.2751	0.11904	-26.442	25.0209	36.6529	0.050781	0.2998	-0.19727	-21.928	153.27	842.6849	-0.93311	0.77002	-0.10547	-23.852	73.3132	844.0651	-1.0675	0.78135	-0.2166	-51.024	67.8054	152.2369	0.011719	0.036621	0.07666	-13.581	65.86	130.9734	-0.01123	0.033691	-0.11328
0.488	2.388	-5.68	1325.83	-2.3398	1.7344	-0.32764	-17.9	21.577054	41.4277	-0.0027343	0.28681	0.12549	-20.315	40.2772	39.2963	0.041016	0.31982	-0.1958	-9.698	126.262	798.173	-0.86865	0.72607	-0.10449	-16.63	94.7814	846.58021	-1.0415	0.76221	-0.2041	-37.347	63.1644	134.0421	0.023926	0.032715	0.078125	-22.676	63.6166	123.3407	0.0078125	0.031738	-0.12012
0.49	4.848	13.944	1320.7595	-2.2319	1.729	-0.32666	-26.552	15.9273	34.71271	-0.010254	0.29297	0.13428	-28.134	46.066	47.921	0.040527	0.32715	-0.19385	4.361	97.074	754.929	-0.8208	0.69141	-0.10816	-13.135	99.915	821.6264	-1.022	0.74834	-0.18945	-18.109	69.0951	118.5272	0.050293	0.022461	0.083984	-22.075	68.0915	100.7981	0.017578	0.030762	-0.11377
0.492	-21.9688	50.623	1293.416	-2.1641	1.7168	-0.33008	-30.569	31.0718	15.8267	-0.016504	0.30264	0.14053	-20.356	34.3504	33.7337	0.037598	0.34668	-0.19873	13.452	83.372	726.299	-0.76709	0.6626	-0.11035	2.673	106.735	801.1921	-1.0049	0.73516	-0.17481	-31.257	78.3805	107.5235	0.070312	0.01587	0.090332	-47.174	67.7885	90.4319	0.033691	0.027832	-0.11377
0.494	-21.463	79.3518	1278.3602	-2.0098	1.6719	-0.33398	-34.106	25.832	31.072	-0.022754	0.3042	0.14814	-7.572	25.9224	43.7058	0.043701	0.35888	-0.198	33.909	98.483	699.506	-0.69922	0.61523	-0.11279	-7.737	123.858	789.14	-0.98809	0.71602	-0.16426	-6.855	59.6394	93.2491	0.09082	0.0092773	0.09082	-51.375	61.193	97.336	0.048095	0.029297	-0.11572
0.496	-32.164	86.9913	1267.2056	-1.895	1.626	-0.32837	-22.405	3.7606	76.2534	-0.029395	0.31162	0.15283	-5.095	-4.2795	53.033	0.040527	0.36328	-0.20117	21.446	114.1679	684.1621	-0.67041	0.59424	-0.11182	-14.961	125.9	756.34086	-0.97022	0.70772	-0.15586	-11.681	51.9461	91.0123	0.12256	0.0024414	0.096191	-56.01639	61.4098	91.064	0.058105	0.027344	-0.1167
0.498	11.482	95.562	1249.2092	-1.7969	1.584	-0.33496	-36.554	-25.0292	112.107	-0.029297	0.31787	0.15508	-41.063	-28.6989	86.0515	0.049316	0.36963	-0.20557	1.107	140.239	655.517	-0.60596	0.55322	-0.12061	-5.602	107.841	726.357	-0.95117	0.69238	-0.14258	-4.652	47.9777	74.3263	0.13818	-0.0014648	0.097656	-22.742	55.2017	91.2937	0.070313	0.034668	-0.11475
0.5	-7.663	98.777	1241.1044	-1.7046	1.5376	-0.32471	-39.307	-32.6118	145.5696	-0.026367	0.33154	0.15137	5.089	-30.7754	102.4491	0.049805	0.37061	-0.20605	-11.785	150.364	658.2722	-0.56152	0.52417	-0.12573	0.123999999999999	99.6817	701.291	-0.92735	0.67656	-0.12783	-17.655	64.5437	83.6102	0.15967	-0.0078125	0.095703	-44.9509	46.381	84.5891	0.07959	0.037109	-0.11279
0.502	-18.792	114.743	1214.2378	-1.6694	1.5122	-0.3208	-39.936	-0.1509	209.1241	-0.022363	0.33808	0.13721	-1.978	3.20462	100.2067	0.033691	0.36182	-0.21924	-20.579	154.212	620.9351	-0.51807	0.49463	-0.13623	-1.257	100.2531	675.381	-0.90469	0.65332	-0.1166	-43.548	62.586	87.3154	0.17602	-0.012939	0.098633	-58.85324	37.2157	67.8073	0.087402	0.046387	-0.11426
0.504	-46.3906	116.27	1204.388	-1.627	1.4766	-0.31055	-55.048	7.7061	290.465	-0.032715	0.35273	0.093557	-10.675	25.7529	161.377	0.0048829	0.34741	-0.22607	-20.875	136.019	592.0719	-0.46973	0.46094	-0.13525	-21.675	101.80093	665.1235	-0.88203	0.63066	-0.10605	-58.7101	58.93	77.43817	0.18848	-0.017578	0.098633	-29.926	52.6517	55.6846	0.090576	0.047363	-0.11548
0.506	-16.869	102.321	1174.0158	-1.6082	1.4524	-0.29737	-112.992	-37.665	401.349	-0.051465	0.36797	0.048633	-1.177	31.052	236.289	-0.046387	0.34033	-0.22803	-28.553	124.336	566.01	-0.43848	0.44165	-0.13891	-5.482	99.3746	649.08551	-0.86143	0.60654	-0.097266	-37.23	49.4971	53.033	0.19629	-0.028809	0.098145	-30.066	65.4031	45.4067	0.094727	0.050293	-0.11328
0.508	-14.818	78.1295	1143.331	-1.5952	1.4263	-0.28467	-146.182	-95.909	517.419	-0.11631	0.38125	-0.0075194	17.3737	21.667	337.311	-0.14355	0.34326	-0.23438	-29.011	121.942	531.988	-0.40527	0.42188	-0.13916	-22.218	118.8849	637.8762	-0.83398	0.58203	-0.088867	-56.163699	36.2463	42.7323	0.19385	-0.032715	0.099609	-36.528	47.187	51.297	0.097656	0.053711	-0.11182
0.51	-17.066	77.7048	1088.9658	-1.5796	1.3872	-0.2666	-126.576	-119.78	593.845	-0.2251	0.38818	-0.071777	55.98	12.6542	437.997	-0.19678	0.35303	-0.2417	-34.173	130.2478	508.8372	-0.35498	0.39502	-0.13916	-20.481	128.362	633.7887	-0.81826	0.55459	-0.081543	-63.154	24.3852	37.0523	0.19189	-0.032715	0.097168	-16.63	38.917	41.2118	0.10205	0.058594	-0.11621
0.512	-3.064	75.1649	1061.7479	-1.5628	1.3586	-0.25757	-87.559	-104.282	644.266	-0.37823	0.39815	-0.13408	76.782	27.037	580.86318	-0.32813	0.375	-0.25537	-22.401	125.404	448.9122	-0.33008	0.37793	-0.13818	-26.339	116.3607	622.4144	-0.80147	0.53408	-0.073145	-41.347	25.3018	39.1733	0.17896	-0.035645	0.09839	-17.197	29.7936	38.3374	0.10303	0.06543	-0.10889
0.514	2.227	93.304	1048.462	-1.5361	1.3184	-0.24463	-111.041	-63.775	707.222	-0.57764	0.41319	-0.19053	56.279	31.8856	716.2428	-0.44922	0.38818	-0.26879	-36.112	107.683	418.686	-0.28174	0.35107	-0.14551	-13.528	109.0916	622.169	-0.78389	0.51768	-0.062598	-25.134	31.078	20.6694	0.17041	-0.033203	0.10449	-20.717	33.0121	29.5999	0.10205	0.063232	-0.10767
0.516	-3.86	106.223	1041.6107	-1.478	1.2642	-0.23389	-152.127	17.4431	738.323	-0.82139	0.43819	-0.2292	39.2924	38.811	761.792	-0.61865	0.39844	-0.28613	-37.896	90.736	392.4274	-0.24365	0.33056	-0.14794	-31.317	121.7507	592.254	-0.75898	0.50293	-0.066211	-37.2204	41.7664	16.7495	0.1499	-0.032227	0.10791	-20.779	21.76437	47.1373	0.10205	0.066895	-0.10645
0.518	-5.187	101.149	1055.936	-1.4438	1.231	-0.22998	-111.838	58.1299	759.116	-1.1048	0.48262	-0.2581	30.182	37.2417	799.3371	-0.94971	0.40771	-0.29639	-49.9068	92.113	364.8879	-0.20947	0.3125	-0.14893	-30.561	120.742	571.121	-0.73877	0.49121	-0.046387	-31.672	27.4364	33.0531	0.14063	-0.03125	0.11182	-18.649	21.1501	37.83612	0.097656	0.066895	-0.10352
0.52	4.253	92.45	1011.311	-1.3647	1.1626	-0.21729	-51.71	56.409	807.117	-1.4111	0.56445	-0.25977	20.662	38.6452	829.848	-1.1772	0.43311	-0.29297	-44.806	111.5633	346.972	-0.16309	0.28613	-0.15283	-34.261	115.8704	544.2932	-0.721	0.4708	-0.04248	-6.434	27.099	30.6747	0.12842	-0.022461	0.11719	-20.607	29.289	21.79583	0.092773	0.06543	-0.10156
0.522	-1.38	109.30132	975.247	-1.2976	1.1126	-0.21167	11.5017	46.441	872.413	-1.7301	0.70488	-0.221	4.515	57.495	855.573	-1.7188	0.54883	-0.25879	-66.144	125.802	332.6943	-0.13965	0.27441	-0.15674	-38.063	115.2046	503.5128	-0.70302	0.45088	-0.03584	-27.606	38.4558	28.444	0.12085	-0.022461	0.11914	-34.797	46.507	26.7241	0.083008	0.067383	-0.095703
0.524	-18.818	152.581	944.09701	-1.2363	1.0645	-0.19727	43.914	35.089	973.931	-2.0266	0.89845	-0.16367	5.611	64.88761	885.616	-2.1648	0.7019	-0.22339	-66.6049	126.098	332.226	-0.095703	0.25977	-0.16016	-41.397	120.2344	481.6064	-0.68506	0.43603	-0.034277	-35.661	53.743	31.9598	0.12061	-0.01709	0.12012	-33.71	37.306	29.9802	0.074219	0.064209	-0.09253
0.526	-37.201	173.644	922.4635	-1.1558	0.99658	-0.18994	64.147	40.27	1014.202	-2.2894	1.1051	-0.11446	-28.563	62.415	874.0364	-2.5542	0.89893	-0.1748	-59.900515	115.858	307.3679	-0.069336	0.24682	-0.16187	-31.596	116.4275	468.4927	-0.66904	0.4208	-0.024317	-29.314	49.367	29.5338	0.12256	-0.015137	0.12158	-20.185	32.3737	44.5316	0.068359	0.064453	-0.088867
0.528	-25.92	169.198	894.3453	-1.1211	0.9707	-0.18457	9.9948	53.517	1014.637	-2.4597	1.2755	-0.071094	-48.391	28.964	892.8951	-2.7891	1.1367	-0.14355	-47.778	107.832	273.1177	-0.043945	0.24121	-0.17285	-44.982	111.5104	435.5021	-0.65381	0.40869	-0.016113	-35.218	35.331	26.6959	0.12402	-0.014648	0.11865	5.837	28.5746	39.4713	0.058105	0.066406	-0.08252
0.53	-32.131	157.169	846.248	-1.0635	0.92285	-0.16846	-13.395	76.294	985.923	-2.5313	1.373	-0.056152	-26.728	-13.334	911.3388	-2.7637	1.2676	-0.098633	-52.853	117.657	258.429	-0.017578	0.22852	-0.17432	-47.236	112.5525	421.255	-0.63505	0.39092	-0.0080077	-37.864	36.897	19.7152	0.13037	-0.014648	0.11572	-9.696	24.7903	39.433	0.056152	0.063477	-0.07666
0.532	-47.7256	134.18173	792.5007	-1.0271	0.89039	-0.15894	16.253	71.1633	1004.0648	-2.5103	1.4051	-0.074805	25.082	-41.067	937.925	-2.6172	1.5957	-0.046875	-46.986	117.276	242.553	-0.010742	0.22754	-0.17529	-46.5234	118.8815	399.8186	-0.61289	0.38125	-0.0036133	-46.752	31.57	14.68032	0.14282	-0.0070801	0.11303	-20.061	5.593	26.9619	0.054688	0.066895	-0.072754
0.534	-38.1957	125.747	754.255	-0.99414	0.86133	-0.14795	54.859	40.58	1003.64	-2.4101	1.4024	-0.099512	35.385	-47.214	941.654	-2.5008	1.8098	-0.088134	-17.768	115.3405	216.7577	0.0058594	0.21533	-0.17578	-40.592	116.112	388.7184	-0.57891	0.36914	0.0014648	-10.746	19.7494	27.1463	0.146	-0.0083008	0.10986	-13.191	6.831	22.3055	0.053467	0.071777	-0.071045
0.536	-37.656	130.512	725.217	-0.9541	0.82227	-0.13672	57.383	-11.103	991.562	-2.2362	1.3778	-0.09873	21.933	-43.084	961.3609	-2.3281	1.8828	-0.14697	-25.138	94.9299	185.1115	0.017334	0.2063	-0.17798	-20.062	112.862	373.5748	-0.54316	0.35498	0.0053711	-14.373	19.8223	34.1686	0.15674	-0.0029297	0.097168	-21.877	24.7962	18.37	0.054688	0.07373	-0.067383
0.538	-37.17	155.549	680.079	-0.94043	0.80078	-0.12451	8.32127	-74.519	998.207	-2.0289	1.3336	-0.075684	-33.129	-43.016	977.542	-1.9785	1.7227	-0.23535	-10.27	71.449	152.007	0.026367	0.19922	-0.17725	-28.175	112.699	368.9006	-0.50586	0.33203	0.0078125	-22.313	41.1526	28.8281	0.16016	-2.0817e-14	0.098145	-43.0447	36.3957	27.59202	0.056152	0.077148	-0.061523
0.54	-26.729	153.0253	666.20753	-0.91211	0.76855	-0.1123	-20.972	-116.284	1016.7698	-1.8428	1.2949	-0.046875	-51.6536	-23.311	981.476	-1.7832	1.5918	-0.2793	6.579	42.943	130.7326	0.039551	0.18945	-0.17578	-27.596	124.499	344.3371	-0.47646	0.3208	0.015723	-6.988	37.2565	34.8035	0.16064	0.01123	0.09082	-20.266	23.625	45.5093	0.060059	0.076172	-0.060547
0.542	-25.861	146.38121	637.8577	-0.88941	0.74439	-0.097901	-37.11471	-123.993	1024.6441	-1.7209	1.2428	-0.025489	-49.794	-26.509	1005.7856	-1.4429	1.3521	-0.33545	-1.59399999999999	39.28	113.6814	0.04834	0.18213	-0.17578	-33.331	109.874	341.5363	-0.44287	0.30517	0.016895	1.91200000000001	31.6446	33.1397	0.15918	0.016601	0.08789	-53.9081	22.6993	34.9961	0.066895	0.077148	-0.059082
0.544	-34.0724	139.15684	619.7071	-0.86084	0.71729	-0.088867	37.069	-124.608	1008.9663	-1.6694	1.1903	-0.012305	-56.139	-57.939	1001.3011	-1.2852	1.2588	-0.35791	-25.872	52.6641	101.535	0.070313	0.17432	-0.16992	-27.529	97.6165	326.2575	-0.41475	0.29502	0.02002	-3.853	22.22	29.8983	0.15674	0.026855	0.084473	-47.341	32.609	12.466	0.067871	0.074951	-0.057129
0.546	-46.0858	150.944	603.579	-0.8125	0.67969	-0.069336	84.0946	-118.606	999.99489	-1.6569	1.1293	0.005664	-68.5507	-99.3053	1007.374	-1.2031	1.2246	-0.35742	-13.726	63.35	97.1294	0.088135	0.16259	-0.17139	-17.946	88.0085	299.8333	-0.37774	0.28037	0.02207	-39.313	38.47656	31.3086	0.15039	0.044434	0.084961	-68.99305	38.268	38.1888	0.069336	0.07373	-0.052734
0.548	-58.4665	153.864	593.097	-0.78955	0.66064	-0.061523	68.4968	-98.502	1027.9914	-1.6688	1.0633	0.032129	-86.31	-122.263	1029.292	-1.1987	1.2583	-0.3125	2.533	79.547	80.2319	0.10449	0.15088	-0.17529	-25.438	88.7963	281.6887	-0.34619	0.26416	0.027344	-21.011	30.2933	38.7763	0.14331	0.056885	0.083008	-42.555	31.4879	35.0308	0.068359	0.080078	-0.047852
0.55	-64.967	158.703	569.577	-0.73047	0.61426	-0.044922	74.019	-70.2447	1095.0412	-1.6753	1.0161	0.060059	-66.9211	-125.753	1064.287	-1.2046	1.2935	-0.29736	-14.616	74.378	70.11827	0.13672	0.12646	-0.18311	-16.867	85.3919	257.0719	-0.32109	0.25137	0.031738	-37.416	32.4382	44.497	0.14063	0.069336	0.077637	-30.008	26.8739	24.8272	0.068848	0.08252	-0.045898
0.552	-26.22	153.615	504.43194	-0.68555	0.57715	-0.032227	47.9231	-66.75445	1140.3359	-1.6323	0.99248	0.095408	-39.376	-135.049	1111.785	-1.1909	1.3169	-0.25342	-9.08799999999999	67.492	68.32361	0.14795	0.12305	-0.17676	-25.402	73.99471	244.8779	-0.2915	0.24043	0.034961	-19.351	38.33	24.2081	0.13477	0.076172	0.080078	-33.738	25.2391	11.729	0.064941	0.089844	-0.044434
0.554	-52.714	139.3467	454.148	-0.63672	0.54102	-0.018555	33.8782	-54.1627	1181.663	-1.5702	0.96221	0.11094	11.219	-143.694	1140.017	-1.1536	1.3072	-0.24805	-19.068	46.1803	63.0027	0.17236	0.11328	-0.18262	-6.189	86.7744	225.3042	-0.26181	0.22832	0.039258	-33.126	38.787	33.82227	0.1333	0.08252	0.075195	-45.882	15.3243	17.7412	0.062988	0.092285	-0.046143
0.556	-53.716	120.2	420.3567	-0.57617	0.49805	-0.0039063	-5.112	-63.867	1181.782	-1.4999	0.93017	0.11719	19.345	-154.594	1146.7157	-1.1172	1.2881	-0.24609	-19.784	45.5998	46.10001	0.17969	0.10913	-0.18116	-9.66999999999999	78.3304	227.099	-0.22744	0.22129	0.041504	-28.391	30.579	38.8329	0.12793	0.089355	0.078613	-42.6456	29.0718	17.4003	0.06543	0.097656	-0.044922
0.558	-56.5253	99.575	400.8702	-0.5459	0.4707	0.00048828	-40.329	-76.72	1140.1073	-1.452	0.90342	0.10088	-0.114000000000001	-141.5812	1165.753	-1.0771	1.2598	-0.26123	-9.109	46.9771	25.5948	0.18506	0.1001	-0.18652	-21.393	72.23452	224.5985	-0.19287	0.21338	0.042969	-33.646	28.6335	33.162	0.12426	0.091797	0.074463	-34.327	40.5779	32.9383	0.063965	0.10254	-0.046875
0.56	-14.528	108.727	381.7994	-0.48975	0.42432	0.013184	-73.905	-83.248	1114.188	-1.4136	0.8833	0.080078	-18.847	-134.1976	1217.4	-1.061	1.2446	-0.26563	-16.347	35.046	33.182	0.18164	0.09668	-0.19238	-5.913	76.7332	203.3142	-0.15342	0.20117	0.048828	-30.591	38.9384	18.6844	0.11914	0.099121	0.07666	-38.464	51.8318	27.847777	0.067871	0.10132	-0.048095
0.562	-28.246	121.5972	329.683	-0.4502	0.38916	0.019775	-129.4872	-82.838	1146.875	-1.3848	0.85899	0.050781	-48.805	-117.548	1273.7124	-1.0659	1.2212	-0.28564	-7.769	23.489	12.361	0.17725	0.092285	-0.19287	-34.592	83.552	195.0967	-0.11905	0.19424	0.051269	-34.202	42.0442	21.2987	0.10986	0.10156	0.071777	-36.786	33.075	33.1932	0.07373	0.10498	-0.047852
0.564	-20.289	118.89776	318.2853	-0.41309	0.35938	0.025391	-115.04	-86.696	1174.597	-1.359	0.83516	0.025977	-27.007	-103.727	1304.061	-1.0857	1.2092	-0.29932	-37.374	26.56	1.998	0.16016	0.087402	-0.19287	-26.231	86.308	185.9011	-0.087011	0.18252	0.054395	-35.121	24.92614	33.27	0.10498	0.10498	0.074707	-31.919	18.5621	23.348	0.078613	0.10498	-0.05127
0.566	-25.402	116.9564	296.434	-0.36523	0.31934	0.036133	-88.934	-121.219	1192.9716	-1.3308	0.80703	0.0076171	-19.817	-102.449	1296.503	-1.1187	1.1899	-0.30713	-36.48	31.0604	7.2051	0.14112	0.086915	-0.19629	-27.925	81.776	184.4425	-0.052735	0.16954	0.054981	-23.445	22.8936	28.6503	0.086914	0.10986	0.075195	-52.8821	20.2822	11.633	0.084961	0.10059	-0.056152
0.568	-30.77	108.4141	272.309	-0.34473	0.30127	0.044434	-53.174	-135.749	1181.6628	-1.3095	0.77803	-0.010644	-42.633	-88.168	1286.2888	-1.168	1.1523	-0.31836	-63.26084	28.1341	32.5722	0.12207	0.091309	-0.19775	-10.995	81.8511	148.5523	-0.026855	0.15186	0.051758	-40.165	26.6357	20.1033	0.073242	0.11841	0.075683	-37.811	22.4349	29.36057	0.09668	0.104	-0.054199
0.57	-29.81	121.026	262.4344	-0.30469	0.26807	0.055176	-70.2708	-126.173	1197.956	-1.2964	0.76221	-0.025879	-28.104	-72.165	1288.405	-1.2099	1.1099	-0.31616	-49.934	36.7551	48.224	0.09668	0.10254	-0.19092	-46.401	70.4204	131.644	0.0062498	0.14004	0.056738	-40.953	28.9517	30.9226	0.057617	0.12402	0.083008	-21.524	25.018	39.857	0.10571	0.10693	-0.05957
0.572	-39.001	118.014	247.4689	-0.27808	0.24805	0.068359	-69.949	-102.201	1237.773	-1.2904	0.76943	-0.039941	-25.474	-49.379	1311.141	-1.2593	1.0649	-0.32227	-63.3269	32.7794	52.7432	0.084961	0.10596	-0.18994	-51.051	65.2529	123.1274	0.027246	0.12734	0.060937	-35.556	24.48069	41.4313	0.036621	0.14014	0.087402	-8.772	25.5528	35.1826	0.11621	0.11621	-0.05957
0.574	-30.44	124.197	228.344	-0.24756	0.21875	0.070801	-57.846	-68.825	1270.807	-1.2932	0.79287	-0.047754	22.564	-22.641	1340.0828	-1.3218	1.0171	-0.31689	-58.007	17.7121	31.5739	0.071777	0.1167	-0.18945	-39.562	59.0116	110.878	0.052246	0.11953	0.060937	-49.955	30.7973	48.795	0.025879	0.14551	0.087402	-13.543	36.8168	5.0487	0.12256	0.12158	-0.061035
0.576	-25.714	118.443	195.1742	-0.20654	0.19385	0.075195	-47.505	-58.604	1303.033	-1.3136	0.82959	-0.054785	28.37	-51.041	1356.46813	-1.3491	1.0015	-0.31934	-51.6929	12.78527	25.4827	0.06372	0.11719	-0.19214	-45.266	60.3894	84.396	0.073535	0.11651	0.066406	-36.362	40.42	39.9469	0.0053711	0.15869	0.094727	1.772	46.687	21.076	0.12549	0.12354	-0.062012
0.578	-52.038	104.454	159.0443	-0.1875	0.18164	0.078125	-70.927	-83.507	1328.958	-1.3532	0.87802	-0.055957	76.4556	-89.558	1380.62856	-1.3984	0.96484	-0.34766	-50.692	22.4269	21.9691	0.062012	0.1167	-0.18262	-31.8743	48.9763	81.4417	0.095215	0.10791	0.069824	-35.386	35.567	38.4661	-0.0075683	0.17261	0.104	0.128	42.0032	29.059	0.12793	0.12158	-0.062012
0.58	-26.117	87.36715	128.975	-0.14844	0.15625	0.075195	-76.834	-112.484	1329.756	-1.4155	0.92822	-0.053711	43.5124	-102.4385	1379.315	-1.4363	0.94849	-0.35864	-43.9775	50.44334	21.7512	0.070801	0.11182	-0.18896	-47.007	44.3259	76.3285	0.11113	0.1002	0.072071	-15.694	17.3639	32.6431	-0.017578	0.18311	0.1123	-18.449	45.4455	41.7073	0.12842	0.1167	-0.067383
0.582	-23.681	70.273	130.8515	-0.12427	0.13916	0.080811	-75.172	-107.15424	1320.227	-1.5131	0.96543	-0.044336	17.528	-71.0586	1378.75	-1.4995	0.93799	-0.36768	-45.8214	44.3976	33.1431	0.076172	0.10107	-0.18799	-46.031	32.2807	73.8819	0.13125	0.10049	0.073828	-31.783	11.3692	28.2394	-0.025879	0.19385	0.12598	-19.501	53.6533	33.372	0.12598	0.1167	-0.066895
0.584	-26.597	68.773	112.6522	-0.10205	0.12158	0.083496	-95.813	-76.719	1306.8983	-1.6378	1.0075	-0.032715	0.0579999999999998	-49.3807	1388.391	-1.6279	0.93164	-0.38623	-32.409	31.8046	34.12975	0.087402	0.087402	-0.18896	-55.367	41.1876	73.13866	0.14961	0.09502	0.076953	-16.25	29.1912	15.0485	-0.023926	0.19922	0.13623	-15.764	32.993	38.1696	0.12256	0.11523	-0.066895
0.586	-33.873	55.082	108.14309	-0.072266	0.10547	0.092773	-77.928	-39.442	1297.7755	-1.7613	1.0575	-0.023731	-5.275	-49.9867	1375.048	-1.7021	0.93945	-0.39355	-19.131	20.9159	18.0419	0.095215	0.080566	-0.18579	-43.839	57.3945	67.932	0.16514	0.084961	0.076367	-31.195	21.933329	22.6148	-0.035645	0.20801	0.14697	-8.133	12.2878	30.4579	0.12402	0.11426	-0.067383
0.588	-13.372	43.6995	75.058	-0.056641	0.099121	0.098633	-58.755	-48.019	1295.8549	-1.8833	1.1257	-0.0078126	-22.5657	-60.9177	1378.443	-1.8706	0.97705	-0.396	-33.794	35.3261	22.6574	0.098633	0.076172	-0.1792	-57.1642	54.1552	67.5574	0.17529	0.075684	0.074707	-19.573	25.6645	26.9423	-0.034424	0.21411	0.1604	-34.482	20.7311	21.5557	0.11816	0.11914	-0.066895
0.59	-24.906	48.60505	56.726	-0.027344	0.078125	0.10352	-40.953	-86.463	1278.872	-1.9941	1.1992	0.015137	-35.1079	-92.4191	1363.4023	-2.0124	1.031	-0.40063	-25.355	39.276	26.1827	0.10791	0.069336	-0.17578	-38.554	43.5488	61.4712	0.18125	0.062793	0.06914	-14.046	25.0151	34.23051	-0.037109	0.2251	0.17236	-40.176	34.3604	25.0086	0.11426	0.12305	-0.070557
0.592	-48.99	68.5394	60.7989	0.0024414	0.063721	0.1062	-37.714	-108.3968	1278.502	-2.0756	1.2717	0.019531	4.029	-107.352	1372.2652	-2.144	1.106	-0.40967	-13.877	32.732	34.3111	0.11035	0.064941	-0.1748	-38.911	51.737	34.3523	0.18242	0.050781	0.07002	-27.603	37.8212	20.2044	-0.039063	0.22461	0.18555	-28.466	48.138	25.2634	0.10693	0.12744	-0.070801
0.594	-50.161	62.064	62.36955	0.027832	0.045898	0.10254	-0.296999999999997	-95.46	1298.1022	-2.1449	1.3297	0.017969	4.233	-87.351	1379.349	-2.2891	1.2246	-0.41943	-14.084	19.0214	16.9964	0.12402	0.062012	-0.17041	-54.298	47.2467	31.887	0.18242	0.041406	0.069629	-1.095	35.1346	37.011	-0.04541	0.23047	0.1958	-40.267	34.641	40.5682	0.09668	0.13037	-0.071777
0.596	-47.885	58.568	52.2005	0.071777	0.018066	0.097656	20.383	-67.083	1314.058	-2.2152	1.3828	0.0097657	1.408	-47.0627	1371.609	-2.3472	1.2856	-0.4292	-25.364	22.7524	13.78403	0.13623	0.055908	-0.16333	-36.516	38.3623	32.8304	0.17979	0.032715	0.066797	-25.659	36.102	44.1508	-0.055176	0.23975	0.20313	-47.401	33.401	19.517	0.09082	0.13281	-0.070801
0.598	-38.626	50.2097	49.1341	0.085449	0.0087891	0.091309	0.417999999999999	-26.0349	1313.448	-2.303	1.4306	-0.00078126	17.5709	-37.4861	1346.273	-2.4487	1.3892	-0.43896	-14.242	22.4676	33.8514	0.14697	0.054199	-0.15967	-29.135	38.0459	25.0706	0.16895	0.026855	0.066895	-26.123	41.0993	41.7555	-0.062011	0.24267	0.21167	-34.155	24.9299	24.0007	0.07666	0.13721	-0.080566
0.6	-56.5186	48.054	48.1659	0.10938	-0.020508	0.078613	-3.48200000000001	9.8702	1300.8872	-2.4063	1.4707	-0.0058594	18.88096	-30.095	1313.257	-2.5024	1.4467	-0.43701	6.259	38.247	43.2809	0.16357	0.044434	-0.15918	-25.669	39.69678	25.9821	0.15791	0.022461	0.06875	-26.126	26.7004	33.80757	-0.070801	0.25098	0.21484	-25.583	24.5694	52.1397	0.061768	0.14136	-0.080322
0.602	-34.038	32.0518	52.60076	0.12671	-0.033691	0.083008	-30.698	-2.8399	1308.322	-2.4988	1.5129	-0.013281	28.591	-25.85186	1317.64	-2.5391	1.5	-0.43262	9.44	45.138	38.8456	0.16992	0.044922	-0.15674	-19.061	39.1064	31.848	0.1457	0.016797	0.070313	-20.443	2.81062	18.3177	-0.091309	0.25586	0.22705	-31.73	30.6768	48.26543	0.04834	0.15137	-0.086426
0.604	-31.561	34.27358	36.1129	0.13574	-0.047363	0.077148	-34.404	-19.667	1313.3293	-2.5664	1.5442	-0.016895	9.557	-12.7399	1324.113	-2.5581	1.5493	-0.42822	6.577	42.961	13.8657	0.17969	0.047363	-0.14697	-11.898	31.1839	38.28191	0.13047	0.024609	0.077344	-26.311	8.1707	12.503	-0.095215	0.26514	0.22949	-51.6094	23.91288	63.8327	0.027344	0.15674	-0.091309
0.606	-22.991	46.8337	-3.937	0.13672	-0.057617	0.072266	-29.297	-29.818	1333.77	-2.5949	1.5781	-0.023145	14.902	-9.6142	1353.094	-2.543	1.5586	-0.41797	-7.25700000000001	17.47634	34.3529	0.17896	0.051025	-0.14282	-22.689	33.5533	31.346	0.11865	0.031445	0.07793	-24.82	18.2917	17.6679	-0.10498	0.27441	0.24072	-55.13819	0.1383	81.3314	0.01123	0.1582	-0.099121
0.608	-44.001	34.9156	-6.4293	0.13281	-0.063965	0.07666	-41.859	-9.954	1328.054	-2.5625	1.6	-0.022949	-13.533	-2.23775	1311.3878	-2.4819	1.5747	-0.41162	6.342	14.1105	37.3022	0.17285	0.057129	-0.13721	-28.007	44.5877	28.4924	0.10449	0.037109	0.080078	-22.323	23.0508	68.2335	-0.11035	0.28589	0.24122	-44.365	-8.0285	110.59428	-0.044434	0.16455	-0.1123
0.61	-29.153	21.933	12.65	0.11377	-0.068359	0.070313	-69.2854	-3.203	1302.3144	-2.4766	1.5996	-0.02002	-34.1541	4.0963	1268.2196	-2.3941	1.5679	-0.40552	-6.025	22.4173	38.795	0.15527	0.067383	-0.13623	-18.199	36.1439	27.314	0.092675	0.044727	0.081055	-31.142	-11.65332	112.198	-0.11133	0.29541	0.2334	-6.678	7.9882	139.9597	-0.10083	0.17041	-0.11425
0.612	-15.344	18.5545	25.014	0.093018	-0.072266	0.072265	-98.16019	-11.439	1270.725	-2.3445	1.5758	-0.018164	-24.129	-4.029	1243.812	-2.2788	1.5454	-0.40186	-3.235	29.9652	34.5595	0.14893	0.068359	-0.13086	-27.192	27.8748	30.1789	0.079395	0.053321	0.08252	-51.508	-13.2056	153.514	-0.12305	0.30957	0.18311	2.878	29.054	182.6336	-0.18018	0.1748	-0.12012
0.614	-20.562	16.298	31.2214	0.07666	-0.074219	0.074707	-76.075	-11.9535	1224.514	-2.2015	1.5341	-0.01875	-9.492	-16.291	1234.854	-2.1128	1.5024	-0.396	-8.564	22.9468	23.0948	0.13135	0.079102	-0.12402	-5.591	26.6948	19.022	0.070801	0.060742	0.08291	-40.765	25.5517	199.161	-0.13379	0.31494	0.1543	-28.1528	33.604	213.363	-0.30615	0.18213	-0.12158
0.616	-16.643	18.01054	32.722	0.041016	-0.063477	0.081543	-96.611	-11.663	1230.659	-2.0667	1.4735	-0.02461	47.0945	-17.5361	1254.1604	-2.0332	1.4746	-0.39453	-31.229	31.344	17.789	0.11938	0.092285	-0.12012	-26.868	25.2672	29.9653	0.064453	0.06582	0.086621	-33.288	40.526	292.51439	-0.19873	0.3252	0.088867	-13.0315	32.364	254.702	-0.37891	0.18848	-0.11963
0.618	-37.018	16.7585	34.3716	0.027344	-0.0625	0.083496	-54.11	-6.018	1245.539	-1.9534	1.4024	-0.022852	18.68246	-4.6757	1251.6577	-1.8906	1.4258	-0.38525	-60.38819	34.28	16.4261	0.10742	0.10156	-0.11377	-20.954	30.2322	36.4523	0.064453	0.071289	0.081055	-106.998	-26.571	385.33	-0.29761	0.32763	0.034424	12.2598	42.5522	340.932	-0.54102	0.21045	-0.12695
0.62	-28.14	39.984	35.673	0.0014648	-0.050781	0.095703	-75.754	14.981	1257.6299	-1.8594	1.3359	-0.026367	28.2621	4.3264	1235.4631	-1.8095	1.3891	-0.38134	-43.252	38.281	36.2215	0.095703	0.11914	-0.1084	-21.213	31.9113	32.8061	0.06289	0.077637	0.087012	-162.654	-86.182	468.032	-0.42969	0.32715	-0.020508	29.397	67.779	463.8785	-0.6853	0.23242	-0.13989
0.622	-17.004	45.975	14.1621	-0.0075681	-0.047852	0.099364	-79.8842	46.43	1260.2747	-1.7953	1.2801	-0.020899	4.199	-3.714	1218.268	-1.7456	1.3501	-0.37256	-36.7059	31.028	48.2306	0.097656	0.12939	-0.10596	-20.482	45.9468	28.3718	0.068457	0.089063	0.08789	-107.829	-106.037	520.944	-0.64453	0.34766	-0.083008	29.7665	84.3236	623.735254	-0.85303	0.25293	-0.16357
0.624	-18.477	39.282	37.4232	-0.012695	-0.044922	0.1001	-90.483	69.169	1262.2665	-1.7488	1.2308	-0.013574	35.924	-2.483	1202.2528	-1.6816	1.3086	-0.36426	-49.5523	31.8183	34.5524	0.095215	0.14551	-0.10059	-34.6704	46.7708	29.5906	0.074317	0.094532	0.082422	-103.01	-87.774	602.4867	-0.77148	0.36914	-0.10254	16.691	62.176	731.713	-1.1504	0.271	-0.18164
0.626	-8.602	22.611	27.2314	-0.010742	-0.04541	0.10693	-93.602	83.856	1247.3341	-1.7168	1.184	-0.010059	32.3264	21.564	1181.905	-1.6636	1.2837	-0.34521	-41.7513	34.69	17.5032	0.093506	0.15161	-0.10351	-32.902	34.1998	42.7545	0.075781	0.10322	0.07959	-109.157	-45.731	675.097	-1.0615	0.43115	-0.1416	-9.723	32.763	818.465	-1.3491	0.28711	-0.19189
0.628	-21.525	21.1816	31.5986	-0.0053711	-0.044922	0.10914	-97.7863	90.041	1228.1304	-1.6971	1.151	-0.0024414	30.4335	44.6495	1168.419	-1.6284	1.2407	-0.33545	-38.532	19.5883	21.5205	0.09375	0.1543	-0.10205	-21.868	23.61292	29.8195	0.082031	0.10986	0.074707	-117.5215	11.11526	687.7058	-1.2995	0.49878	-0.15039	5.457	44.137	907.347	-1.8633	0.35156	-0.21289
0.63	-9.973	38.4151	22.232	0.0063477	-0.050293	0.11182	-108.366	99.997	1209.378	-1.6855	1.1211	-0.00048828	23.5521	53.4865	1144.01403	-1.6121	1.2112	-0.32447	-37.005	25.2159	32.31097	0.097168	0.16016	-0.099609	-35.224	23.738	16.5533	0.085547	0.11523	0.069141	-108.287	63.9223	680.487	-1.5347	0.58057	-0.15137	12.686	34.9413	999.055	-2.3076	0.43652	-0.23633
0.632	-35.144	42.8086	20.5369	0.025391	-0.046387	0.1123	-136.712	93.2	1188.3469	-1.6741	1.0872	0.0088864	-3.9863	75.059	1118.4494	-1.5913	1.1782	-0.31885	-62.939	37.02289	31.9833	0.098633	0.16455	-0.1001	-47.8846	36.8884	19.6919	0.086426	0.12216	0.064941	-103.155	57.79	728.588	-1.814	0.70557	-0.14404	-6.177	19.767	1023.68	-2.7266	0.5332	-0.2627
0.634	-11.333	31.1671	19.7234	0.037109	-0.044434	0.11182	-112.4996	81.313	1171.065	-1.6574	1.0544	0.020118	9.3617	83.995	1108.2539	-1.564	1.1411	-0.30127	-49.575	38.767	26.4371	0.10742	0.16895	-0.099609	-55.883	32.2142	31.4122	0.087207	0.12646	0.059473	-37.307	39.78	823.325	-1.9336	0.77246	-0.13574	-26.534	22.9988	996.847	-3.1206	0.76025	-0.16992
0.636	-20.895	29.6404	14.4789	0.049805	-0.047363	0.11133	-81.25054	71.2955	1144.2988	-1.6323	1.0239	0.025586	2.419	94.103	1099.423	-1.5503	1.1196	-0.29932	-29.789	31.897	42.8865	0.11548	0.16919	-0.1001	-42.802	37.8005	31.09	0.083398	0.13096	0.05791	33.482	29.665	935.93	-2.1113	0.92969	-0.10254	-33.9	6.5456	951.259	-3.2637	0.95117	-0.13525
0.638	-36.174	39.668	21.363	0.066406	-0.047363	0.1123	-44.52	63.87	1120.199	-1.5955	0.99043	0.030762	22.302	86.9424	1070.0476	-1.5151	1.0874	-0.28271	-37.31	12.6543	49.6567	0.12207	0.17139	-0.10107	-46.463	47.284	28.3107	0.080566	0.13818	0.055176	28.1169	41.472	997.333	-2.2192	1.0566	-0.087403	-49.57316	-6.731	928.989	-3.373	1.4355	-0.10547
0.64	-25.799	34.061	30.7629	0.079102	-0.045898	0.11621	-28.553	58.163	1081.6659	-1.5444	0.95947	0.03418	18.009	109.135	1020.182	-1.4756	1.0625	-0.27637	-39.288	10.85994	34.4962	0.12744	0.1792	-0.10449	-44.619	41.217	31.6764	0.076758	0.14814	0.057129	8.108	43.2597	1004.558	-2.2905	1.1694	-0.07666	-33.526	-18.909	941.622	-3.2051	1.7285	-0.1084
0.642	-44.0751	35.408	31.2007	0.096191	-0.044434	0.1167	-8.909	70.487	1060.5484	-1.493	0.92149	0.046777	-11.359	120.911	1003.754	-1.4331	1.0415	-0.27002	-51.025	10.537	29.61268	0.12988	0.18262	-0.10205	-44.396	34.593	46.0657	0.07373	0.16045	0.059375	-37.3392	35.71771	1002.4679	-2.3164	1.2715	-0.060547	-17.432	-26.323	940.777	-2.8257	1.8628	-0.14795
0.644	-52.021	31.6931	26.595	0.10742	-0.034668	0.11865	-19.121	90.109	1049.83	-1.4417	0.87979	0.05205	-13.272	116.2858	993	-1.3613	1.0078	-0.25879	-34.51	16.7346	19.2262	0.13281	0.19189	-0.104	-41.324	28.0439	41.8562	0.069434	0.17139	0.066797	-8.296	34.534	990.135	-2.2949	1.293	-0.049805	1.665	-48.884	946.278	-2.0444	1.7329	-0.2124
0.646	-46.186	39.1151	31.43086	0.12744	-0.02832	0.12061	-13.66	112.7642	1037.7267	-1.3944	0.84268	0.048535	13.64	99.964	974.9131	-1.3315	0.99268	-0.25342	-25.277	22.1718	23.6091	0.12549	0.19727	-0.10547	-37.435	34.026	31.49277	0.067676	0.18418	0.072168	4	19.109	1000.267	-2.1362	1.2915	-0.038574	-24.824	-69.8243	968.6936	-1.6387	1.6055	-0.2207
0.648	-18.108	20.7883	29.1099	0.14844	-0.024658	0.11914	-7.632	108.4874	1052.044	-1.3586	0.80625	0.049023	-11.95	91.863	960.591	-1.2637	0.95898	-0.24219	-10.13	33.5611	20.5881	0.12451	0.19824	-0.10645	-34.48	25.5511	37.4253	0.06543	0.19824	0.07666	31.6999	-26.984	1013.8998	-1.9551	1.249	-0.030518	-27.036	-56.4214	972.0566	-1.002	1.3262	-0.23877
0.65	-50.535	21.3033	28.233	0.17139	-0.015625	0.11523	-10.78	110.2335	1029.434	-1.3315	0.78174	0.053223	-29.374	98.9698	921.038	-1.2163	0.93262	-0.23267	2.992	28.9633	21.7815	0.11865	0.20703	-0.1084	-23.596	16.8415	30.236	0.067285	0.21436	0.083496	29.00195	-91.815	1034.5995	-1.7769	1.2056	-0.017578	-6.509	-30.523	989.4143	-0.75879	1.1343	-0.26025
0.652	-29.904	39.6611	12.1	0.19727	-0.0063477	0.11035	-27.135	112.668	974.4211	-1.2996	0.75566	0.062305	-30.287	101.6747	902.5478	-1.1714	0.90576	-0.22021	-1.417	34.3082	39.4762	0.11157	0.21289	-0.10303	-22.461	17.2844	24.418	0.068066	0.22978	0.093652	-10.9682	-141.385	1045.868	-1.623	1.1563	0.0083008	-8.244	14.223	1006.6269	-0.69141	0.98242	-0.24854
0.654	-36.67	32.47981	39.8739	0.21484	0.0024414	0.11133	-32.819	129.858	944.128	-1.2754	0.73047	0.058496	-38.6	125.6633	875.108	-1.1221	0.86328	-0.21387	7.243	40.3508	40.208	0.10938	0.21973	-0.10742	-40.772	35.481	32.90725	0.07041	0.23916	0.09834	-1.18	-154.328	1055.2373	-1.5918	1.1406	0.018066	-58.4751	17.993	1023.26051	-0.84082	0.88086	-0.19189
0.656	-27.587	26.6521	33.795	0.23535	0.012207	0.10107	-62.043	133.367	923.3956	-1.2508	0.7168	0.060059	-44.4817	141.715	840.2751	-1.0972	0.84424	-0.2041	-14.422	51.246	28.2351	0.11475	0.2251	-0.10547	-23.336	31.702	36.0445	0.061524	0.25224	0.10625	5.824	-163.836	1055.4623	-1.6108	1.1313	0.042969	-91.503	-9.613	1005.188	-0.95898	0.86523	-0.1543
0.658	-30.358	27.0023	27.433	0.24829	0.022949	0.1001	-28.741	135.591	880.9286	-1.2143	0.69951	0.063183	-36.507	132.047	826.6212	-1.0581	0.80713	-0.19092	-1.791	43.632	25.4016	0.11768	0.22803	-0.10742	-38.945	37.084	44.6176	0.060547	0.25439	0.10938	86.0427	-150.804	1070.7147	-1.6587	1.1343	0.073974	-89.603	-58.66	989.805	-1.1675	0.87354	-0.10254
0.66	-38.387	32.3967	1.9507	0.2583	0.032715	0.1001	8.462	119.02	858.56477	-1.1694	0.68311	0.067383	-32.736	103.1004	787.2604	-1.0252	0.78052	-0.17725	-12.542	23.9003	39.78509	0.13721	0.22803	-0.11328	-16.181	41.409	31.9459	0.054492	0.25498	0.11533	87.668	-124.677	1089.5829	-1.6875	1.1445	0.10254	-79.196	-113.98075	991.317	-1.2666	0.89062	-0.091064
0.662	-30.386	41.0163	27.531	0.26074	0.046875	0.097656	-2.538	97.3576	835.99	-1.1268	0.65986	0.071485	-46.798	94.6149	748.665	-0.99756	0.75244	-0.16895	-1.182	19.5226	26.796	0.14893	0.22437	-0.1189	-25.421	41.256	27.592	0.04961	0.25801	0.12383	60.9228	-81.7419	1155.7833	-1.6797	1.1426	0.12109	-51.2826	-151.879	1021.7033431	-1.3159	0.9126	-0.10205
0.664	-40.291	44.405	35.279	0.26367	0.052734	0.10107	-5.699	82.468	807.351	-1.075	0.63984	0.07207	-36.285	127.9535	713.481	-0.94531	0.7168	-0.14404	-7.864	7.1361	18.2788	0.16064	0.22412	-0.12354	-1.10700000000001	27.2505	40.18104	0.044141	0.25762	0.12813	59.982	-68.733	1218.698	-1.6636	1.1392	0.11914	-10.337	-182.754	1047.5049	-1.2866	0.92725	-0.15283
0.666	-27.008	46.3517	37.413	0.25342	0.066895	0.104	-6.633	98.274	783.539	-1.0148	0.61875	0.070898	-35.173	141.6879	717.7024	-0.92334	0.69873	-0.1377	-24.843	16.0804	16.33837	0.16846	0.22412	-0.12988	-8.089	19.3138	36.139	0.041406	0.26016	0.13994	48.3795	-67.865	1262.428	-1.646	1.1157	0.088867	13.884	-199.133	1041.176	-1.249	0.93164	-0.16943
0.668	-34.875	33.7294	21.00896	0.24781	0.072509	0.10571	-9.44	127.371	743.237	-0.95664	0.59414	0.07041	-31.048	141.3435	680.0861	-0.87842	0.66846	-0.11719	-26.717	27.13405	21.298	0.17041	0.23193	-0.13037	-24.66	23.6332	34.5248	0.035645	0.26514	0.15234	28.2097	-63.757	1255.886	-1.6394	1.0989	0.061524	41.45294	-199.289	1057.104	-1.168	0.9375	-0.21484
0.67	-20.733	21.7804	28.6582	0.23779	0.083984	0.10059	-34.41	137.349	733.326	-0.89893	0.57568	0.065918	-6.941	150.0022	659.1499	-0.84107	0.64282	-0.10278	-30.611	38.876	23.821	0.16406	0.23975	-0.13281	-15.574	28.9443	34.6478	0.026269	0.27178	0.16035	-28.747	-68.352	1226.031	-1.6289	1.0771	0.03125	35.2227	-191.574	1112.398	-1.1336	0.91626	-0.2439
0.672	-27.985	23.95107	32.0511	0.22998	0.094727	0.10254	-20.493	120.8027	722.401555	-0.84776	0.55068	0.062305	-27.908	142.8351	627.2717	-0.80029	0.61768	-0.087891	-11.034	21.76761	43.086	0.15845	0.24927	-0.13648	-26.754	30.6692	42.477	0.015039	0.28028	0.17334	-54.218	-88.503	1198.057	-1.6069	1.0278	-0.0087891	63.607	-161.431	1189.92	-1.123	0.87988	-0.25684
0.674	-23.703	49.0356	25.0919	0.22217	0.097656	0.099609	-66.0917	118.0826	698.7084	-0.80078	0.53164	0.061914	-33.861	131.179	612.0209	-0.75439	0.5791	-0.067383	-40.259	-21.6409	93.5384	0.14502	0.26123	-0.14355	-16.279	34.2532	32.39481	0.0033206	0.28457	0.18389	-78.7679	-108.295	1195.369	-1.5991	1.0044	-0.025879	62.809	-127.9721	1239.062	-1.1621	0.83008	-0.25879
0.676	-2.969	54.726	33.7664	0.19971	0.11475	0.095703	-69.8247	127.016	673.5306	-0.75742	0.51484	0.05957	-34.545	141.879	584.84872	-0.72656	0.56055	-0.067383	-27.479	-35.5723	138.2173	0.11475	0.27881	-0.15625	-29.952	33.085	19.6374	-0.0083983	0.29492	0.19795	-83.2166	-110.862	1222.816	-1.5835	0.94971	-0.062012	29.1377	-103.572	1271.916	-1.1987	0.80518	-0.24951
0.678	-14.315	42.9082	28.2772	0.17554	0.12524	0.092773	-78.403	143.595	670.0299	-0.71865	0.50029	0.051856	-18.595	152.079	551.6121	-0.67725	0.51807	-0.047852	-24.5972	-36.5116	177.2264	0.089355	0.29688	-0.17188	-29.596	26.5268	43.903	-0.020996	0.30078	0.20703	-39.8973	-124.837	1256.4351	-1.5798	0.92017	-0.072998	-8.6762	-85.878	1284.0013	-1.3047	0.7793	-0.23242
0.68	-13.287	15.0321	26.1041	0.15723	0.13574	0.09375	-51.238	147.997	647.48	-0.68311	0.49072	0.047363	-30.797	151.321	507.7575	-0.64063	0.48658	-0.031494	1.1198	-15.4524	240.066	0.0058594	0.33936	-0.20264	-50.079	3.36318	73.325	-0.031446	0.3122	0.21895	-44.0727	-150.4154	1284.024	-1.5781	0.89453	-0.076172	-7.4168	-66.853	1273.0581	-1.3848	0.77929	-0.2146
0.682	-12.827	1.291	39.6158	0.11279	0.15088	0.095215	-51.4319	152.526	611.6442	-0.64961	0.47285	0.046289	-38.114	125.9622	493.6214	-0.6084	0.44922	-0.018555	-0.926400000000001	-27.214	308.827	-0.10327	0.37524	-0.21484	-42.441	-27.954	118.202	-0.045313	0.32071	0.22598	-19.4285	-145.878	1299.1388	-1.5835	0.87939	-0.077637	-1.069	-47.022	1256.6623	-1.4526	0.79736	-0.20264
0.684	-27.275	16.587	42.1334	0.09375	0.1626	0.10107	-59.693	128.7784	568.405	-0.61445	0.46524	0.042871	-16.752	115.6358	469.28	-0.56641	0.4082	-0.0014648	-8.1428	-75.569	315.508	-0.26172	0.41748	-0.2207	-48.137	-33.782	171.952	-0.049219	0.32695	0.23301	-67.7637	-112.358	1306.644	-1.5781	0.87891	-0.080322	6.446	-29.554	1240.93985	-1.5234	0.81445	-0.19189
0.686	-33.11	25.4016	31.9615	0.051758	0.17432	0.10791	-46.778	112.3958	531.308	-0.57383	0.45391	0.037012	-21.037	124.7919	436.2069	-0.5437	0.38355	0.013183	8.41086	-135.0221	318.016	-0.52832	0.48242	-0.21191	-54.319	9.1786	218.0814	-0.059668	0.33672	0.22793	-66.804	-84.55	1326.197	-1.5879	0.88281	-0.07959	50.3143	-39.738	1259.299	-1.5566	0.82129	-0.19336
0.688	-28.934	40.232	28.15972	0.022949	0.18921	0.1123	-27.287	101.403	500.923	-0.53349	0.44346	0.03457	-14.641	130.2559	445.261	-0.51953	0.35938	0.026855	21.80163	-144.58	358.33	-0.6748	0.52734	-0.19824	-67.892	16.1439	315.9923	-0.071289	0.34326	0.19531	-62.171	-83.114	1360.636	-1.6304	0.88818	-0.086426	78.17	-45.818	1272.492	-1.627	0.82324	-0.19482
0.69	-25.45	32.407	15.5133	0.0014648	0.20313	0.11963	-1.461	118.532	484.16073	-0.49365	0.42725	0.02832	-32.157	137.3604	419.746	-0.48828	0.32813	0.040527	14.2949	-107.594	439.723	-0.94531	0.64063	-0.16016	-130.566	-34.272	426.767	-0.097166	0.34912	0.1418	-64.156	-93.252	1390.147	-1.6719	0.8916	-0.089844	62.7	-48.6733	1270.414	-1.6924	0.82227	-0.20019
0.692	-52.442	34.0888	27.25385	-0.022949	0.22021	0.13037	3.508	113.6531	452.866	-0.45673	0.41338	0.02334	-13.983	120.7001	402.03	-0.46973	0.31543	0.048828	-11.773	-41.9353	466.244	-1.1065	0.73779	-0.13354	-169.501	-95.634	537.969	-0.15047	0.35498	0.090638	-97.325	-108.732	1367.931	-1.7847	0.91846	-0.090332	80.751	-68.028	1300.692	-1.769	0.82666	-0.20215
0.694	-16.227	26.3662	27.75019	-0.030762	0.2334	0.13525	-21.047	119.3863	429.3483	-0.42217	0.39952	0.021191	-13.678	122.117	365.1985	-0.43311	0.28857	0.060059	2.451	8.7489	453.734	-1.2295	0.83105	-0.12305	-117.02	-115.744	628.386	-0.25007	0.3499	0.036733	-102.656	-109.401	1349.264	-1.8901	0.95654	-0.089844	72.893	-85.085	1327.9114	-1.8848	0.85645	-0.21875
0.696	-35.541	28.56244	31.199	-0.035645	0.25049	0.13965	-25.261	114.752	417.536	-0.38428	0.38116	0.021582	-48.038	114.181	328.1758	-0.40258	0.26904	0.066651	26.7372	5.693	467.577	-1.2983	0.91455	-0.1416	-109.508	-111.253	689.364	-0.39606	0.34512	-0.025279	-91.29	-92.292	1347.6994	-2.0039	1.002	-0.083984	46.3988	-87.923	1352.481	-1.9675	0.89184	-0.23926
0.698	-21.043	42.5404	32.56685	-0.035645	0.25098	0.1438	-38.969	128.059	405.4477	-0.35498	0.36641	0.016113	-38.276	104.8433	307.8764	-0.37012	0.24951	0.067871	48.034	7.815	541.844	-1.3096	0.93945	-0.15479	-153.6428	-70.183	737.077	-0.5791	0.34229	-0.077148	-80.226	-67.417	1339.75816	-2.1323	1.0767	-0.068359	-20.299	-65.1798	1358.657	-2.0508	0.9375	-0.26416
0.7	-37.664	43.7475	38.5772	-0.03418	0.25732	0.14697	-39.685	127.434	407.01	-0.32617	0.3501	0.01709	-31.416	103.85041	288.8717	-0.32813	0.23145	0.080566	91.37	30.289	658.5668	-1.314	0.98682	-0.18457	-163.3232	3.0458	747.4941	-0.80098	0.36847	-0.11837	-51.708	-53.489	1334.4723	-2.1831	1.1177	-0.059082	-36.631	-70.966	1350.794	-2.144	1.0142	-0.30225
0.702	-33.272	33.9778	32.905	-0.027344	0.27344	0.14844	-30.927	128.593	409.502	-0.29678	0.32929	0.0086913	-59.0749	106.99327	262.3436	-0.30664	0.21777	0.083008	69.415	51.16	744.787	-1.3768	1.0408	-0.20484	-134.5816	33.7102	760.804	-1.0532	0.41626	-0.14337	-51.287	-74.235	1313.618	-2.2769	1.1978	-0.062988	-34.757	-95.726	1340.407	-2.1895	1.0508	-0.32227
0.704	-38.156	12.1685	40.039	-0.023926	0.27783	0.15625	-11.369	115.324	352.948	-0.26709	0.31289	-4e-08	-63.6639	97.4076	234.4473	-0.26709	0.18994	0.086426	54.511	64.816	816.719	-1.5015	1.1118	-0.20801	-102.029	50.34	802.429	-1.3217	0.49483	-0.15313	-38.649	-102.4801	1305.278	-2.3447	1.2568	-0.072021	-33.857	-82.17	1351.454	-2.269	1.1177	-0.35205
0.706	-49.756	-23.2701	57.539	-0.020996	0.28711	0.1626	-2.074	90.246	309.736	-0.2378	0.29531	-0.0058594	-63.671	89.7654	215.6522	-0.23316	0.17017	0.089355	44.087	62.919	859.233	-1.7695	1.2363	-0.18945	-6.0705	63.569	890.213	-1.5769	0.59687	-0.15625	-17.316	-105.794	1327.193	-2.4121	1.3027	-0.084473	-26.0159	-68.415	1330.06	-2.3222	1.1523	-0.36645
0.708	-50.3066	-36.8335	116.4811	-0.020752	0.29785	0.16772	-20.856	94.385	282.941	-0.21133	0.27451	-0.0096681	-32.159	99.7859	191.2658	-0.1958	0.14844	0.094727	92.787	47.37	881.4567	-1.9214	1.2993	-0.18018	32.0014	56.44	982.313	-1.7944	0.71729	-0.1377	-9.288	-82.305	1341.974	-2.5176	1.3613	-0.088379	-20.9606	-49.752	1306.4999	-2.3491	1.1841	-0.37842
0.71	-27.98	-47.887	172.8903	-0.021973	0.30811	0.17236	-1.216	92.35931	254.529	-0.18213	0.25635	-0.017578	-35.973	111.4578	162.875	-0.1499	0.12842	0.09668	80.916	2.761	916.941	-2.1714	1.4224	-0.15039	24.5771	72.637	1045.476	-1.9519	0.87434	-0.078308	-7.691	-46.769	1344.721	-2.5581	1.3931	-0.085938	12.013	-53.483	1289.182	-2.3555	1.2217	-0.38867
0.712	-48.143	-39.671	231.561	-0.027344	0.31982	0.18066	10.402	79.694	241.44071	-0.15879	0.23721	-0.026172	-39.897	101.7005	163.7196	-0.12549	0.1123	0.096191	48.3781	-44.135	975.755	-2.27	1.5049	-0.14161	-14.503	69.027	1044.969	-2.075	1.0482	-0.037292	-3.898	-29.9512	1330.3639	-2.6069	1.4458	-0.086914	9.91381	-42.779	1261.649	-2.3379	1.2402	-0.38867
0.714	-98.268	-64.632	292.584	-0.027832	0.32666	0.18164	-5.375	69.139	224.96406	-0.13711	0.21465	-0.031836	-56.8025	88.6253	158.3442	-0.070801	0.092773	0.093262	-6.225	-98.5263	1029.393	-2.2793	1.582	-0.15039	-30.366	67.358	1000.794	-2.177	1.2126	-0.011527	-38.573	-23.6582	1311.6703	-2.5877	1.4777	-0.086182	33.9452	-41.306	1270.891	-2.271	1.2563	-0.37939
0.716	-112.148	-122.305	310.117	-0.036133	0.34277	0.1665	-23.889	66.039	220.9593	-0.11562	0.20176	-0.038086	-48.11	71.8503	131.698	-0.042481	0.078614	0.090332	-62.3462	-129.935	1055.3257	-2.1211	1.6602	-0.18359	-24.357	56.3341	990.481	-2.2318	1.3466	0.00074637	-53.822	-37.837	1321.7078	-2.5288	1.4956	-0.095215	44.487	-44.796	1270.8381	-2.1973	1.2579	-0.3772
0.718	-85.265	-178.328	309.1574	-0.06372	0.35718	0.12598	-8.937	72.6667	219.1928	-0.094922	0.18408	-0.039062	-33.209	70.3139	107.6	-0.01123	0.060059	0.09082	-55.3581	-139.875	1065.57473	-1.9917	1.6821	-0.19482	11.265	35.282	982.501	-2.2432	1.4258	0.010254	-23.329	-40.562	1328.271	-2.4077	1.4849	-0.10938	30.539	-25.1792	1263.4559	-2.1191	1.25	-0.37158
0.72	-59.088	-152.1156	305.127	-0.10742	0.37891	0.080078	-28.793	90.206	200.9547	-0.080078	0.16797	-0.044922	-50.591	67.1358	108.71617	0.016602	0.04248	0.091797	-24.673	-131.121	1065.9131	-1.7275	1.6855	-0.23096	49.4924	-7.77800000000001	986.249	-2.1994	1.4254	0.013625	-21.995	-34.133	1328.663	-2.3359	1.4668	-0.11328	5.0285	6.8095	1247.202	-2.0151	1.2192	-0.36816
0.722	-70.892	-101.4652	348.828	-0.2168	0.41846	0.037598	-20.086	104.673	192.935	-0.063867	0.15147	-0.046387	-49.812	76.674	83.9597	0.039063	0.03125	0.088867	19.78	-124.743	1100.6966	-1.5611	1.6519	-0.24415	-15.95189	-63.35	991.099	-2.095	1.3839	0.010468	-38.298	-13.531	1294.9564	-2.1909	1.4028	-0.12988	-5.8271	24.5805	1237.8865	-1.9702	1.2017	-0.3623
0.724	-97.9928	-40.333	389.1513	-0.29883	0.43555	0.01709	-34.256	89.024	175.1957	-0.049219	0.13467	-0.050293	-38.565	69.757	69.7055	0.068359	0.021484	0.094727	7.272	-118.479	1153.0669	-1.4331	1.5962	-0.24268	-45.05523	-99.834	1015.0613	-1.9541	1.3224	0.015255	-47.5197	-24.09	1265.341	-2.1021	1.3491	-0.14233	13.21	30.921	1250.395	-1.8926	1.166	-0.35303
0.726	-99.594	-11.4902	398.498	-0.49365	0.48291	0.031738	-31.438	77.702	143.0947	-0.039453	0.11865	-0.058887	-68.3039	68.806	60.9419	0.085449	0.0056152	0.091553	-40.9327	-96.82	1210.261	-1.3267	1.52	-0.2417	-54.8964	-112.92	1015.4058	-1.8213	1.2807	0.019716	-52.962	-29.2936	1240.295	-2.0269	1.2993	-0.1499	29.3696	18.394	1235.64086	-1.8435	1.1433	-0.34839
0.728	-81.252	-6.533	401.388	-0.63794	0.53931	0.062744	-53.52755	67.6358	117.56	-0.030078	0.10332	-0.054883	-57.2322	52.8253	64.5143	0.10059	-0.0068359	0.094727	-39.219	-68.141	1265.51	-1.2949	1.4902	-0.23779	-2.215	-131.901	1023.0459	-1.7183	1.2563	0.04541	-48.599	-31.3631	1245.013	-1.9414	1.2422	-0.14648	32.0992	0.244	1232.9233	-1.8062	1.1274	-0.34131
0.73	-29.795	1.772	463.9947	-0.76221	0.60596	0.11182	-44.861	62.583644	111.7029	-0.02002	0.086914	-0.061523	-23.587	36.896	69.55504	0.11816	-0.020508	0.099121	-34.601	-73.5497	1304.146	-1.2324	1.459	-0.22803	65.254	-132.76	1015.0104	-1.6772	1.2478	0.080477	-56.989	-1.498	1253.9565	-1.9063	1.2188	-0.14648	27.883	-15.304	1222.4689	-1.7749	1.104	-0.33154
0.732	-22.226	40.193	534.7906	-0.86719	0.69922	0.15576	-37.134	58.2806	133.786	-0.016211	0.072461	-0.060351	-3.724	30.108	51.3927	0.12451	-0.022461	0.097656	-19.847	-70.815	1301.412	-1.187	1.4438	-0.22534	68.398	-98.488	1027.3232	-1.6743	1.2372	0.12011	-46.786	16.23	1258.208	-1.8438	1.1846	-0.14209	59.928	-31.4264	1200.9677	-1.7612	1.0923	-0.32666
0.734	-11.416	110.278	617.6232	-0.89307	0.74756	0.16797	-33.977	62.409	93.22007	-0.0086915	0.059766	-0.062402	-18.424	38.5757	50.0923	0.13428	-0.035645	0.10254	-33.673	-64.758	1263.2611	-1.1387	1.4355	-0.23682	52.755	-66.8952	1079.0864	-1.6819	1.2191	0.16179	-84.2573	31.1242	1242.1452	-1.8011	1.1517	-0.14331	71.567	-21.1225	1197.76	-1.7422	1.0625	-0.3125
0.736	-1.031	171.562	695.2281	-0.90576	0.81982	0.1416	-17.125	67.911	64.639	0.00029297	0.051563	-0.062793	-12.582	40.6739	36.513	0.13843	-0.044434	0.10157	-65.114	-55.214	1236.383	-1.0801	1.4219	-0.2627	34.1768	-73.9035	1147.26427	-1.6641	1.187	0.19763	-72.2372	66.121	1226.7599	-1.7671	1.1274	-0.14063	80.318	-13.753	1177.715	-1.7312	1.0501	-0.30639
0.738	-62.04	188.333	782.6306	-0.90015	0.84936	0.097411	-39.178	55.7347	54.885	0.014843	0.041504	-0.066113	-23.279	43.4735	31.2592	0.14258	-0.048828	0.10107	-77.3724	-38.802	1221.05	-1.0557	1.4102	-0.27344	25.76	-73.8344786	1186.79	-1.6226	1.1431	0.21484	-105.6356	79.999	1233.6579	-1.7285	1.082	-0.13916	78.945	-13.139	1160.277	-1.7144	1.0317	-0.3042
0.74	-30.292	167.101	860.83877	-0.91064	0.87549	0.037109	-42.326	48.3518	66.026358	0.023438	0.038086	-0.064453	-27.644	54.0058	27.2855	0.13672	-0.052246	0.10498	-102.071	-50.087	1235.815	-1.0122	1.3647	-0.29834	-13.139	-76.6163	1174.607	-1.574	1.0832	0.20596	-79.683	82.498	1205.0791	-1.7144	1.063	-0.13623	79.304	0.119	1143.579944	-1.6953	1.0039	-0.29199
0.742	-10.69	116.139	915.429	-0.98975	0.89502	-0.061523	-21.536	46.5015	86.4671	0.035254	0.031153	-0.070899	-26.457	45.9376	40.949	0.13428	-0.055664	0.10547	-48.671	-86.0824	1265.5238	-0.99268	1.3135	-0.31201	-62.263	-81.625	1147.471	-1.5308	1.0274	0.17408	-95.5827	67.984	1192.2198	-1.6792	1.0337	-0.13379	46.759	20.006	1145.1479	-1.6895	0.99023	-0.28125
0.744	-43.964	69.853	966.688	-1.0703	0.9043	-0.1123	-25.839	44.9306	85.716	0.044336	0.021192	-0.074707	-11.559	29.3749	31.1205	0.12061	-0.04834	0.10791	-18.1319	-135.12	1314.9519	-0.99121	1.2539	-0.32031	-86.254	-76.719	1125.761	-1.4981	0.97816	0.13832	-100.09671	62.7447	1162.2199	-1.6472	1.0046	-0.12696	22.818	53.415	1121.3907	-1.6699	0.96094	-0.27637
0.746	-105.63	33.717	1040.9893	-1.2974	0.93213	-0.19092	-38.866	37.162	71.5106	0.052539	0.012988	-0.07627	-26.42	22.2337	23.4831	0.10889	-0.048828	0.11157	22.739	-146.117	1344.236	-1.001	1.1777	-0.32275	-161.7631	-77.375	1141.569	-1.4673	0.92525	0.10877	-105.443	42.6841	1147.24	-1.6172	0.97656	-0.12354	37.671	64.466	1109.524	-1.6494	0.94287	-0.27002
0.748	-58.80428	-0.00100000000000122	1096.317	-1.6074	0.97852	-0.22363	-43.333	42.853	63.3992	0.050977	0.002832	-0.079492	-42.001	32.1577	32.3672	0.089844	-0.044922	0.11426	27.127	-109.83	1381.857	-1.0112	1.145	-0.31982	-131.812	-87.304	1174.336	-1.4429	0.86572	0.087891	-74.3358	42.266	1125.846	-1.5581	0.93604	-0.11768	21.1719	58.6158	1082.0598	-1.6216	0.92529	-0.26563
0.75	-32.2597	-36.2433	1100.5742	-1.7793	1.0176	-0.20703	-40.225	50.566	50.8764	0.049805	-0.0014648	-0.08252	-32.707	37.8379	15.282	0.073242	-0.039551	0.11963	38.2525	-53.29949	1381.6885	-1.0503	1.0942	-0.30908	-98.024	-123.572	1187.5078	-1.4303	0.81852	0.075975	-43.485	43.359	1111.1082	-1.5273	0.91992	-0.11621	-5.6335	65.77	1055.31091	-1.582	0.90039	-0.26465
0.752	-8.4791	-59.24	1060.39	-2.0918	1.125	-0.16602	-52.196	62.05067	50.41944	0.049023	-0.0071289	-0.082813	-31.238	32.3649	19.56287	0.066406	-0.037109	0.12305	55.135	-37.531	1406.032	-1.0977	1.0811	-0.31103	-68.4821	-153.6413	1192.027	-1.4223	0.77381	0.069308	-36.627	61.762	1069.3371	-1.4668	0.875	-0.1123	-20.784	72.146	1036.853	-1.5566	0.88379	-0.26172
0.754	36.7607	-95.46	1052.969	-2.2524	1.2256	-0.10889	-27.466	54.7321	57.335	0.042383	-0.0095703	-0.087207	-7.498	32.1108	15.92719	0.055664	-0.031738	0.12158	51.883	-61.9681	1426.44	-1.1602	1.0869	-0.30566	-76.6976	-140.994	1204.21	-1.4243	0.74164	0.057651	-37.503	69.48756	1052.9245	-1.4231	0.84204	-0.10865	-27.67437	65.4933	1008.1757	-1.5034	0.85693	-0.25928
0.756	41.2888	-96.442	1077.2709	-2.3452	1.3208	-0.051758	-24.701	35.3658	47.4975	0.029883	-0.0091797	-0.090723	-33.26	23.9855	11.3787	0.059815	-0.028076	0.12524	46.543	-98.9326	1421.69	-1.2769	1.1235	-0.30127	-90.987	-106.445	1226.956	-1.4334	0.72429	0.049444	-54.084	83.4858	1028.672	-1.3857	0.81543	-0.1084	-18.377	56.14	987.9544	-1.4683	0.83594	-0.25683
0.758	22.7663	-65.104	1140.636	-2.3296	1.4438	0.013672	-25.983	28.226	21.3999	0.02334	-0.0055664	-0.091699	-24.183	25.4951	29.4974	0.064453	-0.023926	0.12939	54.179	-104.744	1411.096	-1.3398	1.1484	-0.29688	-76.983	-71.39	1263.765	-1.4468	0.73193	0.043457	-39.96	101.4205	1021.0105	-1.3354	0.78174	-0.10645	-15.1567	68.867	973.9449	-1.4351	0.81396	-0.25293
0.76	2.062	-20.699	1198.698	-2.2749	1.4966	0.040039	-14.507	20.775	20.762	0.012695	-0.0043945	-0.092285	-38.937	36.77964	31.9776	0.077637	-0.014648	0.13037	57.438	-81.0546	1397.1156	-1.4883	1.2168	-0.30176	-83.037	-55.996	1296.765	-1.469	0.75639	0.033988	-14.82	106.5472	1010.7528	-1.3184	0.75977	-0.10254	-9.683	72.679	967.3116	-1.3979	0.78174	-0.24463
0.762	34.7956	-19.173	1214.461	-2.0933	1.5591	0.081543	-15.328	29.4547	39.9032	0.0039063	0.0019531	-0.089746	-35.936	38.5394	24.3701	0.086914	-0.0097656	0.13037	62.233	-48.3124	1385.8957	-1.6016	1.273	-0.30591	-94.1579	-71.025	1314.301	-1.5027	0.79476	0.028755	-35.584	104.8776	990.158	-1.2783	0.72949	-0.10205	-6.851	64.834	931.985	-1.3784	0.76416	-0.24072
0.764	66.268	-32.4888	1198.125	-1.9253	1.5571	0.1106	9.73999999999999	32.986	30.8971	-0.00625	0.0064453	-0.090723	-41.519	33.0972	23.3289	0.10791	-0.003418	0.12988	38.551	-34.34	1359.23	-1.7129	1.3301	-0.31934	-98.8314	-115.791	1326.652	-1.5496	0.83862	0.028119	-19.645	112.605	941.4557	-1.241	0.70581	-0.098145	-12.901	62.517	899.317	-1.3374	0.73779	-0.23047
0.766	30.398	-26.8474	1181.9366	-1.7612	1.5161	0.13818	-25.217	34.714	18.6691	-0.0050781	0.013086	-0.090332	-43.305	26.48957	25.915	0.12256	-0.00024414	0.12573	65.435	-50.56	1342.78	-1.8315	1.4136	-0.34326	-123.891	-117.8945	1327.104	-1.6177	0.87924	0.032072	-32.411	114.379	909.3047	-1.1987	0.68799	-0.095215	-32.1	75.0343	879.43435	-1.3047	0.72217	-0.22461
0.768	6.163	4.675	1182.078	-1.5913	1.4185	0.15771	-41.149	53.645	15.2005	-0.0046875	0.018555	-0.088965	-53.02228	32.6254	5.541	0.13721	0.0029297	0.11963	87.424	-67.387	1347.135	-1.8765	1.4536	-0.35498	-120.0803	-93.05	1314.647	-1.7031	0.92188	0.038086	-9.111	129.884	871.4876	-1.1323	0.65283	-0.091309	-41.62264	76.689	887.198	-1.2676	0.70313	-0.21533
0.77	-24.808	24.138	1202.1447	-1.5225	1.3574	0.16553	-35.121	39.819	51.181	-0.0024414	0.018555	-0.092773	-37.695	50.44	7.7828	0.1499	0.0092773	0.11572	119.44	-58.446	1372.7633	-1.9653	1.5337	-0.38721	-120.9745	-53.395	1289.6184	-1.7857	0.97039	0.043199	-29.143	120.666	864.4185	-1.1011	0.63428	-0.087891	-37.9325	83.158	883.6948	-1.21	0.68652	-0.20361
0.772	-21.948	31.837	1194.9855	-1.4082	1.2617	0.17139	-13.853	36.327	50.05309	0.0042969	0.022266	-0.090625	-42.958	53.048	32.5287	0.15674	0.0097656	0.11133	100.976	-25.885	1377.3012	-2.0339	1.595	-0.40552	-78.91	-51.351	1281.2219	-1.8572	1.0245	0.044248	13.503	124.859	847.4292	-1.0347	0.60205	-0.084961	-53.7069	97.678	833.53	-1.1831	0.67432	-0.19678
0.774	-34.677	-9.608	1205.56	-1.3562	1.2049	0.16333	-26.085	38.8151	45.7686	0.0095702	0.023047	-0.090039	-29.952	37.708	27.7869	0.1665	0.013184	0.10352	69.333	11.6872	1376.274	-2.0894	1.6489	-0.41406	-63.424	-81.402	1276.013	-1.9122	1.0741	0.039513	12.347	98.7803	813.0649	-0.98047	0.57813	-0.085205	-33.23	104.149	804.148	-1.1382	0.64697	-0.19092
0.776	-5.021	-56.349	1206.275	-1.312	1.1685	0.14258	-32.051	26.8627	37.432	0.018164	0.020312	-0.093554	-36.243	37.2774	23.2915	0.16601	0.021972	0.10449	30.894	11.97361	1366.20825	-2.1445	1.7031	-0.41504	-55.217	-106.1617	1265.382	-1.9612	1.121	0.029481	0.960000000000001	103.3873	784.716	-0.92725	0.55713	-0.087891	-32.896	107.95	783.4726	-1.1023	0.62281	-0.17822
0.778	7.745	-89.42022	1243.488	-1.2793	1.1211	0.10938	-6.781	15.7449	27.8803	0.023633	0.018652	-0.089648	-32.992	33.54593	17.8635	0.16699	0.027344	0.10449	24.6017	-7.2504	1356.7886	-2.1628	1.7434	-0.40551	-31.763	-112.787	1282.511	-2.0132	1.1685	0.015137	-25.059	88.8775	766.486	-0.85303	0.53174	-0.088379	-20.056	108.4403	749.78187	-1.0737	0.60596	-0.16895
0.78	15.092	-67.215	1265.937	-1.2734	1.1016	0.084473	-37.503	19.2999	11.298	0.032715	0.015137	-0.088379	-41.545	34.29581	27.3138	0.1748	0.044922	0.104	27.105	-35.2856	1353.608	-2.1582	1.7695	-0.39111	-23.403	-78.253	1307.021	-2.0875	1.2136	0.00069755	-17.933	104.13536	741.2271	-0.81836	0.51563	-0.087891	-25.343	122.40144	708.3182	-1.0376	0.57275	-0.15332
0.782	3.354	-47.328	1285.5418	-1.2964	1.0552	0.035645	-18.801	31.9857	7.3389	0.041113	0.016309	-0.091602	-8.702	38.6667	41.9234	0.18213	0.052734	0.10547	26.6589	-31.899	1346.896	-2.1089	1.7739	-0.38232	-31.725	-48.225	1308.982	-2.19	1.2682	-0.01669	-4.49	114.6151	710.6411	-0.75586	0.49414	-0.085449	10.514	119.0633	694.482	-1.0215	0.55957	-0.146
0.784	-36.547	-42.1276	1307.982	-1.3306	1.0264	0.017578	-27.677	31.7342	31.102	0.044922	0.017774	-0.087695	-23.983	40.68561	35.2597	0.18945	0.069336	0.10547	21.04601	-19.1005	1357.069	-2.0601	1.7661	-0.37744	-34.163	-20.1991	1302.486	-2.31	1.3311	-0.020996	-42.954	128.853	695.4628	-0.71509	0.46412	-0.097168	6.704	96.373	674.607	-0.98242	0.5332	-0.12402
0.786	-23.856	-78.467	1324.2	-1.375	1	0.0053711	-5.317	24.4233	52.229	0.05	0.023633	-0.089257	-36.364	46.5801	26.6672	0.19971	0.07959	0.10645	6.2408	-11.027	1337.05272	-1.9355	1.7324	-0.375	-54.281	-24.7803	1284.94212	-2.4176	1.3928	-0.026072	-29.284	120.327	661.63035	-0.68018	0.44092	-0.096191	10.038	96.9583	664.6843	-0.95362	0.51514	-0.11646
0.788	-36.729	-113.851	1347.134	-1.4287	0.98633	0.0053711	-40.005	23.7356	41.43346	0.058203	0.030469	-0.084473	-28.121	33.238	25.4136	0.20801	0.090332	0.10938	0.5246	-12.485	1298.761	-1.832	1.7036	-0.37109	-63.778	-36.303	1289.43506	-2.4956	1.4517	-0.024902	-52.0793	116.9231	658.77545	-0.63867	0.41602	-0.097656	12.255	102.0713	650.8659	-0.91992	0.49414	-0.10742
0.79	-31.569	-105.961	1376.565	-1.4414	0.98828	0.0073242	-51.3719	38.8322	15.82	0.058105	0.037109	-0.082031	-24.044	31.138	25.4563	0.21973	0.10156	0.10596	4.8725	-29.193	1284.21	-1.7241	1.6567	-0.36572	-48.441	-37.526	1315.884	-2.5301	1.5012	-0.0291	-33.7573	123.7643	633.207	-0.62207	0.40918	-0.097168	-4.715	117.556	627.0449	-0.875	0.47168	-0.084961
0.792	-50.205	-74.6558	1398.434	-1.4585	1.0122	0.013184	-41.882	31.392	38.6177	0.055664	0.046094	-0.078711	-32.243	40.0729	29.9644	0.22705	0.10645	0.104	49.518	-33.4419	1256.578	-1.604	1.604	-0.3584	-74.104	-24.149	1316.383	-2.512	1.5427	-0.035159	-48.7605	125.4119	621.774	-0.58154	0.38818	-0.10156	-26.041	129.658	621.3924	-0.85596	0.46143	-0.074707
0.794	-86.2054	-55.4103	1377.6769	-1.4704	1.0393	0.012451	-57.129	40.537	44.1973	0.052149	0.056543	-0.073437	-13.941	37.965	54.3464	0.23438	0.10889	0.098633	38.558	-6.739	1257.574	-1.5601	1.5767	-0.35889	-101.7163	-18.331	1307.8702	-2.4385	1.5661	-0.041407	-29.249	120.3913	585.169	-0.55079	0.37305	-0.10083	-34.791	135.345	590.2518	-0.81982	0.43408	-0.063965
0.796	-105.458	-50.329	1356.6334	-1.4863	1.0684	0.0043945	-38.538	33.5799	33.1359	0.044726	0.06709	-0.071875	-13.09	32.662	50.728	0.24096	0.10864	0.095215	32.104	38.056	1251.5136	-1.498	1.5322	-0.35059	-115.01404	-16.799	1260.035	-2.3316	1.5633	-0.050489	-33.872	122.2537	548.1455	-0.52197	0.35938	-0.10205	-27.665	119.262	562.6892	-0.79615	0.41724	-0.057129
0.798	-132.636	-56.026	1333.4791	-1.5288	1.106	0.0087891	-46.13	22.46201	14.1972	0.039649	0.070313	-0.064746	-31.78	27.1907	39.1127	0.23926	0.11035	0.092773	-6.6408	69.7392	1261.5306	-1.4766	1.5059	-0.34082	-99.403	-26.1997	1221.713	-2.2124	1.5435	-0.060059	-59.214	111.2604	500.764	-0.479	0.34277	-0.09668	-11.765	114.073	547.9777	-0.77148	0.39844	-0.046875
0.8	-89.5472	-53.097	1334.859	-1.563	1.1226	0.016113	-38.898	23.882	14.0929	0.033203	0.080566	-0.062012	-10.588	28.831	28.4867	0.22607	0.11182	0.078125	20.4122	94.921	1232.3236	-1.4663	1.481	-0.32666	-101.016	-17.427	1222.261	-2.0981	1.4936	-0.071289	-53.0127	100.3588	485.189	-0.45215	0.33643	-0.099609	-37.137	99.6382	528.191	-0.74414	0.37695	-0.03418
0.802	-55.544	-48.1335	1341.195	-1.668	1.1543	0.023926	-44.624	33.3879	35.5778	0.029394	0.092383	-0.0625	-27.528	39.8212	38.0088	0.22119	0.11328	0.080566	38.293	90.269	1185.6523	-1.4614	1.4517	-0.31934	-71.037	-4.353	1228.9	-1.9911	1.4317	-0.080567	-31.356	90.6516	474.6632	-0.40186	0.31396	-0.10449	-28.87	104.016	501.8823	-0.72803	0.36719	-0.024902
0.804	-40.9	-16.4404	1342.154	-1.7646	1.1967	0.031982	-42.497	45.0214	32.0501	0.024121	0.093556	-0.05625	-23.249	36.0381	40.926	0.19482	0.12109	0.076172	50.368	87.8692	1156.8015	-1.4619	1.4336	-0.31689	-67.776	13.046	1249.695	-1.9	1.368	-0.080957	-9.167	102.7994	436.932	-0.36035	0.30176	-0.10669	-32.29	106.34	477.5163	-0.69873	0.34814	-0.018555
0.806	-67.481	10.3353	1351.964	-1.8574	1.2441	0.049805	-20.482	41.8685	29.539	0.020996	0.10293	-0.051172	-31.18	40.3424	28.603	0.1665	0.13672	0.073242	48.851	97.901	1156.80416	-1.4492	1.4023	-0.30957	-94.09895	41.702	1248.2466	-1.8224	1.3112	-0.085059	-34.0675	100.77378	403.6373	-0.31836	0.28467	-0.11035	-30.157	109.8514	461.5544	-0.67481	0.33496	-0.0046387
0.808	-63.003	15.1444	1370.784	-1.9766	1.3145	0.05957	-32.965	37.890737	34.4662	0.020605	0.11133	-0.049316	-19.748	40.7506	12.0525	0.146	0.14551	0.074219	44.7008	96.351	1152.921	-1.4333	1.3728	-0.29785	-105.904	64.7565	1232.6452	-1.7534	1.2622	-0.084473	-57.3061	111.585	384.593	-0.2749	0.26416	-0.1084	-29.622	105.8808	435.1971	-0.646	0.32666	0.0053711
0.81	-58.313	8.558	1376.746	-2.0308	1.3501	0.052734	-19.984	20.5219	23.6822	0.019531	0.12061	-0.050781	-42.1169	31.0673	29.957	0.10938	0.16309	0.078613	59.516	105.217	1130.658	-1.4097	1.3462	-0.28662	-108.894	66.097	1233.113	-1.7051	1.2217	-0.086035	-34.206	110.085	375.545	-0.25342	0.25244	-0.11084	-24.54	101.8828	407.9247	-0.59521	0.31104	0.022949
0.812	-52.642	7.819	1401.023	-2.1387	1.4219	0.037109	-49.0177	9.13997	31.6219	0.023047	0.13096	-0.049024	-26.799	17.4895	41.8744	0.083252	0.17969	0.084473	69.726	74.6263	1114.4315	-1.3589	1.2993	-0.27881	-104.176	70.975	1208.5447	-1.6582	1.1797	-0.085059	-20.44	123.8743	364.8534	-0.21143	0.23877	-0.10547	-43.438	107.2259	388.4113	-0.56738	0.30273	0.018066
0.814	-36.869	17.8159	1401.342	-2.2312	1.4787	0.040527	-34.873	24.4761	37.491	0.025488	0.1376	-0.046875	-35.506	28.8566	43.7048	0.060547	0.19092	0.089844	75.202	46.012	1081.6508	-1.3257	1.2759	-0.28271	-136.4738	78.601	1189.9343	-1.6301	1.1422	-0.090136	-2.99	115.9938	351.176	-0.18701	0.2229	-0.10767	-82.7272	118.711	379.69	-0.51025	0.28271	0.035645
0.816	-49.843	24.267	1420.321	-2.332	1.5371	0.037109	-28.035	31.725	34.2224	0.030175	0.14385	-0.047266	-45.16	36.35659	33.5284	0.03125	0.20996	0.10254	85.141	42.816	1045.5294	-1.2573	1.2251	-0.27881	-139.13	87.883	1163.6144	-1.6057	1.0967	-0.087402	-36.088	105.5127	320.905	-0.16455	0.21094	-0.11084	-76.8429	113.354	351.3873	-0.47217	0.26611	0.039062
0.818	-58.714	14.221	1411.56	-2.4629	1.6152	0.038574	-11.724	38.691	23.32957	0.036426	0.14942	-0.049023	-38.334	35.6649	28.9186	0.020996	0.21729	0.11133	58.942	78.004	1018.986	-1.2043	1.1897	-0.27442	-142.474	60.476	1166.3801	-1.5898	1.0605	-0.083984	-8.712	82.738	299.8699	-0.13135	0.19824	-0.10889	-67.86831	116.886	320.4187	-0.4375	0.24609	0.040527
0.82	-93.23368	-8.066	1401.3654	-2.5137	1.6543	0.03418	-31.448	32.2611	8.519	0.043457	0.15137	-0.044922	-35.212	17.7143	39.4347	0.003418	0.22803	0.12207	37.892	117.52	1013.5325	-1.1538	1.1548	-0.27783	-113.158	55.4945706	1139.8886	-1.5744	1.026	-0.078809	-18.523	73.5132	271.26	-0.11841	0.19068	-0.11303	-71.657	112.146	298.56168	-0.3877	0.21826	0.047852
0.822	-68.603	-19.4235	1398.3411	-2.5703	1.7227	0.024414	-21.856	23.08106	30.3171	0.05127	0.1542	-0.049316	-50.387	26.3238	27.4866	-0.00708	0.23364	0.12597	42.8645	118.914	1012.7162	-1.0996	1.1074	-0.26758	-66.411	42.477	1109.0674	-1.5496	0.99297	-0.069824	-20.788	86.3098	254.1364	-0.098633	0.17578	-0.11133	-61.2338	106.555	278.8004	-0.36035	0.20508	0.051758
0.824	-51.842	-41.728	1370.9894	-2.5642	1.7697	0.02417	-0.670999999999999	25.8037	37.6546	0.061426	0.1541	-0.051661	-29.148	29.2744	28.2463	-0.0083008	0.23877	0.13672	58.445	103.477	984.552	-1.0776	1.0884	-0.26611	-43.225	55.672	1085.4	-1.5261	0.96094	-0.065137	-4.093	80.2618	233.6224	-0.080078	0.16553	-0.11182	-48.072	100.1691	277.373	-0.30566	0.17578	0.055176
0.826	-26.021	-29.449	1353.501	-2.5278	1.8052	0.027832	-15.532	39.8301	34.9753	0.073926	0.15137	-0.060645	-33.17	25.5669	37.2546	-0.0068359	0.23975	0.14746	42.5857	87.082	956.116	-1.0327	1.0493	-0.25732	-27.476	64.144	1048.9088	-1.5003	0.92822	-0.059472	1.594	69.2993	213.7144	-0.070313	0.16016	-0.1167	-38.6199	122.5828	246.75	-0.26904	0.16651	0.057617
0.828	-15.113	5.652	1337.426	-2.4258	1.8125	0.019043	-7.298	48.2948	39.6125	0.08418	0.14717	-0.063965	-33.585	20.578	17.533	-0.003418	0.23926	0.14746	33.023	107.785	920.47968	-1.0054	1.0259	-0.23999	-45.614	89.494	1035.369	-1.4722	0.89502	-0.05957	-11.113	64.1148	186.393	-0.053711	0.14893	-0.11523	-34.051	110.2256	240.2174	-0.22852	0.15088	0.063965
0.83	-40.582	49.51717	1316.167	-2.3589	1.8091	0.012207	-16.224	35.1293	31.9698	0.092285	0.14893	-0.063965	-48.33	16.34	21.0704	0.0019531	0.24121	0.15527	12.567	133.906	900.7684	-0.97852	0.99805	-0.22314	-31.929	104.7473	1022.094	-1.4447	0.85762	-0.057715	-48.5378	67.6751	192.1149	-0.034424	0.14136	-0.11718	-11.526	94.8899	234.8347	-0.18115	0.13672	0.0625
0.832	-30.96	71.707	1301.753	-2.2148	1.7578	0.0019531	-11.549	20.3739	29.7817	0.10068	0.14199	-0.072461	-41.466	24.5093	20.3185	0.0095214	0.24804	0.15967	8.688	159.948	865.709	-0.94482	0.95947	-0.20313	-38.127	93.60545	1041.262	-1.4237	0.83095	-0.052636	-14.592	69.2647	183.08305	-0.011719	0.13037	-0.12695	-15.783	69.606	207.2803	-0.14429	0.12866	0.067139
0.834	-36.157	80.2571	1308.7492	-2.1033	1.7014	-0.0073241	-38.198	23.0756	18.135	0.10713	0.14219	-0.074609	-13.5	24.2446	41.1628	0.018555	0.25	0.16162	0.355999999999998	152.528	834.7202	-0.92334	0.93799	-0.19531	-31.273	95.92	1027.755	-1.4003	0.80752	-0.050684	2.421	81.7997	163.1525	0.010254	0.12109	-0.11816	-12.006	69.6914	195.8947	-0.11328	0.11816	0.06543
0.836	-34.188	92.148	1289.48	-2.0073	1.6392	-0.015137	-31.747	35.6516	17.74904	0.11025	0.14453	-0.082031	-16.306	34.2438	44.5185	0.030273	0.25586	0.16699	-3.939	126.903	816.2068	-0.88623	0.89893	-0.18262	-42.012	108.975	988.35	-1.3762	0.79062	-0.048438	4.575	83.5133	141.2601	0.022461	0.11963	-0.12402	-29.49	66.236	194.34453	-0.071289	0.09375	0.072754
0.838	-55.89	97.508	1290.7694	-1.9141	1.5703	-0.026855	-35.551	26.8514	39.71934	0.11162	0.14375	-0.084766	-26.996	32.9761	24.568	0.033203	0.25586	0.16992	2.4527	94.0096	776.4724	-0.84961	0.86645	-0.17188	-69.837	129.11	950.172	-1.3438	0.77539	-0.043457	-31.664	65.23768	124.9902	0.049316	0.10791	-0.13037	-44.395	75.406	191.4356	-0.049316	0.080078	0.067871
0.84	-69.675	116.042	1252.828	-1.877	1.5313	-0.026855	-37.4464	33.6442	43.4288	0.10791	0.14697	-0.089844	-41.793	35.011	27.7147	0.044922	0.26172	0.17432	-40.4786	96.7632	755.685	-0.81445	0.83008	-0.16064	-85.232	142.186	914.332	-1.3037	0.76172	-0.04336	-20.87	48.8481	117.8535	0.069336	0.1001	-0.13427	-18.44	85.226	166.3139	-0.01416	0.054688	0.067383
0.842	-95.1332	129.996	1252.732	-1.8179	1.4751	-0.023926	-38.96	15.4248	45.332	0.10811	0.15283	-0.094336	-25.634	28	27.9213	0.057617	0.26929	0.17358	-53.4443	116.2062	721.3638	-0.77295	0.78467	-0.14551	-69.377	137.561	893.12319	-1.2633	0.73994	-0.041797	-29.873	61.05845	108.2339	0.083008	0.091797	-0.14014	-14.004	70.719	156.328	0.016602	0.043213	0.069092
0.844	-83.26	124.319	1220.9954	-1.792	1.4385	-0.019287	-45.711	-17.5066	50.3524	0.10762	0.15918	-0.098339	-30.544	25.7828	41.2776	0.065918	0.27441	0.17334	-44.57169	129.5573	699.58	-0.75342	0.76611	-0.13965	-26.189	126.701	848.7866	-1.2153	0.71728	-0.039844	-42.876	76.0174	102.1008	0.1001	0.083984	-0.14453	-17.375	55.499	132.1764	0.044922	0.032715	0.06543
0.846	-83.3602	80.148	1196.94018	-1.7729	1.4048	-0.012695	-33.832	-17.927474	72.35147	0.11387	0.16817	-0.10381	-4.064	7.8013	71.298	0.087891	0.2876	0.17188	-15.704	153.03	652.666	-0.70752	0.72412	-0.12744	-20.521	103.203	821.0423	-1.1663	0.68936	-0.040137	-40.674	65.3931	93.6601	0.10938	0.07959	-0.14502	-29.872	54.231	122.3271	0.084961	0.021973	0.067383
0.848	-89.403	49.8206	1155.8111	-1.7358	1.3657	-0.0024414	-45.088	-1.7205	85.8428	0.11191	0.17295	-0.1125	-24.827	-23.7561	117.292	0.099121	0.29346	0.17725	-22.6048	141.26	629.3906	-0.68066	0.69385	-0.11181	-18.544	81.245	802.086	-1.1162	0.66211	-0.04248	-34.799	46.74	79.0498	0.12354	0.069824	-0.15479	-1.676	70.713	102.2142	0.099121	0.014648	0.066406
0.85	-69.911	50.937	1128.193	-1.7241	1.3442	0.0014648	-32.313	0.397	88.0516	0.10449	0.17627	-0.12158	-33.055	-24.2109	167.506	0.13379	0.30957	0.15332	-31.934	129.6754	621.7994	-0.65479	0.66748	-0.1001	-30.601	96.532	760.107	-1.0653	0.63349	-0.041113	-41.279	43.007	49.353	0.12744	0.063721	-0.15332	8.342	74.5486	100.9251	0.13086	0.0087891	0.060547
0.852	-59.894	81.483	1120.749	-1.6836	1.2871	0.0083008	-36.3521	-21.7442	126.6242	0.081348	0.16397	-0.12617	-29.525	3.5494	227.729	0.15088	0.3125	0.12036	-1.94	122.30609	617.7217	-0.61426	0.62305	-0.092773	-22.173	134.925	738.163	-1.017	0.6	-0.039941	-62.5421	41.0138	23.478	0.12988	0.056641	-0.15967	-4.272	64.5903	102.941	0.15356	0.0041504	0.063233
0.854	-59.401	97.741	1111.7809	-1.6409	1.2415	0.013183	-38.00849	-32.259	162.2974	0.029102	0.1584	-0.13369	-42.516	10.6253	306.444	0.15625	0.31348	0.074707	-32.455	137.973	601.539	-0.59521	0.60205	-0.083496	-44.154	151.9906	735.3281	-0.97051	0.57539	-0.038769	-46.7645	34.4711	51.4705	0.13281	0.046875	-0.16504	-11.033	45.271	89.5697	0.17334	0.00048828	0.063477
0.856	-50.303	93.902	1088.8056	-1.5933	1.1938	0.019531	-6.312	-33.26212	194.851	-0.04707	0.15723	-0.13448	-98.056	-34.898	391.2046	0.11035	0.33398	0.012695	-19.4363	152.4582	550.707	-0.56152	0.56836	-0.068359	-61.25	160.6662	727.5831	-0.92715	0.55196	-0.040137	-22.705	27.284	49.117	0.13574	0.053223	-0.16553	-20.619	31.382	68.4717	0.19189	-0.0053711	0.058594
0.858	-45.582	98.72	1068.933	-1.5249	1.1313	0.021484	-20.494	-23.4369	249.946	-0.13623	0.16269	-0.14014	-106.793	-88.744	450.0057	0.050781	0.34521	-0.016113	-3.839	132.8876	529.6461	-0.53467	0.54395	-0.059082	-63.6614	143.424	705.1691	-0.88232	0.53174	-0.041992	-30.432	34.1731	41.4379	0.13867	0.041504	-0.16748	-34.93	46.11585	56.2348	0.19727	-0.010742	0.052246
0.86	-64.127	112.339	1038.654	-1.4863	1.0996	0.023926	2.704	5.4082	331.1176	-0.22705	0.17676	-0.14014	-92.597	-78.173	496.0493	-0.13037	0.36914	-0.086914	-4.858	110.972	485.5797	-0.50928	0.51563	-0.046875	-87.8049	134.325	683.12608	-0.8418	0.51699	-0.036817	-27.234	24.20276	35.5639	0.13623	0.042237	-0.17309	-51.818	56.787	74.53772	0.20605	-0.012695	0.055176
0.862	-73.9455	151.068	1020.424	-1.4277	1.0391	0.031738	-20.221	48.8262	444.54	-0.32627	0.19307	-0.14824	-108.156	-37.2179	566.1639	-0.29028	0.39624	-0.12549	-27.165	110.7232	460.2819	-0.47314	0.4873	-0.03418	-109.584	135.356	668.7891	-0.80518	0.50205	-0.035645	-45.824	31.1187	24.627	0.13428	0.039551	-0.17627	-41.461	58.838	54.37569	0.20678	-0.016846	0.053711
0.864	-39.054	180.843	1005.0696	-1.3826	0.99633	0.035156	-0.328999999999997	74.0007	541.98	-0.43096	0.21885	-0.15957	-144.232	11.2496	640.41	-0.46729	0.43408	-0.15088	6.715	103.4268	431.1402	-0.45313	0.47461	-0.026367	-88.731	135.498	656.726	-0.76729	0.48447	-0.034863	-31.628	48.1009	39.196	0.13184	0.03418	-0.17529	-52.2652	43.715	52.6597	0.20459	-0.016602	0.057129
0.866	-53.511	184.562	962.5005	-1.3413	0.95947	0.039063	-26.459	58.2097	658.008	-0.54697	0.24463	-0.17715	-135.928	50.7137	663.879	-0.7417	0.52002	-0.16455	-0.853999999999999	105.963	409.6677	-0.41748	0.44141	-0.016113	-65.373	143.521	624.8619	-0.73066	0.46035	-0.040625	-45.226	64.63	35.9812	0.12695	0.033203	-0.17773	-73.5831	25.0964	46.745	0.19922	-0.019531	0.056152
0.868	-52.082	167.239	931.076	-1.2813	0.91748	0.038574	-23.642	49.8962	744.99	-0.68154	0.27031	-0.19678	-102.1904	69.088	689.553	-0.89063	0.57227	-0.16162	8.194	113.553	390.996	-0.39063	0.41748	-0.0024414	-87.574	129.7602	575.058	-0.69434	0.43848	-0.041992	-40.556	44.385	26.725	0.11816	0.02832	-0.1748	-64.4002	10.647	32.7215	0.19336	-0.018555	0.059082
0.87	-60.862	135.809	889.8034	-1.2347	0.89087	0.044433	21.125	57.592	849.635	-0.85938	0.28809	-0.21484	-89.11712	68.878	745.018	-1.2056	0.69385	-0.14844	8.705	105.0774	361.1341	-0.36133	0.38867	0.0097656	-63.201	110.9971	537.874	-0.65928	0.42451	-0.047461	-33.484	32.0629	24.7864	0.10621	0.030273	-0.17358	-49.734	10.201	45.644	0.18018	-0.018066	0.061523
0.872	-28.859	135.3124	838.674	-1.1831	0.86377	0.035645	-1.875	75.53	904.919	-1.1156	0.30527	-0.21699	-65.565	59.772	852.4225	-1.4472	0.79199	-0.14843	8.626	101.1712	333.381	-0.31348	0.35645	0.020508	-36.15	96.561	518.599	-0.61993	0.4043	-0.044434	-24.174	18.88801	14.526	0.1001	0.035156	-0.1709	-41.0521	30.409	41.314	0.16821	-0.015137	0.062988
0.874	-14.643	139.1983	804.806	-1.105	0.82275	0.032715	-33.937	70.327	914.83	-1.4479	0.33389	-0.21484	-15.813	66.222	953.935	-1.668	0.87695	-0.14795	13.6	100.8346	323.4124	-0.28467	0.33594	0.033203	-13.295	106.814	496.04	-0.58985	0.3875	-0.045605	-27.525	16.634	5.827	0.083008	0.040527	-0.16943	-34.824	33.7425	27.6495	0.15723	-0.0087891	0.066406
0.876	-7.633	157.2423	786.54186	-1.0718	0.80615	0.037109	-56.021	68.482	897.993	-1.8546	0.39287	-0.19414	-34.119	72.2375	1021.943	-1.918	0.99609	-0.10938	10.306	109.0806	308.359	-0.22119	0.30615	0.029785	-10.691	117.169	482.6105	-0.55928	0.36944	-0.04873	-19.759	19.5439	22.3141	0.077637	0.03418	-0.16602	-29.889	31.8182	27.9829	0.14404	0.00048828	0.073242
0.878	0.707999999999998	141.9231	739.1842	-0.99365	0.76123	0.03125	-14.182	35.463	878.391	-2.2785	0.50176	-0.15274	-63.6611	77.916	1027.4793	-2.0273	1.0645	-0.099609	0.999000000000002	113.0562	281.724	-0.17847	0.28003	0.036377	-34.808	121.8207	460.1876	-0.52539	0.35547	-0.051758	-0.337000000000003	25.3335	32.6653	0.063965	0.036133	-0.16406	-37.615	25.7224	4.982	0.14111	3.4694e-15	0.07373
0.88	-4.083	136.9484	721.4677	-0.94019	0.7273	0.028564	-35.924	8.478	868.836	-2.6738	0.66016	-0.11816	-45.8658	43.1958	1041.3261	-2.2285	1.1875	-0.093262	-22.809	107.1047	265.358	-0.13037	0.25293	0.038574	-49.385	116.5569	431.1562	-0.50215	0.33936	-0.056738	-23.888	41.331	18.2794	0.059082	0.036621	-0.16162	-42.684	35.271	20.059548	0.13428	0.015137	0.07666
0.882	-5.593	144.5476	686.7627	-0.88867	0.69434	0.026367	-52.904	-6.545	870.213	-2.9485	0.86357	-0.0875	-22.8943	2.087	1049.92	-2.3442	1.2807	-0.089844	-21.482	99.1843	246.1979	-0.075195	0.21875	0.040527	-63.375	117.253	416.2876	-0.47149	0.32246	-0.062304	-20.542	48.474	22.3108	0.055176	0.041992	-0.15625	-40.02	28.2888	30.2543413	0.13135	0.024902	0.07788
0.884	-43.148	141.8098	684.4968	-0.81982	0.66064	0.023438	-64.057	-10.895	856.8593	-3.0457	1.0727	-0.085449	-23.648	-27.024	1077.764	-2.4258	1.3682	-0.079102	-16.402	94.2043	220.6458	-0.055664	0.20459	0.041504	-34.551	127.762	415.143	-0.44062	0.3084	-0.06543	-8.143	31.3996	35.4089	0.052246	0.032715	-0.15967	-38.52	31.979	40.88118	0.13037	0.02832	0.07959
0.886	-28.669	144.6706	664.816	-0.78711	0.64258	0.019531	-70.973	-18.454	848.587	-2.9004	1.2601	-0.090918	-20.1515	-47.27	1103.666	-2.437	1.4692	-0.061523	-34.308	85.96033	196.5508	-0.0087891	0.17236	0.046387	-44.189	128.399	421.357	-0.40996	0.29473	-0.06875	2.395	26.8234	43.4973	0.054199	0.034668	-0.16406	-30.111	39.436	19.263	0.12012	0.030762	0.088379
0.888	-28.406	153.885	646.171	-0.71484	0.60547	0.015625	-37.629	-31.799	838.912	-2.5533	1.3885	-0.099709	7.1134	-69.789	1120.0631	-2.4033	1.5176	-0.052246	-31.85	77.8242	184.9096	0.023438	0.14551	0.048584	-28.86	128.68	399.599	-0.37793	0.28418	-0.071777	-6.442	39.4633	39.5315	0.04834	0.03418	-0.15967	-44.468	33.617	23.6821	0.12402	0.030273	0.083008
0.89	-35.053	161.163	608.834	-0.66114	0.57593	0.015381	-61.493	-51.338	854.63578	-2.0991	1.4321	-0.13281	-6.3794	-94.4302	1124.958	-2.2695	1.582	-0.037109	-54.4183	71.6475	169.3644	0.048828	0.125	0.055664	-28.208	122.038	357.8585	-0.34941	0.27637	-0.073535	-26.928	39.7484	26.85658	0.047607	0.034423	-0.15698	-22.222	16.4125	34.4551	0.12354	0.033203	0.072754
0.892	-35.571	142.248	562.328	-0.60254	0.5415	0.010254	-15.317	-41.151	862.5126	-1.6383	1.3774	-0.18867	34.825	-106.748	1121.2419	-2.1502	1.5998	-0.019043	-54.3694	61.1868	146.2338	0.074219	0.10352	0.061035	-42.678	117.809	305.562	-0.32021	0.2625	-0.072168	-21.611	18.7744	30.1704	0.046387	0.039063	-0.15771	-8.807	14.35343	45.6363	0.12354	0.034912	0.067872
0.894	-53.688	139.994	516.4006	-0.53076	0.50146	0.00048828	-41.234	-9.16699999999999	889.1777	-1.2511	1.2519	-0.23272	64.2335	-115.395	1144.7832	-2.0308	1.5903	0.0039063	-76.9232	63.6548	141.67143	0.084961	0.09375	0.0625	-10.018	96.3104	277.8087	-0.29482	0.25	-0.07334	-30.576	24.8391	22.03	0.041992	0.039063	-0.15234	7.752	29.8039	15.4757	0.12109	0.038086	0.063477
0.896	-49.34	141.40395	473.811	-0.49512	0.47998	-0.00048828	-89.452	33.975	909.5118	-0.98076	1.0956	-0.26865	73.0393	-113.686	1183.337	-1.9136	1.5239	0.022949	-46.109	53.9897	107.7045	0.11328	0.07373	0.07666	-17.884	85.012	246.8238	-0.26631	0.23447	-0.073144	-24.768	36.1081	27.4683	0.041504	0.04248	-0.15039	-4.011	24.32898	8.6275	0.11914	0.041992	0.059082
0.898	-59.086	137.514	438.8657	-0.42529	0.43799	-0.0039063	-98.835	31.415	920.7012	-0.86435	0.97158	-0.29707	91.884	-88.041	1229.084	-1.8804	1.4849	0.03418	-41.411	54.5947	94.3062	0.12989	0.064453	0.079346	11.594	69.264	225.1179	-0.23535	0.21826	-0.075684	-25.839	43.932	36.2007	0.032715	0.049805	-0.14697	9.251	24.0723	24.0596	0.11621	0.04834	0.056641
0.9	-31.89	122.126	405.464	-0.38257	0.40503	-0.011718	-92.0947	-3.537	917.36999	-0.86182	0.88135	-0.31152	87.217	-65.7648	1274.037	-1.8374	1.4146	0.050781	-51.542	85.7346	74.1987	0.14404	0.057617	0.083496	-21.626	65.03	235.269	-0.21328	0.19677	-0.077148	-15.34	33.1533	49.2527	0.029541	0.05664	-0.14014	-11.749	26.3893	29.781	0.10742	0.054199	0.053223
0.902	-36.579	103.055	379.155	-0.34326	0.37012	-0.01709	-43.732	-79.369	904.4061	-0.93623	0.85205	-0.29287	71.892	-40.095	1298.979	-1.7888	1.3733	0.074218	-74.4189	88.3139	66.639	0.16113	0.049316	0.089844	-26.578	85.8055	237.2418	-0.18838	0.17627	-0.080469	-36.137	30.1184	30.0669	0.021484	0.063477	-0.13574	-11.474	28.8148	24.6156	0.10474	0.060058	0.052979
0.904	-32.945	115.929	350.63	-0.2876	0.32959	-0.01709	-66.5645	-140.221	895.042	-0.99726	0.87734	-0.26719	52.8498	-38.744	1327.416	-1.7246	1.3457	0.091797	-58.079	72.44765	73.2298	0.17383	0.038086	0.087891	-35.515	104.189	227.81939	-0.16689	0.16572	-0.083593	-60.509	39.8121	25.0219	0.013672	0.078125	-0.13525	-11.502	22.9756	32.12294	0.099121	0.070313	0.050781
0.906	-42.958	117.0844	345.6953	-0.2666	0.30762	-0.023438	-31.017	-170.263	914.894	-1.0071	0.92226	-0.23868	43.6751	-34.445	1320.885	-1.6333	1.2983	0.083984	-26.85	52.7801	77.5784	0.18408	0.028809	0.09082	-16.207	115.774	229.512	-0.14971	0.15186	-0.085644	-37.583	34.9502	29.0191	0.010254	0.077637	-0.12939	-25.948	24.1444	44.9272	0.089355	0.084961	0.050293
0.908	-63.8211	138.0434	328.797	-0.22852	0.27051	-0.03418	-49.4842	-178.329	948.609	-0.96826	0.95693	-0.22764	6.308	-40.265	1291.7799	-1.5933	1.2681	0.069336	-46.586	39.91	69.2707	0.18921	0.028564	0.088867	-38.6	107.768	237.932	-0.13086	0.14307	-0.088867	-32.539	26.9327	33.1807	0.0083008	0.092285	-0.12451	-25.629	38.732	34.57066	0.087891	0.091309	0.049805
0.91	-48.7118	143.551	305.49	-0.20093	0.24976	-0.031738	-25.464	-175.135	960.7131	-0.90039	0.98438	-0.23096	-42.608	-59.707	1287.961	-1.5342	1.2012	0.027832	-36.359	35.27667	51.074	0.19287	0.016602	0.091797	-54.926	92.636	185.9911	-0.11552	0.13506	-0.089746	-22.885	20.9992	32.4962	0.0070801	0.095459	-0.12207	-36.337	48.626	28.0314	0.085449	0.10156	0.046875
0.912	-51.451	142.332	281.4636	-0.17529	0.2251	-0.037598	22.241	-168.484	983.271	-0.82422	1	-0.2498	-30.522	-76.873	1281.324	-1.5213	1.1492	-0.0065918	-18.625	38.335	30.438	0.18506	0.012207	0.086914	-36.9821	88.686	163.04	-0.099999	0.12744	-0.091211	-48.6735	26.85939	21.1601	0.011719	0.099121	-0.12598	-36.346	40.283	25.71457	0.080078	0.10815	0.044677
0.914	-67.04	124.655	275.2256	-0.1499	0.20557	-0.035156	24.709	-173.919	1014.654	-0.7543	1.0063	-0.27617	-15.74	-107.7977	1295.938	-1.519	1.0903	-0.036621	-31.691	56.6	16.4155	0.17334	0.011963	0.087403	-60.16938	77.317	149.0018	-0.084766	0.12236	-0.089258	-47.655	39.232	42.6533	0.02002	0.11328	-0.12695	-30.761	19.0848	28.2859	0.074219	0.12012	0.046387
0.916	-37.279	110.321	266.451	-0.13379	0.18652	-0.036133	17.645	-149.348	1073.129	-0.70743	1.0117	-0.30117	-6.51	-106.315	1305.233	-1.5366	1.0063	-0.058594	-42.751	50.91	13.234	0.16406	0.013672	0.088379	-49.1632	59.3424	143.3457	-0.070996	0.11611	-0.096193	-55.972	41.2355	47.1829	0.024902	0.11816	-0.12598	-37.122	15.0753	13.7588	0.078613	0.13428	0.04541
0.918	-8.251	101.304154	234.3877	-0.098633	0.15869	-0.043945	5.529	-111.8268	1149.4015	-0.69785	1.0153	-0.32071	-13.903	-108.875	1340.6243	-1.5547	0.96777	-0.067871	-22.028	23.7195	26.7186	0.14209	0.02002	0.091797	-24.759	46.687	116.0799	-0.058594	0.1084	-0.095215	-37.278	46.106	40.389	0.039063	0.12402	-0.12891	-44.9173	27.446	14.838	0.075684	0.14111	0.043457
0.92	-33.121	87.72	205.7222	-0.073731	0.13477	-0.053223	-2.894	-50.152	1193.873	-0.72559	1.0117	-0.3291	-16.449	-101.753	1355.813	-1.5981	0.9165	-0.07373	4.317	1.534	39.1453	0.13086	0.019531	0.094238	-20.861	44.635	94.874	-0.043652	0.10654	-0.099412	-32.701	27.8828	37.6493	0.04834	0.1272	-0.12793	-57.936	38.7452	17.212	0.071777	0.15283	0.044922
0.922	-35.288	73.864	187.5483	-0.046875	0.11279	-0.06543	-32.5176	-30.815	1214.569	-0.79776	1.0182	-0.33301	-15.123	-84.7	1381.619	-1.6296	0.9021	-0.076416	5.404	9.309	35.8142	0.1084	0.03125	0.097656	-43.216	53.876	74.923	-0.026563	0.1042	-0.10264	-46.518	14.78085	32.9281	0.061035	0.13232	-0.1333	-37.248	41.1893	28.369	0.067383	0.16162	0.044922
0.924	-11.36	56.22	157.7442	-0.029785	0.078613	-0.081055	-2.335	-22.046	1228.994	-0.90508	1.0293	-0.33164	-70.4378	-38.238	1415.307	-1.6538	0.90283	-0.077148	5.489	17.8833	27.2959	0.086914	0.041259	0.10669	-35.313	67.5332	97.7661	-0.0070312	0.10693	-0.10577	-19.714	9.01328	25.528	0.070801	0.14307	-0.13623	-46.743	40.5153	24.6082	0.059082	0.16699	0.046387
0.926	-10.256	63.991	125.0118	-0.024414	0.066895	-0.074219	11.191	-48.596	1191.574	-1.0215	1.0418	-0.31992	-86.3856	-40.97143	1452.447	-1.6597	0.92432	-0.071777	-5.714	30.9324	33.48134	0.065918	0.051758	0.11914	-6.603	67.0094	117.06164	0.0071287	0.1041	-0.10566	-38.612	25.8599	21.755	0.07959	0.14355	-0.13428	-46.746	40.4342	20.2167	0.054199	0.17334	0.049805
0.928	3.706	79.5527	122.3124	-0.0053711	0.046875	-0.075684	-1.945	-58.824	1185.471	-1.1482	1.051	-0.30586	-88.8271	-66.6593	1452.931	-1.6704	0.93555	-0.070556	1.3	56.966	41.5164	0.050781	0.060547	0.11816	-22.686	64.2751	103.387	0.023438	0.097656	-0.1084	-15.872	23.97825	25.4981	0.086426	0.14941	-0.13965	-37.353	38.268	27.5169	0.046387	0.18018	0.053711
0.93	-8.337	76.828	119.49997	0.0056152	0.032471	-0.07959	21.669	-52.394	1212.715	-1.271	1.0649	-0.29639	-98.6952	-78.908	1430.687	-1.6841	0.94775	-0.070313	12.447	52.723	17.621961	0.043457	0.062988	0.125	-11.758	55.605	98.238	0.035645	0.092188	-0.10849	-27.231	22.1032	33.2614	0.092285	0.15771	-0.13989	-54.0762	34.09	31.9248	0.032227	0.18652	0.053223
0.932	-7.371	67.6245	107.238	0.01709	0.019531	-0.080566	18.626	-51.428	1237.918	-1.381	1.077	-0.28769	-141.373	-63.376	1393.6408	-1.7358	0.96729	-0.085449	-12.895	36.031	3.2568	0.032227	0.068359	0.13428	-39.997	36.433	82.1978	0.049024	0.08623	-0.10918	-19.169	20.22885	24.9828	0.10498	0.16504	-0.14111	-48.5	32.377	35.1138	0.025635	0.19507	0.060791
0.934	-32.332	68.9547	89.828	0.041016	0.0068359	-0.085938	33.2361	-66.2509	1250.2551	-1.4798	1.095	-0.28506	-127.422	-58.36	1376.957	-1.7671	0.97705	-0.094238	0.427	14.6935	36.9664	0.027832	0.07251	0.13672	-60.517	48.855	69.9757	0.058008	0.079981	-0.11114	-16.081	37.6403	12.868	0.1123	0.17432	-0.14111	-54.481	34.957	44.9889	0.016602	0.20068	0.063477
0.936	-27.71	53.902	80.8344	0.050293	0.00048828	-0.087402	11.5726	-97.776	1268.02197	-1.5739	1.1165	-0.28232	-74.086	-61.192	1374.277	-1.8613	1.0156	-0.097656	-21.369	35.734	41.0386	0.032715	0.075684	0.14209	-46.062	74.4569	65.468	0.066504	0.070703	-0.11484	-4.677	47.371	41.6019	0.11719	0.17725	-0.14795	-24.177	26.1022	32.8672	0.0058594	0.20898	0.068848
0.938	-15.514	51.667	85.8712	0.072266	-0.013672	-0.092773	-0.635000000000005	-117.41	1268.0401	-1.6701	1.1256	-0.28203	-83.5364	-56.0246	1358.669	-1.9429	1.0566	-0.092774	-18.418	52.1071	28.2489	0.038574	0.081543	0.14404	-46.702	76.7177	62.6854	0.07373	0.062012	-0.11768	-7.306	48.974	58.935	0.11719	0.18506	-0.14941	-31.66	19.6463	26.04	-0.0014648	0.21582	0.068359
0.94	-8.752	66.236	73.518	0.085205	-0.021973	-0.097656	-14.083	-115.538	1276.6815	-1.7632	1.1328	-0.28857	-48.539	-58.4155	1368.967	-2.0288	1.1118	-0.094238	-49.078	41.71854	12.2876	0.044434	0.088379	0.146	-19.54	52.4609	41.6308	0.082227	0.061328	-0.12022	-8.257	31.963	41.195	0.12182	0.18408	-0.1477	-18.672	34.356	14.331	-0.015625	0.21875	0.07959
0.942	-12.752	77.787	46.1053	0.096191	-0.033203	-0.097168	-48.631	-87.294	1295.549	-1.8582	1.1461	-0.28584	-9.079	-64.3299	1368.448	-2.1519	1.186	-0.10693	-30.609	16.848	10.2016	0.057129	0.10205	0.14746	-30.01	38.051	32.983	0.09375	0.054004	-0.12675	1.318	24.1629	30.6142	0.12305	0.18896	-0.15283	-36.237	34.6992	22.1492	-0.027099	0.22167	0.085693
0.944	-28.839	70.596	16.319	0.10156	-0.041016	-0.098145	-47.3387	-56.9351	1320.478	-1.9497	1.1583	-0.29209	-7.587	-48.378	1380.925556	-2.2261	1.2388	-0.11475	-48.23	9.9419	17.478	0.075928	0.10571	0.14697	-5.146	40.679	30.4794	0.10742	0.050098	-0.13106	-25.102	10.9156	23.191	0.12842	0.19189	-0.15381	-17.078	43.996	38.4599	-0.037598	0.22607	0.090332
0.946	-15.609	42.0947	18.848	0.10352	-0.044434	-0.10156	-62.883	-51.03	1347.472	-2.0294	1.1739	-0.30576	-17.868	-16.5593	1387.636	-2.3906	1.332	-0.12549	-43.039	23.304	23.766	0.092285	0.097656	0.14258	-20.843	35.1805	37.8142	0.11992	0.047559	-0.13379	-26.562	5.3336	18.747	0.12891	0.19482	-0.15527	7.558	38.536	34.7704	-0.040527	0.23291	0.098145
0.948	-45.645	26.532	20.6455	0.10352	-0.047852	-0.11084	-26.8296	-63.251	1344.067	-2.0867	1.1836	-0.33486	-37.306	1.95324	1389.285	-2.5095	1.4094	-0.12622	-33.19	40.237	33.2705	0.11523	0.092773	0.13818	-1.038	33.4762	34.7781	0.13428	0.054199	-0.13574	-26.581	10.9829	22.4591	0.13184	0.19629	-0.16016	-17.842	40.7011	25.8832	-0.046875	0.23535	0.10254
0.95	-30.086	18.791	22.9876	0.09375	-0.049561	-0.10815	-46.0093	-58.286	1328.2343	-2.1362	1.188	-0.36084	-41.575	0.75374	1380.466	-2.6147	1.4966	-0.11865	-44.8724	47.675	46.5031	0.12939	0.089844	0.13721	-26.977	38.9535	25.6587	0.14053	0.053418	-0.13653	-20.09	38.0714	21.7867	0.13721	0.19921	-0.1665	-6.16	26.8591	32.0645	-0.048828	0.2417	0.1084
0.952	-30.125	12.385	29.228	0.079102	-0.047363	-0.10791	-29.0487	-36.5689	1307.09994	-2.1936	1.2148	-0.39326	-35.409	-3.7324	1373.96	-2.6953	1.5898	-0.11816	-48.532	31.5708	38.64239	0.15234	0.09082	0.12695	-30.158	36.9023	23.4213	0.14736	0.048926	-0.1376	-25.624	28.9255	30.9443	0.13574	0.20508	-0.17236	-6.805	34.01	44.904	-0.050537	0.24805	0.11548
0.954	-34.018	18.9891	34.647	0.060547	-0.034668	-0.11084	-26.6065	-12.801	1300.089	-2.2652	1.2512	-0.41524	-36.725	-14.5624	1377.431	-2.6953	1.6191	-0.11572	-67.0022	22.9414	23.1547	0.17431	0.089599	0.125	-38.059	22.112	46.5285	0.14893	0.03916	-0.14228	-26.7927	4.2537	54.043	0.13623	0.2085	-0.19092	-27.268	51.193	49.865	-0.049805	0.24707	0.12207
0.956	-52.641	27.055	20.0115	0.041504	-0.036133	-0.10889	-22.953	13.4675	1262.66	-2.3258	1.2929	-0.42617	-29.577	-3.95	1352.1113	-2.6328	1.6582	-0.12598	-52.805	19.4792	17.776	0.19922	0.089844	0.11914	-43.232	37.34	51.4068	0.14473	0.039453	-0.14238	-42.221	-18.474	67.875	0.11719	0.21801	-0.19458	-20.367	49.309	47.441	-0.038086	0.25	0.12305
0.958	-63.5254	26.309	32.3373	0.01709	-0.02832	-0.10645	-29.9913	2.249	1236.523	-2.3667	1.3357	-0.43271	-5.02200000000001	9.032	1328.9445	-2.533	1.6516	-0.14038	-48.8791	31.4531	30.664	0.22461	0.083496	0.10547	-28.398	52.55	41.1939	0.13867	0.034668	-0.1377	-36.222	-9.32059	86.8936	0.087402	0.22559	-0.20605	-13.386	36.3111	48.3021	-0.03125	0.24805	0.12695
0.96	-41.333	28.224	37.7185	0.0012207	-0.027343	-0.10742	-4.587	-28.2649	1243.4837	-2.3848	1.375	-0.43701	-19.96	21.4757	1298.726	-2.4063	1.6191	-0.15771	-39.596	42.7287	44.957	0.23779	0.085449	0.104	-34.783	56.663	34.16742	0.13262	0.034961	-0.1419	-8.888	-2.9352	125.158	0.013672	0.2373	-0.21924	-12.292	-5.95651	81.953	-0.015625	0.24707	0.13379
0.962	-56.5965	30.616	25.497	-0.012207	-0.023438	-0.10889	-0.768999999999998	-45.332	1262.733	-2.3673	1.4114	-0.43799	-25.436	23.4591	1286.964	-2.2319	1.5532	-0.17627	-57.4458	30.4988	36.9478	0.26123	0.090332	0.098145	-16.399	35.9675	30.2033	0.12324	0.040039	-0.13789	-37.8075	3.0137	156.448	-0.03418	0.2417	-0.22461	-26.035	-39.5495	114.388	-0.0063477	0.24146	0.11841
0.964	-41.745	39.87	26.5129	-0.029297	-0.02002	-0.1084	-9.468	-15.0808	1258.5857	-2.3151	1.4292	-0.43682	-26.417	7.083	1293.876	-2.1577	1.522	-0.18408	-39.004	15.3511	32.4304	0.27076	0.096436	0.096191	-32.549	20.1447	10.698	0.12441	0.047851	-0.13516	-30.61266	21.1441	170.084	-0.14307	0.25293	-0.23047	-47.055	-17.5356	169.348	-0.0083008	0.23486	0.088867
0.966	-40.992	37.7441	26.213	-0.03418	-0.019043	-0.1084	-3.056	34.73	1267.4286	-2.2386	1.4339	-0.43565	-10.88	23.434	1265.8932	-2.0293	1.4453	-0.19238	-15.246	15.1878	21.357	0.2749	0.10254	0.09375	-20.156	22.3157	6.882	0.12021	0.049805	-0.12754	-22.571	13.4656	209.007	-0.24341	0.26513	-0.23413	-48.553	32.6686	225.2857	-0.037598	0.21582	0.050781
0.968	-31.422	31.7343	28.3765	-0.038574	-0.011719	-0.10938	-16.859	60.387	1275.2992	-2.1462	1.4132	-0.43037	-24.494	43.61	1279.66	-1.9629	1.4004	-0.18799	-21.406	37.985	11.4896	0.26904	0.11963	0.094727	-15.87	18.772	38.1616	0.11768	0.052734	-0.12842	-17.1582	15.7048	257.699	-0.34912	0.27832	-0.24121	-63.582	22.3182	310.713	-0.10254	0.19068	0.016357
0.97	-26.937	30.8308	23.6396	-0.036865	-0.0090332	-0.11059	-1.775	64.435	1269.18701	-2.0547	1.3809	-0.42871	-37.768	75.9066	1256.0586	-1.9043	1.3652	-0.18262	-12.048	46.343	24.3412	0.25928	0.13037	0.098633	-18.558	26.6238	42.8794	0.11807	0.059375	-0.12549	-5.454	44.1853	348.1374	-0.51025	0.30469	-0.25049	-149.31	-71.55544	431.254	-0.21094	0.15381	-0.018066
0.972	-39.733	28.8141	5.2937	-0.033691	-0.0048828	-0.12109	16.66	29.8698	1264.5444	-1.9734	1.3469	-0.42285	-60.832	95.4	1258.658	-1.8613	1.3164	-0.17432	-10.871	33.3615	30.32072	0.23975	0.14502	0.10303	-14.452	34.4361	36.11089	0.11299	0.066016	-0.12422	1.257	81.629	438.78752	-0.59961	0.31934	-0.25586	-161.166	-115.485	506.159	-0.41992	0.11182	-0.077148
0.974	-14.267	20.3065	4.7893	-0.022949	-0.017578	-0.11133	31.4398	12.7645	1260.196	-1.9028	1.3145	-0.4166	-77.315	112.338	1225.7868	-1.8496	1.3008	-0.16699	5.163	26.7725	32.7386	0.21802	0.15185	0.10767	-50.089	45.651	26.3472	0.10674	0.071875	-0.11953	12.775	101.1381	531.019	-0.79443	0.35986	-0.28174	-104.077	-109.785	577.84543	-0.54297	0.096191	-0.097168
0.976	-30.274	36.725	21.5963	-0.01709	-0.010254	-0.11328	25.8684	6.7728	1256.627	-1.85	1.2789	-0.40567	-65.3654	108.072	1197.2893	-1.8281	1.2754	-0.14746	-15.627	24.6332	36.7266	0.19922	0.1626	0.11768	-53.992	49.74	27.234	0.10303	0.075	-0.11152	-29.804	83.6007	625.442	-0.98045	0.39111	-0.29004	-99.057	-47.741	656.396	-0.84082	0.091797	-0.13184
0.978	-28.408	48.113	23.5795	-0.0073242	-0.01416	-0.11035	22.6678	9.389	1240.843	-1.805	1.254	-0.39248	-92.799	106.462	1189.3075	-1.8145	1.2491	-0.14038	-18.708	19.45809	28.4048	0.17578	0.1665	0.12354	-44.295	36.132	41.5523	0.097656	0.078613	-0.104	-10.664	48.5599	727.145	-1.2183	0.42627	-0.30078	-157.8493	10.853	720.696	-1.1084	0.11767	-0.14355
0.98	-15.926	52.172	30.7184	0.0024414	-0.017334	-0.11011	39.4292	16.527	1196.2279	-1.7612	1.229	-0.38818	-97.627	90.866	1175.875	-1.8008	1.2266	-0.13135	5.15000000000001	24.04775	44.4855	0.16895	0.16992	0.12793	-36.555	38.8094	41.8591	0.08711	0.081543	-0.098341	23.847	40.55	823.5348	-1.6421	0.48779	-0.30713	-172.684	50.047	735.5851	-1.4126	0.17627	-0.14355
0.982	-10.782	30.05	38.7411	0.0097656	-0.017578	-0.10693	23.645	24.454	1170.8663	-1.7355	1.1992	-0.37988	-96.8083	84.5357	1143.647	-1.7769	1.1899	-0.12012	-9.97900000000001	42.133	39.8766	0.15186	0.17627	0.13525	-49.211	29.4464	22.05032	0.084863	0.090527	-0.090918	17.528	49.249	906.693	-1.896	0.5249	-0.31201	-107.835	42.364	732.272	-1.8257	0.29932	-0.13818
0.984	-16.984	11.48333	38.6418	0.025879	-0.022461	-0.10498	45.544	23.757	1156.2912918	-1.7176	1.166	-0.37354	-83.2793	88.9711	1106.867	-1.7598	1.166	-0.11426	-0.0689999999999955	49.352	21.71225	0.13672	0.17969	0.13696	-54.0293	29.4436	25.0045	0.082519	0.09834	-0.088965	-17.474	50.1759	942.194	-2.3999	0.64307	-0.29053	-91.139	21.745	799.464	-2.021	0.37939	-0.13574
0.986	-16.129	9.1026	27.8665	0.037353	-0.022949	-0.10303	36.9404	34.216	1133.3564	-1.7008	1.1305	-0.3665	-95.46773	83.659	1084.277	-1.707	1.1211	-0.11475	-11.736	29.209	24.9549	0.12646	0.1875	0.14014	-33.871	19.3022	38.73	0.080566	0.10967	-0.085645	-53.224	40.5793	915.0747	-2.6845	0.72705	-0.28565	8.4473	17.678	874.7119	-2.3594	0.56543	-0.15332
0.988	-11.063	29.5874	22.311996	0.056152	-0.026855	-0.10156	30.56174	62.441	1121.0225	-1.6868	1.103	-0.35918	-66.16	83.113	1051.905	-1.657	1.0813	-0.11158	13.222	12.2126	35.0913	0.11035	0.19678	0.14551	-47.844	42.3844	31.785	0.07959	0.11182	-0.08252	-49.593	35.8564	900.111	-2.8315	0.82471	-0.23047	38.985	28.708	977.36	-2.5222	0.70142	-0.16724
0.99	-12.137	40.1932	30.7026	0.083496	-0.029297	-0.10156	-13.4663	87.631	1130.576	-1.6792	1.0767	-0.35303	-43.82	89.354	1036.1094	-1.603	1.0337	-0.10938	-24.877	7.1859	36.5893	0.10352	0.20215	0.14453	-13.204	41.0665	40.0173	0.078906	0.11699	-0.076953	-36.177	27.2519	889.581	-2.8081	1.1274	-0.086914	12.9105	75.939	973.079	-2.5859	0.86914	-0.091797
0.992	5.311	37.426	35.785	0.099609	-0.031738	-0.1001	-26.436	105.337	1125.811	-1.6648	1.0509	-0.34658	-53.443	106.891	1011.0673	-1.5298	0.96924	-0.10596	-9.109	12.8076	22.9806	0.09082	0.21289	0.1499	-24.133	36.635904	31.7033	0.080175	0.12285	-0.079004	8.428	1.419	895.456	-2.7754	1.3164	-0.083984	-7.0828	88.459	962.82	-2.6694	1.188	-0.016602
0.994	-11.205	27.7181	17.9766	0.12891	-0.033691	-0.097656	-8.091	88.794	1104.6627	-1.6379	1.0304	-0.3416	-42.686	139.2561	1011.511	-1.4902	0.9375	-0.10742	-25.466	24.44195	23.91305	0.082519	0.22486	0.15479	-26.886	20.860061	28.8721	0.082129	0.12871	-0.079786	16.489	-20.49	874.598	-2.5464	1.5786	-0.14014	-24.6059	77.141	941.9919	-2.7202	1.3481	-0.0024414
0.996	-17.377	17.106	19.5547	0.15283	-0.030274	-0.10132	-42.5952	84.0966	1069.0888	-1.6051	1.0203	-0.33457	-28.133	145.47	993.683	-1.4155	0.87744	-0.10059	-45.11	35.7255	21.9186	0.071777	0.23096	0.15137	-56.9981	33.7428	34.042	0.082813	0.13516	-0.079688	-19.7043	-24.34	860.8471	-2.166	1.5796	-0.21118	5.323	40.49889	938.288	-2.687	1.5298	-0.0083008
0.998	-24.249	24.1645	20.6948	0.16895	-0.025879	-0.094727	-33.324	72.5072	1044.6177	-1.5585	1.0064	-0.33174	-40.358	154.925	955.0017	-1.3606	0.84009	-0.10278	-42.648	38.6433	22.4827	0.055176	0.24805	0.17236	-39.526	29.28	33.9035	0.091797	0.14404	-0.083496	-18.832	-43.542	869.3136	-1.6909	1.4487	-0.25928	25.528	-17.922	966.802	-2.449	1.488	-0.050048
1	-31.893	45.438	37.9041	0.18408	-0.02002	-0.10449	-41.6588	82.5001	1034.0066	-1.5054	0.9917	-0.32568	-36.965	159.383	920.4876	-1.3081	0.79932	-0.094238	-57.4669	36.9459	26.3425	0.050293	0.25391	0.17188	-25.21	24.185	45.82245	0.091895	0.15156	-0.085937	16.587	-37.321	877.5544	-1.1328	1.1953	-0.30859	44.9872	-59.825	960.412	-2.0972	1.3579	-0.094238
1.002	-36.61	54.09	35.3788	0.19043	-0.013672	-0.10742	-26.087	104.60649	1007.2502	-1.4508	0.96289	-0.32129	-43.163	158.498	888.5255	-1.2397	0.75928	-0.08252	-43.599	33.0598	39.279	0.03418	0.26367	0.18213	-28.413	29.333	26.5756	0.094238	0.15469	-0.089843	47.437	-15.789	880.21007	-0.94385	1.0845	-0.33545	-17.1141	-86.775	982.3638	-1.6094	1.1426	-0.11328
1.004	-42.146	48.329	20.374	0.19141	-0.00048828	-0.10107	-46.3151	106.2508	961.9211	-1.3956	0.94189	-0.31279	-26.29	149.722	847.2013	-1.2051	0.73633	-0.083008	-45.606	39.4283	41.9056	0.032471	0.26636	0.18799	-20.263	29.1727	15.0246	0.097754	0.15664	-0.09375	11.537	2.97499999999999	887.361	-0.75635	0.93213	-0.37793	-16.3718	-84.591	982.8971	-1.4199	1.0508	-0.1333
1.006	-42.38	27.953	26.0743	0.18677	0.012696	-0.10059	-36.861	89.287	942.4759	-1.3492	0.90948	-0.30966	-19.955	152.7357	816.3118	-1.1353	0.69189	-0.075684	-46.437	34.2405	39.3022	0.027832	0.27148	0.19482	-34.267	28.204	29.9659	0.099806	0.16279	-0.098145	-0.996	2.55199999999999	903.36	-0.75634	0.89453	-0.35791	11.8259	-85.408	962.1763	-1.2163	0.92041	-0.1748
1.008	-53.3334	21.9156	16.0277	0.18066	0.028809	-0.1001	-13.734	72.323	919.956	-1.3137	0.88262	-0.29844	-0.651999999999994	142.8874	789.181	-1.0833	0.66333	-0.068848	-60.182	25.4006	22.1464	0.030273	0.28223	0.2041	-17.988	32.474	47.1774	0.10693	0.16455	-0.10449	-49.203	-5.74000000000001	936.157	-0.80762	0.91602	-0.30469	74.9412	-101.638	936.9408	-1.2158	0.88086	-0.17236
1.01	-41.005	32.1992	20.5349	0.16699	0.050293	-0.097168	-39.626	77.069	893.601	-1.2866	0.85986	-0.28662	4.09	130.85878	763.3905	-1.0298	0.62939	-0.068359	-51.054	25.7568	27.88391	0.032715	0.28418	0.21045	-20.685	46.7703	39.9413	0.11191	0.16865	-0.10752	-50.252	-19.421	953.29428	-0.89404	0.98486	-0.22314	104.778	-80.481	961.44504	-1.291	0.88086	-0.14453
1.012	-51.545	45.9724	32.0903	0.15625	0.057617	-0.092285	-32.9381	101.7282	882.515	-1.2634	0.83867	-0.27598	20.086	129.8215	724.888	-0.96094	0.58789	-0.067383	-24.637	2.727	49.5252	0.041992	0.2876	0.21094	-1.351	42.42359	35.232	0.1166	0.1709	-0.11387	-29.1222	-54.186	939.3452	-0.93018	1.0142	-0.19629	69.5972	-72.193	1015.5173	-1.4058	0.9126	-0.070801
1.014	-35.151	43.4582	33.45215	0.13916	0.077148	-0.085938	-56.7851	112.0834	884.5845	-1.2366	0.81885	-0.2626	14.911	133.6606	701.6182	-0.91797	0.56543	-0.068359	-41.451	-17.857	71.246	0.049317	0.29419	0.19848	-2.208	23.5657	30.8346	0.11894	0.17168	-0.11972	-18.755	-104.1735	929.81658	-0.97656	1.041	-0.18066	58.522	-69.6411	1085.7752	-1.4473	0.91602	-0.038574
1.016	-39.758	33.8097	34.9837	0.1272	0.095949	-0.084472	-29.9984	119.0661	867.6158	-1.2085	0.79775	-0.25009	8.942	138.31121	671	-0.84326	0.52979	-0.071289	-49.011	-38.4682	110.047	0.055664	0.30029	0.18018	-21.715	11.3994	27.5459	0.11982	0.17481	-0.12813	15.685	-155.894	921.29	-0.98486	1.0386	-0.19946	48.4687	-81.4028	1124.49	-1.4878	0.90771	0.025879
1.018	-25.144	20.977	23.4256	0.11426	0.11279	-0.083008	-42.99	122.15	824.0967	-1.1736	0.78194	-0.23525	-0.225999999999999	141.42	674.9123	-0.78784	0.5022	-0.068116	-52.953	-39.94399	166.08	0.036133	0.31738	0.12012	-21.992	18.0822	28.2786	0.11963	0.18506	-0.125	2.479	-178.553	948.403	-0.98438	1.0313	-0.23242	43.231	-73.181	1130.144	-1.4997	0.9021	0.048828
1.02	-36.157	9	31.9469	0.10205	0.13574	-0.079102	-31.943	126.702	806.4585	-1.1343	0.76221	-0.22412	-8.819	154.688	636.059	-0.73193	0.47705	-0.074219	-43.577	-18.652	237.087	0.014648	0.33594	0.076172	-44.535	31.3116	30.4967	0.1165	0.19355	-0.12666	43.981	-177.697	1000.813	-0.98291	1.021	-0.271	-1.76300000000001	-66.208	1107.084	-1.499	0.89355	0.060059
1.022	-41.844	21.8123	45.9071	0.094727	0.13965	-0.077148	-19.226	138.477	781.0759	-1.0956	0.74697	-0.2083	-8	156.712	602.9272	-0.64795	0.4458	-0.077637	-82.671	-32.344	292.8047	-0.070801	0.39258	-0.0019531	-30.922	36.55	46.685	0.11455	0.20078	-0.12734	32.3474	-191.931	1060.7085	-0.99268	1.022	-0.2915	-46.932	-73.125	1064.135	-1.4761	0.89307	0.057617
1.024	-40.715	32.7599	36.4841	0.082031	0.16504	-0.078613	-22.868	151.564	758.5306	-1.0561	0.7251	-0.19248	-20.755	157.882	564.2024	-0.60889	0.42334	-0.080566	-106.433	-89.444	319.0234	-0.18408	0.45704	-0.038819	-37.298	29.99	38.8329	0.10791	0.21054	-0.12773	75.915	-196.31	1105.707	-1.0332	1.0146	-0.32617	-70.3279	-72.853	1057.025	-1.459	0.89063	0.052246
1.026	-51.5393	39.643	17.961	0.068359	0.18261	-0.067138	-10.356	143.933	736.0516	-1.0171	0.70634	-0.17763	-30.098	144.273	546.4455	-0.54102	0.3833	-0.083496	-63.927	-166.3266	310.9703	-0.32568	0.52246	-0.052246	-39.01	19.8453	29.6929	0.10352	0.21944	-0.12803	64.007	-187.129	1127.9493	-1.0893	1.021	-0.33838	-150.657	-87.157	1091.859	-1.4453	0.88281	0.033203
1.028	-24.571	31.5011	21.8476	0.056641	0.19824	-0.064941	-3.141	125.7235	719.4673	-0.97725	0.67939	-0.16992	-19.212	139.3612	507.0647	-0.4895	0.34912	-0.086426	-42.947	-157.1337	348.14	-0.53223	0.63086	-0.0087891	-41.928	17.30517	23.365	0.10547	0.22656	-0.13428	25.6357	-138.8118	1150.3743	-1.1548	1.0298	-0.34082	-101.4252	-105.447	1123.9602	-1.4356	0.86719	0.0271
1.03	-25.006	22.0181	18.1091	0.053223	0.21191	-0.063477	-1.475	96.669	688.78914	-0.94629	0.65234	-0.15576	-26.568	129.719	475.4512	-0.44434	0.32129	-0.090332	-36.608	-102.3527	398.364	-0.62695	0.68164	0.018555	-46.351	5.6082	56.6918	0.10938	0.23271	-0.13554	12.4647	-86.902	1204.96773	-1.252	1.0488	-0.33447	-50.7422	-146.0014	1148.7628	-1.4316	0.84766	0.020508
1.032	-25.51	17.743	33.706	0.046875	0.21875	-0.064453	-1.754	87.214	655.251	-0.91514	0.62783	-0.14239	-49.496	129.5205	460.7565	-0.38574	0.28418	-0.09668	-90.8823	-46.2415	423.1302	-0.79053	0.76221	0.070313	-36.612	-1.15508	86.2741	0.12109	0.24238	-0.14307	-6.78	-61.067	1215.542	-1.2983	1.0562	-0.33154	-46.2552	-141.558	1144.477	-1.4316	0.81055	0.0024414
1.034	-29.98	39.5714	32.5532	0.047363	0.23926	-0.064453	-1.858	113.4838	616.421	-0.88468	0.59893	-0.13194	-39.024	117.9233	439.8544	-0.35889	0.26611	-0.096191	-62.664	-18.392	422.663	-0.87867	0.80786	0.10303	-44.602	-1.3128	89.0222	0.13672	0.24238	-0.15518	3.1291	-50.313	1251.521	-1.375	1.0781	-0.33301	-71.5108	-120.075	1168.752	-1.4277	0.79004	-0.0058594
1.036	-21.563	47.0392	36.7414	0.047852	0.25561	-0.058838	-24.572	132.1142	618.6312	-0.85733	0.57901	-0.12061	-27.48	112.7348	406.5251	-0.30664	0.23535	-0.10156	-64.452	-21.639	419.877	-0.94824	0.8418	0.10938	-1.945	-17.2624	102.53505	0.13926	0.23994	-0.15938	7.201633	-58.679	1246.911	-1.405	1.092	-0.33081	-66.243	-89.889	1215.935	-1.4248	0.75684	-0.027344
1.038	2.71400000000001	45.955	39.3661	0.045898	0.26855	-0.057617	-34.577	148.901	608.884	-0.82432	0.55557	-0.10606	-18.619	113.2993	367.4125	-0.27295	0.2168	-0.10425	-38.34	-4.26	470.463	-1.0073	0.8833	0.074707	-31.9403	-18.942	143.8301	0.12598	0.23193	-0.1626	29.7595	-80.759	1244.7252	-1.4292	1.1021	-0.34033	-48.71	-59.82	1250.93777	-1.4343	0.72974	-0.027588
1.04	2.964	32.8121	18.05	0.040527	0.28271	-0.062988	-11.114	127.887	588.3643	-0.79834	0.53613	-0.094238	-50.985	114.984	352.28297	-0.2417	0.20117	-0.10645	-35.476	19.29	568.9078	-1.0254	0.90625	0.039551	-18.418	-10.9878	172.3712	0.075291	0.2292	-0.16514	62.436	-80.8	1238.923	-1.4688	1.1094	-0.35352	-77.6238	-52.0305	1293.446	-1.4629	0.71484	-0.034668
1.042	-1.729	22.0305	30.51	0.040527	0.27734	-0.067871	-45.094	120.371	577.7544	-0.77001	0.51767	-0.080949	-36.742	111.172	329.6356	-0.2002	0.1792	-0.1001	6.565	69.331	657.678	-1.0625	0.95898	-0.035156	-29.3509	-0.8545	201.195	-0.0031251	0.22578	-0.16748	61.344	-53.3536	1252.501	-1.4941	1.1133	-0.36035	-82.885	-78.892	1315.851	-1.5605	0.70313	-0.035645
1.044	-18.396	21.963	26.39427	0.039551	0.27539	-0.070801	-41.964	115.8208	561.324	-0.74041	0.4953	-0.071957	-49.9735	114.6235	290.484	-0.17359	0.16016	-0.10107	-26.742	107.764	753.991	-1.117	1.01	-0.092288	-3.582	8.376402	250.72	-0.089066	0.23086	-0.16397	66.872	-35.2918	1278.2008	-1.5601	1.1196	-0.37256	-90.506	-92.8987	1311.51	-1.623	0.70508	-0.027832
1.046	-26.327	34.3305	25.13117	0.047607	0.27173	-0.081787	-36.336	120.1007	551.6132	-0.71188	0.4738	-0.053593	-59.08	117.7841	269.45405	-0.14014	0.14063	-0.1001	-74.1046	111.987	815.8972	-1.2085	1.0649	-0.13672	0.556000000000001	22.119	330.4782	-0.18789	0.24219	-0.15703	42.7009	-49.00255	1293.2072	-1.6289	1.1269	-0.38086	-89.072	-85.093	1283.71258	-1.7749	0.72998	-0.013672
1.048	-42.285	39.8131	14.485	0.056152	0.26904	-0.086426	-35.348	144.3932	512.3207	-0.67839	0.45242	-0.044423	-31.6967	115.1253	273.665	-0.099121	0.10645	-0.104	-66.663	83.17783	872.048	-1.394	1.1587	-0.16504	-9.5189	46.903	395.233	-0.30859	0.25391	-0.1582	68.634	-88.136	1313.7413	-1.7168	1.1387	-0.3877	-87.0807	-48.576	1271.70418	-1.8943	0.76196	-0.0048828
1.05	-32.385	38.6195	26.395	0.068848	0.26416	-0.098633	-58.0291	143.3082	457.3182	-0.64355	0.42969	-0.029785	-17.469	111.6113	254.936	-0.07666	0.094238	-0.10938	-57.595	43.104	903.892	-1.5589	1.2337	-0.16211	10.5052	71.53	505.915	-0.44697	0.26797	-0.15899	-1.0906	-117.328	1336.342	-1.8569	1.1743	-0.40576	-52.814	-41.244	1264.1371	-2.0078	0.80273	0.00097656
1.052	-12.585	7.7524	28.3428	0.07373	0.26367	-0.10645	-41.612	129.5155	410.8314	-0.61012	0.40686	-0.025999	-7.741	123.0185	221.28	-0.043945	0.069824	-0.11035	-64.228	6.524	972.844	-1.7188	1.3223	-0.13867	12.267	90.6409	615.178	-0.58769	0.28408	-0.16221	-0.1785	-109.527	1360.603	-1.9316	1.2012	-0.41992	-14.697	-48.059	1270.9408	-2.1401	0.87354	0.010254
1.054	-19.931	3.1059	31.638	0.09082	0.27588	-0.11475	-42.247	108.0218	397.048	-0.57415	0.39014	-0.015746	-27.758	108.7	200.8563	-0.020508	0.056885	-0.11011	-123.9614	-32.347	1028.3581	-1.8921	1.4341	-0.10059	2.955	89.3102	729.072	-0.75332	0.30947	-0.16142	-15.5378	-109.97964	1361.709	-2.062	1.2603	-0.44092	-21.561	-94.8449	1251.732	-2.1953	0.91211	0.010254
1.056	-19.223	13.3617	42.784	0.098631	0.27661	-0.12427	-52.044	107.0484	377.077	-0.53279	0.3686	-0.0091074	-5.254	90.4485	172.6059	-0.0053711	0.049805	-0.10449	-111.182	-58.931	1061.3413	-1.9526	1.4985	-0.075684	-0.865000000000002	79.024	800.639	-0.9412	0.34638	-0.16357	-33.2008	-78.22	1339.805	-2.1394	1.3117	-0.44848	-9.692	-100.722	1271.343	-2.2866	0.98486	0.0068359
1.058	-50.1635	-5.90371	99.414	0.10791	0.28076	-0.13477	-55.1841	109.2149	377.2917	-0.50225	0.34481	0.0022486	-6.41399999999999	67.5912	158.17107	0.021973	0.030273	-0.104	-71.442	-85.1547	1065.984	-2.0117	1.6133	-0.02832	30.238	71.31	880.9806	-1.1719	0.37891	-0.15918	-41.73	-67.415	1309.6348	-2.1895	1.3525	-0.45703	11.658	-83.665	1319.50968	-2.3506	1.0254	0.00097657
1.06	-38.146	-30.0528	143.534	0.11328	0.29248	-0.146	-53.8892	119.2888	354.6938	-0.4707	0.31982	0.0073242	-26.664	72.1331	133.0905	0.035156	0.024414	-0.10986	-41.696	-112.938	1058.924	-1.991	1.6912	-0.0012206	22.659	47.6781	951.171	-1.4693	0.41807	-0.14531	-32.21596	-72.097	1305.8612	-2.2441	1.4023	-0.48047	30.028	-24.1973	1333.168	-2.4272	1.0669	-0.0073242
1.062	0.946000000000002	-55.516	198.889	0.11084	0.2959	-0.15186	-55.44599	118.953	350.8663	-0.43606	0.30251	0.014863	-2.892	53.712	106.9457	0.052734	0.0063477	-0.10938	5.358	-133.157	1095.106	-1.9316	1.748	0.020508	-13.976	23.724	973.299	-1.8198	0.47334	-0.13887	30.2063	-95.5053	1306.2161	-2.2573	1.4204	-0.48584	11.92	6.6706	1326.515	-2.5527	1.1113	-0.022949
1.064	34.3935	-58.831	236.914	0.11914	0.30518	-0.1748	-68.435	119.722	310.555	-0.40398	0.281	0.023117	-10.067	52.5737	101.386	0.070068	-0.0012207	-0.10571	10.153	-122.916	1138.5519	-1.7988	1.7695	0.046387	-16.947	-13.41	952.911	-2.2022	0.5628	-0.11933	13.9702	-79.485	1318.4337	-2.25	1.4473	-0.49707	-12.766	14.42151	1311.7031	-2.6191	1.125	-0.029297
1.066	14.6847	-84.528	291.329	0.11524	0.3125	-0.19385	-61.8548	106.979	310.76174	-0.37715	0.26686	0.025595	-24.61	55.1038	78.8114	0.081055	-0.010742	-0.1084	13.946	-83.29	1195.432	-1.7285	1.7568	0.052246	-41.6198	-19.409102	905.799	-2.5584	0.68828	-0.076172	43.349	-51.096	1306.50253	-2.2222	1.4565	-0.49341	-38.819	-19.405	1312.6728	-2.7163	1.1831	-0.041016
1.068	16.5678	-125.74	309.263	0.10791	0.32178	-0.22705	-48.429	100.423	292.67736	-0.34684	0.24579	0.027515	-29.942	65.24	70.5203	0.10254	-0.016602	-0.099121	-15.075	-56.078	1251.358	-1.5977	1.707	0.058594	-21.999	-36.3462	917.489	-2.875	0.88477	-0.003418	26.3806	-34.916	1286.385	-2.1792	1.4585	-0.48779	-47.391	-28.736	1321.8675	-2.74	1.2307	-0.047607
1.07	31.8668	-176.302	298.8045	0.046875	0.34277	-0.27295	-23.765	105.197	268.3779	-0.32471	0.22949	0.038574	-20.41	60.239	59.0693	0.10791	-0.01709	-0.098145	-5.547	-39.1551	1284.001	-1.5124	1.6467	0.056152	-29.581	-47.3019	886.1275	-3.0753	1.1337	0.012402	23.12574	-33.251	1254.362	-2.1055	1.457	-0.48242	-25.559	-29.11	1323.203	-2.7227	1.2793	-0.047852
1.072	4.691	-176.836	368.94198	-0.0048828	0.36133	-0.29785	-45.256	106.91	255.14158	-0.29858	0.21903	0.046641	-22.002	55.94	61.8401	0.12109	-0.017578	-0.095215	14.722	-45.028	1290.618	-1.4414	1.582	0.049805	-26.007	-44.525	878.1163	-3.0667	1.3712	-0.010645	12.60171	-23.323	1247.523	-2.0605	1.4453	-0.47754	-48.534	-13.83	1306.549	-2.6128	1.3208	-0.054199
1.074	23.8948	-95.2401	487.3677	-0.2002	0.38574	-0.30078	-40.9734	94.421	232.62963	-0.27587	0.20539	0.053176	-22.833	56.943	58.3383	0.12451	-0.023438	-0.094726	23.697	-25.259	1265.1696	-1.3872	1.4966	0.03418	-30.123	-59.354	876.3467	-2.7882	1.5013	-0.054785	19.401	-17.2703	1249.7086	-1.9648	1.416	-0.46777	-41.947	-4.797	1279.2139	-2.5327	1.3208	-0.064941
1.076	37.7836	-17.0258	568.255	-0.40332	0.427	-0.30664	-14.296	77.968	224.641	-0.24813	0.19226	0.057539	-8.409	43.6149	44.01161	0.125	-0.03125	-0.089355	12.716	-15.762	1244.554	-1.3716	1.4595	0.020996	-15.659	-63.49	889.3318	-2.3248	1.5009	-0.12178	33.047	-11.473	1273.4071	-1.8948	1.3938	-0.45972	-62.328	-22.0246	1248.054	-2.3452	1.2866	-0.087891
1.078	59.014	20.533	560.722	-0.61719	0.46777	-0.30469	-18.549	70.738	199.8256	-0.2202	0.17522	0.058922	-12.58	32.3539	44.4081	0.12256	-0.041504	-0.086914	-52.5915	-20.753	1234.411	-1.3535	1.3867	0.0053711	21.832	-56.047	896.8035	-1.7886	1.3755	-0.19287	5.56565	4.575	1268.98074	-1.832	1.3672	-0.4541	-75.775	-30.116589	1230.509	-2.2114	1.2402	-0.1062
1.08	14.3263	25.285	586.479	-0.88672	0.54443	-0.30029	-9.943	64.79	178.5204	-0.18848	0.16016	0.061523	-10.495	32.8204	28.7843	0.11816	-0.050293	-0.087891	-46.5307	-31.619	1232.888	-1.3535	1.3286	-0.0058594	5.577	-28.598	910.55	-1.328	1.1652	-0.26377	2.6392	14.48	1270.3942	-1.7578	1.3359	-0.43213	-66.007	-28.55	1254.2622	-2.0898	1.1836	-0.11914
1.082	5.017	47.12	694.7007	-1.002	0.5957	-0.29883	-6.703	77.135903	187.7877	-0.15663	0.14812	0.063965	-30.679	32.297	6.845	0.11328	-0.057617	-0.084961	-35.662	-62.333	1242.389	-1.354	1.2778	-0.011719	23.785	-1.468	944.214	-1.0145	0.97812	-0.33389	28.383	1.133	1251.695	-1.7324	1.3164	-0.43115	-41.43	-6.431	1284.155	-1.9526	1.1196	-0.13037
1.084	56.713	75.785	852.087	-1.1973	0.70898	-0.29883	-8.382	89.784	185.663	-0.1234	0.12996	0.067228	-34.685	32.81	10.261	0.10278	-0.062256	-0.084717	9.597	-75.7785	1240.745	-1.3691	1.2148	-0.01123	-25.785	-0.579999999999998	981.6197	-0.87539	0.85	-0.38154	43.406	-8.8801	1229.4401	-1.686	1.2817	-0.41553	-68.2862	20.861	1277.908	-1.8984	1.0918	-0.13037
1.086	24.679	133.314	931.713	-1.3232	0.80175	-0.30957	-31.976	89.923	159.6392	-0.087535	0.11357	0.064144	-61.169	22.7362	26.3902	0.095215	-0.057129	-0.083984	43.849	-92.718	1266.736	-1.375	1.1855	-0.013672	-42.0403	-17.372	996.4509	-0.875	0.8043	-0.3795	59.572	-22.99816	1206.261	-1.6668	1.2517	-0.40332	-116.218	46.8129	1279.267471	-1.8145	1.0586	-0.13184
1.088	29.321	146.609	959.223	-1.4331	0.8833	-0.31201	-28.596	77.558	154.1332	-0.05423	0.102	0.061387	-45.453	26.2832	22.4496	0.07373	-0.049805	-0.084961	46.526	-84.525	1314.974	-1.3765	1.1353	-0.0024414	-52.5548	-49.68	974.004	-0.95605	0.81641	-0.33496	64.88	-15.248	1203.88862	-1.6582	1.2207	-0.39551	-119.21	61.734	1259.8172	-1.7801	1.0295	-0.12232
1.09	27.369	109.6684	954.793	-1.5962	0.96729	-0.32178	-17.17	61.286	140.8268	-0.025879	0.087402	0.066406	-57.6201	28.692	17.2209	0.063477	-0.04541	-0.084961	26.219	-66.306	1343.8025	-1.375	1.1094	0.0061036	-37.956736	-97.643	986.842	-1.0419	0.86963	-0.28369	59.355	-19.7398	1200.4984	-1.6616	1.1831	-0.38818	-117.6808	63.471	1252.5024	-1.7534	1.0005	-0.12109
1.092	25.218	84.1847	984.3795	-1.6934	1.0059	-0.32031	-32.595	70.5651	132.1899	-0.0022162	0.072041	0.069383	-54.696	34.609	20.6311	0.04248	-0.039063	-0.083496	-12.338	-57.23	1366.29	-1.3779	1.0879	0.012207	-25.4949	-155.0885	1005.86	-1.1066	0.91923	-0.24239	53.743	-9.729	1193.4416	-1.6658	1.1604	-0.3811	-119.7495	72.601	1233.827	-1.7441	0.96484	-0.11035
1.094	-15.962	49.6385	1000.312	-1.9551	1.1162	-0.27197	-19.539	79.7397	117.5236	0.011966	0.051652	0.067383	-40.737	28.804	38.6408	0.029541	-0.027588	-0.079834	-14.662	-68.0903	1390.301	-1.3887	1.0859	0.01709	-5.466	-197.174	1037.099	-1.1398	0.96338	-0.22559	74.81	-4.155	1187.803	-1.6641	1.1348	-0.37891	-131.8564	72.166	1217.861	-1.752	0.94336	-0.10303
1.096	-43.0538	-22.009	1028.241	-2.2212	1.2426	-0.22022	-49.331	72.9582	111.8905	0.026632	0.039884	0.070784	-42.28	22.5166	13.92	0.01709	-0.024414	-0.08252	-57.922	-99.283156	1401.836	-1.4043	1.084	0.023438	10.0215	-218.39	1059.597	-1.1338	0.99297	-0.23652	50.438	30.0166	1160.954	-1.6528	1.1099	-0.37451	-118.996	73.831	1200.8915	-1.7612	0.9165	-0.09375
1.098	-61.6837	-102.88	1067.584	-2.5176	1.3652	-0.17432	-28.827	63.1961	106.0217	0.038681	0.024837	0.072966	-34.103	21.994	24.399	0	-0.01709	-0.075195	-53.826	-92.4582	1397.241	-1.4531	1.1172	0.039551	13.676	-235.285	1089.347	-1.1006	1.0049	-0.25098	44.8815	50.192	1146.368	-1.6382	1.0981	-0.36768	-91.563	60.1931	1172.653	-1.7705	0.8916	-0.085694
1.1	-96.135	-157.86	1071.6886	-2.8198	1.479	-0.13232	-27.582	58.33916	85.4517	0.046875	0.016602	0.07959	-37.654	29.6353	25.8395	0.0014648	-0.016113	-0.081055	-81.252	-79.75	1378.2439	-1.5208	1.1448	0.058594	56.2826	-235.262	1141.6816	-1.0671	1.0044	-0.26592	-1.885	61.578	1104.587	-1.5957	1.0762	-0.35742	-73.558	59.087	1142.591	-1.7695	0.86719	-0.085449
1.102	-61.346	-156.151	1054.1905	-2.8906	1.5098	-0.11621	-34.576	48.3605	63.0986	0.059386	0.01222	0.083166	-29.282	32.9512	37.8998	-0.0019531	-0.02002	-0.080078	-116.009	-64.1728	1342.5378	-1.6035	1.1914	0.083008	55.0387	-205.285	1195.88204	-1.0706	1.0009	-0.27959	15.3708	79.676	1078.875	-1.5581	1.0552	-0.35645	-20.512	53.256	1133.4072	-1.7437	0.8335	-0.071777
1.104	-61.031	-146.923	1062.511	-2.8418	1.5469	-0.12598	-44.817	42.00676	56.097	0.069646	0.0044272	0.085621	-28.582	45.0775	24.0684	0.001709	-0.021728	-0.074463	-115.391	-64.5825	1321.665	-1.7183	1.2563	0.10107	39.2097	-152.012	1261.657	-1.1148	0.99346	-0.28545	-9.08413	84.084	1073.74499	-1.5156	1.0352	-0.35107	-10.945	56.592	1133.773	-1.7107	0.80396	-0.064697
1.106	-44.751	-114.505	1106.5856	-2.5386	1.5747	-0.1543	-33.387	55.4318	57.9228	0.081021	-0.0030494	0.088713	-35.897	49.0464	20.16246	0.0053711	-0.019043	-0.076172	-129.464	-68.4059	1324.846	-1.7651	1.2935	0.10938	54.234	-104.475	1294.446	-1.2008	0.99287	-0.28281	-2.9017	58.981	1055.968	-1.4551	0.99609	-0.34277	-9.76	81.891	1101.3355	-1.6719	0.77344	-0.057617
1.108	-65.305	-103.231	1152.44	-2.3315	1.5698	-0.17188	-65.9743	46.7788	63.5852	0.09281	-0.0068124	0.091094	-42.294	43.404	15.6795	0.021973	-0.018066	-0.076172	-80.144	-70.432	1321.93	-1.8457	1.3633	0.12402	23.9626	-82.146	1320.476	-1.3047	1.0039	-0.27344	16.127	37.4509	1042.2778	-1.4233	0.98096	-0.34375	-43.275	84.427	1088.537	-1.623	0.72852	-0.049316
1.11	-38.8672	-78.5	1190.342	-1.9175	1.5122	-0.23926	-86.2015	35.7832	57.8405	0.10205	-0.011719	0.092773	-31.408	30.7494	16.0288	0.027344	-0.015625	-0.075684	-72.94	-64.915	1329.803	-1.8877	1.4141	0.12353	-0.282	-78.019	1322.564	-1.4048	1.0196	-0.26104	0.501999999999999	40.769	995.73	-1.3691	0.94141	-0.33105	-34.121	98.254	1083.3956	-1.5991	0.7085	-0.043945
1.112	-36.4815	-66.523	1229.496	-1.6687	1.4358	-0.27759	-58.4979	28.329	60.7216	0.10804	-0.020147	0.091784	-26.361	27.2317	17.8168	0.048828	-0.019531	-0.073242	-46.209	-31.659	1327.8655	-1.9136	1.4634	0.11816	-16.2623	-82.452	1308.117	-1.4896	1.0391	-0.25078	7.712	65.64	980.682	-1.3382	0.91431	-0.32398	-30.086	86.705	1092.42	-1.5405	0.68213	-0.03125
1.114	-36.1541	-35.387	1270.006	-1.4829	1.3423	-0.30322	-54.7511	31.8486	50.1162	0.11085	-0.031096	0.090517	-55.166	17.2002	16.9554	0.066406	-0.018798	-0.074463	-73.752	2.5717	1333.4186	-1.9487	1.5278	0.090332	12.958	-78.376	1276.7396	-1.5427	1.0578	-0.2461	7.23	86.329	970.465	-1.3066	0.88867	-0.30957	-27.557	92.376	1046.492	-1.5037	0.65601	-0.03125
1.116	-27.885	-40.032	1287.114	-1.314	1.2271	-0.31982	-52.4398	44.4381	39.07559	0.11437	-0.036133	0.091714	-32.231	23.5893	28.4938	0.082031	-0.018066	-0.072754	-82.965	29.705	1341.488	-1.9688	1.5586	0.075684	18.86	-94.213	1287.395	-1.5722	1.0659	-0.24434	24.658	92.8411	949.10727	-1.269	0.86377	-0.29443	-22.692	101.348	985.4092	-1.4663	0.64014	-0.03125
1.118	-84.363	-59.994	1264.4611	-1.248	1.1846	-0.32129	-48.891	61.593	34.1656	0.11621	-0.045226	0.091416	-33.995	31.215	42.7568	0.11133	-0.024414	-0.068848	-110.8292	28.13	1365.354	-2.0269	1.6274	0.062012	29.6142	-86.656	1278.354	-1.5835	1.0688	-0.2417	-10.787	92.3242	948.091	-1.2534	0.84912	-0.28271	-52.712	111.868	962.45	-1.4155	0.62061	-0.020996
1.12	-43.472	-66.322	1222.6955	-1.103	1.1196	-0.32617	-38.709	50.169	28.4171	0.11768	-0.051758	0.094238	-14.34	53.007	20.4444	0.12549	-0.02832	-0.070313	-113.3252	19.8046	1359.0406	-2.0832	1.676	0.062988	38.509	-80.573	1266.788	-1.6069	1.0651	-0.25674	-27.5774	73.4471	927.477	-1.2065	0.82178	-0.26074	-26.491	102.159	924.118	-1.3887	0.60938	-0.023926
1.122	-29.475	-72.608	1207.429	-1.0176	1.084	-0.34204	-34.707	37.3506	20.4794	0.11718	-0.0541	0.096972	0.457999999999998	47.794	16.217	0.14844	-0.032227	-0.069336	-87.856	0.982000000000001	1343.871	-2.1206	1.7251	0.064941	53.146	-94.5108	1278.497	-1.6422	1.0554	-0.26523	-19.242	62.209	904.2769	-1.1763	0.79981	-0.24951	-24.4	102.1176	918.4918	-1.3276	0.59033	-0.022461
1.124	-7.5604	-75.712	1209.063	-0.94141	1.043	-0.36328	-30.949	28.881	18.3164	0.1211	-0.056447	0.095889	-6.861	51.0015	33.3277	0.15869	-0.034668	-0.06836	-104.8495	-6.835	1323.6779	-2.1304	1.7661	0.07373	41.8421	-120.667	1307.5172	-1.6825	1.045	-0.27617	-50.8293	77.4414	867.1757	-1.1499	0.77881	-0.23633	19.322	100.403	878.967953	-1.2786	0.57593	-0.022461
1.126	-7.0087	-88.6565	1263.587	-0.89453	1.0078	-0.38379	-33.989	15.656	29.4844	0.12109	-0.054885	0.097857	-17.213	42.1533	18.44691	0.16357	-0.036621	-0.075195	-88.317	-14.2954	1323.385	-2.1172	1.7793	0.072754	20.766	-137.815	1342.946	-1.7364	1.039	-0.28779	-49.4048	104.5633	844.636	-1.1069	0.74854	-0.21826	10.082	95.156	858.3866	-1.2246	0.55664	-0.021484
1.128	2.377	-108.079	1323.717	-0.88965	0.99414	-0.38818	-30.731	14.102	31.6914	0.12461	-0.060059	0.10127	-29.438	38.6257	30.432	0.16113	-0.035645	-0.075684	-82.58	-10.32809	1320.6341	-2.043	1.7715	0.067383	13.6232	-129.099	1363.876	-1.8145	1.043	-0.29395	-38.082	115.201	810.227	-1.0884	0.73193	-0.20996	9.181	95.432	819.655	-1.1387	0.5293	-0.023438
1.13	46.583	-114.307	1364.5414	-0.91602	0.96094	-0.40723	-21.249	36.7505	44.1284	0.12891	-0.063477	0.098633	-3.425	22.4295	37.72401	0.16455	-0.025391	-0.076172	-63.328	-4.6891	1288.3731	-1.9656	1.7414	0.057861	-12.5213	-129.282	1371.269	-1.9182	1.0644	-0.31016	-10.734	109.8058	783.6259	-1.0542	0.7041	-0.18506	-25.282	105.2263	795.411	-1.0957	0.51318	-0.021973
1.132	76.2727	-98.46	1356.794	-0.97436	0.94458	-0.41381	-33.01	46.87	20.7888	0.13105	-0.056251	0.098438	-17.608	24.1655	42.16974	0.15527	-0.0043945	-0.064941	-47.926	-32.0724	1285.581	-1.8789	1.7012	0.052734	-11.4479	-116.483	1363.889	-2.0327	1.1075	-0.32364	-17.791	108.0424	746.923	-1.0274	0.67676	-0.17115	-24.206	133.3287	784.3013	-1.0078	0.48584	-0.032715
1.134	91.122	-53.143	1361.292	-1.0425	0.93408	-0.41162	-34.398	43.182	22.43	0.13174	-0.052342	0.098048	-10.305	32.0785	26.4157	0.14771	0.0085451	-0.068115	-10.957	-20.796	1276.5106	-1.771	1.6431	0.037109	-33.644	-120.13	1362.835	-2.1218	1.1559	-0.33223	6.697	124.6146	737.4738	-0.99805	0.65137	-0.15283	-38.966	138.272	792.196	-0.94483	0.46241	-0.033203
1.136	53.568	-48.1416	1399.853	-1.1641	0.93164	-0.40479	-2.48200000000001	25.7999	43.6062	0.13838	-0.05	0.098437	-20.661	38.208	18.9397	0.13867	0.023926	-0.066895	-1.151	8.252	1276.31952	-1.7266	1.6113	0.03418	-27.8356	-96.835	1349.96	-2.1891	1.2098	-0.3373	20.769	121.1964	731.5678	-0.95703	0.61328	-0.13135	-50.881	123.299	764.603	-0.8877	0.43457	-0.039551
1.138	66.798	-44.821	1445.741	-1.2314	0.94531	-0.39844	-14.985	27.056	35.99	0.13623	-0.045116	0.095606	-43.303	42.157	15.7496	0.12793	0.049805	-0.064453	-58.105	56.4505	1261.9017	-1.6563	1.5645	0.028809	-27.975	-87.155	1335.1298	-2.2383	1.25	-0.3418	10.715	127.777	716.743	-0.93359	0.59277	-0.125	-66.725	123.255	715.053	-0.81543	0.40625	-0.047852
1.14	62.821	-44.313	1450.541	-1.3354	0.98389	-0.38525	-10.464	30.7586	18.473	0.13672	-0.042969	0.089355	-36.394	47.037	38.7421	0.12256	0.063965	-0.066895	-50.02	90.933	1247.6667	-1.6257	1.5373	0.02832	-16.1021	-74.0084	1299.552	-2.266	1.275	-0.35283	19.405	120.039	690.6534	-0.88623	0.55518	-0.10449	-89.427	129.23	687.4419	-0.78271	0.39111	-0.056152
1.142	53.618	-47.839	1423.535	-1.3931	1.0112	-0.38525	-9.293	22.81758	37.0124	0.13203	-0.037208	0.088183	-53.987	35.997	40.20244	0.12256	0.082031	-0.06543	-68.146	100.224	1233.517	-1.603	1.5044	0.024414	31.385	-62.32933	1281.98	-2.2871	1.2871	-0.35137	0.16	117.71	650.888	-0.8562	0.52759	-0.09668	-69.3691	140.347	668.07048	-0.72705	0.36377	-0.059082
1.144	62.091	-57.446	1389.749	-1.4375	1.0352	-0.3916	6.524	22.3597	42.1295	0.12773	-0.028907	0.085352	-31.592	39.43087	28.2581	0.11865	0.093994	-0.064942	-56.605	106.467	1201.3652	-1.5767	1.4614	0.031738	15.7525	-59.323	1256.536	-2.2976	1.3	-0.35098	-15.059	101.4358	641.4738	-0.82129	0.5	-0.092285	-51.816	137.2302	649.3937	-0.69287	0.34742	-0.061767
1.146	40.996	-64.86	1348.216	-1.4961	1.0703	-0.39258	-11.672	29.8392	26.0931	0.12852	-0.016798	0.082227	-28.887	30.79915	33.61237	0.11768	0.10791	-0.064941	-70.015	104.844	1167.15921	-1.564	1.436	0.025879	49.875	-54.281	1248.1231	-2.2923	1.3081	-0.34688	-30.046	102.4246	623.1037	-0.77295	0.46729	-0.078125	-36.317	134.9846	605.6793	-0.65771	0.33594	-0.06543
1.148	55.858	-67.0817	1322.058	-1.5327	1.0864	-0.39014	-11.712	26.5624	31.42156	0.12168	-0.0041996	0.076758	-18.112	29.7949	29.72	0.11963	0.11865	-0.069824	-59.92	108.047	1164.4162	-1.5273	1.3848	0.02832	44.8912	-45.358	1239.532	-2.2695	1.3066	-0.33789	-4.66	113.114	599.8193	-0.75146	0.45361	-0.072754	-41.704	114.858	578.013	-0.61279	0.31592	-0.068848
1.15	14.99805	-52.5361	1321.397	-1.6094	1.1211	-0.3877	-29.498	35.4295	35.7185	0.11914	0.014648	0.075195	-50.96	32.2626	14.7006	0.11719	0.12744	-0.069336	-72.746	106.918	1152.187	-1.497	1.3559	0.031006	44.93	-20.9865	1240.1948	-2.2194	1.3122	-0.33213	-31.33	124.606	579.3583	-0.70459	0.41943	-0.063965	-44.285	109.647	559.117	-0.59082	0.31152	-0.070313
1.152	70.045	-51.6888	1317.136	-1.6823	1.1604	-0.37769	-27.927	43.327	48.3755	0.11045	0.027539	0.069531	-43.364	47.80824	31.85393	0.11523	0.14014	-0.073242	-90.1429	107.4247	1130.397	-1.4663	1.3188	0.03125	33.7366	-1.3108	1246.0201	-2.155	1.3106	-0.32539	-27.539	116.223	568.964	-0.67676	0.40039	-0.054443	-8.639	113.264	558.4943	-0.54688	0.29688	-0.072266
1.154	81.018	-70.595	1310.098	-1.7583	1.2075	-0.36865	-33.624	50.65	28.68454	0.10713	0.05127	0.076855	-26.826	41.2111	37.7761	0.11694	0.1438	-0.070556	-64.657	76.505	1082.993	-1.4063	1.2646	0.040039	30.3817	11.841	1249.1693	-2.08	1.295	-0.31758	-9.39700000000001	103.7824	539.3583	-0.64307	0.38037	-0.045898	-18.471	136.4562	513.7715	-0.51074	0.28711	-0.070557
1.156	70.437	-62.423	1306.23819	-1.8438	1.2754	-0.375	-46.716	34.794	16.6175	0.10127	0.066113	0.072168	-39.803	37.2401	39.0102	0.1123	0.15332	-0.072266	-59.608	49.156	1049.979	-1.3726	1.2349	0.041016	31.2648	11.003	1258.8596	-2.0008	1.2723	-0.31269	-5.887	95.66	510.5797	-0.59961	0.35498	-0.027344	-11.853	130.166	499.64	-0.48828	0.27734	-0.07373
1.158	46.361	-28.274	1332.2028	-1.8823	1.3149	-0.37939	-49.018	21.1675	32.792	0.098242	0.079883	0.07168	-32.918	14.1979	42.5318	0.11426	0.16211	-0.078125	-44.376	52.63	1045.213	-1.312	1.1685	0.04248	12.7226	20.588	1251.0293	-1.9258	1.2402	-0.30664	3.4	97.058	498.646	-0.57959	0.34717	-0.026855	-32.339	132.866	476.1824	-0.44727	0.25977	-0.069824
1.16	4.038	-0.3451	1352.36905	-1.9761	1.397	-0.40381	-47.201	17.9237	25.555	0.092285	0.093262	0.074707	-62.6648	14.59817	42.36684	0.1123	0.1709	-0.077637	-76.466	81.292	1039.211	-1.2617	1.1172	0.044189	39.163	10.092	1236.392	-1.8602	1.205	-0.29932	-7.877	89.162	474.541	-0.54053	0.32324	-0.0083008	-49.96778	133.644	443.003	-0.42773	0.25195	-0.073242
1.162	30.293	8.0352	1356.1711	-2.0684	1.4638	-0.40503	-51.652	20.81407	28.0498	0.087695	0.10557	0.073926	-47.779	20.7499	28.5555	0.10938	0.17969	-0.080566	-101.2004	107.6375	1027.1185	-1.2178	1.0703	0.044922	36.883	-15.868	1208.6487	-1.8108	1.1743	-0.29306	-7.244	92.543	438.6296	-0.50562	0.31177	0.0019531	-31.42	132.561	424.752	-0.38916	0.24072	-0.08252
1.164	11.0365	11.068	1330.742	-2.1699	1.5332	-0.40039	-46.381	26.8454	19.2129	0.0833	0.1125	0.073047	-51.253	27.4971	15.2866	0.10254	0.18164	-0.088867	-91.1555	108.4008	1021.053	-1.1558	1.0112	0.041992	49.189	-23.832	1183.97105	-1.7706	1.1458	-0.29111	-41.8736	98.6067	420.2698	-0.46924	0.29346	0.013184	-34.347	123.203	417.815	-0.35303	0.22608	-0.085205
1.166	25.9843	-4.182	1305.327	-2.272	1.6157	-0.37109	-39.336	30.005	34.3634	0.081348	0.12773	0.071094	-41.396	35.3555	18.5201	0.094727	0.18652	-0.09375	-99.0676	113.869	982.177	-1.1284	0.98096	0.038086	72.813	-29.242	1160.98464	-1.7425	1.1206	-0.2793	-58.7806	108.264	393.82688	-0.41992	0.27734	0.022461	-17.858	107.0865	392.306	-0.31738	0.2168	-0.089355
1.168	17.9816	-28.627	1298.0515	-2.3062	1.6509	-0.35742	-50.815	37.8252	40.4143	0.081641	0.13926	0.070899	-36.701	25.0444	26.0133	0.083496	0.19385	-0.094727	-77.4561	122.332	957.8139	-1.0801	0.93555	0.045898	56.806	-26.214	1151.1935	-1.7207	1.0898	-0.27393	-37.502	100.074	350.5715	-0.39111	0.2666	0.032715	-15.882	110.219	354.8259	-0.27393	0.19678	-0.099121
1.17	-2.0627	-21.2083	1287.84869	-2.3223	1.6934	-0.34277	-52.4152	42.9424	19.1334	0.080078	0.15137	0.070801	-20.839	15.72203	40.5493	0.075928	0.20459	-0.091797	-86.6504	142.321	934.2777	-1.0469	0.90137	0.04956	76.453	-15.974	1130.1472	-1.7109	1.0715	-0.27187	-27.919	115.528	334.7636	-0.33643	0.24951	0.040527	-1.381	105.6939	319.8831	-0.25391	0.18799	-0.10107
1.172	-13.9292	-12.1442	1263.527	-2.2781	1.7082	-0.33228	-45.402	44.7063	22.0496	0.075977	0.16016	0.067676	2.49	28.8066	38.15861	0.064453	0.22021	-0.091309	-37.731	157.78	913.7044	-1.0112	0.87354	0.050781	46.1418	14.804	1112.7427	-1.6946	1.0535	-0.26416	-65.5065	122.304	320.1546	-0.2981	0.23096	0.041504	-15.038	106.9782	306.891	-0.2124	0.16602	-0.11133
1.174	16.2608	-18.4672	1230.144	-2.189	1.6997	-0.3208	-45.6344	39.0866	34.04657	0.072754	0.16973	0.067383	-18.363	41.1462	29.3417	0.047363	0.23291	-0.10205	-51.127	160.715	860.035	-0.97705	0.83643	0.050293	57.501	46.74	1092.1003	-1.677	1.0367	-0.2626	-79.5332	107.8	304.6575	-0.25928	0.21143	0.047852	23.015	111.9245	296.2659	-0.18482	0.15503	-0.11572
1.176	59.231	-6.009	1214.537	-2.0254	1.6582	-0.32227	-38.031	28.6492	35.9556	0.065332	0.17871	0.064649	-18.814	46.154	42.226	0.037598	0.23047	-0.10547	-47.6	144.061	826.7569	-0.95313	0.80957	0.060059	10.9809	72.121	1079.4918	-1.6488	1.0232	-0.25371	-19.39	82.5594	293.024	-0.21436	0.18115	0.054199	10.704	98.9457	277.6117	-0.15625	0.14014	-0.11572
1.178	53.511	11.872	1199.127	-1.9429	1.6313	-0.32764	-44.319	14.1623	31.7241	0.065235	0.18379	0.068262	-9.18899999999999	41.403	49.0751	0.024414	0.23828	-0.10449	-52.037	121.3189	810.6717	-0.90674	0.76611	0.054688	23.4358	92.975	1060.39564	-1.6152	1.0098	-0.25391	-7.879	85.7827	258.529	-0.19092	0.16943	0.060059	-13.704	88.3321	261.764	-0.13037	0.12695	-0.12354
1.18	61.631	34.846	1217.797	-1.7852	1.5723	-0.3291	-32.725	14.28321	30.733887	0.054688	0.19873	0.07373	-15.939	29.9644	27.1627	0.022705	0.23657	-0.10303	-8.072	118.054	775.445	-0.86792	0.73242	0.05542	-0.4998	78.446	1046.8277	-1.5665	0.99523	-0.246	-29.713	80.954	242.0193	-0.14502	0.15283	0.063965	-36.222	87.8902	250.4471	-0.12109	0.12012	-0.12109
1.182	39.4965	57.9094	1223.7801	-1.6951	1.5335	-0.32983	-27.545	12.923	38.50876	0.045703	0.20977	0.078906	-7.351	19.1738	15.3678	0.025879	0.24316	-0.11084	-5.18	131.5891	753.264	-0.82617	0.69629	0.056152	-8.4476	69.443	1011.421	-1.5141	0.97617	-0.24336	-16.705	75.3286	237.0575	-0.11524	0.1316	0.062988	-42.041	99.592	236.8746	-0.10254	0.1123	-0.13037
1.184	50.255	90.826	1215.567	-1.6348	1.5039	-0.32959	-33.212	40.484	28.6195	0.035449	0.22285	0.086524	-23.095	11.9739	25.18043	0.03418	0.24756	-0.11719	-23.712	143.4138	718.138	-0.76855	0.65039	0.05127	-29.95212	54.263	1009.92138	-1.4562	0.9543	-0.24336	-9.516	83.3042	216.5236	-0.091797	0.11768	0.064941	-34.322	116.776	217.3489	-0.094727	0.10889	-0.13012
1.186	54.455	104.124	1191.447	-1.5835	1.4888	-0.32178	-13.737	43.695	17.86834	0.022559	0.2334	0.10059	-30.552	9.0773	40.534	0.040527	0.24951	-0.11865	-18.77	137.268	709.9776	-0.7229	0.6189	0.043457	-18.829	71.2253	951.9791	-1.3888	0.92569	-0.24238	-30.235	91.88349	194.1863	-0.058105	0.10059	0.067871	-31.387	108.666	203.0411	-0.084473	0.11035	-0.14063
1.188	54.433	105.159	1174.34047	-1.5723	1.4805	-0.3125	-29.201	41.832	19.6629	0.0083982	0.24141	0.11221	-19.846	-0.0908000000000002	51.6459	0.053711	0.25391	-0.12793	-7.935	148.726	692.2673	-0.67627	0.58252	0.039551	-1.898	71.06765	928.8157	-1.3291	0.89648	-0.24023	-25.5223	90.03781	195.60853	-0.04248	0.094238	0.072754	-21.108	94.18	188.3767	-0.072266	0.10156	-0.13867
1.19	33.7795	88.392	1160.9006	-1.5547	1.4824	-0.29688	13.199	33.2359	28.2254	-0.0092773	0.24707	0.11865	-29.594	-13.4239	61.371	0.066894	0.25928	-0.13135	-27.98	142.241	671.17	-0.61572	0.5376	0.02832	-2.383	81.1628	900.5797	-1.2669	0.86475	-0.24033	-23.571	65.1045	207.6293	-0.025391	0.083984	0.07959	-31.375	65.4707	166.8952	-0.063965	0.10449	-0.14111
1.192	37.581	72.409	1145.0499	-1.5398	1.4856	-0.28418	-19.19	32.4557	27.27111	-0.020117	0.25605	0.12891	-20.259	-8.7364	78.6942	0.078125	0.26563	-0.13916	-32.14	136.522	640.1946	-0.58643	0.5166	0.023438	-9.5968	65.452	873.0452	-1.212	0.83642	-0.24063	-34.4697	51.100828	187.0663	-0.014893	0.074707	0.079834	-27.652	72.0388	139.3771	-0.04834	0.1084	-0.14307
1.194	60.724	74.601	1116.898	-1.5195	1.4824	-0.27246	-3.586	35.62015	31.3377	-0.030567	0.26425	0.1375	26.44	0.9859	150.6019	0.069824	0.26758	-0.15479	-5.351	123.666	637.021	-0.53564	0.48291	0.013672	8.014	54.672	846.519	-1.1667	0.80518	-0.2293	-18.413	53.827	161.0421	-0.0019531	0.067383	0.089844	-41.526	74.422	135.87498	-0.033448	0.10937	-0.14991
1.196	42.711	82.2008	1080.9329	-1.4766	1.4746	-0.26172	-20.711	22.240303	50.221	-0.036426	0.27324	0.14649	21.0765	15.0968	212.671	0.052246	0.27051	-0.16309	-10.894	120.8251	607.2414	-0.50268	0.46216	0.01123	0.852	47.87	831.0954	-1.1276	0.76787	-0.22236	-45.154	66.098	146.6512	0.014648	0.064941	0.10205	-23.239	81.528	122.32	-0.018066	0.11279	-0.15039
1.198	74.369	76.8193	1045.309	-1.4473	1.4609	-0.25391	-5.982	25.35296	28.8334	-0.040235	0.28145	0.15381	-16.0454	16.8748	306.676	-0.017578	0.28369	-0.18359	-8.66	130.0293	574.6418	-0.46729	0.44482	0.0029297	-26.722	55.1	823.3722	-1.0957	0.73828	-0.21289	-19.676	71.799	136.38336	0.021484	0.056641	0.098633	-16.161	63.614	110.22604	0.0039063	0.11133	-0.15527
1.2	44.6027	52.708	1013.926	-1.3848	1.4238	-0.24512	-16.741	30.9439	34.0616	-0.046387	0.28906	0.16602	22.5941	-8.8692	400.506	-0.10596	0.29004	-0.20288	-5.522	119.4015	545.4189	-0.43359	0.41943	0.0019531	-31.531	65.6684	823.2398	-1.0566	0.71748	-0.19834	-4.114	73.828	113.1994	0.043457	0.052246	0.10938	-31.879	59.0889	83.3486	0.015625	0.11084	-0.15723
1.202	48.20806	53.757	988.5313	-1.3289	1.386	-0.24634	-30.678	29.366	51.41446	-0.047754	0.28945	0.17305	62.6062	-13.45522	532.695	-0.21191	0.31104	-0.22266	-14.029	108.793	511.8927	-0.41748	0.40674	0.0053711	-18.79	83.619	799.21777	-1.0245	0.69463	-0.18428	-5.177	62.6847	89.6809	0.056396	0.048096	0.11596	-49.572	46.19663	89.4552	0.039063	0.10547	-0.1582
1.204	45.6475	61.179	1011.9207	-1.2749	1.3462	-0.24219	-19.656	-18.07	108.8573	-0.047461	0.29599	0.18418	43.803	2.9776	648.911	-0.38916	0.32861	-0.25439	-24.614	110.4264	473.7848	-0.38623	0.37695	0.0029297	-37.7795	102.09	762.5348	-0.98819	0.67549	-0.17178	-12.223	53.3018	94.1262	0.073242	0.040527	0.12109	-44.032	60.166	93.734571	0.055908	0.10083	-0.16479
1.206	40.8684	85.318	994.777	-1.2061	1.2871	-0.24072	-35.055	-34.127	135.276	-0.049414	0.29639	0.18457	34.668	-3.8892	718.6637	-0.51367	0.33057	-0.27295	-32.899	106.4399	436.80162	-0.35938	0.35694	0.0029297	-18.075	114.65	747.7176	-0.9458	0.65185	-0.15859	-13.248	56.0441	95.4472	0.098633	0.038086	0.12207	-38.141	73.322	105.121	0.067383	0.09375	-0.16943
1.208	8.4818	105.1274	970.77	-1.1758	1.2617	-0.23877	-41.045	-15.866	163.4292	-0.05664	0.28272	0.19043	63.389	-7.869	738.137	-0.8457	0.33789	-0.30859	-9.281	107.2916	416.9696	-0.3291	0.33301	0.0039063	-20.069	118.759	727.1146	-0.90479	0.62354	-0.14258	-10.029	56.3209	98.22856	0.11279	0.033691	0.11865	-23.095	63.031	84.376	0.083496	0.087402	-0.17236
1.21	-24.3721	130.923	942.788	-1.125	1.2129	-0.23242	-59.612	10.6064	217.534	-0.074707	0.31494	0.20166	0.2626	12.841	769.267	-1.1933	0.37939	-0.31982	-40.701	108.0258	408.1333	-0.27881	0.30713	-0.0014648	-8.855	130.618	687.2837	-0.86485	0.59375	-0.12598	-32.004	66.317	71.3382	0.12695	0.034668	0.10986	-20.188	45.395	83.0941	0.089355	0.083984	-0.1748
1.212	-20.664	139.526	907.2405	-1.0877	1.1848	-0.22241	-109.124	-33.398	335.709	-0.11807	0.32998	0.10254	-3.327	65.261	812.952	-1.5894	0.46924	-0.31299	-56.2519	123.787	390.6971	-0.25293	0.28662	-0.0043945	-6.008	113.7472	650.808	-0.82705	0.56338	-0.11299	-27.11	65.165	69.9913	0.13379	0.035645	0.10889	-29.661	35.2375	67.6623	0.089355	0.077148	-0.18652
1.214	-37.1	148.142	880.6346	-1.0508	1.1543	-0.2168	-150.8	-93.5254	436.812	-0.12959	0.34473	0.078418	5.789	77.80951	859.051	-2.123	0.71289	-0.2793	-57.1793	117.338	366.645053	-0.2002	0.24854	-0.021484	14.174	107.5538	618.89	-0.79385	0.53252	-0.10439	-37.03	45.116	52.1647	0.13574	0.038574	0.11035	-32.308	37.0929	41.361	0.083252	0.077637	-0.18017
1.216	-39.012	151.95	837.6126	-1.0049	1.1172	-0.21094	-158.3	-120.5516	509.992	-0.19131	0.3748	0.057715	3.351	73.025	859.908	-2.353	0.87354	-0.2417	-67.8639	125.1656	344.3004	-0.16015	0.22021	-0.028076	12.543	92.16	582.692	-0.76699	0.50527	-0.091309	-60.402	36.508	41.1187	0.13037	0.041504	0.10547	-7.39400000000001	41.078	51.4453	0.074707	0.078125	-0.1792
1.218	-31.1123	141.968	802.6634	-0.98438	1.0986	-0.20508	-98.659	-117.2226	579.6757	-0.32559	0.40977	-0.012012	-4.71	36.334	883.858	-2.5894	1.231	-0.1333	-33.713	122.2815	319.5552	-0.12598	0.19238	-0.036133	11.776	100.059	562.082	-0.7417	0.47314	-0.073242	-59.9429	40.403	45.3004	0.125	0.038086	0.10449	-20.165	36.652	50.8138	0.063965	0.078125	-0.18457
1.22	-37.5455	122.8504	766.8487	-0.94287	1.0571	-0.18896	-120.217	-74.144	627.254	-0.48096	0.42432	-0.078613	4.28400000000001	1.316	898.881	-2.6042	1.4778	-0.058106	-45.2507	128.142	293.4957	-0.087402	0.16064	-0.040527	9.467	107.1337	554.5892	-0.71426	0.44805	-0.062793	-41.357	42.6946	52.623	0.1084	0.036621	0.10156	-29.532	37.0061	39.2519	0.053223	0.078125	-0.18262
1.222	-37.8489	104.43	734.486	-0.89404	1.0239	-0.18115	-140.3961	-7.267	680.974	-0.66953	0.42715	-0.11123	14.082	-38.335	905.951	-2.5503	1.6724	-0.047363	-20.46	118.038	268.83574	-0.066406	0.14307	-0.042969	-5.599	122.537	543.5307	-0.69365	0.42607	-0.049804	-33.211	30.9182	49.4918	0.094972	0.035889	0.10449	-31.707	40.43627	23.761	0.035645	0.080078	-0.17822
1.224	-50.2837	124.428	691.621	-0.87305	1.002	-0.1709	-175.853	48.176	663.734	-0.91514	0.45634	-0.13174	-15.131	-34.449	928.977	-2.3999	1.7856	-0.10205	-40.261	111.745	256.2617	-0.042969	0.12646	-0.040527	0.199000000000002	126.147	543.9654	-0.67569	0.41201	-0.031836	-41.288	34.1352	38.1268	0.082031	0.037598	0.10645	-17.023	40.8506	23.383	0.025147	0.084961	-0.17798
1.226	-24.608	124.288	671.828	-0.82764	0.95361	-0.15625	-130.149	47.998	701.42	-1.1995	0.5083	-0.17119	19.985	-31.242	933.9011	-2.2944	1.7642	-0.14502	-20.693	88.7761	240.675	-0.028808	0.10645	-0.053223	-28.723	140.451	522.278	-0.6583	0.39346	-0.019532	-49.711	31.6144	26.0226	0.063477	0.039063	0.10547	-31.547	38.0452	45.1669	0.018555	0.086426	-0.1748
1.228	-33.138	134.4197	642.005	-0.79077	0.92163	-0.14771	-58.4816	27.987	776.983	-1.4883	0.59941	-0.18496	-4.501	-21.922	940.96	-2.0371	1.5742	-0.24268	-27.319	82.898	227.2803	-0.024902	0.1001	-0.058594	-36.047	121.46	518.609	-0.6416	0.37207	-0.0068359	-25.914	31.8764	18.7548	0.051026	0.042236	0.11181	-13.103	39.189	54.968	0.0097656	0.094238	-0.18066
1.23	-34.062	132.848	635.3391	-0.76123	0.88525	-0.1333	-25.924	29.373	882.1302	-1.7461	0.71094	-0.19482	-35.82	-11.561	952.478	-1.8006	1.4104	-0.30005	-29.642	63.952	214.6733	-0.016602	0.084473	-0.05957	-31.887	117.692	509.0427	-0.63144	0.35899	0.0016601	-27.282	39.13588	32.9925	0.041016	0.046387	0.11426	-24.194	25.862	38.8265	0.012207	0.092773	-0.17383
1.232	-53.8677	144.565	612.7811	-0.7207	0.8418	-0.12012	4.1439	35.717	946.38	-1.9446	0.83896	-0.19385	-59.519	-29.834	981.441	-1.5684	1.2949	-0.34082	-25.416	52.263	200.5549	-0.013184	0.078613	-0.060059	-38.588	109.218	474.684	-0.61612	0.3416	0.01123	-36.678	50.0189	8.30383	0.035156	0.044434	0.11963	-50.156	32.981	28.925	0.0083008	0.096191	-0.17383
1.234	-47.3492	150.754	619.403	-0.70752	0.82275	-0.10986	-7.201	44.251	973.996	-2.0719	0.975	-0.15869	-76.4	-81.692	994.607	-1.3511	1.2388	-0.37646	-21.844	69.7434	176.95	-0.0073242	0.071289	-0.056152	-57.438	109.9233	455.5476	-0.60322	0.3295	0.018653	-45.2338	38.1374	26.1868	0.03418	0.04248	0.12012	-21.3	30.5491	28.463	0.014892	0.099365	-0.17139
1.236	-34.288	141.399	604.065	-0.66504	0.78125	-0.088379	-21.452	59.33	973.486	-2.1582	1.1261	-0.12705	-90.91903	-111.333	1027.9529	-1.2969	1.2432	-0.38086	-23.449	81.811	165.062	-0.0043945	0.065186	-0.056152	-28.584	94.9198	407.254	-0.58633	0.31397	0.031836	-23.75	32.347	30.4472	0.03418	0.041016	0.12158	-24.23	29.0672	29.755	0.023926	0.10059	-0.17188
1.238	-17.207	130.597	561.126	-0.63428	0.75074	-0.072754	-43.5457	84.721	963.0153	-2.2329	1.246	-0.12461	-94.0511	-131.458	1058.14	-1.251	1.2852	-0.35645	-27.453	82.553	143.5871	-0.00048828	0.061523	-0.056641	-8.877	89.524	382.0178	-0.56934	0.30615	0.042969	-41.599	29.3619	17.104	0.043213	0.037842	0.12353	-2.336	31.8938	11.4543	0.028809	0.10791	-0.16357
1.24	-7.74299999999999	126.6993	506.1311	-0.6001	0.71484	-0.061035	9.185	66.2594	973.806	-2.2808	1.3374	-0.12256	-52.581	-126.451	1064.448	-1.2359	1.3286	-0.32398	-12.185	67.22	133.418	0.0092773	0.052734	-0.057129	-32.723	93.172	353.0266	-0.54365	0.29443	0.052734	-41.708	38.3865	34.8178	0.050781	0.038086	0.12549	-27.254	26.0479	33.1272	0.029297	0.10352	-0.16089
1.242	-15.635	127.2468	473.3778	-0.55664	0.67188	-0.050781	36.414	8.44600000000001	993.868	-2.2872	1.3722	-0.11347	-44.328	-131.781	1064.4068	-1.2109	1.3486	-0.30127	0.528999999999996	56.0933	121.9348	0.0087891	0.047852	-0.057617	-30.289	89.188	335.4714	-0.51387	0.27871	0.057031	-28.775	38.213	39.914	0.066406	0.034668	0.12451	-19.649	21.0636	26.9361	0.028809	0.099609	-0.16016
1.244	-2.986	128.682	441.8553	-0.53516	0.64844	-0.046387	2.8164	-57.407	1029.7065	-2.2012	1.3519	-0.10821	-21.332	-127.994	1096.657	-1.1753	1.3228	-0.2915	-11.085	50.1930681	102.1225	0.023438	0.040039	-0.057617	-46.285	91.2907	329.615	-0.48379	0.26739	0.065234	-23.797	38.28	43.0885	0.073242	0.02832	0.12354	-26.517	18.2312	15.294	0.024414	0.092773	-0.15674
1.246	-2.457	118.8067	417.5661	-0.49219	0.60449	-0.027832	-18.4007	-120.35	1058.9646	-2.0196	1.3055	-0.10469	-12.79	-139.343	1132.2508	-1.1519	1.3052	-0.28467	-6.29499999999999	54.7845	94.2961	0.032226	0.031494	-0.059082	-44.2859	103.7593	315.44	-0.45303	0.25478	0.069043	-17.668	34.7208	20.6332	0.092285	0.025879	0.11816	-37.083	28.8393	26.7116	0.024414	0.090332	-0.15332
1.248	18.143	102.647	395.0848	-0.45972	0.56763	-0.028076	-39.85	-142.66	1059.2677	-1.7965	1.25	-0.099022	-22.055	-157.335	1197.7629	-1.1108	1.2954	-0.29688	4.041	68.8731	90.0902	0.037598	0.029297	-0.059082	-42.501	103.232	303.344	-0.42383	0.24219	0.072266	-17.812	24.3733	18.9244	0.10522	0.026123	0.11743	-23.616	22.8248	40.1178	0.022461	0.089844	-0.14941
1.25	25.579	88.239	363.40288	-0.43457	0.5332	-0.017578	2.108	-136.515	1036.4179	-1.6055	1.209	-0.092773	-16.216	-158.021	1237.278	-1.0689	1.2778	-0.29834	6.364	74.4357	65.1177	0.046875	0.018555	-0.05957	-51.5114	105.09	289.2193	-0.39278	0.23262	0.072266	4.07	23.5312	33.15472	0.11816	0.023438	0.11182	-32.361	30.294	42.7679	0.023437	0.089843	-0.14356
1.252	23.539	96.022	344.5293	-0.39697	0.48438	-0.0097656	40.396	-132.602	1006.7652	-1.4972	1.1821	-0.079004	-36.6709	-146.2295	1241.7377	-1.0391	1.2617	-0.30859	-13.373	58.67	51.4714	0.049316	0.016602	-0.066406	-52.569	104.54	293.5141	-0.36201	0.22275	0.074317	1.54	24.1103	34.8969	0.13232	0.024902	0.10596	-29.73	32.476	22.767	0.026855	0.09082	-0.14063
1.254	5.393	112.9189	314.039	-0.38135	0.46143	-0.0043945	72.413	-102.279	1018.21	-1.4738	1.1625	-0.057324	-37.191	-131.798	1248.3805	-1.043	1.2266	-0.31445	-11.382	41.5966	52.2294	0.051758	0.016602	-0.070313	-60.2159	119.586	268.68471	-0.32842	0.21495	0.075879	-6.808	24.0887	27.9846	0.13965	0.024902	0.10693	-55.74	26.463	15.998	0.029297	0.09668	-0.14355
1.256	-29.877	123.9336	320.7957	-0.35449	0.41797	0.0073242	54.245	-81.1142	1077.519	-1.5145	1.1438	-0.033887	-49.496	-110.136	1249.681	-1.0679	1.2017	-0.31787	-8.97499999999999	39.5731	45.08	0.049072	0.016846	-0.073975	-36.617	122.714	229.2912	-0.29766	0.20771	0.076465	-15.969	33.352	24.4215	0.15869	0.030762	0.099121	-52.152	33.484	25.2061	0.033691	0.098633	-0.13916
1.258	-24.187	120.07	328.373	-0.33447	0.3877	0.016845	33.183	-71.60556	1167.919	-1.5716	1.1366	0.0048828	-44.837	-84.398	1248.5319	-1.144	1.1509	-0.31885	-30.456	64.609	45.4762	0.041504	0.018555	-0.075684	-35.564	113.1779	214.3391	-0.26904	0.20166	0.077637	-8.077	26.969	48.3158	0.1687	0.034179	0.092041	-25.643	39.404	49.0516	0.039063	0.10693	-0.13818
1.26	-36.078	118.435	293.181	-0.31836	0.35596	0.023438	38.3413	-78.0954	1213.448	-1.5957	1.123	0.047852	-25.264	-85.4	1257.3511	-1.2085	1.1187	-0.31982	-48.058	60.952	49.5378	0.025879	0.021973	-0.079102	-23.345	91.3667	206.6837	-0.24492	0.19062	0.077344	-19.196	38.603	52.6169	0.18018	0.039551	0.088867	-28.928	42.5182	25.90255	0.048339	0.10425	-0.13868
1.262	-24.494	117.243	254.344	-0.29346	0.31299	0.032715	6.33000000000001	-85.0749	1218.75	-1.5855	1.0937	0.073144	-20.389	-99.5241	1290.6016	-1.2676	1.0859	-0.32129	-48.8252	37.7445	42.114	0.019531	0.024902	-0.077637	-11.902	67.308	175.3914	-0.21875	0.18799	0.080371	-27.331	42.452	39.8247	0.18848	0.057617	0.081055	-18.814	24.0744	10.5411	0.051758	0.10107	-0.12842
1.264	-39.453	110.455	222.2223	-0.27979	0.29346	0.038574	12.192	-66.325	1183.084	-1.5676	1.0551	0.092969	21.9487	-110.508	1316.562	-1.3394	1.064	-0.31592	-33.336	21.8572	42.9472	0.0083008	0.030273	-0.075684	-5.34699999999999	61.946	164.568	-0.19141	0.18252	0.081543	-34.937	45.521	38.1232	0.18994	0.057617	0.084961	-39.938	21.287	8.614	0.055176	0.10693	-0.13477
1.266	-49.039	98.122	207.875	-0.25	0.25488	0.052734	-76.187	-55.288	1153.286	-1.5484	1.0258	0.088672	24.492	-99.173	1348.349	-1.3633	1.0664	-0.31592	-54.287566	27.208	32.29485	0.0073242	0.035889	-0.078857	-12.537	64.175	162.8042	-0.16084	0.17832	0.078711	-29.959	40.961	35.6943	0.1875	0.074707	0.08252	-52.856	27.9178	25.153	0.0625	0.10547	-0.13281
1.268	-52.899	93.156	186.914	-0.22754	0.22559	0.057861	-99.78	-55.522	1146.38	-1.5252	0.99593	0.075098	57.1741	-73.1191	1362.2854	-1.3984	1.0762	-0.31934	-27.677	28.7308	36.6971	0.00048828	0.038574	-0.078125	-14.321	79.8119	155.9876	-0.12744	0.17627	0.085449	-39.046	23.9917	14.054	0.18579	0.08081	0.08252	-53.904	44.3361	27.7518	0.0625	0.11279	-0.13281
1.27	-42.7068	81.201	136.427	-0.19971	0.19287	0.058594	-127.8624	-74.724	1164.053	-1.5059	0.96875	0.05957	52.4579	-56.128	1378.288	-1.4082	1.0781	-0.33057	-22.498	49.2257	47.2828	0.00097656	0.042969	-0.078613	-22.989	82.0892	151.3346	-0.10029	0.17568	0.086231	-36.824	19.8673	17.3	0.1792	0.091797	0.082031	-12.17	36.5465	47.912	0.066894	0.11377	-0.13111
1.272	-51.1433	50.111	134.423	-0.16357	0.14746	0.053711	-112.2052	-116.879	1205.5806	-1.4994	0.93545	0.037109	53.8985	-56.548	1358.8021	-1.4258	1.0752	-0.34375	-31.968	47.7851	42.566	0.0048828	0.035156	-0.079102	-40.36	80.351	154.669	-0.070898	0.17227	0.085449	-30.523	17.2612	36.26463	0.16211	0.10156	0.089355	-25.401	27.2876	31.0441	0.073242	0.11768	-0.13232
1.274	-43.055	45.03	130.93	-0.14258	0.13232	0.060547	-85.817	-157.5466	1214.4666	-1.4933	0.89307	0.0028322	31.52996	-75.401	1361.868	-1.5059	1.082	-0.36719	-48.974	53.1178	10.723	0.012207	0.033203	-0.084473	-36.366	67.352	151.1495	-0.036133	0.16328	0.083105	-17.864	20.7639	27.8897	0.15479	0.11084	0.093262	-47.463	21.3934	29.88549	0.07373	0.11621	-0.12842
1.276	-50.084	43.7075	136.734	-0.10791	0.098145	0.055664	-82.172	-149.173	1224.215	-1.4983	0.85049	-0.024121	-0.560599999999999	-80.3502	1366.75	-1.562	1.0845	-0.37061	-57.379	26.0723	14.7228	0.017823	0.029785	-0.083252	-38.056	72.043	143.4819	-0.0125	0.15058	0.081055	-45.906	25.7052	28.2341	0.13086	0.12549	0.10156	-43.834	32.31	20.7331	0.07666	0.11768	-0.13086
1.278	-65.915	74.11	108.35394	-0.08667	0.076172	0.057617	-90.0972	-115.82	1223.13	-1.5128	0.80908	-0.045313	-4.0219	-92.2127	1397.458	-1.7124	1.1235	-0.37012	-48.413	13.856	30.99	0.023926	0.023926	-0.08252	-26.587	79.742	115.886716	0.0097656	0.14063	0.081543	-43.995	32.6181	26.8794	0.11231	0.13989	0.11059	-43.622	41.42	28.00631	0.078125	0.12793	-0.12744
1.28	-68.2141	89.91	101.8674	-0.072266	0.053711	0.060059	-96.989	-79.758	1239.584	-1.5288	0.7915	-0.066895	14.755	-104.393	1397.415	-1.8887	1.1895	-0.36914	-37.926	17.3705	37.34707	0.039063	0.023438	-0.08252	-52.912	83.404	105.7063	0.026757	0.12598	0.08252	-49.696	35.2274	42.668	0.098145	0.15039	0.12109	-11.061	45.666	39.0307	0.082519	0.1289	-0.12671
1.282	-61.854	93.753	95.249	-0.041992	0.032227	0.061035	-61.109	-56.074	1298.3123	-1.549	0.78593	-0.077441	2.776	-81.6168	1388.6248	-1.9663	1.2329	-0.36865	-38.18	28.483	41.56221	0.046387	0.020508	-0.085449	-33.68	70.206	77.1234	0.042969	0.11387	0.08291	-33.148	39.614	45.9736	0.075684	0.16797	0.13135	-21.287	30.5234	29.3571	0.088379	0.1333	-0.12451
1.284	-61.7904	72.895	65.355	-0.032227	0.021973	0.061523	-101.7397	-68.717	1326.791	-1.5793	0.8	-0.09375	0.850000000000001	-70.014	1367.6376	-2.0854	1.3364	-0.38232	-51.6304	31.305	13.191	0.061523	0.01709	-0.087891	-24.873	54.8012	77.34216	0.05664	0.10605	0.087207	-44.2702	34.0159	31.36264	0.064453	0.17188	0.13623	-17.681	25.1858	15.8518	0.099121	0.1333	-0.12939
1.286	-41.118	46.5912	68.129	-0.0078125	-0.0024414	0.06543	-113.566	-99.555	1340.511	-1.623	0.81875	-0.10625	31.3618	-53.719	1345.177	-2.146	1.4224	-0.39746	-35.682	34.636	21.1463	0.078613	0.016357	-0.084717	-37.488	58.774	44.9321	0.066308	0.096777	0.090918	-50.872	21.6617	39.8924	0.043457	0.19287	0.15234	-17.548	16.776	19.006	0.099121	0.14063	-0.12842
1.288	-45.541	29.6464	68.0734	0.010498	-0.012695	0.067383	-117.227	-118.6482	1354.579	-1.6943	0.83896	-0.10947	30.826	-41.885	1354.1142	-2.1973	1.5107	-0.40918	-18.54	39.6508	10.29	0.096191	0.012695	-0.087891	-32.348	52.493	55.478	0.074707	0.089355	0.09668	-39.2356	11.1035	29.2193	0.033203	0.2041	0.1582	-13.556	38.206	38.172	0.10352	0.14014	-0.12402
1.29	-21.586	38.8405	66.2599	0.027344	-0.030273	0.071777	-117.7654	-88.96	1351.917	-1.7866	0.86572	-0.10791	20.291	-23.707	1352.1352	-2.252	1.6309	-0.42188	-24.598	32.94	24.32773	0.11523	-0.0019531	-0.087402	-30.783	51.156	63.9477	0.087402	0.08252	0.099123	-42.788	4.2077	29.055	0.023438	0.21533	0.16504	-15.134	52.6704	42.2265	0.10278	0.13868	-0.12744
1.292	-33.078	47.2806	27.721	0.053223	-0.039063	0.06543	-105.5729	-50.435	1339.0301	-1.8832	0.90195	-0.10429	30.2789	-35.0473	1358.7738	-2.2749	1.6724	-0.41943	-15.303	24.3328	34.7578	0.12256	-0.0019531	-0.086914	-53.217	54.7266	61.1213	0.10224	0.082324	0.10635	-42.082	23.583	12.3553	0.0087891	0.22656	0.17578	-16.749	57.3781	34.471	0.10156	0.13818	-0.12695
1.294	-14.564	52.9715	8.292	0.060547	-0.04541	0.072754	-73.219	-33.956	1290.821	-1.9773	0.95078	-0.094336	17.1035	-42.358	1332.2064	-2.3101	1.7397	-0.41406	8.496	25.8055	38.3603	0.13574	-0.0078125	-0.091797	-57.874	54.767	39.5762	0.11123	0.07295	0.10752	-16.409	26.92849	17.791	0.0024414	0.23145	0.18164	-7.176	31.0215	43.6412	0.098633	0.13916	-0.12598
1.296	-8.42899999999999	36.6901	16.024	0.087402	-0.052734	0.066895	-67.255	-57.709	1267.956	-2.057	1.0102	-0.079883	2.7386	-30.0031	1310.10165	-2.3125	1.7598	-0.40625	-3.294	28.726	38.735	0.13989	-0.010254	-0.091797	-70.935	35.5199	47.0369	0.12265	0.070703	0.10703	-10.392	30.812	34.6966	-0.013184	0.23926	0.18652	-14.798	20.7998	29.6721	0.095703	0.13965	-0.125
1.298	3.781	25.9143	28.8436	0.10156	-0.061767	0.059815	-88.915	-94.3198	1276.383	-2.1271	1.0697	-0.07168	-23.218	-9.296	1303.9943	-2.2886	1.7661	-0.40381	-17.291	37.611	34.5833	0.13916	-0.0087891	-0.090332	-58.788	29.536	52.8691	0.12891	0.057129	0.11621	-8.651	30.5621	25.909	-0.026611	0.24536	0.19311	-19.61	24.1026	25.6472	0.092773	0.146	-0.12744
1.3	-0.659999999999997	17.0736	38.8499	0.11182	-0.060059	0.059082	-39.561	-109.434	1322.4839	-2.1797	1.125	-0.063965	-19.141	2.765	1289.5966	-2.2085	1.7505	-0.40137	5.91699999999999	25.2477	41.3801	0.1333	-0.00048828	-0.087402	-68.5458	48.338	49.1989	0.13144	0.043652	0.10742	-19.665	39.3868	32.7418	-0.036133	0.25195	0.19971	-40.847	34.0547	34.9937	0.092529	0.14673	-0.125
1.302	-19.998	18.1878	46.6478	0.1123	-0.067383	0.058594	-17.467	-95.794	1344.916	-2.2326	1.1705	-0.071289	-24.2984	1.732	1290.9868	-2.1406	1.7305	-0.40137	-2.708	26.2086	23.8346	0.125	0.0014648	-0.093262	-53.8526	50.238	39.4875	0.13829	0.03125	0.11104	-15.368	32.4101	34.689	-0.056152	0.25732	0.20557	-34.828	35.3704	52.183	0.09082	0.14941	-0.12549
1.304	-8.192	22.5684	39.5899	0.10986	-0.063965	0.054199	-3.646	-41.429	1343.5	-2.2879	1.2106	-0.080957	2.4149	-4.513	1269.924	-1.9824	1.6777	-0.40088	-11.06	34.1267	10.0439	0.11865	0.013184	-0.085449	-48.284	48.3635	31.5281	0.13633	0.022265	0.11768	-8.174	15.3015	42.727	-0.061035	0.26416	0.2168	-27.962	34.8109	31.1023	0.095703	0.15625	-0.12695
1.306	-29.113	30.669	27.873	0.1001	-0.060059	0.053711	-3.599	-10.9786	1332.607	-2.3692	1.2527	-0.086426	5.9884	-15.241	1274.279	-1.8525	1.625	-0.40332	-35.527	30.6478	12.022	0.1062	0.024658	-0.087158	-30.451	41.47976	48.4612	0.12842	0.014551	0.11123	-26.696	19.5695	34.3493	-0.075684	0.26221	0.22363	-33.6535	26.8222	3.373	0.10156	0.16162	-0.13086
1.308	-22.332	35.569	15.4587	0.08667	-0.061524	0.055908	-46.498	-10.3808	1298.887	-2.4637	1.2941	-0.089063	4.815	-23.732	1277.8036	-1.7344	1.5703	-0.4043	-16.311	24.543	34.9872	0.097656	0.036621	-0.085449	-33.463	42.8812	30.4174	0.12793	0.0087891	0.11523	-19.261	31.9374	19.8031	-0.085449	0.26831	0.22924	-32.178	11.037	22.5431	0.10498	0.16846	-0.12988
1.31	-12.983	43.426	22.9957	0.076172	-0.0625	0.053711	-49.393	-15.13075	1303.503	-2.5483	1.3481	-0.089355	29.98631	-34.228	1252.0548	-1.6152	1.5059	-0.396	-6.365	24.347	37.9123	0.094727	0.054199	-0.083984	-22.428	26.997	27.432	0.12539	0.0030274	0.1167	-23.038	27.161	25.0293	-0.093262	0.26807	0.23242	-34.394	25.3938	52.6244	0.10742	0.16748	-0.1377
1.312	0.945	36.618	32.5402	0.060547	-0.052734	0.060547	-71.355	-14.016	1339.998	-2.6052	1.4011	-0.090723	20.371	-14.0195	1238.0679	-1.5718	1.4731	-0.38965	-28.301	35.423	32.0095	0.091797	0.058594	-0.081543	-12.702	27.3458	14.594	0.12236	-0.0026367	0.11348	-11.035	29.767	25.1152	-0.095703	0.27539	0.24609	-10.923	44.84148	60.7558	0.10498	0.17285	-0.14209
1.314	-13.273	37.8449	30.0198	0.059082	-0.050293	0.063965	-30.963	-5.72799999999999	1346.161	-2.6148	1.45	-0.093555	22.9226	8.412	1218.88555	-1.5215	1.4219	-0.37354	-10.835	22.125	26.3453	0.097168	0.071289	-0.079102	-23.28	34.2548	21.0759	0.1208	-0.0057618	0.11074	-21.885	23.8331	25.6331	-0.10205	0.27979	0.25293	-60.0813	34.1987	54.5822	0.099609	0.18408	-0.15039
1.316	-18.319	30.4836	32.4279	0.055664	-0.044922	0.067383	-61.442	-5.461	1331.63	-2.566	1.4801	-0.097071	44.515	21.103	1224.4157	-1.5054	1.3926	-0.36133	-28.333	21.5587	16.7296	0.10181	0.078369	-0.081543	-36.493	42.109	26.0051	0.11777	-0.0072266	0.10976	-15.678	35.6457	39.7453	-0.10059	0.28955	0.26172	-38.465	-4.6576	78.4487	0.1001	0.19189	-0.15186
1.318	-25.89	24.4233	22.7357	0.055908	-0.040771	0.066895	-84.7835	-13.114	1294.7721	-2.471	1.4802	-0.1041	48.241	32.9921	1189.5202	-1.4902	1.3652	-0.34766	-30.928	38.3573	24.7273	0.104	0.087891	-0.081543	-34.267	38.309	33.179874	0.11426	-0.010254	0.10645	-24.934	16.3387	89.7704	-0.09375	0.29443	0.26123	-49.688	-29.4637	98.9136	0.066895	0.19336	-0.15137
1.32	-20.189	24.1037	14.1905	0.064941	-0.037109	0.074219	-104.02	-23.2209	1256.145	-2.3457	1.4531	-0.10938	35.091	42.71944	1174.499	-1.4902	1.3359	-0.3252	-67.7516	56.388	34.83765	0.10693	0.098633	-0.084473	-25.282	35.739	49.038	0.11846	-0.0066406	0.10244	-26.176	-21.10739	122.384	-0.09668	0.29688	0.24561	-37.094	-10.5481	118.2981	0.020508	0.198	-0.15088
1.322	-28.356	25.7257	11.5793	0.078613	-0.031738	0.068359	-105.222	-18.80988	1235.167	-2.2087	1.3987	-0.11504	35.6835	63.065	1160.939	-1.4863	1.3281	-0.31885	-37.254	33.3077	36.2049	0.10937	0.10547	-0.084473	-23.062	41.631	33.26202	0.12109	0.0019531	0.1002	-49.418	-24.6094	165.544	-0.104	0.30029	0.19629	-26.94	14.3856	153.288	-0.045898	0.19727	-0.1543
1.324	-54.276	27.06204	0.5595	0.087402	-0.036133	0.077148	-84.583	-5.704	1236.7719	-2.0785	1.3305	-0.121	35.0778	75.939	1132.0071	-1.4819	1.2954	-0.29248	-23.007	20.5623	36.7698	0.11865	0.10693	-0.085449	-14.027	38.102	34.9648	0.12109	0.0078125	0.098243	-40.988	14.5364	219.415	-0.11914	0.3042	0.16064	-27.527	30.8423	183.832	-0.1582	0.20508	-0.15576
1.326	-64.2856	30.867	18.7035	0.097656	-0.02832	0.080566	-106.148	14.175	1244.53	-1.9676	1.2586	-0.12568	21.227	83.85	1096.642	-1.4653	1.2886	-0.28101	-40.727	19.3486	19.21016	0.11963	0.11816	-0.091309	-27.534	44.026	33.3464	0.12129	0.018262	0.099513	-82.062	6.9015	319.7311	-0.18408	0.30322	0.089355	-25.9701	25.7144	228.618	-0.21484	0.21387	-0.15283
1.328	-57.4697	38.869	36.69336	0.1123	-0.025635	0.078857	-68.665	29.03	1258.4699	-1.8946	1.1823	-0.11162	34.0726	89.328	1072.862	-1.4512	1.2656	-0.26855	-57.6486	19.3416	20.0292	0.11914	0.12158	-0.094238	-4.631	32.6732	26.2328	0.12842	0.02832	0.099609	-115.969	-56.253	390.462	-0.2749	0.30005	0.034912	-22.3657	26.6466	292.311	-0.34033	0.23096	-0.15381
1.33	-70.5196	42.411	31.9037	0.12305	-0.020508	0.083496	-113.0264	47.1028	1253.837	-1.8413	1.1255	-0.15332	32.608	64.077	1062.1211	-1.4058	1.229	-0.25342	-58.7399	26.8676	34.37103	0.12451	0.13379	-0.099121	-0.942999999999998	30.2774	30.8393	0.12813	0.039355	0.099218	-158.09	-111.111	423.111	-0.38916	0.30127	-0.018066	25.8482	44.015	418.069	-0.45507	0.24243	-0.1582
1.332	-58.608	28.9256	37.7193	0.14063	-0.01416	0.09082	-131.1235	82.4483	1243.3382	-1.7789	1.0949	-0.13144	45.362	71.0262	1048.7603	-1.3828	1.209	-0.25	-46.705	25.7807	43.0171	0.12476	0.14746	-0.099121	-10.884	13.734	18.913	0.13125	0.051074	0.098242	-115.725	-98.571	479.6404	-0.57959	0.31689	-0.071777	26.072	75.161	578.9765	-0.59326	0.24219	-0.16357
1.334	-40.332	27.12787	27.6439	0.14648	-0.014648	0.091309	-129.558	93.562	1232.939	-1.7246	1.0879	-0.11553	13.1014	78.131	1042.368	-1.3379	1.166	-0.23779	-36.217	35.916	25.1392	0.12451	0.1582	-0.097168	-11.357	6.582	37.666	0.13438	0.06084	0.096289	-100.32	-52.003	568.074	-0.68945	0.33105	-0.10059	11.043	79.95785	722.8469	-0.86279	0.21289	-0.1709
1.336	-33.968	32.5235	22.2813	0.1626	-0.0078125	0.097168	-106.032	105.72	1214.599	-1.6992	1.0672	-0.12178	-12.118	92.5459	1011.6426	-1.2959	1.1343	-0.22681	-29.223	18.5148	32.3881	0.12451	0.17627	-0.10498	-14.583	23.79625	39.8139	0.13554	0.073145	0.096387	-128.333	12.8887	672.069	-0.93701	0.38525	-0.13477	-19.701	54.6745	801.84	-1.0503	0.1958	-0.16943
1.338	-34.76	38.56952	4.171	0.17431	-0.0065918	0.097168	-141.3122	98.812	1180.9457	-1.6737	1.0419	-0.11123	-2.325	97.9062	968.5787	-1.2593	1.1069	-0.21924	-26.707	3.9713	17.5569	0.12256	0.18066	-0.10547	-37.214	58.785	41.5767	0.1416	0.083496	0.091797	-139.7348	63.8778	687.603	-1.1618	0.44018	-0.1521	-19.532	42.118	878.45	-1.5664	0.15039	-0.15527
1.34	-30.173	38.0444	27.8199	0.18408	-0.0053711	0.1001	-157.413	86.091	1150.263	-1.6582	1.0156	-0.10352	-2.925	99.32023	921.692	-1.2148	1.0703	-0.2168	-29.172	15.101	31.9473	0.11719	0.18945	-0.10742	-51	61.632	34.71543	0.13965	0.089258	0.088281	-111.55306	47.392	693.383	-1.4048	0.50635	-0.15967	-28.215	32.2702	956.9228	-2.0642	0.17626	-0.14014
1.342	-35.634	28.6557	47.96	0.20313	0	0.097656	-128.36	50.2796	1160.356	-1.6434	0.9875	-0.09541	-15.049	110.5006	906.9727	-1.1914	1.0527	-0.20996	-34.366	46.746	29.3636	0.11352	0.19287	-0.10816	-46.593	45.291	44.0763	0.13769	0.099218	0.090137	-75.5141	20.935	774.046	-1.7402	0.61914	-0.15869	-54.252	46.818	1006.734	-2.6016	0.25781	-0.14453
1.344	-24.706	25.4444	30.8061	0.21777	0.0085449	0.093505	-94.07	44.975	1126.85311	-1.6113	0.96055	-0.086816	-28.084	115.3502	902.7791	-1.1519	1.0142	-0.20361	-35.561	50.1907	30.9672	0.11377	0.19873	-0.10693	-44.615	22.086	43.0579	0.13457	0.1043	0.085449	-34.386	42.227	891.9967	-1.8901	0.67822	-0.16113	-46.312	56.044	980.375	-3.2617	0.48389	-0.15723
1.346	-30.548	28.2247	12.8567	0.23193	0.017578	0.10205	-77.776	48.53	1097.869	-1.5785	0.93868	-0.082519	-15.668	97.4332	886.2967	-1.1199	0.99048	-0.19922	2.538	35.7695	32.4238	0.1084	0.21436	-0.10693	-54.7994	20.2158	19.3885	0.12519	0.11153	0.085254	-17.28	77.389	975.951	-2.1484	0.80078	-0.14844	-64.825	47.782	932.224	-3.4688	0.61133	-0.17139
1.348	-43.553	28.1188	16.05209	0.23926	0.035645	0.09668	-42.363	70.848	1045.9088	-1.5375	0.91016	-0.075879	-43.0023	100.50174	851.4367	-1.0918	0.95996	-0.18066	-9.394	22.8448	33.4507	0.11768	0.21973	-0.11328	-40.96	18.5825	17.5748	0.11572	0.11914	0.085938	-7.273	121.914	1006.648	-2.2712	0.90551	-0.1123	-85.9483	31.0726	915.5904	-3.6187	1.1313	0.015137
1.35	-32.989	40.143	31.9998	0.25	0.044434	0.097656	-42.631	87.266	1019.107	-1.4941	0.875	-0.064941	-39.5383	112.68895	810.3507	-1.041	0.91406	-0.17139	-10.732	18.6165	43.7255	0.12256	0.23096	-0.104	-63.8561	20.98931	38.9266	0.10791	0.1293	0.08877	-42.229	113.787	1015.917	-2.3496	1.0273	-0.068848	-82.3914	13.023	930.5924	-3.5954	1.6467	0.072265
1.352	-24.899	53.738	39.0669	0.25439	0.057129	0.09668	-39.98	105.9829	1019.403	-1.4547	0.83867	-0.064355	-40.014	123.0854	798.5284	-1.0137	0.89453	-0.16846	-5.361	0.730399999999999	53.3126	0.13281	0.23852	-0.11474	-38.12	29.7789	37.593	0.096973	0.13809	0.093164	-63.613	85.516	996.51783	-2.3608	1.188	-0.029297	-38.84	-1.56100000000001	948.42	-3.3823	2.0239	0.039063
1.354	-17.964	42.279	30.39041	0.25293	0.074463	0.098877	-46.91	115.2981	1021.147	-1.4172	0.80879	-0.062305	-34.933	135.447	759.5625	-0.96094	0.84766	-0.14648	-17.831	-5.449	70.7597	0.14111	0.24316	-0.11621	-29.531	44.94211	21.816	0.084863	0.14981	0.096289	-36.021	28.3949	1002.353	-2.3281	1.2617	-0.017578	-17.399	-40.409	962.179	-2.6499	2.0688	-0.089844
1.356	-11.234	20.1951	27.22696	0.25244	0.087891	0.098145	-21.678	100.7297	1014.337	-1.3832	0.77715	-0.063086	-47.101	132.6666	726.874	-0.91919	0.80982	-0.1355	-20.657	-8.887	90.522	0.13428	0.26123	-0.13086	-37.123	42.2717	24.3102	0.073535	0.15957	0.096778	-27.169	-32.141	1014.7721	-2.2012	1.3535	-0.0024414	-51.534	-61.0794	965.2564	-2.1772	1.9399	-0.14014
1.358	11.813	9.83586	41.3093	0.24365	0.10449	0.097168	-28.197	104.977	989.53	-1.3498	0.75176	-0.056543	-43.941	138.7007	689.2597	-0.87695	0.77539	-0.12549	22.2697	-31.508	128.67	0.11279	0.27295	-0.1416	-42.677	40.62222	30.9528	0.06543	0.17236	0.098633	-5.099	-81.329	1045.0301	-2.0584	1.3631	-0.013428	-40.329	-51.9117	971.7368	-1.3398	1.5488	-0.22656
1.36	-15.394	33.4365	25.3559	0.24512	0.1167	0.097168	-52.204	123.81	947.2817	-1.3101	0.729	-0.052246	-38.8013	129.9418	689.72224	-0.82178	0.73682	-0.10938	27.7354	-79.2163	195.801	0.030273	0.2959	-0.1709	-43.735	39.7632	53.9322	0.060254	0.1834	0.10664	-26.2246	-103.327	1049.67976	-1.8882	1.3384	-0.015625	-64.228	-15.692	981.918	-0.92309	1.2327	-0.32251
1.362	-2.361	53.5233	28.2112	0.229	0.13525	0.096191	-80.742	134.681	904.483	-1.2695	0.70596	-0.046289	-39.3466	126.455	665.0281	-0.79639	0.71533	-0.10303	31.79	-106.6567	265.791	-0.085449	0.33032	-0.18848	-42.487	35.7572	48.8626	0.055469	0.19609	0.10879	-38.832	-108.1804	1032.0776	-1.6719	1.2832	-0.021973	-41.288	17.266	1011.4135	-0.70703	0.97461	-0.41504
1.364	-11.136	57.4305	32.5138	0.21412	0.14892	0.097168	-37.798	136.545	896.2799	-1.2235	0.69102	-0.044336	-16.461	138.383	625.964	-0.7417	0.67725	-0.084473	36.398	-113.6298	307.985	-0.23633	0.37695	-0.19824	-31.562	18.8694	31.9875	0.048827	0.22657	0.12285	-14.603	-98.797	1021.811	-1.5828	1.2552	-0.029053	-93.027	25.873	1026.1873	-0.71875	0.79688	-0.42285
1.366	-6.434	41.0657	31.88412	0.2002	0.16357	0.10059	-33.349	130.393	868.50573	-1.1731	0.67266	-0.044726	-25.794	140.7875	590.453	-0.70557	0.6499	-0.073975	31.2339	-132.58	326.1069	-0.48633	0.46338	-0.18604	-25.893	5.32114	37.5599	0.042285	0.24053	0.11934	17.91	-106.322	1042.8363	-1.5562	1.2485	-0.024414	-115.5022	-2.64099999999999	1013.624	-0.80859	0.78516	-0.39404
1.368	-7.798	16.9561	34.0788	0.16992	0.18066	0.10156	-15.953	123.3691	821.4112	-1.1165	0.65127	-0.041699	-18.647	139.6146	557.1264	-0.67139	0.61768	-0.060059	49.606	-154.59332	345.497	-0.61328	0.51123	-0.17236	-34.186	10.6848	21.0009	0.030762	0.25537	0.12793	44.382	-98.396	1075.7687	-1.6016	1.2695	-0.0053711	-126.327	-47.423	996.781	-1.0273	0.85547	-0.31445
1.37	-18.624	3.95	32.1	0.15283	0.19189	0.10156	-15.318	96.398	778.924	-1.0605	0.62695	-0.037598	-5.157	137.0072	538.4942	-0.6333	0.57471	-0.049316	53.035	-145.2832	365.176	-0.85693	0.63135	-0.13818	-23.682	18.187	25.3478	0.022853	0.26436	0.13008	27.445	-55.347	1145.354	-1.623	1.2783	0.0097656	-113.927	-92.5447	1001.043	-1.1423	0.92212	-0.24097
1.372	-36.848	17.3748	41.344	0.12402	0.2041	0.10059	-48.505	98.762	746.655	-1.0017	0.6003	-0.041894	-0.297999999999998	143.6173	518.9582	-0.61377	0.55127	-0.040527	33.4227	-94.5599	376.376	-0.99314	0.73389	-0.10889	-28.589	36.632	40.878	0.010551	0.27275	0.13877	7.005	-23.819	1207.493	-1.6245	1.2837	0.034668	-73.5203	-111.761	1046.6526	-1.2378	0.9751	-0.19287
1.374	-36.243	38.4863	31.4131	0.10376	0.21729	0.11084	-34.101	109.753	730.046	-0.93818	0.5749	-0.041992	-4.077	135.2153	514.664	-0.57568	0.51514	-0.029297	-0.715	-26.7783	408.173	-1.0718	0.81689	-0.10156	-27.886	48.684	35.4119	1.1334e-06	0.27901	0.14541	22.76	-35.01	1229.822	-1.6116	1.2595	0.039307	-37.931	-131.936	1049.4426	-1.3237	1.0122	-0.17725
1.376	-54.92	42.132	20.39	0.083496	0.22998	0.12207	-24.495	142.99777	707.3688	-0.88467	0.55029	-0.04668	-3.421	120.4818	520.854	-0.54444	0.49072	-0.019532	10.593	2.23	426.696	-1.0762	0.88086	-0.1123	-8.418	39.0169	34.985	-0.0082988	0.28457	0.15498	-0.774000000000001	-44.959	1232.048	-1.5938	1.2285	0.02832	0.186	-138.514	1069.0264	-1.3386	1.0242	-0.18384
1.378	-57.306	37.3073	9.968	0.066895	0.24707	0.13037	-32.999	135.68266	691.9079	-0.82402	0.52832	-0.046582	0.859999999999999	112.2715	475.4797	-0.51221	0.46143	-0.010742	7.457	14.021	495.963	-1.0464	0.88525	-0.12793	4.48	28.3104	22.4233	-0.012207	0.29053	0.15869	-37.172	-47.122	1199.623	-1.5664	1.1816	-0.0039063	-0.681999999999995	-155.084	1073.593	-1.3179	1.0298	-0.19531
1.38	-34.43	25.93767	24.6281	0.058594	0.25781	0.1333	-55.77	132.4241	669.9573	-0.77148	0.50488	-0.050293	-5.227	113.3073	427.9997	-0.46826	0.41699	-0.00097656	17.657	41.202	562.4128	-0.99365	0.89697	-0.17432	-18.475	11.404	39.0471	-0.01279	0.30499	0.16904	-87.003	-45.127	1174.4409	-1.5547	1.1621	-0.026855	22.135	-152.194	1119.597	-1.2671	1.0337	-0.22461
1.382	-28.209	31.2462	34.92175	0.047363	0.26807	0.14746	-59.5028	130.3349	655.3083	-0.72236	0.48564	-0.052637	-6.75700000000001	119.432	408.7214	-0.44482	0.39697	-0.0019531	38.2268	44.062	648.292	-1.0134	0.92016	-0.19897	-12.334	21.7452	32.4394	-0.014746	0.31563	0.17587	-76.233	-64.44	1171.14	-1.5352	1.125	-0.057617	18.18	-138.162	1180.983	-1.2397	1.0322	-0.23389
1.384	-54.57689	36.6924	32.9911	0.04419	0.27466	0.15234	-89.259	152.369	644.5102	-0.67696	0.46484	-0.054297	-19.589	99.4563	376.8661	-0.39795	0.35791	0.0014648	5.051	52.428335	720.266	-1.1113	0.96289	-0.21533	-17.25	31.3977	26.5212	-0.010831	0.33009	0.18059	-110.67605	-84.176	1183.143	-1.5134	1.0901	-0.071289	-2.287	-109.02811	1228.916	-1.2021	1.0176	-0.25293
1.386	-46.615	40.2587	48.7935	0.039063	0.27783	0.16162	-101.533	156.354	625.245	-0.63399	0.44922	-0.056641	1.84	101.8269	351.6408	-0.35987	0.32886	0.0075683	-15.223	83.133	758.7919	-1.3809	1.0625	-0.20605	-38.74	41.2372	36.8296	-0.0058494	0.33575	0.18555	-101.2403	-105.2905	1213.217	-1.502	1.0508	-0.087402	-12.062	-81.904	1269.582	-1.1948	0.99266	-0.25635
1.388	-35.912	39.694928	42.1495	0.035156	0.2793	0.16602	-62.595	149.166	603.636	-0.59141	0.43281	-0.058398	-3.717	103.5925	316.8437	-0.32568	0.30518	0.010254	-17.383	104.8242	787.512	-1.562	1.1235	-0.18701	-16.559	17.3724	89.3431	0.003418	0.34473	0.1875	-70.3257	-125.442	1229.955	-1.4863	0.99805	-0.1084	-43.0091	-63.516	1271.0592	-1.209	0.95215	-0.25781
1.39	-57.017	38.41163	23.8005	0.036133	0.2793	0.17383	-59.378	133.122	538.4361	-0.54639	0.41699	-0.064453	-26.563	101.0868	289.1733	-0.27881	0.2749	0.019043	-3.899	85.568	817.3	-1.957	1.2734	-0.13379	-27.976	-29.5429	132.731	0.0098542	0.35409	0.19063	-60.885	-141.64	1253.5242	-1.4897	0.9751	-0.11279	-46.6449	-60.66	1260.4729	-1.2471	0.89258	-0.25098
1.392	-43.917	20.5402	7.451	0.033691	0.28027	0.18408	-78.7093	119.301	497.194	-0.50742	0.40283	-0.066406	-8.532	91.1764	269.9427	-0.25342	0.26416	0.027832	-9.335	32.828	861.319	-2.2029	1.3958	-0.093993	-63.599	-16.718	167.809	0.017971	0.35913	0.19094	-86.0511	-123.748	1281.25	-1.5078	0.94434	-0.12158	-53.881	-48.235	1232.6263	-1.2666	0.86719	-0.24414
1.394	-27.493	16.0555	18.8133	0.033448	0.28442	0.19238	-62.629	105.5003	470.987	-0.46338	0.39014	-0.066895	-33.622	100.4432	247.593	-0.21924	0.2373	0.04248	-56.2331	-45.375	912.3265	-2.3608	1.52	-0.068359	-54.034	32.8749	225.274	0.019903	0.36621	0.17771	-97.0571	-82.866	1288.153	-1.5447	0.93628	-0.11792	-29.382	-31.912	1240.778	-1.3066	0.81836	-0.25195
1.396	-40.969	17.4658	41.29226	0.030762	0.28662	0.20752	-54.4468	96.168	468.792	-0.42236	0.3749	-0.074316	-31.824	109.5573	217.4122	-0.1836	0.21704	0.052979	-89.355	-97.981	941.305	-2.3472	1.6665	-0.067383	-81.906	28.9944	316.744	0.013927	0.37352	0.13463	-95.333	-56.7164	1321.48	-1.5972	0.93799	-0.10889	7.105	-38.929	1264.1944	-1.3452	0.79004	-0.2583
1.398	-55.1872	30.902	60.88865	0.021973	0.2832	0.22314	-36.771	104.175	439.976	-0.38496	0.3584	-0.075879	-43.807	105.8989	210.1538	-0.14258	0.18701	0.058105	-107.796	-135.016	941.123	-2.2559	1.7188	-0.088379	-148.254	-55.8666	433.48	-0.0087891	0.3833	0.078613	-92.529	-56.0212	1345.416	-1.7129	0.94727	-0.10205	17.299	-47.221	1265.518	-1.3999	0.77148	-0.26416
1.4	-39.863	2.6944	75.701	0.019043	0.2876	0.22852	-25.844	104.654	409.0141	-0.35156	0.34863	-0.075684	-31.285	101.471	199.3687	-0.084473	0.15332	0.067383	-79.209	-132.205	943.2454	-1.9253	1.7524	-0.10938	-176.673	-117.677	517.03	-0.070724	0.38585	0.032003	-105.0783	-63.9065	1373.529	-1.7891	0.95508	-0.094727	31.3341	-61.9706	1253.769	-1.5059	0.73633	-0.27393
1.402	-42.812	-31.3124	119.856	0.019531	0.29199	0.23438	0.462000000000003	108.8509	384.692	-0.31885	0.33389	-0.088281	-47.927	90.091	168.929	-0.049805	0.12964	0.066406	-47.318	-133.552	954.5616	-1.6413	1.7073	-0.14307	-99.353	-123.1631	584.511	-0.18507	0.37324	-0.02711	-134.892	-75.1627	1360.788	-1.9526	0.98682	-0.07959	13.621	-65.956	1283.624	-1.5835	0.72803	-0.27295
1.404	-16.252	-25.1156	193.097	0.025634	0.28613	0.24218	-31.781	117.302	373.5869	-0.2876	0.3208	-0.090528	-50.633	82.1876	137.1267	-0.0083008	0.10938	0.066895	-40.002	-119.476	988.1397	-1.3726	1.6216	-0.1665	-102.305	-91.052	677.834	-0.34811	0.35879	-0.093235	-133.4809	-64.9772	1317.559	-2.0693	1.0146	-0.073486	48.152	-72.011	1311.1025	-1.748	0.73633	-0.27295
1.406	-41.99	-8.7561	270.514	0.041016	0.28418	0.23975	-34.064	142.946	379.5413	-0.25869	0.30596	-0.089356	-54.741	67.3931	120.1567	0.038086	0.078125	0.074219	-34.969	-120.316	1051.396	-1.0918	1.4668	-0.19873	-156.44909	-16.592	775.662	-0.54661	0.35503	-0.15469	-112.9685	-49.571	1294.742	-2.1719	1.0508	-0.064453	-20.224	-70.201	1327.212	-1.8815	0.77124	-0.2876
1.408	-73.146	-38.6798	332.221	0.060547	0.27539	0.21338	-38.197	138.881	352.823	-0.23105	0.28868	-0.095801	-69.984	76.535	88.7245	0.060059	0.063477	0.074707	-50.577	-104.485	1108.575	-0.98828	1.3887	-0.21484	-163.108	54.881	805.6219	-0.77588	0.3667	-0.18701	-104.5768	-34.027	1283.918	-2.2715	1.0879	-0.057617	-47.2095	-45.6525	1309.852	-2.0015	0.8208	-0.30225
1.41	-102.09	-87.646	323.102	0.061035	0.27734	0.1875	-32.424	113.838	332.802	-0.20508	0.27832	-0.098633	-53.559	72.203	74.4116	0.10449	0.03418	0.075684	-25.955	-81.833	1151.228	-0.85693	1.2603	-0.23096	-125.012	63.2426	820.9	-1.0416	0.41373	-0.20739	-97.043	-46.115	1311.398	-2.3062	1.1079	-0.057617	-73.737	-63.5609	1315.319	-2.127	0.91602	-0.33105
1.412	-73.511	-129.401	327.8837	0.031738	0.29395	0.10742	-39.8459	101.095	310.0901	-0.1749	0.25732	-0.098537	-52.784	51.1148	63.4115	0.1289	0.012939	0.078613	-41.4593	-53.284	1186.806	-0.81201	1.2065	-0.23999	-63.477	38.121	887.27	-1.3355	0.49419	-0.22673	-74.556	-68.748	1300.519	-2.3589	1.1392	-0.068848	-71.6899	-75.08	1305.795	-2.1875	0.95898	-0.34521
1.414	-53.367	-122.553	363.904	-0.036621	0.33203	0.047119	-19.538	95.505	278.9473	-0.14931	0.24033	-0.1002	-36.681	33.343	59.6665	0.15137	-0.0073242	0.080566	-41.028	-37.831	1176.6216	-0.80127	1.1763	-0.2417	-15.9768	17.452	981.387	-1.6367	0.6033	-0.23403	-49.757	-88.966	1311.267	-2.4014	1.1548	-0.085693	-76.885	-70.115	1304.691	-2.2983	1.0386	-0.36328
1.416	-66.351	-90.794	434.534	-0.15137	0.38086	-0.0014648	-26.085	85.7224	245.415	-0.12471	0.22627	-0.10449	-35.867	40.489	60.5454	0.17432	-0.029297	0.087402	-61.414	-31.927	1163.977	-0.84131	1.1626	-0.24512	26.8332	6.07300000000001	1059.361	-1.9061	0.72461	-0.2434	-43.318	-62.264	1319.581	-2.4551	1.1719	-0.10645	-49.264	-51.258	1303.076	-2.3735	1.084	-0.37744
1.418	-108.392	-37.682	475.7847	-0.36523	0.44238	-0.022461	-19.652	98.2438	225.8622	-0.10313	0.20937	-0.10645	-21.499	43.401	47.81758	0.18262	-0.036621	0.091309	-70.489	-31.785	1137.358	-0.87451	1.1646	-0.24854	15.295869	35.517	1092.986	-2.1382	0.87549	-0.2085	-42.751	-19.1792	1341.488	-2.5601	1.2065	-0.12646	-17.957	-32.8546	1286.8106	-2.4297	1.1152	-0.38477
1.42	-105.566	-10.5561	489.006	-0.4834	0.4668	-0.0097656	-1.023	94.2314	199.3537	-0.085449	0.19678	-0.10791	-47.401	48.0033	53.1903	0.20313	-0.051758	0.09375	-59.4476	-48.716	1139.062	-0.98193	1.1587	-0.24951	3.78	72.354	1090.095	-2.3334	1.0225	-0.17672	-49.788	3.20202	1348.544	-2.6113	1.2246	-0.13721	-37.727	-32.782	1264.793	-2.457	1.1445	-0.38672
1.422	-103.594	-15.486	528.269	-0.71289	0.53613	0.034668	-18.759	90.8293	164.824	-0.070996	0.17998	-0.10742	-48.43	48.3569	41.376	0.21728	-0.060303	0.098389	-48.4799	-61.281	1145.084	-1.0737	1.1675	-0.24487	-13.869	70.161	1064.892	-2.4596	1.1416	-0.14342	-62.093	6.4645	1331.2817	-2.7085	1.2681	-0.1416	-5.961	-21.2109	1242.935	-2.4512	1.1602	-0.38965
1.424	-79.828	-9.883	622.293	-0.85229	0.5935	0.063964	-18.244	66.3403	167.15585	-0.057422	0.16494	-0.10713	-33.592	38.684	40.0034	0.22705	-0.073242	0.10791	1.9031	-84.4399	1178.6975	-1.1558	1.1743	-0.23291	17.956	71.708	1065.32	-2.5	1.2502	-0.11747	-76.215	-6.332	1317.2125	-2.7497	1.3059	-0.14112	-6.268	-17.9802	1242.831	-2.3945	1.1836	-0.38867
1.426	-52.675	34.517	727.4912	-0.94873	0.65283	0.085449	-18.331	73.8856	164.871	-0.046484	0.15401	-0.10518	-26.961	32.9878	22.5705	0.23584	-0.083008	0.09375	18.25	-99.048	1206.153	-1.2295	1.1719	-0.23145	51.2804	18.452	1084.07	-2.4533	1.3266	-0.10189	-87.163	-17.513	1319.939	-2.75	1.3418	-0.13574	23.128	-6.403	1255.236	-2.326	1.1955	-0.38111
1.428	-46.149	82.349	828.7106	-1.0371	0.74023	0.071777	-21.341	83.505	164.6767	-0.035645	0.14248	-0.10264	-12.23	26.975	36.4492	0.23828	-0.09082	0.093262	46.87169	-95.568	1244.292	-1.2456	1.1704	-0.2334	45.7906	-41.924	1084.282	-2.3203	1.3457	-0.095703	-64.415	-26.269	1323.829	-2.6582	1.3594	-0.12158	3.649	5.472	1251.741	-2.2397	1.1948	-0.37646
1.43	-66.683	115.946	888.8613	-1.0742	0.78711	0.052734	-22.046	100.881	152.2354	-0.025391	0.13574	-0.10059	-23.673	36.586	42.047	0.22754	-0.09375	0.090332	46.533	-106.321	1288.492	-1.2456	1.1606	-0.24121	16.585	-85.75	1102.7863	-2.1247	1.3217	-0.08851	-71.885	-17.836	1304.7436	-2.5859	1.3574	-0.11719	-46.1148	21.540189	1231.141	-2.1152	1.1738	-0.36719
1.432	-80.561	103.805	948.56546	-1.1602	0.87988	-0.0024414	-45.302	84.043	134.1246	-0.014258	0.12871	-0.093066	-17.235	34.7842	27.1842	0.2129	-0.088135	0.090088	57.4345	-92.164	1316.568	-1.2293	1.1453	-0.24487	-17.736	-102.433	1100.1864	-1.9276	1.288	-0.064383	-85.368	-1.886	1274.612	-2.4043	1.3164	-0.12695	-47.6731	27.7595	1235.482	-2.0527	1.1582	-0.36133
1.434	-70.9884	75.154	1018.982	-1.2573	0.94873	-0.046142	-59.773	67.75	121.5116	-0.0030274	0.11885	-0.093653	-20.821	33.64338	4.8616	0.19141	-0.083008	0.089844	35.6743	-77.5254	1343.575	-1.2095	1.1294	-0.25146	2.93	-97.4202	1084.658	-1.7741	1.2496	-0.037366	-95.88	-5.298394	1254.987	-2.2683	1.2659	-0.13086	-33.096	27.1601	1231.0987	-1.9443	1.1191	-0.35059
1.436	-62.956	16.825	1085.3718	-1.3975	1.0244	-0.085449	-47.666	67.3181	102.04688	0.0047852	0.1126	-0.093261	-23.327	24.65459	4.6039	0.16357	-0.071777	0.098145	-5.7109	-66.189	1351.513	-1.2012	1.0928	-0.26172	54.195	-108.821	1062.6627	-1.7056	1.2118	-0.01265	-76.528	-1.3079	1247.63	-2.1479	1.2075	-0.13965	-8.952	20.5685	1214.5417	-1.877	1.0811	-0.33643
1.438	-87.90691	-45.229	1113.6535	-1.6558	1.1392	-0.1167	-47.823	64.95197	85.96201	0.012695	0.10322	-0.093164	5.386	14.59557	15.8737	0.14111	-0.063477	0.094727	6.49328	-64.269	1358.773	-1.2104	1.0767	-0.26904	90.6501	-113.97	1071.9243	-1.7065	1.1812	0.010742	-90.746	4.811	1263.1807	-2.019	1.1431	-0.14404	-11.675	14.409	1210.58195	-1.8179	1.0532	-0.32227
1.44	-103.585	-100.5752	1136.727	-1.8066	1.1992	-0.11328	-45.616	52.833	64.4986	0.022461	0.097168	-0.09375	-3.892	19.8725	16.291	0.10742	-0.049805	0.10791	18.9558	-70.932	1361.371	-1.2632	1.0649	-0.30029	92.8264	-68.783	1100.447	-1.7483	1.1457	0.046665	-86.169	32.145	1258.881	-1.9688	1.1123	-0.14014	8.555	13.0252	1190.7591	-1.769	1.0161	-0.31104
1.442	-113.336	-119.4395	1133.7832	-2.1191	1.332	-0.082031	-43.986	44.4568	68.1875	0.035547	0.086719	-0.095019	4.408	30.736	23.9831	0.086426	-0.031251	0.10962	27.8389	-61.095	1359.187	-1.3464	1.0862	-0.31495	66.564	-51.9725	1160.349	-1.772	1.1236	0.078628	-93.153	58.6687	1255.817	-1.8887	1.0625	-0.13428	10.811	6.81454	1179.572	-1.752	0.99805	-0.30078
1.444	-62.3885	-112.4622	1118.794	-2.3171	1.4358	-0.043946	-33.57	37.0874	35.7515	0.045703	0.086328	-0.092578	-31.293	28.90497	33.5679	0.070801	-0.015137	0.11719	20.6246	-66.3546	1318.5517	-1.4565	1.1235	-0.32764	60.438	-48.8639	1220.351	-1.7458	1.1035	0.10388	-130.5821	87.16	1239.8962	-1.8501	1.0391	-0.12232	11.968	6.424	1163.7621	-1.7246	0.9707	-0.28809
1.446	-10.038	-119.262	1118.566	-2.4531	1.5391	0.003418	-38.35	36.7046	23.054	0.055469	0.080859	-0.09375	-5.985	33.3636	35.4053	0.065918	-0.00097656	0.11621	26.4791	-61.745	1299.918	-1.625	1.1973	-0.33789	32.233	-77.45433	1211.098	-1.6958	1.0707	0.11782	-134.049	100.698	1219.5979	-1.8145	1.0137	-0.11914	45.9004	10.507	1154.275	-1.7139	0.9502	-0.27954
1.448	16.158	-143.675	1129.9045	-2.4609	1.666	0.053223	-20.399	30.946	40.7581	0.063867	0.072559	-0.09707	-36.733	39.6746	22.0081	0.064453	0.0078125	0.11865	29.0023	-57.4318	1295.584	-1.709	1.25	-0.3418	21.913	-74.323	1179.236	-1.6406	1.0332	0.11377	-122.8238	95.599	1204.4777	-1.7793	0.98047	-0.10449	45.532	10.284	1155.416	-1.6992	0.92773	-0.27148
1.45	27.595	-156.021	1200.748	-2.416	1.7188	0.068848	-37.302	40.3275	48.5887	0.074219	0.064941	-0.1001	-42.438	32.7006	32.6365	0.068848	0.01709	0.12842	27.014	-37.5527	1317.393	-1.855	1.3579	-0.35547	-41.255	-79.05	1146.0537	-1.5914	1.0041	0.094175	-121.5037	86.1145	1179.31154	-1.7598	0.96191	-0.098633	46.8304	10.287	1136.291	-1.6831	0.90674	-0.26904
1.452	10.199	-144.903	1255.829	-2.1992	1.791	0.078613	-27.724	39.5051	51.0976	0.085449	0.057617	-0.099509	-31.688	27.1948	29.8658	0.078369	0.021729	0.12964	81.919	-26.985	1327.332	-1.9365	1.4366	-0.36646	-75.523	-67.022	1147.67	-1.5483	0.96977	0.075387	-132.0572	72.7543	1169.09639	-1.7222	0.92627	-0.086426	2.828	32.746	1104.8617	-1.6719	0.89258	-0.27051
1.454	13.99	-102.932	1308.33	-1.9809	1.7984	0.088868	-46.2684	36.039	44.3084	0.087207	0.049414	-0.10244	-36.359	41.978	27.02222	0.09082	0.024414	0.13037	68.664	-19.8467	1325.1468	-1.9917	1.5122	-0.37939	-130.655	-90.907	1162.93	-1.5151	0.93269	0.046083	-117.3188	83.8392	1145.8702	-1.6863	0.89282	-0.074707	-13.197	62.559	1098.2661	-1.6367	0.875	-0.26416
1.456	17.699	-62.0146	1333.036	-1.7793	1.7656	0.088379	-44.898	38.512	45.0837	0.089942	0.041601	-0.10323	-38.201	42.356	3.931	0.1123	0.037598	0.125	59.307	-8.5168	1322.8913	-2.0308	1.5923	-0.39941	-129.969	-99.766	1194.557	-1.4991	0.88987	0.019183	-105.9582	73.5925	1149.7307	-1.6484	0.85645	-0.063477	-15.6	87.327	1077.8154	-1.6082	0.85376	-0.2666
1.458	42.234	-45.353	1331.994	-1.5723	1.6875	0.087891	-41.914	44.258	41.7348	0.094922	0.02832	-0.10781	-57.4854	34.5671	5.682	0.12549	0.041992	0.12744	-22.99662	5.8809	1340.8574	-2.0445	1.6348	-0.41138	-82.689	-132.0892	1199.36	-1.4888	0.84814	-0.0097656	-79.96	77.38342	1120.2162	-1.5859	0.8125	-0.066406	-13.846	88.502	1060.535	-1.5762	0.83398	-0.2666
1.46	24.767	-52.415	1303.8027	-1.4678	1.6143	0.077881	-32.263	39.0949	33.0248	0.09668	0.018066	-0.11182	-33.937	31.80199	22.7402	0.14795	0.05957	0.12646	-27.4206	-0.093	1353.693	-2.0483	1.6685	-0.41748	-90.445	-150.64	1199.3179	-1.4818	0.80657	-0.029579	-71.05	70.5505	1087.70217	-1.5542	0.7915	-0.064453	-43.7965	91.519	1027.0602	-1.5327	0.79541	-0.26709
1.462	-18.139	-57.207	1295.764	-1.3921	1.5474	0.066406	-43.688	33.6608	27.81958	0.10068	0.015137	-0.11572	-55.789	27.2406	14.348	0.15893	0.063232	0.1228	-7.0604	-11.269	1360.572	-2.0405	1.6997	-0.42334	-74.8244	-132.993	1190.717	-1.48	0.77941	-0.048037	-58.391	80.969	1062.6976	-1.4917	0.74463	-0.058594	-49.5276	86.363	1013.143	-1.5151	0.78174	-0.26416
1.464	-56.2576	-66.012	1295.7839	-1.3198	1.4771	0.061523	-21.56	20.6652	19.7712	0.09502	0.0095703	-0.11787	-50.349	33.8951	27.3441	0.1748	0.066895	0.11719	25.6688	-12.18	1330.995	-2.0249	1.7036	-0.41895	-103.263	-91.247	1208.235	-1.4808	0.76925	-0.058974	-68.402	93.5707	1051.7668	-1.4539	0.71216	-0.0542	-30.0847	86.9046	1001.127	-1.48	0.75439	-0.25879
1.466	-69.3076	-91.192	1290.441	-1.2871	1.4531	0.056152	-21.398	24.682	3.217	0.094238	0.0099608	-0.12022	-52.796	38.7021	37.895	0.20264	0.068359	0.11621	39.2244	-29.661	1319.632	-1.9902	1.7061	-0.4209	-98.63	-64.264	1244.4092	-1.4863	0.77988	-0.07851	-80.493	113.5713	1044.6626	-1.4219	0.68457	-0.049805	-53.10383	88.879	959.3177	-1.4493	0.74122	-0.25195
1.468	-37.477	-120.028	1295.757	-1.2441	1.3984	0.026367	-23.801	25.6474	13.721	0.084863	0.0071289	-0.12647	-35.459	46.3008	35.23884	0.21191	0.067383	0.10547	14.9869	-30.8022	1293.216	-1.9441	1.6985	-0.41773	-102.2213	-63.165	1286.228	-1.4995	0.79932	-0.088379	-69.835	114.7505	1022.8024	-1.3857	0.65625	-0.044922	-25.6241	95.222	949.5264	-1.4194	0.72705	-0.24561
1.47	-18.6	-150.053	1291.41	-1.2286	1.3594	-0.0021974	-10.215	21.6788	30.8611	0.078613	0.0058594	-0.12695	-34.466	44.573	29.7641	0.2373	0.078125	0.10156	15.917	-28.123	1284.3858	-1.8901	1.6841	-0.41357	-114.251	-94.502	1303.718	-1.5259	0.82276	-0.094923	-46.321	115.7253	1004.154	-1.3647	0.64893	-0.040527	-21.343	89.515	931.9963	-1.3794	0.71045	-0.22607
1.472	-8.789	-159.834	1312.464	-1.2383	1.3086	-0.019043	-7.366	29.0524	33.6158	0.065136	0.0045898	-0.12783	-41.54	42.2944	17.9098	0.2539	0.094726	0.10229	24.221	-17.076	1289.8437	-1.8086	1.6504	-0.41992	-102.1509	-117.726	1297.701	-1.5683	0.84532	-0.093846	-38.012	127.364	966.536	-1.3198	0.63232	-0.039063	-13.082	89.789	910.9818	-1.3555	0.7041	-0.21924
1.474	20.126	-150.476	1343.902	-1.2905	1.2417	-0.031738	-35.009	35.038	26.7672	0.053907	0.0073242	-0.12773	-41.226	36.2966	27.08462	0.26904	0.10986	0.1084	53.065	-4.918	1276.8823	-1.7612	1.6313	-0.41064	-141.035	-118.29019	1277.8114	-1.6355	0.87501	-0.086033	-46.459	144.356	941.588	-1.2791	0.62036	-0.030762	-37.953	83.5654	887.884	-1.3105	0.6875	-0.19678
1.476	-33.924	-117.539	1378.965	-1.3394	1.2075	-0.032715	-40.991	47.756	22.2924	0.047266	0.013574	-0.12656	-38.472	27.441	30.9374	0.28662	0.12207	0.097168	67.388	-2.002	1277.1187	-1.6733	1.5903	-0.4126	-112.074	-78.171	1262.5413	-1.7067	0.91133	-0.073729	-36.123	151.075	903.3045	-1.2363	0.6084	-0.024902	-48.131	98.1092	870.2241	-1.2737	0.67408	-0.18628
1.478	-32.201	-109.329	1415.284	-1.4497	1.1499	-0.018555	-32.782	33.5575	38.6543	0.042285	0.020019	-0.12187	-35.455	30.3212	26.3662	0.29102	0.13037	0.09375	67.713	21.99	1264.7308	-1.6208	1.5569	-0.41357	-95.247	-45.667	1233.3915	-1.7749	0.96338	-0.061035	-41.788	132.962	893.2398	-1.1758	0.58594	-0.024902	-55.8835	94.659	858.9056	-1.2417	0.65479	-0.17432
1.48	-78.879	-110.8362	1461.097	-1.5339	1.1262	-0.0083007	-23.96	37.457	50.5039	0.038086	0.024414	-0.12305	-33.179	27.1778	28.0255	0.29395	0.14795	0.088867	37.76	57.622	1250.2176	-1.582	1.5293	-0.41211	-83.588	-52.749	1238.2568	-1.828	1.0196	-0.047071	-34.886	115.443	869.364	-1.1367	0.56836	-0.032227	-67.33231	103.107	841.3794	-1.1909	0.61768	-0.16357
1.482	-82.176	-115.621	1458.65	-1.6055	1.1162	-0.0043945	-20.941	39.096	37.245	0.038574	0.023731	-0.12529	-21.152	33.9579	43.2757	0.29224	0.15918	0.090332	0.7979	99.874	1249.942	-1.5508	1.5	-0.41016	-67.55	-101.935	1227.384	-1.8792	1.0767	-0.044433	-7.445	108.3958	836.5755	-1.062	0.54932	-0.02002	-66.9562	103.6968	797.828	-1.1665	0.60303	-0.1582
1.484	-126.2605	-110.19	1433.3337	-1.6655	1.1274	0.0039063	-20.377	24.2964	30.1284	0.039551	0.02461	-0.12637	-9.751	40.483	43.3285	0.28418	0.17041	0.083008	26.5618	118.817	1238.488	-1.5366	1.481	-0.40332	-66.277	-126.012	1216.93	-1.9308	1.1235	-0.058495	-12.242	111.52127	800.7605	-1.0046	0.53541	-0.015625	-70.0869	99.2026	758.603	-1.1235	0.56689	-0.13574
1.486	-143.2429	-92.634	1401.9238	-1.6895	1.1445	0.01416	-8.261	13.9535	16.934	0.036035	0.019141	-0.12403	-3.596	46.2801	20.4983	0.26465	0.18408	0.080078	27.6805	104.051	1216.7845	-1.5254	1.457	-0.39063	-24.27	-122.623	1243.10303	-1.9876	1.1694	-0.077441	-43.909	109.5255	767.818	-0.94287	0.5166	-0.014648	-38.22	105.8527	729.579	-1.0943	0.54346	-0.12622
1.488	-158.28	-98.417	1380.319	-1.7246	1.166	0.037109	-37.95	24.9714	30.9001	0.037305	0.017676	-0.12471	-4.334	44.8734	20.8509	0.25732	0.19141	0.080078	46.813	90.988	1193.3653	-1.5254	1.435	-0.37988	-21.223	-69.466	1249.968	-2.0659	1.2153	-0.092285	-36.225	120.1284	751.567	-0.87061	0.48877	-0.013672	-29.728	126.738	708.0907	-1.0664	0.52344	-0.10742
1.49	-171.393	-86.63	1367.106	-1.7449	1.1809	0.049316	-23.497	42.0103	8.9457	0.038574	0.013184	-0.12549	-27.836	46.0044	21.16946	0.22998	0.20215	0.075684	30.9187	71.039	1162.815	-1.5273	1.418	-0.36523	-7.07899999999999	-9.6398	1249.068	-2.1849	1.2726	-0.087402	-40.08	138.4059	712.3774	-0.83008	0.47559	-0.015137	-13.384	135.8791	689.03	-1.0254	0.50391	-0.089355
1.492	-160.259	-85.1487	1372.757	-1.7637	1.1934	0.054688	-28.009	34.99527	26.0027	0.036231	0.012695	-0.12393	6.456	36.7679	32.3121	0.20679	0.20923	0.076172	60.96	66.2436	1156.754	-1.5156	1.3867	-0.3457	-30.033	-1.5311	1223.4658	-2.305	1.3384	-0.086133	-51.77	143.4702	702.9691	-0.76123	0.43896	-0.01709	-0.436999999999998	124.90814	676.833	-1.0039	0.49414	-0.082031
1.494	-126.7774	-83.603	1367.438	-1.7886	1.2212	0.04248	-16.345	27.177	38.8059	0.041407	0.017383	-0.12353	-20.198	26.0226	36.90336	0.18555	0.21973	0.07959	49.557	77.141	1138.6244	-1.5078	1.3711	-0.33154	-43.575	-18.1956	1222.23826	-2.3972	1.4165	-0.073242	-56.162	140.9458	690.786	-0.70874	0.41846	-0.020019	-1.279	122.9648	665.7395	-0.96045	0.47803	-0.060059
1.496	-55.291	-78.44	1388.468	-1.8042	1.229	0.040039	-45.5262	22.1881	35.419	0.041407	0.020118	-0.12353	-8.458	28.0348	37.5542	0.1543	0.22852	0.080078	38.097	87.938	1103.1547	-1.4668	1.3301	-0.31934	-58.703	-41.716	1246.8947	-2.4409	1.4852	-0.068555	-52.258	135.0251	675.0512	-0.66406	0.39648	-0.020508	1.362	120.918	632.718	-0.91773	0.46607	-0.04541
1.498	-61.678	-65.841	1384.199	-1.8574	1.2617	0.030273	-35.187	33.6517	28.3782	0.044434	0.027441	-0.12656	-17.634	21.4475	46.4117	0.1377	0.23535	0.085449	50.974	67.908	1087.80012	-1.427	1.2913	-0.30493	-47.054	-43.886	1264.861	-2.4297	1.5352	-0.068848	-53.795	147.6103	635.8536	-0.60449	0.36914	-0.022949	-22.309	131.3116	614.4776	-0.87891	0.45508	-0.029785
1.5	-79.197	-34.268	1387.6423	-1.9092	1.2881	0.018067	-41.484	41.579	35.8649	0.049316	0.035156	-0.12891	-17.5	45.386	30.97232	0.10938	0.26367	0.096191	37.926	66.089	1070.312	-1.3848	1.2578	-0.28613	-49.192	-35.936	1255.896	-2.3482	1.5556	-0.070605	-47.597	143.7436	616.5122	-0.55835	0.35327	-0.026855	-22.497	132.742	593.91843	-0.82813	0.4375	-0.01416
1.502	-88.572	-13.0878	1410.5685	-1.98	1.3169	0.0019531	-38.632	41.395	45.494	0.049317	0.044043	-0.12461	-31.352	45.0554	19.3186	0.088867	0.26904	0.10473	36.6777	76.662	1079.88338	-1.3223	1.209	-0.28613	-93.4156	-11.742	1219.017	-2.2221	1.5415	-0.080078	-49.587	138.61	597.628	-0.51563	0.33887	-0.026367	-65.6625	142.195	566.5507	-0.80957	0.42871	-0.0058594
1.504	-95.541	-9.6717	1431.3426	-2.1167	1.3853	-0.024902	-27.133	35.5863	28.8487	0.05205	0.051269	-0.12685	-44.741	40.8452	30.0611	0.068848	0.27051	0.10938	0.995000000000001	110.4675	1071.8621	-1.2871	1.1895	-0.2793	-98.672	-11.994	1187.782	-2.082	1.5005	-0.091797	-52.282	122.50436	562.1606	-0.45947	0.31689	-0.027344	-49.022	146.402	537.5187	-0.76221	0.40674	-0.00097656
1.506	-115.085	-32.246	1450.541	-2.1992	1.4238	-0.032227	-47.488	29.3403	22.1676	0.05205	0.056348	-0.12803	-28.696	23.6326	41.3103	0.052246	0.27588	0.12402	13.89988	119.845	1048.625	-1.2241	1.1431	-0.2749	-106.767	-12.1088	1155.653	-1.9494	1.4392	-0.10332	-72.026	112.83394	520.042	-0.43311	0.31201	-0.023438	-67.3426	128.581	512.9622	-0.73218	0.38159	0.014648
1.508	-107.674	-43.264	1446.525	-2.3784	1.5239	-0.036621	-56.6938	24.8609	18.9466	0.051367	0.064746	-0.12783	-49.016	21.4333	25.3269	0.044434	0.27246	0.12549	1.3812	133.055	1015.4349	-1.1855	1.1103	-0.26367	-90.485	-18.052	1155.255	-1.8433	1.3677	-0.11719	-69.6461	102.4146	489.615	-0.38086	0.29346	-0.031738	-45.012	125.6698	495.2481	-0.70459	0.36084	0.023438
1.51	-94.062	-45.423	1441.373	-2.5009	1.6054	-0.03711	-24.479	34.4474	27.4693	0.053711	0.077637	-0.12842	-33.358	20.4889	25.5881	0.038086	0.26465	0.13623	-12.943	133.808	969.0152	-1.1465	1.0801	-0.25391	-87.477	-7.418	1161.06	-1.7661	1.3116	-0.12188	-69.766	106.1484	489.3191	-0.34912	0.27759	-0.035889	-26.082	117.0741	504.793	-0.66406	0.35059	0.03418
1.512	-123.1412	-32.802	1399.6698	-2.5835	1.6841	-0.03418	-37.785	39.9222	37.54	0.055664	0.091113	-0.12774	-43.038	26.40721	27.47478	0.040772	0.26172	0.14404	-17.894	126.756	945.2715	-1.0972	1.0415	-0.24561	-79.783	9.625	1186.042	-1.7092	1.2593	-0.12109	-32.793	118.5405	452.731	-0.31592	0.26074	-0.036621	-48.516	126.7124	469.6714	-0.63867	0.33252	0.046386
1.514	-104.005	-24.114	1361.0346	-2.6128	1.7544	-0.027344	-46.863	36.2817	46.0228	0.05791	0.1043	-0.12783	-27.829	29.9956	33.537313	0.044922	0.26025	0.14697	10.738	120.8349	911.641	-1.0723	1.0176	-0.23633	-113.5042	34.191	1185.8002	-1.6718	1.2124	-0.1164	-41.8599	111.1081	420.6726	-0.27148	0.24756	-0.041504	-41.356	114.859	455.9415	-0.60742	0.3252	0.056152
1.516	-84.367	-29.354	1336.306	-2.5835	1.772	-0.024414	-35.138	14.5153	36.2574	0.056347	0.11953	-0.12979	-64.239	36.7706	35.1667	0.053711	0.25293	0.15576	10.221	128.1796	891.9094	-1.0215	0.97461	-0.21875	-112.631	51.2229	1164.33	-1.6524	1.1765	-0.11982	-29.422	111.2353	387.4573	-0.25244	0.23486	-0.044434	-34.686	119.9611	437.9731	-0.55713	0.30762	0.065918
1.518	-40.168	-34.4362	1326.2604	-2.4761	1.7681	-0.029297	-22.858	13.1402	15.8308	0.059668	0.129	-0.13311	-59.339	34.745	34.8043	0.055908	0.24927	0.16137	-8.5418	128.4062	847.626	-0.98535	0.94482	-0.20385	-98.513	59.1845	1164.4943	-1.6343	1.145	-0.11572	-52.661	108.8861	388.5715	-0.21484	0.21582	-0.045898	-23.765	109.0725	412.9825	-0.53418	0.30566	0.070801
1.52	-17.413	-36.0173	1308.994	-2.3501	1.7319	-0.047608	-35.46	23.8381	16.09163	0.056152	0.14307	-0.13818	-36.618	26.20255	37.5911	0.057617	0.24121	0.16357	3.013	114.4704	824.773	-0.94922	0.9082	-0.19189	-108.394	64.892	1129.7542	-1.6249	1.1219	-0.11065	-41.173	115.07	380.7282	-0.18384	0.2024	-0.046631	-40.8	118.91421	385.4287	-0.48877	0.2876	0.073242
1.522	-32.568	-8.163	1296.499	-2.2124	1.6899	-0.081055	-36.123	35.92	38.8107	0.061817	0.15586	-0.13711	-25.965	25.3391	36.2018	0.052734	0.24854	0.17188	10.876	114.516	794.885	-0.90039	0.87012	-0.17334	-129.4784	73.794	1123.7283	-1.6128	1.099	-0.10733	-15.882	114.6096	362.5309	-0.15234	0.19092	-0.05127	-55.12	111.3019	365.3348	-0.45069	0.27906	0.078614
1.524	-46.402	21.149	1294.5447	-2.0405	1.606	-0.095215	-19.816	36.789	53.8392	0.062695	0.16816	-0.1374	-44.112	29.9784	36.5744	0.047363	0.25537	0.17529	-11.963	126.6393	780.5	-0.87451	0.854	-0.16016	-139.201	84.429	1105.14137	-1.5956	1.077	-0.10069	-13.761	101.1415	346.942	-0.11426	0.1792	-0.053223	-78.88182	118.768	347.498	-0.41357	0.27002	0.082031
1.526	-67.42	67.514	1279.4237	-1.9644	1.5669	-0.10596	-18.1	27.516	37.66	0.064648	0.18418	-0.13779	-54.11	27.3583	14.9751	0.04248	0.26074	0.17871	1.068	138.8713	749.4661	-0.82129	0.81641	-0.13867	-141.169	73.445	1101.0325	-1.5761	1.0583	-0.095215	-25.333	88.9331	315.6641	-0.092285	0.16846	-0.055176	-81.664	124.077	317.297	-0.36914	0.24951	0.085938
1.528	-70.973	94.059	1274.042	-1.8555	1.502	-0.11523	-31.49	29.3879	16.7312	0.06709	0.19268	-0.14492	-27.905	26.5558	19.1006	0.038819	0.26733	0.18554	-9.404	145.146	729.07092	-0.78442	0.78198	-0.12696	-96.7502	46.5094	1075.5427	-1.5503	1.0298	-0.089355	-30.604	93.9689	274.078	-0.061035	0.1416	-0.058594	-65.682	113.342	302.5065	-0.34814	0.24072	0.088379
1.53	-108.133	94.215	1242.4071	-1.7959	1.4595	-0.1145	-23.32	24.9136	20.8222	0.065918	0.20264	-0.14551	-28.411	23.668	21.4671	0.039063	0.27051	0.18945	-26.639	147.382	716.9098	-0.74902	0.75195	-0.1084	-61.472	33.609	1030.2409	-1.5167	1.003	-0.086035	-23.294	100.103	246.534	-0.037354	0.13233	-0.062011	-51.298	102.7199	291.9457	-0.31104	0.22656	0.099121
1.532	-105.143	76.915	1218.4734	-1.7573	1.4243	-0.11084	-22.162	27.4373	34.8916	0.068066	0.21387	-0.14609	-36.824	25.0227	16.8602	0.04248	0.27734	0.19678	-36.6528	143.13	693.5054	-0.69434	0.71289	-0.090332	-19.721	39.059	1001.2843	-1.4839	0.97393	-0.086426	-36.475	100.669	242.4492	-0.020508	0.11865	-0.062012	-32.857	100.6703	288.097	-0.28296	0.21802	0.1062
1.534	-110.2772	68.377	1206.3046	-1.7227	1.3848	-0.10254	-13.871	45.5453	47.8294	0.077929	0.2208	-0.14922	-17.038	8.535	49.4297	0.046387	0.28027	0.19971	-1.963	140.749	669.2198	-0.67334	0.69775	-0.08252	-24.861	72.766	987.978	-1.4511	0.93799	-0.081738	-14.27	81.4329	241.2497	-0.0063477	0.10449	-0.06543	-27.02	102.781	254.3483	-0.25439	0.20947	0.11084
1.536	-121.8426	72.467	1176.9799	-1.7046	1.3657	-0.10107	-10.675	55.799	30.5478	0.08457	0.22979	-0.15469	-29.355	29.8457	81.7536	0.055664	0.28564	0.20605	-11.524	133.99846	629.4604	-0.63135	0.65771	-0.061035	-18.651	97.372	977.32	-1.4233	0.90605	-0.081445	-11.481	65.7252	208.4244	0.0043945	0.1001	-0.069336	-32.649	105.5528	232.1266	-0.21338	0.19922	0.12549
1.538	-98.31175	70.2946	1148.0302	-1.6772	1.3228	-0.094727	-12.112	24.2531	21.97449	0.092675	0.24151	-0.15225	4.989	18.1929	134.287	0.071533	0.28735	0.20776	5.154	125.5246	600.7905	-0.59814	0.62842	-0.048584	-43.396	118.2973	980.8093	-1.3979	0.88525	-0.08252	-30.216	58.8381	181.8311	0.019043	0.090332	-0.066406	-20.612	100.207	227.874	-0.1958	0.18701	0.12012
1.54	-103.7698	53.939	1101.8297	-1.6443	1.2825	-0.088623	-3.043	5.576	32.8488	0.10107	0.25049	-0.15674	-50.204	12.85445	179.816	0.084473	0.29541	0.19873	1.29	130.3595	554.592	-0.57031	0.60156	-0.033203	-16.992	101.25	993.257	-1.3812	0.85517	-0.075683	-42.864	69.61992	181.227	0.029297	0.084473	-0.068603	-11.814	95.719	216.8436	-0.16357	0.16992	0.12354
1.542	-80.67	30.783	1059.876	-1.6196	1.2388	-0.08252	-37.373	10.629	32.4941	0.1085	0.26494	-0.16123	-30.142	46.106	238.652	0.090332	0.30957	0.1499	-8.773	133.4869	530.903	-0.52783	0.56494	-0.019531	-6.144	99.0577	967.16	-1.3671	0.83095	-0.075977	-13.772	81.1743	183.08657	0.040527	0.084473	-0.069336	-1.928	81.438	196.68267	-0.14258	0.15162	0.12207
1.544	-84.059	36.882	1025.006	-1.5762	1.1797	-0.078125	-27.714	35.8316	26.645	0.11484	0.27676	-0.16573	-32.733	48.803	322.029	0.083008	0.31348	0.10596	-6.409	118.6281	506.3058	-0.50439	0.55078	-0.0083008	-15.991	111.454	924.88	-1.353	0.80439	-0.072461	-11.331	99.221	156.6771	0.058105	0.080078	-0.067871	-22.546	70.224	182.8458	-0.12256	0.1333	0.12402
1.546	-81.185	62.38	1032.195	-1.5503	1.1548	-0.072754	-26.5	39.917	37.9745	0.11758	0.29512	-0.16729	-82.491	-16.292	419.521	0.01416	0.35352	0.017578	14.998	110.5909	484.6967	-0.46875	0.50977	0.003418	-55.173	121.342	878.342	-1.3234	0.7833	-0.067578	-26.31	82.5306	131.7366	0.062012	0.077637	-0.070313	-35.77	72.0878	195.8604	-0.091309	0.11572	0.12842
1.548	-88.866	96.262	1040.66	-1.4995	1.0923	-0.068848	-33.3	9.4378	64.1267	0.1168	0.3164	-0.16738	-142.622	-83.353	499.617	-0.10327	0.39966	-0.042236	14.439	106.0715	457.3624	-0.43287	0.48096	0.0070801	-57.315	115.5	857.593	-1.2925	0.76123	-0.060059	-29.289	77.1116	116.4084	0.07959	0.074707	-0.067871	-50.5634	88.082	183.0713	-0.078613	0.10303	0.13086
1.55	-71.425	112.9826	1027.396	-1.4585	1.0513	-0.068604	-50.069	-12.2252	62.913	0.11475	0.33203	-0.17529	-103.977	-92.744	590.8831	-0.271	0.4458	-0.11084	-19.503	112.661	429.1821	-0.4043	0.44824	0.022461	-42.174	101.799	848.6022	-1.2508	0.73672	-0.058594	-23.91	60.5447	112.9171	0.088134	0.075684	-0.069336	-26.264	88.238	158.612	-0.057129	0.087402	0.13281
1.552	-95.9773	116.375	987.783	-1.4141	1.0137	-0.062012	-35.065	-24.22	79.156	0.10488	0.34541	-0.17022	-52.058	-58.489	688.432	-0.53857	0.51025	-0.1665	-20.72	115.492	421.663	-0.35693	0.41504	0.030762	-14.008	113.39	815.14783	-1.2046	0.7081	-0.054786	-52.357	67.3844	108.5843	0.098633	0.07373	-0.072754	-32.714	86.92	142.6216	-0.042237	0.077881	0.13672
1.554	-88.4683	120.89	933.4992	-1.3501	0.97021	-0.058105	-24.086	-18.3265	109.7554	0.091211	0.35938	-0.17988	-132.429	3.737	779.806	-0.69092	0.55713	-0.18213	-28.314	136.881	396.431	-0.3335	0.39648	0.027832	-10.084	96.4344	790.8937	-1.1507	0.6753	-0.053222	-41.856	64.7123	105.2676	0.1123	0.07666	-0.07373	-14.192	63.862	131.8282	-0.03125	0.067871	0.1377
1.556	-75.653	139.728	917.8609	-1.3101	0.94775	-0.059082	-23.305	-6.5167	153.2999	0.063868	0.36367	-0.18652	-123.403	52.537	820.686	-1.0132	0.68408	-0.19189	-31.078	139.898	371.1828	-0.28955	0.36377	0.035156	-29.725	93.2357	758.572	-1.0989	0.64073	-0.0583	-43.123	46.44645	88.1672	0.11914	0.068848	-0.083984	-22.824	61.019	116.585	-0.0083008	0.056152	0.14355
1.558	-60.19	158.733	884.7043	-1.2461	0.90137	-0.054688	-22.277	14.128	184.5112	0.018555	0.37305	-0.18623	-114.288	53.7	828.435	-1.2612	0.81103	-0.17823	-33.975	120.748	355.291	-0.26294	0.33765	0.048096	-17.622	107.96	743.985	-1.0508	0.60742	-0.063477	-24.034	34.0745	64.2776	0.125	0.062988	-0.079102	-24.307	63.90623	113.9043	0.00048828	0.047363	0.14893
1.56	-65.314	142.618	843.97886	-1.1873	0.87232	-0.047608	-22.7357	11.3524	204.003	-0.043945	0.38477	-0.18945	-89.44219	29.915	904.477	-1.5098	0.96289	-0.14746	-27.962	103.4573	313.1757	-0.23633	0.31445	0.057129	-19.161	143.6492	731.99	-0.99871	0.57295	-0.061426	-55.901	26.7913	49.371	0.13257	0.0625	-0.083008	-24.205	67.224	101.0713	0.016113	0.046875	0.16162
1.562	-46.586	115.408	800.1693	-1.1284	0.83838	-0.044922	-11.858	5.6297	275.988	-0.11914	0.39678	-0.18798	-81.07323	20.107	1001.4144	-1.8237	1.1743	-0.089355	-16.549	100.2106	297.7834	-0.20068	0.28564	0.072266	-32.913	142.7	696.0588	-0.95771	0.54327	-0.062695	-48.855	31.2395	47.9949	0.13281	0.059082	-0.084961	-21.262	62.884	90.4811	0.029052	0.036132	0.1582
1.564	-59.554	103.59	764.0377	-1.0601	0.78369	-0.042969	23.3657	25.265	357.7882	-0.2126	0.40342	-0.18789	-39.001	14.792	1082.032	-1.9702	1.2798	-0.062012	-26.635	102.9265	268.8946	-0.18506	0.26807	0.084473	-33.704	128.975	700.0588	-0.91631	0.51827	-0.060742	-37.439	53.1946	54.9625	0.13721	0.060547	-0.086914	-12.808	50.4	87.2566	0.043945	0.031738	0.16113
1.566	-23.661	107.269	719.561	-1.0215	0.76367	-0.041016	8.68	66.078	495.6675	-0.3208	0.4206	-0.18789	-28.44	15.189	1140.93	-2.23	1.4683	-0.02002	-24.822	97.8375	261.4601	-0.13477	0.23877	0.089844	-48.734	102.8956	681.8666	-0.88008	0.49922	-0.065332	-26.851	58.868	45.7185	0.13623	0.060059	-0.087891	-41.058	53.49	55.5649	0.063965	0.024902	0.16113
1.568	0.506	114.986	688.612	-0.94678	0.71533	-0.040527	0.1058	89.4401	593.144	-0.44326	0.43858	-0.18848	-53.4834	32.273	1125.559	-2.3796	1.5998	-0.0053711	-14.629	84.417	233.26826	-0.096436	0.21118	0.085205	-86.347	108.1978	667.0455	-0.83984	0.47949	-0.068359	-25.8759	53.625	29.4477	0.13232	0.057129	-0.093262	-44.67	57.9821	66.8308	0.075684	0.026367	0.16602
1.57	11.289	119.887	678.4299	-0.89722	0.68726	-0.036865	-22.862	66.7862	698.874	-0.5835	0.45752	-0.19385	-64.8698	20.186	1098.883	-2.4722	1.7134	0.019043	-26.257	66.827	224.3383	-0.057129	0.19336	0.07959	-94.1144	131.156	652.632	-0.80254	0.46445	-0.068457	-24.6	36.965	44.8216	0.12476	0.052246	-0.094238	-44.275	69.618	63.7403	0.091797	0.017578	0.16846
1.572	-19.781	120.6428	653.7561	-0.84961	0.65625	-0.037598	-21.013	51.344	788.126	-0.75303	0.49131	-0.20488	-81.2768	-9.916	1090.586	-2.4512	1.8066	0.056152	-38.005	60.637	195.621	-0.015625	0.16943	0.081543	-70.656	151.787	657.877	-0.76318	0.44815	-0.068652	-23.508	30.2484	52.2948	0.11523	0.051758	-0.099121	-42.427	60.968	61.0244	0.10546	0.013916	0.16845
1.574	-13.003	124.399	635.9479	-0.7793	0.61621	-0.032715	2.589	33.055	884.299	-0.9585	0.51709	-0.21211	-41.205	-38.927	1080.644	-2.3745	1.8306	0.048828	-49.3768	67.531	195.8851	-0.0014648	0.15674	0.087402	-59.469	147.003	602.3142	-0.7292	0.43135	-0.070996	-35.364	37.1321	45.0659	0.10791	0.052734	-0.095215	-53.218	43.367	61.8513	0.11133	0.0019531	0.16797
1.576	-36.185	136.625	614.0102	-0.73975	0.60205	-0.036133	21.894	31.9026	980.732	-1.2374	0.54639	-0.21172	-11.38	-95.596	1102.606	-2.1401	1.8521	0.057129	-35.831	87.571	176.9362	0.019043	0.14453	0.084961	-63.3737	127.922	554.232	-0.69639	0.41543	-0.070508	-34.373	47.413	42.225	0.10596	0.055664	-0.10205	-53.66014	19.109726	71.9959	0.11914	-0.011719	0.17041
1.578	-41.931	134.448	606.344	-0.66797	0.56445	-0.035645	20.493	29.275	1015.551	-1.6211	0.58398	-0.20976	-48.194	-121.77	1136.3414	-1.9375	1.8457	0.058594	-44.8054	105.106	159.8413	0.027343	0.13697	0.089111	-60.493	95.3942	521.952	-0.66357	0.39502	-0.071777	-42.675	35.7038	30.834	0.098633	0.054199	-0.1123	-42.726	20.2174	47.156	0.12109	-0.015625	0.17139
1.58	-31.067	135.083	578.826	-0.58496	0.53125	-0.042969	-32.64893	29.234	1008.863	-2.0977	0.64063	-0.20361	-20.401	-134.522	1129.573	-1.7666	1.8184	0.06543	-32.971	94.749	146.3118	0.037598	0.13574	0.09668	-45.7644	83.976	513.114	-0.63086	0.37969	-0.071094	-33.522	38.208	20.2943	0.090576	0.056397	-0.1123	-41.828	40.6841	25.9	0.12354	-0.025879	0.16748
1.582	-23.249	136.546	521.356	-0.54883	0.51367	-0.040039	-17.9449	19.3361	978.167	-2.6297	0.73829	-0.18525	-24.6944	-127.2788	1144.8652	-1.6211	1.7461	0.084473	-33.497	72.103	124.1082	0.041504	0.12988	0.10352	-19.457	92.384	503.1509	-0.59746	0.36435	-0.074902	-20.345	32.68	6.4	0.084961	0.056641	-0.10791	-38.636	46.9916	21.17	0.12817	-0.033447	0.16773
1.584	-44.605	139.898	470.12252	-0.46436	0.47021	-0.04541	-8.774	1.571	972.806	-3.0905	0.84189	-0.18555	15.023	-126.214	1144.34502	-1.5737	1.7036	0.092285	-23.92	54.816	116.3699	0.038574	0.12744	0.10742	-11.213	96.975	468.391	-0.55996	0.34795	-0.072559	-42.688	31.2357	14.586	0.080078	0.060059	-0.11768	-27.806	32.22	19.0615	0.12695	-0.038574	0.17334
1.586	-45.986	132.9174	438.9233	-0.40943	0.43946	-0.053955	18.911	-18.852	966.815	-3.33	0.98758	-0.086328	21.498	-138.165	1157.8466	-1.5059	1.6113	0.10889	-19.287	65.681	100.7511	0.04541	0.11719	0.11914	-5.244	100.1281	449.767	-0.51826	0.33027	-0.073535	-19.519	28.8927	29.1214	0.077148	0.062988	-0.11572	-33.673	34.0334	32.9479	0.12842	-0.042969	0.17725
1.588	-39.463	104.192	402.795	-0.35156	0.40625	-0.0625	23.274	-38.375	974.248	-3.3695	1.2661	0.02207	56.39	-103.881	1202.2489	-1.459	1.5508	0.10962	-14.926	65.2178	106.506	0.054199	0.10474	0.12354	0.527999999999999	115.182	436.57621	-0.47803	0.31494	-0.07666	-27.988	23.9441	41.85104	0.078125	0.064941	-0.12109	-21.835	25.8591	14.1296	0.12646	-0.041016	0.17725
1.59	-38.196	96.065	365.9232	-0.28223	0.37012	-0.069824	-12.338	-51.987	944.3234	-3.2559	1.5703	0.0043945	25.061	-79.7775	1252.6521	-1.3999	1.4927	0.11328	-20.602	72.37223	86.4109	0.069824	0.095215	0.12158	-35.184	132.214	438.8621	-0.44063	0.29658	-0.075	-24.534	32.4099	19.6929	0.073242	0.066894	-0.11841	-39.324	18.59	30.7223	0.12793	-0.041504	0.17578
1.592	-32.999	87.05	348.5865	-0.24951	0.35498	-0.067871	-8.6152	-76.956	948.5925	-2.8458	1.7015	-0.093166	41.726	-74.53	1295.529	-1.3237	1.4243	0.10986	-18.414	59.47318	67.6475	0.094238	0.084961	0.11621	-27.946	156.571	407.573	-0.40742	0.27383	-0.070704	-29.524	27.092	30.0208	0.076172	0.068359	-0.12402	-22.839	29.53585	41.44094	0.13135	-0.047119	0.17774
1.594	-18.813	104.383	319.983	-0.19775	0.32178	-0.07959	19.22	-80.32	976.18087	-2.2385	1.6346	-0.18388	34.412	-94.332	1320.128	-1.2886	1.3911	0.11475	-1.045	52.26	42.821	0.11743	0.079346	0.11572	-28.841	129.687	406.872	-0.37851	0.25313	-0.071094	4.122	31.8163	43.3404	0.073242	0.072266	-0.12207	-40.305	38.633	47.4043	0.13428	-0.044922	0.18115
1.596	-35.391	118.5994	318.03	-0.16382	0.30762	-0.082276	37.39	-50.787	984.6957	-1.5858	1.4234	-0.24287	-21.372	-107.105	1293.429	-1.2261	1.3228	0.10156	-39.383	35.277	44.6176	0.13281	0.073242	0.11328	-19.453	107.367	380.604	-0.34746	0.23467	-0.068945	-1.3	28.1809	34.6793	0.072754	0.074707	-0.12695	-27.732	42.507	22.2001	0.14111	-0.050293	0.17578
1.598	-59.845	129.562	304.323	-0.13184	0.29443	-0.083984	36.4085	-11.752	987.2249	-1.0787	1.1674	-0.30274	-37.214	-103.161	1270.949	-1.1999	1.2639	0.070557	-32.93	35.88074	67.6056	0.15771	0.066406	0.104	-31.365	82.0205	342.7561	-0.31836	0.2168	-0.065918	-22.486	44.531	22.3955	0.075195	0.075195	-0.12744	-27.058	43.68	17.0167	0.14453	-0.04541	0.17969
1.6	-70.7976	122.599	299.327	-0.089844	0.27588	-0.080078	-11.4316	12.4	996.744	-0.76367	0.94531	-0.38037	-64.19	-115.57	1240.566	-1.1851	1.1997	0.043945	-25.813	53.4917	65.946	0.16211	0.067383	0.10352	-27.848	73.3989	302.485	-0.29775	0.20117	-0.066113	-18.374	44.625	26.32903	0.071534	0.076904	-0.12939	-17.343	24.27	20.8976	0.15381	-0.049805	0.18018
1.602	-58.838	119.513	289.795	-0.066406	0.26172	-0.081543	-30.7619	12.102	996.19	-0.65772	0.8165	-0.43184	-75.45	-125.724	1239.629	-1.2026	1.103	0.017578	-30.81	49.263	58.3167	0.16211	0.064941	0.10352	-14.14	77.6017	287.8626	-0.27812	0.18428	-0.067383	-36.985	39.906	42.8729	0.067383	0.08252	-0.12939	-21.095	25.7339	19.8459	0.16162	-0.039551	0.17822
1.604	-50.8663	117.369	255.644	-0.012207	0.24023	-0.088867	-61.424	-2.29599999999999	992.683	-0.66523	0.78691	-0.41523	-102.7146	-131.25	1291.792	-1.228	1.063	0.0024414	-36.8922	36.9146	41.7991	0.15137	0.064209	0.10107	-5.883	76.8846	270.6003	-0.25899	0.16201	-0.065039	-11.243	39.5734	41.2277	0.0625	0.088379	-0.11963	-6.76	31.11093	21.6708	0.16699	-0.035156	0.16699
1.606	-58.1921	113.9805	225.299	0.020996	0.2207	-0.096191	-20.5907	-44.903	1001.8636	-0.72461	0.83222	-0.34492	-66.352	-137.4	1326.24018	-1.2803	0.98828	-0.0048828	-24.725	18.2107	39.14	0.13818	0.0625	0.10547	-1.187	76.301	246.6293	-0.2377	0.14658	-0.065137	-42.809	27.4707	39.52356	0.060059	0.094238	-0.11621	-18.145	21.7965	21.2247	0.17676	-0.021973	0.16553
1.608	-55.318	97.6306	201.9371	0.048828	0.20264	-0.10596	5.824	-105.738	1025.5	-0.78086	0.90605	-0.26299	-49.554	-148.633	1321.5287	-1.3359	0.96289	-0.0039063	-9.093	28.8129	35.355	0.11768	0.064941	0.11133	-16.737	81.1965	241.4112	-0.22168	0.13037	-0.063477	-11.358	10.7048	22.2757	0.056152	0.098145	-0.11914	0.451000000000001	29.1484	13.703	0.18164	-0.017578	0.16211
1.61	-31.954	91.9344	175.529	0.079102	0.18945	-0.11035	31.4099	-154.901	1031.2018	-0.82031	0.96289	-0.20459	-80.4456	-130.4	1337.647	-1.3877	0.96387	-0.0048828	-12.927	49.65682	30.5698	0.11084	0.0625	0.11035	-24.74	78.0693	246.8301	-0.20068	0.11563	-0.061328	-30.614	14.8943	28.4499	0.048828	0.10571	-0.11451	-1.532	19.858	31.2311	0.18701	-0.003418	0.15479
1.612	-10.191	82.922	150.3686	0.092285	0.18604	-0.1123	24.3251	-194.734	1047.855	-0.84111	0.98936	-0.17998	-100.336	-99.781	1356.4429	-1.457	1.0059	0.0019531	-36.77	49.5022	41.7813	0.094238	0.068848	0.1123	-14.769	93.5538	245.43474	-0.18154	0.10234	-0.065137	-36.169	37.22	17.9325	0.041992	0.11377	-0.11572	-10.739	31.31548	24.8213	0.1853	0.00708	0.14502
1.614	-9.046	61.996	128.6975	0.1123	0.17383	-0.11621	4.7239	-186.68	1059.405	-0.85977	0.99492	-0.18047	-114.586	-73.7511	1363.9293	-1.498	1.041	0.012207	-21.16	42.1879	26.4943	0.0896	0.069336	0.11914	-20.483	94.317	237.8674	-0.16045	0.084765	-0.071777	-44.28	46.674	23.95196	0.033203	0.12598	-0.10742	-16.87	30.6404	41.485	0.18457	0.018066	0.14355
1.616	7.3	45.139	128.0932	0.12207	0.17114	-0.12182	42.456	-170.474	1103.3996	-0.87421	0.99219	-0.18867	-100.846	-61.0304	1383.281	-1.5796	1.1157	0.039551	-28.676	25.5628	29.039	0.083984	0.071777	0.12354	-45.613	76.441	202.6266	-0.1375	0.077344	-0.071778	-14.531	34.0568	37.7855	0.028809	0.13135	-0.10645	-19.013	40.256	44.8851	0.18066	0.029297	0.13232
1.618	-23.018	51.399	117.5235	0.125	0.16699	-0.12158	58.787	-159.562	1146.5896	-0.90215	0.97363	-0.20498	-135.3376	-81.1138	1388.555	-1.6452	1.1594	0.052734	-23.89	30.57195	23.8595	0.091797	0.072754	0.12207	-52.04	72.27	187.3016	-0.11768	0.062012	-0.062988	-11.582	25.6384	38.2952	0.02002	0.14258	-0.10645	-46.2307	48.36	24.0733	0.17578	0.040039	0.13086
1.62	-20.553	72.4739	92.5997	0.13232	0.16211	-0.12354	63.725	-152.732	1178.5696	-0.96191	0.96289	-0.22021	-153.821	-95.7072	1399.338	-1.7104	1.1978	0.061035	-48.747	18.9802	28.1128	0.094238	0.071777	0.12744	-43.035	69.5514	166.1865	-0.098242	0.052344	-0.068262	-47.463	24.1215	21.8667	0.016602	0.15112	-0.10645	-56.025	44.806	29.8165	0.17139	0.058594	0.11865
1.622	-32.966	93.855	93.37195	0.13867	0.15967	-0.11865	14.8369	-143.1101	1205.591	-1.0467	0.95996	-0.23144	-152.712	-119.8733	1385.15774	-1.7754	1.2578	0.067383	-34.526	27.8174	23.0411	0.10645	0.064453	0.12939	-59.892	74.4325	142.432	-0.080469	0.044824	-0.06709	-29.862	31.19707	38.9289	0.016602	0.16016	-0.10107	-46.2	28.2832	31.97989	0.15699	0.07373	0.11817
1.624	-21.587	79.837	98.1058	0.14063	0.15723	-0.12646	4.7869	-102.788	1240.0611	-1.1388	0.96533	-0.23545	-172.187	-101.971	1352.59	-1.8047	1.2852	0.05957	-47.2161	38.777	24.3197	0.12232	0.063965	0.13038	-47.21	82.7792	152.6452	-0.066797	0.036231	-0.070215	-34.751	36.1729	51.57082	0.018066	0.16211	-0.10352	-38.347	29.71	31.35873	0.14258	0.083496	0.11328
1.626	-22.294	67.241	76.4898	0.15186	0.15137	-0.12622	-5.5336	-73.654	1278.918	-1.2322	0.98291	-0.23428	-149.7926	-85.451	1348.302	-1.8589	1.3403	0.07666	-67.461	39.476	22.1193	0.1333	0.060547	0.13037	-26.901	74.1726	137.9462	-0.049121	0.030957	-0.071875	-52.7841	36.8551	59.553	0.020996	0.16699	-0.10303	-42.824	28.9607	11.259	0.12598	0.10254	0.10889
1.628	-33.547	51.42	58.4965	0.15625	0.14307	-0.12598	-12.9117	-43.86	1273.318	-1.3178	0.99707	-0.23321	-128.949	-75.175	1349.555	-1.8906	1.3833	0.068115	-20.768	23.7889	28.6089	0.1543	0.057129	0.12988	-27.401	60.8701	110.414	-0.032227	0.024414	-0.068848	-45.348	29.86755	24.1513	0.028809	0.18018	-0.11182	-39.647	20.019	27.3673	0.11768	0.11279	0.1084
1.63	-30.63	51.443	45.60745	0.16113	0.13525	-0.13184	17.9704	-45.868	1253.52	-1.3926	1.0137	-0.23926	-78.869	-81.028	1345.7852	-1.9292	1.4302	0.049805	-17.296	23.7682	29.69742	0.16797	0.050781	0.12744	-33.8	61.3317	81.015	-0.017676	0.024805	-0.069336	-47.649	5.9083	27.0939	0.034912	0.18164	-0.10742	-38.172	25.0887	22.5687	0.097168	0.13574	0.11377
1.632	-19.873	52.608	51.9219	0.1582	0.13477	-0.13086	48.0544	-64.99	1233.269	-1.4365	1.0225	-0.24346	-100.291	-95.7845	1349.2534	-2.0195	1.5039	0.01709	-27.094	35.3477834	19.89725	0.19141	0.04834	0.12646	-34.322	46.5587	87.142	4e-08	0.023242	-0.067286	-26.896	5.9304	15.617	0.041016	0.18799	-0.11084	-25.974	39.3807	32.81	0.081055	0.15405	0.11108
1.634	-10.872	52.5145	44.5556	0.15967	0.12207	-0.13379	78.25	-61.529	1237.363	-1.4601	1.0231	-0.25498	-48.883	-87.995	1339.2913	-2.0854	1.5405	0.0087891	-25.134	36.1652	42.3093	0.20972	0.042968	0.11963	-20.87	51.2091	88.8819	0.01875	0.016602	-0.071973	-46.373	15.9638	21.523	0.05127	0.19775	-0.11621	-27.917	49.7851	22.1206	0.063477	0.16846	0.10986
1.636	-9.079	39.6766	7.625	0.14917	0.12158	-0.1311	65.722	-55.838	1259.685	-1.4725	1.0193	-0.26709	-51.158	-63.519	1367.818	-2.2344	1.623	-0.0043945	-21.081	37.3949	27.637	0.22559	0.039063	0.11572	-19.19	51.4388	89.3591	0.035547	0.012109	-0.070215	-33.249	42.607	26.9732	0.055908	0.20239	-0.11987	-51.423	39.9594	30.4724	0.035156	0.18555	0.10889
1.638	-14.366	11.24	10.247	0.13672	0.11963	-0.12988	68.124	-51.719	1256.0156	-1.4923	1.0097	-0.28359	-58.711	-41.0845	1366.517	-2.3706	1.7231	0.0024414	-31.545	36.99292	26.9961	0.2417	0.033691	0.10986	-32.219	55.2157	75.1887	0.057129	0.0073242	-0.081543	-17.97	30.7506	34.2764	0.062012	0.20947	-0.12402	-37.745	32.4326	30.2317	0.025391	0.18896	0.11816
1.64	9.08	6.41	8.473	0.12354	0.11328	-0.12598	67.442	-66.65702	1283.6594	-1.5234	1.002	-0.30469	-70.071	-18.9761	1337.1433	-2.4194	1.7739	0.0068359	-38.784	35.4358	31.3263	0.25049	0.034668	0.10107	-39.5187	45.973	88.0499	0.074707	0.0054688	-0.072363	2.668	29.02191	31.6964	0.062988	0.2168	-0.12793	-56.9403	43.942	42.2727	0.00048828	0.20361	0.12354
1.642	-27.157	17.0193	27.3034	0.11133	0.10986	-0.11865	33.629	-95.511	1285.869	-1.5745	1.0075	-0.33017	-91.693	-26.1997	1320.3098	-2.439	1.8462	0.016602	-15.289	14.4655	31.5388	0.26025	0.041016	0.1001	-36.872	53.575	90.3468	0.094336	0.0018555	-0.078711	-20.509	15.8818	35.00924	0.072266	0.21777	-0.13379	-51.6606	45.554	41.7646	-0.013184	0.21924	0.12207
1.644	-49.109	41.7297	36.6658	0.093262	0.10449	-0.12061	17.4202	-99.021	1281.435	-1.6441	1.0286	-0.34658	-66.065	-38.13602	1300.6543	-2.4021	1.8626	0.021973	-5.46899999999999	12.7233	30.211	0.26148	0.050782	0.094727	-49.443	68.568	81.5648	0.10801	-0.0055664	-0.083398	-35.108	23.1308	31.6943	0.074707	0.2251	-0.13916	-30.4652	25.0409	51.869	-0.024902	0.22754	0.12891
1.646	-40.875	35.2711	44.5259	0.072022	0.10059	-0.11328	-5.1575	-100.404	1288.545	-1.7366	1.0548	-0.36728	-71.722	-39.345	1295.8289	-2.332	1.8535	0.014648	-27.677	39.007	22.3723	0.25977	0.063477	0.092285	-22.007	66.1315	63.4452	0.1164	-0.012304	-0.086426	-10.518	30.2112	33.72799	0.077636	0.23022	-0.14844	-12.944	14.63784	48.0792	-0.043457	0.24268	0.13623
1.648	-53.574	30.246	30.5990356	0.060059	0.095215	-0.11865	-0.6942	-89.7757	1295.736	-1.8458	1.0987	-0.39502	-68.98	-25.764	1290.2563	-2.1753	1.772	-0.016113	-30.345	48.713	21.491288	0.25049	0.078613	0.089844	-26.145	42.6526	51.5688	0.11865	-0.018555	-0.089355	-25.427	50.854	48.1601	0.077637	0.23682	-0.15332	-36.617	21.393	19.9226	-0.051513	0.25146	0.13769
1.65	-56.45511	20.2158	27.41034	0.038574	0.093262	-0.11035	1.3138	-72.6489	1289.682	-1.9648	1.1523	-0.4248	-77.02	-22.524	1277.8146	-2.0938	1.7246	-0.019043	-25.529	37.928	25.5339	0.2417	0.083008	0.092773	-25.741	41.1239	34.4307	0.11806	-0.022559	-0.091797	-9.263	45.438	24.9848	0.07666	0.24219	-0.16113	-21.244	30.0523	11.0178	-0.0625	0.26074	0.13818
1.652	-50.992	24.734	32.176	0.029297	0.089355	-0.10693	-1.82572	-51.842	1279.288	-2.0884	1.2108	-0.43369	-53.472	-7.465	1246.126	-1.9238	1.6211	-0.033203	-14.512	18.7652	29.98363	0.22021	0.10449	0.089355	-25.037	30.901	23.317	0.10938	-0.021192	-0.094336	-12.749	22.1553	19.0089	0.079102	0.24902	-0.16162	-13.007	37.5914	23.8469	-0.071777	0.26855	0.14795
1.654	-25.864	26.4375	41.4468	0.011719	0.096191	-0.10156	15.3888	-69.059	1279.3404	-2.2055	1.2703	-0.46192	-57.106	-23.1947	1243.056	-1.8135	1.5518	-0.041259	-14.749	16.6386	27.8372	0.20532	0.11939	0.092285	-8.32	29.56	38.809	0.092578	-0.014551	-0.092773	6.343	1.4421	29.503	0.080566	0.26074	-0.17822	-8.325	36.7801	38.2204	-0.078125	0.27588	0.15186
1.656	-25.982	41.268	42.4312	0.0073243	0.092286	-0.1001	39.402	-72.70738	1271.6461	-2.2894	1.3285	-0.46621	-90.127	-7.3836	1209.3538	-1.7246	1.4883	-0.040039	-10.043	29.5577	26.4561	0.19336	0.12939	0.087891	-11.774	41.3362	44.789	0.075391	-0.0048828	-0.092285	-37.081	7.69593	34.078	0.08374	0.26171	-0.17798	-9.204	36.9747	42.1064	-0.084961	0.28369	0.15967
1.658	-25.511	49.2639	6.646	0.0014648	0.087891	-0.097656	60.257	-64.7313	1253.2105	-2.3302	1.3765	-0.46728	-83.485	2.402	1221.629	-1.6382	1.4185	-0.044434	-22.342	31.8699	33.8929	0.18359	0.1377	0.092773	-20.116	51.6812	42.7714	0.056152	0.0048828	-0.089355	-19.847	29.038	22.0421	0.09082	0.26807	-0.18506	-9.463	25.874	29.8183	-0.091064	0.29126	0.1665
1.66	-38.482	33.1486	13.7273	0.0039063	0.081055	-0.095215	35.474	-30.093	1219.376	-2.3296	1.4165	-0.46631	-72.295	29.7066	1217.2449	-1.6079	1.3833	-0.043457	-20.973	38.0732	36.1854	0.17285	0.1499	0.090332	-33.984	52.791	27.9258	0.039844	0.012988	-0.086914	-23.943	35.0104	37.1215	0.094727	0.28125	-0.18896	-15.581	16.5872	42.0445	-0.095215	0.29541	0.16992
1.662	-24.699	21.1533	15.0039	0.0068359	0.078613	-0.094727	33.186	-14.707	1206.3	-2.2812	1.4426	-0.45225	-94.5669	54.6092	1195.9406	-1.5737	1.3218	-0.043945	-22.906	42.4948	26.7972	0.15479	0.16406	0.091309	-42.836	53.322	31.329	0.020996	0.024317	-0.084277	-17.929	13.4229	38.7984	0.096191	0.28174	-0.19434	-20.488	40.9484	49.9153	-0.098145	0.30762	0.17236
1.664	-33.633	19.9963	13.6592	0.022461	0.07959	-0.092285	27.261	-13.8392	1203.19	-2.212	1.4505	-0.43408	-110.2011	72.2475	1190.9417	-1.5623	1.2766	-0.040039	-22.075	35.538	28.38242	0.13721	0.18066	0.092773	-37.975	61.688	49.89626	0.009668	0.029785	-0.089746	-21.22	-12.22992	60.592	0.098145	0.28125	-0.20996	-32.682	32.359	88.445	-0.094238	0.30811	0.17822
1.666	-29.457	35.02372	6.2878	0.034668	0.067139	-0.091309	22.2644	-13.0287	1181.09632	-2.1335	1.4415	-0.41885	-83.207	65.9924	1166.34522	-1.5566	1.2363	-0.039063	-39.906	15.7018	36.05	0.11963	0.19531	0.10205	-5.852	48.745	43.11	-0.0020508	0.039356	-0.082129	-43.302	-31.5792	67.737	0.086182	0.27954	-0.21606	-31.635	-23.309	120.2552	-0.088867	0.30518	0.1665
1.668	-41.4612	29.019	29.06322	0.049316	0.054688	-0.09668	23.618	-20.0627	1178.0654	-2.0498	1.4111	-0.40996	-101.218	64.8441	1144.4472	-1.5527	1.1992	-0.036133	-24.659	21.4063	28.1625	0.097168	0.2207	0.10107	-31.193	34.473	44.2688	-0.003418	0.044434	-0.076172	-16.121	-21.65387	96.963034	0.052246	0.27588	-0.22314	-28.041	-42.1217	145.3099	-0.093994	0.30005	0.14209
1.67	-39.743	25.531	35.5616	0.071289	0.035645	-0.097168	27.0436	-7.61	1189.9931	-1.9702	1.3638	-0.40137	-139.95265	67.0103	1121.7937	-1.5527	1.1836	-0.026855	-36.1267	32.648	22.8399	0.085449	0.23438	0.10596	-32.301	22.87621	41.99846	-0.0070313	0.045215	-0.082422	-19.604	5.9203	136.1488	-0.029297	0.27295	-0.23779	-8.442	-15.926	193.8736	-0.11328	0.28125	0.1084
1.672	-48.4981	29.195	32.9306	0.078125	0.028809	-0.1001	26.885	6.468	1195.8779	-1.8987	1.3154	-0.39219	-128.1448	57.5754	1094.975643	-1.5449	1.1484	-0.01709	-36.765	30.449	27.1453	0.062012	0.25537	0.11719	-31.965	21.25963	30.962	-0.013184	0.04707	-0.077539	-28.5305	27.1259	174.9934	-0.086914	0.27393	-0.23975	-21.525	6.7606	251.926	-0.17383	0.24902	0.072266
1.674	-38.267	27.221	25.58986	0.095703	0.012695	-0.095703	22.7563	15.687	1180.827	-1.8387	1.2718	-0.38408	-121.1105	59.3982	1076.32	-1.5223	1.1184	-0.0090331	-29.464	16.9159	30.4378	0.047607	0.27222	0.12183	-26.844	41.6554	11.961	-0.020605	0.049023	-0.075586	-23.2012	16.1461	186.839	-0.19971	0.28125	-0.24219	-83.986	-54.3772	376.328	-0.23242	0.23193	0.045898
1.676	-15.072	32.075	29.61234	0.11426	0.003418	-0.094726	29.2537	8.868	1160.835	-1.7903	1.2281	-0.38174	-82.645	56.3711	1060.1761	-1.4937	1.0806	-0.0078125	-37.246	13.335	16.316	0.033691	0.28906	0.12695	-31.354	46.772	18.3711	-0.024316	0.05293	-0.076172	-13.113	-0.2135	236.396	-0.30493	0.29541	-0.24194	-131.17	-108.7295	450.468	-0.38818	0.20361	-0.013672
1.678	0.0730000000000004	40.022	33.93663	0.12354	-0.0024414	-0.09668	68.522	-20.5797	1145.0882	-1.7501	1.1921	-0.37715	-105.90379	60.37289	1005.0493	-1.4434	1.0293	-0.0019531	-21.602	26.7897	19.2708	0.01416	0.29834	0.13281	-22.281	35.0675	38.0641	-0.029785	0.052734	-0.07373	12.2381	9.6866	306.574	-0.41553	0.31689	-0.24902	-96.322	-129.1932	489.442	-0.54028	0.19458	-0.046631
1.68	-23.193	40.874	35.9664	0.13818	-0.012207	-0.097168	74.685	-30.168	1148.934	-1.7163	1.1548	-0.37256	-78.746	66.7204	992.8419	-1.4146	1.0063	-0.0014648	-40.655	30.8357	28.2189	0.0073242	0.29883	0.13721	-28.258	21.78144	35.3064	-0.036328	0.057715	-0.073145	-9.664	58.451	398.0379	-0.58398	0.34473	-0.24707	-67.717	-109.69795	565.756	-0.70898	0.19922	-0.06543
1.682	-13.127	38.284	19.1998	0.14551	-0.011719	-0.099609	61.813	-24.9784	1139.9	-1.6947	1.1224	-0.37315	-72.302	87.0302	983.1566	-1.3516	0.95313	-0.0024414	-29.422	30.7417	32.2163	-0.0048828	0.30908	0.14063	-44.462	26.355	33.3542	-0.042187	0.058594	-0.072656	25.2144	90.884	508.048	-0.67871	0.36816	-0.25244	-86.6202	-58.71	639.357	-0.97656	0.23975	-0.088867
1.684	-5.87	17.2435	32.45	0.15479	-0.01416	-0.10107	32.915	-10.009	1123.965	-1.6757	1.0923	-0.36865	-73.584	113.5237	952.2075	-1.2976	0.91431	-0.0061035	-36.702	40.479	42.2386	-0.0073242	0.31104	0.14282	-43.1359	32.086	35.7808	-0.041015	0.0625	-0.06875	0.931999999999999	93.97781	614.097	-0.90088	0.41064	-0.26318	-137.82	4.0233	680.678	-1.1196	0.27246	-0.092285
1.686	0.0829999999999984	16.007	32.425	0.15527	-0.013184	-0.10254	48.316	1.989	1113.316	-1.6601	1.0618	-0.36279	-43.588	124.538	926.902	-1.2495	0.87744	-0.0083008	-38.503	47.96	32.404	-0.010254	0.31006	0.14697	-39.337	31.126	49.9682	-0.03877	0.064258	-0.067773	-14.707	72.3956	707.232	-1.1279	0.45703	-0.25635	-114.993	69.2273	676.433	-1.4136	0.37354	-0.11377
1.688	-14.487	25.0356	21.1661	0.15479	-0.0092773	-0.104	48.045	23.3196	1077.3749	-1.6447	1.0424	-0.35937	-29.95	122.74578	899.1578	-1.1875	0.83008	-0.015137	-13.791	28.7849	43.275	-0.0078125	0.31152	0.1543	-24.804	33.822	44.5988	-0.038086	0.070801	-0.067383	5.562	54.498	802.586	-1.4077	0.50537	-0.25195	-59.46715	75.6294	720.807	-1.6221	0.48584	-0.12939
1.69	-15.302	31.0363	11.8396	0.14746	-0.0058594	-0.10107	37.518	34.63106	1074.2419	-1.6274	1.0239	-0.35498	-20.924	119.954	888.8657	-1.1621	0.81055	-0.0097656	-16.835	17.06857	24.9841	-0.00097656	0.31055	0.15283	-45.519	34.947	26.67042	-0.02959	0.074805	-0.069043	31.426	56.568	894.761	-1.8862	0.5874	-0.24219	-8.32832	71.501	821.252	-1.8184	0.60449	-0.15479
1.692	-32.405	36.155	15.4415	0.1416	0.0029297	-0.10156	30.2979	46.137	1046.65511	-1.5994	1.0023	-0.3499	-35.292	131.461	852.945	-1.103	0.76709	-0.0053711	-35.55	27.25665	21.2726	0.015137	0.30957	0.15527	-47.618	40.526	13.52	-0.02207	0.08623	-0.070312	2.068	49.822	967.259	-2.144	0.64697	-0.2373	35.1803	66.442	915.248	-2.0513	0.75049	-0.19287
1.694	-32.996	45.959	30.7807	0.12793	0.0068359	-0.099609	36.3188	60.073	1034.8919	-1.5746	0.98457	-0.35058	-30.436	130.697	816.3538	-1.0603	0.73511	-0.0083008	-47.443	28.8674	33.2224	0.023437	0.31153	0.1604	-39.2078	36.8505	20.703	-0.0064452	0.099899	-0.069532	-39.1652	66.752	976.086	-2.6226	0.78369	-0.22559	25.7336	78.124	958.01	-2.1484	0.80859	-0.1958
1.696	-38.845	45.986	35.9601	0.11963	0.025391	-0.10547	2.631	95.396	1020.9322	-1.5391	0.96387	-0.34394	-40.261	127.942	797.962	-1.0093	0.70361	-0.0029297	-28.179	19.1406	22.6549	0.036133	0.30713	0.16357	-58.5887	42.0157	40.309	0.010547	0.10205	-0.072949	-27.0134	46.2067	929.015	-2.8291	0.89062	-0.19263	0.195	91.299	954.647	-2.2886	0.92822	-0.1333
1.698	-31.354	27.6653	32.3172	0.11621	0.028809	-0.093262	9.3524	95.157	1000.1103	-1.5052	0.95029	-0.3376	-11.64	102.9207	777.4505	-0.94336	0.66016	-0.010742	-18.389	17.0076	26.2334	0.049805	0.30469	0.16357	-28.399	44.12395	34.9819	0.030273	0.10449	-0.075684	-37.655	16.7849	894.798	-2.9063	1.0684	-0.092285	-44.3689	92.375	966.8794	-2.3911	1.0161	-0.1128
1.7	-24.48	16.6359	22.6435	0.11377	0.047363	-0.095703	12.1477	81.528	992.9813	-1.4746	0.93359	-0.32422	-24.193	97.95565	732.8367	-0.91162	0.63867	-0.0087891	-22.391	17.8043	32.709	0.054688	0.30957	0.17188	-17.192	18.1136	37.8554	0.050586	0.1003	-0.079004	-4.1	1.454	893.809	-2.8906	1.4141	-0.070313	-17.015	92.387	961.603	-2.4819	1.0903	-0.094727
1.702	-39.514	31.45239	27.3244	0.10986	0.05664	-0.10132	19.85839	63.5979	965.0918	-1.4414	0.91211	-0.32354	-32.841	103.4818	723.075	-0.8457	0.60254	-0.01123	1.186	-6.2042	75.0852	0.063477	0.30566	0.15771	-25.67	16.6356	25.6264	0.071192	0.096191	-0.080078	-15.476	-15.786	897.894	-2.7925	1.5415	-0.088379	24.119	43.214	969.782	-2.5332	1.1611	-0.074219
1.704	-42.949	50.4827	18.1729	0.11084	0.064453	-0.099609	13.052	68.539	953.02241	-1.4132	0.89307	-0.31592	-26.918	109.010352	690.598	-0.80005	0.57349	-0.018799	-28.97	-16.9722	125.2815	0.065673	0.31152	0.13452	-44.929	26.1936	26.0198	0.089551	0.095801	-0.0875	-17.656	-20.867	862.5553	-2.3281	1.584	-0.18408	33.933	-12.686	982.042	-2.5093	1.1704	-0.070801
1.706	-47.033	48.2334	25.8947	0.12158	0.075195	-0.10107	-4.964	90.8841	923.3065	-1.3807	0.87392	-0.30615	-12.376	122.987	658.24	-0.75439	0.54736	-0.016602	-20.522	-14.1267	192.124	0.054199	0.32031	0.10303	-41.032	30.399	30.2388	0.10986	0.092578	-0.091406	-23.51	-35.641	868.71885	-1.8347	1.4378	-0.23437	-15.3581	-67.581	1024.0089	-2.3359	1.1348	-0.067871
1.708	-22.702	34.7887	32.4023	0.12305	0.085449	-0.10107	-14.634	87.100213	913.286	-1.3482	0.85205	-0.29873	-11.625	133.718	620.982	-0.69971	0.51123	-0.022461	-43.861	-13.8825	265.3057	0.003418	0.354	0.017578	-17.074	34.759	45.944	0.12305	0.092773	-0.097168	-20.209	-51.769	877.8502	-1.3608	1.2368	-0.28027	-57.202	-86.709	1051.0332	-2.1277	1.095	-0.064941
1.71	-37.559	29.7215	23.0894	0.12695	0.1001	-0.10449	-10.951	100.3183	886.5686	-1.3081	0.83643	-0.28271	-23.673	133.2546	594.455	-0.67676	0.49219	-0.023438	-68.23	-52.417	316.8059	-0.041016	0.38525	-0.01416	-30.741	32.865	50.717	0.13877	0.091211	-0.095898	18.431	-42.10674	899.3785	-0.93945	0.98633	-0.34473	-37.829	-89.716	1053.8017	-1.9102	1.0645	-0.055176
1.712	-51.483	20.3606	21.38451	0.13013	0.10718	-0.10693	-11.223	78.6204	863.3968	-1.2674	0.81914	-0.2789	-10.123	131.1837	592.0356	-0.62549	0.45459	-0.027832	-93.442	-124.1433	318.3396	-0.19287	0.46191	-0.063965	-19.477	28.2095	23.5448	0.14697	0.097265	-0.1	21.882	-13.767	901.01647	-0.82275	0.89844	-0.37793	-0.850999999999999	-118.256	1024.0306	-1.7148	1.0313	-0.037598
1.714	-40.965	20.9483	38.4394	0.13135	0.11035	-0.10938	-33.532	66.2857	847.1721	-1.2211	0.79806	-0.2707	-23.221	139.551	581.305139	-0.59472	0.43213	-0.033203	-64.75	-152.875	298.22343	-0.34326	0.52149	-0.068115	-35.304	19.5463	24.5682	0.15752	0.098047	-0.10742	8.228	11.847	904.4462	-0.77441	0.81445	-0.39844	48.659	-119.083	1010.3804	-1.6655	1.022	-0.038574
1.716	-47.234	33.3453	48.1363	0.13086	0.11865	-0.10889	-27.6833	74.8467	833.222	-1.1747	0.76876	-0.26329	-31.117	146.857	558.1498	-0.56299	0.41064	-0.03418	-57.383	-128.567	333.23	-0.50977	0.58789	-0.041504	-22.002	19.07851	37.2105	0.1628	0.10039	-0.10537	-39.1804	14.509	918.285	-0.83667	0.8269	-0.35669	73.894	-98.828	1047.288	-1.6602	1.0215	-0.010742
1.718	-53.0398	41.3217	38.6169	0.12891	0.12549	-0.11084	-32.1578	90.1869	813.6686	-1.1297	0.74493	-0.25743	-26.299	139.4743	539.7514	-0.52588	0.3877	-0.040039	-90.935	-67.454	394.571	-0.71143	0.67139	0.01709	-12.339	35.9516	40.7985	0.16846	0.10645	-0.10742	-74.309	-2.52600000000001	936.4317	-0.91406	0.85938	-0.30566	48.0135	-50.7174	1100.4527	-1.6814	1.0305	0.023681
1.72	-43.85	18.94662	15.5048	0.12695	0.12891	-0.10791	-25.39524	110.5565	784.5426	-1.0859	0.71484	-0.24707	-38.143	124.8721	511.902	-0.50342	0.38281	-0.040039	-99.255	-38.8558	426.2611	-0.78613	0.71094	0.045898	-18.47	48.0056	37.3639	0.16738	0.11602	-0.10879	-50.911	-39.907	916.5404	-0.98193	0.9165	-0.2417	34.643	-33.5039	1172.879	-1.6792	1.0337	0.056641
1.722	-35.438	17.0263	17.1268	0.12476	0.14087	-0.11401	-24.446	109.2721	772.2167	-1.0543	0.69257	-0.23222	-34.034	129.1061	472.3375	-0.46436	0.37061	-0.038574	-106.802	-36.5528	418.048	-0.87891	0.76563	0.08252	-18.526	30.0462	30.50809	0.16719	0.12197	-0.11025	-32.5009	-97.364	923.2894	-0.99414	0.9375	-0.23047	2.016	-43.4182	1210.174	-1.646	1.0171	0.084961
1.724	-12.892	18.9541	25.5844	0.12354	0.14355	-0.11963	-13.358	101.6025	749.9497	-1.018	0.66443	-0.21659	-75.4504	113.5124	434.5621	-0.43677	0.36036	-0.035645	-83.106	-41.731	422.592	-0.89819	0.78784	0.082519	-12.174	15.0228	32.8648	0.16328	0.12979	-0.10947	5.462	-150.242	929.1382	-0.97998	0.95459	-0.23193	11.31	-48.2261	1213.08	-1.6167	0.99658	0.090332
1.726	-32.693	42.5716	31.160109	0.11426	0.16016	-0.12207	-21.561	117.212	724.0687	-0.99021	0.64138	-0.20291	-58.019	100.941	424.1896	-0.40186	0.3501	-0.037109	-71.603	-29.986	474.7109	-0.89404	0.80322	0.066895	-18.713	10.5636	39.2061	0.16104	0.1335	-0.10957	-8.932	-189.221	938.638	-0.94483	0.95947	-0.25122	-24.509	-45.391	1177.499	-1.5542	0.95947	0.07666
1.728	-19.893	54.3704	34.8886	0.1123	0.16992	-0.12256	3.41	123.49	693.6985	-0.96071	0.61727	-0.18134	-53.219	98.4524	402.9042	-0.35059	0.33447	-0.041016	-65.381	27.269	556.4335	-0.88672	0.82617	0.01709	-26.403	17.6876	49.287	0.15674	0.14258	-0.11328	5.128	-183.918	943.922	-0.9082	0.96191	-0.27637	-74.465	-34.72	1157.88	-1.5103	0.91749	0.053223
1.73	-17.39	57.1231	36.71778	0.1084	0.18408	-0.12549	-17.378	129.305	693.5603	-0.93066	0.58984	-0.1665	-30.807	109.7315	351.439	-0.31543	0.31982	-0.041504	-54.928	96.0156	620.8131	-0.90527	0.84717	-0.028564	-38.886	15.978	64.7684	0.15146	0.14336	-0.11455	24.68343	-185.505	999.58	-0.87891	0.98145	-0.2998	-103.226	-40.414	1180.175	-1.4766	0.86914	0.023438
1.732	1.538	39.3796	38.3803	0.11133	0.19873	-0.12891	6.671	124.378	682.3213	-0.89195	0.568	-0.15471	-34.2525	97.5586	331.7578	-0.26465	0.28564	-0.049805	-62.072	141.577	685.7937	-0.9668	0.88281	-0.074707	-31.799	-5.9019	85.5666	0.14931	0.14912	-0.11865	52.832	-175.658	1060.5931	-0.88281	0.98438	-0.31787	-106.9415	-48.47	1189.618	-1.4668	0.79297	-0.0083008
1.734	-7.057	27.82792	37.6982	0.10693	0.20703	-0.12598	9.801	125.099	643.627	-0.85519	0.54581	-0.13794	-33.975	90.568	316.5637	-0.22754	0.26343	-0.048584	-74.3597	119.861	751.3075	-1.1382	0.96533	-0.1167	-28.878	-8.0953	74.041	0.14033	0.15342	-0.12022	73.725	-187.973	1113.0184	-0.93359	1	-0.33984	-89.4158	-73.501	1187.7201	-1.4688	0.75195	-0.019043
1.736	-14.659	13.9513	25.6531	0.10547	0.21484	-0.13135	-12.903	117.2975	608.718	-0.82007	0.51613	-0.12621	-32.178	108.87	318.444	-0.18945	0.24414	-0.05127	-106.7489	59.8881	817.865	-1.2598	1.0117	-0.11523	-44.4139	-15.2201	111.1594	0.11944	0.15098	-0.12217	25.7076	-167.811	1150.9244	-0.99	1.0071	-0.3435	-82.132	-110.414	1183.93627	-1.4922	0.68945	-0.043945
1.738	-14.304	19.6006	40.4468	0.10547	0.22461	-0.12891	-22.517	110.94925	587.716	-0.78847	0.49118	-0.11537	-17.72	128.7139	290.935	-0.14404	0.21533	-0.053711	-106.465	12.343	884.251	-1.5488	1.1279	-0.097656	-32.8353	6.1042	147.84428	0.072266	0.1499	-0.12158	21.1387	-128.0799	1179.00588	-1.0645	1.0176	-0.34375	-62.005	-117.802	1202.012	-1.5225	0.66406	-0.046386
1.74	-23.78	29.423	32.1755	0.10742	0.23242	-0.12939	-0.529999999999994	105.58588	578.64502	-0.75928	0.46826	-0.10498	2.836	131.953	267.681	-0.125	0.20068	-0.055664	-122.148	-24.118	956.208	-1.7569	1.2188	-0.064697	-11.494	20.7216	197.3797	0.010742	0.15381	-0.13496	-14.133	-73.38	1215.156	-1.1563	1.0215	-0.34277	-72.381	-91.077	1239.39	-1.5552	0.65869	-0.053223
1.742	-33.715	28.3503	13.3295	0.10401	0.24023	-0.12573	-13.537	134.259	560.99	-0.7368	0.44281	-0.097633	-7.817	128.618	232.5756	-0.083984	0.18213	-0.057617	-157.79781	-52.797	1011.0601	-1.9351	1.3159	-0.024414	1.167	47.5233	245.277	-0.063183	0.16621	-0.13017	-16.493	-35.973	1232.055	-1.2036	1.0161	-0.33936	-69.258	-38.9261	1275.278	-1.5977	0.67969	-0.070313
1.744	-25.22	25.735	10.246	0.10156	0.24219	-0.12109	-27.235	125.288	549.653	-0.71136	0.41453	-0.091977	-21.381	97.135	228.28344	-0.060303	0.16553	-0.063232	-122.9146	-79.548	1032.921	-2.0698	1.4282	0.018555	-15.414	53.1443	296.291	-0.15029	0.18223	-0.13369	-15.103	-39.2	1217.704	-1.2773	1.001	-0.3457	-62.381	-32.3658	1317.548	-1.6206	0.69971	-0.072266
1.746	-16.162	13.3418	18.8006	0.094727	0.25146	-0.11133	-13.85	121.578	542.3845	-0.69304	0.39248	-0.081767	-31.456	82.873	200.066	-0.03418	0.1543	-0.071289	-87.8904	-97.4738	1049.459	-2.0913	1.4868	0.041016	20.0708	35.129	403.003	-0.24043	0.20821	-0.14082	15.206	-60.6	1203.71699	-1.3257	0.99072	-0.35156	-64.5961	-48.021	1337.581	-1.6616	0.7417	-0.078125
1.748	-31.819	28.0797	56.4609	0.094727	0.25586	-0.11084	-2.235	100.20759	528.0653	-0.67372	0.37449	-0.073388	-37.033	65.8471	188.8016	-0.020508	0.13721	-0.0625	-42.5353	-118.311	1067.078	-2.0508	1.5703	0.067383	45.367	25.108	519.111	-0.33594	0.229	-0.14844	57.907	-87.843	1219.679	-1.3726	0.98486	-0.35791	-98.021	-83.0318	1351.532	-1.7068	0.7727	-0.080567
1.75	2.103	17.2281	115.323	0.083984	0.26465	-0.098633	-13.126	107.62274	513.2785	-0.65381	0.35986	-0.0625	-22.762	77.40833	154.8414862	-0.0083008	0.12695	-0.064941	-18.997	-148.914	1109.941	-1.9692	1.6285	0.08667	22.553	43.7331	616.634	-0.44805	0.24961	-0.15996	47.5586	-90.15487	1221.45	-1.4526	0.98096	-0.37061	-123.788	-70.823	1312.761	-1.7612	0.80127	-0.079102
1.752	-49.0543	-10.9046	180.088	0.07666	0.26758	-0.089356	-14.505	108.70995	481.2456	-0.64086	0.35124	-0.049592	-19.18	75.78588	116.3526	0.0068359	0.11621	-0.069336	1.576	-141.674	1181.3885	-1.8667	1.6528	0.092285	37.932	40.268	699.868	-0.60029	0.2626	-0.17598	67.233	-68.6027	1232.916	-1.5034	0.98096	-0.37207	-115.08719	-49.73	1326.285	-1.8511	0.85791	-0.068848
1.754	-3.837	-22.0853	236.389	0.071777	0.27734	-0.07959	-24.946	99.9494	451.8488	-0.62453	0.3378	-0.043187	-25.366	50.29428	97.5271	0.032227	0.10742	-0.064941	-26.947	-100.38	1252.478	-1.7285	1.6309	0.098145	30.997	17.182	757.225	-0.81552	0.27549	-0.18536	59.6851	-82.909	1247.8095	-1.6245	0.99268	-0.37646	-97.121	-20.08	1312.4736	-1.8882	0.88916	-0.060059
1.756	29.5201	-24.8064	269.546	0.064941	0.29248	-0.074707	-37.929	118.151	411.5618	-0.60781	0.32779	-0.033231	-37.697	51.9826	84.5079	0.046387	0.099609	-0.068359	-9.154	-68.941	1291.94	-1.668	1.5996	0.1001	-15.372	0.241999999999997	802.327	-1.1174	0.2998	-0.18438	58.001	-104.557	1260.7969	-1.7251	1.0137	-0.37183	-82.163	-22.204	1295.5282	-1.9785	0.96875	-0.049805
1.758	24.9576	-51.6907	263.8094	0.056152	0.29785	-0.07666	-50.017	111.017	391.69604	-0.58376	0.31841	-0.02233	-26.938	60.9364	89.6427	0.074219	0.095703	-0.067871	-13.642	-72.267	1306.833	-1.5703	1.5273	0.1001	-0.826000000000001	27.666	825.121	-1.4922	0.35156	-0.18604	24.752	-118.422	1273.147	-1.8438	1.0488	-0.36963	-93.352	-67.0548	1257.507	-2.0439	1.0317	-0.048096
1.76	19.5077	-108.262	272.67	0.024414	0.31836	-0.10156	-37.723	94.7501	363.7147	-0.55957	0.30664	-0.015137	-26.648	68.2699	64.9438	0.098875	0.089111	-0.070068	4.713	-73.2402	1297.506	-1.5115	1.4661	0.089599	-4.984	40.8802	832.32	-1.9009	0.45889	-0.17373	-0.733500000000001	-120.141	1289.87	-1.9863	1.1045	-0.37988	-60.937	-109.105	1253.955	-2.0957	1.0957	-0.051758
1.762	7.75653	-147.596	293.8135	-0.037353	0.33984	-0.1167	-33.285	86.3286	355.68505	-0.53358	0.28846	-0.0043388	-16.605	63.651	63.7092	0.12207	0.081543	-0.07373	3.096	-58.673	1296.2292	-1.4688	1.4141	0.075195	-26.739	40.3286	837.697	-2.2722	0.59932	-0.1583	0.0580000000000016	-102.3167	1311.975	-2.0444	1.1362	-0.38623	-32.674	-102.673	1292.119	-2.1694	1.1646	-0.067383
1.764	11.2386	-139.231	377.516	-0.14209	0.36475	-0.12549	-20.44	109.3061	338.5287	-0.49504	0.274	0.0022887	-29.737	49.2772	60.4435	0.15479	0.068359	-0.07373	-10.36	-32.879	1289.889	-1.4175	1.354	0.042969	-30.243	32.095	829.60483	-2.5359	0.75752	-0.13682	-26.156	-76.721	1326.91	-2.146	1.1919	-0.40283	-30.201	-50.877	1309.968	-2.2188	1.1953	-0.071289
1.766	-4.441	-71.49	459.857	-0.37793	0.41699	-0.12646	-50.2923	110.38246	309.392	-0.45418	0.25728	0.01308	-32.517	39.2025	53.9024	0.16064	0.068359	-0.07373	-54.721	-28.694	1294.783	-1.4063	1.3232	0.024414	-9.356	14.313	829.4776	-2.6632	0.96943	-0.045215	-44.332	-60.756	1322.727	-2.2046	1.2402	-0.41406	-7.986	-2.1598	1295.872	-2.3433	1.2505	-0.078613
1.768	30.7877	-18.32671	540.682	-0.51758	0.44531	-0.11865	-56.668	104.98	308.697	-0.41077	0.23861	0.015508	-24.428	38.7893	45.9383	0.17578	0.060059	-0.076172	-54.9328	-48.604	1291.409	-1.396	1.2798	-0.0039063	-4.782	-16.708	856.4732	-2.6953	1.2266	0.029785	-20.2	-68.373	1284.9824	-2.2515	1.2729	-0.43018	-19.924	7.2246	1297.2255	-2.449	1.3005	-0.085205
1.77	56.598	-20.1229	569.388	-0.79688	0.52148	-0.10596	-19.981	101.94	289.0036	-0.36279	0.21826	0.02002	-36.427	40.8163	38.5117	0.18066	0.057373	-0.078614	-48.413	-70.107	1301.481	-1.406	1.2541	-0.013184	14.313	-28.976	885.037	-2.6159	1.4712	0.02207	15.3358	-75.439	1266.046	-2.2925	1.3188	-0.43896	-34.151	2.3474	1301.9018	-2.5469	1.3535	-0.084473
1.772	39.353	-5.77	625.135	-0.97168	0.59472	-0.098875	-31.457	100.965	277.2844	-0.31657	0.19738	0.019371	-31.944	44.5246	24.2827	0.17871	0.062012	-0.08252	-23.848	-98.047	1312.87	-1.4272	1.229	-0.016602	21.282	-18.17362	892.734	-2.4022	1.593	-0.017969	29.42814	-69.37	1258.49	-2.3086	1.3418	-0.43994	-88.558	-15.405	1327.554	-2.6108	1.4302	-0.081543
1.774	40.996	27.977	741.304	-1.1152	0.67188	-0.095215	-6.491	98.142	249.6135	-0.27887	0.17951	0.02014	-54.25046	42.061	22.0928	0.1665	0.060059	-0.080078	-10.622	-113.1307	1339.875	-1.4761	1.2036	-0.022949	15.479	4.58	875.9426	-2.057	1.5322	-0.086719	47.827	-42.331	1251.587	-2.3066	1.3672	-0.44141	-64.091	-9.186	1333.152	-2.6089	1.4614	-0.08252
1.776	30.7986	66.234	888.7269	-1.2598	0.77539	-0.13916	-40.512	90.1278	233.0482	-0.24297	0.15997	0.029234	-39.702	33.783	7.088	0.15771	0.061523	-0.081543	16.942	-100.579	1364.199	-1.5059	1.1953	-0.0097656	-1.189	24.586	881.615	-1.6572	1.3355	-0.14971	47.401	-21.393	1265.4771	-2.2754	1.377	-0.44189	-61.29	-0.850999999999999	1326.957	-2.5322	1.4961	-0.077637
1.778	32.717	102.777	1001.214	-1.3281	0.82227	-0.1543	-41.772	79.8013	222.2855	-0.20928	0.14903	0.028681	-63.916	13.7483	19.007	0.13477	0.062012	-0.087891	-12.696	-70.3993	1386.9355	-1.5605	1.1855	0.0048828	-33.792	17.982	905.322	-1.3027	1.1133	-0.2041	34.391	-12.503	1268.2987	-2.2534	1.3774	-0.44043	-81.3417	19.406	1290.113	-2.4158	1.4837	-0.087402
1.78	61.683	108.465	1041.082	-1.5073	0.92822	-0.17578	-44.0081	80.2569	213.3793	-0.17676	0.13379	0.028809	-22.28	1.222	29.1922	0.12134	0.062256	-0.085937	-33.7777	-65.1098	1421.973	-1.6004	1.1937	0.013184	-43.4738	-12.998	915.609	-1.0695	0.94941	-0.25606	32.238	-23.3873	1255.4007	-2.1719	1.3682	-0.43945	-102.9009	17.878	1246.001	-2.2793	1.4375	-0.095215
1.782	68.2722	74.959	1045.543	-1.706	1.0254	-0.17579	-41.588	86.7996	202.1934	-0.14726	0.12249	0.029297	-24.294	9.105	33.0894	0.10547	0.069824	-0.086914	-49.414	-106.828	1454.867	-1.6367	1.2031	0.023926	-51.1379	-57.829	913.162	-0.95391	0.86132	-0.28965	10.999	-25.5439	1241.1044	-2.0957	1.3536	-0.4353	-117.4569	6.3749	1220.859	-2.0952	1.356	-0.11084
1.784	15.147	28.845	1058.5479	-1.9629	1.1426	-0.1665	-24.371	81.1768	194.1769	-0.11539	0.11002	0.025846	-29.767	26.761	5.566	0.081055	0.067871	-0.090332	-60.495	-135.079	1462.012	-1.6812	1.2446	0.037109	-82.732	-95.5004	905.7234	-0.94297	0.84727	-0.28379	23.0355	-4.112	1240.3777	-2.019	1.3423	-0.43896	-70.046	-4.48999999999999	1228.003	-1.9822	1.2884	-0.12109
1.786	-6.927	-6.171	1099.066	-2.3535	1.3359	-0.12988	-12.92	65.411	180.8067	-0.09095	0.094319	0.028748	-23.451	22.08178	26.3096	0.07666	0.070313	-0.092773	-68.229	-127.837	1453.127	-1.7031	1.2656	0.043945	-78.225	-107	916.82681	-0.97275	0.88271	-0.25605	6.039	26.147	1253.254	-1.9136	1.3276	-0.43408	-79.281	-2.309	1231.17212	-1.8965	1.2246	-0.12988
1.788	-37.4769	-66.4762	1118.806	-2.543	1.4238	-0.11621	-12.491	73.1544	156.546	-0.065631	0.079065	0.030166	-26.528	34.4068	25.7611	0.07373	0.073242	-0.097168	-95.454	-108.6973	1443.557	-1.7612	1.311	0.06543	-51.901	-94.961	929.4683	-0.99365	0.93896	-0.22607	27.47	30.329	1248.2702	-1.873	1.3164	-0.43555	-64.309	16.278	1236.7714	-1.8145	1.1523	-0.13428
1.79	-56.6578	-140.053	1132.6013	-2.8242	1.5898	-0.10059	-37.456	73.554	150.34628	-0.037598	0.069824	0.030273	-30.192	39.1385	35.636	0.08374	0.077392	-0.098879	-112.7493	-94.1763	1417.56716	-1.8054	1.3484	0.073974	-13.262	-88.894	952.6157	-0.98623	0.96592	-0.21045	-7.9741	13.915	1234.228	-1.7925	1.3032	-0.43506	-79.615	50.94	1251.6964	-1.7891	1.1289	-0.12842
1.792	-39.842	-174.339	1128.6036	-2.8907	1.6836	-0.12011	-22.435	82.571	151.4025	-0.016244	0.063632	0.033384	-14.379	44.8831	29.3553	0.091797	0.082031	-0.098145	-144.872	-87.878	1405.4474	-1.8511	1.3892	0.077148	21.3	-130.575	980.4532	-0.9624	0.97588	-0.2001	46.699	-5.035	1223.9273	-1.7564	1.2925	-0.42505	-85.0581	79.6858	1240.2307	-1.7559	1.082	-0.12305
1.794	-29.924	-180.955	1121.65826	-2.8242	1.7598	-0.15527	-11.106	77.7559	141.2849	0.0039321	0.057718	0.037815	-21.491	35.3763	29.4601	0.10596	0.07373	-0.10352	-134.395	-85.0716	1401.1067	-1.9077	1.4399	0.088867	45.5119	-164.428	1015.958	-0.92216	0.97158	-0.21221	61.122	-25.282	1228.086	-1.728	1.2808	-0.42139	-109.9969	95.043	1229.9824	-1.7395	1.0554	-0.11817
1.796	-24.302	-152.368	1121.6945	-2.4941	1.8105	-0.21289	-21.581	74.1758	124.25485	0.028479	0.056533	0.043279	-43.969	36.5146	25.074	0.11035	0.06543	-0.1123	-113.8196	-108.0755	1410.727	-1.9331	1.4614	0.089355	35.5927	-169	1051.045	-0.88418	0.95605	-0.23144	69.393	-25.2216	1207.8039	-1.6953	1.2598	-0.41211	-125.1091	105.87	1199.429	-1.7183	1.0317	-0.10742
1.798	-39.202	-124.825	1184.0502	-2.2773	1.8125	-0.25391	-42.585	49.7954	119.2558	0.050426	0.050477	0.045232	-48.7672	36.5021	15.489	0.1167	0.055664	-0.11035	-67.133	-92.736	1394.173	-1.9854	1.5117	0.087891	3.9421	-145.036	1077.1718	-0.85938	0.92578	-0.25195	69.502	-5.633	1193.3946	-1.6831	1.2505	-0.40674	-128.8146	84.76	1200.013	-1.6909	1.0093	-0.097656
1.8	-36.387	-82.054	1230.548	-1.8379	1.7773	-0.32715	-21.292	46.5147	113.4411	0.070313	0.04541	0.05127	-46.6	27.62266	24.0924	0.12011	0.056153	-0.10425	-83.843	-52.6754	1413.298	-2.0186	1.5479	0.069824	-2.371	-116.953	1118.3743	-0.87305	0.90234	-0.26582	55.7339	14.684	1192.5391	-1.6699	1.2266	-0.39746	-137.376	87.096	1179.18831	-1.6851	0.99268	-0.096191
1.802	-16.8429	-54.1718	1273.204	-1.5733	1.7158	-0.36768	-20.514	67.8099	98.83473	0.08807	0.035163	0.050389	-40.184	17.3887	10.94824	0.12451	0.055176	-0.104	-87.72	1.405	1397.403	-2.0625	1.5918	0.043457	-0.533000000000001	-104.096	1139.5605	-0.92452	0.88174	-0.27314	59.62	17.659	1173.21541	-1.6572	1.2085	-0.3938	-126.008	83.183	1151.674	-1.6465	0.95508	-0.092285
1.804	-17.028	-37.92	1293.574	-1.3809	1.6406	-0.39502	-47.63	75.37	93.0996	0.1075	0.027739	0.051754	-17.383	15.2765	13.1222	0.13232	0.049316	-0.10645	-97.303	28.418772	1417.4785	-2.1387	1.6582	0.022949	-3.524	-91.395	1116.2774	-1.0042	0.87393	-0.27783	37.0578	17.7124	1154.5371	-1.6382	1.1812	-0.39502	-113.1882	77.8755	1123.264	-1.614	0.92505	-0.08667
1.806	-25.9506	-31.891	1296.5538	-1.2358	1.5435	-0.39697	-27.884	61.74	68.6872	0.1243	0.021881	0.054491	-26.89	31.7623	1.144	0.1377	0.047852	-0.10059	-91.732	17.6452	1434.95343	-2.1929	1.6958	0.017578	-11.587	-80.525	1115.961	-1.1042	0.87393	-0.27373	31.667	22.1379	1141.666	-1.6152	1.1523	-0.37305	-59.094	51.921	1095.797	-1.5791	0.89453	-0.083984
1.808	-40.43	-57.488	1313.9675	-1.1753	1.5024	-0.39111	-32.815	35.9122	70.4388	0.13769	0.013575	0.054589	-38.507	45.592	21.031	0.14014	0.045898	-0.099609	-89.371	6.31948	1446.049	-2.2891	1.7695	0.012695	-1.565	-67.339	1147.0109	-1.2129	0.87305	-0.27148	13.49014	42.1171	1134.2255	-1.6011	1.1411	-0.37256	-35.363	48.185	1064.53862	-1.5215	0.84961	-0.088379
1.81	-45.02	-59.325	1300.607	-1.0679	1.4302	-0.37061	-47.472	34.96731	48.809	0.15088	0.012207	0.056641	-30.187	51.0054	28.7324	0.14819	0.040772	-0.1001	-72.856	-7.1166	1437.796	-2.3413	1.8208	0.015625	4.4259	-53.968	1194.918	-1.3128	0.88213	-0.26435	-0.688800000000001	85.081	1111.5048	-1.5625	1.1113	-0.3623	-39.386	73.852	1029.90012	-1.498	0.82324	-0.087891
1.812	-60.9293	-50.652	1231.852	-0.97561	1.374	-0.36865	-53.384	33.9905	61.72	0.16289	0.0078125	0.056837	-21.192	46.9365	40.8789	0.15381	0.039063	-0.097168	-95.7477	-14.585	1429.438	-2.3594	1.8652	0.015625	44.3961	-46.443	1210.0082	-1.3901	0.89151	-0.25957	-5.7569	107.393	1090.194	-1.5325	1.0916	-0.35523	-35.606	99.01	1022.987	-1.4414	0.7832	-0.085449
1.814	-42.73	-64.855	1215.531	-0.89063	1.3164	-0.37793	-45.721	38.3131	75.6175	0.17305	0.0099636	0.056251	-12.057	33.2977	32.0842	0.15479	0.029297	-0.096191	-112.499	-12.194	1412.7815	-2.3184	1.8984	0.0014648	62.18	-50.4363	1207.944	-1.4436	0.90283	-0.26231	-17.299	99.838	1078.7205	-1.5015	1.0708	-0.34961	-23.504	108.0527	1029.136	-1.4031	0.75855	-0.082031
1.816	-14.6222	-106.82412	1240.277	-0.80469	1.2207	-0.39648	-26.361	49.113	65.3635	0.1793	0.013476	0.057421	-28.424	26.6725	32.7799	0.15332	0.033691	-0.098633	-110.815	-15.2877	1395.3704	-2.2695	1.8965	-0.0039063	65.0506	-63.9697	1206.051	-1.4758	0.90566	-0.25351	16.572	74.5555	1050.8227	-1.457	1.0381	-0.34082	-16.621	117.605	1041.93	-1.3691	0.73828	-0.080566
1.818	-10.07426	-146.909	1286.021	-0.7793	1.1431	-0.40234	-55.7333	55.6567	42.3209	0.18271	0.01709	0.061329	-23.404	19.5365	32.90235	0.15088	0.037598	-0.097168	-82.347	-35.651	1382.4497	-2.1543	1.8555	-0.017578	92.567	-71.253	1235.606	-1.4883	0.91113	-0.25781	0.518999999999998	60.974	1030.2969	-1.4331	1.022	-0.33447	-46.738	108.3784	1008.47	-1.3179	0.71338	-0.077148
1.82	9.046	-160.729	1340.208	-0.7876	1.0747	-0.40332	-38.734	45.8037	29.9437	0.18311	0.01416	0.060059	-42.417	39.183	29.2379	0.14892	0.04248	-0.10034	-57.558	-51.516	1347.641	-2.0594	1.8098	-0.025879	50.8572	-67.2602	1275.0157	-1.5017	0.91514	-0.26914	14.0993	75.436	1001.4511	-1.3926	0.9873	-0.33057	-46.141	118.0145	971.173	-1.2969	0.70117	-0.07373
1.822	38.217	-163.511	1385.907	-0.86279	0.99268	-0.39795	-42.513	35.0194	32.401	0.18183	0.010644	0.059766	-19.849	60.803	20.8829	0.15137	0.050781	-0.096191	-28.746	-48.75	1355.27815	-1.958	1.7578	-0.028809	8.4539	-42.145	1300.258	-1.5163	0.91377	-0.28057	1.24	82.391	1010.1866	-1.3614	0.96778	-0.31885	-58.532	128.947	910.445	-1.2495	0.67432	-0.068848
1.824	64.4802	-118.332	1388.573	-0.9248	0.95898	-0.39502	-33.341	46.3558	42.891	0.179	0.01084	0.061035	-45.49	53.694	12.658	0.15088	0.060547	-0.097168	-56.139	-7.056	1347.3918	-1.853	1.6821	-0.030762	-5.4486	-37.626	1327.672	-1.5495	0.90634	-0.29306	8.207	109.9633	995.5192	-1.3257	0.9458	-0.30811	-80.6608	147.354	879.6913	-1.2131	0.65503	-0.065186
1.826	48.165	-82.438	1386.427	-1.0918	0.91602	-0.37305	-54.5285	48.0768	29.4731	0.17627	0.013183	0.05791	-17.233	24.58054	18.9749	0.1499	0.063477	-0.1001	-78.772	38.4526	1348.3558	-1.8022	1.645	-0.038086	1.0785	-36.982	1316.353	-1.611	0.90264	-0.31358	-6.835	84.1625	957.9605	-1.2832	0.91406	-0.29492	-36.871	133.382	847.1974	-1.1738	0.63867	-0.061035
1.828	55.261	-62.357	1399.577	-1.2243	0.90454	-0.35718	-44.623	34.4725	32.5834	0.16875	0.014453	0.057129	-19.364	18.7766	31.645	0.14844	0.073242	-0.104	-75.513	67.4797	1330.3852	-1.728	1.5845	-0.041992	-14.7591	-49.785	1285.335	-1.6978	0.8999	-0.32861	-16.589	76.5777	930.35	-1.2588	0.90137	-0.28418	-0.707999999999998	123.378	828.7246	-1.1157	0.61572	-0.05957
1.83	58.803	-60.921	1442.639	-1.3423	0.90088	-0.34717	-28.022	15.50342	31.246	0.16504	0.015625	0.053711	-35.532	32.01759	23.379	0.1543	0.077636	-0.11084	-71.464	86.7011	1291.315	-1.6833	1.5471	-0.035644	-28.069	-62.2467	1271.653	-1.8102	0.92197	-0.34043	-40.0753	67.3161	932.7215	-1.1963	0.86914	-0.27393	9.851	116.5697	801.391	-1.0854	0.60303	-0.060059
1.832	75.267	-57.955	1459.804	-1.4629	0.92285	-0.34619	-36.935	21.47	17.679	0.15791	0.021875	0.058496	-38.417	37.4069	36.49429	0.15381	0.087891	-0.11426	-74.705	87.155	1260.419	-1.6387	1.5098	-0.030762	-2.554	-66.7964	1272.5923	-1.9307	0.96123	-0.35147	-48.6834	85.8617	908.3203	-1.1546	0.85181	-0.2605	-8.812	110.24	755.362	-1.0234	0.56934	-0.059082
1.834	68.026	-58.525	1422.888	-1.5117	0.93945	-0.35254	-26.536	42.7895	23.2089	0.1499	0.030176	0.058398	-7.297	45.8792	47.8098	0.15918	0.10352	-0.11865	-85.837	94.134	1230.7638	-1.6011	1.4683	-0.027344	-1.825	-61.25759	1286.881	-2.0413	1.0155	-0.36279	-38.1184	101.164	879.3316	-1.1113	0.82422	-0.25049	-17.55	98.772	732.184	-0.9795	0.55518	-0.060302
1.836	51.23	-60.3545	1370.353	-1.582	0.98535	-0.375	-31.017	40.6664	26.0604	0.14092	0.037207	0.060742	-11.612	43.0317	24.7257	0.15723	0.10938	-0.11914	-106.9549	97.51	1224.8972	-1.5825	1.4429	-0.025879	6.3715	-34.0139	1265.113	-2.1269	1.0813	-0.37588	-37.474	114.262	855.4071	-1.062	0.78955	-0.23779	-40.512	132.956	720.825	-0.93359	0.5293	-0.0625
1.838	55.186	-54.0436	1333.856	-1.6189	1.0202	-0.38208	-18.601	44.1169	32.0847	0.13291	0.043554	0.058398	-40.475	30.7122	2.957	0.15723	0.12012	-0.12598	-104.4439	119.878	1214.524	-1.542	1.4004	-0.024902	5.8108	-37.63	1269.12	-2.1895	1.1426	-0.37891	-8.976	108.303	827.8756	-1.0396	0.77393	-0.229	-21.265	156.536928	720.5909	-0.86621	0.50195	-0.058105
1.84	50.7812	-65.763	1347.589	-1.6616	1.0513	-0.39795	-30.206	43.7551	26.62679	0.12158	0.050293	0.059082	-28.237	24.2707	30.71882	0.16064	0.12939	-0.1289	-91.709	107.071	1189.5035	-1.511	1.3655	-0.022461	32.5711	-41.017	1259.881	-2.2274	1.1879	-0.39688	-1.00700000000001	115.9124	804.417	-0.9917	0.74854	-0.21582	-22.029	162.686	688.3525	-0.83936	0.49268	-0.061523
1.842	71.312	-64.037	1331.595	-1.7246	1.0898	-0.41113	-21.675	25.5674	34.4929	0.11182	0.055762	0.057227	-33.702	40.5616	40.7998	0.15674	0.14209	-0.12744	-88.274	68.5977	1154.413	-1.4819	1.3247	-0.018555	34.5664	-13.5052	1248.6859	-2.2539	1.2187	-0.40244	17.581	115.427	774.497	-0.9646	0.72681	-0.19995	-57.6556	141.179	656.4424	-0.7749	0.46924	-0.060547
1.844	101.052	-75.52902	1333.721	-1.7627	1.1094	-0.41992	-18.18	14.015	41.594	0.10449	0.058984	0.057324	-47.024	54.32	54.473	0.15381	0.15869	-0.12988	-73.549	33.901	1106.291	-1.4297	1.2656	-0.017578	-21.701	27.2747	1235.0915	-2.2695	1.2469	-0.40478	3.749	119.934	756.9964	-0.93408	0.70605	-0.18506	-81.0695	137.268	646.47526	-0.73316	0.45093	-0.064697
1.846	110.268	-80.801	1331.044	-1.8354	1.1528	-0.43994	-6.615	20.7356	48.1853	0.097461	0.063672	0.056153	-48.143	43.435	49.3204	0.1499	0.16357	-0.13232	-88.869	43.302	1086.393	-1.3999	1.2388	-0.012695	-17.0382	44.631	1232.659	-2.2684	1.2599	-0.40606	19.322	122.0526	756.2075	-0.896	0.68115	-0.16699	-81.486	142.737	620.8644	-0.68506	0.43311	-0.06543
1.848	73.162	-66.4256	1345.8849	-1.894	1.1987	-0.4624	-4.16699999999999	31.5418	21.8421	0.091992	0.074902	0.057617	-37.127	11.71345	29.2132	0.13574	0.18359	-0.12451	-113.1198	76.23	1082.341	-1.3398	1.1641	-0.01709	-11.616	37.0764	1249.42	-2.252	1.2676	-0.39941	22.558	125.1968	743.8292	-0.87305	0.66992	-0.15771	-80.5041	146.409	602.43	-0.6333	0.40527	-0.062988
1.85	34.4313	-40.6135	1368.4892	-1.9707	1.2539	-0.48242	-28.961	40.667	19.2804	0.088867	0.091797	0.055664	-34.367	17.2606	16.684	0.13355	0.19018	-0.13843	-102.6383	95.17	1089.5564	-1.2886	1.1118	-0.013184	-2.3713	12.862	1233.7364	-2.2172	1.2688	-0.39707	-8.279	116.412	699.589	-0.83545	0.64307	-0.14502	-67.315	139.5992	565.7636	-0.60742	0.38867	-0.065918
1.852	30.5328	-16.6044	1365.6561	-2.1016	1.3379	-0.49609	-27.364	29.693	29.7925	0.088379	0.10117	0.060254	-39.296	26.0438	14.1817	0.12842	0.19971	-0.14014	-79.264	101.8674	1049.4	-1.2344	1.0605	-0.0092773	14.7954	-3.046	1217.4699	-2.1656	1.2605	-0.39229	-13.397	117.065	679.7832	-0.80054	0.62378	-0.12769	-46.978	119.3567	527.4237	-0.55859	0.36719	-0.071289
1.854	36.4657	-22.589724	1366.6129	-2.1733	1.3872	-0.49658	-34.313	30.69	37.3287	0.085254	0.10859	0.058203	-36.425	27.2368	33.4123	0.12207	0.21094	-0.14697	-75.942	91.8428	1017.149	-1.1665	1.0063	-0.016602	31.1255	-12.1774	1208.261	-2.0949	1.25	-0.39189	-14.74	111.984	648.0176	-0.77246	0.59961	-0.12842	-44.675	107.373	476.147	-0.5232	0.34424	-0.072998
1.856	43.032	-28.6162	1341.828	-2.3086	1.4902	-0.4834	-20.566	40.6748	26.9959	0.082129	0.11211	0.054297	-24.606	32.5021	22.8082	0.11914	0.21729	-0.15332	-90.001	103.65448	979.5397	-1.1289	0.97461	-0.019043	46.945	1.2909	1203.424	-2.0125	1.2344	-0.39141	-24.843	130.468	627.0977	-0.72852	0.57031	-0.1084	-40.602	108.27	461.159	-0.48584	0.32666	-0.078125
1.858	17.7377	-29.044	1324.966	-2.3825	1.5549	-0.46778	-33.686	34.0449	41.5304	0.082129	0.11816	0.056641	-24.258	34.659	39.6134	0.11963	0.22461	-0.1626	-70.887	129.4474	965.435	-1.0581	0.9165	-0.018555	13.878	32.1379	1170.324	-1.9272	1.2173	-0.39355	-25.29	122.7993	611.3716	-0.70898	0.55469	-0.096191	-24.903	117.49	446.8826	-0.44434	0.30664	-0.083984
1.86	-8.254	-27.7617	1305.567	-2.4199	1.6113	-0.44727	-13.406	31.8969	28.0791	0.075195	0.12012	0.054688	-38.262	37.6354	17.08	0.11743	0.23291	-0.16601	-68.436	163.984	947.7832	-1.0105	0.87524	-0.019287	16.29855	35.836	1177.24	-1.8544	1.1917	-0.39092	-29.454	111.7078	600.3326	-0.6792	0.52979	-0.089844	-15.04	120.6166	426.211	-0.41943	0.29932	-0.084473
1.862	17.9362	-20.5221	1292.5693	-2.3921	1.647	-0.43115	-29.246	20.00048	28.882	0.072656	0.125	0.051563	-38.447	29.13829	39.7852	0.11328	0.24219	-0.17334	-60.073	170.33	906.396245	-0.96289	0.83984	-0.020508	59.1348	20.615	1168.3919	-1.787	1.1675	-0.38935	-5.823	97.68	571.3773	-0.65699	0.50415	-0.078125	-15.227	123.7851	413.2377	-0.37842	0.28174	-0.077637
1.864	2.455	-19.1843	1258.49	-2.3496	1.6563	-0.42627	-59.245	34.9175	25.8387	0.065039	0.13447	0.052051	-9.28700000000001	25.2541	54.754	0.104	0.25146	-0.17871	-54.455	141.272	875.9806	-0.89941	0.78516	-0.01709	75.62	15.843	1178.742	-1.7359	1.1452	-0.3835	-6.64	110.068	537.3626	-0.63672	0.48828	-0.072266	-50.801	120.74	385.8295	-0.34961	0.26611	-0.084229
1.866	21.8065	-9.934	1213.385	-2.2085	1.645	-0.42529	-33.234	29.0743	21.3728	0.058008	0.14424	0.055566	-34.986	46.053	47.9922	0.099121	0.2583	-0.18018	-42.886	124.819	813.0153	-0.84961	0.74853	-0.020996	60.7146	16.257	1176.899	-1.6979	1.1158	-0.38711	1.755	116.976	503.9543	-0.60645	0.46484	-0.057617	-54.448	120.552	389.2215	-0.31543	0.25439	-0.083984
1.868	31.72	-10.902	1212.05	-2.0786	1.6147	-0.41919	-29.865	23.801	29.74958	0.051562	0.15117	0.059473	-34.173	43.267	31.6594	0.085449	0.27002	-0.18701	-38.556	118.66419	781.385	-0.7998	0.71191	-0.017578	27.766	49.2207	1137.8916	-1.6714	1.1001	-0.37939	-15.771	123.8425	495.972	-0.58984	0.45313	-0.046387	-25.386	137.037	376.3537	-0.271	0.23535	-0.085449
1.87	42.09	10.975	1202.06	-1.9473	1.5723	-0.41406	-29.279	28.4235	31.1125	0.044434	0.15771	0.062988	-29.0756	23.7161	28.5567	0.074951	0.27735	-0.19092	-36.202	136.8363	763.744	-0.73975	0.66748	-0.019043	24.2865	70.483	1119.9657	-1.6529	1.075	-0.37344	-10.384	126.2501	473.4032	-0.55518	0.43799	-0.036621	-36.296	146.442	346.3	-0.24658	0.22314	-0.085938
1.872	19.0673	39.008	1214.153	-1.8066	1.5146	-0.42285	-64.9902	43.983	29.4375	0.03584	0.1625	0.066406	-3.404	3.277	20.5573	0.070801	0.28516	-0.19385	-42.457	127.4496	747.0382	-0.70508	0.64551	-0.018555	24.5614	88.306	1101.968	-1.6394	1.0555	-0.3709	-49.6725	126.814	450.2047	-0.52759	0.42383	-0.031006	-43.686	129.076	320.562	-0.20313	0.19775	-0.087891
1.874	27.658	70.087	1216.2097	-1.7495	1.4927	-0.41357	-32.989	39.7607	34.2698	0.025586	0.16797	0.074511	-21.855	17.21	23.98692	0.06543	0.29492	-0.19482	-31.636	135.0938	705.1941	-0.64355	0.60742	-0.022461	0.690999999999999	97.395	1082.3925	-1.6273	1.0371	-0.36543	-43.0512	110.2859	419.28	-0.49512	0.41504	-0.024902	-32.09	106.621	284.7021	-0.17505	0.17676	-0.089599
1.876	36.297	79.475	1197.179	-1.6758	1.4551	-0.40234	-37.5016	38.706	31.8226	0.025976	0.17656	0.083106	-23.24	21.9552	17.4351	0.061523	0.30371	-0.20483	-36.084	130.238	675.2034	-0.59278	0.57788	-0.023682	21.829	93.955	1072.4661	-1.6076	1.0162	-0.36094	-52.7157	93.6632	411.9016	-0.45801	0.39453	-0.010742	-14.056	95.9722	246.965	-0.15137	0.15234	-0.091797
1.878	33.8177	96.215	1148.5753	-1.6504	1.4356	-0.39063	-57.155	27.0241	37.4328	0.018653	0.18437	0.09209	-24.719	30.2733	26.51827	0.062012	0.31152	-0.20996	-50.565	122.043	646.6515	-0.5415	0.54932	-0.030273	15.959	93.118	1066.2429	-1.584	0.99609	-0.35352	-46.332	107.872	380.1908	-0.43848	0.38672	-0.0078125	-12.223	101.9211	219.762	-0.12891	0.12061	-0.092773
1.88	26.2841	84.637	1136.312	-1.6406	1.4248	-0.37695	-31.349	22.5797	37.6279	0.020508	0.1958	0.099609	-15.853	30.0207	45.9858	0.062012	0.32422	-0.21484	-43.59	124.9073	644.9778	-0.48193	0.51025	-0.03418	2.7223	101.3008	1036.5257	-1.5588	0.97539	-0.35059	-61.0124	109.279	340.947	-0.39063	0.36426	0.0083008	9.386	84.555	221.7214	-0.12158	0.10352	-0.094727
1.882	34.2002	75.96	1132.7166	-1.6348	1.4082	-0.3584	-36.297	7.1992	27.6785	0.016504	0.20254	0.11133	-14.728	24.1557	92.304	0.061523	0.32715	-0.21533	-30.48	143.048	622.646	-0.44922	0.49121	-0.033203	-14.1396	106.864	1005.6495	-1.5237	0.95225	-0.35293	-60.555	109.136	309.34	-0.34937	0.34131	0.012451	2.255	76.508	218.75405	-0.10352	0.080566	-0.09375
1.884	26.0124	60.9488	1134.097	-1.6309	1.4014	-0.3457	-28.189	24.8287	33.5115	0.012402	0.20791	0.12295	-30.405	-19.66346	128.71	0.050293	0.33594	-0.21582	-33.699	142.727	581.513	-0.39795	0.46729	-0.044434	-7.25	101.865	991.841	-1.4843	0.93233	-0.35254	-45.359	105.566	280.018	-0.30811	0.32471	0.015625	-13.628	69.615	201.41884	-0.089111	0.068603	-0.090332
1.886	61.807	67.5109	1111.008	-1.6167	1.3794	-0.3252	-34.986	31.414	21.81812	0.010058	0.21142	0.12803	-27.459	-24.3026	196.7631	0.040772	0.3418	-0.22167	-34.181	145.979	551.9091	-0.35278	0.4397	-0.046387	8.345	82.172	979.23026	-1.4458	0.90654	-0.34902	-36.106	99.8823	278.778	-0.25732	0.29443	0.016602	-31.541	86.9989	183.6037	-0.078613	0.052246	-0.090332
1.888	66.601	51.3949	1060.6157	-1.5984	1.3557	-0.30835	-26.909	37.315	31.6471	0.0038086	0.21621	0.13584	30.10532	18.2506	269.1152	0.02832	0.34619	-0.23389	-42.72	116.872	527.0346	-0.31348	0.41699	-0.054688	-4.846	86.222	955.959	-1.4063	0.87891	-0.3457	3.534	88.1048	270.7651	-0.23535	0.28125	0.018555	-41.7664	90.828	184.6902	-0.062012	0.038086	-0.091797
1.89	55.4904	35.773	1020.268	-1.5679	1.3267	-0.29688	-27.162	30.7246	33.1261	-0.0019531	0.22119	0.14258	53.6732	46.005	357.245	-0.033691	0.35205	-0.25635	-27.853	99.412	492.1336	-0.26855	0.38623	-0.063477	-28.454	95.5769	938.78234	-1.3631	0.85215	-0.34004	-19.641	81.105	272.4802	-0.19238	0.25	0.022461	-20.767	105.026	190.061	-0.054199	0.036621	-0.088379
1.892	57.1234	42.126	992.596	-1.5137	1.2773	-0.27832	-22.589	34.2039	32.9156	-0.0067383	0.22617	0.1585	14.408	-18.444	459.092	-0.092773	0.3501	-0.26514	-40.195	102.75	449.64656	-0.25244	0.37793	-0.06543	-26.5031	110.87	925.9235	-1.3246	0.83066	-0.33437	-15.667	89.463	246.81966	-0.15674	0.23389	0.026611	-20.191	110.11	165.004	-0.041992	0.024414	-0.087891
1.894	31.524	59.7612	984.3576	-1.4756	1.248	-0.27051	-4.672	29.02395	18.526	-0.015234	0.23155	0.16865	29.248	-67.2376	524.862	-0.2793	0.35352	-0.27344	-49.149	110.8394	414.9236	-0.20996	0.35498	-0.074707	-38.586	128.77	908.0764	-1.286	0.81309	-0.32852	-19.621	91.1398	233.0578	-0.12549	0.2124	0.030762	-43.898	95.527	137.6691	-0.036133	0.021484	-0.089111
1.896	35.8494	82.5592	983.8277	-1.3984	1.1777	-0.2627	-37.941	26.2232	40.9215	-0.017578	0.23662	0.17764	91.138	-80.12217	601.0097	-0.48682	0.3623	-0.27905	-55.504	113.0429	378.1114	-0.18262	0.3435	-0.078125	-44.9477	146.216	883.3136	-1.2456	0.79112	-0.31982	-31.314	92.8749	207.674	-0.087891	0.19092	0.035645	-49.4837	61.86666	114.9803	-0.024414	0.013672	-0.087402
1.898	25.2076	92.6339	979.414	-1.3376	1.1282	-0.25562	-32.064	24.5281	46.147	-0.02334	0.24971	0.18252	75.422	-22.7521	690.63	-0.75439	0.36865	-0.26611	-48.067	119.609	343.073	-0.15918	0.32715	-0.074219	-51.252	136.88	842.8395	-1.2026	0.77441	-0.30615	-32.127	83.132	205.8411	-0.070313	0.17773	0.035156	-45.8781	50.897	117.9169	-0.0068359	0.010254	-0.088867
1.9	22.122	88.979	946.896	-1.271	1.0786	-0.24268	-19.935	35.9177	46.6205	-0.027344	0.26367	0.18652	37.491	40.1019	767.873	-1.1992	0.42529	-0.25195	-67.0957	112.864	344.2465	-0.125	0.30762	-0.084961	-36.782	123.5583	816.181	-1.1581	0.75772	-0.29853	-15.179	76.706	194.052	-0.038086	0.14941	0.041992	-38.781	51.37	109.869	-0.0048828	0.0029297	-0.084473
1.902	8.221	109.487	903.472	-1.1929	1.019	-0.22998	-4.123	42.1523	12.9066	-0.031641	0.27256	0.18769	13.8703	90.1894	764.2676	-1.4487	0.479	-0.24023	-36.58	114.587	323.447734	-0.104	0.29248	-0.089844	-40.526	115.701	792.433	-1.1219	0.7416	-0.28428	-22.478	73.979	182.7626	-0.016357	0.13477	0.041504	-33.072	45.289	101.8502	0.010254	0.00097656	-0.085449
1.904	-7.353	139.315	871.26661	-1.1558	0.99268	-0.22314	-26.457	34.251	22.5365	-0.026563	0.28652	0.19629	7.404	86.8937	782.235	-1.9585	0.64307	-0.19385	-32.579	106.303	312.129	-0.070313	0.26514	-0.096191	-25.314	127.801	763.5201	-1.0813	0.71895	-0.27334	-37.351	71.608	149.6729	-9.7144e-14	0.11621	0.048828	-7.48	41.498	87.2298	0.015869	-0.0014648	-0.085937
1.906	-19.598	165.112	836.6743	-1.0835	0.93604	-0.21436	-29.021	32.4658	44.9204	-0.027735	0.30175	0.19903	5.733	73.879	834.915	-2.2729	0.80761	-0.15698	-27.969	127.2786	286.6683	-0.049805	0.24731	-0.10816	-33.7842	129.59	752.8304	-1.0499	0.69775	-0.26094	-27.535	78.033	142.5446	0.022949	0.099121	0.047852	-21.919	49.12822	59.766	0.027344	-0.0058594	-0.085449
1.908	-15.56	144.365	800.9739	-1.0366	0.89697	-0.2002	-7.23999999999999	4.6835	73.2495	-0.023438	0.31875	0.20439	60.2339	39.044	932.649	-2.4897	0.9751	-0.13818	-41.1216	124.548	255.8317	-0.037109	0.23242	-0.1123	9.222	147.486	735.0775	-1.021	0.67627	-0.24854	-15.146	75.63933	127.7571	0.03955	0.082275	0.053711	-36.849	61.038	50.3773	0.03418	-0.013672	-0.086914
1.91	-15.635	119.008	763.55341	-0.99414	0.86328	-0.18701	-41.152	-18.6304	136.93	-0.023438	0.33643	0.20947	80.637	10.489	985.426	-2.5801	1.1563	-0.15039	-39.819	117.37	243.8075	-0.024414	0.21875	-0.11621	4.341	152.21	701.568	-0.98858	0.65498	-0.23252	-12.16	82.5703	111.7453	0.057129	0.068848	0.055176	-43.25	65.1608	61.0873	0.038086	-0.014648	-0.083984
1.912	-31.0211	92.773	723.911	-0.93701	0.82471	-0.16895	-61.504	-8.4893	173.112	-0.020606	0.35068	0.20859	28.0256	10.3842	1004.117	-2.5684	1.2559	-0.1499	-26.958	101.6864	230.8767	-0.020996	0.21631	-0.11621	-0.610000000000007	158.184	683.109	-0.95859	0.63496	-0.21709	-8.45	60.442	99.0921	0.076172	0.050781	0.05957	-39.259	54.6511	74.9014	0.044434	-0.028809	-0.093262
1.914	-28.649	98.669	714.2793	-0.90967	0.80322	-0.15479	-42.14	19.3349	212.394	-0.027637	0.37197	0.18848	-9.038	16.478	989.247	-2.521	1.4595	-0.13965	-29.119	94.4792	210.2225	-0.010742	0.20215	-0.12109	-15.293	141.759	674.162	-0.92891	0.60918	-0.21123	-15.59	56.8412	95.3009	0.088379	0.043945	0.0625	-33.519	41.4437	71.1369	0.046142	-0.026611	-0.088379
1.916	-12.344	114.0543	681.847	-0.854	0.76318	-0.14307	-33.011	18.2737	299.264	-0.044825	0.39345	0.14395	-17.044	4.31100000000001	990.5451	-2.4949	1.5852	-0.17089	-11.482	74.0577	196.486	-0.0068359	0.19433	-0.12085	-24.411	136.637	670.6645	-0.8957	0.58516	-0.19551	1.975	59.79515	100.2696	0.11133	0.033691	0.069824	-41.628	35.6305	67.1588	0.04834	-0.02002	-0.085938
1.918	-38.553	129.8982	650.7747	-0.81861	0.73804	-0.12598	-150.575	-46.3805	421.045	-0.075781	0.42041	0.089846	5.688	0.484999999999999	994.304	-2.4409	1.6597	-0.19482	-36.434	63.064	178.36473	-0.00097656	0.18994	-0.12354	-16.2974	140.636	644.9	-0.86523	0.56738	-0.19043	-29.379	75.238	89.4873	0.12768	0.022217	0.071289	-52.288	32.1148	40.279	0.05127	-0.022949	-0.088379
1.92	-46.787	117.3975	618.5142	-0.78076	0.71533	-0.11279	-164.437	-84.376	510.301	-0.14355	0.43848	0.031738	-14.318	-24.004	992.407	-2.2793	1.6484	-0.22266	-25.264	62.5587	154.99353	0.012695	0.18994	-0.12451	-38.494	125.196	624.083	-0.83399	0.54551	-0.17617	-33.596	70.366	90.2117	0.14746	0.0083008	0.073242	-44.201	31.0117	47.1425	0.050293	-0.030273	-0.091065
1.922	-49.719	108.603	597.97587	-0.73926	0.68359	-0.088867	-90.367	-96.188	579.946	-0.25244	0.45928	-0.030957	-20.317	-62.992	1018.333	-2.1558	1.6216	-0.25049	-35.225	65.2687	139.017	0.018555	0.19092	-0.12451	-10.606	113.9091	585.4369	-0.80849	0.52236	-0.16631	-28.596	56.682	78.4483	0.16406	-0.010254	0.070801	-29.661	41.6108	44.398	0.05127	-0.041016	-0.092285
1.924	-31.101	119.611	585.6026	-0.71045	0.6665	-0.078613	-102.266	-69.046	651.865	-0.39463	0.48213	-0.0917	-90.389	-117.6999	1064.173	-1.8965	1.5449	-0.29688	-36.966	63.6028	128.079593	0.038574	0.18164	-0.11719	-9.1	116.3429	554.9849	-0.7831	0.49736	-0.16006	-48.07	51.732	60.2495	0.17334	-0.014648	0.070313	-30.196	44.14594	9.4802	0.061035	-0.056152	-0.09668
1.926	-39.77	126.378	578.0374	-0.66699	0.62549	-0.057129	-140.4384	-12.811	748.86	-0.56455	0.51064	-0.15888	-116.544	-119.469	1118.2826	-1.7161	1.4954	-0.30298	-10.825	57.1903	110.9183	0.052246	0.17017	-0.12939	-12.768	137.828	541.973	-0.75967	0.47315	-0.14863	-71.946	47.781	47.738	0.18945	-0.02832	0.067871	-26.689	24.69308	12.4995	0.06543	-0.063965	-0.095703
1.928	-35.897	130.7592	557.513	-0.62842	0.59668	-0.039551	-150.0188	25.1335	760.585	-0.7793	0.55293	-0.21289	-84.7554	-101.413	1145.688	-1.582	1.4453	-0.30176	-0.737000000000002	59.6816	91.048798	0.0625	0.16357	-0.12646	-7.603	135.3449	518.331	-0.73877	0.44922	-0.14258	-58.4943	40.2133	48.3539	0.1958	-0.039062	0.064941	-5.116	19.8832	7.665	0.07373	-0.069336	-0.10254
1.93	-33.933	123.22735	514.1745	-0.59277	0.57031	-0.025391	-107.139	49.5774	758.004	-1.0308	0.60498	-0.2417	-38.703	-95.886	1135.222	-1.4863	1.4004	-0.271	-1.131	61.7733	78.1651	0.078125	0.15332	-0.13037	-31.683	123.196	508.358	-0.71377	0.43272	-0.13037	-33.913	34.5788	61.6903	0.2041	-0.04541	0.063965	-13.273	13.6307	31.001	0.077149	-0.073242	-0.10376
1.932	-10.928	124.227627	456.28112	-0.5376	0.5415	-0.010254	-80.352	54.358	822.481	-1.3431	0.65674	-0.25352	0.0579999999999998	-81.148	1139.9361	-1.4453	1.3809	-0.26172	-25.117	56.9453	76.3933	0.086426	0.14551	-0.1377	-20.719	116.5823	489.26	-0.6917	0.41533	-0.12012	-54.8252	38.9302	43.8564	0.20508	-0.055664	0.065918	-8.875	17.7119	39.38119	0.077637	-0.072266	-0.10059
1.934	-15.745	110.758	422.7297	-0.49976	0.51587	0.0024414	-14.5013	46.024	921.143	-1.6879	0.71006	-0.24785	-21.959	-74.5454	1154.104	-1.3413	1.3286	-0.24902	-17.796	61.3073	93.851	0.092773	0.13818	-0.13525	-16.473	113.9327	464.4104	-0.66319	0.39931	-0.11036	-36.955	29.9787	17.354	0.20508	-0.062988	0.062988	-29.422	8.7669	42.0499	0.07373	-0.073242	-0.10059
1.936	-20.77	108.472	413.8764	-0.4585	0.49072	0.011719	19.3313	28.735	1017.333	-2.0207	0.78037	-0.19785	-36.2378	-75.0506	1214.255	-1.2508	1.2747	-0.24658	-4.517	69.3595	78.0653	0.091309	0.1311	-0.14063	-20.035	122.1448	425.4447	-0.6335	0.3836	-0.10283	-31.885	25.012	26.391	0.19922	-0.068848	0.06543	-31.907	19.908	39.0881	0.072754	-0.073242	-0.10791
1.938	0.968000000000004	91.3832	394.0339	-0.41553	0.45361	0.023926	15.8732	45.718	1060.784	-2.313	0.91201	-0.12676	-48.68428	-93.072	1290.4853	-1.1709	1.2305	-0.26855	-13.264	65.8365	49.68894	0.083496	0.12842	-0.14307	-45.573	125.031	408.3379	-0.60107	0.36865	-0.092285	-26.145	35.521	30.4017	0.18921	-0.07373	0.065186	-30.627	43.798	9.479	0.070801	-0.068848	-0.10742
1.94	7.981	95.0387	367.4849	-0.3916	0.44043	0.024902	-5.403	65.4771	1046.316	-2.5469	1.0625	-0.086914	-43.2287	-98.8627	1316.745	-1.1201	1.1699	-0.27832	-19.33	53.3332	35.3421	0.066895	0.13086	-0.14014	-64.663	143.421	383.3705	-0.56025	0.35283	-0.085937	-38.232	52.0041	32.0937	0.17822	-0.074707	0.064453	-37.102	43.691	34.60618	0.066162	-0.060791	-0.10791
1.942	-4.479	100.751	324.8804	-0.35156	0.40723	0.041016	-38.8593	61.99	1044.1476	-2.654	1.1846	-0.064258	-28.415	-121.988813	1292.319	-1.1167	1.145	-0.28467	-34.464	35.184	33.4398	0.061523	0.13623	-0.14014	-58.3868	132.734	345.4542	-0.52187	0.3373	-0.075195	-29.904	43.5491	49.5255	0.15967	-0.074219	0.072754	-7.826	34.053	28.8086	0.061523	-0.059082	-0.10693
1.944	-14.659	101.3392	315.795	-0.32227	0.38623	0.053467	11.166	52.0073	1044.0503	-2.6312	1.2695	-0.060742	-39.726	-116.345	1241.015	-1.1479	1.1099	-0.30127	-21.685	34.5409	23.778	0.039551	0.13525	-0.13721	-82.905	122.781	334.3521	-0.48438	0.3209	-0.074805	-45.2517	33.549	40.3834	0.15137	-0.070313	0.074707	-16.996	24.6227	41.1156	0.063477	-0.053711	-0.10889
1.946	2.485	110.8253	291.5552	-0.29541	0.3623	0.067383	35.173	19.58	1049.901	-2.4965	1.3278	-0.054102	-37.695	-79.353	1215.648	-1.1865	1.0825	-0.30249	-41.669	38.4315	24.7231	0.030761	0.13379	-0.13745	-54.077	106.00238	320.2099	-0.44414	0.30801	-0.062305	-40.699	38.927	27.2598	0.14209	-0.06543	0.07666	-15.653	33.507717	20.2277	0.063965	-0.046387	-0.10742
1.948	-18.111	112.56	275.806	-0.25098	0.33545	0.077637	30.302859	-19.058	1047.5094	-2.2886	1.3599	-0.043554	-62.6359	-56.071	1254.51	-1.228	1.0552	-0.31543	-26.772	31.313	26.01863	0.022949	0.13525	-0.13037	-32.367	109.30562	296.7191	-0.41162	0.29102	-0.056641	-29.245	44.387	14.3957	0.13135	-0.062988	0.084229	-34.449	17.2886	15.655	0.069336	-0.036621	-0.10693
1.95	-26.794	108.394	258.709	-0.22754	0.31787	0.084961	-0.92	-96.954	1065.8165	-2.0503	1.3599	-0.022461	-2.16	-49.799	1313.365	-1.2788	1.0239	-0.32764	-30.182	16.92162	21.332	0.024414	0.12842	-0.13232	-20.235	104.9934	270.7644	-0.3706	0.27373	-0.04414	-40.799	41.271	15.7106	0.12012	-0.055664	0.088379	-12.066	20.2691	16.952	0.073486	-0.032227	-0.10864
1.952	-12.848	104.352	242.683	-0.18066	0.27832	0.088379	-29.207	-117.525	1085.5536	-1.8308	1.3126	-0.0058595	7.84	-64.613	1364.672	-1.3062	1.0151	-0.33203	-31.204	26.4493	27.8169	0.024414	0.12598	-0.13232	-60.59	109.1724	246.3168	-0.32578	0.25644	-0.033007	-22.378	34.5614	43.6995	0.11279	-0.052246	0.086426	-18.522	28.9148	30.0814	0.077637	-0.023438	-0.11035
1.954	-1.575	97.5072	225.8406	-0.15259	0.25586	0.090088	-9.527	-127.28	1075.113	-1.6635	1.2462	0.0035156	33.031	-81.995	1381.029	-1.355	0.99072	-0.33984	-43.261	20.0747	50.8373	0.029297	0.11719	-0.1333	-35.617	103.72779	234.128	-0.28672	0.24277	-0.028711	-18.444	23.7486	31.5635	0.11182	-0.048828	0.082031	-23.393	43.1123	21.4684	0.077637	-0.018555	-0.10889
1.956	-11.276	99.8034	197.7505	-0.11914	0.22852	0.094727	31.396	-115.401	1055.6112	-1.5757	1.17	0.015625	61.806	-73.659	1390.441	-1.3933	0.97876	-0.34692	-29.782	40.4744	39.6466	0.035157	0.10889	-0.13354	-42.949	88.57385	236.486	-0.24619	0.22471	-0.024317	-18.055	18.2653	31.29225	0.11133	-0.045898	0.092773	-31.684	26.2751	31.309	0.077637	-0.01416	-0.10547
1.958	-38.177	83.391	170.5466	-0.082031	0.19824	0.098633	86.0845	-106.825	1060.3613	-1.5644	1.1074	0.025098	54.16325	-27.9619	1416.8491	-1.4175	0.9751	-0.35498	-32.782	35.1363	43.10911	0.038086	0.097656	-0.13574	-30.798	92.557	210.0564	-0.20801	0.20508	-0.02002	-4.204	11.33	32.7619	0.11181	-0.043457	0.089356	-37.481	22.668	19.5543	0.071777	-0.010742	-0.10352
1.96	-14.546	70.676	151.8022	-0.0625	0.18701	0.10107	63.648	-79.152	1100.6443	-1.5991	1.0688	0.044922	68.90645	25.5159	1397.711	-1.4448	0.96533	-0.36182	-40.581	41.4094	24.3916	0.041016	0.09375	-0.13086	-29.319	69.9924	217.4252	-0.17579	0.17979	-0.016601	16.034	22.9133	50.2889	0.11328	-0.038574	0.087891	-60.82715	37.798	22.8101	0.071777	-0.003418	-0.097901
1.962	-26.896	69.8754	134.579	-0.020508	0.16357	0.097656	65.3208	-65.49773	1166.6004	-1.6337	1.0622	0.075879	40.749	7.078	1392.299	-1.4648	0.95508	-0.36133	-33.8066	22.34959	9.787	0.046875	0.090332	-0.13184	-29.59	68.9556	192.5421	-0.14805	0.16104	-0.012402	3.309	38.658	38.8517	0.11768	-0.035645	0.086426	-57.8632	50.376	44.4897	0.067871	0.0058594	-0.10986
1.964	-47.358	67.11523	111.7332	0.0043946	0.14868	0.099853	43.8064	-54.537	1222.487	-1.6364	1.0566	0.10732	55.284	-23.487	1398.542	-1.5313	0.94141	-0.36523	-43.331	21.40715	17.467	0.055664	0.085449	-0.12646	-33.314	82.026	183.6074	-0.12383	0.14463	-0.0081054	-25.821	42.2375	24.6295	0.11963	-0.028809	0.083496	-31.681	38.705	43.3346	0.064941	0.025391	-0.096191
1.966	-57.5215	53.5431	100.588	0.026367	0.1377	0.10156	31.31	-61.2643	1244.782	-1.6144	1.0535	0.12529	32.6503	-61.9256	1378.5311	-1.6013	0.93482	-0.36353	-32.898	29.6578	19.6214	0.06543	0.074707	-0.12598	-50.947	87.5719	166.4914	-0.10674	0.1293	-0.0033203	-14.64	33.4151	20.4899	0.12354	-0.019043	0.080566	-27.565	24.05109	29.601	0.06543	0.029785	-0.094727
1.968	-59.5	48.1436	106.45904	0.057129	0.12109	0.099609	14.029	-52.849	1223.379	-1.5879	1.0428	0.12334	23.2575	-77.7361	1385.56619	-1.6895	0.94531	-0.36523	-40.182	34.1811585	21.9893	0.076172	0.067871	-0.125	-20.423	72.8626	150.3653	-0.091309	0.11523	0.0019531	-31.331	21.7384	40.0118	0.11695	-0.01001	0.077637	-35.423	24.6406	18.055	0.065918	0.053711	-0.095215
1.97	-42.996	56.3544	92.765	0.063965	0.11816	0.1084	-27.118	-48.434	1185.3182	-1.5625	1.0352	0.10645	33.2578	-65.756	1409.651	-1.8374	0.98291	-0.35938	-28.962	25.2692	30.9912	0.088867	0.062988	-0.12207	-23.125	63.8744	138.50664	-0.078418	0.1086	0.011426	-21.566	34.236	50.0771	0.11182	0	0.072266	-43.935	29.829	24.566	0.060791	0.065186	-0.094238
1.972	-84.4114	54.2793	56.4284	0.090332	0.11279	0.10449	-86.5424	-40.82	1166.366	-1.5364	1.0124	0.070703	28.695	-37.258	1386.818	-1.916	1.0195	-0.3623	-20.433	26.1626	34.2002	0.097656	0.061035	-0.1123	-3.18	61.7295	122.1103	-0.066016	0.095996	0.019727	-34.93	31.745	53.1261	0.1001	0.013672	0.069336	-49.675	27.8889	26.7297	0.061523	0.083496	-0.094727
1.974	-53.471	55.3218	44.785	0.10669	0.10108	0.10279	-117.7008	-68.456	1184.06	-1.5182	0.98838	0.030664	58.248	-34.728	1364.509	-2.0659	1.1177	-0.37256	-20.877	36.404	15.656	0.11475	0.055176	-0.11377	-21.951	62.9602	113.6652	-0.056641	0.088574	0.027539	-27.543	27.426	33.5684	0.089844	0.022949	0.068848	-25.511	39.4562	36.924	0.05957	0.104	-0.094238
1.976	-51.575	48.94897	46.285	0.12012	0.094238	0.104	-90.3601	-103.031	1229.022	-1.514	0.95127	-0.0021485	15.997	-36.432	1310.697	-2.1687	1.2009	-0.38086	-21.461	44.84	31.5069	0.12232	0.04834	-0.11059	-9.271	65.5383	109.9854	-0.040918	0.076855	0.034961	-30.111	21.4972	27.9682	0.076172	0.041992	0.067383	-16.864	45.295	24.598	0.059082	0.10986	-0.098145
1.978	-29.601	57.1179	46.0776	0.14355	0.084473	0.093262	-79.3454	-138.7089	1234.7985	-1.5124	0.92041	-0.028906	42.891	-46.3215	1316.596	-2.2695	1.2871	-0.38281	-29.449	35.801	28.6478	0.13135	0.048828	-0.10449	-7.363	72.35984	91.2241	-0.030273	0.063477	0.04248	-48.728	33.0223	15.3743	0.067627	0.053711	0.066651	-25.382	38.999	13.5795	0.05957	0.12744	-0.10107
1.98	-33.771	41.8032	47.7291	0.15381	0.074219	0.097656	-66.4443	-141.404	1248.6997	-1.5176	0.88477	-0.054688	62.708	-42.708	1346.6619	-2.3843	1.3872	-0.38135	-1.879	33.5509	29.73509	0.13477	0.050781	-0.10596	-23.222	70.12901	84.9149	-0.0091798	0.044726	0.046192	-32.912	26.37155	16.2454	0.061035	0.064941	0.073242	-41.673	22.76	25.647	0.063232	0.13769	-0.10424
1.982	-39.167	36.4261	45.7704	0.16797	0.064453	0.091797	-79.1116	-131.162	1257.635	-1.5196	0.86045	-0.067383	31.425	-11.1722	1352.046	-2.4277	1.4287	-0.37891	-14.46	30.1648	20.4604	0.13184	0.049316	-0.097656	-11.748	55.11496	69.5897	0.0097655	0.031641	0.050586	-30.069	19.036	20.8417	0.04834	0.083984	0.072754	-36.6505	34.951	35.466	0.070801	0.14746	-0.10645
1.984	-23.628	43.404	8.595	0.17505	0.058349	0.087158	-94.3916	-92.065	1273.446	-1.5254	0.8416	-0.076269	8.3018	14.0003	1321.6952	-2.4648	1.5	-0.375	-20.853	28.9235	23.0139	0.12646	0.044922	-0.089355	-25.979	46.23192	70.1326	0.029687	0.022265	0.053711	-18.84	22.5876	19.1972	0.045898	0.091797	0.075684	-25.759	39.725	33.7685	0.07666	0.16504	-0.11279
1.986	-43.899	50.4779	7.671	0.18018	0.053711	0.084961	-85.775	-39.8462	1299.9692	-1.5277	0.82754	-0.08252	-10.229	9.419	1302.9863	-2.439	1.5302	-0.37378	-7.571	21.5494	47.81918	0.12818	0.051025	-0.085205	-29.199	62.3863	71.5433	0.049707	0.012012	0.059375	-51.971	27.5657	18.3684	0.041016	0.10352	0.07666	-38.029	34.418	47.152	0.080078	0.17236	-0.1167
1.988	-36.277	41.942	11.973	0.18848	0.044434	0.080566	-87.656	-46.158	1326.999	-1.5273	0.82803	-0.083594	-5.064	-4.981	1276.492	-2.3809	1.5469	-0.37402	-11.374	33.2584	46.6619	0.12646	0.050781	-0.083008	-39.395	67.658	68.4224	0.068848	0.0053711	0.0625	-43.589	28.71799	25.6986	0.033448	0.11645	0.081055	-13.198	17.80726	26.9534	0.083496	0.18506	-0.12158
1.99	-22.254	22.702	42.5462	0.18604	0.047852	0.07959	-94.6844	-88.164	1340.453	-1.5352	0.83008	-0.091309	-9.6374	-4.9748	1268.1609	-2.2461	1.541	-0.37402	3.001	30.2853	30.019	0.12207	0.054199	-0.078125	-55.578	63.969	70.6021	0.086816	-0.0041992	0.060547	-39.628	29.3048	45.2987	0.034668	0.12354	0.089355	-10.122	27.4188	22.3721	0.090332	0.19189	-0.12695
1.992	-11.449	19.6107	44.3076	0.18311	0.046387	0.078125	-108.274	-119.285	1354.602	-1.5663	0.8376	-0.097754	23.4467	2.434	1270.454	-2.1296	1.5227	-0.3728	-38.949	26.5199	25.4465	0.12256	0.058594	-0.074219	-37.094	47.731	54.6376	0.1	-0.011621	0.061816	-51.053	36.9074	41.2288	0.032227	0.13672	0.094727	7.31	44.74	12.8094	0.088867	0.20166	-0.13281
1.994	-16.046	17.7419	21.4528	0.17432	0.051025	0.082031	-118.278	-98.09003	1338.035	-1.6171	0.85772	-0.10537	17.7914	9.107	1271.2736	-2.002	1.4922	-0.36914	-21.045	17.0948	31.01084	0.12158	0.066406	-0.072266	-37.697	44.7521	37.7616	0.11172	-0.018652	0.066113	-33.429	32.5829	35.5648	0.032715	0.13867	0.098633	-20.961	48.05	36.294	0.086426	0.21436	-0.13525
1.996	-23.742	9.41498	31.3408	0.15771	0.054199	0.075195	-118.2443	-66.554	1332.7752	-1.6995	0.89013	-0.10889	4.5085	4.696	1241.108	-1.8555	1.4395	-0.3623	-37.259	21.5748	29.6284	0.12378	0.073487	-0.072754	-43.04	38.6587	36.952	0.11514	-0.024707	0.064258	-50.384	18.8093	31.78876	0.023438	0.14355	0.1084	-7.709	41.9756	44.626	0.088379	0.21826	-0.1416
1.998	-4.351	14.9899	38.66135	0.14307	0.063477	0.083008	-85.755	-40.18	1312.3273	-1.794	0.92354	-0.10869	3.9742	-0.960299999999999	1206.361	-1.7949	1.4102	-0.3584	-16.024	46.492	6.476	0.12109	0.083984	-0.072266	-56.074	37.0184	41.295	0.11426	-0.028809	0.063965	-25.698	12.7302	36.8189	0.019531	0.14282	0.11694	-20.677	30.3968	50.277	0.086426	0.23145	-0.15039
2	-13.534	33.138	36.49	0.13086	0.067871	0.088867	-43.292	-36.551	1284.558	-1.9004	0.96484	-0.09375	4.7252	-11.809	1199.273	-1.7007	1.3657	-0.35303	-39.68	34.042	31.8374	0.12109	0.089355	-0.069824	-16.818	37.3308	33.7326	0.11123	-0.031738	0.065234	-35.16	17.2601	16.3083	0.01709	0.14648	0.12354	-15.318	15.09891	50.6606	0.090576	0.23852	-0.15503
2.002	11.721	41.2468	11.8303	0.12158	0.074707	0.091797	-75.081	-61.049	1282.677	-2.0041	1.0242	-0.090625	35.3007	-6.695	1198.34894	-1.6509	1.3379	-0.33692	-28.352	33.572	25.739	0.12939	0.098877	-0.069824	-52.3908	43.4105	29.9257	0.1042	-0.03252	0.067676	-24.427	22.693655	17.4158	0.013672	0.14453	0.12939	-30.84	-11.14862	67.418	0.090332	0.24658	-0.16553
2.004	3.652	25.5465	20.8099	0.11231	0.079834	0.095459	-47.135	-94.7357	1282.869	-2.0988	1.0863	-0.080664	44.0374	33.161	1188.788	-1.625	1.3125	-0.32617	-35.5096	24.91771	30.597	0.13379	0.10303	-0.071777	-51.396	40.3266	27.7091	0.09912	-0.03291	0.066894	-17.496	18.5547	8.337	0.01123	0.15576	0.14209	-25.473	-11.4934	96.2128	0.084961	0.24854	-0.1748
2.006	-5	29.2959	27.6163	0.11182	0.086426	0.098633	-35.704	-97.408	1318.1742	-2.1875	1.1492	-0.078321	32.526	64.933	1177.947	-1.5996	1.2813	-0.31055	-40.415	36.5382	30.791	0.14697	0.10938	-0.069336	-47.065	37.2188	34.6966	0.092285	-0.029883	0.069922	-16.381	30.0886	20.139	0.0092773	0.16064	0.14551	-29.917	0.000999999999999446	92.9556	0.072266	0.24707	-0.18018
2.008	-22.301	29.4181	29.649	0.10791	0.085938	0.104	-15.465	-61.276	1324.011	-2.2744	1.2049	-0.088868	17.0045	80.4353	1145.847	-1.5977	1.2617	-0.30518	-21.81	38.5292	35.7753	0.14941	0.11328	-0.07373	-34.468	39.0205	37.7798	0.086914	-0.025391	0.071777	-10.465	31.1252	24.8463	0.0063477	0.16674	0.15063	-37.317	-6.348	82.6566	0.020508	0.24365	-0.18994
2.01	-28.573	44.127	38.1771	0.10986	0.086914	0.10156	-23.283	-7.3535	1313.824	-2.3672	1.2559	-0.099121	53.015	89.694	1136.5509	-1.5898	1.2344	-0.29346	-29.097	38.095	45.606	0.16113	0.11621	-0.076172	-39.312	58.746	36.926127	0.079882	-0.020606	0.074219	-21.811	29.3721	30.3497	0.0014648	0.17676	0.15527	-32.425	-29.183	113.9037	-0.03833	0.24195	-0.20313
2.012	-23.516	33.8422	22.8741	0.10498	0.088379	0.10254	-35.624	1.9618	1278.6027	-2.4557	1.3061	-0.10616	42.5279	87.82	1116.6812	-1.5786	1.2203	-0.2815	-29.611	32.267	42.673	0.17139	0.1211	-0.080078	-46.077	51.528	36.6105	0.077929	-0.014648	0.07705	-13.374	26.5953	47.597	-0.0087891	0.18506	0.16553	-33.5391	-40.1	152.3586	-0.11328	0.24219	-0.20508
2.014	-26.03	36.8246	24.9869	0.10694	0.087647	0.10572	-56.017	-12.1425	1288.5627	-2.5272	1.3487	-0.10449	52.4795	89.493	1088.255	-1.5703	1.1973	-0.27441	-36.132	26.9493	23.6179	0.18164	0.13232	-0.080078	-31.98	36.139	34.3888	0.083008	-0.0076171	0.078222	-22.637	36.983	40.9746	-0.015137	0.19189	0.16992	-18.654	-26.8713	198.7174	-0.2085	0.2583	-0.21143
2.016	-31.774	34.747	12.9999	0.10645	0.091797	0.10645	-43.225	-18.146	1288.3347	-2.5663	1.3854	-0.099805	42.96	91.312	1077.8135	-1.5444	1.1646	-0.26318	-40.4984	13.6757	9.337	0.19336	0.14258	-0.083984	-43.661	21.150323	30.6389	0.086035	0.0030274	0.084864	-7.498	41.813	33.137	-0.032227	0.20361	0.18213	-3.097	2.555	268.90355	-0.26367	0.26953	-0.21484
2.018	-68.758	27.072	17.1454	0.11133	0.092773	0.11279	-47.736	-10.544	1305.037	-2.5664	1.4266	-0.092676	42.7986	94.407	1053.636	-1.5195	1.1484	-0.26367	-46.9577	10.9648	26.3746	0.19336	0.13867	-0.083984	-23.23	31.9085	18.4168	0.091797	0.0073242	0.081543	-24.004	40.162	28.4027	-0.048096	0.21167	0.19116	-14.245	30.252	319.2865	-0.37256	0.29932	-0.22314
2.02	-37.208	30.41	31.44634	0.11377	0.097656	0.11475	-60.601	-18.823	1302.527	-2.5215	1.4512	-0.09082	34.673	93.212	1027.552	-1.46	1.1191	-0.26172	-46.738	20.3709	27.73845	0.20068	0.15088	-0.084473	-22.236	29.07004	31.0003	0.097754	0.021582	0.083398	-23.906	24.986	31.0547	-0.062988	0.22119	0.19434	1.5717	56.266	402.094	-0.47143	0.32129	-0.22974
2.022	-52.9732	31.072	27.1337	0.13428	0.096191	0.11084	-51.098	-8.507	1273.1809	-2.4382	1.4583	-0.1001	37.67	102.218	998.3437	-1.4082	1.0913	-0.25049	-17.113	22.5866	35.3915	0.20361	0.15796	-0.087402	-16.444	36.3019	36.433	0.10147	0.035058	0.082324	-9.05099999999999	9.5038	36.377	-0.080566	0.23291	0.19727	-10.054	69.886	491.024	-0.58057	0.33301	-0.2417
2.024	-49.1324	33.30415	21.6847	0.15551	0.0979	0.11792	-73.059	-13.754	1238.693	-2.3194	1.4458	-0.11142	43.571	78.638	979.882	-1.3594	1.0684	-0.24805	-32.169	17.4468	35.98387	0.20117	0.15967	-0.07373	-1.883	41.8089	30.0622	0.10927	0.045996	0.078027	-21.126	1.1111	61.275	-0.090332	0.24023	0.20361	-31.011	64.781	588.131	-0.78711	0.3374	-0.25732
2.026	-46.177	24.159	17.918	0.17236	0.099609	0.11328	-97.055	-3.02216	1186.534	-2.1893	1.4103	-0.1165	32.607	93.88	946.6766	-1.293	1.0391	-0.24414	-16.562	21.2159	32.266046	0.19971	0.16797	-0.087891	-23.384	50.97	27.3537	0.11699	0.052051	0.076465	-37.328	-19.6844	108.677	-0.10254	0.25928	0.19189	-26.632	57.44248	670.176	-0.92334	0.33447	-0.25049
2.028	-42.358	19.4575	17.8714	0.20654	0.104	0.11084	-110.939	-17.9451	1190.084	-2.0641	1.3605	-0.12939	11.668	103.5542	920.0004	-1.2593	1.022	-0.23828	-17.498	30.6026	24.4123	0.19678	0.17285	-0.087891	-13.747	30.3894	39.5153	0.12598	0.057617	0.072266	-51.842	-8.6282	156.959	-0.11596	0.27515	0.16211	16.528	64.009	746.9125	-1.2773	0.33984	-0.25
2.03	-45.465	32.526	26.183	0.22363	0.10645	0.10791	-81.374	12.099	1215.8821	-1.9546	1.3013	-0.13428	-1.662	128.45251	896.4541	-1.1968	0.97314	-0.23242	-35.066	44.7149	41.765	0.19531	0.17969	-0.088867	-13.958	13.4571	53.1278	0.13945	0.059863	0.069433	-30.081	16.0662	198.943	-0.14111	0.29199	0.11914	1.239	76.279	807.015	-1.6023	0.37915	-0.23365
2.032	-58.029	45.0715	28.4255	0.24902	0.10938	0.10449	-81.253	28.589	1212.4486	-1.867	1.2408	-0.13867	11.27	125.2448	885.6469	-1.1587	0.9419	-0.21973	-19.574	35.846	50.441	0.18921	0.18823	-0.090821	-15.114	29.5264	36.3164	0.14511	0.066601	0.06748	-83.315	14.1411	285.831	-0.2041	0.31836	0.056641	-16.292	60.541	837.093	-1.9414	0.45508	-0.22754
2.034	-43.674	36.179	46.542	0.26514	0.10743	0.095459	-120.6967	54.402	1219.1177	-1.7999	1.1923	-0.14131	22.297	112.0789	897.556	-1.1226	0.91064	-0.2124	-14.949	36.123	27.1722	0.18701	0.19873	-0.092285	-16.732	32.597	20.9166	0.15801	0.077539	0.064356	-125.032	-38.282	397.809	-0.25879	0.32324	0.024902	-17.1759	38.5577	822.4875	-2.3374	0.62158	-0.22656
2.036	-42.098	28.8506	37.6571	0.27246	0.10645	0.088867	-107.1492	67.9159	1212.69871	-1.7531	1.1501	-0.14248	-18.8308	112.6076	845.8864	-1.0815	0.86279	-0.2002	-0.0790000000000006	29.1418	15.3303	0.18506	0.20801	-0.090332	-33.713	31.834	36.3888	0.16992	0.088378	0.063281	-138.519	-86.101	512.045	-0.41357	0.35205	-0.055176	-6.333	21.5404	810.743	-2.4668	0.71875	-0.24023
2.038	-25.568	19.5082	18.3796	0.28027	0.11328	0.084473	-116.392	81.812	1185.9856	-1.7174	1.1196	-0.13701	-27.663	120.1347	807.0874	-1.0547	0.84961	-0.19434	-25.446	27.1976	29.83774	0.18115	0.21094	-0.095703	-19.511	28.3668	39.6033	0.18213	0.10059	0.062012	-119.249	-83.926	581.4363	-0.57202	0.38574	-0.10034	15.447	19.466	788.27	-2.5098	0.91016	-0.26758
2.04	-35.856	29.0476	13.158	0.28076	0.12158	0.084961	-98.373	103.5	1168.981	-1.6914	1.0928	-0.13086	-42.42729	139.322	780.701	-1.0117	0.8125	-0.17578	-2.545	24.5579	35.0409	0.18506	0.21436	-0.095703	-40.733	42.874	42.6553	0.18282	0.11455	0.060449	-115.394	-63.668	632.759	-0.76367	0.43164	-0.13379	-9.017	6.266	803.008	-2.366	1.1443	-0.17578
2.042	-33.473	35.2045	24.9129	0.27734	0.12549	0.07666	-135.9709	99.914	1156.8663	-1.6702	1.0641	-0.12568	-64.6976	152.874	747.6665	-0.97241	0.78198	-0.16724	-29.512	25.1287	33.14148	0.18506	0.219	-0.094727	-15.553	41.2412	19.1889	0.18447	0.12422	0.058985	-160.7006	-27.211	680.291	-1.0874	0.52588	-0.15137	8.245	2.435	781.385	-2.23	1.4224	-0.13281
2.044	-21.156	41.257	25.1759	0.26783	0.13525	0.072754	-134.6964	85.052	1135.2478	-1.6496	1.0352	-0.12187	-62.3727	140.435	715.4173	-0.93164	0.75293	-0.1543	-18.075	30.36394	13.2114	0.19189	0.21777	-0.097168	-33.808	35.190615	28.4948	0.17744	0.13789	0.059765	-138.8978	22.0239	705.9343	-1.3672	0.60498	-0.15845	2.247	-13.095	779.6184	-1.9941	1.627	-0.16309
2.046	-18.271	51.6011	14.4289	0.25732	0.14111	0.069336	-100.3743	67.6802	1132.7982	-1.6281	1.0035	-0.11953	-43.271	123.2933	702.96198	-0.87842	0.71143	-0.13818	-21.413	23.9014	14.6625	0.19482	0.2124	-0.10693	-32.74	31.2228	40.4071	0.17168	0.15039	0.059863	-106.7815	51.839	700.646	-1.6577	0.69092	-0.15088	15.9	-21.519	791.027	-1.8159	1.6118	-0.19287
2.048	-14.184	32.6692	9.6567	0.23633	0.15137	0.069824	-106.3034	55.2797	1106.2805	-1.5972	0.97588	-0.11347	-41.162	113.577	661.681	-0.84961	0.68652	-0.12988	-11.057	14.1387	27.3767	0.19922	0.20557	-0.11768	-50.485	41.9538	25.6379	0.16553	0.16211	0.0625	-79.894	63.417	773.83	-2.0117	0.80859	-0.14258	29.78364	-41.931	804.811	-1.3838	1.4121	-0.26074
2.05	-9.459	18.8598	28.8449	0.22119	0.15625	0.064453	-86.753	55.676	1073.267	-1.561	0.9458	-0.10693	-41.63592	127.32	616.695	-0.8042	0.646	-0.12842	-20.821	10.1035	26.1761	0.19922	0.19824	-0.11572	-38.918	23.8404	22.9724	0.14961	0.16934	0.070312	-28.67	44.049	856.5893	-2.1484	0.87109	-0.11377	49.406	-34.0532	823.601	-1.0965	1.2054	-0.29614
2.052	-0.727000000000004	32.4386	45.6631	0.19434	0.16602	0.069824	-37.841	69.02	1041.7595	-1.5255	0.91006	-0.10635	-37.827	140.3974	594.164	-0.77051	0.61084	-0.11426	-28.319	25.417	42.9683	0.19458	0.2002	-0.12427	-44.304	19.3954	29.5015	0.13155	0.17998	0.076465	26.5663	38.267	933.876	-2.332	1.0254	-0.061523	41.851	-6.426	823.0296	-0.89209	1.022	-0.33057
2.054	-15.435	49.8961	33.828	0.15918	0.18213	0.069824	-36.559	96.6026	1001.63	-1.489	0.87071	-0.10723	-34.032	163.8116	570.591	-0.73389	0.58154	-0.10107	-19.114	25.294	75.8216	0.18115	0.2041	-0.12451	-30.844	27.8496	28.9377	0.11475	0.18623	0.080759	23.01	55.176	976.236	-2.3806	1.1281	-0.052979	-10.5136	11.526	837.281	-0.79492	0.86719	-0.35547
2.056	-4.427	60.06	36.13	0.14844	0.18213	0.075684	-54.553	118.2912	997.319	-1.4469	0.8293	-0.10411	-17.312	165.187	564.3872	-0.69922	0.54688	-0.084961	-39.1745	-10.39524	97.4358	0.16064	0.21338	-0.13477	-66.9193	33.9831	40.9885	0.1002	0.19356	0.088571	-29.8163	62.1174	975.469	-2.3687	1.2212	-0.044922	-18.56	-7.91	842.894	-0.82666	0.82422	-0.34571
2.058	-3.863	35.754	36.346	0.11475	0.18555	0.082031	-40.404	114.6323	983.8548	-1.4124	0.79306	-0.10713	-5.671	165.698	527.3498	-0.68311	0.52979	-0.073242	-20.4035	-34.497	124.664	0.14014	0.21826	-0.13965	-56.1855	31.0208	37.31726	0.087402	0.20068	0.096191	-21.544	64.49	966.2472	-2.2871	1.3193	-0.043945	2.098	-28.194	836.1607	-0.896	0.81885	-0.31543
2.06	-13.158	19.5169	37.8578	0.098145	0.18335	0.08789	-14.683	98.16159	991.687	-1.3687	0.76416	-0.10742	-24.885	136.37	513.1679	-0.64014	0.50244	-0.054199	-6.339	-48.2754	192.359	0.072266	0.24219	-0.16016	-39.374	30.7051	38.39545	0.076364	0.21114	0.10333	-14.482	47.4533	962.437	-2.2202	1.3462	-0.04834	7.3821	-59.764	813.984	-0.98633	0.8623	-0.26416
2.062	-8.973	10.9739	36.8476	0.078613	0.18359	0.095215	-11.179	116.21798	970.458	-1.3306	0.73408	-0.10674	-26.049	135.355	497.3204	-0.61401	0.47778	-0.040039	22.8551	-44.21	261.244	-0.015381	0.27588	-0.17798	-51.905	28.4793	35.945	0.062585	0.21983	0.11261	30.476	23.794	959.3276	-1.9858	1.3237	-0.047852	9.4119	-92.128	841.477	-1.0186	0.87305	-0.23926
2.064	-32.901	12.5903	26.7917	0.056641	0.18457	0.10205	-26.032	130.7914	930.937	-1.2913	0.70967	-0.10557	-14.686	133.725	500.187	-0.5835	0.45068	-0.032227	13.4307	-55.796	312.719	-0.15479	0.32568	-0.18408	-34.84	34.844	30.5278	0.046955	0.23234	0.11141	-0.111000000000001	-23.465	960.9336	-1.7664	1.2542	-0.041016	5.27015	-133.447	880.802	-1.0513	0.90381	-0.22998
2.066	-21.481	22.9278	25.874	0.04541	0.18555	0.10547	-44.254	137.916	895.2376	-1.2515	0.68623	-0.10635	-22.864	144.905	458.7069	-0.55469	0.4209	-0.015137	6.218	-101.291	294.412	-0.41992	0.41016	-0.16797	-28.525	18.2009	33.97369	0.035535	0.24386	0.12258	-20.6721	-74.704	984.0209	-1.5684	1.1738	-0.038086	19.1248	-146.44	914.942	-1.0593	0.92309	-0.23437
2.068	-53.4609	29.7832	17.2785	0.019531	0.18799	0.11377	-31.747	137.211	865.0277	-1.2133	0.66025	-0.10293	-27.09	123.6773	419.3277	-0.53564	0.40869	-0.0053711	47.0495	-160.6961	291.55443	-0.57813	0.46094	-0.15039	-17.388	9.922	24.1558	0.018555	0.25586	0.13477	-31.513	-115.1198	985.8806	-1.4238	1.0879	-0.033691	46.4416	-156.568	962.277	-1.0645	0.94336	-0.24268
2.07	-37.762	34.1014	17.4984	0.0075685	0.18604	0.12402	-25.525	143.318	837.1365	-1.1738	0.63574	-0.096191	-6.604	107.063	393.3865	-0.49805	0.37939	0.016602	40.049	-161.8604	356.24	-0.86914	0.58594	-0.10205	-33.365	16.9625	23.1235	0.00041815	0.27224	0.14295	-25.521	-110.894	982.31078	-1.4038	1.0649	-0.029785	59.77	-151.966	990.7978	-1.0913	0.98193	-0.25928
2.072	-39.932	36.47059	9.922	-0.0068359	0.18848	0.12744	-7.161	136.258	826.1575	-1.1298	0.61045	-0.094824	1.816	97.0917	361.7715	-0.46362	0.35328	0.029297	14.1227	-117.115	413.535	-1.0561	0.69506	-0.067627	-41.822	36.9459	31.5056	-0.015384	0.28665	0.14938	38.333	-117.24	966.4632	-1.4526	1.0415	-0.0048828	62.708	-154.526	1012.5047	-1.1191	1	-0.26758
2.074	-29.379	43.6523	19.40879	-0.029785	0.18359	0.13574	-11.489	94.6091	806.6215	-1.0793	0.58887	-0.091309	-6.036	108.3491	341.5376	-0.42725	0.32471	0.030273	-7.205	-40.262	433.0426	-1.1895	0.80469	-0.036133	-11.252	33.4951	45.5627	-0.032535	0.30617	0.15798	54.951	-114.937	969.0842	-1.4995	1.0405	0.031982	51.857	-124.2016	1040.065	-1.2051	1.0371	-0.28516
2.076	-47.233	45.84	42.2365	-0.04248	0.18213	0.14063	-7.238	88.5159	780.488	-1.0281	0.55332	-0.084668	8.59	118.9029	316.6047	-0.37891	0.28857	0.038086	29.6315	-3.00285	432.789	-1.2637	0.88867	-0.039063	-15.206	35.3835	47.2933	-0.046735	0.32095	0.16616	85.0337	-94.585	1023.5307	-1.5288	1.0454	0.072266	17.1184	-90.536	1101.498	-1.2749	1.0629	-0.29663
2.078	-64.0791	47.86	50.1018	-0.0625	0.18115	0.14941	-24.375	97.1072	733.471	-0.97656	0.52822	-0.082226	-11.336	105.9096	307.2917	-0.35449	0.26953	0.036133	53.605	-21.5896	462.152	-1.2617	0.91602	-0.04834	-7.751	28.66	55.98	-0.05957	0.33203	0.18408	29.002	-73.585563	1083.1961	-1.5308	1.0278	0.10645	6.2477	-65.534	1145.5399	-1.3379	1.0801	-0.29639
2.08	-42.948	38.5893	52.859	-0.074707	0.18481	0.15503	-41.892	117.0126	705.307	-0.92969	0.50293	-0.081055	-9.907	106.3709	288.8569	-0.31152	0.23145	0.040039	77.432	-15.917	533.479	-1.2202	0.92432	-0.10742	-46.534	-1.87	61.9933	-0.063584	0.34333	0.18625	29.403	-72.555	1113.136	-1.519	1.022	0.12012	14.9394	-59.599	1189.316	-1.3921	1.0903	-0.29053
2.082	-51.657	34.9761	31.2938	-0.083008	0.18945	0.16211	-16.639	130.197	699.6256	-0.87764	0.47705	-0.075488	-33.503	102.1531	270.2294	-0.27735	0.20825	0.047607	70.039	24.502	650.582	-1.1814	0.91773	-0.15064	-35.624	-4.4677	105.3238	-0.069169	0.3536	0.1927	22.982	-64.155	1151.294	-1.5054	1.0005	0.12109	11.7431	-69.057	1205.71	-1.418	1.084	-0.29297
2.084	-31.061	31.0474	28.346	-0.099121	0.20117	0.17236	-16.942	132.5487	670.9432	-0.83174	0.4584	-0.07793	-30.492	107.50224	257.2037	-0.24463	0.18652	0.047363	31.0278	48.444	742.152	-1.1772	0.94385	-0.17236	1.942	0.03412	149.6163	-0.073129	0.36366	0.18902	-10.993	-57.659	1133.968	-1.4849	0.99268	0.10865	8.012	-60.337	1196.866	-1.4351	1.063	-0.30078
2.086	-50.202	12.1756	52.372	-0.10059	0.20752	0.17578	-39.249	133.3512	651.4156	-0.78721	0.4377	-0.081836	-14.717	115.45	228.2869	-0.1958	0.15674	0.049316	59.4875	70.433	810.843	-1.3472	1.0747	-0.17041	-54.04	22.6251	196.3236	-0.078434	0.36789	0.18019	-62.396	-51.057	1111.735	-1.4683	0.98682	0.083496	25.2678	-51.68	1202.7161	-1.4431	1.0296	-0.30273
2.088	-56.572	-24.9788	95.194	-0.10303	0.21484	0.19385	-68.766	135.085	640.1473	-0.75283	0.41875	-0.078418	-37.638	127.818	215.3853	-0.18066	0.146	0.053223	44.1412	64.606	843.81064	-1.5151	1.1743	-0.16211	-53.048	2.55362	288.426	-0.092773	0.37451	0.15381	-108.033	-62.434	1096.722	-1.4492	0.9668	0.055664	37.2303	-38.45	1210.023	-1.4512	1.0078	-0.31396
2.09	-40.882	-30.8938	133.246	-0.096435	0.22143	0.19995	-51.1224	137.079	631.255	-0.71924	0.39648	-0.081543	-58.8747	112.358	184.38331	-0.13672	0.12598	0.053711	86.764	63.834	870.541	-1.9624	1.4009	-0.11475	-97.417	-39.2677	391.205	-0.12595	0.37076	0.11469	-123.5375	-74.973	1118.629	-1.4448	0.94971	0.041016	66.479	-38.141	1236.6007	-1.4624	0.9751	-0.32373
2.092	-37.243	2.9489	192.428	-0.078125	0.229	0.20215	-55.4052	146.168	622.235	-0.69375	0.38321	-0.079199	-57.073	90.64	172.285	-0.11036	0.10644	0.055176	56.031	20.653	942.234	-2.2693	1.552	-0.081543	-117.828	-62.08968	526.093	-0.18453	0.37375	0.071833	-125.5586	-107.027	1134.256	-1.4395	0.91797	0.023438	79.943	-51.839	1264.4821	-1.4824	0.96484	-0.32813
2.094	-52.381	-9.079	274.569	-0.047363	0.23682	0.18115	-55.764	141.664	585.621	-0.66679	0.36758	-0.081836	-42.759	80.9064	151.859	-0.083008	0.093262	0.058105	15.695	-38.32	1017.962	-2.4941	1.6719	-0.053223	-127.464	-49.511	621.2978	-0.27456	0.36345	0.018157	-92.988	-121.60775	1150.855	-1.446	0.8899	0.014161	49.926	-86.5645	1259.029831	-1.5552	0.95166	-0.33936
2.096	-94.915	-74.4315	309.3957	-0.029785	0.24365	0.1792	-56.097	120.3889	541.796	-0.64179	0.35117	-0.077929	-59.7617	80.9631	134.052	-0.044922	0.080566	0.058105	-57.6728	-92.5118	1073.7212	-2.5483	1.8013	-0.066895	-104.241	-67.18	682.961	-0.40785	0.35164	-0.046247	-68.9563	-133.862	1168.175	-1.4546	0.86963	0.0078125	35.413	-120.453	1272.23754	-1.643	0.95166	-0.34521
2.098	-56.294	-124.7308	300.8655	-0.0014648	0.26318	0.11914	-44.077	108.75946	493.799	-0.61445	0.33164	-0.072559	-60.419	72.0223	118.0171	-0.023438	0.069336	0.062012	-86.9644	-121.526	1085.4452	-2.4683	1.8423	-0.074707	-130.467	-50.241	731.664	-0.59961	0.34277	-0.12207	-73.267	-104.29	1190.801	-1.4702	0.8501	0.010254	13.5443	-109.336	1277.5893	-1.7559	0.97266	-0.35254
2.1	-29.769	-123.86	287.963	-0.02417	0.28491	0.060303	-39.965	118.9143	461.34	-0.58984	0.30762	-0.075195	-58.6293	56.8266	105.2876	0.0063477	0.049805	0.063477	-46.3359	-126.908	1079.6567	-2.1523	1.9004	-0.12695	-155.678	-16.247	756.6761	-0.84673	0.33211	-0.18301	-76.633	-86.961	1224.19	-1.4741	0.84521	0.0078125	-8.068	-67.4178	1298.44	-1.9268	1.0195	-0.35938
2.102	-34.632	-88.86	350.044	-0.081055	0.31641	0.0083008	-49.217	118.6271	447.5417	-0.56035	0.30098	-0.074609	-62.691	65.7303	85.9751	0.029541	0.039551	0.062744	-54.919	-124.595	1087.58	-1.8513	1.8919	-0.15844	-125.474	17.1542	799.029	-1.1393	0.35612	-0.21387	-102.749	-56.4	1264.4861	-1.4824	0.85059	0.0039063	-4.4078	-50.1769	1286.859	-2.0093	1.062	-0.36865
2.104	-65.7957	-46.831	402.8473	-0.23193	0.38037	-0.020996	-8.464	116.1127	432.0732	-0.52363	0.2915	-0.070996	-57.5863	79.8947	74.0718	0.052734	0.027344	0.065918	-25.163	-123.051	1132.7416	-1.5605	1.8379	-0.1875	-82.478	45.849	854.516	-1.4655	0.43725	-0.21996	-80.931	-69.615	1296.185	-1.5127	0.85058	-0.0053711	12.556	-54.741	1289.467	-2.1304	1.1509	-0.37939
2.106	-89.285	-23.3151	410.373	-0.32129	0.41016	-0.021484	-19.298	104.42128	413.1939	-0.48183	0.28565	-0.069434	-44.988	65.70073	80.5115	0.076172	0.011719	0.061035	-52.836	-106.467	1185.122	-1.2847	1.6821	-0.21924	-28.78	50.482	923.5093	-1.7875	0.57773	-0.20123	-116.421	-93.436	1313.51	-1.5503	0.86963	-0.0073242	17.6027	-67.263	1298.7645	-2.1733	1.2178	-0.38818
2.108	-57.361	-30.242	381.896	-0.50391	0.47461	0.0048828	-20.423	123.0738	391.186	-0.43672	0.27754	-0.072461	-39.515	65.31853	74.64409	0.088867	0.0029297	0.063477	-45.513	-95.277	1248.891	-1.1973	1.6016	-0.22363	-16.9784	44.72	967.195	-2.0586	0.74414	-0.18066	-107.305	-96.833	1301.231	-1.644	0.90283	-0.0024414	21.1515	-67.1466	1312.0955	-2.187	1.27	-0.40479
2.11	-61.919	-37.402	401.592	-0.6018	0.53931	0.03418	-31.8	116.5974	380.8402	-0.39014	0.26563	-0.072266	-41.936	54.4218	74.9763	0.1084	-0.016113	0.062988	-40.944	-92.562	1275.987	-1.0952	1.4634	-0.22607	-8.9761	49.982	994.595	-2.2298	0.91375	-0.11396	-141.537	-89.9954	1271.2162	-1.6968	0.91846	0.003418	46.657	-62.59579	1346.241	-2.1836	1.3047	-0.41846
2.112	-11.902	-8.807	471.414	-0.66748	0.59961	0.059082	-26.362	119.5267	384.803	-0.34287	0.25284	-0.073535	-42.83	49.017	67.5687	0.12402	-0.037598	0.063965	-65.49	-88.334	1301.1	-1.06	1.395	-0.21509	-29.8035	27.052	994.438	-2.3518	1.0763	-0.037549	-118.41263	-60.24	1268.95169	-1.8125	0.96875	0.0014648	41.535	-34.2103	1330.2829	-2.1777	1.3105	-0.44141
2.114	-25.127	55.225	562.7035	-0.69678	0.68018	0.067871	-10.508	112.535	370.585	-0.29492	0.23906	-0.077148	-49.928	34.7017	59.9984	0.12988	-0.048828	0.067871	-54.314	-61.083	1304.0405	-1.0425	1.3481	-0.20313	-23.989	40.0987	1010.376	-2.4459	1.1986	-0.00093437	-78.611	-51.228	1261.0495	-1.8984	1.0146	0.0063476	62.959	-28.6917	1290.1915	-2.1772	1.2993	-0.44873
2.116	-13.204	137.443	647.9077	-0.70264	0.71143	0.062012	-23.762	113.468	333.697	-0.25742	0.21836	-0.080273	-28.079	33.3847	65.3652	0.13818	-0.068359	0.06543	-90.29	-45.35	1309.1829	-1.0288	1.3013	-0.20264	12.158	41.205213	1003.7572	-2.4821	1.2896	0.016052	-71.599	-59.388	1255.1657	-1.9761	1.063	0.01709	45.915	-16.9843	1251.631	-2.1755	1.2893	-0.45312
2.118	-17.659	144.647	722.83089	-0.71484	0.75781	0.036133	-23.021	95.762	315.40298	-0.22022	0.19824	-0.084766	-27.174	43.3819	32.2981	0.14233	-0.081299	0.07129	-64.486	-21.736	1289.812	-1.0293	1.2871	-0.20605	25.694	53.14	993.6532	-2.457	1.3281	0.025879	-31.223	-87.27332	1247.381	-2.064	1.1274	0.025391	35.121	-28.8524	1260.044	-2.1772	1.2837	-0.44678
2.12	-49.683	121.588	798.19925	-0.73877	0.78222	0.0070801	-15.399	86.636	271.109	-0.19336	0.17969	-0.085449	-40.159	37.0078	10.3886	0.1416	-0.088379	0.075684	-97.508	-43.098	1269.341	-1.0488	1.2461	-0.20166	25.4659	23.543	976.115	-2.3573	1.3116	0.012299	-55.074	-112.525	1266.044	-2.105	1.1567	0.028809	25.7582	-9.9746	1276.9024	-2.1694	1.2798	-0.43701
2.122	-52.709	83.853	883.4491	-0.79541	0.80615	-0.028809	-12.455	96.804	248.4073	-0.16572	0.16465	-0.092871	-21.783	21.94302	19.2799	0.14697	-0.099609	0.069824	-90.198	-53.421	1248.691	-1.0777	1.229	-0.19922	-19.9615	-48.97	994.37	-2.1865	1.2672	0.0094755	-3.282	-80.333	1280.8318	-2.1772	1.2075	0.016113	29.862	8.759	1306.061	-2.1499	1.2817	-0.43115
2.124	-60.028	53.705	939.309	-0.93701	0.84229	-0.084961	-21.15	99.3677	239.5085	-0.14795	0.15371	-0.090625	-27.512	21.69829	31.2048	0.14453	-0.1001	0.073242	-71.051	-87.1755	1287.006	-1.1074	1.2061	-0.19336	-10.69622	-75.325	992.02	-1.9941	1.2189	0.021082	-23.297	-38.9969	1303.482	-2.2446	1.2378	-0.003418	6.114187	19.32904	1288.7564	-2.0854	1.2778	-0.42041
2.126	-83.699	15.335	998.901	-1.041	0.87109	-0.10693	-9.998	80.0166	234.9537	-0.13037	0.14472	-0.091406	-7.546	34.9514	15.9931	0.13916	-0.10156	0.074707	-39.75	-110.588	1316.44	-1.1362	1.1743	-0.18896	-10.2181	-70.2883	999.7666	-1.8282	1.1814	0.035681	-14.395	-13.23797	1276.829	-2.3218	1.2739	-0.014648	25.6638	13.6837	1268.3815	-2.0249	1.2642	-0.41699
2.128	-112.263	-12.034	1063.02006	-1.3193	0.94336	-0.14307	-13.475	69.735	214.2193	-0.11426	0.13711	-0.093262	-1.129	26.3772	35.2476	0.13208	-0.10913	0.078613	9.04	-113.161	1357.244	-1.144	1.1646	-0.18457	23.459	-59.145	988.209	-1.7241	1.1587	0.048828	-39.617	-12.455	1274.5706	-2.4214	1.3228	-0.015137	35.636	-4.0168	1283.794	-1.9546	1.2495	-0.41553
2.13	-74.6903	-15.806	1083.2177	-1.5776	1.0151	-0.12915	-32.686	77.77	194.2257	-0.10254	0.13135	-0.091797	2.082	19.4808	24.9755	0.12207	-0.11182	0.07666	12.157	-93.026	1370.4629	-1.1577	1.1313	-0.16504	49.361	-64.096	979.3079	-1.6846	1.1438	0.070412	-56.495	-20.53	1272.630951	-2.4585	1.354	-0.015137	50.207	-0.8046	1262.9805	-1.8657	1.2095	-0.4126
2.132	-37.3024	-39.6208	1089.12	-1.8413	1.1021	-0.10645	-16.526	81.7879	188.7303	-0.087598	0.13027	-0.093164	-10.385	26.4289	25.6141	0.10742	-0.11279	0.074219	57.2582	-83.326	1365.4108	-1.1726	1.1057	-0.1726	58.617	-73.622	1004.6594	-1.6713	1.1349	0.10205	-75.042	-25.298	1300.7397	-2.4844	1.4063	-0.01709	53.263	5.1732	1271.6074	-1.832	1.1914	-0.40918
2.134	-21.5574	-86.274	1098.685	-2.1431	1.2446	-0.053711	-15.1	83.077	198.7464	-0.075	0.13017	-0.091797	-24.118	45.351	32.4822	0.098633	-0.11182	0.075195	41.584	-84.676	1390.621	-1.1895	1.0801	-0.18359	91.848	-71.5	1022.8116	-1.6419	1.1298	0.13983	-72.266	-26.891	1298.9997	-2.4519	1.4309	-0.020752	67.12	12.84132	1261.4473	-1.7832	1.1328	-0.40137
2.136	-10.529	-104.053	1133.524	-2.252	1.3223	-0.027344	-17.861	88.209	174.266	-0.054687	0.12744	-0.094532	-20.526	42.8	31.4637	0.081055	-0.10986	0.080078	36.66	-77.4158	1430.484	-1.2397	1.0728	-0.20264	62.6515	-71.746	1079.894	-1.5649	1.1213	0.17464	-37.864	-12.216	1293.8056	-2.3848	1.4355	-0.024902	53.378	9.3728	1256.409	-1.7598	1.1006	-0.39404
2.138	-12.871	-78.106	1195.852	-2.3672	1.4863	0.015625	-34.2337	93.001	139.3133	-0.04082	0.12344	-0.090723	-20.008	35.16	33.846	0.072266	-0.10498	0.085693	31.4834	-71.4077	1461.911	-1.3289	1.0833	-0.21289	87.693	-75.157	1115.614	-1.4683	1.0884	0.18848	-71.566	-5.052	1256.809	-2.2446	1.4185	-0.040527	44.253	10.282	1244.7639	-1.7549	1.0659	-0.38867
2.14	8.304	-44.3713	1283.678	-2.3462	1.5952	0.036132	-29.392	87.8	135.0209	-0.027832	0.12207	-0.088379	-15.676	28.9852	23.543	0.066895	-0.1001	0.087402	37.20921	-70.337	1456.315	-1.4448	1.1216	-0.22119	26.486	-65.4775	1102.149	-1.3701	1.0523	0.17618	-86.112	-10.548	1226.201	-2.1675	1.395	-0.054688	35.622	9.93	1210.06142	-1.7539	1.0313	-0.38623
2.142	19.853	-32.5851	1302.517	-2.271	1.6841	0.046875	-40.932	65.4315	130.038	-0.010449	0.11845	-0.092774	-34.96	24.0423	9.0974	0.066895	-0.091309	0.091309	58.945	-68.4315	1426.056	-1.626	1.2109	-0.23438	-41.501	-42.927	1085.3971	-1.2852	1.0018	0.14916	-87.482	-22.7594	1230.064	-2.0234	1.3428	-0.072266	44.3829	20.399	1201.4272	-1.7539	1.0195	-0.37793
2.144	48.2374	-24.7166	1314.018	-2.1055	1.7559	0.051758	-45.517	72.0973	134.5231	0.0029297	0.1167	-0.097656	-41.857	22.3731	11.29	0.071289	-0.089355	0.090332	22.385	-64.659	1379.3118	-1.7148	1.2676	-0.23193	-95.032	-50.06	1081.339	-1.2071	0.94244	0.11009	-94.611	-8.81	1243.3559	-1.9351	1.2964	-0.083496	41.947	46.6624	1178.6237	-1.748	0.99219	-0.37305
2.146	25.08	-24.094	1303.1273	-2.019	1.7603	0.054199	-35.286	62.9136	120.6967	0.016992	0.11944	-0.098828	-39.143	21.6792	18.171	0.077148	-0.079102	0.096191	27.958	-54.645	1377.4698	-1.8848	1.3965	-0.23438	-94.421	-55.013	1091.165	-1.1564	0.86576	0.072672	-68.866	4.18	1258.445	-1.8652	1.25	-0.09082	27.774	65.18	1156.6885	-1.7322	0.97681	-0.36402
2.148	7.019	-17.024	1294.4574	-1.8394	1.7153	0.041016	-52.55	60.6554	94.9051	0.022851	0.11797	-0.098145	-42.73	22.2204	17.3881	0.095457	-0.070557	0.092041	14.368	-64.638	1388.43	-1.9771	1.4947	-0.25684	-87.13104	-67.042	1110.4698	-1.1284	0.78271	0.041016	-106.5931	29.806	1255.533	-1.7964	1.2056	-0.09375	1.0619	70.489	1135.6173	-1.709	0.95996	-0.35742
2.15	-12.376	-5.274	1297.4043	-1.7312	1.6516	0.027588	-43.555	48.4241	71.2834	0.027344	0.11914	-0.10498	-38.259	32.0949	13.9134	0.11084	-0.061035	0.091309	68.854	-51.9712	1383.655	-2.0352	1.582	-0.28223	-111.14	-96.471	1108.3524	-1.1289	0.71327	0.02617	-109.1238	45.765	1252.632	-1.7749	1.1812	-0.091309	37.791	63.739	1136.3471	-1.6694	0.94189	-0.34619
2.152	-31.3585	-12.292	1302.3967	-1.6426	1.5801	0.018066	-47.521	49.3264	60.946	0.031152	0.11601	-0.0999	-53.921	25.5035	30.1314	0.12988	-0.049805	0.087891	85.332	-56.0673	1375.6	-2.0874	1.6841	-0.32178	-68.795	-104.069	1106.982	-1.1467	0.66913	0.014258	-136.5239	58.463	1241.596	-1.7578	1.1475	-0.083008	34.490736	76.487	1136.2232	-1.6406	0.92969	-0.3457
2.154	-10.141	-21.067	1291.6914	-1.5581	1.4995	0.01123	-12.202	57.6199	48.847	0.03418	0.1169	-0.10381	-43.0647	37.6748	35.775	0.14453	-0.041504	0.084473	75.457	-29.08851	1366.42772	-2.1069	1.7231	-0.3374	-85.6043	-94.4534	1124.225	-1.1795	0.65039	0.012304	-123.9679	81.235	1223.2801	-1.7569	1.1221	-0.081054	20.037	88.6885	1121.045	-1.5903	0.90576	-0.33057
2.156	-7.4	-55.796	1280.024	-1.5156	1.4609	0.012695	-22.53	55.6485	69.7377	0.036914	0.1165	-0.10303	-50.315	51.692	21.0911	0.15527	-0.027832	0.081055	60.804	-0.47118	1358.5429	-2.1348	1.7832	-0.36719	-73.6304	-56.43	1157.032	-1.2203	0.6586	0.014454	-148.39	89.617	1213.441	-1.7617	1.0996	-0.072266	15.1999	92.068	1094.1877	-1.5486	0.88892	-0.323
2.158	29.501	-94.6479	1285.487	-1.4473	1.4043	0.0087891	-21.091	50.0025	66.1219	0.037891	0.11895	-0.10088	-50.175	58.957	27.424	0.16406	-0.012451	0.077148	5.487	19.9582	1379.5526	-2.1446	1.8145	-0.37696	-52.854	-49.897	1192.1459	-1.2559	0.6875	0.018555	-128.52208	90.602	1194.571	-1.771	1.0708	-0.064941	22.0784	102.18774	1057.992	-1.5171	0.86963	-0.31494
2.16	30.979	-97.019	1310.922	-1.3941	1.3565	-0.0031738	-30.042	42.3086	69.9954	0.04248	0.12305	-0.10498	-47.258	38.3508	23.49921	0.16797	-0.0024414	0.074707	9.6283	22.6907	1396.027	-2.1367	1.8408	-0.38477	-75.117	-74.755	1247.65	-1.2902	0.73534	0.024121	-123.2121	72.609	1181.9941	-1.772	1.0513	-0.058105	10.432	101.09	1037.0047	-1.4702	0.84619	-0.3042
2.162	49.797	-67.13	1341.6345	-1.355	1.3013	-0.018555	-43.201	47.966	58.8105	0.050293	0.1209	-0.10361	-53.834	27.2505	31.7529	0.17383	0.0097656	0.081055	2.9564	11.0799	1405.797	-2.1089	1.8521	-0.3833	-82.68808	-78.707	1245.399	-1.3229	0.78623	0.017189	-116.7708	65.5238	1167.474	-1.7578	1.0137	-0.047363	4.9571	93.6869	1021.7006	-1.4473	0.83008	-0.29883
2.164	16.103	-62.184	1369.083	-1.3574	1.2266	-0.047852	-41.269	48.53415	62.5625	0.052246	0.12207	-0.10449	-44.558	22.3739	24.637	0.18115	0.018555	0.080078	37.412056	-19.05797	1390.648	-2.0762	1.8535	-0.38086	-124.001	-88.027	1247.404	-1.3741	0.83896	0.0023444	-92.746	51.72	1140.469	-1.7361	0.98413	-0.042969	2.875	68.4281	1015.698	-1.3999	0.80908	-0.28613
2.166	8.147	-88.387	1405.425	-1.3711	1.1895	-0.056152	-43.607	41.3197	46.6535	0.057324	0.12051	-0.10801	-56.14	27.287	25.586	0.18018	0.039551	0.082031	19.5509	-27.5409	1381.9546	-1.9878	1.8345	-0.37549	-119.057	-72.1701	1254.379	-1.4436	0.87246	0.010547	-64.55	50.449	1130.79773	-1.7007	0.95166	-0.036133	13.306	66.4729	983.7298	-1.3655	0.79273	-0.27759
2.168	21.305	-109.4046	1429.017	-1.418	1.123	-0.070313	-24.618	44.4705	32.7587	0.059375	0.12119	-0.10635	-27.873	31.8799	19.21	0.18408	0.051758	0.087402	-21.1301	-3.626	1366.2415	-1.8965	1.8095	-0.36792	-122.9465	-66.566	1250.909	-1.5405	0.90869	0.0073242	-22.596	65.904	1109.794	-1.6479	0.90674	-0.030762	-11.903	79.3515	941.375	-1.3262	0.77246	-0.26953
2.17	-30.623	-103.4462	1424.323	-1.4946	1.0786	-0.066895	-47.403	49.086	16.6326	0.063477	0.11816	-0.11084	-26.302	37.1145	35.4439	0.18457	0.053711	0.085449	-39.26236	16.78497	1348.9267	-1.7949	1.7734	-0.36182	-95.927	-62.668	1244.116	-1.6513	0.95322	0.0094728	-46.676	87.7532	1090.0355	-1.6187	0.8833	-0.026367	-28.2978	98.8401	928.428	-1.2822	0.74805	-0.25195
2.172	-33.079	-87.2385	1406.623	-1.541	1.0732	-0.070313	-39.198	32.7965	17.579	0.067676	0.11114	-0.1124	-18.996	43.9816	15.8269	0.18066	0.063477	0.085449	-17.57	16.41508	1308.153	-1.6582	1.7148	-0.35742	-68.124	-64.227	1206.1927	-1.7565	1.0126	0.014551	-44.918	99.227	1080.34455	-1.5664	0.83691	-0.02832	8.5162	107.6378	917.6558	-1.2593	0.73486	-0.24512
2.174	-71.567	-72.8958	1392.1821	-1.644	1.0884	-0.055664	-27.629	16.0752	24.202	0.067578	0.1084	-0.11894	-29.833	41.3298	26.8892	0.17529	0.069336	0.089844	31.4092	7.636	1274.985	-1.605	1.6782	-0.35205	-65.679	-75.613	1199.241	-1.8546	1.0802	0.01416	-39.421	90.625	1078.2363	-1.5264	0.80518	-0.026855	2.295	108.95427	889.3438	-1.2163	0.71143	-0.23682
2.176	-100.4381	-74.7899	1368.62166	-1.7119	1.1172	-0.042969	-22.397	14.7141	23.46	0.067969	0.10293	-0.11934	-22.426	29.0964	28.83	0.16016	0.082031	0.092285	18.8191	9.21	1267.9747	-1.5288	1.6255	-0.33447	-17.992	-78.1929	1244.67	-1.941	1.1437	0.009961	-31.554	104.462	1066.432	-1.4941	0.77539	-0.025879	20.132	110.919021	858.34092	-1.19	0.69238	-0.22168
2.178	-131.135	-76.403	1356.942	-1.7676	1.1465	-0.019531	-11.964	20.9685	40.386	0.06709	0.097951	-0.11718	-19.597	36.5468	39.1561	0.14966	0.093262	0.10108	33.447	27.804	1268.661	-1.4968	1.5911	-0.3186	-21.249	-67.0192	1261.3894	-2.021	1.2056	0.0019531	-33.173	118.448	1034.572	-1.4512	0.74219	-0.032715	-14.67	112.442	837.3782	-1.1577	0.67676	-0.20947
2.18	-114.73339	-84.8798	1357.887	-1.8105	1.1797	0.0048828	-25.566	32.8878	35.2254	0.062988	0.095215	-0.11865	-14.385	48.9693	42.7654	0.13623	0.10596	0.104	25.598	60.497	1264.5607	-1.4824	1.5664	-0.30762	9.963	-46.443	1266.342	-2.1021	1.2608	-0.0098632	-56.658	116.3078	987.1474	-1.4124	0.71899	-0.026367	11.771	127.594	805.6052	-1.1108	0.66064	-0.19043
2.182	-52.078	-66.137	1366.686	-1.8262	1.1895	0.017578	-10.425	50.644	33.3585	0.060547	0.085742	-0.11894	-6.664	37.8617	33.4116	0.11572	0.11768	0.11035	8.7195	105.43	1243.2454	-1.4819	1.5337	-0.2832	0.480000000000004	-25.7699	1249.1267	-2.1879	1.3032	-0.022265	-44.949	117.5413	955.6919	-1.375	0.70215	-0.020508	-0.122	138.458	799.0778	-1.0859	0.64258	-0.18506
2.184	-48.535	-43.0988	1353.605	-1.8315	1.2075	0.018066	-40.9	50.0132	27.057562	0.055371	0.082031	-0.11729	-21.007	27.4062	34.0513	0.10156	0.12598	0.11621	13.0767	114.872	1229.78	-1.4858	1.522	-0.27197	-5.999	-15.7722	1231.9318	-2.2836	1.3496	-0.031641	-60.048	128.04	924.2766	-1.3184	0.67578	-0.015137	-3	141.559	768.1367	-1.0293	0.62305	-0.16406
2.186	-58.775	-8.7465	1348.065	-1.8359	1.2207	0.011475	-22.366	40.847	38.2493	0.049512	0.077344	-0.11455	-8.657	34.219	27.3506	0.074219	0.13721	0.12402	49.5318	100.352	1197.58806	-1.4824	1.4941	-0.25049	-28.651	-9.5856	1253.4557	-2.3735	1.403	-0.040918	-20.936	131.295	912.2824	-1.2856	0.66748	-0.013184	5.323	129.326	755.6586	-0.98782	0.60254	-0.15674
2.188	-92.64	16.0617	1364.89	-1.8491	1.2388	0.0083008	-9.937	20.3724	41.5728	0.045312	0.074121	-0.11172	-17.738	47.213	31.72682	0.055908	0.1455	0.12817	30.0794	92.581	1172.9569	-1.4714	1.4788	-0.23755	-46.192	-13.318	1273.168	-2.4351	1.4565	-0.047852	0.556000000000004	116.0015	889.61483	-1.2188	0.64453	-0.0097656	6.861	105.4374	726.536	-0.94141	0.58301	-0.14648
2.19	-75.771	28.1896	1390.0824	-1.8921	1.2485	0.0024414	-32.205	26.8941	35.2294	0.041504	0.077637	-0.10791	-16.775	47.546	29.258	0.038574	0.15332	0.13672	22.2491	104.112	1177.0907	-1.4473	1.4531	-0.22461	-55.946	-12.609	1280.959	-2.4552	1.5065	-0.055176	3.293	113.4654	856.8101	-1.166	0.62793	-0.0063477	0.587999999999999	125.3253	686.327	-0.88623	0.54834	-0.13184
2.192	-82.934	18.1535	1418.443	-1.9199	1.2617	-0.0043945	-45.424	28.6234	19.186	0.037207	0.078906	-0.1042	0.629000000000005	36.6379	33.7641	0.011719	0.16699	0.14258	30.057	112.048	1181.1445	-1.3979	1.4155	-0.21338	-21.881	-7.189	1263.2018	-2.4227	1.5504	-0.060156	-15.958	108.2657	839.539	-1.1128	0.61084	-0.003418	-14.433	145.454	659.1048	-0.84546	0.5293	-0.12305
2.194	-88.354	16.9237	1416.35	-2.0103	1.313	-0.032715	-26.019	36.408	32.156	0.03584	0.081152	-0.10488	-19.072	29.1012	32.3758	0.003418	0.17578	0.14795	30.262	96.244	1140.22549	-1.3633	1.3926	-0.20605	-51.044	-11.248	1236.139	-2.3523	1.5754	-0.065625	-53.984	112.8033	818.718	-1.0371	0.58984	-0.0014648	-24.291	143.902	642.1725	-0.80664	0.50391	-0.11279
2.196	-70.297	-2.907	1407.363	-2.1189	1.3557	-0.052002	-18.239	30.4591	29.3698	0.039356	0.078027	-0.10293	-38.394	16.6047	21.6775	-0.01416	0.19775	0.15234	48.546	77.4053	1067.1534	-1.2871	1.334	-0.19971	-75.901	-17.214	1200.704	-2.2574	1.5742	-0.069336	-52.162	117.965	818.756	-0.99951	0.57959	-1.0408e-14	-2.803	126.3579	619.5303	-0.76172	0.4668	-0.094727
2.198	-93.1369	-0.765000000000001	1395.4478	-2.2598	1.416	-0.072266	-40.632	28.62619	39.63424	0.041504	0.075977	-0.10576	-36.216	13.266	25.1864	-0.025879	0.20849	0.16651	30.1727	58.013	1004.981	-1.2351	1.2923	-0.19507	-66.929	-22.762	1197.652	-2.1519	1.5522	-0.067871	-46.332	129.9844	794.3733	-0.92773	0.55176	-0.0029297	-10.691	126.7757	594.3035	-0.74121	0.45313	-0.089355
2.2	-112.3971	-6.374	1375.7814	-2.4551	1.5078	-0.07959	-9.931	21.0904	25.8095	0.046387	0.07959	-0.097168	-23.116	33.80596	41.3038	-0.032227	0.21729	0.17334	50.5536	58.482	1008.55	-1.1909	1.2446	-0.18896	-57.555	-12.803	1199.2555	-2.0478	1.4941	-0.078613	-48.672	124.504	753.2342	-0.86914	0.53321	-0.0056153	-13.509	116.7985	572.2811	-0.70166	0.42529	-0.07959
2.202	-98.553	-7.7404	1363.8469	-2.5425	1.5571	-0.07666	-50.357	24.4092	24.8501	0.048047	0.074805	-0.096289	-44.438	33.7415	32.948	-0.042969	0.23242	0.18506	43.1034	76.221	1022.6247	-1.1328	1.1855	-0.17773	-74.453	-0.861000000000004	1211.302	-1.9507	1.4231	-0.082129	-77.4986	126.701	715.9981	-0.81104	0.521	-0.018066	-7.598	126.9943	569.6484	-0.6753	0.40576	-0.068604
2.204	-37.809	-20.561	1343.3042	-2.6421	1.6353	-0.068359	-42.618	42.5966	32.6811	0.049805	0.074024	-0.096875	-65.3861	44.736	38.4288	-0.047852	0.23242	0.18848	33.3821	110.675	1012.4155	-1.1094	1.1621	-0.17041	-68.979	1.523	1223.699	-1.8722	1.3532	-0.08916	-83.2886	122.1687	692.4573	-0.74414	0.49414	-0.015625	-6.996	131.377	554.19415	-0.6499	0.3877	-0.055176
2.206	-19.321	-29.1595	1331.8903	-2.6607	1.687	-0.061768	-29.959	42.956	25.1123	0.052539	0.074804	-0.099609	-46.706	33.4469	28.1228	-0.05127	0.24023	0.19678	38.907	120.50426	990.999	-1.0625	1.1113	-0.16211	-59.535	15.446	1220.5292	-1.8149	1.2956	-0.088965	-87.6007	135.462	679.7018	-0.7168	0.48438	-0.019043	-25.676	143.5475	519.254	-0.61279	0.37207	-0.047363
2.208	-3.916	-11.256	1324.2134	-2.627	1.7129	-0.058105	-37.745	39.4075	25.6379	0.051562	0.074414	-0.099315	-41.106	27.8164	31.8081	-0.05664	0.23803	0.20556	24.0064	118.242	962.963	-1.0312	1.0678	-0.14575	-83.556	45.604	1218.6915	-1.7695	1.2441	-0.087891	-61.7623	132.0067	667.548	-0.65576	0.46436	-0.021973	-29.471	134.135	492.348	-0.59424	0.36426	-0.043457
2.21	-28.021	17.922	1319.6945	-2.5073	1.7134	-0.066895	-35.49	25.7546	33.06598	0.04834	0.077637	-0.097656	-46.599	36.3744	31.6406	-0.062012	0.2417	0.21533	32.5317	131.85	926.512	-0.99756	1.0317	-0.14014	-120.5606	86.205	1200.507	-1.7443	1.2037	-0.079492	-58.9	119.391	634.9912	-0.61597	0.45142	-0.023926	-18.21	124.092	468.267	-0.55664	0.35254	-0.036133
2.212	-14.878	54.3472	1296.9962	-2.4238	1.6973	-0.071777	-42.82	21.8425	26.2419	0.05039	0.083789	-0.098341	-60.661	28.7046	47.2495	-0.068848	0.24219	0.22754	-10.066	160.102	909.2016	-0.95068	0.98096	-0.12646	-123.2738	93.392	1203.996	-1.7257	1.1622	-0.080567	-46.979	104.05	613.8767	-0.57861	0.44189	-0.02832	-15.19	123.104	430.58322	-0.52588	0.33789	-0.027587
2.214	-19.699	81.8779	1285.5058	-2.2383	1.6543	-0.088379	-32.373	27.8445	32.038	0.050781	0.089843	-0.10127	-43.468	29.5441	27.9758	-0.063965	0.24561	0.23193	-18.626	163.954	888.9019	-0.92529	0.95361	-0.12305	-144.319	90.033	1166.5	-1.705	1.122	-0.067676	-40.216	103.3317	582.561	-0.52734	0.42578	-0.025879	-36.691	123.2	404.0677	-0.49414	0.32129	-0.02002
2.216	-40.088	100.701	1256.5649	-2.1006	1.5947	-0.096194	-57.35	35.594	53.2615	0.052343	0.099607	-0.10049	-32.223	19.149	26.152	-0.060547	0.25098	0.2334	-15.817	138.869	845.858	-0.87646	0.9126	-0.11133	-123.397	86.562	1140.4847	-1.6887	1.0906	-0.064746	-54.308	124.7047	552.2796	-0.5	0.41797	-0.028809	-39.8056	118.167	382.48114	-0.45996	0.30469	-0.0063477
2.218	-56.186	94.75	1240.9963	-1.9883	1.5313	-0.104	-50.45	36.9961	38.8125	0.054687	0.10938	-0.10205	-38.411	17.9371	19.8248	-0.056396	0.25415	0.24292	-51.3365	118.5703	787.2013	-0.83789	0.87402	-0.10181	-129.712	74.429	1129.599	-1.6694	1.0552	-0.060059	-44.856	129.576	531.2718	-0.45117	0.39941	-0.030762	-29.873	103.7728	366.4477	-0.44092	0.29785	-0.0039063
[truncated: 11,890 more rows]
