# Supplementary material for: Reliability and Validity of Running Cadence and Stance Time Derived from Instrumented Wireless Earbuds
Source: Sensors (Basel). 2021 Nov 30;21(23):7995. doi: 10.3390/s21237995 (PMC8659722; doi:10.3390/s21237995)
Supplement: Supplementary file 1 [file sensors-21-07995-s001.zip › Data_P10_speeds_1.csv]

time	S7kmh_force_plate_1	S7kmh_force_plate_2	S7kmh_force_plate_3	S7kmh_earbuds_1	S7kmh_earbuds_2	S7kmh_earbuds_3	S10kmh_force_plate_1	S10kmh_force_plate_2	S10kmh_force_plate_3	S10kmh_earbuds_1	S10kmh_earbuds_2	S10kmh_earbuds_3	S13kmh_force_plate_1	S13kmh_force_plate_2	S13kmh_force_plate_3	S13kmh_earbuds_1	S13kmh_earbuds_2	S13kmh_earbuds_3	max_force_plate_1	max_force_plate_2	max_force_plate_3	max_earbuds_1	max_earbuds_2	max_earbuds_3
0	-17.596	146.96204	644.73	-0.70215	0.74854	-0.015625	-28.783	90.296	17.0197	0.097951	0.22588	0.080664	NaN	NaN	NaN	NaN	NaN	NaN	NaN	NaN	NaN	NaN	NaN	NaN
0.002	-17.141	137.76264	629.6781	-0.66797	0.72559	-0.02002	-27.776	35.412	14.1015	0.069629	0.24922	0.087988	NaN	NaN	NaN	NaN	NaN	NaN	NaN	NaN	NaN	NaN	NaN	NaN
0.004	-11.058	129.11409	613.2556	-0.59912	0.68164	-0.027832	13.67	49.78	6.182	0.039551	0.26836	0.098144	NaN	NaN	NaN	NaN	NaN	NaN	NaN	NaN	NaN	NaN	NaN	NaN
0.006	-6.214	115.5607	577.6787	-0.55273	0.65259	-0.037598	-1.709	23.0988	-1.033	0.013574	0.28877	0.11562	NaN	NaN	NaN	NaN	NaN	NaN	NaN	NaN	NaN	NaN	NaN	NaN
0.008	-47.261	125.085171	561.63999	-0.51074	0.62598	-0.042969	-24.266	26.418	31.4903	-0.01123	0.30127	0.12793	NaN	NaN	NaN	NaN	NaN	NaN	NaN	NaN	NaN	NaN	NaN	NaN
0.01	-30.257	121.8719	556.885	-0.45654	0.59131	-0.043457	-20.523	82.399	21.618	-0.031738	0.30918	0.14248	NaN	NaN	NaN	NaN	NaN	NaN	NaN	NaN	NaN	NaN	NaN	NaN
0.012	-24.024	141.269	536.824	-0.42822	0.57568	-0.049805	-45.15	33.8471	15.2656	-0.048926	0.31162	0.15781	NaN	NaN	NaN	NaN	NaN	NaN	NaN	NaN	NaN	NaN	NaN	NaN
0.014	-10.191	159.909	501.558	-0.3623	0.52734	-0.055664	-31.017	34.723	37.0744	-0.054394	0.31553	0.17344	NaN	NaN	NaN	NaN	NaN	NaN	NaN	NaN	NaN	NaN	NaN	NaN
0.016	-34.814	148.116	432.86	-0.3081	0.4917	-0.063232	-22.667	28.82	22.0225	-0.060449	0.3124	0.18535	NaN	NaN	NaN	NaN	NaN	NaN	NaN	NaN	NaN	NaN	NaN	NaN
0.018	-11.288	109.45861	404.5385	-0.25439	0.45508	-0.071289	-21.523	3.1225	41.026	-0.0625	0.30469	0.19629	NaN	NaN	NaN	NaN	NaN	NaN	NaN	NaN	NaN	NaN	NaN	NaN
0.02	-9.144	92.804	373.4553	-0.18896	0.40771	-0.078613	-4.465	67.327	64.433	-0.0625	0.3	0.20527	NaN	NaN	NaN	NaN	NaN	NaN	NaN	NaN	NaN	NaN	NaN	NaN
0.022	-7.401	99.148	333.8467	-0.15674	0.38721	-0.083496	-45.3786	63.562	58.7887	-0.063476	0.29424	0.21123	NaN	NaN	NaN	NaN	NaN	NaN	NaN	NaN	NaN	NaN	NaN	NaN
0.024	-9.288	104.327	306.5111	-0.090332	0.33936	-0.090332	-50.715	6.3451	125.0237	-0.067383	0.28877	0.21358	NaN	NaN	NaN	NaN	NaN	NaN	NaN	NaN	NaN	NaN	NaN	NaN
0.026	-5.669	102.899	299.287	-0.046143	0.30127	-0.097658	-45.197	-24.534	186.724	-0.076562	0.28291	0.21455	NaN	NaN	NaN	NaN	NaN	NaN	NaN	NaN	NaN	NaN	NaN	NaN
0.028	-15.592	104.0878	284.175	-0.00097656	0.271	-0.10986	-75.55	-45.506	271.483	-0.091309	0.27979	0.20947	NaN	NaN	NaN	NaN	NaN	NaN	NaN	NaN	NaN	NaN	NaN	NaN
0.03	-27.664	102.8003	249.648	0.061035	0.2251	-0.12012	-9.96999999999999	31.293	394.1686	-0.10722	0.28564	0.21328	NaN	NaN	NaN	NaN	NaN	NaN	NaN	NaN	NaN	NaN	NaN	NaN
0.032	-14.709	109.965	235.1544	0.086914	0.20801	-0.13135	-111.2204	6.594	509.041	-0.1165	0.29277	0.2126	NaN	NaN	NaN	NaN	NaN	NaN	NaN	NaN	NaN	NaN	NaN	NaN
0.034	-21.659	122.285	221.0275	0.14111	0.18457	-0.14844	-203.2262	-135.032	634.247	-0.12002	0.29629	0.21924	NaN	NaN	NaN	NaN	NaN	NaN	NaN	NaN	NaN	NaN	NaN	NaN
0.036	-23.918	138.063	203.1782	0.17139	0.16699	-0.1521	-156.753	-138.782	701.825	-0.11475	0.29521	0.21895	NaN	NaN	NaN	NaN	NaN	NaN	NaN	NaN	NaN	NaN	NaN	NaN
0.038	-26.817	117.277	168.3252	0.19482	0.15967	-0.16699	-108.155	-133.93	771.1349	-0.104	0.29248	0.21289	NaN	NaN	NaN	NaN	NaN	NaN	NaN	NaN	NaN	NaN	NaN	NaN
0.04	-44.0353	101.637	132.082	0.20654	0.14551	-0.17236	-139.341	-69.7896	921.59	-0.089942	0.28701	0.1875	NaN	NaN	NaN	NaN	NaN	NaN	NaN	NaN	NaN	NaN	NaN	NaN
0.042	-2.726	75.4836	134.1208	0.2085	0.14648	-0.16992	-144.255	29.2572	1001.944	-0.080273	0.27862	0.12578	NaN	NaN	NaN	NaN	NaN	NaN	NaN	NaN	NaN	NaN	NaN	NaN
0.044	0.632999999999999	73.75	108.0096	0.1958	0.15234	-0.16455	-154.166	27.101	994.0026	-0.094727	0.27862	0.017578	NaN	NaN	NaN	NaN	NaN	NaN	NaN	NaN	NaN	NaN	NaN	NaN
0.046	-0.0429999999999993	66.439	97.8167	0.1748	0.15577	-0.16284	-102.219	19.248	1027.907	-0.17031	0.29971	-0.092384	NaN	NaN	NaN	NaN	NaN	NaN	NaN	NaN	NaN	NaN	NaN	NaN
0.048	-7.263	72.0084	89.0337	0.15527	0.15918	-0.16016	-42.538	-3.601	1126.9424	-0.31641	0.34277	-0.18115	NaN	NaN	NaN	NaN	NaN	NaN	NaN	NaN	NaN	NaN	NaN	NaN
0.05	2.109	72.1184	79.1742	0.13721	0.16748	-0.14307	39.292	-87.924	1250.456	-0.53076	0.40478	-0.24941	NaN	NaN	NaN	NaN	NaN	NaN	NaN	NaN	NaN	NaN	NaN	NaN
0.052	9.775	63.904	58.396	0.12305	0.16895	-0.14453	63.7986	-40.34	1325.73	-0.77647	0.47041	-0.27685	NaN	NaN	NaN	NaN	NaN	NaN	NaN	NaN	NaN	NaN	NaN	NaN
0.054	-10.231	37.7405	66.5825	0.11035	0.16943	-0.13818	10.178	-12.64024	1265.321	-1.0589	0.54658	-0.28506	NaN	NaN	NaN	NaN	NaN	NaN	NaN	NaN	NaN	NaN	NaN	NaN
0.056	-4.789	28.9445	63.597	0.096436	0.16431	-0.1333	-34.352	-33.149	1213.95345	-1.3678	0.67216	-0.26299	NaN	NaN	NaN	NaN	NaN	NaN	NaN	NaN	NaN	NaN	NaN	NaN
0.058	-29.941	34.8004	54.6967	0.090332	0.1582	-0.1333	-28.124	-33.033	1176.953	-1.6909	0.82275	-0.23145	NaN	NaN	NaN	NaN	NaN	NaN	NaN	NaN	NaN	NaN	NaN	NaN
0.06	-29.645	41.676	39.2949	0.074219	0.15088	-0.13818	-8.999	-136.822	1158.455	-2.0123	0.99553	-0.18662	NaN	NaN	NaN	NaN	NaN	NaN	NaN	NaN	NaN	NaN	NaN	NaN
0.062	-31.2793	46.217	48.0785	0.067871	0.14307	-0.13281	47.2597	-196.771	1204.5239	-2.302	1.1847	-0.1084	NaN	NaN	NaN	NaN	NaN	NaN	NaN	NaN	NaN	NaN	NaN	NaN
0.064	-11.481	45.1559	51.4712	0.053223	0.1416	-0.13135	28.7335	-197.281	1209.6956	-2.5696	1.3766	-0.041211	NaN	NaN	NaN	NaN	NaN	NaN	NaN	NaN	NaN	NaN	NaN	NaN
0.066	-12.34	38.715	35.4545	0.034424	0.14282	-0.13111	-24.785	-214.933	1228.6174	-2.7916	1.5654	-0.010254	NaN	NaN	NaN	NaN	NaN	NaN	NaN	NaN	NaN	NaN	NaN	NaN
0.068	0.484999999999999	43.2046	12.0422	0.022461	0.14502	-0.12842	-0.00999999999999979	-144.991	1212.581	-2.9546	1.7212	0.013672	NaN	NaN	NaN	NaN	NaN	NaN	NaN	NaN	NaN	NaN	NaN	NaN
0.07	-21.603	30.1063	10.165	0.00097656	0.1416	-0.12695	12.822	-137.037	1203.04	-3.0512	1.8808	0.046191	NaN	NaN	NaN	NaN	NaN	NaN	NaN	NaN	NaN	NaN	NaN	NaN
0.072	-22.688	21.2155	17.2189	-0.0041504	0.13916	-0.12232	93.929	-211.403	1256.6262	-3.0593	1.9833	0.086621	NaN	NaN	NaN	NaN	NaN	NaN	NaN	NaN	NaN	NaN	NaN	NaN
0.074	-8.909	20.9442	31.2542	-0.010254	0.13721	-0.11963	154.198	-169.283	1284.3675	-2.9401	2.0353	0.12061	NaN	NaN	NaN	NaN	NaN	NaN	NaN	NaN	NaN	NaN	NaN	NaN
0.076	-12.785	12.7398	22.67878	0.0048828	0.12793	-0.11523	97.162	-172.783	1328.1164	-2.707	2.0379	0.14033	NaN	NaN	NaN	NaN	NaN	NaN	NaN	NaN	NaN	NaN	NaN	NaN
0.078	-17.173	-0.2487	19.577	0.01123	0.12207	-0.11426	61.494	-150.691	1421.563	-2.4258	1.9766	0.16992	NaN	NaN	NaN	NaN	NaN	NaN	NaN	NaN	NaN	NaN	NaN	NaN
0.08	-21.946	7.28522	22.2599	0.036621	0.10986	-0.11084	31.0223	-109.44	1426.287	-2.1887	1.8894	0.196	NaN	NaN	NaN	NaN	NaN	NaN	NaN	NaN	NaN	NaN	NaN	NaN
0.082	-35.089	31.5699	23.3656	0.053711	0.098878	-0.11011	-1.423	-167.372	1405.081	-2.0288	1.8056	0.22696	NaN	NaN	NaN	NaN	NaN	NaN	NaN	NaN	NaN	NaN	NaN	NaN
0.084	-54.22801	42.1866	17.569	0.08252	0.085449	-0.10791	-33.169	-150.538	1357.245	-1.921	1.7165	0.23633	NaN	NaN	NaN	NaN	NaN	NaN	NaN	NaN	NaN	NaN	NaN	NaN
0.086	-24.677	36.3885	23.6407	0.11426	0.064453	-0.10596	-72.547	-140.576	1298.678	-1.812	1.6157	0.24843	NaN	NaN	NaN	NaN	NaN	NaN	NaN	NaN	NaN	NaN	NaN	NaN
0.088	-18.232	15.528	27.3581	0.14063	0.050293	-0.10303	-107.6766	-180.2317	1323.447	-1.6738	1.5059	0.25293	NaN	NaN	NaN	NaN	NaN	NaN	NaN	NaN	NaN	NaN	NaN	NaN
0.09	-11.944	11.1721	16.0698	0.18262	0.026855	-0.10986	-120.77	-114.99	1344.248	-1.5059	1.3816	0.23584	NaN	NaN	NaN	NaN	NaN	NaN	NaN	NaN	NaN	NaN	NaN	NaN
0.092	-13.487	7.22177	17.8297	0.21729	0.0034179	-0.11548	-85.145	-142.8437	1384.9015	-1.338	1.2575	0.19561	NaN	NaN	NaN	NaN	NaN	NaN	NaN	NaN	NaN	NaN	NaN	NaN
0.094	-13.853	31.9042	10.4712	0.24805	-0.019531	-0.12012	-45.595	-166.508	1436.667	-1.1997	1.1517	0.13466	NaN	NaN	NaN	NaN	NaN	NaN	NaN	NaN	NaN	NaN	NaN	NaN
0.096	-13.611	42.1848	25.7107	0.28711	-0.032715	-0.12988	-26.092	-127.37	1429.067	-1.0778	1.0533	0.10059	NaN	NaN	NaN	NaN	NaN	NaN	NaN	NaN	NaN	NaN	NaN	NaN
0.098	-10.037	42.7712	19.2118	0.30273	-0.041992	-0.13525	-65.581	-148.251	1435.6	-1.0015	0.97314	0.054199	NaN	NaN	NaN	NaN	NaN	NaN	NaN	NaN	NaN	NaN	NaN	NaN
0.1	-31.237	25.1916	19.5427	0.31982	-0.054688	-0.13721	-89.158	-50.7961	1480.87	-0.99668	0.92051	0.056347	NaN	NaN	NaN	NaN	NaN	NaN	NaN	NaN	NaN	NaN	NaN	NaN
0.102	-24.065	20.9501	20.0504	0.32691	-0.05542	-0.14233	-110.6464	16.678	1507.856	-1.0234	0.90273	0.042285	NaN	NaN	NaN	NaN	NaN	NaN	NaN	NaN	NaN	NaN	NaN	NaN
0.104	-19.718	33.144	18.3794	0.32275	-0.048828	-0.14648	-122.529	-34.591	1564.473	-1.0734	0.92852	0.030176	NaN	NaN	NaN	NaN	NaN	NaN	NaN	NaN	NaN	NaN	NaN	NaN
0.106	-22.249	33.749	23.6958	0.30664	-0.033203	-0.13721	-136.74	-38.26	1562.49	-1.128	0.9798	0.030567	NaN	NaN	NaN	NaN	NaN	NaN	NaN	NaN	NaN	NaN	NaN	NaN
0.108	-46.8678	25.7051	13.87962	0.29395	-0.020996	-0.1333	-153.731	-128.55357	1504.87197	-1.2183	1.0532	0.03418	NaN	NaN	NaN	NaN	NaN	NaN	NaN	NaN	NaN	NaN	NaN	NaN
0.11	-13.104	18.4687	22.15547	0.26221	0.00048828	-0.13379	-128.0829	-158.6445	1486.99	-1.3475	1.1513	0.051269	NaN	NaN	NaN	NaN	NaN	NaN	NaN	NaN	NaN	NaN	NaN	NaN
0.112	-29.539	13.6442	15.8103	0.23877	0.0070802	-0.12207	-101.7599	-68.908	1462.978	-1.4918	1.248	0.077637	NaN	NaN	NaN	NaN	NaN	NaN	NaN	NaN	NaN	NaN	NaN	NaN
0.114	-16.974	26.8082	28.27433	0.21973	0.018066	-0.12109	-80.133	-74.661	1486.446	-1.6402	1.3418	0.11123	NaN	NaN	NaN	NaN	NaN	NaN	NaN	NaN	NaN	NaN	NaN	NaN
0.116	-8.302	31.2467	40.1419	0.19824	0.038574	-0.11914	-29.661	-22.52	1494.8495	-1.7688	1.427	0.13477	NaN	NaN	NaN	NaN	NaN	NaN	NaN	NaN	NaN	NaN	NaN	NaN
0.118	2.074	37.8501	38.9347	0.1875	0.05127	-0.1123	-9.868	-39.915	1463.551	-1.8877	1.4922	0.12891	NaN	NaN	NaN	NaN	NaN	NaN	NaN	NaN	NaN	NaN	NaN	NaN
0.12	-8.549	40.36486	19.2016	0.18262	0.062988	-0.1123	17.385	-111.21	1486.7112	-1.983	1.5416	0.12139	NaN	NaN	NaN	NaN	NaN	NaN	NaN	NaN	NaN	NaN	NaN	NaN
0.122	-28.606	32.4969	1.2698	0.1814	0.06958	-0.11084	34.445	-10.705	1506.746	-2.0711	1.5793	0.092188	NaN	NaN	NaN	NaN	NaN	NaN	NaN	NaN	NaN	NaN	NaN	NaN
0.124	-21.268	17.0261	15.6201	0.17822	0.080078	-0.1084	5.51000000000001	27.597	1500.249	-2.1668	1.6101	0.046093	NaN	NaN	NaN	NaN	NaN	NaN	NaN	NaN	NaN	NaN	NaN	NaN
0.126	-21.438	27.1147	20.043	0.18213	0.095215	-0.11523	-22.192	70.0966	1508.039	-2.3018	1.6532	0.0028318	NaN	NaN	NaN	NaN	NaN	NaN	NaN	NaN	NaN	NaN	NaN	NaN
0.128	0.884	36.5169	26.5475	0.17725	0.10547	-0.11035	-44.026	116.363	1455.4426	-2.4741	1.7192	-0.017578	NaN	NaN	NaN	NaN	NaN	NaN	NaN	NaN	NaN	NaN	NaN	NaN
0.13	-36.374	33.662	17.1358	0.17529	0.12793	-0.10693	-91.1752	3.1061	1419.8785	-2.6452	1.8114	-0.011035	NaN	NaN	NaN	NaN	NaN	NaN	NaN	NaN	NaN	NaN	NaN	NaN
0.132	-32.483	22.6194	25.17783	0.17627	0.14258	-0.10351	-45.242	15.637	1400.3804	-2.7911	1.9035	0.0048828	NaN	NaN	NaN	NaN	NaN	NaN	NaN	NaN	NaN	NaN	NaN	NaN
0.134	-10.753	35.7527	38.0333	0.1748	0.15771	-0.10254	-42.868	32.8343	1358.1904	-2.8691	1.9816	0.025977	NaN	NaN	NaN	NaN	NaN	NaN	NaN	NaN	NaN	NaN	NaN	NaN
0.136	-9.775	48.98	32.1434	0.16357	0.16797	-0.098633	-45.663	38.566	1347.3115	-2.8682	2.0259	0.032324	NaN	NaN	NaN	NaN	NaN	NaN	NaN	NaN	NaN	NaN	NaN	NaN
0.138	-15.919	41.853	20.67	0.16406	0.17773	-0.099609	-50.66	125.858	1313.492	-2.8145	2.0352	0.023438	NaN	NaN	NaN	NaN	NaN	NaN	NaN	NaN	NaN	NaN	NaN	NaN
0.14	-5.356	30.49385	24.6043	0.15771	0.19678	-0.091309	-79.9039	68.028	1279.685	-2.7167	2.0044	0.0029298	NaN	NaN	NaN	NaN	NaN	NaN	NaN	NaN	NaN	NaN	NaN	NaN
0.142	-8.011	20.6425	27.7748	0.16016	0.21142	-0.097412	-33.976	20.784	1259.332	-2.5922	1.9559	-0.0048828	NaN	NaN	NaN	NaN	NaN	NaN	NaN	NaN	NaN	NaN	NaN	NaN
0.144	-34.974	13.0177	19.1308	0.1665	0.22656	-0.098145	-28.809	56.42	1231.4698	-2.4293	1.8922	-0.013477	NaN	NaN	NaN	NaN	NaN	NaN	NaN	NaN	NaN	NaN	NaN	NaN
0.146	-36.316	15.3599	33.1213	0.17188	0.24463	-0.099121	-31.652	34.785	1240.594	-2.2641	1.8086	-0.028028	NaN	NaN	NaN	NaN	NaN	NaN	NaN	NaN	NaN	NaN	NaN	NaN
0.148	-17.268	13.7721	29.7965	0.17188	0.25244	-0.094727	-52.668	142.595	1225.069	-2.1094	1.7051	-0.039063	NaN	NaN	NaN	NaN	NaN	NaN	NaN	NaN	NaN	NaN	NaN	NaN
0.15	-33.024	30.4684	24.9222	0.1709	0.27686	-0.098145	-95.041	204.426	1166.03	-1.9749	1.5819	-0.045313	NaN	NaN	NaN	NaN	NaN	NaN	NaN	NaN	NaN	NaN	NaN	NaN
0.152	-21.336	31.2133	24.38	0.16577	0.29028	-0.099854	-120.862	179.486	1144.6438	-1.8652	1.463	-0.049609	NaN	NaN	NaN	NaN	NaN	NaN	NaN	NaN	NaN	NaN	NaN	NaN
0.154	-34.9964	20.6046	28.838	0.15283	0.30176	-0.10254	-76.5161	211.319	1098.336	-1.776	1.3645	-0.044141	NaN	NaN	NaN	NaN	NaN	NaN	NaN	NaN	NaN	NaN	NaN	NaN
0.156	-28.43	21.5801	43.1117	0.13721	0.31689	-0.099121	-107.0269	147.467	1070.0747	-1.6918	1.2805	-0.045703	NaN	NaN	NaN	NaN	NaN	NaN	NaN	NaN	NaN	NaN	NaN	NaN
0.158	-27.9629	36.8052	28.0568	0.13232	0.32568	-0.099609	-95.7626	141.771	1059.0068	-1.6108	1.2036	-0.041016	NaN	NaN	NaN	NaN	NaN	NaN	NaN	NaN	NaN	NaN	NaN	NaN
0.16	-17.693	35.1245	35.618	0.11426	0.33594	-0.10205	-77.395	189.097	1002.15	-1.553	1.1451	-0.052441	NaN	NaN	NaN	NaN	NaN	NaN	NaN	NaN	NaN	NaN	NaN	NaN
0.162	-8.745	28.7596	54.5665	0.099854	0.33887	-0.09375	-103.679	146.9461	945.222	-1.5042	1.0866	-0.045898	NaN	NaN	NaN	NaN	NaN	NaN	NaN	NaN	NaN	NaN	NaN	NaN
0.164	0.822999999999997	-16.587	109.938	0.089355	0.34521	-0.093262	-50.536	166.7638	889.09	-1.4663	1.0394	-0.046289	NaN	NaN	NaN	NaN	NaN	NaN	NaN	NaN	NaN	NaN	NaN	NaN
0.166	-25.571	-29.7034	172.305	0.077148	0.35596	-0.099121	2.248	153.299	832.146	-1.4203	1.0039	-0.051367	NaN	NaN	NaN	NaN	NaN	NaN	NaN	NaN	NaN	NaN	NaN	NaN
0.168	0.568	-28.0461	232.827	0.070801	0.35986	-0.10303	9.219	132.094	818.4237	-1.3628	0.95947	-0.053223	NaN	NaN	NaN	NaN	NaN	NaN	NaN	NaN	NaN	NaN	NaN	NaN
0.17	60.624	-45.5376	289.478	0.038574	0.38232	-0.12061	40.45	222.4373	791.1119	-1.3096	0.91631	-0.053906	NaN	NaN	NaN	NaN	NaN	NaN	NaN	NaN	NaN	NaN	NaN	NaN
0.172	42.4427	-75.5218	290.425	-0.01709	0.41137	-0.14868	-3.2613	225.136	783.5564	-1.2573	0.88135	-0.061914	NaN	NaN	NaN	NaN	NaN	NaN	NaN	NaN	NaN	NaN	NaN	NaN
0.174	24.4817	-105.558	254.619	-0.11621	0.46338	-0.17432	-23.465	228.733	787.312	-1.2049	0.84854	-0.054883	NaN	NaN	NaN	NaN	NaN	NaN	NaN	NaN	NaN	NaN	NaN	NaN
0.176	11.5076	-136.9971	263.349	-0.34717	0.5415	-0.18115	-3.289	241.265	734.294	-1.1416	0.81582	-0.051758	NaN	NaN	NaN	NaN	NaN	NaN	NaN	NaN	NaN	NaN	NaN	NaN
0.178	2.869	-121.2844	345.227	-0.49756	0.59424	-0.16455	-7.21	175.411	688.145	-1.0771	0.78125	-0.054688	NaN	NaN	NaN	NaN	NaN	NaN	NaN	NaN	NaN	NaN	NaN	NaN
0.18	-19.031	-76.6285	416.8874	-0.78857	0.69385	-0.11279	15.907	194.388	608.3083	-1.0066	0.74502	-0.052149	NaN	NaN	NaN	NaN	NaN	NaN	NaN	NaN	NaN	NaN	NaN	NaN
0.182	-11.856	-32.8866	409.9558	-0.93872	0.77954	-0.075928	-9.528	195.919	542.417	-0.9332	0.70781	-0.056348	NaN	NaN	NaN	NaN	NaN	NaN	NaN	NaN	NaN	NaN	NaN	NaN
0.184	35.1567	-57.242	393.858	-1.0117	0.85156	-0.050293	-42.664	155.4473	534.5841	-0.85195	0.66562	-0.054786	NaN	NaN	NaN	NaN	NaN	NaN	NaN	NaN	NaN	NaN	NaN	NaN
0.186	84.311	-51.1497	432.703	-0.98242	0.91602	-0.071289	5.24	193.674	492.8026	-0.77265	0.62149	-0.065039	NaN	NaN	NaN	NaN	NaN	NaN	NaN	NaN	NaN	NaN	NaN	NaN
0.188	69.8916	0.530999999999999	518.178	-0.92969	0.93945	-0.09082	6.908	157.1711	435.9577	-0.69678	0.58252	-0.065918	NaN	NaN	NaN	NaN	NaN	NaN	NaN	NaN	NaN	NaN	NaN	NaN
0.19	38.397	56.249	592.8725	-0.80859	0.95703	-0.14697	28.877	122.873	413.44156	-0.63008	0.54395	-0.070996	NaN	NaN	NaN	NaN	NaN	NaN	NaN	NaN	NaN	NaN	NaN	NaN
0.192	16.556	72.617	663.8583	-0.75586	0.96826	-0.1875	27.884	127.155	350.751	-0.56016	0.50977	-0.077637	NaN	NaN	NaN	NaN	NaN	NaN	NaN	NaN	NaN	NaN	NaN	NaN
0.194	43.084	65.7118	734.044	-0.75781	0.99414	-0.22363	-36.152	113.031	336.953	-0.49688	0.47461	-0.080371	NaN	NaN	NaN	NaN	NaN	NaN	NaN	NaN	NaN	NaN	NaN	NaN
0.196	56.695	43.925	807.1435	-0.86865	1.0522	-0.25684	-15.201	172.3019	331.0688	-0.44102	0.45039	-0.078125	NaN	NaN	NaN	NaN	NaN	NaN	NaN	NaN	NaN	NaN	NaN	NaN
0.198	46.643	13.949	894.442	-0.97021	1.0864	-0.26221	-39.6697	184.681	303.725	-0.3877	0.42578	-0.074219	NaN	NaN	NaN	NaN	NaN	NaN	NaN	NaN	NaN	NaN	NaN	NaN
0.2	-1.70188	-15.757	994.298	-1.2417	1.1782	-0.27295	-47.8805	132.166	297.408	-0.33418	0.40195	-0.078418	NaN	NaN	NaN	NaN	NaN	NaN	NaN	NaN	NaN	NaN	NaN	NaN
0.202	-8.69	-54.841	1080.609	-1.4968	1.2727	-0.26611	-27.917	135.317	250.0574	-0.2791	0.38047	-0.074219	NaN	NaN	NaN	NaN	NaN	NaN	NaN	NaN	NaN	NaN	NaN	NaN
0.204	-58.357	-86.713	1144.581	-1.7651	1.3892	-0.24463	-60.0098	88.5819	206.2486	-0.22598	0.36172	-0.08125	NaN	NaN	NaN	NaN	NaN	NaN	NaN	NaN	NaN	NaN	NaN	NaN
0.206	-33.5814	-88.5558	1157.145	-2.0801	1.5693	-0.19238	-58.18	93.2273	200.663	-0.17295	0.35039	-0.080274	NaN	NaN	NaN	NaN	NaN	NaN	NaN	NaN	NaN	NaN	NaN	NaN
0.208	-29.508	-104.408	1200.789	-2.1914	1.6641	-0.16504	-52.3911	121.818	171.0869	-0.11719	0.32861	-0.084961	NaN	NaN	NaN	NaN	NaN	NaN	NaN	NaN	NaN	NaN	NaN	NaN
0.21	-18.335	-121.948	1237.1759	-2.3047	1.8418	-0.13574	-82.7228	72.059	143.912	-0.067676	0.30391	-0.091992	NaN	NaN	NaN	NaN	NaN	NaN	NaN	NaN	NaN	NaN	NaN	NaN
0.212	-49.339	-130.164	1293.914	-2.2358	1.9927	-0.14697	-35.347	59.726	112.822	-0.013086	0.27968	-0.097168	NaN	NaN	NaN	NaN	NaN	NaN	NaN	NaN	NaN	NaN	NaN	NaN
0.214	-59.041	-110.621	1333.432	-2.1563	2.0605	-0.16016	-6.326	39.395	60.068	0.030274	0.25586	-0.10225	NaN	NaN	NaN	NaN	NaN	NaN	NaN	NaN	NaN	NaN	NaN	NaN
0.216	-25.80674	-94.601	1368.907	-1.9043	2.1465	-0.19238	-26.295	6.631	56.481	0.079688	0.23682	-0.10791	NaN	NaN	NaN	NaN	NaN	NaN	NaN	NaN	NaN	NaN	NaN	NaN
0.218	-9.0168	-86.783	1367.819	-1.6697	2.1468	-0.21777	10.73	51.8662	53.28	0.12305	0.21582	-0.11475	NaN	NaN	NaN	NaN	NaN	NaN	NaN	NaN	NaN	NaN	NaN	NaN
0.22	-28.452	-94.718	1366.7332	-1.4351	2.1001	-0.23779	-38.451	43.8004	62.165	0.15761	0.20518	-0.12324	NaN	NaN	NaN	NaN	NaN	NaN	NaN	NaN	NaN	NaN	NaN	NaN
0.222	-76.512	-100.4335	1347.636	-1.1777	1.9805	-0.25977	-28.49	47.7043	79.543	0.19306	0.1874	-0.13066	NaN	NaN	NaN	NaN	NaN	NaN	NaN	NaN	NaN	NaN	NaN	NaN
0.224	-66.085	-99.11	1333.8232	-1.0703	1.9141	-0.26953	-24.221	70.711	52.8605	0.21963	0.17256	-0.13926	NaN	NaN	NaN	NaN	NaN	NaN	NaN	NaN	NaN	NaN	NaN	NaN
0.226	-55.723	-81.702	1323.951	-0.89014	1.7915	-0.27783	-41.907	26.967	43.4451	0.23311	0.15918	-0.14707	NaN	NaN	NaN	NaN	NaN	NaN	NaN	NaN	NaN	NaN	NaN	NaN
0.228	-96.444	-62.06	1304.6398	-0.79687	1.7139	-0.28125	-5.837	50.505	54.9574	0.23389	0.15381	-0.15576	NaN	NaN	NaN	NaN	NaN	NaN	NaN	NaN	NaN	NaN	NaN	NaN
0.23	-72.538	-68.309	1308.065	-0.73242	1.6543	-0.28906	-9.06	59.976	22.728	0.22803	0.14873	-0.15791	NaN	NaN	NaN	NaN	NaN	NaN	NaN	NaN	NaN	NaN	NaN	NaN
0.232	-50.3007	-92.547	1327.31	-0.71436	1.5845	-0.29004	-24.821	24.6761	18.331	0.20537	0.14717	-0.15889	NaN	NaN	NaN	NaN	NaN	NaN	NaN	NaN	NaN	NaN	NaN	NaN
0.234	-19.82	-106.836	1385.118	-0.73438	1.5566	-0.28857	-7.424	33.4959	-6.142	0.17022	0.15459	-0.15849	NaN	NaN	NaN	NaN	NaN	NaN	NaN	NaN	NaN	NaN	NaN	NaN
0.236	-10.968	-111.84	1397.369	-0.81201	1.52	-0.27686	-34.2771	0.853000000000002	-20.631	0.12686	0.15859	-0.1542	NaN	NaN	NaN	NaN	NaN	NaN	NaN	NaN	NaN	NaN	NaN	NaN
0.238	-4.943	-105.951	1390.8511	-0.89917	1.5032	-0.25512	5.27	-16.387	-6.2787	0.077148	0.16406	-0.15527	NaN	NaN	NaN	NaN	NaN	NaN	NaN	NaN	NaN	NaN	NaN	NaN
0.24	-5.948	-104.113	1392.578	-0.98779	1.5054	-0.23291	22.191	3.6614	0.670999999999999	0.01875	0.17227	-0.15244	NaN	NaN	NaN	NaN	NaN	NaN	NaN	NaN	NaN	NaN	NaN	NaN
0.242	-4.0236	-112.0775	1407.128	-1.0933	1.5083	-0.2124	-28.431	10.4426	3.169	-0.043554	0.17803	-0.1498	NaN	NaN	NaN	NaN	NaN	NaN	NaN	NaN	NaN	NaN	NaN	NaN
0.244	33.4194	-114.1929	1433.856	-1.1304	1.5181	-0.21143	-5.948	50.868	13.929	-0.10879	0.18389	-0.14082	NaN	NaN	NaN	NaN	NaN	NaN	NaN	NaN	NaN	NaN	NaN	NaN
0.246	22.6545	-116.7225	1430.4276	-1.1733	1.5044	-0.23535	-47.6835	79.53	14.535	-0.16084	0.19258	-0.14268	NaN	NaN	NaN	NaN	NaN	NaN	NaN	NaN	NaN	NaN	NaN	NaN
0.248	38.9674	-124.171	1432.169	-1.2112	1.5012	-0.25806	-51.5159	56.954	38.9994	-0.21045	0.19727	-0.13916	NaN	NaN	NaN	NaN	NaN	NaN	NaN	NaN	NaN	NaN	NaN	NaN
0.25	-2.811	-134.728	1411.9892	-1.2583	1.4966	-0.27393	3.201	57.532	52.2153	-0.24981	0.20557	-0.13477	NaN	NaN	NaN	NaN	NaN	NaN	NaN	NaN	NaN	NaN	NaN	NaN
0.252	-18.342	-133.2978	1393.64964	-1.3457	1.5029	-0.29541	-52.9999	45.553	19.90756	-0.28584	0.21123	-0.12793	NaN	NaN	NaN	NaN	NaN	NaN	NaN	NaN	NaN	NaN	NaN	NaN
0.254	-26.96195	-119.478076	1388.759	-1.3867	1.5098	-0.30762	-37.398	40.4491	40.227	-0.31748	0.21592	-0.11895	NaN	NaN	NaN	NaN	NaN	NaN	NaN	NaN	NaN	NaN	NaN	NaN
0.256	38.8476	-108.9986	1393.586	-1.481	1.5337	-0.32715	-25.309	66.136	7.338	-0.34102	0.21856	-0.11094	NaN	NaN	NaN	NaN	NaN	NaN	NaN	NaN	NaN	NaN	NaN	NaN
0.258	66.779	-87.941	1381.473	-1.5486	1.5686	-0.3396	-75.14264	46.2803	6.3714	-0.36035	0.21484	-0.097168	NaN	NaN	NaN	NaN	NaN	NaN	NaN	NaN	NaN	NaN	NaN	NaN
0.26	57.206	-59.015	1354.583	-1.6108	1.6079	-0.34912	-39.131	45.9599	25.9811	-0.37666	0.21201	-0.093945	NaN	NaN	NaN	NaN	NaN	NaN	NaN	NaN	NaN	NaN	NaN	NaN
0.262	28.817	-20.751	1363.077	-1.6797	1.6699	-0.38916	-19.338	38.6246	14.0012	-0.38164	0.20977	-0.080664	NaN	NaN	NaN	NaN	NaN	NaN	NaN	NaN	NaN	NaN	NaN	NaN
0.264	22.6414	8.986	1391.8341	-1.7109	1.709	-0.39697	-20.998	13.275	35.5288	-0.37891	0.2	-0.074023	NaN	NaN	NaN	NaN	NaN	NaN	NaN	NaN	NaN	NaN	NaN	NaN
0.266	28.6101	25.8416	1410.749	-1.7969	1.791	-0.41992	-17.426	40.3779	53.6864	-0.36094	0.18574	-0.068652	NaN	NaN	NaN	NaN	NaN	NaN	NaN	NaN	NaN	NaN	NaN	NaN
0.268	27.8805	-0.4446	1396.238	-1.8709	1.8518	-0.42553	-73.7326	43.994	41.679	-0.34277	0.16992	-0.055176	NaN	NaN	NaN	NaN	NaN	NaN	NaN	NaN	NaN	NaN	NaN	NaN
0.27	49.583	-25.3183	1370.514	-1.9434	1.9141	-0.4248	-50.18	45.4296	65.779	-0.30664	0.14472	-0.055566	NaN	NaN	NaN	NaN	NaN	NaN	NaN	NaN	NaN	NaN	NaN	NaN
0.272	67.807	-45.1389	1366.4361	-2.0049	1.9922	-0.39844	-16.983	48.79	45.273	-0.2622	0.1205	-0.053418	NaN	NaN	NaN	NaN	NaN	NaN	NaN	NaN	NaN	NaN	NaN	NaN
0.274	14.246	-42.1059	1369.7153	-2.0176	2.0156	-0.39063	-42.503	8.1334	36.882	-0.21298	0.096288	-0.051855	NaN	NaN	NaN	NaN	NaN	NaN	NaN	NaN	NaN	NaN	NaN	NaN
0.276	-13.865	-37.8316	1366.7353	-1.9956	2.0415	-0.37061	4.37	16.0868	61.707	-0.15986	0.068065	-0.051074	NaN	NaN	NaN	NaN	NaN	NaN	NaN	NaN	NaN	NaN	NaN	NaN
0.278	-2.854	-48.513	1342.6461	-1.9324	2.0295	-0.36035	-25.089	33.312	51.4611	-0.095215	0.033203	-0.049316	NaN	NaN	NaN	NaN	NaN	NaN	NaN	NaN	NaN	NaN	NaN	NaN
0.28	43.3823	-56.797	1312.5981	-1.8491	2.0005	-0.35645	-20.928	25.825	58.211	-0.021688	-0.0046834	-0.053515	NaN	NaN	NaN	NaN	NaN	NaN	NaN	NaN	NaN	NaN	NaN	NaN
0.282	22.8762	-59.856	1294.7093	-1.7129	1.9512	-0.34766	8.968	36.6785	62.634	0.049592	-0.042765	-0.059371	NaN	NaN	NaN	NaN	NaN	NaN	NaN	NaN	NaN	NaN	NaN	NaN
0.284	9.1797	-33.792	1275.4979	-1.6445	1.918	-0.34277	-63.6716	29.1834	16.5478	0.12264	-0.081044	-0.075777	NaN	NaN	NaN	NaN	NaN	NaN	NaN	NaN	NaN	NaN	NaN	NaN
0.286	15.5057	-7.36522	1267.543	-1.5117	1.8457	-0.33398	-15.244	5.576	24.1825	0.19481	-0.11484	-0.090137	NaN	NaN	NaN	NaN	NaN	NaN	NaN	NaN	NaN	NaN	NaN	NaN
0.288	-5.0505	45.85	1228.676	-1.4358	1.7942	-0.32276	2.21	13.56817	4.756	0.26025	-0.14844	-0.094727	NaN	NaN	NaN	NaN	NaN	NaN	NaN	NaN	NaN	NaN	NaN	NaN
0.29	12.6509	52.5973	1188.026	-1.373	1.7461	-0.31445	-54.244	3.5285	18.01645	0.31056	-0.17149	-0.10205	NaN	NaN	NaN	NaN	NaN	NaN	NaN	NaN	NaN	NaN	NaN	NaN
0.292	11.618	50.7712	1152.4146	-1.3218	1.6938	-0.29639	-9.741	7.4867	56.738	0.35599	-0.18791	-0.11133	NaN	NaN	NaN	NaN	NaN	NaN	NaN	NaN	NaN	NaN	NaN	NaN
0.294	31.367	39.35996	1129.358	-1.3086	1.666	-0.28955	-15.152	21.2843	32.8691	0.39545	-0.2047	-0.1172	NaN	NaN	NaN	NaN	NaN	NaN	NaN	NaN	NaN	NaN	NaN	NaN
0.296	-0.626999999999999	55.049	1125.318	-1.2808	1.6157	-0.26904	-56.9958	-0.772	30.3562	0.42406	-0.20919	-0.11455	NaN	NaN	NaN	NaN	NaN	NaN	NaN	NaN	NaN	NaN	NaN	NaN
0.298	5.053	88.37	1096.0377	-1.261	1.5803	-0.2517	-10.652	17.68148	27.74	0.44336	-0.21143	-0.11865	NaN	NaN	NaN	NaN	NaN	NaN	NaN	NaN	NaN	NaN	NaN	NaN
0.3	15.3246	80.25	1067.1313	-1.25	1.5469	-0.2373	-32.901	21.56597	18.628	0.4649	-0.21104	-0.11836	NaN	NaN	NaN	NaN	NaN	NaN	NaN	NaN	NaN	NaN	NaN	NaN
0.302	5.01	58.188	1022.1537	-1.2109	1.4941	-0.20996	-17.82	15.036	46.3901	0.477	-0.21316	-0.11914	NaN	NaN	NaN	NaN	NaN	NaN	NaN	NaN	NaN	NaN	NaN	NaN
0.304	7.756	25.08	971.913	-1.1895	1.4688	-0.19922	-3.355	34.7913	24.6419	0.48448	-0.21902	-0.11759	NaN	NaN	NaN	NaN	NaN	NaN	NaN	NaN	NaN	NaN	NaN	NaN
0.306	4.967	13.8081	937.636	-1.127	1.4102	-0.17627	-56.67754	3.64	4.1727	0.48021	-0.21243	-0.12061	NaN	NaN	NaN	NaN	NaN	NaN	NaN	NaN	NaN	NaN	NaN	NaN
0.308	7.599	20.344	933.871	-1.0781	1.3545	-0.16235	-10.88	-7.1134	6.8506	0.47119	-0.20752	-0.11914	NaN	NaN	NaN	NaN	NaN	NaN	NaN	NaN	NaN	NaN	NaN	NaN
0.31	2.708	48.955	924.0092	-1.0137	1.3047	-0.1543	-23.613	12.8243	-16.2301	0.45033	-0.19441	-0.11825	NaN	NaN	NaN	NaN	NaN	NaN	NaN	NaN	NaN	NaN	NaN	NaN
0.312	3.968	68.156	902.564	-0.93213	1.2153	-0.13721	-39.057	2.333	7.5351	0.4189	-0.17496	-0.11047	NaN	NaN	NaN	NaN	NaN	NaN	NaN	NaN	NaN	NaN	NaN	NaN
0.314	-0.0129999999999999	65.542	853.165	-0.88818	1.1743	-0.12891	-9.69	29.8921	22.5326	0.38446	-0.15076	-0.10259	NaN	NaN	NaN	NaN	NaN	NaN	NaN	NaN	NaN	NaN	NaN	NaN
0.316	22.71	79.5484	827.24	-0.82031	1.0898	-0.12061	-56.9658	34.465	5.586	0.35221	-0.12868	-0.099575	NaN	NaN	NaN	NaN	NaN	NaN	NaN	NaN	NaN	NaN	NaN	NaN
0.318	22.306	113.5482	807.3042	-0.78808	1.0254	-0.11523	-40.176	29.3902	42.5663	0.31738	-0.11035	-0.089355	NaN	NaN	NaN	NaN	NaN	NaN	NaN	NaN	NaN	NaN	NaN	NaN
0.32	18.35	146.338	773.2909	-0.75537	0.96924	-0.11084	-36.553	58.323	17.604	0.28085	-0.083732	-0.08978	NaN	NaN	NaN	NaN	NaN	NaN	NaN	NaN	NaN	NaN	NaN	NaN
0.322	3.324	124.286	739.435	-0.70947	0.91162	-0.095703	-37.733	46.95	7.9145	0.24961	-0.066465	-0.084426	NaN	NaN	NaN	NaN	NaN	NaN	NaN	NaN	NaN	NaN	NaN	NaN
0.324	-3.856	99.0678	679.7763	-0.68896	0.89111	-0.085449	0.00799999999999557	39.397	30.0593	0.22106	-0.042961	-0.086362	NaN	NaN	NaN	NaN	NaN	NaN	NaN	NaN	NaN	NaN	NaN	NaN
0.326	-10.21	84.629	647.2384	-0.65186	0.84229	-0.06543	-24.073	51.199	-10.67	0.1959	-0.023343	-0.090492	NaN	NaN	NaN	NaN	NaN	NaN	NaN	NaN	NaN	NaN	NaN	NaN
0.328	-17.762	93.06537	614.6047	-0.6272	0.80322	-0.052246	-43.018	19.724	7.394	0.17773	-0.0019531	-0.09082	NaN	NaN	NaN	NaN	NaN	NaN	NaN	NaN	NaN	NaN	NaN	NaN
0.33	-25.285	93.7103	581.674	-0.60693	0.76416	-0.035645	-20.038	35.9455	37.7029	0.1619	0.016206	-0.094764	NaN	NaN	NaN	NaN	NaN	NaN	NaN	NaN	NaN	NaN	NaN	NaN
0.332	-7.257	116.6255	528.624	-0.57471	0.70459	-0.021973	-54.1158	36.0764	22.9062	0.14222	0.042895	-0.099688	NaN	NaN	NaN	NaN	NaN	NaN	NaN	NaN	NaN	NaN	NaN	NaN
0.334	-14.214	129.309	500.724	-0.55762	0.67773	-0.012695	-15.388	21.4055	54.556	0.12091	0.073161	-0.10688	NaN	NaN	NaN	NaN	NaN	NaN	NaN	NaN	NaN	NaN	NaN	NaN
0.336	-21.942	122.711	481.6254	-0.51709	0.63135	-0.0039063	0.0579999999999998	59.544	20.8287	0.096981	0.10979	-0.10957	NaN	NaN	NaN	NaN	NaN	NaN	NaN	NaN	NaN	NaN	NaN	NaN
0.338	-28.426	97.5236	466.7559	-0.48047	0.58252	0.013672	-56.2066	54.23	3.9005	0.071289	0.14307	-0.11279	NaN	NaN	NaN	NaN	NaN	NaN	NaN	NaN	NaN	NaN	NaN	NaN
0.34	-3.075	85.901	462.152	-0.43848	0.54639	0.021484	-21.232	52.403	29.4852	0.046284	0.17233	-0.12213	NaN	NaN	NaN	NaN	NaN	NaN	NaN	NaN	NaN	NaN	NaN	NaN
0.342	-10.578	98.9877	417.474	-0.38281	0.49023	0.039551	-43.1157	67.261	18.422	0.026813	0.2101	-0.12257	NaN	NaN	NaN	NaN	NaN	NaN	NaN	NaN	NaN	NaN	NaN	NaN
0.344	-6.006	106.4663	378.8258	-0.35791	0.46436	0.05127	-49.814	24.5276	50.696	0.012303	0.23735	-0.12798	NaN	NaN	NaN	NaN	NaN	NaN	NaN	NaN	NaN	NaN	NaN	NaN
0.346	-9.889	116.75417	351.0667	-0.30859	0.40381	0.073242	9.231	26.7862	58.5038	-0.0016355	0.26238	-0.13502	NaN	NaN	NaN	NaN	NaN	NaN	NaN	NaN	NaN	NaN	NaN	NaN
0.348	-34.823	120.6663	317.2494	-0.27441	0.36792	0.087158	-25.036	23.66124	39.71812	-0.0068359	0.27734	-0.14648	NaN	NaN	NaN	NaN	NaN	NaN	NaN	NaN	NaN	NaN	NaN	NaN
0.35	-43.1387	115.6762	292.51881	-0.23828	0.33008	0.088867	-13.369	26.1894	43.4314	0.00047541	0.29992	-0.15665	NaN	NaN	NaN	NaN	NaN	NaN	NaN	NaN	NaN	NaN	NaN	NaN
0.352	-31.327	90.6768	271.0622	-0.18701	0.28467	0.097656	-21.097	77.894	29.1605	0.010419	0.31064	-0.16285	NaN	NaN	NaN	NaN	NaN	NaN	NaN	NaN	NaN	NaN	NaN	NaN
0.354	-14.249	79.8732	252.9518	-0.15869	0.25268	0.098146	-52.46	80.942	30.9878	0.026833	0.31408	-0.17586	NaN	NaN	NaN	NaN	NaN	NaN	NaN	NaN	NaN	NaN	NaN	NaN
0.356	-30.412	91.739	218.29562	-0.13477	0.22705	0.10303	-0.0339999999999989	48.971	49.9667	0.05195	0.31598	-0.189	NaN	NaN	NaN	NaN	NaN	NaN	NaN	NaN	NaN	NaN	NaN	NaN
0.358	-20.374	100.8577	189.514	-0.10107	0.19922	0.10889	-9.812	24.0189	52.6925	0.082031	0.32275	-0.20068	NaN	NaN	NaN	NaN	NaN	NaN	NaN	NaN	NaN	NaN	NaN	NaN
0.36	-32.45	101.134	170.962	-0.088379	0.19238	0.11816	-23.293	-49.471	115.249	0.11104	0.32392	-0.21528	NaN	NaN	NaN	NaN	NaN	NaN	NaN	NaN	NaN	NaN	NaN	NaN
0.362	-34.098	86.594	154.96	-0.056152	0.16602	0.12305	5.341	-86.8132	159.196	0.14309	0.32421	-0.22562	NaN	NaN	NaN	NaN	NaN	NaN	NaN	NaN	NaN	NaN	NaN	NaN
0.364	-16.292	95.9806	124.7022	-0.033447	0.1521	0.12818	-45.442	-60.5624	215.717	0.17628	0.32148	-0.23421	NaN	NaN	NaN	NaN	NaN	NaN	NaN	NaN	NaN	NaN	NaN	NaN
0.366	-11.815	102.2834	112.8895	-0.011719	0.13965	0.13623	33.5136	-28.14	333.983	0.2063	0.32119	-0.23876	NaN	NaN	NaN	NaN	NaN	NaN	NaN	NaN	NaN	NaN	NaN	NaN
0.368	-24.632	111.21	99.3249	0.015137	0.12109	0.13477	107.828	-10.884	452.534	0.22363	0.32129	-0.23242	NaN	NaN	NaN	NaN	NaN	NaN	NaN	NaN	NaN	NaN	NaN	NaN
0.37	-38.717	115.322	107.1303	0.029297	0.11279	0.14063	43.201	-125.331	562.097	0.22471	0.32734	-0.2296	NaN	NaN	NaN	NaN	NaN	NaN	NaN	NaN	NaN	NaN	NaN	NaN
0.372	-16.313	108.922	91.5511	0.055176	0.092773	0.13916	59.6248	-181.5931	661.014	0.21252	0.337	-0.21915	NaN	NaN	NaN	NaN	NaN	NaN	NaN	NaN	NaN	NaN	NaN	NaN
0.374	-25.452	79.0891	73.84287	0.074707	0.081543	0.14112	107.838	-132.4467	732.987	0.18675	0.34755	-0.21289	NaN	NaN	NaN	NaN	NaN	NaN	NaN	NaN	NaN	NaN	NaN	NaN
0.376	-31.76	46.6555	72.7432	0.092773	0.068848	0.1377	105.933	-59.0649	857.107	0.15675	0.35624	-0.21093	NaN	NaN	NaN	NaN	NaN	NaN	NaN	NaN	NaN	NaN	NaN	NaN
0.378	-12.86	21.859	55.7331	0.10352	0.058105	0.14014	111.101	61.818	957.911	0.11816	0.37549	-0.21729	NaN	NaN	NaN	NaN	NaN	NaN	NaN	NaN	NaN	NaN	NaN	NaN
0.38	-27.507	27.1896	56.322	0.10303	0.049805	0.14307	1.1626	119.1258	954.067	0.056721	0.39522	-0.23878	NaN	NaN	NaN	NaN	NaN	NaN	NaN	NaN	NaN	NaN	NaN	NaN
0.382	-32.124	41.589	58.3604	0.10156	0.041504	0.14404	19.953	26.33	1012.619	-0.057469	0.41701	-0.26133	NaN	NaN	NaN	NaN	NaN	NaN	NaN	NaN	NaN	NaN	NaN	NaN
0.384	-30.844	42.294	42.2425	0.097901	0.032715	0.14917	10.968	-9.87800000000001	1101.091	-0.24341	0.43966	-0.27461	NaN	NaN	NaN	NaN	NaN	NaN	NaN	NaN	NaN	NaN	NaN	NaN
0.386	-13.391	37.1336	30.21841	0.090332	0.027344	0.14697	-12.521	-66.53	1233.896	-0.51156	0.4627	-0.28809	NaN	NaN	NaN	NaN	NaN	NaN	NaN	NaN	NaN	NaN	NaN	NaN
0.388	-15.996	29.02	21.324	0.085938	0.021973	0.14502	64.829	-91.38	1344.03	-0.8667	0.50635	-0.2998	NaN	NaN	NaN	NaN	NaN	NaN	NaN	NaN	NaN	NaN	NaN	NaN
0.39	-31.822	13.567	39.7948	0.083008	0.020996	0.14355	12.233	-43.524	1296.042	-1.3285	0.5998	-0.3039	NaN	NaN	NaN	NaN	NaN	NaN	NaN	NaN	NaN	NaN	NaN	NaN
0.392	-30.3158	14.371	49.6589	0.068359	0.020508	0.14941	-82.5578	-48.981	1226.5552	-1.8683	0.76365	-0.28653	NaN	NaN	NaN	NaN	NaN	NaN	NaN	NaN	NaN	NaN	NaN	NaN
0.394	-12.391	26.2489	58.146	0.059815	0.023682	0.15235	-42.078	-49.56	1199.156	-2.4133	0.96561	-0.2584	NaN	NaN	NaN	NaN	NaN	NaN	NaN	NaN	NaN	NaN	NaN	NaN
0.396	-20.235	47.508	45.175	0.05127	0.016602	0.15723	-77.349	-86.662	1195.732	-2.85	1.1633	-0.19053	NaN	NaN	NaN	NaN	NaN	NaN	NaN	NaN	NaN	NaN	NaN	NaN
0.398	-19.586	35.506	10.8096	0.041504	0.010254	0.16895	-86.779	-173.63613	1280.831	-3.1265	1.3403	-0.11768	NaN	NaN	NaN	NaN	NaN	NaN	NaN	NaN	NaN	NaN	NaN	NaN
0.4	-18.013	29.483	4.6604	0.035645	0.01123	0.16992	-116.66607	-184.788	1304.53	-3.2437	1.5296	-0.087305	NaN	NaN	NaN	NaN	NaN	NaN	NaN	NaN	NaN	NaN	NaN	NaN
0.402	-28.009	35.907	-10.4941	0.029297	0.0043945	0.17334	-207.565	-237.376	1319.057	-3.3156	1.7445	-0.094727	NaN	NaN	NaN	NaN	NaN	NaN	NaN	NaN	NaN	NaN	NaN	NaN
0.404	-40.316	41.893	7.2409	0.035644	-0.0046386	0.17871	-179.919	-216.993	1351.491	-3.4016	1.9883	-0.14629	NaN	NaN	NaN	NaN	NaN	NaN	NaN	NaN	NaN	NaN	NaN	NaN
0.406	-19.728	25.2992	29.152	0.044434	-0.015625	0.18164	-138.1142	-107.834	1309.392	-3.4385	2.1998	-0.17442	NaN	NaN	NaN	NaN	NaN	NaN	NaN	NaN	NaN	NaN	NaN	NaN
0.408	-5.303	5.302	43.6929	0.062988	-0.023438	0.18213	-90.421	-113.47	1323.5805	-3.3164	2.2988	-0.22461	NaN	NaN	NaN	NaN	NaN	NaN	NaN	NaN	NaN	NaN	NaN	NaN
0.41	-10.742	-8.028	29.6266	0.072266	-0.021484	0.18506	-21.263	-104.0546	1349.642	-2.9698	2.2583	-0.31436	NaN	NaN	NaN	NaN	NaN	NaN	NaN	NaN	NaN	NaN	NaN	NaN
0.412	-15.354	-6.9429	21.9794	0.097656	-0.022461	0.1875	-97.8485	-135.78425	1389.609	-2.5194	2.1337	-0.39561	NaN	NaN	NaN	NaN	NaN	NaN	NaN	NaN	NaN	NaN	NaN	NaN
0.414	-20.84	15.3877	16.8869	0.11963	-0.020996	0.19092	-137.579	-195.7511	1512.4076	-2.0663	2.0134	-0.45811	NaN	NaN	NaN	NaN	NaN	NaN	NaN	NaN	NaN	NaN	NaN	NaN
0.416	-15.219	36.0366	21.643	0.13477	-0.022461	0.19678	-112.917	-135.531	1537.518	-1.711	1.8913	-0.46904	NaN	NaN	NaN	NaN	NaN	NaN	NaN	NaN	NaN	NaN	NaN	NaN
0.418	-12.763	47.178	21.48	0.15332	-0.015137	0.20068	-126.52	-138.312	1526.152	-1.4761	1.7856	-0.44971	NaN	NaN	NaN	NaN	NaN	NaN	NaN	NaN	NaN	NaN	NaN	NaN
0.42	-30.421	24.96	34.0478	0.15918	-0.015625	0.19922	-101.752	-120.019	1472.323	-1.325	1.7131	-0.41113	NaN	NaN	NaN	NaN	NaN	NaN	NaN	NaN	NaN	NaN	NaN	NaN
0.422	-27.308	5.8006	32.2756	0.17334	-0.0078125	0.20703	-105.026	-74.121	1372.671	-1.1735	1.6344	-0.36875	NaN	NaN	NaN	NaN	NaN	NaN	NaN	NaN	NaN	NaN	NaN	NaN
0.424	0.277999999999999	1.192	29.8465	0.18824	-0.0043945	0.21314	-111.89998	-115.3654	1402.652	-1.0301	1.5246	-0.33594	NaN	NaN	NaN	NaN	NaN	NaN	NaN	NaN	NaN	NaN	NaN	NaN
0.426	-18.01	24.0441	27.5252	0.20215	-0.0014648	0.21143	-41.5642	-83.21	1498.86	-0.93584	1.3806	-0.31631	NaN	NaN	NaN	NaN	NaN	NaN	NaN	NaN	NaN	NaN	NaN	NaN
0.428	-29.82	28.7153	17.6673	0.21484	0.0019531	0.21191	-13.7069	-87.7846	1566.306	-0.88965	1.2344	-0.30762	NaN	NaN	NaN	NaN	NaN	NaN	NaN	NaN	NaN	NaN	NaN	NaN
0.43	-30.108	34.7906	2.799	0.22266	0.003418	0.21387	74.574	-162.521	1622.457	-0.94913	1.137	-0.33604	NaN	NaN	NaN	NaN	NaN	NaN	NaN	NaN	NaN	NaN	NaN	NaN
0.432	-4.095	26.6	-5.6841	0.23779	0.003418	0.20996	111.242	-99.8341	1572.05583	-1.058	1.0547	-0.33135	NaN	NaN	NaN	NaN	NaN	NaN	NaN	NaN	NaN	NaN	NaN	NaN
0.434	-29.734	28.81	-0.2112	0.2461	0.0029296	0.20655	62.43074	-70.1658	1506.277	-1.2045	1.0411	-0.32432	NaN	NaN	NaN	NaN	NaN	NaN	NaN	NaN	NaN	NaN	NaN	NaN
0.436	-18.12	23.9773	25.7089	0.25	0.011719	0.20752	64.8027	-2.34	1504.676	-1.3435	1.0791	-0.31309	NaN	NaN	NaN	NaN	NaN	NaN	NaN	NaN	NaN	NaN	NaN	NaN
0.438	-9.926	28.83863	32.7558	0.25146	0.021484	0.2124	44.155	57.3759	1510.59	-1.4624	1.1392	-0.29932	NaN	NaN	NaN	NaN	NaN	NaN	NaN	NaN	NaN	NaN	NaN	NaN
0.44	-18.564	24.6803	19.468	0.24512	0.02832	0.20801	-24.039	-47.4557	1575.556	-1.5435	1.2096	-0.30625	NaN	NaN	NaN	NaN	NaN	NaN	NaN	NaN	NaN	NaN	NaN	NaN
0.442	-39.5416	32.1414	21.188	0.23291	0.035156	0.21582	12.0291	-85.5064	1605.585	-1.5989	1.2664	-0.32822	NaN	NaN	NaN	NaN	NaN	NaN	NaN	NaN	NaN	NaN	NaN	NaN
0.444	-30.94	20.5498	23.319	0.22681	0.037353	0.21607	-2.9272	-114.6617	1539.377	-1.6332	1.2961	-0.34463	NaN	NaN	NaN	NaN	NaN	NaN	NaN	NaN	NaN	NaN	NaN	NaN
0.446	-10.537	12.4053	46.2437	0.21924	0.044434	0.21777	-3.903	-128.826	1515.6679	-1.6705	1.3162	-0.35586	NaN	NaN	NaN	NaN	NaN	NaN	NaN	NaN	NaN	NaN	NaN	NaN
0.448	-14.359	19.3889	34.812	0.21191	0.060059	0.21875	30.009	-8.687	1473.214	-1.7065	1.3267	-0.354	NaN	NaN	NaN	NaN	NaN	NaN	NaN	NaN	NaN	NaN	NaN	NaN
0.45	-32.849	18.7163	19.0637	0.20898	0.064941	0.21484	-1.38	-18.427	1436.644	-1.749	1.3375	-0.34941	NaN	NaN	NaN	NaN	NaN	NaN	NaN	NaN	NaN	NaN	NaN	NaN
0.452	-21.682	16.1587	-1.2859	0.20459	0.074219	0.21484	19.498	-25.9808	1447.2178	-1.8195	1.366	-0.35332	NaN	NaN	NaN	NaN	NaN	NaN	NaN	NaN	NaN	NaN	NaN	NaN
0.454	-16.261	22.1811	13.433	0.19311	0.07959	0.21387	-2.2549	-24.4763	1425.868	-1.8914	1.4114	-0.37636	NaN	NaN	NaN	NaN	NaN	NaN	NaN	NaN	NaN	NaN	NaN	NaN
0.456	-10.589	39.9273	11.951	0.18213	0.085938	0.20947	1.015	-99.61	1462.118	-1.9584	1.465	-0.40586	NaN	NaN	NaN	NaN	NaN	NaN	NaN	NaN	NaN	NaN	NaN	NaN
0.458	-26.517	35.5221	13.41	0.1626	0.091797	0.21143	39.8427	-39.62	1495.887	-2.0449	1.5332	-0.4292	NaN	NaN	NaN	NaN	NaN	NaN	NaN	NaN	NaN	NaN	NaN	NaN
0.46	-11.774	23.1673	26.8034	0.15332	0.098633	0.21143	-30.4894	43.469	1444.119	-2.1711	1.6223	-0.43945	NaN	NaN	NaN	NaN	NaN	NaN	NaN	NaN	NaN	NaN	NaN	NaN
0.462	-11.863	22.10259	26.25801	0.12793	0.11377	0.2168	-71.884	72.728	1400.087	-2.3309	1.7274	-0.43731	NaN	NaN	NaN	NaN	NaN	NaN	NaN	NaN	NaN	NaN	NaN	NaN
0.464	-38.4236	43.111	24.5612	0.11475	0.12549	0.21484	-47.9495	123.234	1319.747	-2.4844	1.841	-0.42168	NaN	NaN	NaN	NaN	NaN	NaN	NaN	NaN	NaN	NaN	NaN	NaN
0.466	-30.078	54.867	28.3021	0.090332	0.13428	0.21289	-80.506	55.058	1280.986	-2.5699	1.9336	-0.39258	NaN	NaN	NaN	NaN	NaN	NaN	NaN	NaN	NaN	NaN	NaN	NaN
0.468	-10.854	50.636	26.9876	0.069336	0.15186	0.21436	-60.4461	35.83	1309.323	-2.5703	1.9941	-0.36475	NaN	NaN	NaN	NaN	NaN	NaN	NaN	NaN	NaN	NaN	NaN	NaN
0.47	-11.78	47.5369	11.3078	0.061523	0.1582	0.21777	-24.81795	82.713	1288.8438	-2.4862	2.0002	-0.35527	NaN	NaN	NaN	NaN	NaN	NaN	NaN	NaN	NaN	NaN	NaN	NaN
0.472	-27.94	29.0875	20.5187	0.046387	0.16699	0.21875	-28.8342	63.5882	1260.6002	-2.355	1.9661	-0.34736	NaN	NaN	NaN	NaN	NaN	NaN	NaN	NaN	NaN	NaN	NaN	NaN
0.474	-18.898	6.211	16.7183	0.03125	0.17431	0.22363	6.316	108.3092	1184.42	-2.1769	1.9067	-0.33174	NaN	NaN	NaN	NaN	NaN	NaN	NaN	NaN	NaN	NaN	NaN	NaN
0.476	-15.287	-4.108	37.9013	0.023438	0.17627	0.22412	-38.1451	110.828	1114.375	-1.9994	1.8354	-0.31982	NaN	NaN	NaN	NaN	NaN	NaN	NaN	NaN	NaN	NaN	NaN	NaN
0.478	-18.322	20.4413	35.0652	0.017578	0.17969	0.229	-11.605	67.227	1112.483	-1.8457	1.7598	-0.30713	NaN	NaN	NaN	NaN	NaN	NaN	NaN	NaN	NaN	NaN	NaN	NaN
0.48	-22.709	32.0816	31.7612	0.0097656	0.18555	0.22949	70.9462	139.423	1108.1512	-1.7226	1.6904	-0.28809	NaN	NaN	NaN	NaN	NaN	NaN	NaN	NaN	NaN	NaN	NaN	NaN
0.482	-14.596	29.9084	24.4422	0.010254	0.18994	0.22852	7.275	150.0524	1109.754	-1.6125	1.6125	-0.26885	NaN	NaN	NaN	NaN	NaN	NaN	NaN	NaN	NaN	NaN	NaN	NaN
0.484	-20.625	27.6992	14.5194	0.016602	0.19702	0.22534	9.628	167.732	1109.336	-1.5226	1.5313	-0.2583	NaN	NaN	NaN	NaN	NaN	NaN	NaN	NaN	NaN	NaN	NaN	NaN
0.486	-27.837	33.9025	15.7116	0.023926	0.20068	0.22461	-3.23965	197.934	1040.624	-1.449	1.456	-0.24834	NaN	NaN	NaN	NaN	NaN	NaN	NaN	NaN	NaN	NaN	NaN	NaN
0.488	-37.0642	33.762	31.442	0.03125	0.21484	0.22705	-18.298	156.022	973.2835	-1.375	1.3848	-0.24219	NaN	NaN	NaN	NaN	NaN	NaN	NaN	NaN	NaN	NaN	NaN	NaN
0.49	-28.812	24.6589	50.5902	0.038086	0.21875	0.22461	44.225	175.914	933.983	-1.3267	1.3331	-0.24746	NaN	NaN	NaN	NaN	NaN	NaN	NaN	NaN	NaN	NaN	NaN	NaN
0.492	-3.017	33.6542	44.4119	0.054199	0.2207	0.22461	9.95099999999999	165.003	906.39	-1.2848	1.2786	-0.24385	NaN	NaN	NaN	NaN	NaN	NaN	NaN	NaN	NaN	NaN	NaN	NaN
0.494	-7.997	25.46	49.283	0.06836	0.22681	0.22412	-6.57100000000001	130.6432	894.802	-1.2485	1.243	-0.22549	NaN	NaN	NaN	NaN	NaN	NaN	NaN	NaN	NaN	NaN	NaN	NaN
0.496	-25.793	-1.4947	72.832	0.083496	0.2334	0.2251	13.6118	184.147	841.5436	-1.2155	1.2159	-0.20947	NaN	NaN	NaN	NaN	NaN	NaN	NaN	NaN	NaN	NaN	NaN	NaN
0.498	-13.353	-21.7725	117.141	0.10449	0.23926	0.22266	-3.428	183.373	798.9332	-1.1675	1.1841	-0.19287	NaN	NaN	NaN	NaN	NaN	NaN	NaN	NaN	NaN	NaN	NaN	NaN
0.5	1.877	-17.9412	208.5528	0.12037	0.24414	0.21533	14.148	172.1053	760.465	-1.1251	1.1542	-0.17666	NaN	NaN	NaN	NaN	NaN	NaN	NaN	NaN	NaN	NaN	NaN	NaN
0.502	-20.9605	-14.805	275.974	0.13184	0.25098	0.20166	27.909	200.5751	709.119	-1.0762	1.1187	-0.1624	NaN	NaN	NaN	NaN	NaN	NaN	NaN	NaN	NaN	NaN	NaN	NaN
0.504	-60.1963	-79.811	318.101	0.11133	0.2666	0.14697	-17.644	183.487	653.1717	-1.0179	1.0824	-0.15302	NaN	NaN	NaN	NaN	NaN	NaN	NaN	NaN	NaN	NaN	NaN	NaN
0.506	-46.382	-149.3389	295.886	0.071289	0.28125	0.10938	-14.027	204.139	629.43	-0.95341	1.0391	-0.1417	NaN	NaN	NaN	NaN	NaN	NaN	NaN	NaN	NaN	NaN	NaN	NaN
0.508	-26.032	-171.25792	285.2404	-0.072754	0.33789	0.052246	-45.5121	223.94	604.6286	-0.88281	0.99609	-0.13477	NaN	NaN	NaN	NaN	NaN	NaN	NaN	NaN	NaN	NaN	NaN	NaN
0.51	-16.547	-118.1898	300.916	-0.2207	0.3999	0.058106	-38.7188	183.7822	605.153	-0.80908	0.95263	-0.12636	NaN	NaN	NaN	NaN	NaN	NaN	NaN	NaN	NaN	NaN	NaN	NaN
0.512	-74.3334	-74.4128	342.551	-0.38721	0.47119	0.08252	-8.986	189.094	571.855	-0.74043	0.89531	-0.11435	NaN	NaN	NaN	NaN	NaN	NaN	NaN	NaN	NaN	NaN	NaN	NaN
0.514	-89.466	-37.9455	354.0947	-0.58398	0.57422	0.14453	-98.9	169.752	484.335	-0.68301	0.83945	-0.10498	NaN	NaN	NaN	NaN	NaN	NaN	NaN	NaN	NaN	NaN	NaN	NaN
0.516	-52.348	-29.7541	358.839	-0.64746	0.63281	0.1792	-75.968	175.682	429.631	-0.64101	0.78281	-0.09424	NaN	NaN	NaN	NaN	NaN	NaN	NaN	NaN	NaN	NaN	NaN	NaN
0.518	-44.614	-27.098	391.2981	-0.72461	0.73633	0.22021	-73.7714	216.47	370.907	-0.60889	0.7251	-0.069824	NaN	NaN	NaN	NaN	NaN	NaN	NaN	NaN	NaN	NaN	NaN	NaN
0.52	-26.737	-14.665	424.703	-0.73316	0.79053	0.21949	-105.9371	175.0306	363.585	-0.57403	0.66992	-0.060352	NaN	NaN	NaN	NaN	NaN	NaN	NaN	NaN	NaN	NaN	NaN	NaN
0.522	-7.429	45.919	452.4223	-0.70752	0.81885	0.20215	-56.804	129.43	341.12	-0.54482	0.61748	-0.039844	NaN	NaN	NaN	NaN	NaN	NaN	NaN	NaN	NaN	NaN	NaN	NaN
0.524	-28.671	130.9831	470.502	-0.66113	0.82422	0.15479	-61.808	92.909	303.249	-0.51866	0.56396	-0.022657	NaN	NaN	NaN	NaN	NaN	NaN	NaN	NaN	NaN	NaN	NaN	NaN
0.526	-40.974	182.743	522.4402	-0.63965	0.82471	0.11914	-77.1382	58.471	267.0271	-0.4916	0.51025	-0.003418	NaN	NaN	NaN	NaN	NaN	NaN	NaN	NaN	NaN	NaN	NaN	NaN
0.528	-43.12	170.811	607.879	-0.63574	0.81055	0.035156	-38.258	109.71	222.929	-0.46533	0.45898	0.018066	NaN	NaN	NaN	NaN	NaN	NaN	NaN	NaN	NaN	NaN	NaN	NaN
0.53	-46.593	141.58	693.451	-0.67188	0.81543	-0.0043945	-53.628	166.512	182.542	-0.43809	0.41016	0.036035	NaN	NaN	NaN	NaN	NaN	NaN	NaN	NaN	NaN	NaN	NaN	NaN
0.532	-51.055	97.068	759.501	-0.75537	0.83643	-0.041016	-44.085	177.088	180.164	-0.40508	0.35703	0.052148	NaN	NaN	NaN	NaN	NaN	NaN	NaN	NaN	NaN	NaN	NaN	NaN
0.534	-77.436	40.957	845.825	-0.96094	0.91016	-0.089844	-29.238	178.783	178.8913	-0.37305	0.31055	0.05957	NaN	NaN	NaN	NaN	NaN	NaN	NaN	NaN	NaN	NaN	NaN	NaN
0.536	-139.0464	-12.284	937.75	-1.0796	0.95166	-0.10498	-72.2268	105.4366	161.0959	-0.33721	0.26152	0.07666	NaN	NaN	NaN	NaN	NaN	NaN	NaN	NaN	NaN	NaN	NaN	NaN
0.538	-139.081	-41.984	1034.0463	-1.3608	1.0708	-0.12256	-30.754	51.4	142.9061	-0.30615	0.21289	0.083984	NaN	NaN	NaN	NaN	NaN	NaN	NaN	NaN	NaN	NaN	NaN	NaN
0.54	-65.796	-48.6103	1075.925	-1.5704	1.1748	-0.11816	-54.6054	68.3422	100.8822	-0.27002	0.1665	0.096483	NaN	NaN	NaN	NaN	NaN	NaN	NaN	NaN	NaN	NaN	NaN	NaN
0.542	-16.229	-72.054	1127.468	-1.7598	1.2832	-0.10547	-52.481	58.65	86.63	-0.2373	0.12149	0.10293	NaN	NaN	NaN	NaN	NaN	NaN	NaN	NaN	NaN	NaN	NaN	NaN
0.544	-10.537	-82.983	1171.409	-1.9526	1.4243	-0.082031	-3.304	80.346	60.8837	-0.20801	0.092188	0.11074	NaN	NaN	NaN	NaN	NaN	NaN	NaN	NaN	NaN	NaN	NaN	NaN
0.546	-13.37841	-76.38	1245.5032	-2.0234	1.4922	-0.074219	-51.212	73.024	9.463	-0.18017	0.06084	0.10879	NaN	NaN	NaN	NaN	NaN	NaN	NaN	NaN	NaN	NaN	NaN	NaN
0.548	-13.056	-23.901	1288.697	-2.1055	1.6191	-0.056152	-22.924	13.656	14.751	-0.15381	0.033203	0.11084	NaN	NaN	NaN	NaN	NaN	NaN	NaN	NaN	NaN	NaN	NaN	NaN
0.55	-19.1015	29.65	1348.001	-2.1258	1.7131	-0.043213	-9.404	19.8198	29.288	-0.12627	0.023144	0.11651	NaN	NaN	NaN	NaN	NaN	NaN	NaN	NaN	NaN	NaN	NaN	NaN
0.552	18.616	47.198	1388.848	-2.1245	1.8032	-0.029297	0.0169999999999995	15.049	68.4861	-0.098828	0.012305	0.11729	NaN	NaN	NaN	NaN	NaN	NaN	NaN	NaN	NaN	NaN	NaN	NaN
0.554	63.7952	27.602	1409.986	-2.062	1.9048	0.00048828	39.54129	21.486	87.137	-0.075391	0.005664	0.11338	NaN	NaN	NaN	NaN	NaN	NaN	NaN	NaN	NaN	NaN	NaN	NaN
0.556	39.592	15.2614	1386.27	-2.0308	1.9341	0.013672	-21.933	70.594	40.8339	-0.05664	-0.0032226	0.10869	NaN	NaN	NaN	NaN	NaN	NaN	NaN	NaN	NaN	NaN	NaN	NaN
0.558	13.4872	12.933	1358.746	-1.9414	1.9395	0.039063	-28.193	29.76762	27.6097	-0.044434	-0.010254	0.10254	NaN	NaN	NaN	NaN	NaN	NaN	NaN	NaN	NaN	NaN	NaN	NaN
0.56	3.25	13.361	1355.877	-1.8477	1.8985	0.063965	-13.268	26.197	23.1171	-0.037793	-0.014258	0.10654	NaN	NaN	NaN	NaN	NaN	NaN	NaN	NaN	NaN	NaN	NaN	NaN
0.562	3.81226	1.827	1350.37	-1.748	1.8262	0.095703	-54.499	45.4822	2.38819	-0.034863	-0.021191	0.10674	NaN	NaN	NaN	NaN	NaN	NaN	NaN	NaN	NaN	NaN	NaN	NaN
0.564	14.363	-1.813	1335.752	-1.6108	1.6958	0.089355	-3.508	21.646	16.5009	-0.035254	-0.020801	0.10205	NaN	NaN	NaN	NaN	NaN	NaN	NaN	NaN	NaN	NaN	NaN	NaN
0.566	13.435	-32.521	1317.982	-1.5425	1.6216	0.080078	-8.399	53.026	25.8684	-0.045703	-0.01836	0.10615	NaN	NaN	NaN	NaN	NaN	NaN	NaN	NaN	NaN	NaN	NaN	NaN
0.568	38.555	-50.558	1319.244	-1.4292	1.4595	0.070313	-81.945	54.93	18.034	-0.054199	-0.019043	0.098633	NaN	NaN	NaN	NaN	NaN	NaN	NaN	NaN	NaN	NaN	NaN	NaN
0.57	33.797	-59.297	1347.172	-1.3686	1.3491	0.060302	-8.459	27.188	25.153	-0.074512	-0.011719	0.10264	NaN	NaN	NaN	NaN	NaN	NaN	NaN	NaN	NaN	NaN	NaN	NaN
0.572	19.1334	-28.583	1383.309	-1.3398	1.25	0.060547	-23.84	51.933	-18.074	-0.093847	-0.008789	0.10186	NaN	NaN	NaN	NaN	NaN	NaN	NaN	NaN	NaN	NaN	NaN	NaN
0.574	21.3391	-45.72	1407.857	-1.3418	1.1602	0.046875	-29.369	25.166	-8.8596	-0.11846	-0.0017578	0.10927	NaN	NaN	NaN	NaN	NaN	NaN	NaN	NaN	NaN	NaN	NaN	NaN
0.576	37.323	-67.532	1415.221	-1.3438	1.1289	0.038086	-16.836	35.3889	3.5614	-0.142	0.0039063	0.11592	NaN	NaN	NaN	NaN	NaN	NaN	NaN	NaN	NaN	NaN	NaN	NaN
0.578	34.693	-99.598	1412.663	-1.3418	1.1094	0.038086	-81.1073	52.203	1.386	-0.16162	0.0097656	0.12207	NaN	NaN	NaN	NaN	NaN	NaN	NaN	NaN	NaN	NaN	NaN	NaN
0.58	-12.394	-88.1883	1420.1487	-1.3443	1.1099	0.040772	-52.009	31.3413	36.8215	-0.18067	0.015918	0.13477	NaN	NaN	NaN	NaN	NaN	NaN	NaN	NaN	NaN	NaN	NaN	NaN
0.582	-4.205	-75.9399	1434.605	-1.3413	1.1226	0.041504	-16.622	64.63	29.5445	-0.19443	0.020215	0.14316	NaN	NaN	NaN	NaN	NaN	NaN	NaN	NaN	NaN	NaN	NaN	NaN
0.584	-25.629	-65.78	1420.305	-1.3438	1.1406	0.053223	-44.9172	56.9432	39.13	-0.20069	0.020215	0.15644	NaN	NaN	NaN	NaN	NaN	NaN	NaN	NaN	NaN	NaN	NaN	NaN
0.586	-86.251	-65.372	1377.4525	-1.3511	1.147	0.041504	-2.899	44.8888	55.366	-0.20264	0.02334	0.17168	NaN	NaN	NaN	NaN	NaN	NaN	NaN	NaN	NaN	NaN	NaN	NaN
0.588	-111.259	-87.0139	1346.591	-1.3726	1.1782	0.032715	-42.728	81.762	36.004	-0.20068	0.018066	0.18408	NaN	NaN	NaN	NaN	NaN	NaN	NaN	NaN	NaN	NaN	NaN	NaN
0.59	-93.148	-103.405	1320.681	-1.3984	1.2031	0.023682	-58.7375	40.763	41.3122	-0.18164	0.0065429	0.19268	NaN	NaN	NaN	NaN	NaN	NaN	NaN	NaN	NaN	NaN	NaN	NaN
0.592	-45.433	-92.659	1341.594	-1.439	1.231	0.012207	-21.138	30.6322	54.7058	-0.14873	-0.012207	0.19268	NaN	NaN	NaN	NaN	NaN	NaN	NaN	NaN	NaN	NaN	NaN	NaN
0.594	-74.586	-38.6821	1350.511	-1.5254	1.2715	-0.0087891	-43.259	25.85291	28.9451	-0.10225	-0.02666	0.19424	NaN	NaN	NaN	NaN	NaN	NaN	NaN	NaN	NaN	NaN	NaN	NaN
0.596	-83.926	24.408	1368.0192	-1.5776	1.2954	-0.022461	-1.854	-11.633	25.3342	-0.047265	-0.041894	0.19023	NaN	NaN	NaN	NaN	NaN	NaN	NaN	NaN	NaN	NaN	NaN	NaN
0.598	-89.94	47.798	1378.161	-1.7207	1.3652	-0.057617	-10.784	20.6121	14.3346	0.010254	-0.055664	0.18359	NaN	NaN	NaN	NaN	NaN	NaN	NaN	NaN	NaN	NaN	NaN	NaN
0.6	-50.368	48.792	1399.588	-1.8486	1.4409	-0.074952	-51.0649	31.6866	18.244	0.070996	-0.066016	0.18516	NaN	NaN	NaN	NaN	NaN	NaN	NaN	NaN	NaN	NaN	NaN	NaN
0.602	-68.827	51.013	1421.71137	-1.9995	1.5337	-0.088867	-2.757	29.7105	57.7153	0.12364	-0.073437	0.18056	NaN	NaN	NaN	NaN	NaN	NaN	NaN	NaN	NaN	NaN	NaN	NaN
0.604	-59.228	54.31	1423.564	-2.1875	1.6758	-0.093262	-34.438	71.629	49.1795	0.16895	-0.075391	0.18213	NaN	NaN	NaN	NaN	NaN	NaN	NaN	NaN	NaN	NaN	NaN	NaN
0.606	-51.137	47.136	1424.474	-2.2593	1.7485	-0.085449	5.657	26.8707	73.034	0.21153	-0.072071	0.17988	NaN	NaN	NaN	NaN	NaN	NaN	NaN	NaN	NaN	NaN	NaN	NaN
0.608	-91.6844	40.108	1393.2703	-2.3516	1.8789	-0.071777	10.561	13.35029	68.417	0.24854	-0.065918	0.17529	NaN	NaN	NaN	NaN	NaN	NaN	NaN	NaN	NaN	NaN	NaN	NaN
0.61	-129.86	14.256	1375.6486	-2.3633	1.9414	-0.067627	-61.29904	26.704	35.0896	0.28867	-0.056641	0.17148	NaN	NaN	NaN	NaN	NaN	NaN	NaN	NaN	NaN	NaN	NaN	NaN
0.612	-99.1273	-19.87731	1359.8572	-2.3315	1.9771	-0.061035	-19.292	8.985	42.5082	0.32051	-0.04375	0.16933	NaN	NaN	NaN	NaN	NaN	NaN	NaN	NaN	NaN	NaN	NaN	NaN
0.614	-42.036	-47.6545	1349.4161	-2.2417	1.9771	-0.063477	-5.878	42.499	36.84786	0.3459	-0.040625	0.16894	NaN	NaN	NaN	NaN	NaN	NaN	NaN	NaN	NaN	NaN	NaN	NaN
0.616	-23.486	-39.3642	1339.8057	-2.1816	1.9551	-0.073242	-29.342	26.995	29.6459	0.36846	-0.03584	0.17246	NaN	NaN	NaN	NaN	NaN	NaN	NaN	NaN	NaN	NaN	NaN	NaN
0.618	-41.975	-5.681	1330.0236	-2.0469	1.9063	-0.08252	19.534	-26.9317	26.80581	0.38525	-0.027344	0.17139	NaN	NaN	NaN	NaN	NaN	NaN	NaN	NaN	NaN	NaN	NaN	NaN
0.62	-34.807	33.1403	1306.878	-1.9467	1.8559	-0.089111	-24.929	-1.087	9.484	0.39727	-0.020703	0.16816	NaN	NaN	NaN	NaN	NaN	NaN	NaN	NaN	NaN	NaN	NaN	NaN
0.622	-34.726	61.3078	1284.0866	-1.8628	1.8071	-0.09668	-53.1666	-13.614	17.0581	0.40625	-0.013477	0.16787	NaN	NaN	NaN	NaN	NaN	NaN	NaN	NaN	NaN	NaN	NaN	NaN
0.624	-12.79	84.4256	1269.976	-1.771	1.7446	-0.098145	-3.964	6.7722	37.1076	0.41875	0.00097656	0.16631	NaN	NaN	NaN	NaN	NaN	NaN	NaN	NaN	NaN	NaN	NaN	NaN
0.626	-33.061	86.3327	1255.541	-1.7441	1.7129	-0.10156	-47.1101	33.55837	16.5597	0.42666	0.011719	0.16514	NaN	NaN	NaN	NaN	NaN	NaN	NaN	NaN	NaN	NaN	NaN	NaN
0.628	-31.847	90.646	1239.1623	-1.6968	1.6626	-0.091797	-25.995	-8.4911	23.624	0.42969	0.021973	0.16357	NaN	NaN	NaN	NaN	NaN	NaN	NaN	NaN	NaN	NaN	NaN	NaN
0.63	-38.536	121.724	1206.7039	-1.667	1.6226	-0.087891	-37.832	9.693	8.468	0.43008	0.03291	0.15117	NaN	NaN	NaN	NaN	NaN	NaN	NaN	NaN	NaN	NaN	NaN	NaN
0.632	-64.6144	149.696	1189.0944	-1.6348	1.5791	-0.084473	-62.8761	14.99411	6.482	0.42598	0.04375	0.14209	NaN	NaN	NaN	NaN	NaN	NaN	NaN	NaN	NaN	NaN	NaN	NaN
0.634	-59.261	141.878	1135.58854	-1.5938	1.5195	-0.074707	-34.791	20.7709	30.3594	0.41308	0.058984	0.13467	NaN	NaN	NaN	NaN	NaN	NaN	NaN	NaN	NaN	NaN	NaN	NaN
0.636	-30.488	102.7325	1088.5447	-1.5737	1.4868	-0.073242	-50.4391	69.269	12.9011	0.39561	0.073926	0.12588	NaN	NaN	NaN	NaN	NaN	NaN	NaN	NaN	NaN	NaN	NaN	NaN
0.638	-33.909	67.7106	1054.838	-1.5366	1.4185	-0.060547	-41.67	39.9782	9.3585	0.37109	0.091309	0.11768	NaN	NaN	NaN	NaN	NaN	NaN	NaN	NaN	NaN	NaN	NaN	NaN
0.64	-40.725	59.939	1026.861	-1.4941	1.3418	-0.046387	-21.24	17.523041242	6.716	0.3415	0.11026	0.10869	NaN	NaN	NaN	NaN	NaN	NaN	NaN	NaN	NaN	NaN	NaN	NaN
0.642	-47.388	63.567	1031.794	-1.4707	1.3047	-0.041504	-50.379	34.281	-11.909	0.30742	0.13369	0.10185	NaN	NaN	NaN	NaN	NaN	NaN	NaN	NaN	NaN	NaN	NaN	NaN
0.644	-28.508	72.067	1028.426	-1.4155	1.2349	-0.03125	-29.89	4.061	22.4464	0.2668	0.15752	0.09795	NaN	NaN	NaN	NaN	NaN	NaN	NaN	NaN	NaN	NaN	NaN	NaN
0.646	-37.03	70.301	1022.191	-1.3579	1.187	-0.025635	-23.322	46.65	21.607	0.22285	0.17988	0.0999	NaN	NaN	NaN	NaN	NaN	NaN	NaN	NaN	NaN	NaN	NaN	NaN
0.648	-44.295	80.571	985.55	-1.2949	1.1426	-0.020996	-44.2677	40.7208	13.767765	0.17236	0.2041	0.10107	NaN	NaN	NaN	NaN	NaN	NaN	NaN	NaN	NaN	NaN	NaN	NaN
0.65	-79.36131	97.4224	950.5775	-1.2065	1.0864	-0.020508	-20.173	12.40688	21.33296	0.12959	0.23193	0.10684	NaN	NaN	NaN	NaN	NaN	NaN	NaN	NaN	NaN	NaN	NaN	NaN
0.652	-68.423	142.353	923.7912	-1.1621	1.0566	-0.025391	-50.6362	50.036	-2.296	0.08711	0.25234	0.11445	NaN	NaN	NaN	NaN	NaN	NaN	NaN	NaN	NaN	NaN	NaN	NaN
0.654	-70.0995	173.889	894.4738	-1.0703	1.0117	-0.026855	-37.138	27.0373	12.803	0.060547	0.27578	0.12031	NaN	NaN	NaN	NaN	NaN	NaN	NaN	NaN	NaN	NaN	NaN	NaN
0.656	-56.194	173.444	871.661	-1.0093	0.98194	-0.031983	4.723	39.176	47.7238	0.041114	0.29766	0.12822	NaN	NaN	NaN	NaN	NaN	NaN	NaN	NaN	NaN	NaN	NaN	NaN
0.658	-47.281	142.869	839.644	-0.95313	0.95117	-0.032227	-47.082	78.011	35.567	0.027344	0.31641	0.13867	NaN	NaN	NaN	NaN	NaN	NaN	NaN	NaN	NaN	NaN	NaN	NaN
0.66	-40.453	111.9712	794.8083	-0.88672	0.91211	-0.027344	0.553000000000001	43.0753	40.79	0.014453	0.33623	0.14785	NaN	NaN	NaN	NaN	NaN	NaN	NaN	NaN	NaN	NaN	NaN	NaN
0.662	-40.206	118.074	742.92	-0.85205	0.89307	-0.024414	-5.573	44.936	37.5687	0.012109	0.34912	0.15547	NaN	NaN	NaN	NaN	NaN	NaN	NaN	NaN	NaN	NaN	NaN	NaN
0.664	-30.914	135.3121	712.409	-0.79199	0.85742	-0.029297	-32.716	39.124	20.404	0.010547	0.34443	0.16211	NaN	NaN	NaN	NaN	NaN	NaN	NaN	NaN	NaN	NaN	NaN	NaN
0.666	-11.191	144.5939	692.463	-0.74121	0.8291	-0.024658	14.649	32.165	37.1077	0.012891	0.34024	0.16787	NaN	NaN	NaN	NaN	NaN	NaN	NaN	NaN	NaN	NaN	NaN	NaN
0.668	-16.676	147.94	661.447	-0.6875	0.79688	-0.024414	-14.479	74.06	25.7544	0.013184	0.32764	0.1709	NaN	NaN	NaN	NaN	NaN	NaN	NaN	NaN	NaN	NaN	NaN	NaN
0.67	-26.078	133.29	624.8398	-0.6084	0.74756	-0.029785	-25.381	59.741	23.7502	0.011035	0.32315	0.17295	NaN	NaN	NaN	NaN	NaN	NaN	NaN	NaN	NaN	NaN	NaN	NaN
0.672	-37.321	125.4584	608.2437	-0.57227	0.72168	-0.036621	9.59	40.065	24.6226	0.0049804	0.32334	0.17764	NaN	NaN	NaN	NaN	NaN	NaN	NaN	NaN	NaN	NaN	NaN	NaN
0.674	-34.576	113.31564	598.6691	-0.49756	0.67432	-0.040527	-45.2321	43.887	28.6759	-9.7656e-05	0.32021	0.18506	NaN	NaN	NaN	NaN	NaN	NaN	NaN	NaN	NaN	NaN	NaN	NaN
0.676	-34.773	135.8136	584.842	-0.44287	0.6333	-0.044922	-34.316	12.194	49.573	-0.011621	0.32451	0.19434	NaN	NaN	NaN	NaN	NaN	NaN	NaN	NaN	NaN	NaN	NaN	NaN
0.678	-16.335	147.53	552.821	-0.38916	0.59424	-0.046875	0.988999999999997	40.3819	77.01	-0.022949	0.33008	0.20752	NaN	NaN	NaN	NaN	NaN	NaN	NaN	NaN	NaN	NaN	NaN	NaN
0.68	-18.011	143.718	504.3428	-0.31982	0.5498	-0.049316	-43.726	22.3876	133.9813	-0.034277	0.33955	0.21914	NaN	NaN	NaN	NaN	NaN	NaN	NaN	NaN	NaN	NaN	NaN	NaN
0.682	-13.994	129.669	455.184	-0.27881	0.52686	-0.054688	-40.084	-42.9949	195.5257	-0.048828	0.34424	0.22598	NaN	NaN	NaN	NaN	NaN	NaN	NaN	NaN	NaN	NaN	NaN	NaN
0.684	-9.979	115.0303	420.09	-0.2002	0.4873	-0.066406	-76.662	-20.968	262.461	-0.059766	0.3458	0.23496	NaN	NaN	NaN	NaN	NaN	NaN	NaN	NaN	NaN	NaN	NaN	NaN
0.686	-0.698	113.4636	380.7279	-0.13501	0.44677	-0.075196	-56.94	-23.6059	366.035	-0.060059	0.35098	0.23613	NaN	NaN	NaN	NaN	NaN	NaN	NaN	NaN	NaN	NaN	NaN	NaN
0.688	-4.454	116.1422	352.8212	-0.065918	0.4082	-0.098145	-78.768	-77.965	439.3033	-0.05957	0.3418	0.23438	NaN	NaN	NaN	NaN	NaN	NaN	NaN	NaN	NaN	NaN	NaN	NaN
0.69	-0.302999999999997	111.9316	326.5274	0.02832	0.35938	-0.125	-184.1156	-143.011	458.075	-0.047656	0.34571	0.23193	NaN	NaN	NaN	NaN	NaN	NaN	NaN	NaN	NaN	NaN	NaN	NaN
0.692	-16.049	105.7693	304.113	0.069336	0.34033	-0.13818	-121.057	-230.5933	516.68783	-0.033887	0.34677	0.23262	NaN	NaN	NaN	NaN	NaN	NaN	NaN	NaN	NaN	NaN	NaN	NaN
0.694	-29.694	104.0609	283.578	0.14014	0.30859	-0.15479	-99.799	-153.412	608.374	-0.028808	0.35303	0.2248	NaN	NaN	NaN	NaN	NaN	NaN	NaN	NaN	NaN	NaN	NaN	NaN
0.696	-24.359	109.7904	281.5565	0.18262	0.29199	-0.16968	-154.6158	-48.886	748.726	-0.024805	0.3581	0.20908	NaN	NaN	NaN	NaN	NaN	NaN	NaN	NaN	NaN	NaN	NaN	NaN
0.698	-3.329	127.083	257.0205	0.21338	0.28711	-0.17725	-149.8649	-12.7205	863.6966	-0.026855	0.37061	0.16797	NaN	NaN	NaN	NaN	NaN	NaN	NaN	NaN	NaN	NaN	NaN	NaN
0.7	-22.3204	137.14	224.1792	0.23291	0.28027	-0.1875	-144.668	33.781	881.423	-0.047656	0.37969	0.10097	NaN	NaN	NaN	NaN	NaN	NaN	NaN	NaN	NaN	NaN	NaN	NaN
0.702	-46.8507	140.821	209.7293	0.22607	0.28467	-0.18945	-100.4161	-1.967	944.31	-0.1002	0.39922	0.031641	NaN	NaN	NaN	NaN	NaN	NaN	NaN	NaN	NaN	NaN	NaN	NaN
0.704	-45.51673	119.166	181.718	0.22949	0.2793	-0.18994	-10.5909	-26.537	1083.914	-0.21699	0.43359	-0.034375	NaN	NaN	NaN	NaN	NaN	NaN	NaN	NaN	NaN	NaN	NaN	NaN
0.706	-15.571	101.3865	164.385	0.21875	0.28393	-0.18847	-34.4797	2.43	1220.0932	-0.39151	0.46865	-0.098047	NaN	NaN	NaN	NaN	NaN	NaN	NaN	NaN	NaN	NaN	NaN	NaN
0.708	16.265	90.696	139.4671	0.21289	0.28809	-0.18945	-4.98	7.146	1345.811	-0.60303	0.49951	-0.12842	NaN	NaN	NaN	NaN	NaN	NaN	NaN	NaN	NaN	NaN	NaN	NaN
0.71	-13.607	71.058	133.4838	0.20459	0.2832	-0.18604	70.453	39.579	1343.759	-0.84756	0.55049	-0.12373	NaN	NaN	NaN	NaN	NaN	NaN	NaN	NaN	NaN	NaN	NaN	NaN
0.712	-15.954	61.048	117.9118	0.19727	0.28369	-0.18799	-13.5223	-13.565	1306.791	-1.1117	0.63789	-0.10743	NaN	NaN	NaN	NaN	NaN	NaN	NaN	NaN	NaN	NaN	NaN	NaN
0.714	-24.915	63.407	109.6913	0.18896	0.27832	-0.18164	-31.0121	-66.026	1312.5242	-1.3867	0.75117	-0.096094	NaN	NaN	NaN	NaN	NaN	NaN	NaN	NaN	NaN	NaN	NaN	NaN
0.716	-4.988	83.9329	91.5353	0.18164	0.2771	-0.18261	-15.522	-94.17	1283.162	-1.6557	0.8834	-0.10147	NaN	NaN	NaN	NaN	NaN	NaN	NaN	NaN	NaN	NaN	NaN	NaN
0.718	-19.535	82.181	94.5222	0.1665	0.27051	-0.18555	4.477	-187.942	1306.918	-1.9141	1.0176	-0.11768	NaN	NaN	NaN	NaN	NaN	NaN	NaN	NaN	NaN	NaN	NaN	NaN
0.72	-20.092	58.261	90.743	0.14941	0.26025	-0.18213	33.3511	-211.6875	1338.179	-2.1677	1.1522	-0.12432	NaN	NaN	NaN	NaN	NaN	NaN	NaN	NaN	NaN	NaN	NaN	NaN
0.722	-15.763	54.0863	53.7708	0.13184	0.26123	-0.18457	16.467	-210.2792	1316.8305	-2.4175	1.2821	-0.12109	NaN	NaN	NaN	NaN	NaN	NaN	NaN	NaN	NaN	NaN	NaN	NaN
0.724	-42.333	42.4842	43.079	0.104	0.25488	-0.17871	76.48937	-222.409	1301.5022	-2.6535	1.4056	-0.10625	NaN	NaN	NaN	NaN	NaN	NaN	NaN	NaN	NaN	NaN	NaN	NaN
0.726	-41.708	47.0965	54.3271	0.075928	0.25488	-0.17651	87.953	-171.346	1262.189	-2.8525	1.5245	-0.072363	NaN	NaN	NaN	NaN	NaN	NaN	NaN	NaN	NaN	NaN	NaN	NaN
0.728	-20.243	52.5145	66.1213	0.050293	0.25635	-0.17627	61.056	-176.38	1307.375	-2.9883	1.6406	-0.03418	NaN	NaN	NaN	NaN	NaN	NaN	NaN	NaN	NaN	NaN	NaN	NaN
0.73	-0.774999999999999	61.5768	49.9675	0.024902	0.25879	-0.17627	113.45	-139.243	1395.238	-3.0119	1.7604	0.016992	NaN	NaN	NaN	NaN	NaN	NaN	NaN	NaN	NaN	NaN	NaN	NaN
0.732	-0.573	52.5341	21.464	0.010254	0.25977	-0.17676	122.844	-49.209	1448.921	-2.9163	1.8704	0.069532	NaN	NaN	NaN	NaN	NaN	NaN	NaN	NaN	NaN	NaN	NaN	NaN
0.734	-10.905	41.2343	21.617	-0.020508	0.26221	-0.16943	97.255	-31.659	1491.278	-2.7241	1.947	0.098436	NaN	NaN	NaN	NaN	NaN	NaN	NaN	NaN	NaN	NaN	NaN	NaN
0.736	-5.876	32.0987	22.5369	-0.032226	0.26123	-0.16967	102.206	-30.888	1473.4204	-2.4941	1.9562	0.12734	NaN	NaN	NaN	NaN	NaN	NaN	NaN	NaN	NaN	NaN	NaN	NaN
0.738	-11.737	37.0668	39.6507	-0.038574	0.26025	-0.16943	25.5156	-76.358	1441.2682	-2.2734	1.9023	0.14893	NaN	NaN	NaN	NaN	NaN	NaN	NaN	NaN	NaN	NaN	NaN	NaN
0.74	-4.499	33.9403	37.0233	-0.038086	0.25391	-0.17236	-30.396	-109.598	1431.149	-2.1155	1.8019	0.15469	NaN	NaN	NaN	NaN	NaN	NaN	NaN	NaN	NaN	NaN	NaN	NaN
0.742	-18.905	10.9144	26.5655	-0.036133	0.25195	-0.17041	-8.925	-75.178	1379.133	-1.9863	1.6946	0.15606	NaN	NaN	NaN	NaN	NaN	NaN	NaN	NaN	NaN	NaN	NaN	NaN
0.744	-21.414	-0.2653	19.364	-0.020996	0.24023	-0.1748	-72.7763	-126.444	1346.783	-1.8628	1.5665	0.16191	NaN	NaN	NaN	NaN	NaN	NaN	NaN	NaN	NaN	NaN	NaN	NaN
0.746	-32.43	3.16255	26.981	-1.7347e-14	0.23291	-0.17627	-55.399	-162.902	1389.497	-1.7315	1.4415	0.15195	NaN	NaN	NaN	NaN	NaN	NaN	NaN	NaN	NaN	NaN	NaN	NaN
0.748	-33.932	24.627	38.8773	0.020996	0.22119	-0.17188	-32.084	-164.011	1417.048	-1.5957	1.3232	0.12256	NaN	NaN	NaN	NaN	NaN	NaN	NaN	NaN	NaN	NaN	NaN	NaN
0.75	-26.218	36.1132	33.8371	0.043945	0.20166	-0.17285	-47.673	-203.877	1469.6877	-1.4879	1.2147	0.081738	NaN	NaN	NaN	NaN	NaN	NaN	NaN	NaN	NaN	NaN	NaN	NaN
0.752	0.305	34.8386	30.953	0.058594	0.19141	-0.17236	3.612	-161.573	1522.468	-1.4202	1.1286	0.047656	NaN	NaN	NaN	NaN	NaN	NaN	NaN	NaN	NaN	NaN	NaN	NaN
0.754	-9.287	24.0376	16.5492	0.083984	0.16064	-0.16797	-42.505	-103.482	1492.113	-1.3777	1.0688	0.0375	NaN	NaN	NaN	NaN	NaN	NaN	NaN	NaN	NaN	NaN	NaN	NaN
0.756	-24.622	13.0593	24.9467	0.10645	0.14038	-0.16772	-92.4838	-75.478	1476.975	-1.3734	1.0488	0.0088866	NaN	NaN	NaN	NaN	NaN	NaN	NaN	NaN	NaN	NaN	NaN	NaN
0.758	-2.381	12.1495	27.0308	0.12939	0.11621	-0.16699	-86.3225	-4.751	1480.309	-1.3926	1.0352	0.015625	NaN	NaN	NaN	NaN	NaN	NaN	NaN	NaN	NaN	NaN	NaN	NaN
0.76	-16.535	25.6845	29.35906	0.1626	0.090332	-0.16699	-144.79	-16.416	1507.557	-1.4354	1.0451	0.01709	NaN	NaN	NaN	NaN	NaN	NaN	NaN	NaN	NaN	NaN	NaN	NaN
0.762	-14.529	34.78661	25.2381	0.1748	0.073242	-0.17432	-111.9913	-22.872	1567.919	-1.4871	1.0738	0.021094	NaN	NaN	NaN	NaN	NaN	NaN	NaN	NaN	NaN	NaN	NaN	NaN
0.764	-36.5905	20.089	24.938	0.19336	0.060059	-0.1709	-95.3457	-37.743	1515.6852	-1.5531	1.1086	0.030078	NaN	NaN	NaN	NaN	NaN	NaN	NaN	NaN	NaN	NaN	NaN	NaN
0.766	-43.0154	13.4787	21.821	0.20483	0.049316	-0.16675	-137.874	-71.9972	1468.751275	-1.6414	1.1516	0.044726	NaN	NaN	NaN	NaN	NaN	NaN	NaN	NaN	NaN	NaN	NaN	NaN
0.768	-34.152	34.095	18.9512	0.2085	0.042969	-0.16504	-72.254	-25.922	1436.136	-1.7368	1.2056	0.067871	NaN	NaN	NaN	NaN	NaN	NaN	NaN	NaN	NaN	NaN	NaN	NaN
0.77	-33.998	35.859	22.3083	0.21094	0.038086	-0.16406	-81.23354	5.249	1416.45	-1.8106	1.2636	0.080762	NaN	NaN	NaN	NaN	NaN	NaN	NaN	NaN	NaN	NaN	NaN	NaN
0.772	-25.373	23.9664	25.0254	0.21045	0.038086	-0.16016	-52.527	1.329	1440.6917	-1.8652	1.3223	0.092871	NaN	NaN	NaN	NaN	NaN	NaN	NaN	NaN	NaN	NaN	NaN	NaN
0.774	-25.954	-0.5484	22.5449	0.20605	0.034668	-0.16113	9.647	1.8921	1436.7768	-1.9132	1.3664	0.1003	NaN	NaN	NaN	NaN	NaN	NaN	NaN	NaN	NaN	NaN	NaN	NaN
0.776	-18.891	7.1782	14.9534	0.20484	0.039795	-0.15869	-21.062	-59.503	1431.9335	-1.9552	1.3972	0.089062	NaN	NaN	NaN	NaN	NaN	NaN	NaN	NaN	NaN	NaN	NaN	NaN
0.778	-10.484	13.3795	28.8642	0.2002	0.046875	-0.1582	17.4	-68.7145	1450.516	-2.0117	1.4258	0.067871	NaN	NaN	NaN	NaN	NaN	NaN	NaN	NaN	NaN	NaN	NaN	NaN
0.78	-4.469	20.942	35.3826	0.18994	0.057129	-0.15479	-8.862	-7.195	1460.214	-2.1068	1.4717	0.044824	NaN	NaN	NaN	NaN	NaN	NaN	NaN	NaN	NaN	NaN	NaN	NaN
0.782	5.329	30.0881	41.447	0.18335	0.060791	-0.14843	-55.813	29.244	1464.204	-2.2413	1.5286	0.021484	NaN	NaN	NaN	NaN	NaN	NaN	NaN	NaN	NaN	NaN	NaN	NaN
0.784	-30.275	40.6112	26.1181	0.17773	0.063477	-0.15137	-33.312	74.1485	1434.299	-2.4116	1.6068	0.021484	NaN	NaN	NaN	NaN	NaN	NaN	NaN	NaN	NaN	NaN	NaN	NaN
0.786	-28.339	21.4827	10.0745	0.16455	0.070801	-0.1377	-57.919	78.428	1365.92	-2.5769	1.7105	0.03252	NaN	NaN	NaN	NaN	NaN	NaN	NaN	NaN	NaN	NaN	NaN	NaN
0.788	-21.54	14.4005	16.2661	0.16406	0.074219	-0.13281	-30.223	40.702	1326.981	-2.7109	1.8203	0.046875	NaN	NaN	NaN	NaN	NaN	NaN	NaN	NaN	NaN	NaN	NaN	NaN
0.79	-13.127	23.6528	10.1997	0.1543	0.080566	-0.13232	1.734	50.2828	1295.40154	-2.7588	1.9029	0.064551	NaN	NaN	NaN	NaN	NaN	NaN	NaN	NaN	NaN	NaN	NaN	NaN
0.792	-15.599	27.2888	17.2195	0.15357	0.083985	-0.12305	-53.948	44.014	1268.656	-2.7257	1.9388	0.061132	NaN	NaN	NaN	NaN	NaN	NaN	NaN	NaN	NaN	NaN	NaN	NaN
0.794	-1.162	23.8373	18.8789	0.14795	0.091797	-0.11279	-24.731	52.958	1254.423	-2.6257	1.9231	0.053711	NaN	NaN	NaN	NaN	NaN	NaN	NaN	NaN	NaN	NaN	NaN	NaN
0.796	-21.287	13.7403	12.053	0.14453	0.097656	-0.10547	-5.997	90.417	1195.135	-2.5021	1.8703	0.04043	NaN	NaN	NaN	NaN	NaN	NaN	NaN	NaN	NaN	NaN	NaN	NaN
0.798	-25.562	23.8297	13.8623	0.14648	0.104	-0.10303	-38.389	80.383	1141.835	-2.3691	1.8086	0.017578	NaN	NaN	NaN	NaN	NaN	NaN	NaN	NaN	NaN	NaN	NaN	NaN
0.8	-12.6	42.4492	14.9533	0.14893	0.10693	-0.098145	-13.228	101.975	1120.294	-2.232	1.734	0.0079102	NaN	NaN	NaN	NaN	NaN	NaN	NaN	NaN	NaN	NaN	NaN	NaN
0.802	-22.323	49.282	27.3747	0.1482	0.10669	-0.09497	-32.859	134.4942	1097.087	-2.0984	1.6548	0.0042969	NaN	NaN	NaN	NaN	NaN	NaN	NaN	NaN	NaN	NaN	NaN	NaN
0.804	5.245	42.5779	29.40837	0.14746	0.10742	-0.095215	-78.6369	149.5759	1107.358	-1.9812	1.5735	0.00625	NaN	NaN	NaN	NaN	NaN	NaN	NaN	NaN	NaN	NaN	NaN	NaN
0.806	-6.209	32.23529	12.4477	0.15039	0.11768	-0.090332	-64.79661	195.577	1102.381	-1.8821	1.4923	0.0049805	NaN	NaN	NaN	NaN	NaN	NaN	NaN	NaN	NaN	NaN	NaN	NaN
0.808	-37.3542	19.958	17.5752	0.15234	0.12842	-0.089355	-110.248	193.161	1068.322	-1.7813	1.4121	0.0014648	NaN	NaN	NaN	NaN	NaN	NaN	NaN	NaN	NaN	NaN	NaN	NaN
0.81	-42.251	6.257	26.4454	0.14697	0.14941	-0.09375	-70.6456	154.317	1027.2161	-1.6931	1.3361	0.0024414	NaN	NaN	NaN	NaN	NaN	NaN	NaN	NaN	NaN	NaN	NaN	NaN
0.812	-19.382	2.1336	39.3929	0.15259	0.15674	-0.09253	-72.552	151.005	967.277	-1.5991	1.2673	-0.00097648	NaN	NaN	NaN	NaN	NaN	NaN	NaN	NaN	NaN	NaN	NaN	NaN
0.814	-20.502	30.6241	24.04695	0.16016	0.17432	-0.091309	-119.032	128.95	929.929	-1.51	1.2141	-0.022851	NaN	NaN	NaN	NaN	NaN	NaN	NaN	NaN	NaN	NaN	NaN	NaN
0.816	-38.836	37.303	18.1247	0.16357	0.18799	-0.085449	-51.31	147.3196	904.0484	-1.4258	1.1664	-0.019531	NaN	NaN	NaN	NaN	NaN	NaN	NaN	NaN	NaN	NaN	NaN	NaN
0.818	-15.528	41.208	20.521	0.16113	0.19727	-0.087402	-58.3843	184.3878	849.2599	-1.3496	1.1191	-0.024414	NaN	NaN	NaN	NaN	NaN	NaN	NaN	NaN	NaN	NaN	NaN	NaN
0.82	-24.353	26.805	13.652	0.16357	0.20508	-0.086914	-58.637	152.923	803.833	-1.2859	1.0883	-0.033789	NaN	NaN	NaN	NaN	NaN	NaN	NaN	NaN	NaN	NaN	NaN	NaN
0.822	-33.415	41.6263	18.3988	0.15966	0.20556	-0.084229	5.34	144.87	767.1637	-1.2338	1.0493	-0.037695	NaN	NaN	NaN	NaN	NaN	NaN	NaN	NaN	NaN	NaN	NaN	NaN
0.824	-24.959	35.4137	29.7358	0.16064	0.20898	-0.079102	-14.097	163.311	721.9594	-1.1979	1.0126	-0.044336	NaN	NaN	NaN	NaN	NaN	NaN	NaN	NaN	NaN	NaN	NaN	NaN
0.826	-29.45	30.8422	44.8838	0.16113	0.21338	-0.076172	23.623	179.282	732.6591	-1.1683	0.98018	-0.04248	NaN	NaN	NaN	NaN	NaN	NaN	NaN	NaN	NaN	NaN	NaN	NaN
0.828	-8.324	25.6505	29.9522	0.16504	0.2085	-0.075195	-6.126	224.324	695.894	-1.1343	0.94385	-0.040527	NaN	NaN	NaN	NaN	NaN	NaN	NaN	NaN	NaN	NaN	NaN	NaN
0.83	-18.538	30.3596	28.1208	0.1626	0.20557	-0.076172	-45.9772	210.351	647.7221	-1.1027	0.92031	-0.035058	NaN	NaN	NaN	NaN	NaN	NaN	NaN	NaN	NaN	NaN	NaN	NaN
0.832	-9.837	28.9043	20.8451	0.15405	0.20386	-0.075683	8.534	204.218	621.99	-1.0538	0.89716	-0.033594	NaN	NaN	NaN	NaN	NaN	NaN	NaN	NaN	NaN	NaN	NaN	NaN
0.834	-39.187	36.692	39.9238	0.1377	0.20752	-0.072266	-13.096	223.278	561.1461	-0.98154	0.86396	-0.030078	NaN	NaN	NaN	NaN	NaN	NaN	NaN	NaN	NaN	NaN	NaN	NaN
0.836	-0.183	40.269	41.345	0.12744	0.21631	-0.063965	-11.978	194.015	536.4476	-0.90654	0.83096	-0.032715	NaN	NaN	NaN	NaN	NaN	NaN	NaN	NaN	NaN	NaN	NaN	NaN
0.838	-29.2712	19.4828	55.987	0.11523	0.22119	-0.06543	20.075	184.801	499.2236	-0.83105	0.78516	-0.033691	NaN	NaN	NaN	NaN	NaN	NaN	NaN	NaN	NaN	NaN	NaN	NaN
0.84	-29.747	12.1084	74.602	0.10303	0.22803	-0.062988	-16.66	156.7894	438.81119	-0.75635	0.73194	-0.037695	NaN	NaN	NaN	NaN	NaN	NaN	NaN	NaN	NaN	NaN	NaN	NaN
0.842	1.282	21.6685	103.964	0.088135	0.23242	-0.065674	16.964	105.616	400.6244	-0.68389	0.68017	-0.039062	NaN	NaN	NaN	NaN	NaN	NaN	NaN	NaN	NaN	NaN	NaN	NaN
0.844	33.8339	47.8531	146.1843	0.067383	0.23926	-0.074707	12.847	122.094	361.07	-0.62686	0.63096	-0.033984	NaN	NaN	NaN	NaN	NaN	NaN	NaN	NaN	NaN	NaN	NaN	NaN
0.846	39.888	62.997	243.788	-0.00048828	0.26611	-0.071289	10.877	102.686	339.2275	-0.5627	0.58164	-0.038867	NaN	NaN	NaN	NaN	NaN	NaN	NaN	NaN	NaN	NaN	NaN	NaN
0.848	-4.6164	68.5918	330.642	-0.052246	0.28174	-0.072266	50.2407	71.931	324.6152	-0.50146	0.52783	-0.041992	NaN	NaN	NaN	NaN	NaN	NaN	NaN	NaN	NaN	NaN	NaN	NaN
0.85	60.298	56.8517	423.776	-0.20801	0.32666	-0.085938	9.181	122.07039	271.5454	-0.44052	0.47862	-0.043848	NaN	NaN	NaN	NaN	NaN	NaN	NaN	NaN	NaN	NaN	NaN	NaN
0.852	124.885	47.2389	573.632	-0.34717	0.37549	-0.096194	-17.795	117.4865	256.23	-0.38565	0.42871	-0.049317	NaN	NaN	NaN	NaN	NaN	NaN	NaN	NaN	NaN	NaN	NaN	NaN
0.854	70.345	53.335	740.4968	-0.5127	0.4248	-0.11719	-11.8	147.002	250.314	-0.33057	0.37911	-0.054786	NaN	NaN	NaN	NaN	NaN	NaN	NaN	NaN	NaN	NaN	NaN	NaN
0.856	48.522	28.885	837.10436	-0.79443	0.51514	-0.1582	-52.2706	162.302	211.8012	-0.28145	0.33135	-0.062304	NaN	NaN	NaN	NaN	NaN	NaN	NaN	NaN	NaN	NaN	NaN	NaN
0.858	63.139	-6.694	861.834	-0.9585	0.57959	-0.1792	-29.021	87.7895	219.446	-0.23486	0.28516	-0.067383	NaN	NaN	NaN	NaN	NaN	NaN	NaN	NaN	NaN	NaN	NaN	NaN
0.86	-17.091	16.426	905.9431	-1.334	0.75195	-0.20996	-22.925	86.6733	173.8152	-0.18135	0.23916	-0.078027	NaN	NaN	NaN	NaN	NaN	NaN	NaN	NaN	NaN	NaN	NaN	NaN
0.862	-62.336	46.413	978.124	-1.6697	0.93286	-0.20923	-37.3992	62.547	131.074	-0.13515	0.19727	-0.086621	NaN	NaN	NaN	NaN	NaN	NaN	NaN	NaN	NaN	NaN	NaN	NaN
0.864	1.631	55.622	1016.478	-2.019	1.1196	-0.18701	-11.826	57.6981	114.5803	-0.08086	0.15781	-0.10068	NaN	NaN	NaN	NaN	NaN	NaN	NaN	NaN	NaN	NaN	NaN	NaN
0.866	-22.164	63.76	994.3021	-2.4214	1.3735	-0.069824	-61.3332	117.847	51.198	-0.020703	0.12383	-0.11299	NaN	NaN	NaN	NaN	NaN	NaN	NaN	NaN	NaN	NaN	NaN	NaN
0.868	-35.028	48.873	980.711	-2.5547	1.498	0.023438	-55.4729	58.46	24.946	0.03418	0.089355	-0.12695	NaN	NaN	NaN	NaN	NaN	NaN	NaN	NaN	NaN	NaN	NaN	NaN
0.87	-6.7493	-22.653	985.932	-2.6753	1.7192	0.14111	-16.114	42.9364	29.39	0.086328	0.061719	-0.14287	NaN	NaN	NaN	NaN	NaN	NaN	NaN	NaN	NaN	NaN	NaN	NaN
0.872	16.60819	-63.7316	1022.989	-2.5991	1.8413	0.12378	-29.609	53.458	26.621	0.13281	0.037793	-0.1541	NaN	NaN	NaN	NaN	NaN	NaN	NaN	NaN	NaN	NaN	NaN	NaN
0.874	8.614	-44.105	1022.248	-2.4258	1.9355	0.067383	-16.117	2.211	48.4318	0.16797	0.019433	-0.16621	NaN	NaN	NaN	NaN	NaN	NaN	NaN	NaN	NaN	NaN	NaN	NaN
0.876	11.812	-24.956	1013.85	-2.0703	2.0098	-0.028809	-29.62	38.8287	66.1753	0.18945	0.0045898	-0.17725	NaN	NaN	NaN	NaN	NaN	NaN	NaN	NaN	NaN	NaN	NaN	NaN
0.878	1.934	-35.355	982.808	-1.8545	2.0117	-0.068848	-49.6094	53.27418	61.937	0.19531	-0.0053711	-0.18555	NaN	NaN	NaN	NaN	NaN	NaN	NaN	NaN	NaN	NaN	NaN	NaN
0.88	-79.7799	-42.894	976.108	-1.4102	1.9414	-0.14209	-11.32	32.068	81.322	0.1916	-0.0045898	-0.19229	NaN	NaN	NaN	NaN	NaN	NaN	NaN	NaN	NaN	NaN	NaN	NaN
0.882	-54.867	-51.507	961.829	-1.1428	1.8108	-0.16235	-38.904	86.726	42.027	0.17568	-0.0032227	-0.1918	NaN	NaN	NaN	NaN	NaN	NaN	NaN	NaN	NaN	NaN	NaN	NaN
0.884	-68.5427	-71.386	980.496	-0.96094	1.6602	-0.1709	-16.018	28.2738	10.5881	0.1499	-0.00048829	-0.19375	NaN	NaN	NaN	NaN	NaN	NaN	NaN	NaN	NaN	NaN	NaN	NaN
0.886	-97.891	-77.463	1007.492	-0.83301	1.4629	-0.1543	10.808	19.1228	9.784	0.1083	-0.0015625	-0.19512	NaN	NaN	NaN	NaN	NaN	NaN	NaN	NaN	NaN	NaN	NaN	NaN
0.888	-114.789	-87.951	987.1547	-0.7793	1.373	-0.13721	-44.6519	34.19043	-7.586	0.060547	0.0029297	-0.19434	NaN	NaN	NaN	NaN	NaN	NaN	NaN	NaN	NaN	NaN	NaN	NaN
0.89	-64.5698	-124.0825	979.673	-0.67578	1.2031	-0.11475	-27.823	-18.1112	24.39279	0.0076172	0.0074219	-0.19317	NaN	NaN	NaN	NaN	NaN	NaN	NaN	NaN	NaN	NaN	NaN	NaN
0.892	-22.664	-127.6	993.027	-0.61035	1.0635	-0.098387	-17.707	38.2655	10.175	-0.044922	0.013379	-0.19277	NaN	NaN	NaN	NaN	NaN	NaN	NaN	NaN	NaN	NaN	NaN	NaN
0.894	-8.90799999999999	-145.549	1056.844	-0.56592	0.92041	-0.085449	-9.597	30.144	-16.1438	-0.097269	0.021192	-0.18262	NaN	NaN	NaN	NaN	NaN	NaN	NaN	NaN	NaN	NaN	NaN	NaN
0.896	40.0072	-156.426	1095.0608	-0.54639	0.77002	-0.088379	19.521	-1.343	5.055	-0.14297	0.028711	-0.18125	NaN	NaN	NaN	NaN	NaN	NaN	NaN	NaN	NaN	NaN	NaN	NaN
0.898	18.3315	-174.639	1131.7112	-0.54932	0.71143	-0.088867	-30.704	62.635	-8.321	-0.18018	0.03418	-0.18066	NaN	NaN	NaN	NaN	NaN	NaN	NaN	NaN	NaN	NaN	NaN	NaN
0.9	36.335	-170.113	1168.00623	-0.56885	0.64502	-0.11768	-35.537	54.279	29.666	-0.20752	0.038574	-0.18086	NaN	NaN	NaN	NaN	NaN	NaN	NaN	NaN	NaN	NaN	NaN	NaN
0.902	21.61323	-153.3735	1186.367	-0.61621	0.65284	-0.14453	-12.684	97.812	41.18	-0.23506	0.04082	-0.17432	NaN	NaN	NaN	NaN	NaN	NaN	NaN	NaN	NaN	NaN	NaN	NaN
0.904	2.796	-151.807	1204.317	-0.70947	0.70557	-0.17285	-48.7756	110.257	31.7107	-0.26123	0.04043	-0.17666	NaN	NaN	NaN	NaN	NaN	NaN	NaN	NaN	NaN	NaN	NaN	NaN
0.906	9.596	-129.004	1215.4938	-0.89795	0.83252	-0.20459	-6.819	24.6757	53.339	-0.28145	0.04248	-0.17539	NaN	NaN	NaN	NaN	NaN	NaN	NaN	NaN	NaN	NaN	NaN	NaN
0.908	-21.515	-122.287	1230.5076	-0.99756	0.90381	-0.20752	-16.687	36.159	32.3597	-0.30127	0.044922	-0.17432	NaN	NaN	NaN	NaN	NaN	NaN	NaN	NaN	NaN	NaN	NaN	NaN
0.91	-29.2733	-127.17264	1256.2999	-1.1738	1.0361	-0.19531	-40.914	31.8658	12.142	-0.3168	0.047559	-0.16806	NaN	NaN	NaN	NaN	NaN	NaN	NaN	NaN	NaN	NaN	NaN	NaN
0.912	9.3868	-124.482	1283.273	-1.2764	1.1163	-0.19825	-11.731	9.629	28.1056	-0.32471	0.049902	-0.16416	NaN	NaN	NaN	NaN	NaN	NaN	NaN	NaN	NaN	NaN	NaN	NaN
0.914	52.684	-92.5466	1298.755	-1.3511	1.1782	-0.20508	-58.8908	74.1186	24.238	-0.32861	0.051855	-0.15674	NaN	NaN	NaN	NaN	NaN	NaN	NaN	NaN	NaN	NaN	NaN	NaN
0.916	82.35	-62.544	1318.5433	-1.4058	1.2407	-0.23779	-47.4437	22.862	30.029	-0.31865	0.054199	-0.15078	NaN	NaN	NaN	NaN	NaN	NaN	NaN	NaN	NaN	NaN	NaN	NaN
0.918	77.864	-62.576	1350.32206	-1.4116	1.2622	-0.25488	-9.966	6.7069	27.7446	-0.29346	0.052734	-0.14893	NaN	NaN	NaN	NaN	NaN	NaN	NaN	NaN	NaN	NaN	NaN	NaN
0.92	98.827	-59.835	1344.654	-1.4253	1.313	-0.29443	-39.412	38.0745	18.0496	-0.25761	0.045508	-0.14395	NaN	NaN	NaN	NaN	NaN	NaN	NaN	NaN	NaN	NaN	NaN	NaN
0.922	27.3672	-49.376	1362.4464	-1.4668	1.376	-0.33008	-20.797	3.7273	60.201	-0.20498	0.03291	-0.14199	NaN	NaN	NaN	NaN	NaN	NaN	NaN	NaN	NaN	NaN	NaN	NaN
0.924	37.703	-64.82391	1376.334	-1.4897	1.4126	-0.33838	-49.8698	62.07	63.493	-0.14327	0.016504	-0.14121	NaN	NaN	NaN	NaN	NaN	NaN	NaN	NaN	NaN	NaN	NaN	NaN
0.926	20.0153	-103.547	1389.313	-1.5527	1.4863	-0.35254	-53.6441	64.121	60.636	-0.082715	-0.0045899	-0.13926	NaN	NaN	NaN	NaN	NaN	NaN	NaN	NaN	NaN	NaN	NaN	NaN
0.928	19.755	-110.734	1398.25	-1.6025	1.5537	-0.37036	-25.921	12.7605	60.0103	-0.023438	-0.026855	-0.14258	NaN	NaN	NaN	NaN	NaN	NaN	NaN	NaN	NaN	NaN	NaN	NaN
0.93	-16.395	-100.6603	1383.8589	-1.6616	1.6294	-0.39355	-25.827	41.815	44.02719	0.036719	-0.052344	-0.14268	NaN	NaN	NaN	NaN	NaN	NaN	NaN	NaN	NaN	NaN	NaN	NaN
0.932	-34.796	-82.887	1365.87644	-1.7441	1.7402	-0.43652	-33.675	-2.7359	45.5577	0.099121	-0.074219	-0.13819	NaN	NaN	NaN	NaN	NaN	NaN	NaN	NaN	NaN	NaN	NaN	NaN
0.934	-8.4359	-91.529	1369.1696	-1.7866	1.7935	-0.4624	-2.758	24.0459	54.157	0.15655	-0.096484	-0.14053	NaN	NaN	NaN	NaN	NaN	NaN	NaN	NaN	NaN	NaN	NaN	NaN
0.936	-14.292	-100.3538	1384.527	-1.8965	1.877	-0.50684	-35.382	65.803	26.16064	0.21035	-0.11641	-0.14063	NaN	NaN	NaN	NaN	NaN	NaN	NaN	NaN	NaN	NaN	NaN	NaN
0.938	12.5309	-95.5485	1386.038	-1.9919	1.9387	-0.52002	-20.429	8.4674	20.1472	0.2583	-0.14355	-0.1416	NaN	NaN	NaN	NaN	NaN	NaN	NaN	NaN	NaN	NaN	NaN	NaN
0.94	31.788	-94.427	1396.6387	-2.0933	1.9927	-0.51514	-31.936	20.7567	26.4566	0.29697	-0.15996	-0.14473	NaN	NaN	NaN	NaN	NaN	NaN	NaN	NaN	NaN	NaN	NaN	NaN
0.942	21.1833	-77.476	1369.521	-2.1909	2.061	-0.49072	-36.481	-9.432	22.4104	0.33565	-0.17646	-0.14824	NaN	NaN	NaN	NaN	NaN	NaN	NaN	NaN	NaN	NaN	NaN	NaN
0.944	21.3337	-41.925	1345.783	-2.2183	2.0884	-0.47656	4.839	-58.839	54	0.35908	-0.18662	-0.14668	NaN	NaN	NaN	NaN	NaN	NaN	NaN	NaN	NaN	NaN	NaN	NaN
0.946	1.43	-12.5395	1337.0598	-2.2148	2.1191	-0.44287	-25.521	5.256	30.188	0.38018	-0.19004	-0.14941	NaN	NaN	NaN	NaN	NaN	NaN	NaN	NaN	NaN	NaN	NaN	NaN
0.948	-14.64	10.3927	1337.267	-2.1667	2.1155	-0.42163	-42.9267	-4.2082	40.6335	0.39502	-0.18555	-0.15039	NaN	NaN	NaN	NaN	NaN	NaN	NaN	NaN	NaN	NaN	NaN	NaN
0.95	-9.724	10.6632	1343.7404	-2.0894	2.0923	-0.40771	-21.238	27.002	37.0998	0.4003	-0.17725	-0.1544	NaN	NaN	NaN	NaN	NaN	NaN	NaN	NaN	NaN	NaN	NaN	NaN
0.952	12.062	2.171	1336.9181	-1.9448	2.0278	-0.39697	-32.7738	70.16	8.262	0.40215	-0.1709	-0.15909	NaN	NaN	NaN	NaN	NaN	NaN	NaN	NaN	NaN	NaN	NaN	NaN
0.954	21.021	3.345	1318.468	-1.8706	1.9888	-0.39502	-18.695	4.0282	12.539	0.39551	-0.15996	-0.15401	NaN	NaN	NaN	NaN	NaN	NaN	NaN	NaN	NaN	NaN	NaN	NaN
0.956	21.954	3.329	1306.998	-1.7339	1.9106	-0.39063	-19.54	18.05538	13.903	0.3876	-0.14453	-0.15527	NaN	NaN	NaN	NaN	NaN	NaN	NaN	NaN	NaN	NaN	NaN	NaN
0.958	47.68	6.5851	1296.756	-1.6521	1.8494	-0.39526	-15.376	24.1687	9.1689	0.37061	-0.13574	-0.15625	NaN	NaN	NaN	NaN	NaN	NaN	NaN	NaN	NaN	NaN	NaN	NaN
0.96	35.2532	11.0559	1270.932	-1.5933	1.7837	-0.396	-23.068	-8.53805	36.0821	0.35996	-0.11894	-0.15625	NaN	NaN	NaN	NaN	NaN	NaN	NaN	NaN	NaN	NaN	NaN	NaN
0.962	23.3436	9.2162	1263.639	-1.5449	1.7109	-0.3877	-31.621	58.548	13.809	0.34189	-0.10234	-0.15674	NaN	NaN	NaN	NaN	NaN	NaN	NaN	NaN	NaN	NaN	NaN	NaN
0.964	44.543	23.383	1266.416	-1.5273	1.6797	-0.38281	-21.537	15.5705	2.752	0.32861	-0.084375	-0.15596	NaN	NaN	NaN	NaN	NaN	NaN	NaN	NaN	NaN	NaN	NaN	NaN
0.966	90.662	24.666	1288.24	-1.5249	1.6313	-0.37256	-2.227	11.11494	9.618	0.31562	-0.064648	-0.15771	NaN	NaN	NaN	NaN	NaN	NaN	NaN	NaN	NaN	NaN	NaN	NaN
0.968	54.978	46.801	1278.117	-1.5349	1.6096	-0.3584	-38.5023	59.1036	-15.7256	0.30176	-0.04834	-0.15918	NaN	NaN	NaN	NaN	NaN	NaN	NaN	NaN	NaN	NaN	NaN	NaN
0.97	21.4007	57.061	1239.947	-1.5405	1.5903	-0.33691	-19.536	10.2441	13.4998	0.27773	-0.030371	-0.15615	NaN	NaN	NaN	NaN	NaN	NaN	NaN	NaN	NaN	NaN	NaN	NaN
0.972	11.738	56.2794	1198.7294	-1.5371	1.5723	-0.32031	-44.295	47.629	25.0726	0.25274	-0.0091801	-0.15898	NaN	NaN	NaN	NaN	NaN	NaN	NaN	NaN	NaN	NaN	NaN	NaN
0.974	31.766	67.411	1167.1842	-1.521	1.5591	-0.31201	-66.1744	56.691	17.501	0.22148	0.01621	-0.15898	NaN	NaN	NaN	NaN	NaN	NaN	NaN	NaN	NaN	NaN	NaN	NaN
0.976	0.516999999999999	91.255	1157.10061	-1.4658	1.5293	-0.29443	-18.59	2.12181	33.6268	0.19219	0.036328	-0.15869	NaN	NaN	NaN	NaN	NaN	NaN	NaN	NaN	NaN	NaN	NaN	NaN
0.978	14.133	99.87	1134.3782	-1.4187	1.5061	-0.28003	-27.179	50.063	7.77	0.15918	0.057129	-0.16016	NaN	NaN	NaN	NaN	NaN	NaN	NaN	NaN	NaN	NaN	NaN	NaN
0.98	5.4733	83.923	1110.6121	-1.3589	1.4751	-0.26709	-13.934	22.139	10.0182	0.12949	0.080274	-0.15596	NaN	NaN	NaN	NaN	NaN	NaN	NaN	NaN	NaN	NaN	NaN	NaN
0.982	-13.619	88.5859	1079.2749	-1.2871	1.4238	-0.25586	-2.874	36.2592	25.647	0.10469	0.10069	-0.158	NaN	NaN	NaN	NaN	NaN	NaN	NaN	NaN	NaN	NaN	NaN	NaN
0.984	-27.7009	102.125	1040.0881	-1.252	1.3896	-0.25	-60.4609	94.318	28.1955	0.082811	0.12022	-0.15918	NaN	NaN	NaN	NaN	NaN	NaN	NaN	NaN	NaN	NaN	NaN	NaN
0.986	-29.463	105.582	1003.8685	-1.1719	1.3359	-0.22119	-23.33	47.996	40.274	0.059374	0.13926	-0.16211	NaN	NaN	NaN	NaN	NaN	NaN	NaN	NaN	NaN	NaN	NaN	NaN
0.988	3.852	101.391	978.0229	-1.1203	1.2966	-0.21313	-19.132	60.548	39.3065	0.041016	0.16064	-0.16406	NaN	NaN	NaN	NaN	NaN	NaN	NaN	NaN	NaN	NaN	NaN	NaN
0.99	-19.038	102.808	925.6916	-1.062	1.2563	-0.19775	-37.201	49.0361	28.0976	0.030666	0.17705	-0.16904	NaN	NaN	NaN	NaN	NaN	NaN	NaN	NaN	NaN	NaN	NaN	NaN
0.992	-28.42	102.73927	914.87553	-0.98975	1.1978	-0.19043	-19.702	3.6994	23.5452	0.016603	0.19951	-0.16562	NaN	NaN	NaN	NaN	NaN	NaN	NaN	NaN	NaN	NaN	NaN	NaN
0.994	-28.4922	92.9851	907.1184	-0.94482	1.1665	-0.18555	-30.448	62.16	15.259	0.010353	0.22021	-0.1711	NaN	NaN	NaN	NaN	NaN	NaN	NaN	NaN	NaN	NaN	NaN	NaN
0.996	-47.2727	101.5875	882.221	-0.85303	1.0981	-0.17773	-57.8909	40.6645	18.7471	0.0015628	0.24081	-0.17441	NaN	NaN	NaN	NaN	NaN	NaN	NaN	NaN	NaN	NaN	NaN	NaN
0.998	-28.508	115.4247	836.729	-0.79272	1.0419	-0.17285	-31.147	32.988	57.7568	-0.014648	0.25684	-0.17969	NaN	NaN	NaN	NaN	NaN	NaN	NaN	NaN	NaN	NaN	NaN	NaN
1	-53.312	126.954	793.9243	-0.73242	0.99023	-0.16211	-32.602	62.375	47.8479	-0.025008	0.26944	-0.18203	NaN	NaN	NaN	NaN	NaN	NaN	NaN	NaN	NaN	NaN	NaN	NaN
1.002	-42.919	128.6624	747.812	-0.66553	0.93311	-0.15967	-1.826	-8.6938	76.899	-0.033891	0.28361	-0.18819	NaN	NaN	NaN	NaN	NaN	NaN	NaN	NaN	NaN	NaN	NaN	NaN
1.004	-45.434	130.3585	709.346	-0.63867	0.89844	-0.14893	-0.0459999999999994	1.455	92.1562	-0.040145	0.29924	-0.19327	NaN	NaN	NaN	NaN	NaN	NaN	NaN	NaN	NaN	NaN	NaN	NaN
1.006	-26.802	122.6114	677.094	-0.5918	0.84766	-0.12988	-42.211	6.362	107.6119	-0.041696	0.31203	-0.19737	NaN	NaN	NaN	NaN	NaN	NaN	NaN	NaN	NaN	NaN	NaN	NaN
1.008	-27.5135	118.0471	655.9815	-0.55298	0.81763	-0.11768	4.633	-22.077	194.0999	-0.035156	0.32764	-0.20508	NaN	NaN	NaN	NaN	NaN	NaN	NaN	NaN	NaN	NaN	NaN	NaN
1.01	-4.988	114.2359	621.6517	-0.52539	0.78613	-0.1001	19.8117	35	242.17	-0.022201	0.34149	-0.20722	NaN	NaN	NaN	NaN	NaN	NaN	NaN	NaN	NaN	NaN	NaN	NaN
1.012	9.909	125.2337	593.1432	-0.49316	0.73682	-0.072754	44.5284	-23.3732	416.641	-0.0047428	0.35709	-0.21025	NaN	NaN	NaN	NaN	NaN	NaN	NaN	NaN	NaN	NaN	NaN	NaN
1.014	-7.512	153.009	565.588	-0.47217	0.70996	-0.062012	87.368	-106.3578	597.614	0.016305	0.36571	-0.21337	NaN	NaN	NaN	NaN	NaN	NaN	NaN	NaN	NaN	NaN	NaN	NaN
1.016	-1.193	156.946	543.426	-0.43848	0.65918	-0.041992	36.8455	-117.5416	732.352	0.036624	0.3668	-0.22087	NaN	NaN	NaN	NaN	NaN	NaN	NaN	NaN	NaN	NaN	NaN	NaN
1.018	-5.402	151.788	512.3407	-0.41284	0.62036	-0.028808	72.684	-123.5573	848.335	0.057129	0.36426	-0.22168	NaN	NaN	NaN	NaN	NaN	NaN	NaN	NaN	NaN	NaN	NaN	NaN
1.02	12.493	129.9597	471.48362	-0.38818	0.58936	-0.016113	119.673	-44.921	910.037	0.069085	0.35921	-0.22525	NaN	NaN	NaN	NaN	NaN	NaN	NaN	NaN	NaN	NaN	NaN	NaN
1.022	-28.9518	123.847	444.689	-0.35059	0.54834	-0.0039063	62.5309	19.341	959.288	0.065622	0.35855	-0.23236	NaN	NaN	NaN	NaN	NaN	NaN	NaN	NaN	NaN	NaN	NaN	NaN
1.024	-19.495	121.752	415.633	-0.3335	0.52783	0.003418	-2.003	52.335	1037.391	0.047153	0.36245	-0.2367	NaN	NaN	NaN	NaN	NaN	NaN	NaN	NaN	NaN	NaN	NaN	NaN
1.026	-28.265	116.996	389.2001	-0.29688	0.49805	0.019043	20.142	105.156	1044.8551	-0.0027486	0.37474	-0.25153	NaN	NaN	NaN	NaN	NaN	NaN	NaN	NaN	NaN	NaN	NaN	NaN
1.028	-4.477	116.7579	363.37712	-0.26758	0.47413	0.027344	-12.301	47.154	1061.0699	-0.097656	0.39209	-0.26221	NaN	NaN	NaN	NaN	NaN	NaN	NaN	NaN	NaN	NaN	NaN	NaN
1.03	-18.127	106.1192	349.2582	-0.24365	0.44434	0.037109	22.131	1.006	1159.454	-0.25172	0.40837	-0.27526	NaN	NaN	NaN	NaN	NaN	NaN	NaN	NaN	NaN	NaN	NaN	NaN
1.032	-15.539	104.691	320.2559	-0.20361	0.40234	0.047852	24.536	-57.026	1204.678	-0.47568	0.41968	-0.28916	NaN	NaN	NaN	NaN	NaN	NaN	NaN	NaN	NaN	NaN	NaN	NaN
1.034	-6.585	102.595	303.1322	-0.18604	0.38574	0.047852	38.5272	-167.298	1191.649	-0.81361	0.42728	-0.30159	NaN	NaN	NaN	NaN	NaN	NaN	NaN	NaN	NaN	NaN	NaN	NaN
1.036	-16.438	110.653	280.796078	-0.15723	0.34033	0.068359	-5.041	-151.562	1160.747	-1.2991	0.48584	-0.31543	NaN	NaN	NaN	NaN	NaN	NaN	NaN	NaN	NaN	NaN	NaN	NaN
1.038	-31.617	113.5434	259.7545	-0.13355	0.31617	0.084228	-62.2177	-111.397	1111.678	-1.9331	0.6499	-0.30322	NaN	NaN	NaN	NaN	NaN	NaN	NaN	NaN	NaN	NaN	NaN	NaN
1.04	-21.966	103.359	235.0536	-0.10742	0.29004	0.090332	-17.516	-101.81	1138.868	-2.6795	0.96779	-0.23183	NaN	NaN	NaN	NaN	NaN	NaN	NaN	NaN	NaN	NaN	NaN	NaN
1.042	-28.04	104.689	200.6207	-0.064453	0.25391	0.087402	-24.859	-53.4	1142.793	-3.2685	1.3374	-0.13417	NaN	NaN	NaN	NaN	NaN	NaN	NaN	NaN	NaN	NaN	NaN	NaN
1.044	-52.6106	109.098	170.1844	-0.041992	0.22803	0.076172	-81.6544	-106.92	1161.542	-3.4022	1.6159	-0.053951	NaN	NaN	NaN	NaN	NaN	NaN	NaN	NaN	NaN	NaN	NaN	NaN
1.046	-59.055	102.5879	179.50269	0.0053711	0.19043	0.064453	-128.709	-178.9132	1204.437	-3.1417	1.8312	-0.0072192	NaN	NaN	NaN	NaN	NaN	NaN	NaN	NaN	NaN	NaN	NaN	NaN
1.048	-48.3195	102.3047	162.851	0.030518	0.17041	0.070313	-183.468	-181.292	1254.56	-2.8491	2.0337	-0.03125	NaN	NaN	NaN	NaN	NaN	NaN	NaN	NaN	NaN	NaN	NaN	NaN
1.05	-48.6192	107.5274	137.0345	0.048828	0.16553	0.081543	-139.085	-173.313	1300.046	-2.7207	2.1868	-0.11254	NaN	NaN	NaN	NaN	NaN	NaN	NaN	NaN	NaN	NaN	NaN	NaN
1.052	-15.814	108.596	105.4337	0.066895	0.16064	0.092773	-40.089	-101.758	1299.4	-2.5377	2.1806	-0.17765	NaN	NaN	NaN	NaN	NaN	NaN	NaN	NaN	NaN	NaN	NaN	NaN
1.054	-21.309	100.319	94.32	0.074707	0.1582	0.091797	-36.401	-73.8863	1291.7472	-2.268	2.0094	-0.26918	NaN	NaN	NaN	NaN	NaN	NaN	NaN	NaN	NaN	NaN	NaN	NaN
1.056	-29.174	85.484	76.213	0.086426	0.1543	0.093262	-3.476	-111.9011	1318.688	-1.9729	1.791	-0.33038	NaN	NaN	NaN	NaN	NaN	NaN	NaN	NaN	NaN	NaN	NaN	NaN
1.058	-32.601	80.4721	53.929	0.095459	0.14844	0.09375	-37.2079	-129.6555	1379.353	-1.7319	1.6313	-0.36133	NaN	NaN	NaN	NaN	NaN	NaN	NaN	NaN	NaN	NaN	NaN	NaN
1.06	-22.099	79.182	59.007	0.10547	0.14404	0.095703	-52.426	-200.89	1477.1832	-1.6056	1.5704	-0.36793	NaN	NaN	NaN	NaN	NaN	NaN	NaN	NaN	NaN	NaN	NaN	NaN
1.062	-20.861	58.4718	65.4194	0.11475	0.13477	0.09668	-3.201	-200.697	1527.217	-1.5383	1.557	-0.35304	NaN	NaN	NaN	NaN	NaN	NaN	NaN	NaN	NaN	NaN	NaN	NaN
1.064	-33.9187	53.222	79.15348	0.11621	0.13281	0.09668	-31.8033	-148.4967	1472.2301	-1.4631	1.5575	-0.31956	NaN	NaN	NaN	NaN	NaN	NaN	NaN	NaN	NaN	NaN	NaN	NaN
1.066	-10.086	52.67	61.2745	0.11963	0.12549	0.10449	-46.1669213	-144.8547	1449.847	-1.3405	1.5248	-0.30824	NaN	NaN	NaN	NaN	NaN	NaN	NaN	NaN	NaN	NaN	NaN	NaN
1.068	-39.919	57.094	55.5828	0.11475	0.11182	0.104	-39.058	-116.631	1436.914	-1.1836	1.4443	-0.32422	NaN	NaN	NaN	NaN	NaN	NaN	NaN	NaN	NaN	NaN	NaN	NaN
1.07	-23.714	61.587	55.476	0.11084	0.10791	0.1084	-57.6609	-96.909	1461.295	-1.0531	1.3411	-0.34723	NaN	NaN	NaN	NaN	NaN	NaN	NaN	NaN	NaN	NaN	NaN	NaN
1.072	-14.687	55.873	43.5566	0.10059	0.099609	0.11182	25.9179	-97.0425	1508.469	-0.96902	1.2541	-0.37733	NaN	NaN	NaN	NaN	NaN	NaN	NaN	NaN	NaN	NaN	NaN	NaN
1.074	13.798	44.1984	22.2905	0.091797	0.097412	0.11596	56.72	-52.6656	1504.86	-0.97653	1.196	-0.39902	NaN	NaN	NaN	NaN	NaN	NaN	NaN	NaN	NaN	NaN	NaN	NaN
1.076	-6.556	17.8417	32.1838	0.081543	0.097656	0.12109	68.69	-47.1036	1513.55542	-1.0428	1.1549	-0.38894	NaN	NaN	NaN	NaN	NaN	NaN	NaN	NaN	NaN	NaN	NaN	NaN
1.078	0.465000000000003	6.768	36.268	0.076172	0.10498	0.13037	115.498	-31.822	1522.059	-1.1631	1.1641	-0.37451	NaN	NaN	NaN	NaN	NaN	NaN	NaN	NaN	NaN	NaN	NaN	NaN
1.08	-9.514	16.5742	46.1627	0.07666	0.1084	0.13184	81.7611	23.255	1526.923	-1.2961	1.1763	-0.35285	NaN	NaN	NaN	NaN	NaN	NaN	NaN	NaN	NaN	NaN	NaN	NaN
1.082	2.832	38.09	40.9547	0.070313	0.10547	0.14063	114.063	15.454	1531.847	-1.4284	1.1953	-0.33088	NaN	NaN	NaN	NaN	NaN	NaN	NaN	NaN	NaN	NaN	NaN	NaN
1.084	-13.583	43.16949	41.5323	0.073974	0.10376	0.13916	122.595	-7.521	1528.284	-1.5437	1.2285	-0.31954	NaN	NaN	NaN	NaN	NaN	NaN	NaN	NaN	NaN	NaN	NaN	NaN
1.086	-12.751	37.5581	17.1528	0.07959	0.095215	0.14795	31.048	-44.4542	1525.563	-1.6297	1.2651	-0.32254	NaN	NaN	NaN	NaN	NaN	NaN	NaN	NaN	NaN	NaN	NaN	NaN
1.088	-5.555	35.803	12.7631	0.088867	0.088867	0.14551	1.906	-107.4312	1521.426	-1.6968	1.2954	-0.34521	NaN	NaN	NaN	NaN	NaN	NaN	NaN	NaN	NaN	NaN	NaN	NaN
1.09	-28.77	30.585	22.5144	0.091309	0.089355	0.14404	-19.8896	-87.6002	1520.1375	-1.7573	1.3171	-0.35996	NaN	NaN	NaN	NaN	NaN	NaN	NaN	NaN	NaN	NaN	NaN	NaN
1.092	-18.915	29.885	43.7754	0.10254	0.081543	0.14795	-2.781	-86.1826	1506.072	-1.8144	1.345	-0.37218	NaN	NaN	NaN	NaN	NaN	NaN	NaN	NaN	NaN	NaN	NaN	NaN
1.094	-21.152	7.3208	48.7645	0.10791	0.07666	0.15088	57.4712	-73.0414	1492.665	-1.8648	1.3618	-0.39717	NaN	NaN	NaN	NaN	NaN	NaN	NaN	NaN	NaN	NaN	NaN	NaN
1.096	-30.997	14.494199	29.2769	0.11719	0.075195	0.15381	19.305	-49.3405	1461.82298	-1.9121	1.393	-0.4125	NaN	NaN	NaN	NaN	NaN	NaN	NaN	NaN	NaN	NaN	NaN	NaN
1.098	-31.848	10.1273	30.4626	0.12939	0.066406	0.15674	26.5116	-73.126	1435.9896	-1.9688	1.4375	-0.43359	NaN	NaN	NaN	NaN	NaN	NaN	NaN	NaN	NaN	NaN	NaN	NaN
1.1	-23.455	19.5125	25.7631	0.13672	0.060547	0.15674	41.8842	-44.065	1462.099	-2.0173	1.489	-0.45957	NaN	NaN	NaN	NaN	NaN	NaN	NaN	NaN	NaN	NaN	NaN	NaN
1.102	-16.933	25.6636	35.0825	0.15576	0.053711	0.15869	16.3735	2.682	1471.65	-2.0651	1.5368	-0.4831	NaN	NaN	NaN	NaN	NaN	NaN	NaN	NaN	NaN	NaN	NaN	NaN
1.104	-42.903	36.147352	14.23644	0.17261	0.04956	0.16162	63.706	7.337	1462.196	-2.1296	1.584	-0.50537	NaN	NaN	NaN	NaN	NaN	NaN	NaN	NaN	NaN	NaN	NaN	NaN
1.106	-35.0245	26.664	10.2307	0.19238	0.041016	0.15869	47.387	63.124	1386.1877	-2.2216	1.6321	-0.5126	NaN	NaN	NaN	NaN	NaN	NaN	NaN	NaN	NaN	NaN	NaN	NaN
1.108	-30.321	4.2922	18.3252	0.2168	0.026855	0.15039	-34.217	81.543	1317.386	-2.3296	1.6997	-0.51025	NaN	NaN	NaN	NaN	NaN	NaN	NaN	NaN	NaN	NaN	NaN	NaN
1.11	-45.93	0.638	26.3696	0.22754	0.022461	0.1499	-21.7228	89.945	1292.642	-2.4165	1.7757	-0.49355	NaN	NaN	NaN	NaN	NaN	NaN	NaN	NaN	NaN	NaN	NaN	NaN
1.112	-14.458	11.9346	33.8682	0.24463	0.023438	0.1416	-52.555	127.603	1289.552	-2.4773	1.8505	-0.46104	NaN	NaN	NaN	NaN	NaN	NaN	NaN	NaN	NaN	NaN	NaN	NaN
1.114	-26.632	25.2972	34.4931	0.25415	0.024903	0.14233	-9.99125	107.491	1313.25	-2.4917	1.9095	-0.43838	NaN	NaN	NaN	NaN	NaN	NaN	NaN	NaN	NaN	NaN	NaN	NaN
1.116	-23.044	35.995	27.966	0.25635	0.030762	0.14307	42.137	87.52	1274.5305	-2.4674	1.9334	-0.40195	NaN	NaN	NaN	NaN	NaN	NaN	NaN	NaN	NaN	NaN	NaN	NaN
1.118	-47.1883	43.724	23.5007	0.25586	0.034668	0.13818	8.188	85.897	1198.897	-2.377	1.9258	-0.37695	NaN	NaN	NaN	NaN	NaN	NaN	NaN	NaN	NaN	NaN	NaN	NaN
1.12	-13.44	32.338	22.7533	0.25635	0.041504	0.13574	33.692	59.813	1175.991	-2.2253	1.8802	-0.3583	NaN	NaN	NaN	NaN	NaN	NaN	NaN	NaN	NaN	NaN	NaN	NaN
1.122	-27.929	18.0279	13.6907	0.25391	0.040527	0.13965	20.999	97.1817	1147.084	-2.053	1.8025	-0.34707	NaN	NaN	NaN	NaN	NaN	NaN	NaN	NaN	NaN	NaN	NaN	NaN
1.124	-8.538	20.0541	21.85	0.25683	0.042481	0.13697	15.652	121.562	1142.3224	-1.8753	1.7083	-0.33731	NaN	NaN	NaN	NaN	NaN	NaN	NaN	NaN	NaN	NaN	NaN	NaN
1.126	8.836	17.1525	14.4323	0.25244	0.043457	0.13916	53.944	104.661	1148.914	-1.7222	1.6024	-0.33086	NaN	NaN	NaN	NaN	NaN	NaN	NaN	NaN	NaN	NaN	NaN	NaN
1.128	-11.144	15.7171	3.517	0.24951	0.043457	0.13672	24.43	139.774	1104.3319	-1.605	1.5024	-0.32764	NaN	NaN	NaN	NaN	NaN	NaN	NaN	NaN	NaN	NaN	NaN	NaN
1.13	-11.644	14.2477	28.6646	0.24658	0.046387	0.13379	11.5837	104.685	1077.921	-1.526	1.4142	-0.31484	NaN	NaN	NaN	NaN	NaN	NaN	NaN	NaN	NaN	NaN	NaN	NaN
1.132	-13.015	16.4071	32.48404	0.23584	0.05127	0.13086	18.63113	129.5145	1056.473	-1.4752	1.3461	-0.30498	NaN	NaN	NaN	NaN	NaN	NaN	NaN	NaN	NaN	NaN	NaN	NaN
1.134	15.671	16.8954	33.2781	0.2229	0.065918	0.12793	3.184	190.641	997.4625	-1.4522	1.2911	-0.30264	NaN	NaN	NaN	NaN	NaN	NaN	NaN	NaN	NaN	NaN	NaN	NaN
1.136	-12.734	18.5116	33.2785	0.20703	0.07959	0.11914	20.258	180.123	957.493	-1.4445	1.2457	-0.28731	NaN	NaN	NaN	NaN	NaN	NaN	NaN	NaN	NaN	NaN	NaN	NaN
1.138	-15.528	32.804	30.4964	0.18359	0.10059	0.11768	5.534	213.111	888.572	-1.4409	1.2144	-0.27295	NaN	NaN	NaN	NaN	NaN	NaN	NaN	NaN	NaN	NaN	NaN	NaN
1.14	-3.826	27.537	12.6362	0.17529	0.11377	0.11865	-6.909	178.33	823.896	-1.4334	1.1889	-0.25761	NaN	NaN	NaN	NaN	NaN	NaN	NaN	NaN	NaN	NaN	NaN	NaN
1.142	-25.062	33.7401	8.378	0.14258	0.13135	0.12256	20.032	144.149	823.375	-1.4148	1.1583	-0.23877	NaN	NaN	NaN	NaN	NaN	NaN	NaN	NaN	NaN	NaN	NaN	NaN
1.144	-28.966	29.48538	18.9658	0.12183	0.14551	0.1228	-13.095	203.984	800.8953	-1.3847	1.1251	-0.22705	NaN	NaN	NaN	NaN	NaN	NaN	NaN	NaN	NaN	NaN	NaN	NaN
1.146	-24.853	18.2658	23.6817	0.10205	0.16309	0.13135	-1.065	197.3062	769.476	-1.3479	1.0849	-0.21054	NaN	NaN	NaN	NaN	NaN	NaN	NaN	NaN	NaN	NaN	NaN	NaN
1.148	-10.189	19.1164	23.3316	0.067383	0.18018	0.13672	-13.864	221.9348	712.1246	-1.2925	1.0415	-0.18945	NaN	NaN	NaN	NaN	NaN	NaN	NaN	NaN	NaN	NaN	NaN	NaN
1.15	-36.934	30.9791	8.7682	0.055664	0.18506	0.14063	-33.4902	236.6183	639.115	-1.2281	0.99297	-0.17266	NaN	NaN	NaN	NaN	NaN	NaN	NaN	NaN	NaN	NaN	NaN	NaN
1.152	-33.498	43.681	25.104	0.022461	0.20313	0.14551	-22.927	193.0539	617.235	-1.1456	0.93955	-0.1585	NaN	NaN	NaN	NaN	NaN	NaN	NaN	NaN	NaN	NaN	NaN	NaN
1.154	-17.751	41.793	26.0435	0.0065916	0.21313	0.14453	-32.886	219.037	618.738	-1.06	0.88291	-0.14443	NaN	NaN	NaN	NaN	NaN	NaN	NaN	NaN	NaN	NaN	NaN	NaN
1.156	-30.744	33.1689	16.3733	-0.0063477	0.23193	0.14453	-30.137	196.44	608.938	-0.97754	0.82676	-0.13691	NaN	NaN	NaN	NaN	NaN	NaN	NaN	NaN	NaN	NaN	NaN	NaN
1.158	-38.0981	28.2596	6.48708	-0.012695	0.24902	0.15088	-42.563	156.239	584.752	-0.89404	0.76807	-0.12891	NaN	NaN	NaN	NaN	NaN	NaN	NaN	NaN	NaN	NaN	NaN	NaN
1.16	-42.36557	11.0439	13.5825	-0.010742	0.25879	0.15137	-84.964	194.982	513.576569	-0.82344	0.71153	-0.11856	NaN	NaN	NaN	NaN	NaN	NaN	NaN	NaN	NaN	NaN	NaN	NaN
1.162	-28.34	11.99	24.6625	-0.003418	0.27832	0.15674	-86.183	141.3096	450.066	-0.75117	0.65801	-0.10986	NaN	NaN	NaN	NaN	NaN	NaN	NaN	NaN	NaN	NaN	NaN	NaN
1.164	-43.395	29.3346	29.2845	0.0043945	0.29029	0.16065	-56.769	145.66717	424.426	-0.6918	0.60098	-0.098144	NaN	NaN	NaN	NaN	NaN	NaN	NaN	NaN	NaN	NaN	NaN	NaN
1.166	-24.136	48.087	23.88161	0.011719	0.2959	0.16455	-53.994	173.6362	369.628	-0.63711	0.55234	-0.08291	NaN	NaN	NaN	NaN	NaN	NaN	NaN	NaN	NaN	NaN	NaN	NaN
1.168	-28.176	42.114	26.3519	0.018555	0.29102	0.1748	-44.582	115.774	359.409	-0.58984	0.50391	-0.061523	NaN	NaN	NaN	NaN	NaN	NaN	NaN	NaN	NaN	NaN	NaN	NaN
1.17	-11.887	31.09	29.63633	0.024414	0.28906	0.17383	-47.793	146.896	322.8509	-0.54698	0.45361	-0.041113	NaN	NaN	NaN	NaN	NaN	NaN	NaN	NaN	NaN	NaN	NaN	NaN
1.172	-18.189	22.9876	19.9931	0.03418	0.29004	0.18555	-61.737	130.502	272.7093	-0.5043	0.40703	-0.016992	NaN	NaN	NaN	NaN	NaN	NaN	NaN	NaN	NaN	NaN	NaN	NaN
1.174	-28.843	22.4633	30.3033	0.045166	0.29028	0.19287	-18.231	128.5695	265.8348	-0.46172	0.3582	0.0001953	NaN	NaN	NaN	NaN	NaN	NaN	NaN	NaN	NaN	NaN	NaN	NaN
1.176	-5.946	28.807	29.2242	0.054688	0.28955	0.19629	-30.037	204.323	225.815	-0.42119	0.30889	0.012598	NaN	NaN	NaN	NaN	NaN	NaN	NaN	NaN	NaN	NaN	NaN	NaN
1.178	-12.404	33.7914	27.9072	0.076172	0.28271	0.20166	-19.298	150.834	220.5556	-0.38232	0.25977	0.016602	NaN	NaN	NaN	NaN	NaN	NaN	NaN	NaN	NaN	NaN	NaN	NaN
1.18	-0.0509999999999948	36.0577	19.542	0.084961	0.27979	0.19922	-18.629	145.503	202.3721	-0.34385	0.21719	0.025586	NaN	NaN	NaN	NaN	NaN	NaN	NaN	NaN	NaN	NaN	NaN	NaN
1.182	-29.992	30.8182	14.955	0.1084	0.27588	0.21045	-58.4852	145.75	145.051	-0.31162	0.17227	0.03125	NaN	NaN	NaN	NaN	NaN	NaN	NaN	NaN	NaN	NaN	NaN	NaN
1.184	-7.531	39.7516	36.9563	0.12964	0.27075	0.21265	-46.9721	78.5635	144.2055	-0.27802	0.13711	0.036328	NaN	NaN	NaN	NaN	NaN	NaN	NaN	NaN	NaN	NaN	NaN	NaN
1.186	-3.693	35.0717	65.6133	0.14746	0.27148	0.22705	-35.791	112.495	145.777	-0.25469	0.10537	0.043555	NaN	NaN	NaN	NaN	NaN	NaN	NaN	NaN	NaN	NaN	NaN	NaN
1.188	-9.163	16.7953	118.0015	0.16846	0.26172	0.22217	-31.005	86.0417	114.785	-0.23047	0.067383	0.057129	NaN	NaN	NaN	NaN	NaN	NaN	NaN	NaN	NaN	NaN	NaN	NaN
1.19	-31.851	8.061	175.911	0.18066	0.26123	0.22412	-12.957	31.8405	94.2564	-0.20801	0.045117	0.069531	NaN	NaN	NaN	NaN	NaN	NaN	NaN	NaN	NaN	NaN	NaN	NaN
1.192	-11.956	13.0675	234.538	0.19629	0.25244	0.19629	-37.08	74.816	36.478	-0.17998	0.017481	0.080762	NaN	NaN	NaN	NaN	NaN	NaN	NaN	NaN	NaN	NaN	NaN	NaN
1.194	-4.184	-1.0468	277.84	0.18897	0.26562	0.15479	-22.903	16.554	45.332	-0.14717	-0.0012695	0.087793	NaN	NaN	NaN	NaN	NaN	NaN	NaN	NaN	NaN	NaN	NaN	NaN
1.196	-86.541	-51.1614	302.6965	0.1499	0.2793	0.098633	-6.369	20.434	91.5613	-0.11191	-0.017481	0.091504	NaN	NaN	NaN	NaN	NaN	NaN	NaN	NaN	NaN	NaN	NaN	NaN
1.198	-92.199	-85.18	313.052	0.037109	0.33643	0.04541	-14.239	42.717	87.545	-0.074219	-0.037109	0.092285	NaN	NaN	NaN	NaN	NaN	NaN	NaN	NaN	NaN	NaN	NaN	NaN
1.2	-50.779	-88.667	338.574	-0.046387	0.375	0.034668	6.865	-19.3617	84.558	-0.040136	-0.04541	0.087402	NaN	NaN	NaN	NaN	NaN	NaN	NaN	NaN	NaN	NaN	NaN	NaN
1.202	-69.88	-40.167	433.0814	-0.25	0.46289	0.038574	-22.937	45.8149	34.2703	-0.012304	-0.05459	0.082422	NaN	NaN	NaN	NaN	NaN	NaN	NaN	NaN	NaN	NaN	NaN	NaN
1.204	-125.4563	5.7626	535.7309	-0.39991	0.51855	0.046875	-49.137	42.6066	1.223	0.019336	-0.061621	0.075781	NaN	NaN	NaN	NaN	NaN	NaN	NaN	NaN	NaN	NaN	NaN	NaN
1.206	-118.68553	22.4184	607.507	-0.53271	0.57471	0.046387	-33.098	33.1167	28.3026	0.041309	-0.066015	0.071192	NaN	NaN	NaN	NaN	NaN	NaN	NaN	NaN	NaN	NaN	NaN	NaN
1.208	-87.856	13.999	682.17	-0.69531	0.66699	0.010742	-43.305	100.396	13.2608	0.053711	-0.065918	0.067383	NaN	NaN	NaN	NaN	NaN	NaN	NaN	NaN	NaN	NaN	NaN	NaN
1.21	-101.4915	39.09	760.234	-0.82715	0.76026	-0.04126	-43.5574	31.3466	17.7965	0.055664	-0.070215	0.065723	NaN	NaN	NaN	NaN	NaN	NaN	NaN	NaN	NaN	NaN	NaN	NaN
1.212	-50.167	60.018	874.029	-0.96924	0.8501	-0.10059	-34.663	21.7166	15.051	0.045508	-0.06377	0.067578	NaN	NaN	NaN	NaN	NaN	NaN	NaN	NaN	NaN	NaN	NaN	NaN
1.214	-59.867	94.187	1011.894	-1.1973	0.98828	-0.16016	-43.95906	51.065	-4.814	0.025586	-0.05791	0.067188	NaN	NaN	NaN	NaN	NaN	NaN	NaN	NaN	NaN	NaN	NaN	NaN
1.216	-38.967	126.26	1124.312	-1.3418	1.0703	-0.17822	-26.076	10.1895	8.167	-0.0012694	-0.057812	0.064648	NaN	NaN	NaN	NaN	NaN	NaN	NaN	NaN	NaN	NaN	NaN	NaN
1.218	-47.507	130.363	1161.962	-1.6875	1.2539	-0.17041	-27.895	72.692	-14.5921	-0.033691	-0.055176	0.065918	NaN	NaN	NaN	NaN	NaN	NaN	NaN	NaN	NaN	NaN	NaN	NaN
1.22	-20.3021	86.5808	1173.1009	-1.9814	1.4023	-0.12232	-42.951	54.658	-4.226	-0.071094	-0.050977	0.063867	NaN	NaN	NaN	NaN	NaN	NaN	NaN	NaN	NaN	NaN	NaN	NaN
1.222	-20.11475	27.17	1189.3296	-2.2754	1.5508	-0.05957	-29.522	13.0484	7.3082	-0.10977	-0.045606	0.06543	NaN	NaN	NaN	NaN	NaN	NaN	NaN	NaN	NaN	NaN	NaN	NaN
1.224	-75.373	-26.0269	1216.2718	-2.5718	1.7427	0.010254	-37.42	61.968	7.965	-0.14414	-0.034668	0.063086	NaN	NaN	NaN	NaN	NaN	NaN	NaN	NaN	NaN	NaN	NaN	NaN
1.226	-47.7444	-77.481	1216.61831	-2.6602	1.8203	0.032715	-22.1349	13.7531	25.8873	-0.17783	-0.020508	0.064844	NaN	NaN	NaN	NaN	NaN	NaN	NaN	NaN	NaN	NaN	NaN	NaN
1.228	-49.9866	-117.413	1200.1399	-2.666	1.9824	0.075684	-32.421	28.2123	53.778	-0.21045	-0.0039063	0.071777	NaN	NaN	NaN	NaN	NaN	NaN	NaN	NaN	NaN	NaN	NaN	NaN
1.23	-10.2543	-120.315	1216.4227	-2.5622	2.0852	0.082276	-41.026	79.069	44.5896	-0.23721	0.016015	0.08418	NaN	NaN	NaN	NaN	NaN	NaN	NaN	NaN	NaN	NaN	NaN	NaN
1.232	51.953	-124.328	1212.071	-2.3921	2.1587	0.098145	-30.958	22.1362	42.3909	-0.25801	0.035058	0.09414	NaN	NaN	NaN	NaN	NaN	NaN	NaN	NaN	NaN	NaN	NaN	NaN
1.234	90.363	-130.756	1242.9463	-2.1147	2.1587	0.13281	-39.784	63.149	30.691	-0.267	0.050293	0.10859	NaN	NaN	NaN	NaN	NaN	NaN	NaN	NaN	NaN	NaN	NaN	NaN
1.236	60.685	-120.609	1277.3171	-1.9917	2.104	0.12744	-39.132	46.074	16.811	-0.26377	0.06748	0.12822	NaN	NaN	NaN	NaN	NaN	NaN	NaN	NaN	NaN	NaN	NaN	NaN
1.238	13.32	-92.473	1329.966	-1.8179	1.9556	0.12744	-8.273	12.09169	53.824	-0.25391	0.081543	0.14551	NaN	NaN	NaN	NaN	NaN	NaN	NaN	NaN	NaN	NaN	NaN	NaN
1.24	61.3059	-67.013	1372.455	-1.7373	1.8212	0.12915	-10.635	71.886	42.0601	-0.22979	0.096582	0.15586	NaN	NaN	NaN	NaN	NaN	NaN	NaN	NaN	NaN	NaN	NaN	NaN
1.242	69.9543	-37.905	1382.733	-1.6675	1.688	0.14209	-30.236	27.9523	43.763	-0.19179	0.099707	0.16797	NaN	NaN	NaN	NaN	NaN	NaN	NaN	NaN	NaN	NaN	NaN	NaN
1.244	57.5966	-17.635	1382.987	-1.5815	1.5278	0.15967	-18.261	44.6581	38.8216	-0.13867	0.099707	0.16368	NaN	NaN	NaN	NaN	NaN	NaN	NaN	NaN	NaN	NaN	NaN	NaN
1.246	32.5562	-24.503	1381.7856	-1.543	1.4648	0.15723	-23.065	74.641	13.878	-0.07461	0.096484	0.16963	NaN	NaN	NaN	NaN	NaN	NaN	NaN	NaN	NaN	NaN	NaN	NaN
1.248	-0.623999999999999	-32.705	1372.5944	-1.4673	1.3618	0.16406	-20.988	14.7064	31.843	-0.012695	0.093262	0.17041	NaN	NaN	NaN	NaN	NaN	NaN	NaN	NaN	NaN	NaN	NaN	NaN
1.25	-14.8569	-43.904	1318.471	-1.445	1.2971	0.15625	3.27	58.875	46.77	0.046289	0.082618	0.16836	NaN	NaN	NaN	NaN	NaN	NaN	NaN	NaN	NaN	NaN	NaN	NaN
1.252	-45.268	-70.413	1302.535	-1.4507	1.2495	0.14941	-25.915	30.7665	53.5069	0.099806	0.066016	0.17031	NaN	NaN	NaN	NaN	NaN	NaN	NaN	NaN	NaN	NaN	NaN	NaN
1.254	-2.318	-111.9057	1297.035	-1.4961	1.2227	0.15674	-17.061	-5.0138	77.216	0.14941	0.048828	0.16875	NaN	NaN	NaN	NaN	NaN	NaN	NaN	NaN	NaN	NaN	NaN	NaN
1.256	-9.085	-145.589	1336.537	-1.521	1.2134	0.16699	-39.1507	46.028	55.6672	0.19072	0.037793	0.16377	NaN	NaN	NaN	NaN	NaN	NaN	NaN	NaN	NaN	NaN	NaN	NaN
1.258	9.935	-147.613	1378.292	-1.5605	1.207	0.19043	-25.105	-7.343	39.647	0.22754	0.024414	0.15332	NaN	NaN	NaN	NaN	NaN	NaN	NaN	NaN	NaN	NaN	NaN	NaN
1.26	-44.251	-151.428	1416.5203	-1.5554	1.1926	0.19311	6.456	8.014	45.414	0.26816	0.018946	0.15381	NaN	NaN	NaN	NaN	NaN	NaN	NaN	NaN	NaN	NaN	NaN	NaN
1.262	-44.101	-125.082	1432.304	-1.521	1.1694	0.18018	-18.211	30.9881	29.4405	0.30566	0.012011	0.15166	NaN	NaN	NaN	NaN	NaN	NaN	NaN	NaN	NaN	NaN	NaN	NaN
1.264	-56.34375	-88.869	1433.51	-1.4395	1.1406	0.146	-31.467	-24.1424	40.71	0.33418	0.0081055	0.14775	NaN	NaN	NaN	NaN	NaN	NaN	NaN	NaN	NaN	NaN	NaN	NaN
1.266	-107.9046	-48.6649	1427.264	-1.3926	1.127	0.12744	-34.933	13.7987	25.3024	0.36455	0.012207	0.14336	NaN	NaN	NaN	NaN	NaN	NaN	NaN	NaN	NaN	NaN	NaN	NaN
1.268	-141.443	-28.488	1443.687	-1.3159	1.1196	0.10449	-29.0309	7.1907	13.9177	0.3833	0.017578	0.13916	NaN	NaN	NaN	NaN	NaN	NaN	NaN	NaN	NaN	NaN	NaN	NaN
1.27	-150.4108	-37.572	1437.8301	-1.2781	1.1418	0.078858	-21.122	-28.6279	38.9107	0.39922	0.026562	0.13643	NaN	NaN	NaN	NaN	NaN	NaN	NaN	NaN	NaN	NaN	NaN	NaN
1.272	-146.02439	-47.186	1419.7241	-1.2578	1.1699	0.052246	-32.02	46.26002	14.594	0.40518	0.039941	0.13379	NaN	NaN	NaN	NaN	NaN	NaN	NaN	NaN	NaN	NaN	NaN	NaN
1.274	-161.363	-57.8843	1393.6673	-1.2676	1.2422	0.022949	-38.714	11.642	11.036	0.40244	0.05166	0.13652	NaN	NaN	NaN	NaN	NaN	NaN	NaN	NaN	NaN	NaN	NaN	NaN
1.276	-128.103	-57.3279	1379.6906	-1.2983	1.2856	0.013672	-44.626	24.5153	22.176	0.38955	0.061035	0.14268	NaN	NaN	NaN	NaN	NaN	NaN	NaN	NaN	NaN	NaN	NaN	NaN
1.278	-98.0215	-55.5412	1362.831	-1.396	1.397	-0.0078125	-40.1129	63.36	14.577	0.36963	0.072754	0.15186	NaN	NaN	NaN	NaN	NaN	NaN	NaN	NaN	NaN	NaN	NaN	NaN
1.28	-115.173	-34.9224	1345.923	-1.5074	1.4854	-0.01709	-41.0017	4.6311	34.296	0.34561	0.088183	0.16162	NaN	NaN	NaN	NaN	NaN	NaN	NaN	NaN	NaN	NaN	NaN	NaN
1.282	-80.31	-12.4825	1350.331	-1.6543	1.582	-0.020996	-30.667	38.833	25.893	0.31318	0.10323	0.16963	NaN	NaN	NaN	NaN	NaN	NaN	NaN	NaN	NaN	NaN	NaN	NaN
1.284	-71.123	-11.114	1351.852	-1.873	1.7246	-0.0078125	-31.355	32.2223	-0.145000000000001	0.2835	0.12431	0.17627	NaN	NaN	NaN	NaN	NaN	NaN	NaN	NaN	NaN	NaN	NaN	NaN
1.286	-49.12	-10.9823	1382.858	-1.9883	1.8086	0.022461	-35.548	-16.506754	13.731	0.26162	0.13584	0.17813	NaN	NaN	NaN	NaN	NaN	NaN	NaN	NaN	NaN	NaN	NaN	NaN
1.288	-66.03	-13.34639	1410.861	-2.1694	1.9653	0.068848	-51.549	37.39053	-1.352	0.24658	0.14697	0.17773	NaN	NaN	NaN	NaN	NaN	NaN	NaN	NaN	NaN	NaN	NaN	NaN
1.29	-80.324	-2.0181	1428.28	-2.2595	2.0608	0.1023	-30.839	-4.111	9.319	0.22403	0.15996	0.175	NaN	NaN	NaN	NaN	NaN	NaN	NaN	NaN	NaN	NaN	NaN	NaN
1.292	-86.195	-10.575	1409.3253	-2.3091	2.1196	0.12109	-15.536	9.93	32.3279	0.20479	0.17305	0.17187	NaN	NaN	NaN	NaN	NaN	NaN	NaN	NaN	NaN	NaN	NaN	NaN
1.294	-60.104	8.7705	1379.104	-2.2715	2.123	0.125	-32.929	51.585	13.787	0.18447	0.18125	0.16484	NaN	NaN	NaN	NaN	NaN	NaN	NaN	NaN	NaN	NaN	NaN	NaN
1.296	-53.333	18.8014	1345.331	-2.2163	2.0962	0.12451	-30.441	-4.3875	24.4983	0.15498	0.18896	0.16035	NaN	NaN	NaN	NaN	NaN	NaN	NaN	NaN	NaN	NaN	NaN	NaN
1.298	-74.176	22.966	1305.413	-2.0879	2	0.12012	-31.915	44.85	24.6238	0.12207	0.19873	0.1582	NaN	NaN	NaN	NaN	NaN	NaN	NaN	NaN	NaN	NaN	NaN	NaN
1.3	-54.419	16.5498	1291.1607	-1.9909	1.9197	0.11694	-22.066	67.137	4.9876	0.089942	0.20303	0.15957	NaN	NaN	NaN	NaN	NaN	NaN	NaN	NaN	NaN	NaN	NaN	NaN
1.302	-53.681	20.4989	1283.656	-1.9116	1.8364	0.10889	-10.096	38.3967	19.6251	0.054101	0.21787	0.16191	NaN	NaN	NaN	NaN	NaN	NaN	NaN	NaN	NaN	NaN	NaN	NaN
1.304	-19.887	24.887	1261.912	-1.8379	1.7305	0.10205	-9.826	78.462	30.595	0.020899	0.22998	0.16699	NaN	NaN	NaN	NaN	NaN	NaN	NaN	NaN	NaN	NaN	NaN	NaN
1.306	-31.855	28.587	1242.135	-1.8105	1.6797	0.10303	-14.047	24.0579	23.797	-0.0038088	0.24268	0.17803	NaN	NaN	NaN	NaN	NaN	NaN	NaN	NaN	NaN	NaN	NaN	NaN
1.308	-9.776	50.529	1194.217	-1.7617	1.5938	0.10986	-19.386	28.3661	33.5292	-0.02832	0.25781	0.18799	NaN	NaN	NaN	NaN	NaN	NaN	NaN	NaN	NaN	NaN	NaN	NaN
1.31	-58.284	74.391	1173.087	-1.7293	1.5305	0.10571	-10.231	77.637	5.083	-0.046875	0.27207	0.20146	NaN	NaN	NaN	NaN	NaN	NaN	NaN	NaN	NaN	NaN	NaN	NaN
1.312	-90.679	102.776	1180.251	-1.6851	1.4722	0.10156	-34.449	40.8259	13.6777	-0.061719	0.28818	0.21045	NaN	NaN	NaN	NaN	NaN	NaN	NaN	NaN	NaN	NaN	NaN	NaN
1.314	-99.59695	118.308	1177.811	-1.6211	1.3906	0.098145	-6.291	82.676	28.44019	-0.066797	0.29756	0.21905	NaN	NaN	NaN	NaN	NaN	NaN	NaN	NaN	NaN	NaN	NaN	NaN
1.316	-96.2151	114.305	1154.753	-1.5854	1.3462	0.10107	-29.53	65.768	11.206	-0.072266	0.30302	0.23047	NaN	NaN	NaN	NaN	NaN	NaN	NaN	NaN	NaN	NaN	NaN	NaN
1.318	-76.52778	120.258	1129.08	-1.5112	1.27	0.09375	-32.887	9.29018	36.6111	-0.069336	0.30322	0.24219	NaN	NaN	NaN	NaN	NaN	NaN	NaN	NaN	NaN	NaN	NaN	NaN
1.32	-109.2163	113.776	1093.8865	-1.4551	1.2197	0.094727	-18.71	44.9661	42.2158	-0.069727	0.2957	0.25117	NaN	NaN	NaN	NaN	NaN	NaN	NaN	NaN	NaN	NaN	NaN	NaN
1.322	-101.918213	107.6062	1072.5634	-1.4004	1.168	0.094238	-28.4946	4.882	61.754	-0.067187	0.28759	0.2623	NaN	NaN	NaN	NaN	NaN	NaN	NaN	NaN	NaN	NaN	NaN	NaN
1.324	-94.4008	88.64	1024.628	-1.3232	1.1074	0.093262	-16.805	13.817	77.244	-0.067187	0.27939	0.26816	NaN	NaN	NaN	NaN	NaN	NaN	NaN	NaN	NaN	NaN	NaN	NaN
1.326	-95.6497	74.202	979.8631	-1.2788	1.0747	0.091309	-46.894	61.545	47.424	-0.071485	0.26992	0.2791	NaN	NaN	NaN	NaN	NaN	NaN	NaN	NaN	NaN	NaN	NaN	NaN
1.328	-78.497	62.299	947.6191	-1.2129	1.0195	0.081543	-42.093	-1.2588	83.1946	-0.07666	0.26367	0.28564	NaN	NaN	NaN	NaN	NaN	NaN	NaN	NaN	NaN	NaN	NaN	NaN
1.33	-66.482	70.494	939.5662	-1.1645	0.9883	0.077637	-36.863	-25.395	147.3462	-0.088769	0.26221	0.29414	NaN	NaN	NaN	NaN	NaN	NaN	NaN	NaN	NaN	NaN	NaN	NaN
1.332	-63.261	84.203	929.8766	-1.1133	0.95801	0.07666	-57.044	-43.497	217.0428	-0.10215	0.26045	0.3039	NaN	NaN	NaN	NaN	NaN	NaN	NaN	NaN	NaN	NaN	NaN	NaN
1.334	-74.9547	125.5506	913.8936	-1.0527	0.92773	0.070313	-39.637	-56.4911	331.2812	-0.1123	0.25967	0.30977	NaN	NaN	NaN	NaN	NaN	NaN	NaN	NaN	NaN	NaN	NaN	NaN
1.336	-58.249	148.915	884.308	-1.019	0.91162	0.069824	-79.753	-14.952	425.138	-0.12207	0.25782	0.32471	NaN	NaN	NaN	NaN	NaN	NaN	NaN	NaN	NaN	NaN	NaN	NaN
1.338	-61.736	147.819	845.041	-0.94873	0.89307	0.058105	-155.4066	-133.991	513.09	-0.13086	0.25488	0.33057	NaN	NaN	NaN	NaN	NaN	NaN	NaN	NaN	NaN	NaN	NaN	NaN
1.34	-47.374	159.775	793.9414	-0.89307	0.87183	0.053711	-163.433	-219.545	595.525	-0.13535	0.25098	0.34111	NaN	NaN	NaN	NaN	NaN	NaN	NaN	NaN	NaN	NaN	NaN	NaN
1.342	-37.675	163.338	766.06266	-0.83545	0.8501	0.051758	-116.959	-158.674	646.854	-0.13926	0.24483	0.34766	NaN	NaN	NaN	NaN	NaN	NaN	NaN	NaN	NaN	NaN	NaN	NaN
1.344	-33.123	166.725	739.654	-0.76807	0.81836	0.043457	-132.493	-100.4467	760.428	-0.13926	0.2378	0.34609	NaN	NaN	NaN	NaN	NaN	NaN	NaN	NaN	NaN	NaN	NaN	NaN
1.346	-8.288	127.183	708.9639	-0.72998	0.79736	0.042969	-160.151	18.0686	879.793	-0.13486	0.23916	0.31182	NaN	NaN	NaN	NaN	NaN	NaN	NaN	NaN	NaN	NaN	NaN	NaN
1.348	-11.234	121.4722	660.074	-0.66016	0.76563	0.041992	-175.634	83.0165	931.444	-0.14111	0.23389	0.24756	NaN	NaN	NaN	NaN	NaN	NaN	NaN	NaN	NaN	NaN	NaN	NaN
1.35	5.605	119.822	613.8223	-0.59131	0.73486	0.041504	-135.738	37.688	977.548	-0.16709	0.24785	0.15879	NaN	NaN	NaN	NaN	NaN	NaN	NaN	NaN	NaN	NaN	NaN	NaN
1.352	-8.611	116.5	593.704	-0.55811	0.71631	0.039063	-29.97833	30.048	1060.053	-0.24902	0.28535	0.072265	NaN	NaN	NaN	NaN	NaN	NaN	NaN	NaN	NaN	NaN	NaN	NaN
1.354	2.824	107.839	575.599	-0.49023	0.67773	0.033203	8.3623	-34.238	1168.825	-0.40176	0.32363	-0.0375	NaN	NaN	NaN	NaN	NaN	NaN	NaN	NaN	NaN	NaN	NaN	NaN
1.356	-4.218	110.1669	545.421	-0.44677	0.64697	0.03125	23.4883	-38.958	1306.756	-0.59697	0.35967	-0.12217	NaN	NaN	NaN	NaN	NaN	NaN	NaN	NaN	NaN	NaN	NaN	NaN
1.358	6.75	104.1235	526.494	-0.41162	0.61865	0.025391	33.998232	27.2447	1315.444	-0.82764	0.40088	-0.16699	NaN	NaN	NaN	NaN	NaN	NaN	NaN	NaN	NaN	NaN	NaN	NaN
1.36	-8.851	101.285	507.233	-0.35352	0.57031	0.023926	-5.52973	-8.13	1266.916	-1.1022	0.49151	-0.17432	NaN	NaN	NaN	NaN	NaN	NaN	NaN	NaN	NaN	NaN	NaN	NaN
1.362	-37.334	115.537	457.3905	-0.3291	0.55322	0.024414	-50.018	-7.529	1235.271	-1.4016	0.62695	-0.15107	NaN	NaN	NaN	NaN	NaN	NaN	NaN	NaN	NaN	NaN	NaN	NaN
1.364	-41.9739	131.292	438.8106	-0.28516	0.51953	0.02002	-41.2206	-55.103	1178.898	-1.7047	0.80039	-0.10654	NaN	NaN	NaN	NaN	NaN	NaN	NaN	NaN	NaN	NaN	NaN	NaN
1.366	-50.171	135.181	415.7671	-0.25073	0.48877	0.018798	0.849000000000004	-175.793	1201.342	-2.0082	0.98438	-0.060547	NaN	NaN	NaN	NaN	NaN	NaN	NaN	NaN	NaN	NaN	NaN	NaN
1.368	-18.937	120.8037	398.7768	-0.21826	0.45752	0.019531	-2.395	-172.33	1241.354	-2.3101	1.1685	-0.016113	NaN	NaN	NaN	NaN	NaN	NaN	NaN	NaN	NaN	NaN	NaN	NaN
1.37	-21.534	113.1331	342.141	-0.1665	0.40869	0.01709	-18.671	-192.9957	1247.5669	-2.5896	1.337	0.018652	NaN	NaN	NaN	NaN	NaN	NaN	NaN	NaN	NaN	NaN	NaN	NaN
1.372	-24.1328	102.3	311.1291	-0.13867	0.38477	0.014648	13.128	-192.794	1259.3673	-2.8234	1.4804	0.046972	NaN	NaN	NaN	NaN	NaN	NaN	NaN	NaN	NaN	NaN	NaN	NaN
1.374	-31.724	95.783	277.503	-0.084961	0.34033	0.0048828	32.72059	-154.545	1222.471	-2.9969	1.6055	0.066113	NaN	NaN	NaN	NaN	NaN	NaN	NaN	NaN	NaN	NaN	NaN	NaN
1.376	-38.578	92.7888	273.4349	-0.051758	0.30639	0.0058594	74.2087	-197.377	1241.9668	-3.06	1.7018	0.078613	NaN	NaN	NaN	NaN	NaN	NaN	NaN	NaN	NaN	NaN	NaN	NaN
1.378	-35.396	92.22046	243.5287	-0.017578	0.27441	0.0024414	124.564	-167.019	1298.941	-3.0234	1.7598	0.10352	NaN	NaN	NaN	NaN	NaN	NaN	NaN	NaN	NaN	NaN	NaN	NaN
1.38	-43.995	92.3111	205.552	0.021484	0.24072	-0.0068359	108.82196	-91.9116	1345.5457	-2.8536	1.8116	0.13311	NaN	NaN	NaN	NaN	NaN	NaN	NaN	NaN	NaN	NaN	NaN	NaN
1.382	-47.288	87.749	202.698	0.037109	0.21826	-0.010254	92.503	-58.371	1417.763	-2.6149	1.8149	0.1666	NaN	NaN	NaN	NaN	NaN	NaN	NaN	NaN	NaN	NaN	NaN	NaN
1.384	-57.0343	95.272	192.893	0.064453	0.18945	-0.02002	42.022	-36.854	1434.164	-2.3805	1.7695	0.17598	NaN	NaN	NaN	NaN	NaN	NaN	NaN	NaN	NaN	NaN	NaN	NaN
1.386	-46.6607	107.647	191.719	0.080322	0.16211	-0.022705	23.7547	-98.477	1433.355	-2.2002	1.7072	0.17539	NaN	NaN	NaN	NaN	NaN	NaN	NaN	NaN	NaN	NaN	NaN	NaN
1.388	-40.3233	105.178	175.782	0.089355	0.14746	-0.030762	-2.816	-151.022	1401.693	-2.0483	1.6274	0.18896	NaN	NaN	NaN	NaN	NaN	NaN	NaN	NaN	NaN	NaN	NaN	NaN
1.39	-18.329	89.322	150.701	0.10107	0.12207	-0.03125	-59.778	-125.846	1357.582	-1.9179	1.5341	0.20996	NaN	NaN	NaN	NaN	NaN	NaN	NaN	NaN	NaN	NaN	NaN	NaN
1.392	3.339	71.0391	111.145	0.10254	0.10986	-0.032227	-83.296	-147.673	1343.937	-1.7887	1.4399	0.22959	NaN	NaN	NaN	NaN	NaN	NaN	NaN	NaN	NaN	NaN	NaN	NaN
1.394	4.85899999999999	66.6289	88.8148	0.11182	0.094238	-0.035156	-100.5125	-133.789	1358.493	-1.6375	1.341	0.23076	NaN	NaN	NaN	NaN	NaN	NaN	NaN	NaN	NaN	NaN	NaN	NaN
1.396	-2.249	61.1517	79.956	0.11499	0.083984	-0.036133	-106.7104	-94.427	1377.829	-1.4833	1.2354	0.20098	NaN	NaN	NaN	NaN	NaN	NaN	NaN	NaN	NaN	NaN	NaN	NaN
1.398	-2.455	56.5769	81.117	0.11963	0.073242	-0.036621	-40.563	-148.274	1423.7382	-1.3462	1.1216	0.14941	NaN	NaN	NaN	NaN	NaN	NaN	NaN	NaN	NaN	NaN	NaN	NaN
1.4	1.918	46.065	57.7854	0.12549	0.057617	-0.041504	-18.725	-124.271	1467.2126	-1.2506	1.0184	0.093749	NaN	NaN	NaN	NaN	NaN	NaN	NaN	NaN	NaN	NaN	NaN	NaN
1.402	-16.109	29.819	37.1675	0.12744	0.053223	-0.046387	-39.536	-103.638	1473.645	-1.1792	0.93877	0.056055	NaN	NaN	NaN	NaN	NaN	NaN	NaN	NaN	NaN	NaN	NaN	NaN
1.404	-14.435	20.1642	35.4536	0.12842	0.041504	-0.050293	-68.289	-90.2	1494.704	-1.1542	0.89424	0.024024	NaN	NaN	NaN	NaN	NaN	NaN	NaN	NaN	NaN	NaN	NaN	NaN
1.406	-29.334	31.589	42.8458	0.12768	0.032227	-0.057373	-117.754	1.806	1501.865	-1.1496	0.86133	0.037012	NaN	NaN	NaN	NaN	NaN	NaN	NaN	NaN	NaN	NaN	NaN	NaN
1.408	-44.244	63.688	41.6272	0.12402	0.029297	-0.064453	-155.217	-8.808	1513.738	-1.1836	0.86719	0.043457	NaN	NaN	NaN	NaN	NaN	NaN	NaN	NaN	NaN	NaN	NaN	NaN
1.41	-24.279	80.943	30.5987	0.10986	0.019531	-0.065918	-158.712	-43.12	1536.086	-1.2245	0.89502	0.037109	NaN	NaN	NaN	NaN	NaN	NaN	NaN	NaN	NaN	NaN	NaN	NaN
1.412	-23.859	58.031	29.0812	0.099609	0.019531	-0.067871	-168.748	-61.894	1507.094	-1.2707	0.92696	0.028125	NaN	NaN	NaN	NaN	NaN	NaN	NaN	NaN	NaN	NaN	NaN	NaN
1.414	-7.968	32.4273	30.954	0.072754	0.021973	-0.068848	-159.08	-128.8843	1470.4937	-1.3426	0.96914	0.023828	NaN	NaN	NaN	NaN	NaN	NaN	NaN	NaN	NaN	NaN	NaN	NaN
1.416	-6.975	22.1871	24.2329	0.047119	0.023926	-0.071533	-129.066	-59.402	1443.048	-1.4639	1.0242	0.031347	NaN	NaN	NaN	NaN	NaN	NaN	NaN	NaN	NaN	NaN	NaN	NaN
1.418	1.42	19.243	34.6662	0.028809	0.031738	-0.072266	-121.415	-14.841	1436.517	-1.6094	1.0947	0.054688	NaN	NaN	NaN	NaN	NaN	NaN	NaN	NaN	NaN	NaN	NaN	NaN
1.42	-8.671	38.214	35.4643	-0.00097656	0.040039	-0.074707	-67.863	-36.968	1469.915	-1.7705	1.176	0.076269	NaN	NaN	NaN	NaN	NaN	NaN	NaN	NaN	NaN	NaN	NaN	NaN
1.422	-10.826	45.4515	15.8926	-0.0068359	0.04834	-0.074707	-50.839	-7.357	1468.7049	-1.9152	1.2496	0.091602	NaN	NaN	NaN	NaN	NaN	NaN	NaN	NaN	NaN	NaN	NaN	NaN
1.424	-25.923	24.979	-12.9677	-0.013672	0.047363	-0.077148	-24.094	-82.904	1453.6158	-2.0496	1.3215	0.097851	NaN	NaN	NaN	NaN	NaN	NaN	NaN	NaN	NaN	NaN	NaN	NaN
1.426	-49.4563	6.191	-1.176	-0.00097655	0.042725	-0.083252	13.075	-76.398	1473.112	-2.1635	1.3912	0.086231	NaN	NaN	NaN	NaN	NaN	NaN	NaN	NaN	NaN	NaN	NaN	NaN
1.428	-38.374	-1.0611	39.6015	0.023438	0.033203	-0.088379	-28.051	23.419	1474.227	-2.2617	1.459	0.063965	NaN	NaN	NaN	NaN	NaN	NaN	NaN	NaN	NaN	NaN	NaN	NaN
1.43	-46.1803	16.1802	52.936	0.061035	0.017578	-0.095703	-43.122	43.987	1477.863	-2.3667	1.5288	0.038184	NaN	NaN	NaN	NaN	NaN	NaN	NaN	NaN	NaN	NaN	NaN	NaN
1.432	-43.3076	29.178	44.922	0.085938	0.011719	-0.10254	-68.383	112.905	1446.827	-2.4891	1.5949	0.017871	NaN	NaN	NaN	NaN	NaN	NaN	NaN	NaN	NaN	NaN	NaN	NaN
1.434	-46.92	32.519	34.1255	0.12891	-0.0029297	-0.11084	-84.324	97.198	1385.50404	-2.6234	1.6645	0.0041992	NaN	NaN	NaN	NaN	NaN	NaN	NaN	NaN	NaN	NaN	NaN	NaN
1.436	-29.228	36.767	30.7692	0.15503	-0.013672	-0.11744	-66.437	18.0746	1363.6306	-2.7397	1.7278	0.0041016	NaN	NaN	NaN	NaN	NaN	NaN	NaN	NaN	NaN	NaN	NaN	NaN
1.438	-24.459	28.1008	24.647	0.18066	-0.017578	-0.12402	-52.84	48.051	1332.214	-2.8179	1.7856	0.01709	NaN	NaN	NaN	NaN	NaN	NaN	NaN	NaN	NaN	NaN	NaN	NaN
1.44	-3.592	33.2865	22.5731	0.19922	-0.035156	-0.12939	-49.808	27.697	1320.74145	-2.8317	1.8262	0.024512	NaN	NaN	NaN	NaN	NaN	NaN	NaN	NaN	NaN	NaN	NaN	NaN
1.442	0.5	29.619	32.5899	0.20801	-0.041992	-0.13525	-64.321	68.112	1302.431	-2.8016	1.85	0.021875	NaN	NaN	NaN	NaN	NaN	NaN	NaN	NaN	NaN	NaN	NaN	NaN
1.444	-10.857	29.5624	29.6244	0.21387	-0.04834	-0.13428	-70.6961	113.8228	1240.234	-2.7457	1.8418	0.0097656	NaN	NaN	NaN	NaN	NaN	NaN	NaN	NaN	NaN	NaN	NaN	NaN
1.446	-2.975	20.0711	29.73192	0.21851	-0.053711	-0.1377	-46.871	43.459	1200.263	-2.6736	1.811	0.00087892	NaN	NaN	NaN	NaN	NaN	NaN	NaN	NaN	NaN	NaN	NaN	NaN
1.448	-38.449	25.51	22.357	0.22656	-0.048828	-0.13818	-29.842	83.864	1170.975	-2.5723	1.7637	-0.0063477	NaN	NaN	NaN	NaN	NaN	NaN	NaN	NaN	NaN	NaN	NaN	NaN
1.45	-16.568	25.9708	13.9076	0.24365	-0.044434	-0.13379	-38.285	109.772	1163.5092	-2.4328	1.6965	-0.016406	NaN	NaN	NaN	NaN	NaN	NaN	NaN	NaN	NaN	NaN	NaN	NaN
1.452	-14.949	23.7962	24.335	0.24805	-0.040527	-0.13379	-69.21	116.957	1194.01	-2.2761	1.6016	-0.025976	NaN	NaN	NaN	NaN	NaN	NaN	NaN	NaN	NaN	NaN	NaN	NaN
1.454	-21.057	13.4413	21.5909	0.25586	-0.033691	-0.13721	-78.8277	219.911	1170.93811	-2.1308	1.4908	-0.031836	NaN	NaN	NaN	NaN	NaN	NaN	NaN	NaN	NaN	NaN	NaN	NaN
1.456	-40.9824	5.8178	24.9321	0.25488	-0.023438	-0.14087	-114.581	184.029	1146.206	-2.0066	1.3767	-0.04375	NaN	NaN	NaN	NaN	NaN	NaN	NaN	NaN	NaN	NaN	NaN	NaN
1.458	-27.987	3.6761	36.4133	0.25	-0.014648	-0.13672	-88.5582	177.666	1091.0028	-1.8984	1.2773	-0.041504	NaN	NaN	NaN	NaN	NaN	NaN	NaN	NaN	NaN	NaN	NaN	NaN
1.46	-5.651	9.4794	45.9532	0.24121	0.0014648	-0.13916	-100.445	189.882	1034.6062	-1.8022	1.201	-0.044727	NaN	NaN	NaN	NaN	NaN	NaN	NaN	NaN	NaN	NaN	NaN	NaN
1.462	-6.785	25.2213	16.3171	0.23633	0.0078125	-0.1416	-109.022	136.6166	1000.881171	-1.7164	1.1279	-0.040625	NaN	NaN	NaN	NaN	NaN	NaN	NaN	NaN	NaN	NaN	NaN	NaN
1.464	-1.083	28.5797	15.5512	0.22461	0.027344	-0.14697	-94.749	193.075	961.185	-1.6391	1.0733	-0.048828	NaN	NaN	NaN	NaN	NaN	NaN	NaN	NaN	NaN	NaN	NaN	NaN
1.466	-13.958	28.55768	13.4449	0.22192	0.042969	-0.1499	-84.163	192.651	934.328	-1.5849	1.0214	-0.052441	NaN	NaN	NaN	NaN	NaN	NaN	NaN	NaN	NaN	NaN	NaN	NaN
1.468	-19.357	31.3279	23.63963	0.21875	0.061035	-0.14941	-72.3022	149.37	899.8045	-1.541	0.97266	-0.046875	NaN	NaN	NaN	NaN	NaN	NaN	NaN	NaN	NaN	NaN	NaN	NaN
1.47	-10.365	31.802	27.5569	0.21826	0.083496	-0.15381	-35.6707	176.928	839.27	-1.4917	0.95088	-0.042285	NaN	NaN	NaN	NaN	NaN	NaN	NaN	NaN	NaN	NaN	NaN	NaN
1.472	-21.996	19.808652	40.2993	0.2168	0.091797	-0.15625	-7.895	132.102	809.2941	-1.4333	0.92139	-0.039355	NaN	NaN	NaN	NaN	NaN	NaN	NaN	NaN	NaN	NaN	NaN	NaN
1.474	2.667	5.2063	31.3911	0.20752	0.11572	-0.1582	8.867	180.653	794.0186	-1.3755	0.89795	-0.033887	NaN	NaN	NaN	NaN	NaN	NaN	NaN	NaN	NaN	NaN	NaN	NaN
1.476	-13.673	10.7408	11.3911	0.20166	0.12622	-0.15699	3.104	267.361	752.3678	-1.3185	0.87559	-0.029688	NaN	NaN	NaN	NaN	NaN	NaN	NaN	NaN	NaN	NaN	NaN	NaN
1.478	-35.197	24.806	-7.36	0.19482	0.13965	-0.1582	-10.839	226.852	746.511	-1.2578	0.85449	-0.028809	NaN	NaN	NaN	NaN	NaN	NaN	NaN	NaN	NaN	NaN	NaN	NaN
1.48	-55.75741	37.5	4.8111	0.17773	0.1582	-0.15674	-12.087	244.075	719.489	-1.19	0.83125	-0.025781	NaN	NaN	NaN	NaN	NaN	NaN	NaN	NaN	NaN	NaN	NaN	NaN
1.482	-29.992	45.572	34.7861	0.16748	0.17188	-0.15576	-6.002	204.153	680.512	-1.1136	0.8	-0.02959	NaN	NaN	NaN	NaN	NaN	NaN	NaN	NaN	NaN	NaN	NaN	NaN
1.484	-17.048	29.6785	26.562	0.14209	0.19385	-0.15625	-1.329	156.984	651.877	-1.0352	0.7707	-0.02998	NaN	NaN	NaN	NaN	NaN	NaN	NaN	NaN	NaN	NaN	NaN	NaN
1.486	-21.075	13.1874	23.3258	0.11962	0.20972	-0.15088	-11.025	208.778	581.4066	-0.95049	0.73506	-0.03623	NaN	NaN	NaN	NaN	NaN	NaN	NaN	NaN	NaN	NaN	NaN	NaN
1.488	-15.479	5.0891	18.8925	0.10059	0.22266	-0.14648	-28.458	157.8251	532.8707	-0.86279	0.69971	-0.039063	NaN	NaN	NaN	NaN	NaN	NaN	NaN	NaN	NaN	NaN	NaN	NaN
1.49	-22.655	21.8569	18.9429	0.071777	0.24561	-0.14014	-0.423999999999999	155.0053	493.2789	-0.78057	0.67217	-0.044726	NaN	NaN	NaN	NaN	NaN	NaN	NaN	NaN	NaN	NaN	NaN	NaN
1.492	-15.111	38.81	19.8684	0.053711	0.25244	-0.14209	7.738	159.731	431.925	-0.70068	0.64091	-0.049512	NaN	NaN	NaN	NaN	NaN	NaN	NaN	NaN	NaN	NaN	NaN	NaN
1.494	-32.219	38.1843	20.2732343	0.023926	0.26367	-0.14258	16.224	90.631	424.9718	-0.62334	0.59873	-0.052636	NaN	NaN	NaN	NaN	NaN	NaN	NaN	NaN	NaN	NaN	NaN	NaN
1.496	-10.503	23.0751	27.4079	-0.0068359	0.27832	-0.1416	42.4674	122.732	378.6086	-0.54609	0.55723	-0.063672	NaN	NaN	NaN	NaN	NaN	NaN	NaN	NaN	NaN	NaN	NaN	NaN
1.498	-18.336	10.9259	29.8872	-0.018066	0.27979	-0.14307	22.183	114.511	347.4489	-0.47266	0.51563	-0.069336	NaN	NaN	NaN	NaN	NaN	NaN	NaN	NaN	NaN	NaN	NaN	NaN
1.5	-19.18	11.0045	16.4799	-0.042969	0.28516	-0.14307	-11.722	118.394608	342.547	-0.40439	0.47666	-0.075098	NaN	NaN	NaN	NaN	NaN	NaN	NaN	NaN	NaN	NaN	NaN	NaN
1.502	-47.5899	35.7848	16.6397	-0.056152	0.2854	-0.14282	-23.092	195.344	305.9572	-0.3458	0.43447	-0.079883	NaN	NaN	NaN	NaN	NaN	NaN	NaN	NaN	NaN	NaN	NaN	NaN
1.504	-44.923	48.522	12.7256	-0.072754	0.28418	-0.14502	-41.672	142.02	295.467	-0.29307	0.39814	-0.09082	NaN	NaN	NaN	NaN	NaN	NaN	NaN	NaN	NaN	NaN	NaN	NaN
1.506	-20.845	34.8684	17.407	-0.086426	0.28174	-0.14746	-53.0058	128.5994	270.648	-0.24248	0.36768	-0.09834	NaN	NaN	NaN	NaN	NaN	NaN	NaN	NaN	NaN	NaN	NaN	NaN
1.508	-22.355	16.957	-8.47	-0.092773	0.28711	-0.146	-44.67698	117.996	230.111	-0.19775	0.33838	-0.10107	NaN	NaN	NaN	NaN	NaN	NaN	NaN	NaN	NaN	NaN	NaN	NaN
1.51	-12.315	5.482	4.505	-0.088867	0.2876	-0.15723	-48.771	52.419	205.6246	-0.15693	0.30703	-0.10606	NaN	NaN	NaN	NaN	NaN	NaN	NaN	NaN	NaN	NaN	NaN	NaN
1.512	-4.316	22.715	21.2362	-0.074218	0.28369	-0.15967	-39.7394	109.5022	172.30459	-0.11846	0.27861	-0.10547	NaN	NaN	NaN	NaN	NaN	NaN	NaN	NaN	NaN	NaN	NaN	NaN
1.514	-4.783	48.022	42.561	-0.056641	0.27588	-0.16943	-48.5707	102.773	132.6729	-0.078223	0.25478	-0.10429	NaN	NaN	NaN	NaN	NaN	NaN	NaN	NaN	NaN	NaN	NaN	NaN
1.516	-20.824	73.562	39.64	-0.032227	0.26123	-0.18066	-58.32	56.475	106.1309	-0.040039	0.22588	-0.11348	NaN	NaN	NaN	NaN	NaN	NaN	NaN	NaN	NaN	NaN	NaN	NaN
1.518	-9.261	43.467	77.004	-0.025391	0.26367	-0.18066	-28.544	77.0202	71.251	-0.0053711	0.20264	-0.11914	NaN	NaN	NaN	NaN	NaN	NaN	NaN	NaN	NaN	NaN	NaN	NaN
1.52	4.895	-29.7568	115.746	-0.015625	0.26123	-0.19531	-27.649	6.707	61.381	0.020899	0.17647	-0.1247	NaN	NaN	NaN	NaN	NaN	NaN	NaN	NaN	NaN	NaN	NaN	NaN
1.522	-39.9484	-40.8858	158.487	-0.013184	0.26245	-0.20605	-11.664	23.522	78.7301	0.051172	0.15107	-0.12695	NaN	NaN	NaN	NaN	NaN	NaN	NaN	NaN	NaN	NaN	NaN	NaN
1.524	38.9719	0.1734	234.206	-0.013672	0.26514	-0.229	-16.7783	57.181	62.25	0.071484	0.1331	-0.13476	NaN	NaN	NaN	NaN	NaN	NaN	NaN	NaN	NaN	NaN	NaN	NaN
1.526	89.18	1.5139	361.448	-0.036621	0.27246	-0.28564	-42.048	33.699	90.623	0.091799	0.11592	-0.14258	NaN	NaN	NaN	NaN	NaN	NaN	NaN	NaN	NaN	NaN	NaN	NaN
1.528	22.5391	-57.6338	475.828	-0.077148	0.28564	-0.3042	-18.017	91.261	77.847	0.11523	0.09668	-0.14844	NaN	NaN	NaN	NaN	NaN	NaN	NaN	NaN	NaN	NaN	NaN	NaN
1.53	15.475	-79.2412	519.81	-0.24316	0.33398	-0.34766	-27.639	80.334	46.9278	0.1373	0.084766	-0.15283	NaN	NaN	NaN	NaN	NaN	NaN	NaN	NaN	NaN	NaN	NaN	NaN
1.532	92.333	-75.69736	592.307	-0.41919	0.38404	-0.3733	-14.799	51.154	37.1132	0.14991	0.068457	-0.16133	NaN	NaN	NaN	NaN	NaN	NaN	NaN	NaN	NaN	NaN	NaN	NaN
1.534	76.847	-25.6355	713.602	-0.63428	0.43701	-0.40771	7.876	82.5	12.026	0.15459	0.054004	-0.16797	NaN	NaN	NaN	NaN	NaN	NaN	NaN	NaN	NaN	NaN	NaN	NaN
1.536	31.987	61.568	836.038	-0.99121	0.52637	-0.44141	-23.488	24.806	22.2844	0.14023	0.047754	-0.17295	NaN	NaN	NaN	NaN	NaN	NaN	NaN	NaN	NaN	NaN	NaN	NaN
1.538	-6.64	116.301	835.391	-1.2007	0.60303	-0.44482	-11.313	28.0951	32.8394	0.12158	0.042969	-0.17627	NaN	NaN	NaN	NaN	NaN	NaN	NaN	NaN	NaN	NaN	NaN	NaN
1.54	-34.844	103.6642	816.873	-1.6421	0.80615	-0.42725	-14.365	35.76811	-2.42	0.088966	0.041699	-0.17607	NaN	NaN	NaN	NaN	NaN	NaN	NaN	NaN	NaN	NaN	NaN	NaN
1.542	-6.408	60.261	879.884	-1.9497	0.9873	-0.38183	-29.086	-4.84	-17.7977	0.052441	0.042383	-0.17636	NaN	NaN	NaN	NaN	NaN	NaN	NaN	NaN	NaN	NaN	NaN	NaN
1.544	29.5733	15.61	940.882	-2.1953	1.1582	-0.32617	22.163	24.552	-11.5693	-0.0010742	0.051367	-0.17676	NaN	NaN	NaN	NaN	NaN	NaN	NaN	NaN	NaN	NaN	NaN	NaN
1.546	36.6232	-11.59	1001.117	-2.3867	1.377	-0.25146	-7.194	26.56818	-7.6396	-0.059668	0.065625	-0.17783	NaN	NaN	NaN	NaN	NaN	NaN	NaN	NaN	NaN	NaN	NaN	NaN
1.548	9.486	1.247	1004.26	-2.4331	1.4751	-0.23291	-26.882	35.8829	31.191	-0.12109	0.086426	-0.17383	NaN	NaN	NaN	NaN	NaN	NaN	NaN	NaN	NaN	NaN	NaN	NaN
1.55	-16.952	10.995	973.358	-2.4531	1.6074	-0.2334	-17.755	95.929	34.6326	-0.17949	0.099904	-0.17119	NaN	NaN	NaN	NaN	NaN	NaN	NaN	NaN	NaN	NaN	NaN	NaN
1.552	-60.4267	-0.823000000000008	980.832	-2.4109	1.6819	-0.24463	-42.24044	53.528	40.937	-0.24707	0.11816	-0.16865	NaN	NaN	NaN	NaN	NaN	NaN	NaN	NaN	NaN	NaN	NaN	NaN
1.554	-52.21	-19.151	1004.348	-2.3457	1.752	-0.25439	-32.706	43.297	62.928	-0.30098	0.13144	-0.16436	NaN	NaN	NaN	NaN	NaN	NaN	NaN	NaN	NaN	NaN	NaN	NaN
1.556	-12.508	-65.131	1018.081	-2.1973	1.8262	-0.27441	-13.881	47.528	20.663	-0.35117	0.14482	-0.16006	NaN	NaN	NaN	NaN	NaN	NaN	NaN	NaN	NaN	NaN	NaN	NaN
1.558	-40.639	-102.30837	1044.743	-2.0835	1.8462	-0.27686	-40.363	16.0939	22.1998	-0.39111	0.16113	-0.15771	NaN	NaN	NaN	NaN	NaN	NaN	NaN	NaN	NaN	NaN	NaN	NaN
1.56	-112.38	-143.0169	1084.5634	-1.7788	1.8306	-0.3042	-24.107	61.1478	23.81	-0.42256	0.1709	-0.154	NaN	NaN	NaN	NaN	NaN	NaN	NaN	NaN	NaN	NaN	NaN	NaN
1.562	-138.688	-136.3568	1084.23046	-1.5454	1.7564	-0.30005	-43.1851	57.8394	21.341	-0.4416	0.17832	-0.15215	NaN	NaN	NaN	NaN	NaN	NaN	NaN	NaN	NaN	NaN	NaN	NaN
1.564	-88.374	-111.7867	1121.299	-1.3569	1.6411	-0.28857	-57.9665	32.018	43.782	-0.45293	0.19004	-0.15059	NaN	NaN	NaN	NaN	NaN	NaN	NaN	NaN	NaN	NaN	NaN	NaN
1.566	-23.049	-96.6389	1124.426	-1.2246	1.4492	-0.25488	-22.568	60.1491	28.409	-0.45664	0.19013	-0.1377	NaN	NaN	NaN	NaN	NaN	NaN	NaN	NaN	NaN	NaN	NaN	NaN
1.568	11.571	-105.546	1115.6322	-1.1733	1.354	-0.22705	-39.755	20.7185	9.677	-0.44678	0.18604	-0.1333	NaN	NaN	NaN	NaN	NaN	NaN	NaN	NaN	NaN	NaN	NaN	NaN
1.57	19.2151	-127.448	1147.952	-1.0874	1.186	-0.19434	-25.096	30.759	50.613	-0.425	0.17744	-0.13262	NaN	NaN	NaN	NaN	NaN	NaN	NaN	NaN	NaN	NaN	NaN	NaN
1.572	-27.812	-153.497	1207.467	-1.0283	1.0742	-0.18652	-52.0982	55.814	39.6345	-0.39512	0.16621	-0.13164	NaN	NaN	NaN	NaN	NaN	NaN	NaN	NaN	NaN	NaN	NaN	NaN
1.574	7.8417	-153.124	1260.041	-0.96631	0.97803	-0.18896	-63.9786	22.9689	54.9751	-0.35098	0.14707	-0.12539	NaN	NaN	NaN	NaN	NaN	NaN	NaN	NaN	NaN	NaN	NaN	NaN
1.576	9.554	-172.912	1284.304	-0.9082	0.90625	-0.21875	-28.009	41.3999	57.0783	-0.30937	0.12891	-0.12598	NaN	NaN	NaN	NaN	NaN	NaN	NaN	NaN	NaN	NaN	NaN	NaN
1.578	26.243	-154.12998	1251.173	-0.90186	0.89111	-0.229	-25.377	9.2649	42.8664	-0.26025	0.10693	-0.12744	NaN	NaN	NaN	NaN	NaN	NaN	NaN	NaN	NaN	NaN	NaN	NaN
1.58	8.038	-140.153	1227.202	-0.94092	0.92236	-0.25732	-23.78	-15.416368	78.629	-0.21192	0.086914	-0.12363	NaN	NaN	NaN	NaN	NaN	NaN	NaN	NaN	NaN	NaN	NaN	NaN
1.582	-1.941	-112.343	1230.256	-1.0163	0.98362	-0.26514	-3.595	41.6	58.855	-0.16495	0.064355	-0.12334	NaN	NaN	NaN	NaN	NaN	NaN	NaN	NaN	NaN	NaN	NaN	NaN
1.584	-29.8668	-97.015	1271.717	-1.1089	1.0688	-0.27393	-12.824	35.877	31.2033	-0.10987	0.036231	-0.11865	NaN	NaN	NaN	NaN	NaN	NaN	NaN	NaN	NaN	NaN	NaN	NaN
1.586	2.4952	-80.232	1325.45958	-1.1934	1.1777	-0.24902	-8.896	31.0869	32.0071	-0.048828	0.0032224	-0.11406	NaN	NaN	NaN	NaN	NaN	NaN	NaN	NaN	NaN	NaN	NaN	NaN
1.588	67.456	-98.5927	1356.978	-1.2241	1.2349	-0.24121	-22.286	28.8969	11.881	0.012207	-0.030762	-0.11719	NaN	NaN	NaN	NaN	NaN	NaN	NaN	NaN	NaN	NaN	NaN	NaN
1.59	67.864	-115.442	1361.234	-1.2373	1.3125	-0.24121	-54.076	-28.40038	24.16504	0.075	-0.061426	-0.11885	NaN	NaN	NaN	NaN	NaN	NaN	NaN	NaN	NaN	NaN	NaN	NaN
1.592	82.827	-110.223	1349.22	-1.2034	1.3406	-0.23657	5.257	-13.741	35.1985	0.13867	-0.094239	-0.12256	NaN	NaN	NaN	NaN	NaN	NaN	NaN	NaN	NaN	NaN	NaN	NaN
1.594	89.902	-63.2528	1345.976	-1.1616	1.3481	-0.22998	-10.021	-8.8695	3.397	0.19687	-0.129	-0.1249	NaN	NaN	NaN	NaN	NaN	NaN	NaN	NaN	NaN	NaN	NaN	NaN
1.596	67.235	-21.726	1359.9987	-1.1187	1.3403	-0.24609	-49.747	-10.0701	32.206	0.24912	-0.15566	-0.12519	NaN	NaN	NaN	NaN	NaN	NaN	NaN	NaN	NaN	NaN	NaN	NaN
1.598	88.327	-33.955	1397.898	-1.1094	1.3301	-0.25586	-8.433	55.729	28.9489	0.2915	-0.17676	-0.12695	NaN	NaN	NaN	NaN	NaN	NaN	NaN	NaN	NaN	NaN	NaN	NaN
1.6	60.2296	-76.973	1401.627	-1.1519	1.3091	-0.26514	-35.8158	42.268	15.77863	0.32549	-0.19365	-0.12578	NaN	NaN	NaN	NaN	NaN	NaN	NaN	NaN	NaN	NaN	NaN	NaN
1.602	46.0536	-105.2	1392.0003	-1.2376	1.3146	-0.26855	-23.194	37.4565	28.75	0.35508	-0.20673	-0.12842	NaN	NaN	NaN	NaN	NaN	NaN	NaN	NaN	NaN	NaN	NaN	NaN
1.604	-0.9063	-100.5896	1367.265	-1.3633	1.3301	-0.26953	-27.659	31.724	2.254	0.37969	-0.21299	-0.12373	NaN	NaN	NaN	NaN	NaN	NaN	NaN	NaN	NaN	NaN	NaN	NaN
1.606	26.2467	-66.031	1377.711802	-1.5684	1.3887	-0.27393	-42.691	-14.2275	25.3703	0.40039	-0.21065	-0.12246	NaN	NaN	NaN	NaN	NaN	NaN	NaN	NaN	NaN	NaN	NaN	NaN
1.608	36.609	-56.233	1373.319	-1.6816	1.4395	-0.28906	-8.89	16.0692	37.3908	0.4165	-0.20654	-0.12061	NaN	NaN	NaN	NaN	NaN	NaN	NaN	NaN	NaN	NaN	NaN	NaN
1.61	7.8183	-54.994	1360.96	-1.8945	1.5488	-0.31152	-18.702	23.1628	1.117	0.42725	-0.19482	-0.11992	NaN	NaN	NaN	NaN	NaN	NaN	NaN	NaN	NaN	NaN	NaN	NaN
1.612	21.4211	-71.988	1338.8657	-2.0215	1.6387	-0.33057	-37.696	1.211	6.846	0.43945	-0.18154	-0.11475	NaN	NaN	NaN	NaN	NaN	NaN	NaN	NaN	NaN	NaN	NaN	NaN
1.614	54.3208	-88.88	1331.283	-2.1323	1.7173	-0.36377	-8.215	31.0019	-4.486	0.43789	-0.15889	-0.11201	NaN	NaN	NaN	NaN	NaN	NaN	NaN	NaN	NaN	NaN	NaN	NaN
1.616	70.241	-69.476	1341.309	-2.2148	1.7852	-0.38965	-26.578	8.595	-8.488	0.4291	-0.14444	-0.10869	NaN	NaN	NaN	NaN	NaN	NaN	NaN	NaN	NaN	NaN	NaN	NaN
1.618	22.9291	-16.626	1340.166	-2.2402	1.8105	-0.39209	-32.399	15.817	31.1961	0.41504	-0.12354	-0.10596	NaN	NaN	NaN	NaN	NaN	NaN	NaN	NaN	NaN	NaN	NaN	NaN
1.62	38.2444	29.8087	1319.3425	-2.252	1.8301	-0.40137	-36.988	58.124	10.205	0.39395	-0.10732	-0.10635	NaN	NaN	NaN	NaN	NaN	NaN	NaN	NaN	NaN	NaN	NaN	NaN
1.622	25.3651	30.9544	1280.505	-2.2329	1.8257	-0.4082	-56.3923	25.887	29.605	0.37227	-0.08164	-0.10674	NaN	NaN	NaN	NaN	NaN	NaN	NaN	NaN	NaN	NaN	NaN	NaN
1.624	9.6142	13.57	1279.3461	-2.1909	1.8091	-0.40771	-25.518	57.082	28.6908	0.35235	-0.058594	-0.10439	NaN	NaN	NaN	NaN	NaN	NaN	NaN	NaN	NaN	NaN	NaN	NaN
1.626	24.1482	-7.171	1302.4738	-2.0972	1.77	-0.40283	-34.15	56.55	1.096	0.33135	-0.033301	-0.10059	NaN	NaN	NaN	NaN	NaN	NaN	NaN	NaN	NaN	NaN	NaN	NaN
1.628	49.334	-16.168	1317.704	-2.0356	1.7515	-0.40381	-32.596	27.7704	8.327	0.30469	-0.0043945	-0.10742	NaN	NaN	NaN	NaN	NaN	NaN	NaN	NaN	NaN	NaN	NaN	NaN
1.63	45.758	4.964	1303.388	-1.9077	1.7017	-0.396	8.678	64.792	14.528	0.28438	0.023144	-0.10537	NaN	NaN	NaN	NaN	NaN	NaN	NaN	NaN	NaN	NaN	NaN	NaN
1.632	-1.8846	22.91127	1240.929	-1.8045	1.6565	-0.39331	-46.9415	44.3202	25.663	0.26036	0.046582	-0.10664	NaN	NaN	NaN	NaN	NaN	NaN	NaN	NaN	NaN	NaN	NaN	NaN
1.634	14.76	19.9932	1216.724	-1.7129	1.6035	-0.39355	-30.144	52.7253	51.168	0.24238	0.069239	-0.11055	NaN	NaN	NaN	NaN	NaN	NaN	NaN	NaN	NaN	NaN	NaN	NaN
1.636	36.4094	21.699	1207.652	-1.6133	1.5381	-0.3916	-20.717	73.627	33.0286	0.22656	0.091797	-0.11328	NaN	NaN	NaN	NaN	NaN	NaN	NaN	NaN	NaN	NaN	NaN	NaN
1.638	60.231	22.536	1202.3796	-1.5633	1.4958	-0.38867	-26.661	26.6245	26.026	0.21338	0.11182	-0.12061	NaN	NaN	NaN	NaN	NaN	NaN	NaN	NaN	NaN	NaN	NaN	NaN
1.64	79.567	47.845	1217.823	-1.5249	1.4536	-0.38525	0.0570000000000022	41.299	29.485	0.19931	0.13711	-0.12754	NaN	NaN	NaN	NaN	NaN	NaN	NaN	NaN	NaN	NaN	NaN	NaN
1.642	74.032	70.264	1227.003	-1.5044	1.4126	-0.37646	-45.0587	33.4965	7.4528	0.18222	0.1582	-0.13379	NaN	NaN	NaN	NaN	NaN	NaN	NaN	NaN	NaN	NaN	NaN	NaN
1.644	40.1444	73.1211	1202.2951	-1.4956	1.3989	-0.36865	-32.352	5.261	44.7719	0.16621	0.17851	-0.1416	NaN	NaN	NaN	NaN	NaN	NaN	NaN	NaN	NaN	NaN	NaN	NaN
1.646	38.171	91.0604	1153.6788	-1.4941	1.3672	-0.3584	-20.27	48.768	38.363	0.14609	0.19677	-0.14912	NaN	NaN	NaN	NaN	NaN	NaN	NaN	NaN	NaN	NaN	NaN	NaN
1.648	42.376	97.984	1126.628	-1.4908	1.3511	-0.34668	-60.9804	30.6148	48.7973	0.12646	0.21973	-0.15479	NaN	NaN	NaN	NaN	NaN	NaN	NaN	NaN	NaN	NaN	NaN	NaN
1.65	50.9878	107.16	1105.8524	-1.4731	1.3325	-0.33691	-18.177	23.0382	64.797	0.10547	0.23652	-0.16387	NaN	NaN	NaN	NaN	NaN	NaN	NaN	NaN	NaN	NaN	NaN	NaN
1.652	46.0302	104.462	1106.4203	-1.4375	1.3027	-0.32227	-2.817	53.708	33.6888	0.092285	0.25166	-0.17021	NaN	NaN	NaN	NaN	NaN	NaN	NaN	NaN	NaN	NaN	NaN	NaN
1.654	18.6919	105.246	1078.135	-1.4155	1.2837	-0.31787	-39.623	31.8735	31.236	0.080957	0.26885	-0.1749	NaN	NaN	NaN	NaN	NaN	NaN	NaN	NaN	NaN	NaN	NaN	NaN
1.656	-1.613	100.921	1054.611	-1.3589	1.2329	-0.31104	-14.806	64.177	43.413	0.067188	0.28311	-0.18145	NaN	NaN	NaN	NaN	NaN	NaN	NaN	NaN	NaN	NaN	NaN	NaN
1.658	10.85245	79.5964	1026.506	-1.312	1.187	-0.3064	-37.9995	54.101	33.3086	0.055176	0.29443	-0.19189	NaN	NaN	NaN	NaN	NaN	NaN	NaN	NaN	NaN	NaN	NaN	NaN
1.66	25.9284	74.495	988.3599	-1.2671	1.1353	-0.30615	-25.86	8.3332	77.101	0.043261	0.30332	-0.20391	NaN	NaN	NaN	NaN	NaN	NaN	NaN	NaN	NaN	NaN	NaN	NaN
1.662	9.892	82.686	946.3821	-1.2129	1.0869	-0.29639	19.634	-12.738	95.3115	0.0375	0.31084	-0.20869	NaN	NaN	NaN	NaN	NaN	NaN	NaN	NaN	NaN	NaN	NaN	NaN
1.664	-13.613	97.004	919.789	-1.189	1.064	-0.29492	-41.788	-77.022	112.991	0.034375	0.31592	-0.22315	NaN	NaN	NaN	NaN	NaN	NaN	NaN	NaN	NaN	NaN	NaN	NaN
1.666	4.755	120.0861	904.8863	-1.1401	1.022	-0.28467	-2.296	-82.847	184.295	0.036621	0.32979	-0.23535	NaN	NaN	NaN	NaN	NaN	NaN	NaN	NaN	NaN	NaN	NaN	NaN
1.668	-1.2034	119.01364	888.2814	-1.1108	0.9917	-0.27344	29.0064	-18.172	267.663	0.04834	0.3457	-0.24805	NaN	NaN	NaN	NaN	NaN	NaN	NaN	NaN	NaN	NaN	NaN	NaN
1.67	10.1113	108.5383	881.934	-1.0859	0.96289	-0.2627	28.3726	-49.911	456.247	0.082617	0.35957	-0.25928	NaN	NaN	NaN	NaN	NaN	NaN	NaN	NaN	NaN	NaN	NaN	NaN
1.672	-9.515	102.4384	860.592	-1.042	0.93359	-0.24316	55.2878	-97.848	636.224	0.11494	0.3666	-0.27627	NaN	NaN	NaN	NaN	NaN	NaN	NaN	NaN	NaN	NaN	NaN	NaN
1.674	-34.223	113.4797	807.8701	-1.0181	0.91553	-0.23486	42.676	-171.604	754.266	0.14267	0.37558	-0.29111	NaN	NaN	NaN	NaN	NaN	NaN	NaN	NaN	NaN	NaN	NaN	NaN
1.676	-52.182	131.1	761.556	-0.96533	0.86963	-0.22461	69.4893	-188.891	845.992	0.16543	0.37197	-0.30576	NaN	NaN	NaN	NaN	NaN	NaN	NaN	NaN	NaN	NaN	NaN	NaN
1.678	-63.2797	136.297	721.485	-0.92188	0.83691	-0.20556	139.644	-85.6323	920.325	0.18359	0.37305	-0.31641	NaN	NaN	NaN	NaN	NaN	NaN	NaN	NaN	NaN	NaN	NaN	NaN
1.68	-18.806	116.504	702.54913	-0.88232	0.80127	-0.18701	42.516	6.3988	975.748	0.19092	0.37354	-0.3333	NaN	NaN	NaN	NaN	NaN	NaN	NaN	NaN	NaN	NaN	NaN	NaN
1.682	-31.967	111.6738	671.4318	-0.84229	0.75244	-0.17188	-26.7418	105.431816	1020.655	0.17158	0.38222	-0.33965	NaN	NaN	NaN	NaN	NaN	NaN	NaN	NaN	NaN	NaN	NaN	NaN
1.684	-31.9692	109.5287	613.8533	-0.81689	0.729	-0.16895	11.285	143.2355	980.97	0.098537	0.39981	-0.33926	NaN	NaN	NaN	NaN	NaN	NaN	NaN	NaN	NaN	NaN	NaN	NaN
1.686	-43.4845	125.6966	577.33	-0.7793	0.67676	-0.14014	-10.408	52.035	1043.1872	-0.050975	0.42608	-0.33389	NaN	NaN	NaN	NaN	NaN	NaN	NaN	NaN	NaN	NaN	NaN	NaN
1.688	-5.234	138.6867	547.795	-0.75415	0.63843	-0.12696	23.003	-10.183	1152.123	-0.27881	0.45361	-0.32178	NaN	NaN	NaN	NaN	NaN	NaN	NaN	NaN	NaN	NaN	NaN	NaN
1.69	-8.993	149.3445	525.758	-0.73389	0.60205	-0.10596	40.546	-88.146	1183.812	-0.58946	0.47207	-0.30645	NaN	NaN	NaN	NaN	NaN	NaN	NaN	NaN	NaN	NaN	NaN	NaN
1.692	-6.555	140.782	492.235	-0.70752	0.56104	-0.078613	12.39	-140.389	1195.561	-1.0015	0.52354	-0.26826	NaN	NaN	NaN	NaN	NaN	NaN	NaN	NaN	NaN	NaN	NaN	NaN
1.694	0.518999999999998	117.8916	488.49314	-0.69287	0.5415	-0.066406	-35.937	-70.308	1148.9991	-1.5452	0.65871	-0.22451	NaN	NaN	NaN	NaN	NaN	NaN	NaN	NaN	NaN	NaN	NaN	NaN
1.696	-18.349	111.1277	473.63648	-0.646	0.49561	-0.044922	-107.3363	-41.48	1091.914	-2.1733	0.89924	-0.16035	NaN	NaN	NaN	NaN	NaN	NaN	NaN	NaN	NaN	NaN	NaN	NaN
1.698	-30.3164	119.258	449.859	-0.60718	0.45825	-0.037842	-66.333	-46.7	1112.399	-2.7983	1.2056	-0.083008	NaN	NaN	NaN	NaN	NaN	NaN	NaN	NaN	NaN	NaN	NaN	NaN
1.7	-29.261	131.452	413.92	-0.5625	0.41895	-0.032715	-37.746	-43.61	1109.662	-3.2007	1.5098	0.042956	NaN	NaN	NaN	NaN	NaN	NaN	NaN	NaN	NaN	NaN	NaN	NaN
1.702	-28.782	121.949	396.252	-0.49902	0.37012	-0.018066	-115.7496	-147.195	1155.387	-3.3452	1.7493	0.088872	NaN	NaN	NaN	NaN	NaN	NaN	NaN	NaN	NaN	NaN	NaN	NaN
1.704	-15.723	109.28	346.6697	-0.46631	0.34229	-0.01123	-179.196	-195.2827	1252.168	-3.2168	1.9153	0.056068	NaN	NaN	NaN	NaN	NaN	NaN	NaN	NaN	NaN	NaN	NaN	NaN
1.706	-34.622	88.824	307.388	-0.40576	0.29639	0.010254	-213.754	-182.663	1276.3792	-2.9957	2.0734	0.00187	NaN	NaN	NaN	NaN	NaN	NaN	NaN	NaN	NaN	NaN	NaN	NaN
1.708	-20.286	68.714	280.971	-0.35938	0.2666	0.0056152	-157.138	-185.884	1294.142	-2.8398	2.2363	-0.050781	NaN	NaN	NaN	NaN	NaN	NaN	NaN	NaN	NaN	NaN	NaN	NaN
1.71	-14.657	64.009	263.911	-0.31641	0.22949	0.016602	-46.484	-116.764	1277.021	-2.6618	2.2682	-0.13471	NaN	NaN	NaN	NaN	NaN	NaN	NaN	NaN	NaN	NaN	NaN	NaN
1.712	-5.977	76.754	260.141	-0.24854	0.1958	0.023438	-36.798	-124.923	1243.185	-2.4212	2.1523	-0.23731	NaN	NaN	NaN	NaN	NaN	NaN	NaN	NaN	NaN	NaN	NaN	NaN
1.714	-4.85	89.835	225.056	-0.21826	0.18018	0.023926	-51.378	-169.675	1321.272	-2.1418	1.9879	-0.3467	NaN	NaN	NaN	NaN	NaN	NaN	NaN	NaN	NaN	NaN	NaN	NaN
1.716	-26.611	98.7707	201.76673	-0.16699	0.15088	0.035156	-68.663	-137.9524	1386.914	-1.8598	1.8922	-0.39758	NaN	NaN	NaN	NaN	NaN	NaN	NaN	NaN	NaN	NaN	NaN	NaN
1.718	-29.518	111.27	179.7951	-0.13281	0.14014	0.036132	-92.415	-192.249	1482.243	-1.6206	1.8608	-0.42285	NaN	NaN	NaN	NaN	NaN	NaN	NaN	NaN	NaN	NaN	NaN	NaN
1.72	-43.201	113.019	169.0616	-0.1001	0.12549	0.037109	-73.93928	-175.1166	1543.555	-1.4757	1.8515	-0.41869	NaN	NaN	NaN	NaN	NaN	NaN	NaN	NaN	NaN	NaN	NaN	NaN
1.722	-36.316	112.495	143.4627	-0.05957	0.10547	0.041992	-71.84912	-123.972	1466.7344	-1.3558	1.8517	-0.38034	NaN	NaN	NaN	NaN	NaN	NaN	NaN	NaN	NaN	NaN	NaN	NaN
1.724	-48.2125	95.575	143.0565	-0.042969	0.099121	0.040039	-91.884	-167.9728	1396.681	-1.215	1.814	-0.33308	NaN	NaN	NaN	NaN	NaN	NaN	NaN	NaN	NaN	NaN	NaN	NaN
1.726	-63.1701	69.296	117.0314	-0.011719	0.086426	0.049316	-63.556	-101.25	1396.2	-1.0527	1.7248	-0.30905	NaN	NaN	NaN	NaN	NaN	NaN	NaN	NaN	NaN	NaN	NaN	NaN
1.728	-66.4577	60.7413	79.717	0.0080565	0.073242	0.053223	-63.525	-66.901	1414.15	-0.89063	1.6016	-0.2959	NaN	NaN	NaN	NaN	NaN	NaN	NaN	NaN	NaN	NaN	NaN	NaN
1.73	-42.631	58.3013	45.667	0.026855	0.06543	0.059082	-27.5105	-81.495	1509.877	-0.76496	1.475	-0.28483	NaN	NaN	NaN	NaN	NaN	NaN	NaN	NaN	NaN	NaN	NaN	NaN
1.732	-37.53	65.0655	37.138	0.056152	0.050293	0.060547	52.242	-28.365	1538.49	-0.72598	1.3771	-0.29845	NaN	NaN	NaN	NaN	NaN	NaN	NaN	NaN	NaN	NaN	NaN	NaN
1.734	-23.482	55.38277	44.8756	0.065918	0.041016	0.069336	67.568	-88.838	1519.4839	-0.76677	1.2912	-0.27033	NaN	NaN	NaN	NaN	NaN	NaN	NaN	NaN	NaN	NaN	NaN	NaN
1.736	-20.228	47.6298	40.7754	0.091797	0.02832	0.058594	90.07	-75.4536	1527.718	-0.87419	1.2516	-0.24335	NaN	NaN	NaN	NaN	NaN	NaN	NaN	NaN	NaN	NaN	NaN	NaN
1.738	-31.601	33.234	34.5938	0.10523	0.019287	0.057373	87.3836	-6.99	1517.307	-1.0293	1.252	-0.21729	NaN	NaN	NaN	NaN	NaN	NaN	NaN	NaN	NaN	NaN	NaN	NaN
1.74	-38.474	30.575	52.0538	0.11914	0.0073242	0.059082	58.358	-44.5361	1529.809	-1.186	1.2756	-0.19557	NaN	NaN	NaN	NaN	NaN	NaN	NaN	NaN	NaN	NaN	NaN	NaN
1.742	-12.853	37.7304	44.7878	0.1377	-0.0039063	0.059082	29.555	-12.486	1540.665	-1.3488	1.316	-0.18199	NaN	NaN	NaN	NaN	NaN	NaN	NaN	NaN	NaN	NaN	NaN	NaN
1.744	-20.002	48.6627	32.8256	0.14502	-0.01123	0.056641	-18.2775	-87.9818	1532.123	-1.4754	1.3502	-0.18224	NaN	NaN	NaN	NaN	NaN	NaN	NaN	NaN	NaN	NaN	NaN	NaN
1.746	-28.082	49.6365	16.7423	0.15186	-0.019043	0.055664	-36.4623	-175.221	1543.797	-1.5637	1.3728	-0.19118	NaN	NaN	NaN	NaN	NaN	NaN	NaN	NaN	NaN	NaN	NaN	NaN
1.748	-41.8905	37.073	29.2196	0.15234	-0.022461	0.05127	-27.235	-106.7477	1529.02993	-1.6245	1.3872	-0.21045	NaN	NaN	NaN	NaN	NaN	NaN	NaN	NaN	NaN	NaN	NaN	NaN
1.75	-16.585	29.0507	30.6038	0.15137	-0.025879	0.054199	-23.821	-114.951	1499.1993	-1.6885	1.3891	-0.23954	NaN	NaN	NaN	NaN	NaN	NaN	NaN	NaN	NaN	NaN	NaN	NaN
1.752	-11.125	31.137	32.6137	0.13965	-0.010254	0.058594	16.388	-69.825	1493.84594	-1.7516	1.3791	-0.2637	NaN	NaN	NaN	NaN	NaN	NaN	NaN	NaN	NaN	NaN	NaN	NaN
1.754	1.681	30.9121	35.989	0.13818	-0.0087891	0.062012	-10.989	-11.881	1451.967	-1.8255	1.3755	-0.27496	NaN	NaN	NaN	NaN	NaN	NaN	NaN	NaN	NaN	NaN	NaN	NaN
1.756	-8.943	21.8816	17.1778	0.12354	0.0019531	0.068848	-35.0454	-76.166	1452.989	-1.9265	1.409	-0.27881	NaN	NaN	NaN	NaN	NaN	NaN	NaN	NaN	NaN	NaN	NaN	NaN
1.758	10.684	33.8184	3.453	0.11377	0.0078125	0.071289	28.7359	-28.519	1475.0841	-2.041	1.4785	-0.29102	NaN	NaN	NaN	NaN	NaN	NaN	NaN	NaN	NaN	NaN	NaN	NaN
1.76	-5.433	32.75114	-7.463	0.10449	0.011719	0.083496	31.204	-9.35	1478.222	-2.1318	1.5563	-0.31099	NaN	NaN	NaN	NaN	NaN	NaN	NaN	NaN	NaN	NaN	NaN	NaN
1.762	-5.126	23.9849	20.9023	0.10693	0.029297	0.088867	25.7821	27.892	1482.86	-2.1955	1.631	-0.33121	NaN	NaN	NaN	NaN	NaN	NaN	NaN	NaN	NaN	NaN	NaN	NaN
1.764	6.242	30.3162	39.3986	0.10352	0.031738	0.092285	-11.2304	142.775	1436.5955	-2.262	1.6993	-0.34206	NaN	NaN	NaN	NaN	NaN	NaN	NaN	NaN	NaN	NaN	NaN	NaN
1.766	-1.871	33.1091	53.894	0.11475	0.029297	0.092773	-96.486	112.734	1363.877	-2.3245	1.7535	-0.35816	NaN	NaN	NaN	NaN	NaN	NaN	NaN	NaN	NaN	NaN	NaN	NaN
1.768	-19.177	37.091	44.9987	0.11768	0.031494	0.095215	-84.606	109.546	1343.575	-2.3921	1.7954	-0.36035	NaN	NaN	NaN	NaN	NaN	NaN	NaN	NaN	NaN	NaN	NaN	NaN
1.77	-27.963	32.079	45.63624	0.13037	0.024414	0.09668	-58.766	102.901	1335.231	-2.4409	1.8294	-0.35157	NaN	NaN	NaN	NaN	NaN	NaN	NaN	NaN	NaN	NaN	NaN	NaN
1.772	-33.532	36.51	46.7452	0.146	0.022949	0.094238	-31.22	11.0915	1358.347	-2.4654	1.8602	-0.33687	NaN	NaN	NaN	NaN	NaN	NaN	NaN	NaN	NaN	NaN	NaN	NaN
1.774	-26.97	39.2209	40.3013	0.15576	0.02002	0.098633	17.1638	62.821	1333.966	-2.4377	1.8822	-0.31415	NaN	NaN	NaN	NaN	NaN	NaN	NaN	NaN	NaN	NaN	NaN	NaN
1.776	-10.389	18.199811	11.7894	0.17334	0.02002	0.088867	-12.47	68.627	1251.644	-2.3618	1.8938	-0.28676	NaN	NaN	NaN	NaN	NaN	NaN	NaN	NaN	NaN	NaN	NaN	NaN
1.778	-34.4134	3.0047	11.2631	0.18457	0.016602	0.088867	-5.731	62.405	1221.368	-2.2515	1.8813	-0.26465	NaN	NaN	NaN	NaN	NaN	NaN	NaN	NaN	NaN	NaN	NaN	NaN
1.78	-35.0022	-0.542899999999999	14.343	0.19043	0.01709	0.089355	21.798	140.8376	1204.8	-2.0957	1.8333	-0.24526	NaN	NaN	NaN	NaN	NaN	NaN	NaN	NaN	NaN	NaN	NaN	NaN
1.782	-25.78	14.372	10.566	0.20947	0.025879	0.09375	9.672	113.423	1219.613	-1.9391	1.7603	-0.23197	NaN	NaN	NaN	NaN	NaN	NaN	NaN	NaN	NaN	NaN	NaN	NaN
1.784	-36.733	31.826	19.559	0.21582	0.037598	0.092773	53.988	134.548	1215.156	-1.7908	1.6697	-0.21753	NaN	NaN	NaN	NaN	NaN	NaN	NaN	NaN	NaN	NaN	NaN	NaN
1.786	-32.184	40.2363	27.27095	0.23389	0.050293	0.093262	37.3207	183.7409	1187.9685	-1.672	1.5816	-0.20693	NaN	NaN	NaN	NaN	NaN	NaN	NaN	NaN	NaN	NaN	NaN	NaN
1.788	-32.132	37.7752	28.1271	0.24951	0.064453	0.090332	-25.5036	156.9521	1167.473	-1.5757	1.5083	-0.19971	NaN	NaN	NaN	NaN	NaN	NaN	NaN	NaN	NaN	NaN	NaN	NaN
1.79	-47.3603	38.738	30.42	0.25488	0.067383	0.091797	-13.2771	209.682	1127.341	-1.5099	1.4435	-0.18234	NaN	NaN	NaN	NaN	NaN	NaN	NaN	NaN	NaN	NaN	NaN	NaN
1.792	-41.3447	25.039	39.182	0.26904	0.070313	0.085938	0.575999999999997	200.289	1063.5561	-1.4653	1.3911	-0.17265	NaN	NaN	NaN	NaN	NaN	NaN	NaN	NaN	NaN	NaN	NaN	NaN
1.794	-30.598	30.517	54.577	0.28174	0.067627	0.086181	1.781	168.476	1029.5241	-1.445	1.3488	-0.16408	NaN	NaN	NaN	NaN	NaN	NaN	NaN	NaN	NaN	NaN	NaN	NaN
1.796	-9.303	24.2718	41.031	0.28613	0.064941	0.081055	-1.469	215.154	972.972	-1.4368	1.3095	-0.14502	NaN	NaN	NaN	NaN	NaN	NaN	NaN	NaN	NaN	NaN	NaN	NaN
1.798	-40.35	18.1171	-4.132	0.2998	0.063477	0.075684	-34.2058	169.858	933.519	-1.4448	1.2798	-0.13623	NaN	NaN	NaN	NaN	NaN	NaN	NaN	NaN	NaN	NaN	NaN	NaN
1.8	-31.963	7.102	0.781000000000002	0.30566	0.054199	0.072266	-18.89	185.942	926.807	-1.436	1.2535	-0.12939	NaN	NaN	NaN	NaN	NaN	NaN	NaN	NaN	NaN	NaN	NaN	NaN
1.802	-25.246	8.4213	15.534	0.31201	0.063477	0.063965	-12.222	216.023	882.9132	-1.4144	1.2251	-0.11767	NaN	NaN	NaN	NaN	NaN	NaN	NaN	NaN	NaN	NaN	NaN	NaN
1.804	-4.8	15.4627	33.15731	0.3064	0.06543	0.058594	-32.567	158.016	864.217	-1.3823	1.1939	-0.10478	NaN	NaN	NaN	NaN	NaN	NaN	NaN	NaN	NaN	NaN	NaN	NaN
1.806	5.428	30.75869	32.2676	0.29395	0.07373	0.053711	0.124000000000002	183.881	807.497	-1.3343	1.161	-0.094139	NaN	NaN	NaN	NaN	NaN	NaN	NaN	NaN	NaN	NaN	NaN	NaN
1.808	9.323	8.14345	32.7631	0.27148	0.080078	0.048828	-41.951	181.727	737.898	-1.2676	1.1211	-0.083984	NaN	NaN	NaN	NaN	NaN	NaN	NaN	NaN	NaN	NaN	NaN	NaN
1.81	-0.242000000000001	7.446	27.0113	0.25439	0.081543	0.056152	-60.776	180.865	736.2043	-1.1855	1.0742	-0.078613	NaN	NaN	NaN	NaN	NaN	NaN	NaN	NaN	NaN	NaN	NaN	NaN
1.812	-18.459	20.1428	26.7389	0.20996	0.098145	0.053711	-39.462	237.294	732.035	-1.0964	1.0184	-0.079003	NaN	NaN	NaN	NaN	NaN	NaN	NaN	NaN	NaN	NaN	NaN	NaN
1.814	-10.786	38.782	21.5878	0.18066	0.10498	0.0625	-61.2561	206.054	695.612	-1.0108	0.95323	-0.072364	NaN	NaN	NaN	NaN	NaN	NaN	NaN	NaN	NaN	NaN	NaN	NaN
1.816	-4.932	41.173	32.025	0.14795	0.11523	0.068848	-45.9764	193.329	661.299	-0.93076	0.89033	-0.07207	NaN	NaN	NaN	NaN	NaN	NaN	NaN	NaN	NaN	NaN	NaN	NaN
1.818	1.042	29.5276	38.6501	0.10498	0.12598	0.07959	-71.9367	182.363	577.329	-0.8667	0.83252	-0.071289	NaN	NaN	NaN	NaN	NaN	NaN	NaN	NaN	NaN	NaN	NaN	NaN
1.82	-8.883	22.2101	18.4766	0.086914	0.13525	0.085938	-114.926	142.279	531.5558	-0.80674	0.77334	-0.05957	NaN	NaN	NaN	NaN	NaN	NaN	NaN	NaN	NaN	NaN	NaN	NaN
1.822	-28.437	18.7796	22.4198	0.058105	0.14697	0.096191	-64.851	172.694	487.87	-0.75977	0.72265	-0.047265	NaN	NaN	NaN	NaN	NaN	NaN	NaN	NaN	NaN	NaN	NaN	NaN
1.824	-25.7526	19.5994	20.7339	0.033936	0.15748	0.10279	-74.873	161.1124	432.068	-0.72031	0.67539	-0.035547	NaN	NaN	NaN	NaN	NaN	NaN	NaN	NaN	NaN	NaN	NaN	NaN
1.826	-3.257	25.7443	14.2853	0.012695	0.16162	0.10791	-59.799	114.804	409.9886	-0.67568	0.62861	-0.013965	NaN	NaN	NaN	NaN	NaN	NaN	NaN	NaN	NaN	NaN	NaN	NaN
1.828	-12.765	24.9763	4.2974	-0.0048828	0.1665	0.11865	-30.352	117.982	358.462	-0.62939	0.58643	0.0043945	NaN	NaN	NaN	NaN	NaN	NaN	NaN	NaN	NaN	NaN	NaN	NaN
1.83	-32.976	5.6348	7.5268	-0.012207	0.16895	0.12451	-54.84	80.138	329.578	-0.58271	0.53311	0.026074	NaN	NaN	NaN	NaN	NaN	NaN	NaN	NaN	NaN	NaN	NaN	NaN
1.832	-27.387	4.0178	10.998	-0.029785	0.17725	0.13477	-19.595	116.315	307.741	-0.53223	0.48242	0.046777	NaN	NaN	NaN	NaN	NaN	NaN	NaN	NaN	NaN	NaN	NaN	NaN
1.834	-25.413	22.04725	26.188	-0.040039	0.18287	0.14551	-13.661	180.326	286.4351	-0.48261	0.4289	0.062403	NaN	NaN	NaN	NaN	NaN	NaN	NaN	NaN	NaN	NaN	NaN	NaN
1.836	-49.8092	34.9186	37.0358	-0.049316	0.19189	0.16504	-51.039	147.621	284.796	-0.43633	0.3711	0.066504	NaN	NaN	NaN	NaN	NaN	NaN	NaN	NaN	NaN	NaN	NaN	NaN
1.838	-44.37	36.78249	30.8491	-0.063965	0.20215	0.18115	-22.937	144.428	239.8048	-0.39258	0.31445	0.07373	NaN	NaN	NaN	NaN	NaN	NaN	NaN	NaN	NaN	NaN	NaN	NaN
1.84	-26.241	34.4022	37.3837	-0.072266	0.20947	0.19531	-64.2157	120.847	176.967	-0.3582	0.25566	0.081543	NaN	NaN	NaN	NaN	NaN	NaN	NaN	NaN	NaN	NaN	NaN	NaN
1.842	-35.592	30.8084	10.6595	-0.083008	0.20996	0.20605	-47.9208	73.412	168.4209	-0.33477	0.2041	0.088867	NaN	NaN	NaN	NaN	NaN	NaN	NaN	NaN	NaN	NaN	NaN	NaN
1.844	-49.7044	19.0031	8.63	-0.088868	0.21655	0.22315	-24.437	92.233	155.789	-0.30938	0.15332	0.093946	NaN	NaN	NaN	NaN	NaN	NaN	NaN	NaN	NaN	NaN	NaN	NaN
1.846	-24.224	18.1189	22.5915	-0.094727	0.22266	0.23486	-60.192	59.037	156.347	-0.29121	0.10918	0.10098	NaN	NaN	NaN	NaN	NaN	NaN	NaN	NaN	NaN	NaN	NaN	NaN
1.848	-22.348	32.1903	25.1169	-0.09668	0.24023	0.25146	-27.165	60.399	123.1168	-0.26758	0.068848	0.1123	NaN	NaN	NaN	NaN	NaN	NaN	NaN	NaN	NaN	NaN	NaN	NaN
1.85	-13.174	41.0319	11.7129	-0.098633	0.25049	0.25879	-37.271	90.507	69.454	-0.25088	0.023047	0.12412	NaN	NaN	NaN	NaN	NaN	NaN	NaN	NaN	NaN	NaN	NaN	NaN
1.852	-33.605	32.03027	12.665	-0.091309	0.25977	0.27051	-37.927	65.0981	59.978	-0.22998	-0.014551	0.12675	NaN	NaN	NaN	NaN	NaN	NaN	NaN	NaN	NaN	NaN	NaN	NaN
1.854	-16.541	9.0808	65.528	-0.091797	0.27002	0.28052	14.493	71.2988	63.9611	-0.20303	-0.046973	0.12793	NaN	NaN	NaN	NaN	NaN	NaN	NaN	NaN	NaN	NaN	NaN	NaN
1.856	-14.163	-7.77881	144.6281	-0.090332	0.27881	0.2876	-36.08	64.7593	39.627	-0.17569	-0.07627	0.1291	NaN	NaN	NaN	NaN	NaN	NaN	NaN	NaN	NaN	NaN	NaN	NaN
1.858	-15.292	19.6282	215.2296	-0.084961	0.2959	0.28223	-36.416	38.267	55.2417	-0.14746	-0.104	0.13574	NaN	NaN	NaN	NaN	NaN	NaN	NaN	NaN	NaN	NaN	NaN	NaN
1.86	-1.32	33.254	284.8713	-0.077637	0.30127	0.27148	-8.559	67.071	50.443	-0.12784	-0.11397	0.13858	NaN	NaN	NaN	NaN	NaN	NaN	NaN	NaN	NaN	NaN	NaN	NaN
1.862	-30.614	-32.14	324.965	-0.089844	0.32764	0.21533	-80.5685	51.15859	48.837	-0.10479	-0.12939	0.13174	NaN	NaN	NaN	NaN	NaN	NaN	NaN	NaN	NaN	NaN	NaN	NaN
1.864	-72.74	-111.411	311.3178	-0.13037	0.34058	0.16431	-34.156	49.43875	59.9829	-0.066895	-0.15088	0.12588	NaN	NaN	NaN	NaN	NaN	NaN	NaN	NaN	NaN	NaN	NaN	NaN
1.866	-38.662	-138.216	291.005	-0.19385	0.35791	0.13037	-34.963	82.048	20.8023	-0.036231	-0.16738	0.12334	NaN	NaN	NaN	NaN	NaN	NaN	NaN	NaN	NaN	NaN	NaN	NaN
1.868	-30.209	-93.845	336.848	-0.35938	0.37988	0.10156	-61.2958	69.098	20.0888	-0.0073242	-0.16943	0.11426	NaN	NaN	NaN	NaN	NaN	NaN	NaN	NaN	NaN	NaN	NaN	NaN
1.87	-66.784	-18.632	432.465	-0.45996	0.40186	0.093262	-28.596	77.178	14.215	0.013574	-0.16719	0.10674	NaN	NaN	NaN	NaN	NaN	NaN	NaN	NaN	NaN	NaN	NaN	NaN
1.872	-82.158	0.132	491.863	-0.6499	0.46533	0.096191	-61.966	55.245	6.138	0.019043	-0.15244	0.095703	NaN	NaN	NaN	NaN	NaN	NaN	NaN	NaN	NaN	NaN	NaN	NaN
1.874	-75.38	1.519	496.35	-0.77856	0.53637	0.1001	-41.385	15.1414	13.748	0.017481	-0.1333	0.089843	NaN	NaN	NaN	NaN	NaN	NaN	NaN	NaN	NaN	NaN	NaN	NaN
1.876	-52.503	-12.326	613.202	-0.90039	0.61719	0.09375	0.630000000000003	19.8615	3.035	0.0035156	-0.10205	0.093066	NaN	NaN	NaN	NaN	NaN	NaN	NaN	NaN	NaN	NaN	NaN	NaN
1.878	-36.853	7.373	733.8903	-1.0669	0.71631	0.070313	-36.127	-0.299000000000003	1.958	-0.026367	-0.070801	0.10254	NaN	NaN	NaN	NaN	NaN	NaN	NaN	NaN	NaN	NaN	NaN	NaN
1.88	-24.443	54.574	843.223	-1.1572	0.75977	0.05127	-23.01	15.05	30.5177	-0.063672	-0.034472	0.11816	NaN	NaN	NaN	NaN	NaN	NaN	NaN	NaN	NaN	NaN	NaN	NaN
1.882	-31.37	123.178	936.479	-1.373	0.8291	-0.0019531	-16.829	60.254	19.941	-0.10801	0.0018554	0.125	NaN	NaN	NaN	NaN	NaN	NaN	NaN	NaN	NaN	NaN	NaN	NaN
1.884	-51.379	146.147	1011.496	-1.5728	0.87354	-0.042969	-55.4153	57.071	35.5347	-0.14746	0.03545	0.13242	NaN	NaN	NaN	NaN	NaN	NaN	NaN	NaN	NaN	NaN	NaN	NaN
1.886	-43.3771	126.4709	1069.3403	-1.8105	0.91406	-0.072266	-7.467	81.083	49.076	-0.17646	0.06455	0.13721	NaN	NaN	NaN	NaN	NaN	NaN	NaN	NaN	NaN	NaN	NaN	NaN
1.888	-14.9932	75.226	1116.8258	-2.2051	1.0391	-0.027832	-37.915	74.527	38.8301	-0.20313	0.09668	0.13232	NaN	NaN	NaN	NaN	NaN	NaN	NaN	NaN	NaN	NaN	NaN	NaN
1.89	-41.686	18.061	1145.03639	-2.4194	1.1255	0.015137	-31.605	34.258	57.916	-0.21572	0.12685	0.13457	NaN	NaN	NaN	NaN	NaN	NaN	NaN	NaN	NaN	NaN	NaN	NaN
1.892	-78.0977	-43.438	1179.3645	-2.8179	1.3325	0.091309	-12.378	46.576	42.5902	-0.22852	0.15488	0.13906	NaN	NaN	NaN	NaN	NaN	NaN	NaN	NaN	NaN	NaN	NaN	NaN
1.894	-79.242	-96.999	1193.3	-2.997	1.4936	0.1289	-61.688014	30.8162	34.9309	-0.23984	0.18691	0.14414	NaN	NaN	NaN	NaN	NaN	NaN	NaN	NaN	NaN	NaN	NaN	NaN
1.896	-78.679	-127.856	1157.791	-3.0386	1.6606	0.15137	-12.492	23.215	50.9064	-0.24824	0.21885	0.15449	NaN	NaN	NaN	NaN	NaN	NaN	NaN	NaN	NaN	NaN	NaN	NaN
1.898	-7.2987	-125.666	1167.9528	-2.8262	1.8516	0.17139	-7.939	39.41354	38.7326	-0.25977	0.24219	0.16602	NaN	NaN	NaN	NaN	NaN	NaN	NaN	NaN	NaN	NaN	NaN	NaN
1.9	52.0985	-157.249	1197.16108	-2.644	1.9458	0.1665	-37.473	5.708	41.7449	-0.25996	0.2626	0.17559	NaN	NaN	NaN	NaN	NaN	NaN	NaN	NaN	NaN	NaN	NaN	NaN
1.902	59.137	-170.676	1215.7457	-2.2051	2.0645	0.13428	4.73399999999999	16.63	40.4128	-0.25332	0.28106	0.18477	NaN	NaN	NaN	NaN	NaN	NaN	NaN	NaN	NaN	NaN	NaN	NaN
1.904	11.519	-141.923	1261.621	-1.8904	2.0442	0.092775	-37.653	36.005	28.6792	-0.23808	0.28887	0.19141	NaN	NaN	NaN	NaN	NaN	NaN	NaN	NaN	NaN	NaN	NaN	NaN
1.906	-8.1417	-80.027	1322.933	-1.623	1.9512	0.046875	-30.347	21.1641	45.879	-0.21446	0.29707	0.20049	NaN	NaN	NaN	NaN	NaN	NaN	NaN	NaN	NaN	NaN	NaN	NaN
1.908	37.8879	-45.09193	1359.475	-1.3906	1.7578	0.0043945	6.432	40.139	45.5281	-0.18359	0.30078	0.20801	NaN	NaN	NaN	NaN	NaN	NaN	NaN	NaN	NaN	NaN	NaN	NaN
1.91	60.653	-39.668	1365.971	-1.3105	1.666	-0.0092773	-49.0461	13.93877	45.0384	-0.14599	0.29267	0.21123	NaN	NaN	NaN	NaN	NaN	NaN	NaN	NaN	NaN	NaN	NaN	NaN
1.912	49.3631	-38.084	1334.9695	-1.168	1.5078	-0.03125	-22.408	-12.784035	70.704	-0.10411	0.27178	0.21192	NaN	NaN	NaN	NaN	NaN	NaN	NaN	NaN	NaN	NaN	NaN	NaN
1.914	10.877	-48.557	1309.91365	-1.074	1.4152	-0.035645	-22.324	13.8617	49.031	-0.05918	0.24638	0.21504	NaN	NaN	NaN	NaN	NaN	NaN	NaN	NaN	NaN	NaN	NaN	NaN
1.916	-5.9313	-44.463	1299.7875	-1.0093	1.3286	-0.046387	-47.74	7.023	45.0713	-0.013672	0.21455	0.21015	NaN	NaN	NaN	NaN	NaN	NaN	NaN	NaN	NaN	NaN	NaN	NaN
1.918	-18.159	-50.505	1301.52351	-1.0171	1.2427	-0.052246	5.193	30.02752	41.489	0.032227	0.18359	0.20996	NaN	NaN	NaN	NaN	NaN	NaN	NaN	NaN	NaN	NaN	NaN	NaN
1.92	-30.23	-74.021	1289.9346	-1.0955	1.1955	-0.050293	-43.717	34.7518	7.306	0.083203	0.1539	0.20683	NaN	NaN	NaN	NaN	NaN	NaN	NaN	NaN	NaN	NaN	NaN	NaN
1.922	20.88	-115.1333	1288.721	-1.1934	1.1748	-0.038574	-37.508	1.441	11.09977	0.13711	0.12803	0.2083	NaN	NaN	NaN	NaN	NaN	NaN	NaN	NaN	NaN	NaN	NaN	NaN
1.924	38.183	-159.32	1309.868	-1.3242	1.2012	0.0024414	0.109999999999999	4.99712	-10.336	0.18984	0.10303	0.20479	NaN	NaN	NaN	NaN	NaN	NaN	NaN	NaN	NaN	NaN	NaN	NaN
1.926	21.2	-167.038	1344.753	-1.3789	1.2266	0.023438	-44.8491	-1.55	-7.206	0.23887	0.075879	0.19736	NaN	NaN	NaN	NaN	NaN	NaN	NaN	NaN	NaN	NaN	NaN	NaN
1.928	-15.96	-148.238	1393.02	-1.4233	1.2876	0.049805	-25.223	-7.716	30.4806	0.28027	0.050781	0.19678	NaN	NaN	NaN	NaN	NaN	NaN	NaN	NaN	NaN	NaN	NaN	NaN
1.93	-29.7251	-95.407	1417.058	-1.4101	1.3277	0.044433	-41.12	20.194	16.583	0.32217	0.029492	0.19121	NaN	NaN	NaN	NaN	NaN	NaN	NaN	NaN	NaN	NaN	NaN	NaN
1.932	-51.951	-73.3014	1435.187	-1.355	1.3423	0.026367	-52.712	15.022	24.0508	0.35791	0.0097658	0.18945	NaN	NaN	NaN	NaN	NaN	NaN	NaN	NaN	NaN	NaN	NaN	NaN
1.934	-70.904	-82.199	1449.983	-1.2598	1.3125	-0.0078125	-15.766	27.025	23.8391	0.38604	-0.0042969	0.18555	NaN	NaN	NaN	NaN	NaN	NaN	NaN	NaN	NaN	NaN	NaN	NaN
1.936	-87.441	-88.446	1448.76	-1.2344	1.2852	-0.015625	-48.5425	52.171	6.275	0.41484	-0.019239	0.18125	NaN	NaN	NaN	NaN	NaN	NaN	NaN	NaN	NaN	NaN	NaN	NaN
1.938	-99.277	-77.866	1435.2475	-1.2241	1.2173	-0.035645	-26.207	30.6697	22.1135	0.43359	-0.033691	0.16602	NaN	NaN	NaN	NaN	NaN	NaN	NaN	NaN	NaN	NaN	NaN	NaN
1.94	-124.3242	-57.8493	1406.4882	-1.2771	1.177	-0.044678	-4.465	40.392	22.5714	0.45196	-0.046191	0.15733	NaN	NaN	NaN	NaN	NaN	NaN	NaN	NaN	NaN	NaN	NaN	NaN
1.942	-132.948	-56.7338	1383.4708	-1.3887	1.1602	-0.054688	-50.3333	27.559	-3.4133	0.4624	-0.046778	0.15459	NaN	NaN	NaN	NaN	NaN	NaN	NaN	NaN	NaN	NaN	NaN	NaN
1.944	-125.48	-55.9901	1362.671	-1.6191	1.1777	-0.047852	-26.271	-2.578	21.7614	0.46944	-0.045606	0.14561	NaN	NaN	NaN	NaN	NaN	NaN	NaN	NaN	NaN	NaN	NaN	NaN
1.946	-100.97987	-74.3025	1366.144	-1.7578	1.1895	-0.040039	-29.611	27.8296	0.391999999999999	0.46797	-0.030371	0.13994	NaN	NaN	NaN	NaN	NaN	NaN	NaN	NaN	NaN	NaN	NaN	NaN
1.948	-85.407	-81.052	1370.005	-2.0576	1.2383	-0.034668	-53.677	23.178	12.0392	0.46289	-0.010742	0.13232	NaN	NaN	NaN	NaN	NaN	NaN	NaN	NaN	NaN	NaN	NaN	NaN
1.95	-50.424	-70.713	1363.538	-2.2954	1.2895	-0.034912	9.54	53.959	21.8428	0.44336	0.014648	0.13584	NaN	NaN	NaN	NaN	NaN	NaN	NaN	NaN	NaN	NaN	NaN	NaN
1.952	-57.027	-32.66994	1370.5887	-2.5273	1.3574	-0.034668	-34.204	75.919	2.603	0.41758	0.043848	0.13349	NaN	NaN	NaN	NaN	NaN	NaN	NaN	NaN	NaN	NaN	NaN	NaN
1.954	-87.0333	0.2429	1399.074	-2.7695	1.4688	-0.023926	-45.0332	39.091	30.6864	0.38828	0.075489	0.13545	NaN	NaN	NaN	NaN	NaN	NaN	NaN	NaN	NaN	NaN	NaN	NaN
1.956	-89.61825	3.2784	1409.3561	-2.8589	1.5239	-0.020996	-8.207	47.342	32.5051	0.36172	0.10147	0.1333	NaN	NaN	NaN	NaN	NaN	NaN	NaN	NaN	NaN	NaN	NaN	NaN
1.958	-77.9004	-8.431	1402.061	-2.9355	1.6172	-0.017578	-58.192	45.219	23.6728	0.33301	0.12598	0.12891	NaN	NaN	NaN	NaN	NaN	NaN	NaN	NaN	NaN	NaN	NaN	NaN
1.96	-67.11	-18.323	1393.956	-2.9275	1.6551	-0.02002	-5.4	37.68948	40.211	0.31054	0.14551	0.12148	NaN	NaN	NaN	NaN	NaN	NaN	NaN	NaN	NaN	NaN	NaN	NaN
1.962	-47.599	-14.281	1376.479	-2.8765	1.6567	-0.028809	-5.048	59.803	30.462	0.29043	0.16943	0.11738	NaN	NaN	NaN	NaN	NaN	NaN	NaN	NaN	NaN	NaN	NaN	NaN
1.964	-31.61	-5.981	1369.198	-2.7632	1.6216	-0.041504	-54.481	39.0646	34.7862	0.26934	0.1917	0.11035	NaN	NaN	NaN	NaN	NaN	NaN	NaN	NaN	NaN	NaN	NaN	NaN
1.966	-67.495	6.2781	1339.9046	-2.6953	1.5957	-0.048828	10.365	44.1801	44.1673	0.25244	0.21426	0.11055	NaN	NaN	NaN	NaN	NaN	NaN	NaN	NaN	NaN	NaN	NaN	NaN
1.968	-59.293	-1.6569	1313.4353	-2.5527	1.5391	-0.063477	-19.326	54.005	19.7555	0.23486	0.23584	0.10986	NaN	NaN	NaN	NaN	NaN	NaN	NaN	NaN	NaN	NaN	NaN	NaN
1.97	-22.553	-16.4087	1284.438	-2.4421	1.4964	-0.062256	-21.039	23.7625	45.855	0.21455	0.25586	0.11103	NaN	NaN	NaN	NaN	NaN	NaN	NaN	NaN	NaN	NaN	NaN	NaN
1.972	19.741	-10.998	1274.096	-2.3257	1.4526	-0.062012	2.36799999999999	41.502	44.3972	0.19453	0.27891	0.11289	NaN	NaN	NaN	NaN	NaN	NaN	NaN	NaN	NaN	NaN	NaN	NaN
1.974	2.69	10.6847	1256.1061	-2.1777	1.3857	-0.069336	-46.7003	38.9473	23.8509	0.17188	0.2957	0.11875	NaN	NaN	NaN	NaN	NaN	NaN	NaN	NaN	NaN	NaN	NaN	NaN
1.976	-21.447	55.563	1211.604	-2.1089	1.356	-0.069824	-31.76	22.8846	43.89755	0.14375	0.30996	0.12461	NaN	NaN	NaN	NaN	NaN	NaN	NaN	NaN	NaN	NaN	NaN	NaN
1.978	-60.623	79.994	1214.1867	-1.9819	1.2856	-0.087402	-24.908	37.327	32.306	0.12158	0.31641	0.13086	NaN	NaN	NaN	NaN	NaN	NaN	NaN	NaN	NaN	NaN	NaN	NaN
1.98	-58.997	95.738	1200.3524	-1.9002	1.2361	-0.098389	-51.7908	20.9447	53.792	0.097365	0.31934	0.13799	NaN	NaN	NaN	NaN	NaN	NaN	NaN	NaN	NaN	NaN	NaN	NaN
1.982	-46.291	91.97	1181.8497	-1.8247	1.1802	-0.10693	-4.44	24.5029	70.672	0.079883	0.32188	0.14688	NaN	NaN	NaN	NaN	NaN	NaN	NaN	NaN	NaN	NaN	NaN	NaN
1.984	-30.101	90.8797	1153.4248	-1.7402	1.125	-0.098145	-34.48	46.982	33.7087	0.066211	0.31523	0.15703	NaN	NaN	NaN	NaN	NaN	NaN	NaN	NaN	NaN	NaN	NaN	NaN
1.986	-65.6441	97.189	1150.3374	-1.6992	1.1035	-0.10791	-46.068	23.8919	52.9561	0.052832	0.30625	0.16396	NaN	NaN	NaN	NaN	NaN	NaN	NaN	NaN	NaN	NaN	NaN	NaN
1.988	-65.858	116.965	1124.358	-1.6172	1.0605	-0.099609	2.175	33.07	39.7175	0.04834	0.29639	0.16895	NaN	NaN	NaN	NaN	NaN	NaN	NaN	NaN	NaN	NaN	NaN	NaN
1.99	-66.52731	114.824	1083.206	-1.5591	1.0209	-0.099853	-59.8394	13.5993	32.9135	0.044238	0.27939	0.16904	NaN	NaN	NaN	NaN	NaN	NaN	NaN	NaN	NaN	NaN	NaN	NaN
1.992	-71.143	85.4201	1064.8274	-1.502	0.97656	-0.087891	-24.563	5.832	51.4214	0.044238	0.26767	0.17071	NaN	NaN	NaN	NaN	NaN	NaN	NaN	NaN	NaN	NaN	NaN	NaN
1.994	-62.142	46.118	1028.478	-1.4272	0.9165	-0.079102	-19.633	12.8928	50.065	0.049707	0.25556	0.16914	NaN	NaN	NaN	NaN	NaN	NaN	NaN	NaN	NaN	NaN	NaN	NaN
1.996	-43.934	27.676	990.4954	-1.3926	0.89258	-0.078613	-64.3253	-46.06	110.6328	0.050098	0.25859	0.17305	NaN	NaN	NaN	NaN	NaN	NaN	NaN	NaN	NaN	NaN	NaN	NaN
1.998	-79.8627	52.444	962.553	-1.3228	0.83252	-0.075684	-32.674	-72.5031	207.149	0.049805	0.25732	0.18018	NaN	NaN	NaN	NaN	NaN	NaN	NaN	NaN	NaN	NaN	NaN	NaN
2	-90.7346	92.6533	968.325	-1.2705	0.79883	-0.06958	-68.05	-26.585	269.789	0.050488	0.25742	0.18613	NaN	NaN	NaN	NaN	NaN	NaN	NaN	NaN	NaN	NaN	NaN	NaN
2.002	-77.4787	126.948	946.1879	-1.2241	0.76416	-0.067871	-89.337	-30.9689	388.312	0.05	0.2583	0.19267	NaN	NaN	NaN	NaN	NaN	NaN	NaN	NaN	NaN	NaN	NaN	NaN
2.004	-61.934	121.1563	897.471	-1.1646	0.72803	-0.066895	-87.751	-78.116	482.345	0.054688	0.25283	0.19424	NaN	NaN	NaN	NaN	NaN	NaN	NaN	NaN	NaN	NaN	NaN	NaN
2.006	-64.064	123.057	853.784	-1.1323	0.70752	-0.067871	-159.809	-177.72	517.209	0.062793	0.2542	0.19336	NaN	NaN	NaN	NaN	NaN	NaN	NaN	NaN	NaN	NaN	NaN	NaN
2.008	-35.448	137.164	833.0096	-1.0742	0.67578	-0.075195	-123.058	-242.0166	604.6979	0.074707	0.26123	0.19189	NaN	NaN	NaN	NaN	NaN	NaN	NaN	NaN	NaN	NaN	NaN	NaN
2.01	-13.42	164.067	808.9927	-1.0269	0.65625	-0.062744	-87.906	-159.925	688.2696	0.094043	0.26045	0.17646	NaN	NaN	NaN	NaN	NaN	NaN	NaN	NaN	NaN	NaN	NaN	NaN
2.012	-13.128	179.75	781.5754	-0.98193	0.63916	-0.063477	-121.8201	-79.584	802.7455	0.10156	0.26484	0.1502	NaN	NaN	NaN	NaN	NaN	NaN	NaN	NaN	NaN	NaN	NaN	NaN
2.014	-13.562	149.1675	741.1217	-0.91602	0.61621	-0.05957	-123.9	-6.7913	889.0582	0.091015	0.27891	0.083398	NaN	NaN	NaN	NaN	NaN	NaN	NaN	NaN	NaN	NaN	NaN	NaN
2.016	11.864	108.156	691.0077	-0.88086	0.59473	-0.061523	-160.574	42.5528	886.146	0.044238	0.31777	0.0051762	NaN	NaN	NaN	NaN	NaN	NaN	NaN	NaN	NaN	NaN	NaN	NaN
2.018	8.086	91.684	665.1712	-0.8125	0.55664	-0.056641	-92.6092	1.97699999999999	970.627	-0.051758	0.38086	-0.086426	NaN	NaN	NaN	NaN	NaN	NaN	NaN	NaN	NaN	NaN	NaN	NaN
2.02	-30.842	107.512	629.208	-0.7544	0.52222	-0.05664	-14.034	-18.644	1114.242	-0.21895	0.47705	-0.16894	NaN	NaN	NaN	NaN	NaN	NaN	NaN	NaN	NaN	NaN	NaN	NaN
2.022	-5.078	120.457	595.23	-0.69922	0.48828	-0.057129	-36.466	-27.362	1260.379	-0.43232	0.57061	-0.21611	NaN	NaN	NaN	NaN	NaN	NaN	NaN	NaN	NaN	NaN	NaN	NaN
2.024	3.784	126.691	573.4903	-0.61719	0.43945	-0.057129	-6.986	-18.9894	1379.682	-0.70224	0.67412	-0.2251	NaN	NaN	NaN	NaN	NaN	NaN	NaN	NaN	NaN	NaN	NaN	NaN
2.026	-0.0779999999999994	113.939	545.0595	-0.57715	0.41553	-0.062012	52.313	6.547	1375.032	-1.0166	0.80566	-0.18545	NaN	NaN	NaN	NaN	NaN	NaN	NaN	NaN	NaN	NaN	NaN	NaN
2.028	-16.57	94.762	510.2628	-0.50635	0.37012	-0.063965	-15.1062	-36.935	1341.8416	-1.3652	0.95703	-0.1123	NaN	NaN	NaN	NaN	NaN	NaN	NaN	NaN	NaN	NaN	NaN	NaN
2.03	4.741	88.4194	477.1084	-0.45898	0.33911	-0.069824	-35.6651	-56.581	1332.038	-1.7224	1.1093	-0.022656	NaN	NaN	NaN	NaN	NaN	NaN	NaN	NaN	NaN	NaN	NaN	NaN
2.032	-10.996	99.2936	475.5196	-0.41309	0.31104	-0.07373	-31.12384	-69.185	1296.609	-2.0507	1.245	0.031543	NaN	NaN	NaN	NaN	NaN	NaN	NaN	NaN	NaN	NaN	NaN	NaN
2.034	7.925	119.396	446.4935	-0.35791	0.2583	-0.075195	-21.257	-164.323	1352.989	-2.3159	1.3532	0.034277	NaN	NaN	NaN	NaN	NaN	NaN	NaN	NaN	NaN	NaN	NaN	NaN
2.036	3.221	119.2687	422.9252	-0.33398	0.24072	-0.078613	28.103	-153.789	1388.217	-2.501	1.4467	0.0074219	NaN	NaN	NaN	NaN	NaN	NaN	NaN	NaN	NaN	NaN	NaN	NaN
2.038	-4.479	117.063545	388.6248	-0.2915	0.2085	-0.080566	9.783	-183.067	1370.157	-2.6499	1.5532	-0.01123	NaN	NaN	NaN	NaN	NaN	NaN	NaN	NaN	NaN	NaN	NaN	NaN
2.04	-9.7882	102.2831	350.8206	-0.2583	0.17871	-0.087159	80.4417	-205.554	1394.401	-2.8131	1.6955	0.0061522	NaN	NaN	NaN	NaN	NaN	NaN	NaN	NaN	NaN	NaN	NaN	NaN
2.042	-14.849	91.9357	305.319	-0.22607	0.16064	-0.08252	115.222	-178.664	1383.666	-2.9682	1.8632	0.041895	NaN	NaN	NaN	NaN	NaN	NaN	NaN	NaN	NaN	NaN	NaN	NaN
2.044	-37.7243	86.75139	285.961	-0.18701	0.13623	-0.089355	83.967	-224.409	1412.8718	-3.0651	1.9976	0.068067	NaN	NaN	NaN	NaN	NaN	NaN	NaN	NaN	NaN	NaN	NaN	NaN
2.046	-39.997	83.3108	274.278	-0.16211	0.12256	-0.090332	142.615	-180.425	1484.917	-3.0352	2.116	0.096191	NaN	NaN	NaN	NaN	NaN	NaN	NaN	NaN	NaN	NaN	NaN	NaN
2.048	-37.74691	95.187	239.1269	-0.12402	0.083984	-0.10254	132.63	-92.016	1500.088	-2.9019	2.1997	0.097656	NaN	NaN	NaN	NaN	NaN	NaN	NaN	NaN	NaN	NaN	NaN	NaN
2.05	-47.44865	84.1896	206.991	-0.091797	0.053711	-0.10206	102.838	-94.605	1547.549	-2.716	2.2062	0.069531	NaN	NaN	NaN	NaN	NaN	NaN	NaN	NaN	NaN	NaN	NaN	NaN
2.052	-61.56058	81.6036	199.852	-0.064941	0.024414	-0.10156	113.538	-65.439	1553.559	-2.5168	2.1222	0.041406	NaN	NaN	NaN	NaN	NaN	NaN	NaN	NaN	NaN	NaN	NaN	NaN
2.054	-23.299	89.8902	188.0839	-0.033203	-0.0048828	-0.1123	34.2895	-114.535	1506.4708	-2.3215	1.9598	0.029688	NaN	NaN	NaN	NaN	NaN	NaN	NaN	NaN	NaN	NaN	NaN	NaN
2.056	-20.281	111.2361	169.9668	-0.021973	-0.019531	-0.11133	-10.805	-149.095	1495.31	-2.1391	1.7656	0.030761	NaN	NaN	NaN	NaN	NaN	NaN	NaN	NaN	NaN	NaN	NaN	NaN
2.058	-17.475	120.9317	146.3046	-0.00097656	-0.038086	-0.11914	-7.8087	-117.791	1453.403	-1.98	1.5728	0.010254	NaN	NaN	NaN	NaN	NaN	NaN	NaN	NaN	NaN	NaN	NaN	NaN
2.06	-22.805	106.8405	139.9944	0.01001	-0.052978	-0.11303	-44.758	-188.607	1430.941	-1.8246	1.4219	0.0026367	NaN	NaN	NaN	NaN	NaN	NaN	NaN	NaN	NaN	NaN	NaN	NaN
2.062	2.41	77.0966	131.29667	0.011719	-0.061523	-0.11768	-20.247	-181.418	1471.877	-1.6589	1.3044	-0.013281	NaN	NaN	NaN	NaN	NaN	NaN	NaN	NaN	NaN	NaN	NaN	NaN
2.064	-3.483	67.6664	107.4808	0.0073242	-0.063477	-0.11621	1.401	-154.96971	1480.523	-1.5136	1.2137	-0.048438	NaN	NaN	NaN	NaN	NaN	NaN	NaN	NaN	NaN	NaN	NaN	NaN
2.066	-11.02	65.5336	100.83148	0.0078125	-0.070068	-0.11084	7.351	-197.369	1512.5985	-1.3983	1.1427	-0.082031	NaN	NaN	NaN	NaN	NaN	NaN	NaN	NaN	NaN	NaN	NaN	NaN
2.068	-16.34	61.5426	71.6794	0	-0.076172	-0.11035	16.757	-136.892	1551.0815	-1.3003	1.0845	-0.092285	NaN	NaN	NaN	NaN	NaN	NaN	NaN	NaN	NaN	NaN	NaN	NaN
2.07	-18.98	56.468	51.508	-0.01123	-0.07373	-0.10596	-20.934	-112.823	1518.113	-1.2638	1.0618	-0.14111	NaN	NaN	NaN	NaN	NaN	NaN	NaN	NaN	NaN	NaN	NaN	NaN
2.072	-26.919	51.815	49.25	-0.01416	-0.07373	-0.10059	-54.512	-98.195	1520.87364	-1.2534	1.0447	-0.13877	NaN	NaN	NaN	NaN	NaN	NaN	NaN	NaN	NaN	NaN	NaN	NaN
2.074	-42.335	52.264	35.0579	-0.032227	-0.063477	-0.1001	-89.2486	-46.343	1538.614	-1.2714	1.0524	-0.1415	NaN	NaN	NaN	NaN	NaN	NaN	NaN	NaN	NaN	NaN	NaN	NaN
2.076	0.158999999999999	38.0754	47.7053	-0.040528	-0.055419	-0.097412	-156.315	-98.3254	1559.858	-1.3063	1.085	-0.1375	NaN	NaN	NaN	NaN	NaN	NaN	NaN	NaN	NaN	NaN	NaN	NaN
2.078	-2.751	38.8043	57.9499	-0.050781	-0.04834	-0.090332	-116.0856	-110.6954	1575.583	-1.3555	1.1309	-0.12549	NaN	NaN	NaN	NaN	NaN	NaN	NaN	NaN	NaN	NaN	NaN	NaN
2.08	-4.306	48.5773	30.4406	-0.074219	-0.037598	-0.092773	-122.171	-101.772	1514.185344	-1.4159	1.2009	-0.095117	NaN	NaN	NaN	NaN	NaN	NaN	NaN	NaN	NaN	NaN	NaN	NaN
2.082	-15.089	46.63331	28.312	-0.079102	-0.037109	-0.092285	-148.39	-119.1025	1463.0781	-1.4918	1.2719	-0.059473	NaN	NaN	NaN	NaN	NaN	NaN	NaN	NaN	NaN	NaN	NaN	NaN
2.084	-2.943	37.0583	20.892	-0.1001	-0.021973	-0.09668	-70.062	-35.707	1459.611	-1.5856	1.3406	-0.032519	NaN	NaN	NaN	NaN	NaN	NaN	NaN	NaN	NaN	NaN	NaN	NaN
2.086	-8.071	44.1534	33.1542	-0.10766	-0.012695	-0.095215	-74.3348	-21.708	1450.224	-1.6813	1.3992	-0.019922	NaN	NaN	NaN	NaN	NaN	NaN	NaN	NaN	NaN	NaN	NaN	NaN
2.088	2.448	54.8	22.8855	-0.11523	-0.0039063	-0.095215	-75.455	-41.1757	1469.811	-1.7778	1.4556	-0.0014648	NaN	NaN	NaN	NaN	NaN	NaN	NaN	NaN	NaN	NaN	NaN	NaN
2.09	-18.668	32.9128	18.86957	-0.11475	0.0053711	-0.092773	1.14699999999999	-19.9362	1450.374	-1.8756	1.5139	0.021191	NaN	NaN	NaN	NaN	NaN	NaN	NaN	NaN	NaN	NaN	NaN	NaN
2.092	-23.504	21.5614	19.0259	-0.1123	0.01123	-0.095215	-9.78299999999999	-91.607	1433.476	-1.9565	1.5685	0.03623	NaN	NaN	NaN	NaN	NaN	NaN	NaN	NaN	NaN	NaN	NaN	NaN
2.094	-23.348	25.869	7.641	-0.098145	0.017578	-0.092285	9.732	-57.28962	1453.903	-2.0132	1.6056	0.028418	NaN	NaN	NaN	NaN	NaN	NaN	NaN	NaN	NaN	NaN	NaN	NaN
2.096	-43.798	33.5724	11.4083	-0.085205	0.019287	-0.091064	-47.369	30.2248	1439.939	-2.0626	1.6342	0.017871	NaN	NaN	NaN	NaN	NaN	NaN	NaN	NaN	NaN	NaN	NaN	NaN
2.098	-31.136	32.7332	19.9749	-0.071777	0.022949	-0.088867	-79.275	46.6562	1414.346	-2.1309	1.6563	0.013184	NaN	NaN	NaN	NaN	NaN	NaN	NaN	NaN	NaN	NaN	NaN	NaN
2.1	-18.816	13.9907	24.8284	-0.05127	0.030762	-0.089355	-30.181	114.146	1402.009	-2.2386	1.6933	0.019043	NaN	NaN	NaN	NaN	NaN	NaN	NaN	NaN	NaN	NaN	NaN	NaN
2.102	-21.962	15.0578	22.3747	-0.039551	0.036133	-0.083984	-64.71	97.93	1335.3261	-2.3626	1.7427	0.036133	NaN	NaN	NaN	NaN	NaN	NaN	NaN	NaN	NaN	NaN	NaN	NaN
2.104	-38.1773	13.1219	25.5587	-0.010742	0.033691	-0.081055	-32.169	47.475	1314.4854	-2.472	1.7911	0.047461	NaN	NaN	NaN	NaN	NaN	NaN	NaN	NaN	NaN	NaN	NaN	NaN
2.106	-19.798	34.0222	35.7417	0.01001	0.023925	-0.074218	14.678	74.281	1295.804	-2.5332	1.8265	0.058789	NaN	NaN	NaN	NaN	NaN	NaN	NaN	NaN	NaN	NaN	NaN	NaN
2.108	-14.065	51.7854	40.8276	0.039063	0.01123	-0.070801	-22.402	53.338	1264.607	-2.5449	1.8457	0.050781	NaN	NaN	NaN	NaN	NaN	NaN	NaN	NaN	NaN	NaN	NaN	NaN
2.11	-23.226	51.8474	31.3329	0.090332	-0.0063477	-0.074707	-3.707	83.70132	1251.005	-2.5038	1.8274	0.035157	NaN	NaN	NaN	NaN	NaN	NaN	NaN	NaN	NaN	NaN	NaN	NaN
2.112	-21.518	36.8959	17.4327	0.11475	-0.010742	-0.074219	-15.158	107.35451	1194.983	-2.4354	1.7822	0.022754	NaN	NaN	NaN	NaN	NaN	NaN	NaN	NaN	NaN	NaN	NaN	NaN
2.114	-29.175	21.0156	19.5064	0.17139	-0.022949	-0.070801	-14.233	67.541	1148.535	-2.3405	1.727	0.011035	NaN	NaN	NaN	NaN	NaN	NaN	NaN	NaN	NaN	NaN	NaN	NaN
2.116	-25.422	32.4187	36.7702	0.20728	-0.043457	-0.073486	10.46	118.038	1137.2625	-2.213	1.6569	0.0011719	NaN	NaN	NaN	NaN	NaN	NaN	NaN	NaN	NaN	NaN	NaN	NaN
2.118	-23.457	34.045	28.4719	0.2373	-0.059082	-0.070313	-45.146	144.97568	1118.3975	-2.0688	1.5806	0.0014648	NaN	NaN	NaN	NaN	NaN	NaN	NaN	NaN	NaN	NaN	NaN	NaN
2.12	-37.981	28.0055	23.34551	0.26318	-0.078613	-0.075195	-63.208	161.088	1130.841	-1.9288	1.4882	-0.000293	NaN	NaN	NaN	NaN	NaN	NaN	NaN	NaN	NaN	NaN	NaN	NaN
2.122	-13.507	16.7159	19.935	0.27344	-0.081543	-0.070801	-44.4682	221.479	1103.8098	-1.8078	1.3969	-0.0065429	NaN	NaN	NaN	NaN	NaN	NaN	NaN	NaN	NaN	NaN	NaN	NaN
2.124	-46.5533	12.4105	13.497	0.28516	-0.083496	-0.068848	-90.958	179.135	1052.6172	-1.6942	1.316	-0.011621	NaN	NaN	NaN	NaN	NaN	NaN	NaN	NaN	NaN	NaN	NaN	NaN
2.126	-24.099	33.85615	5.462	0.28321	-0.073243	-0.066406	-60.337	156.137	1013.3027	-1.5793	1.2422	-0.017285	NaN	NaN	NaN	NaN	NaN	NaN	NaN	NaN	NaN	NaN	NaN	NaN
2.128	-25.654	27.5809	28.8438	0.27637	-0.063965	-0.066406	-84.073	160.975	981.43	-1.4863	1.1895	-0.035156	NaN	NaN	NaN	NaN	NaN	NaN	NaN	NaN	NaN	NaN	NaN	NaN
2.13	5.074	26.7077	41.30306	0.25684	-0.040527	-0.057617	-118.118	142.9186	948.569	-1.4106	1.126	-0.032715	NaN	NaN	NaN	NaN	NaN	NaN	NaN	NaN	NaN	NaN	NaN	NaN
2.132	-14.278	24.7217	45.6502	0.24854	-0.028809	-0.061523	-61.241	179.757	928.5284	-1.3449	1.0802	-0.030274	NaN	NaN	NaN	NaN	NaN	NaN	NaN	NaN	NaN	NaN	NaN	NaN
2.134	-8.937	23.3426	34.8868	0.22266	-0.00048828	-0.049316	-80.421	178.4849	877.6173	-1.2854	1.0411	-0.032618	NaN	NaN	NaN	NaN	NaN	NaN	NaN	NaN	NaN	NaN	NaN	NaN
2.136	-10.572	20.1155	29.73541	0.20264	0.022949	-0.049561	-65.619	144.963	820.457	-1.2305	1.0016	-0.031445	NaN	NaN	NaN	NaN	NaN	NaN	NaN	NaN	NaN	NaN	NaN	NaN
2.138	-9.087	32.2919	40.9009	0.18945	0.049316	-0.04541	-20.212	159.296	784.9347	-1.1797	0.95898	-0.024414	NaN	NaN	NaN	NaN	NaN	NaN	NaN	NaN	NaN	NaN	NaN	NaN
2.14	-10.789	42.208	36.92	0.17139	0.080078	-0.039551	-51.896	155	739.3872	-1.1438	0.92109	-0.020508	NaN	NaN	NaN	NaN	NaN	NaN	NaN	NaN	NaN	NaN	NaN	NaN
2.142	-21.105	26.0823	27.3446	0.16699	0.10205	-0.040527	-8.475	178.721	714.5805	-1.1057	0.87802	-0.016797	NaN	NaN	NaN	NaN	NaN	NaN	NaN	NaN	NaN	NaN	NaN	NaN
2.144	-11.503	-0.3273	18.407	0.15527	0.12842	-0.040039	-20.849	216.091	680.0683	-1.0588	0.83897	-0.014843	NaN	NaN	NaN	NaN	NaN	NaN	NaN	NaN	NaN	NaN	NaN	NaN
2.146	-10.751	-1.9534	19.857	0.15063	0.14136	-0.039063	-45.6192	166.6839	660.176	-1.005	0.79228	-0.014551	NaN	NaN	NaN	NaN	NaN	NaN	NaN	NaN	NaN	NaN	NaN	NaN
2.148	-27.411	26.42714	13.555	0.14795	0.15479	-0.046875	-2.845	176.09	635.434	-0.94482	0.74268	-0.024414	NaN	NaN	NaN	NaN	NaN	NaN	NaN	NaN	NaN	NaN	NaN	NaN
2.15	-19.19	29.1076	21.4625	0.14209	0.17432	-0.046875	-25.3402	177.491	588.3993	-0.8749	0.69854	-0.037891	NaN	NaN	NaN	NaN	NaN	NaN	NaN	NaN	NaN	NaN	NaN	NaN
2.152	-3.641	29.4173521	22.2755	0.1416	0.18359	-0.044922	-1.641	148.334	557.477	-0.79532	0.64883	-0.056055	NaN	NaN	NaN	NaN	NaN	NaN	NaN	NaN	NaN	NaN	NaN	NaN
2.154	-10.566	27.5245	34.3332	0.13281	0.19824	-0.050293	11.961	169.627	497.5746	-0.71797	0.59805	-0.075586	NaN	NaN	NaN	NaN	NaN	NaN	NaN	NaN	NaN	NaN	NaN	NaN
2.156	-25.674	27.2297	29.0357	0.13672	0.21216	-0.060547	-16.082	142.964	425.4259	-0.6417	0.55459	-0.093945	NaN	NaN	NaN	NaN	NaN	NaN	NaN	NaN	NaN	NaN	NaN	NaN
2.158	-17.273	24.5313	31.27743	0.1333	0.22217	-0.066895	33.269	100.001	382.66	-0.56934	0.5166	-0.11523	NaN	NaN	NaN	NaN	NaN	NaN	NaN	NaN	NaN	NaN	NaN	NaN
2.16	-25.92	19.7238	56.181	0.1416	0.24609	-0.072266	20.342	113.775	338.097	-0.50332	0.48047	-0.12578	NaN	NaN	NaN	NaN	NaN	NaN	NaN	NaN	NaN	NaN	NaN	NaN
2.162	-24.84	28.9278	41.255	0.14355	0.25195	-0.07666	9.469	78.993	319.252	-0.44043	0.45313	-0.13535	NaN	NaN	NaN	NaN	NaN	NaN	NaN	NaN	NaN	NaN	NaN	NaN
2.164	-34.683	24.4529	21.6519	0.15576	0.26416	-0.085938	66.1574	90.462	309.3836	-0.38886	0.42969	-0.15293	NaN	NaN	NaN	NaN	NaN	NaN	NaN	NaN	NaN	NaN	NaN	NaN
2.166	-40.025	10.6545	10.583	0.15527	0.26758	-0.091309	17.347	133.7029	259.104	-0.33691	0.40479	-0.15635	NaN	NaN	NaN	NaN	NaN	NaN	NaN	NaN	NaN	NaN	NaN	NaN
2.168	-32.265	3.7384	14.482	0.16406	0.27197	-0.10059	6.18	143.7427	248.346	-0.28564	0.38525	-0.16113	NaN	NaN	NaN	NaN	NaN	NaN	NaN	NaN	NaN	NaN	NaN	NaN
2.17	-26.129	20.6072	16.566	0.17139	0.27783	-0.10596	11.079	168.936	228.2057	-0.24033	0.36933	-0.17109	NaN	NaN	NaN	NaN	NaN	NaN	NaN	NaN	NaN	NaN	NaN	NaN
2.172	-10.783	14.3908	19.4698	0.17676	0.27979	-0.11279	-44.5617	149.689	198.9273	-0.19805	0.35078	-0.17656	NaN	NaN	NaN	NaN	NaN	NaN	NaN	NaN	NaN	NaN	NaN	NaN
2.174	-43.9	12.6469	17.5518	0.16602	0.2915	-0.12256	-11.25	95.7136	176.3834	-0.15078	0.33438	-0.18516	NaN	NaN	NaN	NaN	NaN	NaN	NaN	NaN	NaN	NaN	NaN	NaN
2.176	-17.21	13.6605	21.3477	0.15259	0.30127	-0.12842	-10.464	99.975	123.124	-0.10781	0.321	-0.19346	NaN	NaN	NaN	NaN	NaN	NaN	NaN	NaN	NaN	NaN	NaN	NaN
2.178	-23.076	21.62607	32.9662	0.14502	0.30859	-0.13525	-39.3933	77.161	106.2407	-0.064941	0.3042	-0.20703	NaN	NaN	NaN	NaN	NaN	NaN	NaN	NaN	NaN	NaN	NaN	NaN
2.18	-10.88	11.4312	44.6765	0.1333	0.3125	-0.13965	-12.406	92.6772	91.0204	-0.029688	0.29092	-0.21758	NaN	NaN	NaN	NaN	NaN	NaN	NaN	NaN	NaN	NaN	NaN	NaN
2.182	-27.631	-4.498	87.9372	0.13135	0.31543	-0.14404	-56.8906	112.774	60.884	0.0064454	0.27793	-0.22549	NaN	NaN	NaN	NaN	NaN	NaN	NaN	NaN	NaN	NaN	NaN	NaN
2.184	0.693000000000001	-13.394	116.1985	0.12256	0.31885	-0.14404	-67.34	71.552	55.102	0.03418	0.26348	-0.22939	NaN	NaN	NaN	NaN	NaN	NaN	NaN	NaN	NaN	NaN	NaN	NaN
2.186	33.1772	-23.419	144.451	0.11694	0.31885	-0.15552	-23.355	73.4327	36.078	0.063184	0.25293	-0.23985	NaN	NaN	NaN	NaN	NaN	NaN	NaN	NaN	NaN	NaN	NaN	NaN
2.188	8.653	-50.43	197.223	0.10596	0.32227	-0.16699	-57.0777	59.356	38.364	0.088379	0.25	-0.25049	NaN	NaN	NaN	NaN	NaN	NaN	NaN	NaN	NaN	NaN	NaN	NaN
2.19	31.0439	-72.176	254.971	0.057617	0.3252	-0.19287	-25.609	33.788	53.215	0.11475	0.23692	-0.24883	NaN	NaN	NaN	NaN	NaN	NaN	NaN	NaN	NaN	NaN	NaN	NaN
2.192	46.216	-106.97	279.325	0.016602	0.3291	-0.20898	-54.21733	71.699	42.5995	0.14238	0.22969	-0.25918	NaN	NaN	NaN	NaN	NaN	NaN	NaN	NaN	NaN	NaN	NaN	NaN
2.194	59.218	-129.099	282.4025	-0.12256	0.33838	-0.229	-79.5773	58.1317	56.0842	0.16738	0.21953	-0.26426	NaN	NaN	NaN	NaN	NaN	NaN	NaN	NaN	NaN	NaN	NaN	NaN
2.196	70.483	-134.0638	291.107	-0.28198	0.34961	-0.23657	-23.918	43.693	43.7133	0.18731	0.20605	-0.27314	NaN	NaN	NaN	NaN	NaN	NaN	NaN	NaN	NaN	NaN	NaN	NaN
2.198	55.161	-108.951	321.897	-0.4624	0.37744	-0.23828	-39.594	79.219	24.2453	0.19629	0.19727	-0.27881	NaN	NaN	NaN	NaN	NaN	NaN	NaN	NaN	NaN	NaN	NaN	NaN
2.2	36.6961	-56.053	359.761	-0.73389	0.44775	-0.2373	-8.856	53.6441	43.742	0.18867	0.19365	-0.28077	NaN	NaN	NaN	NaN	NaN	NaN	NaN	NaN	NaN	NaN	NaN	NaN
2.202	19.268	-1.1657	376.3737	-0.85303	0.49756	-0.23779	6.023	64.807	42.9682	0.15791	0.1918	-0.27989	NaN	NaN	NaN	NaN	NaN	NaN	NaN	NaN	NaN	NaN	NaN	NaN
2.204	40.3402	25.443	403.071	-1.0127	0.62695	-0.24219	-45.314	55.015	36.649	0.11455	0.19727	-0.27481	NaN	NaN	NaN	NaN	NaN	NaN	NaN	NaN	NaN	NaN	NaN	NaN
2.206	67.572	43.872	471.264	-1.0527	0.75781	-0.25879	-7.976	15.5925	43.86421	0.053711	0.20996	-0.26728	NaN	NaN	NaN	NaN	NaN	NaN	NaN	NaN	NaN	NaN	NaN	NaN
2.208	64.487	56.54	558.4264	-1.0449	0.81445	-0.271	-19.296	43.342	-6.9842	-0.0024414	0.22021	-0.25928	NaN	NaN	NaN	NaN	NaN	NaN	NaN	NaN	NaN	NaN	NaN	NaN
2.21	46.89	63.654	637.66	-0.98828	0.87207	-0.32178	-27.091	27.214	-1.6634	-0.062207	0.2333	-0.24785	NaN	NaN	NaN	NaN	NaN	NaN	NaN	NaN	NaN	NaN	NaN	NaN
2.212	28.86252	78.478	696.746	-0.96069	0.85767	-0.37451	24.623	7.4769	16.70661	-0.11299	0.24102	-0.24102	NaN	NaN	NaN	NaN	NaN	NaN	NaN	NaN	NaN	NaN	NaN	NaN
2.214	34.769	90.209	772.53966	-0.98633	0.81836	-0.4248	-28.349	60.757	12.958	-0.16299	0.24727	-0.23243	NaN	NaN	NaN	NaN	NaN	NaN	NaN	NaN	NaN	NaN	NaN	NaN
2.216	28.9613	101.032	831.788	-1.1719	0.77344	-0.48291	-37.57	45.927	61.3466	-0.20264	0.25596	-0.22666	NaN	NaN	NaN	NaN	NaN	NaN	NaN	NaN	NaN	NaN	NaN	NaN
2.218	44.882	85.5543	883.796	-1.3301	0.76367	-0.49316	4.715	69.199	81.334	-0.23389	0.26074	-0.21436	NaN	NaN	NaN	NaN	NaN	NaN	NaN	NaN	NaN	NaN	NaN	NaN
2.22	-8.864	30.649	960.003	-1.7441	0.8291	-0.46484	-22.702	62.443	64.712	-0.26055	0.25684	-0.20879	NaN	NaN	NaN	NaN	NaN	NaN	NaN	NaN	NaN	NaN	NaN	NaN
2.222	-42.982	-31.914	1024.7595	-2.105	0.9624	-0.3955	12.851	7.6759	69.549	-0.27646	0.25576	-0.20205	NaN	NaN	NaN	NaN	NaN	NaN	NaN	NaN	NaN	NaN	NaN	NaN
2.224	-85.7018	-81.857	1069.6153	-2.4316	1.123	-0.31543	-21.572	29.521	34.4144	-0.28936	0.25655	-0.19229	NaN	NaN	NaN	NaN	NaN	NaN	NaN	NaN	NaN	NaN	NaN	NaN
2.226	-107.2814	-113.695	1065.095	-2.728	1.3696	-0.24561	-47.526	17.49564	28.7854	-0.28945	0.25537	-0.18779	NaN	NaN	NaN	NaN	NaN	NaN	NaN	NaN	NaN	NaN	NaN	NaN
2.228	-82.4726	-120.86	1066.0917	-2.7852	1.4883	-0.24023	4.465	2.8196	37.44378	-0.27783	0.25635	-0.18359	NaN	NaN	NaN	NaN	NaN	NaN	NaN	NaN	NaN	NaN	NaN	NaN
2.23	-42.16	-109.094	1083.81	-2.6479	1.6665	-0.23193	-53.3223	39.73152	14.943	-0.25449	0.25058	-0.1748	NaN	NaN	NaN	NaN	NaN	NaN	NaN	NaN	NaN	NaN	NaN	NaN
2.232	-40.17	-99.741	1115.676	-2.3921	1.7271	-0.20825	-30.005	-0.625	31.6017	-0.21514	0.24541	-0.16533	NaN	NaN	NaN	NaN	NaN	NaN	NaN	NaN	NaN	NaN	NaN	NaN
2.234	-79.526	-94.011	1162.174	-2.1147	1.7427	-0.1958	-6.236	3.637	34.1327	-0.17217	0.23408	-0.15439	NaN	NaN	NaN	NaN	NaN	NaN	NaN	NaN	NaN	NaN	NaN	NaN
2.236	-77.468	-93.518	1198.931	-1.8062	1.6743	-0.15918	-63.8471	22.7124	42.04709	-0.13047	0.21123	-0.14853	NaN	NaN	NaN	NaN	NaN	NaN	NaN	NaN	NaN	NaN	NaN	NaN
2.238	-54.3515	-84.191	1217.809	-1.7012	1.6152	-0.13623	-41.965	9.8052	59.197	-0.090332	0.18115	-0.13623	NaN	NaN	NaN	NaN	NaN	NaN	NaN	NaN	NaN	NaN	NaN	NaN
2.24	-45.404	-60.323	1235.817	-1.5742	1.4824	-0.095703	-46.877	51.946	36.404359	-0.062988	0.14717	-0.12715	NaN	NaN	NaN	NaN	NaN	NaN	NaN	NaN	NaN	NaN	NaN	NaN
2.242	-47.906	-39.592	1216.548	-1.529	1.3996	-0.072998	-56.29965	29.0116	41.344	-0.039453	0.11231	-0.12022	NaN	NaN	NaN	NaN	NaN	NaN	NaN	NaN	NaN	NaN	NaN	NaN
2.244	-52.868	-30.62	1234.756	-1.5078	1.3457	-0.067871	-17.241	-23.6975	39.0546	-0.014843	0.072852	-0.11591	NaN	NaN	NaN	NaN	NaN	NaN	NaN	NaN	NaN	NaN	NaN	NaN
2.246	-47.551	-24.85	1237.254	-1.4844	1.3066	-0.089844	-56.9262	5.959	12.763	0.013867	0.040625	-0.10674	NaN	NaN	NaN	NaN	NaN	NaN	NaN	NaN	NaN	NaN	NaN	NaN
2.248	-91.787	-39.885	1243.407	-1.4644	1.2856	-0.10254	-37.423	-8.145	37.9218	0.049805	0.012207	-0.1001	NaN	NaN	NaN	NaN	NaN	NaN	NaN	NaN	NaN	NaN	NaN	NaN
2.25	-73.4755	-51.014	1244.7615	-1.4429	1.229	-0.1333	-14.192	26.6286	29.7094	0.087988	-0.011914	-0.10166	NaN	NaN	NaN	NaN	NaN	NaN	NaN	NaN	NaN	NaN	NaN	NaN
2.252	-33.065	-76.7011	1273.7366	-1.4332	1.19	-0.15283	-50.875	53.002	14.2043	0.13027	-0.036231	-0.10097	NaN	NaN	NaN	NaN	NaN	NaN	NaN	NaN	NaN	NaN	NaN	NaN
2.254	-15.489	-86.886	1319.176	-1.4238	1.1484	-0.17773	-13.019	-1.9608	13.41826	0.1666	-0.05498	-0.10215	NaN	NaN	NaN	NaN	NaN	NaN	NaN	NaN	NaN	NaN	NaN	NaN
2.256	-3.553	-81.938	1335.706	-1.377	1.1133	-0.23828	-26.618	23.72	-10.712	0.20224	-0.067871	-0.10469	NaN	NaN	NaN	NaN	NaN	NaN	NaN	NaN	NaN	NaN	NaN	NaN
2.258	21.34	-93.668	1354.2837	-1.3281	1.0811	-0.24561	-37.3017	3.8982	5.209	0.23193	-0.080078	-0.10352	NaN	NaN	NaN	NaN	NaN	NaN	NaN	NaN	NaN	NaN	NaN	NaN
2.26	41.7751	-105.086	1356.0358	-1.2422	1.0332	-0.25879	10.81	-22.825	32.5069	0.25674	-0.088281	-0.10732	NaN	NaN	NaN	NaN	NaN	NaN	NaN	NaN	NaN	NaN	NaN	NaN
2.262	22.1272	-121.559	1397.937	-1.2053	1.0149	-0.26294	-40.034	27.5504	2.542	0.27959	-0.096777	-0.10772	NaN	NaN	NaN	NaN	NaN	NaN	NaN	NaN	NaN	NaN	NaN	NaN
2.264	0.3283	-115.99	1420.801	-1.1909	1.0024	-0.26709	-34.194	7.1968	15.75682	0.3042	-0.10733	-0.10146	NaN	NaN	NaN	NaN	NaN	NaN	NaN	NaN	NaN	NaN	NaN	NaN
2.266	-0.318999999999999	-108.9835	1446.563	-1.1934	1.0137	-0.28711	-7.21	42.044	15.669	0.32783	-0.11953	-0.11201	NaN	NaN	NaN	NaN	NaN	NaN	NaN	NaN	NaN	NaN	NaN	NaN
2.268	33.388	-86.4887	1431.9401	-1.2026	1.019	-0.29639	-55.1024	77.195	4.169	0.35547	-0.12744	-0.11523	NaN	NaN	NaN	NaN	NaN	NaN	NaN	NaN	NaN	NaN	NaN	NaN
2.27	2.749	-63.368	1418.7942	-1.2476	1.0376	-0.29639	-12.837	37.59	21.1661	0.38291	-0.13379	-0.12051	NaN	NaN	NaN	NaN	NaN	NaN	NaN	NaN	NaN	NaN	NaN	NaN
2.272	-2.691	-48.001	1388.6531	-1.3317	1.0408	-0.29224	-13.641	62.755	7.5804	0.4166	-0.13076	-0.12714	NaN	NaN	NaN	NaN	NaN	NaN	NaN	NaN	NaN	NaN	NaN	NaN
2.274	-12.8014	-45.542	1368.8309	-1.4453	1.0488	-0.28711	-33.901	38.7887	7.3479	0.44707	-0.12998	-0.13379	NaN	NaN	NaN	NaN	NaN	NaN	NaN	NaN	NaN	NaN	NaN	NaN
2.276	-11.488	-46.826	1364.096	-1.6382	1.0854	-0.28076	3.778	14.5511	24.622	0.47461	-0.12734	-0.13193	NaN	NaN	NaN	NaN	NaN	NaN	NaN	NaN	NaN	NaN	NaN	NaN
2.278	3.8891	-32.305	1358.187	-1.7378	1.1216	-0.27881	-42.757	45.127	8.992	0.48828	-0.12061	-0.13135	NaN	NaN	NaN	NaN	NaN	NaN	NaN	NaN	NaN	NaN	NaN	NaN
2.28	28.928	-33.2072	1344.686	-1.9058	1.2095	-0.28271	-19.715	17.284	24.0507	0.48975	-0.1124	-0.13428	NaN	NaN	NaN	NaN	NaN	NaN	NaN	NaN	NaN	NaN	NaN	NaN
2.282	37.07157	-22.84191	1336.184	-1.9971	1.2759	-0.29736	10.422	38.393	22.9288	0.47578	-0.095703	-0.13262	NaN	NaN	NaN	NaN	NaN	NaN	NaN	NaN	NaN	NaN	NaN	NaN
2.284	24.5866	-10.8092	1350.2413	-2.0815	1.3442	-0.30762	-45.5524	71.9133	23.22818	0.4543	-0.078516	-0.12754	NaN	NaN	NaN	NaN	NaN	NaN	NaN	NaN	NaN	NaN	NaN	NaN
2.286	-1.013	-4.68617	1366.43529	-2.187	1.4263	-0.33936	-14.192	33.8487	38.868	0.42334	-0.056934	-0.12266	NaN	NaN	NaN	NaN	NaN	NaN	NaN	NaN	NaN	NaN	NaN	NaN
2.288	-7.1388	6.6817	1365.0155	-2.2417	1.4595	-0.34717	-31.771	69.475	36.30216	0.38867	-0.033203	-0.11719	NaN	NaN	NaN	NaN	NaN	NaN	NaN	NaN	NaN	NaN	NaN	NaN
2.29	-17.7856	-0.3972	1374.9859	-2.3354	1.5161	-0.3667	-63.3076	51.775	42.3009	0.35127	-0.0078126	-0.10723	NaN	NaN	NaN	NaN	NaN	NaN	NaN	NaN	NaN	NaN	NaN	NaN
2.292	29.284	-1.2592	1372.346	-2.377	1.5586	-0.37256	-20.542	14.3623	52.311	0.31397	0.013086	-0.1042	NaN	NaN	NaN	NaN	NaN	NaN	NaN	NaN	NaN	NaN	NaN	NaN
2.294	-2.551	-23.505	1356.672	-2.3887	1.584	-0.37207	-30.298	42.8457	29.1283	0.27881	0.030273	-0.09912	NaN	NaN	NaN	NaN	NaN	NaN	NaN	NaN	NaN	NaN	NaN	NaN
2.296	-17.946	-33.61276	1332.6163	-2.3555	1.5879	-0.37109	-25.38	15.099	37.878	0.24834	0.05127	-0.098731	NaN	NaN	NaN	NaN	NaN	NaN	NaN	NaN	NaN	NaN	NaN	NaN
2.298	-30.1895	-28.707	1317.3276	-2.3047	1.5742	-0.36523	-16.631	33.1765	42.17023	0.22021	0.071777	-0.09375	NaN	NaN	NaN	NaN	NaN	NaN	NaN	NaN	NaN	NaN	NaN	NaN
2.3	-0.359999999999999	-10.5366	1292.4932	-2.1733	1.5298	-0.3667	-64.9417	70.012	35.4272	0.19492	0.091797	-0.089648	NaN	NaN	NaN	NaN	NaN	NaN	NaN	NaN	NaN	NaN	NaN	NaN
2.302	12.61576	5.572	1279.5379	-2.0503	1.4877	-0.36963	-39.095	40.45	70.361	0.17568	0.11611	-0.088965	NaN	NaN	NaN	NaN	NaN	NaN	NaN	NaN	NaN	NaN	NaN	NaN
2.304	24.7109	26.624	1254.3625	-1.9297	1.4375	-0.37305	-11.811	72.378	38.221	0.15186	0.1415	-0.083496	NaN	NaN	NaN	NaN	NaN	NaN	NaN	NaN	NaN	NaN	NaN	NaN
2.306	27.2882	44.976	1236.176	-1.7925	1.3853	-0.37256	-32.615	31.273	37.473	0.12764	0.16211	-0.085059	NaN	NaN	NaN	NaN	NaN	NaN	NaN	NaN	NaN	NaN	NaN	NaN
2.308	22.4781	86.1187	1230.784	-1.7402	1.3516	-0.36914	-14.565	-7.4508	39.4447	0.10645	0.18896	-0.084961	NaN	NaN	NaN	NaN	NaN	NaN	NaN	NaN	NaN	NaN	NaN	NaN
2.31	7.33	116.506	1195.5273	-1.6772	1.2993	-0.35889	-61.0958	15.0432	30.016	0.091602	0.20967	-0.088672	NaN	NaN	NaN	NaN	NaN	NaN	NaN	NaN	NaN	NaN	NaN	NaN
2.312	13.314	118.833	1191.1628	-1.6504	1.2719	-0.34521	-43.8436	-13.624	42.7602	0.07793	0.23272	-0.090821	NaN	NaN	NaN	NaN	NaN	NaN	NaN	NaN	NaN	NaN	NaN	NaN
2.314	37.4447	111.014	1171.821	-1.6387	1.2461	-0.33008	-11.478	1.6285	54.5535	0.067774	0.25224	-0.099025	NaN	NaN	NaN	NaN	NaN	NaN	NaN	NaN	NaN	NaN	NaN	NaN
2.316	14.13	106.563	1156.821	-1.627	1.2246	-0.31592	-46.129	34.88162	34.1135	0.059473	0.26866	-0.097949	NaN	NaN	NaN	NaN	NaN	NaN	NaN	NaN	NaN	NaN	NaN	NaN
2.318	11.754	105.59	1135.8259	-1.6138	1.2153	-0.30811	-17.452	-3.3392	42.924	0.061523	0.28662	-0.10645	NaN	NaN	NaN	NaN	NaN	NaN	NaN	NaN	NaN	NaN	NaN	NaN
2.32	-4.8411	85.602	1118.0682	-1.5781	1.1992	-0.29395	-18.71	36.787	32.5928	0.065723	0.30137	-0.11485	NaN	NaN	NaN	NaN	NaN	NaN	NaN	NaN	NaN	NaN	NaN	NaN
2.322	2.999	93.376	1080.5432	-1.5323	1.1856	-0.28516	-37.787	30.9134	31.2326	0.07959	0.32207	-0.12354	NaN	NaN	NaN	NaN	NaN	NaN	NaN	NaN	NaN	NaN	NaN	NaN
2.324	1.371	94.01647	1031.4466	-1.4805	1.1602	-0.28223	-15.133	5.6499	46.259	0.089746	0.34277	-0.13096	NaN	NaN	NaN	NaN	NaN	NaN	NaN	NaN	NaN	NaN	NaN	NaN
2.326	9.969	82.938	985.261	-1.3926	1.123	-0.271	-27.181	22.36081	39.122	0.094238	0.37451	-0.14287	NaN	NaN	NaN	NaN	NaN	NaN	NaN	NaN	NaN	NaN	NaN	NaN
2.328	11.564	82.28	972.775	-1.3516	1.0996	-0.26172	-4.063	-55.308	84.138	0.094727	0.39502	-0.15234	NaN	NaN	NaN	NaN	NaN	NaN	NaN	NaN	NaN	NaN	NaN	NaN
2.33	-6.483	85.115	970.3283	-1.2637	1.0586	-0.24658	-3.33	-107.2582	125.999	0.098145	0.41855	-0.16133	NaN	NaN	NaN	NaN	NaN	NaN	NaN	NaN	NaN	NaN	NaN	NaN
2.332	11.499	100.531	954.444	-1.2017	1.0249	-0.23877	-32.509	-75.6088	186.931	0.099218	0.43799	-0.16846	NaN	NaN	NaN	NaN	NaN	NaN	NaN	NaN	NaN	NaN	NaN	NaN
2.334	-8.456	109.736	942.439	-1.1406	0.99414	-0.22021	66.969	-86.04	324.661	0.10547	0.45869	-0.17744	NaN	NaN	NaN	NaN	NaN	NaN	NaN	NaN	NaN	NaN	NaN	NaN
2.336	-9.652	131.5062	921.912	-1.0703	0.94727	-0.20703	85.848	-72.588	500.869	0.11973	0.47783	-0.18144	NaN	NaN	NaN	NaN	NaN	NaN	NaN	NaN	NaN	NaN	NaN	NaN
2.338	-9.617	148.213	883.3188	-1.0342	0.93066	-0.19678	2.801	-172.95	661.065	0.13232	0.49268	-0.18604	NaN	NaN	NaN	NaN	NaN	NaN	NaN	NaN	NaN	NaN	NaN	NaN
2.34	-22.789	156.77	847.6372	-0.9707	0.89844	-0.18115	54.9596	-226.874	750.03	0.14219	0.50879	-0.18564	NaN	NaN	NaN	NaN	NaN	NaN	NaN	NaN	NaN	NaN	NaN	NaN
2.342	-38.317	163.869	790.9222	-0.92505	0.87427	-0.16822	102.584	-174.562	803.773	0.14775	0.52617	-0.18516	NaN	NaN	NaN	NaN	NaN	NaN	NaN	NaN	NaN	NaN	NaN	NaN
2.344	-58.6184	154.222	757.1813	-0.88867	0.84766	-0.15527	103.847	-117.703	946.711	0.14267	0.54688	-0.18398	NaN	NaN	NaN	NaN	NaN	NaN	NaN	NaN	NaN	NaN	NaN	NaN
2.346	-34.8205	143.3712	723.8949	-0.83594	0.80859	-0.13818	13.015	19.3605	1056.687	0.12959	0.56358	-0.19736	NaN	NaN	NaN	NaN	NaN	NaN	NaN	NaN	NaN	NaN	NaN	NaN
2.348	-53.2532	122.571	673.904	-0.79858	0.77978	-0.12353	-73.9433	134.9069	1067.6624	0.097656	0.5791	-0.21729	NaN	NaN	NaN	NaN	NaN	NaN	NaN	NaN	NaN	NaN	NaN	NaN
2.35	-56.1026	122.556	629.989	-0.76123	0.75146	-0.10693	-11.93	68.447	1068.582	0.0041992	0.59677	-0.25185	NaN	NaN	NaN	NaN	NaN	NaN	NaN	NaN	NaN	NaN	NaN	NaN
2.352	-8.604	112.913	618.411	-0.71631	0.70947	-0.087402	6.879	31.066	1123.59	-0.15391	0.6125	-0.28789	NaN	NaN	NaN	NaN	NaN	NaN	NaN	NaN	NaN	NaN	NaN	NaN
2.354	2.839	141.1918	586.7889	-0.70313	0.68848	-0.076172	6.068	-55.152	1252.064	-0.39961	0.63164	-0.325	NaN	NaN	NaN	NaN	NaN	NaN	NaN	NaN	NaN	NaN	NaN	NaN
2.356	-7.154	152.5204	574.2487	-0.66406	0.64844	-0.052734	46.46	-98.944	1315.24	-0.75869	0.68076	-0.35537	NaN	NaN	NaN	NaN	NaN	NaN	NaN	NaN	NaN	NaN	NaN	NaN
2.358	-43.034	152.873	560.231	-0.63575	0.61133	-0.031982	-37.182	-33.976	1242.95	-1.2378	0.78564	-0.35889	NaN	NaN	NaN	NaN	NaN	NaN	NaN	NaN	NaN	NaN	NaN	NaN
2.36	-9.646	135.5	532.7853	-0.60889	0.57666	-0.01416	-80.2317	-35.866	1162.758	-1.8442	0.96552	-0.31572	NaN	NaN	NaN	NaN	NaN	NaN	NaN	NaN	NaN	NaN	NaN	NaN
2.362	-36.542	140.411	509.0275	-0.56689	0.53467	0.0087891	-71.2951	-43.5	1121.39	-2.4945	1.2184	-0.21631	NaN	NaN	NaN	NaN	NaN	NaN	NaN	NaN	NaN	NaN	NaN	NaN
2.364	-45.365	142.463	474.9657	-0.54883	0.51123	0.021973	-90.8684	-55.7	1150.983	-3.085	1.4731	-0.10576	NaN	NaN	NaN	NaN	NaN	NaN	NaN	NaN	NaN	NaN	NaN	NaN
2.366	-31.251	126.2723	437.0005	-0.5	0.46094	0.038086	-71.641	-134.255	1204.516	-3.4056	1.6632	-0.031055	NaN	NaN	NaN	NaN	NaN	NaN	NaN	NaN	NaN	NaN	NaN	NaN
2.368	-27.069	119.8007	396.8593	-0.46289	0.42163	0.047119	-142.666	-152.567	1221.684	-3.3667	1.811	0.035645	NaN	NaN	NaN	NaN	NaN	NaN	NaN	NaN	NaN	NaN	NaN	NaN
2.37	-47.8469	130.1784	348.7407	-0.42871	0.37305	0.051758	-252.562	-224.1147	1271.9469	-3.132	2.0125	0.028125	NaN	NaN	NaN	NaN	NaN	NaN	NaN	NaN	NaN	NaN	NaN	NaN
2.372	-51.238	107.0319	325.8671	-0.37646	0.31104	0.061035	-202.221	-189.414	1305.15	-2.964	2.2255	-0.078809	NaN	NaN	NaN	NaN	NaN	NaN	NaN	NaN	NaN	NaN	NaN	NaN
2.374	-6.122	94.485	296.0321	-0.34668	0.28223	0.060547	-115.971	-104.4285	1287.705	-2.7761	2.3555	-0.14521	NaN	NaN	NaN	NaN	NaN	NaN	NaN	NaN	NaN	NaN	NaN	NaN
2.376	4.637	95.09	268.5228	-0.2998	0.21973	0.063477	-21.308	-132.052	1266.9812	-2.4891	2.3297	-0.20996	NaN	NaN	NaN	NaN	NaN	NaN	NaN	NaN	NaN	NaN	NaN	NaN
2.378	-10.243	104.298	240.439	-0.2605	0.19043	0.066895	9.436	-162.744	1293.781	-2.1577	2.1958	-0.29248	NaN	NaN	NaN	NaN	NaN	NaN	NaN	NaN	NaN	NaN	NaN	NaN
2.38	-14.798	109.4097	211.314	-0.2251	0.15576	0.067871	-73.421	-202.502	1373.931	-1.8522	2.0017	-0.34355	NaN	NaN	NaN	NaN	NaN	NaN	NaN	NaN	NaN	NaN	NaN	NaN
2.382	-15.167	125.155	205.43	-0.18164	0.11621	0.066406	-74.673	-254.385	1482.502	-1.6398	1.881	-0.3581	NaN	NaN	NaN	NaN	NaN	NaN	NaN	NaN	NaN	NaN	NaN	NaN
2.384	-43.864	134.659	200.8896	-0.15869	0.10498	0.061523	-46.5012	-196.5139	1542.894	-1.5335	1.8294	-0.34013	NaN	NaN	NaN	NaN	NaN	NaN	NaN	NaN	NaN	NaN	NaN	NaN
2.386	-49.86	126.51	189.093	-0.13232	0.081543	0.066895	-61.0555	-196.6069	1506.743	-1.4842	1.8037	-0.30752	NaN	NaN	NaN	NaN	NaN	NaN	NaN	NaN	NaN	NaN	NaN	NaN
2.388	-37.075	97.559	176.8352	-0.11938	0.064941	0.073242	-43.601	-187.8406	1417.5336	-1.4023	1.7773	-0.26172	NaN	NaN	NaN	NaN	NaN	NaN	NaN	NaN	NaN	NaN	NaN	NaN
2.39	-53.2132	99.578	160.86	-0.1084	0.053223	0.078125	-54.803	-173.605	1328.086	-1.2463	1.6951	-0.2374	NaN	NaN	NaN	NaN	NaN	NaN	NaN	NaN	NaN	NaN	NaN	NaN
2.392	-46.848	100.271	130.3031	-0.097656	0.039063	0.078125	-55.2463	-179.11187	1352.355	-1.0605	1.5888	-0.23408	NaN	NaN	NaN	NaN	NaN	NaN	NaN	NaN	NaN	NaN	NaN	NaN
2.394	-52.063	93.193	113.3286	-0.09082	0.030273	0.076172	22.5282	-128.5366	1430.626	-0.86866	1.4657	-0.26182	NaN	NaN	NaN	NaN	NaN	NaN	NaN	NaN	NaN	NaN	NaN	NaN
2.396	-36.784	59.3462	83.5554	-0.075684	0.02002	0.072266	38.4159	-108.6077	1483.165	-0.74795	1.3614	-0.33799	NaN	NaN	NaN	NaN	NaN	NaN	NaN	NaN	NaN	NaN	NaN	NaN
2.398	-34.127	40.835	73.182	-0.065918	0.015625	0.071289	82.466	-125.127	1525.122	-0.69336	1.2754	-0.36426	NaN	NaN	NaN	NaN	NaN	NaN	NaN	NaN	NaN	NaN	NaN	NaN
2.4	-15.522	34.008	61.681	-0.057129	0.01416	0.069336	124.522	-78.378	1500.049	-0.73067	1.2337	-0.35869	NaN	NaN	NaN	NaN	NaN	NaN	NaN	NaN	NaN	NaN	NaN	NaN
2.402	-35.876	35.478	55.947	-0.046387	0.015625	0.075684	79.91954	-71.731	1478.296	-0.84923	1.2472	-0.33925	NaN	NaN	NaN	NaN	NaN	NaN	NaN	NaN	NaN	NaN	NaN	NaN
2.404	-31.044	49.6907	66.8034	-0.04541	0.022949	0.070313	115.212	0.110000000000007	1484.0576	-1.0051	1.2711	-0.30332	NaN	NaN	NaN	NaN	NaN	NaN	NaN	NaN	NaN	NaN	NaN	NaN
2.406	-14.562	64.5077	62.450163	-0.036133	0.020996	0.075195	105.59	21.236	1475.257	-1.1803	1.3006	-0.27344	NaN	NaN	NaN	NaN	NaN	NaN	NaN	NaN	NaN	NaN	NaN	NaN
2.408	-40.981	66.852	51.6745	-0.023437	0.010742	0.072998	5.1467	-59.972	1516.65	-1.353	1.3208	-0.26123	NaN	NaN	NaN	NaN	NaN	NaN	NaN	NaN	NaN	NaN	NaN	NaN
2.41	-51.2275	49.56	42.2844	-0.013184	0.0063477	0.064941	10.415	-136.991	1537.661	-1.5015	1.355	-0.26338	NaN	NaN	NaN	NaN	NaN	NaN	NaN	NaN	NaN	NaN	NaN	NaN
2.412	-24.652	35.158	35.4113	-0.0014648	0	0.054688	-34.10612	-201.504	1495.5159	-1.6319	1.3981	-0.27578	NaN	NaN	NaN	NaN	NaN	NaN	NaN	NaN	NaN	NaN	NaN	NaN
2.414	-12.394	47.37	31.0746	0.0068359	-0.0043945	0.053223	-7.871	-206.26	1474.1071	-1.7241	1.4575	-0.29453	NaN	NaN	NaN	NaN	NaN	NaN	NaN	NaN	NaN	NaN	NaN	NaN
2.416	-29.274	58.598	36.5962	0.011719	-0.0043945	0.049805	12.169	-128.179	1444.0675	-1.7814	1.5163	-0.30557	NaN	NaN	NaN	NaN	NaN	NaN	NaN	NaN	NaN	NaN	NaN	NaN
2.418	-25.519	53.991	30.0781	0.017822	0.00024415	0.053223	-24.196	-89.449	1414.7101	-1.812	1.5688	-0.31885	NaN	NaN	NaN	NaN	NaN	NaN	NaN	NaN	NaN	NaN	NaN	NaN
2.42	1.339	29.28625	8.725	0.016113	0.0078125	0.052246	20.2761	-55.7772	1414.8826	-1.8511	1.611	-0.34952	NaN	NaN	NaN	NaN	NaN	NaN	NaN	NaN	NaN	NaN	NaN	NaN
2.422	-7.634	17.016	-12.5694	0.011719	0.021484	0.058105	15.9905	-40.28674	1407.881	-1.8812	1.6407	-0.37961	NaN	NaN	NaN	NaN	NaN	NaN	NaN	NaN	NaN	NaN	NaN	NaN
2.424	0.571000000000002	10.061	5.485	0.012207	0.028809	0.057617	17.48	-48.262	1430.31473	-1.8984	1.6642	-0.40306	NaN	NaN	NaN	NaN	NaN	NaN	NaN	NaN	NaN	NaN	NaN	NaN
2.426	2.849	9.62	9.5809	0.0087891	0.033691	0.068848	71.118	-32.284	1452.988	-1.9069	1.6829	-0.42414	NaN	NaN	NaN	NaN	NaN	NaN	NaN	NaN	NaN	NaN	NaN	NaN
2.428	7.212	10.9788	35.2056	0.008789	0.038086	0.073242	5.136	39.873	1414.942	-1.9292	1.7056	-0.43848	NaN	NaN	NaN	NaN	NaN	NaN	NaN	NaN	NaN	NaN	NaN	NaN
2.43	-9.571	29.4043	21.9576	0.015625	0.039063	0.076172	-46.9429	90.2439	1378.2696	-1.9804	1.7222	-0.45476	NaN	NaN	NaN	NaN	NaN	NaN	NaN	NaN	NaN	NaN	NaN	NaN
2.432	-31.972	25.39	17.7895	0.02832	0.046875	0.083984	-58.661	151.775	1330.519	-2.0482	1.7481	-0.45392	NaN	NaN	NaN	NaN	NaN	NaN	NaN	NaN	NaN	NaN	NaN	NaN
2.434	-11.903	17.3008	38.3632	0.036133	0.046875	0.080566	-79.523	129.948	1291.066	-2.1122	1.7809	-0.44536	NaN	NaN	NaN	NaN	NaN	NaN	NaN	NaN	NaN	NaN	NaN	NaN
2.436	-20.361	29.5924	45.8795	0.058105	0.045898	0.086914	12.03569	95.434	1309.5156	-2.1711	1.8118	-0.42996	NaN	NaN	NaN	NaN	NaN	NaN	NaN	NaN	NaN	NaN	NaN	NaN
2.438	-6.015	54.434	34.152	0.070312	0.048584	0.089355	45.762	77.025	1287.1911	-2.2227	1.834	-0.4043	NaN	NaN	NaN	NaN	NaN	NaN	NaN	NaN	NaN	NaN	NaN	NaN
2.44	-24.323	50.968	35.9486	0.085938	0.04248	0.091309	2.2701	48.685	1263.593	-2.2411	1.8425	-0.37135	NaN	NaN	NaN	NaN	NaN	NaN	NaN	NaN	NaN	NaN	NaN	NaN
2.442	-16.9	31.691	21.1584	0.10254	0.027832	0.092285	38.109	54.559	1220.577	-2.2117	1.8306	-0.33652	NaN	NaN	NaN	NaN	NaN	NaN	NaN	NaN	NaN	NaN	NaN	NaN
2.444	-32.784	26.7207	8.0222	0.11328	0.02002	0.09375	-23.22	65.133	1190.341	-2.1218	1.8022	-0.31505	NaN	NaN	NaN	NaN	NaN	NaN	NaN	NaN	NaN	NaN	NaN	NaN
2.446	-18.129	29.7972	3.48161	0.13721	0.011719	0.1001	43.96	59.472	1192.3259	-1.9846	1.7498	-0.30448	NaN	NaN	NaN	NaN	NaN	NaN	NaN	NaN	NaN	NaN	NaN	NaN
2.448	-10.453	10.743	3.8114	0.14747	0.0097656	0.10108	98.8427	94.743	1204.183	-1.8276	1.6782	-0.30322	NaN	NaN	NaN	NaN	NaN	NaN	NaN	NaN	NaN	NaN	NaN	NaN
2.45	-26.048	26.2321	19.109	0.16162	0.0092773	0.10449	58.225	133.369	1191.871	-1.6855	1.5924	-0.3119	NaN	NaN	NaN	NaN	NaN	NaN	NaN	NaN	NaN	NaN	NaN	NaN
2.452	-32.241	41.4247	22.0098	0.17285	0.0083008	0.10791	53.664	162.2924	1174.224	-1.5642	1.5176	-0.32016	NaN	NaN	NaN	NaN	NaN	NaN	NaN	NaN	NaN	NaN	NaN	NaN
2.454	-37.352	50.385	31.1639	0.18506	0.0029297	0.1084	-7.227	203.371	1143.192	-1.4757	1.446	-0.32707	NaN	NaN	NaN	NaN	NaN	NaN	NaN	NaN	NaN	NaN	NaN	NaN
2.456	-21.392	39.432	39.417	0.19873	0.0048828	0.11621	-10.0408	204.601	1106.524	-1.4224	1.4001	-0.33967	NaN	NaN	NaN	NaN	NaN	NaN	NaN	NaN	NaN	NaN	NaN	NaN
2.458	-44.4518	23.7302	33.1692	0.21704	0.0036621	0.11792	54.386	181.92	1087.861	-1.4058	1.3638	-0.3374	NaN	NaN	NaN	NaN	NaN	NaN	NaN	NaN	NaN	NaN	NaN	NaN
2.46	-29.163	23.5719	38.4548	0.23145	0.0078125	0.12109	33.316	176.847	1013.1438	-1.4022	1.3429	-0.3283	NaN	NaN	NaN	NaN	NaN	NaN	NaN	NaN	NaN	NaN	NaN	NaN
2.462	-35.52	25.1485	25.6541	0.25439	0.0058594	0.11914	21.94	122.591	964.418	-1.4096	1.3427	-0.31571	NaN	NaN	NaN	NaN	NaN	NaN	NaN	NaN	NaN	NaN	NaN	NaN
2.464	-39.845	21.2237	23.9616	0.26172	0.0029297	0.11475	4.062	147.126	929.52	-1.4105	1.3349	-0.30042	NaN	NaN	NaN	NaN	NaN	NaN	NaN	NaN	NaN	NaN	NaN	NaN
2.466	-10.954	26.2368	37.5185	0.27686	0.0092773	0.11182	-40.247	178.623	888.249	-1.4094	1.3144	-0.28232	NaN	NaN	NaN	NaN	NaN	NaN	NaN	NaN	NaN	NaN	NaN	NaN
2.468	-10.047	21.453	18.7947	0.28735	0.013671	0.11133	-7.9135	172.141	878.121	-1.3867	1.291	-0.26855	NaN	NaN	NaN	NaN	NaN	NaN	NaN	NaN	NaN	NaN	NaN	NaN
2.47	-14.828	24.3111	35.1672	0.29883	0.018066	0.11475	4.394	177.817	820.122	-1.3427	1.2618	-0.25632	NaN	NaN	NaN	NaN	NaN	NaN	NaN	NaN	NaN	NaN	NaN	NaN
2.472	-12.914	27.3218	21.2188	0.31299	0.029297	0.104	-33.408	133.571	767.7245	-1.2839	1.2243	-0.2463	NaN	NaN	NaN	NaN	NaN	NaN	NaN	NaN	NaN	NaN	NaN	NaN
2.474	-10.747	34.1725	25.2344	0.31641	0.03418	0.10107	-9.197	128.834	756.1729	-1.2168	1.1869	-0.2371	NaN	NaN	NaN	NaN	NaN	NaN	NaN	NaN	NaN	NaN	NaN	NaN
2.476	-12.801	47.844	25.0136	0.32275	0.049316	0.10156	-60.0251	181.338	731.9033	-1.146	1.1381	-0.22267	NaN	NaN	NaN	NaN	NaN	NaN	NaN	NaN	NaN	NaN	NaN	NaN
2.478	-14.916	30.592	29.88457	0.32299	0.063233	0.10034	-36.9464	170.734	739.498	-1.0815	1.0942	-0.20752	NaN	NaN	NaN	NaN	NaN	NaN	NaN	NaN	NaN	NaN	NaN	NaN
2.48	-9.29799999999999	11.1657	35.4859	0.31689	0.080078	0.097656	-30.8319	174.837	702.361	-1.022	1.0386	-0.18841	NaN	NaN	NaN	NaN	NaN	NaN	NaN	NaN	NaN	NaN	NaN	NaN
2.482	-7.302	15.88507	25.9598	0.30029	0.094727	0.089844	-79.97	159.829	616.7616	-0.97113	0.98463	-0.17406	NaN	NaN	NaN	NaN	NaN	NaN	NaN	NaN	NaN	NaN	NaN	NaN
2.484	-25.456	26.5225	18.3701	0.28711	0.104	0.085938	-54.7628	135.4541	555.28	-0.92239	0.92671	-0.1603	NaN	NaN	NaN	NaN	NaN	NaN	NaN	NaN	NaN	NaN	NaN	NaN
2.486	-39.6522	39.9864	26.469	0.25781	0.11816	0.09082	-76.06	178.68	505.531	-0.87675	0.86805	-0.1484	NaN	NaN	NaN	NaN	NaN	NaN	NaN	NaN	NaN	NaN	NaN	NaN
2.488	-10.445	38.5788	37.0234	0.22363	0.14746	0.088379	-74.9207	167.1315	465.7042	-0.83154	0.81299	-0.12695	NaN	NaN	NaN	NaN	NaN	NaN	NaN	NaN	NaN	NaN	NaN	NaN
2.49	-9.584	33.0744	39.1557	0.20459	0.16064	0.091309	-23.096	131.241	427.0146	-0.79237	0.75264	-0.10794	NaN	NaN	NaN	NaN	NaN	NaN	NaN	NaN	NaN	NaN	NaN	NaN
2.492	6.177	26.06483	25.8612	0.15967	0.19922	0.099121	-54.031	134.144	375.751	-0.75599	0.69968	-0.08347	NaN	NaN	NaN	NaN	NaN	NaN	NaN	NaN	NaN	NaN	NaN	NaN
2.494	-14.588	-4.5503	24.21	0.12744	0.22583	0.10523	-49.7308	65.388	341.751	-0.71107	0.64857	-0.056172	NaN	NaN	NaN	NaN	NaN	NaN	NaN	NaN	NaN	NaN	NaN	NaN
2.496	-19.018	1.424	25.463	0.096191	0.24756	0.11133	-5.443	111.125	303.867	-0.65887	0.59504	-0.030134	NaN	NaN	NaN	NaN	NaN	NaN	NaN	NaN	NaN	NaN	NaN	NaN
2.498	-25.443	8.2308	28.28304	0.070801	0.27002	0.12988	-20.38	167.1367	265.909	-0.58887	0.54004	-0.0097656	NaN	NaN	NaN	NaN	NaN	NaN	NaN	NaN	NaN	NaN	NaN	NaN
2.5	-45.4469	21.8255	27.2938	0.058594	0.27881	0.13916	3.349	162.163	276.7305	-0.51793	0.48784	0.0099483	NaN	NaN	NaN	NaN	NaN	NaN	NaN	NaN	NaN	NaN	NaN	NaN
2.502	-25.975	20.8815	19.65578	0.04834	0.29102	0.14941	-41.206	209.011	241.9295	-0.4489	0.43639	0.023425	NaN	NaN	NaN	NaN	NaN	NaN	NaN	NaN	NaN	NaN	NaN	NaN
2.504	-45.6038	24.4867	19.2124	0.041504	0.30175	0.16138	-66.3074	167.557	217.12489	-0.38131	0.38169	0.033197	NaN	NaN	NaN	NaN	NaN	NaN	NaN	NaN	NaN	NaN	NaN	NaN
2.506	-20.518	28.0752	19.97	0.038574	0.30713	0.17725	-11.296	118.806	200.5269	-0.31819	0.33049	0.041014	NaN	NaN	NaN	NaN	NaN	NaN	NaN	NaN	NaN	NaN	NaN	NaN
2.508	-40.2691	28.884	27.9453	0.040527	0.31104	0.18555	-62.7387	143.05313	164.858	-0.26709	0.28369	0.049316	NaN	NaN	NaN	NaN	NaN	NaN	NaN	NaN	NaN	NaN	NaN	NaN
2.51	-39.757	30.6041	27.3459	0.040039	0.31982	0.1958	-31.847	77.289	170.223	-0.22402	0.24833	0.060256	NaN	NaN	NaN	NaN	NaN	NaN	NaN	NaN	NaN	NaN	NaN	NaN
2.512	-28.437	26.4839	29.6352	0.030762	0.32617	0.20898	-15.056	90.9365	148.7041	-0.18846	0.21406	0.07364	NaN	NaN	NaN	NaN	NaN	NaN	NaN	NaN	NaN	NaN	NaN	NaN
2.514	-11.826	21.7702	27.625	0.024902	0.33056	0.22192	-54.469	116.5791	81.613	-0.15722	0.19413	0.087697	NaN	NaN	NaN	NaN	NaN	NaN	NaN	NaN	NaN	NaN	NaN	NaN
2.516	-0.244999999999997	-15.4661	62.145	0.014648	0.33789	0.22998	-11.265	68.0032	66.528	-0.12285	0.17969	0.099612	NaN	NaN	NaN	NaN	NaN	NaN	NaN	NaN	NaN	NaN	NaN	NaN
2.518	-28.809	-64.6722	105.99	0.014648	0.35156	0.24512	-28.643	105.768	53.493	-0.087891	0.16162	0.10742	NaN	NaN	NaN	NaN	NaN	NaN	NaN	NaN	NaN	NaN	NaN	NaN
2.52	-17.574	-68.2345	180.1266	0.022461	0.36133	0.24902	-22.175	70.63408	84.838	-0.051271	0.14746	0.11426	NaN	NaN	NaN	NaN	NaN	NaN	NaN	NaN	NaN	NaN	NaN	NaN
2.522	-13.864	-44.369	250.889	0.023438	0.37305	0.23584	4.401	47.9843	94.572	-0.014456	0.13398	0.12178	NaN	NaN	NaN	NaN	NaN	NaN	NaN	NaN	NaN	NaN	NaN	NaN
2.524	-67.077221	-54.815	307.984	0.0031737	0.38501	0.20019	-49.9948	95.254	49.687	0.023044	0.11914	0.13467	NaN	NaN	NaN	NaN	NaN	NaN	NaN	NaN	NaN	NaN	NaN	NaN
2.526	-82.391	-138.344	337.735	-0.041016	0.40967	0.13477	-57.5327	54.3744	55.9586	0.05244	0.10234	0.15019	NaN	NaN	NaN	NaN	NaN	NaN	NaN	NaN	NaN	NaN	NaN	NaN
2.528	-60.485	-209.3398	332.758	-0.1665	0.46826	0.062012	-46.914	78.593	57.0675	0.08252	0.088379	0.15771	NaN	NaN	NaN	NaN	NaN	NaN	NaN	NaN	NaN	NaN	NaN	NaN
2.53	-47.251	-221.2245	385.1652	-0.26904	0.50439	0.036621	-56.684	98.47	49.9244	0.12403	0.072363	0.15273	NaN	NaN	NaN	NaN	NaN	NaN	NaN	NaN	NaN	NaN	NaN	NaN
2.532	-63.029	-128.9455	450.7102	-0.53906	0.60938	0.033203	-34.401	66.459	45.686	0.1624	0.054394	0.14766	NaN	NaN	NaN	NaN	NaN	NaN	NaN	NaN	NaN	NaN	NaN	NaN
2.534	-61.212	-51.0106	522.8212	-0.74414	0.69825	0.081299	-26.74	109.942	35.1824	0.19326	0.0333	0.14375	NaN	NaN	NaN	NaN	NaN	NaN	NaN	NaN	NaN	NaN	NaN	NaN
2.536	-101.199	-5.6577	558.4319	-0.91504	0.80078	0.13623	-48.3344	65.828	33.11	0.21025	0.015332	0.13438	NaN	NaN	NaN	NaN	NaN	NaN	NaN	NaN	NaN	NaN	NaN	NaN
2.538	-71.479	21.496	626.509	-1.0508	0.93945	0.17188	-28.376	26.026	53.07365	0.21387	0.0048828	0.13184	NaN	NaN	NaN	NaN	NaN	NaN	NaN	NaN	NaN	NaN	NaN	NaN
2.54	-5.34200000000001	42.525	737.373	-1.0918	1.002	0.1665	-38.152	59.766	34.2126	0.20654	-0.0033203	0.1374	NaN	NaN	NaN	NaN	NaN	NaN	NaN	NaN	NaN	NaN	NaN	NaN
2.542	11.553	68.934	849.706	-1.1475	1.1211	0.10498	-6.99299999999999	-19.682	30.777	0.18086	-0.0017578	0.13877	NaN	NaN	NaN	NaN	NaN	NaN	NaN	NaN	NaN	NaN	NaN	NaN
2.544	12.26	101.748	981.48208	-1.2244	1.2	0.023438	3.992	-6.749	17.6364	0.14492	0.0064453	0.14346	NaN	NaN	NaN	NaN	NaN	NaN	NaN	NaN	NaN	NaN	NaN	NaN
2.546	-4.845	128.457	1077.817	-1.3418	1.2734	-0.056152	-58.4709	17.57	17.374	0.10088	0.013672	0.14698	NaN	NaN	NaN	NaN	NaN	NaN	NaN	NaN	NaN	NaN	NaN	NaN
2.548	-14.735	115.111	1136.689	-1.5664	1.3828	-0.12793	-8.916	-8.4705	40.35725	0.050781	0.026855	0.1499	NaN	NaN	NaN	NaN	NaN	NaN	NaN	NaN	NaN	NaN	NaN	NaN
2.55	-36.13271	78.861	1150.2602	-1.7012	1.4434	-0.14746	-26.421	69.747	47.5084	0.004785	0.045313	0.15479	NaN	NaN	NaN	NaN	NaN	NaN	NaN	NaN	NaN	NaN	NaN	NaN
2.552	-38.5137	40.69	1144.662	-1.9897	1.5884	-0.14307	-30.578	49.773	63.312	-0.041211	0.060547	0.15489	NaN	NaN	NaN	NaN	NaN	NaN	NaN	NaN	NaN	NaN	NaN	NaN
2.554	-59.0439	-12.782	1156.976	-2.1516	1.6917	-0.10766	-11.641	16.3842	69.247	-0.079492	0.08125	0.15449	NaN	NaN	NaN	NaN	NaN	NaN	NaN	NaN	NaN	NaN	NaN	NaN
2.556	-49.2823	-71.2247	1184.5601	-2.2612	1.7974	-0.067383	-56.596	45.86	45.7221	-0.11758	0.099121	0.16006	NaN	NaN	NaN	NaN	NaN	NaN	NaN	NaN	NaN	NaN	NaN	NaN
2.558	-53.32	-117.341	1189.23	-2.2793	1.9375	-0.0068359	-17.37	-6.1956	27.94681	-0.14941	0.1123	0.16748	NaN	NaN	NaN	NaN	NaN	NaN	NaN	NaN	NaN	NaN	NaN	NaN
2.56	-41.433	-136.741	1181.3464	-2.2344	1.998	0.015137	-10.18	21.2316	31.1177	-0.17569	0.12354	0.16758	NaN	NaN	NaN	NaN	NaN	NaN	NaN	NaN	NaN	NaN	NaN	NaN
2.562	15.0874	-163.339	1171.2486	-2.082	2.0957	0.050781	-32.7574	50.0467	14.0802	-0.20195	0.13887	0.18203	NaN	NaN	NaN	NaN	NaN	NaN	NaN	NaN	NaN	NaN	NaN	NaN
2.564	35.2068	-194.902	1162.8187	-1.9431	2.1135	0.076905	-12.372	-9.167	43.9553	-0.22266	0.15371	0.18945	NaN	NaN	NaN	NaN	NaN	NaN	NaN	NaN	NaN	NaN	NaN	NaN
2.566	45.384	-176.678	1207.581	-1.8105	2.0742	0.089844	-28.335	34.166	18.676	-0.23066	0.15928	0.20752	NaN	NaN	NaN	NaN	NaN	NaN	NaN	NaN	NaN	NaN	NaN	NaN
2.568	28.586	-98.111	1247.159	-1.666	1.959	0.11963	-43.455	4.7813	5.392	-0.22656	0.1626	0.21826	NaN	NaN	NaN	NaN	NaN	NaN	NaN	NaN	NaN	NaN	NaN	NaN
2.57	38.7897	-37.349	1308.127	-1.6011	1.8911	0.13574	-17.458	-7.5823	21.5671463	-0.21143	0.16562	0.2252	NaN	NaN	NaN	NaN	NaN	NaN	NaN	NaN	NaN	NaN	NaN	NaN
2.572	45.791	-24.896	1331.753	-1.4805	1.7637	0.17822	-40.076	58.973	28.44329	-0.17568	0.16426	0.23018	NaN	NaN	NaN	NaN	NaN	NaN	NaN	NaN	NaN	NaN	NaN	NaN
2.574	18.7342	-52.767	1328.2569	-1.3881	1.6645	0.21241	-12.01	3.6513	39.576	-0.12608	0.15762	0.23096	NaN	NaN	NaN	NaN	NaN	NaN	NaN	NaN	NaN	NaN	NaN	NaN
2.576	18.971	-60.7	1305.1746	-1.2988	1.5703	0.24561	-6.893	-0.89568	41.8335	-0.069141	0.14863	0.23272	NaN	NaN	NaN	NaN	NaN	NaN	NaN	NaN	NaN	NaN	NaN	NaN
2.578	-25.305	-57.986	1269.36491	-1.1758	1.4258	0.25146	-66.4084	2.978	9.817	-0.014648	0.13721	0.23047	NaN	NaN	NaN	NaN	NaN	NaN	NaN	NaN	NaN	NaN	NaN	NaN
2.58	-31.839	-37.814	1243.676	-1.1211	1.3457	0.23242	-21.987	-47.798	23.206	0.044043	0.12119	0.23281	NaN	NaN	NaN	NaN	NaN	NaN	NaN	NaN	NaN	NaN	NaN	NaN
2.582	-88.8417	-66.985	1250.043	-1.0483	1.1743	0.15234	-17.629	41.7377	37.7179	0.089356	0.10801	0.23174	NaN	NaN	NaN	NaN	NaN	NaN	NaN	NaN	NaN	NaN	NaN	NaN
2.584	-43.734	-101.1802	1253.062	-1.0274	1.0601	0.10523	-34.302	53.12	20.3592	0.13897	0.089258	0.23604	NaN	NaN	NaN	NaN	NaN	NaN	NaN	NaN	NaN	NaN	NaN	NaN
2.586	15.406	-158.005	1278.654	-1.0332	0.97461	0.08252	-13.745	29.6421	17.3857	0.18614	0.071875	0.23711	NaN	NaN	NaN	NaN	NaN	NaN	NaN	NaN	NaN	NaN	NaN	NaN
2.588	34.62	-170.757	1337.835	-1.0786	0.93945	0.077148	-37.2436	60.423	-16.928	0.23926	0.050781	0.23291	NaN	NaN	NaN	NaN	NaN	NaN	NaN	NaN	NaN	NaN	NaN	NaN
2.59	28.638	-153.576	1373.229	-1.1147	0.94385	0.084473	-28.0762	5.5801	-15.9885	0.29726	0.038672	0.22061	NaN	NaN	NaN	NaN	NaN	NaN	NaN	NaN	NaN	NaN	NaN	NaN
2.592	-33.824	-105.566	1389.6185	-1.1885	1.0039	0.11182	-14.433	19.0293	-0.655000000000001	0.3583	0.028223	0.21367	NaN	NaN	NaN	NaN	NaN	NaN	NaN	NaN	NaN	NaN	NaN	NaN
2.594	-47.781	-75.7679	1403.349	-1.2579	1.0621	0.12891	-31.525	49.826	1.7578	0.41221	0.023145	0.19727	NaN	NaN	NaN	NaN	NaN	NaN	NaN	NaN	NaN	NaN	NaN	NaN
2.596	-88.6611	-84.028	1415.996	-1.3379	1.1191	0.14404	-28.147	2.4163	18.0741	0.45791	0.023047	0.18379	NaN	NaN	NaN	NaN	NaN	NaN	NaN	NaN	NaN	NaN	NaN	NaN
2.598	-80.936	-102.565	1433.215	-1.4766	1.1816	0.16211	-44.108	66.305	15.104	0.49951	0.025879	0.17139	NaN	NaN	NaN	NaN	NaN	NaN	NaN	NaN	NaN	NaN	NaN	NaN
2.6	-95.5686	-119.1884	1433.795	-1.5444	1.2085	0.17139	-44.5305	58.847	-2.813	0.52461	0.041797	0.15918	NaN	NaN	NaN	NaN	NaN	NaN	NaN	NaN	NaN	NaN	NaN	NaN
2.602	-132.895	-111.9191	1399.341	-1.6743	1.2603	0.18359	-12.809	39.3624	26.82	0.53681	0.054883	0.1501	NaN	NaN	NaN	NaN	NaN	NaN	NaN	NaN	NaN	NaN	NaN	NaN
2.604	-122.964	-76.8152	1373.383	-1.7586	1.3098	0.18237	-26.857	92.435	27.7234	0.53565	0.07832	0.1419	NaN	NaN	NaN	NaN	NaN	NaN	NaN	NaN	NaN	NaN	NaN	NaN
2.606	-138.28	-68.474	1353.475	-1.8242	1.3711	0.18018	-23.992	31.5962	29.884	0.52666	0.098339	0.1417	NaN	NaN	NaN	NaN	NaN	NaN	NaN	NaN	NaN	NaN	NaN	NaN
2.608	-102.6414	-47.654	1344.104	-1.8765	1.4419	0.16846	-39.055	19.9999	33.6874	0.50049	0.12109	0.13867	NaN	NaN	NaN	NaN	NaN	NaN	NaN	NaN	NaN	NaN	NaN	NaN
2.61	-72.271	-69.7999	1353.161	-1.9004	1.4727	0.15479	-54.593	40.85446	9.586	0.47197	0.14385	0.13496	NaN	NaN	NaN	NaN	NaN	NaN	NaN	NaN	NaN	NaN	NaN	NaN
2.612	-16.517	-86.313	1353.114	-1.9507	1.5513	0.12207	-12.657	-20.9159	37.565	0.44336	0.1625	0.13164	NaN	NaN	NaN	NaN	NaN	NaN	NaN	NaN	NaN	NaN	NaN	NaN
2.614	-38.144	-75.903	1378.5865	-2.0127	1.624	0.1001	-27.583	55.458	35.5851	0.41132	0.17734	0.13477	NaN	NaN	NaN	NaN	NaN	NaN	NaN	NaN	NaN	NaN	NaN	NaN
2.616	-75.8821	-36.5031	1398.941	-2.0898	1.707	0.084473	-34.0359	57.8338	27.92395	0.3792	0.19316	0.1336	NaN	NaN	NaN	NaN	NaN	NaN	NaN	NaN	NaN	NaN	NaN	NaN
2.618	-81.7631	-17.6405	1413.007	-2.2202	1.8286	0.091797	3.611	39.354	38.4888	0.35156	0.20557	0.12451	NaN	NaN	NaN	NaN	NaN	NaN	NaN	NaN	NaN	NaN	NaN	NaN
2.62	-86.168	-2.6113	1412.886	-2.2847	1.8911	0.10889	-46.419	86.604	39.341	0.32119	0.2084	0.11182	NaN	NaN	NaN	NaN	NaN	NaN	NaN	NaN	NaN	NaN	NaN	NaN
2.622	-82.54	-15.864	1378.015	-2.3711	1.9961	0.13477	-53.12	40.861	47.9723	0.28594	0.21787	0.1042	NaN	NaN	NaN	NaN	NaN	NaN	NaN	NaN	NaN	NaN	NaN	NaN
2.624	-81.749	-26.814	1360.5944	-2.3721	2.0361	0.13989	-4.568	45.544	56.662	0.25351	0.22998	0.097558	NaN	NaN	NaN	NaN	NaN	NaN	NaN	NaN	NaN	NaN	NaN	NaN
2.626	-66.972	-37.759	1363.303	-2.3374	2.0454	0.14111	-30.194	60.742	26.4586	0.21533	0.23613	0.094141	NaN	NaN	NaN	NaN	NaN	NaN	NaN	NaN	NaN	NaN	NaN	NaN
2.628	-79.0258	-42.316	1358.731	-2.2144	1.9966	0.12354	-20.876	-9.3122	43.744	0.18066	0.25244	0.096191	NaN	NaN	NaN	NaN	NaN	NaN	NaN	NaN	NaN	NaN	NaN	NaN
2.63	-54.116	-36.8296	1328.8436	-2.1328	1.9512	0.11084	-7.017	33.2668	38.881	0.13955	0.26484	0.092773	NaN	NaN	NaN	NaN	NaN	NaN	NaN	NaN	NaN	NaN	NaN	NaN
2.632	-43.41	-54.832	1288.588	-1.9648	1.834	0.086914	-36.2124	32.2887	39.1159	0.10322	0.28115	0.098047	NaN	NaN	NaN	NaN	NaN	NaN	NaN	NaN	NaN	NaN	NaN	NaN
2.634	-3.215	-48.6177	1260.994	-1.8145	1.7168	0.069336	-9.22499999999999	16.381	54.836	0.071972	0.29755	0.10156	NaN	NaN	NaN	NaN	NaN	NaN	NaN	NaN	NaN	NaN	NaN	NaN
2.636	-6.51000000000001	-22.391	1232.815	-1.7515	1.6646	0.058105	-14.786	61.7584	43.0215	0.047168	0.30635	0.10352	NaN	NaN	NaN	NaN	NaN	NaN	NaN	NaN	NaN	NaN	NaN	NaN
2.638	-50.01	19.838	1228.137	-1.6479	1.5649	0.049316	-23.199	0.922000000000001	37.4446	0.024414	0.29688	0.10547	NaN	NaN	NaN	NaN	NaN	NaN	NaN	NaN	NaN	NaN	NaN	NaN
2.64	-58.858	62.249	1217.771	-1.5849	1.5009	0.043213	-23.919	-7.418	38.8039	0.0048829	0.29317	0.10928	NaN	NaN	NaN	NaN	NaN	NaN	NaN	NaN	NaN	NaN	NaN	NaN
2.642	-75.407	82.49	1220.39	-1.5352	1.4336	0.039063	-34.2889	24.4085	14.8477	-0.0068359	0.28613	0.11309	NaN	NaN	NaN	NaN	NaN	NaN	NaN	NaN	NaN	NaN	NaN	NaN
2.644	-59.0322	78.688	1189.495	-1.4902	1.3574	0.02832	-22.116	-32.619	36.271	-0.014649	0.27636	0.11426	NaN	NaN	NaN	NaN	NaN	NaN	NaN	NaN	NaN	NaN	NaN	NaN
2.646	-85.29245	71.224	1151.2282	-1.4741	1.3267	0.024902	-20.021	23.1959	38.03419	-0.025098	0.26787	0.11631	NaN	NaN	NaN	NaN	NaN	NaN	NaN	NaN	NaN	NaN	NaN	NaN
2.648	-91.069	69.043	1116.7288	-1.4355	1.2637	0.020508	-43.9543	18.837	40.4733	-0.029785	0.26172	0.12061	NaN	NaN	NaN	NaN	NaN	NaN	NaN	NaN	NaN	NaN	NaN	NaN
2.65	-78.515	86.611	1093.964	-1.3986	1.219	0.024903	-33.128	-9.14	33.2221	-0.040527	0.25449	0.13008	NaN	NaN	NaN	NaN	NaN	NaN	NaN	NaN	NaN	NaN	NaN	NaN
2.652	-82.758	102.401	1061.1084	-1.3516	1.168	0.021484	-42.525	53.702	17.1	-0.047266	0.24668	0.13916	NaN	NaN	NaN	NaN	NaN	NaN	NaN	NaN	NaN	NaN	NaN	NaN
2.654	-95.0844	78.5498	1051.6934	-1.2852	1.1074	0.02002	-33.814	18.97647	23.1151	-0.058594	0.23926	0.15244	NaN	NaN	NaN	NaN	NaN	NaN	NaN	NaN	NaN	NaN	NaN	NaN
2.656	-80.7055	41.317	1014.9535	-1.2437	1.0767	0.014648	-23.377	35.847	21.74319	-0.067578	0.23448	0.15761	NaN	NaN	NaN	NaN	NaN	NaN	NaN	NaN	NaN	NaN	NaN	NaN
2.658	-48.76	10.782	974.8338	-1.1675	1.02	0.010254	-43.4085	59.293	0.648999999999997	-0.077637	0.229	0.16504	NaN	NaN	NaN	NaN	NaN	NaN	NaN	NaN	NaN	NaN	NaN	NaN
2.66	-63.994	36.03	952.7658	-1.1036	0.97803	0.0078125	-19.678	-23.3499	53.1165	-0.093067	0.23271	0.17763	NaN	NaN	NaN	NaN	NaN	NaN	NaN	NaN	NaN	NaN	NaN	NaN
2.662	-85.3506	89.004	934.2672	-1.0425	0.93994	0.0043945	-47.154	-31.4008	121.315	-0.10371	0.23643	0.18633	NaN	NaN	NaN	NaN	NaN	NaN	NaN	NaN	NaN	NaN	NaN	NaN
2.664	-73.28	113.2309	920.3495	-0.97461	0.90137	0.00048828	-73.504	-51.642	204.535	-0.11386	0.23838	0.1961	NaN	NaN	NaN	NaN	NaN	NaN	NaN	NaN	NaN	NaN	NaN	NaN
2.666	-72.6676	127.28	882.4512	-0.94141	0.87793	-0.0019531	-43.098	-27.9139	333.052	-0.11377	0.24677	0.20235	NaN	NaN	NaN	NaN	NaN	NaN	NaN	NaN	NaN	NaN	NaN	NaN
2.668	-75.0341	109.359	858.699	-0.88525	0.84033	-0.0019531	-88.561	47.163	419.83	-0.11133	0.25293	0.20166	NaN	NaN	NaN	NaN	NaN	NaN	NaN	NaN	NaN	NaN	NaN	NaN
2.67	-57.3383	128.232	834.264	-0.84082	0.80761	-0.0078125	-127.347	-81.538	475.725	-0.098632	0.26455	0.20127	NaN	NaN	NaN	NaN	NaN	NaN	NaN	NaN	NaN	NaN	NaN	NaN
2.672	-20.51	148.854	816.677	-0.79688	0.77539	-0.010254	-137.729	-151.648	551.571	-0.082324	0.26895	0.1958	NaN	NaN	NaN	NaN	NaN	NaN	NaN	NaN	NaN	NaN	NaN	NaN
2.674	-28.88	171.902	763.6383	-0.72412	0.73779	-0.02002	-100.628	-108.646	615.143	-0.058106	0.27675	0.19385	NaN	NaN	NaN	NaN	NaN	NaN	NaN	NaN	NaN	NaN	NaN	NaN
2.676	-27.751	154.432	709.2551	-0.6875	0.7168	-0.026367	-92.186	-96.1732	768.1557	-0.033887	0.27969	0.1752	NaN	NaN	NaN	NaN	NaN	NaN	NaN	NaN	NaN	NaN	NaN	NaN
2.678	-29.87	110.196	654.946	-0.61328	0.67529	-0.035645	-126.269	18.1008	925.7581	-0.0092773	0.28809	0.12793	NaN	NaN	NaN	NaN	NaN	NaN	NaN	NaN	NaN	NaN	NaN	NaN
2.68	-0.657000000000004	84.737	630.558	-0.56054	0.6499	-0.050293	-162.9897	71.2094	975.535	0.0097654	0.29619	0.047852	NaN	NaN	NaN	NaN	NaN	NaN	NaN	NaN	NaN	NaN	NaN	NaN
2.682	5.76300000000001	90.088	606.006	-0.51025	0.62842	-0.060547	-97.049	29.299	1031.243	0.0050778	0.31894	-0.043164	NaN	NaN	NaN	NaN	NaN	NaN	NaN	NaN	NaN	NaN	NaN	NaN
2.684	-2.318	107.2803	579.3017	-0.44385	0.5957	-0.059082	-20.176	9.023	1140.643	-0.075	0.36504	-0.14277	NaN	NaN	NaN	NaN	NaN	NaN	NaN	NaN	NaN	NaN	NaN	NaN
2.686	-2.514	116.621	566.9083	-0.41553	0.58252	-0.061035	-6.4549	-65.0033	1268.67	-0.22705	0.41445	-0.23525	NaN	NaN	NaN	NaN	NaN	NaN	NaN	NaN	NaN	NaN	NaN	NaN
2.688	-14.282	139.697	528.97642	-0.36328	0.55273	-0.068359	-12.175	-15.1273	1393.517	-0.43018	0.46875	-0.29395	NaN	NaN	NaN	NaN	NaN	NaN	NaN	NaN	NaN	NaN	NaN	NaN
2.69	-9.697	152.519	497.9057	-0.32617	0.52294	-0.06958	33.974	45.025	1410.298	-0.6958	0.53448	-0.29365	NaN	NaN	NaN	NaN	NaN	NaN	NaN	NaN	NaN	NaN	NaN	NaN
2.692	-25.314	145.205	464.81897	-0.29688	0.5	-0.074219	6.340014	-20.584	1389.329	-1.0081	0.63662	-0.28086	NaN	NaN	NaN	NaN	NaN	NaN	NaN	NaN	NaN	NaN	NaN	NaN
2.694	-19.372	127.5978	458.8423	-0.25586	0.46729	-0.074707	-70.812	-49.054	1359.74604	-1.3706	0.77412	-0.24609	NaN	NaN	NaN	NaN	NaN	NaN	NaN	NaN	NaN	NaN	NaN	NaN
2.696	-20.633	122.74037	433.1172	-0.24121	0.44922	-0.075195	-38.4814	-144.712	1324.03	-1.7547	0.92929	-0.21445	NaN	NaN	NaN	NaN	NaN	NaN	NaN	NaN	NaN	NaN	NaN	NaN
2.698	-6.86	131.9966	395.9304	-0.20947	0.43115	-0.07959	30.555	-228.581	1339.033	-2.1602	1.0918	-0.17578	NaN	NaN	NaN	NaN	NaN	NaN	NaN	NaN	NaN	NaN	NaN	NaN
2.7	-13.91	131.3199	366.96437	-0.18506	0.41236	-0.079346	16.4618	-178.2778	1378.2829	-2.5526	1.2556	-0.13857	NaN	NaN	NaN	NaN	NaN	NaN	NaN	NaN	NaN	NaN	NaN	NaN
2.702	-17.072	122.098	326.6588	-0.16113	0.39111	-0.083984	19.265	-183.7217	1416.196	-2.8883	1.4062	-0.1001	NaN	NaN	NaN	NaN	NaN	NaN	NaN	NaN	NaN	NaN	NaN	NaN
2.704	-13.787	114.137	306.2866	-0.12305	0.36182	-0.089844	50.6136	-168.5727	1410.35	-3.1238	1.5722	-0.06416	NaN	NaN	NaN	NaN	NaN	NaN	NaN	NaN	NaN	NaN	NaN	NaN
2.706	-36.633	109.1355	270.7992	-0.10547	0.35205	-0.095703	22.8791	-128.928	1370.4828	-3.2428	1.7579	-0.016602	NaN	NaN	NaN	NaN	NaN	NaN	NaN	NaN	NaN	NaN	NaN	NaN
2.708	-53.5206	104.2486	248.857	-0.064941	0.3208	-0.099121	63.27	-194.434	1387.1075309	-3.2632	1.9546	0.022949	NaN	NaN	NaN	NaN	NaN	NaN	NaN	NaN	NaN	NaN	NaN	NaN
2.71	-32.13	97.6954	241.081	-0.046142	0.29589	-0.10962	116.8185	-181.907	1439.6366	-3.1502	2.1095	0.050683	NaN	NaN	NaN	NaN	NaN	NaN	NaN	NaN	NaN	NaN	NaN	NaN
2.712	-47.5157	93.6439	229.4359	-0.029785	0.2793	-0.11426	75.4436	-126.5884	1515.9	-2.907	2.2181	0.061328	NaN	NaN	NaN	NaN	NaN	NaN	NaN	NaN	NaN	NaN	NaN	NaN
2.714	-58.249	87.4324	210.1752	-0.024414	0.25635	-0.11768	112.366	-77.555	1561.825	-2.5742	2.2134	0.069922	NaN	NaN	NaN	NaN	NaN	NaN	NaN	NaN	NaN	NaN	NaN	NaN
2.716	-59.4507	88.5017	178.4787	-0.022949	0.24658	-0.11572	68.412	-55.586	1547.3375	-2.2753	2.1028	0.065039	NaN	NaN	NaN	NaN	NaN	NaN	NaN	NaN	NaN	NaN	NaN	NaN
2.718	-50.853	105.5045	148.904	-0.026367	0.23389	-0.11719	28.004	-120.322	1529.4032	-2.0854	1.9595	0.040039	NaN	NaN	NaN	NaN	NaN	NaN	NaN	NaN	NaN	NaN	NaN	NaN
2.72	-27.861	136.429	141	-0.031006	0.22583	-0.11768	-0.0139999999999958	-151.914	1516.008	-2.0021	1.8263	0.044824	NaN	NaN	NaN	NaN	NaN	NaN	NaN	NaN	NaN	NaN	NaN	NaN
2.722	-8.797	123.699	139.849	-0.038086	0.22314	-0.11377	-51.501	-145.179	1456.407	-1.9523	1.7012	0.06543	NaN	NaN	NaN	NaN	NaN	NaN	NaN	NaN	NaN	NaN	NaN	NaN
2.724	-25.879	96.5564	133.535	-0.04541	0.2168	-0.11328	-48.362	-176.938	1423.762	-1.8851	1.5809	0.075586	NaN	NaN	NaN	NaN	NaN	NaN	NaN	NaN	NaN	NaN	NaN	NaN
2.726	5.291	64.7933	107.4738	-0.038574	0.21533	-0.1123	-55.045	-171.3868	1437.238	-1.7639	1.4719	0.068652	NaN	NaN	NaN	NaN	NaN	NaN	NaN	NaN	NaN	NaN	NaN	NaN
2.728	-9.894	48.2824	66.8176	-0.032227	0.19873	-0.10547	-69.1914	-178.878	1492.661	-1.5952	1.3638	0.041016	NaN	NaN	NaN	NaN	NaN	NaN	NaN	NaN	NaN	NaN	NaN	NaN
2.73	-30.381	48.1192	39.772	-0.02002	0.19336	-0.1084	-10.429	-231.237	1541.0129	-1.4402	1.2517	0.0041017	NaN	NaN	NaN	NaN	NaN	NaN	NaN	NaN	NaN	NaN	NaN	NaN
2.732	-24.165	24.8512	36.766	-0.0083008	0.18115	-0.104	-21.251	-203.21	1560.12608	-1.3261	1.1501	-0.030664	NaN	NaN	NaN	NaN	NaN	NaN	NaN	NaN	NaN	NaN	NaN	NaN
2.734	-18.741	29.9849	20.377	0.0073242	0.16455	-0.10547	-49.142	-164.261	1550.111	-1.2737	1.079	-0.065039	NaN	NaN	NaN	NaN	NaN	NaN	NaN	NaN	NaN	NaN	NaN	NaN
2.736	-14.618	27.6974	33.6102	0.0097656	0.15137	-0.10205	-73.31	-108.388	1525.069	-1.2899	1.0277	-0.057813	NaN	NaN	NaN	NaN	NaN	NaN	NaN	NaN	NaN	NaN	NaN	NaN
2.738	-36.008	26.575	43.3261	0.011719	0.12988	-0.10449	-142.8262	-10.527	1503.8767	-1.3574	1.0068	-0.047363	NaN	NaN	NaN	NaN	NaN	NaN	NaN	NaN	NaN	NaN	NaN	NaN
2.74	-16.596	23.766	43.3357	0.016846	0.11523	-0.10376	-144.126	-14.687	1531.124	-1.4586	1.0324	-0.034082	NaN	NaN	NaN	NaN	NaN	NaN	NaN	NaN	NaN	NaN	NaN	NaN
2.742	-18.496	43.142	42.6366	0.013672	0.10645	-0.10205	-123.1527	-48.669	1536.1422	-1.5679	1.0746	-0.010449	NaN	NaN	NaN	NaN	NaN	NaN	NaN	NaN	NaN	NaN	NaN	NaN
2.744	-11.962	37.813	28.839	0.0014648	0.095703	-0.1001	-133.989	-81.637	1517.5885	-1.7075	1.1461	0.024316	NaN	NaN	NaN	NaN	NaN	NaN	NaN	NaN	NaN	NaN	NaN	NaN
2.746	-4.763	30.4448	11.893	-0.0058594	0.086914	-0.098633	-111.907	-131.008	1483.83	-1.8645	1.2371	0.060351	NaN	NaN	NaN	NaN	NaN	NaN	NaN	NaN	NaN	NaN	NaN	NaN
2.748	-3.003	13.0712	9.478	-0.015625	0.086426	-0.10059	-142.25	-66.1719	1461.682	-2.0034	1.3374	0.095703	NaN	NaN	NaN	NaN	NaN	NaN	NaN	NaN	NaN	NaN	NaN	NaN
2.75	4.518	15.415	13.161	-0.027344	0.083008	-0.10108	-121.418	-6.729	1467.057	-2.1097	1.4349	0.11963	NaN	NaN	NaN	NaN	NaN	NaN	NaN	NaN	NaN	NaN	NaN	NaN
2.752	-4.519	13.951	4.787	-0.036621	0.088867	-0.099121	-65.881	12.839	1484.159	-2.1687	1.5121	0.12773	NaN	NaN	NaN	NaN	NaN	NaN	NaN	NaN	NaN	NaN	NaN	NaN
2.754	-6.88	7.51	22.3078	-0.038574	0.084961	-0.1001	-53.843	36.833	1465.432	-2.1863	1.568	0.12422	NaN	NaN	NaN	NaN	NaN	NaN	NaN	NaN	NaN	NaN	NaN	NaN
2.756	-22.667	29.1747	11.0169	-0.037598	0.088379	-0.10352	1.162	-42.333	1467.9214	-2.1775	1.6057	0.11396	NaN	NaN	NaN	NaN	NaN	NaN	NaN	NaN	NaN	NaN	NaN	NaN
2.758	-36.268	38.665	17.1358	-0.036621	0.091309	-0.10205	10.86	-50.0381	1462.4855	-2.1602	1.623	0.086426	NaN	NaN	NaN	NaN	NaN	NaN	NaN	NaN	NaN	NaN	NaN	NaN
2.76	-39.585	31.756	19.6762	-0.031982	0.083985	-0.10205	-70.2001	19.613	1457.533	-2.1723	1.634	0.049707	NaN	NaN	NaN	NaN	NaN	NaN	NaN	NaN	NaN	NaN	NaN	NaN
2.762	-46.6532	15.2113	15.572	-0.021484	0.083008	-0.10449	-77.059	41.5597	1474.227	-2.2269	1.6375	0.010937	NaN	NaN	NaN	NaN	NaN	NaN	NaN	NaN	NaN	NaN	NaN	NaN
2.764	-29.241	5.32987	22.771	-0.00097656	0.075684	-0.10498	-77.014	99.863	1447.19	-2.3379	1.6532	-0.0070313	NaN	NaN	NaN	NaN	NaN	NaN	NaN	NaN	NaN	NaN	NaN	NaN
2.766	-26.43036	8.30838	21.1277	0.010254	0.071289	-0.10596	-65.93	99.846	1387.936	-2.488	1.6897	-0.0073242	NaN	NaN	NaN	NaN	NaN	NaN	NaN	NaN	NaN	NaN	NaN	NaN
2.768	-32.048	15.4099	33.3038	0.029785	0.054688	-0.10693	-14.742	42.621	1343.4195	-2.6367	1.7441	0.0092773	NaN	NaN	NaN	NaN	NaN	NaN	NaN	NaN	NaN	NaN	NaN	NaN
2.77	-33.15	34.01512	37.0986	0.057617	0.042237	-0.11206	-53.37	79.378	1292.966	-2.741	1.8145	0.02627	NaN	NaN	NaN	NaN	NaN	NaN	NaN	NaN	NaN	NaN	NaN	NaN
2.772	-12.039	42.81227	17.7694	0.090332	0.024414	-0.11523	-46.717	66.968	1302.1367	-2.7781	1.863	0.044824	NaN	NaN	NaN	NaN	NaN	NaN	NaN	NaN	NaN	NaN	NaN	NaN
2.774	-15.828	50.1101	13.5106	0.13916	0.0039063	-0.11963	-33.023	99.798	1281.3267	-2.7409	1.8735	0.056152	NaN	NaN	NaN	NaN	NaN	NaN	NaN	NaN	NaN	NaN	NaN	NaN
2.776	-18.651	42.9208	29.6104	0.18359	-0.0024414	-0.12281	-58.274	148.683	1222.995	-2.6564	1.8483	0.058887	NaN	NaN	NaN	NaN	NaN	NaN	NaN	NaN	NaN	NaN	NaN	NaN
2.778	-18.613	26.147	26.8954	0.2207	-0.012207	-0.12451	-17.039	89.746	1197.081	-2.521	1.7954	0.056641	NaN	NaN	NaN	NaN	NaN	NaN	NaN	NaN	NaN	NaN	NaN	NaN
2.78	-34.907	18.38295	28.6562	0.27197	-0.024902	-0.13184	-13.469	103.92	1144.975	-2.3456	1.7184	0.049023	NaN	NaN	NaN	NaN	NaN	NaN	NaN	NaN	NaN	NaN	NaN	NaN
2.782	-32.584	13.5357	12.6498	0.29443	-0.033691	-0.13037	-28.105	119.572	1138.29788	-2.1761	1.6192	0.043945	NaN	NaN	NaN	NaN	NaN	NaN	NaN	NaN	NaN	NaN	NaN	NaN
2.784	-35.235	9.219	10.555	0.33398	-0.042969	-0.13721	-72.335	145.9535	1155.981	-2.0323	1.5036	0.038476	NaN	NaN	NaN	NaN	NaN	NaN	NaN	NaN	NaN	NaN	NaN	NaN
2.786	-19.968	12.3419	19.2432	0.36499	-0.041993	-0.13917	-116.142	232.202	1118.761	-1.9163	1.3878	0.03457	NaN	NaN	NaN	NaN	NaN	NaN	NaN	NaN	NaN	NaN	NaN	NaN
2.788	-33.256	41.396	5.4379	0.38379	-0.040527	-0.14453	-82.302	186.628	1083.748	-1.814	1.2935	0.034668	NaN	NaN	NaN	NaN	NaN	NaN	NaN	NaN	NaN	NaN	NaN	NaN
2.79	-12.986	51.557	15.3449	0.41064	-0.024902	-0.1416	-62.9984	155.44	1030.8748	-1.7129	1.2062	0.03125	NaN	NaN	NaN	NaN	NaN	NaN	NaN	NaN	NaN	NaN	NaN	NaN
2.792	-7.303	42.2738	23.6566	0.41699	-0.018066	-0.14453	-96.43804	141.5421	973.68	-1.6293	1.1461	0.029493	NaN	NaN	NaN	NaN	NaN	NaN	NaN	NaN	NaN	NaN	NaN	NaN
2.794	-0.0940000000000012	25.8939	40.2364	0.42578	-0.0048828	-0.14111	-68.475	79.439	969.0343	-1.5437	1.0871	0.033789	NaN	NaN	NaN	NaN	NaN	NaN	NaN	NaN	NaN	NaN	NaN	NaN
2.796	3.052	28.1715	33.752	0.42138	0.0075685	-0.14111	-92.30056	130.6217	935.07717	-1.4592	1.0486	0.031641	NaN	NaN	NaN	NaN	NaN	NaN	NaN	NaN	NaN	NaN	NaN	NaN
2.798	3.475	26.95232	30.3201	0.4126	0.022461	-0.14111	-79.698	145.009	887.7951	-1.3613	1.0098	0.032715	NaN	NaN	NaN	NaN	NaN	NaN	NaN	NaN	NaN	NaN	NaN	NaN
2.8	-5.317	23.72389	26.4518	0.38867	0.052246	-0.1377	-51.0462	114.863	843.635	-1.2685	0.9623	0.027246	NaN	NaN	NaN	NaN	NaN	NaN	NaN	NaN	NaN	NaN	NaN	NaN
2.802	-16.02	33.1812	16.893	0.37891	0.069824	-0.13135	-46.9292	146.96	765.1382	-1.1933	0.92061	0.021875	NaN	NaN	NaN	NaN	NaN	NaN	NaN	NaN	NaN	NaN	NaN	NaN
2.804	-10.132	39.08	12.738	0.34375	0.104	-0.12744	-12.181	110.701	741.5103	-1.1315	0.88154	0.014844	NaN	NaN	NaN	NaN	NaN	NaN	NaN	NaN	NaN	NaN	NaN	NaN
2.806	-20.406	27.5062	26.66113	0.32007	0.13525	-0.1228	-11.942	162.7384	711.5966	-1.0863	0.84883	0.016992	NaN	NaN	NaN	NaN	NaN	NaN	NaN	NaN	NaN	NaN	NaN	NaN
2.808	-28.11	29.21	22.10203	0.29248	0.15869	-0.125	-32.33	214.974	658.486104	-1.0488	0.82422	0.021484	NaN	NaN	NaN	NaN	NaN	NaN	NaN	NaN	NaN	NaN	NaN	NaN
2.81	-13.505	30.56	16.346	0.26904	0.19775	-0.11719	-15.033	167.5068	658.59	-1.0064	0.79804	0.02832	NaN	NaN	NaN	NaN	NaN	NaN	NaN	NaN	NaN	NaN	NaN	NaN
2.812	-25.137	39.657	34.52574	0.26123	0.20996	-0.11816	-15.8883	174.519	609.2519	-0.96201	0.78056	0.030273	NaN	NaN	NaN	NaN	NaN	NaN	NaN	NaN	NaN	NaN	NaN	NaN
2.814	-24.11	33.0519	35.6792	0.25098	0.23877	-0.11865	-13.544	147.98	557.8386	-0.90224	0.75674	0.040039	NaN	NaN	NaN	NaN	NaN	NaN	NaN	NaN	NaN	NaN	NaN	NaN
2.816	-18.094	21.2637	23.29057	0.25	0.24853	-0.12378	4.637	126.809	524.784	-0.83164	0.72618	0.034277	NaN	NaN	NaN	NaN	NaN	NaN	NaN	NaN	NaN	NaN	NaN	NaN
2.818	-5.611	20.4091	22.27904	0.24854	0.25977	-0.125	-5.09999999999999	193.26	450.454	-0.75293	0.69336	0.032715	NaN	NaN	NaN	NaN	NaN	NaN	NaN	NaN	NaN	NaN	NaN	NaN
2.82	-41.2243	27.9222	22.1759	0.23291	0.28174	-0.1333	-9.319	139.3285	407.7882	-0.66738	0.65039	0.028808	NaN	NaN	NaN	NaN	NaN	NaN	NaN	NaN	NaN	NaN	NaN	NaN
2.822	-22.777	32.8927	49.2366	0.22168	0.28564	-0.13135	-20.751	133.73639	354.79104	-0.58125	0.60684	0.022656	NaN	NaN	NaN	NaN	NaN	NaN	NaN	NaN	NaN	NaN	NaN	NaN
2.824	-33.5879	36.1941	45.407	0.20313	0.30371	-0.13867	-23.1	111.161	300.261	-0.49961	0.56269	0.017969	NaN	NaN	NaN	NaN	NaN	NaN	NaN	NaN	NaN	NaN	NaN	NaN
2.826	-18.719	36.4841	23.4867	0.18921	0.31861	-0.1416	17.492	43.786	311.6512	-0.42373	0.52344	0.0089843	NaN	NaN	NaN	NaN	NaN	NaN	NaN	NaN	NaN	NaN	NaN	NaN
2.828	-30.568	27.8328	18.17474	0.17725	0.33496	-0.14648	29.08	85.927	293.498	-0.34326	0.48096	0.0048828	NaN	NaN	NaN	NaN	NaN	NaN	NaN	NaN	NaN	NaN	NaN	NaN
2.83	-40.287	12.4876	15.649	0.15918	0.35596	-0.15771	15.618	102.827	252.956	-0.27529	0.4373	-0.0052734	NaN	NaN	NaN	NaN	NaN	NaN	NaN	NaN	NaN	NaN	NaN	NaN
2.832	-30.029	-0.5997	35.004	0.15088	0.36328	-0.1582	-2.84999999999999	131.0577	233.7308	-0.21455	0.39883	-0.0094726	NaN	NaN	NaN	NaN	NaN	NaN	NaN	NaN	NaN	NaN	NaN	NaN
2.834	-38.8422	20.9525	26.4739	0.13379	0.38086	-0.1626	-42.1792	199.109	191.378	-0.16612	0.36367	-0.015723	NaN	NaN	NaN	NaN	NaN	NaN	NaN	NaN	NaN	NaN	NaN	NaN
2.836	-34.12	21.9639	27.2567	0.12011	0.39747	-0.1709	-42.034	135.983	182.3897	-0.12138	0.33574	-0.015625	NaN	NaN	NaN	NaN	NaN	NaN	NaN	NaN	NaN	NaN	NaN	NaN
2.838	-22.875	22.53124	23.3819	0.10693	0.40674	-0.18018	-33.714	134.573	173.0811	-0.081543	0.31396	-0.01416	NaN	NaN	NaN	NaN	NaN	NaN	NaN	NaN	NaN	NaN	NaN	NaN
2.84	-4.877	22.9856	20.6713	0.096191	0.41797	-0.18945	-26.9215	129.205	124.3437	-0.04502	0.29512	-0.024805	NaN	NaN	NaN	NaN	NaN	NaN	NaN	NaN	NaN	NaN	NaN	NaN
2.842	-24.702	35.7318	19.7372	0.094238	0.42139	-0.1958	-17.169	67.0564	105.6269	-0.0024414	0.27012	-0.024805	NaN	NaN	NaN	NaN	NaN	NaN	NaN	NaN	NaN	NaN	NaN	NaN
2.844	-22.07	42.771	23.3201	0.10107	0.43359	-0.1958	-25.368	110.468	80.399	0.028418	0.25254	-0.026757	NaN	NaN	NaN	NaN	NaN	NaN	NaN	NaN	NaN	NaN	NaN	NaN
2.846	-3.593	36.671	36.3349	0.10889	0.4397	-0.2002	-67.4334	95.0595	50.88	0.056348	0.22998	-0.033594	NaN	NaN	NaN	NaN	NaN	NaN	NaN	NaN	NaN	NaN	NaN	NaN
2.848	-4.633	31.82303	46.2939	0.12695	0.43945	-0.20557	-68.289	74.39	50.706	0.086914	0.2085	-0.031738	NaN	NaN	NaN	NaN	NaN	NaN	NaN	NaN	NaN	NaN	NaN	NaN
2.85	0.689	-1.0483	78.3283	0.1543	0.43457	-0.21289	-45.685	110.817	19.928	0.1208	0.18233	-0.037598	NaN	NaN	NaN	NaN	NaN	NaN	NaN	NaN	NaN	NaN	NaN	NaN
2.852	-2.902	-62.42691	104.149	0.16748	0.43213	-0.21631	-18.014	44.9171	40.771	0.15459	0.16455	-0.046679	NaN	NaN	NaN	NaN	NaN	NaN	NaN	NaN	NaN	NaN	NaN	NaN
2.854	-25.311	-83.7407	154.642	0.19189	0.42041	-0.22559	-2.936	77.31	60.9209	0.1917	0.14229	-0.055664	NaN	NaN	NaN	NaN	NaN	NaN	NaN	NaN	NaN	NaN	NaN	NaN
2.856	21.099	-65.178	199.484	0.20313	0.40601	-0.23853	-40.7535	91.522	59.0822	0.229	0.11377	-0.068067	NaN	NaN	NaN	NaN	NaN	NaN	NaN	NaN	NaN	NaN	NaN	NaN
2.858	35.133	-38.647	251.576	0.2002	0.40674	-0.2583	-38.805	40.581	83.358	0.25049	0.09082	-0.080078	NaN	NaN	NaN	NaN	NaN	NaN	NaN	NaN	NaN	NaN	NaN	NaN
2.86	20.1874	-88.605	291.0784	0.14258	0.41797	-0.29736	-45.874	69.455	82.716	0.26718	0.070898	-0.091504	NaN	NaN	NaN	NaN	NaN	NaN	NaN	NaN	NaN	NaN	NaN	NaN
2.862	24.868	-163.1471	292.5834	0.080566	0.44043	-0.30127	-28.991	36.0919	57.221	0.27197	0.060937	-0.10264	NaN	NaN	NaN	NaN	NaN	NaN	NaN	NaN	NaN	NaN	NaN	NaN
2.864	57.053	-206.464	337.5758	-0.14648	0.51367	-0.28516	5.938	14.421	62.071	0.26299	0.045312	-0.10771	NaN	NaN	NaN	NaN	NaN	NaN	NaN	NaN	NaN	NaN	NaN	NaN
2.866	11.3964	-136.363	407.457	-0.36817	0.57129	-0.25586	-1.864	72.852	41.394	0.24141	0.039649	-0.11972	NaN	NaN	NaN	NaN	NaN	NaN	NaN	NaN	NaN	NaN	NaN	NaN
2.868	16.512	-30.4372	478.686	-0.58887	0.63867	-0.2168	-11.257	20.3936	52.768	0.19873	0.044434	-0.12207	NaN	NaN	NaN	NaN	NaN	NaN	NaN	NaN	NaN	NaN	NaN	NaN
2.87	46.725	31.1466	481.9224	-0.82227	0.73438	-0.16895	-26.351	33.976	48.68824	0.13916	0.054395	-0.1289	NaN	NaN	NaN	NaN	NaN	NaN	NaN	NaN	NaN	NaN	NaN	NaN
2.872	40.684	28.224	491.1	-0.90234	0.78906	-0.1626	-30.485	40.4047	19.97081	0.064258	0.06709	-0.12656	NaN	NaN	NaN	NaN	NaN	NaN	NaN	NaN	NaN	NaN	NaN	NaN
2.874	24.1937	31.241	576.842	-0.98926	0.88867	-0.17236	-15.825	-13.9881	9.6135	-0.016992	0.081543	-0.12266	NaN	NaN	NaN	NaN	NaN	NaN	NaN	NaN	NaN	NaN	NaN	NaN
2.876	44.494	53.756	718.2043	-1.0198	0.94556	-0.20874	-7.028	23.679	1.4937	-0.098146	0.098145	-0.12129	NaN	NaN	NaN	NaN	NaN	NaN	NaN	NaN	NaN	NaN	NaN	NaN
2.878	69.213	74.538	859.876	-1.0664	0.99023	-0.25293	-21.488	2.771	25.3937	-0.16943	0.11133	-0.11377	NaN	NaN	NaN	NaN	NaN	NaN	NaN	NaN	NaN	NaN	NaN	NaN
2.88	39.0565	118.103	949.175	-1.2012	1.0625	-0.30469	-28.244	11.0419	69.0591	-0.22813	0.12842	-0.11162	NaN	NaN	NaN	NaN	NaN	NaN	NaN	NaN	NaN	NaN	NaN	NaN
2.882	34.585	127.547	991.501	-1.3257	1.1099	-0.31592	-20.137	80.95	62.4996	-0.27725	0.13809	-0.10771	NaN	NaN	NaN	NaN	NaN	NaN	NaN	NaN	NaN	NaN	NaN	NaN
2.884	32.304	91.4496	1028.487	-1.6563	1.2539	-0.29785	-22.738	37.5124	57.151	-0.31513	0.14746	-0.10693	NaN	NaN	NaN	NaN	NaN	NaN	NaN	NaN	NaN	NaN	NaN	NaN
2.886	36.2996	59.867	1076.942	-1.9743	1.3869	-0.23975	-20.758	42.467	55.514	-0.34385	0.15547	-0.10898	NaN	NaN	NaN	NaN	NaN	NaN	NaN	NaN	NaN	NaN	NaN	NaN
2.888	-13.321	11.121	1147.806	-2.2988	1.5391	-0.17188	-28.101	44.235	20.733	-0.3584	0.15967	-0.10938	NaN	NaN	NaN	NaN	NaN	NaN	NaN	NaN	NaN	NaN	NaN	NaN
2.89	-35.0913	-55.977	1187.4747	-2.6304	1.7407	-0.092285	-32.021	-19.6655	26.80114	-0.36631	0.16992	-0.10449	NaN	NaN	NaN	NaN	NaN	NaN	NaN	NaN	NaN	NaN	NaN	NaN
2.892	-27.2816	-104.4735	1194.013	-2.7261	1.8403	-0.070313	-42.564	15.9627	18.235	-0.36631	0.17373	-0.10303	NaN	NaN	NaN	NaN	NaN	NaN	NaN	NaN	NaN	NaN	NaN	NaN
2.894	-37.28	-129.532	1164.7037	-2.7104	2.0181	-0.082031	-37.5351	-18.97996	9.488	-0.35654	0.17686	-0.09873	NaN	NaN	NaN	NaN	NaN	NaN	NaN	NaN	NaN	NaN	NaN	NaN
2.896	-7.265	-145.016	1158.2942	-2.5469	2.1319	-0.13916	-45.7146	-32.3605	19.74498	-0.33487	0.18018	-0.094727	NaN	NaN	NaN	NaN	NaN	NaN	NaN	NaN	NaN	NaN	NaN	NaN
2.898	19.87	-160.035	1180.8521	-2.2832	2.207	-0.19727	-32.576	14.302	2.516	-0.30811	0.17334	-0.094727	NaN	NaN	NaN	NaN	NaN	NaN	NaN	NaN	NaN	NaN	NaN	NaN
2.9	45.7086	-149.911	1230.362	-1.855	2.2153	-0.24951	-39.716	-26.2597	17.4359	-0.26611	0.16533	-0.090039	NaN	NaN	NaN	NaN	NaN	NaN	NaN	NaN	NaN	NaN	NaN	NaN
2.902	27.8172	-129.466	1271.084	-1.6577	2.1743	-0.27441	-34.493	29.0877	39.22104	-0.22285	0.15302	-0.089844	NaN	NaN	NaN	NaN	NaN	NaN	NaN	NaN	NaN	NaN	NaN	NaN
2.904	24.033	-107.305	1304.26	-1.3369	2.0332	-0.31055	-40.237	68.892	28.432	-0.17636	0.13428	-0.089844	NaN	NaN	NaN	NaN	NaN	NaN	NaN	NaN	NaN	NaN	NaN	NaN
2.906	40.2326	-82.762	1347.83	-1.1626	1.9038	-0.31934	-29.741	26.0022	37.4391	-0.12646	0.11758	-0.087988	NaN	NaN	NaN	NaN	NaN	NaN	NaN	NaN	NaN	NaN	NaN	NaN
2.908	24.935	-70.678	1356.2016	-1.0093	1.7856	-0.32568	-20.796	47.84	18.2931	-0.082031	0.09668	-0.085938	NaN	NaN	NaN	NaN	NaN	NaN	NaN	NaN	NaN	NaN	NaN	NaN
2.91	38.8081	-62.11	1324.4671	-0.83594	1.6426	-0.34082	-37.478	5.4803	4.4556	-0.033887	0.074707	-0.085059	NaN	NaN	NaN	NaN	NaN	NaN	NaN	NaN	NaN	NaN	NaN	NaN
2.912	-9.339	-54.554	1289.056	-0.75781	1.582	-0.35352	-25.873	-12.9117	16.5787	0.022558	0.051856	-0.082617	NaN	NaN	NaN	NaN	NaN	NaN	NaN	NaN	NaN	NaN	NaN	NaN
2.914	2.18690204	-28.78	1257.207	-0.64648	1.4648	-0.36914	-14.45	60.691	9.33	0.085058	0.034277	-0.085742	NaN	NaN	NaN	NaN	NaN	NaN	NaN	NaN	NaN	NaN	NaN	NaN
2.916	-11.286	-42.914	1260.033	-0.63037	1.3647	-0.38037	-27.944	38.1747	6.607	0.15312	-0.001172	-0.098145	NaN	NaN	NaN	NaN	NaN	NaN	NaN	NaN	NaN	NaN	NaN	NaN
2.918	34.966	-75.084	1294.551	-0.65771	1.311	-0.3833	-2.356	58.496	6.615	0.21973	-0.026367	-0.10791	NaN	NaN	NaN	NaN	NaN	NaN	NaN	NaN	NaN	NaN	NaN	NaN
2.92	87.718	-99.6	1353.7559	-0.74658	1.2251	-0.37891	-28.5879	59.33	-5.919	0.27744	-0.061231	-0.11494	NaN	NaN	NaN	NaN	NaN	NaN	NaN	NaN	NaN	NaN	NaN	NaN
2.922	91.927	-131.892	1383.09013	-0.83008	1.1856	-0.37012	-43.458	-12.08732	12.79752	0.321	-0.089746	-0.12383	NaN	NaN	NaN	NaN	NaN	NaN	NaN	NaN	NaN	NaN	NaN	NaN
2.924	124.87	-125.174	1393.6474	-0.92188	1.168	-0.35986	-23.675	41.2787	29.38416	0.36123	-0.10771	-0.12813	NaN	NaN	NaN	NaN	NaN	NaN	NaN	NaN	NaN	NaN	NaN	NaN
2.926	102.167	-97.601	1383.736	-1.0425	1.1841	-0.33838	-21.602	20.5446	15.6332	0.39053	-0.1211	-0.13271	NaN	NaN	NaN	NaN	NaN	NaN	NaN	NaN	NaN	NaN	NaN	NaN
2.928	111.008	-48.97441	1403.2541	-1.0815	1.2056	-0.32764	-22.828	2.2419	27.0261	0.41797	-0.12598	-0.13623	NaN	NaN	NaN	NaN	NaN	NaN	NaN	NaN	NaN	NaN	NaN	NaN
2.93	81.25	-52.543	1457.693	-1.1382	1.2495	-0.31787	-48.7293	70.101	19.8888	0.44395	-0.13291	-0.14209	NaN	NaN	NaN	NaN	NaN	NaN	NaN	NaN	NaN	NaN	NaN	NaN
2.932	108.061	-75.8667	1490.783	-1.1714	1.2759	-0.33032	-41.97	32.117	22.72174	0.4627	-0.13154	-0.14238	NaN	NaN	NaN	NaN	NaN	NaN	NaN	NaN	NaN	NaN	NaN	NaN
2.934	108.929	-91.113	1490.375	-1.2085	1.3032	-0.33789	-15.091	57.755	38.6287	0.47715	-0.12842	-0.14512	NaN	NaN	NaN	NaN	NaN	NaN	NaN	NaN	NaN	NaN	NaN	NaN
2.936	49.81994	-72.47665	1453.253	-1.2944	1.3442	-0.34766	-26.256	78.223	29.1541	0.48154	-0.12353	-0.14844	NaN	NaN	NaN	NaN	NaN	NaN	NaN	NaN	NaN	NaN	NaN	NaN
2.938	41.92	-39.513	1436.095	-1.3535	1.3633	-0.35645	-25.067	33.44971	36.7085	0.47559	-0.10986	-0.15674	NaN	NaN	NaN	NaN	NaN	NaN	NaN	NaN	NaN	NaN	NaN	NaN
2.94	55.626	-11.394	1402.5379	-1.4766	1.4131	-0.36719	-18.689	71.729	28.144	0.47149	-0.098438	-0.15342	NaN	NaN	NaN	NaN	NaN	NaN	NaN	NaN	NaN	NaN	NaN	NaN
2.942	91.564	-7.029	1385.4175	-1.5711	1.4642	-0.37256	-36.447	46.6541	17.621	0.45976	-0.088183	-0.1541	NaN	NaN	NaN	NaN	NaN	NaN	NaN	NaN	NaN	NaN	NaN	NaN
2.944	99.906	-30.715	1355.238	-1.6602	1.5234	-0.37695	-30.218	18.0779	30.708	0.43907	-0.081152	-0.15918	NaN	NaN	NaN	NaN	NaN	NaN	NaN	NaN	NaN	NaN	NaN	NaN
2.946	140.992	-50.9727	1344.393	-1.7461	1.6133	-0.39844	-38.181	59.577	23.1602	0.40772	-0.068164	-0.15879	NaN	NaN	NaN	NaN	NaN	NaN	NaN	NaN	NaN	NaN	NaN	NaN
2.948	166.785	-54.112	1353.4	-1.7695	1.6484	-0.41406	-24.123	5.3575	27.938	0.37598	-0.054199	-0.15967	NaN	NaN	NaN	NaN	NaN	NaN	NaN	NaN	NaN	NaN	NaN	NaN
2.95	79.5967	-13.2369	1379.0167	-1.8237	1.7368	-0.44775	-25.883	31.57866	55.4982	0.33574	-0.031836	-0.15635	NaN	NaN	NaN	NaN	NaN	NaN	NaN	NaN	NaN	NaN	NaN	NaN
2.952	79.667	15.4202	1397.427	-1.8657	1.7905	-0.46973	-35.5523	59.913	46.355	0.29961	-0.008203	-0.15537	NaN	NaN	NaN	NaN	NaN	NaN	NaN	NaN	NaN	NaN	NaN	NaN
2.954	69.607	14.9686	1382.699	-1.9233	1.856	-0.48193	-34.177	16.7218	65.0161	0.26523	0.016015	-0.15303	NaN	NaN	NaN	NaN	NaN	NaN	NaN	NaN	NaN	NaN	NaN	NaN
2.956	89.473	2.9378	1359.006	-1.998	1.9199	-0.4707	-31.153	50.46	65.0687	0.2376	0.042481	-0.14873	NaN	NaN	NaN	NaN	NaN	NaN	NaN	NaN	NaN	NaN	NaN	NaN
2.958	66.5506	2.758	1345.663	-2.0273	1.9492	-0.45605	-21.632	23.5004	33.5673	0.21045	0.062012	-0.15088	NaN	NaN	NaN	NaN	NaN	NaN	NaN	NaN	NaN	NaN	NaN	NaN
2.96	71.1146	-10.345	1345.916	-2.0269	1.9731	-0.43604	-21.965	-18.514	37.937	0.19111	0.08584	-0.1457	NaN	NaN	NaN	NaN	NaN	NaN	NaN	NaN	NaN	NaN	NaN	NaN
2.962	55.54	-29.544	1331.161	-1.9805	1.9688	-0.42115	-4.067	27.33334	36.6974	0.17139	0.10449	-0.14482	NaN	NaN	NaN	NaN	NaN	NaN	NaN	NaN	NaN	NaN	NaN	NaN
2.964	55.483	-31.0362	1298.4216	-1.8965	1.9482	-0.41211	-33.162	-10.385332	40.6371	0.15225	0.12324	-0.14131	NaN	NaN	NaN	NaN	NaN	NaN	NaN	NaN	NaN	NaN	NaN	NaN
2.966	87.599	-41.3068	1249.286	-1.7402	1.8965	-0.40234	-31.091	28.871	66.26	0.13467	0.14131	-0.13838	NaN	NaN	NaN	NaN	NaN	NaN	NaN	NaN	NaN	NaN	NaN	NaN
2.968	106.191	-37.804	1195.205	-1.6582	1.8564	-0.40088	-17.161	53.68	45.4223	0.11523	0.15576	-0.1377	NaN	NaN	NaN	NaN	NaN	NaN	NaN	NaN	NaN	NaN	NaN	NaN
2.97	130.317	-11.442	1189.44	-1.5151	1.77	-0.3999	-31.062	-3.1296	37.61444	0.096092	0.17451	-0.13008	NaN	NaN	NaN	NaN	NaN	NaN	NaN	NaN	NaN	NaN	NaN	NaN
2.972	110.08	39.434	1181.621	-1.4394	1.7046	-0.39893	-19.48	28.5869	32.611	0.077149	0.18809	-0.12764	NaN	NaN	NaN	NaN	NaN	NaN	NaN	NaN	NaN	NaN	NaN	NaN
2.974	94.444	80.93	1184.291	-1.3789	1.6445	-0.39502	-33.375	13.2994	-4.219	0.060742	0.20567	-0.12451	NaN	NaN	NaN	NaN	NaN	NaN	NaN	NaN	NaN	NaN	NaN	NaN
2.976	59.05585	87.623	1176.664	-1.334	1.5879	-0.38477	-40.473	-6.9335	15.0085	0.042774	0.2211	-0.12041	NaN	NaN	NaN	NaN	NaN	NaN	NaN	NaN	NaN	NaN	NaN	NaN
2.978	79.0779	73.792	1156.576	-1.3203	1.5586	-0.37695	-45.355	40.112	27.323	0.022461	0.23145	-0.12012	NaN	NaN	NaN	NaN	NaN	NaN	NaN	NaN	NaN	NaN	NaN	NaN
2.98	87.027	63.849	1123.9297	-1.3086	1.5156	-0.35547	-41.651	-5.37751	17.4967	0.0030273	0.24551	-0.11601	NaN	NaN	NaN	NaN	NaN	NaN	NaN	NaN	NaN	NaN	NaN	NaN
2.982	74.015	75.591	1071.186	-1.29	1.4887	-0.34912	-15.474	10.4077	36.1488	-0.016602	0.26338	-0.11885	NaN	NaN	NaN	NaN	NaN	NaN	NaN	NaN	NaN	NaN	NaN	NaN
2.984	48.545	81.886	1054.444	-1.2695	1.4629	-0.33154	-30.262	32.8672	22.002	-0.036133	0.27822	-0.11573	NaN	NaN	NaN	NaN	NaN	NaN	NaN	NaN	NaN	NaN	NaN	NaN
2.986	61.687	99.636	1025.13	-1.2217	1.4199	-0.31836	-37.65	-3.7245	29.6401	-0.046191	0.29453	-0.12353	NaN	NaN	NaN	NaN	NaN	NaN	NaN	NaN	NaN	NaN	NaN	NaN
2.988	64.9371	88.179	998.9327	-1.187	1.397	-0.31396	-20.367	46.471	42.9552	-0.052734	0.30615	-0.12598	NaN	NaN	NaN	NaN	NaN	NaN	NaN	NaN	NaN	NaN	NaN	NaN
2.99	52.573	63.459	960.6968	-1.1187	1.3423	-0.30615	-42.44379	42.3705	10.954	-0.048242	0.31387	-0.14219	NaN	NaN	NaN	NaN	NaN	NaN	NaN	NaN	NaN	NaN	NaN	NaN
2.992	85.35	31.183	930.6229	-1.063	1.2993	-0.29956	-36.914	0.302000000000001	11.1255	-0.035449	0.31631	-0.1626	NaN	NaN	NaN	NaN	NaN	NaN	NaN	NaN	NaN	NaN	NaN	NaN
2.994	89.763	47.677	913.6603	-1.0117	1.2539	-0.29785	-4.912	21.667	2.15	-0.012402	0.31787	-0.17237	NaN	NaN	NaN	NaN	NaN	NaN	NaN	NaN	NaN	NaN	NaN	NaN
2.996	53.956	97.102	894.0911	-0.94336	1.1953	-0.29297	-24.07	-37.218	49.073	0.024219	0.31514	-0.18262	NaN	NaN	NaN	NaN	NaN	NaN	NaN	NaN	NaN	NaN	NaN	NaN
2.998	48.28	115.885	891.1198	-0.91016	1.1738	-0.28809	-3.459	-61.7493	131.847	0.067871	0.30566	-0.20313	NaN	NaN	NaN	NaN	NaN	NaN	NaN	NaN	NaN	NaN	NaN	NaN
3	44.732	108.8372	851.56404	-0.85938	1.127	-0.26953	-44.2862	2.227	196.646	0.09873	0.29453	-0.21631	NaN	NaN	NaN	NaN	NaN	NaN	NaN	NaN	NaN	NaN	NaN	NaN
3.002	34.583	99.8635	838.2907	-0.83228	1.0935	-0.25391	26.0744	16.4919	327.11	0.12754	0.2832	-0.225	NaN	NaN	NaN	NaN	NaN	NaN	NaN	NaN	NaN	NaN	NaN	NaN
3.004	5.9643	121.56	811.778	-0.80762	1.0586	-0.23828	119.626	38.5514	480.503	0.14356	0.28047	-0.23476	NaN	NaN	NaN	NaN	NaN	NaN	NaN	NaN	NaN	NaN	NaN	NaN
3.006	21.7269	153.689	788.5941	-0.77637	1.0137	-0.21973	45.044	-92.59	597.308	0.15518	0.27226	-0.23808	NaN	NaN	NaN	NaN	NaN	NaN	NaN	NaN	NaN	NaN	NaN	NaN
3.008	8.2375	176.068	739.4181	-0.7583	0.98877	-0.20947	40.6773	-153.2499	673.454	0.1499	0.28174	-0.23779	NaN	NaN	NaN	NaN	NaN	NaN	NaN	NaN	NaN	NaN	NaN	NaN
3.01	5.175	172.388	698.8123	-0.72412	0.9458	-0.19189	157.768	-91.695	735.019	0.13145	0.28379	-0.23574	NaN	NaN	NaN	NaN	NaN	NaN	NaN	NaN	NaN	NaN	NaN	NaN
3.012	4.853	139.9794	638.2662	-0.69287	0.90429	-0.17724	112.441	-23.281	841.688	0.1082	0.28974	-0.23643	NaN	NaN	NaN	NaN	NaN	NaN	NaN	NaN	NaN	NaN	NaN	NaN
3.014	14.0314	98.435	599.2953	-0.66406	0.86133	-0.16113	7.14406	81.568	969.202	0.0875	0.29795	-0.23604	NaN	NaN	NaN	NaN	NaN	NaN	NaN	NaN	NaN	NaN	NaN	NaN
3.016	26.6248	92.44	581.616	-0.62158	0.80908	-0.13916	1.519	141.782	954.563	0.052246	0.29853	-0.24717	NaN	NaN	NaN	NaN	NaN	NaN	NaN	NaN	NaN	NaN	NaN	NaN
3.018	24.349	120.506	544.802	-0.60547	0.7832	-0.1333	-0.552	16.477	983.362	-0.01416	0.30566	-0.26904	NaN	NaN	NaN	NaN	NaN	NaN	NaN	NaN	NaN	NaN	NaN	NaN
3.02	21.465	135.40992	546.214	-0.5625	0.7334	-0.11621	15.411	-19.514	1085.5342	-0.16377	0.329	-0.2875	NaN	NaN	NaN	NaN	NaN	NaN	NaN	NaN	NaN	NaN	NaN	NaN
3.022	13.381	156.133	516.081	-0.5376	0.69532	-0.0979	51.951	-64.868	1192.425	-0.39727	0.34453	-0.30635	NaN	NaN	NaN	NaN	NaN	NaN	NaN	NaN	NaN	NaN	NaN	NaN
3.024	-0.419999999999998	147.157	503.9558	-0.5127	0.65918	-0.086426	33.882	-82.709	1271.18	-0.73477	0.3707	-0.32822	NaN	NaN	NaN	NaN	NaN	NaN	NaN	NaN	NaN	NaN	NaN	NaN
3.026	-2.713	148.336	479.598528	-0.47461	0.61133	-0.069336	-0.816000000000003	-13.197	1251.771	-1.1501	0.41963	-0.33056	NaN	NaN	NaN	NaN	NaN	NaN	NaN	NaN	NaN	NaN	NaN	NaN
3.028	-17.995	130.248	472.7642	-0.45557	0.58838	-0.062988	-82.6028	-26.034	1175.522	-1.6348	0.53711	-0.30322	NaN	NaN	NaN	NaN	NaN	NaN	NaN	NaN	NaN	NaN	NaN	NaN
3.03	-22.082	126.926	450.768	-0.41895	0.53369	-0.048828	-59.18	-54.201	1190.033	-2.1617	0.75059	-0.24844	NaN	NaN	NaN	NaN	NaN	NaN	NaN	NaN	NaN	NaN	NaN	NaN
3.032	-12.7244	127.146	412.0538	-0.39233	0.50366	-0.041993	-47.907	-34.837	1245.822	-2.6546	1.0124	-0.18526	NaN	NaN	NaN	NaN	NaN	NaN	NaN	NaN	NaN	NaN	NaN	NaN
3.034	11.513	124.961	368.9092	-0.36865	0.47168	-0.037109	-59.264	-106.674	1299.898	-3.0066	1.2542	-0.14931	NaN	NaN	NaN	NaN	NaN	NaN	NaN	NaN	NaN	NaN	NaN	NaN
3.036	-13.257	108.9039	320.8491	-0.33936	0.43018	-0.021484	-122.1217	-111.4495	1371.88	-3.1296	1.4513	-0.10195	NaN	NaN	NaN	NaN	NaN	NaN	NaN	NaN	NaN	NaN	NaN	NaN
3.038	-2.099	95.818	294.6134	-0.32813	0.41113	-0.015625	-180.555	-138.3612	1357.693	-3.1011	1.6274	-0.066895	NaN	NaN	NaN	NaN	NaN	NaN	NaN	NaN	NaN	NaN	NaN	NaN
3.04	23.443	98.4	266.493	-0.30127	0.37354	0.0039063	-176.184	-155.385	1368.833	-3.0443	1.8226	-0.056543	NaN	NaN	NaN	NaN	NaN	NaN	NaN	NaN	NaN	NaN	NaN	NaN
3.042	3.488	120.213	258.128	-0.27295	0.34228	0.02124	-94.879	-90.868	1376.003	-3.0367	2.0137	-0.11651	NaN	NaN	NaN	NaN	NaN	NaN	NaN	NaN	NaN	NaN	NaN	NaN
3.044	4.477	120.93828	260.4037	-0.24072	0.31299	0.03125	-51.894	-119.357	1342.2342	-2.9793	2.1399	-0.15752	NaN	NaN	NaN	NaN	NaN	NaN	NaN	NaN	NaN	NaN	NaN	NaN
3.046	-8.093	114.1035	244.9169	-0.19678	0.27441	0.039551	-40.535	-148.587	1393.478	-2.7488	2.1219	-0.22578	NaN	NaN	NaN	NaN	NaN	NaN	NaN	NaN	NaN	NaN	NaN	NaN
3.048	-12.896	103.818	228.8504	-0.17188	0.25439	0.036621	-77.7879	-126.903	1478.116	-2.3706	2.0063	-0.33447	NaN	NaN	NaN	NaN	NaN	NaN	NaN	NaN	NaN	NaN	NaN	NaN
3.05	-42.721	110.002	207.7701	-0.12109	0.21289	0.035156	-132.07	-189.942	1558.162	-1.9781	1.8871	-0.42285	NaN	NaN	NaN	NaN	NaN	NaN	NaN	NaN	NaN	NaN	NaN	NaN
3.052	-36.702	124.458	195.086	-0.081787	0.19043	0.033691	-85.113	-159.4314	1605.873	-1.6781	1.8051	-0.46778	NaN	NaN	NaN	NaN	NaN	NaN	NaN	NaN	NaN	NaN	NaN	NaN
3.054	-36.9185	140.344	165.9927	-0.049316	0.16602	0.038086	-69.887439	-134.4146	1566.032	-1.5235	1.7535	-0.46152	NaN	NaN	NaN	NaN	NaN	NaN	NaN	NaN	NaN	NaN	NaN	NaN
3.056	-27.678	139.549	154.63864	-0.01416	0.13721	0.040039	-86.452	-163.063	1471.1233	-1.4586	1.7299	-0.4334	NaN	NaN	NaN	NaN	NaN	NaN	NaN	NaN	NaN	NaN	NaN	NaN
3.058	-38.59	111.9187	145.1641	-0.0039063	0.12354	0.047363	-55.534	-107.592	1433.638	-1.3848	1.7002	-0.40039	NaN	NaN	NaN	NaN	NaN	NaN	NaN	NaN	NaN	NaN	NaN	NaN
3.06	-27.995	71.969	122.0042	0.01709	0.10156	0.055176	-81.0683	-91.265	1432.733	-1.2702	1.6173	-0.38759	NaN	NaN	NaN	NaN	NaN	NaN	NaN	NaN	NaN	NaN	NaN	NaN
3.062	-17.102	53.345	97.597	0.025879	0.080566	0.063477	-34.3847	-101.4727	1520.895	-1.1632	1.4872	-0.38271	NaN	NaN	NaN	NaN	NaN	NaN	NaN	NaN	NaN	NaN	NaN	NaN
3.064	-19.722	56.605	63.8451	0.026367	0.071777	0.070801	40.845	-65.9186	1549.9305	-1.0992	1.3606	-0.3749	NaN	NaN	NaN	NaN	NaN	NaN	NaN	NaN	NaN	NaN	NaN	NaN
3.066	-23.131	63.8672	71.39504	0.037109	0.054688	0.085938	92.8	-129.425	1562.847	-1.1232	1.2819	-0.37783	NaN	NaN	NaN	NaN	NaN	NaN	NaN	NaN	NaN	NaN	NaN	NaN
3.068	-25.078	58.28125	63.334	0.047607	0.039551	0.089356	99.015	-82.724	1556.494	-1.2075	1.2231	-0.34424	NaN	NaN	NaN	NaN	NaN	NaN	NaN	NaN	NaN	NaN	NaN	NaN
3.07	-32.588	56.0937	62.2393	0.055664	0.027832	0.09668	85.184	5.772	1515.659	-1.3284	1.2189	-0.30791	NaN	NaN	NaN	NaN	NaN	NaN	NaN	NaN	NaN	NaN	NaN	NaN
3.072	-42.101	48.418	60.2031	0.069824	0.0039063	0.094727	72.0407	23.83	1510.215	-1.4331	1.2469	-0.28418	NaN	NaN	NaN	NaN	NaN	NaN	NaN	NaN	NaN	NaN	NaN	NaN
3.074	-45.4915	37.3299	62.7545	0.081543	-0.0024414	0.099609	56.43947	62.7061	1522.892	-1.4976	1.2661	-0.27519	NaN	NaN	NaN	NaN	NaN	NaN	NaN	NaN	NaN	NaN	NaN	NaN
3.076	-36.42	45.3932	58.73898	0.095215	-0.02002	0.10352	23.0501	-14.892	1539.932	-1.5376	1.279	-0.29102	NaN	NaN	NaN	NaN	NaN	NaN	NaN	NaN	NaN	NaN	NaN	NaN
3.078	-35.169	58.013	39.5694	0.1001	-0.027099	0.10303	35.365	-122.145	1566.433	-1.5664	1.2754	-0.30566	NaN	NaN	NaN	NaN	NaN	NaN	NaN	NaN	NaN	NaN	NaN	NaN
3.08	-17.364	54.564	36.1298	0.10693	-0.029785	0.10303	12.1329	-86.0622	1528.19	-1.6141	1.2531	-0.32871	NaN	NaN	NaN	NaN	NaN	NaN	NaN	NaN	NaN	NaN	NaN	NaN
3.082	-19.504	30.444	29.1055	0.11475	-0.031738	0.1123	-8.1846	-73.795	1484.825	-1.6863	1.2289	-0.36133	NaN	NaN	NaN	NaN	NaN	NaN	NaN	NaN	NaN	NaN	NaN	NaN
3.084	-14.518	17.9579	16.0065	0.1167	-0.036133	0.11133	17.085	6.789	1486.507	-1.7648	1.2121	-0.39219	NaN	NaN	NaN	NaN	NaN	NaN	NaN	NaN	NaN	NaN	NaN	NaN
3.086	6.855	10.045	1.7524	0.11914	-0.035645	0.1167	1.57	52.8594	1456.908	-1.8325	1.2148	-0.40713	NaN	NaN	NaN	NaN	NaN	NaN	NaN	NaN	NaN	NaN	NaN	NaN
3.088	-14.693	14.539	18.4811	0.12598	-0.030517	0.11817	13.185	-11.329	1453.928	-1.9063	1.2441	-0.41602	NaN	NaN	NaN	NaN	NaN	NaN	NaN	NaN	NaN	NaN	NaN	NaN
3.09	-7.846	21.0249	22.704	0.13037	-0.026855	0.12158	17.2734	8.7418	1451.31	-1.9913	1.2923	-0.44522	NaN	NaN	NaN	NaN	NaN	NaN	NaN	NaN	NaN	NaN	NaN	NaN
3.092	-24.494	27.0625	22.2351	0.13623	-0.01416	0.12793	39.406	3.041	1457.4432	-2.0797	1.3519	-0.47119	NaN	NaN	NaN	NaN	NaN	NaN	NaN	NaN	NaN	NaN	NaN	NaN
3.094	9.04	21.11491	16.6132	0.1377	-0.011719	0.12793	32.283	21.17	1492.496	-2.175	1.4176	-0.49229	NaN	NaN	NaN	NaN	NaN	NaN	NaN	NaN	NaN	NaN	NaN	NaN
3.096	-20.74	12.4507	22.7664	0.1377	0.00097656	0.12793	-6.9804	161.2289	1445.167	-2.2869	1.5041	-0.50156	NaN	NaN	NaN	NaN	NaN	NaN	NaN	NaN	NaN	NaN	NaN	NaN
3.098	-19.697	4.1718	32.7193	0.14331	-0.00073242	0.13306	-44.6678	163.7195	1387.5026	-2.3979	1.5864	-0.49902	NaN	NaN	NaN	NaN	NaN	NaN	NaN	NaN	NaN	NaN	NaN	NaN
3.1	-20.8936	17.2934	31.112	0.14453	0.00048828	0.13623	-36.7405	166.399	1358.109	-2.4868	1.6671	-0.48731	NaN	NaN	NaN	NaN	NaN	NaN	NaN	NaN	NaN	NaN	NaN	NaN
3.102	-34.501	27.2854	36.299	0.15332	0.0043945	0.13281	-50.314	153.169	1332.586	-2.5402	1.727	-0.4748	NaN	NaN	NaN	NaN	NaN	NaN	NaN	NaN	NaN	NaN	NaN	NaN
3.104	-36.199	42.035	33.8197	0.1582	0.0058594	0.13721	-55.3259	73.733	1352.52	-2.5489	1.7676	-0.46387	NaN	NaN	NaN	NaN	NaN	NaN	NaN	NaN	NaN	NaN	NaN	NaN
3.106	-5.157	28.871	23.84	0.17285	0.018555	0.14258	12.9147	120.958	1337.201	-2.5065	1.7801	-0.45185	NaN	NaN	NaN	NaN	NaN	NaN	NaN	NaN	NaN	NaN	NaN	NaN
3.108	0.503999999999998	19.7445	7.42	0.18628	0.014648	0.13696	-0.7704	121.49	1275.1254	-2.4224	1.7642	-0.43408	NaN	NaN	NaN	NaN	NaN	NaN	NaN	NaN	NaN	NaN	NaN	NaN
3.11	-16.77	15.857	2.6235	0.20508	0.020508	0.13623	-16.1941	88.1439	1223.694	-2.2971	1.7381	-0.4251	NaN	NaN	NaN	NaN	NaN	NaN	NaN	NaN	NaN	NaN	NaN	NaN
3.112	-30.469	25.3117	16.3353	0.23096	0.03418	0.13086	6.052	123.825	1173.199	-2.1441	1.6982	-0.40655	NaN	NaN	NaN	NaN	NaN	NaN	NaN	NaN	NaN	NaN	NaN	NaN
3.114	-18.213	26.0944	15.2236	0.24316	0.038086	0.13037	14.992	67.985	1177.493	-1.9976	1.6509	-0.40655	NaN	NaN	NaN	NaN	NaN	NaN	NaN	NaN	NaN	NaN	NaN	NaN
3.116	-31.241	27.286421	21.708	0.2666	0.054199	0.12891	43.712	111.349	1179.161	-1.8653	1.5973	-0.39238	NaN	NaN	NaN	NaN	NaN	NaN	NaN	NaN	NaN	NaN	NaN	NaN
3.118	-39.728	25.556	21.9616	0.27734	0.063232	0.12524	26.2176	178.1986	1164.031	-1.7534	1.5415	-0.37646	NaN	NaN	NaN	NaN	NaN	NaN	NaN	NaN	NaN	NaN	NaN	NaN
3.12	-32.632	20.26588	20.3491	0.29004	0.067871	0.12012	1.909	142.792252	1162.502	-1.6769	1.4809	-0.36436	NaN	NaN	NaN	NaN	NaN	NaN	NaN	NaN	NaN	NaN	NaN	NaN
3.122	-26.492	30.4702	15.3179	0.30664	0.07373	0.11768	-6.0137	204.039	1094.746	-1.6249	1.4255	-0.33878	NaN	NaN	NaN	NaN	NaN	NaN	NaN	NaN	NaN	NaN	NaN	NaN
3.124	-38.618	43.537	17.225	0.31396	0.076172	0.11377	4.2	182.519	1004.5206	-1.5917	1.372	-0.31495	NaN	NaN	NaN	NaN	NaN	NaN	NaN	NaN	NaN	NaN	NaN	NaN
3.126	-42.575	41.8527	29.5046	0.32324	0.086914	0.11328	27.553	142.1603	974.9525	-1.577	1.3273	-0.29922	NaN	NaN	NaN	NaN	NaN	NaN	NaN	NaN	NaN	NaN	NaN	NaN
3.128	-24.078	24.31371	26.5119	0.33228	0.098388	0.1101	11.75	188.578	930.101	-1.5723	1.2793	-0.27246	NaN	NaN	NaN	NaN	NaN	NaN	NaN	NaN	NaN	NaN	NaN	NaN
3.13	-15.69	6.287	9.415	0.33545	0.12061	0.1084	-23.795	145.4247	906.0741	-1.5617	1.2359	-0.24921	NaN	NaN	NaN	NaN	NaN	NaN	NaN	NaN	NaN	NaN	NaN	NaN
3.132	-7.517	11.338	-0.9994	0.33496	0.14307	0.10938	-3.69	176.985	881.584	-1.5315	1.1944	-0.22938	NaN	NaN	NaN	NaN	NaN	NaN	NaN	NaN	NaN	NaN	NaN	NaN
3.134	-24.052	19.357	21.3345	0.3335	0.1582	0.11279	-9.5751	195.218	812.656	-1.4908	1.146	-0.21493	NaN	NaN	NaN	NaN	NaN	NaN	NaN	NaN	NaN	NaN	NaN	NaN
3.136	-17.384	27.657	27.9698	0.32568	0.17871	0.11719	-28.518	134.749	790.385	-1.4369	1.099	-0.19852	NaN	NaN	NaN	NaN	NaN	NaN	NaN	NaN	NaN	NaN	NaN	NaN
3.138	-15.475	45.0051	26.1334	0.31079	0.18945	0.11377	5.636	172.35	723.6703	-1.3691	1.0449	-0.18945	NaN	NaN	NaN	NaN	NaN	NaN	NaN	NaN	NaN	NaN	NaN	NaN
3.14	-11.957	47.038	10.4101	0.30078	0.20459	0.11572	-33.667	164.759	652.311	-1.2885	0.99333	-0.17621	NaN	NaN	NaN	NaN	NaN	NaN	NaN	NaN	NaN	NaN	NaN	NaN
3.142	-29.846	37.033	26.6814	0.28711	0.22021	0.11377	-44.075	163.54	634.982	-1.2047	0.94394	-0.17082	NaN	NaN	NaN	NaN	NaN	NaN	NaN	NaN	NaN	NaN	NaN	NaN
3.144	-14.596	29.3436	34.7365	0.271	0.21875	0.10938	-47.1737	202.4631	625.748	-1.1205	0.88926	-0.16729	NaN	NaN	NaN	NaN	NaN	NaN	NaN	NaN	NaN	NaN	NaN	NaN
3.146	-12.597	34.757	21.688	0.23779	0.229	0.11279	-65.04499	136.018	618.728	-1.0433	0.83602	-0.16486	NaN	NaN	NaN	NaN	NaN	NaN	NaN	NaN	NaN	NaN	NaN	NaN
3.148	-26.674	42.5145	18.9972	0.21265	0.23169	0.11499	-49.356	116.837	589.478	-0.97119	0.78369	-0.15479	NaN	NaN	NaN	NaN	NaN	NaN	NaN	NaN	NaN	NaN	NaN	NaN
3.15	-18.499	35.2874	18.9941	0.18604	0.24316	0.12061	-63.216	146.103	495.1994	-0.91826	0.737	-0.1466	NaN	NaN	NaN	NaN	NaN	NaN	NaN	NaN	NaN	NaN	NaN	NaN
3.152	-0.542000000000002	20.098	37.1127	0.15479	0.25098	0.12354	-89.1254	147.652	452.831	-0.87253	0.68817	-0.12792	NaN	NaN	NaN	NaN	NaN	NaN	NaN	NaN	NaN	NaN	NaN	NaN
3.154	-6.347	34.65	25.01088	0.14014	0.25342	0.12695	-90.2679	229.976	397.203	-0.83385	0.64543	-0.10164	NaN	NaN	NaN	NaN	NaN	NaN	NaN	NaN	NaN	NaN	NaN	NaN
3.156	1.915	38.0783	30.08221	0.11426	0.2666	0.12842	-84.6017	196.594	354.922	-0.804	0.6046	-0.083583	NaN	NaN	NaN	NaN	NaN	NaN	NaN	NaN	NaN	NaN	NaN	NaN
3.158	-12.485	39.6258	39.4808	0.099851	0.27198	0.13477	-75.385	120.496	325.2002	-0.77148	0.56445	-0.062012	NaN	NaN	NaN	NaN	NaN	NaN	NaN	NaN	NaN	NaN	NaN	NaN
3.16	-12.617	28.9721	33.7514	0.087402	0.28223	0.14453	-32.891	105.301	291.104	-0.7407	0.52493	-0.036794	NaN	NaN	NaN	NaN	NaN	NaN	NaN	NaN	NaN	NaN	NaN	NaN
3.162	-36.29	23.7715	30.2638	0.074707	0.28125	0.15137	-66.4078	56.064	284.6237	-0.70274	0.48462	-0.013448	NaN	NaN	NaN	NaN	NaN	NaN	NaN	NaN	NaN	NaN	NaN	NaN
3.164	-33.052	11.90715	9.934	0.067383	0.28467	0.15479	-43.487	128.462	265.5482	-0.66655	0.43985	0.007459	NaN	NaN	NaN	NaN	NaN	NaN	NaN	NaN	NaN	NaN	NaN	NaN
3.166	-29.507	7.9267	35.769	0.063477	0.28027	0.16455	-23.471	218.786	207.762	-0.61736	0.39047	0.025315	NaN	NaN	NaN	NaN	NaN	NaN	NaN	NaN	NaN	NaN	NaN	NaN
3.168	-23.105	24.5449	38.4349	0.062256	0.28149	0.16577	-48.196	195.011	190.621	-0.56836	0.34277	0.038574	NaN	NaN	NaN	NaN	NaN	NaN	NaN	NaN	NaN	NaN	NaN	NaN
3.17	-40.7914	33.7949	33.1212	0.063477	0.28271	0.16895	-24.542	211.948	174.811	-0.50908	0.29232	0.046208	NaN	NaN	NaN	NaN	NaN	NaN	NaN	NaN	NaN	NaN	NaN	NaN
3.172	-52.797	40.9029	27.354	0.063965	0.28125	0.18066	-49.066	135.742	152.775	-0.44937	0.24275	0.055203	NaN	NaN	NaN	NaN	NaN	NaN	NaN	NaN	NaN	NaN	NaN	NaN
3.174	-26.577	36.1889	20.86217	0.0625	0.27979	0.1875	-43.356	94.7448	161.9916	-0.38975	0.19324	0.065224	NaN	NaN	NaN	NaN	NaN	NaN	NaN	NaN	NaN	NaN	NaN	NaN
3.176	-22.689	35.9944	22.1706	0.0625	0.27588	0.19287	-41.3031	117.006	154.1685	-0.3412	0.14989	0.063575	NaN	NaN	NaN	NaN	NaN	NaN	NaN	NaN	NaN	NaN	NaN	NaN
3.178	-18.316	43.621	44.7617	0.060059	0.27564	0.1958	-48.003	81.58751	152.854	-0.29541	0.10986	0.060547	NaN	NaN	NaN	NaN	NaN	NaN	NaN	NaN	NaN	NaN	NaN	NaN
3.18	-12.493	6.957	83.3752	0.056152	0.2749	0.19922	-23.051	104.588	137.671	-0.25947	0.083242	0.061195	NaN	NaN	NaN	NaN	NaN	NaN	NaN	NaN	NaN	NaN	NaN	NaN
3.182	-21.518	-55.6422	128.869	0.046387	0.28125	0.21582	-25.895	109.179	71.065	-0.21972	0.061326	0.06146	NaN	NaN	NaN	NaN	NaN	NaN	NaN	NaN	NaN	NaN	NaN	NaN
3.184	-55.238	-55.93678	172.1	0.044434	0.28467	0.21338	-37.87	53.256	59.559	-0.18698	0.040641	0.069728	NaN	NaN	NaN	NaN	NaN	NaN	NaN	NaN	NaN	NaN	NaN	NaN
3.186	-37.472	-27.8868	239.295	0.035645	0.28125	0.19434	6.46899999999999	76.9274	77.016	-0.16249	0.03388	0.08458	NaN	NaN	NaN	NaN	NaN	NaN	NaN	NaN	NaN	NaN	NaN	NaN
3.188	-71.552	-36.157	358.7239	0.012451	0.29419	0.14722	-3.758	61.634	95.282	-0.13672	0.02832	0.10156	NaN	NaN	NaN	NaN	NaN	NaN	NaN	NaN	NaN	NaN	NaN	NaN
3.19	-105.48	-107.775	399.26	-0.040039	0.31934	0.084961	-37.3219	49.3353	112.978	-0.11535	0.021214	0.099405	NaN	NaN	NaN	NaN	NaN	NaN	NaN	NaN	NaN	NaN	NaN	NaN
3.192	-120.43	-152.841	434.855	-0.14893	0.38916	0.010742	-14.25	71.243	82.0134	-0.093043	0.016779	0.10166	NaN	NaN	NaN	NaN	NaN	NaN	NaN	NaN	NaN	NaN	NaN	NaN
3.194	-68.094	-151.751	519.0521	-0.23096	0.43311	-0.010254	-51.188	30.90145	44.7414	-0.069894	0.0065492	0.092928	NaN	NaN	NaN	NaN	NaN	NaN	NaN	NaN	NaN	NaN	NaN	NaN
3.196	-71.943	-81.1539	651.682	-0.45459	0.53369	-0.049316	-44.522	42.3647	43.0514	-0.056628	-0.0012742	0.096572	NaN	NaN	NaN	NaN	NaN	NaN	NaN	NaN	NaN	NaN	NaN	NaN
3.198	-118.355	-19.8983	759.3658	-0.65601	0.62329	-0.069092	-36.208	63.853	37.4027	-0.04834	-0.0024414	0.093262	NaN	NaN	NaN	NaN	NaN	NaN	NaN	NaN	NaN	NaN	NaN	NaN
3.2	-112.257	50.134	790.7926	-0.85596	0.71533	-0.075684	-48.959	50.8851	49.027	-0.049727	-0.0042919	0.096589	NaN	NaN	NaN	NaN	NaN	NaN	NaN	NaN	NaN	NaN	NaN	NaN
3.202	-65.884	64.156	812.823	-1.1108	0.85986	-0.07373	-24.728	90.416	71.9053	-0.055207	-0.0019373	0.09513	NaN	NaN	NaN	NaN	NaN	NaN	NaN	NaN	NaN	NaN	NaN	NaN
3.204	-7.085	59.932	910.596	-1.2881	0.9678	-0.087403	-62.471	44.368	56.6993	-0.065373	0.00078628	0.09668	NaN	NaN	NaN	NaN	NaN	NaN	NaN	NaN	NaN	NaN	NaN	NaN
3.206	16.6491	52.877	1014.6318	-1.4609	1.0801	-0.098633	-40.92	-6.7755	50.5412	-0.079526	-0.0041028	0.10097	NaN	NaN	NaN	NaN	NaN	NaN	NaN	NaN	NaN	NaN	NaN	NaN
3.208	-2.046	69.201	1098.594	-1.6831	1.2456	-0.093262	-16.065	4.7034	15.82	-0.10107	-0.010742	0.10156	NaN	NaN	NaN	NaN	NaN	NaN	NaN	NaN	NaN	NaN	NaN	NaN
3.21	8.386	84.979	1126.868	-1.7969	1.332	-0.087891	-46.511	-15.4439	-2.9709	-0.11971	-0.012008	0.11044	NaN	NaN	NaN	NaN	NaN	NaN	NaN	NaN	NaN	NaN	NaN	NaN
3.212	-42.5584	68.41113	1107.701	-2.0078	1.4883	-0.058594	-38.401	-3.422	25.6355	-0.13679	-0.017768	0.11104	NaN	NaN	NaN	NaN	NaN	NaN	NaN	NaN	NaN	NaN	NaN	NaN
3.214	-76.301	0.792000000000002	1062.935	-2.1333	1.5981	-0.017334	-50.2751	9.5372	14.651	-0.15906	-0.018168	0.11454	NaN	NaN	NaN	NaN	NaN	NaN	NaN	NaN	NaN	NaN	NaN	NaN
3.216	-55.894	-55.048	1020.372	-2.23	1.6938	0.033203	-59.85023	-18.6126	41.056	-0.18094	-0.01631	0.11455	NaN	NaN	NaN	NaN	NaN	NaN	NaN	NaN	NaN	NaN	NaN	NaN
3.218	-20.426	-116.6525	1029.463	-2.3022	1.8169	0.10156	-0.755000000000003	12.6082	48.6867	-0.19873	-0.011719	0.11914	NaN	NaN	NaN	NaN	NaN	NaN	NaN	NaN	NaN	NaN	NaN	NaN
3.22	-20.035	-144.3444	1068.309	-2.2905	1.8618	0.10889	-14.696	16.0804	38.7517	-0.2083	-0.0042947	0.12344	NaN	NaN	NaN	NaN	NaN	NaN	NaN	NaN	NaN	NaN	NaN	NaN
3.222	-52.593	-153.85318	1099.5995	-2.1812	1.9224	0.11035	-22.394	25.9744	51.2833	-0.21983	0.0035159	0.12979	NaN	NaN	NaN	NaN	NaN	NaN	NaN	NaN	NaN	NaN	NaN	NaN
3.224	-13.973	-136.554	1074.7512	-2.0327	1.936	0.13037	-17.58	53.888	18.509	-0.22764	0.01055	0.14034	NaN	NaN	NaN	NaN	NaN	NaN	NaN	NaN	NaN	NaN	NaN	NaN
3.226	-13.0497	-132.903	1071.8389	-1.8823	1.9224	0.16357	-59.0741	13.027	-2.192	-0.23174	0.021583	0.14834	NaN	NaN	NaN	NaN	NaN	NaN	NaN	NaN	NaN	NaN	NaN	NaN
3.228	22.786	-147.563	1076.85911	-1.7065	1.8481	0.20215	-15.567	5.6706	26.0126	-0.22803	0.030762	0.16016	NaN	NaN	NaN	NaN	NaN	NaN	NaN	NaN	NaN	NaN	NaN	NaN
3.23	38.417	-152.606	1102.483	-1.6265	1.7935	0.21973	-15.802	20.42185	2.221	-0.2165	0.040917	0.17597	NaN	NaN	NaN	NaN	NaN	NaN	NaN	NaN	NaN	NaN	NaN	NaN
3.232	46.204	-100.1489	1160.62	-1.5034	1.6685	0.24561	-18.67	-6.216	7.056	-0.19962	0.052539	0.18135	NaN	NaN	NaN	NaN	NaN	NaN	NaN	NaN	NaN	NaN	NaN	NaN
3.234	39.1346	-64.575	1212.556	-1.4067	1.5547	0.24854	-6.057	35.959	6.946	-0.16875	0.064257	0.18799	NaN	NaN	NaN	NaN	NaN	NaN	NaN	NaN	NaN	NaN	NaN	NaN
3.236	16.799	-75.481	1218.1867	-1.3042	1.4487	0.2583	-46.302	46.407	-17.386	-0.12344	0.070215	0.19336	NaN	NaN	NaN	NaN	NaN	NaN	NaN	NaN	NaN	NaN	NaN	NaN
3.238	-14.5209	-107.438	1190.682403	-1.1602	1.3184	0.24756	-45.977	46.144	12.9722	-0.072754	0.068359	0.19385	NaN	NaN	NaN	NaN	NaN	NaN	NaN	NaN	NaN	NaN	NaN	NaN
3.24	-32.933	-108.935	1149.9702	-1.0889	1.2598	0.229	7.068	70.803	20.442	-0.026268	0.078418	0.19307	NaN	NaN	NaN	NaN	NaN	NaN	NaN	NaN	NaN	NaN	NaN	NaN
3.242	-67.56	-103.506	1146.684	-0.96826	1.1548	0.15088	-12.504	7.4714	29.2632	0.024415	0.07666	0.19639	NaN	NaN	NaN	NaN	NaN	NaN	NaN	NaN	NaN	NaN	NaN	NaN
3.244	-69.324	-113.874	1146.289	-0.89502	1.0561	0.10108	-23.595	-10.7571	42.5226	0.074024	0.07041	0.19209	NaN	NaN	NaN	NaN	NaN	NaN	NaN	NaN	NaN	NaN	NaN	NaN
3.246	-104.9	-139.497	1162.411	-0.8418	0.97852	0.069824	-31.039	5.506	26.4476	0.12149	0.056054	0.19033	NaN	NaN	NaN	NaN	NaN	NaN	NaN	NaN	NaN	NaN	NaN	NaN
3.248	-72.316	-149.691	1218.235	-0.81396	0.92822	0.061035	-57.0367	17.1011	19.8011	0.16797	0.039551	0.18848	NaN	NaN	NaN	NaN	NaN	NaN	NaN	NaN	NaN	NaN	NaN	NaN
3.25	-49.194	-174.359	1264.3131	-0.81982	0.93018	0.066406	-4.122	81.118	31.4589	0.21025	0.026368	0.18604	NaN	NaN	NaN	NaN	NaN	NaN	NaN	NaN	NaN	NaN	NaN	NaN
3.252	-23.872	-167.735	1291.56828	-0.85986	0.97607	0.075195	-26.083	71.575	-1.1607	0.25215	0.015527	0.17998	NaN	NaN	NaN	NaN	NaN	NaN	NaN	NaN	NaN	NaN	NaN	NaN
3.254	-48.958	-138.019	1328.8356	-0.90186	1.04	0.083985	-34.565	29.443	11.8249	0.28965	0.0084962	0.18193	NaN	NaN	NaN	NaN	NaN	NaN	NaN	NaN	NaN	NaN	NaN	NaN
3.256	-84.549	-76.179	1315.0894	-0.95508	1.1113	0.095703	-10.978	38.0547	12.465	0.3249	0.0053711	0.18076	NaN	NaN	NaN	NaN	NaN	NaN	NaN	NaN	NaN	NaN	NaN	NaN
3.258	-107.622	-60.666	1327.222	-1.0269	1.2095	0.10791	-54.6329	21.7523	15.2963	0.35742	0.00097656	0.17969	NaN	NaN	NaN	NaN	NaN	NaN	NaN	NaN	NaN	NaN	NaN	NaN
3.26	-117.032	-78.649	1344.942	-1.0664	1.2578	0.10889	-17.604	40.6174	54.873	0.39131	-0.0030274	0.17129	NaN	NaN	NaN	NaN	NaN	NaN	NaN	NaN	NaN	NaN	NaN	NaN
3.262	-121.524	-115.4376	1373.841	-1.1655	1.3442	0.13037	-39.302	66.324	31.72238	0.41612	-0.002539	0.17325	NaN	NaN	NaN	NaN	NaN	NaN	NaN	NaN	NaN	NaN	NaN	NaN
3.264	-133.0458	-136.5905	1372.836	-1.2578	1.4111	0.14599	-49.21	41.8567	21.308	0.43799	-0.0041016	0.16387	NaN	NaN	NaN	NaN	NaN	NaN	NaN	NaN	NaN	NaN	NaN	NaN
3.266	-144.466	-148.6042	1334.2057	-1.3472	1.4771	0.17334	-5.15	69.087	16.727	0.45908	0.0037109	0.16006	NaN	NaN	NaN	NaN	NaN	NaN	NaN	NaN	NaN	NaN	NaN	NaN
3.268	-135.5883	-128.1919	1301.187	-1.4624	1.5708	0.20947	-40.87177	58.29	11.663	0.46777	0.016113	0.15576	NaN	NaN	NaN	NaN	NaN	NaN	NaN	NaN	NaN	NaN	NaN	NaN
3.27	-137.75973	-93.998	1297.806	-1.5059	1.6152	0.21533	-56.7171	50.9026	68.023	0.47002	0.033203	0.15078	NaN	NaN	NaN	NaN	NaN	NaN	NaN	NaN	NaN	NaN	NaN	NaN
3.272	-106.493	-71.464	1323.371	-1.564	1.7036	0.20068	0.131	68.813	72.362	0.46573	0.049316	0.15342	NaN	NaN	NaN	NaN	NaN	NaN	NaN	NaN	NaN	NaN	NaN	NaN
3.274	-83.675	-80.7431	1343.8076	-1.5918	1.753	0.18555	-51.6602	14.158	50.895	0.44893	0.068457	0.14912	NaN	NaN	NaN	NaN	NaN	NaN	NaN	NaN	NaN	NaN	NaN	NaN
3.276	-37.871	-92.809	1359.2419	-1.627	1.8027	0.17188	-17.227	-2.027	42.3164	0.42871	0.086816	0.15019	NaN	NaN	NaN	NaN	NaN	NaN	NaN	NaN	NaN	NaN	NaN	NaN
3.278	-37.339	-91.725	1369.609	-1.6909	1.8618	0.14551	-31.317	1.7956	10.095	0.40625	0.10303	0.14893	NaN	NaN	NaN	NaN	NaN	NaN	NaN	NaN	NaN	NaN	NaN	NaN
3.28	-66.8302	-50.6302	1376.076	-1.7363	1.8975	0.13525	-47.83	-16.4463	33.881	0.37344	0.12061	0.14629	NaN	NaN	NaN	NaN	NaN	NaN	NaN	NaN	NaN	NaN	NaN	NaN
3.282	-80.861	-17.0787	1374.612	-1.8511	1.981	0.12109	5.503	42.2962	52.475	0.33779	0.13399	0.14433	NaN	NaN	NaN	NaN	NaN	NaN	NaN	NaN	NaN	NaN	NaN	NaN
3.284	-89.076	1.0923	1361.7214	-1.9558	2.0462	0.12891	-33.4977	43.609	37.7512	0.30381	0.15468	0.14277	NaN	NaN	NaN	NaN	NaN	NaN	NaN	NaN	NaN	NaN	NaN	NaN
3.286	-93.36	-11.7194	1352.6462	-2.0527	2.1152	0.14941	-37.9137	12.1669	60.889	0.26904	0.17305	0.14023	NaN	NaN	NaN	NaN	NaN	NaN	NaN	NaN	NaN	NaN	NaN	NaN
3.288	-90.735	-36.123	1349.864	-2.1343	2.1685	0.16748	-13.782	26.173	52.8502	0.23291	0.19141	0.13623	NaN	NaN	NaN	NaN	NaN	NaN	NaN	NaN	NaN	NaN	NaN	NaN
3.29	-65.39	-58.977	1339.3465	-2.1426	2.1836	0.16504	-60.189	11.7348	33.1507	0.19658	0.20635	0.13613	NaN	NaN	NaN	NaN	NaN	NaN	NaN	NaN	NaN	NaN	NaN	NaN
3.292	-60.994	-37.943	1329.4088	-2.0859	2.1641	0.15576	-10.995	28.6007	51.351	0.15664	0.22657	0.13789	NaN	NaN	NaN	NaN	NaN	NaN	NaN	NaN	NaN	NaN	NaN	NaN
3.294	-80.911	-5.688	1301.893	-1.9936	2.1108	0.15698	-9.518	52.936	17.6225	0.11641	0.23555	0.1418	NaN	NaN	NaN	NaN	NaN	NaN	NaN	NaN	NaN	NaN	NaN	NaN
3.296	-84.611	5.24726	1288.349	-1.8984	2.041	0.14746	-25.921	7.0077	20.5832	0.077441	0.24502	0.14541	NaN	NaN	NaN	NaN	NaN	NaN	NaN	NaN	NaN	NaN	NaN	NaN
3.298	-59.938	-4.363	1271.935	-1.7734	1.9199	0.13135	-18.188	10.96625	32.2999	0.044434	0.25293	0.15234	NaN	NaN	NaN	NaN	NaN	NaN	NaN	NaN	NaN	NaN	NaN	NaN
3.3	-74.447	-20.3269	1260.5582	-1.7188	1.8594	0.12305	-27.446	9.0141	19.238	0.014062	0.26133	0.16133	NaN	NaN	NaN	NaN	NaN	NaN	NaN	NaN	NaN	NaN	NaN	NaN
3.302	-81.386	6.498	1255.0726	-1.6323	1.7329	0.10986	-7.419	6.0379	37.8601	-0.013867	0.26817	0.17304	NaN	NaN	NaN	NaN	NaN	NaN	NaN	NaN	NaN	NaN	NaN	NaN
3.304	-96.436	33.5718	1273.893	-1.5827	1.6438	0.10278	-0.318999999999996	39.971	28.079	-0.039649	0.27402	0.17891	NaN	NaN	NaN	NaN	NaN	NaN	NaN	NaN	NaN	NaN	NaN	NaN
3.306	-106.68644	79.73	1256.678	-1.5527	1.5586	0.092285	-43.772	16.0415	3.468	-0.054395	0.27177	0.18457	NaN	NaN	NaN	NaN	NaN	NaN	NaN	NaN	NaN	NaN	NaN	NaN
3.308	-106.057	89.938	1248.4936	-1.5386	1.4673	0.088379	-26.77	-7.4906	9.544	-0.074707	0.26709	0.19287	NaN	NaN	NaN	NaN	NaN	NaN	NaN	NaN	NaN	NaN	NaN	NaN
3.31	-106.486	78.627	1195.0801	-1.5366	1.4292	0.087402	-39.2259	6.8913	2.158	-0.090234	0.2623	0.19443	NaN	NaN	NaN	NaN	NaN	NaN	NaN	NaN	NaN	NaN	NaN	NaN
3.312	-96.601	53.666	1159.094	-1.5293	1.3594	0.090332	-35.195	-24.245	22.3802	-0.10186	0.25723	0.19834	NaN	NaN	NaN	NaN	NaN	NaN	NaN	NaN	NaN	NaN	NaN	NaN
3.314	-107.56	39.9436	1148.5767	-1.5244	1.3174	0.094727	-8.378	10.65895	45.942	-0.10771	0.2498	0.20147	NaN	NaN	NaN	NaN	NaN	NaN	NaN	NaN	NaN	NaN	NaN	NaN
3.316	-109.5218	41.4271	1138.1547	-1.5078	1.2793	0.098145	-54.8609	35.3	22.7754	-0.1208	0.24385	0.21006	NaN	NaN	NaN	NaN	NaN	NaN	NaN	NaN	NaN	NaN	NaN	NaN
3.318	-110.8496	50.1765	1135.6797	-1.4761	1.2339	0.10547	-22.613	12.8613	63.4694	-0.12695	0.24268	0.21777	NaN	NaN	NaN	NaN	NaN	NaN	NaN	NaN	NaN	NaN	NaN	NaN
3.32	-88.1213	39.022	1085.0681	-1.459	1.209	0.10693	-11.837	4.24	96.642	-0.13067	0.23672	0.22764	NaN	NaN	NaN	NaN	NaN	NaN	NaN	NaN	NaN	NaN	NaN	NaN
3.322	-83.054	39.991	1038.1007	-1.4019	1.1704	0.10498	-82.0309	-46.852	170.196	-0.13203	0.22998	0.23291	NaN	NaN	NaN	NaN	NaN	NaN	NaN	NaN	NaN	NaN	NaN	NaN
3.324	-78.434	54.985	1011.1496	-1.3581	1.136	0.10742	-12.177	-13.2565	293.036	-0.13907	0.22998	0.24307	NaN	NaN	NaN	NaN	NaN	NaN	NaN	NaN	NaN	NaN	NaN	NaN
3.326	-67.842	82.8281	993.6861	-1.3179	1.106	0.10645	-22.591	5.064	391.01	-0.14765	0.22793	0.25674	NaN	NaN	NaN	NaN	NaN	NaN	NaN	NaN	NaN	NaN	NaN	NaN
3.328	-61.468	98.9112	984.9038	-1.2612	1.0571	0.10938	-150.65671	-111.2139	512.355	-0.14697	0.22607	0.26514	NaN	NaN	NaN	NaN	NaN	NaN	NaN	NaN	NaN	NaN	NaN	NaN
3.33	-57.5	111.912	960.65	-1.2344	1.0293	0.11035	-167.647	-173.418	582.184	-0.14629	0.22461	0.2789	NaN	NaN	NaN	NaN	NaN	NaN	NaN	NaN	NaN	NaN	NaN	NaN
3.332	-42.258	96.624	922.745	-1.1816	0.98633	0.10791	-125.987	-172.146	632.861	-0.14179	0.21817	0.29053	NaN	NaN	NaN	NaN	NaN	NaN	NaN	NaN	NaN	NaN	NaN	NaN
3.334	-30.05	103.213	897.4886	-1.1333	0.95313	0.11621	-87.257	-113.122	754.169	-0.13399	0.21504	0.296	NaN	NaN	NaN	NaN	NaN	NaN	NaN	NaN	NaN	NaN	NaN	NaN
3.336	-34.307	112.086	855.4204	-1.0874	0.92236	0.12061	-121.733	33.261	871.762	-0.13017	0.21025	0.27422	NaN	NaN	NaN	NaN	NaN	NaN	NaN	NaN	NaN	NaN	NaN	NaN
3.338	-44.354	132.636	801.259	-1.0215	0.8877	0.12061	-171.947	72.265	905.3465	-0.1416	0.21191	0.21289	NaN	NaN	NaN	NaN	NaN	NaN	NaN	NaN	NaN	NaN	NaN	NaN
3.34	-33.18	110.4478	773.2478	-0.98438	0.87695	0.12402	-99.545	48.651	932.289	-0.19063	0.22012	0.12666	NaN	NaN	NaN	NaN	NaN	NaN	NaN	NaN	NaN	NaN	NaN	NaN
3.342	-28.469	96.0956	743.5193	-0.89795	0.84229	0.12695	-18.3554	12.133	997.484	-0.30098	0.24356	0.052734	NaN	NaN	NaN	NaN	NaN	NaN	NaN	NaN	NaN	NaN	NaN	NaN
3.344	-18.745	89.6406	709.9413	-0.81006	0.79639	0.12109	6.2272	-54.04	1122.786	-0.47871	0.26269	-0.023437	NaN	NaN	NaN	NaN	NaN	NaN	NaN	NaN	NaN	NaN	NaN	NaN
3.346	-20.806	86.4659	677.607	-0.76514	0.76807	0.12451	69.204	-21.582	1255.719	-0.71045	0.28486	-0.08994	NaN	NaN	NaN	NaN	NaN	NaN	NaN	NaN	NaN	NaN	NaN	NaN
3.348	-21.15	87.2734	653.565	-0.6875	0.72656	0.12549	58.551	55.536	1238.291	-0.9707	0.32813	-0.11426	NaN	NaN	NaN	NaN	NaN	NaN	NaN	NaN	NaN	NaN	NaN	NaN
3.35	-33.793	99.3812	634.068	-0.63159	0.6936	0.1189	4.85012	63.922	1209.14	-1.2662	0.42051	-0.10723	NaN	NaN	NaN	NaN	NaN	NaN	NaN	NaN	NaN	NaN	NaN	NaN
3.352	-32.944	122.702	595.313	-0.57471	0.6665	0.11719	-5.5216	77.253	1168.594	-1.5699	0.56191	-0.07334	NaN	NaN	NaN	NaN	NaN	NaN	NaN	NaN	NaN	NaN	NaN	NaN
3.354	-40.864	136.743	564.8354	-0.50293	0.63086	0.11475	-16.74831	-24.755	1125.758	-1.8554	0.73183	-0.025293	NaN	NaN	NaN	NaN	NaN	NaN	NaN	NaN	NaN	NaN	NaN	NaN
3.356	-40.512	138.684	547.3014	-0.47217	0.61182	0.11719	32.179	-113.044	1161.1694	-2.1178	0.91465	0.026758	NaN	NaN	NaN	NaN	NaN	NaN	NaN	NaN	NaN	NaN	NaN	NaN
3.358	-40.645	126.631	532.2102	-0.41602	0.57422	0.11377	45.9832	-134.589	1167.0964	-2.3477	1.0918	0.048828	NaN	NaN	NaN	NaN	NaN	NaN	NaN	NaN	NaN	NaN	NaN	NaN
3.36	-27.406	116.3168	495.85772	-0.37207	0.54834	0.1101	-19.9699	-195.659	1177.971	-2.5256	1.2354	0.044629	NaN	NaN	NaN	NaN	NaN	NaN	NaN	NaN	NaN	NaN	NaN	NaN
3.362	-36.48	111.9067	457.0764	-0.33008	0.52881	0.10986	11.633	-162.594	1189.5191	-2.6604	1.3411	0.038575	NaN	NaN	NaN	NaN	NaN	NaN	NaN	NaN	NaN	NaN	NaN	NaN
3.364	-32.903	118.1657	434.8576	-0.27881	0.49805	0.104	25.18107	-137.558	1139.786	-2.7483	1.4337	0.025683	NaN	NaN	NaN	NaN	NaN	NaN	NaN	NaN	NaN	NaN	NaN	NaN
3.366	-38.608	106.9219	394.5588	-0.25781	0.4873	0.10547	68.8495	-195.293	1198.54877	-2.7895	1.5195	0.03125	NaN	NaN	NaN	NaN	NaN	NaN	NaN	NaN	NaN	NaN	NaN	NaN
3.368	-58.62	100.5934	369.859	-0.20703	0.46387	0.11182	138.714	-165.772	1245.3663	-2.7617	1.5869	0.05957	NaN	NaN	NaN	NaN	NaN	NaN	NaN	NaN	NaN	NaN	NaN	NaN
3.37	-44.302	95.3815	347.167	-0.17261	0.44409	0.11865	70.0019	-159.013	1289.96	-2.6604	1.6438	0.1042	NaN	NaN	NaN	NaN	NaN	NaN	NaN	NaN	NaN	NaN	NaN	NaN
3.372	-39.483	92.6422	341.0403	-0.13623	0.42383	0.11914	64.6258	-131.7192	1380.814	-2.525	1.6834	0.12412	NaN	NaN	NaN	NaN	NaN	NaN	NaN	NaN	NaN	NaN	NaN	NaN
3.374	-21.372	108.463	301.9151	-0.068848	0.38818	0.11572	51.254	-70.22	1392.806	-2.3606	1.6556	0.12022	NaN	NaN	NaN	NaN	NaN	NaN	NaN	NaN	NaN	NaN	NaN	NaN
3.376	-34.187	111.7167	267.8065	-0.034668	0.36719	0.10791	7.63	-133.8228	1407.042	-2.2027	1.5801	0.11406	NaN	NaN	NaN	NaN	NaN	NaN	NaN	NaN	NaN	NaN	NaN	NaN
3.378	-41.306	104.3407	251.8795	0.036133	0.33252	0.085449	11.264	-135.406	1387.14	-2.0562	1.4888	0.11523	NaN	NaN	NaN	NaN	NaN	NaN	NaN	NaN	NaN	NaN	NaN	NaN
3.38	-25.456	102.8217	246.8979	0.083008	0.31055	0.077393	-51.609	-134.957	1324.119	-1.9137	1.386	0.13115	NaN	NaN	NaN	NaN	NaN	NaN	NaN	NaN	NaN	NaN	NaN	NaN
3.382	-1.996	105.811	227.256	0.11914	0.29053	0.060547	-107.0541	-180.273	1335.432	-1.7683	1.2837	0.15009	NaN	NaN	NaN	NaN	NaN	NaN	NaN	NaN	NaN	NaN	NaN	NaN
3.384	20.8067	122.197	200.946	0.16357	0.26172	0.056152	-107.372	-113.584	1350.495	-1.6116	1.1903	0.17432	NaN	NaN	NaN	NaN	NaN	NaN	NaN	NaN	NaN	NaN	NaN	NaN
3.386	9.356	112.5018	192.7759	0.18555	0.25195	0.052734	-116.189	-130.145	1385.4207	-1.4555	1.0944	0.17363	NaN	NaN	NaN	NaN	NaN	NaN	NaN	NaN	NaN	NaN	NaN	NaN
3.388	2.325	101.2567	173.4679	0.21143	0.23047	0.041504	-63.53	-153.4072	1422.862	-1.3257	1.0005	0.14307	NaN	NaN	NaN	NaN	NaN	NaN	NaN	NaN	NaN	NaN	NaN	NaN
3.39	-15.29	94.4522	141.789	0.22461	0.21484	0.036132	-30.271	-116.4158	1400.09	-1.2215	0.92344	0.066602	NaN	NaN	NaN	NaN	NaN	NaN	NaN	NaN	NaN	NaN	NaN	NaN
3.392	-7.865	89.6697	126.6576	0.23535	0.19824	0.030762	-65.771	-160.568	1382.623	-1.1555	0.85879	-0.027343	NaN	NaN	NaN	NaN	NaN	NaN	NaN	NaN	NaN	NaN	NaN	NaN
3.394	-6.582	71.2773	111.4342	0.24219	0.18311	0.022949	-67.958	-113.998	1419.92	-1.1063	0.79629	-0.060547	NaN	NaN	NaN	NaN	NaN	NaN	NaN	NaN	NaN	NaN	NaN	NaN
3.396	-5.664	64.6465	99.2648	0.24756	0.17969	0.019531	-99.9174	-46.4752	1451.756	-1.0891	0.77168	-0.069922	NaN	NaN	NaN	NaN	NaN	NaN	NaN	NaN	NaN	NaN	NaN	NaN
3.398	2.544	46.6521	68.7318	0.24561	0.16309	0.021973	-120.5911	-80.197	1516.174	-1.1055	0.78125	-0.062012	NaN	NaN	NaN	NaN	NaN	NaN	NaN	NaN	NaN	NaN	NaN	NaN
3.4	-27.891	54.6276	69.4847	0.23584	0.1582	0.021728	-122.434	-53.44	1530.219	-1.1634	0.82354	-0.051074	NaN	NaN	NaN	NaN	NaN	NaN	NaN	NaN	NaN	NaN	NaN	NaN
3.402	-31.918	79.736	72.01127	0.22266	0.15479	0.02002	-148.507	-104.1432	1469.248	-1.2554	0.8875	-0.044824	NaN	NaN	NaN	NaN	NaN	NaN	NaN	NaN	NaN	NaN	NaN	NaN
3.404	-17.923	79.699	76.849	0.21143	0.14258	0.01709	-139.61	-128.734	1443.402	-1.3816	0.95352	-0.03584	NaN	NaN	NaN	NaN	NaN	NaN	NaN	NaN	NaN	NaN	NaN	NaN
3.406	1.624	74.5447	60.7015	0.2002	0.146	0.016113	-118.4999	-44.033	1407.456	-1.5311	1.0188	-0.0084958	NaN	NaN	NaN	NaN	NaN	NaN	NaN	NaN	NaN	NaN	NaN	NaN
3.408	-17.713	51.2882	42.401	0.18311	0.13965	0.022949	-109.1183	-63	1413.8923	-1.7104	1.0874	0.03125	NaN	NaN	NaN	NaN	NaN	NaN	NaN	NaN	NaN	NaN	NaN	NaN
3.41	-10.291	47.2596	40.15501	0.1687	0.13599	0.026855	-67.287	-29.896	1459.2156	-1.9067	1.1648	0.062402	NaN	NaN	NaN	NaN	NaN	NaN	NaN	NaN	NaN	NaN	NaN	NaN
3.412	-17.726	32.5845	51.2043	0.1543	0.12988	0.023926	-52.666	-49.1581	1435.338	-2.0871	1.2469	0.087012	NaN	NaN	NaN	NaN	NaN	NaN	NaN	NaN	NaN	NaN	NaN	NaN
3.414	-19.969	46.201057	46	0.13623	0.12109	0.026855	-40.809	-128.494	1445.354	-2.2328	1.3277	0.09795	NaN	NaN	NaN	NaN	NaN	NaN	NaN	NaN	NaN	NaN	NaN	NaN
3.416	-34.26	33.0581	36.7166	0.13086	0.12061	0.024414	18.628	-41.4948	1457.054	-2.3429	1.3946	0.10098	NaN	NaN	NaN	NaN	NaN	NaN	NaN	NaN	NaN	NaN	NaN	NaN
3.418	-37.331	24.2637	28.7966	0.11768	0.11475	0.029297	-14.2	24.062	1453.748	-2.4102	1.4434	0.081543	NaN	NaN	NaN	NaN	NaN	NaN	NaN	NaN	NaN	NaN	NaN	NaN
3.42	-27.381	16.7896	19.7835	0.11108	0.10303	0.028321	-21.287	90.829	1483.429	-2.4385	1.474	0.037891	NaN	NaN	NaN	NaN	NaN	NaN	NaN	NaN	NaN	NaN	NaN	NaN
3.422	-47.6747	26.3807	27.0165	0.10449	0.091797	0.026855	-28.388	158.379	1466.081	-2.4761	1.4934	-0.0054686	NaN	NaN	NaN	NaN	NaN	NaN	NaN	NaN	NaN	NaN	NaN	NaN
3.424	-37.803	28.4596	47.2159	0.10107	0.078613	0.022461	-101.238	64.193	1427.0641	-2.5448	1.5154	-0.03711	NaN	NaN	NaN	NaN	NaN	NaN	NaN	NaN	NaN	NaN	NaN	NaN
3.426	-34.3728	25.1878	46.1292	0.096191	0.078613	0.020996	-61.127	31.5043	1432.238	-2.6478	1.5538	-0.052637	NaN	NaN	NaN	NaN	NaN	NaN	NaN	NaN	NaN	NaN	NaN	NaN
3.428	-16.914	14.3539	20.2218	0.097168	0.078613	0.022949	-56.553	43.5162	1391.34556	-2.7476	1.5981	-0.058594	NaN	NaN	NaN	NaN	NaN	NaN	NaN	NaN	NaN	NaN	NaN	NaN
3.43	-7.59	6.3939	12.1553	0.097168	0.073974	0.019775	-73.059	25.507	1393.937	-2.8305	1.6519	-0.053418	NaN	NaN	NaN	NaN	NaN	NaN	NaN	NaN	NaN	NaN	NaN	NaN
3.432	-6.847	1.0776	26.6949	0.10449	0.066895	0.0087891	-62.072	111.087	1368.14	-2.8973	1.7039	-0.05166	NaN	NaN	NaN	NaN	NaN	NaN	NaN	NaN	NaN	NaN	NaN	NaN
3.434	-5.288	15.5944	46.9248	0.11865	0.050293	0.0068359	-87.67963	88.09	1303.602	-2.9172	1.7559	-0.045019	NaN	NaN	NaN	NaN	NaN	NaN	NaN	NaN	NaN	NaN	NaN	NaN
3.436	-13.751	39.0119	34.1721	0.12891	0.043457	0.0063477	-68.442	50.086	1300.248	-2.8698	1.788	-0.042285	NaN	NaN	NaN	NaN	NaN	NaN	NaN	NaN	NaN	NaN	NaN	NaN
3.438	-18.085	41.8919	30.6457	0.14746	0.036133	-0.003418	-31.905	80.472	1290.16513	-2.7539	1.7969	-0.041992	NaN	NaN	NaN	NaN	NaN	NaN	NaN	NaN	NaN	NaN	NaN	NaN
3.44	-24.993	31.389	29.1751	0.16357	0.030517	-0.0043946	-52.41	43.632	1301.388	-2.5715	1.757	-0.050977	NaN	NaN	NaN	NaN	NaN	NaN	NaN	NaN	NaN	NaN	NaN	NaN
3.442	-32.2312	19.3631	22.2762	0.17627	0.027344	-0.0068359	-59.096	111.812	1306.021	-2.3761	1.6719	-0.059668	NaN	NaN	NaN	NaN	NaN	NaN	NaN	NaN	NaN	NaN	NaN	NaN
3.444	-13.326	14.5242	8.665	0.19189	0.020508	-0.010742	-106.071	179.458	1255.7824	-2.1878	1.5485	-0.07373	NaN	NaN	NaN	NaN	NaN	NaN	NaN	NaN	NaN	NaN	NaN	NaN
3.446	-26.697	10.0505	16.3048	0.20361	0.017578	-0.010742	-124.503	149.26186	1221.44396	-2.0356	1.4227	-0.091406	NaN	NaN	NaN	NaN	NaN	NaN	NaN	NaN	NaN	NaN	NaN	NaN
3.448	-20.759	6.53424	12.0976	0.21582	0.020996	-0.013672	-73.7001	181.764	1180.7013	-1.916	1.3125	-0.10205	NaN	NaN	NaN	NaN	NaN	NaN	NaN	NaN	NaN	NaN	NaN	NaN
3.45	-28.249	13.194	11.173	0.22534	0.020264	-0.016113	-86.066	147.611	1144.9565	-1.822	1.2397	-0.095801	NaN	NaN	NaN	NaN	NaN	NaN	NaN	NaN	NaN	NaN	NaN	NaN
3.452	-7.593	28.845	0.634	0.23779	0.020508	-0.017578	-109.9724	126.8047	1142.411	-1.7528	1.191	-0.096777	NaN	NaN	NaN	NaN	NaN	NaN	NaN	NaN	NaN	NaN	NaN	NaN
3.454	-13.505	26.5278	31.2553	0.25098	0.023926	-0.017578	-91.2333	182.94	1093.139	-1.7215	1.1598	-0.089746	NaN	NaN	NaN	NaN	NaN	NaN	NaN	NaN	NaN	NaN	NaN	NaN
3.456	2.595	30.19307	38.385	0.26074	0.027832	-0.01709	-114.765	146.178	1051.712	-1.6926	1.1316	-0.075586	NaN	NaN	NaN	NaN	NaN	NaN	NaN	NaN	NaN	NaN	NaN	NaN
3.458	-19.449	25.10347	32.2784	0.26709	0.029297	-0.022949	-56.447	142.0203	1014.5274	-1.6616	1.1147	-0.065918	NaN	NaN	NaN	NaN	NaN	NaN	NaN	NaN	NaN	NaN	NaN	NaN
3.46	-20.793	33.02622	21.8359	0.27368	0.029785	-0.026612	-13.744	115.701	947.55	-1.6069	1.0933	-0.062402	NaN	NaN	NaN	NaN	NaN	NaN	NaN	NaN	NaN	NaN	NaN	NaN
3.462	-20.643	31.3814	17.4804	0.27588	0.031738	-0.027344	-20.222	65.923	919.859	-1.5504	1.0617	-0.058594	NaN	NaN	NaN	NaN	NaN	NaN	NaN	NaN	NaN	NaN	NaN	NaN
3.464	-21.71	14.5603	25.593	0.27539	0.036133	-0.033203	32.421	143.507	874.713	-1.4863	1.0227	-0.054297	NaN	NaN	NaN	NaN	NaN	NaN	NaN	NaN	NaN	NaN	NaN	NaN
3.466	-13.907	12.79383	12.8597	0.27393	0.035156	-0.031738	-31.9308	178.1518	846.707	-1.4164	0.97988	-0.052832	NaN	NaN	NaN	NaN	NaN	NaN	NaN	NaN	NaN	NaN	NaN	NaN
3.468	-25.566	13.804	-0.742	0.26904	0.049316	-0.034668	-25.033	195.488	842.3444	-1.3516	0.92871	-0.050293	NaN	NaN	NaN	NaN	NaN	NaN	NaN	NaN	NaN	NaN	NaN	NaN
3.47	-19.896	18.3974	6.5131	0.26172	0.057861	-0.039306	6.473	228.663	805.6882	-1.2835	0.87705	-0.046582	NaN	NaN	NaN	NaN	NaN	NaN	NaN	NaN	NaN	NaN	NaN	NaN
3.472	-31.001	24.6912	22.7924	0.25537	0.064941	-0.040527	-15.796	169.041	750.605	-1.2218	0.82861	-0.041504	NaN	NaN	NaN	NaN	NaN	NaN	NaN	NaN	NaN	NaN	NaN	NaN
3.474	-22.318	45.139	19.1804	0.24219	0.078613	-0.045898	-4.936	171	710.5441	-1.1655	0.78643	-0.039942	NaN	NaN	NaN	NaN	NaN	NaN	NaN	NaN	NaN	NaN	NaN	NaN
3.476	-23.302	47.2	27.1557	0.23193	0.083496	-0.049316	-21.287	194.24	647.337	-1.107	0.74736	-0.035937	NaN	NaN	NaN	NaN	NaN	NaN	NaN	NaN	NaN	NaN	NaN	NaN
3.478	-18.184	29.0543	23.9959	0.22363	0.096191	-0.048828	-55.8226	160.1377	621.3567	-1.0488	0.71484	-0.030273	NaN	NaN	NaN	NaN	NaN	NaN	NaN	NaN	NaN	NaN	NaN	NaN
3.48	-1.975	15.0264	26.997	0.21924	0.10229	-0.058594	16.456	174.813	574.50577	-0.98888	0.68594	-0.034277	NaN	NaN	NaN	NaN	NaN	NaN	NaN	NaN	NaN	NaN	NaN	NaN
3.482	-24.596	24.7814	11.864	0.21631	0.11914	-0.052734	-2.313	165.9355	511.6114	-0.92735	0.66113	-0.033203	NaN	NaN	NaN	NaN	NaN	NaN	NaN	NaN	NaN	NaN	NaN	NaN
3.484	-33.6178	34.7767	21.8466	0.20654	0.13818	-0.064453	10.302	147.147	477.684	-0.86172	0.6377	-0.038281	NaN	NaN	NaN	NaN	NaN	NaN	NaN	NaN	NaN	NaN	NaN	NaN
3.486	-21.926	43.041	39.7232	0.20191	0.14258	-0.067627	16.946	165.2998	421.724	-0.79306	0.60928	-0.041992	NaN	NaN	NaN	NaN	NaN	NaN	NaN	NaN	NaN	NaN	NaN	NaN
3.488	-24.81	38.308	38.1675	0.1958	0.14551	-0.07373	-48.001	155.0486	386.667	-0.72754	0.58203	-0.040527	NaN	NaN	NaN	NaN	NaN	NaN	NaN	NaN	NaN	NaN	NaN	NaN
3.49	-22.22	30.414	17.14997	0.18506	0.16113	-0.078125	-25.629	189.8524	388.0417	-0.66064	0.55381	-0.043164	NaN	NaN	NaN	NaN	NaN	NaN	NaN	NaN	NaN	NaN	NaN	NaN
3.492	-30.912	21.4777	25.1171	0.18408	0.17188	-0.083496	-41.32795	202.51	371.35471	-0.58809	0.52031	-0.043261	NaN	NaN	NaN	NaN	NaN	NaN	NaN	NaN	NaN	NaN	NaN	NaN
3.494	-12.397	14.7926	20.4461	0.1709	0.19092	-0.085938	-60.656	145.4334	362.386	-0.51426	0.48945	-0.046777	NaN	NaN	NaN	NaN	NaN	NaN	NaN	NaN	NaN	NaN	NaN	NaN
3.496	-39.219	18.4239	26.8431	0.17115	0.20801	-0.091064	-26.994	143.222	329.8909	-0.4414	0.45703	-0.051074	NaN	NaN	NaN	NaN	NaN	NaN	NaN	NaN	NaN	NaN	NaN	NaN
3.498	-17.588	30.01	14.7076	0.16357	0.22412	-0.094727	-76.0705	147.496	263.062	-0.37109	0.42285	-0.056152	NaN	NaN	NaN	NaN	NaN	NaN	NaN	NaN	NaN	NaN	NaN	NaN
3.5	-23.423	19.1183	14.5	0.16113	0.24268	-0.099609	-55.249	163.229	253.969	-0.30889	0.38897	-0.060058	NaN	NaN	NaN	NaN	NaN	NaN	NaN	NaN	NaN	NaN	NaN	NaN
3.502	-13.373	29.9812	23.91681	0.15674	0.25	-0.095215	-43.111	204.972	233.0528	-0.24951	0.35361	-0.066113	NaN	NaN	NaN	NaN	NaN	NaN	NaN	NaN	NaN	NaN	NaN	NaN
3.504	-11.183	34.1975	25.11298	0.1499	0.26514	-0.097168	-81.7403	164.0875	202.0835	-0.19561	0.32158	-0.067676	NaN	NaN	NaN	NaN	NaN	NaN	NaN	NaN	NaN	NaN	NaN	NaN
3.506	-25.803	48.553	17.0788	0.14941	0.27051	-0.10669	-38.518	110.844	186.7124	-0.14795	0.29121	-0.076562	NaN	NaN	NaN	NaN	NaN	NaN	NaN	NaN	NaN	NaN	NaN	NaN
3.508	-13.324	52.924	44.979	0.1499	0.27441	-0.11084	-33.129	89.4792	141.374	-0.10498	0.26123	-0.075684	NaN	NaN	NaN	NaN	NaN	NaN	NaN	NaN	NaN	NaN	NaN	NaN
3.51	-27.0486	54.535	44.239	0.16064	0.28809	-0.12012	-44.37	56.09	131.4011	-0.075293	0.24112	-0.071973	NaN	NaN	NaN	NaN	NaN	NaN	NaN	NaN	NaN	NaN	NaN	NaN
3.512	-14.942	35.7305	29.594	0.16748	0.29541	-0.12793	11.153	86.7196	126.121	-0.043262	0.22549	-0.071777	NaN	NaN	NaN	NaN	NaN	NaN	NaN	NaN	NaN	NaN	NaN	NaN
3.514	-9.633	16.0149	27.618	0.17822	0.31201	-0.13818	-42.5497	107.154	93.107	-0.002246	0.19463	-0.078808	NaN	NaN	NaN	NaN	NaN	NaN	NaN	NaN	NaN	NaN	NaN	NaN
3.516	0.0779999999999959	0.729999999999999	18.4645	0.18946	0.32397	-0.14502	-27.912	80.8778	83.431	0.031152	0.17549	-0.078027	NaN	NaN	NaN	NaN	NaN	NaN	NaN	NaN	NaN	NaN	NaN	NaN
3.518	-20.669	7.8985	14.3857	0.20068	0.33887	-0.15674	-7.627	96.75	65.9539	0.055664	0.15771	-0.077637	NaN	NaN	NaN	NaN	NaN	NaN	NaN	NaN	NaN	NaN	NaN	NaN
3.52	-24.238	25.8302	16.42369	0.20703	0.36328	-0.15918	-41.107	76.533	68.59619	0.081543	0.14199	-0.077734	NaN	NaN	NaN	NaN	NaN	NaN	NaN	NaN	NaN	NaN	NaN	NaN
3.522	-26.389	41.302	43.305	0.20313	0.37793	-0.16602	19.227	56.46	94.207	0.10215	0.12812	-0.077148	NaN	NaN	NaN	NaN	NaN	NaN	NaN	NaN	NaN	NaN	NaN	NaN
3.524	-7.714	32.9298	101.716	0.19629	0.40625	-0.17139	-17.933	72.243	70.0099	0.12129	0.11172	-0.075977	NaN	NaN	NaN	NaN	NaN	NaN	NaN	NaN	NaN	NaN	NaN	NaN
3.526	12.543	-23.95405	161.815	0.19336	0.42895	-0.17089	-35.474	27.1294	60.672	0.13125	0.09463	-0.079297	NaN	NaN	NaN	NaN	NaN	NaN	NaN	NaN	NaN	NaN	NaN	NaN
3.528	-30.1	-31.9549	208.005	0.18506	0.44238	-0.17969	-14.641	14.7419	36.5936	0.13428	0.078125	-0.086426	NaN	NaN	NaN	NaN	NaN	NaN	NaN	NaN	NaN	NaN	NaN	NaN
3.53	-11.459	-14.6324	256.6049	0.17285	0.46777	-0.20898	-32.078	4.59	4.447	0.12559	0.065528	-0.086816	NaN	NaN	NaN	NaN	NaN	NaN	NaN	NaN	NaN	NaN	NaN	NaN
3.532	28.3662	-23.734	300.0869	0.1582	0.47852	-0.23291	11.061	-19.258	30.5176	0.11357	0.055664	-0.089648	NaN	NaN	NaN	NaN	NaN	NaN	NaN	NaN	NaN	NaN	NaN	NaN
3.534	26.9866	-73.83	318.849	0.053711	0.5293	-0.28955	17.728	12.6368	18.8558	0.088183	0.051367	-0.093554	NaN	NaN	NaN	NaN	NaN	NaN	NaN	NaN	NaN	NaN	NaN	NaN
3.536	1.684	-141.319	365.7752	-0.10669	0.58692	-0.30688	-34.459	9.976	22.032313	0.066113	0.057031	-0.093359	NaN	NaN	NaN	NaN	NaN	NaN	NaN	NaN	NaN	NaN	NaN	NaN
3.538	-9.9521	-160.4237	494.674	-0.3125	0.65869	-0.29395	-18.732	8.8861	35.8773	0.035156	0.05127	-0.090332	NaN	NaN	NaN	NaN	NaN	NaN	NaN	NaN	NaN	NaN	NaN	NaN
3.54	31.735	-55.063	637.03	-0.63135	0.77393	-0.27539	-29.177	35.595	23.602	0.0031252	0.052637	-0.10244	NaN	NaN	NaN	NaN	NaN	NaN	NaN	NaN	NaN	NaN	NaN	NaN
3.542	23.4962	34.9693	722.531	-0.78467	0.83838	-0.27393	-44.19	11.152	39.2857	-0.035839	0.052637	-0.10537	NaN	NaN	NaN	NaN	NaN	NaN	NaN	NaN	NaN	NaN	NaN	NaN
3.544	15.2242	53.186	771.932	-1.0693	0.96484	-0.29443	0.234999999999999	8.2238	55.258	-0.081543	0.053418	-0.10928	NaN	NaN	NaN	NaN	NaN	NaN	NaN	NaN	NaN	NaN	NaN	NaN
3.546	-38.7399	22.423	838.196	-1.2947	1.0764	-0.31445	-48.4191	19.8784	28.2192	-0.1374	0.056933	-0.10888	NaN	NaN	NaN	NaN	NaN	NaN	NaN	NaN	NaN	NaN	NaN	NaN
3.548	-1.254	32.607	945.001	-1.5449	1.1992	-0.31348	-35.455	0.4037	24.0152	-0.19434	0.061035	-0.11182	NaN	NaN	NaN	NaN	NaN	NaN	NaN	NaN	NaN	NaN	NaN	NaN
3.55	30.771	61.165	1056.586	-1.9009	1.3706	-0.28662	-36.289	30.06	12.723	-0.24229	0.067578	-0.10821	NaN	NaN	NaN	NaN	NaN	NaN	NaN	NaN	NaN	NaN	NaN	NaN
3.552	29.029	119.501	1126.105	-2.0713	1.4531	-0.25	-80.2769	33.9134	4.412	-0.28438	0.079004	-0.10742	NaN	NaN	NaN	NaN	NaN	NaN	NaN	NaN	NaN	NaN	NaN	NaN
3.554	8.592	101.691	1143.972	-2.3711	1.6152	-0.17822	-16.237	27.648	17.02263	-0.31602	0.08916	-0.10117	NaN	NaN	NaN	NaN	NaN	NaN	NaN	NaN	NaN	NaN	NaN	NaN
3.556	-11.755	58.86	1116.458	-2.5445	1.7612	-0.092775	-22.768	36.8385	-6.851	-0.33496	0.10078	-0.098242	NaN	NaN	NaN	NaN	NaN	NaN	NaN	NaN	NaN	NaN	NaN	NaN
3.558	-21.24	-3.185	1081.7481	-2.6851	1.9165	-0.033203	-56.912	10.899	-2.249	-0.34375	0.11035	-0.097168	NaN	NaN	NaN	NaN	NaN	NaN	NaN	NaN	NaN	NaN	NaN	NaN
3.56	-60.344	-82.75	1071.697	-2.7397	2.1411	0.0029297	-21.943	11.3695	17.779	-0.33721	0.11836	-0.097461	NaN	NaN	NaN	NaN	NaN	NaN	NaN	NaN	NaN	NaN	NaN	NaN
3.562	-47.385	-140.704	1080.867	-2.6719	2.2246	-0.0029297	-47.6088	31.606	21.063	-0.32959	0.1249	-0.093164	NaN	NaN	NaN	NaN	NaN	NaN	NaN	NaN	NaN	NaN	NaN	NaN
3.564	-47.92	-186.343	1086.942	-2.3301	2.2891	-0.047852	-31.943	13.124	35.292	-0.31201	0.1206	-0.090821	NaN	NaN	NaN	NaN	NaN	NaN	NaN	NaN	NaN	NaN	NaN	NaN
3.566	-70.7696	-194.149	1056.359	-1.9471	2.2229	-0.10987	-1.244	30.388	22.4716	-0.28653	0.11562	-0.08623	NaN	NaN	NaN	NaN	NaN	NaN	NaN	NaN	NaN	NaN	NaN	NaN
3.568	-91.972	-175.0333	1064.749	-1.5601	2.0923	-0.18262	-46.5469	30.1457	8.90566	-0.25781	0.10742	-0.085938	NaN	NaN	NaN	NaN	NaN	NaN	NaN	NaN	NaN	NaN	NaN	NaN
3.57	-94.3298	-169.744	1108.7057	-1.1719	1.8867	-0.25586	-3.95500000000001	21.0145	27.4181	-0.22783	0.094336	-0.083496	NaN	NaN	NaN	NaN	NaN	NaN	NaN	NaN	NaN	NaN	NaN	NaN
3.572	-48.668	-140.961	1150.988	-1.0444	1.7896	-0.27051	-22.758	71.813	9.785	-0.19521	0.083398	-0.083691	NaN	NaN	NaN	NaN	NaN	NaN	NaN	NaN	NaN	NaN	NaN	NaN
3.574	-28.635	-130.441	1187.217	-0.88037	1.6333	-0.27051	-37.398	56.4599	23.44204	-0.14444	0.069726	-0.081348	NaN	NaN	NaN	NaN	NaN	NaN	NaN	NaN	NaN	NaN	NaN	NaN
3.576	-15.464	-92.7204	1207.714	-0.79419	1.5588	-0.25219	17.194	38.2116	29.78475	-0.092772	0.05498	-0.082813	NaN	NaN	NaN	NaN	NaN	NaN	NaN	NaN	NaN	NaN	NaN	NaN
3.578	-33.889	-61.088	1235.2177	-0.70313	1.5059	-0.2334	-33.309	25.70159	2.493	-0.033691	0.038574	-0.077148	NaN	NaN	NaN	NaN	NaN	NaN	NaN	NaN	NaN	NaN	NaN	NaN
3.58	-28.3336	-75.384	1271.6214	-0.57813	1.4395	-0.24463	-10.544	-0.577999999999999	17.82761	0.023828	0.015332	-0.084961	NaN	NaN	NaN	NaN	NaN	NaN	NaN	NaN	NaN	NaN	NaN	NaN
3.582	-40.202	-108.959	1266.6212	-0.53125	1.416	-0.26855	-21.846	44.8032	13.445	0.084276	-0.013477	-0.089942	NaN	NaN	NaN	NaN	NaN	NaN	NaN	NaN	NaN	NaN	NaN	NaN
3.584	-69.504	-154.241	1245.055	-0.44092	1.3462	-0.28271	-48.72	67.3591	15.648	0.1417	-0.036524	-0.097363	NaN	NaN	NaN	NaN	NaN	NaN	NaN	NaN	NaN	NaN	NaN	NaN
3.586	-12.717	-158.98	1216.1438	-0.40455	1.3108	-0.29419	-3.193	53.519	54.438	0.19443	-0.054785	-0.10508	NaN	NaN	NaN	NaN	NaN	NaN	NaN	NaN	NaN	NaN	NaN	NaN
3.588	-35.926	-138.793	1189.977	-0.39893	1.2896	-0.29785	-27.607	74.522	21.6763	0.24072	-0.071777	-0.1084	NaN	NaN	NaN	NaN	NaN	NaN	NaN	NaN	NaN	NaN	NaN	NaN
3.59	-42.238	-132.1865	1224.437	-0.46191	1.2715	-0.30469	-56.3289	38.974	19.2799	0.27773	-0.079004	-0.11602	NaN	NaN	NaN	NaN	NaN	NaN	NaN	NaN	NaN	NaN	NaN	NaN
3.592	-22.9136	-148.1013	1300.867	-0.51514	1.2681	-0.30225	-0.138999999999999	40.737	42.5576	0.3122	-0.08125	-0.12002	NaN	NaN	NaN	NaN	NaN	NaN	NaN	NaN	NaN	NaN	NaN	NaN
3.594	14.422	-169.911	1355.6837	-0.66748	1.2798	-0.29736	-40.465	56.789	37.3007	0.33799	-0.082031	-0.12471	NaN	NaN	NaN	NaN	NaN	NaN	NaN	NaN	NaN	NaN	NaN	NaN
3.596	56.2462	-168.752	1389.487	-0.79663	1.2922	-0.2937	-35.116	27.752	69.229	0.3626	-0.076367	-0.12783	NaN	NaN	NaN	NaN	NaN	NaN	NaN	NaN	NaN	NaN	NaN	NaN
3.598	28.875	-129.637	1391.628	-0.91846	1.3228	-0.29053	-6.411	29.3146	43.3295	0.38232	-0.073242	-0.13232	NaN	NaN	NaN	NaN	NaN	NaN	NaN	NaN	NaN	NaN	NaN	NaN
3.6	34.5328	-70.0576	1397.303	-1.0503	1.3794	-0.29004	-54.94	20.054	19.90115	0.40235	-0.068359	-0.14033	NaN	NaN	NaN	NaN	NaN	NaN	NaN	NaN	NaN	NaN	NaN	NaN
3.602	30.5353	-24.567	1420.674	-1.0933	1.4028	-0.29541	-3.783	7.804	45.895	0.4169	-0.067871	-0.14756	NaN	NaN	NaN	NaN	NaN	NaN	NaN	NaN	NaN	NaN	NaN	NaN
3.604	39.971	-0.473000000000006	1417.12	-1.1641	1.4453	-0.31348	-26.788	45.569	36.6364252	0.42627	-0.062012	-0.15498	NaN	NaN	NaN	NaN	NaN	NaN	NaN	NaN	NaN	NaN	NaN	NaN
3.606	45.349	-10.607	1414.364	-1.2246	1.4712	-0.33618	-42.5081	35.6654	52.861	0.4335	-0.05752	-0.15859	NaN	NaN	NaN	NaN	NaN	NaN	NaN	NaN	NaN	NaN	NaN	NaN
3.608	58.415	-56.5142	1383.262	-1.3008	1.502	-0.3457	-2.492	29.1074	54.9021	0.43994	-0.060547	-0.16064	NaN	NaN	NaN	NaN	NaN	NaN	NaN	NaN	NaN	NaN	NaN	NaN
3.61	27.802	-94.52	1344.043	-1.4297	1.5381	-0.35938	-48.8994	27.5801	26.41	0.42881	-0.051953	-0.16582	NaN	NaN	NaN	NaN	NaN	NaN	NaN	NaN	NaN	NaN	NaN	NaN
3.612	-6.127	-99.2862	1347.732	-1.5034	1.561	-0.35791	-45.039	-14.9579	43.7787	0.41758	-0.046973	-0.1667	NaN	NaN	NaN	NaN	NaN	NaN	NaN	NaN	NaN	NaN	NaN	NaN
3.614	9.184	-80.152	1372.339	-1.6519	1.6274	-0.354	-38.467	9.3756	49.1167	0.39961	-0.033692	-0.16553	NaN	NaN	NaN	NaN	NaN	NaN	NaN	NaN	NaN	NaN	NaN	NaN
3.616	42.77314	-76.072	1372.75638	-1.7515	1.69	-0.35547	-23.34	32.9194	32.4579	0.37354	-0.01875	-0.16446	NaN	NaN	NaN	NaN	NaN	NaN	NaN	NaN	NaN	NaN	NaN	NaN
3.618	64.483	-69.1085	1349.0446	-1.8296	1.7603	-0.3667	-11.015	25.93665	35.2855	0.34082	0.0019531	-0.16064	NaN	NaN	NaN	NaN	NaN	NaN	NaN	NaN	NaN	NaN	NaN	NaN
3.62	56.056	-84.613	1332.9153	-1.9102	1.8613	-0.38477	-13.987	44.42	19.1892	0.31094	0.018262	-0.15547	NaN	NaN	NaN	NaN	NaN	NaN	NaN	NaN	NaN	NaN	NaN	NaN
3.622	24.70147	-60.579	1342.7342	-1.9429	1.9146	-0.38916	-41.98	14.7273	30.99	0.27822	0.031055	-0.15674	NaN	NaN	NaN	NaN	NaN	NaN	NaN	NaN	NaN	NaN	NaN	NaN
3.624	-0.0617999999999999	-28.238	1377.884	-2.0073	2.0005	-0.39795	-5.541	8.9017	36.7645	0.24502	0.04668	-0.15791	NaN	NaN	NaN	NaN	NaN	NaN	NaN	NaN	NaN	NaN	NaN	NaN
3.626	1.07	-5.0046	1410.101	-2.0427	2.0412	-0.4021	-43.9776	19.8303	20.5716	0.21553	0.06123	-0.16445	NaN	NaN	NaN	NaN	NaN	NaN	NaN	NaN	NaN	NaN	NaN	NaN
3.628	44.656	-4.4777	1361.185	-2.0522	2.0669	-0.396	-31.096	-11.882	28.0555	0.18848	0.076172	-0.1626	NaN	NaN	NaN	NaN	NaN	NaN	NaN	NaN	NaN	NaN	NaN	NaN
3.63	24.7544	-44.9152	1306.0331	-2.0288	2.0649	-0.40186	-14.553	4.64488	25.168	0.15683	0.09844	-0.16045	NaN	NaN	NaN	NaN	NaN	NaN	NaN	NaN	NaN	NaN	NaN	NaN
3.632	22.168	-57.5243	1280.01529	-1.9605	2.0366	-0.39404	-58.1448	10.518	5.478	0.12949	0.11797	-0.16064	NaN	NaN	NaN	NaN	NaN	NaN	NaN	NaN	NaN	NaN	NaN	NaN
3.634	2.0232	-50.08895	1276.4901	-1.8589	1.9907	-0.39697	-14.086	-5.3222	18.722071	0.10137	0.13359	-0.15518	NaN	NaN	NaN	NaN	NaN	NaN	NaN	NaN	NaN	NaN	NaN	NaN
3.636	12.1731	-11.9762	1257.1973	-1.6973	1.9199	-0.39941	-44.9542	27.8846	-8.727	0.070215	0.15615	-0.15605	NaN	NaN	NaN	NaN	NaN	NaN	NaN	NaN	NaN	NaN	NaN	NaN
3.638	12.2738	2.8712	1246.1441	-1.6108	1.8735	-0.396	-52.826	27.0641	21.904	0.041504	0.17139	-0.14307	NaN	NaN	NaN	NaN	NaN	NaN	NaN	NaN	NaN	NaN	NaN	NaN
3.64	41.89	-12.84329	1223.551	-1.4722	1.7876	-0.40088	9.221	26.6414	35.9967	0.0075194	0.18769	-0.14746	NaN	NaN	NaN	NaN	NaN	NaN	NaN	NaN	NaN	NaN	NaN	NaN
3.642	64.923	-44.413	1191.918	-1.3948	1.719	-0.39722	-35.553	43.889	3.274	-0.022364	0.20849	-0.1499	NaN	NaN	NaN	NaN	NaN	NaN	NaN	NaN	NaN	NaN	NaN	NaN
3.644	42.198	-32.5	1184.419	-1.3433	1.6606	-0.39014	-21.49	12.3258	12.3107	-0.05166	0.2249	-0.15224	NaN	NaN	NaN	NaN	NaN	NaN	NaN	NaN	NaN	NaN	NaN	NaN
3.646	40.4	-0.06028	1182.3757	-1.3145	1.6016	-0.37793	-13.302	26.932	11.67	-0.080078	0.24307	-0.15127	NaN	NaN	NaN	NaN	NaN	NaN	NaN	NaN	NaN	NaN	NaN	NaN
3.648	31.8916	37.052	1175.93	-1.3042	1.5728	-0.36963	-31.676	53.862	3.626	-0.10254	0.2627	-0.15381	NaN	NaN	NaN	NaN	NaN	NaN	NaN	NaN	NaN	NaN	NaN	NaN
3.65	42.94	55.871	1162.101	-1.2939	1.5371	-0.36035	-19.141	42.8581	36.903	-0.11816	0.28145	-0.15976	NaN	NaN	NaN	NaN	NaN	NaN	NaN	NaN	NaN	NaN	NaN	NaN
3.652	54.214	56.764	1137.7679	-1.2812	1.521	-0.34399	-12.711	67.251	24.3323	-0.12168	0.29648	-0.16533	NaN	NaN	NaN	NaN	NaN	NaN	NaN	NaN	NaN	NaN	NaN	NaN
3.654	63.994	40.2606	1116.8778	-1.2651	1.4995	-0.32861	-35.4268	14.157	58.6861	-0.11348	0.31289	-0.17119	NaN	NaN	NaN	NaN	NaN	NaN	NaN	NaN	NaN	NaN	NaN	NaN
3.656	48.832	32.23	1122.4716	-1.2437	1.4653	-0.32568	1.484	-55.169	124.343	-0.10019	0.32783	-0.17354	NaN	NaN	NaN	NaN	NaN	NaN	NaN	NaN	NaN	NaN	NaN	NaN
3.658	39.2692	52.1531	1086.605	-1.228	1.4438	-0.30713	-40.787	-41.859	171.396	-0.088867	0.3374	-0.18115	NaN	NaN	NaN	NaN	NaN	NaN	NaN	NaN	NaN	NaN	NaN	NaN
3.66	53.539	62.3409	1050.3513	-1.1914	1.4004	-0.28906	51.667	-31.3443	325.305	-0.068945	0.34346	-0.19219	NaN	NaN	NaN	NaN	NaN	NaN	NaN	NaN	NaN	NaN	NaN	NaN
3.662	50.61	50.8409	1008.61	-1.1572	1.3672	-0.2749	129.369	-37.21	509.504	-0.053613	0.35	-0.20225	NaN	NaN	NaN	NaN	NaN	NaN	NaN	NaN	NaN	NaN	NaN	NaN
3.664	36.73	18.5753	978.768	-1.1172	1.3301	-0.25977	17.607	-105.314	648.391	-0.034082	0.35195	-0.21318	NaN	NaN	NaN	NaN	NaN	NaN	NaN	NaN	NaN	NaN	NaN	NaN
3.666	24.0129	9.143	947.785	-1.061	1.2778	-0.2417	38.6794	-159.2305	751.569	-0.020118	0.35107	-0.22764	NaN	NaN	NaN	NaN	NaN	NaN	NaN	NaN	NaN	NaN	NaN	NaN
3.668	39.6514	33.385	947.9819	-1.0283	1.2559	-0.23242	126.778	-134.854	797.3796	-0.0092773	0.34814	-0.24365	NaN	NaN	NaN	NaN	NaN	NaN	NaN	NaN	NaN	NaN	NaN	NaN
3.67	-5.095	67.5988	954.006	-0.98438	1.209	-0.21143	73.898	-65.9423	915.364	-0.0075195	0.34414	-0.25332	NaN	NaN	NaN	NaN	NaN	NaN	NaN	NaN	NaN	NaN	NaN	NaN
3.672	-0.6076	115.3333	925.353	-0.94605	1.1682	-0.20044	26.1698	75.114	1015.702	-0.010156	0.33526	-0.27011	NaN	NaN	NaN	NaN	NaN	NaN	NaN	NaN	NaN	NaN	NaN	NaN
3.674	1.91706	119.959	879.19935	-0.90967	1.1333	-0.19141	-6.402	173.169	964.15	-0.030468	0.32627	-0.28809	NaN	NaN	NaN	NaN	NaN	NaN	NaN	NaN	NaN	NaN	NaN	NaN
3.676	-11.59	123.286	848.7536	-0.86865	1.0786	-0.17725	0.220999999999997	80.544	942.495	-0.086134	0.32256	-0.31719	NaN	NaN	NaN	NaN	NaN	NaN	NaN	NaN	NaN	NaN	NaN	NaN
3.678	-0.466000000000001	113.498	823.017	-0.84717	1.0532	-0.17432	-12.37	36.399	987.775	-0.18994	0.30469	-0.36084	NaN	NaN	NaN	NaN	NaN	NaN	NaN	NaN	NaN	NaN	NaN	NaN
3.68	-5.469	105.3132	807.0794	-0.82764	1.0063	-0.16162	19.322	-52.47	1071.124	-0.33701	0.25478	-0.37471	NaN	NaN	NaN	NaN	NaN	NaN	NaN	NaN	NaN	NaN	NaN	NaN
3.682	-8.803	104.6811	755.035	-0.80933	0.97193	-0.14966	73.27038	-121.8532	1139.95	-0.571	0.19629	-0.39434	NaN	NaN	NaN	NaN	NaN	NaN	NaN	NaN	NaN	NaN	NaN	NaN
3.684	-64.404	90.321	723.3794	-0.78906	0.93945	-0.13184	31.471	-53.5798	1085.753	-0.93857	0.15449	-0.41816	NaN	NaN	NaN	NaN	NaN	NaN	NaN	NaN	NaN	NaN	NaN	NaN
3.686	-22.389	74.4488	693.1691	-0.75342	0.89697	-0.11133	-66.0848	-31.327	1029.2968	-1.4089	0.14414	-0.41748	NaN	NaN	NaN	NaN	NaN	NaN	NaN	NaN	NaN	NaN	NaN	NaN
3.688	-22.785	74.5278	670.2	-0.73145	0.87305	-0.099121	12.693	-14.19	997.526	-1.9604	0.22119	-0.39404	NaN	NaN	NaN	NaN	NaN	NaN	NaN	NaN	NaN	NaN	NaN	NaN
3.69	-25.848	99.41044	650.2388	-0.68311	0.82617	-0.087402	-8.494	-0.590000000000003	1006.071	-2.5458	0.42256	-0.35205	NaN	NaN	NaN	NaN	NaN	NaN	NaN	NaN	NaN	NaN	NaN	NaN
3.692	-20.301	119.268	610.143	-0.65088	0.79101	-0.071533	-39.624	-81.198	1087.725	-3.0289	0.7043	-0.30078	NaN	NaN	NaN	NaN	NaN	NaN	NaN	NaN	NaN	NaN	NaN	NaN
3.694	-27.749	121.115	574.188	-0.61768	0.75439	-0.055664	-66.5656	-148.05707	1131.707	-3.2946	1.0215	-0.24766	NaN	NaN	NaN	NaN	NaN	NaN	NaN	NaN	NaN	NaN	NaN	NaN
3.696	-27.808	116.729	549.664	-0.57861	0.70947	-0.043945	-173.828	-216.069	1161.5084	-3.2989	1.3217	-0.18623	NaN	NaN	NaN	NaN	NaN	NaN	NaN	NaN	NaN	NaN	NaN	NaN
3.698	-53.6423	119.7622	548.6041	-0.55713	0.68994	-0.037109	-157.03	-190.619	1207.032	-3.1401	1.5532	-0.15088	NaN	NaN	NaN	NaN	NaN	NaN	NaN	NaN	NaN	NaN	NaN	NaN
3.7	-5.488	115.4536	548.753	-0.52148	0.64844	-0.018555	-54.03	-76.0727	1169.442	-2.9672	1.6905	-0.18418	NaN	NaN	NaN	NaN	NaN	NaN	NaN	NaN	NaN	NaN	NaN	NaN
3.702	5.674	113.024	520.49265	-0.49682	0.62109	-0.0070802	5.47499999999999	-85.414	1153.3053	-2.8094	1.723	-0.25078	NaN	NaN	NaN	NaN	NaN	NaN	NaN	NaN	NaN	NaN	NaN	NaN
3.704	-3.08	127.6112	478.0471	-0.46631	0.59424	0.0024414	40.556	-100.619	1196.319	-2.5922	1.609	-0.28516	NaN	NaN	NaN	NaN	NaN	NaN	NaN	NaN	NaN	NaN	NaN	NaN
3.706	-17.555	132.8619	446.0212	-0.44092	0.55713	0.019531	-3.302	-142.859	1246.284	-2.3104	1.4377	-0.32813	NaN	NaN	NaN	NaN	NaN	NaN	NaN	NaN	NaN	NaN	NaN	NaN
3.708	-5.85599999999999	141.487	425.3769	-0.42139	0.54346	0.029297	-30.1593	-226.538	1373.8643	-2.0093	1.2739	-0.37842	NaN	NaN	NaN	NaN	NaN	NaN	NaN	NaN	NaN	NaN	NaN	NaN
3.71	-2.746	135.746	409.4525	-0.38135	0.51318	0.044434	23.491	-198.733	1456.709	-1.7969	1.1977	-0.41953	NaN	NaN	NaN	NaN	NaN	NaN	NaN	NaN	NaN	NaN	NaN	NaN
3.712	-18.561	114.422	377.8914	-0.34863	0.48877	0.057617	3.0704	-169.293	1440.742	-1.6891	1.184	-0.42403	NaN	NaN	NaN	NaN	NaN	NaN	NaN	NaN	NaN	NaN	NaN	NaN
3.714	-8.559	81.5892	351.7122	-0.31494	0.46729	0.067871	-33.767	-167.409	1405.0958	-1.675	1.1918	-0.39043	NaN	NaN	NaN	NaN	NaN	NaN	NaN	NaN	NaN	NaN	NaN	NaN
3.716	-1.899	73.451	325.707	-0.27686	0.43115	0.077637	-4.612	-110.307	1309.838	-1.6602	1.2159	-0.34912	NaN	NaN	NaN	NaN	NaN	NaN	NaN	NaN	NaN	NaN	NaN	NaN
3.718	-19.177	91.4455	311.555	-0.25146	0.41162	0.081055	-33.288	-94.503	1305.115	-1.5737	1.2114	-0.33105	NaN	NaN	NaN	NaN	NaN	NaN	NaN	NaN	NaN	NaN	NaN	NaN
3.72	-20.287	115.4032	303.0203	-0.20654	0.37354	0.084473	28.511	-34.703	1399.7444	-1.4152	1.1646	-0.3418	NaN	NaN	NaN	NaN	NaN	NaN	NaN	NaN	NaN	NaN	NaN	NaN
3.722	-29.483	120.8598	302.542	-0.18384	0.34961	0.08667	38.081	-13.041	1434.757	-1.296	1.106	-0.37403	NaN	NaN	NaN	NaN	NaN	NaN	NaN	NaN	NaN	NaN	NaN	NaN
3.724	-22.081	115.3207	280.583	-0.16504	0.32861	0.095703	62.443	-86.159	1476.505	-1.2397	1.0372	-0.37832	NaN	NaN	NaN	NaN	NaN	NaN	NaN	NaN	NaN	NaN	NaN	NaN
3.726	-27.873	126.6202	242.396	-0.13818	0.31201	0.10205	110.888	-63.4905	1467.409	-1.244	0.99406	-0.39014	NaN	NaN	NaN	NaN	NaN	NaN	NaN	NaN	NaN	NaN	NaN	NaN
3.728	-9.367	126.621	219.7343	-0.12842	0.30078	0.11084	82.61	-63.72	1395.464	-1.2773	0.96289	-0.39844	NaN	NaN	NaN	NaN	NaN	NaN	NaN	NaN	NaN	NaN	NaN	NaN
3.73	-37.061	129.412	218.16778	-0.10449	0.27881	0.10791	109.87	-22.528	1386.243	-1.3149	0.94014	-0.41368	NaN	NaN	NaN	NaN	NaN	NaN	NaN	NaN	NaN	NaN	NaN	NaN
3.732	-24.352	119.9567	209.6334	-0.0896	0.26538	0.11817	121.139	53.9814	1382.8438	-1.3582	0.92891	-0.42227	NaN	NaN	NaN	NaN	NaN	NaN	NaN	NaN	NaN	NaN	NaN	NaN
3.734	-44.948	91.7366	176.8862	-0.07373	0.24609	0.11914	28.1337	-19.057	1436.177	-1.4106	0.92344	-0.42344	NaN	NaN	NaN	NaN	NaN	NaN	NaN	NaN	NaN	NaN	NaN	NaN
3.736	-52.256	80.9653	149.728	-0.047852	0.23096	0.12695	36.296	-65.084	1495.447	-1.4857	0.93252	-0.42588	NaN	NaN	NaN	NaN	NaN	NaN	NaN	NaN	NaN	NaN	NaN	NaN
3.738	-47.1595	83.1928	144.028	-0.036621	0.21436	0.12695	-11.097	-104.3072	1465.2615	-1.5781	0.94434	-0.42383	NaN	NaN	NaN	NaN	NaN	NaN	NaN	NaN	NaN	NaN	NaN	NaN
3.74	-32.539	90.9691	133.2959	-0.01709	0.1958	0.13525	3.0301	-130.309	1460.7214	-1.6899	0.95899	-0.42187	NaN	NaN	NaN	NaN	NaN	NaN	NaN	NaN	NaN	NaN	NaN	NaN
3.742	-49.6942	98.411	110.1792	-0.0029297	0.1836	0.14258	36.16	-51.4972	1434.4568	-1.8136	0.98252	-0.41338	NaN	NaN	NaN	NaN	NaN	NaN	NaN	NaN	NaN	NaN	NaN	NaN
3.744	-61.127	102.029	105.4469	0.010254	0.16748	0.14307	5.854	-25.05	1383.8211	-1.9452	1.0149	-0.40674	NaN	NaN	NaN	NaN	NaN	NaN	NaN	NaN	NaN	NaN	NaN	NaN
3.746	-32.664	91.78	94.3109	0.026367	0.14893	0.146	15.8476	-12.162	1392.9212	-2.0573	1.0548	-0.40303	NaN	NaN	NaN	NaN	NaN	NaN	NaN	NaN	NaN	NaN	NaN	NaN
3.748	-45.8212	87.00431	68.81	0.037109	0.13965	0.14453	49.737	21.6717	1385.246	-2.1406	1.0957	-0.39063	NaN	NaN	NaN	NaN	NaN	NaN	NaN	NaN	NaN	NaN	NaN	NaN
3.75	-22.33	72.01	71.2974	0.056641	0.12158	0.14844	32.853	-22.999	1435.9946	-2.1876	1.1351	-0.39404	NaN	NaN	NaN	NaN	NaN	NaN	NaN	NaN	NaN	NaN	NaN	NaN
3.752	-25.317	57.276	87.7736	0.072265	0.10645	0.1499	82.538	21.046	1469.415	-2.2059	1.1708	-0.40615	NaN	NaN	NaN	NaN	NaN	NaN	NaN	NaN	NaN	NaN	NaN	NaN
3.754	-19.06	52.6174	90.2686	0.089355	0.09668	0.1543	62.467	80.842	1412.599	-2.1954	1.1938	-0.43233	NaN	NaN	NaN	NaN	NaN	NaN	NaN	NaN	NaN	NaN	NaN	NaN
3.756	-20.458	60.7041	70.4426	0.10791	0.080566	0.15088	-19.7672	108.3188	1378.2412	-2.1809	1.1989	-0.46065	NaN	NaN	NaN	NaN	NaN	NaN	NaN	NaN	NaN	NaN	NaN	NaN
3.758	-28.996	76.2851	39.853	0.11816	0.071777	0.1543	-5.7481	162.012	1335.341	-2.1895	1.1934	-0.49219	NaN	NaN	NaN	NaN	NaN	NaN	NaN	NaN	NaN	NaN	NaN	NaN
3.76	-13.642	61.257	49.91875	0.13135	0.057129	0.14795	-18.9459	126.355	1300.467	-2.2349	1.2003	-0.50713	NaN	NaN	NaN	NaN	NaN	NaN	NaN	NaN	NaN	NaN	NaN	NaN
3.762	-20.146	40.284	41.7885	0.14209	0.049804	0.1416	31.034	68.78	1331.641	-2.2984	1.2172	-0.50976	NaN	NaN	NaN	NaN	NaN	NaN	NaN	NaN	NaN	NaN	NaN	NaN
3.764	-28.188	35.328	36.4451	0.14355	0.04834	0.13867	85.912	76.362	1328.258	-2.3531	1.25	-0.51758	NaN	NaN	NaN	NaN	NaN	NaN	NaN	NaN	NaN	NaN	NaN	NaN
3.766	-25.138	16.8198	31.5696	0.14648	0.053711	0.13867	28.05	43.8973	1319.9979	-2.3813	1.2867	-0.50722	NaN	NaN	NaN	NaN	NaN	NaN	NaN	NaN	NaN	NaN	NaN	NaN
3.768	-6.36	8.0714	41.839	0.13623	0.057129	0.1416	46.3767	86.2286	1288.554	-2.373	1.3164	-0.49219	NaN	NaN	NaN	NaN	NaN	NaN	NaN	NaN	NaN	NaN	NaN	NaN
3.77	-1.006	11.1039	51.8242	0.12158	0.069336	0.146	-0.00399999999999956	105.62525	1228.612	-2.3123	1.3302	-0.47324	NaN	NaN	NaN	NaN	NaN	NaN	NaN	NaN	NaN	NaN	NaN	NaN
3.772	-14.338	18.037	35.90876	0.10547	0.068359	0.14551	37.81	79.213	1226.3372	-2.2199	1.3301	-0.46191	NaN	NaN	NaN	NaN	NaN	NaN	NaN	NaN	NaN	NaN	NaN	NaN
3.774	17.25	30.5564	22.33199	0.092773	0.069824	0.15039	129.403	105.915	1225.977	-2.0984	1.3195	-0.45488	NaN	NaN	NaN	NaN	NaN	NaN	NaN	NaN	NaN	NaN	NaN	NaN
3.776	-3.655	37.2008	32.6059	0.08252	0.072266	0.15088	71.455	104.969	1200.786	-1.9754	1.2938	-0.4459	NaN	NaN	NaN	NaN	NaN	NaN	NaN	NaN	NaN	NaN	NaN	NaN
3.778	-16.886	44.828	40.102	0.07959	0.069824	0.15088	41.7106	104.058	1211.707	-1.8633	1.2578	-0.44238	NaN	NaN	NaN	NaN	NaN	NaN	NaN	NaN	NaN	NaN	NaN	NaN
3.78	-19.057	34.896	32.5769	0.081055	0.066406	0.15332	29.9269	132.9132	1171.285	-1.7846	1.2256	-0.43496	NaN	NaN	NaN	NaN	NaN	NaN	NaN	NaN	NaN	NaN	NaN	NaN
3.782	-15.17	19.113	32.0993	0.087402	0.059082	0.15283	1.18923	124.193	1111.389	-1.7332	1.1895	-0.42539	NaN	NaN	NaN	NaN	NaN	NaN	NaN	NaN	NaN	NaN	NaN	NaN
3.784	-20.26	13.0349	27.8142	0.096191	0.054199	0.15479	62.3236	149.3823	1076.9882	-1.6957	1.1723	-0.41328	NaN	NaN	NaN	NaN	NaN	NaN	NaN	NaN	NaN	NaN	NaN	NaN
3.786	-34.025	25.0859	28.12271	0.12207	0.046875	0.15576	42.103	160.77	997.715	-1.668	1.1567	-0.40098	NaN	NaN	NaN	NaN	NaN	NaN	NaN	NaN	NaN	NaN	NaN	NaN
3.788	-44.236	15.3415	20.541	0.13892	0.04541	0.15283	0.0790000000000006	134.87	957.424	-1.6538	1.144	-0.38818	NaN	NaN	NaN	NaN	NaN	NaN	NaN	NaN	NaN	NaN	NaN	NaN
3.79	-44.581	14.1377	5.135	0.15918	0.041992	0.15088	20.9027	170.187	948.981	-1.6453	1.1309	-0.37734	NaN	NaN	NaN	NaN	NaN	NaN	NaN	NaN	NaN	NaN	NaN	NaN
3.792	-22.6	6.16918	20.824	0.18896	0.044922	0.14844	-20.57238	175.912	906.094	-1.6413	1.118	-0.36299	NaN	NaN	NaN	NaN	NaN	NaN	NaN	NaN	NaN	NaN	NaN	NaN
3.794	-26.596	21.9641	16.4533	0.19971	0.052246	0.14893	-4.6261	142.884	888.26	-1.6304	1.104	-0.35205	NaN	NaN	NaN	NaN	NaN	NaN	NaN	NaN	NaN	NaN	NaN	NaN
3.796	-22.051	15.78035	19.2494	0.23486	0.063477	0.14502	40.369	162.412	821.0255	-1.6084	1.0826	-0.3377	NaN	NaN	NaN	NaN	NaN	NaN	NaN	NaN	NaN	NaN	NaN	NaN
3.798	-34.645	25.9787	22.6451	0.26075	0.071777	0.13916	-24.057	146.805	746.458	-1.5645	1.0625	-0.32617	NaN	NaN	NaN	NaN	NaN	NaN	NaN	NaN	NaN	NaN	NaN	NaN
3.8	-31.835	26.2216	22.8026	0.28369	0.074707	0.12939	11.173	173.175	725.706	-1.5045	1.0435	-0.31533	NaN	NaN	NaN	NaN	NaN	NaN	NaN	NaN	NaN	NaN	NaN	NaN
3.802	-29.951	35.3306	12.4357	0.3125	0.074219	0.11621	-33.04	217.4737	714.78	-1.4354	1.0154	-0.30263	NaN	NaN	NaN	NaN	NaN	NaN	NaN	NaN	NaN	NaN	NaN	NaN
3.804	-34.6591	25.8577	24.27222	0.3252	0.077637	0.10938	-30.91043	194.3187	718.35	-1.3667	0.98721	-0.30107	NaN	NaN	NaN	NaN	NaN	NaN	NaN	NaN	NaN	NaN	NaN	NaN
3.806	-34.227	19.514	50.6117	0.34277	0.083984	0.095215	1.627	174.645	679.287	-1.2967	0.95703	-0.28554	NaN	NaN	NaN	NaN	NaN	NaN	NaN	NaN	NaN	NaN	NaN	NaN
3.808	-27.282	25.3704	31.9625	0.3501	0.092041	0.092285	-63.627	151.203	591.3402	-1.2241	0.92334	-0.2749	NaN	NaN	NaN	NaN	NaN	NaN	NaN	NaN	NaN	NaN	NaN	NaN
3.81	-20.084	18.8736	24.5025	0.35889	0.10449	0.087891	-46.546	136.8887	547.447	-1.1648	0.88438	-0.26172	NaN	NaN	NaN	NaN	NaN	NaN	NaN	NaN	NaN	NaN	NaN	NaN
3.812	-26.182	18.273	2.1162	0.35596	0.12598	0.084473	-58.8184	186.343	498.846	-1.1099	0.84815	-0.24571	NaN	NaN	NaN	NaN	NaN	NaN	NaN	NaN	NaN	NaN	NaN	NaN
3.814	-15.824	19.1201	7.4756	0.35205	0.13672	0.07959	-67.4719	185.9303	467.145	-1.0564	0.80713	-0.23125	NaN	NaN	NaN	NaN	NaN	NaN	NaN	NaN	NaN	NaN	NaN	NaN
3.816	1.45200000000001	25.8465	12.4201	0.34424	0.15771	0.077148	-4.799	146.778	424.913	-1.0147	0.77021	-0.20625	NaN	NaN	NaN	NaN	NaN	NaN	NaN	NaN	NaN	NaN	NaN	NaN
3.818	-17.659	34.4016	-2.976	0.3313	0.17041	0.075439	-16.766	146.699	395.2677	-0.97803	0.73389	-0.18164	NaN	NaN	NaN	NaN	NaN	NaN	NaN	NaN	NaN	NaN	NaN	NaN
3.82	-12.797	21.3071	19.7458	0.31348	0.18555	0.077637	-34.55	118.701	376.68076	-0.93799	0.70069	-0.16172	NaN	NaN	NaN	NaN	NaN	NaN	NaN	NaN	NaN	NaN	NaN	NaN
3.822	-5.678	25.7456	34.6471	0.29199	0.19971	0.081055	7.707	167.163	352.648	-0.88662	0.6708	-0.13623	NaN	NaN	NaN	NaN	NaN	NaN	NaN	NaN	NaN	NaN	NaN	NaN
3.824	3.28	32.9377	41.156	0.27979	0.20898	0.081055	-29.372	227.015	284.318	-0.82608	0.64228	-0.11045	NaN	NaN	NaN	NaN	NaN	NaN	NaN	NaN	NaN	NaN	NaN	NaN
3.826	-13.8	49.325	24.48467	0.25293	0.22461	0.083008	-9.759	196.516	274.611	-0.75547	0.60528	-0.092578	NaN	NaN	NaN	NaN	NaN	NaN	NaN	NaN	NaN	NaN	NaN	NaN
3.828	0.721999999999994	38.0191	24.8767	0.23926	0.23364	0.081787	2.78700000000001	202.569	248.3707	-0.6748	0.57275	-0.071289	NaN	NaN	NaN	NaN	NaN	NaN	NaN	NaN	NaN	NaN	NaN	NaN
3.83	-16.971	25.9189	31.9657	0.2207	0.2417	0.083496	-58.0016	160.2948	217.7371	-0.59082	0.53476	-0.056347	NaN	NaN	NaN	NaN	NaN	NaN	NaN	NaN	NaN	NaN	NaN	NaN
3.832	-11.317	27.729	27.9704	0.20508	0.25146	0.08252	-4.936	120.4065	222.7984	-0.50947	0.49091	-0.046191	NaN	NaN	NaN	NaN	NaN	NaN	NaN	NaN	NaN	NaN	NaN	NaN
3.834	-15.999	19.27617	13.8289	0.19727	0.26074	0.086914	-39.72182	148.727	208.4409	-0.429	0.44638	-0.034081	NaN	NaN	NaN	NaN	NaN	NaN	NaN	NaN	NaN	NaN	NaN	NaN
3.836	-18.209	10.2255	17.2603	0.17383	0.27588	0.087402	-43.378	126.9152	199.441	-0.35595	0.39199	-0.021972	NaN	NaN	NaN	NaN	NaN	NaN	NaN	NaN	NaN	NaN	NaN	NaN
3.838	-9.889	18.4338	14.8129	0.15405	0.28076	0.091064	-0.963999999999999	123.376	169.453	-0.29102	0.35254	-0.012207	NaN	NaN	NaN	NaN	NaN	NaN	NaN	NaN	NaN	NaN	NaN	NaN
3.84	-42.0527	33.4624	8.526	0.13867	0.28809	0.09668	-47.358	130.29	112.5653	-0.23467	0.30001	-0.0032235	NaN	NaN	NaN	NaN	NaN	NaN	NaN	NaN	NaN	NaN	NaN	NaN
3.842	-37.52	39.4175	15.667	0.11768	0.30029	0.1084	-15.272	79.5838	83.597	-0.18566	0.25734	0.0041959	NaN	NaN	NaN	NaN	NaN	NaN	NaN	NaN	NaN	NaN	NaN	NaN
3.844	-30.09	39.2101	4.753	0.11084	0.30518	0.11035	-5.461	76.8964	113.5102	-0.1423	0.21788	0.01045	NaN	NaN	NaN	NaN	NaN	NaN	NaN	NaN	NaN	NaN	NaN	NaN
3.846	-11.297	34.783	24.91204	0.092773	0.30225	0.11914	-27.122	63.592	127.069	-0.092197	0.17784	0.0082002	NaN	NaN	NaN	NaN	NaN	NaN	NaN	NaN	NaN	NaN	NaN	NaN
3.848	-33.583	25.6368	25.44515	0.079345	0.30176	0.12745	-5.122	31.023	126.526	-0.04834	0.14795	0.011719	NaN	NaN	NaN	NaN	NaN	NaN	NaN	NaN	NaN	NaN	NaN	NaN
3.85	-50.9799	25.14597	35.7158	0.071777	0.29883	0.1377	-16.357	62.9524	77.3368	-0.017954	0.12694	0.01211	NaN	NaN	NaN	NaN	NaN	NaN	NaN	NaN	NaN	NaN	NaN	NaN
3.852	-30.707	42.94	44.3946	0.068359	0.28857	0.146	-63.0655	47.744	54.3604	0.012231	0.1034	0.015825	NaN	NaN	NaN	NaN	NaN	NaN	NaN	NaN	NaN	NaN	NaN	NaN
3.854	-22.727	58.562	32.4382	0.064453	0.28564	0.15918	-35.158	48.8902	68.3493	0.035275	0.083083	0.025601	NaN	NaN	NaN	NaN	NaN	NaN	NaN	NaN	NaN	NaN	NaN	NaN
3.856	-27.752	48.5973	25.2083	0.057617	0.27197	0.15625	-59.171	87.799	43.7551	0.04923	0.064533	0.035359	NaN	NaN	NaN	NaN	NaN	NaN	NaN	NaN	NaN	NaN	NaN	NaN
3.858	-37.247	24.6708	13.8014	0.048584	0.26684	0.16748	-44.579	41.3285	48.297	0.062988	0.043945	0.043945	NaN	NaN	NaN	NaN	NaN	NaN	NaN	NaN	NaN	NaN	NaN	NaN
3.86	-24.613	8.8952	24.1348	0.036133	0.26367	0.17676	-20.6017	45.564	53.5561	0.070681	0.028256	0.050965	NaN	NaN	NaN	NaN	NaN	NaN	NaN	NaN	NaN	NaN	NaN	NaN
3.862	-28.831	9.03	16.6	0.013672	0.26563	0.19141	-54.881	33.7804	37.382	0.070395	0.0090172	0.057281	NaN	NaN	NaN	NaN	NaN	NaN	NaN	NaN	NaN	NaN	NaN	NaN
3.864	-36.379	12.898	42.645	0.0058594	0.26807	0.2085	-15.298	-28.4924	43.771	0.073141	-0.0053927	0.061253	NaN	NaN	NaN	NaN	NaN	NaN	NaN	NaN	NaN	NaN	NaN	NaN
3.866	-24.232	-3.59685	85.4403	-0.0058594	0.26904	0.22266	-55.854	12.3739	7.731	0.074219	-0.027769	0.06845	NaN	NaN	NaN	NaN	NaN	NaN	NaN	NaN	NaN	NaN	NaN	NaN
3.868	-18.305	-30.6358	133.2816	-0.0068359	0.26661	0.23584	-33.814	-0.522000000000002	-5.1799	0.073242	-0.047363	0.071289	NaN	NaN	NaN	NaN	NaN	NaN	NaN	NaN	NaN	NaN	NaN	NaN
3.87	-3.675	-18.97	191.9211	-0.0097656	0.2627	0.23633	2.996	1.20729	2.5103	0.067931	-0.06819	0.07167	NaN	NaN	NaN	NaN	NaN	NaN	NaN	NaN	NaN	NaN	NaN	NaN
3.872	-34.408	14.5547	261.951	-0.0078125	0.25244	0.21045	-56.9369	46.955	0.0829999999999984	0.06062	-0.084495	0.069289	NaN	NaN	NaN	NaN	NaN	NaN	NaN	NaN	NaN	NaN	NaN	NaN
3.874	-55.367	-19.54	345.0636	-0.016113	0.25732	0.18018	-24.6365	0.6447	29.4372	0.048017	-0.098494	0.068591	NaN	NaN	NaN	NaN	NaN	NaN	NaN	NaN	NaN	NaN	NaN	NaN
3.876	-101.419	-106.862	354.0987	-0.069336	0.28223	0.099609	1.494	18.7579	35.028	0.02458	-0.10895	0.063919	NaN	NaN	NaN	NaN	NaN	NaN	NaN	NaN	NaN	NaN	NaN	NaN
3.878	-58.242	-148.922	320.7583	-0.14941	0.32544	0.058105	-52.6594	21.561	32.7764	-0.0078125	-0.11523	0.064453	NaN	NaN	NaN	NaN	NaN	NaN	NaN	NaN	NaN	NaN	NaN	NaN
3.88	-49.325	-142.6851	345.418	-0.2749	0.38184	0.024414	-25.205	-9.2528	41.542	-0.04965	-0.11131	0.075513	NaN	NaN	NaN	NaN	NaN	NaN	NaN	NaN	NaN	NaN	NaN	NaN
3.882	-78.936	-92.0911	428.1071	-0.48291	0.47168	0.04248	-43.541	44.463	13.7437	-0.095729	-0.098774	0.080284	NaN	NaN	NaN	NaN	NaN	NaN	NaN	NaN	NaN	NaN	NaN	NaN
3.884	-103.64	-33.1139	496.199	-0.57617	0.51172	0.068359	-49.401	27.718	6.3	-0.14699	-0.079788	0.090856	NaN	NaN	NaN	NaN	NaN	NaN	NaN	NaN	NaN	NaN	NaN	NaN
3.886	-121.564	21.837	527.24	-0.72314	0.61377	0.097656	-1.111	14.5351	27.576	-0.1974	-0.061458	0.10394	NaN	NaN	NaN	NaN	NaN	NaN	NaN	NaN	NaN	NaN	NaN	NaN
3.888	-81.063	40.346	593.685	-0.78491	0.68359	0.087402	-28.6579	65.793	10.578	-0.24219	-0.033203	0.12061	NaN	NaN	NaN	NaN	NaN	NaN	NaN	NaN	NaN	NaN	NaN	NaN
3.89	-37.471	50.878	716.842	-0.82715	0.75781	0.053223	-22.191	10.626	30.8202	-0.27812	-0.012232	0.13484	NaN	NaN	NaN	NaN	NaN	NaN	NaN	NaN	NaN	NaN	NaN	NaN
3.892	-9.877	78.95	865.2018	-0.90186	0.85205	-0.03125	-15.533	30.70346	12.411	-0.29421	0.012801	0.15584	NaN	NaN	NaN	NaN	NaN	NaN	NaN	NaN	NaN	NaN	NaN	NaN
3.894	-26.612	116.521	983.333	-0.96289	0.89844	-0.07373	-38.692	42.4845	-23.663	-0.2958	0.036337	0.16943	NaN	NaN	NaN	NaN	NaN	NaN	NaN	NaN	NaN	NaN	NaN	NaN
3.896	-35.449	137.226	1051.318	-1.1401	1.0005	-0.15234	-19.24	15.0935	9.9603	-0.28015	0.047635	0.17746	NaN	NaN	NaN	NaN	NaN	NaN	NaN	NaN	NaN	NaN	NaN	NaN
3.898	-44.8288	143.684	1088.989	-1.3237	1.0835	-0.1831	-25.782	71.633	20.0836	-0.24805	0.050781	0.18262	NaN	NaN	NaN	NaN	NaN	NaN	NaN	NaN	NaN	NaN	NaN	NaN
3.9	-55.719	96.3292	1110.5394	-1.5527	1.1836	-0.18457	-1.349	40.5491	33.9046	-0.20341	0.05126	0.19029	NaN	NaN	NaN	NaN	NaN	NaN	NaN	NaN	NaN	NaN	NaN	NaN
3.902	-62.9332	28.542	1114.918	-1.8965	1.3408	-0.13379	11.365	15.1043	35.953	-0.14787	0.04771	0.19306	NaN	NaN	NaN	NaN	NaN	NaN	NaN	NaN	NaN	NaN	NaN	NaN
3.904	-89.5463	-45.9947	1132.041	-2.0625	1.4277	-0.09082	-72.392	67.767	10.2686	-0.088547	0.044813	0.19334	NaN	NaN	NaN	NaN	NaN	NaN	NaN	NaN	NaN	NaN	NaN	NaN
3.906	-90.5112	-91.318	1151.3303	-2.3125	1.582	-0.0087891	-38.179	37.9909	40.424	-0.02893	0.040293	0.1948	NaN	NaN	NaN	NaN	NaN	NaN	NaN	NaN	NaN	NaN	NaN	NaN
3.908	-80.558	-138.834	1151.0397	-2.4019	1.6851	0.043457	3.96700000000001	78.263	45.6565	0.025391	0.037598	0.19482	NaN	NaN	NaN	NaN	NaN	NaN	NaN	NaN	NaN	NaN	NaN	NaN
3.91	-35.91	-141.841	1136.2959	-2.4136	1.7778	0.085938	-57.956	66.0652	28.57	0.075369	0.034305	0.18975	NaN	NaN	NaN	NaN	NaN	NaN	NaN	NaN	NaN	NaN	NaN	NaN
3.912	18.8678	-178.277	1118.408	-2.3223	1.8926	0.12891	-11.259	-2.315	29.138	0.12401	0.03418	0.19291	NaN	NaN	NaN	NaN	NaN	NaN	NaN	NaN	NaN	NaN	NaN	NaN
3.914	53.5387	-194.275	1125.498	-2.1902	1.9495	0.15601	-21.112	23.0919	4.918	0.16931	0.030368	0.19038	NaN	NaN	NaN	NaN	NaN	NaN	NaN	NaN	NaN	NaN	NaN	NaN
3.916	45.08	-173.562	1172.095	-2.0464	1.9556	0.18164	-44.53173	15.6456	24.2431	0.21611	0.024438	0.1889	NaN	NaN	NaN	NaN	NaN	NaN	NaN	NaN	NaN	NaN	NaN	NaN
3.918	-4.42100000000001	-104.543	1238.093	-1.8706	1.8735	0.19824	-7.668	38.46	32.604	0.25879	0.015137	0.18555	NaN	NaN	NaN	NaN	NaN	NaN	NaN	NaN	NaN	NaN	NaN	NaN
3.92	28.625	-53.65001	1292.303	-1.7983	1.8032	0.21094	-54.834	91.753	19.7566	0.30738	0.011013	0.17771	NaN	NaN	NaN	NaN	NaN	NaN	NaN	NaN	NaN	NaN	NaN	NaN
3.922	22.379	-26.332	1296.59	-1.6602	1.6523	0.23682	-23.552	33.6643	38.527	0.35086	0.0021706	0.17137	NaN	NaN	NaN	NaN	NaN	NaN	NaN	NaN	NaN	NaN	NaN	NaN
3.924	18.507	-13.044	1268.485	-1.5722	1.5341	0.25513	-12.054	30.315	38.012	0.38396	0.0056691	0.16707	NaN	NaN	NaN	NaN	NaN	NaN	NaN	NaN	NaN	NaN	NaN	NaN
3.926	3.353	-13.028	1243.7593	-1.4878	1.4399	0.26758	-60.4613	51.0624	41.833	0.4228	0.014071	0.16083	NaN	NaN	NaN	NaN	NaN	NaN	NaN	NaN	NaN	NaN	NaN	NaN
3.928	-31.114	-41.486	1218.0528	-1.373	1.3477	0.27734	-16.265	11.8269	76.686	0.44971	0.016602	0.15479	NaN	NaN	NaN	NaN	NaN	NaN	NaN	NaN	NaN	NaN	NaN	NaN
3.93	-60.125	-61.93	1204.009	-1.3081	1.3032	0.26465	-32.474	58.397	58.9749	0.47254	0.033585	0.14922	NaN	NaN	NaN	NaN	NaN	NaN	NaN	NaN	NaN	NaN	NaN	NaN
3.932	-76.326	-104.983	1198.632	-1.1733	1.1958	0.20703	-31.823	31.1381	46.101	0.47968	0.044421	0.14551	NaN	NaN	NaN	NaN	NaN	NaN	NaN	NaN	NaN	NaN	NaN	NaN
3.934	-25.636	-135.0269	1216.568	-1.0869	1.0908	0.16015	-30.207	-1.8127	27.2126	0.48126	0.060042	0.14394	NaN	NaN	NaN	NaN	NaN	NaN	NaN	NaN	NaN	NaN	NaN	NaN
3.936	-10.966	-174.437	1252.867	-1.0205	0.99414	0.125	-49.028	31.7548	-0.0870999999999995	0.47335	0.075872	0.14795	NaN	NaN	NaN	NaN	NaN	NaN	NaN	NaN	NaN	NaN	NaN	NaN
3.938	8.025	-178.609	1308.063	-0.9917	0.92236	0.097656	-22.279	-8.2571	37.9534	0.44775	0.093262	0.14063	NaN	NaN	NaN	NaN	NaN	NaN	NaN	NaN	NaN	NaN	NaN	NaN
3.94	-31.714	-160.007	1337.909	-0.99951	0.90576	0.089355	-4.097	34.7263	64.0919	0.41933	0.10401	0.13633	NaN	NaN	NaN	NaN	NaN	NaN	NaN	NaN	NaN	NaN	NaN	NaN
3.942	-62.079	-101.209	1355.1224	-1.0308	0.92041	0.083008	-52.7675	40.9444	50.7236	0.38124	0.11348	0.13623	NaN	NaN	NaN	NaN	NaN	NaN	NaN	NaN	NaN	NaN	NaN	NaN
3.944	-90.3029	-68.6183	1380.098	-1.0559	0.9602	0.07544	5.246	-23.4783	58.6153	0.34296	0.12793	0.13193	NaN	NaN	NaN	NaN	NaN	NaN	NaN	NaN	NaN	NaN	NaN	NaN
3.946	-122.6454	-66.893	1404.782	-1.0894	1.0132	0.071777	-30.168	10.31973	29.478	0.30146	0.14023	0.12656	NaN	NaN	NaN	NaN	NaN	NaN	NaN	NaN	NaN	NaN	NaN	NaN
3.948	-128.406661	-89.365	1415.469	-1.1543	1.1016	0.075684	-44.793	-0.129	13.09	0.26416	0.1626	0.12549	NaN	NaN	NaN	NaN	NaN	NaN	NaN	NaN	NaN	NaN	NaN	NaN
3.95	-129.056	-101.8158	1407.602	-1.2046	1.1509	0.07666	-15.317	4.6636	35.4714	0.22324	0.18066	0.12675	NaN	NaN	NaN	NaN	NaN	NaN	NaN	NaN	NaN	NaN	NaN	NaN
3.952	-141.4544	-91.69907	1382.1967	-1.3218	1.2407	0.10107	-43.538	67.095	23.9031	0.18769	0.19892	0.12627	NaN	NaN	NaN	NaN	NaN	NaN	NaN	NaN	NaN	NaN	NaN	NaN
3.954	-158.611	-76.2176	1354.83	-1.3977	1.2928	0.1189	-4.26	16.9738	38.485	0.15489	0.21807	0.12939	NaN	NaN	NaN	NaN	NaN	NaN	NaN	NaN	NaN	NaN	NaN	NaN
3.956	-154.558	-59.048	1327.87	-1.4663	1.3462	0.13574	-3.439	10.85795	23.9724	0.12422	0.23828	0.13262	NaN	NaN	NaN	NaN	NaN	NaN	NaN	NaN	NaN	NaN	NaN	NaN
3.958	-127.12602	-60.264	1331.519	-1.5449	1.416	0.1377	-39.576	18.0221	12.824	0.094727	0.25244	0.14307	NaN	NaN	NaN	NaN	NaN	NaN	NaN	NaN	NaN	NaN	NaN	NaN
3.96	-123.042	-65.3503	1331.46	-1.5859	1.4531	0.14355	-1.689	-14.9644	24.34	0.069433	0.26211	0.15674	NaN	NaN	NaN	NaN	NaN	NaN	NaN	NaN	NaN	NaN	NaN	NaN
3.962	-63.164	-79.261	1329.019	-1.6655	1.52	0.13477	-23.133	43.0732	16.348	0.039941	0.2668	0.1666	NaN	NaN	NaN	NaN	NaN	NaN	NaN	NaN	NaN	NaN	NaN	NaN
3.964	-84.511	-68.899	1352.451	-1.7263	1.5618	0.11865	-33.865	29.6451	6.062	0.017676	0.26406	0.17598	NaN	NaN	NaN	NaN	NaN	NaN	NaN	NaN	NaN	NaN	NaN	NaN
3.966	-88.4601	-48.233	1361.3855	-1.8022	1.6118	0.092285	-28.108	6.3292	2.4638	-0.0016603	0.26397	0.19531	NaN	NaN	NaN	NaN	NaN	NaN	NaN	NaN	NaN	NaN	NaN	NaN
3.968	-115.7398	-25.9394	1400.589	-1.9434	1.6914	0.074219	-30.22	42.38	-7.3133	-0.026855	0.26123	0.21143	NaN	NaN	NaN	NaN	NaN	NaN	NaN	NaN	NaN	NaN	NaN	NaN
3.97	-108.417	-12.9447	1400.044	-2.0269	1.7446	0.0625	-25.632	2.90725	18.11412	-0.042383	0.25605	0.22656	NaN	NaN	NaN	NaN	NaN	NaN	NaN	NaN	NaN	NaN	NaN	NaN
3.972	-98.389	-6.808	1393.788	-2.189	1.854	0.07959	-10.742	44.005	37.9265	-0.05625	0.24629	0.23672	NaN	NaN	NaN	NaN	NaN	NaN	NaN	NaN	NaN	NaN	NaN	NaN
3.974	-83.512	-7.726	1397.098	-2.2839	1.9348	0.087158	-67.4562	52.025	66.6124	-0.070703	0.23926	0.24649	NaN	NaN	NaN	NaN	NaN	NaN	NaN	NaN	NaN	NaN	NaN	NaN
3.976	-63.981	-6.76000000000001	1383.493	-2.3438	2.002	0.099609	-29.095	-50.286636	114.3418	-0.085059	0.23457	0.24736	NaN	NaN	NaN	NaN	NaN	NaN	NaN	NaN	NaN	NaN	NaN	NaN
3.978	-92.477	-8.376	1362.477	-2.3472	2.0532	0.097168	-49.562	-52.68	154.891	-0.098633	0.22852	0.25244	NaN	NaN	NaN	NaN	NaN	NaN	NaN	NaN	NaN	NaN	NaN	NaN
3.98	-83.722	-6.9655	1343.94743	-2.3203	2.0488	0.095215	-41.701	-80.4575	265.852	-0.11582	0.23643	0.25176	NaN	NaN	NaN	NaN	NaN	NaN	NaN	NaN	NaN	NaN	NaN	NaN
3.982	-79.078	-29.4913	1315.489	-2.2168	2.0195	0.075684	-38.848	-85.944	400.4719	-0.12783	0.2419	0.24717	NaN	NaN	NaN	NaN	NaN	NaN	NaN	NaN	NaN	NaN	NaN	NaN
3.984	-52.18	-38.6388	1299.487	-2.1113	1.9814	0.063964	-117.4319	-70.357	476.949	-0.14854	0.2501	0.25381	NaN	NaN	NaN	NaN	NaN	NaN	NaN	NaN	NaN	NaN	NaN	NaN
3.986	-47.474	-32.6363	1276.892	-2	1.9297	0.056152	-141.19	-183.974	546.746	-0.16474	0.25605	0.25137	NaN	NaN	NaN	NaN	NaN	NaN	NaN	NaN	NaN	NaN	NaN	NaN
3.988	-73.298	4.855	1257.003	-1.8711	1.8574	0.046875	-124.743	-199.498	592.601	-0.17871	0.26807	0.25684	NaN	NaN	NaN	NaN	NaN	NaN	NaN	NaN	NaN	NaN	NaN	NaN
3.99	-105.102	52.351	1261.939	-1.8179	1.813	0.044922	-109.369	-103.263	671.7024	-0.19082	0.27402	0.25215	NaN	NaN	NaN	NaN	NaN	NaN	NaN	NaN	NaN	NaN	NaN	NaN
3.992	-120.3866	98.699	1258.9055	-1.7178	1.7148	0.044434	-86.325	-39.401	819.518	-0.19638	0.28086	0.23301	NaN	NaN	NaN	NaN	NaN	NaN	NaN	NaN	NaN	NaN	NaN	NaN
3.994	-102.811	107.317	1257.657	-1.6601	1.6475	0.037109	-149.6739	70.317	879.907	-0.21201	0.29219	0.18848	NaN	NaN	NaN	NaN	NaN	NaN	NaN	NaN	NaN	NaN	NaN	NaN
3.996	-112.7007	96.146	1232.26	-1.6226	1.5835	0.033203	-127.299	63.596	896.359	-0.24102	0.30664	0.11738	NaN	NaN	NaN	NaN	NaN	NaN	NaN	NaN	NaN	NaN	NaN	NaN
[truncated: 28,002 more rows]
