# Supplementary material for: Reliability and Validity of Running Cadence and Stance Time Derived from Instrumented Wireless Earbuds
Source: Sensors (Basel). 2021 Nov 30;21(23):7995. doi: 10.3390/s21237995 (PMC8659722; doi:10.3390/s21237995)
Supplement: Supplementary file 1 [file sensors-21-07995-s001.zip › Data_P10_speeds_2.csv]

time	S7kmh_force_plate_1	S7kmh_force_plate_2	S7kmh_force_plate_3	S7kmh_earbuds_1	S7kmh_earbuds_2	S7kmh_earbuds_3	S10kmh_force_plate_1	S10kmh_force_plate_2	S10kmh_force_plate_3	S10kmh_earbuds_1	S10kmh_earbuds_2	S10kmh_earbuds_3	S13kmh_force_plate_1	S13kmh_force_plate_2	S13kmh_force_plate_3	S13kmh_earbuds_1	S13kmh_earbuds_2	S13kmh_earbuds_3	max_force_plate_1	max_force_plate_2	max_force_plate_3	max_earbuds_1	max_earbuds_2	max_earbuds_3
0	-52.657	-29.614	413.482	-0.72607	0.80566	0.078613	54.4717	-75.852	1440.838	-1.7831	1.3728	-0.396	NaN	NaN	NaN	NaN	NaN	NaN	NaN	NaN	NaN	NaN	NaN	NaN
0.002	-41.167	10.17	450.038	-0.75342	0.81885	0.057617	-17.617	-108.632	1422.7257	-1.8569	1.4185	-0.42041	NaN	NaN	NaN	NaN	NaN	NaN	NaN	NaN	NaN	NaN	NaN	NaN
0.004	-67.148	82.9226	466.1551	-0.85498	0.85986	0.013184	-54.1342	-125.347	1457.319	-1.9068	1.4529	-0.44825	NaN	NaN	NaN	NaN	NaN	NaN	NaN	NaN	NaN	NaN	NaN	NaN
0.006	-66.1257	126.443	518.3993	-0.98488	0.9126	-0.011474	-66.274	-56.977	1454.951	-1.943	1.4906	-0.4668	NaN	NaN	NaN	NaN	NaN	NaN	NaN	NaN	NaN	NaN	NaN	NaN
0.008	-62.503	126.557	586.7137	-1.1343	0.9751	-0.035156	-86.139	-89.4684	1458.443	-1.9692	1.5379	-0.47812	NaN	NaN	NaN	NaN	NaN	NaN	NaN	NaN	NaN	NaN	NaN	NaN
0.01	-55.815	106.445	658.275	-1.3613	1.084	-0.050293	-9.6379	-38.382	1482.239	-1.9827	1.5884	-0.49697	NaN	NaN	NaN	NaN	NaN	NaN	NaN	NaN	NaN	NaN	NaN	NaN
0.012	-64.126	64.64	744.266	-1.4766	1.1426	-0.051758	2.052	7.919	1449.2572	-1.9839	1.6353	-0.52979	NaN	NaN	NaN	NaN	NaN	NaN	NaN	NaN	NaN	NaN	NaN	NaN
0.014	-98.091	14.2586	828.137	-1.6821	1.272	-0.062012	-28.643	-25.79638	1435.0666	-2.0004	1.6551	-0.55684	NaN	NaN	NaN	NaN	NaN	NaN	NaN	NaN	NaN	NaN	NaN	NaN
0.016	-113.11	-31.533	912.755	-1.8315	1.4009	-0.073242	8.314	40.452	1411.664	-2.0582	1.6898	-0.58438	NaN	NaN	NaN	NaN	NaN	NaN	NaN	NaN	NaN	NaN	NaN	NaN
0.018	-104.986	-64.909	996.973	-1.8887	1.4629	-0.078125	3.35	19.1569	1363.491	-2.1633	1.7254	-0.58633	NaN	NaN	NaN	NaN	NaN	NaN	NaN	NaN	NaN	NaN	NaN	NaN
0.02	-81.7775	-53.87	1056.532	-1.9609	1.5996	-0.080078	37.034	-7.894	1364.922	-2.2866	1.7767	-0.56914	NaN	NaN	NaN	NaN	NaN	NaN	NaN	NaN	NaN	NaN	NaN	NaN
0.022	-9.887	-53.4	1116.094	-1.9795	1.688	-0.076171	42.1663	59.6638	1317.6599	-2.3945	1.8359	-0.54297	NaN	NaN	NaN	NaN	NaN	NaN	NaN	NaN	NaN	NaN	NaN	NaN
0.024	14.901	-51.318	1185.2885	-1.9741	1.7544	-0.070313	-8.386	28.059	1293.84925	-2.456	1.8935	-0.51015	NaN	NaN	NaN	NaN	NaN	NaN	NaN	NaN	NaN	NaN	NaN	NaN
0.026	18.4651	-45.005	1237.364	-1.9487	1.8071	-0.058105	-12.237	89.575	1296.206	-2.4546	1.9259	-0.48389	NaN	NaN	NaN	NaN	NaN	NaN	NaN	NaN	NaN	NaN	NaN	NaN
0.028	-0.4243	-16.353	1312.543	-1.9336	1.8223	-0.043945	-12.094	142.539	1253.958	-2.3827	1.929	-0.4667	NaN	NaN	NaN	NaN	NaN	NaN	NaN	NaN	NaN	NaN	NaN	NaN
0.03	28.428	30.272	1365.157	-1.8887	1.8105	-0.010742	-28.433	100.874	1257.4139	-2.2522	1.8926	-0.45146	NaN	NaN	NaN	NaN	NaN	NaN	NaN	NaN	NaN	NaN	NaN	NaN
0.032	35.833	26.788	1375.454	-1.831	1.7773	0.01416	18.513	138.301	1273.666	-2.0938	1.8242	-0.43359	NaN	NaN	NaN	NaN	NaN	NaN	NaN	NaN	NaN	NaN	NaN	NaN
0.034	29.832	1.291	1386.484	-1.7598	1.7246	0.049805	-12.06	85.371	1252.2827	-1.9334	1.7311	-0.4249	NaN	NaN	NaN	NaN	NaN	NaN	NaN	NaN	NaN	NaN	NaN	NaN
0.036	32.37	-30.1508	1381.743	-1.6387	1.6348	0.060059	20.496	48.0241	1240.0383	-1.7876	1.6302	-0.41953	NaN	NaN	NaN	NaN	NaN	NaN	NaN	NaN	NaN	NaN	NaN	NaN
0.038	18.65	-29.035	1382.482	-1.5776	1.5825	0.063965	42.1557	95.684	1200.624	-1.6732	1.5478	-0.4125	NaN	NaN	NaN	NaN	NaN	NaN	NaN	NaN	NaN	NaN	NaN	NaN
0.04	38.448	-27.869	1356.511	-1.4844	1.4844	0.058594	-3.143	67.336	1174.929	-1.5963	1.4738	-0.41192	NaN	NaN	NaN	NaN	NaN	NaN	NaN	NaN	NaN	NaN	NaN	NaN
0.042	25.9126	-37.938	1327.668	-1.4539	1.4211	0.046631	36.656	109.975	1169.34	-1.5381	1.4082	-0.39941	NaN	NaN	NaN	NaN	NaN	NaN	NaN	NaN	NaN	NaN	NaN	NaN
0.044	20.5968	-38.992	1332.231	-1.4438	1.3735	0.035156	22.269	120.817	1095.37893	-1.5023	1.363	-0.38994	NaN	NaN	NaN	NaN	NaN	NaN	NaN	NaN	NaN	NaN	NaN	NaN
0.046	15.765	-74.864	1334.676	-1.4448	1.3188	0.023926	-44.65	73.092	1087.807	-1.4656	1.3211	-0.37383	NaN	NaN	NaN	NaN	NaN	NaN	NaN	NaN	NaN	NaN	NaN	NaN
0.048	2.96	-85.6703	1331.377	-1.4453	1.2959	0.020996	-8.76499999999999	129.806	1081.017	-1.4375	1.282	-0.35547	NaN	NaN	NaN	NaN	NaN	NaN	NaN	NaN	NaN	NaN	NaN	NaN
0.05	20.424	-82.195	1354.1	-1.4575	1.2583	0.019043	-24.384	139.256	1023.3205	-1.413	1.2432	-0.34033	NaN	NaN	NaN	NaN	NaN	NaN	NaN	NaN	NaN	NaN	NaN	NaN
0.052	13.788	-76.426	1394.831	-1.4636	1.2375	0.019287	-40.869	144.649	999.613	-1.3862	1.2095	-0.32227	NaN	NaN	NaN	NaN	NaN	NaN	NaN	NaN	NaN	NaN	NaN	NaN
0.054	35.2644	-56.774	1431.059	-1.4746	1.2148	0.020996	-47.213	188.559	932.0129	-1.3518	1.1705	-0.2998	NaN	NaN	NaN	NaN	NaN	NaN	NaN	NaN	NaN	NaN	NaN	NaN
0.056	1.093	-64.87508	1446.322	-1.4888	1.1978	0.032715	-93.7701	139.579	907.222	-1.3084	1.1295	-0.27773	NaN	NaN	NaN	NaN	NaN	NaN	NaN	NaN	NaN	NaN	NaN	NaN
0.058	-31.689	-83.9541	1439.834	-1.5039	1.1953	0.036621	-69.831	151.9202	889.841	-1.2564	1.0846	-0.25937	NaN	NaN	NaN	NaN	NaN	NaN	NaN	NaN	NaN	NaN	NaN	NaN
0.06	-12.844	-93.5287	1457.3113	-1.5366	1.2046	0.041016	-70.802	177.303	844.807	-1.1932	1.0455	-0.24824	NaN	NaN	NaN	NaN	NaN	NaN	NaN	NaN	NaN	NaN	NaN	NaN
0.062	-29.655	-102.5802	1447.79	-1.575	1.2248	0.046143	-92.2489	155.689	822.36835	-1.1304	1.0083	-0.23047	NaN	NaN	NaN	NaN	NaN	NaN	NaN	NaN	NaN	NaN	NaN	NaN
0.064	-48.049	-110.1055	1434.662	-1.6328	1.2539	0.047852	-24.541	198.4352	783.9778	-1.0675	0.96016	-0.21924	NaN	NaN	NaN	NaN	NaN	NaN	NaN	NaN	NaN	NaN	NaN	NaN
0.066	-96.1144	-124.8951	1429.4588	-1.7344	1.3047	0.046387	-54.5185	182.7909	713.9285	-1.0098	0.90937	-0.20762	NaN	NaN	NaN	NaN	NaN	NaN	NaN	NaN	NaN	NaN	NaN	NaN
0.068	-109.8882	-119.2199	1398.194	-1.7949	1.3398	0.044922	-75.8074	149.598	674.9381	-0.95039	0.85547	-0.19355	NaN	NaN	NaN	NaN	NaN	NaN	NaN	NaN	NaN	NaN	NaN	NaN
0.07	-103.78807	-112.47	1398.85	-1.9312	1.4321	0.033691	-54.515	166.8433	617.151	-0.90645	0.80527	-0.16972	NaN	NaN	NaN	NaN	NaN	NaN	NaN	NaN	NaN	NaN	NaN	NaN
0.072	-96.2106	-86.995	1392.215	-2.0457	1.511	0.027344	-70.464	114.411	615.8527	-0.86572	0.7583	-0.15234	NaN	NaN	NaN	NaN	NaN	NaN	NaN	NaN	NaN	NaN	NaN	NaN
0.074	-65.397	-71.719	1399.466	-2.1675	1.6021	0.022461	-37.97	127.062	611.6972	-0.82783	0.70869	-0.13174	NaN	NaN	NaN	NaN	NaN	NaN	NaN	NaN	NaN	NaN	NaN	NaN
0.076	-85.945	-22.0535	1420.846578	-2.3203	1.7383	0.021484	-56.078	163.437	561.686	-0.78623	0.66181	-0.10889	NaN	NaN	NaN	NaN	NaN	NaN	NaN	NaN	NaN	NaN	NaN	NaN
0.078	-74.167	14.5173	1447.3533	-2.3843	1.8032	0.030273	-71.217	162.79	530.845	-0.74912	0.62002	-0.083106	NaN	NaN	NaN	NaN	NaN	NaN	NaN	NaN	NaN	NaN	NaN	NaN
0.08	-93.587	25.8603	1480.2998	-2.4761	1.9185	0.048828	-17.538	187.313	489.2738	-0.71582	0.58418	-0.058398	NaN	NaN	NaN	NaN	NaN	NaN	NaN	NaN	NaN	NaN	NaN	NaN
0.082	-56.01	27.1075	1500.445	-2.4942	1.9795	0.062744	-58.647	172.322	427.1034	-0.68164	0.54688	-0.039063	NaN	NaN	NaN	NaN	NaN	NaN	NaN	NaN	NaN	NaN	NaN	NaN
0.084	-33.23	20.8211	1479.367	-2.4702	2.02	0.052734	-47.425	136.4193	402.092	-0.63496	0.50488	-0.013086	NaN	NaN	NaN	NaN	NaN	NaN	NaN	NaN	NaN	NaN	NaN	NaN
0.086	-64.726	23.172832	1452.4648	-2.377	2.0293	0.053223	-11.55	168.984	367.30032	-0.58838	0.46738	-0.00048828	NaN	NaN	NaN	NaN	NaN	NaN	NaN	NaN	NaN	NaN	NaN	NaN
0.088	-88.484	-3.647	1435.856	-2.314	2.0239	0.046875	-33.537	149.746876	336.521	-0.53291	0.42129	0.019824	NaN	NaN	NaN	NaN	NaN	NaN	NaN	NaN	NaN	NaN	NaN	NaN
0.09	-135.91	-28.70222	1433.964	-2.1655	1.979	0.030273	-4.336	144.037	329.799	-0.47734	0.38066	0.038184	NaN	NaN	NaN	NaN	NaN	NaN	NaN	NaN	NaN	NaN	NaN	NaN
0.092	-88.229	-30.919	1426.8679	-2.0644	1.9316	0.020752	-5.15499999999999	154.0994	284.379	-0.41406	0.33594	0.052734	NaN	NaN	NaN	NaN	NaN	NaN	NaN	NaN	NaN	NaN	NaN	NaN
0.094	-66.637	-37.3347	1405.054	-1.9819	1.8794	0.010742	-27.07	113.871	264.3865	-0.35381	0.29814	0.063575	NaN	NaN	NaN	NaN	NaN	NaN	NaN	NaN	NaN	NaN	NaN	NaN
0.096	-22.82	-43.022	1397.346	-1.8901	1.8071	0.010742	11.39	150.539	233.4204	-0.29688	0.2584	0.067773	NaN	NaN	NaN	NaN	NaN	NaN	NaN	NaN	NaN	NaN	NaN	NaN
0.098	-33.839	-30.5953	1388.9951	-1.8569	1.7798	0.010742	-56.4956	168.992	197.688	-0.23555	0.22051	0.07168	NaN	NaN	NaN	NaN	NaN	NaN	NaN	NaN	NaN	NaN	NaN	NaN
0.1	-58.826	15.741	1368.7539	-1.7793	1.7227	0.022461	-58.767	139.966	200.2739	-0.18633	0.18447	0.075781	NaN	NaN	NaN	NaN	NaN	NaN	NaN	NaN	NaN	NaN	NaN	NaN
0.102	-41.706	58.5018	1375.5772	-1.7266	1.6748	0.023926	-42.68	141.711	183.4943	-0.14063	0.15039	0.083984	NaN	NaN	NaN	NaN	NaN	NaN	NaN	NaN	NaN	NaN	NaN	NaN
0.104	-30.193	70.8293	1357.9438	-1.666	1.6289	0.026367	-85.806	96.2613	172.28	-0.10234	0.11953	0.091114	NaN	NaN	NaN	NaN	NaN	NaN	NaN	NaN	NaN	NaN	NaN	NaN
0.106	-28.638	70.6817	1335.16	-1.5806	1.5669	0.02832	-49.592	81.049	166.473	-0.064062	0.096289	0.10098	NaN	NaN	NaN	NaN	NaN	NaN	NaN	NaN	NaN	NaN	NaN	NaN
0.108	-52.144	72.65	1311.812	-1.5391	1.5293	0.03125	-50.227	101.894	128.4531	-0.01875	0.077539	0.11113	NaN	NaN	NaN	NaN	NaN	NaN	NaN	NaN	NaN	NaN	NaN	NaN
0.11	-83.453	95.54	1276.9345	-1.4668	1.4531	0.030273	-65.38	84.61	140.143	0.02627	0.07041	0.11426	NaN	NaN	NaN	NaN	NaN	NaN	NaN	NaN	NaN	NaN	NaN	NaN
0.112	-68.619	104.829	1257.225	-1.4209	1.393	0.033447	-26.58	104.4934	123.8483	0.079102	0.058594	0.11768	NaN	NaN	NaN	NaN	NaN	NaN	NaN	NaN	NaN	NaN	NaN	NaN
0.114	-68.257	109.436	1230.8443	-1.3838	1.3379	0.041992	-69.209	108.354	90.3061	0.12412	0.041992	0.125	NaN	NaN	NaN	NaN	NaN	NaN	NaN	NaN	NaN	NaN	NaN	NaN
0.116	-58.005	87.417	1190.498	-1.3281	1.2637	0.047852	-49.225	58.9851	72.782	0.16768	0.033985	0.12705	NaN	NaN	NaN	NaN	NaN	NaN	NaN	NaN	NaN	NaN	NaN	NaN
0.118	-54.516	56.3746	1144.7783	-1.2988	1.2324	0.056641	-31.459	59.7833	41.2779	0.20401	0.022656	0.1333	NaN	NaN	NaN	NaN	NaN	NaN	NaN	NaN	NaN	NaN	NaN	NaN
0.12	-65.125	50.439	1115.894	-1.2397	1.1704	0.064453	-88.2537	41.951	39.6013	0.23896	0.016113	0.13525	NaN	NaN	NaN	NaN	NaN	NaN	NaN	NaN	NaN	NaN	NaN	NaN
0.122	-59.304	54.978	1095.329	-1.1882	1.1203	0.070313	-49.443	48.5112	54.7568	0.2627	0.011719	0.13428	NaN	NaN	NaN	NaN	NaN	NaN	NaN	NaN	NaN	NaN	NaN	NaN
0.124	-60.389	89.826	1105.843	-1.1362	1.0708	0.070801	-53.9167	75.357	48.082	0.28105	0.0067383	0.1335	NaN	NaN	NaN	NaN	NaN	NaN	NaN	NaN	NaN	NaN	NaN	NaN
0.126	-31.648	91.55	1098.635	-1.0596	1.0156	0.074219	-73.5717	57.401	66.50758	0.28301	0.011816	0.13311	NaN	NaN	NaN	NaN	NaN	NaN	NaN	NaN	NaN	NaN	NaN	NaN
0.128	-54.564	105.5623	1066.669	-1.0195	0.98633	0.071289	-15.7	49.457	70.30869	0.27012	0.021582	0.13115	NaN	NaN	NaN	NaN	NaN	NaN	NaN	NaN	NaN	NaN	NaN	NaN
0.13	-75.5172	107.5019	1049.3977	-0.95313	0.94043	0.068359	-61.222	42.7645	42.0449	0.24492	0.022266	0.12539	NaN	NaN	NaN	NaN	NaN	NaN	NaN	NaN	NaN	NaN	NaN	NaN
0.132	-83.6837	135.524	1035.5967	-0.91065	0.91016	0.064453	-39.888	17.625	41.047	0.20361	0.02832	0.12646	NaN	NaN	NaN	NaN	NaN	NaN	NaN	NaN	NaN	NaN	NaN	NaN
0.134	-65.777	142.742	1019.734	-0.87061	0.8833	0.062988	8.367	51.068	15.3576	0.15049	0.04082	0.12607	NaN	NaN	NaN	NaN	NaN	NaN	NaN	NaN	NaN	NaN	NaN	NaN
0.136	-49.103	143.547	976.373	-0.81641	0.84766	0.060547	-29.606	23.1733	11.0389	0.089844	0.055078	0.1333	NaN	NaN	NaN	NaN	NaN	NaN	NaN	NaN	NaN	NaN	NaN	NaN
0.138	-56.312	146.266	920.3783	-0.79297	0.82813	0.060059	-0.451000000000001	-4.511	22.766	0.027344	0.071094	0.14424	NaN	NaN	NaN	NaN	NaN	NaN	NaN	NaN	NaN	NaN	NaN	NaN
0.14	-65.327	137.283	872.309	-0.73389	0.79443	0.049316	0.531999999999996	0.1871	21.989	-0.031933	0.086036	0.14883	NaN	NaN	NaN	NaN	NaN	NaN	NaN	NaN	NaN	NaN	NaN	NaN
0.142	-58.225	121.5567	827.119	-0.6897	0.77075	0.04248	-31.437	-10.72	27.234	-0.083984	0.097656	0.15576	NaN	NaN	NaN	NaN	NaN	NaN	NaN	NaN	NaN	NaN	NaN	NaN
0.144	-54.952	107.63	800.166	-0.63867	0.74512	0.035645	-3.508	17.4445	51.722	-0.12442	0.1082	0.15576	NaN	NaN	NaN	NaN	NaN	NaN	NaN	NaN	NaN	NaN	NaN	NaN
0.146	-39.543	120.726	778	-0.56689	0.70361	0.025391	-52.094	52.937	38.5876	-0.15117	0.12011	0.15772	NaN	NaN	NaN	NaN	NaN	NaN	NaN	NaN	NaN	NaN	NaN	NaN
0.148	-25.009	133.049	770.4112	-0.53125	0.6875	0.016113	-46.47	32.92	44.815	-0.17344	0.13262	0.16318	NaN	NaN	NaN	NaN	NaN	NaN	NaN	NaN	NaN	NaN	NaN	NaN
0.15	-5.933	135.7514	747.5546	-0.45996	0.64258	0.010254	0.643999999999998	60.591	15.819	-0.18604	0.13896	0.16641	NaN	NaN	NaN	NaN	NaN	NaN	NaN	NaN	NaN	NaN	NaN	NaN
0.152	-35.882	143.087	701.507	-0.40527	0.61279	0.0004883	-37.804	39.371	1.806	-0.19141	0.14258	0.16992	NaN	NaN	NaN	NaN	NaN	NaN	NaN	NaN	NaN	NaN	NaN	NaN
0.154	-54.262	149.909	695.7015	-0.35645	0.58057	-0.0063477	-2.672	15.3092	36.2671	-0.19678	0.14414	0.17539	NaN	NaN	NaN	NaN	NaN	NaN	NaN	NaN	NaN	NaN	NaN	NaN
0.156	-24.012	156.032	673.947	-0.29785	0.54102	-0.011719	-26.519	31.6428	34.145	-0.19287	0.14316	0.18633	NaN	NaN	NaN	NaN	NaN	NaN	NaN	NaN	NaN	NaN	NaN	NaN
0.158	-27.703	149.582	650.6	-0.26318	0.52002	-0.017578	-61.644	13.152	40.8715	-0.18154	0.14082	0.19024	NaN	NaN	NaN	NaN	NaN	NaN	NaN	NaN	NaN	NaN	NaN	NaN
0.16	-17.566	131.775	587.9582	-0.19678	0.4707	-0.033691	-18.979	29.2984	44.3156	-0.1625	0.13272	0.19941	NaN	NaN	NaN	NaN	NaN	NaN	NaN	NaN	NaN	NaN	NaN	NaN
0.162	-44.799	123.954	549.19	-0.12793	0.43506	-0.05127	-52.176	62.328	7.948	-0.13037	0.12598	0.20654	NaN	NaN	NaN	NaN	NaN	NaN	NaN	NaN	NaN	NaN	NaN	NaN
0.164	-36.415	114.6003	503.947	-0.097168	0.41455	-0.056152	-47.068	32.9563	30.0062	-0.099414	0.12031	0.21143	NaN	NaN	NaN	NaN	NaN	NaN	NaN	NaN	NaN	NaN	NaN	NaN
0.166	-15.355	109.5616	478.3143	-0.041016	0.37158	-0.073242	-18.755	50.723	10.939	-0.064843	0.10517	0.20596	NaN	NaN	NaN	NaN	NaN	NaN	NaN	NaN	NaN	NaN	NaN	NaN
0.168	-6.016	100.107	446.0815	0.0014645	0.34546	-0.078857	-82.202	27.65404	0.549	-0.025781	0.091113	0.20205	NaN	NaN	NaN	NaN	NaN	NaN	NaN	NaN	NaN	NaN	NaN	NaN
0.17	-22.797	102.9	398.7591	0.037109	0.32178	-0.088867	-44.524	7.3616	29.6443	0.0073243	0.068457	0.20097	NaN	NaN	NaN	NaN	NaN	NaN	NaN	NaN	NaN	NaN	NaN	NaN
0.172	-34.502	108.4502	379.242	0.077148	0.28662	-0.10498	-66.19	25.9119	28.4739	0.040039	0.05127	0.20361	NaN	NaN	NaN	NaN	NaN	NaN	NaN	NaN	NaN	NaN	NaN	NaN
0.174	-25.891	111.885	361.23	0.095703	0.27393	-0.10986	-79.7086	20.5448	45.604	0.079297	0.025489	0.20029	NaN	NaN	NaN	NaN	NaN	NaN	NaN	NaN	NaN	NaN	NaN	NaN
0.176	-38.829	121.082	358.9111	0.11914	0.25	-0.11963	-15.392	41.616	55.6235	0.12666	0.0019534	0.19912	NaN	NaN	NaN	NaN	NaN	NaN	NaN	NaN	NaN	NaN	NaN	NaN
0.178	-37.125	128.593	341.987	0.12744	0.24219	-0.13013	-47.15	68.389	17.1877	0.17549	-0.016406	0.19248	NaN	NaN	NaN	NaN	NaN	NaN	NaN	NaN	NaN	NaN	NaN	NaN
0.18	-28.04	119.377	324.899	0.12891	0.23389	-0.1333	-45.642	46.0219	22.671	0.22158	-0.024609	0.18916	NaN	NaN	NaN	NaN	NaN	NaN	NaN	NaN	NaN	NaN	NaN	NaN
0.182	-45.109	104.321	291.1175	0.13037	0.22852	-0.13574	-21.445	63.18	20.3955	0.26465	-0.032227	0.18115	NaN	NaN	NaN	NaN	NaN	NaN	NaN	NaN	NaN	NaN	NaN	NaN
0.184	-67.8811	94.146	264.993	0.12598	0.22266	-0.13672	-63.099	50.4159	7.73376	0.29805	-0.026953	0.18154	NaN	NaN	NaN	NaN	NaN	NaN	NaN	NaN	NaN	NaN	NaN	NaN
0.186	-50.771	102.367	248.4487	0.11328	0.22021	-0.14258	-9.562	26.8559	27.376	0.32979	-0.018066	0.18633	NaN	NaN	NaN	NaN	NaN	NaN	NaN	NaN	NaN	NaN	NaN	NaN
0.188	-27.621	96.1666	229.1439	0.1062	0.21631	-0.14673	-25.673	47.74	3.549	0.3501	-0.0086912	0.18242	NaN	NaN	NaN	NaN	NaN	NaN	NaN	NaN	NaN	NaN	NaN	NaN
0.19	-23.828	81.1919	204.4442	0.10498	0.21094	-0.15137	-41.046	25.1728	18.6688	0.36563	0.0095713	0.17861	NaN	NaN	NaN	NaN	NaN	NaN	NaN	NaN	NaN	NaN	NaN	NaN
0.192	-35.123	59.822	172.177	0.104	0.20166	-0.15381	4.508	28.709	43.5952	0.37646	0.022949	0.16895	NaN	NaN	NaN	NaN	NaN	NaN	NaN	NaN	NaN	NaN	NaN	NaN
0.194	-36.213	53.34	142.3746	0.10547	0.19385	-0.15332	-42.841	60.321	45.6032	0.38125	0.035253	0.15947	NaN	NaN	NaN	NaN	NaN	NaN	NaN	NaN	NaN	NaN	NaN	NaN
0.196	-24.164	62.9269	154.59995	0.11035	0.18311	-0.16016	-35.448	45.26265	67.914	0.38369	0.046872	0.15332	NaN	NaN	NaN	NaN	NaN	NaN	NaN	NaN	NaN	NaN	NaN	NaN
0.198	-4.198	69.1326	158.755	0.11792	0.17285	-0.1665	0.741999999999997	57.677	51.3683	0.37979	0.057811	0.13965	NaN	NaN	NaN	NaN	NaN	NaN	NaN	NaN	NaN	NaN	NaN	NaN
0.2	-13.359	65.0833	143.1212	0.12549	0.16357	-0.16748	-29.273	35.62408	37.0198	0.375	0.070894	0.13067	NaN	NaN	NaN	NaN	NaN	NaN	NaN	NaN	NaN	NaN	NaN	NaN
0.202	-25.919	53.6078	110.8759	0.13135	0.15527	-0.17285	-10.714	0.972000000000001	34.81509	0.35693	0.089844	0.12109	NaN	NaN	NaN	NaN	NaN	NaN	NaN	NaN	NaN	NaN	NaN	NaN
0.204	-36.335	38.9441	101.5558	0.12891	0.14941	-0.17432	-13.614	25.8739	18.9424	0.33329	0.11476	0.11504	NaN	NaN	NaN	NaN	NaN	NaN	NaN	NaN	NaN	NaN	NaN	NaN
0.206	-41.78	43.161	91.0379	0.125	0.14893	-0.18213	-43.532	13.679	22.5239	0.30368	0.14329	0.11308	NaN	NaN	NaN	NaN	NaN	NaN	NaN	NaN	NaN	NaN	NaN	NaN
0.208	-37.368	58.19	71.5288	0.11621	0.14258	-0.18042	-4.541	23.762	50.32149	0.2646	0.16829	0.10957	NaN	NaN	NaN	NaN	NaN	NaN	NaN	NaN	NaN	NaN	NaN	NaN
0.21	-29.728	66.83	62.9073	0.10449	0.13965	-0.17822	-43.056	47.9307	39.2076	0.22164	0.19123	0.10899	NaN	NaN	NaN	NaN	NaN	NaN	NaN	NaN	NaN	NaN	NaN	NaN
0.212	1.69	55.9969	38.5744	0.083984	0.14258	-0.18115	-39.419	30.18236	60.707	0.17871	0.21533	0.10254	NaN	NaN	NaN	NaN	NaN	NaN	NaN	NaN	NaN	NaN	NaN	NaN
0.214	-13.041	32.4058	22.592	0.067383	0.14502	-0.18115	-20.763	48.186	55.9403	0.1323	0.24176	0.108	NaN	NaN	NaN	NaN	NaN	NaN	NaN	NaN	NaN	NaN	NaN	NaN
0.216	-26.578	26.3842	14.418	0.041992	0.1499	-0.1792	-76.1103	49.843	34.12449	0.087909	0.26681	0.10915	NaN	NaN	NaN	NaN	NaN	NaN	NaN	NaN	NaN	NaN	NaN	NaN
0.218	-14.402	30.242	29.8168	0.025146	0.1543	-0.18408	-36.334	22.9452	49.9132	0.050838	0.29257	0.11465	NaN	NaN	NaN	NaN	NaN	NaN	NaN	NaN	NaN	NaN	NaN	NaN
0.22	-15.143	30.4076	42.2727	0.0087891	0.15771	-0.18018	-47.159	23.1674	16.475	0.023525	0.3177	0.12184	NaN	NaN	NaN	NaN	NaN	NaN	NaN	NaN	NaN	NaN	NaN	NaN
0.222	-17.111	34.9794	42.9972	-0.0083008	0.15869	-0.1792	-92.9797	5.008	6.5	0.0029297	0.33838	0.13232	NaN	NaN	NaN	NaN	NaN	NaN	NaN	NaN	NaN	NaN	NaN	NaN
0.224	-43.222	23.8851	23.503	-0.016602	0.16406	-0.18213	-30.025	-1.126	24.235	-0.012552	0.35242	0.13598	NaN	NaN	NaN	NaN	NaN	NaN	NaN	NaN	NaN	NaN	NaN	NaN
0.226	-42.224	31.6323	18.2476	-0.023926	0.16309	-0.17236	-58.704	34.64808	9.765	-0.022294	0.36013	0.1462	NaN	NaN	NaN	NaN	NaN	NaN	NaN	NaN	NaN	NaN	NaN	NaN
0.228	-41.081	34.8936	29.78215	-0.030518	0.16259	-0.17114	-63.03	21.673	50.2244	-0.027462	0.3648	0.15321	NaN	NaN	NaN	NaN	NaN	NaN	NaN	NaN	NaN	NaN	NaN	NaN
0.23	-40.966	40.2129	21.8908228	-0.03125	0.16162	-0.17041	-24.663	43.874	34.0819	-0.033203	0.36605	0.15996	NaN	NaN	NaN	NaN	NaN	NaN	NaN	NaN	NaN	NaN	NaN	NaN
0.232	-50.165	35.807	11.9668	-0.033203	0.14502	-0.16846	-75.484027	48.049	12.81156	-0.036133	0.36719	0.16553	NaN	NaN	NaN	NaN	NaN	NaN	NaN	NaN	NaN	NaN	NaN	NaN
0.234	-44.737	22.8642	4.5183	-0.030762	0.13867	-0.16113	-31.338	17.3513	40.3077	-0.0494	0.36676	0.17429	NaN	NaN	NaN	NaN	NaN	NaN	NaN	NaN	NaN	NaN	NaN	NaN
0.236	-27.766	17.3512	18.99	-0.025879	0.12354	-0.15869	-22.951	31.92	17.215	-0.065228	0.36217	0.1824	NaN	NaN	NaN	NaN	NaN	NaN	NaN	NaN	NaN	NaN	NaN	NaN
0.238	-30.635	16.9897	34.0639	-0.023193	0.11718	-0.15698	-59.146	12.1588	31.0121	-0.084826	0.35474	0.19652	NaN	NaN	NaN	NaN	NaN	NaN	NaN	NaN	NaN	NaN	NaN	NaN
0.24	-26.691	32.243	30.6714	-0.02002	0.10938	-0.15625	-17.515	7.8292	35.2464	-0.10962	0.34849	0.20925	NaN	NaN	NaN	NaN	NaN	NaN	NaN	NaN	NaN	NaN	NaN	NaN
0.242	-27.381	39.8188	26.7936	-0.01123	0.10498	-0.146	-49.8704	41.87	-4.024	-0.13184	0.34424	0.22852	NaN	NaN	NaN	NaN	NaN	NaN	NaN	NaN	NaN	NaN	NaN	NaN
0.244	-40.424	41.7492	17.8158	-0.0068359	0.096191	-0.14697	-32.688	21.4393	37.8128	-0.15442	0.34551	0.24472	NaN	NaN	NaN	NaN	NaN	NaN	NaN	NaN	NaN	NaN	NaN	NaN
0.246	-42.146	38.0597	12.293	0.0029297	0.079102	-0.14258	9.77	37.4619	69.7143	-0.17517	0.34318	0.25725	NaN	NaN	NaN	NaN	NaN	NaN	NaN	NaN	NaN	NaN	NaN	NaN
0.248	-52.203	46.7326	18.761	0.01416	0.075927	-0.14258	-42.908	12.26	101.998	-0.19269	0.34206	0.27464	NaN	NaN	NaN	NaN	NaN	NaN	NaN	NaN	NaN	NaN	NaN	NaN
0.25	-33.041	42.3146	32.6381	0.019531	0.071777	-0.1377	8.28700000000001	-29.234	180.0776	-0.1981	0.33195	0.28414	NaN	NaN	NaN	NaN	NaN	NaN	NaN	NaN	NaN	NaN	NaN	NaN
0.252	-32.029	29.3785	45.161	0.036621	0.064453	-0.13574	-2.062	10.305	227.585	-0.19971	0.32715	0.29102	NaN	NaN	NaN	NaN	NaN	NaN	NaN	NaN	NaN	NaN	NaN	NaN
0.254	-17.898	22.02376	35.0972	0.037598	0.062988	-0.13379	-53.84	-4.8103	358.703	-0.19464	0.32536	0.29249	NaN	NaN	NaN	NaN	NaN	NaN	NaN	NaN	NaN	NaN	NaN	NaN
0.256	-45.944	21.7335	29.4819	0.038574	0.063477	-0.13477	-75.353	-90.3847	531.555	-0.18525	0.33222	0.29154	NaN	NaN	NaN	NaN	NaN	NaN	NaN	NaN	NaN	NaN	NaN	NaN
0.258	-30.756	35.878	31.3422	0.040771	0.067627	-0.12842	-149.912	-165.478	652.168	-0.1817	0.32953	0.27416	NaN	NaN	NaN	NaN	NaN	NaN	NaN	NaN	NaN	NaN	NaN	NaN
0.26	-8.479	46.3143	45.5707	0.037598	0.080078	-0.12842	-128.955	-206.998	761.499	-0.18264	0.3281	0.23513	NaN	NaN	NaN	NaN	NaN	NaN	NaN	NaN	NaN	NaN	NaN	NaN
0.262	-8.617	38.5939	30.6346	0.03418	0.089355	-0.12109	-64.516	-132.771	819.974	-0.20215	0.33008	0.1626	NaN	NaN	NaN	NaN	NaN	NaN	NaN	NaN	NaN	NaN	NaN	NaN
0.264	-17.717	28.86	18.6603	0.030273	0.093262	-0.12256	-150.765	-52.572	875.095	-0.27033	0.364	0.078434	NaN	NaN	NaN	NaN	NaN	NaN	NaN	NaN	NaN	NaN	NaN	NaN
0.266	-27.968	27.25814	19.9013	0.035156	0.097168	-0.11768	-193.3627	23.9633	913.231	-0.40224	0.40149	-0.010614	NaN	NaN	NaN	NaN	NaN	NaN	NaN	NaN	NaN	NaN	NaN	NaN
0.268	-15.203	25.5299	30.0344	0.043213	0.09839	-0.11744	-167.622	80.898	911.039	-0.58101	0.43566	-0.09508	NaN	NaN	NaN	NaN	NaN	NaN	NaN	NaN	NaN	NaN	NaN	NaN
0.27	-28.304	29.7594	24.634	0.058594	0.104	-0.11475	-114.472	32.335	961.266	-0.77897	0.49039	-0.14922	NaN	NaN	NaN	NaN	NaN	NaN	NaN	NaN	NaN	NaN	NaN	NaN
0.272	-26.272	38.1765	19.547	0.085449	0.098633	-0.11523	33.3409	-9.45	1091.7674	-1.0151	0.56885	-0.19238	NaN	NaN	NaN	NaN	NaN	NaN	NaN	NaN	NaN	NaN	NaN	NaN
0.274	-26.027	37.01	37.2006	0.099609	0.09375	-0.11426	46.354363	-11.18	1177.68	-1.2714	0.67005	-0.22331	NaN	NaN	NaN	NaN	NaN	NaN	NaN	NaN	NaN	NaN	NaN	NaN
0.276	-17.614	22.82	35.1789	0.13379	0.086914	-0.11621	46.046	-19.555	1256.46	-1.535	0.78418	-0.23182	NaN	NaN	NaN	NaN	NaN	NaN	NaN	NaN	NaN	NaN	NaN	NaN
0.278	-33.817	32.53	31.1624	0.15112	0.085449	-0.11597	26.293252	54.73286	1240.075	-1.7874	0.90714	-0.20018	NaN	NaN	NaN	NaN	NaN	NaN	NaN	NaN	NaN	NaN	NaN	NaN
0.28	-60.715	51.24	23.2244	0.16455	0.086426	-0.11621	-72.7912	63.63534	1170.4566	-2.0143	1.0382	-0.14375	NaN	NaN	NaN	NaN	NaN	NaN	NaN	NaN	NaN	NaN	NaN	NaN
0.282	-27.551	57.61	19.294	0.18555	0.083008	-0.11523	-39.538	25.336	1145.227	-2.2339	1.1841	-0.095703	NaN	NaN	NaN	NaN	NaN	NaN	NaN	NaN	NaN	NaN	NaN	NaN
0.284	-16.08	42.214	34.5291	0.18994	0.089355	-0.11523	28.5	-5.56	1119.606	-2.4309	1.3231	-0.080274	NaN	NaN	NaN	NaN	NaN	NaN	NaN	NaN	NaN	NaN	NaN	NaN
0.286	-39.945	27.7392	18.334	0.20264	0.097168	-0.11963	-0.994	-107.589	1157.3124	-2.5779	1.441	-0.09373	NaN	NaN	NaN	NaN	NaN	NaN	NaN	NaN	NaN	NaN	NaN	NaN
0.288	-31.354	17.3174	16.603	0.20508	0.104	-0.11914	11.368	-165.688	1223.315	-2.6452	1.5441	-0.094937	NaN	NaN	NaN	NaN	NaN	NaN	NaN	NaN	NaN	NaN	NaN	NaN
0.29	-40.617	7.852	33.4912	0.20557	0.11328	-0.11768	-52.4766	-187.57	1218.3105	-2.6252	1.6295	-0.074131	NaN	NaN	NaN	NaN	NaN	NaN	NaN	NaN	NaN	NaN	NaN	NaN
0.292	-37.825	21.4231	47.4927	0.19336	0.1333	-0.11572	-78.23	-225.434	1208.9	-2.5444	1.7212	-0.033691	NaN	NaN	NaN	NaN	NaN	NaN	NaN	NaN	NaN	NaN	NaN	NaN
0.294	-49.592	24.4465	46.0548	0.18896	0.13818	-0.1167	59.977	-165.342	1181.499	-2.399	1.788	0.024623	NaN	NaN	NaN	NaN	NaN	NaN	NaN	NaN	NaN	NaN	NaN	NaN
0.296	-35.158	42.466	27.1665	0.17822	0.15869	-0.10791	91.548	-158.024	1151.679	-2.2597	1.8058	0.061917	NaN	NaN	NaN	NaN	NaN	NaN	NaN	NaN	NaN	NaN	NaN	NaN
0.298	-33.662	33.075	21.929	0.17114	0.17139	-0.10742	136.955	-133.175	1251.3404	-2.1265	1.7734	0.079498	NaN	NaN	NaN	NaN	NaN	NaN	NaN	NaN	NaN	NaN	NaN	NaN
0.3	-35.068	29.464	21.898	0.17041	0.18115	-0.11084	130.209	-70.4259	1333.233	-1.9873	1.6772	0.10498	NaN	NaN	NaN	NaN	NaN	NaN	NaN	NaN	NaN	NaN	NaN	NaN
0.302	-36.141	24.0097	39.5003	0.17285	0.19629	-0.11133	45.393	-110.32383	1404.406	-1.8652	1.5527	0.13135	NaN	NaN	NaN	NaN	NaN	NaN	NaN	NaN	NaN	NaN	NaN	NaN
0.304	-50.069	31.4167	42.207	0.17676	0.20361	-0.11084	73.635	-115.4679	1465.328	-1.7737	1.4445	0.14404	NaN	NaN	NaN	NaN	NaN	NaN	NaN	NaN	NaN	NaN	NaN	NaN
0.306	-19.684	35.18535	44.94	0.18701	0.21729	-0.11768	26.9767	-100.296	1406.235	-1.6965	1.3523	0.15439	NaN	NaN	NaN	NaN	NaN	NaN	NaN	NaN	NaN	NaN	NaN	NaN
0.308	-20.389	26.9713	40.4062	0.19873	0.22754	-0.11328	-9.27800000000001	-128.584	1374.2579	-1.6188	1.2816	0.16338	NaN	NaN	NaN	NaN	NaN	NaN	NaN	NaN	NaN	NaN	NaN	NaN
0.31	-27.191	15.0097	27.1424	0.2041	0.23096	-0.11328	-49.944	-77.919	1323.56	-1.5484	1.234	0.15479	NaN	NaN	NaN	NaN	NaN	NaN	NaN	NaN	NaN	NaN	NaN	NaN
0.312	-16.639	28.53662	14.62528	0.21143	0.24854	-0.11084	-142.2579	-98.942	1290.392	-1.4819	1.1938	0.12402	NaN	NaN	NaN	NaN	NaN	NaN	NaN	NaN	NaN	NaN	NaN	NaN
0.314	-18.264	40.949	21.5189	0.20947	0.25928	-0.10742	-119.008	-122.149	1327.776	-1.4236	1.1482	0.083984	NaN	NaN	NaN	NaN	NaN	NaN	NaN	NaN	NaN	NaN	NaN	NaN
0.316	-8.551	42.092	28.2657	0.20898	0.26611	-0.10352	-39.0853	-119.68	1343.9915	-1.3601	1.0902	0.042675	NaN	NaN	NaN	NaN	NaN	NaN	NaN	NaN	NaN	NaN	NaN	NaN
0.318	-44.974	27.361	17.0855	0.20068	0.2876	-0.097656	-44.1854	-169.26	1342.1297	-1.2941	1.0039	0.029003	NaN	NaN	NaN	NaN	NaN	NaN	NaN	NaN	NaN	NaN	NaN	NaN
0.32	-30.101	19.3935	19.8143	0.20117	0.29053	-0.095215	-5.505	-139.49	1369.115	-1.2449	0.93438	0.015039	NaN	NaN	NaN	NaN	NaN	NaN	NaN	NaN	NaN	NaN	NaN	NaN
0.322	-13.123	11.3466	30.6674	0.19434	0.30371	-0.09082	-43.811	-89.648	1358.316	-1.2158	0.87695	-0.0024414	NaN	NaN	NaN	NaN	NaN	NaN	NaN	NaN	NaN	NaN	NaN	NaN
0.324	-10.08	10.6078	33.8365	0.19604	0.30859	-0.089111	-92.087	-73.363	1395.944	-1.2274	0.84287	-0.01709	NaN	NaN	NaN	NaN	NaN	NaN	NaN	NaN	NaN	NaN	NaN	NaN
0.326	-36.329	30.19191	50.80791	0.19287	0.31885	-0.09668	-60.336	-1.6781	1448.766	-1.2815	0.82783	-0.029004	NaN	NaN	NaN	NaN	NaN	NaN	NaN	NaN	NaN	NaN	NaN	NaN
0.328	-36.926	26.5568	76.4164114	0.1626	0.33789	-0.11035	-126.621	-29.0377	1459.91	-1.3999	0.85322	-0.015332	NaN	NaN	NaN	NaN	NaN	NaN	NaN	NaN	NaN	NaN	NaN	NaN
0.33	-17.419	11.4836	90.5007	0.12451	0.35693	-0.11865	-137.639	-76.7883	1473.818	-1.571	0.91338	0.013477	NaN	NaN	NaN	NaN	NaN	NaN	NaN	NaN	NaN	NaN	NaN	NaN
0.332	-9.009	-6.1465	143.56	-0.025879	0.41016	-0.12207	-128.429	-51.955	1439.465	-1.7651	0.99365	0.05127	NaN	NaN	NaN	NaN	NaN	NaN	NaN	NaN	NaN	NaN	NaN	NaN
0.334	25.033	0.5772	198.7068	-0.19873	0.47022	-0.11035	-191.057	-63.82	1416.386	-1.9439	1.0935	0.094532	NaN	NaN	NaN	NaN	NaN	NaN	NaN	NaN	NaN	NaN	NaN	NaN
0.336	29.5913	2.7282	275.469	-0.40381	0.52686	-0.086426	-108.811	-28.965	1414.662	-2.0921	1.1939	0.11299	NaN	NaN	NaN	NaN	NaN	NaN	NaN	NaN	NaN	NaN	NaN	NaN
0.338	24.473	-21.2788	285.4922	-0.66846	0.63037	-0.04248	-60.595	-8.904	1374.519	-2.205	1.288	0.11728	NaN	NaN	NaN	NaN	NaN	NaN	NaN	NaN	NaN	NaN	NaN	NaN
0.34	32.8819	-74.2972	229.5313	-0.7793	0.69141	-0.018555	-79.142	-66.803	1371.7889	-2.2658	1.3538	0.098924	NaN	NaN	NaN	NaN	NaN	NaN	NaN	NaN	NaN	NaN	NaN	NaN
0.342	-3.0032	-108.377	248.68	-0.94043	0.79688	0.0058594	-25.508	-45.676	1390.967	-2.2866	1.4067	0.064941	NaN	NaN	NaN	NaN	NaN	NaN	NaN	NaN	NaN	NaN	NaN	NaN
0.344	-11.827	-99.6354	347.231	-0.98803	0.85864	0.0061035	-36.431	-48.734	1401.1036	-2.2956	1.4447	0.018066	NaN	NaN	NaN	NaN	NaN	NaN	NaN	NaN	NaN	NaN	NaN	NaN
0.346	-22.065	-61.3332	421.5231	-0.99756	0.89307	-0.0087891	-2.214	-1.532	1431.044	-2.325	1.4727	-0.027051	NaN	NaN	NaN	NaN	NaN	NaN	NaN	NaN	NaN	NaN	NaN	NaN
0.348	-27.685	-26.537	409.721	-0.96973	0.91211	-0.030273	37.95	115.5685	1415.763	-2.384	1.5074	-0.055176	NaN	NaN	NaN	NaN	NaN	NaN	NaN	NaN	NaN	NaN	NaN	NaN
0.35	-2.029	-22.2008	382.006	-0.96094	0.92383	-0.045898	-26.353	101.917	1386.898	-2.4578	1.5516	-0.064551	NaN	NaN	NaN	NaN	NaN	NaN	NaN	NaN	NaN	NaN	NaN	NaN
0.352	43.692	-32.3311	402.327	-0.96484	0.94922	-0.072266	-19.536	86.7203	1393.681	-2.5405	1.6099	-0.068848	NaN	NaN	NaN	NaN	NaN	NaN	NaN	NaN	NaN	NaN	NaN	NaN
0.354	60.711	-29.015	487.8759	-1.0127	0.98047	-0.097415	-68.184	66.92	1379.2347	-2.5988	1.6711	-0.069434	NaN	NaN	NaN	NaN	NaN	NaN	NaN	NaN	NaN	NaN	NaN	NaN
0.356	28.133	7.712	553.1002	-1.0938	1.0068	-0.13379	-96.6091	34.5777	1393.509	-2.6164	1.7239	-0.066016	NaN	NaN	NaN	NaN	NaN	NaN	NaN	NaN	NaN	NaN	NaN	NaN
0.358	8.395	55.752	616.7071	-1.2852	1.0781	-0.16943	-8.747	90.669	1380.179	-2.5914	1.7551	-0.064063	NaN	NaN	NaN	NaN	NaN	NaN	NaN	NaN	NaN	NaN	NaN	NaN
0.36	7.188	71.949	697.768	-1.4219	1.127	-0.17383	-41.739	102.753	1306.76	-2.4986	1.7654	-0.059765	NaN	NaN	NaN	NaN	NaN	NaN	NaN	NaN	NaN	NaN	NaN	NaN
0.362	45.888	67.7491	763.4186	-1.7163	1.2485	-0.15527	-60.9	97.649	1260.682	-2.3711	1.7461	-0.068359	NaN	NaN	NaN	NaN	NaN	NaN	NaN	NaN	NaN	NaN	NaN	NaN
0.364	61.78	45.463	821.029	-1.9199	1.3652	-0.12232	-74.093	113.8547	1216.797	-2.2222	1.6824	-0.069727	NaN	NaN	NaN	NaN	NaN	NaN	NaN	NaN	NaN	NaN	NaN	NaN
0.366	14.838	16.2469	878.711	-2.0718	1.481	-0.090332	-73.644	72.943	1200.933	-2.0774	1.5914	-0.078418	NaN	NaN	NaN	NaN	NaN	NaN	NaN	NaN	NaN	NaN	NaN	NaN
0.368	-29.8513	-7.2958	986.604	-2.1284	1.6313	-0.062012	-13.398	60.467	1238.923	-1.9539	1.4914	-0.085449	NaN	NaN	NaN	NaN	NaN	NaN	NaN	NaN	NaN	NaN	NaN	NaN
0.37	-46.3083	-23.605	1043.5686	-2.0894	1.6899	-0.057617	-10.341	92.971	1232.293	-1.8486	1.405	-0.092969	NaN	NaN	NaN	NaN	NaN	NaN	NaN	NaN	NaN	NaN	NaN	NaN
0.372	-59.9615	-43.083	1076.663	-1.8901	1.7622	-0.075684	-31.614	99.699	1218.647	-1.7559	1.3281	-0.095703	NaN	NaN	NaN	NaN	NaN	NaN	NaN	NaN	NaN	NaN	NaN	NaN
0.374	-36.799	-28.5955	1046.49521	-1.6733	1.77	-0.10278	-27.638	163.671	1201.1234	-1.6699	1.2739	-0.10205	NaN	NaN	NaN	NaN	NaN	NaN	NaN	NaN	NaN	NaN	NaN	NaN
0.376	-23.158	-52.305	1060.633	-1.4507	1.7388	-0.13574	-123.905	194.351	1139.745	-1.6101	1.2315	-0.10869	NaN	NaN	NaN	NaN	NaN	NaN	NaN	NaN	NaN	NaN	NaN	NaN
0.378	-42.457	-66.962	1087.06486	-1.1987	1.6431	-0.1792	-126.60252	184.56	1128.294	-1.562	1.1921	-0.1001	NaN	NaN	NaN	NaN	NaN	NaN	NaN	NaN	NaN	NaN	NaN	NaN
0.38	-93.268	-87.853	1149.508	-1.1113	1.5957	-0.19922	-78.198	203.409	1105.828	-1.5216	1.1589	-0.094238	NaN	NaN	NaN	NaN	NaN	NaN	NaN	NaN	NaN	NaN	NaN	NaN
0.382	-67.202209	-63.423	1191.936	-0.98682	1.5063	-0.2207	-139.444	155.323	1052.1656	-1.4766	1.1172	-0.091797	NaN	NaN	NaN	NaN	NaN	NaN	NaN	NaN	NaN	NaN	NaN	NaN
0.384	-7.0659	-48.1334	1202.789	-0.93726	1.4593	-0.21143	-89.953	125.6614	1025.592	-1.4266	1.0699	-0.081836	NaN	NaN	NaN	NaN	NaN	NaN	NaN	NaN	NaN	NaN	NaN	NaN
0.386	-37.001	-45.675	1206.8955	-0.90771	1.4321	-0.21045	-87.758	127.9156	965.85	-1.3827	1.0245	-0.072168	NaN	NaN	NaN	NaN	NaN	NaN	NaN	NaN	NaN	NaN	NaN	NaN
0.388	-67.807	-64.441	1220.7009	-0.87891	1.4102	-0.21582	-79.112	95.59	919.011	-1.3362	0.97724	-0.063965	NaN	NaN	NaN	NaN	NaN	NaN	NaN	NaN	NaN	NaN	NaN	NaN
0.39	-98.767	-78.054	1220.7638	-0.87109	1.3984	-0.2207	7.73	128.969	874.4632	-1.2897	0.93135	-0.057813	NaN	NaN	NaN	NaN	NaN	NaN	NaN	NaN	NaN	NaN	NaN	NaN
0.392	-87.053	-52.107	1208.3616	-0.875	1.3848	-0.24219	-5.846	168.769	814.8757	-1.2397	0.88818	-0.053223	NaN	NaN	NaN	NaN	NaN	NaN	NaN	NaN	NaN	NaN	NaN	NaN
0.394	-100.5719	-32.092	1213.81	-0.89453	1.3706	-0.25488	8.21	180.761	808.6123	-1.1879	0.85391	-0.045606	NaN	NaN	NaN	NaN	NaN	NaN	NaN	NaN	NaN	NaN	NaN	NaN
0.396	-94.348	-51.337	1199.387	-0.93945	1.3604	-0.26563	10.156	232.994	808.334	-1.141	0.82031	-0.045996	NaN	NaN	NaN	NaN	NaN	NaN	NaN	NaN	NaN	NaN	NaN	NaN
0.398	-72.965	-74.73	1230.965	-1.0088	1.3438	-0.26758	-36.06	202.926	811.21862	-1.0946	0.79102	-0.048731	NaN	NaN	NaN	NaN	NaN	NaN	NaN	NaN	NaN	NaN	NaN	NaN
0.4	-50.157	-105.7767	1259.904	-1.0508	1.3398	-0.25977	7.38	186.647	773.282	-1.0425	0.76572	-0.048144	NaN	NaN	NaN	NaN	NaN	NaN	NaN	NaN	NaN	NaN	NaN	NaN
0.402	-36.382	-107.689	1293.124	-1.1304	1.3423	-0.26709	-28.566	223.265	711.872	-0.98438	0.74023	-0.052246	NaN	NaN	NaN	NaN	NaN	NaN	NaN	NaN	NaN	NaN	NaN	NaN
0.404	-21.908	-108.075	1308.6345	-1.1844	1.3489	-0.27002	-56.6058	184.53	636.8976	-0.92431	0.71553	-0.056543	NaN	NaN	NaN	NaN	NaN	NaN	NaN	NaN	NaN	NaN	NaN	NaN
0.406	-6.539	-96.67	1322.909	-1.2388	1.3677	-0.28271	-23.24	164.775	595.059	-0.8585	0.68838	-0.060156	NaN	NaN	NaN	NaN	NaN	NaN	NaN	NaN	NaN	NaN	NaN	NaN
0.408	12.2399	-80.16	1345.724	-1.3237	1.3931	-0.2959	-66.686	179.672	557.882	-0.78975	0.65752	-0.061328	NaN	NaN	NaN	NaN	NaN	NaN	NaN	NaN	NaN	NaN	NaN	NaN
0.41	-1.429	-88.13	1376.3551	-1.3647	1.4067	-0.29834	-11.319	149.131	535.8035	-0.71796	0.62559	-0.064453	NaN	NaN	NaN	NaN	NaN	NaN	NaN	NaN	NaN	NaN	NaN	NaN
0.412	15.01	-94.299	1396.19287	-1.4629	1.4512	-0.29492	46.1698	169.79	505.6477	-0.64355	0.5918	-0.067871	NaN	NaN	NaN	NaN	NaN	NaN	NaN	NaN	NaN	NaN	NaN	NaN
0.414	18.941	-93.4077	1398.03	-1.5444	1.4873	-0.29029	1.827	139.832	440.85	-0.56358	0.55225	-0.077149	NaN	NaN	NaN	NaN	NaN	NaN	NaN	NaN	NaN	NaN	NaN	NaN
0.416	10.631	-89.4282	1386.243	-1.6245	1.5259	-0.29639	24.851	118.427	420.593	-0.48672	0.50977	-0.086914	NaN	NaN	NaN	NaN	NaN	NaN	NaN	NaN	NaN	NaN	NaN	NaN
0.418	-9.323	-89.0807	1372.8113	-1.7085	1.5864	-0.31201	-6.75	157.5672	380.724	-0.4043	0.46836	-0.098242	NaN	NaN	NaN	NaN	NaN	NaN	NaN	NaN	NaN	NaN	NaN	NaN
0.42	-57.1369	-75.915	1376.428	-1.7437	1.6157	-0.32764	-31.337	145.9302	367.3295	-0.32978	0.42187	-0.10889	NaN	NaN	NaN	NaN	NaN	NaN	NaN	NaN	NaN	NaN	NaN	NaN
0.422	9.302	-60.933	1372.536	-1.8086	1.6836	-0.36133	1.59	161.808	368.573	-0.2666	0.37695	-0.11719	NaN	NaN	NaN	NaN	NaN	NaN	NaN	NaN	NaN	NaN	NaN	NaN
0.424	30.2621	-51.503	1377.589	-1.8672	1.7334	-0.38452	-54.2246	192.062	325.663	-0.21641	0.34356	-0.12481	NaN	NaN	NaN	NaN	NaN	NaN	NaN	NaN	NaN	NaN	NaN	NaN
0.426	76.86	-55.43	1375.02639	-1.9292	1.7896	-0.39844	-59.6192	146.766	297.683	-0.17451	0.31338	-0.13076	NaN	NaN	NaN	NaN	NaN	NaN	NaN	NaN	NaN	NaN	NaN	NaN
0.428	34.7469	-47.6736	1357.5652	-2.0156	1.873	-0.40234	-67.50075	169.142	281.1314	-0.14013	0.29424	-0.13506	NaN	NaN	NaN	NaN	NaN	NaN	NaN	NaN	NaN	NaN	NaN	NaN
0.43	16.961	-17.6814	1357.3122	-2.0449	1.9141	-0.40234	-119.011	180.861	264.4728	-0.10459	0.27158	-0.13994	NaN	NaN	NaN	NaN	NaN	NaN	NaN	NaN	NaN	NaN	NaN	NaN
0.432	-9.825	-10.55	1399.41879	-2.0757	1.9634	-0.39111	-40.598	140.6745	264.408	-0.071777	0.25439	-0.13916	NaN	NaN	NaN	NaN	NaN	NaN	NaN	NaN	NaN	NaN	NaN	NaN
0.434	-5.136	-36.2884	1413.1761	-2.0662	1.9788	-0.37842	-35.639	146.618	216.2423	-0.042383	0.23291	-0.14765	NaN	NaN	NaN	NaN	NaN	NaN	NaN	NaN	NaN	NaN	NaN	NaN
0.436	25.4029	-63.502	1416.775	-2.0313	1.9785	-0.37305	-58.316	87.872	151.158	-0.014258	0.204	-0.15088	NaN	NaN	NaN	NaN	NaN	NaN	NaN	NaN	NaN	NaN	NaN	NaN
0.438	9.9947	-51.7965	1369.268	-1.9258	1.9453	-0.38086	-24.973	59.086	128.917	0.014648	0.17705	-0.15517	NaN	NaN	NaN	NaN	NaN	NaN	NaN	NaN	NaN	NaN	NaN	NaN
0.44	-13.7238	-46.742	1359.541	-1.8535	1.918	-0.38281	-53.1115	82.122	109.224	0.034375	0.15274	-0.1583	NaN	NaN	NaN	NaN	NaN	NaN	NaN	NaN	NaN	NaN	NaN	NaN
0.442	-36.5703	-38.869	1373.5415	-1.7163	1.854	-0.38916	-29.259	58.055	114.2619	0.053223	0.12988	-0.15625	NaN	NaN	NaN	NaN	NaN	NaN	NaN	NaN	NaN	NaN	NaN	NaN
0.444	-64.8581	-27.39	1364.6513	-1.6284	1.8022	-0.39209	-3.939	90.6117	114.2761	0.065332	0.11377	-0.15645	NaN	NaN	NaN	NaN	NaN	NaN	NaN	NaN	NaN	NaN	NaN	NaN
0.446	-21.294	-25.1608	1342.2982	-1.5605	1.748	-0.39063	-69.1412	110.30501	106.33916	0.076562	0.099508	-0.15351	NaN	NaN	NaN	NaN	NaN	NaN	NaN	NaN	NaN	NaN	NaN	NaN
0.448	13.129	-32.169	1310.477	-1.5034	1.6968	-0.38037	-21.185	80.079	132.3124	0.093359	0.090136	-0.15781	NaN	NaN	NaN	NaN	NaN	NaN	NaN	NaN	NaN	NaN	NaN	NaN
0.45	33.4706	-52.895	1302.757	-1.4878	1.6724	-0.37646	-39.8491	119.873	123.35624	0.11699	0.077441	-0.16201	NaN	NaN	NaN	NaN	NaN	NaN	NaN	NaN	NaN	NaN	NaN	NaN
0.452	-9.1028	-22.6655	1297.9154	-1.478	1.6372	-0.36475	-58.1011	75.5722	121.593	0.13037	0.068848	-0.16797	NaN	NaN	NaN	NaN	NaN	NaN	NaN	NaN	NaN	NaN	NaN	NaN
0.454	-14.604	46.6774	1288.7142	-1.4819	1.606	-0.34619	-5.529	44.2732	92.517	0.14375	0.055469	-0.17285	NaN	NaN	NaN	NaN	NaN	NaN	NaN	NaN	NaN	NaN	NaN	NaN
0.456	5.401	79.9512	1282.1164	-1.4805	1.5957	-0.32959	-49.806	60.3926	25.9585	0.14073	0.041406	-0.17725	NaN	NaN	NaN	NaN	NaN	NaN	NaN	NaN	NaN	NaN	NaN	NaN
0.458	19.34	77.975	1254.2828	-1.48	1.562	-0.31689	-28.741	12.131	16.409	0.13565	0.026562	-0.1792	NaN	NaN	NaN	NaN	NaN	NaN	NaN	NaN	NaN	NaN	NaN	NaN
0.46	17.059	41.217	1249.308	-1.4668	1.5337	-0.30639	3.096	25.9551	10.718	0.11884	0.020508	-0.18428	NaN	NaN	NaN	NaN	NaN	NaN	NaN	NaN	NaN	NaN	NaN	NaN
0.462	-18.238	49.225	1236.6191	-1.4429	1.5024	-0.29395	-27.408	36.613	19.653	0.095215	0.01709	-0.17676	NaN	NaN	NaN	NaN	NaN	NaN	NaN	NaN	NaN	NaN	NaN	NaN
0.464	3.326	52.594	1225.6468	-1.4097	1.4536	-0.27832	21.979	-13.395	47.8876	0.065625	0.016113	-0.18242	NaN	NaN	NaN	NaN	NaN	NaN	NaN	NaN	NaN	NaN	NaN	NaN
0.466	-11.355	57.133	1210.6876	-1.3906	1.4316	-0.26611	-14.482	40.5565	23.2595	0.025293	0.022071	-0.18076	NaN	NaN	NaN	NaN	NaN	NaN	NaN	NaN	NaN	NaN	NaN	NaN
0.468	0.0329999999999977	56.1827	1169.4633	-1.353	1.3794	-0.24854	-64.1341	24.2569	14.4235	-0.028222	0.024805	-0.17569	NaN	NaN	NaN	NaN	NaN	NaN	NaN	NaN	NaN	NaN	NaN	NaN
0.47	4.875	32.6975	1119.183	-1.3249	1.343	-0.23828	-30.749	23.323	31.4655	-0.087598	0.039258	-0.17432	NaN	NaN	NaN	NaN	NaN	NaN	NaN	NaN	NaN	NaN	NaN	NaN
0.472	37.391	14.827	1075.878	-1.3013	1.3091	-0.2168	-45.3	69.084	29.022	-0.14307	0.059082	-0.16406	NaN	NaN	NaN	NaN	NaN	NaN	NaN	NaN	NaN	NaN	NaN	NaN
0.474	17.094	32.674	1088.166	-1.2637	1.2617	-0.19434	-15.125	22.9928	54.814	-0.20059	0.074511	-0.15967	NaN	NaN	NaN	NaN	NaN	NaN	NaN	NaN	NaN	NaN	NaN	NaN
0.476	12.482	65.947	1111.0729	-1.2456	1.2446	-0.18311	-9.429	27.8165	49.81	-0.24795	0.085449	-0.15791	NaN	NaN	NaN	NaN	NaN	NaN	NaN	NaN	NaN	NaN	NaN	NaN
0.478	21.05756	87.161	1117.984	-1.1968	1.1958	-0.16309	-47.3195	34.0015	25.7859	-0.28389	0.094043	-0.1544	NaN	NaN	NaN	NaN	NaN	NaN	NaN	NaN	NaN	NaN	NaN	NaN
0.48	16.079	83.1757	1061.431	-1.1538	1.1568	-0.14844	-26.899	-2.898	29.806	-0.31377	0.096973	-0.15049	NaN	NaN	NaN	NaN	NaN	NaN	NaN	NaN	NaN	NaN	NaN	NaN
0.482	0.452999999999999	93.0722	1010.4356	-1.1099	1.1157	-0.13916	-55.7072	53.6431	7.302	-0.33008	0.099121	-0.15332	NaN	NaN	NaN	NaN	NaN	NaN	NaN	NaN	NaN	NaN	NaN	NaN
0.484	-11.128	109.488	980.902	-1.0513	1.0708	-0.12451	-68.802	31.117	23.0265	-0.33516	0.10449	-0.15274	NaN	NaN	NaN	NaN	NaN	NaN	NaN	NaN	NaN	NaN	NaN	NaN
0.486	-12.323	130.846	971.619	-1.021	1.0376	-0.12158	-7.67299999999999	16.6048	24.4239	-0.33418	0.10498	-0.14228	NaN	NaN	NaN	NaN	NaN	NaN	NaN	NaN	NaN	NaN	NaN	NaN
0.488	-27.55	131.555	958.26535	-0.9707	0.98242	-0.11084	-42.688	48.625	-5.4597	-0.32325	0.10693	-0.14502	NaN	NaN	NaN	NaN	NaN	NaN	NaN	NaN	NaN	NaN	NaN	NaN
0.49	-34.2589	109.619	914.9835	-0.92871	0.94433	-0.10083	-56.013	1.79934	-1.1951	-0.30596	0.10283	-0.14043	NaN	NaN	NaN	NaN	NaN	NaN	NaN	NaN	NaN	NaN	NaN	NaN
0.492	-47.409	100.1574	866.304	-0.89453	0.91016	-0.088867	-43.193	29.2364	23.0927	-0.28174	0.098633	-0.13623	NaN	NaN	NaN	NaN	NaN	NaN	NaN	NaN	NaN	NaN	NaN	NaN
0.494	-50.7015	94.139	848.199	-0.84814	0.86182	-0.075195	-64.3423	68.681	39.2161	-0.2542	0.09082	-0.12822	NaN	NaN	NaN	NaN	NaN	NaN	NaN	NaN	NaN	NaN	NaN	NaN
0.496	-17.742	110.875	819.818	-0.82813	0.8418	-0.062012	-6.974	34.751	74.061	-0.22246	0.078808	-0.12441	NaN	NaN	NaN	NaN	NaN	NaN	NaN	NaN	NaN	NaN	NaN	NaN
0.498	-20.657	115.969	777.5412	-0.78271	0.79541	-0.049805	-34.016	72.554	40.7119	-0.18105	0.063574	-0.11777	NaN	NaN	NaN	NaN	NaN	NaN	NaN	NaN	NaN	NaN	NaN	NaN
0.5	-13.28	151.98558	743.6789	-0.74585	0.75854	-0.032226	-69.5125	37.3959	26.9268	-0.13643	0.045801	-0.11221	NaN	NaN	NaN	NaN	NaN	NaN	NaN	NaN	NaN	NaN	NaN	NaN
0.502	-22.993	144.079	708.7035	-0.70508	0.71875	-0.018066	-29.778	23.906	37.0447	-0.084961	0.026855	-0.10938	NaN	NaN	NaN	NaN	NaN	NaN	NaN	NaN	NaN	NaN	NaN	NaN
0.504	-49.6416	126.4447	712.9489	-0.64844	0.6709	-0.0083008	-67.791	77.314	17.3671	-0.027929	0.0055662	-0.099709	NaN	NaN	NaN	NaN	NaN	NaN	NaN	NaN	NaN	NaN	NaN	NaN
0.506	-30.4023	116.1951	711.1155	-0.62305	0.64844	-0.0058594	-29.056	29.852	23.2935	0.037988	-0.018164	-0.1	NaN	NaN	NaN	NaN	NaN	NaN	NaN	NaN	NaN	NaN	NaN	NaN
0.508	-50.745	126.7136	698.3828	-0.57178	0.60693	0.012207	-14.589	32.1996	15.8099	0.104	-0.048633	-0.10117	NaN	NaN	NaN	NaN	NaN	NaN	NaN	NaN	NaN	NaN	NaN	NaN
0.51	-22.779	133.427	654.8063	-0.53296	0.56812	0.025879	-58.914	37.3239	-0.552	0.17061	-0.081543	-0.094336	NaN	NaN	NaN	NaN	NaN	NaN	NaN	NaN	NaN	NaN	NaN	NaN
0.512	-42.87	132.016	603.9809	-0.49023	0.53271	0.04541	-22.152	-12.0555	30.3211	0.23584	-0.11377	-0.10254	NaN	NaN	NaN	NaN	NaN	NaN	NaN	NaN	NaN	NaN	NaN	NaN
0.514	-30.345	139.48	551.1127	-0.44043	0.48926	0.063965	-27.423	55.401	36.911	0.28614	-0.13428	-0.09668	NaN	NaN	NaN	NaN	NaN	NaN	NaN	NaN	NaN	NaN	NaN	NaN
0.516	-55.4696	135.007	528.032	-0.4082	0.4707	0.069336	-48.18	50.0605	58.513	0.32715	-0.14873	-0.095801	NaN	NaN	NaN	NaN	NaN	NaN	NaN	NaN	NaN	NaN	NaN	NaN
0.518	-22.952	108.2645	504.5803	-0.35059	0.4292	0.07959	-9.45699999999999	33.772	62.687	0.35449	-0.15654	-0.096973	NaN	NaN	NaN	NaN	NaN	NaN	NaN	NaN	NaN	NaN	NaN	NaN
0.52	4.782	90.671	472.4911	-0.30517	0.39575	0.089356	-62.1224	78.078	11.2172	0.37207	-0.15556	-0.092871	NaN	NaN	NaN	NaN	NaN	NaN	NaN	NaN	NaN	NaN	NaN	NaN
0.522	11.178	87.42	424.2428	-0.2627	0.3584	0.10205	-35.159	26.892	22.5522	0.37744	-0.15381	-0.09082	NaN	NaN	NaN	NaN	NaN	NaN	NaN	NaN	NaN	NaN	NaN	NaN
0.524	-8.662	110.5454	404.914	-0.21191	0.32422	0.10791	-6.963	37.374	41.49623	0.37432	-0.14834	-0.086914	NaN	NaN	NaN	NaN	NaN	NaN	NaN	NaN	NaN	NaN	NaN	NaN
0.526	-23.236	118.25667	402.136	-0.18848	0.29883	0.1167	-41.179	61.5888	40.8346	0.36094	-0.13477	-0.085743	NaN	NaN	NaN	NaN	NaN	NaN	NaN	NaN	NaN	NaN	NaN	NaN
0.528	-10.863	121.7398	385.973	-0.13672	0.25977	0.11768	4.774	5.669	59.503	0.34141	-0.11172	-0.084571	NaN	NaN	NaN	NaN	NaN	NaN	NaN	NaN	NaN	NaN	NaN	NaN
0.53	-0.213000000000001	124.172	362.737	-0.097903	0.24024	0.12329	-29.106	37.59328	29.1098	0.31484	-0.08916	-0.083105	NaN	NaN	NaN	NaN	NaN	NaN	NaN	NaN	NaN	NaN	NaN	NaN
0.532	-15.08	116.907	340.686	-0.062988	0.22119	0.12939	-30.037	26.81	23.808	0.29053	-0.059082	-0.084473	NaN	NaN	NaN	NaN	NaN	NaN	NaN	NaN	NaN	NaN	NaN	NaN
0.534	-14.341	108.5	319.935	-0.022949	0.18994	0.14063	8.787	13.3316	46.9558	0.25937	-0.031934	-0.080176	NaN	NaN	NaN	NaN	NaN	NaN	NaN	NaN	NaN	NaN	NaN	NaN
0.536	-32.071	105.539	290.8313	-0.003418	0.18115	0.14111	-46.724	56.7075	26.875	0.23096	0.0018555	-0.076367	NaN	NaN	NaN	NaN	NaN	NaN	NaN	NaN	NaN	NaN	NaN	NaN
0.538	-38.567	104.397	256.4629	0.040039	0.16797	0.14746	-26.13	11.016	46.504	0.20752	0.02959	-0.078321	NaN	NaN	NaN	NaN	NaN	NaN	NaN	NaN	NaN	NaN	NaN	NaN
0.54	-56.063	92.9973	238.1908	0.070557	0.16016	0.15552	-37.253	11.0848	48.2967	0.18887	0.054102	-0.083887	NaN	NaN	NaN	NaN	NaN	NaN	NaN	NaN	NaN	NaN	NaN	NaN
0.542	-16.675	66.583	222.4298	0.10498	0.14844	0.1543	-72.8352	42.546	38.7399	0.1792	0.078613	-0.084961	NaN	NaN	NaN	NaN	NaN	NaN	NaN	NaN	NaN	NaN	NaN	NaN
0.544	-23.395	48.928	188.123	0.14404	0.12939	0.15479	-38.111	1.633	53.12297	0.16738	0.099705	-0.092969	NaN	NaN	NaN	NaN	NaN	NaN	NaN	NaN	NaN	NaN	NaN	NaN
0.546	-36.251	54.926	167.968	0.16504	0.12109	0.15479	-33.846	46.081	48.2995	0.1625	0.12197	-0.10459	NaN	NaN	NaN	NaN	NaN	NaN	NaN	NaN	NaN	NaN	NaN	NaN
0.548	-47.814	61.1202	169.3319	0.2002	0.10889	0.14746	-56.071	33.8881	31.3729	0.15508	0.14502	-0.10732	NaN	NaN	NaN	NaN	NaN	NaN	NaN	NaN	NaN	NaN	NaN	NaN
0.55	-33.642	78.38	162.307	0.22851	0.094482	0.14258	-14.958	5.1612	34.1833	0.14463	0.1707	-0.11797	NaN	NaN	NaN	NaN	NaN	NaN	NaN	NaN	NaN	NaN	NaN	NaN
0.552	-36.187	86.183	143.96	0.24854	0.085938	0.14209	-73.3744	49.3644	9.783	0.1416	0.20313	-0.12549	NaN	NaN	NaN	NaN	NaN	NaN	NaN	NaN	NaN	NaN	NaN	NaN
0.554	-62.325	87.285	101.6563	0.27002	0.079102	0.13574	-65.253	4.449	27.011	0.13701	0.22901	-0.12529	NaN	NaN	NaN	NaN	NaN	NaN	NaN	NaN	NaN	NaN	NaN	NaN
0.556	-47.441	55.7429	93.9354	0.2749	0.077148	0.13574	-26.104	25.1047	34.3032	0.1334	0.26104	-0.13486	NaN	NaN	NaN	NaN	NaN	NaN	NaN	NaN	NaN	NaN	NaN	NaN
0.558	-56.951	49.0836	102.4327	0.28418	0.064453	0.14453	-56.221	47.8143	17.6931	0.12754	0.28213	-0.14502	NaN	NaN	NaN	NaN	NaN	NaN	NaN	NaN	NaN	NaN	NaN	NaN
0.56	-49.271	58.3169	104.2879	0.28711	0.062011	0.13598	-33.512	-0.447100000000001	38.1707	0.12705	0.30293	-0.1583	NaN	NaN	NaN	NaN	NaN	NaN	NaN	NaN	NaN	NaN	NaN	NaN
0.562	-76.7916	69.3615	81.2261	0.28857	0.060547	0.13477	-44.868	45.447	13.74	0.12402	0.32275	-0.15967	NaN	NaN	NaN	NaN	NaN	NaN	NaN	NaN	NaN	NaN	NaN	NaN
0.564	-37.231	59.53528	51.0699	0.28369	0.0625	0.12842	-78.6978	40.634	13.174	0.12129	0.33691	-0.17246	NaN	NaN	NaN	NaN	NaN	NaN	NaN	NaN	NaN	NaN	NaN	NaN
0.566	-24.744	37.4222	30.552	0.28271	0.061523	0.12988	-32.042	19.1573	38.05229	0.11074	0.34903	-0.18311	NaN	NaN	NaN	NaN	NaN	NaN	NaN	NaN	NaN	NaN	NaN	NaN
0.568	-27.704	14.4345	5.691	0.2666	0.060547	0.12354	-35.741	34.193	49.5065	0.094336	0.35723	-0.19014	NaN	NaN	NaN	NaN	NaN	NaN	NaN	NaN	NaN	NaN	NaN	NaN
0.57	-37.915	23.8629	21.4766	0.25513	0.062744	0.12549	-20.861	-35.07692	73.1426	0.071094	0.3666	-0.1958	NaN	NaN	NaN	NaN	NaN	NaN	NaN	NaN	NaN	NaN	NaN	NaN
0.572	-17.459	40.9455	34.6246	0.24268	0.065918	0.12354	-14.923	-26.309	73.393	0.049805	0.37402	-0.20361	NaN	NaN	NaN	NaN	NaN	NaN	NaN	NaN	NaN	NaN	NaN	NaN
0.574	3.56	39.4971	54.0138	0.21191	0.072754	0.12598	-15.581	-5.912	78.478	0.030176	0.38594	-0.21152	NaN	NaN	NaN	NaN	NaN	NaN	NaN	NaN	NaN	NaN	NaN	NaN
0.576	-27.221	17.204	46.5547	0.20166	0.079102	0.12695	6.823	-48.2429	125.7656	0.02168	0.40283	-0.21621	NaN	NaN	NaN	NaN	NaN	NaN	NaN	NaN	NaN	NaN	NaN	NaN
0.578	-41.724	5.5208	27.03377	0.16748	0.090332	0.13037	-7.289	-12.633	183.55842	0.023633	0.42392	-0.2248	NaN	NaN	NaN	NaN	NaN	NaN	NaN	NaN	NaN	NaN	NaN	NaN
0.58	-11.343	14.730565	19.6322	0.14136	0.09375	0.13428	-18.622	-48.5757	208.7784	0.025098	0.44033	-0.23857	NaN	NaN	NaN	NaN	NaN	NaN	NaN	NaN	NaN	NaN	NaN	NaN
0.582	-4.938	48.729	42.0181	0.11963	0.1001	0.14063	39.199	-97.1876	269.1096	0.010742	0.4541	-0.25488	NaN	NaN	NaN	NaN	NaN	NaN	NaN	NaN	NaN	NaN	NaN	NaN
0.584	-20.055	64.433	28.8598	0.09375	0.10449	0.14258	-5.059	-31.665	349.013	-0.017871	0.45703	-0.2667	NaN	NaN	NaN	NaN	NaN	NaN	NaN	NaN	NaN	NaN	NaN	NaN
0.586	-45.69	50.486	30.1961	0.087402	0.10498	0.14893	-24.6376	-21.6884	493.2807	-0.080957	0.47002	-0.27207	NaN	NaN	NaN	NaN	NaN	NaN	NaN	NaN	NaN	NaN	NaN	NaN
0.588	-1.261	15.409	6.6663	0.073242	0.10645	0.1543	29.6602	44.1427	651.645	-0.16573	0.479	-0.27441	NaN	NaN	NaN	NaN	NaN	NaN	NaN	NaN	NaN	NaN	NaN	NaN
0.59	-24.77	10.0385	12.706	0.068603	0.11621	0.15479	-16.333	86.1034	777.943	-0.26885	0.50762	-0.27207	NaN	NaN	NaN	NaN	NaN	NaN	NaN	NaN	NaN	NaN	NaN	NaN
0.592	-12.726	19.973	19.635	0.066406	0.12646	0.15771	-26.747	21.736	964.302	-0.37207	0.54297	-0.27002	NaN	NaN	NaN	NaN	NaN	NaN	NaN	NaN	NaN	NaN	NaN	NaN
0.594	-31.493	31.6873	31.1321	0.066406	0.13818	0.16113	1.207	55.153	1091.091	-0.4832	0.58652	-0.27188	NaN	NaN	NaN	NaN	NaN	NaN	NaN	NaN	NaN	NaN	NaN	NaN
0.596	-8.858	47.6961	20.558	0.070313	0.1377	0.15625	-0.323999999999998	33.1649	1208.511	-0.59219	0.62471	-0.28223	NaN	NaN	NaN	NaN	NaN	NaN	NaN	NaN	NaN	NaN	NaN	NaN
0.598	-32.755	48.8419	6.142	0.072754	0.12549	0.1543	27.756	20.516	1264.598	-0.72109	0.66182	-0.29824	NaN	NaN	NaN	NaN	NaN	NaN	NaN	NaN	NaN	NaN	NaN	NaN
0.6	-64.3039	37.8832	16.8363	0.074707	0.11719	0.15503	-42.299	51.536	1216.616	-0.89688	0.68457	-0.32178	NaN	NaN	NaN	NaN	NaN	NaN	NaN	NaN	NaN	NaN	NaN	NaN
0.602	-40.495	17.59822	46.1138	0.083008	0.11133	0.15137	-36.156	-20.093	1176.073	-1.1421	0.70752	-0.3335	NaN	NaN	NaN	NaN	NaN	NaN	NaN	NaN	NaN	NaN	NaN	NaN
0.604	-34.667	34.183699	42.1927	0.095215	0.10645	0.15039	-16.044	-53.919	1135.094	-1.5243	0.7415	-0.32158	NaN	NaN	NaN	NaN	NaN	NaN	NaN	NaN	NaN	NaN	NaN	NaN
0.606	-33.245	40.6703	30.1842	0.10693	0.11108	0.14965	-87.90046	-71.4062	1112.678	-2.0304	0.82256	-0.28271	NaN	NaN	NaN	NaN	NaN	NaN	NaN	NaN	NaN	NaN	NaN	NaN
0.608	-70.1672	38.037	24.5017	0.11914	0.11328	0.14355	-82.555	-135.7934	1123.937	-2.6179	0.96475	-0.20342	NaN	NaN	NaN	NaN	NaN	NaN	NaN	NaN	NaN	NaN	NaN	NaN
0.61	-49.943	27.4579	21.268	0.13623	0.11523	0.13477	-59.939	-132.786	1100.147	-3.1579	1.1753	-0.086038	NaN	NaN	NaN	NaN	NaN	NaN	NaN	NaN	NaN	NaN	NaN	NaN
0.612	-40.687	24.8581	29.361	0.14209	0.11865	0.13086	-53.98	-205.616	1101.54	-3.5444	1.4634	0.032715	NaN	NaN	NaN	NaN	NaN	NaN	NaN	NaN	NaN	NaN	NaN	NaN
0.614	-37.067	29.204	10.922	0.15381	0.12646	0.12402	1.134	-234.755	1103.1851	-3.6874	1.7977	0.017676	NaN	NaN	NaN	NaN	NaN	NaN	NaN	NaN	NaN	NaN	NaN	NaN
0.616	-41.996	29.8677	24.0882	0.15503	0.13013	0.11938	-24.82	-155.518	1106.9959	-3.5574	2.1156	-0.07041	NaN	NaN	NaN	NaN	NaN	NaN	NaN	NaN	NaN	NaN	NaN	NaN
0.618	-43.096	26.88983	20.2036	0.15723	0.13477	0.11572	16.315	-87.223	1145.93	-3.1168	2.3234	-0.13135	NaN	NaN	NaN	NaN	NaN	NaN	NaN	NaN	NaN	NaN	NaN	NaN
0.62	-21.024	37.2881	26.252	0.15137	0.15137	0.11475	-17.215	1.27999999999997	1152.36	-2.4586	2.3496	-0.17969	NaN	NaN	NaN	NaN	NaN	NaN	NaN	NaN	NaN	NaN	NaN	NaN
0.622	-38.444	55.608	9.73	0.15186	0.15283	0.1167	-110.467	-6.44999999999999	1137.727	-1.8237	2.1978	-0.26514	NaN	NaN	NaN	NaN	NaN	NaN	NaN	NaN	NaN	NaN	NaN	NaN
0.624	-37.426	51.238	35.1628	0.14551	0.16553	0.11621	-78.5031	-92.419	1165.575	-1.3553	1.9033	-0.32441	NaN	NaN	NaN	NaN	NaN	NaN	NaN	NaN	NaN	NaN	NaN	NaN
0.626	-17.659	32.406	39.9671	0.13819	0.16479	0.11524	-39.551	-127.242	1200.168	-1.0891	1.6191	-0.35117	NaN	NaN	NaN	NaN	NaN	NaN	NaN	NaN	NaN	NaN	NaN	NaN
0.628	-22.577	23.2662	44.0733	0.1333	0.17188	0.11475	-28.962	-191.792	1236.74602	-1.0016	1.4176	-0.35625	NaN	NaN	NaN	NaN	NaN	NaN	NaN	NaN	NaN	NaN	NaN	NaN
0.63	-40.689	35.5552	21.53595	0.12354	0.1748	0.10303	20.597	-233.793	1267.472	-0.99385	1.3114	-0.32354	NaN	NaN	NaN	NaN	NaN	NaN	NaN	NaN	NaN	NaN	NaN	NaN
0.632	-30.588	43.036	23.719	0.11914	0.18213	0.11133	-0.728999999999999	-235.525	1232.7911	-0.98242	1.2813	-0.2915	NaN	NaN	NaN	NaN	NaN	NaN	NaN	NaN	NaN	NaN	NaN	NaN
0.634	-4.774	42.493	21.706	0.10498	0.18555	0.10547	22.915	-271.543	1225.213	-0.92881	1.279	-0.28418	NaN	NaN	NaN	NaN	NaN	NaN	NaN	NaN	NaN	NaN	NaN	NaN
0.636	-5.782	41.0152	33.3283	0.097414	0.19214	0.10108	74.4433	-271.204	1247.804	-0.83945	1.2571	-0.2958	NaN	NaN	NaN	NaN	NaN	NaN	NaN	NaN	NaN	NaN	NaN	NaN
0.638	5.302	23.42101	35.7226	0.087891	0.1958	0.098633	32.396	-281.095	1312.935	-0.7914	1.2254	-0.33174	NaN	NaN	NaN	NaN	NaN	NaN	NaN	NaN	NaN	NaN	NaN	NaN
0.64	-13.231	5.6002	21.6571	0.068359	0.1958	0.096191	39.429	-293.483	1425.9371	-0.77978	1.1822	-0.35293	NaN	NaN	NaN	NaN	NaN	NaN	NaN	NaN	NaN	NaN	NaN	NaN
0.642	-11.83	20.89	31.4943	0.0625	0.1958	0.092773	30.783	-236.144	1480.598	-0.78564	1.1606	-0.37842	NaN	NaN	NaN	NaN	NaN	NaN	NaN	NaN	NaN	NaN	NaN	NaN
0.644	-36.18	34.5782	31.6405	0.044922	0.19482	0.091797	-39.659	-188.9618	1465.031	-0.80274	1.1449	-0.38047	NaN	NaN	NaN	NaN	NaN	NaN	NaN	NaN	NaN	NaN	NaN	NaN
0.646	-23.895	45.464	44.923	0.031494	0.19727	0.094727	-25.778	-102.346	1426.002	-0.83896	1.1439	-0.36953	NaN	NaN	NaN	NaN	NaN	NaN	NaN	NaN	NaN	NaN	NaN	NaN
0.648	-19.928	32.797	36.9044	0.018066	0.2041	0.098145	-13.749	-32.188	1366.526	-0.8999	1.1548	-0.35117	NaN	NaN	NaN	NaN	NaN	NaN	NaN	NaN	NaN	NaN	NaN	NaN
0.65	-32.968	32.1505	18.311	0.00048828	0.2124	0.10742	-11.434	-37.47	1353.665	-0.98996	1.1681	-0.32802	NaN	NaN	NaN	NaN	NaN	NaN	NaN	NaN	NaN	NaN	NaN	NaN
0.652	-29.892	28.6567	12.251	-0.010254	0.22168	0.10693	28.374	-50.776	1358.8296	-1.0913	1.188	-0.31738	NaN	NaN	NaN	NaN	NaN	NaN	NaN	NaN	NaN	NaN	NaN	NaN
0.654	-51.543	23.3327	42.5608	-0.025391	0.23438	0.11816	4.67	-79.989	1359.056	-1.204	1.171	-0.325	NaN	NaN	NaN	NaN	NaN	NaN	NaN	NaN	NaN	NaN	NaN	NaN
0.656	-37.693	26.7984	57.221	-0.031739	0.23925	0.12109	38.528	-130.1714	1410.389	-1.3214	1.1786	-0.31397	NaN	NaN	NaN	NaN	NaN	NaN	NaN	NaN	NaN	NaN	NaN	NaN
0.658	-48.129	33.6207	52.9315	-0.032227	0.23145	0.13428	82.822	-118.4243	1411.127	-1.4714	1.2083	-0.32061	NaN	NaN	NaN	NaN	NaN	NaN	NaN	NaN	NaN	NaN	NaN	NaN
0.66	-21.472	34.9598	17.5294	-0.021973	0.22754	0.13184	29.0367	-123.109	1424.933238	-1.614	1.2536	-0.32744	NaN	NaN	NaN	NaN	NaN	NaN	NaN	NaN	NaN	NaN	NaN	NaN
0.662	-45.109	33.5056	19.0666	-0.012207	0.22119	0.13184	58.5008	-98.5513	1422.3388	-1.748	1.3047	-0.33057	NaN	NaN	NaN	NaN	NaN	NaN	NaN	NaN	NaN	NaN	NaN	NaN
0.664	-39.206	21.1642	10.60697	0.014648	0.21289	0.13525	0.754000000000005	-55.15	1392.8333	-1.8793	1.3679	-0.34082	NaN	NaN	NaN	NaN	NaN	NaN	NaN	NaN	NaN	NaN	NaN	NaN
0.666	-47.588	24.0412	18.8362	0.040039	0.21094	0.13208	-62.814	-64.8	1418.146	-2.0101	1.4426	-0.35254	NaN	NaN	NaN	NaN	NaN	NaN	NaN	NaN	NaN	NaN	NaN	NaN
0.668	-55.272	30.6351	34.3111	0.062012	0.21387	0.13086	-12.567	-72.667	1447.591	-2.1085	1.527	-0.36347	NaN	NaN	NaN	NaN	NaN	NaN	NaN	NaN	NaN	NaN	NaN	NaN
0.67	-41.974	18.1156	32.6735	0.090332	0.22656	0.12842	-50.876	-86.99541	1475.839	-2.1547	1.5953	-0.38613	NaN	NaN	NaN	NaN	NaN	NaN	NaN	NaN	NaN	NaN	NaN	NaN
0.672	-41.557	10.733	31.8825	0.096191	0.22754	0.12354	15.1115	-111.272	1507.298	-2.1616	1.6362	-0.4126	NaN	NaN	NaN	NaN	NaN	NaN	NaN	NaN	NaN	NaN	NaN	NaN
0.674	-24.652	18.8932	28.4705	0.11719	0.23291	0.10596	39.8873	-82.899	1443.598	-2.16	1.6536	-0.45088	NaN	NaN	NaN	NaN	NaN	NaN	NaN	NaN	NaN	NaN	NaN	NaN
0.676	-29.56	23.438	50.291	0.12061	0.24512	0.079345	6.26	-48.522	1365.342	-2.1668	1.6547	-0.48106	NaN	NaN	NaN	NaN	NaN	NaN	NaN	NaN	NaN	NaN	NaN	NaN
0.678	-32.006	31.068	77.056	0.11035	0.26221	0.040527	70.9563	-28.6343	1315.539	-2.1914	1.6605	-0.49941	NaN	NaN	NaN	NaN	NaN	NaN	NaN	NaN	NaN	NaN	NaN	NaN
0.68	-31.902	4.979	96.2556	0.061523	0.31543	-0.029785	27.045	22.468	1290.694	-2.2197	1.6635	-0.49004	NaN	NaN	NaN	NaN	NaN	NaN	NaN	NaN	NaN	NaN	NaN	NaN
0.682	-32.129	7.9851	126.5515	0.014648	0.35156	-0.058594	17.127	36.49357	1296.789	-2.2578	1.6748	-0.48047	NaN	NaN	NaN	NaN	NaN	NaN	NaN	NaN	NaN	NaN	NaN	NaN
0.684	-13.623	2.1178	201.8543	-0.12939	0.44434	-0.086426	40.29	31.3679	1305.0045	-2.3082	1.6918	-0.45937	NaN	NaN	NaN	NaN	NaN	NaN	NaN	NaN	NaN	NaN	NaN	NaN
0.686	-61.663	-30.002476	259.953	-0.28467	0.51514	-0.073974	32.553	54.1849	1277.417	-2.3258	1.7067	-0.42617	NaN	NaN	NaN	NaN	NaN	NaN	NaN	NaN	NaN	NaN	NaN	NaN
0.688	-66.314	-73.4108	286.763	-0.42969	0.57715	-0.041016	14.3523	33.6606	1247.112	-2.2785	1.7086	-0.39141	NaN	NaN	NaN	NaN	NaN	NaN	NaN	NaN	NaN	NaN	NaN	NaN
0.69	-76.367	-108.47032	277.7231	-0.58154	0.6499	0.013184	8.063	78.022	1224.578	-2.1744	1.6908	-0.36816	NaN	NaN	NaN	NaN	NaN	NaN	NaN	NaN	NaN	NaN	NaN	NaN
0.692	-51.001	-107.553	282.84	-0.63525	0.68408	0.038086	-22.499	107.034	1215.5337	-2.021	1.6411	-0.35303	NaN	NaN	NaN	NaN	NaN	NaN	NaN	NaN	NaN	NaN	NaN	NaN
0.694	-51.119	-82.579	324.167	-0.68701	0.75635	0.071289	9.927	90.556	1229.0623	-1.8632	1.5579	-0.35	NaN	NaN	NaN	NaN	NaN	NaN	NaN	NaN	NaN	NaN	NaN	NaN
0.696	-66.822	-50.908	351.157	-0.68945	0.7998	0.066162	31.9118	105.07	1207.0159	-1.7266	1.457	-0.34492	NaN	NaN	NaN	NaN	NaN	NaN	NaN	NaN	NaN	NaN	NaN	NaN
0.698	-72.087	-26.7251	376.8236	-0.68164	0.83203	0.04834	25.9671	68.26	1195.9407	-1.609	1.366	-0.34687	NaN	NaN	NaN	NaN	NaN	NaN	NaN	NaN	NaN	NaN	NaN	NaN
0.7	-97.3331	-25.94	396.365	-0.68262	0.86914	0.01123	84.207	59.7291	1179.716	-1.5404	1.2893	-0.34043	NaN	NaN	NaN	NaN	NaN	NaN	NaN	NaN	NaN	NaN	NaN	NaN
0.702	-79.296	-39.137	425.475	-0.69238	0.88086	-0.0063477	21.1648	85.022	1140.317	-1.5068	1.2188	-0.32129	NaN	NaN	NaN	NaN	NaN	NaN	NaN	NaN	NaN	NaN	NaN	NaN
0.704	-65.547	-21.136	463.931	-0.75342	0.91748	-0.047852	18.404	61.544	1127.69758	-1.4941	1.193	-0.3039	NaN	NaN	NaN	NaN	NaN	NaN	NaN	NaN	NaN	NaN	NaN	NaN
0.706	-40.638	26.716	506.904	-0.85083	0.95337	-0.08252	0.0450000000000017	54.558	1099.20754	-1.4781	1.1645	-0.28516	NaN	NaN	NaN	NaN	NaN	NaN	NaN	NaN	NaN	NaN	NaN	NaN
0.708	-63.864	76.2432	590.9393	-0.97705	1.0122	-0.11523	-51.59644	46.114	1047.4454	-1.4704	1.145	-0.26719	NaN	NaN	NaN	NaN	NaN	NaN	NaN	NaN	NaN	NaN	NaN	NaN
0.71	-74.405	102.545	654.5739	-1.1943	1.1035	-0.13135	13.753	42.298	1023.676	-1.4652	1.1227	-0.25859	NaN	NaN	NaN	NaN	NaN	NaN	NaN	NaN	NaN	NaN	NaN	NaN
0.712	-75.044	96.059	722.878	-1.314	1.1548	-0.12939	-27.5033	116.298	974.6654	-1.4512	1.0977	-0.23682	NaN	NaN	NaN	NaN	NaN	NaN	NaN	NaN	NaN	NaN	NaN	NaN
0.714	-72.096	85.273	788.721	-1.5659	1.272	-0.11475	-46.1285	152.41	964.3183	-1.422	1.0807	-0.2249	NaN	NaN	NaN	NaN	NaN	NaN	NaN	NaN	NaN	NaN	NaN	NaN
0.716	-86.734	26.3551	884.7225	-1.7263	1.3694	-0.098634	-20.809	178.092	949.488	-1.3885	1.0521	-0.21924	NaN	NaN	NaN	NaN	NaN	NaN	NaN	NaN	NaN	NaN	NaN	NaN
0.718	-127.654	-28.287	950.126	-1.8589	1.4731	-0.083984	-73.5458	208.837	873.295	-1.337	1.0278	-0.20713	NaN	NaN	NaN	NaN	NaN	NaN	NaN	NaN	NaN	NaN	NaN	NaN
0.72	-131.8198	-44.718	1042.383	-1.9663	1.5962	-0.058105	-35.4306	141.9022	846.283	-1.2699	0.99807	-0.20225	NaN	NaN	NaN	NaN	NaN	NaN	NaN	NaN	NaN	NaN	NaN	NaN
0.722	-117.43425	-52.598	1080.477	-1.9937	1.6509	-0.046875	-5.884	130.573	832.8014	-1.1948	0.95947	-0.19385	NaN	NaN	NaN	NaN	NaN	NaN	NaN	NaN	NaN	NaN	NaN	NaN
0.724	-48.138	-49.356	1119.527	-2.0024	1.7563	-0.024414	-27.032	137.037	797.853	-1.1263	0.92451	-0.18682	NaN	NaN	NaN	NaN	NaN	NaN	NaN	NaN	NaN	NaN	NaN	NaN
0.726	-7.033	-64.355	1184.545	-1.9692	1.8052	-0.011475	-12.66	125.3617	768.808	-1.063	0.88643	-0.17978	NaN	NaN	NaN	NaN	NaN	NaN	NaN	NaN	NaN	NaN	NaN	NaN
0.728	4.1866	-66.985	1215.1237	-1.9155	1.8267	-0.0083008	-41.761	190.158	687.636	-1.0044	0.85049	-0.17041	NaN	NaN	NaN	NaN	NaN	NaN	NaN	NaN	NaN	NaN	NaN	NaN
0.73	13.8366	-45.451	1258.979	-1.8203	1.8086	-0.0024414	-34.564	165.485	626.315	-0.94932	0.81045	-0.15918	NaN	NaN	NaN	NaN	NaN	NaN	NaN	NaN	NaN	NaN	NaN	NaN
0.732	-2.5937	-26.153	1314.747	-1.7754	1.7793	0.00097656	-14.304	131.4491	617.9794	-0.89063	0.76953	-0.14844	NaN	NaN	NaN	NaN	NaN	NaN	NaN	NaN	NaN	NaN	NaN	NaN
0.734	37.1532	-19.053	1356.849	-1.6973	1.6992	0.019531	-57.184	138.3125	596.499	-0.84356	0.73555	-0.13594	NaN	NaN	NaN	NaN	NaN	NaN	NaN	NaN	NaN	NaN	NaN	NaN
0.736	48.543	-37.6399	1374.977	-1.6433	1.6301	0.02832	-51.495	98.249	603.0587	-0.80078	0.7039	-0.11778	NaN	NaN	NaN	NaN	NaN	NaN	NaN	NaN	NaN	NaN	NaN	NaN
0.738	51.3653	-44.7248	1368.221	-1.5933	1.5688	0.030762	-31.864	130.411	599.71997	-0.76367	0.6668	-0.10254	NaN	NaN	NaN	NaN	NaN	NaN	NaN	NaN	NaN	NaN	NaN	NaN
0.74	35.603	-52.258	1341.0888	-1.5332	1.4844	0.02832	-57.4719	152.681	550.8863	-0.72383	0.6373	-0.081445	NaN	NaN	NaN	NaN	NaN	NaN	NaN	NaN	NaN	NaN	NaN	NaN
0.742	26.3653	-48.103	1338.867	-1.5112	1.4556	0.022949	-12.342	117.475	493.941	-0.68457	0.60547	-0.061035	NaN	NaN	NaN	NaN	NaN	NaN	NaN	NaN	NaN	NaN	NaN	NaN
0.744	23.287	-28.05	1313.38	-1.4907	1.3911	0.013184	-30.831	175.081	420.4631	-0.63437	0.56592	-0.037891	NaN	NaN	NaN	NaN	NaN	NaN	NaN	NaN	NaN	NaN	NaN	NaN
0.746	4.41212	-27.941	1312.8269	-1.4805	1.3462	0.0024414	-26.497	163.853	374.913	-0.58388	0.52803	-0.017969	NaN	NaN	NaN	NaN	NaN	NaN	NaN	NaN	NaN	NaN	NaN	NaN
0.748	39.26669	-52.358	1322.7009	-1.4688	1.3047	-0.0053711	-11.323	158.9629	395.1439	-0.53388	0.48428	0.00039064	NaN	NaN	NaN	NaN	NaN	NaN	NaN	NaN	NaN	NaN	NaN	NaN
0.75	22.543	-98.567	1325.078	-1.439	1.2466	-0.021484	-41.437	195.75348	361.731	-0.48291	0.44463	0.012402	NaN	NaN	NaN	NaN	NaN	NaN	NaN	NaN	NaN	NaN	NaN	NaN
0.752	20.684	-102.9426	1343.583	-1.4204	1.2114	-0.037354	-23.177	125.775	348.333	-0.43066	0.40527	0.024414	NaN	NaN	NaN	NaN	NaN	NaN	NaN	NaN	NaN	NaN	NaN	NaN
0.754	31.154	-90.083	1379.6726	-1.4023	1.1816	-0.050781	-6.37	134.6418	324.044	-0.37676	0.36572	0.035937	NaN	NaN	NaN	NaN	NaN	NaN	NaN	NaN	NaN	NaN	NaN	NaN
0.756	36.909	-73.952	1402.033	-1.4023	1.168	-0.056152	-41.232	145.574	256.1515	-0.32334	0.32734	0.043262	NaN	NaN	NaN	NaN	NaN	NaN	NaN	NaN	NaN	NaN	NaN	NaN
0.758	46.256	-65.996	1406.406	-1.4136	1.1626	-0.055176	-12.805	100.851	239.1029	-0.27764	0.28398	0.051465	NaN	NaN	NaN	NaN	NaN	NaN	NaN	NaN	NaN	NaN	NaN	NaN
0.76	-6.224	-86.6065	1401.3755	-1.4585	1.1763	-0.052246	-55.954	173.655	209.588	-0.2376	0.25088	0.055078	NaN	NaN	NaN	NaN	NaN	NaN	NaN	NaN	NaN	NaN	NaN	NaN
0.762	-33.188	-99.2537	1413.9472	-1.5087	1.2002	-0.045166	-77.6898	141.212	198.3878	-0.19678	0.21729	0.055176	NaN	NaN	NaN	NaN	NaN	NaN	NaN	NaN	NaN	NaN	NaN	NaN
0.764	-51.5	-102.5402	1439.4244	-1.5757	1.2368	-0.035645	-44.434	116.161	209.511	-0.16465	0.18789	0.059766	NaN	NaN	NaN	NaN	NaN	NaN	NaN	NaN	NaN	NaN	NaN	NaN
0.766	-50.086	-95.161	1435.375	-1.6772	1.2856	-0.024902	-73.2225	130.88771	195.4112	-0.14014	0.16103	0.065527	NaN	NaN	NaN	NaN	NaN	NaN	NaN	NaN	NaN	NaN	NaN	NaN
0.768	-85.7807	-79.407	1414.188	-1.7324	1.3184	-0.021484	-57.326	60.001	208.743	-0.12217	0.13447	0.077246	NaN	NaN	NaN	NaN	NaN	NaN	NaN	NaN	NaN	NaN	NaN	NaN
0.77	-119.749	-88.2046	1382.0571	-1.8496	1.3867	-0.023926	-48.452	84.037	190.273	-0.10039	0.10947	0.084082	NaN	NaN	NaN	NaN	NaN	NaN	NaN	NaN	NaN	NaN	NaN	NaN
0.772	-100.316	-104.692	1370.473	-1.939	1.4487	-0.029541	-60.007	103.696	140.428	-0.081055	0.094727	0.093262	NaN	NaN	NaN	NaN	NaN	NaN	NaN	NaN	NaN	NaN	NaN	NaN
0.774	-89.9926	-89.942	1381.003	-2.0439	1.5176	-0.030273	-30.139	64.676	128.09	-0.056055	0.075782	0.10098	NaN	NaN	NaN	NaN	NaN	NaN	NaN	NaN	NaN	NaN	NaN	NaN
0.776	-76.432	-54.587	1381.979	-2.1875	1.6191	-0.02002	-47.271	121.659	90.8215	-0.022949	0.064062	0.10527	NaN	NaN	NaN	NaN	NaN	NaN	NaN	NaN	NaN	NaN	NaN	NaN
0.778	-66.831	-28.1026	1400.0241	-2.2598	1.6758	-0.015137	-54.4711	60.7	78.8468	0.0098634	0.055469	0.11347	NaN	NaN	NaN	NaN	NaN	NaN	NaN	NaN	NaN	NaN	NaN	NaN
0.78	-47.867	2.7797	1420.657	-2.3647	1.7778	0.0068359	-50.901	10.401	75.6393	0.038379	0.045312	0.11475	NaN	NaN	NaN	NaN	NaN	NaN	NaN	NaN	NaN	NaN	NaN	NaN
0.782	-76.759	15.0961	1428.4307	-2.4014	1.8369	0.011475	-80.772	44.3146	42.676	0.068848	0.035645	0.11914	NaN	NaN	NaN	NaN	NaN	NaN	NaN	NaN	NaN	NaN	NaN	NaN
0.784	-87.3365	31.4027	1446.5623	-2.4004	1.877	0.023438	-58.803	18.081	48.2089	0.097361	0.026367	0.12041	NaN	NaN	NaN	NaN	NaN	NaN	NaN	NaN	NaN	NaN	NaN	NaN
0.786	-46.699	8.838	1446.841	-2.3408	1.8926	0.028809	-45.154	72.922	65.28839	0.12109	0.0093749	0.11426	NaN	NaN	NaN	NaN	NaN	NaN	NaN	NaN	NaN	NaN	NaN	NaN
0.788	-45.229	6.919	1424.209	-2.293	1.8828	0.027344	-64.112	89.316	28.237	0.14219	-0.0011719	0.10723	NaN	NaN	NaN	NaN	NaN	NaN	NaN	NaN	NaN	NaN	NaN	NaN
0.79	-65.307	9.601	1408.258	-2.1694	1.8481	0.020996	-37.039	37.398	34.251	0.15459	-0.018652	0.097854	NaN	NaN	NaN	NaN	NaN	NaN	NaN	NaN	NaN	NaN	NaN	NaN
0.792	-107.809	-5.4502	1397.9293	-2.0857	1.8039	0.014648	-22.623	72.764	28.581	0.16064	-0.024902	0.089844	NaN	NaN	NaN	NaN	NaN	NaN	NaN	NaN	NaN	NaN	NaN	NaN
0.794	-73.368	-28.7265	1374.6989	-2.0112	1.7583	0.010254	-9.327	33.1141	37.2794	0.15127	-0.020703	0.082129	NaN	NaN	NaN	NaN	NaN	NaN	NaN	NaN	NaN	NaN	NaN	NaN
0.796	-59.299	-53.248	1380.7158	-1.9277	1.6816	0.012207	2.675	4.626	51.606	0.1375	-0.01416	0.078027	NaN	NaN	NaN	NaN	NaN	NaN	NaN	NaN	NaN	NaN	NaN	NaN
0.798	-7.606	-40.217	1361.4632	-1.8882	1.6509	0.01123	-34.703	55.6488	25.321	0.10703	-0.0071289	0.074511	NaN	NaN	NaN	NaN	NaN	NaN	NaN	NaN	NaN	NaN	NaN	NaN
0.8	2.282	-14.763	1346.4481	-1.8242	1.5859	0.02002	-22.415	-0.9577	15.189	0.071387	0.0029297	0.080176	NaN	NaN	NaN	NaN	NaN	NaN	NaN	NaN	NaN	NaN	NaN	NaN
0.802	1.203	15.313	1328.64476	-1.7756	1.5373	0.024414	-6.528	20.6283	14.283	0.029785	0.012695	0.088867	NaN	NaN	NaN	NaN	NaN	NaN	NaN	NaN	NaN	NaN	NaN	NaN
0.804	-30.327	46.8905	1297.2037	-1.7246	1.4941	0.031738	-40.184	22.9069	7.179	-0.018848	0.031348	0.1	NaN	NaN	NaN	NaN	NaN	NaN	NaN	NaN	NaN	NaN	NaN	NaN
0.806	-55.144	72.126	1282.245	-1.6504	1.4355	0.041504	-9.805	-23.2774	21.5353	-0.064258	0.054199	0.11036	NaN	NaN	NaN	NaN	NaN	NaN	NaN	NaN	NaN	NaN	NaN	NaN
0.808	-34.601	83.307	1276.139	-1.6089	1.4028	0.046387	-33.088	44.357	20.6762	-0.097074	0.072168	0.117	NaN	NaN	NaN	NaN	NaN	NaN	NaN	NaN	NaN	NaN	NaN	NaN
0.81	-31.035	89.804	1237.79	-1.5371	1.332	0.047852	-60.3906	33.819	31.6916	-0.12627	0.096486	0.1248	NaN	NaN	NaN	NaN	NaN	NaN	NaN	NaN	NaN	NaN	NaN	NaN
0.812	-49.87	92.633	1206.0479	-1.4734	1.2776	0.05249	-25.559	24.5135	61.043	-0.14746	0.10693	0.12939	NaN	NaN	NaN	NaN	NaN	NaN	NaN	NaN	NaN	NaN	NaN	NaN
0.814	-73.1569	102.868	1192.627	-1.4116	1.2212	0.049316	-39.538	80.491	32.8643	-0.16103	0.12383	0.13428	NaN	NaN	NaN	NaN	NaN	NaN	NaN	NaN	NaN	NaN	NaN	NaN
0.816	-83.931	107.467	1172.5024	-1.333	1.1484	0.044922	-8.211	15.4109	33.3805	-0.17392	0.13437	0.14092	NaN	NaN	NaN	NaN	NaN	NaN	NaN	NaN	NaN	NaN	NaN	NaN
0.818	-39.711	93.3255	1129.3749	-1.2949	1.1191	0.045898	-7.018	43.5817	25.0145	-0.179	0.14649	0.14873	NaN	NaN	NaN	NaN	NaN	NaN	NaN	NaN	NaN	NaN	NaN	NaN
0.82	-55.464	77.7991	1085.7249	-1.2202	1.0581	0.046875	-56.345427	56.2634	6.2929	-0.18233	0.15371	0.15479	NaN	NaN	NaN	NaN	NaN	NaN	NaN	NaN	NaN	NaN	NaN	NaN
0.822	-56.183	64.975	1052.945	-1.1677	1.012	0.046387	-50.077	16.62818	38.178	-0.18115	0.15967	0.16455	NaN	NaN	NaN	NaN	NaN	NaN	NaN	NaN	NaN	NaN	NaN	NaN
0.824	-85.7244	59.137	1039.988	-1.1226	0.9751	0.043945	-57.968	81.258	23.425	-0.17246	0.16074	0.17412	NaN	NaN	NaN	NaN	NaN	NaN	NaN	NaN	NaN	NaN	NaN	NaN
0.826	-56.303	75.481	1031.565	-1.0601	0.92627	0.04248	-31.9	54.6927	6.8134	-0.15986	0.16191	0.17998	NaN	NaN	NaN	NaN	NaN	NaN	NaN	NaN	NaN	NaN	NaN	NaN
0.828	-86.9103	92.301	1032.6542	-1.0366	0.91064	0.041992	-36.081	17.7475	28.6724	-0.14385	0.15957	0.18349	NaN	NaN	NaN	NaN	NaN	NaN	NaN	NaN	NaN	NaN	NaN	NaN
0.83	-87.963	112.94	1015.995	-0.98193	0.86963	0.033691	-51.384	69.534	17.1584	-0.1205	0.15899	0.18691	NaN	NaN	NaN	NaN	NaN	NaN	NaN	NaN	NaN	NaN	NaN	NaN
0.832	-91.3569	102.7496	981.615	-0.94605	0.84448	0.029296	-55.1332	12.5074	41.513	-0.095703	0.15283	0.18848	NaN	NaN	NaN	NaN	NaN	NaN	NaN	NaN	NaN	NaN	NaN	NaN
0.834	-67.415	132.2688	925.793	-0.91016	0.82031	0.029297	-64.0897	44.092	45.8933	-0.0625	0.14639	0.19551	NaN	NaN	NaN	NaN	NaN	NaN	NaN	NaN	NaN	NaN	NaN	NaN
0.836	-87.0283	155.943	907.70864	-0.85156	0.79199	0.025879	-65.4351	51.2077	45.554	-0.027734	0.13115	0.19219	NaN	NaN	NaN	NaN	NaN	NaN	NaN	NaN	NaN	NaN	NaN	NaN
0.838	-63.389	175.346	898.8967	-0.82178	0.77783	0.024902	-32.158	-12.8822	49.622	0.01211	0.11552	0.19453	NaN	NaN	NaN	NaN	NaN	NaN	NaN	NaN	NaN	NaN	NaN	NaN
0.84	-33.891	147.901	869.136	-0.75537	0.73877	0.021973	-28.426	32.4576	29.4406	0.055566	0.098633	0.19384	NaN	NaN	NaN	NaN	NaN	NaN	NaN	NaN	NaN	NaN	NaN	NaN
0.842	-51.089	138.7346	802.3623	-0.70776	0.70923	0.018555	-33.704	25.559	4.599	0.094238	0.083984	0.19434	NaN	NaN	NaN	NaN	NaN	NaN	NaN	NaN	NaN	NaN	NaN	NaN
0.844	-49.244	120.739	761.53	-0.65088	0.68018	0.013184	-33.21	26.109	36.5572	0.14531	0.077734	0.19082	NaN	NaN	NaN	NaN	NaN	NaN	NaN	NaN	NaN	NaN	NaN	NaN
0.846	-54.413	115.752	728.332	-0.57666	0.64697	0.0019531	-45.711	96.092	40.5117	0.19063	0.078223	0.1917	NaN	NaN	NaN	NaN	NaN	NaN	NaN	NaN	NaN	NaN	NaN	NaN
0.848	-43.502	123.175	705.89	-0.54004	0.62695	-0.00097656	-26.718	32.7895	50.302	0.23555	0.078613	0.18232	NaN	NaN	NaN	NaN	NaN	NaN	NaN	NaN	NaN	NaN	NaN	NaN
0.85	-28.788	145.42647	685.6369	-0.46533	0.59229	-0.010742	-22.263	33.8946	44.119	0.27099	0.078516	0.17979	NaN	NaN	NaN	NaN	NaN	NaN	NaN	NaN	NaN	NaN	NaN	NaN
0.852	-30.337	144.8165	649.7476	-0.42017	0.5647	-0.02124	-37.451	42.3726	9.715	0.30566	0.07373	0.17041	NaN	NaN	NaN	NaN	NaN	NaN	NaN	NaN	NaN	NaN	NaN	NaN
0.854	-25.282	137.164	627.4927	-0.37549	0.53857	-0.023438	-37.29	-4.3769	37.79282	0.32803	0.079297	0.16904	NaN	NaN	NaN	NaN	NaN	NaN	NaN	NaN	NaN	NaN	NaN	NaN
0.856	-43.388	128.336	619.5304	-0.31689	0.50586	-0.030273	-36.635	59.635	45.275	0.34551	0.083496	0.16084	NaN	NaN	NaN	NaN	NaN	NaN	NaN	NaN	NaN	NaN	NaN	NaN
0.858	-32.508	149.772	600.08	-0.28906	0.49023	-0.022461	-13.761	50.8098	37.629	0.3584	0.089746	0.1581	NaN	NaN	NaN	NaN	NaN	NaN	NaN	NaN	NaN	NaN	NaN	NaN
0.86	-29.447	146.623	566.364	-0.23486	0.44824	-0.03418	-14.158	19.5138	36.38911	0.3669	0.096875	0.14648	NaN	NaN	NaN	NaN	NaN	NaN	NaN	NaN	NaN	NaN	NaN	NaN
0.862	-25.416	152.282	530.1343	-0.18188	0.42407	-0.037598	-20.807	55.3206	30.984	0.3623	0.10059	0.1377	NaN	NaN	NaN	NaN	NaN	NaN	NaN	NaN	NaN	NaN	NaN	NaN
0.864	-13.529	136.0613	460.842	-0.13477	0.39746	-0.049805	-37.697	-11.757	33.1255	0.35439	0.11504	0.13242	NaN	NaN	NaN	NaN	NaN	NaN	NaN	NaN	NaN	NaN	NaN	NaN
0.866	-21.381	129.15	416.092	-0.068359	0.35547	-0.0625	-20.887	18.292	65.1263	0.34199	0.12461	0.13076	NaN	NaN	NaN	NaN	NaN	NaN	NaN	NaN	NaN	NaN	NaN	NaN
0.868	-22.662	107.0406	414.837	-0.044922	0.33545	-0.06543	-41.806	50.5642	40.64961	0.32129	0.14063	0.12842	NaN	NaN	NaN	NaN	NaN	NaN	NaN	NaN	NaN	NaN	NaN	NaN
0.87	-32.949	111.9011	402.444	0.0073242	0.2959	-0.077148	-22.762	-5.2622	29.794	0.28741	0.15937	0.12627	NaN	NaN	NaN	NaN	NaN	NaN	NaN	NaN	NaN	NaN	NaN	NaN
0.872	-16.442	104.287	363.2565	0.033203	0.27441	-0.08252	-37.001	31.949	28.8039	0.24902	0.18506	0.12451	NaN	NaN	NaN	NaN	NaN	NaN	NaN	NaN	NaN	NaN	NaN	NaN
0.874	-32.076	108.178	333.274	0.062012	0.24902	-0.087891	-48.4635	1.7025	23.157	0.20683	0.20166	0.12861	NaN	NaN	NaN	NaN	NaN	NaN	NaN	NaN	NaN	NaN	NaN	NaN
0.876	-56.423	100.3922	318.82	0.080078	0.22363	-0.10352	-30.474	-5.38017	50.2962	0.16875	0.221	0.13271	NaN	NaN	NaN	NaN	NaN	NaN	NaN	NaN	NaN	NaN	NaN	NaN
0.878	-67.11	107.885	302.708	0.091797	0.21387	-0.10352	-38.339	66.081	35.824	0.12852	0.23662	0.13389	NaN	NaN	NaN	NaN	NaN	NaN	NaN	NaN	NaN	NaN	NaN	NaN
0.88	-30.016	117.683	285.0272	0.11133	0.20313	-0.11621	-69.288	26.8725	36.8101	0.091211	0.25635	0.14229	NaN	NaN	NaN	NaN	NaN	NaN	NaN	NaN	NaN	NaN	NaN	NaN
0.882	-40.615	125.135	261.0452	0.1145	0.18433	-0.12036	-60.823	43.183	34.9052	0.057617	0.28076	0.14648	NaN	NaN	NaN	NaN	NaN	NaN	NaN	NaN	NaN	NaN	NaN	NaN
0.884	-58.22654	114.112	235.619	0.12158	0.16797	-0.11182	-63.796	54.148	6.539	0.030566	0.30029	0.15342	NaN	NaN	NaN	NaN	NaN	NaN	NaN	NaN	NaN	NaN	NaN	NaN
0.886	-50.656	92.662	209.5157	0.12793	0.15332	-0.12451	-35.745	-2.7266	9.6093	0.012988	0.321	0.15879	NaN	NaN	NaN	NaN	NaN	NaN	NaN	NaN	NaN	NaN	NaN	NaN
0.888	-37.729	95.0819	181.091	0.12988	0.14404	-0.12646	-24.561	45.451	7.344	-0.0038086	0.32842	0.1709	NaN	NaN	NaN	NaN	NaN	NaN	NaN	NaN	NaN	NaN	NaN	NaN
0.89	-27.941	95.2185	186.35084	0.13818	0.13086	-0.12451	-40.444	38.8814	7.1763	-0.014844	0.33965	0.17412	NaN	NaN	NaN	NaN	NaN	NaN	NaN	NaN	NaN	NaN	NaN	NaN
0.892	-33.53	76.563	187.9609	0.14014	0.12622	-0.1294	-27.679	7.3946	30.7944	-0.018066	0.34766	0.18164	NaN	NaN	NaN	NaN	NaN	NaN	NaN	NaN	NaN	NaN	NaN	NaN
0.894	-19.962	60.32	160.02833	0.14404	0.12061	-0.13232	-47.874	69.756	20.216	-0.018359	0.35303	0.18301	NaN	NaN	NaN	NaN	NaN	NaN	NaN	NaN	NaN	NaN	NaN	NaN
0.896	-26.424	61.331	135.5222	0.146	0.10498	-0.13818	-60.314	21.1834	24.0517	-0.020899	0.36045	0.18907	NaN	NaN	NaN	NaN	NaN	NaN	NaN	NaN	NaN	NaN	NaN	NaN
0.898	-40.017	61.6516	109.60994	0.14209	0.10132	-0.14234	-34.755	34.93	49.222	-0.021289	0.3667	0.1961	NaN	NaN	NaN	NaN	NaN	NaN	NaN	NaN	NaN	NaN	NaN	NaN
0.9	-30.748	57.35	117.053	0.14453	0.094238	-0.14502	-31.658	61.309	39.8364	-0.019531	0.36426	0.20537	NaN	NaN	NaN	NaN	NaN	NaN	NaN	NaN	NaN	NaN	NaN	NaN
0.902	-32.803	71.41	110.705	0.14355	0.085938	-0.15283	-23.775	1.4845	40.11	-0.027832	0.37256	0.21484	NaN	NaN	NaN	NaN	NaN	NaN	NaN	NaN	NaN	NaN	NaN	NaN
0.904	-25.36	72.48	88.4054	0.13623	0.084961	-0.15039	-28.248	45.34	17.5058	-0.036035	0.37764	0.23145	NaN	NaN	NaN	NaN	NaN	NaN	NaN	NaN	NaN	NaN	NaN	NaN
0.906	-38.284	59.8274	61.968	0.1333	0.089355	-0.15527	-45.588	29.0323	2.653	-0.04834	0.38213	0.24688	NaN	NaN	NaN	NaN	NaN	NaN	NaN	NaN	NaN	NaN	NaN	NaN
0.908	-20.737	39.7807	77.857	0.12768	0.093018	-0.16089	-30.609	-6.7126	27.8626	-0.067871	0.38017	0.25977	NaN	NaN	NaN	NaN	NaN	NaN	NaN	NaN	NaN	NaN	NaN	NaN
0.91	-10.34	44.982	74.5695	0.11768	0.10059	-0.16504	-6.961	62.644	18.6119	-0.083887	0.37803	0.27148	NaN	NaN	NaN	NaN	NaN	NaN	NaN	NaN	NaN	NaN	NaN	NaN
0.912	6.349	54.307	77.872	0.097168	0.11035	-0.16748	-4.565	26.25582	38.092	-0.096191	0.375	0.28857	NaN	NaN	NaN	NaN	NaN	NaN	NaN	NaN	NaN	NaN	NaN	NaN
0.914	8.919	59.4945	64.997	0.087891	0.11475	-0.1709	-3.78	42.235	96.917	-0.10762	0.38076	0.29551	NaN	NaN	NaN	NaN	NaN	NaN	NaN	NaN	NaN	NaN	NaN	NaN
0.916	-14.046	70.375	23.99604	0.072754	0.125	-0.17432	-30.675	60.181	157.187	-0.11299	0.38516	0.30518	NaN	NaN	NaN	NaN	NaN	NaN	NaN	NaN	NaN	NaN	NaN	NaN
0.918	-2.339	60.984	11.305	0.057373	0.13745	-0.17847	-61.714	16.927	242.6806	-0.10869	0.38985	0.31142	NaN	NaN	NaN	NaN	NaN	NaN	NaN	NaN	NaN	NaN	NaN	NaN
0.92	-9.327	44.9381	11.074	0.042969	0.14746	-0.18359	-47.929	83.124	331.6147	-0.10127	0.39629	0.31543	NaN	NaN	NaN	NaN	NaN	NaN	NaN	NaN	NaN	NaN	NaN	NaN
0.922	-13.84	23.22185	39.4425	0.032715	0.15723	-0.18408	-75.776	29.796	456.866	-0.088379	0.40283	0.3208	NaN	NaN	NaN	NaN	NaN	NaN	NaN	NaN	NaN	NaN	NaN	NaN
0.924	-38.111	24.2267	47.0664	0.028809	0.16455	-0.18555	-149.686	-123.50916	631.461	-0.074804	0.4082	0.3209	NaN	NaN	NaN	NaN	NaN	NaN	NaN	NaN	NaN	NaN	NaN	NaN
0.926	-25.905	24.4081	39.5038	0.020508	0.1709	-0.18115	-167.012	-163.556	743.114	-0.059276	0.4123	0.31504	NaN	NaN	NaN	NaN	NaN	NaN	NaN	NaN	NaN	NaN	NaN	NaN
0.928	-44.289	24.7983	36.094	0.018799	0.17212	-0.1809	-137.299	-215.388	811.484	-0.04873	0.41894	0.28183	NaN	NaN	NaN	NaN	NaN	NaN	NaN	NaN	NaN	NaN	NaN	NaN
0.93	-45.302	34.3193	27.4589	0.024414	0.17188	-0.17676	-125.633	-132.372	912.088	-0.057618	0.42744	0.20498	NaN	NaN	NaN	NaN	NaN	NaN	NaN	NaN	NaN	NaN	NaN	NaN
0.932	-33.761	38.411	18.0575	0.025391	0.16895	-0.17822	-198.7547	17.215	973.961	-0.10107	0.45508	0.11279	NaN	NaN	NaN	NaN	NaN	NaN	NaN	NaN	NaN	NaN	NaN	NaN
0.934	-29.013	38.9147	17.7776	0.03125	0.16797	-0.17285	-209.6342	39.808	1002.157	-0.21542	0.49521	0.0089969	NaN	NaN	NaN	NaN	NaN	NaN	NaN	NaN	NaN	NaN	NaN	NaN
0.936	-30.015	32.5159	15.6762	0.047363	0.16064	-0.17041	-170.339	52.134	1018.464	-0.39477	0.52783	-0.10711	NaN	NaN	NaN	NaN	NaN	NaN	NaN	NaN	NaN	NaN	NaN	NaN
0.938	-63.4895	23.5463	30.0164	0.067383	0.15405	-0.16601	-100.453	11.439	1094.649	-0.62913	0.57235	-0.19266	NaN	NaN	NaN	NaN	NaN	NaN	NaN	NaN	NaN	NaN	NaN	NaN
0.94	-46.34	17.5845	31.2309	0.090332	0.14404	-0.16895	10.3219	-67.533	1213.815	-0.90073	0.65505	-0.25184	NaN	NaN	NaN	NaN	NaN	NaN	NaN	NaN	NaN	NaN	NaN	NaN
0.942	-47.96	33.469	18.738	0.12305	0.13184	-0.16553	42.4288	-38.845	1310.988	-1.2031	0.7793	-0.28027	NaN	NaN	NaN	NaN	NaN	NaN	NaN	NaN	NaN	NaN	NaN	NaN
0.944	-38.813	34.0975	34.3048	0.14014	0.12695	-0.16846	9.4854	-39.1	1320.03	-1.5239	0.95076	-0.2534	NaN	NaN	NaN	NaN	NaN	NaN	NaN	NaN	NaN	NaN	NaN	NaN
0.946	-44.951	35.8723	30.764	0.17627	0.11523	-0.17529	-30.955	-7.3398	1270.885	-1.8476	1.1455	-0.19798	NaN	NaN	NaN	NaN	NaN	NaN	NaN	NaN	NaN	NaN	NaN	NaN
0.948	-54.44	47.0708	10.6158	0.19824	0.1106	-0.17529	-50.678	26.345	1181.84	-2.1589	1.3561	-0.12063	NaN	NaN	NaN	NaN	NaN	NaN	NaN	NaN	NaN	NaN	NaN	NaN
0.95	-47.8858	52.838	9.4358	0.21289	0.10596	-0.17822	-14.705	-68.074	1161.815	-2.4091	1.5537	-0.063732	NaN	NaN	NaN	NaN	NaN	NaN	NaN	NaN	NaN	NaN	NaN	NaN
0.952	-62.8986	42.448	22.60836	0.22314	0.10449	-0.18066	16.076	-98.811	1199.331	-2.5664	1.7129	-0.041016	NaN	NaN	NaN	NaN	NaN	NaN	NaN	NaN	NaN	NaN	NaN	NaN
0.954	-17.813	28.5757	29.3993	0.22314	0.1084	-0.17676	12.4602	-142.266	1248.6448	-2.6069	1.8429	-0.046564	NaN	NaN	NaN	NaN	NaN	NaN	NaN	NaN	NaN	NaN	NaN	NaN
0.956	-6.961	24.9756	26.426	0.21191	0.11426	-0.17627	4.215	-206.964	1277.263	-2.5512	1.9206	-0.058746	NaN	NaN	NaN	NaN	NaN	NaN	NaN	NaN	NaN	NaN	NaN	NaN
0.958	-25.856	27.1552	16.534	0.19946	0.12622	-0.17212	-49.7618	-183.514	1248.39	-2.4151	1.9413	-0.06078	NaN	NaN	NaN	NaN	NaN	NaN	NaN	NaN	NaN	NaN	NaN	NaN
0.96	-20.391	26.7769	29.493	0.18506	0.14063	-0.16602	-51.186	-201.403	1215.026	-2.2403	1.937	-0.038301	NaN	NaN	NaN	NaN	NaN	NaN	NaN	NaN	NaN	NaN	NaN	NaN
0.962	-13.28	32.9103	41.7385	0.15869	0.16162	-0.15967	67.6	-199.497	1225.937	-2.0645	1.873	-0.016113	NaN	NaN	NaN	NaN	NaN	NaN	NaN	NaN	NaN	NaN	NaN	NaN
0.964	-8.93	42.9314	45.5911	0.1499	0.16309	-0.16016	107.647	-146.246	1250.715	-1.9583	1.7761	-0.0022744	NaN	NaN	NaN	NaN	NaN	NaN	NaN	NaN	NaN	NaN	NaN	NaN
0.966	-11.614	46.9816	30.819	0.14063	0.17773	-0.15723	125.0456	-145.899	1340.035	-1.8814	1.6752	0.0058088	NaN	NaN	NaN	NaN	NaN	NaN	NaN	NaN	NaN	NaN	NaN	NaN
0.968	-7.075	26.658	36.272	0.14185	0.18384	-0.15674	86.253	-111.957	1439.739	-1.8526	1.5731	0.042472	NaN	NaN	NaN	NaN	NaN	NaN	NaN	NaN	NaN	NaN	NaN	NaN
0.97	-22.891	29.824	18.1798	0.1499	0.18555	-0.15576	43.125	-114.539	1485.853	-1.8533	1.49	0.083185	NaN	NaN	NaN	NaN	NaN	NaN	NaN	NaN	NaN	NaN	NaN	NaN
0.972	-19.1	30.213	19.026	0.16992	0.19238	-0.15674	61.803	-164.949	1471.658	-1.8374	1.4146	0.12012	NaN	NaN	NaN	NaN	NaN	NaN	NaN	NaN	NaN	NaN	NaN	NaN
0.974	-26.879	38.419	24.045	0.1792	0.1958	-0.15625	18.063	-124.859	1390.1887	-1.8046	1.3382	0.1444	NaN	NaN	NaN	NaN	NaN	NaN	NaN	NaN	NaN	NaN	NaN	NaN
0.976	-16.879	38.253	41.5614	0.19873	0.20313	-0.1543	-56.384	-131.138	1335.74	-1.7577	1.2686	0.15348	NaN	NaN	NaN	NaN	NaN	NaN	NaN	NaN	NaN	NaN	NaN	NaN
0.978	-23.838	27.0679	37.6155	0.20752	0.21021	-0.15308	-106.56	-160.21	1332.931	-1.7148	1.2034	0.1424	NaN	NaN	NaN	NaN	NaN	NaN	NaN	NaN	NaN	NaN	NaN	NaN
0.98	-17.821	24.3127	29.5547	0.21436	0.21387	-0.15283	-169.951	-154.288	1360.927	-1.6732	1.1533	0.11311	NaN	NaN	NaN	NaN	NaN	NaN	NaN	NaN	NaN	NaN	NaN	NaN
0.982	-35.306	37.5424	37.2145	0.21924	0.21777	-0.15137	-127.39	-193.9379	1390.3394	-1.6304	1.1021	0.080078	NaN	NaN	NaN	NaN	NaN	NaN	NaN	NaN	NaN	NaN	NaN	NaN
0.984	-34.108	52.597	22.5689	0.21973	0.22363	-0.15039	-61.176	-171.2904	1412.158	-1.5538	1.0399	0.042258	NaN	NaN	NaN	NaN	NaN	NaN	NaN	NaN	NaN	NaN	NaN	NaN
0.986	-35.877	60.441	28.8084	0.22217	0.23193	-0.15186	-41.6182	-117.402	1391.9877	-1.4614	0.98108	0.017035	NaN	NaN	NaN	NaN	NaN	NaN	NaN	NaN	NaN	NaN	NaN	NaN
0.988	-43.042	46.424	22.5691	0.2229	0.2334	-0.14771	-42.374	-103.963	1391.321	-1.3869	0.93607	-0.011381	NaN	NaN	NaN	NaN	NaN	NaN	NaN	NaN	NaN	NaN	NaN	NaN
0.99	-41.024	22.2285	33.2542	0.22705	0.24121	-0.14893	-97.112	-15.1497	1396.021	-1.3594	0.93288	-0.039847	NaN	NaN	NaN	NaN	NaN	NaN	NaN	NaN	NaN	NaN	NaN	NaN
0.992	-41.111	1.3948	47.4226	0.23193	0.25195	-0.1543	-119.278	12.6747	1442.5871	-1.3862	0.96338	-0.046875	NaN	NaN	NaN	NaN	NaN	NaN	NaN	NaN	NaN	NaN	NaN	NaN
0.994	-34.631	4.2603	36.9062	0.23535	0.25635	-0.15527	-105.016	-41.959	1510.267	-1.4755	1.0153	-0.026752	NaN	NaN	NaN	NaN	NaN	NaN	NaN	NaN	NaN	NaN	NaN	NaN
0.996	-46.794	38.7758	31.0901	0.2417	0.27295	-0.16162	-151.637	-51.244	1530.877	-1.6005	1.0818	0.0097366	NaN	NaN	NaN	NaN	NaN	NaN	NaN	NaN	NaN	NaN	NaN	NaN
0.998	-57.248	46.254	44.8523	0.24341	0.28149	-0.15991	-160.922	-129.558	1512.67	-1.7472	1.1508	0.039438	NaN	NaN	NaN	NaN	NaN	NaN	NaN	NaN	NaN	NaN	NaN	NaN
1	-41.263	24.7446	39.78635	0.24414	0.28955	-0.16504	-161.263	-90.463	1449.4881	-1.8794	1.2271	0.065348	NaN	NaN	NaN	NaN	NaN	NaN	NaN	NaN	NaN	NaN	NaN	NaN
1.002	-27.524	21.73841	15.5839	0.23877	0.30176	-0.16357	-160.297	-7.20699999999999	1396.803	-1.9956	1.2993	0.09082	NaN	NaN	NaN	NaN	NaN	NaN	NaN	NaN	NaN	NaN	NaN	NaN
1.004	-39.243	20.575108	20.0415	0.24121	0.31006	-0.1665	-121.941	-25.599	1410.98	-2.0837	1.3622	0.091229	NaN	NaN	NaN	NaN	NaN	NaN	NaN	NaN	NaN	NaN	NaN	NaN
1.006	-43.723	25.07873	36.0486	0.22461	0.31592	-0.16602	-82.906	10.002	1410.2162	-2.1503	1.425	0.086841	NaN	NaN	NaN	NaN	NaN	NaN	NaN	NaN	NaN	NaN	NaN	NaN
1.008	-20.731	32.8026	43.6409	0.2168	0.31958	-0.1648	-83.203	-65.832	1437.0395	-2.2036	1.4908	0.066274	NaN	NaN	NaN	NaN	NaN	NaN	NaN	NaN	NaN	NaN	NaN	NaN
1.01	-34.186	42.9242	34.04018	0.20215	0.32959	-0.16504	-25.863	-136.547	1458.8414	-2.2636	1.5618	0.051482	NaN	NaN	NaN	NaN	NaN	NaN	NaN	NaN	NaN	NaN	NaN	NaN
1.012	-38.817	45.0045	20.5767	0.1792	0.33594	-0.16016	-4.33600000000001	-56.7639	1475.1538	-2.3438	1.6367	0.022461	NaN	NaN	NaN	NaN	NaN	NaN	NaN	NaN	NaN	NaN	NaN	NaN
1.014	1.304	17.6658	33.121	0.16699	0.34326	-0.15918	15.362	-8.98699999999999	1446.969	-2.4489	1.7165	0.014726	NaN	NaN	NaN	NaN	NaN	NaN	NaN	NaN	NaN	NaN	NaN	NaN
1.016	-6.268	19.1587	27.9939	0.13477	0.35059	-0.1499	16.588	87.615	1411.97	-2.5472	1.7969	0.010944	NaN	NaN	NaN	NaN	NaN	NaN	NaN	NaN	NaN	NaN	NaN	NaN
1.018	-24.149	27.1673	37.344	0.11499	0.36279	-0.146	-60.403	134.7069	1369.1435	-2.6247	1.8612	0.016436	NaN	NaN	NaN	NaN	NaN	NaN	NaN	NaN	NaN	NaN	NaN	NaN
1.02	-23.485	33.743	29.2292	0.094238	0.37451	-0.13916	-79.252	51.5981	1372.9472	-2.6512	1.9012	0.016398	NaN	NaN	NaN	NaN	NaN	NaN	NaN	NaN	NaN	NaN	NaN	NaN
1.022	-9.921	37.575	18.7773	0.05957	0.38623	-0.14893	-93.586	59.291	1385.07242	-2.6191	1.9063	0.01709	NaN	NaN	NaN	NaN	NaN	NaN	NaN	NaN	NaN	NaN	NaN	NaN
1.024	-21.838	16.859	46.4577	0.046875	0.39893	-0.15771	-69.378	52.03724	1380.646	-2.5406	1.8717	0.0025444	NaN	NaN	NaN	NaN	NaN	NaN	NaN	NaN	NaN	NaN	NaN	NaN
1.026	-14.38	-13.3129	81.139	-0.01416	0.43506	-0.18311	-29.139	54.6935	1376.024	-2.4256	1.8204	-0.0080903	NaN	NaN	NaN	NaN	NaN	NaN	NaN	NaN	NaN	NaN	NaN	NaN
1.028	-12.501	-22.3352	164.523	-0.1128	0.46753	-0.20337	-65.551	122.833	1289.682	-2.2744	1.7481	-0.019426	NaN	NaN	NaN	NaN	NaN	NaN	NaN	NaN	NaN	NaN	NaN	NaN
1.03	-1.802	-1.60345	245.055	-0.25391	0.51465	-0.2002	-77.533	72.246	1216.713	-2.1185	1.6538	-0.021771	NaN	NaN	NaN	NaN	NaN	NaN	NaN	NaN	NaN	NaN	NaN	NaN
1.032	26.6684	-6.0479	265.699	-0.51123	0.58936	-0.17969	-95.276	55.535	1183.705	-1.9839	1.5513	-0.03418	NaN	NaN	NaN	NaN	NaN	NaN	NaN	NaN	NaN	NaN	NaN	NaN
1.034	8.24052	-38.672	252.9837	-0.64307	0.6333	-0.16113	-79.011	69.527	1177.709	-1.8743	1.4558	-0.044631	NaN	NaN	NaN	NaN	NaN	NaN	NaN	NaN	NaN	NaN	NaN	NaN
1.036	38.091	-77.486	231.006	-0.86328	0.72559	-0.11768	-24.588	25.251	1200.007	-1.773	1.3633	-0.036913	NaN	NaN	NaN	NaN	NaN	NaN	NaN	NaN	NaN	NaN	NaN	NaN
1.038	8.4	-121.3238	245.337	-0.96899	0.802	-0.10352	-39.496	114.739	1202.246	-1.689	1.2934	-0.045121	NaN	NaN	NaN	NaN	NaN	NaN	NaN	NaN	NaN	NaN	NaN	NaN
1.04	-29.98	-97.7243	341.4886	-1.0303	0.86914	-0.10645	-69.0163	146.803	1170.29064	-1.6217	1.2324	-0.046387	NaN	NaN	NaN	NaN	NaN	NaN	NaN	NaN	NaN	NaN	NaN	NaN
1.042	-44.052	-45.825	408.787	-1.0601	0.93701	-0.1416	-92.0736	142.604	1141.457	-1.5483	1.1802	-0.041504	NaN	NaN	NaN	NaN	NaN	NaN	NaN	NaN	NaN	NaN	NaN	NaN
1.044	-24.315	-13.6526	437.038	-1.0723	0.96289	-0.16602	-137.7025	202.256	1098.409	-1.4772	1.1375	-0.035645	NaN	NaN	NaN	NaN	NaN	NaN	NaN	NaN	NaN	NaN	NaN	NaN
1.046	24.7659	-43.3364	454.617	-1.123	0.99609	-0.22559	-122.718	152.826	1072.745	-1.4023	1.0855	-0.034571	NaN	NaN	NaN	NaN	NaN	NaN	NaN	NaN	NaN	NaN	NaN	NaN
1.048	36.8189	-47.783	511.065	-1.2612	1.0317	-0.27783	-102.432	163.017	1042.433	-1.3386	1.0336	-0.028711	NaN	NaN	NaN	NaN	NaN	NaN	NaN	NaN	NaN	NaN	NaN	NaN
1.05	9.1203	18.618	636.199	-1.375	1.0742	-0.27295	-123.325	171.95	993.238	-1.285	0.9875	-0.022559	NaN	NaN	NaN	NaN	NaN	NaN	NaN	NaN	NaN	NaN	NaN	NaN
1.052	-4.465	94.4397	772.227	-1.752	1.2461	-0.21338	-127.346	120.801	974.379	-1.2441	0.95313	-0.015137	NaN	NaN	NaN	NaN	NaN	NaN	NaN	NaN	NaN	NaN	NaN	NaN
1.054	8.985	138.5	871.4168	-2.1111	1.4182	-0.15674	-104.1834	162.075	912.088	-1.2139	0.91445	-0.010742	NaN	NaN	NaN	NaN	NaN	NaN	NaN	NaN	NaN	NaN	NaN	NaN
1.056	3.023	134.289	961.121	-2.4453	1.5801	-0.091797	-43.414	131.362	846.93	-1.1796	0.88408	-0.0021483	NaN	NaN	NaN	NaN	NaN	NaN	NaN	NaN	NaN	NaN	NaN	NaN
1.058	21.897	83.752	1016.878	-2.6895	1.7617	-0.020996	-5.61300000000001	112.241	813.842	-1.1378	0.85869	0.0099612	NaN	NaN	NaN	NaN	NaN	NaN	NaN	NaN	NaN	NaN	NaN	NaN
1.06	32.523	20.6016	1064.5841	-2.6968	1.8384	-0.021484	9.602	196.185	766.836	-1.0944	0.83604	0.0072266	NaN	NaN	NaN	NaN	NaN	NaN	NaN	NaN	NaN	NaN	NaN	NaN
1.062	-24.3273	7.9349	1093.2959	-2.4507	1.9458	-0.066406	-5.155	178.5385	765.249	-1.0337	0.81299	0.011719	NaN	NaN	NaN	NaN	NaN	NaN	NaN	NaN	NaN	NaN	NaN	NaN
1.064	-63.5607	6.2909	1111.838	-2.0971	1.9761	-0.11304	-16.699	212.119	780.2123	-0.97696	0.78867	0.010644	NaN	NaN	NaN	NaN	NaN	NaN	NaN	NaN	NaN	NaN	NaN	NaN
1.066	-78.3002	-20.223	1098.0451	-1.6953	1.9531	-0.16406	-10.419	225.672	744.085	-0.91211	0.76621	0.0091797	NaN	NaN	NaN	NaN	NaN	NaN	NaN	NaN	NaN	NaN	NaN	NaN
1.068	-39.673	-66.4971	1048.468	-1.2285	1.8203	-0.23926	-20.765	150.805	706.979	-0.85234	0.73535	0.006836	NaN	NaN	NaN	NaN	NaN	NaN	NaN	NaN	NaN	NaN	NaN	NaN
1.07	-56.082	-137.249	1052.423	-1.0586	1.7344	-0.271	-16.629	213.634	630.74	-0.79609	0.70274	0.0036133	NaN	NaN	NaN	NaN	NaN	NaN	NaN	NaN	NaN	NaN	NaN	NaN
1.072	-39.761	-175.965	1089.9321	-0.8457	1.5508	-0.3042	-45.5	198.667	573.949	-0.7417	0.67041	0.0014648	NaN	NaN	NaN	NaN	NaN	NaN	NaN	NaN	NaN	NaN	NaN	NaN
1.074	-44.063	-186.796	1160.209	-0.77319	1.4455	-0.30688	-43.84	169.013	566.2897	-0.68818	0.64131	0.00039062	NaN	NaN	NaN	NaN	NaN	NaN	NaN	NaN	NaN	NaN	NaN	NaN
1.076	-61.831	-130.479	1185.567	-0.73682	1.3716	-0.29834	-14.896	205.14	536.2436	-0.62852	0.61289	0.0045898	NaN	NaN	NaN	NaN	NaN	NaN	NaN	NaN	NaN	NaN	NaN	NaN
1.078	-28.9789	-78.332	1188.171	-0.70898	1.3242	-0.28809	1.917	134.421339	504.261	-0.56406	0.58633	-0.0028321	NaN	NaN	NaN	NaN	NaN	NaN	NaN	NaN	NaN	NaN	NaN	NaN
1.08	-41.4935	-41.0628	1171.753	-0.70508	1.3145	-0.28418	16.251	139.948	459.689	-0.49521	0.55518	-0.0084962	NaN	NaN	NaN	NaN	NaN	NaN	NaN	NaN	NaN	NaN	NaN	NaN
1.082	-24.199	-34.309	1183.441	-0.69727	1.291	-0.2832	0.323	153.831	373.888	-0.42969	0.51367	-0.010742	NaN	NaN	NaN	NaN	NaN	NaN	NaN	NaN	NaN	NaN	NaN	NaN
1.084	-65.807	-56.424	1217.396	-0.7041	1.2846	-0.2915	-8.339	113.982	370.08	-0.35977	0.47012	-0.019141	NaN	NaN	NaN	NaN	NaN	NaN	NaN	NaN	NaN	NaN	NaN	NaN
1.086	-66.351	-66.663	1227.342	-0.72021	1.2778	-0.29541	-22.334	189.3589	351.683	-0.29278	0.42598	-0.033105	NaN	NaN	NaN	NaN	NaN	NaN	NaN	NaN	NaN	NaN	NaN	NaN
1.088	-86.9992	-42.055	1236.647	-0.76074	1.2583	-0.29785	-35.148	165.5024	343.0131	-0.22988	0.3834	-0.051856	NaN	NaN	NaN	NaN	NaN	NaN	NaN	NaN	NaN	NaN	NaN	NaN
1.09	-97.644	-38.15	1215.282	-0.79053	1.2456	-0.29004	-31.495	132.29097	340.426	-0.17041	0.34756	-0.068555	NaN	NaN	NaN	NaN	NaN	NaN	NaN	NaN	NaN	NaN	NaN	NaN
1.092	-59.325	-73.544	1212.456	-0.88037	1.2231	-0.28516	-36.6594	166.038	301.436	-0.11572	0.32178	-0.081055	NaN	NaN	NaN	NaN	NaN	NaN	NaN	NaN	NaN	NaN	NaN	NaN
1.094	-27.026	-137.786	1241.97	-0.96167	1.2122	-0.28223	-74.819	120.8313	262.0607	-0.070117	0.30664	-0.090918	NaN	NaN	NaN	NaN	NaN	NaN	NaN	NaN	NaN	NaN	NaN	NaN
1.096	6.66	-146.383	1286.641	-1.0508	1.2109	-0.28125	-93.3979	160.751	264.9144	-0.023926	0.29639	-0.10733	NaN	NaN	NaN	NaN	NaN	NaN	NaN	NaN	NaN	NaN	NaN	NaN
1.098	-7.65599999999999	-139.849	1326.7858	-1.168	1.2344	-0.28711	-84.3831	192.11	234.40406	0.0073241	0.27217	-0.11865	NaN	NaN	NaN	NaN	NaN	NaN	NaN	NaN	NaN	NaN	NaN	NaN
1.1	0.161999999999999	-118.57	1356.413	-1.2241	1.2524	-0.28955	-57.481	120.7199	224.362	0.043457	0.24629	-0.12793	NaN	NaN	NaN	NaN	NaN	NaN	NaN	NaN	NaN	NaN	NaN	NaN
1.102	12.8767	-110.6662	1382.723	-1.3452	1.3032	-0.30225	-33.602	124.5936	173.8883	0.068848	0.21631	-0.13623	NaN	NaN	NaN	NaN	NaN	NaN	NaN	NaN	NaN	NaN	NaN	NaN
1.104	-19.7049	-86.8901	1429.048	-1.4351	1.3491	-0.30933	-57.997031	56.468	128.489	0.095315	0.19433	-0.14336	NaN	NaN	NaN	NaN	NaN	NaN	NaN	NaN	NaN	NaN	NaN	NaN
1.106	33.8474	-93.393	1453.255	-1.5239	1.397	-0.3125	-49.396	28.363	130.9767	0.11787	0.16719	-0.15459	NaN	NaN	NaN	NaN	NaN	NaN	NaN	NaN	NaN	NaN	NaN	NaN
1.108	27.979	-88.337	1437.9193	-1.6338	1.4531	-0.33984	-24.598	95.413	102.333	0.12217	0.16132	-0.14912	NaN	NaN	NaN	NaN	NaN	NaN	NaN	NaN	NaN	NaN	NaN	NaN
1.11	30.189	-57.4398	1412.257	-1.6836	1.4922	-0.35547	-9.435	65.43	83.38943	0.12783	0.15215	-0.15557	NaN	NaN	NaN	NaN	NaN	NaN	NaN	NaN	NaN	NaN	NaN	NaN
1.112	-33.78436	-29.681	1399.8426	-1.7734	1.5625	-0.3877	-11.111	84.4431	79.8916	0.14209	0.146	-0.16162	NaN	NaN	NaN	NaN	NaN	NaN	NaN	NaN	NaN	NaN	NaN	NaN
1.114	-16.018	-23.447	1403.52	-1.8291	1.626	-0.41895	-33.999	93.928	74.278	0.16367	0.12832	-0.16006	NaN	NaN	NaN	NaN	NaN	NaN	NaN	NaN	NaN	NaN	NaN	NaN
1.116	19.573	-40.77	1411.3908	-1.8848	1.6914	-0.44922	-53.591	45.6256	106.3605	0.1834	0.11601	-0.16797	NaN	NaN	NaN	NaN	NaN	NaN	NaN	NaN	NaN	NaN	NaN	NaN
1.118	46.5244	-61.086	1410.1079	-1.9902	1.7852	-0.48438	-33.303	98.106	106.3798	0.2002	0.10156	-0.17422	NaN	NaN	NaN	NaN	NaN	NaN	NaN	NaN	NaN	NaN	NaN	NaN
1.12	77.905	-75.85725	1390.88	-2.0425	1.8384	-0.49365	-36.96	67.434	86.044	0.2085	0.089063	-0.18135	NaN	NaN	NaN	NaN	NaN	NaN	NaN	NaN	NaN	NaN	NaN	NaN
1.122	59.068	-76.7238	1369.275	-2.1484	1.9336	-0.48877	-30.743	36.107	62.009	0.21289	0.07666	-0.18359	NaN	NaN	NaN	NaN	NaN	NaN	NaN	NaN	NaN	NaN	NaN	NaN
1.124	23.4029	-51.3584	1372.512	-2.196	1.9905	-0.47753	-19.154	71.521	0.701999999999998	0.20469	0.068555	-0.19033	NaN	NaN	NaN	NaN	NaN	NaN	NaN	NaN	NaN	NaN	NaN	NaN
1.126	-20.373	-8.8181	1396.11033	-2.2168	2.0313	-0.46484	-22.435	8.1304	-16.613	0.20303	0.06211	-0.1955	NaN	NaN	NaN	NaN	NaN	NaN	NaN	NaN	NaN	NaN	NaN	NaN
1.128	1.45	-12.066	1426.149	-2.1812	2.0493	-0.44287	-12.942	27.5543	0.850000000000001	0.18701	0.05625	-0.20215	NaN	NaN	NaN	NaN	NaN	NaN	NaN	NaN	NaN	NaN	NaN	NaN
1.13	40.8042	-48.4865	1429.329	-2.1382	2.0396	-0.43311	-1.34	30.7824	9.654	0.15684	0.062988	-0.20107	NaN	NaN	NaN	NaN	NaN	NaN	NaN	NaN	NaN	NaN	NaN	NaN
1.132	35.264	-69.2266	1396.174	-2.0034	2.0063	-0.43701	-21.278	-11.655	40.965	0.11182	0.071289	-0.20459	NaN	NaN	NaN	NaN	NaN	NaN	NaN	NaN	NaN	NaN	NaN	NaN
1.134	3.8803	-60.88258	1402.087	-1.8787	1.9554	-0.4392	-9.073	44.6475	30.50515	0.045898	0.090723	-0.20244	NaN	NaN	NaN	NaN	NaN	NaN	NaN	NaN	NaN	NaN	NaN	NaN
1.136	-20.6329	-29.1611	1383.87	-1.7559	1.9004	-0.44385	-32.72	44.649	8.829	-0.021094	0.10732	-0.19043	NaN	NaN	NaN	NaN	NaN	NaN	NaN	NaN	NaN	NaN	NaN	NaN
1.138	-20.5804	-26.99	1388.701	-1.6191	1.832	-0.4458	-34.922	37.742	46.5203	-0.085547	0.12998	-0.18183	NaN	NaN	NaN	NaN	NaN	NaN	NaN	NaN	NaN	NaN	NaN	NaN
1.14	0.759999999999998	-34.146	1333.4035	-1.5723	1.7969	-0.44238	-29.455	74.742	39.7266	-0.14033	0.15273	-0.17715	NaN	NaN	NaN	NaN	NaN	NaN	NaN	NaN	NaN	NaN	NaN	NaN
1.142	40.0418	-47.75	1282.341	-1.5117	1.7422	-0.43555	-54.391	17.96223	28.718	-0.18896	0.17041	-0.17285	NaN	NaN	NaN	NaN	NaN	NaN	NaN	NaN	NaN	NaN	NaN	NaN
1.144	37.586	-39.914	1275.969	-1.5007	1.7156	-0.4165	-30.286	33.964	25.059	-0.21553	0.1873	-0.16982	NaN	NaN	NaN	NaN	NaN	NaN	NaN	NaN	NaN	NaN	NaN	NaN
1.146	25.926	5.2585	1279.872	-1.4961	1.6855	-0.4043	-30.0468	39.188	-3.3	-0.23721	0.20391	-0.16504	NaN	NaN	NaN	NaN	NaN	NaN	NaN	NaN	NaN	NaN	NaN	NaN
1.148	-3.7545	47.617	1298.385	-1.4917	1.6567	-0.38135	-68.8564	8.657	24.92	-0.23916	0.21563	-0.1623	NaN	NaN	NaN	NaN	NaN	NaN	NaN	NaN	NaN	NaN	NaN	NaN
1.15	-18.8831	77.968	1278.57	-1.4902	1.6367	-0.37695	-38.302	68.6636	38.1215	-0.2291	0.221	-0.1624	NaN	NaN	NaN	NaN	NaN	NaN	NaN	NaN	NaN	NaN	NaN	NaN
1.152	4.569	57.172	1241.6657	-1.478	1.6118	-0.35303	-42.406	59.2712	27.294	-0.21338	0.21387	-0.15479	NaN	NaN	NaN	NaN	NaN	NaN	NaN	NaN	NaN	NaN	NaN	NaN
1.154	27.82	36.1926	1207.399	-1.4558	1.5773	-0.33764	-37.704	34.4769	34.21	-0.19424	0.20879	-0.15635	NaN	NaN	NaN	NaN	NaN	NaN	NaN	NaN	NaN	NaN	NaN	NaN
1.156	21.606	39.0644	1193.181	-1.418	1.5371	-0.33105	-30.026	59.72	14.580787	-0.16807	0.20039	-0.15693	NaN	NaN	NaN	NaN	NaN	NaN	NaN	NaN	NaN	NaN	NaN	NaN
1.158	-22.231	67.655	1189.507	-1.3613	1.4902	-0.31055	-76.259	4.6625	27.3557	-0.13409	0.19023	-0.15264	NaN	NaN	NaN	NaN	NaN	NaN	NaN	NaN	NaN	NaN	NaN	NaN
1.16	12.36	87.627	1199.964	-1.3223	1.459	-0.29736	-37.316	42.7858	42.451	-0.095998	0.17578	-0.1415	NaN	NaN	NaN	NaN	NaN	NaN	NaN	NaN	NaN	NaN	NaN	NaN
1.162	4.2439	79.419	1162.5567	-1.2524	1.3931	-0.2876	-19.485	66.737	23.5657	-0.058594	0.15576	-0.13623	NaN	NaN	NaN	NaN	NaN	NaN	NaN	NaN	NaN	NaN	NaN	NaN
1.164	15.229	42.424	1118.6373	-1.2048	1.3469	-0.27515	-40.08	20.1078	44.479	-0.017188	0.13799	-0.12763	NaN	NaN	NaN	NaN	NaN	NaN	NaN	NaN	NaN	NaN	NaN	NaN
1.166	33.475	22.048	1091.1794	-1.1621	1.2979	-0.26367	-28.712	51.543	44.4061	0.024024	0.11963	-0.12343	NaN	NaN	NaN	NaN	NaN	NaN	NaN	NaN	NaN	NaN	NaN	NaN
1.168	19.642	20.941	1065.994	-1.1089	1.2427	-0.24707	-64.435	34.0344	40.7125	0.069336	0.10361	-0.11719	NaN	NaN	NaN	NaN	NaN	NaN	NaN	NaN	NaN	NaN	NaN	NaN
1.17	14.02	68.924	1062.9693	-1.0894	1.2134	-0.23779	-48.592	22.3959	64.914	0.11006	0.087109	-0.10986	NaN	NaN	NaN	NaN	NaN	NaN	NaN	NaN	NaN	NaN	NaN	NaN
1.172	-12.407	101.3649	1041.156	-1.0439	1.1582	-0.21875	-11.41	75.4757	45.66	0.15625	0.070801	-0.10986	NaN	NaN	NaN	NaN	NaN	NaN	NaN	NaN	NaN	NaN	NaN	NaN
1.174	1.269	88.5457	1021.79	-1.0188	1.1203	-0.20142	-42.402	26.119	38.651	0.20322	0.050684	-0.10967	NaN	NaN	NaN	NaN	NaN	NaN	NaN	NaN	NaN	NaN	NaN	NaN
1.176	2.134	72.7531	974.6761	-0.98828	1.082	-0.18799	-41.879	18.984	32.718	0.24619	0.03086	-0.11172	NaN	NaN	NaN	NaN	NaN	NaN	NaN	NaN	NaN	NaN	NaN	NaN
1.178	-4.595	100.414	958.9465	-0.94336	1.0234	-0.16602	-34.331	32.5447	-4.958	0.28643	0.019531	-0.11641	NaN	NaN	NaN	NaN	NaN	NaN	NaN	NaN	NaN	NaN	NaN	NaN
1.18	-5.425	143.436	928.2633	-0.91943	0.99561	-0.15869	-33.608	-11.446	7.304	0.3166	0.015234	-0.11739	NaN	NaN	NaN	NaN	NaN	NaN	NaN	NaN	NaN	NaN	NaN	NaN
1.182	-20.47	178.216	907.2627	-0.86719	0.94727	-0.13428	-8.551	38.3457	46.1879	0.34326	0.020996	-0.11914	NaN	NaN	NaN	NaN	NaN	NaN	NaN	NaN	NaN	NaN	NaN	NaN
1.184	-27.753	163.51	875.9729	-0.83008	0.90332	-0.12183	-49.398	40.998	49.3058	0.35352	0.022363	-0.11631	NaN	NaN	NaN	NaN	NaN	NaN	NaN	NaN	NaN	NaN	NaN	NaN
1.186	-25.0626	134.38947	808.0396	-0.80078	0.86328	-0.10986	-45.389	20.0369	71.768	0.35987	0.026172	-0.1085	NaN	NaN	NaN	NaN	NaN	NaN	NaN	NaN	NaN	NaN	NaN	NaN
1.188	-11.966	103.325	781.9169	-0.75391	0.81055	-0.088867	-25.009	66.763	28.65	0.35479	0.033204	-0.10732	NaN	NaN	NaN	NaN	NaN	NaN	NaN	NaN	NaN	NaN	NaN	NaN
1.19	-8.719	106.0494	758.054	-0.73291	0.78564	-0.07373	-50.482	29.8383	19.575	0.34336	0.044824	-0.10566	NaN	NaN	NaN	NaN	NaN	NaN	NaN	NaN	NaN	NaN	NaN	NaN
1.192	-24.142	121.1016	716.653	-0.68994	0.73486	-0.051758	-20.913	40.4163	59.8898	0.33203	0.060547	-0.10205	NaN	NaN	NaN	NaN	NaN	NaN	NaN	NaN	NaN	NaN	NaN	NaN
1.194	-23.884	146.524	687.974	-0.64258	0.68359	-0.033203	-9.515	40.6007	26.2268	0.31133	0.07832	-0.10068	NaN	NaN	NaN	NaN	NaN	NaN	NaN	NaN	NaN	NaN	NaN	NaN
1.196	-43.8449	148.83	673.6697	-0.61377	0.65479	-0.02002	-32.38	-19.4682	30.095	0.29697	0.10117	-0.10156	NaN	NaN	NaN	NaN	NaN	NaN	NaN	NaN	NaN	NaN	NaN	NaN
1.198	-56.599	135.4683	647.8803	-0.56055	0.60156	-0.0024414	-19.189	24.34227	18.412	0.27862	0.11992	-0.10195	NaN	NaN	NaN	NaN	NaN	NaN	NaN	NaN	NaN	NaN	NaN	NaN
1.2	-42.8707	124.9625	624.1873	-0.52295	0.56421	0.0043945	-32.556	22.5238	11.478	0.25977	0.14463	-0.10283	NaN	NaN	NaN	NaN	NaN	NaN	NaN	NaN	NaN	NaN	NaN	NaN
1.202	-21.469	111.6275	611.8722	-0.48242	0.52734	0.019043	-36.644	9.669	59.4458	0.24707	0.1626	-0.10254	NaN	NaN	NaN	NaN	NaN	NaN	NaN	NaN	NaN	NaN	NaN	NaN
1.204	-38.461	132.0967	579.115	-0.43311	0.49463	0.035156	-34.046	51.9734	49.06613	0.23437	0.1753	-0.099709	NaN	NaN	NaN	NaN	NaN	NaN	NaN	NaN	NaN	NaN	NaN	NaN
1.206	-28.98	141.687	541.3074	-0.4082	0.46582	0.047363	-44.961	16.11333	19.8958	0.2251	0.19102	-0.10059	NaN	NaN	NaN	NaN	NaN	NaN	NaN	NaN	NaN	NaN	NaN	NaN
1.208	-32.502	147.52	490.5746	-0.36426	0.42383	0.069824	-37.574	22.4526	27.2054	0.21533	0.21289	-0.10567	NaN	NaN	NaN	NaN	NaN	NaN	NaN	NaN	NaN	NaN	NaN	NaN
1.21	-29.516	137.5939	455.288	-0.33081	0.38916	0.091309	-46.278	41.575	19.882	0.19942	0.22559	-0.10196	NaN	NaN	NaN	NaN	NaN	NaN	NaN	NaN	NaN	NaN	NaN	NaN
1.212	-27.335	107.628	447.4716	-0.30029	0.35791	0.10303	-60.964	7.9324	37.2831	0.18799	0.24561	-0.10205	NaN	NaN	NaN	NaN	NaN	NaN	NaN	NaN	NaN	NaN	NaN	NaN
1.214	3.49299999999999	91.477	422.0609	-0.25391	0.32324	0.10596	-7.84200000000001	54.666	23.11881	0.18018	0.25879	-0.097852	NaN	NaN	NaN	NaN	NaN	NaN	NaN	NaN	NaN	NaN	NaN	NaN
1.216	0.5	100.878	400.0783	-0.23096	0.30713	0.11279	-32.661	33.1238	-4.9692	0.17266	0.27978	-0.098731	NaN	NaN	NaN	NaN	NaN	NaN	NaN	NaN	NaN	NaN	NaN	NaN
1.218	-12.814	119.083	356.218	-0.18701	0.27393	0.11182	-56.828	10.1482	28.7293	0.16055	0.29541	-0.10068	NaN	NaN	NaN	NaN	NaN	NaN	NaN	NaN	NaN	NaN	NaN	NaN
1.22	-23.65	120.902	342.7439	-0.15625	0.24829	0.11548	-44.021	62.696	24.707	0.15274	0.30283	-0.10703	NaN	NaN	NaN	NaN	NaN	NaN	NaN	NaN	NaN	NaN	NaN	NaN
1.222	-43.944	113.056	309.3609	-0.125	0.22852	0.12256	-75.6847	38.8248	29.2348	0.14404	0.30127	-0.1084	NaN	NaN	NaN	NaN	NaN	NaN	NaN	NaN	NaN	NaN	NaN	NaN
1.224	-26.482	108.215	288.3422	-0.084961	0.19971	0.12158	-33.204	53.4003	58.014	0.13779	0.30097	-0.11504	NaN	NaN	NaN	NaN	NaN	NaN	NaN	NaN	NaN	NaN	NaN	NaN
1.226	-29.885	92.2363	278.7244	-0.064941	0.18701	0.12451	-29.324	59.047	22.8015	0.13672	0.30791	-0.12051	NaN	NaN	NaN	NaN	NaN	NaN	NaN	NaN	NaN	NaN	NaN	NaN
1.228	-15.165	96.601	275.059	-0.030273	0.16357	0.13232	-68.0594	-5.3449	21.916	0.12969	0.3208	-0.12402	NaN	NaN	NaN	NaN	NaN	NaN	NaN	NaN	NaN	NaN	NaN	NaN
1.23	-27.559	110.869	265.4352	-0.0092772	0.14795	0.13428	-29.073	32.531	6.003	0.11875	0.32891	-0.13095	NaN	NaN	NaN	NaN	NaN	NaN	NaN	NaN	NaN	NaN	NaN	NaN
1.232	-18.485	119.6528	240.6457	0.0058594	0.12793	0.13574	-48.689	38.485	-20.8134	0.10693	0.33691	-0.13672	NaN	NaN	NaN	NaN	NaN	NaN	NaN	NaN	NaN	NaN	NaN	NaN
1.234	-27.88	101.7749	213.2915	0.029297	0.1084	0.14307	-50.306	27.0203	32.6722	0.090918	0.3501	-0.13935	NaN	NaN	NaN	NaN	NaN	NaN	NaN	NaN	NaN	NaN	NaN	NaN
1.236	-15.639	82.53672	192.8372	0.037598	0.1001	0.14697	-0.981999999999999	68.217	48.9661	0.066309	0.36181	-0.142	NaN	NaN	NaN	NaN	NaN	NaN	NaN	NaN	NaN	NaN	NaN	NaN
1.238	-14.909	65.2218	176.3975	0.05957	0.082031	0.15332	-29.337	-0.3132	70.094	0.041309	0.37237	-0.1498	NaN	NaN	NaN	NaN	NaN	NaN	NaN	NaN	NaN	NaN	NaN	NaN
1.24	-28.85	60.0704	145.9254	0.073243	0.067871	0.15161	-10.009	-13.4413	90.3916	0.025097	0.38193	-0.15303	NaN	NaN	NaN	NaN	NaN	NaN	NaN	NaN	NaN	NaN	NaN	NaN
1.242	-47.733	48.8465	159.09839	0.086914	0.054688	0.15088	-31.775	15.6456	85.9	0.019531	0.39258	-0.15576	NaN	NaN	NaN	NaN	NaN	NaN	NaN	NaN	NaN	NaN	NaN	NaN
1.244	-50.017	66.671	146.5273	0.11182	0.039063	0.15186	-35.032	-2.6171	111.738	0.03252	0.39707	-0.15859	NaN	NaN	NaN	NaN	NaN	NaN	NaN	NaN	NaN	NaN	NaN	NaN
1.246	-57.1138	58.3683	118.188	0.12207	0.025391	0.14795	24.934	21.5776	148.314	0.043164	0.40469	-0.16446	NaN	NaN	NaN	NaN	NaN	NaN	NaN	NaN	NaN	NaN	NaN	NaN
1.248	-51.85	57.4483	93.5958	0.14209	0.0087891	0.14893	-15.902	-15.698	174.9381	0.061524	0.40938	-0.1711	NaN	NaN	NaN	NaN	NaN	NaN	NaN	NaN	NaN	NaN	NaN	NaN
1.25	-55.4113	54.21017	70.3472	0.15284	-0.0068358	0.14233	-32.455	-62.63	214.221	0.065625	0.41514	-0.1833	NaN	NaN	NaN	NaN	NaN	NaN	NaN	NaN	NaN	NaN	NaN	NaN
1.252	-52.202	60.6374	60.015	0.15918	-0.019043	0.14063	8.57	-38.42514	270.725	0.057129	0.42676	-0.19189	NaN	NaN	NaN	NaN	NaN	NaN	NaN	NaN	NaN	NaN	NaN	NaN
1.254	-30.269	61.511	71.9929	0.16846	-0.036133	0.13721	3.205	-20.6045	401.976	0.018359	0.44746	-0.19805	NaN	NaN	NaN	NaN	NaN	NaN	NaN	NaN	NaN	NaN	NaN	NaN
1.256	-33.236	47.677	78.3082	0.1665	-0.043457	0.14014	-6.242	59.351	601.15547	-0.052441	0.47822	-0.19863	NaN	NaN	NaN	NaN	NaN	NaN	NaN	NaN	NaN	NaN	NaN	NaN
1.258	-29.223	45.51708	59.489	0.1582	-0.058105	0.13574	4.197	111.216	734.741	-0.14932	0.52158	-0.19082	NaN	NaN	NaN	NaN	NaN	NaN	NaN	NaN	NaN	NaN	NaN	NaN
1.26	-39.854	26.1092	37.7986	0.15357	-0.0625	0.13843	-53.3785	43.427	862.909	-0.25264	0.5707	-0.18555	NaN	NaN	NaN	NaN	NaN	NaN	NaN	NaN	NaN	NaN	NaN	NaN
1.262	-21.832	28.5568	20.277	0.14307	-0.064941	0.14063	-21.987	41.5765	975.895	-0.3457	0.62207	-0.1875	NaN	NaN	NaN	NaN	NaN	NaN	NaN	NaN	NaN	NaN	NaN	NaN
1.264	-43.202	43.871	14.667	0.12842	-0.067871	0.13867	-10.126	31.3263	1057.0118	-0.42881	0.6708	-0.192	NaN	NaN	NaN	NaN	NaN	NaN	NaN	NaN	NaN	NaN	NaN	NaN
1.266	-48.424	55.566	37.9524	0.12207	-0.068848	0.13721	-39.516	12.216	1157.438	-0.51748	0.7126	-0.20957	NaN	NaN	NaN	NaN	NaN	NaN	NaN	NaN	NaN	NaN	NaN	NaN
1.268	-28.904	46.2	37.2205	0.10303	-0.060059	0.14258	-31.343	101.85	1134.554	-0.61748	0.74541	-0.24043	NaN	NaN	NaN	NaN	NaN	NaN	NaN	NaN	NaN	NaN	NaN	NaN
1.27	-24.715	22.5694	23.8537	0.087158	-0.053955	0.14502	-74.733	68.635	1061.215	-0.76904	0.78389	-0.27158	NaN	NaN	NaN	NaN	NaN	NaN	NaN	NaN	NaN	NaN	NaN	NaN
1.272	-36.239	5.4043	33.125	0.071777	-0.044922	0.15137	-65.0098	10.2915	1034.894	-1.0171	0.83057	-0.30029	NaN	NaN	NaN	NaN	NaN	NaN	NaN	NaN	NaN	NaN	NaN	NaN
1.274	-23.953	8.02294	35.2092	0.054199	-0.026855	0.15771	-73.61156	-17.439	1014.4133	-1.4141	0.93272	-0.29599	NaN	NaN	NaN	NaN	NaN	NaN	NaN	NaN	NaN	NaN	NaN	NaN
1.276	-11.026	28.6429	30.9441	0.04248	-0.023926	0.16064	-61.901	-61.653	1044.589	-1.9077	1.0868	-0.24912	NaN	NaN	NaN	NaN	NaN	NaN	NaN	NaN	NaN	NaN	NaN	NaN
1.278	-11.88	45.4436	32.752	0.026367	-0.019531	0.1665	-6.51199999999999	-64.444	1049.4142	-2.4214	1.2919	-0.14014	NaN	NaN	NaN	NaN	NaN	NaN	NaN	NaN	NaN	NaN	NaN	NaN
1.28	-20.315	39.29353	27.9808	0.023438	-0.014892	0.17041	-57.4474	-114.487	1018.874	-2.8345	1.5159	-0.015234	NaN	NaN	NaN	NaN	NaN	NaN	NaN	NaN	NaN	NaN	NaN	NaN
1.282	-3.356	22.5811	16.5033	0.019531	-0.010254	0.1748	-41.7357	-190.037	1047.171	-3.0483	1.7427	0.07373	NaN	NaN	NaN	NaN	NaN	NaN	NaN	NaN	NaN	NaN	NaN	NaN
1.284	-15.317	17.3369	15.9196	0.025391	-0.0053711	0.1792	3.166	-131.442	1056.768	-2.9873	1.9252	0.059961	NaN	NaN	NaN	NaN	NaN	NaN	NaN	NaN	NaN	NaN	NaN	NaN
1.286	-28.91	36.3587	15.8315	0.035645	-0.0039063	0.17725	4.961	-87.451	1076.6984	-2.7286	2.064	-0.018555	NaN	NaN	NaN	NaN	NaN	NaN	NaN	NaN	NaN	NaN	NaN	NaN
1.288	-41.85	42.0157	32.8944	0.049805	-0.0048828	0.1709	-1.542	-17.56	1124.82086	-2.3145	2.1063	-0.098241	NaN	NaN	NaN	NaN	NaN	NaN	NaN	NaN	NaN	NaN	NaN	NaN
1.29	-18.262	42.3198	23.628	0.068848	-0.0046386	0.1687	-49.999	27.24	1112.565	-1.8563	2.0429	-0.17764	NaN	NaN	NaN	NaN	NaN	NaN	NaN	NaN	NaN	NaN	NaN	NaN
1.292	-32.328	37.0979	15.65	0.084473	-0.0063477	0.16504	-100.19	-65.591	1106.537	-1.4419	1.8931	-0.2583	NaN	NaN	NaN	NaN	NaN	NaN	NaN	NaN	NaN	NaN	NaN	NaN
1.294	-48.744	26.4262	18.6425	0.10303	-0.00097656	0.15576	-53.3789	-106.095	1151.773	-1.1922	1.7094	-0.32725	NaN	NaN	NaN	NaN	NaN	NaN	NaN	NaN	NaN	NaN	NaN	NaN
1.296	-40.327	22.2479	24.8858	0.11084	0.0014648	0.16064	-24.5107	-139.644	1173.5561	-1.0788	1.5599	-0.35175	NaN	NaN	NaN	NaN	NaN	NaN	NaN	NaN	NaN	NaN	NaN	NaN
1.298	-31.984	36.8269	37.5662	0.12646	0.0068359	0.15381	-10.035	-220.18	1239.313	-1.0753	1.4689	-0.32871	NaN	NaN	NaN	NaN	NaN	NaN	NaN	NaN	NaN	NaN	NaN	NaN
1.3	-40.047	48.7726	28.92527	0.13354	0.019776	0.14771	20.053	-185.296	1251.2986	-1.0949	1.4156	-0.30654	NaN	NaN	NaN	NaN	NaN	NaN	NaN	NaN	NaN	NaN	NaN	NaN
1.302	-32.996	40.9747	16.8858	0.14209	0.020996	0.13916	19.071	-196.472	1217.928	-1.0625	1.3848	-0.29102	NaN	NaN	NaN	NaN	NaN	NaN	NaN	NaN	NaN	NaN	NaN	NaN
1.304	-39.074	29.87121	10.871	0.1499	0.029297	0.12842	29.899	-200.07	1283.722	-0.96213	1.3387	-0.30156	NaN	NaN	NaN	NaN	NaN	NaN	NaN	NaN	NaN	NaN	NaN	NaN
1.306	-35.641	32.5944	9.927	0.15283	0.030273	0.12451	60.2009	-145.6489	1345.937	-0.86611	1.2724	-0.31933	NaN	NaN	NaN	NaN	NaN	NaN	NaN	NaN	NaN	NaN	NaN	NaN
1.308	-37.835	32.4542	32.4211	0.15283	0.041992	0.125	38.0325	-176.962	1406.807	-0.8083	1.2021	-0.3373	NaN	NaN	NaN	NaN	NaN	NaN	NaN	NaN	NaN	NaN	NaN	NaN
1.31	-51.282	28.983	50.9414	0.15356	0.054688	0.11963	13.369	-138.2469	1473.178	-0.79258	1.1621	-0.34834	NaN	NaN	NaN	NaN	NaN	NaN	NaN	NaN	NaN	NaN	NaN	NaN
1.312	-38.393	21.0829	49.2502	0.15283	0.063965	0.11719	-48.4782	-81.831	1454.668	-0.81787	1.1313	-0.35547	NaN	NaN	NaN	NaN	NaN	NaN	NaN	NaN	NaN	NaN	NaN	NaN
1.314	-32.377	30.6676	27.3277	0.14844	0.078613	0.11084	-85.984	-80.472	1463.707	-0.89707	1.1213	-0.34502	NaN	NaN	NaN	NaN	NaN	NaN	NaN	NaN	NaN	NaN	NaN	NaN
1.316	-27	41.953	14.564	0.14014	0.084473	0.1084	-47.9764	21.595	1420.118	-1.0258	1.1291	-0.33496	NaN	NaN	NaN	NaN	NaN	NaN	NaN	NaN	NaN	NaN	NaN	NaN
1.318	-40.363	45.336	26.2033	0.13232	0.10059	0.10449	-34.408	-4.004	1371.704	-1.1824	1.1498	-0.3084	NaN	NaN	NaN	NaN	NaN	NaN	NaN	NaN	NaN	NaN	NaN	NaN
1.32	-14.582	39.19	32.788	0.12012	0.10962	0.1018	-9.811	-57.61	1381.944	-1.3447	1.1873	-0.29238	NaN	NaN	NaN	NaN	NaN	NaN	NaN	NaN	NaN	NaN	NaN	NaN
1.322	-20.884	42.3736	16.683	0.10498	0.12646	0.10352	3.421	-28.296	1358.114	-1.4746	1.2246	-0.28711	NaN	NaN	NaN	NaN	NaN	NaN	NaN	NaN	NaN	NaN	NaN	NaN
1.324	-34.156	29.362729	12.022	0.083008	0.13965	0.10352	-6.895	-96.296	1369.996	-1.5553	1.2768	-0.29815	NaN	NaN	NaN	NaN	NaN	NaN	NaN	NaN	NaN	NaN	NaN	NaN
1.326	-28.076	31.6424	39.04817	0.078125	0.14355	0.1084	19.5332	-68.415	1403.436	-1.5958	1.324	-0.31924	NaN	NaN	NaN	NaN	NaN	NaN	NaN	NaN	NaN	NaN	NaN	NaN
1.328	-6.05	40.9767	45.10064	0.053711	0.14209	0.10938	15.475	-38.3604	1414.63	-1.6067	1.3676	-0.3415	NaN	NaN	NaN	NaN	NaN	NaN	NaN	NaN	NaN	NaN	NaN	NaN
1.33	-18.82	55.895	41.7776	0.040527	0.14136	0.11645	9.502	-93.451	1462.464	-1.6226	1.3994	-0.35498	NaN	NaN	NaN	NaN	NaN	NaN	NaN	NaN	NaN	NaN	NaN	NaN
1.332	-16.432	47.4734	21.2784	0.032227	0.14502	0.12305	-17.113	-35.7024	1457.813	-1.6382	1.4263	-0.37061	NaN	NaN	NaN	NaN	NaN	NaN	NaN	NaN	NaN	NaN	NaN	NaN
1.334	-22.637	30.986	29.5547	0.029297	0.13721	0.12158	-59.755	-45.431	1437.018	-1.6784	1.4614	-0.37256	NaN	NaN	NaN	NaN	NaN	NaN	NaN	NaN	NaN	NaN	NaN	NaN
1.336	-5.967	19.0156	38.672	0.020996	0.14111	0.125	-48.632	-55.86	1460.785	-1.7171	1.4943	-0.38418	NaN	NaN	NaN	NaN	NaN	NaN	NaN	NaN	NaN	NaN	NaN	NaN
1.338	-37.178	16.1322	38.1263	0.0048828	0.14502	0.13281	-41.895	8.577	1455.303	-1.7538	1.5333	-0.39629	NaN	NaN	NaN	NaN	NaN	NaN	NaN	NaN	NaN	NaN	NaN	NaN
1.34	-33.815	21.8066	33.7425	-0.010254	0.146	0.13721	-20.556	-32.3079	1453.813	-1.7821	1.5686	-0.41689	NaN	NaN	NaN	NaN	NaN	NaN	NaN	NaN	NaN	NaN	NaN	NaN
1.342	-12.466	16.7621	34.5354	-0.01123	0.15039	0.14209	-4.758	-25.7973	1446.9812	-1.8145	1.6055	-0.4375	NaN	NaN	NaN	NaN	NaN	NaN	NaN	NaN	NaN	NaN	NaN	NaN
1.344	-28.586	29.1583	20.1203	-0.032227	0.15332	0.15479	22.946	-14.0068	1374.854	-1.8775	1.6404	-0.44649	NaN	NaN	NaN	NaN	NaN	NaN	NaN	NaN	NaN	NaN	NaN	NaN
1.346	-40.485	37.88745	7.4	-0.045899	0.16187	0.1604	25.205	-64.732	1337.755	-1.9694	1.6845	-0.44404	NaN	NaN	NaN	NaN	NaN	NaN	NaN	NaN	NaN	NaN	NaN	NaN
1.348	-35.844	26.5044	29.1495	-0.057617	0.16553	0.16602	44.88278	23.081	1325.148	-2.0725	1.7345	-0.4331	NaN	NaN	NaN	NaN	NaN	NaN	NaN	NaN	NaN	NaN	NaN	NaN
1.35	-29.302	30.1184	40.576	-0.070801	0.16943	0.18115	22.5645	51.475	1299.7818	-2.1614	1.784	-0.40781	NaN	NaN	NaN	NaN	NaN	NaN	NaN	NaN	NaN	NaN	NaN	NaN
1.352	-33.415	34.406	50.719	-0.079102	0.16943	0.18799	17.728	57.393	1312.867	-2.2183	1.8325	-0.38184	NaN	NaN	NaN	NaN	NaN	NaN	NaN	NaN	NaN	NaN	NaN	NaN
1.354	-30.428	43.24	24.2161	-0.083496	0.17236	0.1958	32.17842	113.629	1270.002	-2.2322	1.8643	-0.35391	NaN	NaN	NaN	NaN	NaN	NaN	NaN	NaN	NaN	NaN	NaN	NaN
1.356	-32.423	37.1331	33.0066	-0.084961	0.16577	0.20727	-25.379	36.05782	1226.628	-2.1971	1.873	-0.32891	NaN	NaN	NaN	NaN	NaN	NaN	NaN	NaN	NaN	NaN	NaN	NaN
1.358	-42.191	28.6857	34.1299	-0.080566	0.16748	0.20605	1.454	69.818	1235.756	-2.1135	1.8605	-0.30859	NaN	NaN	NaN	NaN	NaN	NaN	NaN	NaN	NaN	NaN	NaN	NaN
1.36	-42.224	30.37903	12.2272	-0.068359	0.16211	0.21826	9.87	112.952	1233.6657	-1.9839	1.8204	-0.30166	NaN	NaN	NaN	NaN	NaN	NaN	NaN	NaN	NaN	NaN	NaN	NaN
1.362	-57.15	24.22519	24.7009	-0.0625	0.16455	0.22021	3.439	75.12	1239.761	-1.8359	1.7539	-0.29932	NaN	NaN	NaN	NaN	NaN	NaN	NaN	NaN	NaN	NaN	NaN	NaN
1.364	-42.698	24.2364	33.114	-0.034668	0.16602	0.22607	26.4307	123.523	1224.332	-1.6966	1.6741	-0.30088	NaN	NaN	NaN	NaN	NaN	NaN	NaN	NaN	NaN	NaN	NaN	NaN
1.366	-32.333	20.8621	34.09037	-0.0097657	0.16748	0.22876	3.9738	82.483	1171.517	-1.5896	1.5822	-0.30283	NaN	NaN	NaN	NaN	NaN	NaN	NaN	NaN	NaN	NaN	NaN	NaN
1.368	-32.257	18.7927	17.1641	0.013184	0.18115	0.22803	30.6206	54.617	1149.346	-1.5021	1.5001	-0.30517	NaN	NaN	NaN	NaN	NaN	NaN	NaN	NaN	NaN	NaN	NaN	NaN
1.37	-27.47	12.4854	13.30797	0.028809	0.19971	0.21143	49.4855	109.062	1119.695	-1.4412	1.4326	-0.30108	NaN	NaN	NaN	NaN	NaN	NaN	NaN	NaN	NaN	NaN	NaN	NaN
1.372	-43.704	20.35572	55.9259	0.025391	0.21289	0.19385	-9.58799999999999	75.867	1108.529	-1.3999	1.3735	-0.29346	NaN	NaN	NaN	NaN	NaN	NaN	NaN	NaN	NaN	NaN	NaN	NaN
1.374	-12.629	12.78719	90.44946	-0.00097656	0.24951	0.13184	-9.717	104.708	1097.417	-1.3709	1.3314	-0.29141	NaN	NaN	NaN	NaN	NaN	NaN	NaN	NaN	NaN	NaN	NaN	NaN
1.376	-54.223	8.41461	130.136	-0.063476	0.29614	0.084962	-36.9471	119.8528	1048.3829	-1.3449	1.2931	-0.2794	NaN	NaN	NaN	NaN	NaN	NaN	NaN	NaN	NaN	NaN	NaN	NaN
1.378	-23.148	11.6187	200.739	-0.16016	0.35791	0.049316	-36.3528	74.061	1025.2743	-1.3229	1.2665	-0.26533	NaN	NaN	NaN	NaN	NaN	NaN	NaN	NaN	NaN	NaN	NaN	NaN
1.38	-42.515	8.2976	288.3449	-0.32764	0.4458	0.040039	-4.155	138.055	991.7691	-1.3076	1.2349	-0.25078	NaN	NaN	NaN	NaN	NaN	NaN	NaN	NaN	NaN	NaN	NaN	NaN
1.382	-67.553	-25.616	314.9948	-0.41748	0.49268	0.054199	-68.5814	154.254	957.01929	-1.2866	1.2017	-0.24072	NaN	NaN	NaN	NaN	NaN	NaN	NaN	NaN	NaN	NaN	NaN	NaN
1.384	-98.374	-79.871	285.60283	-0.58057	0.58008	0.087891	-83.471	172.031	942.9928	-1.2558	1.1745	-0.22754	NaN	NaN	NaN	NaN	NaN	NaN	NaN	NaN	NaN	NaN	NaN	NaN
1.386	-73.005	-103.707	258.894	-0.67188	0.65088	0.1106	-74.708	242.375	892.661	-1.2159	1.1458	-0.21513	NaN	NaN	NaN	NaN	NaN	NaN	NaN	NaN	NaN	NaN	NaN	NaN
1.388	-68.55	-82.298	296.149	-0.73633	0.7168	0.13281	-87.9793	194.158	854.709	-1.1706	1.113	-0.20303	NaN	NaN	NaN	NaN	NaN	NaN	NaN	NaN	NaN	NaN	NaN	NaN
1.39	-85.798	-50.873	354.7526	-0.77734	0.80273	0.14502	-30.952	188.475	853.99	-1.1194	1.0755	-0.19189	NaN	NaN	NaN	NaN	NaN	NaN	NaN	NaN	NaN	NaN	NaN	NaN
1.392	-88.7259	-32.9869	394.806	-0.79346	0.83447	0.14697	-30.84	171.41722	793.7831	-1.064	1.0278	-0.18701	NaN	NaN	NaN	NaN	NaN	NaN	NaN	NaN	NaN	NaN	NaN	NaN
1.394	-73.222	-45.618	420.056	-0.80762	0.90234	0.13135	-44.436	127.039	765.862	-1.0144	0.98836	-0.17647	NaN	NaN	NaN	NaN	NaN	NaN	NaN	NaN	NaN	NaN	NaN	NaN
1.396	-68.823	-53.2379	438.421	-0.8269	0.94654	0.10864	-46.202	193.6122	723.8657	-0.97422	0.94766	-0.16435	NaN	NaN	NaN	NaN	NaN	NaN	NaN	NaN	NaN	NaN	NaN	NaN
1.398	-87.603	-41.42	467.8777	-0.85938	0.99512	0.071777	-66.016	188.554	686.673	-0.94258	0.90899	-0.14834	NaN	NaN	NaN	NaN	NaN	NaN	NaN	NaN	NaN	NaN	NaN	NaN
1.4	-87.214	12.226	529.1221	-0.94482	1.0591	0.010254	-52.276	155.996	664.024	-0.91602	0.8711	-0.13496	NaN	NaN	NaN	NaN	NaN	NaN	NaN	NaN	NaN	NaN	NaN	NaN
1.402	-90.125	82.6828	600.037	-1.0034	1.0981	-0.027832	-35.661	178.625	632.196	-0.89111	0.84033	-0.11914	NaN	NaN	NaN	NaN	NaN	NaN	NaN	NaN	NaN	NaN	NaN	NaN
1.404	-82.106	115.11	673.154	-1.1772	1.1841	-0.07373	-64.4	146.459	614.851	-0.86484	0.80273	-0.10586	NaN	NaN	NaN	NaN	NaN	NaN	NaN	NaN	NaN	NaN	NaN	NaN
1.406	-81.159	102.042	752.2002	-1.3372	1.2513	-0.10327	-48.486	181.379	608.4206	-0.82929	0.7664	-0.095313	NaN	NaN	NaN	NaN	NaN	NaN	NaN	NaN	NaN	NaN	NaN	NaN
1.408	-100.601	72.874	832.615	-1.5215	1.3262	-0.10986	-45.0544	215.796	557.399	-0.7875	0.72851	-0.083985	NaN	NaN	NaN	NaN	NaN	NaN	NaN	NaN	NaN	NaN	NaN	NaN
1.41	-83.201	49.549	934.107	-1.752	1.4375	-0.084473	-69.551	154.5453	513.581	-0.74219	0.69473	-0.073828	NaN	NaN	NaN	NaN	NaN	NaN	NaN	NaN	NaN	NaN	NaN	NaN
1.412	-93.5812	30.2526	1007.503	-1.8481	1.4907	-0.065918	-26	157.05497	471.266	-0.69678	0.65479	-0.056152	NaN	NaN	NaN	NaN	NaN	NaN	NaN	NaN	NaN	NaN	NaN	NaN
1.414	-127.5936	15.4908	1079.269	-1.9878	1.5952	-0.0073242	-40.44	135.837	425.9603	-0.64463	0.60674	-0.038965	NaN	NaN	NaN	NaN	NaN	NaN	NaN	NaN	NaN	NaN	NaN	NaN
1.416	-114.2706	14.9062	1138.279	-2.0122	1.6733	0.036621	-30.302	126.673	418.7286	-0.60068	0.55782	-0.026953	NaN	NaN	NaN	NaN	NaN	NaN	NaN	NaN	NaN	NaN	NaN	NaN
1.418	-43.998	-9.866	1141.7082	-1.9917	1.7368	0.077148	-0.479999999999997	194.3643	376.537	-0.55459	0.50782	-0.010547	NaN	NaN	NaN	NaN	NaN	NaN	NaN	NaN	NaN	NaN	NaN	NaN
1.42	-3.128	-37.0845	1149.5894	-1.8843	1.7944	0.10986	-55.273	169.5478	345.1939	-0.50869	0.45654	0.0045898	NaN	NaN	NaN	NaN	NaN	NaN	NaN	NaN	NaN	NaN	NaN	NaN
1.422	-27.357	-60.094	1187.16297	-1.8184	1.7949	0.11523	-35.13	182.9134	334.385	-0.46484	0.4082	0.014648	NaN	NaN	NaN	NaN	NaN	NaN	NaN	NaN	NaN	NaN	NaN	NaN
1.424	-37.48397	-63.45	1246.451	-1.6816	1.7598	0.11768	-23.502	166.867	288.847	-0.41553	0.35801	0.023145	NaN	NaN	NaN	NaN	NaN	NaN	NaN	NaN	NaN	NaN	NaN	NaN
1.426	-35.027	-58.046	1307.495	-1.6003	1.7023	0.11817	-68.166	110.8269	271.751	-0.36895	0.31133	0.034179	NaN	NaN	NaN	NaN	NaN	NaN	NaN	NaN	NaN	NaN	NaN	NaN
1.428	-18.618	-63.7844	1325.398	-1.5405	1.6431	0.11621	-52.636	142.823	242.002	-0.32676	0.26992	0.046679	NaN	NaN	NaN	NaN	NaN	NaN	NaN	NaN	NaN	NaN	NaN	NaN
1.43	7.194	-78.099	1318.957	-1.5117	1.582	0.11572	-85.398	120.821	203.481	-0.2873	0.2291	0.053418	NaN	NaN	NaN	NaN	NaN	NaN	NaN	NaN	NaN	NaN	NaN	NaN
1.432	27.652	-77.533	1330.702	-1.5078	1.5547	0.10791	-79.189	104.66762	211.64	-0.24707	0.19434	0.065918	NaN	NaN	NaN	NaN	NaN	NaN	NaN	NaN	NaN	NaN	NaN	NaN
1.434	6.437	-56.753	1323.9176	-1.5015	1.5142	0.095703	-52.351	139.764	187.41648	-0.21484	0.1581	0.071777	NaN	NaN	NaN	NaN	NaN	NaN	NaN	NaN	NaN	NaN	NaN	NaN
1.436	-5.09999999999999	-42.039	1295.565	-1.5037	1.4875	0.085205	-88.1914	100.904	169.0881	-0.18476	0.12959	0.078809	NaN	NaN	NaN	NaN	NaN	NaN	NaN	NaN	NaN	NaN	NaN	NaN
1.438	-23.171	-41.059	1306.893	-1.502	1.4512	0.082031	-54.792	101.164	176.66114	-0.14804	0.097558	0.082325	NaN	NaN	NaN	NaN	NaN	NaN	NaN	NaN	NaN	NaN	NaN	NaN
1.44	-22.376	-51.535	1318.9643	-1.4858	1.3989	0.070801	-50.159	100.0489	149.509	-0.11065	0.064551	0.083594	NaN	NaN	NaN	NaN	NaN	NaN	NaN	NaN	NaN	NaN	NaN	NaN
1.442	-13.3	-79.124	1340.0612	-1.4683	1.3657	0.063477	-73.263	70.768	139.921	-0.077637	0.04541	0.09082	NaN	NaN	NaN	NaN	NaN	NaN	NaN	NaN	NaN	NaN	NaN	NaN
1.444	-4.71	-101.8639	1340.39	-1.4199	1.2998	0.056152	-28.483	103.756	107.0068	-0.039551	0.02207	0.095899	NaN	NaN	NaN	NaN	NaN	NaN	NaN	NaN	NaN	NaN	NaN	NaN
1.446	-36.668	-95.3187	1344.747	-1.3904	1.258	0.041748	-73.754	77.852	61.986	-0.0035156	0.005664	0.10596	NaN	NaN	NaN	NaN	NaN	NaN	NaN	NaN	NaN	NaN	NaN	NaN
1.448	-12.937	-61.8175	1358.984	-1.3667	1.2153	0.024902	-75.053	29.596	56.351	0.032031	-0.0033204	0.10752	NaN	NaN	NaN	NaN	NaN	NaN	NaN	NaN	NaN	NaN	NaN	NaN
1.45	-26.968	-59.3624	1382.7168	-1.3657	1.1978	0.013672	-45.513	41.2362	32.395	0.068066	-0.014453	0.10439	NaN	NaN	NaN	NaN	NaN	NaN	NaN	NaN	NaN	NaN	NaN	NaN
1.452	-43.618	-75.5071	1374.091	-1.3804	1.1958	0.01416	-69.821	29.6979	39.34	0.10303	-0.022461	0.098145	NaN	NaN	NaN	NaN	NaN	NaN	NaN	NaN	NaN	NaN	NaN	NaN
1.454	-45.439	-97.7098	1412.666	-1.4375	1.2285	0.022461	-24.181	67.2056	65.4214	0.12881	-0.027246	0.086719	NaN	NaN	NaN	NaN	NaN	NaN	NaN	NaN	NaN	NaN	NaN	NaN
1.456	-66.116	-126.999	1440.1022	-1.4968	1.2717	0.014893	-41.607	95.169	45.24	0.15879	-0.027051	0.083594	NaN	NaN	NaN	NaN	NaN	NaN	NaN	NaN	NaN	NaN	NaN	NaN
1.458	-91.508	-124.636	1467.5621	-1.5679	1.3179	0.020508	-60.317	56.694	61.2947	0.18184	-0.025098	0.074609	NaN	NaN	NaN	NaN	NaN	NaN	NaN	NaN	NaN	NaN	NaN	NaN
1.46	-102.298	-103.1168	1455.9431	-1.687	1.3833	0.035645	8.07	79.777	31.2082	0.1913	-0.013769	0.070312	NaN	NaN	NaN	NaN	NaN	NaN	NaN	NaN	NaN	NaN	NaN	NaN
1.462	-120.3976	-75.2284	1417.5968	-1.752	1.4141	0.04541	-19.987	54.789	6.2307	0.19189	-0.013672	0.063965	NaN	NaN	NaN	NaN	NaN	NaN	NaN	NaN	NaN	NaN	NaN	NaN
1.464	-141.7488	-63.9589	1407.245	-1.8789	1.4863	0.045898	-3.038	24.40283	11.6999	0.18008	0.0024414	0.057813	NaN	NaN	NaN	NaN	NaN	NaN	NaN	NaN	NaN	NaN	NaN	NaN
1.466	-160.942	-64.255	1410.229	-1.9722	1.5395	0.032226	7.486	38.865	18.0883	0.15371	0.018847	0.057617	NaN	NaN	NaN	NaN	NaN	NaN	NaN	NaN	NaN	NaN	NaN	NaN
1.468	-139.2461	-60.582	1413.316	-2.0781	1.5938	0.023438	-51.41	12.6253	14.36	0.1209	0.036035	0.064257	NaN	NaN	NaN	NaN	NaN	NaN	NaN	NaN	NaN	NaN	NaN	NaN
1.47	-131.6641	-43.7004	1422.1927	-2.2246	1.6777	0.02002	-8.034	15.5483	34.6922	0.075586	0.05332	0.071192	NaN	NaN	NaN	NaN	NaN	NaN	NaN	NaN	NaN	NaN	NaN	NaN
1.472	-93.211	-32.5702	1419.5103	-2.2905	1.7251	0.022461	-26.516	36.435	19.8085	0.028809	0.073242	0.080078	NaN	NaN	NaN	NaN	NaN	NaN	NaN	NaN	NaN	NaN	NaN	NaN
1.474	-112.744	-24.3547	1418.121	-2.4023	1.8105	0.038574	-40.69	27.8333	27.76	-0.012012	0.083496	0.081934	NaN	NaN	NaN	NaN	NaN	NaN	NaN	NaN	NaN	NaN	NaN	NaN
1.476	-118.697	-17.9534	1419.5148	-2.4529	1.8675	0.049561	8.512	59.314	39.238	-0.049024	0.090234	0.090528	NaN	NaN	NaN	NaN	NaN	NaN	NaN	NaN	NaN	NaN	NaN	NaN
1.478	-110.444	-6.9183	1414.2984	-2.4668	1.9102	0.054199	-48.214	59.962	25.1068	-0.074804	0.092187	0.097949	NaN	NaN	NaN	NaN	NaN	NaN	NaN	NaN	NaN	NaN	NaN	NaN
1.48	-102.016	12.467697	1420.528	-2.4136	1.9438	0.042969	-56.186	39.57	43.367	-0.08584	0.10341	0.10176	NaN	NaN	NaN	NaN	NaN	NaN	NaN	NaN	NaN	NaN	NaN	NaN
1.482	-99.625	0.443999999999999	1423.176	-2.3672	1.9473	0.040039	-18.539	47.138	40.3927	-0.094238	0.1123	0.10254	NaN	NaN	NaN	NaN	NaN	NaN	NaN	NaN	NaN	NaN	NaN	NaN
1.484	-107.4574	0.535	1410.543	-2.2437	1.9185	0.026855	-37.278	16.994	45.787	-0.093653	0.12842	0.10967	NaN	NaN	NaN	NaN	NaN	NaN	NaN	NaN	NaN	NaN	NaN	NaN
1.486	-105.709	-27.1199	1420.257	-2.1011	1.8657	0.0083008	-17.675	14.926	49.924	-0.091406	0.14004	0.12187	NaN	NaN	NaN	NaN	NaN	NaN	NaN	NaN	NaN	NaN	NaN	NaN
1.488	-116.347	-40.1231	1412.0997	-2.0371	1.8281	0.0014648	-34.875	48.805	21.09	-0.085547	0.15527	0.13203	NaN	NaN	NaN	NaN	NaN	NaN	NaN	NaN	NaN	NaN	NaN	NaN
1.49	-92.719	-41.048	1376.66357	-1.9233	1.7642	-0.0048828	-64.432	42.0289	35.9617	-0.078809	0.16651	0.14092	NaN	NaN	NaN	NaN	NaN	NaN	NaN	NaN	NaN	NaN	NaN	NaN
1.492	-76.348	-23.5854	1358.1209	-1.8569	1.7124	-0.010254	-38.023	79.101	44.1478	-0.063965	0.17139	0.15039	NaN	NaN	NaN	NaN	NaN	NaN	NaN	NaN	NaN	NaN	NaN	NaN
1.494	-55.401	-9.0528	1342.9862	-1.7925	1.6626	-0.015625	-68.7452	73.578	15.84043	-0.038965	0.17334	0.15459	NaN	NaN	NaN	NaN	NaN	NaN	NaN	NaN	NaN	NaN	NaN	NaN
1.496	-52.287	18.3465	1338.0434	-1.7168	1.5957	-0.024414	-61.252	33.4825	45.539	-0.0018555	0.16621	0.15186	NaN	NaN	NaN	NaN	NaN	NaN	NaN	NaN	NaN	NaN	NaN	NaN
1.498	-64.506	38.157	1297.1365	-1.6792	1.5669	-0.020996	-23.579	34.03	39.6145	0.04541	0.15527	0.14639	NaN	NaN	NaN	NaN	NaN	NaN	NaN	NaN	NaN	NaN	NaN	NaN
1.5	-70.072	52.7895	1295.648	-1.6201	1.499	-0.023926	-85.0736	6.8043	23.6585	0.095705	0.13847	0.14629	NaN	NaN	NaN	NaN	NaN	NaN	NaN	NaN	NaN	NaN	NaN	NaN
1.502	-60.413	63.765	1271.6206	-1.5698	1.4565	-0.02417	-54.934	18.7841	53.0191	0.14404	0.12207	0.14355	NaN	NaN	NaN	NaN	NaN	NaN	NaN	NaN	NaN	NaN	NaN	NaN
1.504	-59.411	83.292	1240.0865	-1.5273	1.4043	-0.020508	-49.104	38.62696	43.285	0.18545	0.10625	0.14843	NaN	NaN	NaN	NaN	NaN	NaN	NaN	NaN	NaN	NaN	NaN	NaN
1.506	-93.483	87.9743	1207.754	-1.4707	1.3438	-0.018066	-54.563	12.625	51.181	0.2291	0.097754	0.15244	NaN	NaN	NaN	NaN	NaN	NaN	NaN	NaN	NaN	NaN	NaN	NaN
1.508	-89.001	100.783	1193.021	-1.4434	1.3086	-0.021484	1.006	21.771	48.4929	0.26933	0.093848	0.15361	NaN	NaN	NaN	NaN	NaN	NaN	NaN	NaN	NaN	NaN	NaN	NaN
1.51	-108.221	87.989	1193.9484	-1.3823	1.2485	-0.019043	-43.803	20.153	13.5463	0.31191	0.079492	0.14121	NaN	NaN	NaN	NaN	NaN	NaN	NaN	NaN	NaN	NaN	NaN	NaN
1.512	-96.191	82.391	1171.2213	-1.3484	1.2054	-0.018799	-48.671	13.097	40.394	0.3623	0.067383	0.13818	NaN	NaN	NaN	NaN	NaN	NaN	NaN	NaN	NaN	NaN	NaN	NaN
1.514	-95.721	67.983	1144.2769	-1.314	1.1626	-0.020508	-4.852	51.261	34.7385	0.40889	0.061426	0.12783	NaN	NaN	NaN	NaN	NaN	NaN	NaN	NaN	NaN	NaN	NaN	NaN
1.516	-103.2461	70.819	1098.6203	-1.2695	1.1094	-0.013672	-46.214	45.934	24.7342	0.44785	0.056836	0.1207	NaN	NaN	NaN	NaN	NaN	NaN	NaN	NaN	NaN	NaN	NaN	NaN
1.518	-110.9876	72.0357	1092.938	-1.2402	1.084	-0.010742	-2.496	24.5739	30.511	0.48067	0.054492	0.11094	NaN	NaN	NaN	NaN	NaN	NaN	NaN	NaN	NaN	NaN	NaN	NaN
1.52	-107.667	81.35	1053.794	-1.1831	1.0317	-0.0097656	-1.409	24.3978	17.217	0.50235	0.062891	0.10791	NaN	NaN	NaN	NaN	NaN	NaN	NaN	NaN	NaN	NaN	NaN	NaN
1.522	-109.482	82.734	1043.569	-1.1396	0.99563	-0.0024414	-69.1559	-0.1526	38.3206	0.51172	0.083496	0.10303	NaN	NaN	NaN	NaN	NaN	NaN	NaN	NaN	NaN	NaN	NaN	NaN
1.524	-101.818	93.447	1006.1123	-1.0952	0.95557	0.00048828	-16.018	30.44	51.4131	0.50537	0.11094	0.10283	NaN	NaN	NaN	NaN	NaN	NaN	NaN	NaN	NaN	NaN	NaN	NaN
1.526	-100.0039	88.419	1007.566	-1.0327	0.90674	0.0048828	-35.366	56.313	25.14	0.49053	0.14492	0.10664	NaN	NaN	NaN	NaN	NaN	NaN	NaN	NaN	NaN	NaN	NaN	NaN
1.528	-90.079	117.24061	976.18	-0.99756	0.87939	0.0019531	-19.437	40.1275	42.3892	0.46045	0.17891	0.11172	NaN	NaN	NaN	NaN	NaN	NaN	NaN	NaN	NaN	NaN	NaN	NaN
1.53	-95.23071	137.809	948.5189	-0.92773	0.82617	0.0053711	9.973	45.636	17.6293	0.42363	0.21338	0.11553	NaN	NaN	NaN	NaN	NaN	NaN	NaN	NaN	NaN	NaN	NaN	NaN
1.532	-65.833	159.402	923.6364	-0.87866	0.7893	0.0034179	-44.779	15.4535	-4.743	0.3877	0.24072	0.11328	NaN	NaN	NaN	NaN	NaN	NaN	NaN	NaN	NaN	NaN	NaN	NaN
1.534	-58.258	152.303	885.2752	-0.83008	0.74805	0.00048828	-6.487	15.9537	40.2354	0.35478	0.26045	0.10762	NaN	NaN	NaN	NaN	NaN	NaN	NaN	NaN	NaN	NaN	NaN	NaN
1.536	-56.444	142.004	846.5631	-0.7583	0.69971	-0.0014648	-20.952	39.142	27.413	0.32334	0.27695	0.099411	NaN	NaN	NaN	NaN	NaN	NaN	NaN	NaN	NaN	NaN	NaN	NaN
1.538	-67.657	130.5968	811.994	-0.72217	0.68018	-0.0043945	-59.613	11.8	56.594	0.29326	0.28984	0.091602	NaN	NaN	NaN	NaN	NaN	NaN	NaN	NaN	NaN	NaN	NaN	NaN
1.54	-82.504	125.1924	792.534	-0.66211	0.64014	-0.0087891	-30.637	12.9115	47.89	0.26524	0.30088	0.082812	NaN	NaN	NaN	NaN	NaN	NaN	NaN	NaN	NaN	NaN	NaN	NaN
1.542	-52.236	131.446	762.6131	-0.60938	0.6123	-0.016113	-66.9079	20.779	3.985	0.22998	0.31348	0.085449	NaN	NaN	NaN	NaN	NaN	NaN	NaN	NaN	NaN	NaN	NaN	NaN
1.544	-36.099	138.7026	719.7344	-0.5625	0.58252	-0.018066	-50.56	28.1686	28.9204	0.19912	0.3291	0.094336	NaN	NaN	NaN	NaN	NaN	NaN	NaN	NaN	NaN	NaN	NaN	NaN
1.546	-37.431	131.4024	685.90897	-0.49609	0.54688	-0.025879	-43.459	64.887	29.3522	0.1626	0.34414	0.10215	NaN	NaN	NaN	NaN	NaN	NaN	NaN	NaN	NaN	NaN	NaN	NaN
1.548	-26.706	130.8526	659.6206	-0.46631	0.52783	-0.03418	-83.5366	53.782	25.9867	0.12705	0.36602	0.11191	NaN	NaN	NaN	NaN	NaN	NaN	NaN	NaN	NaN	NaN	NaN	NaN
1.55	-30.252	128.01307	635.4737	-0.40869	0.48633	-0.041504	-39.257	34.2114	32.082	0.092286	0.3832	0.12637	NaN	NaN	NaN	NaN	NaN	NaN	NaN	NaN	NaN	NaN	NaN	NaN
1.552	-32.139	152.1247	609.3309	-0.36572	0.46533	-0.047852	-35.009	39.029	-1.589	0.055664	0.39502	0.13281	NaN	NaN	NaN	NaN	NaN	NaN	NaN	NaN	NaN	NaN	NaN	NaN
1.554	-23.214	139.11042	600.293	-0.32422	0.44092	-0.052246	-67.9513	15.071	22.2406	0.033008	0.40713	0.14619	NaN	NaN	NaN	NaN	NaN	NaN	NaN	NaN	NaN	NaN	NaN	NaN
1.556	-13.054	132.225	586.264	-0.2666	0.40625	-0.048828	-20.094	32.7196	38.479	0.012695	0.4083	0.15479	NaN	NaN	NaN	NaN	NaN	NaN	NaN	NaN	NaN	NaN	NaN	NaN
1.558	-18.294	118.184	544.3199	-0.24023	0.38721	-0.063477	-52.19	69.296	11.7028	0.0021484	0.4169	0.16455	NaN	NaN	NaN	NaN	NaN	NaN	NaN	NaN	NaN	NaN	NaN	NaN
1.56	-44.88	113.072	504.639	-0.17773	0.34961	-0.069824	-43.55	49.10494	27.649	-0.014649	0.41855	0.16826	NaN	NaN	NaN	NaN	NaN	NaN	NaN	NaN	NaN	NaN	NaN	NaN
1.562	-57.687	128.667	462.829	-0.13794	0.31885	-0.080811	-25.148	59.46	21.2092	-0.026855	0.42188	0.17822	NaN	NaN	NaN	NaN	NaN	NaN	NaN	NaN	NaN	NaN	NaN	NaN
1.564	-61.392	127.678	454.5952	-0.1001	0.29443	-0.089355	-65.9503	36.2511	48.8665	-0.040625	0.42265	0.18945	NaN	NaN	NaN	NaN	NaN	NaN	NaN	NaN	NaN	NaN	NaN	NaN
1.566	-42.551	116.2345	409.0604	-0.05957	0.26611	-0.085938	-26.781	-4.61668	99.562	-0.05293	0.42109	0.20059	NaN	NaN	NaN	NaN	NaN	NaN	NaN	NaN	NaN	NaN	NaN	NaN
1.568	-57.387	97.7227	366.2256	-0.039063	0.25537	-0.091797	-28.029	21.6186	98.7098	-0.064648	0.41992	0.20683	NaN	NaN	NaN	NaN	NaN	NaN	NaN	NaN	NaN	NaN	NaN	NaN
1.57	-54.128	84.4283	345.662	-0.0024414	0.23047	-0.094727	-33.155	-5.51131	146.489	-0.07168	0.42002	0.21973	NaN	NaN	NaN	NaN	NaN	NaN	NaN	NaN	NaN	NaN	NaN	NaN
1.572	-53.57	89.7337	337.828	0.013428	0.21631	-0.093017	-4.355	-8.7985	199.9846	-0.079102	0.4165	0.22412	NaN	NaN	NaN	NaN	NaN	NaN	NaN	NaN	NaN	NaN	NaN	NaN
1.574	-41.194	107.9142	324.0772	0.033203	0.20215	-0.093262	-77.585	-4.2435	283.643	-0.083789	0.41641	0.23008	NaN	NaN	NaN	NaN	NaN	NaN	NaN	NaN	NaN	NaN	NaN	NaN
1.576	-48.23	116.572	297.8508	0.058105	0.18994	-0.094238	-74.468	-71.614	421.163	-0.085352	0.41396	0.23389	NaN	NaN	NaN	NaN	NaN	NaN	NaN	NaN	NaN	NaN	NaN	NaN
1.578	-39.365	119.904	283.1524	0.066406	0.18311	-0.091797	-72.301	-117.5768	583.028	-0.083398	0.41123	0.2292	NaN	NaN	NaN	NaN	NaN	NaN	NaN	NaN	NaN	NaN	NaN	NaN
1.58	-39.9	107.8562	273.25608	0.086426	0.17041	-0.089355	-147.67	-164.1049	729.958	-0.082324	0.41699	0.20722	NaN	NaN	NaN	NaN	NaN	NaN	NaN	NaN	NaN	NaN	NaN	NaN
1.582	-48.712	93.9155	247.4366	0.094726	0.16626	-0.0896	-110.742	-151.199	796.94	-0.087891	0.42773	0.1665	NaN	NaN	NaN	NaN	NaN	NaN	NaN	NaN	NaN	NaN	NaN	NaN
1.584	-51.1848	102.462	223.9813	0.10254	0.16113	-0.09375	-127.099	-62.191	805.308	-0.10488	0.44668	0.077539	NaN	NaN	NaN	NaN	NaN	NaN	NaN	NaN	NaN	NaN	NaN	NaN
1.586	-42.965	92.068	220.9207	0.104	0.16016	-0.10352	-207.4179	25.424	844.318	-0.1501	0.49034	-0.010547	NaN	NaN	NaN	NaN	NaN	NaN	NaN	NaN	NaN	NaN	NaN	NaN
1.588	-39.194	79.799	197.632	0.10645	0.15234	-0.097656	-171.314	77.317	918.7483	-0.24111	0.54306	-0.088282	NaN	NaN	NaN	NaN	NaN	NaN	NaN	NaN	NaN	NaN	NaN	NaN
1.59	-33.963	65.2387	164.1153	0.10645	0.15186	-0.097656	-122.36481	89.5549	960.753	-0.39864	0.60742	-0.16904	NaN	NaN	NaN	NaN	NaN	NaN	NaN	NaN	NaN	NaN	NaN	NaN
1.592	-45.343	53.0641	140.1857	0.10302	0.15234	-0.10083	-32.9872	39.077	1067.8723	-0.59814	0.67236	-0.22705	NaN	NaN	NaN	NaN	NaN	NaN	NaN	NaN	NaN	NaN	NaN	NaN
1.594	-11.461	52.029	120.793	0.10156	0.15137	-0.10059	63.974	4.544	1124.52	-0.85908	0.74424	-0.23525	NaN	NaN	NaN	NaN	NaN	NaN	NaN	NaN	NaN	NaN	NaN	NaN
1.596	-17.242	64.0617	131.0861	0.10059	0.14453	-0.10059	26.57	-26.324	1155.178	-1.1652	0.83321	-0.19805	NaN	NaN	NaN	NaN	NaN	NaN	NaN	NaN	NaN	NaN	NaN	NaN
1.598	0.269000000000002	72.5989	116.4851	0.10352	0.14355	-0.10156	-5.8395	-28.408	1205.951	-1.5156	0.95313	-0.11328	NaN	NaN	NaN	NaN	NaN	NaN	NaN	NaN	NaN	NaN	NaN	NaN
1.6	-7.47	65.29127	100.7554	0.10986	0.1416	-0.10742	-28.657	50.3128	1133.037	-1.87	1.071	-0.01709	NaN	NaN	NaN	NaN	NaN	NaN	NaN	NaN	NaN	NaN	NaN	NaN
1.602	6.604	60.1093	81.8757	0.11133	0.1416	-0.10572	-68.215	41.1943	1091.516	-2.1812	1.1851	0.056641	NaN	NaN	NaN	NaN	NaN	NaN	NaN	NaN	NaN	NaN	NaN	NaN
1.604	-21.888	43.6815	61.2468	0.11279	0.146	-0.10645	0.292000000000002	14.147	1079.227	-2.3989	1.2816	0.062989	NaN	NaN	NaN	NaN	NaN	NaN	NaN	NaN	NaN	NaN	NaN	NaN
1.606	-22.96	51.825	71.2715	0.1084	0.14648	-0.11133	19.3253	-30.55	1077.244	-2.5062	1.3649	0.040527	NaN	NaN	NaN	NaN	NaN	NaN	NaN	NaN	NaN	NaN	NaN	NaN
1.608	-20.983	53.013	76.885	0.104	0.1499	-0.11523	-26.9141	-134.699	1152.3075	-2.5233	1.4525	0.012012	NaN	NaN	NaN	NaN	NaN	NaN	NaN	NaN	NaN	NaN	NaN	NaN
1.61	-19.788	72.794	51.22231	0.089355	0.1499	-0.11475	-27.6477	-147.925	1176.697	-2.4996	1.5293	0.016211	NaN	NaN	NaN	NaN	NaN	NaN	NaN	NaN	NaN	NaN	NaN	NaN
1.612	-14.912	58.219	21.308	0.076904	0.1499	-0.11572	-89.519	-150.118	1136.1604	-2.4521	1.5801	0.041504	NaN	NaN	NaN	NaN	NaN	NaN	NaN	NaN	NaN	NaN	NaN	NaN
1.614	-21.422	34.7711	22.547	0.063477	0.15332	-0.11377	-9.296	-160.568	1110.422	-2.3801	1.6207	0.078321	NaN	NaN	NaN	NaN	NaN	NaN	NaN	NaN	NaN	NaN	NaN	NaN
1.616	-24.618	9.46	22.9366	0.056152	0.15234	-0.11377	62.331	-115.63	1074.2	-2.2946	1.6437	0.13271	NaN	NaN	NaN	NaN	NaN	NaN	NaN	NaN	NaN	NaN	NaN	NaN
1.618	-22.419	12.178	29.6576	0.048828	0.15527	-0.11865	61.755	-139.934	1122.249	-2.2039	1.6391	0.17569	NaN	NaN	NaN	NaN	NaN	NaN	NaN	NaN	NaN	NaN	NaN	NaN
1.62	-23	29.0332	5.9574	0.05127	0.15918	-0.11719	132.0488	-115.233	1228.0699	-2.1243	1.5929	0.21328	NaN	NaN	NaN	NaN	NaN	NaN	NaN	NaN	NaN	NaN	NaN	NaN
1.622	-41.409	26.2337	12.402	0.054688	0.15136	-0.12036	78.557	-73.905	1289.87	-2.0308	1.4927	0.24902	NaN	NaN	NaN	NaN	NaN	NaN	NaN	NaN	NaN	NaN	NaN	NaN
1.624	-39.449	16.0797	25.5572	0.061523	0.14551	-0.12012	35.5662	-115.4729	1360.416	-1.9416	1.3619	0.26553	NaN	NaN	NaN	NaN	NaN	NaN	NaN	NaN	NaN	NaN	NaN	NaN
1.626	-45.467	28.3427	28.2902	0.074219	0.13477	-0.125	43.045	-85.507	1327.326	-1.8325	1.2316	0.27266	NaN	NaN	NaN	NaN	NaN	NaN	NaN	NaN	NaN	NaN	NaN	NaN
1.628	-55.756	29.3442	27.9762	0.081543	0.13037	-0.12598	-25.086	-93.649	1246.41	-1.7039	1.1258	0.27148	NaN	NaN	NaN	NaN	NaN	NaN	NaN	NaN	NaN	NaN	NaN	NaN
1.63	-38.926	36.9154	29.9181	0.098633	0.11475	-0.12891	-61.649	-91.955	1253.552	-1.5621	1.0533	0.26064	NaN	NaN	NaN	NaN	NaN	NaN	NaN	NaN	NaN	NaN	NaN	NaN
1.632	-47.912	43.1984	34.2338	0.11646	0.10962	-0.13086	-101.62	-45.339	1259.93	-1.4297	0.99414	0.23096	NaN	NaN	NaN	NaN	NaN	NaN	NaN	NaN	NaN	NaN	NaN	NaN
1.634	-54.4599	50.842	35.02	0.12939	0.10645	-0.12891	-139.678	-131.584	1300.2975	-1.3296	0.94521	0.17471	NaN	NaN	NaN	NaN	NaN	NaN	NaN	NaN	NaN	NaN	NaN	NaN
1.636	-60.3513	40.0434	10.3386	0.13867	0.097168	-0.12939	-105.857	-156.082	1337.522	-1.2567	0.90469	0.11767	NaN	NaN	NaN	NaN	NaN	NaN	NaN	NaN	NaN	NaN	NaN	NaN
1.638	-48.155	19.6939	16.7218	0.13599	0.089356	-0.13575	-63.973	-125.3859	1298.4316	-1.2098	0.87422	0.087207	NaN	NaN	NaN	NaN	NaN	NaN	NaN	NaN	NaN	NaN	NaN	NaN
1.64	-27.539	8.392	17.9531	0.13428	0.083496	-0.13184	-54.5194	-119.268	1286.89	-1.179	0.85928	0.073242	NaN	NaN	NaN	NaN	NaN	NaN	NaN	NaN	NaN	NaN	NaN	NaN
1.642	-46.687	30.3645	11.1546	0.13135	0.087891	-0.12988	-28.628	-26.5814	1302.05	-1.1636	0.86182	0.073242	NaN	NaN	NaN	NaN	NaN	NaN	NaN	NaN	NaN	NaN	NaN	NaN
1.644	-25.868	39.35474	19.9977	0.12646	0.09082	-0.12695	-94.655	-21.93762	1316.044	-1.1756	0.89238	0.074512	NaN	NaN	NaN	NaN	NaN	NaN	NaN	NaN	NaN	NaN	NaN	NaN
1.646	-35.552	51.5615	27.642	0.12256	0.095215	-0.125	-100.401	-52.6903	1375.54	-1.2	0.95078	0.070215	NaN	NaN	NaN	NaN	NaN	NaN	NaN	NaN	NaN	NaN	NaN	NaN
1.648	-21.46	44.6439	31.4959	0.1145	0.1062	-0.1233	-75.911	-47.609	1396.965	-1.2402	1.0238	0.064355	NaN	NaN	NaN	NaN	NaN	NaN	NaN	NaN	NaN	NaN	NaN	NaN
1.65	-26.498	35.7311	31.0995	0.10596	0.11475	-0.12061	-154.316	-117.172	1434.638	-1.3035	1.0992	0.066308	NaN	NaN	NaN	NaN	NaN	NaN	NaN	NaN	NaN	NaN	NaN	NaN
1.652	-26.2	22.5109	26.3742	0.098145	0.12402	-0.11621	-146.606	-85.649	1485.01	-1.3965	1.1875	0.070313	NaN	NaN	NaN	NaN	NaN	NaN	NaN	NaN	NaN	NaN	NaN	NaN
1.654	-8.053	20.3753	41.66072	0.091797	0.13135	-0.12012	-164.38	-14.519	1420.5148	-1.5169	1.2722	0.098143	NaN	NaN	NaN	NaN	NaN	NaN	NaN	NaN	NaN	NaN	NaN	NaN
1.656	-8.281	43.479	38.6084	0.087402	0.14063	-0.11523	-199.7778	-15.107	1380.47	-1.6272	1.3564	0.12647	NaN	NaN	NaN	NaN	NaN	NaN	NaN	NaN	NaN	NaN	NaN	NaN
1.658	-13.446	45.783	27.5142	0.086914	0.1438	-0.10839	-121.813	38.315	1343.627	-1.7245	1.438	0.1499	NaN	NaN	NaN	NaN	NaN	NaN	NaN	NaN	NaN	NaN	NaN	NaN
1.66	-18.487	32.5746	33.8125	0.090332	0.15039	-0.10742	-87.177	-25.182	1321.345	-1.7986	1.5135	0.15322	NaN	NaN	NaN	NaN	NaN	NaN	NaN	NaN	NaN	NaN	NaN	NaN
1.662	-3.754	21.1714	31.9346	0.090332	0.15186	-0.10889	-59.149	-94.602	1385.4824	-1.8516	1.5742	0.16162	NaN	NaN	NaN	NaN	NaN	NaN	NaN	NaN	NaN	NaN	NaN	NaN
1.664	-13.683	27.0751	26.9525	0.089844	0.15723	-0.11035	-22.677	-70.31	1402.9182	-1.8817	1.6312	0.15918	NaN	NaN	NaN	NaN	NaN	NaN	NaN	NaN	NaN	NaN	NaN	NaN
1.666	-6.629	40.8394	11.846	0.089844	0.16846	-0.10693	-46.4	-83.1861	1397.225	-1.9089	1.6786	0.14951	NaN	NaN	NaN	NaN	NaN	NaN	NaN	NaN	NaN	NaN	NaN	NaN
1.668	-31.275	43.197	22.2878	0.088135	0.17846	-0.10913	7.53300000000001	2.78200000000001	1399.9808	-1.9386	1.7161	0.1335	NaN	NaN	NaN	NaN	NaN	NaN	NaN	NaN	NaN	NaN	NaN	NaN
1.67	-29.826	44.856	33.5571	0.086914	0.17969	-0.10693	-13.387	86.383	1341.8154	-1.9958	1.7472	0.11553	NaN	NaN	NaN	NaN	NaN	NaN	NaN	NaN	NaN	NaN	NaN	NaN
1.672	-28.834	34.4146	32.307	0.091309	0.18262	-0.10986	-65.773	77.085	1328.543	-2.0879	1.7852	0.10645	NaN	NaN	NaN	NaN	NaN	NaN	NaN	NaN	NaN	NaN	NaN	NaN
1.674	-27.213	23.53169	18.8281	0.089844	0.18799	-0.11084	-48.593	118.202	1363.182	-2.196	1.8325	0.10605	NaN	NaN	NaN	NaN	NaN	NaN	NaN	NaN	NaN	NaN	NaN	NaN
1.676	-40.341	22.019	32.4038	0.1001	0.19287	-0.11279	-88.7585	76.696	1365.651	-2.3052	1.8852	0.11476	NaN	NaN	NaN	NaN	NaN	NaN	NaN	NaN	NaN	NaN	NaN	NaN
1.678	-45.757	39.698	40.4231	0.11182	0.19385	-0.11499	-52.235	55.6882	1397.371	-2.3809	1.9305	0.12726	NaN	NaN	NaN	NaN	NaN	NaN	NaN	NaN	NaN	NaN	NaN	NaN
1.68	-33.861	58.531	51.8997	0.12646	0.19873	-0.11426	-41.6655	88.5341	1344.1972	-2.4189	1.9655	0.14601	NaN	NaN	NaN	NaN	NaN	NaN	NaN	NaN	NaN	NaN	NaN	NaN
1.682	-49.919	51.162	26.1377	0.14063	0.19141	-0.125	-86.2621	43.727	1256.123	-2.4004	1.9863	0.15283	NaN	NaN	NaN	NaN	NaN	NaN	NaN	NaN	NaN	NaN	NaN	NaN
1.684	-41.817	35.6396	26.43689	0.1499	0.19531	-0.125	-64.593	61.57113	1208.709	-2.3114	1.9654	0.1582	NaN	NaN	NaN	NaN	NaN	NaN	NaN	NaN	NaN	NaN	NaN	NaN
1.686	-37.318	9.1281	29.8619	0.1709	0.19336	-0.13086	-96.217	87.379	1174.467	-2.184	1.9139	0.14599	NaN	NaN	NaN	NaN	NaN	NaN	NaN	NaN	NaN	NaN	NaN	NaN
1.688	-57.116	15.2536	17.331	0.18115	0.19384	-0.13648	-86.477	58.533	1198.9591	-2.0408	1.8199	0.14291	NaN	NaN	NaN	NaN	NaN	NaN	NaN	NaN	NaN	NaN	NaN	NaN
1.69	-36.494	24.2952	24.7661	0.18604	0.19629	-0.14014	-30.43	102.912	1222.504	-1.9031	1.6996	0.12985	NaN	NaN	NaN	NaN	NaN	NaN	NaN	NaN	NaN	NaN	NaN	NaN
1.692	-55.574	32.1631	37.1568	0.19287	0.20361	-0.13916	-28.233	110.629	1210.962	-1.7808	1.5806	0.11377	NaN	NaN	NaN	NaN	NaN	NaN	NaN	NaN	NaN	NaN	NaN	NaN
1.694	-26.011	34.229	43.8588	0.19385	0.20654	-0.14307	-44.408	121.486	1202.311	-1.6835	1.4791	0.0996	NaN	NaN	NaN	NaN	NaN	NaN	NaN	NaN	NaN	NaN	NaN	NaN
1.696	-48.148	27.6306	35.7903	0.18457	0.21436	-0.146	-60.46	187.909	1165.7154	-1.5995	1.4045	0.091428	NaN	NaN	NaN	NaN	NaN	NaN	NaN	NaN	NaN	NaN	NaN	NaN
1.698	-30.952	17.932	31.5922	0.18286	0.21607	-0.14136	-137.3852	161.923	1130.6703	-1.5333	1.3526	0.084354	NaN	NaN	NaN	NaN	NaN	NaN	NaN	NaN	NaN	NaN	NaN	NaN
1.7	-30.174	25.5813	37.9036	0.17578	0.21729	-0.13818	-104.543	171.029	1103.637	-1.478	1.3108	0.083087	NaN	NaN	NaN	NaN	NaN	NaN	NaN	NaN	NaN	NaN	NaN	NaN
1.702	-19.744	51.304	43.6376	0.16992	0.22656	-0.13379	-105.5748	185.121	1064.1	-1.4316	1.2734	0.083008	NaN	NaN	NaN	NaN	NaN	NaN	NaN	NaN	NaN	NaN	NaN	NaN
1.704	-29.076	44.87	32.78894	0.1709	0.22705	-0.13525	-138.432	135.972	1057.9602	-1.3933	1.2371	0.080037	NaN	NaN	NaN	NaN	NaN	NaN	NaN	NaN	NaN	NaN	NaN	NaN
1.706	-36.506	25.4255	19.401	0.16455	0.23145	-0.12793	-77.223	166.875	1034.028	-1.3566	1.2058	0.080331	NaN	NaN	NaN	NaN	NaN	NaN	NaN	NaN	NaN	NaN	NaN	NaN
1.708	9.706	12.4036	23.8756	0.16553	0.23706	-0.13574	-103.296	169.76	959.769	-1.3236	1.1674	0.079604	NaN	NaN	NaN	NaN	NaN	NaN	NaN	NaN	NaN	NaN	NaN	NaN
1.71	-20.416	22.55484	20.75139	0.15723	0.24658	-0.13818	-73.76	160.101	897.5132	-1.2878	1.1331	0.086417	NaN	NaN	NaN	NaN	NaN	NaN	NaN	NaN	NaN	NaN	NaN	NaN
1.712	-13.187	21.8082	23.8484	0.14307	0.25488	-0.13867	-7.181	205.075	844.671	-1.2456	1.0981	0.088867	NaN	NaN	NaN	NaN	NaN	NaN	NaN	NaN	NaN	NaN	NaN	NaN
1.714	-21.928	31.941	32.6328	0.1333	0.2583	-0.14258	-25.427	167.848	826.8404	-1.1881	1.0687	0.094238	NaN	NaN	NaN	NaN	NaN	NaN	NaN	NaN	NaN	NaN	NaN	NaN
1.716	-17.89	40.034	40.6145	0.11377	0.27441	-0.14209	24.29	176.301	844.725	-1.1275	1.0388	0.096525	NaN	NaN	NaN	NaN	NaN	NaN	NaN	NaN	NaN	NaN	NaN	NaN
1.718	2.759	33.546	31.06963	0.10278	0.28296	-0.1438	4.246	194.989	832.3192	-1.0571	1.0102	0.096114	NaN	NaN	NaN	NaN	NaN	NaN	NaN	NaN	NaN	NaN	NaN	NaN
1.72	-19.491	15.7616	14.3697	0.091309	0.29834	-0.14355	-29.427	172.796	820.091	-0.99079	0.97188	0.091445	NaN	NaN	NaN	NaN	NaN	NaN	NaN	NaN	NaN	NaN	NaN	NaN
1.722	-30.397	3.556	37.388	0.078613	0.31201	-0.14746	-10.617	213.882	791.811	-0.93359	0.9248	0.085938	NaN	NaN	NaN	NaN	NaN	NaN	NaN	NaN	NaN	NaN	NaN	NaN
1.724	-22.539	16.0258	38.85302	0.076172	0.32227	-0.1543	-79.122	237.433	704.471	-0.87477	0.88657	0.077937	NaN	NaN	NaN	NaN	NaN	NaN	NaN	NaN	NaN	NaN	NaN	NaN
1.726	-8.104	30.8186	68.4742	0.053223	0.34033	-0.17969	-69.626	219.469	653.809	-0.82102	0.85623	0.076943	NaN	NaN	NaN	NaN	NaN	NaN	NaN	NaN	NaN	NaN	NaN	NaN
1.728	-35.14	22.1129	99.97	-0.0095215	0.37036	-0.19654	-41.416	229.298	619.248	-0.76439	0.82547	0.075937	NaN	NaN	NaN	NaN	NaN	NaN	NaN	NaN	NaN	NaN	NaN	NaN
1.73	-57.7807	15.5684	160.3454	-0.12549	0.40918	-0.21045	-71.046	167.293	598.9712	-0.70479	0.79451	0.069358	NaN	NaN	NaN	NaN	NaN	NaN	NaN	NaN	NaN	NaN	NaN	NaN
1.732	28.082	0.0711000000000004	211.864	-0.36133	0.46777	-0.2124	11.719	127.894	582.63	-0.63574	0.7666	0.064941	NaN	NaN	NaN	NaN	NaN	NaN	NaN	NaN	NaN	NaN	NaN	NaN
1.734	50.505	14.2587	288.63	-0.49951	0.51025	-0.21484	21.6808	139.762	523.4949	-0.5761	0.73419	0.063047	NaN	NaN	NaN	NaN	NaN	NaN	NaN	NaN	NaN	NaN	NaN	NaN
1.736	18.1209	-2.6854	353.68	-0.81055	0.60352	-0.21094	-7.504	127.555	466.7908	-0.51003	0.69671	0.062044	NaN	NaN	NaN	NaN	NaN	NaN	NaN	NaN	NaN	NaN	NaN	NaN
1.738	23.844	-40.2177	400.6129	-1.0627	0.70336	-0.19995	13.89	158.636	429.44	-0.43459	0.65786	0.053043	NaN	NaN	NaN	NaN	NaN	NaN	NaN	NaN	NaN	NaN	NaN	NaN
1.74	75.0833	-60.893	447.6714	-1.3276	0.82861	-0.19092	-47.137	181.1598	403.713	-0.35922	0.61333	0.046839	NaN	NaN	NaN	NaN	NaN	NaN	NaN	NaN	NaN	NaN	NaN	NaN
1.742	36.396	-28.3302	545.3934	-1.6655	1.0103	-0.15967	-41.83	180.1479	414.5581	-0.29102	0.57275	0.041016	NaN	NaN	NaN	NaN	NaN	NaN	NaN	NaN	NaN	NaN	NaN	NaN
1.744	15.683	3.3646	647.18214	-1.8047	1.084	-0.1582	-22.166	198.397	397.3354	-0.22245	0.52504	0.026047	NaN	NaN	NaN	NaN	NaN	NaN	NaN	NaN	NaN	NaN	NaN	NaN
1.746	20.97	38.8632	695.576	-1.9917	1.2095	-0.13428	-75.398	158.39	383.44	-0.16704	0.47833	0.018252	NaN	NaN	NaN	NaN	NaN	NaN	NaN	NaN	NaN	NaN	NaN	NaN
1.748	26.145	69.3379	718.32	-2.0486	1.2991	-0.10669	-48.5036	129.023	353.854	-0.13232	0.4366	0.0084408	NaN	NaN	NaN	NaN	NaN	NaN	NaN	NaN	NaN	NaN	NaN	NaN
1.75	27.932	73.66	773.8992	-2.0879	1.4121	-0.075684	-76.2388	160.503	293.0743	-0.10189	0.39701	-0.00039313	NaN	NaN	NaN	NaN	NaN	NaN	NaN	NaN	NaN	NaN	NaN	NaN
1.752	49.032	64.533	859	-2.1362	1.5552	-0.092773	-107.3535	143.6186	264.9109	-0.070801	0.354	-0.0063477	NaN	NaN	NaN	NaN	NaN	NaN	NaN	NaN	NaN	NaN	NaN	NaN
1.754	82.047	61.65	927.866	-2.1401	1.6216	-0.11523	-45.925	132.5497	245.779	-0.04162	0.32805	-0.017276	NaN	NaN	NaN	NaN	NaN	NaN	NaN	NaN	NaN	NaN	NaN	NaN
1.756	42.4068	49.3326	962.876	-2.0586	1.709	-0.13818	-67.887	113.4191	206.649	-0.016148	0.29691	-0.030846	NaN	NaN	NaN	NaN	NaN	NaN	NaN	NaN	NaN	NaN	NaN	NaN
1.758	40.953	49.473	955.149	-1.9167	1.7269	-0.15356	-41.336	53.221	196.4095	0.0096504	0.27189	-0.040619	NaN	NaN	NaN	NaN	NaN	NaN	NaN	NaN	NaN	NaN	NaN	NaN
1.76	35.23	29.532	967.395	-1.7109	1.7109	-0.18115	-18.992	58.442	187.0005	0.030462	0.25225	-0.045604	NaN	NaN	NaN	NaN	NaN	NaN	NaN	NaN	NaN	NaN	NaN	NaN
1.762	33.289	22.803	968.0611	-1.3989	1.6255	-0.23145	-55.16842	67.416	164.41	0.044434	0.23486	-0.048828	NaN	NaN	NaN	NaN	NaN	NaN	NaN	NaN	NaN	NaN	NaN	NaN
1.764	2.437	-12.278	978.843	-1.2612	1.5806	-0.24561	-7.902	68.565	149.9555	0.070123	0.21592	-0.050586	NaN	NaN	NaN	NaN	NaN	NaN	NaN	NaN	NaN	NaN	NaN	NaN
1.766	-6.41	-80.19977	982.808	-1.0527	1.4922	-0.24902	-24.719	117.361	101.959	0.10275	0.1915	-0.055569	NaN	NaN	NaN	NaN	NaN	NaN	NaN	NaN	NaN	NaN	NaN	NaN
1.768	-39.2018	-127.911	1012.992	-0.95361	1.4356	-0.2456	-50.529	87.5554	85.5199	0.13673	0.16493	-0.06299	NaN	NaN	NaN	NaN	NaN	NaN	NaN	NaN	NaN	NaN	NaN	NaN
1.77	-73.7545	-130.446	1029.9384	-0.88867	1.3926	-0.23828	-13.469	76.922	107.13402	0.16328	0.13467	-0.074024	NaN	NaN	NaN	NaN	NaN	NaN	NaN	NaN	NaN	NaN	NaN	NaN
1.772	-44.374	-97.8669	1033.25	-0.84326	1.3599	-0.22656	-65.0204	84.376	123.3763	0.17725	0.10596	-0.080078	NaN	NaN	NaN	NaN	NaN	NaN	NaN	NaN	NaN	NaN	NaN	NaN
1.774	-59.16	-77.8139	1039.6367	-0.83936	1.3462	-0.2124	-37.499	48.666	127.665	0.18379	0.083693	-0.088867	NaN	NaN	NaN	NaN	NaN	NaN	NaN	NaN	NaN	NaN	NaN	NaN
1.776	-48.459	-74.492	1062.9933	-0.83545	1.3237	-0.21191	-12.566	70.173	88.1274	0.1877	0.068654	-0.088867	NaN	NaN	NaN	NaN	NaN	NaN	NaN	NaN	NaN	NaN	NaN	NaN
1.778	-40.804	-78.403	1106.5488	-0.83618	1.3215	-0.22192	-44.478	80.49	32.4092	0.18535	0.0542	-0.092773	NaN	NaN	NaN	NaN	NaN	NaN	NaN	NaN	NaN	NaN	NaN	NaN
1.78	-22.691	-76.948	1149.5891	-0.8374	1.3286	-0.22998	4.021	56.5928	8.542	0.18438	0.047754	-0.10039	NaN	NaN	NaN	NaN	NaN	NaN	NaN	NaN	NaN	NaN	NaN	NaN
1.782	-14.8408	-69.131	1183.7177	-0.86914	1.3438	-0.25977	-20.142	67.279	-12.794	0.17383	0.039551	-0.11133	NaN	NaN	NaN	NaN	NaN	NaN	NaN	NaN	NaN	NaN	NaN	NaN
1.784	-43.5018	-63.2684	1229.727	-0.89795	1.355	-0.27246	-35.631	25.24	13.5162	0.15928	0.030175	-0.1127	NaN	NaN	NaN	NaN	NaN	NaN	NaN	NaN	NaN	NaN	NaN	NaN
1.786	-53.888	-69.959	1239.3269	-0.94531	1.3691	-0.28223	22.159	1.848	32.803	0.13564	0.023731	-0.1127	NaN	NaN	NaN	NaN	NaN	NaN	NaN	NaN	NaN	NaN	NaN	NaN
1.788	-86.128	-87.54	1228.32883	-1.0229	1.3833	-0.27734	-38.86	20.6249	37.1376	0.11064	0.015918	-0.1209	NaN	NaN	NaN	NaN	NaN	NaN	NaN	NaN	NaN	NaN	NaN	NaN
1.79	-66.483	-85.402	1211.116	-1.0781	1.3857	-0.26563	-35.075	17.8812	50.611	0.074512	0.01582	-0.12129	NaN	NaN	NaN	NaN	NaN	NaN	NaN	NaN	NaN	NaN	NaN	NaN
1.792	-59.4127	-85.245	1228.779	-1.165	1.377	-0.24609	-23.914	68.492	33.2725	0.035645	0.020508	-0.12109	NaN	NaN	NaN	NaN	NaN	NaN	NaN	NaN	NaN	NaN	NaN	NaN
1.794	-41.1032	-83.8242	1264.06	-1.222	1.3625	-0.24194	-66.636	74.624	21.2071	-0.0077147	0.031348	-0.12021	NaN	NaN	NaN	NaN	NaN	NaN	NaN	NaN	NaN	NaN	NaN	NaN
1.796	-27.4436	-90.576	1313.909	-1.271	1.3521	-0.23975	-24.697	35.9596	36.892	-0.052539	0.043457	-0.1168	NaN	NaN	NaN	NaN	NaN	NaN	NaN	NaN	NaN	NaN	NaN	NaN
1.798	-21.953	-96.213	1340.5069	-1.3315	1.3481	-0.25684	-31.745	48.109	26.1962	-0.092773	0.05791	-0.11328	NaN	NaN	NaN	NaN	NaN	NaN	NaN	NaN	NaN	NaN	NaN	NaN
1.8	21.759	-94.972	1366.5018	-1.3633	1.3574	-0.26563	-62.1065	25.7349	26.713	-0.13242	0.069825	-0.10938	NaN	NaN	NaN	NaN	NaN	NaN	NaN	NaN	NaN	NaN	NaN	NaN
1.802	37.756	-86.991	1378.777	-1.4175	1.3765	-0.28662	-10.769	11.8924	41.5073	-0.16309	0.08252	-0.10938	NaN	NaN	NaN	NaN	NaN	NaN	NaN	NaN	NaN	NaN	NaN	NaN
1.804	58.595	-51.797	1373.979	-1.4533	1.3948	-0.30102	-60.8475	53.04688	22.863	-0.18897	0.090429	-0.10938	NaN	NaN	NaN	NaN	NaN	NaN	NaN	NaN	NaN	NaN	NaN	NaN
1.806	66.024	-34.237	1408.311	-1.4976	1.4204	-0.31299	-45.369	26.981	35.835	-0.21035	0.098926	-0.10918	NaN	NaN	NaN	NaN	NaN	NaN	NaN	NaN	NaN	NaN	NaN	NaN
1.808	60.263	-29.141	1439.808	-1.5713	1.4551	-0.33691	-15.022	44.6411	11.3562	-0.22793	0.11221	-0.10293	NaN	NaN	NaN	NaN	NaN	NaN	NaN	NaN	NaN	NaN	NaN	NaN
1.81	42.146	-41.217	1443.786	-1.6172	1.4785	-0.35205	-58.717	53.9445	14.76112	-0.24013	0.11992	-0.099318	NaN	NaN	NaN	NaN	NaN	NaN	NaN	NaN	NaN	NaN	NaN	NaN
1.812	41.9582	-58.622	1413.513	-1.7246	1.5371	-0.37793	-25.035	30.0075	41.136	-0.24854	0.12549	-0.098633	NaN	NaN	NaN	NaN	NaN	NaN	NaN	NaN	NaN	NaN	NaN	NaN
1.814	41.1961	-73.1606	1384.22	-1.8133	1.6008	-0.38697	-40.692	53.303	51.882	-0.25039	0.12773	-0.097265	NaN	NaN	NaN	NaN	NaN	NaN	NaN	NaN	NaN	NaN	NaN	NaN
1.816	38.597	-70.088	1388.7436	-1.9141	1.668	-0.39746	-72.5591	38.7726	65.295	-0.24619	0.12559	-0.095313	NaN	NaN	NaN	NaN	NaN	NaN	NaN	NaN	NaN	NaN	NaN	NaN
1.818	43.9411	-58.473	1371.6208	-2.0566	1.7695	-0.39648	-12.738	26.904	70.513	-0.22979	0.12012	-0.098047	NaN	NaN	NaN	NaN	NaN	NaN	NaN	NaN	NaN	NaN	NaN	NaN
1.82	41.2162	-56.335	1356.82	-2.1152	1.8105	-0.40137	-54.947	59.585	27.117	-0.20771	0.11982	-0.09502	NaN	NaN	NaN	NaN	NaN	NaN	NaN	NaN	NaN	NaN	NaN	NaN
1.822	55.617	-67.4948	1352.3508	-2.1875	1.8945	-0.39063	-44.486	24.014	34.7667	-0.17676	0.1167	-0.098633	NaN	NaN	NaN	NaN	NaN	NaN	NaN	NaN	NaN	NaN	NaN	NaN
1.824	66.401	-70.809	1370.4654	-2.2029	1.9368	-0.38184	-53.833	38.2997	37.0653	-0.14414	0.11006	-0.095898	NaN	NaN	NaN	NaN	NaN	NaN	NaN	NaN	NaN	NaN	NaN	NaN
1.826	46.854	-67.998	1374.4469	-2.1758	1.957	-0.37207	-87.0286	47.478	38.0435	-0.10547	0.10723	-0.096582	NaN	NaN	NaN	NaN	NaN	NaN	NaN	NaN	NaN	NaN	NaN	NaN
1.828	22.557	-39.599	1379.0134	-2.0854	1.9517	-0.37451	-3.771	6.898	61.193	-0.06836	0.099024	-0.09541	NaN	NaN	NaN	NaN	NaN	NaN	NaN	NaN	NaN	NaN	NaN	NaN
1.83	1.854	-11.9154	1384.93812	-2.0176	1.9375	-0.36133	-14.744	23.21	22.8902	-0.023633	0.085059	-0.095508	NaN	NaN	NaN	NaN	NaN	NaN	NaN	NaN	NaN	NaN	NaN	NaN
1.832	20.591	7.7513	1376.93	-1.8711	1.8906	-0.36719	-49.615	2.802	26.8269	0.017578	0.069336	-0.09668	NaN	NaN	NaN	NaN	NaN	NaN	NaN	NaN	NaN	NaN	NaN	NaN
1.834	-1.8066	-13.673	1367.636	-1.7654	1.8508	-0.37012	-5.33900000000001	-2.181	24.758	0.066309	0.05127	-0.095117	NaN	NaN	NaN	NaN	NaN	NaN	NaN	NaN	NaN	NaN	NaN	NaN
1.836	-8.4106	-22.127	1342.597	-1.6758	1.8105	-0.36523	-58.97	68.035	26.854	0.11299	0.028711	-0.093457	NaN	NaN	NaN	NaN	NaN	NaN	NaN	NaN	NaN	NaN	NaN	NaN
1.838	-20.1967	-31.8578	1342.7307	-1.5884	1.7661	-0.35303	-43.622	40.9157	47.4366	0.1544	0.013086	-0.093066	NaN	NaN	NaN	NaN	NaN	NaN	NaN	NaN	NaN	NaN	NaN	NaN
1.84	-24.9711	-24.0973	1325.826	-1.5635	1.75	-0.35205	-16.134	48.39	39.3857	0.19082	0.0014649	-0.096973	NaN	NaN	NaN	NaN	NaN	NaN	NaN	NaN	NaN	NaN	NaN	NaN
1.842	-7.342	-8.0778	1297.619	-1.5332	1.7188	-0.33594	-67.1557	45.749	31.8864	0.22021	-0.011719	-0.09375	NaN	NaN	NaN	NaN	NaN	NaN	NaN	NaN	NaN	NaN	NaN	NaN
1.844	-18.987	12.4716	1284.146	-1.5249	1.7011	-0.32129	-7.45500000000001	0.480576	47.08	0.25078	-0.015332	-0.094238	NaN	NaN	NaN	NaN	NaN	NaN	NaN	NaN	NaN	NaN	NaN	NaN
1.846	30.9223	14.673	1271.717	-1.5254	1.6895	-0.30469	-29.332	42.279	18.197	0.27011	-0.023242	-0.10078	NaN	NaN	NaN	NaN	NaN	NaN	NaN	NaN	NaN	NaN	NaN	NaN
1.848	33.74096	17.496	1271.229	-1.5229	1.6665	-0.28662	-63.002	34.6359	19.7349	0.28183	-0.027149	-0.10313	NaN	NaN	NaN	NaN	NaN	NaN	NaN	NaN	NaN	NaN	NaN	NaN
1.85	18.5969	36.445	1257.8421	-1.5151	1.6567	-0.27979	-3.42	16.46	30.71915	0.29307	-0.028223	-0.10469	NaN	NaN	NaN	NaN	NaN	NaN	NaN	NaN	NaN	NaN	NaN	NaN
1.852	8.6631	56.2195	1258.7113	-1.4932	1.625	-0.26563	-22.533	32.8126	5.546	0.29492	-0.031738	-0.10693	NaN	NaN	NaN	NaN	NaN	NaN	NaN	NaN	NaN	NaN	NaN	NaN
1.854	33.29439	68.6203	1253.972	-1.46	1.5967	-0.25049	-18.123	-7.142	36.7443	0.29024	-0.027637	-0.10752	NaN	NaN	NaN	NaN	NaN	NaN	NaN	NaN	NaN	NaN	NaN	NaN
1.856	34.6864	86.8	1238.243	-1.4141	1.5566	-0.24316	-5.084	21.675	33.6636	0.27793	-0.018652	-0.10742	NaN	NaN	NaN	NaN	NaN	NaN	NaN	NaN	NaN	NaN	NaN	NaN
1.858	8.574	79.641	1212.8165	-1.3394	1.5044	-0.23389	-36.665	46.829	36.4542	0.25527	-0.002246	-0.10977	NaN	NaN	NaN	NaN	NaN	NaN	NaN	NaN	NaN	NaN	NaN	NaN
1.86	26.6647	73.396	1196.6298	-1.3027	1.4727	-0.229	-29.736	27.021	48.968	0.22959	0.013477	-0.10547	NaN	NaN	NaN	NaN	NaN	NaN	NaN	NaN	NaN	NaN	NaN	NaN
1.862	22.9765	70.552	1170.899	-1.2344	1.4102	-0.21973	-59.292	49.406	18.581	0.1958	0.025391	-0.1001	NaN	NaN	NaN	NaN	NaN	NaN	NaN	NaN	NaN	NaN	NaN	NaN
1.864	23.461	89.043	1141.87671	-1.1843	1.3655	-0.2102	-70.34	26.4056	5.163	0.15996	0.047363	-0.10303	NaN	NaN	NaN	NaN	NaN	NaN	NaN	NaN	NaN	NaN	NaN	NaN
1.866	23.932	95.8899	1100.81155	-1.1426	1.3184	-0.2002	-10.823	2.369	33.3628	0.13525	0.073633	-0.10693	NaN	NaN	NaN	NaN	NaN	NaN	NaN	NaN	NaN	NaN	NaN	NaN
1.868	31.954	92.4371	1077.72668	-1.0835	1.2681	-0.19043	-54.889	43.602	28.3232	0.11807	0.10176	-0.1042	NaN	NaN	NaN	NaN	NaN	NaN	NaN	NaN	NaN	NaN	NaN	NaN
1.87	43.84	70.075	1034.85	-1.0566	1.2402	-0.18408	-45.043	15.8998	40.2098	0.10528	0.12939	-0.10713	NaN	NaN	NaN	NaN	NaN	NaN	NaN	NaN	NaN	NaN	NaN	NaN
1.872	24.007	83.825	1015.624	-1.0073	1.1841	-0.17041	-26.976	57.682	37.8275	0.1001	0.14893	-0.11182	NaN	NaN	NaN	NaN	NaN	NaN	NaN	NaN	NaN	NaN	NaN	NaN
1.874	34.4662	94.938	1018.0197	-0.96631	1.1421	-0.16015	-66.19547	78.33	11.1218	0.098242	0.16504	-0.11426	NaN	NaN	NaN	NaN	NaN	NaN	NaN	NaN	NaN	NaN	NaN	NaN
1.876	13.476	120.317	1023.252	-0.92725	1.0972	-0.15039	-30.854	40.9983	19.7333	0.098828	0.18281	-0.11778	NaN	NaN	NaN	NaN	NaN	NaN	NaN	NaN	NaN	NaN	NaN	NaN
1.878	27.9514	136.113	992.275	-0.87842	1.0415	-0.13477	-50.63	50.548	18.86076	0.10195	0.19648	-0.12481	NaN	NaN	NaN	NaN	NaN	NaN	NaN	NaN	NaN	NaN	NaN	NaN
1.88	-31.826	144.933	956.5	-0.85742	1.0127	-0.12451	-70.418	19.758	29.34316	0.10606	0.20606	-0.13232	NaN	NaN	NaN	NaN	NaN	NaN	NaN	NaN	NaN	NaN	NaN	NaN
1.882	-27.986	150.73	903.7832	-0.80811	0.95557	-0.10986	-12.601	2.2335	49.0603	0.11182	0.21484	-0.14307	NaN	NaN	NaN	NaN	NaN	NaN	NaN	NaN	NaN	NaN	NaN	NaN
1.884	-49.592	139.458	878.043	-0.77929	0.91455	-0.095947	-66.018	50.637	22.6685	0.1168	0.2294	-0.1459	NaN	NaN	NaN	NaN	NaN	NaN	NaN	NaN	NaN	NaN	NaN	NaN
1.886	-55.099	142.723	822.858	-0.74951	0.87842	-0.080566	-62.4199	15.0439	34.228	0.12226	0.23574	-0.14952	NaN	NaN	NaN	NaN	NaN	NaN	NaN	NaN	NaN	NaN	NaN	NaN
1.888	-63.7763	116.63769	795.326	-0.71289	0.82617	-0.062012	-16.728	30.894	54.8894	0.12617	0.25098	-0.15616	NaN	NaN	NaN	NaN	NaN	NaN	NaN	NaN	NaN	NaN	NaN	NaN
1.89	-55.479	110.703	756.876	-0.69287	0.80518	-0.053223	-43.778	20.5855	69.2528	0.13291	0.26523	-0.15996	NaN	NaN	NaN	NaN	NaN	NaN	NaN	NaN	NaN	NaN	NaN	NaN
1.892	-65.111	98.458	728.845	-0.6543	0.75	-0.030762	-23.885	-9.9229	92.493	0.12793	0.27783	-0.15967	NaN	NaN	NaN	NaN	NaN	NaN	NaN	NaN	NaN	NaN	NaN	NaN
1.894	-48.628	128.762	702.347	-0.6289	0.71484	-0.018555	-25.431	11.859	89.6706	0.12012	0.29248	-0.16221	NaN	NaN	NaN	NaN	NaN	NaN	NaN	NaN	NaN	NaN	NaN	NaN
1.896	-29.449	139.6417	664.256	-0.59814	0.68018	-0.0073242	-21.392	-29.1231	119.812	0.10889	0.30635	-0.16162	NaN	NaN	NaN	NaN	NaN	NaN	NaN	NaN	NaN	NaN	NaN	NaN
1.898	-38.849	157.8661	664.7466	-0.55908	0.63037	0.01123	15.369	-81.6369	174.573	0.089356	0.32432	-0.15889	NaN	NaN	NaN	NaN	NaN	NaN	NaN	NaN	NaN	NaN	NaN	NaN
1.9	-35.595	157.762	629.014	-0.54004	0.60352	0.015137	-14.688	-58.856	188.522	0.081739	0.34043	-0.16289	NaN	NaN	NaN	NaN	NaN	NaN	NaN	NaN	NaN	NaN	NaN	NaN
1.902	-52.7206	162.302	599.4224	-0.49023	0.55469	0.02832	10.83	-101.398	238.963	0.071289	0.36035	-0.16504	NaN	NaN	NaN	NaN	NaN	NaN	NaN	NaN	NaN	NaN	NaN	NaN
1.904	-52.798	157.588	572.7462	-0.45581	0.51147	0.035157	27.378	-58.8568	314.863	0.05	0.37441	-0.17422	NaN	NaN	NaN	NaN	NaN	NaN	NaN	NaN	NaN	NaN	NaN	NaN
1.906	-45.919	137.198	563.5239	-0.41553	0.479	0.040527	-43.475	1.808	421.655	0.0026364	0.39101	-0.18281	NaN	NaN	NaN	NaN	NaN	NaN	NaN	NaN	NaN	NaN	NaN	NaN
1.908	-28.345	128.415	524.6467	-0.36963	0.42627	0.054199	-18.564	22.4099	582.1461	-0.071582	0.40781	-0.17617	NaN	NaN	NaN	NaN	NaN	NaN	NaN	NaN	NaN	NaN	NaN	NaN
1.91	-33.718	131.351	479.1103	-0.34521	0.3999	0.064453	-13.338	83.012	692.621	-0.16338	0.44014	-0.17149	NaN	NaN	NaN	NaN	NaN	NaN	NaN	NaN	NaN	NaN	NaN	NaN
1.912	-53.609	127.5661	430.054	-0.2876	0.35059	0.08252	-51.04	51.8837	850.663	-0.25244	0.4751	-0.17725	NaN	NaN	NaN	NaN	NaN	NaN	NaN	NaN	NaN	NaN	NaN	NaN
1.914	-20.548	125.8662	409.7824	-0.24487	0.31958	0.084961	15.185	9.0839	984.313	-0.34307	0.52138	-0.17891	NaN	NaN	NaN	NaN	NaN	NaN	NaN	NaN	NaN	NaN	NaN	NaN
1.916	-11.22	119.5048	390.038	-0.20313	0.28223	0.090332	-5.25	29.7346	1054.8629	-0.43701	0.5706	-0.18203	NaN	NaN	NaN	NaN	NaN	NaN	NaN	NaN	NaN	NaN	NaN	NaN
1.918	13.492	117.569	359.7666	-0.14502	0.24072	0.089844	-15.914	0.2006	1102.307	-0.55147	0.62256	-0.19375	NaN	NaN	NaN	NaN	NaN	NaN	NaN	NaN	NaN	NaN	NaN	NaN
1.92	20.012	101.49682	327.94313	-0.12158	0.21484	0.090332	-9.882	28.051	1101.111	-0.69287	0.66357	-0.21553	NaN	NaN	NaN	NaN	NaN	NaN	NaN	NaN	NaN	NaN	NaN	NaN
1.922	3.203	107.9086	301.668	-0.071777	0.17871	0.090332	-71.704	35.3862	1039.032	-0.8833	0.68896	-0.2417	NaN	NaN	NaN	NaN	NaN	NaN	NaN	NaN	NaN	NaN	NaN	NaN
1.924	-15.162	100.7661	301.455	-0.043946	0.15894	0.093261	-13.7877	-23.2849	1008.078	-1.1777	0.72129	-0.24893	NaN	NaN	NaN	NaN	NaN	NaN	NaN	NaN	NaN	NaN	NaN	NaN
1.926	-32.389	116.2448	283.95046	-0.0087891	0.1377	0.098633	-36.655	-12.2843	953.608	-1.5957	0.79492	-0.23496	NaN	NaN	NaN	NaN	NaN	NaN	NaN	NaN	NaN	NaN	NaN	NaN
1.928	-9.182	99.282	275.197	0.028809	0.1167	0.09375	-61.4653	-43.177	926.381	-2.1028	0.91289	-0.21504	NaN	NaN	NaN	NaN	NaN	NaN	NaN	NaN	NaN	NaN	NaN	NaN
1.93	-24.628	109.088	240.449	0.047119	0.099123	0.10058	-21.64	-59.108	933.899	-2.5575	1.0716	-0.17012	NaN	NaN	NaN	NaN	NaN	NaN	NaN	NaN	NaN	NaN	NaN	NaN
1.932	-19.017	112.614	214.186	0.068848	0.080078	0.10352	-70.655	-61.648	904.653	-2.834	1.2666	-0.083008	NaN	NaN	NaN	NaN	NaN	NaN	NaN	NaN	NaN	NaN	NaN	NaN
1.934	-38.799	115.59	169.854	0.087402	0.062012	0.10498	-31.018	-147.635	925.188	-2.8699	1.5231	-0.025976	NaN	NaN	NaN	NaN	NaN	NaN	NaN	NaN	NaN	NaN	NaN	NaN
1.936	-52.714	97.365	151.8745	0.097168	0.049805	0.10693	26.156	-142.0233	940.1991	-2.7496	1.7746	-0.05127	NaN	NaN	NaN	NaN	NaN	NaN	NaN	NaN	NaN	NaN	NaN	NaN
1.938	-47.451	76.72509	129.987	0.11523	0.03418	0.099609	-2.411	-83.875	966.6919	-2.4761	1.9464	-0.13135	NaN	NaN	NaN	NaN	NaN	NaN	NaN	NaN	NaN	NaN	NaN	NaN
1.94	-44.291	56.022	114.9449	0.13184	0.020996	0.09668	34.5727	-16.51	1016.6937	-2.0791	1.9803	-0.20742	NaN	NaN	NaN	NaN	NaN	NaN	NaN	NaN	NaN	NaN	NaN	NaN
1.942	-28.745	40.914	98.061	0.14795	0.012207	0.09668	-13.2381	67.11	1013.771	-1.6499	1.8716	-0.2915	NaN	NaN	NaN	NaN	NaN	NaN	NaN	NaN	NaN	NaN	NaN	NaN
1.944	-49.041	31.059	103.129	0.16064	0.0014648	0.095215	-74.933	12.46	1026.932	-1.269	1.6562	-0.37549	NaN	NaN	NaN	NaN	NaN	NaN	NaN	NaN	NaN	NaN	NaN	NaN
1.946	-54.86	55.159	88.7914	0.16748	-3.8164e-14	0.094238	-12.429	-84.148	1014.554	-1.0292	1.4314	-0.43291	NaN	NaN	NaN	NaN	NaN	NaN	NaN	NaN	NaN	NaN	NaN	NaN
1.948	-68.3252	82.866	69.2819	0.1748	-0.011719	0.092285	7.8535	-171.654	1013.479	-0.94131	1.263	-0.43955	NaN	NaN	NaN	NaN	NaN	NaN	NaN	NaN	NaN	NaN	NaN	NaN
1.95	-58.375	89.784	55.2683	0.17212	-0.018555	0.092529	-9.733	-254.068	1087.0191	-0.96162	1.186	-0.40127	NaN	NaN	NaN	NaN	NaN	NaN	NaN	NaN	NaN	NaN	NaN	NaN
1.952	-65.388	74.84	50.045	0.16553	-0.022461	0.095215	35.696	-257.411	1114.8637	-1.0059	1.1807	-0.34375	NaN	NaN	NaN	NaN	NaN	NaN	NaN	NaN	NaN	NaN	NaN	NaN
1.954	-63.491	60.684	49.97496	0.15723	-0.027344	0.10303	17.86	-247.992	1122.307	-1.0211	1.2047	-0.29101	NaN	NaN	NaN	NaN	NaN	NaN	NaN	NaN	NaN	NaN	NaN	NaN
1.956	-48.449	37.0787	49.4787	0.146	-0.026367	0.10547	76.857	-234.896	1145.451	-0.99417	1.2164	-0.25821	NaN	NaN	NaN	NaN	NaN	NaN	NaN	NaN	NaN	NaN	NaN	NaN
1.958	-63.337	18.9965	46.6073	0.12646	-0.022461	0.10352	99.4	-169.468	1201.121	-0.92813	1.2004	-0.25352	NaN	NaN	NaN	NaN	NaN	NaN	NaN	NaN	NaN	NaN	NaN	NaN
1.96	-27.383	19.718	50.4834	0.10888	-0.021973	0.10938	67.748	-161.898	1280.704	-0.83906	1.1566	-0.25761	NaN	NaN	NaN	NaN	NaN	NaN	NaN	NaN	NaN	NaN	NaN	NaN
1.962	-19.088	31.895	28.2091	0.084473	-0.013184	0.11279	91.15	-142.74	1352.886	-0.77832	1.1045	-0.28418	NaN	NaN	NaN	NaN	NaN	NaN	NaN	NaN	NaN	NaN	NaN	NaN
1.964	-26.762	29.536	8.2276	0.056152	-0.0097656	0.11963	7.83413	-91.392	1392.689	-0.78027	1.0696	-0.30977	NaN	NaN	NaN	NaN	NaN	NaN	NaN	NaN	NaN	NaN	NaN	NaN
1.966	-24.289	21.0118	-0.7121	0.044922	-0.0083008	0.12207	-31.219	-79.289	1404.172	-0.84814	1.0434	-0.32569	NaN	NaN	NaN	NaN	NaN	NaN	NaN	NaN	NaN	NaN	NaN	NaN
1.968	-7.395	25.0074	24.6149	0.020996	-0.0083008	0.13184	40.101	-30.422	1383.602	-0.97588	1.0392	-0.32842	NaN	NaN	NaN	NaN	NaN	NaN	NaN	NaN	NaN	NaN	NaN	NaN
1.97	-6.581	27.5281	40.403	0.013672	-0.0021973	0.13647	6.791	-12.525	1316.315	-1.1427	1.048	-0.31055	NaN	NaN	NaN	NaN	NaN	NaN	NaN	NaN	NaN	NaN	NaN	NaN
1.972	-8.247	27.997	45.43	0.0039063	0.00097656	0.14063	15.07	-45.609	1319.411	-1.3242	1.0723	-0.29053	NaN	NaN	NaN	NaN	NaN	NaN	NaN	NaN	NaN	NaN	NaN	NaN
1.974	-0.530000000000001	15.6732	38.55	0.0048828	0.0087891	0.14648	48.844949	-32.622	1316.177	-1.4795	1.1099	-0.26885	NaN	NaN	NaN	NaN	NaN	NaN	NaN	NaN	NaN	NaN	NaN	NaN
1.976	-11.413	20.864	23.2605	0.0092773	0.0068359	0.1499	3.0301	-66.2529	1327.904	-1.6051	1.1491	-0.25176	NaN	NaN	NaN	NaN	NaN	NaN	NaN	NaN	NaN	NaN	NaN	NaN
1.978	-7.048	40.9951	24.6288	0.020508	0.016602	0.15527	59.528	-77.147	1391.611	-1.6848	1.1991	-0.25058	NaN	NaN	NaN	NaN	NaN	NaN	NaN	NaN	NaN	NaN	NaN	NaN
1.98	-11.953	42.5356	30.0896	0.035645	0.013916	0.15454	55.245	-79.908	1398.704	-1.7307	1.2441	-0.26133	NaN	NaN	NaN	NaN	NaN	NaN	NaN	NaN	NaN	NaN	NaN	NaN
1.982	-8.521	38.2762	29.3294	0.053711	0.015137	0.15381	19.2267	-139.646	1433.526	-1.7651	1.2896	-0.2749	NaN	NaN	NaN	NaN	NaN	NaN	NaN	NaN	NaN	NaN	NaN	NaN
1.984	-7.531	41.343	21.1337	0.086914	0.018555	0.15283	72.5204	-108.439	1447.643	-1.8008	1.3312	-0.29571	NaN	NaN	NaN	NaN	NaN	NaN	NaN	NaN	NaN	NaN	NaN	NaN
1.986	-21.36	38.844	3.507585	0.09668	0.01709	0.14746	-16.9612	-97.133	1429.415	-1.83	1.3712	-0.31699	NaN	NaN	NaN	NaN	NaN	NaN	NaN	NaN	NaN	NaN	NaN	NaN
1.988	-26.144	26.88381	18.8754	0.12842	0.020996	0.1377	-29.6291	-73.931	1463.525	-1.8601	1.4216	-0.33535	NaN	NaN	NaN	NaN	NaN	NaN	NaN	NaN	NaN	NaN	NaN	NaN
1.99	-20.02	25.977	18.7	0.14209	0.030518	0.13892	4.692	-20.6177	1468.975	-1.8782	1.4663	-0.36025	NaN	NaN	NaN	NaN	NaN	NaN	NaN	NaN	NaN	NaN	NaN	NaN
1.992	-29.035	30.0744	22.024	0.15527	0.039551	0.1377	-30.2412	-41.659	1472.264	-1.8979	1.5063	-0.39355	NaN	NaN	NaN	NaN	NaN	NaN	NaN	NaN	NaN	NaN	NaN	NaN
1.994	-55.627	37.5191	8.926	0.1792	0.052246	0.13135	36.12	-29.4421	1461.445	-1.9049	1.5299	-0.43183	NaN	NaN	NaN	NaN	NaN	NaN	NaN	NaN	NaN	NaN	NaN	NaN
1.996	-50.695	25.24119	27.7331	0.19092	0.053711	0.12939	14.4878	-15.3714	1412.601	-1.9336	1.5531	-0.46289	NaN	NaN	NaN	NaN	NaN	NaN	NaN	NaN	NaN	NaN	NaN	NaN
1.998	-58.612	28.3023	41.6962	0.20898	0.071777	0.12695	55.3592	-5.439	1369.103	-1.9902	1.577	-0.47891	NaN	NaN	NaN	NaN	NaN	NaN	NaN	NaN	NaN	NaN	NaN	NaN
2	-49.352	40.293	43.866	0.22046	0.083984	0.12134	69.579	27.6337	1329.224	-2.0592	1.6119	-0.4874	NaN	NaN	NaN	NaN	NaN	NaN	NaN	NaN	NaN	NaN	NaN	NaN
2.002	-58.7962	43.887	18.5959	0.22559	0.093262	0.11621	30.929	36.0393	1322.619	-2.1226	1.6567	-0.4873	NaN	NaN	NaN	NaN	NaN	NaN	NaN	NaN	NaN	NaN	NaN	NaN
2.004	-68.7607	45.753	6.76	0.23438	0.097168	0.11133	38.719	24.975	1342.6885	-2.1695	1.6945	-0.47627	NaN	NaN	NaN	NaN	NaN	NaN	NaN	NaN	NaN	NaN	NaN	NaN
2.006	-54.875	40.2855	25.993	0.23486	0.10156	0.10742	60.877	42.0865	1323.592	-2.1902	1.7247	-0.45986	NaN	NaN	NaN	NaN	NaN	NaN	NaN	NaN	NaN	NaN	NaN	NaN
2.008	-52.373	38.8087	20.324	0.22852	0.10742	0.10107	13.0317	52.1986	1295.304	-2.1858	1.7352	-0.43916	NaN	NaN	NaN	NaN	NaN	NaN	NaN	NaN	NaN	NaN	NaN	NaN
2.01	-44.069	26.218	36.0548	0.22509	0.11353	0.095215	41.4547	77.881	1293.188	-2.1424	1.7334	-0.41973	NaN	NaN	NaN	NaN	NaN	NaN	NaN	NaN	NaN	NaN	NaN	NaN
2.012	-50.072	17.341	40.13653	0.21484	0.11816	0.09082	42.774	121.096	1270.77	-2.0601	1.7056	-0.40576	NaN	NaN	NaN	NaN	NaN	NaN	NaN	NaN	NaN	NaN	NaN	NaN
2.014	-14.511	24.4498	34.39436	0.19727	0.13281	0.09082	8.3095	111.168	1262.4046	-1.9524	1.6562	-0.39658	NaN	NaN	NaN	NaN	NaN	NaN	NaN	NaN	NaN	NaN	NaN	NaN
2.016	-25.622	42.8839	22.6128	0.18408	0.14014	0.092285	57.65	106.759	1285.6228	-1.8296	1.5892	-0.39619	NaN	NaN	NaN	NaN	NaN	NaN	NaN	NaN	NaN	NaN	NaN	NaN
2.018	-45.78	56.659	13.9503	0.15332	0.14941	0.088867	28.241	79.661	1261.581	-1.703	1.5142	-0.39932	NaN	NaN	NaN	NaN	NaN	NaN	NaN	NaN	NaN	NaN	NaN	NaN
2.02	-26.69	47.972	30.45378	0.13232	0.15747	0.09082	65.359	31.625	1265.29	-1.6024	1.4395	-0.40332	NaN	NaN	NaN	NaN	NaN	NaN	NaN	NaN	NaN	NaN	NaN	NaN
2.022	-25.58	36.714	42.1734	0.10791	0.16748	0.092285	87.449	62.934	1236.395	-1.5132	1.3638	-0.40967	NaN	NaN	NaN	NaN	NaN	NaN	NaN	NaN	NaN	NaN	NaN	NaN
2.024	-2.686	29.499	35.1728	0.085938	0.16748	0.099121	-2.744	76.522	1200.39141	-1.4588	1.2974	-0.42187	NaN	NaN	NaN	NaN	NaN	NaN	NaN	NaN	NaN	NaN	NaN	NaN
2.026	-22.783	32.7135	37.6585	0.076172	0.17627	0.099609	43.0302	93.687	1169.193	-1.4335	1.2513	-0.42451	NaN	NaN	NaN	NaN	NaN	NaN	NaN	NaN	NaN	NaN	NaN	NaN
2.028	7.525	24.0309	46.41397	0.057617	0.18359	0.10205	10.332	120.6016	1119.007	-1.4382	1.2169	-0.41553	NaN	NaN	NaN	NaN	NaN	NaN	NaN	NaN	NaN	NaN	NaN	NaN
2.03	7.146	36.8084	39.9013	0.047119	0.18066	0.10645	-6.975	110.594	1087.1972	-1.4665	1.2003	-0.40264	NaN	NaN	NaN	NaN	NaN	NaN	NaN	NaN	NaN	NaN	NaN	NaN
2.032	-17.419	48.9442	34.4579	0.040527	0.17725	0.11035	40.1039	130.435	1093.115	-1.498	1.1934	-0.3877	NaN	NaN	NaN	NaN	NaN	NaN	NaN	NaN	NaN	NaN	NaN	NaN
2.034	6.003	34.0481	21.6453	0.032227	0.17041	0.11133	-25.0837	160.299	1067.8186	-1.5182	1.1907	-0.38594	NaN	NaN	NaN	NaN	NaN	NaN	NaN	NaN	NaN	NaN	NaN	NaN
2.036	5.151	19.4165	35.6084	0.030762	0.1665	0.1084	-38.1472	161.672	1043.877	-1.5171	1.1911	-0.36826	NaN	NaN	NaN	NaN	NaN	NaN	NaN	NaN	NaN	NaN	NaN	NaN
2.038	-11.848	15.74608	36.3915	0.022949	0.1582	0.11621	-45.563	214.321	1021.572	-1.4886	1.1853	-0.36006	NaN	NaN	NaN	NaN	NaN	NaN	NaN	NaN	NaN	NaN	NaN	NaN
2.04	-40.616	18.7637	38.0664	0.018067	0.16016	0.11499	-71.5593	216.609	971.3843	-1.441	1.1719	-0.34834	NaN	NaN	NaN	NaN	NaN	NaN	NaN	NaN	NaN	NaN	NaN	NaN
2.042	-9.144	30.795	43.7432	0.0043945	0.16455	0.11572	-14.689	183.962	951.066	-1.3843	1.147	-0.34131	NaN	NaN	NaN	NaN	NaN	NaN	NaN	NaN	NaN	NaN	NaN	NaN
2.044	-33.817	35.525	29.1432	-0.010254	0.16602	0.11816	-6.385	195.983	892.3236	-1.3314	1.1128	-0.33603	NaN	NaN	NaN	NaN	NaN	NaN	NaN	NaN	NaN	NaN	NaN	NaN
2.046	-43.022	39.683	22.111	-0.019531	0.16943	0.12354	-39.3344	163.2505	867.2692	-1.2787	1.076	-0.33027	NaN	NaN	NaN	NaN	NaN	NaN	NaN	NaN	NaN	NaN	NaN	NaN
2.048	-53.822	32.4	24.9974	-0.037598	0.18066	0.13477	3.773	161.4982	863.8296	-1.2221	1.0451	-0.32246	NaN	NaN	NaN	NaN	NaN	NaN	NaN	NaN	NaN	NaN	NaN	NaN
2.05	-58.995	22.9454	30.7739	-0.051758	0.18628	0.14453	-52.4088	176.4054	799.6861	-1.1748	1.0135	-0.3125	NaN	NaN	NaN	NaN	NaN	NaN	NaN	NaN	NaN	NaN	NaN	NaN
2.052	-36.092	25.1227	42.4485	-0.058105	0.19141	0.15576	-26.688	138.623	780.116	-1.1235	0.97705	-0.29932	NaN	NaN	NaN	NaN	NaN	NaN	NaN	NaN	NaN	NaN	NaN	NaN
2.054	-42.033	37.2567	28.0718	-0.060547	0.19727	0.15967	-0.518999999999998	163.2795	733.0184	-1.0821	0.95156	-0.27901	NaN	NaN	NaN	NaN	NaN	NaN	NaN	NaN	NaN	NaN	NaN	NaN
2.056	-53.129	31.6638	26.9772	-0.04834	0.19336	0.16943	-71.811	158.484	705.3463	-1.0436	0.92158	-0.2583	NaN	NaN	NaN	NaN	NaN	NaN	NaN	NaN	NaN	NaN	NaN	NaN
2.058	-57.966	21.817	22.0456	-0.031738	0.19531	0.17236	-21.959	161.3559	708.4336	-1.0077	0.89111	-0.23525	NaN	NaN	NaN	NaN	NaN	NaN	NaN	NaN	NaN	NaN	NaN	NaN
2.06	-35.057	27.2854	31.44728	-0.011475	0.19898	0.17553	-51.0397	222.287	658.9525	-0.96943	0.86006	-0.2084	NaN	NaN	NaN	NaN	NaN	NaN	NaN	NaN	NaN	NaN	NaN	NaN
2.062	-51.166	31.8136	19.7541	0.010742	0.20752	0.1748	-45.3732	208.34	635.281	-0.93018	0.82471	-0.18994	NaN	NaN	NaN	NaN	NaN	NaN	NaN	NaN	NaN	NaN	NaN	NaN
2.064	-68.2896	30.0399	42.062	0.03418	0.21289	0.15869	-3.483	184.039	601.154	-0.88623	0.78721	-0.16739	NaN	NaN	NaN	NaN	NaN	NaN	NaN	NaN	NaN	NaN	NaN	NaN
2.066	-36.435	6.05642	75.0882	0.041504	0.22266	0.15137	-36.901	197.191	546.7987	-0.8416	0.74297	-0.1502	NaN	NaN	NaN	NaN	NaN	NaN	NaN	NaN	NaN	NaN	NaN	NaN
2.068	-42.237	-9.84078	81.607	0.026367	0.24951	0.10156	-15.89	160.832	510.1434	-0.7959	0.70273	-0.13457	NaN	NaN	NaN	NaN	NaN	NaN	NaN	NaN	NaN	NaN	NaN	NaN
2.07	-39.171	-19.3483	113.8477	-0.023926	0.29102	0.058593	-1.148	192.3414	485.737	-0.74736	0.65908	-0.1166	NaN	NaN	NaN	NaN	NaN	NaN	NaN	NaN	NaN	NaN	NaN	NaN
2.072	-48.128	-1.4002	155.108	-0.10889	0.34424	0.020508	-37.479	204.2649	454.024	-0.69678	0.61963	-0.097168	NaN	NaN	NaN	NaN	NaN	NaN	NaN	NaN	NaN	NaN	NaN	NaN
2.074	-44.897	0.3754	221.5158	-0.27051	0.43164	0.0039063	-12.728	149.152	436.6531	-0.65722	0.57325	-0.077051	NaN	NaN	NaN	NaN	NaN	NaN	NaN	NaN	NaN	NaN	NaN	NaN
2.076	-71.343	-24.0681	296.9728	-0.3938	0.49096	0.019043	-35.927	174.518	388.419	-0.61426	0.53028	-0.058984	NaN	NaN	NaN	NaN	NaN	NaN	NaN	NaN	NaN	NaN	NaN	NaN
2.078	-91.881	-72.727	307.6211	-0.51611	0.55713	0.042969	-48.737	132.3707	342.143	-0.57285	0.48808	-0.046484	NaN	NaN	NaN	NaN	NaN	NaN	NaN	NaN	NaN	NaN	NaN	NaN
2.08	-68.138	-110.2346	295.6852	-0.63135	0.64111	0.058105	-39.295	131.691	326.266	-0.52832	0.44551	-0.032422	NaN	NaN	NaN	NaN	NaN	NaN	NaN	NaN	NaN	NaN	NaN	NaN
2.082	-17.015	-106.2771	325.292	-0.6709	0.68164	0.069336	-85.3225	163.108	301.621	-0.48145	0.39746	-0.025391	NaN	NaN	NaN	NaN	NaN	NaN	NaN	NaN	NaN	NaN	NaN	NaN
2.084	-53.671	-61.221	365.579	-0.7124	0.74561	0.076172	-47.405	105.8928	298.8333	-0.43809	0.35225	-0.0032226	NaN	NaN	NaN	NaN	NaN	NaN	NaN	NaN	NaN	NaN	NaN	NaN
2.086	-103.855539	-22.006	377.0442	-0.72607	0.77978	0.057129	-35.58	129.5788	290.0701	-0.39736	0.30479	-0.0045898	NaN	NaN	NaN	NaN	NaN	NaN	NaN	NaN	NaN	NaN	NaN	NaN
2.088	-67.186	-18.0379	401.53	-0.74561	0.81689	0.026855	-81.2345	136.707	269.0634	-0.35479	0.2626	0.0028321	NaN	NaN	NaN	NaN	NaN	NaN	NaN	NaN	NaN	NaN	NaN	NaN
2.09	-67.611	-11.574	435.08	-0.8042	0.86768	-0.03418	-42.581	102.695	254.989	-0.31904	0.23096	0.0050781	NaN	NaN	NaN	NaN	NaN	NaN	NaN	NaN	NaN	NaN	NaN	NaN
2.092	-50.108	-5.021	504.67	-0.84717	0.8999	-0.062012	-57.728	158.6889	224.4537	-0.27686	0.19629	0.0087891	NaN	NaN	NaN	NaN	NaN	NaN	NaN	NaN	NaN	NaN	NaN	NaN
2.094	-32.41	22.75	592.0067	-1.002	0.96875	-0.12305	-43.833	116.7596	198.069	-0.24082	0.16709	0.014063	NaN	NaN	NaN	NaN	NaN	NaN	NaN	NaN	NaN	NaN	NaN	NaN
2.096	-32.65	79.445	659.914	-1.166	1.0332	-0.15698	-25.237	101.8141	157.24666	-0.20137	0.14179	0.016016	NaN	NaN	NaN	NaN	NaN	NaN	NaN	NaN	NaN	NaN	NaN	NaN
2.098	-66.573	133.549	737.698	-1.3613	1.1104	-0.17383	-71.018	112.046	105.558	-0.16152	0.12851	0.027344	NaN	NaN	NaN	NaN	NaN	NaN	NaN	NaN	NaN	NaN	NaN	NaN
2.1	-77.397	161.726	812.8461	-1.6367	1.2285	-0.16455	-51.852	44.788	91.215	-0.12978	0.11963	0.04668	NaN	NaN	NaN	NaN	NaN	NaN	NaN	NaN	NaN	NaN	NaN	NaN
2.102	-56.302	137.975	871.122	-1.7681	1.2856	-0.14551	-61.396	70.3817	90.06	-0.095215	0.11279	0.062012	NaN	NaN	NaN	NaN	NaN	NaN	NaN	NaN	NaN	NaN	NaN	NaN
2.104	-39.595	78.048	949.167	-1.9722	1.4204	-0.11182	-86.4875	76.9967	72.795	-0.062696	0.10674	0.069336	NaN	NaN	NaN	NaN	NaN	NaN	NaN	NaN	NaN	NaN	NaN	NaN
2.106	-19.374	26.0239	1015.1	-2.0576	1.5127	-0.075439	-37.297	50.55	78.9249	-0.025586	0.095215	0.06875	NaN	NaN	NaN	NaN	NaN	NaN	NaN	NaN	NaN	NaN	NaN	NaN
2.108	-73.731	-12.956	1071.327	-2.0874	1.6099	-0.033203	-59.125	122.186	70.738	0.014648	0.079981	0.064062	NaN	NaN	NaN	NaN	NaN	NaN	NaN	NaN	NaN	NaN	NaN	NaN
2.11	-102.116	-18.535	1118.3324	-2.0425	1.7329	0.016602	-50.634	93.485	52.754	0.054199	0.069433	0.066309	NaN	NaN	NaN	NaN	NaN	NaN	NaN	NaN	NaN	NaN	NaN	NaN
2.112	-42.8313	-22.178	1113.8191	-1.9907	1.7856	0.040039	-6.791	72.569	73.6709	0.085449	0.064453	0.06543	NaN	NaN	NaN	NaN	NaN	NaN	NaN	NaN	NaN	NaN	NaN	NaN
2.114	4.791	-41.0106	1108.561	-1.8633	1.8438	0.083984	-44.435	100.072	52.8133	0.11104	0.060839	0.067578	NaN	NaN	NaN	NaN	NaN	NaN	NaN	NaN	NaN	NaN	NaN	NaN
2.116	58.791	-68.226	1118.5821	-1.7713	1.8391	0.10303	-13.368	31.702	45.68	0.12959	0.054492	0.070312	NaN	NaN	NaN	NaN	NaN	NaN	NaN	NaN	NaN	NaN	NaN	NaN
2.118	40.708	-86.387	1143.45781	-1.6968	1.8052	0.11914	-2.611	40.4856	26.4801	0.14131	0.052148	0.06914	NaN	NaN	NaN	NaN	NaN	NaN	NaN	NaN	NaN	NaN	NaN	NaN
2.12	43.515	-86.314	1218.388	-1.6055	1.7129	0.12256	-38.806	41.2556	14.173	0.14023	0.049121	0.072071	NaN	NaN	NaN	NaN	NaN	NaN	NaN	NaN	NaN	NaN	NaN	NaN
2.122	9.0302	-76.424	1264.822	-1.5742	1.666	0.12646	-9.49	-11.8846	38.5073	0.12988	0.054199	0.075195	NaN	NaN	NaN	NaN	NaN	NaN	NaN	NaN	NaN	NaN	NaN	NaN
2.124	49.15	-67.352	1295.813	-1.5132	1.5806	0.11279	-35.493	61.136	29.929	0.11182	0.057031	0.074024	NaN	NaN	NaN	NaN	NaN	NaN	NaN	NaN	NaN	NaN	NaN	NaN
2.126	88.74	-54.102	1299.493	-1.479	1.5254	0.091797	-29.923	38.7515	24.154	0.086035	0.061035	0.082617	NaN	NaN	NaN	NaN	NaN	NaN	NaN	NaN	NaN	NaN	NaN	NaN
2.128	86.979	-49.182	1283.8854	-1.4492	1.4805	0.065918	-17.155	31.728	36.163	0.05166	0.070019	0.091211	NaN	NaN	NaN	NaN	NaN	NaN	NaN	NaN	NaN	NaN	NaN	NaN
2.13	67.92	-35.231	1275.614	-1.418	1.4141	0.033203	-66.0329	67.54	28.7142	0.020508	0.076367	0.099121	NaN	NaN	NaN	NaN	NaN	NaN	NaN	NaN	NaN	NaN	NaN	NaN
2.132	5.907	-24.78	1284.445	-1.4116	1.3892	0.025879	-31.041	7.6328	43.1365	-0.0087891	0.087891	0.10205	NaN	NaN	NaN	NaN	NaN	NaN	NaN	NaN	NaN	NaN	NaN	NaN
2.134	7.193	-25.489	1276.5447	-1.3994	1.3242	0.023438	-18.372	38.061	31.9375	-0.030273	0.089746	0.10742	NaN	NaN	NaN	NaN	NaN	NaN	NaN	NaN	NaN	NaN	NaN	NaN
2.136	27.1845	-60.282	1292.465	-1.3911	1.2769	0.025147	-44.043	57.0167	38.6106	-0.052051	0.098046	0.10401	NaN	NaN	NaN	NaN	NaN	NaN	NaN	NaN	NaN	NaN	NaN	NaN
2.138	54.833	-96.249	1285.1764	-1.3833	1.229	0.029297	-4.79	16.413	52.495	-0.066894	0.10156	0.10596	NaN	NaN	NaN	NaN	NaN	NaN	NaN	NaN	NaN	NaN	NaN	NaN
2.14	45.7821	-120.52	1278.228	-1.3755	1.1802	0.014648	-49.0522	66.2733	42.19544	-0.075195	0.10791	0.11182	NaN	NaN	NaN	NaN	NaN	NaN	NaN	NaN	NaN	NaN	NaN	NaN
2.142	41.451	-107.722	1300.732	-1.3726	1.1646	0.011719	-48.151	51.064	31.3377	-0.085449	0.11816	0.11719	NaN	NaN	NaN	NaN	NaN	NaN	NaN	NaN	NaN	NaN	NaN	NaN
2.144	40.558	-89.86	1342.933	-1.396	1.1509	0.015137	-29.048	39.2337	32.6781	-0.095508	0.13173	0.1292	NaN	NaN	NaN	NaN	NaN	NaN	NaN	NaN	NaN	NaN	NaN	NaN
2.146	8.005	-74.716	1371.499	-1.4228	1.1563	0.023682	-63.956	82.772	26.5777	-0.10401	0.13936	0.13633	NaN	NaN	NaN	NaN	NaN	NaN	NaN	NaN	NaN	NaN	NaN	NaN
2.148	11.141	-79.253	1401.731	-1.4644	1.1763	0.034668	-56.236	21.579	40.347	-0.11494	0.15069	0.14765	NaN	NaN	NaN	NaN	NaN	NaN	NaN	NaN	NaN	NaN	NaN	NaN
2.15	-13.534	-105.3288	1415.578	-1.5405	1.2134	0.057129	-48.731	23.7888	34.16829	-0.11621	0.15928	0.1584	NaN	NaN	NaN	NaN	NaN	NaN	NaN	NaN	NaN	NaN	NaN	NaN
2.152	-40.365	-106.0029	1428.2557	-1.5879	1.2402	0.061523	-55.5935	23.6	17.206	-0.10986	0.15967	0.1709	NaN	NaN	NaN	NaN	NaN	NaN	NaN	NaN	NaN	NaN	NaN	NaN
2.154	-55.446	-98.631	1432.2847	-1.6934	1.3086	0.083496	-42.5347	-30.158	32.67317	-0.088867	0.1501	0.17315	NaN	NaN	NaN	NaN	NaN	NaN	NaN	NaN	NaN	NaN	NaN	NaN
2.156	-94.0643	-67.43	1407.2367	-1.7832	1.3603	0.081299	-47.835	39.44164	49.5477	-0.052637	0.13642	0.17695	NaN	NaN	NaN	NaN	NaN	NaN	NaN	NaN	NaN	NaN	NaN	NaN
2.158	-90.9823	-69.706	1395.288077	-1.8633	1.4238	0.074219	-47.876	35.974	54.1885	-0.0026368	0.11533	0.1832	NaN	NaN	NaN	NaN	NaN	NaN	NaN	NaN	NaN	NaN	NaN	NaN
2.16	-106.029	-81.8142	1375.863	-1.98	1.5093	0.064941	-18.379	25.828	43.43182	0.05	0.095315	0.17754	NaN	NaN	NaN	NaN	NaN	NaN	NaN	NaN	NaN	NaN	NaN	NaN
2.162	-74.877	-83.9388	1364.627	-2.0405	1.5571	0.063965	-56.91	69.9466	21.793	0.11182	0.069824	0.17285	NaN	NaN	NaN	NaN	NaN	NaN	NaN	NaN	NaN	NaN	NaN	NaN
2.164	-82.7684	-69.7944	1375.586	-2.166	1.6621	0.06543	-39.065	8.31	30.6183	0.16875	0.048828	0.16494	NaN	NaN	NaN	NaN	NaN	NaN	NaN	NaN	NaN	NaN	NaN	NaN
2.166	-21.181	-38.6475	1382.9911638	-2.2442	1.7403	0.063233	-2.83499999999999	25.6579	41.9574	0.22637	0.022168	0.15342	NaN	NaN	NaN	NaN	NaN	NaN	NaN	NaN	NaN	NaN	NaN	NaN
2.168	-40.903	-13.1471	1399.6326	-2.2964	1.8071	0.060059	-26.859	49.1769	12.406	0.28106	0.0053712	0.14287	NaN	NaN	NaN	NaN	NaN	NaN	NaN	NaN	NaN	NaN	NaN	NaN
2.17	-48.227	-2.10601	1396.74814	-2.3184	1.877	0.044434	-19.598	-2.4244	20.4	0.33545	-0.0038086	0.12725	NaN	NaN	NaN	NaN	NaN	NaN	NaN	NaN	NaN	NaN	NaN	NaN
2.172	-47.833	-18.411	1398.801	-2.2988	1.9082	0.035156	-38.509	51.428	14.441	0.38379	-0.0073242	0.11719	NaN	NaN	NaN	NaN	NaN	NaN	NaN	NaN	NaN	NaN	NaN	NaN
2.174	-45.687	-37.5286	1431.2651	-2.2314	1.9375	0.024902	-44.428	24.1867	29.5044	0.4249	0.0008789	0.11221	NaN	NaN	NaN	NaN	NaN	NaN	NaN	NaN	NaN	NaN	NaN	NaN
2.176	-13.885	-39.1831	1428.693	-2.1585	1.9314	0.012939	-30.732	17.7242	45.7674	0.45498	0.0094726	0.10654	NaN	NaN	NaN	NaN	NaN	NaN	NaN	NaN	NaN	NaN	NaN	NaN
2.178	-48.905	-21.769	1427.837	-2.0796	1.9009	0.0063477	-40.738	69.418	31.8935	0.46787	0.027441	0.10498	NaN	NaN	NaN	NaN	NaN	NaN	NaN	NaN	NaN	NaN	NaN	NaN
2.18	-35.674	-11.592	1409.977	-1.9565	1.8364	0	-12.259	20.661	30.182	0.46846	0.044434	0.10225	NaN	NaN	NaN	NaN	NaN	NaN	NaN	NaN	NaN	NaN	NaN	NaN
2.182	-54.031	-15.974	1373.4151	-1.8984	1.7988	-0.015625	-14.6	30.2899	25.1235	0.46143	0.065918	0.099609	NaN	NaN	NaN	NaN	NaN	NaN	NaN	NaN	NaN	NaN	NaN	NaN
2.184	-31.098	-15.705	1350.8215	-1.7729	1.7192	-0.028809	-34.27	45.211	18.588	0.44375	0.084277	0.10391	NaN	NaN	NaN	NaN	NaN	NaN	NaN	NaN	NaN	NaN	NaN	NaN
2.186	-5.074	-27.467	1341.7464	-1.6893	1.6672	-0.035644	-16.507	-9.0124	23.852	0.41797	0.10478	0.10899	NaN	NaN	NaN	NaN	NaN	NaN	NaN	NaN	NaN	NaN	NaN	NaN
2.188	21.05	-29.4604	1327.1066	-1.6172	1.6191	-0.041504	-33.017	45.6103	23.4246	0.38907	0.12119	0.10547	NaN	NaN	NaN	NaN	NaN	NaN	NaN	NaN	NaN	NaN	NaN	NaN
2.19	57.7937	-13.985	1314.2682	-1.5522	1.563	-0.051758	-36.679	15.125	30.0592	0.3583	0.13174	0.10537	NaN	NaN	NaN	NaN	NaN	NaN	NaN	NaN	NaN	NaN	NaN	NaN
2.192	18.046	18.965	1287.7526	-1.5293	1.5371	-0.053711	-26.865	-0.9361	55.975	0.3252	0.14795	0.099121	NaN	NaN	NaN	NaN	NaN	NaN	NaN	NaN	NaN	NaN	NaN	NaN
2.194	-0.271000000000001	54.5446	1276.0468	-1.4878	1.4927	-0.04834	-60.451	74.254	31.0544	0.28955	0.1625	0.10078	NaN	NaN	NaN	NaN	NaN	NaN	NaN	NaN	NaN	NaN	NaN	NaN
2.196	1.94	75.64	1279.694	-1.4614	1.459	-0.049561	-35.651	42.814	27.308	0.25576	0.17783	0.10069	NaN	NaN	NaN	NaN	NaN	NaN	NaN	NaN	NaN	NaN	NaN	NaN
2.198	7.744	88.165	1258.266	-1.4297	1.4316	-0.043457	-40.54	56.828	33.5827	0.22295	0.20127	0.10069	NaN	NaN	NaN	NaN	NaN	NaN	NaN	NaN	NaN	NaN	NaN	NaN
2.2	-25.187	92.271	1246.131	-1.3887	1.3926	-0.040039	-69.975252	61.551	18.58139	0.1918	0.21729	0.099414	NaN	NaN	NaN	NaN	NaN	NaN	NaN	NaN	NaN	NaN	NaN	NaN
2.202	-69.54356	102.742	1212.7374	-1.3652	1.3672	-0.04248	-41.925	-9.4872	27.4237	0.16455	0.23584	0.10205	NaN	NaN	NaN	NaN	NaN	NaN	NaN	NaN	NaN	NaN	NaN	NaN
2.204	-76.197	86.71	1208.691	-1.3237	1.3091	-0.050293	-49.716	39.1584	5.445	0.13037	0.25742	0.096484	NaN	NaN	NaN	NaN	NaN	NaN	NaN	NaN	NaN	NaN	NaN	NaN
2.206	-71.5903	78.914	1167.281	-1.2878	1.2659	-0.047608	-52.416	28.4562	7.946	0.098829	0.27871	0.10644	NaN	NaN	NaN	NaN	NaN	NaN	NaN	NaN	NaN	NaN	NaN	NaN
2.208	-61.365	45.717	1129.3963	-1.2617	1.2227	-0.057617	-37.587	31.5092	38.5849	0.067969	0.29863	0.108	NaN	NaN	NaN	NaN	NaN	NaN	NaN	NaN	NaN	NaN	NaN	NaN
2.21	-77.1523	48.756	1082.1148	-1.2183	1.1685	-0.050781	-39.498	92.323	32.5923	0.04043	0.32256	0.12109	NaN	NaN	NaN	NaN	NaN	NaN	NaN	NaN	NaN	NaN	NaN	NaN
2.212	-44.505	39.479	1064.518	-1.1948	1.1411	-0.046875	-20.951	35.7786	29.077	0.012207	0.34229	0.12598	NaN	NaN	NaN	NaN	NaN	NaN	NaN	NaN	NaN	NaN	NaN	NaN
2.214	-55.908	69.041	1039.247	-1.1563	1.0879	-0.046875	-24.557	43.493	22.529	-0.0125	0.35801	0.13877	NaN	NaN	NaN	NaN	NaN	NaN	NaN	NaN	NaN	NaN	NaN	NaN
2.216	-54.187	88.88	1036.2092	-1.1187	1.0464	-0.045166	-61.705	66.389	23.3174	-0.034668	0.3708	0.1502	NaN	NaN	NaN	NaN	NaN	NaN	NaN	NaN	NaN	NaN	NaN	NaN
2.218	-58.6526	103.384	1039.444	-1.0796	1.0103	-0.043457	-31.118	1.8553	59.69	-0.046387	0.38018	0.16269	NaN	NaN	NaN	NaN	NaN	NaN	NaN	NaN	NaN	NaN	NaN	NaN
2.22	-39.581	109.879	1017.966	-1.0151	0.95459	-0.042969	-37.619	43.0023	57.7897	-0.056347	0.38486	0.18144	NaN	NaN	NaN	NaN	NaN	NaN	NaN	NaN	NaN	NaN	NaN	NaN
2.222	-59.3717	121.3209	980.708	-0.98828	0.92969	-0.04248	-39.942	27.0651	30.7881	-0.060547	0.38379	0.19922	NaN	NaN	NaN	NaN	NaN	NaN	NaN	NaN	NaN	NaN	NaN	NaN
2.224	-91.9604	144.994	924.1979	-0.91943	0.88916	-0.041504	-20.662	-2.343	34.3226	-0.055762	0.38193	0.21074	NaN	NaN	NaN	NaN	NaN	NaN	NaN	NaN	NaN	NaN	NaN	NaN
2.226	-50.18	155.677	917.6006	-0.85303	0.84814	-0.044922	-33.734	48.3692	29.848	-0.052832	0.37119	0.22451	NaN	NaN	NaN	NaN	NaN	NaN	NaN	NaN	NaN	NaN	NaN	NaN
2.228	-38.894	154.526	885.6918	-0.81787	0.82471	-0.047363	-22.759	18.919	25.462	-0.048926	0.36338	0.23076	NaN	NaN	NaN	NaN	NaN	NaN	NaN	NaN	NaN	NaN	NaN	NaN
2.23	-25.007	154.884	853.993	-0.76074	0.7666	-0.049805	-14.587	37.4542	53.6221	-0.050391	0.35635	0.23779	NaN	NaN	NaN	NaN	NaN	NaN	NaN	NaN	NaN	NaN	NaN	NaN
2.232	-25.916	122.2765	788.9465	-0.72437	0.7273	-0.052246	-40.083	35.968	59.3327	-0.05127	0.35205	0.24609	NaN	NaN	NaN	NaN	NaN	NaN	NaN	NaN	NaN	NaN	NaN	NaN
2.234	-4.268	101.372	756.944	-0.67871	0.69043	-0.057129	-26.64	-29.534	115.1398	-0.063575	0.34951	0.24941	NaN	NaN	NaN	NaN	NaN	NaN	NaN	NaN	NaN	NaN	NaN	NaN
2.236	16.834	119.563	711.01	-0.62646	0.64209	-0.0625	-11.617	22.6616	174.636	-0.074805	0.34814	0.26201	NaN	NaN	NaN	NaN	NaN	NaN	NaN	NaN	NaN	NaN	NaN	NaN
2.238	7.722	150.0966	681.201	-0.59521	0.62549	-0.064941	-49.397	30.2548	226.5993	-0.087305	0.3458	0.27373	NaN	NaN	NaN	NaN	NaN	NaN	NaN	NaN	NaN	NaN	NaN	NaN
2.24	32.817	144.7601	686.6427	-0.53955	0.58447	-0.071777	-75.22	8.2458	363.934	-0.10039	0.34004	0.28213	NaN	NaN	NaN	NaN	NaN	NaN	NaN	NaN	NaN	NaN	NaN	NaN
2.242	30.197	143.6672	659.93327	-0.50146	0.55322	-0.074951	-116.556	3.939	496.436	-0.10938	0.33496	0.28564	NaN	NaN	NaN	NaN	NaN	NaN	NaN	NaN	NaN	NaN	NaN	NaN
2.244	19.344	130.2	648.6832	-0.45898	0.52344	-0.080078	-147.57	-118.8836	660.242	-0.11435	0.32354	0.28105	NaN	NaN	NaN	NaN	NaN	NaN	NaN	NaN	NaN	NaN	NaN	NaN
2.246	-20.623	138.034	621.1347	-0.4043	0.4873	-0.086914	-127.736	-162.02	808.806	-0.11279	0.32402	0.25303	NaN	NaN	NaN	NaN	NaN	NaN	NaN	NaN	NaN	NaN	NaN	NaN
2.248	-19.638	143.29	604.956	-0.38281	0.46631	-0.092285	-154.486	-158.756	853.7008	-0.11631	0.32598	0.20263	NaN	NaN	NaN	NaN	NaN	NaN	NaN	NaN	NaN	NaN	NaN	NaN
2.25	-9.646	155.777	587.3022	-0.33545	0.43311	-0.098145	-157.234	-155.203	890.837	-0.13604	0.34483	0.12969	NaN	NaN	NaN	NaN	NaN	NaN	NaN	NaN	NaN	NaN	NaN	NaN
2.252	-12.229	157.084	530.8137	-0.30005	0.40869	-0.10303	-211.3359	-6.456	904.8399	-0.1875	0.38525	0.041016	NaN	NaN	NaN	NaN	NaN	NaN	NaN	NaN	NaN	NaN	NaN	NaN
2.254	-22.485	130.813	472.4072	-0.26514	0.37646	-0.104	-222.628	54.85	931.484	-0.28946	0.43448	-0.078221	NaN	NaN	NaN	NaN	NaN	NaN	NaN	NaN	NaN	NaN	NaN	NaN
2.256	-44.8491	116.4124	433.4791	-0.2168	0.3418	-0.11328	-130.6277	36.898	999.106	-0.43477	0.48427	-0.1875	NaN	NaN	NaN	NaN	NaN	NaN	NaN	NaN	NaN	NaN	NaN	NaN
2.258	-31.397	100.721	407.9574	-0.19434	0.32422	-0.12012	-69.604	45.535	1071.684	-0.62969	0.52959	-0.25586	NaN	NaN	NaN	NaN	NaN	NaN	NaN	NaN	NaN	NaN	NaN	NaN
2.26	-26.869	105.95	392.073953	-0.1543	0.29541	-0.13184	-5.5377	-62.592	1173.072	-0.89472	0.58955	-0.28106	NaN	NaN	NaN	NaN	NaN	NaN	NaN	NaN	NaN	NaN	NaN	NaN
2.262	-22.18	109.714	376.3861	-0.11743	0.2688	-0.13184	36.5176	-83.205	1235.832	-1.2065	0.66748	-0.28076	NaN	NaN	NaN	NaN	NaN	NaN	NaN	NaN	NaN	NaN	NaN	NaN
2.264	-46.115	104.983	346.651	-0.091797	0.24414	-0.13916	-28.0306	-35.1145	1245.619	-1.5723	0.77441	-0.21084	NaN	NaN	NaN	NaN	NaN	NaN	NaN	NaN	NaN	NaN	NaN	NaN
2.266	-60.751	107.9809	327.77	-0.051758	0.22119	-0.14893	-29.187	-12.836	1193.602	-1.9647	0.91494	-0.10996	NaN	NaN	NaN	NaN	NaN	NaN	NaN	NaN	NaN	NaN	NaN	NaN
2.268	-54.284	118.055	309.735	-0.03418	0.20947	-0.1499	-22.826	27.8	1132.94	-2.33	1.0841	-0.0091797	NaN	NaN	NaN	NaN	NaN	NaN	NaN	NaN	NaN	NaN	NaN	NaN
2.27	-70.9349	113.51	300.4267	-0.0029297	0.19043	-0.15332	-20.384	-41.47	1114.716	-2.5998	1.2572	0.058203	NaN	NaN	NaN	NaN	NaN	NaN	NaN	NaN	NaN	NaN	NaN	NaN
2.272	-59.8897	116.751	297.328	0.020263	0.17749	-0.15698	30.601	-128.129	1164.364	-2.75	1.4297	0.088867	NaN	NaN	NaN	NaN	NaN	NaN	NaN	NaN	NaN	NaN	NaN	NaN
2.274	-59.9253	123.254	267.867	0.038086	0.1665	-0.16602	-9.23451	-157.799	1211.997	-2.7761	1.5813	0.098437	NaN	NaN	NaN	NaN	NaN	NaN	NaN	NaN	NaN	NaN	NaN	NaN
2.276	-55.6983	115.964	234.2748	0.063965	0.15332	-0.1626	-38.753	-212.208	1252.197	-2.7242	1.6993	0.10352	NaN	NaN	NaN	NaN	NaN	NaN	NaN	NaN	NaN	NaN	NaN	NaN
2.278	-61.657	97.1157	202.158	0.072754	0.14648	-0.16699	-28.7451	-196.2711	1239.6256	-2.6164	1.7477	0.10976	NaN	NaN	NaN	NaN	NaN	NaN	NaN	NaN	NaN	NaN	NaN	NaN
2.28	-39.175	77.625	201.6229	0.088867	0.1377	-0.17578	-1.201	-154.805	1199.894	-2.4787	1.7475	0.13174	NaN	NaN	NaN	NaN	NaN	NaN	NaN	NaN	NaN	NaN	NaN	NaN
2.282	-13.601	69.67	184.32	0.10791	0.13379	-0.17481	55.404	-167.651	1179.116	-2.3398	1.7207	0.15625	NaN	NaN	NaN	NaN	NaN	NaN	NaN	NaN	NaN	NaN	NaN	NaN
2.284	-0.602999999999998	63.74	150.9461	0.11719	0.12793	-0.17334	82.126	-128.062	1213.886	-2.2349	1.6846	0.18154	NaN	NaN	NaN	NaN	NaN	NaN	NaN	NaN	NaN	NaN	NaN	NaN
2.286	-18.995	47.313	141.2744	0.12988	0.12793	-0.17725	86.939	-130.663	1309.6854	-2.1391	1.6511	0.20723	NaN	NaN	NaN	NaN	NaN	NaN	NaN	NaN	NaN	NaN	NaN	NaN
2.288	1.585	53.25	117.449	0.13379	0.11865	-0.17725	92.389	-143.325	1437.882	-2.0594	1.6043	0.21738	NaN	NaN	NaN	NaN	NaN	NaN	NaN	NaN	NaN	NaN	NaN	NaN
2.29	6.811	67.901	125.8085	0.14551	0.10791	-0.17627	69.517	-116.147	1499.452	-2.0018	1.5463	0.22304	NaN	NaN	NaN	NaN	NaN	NaN	NaN	NaN	NaN	NaN	NaN	NaN
2.292	-1.08	82.699	109.839	0.14649	0.10401	-0.17994	14.901	-122.19	1476.006	-1.937	1.479	0.22754	NaN	NaN	NaN	NaN	NaN	NaN	NaN	NaN	NaN	NaN	NaN	NaN
2.294	-19.829	65.068	106.644	0.15283	0.098145	-0.18018	5.431	-117.265	1394.79	-1.8372	1.4147	0.20889	NaN	NaN	NaN	NaN	NaN	NaN	NaN	NaN	NaN	NaN	NaN	NaN
2.296	6.171	62.938	96.4609	0.1582	0.093262	-0.17578	-89.861	-81.932	1320.949	-1.7027	1.35	0.18467	NaN	NaN	NaN	NaN	NaN	NaN	NaN	NaN	NaN	NaN	NaN	NaN
2.298	-7.475	54.02	88.1853	0.16113	0.090332	-0.1792	-166.3421	-117.685	1329.878	-1.5602	1.2754	0.13506	NaN	NaN	NaN	NaN	NaN	NaN	NaN	NaN	NaN	NaN	NaN	NaN
2.3	-6.923	57.825	75.7917	0.16357	0.088867	-0.18066	-148.4686	-139.137	1364.574	-1.4466	1.2007	0.078613	NaN	NaN	NaN	NaN	NaN	NaN	NaN	NaN	NaN	NaN	NaN	NaN
2.302	-2.943	48.5575	60.6251	0.16333	0.091064	-0.17993	-165.098	-173.244681	1379.8606	-1.3535	1.1465	0.041992	NaN	NaN	NaN	NaN	NaN	NaN	NaN	NaN	NaN	NaN	NaN	NaN
2.304	4.298	40.95045	34.0854	0.15723	0.091797	-0.17529	-84.272	-186.489	1404.253	-1.2893	1.102	0.025097	NaN	NaN	NaN	NaN	NaN	NaN	NaN	NaN	NaN	NaN	NaN	NaN
2.306	-9.734	47.3569	18.647	0.14307	0.095215	-0.17725	-59.9041	-124.307	1390.576	-1.2535	1.061	0.017968	NaN	NaN	NaN	NaN	NaN	NaN	NaN	NaN	NaN	NaN	NaN	NaN
2.308	-12.865	34.3684	30.459	0.1333	0.098633	-0.17383	-104.191	-75.993	1385.797	-1.2426	1.0375	0.0097656	NaN	NaN	NaN	NaN	NaN	NaN	NaN	NaN	NaN	NaN	NaN	NaN
2.31	-19.522	30.499	20.2721	0.11572	0.10791	-0.16553	-80.865	-27.4857	1417.68	-1.2592	1.0379	-0.0068358	NaN	NaN	NaN	NaN	NaN	NaN	NaN	NaN	NaN	NaN	NaN	NaN
2.312	-19.38	40.8626	38.92988	0.1023	0.10864	-0.16162	-154.461	20.442	1413.35209	-1.2949	1.0586	-0.021973	NaN	NaN	NaN	NaN	NaN	NaN	NaN	NaN	NaN	NaN	NaN	NaN
2.314	-31.162	41.7177	57.0243	0.088379	0.11377	-0.15869	-137.0159	-50.1673	1456.313	-1.3645	1.1058	-0.013867	NaN	NaN	NaN	NaN	NaN	NaN	NaN	NaN	NaN	NaN	NaN	NaN
2.316	-57.558	27.0831	52.8502	0.066895	0.12207	-0.1499	-174.286	-96.204	1496.233	-1.4667	1.1747	0.010742	NaN	NaN	NaN	NaN	NaN	NaN	NaN	NaN	NaN	NaN	NaN	NaN
2.318	-78.7033	25.6061	40.6483	0.060059	0.11816	-0.15039	-220.053	-108.56	1492.374	-1.5933	1.2591	0.038476	NaN	NaN	NaN	NaN	NaN	NaN	NaN	NaN	NaN	NaN	NaN	NaN
2.32	-66.7314	36.017	24.6091	0.046387	0.12256	-0.13623	-166.2579	-103.026	1464.7	-1.7237	1.3439	0.065332	NaN	NaN	NaN	NaN	NaN	NaN	NaN	NaN	NaN	NaN	NaN	NaN
2.322	-65.9869	39.806	20.3659	0.040039	0.12109	-0.13061	-167.2156	-28.751	1406.324	-1.834	1.4277	0.086426	NaN	NaN	NaN	NaN	NaN	NaN	NaN	NaN	NaN	NaN	NaN	NaN
2.324	-59.584	38.1038	23.7058	0.027344	0.11768	-0.12598	-162.7466	-0.0160000000000053	1374.019	-1.9081	1.4948	0.10703	NaN	NaN	NaN	NaN	NaN	NaN	NaN	NaN	NaN	NaN	NaN	NaN
2.326	-51.343	23.7252	28.95	0.027344	0.11377	-0.1167	-99.664	-36.267	1375.47	-1.966	1.5528	0.12002	NaN	NaN	NaN	NaN	NaN	NaN	NaN	NaN	NaN	NaN	NaN	NaN
2.328	-56.397	35.7257	10.196	0.032227	0.1084	-0.11572	-97.203	-36.2234	1398.3	-2.0051	1.5996	0.1208	NaN	NaN	NaN	NaN	NaN	NaN	NaN	NaN	NaN	NaN	NaN	NaN
2.33	-49.5883	39.8657	16.0465	0.032227	0.10938	-0.10791	-47.122	-94.878	1427.5224	-2.031	1.6393	0.09834	NaN	NaN	NaN	NaN	NaN	NaN	NaN	NaN	NaN	NaN	NaN	NaN
2.332	-55.944	27.991	30.80277	0.036133	0.10376	-0.10303	-5.569	-58.928	1438.324	-2.0513	1.6685	0.066895	NaN	NaN	NaN	NaN	NaN	NaN	NaN	NaN	NaN	NaN	NaN	NaN
2.334	-30.86	21.853	33.0697	0.04248	0.10059	-0.099609	-19.639	8.416	1404.012	-2.0964	1.6899	0.028613	NaN	NaN	NaN	NaN	NaN	NaN	NaN	NaN	NaN	NaN	NaN	NaN
2.336	-16.44	35.1555	25.3466	0.043945	0.098633	-0.092285	1.37599999999999	33.945	1368.329	-2.1905	1.7165	0.011426	NaN	NaN	NaN	NaN	NaN	NaN	NaN	NaN	NaN	NaN	NaN	NaN
2.338	-40.9857	41.904	1.8192	0.04834	0.1001	-0.088379	-67.703	98.3346	1319.643	-2.3253	1.7606	-0.00068358	NaN	NaN	NaN	NaN	NaN	NaN	NaN	NaN	NaN	NaN	NaN	NaN
2.34	-50.092	30.867	22.433	0.047852	0.10693	-0.082031	-110.603	75.9718	1342.2709	-2.4644	1.8187	0.0047851	NaN	NaN	NaN	NaN	NaN	NaN	NaN	NaN	NaN	NaN	NaN	NaN
2.342	-14.877	29.8062	32.95	0.043213	0.10132	-0.080079	-81.541	49.8952	1366.333	-2.5757	1.8833	0.015625	NaN	NaN	NaN	NaN	NaN	NaN	NaN	NaN	NaN	NaN	NaN	NaN
2.344	-12.719	39.7624	38.20911	0.041992	0.10107	-0.077148	-77.407	99.181	1349.007	-2.6249	1.9305	0.022852	NaN	NaN	NaN	NaN	NaN	NaN	NaN	NaN	NaN	NaN	NaN	NaN
2.346	-20.153	37.1963	36.4734	0.035645	0.10449	-0.073242	-53.523	85.4205	1299.5295	-2.601	1.9599	0.028027	NaN	NaN	NaN	NaN	NaN	NaN	NaN	NaN	NaN	NaN	NaN	NaN
2.348	-4.028	28.344	27.0492	0.036133	0.10498	-0.071777	-62.298	100.276	1235.89	-2.5046	1.9501	0.024902	NaN	NaN	NaN	NaN	NaN	NaN	NaN	NaN	NaN	NaN	NaN	NaN
2.35	11.609	34.122	30.1162	0.04541	0.11035	-0.068359	-113.152	109.958	1177.552	-2.3623	1.8947	0.02334	NaN	NaN	NaN	NaN	NaN	NaN	NaN	NaN	NaN	NaN	NaN	NaN
2.352	2.42299999999999	46.731	18.9843	0.058106	0.11231	-0.06958	-84.474	53.686	1172.928	-2.1992	1.7969	0.018066	NaN	NaN	NaN	NaN	NaN	NaN	NaN	NaN	NaN	NaN	NaN	NaN
2.354	25.869	38.839	31.7413	0.072266	0.10889	-0.071289	-80.542	75.032	1175.084	-2.0423	1.6726	0.0065428	NaN	NaN	NaN	NaN	NaN	NaN	NaN	NaN	NaN	NaN	NaN	NaN
2.356	10.892	24.113	18.0665	0.096191	0.1084	-0.070313	-68.789	74.161	1173.383	-1.8995	1.538	-0.0069336	NaN	NaN	NaN	NaN	NaN	NaN	NaN	NaN	NaN	NaN	NaN	NaN
2.358	-8.491	15.716	24.7499	0.10938	0.10693	-0.072266	-53.61	99.129	1178.551	-1.7796	1.4173	-0.018262	NaN	NaN	NaN	NaN	NaN	NaN	NaN	NaN	NaN	NaN	NaN	NaN
2.36	-27.216	27.7591	23.627	0.13281	0.10449	-0.080566	-84.6228	190.576	1135.993	-1.6755	1.3249	-0.01836	NaN	NaN	NaN	NaN	NaN	NaN	NaN	NaN	NaN	NaN	NaN	NaN
2.362	-35.6	34.164	33.902	0.15283	0.10474	-0.07959	-103.3244	186.558	1094.9784	-1.5796	1.2524	-0.02002	NaN	NaN	NaN	NaN	NaN	NaN	NaN	NaN	NaN	NaN	NaN	NaN
2.364	-30.033	49.486	42.82453	0.17578	0.10791	-0.081055	-135.5227	207.762	1073.1154	-1.4993	1.1948	-0.018555	NaN	NaN	NaN	NaN	NaN	NaN	NaN	NaN	NaN	NaN	NaN	NaN
2.366	-40.33	60.636	34.9612	0.19629	0.10059	-0.084961	-164.715	193.332	1020.422781	-1.4312	1.1528	-0.020996	NaN	NaN	NaN	NaN	NaN	NaN	NaN	NaN	NaN	NaN	NaN	NaN
2.368	-42.171	48.345	30.5285	0.2085	0.10205	-0.088379	-124.307	121.571	1019.387	-1.3682	1.1204	-0.019043	NaN	NaN	NaN	NaN	NaN	NaN	NaN	NaN	NaN	NaN	NaN	NaN
2.37	-55.3247	27.3711	23.4865	0.22363	0.10059	-0.087402	-127.2	145.541	997.4958	-1.3176	1.0824	-0.012988	NaN	NaN	NaN	NaN	NaN	NaN	NaN	NaN	NaN	NaN	NaN	NaN
2.372	-50.793	14.9581	30.2095	0.23877	0.10791	-0.087402	-121.531	132.6277	970.525	-1.271	1.0435	-0.0087891	NaN	NaN	NaN	NaN	NaN	NaN	NaN	NaN	NaN	NaN	NaN	NaN
2.374	-60.622	41.8221	24.3648	0.24561	0.10938	-0.089355	-81.425	146.1998	921.238	-1.23	1.0007	-0.0070313	NaN	NaN	NaN	NaN	NaN	NaN	NaN	NaN	NaN	NaN	NaN	NaN
2.376	-44.367	38.1298	37.29205	0.24463	0.12402	-0.091797	-47.302	200.983	825.063	-1.1851	0.95918	-0.0057617	NaN	NaN	NaN	NaN	NaN	NaN	NaN	NaN	NaN	NaN	NaN	NaN
2.378	-36.33	31.3348	37.73935	0.24145	0.13501	-0.085694	-25.462	177.778	767.718	-1.1383	0.91543	-0.0045898	NaN	NaN	NaN	NaN	NaN	NaN	NaN	NaN	NaN	NaN	NaN	NaN
2.38	-51.693	22.225	32.8388	0.23633	0.14063	-0.09375	6.639	211.407	751.3676	-1.087	0.87803	-0.0081054	NaN	NaN	NaN	NaN	NaN	NaN	NaN	NaN	NaN	NaN	NaN	NaN
2.382	-61.9277	30.0461	28.5182	0.22314	0.15527	-0.092285	5.713	220.5803	749.46982578	-1.0332	0.83594	-0.0092773	NaN	NaN	NaN	NaN	NaN	NaN	NaN	NaN	NaN	NaN	NaN	NaN
2.384	-54.012	35.278	38.84655	0.21631	0.15625	-0.092773	3.358	164.4246	781.691	-0.96572	0.79756	-0.0087892	NaN	NaN	NaN	NaN	NaN	NaN	NaN	NaN	NaN	NaN	NaN	NaN
2.386	-56.376	36.118	55.0842	0.20605	0.1665	-0.092773	-19.68	187.34	756.563	-0.9	0.76133	-0.0092773	NaN	NaN	NaN	NaN	NaN	NaN	NaN	NaN	NaN	NaN	NaN	NaN
2.388	-39.09	31.44	28.6609	0.19922	0.17798	-0.088867	-32.648	168.3724	675.796	-0.83437	0.72461	-0.011621	NaN	NaN	NaN	NaN	NaN	NaN	NaN	NaN	NaN	NaN	NaN	NaN
2.39	-42.656	28.16	28.8413	0.19141	0.18799	-0.091309	-14.023	174.092	633.155	-0.77813	0.69326	-0.011621	NaN	NaN	NaN	NaN	NaN	NaN	NaN	NaN	NaN	NaN	NaN	NaN
2.392	-37.384	11.7158	10.4085	0.18213	0.19971	-0.088867	-37.084	242.701	555.042	-0.7207	0.6582	-0.013672	NaN	NaN	NaN	NaN	NaN	NaN	NaN	NaN	NaN	NaN	NaN	NaN
2.394	-27.727	8.337	30.2476	0.17285	0.20654	-0.087891	-44.32	199.534	542.84	-0.6624	0.62861	-0.0059569	NaN	NaN	NaN	NaN	NaN	NaN	NaN	NaN	NaN	NaN	NaN	NaN
2.396	-6.17400000000001	36.5652	42.3723	0.15283	0.22412	-0.080566	-18.515	181.144	540.5959	-0.60967	0.59258	-0.0078123	NaN	NaN	NaN	NaN	NaN	NaN	NaN	NaN	NaN	NaN	NaN	NaN
2.398	-9.782	53.1154	31.8082	0.13403	0.23609	-0.074219	0.891000000000002	150.2179	489.0344	-0.55146	0.55703	-0.0070314	NaN	NaN	NaN	NaN	NaN	NaN	NaN	NaN	NaN	NaN	NaN	NaN
2.4	7.145	50.2381	33.5183	0.1123	0.25439	-0.072266	14.499	71.576	451.8774	-0.48847	0.51718	-0.0058594	NaN	NaN	NaN	NaN	NaN	NaN	NaN	NaN	NaN	NaN	NaN	NaN
2.402	7.54	28.7041	27.8518	0.084473	0.28125	-0.071289	18.221	112.279	383.251	-0.42969	0.48145	-0.0073242	NaN	NaN	NaN	NaN	NaN	NaN	NaN	NaN	NaN	NaN	NaN	NaN
2.404	-6.991	15.66042	39.3892	0.068359	0.29248	-0.062012	-5.337	110.963	354.268	-0.37657	0.44473	-0.012794	NaN	NaN	NaN	NaN	NaN	NaN	NaN	NaN	NaN	NaN	NaN	NaN
2.406	-9.962	21.4732	27.7519	0.048828	0.30518	-0.061523	-18.851	142.643	351.217	-0.32452	0.40166	-0.017869	NaN	NaN	NaN	NaN	NaN	NaN	NaN	NaN	NaN	NaN	NaN	NaN
2.408	-3.074	18.6918	34.5345	0.042236	0.31348	-0.062011	-36.828	202.635	308.264	-0.27648	0.36729	-0.025292	NaN	NaN	NaN	NaN	NaN	NaN	NaN	NaN	NaN	NaN	NaN	NaN
2.41	-17.619	28.151	37.9835	0.038574	0.32275	-0.062988	-43.322	142.578	291.23445	-0.23477	0.32228	-0.035546	NaN	NaN	NaN	NaN	NaN	NaN	NaN	NaN	NaN	NaN	NaN	NaN
2.412	-12.004	21.3319	26.0918	0.027832	0.33936	-0.070801	-49.4763	148.603	295.842	-0.19824	0.29541	-0.039551	NaN	NaN	NaN	NaN	NaN	NaN	NaN	NaN	NaN	NaN	NaN	NaN
2.414	-16.747	3.4018	51.4258	0.011719	0.35205	-0.072754	-71.286	161.024	261.0923	-0.16551	0.2747	-0.047075	NaN	NaN	NaN	NaN	NaN	NaN	NaN	NaN	NaN	NaN	NaN	NaN
2.416	-24.312	-4.0194	65.6214	-0.04248	0.38916	-0.080566	-81.6862	120.6026	253.1974	-0.13123	0.24969	-0.048635	NaN	NaN	NaN	NaN	NaN	NaN	NaN	NaN	NaN	NaN	NaN	NaN
2.418	-29.828	13.6654	98.9742	-0.10669	0.42553	-0.080078	-83.4471	159.018	222.391	-0.10231	0.23094	-0.051762	NaN	NaN	NaN	NaN	NaN	NaN	NaN	NaN	NaN	NaN	NaN	NaN
2.42	-10.84	52.329	120.8668	-0.18799	0.46094	-0.080078	-73.733	106.9801	162.491	-0.066479	0.21581	-0.057621	NaN	NaN	NaN	NaN	NaN	NaN	NaN	NaN	NaN	NaN	NaN	NaN
2.422	-13.5935	51.6025	148.1242	-0.32227	0.5166	-0.079102	-31.736	73.1074	142.185	-0.036133	0.20361	-0.0625	NaN	NaN	NaN	NaN	NaN	NaN	NaN	NaN	NaN	NaN	NaN	NaN
2.424	-22.7307	42.6566	192.048	-0.39404	0.55225	-0.088379	-46.501	98.40347	103.556	-0.0043556	0.19017	-0.069723	NaN	NaN	NaN	NaN	NaN	NaN	NaN	NaN	NaN	NaN	NaN	NaN
2.426	5.519	48.6083	238.674	-0.56543	0.62744	-0.11475	-42.239	49.564	109.33068	0.028885	0.1696	-0.074491	NaN	NaN	NaN	NaN	NaN	NaN	NaN	NaN	NaN	NaN	NaN	NaN
2.428	-19.55	63.305	334.995	-0.7251	0.69775	-0.14649	-26.685	82.4976	112.8169	0.060537	0.14696	-0.078799	NaN	NaN	NaN	NaN	NaN	NaN	NaN	NaN	NaN	NaN	NaN	NaN
2.43	-0.219999999999999	90.1794	484.753	-0.93555	0.78516	-0.17236	-21.278	90.2322	64.923	0.089845	0.12988	-0.084743	NaN	NaN	NaN	NaN	NaN	NaN	NaN	NaN	NaN	NaN	NaN	NaN
2.432	-31.778	82.8233	615.368	-1.3271	0.93945	-0.19629	-20.239	41.2881	82.4411	0.11914	0.10693	-0.097656	NaN	NaN	NaN	NaN	NaN	NaN	NaN	NaN	NaN	NaN	NaN	NaN
2.434	-10.833	58.243	719.47	-1.562	1.0239	-0.19629	-12.89	95.202	66.042	0.1599	0.07403	-0.10733	NaN	NaN	NaN	NaN	NaN	NaN	NaN	NaN	NaN	NaN	NaN	NaN
2.436	-11.304	25.5767	821.317	-2.0542	1.1899	-0.13623	-27.874	63.7357	86.1037	0.19001	0.050926	-0.11647	NaN	NaN	NaN	NaN	NaN	NaN	NaN	NaN	NaN	NaN	NaN	NaN
2.438	-24.31	1.132	903.8609	-2.3792	1.3459	-0.027344	-33.622	57.732	104.278	0.2027	0.032161	-0.12639	NaN	NaN	NaN	NaN	NaN	NaN	NaN	NaN	NaN	NaN	NaN	NaN
2.44	-31.518	14.802	947.337	-2.6304	1.5181	0.07373	-45.764	90.514	78.462	0.20637	0.019518	-0.1307	NaN	NaN	NaN	NaN	NaN	NaN	NaN	NaN	NaN	NaN	NaN	NaN
2.442	-44.409	42.517	934.074	-2.75	1.7363	0.07666	-38.022	37.561	36.585	0.19678	0.013184	-0.13574	NaN	NaN	NaN	NaN	NaN	NaN	NaN	NaN	NaN	NaN	NaN	NaN
2.444	-68.1368	64.182	911.554	-2.689	1.8286	0.050781	-6.75	65.348	30.5536	0.18179	0.010552	-0.14035	NaN	NaN	NaN	NaN	NaN	NaN	NaN	NaN	NaN	NaN	NaN	NaN
2.446	-53.961	61.052	929.35	-2.353	1.9575	-0.010742	-16.444	67.671	-6.362	0.16086	0.011184	-0.14409	NaN	NaN	NaN	NaN	NaN	NaN	NaN	NaN	NaN	NaN	NaN	NaN
2.448	-33.922	34.751	971.25	-1.9919	1.9612	-0.06836	-22.195	6.368	4.123	0.12455	0.019361	-0.14389	NaN	NaN	NaN	NaN	NaN	NaN	NaN	NaN	NaN	NaN	NaN	NaN
2.45	-9.368	-7.321	998.785	-1.5991	1.8911	-0.13184	-14.3	46.8532	9.479	0.077984	0.029419	-0.14227	NaN	NaN	NaN	NaN	NaN	NaN	NaN	NaN	NaN	NaN	NaN	NaN
2.452	-15.754	-43.721	1007.066	-1.1494	1.7246	-0.22852	-17.988	13.689	16.8079	0.021484	0.04541	-0.13965	NaN	NaN	NaN	NaN	NaN	NaN	NaN	NaN	NaN	NaN	NaN	NaN
2.454	-6.87	-88.104	1028.537	-1.0156	1.6348	-0.25	-19.677	2.856	32.137	-0.037623	0.05695	-0.13424	NaN	NaN	NaN	NaN	NaN	NaN	NaN	NaN	NaN	NaN	NaN	NaN
2.456	-20.445	-82.871	1042.654	-0.90088	1.5298	-0.27197	-21.672	63.236	26.7109	-0.094451	0.070469	-0.12634	NaN	NaN	NaN	NaN	NaN	NaN	NaN	NaN	NaN	NaN	NaN	NaN
2.458	-24.638	-45.503	1051.36646	-0.90014	1.4939	-0.24414	-20.407	38.6	47.254	-0.15057	0.10202	-0.12235	NaN	NaN	NaN	NaN	NaN	NaN	NaN	NaN	NaN	NaN	NaN	NaN
2.46	-22.494	-19.632	1052.012	-0.91211	1.4863	-0.21045	-53.445	76.532	62.698	-0.20165	0.13154	-0.11633	NaN	NaN	NaN	NaN	NaN	NaN	NaN	NaN	NaN	NaN	NaN	NaN
2.462	-40.259	-28.668	1060.723	-0.91943	1.5005	-0.17188	-48.825	75.104	48.2437	-0.24756	0.14307	-0.11523	NaN	NaN	NaN	NaN	NaN	NaN	NaN	NaN	NaN	NaN	NaN	NaN
2.464	-73.537	-55.401	1057.175	-0.91699	1.5068	-0.15527	-40.495	8.7743	46.193	-0.27796	0.14696	-0.11389	NaN	NaN	NaN	NaN	NaN	NaN	NaN	NaN	NaN	NaN	NaN	NaN
2.466	-104.412	-78.282	1066.386	-0.87988	1.5	-0.13916	-40.1846	43.6774	36.8822	-0.30075	0.14789	-0.1153	NaN	NaN	NaN	NaN	NaN	NaN	NaN	NaN	NaN	NaN	NaN	NaN
2.468	-107.101	-100.268	1104.3622	-0.83813	1.4817	-0.15039	-49.2997	4.412	18.71	-0.30664	0.14638	-0.11255	NaN	NaN	NaN	NaN	NaN	NaN	NaN	NaN	NaN	NaN	NaN	NaN
2.47	-95.59244	-117.098	1128.8007	-0.7832	1.4648	-0.17285	-49.577	2.816	45.1806	-0.29893	0.14591	-0.11027	NaN	NaN	NaN	NaN	NaN	NaN	NaN	NaN	NaN	NaN	NaN	NaN
2.472	-43.11	-142.171	1134.8761	-0.71436	1.4321	-0.20654	-52.359	61.2077	30.4467	-0.28076	0.14551	-0.10693	NaN	NaN	NaN	NaN	NaN	NaN	NaN	NaN	NaN	NaN	NaN	NaN
2.474	-11.651	-166.438	1139.416019	-0.69531	1.416	-0.22559	-56.623	16.9	16.39495	-0.2614	0.14503	-0.10298	NaN	NaN	NaN	NaN	NaN	NaN	NaN	NaN	NaN	NaN	NaN	NaN
2.476	-8.19	-174.769	1164.658	-0.69922	1.3828	-0.23828	-43.838	45.3709	36.881	-0.22948	0.14017	-0.099955	NaN	NaN	NaN	NaN	NaN	NaN	NaN	NaN	NaN	NaN	NaN	NaN
2.478	5.692	-159.387	1207.637	-0.76392	1.3616	-0.23852	-45.612	57.9653	41.70356	-0.19889	0.13117	-0.096252	NaN	NaN	NaN	NaN	NaN	NaN	NaN	NaN	NaN	NaN	NaN	NaN
2.48	-7.076	-155.7803	1266.638	-0.85693	1.3423	-0.2373	-30.815	3.932	48.0159	-0.162	0.1165	-0.098504	NaN	NaN	NaN	NaN	NaN	NaN	NaN	NaN	NaN	NaN	NaN	NaN
2.482	-40.177	-129.6521	1296.9998	-1.0078	1.3164	-0.21143	-29.168	54.1075	60.7375	-0.12549	0.094238	-0.094727	NaN	NaN	NaN	NaN	NaN	NaN	NaN	NaN	NaN	NaN	NaN	NaN
2.484	-68.0777	-127.505	1311.7394	-1.0703	1.3066	-0.20801	-46.9991	34.0636	39.6756	-0.088139	0.073155	-0.095921	NaN	NaN	NaN	NaN	NaN	NaN	NaN	NaN	NaN	NaN	NaN	NaN
2.486	-66.92	-120.965	1304.9423	-1.1816	1.291	-0.21289	-40.218	12.9884	33.9013	-0.038639	0.058244	-0.095618	NaN	NaN	NaN	NaN	NaN	NaN	NaN	NaN	NaN	NaN	NaN	NaN
2.488	-65.39	-108.115	1298.734	-1.2478	1.2995	-0.22387	-37.763	51.326	37.7605	0.017171	0.044586	-0.095988	NaN	NaN	NaN	NaN	NaN	NaN	NaN	NaN	NaN	NaN	NaN	NaN
2.49	-73.6181	-76.322	1304.9221	-1.3203	1.3145	-0.23877	-35.274	8.6371	33.1589	0.078417	0.027306	-0.09746	NaN	NaN	NaN	NaN	NaN	NaN	NaN	NaN	NaN	NaN	NaN	NaN
2.492	-36.882	-66.461	1328.842	-1.4038	1.3354	-0.24561	-21.631	37.662	45.6265	0.14258	0.0029297	-0.099609	NaN	NaN	NaN	NaN	NaN	NaN	NaN	NaN	NaN	NaN	NaN	NaN
2.494	-1.435	-73.422	1356.391	-1.4336	1.3418	-0.25195	-31.897	43.4725	33.371	0.20659	-0.019508	-0.10536	NaN	NaN	NaN	NaN	NaN	NaN	NaN	NaN	NaN	NaN	NaN	NaN
2.496	30.827	-75.017	1363.5159	-1.4902	1.3652	-0.27148	-52.0274	-8.147	28.9134	0.26801	-0.047532	-0.10878	NaN	NaN	NaN	NaN	NaN	NaN	NaN	NaN	NaN	NaN	NaN	NaN
2.498	34.336	-74.50321	1345.342	-1.5293	1.3785	-0.29199	-21.108	34.2111	13.709	0.31842	-0.070587	-0.11621	NaN	NaN	NaN	NaN	NaN	NaN	NaN	NaN	NaN	NaN	NaN	NaN
2.5	41.942	-72.49657	1342.397	-1.5684	1.3965	-0.32031	-34.924	-1.2868	4.556	0.3573	-0.08232	-0.12148	NaN	NaN	NaN	NaN	NaN	NaN	NaN	NaN	NaN	NaN	NaN	NaN
2.502	21.001	-67.6488	1378.1304	-1.6328	1.4395	-0.35352	-40.866	-8.4231	34.6706	0.38379	-0.088867	-0.12256	NaN	NaN	NaN	NaN	NaN	NaN	NaN	NaN	NaN	NaN	NaN	NaN
2.504	-4.584	-52.518	1380.255	-1.6758	1.4609	-0.38672	-33.509	63.263	29.44	0.40059	-0.08662	-0.12813	NaN	NaN	NaN	NaN	NaN	NaN	NaN	NaN	NaN	NaN	NaN	NaN
2.506	-11.437	-60.4222	1380.305	-1.793	1.5313	-0.41699	-35.357	19.1917	25.8101	0.41075	-0.081835	-0.13418	NaN	NaN	NaN	NaN	NaN	NaN	NaN	NaN	NaN	NaN	NaN	NaN
2.508	-34.803	-78.6045	1343.2929	-1.9077	1.6099	-0.42823	-31.419	59.795	42.2637	0.41309	-0.06894	-0.13223	NaN	NaN	NaN	NaN	NaN	NaN	NaN	NaN	NaN	NaN	NaN	NaN
2.51	-5.7679	-96.748	1358.4345	-2.021	1.6821	-0.42725	-24.027	78.132	26.84	0.39951	-0.045505	-0.1335	NaN	NaN	NaN	NaN	NaN	NaN	NaN	NaN	NaN	NaN	NaN	NaN
2.512	-12.364	-86.19	1373.581	-2.1401	1.7739	-0.41553	-38.323	18.5301	42.682	0.38037	-0.023438	-0.13672	NaN	NaN	NaN	NaN	NaN	NaN	NaN	NaN	NaN	NaN	NaN	NaN
2.514	-7.863	-58.532	1379.394	-2.1792	1.811	-0.40869	-20.458	54.376	31.5163	0.36006	-0.0018568	-0.13965	NaN	NaN	NaN	NaN	NaN	NaN	NaN	NaN	NaN	NaN	NaN	NaN
2.516	1.994	-56.323	1366.0193	-2.1816	1.8574	-0.39063	-26.874	20.2899	5.8797	0.33555	0.024217	-0.14092	NaN	NaN	NaN	NaN	NaN	NaN	NaN	NaN	NaN	NaN	NaN	NaN
2.518	35.44723	-62.5803	1345.1227	-2.1035	1.8594	-0.39307	-18.523	-1.8306	14.5852	0.3039	0.049998	-0.14014	NaN	NaN	NaN	NaN	NaN	NaN	NaN	NaN	NaN	NaN	NaN	NaN
2.52	41.8331	-76.1827	1320.8081	-2.0386	1.8423	-0.39307	-27.864	57.159	15.6132	0.28008	0.072656	-0.14463	NaN	NaN	NaN	NaN	NaN	NaN	NaN	NaN	NaN	NaN	NaN	NaN
2.522	16.6972	-58.0303	1308.0161	-1.8965	1.7969	-0.4043	-42.505	14.4345	30.2664	0.25391	0.098633	-0.14893	NaN	NaN	NaN	NaN	NaN	NaN	NaN	NaN	NaN	NaN	NaN	NaN
2.524	18.889	-42.05	1312.3919	-1.7859	1.7464	-0.40429	-30.829	41.1959	49.3509	0.23037	0.12949	-0.14717	NaN	NaN	NaN	NaN	NaN	NaN	NaN	NaN	NaN	NaN	NaN	NaN
2.526	-16.002	-10.9915	1289.180726	-1.6914	1.6934	-0.41016	-35.247	49.9806	40.1108	0.2081	0.15489	-0.15449	NaN	NaN	NaN	NaN	NaN	NaN	NaN	NaN	NaN	NaN	NaN	NaN
2.528	-44.7462	-6.63133	1269.8898	-1.5977	1.6406	-0.41064	-59.925	2.2882	34.0876	0.19287	0.18262	-0.16269	NaN	NaN	NaN	NaN	NaN	NaN	NaN	NaN	NaN	NaN	NaN	NaN
2.53	-56.2029	-19.1392	1241.0797	-1.5684	1.6191	-0.39941	-22.872	57.481	34.3331	0.17725	0.20928	-0.16416	NaN	NaN	NaN	NaN	NaN	NaN	NaN	NaN	NaN	NaN	NaN	NaN
2.532	-21.613	-23.809	1243.2841	-1.5273	1.5801	-0.38867	-36.566	49.088	23.962	0.16846	0.23975	-0.1748	NaN	NaN	NaN	NaN	NaN	NaN	NaN	NaN	NaN	NaN	NaN	NaN
2.534	2.565	-11.265	1260.8153	-1.5127	1.5616	-0.375	-32.195	23.0975	33.039	0.15547	0.27041	-0.17217	NaN	NaN	NaN	NaN	NaN	NaN	NaN	NaN	NaN	NaN	NaN	NaN
2.536	-7.143	3.732	1255.30538	-1.5	1.5449	-0.36133	-25.411	55.882	21.92499	0.14697	0.30078	-0.17871	NaN	NaN	NaN	NaN	NaN	NaN	NaN	NaN	NaN	NaN	NaN	NaN
2.538	-7.45	-0.963999999999999	1226.252	-1.4844	1.5215	-0.34277	-52.399	7.9298	12.7595	0.13643	0.31485	-0.18223	NaN	NaN	NaN	NaN	NaN	NaN	NaN	NaN	NaN	NaN	NaN	NaN
2.54	-7.554	-14.5327	1205.862	-1.478	1.5103	-0.3335	-44.959	42.0477	44.9576	0.13262	0.32784	-0.18526	NaN	NaN	NaN	NaN	NaN	NaN	NaN	NaN	NaN	NaN	NaN	NaN
2.542	17.588	-14.767	1190.465	-1.457	1.4883	-0.31836	-55.006	85.091	29.941	0.12549	0.33447	-0.18994	NaN	NaN	NaN	NaN	NaN	NaN	NaN	NaN	NaN	NaN	NaN	NaN
2.544	-0.766000000000002	-6.447	1183.8622	-1.4433	1.4658	-0.30908	-45.427	35.892	47.3652	0.12442	0.3461	-0.19287	NaN	NaN	NaN	NaN	NaN	NaN	NaN	NaN	NaN	NaN	NaN	NaN
2.546	5.001	8.692	1187.215	-1.416	1.4375	-0.29785	-44.64	72.4872	55.615	0.12197	0.35928	-0.19912	NaN	NaN	NaN	NaN	NaN	NaN	NaN	NaN	NaN	NaN	NaN	NaN
2.548	5.553	36.324	1166.36	-1.375	1.3965	-0.28857	-55.96347	35.2573	18.4511	0.11846	0.36474	-0.20186	NaN	NaN	NaN	NaN	NaN	NaN	NaN	NaN	NaN	NaN	NaN	NaN
2.55	-0.0479999999999983	61.6809	1136.742	-1.3496	1.375	-0.28906	-46.847	-14.254424	28.472	0.10684	0.37256	-0.2083	NaN	NaN	NaN	NaN	NaN	NaN	NaN	NaN	NaN	NaN	NaN	NaN
2.552	-18.282	64.021	1114.4678	-1.2925	1.3315	-0.27734	-30.392	35.0042	40.1793	0.085449	0.37842	-0.21191	NaN	NaN	NaN	NaN	NaN	NaN	NaN	NaN	NaN	NaN	NaN	NaN
2.554	-15.067	53.365	1086.5624	-1.2542	1.2952	-0.27832	-47.963	-40.2248	75.8066	0.064648	0.38242	-0.20898	NaN	NaN	NaN	NaN	NaN	NaN	NaN	NaN	NaN	NaN	NaN	NaN
2.556	2.302	49.9866	1085.468	-1.2124	1.2583	-0.27441	-43.258	-19.5249	119.9022	0.037695	0.39688	-0.2123	NaN	NaN	NaN	NaN	NaN	NaN	NaN	NaN	NaN	NaN	NaN	NaN
2.558	-12.204	71.561	1052.159	-1.1636	1.2173	-0.26318	-30.067	-3.5678	114.125	0.016992	0.40781	-0.20645	NaN	NaN	NaN	NaN	NaN	NaN	NaN	NaN	NaN	NaN	NaN	NaN
2.56	-18.341	91.012	1041.167	-1.1406	1.1973	-0.25293	-11.03	-59.612	137.8684	0.0097655	0.41621	-0.2123	NaN	NaN	NaN	NaN	NaN	NaN	NaN	NaN	NaN	NaN	NaN	NaN
2.562	-30.567	100.31	1002.246	-1.0938	1.1572	-0.23975	2.404	-24.666	195.7702	0.010742	0.42969	-0.21289	NaN	NaN	NaN	NaN	NaN	NaN	NaN	NaN	NaN	NaN	NaN	NaN
2.564	-12.089	95.3416	972.67412	-1.0635	1.1231	-0.22828	-31.2672	-25.59	204.105	0.025	0.4416	-0.22588	NaN	NaN	NaN	NaN	NaN	NaN	NaN	NaN	NaN	NaN	NaN	NaN
2.566	-23.345	102.4716	970.603	-1.0278	1.0903	-0.21582	0.345000000000002	-56.8194	305.1173	0.035547	0.44776	-0.23808	NaN	NaN	NaN	NaN	NaN	NaN	NaN	NaN	NaN	NaN	NaN	NaN
2.568	-42.415	97.0007	939.8357	-0.98535	1.0508	-0.20117	14.849	6.6267	377.797	0.026172	0.45127	-0.24395	NaN	NaN	NaN	NaN	NaN	NaN	NaN	NaN	NaN	NaN	NaN	NaN
2.57	-34.301	95.1233	918.0404	-0.96436	1.0317	-0.19092	-10.863	-10.775	516.878	-0.010742	0.4626	-0.24219	NaN	NaN	NaN	NaN	NaN	NaN	NaN	NaN	NaN	NaN	NaN	NaN
2.572	-18.61	102.8981	875.128	-0.92529	0.98682	-0.17285	17.071	29.422	699.051	-0.077637	0.479	-0.24365	NaN	NaN	NaN	NaN	NaN	NaN	NaN	NaN	NaN	NaN	NaN	NaN
2.574	-50.637	104.12592	856.65193	-0.89551	0.95215	-0.15942	-2.933	67.9027	805.965	-0.16465	0.50078	-0.24199	NaN	NaN	NaN	NaN	NaN	NaN	NaN	NaN	NaN	NaN	NaN	NaN
2.576	-37.287	101.91475	838.6622	-0.86816	0.92188	-0.14111	-32.859	40.1302	928.042	-0.25088	0.53193	-0.23721	NaN	NaN	NaN	NaN	NaN	NaN	NaN	NaN	NaN	NaN	NaN	NaN
2.578	-38.989	97.47003	820.10116	-0.82568	0.87354	-0.12549	12.478	79.451	1041.817	-0.33955	0.5628	-0.24267	NaN	NaN	NaN	NaN	NaN	NaN	NaN	NaN	NaN	NaN	NaN	NaN
2.58	-52.832	110.4439	770.4314	-0.81055	0.84961	-0.125	7.289	56.0235	1099.107	-0.44277	0.59756	-0.25655	NaN	NaN	NaN	NaN	NaN	NaN	NaN	NaN	NaN	NaN	NaN	NaN
2.582	-64.5961	119.833	738.083	-0.76465	0.80078	-0.097168	-10.602	-11.329	1126.699	-0.56592	0.63525	-0.27441	NaN	NaN	NaN	NaN	NaN	NaN	NaN	NaN	NaN	NaN	NaN	NaN
2.584	-63.344	118.984	728.8389	-0.72632	0.76586	-0.085205	-24.81	40.972	1080.222	-0.72695	0.67539	-0.30205	NaN	NaN	NaN	NaN	NaN	NaN	NaN	NaN	NaN	NaN	NaN	NaN
2.586	-69.4044	124.6242	708.9433	-0.69189	0.72705	-0.077637	-36.231	-26.4051	1030.875	-0.96328	0.73261	-0.32383	NaN	NaN	NaN	NaN	NaN	NaN	NaN	NaN	NaN	NaN	NaN	NaN
2.588	-43.362	125.6114	675.8926	-0.64404	0.68408	-0.055176	-24.055	-28.557	1032.663	-1.3176	0.82441	-0.32109	NaN	NaN	NaN	NaN	NaN	NaN	NaN	NaN	NaN	NaN	NaN	NaN
2.59	-51.788	122.6265	636.0261	-0.62061	0.65674	-0.053223	-29.8703	-9.75700000000001	1022.41549	-1.7956	0.95908	-0.28896	NaN	NaN	NaN	NaN	NaN	NaN	NaN	NaN	NaN	NaN	NaN	NaN
2.592	-55.654	108.1897	601.99	-0.56982	0.61572	-0.034668	-20.149	-78.436	1023.1343	-2.3179	1.1372	-0.22266	NaN	NaN	NaN	NaN	NaN	NaN	NaN	NaN	NaN	NaN	NaN	NaN
2.594	-44.903	127.1199	574.713	-0.53907	0.58252	-0.025391	-3.77	-103.503	1027.221	-2.7761	1.3587	-0.12276	NaN	NaN	NaN	NaN	NaN	NaN	NaN	NaN	NaN	NaN	NaN	NaN
2.596	-18.476	160.652	547.3221	-0.50732	0.55322	-0.0097656	-17.801	-156.58	1012.973	-3.0574	1.5652	-0.04834	NaN	NaN	NaN	NaN	NaN	NaN	NaN	NaN	NaN	NaN	NaN	NaN
2.598	-46.97	160.706	525.824	-0.46729	0.51221	0.017578	20.944	-203.9906	1052.293	-3.1136	1.7652	-0.021387	NaN	NaN	NaN	NaN	NaN	NaN	NaN	NaN	NaN	NaN	NaN	NaN
2.6	-42.917	145.728	511.3305	-0.44727	0.49023	0.030273	14.871	-96.763	1081.802	-2.9414	1.9543	-0.059179	NaN	NaN	NaN	NaN	NaN	NaN	NaN	NaN	NaN	NaN	NaN	NaN
2.602	-37.774	114.3993	479.3618	-0.3999	0.44482	0.039063	8.4151	-55.62	1101.013	-2.6123	2.0645	-0.13184	NaN	NaN	NaN	NaN	NaN	NaN	NaN	NaN	NaN	NaN	NaN	NaN
2.604	-50.604	109.7765	442.6276	-0.35498	0.40577	0.044677	-11.2312	-6.81	1100.469	-2.173	2.0117	-0.2041	NaN	NaN	NaN	NaN	NaN	NaN	NaN	NaN	NaN	NaN	NaN	NaN
2.606	-36.837	110.96003	432.33611	-0.3125	0.37598	0.055664	-50.632	-12.06	1083.222	-1.7387	1.8406	-0.27949	NaN	NaN	NaN	NaN	NaN	NaN	NaN	NaN	NaN	NaN	NaN	NaN
2.608	-24.5	115.4646	415.01146	-0.25635	0.33447	0.060059	-44.111	-122.638	1112.108	-1.4137	1.6422	-0.33808	NaN	NaN	NaN	NaN	NaN	NaN	NaN	NaN	NaN	NaN	NaN	NaN
2.61	-32.637	111.6204	399.7222	-0.2334	0.31445	0.057129	7.631	-158.139	1175.6534	-1.2221	1.4877	-0.39092	NaN	NaN	NaN	NaN	NaN	NaN	NaN	NaN	NaN	NaN	NaN	NaN
2.612	-30.821	116.472	364.60702	-0.18213	0.26611	0.06543	11.385	-183.438	1201.612	-1.1455	1.4004	-0.4082	NaN	NaN	NaN	NaN	NaN	NaN	NaN	NaN	NaN	NaN	NaN	NaN
2.614	-37.713	92.9505	343.902	-0.14404	0.23461	0.069336	16.552	-249.375	1226.95	-1.1416	1.3803	-0.39267	NaN	NaN	NaN	NaN	NaN	NaN	NaN	NaN	NaN	NaN	NaN	NaN
2.616	-20.686	92.2912	323.846	-0.11133	0.2085	0.069824	65.9118	-223.137	1220.6214	-1.1068	1.3914	-0.36621	NaN	NaN	NaN	NaN	NaN	NaN	NaN	NaN	NaN	NaN	NaN	NaN
2.618	-16.275	97.442	303.569	-0.063477	0.17578	0.081055	75.997	-239.948	1224.221	-1.0006	1.3867	-0.35176	NaN	NaN	NaN	NaN	NaN	NaN	NaN	NaN	NaN	NaN	NaN	NaN
2.62	-35.546	107.551	285.2608	-0.037109	0.15723	0.081055	98.036	-241.262	1296.543	-0.87861	1.3358	-0.36807	NaN	NaN	NaN	NaN	NaN	NaN	NaN	NaN	NaN	NaN	NaN	NaN
2.622	-35.288	88.8756	254.8364	0.003418	0.1333	0.090332	91.638	-176.8	1352.832	-0.76904	1.2544	-0.37891	NaN	NaN	NaN	NaN	NaN	NaN	NaN	NaN	NaN	NaN	NaN	NaN
2.624	-52.357	73.6403	220.895	0.033203	0.11475	0.094727	42.4019	-208.45	1422.293	-0.71748	1.1956	-0.3835	NaN	NaN	NaN	NaN	NaN	NaN	NaN	NaN	NaN	NaN	NaN	NaN
2.626	-29.955	79.4407	193.6316	0.066406	0.092773	0.095215	-7.073	-166.632	1491.461	-0.71084	1.1563	-0.38027	NaN	NaN	NaN	NaN	NaN	NaN	NaN	NaN	NaN	NaN	NaN	NaN
2.628	-50.768	84.82402	195.1146	0.10693	0.070313	0.1001	-29.142	-85.224	1447.536	-0.74404	1.1278	-0.38222	NaN	NaN	NaN	NaN	NaN	NaN	NaN	NaN	NaN	NaN	NaN	NaN
2.63	-41.194	89.691	195.7135	0.12256	0.057129	0.10205	-4.2092	-76.569	1409.05	-0.81611	1.1132	-0.37802	NaN	NaN	NaN	NaN	NaN	NaN	NaN	NaN	NaN	NaN	NaN	NaN
2.632	-37.575	94.562	171.7251	0.15137	0.037598	0.099609	25.0272	7.38	1376.6637	-0.91211	1.0996	-0.37695	NaN	NaN	NaN	NaN	NaN	NaN	NaN	NaN	NaN	NaN	NaN	NaN
2.634	-32.888	90.949	143.574	0.17017	0.018066	0.098877	27.8448	-30.477	1345.9755	-1.0359	1.1082	-0.37226	NaN	NaN	NaN	NaN	NaN	NaN	NaN	NaN	NaN	NaN	NaN	NaN
2.636	-36.25	75.912	125.3423	0.18896	0.0048828	0.10254	34.57	-76.6237	1385.483	-1.1612	1.1251	-0.37881	NaN	NaN	NaN	NaN	NaN	NaN	NaN	NaN	NaN	NaN	NaN	NaN
2.638	-34.981	52.2372	117.523	0.20313	-0.015625	0.10645	20.9549	-53.7523	1409.973	-1.2737	1.1626	-0.39209	NaN	NaN	NaN	NaN	NaN	NaN	NaN	NaN	NaN	NaN	NaN	NaN
2.64	-34.596	52.19	96.5698	0.2124	-0.02002	0.10693	37.639	-110.837	1437.869	-1.3655	1.2178	-0.41103	NaN	NaN	NaN	NaN	NaN	NaN	NaN	NaN	NaN	NaN	NaN	NaN
2.642	-51.802	49.9762	77.28521	0.22021	-0.02832	0.11182	93.683	-83.341	1471.1371	-1.4287	1.2773	-0.4209	NaN	NaN	NaN	NaN	NaN	NaN	NaN	NaN	NaN	NaN	NaN	NaN
2.644	-53.117	51.66218	69.7101	0.22486	-0.03833	0.11255	51.224	-58.9525	1446.6157	-1.5066	1.3332	-0.43125	NaN	NaN	NaN	NaN	NaN	NaN	NaN	NaN	NaN	NaN	NaN	NaN
2.646	-38.266	39.4852	54.652	0.23047	-0.043945	0.1167	30.335	-84.9862	1446.215	-1.5898	1.3871	-0.43594	NaN	NaN	NaN	NaN	NaN	NaN	NaN	NaN	NaN	NaN	NaN	NaN
2.648	-32.315	53.2821	60.1602	0.22998	-0.055664	0.11572	-6.6458	-14.932	1426.1004	-1.6836	1.4403	-0.4375	NaN	NaN	NaN	NaN	NaN	NaN	NaN	NaN	NaN	NaN	NaN	NaN
2.65	-26.37	50.24076	53.4612	0.22998	-0.058105	0.11963	-44.3918	-52.168	1443.942	-1.7829	1.5011	-0.42764	NaN	NaN	NaN	NaN	NaN	NaN	NaN	NaN	NaN	NaN	NaN	NaN
2.652	-33.367	42.1583	53.0133	0.21631	-0.059082	0.12109	-16.3666	-84.885	1502.815	-1.8706	1.5708	-0.42529	NaN	NaN	NaN	NaN	NaN	NaN	NaN	NaN	NaN	NaN	NaN	NaN
2.654	-31.101	37.2805	46.0196	0.19775	-0.063476	0.11817	-13.3542	-56.649	1488.84	-1.9256	1.6252	-0.44141	NaN	NaN	NaN	NaN	NaN	NaN	NaN	NaN	NaN	NaN	NaN	NaN
2.656	-41.429	35.2538	43.9088	0.18311	-0.062012	0.11816	40.926	-90.737	1467.118	-1.9507	1.6736	-0.47061	NaN	NaN	NaN	NaN	NaN	NaN	NaN	NaN	NaN	NaN	NaN	NaN
2.658	-22.587	29.8231	35.8153	0.16016	-0.064941	0.11816	44.2371	-27.485	1414.118	-1.9659	1.713	-0.49521	NaN	NaN	NaN	NaN	NaN	NaN	NaN	NaN	NaN	NaN	NaN	NaN
2.66	-13.638	17.4981	35.5867	0.14941	-0.061035	0.12891	39.449	39.068	1346.451	-1.9855	1.7384	-0.51817	NaN	NaN	NaN	NaN	NaN	NaN	NaN	NaN	NaN	NaN	NaN	NaN
2.662	-15.83	23.9611	20.7764	0.13428	-0.056152	0.12988	69.923	-0.215599999999999	1320.435	-2.0254	1.7578	-0.53516	NaN	NaN	NaN	NaN	NaN	NaN	NaN	NaN	NaN	NaN	NaN	NaN
2.664	-28.59	37.44022	14.0123	0.12207	-0.053223	0.13965	61.244	58.3094	1304.845	-2.096	1.7802	-0.53399	NaN	NaN	NaN	NaN	NaN	NaN	NaN	NaN	NaN	NaN	NaN	NaN
2.666	-42.869	45.97404	25.5711	0.11865	-0.050293	0.13916	36.862	35.689	1294.8385	-2.1742	1.8039	-0.52188	NaN	NaN	NaN	NaN	NaN	NaN	NaN	NaN	NaN	NaN	NaN	NaN
2.668	-17.839	32.5392	24.5968	0.10938	-0.041992	0.14697	32.544	-3.768	1311.255	-2.2414	1.8406	-0.50157	NaN	NaN	NaN	NaN	NaN	NaN	NaN	NaN	NaN	NaN	NaN	NaN
2.67	-22.192	23.3076	19.4402	0.10181	-0.042724	0.15137	38.8697	74.077	1279.666	-2.2564	1.8702	-0.48203	NaN	NaN	NaN	NaN	NaN	NaN	NaN	NaN	NaN	NaN	NaN	NaN
2.672	-13.944	18.9693	14.1587	0.10254	-0.040527	0.15576	13.486	64.325	1247.8403	-2.2188	1.8828	-0.47168	NaN	NaN	NaN	NaN	NaN	NaN	NaN	NaN	NaN	NaN	NaN	NaN
2.674	-24.965	20.5597	32.3237	0.10352	-0.036133	0.15771	40.4745	127.117	1243.23557	-2.0987	1.8748	-0.46016	NaN	NaN	NaN	NaN	NaN	NaN	NaN	NaN	NaN	NaN	NaN	NaN
2.676	-24.234	28.5926	22.7679	0.11035	-0.035645	0.15967	45.862	159.453	1206.596	-1.9362	1.8357	-0.44873	NaN	NaN	NaN	NaN	NaN	NaN	NaN	NaN	NaN	NaN	NaN	NaN
2.678	-35.58	34.3238	26.2019	0.1167	-0.030762	0.15234	30.2179	72.667	1203.6501	-1.7562	1.7594	-0.4456	NaN	NaN	NaN	NaN	NaN	NaN	NaN	NaN	NaN	NaN	NaN	NaN
2.68	-27.109	37.2301	19.4893871	0.12695	-0.023682	0.15479	48.695	111.607	1190.533	-1.598	1.6582	-0.44355	NaN	NaN	NaN	NaN	NaN	NaN	NaN	NaN	NaN	NaN	NaN	NaN
2.682	-37.83	29.1553	36.99415	0.1333	-0.011719	0.15039	43.935	62.0275	1160.1676	-1.4771	1.561	-0.43359	NaN	NaN	NaN	NaN	NaN	NaN	NaN	NaN	NaN	NaN	NaN	NaN
2.684	-39.967	24.9313	25.1402	0.14258	0.0019531	0.15186	59.9672	47.591	1159.842	-1.3942	1.4687	-0.42314	NaN	NaN	NaN	NaN	NaN	NaN	NaN	NaN	NaN	NaN	NaN	NaN
2.686	-28.257	32.9466	13.338	0.1416	0.0097656	0.14502	58.6628	103.913	1121.6912	-1.3397	1.3989	-0.40908	NaN	NaN	NaN	NaN	NaN	NaN	NaN	NaN	NaN	NaN	NaN	NaN
2.688	-37.592	39.9345	11.5967	0.1416	0.029785	0.14404	24.03	62.309	1083.241	-1.3038	1.338	-0.38995	NaN	NaN	NaN	NaN	NaN	NaN	NaN	NaN	NaN	NaN	NaN	NaN
2.69	-40.06	33.2577	7.9583	0.14404	0.047363	0.14697	15.8	108.013	1069.691	-1.2883	1.2943	-0.37578	NaN	NaN	NaN	NaN	NaN	NaN	NaN	NaN	NaN	NaN	NaN	NaN
2.692	-35.147	25.8789	13.7636	0.14258	0.063477	0.14258	-2.343	153.726	1022.5791	-1.2808	1.2544	-0.36084	NaN	NaN	NaN	NaN	NaN	NaN	NaN	NaN	NaN	NaN	NaN	NaN
2.694	-35.699	31.6095	13.4083	0.13916	0.074219	0.13916	-16.71	125.815	1013.422	-1.2763	1.2333	-0.34756	NaN	NaN	NaN	NaN	NaN	NaN	NaN	NaN	NaN	NaN	NaN	NaN
2.696	-34.65	33.2572	31.1723	0.13623	0.074707	0.14014	-13.73	195.004	1000.397	-1.2679	1.2126	-0.33311	NaN	NaN	NaN	NaN	NaN	NaN	NaN	NaN	NaN	NaN	NaN	NaN
2.698	-43.163	41.2125	39.6612	0.13428	0.083984	0.13232	-48.9922	175.433	941.301	-1.264	1.1907	-0.31514	NaN	NaN	NaN	NaN	NaN	NaN	NaN	NaN	NaN	NaN	NaN	NaN
2.7	-29.768	45.8157	45.51294	0.13183	0.09253	0.13061	-54.51	154.053	905.7906	-1.2453	1.1691	-0.2955	NaN	NaN	NaN	NaN	NaN	NaN	NaN	NaN	NaN	NaN	NaN	NaN
2.702	-47.806	55.3015	23.7458	0.12793	0.097168	0.12402	-31.063	207.209	841.791	-1.2261	1.1519	-0.27393	NaN	NaN	NaN	NaN	NaN	NaN	NaN	NaN	NaN	NaN	NaN	NaN
2.704	-25.322	41.8469	16.4249	0.11963	0.11182	0.12451	-45.4527	154.3977	834.3647	-1.1846	1.1224	-0.25449	NaN	NaN	NaN	NaN	NaN	NaN	NaN	NaN	NaN	NaN	NaN	NaN
2.706	-43.796	25.7573	25.7033	0.11768	0.11865	0.12256	-16.171	171.6104	835.783	-1.1339	1.0872	-0.24053	NaN	NaN	NaN	NaN	NaN	NaN	NaN	NaN	NaN	NaN	NaN	NaN
2.708	-21.361	28.463032	25.196	0.099609	0.13281	0.12305	-20.846	195.34463	761.5387	-1.0843	1.0462	-0.22998	NaN	NaN	NaN	NaN	NaN	NaN	NaN	NaN	NaN	NaN	NaN	NaN
2.71	-29.027	30.2344	29.11627	0.084717	0.14306	0.1228	-47.936	147.662	729.588	-1.0337	1.0062	-0.21553	NaN	NaN	NaN	NaN	NaN	NaN	NaN	NaN	NaN	NaN	NaN	NaN
2.712	-29.704	39.6385	31.7168	0.06543	0.14941	0.12354	-10.409	211.10216	669.19699	-0.98389	0.96143	-0.20557	NaN	NaN	NaN	NaN	NaN	NaN	NaN	NaN	NaN	NaN	NaN	NaN
2.714	-22.577	33.9116	35.61001	0.044434	0.16113	0.12402	-34.927	171.8063	643.9915	-0.93105	0.91348	-0.18867	NaN	NaN	NaN	NaN	NaN	NaN	NaN	NaN	NaN	NaN	NaN	NaN
2.716	-31.488	30.8686	32.2364	0.033203	0.1626	0.12549	-33.712	148.135	642.128	-0.88037	0.87432	-0.17569	NaN	NaN	NaN	NaN	NaN	NaN	NaN	NaN	NaN	NaN	NaN	NaN
2.718	-6.331	38.5567	36.376	0.0073242	0.1665	0.12598	-14.86	185.815	587.597	-0.83701	0.82784	-0.15967	NaN	NaN	NaN	NaN	NaN	NaN	NaN	NaN	NaN	NaN	NaN	NaN
2.72	-29.705	35.7854	45.033	-0.0058593	0.1665	0.12988	-39.512	127.482	590.0101	-0.79257	0.78145	-0.14004	NaN	NaN	NaN	NaN	NaN	NaN	NaN	NaN	NaN	NaN	NaN	NaN
2.722	-13.706	37.5235	26.1668	-0.023438	0.16748	0.13232	-45.4189	147.7723	586.3804	-0.75488	0.74023	-0.12402	NaN	NaN	NaN	NaN	NaN	NaN	NaN	NaN	NaN	NaN	NaN	NaN
2.724	-26.598	35.7956	23.09305	-0.032227	0.17236	0.14014	-49.545	167.9801	521.764	-0.71846	0.70146	-0.10537	NaN	NaN	NaN	NaN	NaN	NaN	NaN	NaN	NaN	NaN	NaN	NaN
2.726	-35.85	33.5856	26.3752	-0.036133	0.16992	0.14209	-31.734	139.9697	464.907	-0.67842	0.65986	-0.084375	NaN	NaN	NaN	NaN	NaN	NaN	NaN	NaN	NaN	NaN	NaN	NaN
2.728	-36.6	26.2277	38.5336	-0.046387	0.17432	0.14453	-5.77	203.049	412.6058	-0.63623	0.62549	-0.058593	NaN	NaN	NaN	NaN	NaN	NaN	NaN	NaN	NaN	NaN	NaN	NaN
2.73	-23.101	23.0005	34.6003	-0.050538	0.18262	0.15332	-17.206	173.751	368.507	-0.5874	0.57597	-0.038086	NaN	NaN	NaN	NaN	NaN	NaN	NaN	NaN	NaN	NaN	NaN	NaN
2.732	-6.747	44.7126	24.2492	-0.056152	0.18506	0.16113	-6.722	141.153	365.286	-0.53027	0.52393	-0.020508	NaN	NaN	NaN	NaN	NaN	NaN	NaN	NaN	NaN	NaN	NaN	NaN
2.734	-38.273	46.263	30.9782	-0.062988	0.1875	0.16406	23.639	157.2938	336.53	-0.46729	0.47432	-0.0088865	NaN	NaN	NaN	NaN	NaN	NaN	NaN	NaN	NaN	NaN	NaN	NaN
2.736	-38.796	42.468	41.1422	-0.063965	0.18701	0.16309	-15.989	97.66	320.1778	-0.40957	0.41963	-0.0077149	NaN	NaN	NaN	NaN	NaN	NaN	NaN	NaN	NaN	NaN	NaN	NaN
2.738	-32.013	25.8035	38.8406	-0.069336	0.18164	0.17383	-27.343	126.8844	303.43876	-0.34785	0.36885	-0.0057617	NaN	NaN	NaN	NaN	NaN	NaN	NaN	NaN	NaN	NaN	NaN	NaN
2.74	-42.157	25.37679	21.3116	-0.069336	0.18165	0.17529	-49.084	160.859	261.209	-0.29483	0.31494	-0.0064453	NaN	NaN	NaN	NaN	NaN	NaN	NaN	NaN	NaN	NaN	NaN	NaN
2.742	-20.986	18.2321	28.9433	-0.068848	0.1875	0.18066	-49.43	144.651	228.44	-0.24951	0.26855	-0.014648	NaN	NaN	NaN	NaN	NaN	NaN	NaN	NaN	NaN	NaN	NaN	NaN
2.744	-51.91	21.7871	36.31	-0.06543	0.20264	0.19141	-18.093	195.075	193.283	-0.2168	0.23213	-0.0083984	NaN	NaN	NaN	NaN	NaN	NaN	NaN	NaN	NaN	NaN	NaN	NaN
2.746	-31.006	22.8193	29.5845	-0.059082	0.20703	0.19434	-48.571	143.669	179.897	-0.20127	0.19727	-0.0061523	NaN	NaN	NaN	NaN	NaN	NaN	NaN	NaN	NaN	NaN	NaN	NaN
2.748	-45.316	33.6199	46.3317	-0.04541	0.21436	0.20459	-62.452	100.4055	193.3756	-0.18525	0.17422	0.0024414	NaN	NaN	NaN	NaN	NaN	NaN	NaN	NaN	NaN	NaN	NaN	NaN
2.75	-37.238	29.4222	22.3226	-0.029786	0.21069	0.21362	-37.827	107.0947	180.3817	-0.16348	0.15888	0.019531	NaN	NaN	NaN	NaN	NaN	NaN	NaN	NaN	NaN	NaN	NaN	NaN
2.752	-44.959	22.185	37.7551	-0.010742	0.21533	0.22559	-74.7157	48.984	170.438	-0.14453	0.14844	0.02832	NaN	NaN	NaN	NaN	NaN	NaN	NaN	NaN	NaN	NaN	NaN	NaN
2.754	-14.888	30.8228	34.19742	0.015137	0.20898	0.23682	-48.642	85.789	144.3438	-0.11494	0.14004	0.037109	NaN	NaN	NaN	NaN	NaN	NaN	NaN	NaN	NaN	NaN	NaN	NaN
2.756	-34.008	20.9905	24.3671	0.03418	0.2124	0.23877	-39.533	98.6975	111.4299	-0.084277	0.13418	0.042187	NaN	NaN	NaN	NaN	NaN	NaN	NaN	NaN	NaN	NaN	NaN	NaN
2.758	-38.619	25.8559	30.7074	0.05957	0.21484	0.24951	-42.552	74.6494	93.40101	-0.052246	0.12363	0.057813	NaN	NaN	NaN	NaN	NaN	NaN	NaN	NaN	NaN	NaN	NaN	NaN
2.76	-29.119	26.346	41.856	0.074707	0.22119	0.25977	-26.863	114.542	77.288	-0.018457	0.11846	0.066992	NaN	NaN	NaN	NaN	NaN	NaN	NaN	NaN	NaN	NaN	NaN	NaN
2.762	-33.342	33.4021	23.6512	0.094727	0.22363	0.26025	-81.956	63.115	52.068	0.01709	0.1084	0.077637	NaN	NaN	NaN	NaN	NaN	NaN	NaN	NaN	NaN	NaN	NaN	NaN
2.764	-20.416	37.15694	30.635211	0.10938	0.23438	0.24023	-85.685	35.5783	66.2338	0.051953	0.093652	0.08125	NaN	NaN	NaN	NaN	NaN	NaN	NaN	NaN	NaN	NaN	NaN	NaN
2.766	-39.813	28.4035	68.978969	0.11279	0.24902	0.21924	-50.759	63.236	48.98161	0.082032	0.085742	0.085156	NaN	NaN	NaN	NaN	NaN	NaN	NaN	NaN	NaN	NaN	NaN	NaN
2.768	-36.626	11.4726	105.484	0.081055	0.29053	0.15283	-57.772	26.1766	39.1977	0.10469	0.075976	0.086718	NaN	NaN	NaN	NaN	NaN	NaN	NaN	NaN	NaN	NaN	NaN	NaN
2.77	-43.221	2.3925	145.186	0.012451	0.33912	0.11938	-44.082	59.889	54.40056	0.12568	0.072558	0.086524	NaN	NaN	NaN	NaN	NaN	NaN	NaN	NaN	NaN	NaN	NaN	NaN
2.772	-30.215	2.4348	195.784	-0.081055	0.4043	0.09668	-34.923	83.118	26.686	0.13184	0.071289	0.080566	NaN	NaN	NaN	NaN	NaN	NaN	NaN	NaN	NaN	NaN	NaN	NaN
2.774	-51.774	-8.98773	267.4128	-0.24902	0.48047	0.074707	-50.552	60.741	36.9365	0.13164	0.069727	0.084473	NaN	NaN	NaN	NaN	NaN	NaN	NaN	NaN	NaN	NaN	NaN	NaN
2.776	-82.186	-54.1634	304.4961	-0.33838	0.52246	0.05957	-10.808	89.785	39.7789	0.11758	0.070118	0.085351	NaN	NaN	NaN	NaN	NaN	NaN	NaN	NaN	NaN	NaN	NaN	NaN
2.778	-85.971	-86.5018	329.72968	-0.52393	0.61963	0.012695	-13.277	52.837	32.495	0.087501	0.069726	0.085351	NaN	NaN	NaN	NaN	NaN	NaN	NaN	NaN	NaN	NaN	NaN	NaN
2.78	-101.575	-89.961	359.1197	-0.67212	0.70728	-0.020996	-25.313	28.1347	38.395	0.05293	0.071289	0.090137	NaN	NaN	NaN	NaN	NaN	NaN	NaN	NaN	NaN	NaN	NaN	NaN
2.782	-93.318	-37.207	458.828	-0.83691	0.79932	-0.051758	0.446999999999996	39.5342	13.045	0.0029297	0.07373	0.094727	NaN	NaN	NaN	NaN	NaN	NaN	NaN	NaN	NaN	NaN	NaN	NaN
2.784	-103.407	6.0935	555.8693	-1.0835	0.94189	-0.08252	-42.546	0.0400000000000009	9.69	-0.041699	0.075684	0.10196	NaN	NaN	NaN	NaN	NaN	NaN	NaN	NaN	NaN	NaN	NaN	NaN
2.786	-116.928	24.5374	622.485	-1.2188	1.0156	-0.099609	-17.885	19.761	31.6465	-0.08877	0.086621	0.10957	NaN	NaN	NaN	NaN	NaN	NaN	NaN	NaN	NaN	NaN	NaN	NaN
2.788	-98.268	32.258	692.394	-1.5093	1.1587	-0.11035	-5.815	33.08891	31.3497	-0.13408	0.095996	0.11074	NaN	NaN	NaN	NaN	NaN	NaN	NaN	NaN	NaN	NaN	NaN	NaN
2.79	-103.0817	34.287	768.853	-1.74	1.2649	-0.11499	-38.053	16.289	45.759	-0.17002	0.10078	0.11895	NaN	NaN	NaN	NaN	NaN	NaN	NaN	NaN	NaN	NaN	NaN	NaN
2.792	-43.387	30.405	852.729	-1.9604	1.3677	-0.099609	-14.389	55.3908	63.849	-0.20264	0.11084	0.12207	NaN	NaN	NaN	NaN	NaN	NaN	NaN	NaN	NaN	NaN	NaN	NaN
2.794	-52.287	57.61	977.748	-2.2012	1.5107	-0.066895	-42.232	38.641	40.9725	-0.22871	0.11572	0.13594	NaN	NaN	NaN	NaN	NaN	NaN	NaN	NaN	NaN	NaN	NaN	NaN
2.796	-41.574	90.856	1086.866	-2.2749	1.5825	-0.052734	-24.867	38.6644	62.587	-0.24199	0.1212	0.14307	NaN	NaN	NaN	NaN	NaN	NaN	NaN	NaN	NaN	NaN	NaN	NaN
2.798	-56.176	89.589	1121.801	-2.3296	1.731	-0.0063477	-21.671	64.143	46.20269	-0.24786	0.12432	0.15479	NaN	NaN	NaN	NaN	NaN	NaN	NaN	NaN	NaN	NaN	NaN	NaN
2.8	-18.2014	61.1738	1116.0379	-2.2842	1.836	0.015137	-48.281	18.753	26.2541	-0.24473	0.12383	0.16631	NaN	NaN	NaN	NaN	NaN	NaN	NaN	NaN	NaN	NaN	NaN	NaN
2.802	-25.5179	26.1809	1134.7311	-2.1953	1.9141	0.030273	-23.714	13.723	45.26521	-0.23291	0.12207	0.17627	NaN	NaN	NaN	NaN	NaN	NaN	NaN	NaN	NaN	NaN	NaN	NaN
2.804	-56.90102	-6.9865	1166.1129	-1.9995	1.936	0.064941	-33.469	23.4914	20.274	-0.21318	0.11846	0.1794	NaN	NaN	NaN	NaN	NaN	NaN	NaN	NaN	NaN	NaN	NaN	NaN
2.806	-33.215	-44.475	1197.0344	-1.9038	1.9126	0.081055	-65.1897	19.293	35.4137	-0.18096	0.11934	0.18233	NaN	NaN	NaN	NaN	NaN	NaN	NaN	NaN	NaN	NaN	NaN	NaN
2.808	-43.24381	-83.671	1193.3796	-1.7476	1.8286	0.10645	-32.226	64.7376	37.6878	-0.1458	0.11504	0.18584	NaN	NaN	NaN	NaN	NaN	NaN	NaN	NaN	NaN	NaN	NaN	NaN
2.81	-24.275	-97.584	1172.4803	-1.6713	1.7495	0.11938	-60.0429	64.793	26.68931	-0.097361	0.1083	0.18398	NaN	NaN	NaN	NaN	NaN	NaN	NaN	NaN	NaN	NaN	NaN	NaN
2.812	11.3879	-127.481	1205.532	-1.6152	1.6758	0.12158	-71.6389	38.9619	44.6793	-0.049805	0.096191	0.17676	NaN	NaN	NaN	NaN	NaN	NaN	NaN	NaN	NaN	NaN	NaN	NaN
2.814	72.027	-130.711	1229.8198	-1.5859	1.6035	0.13525	-30.219	40.616	34.57	0.000195	0.080567	0.17734	NaN	NaN	NaN	NaN	NaN	NaN	NaN	NaN	NaN	NaN	NaN	NaN
2.816	53.4521	-99.671	1245.9857	-1.5816	1.5756	0.15723	-77.868	-10.71595	33.4652	0.053613	0.065918	0.17412	NaN	NaN	NaN	NaN	NaN	NaN	NaN	NaN	NaN	NaN	NaN	NaN
2.818	31.079	-65.1	1293.129	-1.5806	1.5571	0.17969	-35.043	0.970000000000001	57.22524	0.10791	0.045215	0.17412	NaN	NaN	NaN	NaN	NaN	NaN	NaN	NaN	NaN	NaN	NaN	NaN
2.82	24.379	-54.94425	1336.024	-1.5737	1.5298	0.18701	-35.791	29.7145	28.207	0.16494	0.028613	0.17071	NaN	NaN	NaN	NaN	NaN	NaN	NaN	NaN	NaN	NaN	NaN	NaN
2.822	22.024	-57.3139	1349.0252	-1.5625	1.5117	0.17822	-62.4866	6.445	28.1954	0.22217	0.0063477	0.16602	NaN	NaN	NaN	NaN	NaN	NaN	NaN	NaN	NaN	NaN	NaN	NaN
2.824	55.957188	-42.033	1349.05	-1.5229	1.4634	0.14355	-29.684	41.5505	30.7631	0.27373	-0.0083983	0.16582	NaN	NaN	NaN	NaN	NaN	NaN	NaN	NaN	NaN	NaN	NaN	NaN
2.826	29.842	-36.754	1333.867	-1.491	1.4095	0.11792	-53.62	32.1415	-2.071	0.31992	-0.02041	0.15996	NaN	NaN	NaN	NaN	NaN	NaN	NaN	NaN	NaN	NaN	NaN	NaN
2.828	-6.79799999999999	-39.002	1341.7004	-1.4604	1.3462	0.091797	-22.216	24.6666	39.1288	0.37305	-0.029394	0.1541	NaN	NaN	NaN	NaN	NaN	NaN	NaN	NaN	NaN	NaN	NaN	NaN
2.83	-41.462	-54.563	1331.207	-1.4233	1.2368	0.0625	-7.823	58.435	23.391	0.41845	-0.032324	0.14356	NaN	NaN	NaN	NaN	NaN	NaN	NaN	NaN	NaN	NaN	NaN	NaN
2.832	-48.609	-80.626	1316.703	-1.4058	1.188	0.062988	-49.186	26.3427	31.87777	0.4541	-0.035645	0.14453	NaN	NaN	NaN	NaN	NaN	NaN	NaN	NaN	NaN	NaN	NaN	NaN
2.834	-22.803	-98.691	1311.36	-1.373	1.0918	0.040527	-8.814	27.981	42.6828	0.48232	-0.019238	0.13857	NaN	NaN	NaN	NaN	NaN	NaN	NaN	NaN	NaN	NaN	NaN	NaN
2.836	-4.52399999999999	-125.414	1336.546	-1.3555	1.0503	0.030762	-32.277	34.285	10.966	0.50058	-0.0056641	0.13359	NaN	NaN	NaN	NaN	NaN	NaN	NaN	NaN	NaN	NaN	NaN	NaN
2.838	-10.466	-146.594	1362.317	-1.3491	1.0308	0.023438	-41.485	10.4074	16.1424	0.50527	0.008789	0.13164	NaN	NaN	NaN	NaN	NaN	NaN	NaN	NaN	NaN	NaN	NaN	NaN
2.84	-52.407	-145.41	1390.108	-1.3691	1.0449	0.033691	4.119	45.521	28.1783	0.50117	0.022656	0.12559	NaN	NaN	NaN	NaN	NaN	NaN	NaN	NaN	NaN	NaN	NaN	NaN
2.842	-67.252	-113.634	1411.18055	-1.3901	1.064	0.041016	-32.397	56.443	20.3649	0.49023	0.037598	0.12109	NaN	NaN	NaN	NaN	NaN	NaN	NaN	NaN	NaN	NaN	NaN	NaN
2.844	-83.6127	-92.427	1422.67	-1.4741	1.1138	0.057129	-30.946	47.551	34.3238	0.46153	0.049317	0.11133	NaN	NaN	NaN	NaN	NaN	NaN	NaN	NaN	NaN	NaN	NaN	NaN
2.846	-98.5349	-80.4677	1431.007	-1.5689	1.1695	0.072998	-7.387	61.943	31.9101	0.42597	0.067871	0.11035	NaN	NaN	NaN	NaN	NaN	NaN	NaN	NaN	NaN	NaN	NaN	NaN
2.848	-118.7347	-75.3955	1457.467	-1.6753	1.2368	0.088867	-44.197	19.493	23.0146	0.38418	0.081934	0.10527	NaN	NaN	NaN	NaN	NaN	NaN	NaN	NaN	NaN	NaN	NaN	NaN
2.85	-145.2301	-67.614	1448.6288	-1.8237	1.3188	0.098633	-9.584	8.628	37.76	0.33906	0.1042	0.10498	NaN	NaN	NaN	NaN	NaN	NaN	NaN	NaN	NaN	NaN	NaN	NaN
2.852	-147.0567	-69.233	1417.7181	-1.8999	1.3716	0.089355	-20.529	24.6699	20.9178	0.29053	0.12158	0.10742	NaN	NaN	NaN	NaN	NaN	NaN	NaN	NaN	NaN	NaN	NaN	NaN
2.854	-143.8026	-72.237	1403.388	-2.0566	1.4766	0.080566	-57.485	1.6356	29.408	0.23926	0.14004	0.1041	NaN	NaN	NaN	NaN	NaN	NaN	NaN	NaN	NaN	NaN	NaN	NaN
2.856	-116.351	-69.061	1390.1762	-2.1878	1.5696	0.079345	-29.979	49.738	45.8519	0.1918	0.15821	0.10888	NaN	NaN	NaN	NaN	NaN	NaN	NaN	NaN	NaN	NaN	NaN	NaN
2.858	-112.391	-78.437	1393.1761	-2.3315	1.6724	0.094727	-45.094	68.707	33.1011	0.15078	0.17188	0.1085	NaN	NaN	NaN	NaN	NaN	NaN	NaN	NaN	NaN	NaN	NaN	NaN
2.86	-89.809	-76.7107	1392.558	-2.4897	1.8013	0.11523	-55.552	41.253	57.183	0.11074	0.18877	0.11123	NaN	NaN	NaN	NaN	NaN	NaN	NaN	NaN	NaN	NaN	NaN	NaN
2.862	-99.671	-72.0388	1390.654	-2.5469	1.8574	0.12842	-25.002	57.629	30.9072	0.070313	0.20459	0.11572	NaN	NaN	NaN	NaN	NaN	NaN	NaN	NaN	NaN	NaN	NaN	NaN
2.864	-83.724	-59.243	1384.5668	-2.5815	1.9282	0.13672	-73.686	20.704	24.592	0.042969	0.22657	0.12402	NaN	NaN	NaN	NaN	NaN	NaN	NaN	NaN	NaN	NaN	NaN	NaN
2.866	-79.827	-44.2111	1401.6608	-2.5388	1.9416	0.13086	-52.562	25.316	38.3517	0.011425	0.24658	0.13662	NaN	NaN	NaN	NaN	NaN	NaN	NaN	NaN	NaN	NaN	NaN	NaN
2.868	-86.272	-37.6457	1414.438	-2.4546	1.9321	0.11865	-48.857	50.248	17.982	-0.015527	0.26103	0.14795	NaN	NaN	NaN	NaN	NaN	NaN	NaN	NaN	NaN	NaN	NaN	NaN
2.87	-73.051	-17.865	1402.38	-2.2866	1.8853	0.095703	-71.5224	25.624	26.9702	-0.038379	0.27373	0.16455	NaN	NaN	NaN	NaN	NaN	NaN	NaN	NaN	NaN	NaN	NaN	NaN
2.872	-71.855	-22.376	1407.797	-2.2007	1.8521	0.085938	-21.387	47.0407	39.6172	-0.061035	0.28369	0.18066	NaN	NaN	NaN	NaN	NaN	NaN	NaN	NaN	NaN	NaN	NaN	NaN
2.874	-73.487	-26.86	1391.556	-2.0356	1.7759	0.062988	-45.269	36.85376	15.6534	-0.079004	0.29277	0.2002	NaN	NaN	NaN	NaN	NaN	NaN	NaN	NaN	NaN	NaN	NaN	NaN
2.876	-60.104	-35.3618	1379.046	-1.9277	1.7158	0.053223	-50.745	28.536	40.6406	-0.10098	0.30723	0.2169	NaN	NaN	NaN	NaN	NaN	NaN	NaN	NaN	NaN	NaN	NaN	NaN
2.878	-44.911	-28.267	1350.535	-1.8379	1.6465	0.042969	-35.745	65.561	41.8085	-0.11699	0.31035	0.2419	NaN	NaN	NaN	NaN	NaN	NaN	NaN	NaN	NaN	NaN	NaN	NaN
2.88	-51.061	-12.4166	1310.1789	-1.7407	1.5708	0.035645	-69.5926	45.8349	41.1729	-0.13115	0.31445	0.26612	NaN	NaN	NaN	NaN	NaN	NaN	NaN	NaN	NaN	NaN	NaN	NaN
2.882	-71.773	-8.1468	1304.139	-1.7026	1.5415	0.03125	-17.186	29.8424	66.053	-0.15137	0.30957	0.28613	NaN	NaN	NaN	NaN	NaN	NaN	NaN	NaN	NaN	NaN	NaN	NaN
2.884	-27.885	-4.664436	1283.832	-1.6289	1.4785	0.032715	-30.477	31.6247	31.6085	-0.16943	0.30918	0.30186	NaN	NaN	NaN	NaN	NaN	NaN	NaN	NaN	NaN	NaN	NaN	NaN
2.886	-41.893	-0.3834	1270.2959	-1.5717	1.436	0.032227	-52.156	-19.6672	33.8907	-0.18984	0.30547	0.31866	NaN	NaN	NaN	NaN	NaN	NaN	NaN	NaN	NaN	NaN	NaN	NaN
2.888	-44.321	19.6236	1251.927	-1.5195	1.3906	0.030762	2.024	6.041	41.821	-0.20703	0.29766	0.32881	NaN	NaN	NaN	NaN	NaN	NaN	NaN	NaN	NaN	NaN	NaN	NaN
2.89	-74.296	23.65491	1234.379	-1.4565	1.3345	0.026367	-34.712	5.68401	58.962	-0.22773	0.29082	0.34248	NaN	NaN	NaN	NaN	NaN	NaN	NaN	NaN	NaN	NaN	NaN	NaN
2.892	-66.294	49.02368	1215.3404	-1.4312	1.3071	0.022949	-35.41	-3.665	143.4947	-0.24219	0.28125	0.34766	NaN	NaN	NaN	NaN	NaN	NaN	NaN	NaN	NaN	NaN	NaN	NaN
2.894	-75.078	52.4896	1199.4082	-1.3848	1.2578	0.023438	8.07	32.3606	198.715	-0.25274	0.27344	0.35566	NaN	NaN	NaN	NaN	NaN	NaN	NaN	NaN	NaN	NaN	NaN	NaN
2.896	-86.175	77.492	1187.9191	-1.3418	1.2173	0.020996	-55.066	28.2138	278.93	-0.25869	0.26699	0.35371	NaN	NaN	NaN	NaN	NaN	NaN	NaN	NaN	NaN	NaN	NaN	NaN
2.898	-84.705	75.352	1168.8551	-1.3066	1.1641	0.019043	-41.088	-0.0734000000000004	439.873	-0.25713	0.26465	0.35723	NaN	NaN	NaN	NaN	NaN	NaN	NaN	NaN	NaN	NaN	NaN	NaN
2.9	-86.574	70.684	1153.8711	-1.2539	1.1064	0.021484	-104.553	-62.164	585.647	-0.25127	0.26084	0.35606	NaN	NaN	NaN	NaN	NaN	NaN	NaN	NaN	NaN	NaN	NaN	NaN
2.902	-101.1954	67.8216	1123.5465	-1.2261	1.0747	0.020996	-174.033	-158.844	750.176	-0.24854	0.26514	0.33643	NaN	NaN	NaN	NaN	NaN	NaN	NaN	NaN	NaN	NaN	NaN	NaN
2.904	-113.759	51.9613	1103.563	-1.1675	1.0181	0.022461	-96.181	-141.746	887.625	-0.23838	0.27148	0.29483	NaN	NaN	NaN	NaN	NaN	NaN	NaN	NaN	NaN	NaN	NaN	NaN
2.906	-90.805	38.317	1059.4635	-1.1211	0.98242	0.019531	-141.162	-97.527	938.4072	-0.23183	0.27978	0.20683	NaN	NaN	NaN	NaN	NaN	NaN	NaN	NaN	NaN	NaN	NaN	NaN
2.908	-79.964	41.089	1035.3874	-1.0723	0.9502	0.014648	-183.367	-60.905	1016.428	-0.24434	0.30322	0.093164	NaN	NaN	NaN	NaN	NaN	NaN	NaN	NaN	NaN	NaN	NaN	NaN
2.91	-88.005	55.419	997.1181	-1.0093	0.91455	0.011719	-195.038	39.5677	1013.6949	-0.30722	0.34209	-0.033105	NaN	NaN	NaN	NaN	NaN	NaN	NaN	NaN	NaN	NaN	NaN	NaN
2.912	-86.361	75.951	981.13	-0.98291	0.89502	0.0058594	-198.944	31.2808	1028.344	-0.42041	0.38477	-0.16211	NaN	NaN	NaN	NaN	NaN	NaN	NaN	NaN	NaN	NaN	NaN	NaN
2.914	-78.409	91.0144	965.2947	-0.93115	0.85791	0.0053711	-82.035	9.531	1115.2938	-0.57832	0.41856	-0.27207	NaN	NaN	NaN	NaN	NaN	NaN	NaN	NaN	NaN	NaN	NaN	NaN
2.916	-66.725	111.78	929.31256	-0.90454	0.83179	0.003418	-20.098	2.425	1187.1413	-0.78476	0.47461	-0.35205	NaN	NaN	NaN	NaN	NaN	NaN	NaN	NaN	NaN	NaN	NaN	NaN
2.918	-74.998	130.715	914.89	-0.875	0.80664	-0.0019531	5.454	-88.03	1269.4	-1.0449	0.54804	-0.40361	NaN	NaN	NaN	NaN	NaN	NaN	NaN	NaN	NaN	NaN	NaN	NaN
2.92	-50.186	135.178	885.131	-0.83154	0.77588	0	28.4741	-81.9489	1312.018	-1.3513	0.66133	-0.4041	NaN	NaN	NaN	NaN	NaN	NaN	NaN	NaN	NaN	NaN	NaN	NaN
2.922	-44.071	136.183	837.8018	-0.8042	0.76025	-0.003418	-53.16286	-50.952	1268.615	-1.7007	0.81201	-0.34424	NaN	NaN	NaN	NaN	NaN	NaN	NaN	NaN	NaN	NaN	NaN	NaN
2.924	-38.538	154.842	805.89	-0.74414	0.72754	-0.0073242	-63.166	-41.548	1232.5368	-2.0968	1.0153	-0.23193	NaN	NaN	NaN	NaN	NaN	NaN	NaN	NaN	NaN	NaN	NaN	NaN
2.926	-34.096	131.5968	779.2506	-0.6897	0.70337	-0.0053711	-18.708	3.071	1184.92	-2.4772	1.2309	-0.12578	NaN	NaN	NaN	NaN	NaN	NaN	NaN	NaN	NaN	NaN	NaN	NaN
2.928	-30.148	116.95863	753.7436	-0.63477	0.67578	-0.014648	-12.493	-49.96	1143.575	-2.7694	1.4388	-0.038281	NaN	NaN	NaN	NaN	NaN	NaN	NaN	NaN	NaN	NaN	NaN	NaN
2.93	-6.182	101.4978	728.0501	-0.56201	0.63721	-0.024902	23.7783	-125.462	1197.3031	-2.9352	1.614	0.0062501	NaN	NaN	NaN	NaN	NaN	NaN	NaN	NaN	NaN	NaN	NaN	NaN
2.932	-29.894	120.9304	687.3462	-0.52295	0.61865	-0.032715	2.372	-140.159	1219.1333	-2.9819	1.7544	0.033691	NaN	NaN	NaN	NaN	NaN	NaN	NaN	NaN	NaN	NaN	NaN	NaN
2.934	-23.747	120.638	650.173	-0.4458	0.58447	-0.04834	-71.949	-210.532	1238.5147	-2.9208	1.8624	0.046289	NaN	NaN	NaN	NaN	NaN	NaN	NaN	NaN	NaN	NaN	NaN	NaN
2.936	-25.847	121.083	633.291	-0.39161	0.56055	-0.056396	-31.4962	-187.842	1257.7815	-2.776	1.9294	0.076562	NaN	NaN	NaN	NaN	NaN	NaN	NaN	NaN	NaN	NaN	NaN	NaN
2.938	0.0910000000000011	114.832	601.3701	-0.33887	0.53125	-0.068848	15.849	-158.6	1205.333	-2.5683	1.9309	0.12734	NaN	NaN	NaN	NaN	NaN	NaN	NaN	NaN	NaN	NaN	NaN	NaN
2.94	-23.365	109.5903	573.212	-0.2793	0.49805	-0.086426	77.991	-186.37	1220.9759	-2.3831	1.8821	0.17988	NaN	NaN	NaN	NaN	NaN	NaN	NaN	NaN	NaN	NaN	NaN	NaN
2.942	-24.118	104.2514	559.03	-0.24756	0.48486	-0.094238	111.012	-121.888	1277.2985	-2.2344	1.8418	0.22314	NaN	NaN	NaN	NaN	NaN	NaN	NaN	NaN	NaN	NaN	NaN	NaN
2.944	-44.317	105.5075	523.2945	-0.18896	0.45654	-0.1084	97.6398	-119.4852653	1360.476	-2.1106	1.7906	0.24209	NaN	NaN	NaN	NaN	NaN	NaN	NaN	NaN	NaN	NaN	NaN	NaN
2.946	-26.121	125.7225	492.3934	-0.14746	0.43188	-0.11768	67.654	-164.7973	1468.736	-2.0183	1.6969	0.24453	NaN	NaN	NaN	NaN	NaN	NaN	NaN	NaN	NaN	NaN	NaN	NaN
2.948	-39.061	133.1958	478.25806	-0.10986	0.41357	-0.12549	55.302	-135.168	1464.844	-1.96	1.588	0.23945	NaN	NaN	NaN	NaN	NaN	NaN	NaN	NaN	NaN	NaN	NaN	NaN
2.95	-42.998	121.3342	451.0007	-0.061035	0.38184	-0.1377	-12.506	-202.601	1418.476	-1.8856	1.4871	0.22588	NaN	NaN	NaN	NaN	NaN	NaN	NaN	NaN	NaN	NaN	NaN	NaN
2.952	-25.589	117.3615	424.154	-0.037109	0.37109	-0.14111	-52.498	-172.9889	1384.6751	-1.7852	1.3926	0.19971	NaN	NaN	NaN	NaN	NaN	NaN	NaN	NaN	NaN	NaN	NaN	NaN
2.954	-55.538	110.0651	381.4623	0.0043945	0.34814	-0.14795	-105.445	-141.779	1321.842	-1.6531	1.3118	0.16582	NaN	NaN	NaN	NaN	NaN	NaN	NaN	NaN	NaN	NaN	NaN	NaN
2.956	-68.0677	101.0093	362.1083	0.030029	0.33642	-0.1565	-170.9605	-199.9258	1344.575	-1.5273	1.2349	0.13076	NaN	NaN	NaN	NaN	NaN	NaN	NaN	NaN	NaN	NaN	NaN	NaN
2.958	-58.227	90.298	350.1557	0.050293	0.31641	-0.16113	-118.71487	-143.148	1357.836	-1.4425	1.1665	0.099511	NaN	NaN	NaN	NaN	NaN	NaN	NaN	NaN	NaN	NaN	NaN	NaN
2.96	-35.163	88.9397	313.0474	0.078613	0.30078	-0.16846	-103.011	-168.1885	1348.8244	-1.3693	1.0741	0.096094	NaN	NaN	NaN	NaN	NaN	NaN	NaN	NaN	NaN	NaN	NaN	NaN
2.962	-56.6598	86.8492	274.314	0.085938	0.28711	-0.17188	-72.061	-177.982	1384.9244	-1.3169	0.99951	0.086426	NaN	NaN	NaN	NaN	NaN	NaN	NaN	NaN	NaN	NaN	NaN	NaN
2.964	-78.666	98.424	251.951	0.09082	0.27246	-0.17529	-71.8737	-84.2338	1374.008	-1.2712	0.94717	0.067187	NaN	NaN	NaN	NaN	NaN	NaN	NaN	NaN	NaN	NaN	NaN	NaN
2.966	-52.648	101.93	249.723	0.086426	0.26416	-0.17432	-124.709	-105.86	1383.517	-1.2359	0.90674	0.041407	NaN	NaN	NaN	NaN	NaN	NaN	NaN	NaN	NaN	NaN	NaN	NaN
2.968	-64.398	112.7376	239.34645	0.088379	0.26172	-0.1748	-101.352	-42.118	1425.662	-1.2261	0.89932	0.014843	NaN	NaN	NaN	NaN	NaN	NaN	NaN	NaN	NaN	NaN	NaN	NaN
2.97	-29.531	118.0307	223.235	0.086914	0.25244	-0.17578	-136.337	-20.3866	1436.4854	-1.249	0.92324	-0.0084963	NaN	NaN	NaN	NaN	NaN	NaN	NaN	NaN	NaN	NaN	NaN	NaN
2.972	-31.978	90.823	212.113	0.087402	0.2456	-0.17651	-149.3452	-84.1	1495.992	-1.3164	0.97852	-0.0053711	NaN	NaN	NaN	NaN	NaN	NaN	NaN	NaN	NaN	NaN	NaN	NaN
2.974	-29.334	76.064	196.155	0.083984	0.23584	-0.17236	-169.542	-56.771	1507.153	-1.4432	1.0522	0.02168	NaN	NaN	NaN	NaN	NaN	NaN	NaN	NaN	NaN	NaN	NaN	NaN
2.976	-35.351	63.4964	166.837	0.088867	0.22656	-0.17578	-213.61	-94.574	1474.968	-1.5999	1.1391	0.050781	NaN	NaN	NaN	NaN	NaN	NaN	NaN	NaN	NaN	NaN	NaN	NaN
2.978	-36.446	70.9981	153.7868	0.09375	0.21777	-0.17236	-201.527	-101.993	1471.3876	-1.7597	1.2341	0.075781	NaN	NaN	NaN	NaN	NaN	NaN	NaN	NaN	NaN	NaN	NaN	NaN
2.98	-15.555	61.5329	126.0696	0.097656	0.21289	-0.17383	-149.06	-33.946	1414.299	-1.891	1.3238	0.095117	NaN	NaN	NaN	NaN	NaN	NaN	NaN	NaN	NaN	NaN	NaN	NaN
2.982	-25.624	58.734	98.9912	0.10718	0.21094	-0.17334	-123.138	-84.1214	1380.32	-1.9961	1.3945	0.094238	NaN	NaN	NaN	NaN	NaN	NaN	NaN	NaN	NaN	NaN	NaN	NaN
2.984	-9.454	55.3334	82.2894	0.11523	0.20557	-0.17822	-66.213	-71.658	1385.484	-2.0723	1.4538	0.063574	NaN	NaN	NaN	NaN	NaN	NaN	NaN	NaN	NaN	NaN	NaN	NaN
2.986	-36.277	51.513	74.831	0.12598	0.19824	-0.17871	-39.552	-67.747	1383.632	-2.1248	1.502	0.026465	NaN	NaN	NaN	NaN	NaN	NaN	NaN	NaN	NaN	NaN	NaN	NaN
2.988	-20.936	55.965	76.876	0.13037	0.19336	-0.17773	-41.524	-105.127	1424.7116	-2.1842	1.552	-0.014551	NaN	NaN	NaN	NaN	NaN	NaN	NaN	NaN	NaN	NaN	NaN	NaN
2.99	-17.228	51.6966	67.9682	0.1333	0.19189	-0.18115	-2.216	14.552	1461.96	-2.2532	1.6081	-0.044434	NaN	NaN	NaN	NaN	NaN	NaN	NaN	NaN	NaN	NaN	NaN	NaN
2.992	-10.362	44.7237	53.6946	0.13672	0.18701	-0.18457	-9.08300000000001	61.155	1430.112	-2.3433	1.6743	-0.061035	NaN	NaN	NaN	NaN	NaN	NaN	NaN	NaN	NaN	NaN	NaN	NaN
2.994	3.112	33.12415	56.2535	0.13672	0.18652	-0.18359	-16.117	75.9331	1412.393	-2.4438	1.7437	-0.07207	NaN	NaN	NaN	NaN	NaN	NaN	NaN	NaN	NaN	NaN	NaN	NaN
2.996	-8.922	31.9529	55.4341	0.12744	0.18555	-0.18359	-37.656	135.805	1349.3565	-2.5292	1.8017	-0.07334	NaN	NaN	NaN	NaN	NaN	NaN	NaN	NaN	NaN	NaN	NaN	NaN
2.998	-6.726	44.7221	30.8499	0.12207	0.18457	-0.19092	-105.769	54.139	1336.7387	-2.5846	1.8501	-0.078809	NaN	NaN	NaN	NaN	NaN	NaN	NaN	NaN	NaN	NaN	NaN	NaN
3	-23.662	48.7596	25.0623	0.11279	0.18018	-0.18848	-79.179	76.059	1348.61273	-2.5959	1.8892	-0.086133	NaN	NaN	NaN	NaN	NaN	NaN	NaN	NaN	NaN	NaN	NaN	NaN
3.002	-27.272	41.121	35.06145	0.10816	0.18383	-0.18726	-65.155	84.7773	1305.794	-2.5547	1.8984	-0.089844	NaN	NaN	NaN	NaN	NaN	NaN	NaN	NaN	NaN	NaN	NaN	NaN
3.004	-45.877	23.1588	29.80755	0.10596	0.18115	-0.18555	-56.724	43.9811	1273.0181	-2.467	1.8881	-0.095117	NaN	NaN	NaN	NaN	NaN	NaN	NaN	NaN	NaN	NaN	NaN	NaN
3.006	-40.504	16.9218	18.8994	0.10156	0.18115	-0.1792	-55.482	92.022	1228.602	-2.3438	1.8461	-0.098047	NaN	NaN	NaN	NaN	NaN	NaN	NaN	NaN	NaN	NaN	NaN	NaN
3.008	-48.877	13.9003	25.6606	0.099121	0.17822	-0.17871	-88.713	65.4427	1186.201	-2.1855	1.7793	-0.097656	NaN	NaN	NaN	NaN	NaN	NaN	NaN	NaN	NaN	NaN	NaN	NaN
3.01	-60.779	20.6349	22.2368	0.098145	0.17236	-0.17725	-79.794	54.193	1194.968	-2.0315	1.6842	-0.098633	NaN	NaN	NaN	NaN	NaN	NaN	NaN	NaN	NaN	NaN	NaN	NaN
3.012	-31.751	19.28384	32.7376	0.10572	0.16187	-0.17309	-42.459	113.457	1193.104	-1.8804	1.5728	-0.099121	NaN	NaN	NaN	NaN	NaN	NaN	NaN	NaN	NaN	NaN	NaN	NaN
3.014	-45.878	29.9984	18.565	0.10547	0.14648	-0.16895	-67.365	82.198	1185.756	-1.7584	1.4557	-0.10596	NaN	NaN	NaN	NaN	NaN	NaN	NaN	NaN	NaN	NaN	NaN	NaN
3.016	-39.657	27.169	15.1143	0.10791	0.12891	-0.16553	-47.749	132.477	1185.214	-1.6717	1.3593	-0.11181	NaN	NaN	NaN	NaN	NaN	NaN	NaN	NaN	NaN	NaN	NaN	NaN
3.018	-44.818	28.18375	31.9325	0.10791	0.11914	-0.16211	-64.5555	164.3911	1137.0467	-1.5995	1.2722	-0.10166	NaN	NaN	NaN	NaN	NaN	NaN	NaN	NaN	NaN	NaN	NaN	NaN
3.02	-41.092	22.911	43.3591	0.10059	0.10596	-0.15918	-136.235	143.4735	1099.4125	-1.5433	1.2091	-0.096192	NaN	NaN	NaN	NaN	NaN	NaN	NaN	NaN	NaN	NaN	NaN	NaN
3.022	-53.026	35.0485	28.9516	0.096681	0.097169	-0.15577	-111.822	206.437	1091.168	-1.4858	1.1548	-0.088867	NaN	NaN	NaN	NaN	NaN	NaN	NaN	NaN	NaN	NaN	NaN	NaN
3.024	-41.743	41.043	20.93938	0.087891	0.089355	-0.15088	-143.213	199.576	1044.415	-1.4329	1.1062	-0.078711	NaN	NaN	NaN	NaN	NaN	NaN	NaN	NaN	NaN	NaN	NaN	NaN
3.026	-48.938	27.4546	17.4047	0.074707	0.085449	-0.14453	-119.69499	173.548	1019.755	-1.391	1.0598	-0.073242	NaN	NaN	NaN	NaN	NaN	NaN	NaN	NaN	NaN	NaN	NaN	NaN
3.028	-69.591	31.3282	9.1628	0.068848	0.08252	-0.14355	-104.959	192.559	968.369	-1.3609	1.0102	-0.07168	NaN	NaN	NaN	NaN	NaN	NaN	NaN	NaN	NaN	NaN	NaN	NaN
3.03	-33.475	32.9634	15.1529	0.055664	0.078613	-0.13623	-139.195	128.5771	919.618	-1.3356	0.96338	-0.064355	NaN	NaN	NaN	NaN	NaN	NaN	NaN	NaN	NaN	NaN	NaN	NaN
3.032	-38.969	32.5107	14.8877	0.05249	0.071289	-0.13086	-82.296	131.758	907.7699	-1.3125	0.92383	-0.068359	NaN	NaN	NaN	NaN	NaN	NaN	NaN	NaN	NaN	NaN	NaN	NaN
3.034	-17.479	31.06	22.5814	0.043945	0.062988	-0.12939	-21.744	156.164	832.506	-1.2963	0.88144	-0.059277	NaN	NaN	NaN	NaN	NaN	NaN	NaN	NaN	NaN	NaN	NaN	NaN
3.036	-20.243	33.606	25.908	0.041504	0.056641	-0.12891	-32.29	133.486	796.9247	-1.2647	0.84853	-0.052343	NaN	NaN	NaN	NaN	NaN	NaN	NaN	NaN	NaN	NaN	NaN	NaN
3.038	-12.156	31.5552	14.0697	0.040527	0.058105	-0.12451	31.017	194.439	757.9054	-1.2261	0.82158	-0.049219	NaN	NaN	NaN	NaN	NaN	NaN	NaN	NaN	NaN	NaN	NaN	NaN
3.04	-21.164	29.45783	32.076	0.037109	0.052734	-0.12207	-6.547	188.1878	763.8788	-1.1778	0.79893	-0.042871	NaN	NaN	NaN	NaN	NaN	NaN	NaN	NaN	NaN	NaN	NaN	NaN
3.042	-3.10100000000001	34.54313	28.3435	0.033936	0.058106	-0.11547	-19.414	178.0802	783.968	-1.1211	0.7793	-0.037598	NaN	NaN	NaN	NaN	NaN	NaN	NaN	NaN	NaN	NaN	NaN	NaN
3.044	5.345	31.9253	26.8227	0.033203	0.058105	-0.1167	-6.93	213.06	757.455	-1.06	0.75869	-0.037891	NaN	NaN	NaN	NaN	NaN	NaN	NaN	NaN	NaN	NaN	NaN	NaN
3.046	0.286999999999999	39.7949	23.1173	0.044922	0.061523	-0.11475	-50.215	181.869	700.16	-0.99748	0.72383	-0.041113	NaN	NaN	NaN	NaN	NaN	NaN	NaN	NaN	NaN	NaN	NaN	NaN
3.048	-3.65	36.159	39.722	0.043457	0.066895	-0.10986	-11.288	192.984	636.313	-0.92402	0.68555	-0.046973	NaN	NaN	NaN	NaN	NaN	NaN	NaN	NaN	NaN	NaN	NaN	NaN
3.05	-30.467	37.554	27.5965	0.050293	0.06543	-0.1084	-37.045	185.227	556.448	-0.84814	0.63936	-0.051367	NaN	NaN	NaN	NaN	NaN	NaN	NaN	NaN	NaN	NaN	NaN	NaN
3.052	-21.737	42.3128	22.3254	0.056152	0.071533	-0.10571	-58.286	127.026	522.4916	-0.77588	0.60205	-0.058594	NaN	NaN	NaN	NaN	NaN	NaN	NaN	NaN	NaN	NaN	NaN	NaN
3.054	-22.28	35.2153	26.50307	0.066406	0.079102	-0.10938	-5.70800000000001	150.7377	500.596	-0.70117	0.56543	-0.063867	NaN	NaN	NaN	NaN	NaN	NaN	NaN	NaN	NaN	NaN	NaN	NaN
3.056	-31.296	29.3981	31.4033	0.070313	0.077148	-0.10205	11.878	145.501	460.287	-0.63428	0.53448	-0.06709	NaN	NaN	NaN	NaN	NaN	NaN	NaN	NaN	NaN	NaN	NaN	NaN
3.058	-26.555	18.4451	22.1488	0.072266	0.081055	-0.10303	30.086	121.097	429.3178	-0.5667	0.51104	-0.072558	NaN	NaN	NaN	NaN	NaN	NaN	NaN	NaN	NaN	NaN	NaN	NaN
3.06	-38.95	32.1815	19.036	0.07959	0.081055	-0.104	17.323	138.69	389.637	-0.50205	0.48623	-0.071387	NaN	NaN	NaN	NaN	NaN	NaN	NaN	NaN	NaN	NaN	NaN	NaN
3.062	-37.549	44.2424	30.1188	0.089844	0.088135	-0.10352	-33.96	135.683	363.516	-0.43701	0.46338	-0.070313	NaN	NaN	NaN	NaN	NaN	NaN	NaN	NaN	NaN	NaN	NaN	NaN
3.064	-63.894	48.0699	34.0742	0.10059	0.092285	-0.10742	-13.116	159.0536	361.1586	-0.36524	0.43379	-0.074805	NaN	NaN	NaN	NaN	NaN	NaN	NaN	NaN	NaN	NaN	NaN	NaN
3.066	-34.226	34.8946	34.33849	0.10986	0.097656	-0.10742	-28.849	184.713	323.333	-0.3	0.40205	-0.078418	NaN	NaN	NaN	NaN	NaN	NaN	NaN	NaN	NaN	NaN	NaN	NaN
3.068	-48.919	36.2705	9.8438	0.11914	0.099609	-0.10449	-76.4966	130.2285	297.2835	-0.2375	0.36728	-0.083496	NaN	NaN	NaN	NaN	NaN	NaN	NaN	NaN	NaN	NaN	NaN	NaN
3.07	-63.543	38.74942	22.7372	0.12988	0.10889	-0.10547	-38.7937	131.656	271.964805	-0.17548	0.3374	-0.089941	NaN	NaN	NaN	NaN	NaN	NaN	NaN	NaN	NaN	NaN	NaN	NaN
3.072	-42.544	41.897	51.2507	0.14038	0.10938	-0.10938	-81.092	116.703	232.657	-0.12256	0.3042	-0.09668	NaN	NaN	NaN	NaN	NaN	NaN	NaN	NaN	NaN	NaN	NaN	NaN
3.074	-50.53	37.355	46.8377	0.1499	0.11523	-0.11035	-89.59685	110.3727	231.16668	-0.072363	0.27432	-0.10224	NaN	NaN	NaN	NaN	NaN	NaN	NaN	NaN	NaN	NaN	NaN	NaN
3.076	-37.019	33.8085	37.1574	0.16553	0.12793	-0.11719	-55.505	140.881	212.3095	-0.033399	0.24649	-0.10674	NaN	NaN	NaN	NaN	NaN	NaN	NaN	NaN	NaN	NaN	NaN	NaN
3.078	-44.083	22.8728	25.4473	0.17285	0.12842	-0.12305	-87.4991	118.5373	181.7201	0.013477	0.22734	-0.1126	NaN	NaN	NaN	NaN	NaN	NaN	NaN	NaN	NaN	NaN	NaN	NaN
3.08	-37.613	15.33	33.8484	0.19092	0.13281	-0.11914	-30.071	100.3171	150.2633	0.05752	0.20586	-0.11504	NaN	NaN	NaN	NaN	NaN	NaN	NaN	NaN	NaN	NaN	NaN	NaN
3.082	-51.821	22.64422	32.9658	0.21143	0.13867	-0.12133	-33.3189	89.1535	107.904	0.088867	0.18701	-0.1167	NaN	NaN	NaN	NaN	NaN	NaN	NaN	NaN	NaN	NaN	NaN	NaN
3.084	-41.142	33.176	30.5574	0.22607	0.1416	-0.12988	-50.7198	56.005	99.514	0.11494	0.16377	-0.11797	NaN	NaN	NaN	NaN	NaN	NaN	NaN	NaN	NaN	NaN	NaN	NaN
3.086	-26.306	32.29075	24.0824	0.24561	0.14648	-0.13135	4.62	60.2457	108.2449	0.13731	0.14346	-0.11983	NaN	NaN	NaN	NaN	NaN	NaN	NaN	NaN	NaN	NaN	NaN	NaN
3.088	-25.586	28.22864	28.9897	0.24365	0.14893	-0.13525	-36.845	63.5707	97.2934	0.16308	0.1333	-0.12099	NaN	NaN	NaN	NaN	NaN	NaN	NaN	NaN	NaN	NaN	NaN	NaN
3.09	-6.863	18.2518	25.0891	0.23584	0.16455	-0.13916	-36.238	61.6035	93.605	0.18652	0.1251	-0.12471	NaN	NaN	NaN	NaN	NaN	NaN	NaN	NaN	NaN	NaN	NaN	NaN
3.092	-26.488	20.25263	32.5154	0.21973	0.17554	-0.13916	-1.372	109.31	65.806	0.21191	0.11768	-0.13037	NaN	NaN	NaN	NaN	NaN	NaN	NaN	NaN	NaN	NaN	NaN	NaN
3.094	0.599000000000004	32.552	47.1404	0.19873	0.19385	-0.13818	-55.065	103.237	60.1638	0.23603	0.10732	-0.13389	NaN	NaN	NaN	NaN	NaN	NaN	NaN	NaN	NaN	NaN	NaN	NaN
3.096	-12.336	47.888	46.8869	0.16846	0.21777	-0.12842	-33.142	91.17	96.05	0.25195	0.096778	-0.1375	NaN	NaN	NaN	NaN	NaN	NaN	NaN	NaN	NaN	NaN	NaN	NaN
3.098	-10.531	53.763	46.481	0.14844	0.23535	-0.12744	-24.305	95.097	63.341	0.25859	0.087793	-0.13867	NaN	NaN	NaN	NaN	NaN	NaN	NaN	NaN	NaN	NaN	NaN	NaN
3.1	-24.174	34.355	28.55127	0.12354	0.26172	-0.12402	-49.518	47.7154	47.289	0.25771	0.083691	-0.1456	NaN	NaN	NaN	NaN	NaN	NaN	NaN	NaN	NaN	NaN	NaN	NaN
3.102	-9.966	16.182	32.1774	0.11401	0.28394	-0.11865	22.807	35.3242	35.0582	0.25684	0.078613	-0.1499	NaN	NaN	NaN	NaN	NaN	NaN	NaN	NaN	NaN	NaN	NaN	NaN
3.104	-4.04	7.417	27.255	0.10352	0.3042	-0.11182	-32.664	23.133	7.342	0.24932	0.075586	-0.1543	NaN	NaN	NaN	NaN	NaN	NaN	NaN	NaN	NaN	NaN	NaN	NaN
3.106	-36.661	22.7747	17.97554	0.092773	0.32178	-0.11377	-22.005	-0.335999999999999	26.7915	0.23554	0.078027	-0.1625	NaN	NaN	NaN	NaN	NaN	NaN	NaN	NaN	NaN	NaN	NaN	NaN
3.108	-12.232	20.8387	22.1863	0.084472	0.33545	-0.12012	8.334	29.285	18.07	0.21406	0.07334	-0.16563	NaN	NaN	NaN	NaN	NaN	NaN	NaN	NaN	NaN	NaN	NaN	NaN
3.11	-22.108	9.7809	31.1915	0.071289	0.34473	-0.12891	-45.012	39.9298	-0.8153	0.17871	0.073047	-0.1625	NaN	NaN	NaN	NaN	NaN	NaN	NaN	NaN	NaN	NaN	NaN	NaN
3.112	-14.847	-2.8029	59.392	0.027832	0.36182	-0.13525	0.552	43.0028	35.956	0.12549	0.075684	-0.16943	NaN	NaN	NaN	NaN	NaN	NaN	NaN	NaN	NaN	NaN	NaN	NaN
3.114	-33.817	8.77684	88.2734	-0.011719	0.37549	-0.1377	-42.6861	66.089	24.71648	0.066015	0.080469	-0.16885	NaN	NaN	NaN	NaN	NaN	NaN	NaN	NaN	NaN	NaN	NaN	NaN
3.116	-40.284	43.725	132.6578	-0.1377	0.42188	-0.14111	-56.682	38.6927	60.407	0.0083985	0.091699	-0.16699	NaN	NaN	NaN	NaN	NaN	NaN	NaN	NaN	NaN	NaN	NaN	NaN
3.118	3.452	75.174	177.7798	-0.26245	0.4602	-0.1333	-14.366	33.201	67.538	-0.054883	0.10498	-0.16582	NaN	NaN	NaN	NaN	NaN	NaN	NaN	NaN	NaN	NaN	NaN	NaN
3.12	-10.0112	76.3934	199.983	-0.40527	0.50684	-0.13281	-62.5402	37.9	41.5299	-0.11328	0.12178	-0.15967	NaN	NaN	NaN	NaN	NaN	NaN	NaN	NaN	NaN	NaN	NaN	NaN
3.122	-31.623	71.7372	240.942	-0.62451	0.58447	-0.13623	-59.06	5.564	44.8496	-0.16064	0.13574	-0.1582	NaN	NaN	NaN	NaN	NaN	NaN	NaN	NaN	NaN	NaN	NaN	NaN
3.124	-9.6266	64.4461	303.797	-0.74463	0.63232	-0.14795	-37.917	33.7757	13.739	-0.19688	0.14766	-0.15547	NaN	NaN	NaN	NaN	NaN	NaN	NaN	NaN	NaN	NaN	NaN	NaN
3.126	36.3311	77.2948	407.4324	-1.0151	0.74463	-0.17627	-57.566	47.934	4.143	-0.21934	0.15429	-0.15166	NaN	NaN	NaN	NaN	NaN	NaN	NaN	NaN	NaN	NaN	NaN	NaN
3.128	16.4371	95.8195	554.587	-1.2661	0.83838	-0.19262	-14.169	35.895	32.2631	-0.23105	0.16524	-0.14931	NaN	NaN	NaN	NaN	NaN	NaN	NaN	NaN	NaN	NaN	NaN	NaN
3.13	-16.425	87.0546	685.652	-1.5679	0.9458	-0.20752	-49.251	50.726	31.0803	-0.23262	0.1749	-0.14853	NaN	NaN	NaN	NaN	NaN	NaN	NaN	NaN	NaN	NaN	NaN	NaN
3.132	-14.307	52.997	795.833	-2.0503	1.0981	-0.19238	-59.593	29.554	36.8452	-0.21826	0.1792	-0.14404	NaN	NaN	NaN	NaN	NaN	NaN	NaN	NaN	NaN	NaN	NaN	NaN
3.134	39.9455	22.0089	883.73	-2.2891	1.1689	-0.14453	-8.45	20.5498	37.9015	-0.20332	0.175	-0.14414	NaN	NaN	NaN	NaN	NaN	NaN	NaN	NaN	NaN	NaN	NaN	NaN
3.136	9.877	25.2851	979.1659	-2.7051	1.3789	0.040527	-67.3822	30.3537	15.947	-0.17871	0.17598	-0.13789	NaN	NaN	NaN	NaN	NaN	NaN	NaN	NaN	NaN	NaN	NaN	NaN
3.138	-19.015	29.7674	1023.612	-2.9188	1.5843	0.11328	-49.406	5.506	64.3886	-0.1459	0.17012	-0.13946	NaN	NaN	NaN	NaN	NaN	NaN	NaN	NaN	NaN	NaN	NaN	NaN
3.14	-2.91200000000001	38.4421	1022.867	-2.9702	1.7563	0.10547	-20.268	32.358	56.2099	-0.11631	0.16328	-0.13613	NaN	NaN	NaN	NaN	NaN	NaN	NaN	NaN	NaN	NaN	NaN	NaN
3.142	-38.249	48.173	972.112	-2.6621	1.8965	0.043457	-65.443	28.2754	33.9678	-0.085449	0.14893	-0.1333	NaN	NaN	NaN	NaN	NaN	NaN	NaN	NaN	NaN	NaN	NaN	NaN
3.144	-27.122	58.3766	958.526	-2.3984	1.9336	0.0063477	-12.879	27.968	34.3791	-0.053031	0.13008	-0.12988	NaN	NaN	NaN	NaN	NaN	NaN	NaN	NaN	NaN	NaN	NaN	NaN
3.146	-7.666	44.517	979.353	-1.7456	1.8813	-0.084473	-45.8002	60.016	12.44	-0.020223	0.11358	-0.12607	NaN	NaN	NaN	NaN	NaN	NaN	NaN	NaN	NaN	NaN	NaN	NaN
3.148	17.393	25.226	1003.14	-1.2937	1.7287	-0.16602	-61.675	31.915	28.07781	0.021959	0.094829	-0.11905	NaN	NaN	NaN	NaN	NaN	NaN	NaN	NaN	NaN	NaN	NaN	NaN
3.15	11.975	-0.572000000000003	1006.735	-0.95703	1.5488	-0.24316	-13.933	23.61688	48.5679	0.067762	0.08145	-0.11709	NaN	NaN	NaN	NaN	NaN	NaN	NaN	NaN	NaN	NaN	NaN	NaN
3.152	11.447	-35.635	1025.3015	-0.78467	1.3423	-0.30713	-49.774	32.737	11.296	0.11865	0.063477	-0.11719	NaN	NaN	NaN	NaN	NaN	NaN	NaN	NaN	NaN	NaN	NaN	NaN
3.154	32.8894	-45.78	1034.9766	-0.7832	1.2773	-0.31641	-35.586	-12.184	25.2293	0.16984	0.039346	-0.11817	NaN	NaN	NaN	NaN	NaN	NaN	NaN	NaN	NaN	NaN	NaN	NaN
3.156	27.517	-34.597	1055.6457	-0.86182	1.2485	-0.27734	-10.534	14.1493	19.267	0.21185	0.019318	-0.12255	NaN	NaN	NaN	NaN	NaN	NaN	NaN	NaN	NaN	NaN	NaN	NaN
3.158	25.472	-21.893	1066.375	-0.92724	1.2778	-0.22534	-47.395	32.2073	20.477	0.24349	-0.00021483	-0.11357	NaN	NaN	NaN	NaN	NaN	NaN	NaN	NaN	NaN	NaN	NaN	NaN
3.16	-22.822	-11.221	1061.221	-0.97266	1.3125	-0.17676	-16.112	39.132	38.47887	0.26896	-0.019641	-0.11768	NaN	NaN	NaN	NaN	NaN	NaN	NaN	NaN	NaN	NaN	NaN	NaN
3.162	-59.195	-19.546	1069.891	-0.98193	1.3364	-0.14404	-33.576	82.108	21.6664	0.27832	-0.036621	-0.11621	NaN	NaN	NaN	NaN	NaN	NaN	NaN	NaN	NaN	NaN	NaN	NaN
3.164	-87.885	-38.769	1084.171	-0.9668	1.3438	-0.14209	-55.2898	53.14	21.3192	0.28475	-0.039158	-0.1165	NaN	NaN	NaN	NaN	NaN	NaN	NaN	NaN	NaN	NaN	NaN	NaN
3.166	-93.565	-73.453	1108.919	-0.88281	1.3438	-0.16211	-12.153	28.7225	38.8473	0.28383	-0.040337	-0.11524	NaN	NaN	NaN	NaN	NaN	NaN	NaN	NaN	NaN	NaN	NaN	NaN
3.168	-33.461	-113.127	1127.4484	-0.81763	1.343	-0.18555	-52.449	37.773	19.593	0.27289	-0.036064	-0.1125	NaN	NaN	NaN	NaN	NaN	NaN	NaN	NaN	NaN	NaN	NaN	NaN
3.17	-41.336	-155.613	1150.9859	-0.76904	1.3442	-0.21289	-37.471	9.5568	42.7234	0.25648	-0.028936	-0.10732	NaN	NaN	NaN	NaN	NaN	NaN	NaN	NaN	NaN	NaN	NaN	NaN
3.172	0.661999999999999	-165.228	1155.3285	-0.79541	1.3384	-0.2334	6.387	37.393	43.6229	0.23779	-0.016113	-0.10986	NaN	NaN	NaN	NaN	NaN	NaN	NaN	NaN	NaN	NaN	NaN	NaN
3.174	19.9644	-177.792	1178.455	-0.85352	1.3369	-0.23486	-47.172	38.1459	13.3482	0.21882	-0.0020966	-0.10685	NaN	NaN	NaN	NaN	NaN	NaN	NaN	NaN	NaN	NaN	NaN	NaN
3.176	59.736	-153.352	1220.384	-1.0278	1.3359	-0.22217	-5.23699999999999	20.8294	21.1848	0.20262	0.0070722	-0.10477	NaN	NaN	NaN	NaN	NaN	NaN	NaN	NaN	NaN	NaN	NaN	NaN
3.178	35.5075	-135.828	1275.983	-1.1814	1.3425	-0.20654	-18.734	52.38	4.568	0.18399	0.028274	-0.1044	NaN	NaN	NaN	NaN	NaN	NaN	NaN	NaN	NaN	NaN	NaN	NaN
3.18	22.398	-115.85212	1322.7144	-1.3105	1.3379	-0.18848	-56.062	39.2708	16.5561	0.16747	0.042348	-0.1072	NaN	NaN	NaN	NaN	NaN	NaN	NaN	NaN	NaN	NaN	NaN	NaN
3.182	14.562	-109.551	1350.1922	-1.4238	1.3438	-0.18262	-11.051	36.744	52.47	0.15869	0.062988	-0.10791	NaN	NaN	NaN	NaN	NaN	NaN	NaN	NaN	NaN	NaN	NaN	NaN
3.184	-34.7736	-94.883	1371.217	-1.4648	1.3516	-0.18652	-59.055	47.431	43.915	0.15111	0.086975	-0.10558	NaN	NaN	NaN	NaN	NaN	NaN	NaN	NaN	NaN	NaN	NaN	NaN
3.186	-32.686	-63.847	1371.2351	-1.5288	1.3755	-0.18701	-47.195	7.9786	56.214	0.14707	0.10246	-0.10827	NaN	NaN	NaN	NaN	NaN	NaN	NaN	NaN	NaN	NaN	NaN	NaN
3.188	-25.8705	-51.076	1367.065	-1.562	1.3897	-0.19287	-14.81	34.649	36.4454	0.13591	0.11598	-0.11123	NaN	NaN	NaN	NaN	NaN	NaN	NaN	NaN	NaN	NaN	NaN	NaN
3.19	6.534	-34.08	1347.5265	-1.5796	1.3989	-0.19922	-75.0782	48.30704	18.40144	0.13187	0.12349	-0.11491	NaN	NaN	NaN	NaN	NaN	NaN	NaN	NaN	NaN	NaN	NaN	NaN
3.192	25.59057	-30.529	1337.094	-1.6016	1.4063	-0.22119	-19.372	38.1731	38.275	0.11963	0.13379	-0.11279	NaN	NaN	NaN	NaN	NaN	NaN	NaN	NaN	NaN	NaN	NaN	NaN
3.194	66.438	-35.219	1350.949	-1.6128	1.4146	-0.24072	-36.263	68.296	29.7906	0.11363	0.14447	-0.11855	NaN	NaN	NaN	NaN	NaN	NaN	NaN	NaN	NaN	NaN	NaN	NaN
3.196	92.897	-52.977	1359.205	-1.6479	1.4243	-0.27881	-66.4156	49.108	37.917	0.112	0.15304	-0.11963	NaN	NaN	NaN	NaN	NaN	NaN	NaN	NaN	NaN	NaN	NaN	NaN
3.198	72.975	-59.209	1372.995	-1.7028	1.4514	-0.31494	-30.14	29.2045	38.1954	0.11377	0.17036	-0.12212	NaN	NaN	NaN	NaN	NaN	NaN	NaN	NaN	NaN	NaN	NaN	NaN
3.2	100.236	-47.017	1408.4312	-1.7905	1.4946	-0.34473	-57.084	33.3642	20.052	0.11586	0.18244	-0.12936	NaN	NaN	NaN	NaN	NaN	NaN	NaN	NaN	NaN	NaN	NaN	NaN
3.202	51.8631	-45.0662	1429.728	-1.9468	1.5825	-0.36279	-33.284	5.38	40.08	0.12012	0.19531	-0.1333	NaN	NaN	NaN	NaN	NaN	NaN	NaN	NaN	NaN	NaN	NaN	NaN
3.204	37.414	-43.641	1423.865	-2.0313	1.6309	-0.37451	-33.499	25.595	39.04324	0.11784	0.20417	-0.14165	NaN	NaN	NaN	NaN	NaN	NaN	NaN	NaN	NaN	NaN	NaN	NaN
3.206	19.5122	-57.0317	1415.081	-2.1733	1.7349	-0.36816	-84.5428	43.0335	22.5708	0.11634	0.21857	-0.1442	NaN	NaN	NaN	NaN	NaN	NaN	NaN	NaN	NaN	NaN	NaN	NaN
3.208	-0.7602	-54.327	1389.929	-2.2343	1.7978	-0.35669	-45.574	19.0324	46.5583	0.10916	0.23645	-0.15462	NaN	NaN	NaN	NaN	NaN	NaN	NaN	NaN	NaN	NaN	NaN	NaN
3.21	-3.6599	-64.069	1396.442	-2.2495	1.8462	-0.34521	-32.903	49.539	34.024	0.11175	0.25022	-0.15661	NaN	NaN	NaN	NaN	NaN	NaN	NaN	NaN	NaN	NaN	NaN	NaN
3.212	6.8097	-63.778	1407.017	-2.2007	1.8599	-0.33887	-43.119	21.2519	35.7321	0.11475	0.26709	-0.16699	NaN	NaN	NaN	NaN	NaN	NaN	NaN	NaN	NaN	NaN	NaN	NaN
3.214	41.168	-65.2496	1380.78467	-2.1484	1.8496	-0.3374	-8.908	16.1046	56.2699	0.11837	0.28114	-0.17525	NaN	NaN	NaN	NaN	NaN	NaN	NaN	NaN	NaN	NaN	NaN	NaN
3.216	22.4725	-63.0333	1364.382	-1.9961	1.8066	-0.34619	-28.496	29.9237	53.764	0.12087	0.2915	-0.1862	NaN	NaN	NaN	NaN	NaN	NaN	NaN	NaN	NaN	NaN	NaN	NaN
3.218	74.587	-57.287	1327.3503	-1.8625	1.7532	-0.35132	-41.619	-23.6907	73.4838	0.12284	0.30063	-0.19766	NaN	NaN	NaN	NaN	NaN	NaN	NaN	NaN	NaN	NaN	NaN	NaN
3.22	60.273	-44.19	1292.92	-1.7441	1.6973	-0.36035	-18.027	-7.155	100.311	0.12337	0.31319	-0.20403	NaN	NaN	NaN	NaN	NaN	NaN	NaN	NaN	NaN	NaN	NaN	NaN
3.222	45.428	-8.488	1278.5381	-1.6191	1.6367	-0.36523	-19.842	-6.451	111.589	0.12012	0.32715	-0.21094	NaN	NaN	NaN	NaN	NaN	NaN	NaN	NaN	NaN	NaN	NaN	NaN
3.224	23.125	3.2667	1272.6238	-1.582	1.6113	-0.36328	43.51	-37.4529	182.0666	0.10931	0.3386	-0.22202	NaN	NaN	NaN	NaN	NaN	NaN	NaN	NaN	NaN	NaN	NaN	NaN
3.226	7.739	3.9517714	1274.5063	-1.5156	1.5703	-0.36328	1.292	-6.744	228.237	0.092408	0.35122	-0.22614	NaN	NaN	NaN	NaN	NaN	NaN	NaN	NaN	NaN	NaN	NaN	NaN
3.228	11.4861	1.428	1266.6767	-1.4853	1.5372	-0.34912	-51.6518	-18.46486	267.29	0.073667	0.36371	-0.23703	NaN	NaN	NaN	NaN	NaN	NaN	NaN	NaN	NaN	NaN	NaN	NaN
3.23	3.419	3.734	1256.7581	-1.4688	1.5156	-0.3457	14.642	-18.657	343.366	0.044371	0.37728	-0.24601	NaN	NaN	NaN	NaN	NaN	NaN	NaN	NaN	NaN	NaN	NaN	NaN
3.232	11.1956	13.859	1246.9082	-1.4492	1.4883	-0.33643	-5	29.7818	423.391	-0.0092773	0.39014	-0.25	NaN	NaN	NaN	NaN	NaN	NaN	NaN	NaN	NaN	NaN	NaN	NaN
3.234	5.3556	15.685	1226.699	-1.4443	1.4766	-0.33203	2.427	38.889	568.065	-0.093573	0.40878	-0.26434	NaN	NaN	NaN	NaN	NaN	NaN	NaN	NaN	NaN	NaN	NaN	NaN
3.236	25.7579	14.455	1205.458	-1.4331	1.4536	-0.32031	62.5993	64.4434	717.1	-0.2026	0.43024	-0.26153	NaN	NaN	NaN	NaN	NaN	NaN	NaN	NaN	NaN	NaN	NaN	NaN
3.238	28.402	15.9487	1184.275	-1.4277	1.4341	-0.30957	-34.826	49.0163	844.107	-0.33386	0.46423	-0.26074	NaN	NaN	NaN	NaN	NaN	NaN	NaN	NaN	NaN	NaN	NaN	NaN
3.24	46.6183	-6.476	1176.74406	-1.4175	1.4146	-0.29639	-47.58	19.4522	1008.308	-0.4803	0.50994	-0.25644	NaN	NaN	NaN	NaN	NaN	NaN	NaN	NaN	NaN	NaN	NaN	NaN
3.242	86.972	-16.286	1170.03268	-1.4038	1.3794	-0.28271	-18.315	61.0327	1114.543	-0.6416	0.56494	-0.24951	NaN	NaN	NaN	NaN	NaN	NaN	NaN	NaN	NaN	NaN	NaN	NaN
3.244	54.9993	-0.819999999999993	1162.662	-1.3877	1.3594	-0.27441	-39.668	37.6818	1214.208	-0.81821	0.61759	-0.24414	NaN	NaN	NaN	NaN	NaN	NaN	NaN	NaN	NaN	NaN	NaN	NaN
3.246	47.732	31.775	1148.942	-1.356	1.3208	-0.25879	9.094	12.452	1267.625	-1.02	0.66056	-0.24903	NaN	NaN	NaN	NaN	NaN	NaN	NaN	NaN	NaN	NaN	NaN	NaN
3.248	48.902	67.355	1130.8447	-1.3347	1.2893	-0.2478	-57.2273	12.335	1193.409	-1.2555	0.69375	-0.25332	NaN	NaN	NaN	NaN	NaN	NaN	NaN	NaN	NaN	NaN	NaN	NaN
3.25	53.07	88.0798	1101.61	-1.3066	1.2578	-0.23926	-65.18	-63.4907	1138.372	-1.5487	0.71387	-0.25293	NaN	NaN	NaN	NaN	NaN	NaN	NaN	NaN	NaN	NaN	NaN	NaN
3.252	26.4686	94.948	1088.031	-1.2539	1.2168	-0.22852	-45.6141	-55.392	1103.996	-1.9082	0.73828	-0.23975	NaN	NaN	NaN	NaN	NaN	NaN	NaN	NaN	NaN	NaN	NaN	NaN
3.254	15.986	99.443	1073.726	-1.2261	1.1938	-0.22607	-102.726	-69.8591	1063.951	-2.366	0.80429	-0.19922	NaN	NaN	NaN	NaN	NaN	NaN	NaN	NaN	NaN	NaN	NaN	NaN
3.256	-1.661	89.778	1053.0648	-1.1772	1.1509	-0.21436	-39.571	-110.4872	1069.801	-2.8558	0.93474	-0.13614	NaN	NaN	NaN	NaN	NaN	NaN	NaN	NaN	NaN	NaN	NaN	NaN
3.258	-3.27	107.844	1034.2134	-1.1328	1.1074	-0.2041	-36.36	-107.538	1019.7825	-3.3355	1.1957	-0.040826	NaN	NaN	NaN	NaN	NaN	NaN	NaN	NaN	NaN	NaN	NaN	NaN
3.26	-8.559	98.8207	988.9747	-1.1099	1.0903	-0.19922	-56.326	-158.54	1018.586	-3.7363	1.5751	-0.0083004	NaN	NaN	NaN	NaN	NaN	NaN	NaN	NaN	NaN	NaN	NaN	NaN
3.262	-25.325	105.0345	949.2482	-1.0742	1.0488	-0.18701	37.887	-152.849	1046.484	-3.9019	1.9575	-0.027344	NaN	NaN	NaN	NaN	NaN	NaN	NaN	NaN	NaN	NaN	NaN	NaN
3.264	4.488	89.942	921.269	-1.0386	1.0249	-0.17553	9.4	-97.894	1062.7709	-3.6203	2.1996	-0.06377	NaN	NaN	NaN	NaN	NaN	NaN	NaN	NaN	NaN	NaN	NaN	NaN
3.266	-7.304	97.747	877.63	-1.0093	0.99854	-0.16504	-15.136	-85.155	1119.946	-3.005	2.2641	-0.11797	NaN	NaN	NaN	NaN	NaN	NaN	NaN	NaN	NaN	NaN	NaN	NaN
3.268	-7.039	110.034	873.23	-0.96289	0.96094	-0.15088	5.062	-13.19	1115.2638	-2.2206	2.1236	-0.2	NaN	NaN	NaN	NaN	NaN	NaN	NaN	NaN	NaN	NaN	NaN	NaN
3.27	-34.677	116.7257	859.2837	-0.93945	0.94336	-0.14453	-78.0273	-36.27	1088.059	-1.5382	1.8423	-0.28213	NaN	NaN	NaN	NaN	NaN	NaN	NaN	NaN	NaN	NaN	NaN	NaN
3.272	-21.704	110.6847	848.267	-0.88477	0.90039	-0.13086	-69.8697	-86.954	1121.058	-1.0796	1.5337	-0.3667	NaN	NaN	NaN	NaN	NaN	NaN	NaN	NaN	NaN	NaN	NaN	NaN
3.274	-29.367	109.8774	823.4076	-0.85108	0.86914	-0.12255	-25.174	-97.339	1126.11	-0.87393	1.296	-0.43603	NaN	NaN	NaN	NaN	NaN	NaN	NaN	NaN	NaN	NaN	NaN	NaN
3.276	-56.162	109.102	799.4181	-0.81641	0.83594	-0.11768	-35.6669	-175.621	1175.5811	-0.80625	1.149	-0.44024	NaN	NaN	NaN	NaN	NaN	NaN	NaN	NaN	NaN	NaN	NaN	NaN
3.278	-50.9	118.513	785.62	-0.77295	0.79932	-0.10107	14.977	-209.728	1236.355	-0.79062	1.1006	-0.4	NaN	NaN	NaN	NaN	NaN	NaN	NaN	NaN	NaN	NaN	NaN	NaN
3.28	-69.069	130.91	738.512	-0.75342	0.77197	-0.09375	-2.501	-247.565	1214.269	-0.76182	1.1093	-0.36387	NaN	NaN	NaN	NaN	NaN	NaN	NaN	NaN	NaN	NaN	NaN	NaN
3.282	-48.876	144.567	685.3299	-0.70898	0.73438	-0.078125	27.502	-305.046	1251.51	-0.73779	1.1274	-0.36865	NaN	NaN	NaN	NaN	NaN	NaN	NaN	NaN	NaN	NaN	NaN	NaN
3.284	-68.6859	145.3976	655.75021	-0.67944	0.70288	-0.067872	93.678	-258.289	1266.995	-0.7041	1.0984	-0.36231	NaN	NaN	NaN	NaN	NaN	NaN	NaN	NaN	NaN	NaN	NaN	NaN
3.286	-44.892	134.4935	628.6477	-0.65234	0.66504	-0.057617	55.2791	-237.543	1292.008	-0.68203	1.0611	-0.36875	NaN	NaN	NaN	NaN	NaN	NaN	NaN	NaN	NaN	NaN	NaN	NaN
3.288	-39.165	123.6544	602.641	-0.60938	0.61621	-0.041016	61.1097	-214.24	1382.883	-0.68438	1.0252	-0.37969	NaN	NaN	NaN	NaN	NaN	NaN	NaN	NaN	NaN	NaN	NaN	NaN
3.29	-19.067	137.8305	570.34	-0.58984	0.59375	-0.038574	8.4528	-161.4532	1409.328	-0.71221	0.9874	-0.37822	NaN	NaN	NaN	NaN	NaN	NaN	NaN	NaN	NaN	NaN	NaN	NaN
3.292	-6.999	135.6172	556.915	-0.54443	0.55713	-0.028809	-77.8	-168.7179	1430.555	-0.78516	0.95508	-0.37158	NaN	NaN	NaN	NaN	NaN	NaN	NaN	NaN	NaN	NaN	NaN	NaN
3.294	-6.751	149.7474	550.0939	-0.51294	0.52661	-0.017822	-31.4702	-116.967	1419.483	-0.92539	0.94746	-0.34941	NaN	NaN	NaN	NaN	NaN	NaN	NaN	NaN	NaN	NaN	NaN	NaN
3.296	-17.488	139.843	523.8212	-0.479	0.50293	-0.0078125	-16.628	-70.928	1357.698	-1.1114	0.96104	-0.32197	NaN	NaN	NaN	NaN	NaN	NaN	NaN	NaN	NaN	NaN	NaN	NaN
3.298	-50.196	152.642	497.66905	-0.44092	0.46045	0.0063477	-36.542	-81.958	1316.0425	-1.3114	1.0095	-0.30869	NaN	NaN	NaN	NaN	NaN	NaN	NaN	NaN	NaN	NaN	NaN	NaN
3.3	-33.361	136.265	468.0074	-0.42041	0.44385	0.019043	7.498	-43.892	1284.592	-1.4854	1.0685	-0.29864	NaN	NaN	NaN	NaN	NaN	NaN	NaN	NaN	NaN	NaN	NaN	NaN
3.302	-25.973	133.291	449.6156	-0.37451	0.38916	0.028809	-27.6483	-80.306	1272.279	-1.6055	1.1309	-0.29102	NaN	NaN	NaN	NaN	NaN	NaN	NaN	NaN	NaN	NaN	NaN	NaN
3.304	-26.991	134.311	422.2049	-0.33569	0.34887	0.03247	1.466	-108.657	1328.471	-1.6736	1.1759	-0.28379	NaN	NaN	NaN	NaN	NaN	NaN	NaN	NaN	NaN	NaN	NaN	NaN
3.306	-28.633	125.923	405.0146	-0.29541	0.31006	0.033203	62.748	-92.192	1369.421	-1.707	1.2195	-0.29707	NaN	NaN	NaN	NaN	NaN	NaN	NaN	NaN	NaN	NaN	NaN	NaN
3.308	-45.201	107.8015	380.17385	-0.23975	0.26611	0.040527	25.1516	-127.569	1392.285	-1.7117	1.2367	-0.32246	NaN	NaN	NaN	NaN	NaN	NaN	NaN	NaN	NaN	NaN	NaN	NaN
3.31	-19.774	86.47	364.42459	-0.21436	0.24561	0.04248	50.3563	-84.395	1441.6255	-1.7098	1.2238	-0.32969	NaN	NaN	NaN	NaN	NaN	NaN	NaN	NaN	NaN	NaN	NaN	NaN
3.312	-24.024	85.764	333.4205	-0.16211	0.20703	0.047363	-9.893	-43.067	1424.4189	-1.7339	1.2056	-0.3501	NaN	NaN	NaN	NaN	NaN	NaN	NaN	NaN	NaN	NaN	NaN	NaN
3.314	-1.297	94.063	311.0828	-0.12354	0.18188	0.04834	-79.534	-54.3656	1444.05	-1.7824	1.1953	-0.38321	NaN	NaN	NaN	NaN	NaN	NaN	NaN	NaN	NaN	NaN	NaN	NaN
3.316	-4.252	104.6514	296.8699	-0.087891	0.16211	0.050293	-18.795	-38.66	1437.008	-1.8288	1.1985	-0.41709	NaN	NaN	NaN	NaN	NaN	NaN	NaN	NaN	NaN	NaN	NaN	NaN
3.318	-22.898	112.118	270.0617	-0.046387	0.13916	0.046387	-56.145	-85.315	1414.615	-1.8675	1.2302	-0.44248	NaN	NaN	NaN	NaN	NaN	NaN	NaN	NaN	NaN	NaN	NaN	NaN
3.32	-53.828	107.582	244.43	-0.030762	0.12988	0.050781	-3.2223	-106.6087	1451.559	-1.9332	1.2641	-0.46504	NaN	NaN	NaN	NaN	NaN	NaN	NaN	NaN	NaN	NaN	NaN	NaN
3.322	-60.14	97.955	239.8944	0.0048828	0.11621	0.052734	25.40242	-69.603	1402.208	-2.0366	1.313	-0.48096	NaN	NaN	NaN	NaN	NaN	NaN	NaN	NaN	NaN	NaN	NaN	NaN
3.324	-63.9416	91.9893	225.1202	0.031983	0.10595	0.051514	-5.87	-64.003	1363.346	-2.1794	1.3698	-0.49404	NaN	NaN	NaN	NaN	NaN	NaN	NaN	NaN	NaN	NaN	NaN	NaN
3.326	-62.8448	94.0876	197.167	0.056641	0.09668	0.056641	64.2252	-5.499	1321.796	-2.3233	1.4282	-0.49014	NaN	NaN	NaN	NaN	NaN	NaN	NaN	NaN	NaN	NaN	NaN	NaN
3.328	-52.489	93.493	186.5611	0.084961	0.084473	0.053711	43.8557	16.8548	1271.102	-2.4421	1.4892	-0.48154	NaN	NaN	NaN	NaN	NaN	NaN	NaN	NaN	NaN	NaN	NaN	NaN
3.33	-68.145	99.305	153.387	0.10352	0.08252	0.056641	22.6366	9.902	1271.76079	-2.5129	1.5435	-0.45566	NaN	NaN	NaN	NaN	NaN	NaN	NaN	NaN	NaN	NaN	NaN	NaN
3.332	-42.353	93.673	136.1672	0.12891	0.070801	0.067871	69.96	44.5595	1278.31052	-2.5093	1.5806	-0.44189	NaN	NaN	NaN	NaN	NaN	NaN	NaN	NaN	NaN	NaN	NaN	NaN
3.334	-42.96	88.663	100.7522	0.1521	0.063721	0.064209	6.974	55.979	1262.2977	-2.4271	1.6002	-0.43047	NaN	NaN	NaN	NaN	NaN	NaN	NaN	NaN	NaN	NaN	NaN	NaN
3.336	-23.03	70.251	90.30347	0.17139	0.052246	0.068359	7.762	71.557	1264.3432	-2.2975	1.5919	-0.42178	NaN	NaN	NaN	NaN	NaN	NaN	NaN	NaN	NaN	NaN	NaN	NaN
3.338	-42.456	52.331	91.4928	0.19141	0.039551	0.068848	22.407	117.241	1234.1008	-2.1542	1.5493	-0.41123	NaN	NaN	NaN	NaN	NaN	NaN	NaN	NaN	NaN	NaN	NaN	NaN
3.34	-32.312	50.777	93.1438	0.20068	0.025879	0.069336	-32.376	115.699	1180.746	-2.0053	1.4808	-0.40293	NaN	NaN	NaN	NaN	NaN	NaN	NaN	NaN	NaN	NaN	NaN	NaN
3.342	-46.869	52.7833	82.5478	0.21875	0.0073242	0.070313	20.752	112.091	1206.202	-1.8784	1.3989	-0.39746	NaN	NaN	NaN	NaN	NaN	NaN	NaN	NaN	NaN	NaN	NaN	NaN
3.344	-38.864	52.0517	73.2609	0.23681	-0.0070801	0.067139	4.733	113.684	1183.554	-1.7844	1.3309	-0.38867	NaN	NaN	NaN	NaN	NaN	NaN	NaN	NaN	NaN	NaN	NaN	NaN
3.346	-36.092	40.5056	89.889	0.24951	-0.014648	0.061523	13.306	64.3946	1200.711	-1.7059	1.2761	-0.37647	NaN	NaN	NaN	NaN	NaN	NaN	NaN	NaN	NaN	NaN	NaN	NaN
3.348	-40.565	45.786	66.601	0.25879	-0.020508	0.061035	70.054	71.7254	1186.683	-1.6453	1.2321	-0.36279	NaN	NaN	NaN	NaN	NaN	NaN	NaN	NaN	NaN	NaN	NaN	NaN
3.35	-45.803	47.95	45.7539	0.26318	-0.022949	0.060547	8.581	57.194	1142.225	-1.598	1.1996	-0.34746	NaN	NaN	NaN	NaN	NaN	NaN	NaN	NaN	NaN	NaN	NaN	NaN
3.352	-33.439	47.42	48.2179	0.25977	-0.026367	0.067383	12.854	38.113	1123.723	-1.5664	1.1719	-0.33496	NaN	NaN	NaN	NaN	NaN	NaN	NaN	NaN	NaN	NaN	NaN	NaN
3.354	-29.859	47.855	54.7067	0.25757	-0.019775	0.058838	17.887	82.58	1075.25051	-1.5341	1.1506	-0.32754	NaN	NaN	NaN	NaN	NaN	NaN	NaN	NaN	NaN	NaN	NaN	NaN
3.356	-7.606	31.5174	43.1499	0.24414	-0.019531	0.062012	-58.163	78.669	1049.0428	-1.5101	1.1269	-0.31611	NaN	NaN	NaN	NaN	NaN	NaN	NaN	NaN	NaN	NaN	NaN	NaN
3.358	-2.378	13.642	22.471	0.22461	-0.01123	0.067383	-11.959	106.701	1052.684	-1.4819	1.1105	-0.30557	NaN	NaN	NaN	NaN	NaN	NaN	NaN	NaN	NaN	NaN	NaN	NaN
3.36	-7.63	8.7	20.7645	0.21143	-0.0063477	0.070801	-36.257	155.717	1031.104	-1.4518	1.0926	-0.29834	NaN	NaN	NaN	NaN	NaN	NaN	NaN	NaN	NaN	NaN	NaN	NaN
3.362	-25.984	25.7779	31.5278	0.18799	0.0092773	0.077637	-84.14	153.067	1008.227	-1.4141	1.0742	-0.29102	NaN	NaN	NaN	NaN	NaN	NaN	NaN	NaN	NaN	NaN	NaN	NaN
3.364	-8.807	41.8415	19.3219	0.17407	0.012207	0.082031	-39.161	191.937	975.21	-1.3703	1.0611	-0.28652	NaN	NaN	NaN	NaN	NaN	NaN	NaN	NaN	NaN	NaN	NaN	NaN
3.366	-26.983	56.839	23.2907	0.1626	0.018066	0.089844	-104.823	207.97	915.4341	-1.3191	1.04	-0.28135	NaN	NaN	NaN	NaN	NaN	NaN	NaN	NaN	NaN	NaN	NaN	NaN
3.368	-21.593	48.469	24.0243	0.15723	0.026855	0.094238	-66.445	176.03448	869.2018	-1.2628	1.0149	-0.27275	NaN	NaN	NaN	NaN	NaN	NaN	NaN	NaN	NaN	NaN	NaN	NaN
3.37	-36.497	30.26	28.5252	0.15674	0.030273	0.098633	-23.135	185.7618	833.584	-1.2038	0.9876	-0.26592	NaN	NaN	NaN	NaN	NaN	NaN	NaN	NaN	NaN	NaN	NaN	NaN
3.372	-42.431	25.4241	21.206	0.16602	0.032227	0.095215	-52.0622	155.236	807.82	-1.1499	0.95654	-0.25391	NaN	NaN	NaN	NaN	NaN	NaN	NaN	NaN	NaN	NaN	NaN	NaN
3.374	-48.999	21.7979	26.2156	0.17066	0.038818	0.091309	-16.644	129.834	801.906	-1.101	0.9293	-0.2419	NaN	NaN	NaN	NaN	NaN	NaN	NaN	NaN	NaN	NaN	NaN	NaN
3.376	-31.966	21.872	36.1806	0.18066	0.04541	0.088867	-23.279	149.026	755.7245	-1.0581	0.89541	-0.22861	NaN	NaN	NaN	NaN	NaN	NaN	NaN	NaN	NaN	NaN	NaN	NaN
3.378	-19.302	17.4634	34.66882	0.18652	0.047363	0.077148	-44.476	124.752	711.757	-1.0128	0.86728	-0.21611	NaN	NaN	NaN	NaN	NaN	NaN	NaN	NaN	NaN	NaN	NaN	NaN
3.38	-35.888	26.389	13.994	0.18652	0.057617	0.07959	-8.929	161.5861	671.5406	-0.97158	0.83272	-0.20244	NaN	NaN	NaN	NaN	NaN	NaN	NaN	NaN	NaN	NaN	NaN	NaN
3.382	-33.294	29.4334	16.0442	0.18457	0.068848	0.074219	-78.557	189.392	637.176	-0.93311	0.80029	-0.18701	NaN	NaN	NaN	NaN	NaN	NaN	NaN	NaN	NaN	NaN	NaN	NaN
3.384	-45.212	36.29553	17.5286	0.18286	0.083496	0.077636	-61.775	158.6807	633.426	-0.89326	0.76533	-0.17177	NaN	NaN	NaN	NaN	NaN	NaN	NaN	NaN	NaN	NaN	NaN	NaN
3.386	-43.945	45.57847	11.634	0.17871	0.10059	0.076172	-34.126	174.238	618.905	-0.85361	0.73154	-0.15928	NaN	NaN	NaN	NaN	NaN	NaN	NaN	NaN	NaN	NaN	NaN	NaN
3.388	-52.339	45.208	28.0669	0.17041	0.11865	0.07666	-68.5007	133.5781	597.7802	-0.8165	0.70147	-0.13818	NaN	NaN	NaN	NaN	NaN	NaN	NaN	NaN	NaN	NaN	NaN	NaN
3.39	-36.182	32.1288	24.487	0.16211	0.12402	0.079102	-6.559	101.671	583.663	-0.77656	0.67109	-0.12422	NaN	NaN	NaN	NaN	NaN	NaN	NaN	NaN	NaN	NaN	NaN	NaN
3.392	-38.288	24.1314	26.591	0.15039	0.13965	0.084961	-21.748	148.3509	515.878	-0.73389	0.64551	-0.10596	NaN	NaN	NaN	NaN	NaN	NaN	NaN	NaN	NaN	NaN	NaN	NaN
3.394	-36.387	27.5943	30.6262	0.14575	0.14771	0.088135	-30.237	155.1421	451.3496	-0.68691	0.61582	-0.084961	NaN	NaN	NaN	NaN	NaN	NaN	NaN	NaN	NaN	NaN	NaN	NaN
3.396	-42.74	42.7764	25.9213	0.14014	0.15039	0.085938	9.73	193.747	414.238	-0.64131	0.58877	-0.070605	NaN	NaN	NaN	NaN	NaN	NaN	NaN	NaN	NaN	NaN	NaN	NaN
3.398	-41.225	51.756	21.706	0.13135	0.15625	0.086914	-40.78	197.35	377.548	-0.59131	0.55049	-0.064746	NaN	NaN	NaN	NaN	NaN	NaN	NaN	NaN	NaN	NaN	NaN	NaN
3.4	-37.577	49.218	45.649	0.13037	0.1582	0.087402	1.059	133.278	365.74308	-0.54375	0.51875	-0.055859	NaN	NaN	NaN	NaN	NaN	NaN	NaN	NaN	NaN	NaN	NaN	NaN
3.402	-24.127	41.2907	22.6606	0.12256	0.16113	0.087402	6.17	133.1642	358.3073	-0.49512	0.48047	-0.04834	NaN	NaN	NaN	NaN	NaN	NaN	NaN	NaN	NaN	NaN	NaN	NaN
3.404	-25.784	35.8063	8.137	0.10986	0.16406	0.094727	-74.2372	121.279	318.0124	-0.45059	0.44453	-0.040234	NaN	NaN	NaN	NaN	NaN	NaN	NaN	NaN	NaN	NaN	NaN	NaN
3.406	-8.54	24.8568	32.46	0.1001	0.17041	0.088867	-46.443	110.382	294.6265	-0.40772	0.41231	-0.036914	NaN	NaN	NaN	NaN	NaN	NaN	NaN	NaN	NaN	NaN	NaN	NaN
3.408	-24.126	28.2592	36.96391	0.074219	0.17725	0.098145	-66.905	176.37	261.83	-0.3749	0.38144	-0.033789	NaN	NaN	NaN	NaN	NaN	NaN	NaN	NaN	NaN	NaN	NaN	NaN
3.41	-8.739	31.1608	23.8381	0.054687	0.18164	0.10474	-62.174	157.521	227.8684	-0.34922	0.3543	-0.029687	NaN	NaN	NaN	NaN	NaN	NaN	NaN	NaN	NaN	NaN	NaN	NaN
3.412	-29.137	31.9097	20.8393	0.033203	0.18848	0.10645	-29.159	147.875	227.8302	-0.32031	0.32568	-0.019531	NaN	NaN	NaN	NaN	NaN	NaN	NaN	NaN	NaN	NaN	NaN	NaN
3.414	-28.897	34.0576	31.1253	0.0068359	0.19189	0.11328	-81.26548	152.548	218.6271	-0.29482	0.29795	-0.015137	NaN	NaN	NaN	NaN	NaN	NaN	NaN	NaN	NaN	NaN	NaN	NaN
3.416	-17.158	32.723	55.163	-0.003418	0.19092	0.1167	-68.0578	88.654	219.265	-0.27559	0.27383	-0.0014648	NaN	NaN	NaN	NaN	NaN	NaN	NaN	NaN	NaN	NaN	NaN	NaN
3.418	-1.704	41.995	50.6897	-0.022461	0.18848	0.11963	-46.978	111.1855	222.57	-0.24942	0.26328	0.0098635	NaN	NaN	NaN	NaN	NaN	NaN	NaN	NaN	NaN	NaN	NaN	NaN
3.42	-38.998	43.665	37.521	-0.031494	0.18823	0.12549	-70.208	103.931	180.657	-0.22012	0.24951	0.028711	NaN	NaN	NaN	NaN	NaN	NaN	NaN	NaN	NaN	NaN	NaN	NaN
3.422	-26.017	40.8248	26.4817	-0.04248	0.18213	0.12744	-15.375	75.738	157.315	-0.1875	0.24023	0.041016	NaN	NaN	NaN	NaN	NaN	NaN	NaN	NaN	NaN	NaN	NaN	NaN
3.424	-17.878	22.9922	28.726	-0.045898	0.17871	0.13623	-32.768	117.3843	101.383	-0.1459	0.22636	0.048242	NaN	NaN	NaN	NaN	NaN	NaN	NaN	NaN	NaN	NaN	NaN	NaN
3.426	-38.046	28.1894	17.404	-0.047852	0.17188	0.13721	-64.436	77.153	81.7051	-0.097946	0.20928	0.048145	NaN	NaN	NaN	NaN	NaN	NaN	NaN	NaN	NaN	NaN	NaN	NaN
3.428	-24.896	19.7978	26.984158	-0.053711	0.17188	0.13916	-52.638	64.4841	85.2032	-0.049512	0.19678	0.046582	NaN	NaN	NaN	NaN	NaN	NaN	NaN	NaN	NaN	NaN	NaN	NaN
3.43	-19.713	31.5268	26.2263	-0.058349	0.17676	0.14819	-106.778	88.4	66.1393	-0.0004882	0.17549	0.045996	NaN	NaN	NaN	NaN	NaN	NaN	NaN	NaN	NaN	NaN	NaN	NaN
3.432	-25.934	41.6261	19.0725	-0.061523	0.17676	0.15137	-48.189	42.8978	94.358	0.04248	0.15137	0.04834	NaN	NaN	NaN	NaN	NaN	NaN	NaN	NaN	NaN	NaN	NaN	NaN
3.434	-58.43	45.7558	22.4282	-0.069336	0.17725	0.16455	-35.546	72.696	73.380884	0.077637	0.13496	0.056836	NaN	NaN	NaN	NaN	NaN	NaN	NaN	NaN	NaN	NaN	NaN	NaN
3.436	-44.101	41.1294	36.4058	-0.067383	0.18018	0.17041	-56.97	87.796	42.3945	0.10557	0.11523	0.055664	NaN	NaN	NaN	NaN	NaN	NaN	NaN	NaN	NaN	NaN	NaN	NaN
3.438	-44.145	30.4326	54.5968	-0.063965	0.18018	0.17676	-28.609	58.288	51.2777	0.12588	0.091796	0.055664	NaN	NaN	NaN	NaN	NaN	NaN	NaN	NaN	NaN	NaN	NaN	NaN
3.44	-31.596	25.6889	39.9888	-0.05835	0.18384	0.18335	-40.872	102.525	38.421	0.13672	0.070019	0.057422	NaN	NaN	NaN	NaN	NaN	NaN	NaN	NaN	NaN	NaN	NaN	NaN
3.442	-44.424	27.0729	38.558	-0.043945	0.18555	0.19189	-31.021	64.381	49.056	0.13916	0.056152	0.056641	NaN	NaN	NaN	NaN	NaN	NaN	NaN	NaN	NaN	NaN	NaN	NaN
3.444	-55.145	13.2345	26.6801	-0.021484	0.18701	0.19678	3.721	41.423	54.2819	0.1252	0.040137	0.058496	NaN	NaN	NaN	NaN	NaN	NaN	NaN	NaN	NaN	NaN	NaN	NaN
3.446	-40.133	14.282	34.7994	-0.0078125	0.18604	0.20117	-13.464	56.3387	29.682	0.10615	0.033496	0.057227	NaN	NaN	NaN	NaN	NaN	NaN	NaN	NaN	NaN	NaN	NaN	NaN
3.448	-30.833	22.9729	26.3921	0.032715	0.18457	0.20313	-16.115	-7.952	35.415	0.082325	0.034668	0.064258	NaN	NaN	NaN	NaN	NaN	NaN	NaN	NaN	NaN	NaN	NaN	NaN
3.45	-36.519	34.46827	25.8956	0.05835	0.18799	0.20508	-14.667	20.22237	30.674	0.045704	0.036328	0.071582	NaN	NaN	NaN	NaN	NaN	NaN	NaN	NaN	NaN	NaN	NaN	NaN
3.452	-16.964	27.947	29.7339	0.084473	0.19043	0.19922	-50.923	37.0298	17.571812	0.0097656	0.039063	0.07959	NaN	NaN	NaN	NaN	NaN	NaN	NaN	NaN	NaN	NaN	NaN	NaN
3.454	-31.429	27.3033	40.0607	0.11816	0.20166	0.19043	-4.797	8.4211	41.639	-0.026172	0.044922	0.079297	NaN	NaN	NaN	NaN	NaN	NaN	NaN	NaN	NaN	NaN	NaN	NaN
3.456	-31.852	29.9115	31.5522	0.12988	0.21436	0.1875	-35.185	43.428	40.1739	-0.065625	0.048633	0.090527	NaN	NaN	NaN	NaN	NaN	NaN	NaN	NaN	NaN	NaN	NaN	NaN
3.458	-28.993	34.2311	30.2863	0.14404	0.23389	0.15771	-56.5821	15.3298	45.50229	-0.099221	0.054102	0.10146	NaN	NaN	NaN	NaN	NaN	NaN	NaN	NaN	NaN	NaN	NaN	NaN
3.46	-3.698	8.2047	97.251	0.13892	0.26123	0.11938	-9.372	11.8313	65.0946	-0.13076	0.064062	0.10596	NaN	NaN	NaN	NaN	NaN	NaN	NaN	NaN	NaN	NaN	NaN	NaN
3.462	-36.005	-12.3967	118.2097	0.10596	0.29932	0.064453	-52.803	53.811	48.552	-0.1582	0.07373	0.11426	NaN	NaN	NaN	NaN	NaN	NaN	NaN	NaN	NaN	NaN	NaN	NaN
3.464	-29.518	-11.0751	141.861	-0.025879	0.37744	0.0078125	-24.9	20.252	49.2034	-0.17803	0.082129	0.12481	NaN	NaN	NaN	NaN	NaN	NaN	NaN	NaN	NaN	NaN	NaN	NaN
3.466	-33.389	6.7292	204.475	-0.11914	0.41992	-0.0019531	-14.912	33.4857	35.5054	-0.19151	0.090039	0.13379	NaN	NaN	NaN	NaN	NaN	NaN	NaN	NaN	NaN	NaN	NaN	NaN
3.468	-65.96	-1.727	283.5672	-0.32959	0.50195	-0.01123	-59.5607	39.7834	6.447	-0.19697	0.094336	0.14355	NaN	NaN	NaN	NaN	NaN	NaN	NaN	NaN	NaN	NaN	NaN	NaN
3.47	-92.15	-62.245	353.0055	-0.48828	0.56152	-0.016357	-26.869	8.9588	29.7797	-0.20264	0.097363	0.15039	NaN	NaN	NaN	NaN	NaN	NaN	NaN	NaN	NaN	NaN	NaN	NaN
3.472	-108.225	-114.2778	341.7181	-0.63525	0.62988	-0.025391	-45.011	64.937	27.5816	-0.2041	0.091797	0.15576	NaN	NaN	NaN	NaN	NaN	NaN	NaN	NaN	NaN	NaN	NaN	NaN
3.474	-73.769	-136.3384	369.0552	-0.82861	0.74609	-0.041016	-69.8382	41.745	29.8179	-0.19473	0.09541	0.16416	NaN	NaN	NaN	NaN	NaN	NaN	NaN	NaN	NaN	NaN	NaN	NaN
3.476	-74.451	-57.2037	441.322	-0.92578	0.80664	-0.045898	-36.059	30.357	36.0511	-0.18203	0.091114	0.17364	NaN	NaN	NaN	NaN	NaN	NaN	NaN	NaN	NaN	NaN	NaN	NaN
3.478	-124.092	-7.658	548.153	-1.124	0.93359	-0.063477	-83.7565	64.153	20.847	-0.16093	0.087598	0.18652	NaN	NaN	NaN	NaN	NaN	NaN	NaN	NaN	NaN	NaN	NaN	NaN
3.48	-139.816	31.03058	586.395	-1.2937	1.0261	-0.073975	-67.1828	12.1097	21.02	-0.1373	0.091699	0.19121	NaN	NaN	NaN	NaN	NaN	NaN	NaN	NaN	NaN	NaN	NaN	NaN
3.482	-108.1217	39.977	644.592	-1.4844	1.1191	-0.091309	-39.755	19.9097	35.702	-0.10205	0.083984	0.18994	NaN	NaN	NaN	NaN	NaN	NaN	NaN	NaN	NaN	NaN	NaN	NaN
3.484	-97.289	31.253	726.101	-1.7695	1.249	-0.10107	-54.938	32.3943	35.2031	-0.065528	0.077832	0.20147	NaN	NaN	NaN	NaN	NaN	NaN	NaN	NaN	NaN	NaN	NaN	NaN
3.486	-45.72	34.97	843.0482	-1.9253	1.313	-0.098145	-9.454	-21.3925	43.984	-0.016114	0.062793	0.20654	NaN	NaN	NaN	NaN	NaN	NaN	NaN	NaN	NaN	NaN	NaN	NaN
3.488	-33.442	68.78	986.453	-2.2188	1.457	-0.074219	-36.885	26.2879	17.9786	0.033106	0.045605	0.20966	NaN	NaN	NaN	NaN	NaN	NaN	NaN	NaN	NaN	NaN	NaN	NaN
3.49	-45.824	110.733	1062.375	-2.3847	1.5625	-0.054932	-52.079	21.04045	5.2475	0.080565	0.024609	0.20703	NaN	NaN	NaN	NaN	NaN	NaN	NaN	NaN	NaN	NaN	NaN	NaN
3.492	-37.17683	138.802	1079.2702	-2.4854	1.668	-0.03125	-15.72	28.657	30.772	0.13281	0.0019531	0.2002	NaN	NaN	NaN	NaN	NaN	NaN	NaN	NaN	NaN	NaN	NaN	NaN
3.494	-13.0017	101.488	1074.127	-2.4897	1.811	-0.0053711	-44.498	85.945	29.4474	0.19092	-0.02002	0.18838	NaN	NaN	NaN	NaN	NaN	NaN	NaN	NaN	NaN	NaN	NaN	NaN
3.496	-14.6861	56.968	1092.7513	-2.4336	1.875	0.0073242	0.661999999999999	31.52408	37.4981	0.2501	-0.040527	0.16914	NaN	NaN	NaN	NaN	NaN	NaN	NaN	NaN	NaN	NaN	NaN	NaN
3.498	-23.691	7.93987	1138.5373	-2.2266	1.9336	0.036621	-15.814	43.262	20.6817	0.30908	-0.044824	0.15156	NaN	NaN	NaN	NaN	NaN	NaN	NaN	NaN	NaN	NaN	NaN	NaN
3.5	-14.171	-27.4138	1172.6826	-2.0503	1.9214	0.061279	-52.0491	43.963	19.2843	0.36435	-0.04707	0.13584	NaN	NaN	NaN	NaN	NaN	NaN	NaN	NaN	NaN	NaN	NaN	NaN
3.502	-15.6735	-61.937	1175.0831	-1.8745	1.8657	0.092285	-23.722	-1.9889	40.583	0.41064	-0.037109	0.12061	NaN	NaN	NaN	NaN	NaN	NaN	NaN	NaN	NaN	NaN	NaN	NaN
3.504	-26.9066	-83.8191	1166.5345	-1.6855	1.7227	0.11328	-37.646	63.059	26.6674	0.44541	-0.02002	0.11231	NaN	NaN	NaN	NaN	NaN	NaN	NaN	NaN	NaN	NaN	NaN	NaN
3.506	44.539	-125.294	1174.81482	-1.6128	1.645	0.11719	-29.285	53.476	18.4445	0.47275	-0.0035156	0.10127	NaN	NaN	NaN	NaN	NaN	NaN	NaN	NaN	NaN	NaN	NaN	NaN
3.508	78.537	-126.222	1178.3439	-1.5137	1.5078	0.12402	10.568	32.792	29.519	0.48526	0.015234	0.095802	NaN	NaN	NaN	NaN	NaN	NaN	NaN	NaN	NaN	NaN	NaN	NaN
3.51	70.251	-102.339	1196.3964	-1.4756	1.4462	0.13013	-41.656	69.377	20.3305	0.47891	0.039453	0.089844	NaN	NaN	NaN	NaN	NaN	NaN	NaN	NaN	NaN	NaN	NaN	NaN
3.512	59.0288	-53.286	1254.7242	-1.4546	1.4106	0.146	-13.349	17.588	46.3769	0.46777	0.063965	0.083984	NaN	NaN	NaN	NaN	NaN	NaN	NaN	NaN	NaN	NaN	NaN	NaN
3.514	45.6436	-28.06618	1310.542	-1.4507	1.3794	0.13818	-12.08	30.784	56.1554	0.44228	0.086426	0.080957	NaN	NaN	NaN	NaN	NaN	NaN	NaN	NaN	NaN	NaN	NaN	NaN
3.516	75.1556	-20.3642	1333.87	-1.4487	1.3667	0.12646	-46.73	45.837	32.5573	0.4083	0.11025	0.083301	NaN	NaN	NaN	NaN	NaN	NaN	NaN	NaN	NaN	NaN	NaN	NaN
3.518	85.663	-18.3	1321.2	-1.4404	1.3398	0.098633	-17.576	-13.888	55.29	0.3708	0.13213	0.080566	NaN	NaN	NaN	NaN	NaN	NaN	NaN	NaN	NaN	NaN	NaN	NaN
3.52	69.523	-17.479	1330.034	-1.435	1.3061	0.083496	-53.788	28.8188	30.8925	0.32705	0.15117	0.088281	NaN	NaN	NaN	NaN	NaN	NaN	NaN	NaN	NaN	NaN	NaN	NaN
3.522	9.507	-22.996	1308.0458	-1.4233	1.2681	0.063965	-77.9158	24.7941	28.5715	0.2832	0.17285	0.091309	NaN	NaN	NaN	NaN	NaN	NaN	NaN	NaN	NaN	NaN	NaN	NaN
3.524	-17.825	-25.825	1292.089	-1.4023	1.2021	0.042969	-35.365	24.9789	37.029	0.24395	0.19414	0.097559	NaN	NaN	NaN	NaN	NaN	NaN	NaN	NaN	NaN	NaN	NaN	NaN
3.526	-24.173	-47.817	1267.696	-1.3862	1.1685	0.030273	-56.4205	78.013	42.9783	0.21123	0.21777	0.10635	NaN	NaN	NaN	NaN	NaN	NaN	NaN	NaN	NaN	NaN	NaN	NaN
3.528	-30.652	-67.144	1271.3	-1.3359	1.0859	0.01416	-66.138	24.555	56.338	0.18311	0.24043	0.10986	NaN	NaN	NaN	NaN	NaN	NaN	NaN	NaN	NaN	NaN	NaN	NaN
3.53	3.174	-103.5624	1301.9422	-1.3037	1.042	-0.01001	-35.233	34.2596	45.76634	0.15918	0.27071	0.11709	NaN	NaN	NaN	NaN	NaN	NaN	NaN	NaN	NaN	NaN	NaN	NaN
3.532	-13.745	-131.683	1311.888	-1.2734	1.0088	-0.02002	-61.08	49.3351	16.681	0.13721	0.29199	0.12109	NaN	NaN	NaN	NaN	NaN	NaN	NaN	NaN	NaN	NaN	NaN	NaN
3.534	-36.508	-123.217	1332.016	-1.2603	0.99854	-0.025391	-36.895	7.819	18.862	0.11592	0.32432	0.13193	NaN	NaN	NaN	NaN	NaN	NaN	NaN	NaN	NaN	NaN	NaN	NaN
3.536	-46.187	-88.674	1346.238	-1.2651	0.99854	-0.030273	-43.071	49.55983	24.453	0.090918	0.3461	0.14834	NaN	NaN	NaN	NaN	NaN	NaN	NaN	NaN	NaN	NaN	NaN	NaN
3.538	-44.687	-58.565	1365.1149	-1.3105	1.0156	-0.030762	-57.781	29.581	23.13332	0.06748	0.35859	0.15811	NaN	NaN	NaN	NaN	NaN	NaN	NaN	NaN	NaN	NaN	NaN	NaN
3.54	-62.784	-59.453	1374.606	-1.3801	1.0471	-0.022217	-19.169	11.9861	24.0195	0.035644	0.36904	0.17139	NaN	NaN	NaN	NaN	NaN	NaN	NaN	NaN	NaN	NaN	NaN	NaN
3.542	-111.6948	-64.5236	1411.136	-1.4766	1.0898	-0.0053711	-59.1631	67.131	15.198	0.012695	0.37305	0.18994	NaN	NaN	NaN	NaN	NaN	NaN	NaN	NaN	NaN	NaN	NaN	NaN
3.544	-119.603	-75.698	1421.466	-1.6284	1.1606	0.013672	-51.539	27.6413	50.3229	-0.0094726	0.38096	0.20518	NaN	NaN	NaN	NaN	NaN	NaN	NaN	NaN	NaN	NaN	NaN	NaN
3.546	-141.2	-49.994	1404.3721	-1.7075	1.2017	0.019043	-23.815	40.746	63.7998	-0.023047	0.38447	0.22256	NaN	NaN	NaN	NaN	NaN	NaN	NaN	NaN	NaN	NaN	NaN	NaN
3.548	-125.5889	-28.402	1389.31313	-1.8706	1.2993	0.018555	-42.005	53.395	49.181	-0.033984	0.39151	0.23506	NaN	NaN	NaN	NaN	NaN	NaN	NaN	NaN	NaN	NaN	NaN	NaN
3.55	-136.345	-20.721	1360.2211	-2.0444	1.4263	0.019531	-18.888	-11.1361	41.6005	-0.04707	0.39863	0.24893	NaN	NaN	NaN	NaN	NaN	NaN	NaN	NaN	NaN	NaN	NaN	NaN
3.552	-90.992	-41.141	1336.592	-2.1372	1.4927	0.027832	-28.983	15.4185	27.588	-0.058105	0.40283	0.25879	NaN	NaN	NaN	NaN	NaN	NaN	NaN	NaN	NaN	NaN	NaN	NaN
3.554	-89.503	-59.4922	1330.239	-2.3218	1.6255	0.040527	-43.405	-16.9087	47.756	-0.069433	0.40186	0.26953	NaN	NaN	NaN	NaN	NaN	NaN	NaN	NaN	NaN	NaN	NaN	NaN
3.556	-92.397	-60.376	1319.07	-2.4236	1.7034	0.055176	-10.051	-53.9303	81.4524	-0.085351	0.39424	0.27314	NaN	NaN	NaN	NaN	NaN	NaN	NaN	NaN	NaN	NaN	NaN	NaN
3.558	-57.411	-49.669	1327.8505	-2.4805	1.7695	0.066406	-24.303	18.7154	92.053	-0.10215	0.38526	0.28291	NaN	NaN	NaN	NaN	NaN	NaN	NaN	NaN	NaN	NaN	NaN	NaN
3.56	-41.766	-32.538	1363.12	-2.4902	1.8164	0.081055	-2.802	21.5664	159.2256	-0.11943	0.38623	0.2918	NaN	NaN	NaN	NaN	NaN	NaN	NaN	NaN	NaN	NaN	NaN	NaN
3.562	-34.232	-9.2586	1372.038	-2.4585	1.8169	0.080566	-42.907	67.846	273.291	-0.13281	0.38379	0.30566	NaN	NaN	NaN	NaN	NaN	NaN	NaN	NaN	NaN	NaN	NaN	NaN
3.564	-55.638	6.2028	1362.2362	-2.3506	1.7969	0.07666	-101.623	54.933	404.219	-0.14199	0.38516	0.31943	NaN	NaN	NaN	NaN	NaN	NaN	NaN	NaN	NaN	NaN	NaN	NaN
3.566	-43.602	9.82076	1386.731	-2.2329	1.7622	0.069092	-85.716	-58.072	566.26	-0.14668	0.38945	0.32344	NaN	NaN	NaN	NaN	NaN	NaN	NaN	NaN	NaN	NaN	NaN	NaN
3.568	-44.835	8.3742	1370.832	-2.1113	1.7148	0.058594	-128.651	-61.31	720.724	-0.14433	0.3957	0.31524	NaN	NaN	NaN	NaN	NaN	NaN	NaN	NaN	NaN	NaN	NaN	NaN
3.57	-32.557	10.298	1366.641	-1.9585	1.6499	0.040039	-136.554	-85.744	845.2249	-0.14434	0.40547	0.28701	NaN	NaN	NaN	NaN	NaN	NaN	NaN	NaN	NaN	NaN	NaN	NaN
3.572	-33.203	8.604	1340.758	-1.896	1.6157	0.034668	-106.023	-112.831	931.475	-0.15137	0.41357	0.22461	NaN	NaN	NaN	NaN	NaN	NaN	NaN	NaN	NaN	NaN	NaN	NaN
3.574	-32.937	14.046	1297.5035	-1.7959	1.5488	0.026855	-199.47	-10.36	913.0007	-0.17637	0.42988	0.14795	NaN	NaN	NaN	NaN	NaN	NaN	NaN	NaN	NaN	NaN	NaN	NaN
3.576	-37.025	0.563000000000001	1285.286	-1.7373	1.5078	0.015869	-218.19424	22.295	914.082	-0.22969	0.45606	0.046192	NaN	NaN	NaN	NaN	NaN	NaN	NaN	NaN	NaN	NaN	NaN	NaN
3.578	-26.331	-0.676600000000001	1259.484	-1.6929	1.4653	0.01123	-146.7211	66.214	952.2728	-0.33516	0.49395	-0.06748	NaN	NaN	NaN	NaN	NaN	NaN	NaN	NaN	NaN	NaN	NaN	NaN
3.58	-24.618	7.805	1236.26326	-1.6523	1.4258	0.0039063	-100.366	74.622	1003.1229	-0.49638	0.546	-0.18135	NaN	NaN	NaN	NaN	NaN	NaN	NaN	NaN	NaN	NaN	NaN	NaN
3.582	-18.106	43.855	1221.6998	-1.6309	1.4023	0.0063477	-40.926	-12.605	1100.131	-0.70068	0.604	-0.27393	NaN	NaN	NaN	NaN	NaN	NaN	NaN	NaN	NaN	NaN	NaN	NaN
3.584	-23.75	67.4548	1207.04389	-1.5933	1.3677	0.010254	-8.123	-33.831	1123.636	-0.95615	0.69619	-0.31455	NaN	NaN	NaN	NaN	NaN	NaN	NaN	NaN	NaN	NaN	NaN	NaN
3.586	-46.933	88.0618	1191.788	-1.562	1.3374	0.011718	-23.9806	-87.298	1140.884	-1.2633	0.82383	-0.30518	NaN	NaN	NaN	NaN	NaN	NaN	NaN	NaN	NaN	NaN	NaN	NaN
3.588	-45.125	87.5521	1190.89562	-1.5269	1.3003	0.01709	-22.299	-95.251	1161.235	-1.607	0.98553	-0.25596	NaN	NaN	NaN	NaN	NaN	NaN	NaN	NaN	NaN	NaN	NaN	NaN
3.59	-55.331	92.5063	1175.1274	-1.4707	1.2402	0.01416	-43.841	-10.368	1116.971	-1.9696	1.1761	-0.17021	NaN	NaN	NaN	NaN	NaN	NaN	NaN	NaN	NaN	NaN	NaN	NaN
3.592	-74.8708	90.627	1164.352	-1.4434	1.209	0.018555	-17.963	-31.322	1100.422	-2.293	1.3809	-0.094727	NaN	NaN	NaN	NaN	NaN	NaN	NaN	NaN	NaN	NaN	NaN	NaN
3.594	-87.5456	95.804	1148.5584	-1.3765	1.1411	0.014648	39.768	-27.99	1084.2	-2.4911	1.5675	-0.034473	NaN	NaN	NaN	NaN	NaN	NaN	NaN	NaN	NaN	NaN	NaN	NaN
3.596	-117.234	97.803	1127.5866	-1.3261	1.084	0.013916	-33.448	-57.3	1086.041	-2.575	1.7219	0.00019534	NaN	NaN	NaN	NaN	NaN	NaN	NaN	NaN	NaN	NaN	NaN	NaN
3.598	-100.6857	94.916	1107.9026	-1.2769	1.0259	0.012207	-6.235	-141.169	1153.628	-2.5406	1.8344	0.014258	NaN	NaN	NaN	NaN	NaN	NaN	NaN	NaN	NaN	NaN	NaN	NaN
3.6	-86.8298	82.159	1061.8922	-1.2241	0.96143	0.017578	-27.23	-145.264	1155.0617	-2.4219	1.8786	0.022754	NaN	NaN	NaN	NaN	NaN	NaN	NaN	NaN	NaN	NaN	NaN	NaN
3.602	-72.199	82.834	1004.3383	-1.1992	0.92773	0.017578	-45.9001	-162.59	1166.6516	-2.2559	1.8711	0.028809	NaN	NaN	NaN	NaN	NaN	NaN	NaN	NaN	NaN	NaN	NaN	NaN
3.604	-74.281	77.165	971.667	-1.1523	0.87891	0.021484	55.394	-174.767	1145.7956	-2.072	1.8351	0.029394	NaN	NaN	NaN	NaN	NaN	NaN	NaN	NaN	NaN	NaN	NaN	NaN
3.606	-64.969	84.87	948.385	-1.1177	0.84228	0.018555	38.596	-144.551	1123.201	-1.9292	1.7653	0.036914	NaN	NaN	NaN	NaN	NaN	NaN	NaN	NaN	NaN	NaN	NaN	NaN
3.608	-42.155	109.284	942.312	-1.0796	0.81201	0.019043	67.582	-160.747	1207.5643	-1.8433	1.6919	0.05293	NaN	NaN	NaN	NaN	NaN	NaN	NaN	NaN	NaN	NaN	NaN	NaN
3.61	-44.081	126.258	919.607	-1.0229	0.77783	0.014648	129.017	-141.222	1292.2748	-1.8109	1.6215	0.074316	NaN	NaN	NaN	NaN	NaN	NaN	NaN	NaN	NaN	NaN	NaN	NaN
3.612	-42.519	133.1383	920.494	-0.98193	0.76221	0.019043	74.291	-138.5322	1364.106	-1.8086	1.5547	0.093262	NaN	NaN	NaN	NaN	NaN	NaN	NaN	NaN	NaN	NaN	NaN	NaN
3.614	-36.893	147.667	892.6694	-0.91553	0.72314	0.016113	50.7284	-163.253	1431.018	-1.7966	1.5003	0.1086	NaN	NaN	NaN	NaN	NaN	NaN	NaN	NaN	NaN	NaN	NaN	NaN
3.616	-41.414	168.465	864.1497	-0.85962	0.69117	0.0083008	16.807	-145.035	1387.476	-1.764	1.4468	0.11875	NaN	NaN	NaN	NaN	NaN	NaN	NaN	NaN	NaN	NaN	NaN	NaN
3.618	-58.668	186.666	812.1292	-0.80127	0.65479	0.0053711	-71.988	-157.695	1333.935	-1.6889	1.3936	0.12578	NaN	NaN	NaN	NaN	NaN	NaN	NaN	NaN	NaN	NaN	NaN	NaN
3.62	-43.344	169.344	798.376	-0.72949	0.61133	-0.003418	-92.673	-146.537	1319.072	-1.5839	1.3341	0.12364	NaN	NaN	NaN	NaN	NaN	NaN	NaN	NaN	NaN	NaN	NaN	NaN
3.622	-16.297	142.32	764.3831	-0.69727	0.59473	-0.0048828	-157.6494	-115.931	1301.694	-1.4844	1.2617	0.099609	NaN	NaN	NaN	NaN	NaN	NaN	NaN	NaN	NaN	NaN	NaN	NaN
3.624	-8.285	126.6042	711.4686	-0.63672	0.56152	-0.013672	-127.356	-147.1336	1312.202	-1.4189	1.2004	0.068652	NaN	NaN	NaN	NaN	NaN	NaN	NaN	NaN	NaN	NaN	NaN	NaN
3.626	-13.239	111.336	668.045	-0.58887	0.53906	-0.016113	-86.774	-166.7817	1336.00275	-1.3663	1.1349	0.039941	NaN	NaN	NaN	NaN	NaN	NaN	NaN	NaN	NaN	NaN	NaN	NaN
3.628	-0.579000000000001	108.349	628.75	-0.53809	0.51563	-0.020996	-122.783	-146.796	1325.914	-1.321	1.063	0.029395	NaN	NaN	NaN	NaN	NaN	NaN	NaN	NaN	NaN	NaN	NaN	NaN
3.63	14.179	123.7456	613.251	-0.48193	0.48291	-0.024902	-52.143	-109.141	1356.531	-1.303	0.99934	0.027734	NaN	NaN	NaN	NaN	NaN	NaN	NaN	NaN	NaN	NaN	NaN	NaN
3.632	13.478	135.7962	595.48439	-0.44775	0.46826	-0.027832	-57.542	-44.1204	1370.963	-1.2964	0.95361	0.031738	NaN	NaN	NaN	NaN	NaN	NaN	NaN	NaN	NaN	NaN	NaN	NaN
3.634	9.47	139.19992	587.295	-0.38037	0.43701	-0.039063	-113.979	-31.505	1399.583	-1.312	0.93877	0.029199	NaN	NaN	NaN	NaN	NaN	NaN	NaN	NaN	NaN	NaN	NaN	NaN
3.636	5.308	149.77	567.4665	-0.33227	0.41162	-0.044922	-104.478	-48.081	1433.761	-1.3433	0.95108	0.031543	NaN	NaN	NaN	NaN	NaN	NaN	NaN	NaN	NaN	NaN	NaN	NaN
3.638	-31.111	151.367	544.1969	-0.28613	0.38721	-0.057617	-158.707	-56.2612	1445.926	-1.4011	0.99013	0.033887	NaN	NaN	NaN	NaN	NaN	NaN	NaN	NaN	NaN	NaN	NaN	NaN
3.64	-15.571	149.052	511.71647	-0.22656	0.3457	-0.064941	-186.347	-96.0319	1465.242	-1.4989	1.0556	0.05459	NaN	NaN	NaN	NaN	NaN	NaN	NaN	NaN	NaN	NaN	NaN	NaN
3.642	-47.306	146.363	495.957	-0.20117	0.33154	-0.066895	-178.437	-90.509	1464.404	-1.627	1.1348	0.074219	NaN	NaN	NaN	NaN	NaN	NaN	NaN	NaN	NaN	NaN	NaN	NaN
3.644	-46.548	137.091	470.511	-0.15576	0.29785	-0.077637	-205.344	-67.818	1440.5756	-1.7763	1.2253	0.11787	NaN	NaN	NaN	NaN	NaN	NaN	NaN	NaN	NaN	NaN	NaN	NaN
3.646	-52.9088	131.032	419.2108	-0.11915	0.271	-0.081543	-144.604	-73.24	1408.694	-1.9143	1.3165	0.15254	NaN	NaN	NaN	NaN	NaN	NaN	NaN	NaN	NaN	NaN	NaN	NaN
3.648	-44.211	121.2101	372.696	-0.085938	0.25098	-0.089844	-99.476	-58.488	1376.269	-2.0327	1.4091	0.1752	NaN	NaN	NaN	NaN	NaN	NaN	NaN	NaN	NaN	NaN	NaN	NaN
3.65	-74.55007	118.9708	349.212	-0.046875	0.22363	-0.095215	-93.956	-65.3805	1378.49	-2.1084	1.4928	0.1875	NaN	NaN	NaN	NaN	NaN	NaN	NaN	NaN	NaN	NaN	NaN	NaN
3.652	-31.44	104.855	329.45	-0.032715	0.21191	-0.097168	-5.456	-85.263	1429.5344	-2.146	1.5649	0.18359	NaN	NaN	NaN	NaN	NaN	NaN	NaN	NaN	NaN	NaN	NaN	NaN
3.654	-24.356	100.304	318.7479	-0.0058594	0.1792	-0.098633	-17.959	-47.929	1446.302	-2.1467	1.617	0.15733	NaN	NaN	NaN	NaN	NaN	NaN	NaN	NaN	NaN	NaN	NaN	NaN
3.656	-36.116	105.61	272.966	0.01001	0.16211	-0.10205	-33.443	-16.294	1445.582	-2.1319	1.6544	0.11914	NaN	NaN	NaN	NaN	NaN	NaN	NaN	NaN	NaN	NaN	NaN	NaN
3.658	-52.841	89.378	280.0272	0.022949	0.15234	-0.098633	5.443	42.067	1427.372	-2.1366	1.6872	0.057813	NaN	NaN	NaN	NaN	NaN	NaN	NaN	NaN	NaN	NaN	NaN	NaN
3.66	-31.355	103.1627	273.5019	0.035156	0.13818	-0.09668	-34.06	92.898	1366.8707	-2.1905	1.7236	0.016504	NaN	NaN	NaN	NaN	NaN	NaN	NaN	NaN	NaN	NaN	NaN	NaN
3.662	-52.5957	113.951	269.6883	0.042969	0.13379	-0.09668	-46.419	78.6482	1365.322	-2.2827	1.7739	-0.0073242	NaN	NaN	NaN	NaN	NaN	NaN	NaN	NaN	NaN	NaN	NaN	NaN
3.664	-47.065	130.744	244.459	0.057129	0.12012	-0.093262	-69.741	84.479	1373.318	-2.3996	1.8363	-0.0086913	NaN	NaN	NaN	NaN	NaN	NaN	NaN	NaN	NaN	NaN	NaN	NaN
3.666	-43.0336	120.404	242.712	0.069092	0.11425	-0.09375	-89.27	85.072	1382.202	-2.4983	1.8904	0.0015625	NaN	NaN	NaN	NaN	NaN	NaN	NaN	NaN	NaN	NaN	NaN	NaN
3.668	-46.213	110.939	221.9714	0.080078	0.11035	-0.094727	-42.655	57.765	1366.2339	-2.539	1.9232	0.012891	NaN	NaN	NaN	NaN	NaN	NaN	NaN	NaN	NaN	NaN	NaN	NaN
3.67	-35.457	89.531	183.3145	0.09375	0.098145	-0.094727	-56.636	87.2622	1312.929	-2.4978	1.9261	0.016406	NaN	NaN	NaN	NaN	NaN	NaN	NaN	NaN	NaN	NaN	NaN	NaN
3.672	-28.091	73.235551	152.53787	0.094727	0.095215	-0.10059	-95.169	71.272	1275.176	-2.3887	1.8945	0.0087891	NaN	NaN	NaN	NaN	NaN	NaN	NaN	NaN	NaN	NaN	NaN	NaN
3.674	-11.185	54.81	143.5048	0.10107	0.087402	-0.10254	-52.219	70.8095	1254.725	-2.214	1.8181	-0.0044922	NaN	NaN	NaN	NaN	NaN	NaN	NaN	NaN	NaN	NaN	NaN	NaN
3.676	18.601	48.99	119.26239	0.10352	0.083984	-0.097168	-81.501	95.606	1226.199	-2.0389	1.7145	-0.018261	NaN	NaN	NaN	NaN	NaN	NaN	NaN	NaN	NaN	NaN	NaN	NaN
3.678	4.474	43.287	92.2007	0.10059	0.07959	-0.099121	-70.92	72.139	1244.732	-1.8764	1.6005	-0.02334	NaN	NaN	NaN	NaN	NaN	NaN	NaN	NaN	NaN	NaN	NaN	NaN
3.68	-11.897	49.6353	90.287	0.1001	0.068359	-0.10352	-55.187	86.242	1255.701	-1.7543	1.4996	-0.033984	NaN	NaN	NaN	NaN	NaN	NaN	NaN	NaN	NaN	NaN	NaN	NaN
3.682	11.567	65.6699	75.612	0.087891	0.068359	-0.10547	-79.98022	99.007	1245.176	-1.666	1.418	-0.025879	NaN	NaN	NaN	NaN	NaN	NaN	NaN	NaN	NaN	NaN	NaN	NaN
3.684	-8.76	77.792	99.986	0.080078	0.062988	-0.10254	-53.064	103.209	1219.608	-1.5908	1.3479	-0.024317	NaN	NaN	NaN	NaN	NaN	NaN	NaN	NaN	NaN	NaN	NaN	NaN
3.686	-16.639	79.579	91.079	0.067383	0.062256	-0.10522	-124.7004	170.203	1169.9312	-1.5272	1.2848	-0.01875	NaN	NaN	NaN	NaN	NaN	NaN	NaN	NaN	NaN	NaN	NaN	NaN
3.688	-12.562	61.738	85.3141	0.061035	0.063477	-0.10254	-142.9299	179.51	1132.3319	-1.4725	1.2348	-0.016797	NaN	NaN	NaN	NaN	NaN	NaN	NaN	NaN	NaN	NaN	NaN	NaN
3.69	-5.348	51.136	78.66	0.044434	0.070313	-0.10205	-122.2611	172.142	1097.6571	-1.4199	1.1822	-0.011328	NaN	NaN	NaN	NaN	NaN	NaN	NaN	NaN	NaN	NaN	NaN	NaN
3.692	-16.676	52.32	64.6816	0.036133	0.07373	-0.099609	-132.889	199.729	1050.993	-1.3789	1.1387	-0.0058594	NaN	NaN	NaN	NaN	NaN	NaN	NaN	NaN	NaN	NaN	NaN	NaN
3.694	-12.97	55.2247	44.5379	0.015625	0.085449	-0.10059	-99.055	150.535	1046.4258	-1.3342	1.0947	0.0022461	NaN	NaN	NaN	NaN	NaN	NaN	NaN	NaN	NaN	NaN	NaN	NaN
3.696	-22.434	55.2011	41.98227	0.0058594	0.098633	-0.098145	-78.5642	160.207	1031.5421	-1.2941	1.0592	0.00625	NaN	NaN	NaN	NaN	NaN	NaN	NaN	NaN	NaN	NaN	NaN	NaN
3.698	-40.332	31.456	24.0807	0.0019531	0.098633	-0.1001	-97.65665	153.707	982.0183	-1.2551	1.017	0.010547	NaN	NaN	NaN	NaN	NaN	NaN	NaN	NaN	NaN	NaN	NaN	NaN
3.7	-23.57	29	23.256	-0.0048828	0.10303	-0.10254	-38.644	128.009	919.139	-1.2151	0.98252	0.011328	NaN	NaN	NaN	NaN	NaN	NaN	NaN	NaN	NaN	NaN	NaN	NaN
3.702	-36.232	12.95	27.4935	1.7347e-15	0.10376	-0.104	-13.538	188.649	853.544	-1.1763	0.9458	0.01123	NaN	NaN	NaN	NaN	NaN	NaN	NaN	NaN	NaN	NaN	NaN	NaN
3.704	-47.448	22.2459	44.2951	0.0029297	0.10547	-0.098633	11.055	177.433	829.71	-1.1359	0.91338	0.0054688	NaN	NaN	NaN	NaN	NaN	NaN	NaN	NaN	NaN	NaN	NaN	NaN
3.706	-27.387	36.5973	40.66237	0.010254	0.10693	-0.10156	32.245	178.457	840.3659	-1.096	0.88252	0.0018554	NaN	NaN	NaN	NaN	NaN	NaN	NaN	NaN	NaN	NaN	NaN	NaN
3.708	-54.673	41.62	32.8818	0.018555	0.10156	-0.1001	-29.687	205.136	839.61424	-1.0475	0.85908	0.00029298	NaN	NaN	NaN	NaN	NaN	NaN	NaN	NaN	NaN	NaN	NaN	NaN
3.71	-82.1975	29.1251	24.9038	0.027832	0.10205	-0.104	-5.339	160.913	820.419	-0.98772	0.82949	-0.0047852	NaN	NaN	NaN	NaN	NaN	NaN	NaN	NaN	NaN	NaN	NaN	NaN
3.712	-80.0783	23.6683	34.7633	0.03418	0.098633	-0.10058	-21.252	186.191	777.63	-0.92578	0.79688	-0.016113	NaN	NaN	NaN	NaN	NaN	NaN	NaN	NaN	NaN	NaN	NaN	NaN
3.714	-43.065	29.8175	49.8916	0.038086	0.094727	-0.1001	-51.3462	195.007	700.54352	-0.85645	0.76621	-0.01543	NaN	NaN	NaN	NaN	NaN	NaN	NaN	NaN	NaN	NaN	NaN	NaN
3.716	-50.691	44.6906	34.7231	0.047363	0.096191	-0.095215	-12.694	142.676	662.342	-0.78965	0.7334	-0.018554	NaN	NaN	NaN	NaN	NaN	NaN	NaN	NaN	NaN	NaN	NaN	NaN
3.718	-50.716	39.5169	29.221	0.060059	0.092773	-0.09668	-35.502	173.676	603.909	-0.72871	0.70059	-0.023633	NaN	NaN	NaN	NaN	NaN	NaN	NaN	NaN	NaN	NaN	NaN	NaN
3.72	-35.3	32.7759	14.7912	0.07373	0.099609	-0.088867	-29.382	147.115	566.078	-0.66904	0.66933	-0.026172	NaN	NaN	NaN	NaN	NaN	NaN	NaN	NaN	NaN	NaN	NaN	NaN
3.722	-54.656	28.1849	4.355	0.089843	0.099607	-0.086181	4.042	142.0947	537.867	-0.61523	0.64063	-0.029297	NaN	NaN	NaN	NaN	NaN	NaN	NaN	NaN	NaN	NaN	NaN	NaN
3.724	-42.71	29.259	-1.431	0.10254	0.10107	-0.084961	12.571	180.146	485.601	-0.55791	0.61318	-0.031836	NaN	NaN	NaN	NaN	NaN	NaN	NaN	NaN	NaN	NaN	NaN	NaN
3.726	-21.126	16.7	29.184015	0.11963	0.097168	-0.085938	18.34	133.196	472.7633	-0.50069	0.58154	-0.036621	NaN	NaN	NaN	NaN	NaN	NaN	NaN	NaN	NaN	NaN	NaN	NaN
3.728	-11.111	14.8412	21.9997	0.12695	0.083984	-0.080078	-13.471	185.327	449.643	-0.45225	0.54482	-0.040918	NaN	NaN	NaN	NaN	NaN	NaN	NaN	NaN	NaN	NaN	NaN	NaN
3.73	-27.271	25.096	32.44634	0.13037	0.083496	-0.082031	-31.221	194.092	412.634	-0.40479	0.50576	-0.043945	NaN	NaN	NaN	NaN	NaN	NaN	NaN	NaN	NaN	NaN	NaN	NaN
3.732	-32.144	47.782	12.271	0.13062	0.081055	-0.081055	-36.028	144.458	399.3605	-0.36035	0.47021	-0.047852	NaN	NaN	NaN	NaN	NaN	NaN	NaN	NaN	NaN	NaN	NaN	NaN
3.734	-15.045	44.519	31.2862	0.12939	0.084473	-0.079102	-59.3252	181.633	353.6127	-0.32725	0.43574	-0.056836	NaN	NaN	NaN	NaN	NaN	NaN	NaN	NaN	NaN	NaN	NaN	NaN
3.736	5.32100000000001	41.51	38.5879	0.12109	0.094727	-0.072754	-72.5994	124.911	322.8492	-0.29756	0.41016	-0.056738	NaN	NaN	NaN	NaN	NaN	NaN	NaN	NaN	NaN	NaN	NaN	NaN
3.738	-10.113	37.562	35.7341	0.11572	0.097656	-0.070313	-68.0947	114.644	298.777	-0.26905	0.39023	-0.061035	NaN	NaN	NaN	NaN	NaN	NaN	NaN	NaN	NaN	NaN	NaN	NaN
3.74	-11.23	29.4294	14.51449	0.10498	0.10791	-0.065918	-99.1895	172.702	267.6809	-0.23769	0.3752	-0.068653	NaN	NaN	NaN	NaN	NaN	NaN	NaN	NaN	NaN	NaN	NaN	NaN
3.742	2.658	24.5727	29.1429	0.097412	0.11597	-0.063721	-90.0261	127.97	258.18384	-0.20361	0.354	-0.069336	NaN	NaN	NaN	NaN	NaN	NaN	NaN	NaN	NaN	NaN	NaN	NaN
3.744	-4.24	32.2059	47.2483	0.093262	0.12451	-0.061035	-63.813	143.208	244.43511	-0.16758	0.33262	-0.079981	NaN	NaN	NaN	NaN	NaN	NaN	NaN	NaN	NaN	NaN	NaN	NaN
3.746	-9.891	43.2292	25.1624	0.09082	0.13721	-0.062012	-51.249	130.533	200.4245	-0.13594	0.30801	-0.087207	NaN	NaN	NaN	NaN	NaN	NaN	NaN	NaN	NaN	NaN	NaN	NaN
3.748	1.97799999999999	34.7611	13.0109	0.087891	0.14551	-0.064941	-11.055	70.788	196.105	-0.10234	0.28184	-0.095019	NaN	NaN	NaN	NaN	NaN	NaN	NaN	NaN	NaN	NaN	NaN	NaN
3.75	-19.206	30.43656	12.6971	0.09082	0.15479	-0.062988	-27.659	113.474	164.2829	-0.068848	0.25713	-0.10029	NaN	NaN	NaN	NaN	NaN	NaN	NaN	NaN	NaN	NaN	NaN	NaN
3.752	-27.99	40.3851	20.425	0.097902	0.15869	-0.06372	-31.311	61.159	148.1767	-0.044434	0.22998	-0.10547	NaN	NaN	NaN	NaN	NaN	NaN	NaN	NaN	NaN	NaN	NaN	NaN
3.754	-52.441	42.352	35.9715	0.099609	0.16406	-0.066895	-12.585	59.402	139.345	-0.027539	0.21094	-0.10791	NaN	NaN	NaN	NaN	NaN	NaN	NaN	NaN	NaN	NaN	NaN	NaN
3.756	-43.237	34.752	37.8428	0.11865	0.17041	-0.072266	-9.084	123.3861	73.9563	-0.0086915	0.18994	-0.11592	NaN	NaN	NaN	NaN	NaN	NaN	NaN	NaN	NaN	NaN	NaN	NaN
3.758	-53.253	36.3135	42.9764	0.12256	0.17236	-0.076172	-22.133	78.5183	80.224	0.0053711	0.16846	-0.11279	NaN	NaN	NaN	NaN	NaN	NaN	NaN	NaN	NaN	NaN	NaN	NaN
3.76	-29.702	34.3926	28.3933	0.14111	0.16895	-0.082031	-31.807	113.589	106.9372	0.028027	0.15293	-0.11895	NaN	NaN	NaN	NaN	NaN	NaN	NaN	NaN	NaN	NaN	NaN	NaN
3.762	-63.3039	23.6978	20.6112	0.1543	0.17066	-0.084229	-50.5435	121.958	105.5269	0.056152	0.13281	-0.12646	NaN	NaN	NaN	NaN	NaN	NaN	NaN	NaN	NaN	NaN	NaN	NaN
3.764	-70.574	39.72262	27.1834	0.1665	0.1709	-0.088379	-28.72	54.168	103.688	0.075488	0.11181	-0.13682	NaN	NaN	NaN	NaN	NaN	NaN	NaN	NaN	NaN	NaN	NaN	NaN
3.766	-50.651	49.6424	38.8552	0.17871	0.16699	-0.095215	-27.752	97.553	63.1022	0.091211	0.096875	-0.13916	NaN	NaN	NaN	NaN	NaN	NaN	NaN	NaN	NaN	NaN	NaN	NaN
3.768	-41.288	56.4591	43.2753	0.18115	0.1709	-0.095215	-12.885	50.844	27.4582	0.091602	0.079688	-0.14189	NaN	NaN	NaN	NaN	NaN	NaN	NaN	NaN	NaN	NaN	NaN	NaN
3.77	-51.395	41.1053	24.2228	0.18799	0.17578	-0.098145	13.203	10.938	34.3825	0.086914	0.067871	-0.14463	NaN	NaN	NaN	NaN	NaN	NaN	NaN	NaN	NaN	NaN	NaN	NaN
3.772	-40.964	10.1895	31.633	0.18482	0.17944	-0.10107	-32.802	48.91	-3.973	0.077148	0.06543	-0.14014	NaN	NaN	NaN	NaN	NaN	NaN	NaN	NaN	NaN	NaN	NaN	NaN
3.774	-39.516	12.1209	27.5207	0.18457	0.18604	-0.10791	-19.523	-8.177	19.8977	0.060156	0.063086	-0.14571	NaN	NaN	NaN	NaN	NaN	NaN	NaN	NaN	NaN	NaN	NaN	NaN
3.776	-49.114	32.0188	28.1332	0.17285	0.18701	-0.11816	-4.333	27.8196	36.9534	0.031055	0.068945	-0.15146	NaN	NaN	NaN	NaN	NaN	NaN	NaN	NaN	NaN	NaN	NaN	NaN
3.778	-49.812	38.2248	28.959	0.16748	0.19873	-0.10645	-28.912	53.1985	31.1704	-0.0052735	0.076758	-0.1542	NaN	NaN	NaN	NaN	NaN	NaN	NaN	NaN	NaN	NaN	NaN	NaN
3.78	-20.659	31.0715	37.7789	0.16016	0.20459	-0.11426	-23.316	19.58	49.8458	-0.049707	0.081933	-0.15391	NaN	NaN	NaN	NaN	NaN	NaN	NaN	NaN	NaN	NaN	NaN	NaN
3.782	-21.334	26.351	35.3447	0.15259	0.21485	-0.11914	-57.604	84.67	41.763	-0.095703	0.09082	-0.15137	NaN	NaN	NaN	NaN	NaN	NaN	NaN	NaN	NaN	NaN	NaN	NaN
3.784	-24.778	28.781	29.7103	0.14893	0.22217	-0.12305	-56.685	41.953	45.177	-0.1415	0.10459	-0.14834	NaN	NaN	NaN	NaN	NaN	NaN	NaN	NaN	NaN	NaN	NaN	NaN
3.786	-17.757	31.9656	30.27367	0.14502	0.229	-0.12988	-43.23	-1.34181	58.1476	-0.18741	0.11748	-0.14414	NaN	NaN	NaN	NaN	NaN	NaN	NaN	NaN	NaN	NaN	NaN	NaN
3.788	-0.277999999999999	35.8433	37.4708	0.14307	0.23145	-0.13574	-56.4399	39.2442	27.8167	-0.21943	0.13037	-0.14336	NaN	NaN	NaN	NaN	NaN	NaN	NaN	NaN	NaN	NaN	NaN	NaN
3.79	-1.501	37.5372	46.5912	0.13525	0.24219	-0.14063	-27.472	-17.5251	17.9871	-0.24502	0.13994	-0.1377	NaN	NaN	NaN	NaN	NaN	NaN	NaN	NaN	NaN	NaN	NaN	NaN
3.792	-2.677	28.9468	40.733	0.11547	0.2522	-0.15502	-39.186	29.57561	25.6288	-0.26221	0.15283	-0.13965	NaN	NaN	NaN	NaN	NaN	NaN	NaN	NaN	NaN	NaN	NaN	NaN
3.794	12.025	-10.2479	57.9734	0.073242	0.26416	-0.16699	-61.402	61.9932	20.4	-0.26621	0.1624	-0.13281	NaN	NaN	NaN	NaN	NaN	NaN	NaN	NaN	NaN	NaN	NaN	NaN
3.796	-6.562	-26.41785	88.4448	-0.011719	0.29688	-0.17432	-50.499	21.9404	37.2143	-0.26455	0.17119	-0.12832	NaN	NaN	NaN	NaN	NaN	NaN	NaN	NaN	NaN	NaN	NaN	NaN
3.798	1.991	-10.415	98.86	-0.066406	0.31396	-0.17578	-47.58	80.727	24.9893	-0.25439	0.17431	-0.12676	NaN	NaN	NaN	NaN	NaN	NaN	NaN	NaN	NaN	NaN	NaN	NaN
3.8	0.146000000000001	7.296	96.131	-0.18408	0.36084	-0.17041	-38.279	35.4355	20.4573	-0.23262	0.1748	-0.12119	NaN	NaN	NaN	NaN	NaN	NaN	NaN	NaN	NaN	NaN	NaN	NaN
3.802	-15.086	6.784	126.307	-0.27563	0.40478	-0.17603	-36.68	5.7187	37.537	-0.20898	0.16992	-0.10742	NaN	NaN	NaN	NaN	NaN	NaN	NaN	NaN	NaN	NaN	NaN	NaN
3.804	-29.757	1.564	170.275	-0.36279	0.44287	-0.19092	-49.884	47.015	34.835	-0.17637	0.16074	-0.10713	NaN	NaN	NaN	NaN	NaN	NaN	NaN	NaN	NaN	NaN	NaN	NaN
3.806	2.63	-5.141	198.146	-0.47852	0.51025	-0.20947	-41.78	-10.433	51.141	-0.13506	0.14825	-0.10899	NaN	NaN	NaN	NaN	NaN	NaN	NaN	NaN	NaN	NaN	NaN	NaN
3.808	-5.486	-6.797	273.238	-0.5459	0.54541	-0.22852	-21.279	36.211	42.1308	-0.090917	0.12637	-0.099611	NaN	NaN	NaN	NaN	NaN	NaN	NaN	NaN	NaN	NaN	NaN	NaN
3.81	-8.27	27.302	373.379	-0.70898	0.62988	-0.2749	-38.797	54.252	14.4343	-0.044336	0.10098	-0.095117	NaN	NaN	NaN	NaN	NaN	NaN	NaN	NaN	NaN	NaN	NaN	NaN
3.812	3.997	83.396	509.3823	-0.89795	0.7085	-0.30469	-37.524	5.065	29.7658	0.0019531	0.077148	-0.09082	NaN	NaN	NaN	NaN	NaN	NaN	NaN	NaN	NaN	NaN	NaN	NaN
3.814	-13.572	107.4585	606.778	-1.1484	0.80176	-0.32324	-40.359	64.901	34.283	0.052539	0.055469	-0.088086	NaN	NaN	NaN	NaN	NaN	NaN	NaN	NaN	NaN	NaN	NaN	NaN
3.816	-57.23	93.9408	713.948	-1.6055	0.94922	-0.3125	-43.932	31.9352	24.6705	0.10498	0.02959	-0.087402	NaN	NaN	NaN	NaN	NaN	NaN	NaN	NaN	NaN	NaN	NaN	NaN
3.818	-14.617	66.143	789.7576	-1.8594	1.0195	-0.28906	-25.421	20.6582	39.5764	0.16279	0.0084962	-0.081933	NaN	NaN	NaN	NaN	NaN	NaN	NaN	NaN	NaN	NaN	NaN	NaN
3.82	16.282	51.063	875.487	-2.3198	1.2007	-0.17529	-16.306	55.7649	22.16241	0.21787	-0.011231	-0.085254	NaN	NaN	NaN	NaN	NaN	NaN	NaN	NaN	NaN	NaN	NaN	NaN
3.822	-25.058	51.29	935.507	-2.5772	1.3872	-0.062256	-33.724	-17.9929	11.8556	0.26367	-0.029297	-0.083984	NaN	NaN	NaN	NaN	NaN	NaN	NaN	NaN	NaN	NaN	NaN	NaN
3.824	-60.0325	55.08	916.539	-2.7441	1.5879	-0.0063477	-35.079	20.329	28.9632	0.31123	-0.044532	-0.089453	NaN	NaN	NaN	NaN	NaN	NaN	NaN	NaN	NaN	NaN	NaN	NaN
3.826	-77.045	37.639	888.84245	-2.7051	1.8184	-0.035156	-53.618	59.661	10.4143	0.34668	-0.049024	-0.093555	NaN	NaN	NaN	NaN	NaN	NaN	NaN	NaN	NaN	NaN	NaN	NaN
3.828	-46.2784	27.165	862.111	-2.5703	1.8926	-0.061523	-35.846	27.6252	37.759	0.37246	-0.055664	-0.091992	NaN	NaN	NaN	NaN	NaN	NaN	NaN	NaN	NaN	NaN	NaN	NaN
3.83	-43.379	36.657	871.182	-2.1348	1.9355	-0.10986	-24.171	92.396	38.4567	0.3957	-0.055176	-0.094336	NaN	NaN	NaN	NaN	NaN	NaN	NaN	NaN	NaN	NaN	NaN	NaN
3.832	-39.931	29.135	887.1898	-1.7383	1.8681	-0.15405	-30.005	56.364	38.271	0.39844	-0.056152	-0.091309	NaN	NaN	NaN	NaN	NaN	NaN	NaN	NaN	NaN	NaN	NaN	NaN
3.834	-26.499	4.71600000000001	908.0287	-1.3662	1.7383	-0.20313	-30.386	17.3924	38.9768	0.39785	-0.040137	-0.094433	NaN	NaN	NaN	NaN	NaN	NaN	NaN	NaN	NaN	NaN	NaN	NaN
3.836	-39.423	-19.607	917.4338	-1.0313	1.5078	-0.24707	-33.158	62.3	25.0059	0.39004	-0.020703	-0.091699	NaN	NaN	NaN	NaN	NaN	NaN	NaN	NaN	NaN	NaN	NaN	NaN
3.838	-8.378	-38.1198	924.926	-0.94385	1.4048	-0.26221	-28.961	4.015	41.676	0.37988	0.005078	-0.089355	NaN	NaN	NaN	NaN	NaN	NaN	NaN	NaN	NaN	NaN	NaN	NaN
3.84	22.302	-38.2949	931.604	-0.89258	1.2559	-0.24463	-17.652	27.494	41.422	0.3668	0.02666	-0.085449	NaN	NaN	NaN	NaN	NaN	NaN	NaN	NaN	NaN	NaN	NaN	NaN
3.842	11.618	-22.465	953.0553	-0.9082	1.2071	-0.20532	-19.195	34.63	8.410147	0.35254	0.057129	-0.086914	NaN	NaN	NaN	NaN	NaN	NaN	NaN	NaN	NaN	NaN	NaN	NaN
3.844	9.605	2.173	947.238	-0.92236	1.2017	-0.1665	-37.604	-8.635	24.2106	0.33906	0.081445	-0.083887	NaN	NaN	NaN	NaN	NaN	NaN	NaN	NaN	NaN	NaN	NaN	NaN
3.846	-56.2832	-11.162	956.778	-0.90967	1.2114	-0.13623	-34.64	61.245	30.50913	0.32579	0.11114	-0.090234	NaN	NaN	NaN	NaN	NaN	NaN	NaN	NaN	NaN	NaN	NaN	NaN
3.848	-76.8448	-30.77	956.198	-0.87573	1.218	-0.13306	-42.84	45.0448	36.6284	0.31289	0.13379	-0.088281	NaN	NaN	NaN	NaN	NaN	NaN	NaN	NaN	NaN	NaN	NaN	NaN
3.85	-56.3823	-83.388	990.452	-0.82373	1.2251	-0.15381	-33.32	20.8943	74.182	0.29912	0.1543	-0.091406	NaN	NaN	NaN	NaN	NaN	NaN	NaN	NaN	NaN	NaN	NaN	NaN
3.852	-5.675	-126.185	992.459	-0.73096	1.2466	-0.20068	-49.125	70.288	44.8983	0.28613	0.17285	-0.092773	NaN	NaN	NaN	NaN	NaN	NaN	NaN	NaN	NaN	NaN	NaN	NaN
3.854	-24.23	-150.78	1000.6352	-0.69482	1.2466	-0.2124	-45.422	9.6321	33.4135	0.26806	0.18946	-0.09844	NaN	NaN	NaN	NaN	NaN	NaN	NaN	NaN	NaN	NaN	NaN	NaN
3.856	-18.128	-159.966	999.684	-0.66162	1.2681	-0.24658	-34.815	18.8297	45.70988	0.25205	0.20176	-0.10039	NaN	NaN	NaN	NaN	NaN	NaN	NaN	NaN	NaN	NaN	NaN	NaN
3.858	28.017	-168.809	1023.962	-0.66455	1.2808	-0.25586	-50.434	43.64568	25.103	0.2337	0.22285	-0.10586	NaN	NaN	NaN	NaN	NaN	NaN	NaN	NaN	NaN	NaN	NaN	NaN
3.86	34.586	-165.722	1077.921	-0.69727	1.2813	-0.25391	-38.49	2.463	31.6239	0.22217	0.24267	-0.11201	NaN	NaN	NaN	NaN	NaN	NaN	NaN	NaN	NaN	NaN	NaN	NaN
3.862	61.611	-155.399	1110.6279	-0.76904	1.2798	-0.23779	-34.34	59.7325	22.126	0.20752	0.26514	-0.1123	NaN	NaN	NaN	NaN	NaN	NaN	NaN	NaN	NaN	NaN	NaN	NaN
3.864	41.9193	-146.916	1174.7638	-0.81396	1.2759	-0.229	-41.122	51.4054	9.75	0.19599	0.28955	-0.11631	NaN	NaN	NaN	NaN	NaN	NaN	NaN	NaN	NaN	NaN	NaN	NaN
3.866	9.45	-125.38443	1223.015367	-0.91797	1.2656	-0.21533	-54.049	21.728	32.476	0.18262	0.30996	-0.1208	NaN	NaN	NaN	NaN	NaN	NaN	NaN	NaN	NaN	NaN	NaN	NaN
3.868	-22.47701	-92.899	1252.2706	-0.9988	1.2551	-0.20776	-61.724	64.7424	32.192	0.16894	0.33457	-0.11768	NaN	NaN	NaN	NaN	NaN	NaN	NaN	NaN	NaN	NaN	NaN	NaN
3.87	-36.24596	-51.963	1253.7648	-1.0815	1.2524	-0.20264	-50.723	1.362	41.4843	0.15244	0.35166	-0.11592	NaN	NaN	NaN	NaN	NaN	NaN	NaN	NaN	NaN	NaN	NaN	NaN
3.872	-24.3571	-38.379	1261.152	-1.1831	1.2681	-0.21094	-39.256	20.4446	60.175	0.13672	0.37109	-0.11426	NaN	NaN	NaN	NaN	NaN	NaN	NaN	NaN	NaN	NaN	NaN	NaN
3.874	-18.47	-53.734	1258.9242	-1.2363	1.2793	-0.21387	-46.511	38.2604	29.1397	0.1166	0.3832	-0.1165	NaN	NaN	NaN	NaN	NaN	NaN	NaN	NaN	NaN	NaN	NaN	NaN
3.876	-1.462	-71.634	1259.6392	-1.3491	1.3101	-0.21826	-49.806	-8.7806	26.4286	0.099223	0.39775	-0.11963	NaN	NaN	NaN	NaN	NaN	NaN	NaN	NaN	NaN	NaN	NaN	NaN
3.878	-22.064	-85.0714	1273.951	-1.4428	1.3311	-0.22021	-37.395	51.53	26.422	0.078521	0.41025	-0.11767	NaN	NaN	NaN	NaN	NaN	NaN	NaN	NaN	NaN	NaN	NaN	NaN
3.88	24.0926	-69.2708	1282.361	-1.5283	1.3574	-0.22607	-36.981	30.408	11.252	0.058306	0.42256	-0.11924	NaN	NaN	NaN	NaN	NaN	NaN	NaN	NaN	NaN	NaN	NaN	NaN
3.882	79.724	-56.414	1294.9518	-1.6387	1.4063	-0.23242	-20.758	17.958	36.4428	0.035156	0.43115	-0.11523	NaN	NaN	NaN	NaN	NaN	NaN	NaN	NaN	NaN	NaN	NaN	NaN
3.884	40.8698	-58.028	1297.0598	-1.6992	1.4316	-0.23828	-20.903	49.121	36.629	0.014935	0.44835	-0.12217	NaN	NaN	NaN	NaN	NaN	NaN	NaN	NaN	NaN	NaN	NaN	NaN
3.886	28.03561	-66.144	1321.0647	-1.7852	1.4707	-0.25488	-31.981	-34.9026	61.693	-0.0010817	0.45782	-0.11787	NaN	NaN	NaN	NaN	NaN	NaN	NaN	NaN	NaN	NaN	NaN	NaN
3.888	9.037	-89.053	1347.6868	-1.8347	1.4983	-0.27759	-28.057	-11.0254	98.471	-0.0096772	0.46446	-0.11866	NaN	NaN	NaN	NaN	NaN	NaN	NaN	NaN	NaN	NaN	NaN	NaN
3.89	9.475	-79.84886	1353.148	-1.8804	1.5239	-0.29736	-0.234000000000002	8.239	105.798	-0.011031	0.46504	-0.11855	NaN	NaN	NaN	NaN	NaN	NaN	NaN	NaN	NaN	NaN	NaN	NaN
3.892	-20.6772	-82.5993	1368.03	-1.9487	1.5806	-0.32568	9.386	-33.9219	153.392	-0.01416	0.46777	-0.11816	NaN	NaN	NaN	NaN	NaN	NaN	NaN	NaN	NaN	NaN	NaN	NaN
3.894	-12.5174	-61.941	1367.806	-1.9883	1.6113	-0.32959	1.875	17.657	204.88879	-0.005872	0.46356	-0.12236	NaN	NaN	NaN	NaN	NaN	NaN	NaN	NaN	NaN	NaN	NaN	NaN
3.896	-2.9489	-66.761	1360.907	-2.0562	1.6841	-0.3335	-34.082	9.398	219.829	-0.0019657	0.45793	-0.12548	NaN	NaN	NaN	NaN	NaN	NaN	NaN	NaN	NaN	NaN	NaN	NaN
3.898	1.267	-55.237	1343.094	-2.0974	1.7239	-0.33251	-13.929	-24.478	283.324	0.0011623	0.44896	-0.12899	NaN	NaN	NaN	NaN	NaN	NaN	NaN	NaN	NaN	NaN	NaN	NaN
3.9	19.1081	-48.847	1331.258	-2.1167	1.7544	-0.31787	-1.137	48.165	382.421	-0.0077251	0.4458	-0.13105	NaN	NaN	NaN	NaN	NaN	NaN	NaN	NaN	NaN	NaN	NaN	NaN
3.902	40.8422	-41.8286	1321.7287	-2.0898	1.7695	-0.3125	7.818	43.897	564.10694	-0.04248	0.45361	-0.12988	NaN	NaN	NaN	NaN	NaN	NaN	NaN	NaN	NaN	NaN	NaN	NaN
3.904	68.757	-37.12	1314.5973	-2.0542	1.7661	-0.31836	25.91	66.2416	732.662	-0.11381	0.47936	-0.12587	NaN	NaN	NaN	NaN	NaN	NaN	NaN	NaN	NaN	NaN	NaN	NaN
3.906	55.016	-26.546	1307.4436	-1.9429	1.7427	-0.31494	-9.954	65.0475	849.762	-0.20007	0.50555	-0.11554	NaN	NaN	NaN	NaN	NaN	NaN	NaN	NaN	NaN	NaN	NaN	NaN
3.908	33.784	-24.6634	1290.442	-1.8417	1.709	-0.31934	-50.48	15.5213	970.979	-0.30192	0.54357	-0.1065	NaN	NaN	NaN	NaN	NaN	NaN	NaN	NaN	NaN	NaN	NaN	NaN
3.91	40.1556	-22.113	1285.298	-1.7539	1.6719	-0.32129	-3.53	71.27	1075.593	-0.40464	0.5801	-0.10532	NaN	NaN	NaN	NaN	NaN	NaN	NaN	NaN	NaN	NaN	NaN	NaN
3.912	35.2673	-6.5085	1280.8891	-1.6499	1.6157	-0.31494	-12.573	57.202	1163.248	-0.50195	0.62402	-0.11035	NaN	NaN	NaN	NaN	NaN	NaN	NaN	NaN	NaN	NaN	NaN	NaN
3.914	28.2152	22.4762	1287.2038	-1.6152	1.5938	-0.3125	-32.094	36.307	1204.477	-0.61397	0.66455	-0.13536	NaN	NaN	NaN	NaN	NaN	NaN	NaN	NaN	NaN	NaN	NaN	NaN
3.916	15.9187	30.7649	1289.4576	-1.5679	1.5532	-0.30518	-51.871	80.04	1126.577	-0.74663	0.70673	-0.16644	NaN	NaN	NaN	NaN	NaN	NaN	NaN	NaN	NaN	NaN	NaN	NaN
3.918	6.3042	29.486	1292.3267	-1.5447	1.5296	-0.29151	-61.483	-13.577	1062.725	-0.94146	0.75731	-0.20179	NaN	NaN	NaN	NaN	NaN	NaN	NaN	NaN	NaN	NaN	NaN	NaN
3.92	-1.061	9.23	1280.0681	-1.5308	1.5063	-0.27979	-78.5386	-30.812	1068.159	-1.2473	0.83601	-0.22213	NaN	NaN	NaN	NaN	NaN	NaN	NaN	NaN	NaN	NaN	NaN	NaN
3.922	15.4588	3.916	1252.5963	-1.5288	1.4731	-0.26465	-87.55214	-11.808	1053.367	-1.6992	0.96094	-0.22949	NaN	NaN	NaN	NaN	NaN	NaN	NaN	NaN	NaN	NaN	NaN	NaN
3.924	57.788	3.7532	1239.2006	-1.5249	1.4575	-0.25586	-40.656	-90.039	1064.452	-2.2521	1.1397	-0.18754	NaN	NaN	NaN	NaN	NaN	NaN	NaN	NaN	NaN	NaN	NaN	NaN
3.926	33.1155	15.602	1206.6371	-1.5215	1.4238	-0.24121	-46.894	-92.4261	1052.067	-2.808	1.3997	-0.090678	NaN	NaN	NaN	NaN	NaN	NaN	NaN	NaN	NaN	NaN	NaN	NaN
3.928	36.83949	19.731	1197.8284	-1.5075	1.4006	-0.23267	-47.44	-135.645	1030.817	-3.1824	1.7022	-0.0089739	NaN	NaN	NaN	NaN	NaN	NaN	NaN	NaN	NaN	NaN	NaN	NaN
3.93	6.368	36.35	1183.664	-1.4902	1.3779	-0.2207	-4.703	-166.5523	1059.6003	-3.2252	1.993	0.005322	NaN	NaN	NaN	NaN	NaN	NaN	NaN	NaN	NaN	NaN	NaN	NaN
3.932	18.9881	33.124	1185.2845	-1.4624	1.3501	-0.20996	-1.681	-65.266	1093.4915	-2.916	2.1738	-0.052246	NaN	NaN	NaN	NaN	NaN	NaN	NaN	NaN	NaN	NaN	NaN	NaN
3.934	31.531	53.499	1189.391	-1.4419	1.3325	-0.20264	-7.846	-28.62	1111.429	-2.3339	2.1672	-0.1514	NaN	NaN	NaN	NaN	NaN	NaN	NaN	NaN	NaN	NaN	NaN	NaN
3.936	38.4258	68.349	1167.771	-1.3975	1.2969	-0.19141	-56.4476	-9.86	1125.94707	-1.6793	2.0118	-0.23875	NaN	NaN	NaN	NaN	NaN	NaN	NaN	NaN	NaN	NaN	NaN	NaN
3.938	-15.489	86.43	1140.2382	-1.3572	1.2698	-0.18286	-114.414	-41.205	1083.922	-1.112	1.7503	-0.31436	NaN	NaN	NaN	NaN	NaN	NaN	NaN	NaN	NaN	NaN	NaN	NaN
3.94	-30.51301	105.41	1103.713	-1.3179	1.2407	-0.16992	-102.196	-131.94	1088.239	-0.78513	1.4677	-0.39556	NaN	NaN	NaN	NaN	NaN	NaN	NaN	NaN	NaN	NaN	NaN	NaN
3.942	-31.865	108.188	1104.1077	-1.2598	1.1895	-0.16406	-46.579	-149.241	1139.807	-0.65625	1.2383	-0.45996	NaN	NaN	NaN	NaN	NaN	NaN	NaN	NaN	NaN	NaN	NaN	NaN
3.944	-10.128	103.807	1066.04736	-1.2344	1.1641	-0.15918	-34.615	-172.72	1174.055	-0.69038	1.1066	-0.44379	NaN	NaN	NaN	NaN	NaN	NaN	NaN	NaN	NaN	NaN	NaN	NaN
3.946	-29.27	81.3385	1046.755	-1.1816	1.1152	-0.14844	-0.257000000000005	-221.996	1196.209	-0.77142	1.0538	-0.37716	NaN	NaN	NaN	NaN	NaN	NaN	NaN	NaN	NaN	NaN	NaN	NaN
3.948	-1.149	74.112	1007.0562	-1.1355	1.0794	-0.13745	15.209	-201.316	1175.072	-0.84853	1.055	-0.31328	NaN	NaN	NaN	NaN	NaN	NaN	NaN	NaN	NaN	NaN	NaN	NaN
3.95	-23.014	85.057	981.427	-1.0933	1.0474	-0.13525	26.5533	-243.461	1182.417	-0.88239	1.0563	-0.27961	NaN	NaN	NaN	NaN	NaN	NaN	NaN	NaN	NaN	NaN	NaN	NaN
3.952	-11.525	120.1506	956.195	-1.0249	0.99854	-0.11914	41.0307	-246.249	1246.145	-0.87402	1.0352	-0.27734	NaN	NaN	NaN	NaN	NaN	NaN	NaN	NaN	NaN	NaN	NaN	NaN
3.954	4.392	119.6932	928.5655	-0.99414	0.98242	-0.10986	50.84	-194.799	1322.036	-0.84919	1.0084	-0.28911	NaN	NaN	NaN	NaN	NaN	NaN	NaN	NaN	NaN	NaN	NaN	NaN
3.956	-2.034	103.6396	913.1614	-0.92725	0.93994	-0.10107	21.658	-197.996	1373.92	-0.82903	0.98472	-0.30359	NaN	NaN	NaN	NaN	NaN	NaN	NaN	NaN	NaN	NaN	NaN	NaN
3.958	-12.213	83.0817	885.6502	-0.88769	0.90283	-0.088135	-30.73	-141.531	1399.623	-0.82718	0.97577	-0.31879	NaN	NaN	NaN	NaN	NaN	NaN	NaN	NaN	NaN	NaN	NaN	NaN
3.96	-31.598	96.8621	876.8341	-0.84766	0.86719	-0.082031	-69.948	-80.488	1370.9391	-0.87257	0.98498	-0.3203	NaN	NaN	NaN	NaN	NaN	NaN	NaN	NaN	NaN	NaN	NaN	NaN
3.962	-57.8706	123.42	857.1544	-0.79834	0.81982	-0.06543	-53.742	-65.429	1335.7297	-0.9585	1.0044	-0.31006	NaN	NaN	NaN	NaN	NaN	NaN	NaN	NaN	NaN	NaN	NaN	NaN
3.964	-41.9867	137.056	838.0227	-0.77734	0.80469	-0.060059	-23.913	-0.329999999999998	1313.37839	-1.0828	1.0335	-0.29114	NaN	NaN	NaN	NaN	NaN	NaN	NaN	NaN	NaN	NaN	NaN	NaN
3.966	-32.068	143.566	793.3511	-0.73242	0.76172	-0.046875	-6.998	-26.508	1296.2615	-1.2229	1.0734	-0.27112	NaN	NaN	NaN	NaN	NaN	NaN	NaN	NaN	NaN	NaN	NaN	NaN
3.968	-29.886	140.759	749.4508	-0.69995	0.73315	-0.035644	20.73	-91.554	1322.549	-1.3515	1.123	-0.25431	NaN	NaN	NaN	NaN	NaN	NaN	NaN	NaN	NaN	NaN	NaN	NaN
3.97	-37.687	131.0591	704.21	-0.67188	0.70313	-0.026367	-3.118	-80.289	1304.563	-1.4399	1.1839	-0.25381	NaN	NaN	NaN	NaN	NaN	NaN	NaN	NaN	NaN	NaN	NaN	NaN
3.972	-30.15	138.3758	676.098	-0.63379	0.66016	-0.011719	34.1183	-112.199	1314.284	-1.4844	1.2383	-0.27344	NaN	NaN	NaN	NaN	NaN	NaN	NaN	NaN	NaN	NaN	NaN	NaN
3.974	-8.681	146.1675	662.4273	-0.61328	0.63867	-0.0087891	76.6025	-80.947	1351.341	-1.4863	1.2789	-0.30352	NaN	NaN	NaN	NaN	NaN	NaN	NaN	NaN	NaN	NaN	NaN	NaN
3.976	-5.177	146.1301	645.8049	-0.56592	0.59619	0.00048828	32.309	-45.0138	1352.32794	-1.4871	1.3113	-0.32969	NaN	NaN	NaN	NaN	NaN	NaN	NaN	NaN	NaN	NaN	NaN	NaN
3.978	-14.038	129.5533	626.3332	-0.52734	0.55932	0.015137	18.193	-67.4268	1394.557	-1.5098	1.3317	-0.34492	NaN	NaN	NaN	NaN	NaN	NaN	NaN	NaN	NaN	NaN	NaN	NaN
3.98	-12.944	137.83586	596.098	-0.48682	0.52588	0.016113	-46.843	-15.27	1379.649	-1.5522	1.3567	-0.35723	NaN	NaN	NaN	NaN	NaN	NaN	NaN	NaN	NaN	NaN	NaN	NaN
3.982	-19.498	137.963	568.577	-0.42871	0.48438	0.025391	-78.159	-44.952	1372.401	-1.6187	1.4009	-0.36279	NaN	NaN	NaN	NaN	NaN	NaN	NaN	NaN	NaN	NaN	NaN	NaN
3.984	-51.981	153.32	547.9561	-0.40039	0.46387	0.027832	-42.609	-85.0851	1417.647	-1.6907	1.4686	-0.36846	NaN	NaN	NaN	NaN	NaN	NaN	NaN	NaN	NaN	NaN	NaN	NaN
3.986	-60.87965	138.663	542.4	-0.35254	0.42383	0.030762	-38.45826	-41.08	1414.239	-1.7522	1.5465	-0.38476	NaN	NaN	NaN	NaN	NaN	NaN	NaN	NaN	NaN	NaN	NaN	NaN
3.988	-47.593	134.158	525.995	-0.32324	0.39698	0.03833	6.076	-73.6289	1393.339	-1.812	1.6337	-0.40469	NaN	NaN	NaN	NaN	NaN	NaN	NaN	NaN	NaN	NaN	NaN	NaN
3.99	-29.288	115.393	474.36704	-0.29883	0.375	0.037109	27.157	-26.7433	1334.829	-1.8839	1.7171	-0.421	NaN	NaN	NaN	NaN	NaN	NaN	NaN	NaN	NaN	NaN	NaN	NaN
3.992	-71.293	112.0911	448.869	-0.27148	0.34229	0.054199	3.957	34.5539	1270.05	-1.9722	1.7954	-0.43262	NaN	NaN	NaN	NaN	NaN	NaN	NaN	NaN	NaN	NaN	NaN	NaN
3.994	-37.502	107.28	422.0374	-0.25464	0.3208	0.068359	36.4423	9.155	1271.919	-2.0675	1.8431	-0.42022	NaN	NaN	NaN	NaN	NaN	NaN	NaN	NaN	NaN	NaN	NaN	NaN
3.996	-22.535	106.125	401.454767	-0.23828	0.29688	0.079102	18.331	76.829	1286.2903	-2.1519	1.8865	-0.40146	NaN	NaN	NaN	NaN	NaN	NaN	NaN	NaN	NaN	NaN	NaN	NaN
[truncated: 28,002 more rows]
