# Supplementary material for: Reliability and Validity of Running Cadence and Stance Time Derived from Instrumented Wireless Earbuds
Source: Sensors (Basel). 2021 Nov 30;21(23):7995. doi: 10.3390/s21237995 (PMC8659722; doi:10.3390/s21237995)
Supplement: Supplementary file 1 [file sensors-21-07995-s001.zip › Data_P11_HeadMovements.csv]

time	up_force_plate_1	up_force_plate_2	up_force_plate_3	up_earbuds_1	up_earbuds_2	up_earbuds_3	down_force_plate_1	down_force_plate_2	down_force_plate_3	down_earbuds_1	down_earbuds_2	down_earbuds_3	shake_force_plate_1	shake_force_plate_2	shake_force_plate_3	shake_earbuds_1	shake_earbuds_2	shake_earbuds_3	nod_force_plate_1	nod_force_plate_2	nod_force_plate_3	nod_earbuds_1	nod_earbuds_2	nod_earbuds_3	bird_L_force_plate_1	bird_L_force_plate_2	bird_L_force_plate_3	bird_L_earbuds_1	bird_L_earbuds_2	bird_L_earbuds_3	bird_R_force_plate_1	bird_R_force_plate_2	bird_R_force_plate_3	bird_R_earbuds_1	bird_R_earbuds_2	bird_R_earbuds_3	check_watch_force_plate_1	check_watch_force_plate_2	check_watch_force_plate_3	check_watch_earbuds_1	check_watch_earbuds_2	check_watch_earbuds_3
0	-70.751	-136.997	989.552	-1.957	0.53711	0.073242	-64.921	1.0621	116.959	0.096582	0.25547	0.13477	18.546	22.7163	30.464	0.19326	0.092773	0.18194	41.334	134.045	301.61	-0.38623	0.23315	0.05835	63.3313	-34.4319	88.6273	0.14111	0.30566	0.091797	-19.097	35.292	-15.5226	-0.125	-0.019531	-0.05127	10.545	-138.9774	1524.587	-1.8438	0.64844	0.0073242
0.002	-66.22	-196.275	1056.2212	-1.7378	0.51465	0.043457	-46.9211	24.662	86.691	0.14873	0.25205	0.1334	58.6948	5.7213	68.479	0.16299	0.10068	0.18008	44.889	80.829	273.464	-0.34033	0.23096	0.064453	62.86007	-12.832	110.237	0.14375	0.31914	0.083594	-12.595	29.8977	16.5064	-0.15771	-0.0019531	-0.044922	41.958	-116.7906	1559.905	-1.918	0.64844	0.0051269
0.004	-31.383	-207.1837	1099.364	-1.6362	0.48291	0.022461	-58.626	20.0163	82.31883	0.2041	0.24316	0.13232	60.37291	4.776	52.684	0.13818	0.095215	0.18555	46.117	112.4966	251.4329	-0.28906	0.22412	0.068848	51.051	-58.6469	140.236	0.14121	0.33418	0.076855	36.657	56.606	35.3964	-0.16748	0.0014648	-0.04834	-19.163	-99.999	1512.442	-1.9805	0.65234	0.00048828
0.006	-68.355	-232.1314	1110.931	-1.4233	0.41748	-0.024902	-39.204	62.572	78.9119	0.24775	0.23565	0.13389	35.202	-11.9432	40.0547	0.12344	0.096971	0.18711	37.6852	113.099	224.5522	-0.26025	0.21973	0.072266	50.4267	-68.279	187	0.13731	0.34277	0.06709	28.418	7.817	48.981	-0.18408	0.015625	-0.05127	-15.676	-93.495	1528.106	-2.0503	0.66064	-0.01416
0.008	-45.372	-275.892	1170.9304	-1.2862	0.37402	-0.049072	-42.301	60.748	55.68615	0.28994	0.23174	0.13271	97.962	14.9401	38.3769	0.10332	0.089062	0.18565	58.1206	68.0226	237.154	-0.20264	0.21143	0.07373	33.9046	-23.13054	208.132	0.13027	0.35518	0.062305	26.078	26.197	47.433	-0.18628	0.033691	-0.052491	-15.52	-3.127	1487.98	-2.0776	0.66357	-0.024414
0.01	-44.182	-260.474	1183.8947	-1.1714	0.35596	-0.077637	-57.6568	39.35	76.853	0.32549	0.2251	0.13389	61.1842	31.171	33.878	0.082226	0.094141	0.18134	43.8863	96.87	226.164	-0.15942	0.20361	0.082275	12.873	-27.418	293.4724	0.11572	0.37109	0.058105	36.2643	39.513	16.84271	-0.1875	0.043945	-0.058594	-81.553	8.574	1462.1233	-2.127	0.66992	-0.038574
0.012	-35.659	-252.76	1259.759	-1.0684	0.35156	-0.097168	-18.34	64.836	74.831	0.3538	0.21504	0.13526	31.416	17.854	64.771	0.073632	0.089551	0.18086	28.5077	65.608	217.023	-0.11572	0.19482	0.083984	11.942	26.7424	378.7681	0.09961	0.38271	0.04834	47.6879	20.1106	36.612	-0.17578	0.066406	-0.062012	-32.646	12.844	1492.5119	-2.145	0.67724	-0.0542
0.014	30.731	-203.861	1326.513	-1.0347	0.37451	-0.098633	-36.4543	26.782	60.1721	0.37354	0.20654	0.13574	71.0763	45.564	49.044	0.060059	0.089844	0.18213	23.976	60.25	202.935	-0.050781	0.18652	0.092285	9.276	71.8191	471.956	0.071973	0.39189	0.046777	62.2447	50.689	55.977	-0.16992	0.075684	-0.068848	-45.932	29.7268	1468.8613	-2.1582	0.67383	-0.074219
0.016	18.383	-113.865	1343.505	-1.0234	0.45361	-0.098633	-16.736	28.7259	70.421	0.39023	0.19463	0.14102	12.794	31.884	10.6324	0.051758	0.084864	0.18193	-0.230000000000004	100.923	162.976	-0.018555	0.18311	0.092773	-9.217	70.9151	610.896	0.039551	0.40127	0.045605	52.4714	26.5571	46.129	-0.14746	0.095215	-0.075684	-55.444	-46.58	1492.6481	-2.1582	0.66064	-0.1001
0.018	62.8215	-108.971	1393.157	-1.0322	0.51465	-0.10962	-1.236	36.421	26.0202	0.39258	0.18213	0.14697	41.8777	21.23315	23.4377	0.042383	0.077441	0.17881	-0.919000000000004	61.9722	130.8	0.038574	0.17139	0.09668	-13.538	129.105	757.8805	0.0062497	0.41387	0.042969	31.107	15.3518	37.368	-0.13061	0.10694	-0.082031	-18.614	-18.1943	1503.833	-2.1465	0.6543	-0.10938
0.02	91.0048	-104.413	1408.878	-1.0308	0.57275	-0.125	-3.086	4.8835	24.193	0.38633	0.17158	0.14971	35.75	11.854	30.214	0.034961	0.07666	0.17295	-28.494	87.2657	126.6305	0.086425	0.15991	0.11133	-9.41	124.152	869.521	-0.030762	0.42627	0.041992	28.985	30.713	36.208	-0.10596	0.11328	-0.089355	-56.0303	16.7718	1479.945	-2.1147	0.63135	-0.14355
0.022	75.9164	-94.722	1351.7861	-1.0342	0.58789	-0.11328	34.696	37.578	21.067	0.38184	0.16826	0.15811	-15.128	-1.432	32.5651	0.026953	0.079492	0.17119	-44.116	73.5484	117.48091	0.12988	0.15723	0.11035	-37.317	98.608	961.518	-0.071191	0.4378	0.048144	33.983	-13.1023	46.978	-0.078613	0.12549	-0.095215	-4.511	2.905	1507.577	-2.0796	0.60987	-0.16089
0.024	134.816	-116.509	1392.0906	-1.0645	0.57324	-0.10156	23.718	32.504	9.598	0.37646	0.16504	0.15869	-14.319	37.082	29.5102	0.022949	0.086426	0.16699	-22.6648	17.783	119.198	0.17383	0.14795	0.11328	-25.507	82.066	1029.009	-0.10869	0.45	0.047852	31.562	-8.065	66.857	-0.064941	0.12842	-0.093262	33.955	54.95	1513.807	-2.041	0.58594	-0.17969
0.026	109.6525	-59.705	1391.1965	-1.1895	0.56055	-0.077148	42.868	25.6551	47.2762	0.37021	0.15254	0.1708	-54.3188	57.669	13.1271	0.021582	0.090039	0.16533	-47.72818	29.909	112.652	0.19824	0.14648	0.11426	-31.833	-12.48	1099.823	-0.14346	0.46367	0.050977	-13.731	-2.6594	38.0951	-0.033691	0.14307	-0.10303	18.881	2.658	1509.921	-1.9785	0.55615	-0.20166
0.028	44.883	-52.111	1408.505	-1.3155	0.56836	-0.057861	64.02376	47.206	44.501	0.35156	0.14697	0.17236	-48.4378	29.28181	46.561	0.020508	0.09873	0.16347	-55.8662	-5.6963	88.242	0.23877	0.14063	0.12451	-14.541	-67.501	1160.354	-0.1795	0.47871	0.050879	-10.679	-15.9181	45.295	-0.012207	0.15137	-0.10351	103.1979	-27.8979	1525.057	-1.9531	0.53711	-0.20947
0.03	78.5143	-74.262	1448.87	-1.4312	0.58252	-0.043945	43.417	9.7107	38.634	0.33555	0.14307	0.16846	-36.456	34.5934	58.213	0.021289	0.11552	0.16152	-50.061	-6.8782	83.192	0.26709	0.13257	0.12817	-0.0399999999999991	-104.1901	1137.526	-0.22168	0.48926	0.050781	-6.23	29.7632	63.949	0.0024414	0.15674	-0.1084	73.9614	4.251	1503.331	-1.9082	0.5166	-0.21777
0.032	33.0205	-56.289	1425.7947	-1.5464	0.60205	-0.034668	70.0980117	10.4003	64.346	0.31533	0.13115	0.16943	-66.511	16.9573	37.018	0.024512	0.125	0.16006	-59.899	49.15	59.688	0.28516	0.12451	0.13916	11.888	-164.888	1130.627	-0.27314	0.49717	0.052344	-41.1997	2.6551	57.311	0.023926	0.17041	-0.11475	36.8677	-32.1282	1509.7891	-1.8838	0.5	-0.22534
0.034	35.507	-119.129	1494.588	-1.5947	0.60449	-0.039063	63.82174	17.5224	56.571	0.29736	0.12402	0.16943	-41.933	4.677	44.883	0.029785	0.13672	0.1543	-37.027	17.9335	59.1254	0.30518	0.11963	0.14453	17.486	-146.01	1119.072	-0.35039	0.49356	0.051856	-35.414	-19.5087	69.7137	0.028809	0.17871	-0.11963	96.4363	14.497	1510.461	-1.8765	0.48486	-0.22217
0.036	48.465	-120.38	1556.277	-1.6558	0.62061	-0.043457	30.109	-6.5564	51.952	0.28252	0.11494	0.16738	-42.948	13.151	28.2204	0.037891	0.1499	0.1539	-31.681	51.0685	60.8773	0.31396	0.11523	0.14551	30.894	-164.182	1090.11	-0.45117	0.48067	0.059277	-47.382	-2.711	48.7117	0.039063	0.18848	-0.12549	65.378	15.418	1474.245	-1.8726	0.47607	-0.22119
0.038	-9.691	-95.4433	1565.655	-1.7107	0.62476	-0.057617	69.4043	21.6656	44.07	0.25615	0.10791	0.16524	-77.008	-20.8462	50.947	0.045801	0.16455	0.1503	-58.4743	43.9275	45.92	0.31787	0.11084	0.1543	57.103	-168.689	1052.015	-0.5752	0.46386	0.06582	-63.99867	-36.221	54.998	0.039307	0.19922	-0.12891	88.8824	-24.251	1467.773	-1.8799	0.47168	-0.22021
0.04	22.352	-138.126	1596.393	-1.771	0.62744	-0.070801	27.741	18.6313	5.5722	0.23233	0.099707	0.16211	-20.045	-22.4482	55.422	0.059473	0.17432	0.1417	-34.394	18.31	53.2341	0.32373	0.10205	0.15869	70.274	-107.215	1019.9711	-0.72412	0.44189	0.07373	-33.158	-26.848	102.013	0.032715	0.20605	-0.12891	99.3762	41.389	1430.07	-1.895	0.4917	-0.20605
0.042	4.974	-109.472	1590.74	-1.855	0.62354	-0.087402	4.475	7.103	16.0823	0.20957	0.094922	0.16103	-52.72248	-9.4294	16.0709	0.066406	0.18476	0.13877	-47.916	63.628	44.533	0.32373	0.098145	0.16211	75.179	-106.469	1022.167	-0.89756	0.40947	0.087012	-21.076	-27.042	124.288	0.012207	0.21338	-0.12988	51.376	39.54889	1415.477	-1.9072	0.50293	-0.21363
0.044	-31.014	-121.8349	1591.134	-1.8984	0.62598	-0.096191	37.55	39.227	26.2914	0.18457	0.085938	0.16211	-40.036	-16.4575	30.5219	0.074219	0.1958	0.13232	-31.871	36.1203	32.2297	0.31885	0.095215	0.16943	95.198	-67.15726	1045.695	-1.1021	0.38565	0.097363	-45.147	-51.8536	164.541	-0.0043945	0.21777	-0.13086	95.56107	77.599	1438.54	-1.8828	0.50781	-0.21924
0.046	22.643	-149.904	1614.067	-1.98	0.63135	-0.12744	-1.128	10.92098	25.2828	0.16455	0.082519	0.16123	-0.716999999999999	26.4086	32.857	0.093555	0.20508	0.12207	-12.101	23.6869	42.719	0.31543	0.094727	0.16895	111.129	-5.122	1023.051	-1.3197	0.37432	0.10947	2.621	-11.343	191.452	-0.046387	0.22363	-0.13232	68.8513	124.831	1399.3636	-1.8516	0.49219	-0.22266
0.048	-2.231	-70.85	1572.807	-2.0339	0.64135	-0.14819	-14.616	16.02558	44.908	0.13643	0.070215	0.16211	-41.326	25.8972	33.7843	0.10479	0.21094	0.11797	2.653	43.5314	21.6845	0.29883	0.089844	0.16992	116.123485	14.528	1006.0259	-1.5408	0.38105	0.12549	-7.137	-4.3347	208.9988	-0.086914	0.23072	-0.12891	39.835	73.808	1376.276	-1.8511	0.49268	-0.21729
0.05	-41.991	-80.99	1574.527	-2.0781	0.65625	-0.16797	-8.568	28.208	38.3193	0.1126	0.07334	0.16328	10.264	18.7842	60.159	0.11377	0.22031	0.10898	32.868	2.6543	13.7925	0.27783	0.091553	0.16553	124.913	44.255	1031.5605	-1.7539	0.39648	0.13525	-36.983	19.0934	279.129	-0.13477	0.23438	-0.12793	76.577	81.493	1366.7676	-1.8687	0.48682	-0.20068
0.052	-42.271	-47.5361	1571.679	-2.1211	0.6748	-0.19971	-65.929949	7.9373	46.891	0.088184	0.067481	0.1585	32.637	19.66887	49.087	0.11651	0.2293	0.10235	50.9624	37.6526	17.995	0.26904	0.091309	0.15967	98.24	10.58	1001.9747	-1.9396	0.42197	0.14814	-24.762	79.9362	344.498	-0.20215	0.23877	-0.12207	38.884	73.574	1333.5996	-1.8945	0.49804	-0.20019
0.054	-100.173	-17.617	1550.196	-2.1382	0.68604	-0.21631	-35.192	32.0442	48.623	0.064941	0.067383	0.15527	28.918	-21.889	57.966	0.11914	0.24219	0.10107	29.305	40.3982	-3.239	0.25098	0.082031	0.16064	79.536	-82.34	1008.072	-2.0902	0.4627	0.15176	-62.488	75.6429	413.095	-0.23633	0.24609	-0.12158	16.284	48.4346	1355.596	-1.894	0.51025	-0.19531
0.056	-43.049	-81.679	1552.8103	-2.1543	0.69629	-0.25	-48.484	24.2182	17.81296	0.038867	0.066406	0.14893	69.2989	-26.0062	86.97	0.11543	0.25088	0.095801	34.506	9.54	26.625	0.24268	0.081543	0.15527	94.94	-112.476	1020.0413	-2.1746	0.50332	0.15879	-45.595	111.2305	507.5157	-0.31494	0.25928	-0.11621	19.05	116.391	1341.388	-1.8691	0.5127	-0.19336
0.058	-15.324	-19.4458	1521.952	-2.157	0.69751	-0.27368	-73.5783	19.3095	32.462	0.018555	0.068555	0.14161	49.2076	-22.849	54.3139	0.11152	0.26015	0.093653	30.484	45.183	26.384	0.22852	0.074707	0.14893	33.369	-184.2565	1025.958	-2.1825	0.53975	0.17608	-16.1429	121.2297	600.209	-0.39136	0.26807	-0.11231	-45.017	82.6118	1315.145	-1.8472	0.50537	-0.18799
0.06	-51.958	-8.71756	1506.747	-2.1538	0.69385	-0.29785	-45.762	43.522	22.5137	0.0033202	0.076367	0.14394	37.065	-25.511	72.772	0.1002	0.27422	0.088965	51.1046	11.6295	23.343	0.21265	0.072998	0.14551	15.1028	-250.844	1073.322	-2.1265	0.5791	0.18262	-33.267	99.8154	724.624	-0.47314	0.27637	-0.1084	-13.976	67.031	1311.736	-1.8008	0.5	-0.19727
0.062	-15.203	-2.3119	1550.269	-2.1401	0.68115	-0.32227	-72.115	2.5843	32.3773	-0.0088867	0.085547	0.14189	53.2285	-0.641999999999999	90.0154	0.085449	0.28477	0.082715	49.9379	-0.3856	51.036	0.19727	0.07373	0.13916	4.578	-262.767	1066.925	-2.004	0.61905	0.17949	-27.094	137.409	821.893	-0.60254	0.29102	-0.09668	-46.32	92.69	1250.248	-1.7749	0.48877	-0.19629
0.064	-17.67	78.89	1526.067	-2.1309	0.66602	-0.33594	-38.272	-6.8028	52.304	-0.015625	0.10352	0.1416	22.599	-15.159	107.9138	0.068359	0.30322	0.078125	32.694	33.4331	56.733	0.18018	0.063477	0.13477	-60.549	-322.496	1090.6652	-1.8453	0.63672	0.16992	-8.83348	116.596	840.5908	-0.67139	0.30322	-0.088867	-76.6763	67.034	1219.799	-1.748	0.48047	-0.19727
0.066	3.91	11.077	1526.6199	-2.1074	0.6416	-0.35889	-31.122	1.4329	31.736	-0.014355	0.11426	0.13838	54.5921	-41.6909	160.879	0.048828	0.31768	0.07373	44.1017	2.3124	53.334	0.1709	0.061523	0.13281	-69.944	-310.249	1139.573	-1.6692	0.64805	0.16094	15.957	79.834	893.424	-0.84326	0.31396	-0.063965	-21.041	119.6146	1216.9977	-1.7109	0.46094	-0.19092
0.068	88.3262	-17.05	1557.392	-2.0825	0.61621	-0.36035	-44.081	-19.8275	48.891	-0.012696	0.12715	0.14023	18.601	-21.8222	204.747	0.028125	0.33672	0.06875	23.792	47.397	30.3798	0.14893	0.06543	0.12891	-106.639	-247.815	1166.597	-1.5095	0.63496	0.14092	31.039	55.61	930.4319	-0.98804	0.33105	-0.049073	-76.55286	127.616	1187.6994	-1.6929	0.45361	-0.19092
0.07	43.418	-31.655	1536.104	-2.0684	0.58789	-0.37305	-0.303999999999995	3.68702	42.616	-0.00293	0.14082	0.13672	-6.4239	-11.09207	284.331	0.0023438	0.34961	0.060938	15.52	59.763	-2.1	0.13354	0.060303	0.125	-121.617	-218.108	1260.454	-1.3608	0.61475	0.12061	28.582	-37.0524	969.4447	-1.1519	0.35205	-0.029297	-48.257	112.25	1187.496	-1.6563	0.43945	-0.1875
0.072	91.823	-98.138	1543.651	-2.0444	0.55908	-0.37549	-9.679	14.925	20.898	0.0097653	0.15351	0.13242	36.5716	23.9283	385.859	-0.022168	0.3668	0.062109	9.469	18.7958	20.616	0.11865	0.061035	0.12939	-120.211	-126.008	1290.047	-1.2324	0.59492	0.094142	57.367	-93.707	1018.722	-1.3979	0.37842	0.00048828	6.494	172.228	1151.705	-1.6279	0.42627	-0.18286
0.074	83.2894	-28.642	1511.115	-2.0474	0.542	-0.3789	-3.733	12.3161	33.155	0.024414	0.16553	0.12256	13.716	63.3778	483.7019	-0.052246	0.375	0.058594	-11.331	38.893	35.5421	0.098145	0.061035	0.12891	-164.763	-108.127	1271.59	-1.1238	0.57431	0.081347	30.6098	-137.5203	1001.749	-1.5288	0.39209	0.017578	-34.871	161.346	1140.848	-1.5972	0.4126	-0.17725
0.076	31.694	-17.457	1467.8686	-2.0464	0.53467	-0.37793	35.889	52.532	36.3979	0.040919	0.17226	0.11826	-14.311	68.65	600.367	-0.084961	0.38779	0.055957	-10.113	17.9533	29.772	0.088135	0.069336	0.12695	-161.841	-118.059	1274.929	-1.0433	0.56728	0.073926	-6.906	-189.378	1034.228	-1.793	0.43555	0.071777	36.992	198.501	1134.539	-1.5527	0.39844	-0.17139
0.078	93.268779	-45.4678	1492.6655	-2.0566	0.51953	-0.37109	12.944	21.5751	40.2035	0.059669	0.18427	0.11074	9.977	118.384	722.453	-0.11934	0.39219	0.057324	-25.015	27.5912	46.092	0.07959	0.077637	0.12939	-147.925	-61.558	1276.799	-0.99735	0.58662	0.072266	-19.8152	-169.478	1061.845	-1.9898	0.46973	0.10987	3.57	228.107	1087.154	-1.5222	0.38379	-0.16089
0.08	90.3838	7.522	1454.6001	-2.0566	0.51953	-0.36816	54.5585	20.9562	59.19	0.079201	0.19091	0.10215	-34.175	136.695	827.901	-0.15293	0.40547	0.053418	-42.2182	57.577	43.6083	0.074707	0.086914	0.12451	-155.557	-79.036	1284.117	-0.98828	0.64648	0.068848	-56.044	-141.018	1030.205	-2.187	0.50049	0.12744	-9.394	195.782	1076.7858	-1.4941	0.36914	-0.15234
0.082	80.7839	-35.2416	1434.7983	-2.0718	0.51025	-0.3501	59.0846	15.3648	43.79	0.093165	0.20049	0.093553	17.333	127.399	950.7026	-0.18896	0.41299	0.050781	-40.51	13.6654	53.347	0.071289	0.087891	0.12549	-124.846	-64.199	1308.702	-0.99453	0.73105	0.05039	-75.658	-115.047	1015.134	-2.3784	0.52588	0.12695	31.22	205.3197	1045.929	-1.459	0.35498	-0.13477
0.084	97.5948	0.689999999999998	1444.524	-2.0893	0.51026	-0.34302	20.269	-22.1287	56.6013	0.11084	0.20264	0.085449	10.19	104.436	1025.61	-0.22852	0.42285	0.047363	-42.803	33.3923	40.446	0.075684	0.10156	0.13135	-114.384	-38.594	1294.4927	-0.98662	0.80791	0.008691	-80.499	-49.539	1004.0657	-2.439	0.53955	0.10889	4.99	185.8718	1019.1701	-1.4375	0.34766	-0.13574
0.086	36.639	89.812	1408.851	-2.1011	0.5083	-0.33594	80.5315	-3.353	71.999	0.12236	0.20713	0.076466	-43.28	15.813	1098.71	-0.27803	0.42988	0.043164	-54.6661	37.709	12.7451	0.075684	0.11475	0.13159	-135.463	-112.2312	1336.3857	-0.94951	0.80987	-0.018652	-145.191	-39.359	1004.3945	-2.4409	0.58447	0.079102	43.315	159.794	1014.195	-1.4004	0.32813	-0.12012
0.088	77.3763	68.623	1403.945	-2.1011	0.5083	-0.33154	74.52193	-15.7698	56.388	0.13076	0.21299	0.070606	36.989	-74.513	1162.183	-0.3414	0.43691	0.039551	-43.294	8.4372	33.7991	0.078613	0.12744	0.13428	-92.063	-122.826	1379.545	-0.94248	0.76103	-0.03125	-148.411	-8.405	1049.666	-2.3452	0.63135	0.057373	78.1575	200.2741	969.082	-1.375	0.3169	-0.10938
0.09	83.336	124.467	1354.9377	-2.1016	0.50293	-0.33252	54.078	-35.043	64.9736	0.13194	0.22432	0.069824	13.777	-126.924	1173.785	-0.42735	0.43067	0.039942	-55.7915	27.7503	49.186	0.079102	0.14014	0.13525	-92.515	-159.858	1380.103	-0.98926	0.71191	-0.044434	-123.422	8.599	1034.846	-2.2046	0.67627	0.045898	36.773	173.26027	952.045	-1.3452	0.30811	-0.098633
0.092	33.402	99.212	1294.959	-2.0879	0.49023	-0.33691	62.60513	-12.3784	75.2155	0.13154	0.22802	0.06338	34.666	-187.978	1194.267	-0.53516	0.42393	0.042383	-50.5186	-12.3223	67.493	0.083008	0.14795	0.1377	-62.61	-220.052	1450.717	-1.0839	0.69111	-0.059277	-142.21	-8.056	1028.881	-1.98	0.69189	0.020996	64.89479	184.4565	958.771	-1.312	0.29736	-0.078613
0.094	51.833	60.894	1315.0036	-2.0808	0.47779	-0.32129	0.353999999999999	-22.2484	85.827	0.12354	0.23828	0.055664	79.378	-201.904	1165.294	-0.66992	0.40625	0.044434	-23.612	-23.73341	60.574	0.083496	0.16699	0.14014	-37.0845	-183.847	1472.651	-1.1981	0.68291	-0.068164	-77.389	-15.577	1064.6	-1.855	0.66064	0.0053711	54.7633	209.127	921.441	-1.2876	0.2876	-0.074219
0.096	24.308	130.902	1305.063	-2.0742	0.47656	-0.31299	2.762	3.102	145.2981	0.1125	0.24639	0.056444	39.739	-198.669	1127.781	-0.83399	0.38652	0.045312	-26.257	8.843	31.7227	0.081298	0.17652	0.13476	-56.429	-209.385	1487.676	-1.3055	0.69268	-0.072461	-66.028	-48.229	1045.954	-1.5815	0.5874	-0.019043	80.459	167.1623	908.42	-1.2559	0.27148	-0.0625
0.098	0.164999999999999	92.915	1313.946	-2.0508	0.47266	-0.30566	7.801	32.897	191.1698	0.095005	0.25684	0.067471	106.477	-204.601	1124.579	-1.0237	0.36612	0.042968	-8.547	-21.76024	43.1129	0.081543	0.18701	0.13672	11.1445	-205.022	1532.951	-1.403	0.70459	-0.067481	-68.8841	-108.646	1048.3997	-1.3929	0.52856	-0.052735	90.0518	198.1939	871.2625	-1.2268	0.2605	-0.048096
0.1	7.842	101.842	1307.01	-2.0293	0.46973	-0.29834	-42.3626	17.638	270.802	0.076247	0.26701	0.062012	112.059	-162.538	1087.556	-1.2366	0.35283	0.050391	-0.722000000000001	11.9356	48.3364	0.089355	0.20752	0.13867	27.2318	-145.015501	1526.368	-1.4976	0.71924	-0.065918	-31.759	-143.253	1064.195	-1.2217	0.47314	-0.083496	12.912	194.457	836.3328	-1.1948	0.25195	-0.039063
0.102	-54.034	93.6	1262.485	-1.978	0.46387	-0.2915	-24.152	53.8082	359.418	0.052422	0.28195	0.064353	88.462	-134.296	1091.811	-1.4638	0.35264	0.056836	-7.579	20.5549	18.9714	0.085938	0.21338	0.13525	9.8172	-147.9267	1534.9633	-1.5802	0.73223	-0.066211	-72.0948	-198.3727	1098.926	-1.0508	0.44434	-0.11621	24.746	197.849	841.136	-1.1597	0.23584	-0.024902
0.104	-45.242	14.274	1254.45	-1.9356	0.4585	-0.2815	-18.539	70.0145	432.927	0.026855	0.29443	0.067383	152.197	-132.039	1123	-1.6914	0.36133	0.061523	25.422	-2.40496	18.91915	0.087402	0.229	0.12842	77.042	-82.33	1529.685	-1.6664	0.7414	-0.056641	-58.606	-239.668	1163.63652	-0.99707	0.43848	-0.12256	33.269	242.575	781.27	-1.1406	0.22754	-0.018066
0.106	-36.88	70.7257	1211.521	-1.8926	0.44727	-0.27539	-33.789	96.262	539.00062	0.0026757	0.30203	0.067478	147.121	-55.65	1090.854	-1.8948	0.3834	0.06582	22.11	23.8037	29.6478	0.09375	0.23633	0.12573	74.519	-34.984	1488.876	-1.75	0.74453	-0.047266	-20.361	-245.398	1175.387	-0.94043	0.44434	-0.11572	-42.4233	199.887	751.971	-1.104	0.22021	-0.0024414
0.108	-66.204	82.05	1183.5763	-1.833	0.44043	-0.25732	-4.416	152.64	630.4957	-0.027206	0.30905	0.072469	160.2399	-21.77	1096.748	-2.0561	0.4169	0.069531	27.539	-2.6626	31.9882	0.088867	0.24951	0.12109	43.963	-62.0952	1503.823	-1.8267	0.74756	-0.036719	-45.2769	-277.706	1190.328	-0.96021	0.49634	-0.099363	-16.281	185.932	742.431	-1.071	0.21289	0.0092774
0.11	-33.819	84.75481	1200	-1.8066	0.4375	-0.25195	-31.215	147.936	722.515	-0.063164	0.31726	0.070127	189.039	9.035	1082.532	-2.1542	0.45713	0.075	40.357	-5.2911	50.536	0.083496	0.26172	0.12207	50.063	-24.04844	1485.515	-1.8901	0.74854	-0.021484	-6.021	-288.998	1260.345	-1.0244	0.56738	-0.096191	-43.646	190.9649	683.27	-1.0488	0.20313	0.013672
0.112	-53.0152	144.672	1182.486	-1.7476	0.4248	-0.23438	-9.947	136.075	814.14	-0.096464	0.32527	0.070005	130.901	20.599	1025.243	-2.194	0.50146	0.075977	33.995	36.616	18.7296	0.07666	0.26563	0.12207	25.5285	-47.068	1467.275	-1.9383	0.74609	-0.018457	-4.992	-250.703	1294.568	-1.1006	0.66211	-0.12598	-42.492	165.6613	656.132	-1.0015	0.1958	0.026367
0.114	-39.6	113.589	1173.701	-1.6978	0.41504	-0.22827	13.045	111.626	871.391	-0.13721	0.33252	0.067383	120.006	-62.87	1024.771	-2.1597	0.53271	0.072266	44.6401	4.1377	13.5028	0.05957	0.28223	0.12109	30.8226	-57.799	1493.436	-1.9804	0.75459	-0.0012695	5.13500000000001	-234.461	1345.06	-1.1167	0.67432	-0.13232	-15.431	198.589	609.1727	-0.97852	0.19434	0.035156
0.116	10.32	148.636	1155.824	-1.6479	0.40332	-0.21826	-16.938	22.803	962.517	-0.17585	0.33679	0.06842	112.921	-107.717	1006.594	-2.0473	0.56191	0.06875	40.992	27.772	40.6266	0.04541	0.29078	0.12281	-2.432	19.866	1452.842	-2.0225	0.76084	0.0096678	85.2421	-175.6038	1351.322	-1.1602	0.66211	-0.11914	-76.916	175.7161	574.3568	-0.9375	0.18848	0.044922
0.118	-19.924	192.187	1119.564	-1.5854	0.38916	-0.20166	22.913	-10.831	1061.941	-0.21623	0.34232	0.071122	44.7302	-162.379	1022.9538	-1.8898	0.58584	0.06582	38.4824	10.8932	27.2724	0.027832	0.2959	0.12354	-55.326	-3.586	1440.216	-2.0592	0.76739	0.021972	58.7935	-151.9733	1304.5834	-1.2508	0.65503	-0.1062	-55.7352	149.9592	573.6035	-0.90087	0.18945	0.052734
0.12	26.303	157.408	1100.807	-1.5562	0.38672	-0.19434	14.975	-68.263	1072.377	-0.26942	0.34806	0.073876	54.466	-258.238	1100.028	-1.7402	0.5917	0.055664	36.698	-43.396	31.25	0	0.31396	0.11816	-3.413	26.5661	1489.475	-2.0835	0.77588	0.037598	84.2861	-164.4216	1340.4838	-1.3633	0.66992	-0.082031	-9.025	180.949	534.625	-0.8667	0.18359	0.060059
0.122	33.495	201.775	1052.055	-1.4961	0.36816	-0.17871	32.188	-135.399	1092.126	-0.3385	0.34228	0.07028	12.349	-272.671	1079.384	-1.6054	0.58643	0.060742	18.725	-11.832	24.173	-0.014648	0.31689	0.13135	-31.388	49.2146	1494.07367	-2.1003	0.77959	0.050098	119.7824	-122.522	1324.2717	-1.4941	0.71289	-0.05957	-63.8401	157.633	507.641	-0.81787	0.1792	0.063965
0.124	-4.798	175.97	1014.1844	-1.4549	0.3584	-0.16602	96.352	-146.1775	1070.701	-0.41553	0.33008	0.077637	-37.4842	-323.217	1084.5653	-1.5093	0.56885	0.051758	8.419	-31.01576	50.056	-0.037109	0.32959	0.13086	-72.377	-41.736	1549.921	-2.1152	0.77725	0.062207	99.8374	-115.452	1313.9734	-1.5488	0.73047	-0.049805	-34.065	167.744	508.265	-0.79736	0.17432	0.071777
0.126	33.1991	139.899	1010.195	-1.4199	0.3418	-0.15625	66.204	-174.55	1049.294	-0.52491	0.319	0.076299	-35.3694	-337.879	1115.9871	-1.4276	0.53643	0.035547	-7.977	-31.9267	90.8632	-0.055176	0.33838	0.13769	-51.682	-25.169	1566.775	-2.1206	0.78115	0.071192	115.07	-109.957	1356.1412	-1.6211	0.77344	-0.033203	-47.069	175.458	473.895	-0.74609	0.1748	0.083008
0.128	33.388	179.743	978.949	-1.3691	0.32617	-0.14258	125.207	-173.916	1090.461	-0.65176	0.30056	0.081497	-113.588	-272.909	1118.0547	-1.3367	0.51553	0.026172	-34.095	13.9862	111.2136	-0.071777	0.34863	0.13525	-99.173	-67.17346	1555.985	-2.1163	0.78018	0.079395	58.7386	-93.542	1349.2515	-1.6678	0.78491	-0.032959	-43.276	133.233	444.954	-0.70581	0.17725	0.086426
0.13	20.129	131.5433	949.1766	-1.3452	0.3208	-0.13623	136.235	-131.01	1051.418	-0.79656	0.28485	0.088634	-105.853	-253.26	1190.232	-1.2425	0.4874	0.021094	-42.8544	-1.488382	136.134	-0.099609	0.35986	0.1377	-88.582	-86.214	1578.099	-2.1187	0.77979	0.089844	23.083	-134.3221	1383.26686	-1.7124	0.80127	-0.032227	-5.164	139.2219	398.05893	-0.66357	0.17334	0.089844
0.132	67.713	154.5913	935.232	-1.3022	0.30713	-0.12207	118.255	-123.732	1048.069	-0.9604	0.27172	0.094848	-97.797	-199.8848	1236.33	-1.1641	0.47617	0.016406	-61.549	36.164	183.1889	-0.10986	0.3623	0.1416	-78.979	-0.385	1526.117	-2.1157	0.77529	0.10615	61.074	-128.637	1414.655	-1.7554	0.80713	-0.040039	-46.458225	115.5147	375.9269	-0.60352	0.17529	0.095703
0.134	36.311	178.385	906.652	-1.2652	0.30176	-0.11182	166.3594	-80.737	1050.891	-1.1484	0.2583	0.10596	-150.958	-131.697	1233.459	-1.123	0.50195	0.0068359	-59.116	49.862	235.093	-0.13916	0.37451	0.14453	-130.195	-17.7521	1478.3288	-2.1133	0.76524	0.11289	17.745	-99.465	1396.3403	-1.7749	0.80615	-0.046387	-0.436	90.567	378.178	-0.57471	0.16992	0.1001
0.136	56.4023	124.644	903.548	-1.2358	0.29492	-0.1001	158.7943	-56.2177	1007.423	-1.358	0.26447	0.1163	-121.33	-168.63	1266.741	-1.1047	0.57344	-0.0056641	-58.511	43.1093	313.12	-0.17017	0.37476	0.14502	-97.069	11.0324	1490.117	-2.1047	0.75273	0.1289	-2.842	-137.045	1448.8214	-1.8027	0.81055	-0.066406	17.975	115.9918	329.945	-0.51709	0.17139	0.10889
0.138	56.488	148.77563	883.002	-1.1909	0.28711	-0.083496	158.3477	-38.157	1013.553	-1.5701	0.28794	0.12685	-147.364	-104.597	1235.355	-1.1024	0.62656	-0.022559	-85.689	116.79	403.5872	-0.20313	0.37988	0.146	-153.92	19.5026	1452.074	-2.0918	0.74609	0.13672	15.514	-114.469	1478.713	-1.8076	0.81738	-0.085449	1.606	90.514881	309.081	-0.47607	0.17188	0.10913
0.14	43.3952	110.2536	840.058	-1.1729	0.28223	-0.078613	190.985	9.868	1011.523	-1.7583	0.32116	0.13808	-146.03	-92.132	1229.4408	-1.0731	0.64258	-0.04209	-74.818	135.954	497.352	-0.25146	0.37744	0.13477	-153.454	-15.069	1462.321	-2.0776	0.729	0.14307	-12.62	-132.6742	1483.741	-1.8081	0.82568	-0.10107	78.721	104.59	290.945	-0.42676	0.16895	0.11182
0.142	88.559	97.147	818.08	-1.1348	0.271	-0.064453	131.025	18.821	980.2854	-1.9046	0.36849	0.14315	-96.047	-92.432	1245.1898	-1.0605	0.61084	-0.055078	-59.892	141.11	644.382	-0.28271	0.38525	0.13477	-74.894	58.212	1478.845	-2.0623	0.71269	0.15869	17.071	-168.5882	1533.368	-1.8086	0.83398	-0.13281	37.862	108.327	243.664	-0.36523	0.16602	0.11523
0.144	-0.369	161.7512	768.8428	-1.1086	0.27612	-0.049316	103.3488	-14.365	998.369	-2.0034	0.4165	0.14648	-122.861	-13.08	1213.591	-1.0996	0.57715	-0.068359	-38.979	161.941	741.271	-0.35156	0.3877	0.1377	-111.683	64.037	1453.189	-2.0659	0.70557	0.16924	14.732	-124.659	1510.329	-1.8008	0.83984	-0.14648	63.4083	64.986	244.041	-0.33594	0.16699	0.11816
0.146	-18.865	150.4679	745.537	-1.0811	0.27441	-0.041016	98.828	-51.549	996.804	-2.0252	0.46389	0.14551	-111.662	-67.138	1253.81	-1.2015	0.56025	-0.07002	-40.524	99.042	857.066	-0.41967	0.38647	0.12549	-51.2474	63.574	1441.315	-2.0753	0.72666	0.18603	-25.212	-138.0806	1509.136	-1.8003	0.82861	-0.17334	83.7985	92.2767	206.2231	-0.26807	0.16455	0.12061
0.148	-7.847	188.427	714.556	-1.0542	0.26807	-0.026855	38.2584	-118.696	1005.961	-1.9953	0.50462	0.13406	-72.683	-92.307	1305.4607	-1.3285	0.56133	-0.070117	-9.18	104.916	971.335	-0.50244	0.38525	0.1167	-21.8629	132.526	1397.812	-2.0752	0.75938	0.18643	18.972	-99.8147	1518.183	-1.791	0.81933	-0.19287	33.2865	88.7974	186.052	-0.21631	0.16773	0.11915
0.15	-49.5255	186.95	673.305	-1.0322	0.26855	-0.023926	27.5222	-172.8667	1065.14509	-1.918	0.54631	0.11999	-90.246	-100.28831	1333.791	-1.4379	0.57539	-0.069336	-8.325	78.6468	1045.137	-0.64307	0.37744	0.1123	-43.5513	87.911	1391.4595	-2.0488	0.7793	0.1748	-42.627	-38.653	1449.375	-1.7871	0.80859	-0.21484	63.7733	87.27063	196.6984	-0.16357	0.16113	0.12109
0.152	-27.2781	122.317	650.3477	-1.0015	0.26367	-0.0087891	-11.635	-193.302	1059.0155	-1.7949	0.58318	0.11098	-50.5362	-197.602	1407.995	-1.5294	0.59131	-0.068945	24.901	-6.904	1125.992	-0.72803	0.37549	0.11182	28.784	100.33	1427.723	-1.9851	0.76494	0.15859	-76.3352	-48.137	1432.928	-1.7837	0.78955	-0.23486	40.189	106.3448	168.712	-0.10156	0.15771	0.12012
0.154	-53.9618	153.7984	591.2844	-0.96924	0.26001	-0.0039063	-67.9439	-250.931	1090.996	-1.6577	0.60205	0.10596	-22.733	-150.877	1419.665	-1.5991	0.604	-0.064941	57.76	-37.061	1159.916	-0.9292	0.35986	0.1123	12.2908	117.286	1394.48	-1.9397	0.74424	0.15869	-29.475	-2.545	1445.379	-1.7788	0.78369	-0.25122	-0.247	74.049	164.07	-0.056152	0.16016	0.12354
0.156	-81.826	150.031	555.544	-0.93115	0.26025	0.0019531	-47.463391	-260.139	1126.788	-1.527	0.60876	0.098645	-10.828	-165.7457	1434.012	-1.6554	0.5997	-0.051953	75.332	-133.134	1163.109	-1.0991	0.35425	0.12256	28.0136	40.694	1408.698	-1.9397	0.73487	0.16455	-64.996	-19.466	1442.734	-1.7734	0.77148	-0.2627	35.914	79.553	163.418	0.010254	0.15039	0.12598
0.158	-28.542	152.8086	524.9811	-0.88867	0.26025	0.0078125	-118.312	-254.236	1133.23	-1.4144	0.60479	0.082268	35.2777	-187.7813	1471.364	-1.7159	0.59795	-0.042285	104.006	-186.949	1202.348	-1.291	0.34766	0.13867	60.695	67.129	1380.247	-1.9562	0.74853	0.16455	-3.784	-23.9367	1492.106	-1.7632	0.74072	-0.28027	6.544	78.838	121.364	0.054688	0.14966	0.13819
0.16	-65.8362	186.677	474.3581	-0.86426	0.25879	0.016602	-131.479	-256.912	1198.9	-1.3057	0.58482	0.062783	42.971	-122.25	1456.696	-1.7847	0.59638	-0.032129	149.45335	-180.534	1209.801	-1.5679	0.35596	0.15723	-3.067	21.561	1325.583	-1.9644	0.76611	0.15869	4.09	47.767	1480.466	-1.7617	0.71973	-0.28809	-6.088	58.01	126.558	0.10059	0.14453	0.13672
0.162	-84.6212	146.808	461.181	-0.81396	0.25586	0.019531	-122.339	-204.186	1226.089	-1.2021	0.56013	0.039384	65.7165	-162.8562	1490.205	-1.8534	0.59463	-0.026269	179.2836	-219.991	1209.025	-1.7134	0.36572	0.16162	53.3112	-2.788	1315.105	-1.9363	0.77422	0.16142	-38.405	28.7941	1470.6633	-1.7676	0.68164	-0.29883	3.436	56.687	113.517	0.1582	0.13428	0.13965
0.164	-48.093	170.336	440.035	-0.77466	0.25317	0.027832	-153.246	-163.6405	1237.446	-1.1035	0.54492	0.024902	107.952	-134.0412	1500.328	-1.9116	0.59521	-0.016113	193.6125	-184.838	1225.474	-1.9839	0.39209	0.18408	76.528	71.76	1276.826	-1.9016	0.77734	0.15733	57.389	30.729	1505.194	-1.7615	0.65405	-0.29859	-29.813	32.2407	77.0801	0.18311	0.13184	0.14307
0.166	-54.5558	184.335	420.8742	-0.73242	0.25537	0.037598	-110.157	-147.539	1274.077	-1.0248	0.54048	0.02052	73.049	-77.128	1478.247	-1.9532	0.59053	-0.0075195	196.9411	-148.958	1195.899	-2.1521	0.42163	0.17749	45.586	40.175	1273.0019	-1.866	0.77383	0.15498	45.996	25.563	1460.7901	-1.7695	0.63086	-0.30078	-30.308	14.3322	87.0283	0.21973	0.12598	0.14404
0.168	-32.8095	146.432	434.568	-0.6792	0.25537	0.046875	-138.261	-92.046	1260.531	-0.9702	0.54741	0.032545	94.175	-119.043	1499.046	-1.9855	0.5918	-0.0019531	191.606	-153.422	1201.535	-2.2671	0.4624	0.16895	68.168	100.203	1266.3775	-1.8328	0.75977	0.1545	76.8409	-38.06	1469.76752	-1.7925	0.6001	-0.29639	-55.779	47.5369	65.9098	0.26049	0.12159	0.14966
0.17	-51.9906	170.876	406.771	-0.65234	0.24902	0.039551	-134.193	-94.456	1256.567	-0.9645	0.59629	0.035645	73.9002	-42.7436	1472.736	-2.0008	0.59297	0.00039062	188.159	-99.932	1211.577	-2.3242	0.52148	0.15479	35.5657	144.3561	1217.2731	-1.8066	0.75195	0.15088	114.2097	-13.4165	1487.654	-1.8081	0.59229	-0.28857	-70.1255	40.169	78.781	0.29297	0.11426	0.15283
0.172	-50.5949	137.008	365.837	-0.59668	0.25586	0.057129	-49.08357	-81.412	1297.26	-0.99107	0.6579	0.028593	31.406	-35.50263	1435.2618	-2.0068	0.58965	0.0076173	179.80137	-84.882	1182.905	-2.311	0.55713	0.14844	22.743	119.9421	1231.143	-1.7835	0.73682	0.15312	45.327	-25.8521	1476.535	-1.8418	0.57373	-0.2832	-28.388	67.52	94.836	0.31982	0.10693	0.15771
0.174	10.85	111.27459	350.168	-0.55395	0.25342	0.057373	-74.099	-42.905	1271.2145	-1.0098	0.68359	0.0068359	82.2868	-45.903	1460.108	-2.0093	0.58643	0.019043	164.28454	-63.601	1204.8035	-2.1968	0.6333	0.14063	39.246	193.508	1221.776	-1.761	0.72618	0.14971	67.719	-58.462	1516.555	-1.8613	0.5625	-0.28076	-38.4929	78.03	83.58	0.33252	0.099609	0.16064
0.176	-23.491	134.129	295.1516	-0.50977	0.24951	0.061035	-92.771	-66.493	1310.801	-1.0264	0.65092	0.010051	25.465	38.9981	1443.792	-2.0104	0.57354	0.024023	162.457	-20.088	1206.265	-2.075	0.67944	0.13745	-29.918	182.943	1178.59	-1.7371	0.7125	0.15166	79.7312	-5.5267	1476.852	-1.8862	0.56104	-0.27783	-62.9605	56.604	88.547	0.3457	0.088379	0.16309
0.178	0.102999999999998	94.4925	300.5156	-0.4502	0.24365	0.066406	-58.061	-54.9751	1328.3961	-1.0936	0.61096	0.016003	-15.385	0.822999999999999	1436.688	-2.011	0.55664	0.037012	143.002	-55.283	1182.8732	-1.9526	0.7085	0.13477	-16.769	167.837	1149.02	-1.7134	0.70225	0.14648	67.822	-33.4797	1441.8937	-1.9141	0.55664	-0.2666	-22.808	65.12	68.576	0.34912	0.081299	0.16455
0.18	30.94	113.8912	289.985	-0.41992	0.23828	0.067871	-78.596	-64.719	1339.733	-1.2128	0.58986	0.024214	2.639	15.41756	1481.2844	-2.0199	0.54531	0.050684	109.446	-90.864	1200.4765	-1.7881	0.71289	0.12305	-35.24315	199.327	1108.375	-1.6895	0.68945	0.14014	121.5568	-15.941	1461.556	-1.918	0.55469	-0.26318	-53.322	37.195	50.229	0.34766	0.073242	0.16455
0.182	19.261	132.633	264.565	-0.35596	0.23291	0.072754	-8.74	-126.4254	1413.807	-1.3491	0.5874	0.023438	-47.88362	61.7518	1464.0547	-2.0273	0.5292	0.065332	76.945	-130.339	1189.2158	-1.7007	0.69385	0.1123	-83.1889	135.4659	1088.4894	-1.658	0.67715	0.14238	76.701	44.4031	1427.387	-1.9277	0.55176	-0.26611	-9.394	29.0768	48.3692	0.33838	0.069336	0.17383
0.184	80.535	114.383	252.535	-0.30493	0.22266	0.078125	7.886	-109.0836	1422.718	-1.4824	0.59863	0.024414	-14.277	-23.407	1525.476	-2.0386	0.51807	0.081055	40.34	-215.22887	1226.005	-1.5273	0.65625	0.088379	-45.1546	161.8847	1070.0883	-1.6281	0.65762	0.13955	51.581	37.3696	1429.643	-1.9243	0.54712	-0.26685	-28.37	46.7251	17.86	0.33057	0.07959	0.17139
0.186	53.749	137.097	210.932	-0.25195	0.22021	0.081543	5.98200000000001	-151.3155	1472.552	-1.5783	0.61191	0.029591	-18.477	-4.912	1543.11	-2.0513	0.50986	0.096777	38.074	-233.6724	1291.978	-1.4109	0.63598	0.065673	-86.9564	174.4901	1021.755	-1.5969	0.64277	0.13487	91.6062	90.831	1396.022	-1.9136	0.54541	-0.27002	-51.321	25.411	40.3873	0.31445	0.07666	0.17188
0.188	41.137	103.142	201.57	-0.18506	0.2124	0.085449	71.4878	-155.8865	1530.714	-1.6582	0.62227	0.037405	-88.311	-49.736	1518.534	-2.066	0.50196	0.11328	-3.491	-270.411	1278.792	-1.3164	0.63184	0.055664	-98.231	126.1147	1010.047	-1.5659	0.63096	0.13496	36.507	80.86	1347.217	-1.896	0.54395	-0.26855	37.283	31.906	59.581	0.30835	0.075928	0.17578
0.19	81.6225	97.787	197.262	-0.15186	0.20947	0.083984	73.582	-110.517	1507.498	-1.7269	0.62617	0.043653	-46.99649	-98.318	1556.963	-2.0812	0.4836	0.13789	-59.3532	-328.137	1321.5421	-1.2456	0.6626	0.064941	-43.379	164.3752	994.675	-1.541	0.61523	0.13574	63.854	45.702	1361.8637	-1.8867	0.54297	-0.27295	-0.267000000000003	23.6789	45.518	0.29639	0.070801	0.17969
0.192	24.807	117.969	170.935	-0.08252	0.19727	0.097168	74.292	-133.7683	1543.095	-1.7945	0.61914	0.049023	-105.47	-17.968	1551.267	-2.0947	0.46816	0.16133	-88.3032	-311.096	1337.173	-1.2241	0.68311	0.071777	-70.5289	136.0194	971.203	-1.5124	0.60791	0.13027	75.898	95.133	1341.521	-1.8687	0.53955	-0.28467	3.233	15.0162	60.681	0.27197	0.071289	0.18018
0.194	40.33092	98.354	170.2471	-0.03003	0.1875	0.088379	113.625	-92.67	1538.3456	-1.8672	0.61719	0.04834	-118.008	-57.26	1542.136	-2.1016	0.45898	0.17627	-114.215	-305.195	1343.6807	-1.2383	0.77832	0.074219	-22.751	128.228	988.072	-1.487	0.59893	0.1294	10.243	70.014	1329.0148	-1.8366	0.53687	-0.28589	51.4108	28.045	46.95	0.2583	0.068359	0.17432
0.196	44.786	101.7275	167.94	0.013184	0.17578	0.091309	61.7653	-61.4657	1505.23069	-1.9292	0.62451	0.050586	-91.281	-49.416	1507.052	-2.1063	0.45547	0.18916	-104.281	-283.211	1396.795	-1.2715	0.83692	0.054199	-15.934	177.265	964.767	-1.4511	0.58642	0.13213	38.304	94.069	1326.235	-1.8022	0.53857	-0.29639	18.77	24.8025	26.522	0.23291	0.075195	0.17578
0.198	-7.327	103.713	157.964	0.082031	0.16504	0.09375	92.0573	-74.104	1524.937	-1.9791	0.61797	0.049512	-130.979	-18.4443	1448.7247	-2.1015	0.43262	0.20303	-104.86	-194.178	1395.34	-1.2969	0.86133	0.035156	-53.2832	141.823	946.513	-1.4178	0.57217	0.12803	-14.196	98.07	1295.327	-1.7559	0.54492	-0.29639	67.4707	11.9688	59.358	0.20557	0.074219	0.17359
0.2	14.784	65.5151	159.392	0.11572	0.15332	0.087891	80.2976	-7.365	1512.468	-2.0166	0.61797	0.048339	-99.549	-76.934	1458.094	-2.0973	0.42286	0.22217	-106.93	-183.081	1417.628	-1.3257	0.81885	0.023438	-7.121	186.294	900.006	-1.3784	0.55908	0.12256	-23.359	14.249	1299.645	-1.7344	0.54297	-0.29785	67.6727	5.878	35.5481	0.18115	0.083008	0.17334
0.202	5.53899999999999	84.148	127.85	0.1792	0.14111	0.087891	6.305	-15.849	1517.651	-2.0413	0.62236	0.04502	-87.2888	17.59207	1440.775	-2.1022	0.4333	0.23789	-62.5626	-150.404	1456.376	-1.3652	0.7832	0.027832	-30.314	199.885	824.4162	-1.3414	0.5498	0.11934	4.352	32.747	1273.954	-1.6875	0.53516	-0.29248	8.919	-14.1543	43.3936	0.14844	0.083008	0.17773
0.204	-25.1133	46.989	116.926	0.21607	0.13379	0.095215	53.7558	-17.181	1537.416	-2.0605	0.62891	0.038086	-75.902	37.9888	1431.719	-2.0972	0.45947	0.24805	-49.2971	-97.38	1418.06	-1.4678	0.75195	0.02832	-20.362	178.9732	804.0511	-1.3022	0.53486	0.11846	-66.393	32.641	1231.3105	-1.6536	0.52514	-0.29322	67.7511	0.9685	67.994	0.13525	0.085449	0.17383
0.206	-15.704	-2.5262	132.058	0.25342	0.12891	0.09668	-1.347	34.9702	1500.1697	-2.0612	0.63877	0.033887	6.183	23.4425	1449.502	-2.07	0.46806	0.2457	-54.358	-109.426	1415.225	-1.5505	0.75269	0.017334	43.194	233.637	791.252	-1.2648	0.51768	0.11338	-38.045	31.82	1230.0362	-1.6265	0.51807	-0.30078	59.122	22.119	39.805	0.104	0.087891	0.17432
0.208	-50.2164	5.3503	100.591	0.29639	0.10986	0.099121	-44.80885	14.3396	1488.707	-2.055	0.64033	0.035352	10.318	106.596	1426.084	-2.0187	0.46377	0.24356	-25.479	-50.022	1398.603	-1.6094	0.76367	0.01416	17.582	188.438	766.812	-1.2295	0.50528	0.11054	-10.883	94.3437	1202.4875	-1.584	0.51367	-0.2876	9.158	12.4534	53.887	0.075684	0.086426	0.17676
0.21	-34.82	-8.9817	86.634	0.31934	0.10156	0.10107	-6.268	49.305	1493.354	-2.055	0.64268	0.03457	23.1657	62.348	1412.805	-1.9749	0.45205	0.23652	-43.326	-42.624	1389.38	-1.668	0.77539	0.0097656	47.7586	166.999	722.746	-1.1909	0.48682	0.10352	-57.6895	69.6626	1187.4992	-1.5684	0.50781	-0.28369	28.359	26.364	34.2482	0.054199	0.089844	0.17334
0.212	-20.372	22.2262	71.05506	0.34766	0.092285	0.10596	-73.92295	76.407	1486.6005	-2.0553	0.64121	0.033496	61.0034	91.276	1398.907	-1.9579	0.44893	0.2377	-37.72	-75.179	1456.2397	-1.6929	0.77979	0.0068359	64.2101	181.984	653.428	-1.1561	0.47285	0.10283	15.96	99.2467	1181.06	-1.5386	0.50049	-0.27002	-3.051	6.3234	10.5502	0.022949	0.097168	0.17334
0.214	-62.85	43.141	66.7668	0.36279	0.079102	0.11597	-52.7959	21.7291	1526.85	-2.0601	0.63525	0.037598	20.846	131.37	1369.1778	-1.9629	0.45947	0.24316	9.026	-45.31	1461.3094	-1.7515	0.7749	0.00097656	56.5782	135.62364	637.736	-1.116	0.46074	0.10215	-6.271	149.742	1150.193	-1.5156	0.48877	-0.2666	17.715	-12.4896	15.9529	0.0092773	0.10107	0.17139
0.216	-36.577	19.6563	107.294	0.37354	0.080566	0.10645	-48.5768	39.7838	1555.699	-2.0637	0.63164	0.043554	32.875	45.9775	1372.6214	-1.954	0.479	0.24317	19.186	-110.926	1503.506	-1.7986	0.75855	0.0007324	94.1636	190.329	621.1974	-1.0758	0.44473	0.095898	0.960999999999999	138.645	1148.917	-1.4897	0.48193	-0.25635	-8.696	0.69488	5.92765	-0.014648	0.1084	0.16406
0.218	-45.735	60.207	72.938	0.37402	0.070313	0.12256	-121.577	-17.776	1565.897	-2.0675	0.63135	0.049024	66.86388	77.1225	1338.893	-1.9281	0.50176	0.24131	47.807	-135.551	1565.586	-1.8428	0.74805	0.0039063	62.3876	201.308	568.7003	-1.0421	0.43096	0.091699	51.402	181.62	1105.929	-1.4609	0.46875	-0.24512	-39.094	-6.5061	19.4406	-0.031983	0.12256	0.16211
0.22	-52.1357	45.964	60.485	0.37988	0.063965	0.12451	-75.34	-55.28173	1578.763	-2.0691	0.62822	0.060742	60.5696	28.285	1303.0567	-1.8825	0.50996	0.23857	76.5308	-109.3616	1554.99	-1.9019	0.73779	0.022461	67.2698	171.456	546.627	-1.0044	0.42041	0.086914	3.01	172.062	1052.986	-1.4453	0.45996	-0.23633	-24.743	14.3854	45.298	-0.04834	0.13184	0.15918
0.222	-13.134	15.09852	75.515	0.36816	0.056641	0.13916	-117.534	-24.096	1543.972	-2.0749	0.61963	0.067773	86.427	-29.447	1316.061	-1.8402	0.50586	0.23037	81.0185	-151.487	1575.25	-1.9355	0.73047	0.027832	76.686	182.026	539.94	-0.97383	0.40508	0.081933	45.359	153.6668	1038.531	-1.4175	0.44775	-0.22705	-50.9752	23.9918	30.0983	-0.058594	0.15869	0.15332
0.224	-57.0817	17.4879	44.588	0.35596	0.071289	0.13525	-126.913	-69.162	1535.769	-2.0762	0.60449	0.080566	65.7071	35.434	1287.436	-1.8047	0.49609	0.22412	113.22	-83.0891	1576.764	-1.9883	0.73242	0.030273	30.845	136.8969	530.193	-0.94053	0.3955	0.077343	39.751	195.4677	1009.516	-1.3933	0.43432	-0.21582	-41.521	24.436	55.319	-0.060547	0.16602	0.15283
0.226	-22.366	-16.74739	26.9997	0.34277	0.064941	0.146	-58.7467	-23.7092	1511.849	-2.0776	0.59531	0.097754	68.0933	0.920999999999999	1288.708	-1.7797	0.48926	0.21319	110.766	-73.4492	1562.367	-2.0293	0.7334	0.035156	41.628	137.16	527.534	-0.90733	0.38418	0.072656	3.355	149.1662	995.507	-1.3696	0.42334	-0.2041	-29.606	30.142	37.0289	-0.06543	0.18701	0.15186
0.228	6.583	18.777	-7.864	0.33008	0.065918	0.15283	-104.876	8.331	1470.101	-2.0738	0.57539	0.11123	85.442	55.583	1266.159	-1.7538	0.4872	0.21113	122.969	-110.787	1603.046	-2.0488	0.7373	0.035645	24.857	160.511	470.42	-0.87666	0.37685	0.06875	62.2472	163.2192	979.1699	-1.3354	0.41211	-0.18848	-85.922	17.5152	18.1138	-0.053711	0.20801	0.15186
0.23	-37.351	33.309	-16.9393	0.31665	0.062744	0.15357	-80.095	-24.2899	1466.275	-2.0707	0.55273	0.12529	50.031	114.133	1222.8506	-1.7272	0.48486	0.20683	140.069	-55.697	1606.218	-2.0723	0.75195	0.039551	-4.806	110.3419	438.189	-0.84424	0.36084	0.062988	31.015	184.512	944.662	-1.314	0.40674	-0.1792	-28.053	3.497	35.098	-0.044922	0.21631	0.15039
0.232	38.61	-3.7356	39.536	0.29102	0.053711	0.15723	-42.7843	42.90267	1457.644	-2.0706	0.53936	0.14717	55.555	86.2781	1216.046	-1.7045	0.48281	0.20537	86.43	-69.3083	1584.8489	-2.0845	0.76172	0.042725	-1.89	129.0753	415.4	-0.81308	0.34825	0.060742	33.152	145.891	956.763	-1.2788	0.39111	-0.16455	-38.686	7.9898	-1.0156	-0.034668	0.23877	0.15088
0.234	28.598	19.83345	40.084	0.23877	0.052246	0.15527	-49.5136	42.5575	1453.699	-2.0757	0.53369	0.16553	42.156	165.857	1213.598	-1.6831	0.48291	0.20605	81.1435	-44.474	1627.584	-2.1011	0.77002	0.04834	-63.7674	116.69782	358.052	-0.78194	0.33603	0.055762	85.6673	179.22	935.652	-1.2507	0.38061	-0.15356	-60.3736	-9.6374	2.7085	-0.020752	0.25293	0.14624
0.236	6.66	-6.2159	25.0582	0.22168	0.056641	0.15869	39.251	65.7347	1464.078	-2.0848	0.54629	0.17422	-11.487	164.12	1195.059	-1.6636	0.479	0.20596	48.753	31.5339	1579.717	-2.1323	0.77393	0.057617	-51.4732	101.7863	346.9957	-0.75654	0.32354	0.052246	39.533	155.252	902.9	-1.2285	0.36816	-0.14014	-10.264	-7.0172	28.3629	-0.010742	0.26221	0.14063
0.238	81.619	-7.6466	33.6264	0.19287	0.064453	0.1626	2.959	131.467	1425.802	-2.0773	0.54932	0.18262	4.316	139.962	1175.568	-1.641	0.46875	0.20625	0.676000000000002	5.4369	1545.59786	-2.144	0.77002	0.063477	-24.575	129.307	320.76	-0.73301	0.31318	0.053125	61.97105	134.6669	892.766	-1.189	0.35889	-0.125	-41.574	4.107	25.1173	0.0083008	0.27588	0.14111
0.24	36.569	13.0526	17.8566	0.17212	0.061036	0.16308	9.575	101.037	1418.0804	-2.0507	0.54541	0.18496	-60.1342	195.416	1127.295	-1.6191	0.46172	0.20782	18.086	55.475	1539.9679	-2.1719	0.7666	0.07666	-84.409	87.861	304.972	-0.70752	0.29932	0.050781	56.8814	173.7929	839.9743	-1.1777	0.35547	-0.10986	-26.413	10.358	54.996	0.013672	0.27734	0.14209
0.242	54.068	-15.2336	39.489	0.146	0.062988	0.15918	80.627	139.895	1390.0285	-2.0277	0.53516	0.18271	-63.7773	156.983	1108.605	-1.5977	0.45166	0.20869	-36.033	58.48	1488.636	-2.1883	0.76489	0.081787	-76.6161	90.894	295.232	-0.68467	0.28584	0.046582	5.832	162.7799	826.8325	-1.1367	0.3418	-0.09375	29.416	31.098	69.754	0.028809	0.28711	0.13574
0.244	66.5535	6.219	31.8589	0.11328	0.061523	0.15771	35.9374	148.019	1354.103	-2.019	0.53223	0.18896	-46.864	174.685	1077.986	-1.5737	0.44482	0.21826	-44.815	16.7593	1530.5229	-2.1914	0.75977	0.085449	-67.446	109.274	231.253	-0.66592	0.27402	0.046582	10	194.318	816.932	-1.1155	0.33081	-0.079101	1.747	13.182	62.983	0.032715	0.29419	0.12964
0.246	8.303	26.199	-6.959	0.10254	0.062988	0.15625	75.956	93.9388	1368.1854	-2.0169	0.53564	0.19609	-61.385	211.557	1032.5567	-1.5613	0.43906	0.20742	-9.917	51.8477	1563.797	-2.189	0.74072	0.091309	-72.6547	93.021	215.789	-0.64522	0.25996	0.048535	-26.183	208.309	767.365	-1.0859	0.32422	-0.058105	30.265	-7.414	86.773	0.039551	0.2959	0.12793
0.248	55.1717	19.4179	19.9634	0.072266	0.067871	0.15479	86.438	119.7864	1351.4999	-2.0094	0.54922	0.20293	-52.078	153.9763	1015.417	-1.537	0.43096	0.20332	-67.30317	-4.078	1540.531	-2.1812	0.73584	0.10156	-24.608	117.906	214.759	-0.62588	0.24688	0.047949	-28.17	166.489	762.729	-1.0464	0.31689	-0.049805	59.2011	-4.404	56.675	0.035156	0.30518	0.12109
0.25	31.653	52.672	28.406	0.057617	0.07251	0.15356	62.384	72.9012	1339.712	-1.9817	0.55742	0.20059	-52.937	190.441	983.57353	-1.5175	0.41611	0.20605	-41.809	-25.986	1575.146	-2.1616	0.71338	0.10498	-75.908159	97.378	196.539	-0.60547	0.22998	0.04541	-24.682	192.101	719.724	-1.0269	0.3125	-0.041504	17.923	-24.546	52.5023	0.034668	0.30566	0.12256
0.252	5.436	26.9293	24.4624	0.044434	0.074707	0.15088	91.935	48.065	1340.213	-1.9442	0.55888	0.1961	-60.4463	152.535	1000.185	-1.4895	0.40332	0.20059	-44.2893	3.255	1535.188	-2.1416	0.69531	0.1128	-61.7995	89.6446	190.591	-0.57275	0.22197	0.049121	-59.0718	171.204	660.5452	-0.98633	0.30664	-0.025391	57.6962	-28.8859	79.5308	0.018555	0.31201	0.11426
0.254	12.516	23.0175	29.0371	0.036133	0.086426	0.13721	55.43327	89.034	1293.051	-1.9038	0.55811	0.19336	-28.684	112.5375	1002.151	-1.459	0.39209	0.19824	-100.696	-54.604	1522.053	-2.1226	0.67822	0.11914	-11.949	121.039	145.7151	-0.53789	0.21132	0.04707	-39.1982	175.643	636.1355	-0.95362	0.3003	-0.011963	40.2634	-31.92462	89.79993	0.0056152	0.3169	0.1123
0.256	-11.633	48.07	-0.969999999999999	0.03125	0.093262	0.13818	52.474	49.955	1291.5255	-1.865	0.55	0.19522	-62.2753	171.467	985.59	-1.4222	0.37627	0.19277	-48.168	-12.885	1538.059	-2.103	0.65088	0.13477	-35.305	81.558	145.972	-0.48516	0.20508	0.045117	-51.7647	211.191	586.2125	-0.92041	0.29443	-0.0014648	16.97	-35.071	134.644	-0.0083008	0.32617	0.11426
0.258	6.076	24.2573	11.2711	0.027344	0.10742	0.13281	74.8347	90.641	1281.936	-1.8317	0.54258	0.19346	-25.262	117.231	982.922	-1.3859	0.35703	0.18847	-90.856	-24.5546	1494.111	-2.103	0.64697	0.146	4.981	64.099	167.513	-0.42705	0.20098	0.043457	-76.5744	161.799	573.93735	-0.87256	0.2915	0.0073242	39.2609	-7.3049	178.234	-0.04248	0.33008	0.10059
0.26	-6.559	38.421	20.3413	0.022217	0.12085	0.12646	17.841	131.068	1230.6774	-1.8062	0.53672	0.18955	10.471	147.336	937.04	-1.352	0.33945	0.18575	-73.1346	-67.632	1506.936	-2.0898	0.66211	0.15527	14.483	34.4386	133.997	-0.36279	0.19287	0.029297	-9.093	159.814	561.3486	-0.85107	0.28369	0.014648	9.6578	6.0434	221.168	-0.061523	0.33203	0.10498
0.262	-55.346	42.382	7.551	0.019531	0.13281	0.12207	9.062	116.7411	1225.1654	-1.7824	0.53076	0.19033	-28.381	194.09	883.265	-1.3096	0.32188	0.17969	-28.3	-12.9141	1486.029	-2.0781	0.66553	0.15674	16.665	2.308	119.5796	-0.30185	0.18467	0.030957	-64.8382	171.087	522.929	-0.79932	0.27295	0.025879	22.7505	18.9563	304.294	-0.091797	0.34375	0.10205
0.264	-23.262	29.769	33.9811	0.017578	0.14648	0.11328	6.471	188.385	1214.024	-1.7593	0.52588	0.19189	31.666	155.4616	871.58	-1.2715	0.30273	0.17432	-43.5558	-40.13	1448.767	-2.0405	0.66455	0.15918	58.5316	36.174	105.824	-0.23603	0.17041	0.018652	-48.19932	157.468	538.906	-0.75781	0.26563	0.032471	16.145	47.224	375.249	-0.11328	0.34985	0.099611
0.266	-50.527	74.868	36.857	0.017578	0.15527	0.11523	-33.917	174.724	1196.784	-1.743	0.521	0.19717	37.933	220.051	812.228	-1.2354	0.28574	0.17031	-20.954	-21.40079	1451.463	-1.9863	0.64844	0.16113	47.6379	21.901	88.4958	-0.17431	0.16026	0.010449	-0.778999999999996	186.785	520.766	-0.71826	0.25928	0.039551	0.0859999999999985	48.8054	472.407	-0.1377	0.35938	0.099609
0.268	-62.21058	50.9849	59.223	0.017578	0.17627	0.10938	-5.086	177.987	1183.187	-1.7226	0.51348	0.20059	35.053	190.6432	786.891	-1.1989	0.26845	0.1583	-6.543	54.328	1409.502	-1.9668	0.64063	0.16357	86.8551	22.1792	110.5011	-0.11592	0.13916	-0.00029296	-53.0993	142.848	491.566	-0.66162	0.25098	0.050293	39.249	76.0386	600.994	-0.1709	0.37061	0.10107
0.27	-28.524	18.4552	74.32	0.022217	0.18823	0.10352	-52.0409	219.287	1122.397	-1.7039	0.50332	0.20254	109.852	144.448	755.746	-1.1634	0.2583	0.15987	7.382	31.182	1382.3075	-1.9512	0.63867	0.18408	95.3342	51	79.5073	-0.065918	0.12012	-0.012695	-13.255	112.2954	460.765	-0.63428	0.24561	0.061523	6.322	104.202	729.603	-0.19092	0.37744	0.097656
0.272	-71.595	17.1651	47.5664	0.025391	0.19727	0.099121	-69.0697	182.078	1112.412	-1.678	0.49326	0.20791	62.628	177.117	699.8116	-1.1307	0.25029	0.1543	98.119	97.94	1367.6488	-1.9375	0.64844	0.19068	42.696	36.9892	65.8481	-0.011426	0.097266	-0.026563	-8.852	118.601	400.0666	-0.5752	0.24268	0.056641	9.05499999999999	107.892	856.3978	-0.24707	0.38672	0.104
0.274	-33.2904	-4.112	48.664	0.033691	0.21289	0.091797	-26.984	222.168	1070.342	-1.6519	0.479	0.20703	74.2599	140.6613	701.7457	-1.0933	0.24072	0.14551	75.8008	94.647	1334.099	-1.9141	0.65918	0.19775	66.419098	57.279	90.737	0.03623	0.074609	-0.040234	-35.016	93.399	398.273	-0.52637	0.23608	0.067627	41.616	107.856	944.659	-0.31055	0.38501	0.1167
0.276	-8.803	5.6732	50.369	0.034668	0.22119	0.090332	-88.1832	221.455	1026.6896	-1.6271	0.475	0.21338	96.1649	173.159	665.067	-1.0625	0.23154	0.14102	68.0419	49.4127	1345.5971	-1.8569	0.6626	0.19922	65.8619	46.4649	81.072	0.082325	0.055468	-0.056641	43.568	100.13	391.899	-0.4751	0.22803	0.072266	-35.609	79.695	984.973	-0.39111	0.37793	0.12598
0.278	-49.3659	12.2046	21.3799	0.040039	0.2334	0.085938	-48.204	174.53	1012.2516	-1.5995	0.46933	0.21094	91.6874	206.54	607.9539	-1.0277	0.22529	0.13701	95.3975	117.459	1352.946	-1.8301	0.65723	0.19873	30.9	16.9648	80.2067	0.12578	0.036621	-0.069141	24.526	93.932	345.772	-0.40576	0.22412	0.082031	7.019	15.885	1077.336	-0.54199	0.35352	0.14209
0.28	-8.734	-3.0411	39.1443	0.045654	0.23852	0.083496	-50.928	191.818	982.89	-1.5694	0.46035	0.21368	110.394	151.5354	602.8224	-0.99795	0.2206	0.12686	56.0404	75.60193	1329.843	-1.7656	0.64648	0.20068	56.0101	52.684	70.428	0.17334	0.023438	-0.081543	27.082	73.949	331.905	-0.36719	0.21729	0.081055	18.289	-31.677	1122.154	-0.63477	0.34082	0.14502
0.282	-16.353	44.324	29.022	0.047852	0.24268	0.07959	-92.677	155.516	989.325	-1.5392	0.45039	0.21426	64.5386	197.003	554.8845	-0.96563	0.21094	0.12051	85.198	76.0948	1323.961	-1.7273	0.63648	0.19995	7.252	41.62	26.2767	0.20342	0.00087894	-0.096679	70.1817	109.675	293.668	-0.28711	0.21387	0.088379	9.661	-115.259	1127.016	-0.84326	0.30908	0.16016
0.284	-19.365	40.879	42.442	0.046875	0.25098	0.078613	-19.708	155.355	989.276	-1.5024	0.44385	0.21631	55.0477	166.943	545.5243	-0.93115	0.21045	0.11475	108.881	101.9537	1265.75	-1.689	0.62549	0.19531	13.185	45.489	49.959	0.24111	-0.013672	-0.11015	59.58539	90.754	271.637	-0.229	0.20288	0.090577	77.171	-179.39	1114.853	-1.0271	0.27686	0.16308
0.286	47.4545	21.8521	88.071	0.04541	0.25342	0.077637	-39.027	185.674	953.196	-1.4651	0.42988	0.2166	61.607	136.1624	545.059	-0.90342	0.20654	0.11045	61.092	24.03	1240.9475	-1.6323	0.60791	0.19336	-1.26	60.58	35.32	0.26924	-0.032422	-0.11797	73.1209	89.517	269.875	-0.17041	0.19727	0.095215	44.658	-194.539	1061.066	-1.2246	0.2666	0.16943
0.288	20.088	29.9937	80.312	0.037598	0.26611	0.07373	-23.255	150.387	954.604	-1.4284	0.41485	0.21543	5.266	152.404	502.753	-0.87539	0.20117	0.10518	100.9406	72.091	1226.882	-1.606	0.60107	0.18848	-40.008	29.8499	20.97	0.29649	-0.053125	-0.12607	39.791	100.4197	224.109	-0.081543	0.18652	0.098145	55.279	-191.464	1054.356	-1.5137	0.25391	0.1626
0.29	15.432	-16.2966	76.185	0.03003	0.26538	0.073487	32.882	174.41	927.441	-1.3882	0.4043	0.21153	-6.023	73.765	511.799	-0.84375	0.19649	0.099316	61.523	77.8	1193.0952	-1.5566	0.58301	0.18311	-7.752	38.6949	35.6526	0.31592	-0.071777	-0.1377	20.854	81.6577	199.774	-0.043945	0.18066	0.10303	130.433	-153.48	1049.926	-1.6558	0.25635	0.1582
0.292	48.6286	-9.9624	79.212	0.016113	0.27002	0.066895	4.206	189.332	873.89	-1.3509	0.38613	0.21103	-14.538	82.939	468.997	-0.81328	0.19629	0.097363	38.112	59.595	1187.06	-1.5213	0.57203	0.17309	-32.705	15.7597	41.02	0.33027	-0.091504	-0.13789	62.2387	103.6272	203.0844	0.028809	0.17822	0.10254	80.358	-102.46	1003.411	-1.9214	0.28174	0.14453
0.294	30.823	-3.647	62.406	0.003418	0.28174	0.066406	65.865	161.1976	843.026	-1.314	0.37158	0.20703	-57.8433	104.056	414.599	-0.78223	0.18945	0.091797	40.089	128.36	1173.1446	-1.4863	0.55273	0.17529	-68.89585	-22.7656	65.89	0.33857	-0.10606	-0.14287	23.208	98.542	174.458	0.089114	0.17041	0.10034	114.348	-85.136	1012.154	-2.0737	0.31836	0.12867
0.296	56.378	-30.86709	80.2186	-0.0048828	0.28906	0.063965	63.3371	206.75762	795.052	-1.2703	0.35684	0.20508	-13.671	80.5211	397.561	-0.75556	0.18233	0.087304	8.5	101.1165	1150.98772	-1.4434	0.54297	0.16455	-47.541	5.766	49.04	0.34131	-0.12559	-0.14599	35.767	66.86	187.182	0.14502	0.16504	0.098633	144.2376	-45.689	1012.494	-2.1733	0.354	0.11523
0.298	30.893	-5.3489	102.9909	-0.017578	0.30469	0.057129	36.168	189.0728	761.897	-1.2342	0.34053	0.20771	-71.20492	132.163	343.604	-0.73174	0.17871	0.079492	17.742	136.495	1142.06	-1.4219	0.5332	0.16455	-71.8215	4.365	30.834	0.34404	-0.13223	-0.146	12.357	75.3583	157.845	0.21338	0.1582	0.10449	118.5072	-27.111	1012.668	-2.2046	0.42529	0.095703
0.3	3.053	-22.3152	118.6578	-0.026123	0.31494	0.056641	113.633	181.861	745.359	-1.1889	0.33271	0.19951	-120.295	107.557	316.5404	-0.70674	0.17207	0.079492	8.937	202.503	1104.339	-1.3809	0.51758	0.16064	-67.5502	21.344	53.044	0.33984	-0.1416	-0.15234	-52.01122	51.825	139.487	0.23584	0.15527	0.10498	160.9	-22.458	1043.612	-2.189	0.46533	0.089355
0.302	33.8649	-20.391	179.8339	-0.035156	0.32617	0.053711	75.2297	207.3554	684.148	-1.1497	0.31631	0.19453	-42.824	88.3435	307.0764	-0.6794	0.16855	0.074121	-40.003	174.722	1073.3306	-1.353	0.50634	0.15234	-41.3368	44.0382	33.675	0.33896	-0.15489	-0.15019	19.097	41.4636	138.342	0.28955	0.15283	0.10889	127.136	1.837	1009.7708	-2.0586	0.54297	0.080566
0.304	-6.8249	12.0407	213.902	-0.050293	0.3418	0.04541	63.902	168.4695	657.3751	-1.1113	0.31445	0.18945	-89.774	126.611	255.5629	-0.65234	0.16357	0.074707	-12.345	223.459	1051.061	-1.3257	0.50439	0.14746	-69.6985	6.943	42.74	0.33027	-0.16338	-0.15157	-16.359	43.8619	108.9204	0.33301	0.146	0.11035	92.655254	-17.283	995.817	-1.9077	0.59522	0.076416
0.306	-3.4473	-7.4087	284.055	-0.060059	0.3457	0.04541	105.5	185.8017	629.96	-1.0709	0.3041	0.18057	-59.6718	80.864	276.548	-0.62344	0.16074	0.07168	-28.375	205.76	989.6987	-1.2891	0.4873	0.14404	-34.192	18.2933	30.561	0.31934	-0.16377	-0.15157	-47.243	5.5529	91.371	0.34961	0.14746	0.11279	100.015	-60.252	994.705	-1.7466	0.63232	0.064941
0.308	-15.572	16.133	361.571	-0.093262	0.35059	0.047363	51.626	183.765	590.373	-1.0324	0.30039	0.17783	-24.979	100.468	262.196	-0.5878	0.15196	0.074023	-41.807	168.434	982.4676	-1.2729	0.47998	0.14697	-18.677	27.093	18.4893	0.31231	-0.16533	-0.14785	-12.877	32.195	87.2172	0.36963	0.14209	0.11768	43.8083	-96.817	963.539	-1.5151	0.63135	0.054199
0.31	-49.614	73.32	419.145	-0.12061	0.35058	0.045898	91.858	160.5435	579.7196	-0.99766	0.29218	0.16963	-74.6595	115.771	219.39	-0.54834	0.15273	0.069336	-12.514	210.926	948.9047	-1.2456	0.47119	0.14404	-19.319	7.126	52.261	0.2915	-0.16699	-0.13965	-56.3443	47.748	71.0949	0.3728	0.1416	0.12232	43.4289	-186.8978	1022.0162	-1.4258	0.625	0.037598
0.312	-10.622	98.52995	522.25	-0.15918	0.35107	0.050293	63.2159	195.137	534.8215	-0.96221	0.28652	0.16357	-49.7838	90.623	196.409	-0.49961	0.15742	0.067578	-58.876	161.0471	930.8474	-1.2234	0.45825	0.14038	19.824	35.4715	37.8686	0.27461	-0.16338	-0.13701	-55.8555	52.408	92.644	0.37549	0.1377	0.12988	35.85333	-239.748	1052.803	-1.2573	0.59619	-0.0097656
0.314	-37.172	154.381	620.48	-0.22021	0.34814	0.050781	13.547	153.5654	518.1737	-0.9292	0.27539	0.16064	-36.794	136.26	153.5024	-0.44238	0.15967	0.0625	-20.557	174.891	929.444	-1.2031	0.44434	0.13574	-2.548	5.7756	16.4811	0.25811	-0.15293	-0.13311	-23.827	79.988	106.6	0.37891	0.14111	0.13916	-16.019	-273.438	1058.9	-1.1536	0.57276	-0.031006
0.316	-45.551	152.945	732.779	-0.25244	0.35059	0.058594	37.11	140.5431	506.046	-0.89189	0.27451	0.1541	-42.8191	109.237	135.9261	-0.3834	0.16123	0.060547	-16.655	206.343	889.149	-1.1733	0.43213	0.13281	12.79	3.3175	33.948	0.24013	-0.14511	-0.12647	-75.4542	55.062	93.91	0.37744	0.13672	0.13916	-12.675	-329.219	1098.408	-1.064	0.57178	-0.054199
0.318	6.444	114.67	850.1229	-0.32959	0.35352	0.051758	-22.53	152.6961	460.856	-0.85674	0.26924	0.14795	7.913	76.4106	160.4192	-0.32129	0.15957	0.053028	-27.403	149.586	873.456	-1.1597	0.42627	0.13135	54.6791	35.057	33.035	0.20996	-0.12715	-0.12354	-23.358	59.751	83.51	0.36426	0.13525	0.146	-81.759	-296.72	1101.52	-0.97461	0.58008	-0.063477
0.32	-6.556	115.191	907.1663	-0.4104	0.34839	0.05664	-42.778	117.8224	451.114	-0.8251	0.25869	0.14366	-6.031	79.62	134.791	-0.2584	0.15566	0.047168	10.442	176.087	859.822	-1.1211	0.39941	0.12646	27.073	22.1448	39.164	0.17139	-0.11719	-0.1167	-6.322	76.277	48.792	0.34791	0.12939	0.15576	-125.304	-268.146	1125.6982	-0.9585	0.59326	-0.058594
0.322	4.859	28.906	996.102	-0.50439	0.34229	0.058594	-27.069	127.647174	415.546	-0.79209	0.25859	0.13106	15.908	21.84813	149.372	-0.20176	0.15058	0.037695	-11.35	151.033	838.142	-1.0977	0.3916	0.12183	72.7138	38.016	59.12	0.1375	-0.1043	-0.10928	-41.35	49.665	43.4286	0.32568	0.11719	0.16016	-98.881	-223.751	1186.84	-0.96582	0.65039	-0.057129
0.324	22.753	-17.78	1063.758	-0.64844	0.32227	0.063965	-73.6353	118.79	392.648	-0.7627	0.24756	0.12988	52.2012	26.9833	148.188	-0.14258	0.1416	0.021973	43.101	128.965	824.797	-1.0645	0.36914	0.11572	54.001	28.5148	25.878	0.10576	-0.094043	-0.10313	-33.629	58.865	45.381	0.28564	0.11816	0.16357	-136.157	-113.007	1191.3238	-0.9834	0.70996	-0.056885
0.326	-15.928	-61.83	1084.138	-0.73438	0.30664	0.066406	-55.8348	93.7085	369.459	-0.73096	0.24336	0.12695	47.3321	37.595	125.535	-0.086816	0.12695	0.0092775	58.563	190.899	780.842	-1.0195	0.35156	0.10791	39.13	-7.1756	38.914	0.070606	-0.078809	-0.097657	-40.105	48.707	32.55757	0.26025	0.1167	0.16455	-113.018	-105.281	1240.639	-0.98242	0.74219	-0.057617
0.328	52.409	-153.28579	1108.221	-0.9375	0.27344	0.07959	-71.539	119.979	329.333	-0.70225	0.23799	0.12539	101.9294	6.908	140.578	-0.030273	0.11192	0.00019528	35.644	164.0464	731.0449	-0.99756	0.34277	0.10693	89.971	11.1499	43.104	0.037305	-0.064453	-0.092774	20.638	43.8177	39.6749	0.21777	0.10986	0.17139	-108.642	-72.449	1256.18	-0.98633	0.7334	-0.047363
0.33	58.144	-164.23	1106.272	-1.1042	0.25757	0.084228	-88.8346	100.938	304.132669	-0.6749	0.23291	0.12227	60.5087	51.09873	107.297	0.02207	0.093164	-0.0099606	88.4947	168.48385	723.73	-0.95313	0.32422	0.10254	50.6037	-19.6903	41.1068	0.0048828	-0.044434	-0.086426	35.0888	45.583	35.208	0.18555	0.1084	0.17114	-151.371	-50.657	1242.878	-1.0073	0.71729	-0.040039
0.332	49.325	-196.309	1098.014	-1.2871	0.25098	0.09375	-50.151	100.3478	278.4599	-0.64766	0.21983	0.11943	66.2543	59.4954	79.0084	0.070898	0.072852	-0.023438	79.586	199.516	657.997	-0.91528	0.31372	0.093994	57.4674	-17.0281	67.329	-0.020215	-0.028906	-0.078418	8.851	19.6441	60.118	0.14795	0.093262	0.1748	-100.464	-92.298	1273.336	-1.1177	0.68408	-0.028809
0.334	126.594	-213.903	1125.94	-1.5386	0.25635	0.092773	-67.043	135.097	226.7131	-0.61963	0.21387	0.11621	95.767	58.6934	89.472	0.11182	0.060547	-0.033691	60.038	148.861	644.55	-0.87988	0.30078	0.087891	60.3582	4.9543	41.795	-0.048927	-0.0099593	-0.07295	37.083	21.9268	64.038	0.11523	0.080078	0.17578	-88.794	-39.894	1267.32741	-1.2254	0.67505	-0.021729
0.336	101.122	-159.646	1092.148	-1.6548	0.27051	0.09082	-63.2924	103.936	232.9238	-0.59766	0.20283	0.11377	18.955	80.846	78.264	0.14844	0.037891	-0.045508	89.342	183.32	598.025	-0.83154	0.2876	0.081543	4.59	-6.51098	37.383	-0.073146	0.012307	-0.06787	26.743	46.855	27.898	0.094727	0.078125	0.17432	-121.111	-51.234	1269.923	-1.334	0.67578	-0.024902
0.338	118.222	-135.693	1095.958	-1.8691	0.31836	0.10254	-17.44	117.301	220.789	-0.56982	0.19834	0.1084	42.971	35.6109	88.051	0.18828	0.023633	-0.052246	76.2539	151.368	552.825	-0.8125	0.27881	0.080078	17.728	22.9729	37.6835	-0.089552	0.030568	-0.065333	55.641	33.5068	38.45	0.055664	0.069336	0.18066	-74.761	-89.7829	1292.411	-1.4551	0.68066	-0.028809
0.34	149.763	-103.68	1106.934	-1.9768	0.35131	0.10352	-62.595	107.115	198.724	-0.53233	0.19131	0.10606	56.2456	50.4655	87.743	0.21992	0.0072266	-0.062793	70.3356	129.702	533.679	-0.77295	0.2583	0.074219	-3.475	15.515	44.562	-0.10205	0.05127	-0.064941	60.227	20.1703	59.598	0.030517	0.058593	0.18702	-83.464	-76.1087	1303.7478	-1.5093	0.68604	-0.030762
0.342	140.296	-49.84	1083.651	-2.0469	0.39209	0.10254	-6.194	79.428	205.423	-0.48974	0.18672	0.10068	-0.34	55.252	50.897	0.24863	-0.0051758	-0.070703	91.5069	158.561	480.1632	-0.7478	0.25073	0.070068	-34.761	-17.536	66.277	-0.11221	0.075779	-0.060841	2.985	-3.2718	51.0873	0.0048828	0.049805	0.1875	-73.1168	-145.558	1378.451	-1.6021	0.68408	-0.03125
0.344	201.77	-51.628	1076.575	-2.0801	0.45117	0.09375	-9.76199999999999	112.077	164.429	-0.43945	0.18701	0.089355	30.265	30.873	77.143	0.2749	-0.016113	-0.081543	48.634	110.235	455.5193	-0.71484	0.23877	0.0625	-16.807	-4.066	73.21	-0.11836	0.09609	-0.057227	43.266	-2.7865	61.248	-0.02832	0.046387	0.18896	-24.03	-153.696	1432.459	-1.6728	0.67774	-0.024658
0.346	176.8219	0.648000000000003	1050.988	-2.0547	0.4873	0.09668	-24.98	87.877	156.8256	-0.37773	0.18633	0.085156	-4.453	68.805	61.738	0.28593	-0.025977	-0.083984	34.524	126.4897	450.764	-0.6875	0.22461	0.057617	-66.7293	-21.4785	71.764	-0.12383	0.11679	-0.053321	67.0351	38.937	43.403	-0.038086	0.038086	0.1875	-52.8999	-144.7096	1463.403	-1.7456	0.67432	-0.016113
0.348	148.1731	49.885	1028.7734	-1.9448	0.55127	0.094727	41.908	78.501	156.97472	-0.31729	0.18877	0.08252	-36.844	44.146	43.7951	0.29805	-0.036231	-0.086426	26.066	147.808	410.506	-0.6748	0.21777	0.062988	-46.8519	-37.544	102.969	-0.12519	0.13388	-0.052638	-0.477	22.8638	37.333	-0.060547	0.041504	0.18896	3.81	-197.326	1524.711	-1.8315	0.66162	0.0024414
0.35	138.1819	19.536	1049.0068	-1.8281	0.59814	0.096679	3.925	75.537	122.7956	-0.25634	0.1872	0.069238	-9.117	43.282	38.2385	0.30469	-0.040918	-0.092676	-9.701	101.683	413.443	-0.63818	0.21045	0.056641	-25.853	-26.054	93.694	-0.11719	0.15186	-0.049805	21.982	10.6274	58.888	-0.069336	0.043945	0.19311	26.072	-143.525	1524.671	-1.8765	0.65186	0.0014648
0.352	88.8518	17.474	1028.1715	-1.6992	0.62402	0.098145	46.833	33.09	150.506	-0.19814	0.17441	0.060352	-55.54	50.687	30.807	0.30234	-0.045508	-0.095019	-16.069	125.152	377.952	-0.61108	0.20239	0.054688	-49.152	-55.954	111.0193	-0.11513	0.16915	-0.056052	3.469	2.9793	16.60452	-0.07666	0.050781	0.18945	41.929	-116.5732	1513.786	-1.9395	0.62793	-0.0014648
0.354	72.5342	-77.841	1006	-1.5347	0.63135	0.094238	88.575	33.398479	139.878	-0.13428	0.16797	0.051758	-55.4838	4.6142	53.635	0.30078	-0.050293	-0.099121	-44.103	85.8361	345.106	-0.58008	0.19922	0.050293	-23.308	-29.787	133.5963	-0.10213	0.18254	-0.058889	-26.959	-1.074	-4.19855	-0.076172	0.057129	0.18945	98.161	-94.1397	1538.067	-1.9829	0.61573	-0.0043945
0.356	57.8161	-176.36	1041.0717	-1.457	0.61426	0.087891	45.1094	24.6053	124.186	-0.075489	0.16201	0.041504	-45.583	-3.97853	66.988	0.29307	-0.056934	-0.099609	-54.444	60.6235	329.508	-0.53418	0.19336	0.044922	-52.936	-1.602	147.8684	-0.086897	0.19698	-0.060841	17.7	17.1411	22.8415	-0.072266	0.062012	0.18896	71.9274	-10.605	1516.9108	-2.019	0.60596	-0.003418
0.358	10.682	-178.2953	1063.3677	-1.2988	0.56445	0.069336	89.428	6.7012	125.409	-0.021484	0.15225	0.02793	-86.261	0.529	63.863	0.27754	-0.055176	-0.10146	-50.9833	85.3985	274.673	-0.50391	0.19531	0.042969	-63.4165	-13.837	217.0318	-0.071857	0.21252	-0.070123	-37.865	8.8439	32.622	-0.063477	0.073242	0.18701	84.678	-46.2691	1517.2389	-2.0645	0.61133	0.0092773
0.36	8.728	-260.28	1113.297	-1.1951	0.52588	0.053711	74.40555	37.1395	105.741	0.033203	0.13818	0.014258	-57.1165	-21.7136	72.307	0.26113	-0.050489	-0.10185	-86.758	67.86528	238.079	-0.43213	0.18457	0.03125	-9.14100000000001	17.715	282.66393	-0.055176	0.22656	-0.07373	-48.968	2.2594	47.2713	-0.045655	0.081543	0.18506	90.202	-35.0746	1541.697	-2.0801	0.60254	0.0083008
0.362	-10.255	-259.385	1136.928	-1.1069	0.49854	0.041992	44.408	38.108	85.7768	0.087889	0.12705	-0.00068356	-58.2701	5.331	63.466	0.24366	-0.050195	-0.098241	-78.704	84.898	238.9006	-0.37964	0.18066	0.027588	-76.579	9.6098	335.942	-0.037908	0.23963	-0.075576	-4.383	25.137	29.306	-0.026855	0.092773	0.18115	24.9746	-5.236	1513.625	-2.127	0.60645	0.024414
0.364	-88.743	-244.535	1140.42	-1.0352	0.47949	0.040527	75.7224	34.6474	88.2996	0.13574	0.11816	-0.016602	-55.0142	-17.497	39.823	0.22363	-0.049805	-0.090332	-75.255	93.657	215.7492	-0.31543	0.18066	0.022461	-61.45	39.122	448.0861	-0.026678	0.24677	-0.083281	-65.7436	25.528	27.5359	-0.0019531	0.098633	0.17773	59.4142	-65.688	1542.309	-2.158	0.60351	0.031738
0.366	-93.569	-292.086	1208.412	-1.019	0.49365	0.044434	22.54	61.608	63.9445	0.17617	0.10772	-0.031347	-31.444	-12.4014	23.6147	0.19307	-0.04707	-0.085645	-80.506	60.1035	207.231	-0.2417	0.17725	0.010742	-45.782	103.713	518.1775	-0.023926	0.24639	-0.089913	-46.0142	13.099	50.652	0.015137	0.11084	0.17188	55.1993	-13.0983	1503.1659	-2.1875	0.60352	0.038086
0.368	-112.155	-221.536	1237.801	-1.0347	0.54541	0.04248	28.111	40.725	87.543	0.21357	0.09375	-0.043066	-47.273	34.4108	-0.686999999999999	0.16552	-0.037012	-0.081738	-29.581	102.192	181.898	-0.20215	0.16846	0.0039063	-62.677	121.653	649.21	-0.02656	0.25146	-0.092466	-27.254	1.9142	43.7135	0.046387	0.12646	0.16406	8.722	-0.975800000000001	1459.803	-2.2168	0.60352	0.049316
0.37	-129.491	-198.53618	1263.545	-1.0435	0.57471	0.031006	36.0677	49.216	84.854	0.25107	0.080078	-0.055566	-9.857	14.1368	30.78	0.13349	-0.031934	-0.07627	-51.9272	96.362	142.8634	-0.10986	0.16602	0.00048828	-19.9067	165.511	780.233	-0.035156	0.24805	-0.09668	-67.2617	-19.3347	27.145	0.066406	0.13257	0.16065	20.37	-11.5426	1476.284	-2.2241	0.60986	0.058105
0.372	-99.719	-198.6667	1302.655	-1.0386	0.56885	0.028809	-15.543	46.69	65.427	0.2792	0.071973	-0.073535	23.321	23.0656	41.258	0.094822	-0.033496	-0.066601	-34.636	91.223	153.121	-0.05542	0.15478	-0.014404	-34.9674	168.959	816.198	-0.053233	0.24979	-0.1024	-30.67	-5.0915	-0.0916000000000015	0.085938	0.13867	0.15186	-23.218	59.86	1471.81	-2.2339	0.6001	0.067871
0.374	-136.365	-127.882	1289.699	-1.0762	0.5293	0.031738	0.0939999999999941	36.403	70.654	0.30273	0.063477	-0.07959	-17.952	18.1281	23.0633	0.057617	-0.025391	-0.057129	-5.623	113.444	125.225	0.00097656	0.14307	-0.022461	-16.3429	114.302	872.496	-0.072823	0.25178	-0.099824	-37.7796	-3.49743	-3.98417	0.10693	0.14746	0.14844	-19.861	1.356	1533.4515	-2.2271	0.604	0.081055
0.376	-103.841	-158.596	1295.398	-1.1235	0.51123	0.031738	-27.117	50.033	44.4625	0.32051	0.047461	-0.093652	35.361	-2.3724	32.11	0.024121	-0.013769	-0.048828	-43.8651	65.045	106.819	0.070801	0.12891	-0.04248	50.0184	77.896	930.869	-0.098789	0.25253	-0.096964	-32.298	-16.0675	31.127	0.1167	0.15088	0.14551	-1.73	-22.014	1579.117	-2.2163	0.604	0.095215
0.378	-87.5286	-130.302	1283.042	-1.248	0.50488	0.023926	-58.944	25.05201	48.011	0.33525	0.039649	-0.10352	40.7107	43.449	31.733	-0.011231	-0.0042968	-0.046191	0.692999999999998	62.7558	111.512	0.097656	0.12158	-0.047363	12.546	1.411	985.107	-0.13548	0.25473	-0.096112	-11.483	-2.0484	36.4004	0.12939	0.16504	0.146	-63.1526	-12.867	1563.186	-2.1973	0.5957	0.11328
0.38	-78.472	-75.872	1255.9957	-1.3882	0.51416	0.013672	-15.588	17.1299	33.526	0.33643	0.030664	-0.10898	40.399	29.3972	39.973	-0.038574	0.00078125	-0.043847	5.547	67.896	103.4174	0.16113	0.10059	-0.062988	16.05	-64.224	1047.791	-0.17969	0.25488	-0.09375	-30.926	-8.4363	36.7621	0.12817	0.17212	0.1394	-51.8971	-81.896	1590.553	-2.1777	0.58789	0.11768
0.382	-67.5683	-125.131	1317.634	-1.4492	0.52051	0.012207	-68.7139	35.928	8.8567	0.33623	0.021191	-0.11739	89.4047	24.1095	37.1715	-0.058789	0.0097655	-0.04248	5.55	54.502	125.5704	0.21289	0.091309	-0.07959	56.3832	-91.665	1036.735	-0.23032	0.26356	-0.089612	26.118	2.031	54.81	0.12256	0.18262	0.13574	-61.47194	-26.2423	1550.097	-2.1445	0.56885	0.13818
0.384	-84.832	-68.818	1333.2922	-1.5449	0.52734	0.003418	-57.144	7.1822	44.532	0.33447	0.012695	-0.12061	12.127	38.036	-2.27	-0.077148	0.016602	-0.04248	53.344	85.977	121.925	0.22998	0.087402	-0.087402	44.579	-152.5151	1008.414	-0.2939	0.26276	-0.083842	14.498	8.787	55.598	0.11572	0.19678	0.13525	-88.368	-25.092	1515.492	-2.1245	0.56689	0.15918
0.386	-53.519	-103.5591	1356.42953	-1.6052	0.53149	0.00048828	-28.661	6.4365	54.193	0.32822	0.0081055	-0.12276	52.9889	-1.017771	15.8257	-0.095117	0.026465	-0.044434	49.1429	56.306	89.034	0.2666	0.070801	-0.1001	38.088	-164.771	1022.738	-0.37046	0.26353	-0.072654	3.493	-20.871	86.162	0.11084	0.20264	0.12891	-71.69021	-48.435	1506.953	-2.123	0.57031	0.16797
0.388	-13.982	-176.687	1409.566	-1.6616	0.52783	0.00097656	-88.619	-10.9438	42.327	0.31455	0.0050781	-0.12138	93.942	1.0534	35.837	-0.10645	0.036328	-0.04707	60.7967	22.9133	98.357	0.29443	0.062011	-0.10865	-23.4061	-150.835	998.701	-0.46267	0.26366	-0.062566	68.273	-24.4839	76.256	0.081055	0.22119	0.12402	-93.303	29.583	1457.5879	-2.1226	0.59229	0.18652
0.39	-23.885	-140.7637	1422.334	-1.7456	0.52588	0.010254	-37.727	-27.1859	51.801	0.29658	0.0046875	-0.12022	40.6313	-2.513	34.7407	-0.10332	0.050781	-0.05332	78.4897	24.3291	83.966	0.31592	0.055664	-0.12305	-77.553	-129.903	982.4983	-0.57568	0.26221	-0.047363	12.371	-21.371	37.28	0.059082	0.23023	0.11987	-86.866	-12.18519	1473.0018	-2.1094	0.6045	0.18823
0.392	9.232	-209.24	1483.514	-1.7891	0.52539	0.0083008	-47.73	3.97729	35.8231	0.28057	0.00039062	-0.11709	71.3989	-37.976	45.919	-0.095508	0.064355	-0.05625	69.32524	-0.7978	81.4365	0.33643	0.039063	-0.13477	-51.3198	-70.467	999.652	-0.72226	0.26098	-0.029185	53.98983	-27.837	80.124	0.027344	0.23633	0.11865	-61.4588	29.3766	1481.684	-2.0752	0.61328	0.18506
0.394	34.893	-191.593	1536.805	-1.8789	0.53027	0.01416	-70.4935	-0.0629999999999988	45.67	0.25879	0.0014648	-0.11475	39.853	2.3606	28.60115	-0.085938	0.078125	-0.066406	75.0111	24.521	83.9148	0.3418	0.03418	-0.14258	-109.094	-54.237	990.115	-0.89535	0.27228	-0.0092998	59.5477	-11.817	111.728	-0.0087891	0.25098	0.1167	-92.678	82.744	1448	-2.0342	0.60547	0.18555
0.396	54.8374	-127.033	1511.277	-1.9412	0.53051	0.014648	10.322	9.7742	34.779	0.23721	0.0046875	-0.10166	14.683	6.361	25.5575	-0.065527	0.098733	-0.076953	39.1985	54.689	54.2876	0.354	0.019531	-0.14551	-143.947	-65.447	1014.139	-1.1018	0.28443	0.023588	-22.807	-19.135	157.588	-0.02832	0.2583	0.11768	-23.516	47.378	1435.2066	-2.0254	0.60938	0.19238
0.398	90.796	-187.365	1550.333	-1.9961	0.53516	0.01709	-27.767	32.505	8.0035	0.21065	0.0037109	-0.094531	17.983	5.2155	51.172	-0.045116	0.11602	-0.083008	25.231	46.123	72.4593	0.35889	0.012207	-0.15136	-112.182	-48.843	1005.879	-1.3291	0.2997	0.06347	31.8921	-2.574	211.7425	-0.068848	0.27295	0.11572	10.943	110.405	1422.277	-2.021	0.61475	0.20605
0.4	109.439	-105.0587	1546.093	-2.0508	0.54102	0.015137	-16.914	17.784	17.286	0.179	0.01543	-0.093359	-28.328	30.777	35.8631	-0.019724	0.13086	-0.090821	33.87	78.096	79.062	0.36035	0.00048828	-0.15869	-139.658	-28.41	995.889	-1.5718	0.3208	0.11328	18.78	26.2627	232.776	-0.097412	0.2771	0.11987	-8.676	97.263	1410.55	-2.0142	0.61768	0.21704
0.402	109.251	-89.3145	1527.2736	-2.0698	0.54736	0.015625	43.542	31.9754	29.658	0.14659	0.013867	-0.079883	-29.321	3.405	36.719	0.000978	0.14991	-0.099609	-8.796	55.75	53.487	0.35352	-0.0019531	-0.15869	-86.822	-2.00999999999999	1017.961	-1.8144	0.3569	0.16392	-2.24	22.541	325.4779	-0.12939	0.28955	0.12354	42.2886	68.097	1422.077	-2.0005	0.62354	0.21973
0.404	139.599	-108.23	1551.8032	-2.1074	0.55859	0.01709	15.716	27.495	21.379	0.10645	0.015625	-0.078125	-34.33	20.44303	50.127	0.022949	0.16699	-0.10059	-3.805	50.085	80.033	0.34277	-0.0014648	-0.1582	-62.5353	-0.855999999999995	984.496	-2.0592	0.39464	0.19646	51.521	46.7305	419.228	-0.16943	0.30518	0.12842	31.539	141.722	1382.1237	-1.9531	0.625	0.21924
0.406	100.0963	-25.997	1517.431	-2.1269	0.56689	0.017334	51.592	8.972	37.546	0.067187	0.018457	-0.067969	-56.48516	26.222	62.696	0.041502	0.18232	-0.10654	-2.83	61.519	59.845	0.32422	-0.0024414	-0.15625	-54.4878	-77.568	976.263	-2.2774	0.43914	0.19146	13.643	84.6887	497.7048	-0.20215	0.31348	0.12939	31.4139	87.638	1385.4611	-1.9214	0.62158	0.21729
0.408	71.7564	-74.635	1513.52944	-2.1445	0.57129	0.021484	51.4957	36.6585	28.053	0.027832	0.02627	-0.059766	-44.554	-13.763	100.707	0.06113	0.19531	-0.11015	-44.2214	30.4444	44.279	0.29883	-0.0061035	-0.14942	-9.556	-154.391	1004.391	-2.4242	0.47897	0.17795	-5.054	120.069	598.605	-0.27393	0.32764	0.13818	78.382	97.3127	1380.6329	-1.8711	0.6084	0.22754
0.41	66.4163	-63.379	1530.634	-2.1797	0.57422	0.022461	48.966	14.6257	30.7237	-0.0038086	0.029395	-0.051172	-57.1651	-0.741999999999997	86.245	0.073239	0.21015	-0.11445	-17.285	42.794	46.72	0.26514	-0.0097656	-0.14453	-44.558	-210.834	1020.1996	-2.498	0.51611	0.16064	21.621	154.062	725.2765	-0.35376	0.33277	0.14014	46.321	103.4178	1332.6873	-1.8316	0.60694	0.22583
0.412	65.1296	19.101	1508.99285	-2.1855	0.57813	0.02832	94.083	16.752558	36.401	-0.036719	0.034571	-0.046973	-53.399	-30.341	95.1112	0.081052	0.22236	-0.11719	-43.06	27.8733	5.8058	0.21191	-0.0083008	-0.13623	-56.311	-249.38	1092.237	-2.4817	0.5634	0.13144	-13.43	125.56	817.075	-0.44727	0.33984	0.14502	88.9073	31.643	1315.4815	-1.8027	0.60156	0.2251
0.414	43.998	-16.7324	1519.515	-2.207	0.58594	0.035156	48.0682	31.8066	0.738999999999999	-0.069824	0.041016	-0.041504	-12.579	-35.077	126.116	0.085938	0.23828	-0.11963	-65.7952	7.235	41.605	0.18262	-0.0083008	-0.13232	-44.629	-235.975	1132.795	-2.3962	0.61768	0.10124	4.267	89.193	905.009	-0.60693	0.33691	0.14453	90.4643	75.035	1287.982	-1.7559	0.59961	0.2251
0.416	-1.445	72.258	1527.336	-2.2234	0.58764	0.052246	47.389	9.275	18.877	-0.09629	0.047949	-0.038965	-56.674	16.717	129.4822	0.087304	0.24658	-0.11895	-44.583	23.43606	42.737	0.13135	0.0014648	-0.12451	-94.403	-244.385	1126.25	-2.2318	0.66538	0.066142	-19.051	62.986	938.155	-0.69287	0.33252	0.15039	53.54689	72.938	1277.978	-1.7368	0.59229	0.22266
0.418	-26.073	88.119	1494.769	-2.2383	0.5918	0.060547	72.5954	19.10741	23.672	-0.11533	0.058399	-0.035254	-22.24	1.78256	212.8267	0.083879	0.25812	-0.12597	-83.359	-1.134	44.258	0.090576	0.0061036	-0.11865	-53.9829	-281.735	1167.808	-2.0219	0.6725	0.036549	-31.2455	-0.323999999999998	980.938	-0.9043	0.32813	0.15088	91.995	58.029	1294.515	-1.6987	0.58057	0.21973
0.42	-30.047	18.7267	1543.9172	-2.2461	0.58789	0.081055	22.176	12.2601	34.609	-0.12861	0.072461	-0.036426	-32.01	22.0576	262.6147	0.06902	0.2671	-0.11972	-72.7923	-9.858	63.986	0.048828	0.012695	-0.11523	-2.907	-255.305	1179.992	-1.8022	0.64697	0.013672	12.327	-57.895	1023.739	-1.085	0.33228	0.14551	64.5002	132.251	1257.152	-1.6655	0.57568	0.22192
0.422	-27.396	60.09269	1564.396	-2.2456	0.58643	0.085938	57.0907	-14.3706	55.709	-0.13672	0.087304	-0.040332	-60.128	40.609	329.0669	0.049782	0.2753	-0.11689	-54.3031	4.016	56.9312	0.0024414	0.023926	-0.099609	5.852	-218.318	1230.9926	-1.5915	0.58923	-0.025938	1.325	-110.167	1006.465	-1.2656	0.33984	0.14795	51.819	120.16	1230.2288	-1.6382	0.56494	0.21875
0.424	-39.3088	-26.504	1573.864	-2.248	0.57227	0.10693	24.128	2.789	42.981	-0.14014	0.10107	-0.037109	-6.478	40.422	443.214	0.020996	0.27979	-0.10938	-69.7883	-28.1067	53.761	-0.022949	0.03125	-0.099121	74.198	-167.061	1294.532	-1.3903	0.52634	-0.068921	20.607	-178.025	993.491	-1.5269	0.35889	0.14551	56.326	181.172	1218.5841	-1.5972	0.54443	0.21826
0.426	-51.417	-50.53	1595.305	-2.2373	0.56397	0.11694	-11.481	-5.844	56.604	-0.13603	0.11612	-0.043457	-51.085	100.192	556.025	-0.017401	0.27948	-0.098734	-27.876	-17.3773	37.28	-0.053223	0.041016	-0.092285	67.098	-116.103	1277.8172	-1.2073	0.48073	-0.10321	20.862	-168.09	962.431	-1.6602	0.36523	0.13623	5.779	238.818	1190.5548	-1.5796	0.5376	0.21387
0.428	-77.639	-8.144	1560.54	-2.2319	0.55225	0.12646	13.02	12.2619	51.375	-0.12841	0.12666	-0.052246	-56.548	130.811	687.322	-0.063611	0.28095	-0.090928	-15.414	-4.38578	11.3085	-0.073487	0.052246	-0.091309	92.5657	-132.967	1295.009	-1.0246	0.44946	-0.12629	0.0489999999999924	-151.632	971.979	-1.8706	0.39795	0.12402	26.162	191.227	1186.504	-1.5405	0.52393	0.20801
0.43	-87.653	-82.397	1547.885	-2.2285	0.54883	0.15186	-46.848	43.72	19.3017	-0.11748	0.14189	-0.057324	9.3805	154.1261	797.405	-0.11472	0.28174	-0.087418	-26.056	-2.1526	28.5107	-0.089844	0.054688	-0.090332	171.898	-142.144	1314.856	-0.89014	0.43115	-0.12842	91.583	-121.206	996.003	-1.9783	0.44507	0.11499	-0.774999999999999	219.744	1148.983	-1.5149	0.51294	0.20678
0.432	-75.826	-10.44	1531.933	-2.2319	0.55713	0.16455	-37.24	23.2049	34.0353	-0.096584	0.15293	-0.059961	-9.547	188.52	836.02293	-0.16555	0.28359	-0.081683	5.176	37.001	42.277	-0.096191	0.066895	-0.093262	132.143	-123.028	1295.9313	-0.83861	0.45865	-0.13428	82.338	-66.448	946.398	-2.0581	0.50928	0.09375	-50.3759	177.255	1117.859	-1.4863	0.50586	0.20947
0.434	-97.366	4.2259	1492.829	-2.2144	0.58252	0.17578	-39.43	17.9588	48.6063	-0.07373	0.17236	-0.069336	19.8263	122.899	887.456	-0.22559	0.28613	-0.07373	12.892	14.5854	31.087	-0.096191	0.072266	-0.092773	137.76	-137.053	1344.5388	-0.81622	0.50503	-0.12248	56.473	-59.065	944.973	-2.0444	0.59619	0.07959	-12.206	122.607	1110.895	-1.4448	0.49268	0.19336
0.436	-54.577	-34.9846	1509.876	-2.1804	0.59546	0.17675	-88.204	7.531	62.21	-0.046387	0.18496	-0.075782	55.508	68.085	962.393	-0.28526	0.28911	-0.068479	22.244	5.025	39.31	-0.085449	0.082031	-0.10107	127.255	-90.997	1360.4974	-0.82713	0.55658	-0.10256	111.7026	-51.7889	947.974	-1.9956	0.64404	0.076172	-44.559	173.351	1052.236	-1.4199	0.48389	0.19727
0.438	-63.6599	44.526	1495.326	-2.1328	0.60107	0.16846	-48.4982	-25.04	86.933	-0.024023	0.19785	-0.079199	10.928	16.18	1007.435	-0.36146	0.28403	-0.05676	53.2942	16.2507	17.5136	-0.073242	0.091553	-0.10474	48.2582	-81.9843	1369.002	-0.84482	0.62566	-0.10009	59.46	-28.782	947.048	-1.8433	0.73779	0.078125	-53.926	147.855	1018.64675	-1.375	0.47559	0.19287
0.44	-48.8365	10.7254	1476.393	-2.0874	0.59033	0.1748	-53.24767	-7.47199999999999	88.695	-0.0021484	0.20957	-0.085449	56.028	-79.035	1081.976	-0.44432	0.28134	-0.044454	40.4915	-7.5461	16.503	-0.05957	0.10205	-0.11133	52.1364	-113.029	1415.296	-0.85352	0.66309	-0.10449	76.5611	-17.439	974.191	-1.7051	0.78515	0.068115	-26.484	186.9807	1008.76712	-1.3379	0.46386	0.18774
0.442	-7.744	44.1	1492.117	-2.0796	0.58838	0.17969	-69.7432	-26.914	108.127	0.015918	0.22236	-0.096385	77.3088	-93.952	1085.724	-0.53378	0.27506	-0.030406	53.185	21.995	16.536502	-0.031738	0.11475	-0.1123	48.999	-109.303	1414.0559	-0.88498	0.64569	-0.083392	98.948	-7.28100000000001	973.0134	-1.5527	0.81641	0.066895	-77.7995	210.5	984.0816	-1.3027	0.44727	0.18408
0.444	4.732	109.396	1450.697	-2.0718	0.60498	0.18848	-11.214	-16.469	148.187	0.034668	0.23242	-0.10254	48.871	-154.5371	1066.259	-0.64404	0.27148	-0.019531	54.317768	31.08052	-14.6321	-0.016602	0.11914	-0.1167	37.386	-161.264	1481.577	-0.97571	0.61103	-0.045397	36.425	-31.773	927.186	-1.3862	0.81299	0.049805	-20.627	140.053	1001.049	-1.2549	0.42773	0.18408
0.446	31.471	50.311	1446.763	-2.0496	0.61694	0.18726	-25.826	24.2548	157.0797	0.045899	0.24258	-0.11015	49.058	-203.311	1057.891	-0.77351	0.25658	0.0034795	57.577	6.205	3.812	0.014648	0.12451	-0.11816	49.745	-165.988	1547.199	-1.1249	0.58759	-0.010639	71.4647	-96.942	963.73	-1.3203	0.78809	0.046387	-36.495	176.428	964.504	-1.2378	0.4165	0.18262
0.448	63.748	116.756	1428.084	-2.0098	0.62207	0.18994	-18.91	7.1923	211.3532	0.058496	0.25635	-0.11709	-17.051	-147.89	1012.975	-0.91281	0.25175	0.02119	51.062	28.54012	19.978	0.040039	0.13013	-0.12305	-5.774	-112.1496	1539.461	-1.2948	0.58408	0.013089	51.1	-126.266	978.4988	-1.1992	0.75586	0.029297	-36.211	149.575	940.111	-1.1958	0.39209	0.17773
0.45	37.085	123.31	1381.0717	-1.959	0.63086	0.18896	2.465	27.1002	280.81	0.063965	0.26846	-0.1167	-48.3759	-135.228	1002.153726	-1.0819	0.24985	0.049169	24.219	0.457199999999998	26.8849	0.060547	0.13916	-0.125	16.826	-134.2224	1572.71	-1.4541	0.58984	0.030762	-19.7787	-183.1639	1002.6	-1.1101	0.72924	0.020996	21.594	131.8569	927.14	-1.1665	0.37646	0.17773
0.452	68.0569	82.8665	1391.9261	-1.9292	0.62549	0.18848	-46.685	50.405	351.4631	0.062988	0.27764	-0.12822	-67.8661	-86.682	997.0626	-1.2671	0.25675	0.077346	50.125	1.5622	43.571	0.087891	0.1416	-0.12891	33.64	-104.235	1586.302	-1.5908	0.60215	0.036328	18.1795	-260.056	1054.02	-1.0366	0.71631	0.0048828	-7.199	197.557	879.791	-1.1362	0.36182	0.17529
0.454	74.4517	116.406	1375.893	-1.8882	0.62549	0.18604	-18.257	52.702	453.437	0.053711	0.28369	-0.12646	-117.713	-50.774	985.742	-1.48	0.28223	0.10205	48.9385	26.61	29.9137	0.1001	0.14258	-0.12744	-28.386	-97.546	1560.897	-1.6972	0.61494	0.042871	-27.0415	-284.349	1049.275	-0.96582	0.71973	0.0039063	10.959	164.783	831.623	-1.0933	0.34229	0.16748
0.456	89.5381	17.568	1352.567	-1.8533	0.62159	0.17944	-19.40831	115.353	542.92	0.039258	0.29443	-0.12832	-127.827	-87.705	1009.212	-1.7107	0.32496	0.13413	-3.675	-4.1697	28.2804	0.11865	0.14746	-0.12793	13.01	-120.058	1572.256	-1.7816	0.61573	0.034669	-49.4933	-321.968	1086.679	-0.95678	0.73658	0.010986	55.616	201.5	790.3912	-1.0752	0.33301	0.16406
0.458	80.2023	-1.882	1343.481	-1.8223	0.62012	0.17676	-32.2825	130.039	648.68	0.013281	0.29307	-0.13096	-159.612	-35.37	1010.335	-1.9437	0.37187	0.16082	14.679	11.8674	46.493	0.12891	0.15332	-0.12647	-23.486	-44.837	1534.9476	-1.8616	0.6127	0.029199	-42.124	-308.035	1132.377	-0.97266	0.76563	0.024902	33.818	213.811	756.3359	-1.0332	0.32227	0.15674
0.46	70.8873	42.251	1313.199	-1.7769	0.61865	0.17188	-2.57054	140.6201	755.65	-0.021484	0.29385	-0.12627	-155.126	8.432	1007.746	-2.141	0.4303	0.17958	-7.72	10.0404	10.2267	0.13428	0.16016	-0.12256	-95.603	-44.064	1536.3669	-1.9297	0.60547	0.020996	-104.343	-232.075	1141.242	-1.0425	0.81689	0.02002	68.1908	151.104	753.8818	-0.99754	0.31397	0.15527
0.462	84.491	-8.305	1311.21	-1.7578	0.61133	0.17139	-23.6429	163.923	832.105	-0.065137	0.29141	-0.12304	-106.148	12.065	1012.406	-2.2773	0.48442	0.17492	-45.744	-8.897	11.076	0.13428	0.16309	-0.12109	-55.0028	-25.179	1564.45	-2.0004	0.59004	0.018066	-84.339	-204.771	1214.0977	-1.0781	0.83203	0.0078125	55.509	197.7513	699.1059	-0.9668	0.3042	0.1499
0.464	94.685	65.996	1292.083	-1.7124	0.60205	0.16992	8.12464	126.994	892.111	-0.11963	0.28906	-0.11768	-112.139	46.941	971.4836	-2.3179	0.521	0.16748	-40.422	19.08546	44.3687	0.13623	0.16553	-0.11963	-67.0281	5.787	1523.66	-2.0655	0.5833	0.0083005	-85.801	-133.342	1229.5361	-1.1284	0.81787	-0.0014648	53.9535	165.0688	653.0173	-0.93018	0.29541	0.14551
0.466	62.262	82.609	1246.7651	-1.6792	0.59229	0.16187	50.4072	99.396	963.009	-0.18262	0.28672	-0.11347	-71.0537	-41.716	934.097	-2.2858	0.55581	0.14165	-79.0246	3.8968	50.4042	0.12158	0.16504	-0.11621	-28.611	-55.16	1532.72	-2.1202	0.57783	-0.0018556	-117.071	-113.931	1244.269	-1.1888	0.80102	-0.0073244	102.238	137.5298	629.536	-0.9082	0.28711	0.14502
0.468	52.449	59.439	1235.357	-1.6426	0.58301	0.16113	7.249	51.685	1007.092	-0.25244	0.29102	-0.1086	-48.849	-139.417	960.026	-2.1929	0.57083	0.12828	-75.63	14.45	88.574	0.10693	0.16919	-0.11572	-15.698	-11.8878	1525.444	-2.1654	0.57412	-0.017383	-76.229	-121.466	1275.253	-1.2847	0.77197	-0.037109	65.1404	160.669	585.37	-0.86914	0.27979	0.13525
0.47	30.275	157.02	1210.301	-1.6069	0.56885	0.15527	47.951	-35.663	1067.781	-0.32939	0.29375	-0.099609	-50.779	-168.944	976.847	-2.0662	0.57313	0.10613	-41.0508	37.6713	111.415	0.089355	0.16992	-0.11426	-74.713	8.669	1523.385	-2.2031	0.58301	-0.038086	-106.767	-67.851	1266.423	-1.4097	0.76416	-0.027832	71.5341	109.1175	559.4021	-0.83545	0.26611	0.13062
0.472	12.65	133.537	1196.367	-1.5854	0.56104	0.15527	54.593	-78.343	1066.397	-0.42198	0.29746	-0.086035	-44.332	-242.1377	1062.7194	-1.9289	0.54649	0.091009	-50.97652	6.301	130.159	0.059082	0.17188	-0.11133	3.679	-4.953	1542.701	-2.218	0.5917	-0.055273	-83.93	-80.28	1274.3211	-1.4746	0.76953	-0.024902	90.455	152.08682	523.8634	-0.79883	0.25586	0.12988
0.474	0.890000000000001	151.513	1179.254	-1.5547	0.55029	0.15332	27.300314	-154.1922	1057.93	-0.52686	0.29736	-0.07959	-56.184	-238.06669	1115.599	-1.7905	0.50928	0.062988	-20.99	29.0137	190.587	0.038086	0.17236	-0.10791	11.45	34.103	1537.908	-2.2184	0.60098	-0.072656	-26.1292	-86.143	1286.669	-1.5869	0.7832	-0.026367	32.767	193.083	501.181	-0.75342	0.24658	0.11914
0.476	-1.096	195.844	1134.81	-1.532	0.54175	0.15015	40.402	-202.116	1064.09	-0.64492	0.29981	-0.063477	-99.321	-240.715	1112.943	-1.6372	0.45048	0.029395	-17.12	41.482	202.7579	-0.0053711	0.1709	-0.11182	15.559	-20.444	1543.5437	-2.2121	0.61035	-0.097269	-100.449	-57.245	1264.943	-1.6475	0.78662	-0.024902	38.482	168.2219	510.278	-0.73047	0.24121	0.12158
0.478	-27.873	120.433	1123.787	-1.5112	0.53271	0.14648	-38.597	-180.457	1039.17	-0.77998	0.29863	-0.046875	-52.378	-292.539	1153.099	-1.4729	0.3959	-0.010724	-58.061	37.061	256.025	-0.046387	0.16821	-0.10767	102.2404	-48.98248	1571.001	-2.1913	0.61807	-0.11689	-67.304	-110.094	1311.194	-1.7012	0.78516	-0.016113	22.293	195.987	472.612	-0.68604	0.23584	0.10742
0.48	-43.242	191.483	1089.087	-1.481	0.5249	0.13916	-62.695	-167.565	1032.533	-0.93154	0.3041	-0.03086	-21.067	-232.629	1172.319	-1.3031	0.34171	-0.04726	-43.343	87.998	321.466	-0.085449	0.16162	-0.10498	72.317	-20.9729	1543.857	-2.1641	0.62402	-0.14209	-60.1733	-94.1093	1366.503	-1.7671	0.78369	-0.010742	7.264	146.074	435.6683	-0.65454	0.22851	0.10645
0.482	-50.379	187.919	1036.98296	-1.4683	0.52002	0.14014	-59.6212	-119.305	1010.039	-1.1072	0.31328	-0.0022462	15.817	-200.525	1214.9202	-1.1656	0.31679	-0.081211	-58.3357	85.8589	393.0453	-0.14795	0.16455	-0.10498	66.0743	-47.472	1564.351	-2.1283	0.62266	-0.16699	-81.303679	-98.459	1391.832	-1.7964	0.78174	-0.0068359	5.963	109.755	411.203	-0.62598	0.21729	0.099121
0.484	-52.298	171.0464	1001.71	-1.4399	0.49902	0.13672	-143.435	-52.526	978.398	-1.2949	0.33154	0.024414	70.173	-172.282	1278.299	-1.064	0.33447	-0.096191	-41.8796	103.628	501.341	-0.18457	0.16357	-0.10547	82.8274	11.801	1559.638	-2.093	0.61894	-0.18086	-20.565	-155.487	1464.246	-1.8516	0.76953	0.00048828	-44.5757	120.788	379.866	-0.59326	0.20947	0.10693
0.486	-63.85	231.68	967.027	-1.4102	0.48779	0.13843	-135.24	-59.126	1003.851	-1.5044	0.34717	0.059179	64.409	-91.532	1282.064	-1.0055	0.40072	-0.11067	-23.9976	127.725	574.404	-0.26221	0.16455	-0.10303	52.243	33.563	1522.564	-2.0551	0.60918	-0.19844	-25.8345	-122.513	1468.245	-1.8884	0.77124	0.0048828	-65.7929	89.739	377.61	-0.57959	0.20459	0.10254
0.488	-58.976	162.483	975.2817	-1.3853	0.479	0.13086	-158.022	-23.681	1019.781	-1.7175	0.36885	0.10078	92.6447	-143.1659	1312.049	-0.95439	0.47419	-0.13425	-60.188	110.243	669.703	-0.32349	0.16284	-0.10083	116.114	-15.416	1520.485	-2.0247	0.60264	-0.20839	-10.8123	-164.23902	1482.809	-1.9194	0.77197	0.0048828	-49.2092	109.6945	332.909	-0.54883	0.19482	0.10059
0.49	-38.723	156.17	975.268	-1.3452	0.45557	0.13037	-192.925	5.393	1030.615	-1.9167	0.39893	0.13711	151.668	-120.859	1330.561	-0.89657	0.52011	-0.17208	-23.3082	121.146	782.776	-0.39551	0.16162	-0.10059	107.9377	29.002	1475.456	-1.9937	0.59619	-0.21631	50.0467	-182.237	1539.59	-1.9531	0.76855	0.0029297	-86.12	123.447	271.563	-0.52759	0.1875	0.097168
0.492	-58.76789	184.105	954.424	-1.3198	0.44775	0.125	-128.814	10.276	1049.167	-2.1011	0.42275	0.16797	166.518	-89.198	1299.157	-0.84155	0.52909	-0.17458	-3.8011	111.507	822.246	-0.50244	0.16553	-0.092773	58.856	25.316	1449.1499	-1.9703	0.56797	-0.21719	29.4613	-100.525	1517.566	-1.9644	0.76416	-0.0014648	-63.02601	104.7626	260.271	-0.50098	0.17822	0.095703
0.494	-10.389	107.0618	957.392	-1.2813	0.42578	0.12158	-110.2	40.812	1006.9016	-2.2671	0.4458	0.17285	187.358	-112.824	1324.76992	-0.83301	0.50977	-0.15381	5.819	71.392	876.207	-0.56152	0.17188	-0.089844	116.5451	74.23619	1457.396	-1.9542	0.55566	-0.22207	57.269	-108.7185	1530.794	-1.9575	0.75732	0.0043945	-71.5367	148.493	241.7779	-0.46484	0.18262	0.092773
0.496	18.496	178.16	934.61	-1.2478	0.41089	0.1189	-92.824	-8.741	1000.488	-2.38	0.45811	0.16602	122.2147	-42.458	1331.9531	-0.89778	0.50312	-0.1418	49.998	51.502	906.921	-0.69775	0.1792	-0.080566	71.908	140.291	1430.7496	-1.9464	0.54629	-0.22207	63.6978	-55.653	1525.21	-1.9506	0.75732	0.0063477	-67.6386	125.604	233.597	-0.44238	0.18115	0.095703
0.498	3.643	192.237	889	-1.2163	0.39307	0.11816	-39.386	-62.944	983.558	-2.4254	0.4584	0.15224	71.8911	-47.92	1325.46	-1.0095	0.5157	-0.12053	33.355	-25.4312	944.49	-0.81055	0.19214	-0.068115	67.6933	77.6	1430.4248	-1.9427	0.53642	-0.21719	28.544	-23.791	1481.4234	-1.9448	0.75537	0.0078125	-31.6249	102.911	234.667	-0.39258	0.17676	0.082031
0.5	36.591	187.299	855.926	-1.1758	0.375	0.11328	-80.8214	-88.145	989.084	-2.3836	0.47207	0.12451	82.7547	-92.71	1391.1372	-1.1397	0.5403	-0.10294	60.1599	-78.852	1008.09	-0.93115	0.21436	-0.056152	95.2338	91.276	1427.823	-1.939	0.52979	-0.20898	52.9388	-63.1948	1511.778	-1.9395	0.75195	0.013184	-94.154	114.733	219.056	-0.34302	0.17993	0.077636
0.502	57.129	253.64	798.512	-1.1558	0.36865	0.10889	-63.6568	-175.795	1054.993	-2.277	0.48897	0.10537	70.0496	-63.461707	1411.97217	-1.2614	0.56025	-0.083307	67.714	-127.1604	1014.825	-1.1172	0.23926	-0.036621	25.153	86.886	1413.36	-1.9369	0.52803	-0.20283	44.85	-2.104	1510.406	-1.9429	0.74756	0.01709	-49.496	70.034	208.655	-0.29541	0.17969	0.072754
0.504	59.392	177.4389	780.465	-1.1069	0.34717	0.10693	-60.8098	-209.4539	1130.563	-2.127	0.50391	0.083008	73.5249	-149.04	1466.992	-1.3809	0.58105	-0.066406	2.8675	-186.42	1002.868	-1.2129	0.26221	-0.026855	48.424	79.1548	1425.579	-1.9418	0.53242	-0.19766	24.7607	-22.695	1515.922	-1.9468	0.74072	0.030762	-10.244	76.442	199.398	-0.22998	0.18018	0.065918
0.506	69.142	180.816	762.482	-1.0781	0.33521	0.10327	-77.037	-233.3069	1175.454	-1.9629	0.49766	0.06084	56.407	-148.866	1513.153	-1.4957	0.58721	-0.04902	-5.09502	-180.804	1022.867	-1.4199	0.3042	0.00097656	23.792	142.346	1373.505	-1.9371	0.53867	-0.20235	43.717	-35.4213	1532.829	-1.951	0.73169	0.040283	-64.81	100.633	148.0234	-0.19482	0.17529	0.064453
0.508	88.5711	217.068	714.55	-1.0449	0.3252	0.10156	-22.833	-279.047	1204.123	-1.7933	0.46435	0.033789	15.904	-102.6217	1508.712	-1.6136	0.60127	-0.035056	-41.483	-151.917	985.395	-1.5694	0.33008	0.030762	-36.209	99.6784	1346.9825	-1.9177	0.54297	-0.20655	-17.9775	17.5268	1479.446	-1.9648	0.72461	0.051758	3.341	81.1145	143.949	-0.12988	0.16553	0.056641
0.51	85.0171	168.4716	697.1148	-0.99805	0.30566	0.09668	-27.648	-228.355	1199.095	-1.612	0.41943	-0.002539	15.803	-160.216	1555.224	-1.739	0.6087	-0.028417	-66.0943	-129.402	964.822	-1.7202	0.36182	0.063965	-11.793	72.362	1321.3973	-1.9063	0.5332	-0.20703	-36.6608	-30.4128	1485.915	-1.9805	0.70703	0.073242	-10.876	116.678	145.4433	-0.079589	0.15478	0.045898
0.512	79.9299	224.078	674.064	-0.97656	0.29883	0.098145	-11.513	-199.53	1244.266	-1.4279	0.37266	-0.035937	-7.074	-96.986	1552.077	-1.8501	0.62451	-0.02412	-53.2692	-81.291	950.223	-1.9121	0.39844	0.095215	-79.1219	85.855	1296.0415	-1.897	0.5252	-0.20264	-17.158	10.393	1507.9718	-1.9922	0.69727	0.081543	-3.326	83.132	137.482	-0.038574	0.14258	0.038574
0.514	77.9093	185.728	629.023	-0.93506	0.2876	0.091797	29.16	-176.811	1301.397	-1.2598	0.3291	-0.060059	-3.088	-113.03	1543.12	-1.9409	0.63916	-0.023438	-125.815	-61.778	918.2509	-1.9937	0.42529	0.10889	-60.728	45.079	1293.2808	-1.9035	0.51738	-0.20059	-51.9053	41.837	1528.852	-2.0137	0.68555	0.099609	58	37.4007	154.307	0.021973	0.11865	0.021973
0.516	91.381	162.1094	597.3284	-0.90137	0.27051	0.092285	29.976	-84.904	1311.033	-1.136	0.31143	-0.062793	7.872	-154.2001	1564.324	-2.0083	0.64737	-0.027539	-159.775	-42.2959	968.18	-2.1108	0.45215	0.13184	-19.794	92.223	1271.138	-1.9082	0.51855	-0.20449	-20.398	-31.177	1574.796	-2.0231	0.67456	0.10376	41.3365	23.45711	126.144	0.055176	0.11572	0.0087891
0.518	67.9747	222.831	564.5748	-0.87305	0.26074	0.093262	80.15	-118.083	1352.809	-1.0671	0.33877	-0.054394	-36.093	-57.205	1522.581	-2.0629	0.6582	-0.042869	-160.806	-1.619	974.972	-2.1636	0.48047	0.13477	-71.5435	131.106	1232.442	-1.904	0.52315	-0.20615	-49.212	-6.801	1566.232	-2.0249	0.6626	0.11621	55.698	-19.0454	125.729	0.11279	0.09082	-0.0073242
0.52	68.0058	187.698	563.637	-0.83447	0.24512	0.093262	123.775	-108.896	1380.903	-1.0562	0.42002	-0.05166	-80.7175	-78.3749	1499.717	-2.0988	0.66992	-0.062792	-168.76	-7.451	960.654	-2.1792	0.5083	0.13086	-37.941	130.922	1246.053	-1.8867	0.51953	-0.20996	-84.63	-68.9893	1564.086	-2.0313	0.66211	0.13965	86.97427	17.314	104.049	0.15626	0.078125	-0.017822
0.522	40.005	185.09	555.412	-0.80518	0.24365	0.08252	91.2	-79.591	1357.828	-1.0565	0.51357	-0.063867	-71.959	-43.6879	1508.4391	-2.1236	0.67793	-0.087108	-108.652	-13.861	945.936	-2.127	0.55762	0.13037	-37.87	195.074	1194.03	-1.8579	0.5167	-0.21553	-54.885	-108.946	1582.403	-2.0391	0.65918	0.13721	46.306	54.836	88.7519	0.19678	0.072266	-0.028809
0.524	8.963	171.207	510.213	-0.76855	0.22803	0.087891	128.13	-104.219	1367.96	-1.0254	0.57422	-0.076172	-66.634	11.136	1499.248	-2.1343	0.68994	-0.1084	-83.495	-30.038	912.5704	-2.0801	0.58008	0.11182	-45.092	181.787	1173.82091	-1.8229	0.51143	-0.21963	-97.169	-48.6212	1538.393	-2.0361	0.66797	0.14844	63.161396	46.6701	87.929	0.24756	0.052734	-0.047363
0.526	21.466	86.39	492.81	-0.7378	0.22071	0.084229	103.7364	-33.132	1343.591	-1.0018	0.57929	-0.082129	-44.85	-41.181	1515.2713	-2.1437	0.69766	-0.12383	-102.248	-80.256	904.757	-1.9526	0.61182	0.085938	36.554	198.017	1148.1586	-1.7839	0.50205	-0.22353	-78.1694	-91.525	1499.5357	-2.0207	0.67847	0.15088	43.4006	71.384	92.618	0.26221	0.048828	-0.05957
0.528	-24.725	124.014	466.255	-0.70703	0.21191	0.088379	47.8904	-32.336	1331.85	-1.0229	0.5585	-0.070801	-29.442	30.543	1510.416	-2.1444	0.70107	-0.13779	-40.5192	-123.355	930.007	-1.8264	0.60767	0.054931	-13.053	222.635	1107.3372	-1.7496	0.49414	-0.22275	-57.695	-37.556	1465.5607	-2.0034	0.67822	0.14551	42.0284	38.411	88.975	0.2998	0.02832	-0.071289
0.53	-53.2764	109.037	436.855	-0.66992	0.19238	0.086426	63.7764	-87.1637	1387.5025	-1.0929	0.54209	-0.054004	-40.575	28.892	1487.7887	-2.1304	0.69795	-0.16045	-68.547	-146.049	956.599	-1.6816	0.58203	0.020508	-11.617	183.023	1116.8613	-1.7129	0.48047	-0.22363	-131.496	19.0549	1429.8246	-1.9727	0.67383	0.15674	54.2396	21.3614	98.889	0.32642	0.013672	-0.082275
0.532	-42.6345	91.5551	421.144	-0.64282	0.18115	0.085205	14.739	-66.221	1399.238	-1.2027	0.53965	-0.046289	-16.569	-0.0182000000000002	1531.939	-2.1075	0.68818	-0.18017	-90.438	-189.5048	1024.588	-1.4609	0.52148	-0.029785	26.54	208.888	1088.807	-1.6765	0.46611	-0.2206	-67.52	-9.254	1450.553	-1.9663	0.66895	0.15381	-0.765999999999998	43.917	80.209	0.3457	-0.00048828	-0.098145
0.534	-86.2024	131.276	364.553	-0.6167	0.17139	0.082031	23.637	-144.94	1458.829	-1.3145	0.54688	-0.032227	13.391	75.4204	1531.287	-2.0801	0.68359	-0.20313	-62.284	-189.568	1073.312	-1.2988	0.479	-0.066651	-4.078	200.279	1055.0067	-1.642	0.4627	-0.20625	-46.0198	64.118	1461.403	-1.9585	0.67822	0.15869	8.088	8.75023	68.438	0.37207	-0.017578	-0.11572
0.536	-82.3813	75.67	334.6236	-0.57861	0.15723	0.077148	13.29	-129.055	1523.133	-1.4045	0.56133	-0.032129	40.626	3.375	1520.26	-2.0499	0.66807	-0.22051	-74.6078	-208.071	1082.776	-1.1636	0.44482	-0.10547	50.407	171.304	1036.224	-1.6072	0.4498	-0.21054	-62.875	41.319	1454.122	-1.9482	0.68945	0.16187	-0.667999999999999	23.9041	47.592	0.38989	-0.0271	-0.12329
0.538	-61.317	91.38805	320.053	-0.5542	0.1499	0.077637	-41.9262	-85.2534	1522.663	-1.482	0.56611	-0.031153	76.112	-27.639	1530.00512	-2.016	0.65186	-0.2376	-59.1782	-231.361	1116.274	-1.042	0.40771	-0.12598	67.1335	188.7589	993.627	-1.5714	0.43955	-0.20166	-13.875	31.421	1455.189	-1.9277	0.69434	0.16699	-49.4216	29.7306	17.18346	0.40234	-0.035645	-0.13477
0.54	-57.0631	117.547	276.697	-0.50195	0.13379	0.071777	-12.822	-131.016	1549.944	-1.5558	0.56807	-0.02959	62.65	-13.135	1506.587	-1.975	0.6292	-0.2544	-36.308	-208.609	1134.849	-1.0117	0.41211	-0.13086	48.3982	154.4167	966.4316	-1.5332	0.42676	-0.19287	-34.02796	96.989	1396.535	-1.8862	0.6958	0.16309	11.766	1.56111	38.6221	0.40869	-0.053223	-0.1377
0.542	-39.486	65.5021	272.604	-0.45679	0.13403	0.061279	-36.601	-91.5802	1539.559	-1.6349	0.56787	-0.025586	84.9859	-85.134	1526.456	-1.9422	0.60352	-0.26699	-39.594	-196.61	1177.537	-1.0054	0.45605	-0.13672	87.689	179.1106	947.424	-1.4977	0.4168	-0.18642	-3.391	53.208	1369.727	-1.8633	0.69336	0.16357	-47.399	20.2838	22.4043	0.41162	-0.056152	-0.1416
0.544	-48.669	110.442	253.008	-0.40479	0.13867	0.050293	-50.084	-110.3719	1535.233	-1.7124	0.5708	-0.026367	124.28	-17.4395	1530.587	-1.9136	0.56934	-0.2749	43.27	-163.64248	1243.452	-1.0456	0.50537	-0.14672	39.7634	200.987	922.873	-1.4655	0.41084	-0.17695	11.645	90.901	1364.3837	-1.8242	0.67822	0.17285	-73.8735	13.837	40.743	0.40332	-0.067383	-0.13623
0.546	-69.854	80.51	225.784	-0.32178	0.12695	0.041504	-12.845	-143.612	1581.746	-1.7937	0.57832	-0.024121	112.849	-11.861	1505.414	-1.9057	0.54004	-0.28076	49.20939	-105.95	1235.2183	-1.0815	0.55518	-0.17139	67.789448	147.1443	934.781	-1.4319	0.39951	-0.16914	-18.424	104.972	1349.313	-1.7984	0.66358	0.16285	-35.673	11.5868	43.782	0.38037	-0.0625	-0.14185
0.548	-39.929	61.732	217.259	-0.28223	0.12305	0.038086	-45.554	-46.528	1560.962	-1.8609	0.58242	-0.021289	123.51	-60.062	1518.498	-1.9113	0.51943	-0.28526	70.7943	-115.454	1257.8911	-1.1152	0.55566	-0.18115	76.6945	152.3049	894.911	-1.4003	0.39346	-0.1585	42.2666	38.474	1350.173	-1.7754	0.6582	0.16553	-88.059	33.6609	22.0557	0.35547	-0.063965	-0.13867
0.55	-28.926	106.31	170.4153	-0.19922	0.12451	0.024902	-67.602	-72.606	1536.392	-1.9098	0.58945	-0.031445	113.4755	23.93	1466.183	-1.9269	0.50576	-0.29034	120.525	-83.318	1256.1758	-1.1479	0.5415	-0.18604	24.921	158.743	846.149	-1.3691	0.38135	-0.14844	21.5755	76.6425	1321.6116	-1.7476	0.64697	0.16748	-67.354	-5.868	44.956	0.31738	-0.071289	-0.12695
0.552	-12.764	49.889	149.352	-0.13696	0.11304	0.013916	-64.4734	-38.35597	1523.96703	-1.949	0.59922	-0.04209	98.92896	-4.453	1432.509	-1.9457	0.48614	-0.28457	90.9551	-52.905	1241.411	-1.2578	0.54004	-0.1792	57.88807	184.356	826.277	-1.3354	0.37715	-0.13692	2.61033	26.249	1301.8909	-1.7383	0.64551	0.16846	-31.537	-9.8917	34.2836	0.28564	-0.075195	-0.12305
0.554	-33.154	69.39936	143.162	-0.083496	0.10303	0.0053711	-113.385	23.9344	1489.725	-1.998	0.59961	-0.052734	109.2072	39.0884	1428.065	-1.9648	0.47852	-0.28418	127.463	-57.118	1292.4065	-1.3603	0.55273	-0.17358	8.319	242.54	793.895	-1.3069	0.37354	-0.12784	23.5103	8.009	1306.606	-1.7026	0.63135	0.16797	-70.48604	1.009	19.0763	0.22754	-0.066895	-0.1123
0.556	-24.244	79.566	116.6295	-0.0043945	0.087402	-0.003418	-54.492	-22.0485	1502.7367	-2.0262	0.59922	-0.062598	83.416	125.796	1372.9133	-1.9853	0.48037	-0.28008	92.78	-21.331	1296.3868	-1.4463	0.57129	-0.16602	-26.367	218.202	761.518	-1.2772	0.36885	-0.11612	17.69	80.762	1297.178	-1.6844	0.6211	0.16553	-30.512	-5.83007	23.958	0.1836	-0.060059	-0.10742
0.558	33.3129	15.2495	131.8201	0.027344	0.082031	-0.013184	-17.7	43.9434	1503.2601	-2.0448	0.60674	-0.075098	92.839	63.318	1390.0703	-2.0024	0.48848	-0.28887	17.027	-49.041	1330.7978	-1.5332	0.59375	-0.16406	-1.113	191.9427	718.337	-1.2486	0.35791	-0.09834	26.081	43.673	1277.153	-1.6675	0.60889	0.16797	-28.775	46.136	19.5006	0.13281	-0.050293	-0.10059
0.56	39.1757	25.995	125.308	0.093262	0.062988	-0.028809	-54.184	44.097	1506.0317	-2.0592	0.61963	-0.085644	87.476	116.015	1394.187	-1.9929	0.48613	-0.30215	53.8087	-84.5305	1404.22	-1.5679	0.60205	-0.15869	-54.1179	181.09242	643.1606	-1.2207	0.35449	-0.095703	37.2618	105.0463	1225.8254	-1.6309	0.59375	0.1665	-47.721	28.3309	16.9483	0.071289	-0.036621	-0.092773
0.562	54.8786	-9.23028	123.131	0.14331	0.049317	-0.033447	-6.644	6.1878	1549.96	-2.0637	0.62451	-0.10274	34.856	112.584	1356.014	-1.9639	0.4709	-0.30752	13.933	-56.07454	1412.889	-1.6382	0.60303	-0.16162	-44.321	149.8419	630.5948	-1.1851	0.34561	-0.081445	4.771	144.393	1185.855	-1.6191	0.58496	0.16943	7.99	9.07881	17.0255	0.042969	-0.027832	-0.088379
0.564	84.1847	-12.3725	113.074	0.18506	0.03125	-0.041504	-6.74299999999999	71.125	1541.047	-2.0586	0.62207	-0.11377	44.2	65.604	1363.076	-1.9492	0.45508	-0.30908	-11.226	-79.6998	1455.1428	-1.6968	0.6001	-0.1648	-28.305	179.285	589.27	-1.1555	0.33516	-0.06914	9.922	122.9889	1197.6223	-1.5815	0.56689	0.16406	-3.448	21.0698	5.5835	-0.0043945	-0.01123	-0.085449
0.566	64.474	63.2	76.6972	0.23633	0.018066	-0.049805	23.268	-6.521	1547.4384	-2.0525	0.60195	-0.13125	32.963	146.501	1335.873	-1.9609	0.45527	-0.30996	9.845	-59.99917	1475.489	-1.752	0.60059	-0.16748	-66.1512	178.58	568.191	-1.1238	0.32539	-0.058984	-3.558	214.725	1202.2	-1.5635	0.55249	0.16651	24.32	0.306600000000001	16.174	-0.033936	0.00024415	-0.077881
0.568	80.3181	51.7798	70.2	0.26611	0.0087891	-0.057129	87.8857	-0.081999999999999	1548.4258	-2.0468	0.58193	-0.14521	-13.441	83.824	1328.832	-1.9714	0.46552	-0.30791	-39.13	-52.339	1489.318	-1.8179	0.60303	-0.17236	-24.763	152.2335	553.564	-1.0869	0.31993	-0.04668	-41.13	201.394	1176.454	-1.542	0.53906	0.16895	40.9876	17.9943	33.647	-0.064941	0.0087891	-0.072266
0.57	65.1621	74.782	74.3074	0.30518	-0.003418	-0.068359	68.6871	24.6405	1521.417	-2.0354	0.55889	-0.15888	-39.945	83.3638	1309.761	-1.971	0.471	-0.30713	-20.006	-110.0714	1545.245	-1.8535	0.59961	-0.16943	-61.1453	177.957	498.762	-1.0547	0.31055	-0.033691	-23.8827	179.524	1156.841	-1.502	0.51953	0.1709	9.477	36.477	28.5534	-0.094238	0.029297	-0.077637
0.572	29.431	63.255	65.5149	0.33008	-0.019775	-0.080811	92.8632	-39.4881	1525.3177	-2.0262	0.53047	-0.17188	-61.038	104.1269	1257.7675	-1.9517	0.47988	-0.30322	-1.795	-92.259	1551.738	-1.9194	0.60205	-0.17627	-63.9666	140.562	485.333	-1.0214	0.30586	-0.023438	-59.41	202.173	1110.574	-1.4863	0.51172	0.17041	73.4407	24.798	22.0792	-0.10498	0.039551	-0.074219
0.574	48.79	5.2695	80.59	0.3501	-0.031738	-0.081055	83.7445	14.257	1531.823	-2.0229	0.50928	-0.18359	-72.04	25.125	1244.163	-1.9219	0.48389	-0.30371	-40.334	-115.869	1544.657	-1.961	0.60498	-0.19336	-21.101	156.637	463.415	-0.98545	0.29815	-0.01416	-49.9633	127.0952	1092.533	-1.4448	0.49072	0.16797	47.786	50.419	4.5645	-0.12451	0.058105	-0.075684
0.576	28.278	49.18	58.428	0.36963	-0.043945	-0.085938	53.0343	-2.927	1517.573	-2.01	0.48418	-0.19629	-46.869	81.62265	1251.545	-1.887	0.48389	-0.30381	-35.4	-129.4661	1589.876	-1.998	0.61523	-0.2002	-76.70919	170.949	426.547	-0.94639	0.29346	-0.0051758	-23.312	171.676	1063.33	-1.4189	0.47559	0.16577	59.2811	41.014	17.242	-0.13427	0.063477	-0.078125
0.578	1.248	54.054	42.2	0.37891	-0.041504	-0.089355	101.968	-47.6531	1542.451	-2.0021	0.4586	-0.20742	-54.487	93.9616	1242.932	-1.8645	0.48125	-0.30234	-73.0101	-60.006	1548.813	-2.0366	0.62061	-0.21387	-41.188	126.9427	421.707	-0.90605	0.28906	0.0044922	-87.334	201.072	1018.2851	-1.3843	0.4624	0.16016	78.0933	26.0162	35.856	-0.14209	0.072266	-0.080566
0.58	3.09	47.981	56.21	0.38721	-0.043457	-0.095703	87.8018	21.2575	1503.734	-1.9986	0.43555	-0.21445	-55.96	78.2473	1233.231	-1.8422	0.47852	-0.29414	-110.802	-54.936	1521.209	-2.0479	0.625	-0.2207	-36.669	130.7164	380.377	-0.86865	0.2876	0.0087891	-49.85668	156.1478	1017.364	-1.3374	0.44043	0.15967	30.75	42.967	35.407	-0.13477	0.085938	-0.085938
0.582	-18.389	94.418	34.562	0.39038	-0.057129	-0.096437	71.21568	-12.642	1460.812	-2.004	0.41944	-0.22373	-49.026	174.856	1201.994	-1.8195	0.47275	-0.28633	-73.5711	3.148	1512.145	-2.0723	0.63965	-0.2334	-43.46	103.0734	348.609	-0.82832	0.28105	0.016992	-60.2334	194.982	999.904	-1.3145	0.43359	0.15967	56.7365	15.7699	46.432	-0.12891	0.093262	-0.093262
0.584	-9.289	45.545	24.7343	0.38379	-0.058105	-0.094238	90.36155	42.8999	1436.9178	-2.0137	0.39844	-0.22461	-28.007	121.604	1175.27	-1.7939	0.46777	-0.2793	-99.523	41.966	1478.5767	-2.0964	0.64185	-0.23779	29.807	76.449	350.813	-0.78829	0.27559	0.014942	-71.737	151.254	988.805	-1.2734	0.4082	0.15283	35.63	14.1336	40.346	-0.11475	0.10693	-0.10303
0.586	-12.662	50.089	30.0116	0.36621	-0.060059	-0.10303	35.459	130.105	1391.342	-2.0237	0.37901	-0.22539	19.817	150.929	1164.632	-1.7675	0.46514	-0.271	-65.9246	-6.2325	1515.906	-2.1108	0.63818	-0.24512	-5.816	105.3542	287.386	-0.74531	0.27168	0.023145	-14.096	129.1876	994.955	-1.2427	0.3977	0.14966	-3.305	10.0895	32.787	-0.098389	0.12402	-0.10865
0.588	-46.204	37.192	39.797	0.35449	-0.062012	-0.10303	48.639	81.835	1405.018	-2.0321	0.3668	-0.22383	11.395	210.822	1114.8095	-1.7379	0.4543	-0.26201	-38.949	31.4013	1510.55	-2.1304	0.64893	-0.25879	0.439	88.21797	286.08	-0.69873	0.26592	0.024414	-34.629	168.443	985.734	-1.2085	0.38623	0.15039	43.272	-15.185	48.653	-0.077637	0.13818	-0.11523
0.59	-55.373	2.0937	71.69	0.31299	-0.050293	-0.095703	30.24	133.334	1406.1885	-2.0398	0.3625	-0.225	13.931	161.1508	1093.5	-1.7016	0.44609	-0.25303	-79.7467	12.334413	1506.325	-2.1309	0.64453	-0.26807	78.62406	120.5344	249.016	-0.65234	0.2666	0.027832	-21.889	123.083	968.181	-1.1675	0.37354	0.14014	-7.136	31.8707	36.9551	-0.043457	0.15479	-0.12402
0.592	-64.9164	48.8796	59.928	0.27979	-0.043946	-0.090088	10.755	109.8	1374.8789	-2.0413	0.36455	-0.2292	26.268	227.35	1067.912	-1.6641	0.43301	-0.24521	-11.852	-6.3867	1550.357	-2.125	0.63672	-0.2832	36.969	118.847	194.9426	-0.6041	0.25967	0.032519	1.005	172.99	906.891	-1.1392	0.36377	0.1377	-44.0157	16.7387	45.2033	-0.032715	0.15723	-0.12988
0.594	-72.0888	34.402	38.8358	0.23877	-0.032227	-0.087891	20.505	61.154	1386.408	-2.0527	0.37109	-0.23291	16.617	200.787	1054.872	-1.627	0.4209	-0.23242	8.662	35.1331	1529.377	-2.1036	0.62549	-0.28857	67.6475	73.8098	194.381	-0.55518	0.24824	0.033203	-12.956	181.954	829.221	-1.0913	0.35352	0.14111	-13.125	6.3113	72.857	-0.0019531	0.17822	-0.14063
0.596	-52.9993	1.95	45.235	0.18799	-0.025879	-0.071289	-7.298	138.081	1366.908	-2.0413	0.37198	-0.23965	50.53	145.453	1045.021	-1.5938	0.39902	-0.2251	28.567	-5.31	1519.0916	-2.0801	0.61133	-0.30078	63.0452	83.2508	177.6912	-0.50361	0.24277	0.039062	35.439	151.098	804.2511	-1.0551	0.34253	0.12158	-64.8836	16.671	77.934	0.020752	0.18409	-0.14868
0.598	-73.99192	19.204	44.4015	0.1582	-0.021484	-0.062012	-47.3969	79.419	1351.289	-2.0186	0.36768	-0.2502	74.4819	201.106	996.278	-1.5534	0.38623	-0.21259	99.655	7.2348	1516.6421	-2.0542	0.59912	-0.31152	35.759	74.0423	174.6995	-0.45518	0.23711	0.039746	5.349	212.4925	773.16197	-1.0176	0.32813	0.12256	-53.4797	-36.312	92.471	0.036621	0.19189	-0.15576
0.6	-43.172	-9.68173	54.306	0.089844	-0.017578	-0.052246	-30.331	84.767	1327.073	-2.0109	0.36963	-0.25215	82.2389	142.528	970.951	-1.5175	0.37099	-0.19697	37.21	27.076	1497.253	-2.0469	0.59082	-0.3125	80.621	85.102	178.597	-0.40576	0.23096	0.04248	25.629	178.2247	761.7692	-0.96631	0.31494	0.10938	-31.892	-39.767	113.299	0.055664	0.20605	-0.16553
0.602	-37.342	39.598	50.763	0.039063	-0.00097655	-0.046875	-73.911	104.419	1270.172	-2.0072	0.37539	-0.24658	92.0577	168.9783	961.075	-1.4784	0.35381	-0.18437	36.485	-15.391	1534.192	-2.0269	0.57959	-0.31787	36.708	111.174	139.669	-0.35791	0.22314	0.046973	76.4051	161.654	720.815	-0.94092	0.30762	0.11279	-69.4077	-28.811	104.78	0.061035	0.21436	-0.17383
0.604	-44.0196	58.793	38.221	-0.0073242	0.0087891	-0.039551	-79.3332	26.243	1260.7878	-2.0054	0.39014	-0.24268	86.168	194.722	930.447	-1.4434	0.3418	-0.1709	80.7969	3.502	1550.49	-2.0192	0.573	-0.31885	26.72	79.808	135.656	-0.30596	0.221	0.04668	-3.053	173.7307	669.584	-0.89209	0.2915	0.097168	-18.63	-40.789	154.832	0.060059	0.22656	-0.17676
0.606	-6.908	11.5305	59.894	-0.059082	0.016602	-0.028809	-77.7833	88.3621	1249.973	-1.9885	0.4041	-0.2417	93.454	116.563	910.2161	-1.413	0.32236	-0.15791	39.4952	-16.634	1507.118	-2.0156	0.56836	-0.32471	55.9441	74.25	132.024	-0.25479	0.21084	0.045899	46.8655	115.816	658.434	-0.85156	0.27344	0.090332	-31.249	20.7586	176.946	0.052979	0.23535	-0.18213
0.608	-16.949	18.7804	43.434	-0.086426	0.02002	-0.021484	-82.527	93.398	1245.605	-1.9623	0.41973	-0.24375	93.134	161.2992	887.4867	-1.3722	0.308	-0.14404	96.764	-44.135	1520.876	-2.0151	0.5708	-0.32568	-0.876000000000005	74.162	96.7815	-0.19902	0.21016	0.057715	65.7772	160.731	625.16	-0.83154	0.271	0.086914	-35.324	24.8247	209.4422	0.038086	0.25439	-0.17725
0.61	13.49	-2.422	17.2511	-0.13574	0.032715	-0.020508	-42.5634	67.3838	1261.43	-1.9252	0.42676	-0.23945	72.1455	137.03253	864.5623	-1.3347	0.29668	-0.1292	90.7174	16.229	1463.898	-2.0127	0.56982	-0.33008	17.244	40.19	97.6787	-0.14404	0.20947	0.055664	28.354	174.411	573.809	-0.79443	0.25928	0.078613	-30.154	20.9698	271.343	0.0039063	0.2583	-0.17822
0.612	42.4681	4.1349	33.218	-0.16504	0.037353	-0.01709	-54.85956	145.859	1239.964	-1.8866	0.42715	-0.23652	41.225	119.446	858.949	-1.3041	0.28281	-0.11142	62.382	15.703	1434.838	-1.9922	0.57031	-0.33691	1.467	35.3457	88.41377	-0.083497	0.20469	0.057812	69.753	139.0088	538.784	-0.76806	0.24805	0.072998	-63.5153	59.7367	347.3451	-0.018555	0.26855	-0.17773
0.614	36.4918	47.249	46.23	-0.18604	0.04834	-0.0073242	-45.3001	107.601	1207.099	-1.8516	0.42383	-0.23438	14.509	201.066	804.958	-1.2671	0.26709	-0.098145	88.5067	79.1248	1431.5702	-1.9773	0.57569	-0.33789	-46.87	10.343	89.356	-0.021875	0.20284	0.057032	-2.923	186.0556	504.503	-0.74512	0.23828	0.06543	-51.9334	41.1106	447.27401	-0.070313	0.28174	-0.17432
0.616	42.0844	6.0547	56.24	-0.20605	0.059082	-0.012695	1.629	146.569	1172.12	-1.8167	0.42197	-0.22578	-8.962	154.7495	776.657	-1.2322	0.25586	-0.080468	34.288	141.745	1375.785	-1.9648	0.58594	-0.34424	-15.962	2.8131	88.509	0.03711	0.20088	0.058984	-12.953	151.3387	500.6885	-0.7085	0.23096	0.058594	-62.554	93.8213	541.158	-0.12305	0.29566	-0.16846
0.618	63.146	23.61235	47.493	-0.20947	0.064941	-0.015625	-14.404	213.803	1114.242	-1.782	0.4208	-0.21777	-9.838	165.4814	740.588	-1.2008	0.24844	-0.066601	50.303	113.704	1397.803	-1.9434	0.60156	-0.34473	-51.058	32.1139	58.149	0.094628	0.20108	0.058301	23.763	138.2297	494.494	-0.69482	0.22705	0.051758	-66.915	125.931	641.767	-0.1792	0.30664	-0.16406
0.62	45.622	29.0457	4.289	-0.20752	0.075684	-0.016113	19.094	173.7538	1082.0676	-1.7476	0.41767	-0.21153	-37.244	184.498	669.2335	-1.1688	0.23593	-0.051367	70.0805	152.587	1391.4082	-1.937	0.61377	-0.34912	-50.714	30.7211	65.586	0.14893	0.19775	0.060059	-18.171	152.274	448.488	-0.65576	0.21484	0.047363	-29.798	112.8559	770.249	-0.26563	0.32031	-0.1543
0.622	67.5391	-19.423	34.44925	-0.20142	0.088623	-0.030273	13.646	230.091	1066.275	-1.709	0.42168	-0.19853	-55.0881	132.9102	642.4695	-1.1286	0.22295	-0.038964	0.567999999999998	133.184	1364.1009	-1.9082	0.62891	-0.36572	-19.006	39.545	67.888	0.20195	0.1874	0.063086	-24.466	86.5927	438.723	-0.62744	0.20142	0.041992	-19.8311	142.555	841.874	-0.32324	0.3291	-0.1499
0.624	68.1779	7.9504	45.879	-0.18896	0.096191	-0.04248	2.878	200.664	1054.712	-1.6758	0.41602	-0.18408	-77.51074	182.566	599.6318	-1.0952	0.21924	-0.021484	15.486	117.598	1383.553	-1.8677	0.62891	-0.37256	-83.3465	59.173	48.009	0.24433	0.17979	0.066211	-40.158	94.6045	405.364	-0.59912	0.19678	0.039551	3.2414	96.291	893.05495	-0.43701	0.34033	-0.13477
0.626	45.911	-17.6548	47.55	-0.15967	0.10547	-0.050781	54.4302	142.014	1054.891	-1.6352	0.41103	-0.18222	-74.7936	175.116	573.3727	-1.0619	0.21524	-0.012695	-20.648	165.407	1357.709	-1.8467	0.62598	-0.37012	-32.7788	57.253	57.772	0.28965	0.17588	0.070117	-76.184	110.944	365.218	-0.55615	0.18994	0.037598	50.9646	52.489	939.056	-0.5503	0.34863	-0.12182
0.628	42.4812	-28.626	46.733	-0.14795	0.11035	-0.056152	47.9959	193.872	1006.844	-1.5999	0.40235	-0.17022	-62.932	143.1908	561.7095	-1.0265	0.21055	-0.00058594	-67.8831	115.452	1341.725	-1.8354	0.63135	-0.35889	-22.566	63.635	38.426	0.33369	0.17002	0.072363	-40.67528	104.314	326.0522	-0.52832	0.18652	0.036621	-10.434	31.3419	992.811	-0.67627	0.35205	-0.10352
0.63	22.7489	4.6957	20.8744	-0.10596	0.1167	-0.069824	35.0235	144.827	995.455	-1.5577	0.39219	-0.15655	-66.706	192.871	518.646	-0.98477	0.20391	0.0099608	-27.782	115.07284	1317.409	-1.8315	0.63184	-0.35498	-68.6889	28.998	56.96	0.36523	0.16162	0.078613	-43.3188	145.432	301.4042	-0.4707	0.18604	0.029297	28	-69.157	1055.641	-0.86914	0.35107	-0.074219
0.632	29.375	-33.117	26.3931	-0.072998	0.12061	-0.079834	66.0457	180.0463	974.141	-1.5185	0.38428	-0.146	-39.3217	142.528	489.281	-0.94697	0.20693	0.020606	-77.8646	126.1391	1270.9921	-1.8179	0.64893	-0.34668	-11.751	12.0739	63.475	0.37431	0.1501	0.089746	-65.04826	111.9654	288.4419	-0.417	0.1814	0.031006	67.0455	-126.5723	1074.864	-0.98047	0.35596	-0.049316
0.634	8.158	-3.5625	32.916	-0.038574	0.12598	-0.088867	41.2271	213.221	919.607	-1.4819	0.37744	-0.13818	-41.2	159.389	472.748	-0.91211	0.20801	0.027832	-87.6228	101.936	1279.5973	-1.7934	0.65235	-0.34375	-49.872	31.9176	25.5398	0.38311	0.14004	0.0958	-58.8481	107.9118	258.4457	-0.36475	0.1748	0.025879	39.7126	-181.1401	1032.055	-1.2222	0.36182	-0.0043945
0.636	-11.324	28.9725	-2.269	-0.00097656	0.12695	-0.10059	54.7559	145.543	908.4282	-1.447	0.36855	-0.12588	-65.1529	175.039	430.882	-0.86943	0.20332	0.034668	-41.654	150.351	1273.673	-1.7637	0.65527	-0.33789	-33.8336	28.839	26.67526	0.37647	0.13496	0.098144	-64.14144	133.319	215.0066	-0.29199	0.17188	0.020996	58.424	-240.666	1050.097	-1.4248	0.36206	0.046631
0.638	-32.237	10.3972	12.269	0.025391	0.13086	-0.10352	35.5957	184.02568	878.5115	-1.4057	0.35528	-0.11895	-57.2522	128.4515	423.32208	-0.83418	0.20459	0.042676	-78.7977	141.465	1261.9464	-1.7202	0.64209	-0.32764	32.131	24.9915	44.5208	0.37256	0.12588	0.11035	-39.9156	107.367	218.707	-0.25146	0.17041	0.020508	-13.1523	-186.825	1042.299	-1.6558	0.36279	0.094238
0.64	-49.1543	37.5487	47.112	0.063965	0.13428	-0.11572	20.279	152.907338	878.584	-1.3729	0.34785	-0.1084	-35.974	171.571	397.6846	-0.79551	0.20772	0.050097	-46.8604	125.144	1256.653	-1.6992	0.63574	-0.31641	-21.771	9.313	39.538	0.36426	0.12158	0.12354	-42.7289	129.142	236.222	-0.18701	0.14941	0.0087891	-63.014	-130.02	1019.144	-1.9824	0.37598	0.16602
0.642	-32.7464	-16.817	66.964	0.090332	0.13818	-0.12402	33.5301	128.888	869.962	-1.3389	0.33613	-0.098437	-23.642	132.91	377.097	-0.75371	0.21182	0.054297	-39.669	160.041	1226.302	-1.6641	0.61914	-0.30713	22.273	-18.2666	52.784	0.3414	0.11914	0.12774	-72.072	108.166	207.832	-0.12793	0.14087	0.0009766	-29.5488	-92.437	1013.006	-2.1519	0.38916	0.18311
0.644	-48.767	-55.7382	83.05	0.10986	0.14355	-0.13086	-19.976	206.119	827.905	-1.2944	0.32471	-0.084961	0.0760000000000005	91.078	372.654	-0.71631	0.21582	0.062012	-30.001	143.231	1218.162	-1.6365	0.60425	-0.29614	42.175	8.3626	29.1595	0.3169	0.12803	0.12793	16.25	80.3411	195.76	-0.082031	0.12549	-0.0014648	-115.864	-41.184	972.1642	-2.4565	0.42139	0.19873
0.646	-70.0024	-13.046	56.6005	0.13086	0.15771	-0.13623	-37.9516	170.574	798.853	-1.2541	0.31865	-0.07666	-6.027	117.3801	341.577	-0.66865	0.21699	0.062891	21.413	197.658	1205.134	-1.6172	0.59277	-0.28418	13.574	8.4052	16.2578	0.30283	0.12334	0.14277	-43.0704	126.946	135.7159	-0.01709	0.10791	-0.024902	-142.647	-62.917	1007.653	-2.6209	0.44312	0.19946
0.648	-43.5849	-24.685	71.92013	0.13721	0.16211	-0.14746	-33.546	184.52026	751.344	-1.2194	0.31416	-0.067871	16.889	82.9137	329.923	-0.62168	0.22363	0.067871	-6.20800000000001	241.673	1150.793	-1.582	0.57666	-0.26563	71.149	-6.2797	65.522	0.27285	0.12481	0.15459	-31.926	114.398	134.474	0.0083008	0.09375	-0.02832	-120.534	-49.134	1037.809	-2.7144	0.47559	0.19141
0.65	-35.322	25.069	105.571	0.14111	0.17871	-0.15039	-82.651	208.042	686.47103	-1.1804	0.30244	-0.061231	61.5638	116.409	305.568	-0.57597	0.22949	0.076465	19.032	217.336	1113.3444	-1.564	0.56885	-0.25537	54.97	8.5338	55.776	0.23145	0.14453	0.15479	25.796	104.288	162.0122	0.070313	0.074707	-0.045898	-141.319	-9.78699999999999	1031.922	-2.7051	0.55078	0.18652
0.652	-42.198	50.8469	120.5381	0.13208	0.1897	-0.15259	-59.684	157.643	654.333	-1.1479	0.29219	-0.048633	58.82802	125.072	254.876	-0.52256	0.23555	0.081446	15.176	252.577	1098.9519	-1.5234	0.5498	-0.24072	45.362	-6.560359	63.274	0.21983	0.14639	0.16416	-22.408	91.952	141.092	0.1106	0.061523	-0.05835	-102.374	-14.07	1033.737	-2.6382	0.58838	0.18262
0.654	-2.716	-4.08212	168.3718	0.11572	0.20459	-0.15479	-79.55	208.981	609.5537	-1.1113	0.29297	-0.037598	89.2359	78.5452	218.4126	-0.4707	0.23975	0.087891	-8.021	228.356	1070.8687	-1.491	0.53686	-0.22314	77.717	10.01156	53.621	0.20537	0.14365	0.17168	40.3204	42.0379	128.461	0.146	0.04248	-0.070313	-73.84	-14.346	1026.245	-2.4097	0.61963	0.15527
0.656	-27.353	26.4437	220.391	0.070313	0.21777	-0.14893	-104.094	197.407	585.6561	-1.0804	0.2873	-0.029492	61.8347	108.1411	179.912	-0.41172	0.24434	0.089355	62.8651	194.6721	1073.73	-1.4609	0.52344	-0.21289	31.3469	26.141	22.818	0.19443	0.13428	0.17481	71.91	40.6784	127.041	0.19287	0.022461	-0.087891	-74.029	-51.706	1007.287	-2.1924	0.59961	0.12378
0.658	-43.737	19.65825	301.9237	0.046387	0.21973	-0.15234	-57.57895	165.3222	576.956	-1.053	0.28584	-0.019629	58.9302	101.6609	178.16	-0.34825	0.2498	0.089746	54.8876	207.2372	1035.612	-1.4199	0.5	-0.19531	54.584	15.2036	44.451	0.1831	0.1291	0.17646	27.5056	24.9052	131.434	0.20605	0.0092773	-0.098633	-26.827	-140.308	1041.152	-1.9487	0.55029	0.089844
0.66	-9.025	48.11816	407.034	-0.015137	0.229	-0.14844	-75.7354	224.344	531.3598	-1.026	0.28349	-0.013379	75.3187	103.3212	203.581	-0.28027	0.25332	0.09209	38.2056	164.1828	1011.456	-1.3984	0.49023	-0.18701	45.01	34.787	6.0511	0.16113	0.12988	0.15869	72.454	12.067	149.618	0.24805	-0.0073242	-0.11182	-45.654	-153.854	1064.708	-1.6523	0.45117	0.04834
0.662	-34.1564	137.205	466.482	-0.066651	0.2373	-0.13965	-55.344	169.534	521.2544	-1.0005	0.28232	-0.0015625	73.55752	150.635	185.983	-0.21142	0.2583	0.09043	86.99	180.4482	992.055	-1.353	0.46875	-0.16553	-2.507	18.32	0.895	0.14258	0.13018	0.15127	56.805	72.342	111.772	0.27514	-0.020996	-0.11865	-65.8064	-207.7478	1105.464	-1.5332	0.41406	0.014648
0.664	-23.7857	146.575	552.8213	-0.12402	0.23828	-0.13965	-49.0242	178.651	497.1083	-0.97266	0.28516	0.0097656	65.8564	86.5372	186.118	-0.14551	0.25977	0.094238	37.6766	189.702	953.71	-1.3174	0.4541	-0.1582	34.232	16.6118	2.2467	0.13418	0.12793	0.1502	22.35	75.796	75.7121	0.29248	-0.030762	-0.13379	-65.2864	-252.744	1175.512	-1.3374	0.33252	-0.015137
0.666	5.356	182.398	668.795	-0.2124	0.24805	-0.12988	-83.587	191.751	473.02	-0.94375	0.28271	0.019922	45.86	87.272	164.04	-0.077831	0.25234	0.098047	68.4286	158.9167	933.212	-1.2832	0.43555	-0.14209	-4.492	20.6218	10.9076	0.12793	0.12364	0.13848	41.808	64.2776	95.8407	0.31641	-0.046387	-0.14551	-72.4966	-242.117	1166.9	-1.2575	0.33349	-0.029785
0.668	8.4379	190.41	754.45	-0.25342	0.25439	-0.12598	-44.2816	142.419	463.5932	-0.91436	0.28252	0.027735	29.771	90.81	137.49	-0.014649	0.24854	0.10195	78.59	197.4727	901.431	-1.228	0.42139	-0.12598	-1.455	-10.4749	49.214	0.12051	0.12119	0.13144	13.508	57.977	93.036	0.32813	-0.055664	-0.15039	-34.735	-296.352	1209.501	-1.1699	0.33789	-0.043945
0.67	28.8614	132.219	839.89812	-0.35693	0.26221	-0.10889	-34.723	185.198	405.6633	-0.88233	0.28486	0.033984	26.648	48.6772	135.907	0.039258	0.23916	0.1039	18.389	185.6875	882.218	-1.207	0.41211	-0.11572	-15.129	17.8791	52.893	0.10889	0.12207	0.12109	32.81	18.8523	88.33	0.33691	-0.064453	-0.1626	-32.124	-265.406	1249.24	-1.1074	0.38867	-0.043945
0.672	44.557	138.189	901.719	-0.44433	0.271	-0.09961	-38.989	148.8	391.8023	-0.8544	0.28115	0.051074	-0.192	70.591	102.7702	0.087792	0.24014	0.10859	44.8554	168.4057	885.216	-1.1519	0.39893	-0.1001	-59.5273	38.083	30.779	0.10361	0.12324	0.10957	19.581	43.1478	80.777	0.34594	-0.0708	-0.16382	-18.329	-207.049	1280.885	-1.1035	0.42383	-0.061523
0.674	36.981	69.815	953.779	-0.54248	0.27344	-0.080078	-14.096	103.7178	392.692	-0.81982	0.28271	0.045898	-28.521	26.7352	84.431	0.13721	0.23633	0.1123	-8.009	191.40826	837.691	-1.1182	0.3811	-0.090576	-17.339	19.1482	38.981	0.094824	0.12676	0.10371	-21.9819	47.929	68.889	0.34863	-0.07666	-0.17676	50.746	-192.247	1351.218	-1.0776	0.5083	-0.090332
0.676	57.883	-4.391	1028.755	-0.70313	0.28516	-0.054688	-11.218	136.415	353.299	-0.78301	0.28437	0.054883	-31.04	-2.153	96.542	0.17929	0.2209	0.11533	-49.4537	158.405	808.289	-1.0835	0.36963	-0.064941	-23.175	13.926	34.862	0.078027	0.1334	0.093555	15.209	14.9835	74.364	0.34619	-0.077148	-0.1748	58.078	-102.484	1347.999	-1.0361	0.53784	-0.1018
0.678	74.2519	-39.319	1047.225	-0.78906	0.28857	-0.039063	18.353	83.4339	345.169	-0.74287	0.28672	0.057129	-51.854	32.378	85.218	0.21054	0.21397	0.11807	-28.154	164.8686	765.863	-1.0356	0.35693	-0.053223	-92.6338	-4.9166	12.691	0.06416	0.13945	0.090625	-49.77	29.37	49.278	0.34375	-0.073242	-0.17871	97.868	-95.275	1335.818	-1.0137	0.54492	-0.092773
0.68	94.341	-160.254	1047.328	-0.98584	0.29639	-0.0058594	49.5138	104.31	318.909	-0.70225	0.28906	0.061817	-37.025	-1.73876	113.607	0.23672	0.20225	0.12627	-72.8607	186.7194	702.724	-1.0151	0.34863	-0.041504	-29.584	-3.846186	23.0459	0.048828	0.1499	0.086914	-23.688	17.13782	37.40765	0.32959	-0.074707	-0.17773	132.2	-122.628	1342.786	-1.0552	0.55371	-0.06543
0.682	62.85775	-180.666	1055.488	-1.2109	0.30957	0.029785	30.5144	115.11	286.796	-0.65947	0.28935	0.063769	-56.601	29.426	111.29	0.26211	0.1998	0.1293	-57.785	165.3213	661.2978	-0.97217	0.33057	-0.024902	-51.6026	30.3719	9.7813	0.034179	0.15527	0.087988	-8.335	34.417	34.8775	0.30933	-0.075928	-0.17065	136.142	-91.124	1323.85	-1.0947	0.55664	-0.056641
0.684	12.4919	-162.23	1062.037	-1.3354	0.32178	0.046875	84.4117	76.6156	274.76	-0.61084	0.28955	0.070313	-88.057	52.33	81.391	0.27783	0.19189	0.13672	-59.1847	212.5746	599.0794	-0.91992	0.32031	-0.0058594	-35.842	2.228	41.073	0.020899	0.16524	0.088965	-63.0968	45.317	36.274	0.28223	-0.081055	-0.16602	135.6954	-139.647	1335.22215	-1.2246	0.56641	-0.036133
0.686	-6.453	-161.321	1069.6	-1.5952	0.35059	0.081543	60.486	120.739	219.6423	-0.56416	0.28418	0.073242	-43.6295	22.5952	84.056	0.29443	0.18545	0.14355	-98.225	200.556	576.128	-0.89941	0.3125	-0.00048828	-11.705	3.5465	59.886	0.011524	0.18164	0.088965	-21.096	-13.1134	70.283	0.2417	-0.065918	-0.15967	113.7972	-110.856	1365.3894	-1.3306	0.57764	-0.02002
0.688	-54.2763	-98.915	1040.795	-1.7917	0.37622	0.10693	41.642	117.024	186.9656	-0.51943	0.28066	0.073242	-55.867	52.832	46.976	0.30273	0.17334	0.15332	-50.3183	183.666	573.5385	-0.84521	0.30127	0.019043	-53.805	15.76367	27.94	0.0032227	0.19228	0.087305	-51.983	-3.1847	36.345	0.21826	-0.0625	-0.15332	62.0068	-75.027	1362.9431	-1.3828	0.58203	-0.010742
0.69	-92.333	-89.749	1003.116	-1.9819	0.396	0.12305	71.25948	102.002	190.5794	-0.47334	0.27598	0.073242	-65.0804	16.7549	41.4791	0.30351	0.16709	0.16308	-56.853	195.163	532.9141	-0.80713	0.29541	0.03003	-3.763	18.386	23.60142	-0.0029297	0.20654	0.086914	-88.843	-8.392	30.256	0.17236	-0.057617	-0.13916	66.7927	-141.292	1424.5973	-1.4678	0.58301	0.00097656
0.692	-100.949	-106.095	1003.576	-2.2114	0.4165	0.15381	34.717	134.92	176.96	-0.41738	0.26719	0.077735	-45.252	7.8196	45.5135	0.30137	0.15322	0.1669	-70.8435	164.214	523.3501	-0.76514	0.28662	0.04248	25.819	58.431	29.797	-0.0014648	0.21973	0.084668	-5.184	-26.538	41.938	0.12867	-0.046875	-0.13013	61.893	-106.073	1435.462	-1.5222	0.58277	0.01123
0.694	-145.415	-39.1497	1015.281	-2.2949	0.43652	0.16846	60.2782	77.751	197.997	-0.36279	0.26855	0.07373	-34.204	57.248	25.5414	0.2959	0.13721	0.17578	-31.657	190.626	494.084	-0.70996	0.28125	0.055664	-8.216	38.7307	44.55	-0.0013672	0.23652	0.081933	-35.654	-9.037	41.98248	0.086914	-0.032715	-0.12354	41.027	-135.096	1455.584	-1.5859	0.58008	0.014648
0.696	-150.001	-21.751	1045.452	-2.417	0.45996	0.18457	34.1869	87.142	180.428	-0.30156	0.26621	0.073828	-23.876	24.6526	36.514	0.29131	0.12881	0.18643	-76.911	200.551	460.68	-0.68408	0.27881	0.0625	14.28	16.77	43.5659	0.0087889	0.24902	0.078418	-46.901	-19.7303	34.826	0.026855	-0.012695	-0.11426	35.256	-161.52	1500.993	-1.6733	0.59229	0.012695
0.698	-145.406	13.987	1059.154	-2.4502	0.49926	0.18067	-17.879	82.593	150.04	-0.24766	0.26211	0.073145	-9.773	40.464	44.099	0.28174	0.12207	0.18359	-35.434	166.268	454.169	-0.62646	0.26611	0.078613	18.486	24.0432	24.79565	0.016992	0.26064	0.067188	-10.483	6.2853	13.1341	0.003418	-0.00048828	-0.10205	13.489	-107.8509	1488.928	-1.7266	0.59863	0.0097656
0.7	-121.88	35.97	1016.409	-2.4331	0.53955	0.17773	0.246000000000002	37.022	138.06	-0.18438	0.25859	0.073535	-1.869	27.6576	34.88	0.27354	0.11739	0.17812	-31.278	182.924	400.249	-0.58912	0.25953	0.080811	28.373	-5.886	45.0501	0.027832	0.26563	0.061523	-54.49736	47.372	-1.3169	-0.043457	0.020508	-0.089844	15.486	-170.502	1529.95	-1.8101	0.61084	0.0024414
0.702	-78.5901	-43.348	1001.94548	-2.3101	0.58154	0.14014	-30.095	64.424	112.062	-0.11982	0.25811	0.070996	26.975	-26.545	43.757	0.2586	0.11172	0.19092	-64.88293	153.834	381.413	-0.54785	0.25195	0.092285	87.696	2.102	99.495	0.045117	0.2792	0.057227	9.178	18.02976	20.7286	-0.076172	0.036133	-0.084229	14.884	-164.36	1560.506	-1.864	0.62133	-0.0070801
0.704	-60.393	-69.634	988.745	-2.2031	0.5957	0.12549	-37.791	36.7851	81.99925	-0.056152	0.26074	0.066406	45.428	16.00742	27.897	0.24414	0.10889	0.19238	12.242	135.1489	383.5452	-0.49756	0.24316	0.10352	30.587	1.141	88.271	0.057715	0.29141	0.055762	43.029	20.5838	23.302	-0.10156	0.049805	-0.079102	-0.173999999999999	-125.918	1543.78	-1.9038	0.62451	-0.017578
0.706	-51.1901	-110.466	986.186	-1.9233	0.55225	0.087402	-30.421	10.494	83.5162	0.0089844	0.2582	0.064453	49.022	-1.2601	15.0352	0.23467	0.10645	0.19541	7.766	147.9891	350.746	-0.46875	0.23828	0.10986	56.9093	-29.261	90.279	0.069434	0.29882	0.051465	-15.903	1.3326	0.9664	-0.13281	0.070313	-0.078613	4.22199999999999	-158.0448	1549.11	-1.9346	0.63184	-0.042969
0.708	-66.8875	-188.213	1048.631	-1.7127	0.49341	0.054199	-64.4077	41.074	72.017	0.068164	0.25039	0.064355	48.452	-12.5315	37.2978	0.22129	0.098535	0.19639	26.248	108.4636	348.136	-0.41602	0.23389	0.12158	59.6535	-24.428	95.022	0.080078	0.30439	0.052441	16.426	-11.3599	4.14045	-0.14014	0.080566	-0.07373	-14.831	-58.6	1509.917	-1.9409	0.63525	-0.049805
0.71	-65.413	-189.092	1103.606	-1.5176	0.44629	0.0063477	-53.65124	-8.7379	88.802	0.12598	0.25508	0.063574	50.457	20.4296	16.5037	0.19863	0.09541	0.19834	70.3416	117.4127	321.721	-0.37817	0.22607	0.12524	22.223	-46.172	101.4351	0.08252	0.30908	0.049805	35.9861	46.551	17.543	-0.15137	0.095215	-0.077637	-52.644	-31.598	1470.674	-1.957	0.63574	-0.078613
0.712	-72.76992	-249.23	1125.952	-1.2998	0.39063	-0.04834	-38.709	15.3452	97.41	0.179	0.24375	0.06543	84.1591	-19.2428	40.316	0.17803	0.091797	0.19805	50.067	119.99	275.093	-0.33545	0.22314	0.13281	55.8409	-55.8783	159.627	0.084961	0.31699	0.04873	50.948091	31.7769	31.1133	-0.15283	0.10865	-0.078369	-54.815	-30.461	1482.2227	-1.9629	0.63574	-0.088868
0.714	-69.3486	-288.621	1179.649	-1.2056	0.3667	-0.0625	-85.14	44.951	77.74	0.22412	0.23486	0.064453	72.8745	8.37303	55.46	0.16553	0.094727	0.20117	77.5605	97.755	263.492	-0.27002	0.21143	0.14209	-13.668	-20.4246	172.824	0.08291	0.32735	0.048047	40.972	21.1108	30.2738	-0.14453	0.11768	-0.082031	-50.833	38.5659	1463.6202	-1.9746	0.63281	-0.10352
0.716	-30.458	-263.831	1184.273	-1.0742	0.34717	-0.07373	-37.975	27.6997	77.612	0.26524	0.229	0.065039	56.2017	17.0979	38.904	0.14629	0.089844	0.20361	80.6869	132.045	230.3535	-0.23438	0.21289	0.14551	-25.8988	-4.724	218.076	0.077051	0.33438	0.048828	13.911	42.8197	-4.339	-0.13428	0.13477	-0.087402	-42.241	-26.90637	1481.1095	-1.9766	0.61719	-0.11914
0.718	-24.137	-273.568	1215.3529	-1.0408	0.37622	-0.072998	-37.682	72.451	59.722	0.29727	0.22158	0.06836	64.9472	-5.1791	41.659	0.12685	0.086524	0.20488	32.13	131.903	201.66	-0.16406	0.20654	0.14355	6.3734	28.4031	322.467	0.073437	0.34805	0.050293	47.8088	22.6214	2.7798	-0.12256	0.14795	-0.090332	-23.57	-32.398	1504.541	-1.9741	0.60791	-0.13184
0.72	11.43	-216.191	1268.953	-1.0469	0.44336	-0.079102	-51.298	43.935	47.159	0.32383	0.21455	0.06836	23.946	35.303	16.6203	0.11084	0.083008	0.20762	74.2117	133.189	210.92713	-0.10352	0.20239	0.15088	-42.4092	65.7729	411.702	0.061523	0.35889	0.053223	47.7544	47.955	15.6981	-0.098633	0.16309	-0.089355	-52.241	-8.8032	1474.243	-1.9727	0.58008	-0.14844
0.722	54.991	-148.2378	1263.33414	-1.0386	0.53955	-0.098145	-12.1	31.2045	38.3116	0.34883	0.20557	0.072656	22.319	19.1196	-1.651	0.090625	0.077148	0.21113	50.217	145.366	203.307	-0.04541	0.19336	0.15527	-24.722	68.7512	566.464	0.051953	0.37393	0.049512	14.214	23.1644	46.825	-0.074707	0.17578	-0.10181	-6.242	-60.26	1483.6776	-1.9585	0.56641	-0.16113
0.724	79.3864	-165.765	1300.9089	-1.0313	0.57813	-0.10205	-34.341	60.418	24.5719	0.36475	0.19238	0.071777	25.892	16.6239	11.0641	0.070313	0.073242	0.20654	33.121	104.596	196.337	0.030273	0.18652	0.1665	-26.157	118.192	667.8938	0.035449	0.38437	0.049316	25.717	-15.2107	45.899	-0.054688	0.17725	-0.10498	15.033	34.377	1491.855	-1.9453	0.55664	-0.17383
0.726	125.998	-117.438	1302.258	-1.0205	0.60156	-0.089844	-6.078	14.921	33.5296	0.37334	0.18213	0.083496	-2.94	46.753	-11.7882	0.05127	0.076758	0.20098	36.782	101.014	199.507	0.0625	0.17773	0.15967	-73.233	135.756	776.895	0.010449	0.40039	0.046582	-13.818	7.6307	26.9248	-0.018066	0.18994	-0.1167	21.226	26.502	1475.81548	-1.9316	0.52148	-0.17578
0.728	137.175	-133.478	1285.3498	-1.0505	0.59936	-0.077637	0.350000000000001	23.8393	35.474	0.37187	0.17412	0.083594	-19.075	16.4075	6.7656	0.034082	0.08164	0.19912	-18.684	96.708	169.385	0.12598	0.17236	0.16309	-13.617	121.382	883.3842	-0.015527	0.40615	0.052246	14.182	1.227	31.8791	-0.0097656	0.19189	-0.11914	74.75	-37.497	1483.2162	-1.9102	0.50977	-0.17969
0.73	131.7686	-141.959	1309.7234	-1.1167	0.60596	-0.068848	-6.902	17.8092	19.3434	0.36914	0.15811	0.089844	-29.28	50.458	36.2663	0.023145	0.084375	0.19326	-5.609	69.143	176.109	0.17749	0.16455	0.16919	-25.613	117.885	961.692	-0.054688	0.41846	0.054688	24.424	21.5299	41.519	0.018066	0.19385	-0.12891	67.552	5.598	1472.6103	-1.894	0.48291	-0.18164
0.732	131.824	-58.804	1292.7509	-1.2295	0.60254	-0.056641	52.257	-10.8899	32.7647	0.35869	0.15176	0.093262	-55.4582	57.573	43.697	0.017578	0.091309	0.18926	4.297	79.138	139.506	0.21924	0.16602	0.16504	-53.976	44.74031	1058.72	-0.092383	0.42344	0.051172	-62.6245	45.286	41.1343	0.030274	0.19629	-0.13037	76.5424	-66.63	1483.174	-1.8894	0.46802	-0.18555
0.734	88.063	-63.95	1308.3539	-1.2847	0.60791	-0.055664	25.344	28.176	23.581	0.34131	0.14844	0.09668	-53.888	18.607	60.163	0.0083008	0.10205	0.18848	-32.86	40.716	108.9278	0.27441	0.14648	0.17285	26.68	-5.354	1148.437	-0.13232	0.43057	0.056543	-25.46	18.28322	52.8413	0.044922	0.19922	-0.1377	100.4118	-50.711	1508.504	-1.8867	0.45508	-0.19043
0.736	84.6958	-52.093	1352.7217	-1.3789	0.60352	-0.048828	54.4165	7.85565	25.556	0.325	0.1416	0.10234	-57.233	35.2356	43.906	0.0046875	0.11396	0.17959	-24.403	17.337	116.2203	0.29297	0.13818	0.17383	1.681	-46.039	1191.005	-0.17725	0.43603	0.050684	-21.34	37.8459	59.9668	0.050781	0.21045	-0.14209	85.2362	8.7696	1478.135	-1.894	0.43799	-0.18848
0.738	81.1765	-48.863	1328.261	-1.4333	0.59595	-0.050293	91.369	-3.516	47.8248	0.30635	0.13447	0.11104	-65.877	-2.142	15.4327	0.0044922	0.12226	0.17891	-73.43368	29.9143	91.5402	0.31934	0.12598	0.17383	11.99	-140.3871	1221.99	-0.22597	0.44639	0.054492	-68.393	12.863	73.025	0.054688	0.21191	-0.14746	95.9909	-48.3922	1475.162	-1.8965	0.4292	-0.18164
0.74	50.247	-130.911	1379.27	-1.4902	0.58789	-0.048828	36.4466	32.968	22.7584	0.28252	0.12822	0.11064	-46.602	-7.7073	20.6941	0.0052735	0.13164	0.17265	-59.201	13.9413	109.209	0.33618	0.12133	0.17309	50.547	-184.051	1218.55	-0.28809	0.45264	0.049805	2.67	-39.8753	126.524	0.048828	0.2251	-0.15039	93.3942	37.4515	1442.594	-1.9082	0.41797	-0.1748
0.742	36.107	-106.3871	1435.871	-1.5703	0.58105	-0.04541	61.10036	-8.45753	47.952	0.25752	0.12197	0.11553	-58.79965	38.1553	15.255105	0.012207	0.13584	0.16836	-33.103	36.629	115.354	0.34619	0.11426	0.17432	59.241	-215.227	1172.364	-0.36885	0.45459	0.054394	-40.348	-15.134	129.378	0.033692	0.23242	-0.14991	82.3844	50.2296	1399.459	-1.9121	0.42481	-0.17407
0.744	-1.77500000000001	-111.89504	1462.485	-1.6133	0.58301	-0.051758	67.2126	21.3405	67.959	0.22949	0.11426	0.11377	-55.7981	0.6211	32.431	0.023926	0.14893	0.16455	-88.904	42.239	109.42	0.34863	0.099121	0.17578	132.62	-234.273	1163.225	-0.47529	0.45147	0.05664	-30.6	-13.764	152.924	0.0083008	0.23877	-0.15039	97.72403	47.394	1405.4445	-1.9141	0.42969	-0.17773
0.746	10.109	-150.2834	1533.111	-1.6973	0.58789	-0.059082	40.405	26.8162	45.67	0.2	0.10234	0.12217	-27.054	12.2826	55.654	0.030859	0.15937	0.15762	-35.856	20.6682	115.846	0.34619	0.09375	0.17334	117.996	-181.534	1111.791	-0.60576	0.43818	0.060156	25.097	19.9876	185.629	-0.031738	0.24854	-0.1416	72.8	134.265	1374.5888	-1.8921	0.43018	-0.18018
0.748	10.687	-102.824	1525.245	-1.7514	0.58692	-0.055665	61.1586	-3.6739	48.528	0.17353	0.104	0.11553	-25.05	11.3593	37.7463	0.041406	0.1705	0.15098	-19.847	49.927	74.43	0.34082	0.085938	0.17041	122.541	-155.773	1087.50139	-0.77012	0.41855	0.068848	-21.484	55.032	226.03	-0.061035	0.25439	-0.13428	60.036	82.279	1373.7877	-1.8784	0.43018	-0.18457
0.75	0.991	-146.5414	1539.462	-1.8008	0.58984	-0.060547	25.514	33.6552	22.8897	0.13799	0.098926	0.12139	-26.775	-11.3428	56.682	0.056641	0.1748	0.14746	-58.0755	47.244	56.477	0.33471	0.075684	0.17675	171.858	-120.307	1076.99	-0.95313	0.39453	0.07666	-28.271	21.38693	293.8266	-0.12695	0.26025	-0.13135	62.768	98.934	1370.469	-1.8589	0.42432	-0.18018
0.752	-4.62	-137.212	1546.776	-1.8574	0.59375	-0.077637	-10.8	13.9449	21.43417	0.11601	0.094629	0.12276	-14.508	52.54	58.394	0.067481	0.18311	0.13682	1.346	45.2022	65.123	0.3252	0.070801	0.17529	147.619	-35.6086	1064.994	-1.1682	0.38125	0.086621	-23.987	53.468	358.7327	-0.18238	0.26221	-0.125	43.211	122.895	1335.022	-1.8486	0.42602	-0.17945
0.754	-17.409	-63.435	1497.798	-1.8848	0.59375	-0.086426	22.212	18.9645	21.24648	0.088379	0.09375	0.12061	2.388	31.7633	57.592	0.079102	0.18994	0.1333	-32.904	42.7227	37.451	0.29736	0.07666	0.16895	183.4248	-17.406	1089.639	-1.403	0.38115	0.090723	-52.0441	82.302	431.7905	-0.24023	0.26465	-0.12207	44.411	38.6284	1337.145	-1.8472	0.43115	-0.17334
0.756	-55.274	-79.679	1498.6785	-1.9331	0.59326	-0.099121	-22.033	53.57	0.7429	0.069727	0.090918	0.11807	17.48	13.7478	70.417	0.087989	0.19746	0.12705	-34.459	6.6806	26.2146	0.28027	0.084473	0.16113	193.887	13.473	1106.181	-1.6605	0.40381	0.093067	-16.7267	90.1432	539.227	-0.32178	0.2749	-0.11328	22.43	103.48	1344.228	-1.8315	0.43994	-0.17188
0.758	-52.708	-22.075	1501.4278	-1.9624	0.59424	-0.10888	-40.806	17.259882	18.627	0.053321	0.088965	0.11875	22.267	25.0349	50.0843	0.091211	0.20342	0.11572	18.695	7.4937	38.463	0.27197	0.095215	0.15918	159.934	22.324	1069.985	-1.8988	0.4336	0.090039	-34.053	136.908	628.545	-0.37061	0.27344	-0.1084	-3.539	83.956	1328.586	-1.8232	0.4375	-0.15967
0.76	-65.703	3.537	1479.2083	-1.9902	0.5918	-0.12109	-24.604	34.687	32.498	0.04043	0.083887	0.11836	49.9829	-23.1095	39.6916	0.098242	0.21357	0.10674	-8.699	1.1653	20.68662	0.25415	0.088378	0.16089	180.777	-42.62	1040.23176	-2.1035	0.46924	0.086914	-45.862	101.9306	710.015	-0.4707	0.2832	-0.099121	-11.878	54.866	1330.685	-1.7949	0.44141	-0.16016
0.762	-44.794	-31.97555	1509.467	-2.0234	0.58496	-0.13818	-50.1077	39.49682	37.7511	0.02959	0.083301	0.11543	61.647	-3.43	76.076	0.10234	0.22363	0.10303	27.396	-11.8136	45.439	0.23633	0.088867	0.16064	126.752	-56.144	987.39	-2.2602	0.52178	0.083691	-30.168	107.4654	788.5424	-0.59326	0.30029	-0.088867	-37.582	111.9569	1274.484	-1.7703	0.43872	-0.16015
0.764	-10.633	28.3234	1504.277	-2.0273	0.5791	-0.14941	-44.168	-2.184	58.041	0.026855	0.080566	0.11133	55.1634	8.321	88.744	0.097656	0.2334	0.095215	44.5963	13.116	37.821	0.20264	0.087891	0.15381	85.457	-105.478	991.387	-2.3324	0.55498	0.087012	-17.5134	116.95	840.495372	-0.66016	0.30176	-0.08252	-64.4351	53.513	1232.888	-1.7446	0.43213	-0.1543
0.766	-48.96	7.71661	1496.098	-2.0371	0.56641	-0.17188	-55.758	32.0475	48.977	0.018945	0.083887	0.11348	63.3983	-39.70167	125.489	0.096191	0.24463	0.088867	25.23	16.7704	5.9079	0.19043	0.091797	0.1499	91.022	-186.8229	1057.559	-2.3324	0.58857	0.091699	41.1386	53.626	916.3878	-0.80859	0.32031	-0.067871	-41.764	80.748	1236.192	-1.7065	0.43213	-0.14941
0.768	-19.206	27.138	1526.457	-2.0398	0.55103	-0.18286	-53.8864	12.964	45.476	0.014551	0.090918	0.11533	47.3526	-4.911	129.8507	0.088379	0.25508	0.085937	88.985	8.122	19.8239	0.15723	0.094238	0.14404	13.641	-203.4672	1057.228	-2.2561	0.6293	0.087989	14.617	30.577	969.339	-0.93409	0.3291	-0.059082	-48.633	118.268	1215.152	-1.6948	0.43213	-0.14551
0.77	32.776	80.871	1495.947	-2.0342	0.53516	-0.19727	-41.3271	-1.158	44.655	0.0094726	0.097949	0.11689	47.53	-35.3194	153.5809	0.07666	0.2707	0.080859	44.109	14.735	19.2152	0.14209	0.093506	0.14649	-14.943	-290.943	1070.0075	-2.1035	0.66211	0.080078	-4.226	-23.587	987.365	-1.0742	0.34033	-0.035156	-47.141	67.9504	1211.152	-1.6665	0.4248	-0.14111
0.772	15.047	4.651	1497.881615	-2.0293	0.50781	-0.20459	-56.2412	30.7359	19.6156	0.003711	0.10645	0.12236	44.0691	-36.496	223.804	0.064942	0.28271	0.077637	47.902	-10.0669	38.5116	0.12402	0.092773	0.14746	-22.857	-323.491	1117.669	-1.9075	0.6792	0.080078	74.7923	-113.9129	1023.817	-1.2778	0.36279	-0.014648	-35.062	145.955	1192.612	-1.638	0.42505	-0.13745
0.774	65.882	11.103	1523.0586	-2.0254	0.49609	-0.20215	-44.2897	-10.2215	27.526	-0.0014648	0.11475	0.12256	5.891	16.3301	272.4415	0.050293	0.29541	0.070801	77.092	2.9782	42.613	0.095703	0.1001	0.1416	-97.875	-278.137	1145.571	-1.6883	0.679	0.078418	31.3736	-145.46258	1021.54	-1.3867	0.37793	-0.0053711	-11.63	126.59	1167.229	-1.6147	0.41943	-0.12744
0.776	74.2744	-21.5583	1499.3153	-2.0215	0.46875	-0.20898	-26.889	0.8731	31.5325	-0.0016602	0.12559	0.12325	4.149	19.121	334.605	0.030274	0.31191	0.069238	32.629	12.0962	27.477	0.084473	0.097656	0.14111	-107.914	-285.41	1215.114	-1.4943	0.6544	0.066699	17.93934	-207.949	1037.154	-1.6245	0.4126	0.027832	22.863	131.215	1152.119	-1.5859	0.41553	-0.12012
0.778	83.5183	-90.975	1528.323	-2.022	0.45508	-0.21948	-30.658	8.361	36.72896	-0.0017578	0.13359	0.12236	3.551	78.8781	438.076	0.0059571	0.3167	0.066113	43.7106	-4.6182	28.811	0.066895	0.10205	0.14355	-129.264	-210.4055	1215.963	-1.318	0.61934	0.056347	14.5137	-216.159	1045.321	-1.7944	0.44458	0.053711	15.297	218.904	1113.167	-1.5742	0.41406	-0.11426
0.78	120.902	-36.8722	1528.761	-2.0249	0.44385	-0.22803	2.898	-15.0905	55.547	0.0021484	0.14258	0.12158	7.15900000000001	112.565	539.4662	-0.018653	0.3249	0.068457	25.799	20.251	13.6416	0.053956	0.10522	0.14233	-152.011	-159.394	1199.4289	-1.1792	0.58057	0.047363	-70.023	-137.392	1012.161	-1.9629	0.48145	0.081543	7.401	168.698	1062.732	-1.5352	0.4043	-0.11182
0.782	92.9886	-65.395	1497.937	-2.0293	0.42773	-0.23047	-4.844	32.973	37.6103	0.0075195	0.15683	0.11699	13.016	85.097	694.3733	-0.053515	0.32734	0.064063	-14.114	24.2181	-1.1919	0.036133	0.11328	0.14697	-138.374	-168.798	1255.416	-1.0888	0.55986	0.043848	-49.2176	-117.04	1003.264	-2.1558	0.52979	0.10547	21.127	186.3262	1048.609	-1.5151	0.4043	-0.10669
0.784	111.818	-59.018	1516.572	-2.0293	0.42676	-0.229	4.613	26.6332	37.419	0.01123	0.16748	0.11768	-1.90599999999999	136.912	798.3851	-0.085449	0.33838	0.060547	18.041	36.899	-7.4416	0.022949	0.12354	0.14258	-174.531	-74.303	1248.326	-1.0335	0.55947	0.055664	-70.195	-71.201	992.651	-2.2285	0.54688	0.11279	15.44	181.5924	1016.0189	-1.4844	0.39551	-0.1001
0.786	122.364	-8.038	1462.112	-2.0308	0.4126	-0.23779	59.5097	9.9744	52.057	0.022559	0.17705	0.11299	1.937	107.031	863.07254	-0.12119	0.3458	0.057324	-30.054	58.037	-16.1549	0.016602	0.12891	0.14453	-130.97	-72.058	1270.939	-1.0171	0.59541	0.082226	-126.136	-43.723	975.9609	-2.3003	0.57666	0.10254	45.35	111.225	1009.4268	-1.4512	0.38379	-0.095703
0.788	85.3085	-48.4096	1437.227	-2.029	0.4104	-0.24024	16.808	44.734	32.5785	0.028418	0.18682	0.10313	12.002	77.038	942.419	-0.16406	0.35107	0.060059	-51.6253	39.984	8.1188	0.0053711	0.13965	0.14941	-90.539	-65.152	1291.103	-1.0171	0.67705	0.083301	-114.063	-64.747	999.825	-2.282	0.61597	0.08081	66.54218	163.9235	1005.992	-1.439	0.38281	-0.091797
0.79	110.726	12.318	1430.8792	-2.0327	0.41064	-0.24268	45.3112	0.6254	49.2655	0.040918	0.19619	0.097265	-1.285	45.634	982.756	-0.20937	0.35967	0.056933	-22.488	40.127	36.852	-5.204e-15	0.1521	0.15186	-128.307	-25.97	1270.715	-1.0044	0.75488	0.077637	-129.716	-13.968	994.398	-2.2085	0.64307	0.068848	63.5298	131.9026	978.761	-1.3979	0.37354	-0.089844
0.792	74.0452	51.8529	1379.32	-2.0195	0.41016	-0.25098	70.97408	16.1453	59.609	0.053418	0.20733	0.093457	-15.471	-58.504	1038.238	-0.27315	0.3665	0.055664	-61.8823	33.9054	32.53	-0.0024414	0.16406	0.14893	-104.694	-111.313	1285.2984	-0.9624	0.78936	0.063281	-134.971	3.35599999999999	1000.128	-2.0566	0.66797	0.04834	72.8411	125.4387	963.12	-1.3637	0.36987	-0.08789
0.794	56.873	34.5235	1386.4485	-2.0171	0.41455	-0.25342	38.45	11.635	56.477	0.058594	0.21924	0.09082	4.97799999999999	-103.803	1071.262	-0.3501	0.36475	0.059082	-42.0868	22.653	52.352	0	0.17529	0.15234	-86.083	-106.233	1292.615	-0.92305	0.7586	0.064941	-72.234	-7.867	1022.879	-1.9609	0.66992	0.031738	57.184	179.387	913.999	-1.3335	0.36182	-0.083008
0.796	101.506	116.294	1363.95	-1.9956	0.42773	-0.26416	69.0341	-42.6543	83.484	0.062891	0.22832	0.087793	26.584	-141.8992	1076.728	-0.44609	0.35664	0.064648	-28.148	39.7035	35.594	-0.00097656	0.18555	0.1499	-92.97	-123.10225	1313.192	-0.94492	0.70273	0.071192	-58.05666	-8.83199999999999	977.224	-1.7319	0.63525	0.0014648	85.2313	131.599	878.032	-1.2847	0.34766	-0.07959
0.798	35.335	85.761	1328.8511	-1.9646	0.427	-0.27026	51.082	-20.5406	92.461	0.066895	0.23994	0.085547	47.849	-213.044	1096.623	-0.56279	0.34931	0.074609	-79.4794	36.1942	33.325	0.0092773	0.19482	0.14648	-45.979	-199.008	1389.224	-1.0273	0.65693	0.067676	-37.726	-91.034	953.696	-1.5542	0.58642	-0.0271	60.894	161.3734	875.1617	-1.2637	0.34375	-0.077148
0.8	35.548	87.455	1347.981	-1.9448	0.42676	-0.27441	28.9608	-44.5726	106.9667	0.066895	0.25088	0.076953	64.403	-182.736	1095.938	-0.70498	0.33291	0.089844	-38.131	28.0922	30.958	0.017823	0.20484	0.14429	-64.0778	-146.2	1410.646	-1.1499	0.63916	0.056641	-27.835	-133.908	982.208	-1.3711	0.53125	-0.058105	35.797	174.503	842.4185	-1.2246	0.33203	-0.073242
0.802	46.557	128.174	1317.595	-1.9253	0.43408	-0.27686	31.4523	-61.531	143.6831	0.061328	0.26914	0.073438	76.375	-187.922	1049.875	-0.86768	0.31904	0.094043	-48.304	45.438	1.2568	0.02832	0.21387	0.14307	-20.365	-188.977	1450.207	-1.2611	0.63857	0.039453	-69.1077	-140.154	1030.562	-1.1636	0.47607	-0.10352	58.21472	123.902	832.12	-1.1968	0.32251	-0.067383
0.804	-35.676	67.074	1321.044	-1.9214	0.4375	-0.27588	-0.388	-12.3151	162.5091	0.057617	0.28662	0.072754	106.132	-169.206	1056.305	-1.0444	0.30273	0.104	-57.7203	16.9065	21.5289	0.039063	0.22656	0.13867	52.9659	-214.808	1504.286	-1.3565	0.64697	0.023047	-31.542	-212.8438	1097.48658	-1.0737	0.46143	-0.11963	23.735	181.01	794.467	-1.1699	0.31055	-0.05957
0.806	-6.098	97.338	1312.831	-1.9004	0.4502	-0.27246	-16.0624	-27.918	212.9888	0.05	0.30088	0.074024	125.3	-96.722	1032.801	-1.2474	0.30771	0.10772	-15.709	7.3623	48.045	0.047363	0.23584	0.13574	28.506	-151.478	1499.03	-1.4347	0.65323	0.0085937	-30.46	-224.38	1114.757	-0.94092	0.44092	-0.13916	-19.546	167.395	752.703	-1.1333	0.30225	-0.053223
0.808	-37.473	82.684	1242.662	-1.8742	0.45386	-0.27343	-26.4787	1.036	281.8864	0.036035	0.321	0.071387	142.469	-89.998	1011.432	-1.4542	0.31328	0.10898	-39.985	13.9012	41.2684	0.056641	0.24512	0.13232	93.609	-189.876	1550.153	-1.4975	0.6623	-0.0021484	-26.227	-255.986	1108.125	-0.89502	0.44898	-0.1355	-29.681	169.141	738.335	-1.1143	0.30029	-0.052734
0.81	-73.194	23.2	1242.488	-1.8477	0.45117	-0.26758	-50.5385	56.317	346.7802	0.022363	0.33975	0.073339	145.532	-50.595	1021.541	-1.6624	0.3293	0.10781	-3.814	-2.832	57.393	0.062745	0.25268	0.12817	125.038	-117.4937	1566.101	-1.5503	0.65771	-0.010254	3.759	-292.18	1179.608	-0.89258	0.48438	-0.12695	-35.069	217.228	674.499	-1.0811	0.28955	-0.039551
0.812	-41.29	95.4873	1214.1674	-1.8027	0.44922	-0.26855	-37.066	55.022	462.1136	-9.7634e-05	0.3583	0.070801	152.6323	6.345	1004.62	-1.8443	0.35684	0.10537	16.673	32.8058	62.673	0.067871	0.25488	0.12598	89.934	-58.986	1527.575	-1.6061	0.65019	-0.018457	-11.171	-211.868	1207.885	-0.94873	0.56592	-0.15723	-41.698	162.195	638.9289	-1.0542	0.28003	-0.042236
0.814	-81.544	67.8979	1207.9545	-1.7842	0.44873	-0.26514	-62.753	133.246	573.0775	-0.023438	0.37305	0.070801	155.8662	-1.432	1025.411	-1.9922	0.39551	0.095215	-15.502	17.041	70.702	0.063965	0.26416	0.12207	119.738	-112.399	1513.6189	-1.6652	0.64375	-0.026465	30.617	-186.6676	1230.915	-0.9668	0.59961	-0.17285	-55.4679	179.3234	600.281	-1.0215	0.28076	-0.032227
0.816	-61.214	90.363	1225.337	-1.7476	0.44385	-0.26025	-60.072	137.815	686.9602	-0.055176	0.38829	0.070605	159.56	25.278	1017.468	-2.0832	0.44199	0.094726	54.848	10.8749	96.36	0.064941	0.27539	0.12109	84.456	-36.8385	1491.481	-1.7262	0.64063	-0.032715	63.806	-164.2819	1263.71	-0.97656	0.62207	-0.17969	-57.454	182.1207	567.757	-0.98145	0.27539	-0.024414
0.818	-39.998	144.022	1196.798	-1.7254	0.4436	-0.25244	-22.908	116.178	804.928	-0.092675	0.39834	0.06875	123.588	-11.679	950.75	-2.1284	0.48213	0.083105	34.882	23.9412	57.6819	0.060547	0.28467	0.1167	73.436	-52.069	1468.386	-1.7794	0.64092	-0.033399	70.15315	-104.279	1258.2316	-1.0149	0.6184	-0.16968	-41.7642	143.6886	561.9217	-0.96143	0.27637	-0.020996
0.82	-25.064	92.159	1192.807	-1.7026	0.43701	-0.25049	-30.321	138.016	895.1586	-0.13096	0.40771	0.067579	85.8614	-92.394	953.664	-2.1015	0.52783	0.078809	43.422	-2.346	58.5215	0.05664	0.29492	0.11451	69.6403	-52.796	1491.077	-1.8276	0.64307	-0.030273	103.72563	-158.4222	1294.945	-1.0933	0.61816	-0.14893	-28.964	191.909	532.279	-0.91797	0.27539	-0.010254
0.822	26.607	166.74	1164.063	-1.668	0.43164	-0.23828	2.86800000000001	62.552	981.65151	-0.17334	0.41524	0.063281	75.291	-111.785	965.902	-2.0133	0.5707	0.071973	73.1068	-12.4906	86.509	0.044434	0.30957	0.11084	31.274	39.9689	1458.5618	-1.8726	0.65479	-0.030664	130.021	-116.683	1304.173	-1.2358	0.63525	-0.12891	-55.5681	169.76	512.53	-0.87964	0.27807	-0.0036621
0.824	-0.178000000000004	203.876	1102.4279	-1.6455	0.42969	-0.23486	14.338	37.169	1057.2948	-0.21582	0.41895	0.0625	49.6449	-177.333	975.456	-1.8833	0.61377	0.066895	29.975	-26.082	100.258	0.028809	0.32178	0.104	8.478	-30.1797	1460.821	-1.9281	0.66992	-0.024512	124.8501	-71.946	1264.9735	-1.311	0.65088	-0.11572	-58.5736	152.244	516.026	-0.84033	0.28174	0.0024414
0.826	4.537	199.686	1092.0593	-1.6089	0.42725	-0.21973	-22.238	10.926	1087.788	-0.26299	0.43037	0.064453	37.145	-217.42	1048.15	-1.7373	0.63516	0.068848	73.7982	-69.6356	139.718	0.020996	0.32959	0.1001	-6.928	-18.1319	1470.764	-1.9738	0.69297	-0.020605	127.0378	-99.65	1309.3999	-1.4473	0.6875	-0.097656	-66.363	179.346	468.752	-0.7915	0.28223	0.0083008
0.828	32.235	244.98	1056.520341	-1.5779	0.41773	-0.20825	35.081	-96.2	1159.135	-0.31386	0.43321	0.061914	20.282	-220.317	1064.289	-1.6055	0.64277	0.060547	52.0763	-66.236	142.642	-0.01709	0.34229	0.10547	-24.175	-6.997	1454.251	-2.0188	0.72149	-0.017969	80.5926	-42.583	1312.2253	-1.532	0.70337	-0.086426	-18.11	132.857	450.893	-0.76514	0.2876	0.013672
0.83	15.829	192.847	1036.3866	-1.5508	0.41309	-0.20117	61.235	-124.355	1158.377	-0.38184	0.43789	0.05918	-56.1903	-289.033	1105.528	-1.4941	0.63535	0.053516	9.613	-51.7494	172.4862	-0.048828	0.35059	0.097901	11.207	-83.476	1500.2218	-2.0625	0.74414	-0.01123	60.7618	-87.052	1318.6431	-1.6128	0.71533	-0.070313	-25.802	154.883	414.7083	-0.71191	0.28613	0.016602
0.832	49.498	179.3274	1035.282	-1.5093	0.40479	-0.18604	69.032	-194.133	1157.113	-0.47236	0.43467	0.057422	-66.393	-270.281	1159.238	-1.3937	0.61172	0.04248	32.1343	-28.1825	250.945	-0.083008	0.35791	0.10254	-21.208	-0.970000000000002	1525.545	-2.0957	0.76425	-0.011328	92.83048	-120.308	1376.009	-1.7188	0.73242	-0.061523	-30.3923	146.9716	392.11077	-0.66944	0.28564	0.023193
0.834	73.538	214.868	1007.312	-1.4768	0.39575	-0.17432	121.276	-250.734	1179.164	-0.58008	0.42578	0.057129	-103.489	-217.206	1169.059	-1.2949	0.58398	0.019531	-10.301	30.8597	299.209	-0.12646	0.3667	0.099609	-79.734	-24.365	1526.231	-2.1191	0.78916	-0.0083008	57.115	-81.7929	1406.095	-1.7651	0.73877	-0.061523	-20.955	103.16	384.581	-0.62451	0.28271	0.033691
0.836	47.1849	160.5122	1002.205	-1.4453	0.38477	-0.16406	106.597	-189.919	1137.201	-0.71582	0.41485	0.062891	-115.622	-202.091	1241.552	-1.1966	0.56465	0.014356	19.234	35.5246	362.1871	-0.16357	0.37402	0.099855	-59.4984	-50.8084	1558.06	-2.1315	0.80947	-0.0067383	32.688	-140.928	1439.2725	-1.8477	0.73828	-0.064941	-16.206	131.634	340.199	-0.56641	0.28418	0.037598
0.838	77.7363	207.077	974.009	-1.4009	0.37598	-0.15137	131.582	-180.82	1102.236	-0.87374	0.39541	0.070801	-115.951	-120.216	1253.082	-1.1105	0.5623	0.032812	39.44	52.2461	449.8188	-0.20117	0.38281	0.1001	-89.3588	16.693	1544.799	-2.1349	0.82256	-0.0019531	33.019	-110.481	1470.648	-1.8992	0.74634	-0.072022	29.469	103.842	325.329	-0.51904	0.28247	0.043213
0.84	84.8658	182.145	926.7017	-1.3804	0.37451	-0.14404	146.044	-134.338	1074.108	-1.0507	0.37939	0.078614	-136.058	-122.458	1233.053	-1.0578	0.59941	0.048437	-22.127	82.644	556.64318	-0.26074	0.39746	0.097656	-101.56	-65.605	1539.609	-2.1421	0.83838	0.003418	24.497	-102.851	1456.693	-1.9409	0.76025	-0.078125	57.071	100.003	325.954	-0.46533	0.28125	0.047852
0.842	63.184	141.4041	908.3595	-1.3359	0.36084	-0.125	131.427	-63.553	1025.8338	-1.2509	0.37138	0.088868	-138.89	-140.441	1255.513	-1.0436	0.66475	0.038281	-3.16200000000001	75.897	714.845	-0.29102	0.4043	0.095215	-92.758	-34.829	1530.28	-2.1362	0.84424	0.0072266	30.592	-178.387	1506.924	-1.9858	0.77197	-0.093262	46.016	123.148	299.803	-0.3916	0.28125	0.055176
0.844	93.095	192.505	901.86	-1.304	0.35303	-0.10889	181.977	-67.9134	1058.053	-1.4741	0.37158	0.092285	-129.548	-77.759	1234.0316	-1.0327	0.71729	0.017578	33.665	114.721	822.541	-0.375	0.40332	0.089355	-119.585	2.60116	1485.926	-2.1233	0.84619	0.017676	26.04	-141.2191	1530.442	-1.998	0.7793	-0.097656	73.8863	87.5619	271.732	-0.35547	0.28369	0.057617
0.846	75.5416	139.5986	886.616	-1.2754	0.34766	-0.098145	197.3155	-7.94200000000001	1081.003	-1.6923	0.39268	0.094923	-128.651	-96.48	1259.521	-1.0065	0.70967	0.018262	-3.84999999999999	113.28	892.4856	-0.45215	0.40503	0.089356	-82.676	-35.7352	1474.511	-2.1093	0.83213	0.028613	28.132	-144.3269	1519.467	-2.0132	0.78271	-0.12891	70.1609	119.118	221.8784	-0.26855	0.28223	0.062988
0.848	56.80961	152.9821	883.011	-1.2358	0.33643	-0.088867	184.12	14.298	1072.879	-1.898	0.41191	0.080958	-90.196	-62.464	1278.2561	-1.0092	0.66836	0.016211	30.076	81.909	968.8196	-0.54883	0.4043	0.092285	-81.2739	58.608	1460.43153	-2.0956	0.81943	0.043848	27.905	-126.60593	1522.494	-2.0086	0.77856	-0.14502	34.2138	120.233	201.2053	-0.2107	0.28028	0.066162
0.85	34.474	176.2354	848.13	-1.2104	0.32617	-0.074219	165.718	-14.452	1079.66	-2.046	0.44159	0.07549	-72.937	-35.339	1262.3789	-1.0748	0.6293	0.022071	-14.421	58.553	1002.174	-0.7168	0.38379	0.088867	-86.562	52.268	1427.867	-2.0781	0.80078	0.055664	-23.383	-33.158	1466.3855	-2.0015	0.76807	-0.16064	72.9264	74.0477	211.01893	-0.14648	0.2793	0.070801
0.852	-20.846	147.6664	804.707	-1.1675	0.31689	-0.063477	134.633	3.227	1047.243	-2.1359	0.45703	0.06807	-82.709	-118.9172	1303.0137	-1.1791	0.60937	0.010938	-30.8317	-9.755	1059.458	-0.81201	0.37988	0.085449	-21.9	42.233	1443.8006	-2.0644	0.77305	0.068164	-49.456	-79.297	1426.387	-1.9722	0.75146	-0.19092	51.176	94.411	193.734	-0.061035	0.28027	0.072266
0.854	-7.057	191.067	772.996	-1.136	0.3086	-0.05127	104.883	-60.631	1013.4467	-2.1714	0.47119	0.058594	-53.3369	-105.8408	1336.449	-1.2866	0.60596	0.0039063	11.368	-65.94	1096.14	-1.0249	0.36768	0.084961	10.897	127.315	1443.013	-2.0585	0.7624	0.089063	-33.094	-47.6593	1454.1094	-1.959	0.7334	-0.20313	35.97	55.5875	188.29	-0.016602	0.27783	0.069336
0.856	-37.23	175.244	715.779	-1.1035	0.30371	-0.034668	89.9619	-133.647	1026.2624	-2.1202	0.49112	0.068264	-49.2061	-145.588	1380.358	-1.3794	0.60733	0.002832	-15.92	-113.1287	1084.005	-1.2087	0.36426	0.084961	29.258	81.152	1451.948	-2.0695	0.77334	0.1125	-27.292	-0.985000000000003	1441.0377	-1.9272	0.70947	-0.22705	34.788	60.3132	173.827	0.0625	0.27783	0.067871
0.858	-62.6338	151.7571	679.305	-1.0684	0.28809	-0.020996	46.269	-161.391	1022.186	-1.9986	0.50442	0.067973	-26.416	-195.048	1451.553	-1.4609	0.60625	9.7648e-05	28.297	-195.121	1121.338	-1.396	0.36963	0.087402	64.0194	139.201	1456.552	-2.0835	0.78877	0.13154	15.824	-50.068	1477.717	-1.9052	0.68701	-0.24512	-12.82	81.674	162.258	0.125	0.2771	0.067139
0.86	-49.9396	190.1902	623.5054	-1.0464	0.28662	-0.011719	-7.035	-254.646	1068.2425	-1.8505	0.52746	0.074619	4.694	-126.314	1450.939	-1.5301	0.5957	-0.0018554	60.413	-201.819	1091.978	-1.6519	0.38623	0.085449	54.653	157.473	1427.402	-2.062	0.79736	0.125	2.413	28.5855	1485.194	-1.8848	0.66211	-0.26611	13.527	39.0547	154.488	0.18213	0.27197	0.067383
0.862	-78.622	160.921	600.9407	-1.0039	0.27637	0.003418	-53.793	-282.561	1119.304	-1.6882	0.54112	0.077637	0.088000000000001	-175.037	1463.871	-1.5963	0.58408	-0.003418	57.507	-193.077	1065.756	-1.7686	0.4082	0.086426	83.1257	47.3963	1428.122	-2.0159	0.77246	0.1167	-20.503	0.417	1466.6904	-1.8555	0.62598	-0.28125	0.484000000000002	53.3751	127.2822	0.24805	0.2583	0.068848
0.864	-61.4913	172.169	591.86	-0.96436	0.27295	0.013183	-72.976	-291.088	1134.46	-1.5332	0.54688	0.077637	35.091	-157.9176	1501.347	-1.6699	0.57031	-0.0029297	98.679	-171.741	1076.649	-1.9546	0.44971	0.082031	79.7638	76.0597	1384.38	-1.9886	0.74776	0.125	22.479	-20.3284	1488.638	-1.8398	0.6123	-0.28613	-17.792	36.324	80.138	0.27881	0.25635	0.066406
0.866	-33.673	182.708	543.944	-0.92969	0.26807	0.022461	-94.694	-349.19	1201.706	-1.3952	0.53234	0.079691	87.708	-112.751	1480.131	-1.7365	0.56465	-0.0041992	107.482	-85.1	1034.9943	-2.0467	0.50684	0.076904	63.8713	32.336	1353.6008	-2.0038	0.73643	0.13633	60.694	54.50434	1456.4522	-1.8237	0.57666	-0.30518	-24.295	-8.9107	87.61992	0.32227	0.24609	0.064941
0.868	-66.0504	125.449	530.586	-0.87646	0.25635	0.03418	-142.777	-274.991	1212.43	-1.2702	0.52388	0.07347	90.4147	-149.472	1502.393	-1.7999	0.56377	-0.00078122	126.3589	-56.4133	1019.8378	-2.0815	0.55322	0.066406	103.2369	33.034	1352.944	-2.0234	0.7375	0.14561	72.062	-19.303	1444.983	-1.8211	0.55444	-0.31201	-64.3413	23.641	85.477	0.35694	0.23462	0.068603
0.87	-54.5497	162.199	507.982	-0.85059	0.25635	0.047852	-134.299	-246.504	1214.668	-1.1554	0.50981	0.066809	105.396	-81.0059	1510.997	-1.853	0.55674	0.0042969	157.4675	-44.897	1024.82	-2.0176	0.60938	0.067871	95.247	105.032	1327.71	-2.0195	0.75098	0.14746	76.388	-7.164	1473.9936	-1.8198	0.53564	-0.31543	-56.6894	18.68727	89.564	0.38135	0.22412	0.070801
0.872	-64.2782	150.901	466.694	-0.79297	0.25391	0.044434	-124.382	-218.525	1243.759	-1.0525	0.49655	0.073423	81.93	-76.3999	1485.24	-1.9018	0.55342	-2e-08	97.538	-4.147	1000.782	-1.9546	0.64893	0.059082	106.024	40.467	1317.141	-1.997	0.75381	0.15049	64.044	-3.695	1452.7617	-1.8398	0.51563	-0.32031	-43.764	43.128	90.926	0.40527	0.20117	0.075684
0.874	-48.7874	125.97	460.6	-0.75562	0.25513	0.058838	-136.691	-121.477	1243.025	-0.96484	0.49316	0.077148	64.608	-111.031	1493.724	-1.9453	0.54932	-0.00048828	112.5516	-8.102	1031.68	-1.7788	0.71729	0.050293	100.2576	71.556	1292.639	-1.9609	0.75156	0.15127	95.18692	-85.634	1468.673	-1.8433	0.51318	-0.32178	-60.20183	72.424	74.389	0.4209	0.18652	0.079102
0.876	-32.231	149.571	415.353	-0.71777	0.25	0.062988	-137.391	-129.773	1268.766	-0.9019	0.5234	0.088152	87.455	-36.21986	1468.282	-1.9812	0.55117	0.0036133	129.377	5.777	1047.619	-1.6167	0.75488	0.029541	72.0296	92.7533	1269.593	-1.9172	0.74219	0.14658	84.001	-22.44082	1492.029	-1.8701	0.51172	-0.32568	-37.991	28.944	80.137	0.41943	0.16992	0.086914
0.878	-53.0045	86.995	381.422	-0.66211	0.24707	0.070313	-105.157	-102.944	1294.3999	-0.88071	0.5761	0.091013	43.4677	-41.428	1432.006	-2.0128	0.55127	0.0051758	58.9614	18.726	988.086	-1.4609	0.77344	0.026367	84.8449	65.995	1266.613	-1.8721	0.72939	0.14414	75.1897	-39.204	1468.566	-1.8752	0.50708	-0.3252	-47.086	53.146	62.165	0.39966	0.16333	0.086426
0.88	-12.669	96.6539	375.1098	-0.64014	0.23975	0.077637	-89.767	-50.021	1272.9692	-0.8756	0.627	0.073349	40.261	4.4494	1470.42	-2.0409	0.54737	0.013379	79.172	-55.757	1000.071	-1.2944	0.76221	0.021484	39.879	179.716	1254.098	-1.834	0.70605	0.14111	105.885	-41.6107	1453.819	-1.8887	0.51172	-0.32129	-54.4885	51.194	36.7104	0.37158	0.15234	0.092285
0.882	-2.479	111.8355	348.856	-0.58398	0.23828	0.081543	-75.476	-101.663	1295.2628	-0.8547	0.63062	0.060614	14.985	79.968	1440.527	-2.0687	0.54561	0.024121	35.98029	-93.099	998.0089	-1.2227	0.7373	0.010254	24.941	173.509	1219.998	-1.798	0.69502	0.14121	98.1938	68.9582	1401.21	-1.8921	0.52197	-0.32422	-25.468	23.6309	36.2484	0.3252	0.17578	0.087402
0.884	5.558	85.2898	344.624	-0.54126	0.22876	0.083252	-74.9982	-46.033	1300.435	-0.84766	0.58887	0.055176	-31.741	32.8994	1452.03	-2.084	0.54883	0.031738	-16.592	-156.915	1012.153	-1.1206	0.69678	-0.0068359	13.543	176.252	1186.346	-1.7574	0.675	0.14678	88.9431	38.982	1363.0293	-1.8926	0.52441	-0.3252	-44.207	53.01	25.22462	0.30811	0.16602	0.098633
0.886	48.23184	114.4688	326.402	-0.49414	0.22412	0.085449	-81.364	-77.99	1301.7596	-0.89006	0.54285	0.046748	-0.0329999999999995	59.4722	1514.305	-2.1046	0.54912	0.039258	23.436	-223.797	1081.7331	-1.0601	0.6792	-0.023682	-28.151	219.869	1148.264	-1.7297	0.65429	0.14404	82.608	95.614	1366.3812	-1.8809	0.5332	-0.3291	-23.589	3.172	24.7523	0.26318	0.16797	0.11816
0.888	48.5336	82.687	275.506	-0.42432	0.22314	0.089844	-47.421	-151.012	1370.421	-0.97905	0.50911	0.029389	-42.7975	24.797	1520.554	-2.1176	0.55234	0.04668	-27.639	-211.792	1077.8394	-1.0078	0.67383	-0.030762	-42.674	150.1356	1143.991	-1.6969	0.64043	0.14473	69.949	125.561	1362.3152	-1.8704	0.53686	-0.32471	3.354	5.7989	35.036	0.23608	0.16381	0.12573
0.89	64.051	72.8147	249.73996	-0.39258	0.22363	0.090332	-9.365	-132.9614	1399.916	-1.0941	0.49696	0.017196	-45.5626	-46.124	1565.151	-2.1254	0.55782	0.054883	-72.866	-261.043	1131.706	-0.97412	0.69775	-0.036621	-44.919	194.864	1119.892	-1.6675	0.62061	0.14941	76.253	47.035	1365.216	-1.8569	0.54053	-0.32275	-10.432	38.844	8.91844	0.19873	0.15918	0.13721
0.892	79.4247	119.399	189.706	-0.31055	0.21875	0.092773	5.014	-207.756	1437.2939	-1.2209	0.49967	0.012723	-16.04	9.112	1541.912	-2.1278	0.56172	0.067774	-76.858	-275.092	1184.758	-0.96729	0.71826	-0.031738	-64.447	197.356	1084.423	-1.6356	0.60107	0.15147	77.454	110.563	1356.075	-1.8496	0.56055	-0.31982	35.545	23.9962	45.32	0.15918	0.14453	0.14014
0.894	56.293	105.127	176.385	-0.2522	0.21875	0.095947	37.0279	-206.006	1485.711	-1.3418	0.50781	0.010742	-102.263	-37.0173	1506.313	-2.125	0.56445	0.083984	-138.677	-230.46	1193.832	-0.9917	0.75439	-0.021484	-57.8301	124.382	1066.867	-1.6109	0.58408	0.15352	41.552	101.501	1321.735	-1.8428	0.57422	-0.3252	25.065	58.734	54.16	0.13232	0.13672	0.13916
0.896	56.722	126.181	186.431	-0.1958	0.20898	0.086914	62.6308	-156.869	1478.829	-1.4624	0.52531	0.0061128	-99.752	-18.066	1520.4475	-2.1296	0.56025	0.097949	-96.382	-234.973	1245.196	-1.0417	0.78686	-0.02124	-58.223	167.985	1033.394	-1.5846	0.55908	0.15703	35.005	91.119	1325.302	-1.8203	0.58594	-0.30859	26.289	31.2539	29.826	0.079102	0.13281	0.14355
0.898	67.85287	130.395	161.74613	-0.10254	0.20898	0.10205	85.1707	-203.234	1517.94	-1.5793	0.52856	0.0021341	-89.384	22.1171	1492.877	-2.1297	0.55762	0.11953	-117.408	-156.859	1269.291	-1.0903	0.79639	-0.028809	-52.734	108.748	1005.479	-1.5574	0.54756	0.15908	32.146	154.837	1307.032	-1.7949	0.59034	-0.30664	68.07508	-6.1431	30.3883	0.049805	0.12622	0.14991
0.9	58.4196	84.992	171.1447	-0.053223	0.21045	0.098145	125.282	-127.082	1540.336	-1.6925	0.52976	0.00077107	-102.88	-52.356	1502.487	-2.1285	0.54629	0.13164	-143.056	-113.141	1274.778	-1.1597	0.77588	-0.056641	-12.735	104.628	993.33	-1.5352	0.53516	0.15967	10.21	61.9496	1282.0936	-1.7671	0.59619	-0.30469	42.001	18.9032	6.6095	0.021484	0.12158	0.15234
0.902	49.0254	109.044	161.093	0.033203	0.20264	0.097168	130.087	-125.938	1528.219	-1.7959	0.53379	0.00048828	-74.5332	-28.943	1513.172	-2.1204	0.53076	0.15205	-123.75	-130.084	1305.499	-1.2124	0.76416	-0.062012	-43.149	180.076	962.853	-1.5026	0.52314	0.16426	-3.273	81.2291	1258.6805	-1.7305	0.58789	-0.29492	57.8086	-1.69973	32.2461	-0.0019531	0.11426	0.15771
0.904	29.144	84.376	157.061	0.088621	0.19092	0.099365	141.298	-158.602	1571.439	-1.8887	0.53809	0.003418	-123.794	-16.713049	1478.881	-2.1133	0.52148	0.16895	-145.258	-65.881	1270.52	-1.3301	0.76172	-0.080078	-30.265	141.49781	972.735	-1.4785	0.51093	0.16787	-42.221	85.7879	1229.172	-1.7139	0.58789	-0.29395	63.1448	24.288	58.528	-0.0097656	0.11621	0.15869
0.906	0.210000000000001	70.586	162.95	0.14844	0.18506	0.095215	123.521	-83.326	1550.69	-1.9672	0.55362	0	-106.947	-30.02	1490.762	-2.1187	0.51533	0.19404	-115.012	-90.111	1290.1511	-1.4302	0.76905	-0.085938	-11.65	194.03	942.84	-1.443	0.4957	0.171	-21.328	20.067	1243.23	-1.6797	0.58984	-0.28613	30.082	50.77	35.411	-0.026367	0.10693	0.15332
0.908	-4.397	91.428	119.932	0.21338	0.16943	0.093262	92.486	-91.151	1526.9321	-2.0367	0.57087	-0.0048688	-42.897	85.927	1446.402	-2.125	0.53438	0.21709	-65.572	-92.748	1326.2612	-1.5137	0.77734	-0.077148	-15.817	197.488	912.537	-1.4139	0.48848	0.17315	-5.961	92.971	1246.572	-1.6511	0.57641	-0.27441	36.7316	24.5301	27.825	-0.032715	0.10059	0.15356
0.91	-23.061	41.1752	85.262	0.24414	0.16455	0.096191	73.0324	-49.43	1519.657	-2.0972	0.59109	-0.0075432	-54.152	79.942	1418.90172	-2.1231	0.55664	0.22373	-99.877	-45.456	1315.955	-1.6069	0.78955	-0.069824	36.202	138.761	902.02	-1.3765	0.47314	0.16992	-9.274	81.734	1235.649	-1.6211	0.5752	-0.26123	23.877	43.988	37.5429	-0.044922	0.10059	0.1543
0.912	-31.404	32.3307	99.347	0.29883	0.15381	0.092773	47.826	28.7387	1479.652	-2.1456	0.61861	-0.0046069	-9.552	101.281	1422.2491	-2.0991	0.5667	0.22636	-64.463	-112.014	1345.425	-1.6484	0.79297	-0.057129	32.401	202.473	836.299	-1.3425	0.46221	0.17168	-7.785	84.0529	1230.289	-1.5957	0.56445	-0.25391	30.516	30.18725	35.9321	-0.050781	0.10059	0.14893
0.914	-45.195	30.049	81.842	0.33032	0.1499	0.095215	10.537	-24.4405	1474.022	-2.1851	0.64648	-0.0073242	26.209	159.878	1397.842	-2.0503	0.55322	0.22363	-77.332	-92.8872	1363.477	-1.7227	0.79395	-0.049316	64.8041	170.5806	806.566	-1.308	0.44248	0.17519	-2.19	164.733	1190.51	-1.5708	0.5542	-0.24292	26.083	3.6778	30.653	-0.057617	0.096191	0.14893
0.916	-58.5633	15.67163	94.156	0.36328	0.14893	0.094238	13.293	30.786	1490.069	-2.2089	0.6729	-0.013263	25.175	110.724	1410.835	-2.0256	0.54004	0.23271	-83.833	-104.5542	1406.686	-1.78	0.79272	-0.044922	87.6697	174.149	759.7132	-1.2771	0.42647	0.17519	24.692	124.82	1157.602	-1.5444	0.5376	-0.23682	-23.848	38.964	13.4864	-0.053223	0.10107	0.14551
0.918	-40.768	71.362	97.845	0.39014	0.13232	0.095215	-8.973	12.699	1500.1388	-2.2291	0.68718	-0.015941	76.987	152.626	1423.268	-2.0324	0.54717	0.23847	-9.742	-174.225	1492.016	-1.832	0.78711	-0.040527	62.8685	234.946	704.6987	-1.2454	0.41221	0.17793	30.878	175.262	1139.557	-1.5078	0.52148	-0.22461	-26.425	17.7023	11.46734	-0.051514	0.10351	0.14527
0.92	-64.5303	71.769	78.129	0.40234	0.12549	0.10449	-35.7015	-46.349	1565.722	-2.2319	0.70473	-0.013612	43.7588	125.585	1394.521	-2.0382	0.56318	0.24629	-9.734	-123.8336	1478.759	-1.8926	0.77539	-0.038086	92.9875	168.9846	691.374	-1.2148	0.39551	0.17725	38.282	200.149	1100.322	-1.4902	0.51367	-0.22607	-24.089	24.57	43.024	-0.044434	0.10547	0.14111
0.922	-45.828	58.105	118.153	0.39941	0.10596	0.10742	-19.243	9.985	1583.888	-2.2414	0.71955	-0.017364	55.6365	39.695	1392.681	-2.026	0.57793	0.24951	-2.673	-164.699	1483.135	-1.9214	0.77197	-0.037109	110.459	192.243	649.1548	-1.1835	0.3836	0.17773	29.399	139.8102	1099.24042	-1.4453	0.49023	-0.20801	-53.8304	32.5766	49.986	-0.032715	0.11279	0.14307
0.924	-23.068	68.284	95.827	0.38794	0.11719	0.10107	-53.1044	-45.891	1573.969	-2.2397	0.72803	-0.01416	92.3554	76.0005	1353.237	-1.9902	0.59766	0.24463	18.2771	-153.386	1523.437	-1.9683	0.78174	-0.03418	102.1795	175.8089	625.98326	-1.1542	0.37158	0.17618	33.97	188.706	1074.494	-1.4178	0.47339	-0.19873	-26.087	4.9767	50.35	-0.027344	0.11572	0.14307
0.926	-65.0006	29.2022	63.8002	0.38574	0.12256	0.10303	-58.247	-51.624	1573.0426	-2.2347	0.73242	-0.014251	63.949	23.17	1298.8791	-1.9373	0.59668	0.2374	13.703	-82.75656	1518.115	-1.9802	0.78784	-0.035157	116.167	131.731	610.05527	-1.1241	0.3583	0.17188	48.8278	136.6164	1046.713	-1.3838	0.45508	-0.18945	-42.075	40.246	51.569	-0.017578	0.11816	0.13867
0.928	-29.97	57.589	61.489	0.39111	0.10205	0.12012	-76.102	1.03	1533.64206	-2.2268	0.73991	-0.01174	85.1234	48.494	1308.7632	-1.8894	0.5875	0.23457	68.069	-127.007	1528.765	-1.9922	0.79688	-0.03125	74.17228	198.55	576.501	-1.0874	0.35117	0.1707	54.849	120.174	1029.827	-1.3457	0.43164	-0.17773	-65.017	35.0926	45.6681	-0.0063477	0.12305	0.13623
0.93	-27.296	71.551	35.727	0.37695	0.10352	0.12646	-103.1975	-73.4527	1546.724	-2.2147	0.73092	0.0046352	94.358	105.5152	1294.07908	-1.8535	0.575	0.23183	84.573	-91.3753	1538.16	-1.9922	0.81055	-0.022461	59.9542	168.186	568.719	-1.0503	0.33936	0.16309	46.476	190.876	992.873	-1.3223	0.42285	-0.1709	-37.364	9.6405	53.981	0.0029297	0.12549	0.12842
0.932	-42.311	34.045	58.367	0.34424	0.10352	0.12842	-63.66	-38.105	1563.652	-2.1992	0.71991	0.01584	62.6528	45.948	1298.1829	-1.8217	0.56504	0.22823	41.6374	-79.0092	1500.088	-1.9897	0.80713	-0.015137	74.7527	142.315	551.687	-1.0125	0.32969	0.1583	51.139	140.242	982.203	-1.2852	0.4043	-0.1582	-68.78441	22.60015	20.5322	0.020996	0.13916	0.1333
0.934	-19.012	56.218	47.109	0.31909	0.10767	0.13623	-73.714	-52.06221	1547.714	-2.1909	0.71436	0.024414	79.1226	90.548	1294.109	-1.8008	0.55859	0.22559	51.506	-114.955	1534.699	-1.9937	0.79932	-0.0063477	12.682	158.941	505.6931	-0.97851	0.31611	0.14961	74.329	180.423	955.841	-1.2532	0.38892	-0.14453	-46.5919	-25.7778	15.586	0.024414	0.13867	0.12695
0.936	1.159	15.1551	22.157	0.29932	0.10254	0.14795	-79.504	-108.582	1554.845	-2.1727	0.70782	0.039737	54.2941	95.3773	1249.639	-1.7688	0.55361	0.22363	30.61814	-23.394	1502.348	-1.9978	0.7915	0.0058591	14.889	108.001	473.9734	-0.94492	0.30634	0.14649	66.6204	175.646	910.7497	-1.2236	0.37598	-0.13184	-13.714	-19.7331	25.5679	0.04248	0.13867	0.12256
0.938	24.816	-2.5622	56.321	0.26855	0.093262	0.15137	-58.7924	-20.3605	1530.116	-2.1491	0.68684	0.054675	26.679	92.3353	1246.517	-1.7417	0.54931	0.22529	22.6698	-28.3435237	1462.52	-2.0029	0.78223	0.020508	-24.847	164.446	452.8796	-0.90801	0.30284	0.14453	47.6821	99.883	914.534	-1.1895	0.35547	-0.11719	-38.24	8.4811	35.613	0.059082	0.14356	0.12378
0.94	38.8924	11.9932	77.015	0.25146	0.090332	0.15869	-52.9282	-28.356	1483.411	-2.1382	0.66808	0.076925	40.038	183.7	1209.962	-1.7135	0.54307	0.22334	12.847	-13.4932	1467.708	-2.0132	0.77393	0.041016	-54.9957	168.004	421.529	-0.86816	0.29004	0.13525	49.866	156.9204	904.004	-1.1641	0.34961	-0.10791	-16.48	-3.0621	51.863	0.069336	0.14648	0.11865
0.942	39.734	-18.7847	67.591	0.21387	0.078613	0.1626	-14.081	16.7324	1455.2893	-2.1464	0.67461	0.10683	-11.568	166.934	1161.0101	-1.6788	0.53623	0.2208	-33.4358	53.925	1435.076	-2.0132	0.76514	0.054199	-30.094	110.3762	419.686	-0.82998	0.28291	0.12842	50.454	129.40114	889.501	-1.1235	0.33838	-0.09375	-21.431	44.734	57.528	0.077148	0.15088	0.11621
0.944	59.1095	-5.5058	50.9957	0.18701	0.073731	0.1687	17.27	109.636	1416.662	-2.1538	0.69189	0.11816	-17.165	176.715	1139.1293	-1.6494	0.51953	0.22656	-31.633	0.0425999999999997	1455.948	-2.0117	0.75586	0.077637	-73.4318	132.009	371.02	-0.79121	0.27344	0.12432	23.24	144.282	861.716	-1.0947	0.32397	-0.077392	-3.354	36.50593	56.72	0.075684	0.15088	0.11523
0.946	65.1	3.5698	20.7584	0.1582	0.065918	0.17432	23.457	69.578	1420.3341	-2.1371	0.70723	0.11446	-42.029	206.798	1089.222	-1.6189	0.50899	0.23134	-42.0578	35.112	1486.504	-2.0132	0.7456	0.090332	-73.6751	72.732	338.523	-0.75215	0.26406	0.12002	-10.768	193.587	799.825	-1.0723	0.30859	-0.064941	37.082	-10.6368	84.092	0.076172	0.15869	0.1123
0.948	68.243	-23.7226	45.047	0.12354	0.062012	0.17773	74.2221	124.795	1456.542	-2.0824	0.69335	0.10488	-84.83629	149.5391	1086.1119	-1.5848	0.49453	0.22881	-83.807	42.9615	1507.412	-2.0171	0.73877	0.10205	-51.695	76.142	311.125	-0.71748	0.25361	0.11133	3.235	138.221	770.979	-1.0308	0.30371	-0.04834	30.699	-3.836	63.356	0.072266	0.16577	0.11109
0.95	72.9376	1.697907	49.828	0.10107	0.063965	0.18115	67.922	99.309	1458.959	-2.0356	0.66054	0.1127	-53.603	199.726	1066.757	-1.5633	0.49101	0.22608	-55.449	-28.312	1566.923	-2.0249	0.72119	0.12354	-87.21	127.624	274.417	-0.68164	0.24463	0.10352	-21.051	188.235	736.818	-1.0161	0.29541	-0.038086	50.178	-44.6239	32.895	0.063965	0.17432	0.11182
0.952	35.978	-1.94974	28.23	0.064453	0.06543	0.18994	80.54	25.39329	1453.368	-2.0338	0.64121	0.1252	-53.492	190.493	1032.647	-1.5316	0.48047	0.22461	-60.121	24.869	1557.516	-2.0195	0.70996	0.12646	-72.5768	94.111	265.4785	-0.64863	0.23672	0.10059	-47.0603	199.814	690.6498	-0.97803	0.28711	-0.019043	33.925	-25.0128	54.1183	0.056152	0.18359	0.1084
0.954	37.5427	-0.85574	47.278	0.045654	0.063965	0.1936	102.479	84.248	1430.919	-2.0542	0.64111	0.13428	-79.4825	148.127	1023.598	-1.5015	0.47314	0.2251	-106.562	-26.039	1525.254	-2.0098	0.69727	0.14063	-72.4506	136.505	233.19612	-0.61905	0.22402	0.096973	-33.4383	148.5813	675.7185	-0.95776	0.27856	-0.011963	28.582	-7.704	56.2954	0.04834	0.18555	0.10986
0.956	43.2558	29.253	28.345	0.026367	0.06543	0.19531	91.178	32.967	1375.5451	-2.0637	0.65234	0.14209	-34.059	186.67	983.318	-1.4699	0.4582	0.22275	-107.149	-24.1772	1511.7948	-2.0098	0.69091	0.15479	-76.4223	120.608	217.2815	-0.59405	0.20996	0.08877	-56.131	188.89	635.2639	-0.93457	0.27148	-0.0048828	56.7565	-47.0674	105.106	0.033691	0.20557	0.10645
0.958	12.479	-22.2274	25.893	0.0048828	0.066895	0.19824	98.242	35.574	1351.89783	-2.0448	0.66494	0.14903	-55.1722	121.6505	964.854	-1.4333	0.45108	0.22539	-138.032	39.9989	1485.5886	-2.0073	0.69189	0.16553	-36.823	84.9302	205.703	-0.56445	0.19424	0.085547	-62.6193	146.9576	603.1784	-0.8999	0.26611	0.0097656	35.529	-19.976	130.746	0.019287	0.2129	0.10766
0.96	27.772	-3.46327	18.6794	-0.0019531	0.06543	0.20117	95.62999	81.531	1305.1691	-2.0101	0.67002	0.15019	-9.763	126.4155	968.316	-1.3974	0.43467	0.2168	-105.514	-29.5406	1508.496	-2.0093	0.69971	0.17285	-51.2226	116.323	185.408	-0.54004	0.18652	0.086914	-35.983	150.6092	602.7707	-0.87891	0.2627	0.015625	19.1812	-22.5932	142.0239	0.0019531	0.22266	0.10791
0.962	5.296	17.0911	-25.5693	-0.018555	0.070801	0.19678	81.8546	-1.347	1297.205	-1.9701	0.66348	0.15166	-0.922000000000004	180.465	928.8291	-1.3606	0.41787	0.21846	-87.158	7.576	1511.97	-2.0034	0.70947	0.17578	-39.9763	67.642	195.227	-0.50645	0.18154	0.085742	-58.499	213.61	555.8871	-0.83398	0.25879	0.031738	18.9851	-16.3115	210.492	-0.021484	0.23047	0.10742
0.964	-34.569	14.9436	-5.794	-0.023681	0.074951	0.19703	92.909	45.073	1318.895	-1.9336	0.65576	0.15283	-36.619	141.01445	924.571	-1.3203	0.40723	0.21338	-117.99	21.1532	1482.991	-1.9741	0.70557	0.17236	-9.695	59.244	198.993	-0.46494	0.17852	0.083594	-46.92509	169.495	553.215	-0.80639	0.2522	0.039063	-3.342	48.795	276.31	-0.037109	0.23975	0.10986
0.966	-20.355	52.921	15.382	-0.030273	0.080566	0.19531	83.8261	45.964	1317.397	-1.9095	0.64385	0.15488	13.491	198.193	903.938	-1.2817	0.38594	0.21201	-87.901	-21.2735	1498.568	-1.9541	0.70117	0.17676	-16.63	75.732	149.4	-0.40713	0.17304	0.071875	-33.693	193.884	531.051	-0.77344	0.24951	0.047852	10.858	39.4342	344.683	-0.077637	0.25098	0.10742
0.968	-42.144	30.5954	26.0671	-0.03125	0.089355	0.19287	52.728	28.177	1315.16	-1.8874	0.63155	0.15693	-5.078	188.959	860.437	-1.2421	0.37197	0.20772	-71.118	81.967	1477.908	-1.9414	0.70215	0.18701	54.0887	23.1851	134.5514	-0.34688	0.17178	0.066309	-43.35825	178.894	489.9639	-0.72461	0.24316	0.062012	10.631	60.1396	426.252	-0.11084	0.25757	0.10914
0.97	-55.5526	10.9182	33.787	-0.02832	0.095703	0.1875	45.531	143.75	1280.105	-1.8604	0.63311	0.15655	15.692	151.143	847.044	-1.2128	0.35049	0.20576	-56.0425	82.546	1457.022	-1.9429	0.7124	0.19385	54.659	36.236	120.9232	-0.2832	0.16943	0.057129	-18.913	133.965	481.5359	-0.70068	0.2417	0.070313	-15.813	82.184	516.531	-0.14453	0.26563	0.11035
0.972	-34.809	26.9538	20.86059	-0.023926	0.10645	0.18506	24.856	133.748	1237.216	-1.8341	0.62412	0.15722	53.468	190.934	776.669	-1.1761	0.33487	0.19599	5.213	107.216	1426.0495	-1.9346	0.72949	0.19873	38.716	25.2845	111.1622	-0.21211	0.16514	0.048828	-4.433	185.439	460.702	-0.64746	0.23389	0.078125	1.13000000000001	69.349	645.3823	-0.20459	0.27881	0.1123
0.974	-59.6797	-8.927	23.6124	-0.018555	0.11718	0.19263	5.218	172.582	1206.7774	-1.8042	0.62158	0.16553	64.11	161.227	734.907	-1.145	0.32422	0.20313	-24.49277	168.354	1383.1086	-1.9043	0.73633	0.2041	88.3391	12.501	129.107	-0.14043	0.15166	0.041504	-1.98099999999999	139.158	425.521	-0.60449	0.22998	0.088868	11.606	128.147	768.592	-0.23779	0.28467	0.11279
0.976	-53.9675	10.53	39.769	-0.0097656	0.12305	0.18848	0.649000000000001	225.499	1158.5928	-1.7806	0.60986	0.16426	97.69	194.3748	705.052	-1.1047	0.31093	0.19687	-14.40238	88.6722	1399.3542	-1.8733	0.74585	0.20728	66.47621	51.0526	95.884	-0.074024	0.14072	0.029004	-3.4	109.809	419.389	-0.55811	0.22998	0.098145	3.33500000000001	122.058	852.0129	-0.32031	0.2959	0.11621
0.978	-63.15628	21.8975	3.4955	0.0039063	0.13232	0.18311	-36.171	157.816	1143.229	-1.7534	0.60049	0.1666	68.4393	229.894	652.51997	-1.0698	0.30264	0.18896	13.4851	118.782	1417.693	-1.8457	0.74609	0.20361	79.321	13.1094	89.745	-0.0066404	0.12861	0.015137	0.771999999999998	140.8742	385.163	-0.48486	0.22314	0.10449	31.163	73.852	939.751	-0.39599	0.3064	0.11767
0.98	-75.9346	-8.687	2.943	0.010742	0.14014	0.18262	-30.164	208.115	1136.184	-1.7253	0.58095	0.16738	67.4053	184.5168	636.113	-1.0339	0.28897	0.18584	7.4427	124.141	1399.056	-1.8047	0.74121	0.20117	75.99746	7.237	108.17	0.061523	0.104	0	32.97663	90.611	364.597	-0.44482	0.22168	0.10547	-10.096	55.1566	986.725	-0.48096	0.30859	0.11768
0.982	-31.447	22.4171	17.0699	0.03125	0.15234	0.17578	-52.154	181.535	1113.602	-1.701	0.57402	0.16904	108.545	204.843	613.2083	-1.0002	0.28281	0.18281	44.956	46.6883	1398.88	-1.7832	0.73926	0.19531	42.996	30.9178	79.329	0.11817	0.090625	-0.0167	58.8201	135.152	366.765	-0.36572	0.21533	0.11572	-16.567	-32.238	1026.577	-0.62305	0.31641	0.11279
0.984	-28.499	18.0915	15.4935	0.049316	0.16455	0.17725	-65.255	132.4131	1091.7064	-1.6738	0.56445	0.16553	87.35241	182.358	584.9243	-0.96973	0.27734	0.17725	22.073	92.922	1365.287	-1.7397	0.73096	0.19043	74.8522	21.4144	70.59334	0.17334	0.075098	-0.026758	74.7193	126.824	314.901	-0.30395	0.21362	0.12305	17.114	-87.3271	1065.242	-0.70313	0.31445	0.10986
0.986	-25.516	20.05872	38.678	0.05957	0.17285	0.1709	-25.432	187.338	1047.0773	-1.6508	0.56015	0.16611	82.327	164.017	594.111	-0.93809	0.26172	0.16924	11.986	38.445	1318.099	-1.6992	0.72559	0.19189	51.4368	79	58.9046	0.221	0.053613	-0.041992	54.599	88.4376	287.466	-0.24365	0.20459	0.12988	11.681	-114.7249	1056.511	-0.87402	0.31738	0.10986
0.988	4.632	62.824	37.09656	0.072754	0.18555	0.16602	-55.608	128.341882	1025.3752	-1.6157	0.55039	0.16699	79.3159	216.948	555.768	-0.90781	0.25664	0.16524	55.3344	35.197	1292.458	-1.6733	0.72314	0.18945	5.288	74.892	56.7478	0.25918	0.037305	-0.053516	15.67	134.503	241.8774	-0.15479	0.19824	0.13477	25.629	-161.964	1073.901	-1.0679	0.31787	0.10547
0.99	-14.294	26.1534	44.624	0.083252	0.19287	0.16382	-51.769	138.219	1009.8573	-1.584	0.54023	0.1666	41.826	165.922	506.101	-0.88086	0.24804	0.16016	25.8282	98.5394	1265.1278	-1.6348	0.71289	0.18115	18.096	34.40515	71.9126	0.29688	0.018066	-0.065918	47.616	111.25	218.194	-0.11377	0.19629	0.13818	44.441	-149.056	1071.521	-1.1816	0.31836	0.10791
0.992	10.792	36.7648	78.602	0.086914	0.20459	0.15918	-20.919	174.41	980.714	-1.5491	0.53193	0.16836	49.851	148.483	486.959	-0.84502	0.23887	0.15361	38.6806	26.776	1275.9338	-1.6045	0.70459	0.17944	-5.325	52.371	46.277	0.32979	-0.0015625	-0.070996	57.005	101.375	241.07562	-0.024902	0.19238	0.14209	61.263	-136.892	1033.774	-1.396	0.33105	0.11084
0.994	50.9973	21.8368	63.025	0.084961	0.2251	0.15625	-19.628	109.9348	980.195	-1.5059	0.52051	0.1626	15.031	138.6125	452.293	-0.81299	0.22754	0.15137	17.19	76.928	1267.892	-1.5723	0.69824	0.17627	-14.752	8.54441	39.887	0.35683	-0.024609	-0.081347	28.771	119.213	226.373	0.033691	0.18482	0.14673	79.449	-133.45	1032.684	-1.5599	0.34326	0.11914
0.996	41.485	-12.405	60.8379	0.085449	0.22754	0.1543	7.729	181.705	965.444	-1.466	0.50918	0.16211	-32.283	84.544	438.3381	-0.77627	0.2208	0.14834	-7.227	101.2055	1228.866	-1.5342	0.67969	0.17822	-3.108	12.6755	52.147	0.37285	-0.046875	-0.094239	49.0698	59.757	226.36	0.094238	0.18164	0.14209	93.74	-59.851	1002.833	-1.7207	0.36084	0.12939
0.998	52.905	18.8145	69.66495	0.074707	0.24902	0.14746	14.389	171.916	952.909	-1.4159	0.49737	0.15664	-26.689	131.1549	424.557	-0.74678	0.20967	0.13965	-1.984	79.387	1226.224	-1.5156	0.67383	0.18359	-52.216	24.9913	38.921	0.38437	-0.068848	-0.10156	8.037	94.7	202.754	0.16748	0.17969	0.15186	103.303	-39.832	995.313	-1.8867	0.39941	0.13672
1	49.081	9.9333	83.4144	0.06543	0.26245	0.14575	52.957	137.2371	933.158	-1.3678	0.48213	0.15938	-56.9769	119.8183	400.011	-0.72061	0.20107	0.13574	-40.3619	178.458	1196.586	-1.4824	0.66211	0.17041	-66.9458	2.2133	31.1534	0.39307	-0.094238	-0.10645	-7.875	82.579	169.576	0.19873	0.17236	0.14941	117.045	-13.473	1012.137	-1.9429	0.42529	0.14063
1.002	59.4522	-0.0120000000000005	134.071	0.052734	0.27588	0.14014	79.357	202.331	868.493	-1.3252	0.46523	0.15469	-66.9223	91.8207	404.25	-0.69092	0.19258	0.13262	-46.63026	153.186	1159.478	-1.459	0.64844	0.17139	-56.916	36.626	12.419	0.39688	-0.11162	-0.11065	11.865	44.15	166.571	0.25928	0.16553	0.15527	97.9913	20.742	985.348	-2.0073	0.47217	0.13916
1.004	49.0048	14.207	141.931	0.03418	0.29248	0.1333	59.6172	160.9493	827.128	-1.2793	0.45117	0.15039	-52.657	126.058	352.539	-0.66992	0.18359	0.125	-26.168	150.978	1120.499	-1.437	0.64111	0.17383	-83.587	19.352	6.0732	0.38643	-0.12685	-0.11484	-34.759	61.074	131.1757	0.29809	0.15894	0.16088	95.88	-11.7	991.117	-1.9941	0.50977	0.1482
1.006	23.4388	-36.294	172.79	0.022949	0.3042	0.13281	93.5649	180.54026	805.826	-1.2338	0.43516	0.15215	-76.1902	82.31	294.2186	-0.64522	0.1751	0.12265	-64.1982	199.047	1052.62536	-1.3955	0.62402	0.16211	-50.893	-8.2155	57.535	0.38017	-0.12842	-0.11875	-50.555	15.868	103.68	0.33301	0.14648	0.16406	93.8087	-2.675	1010.611	-1.9429	0.53467	0.14648
1.008	43.0344	-17.0477	249.122	-0.01123	0.31348	0.12891	97.2248	215.614	739.331	-1.1942	0.42334	0.15156	-67.1506	96.094	275.248	-0.62217	0.16191	0.12383	-75.328	134.283	1025.397	-1.3784	0.61768	0.16455	-76.8537	31.1814	45.273	0.36914	-0.14053	-0.1209	-12.112	8.958	115.5485	0.36963	0.13477	0.16309	69.8996	1.374	972.14613	-1.7944	0.56494	0.15283
1.01	17.9555	19.786	296.0277	-0.039551	0.32788	0.12549	96.7743	156.1067	699.5816	-1.1525	0.41201	0.1461	-75.012	109.913	234.259	-0.59678	0.14551	0.12187	-63.2123	192.861	1015.2594	-1.3379	0.60156	0.15918	-49.5006	7.711	44.415	0.35107	-0.13818	-0.11816	-44.9265	39.872	101.5143	0.37891	0.12988	0.16943	65.354	-65.915	984.0201	-1.7168	0.57715	0.14551
1.012	4.234	42.127	410.7075	-0.074219	0.33936	0.12207	111.5604	199.805	653.2373	-1.1128	0.40069	0.1418	-86.489	76.838	247.968	-0.56524	0.13662	0.11465	-79.31578	193.982	988.86827	-1.3083	0.58911	0.15405	-36.018	19.6382	47.872	0.32724	-0.13867	-0.11709	-64.107	-11.6371	113.446	0.38916	0.11719	0.17432	18.3525	-86.317	1003.8691	-1.5273	0.58496	0.13525
1.014	19.601	106.5936	504.683	-0.1167	0.34766	0.11963	99.9478	170.3	618.8021	-1.0718	0.39307	0.13721	-54.8166	117.657	209.88375	-0.53955	0.13379	0.11084	-48.725	136.894	985.3835	-1.2788	0.57471	0.1543	-53.42227	35.5974	32.7205	0.29248	-0.12988	-0.1168	-40.429	36.109	122.789	0.39185	0.10693	0.17994	-11.00329	-171.3221	1014.69339	-1.4068	0.56836	0.12378
1.016	-5.459	109.6232	608.37	-0.14063	0.35791	0.11816	82.8047	144.9786	629.44	-1.0306	0.37959	0.13282	-64.48758	96.817	173.0562	-0.48633	0.13203	0.10596	-65.3097	194.526	953.11	-1.2397	0.55176	0.14844	0.890000000000001	-3.268	41.524	0.25576	-0.12246	-0.10781	-60.4177	40.8246	94.733	0.38574	0.095703	0.18262	-4.387	-264.514	1057.3426	-1.2949	0.5498	0.11182
1.018	11.744	117.035	752.0225	-0.19287	0.37109	0.11768	91.378	195.092	601.682	-0.99053	0.36397	0.12783	-57.792	78.78	190.407	-0.42666	0.13096	0.097071	-84.1	146.0939	928.596	-1.2168	0.53906	0.14355	-3.331	35.4989	6.0566	0.21934	-0.11494	-0.095411	-26.371	20.536	91.658	0.36963	0.081055	0.18701	-31.4543	-262.643	1051.2529	-1.1699	0.521	0.081543
1.02	29.768	144.98	844.719	-0.23755	0.38257	0.10474	73.857	146.9629	573.267	-0.95889	0.35733	0.13369	-3.72	106.674	166.926	-0.36338	0.1333	0.084961	-37.446	150.624	931.962	-1.1807	0.51953	0.13232	-6.386	38.948	0.950000000000001	0.17969	-0.097656	-0.089355	-25.698	51.37	65.207	0.35498	0.068848	0.1958	-62.19	-297.438	1089.9912	-1.1138	0.50635	0.074707
1.022	14.073	102.276	925.308	-0.30029	0.39111	0.10107	41.636	147.6596	559.945	-0.92129	0.35264	0.12432	-28.2303	66.1724	149.8036	-0.3003	0.13028	0.078223	-48.615	203.056	881.591	-1.1455	0.50683	0.13354	37.9743	27.712	28.6235	0.14385	-0.084082	-0.083105	-55.9715	11.4533	45.0233	0.32031	0.049805	0.19531	-97.038	-271.259	1150.537	-1.0322	0.50098	0.061035
1.024	12.303	63.3352	1023.4	-0.40576	0.38916	0.10303	16.51	151.537	510.906	-0.88086	0.34766	0.11963	15.008	71.66	141.359	-0.23633	0.125	0.063477	-22.492	141.0808	864.393764	-1.1167	0.49268	0.12646	22.899	63.86	39.958	0.10791	-0.067774	-0.075488	-35.379	24.5399	41.18	0.29297	0.037109	0.19775	-119.111	-206.478	1157.682	-1.0173	0.51367	0.064942
1.026	17.556	7.244	1042.822	-0.47754	0.37939	0.10645	2.802	101.1949	489.413	-0.84815	0.33184	0.1165	26.536	52.427	116.719	-0.16983	0.12188	0.051563	-6.94600000000001	187.327	830.1435	-1.0698	0.47705	0.12988	49.0737	10.440199	40.729	0.071192	-0.058008	-0.071191	-11.28	61.194	24.7428	0.26172	0.019043	0.20313	-116.3	-214.267	1196.647	-1.0176	0.54785	0.069336
1.028	-0.138999999999996	-81.09	1068.171	-0.64941	0.35498	0.11035	-2.611	151.537	439.69	-0.81133	0.32637	0.1082	32.078	1.0525	135.363	-0.10743	0.11612	0.040234	-16.804	192.505	775.0041	-1.0479	0.46582	0.11865	91.609	8.418	48.274	0.034766	-0.042676	-0.067285	-3.921	6.9523	37.5108	0.20605	0.022461	0.2002	-124.43	-151.313	1236.996	-1.0562	0.59717	0.055176
1.03	34.088	-121.1701	1088.64	-0.80932	0.33277	0.11548	-40.8452	122.799	415.17	-0.76914	0.31465	0.10352	69.978	17.6584	126.126	-0.050391	0.10244	0.02539	46.464	156.748	784.327	-1.0039	0.44092	0.11279	64.282985	24.8495	34.136	0.0024414	-0.025391	-0.063477	-21.01	22.665	42	0.18457	0.013184	0.20459	-128.041	-126.232	1250.017	-1.0742	0.60742	0.049316
1.032	31.892	-178.226	1072.059	-0.98877	0.31885	0.12207	-51.2421	93.852	409.336	-0.72763	0.30596	0.10098	65.6989	8.2356	86.029	0.000684	0.0875	0.016602	48.514	225.652	749.571	-0.9707	0.43164	0.10791	76.1951	-8.49872	49.368	-0.029785	-0.013965	-0.05957	0.399000000000001	15.073	39.6487	0.13477	0.0014648	0.21777	-126.796	-131.136	1274.393	-1.1128	0.59473	0.044922
1.034	40.159	-220.631	1089.987	-1.2593	0.30957	0.12305	-61.4179	108.8353	369.729	-0.68799	0.29736	0.09668	74.229	13.9541	95.847	0.050293	0.070313	0.0043945	59.4912	195.7184	714.151	-0.93652	0.41211	0.10107	83.7874	33.551	53.522	-0.057813	-0.0047851	-0.054883	50.741	5.0587	45.725	0.099124	0.0039063	0.21167	-114.131	-61.899	1260.285	-1.1809	0.57593	0.038331
1.036	82.917	-182.745	1063.526	-1.3965	0.31348	0.12061	-77.6441	66.302	341.001	-0.65645	0.28555	0.090527	90.029	54.0205	98.176	0.092188	0.059863	-0.0090823	65.7782	200.1189	682.16	-0.88672	0.39697	0.094238	43.212	20.8891	15.4552	-0.082031	0.0061523	-0.053711	30.523	54.966	24.45176	0.066406	0	0.21289	-99.069	-85.27	1256.307	-1.27	0.57275	0.021484
1.038	59.179	-178.546	1022.336	-1.687	0.3374	0.12305	-72.6292	88.724	318.296	-0.6207	0.27412	0.088672	52.8939	22.1538	90.741	0.13427	0.046582	-0.025391	39.923	229.878	614.5812	-0.86279	0.38721	0.093262	75.5414	4.7677	37.3247	-0.10557	0.021875	-0.05459	55.1703	11.49974	15.6847	0.02002	1.3878e-14	0.21582	-78.288	-79.155	1308.9411	-1.4077	0.57471	-0.0019531
1.04	117.586	-145.796	1029.194	-1.8738	0.37232	0.11865	-60.1232	108.226	269.277	-0.58672	0.2624	0.083594	59.254	31.6001	88.163	0.17256	0.028223	-0.0375	61.8497	164.7967	595.81204	-0.81787	0.36768	0.085449	41.71	32.246	33.9	-0.12549	0.036621	-0.052734	33.068	0.965	13.726	0	0.0039063	0.21436	-84.945	-63.451	1315.434	-1.4678	0.57617	-0.0053711
1.042	133.152	-90.053	987.23	-2.0229	0.4165	0.10645	-63.8976	71.8302	260.777	-0.55781	0.24844	0.083106	45.2451	28.24969	56.078	0.2083	0.013086	-0.04707	61.6919	208.846	565.938	-0.78931	0.344	0.076661	34.889	-7.2606	47.715	-0.14414	0.047852	-0.056836	18.844	38.302	-2.053	-0.035156	0.0073242	0.21484	-70.282	-135.276	1370.262	-1.5796	0.5835	-0.013184
1.044	116.465	-63.389	986.685	-2.1426	0.48633	0.10498	-42.538	129.679	219.754	-0.53027	0.24023	0.078125	22.851	10.5728	59.949	0.24072	0.0019531	-0.061523	38.568	209.543	533.7165	-0.75928	0.32715	0.07373	31.781	2.72913	51.763	-0.1502	0.066699	-0.056543	72.5794	6.8233	25.0912	-0.050049	0.013916	0.21729	-65.2967	-120.6989	1407.144	-1.6553	0.583	-0.016113
1.046	162.0175	-0.609999999999999	989.083	-2.1621	0.50977	0.10693	-46.682086	104.416	179.1945	-0.49072	0.221	0.072363	37.447	72.061	50.469	0.26816	-0.0077146	-0.072754	63.9473	177.533	539.528	-0.72266	0.30762	0.063965	-23.865	24.1108	51.423	-0.15879	0.083887	-0.06084	47.175	44.593	53.312	-0.06543	0.022949	0.21436	-66.346	-124.3816	1432.184	-1.7241	0.59033	-0.014648
1.048	139.9315	38.442	961.4402	-2.1167	0.58545	0.10303	-39.643	83.2957	191.6729	-0.44609	0.21719	0.070996	6.62	62.449	24.3484	0.29346	-0.029687	-0.093359	26.211	218.973	510.93	-0.70898	0.29688	0.05957	-25.544	-22.2328	69.155	-0.16133	0.10107	-0.063867	4.383	21.2412	52.689	-0.074219	0.034668	0.21045	-28.6781	-176.889	1489.739	-1.8159	0.59717	-0.0092773
1.05	136.5447	38.091	985.0894	-2.0076	0.62524	0.10522	-36.456	111.23	178.0272	-0.39883	0.2043	0.064746	-6.719	54.896	40.212968	0.31143	-0.044922	-0.097266	8.356	171.773	482.64	-0.6709	0.27637	0.056152	-44.839	5.966	61.107	-0.15234	0.11768	-0.064941	35.833	-12.2908	47.596	-0.080078	0.044434	0.21436	0.263999999999999	-136.842001	1487.222	-1.8608	0.60596	-0.0083008
1.052	132.1752	35.197	951.924	-1.8496	0.66602	0.10596	-29.131	67.67207	165.939	-0.33985	0.20157	0.058691	-13.459	75.087	26.9837	0.32724	-0.05586	-0.10439	19.056	154.722	485.129	-0.64477	0.25903	0.047119	-37.06	-9.486	44.385	-0.13955	0.13243	-0.070117	8.655	42.3531	15.4203	-0.075684	0.063477	0.21387	13.096	-165.102	1501.993	-1.9395	0.61523	-0.0097656
1.054	104.9774	-10.848	911.674	-1.5762	0.69141	0.094238	-6.779	80.693	163.9486	-0.28418	0.19287	0.045898	-39.265	21.7237	44.943	0.33203	-0.067383	-0.11182	-30.879	169.582	439.15	-0.62451	0.24658	0.043457	-48.9565	-30.9309	56.0208	-0.11855	0.14795	-0.076074	-6.598	30.5393	-4.8457	-0.068115	0.083008	0.20947	28.787	-157.534	1551.738	-1.9881	0.6272	0.00048826
1.056	89.0348	-73.457	946.427	-1.4448	0.67627	0.087402	8.255	83.039	137.9	-0.22227	0.18672	0.040918	-42.428	34.8708	60.229	0.33457	-0.076855	-0.1164	-10.854	104.0679	428.892	-0.58984	0.22803	0.041016	-78.845	19.848	75.293	-0.09668	0.16474	-0.081934	7.602	40.943	10.484	-0.053223	0.10156	0.21045	57.0755	-70.511	1568.333	-2.0303	0.64063	0
1.058	64.962	-107.548	939.39	-1.2012	0.62402	0.067871	36.985	26.9796	150.492	-0.16133	0.175	0.030469	-62.8881	31.8063	42.5201	0.33213	-0.089844	-0.121	-49.6943	123.64	373.641	-0.57178	0.21875	0.040527	-57.0421	-20.606	93.207	-0.063867	0.17568	-0.091504	-31.144	59.97	-6.5002	-0.030762	0.12744	0.19727	68.251	-78.8318	1575.411	-2.0801	0.65625	0.0024414
1.06	14.5568	-185.939	966.151	-1.0525	0.56568	0.047119	69.0318	51.395	128.983	-0.10508	0.16484	0.022657	-77.8421	4.135	44.929	0.31455	-0.095703	-0.12451	-82.057	115.084	337.077	-0.5293	0.20264	0.033691	-29.09	-40.391	125.175	-0.038574	0.18652	-0.089355	-37.001	15.2699	12.8023	-0.016113	0.13965	0.19434	87.519	-33.273	1583.263	-2.1055	0.66797	0.0053711
1.062	16.5627	-228.792	1006.005	-0.93213	0.52588	0.016602	75.6667	21.60314	96.0168	-0.049024	0.15684	0.0076172	-48.509	27.001	23.0462	0.30176	-0.094238	-0.12353	-60.27648	79.4908	342.647	-0.49902	0.19042	0.031738	-54.107	-43.651	119.812	-0.0094728	0.1958	-0.10225	-26.352	50.129	43.798	0.01123	0.1582	0.19141	69.787	-11.68	1539.176	-2.1382	0.68604	0.01709
1.064	-18.0437	-239.526	1004.977	-0.80615	0.48584	-0.0078125	80.6815	16.886	96.1029	0.0058594	0.14697	-0.0014648	-57.1261	-6.1906	19.7896	0.27588	-0.094238	-0.12402	-77.9385	126.334	313.846	-0.45459	0.18213	0.029785	-35.499	-88.128	172.382	0.015528	0.19883	-0.10898	-26.098	35.6387	58.105	0.043945	0.16748	0.18213	42.6541	-65.153	1548.966	-2.1682	0.6897	0.021484
1.066	-80.97	-266.703	1054.164	-0.76221	0.48193	-0.015137	76.6899	54.0645	85.5224	0.05791	0.1293	-0.013476	-57.2912	-1.7545	40.125	0.25	-0.086328	-0.11748	-63.862	88.072	303.163	-0.3916	0.17188	0.022461	-35.833	-12.6863	197.8242	0.0417	0.20312	-0.11562	-50.2226	2.613	82.749	0.059082	0.16992	0.17822	61.8428	11.729	1534.499	-2.1929	0.68799	0.029297
1.068	-71.135	-208.029	1104.114	-0.71289	0.49316	-0.012207	75.6521	21.634	98.4051	0.10459	0.1126	-0.022461	-34.995	28.5296	37.018	0.21739	-0.081347	-0.10713	-61.353	94.936	274.995	-0.35352	0.1626	0.020996	-43.332	7.5704	236.2376	0.060645	0.20664	-0.11777	-38.653	44.1445	58.275	0.089844	0.1792	0.16748	29.05899	-1.25	1510.182	-2.2207	0.6875	0.038086
1.07	-116.525	-159.5784	1118.585	-0.73438	0.52515	-0.001709	75.6898	37.236	91.522	0.14639	0.10166	-0.03457	-63.6271	8.143	45.635	0.17598	-0.07666	-0.098144	-64.8531	127.483	239.781	-0.28076	0.15137	0.01416	11.774	22.9785	330.2578	0.075684	0.21777	-0.12158	-29.177	20.6199	15.70674	0.10327	0.18506	0.15527	3.217	-7.1057	1540.985	-2.23	0.68604	0.040039
1.072	-119.464	-147.769	1192.364	-0.79102	0.57227	0.0019531	59.6311	40.89	80.761	0.18134	0.08291	-0.041113	-37.663	28.94	54.879	0.13721	-0.071094	-0.089843	-33.88361	76.012	240.53	-0.22657	0.14355	0.0075685	-58.0187	85.257	386.852	0.08125	0.21934	-0.11992	-50.7052	27.7219	13.1752	0.1167	0.18652	0.14941	-27.0895	50.086	1523.234	-2.2388	0.68262	0.046875
1.074	-108.878	-103.615	1177.504	-0.85742	0.60938	0.0039063	49.1183	14.8427	91.062	0.21729	0.071289	-0.051758	-15.219	28.27	25.3026	0.092773	-0.0625	-0.07959	-26.253	103.536	214.541	-0.17432	0.1333	0.0053711	-57.778	76.8479	499.829	0.077637	0.22471	-0.11963	-46.5392	33.369	21.5407	0.13623	0.18604	0.13086	-44.4539	-8.1794	1527.3963	-2.2332	0.67114	0.064697
1.076	-158.3	-90.56	1174.141	-0.87695	0.61426	-0.0024414	46.482	66.459	77.151	0.24902	0.063476	-0.059863	-10.218	6.611	43.451	0.049512	-0.057715	-0.074219	-60.3121	80.958	164.4789	-0.10889	0.11621	-0.012695	-7.1864	105.4207	615.2871	0.057324	0.229	-0.11338	-40.854	-27.556	34.8028	0.13867	0.18799	0.1333	-29.214	26.12472	1566.712	-2.2305	0.6582	0.078613
1.078	-116.633	-75.961	1192.135	-0.94336	0.58789	-0.0068359	12.575	58.352	44.925	0.28027	0.053516	-0.070117	25.901	40.7285	36.071	0.0081052	-0.049121	-0.059278	-15.919	52.199	155.7839	-0.074219	0.10449	-0.021484	-27.1979	167.161	713.522	0.02871	0.23291	-0.10489	-25.053	-1.0513	61.142	0.14453	0.18799	0.12109	-52.192	29.915	1570.623	-2.2183	0.65088	0.09375
1.08	-129.1	-27.058	1150.0918	-1.0239	0.56494	-0.012695	4.57	58.958	46.18991	0.30762	0.036328	-0.080273	15.338	29.0908	14.9716	-0.027051	-0.037012	-0.054199	-25.22	86.717	138.448	-0.0092773	0.081055	-0.03418	5.762	134.497	836.2766	-0.010254	0.23291	-0.097656	-8.099	0.671000000000001	58.472	0.14526	0.18774	0.11279	-65.082	-47.5683	1595.489	-2.2163	0.63916	0.11133
1.082	-134.801	-38.514	1175.711	-1.1357	0.54688	-0.021973	-8.092	89.086	25.1939	0.32217	0.02207	-0.089649	20.582	32.439	31.4633	-0.062988	-0.023925	-0.048828	-28.146	59.91	130.3692	0.029541	0.067383	-0.045166	18.93	140.627	887.6842	-0.060839	0.23847	-0.089747	17.216	-22.7873	97.829	0.13672	0.18359	0.1123	-52.551	-16.037	1599.145	-2.1948	0.62354	0.11133
1.084	-82.438	-25.402	1207.064	-1.2964	0.55078	-0.022949	-22.808	34.356	34.7363	0.33594	0.015137	-0.09668	62.1058	64.792	21.0966	-0.092773	-0.019531	-0.041504	10.674	61.00813	140.607	0.065918	0.056152	-0.060547	30.0351	81.844	922.8814	-0.11699	0.23848	-0.076074	-15.902	12.819	92.484	0.12354	0.18945	0.10254	-81.53	-53.95005	1563.843	-2.1895	0.60205	0.13574
1.086	-93.825	-35.038	1211.511	-1.3608	0.54834	-0.021973	-14.495	32.7494	62.013	0.3459	0.0053711	-0.10039	37.921	29.9573	30.9986	-0.11777	-0.010644	-0.038281	6.655	67.503	121.183	0.11816	0.036133	-0.072754	67.6648	8.25	988.366	-0.17207	0.23652	-0.06709	13.699	-31.319	79.923	0.11572	0.19189	0.10059	-93.85	-63.663	1578.407	-2.189	0.59229	0.14844
1.088	-85.916	-109.47159	1301.13	-1.498	0.55713	-0.021973	-51.139193	24.6844	48.398	0.35401	0.00048829	-0.10801	71.06	24.9436	53.887	-0.14043	-0.0030273	-0.041406	60.04469	6.9569	114.332	0.13379	0.028809	-0.080566	58.182	-2.14	1040.91	-0.23418	0.23759	-0.05918	44.165	-28.1	73.498	0.09082	0.19531	0.098633	-91.598	9.3262	1549.089	-2.1816	0.59863	0.17822
1.09	-59.725	-103.43	1325.378	-1.5759	0.5603	-0.022705	-72.9475	-15.031	71.762	0.35986	-0.0088866	-0.10957	65.2549	8.8175	33.687	-0.15567	0.010254	-0.038281	64.9568	17.7919	107.285	0.16602	0.0092773	-0.095215	53.5034	-90.8593	1062.945	-0.2998	0.23438	-0.049316	28.657	-16.079	57.7725	0.062256	0.19629	0.10572	-112.715	-23.694	1532.2991	-2.1758	0.60938	0.18555
1.092	-73.861	-134.803	1352.676	-1.6543	0.55859	-0.013672	-58.7283	22.543	51.129	0.35342	-0.016699	-0.11738	53.021	-23.2838	61.854	-0.16465	0.016211	-0.034961	45.896	11.6284	70.9188	0.19288	-0.0021973	-0.10621	59.885	-134.954	1068.404	-0.37744	0.24072	-0.036718	48.39946	-69.423	92.3479	0.030762	0.19824	0.10791	-77.851	27.779	1529.305	-2.1621	0.62695	0.19141
1.094	-20.854	-160.34	1420.603	-1.7632	0.55225	0.012695	-76.8024	-0.539999999999999	29.30019	0.34375	-0.016113	-0.1167	70.1694	4.2535	56.41	-0.17188	0.022461	-0.036621	67.7899	5.244	75.4361	0.20898	-0.015137	-0.11426	38.17063	-138.794	1024.6	-0.47315	0.23779	-0.01953	37.85	-30.2445	114.746	-0.018555	0.20752	0.11328	-80.936	60.009	1495.403	-2.1245	0.6333	0.19068
1.096	-4.286	-120.0853	1396.81	-1.8198	0.55908	0.021973	-62.181	-11.344	29.136	0.33281	-0.012207	-0.1209	47.64015	-11.40391	45.087	-0.1749	0.037402	-0.040918	49.807	56.1797	68.1557	0.23438	-0.029785	-0.12793	9.5421	-192.564	1014.021	-0.57979	0.24053	-0.00077927	15.458	-32.9928	130.828	-0.039551	0.21289	0.11963	-90.888	9.701	1507.848	-2.0894	0.63525	0.19238
1.098	-5.431	-159.021	1432.058	-1.9214	0.55713	0.024902	-56.8189	21.4008	10.9488	0.31592	-0.0091795	-0.11992	42.544	-7.4312	48.7652	-0.16729	0.047363	-0.041211	60.11699	27.1857	72.6428	0.24023	-0.036133	-0.13281	-43.2225	-141.303	1017.27	-0.70421	0.24267	0.019436	28.308	-36.3021	188.292	-0.080566	0.22949	0.11963	-41.0671	69.329	1504.839	-2.0757	0.62744	0.20117
1.1	49.2602	-146.804	1502.925	-1.979	0.55713	0.031738	-59.1109	-8.925	27.975	0.296	-0.0033203	-0.12031	42.516	6.51604	30.04253	-0.15869	0.057519	-0.032617	43.582	21.2678	70.766	0.24756	-0.05127	-0.14209	-87.511	-100.06	990.839	-0.8418	0.24951	0.041504	20.6747	14.836	251.344	-0.10791	0.23731	0.11889	-42.8716	51.258	1465.786	-2.0757	0.63525	0.21631
1.102	41.7495	-105.4816	1524.474	-2.0195	0.57031	0.031738	-33.999	15.4265	53.961	0.26797	0.00097656	-0.11347	5.301	-25.7107	37.48935	-0.14218	0.071679	-0.037598	4.293	46.088	43.6966	0.24976	-0.05664	-0.13941	-65.58	-75.165	991.728	-0.99938	0.25254	0.071188	7.693	-12.7868	308.4541	-0.13574	0.24805	0.12207	-10.974	56.351	1456.361	-2.0698	0.65674	0.21484
1.104	75.393	-126.368	1550.25	-2.0469	0.58301	0.025391	-25.221	24.59744	52.55	0.23779	0.0063477	-0.10742	-2.292	-5.977	65.09	-0.12646	0.084961	-0.041992	21.4	18.5706	51.686	0.25391	-0.068848	-0.14111	-132.914	8.397	988.552	-1.1809	0.2624	0.1037	38.143	12.887	381.6781	-0.18115	0.26709	0.11328	3.2746	125.096	1412.709	-2.041	0.66358	0.21191
1.106	103.776	-72.332	1513.062	-2.0469	0.58887	0.026367	-14.97	-16.01294	64.015	0.19258	0.0074219	-0.10244	-27.6616	-8.346	68.805	-0.10586	0.098926	-0.040821	10.086	59.866	49.936	0.25439	-0.075684	-0.14404	-152.279	9.292	998.638	-1.3844	0.27763	0.13378	17.152	66.135	427.119	-0.20508	0.27344	0.1123	-11.143	67.0772	1421.688	-2.0034	0.6665	0.2168
1.108	35.1796	-55.698	1457.1496	-2.0444	0.59229	0.03418	4.884	30.9321	46.049	0.14991	0.011231	-0.092578	-44.7775	-28.51	99.758	-0.087207	0.11709	-0.042481	-17.257	53.181	21.519	0.25488	-0.081055	-0.146	-150.347	11.095	1021.724	-1.6024	0.30244	0.17421	10.461	65.9645	541.857	-0.26709	0.28516	0.11133	34.032	98.719	1434.366	-1.9414	0.66602	0.20752
1.11	83.019	-59.8	1466.707	-2.0437	0.58813	0.037597	16.803	16.56528	8.575	0.10655	0.015527	-0.085547	-23.695	-19.702	108.147	-0.062989	0.12998	-0.046777	5.872	30.1882	20.113	0.25146	-0.083984	-0.15186	-119.876	48.563	996.051	-1.8198	0.33203	0.22119	22.897	122.219	681.0078	-0.32495	0.28271	0.1084	54.1753	93.988	1399.709	-1.9102	0.66797	0.2085
1.112	63.05	1.7337	1440.0653	-2.0444	0.58838	0.04248	43.759	26.412	20.1545	0.054199	0.023731	-0.076953	-54.3886	-43.96	81.096	-0.041797	0.13906	-0.054199	-44.902	62.342	-3.724	0.24707	-0.085694	-0.15357	-78.423	-5.745	998.5228	-2.041	0.36847	0.25098	22.785	120.974	748.4695	-0.4043	0.27637	0.10693	46.0399	19.432	1399.559	-1.8574	0.66113	0.20215
1.114	20.169	-14.47897	1444.927	-2.0625	0.57227	0.056641	39.747	61.327	8.0676	0.0092773	0.030273	-0.066406	-55.562	-45.915	105.162	-0.020508	0.14795	-0.062988	-39.7738	32.874	8.5329	0.24316	-0.086426	-0.14697	-61.5024	-43.86	999.824	-2.2317	0.40658	0.25899	3.54499999999999	71.006	824.3509	-0.54395	0.2627	0.11279	55.651	62.6065	1358.52	-1.8151	0.65722	0.20117
1.116	38.8386	-4.0929	1475.12	-2.0698	0.56787	0.063477	39.0699	14.357	13.1703	-0.039356	0.039942	-0.056739	-55.225	7.902	92.881	-0.00078122	0.15351	-0.06543	-14.048	41.672	46.402	0.2207	-0.090332	-0.14697	-51.2226	-95.133	984.61229	-2.3676	0.44564	0.25938	-15.192	70.771	884.802	-0.62695	0.25391	0.11133	35.76602	22.508	1316.992	-1.7769	0.65381	0.19873
1.118	-21.9008	27.9344	1465.601	-2.0996	0.55566	0.080078	56.845	26.9572	35.2123	-0.077637	0.046093	-0.049121	-83.2573	9.801	137.95	0.019629	0.16484	-0.072364	-82.169	63.393	32.9082	0.21729	-0.087402	-0.14551	-36.509	-198.4098	1025.5543	-2.4311	0.48666	0.25136	-11.0836	4.254	961.052	-0.81055	0.25	0.11914	44.612	26.614	1314.816	-1.7339	0.6499	0.19336
1.12	-16.839	-12.268	1506.10884	-2.1162	0.55005	0.09082	67.1156	14.5127	24.3438	-0.1124	0.053906	-0.054199	-48.574	26.26246	216.5812	0.023535	0.1711	-0.075098	-45.9862	18.754	44.271	0.19775	-0.086426	-0.14746	-48.903	-200.5699	1065.7192	-2.4199	0.53125	0.2373	-13.573	-52.672	1011.03	-0.95653	0.25659	0.12158	56.1505	97.4039	1278.469574	-1.7168	0.64453	0.18945
1.122	14.04	42.1391	1522.402	-2.1309	0.5459	0.10596	73.6079	-25.0632	53.879	-0.14326	0.059961	-0.040039	-51.9842	25.9336	273.8122	0.020801	0.18096	-0.078808	-58.8131	30.0349	41.8258	0.18115	-0.088623	-0.14282	-63.5885	-238.245	1075.7998	-2.32	0.58595	0.22016	13.496	-71.444	977.26	-1.1016	0.27686	0.12744	29.9367	74.434	1265.653	-1.6753	0.63721	0.19336
1.124	-48.5135	35.1022	1505.216568	-2.1431	0.54541	0.13184	71.2057	18.5083	47.886	-0.16504	0.064941	-0.036621	-76.203	10.4162	360.63586	0.013184	0.18604	-0.084473	-77.9253	13.987	32.574	0.16504	-0.082031	-0.14063	-57.843	-269.113	1128.929	-2.1653	0.61837	0.19248	14.385	-153.381	950.377	-1.2983	0.31689	0.1377	25.202	137.745	1262.621	-1.6452	0.62817	0.18848
1.126	-26.888	-25.317	1545.399	-2.1479	0.5415	0.14063	50.2609	-6.9054	37.376	-0.18262	0.075097	-0.039941	-49.468	62.804	449.898	-0.0032226	0.19629	-0.082617	-29.881	-5.9917	44.7916	0.13281	-0.084473	-0.13232	-56.084	-233.24	1146.638	-1.9734	0.63096	0.16707	14.161	-138.439	946.399	-1.4043	0.34473	0.13281	23.855	172.963	1228.501	-1.6167	0.61963	0.18555
1.128	-45.7688	-15.528	1542.061	-2.1523	0.5293	0.16895	54.404	-4.93073	40.6545	-0.19179	0.082812	-0.040625	-80.78	100.208	537.9	-0.034277	0.20156	-0.079883	-53.082	39.364	33.6033	0.12207	-0.07959	-0.12793	-2.874	-265.481	1191.077	-1.7663	0.60464	0.13205	37.339	-139.982	949.453	-1.5801	0.40674	0.1499	-14.476	147.502	1214.022	-1.582	0.60596	0.18311
1.13	-88.199	-82.8743	1545.029	-2.1558	0.5144	0.17993	52.0882	26.2539	16.00746	-0.18945	0.093359	-0.040625	-71.539	150.642	677.601	-0.068262	0.20977	-0.080273	-41.7238	22.5214	38.2116	0.089355	-0.072266	-0.12549	23.19	-238.704	1256.463	-1.5557	0.55273	0.091309	73.722	-138.126	961.387	-1.6931	0.46143	0.16064	-5.304	214.819	1205.35	-1.5659	0.60596	0.17871
1.132	-49.7773	-73.471	1557.176	-2.1621	0.50781	0.19336	16.12	-7.7644	18.8692	-0.18877	0.095313	-0.04375	-40.755	196.784	736.7777	-0.10859	0.2125	-0.079395	-22.302	31.9161	57.158	0.068847	-0.068115	-0.11865	35.469	-157.2285	1257.124	-1.3611	0.50256	0.045033	71.979	-54.051	947.656	-1.7847	0.51855	0.17041	-38.3073	180.553	1156.778	-1.5347	0.60254	0.17871
1.134	-107.203	-16.9965	1515.854	-2.1753	0.52002	0.22656	8.57899999999999	17.4695	30.094	-0.18604	0.098633	-0.050293	-54.358	151.434	792.753	-0.15625	0.22119	-0.074219	-5.846	49.661	42.553771	0.043945	-0.056641	-0.11523	84.6023	-171.493	1305.674	-1.1898	0.46453	-0.0024128	69.565	-41.206	934.082	-1.8594	0.60254	0.16992	-32.739	157.617	1132.981	-1.5053	0.59229	0.17188
1.136	-112.359	-46.13	1510.542	-2.1893	0.53833	0.23633	-6.817	27.29	23.1318	-0.16709	0.10381	-0.050195	-3.589	126.019	859.4755	-0.20635	0.2333	-0.070606	22.895	5.596	54.258	0.011719	-0.044434	-0.11133	113.1712	-96.661	1323.682	-1.0442	0.43608	-0.044221	86.37	-36.4788	964.894	-1.875	0.63623	0.17236	-24.177	192.221	1073.8389	-1.48	0.58447	0.16992
1.138	-53.905	9.4238	1480.076	-2.1812	0.55908	0.23242	-44.954	0.294099999999999	42.015	-0.14834	0.1164	-0.053906	12.433	79.621	923.325	-0.26757	0.23125	-0.058691	6.454	26.6498	54.976	-0.0090332	-0.031494	-0.11157	131.912	-91.634	1278.897	-0.96204	0.44327	-0.062546	75.511	2.044	933.724	-1.8335	0.69678	0.17041	-74.1133	145.311	1055.227	-1.4468	0.57471	0.16748
1.14	-121.545	27.779	1434.1115	-2.1343	0.57471	0.23047	-30.8256	43.314	45.451	-0.1249	0.12032	-0.057813	10.458	-7.635	999.354	-0.34844	0.23282	-0.050879	14.666	28.073	46.722	-0.024902	-0.018066	-0.11035	148.46	-118.57	1284.762	-0.92725	0.49561	-0.061523	99.6775	-22.55	932.991	-1.7639	0.73316	0.17505	-65.978	195.434	1059.1878	-1.4297	0.56738	0.15967
1.142	-61.8908	25.652	1463.4706	-2.1035	0.57129	0.22705	-34.7976	14.6568	34.489	-0.097852	0.12724	-0.06748	43.6429	-37.964	1021.093	-0.4418	0.22871	-0.034082	45.4614	15.9142	39.036	-0.05127	-0.0019531	-0.10645	155.014	-70.713	1290.8048	-0.93644	0.58079	-0.068931	80.163	7.48699999999999	965.8653	-1.6816	0.75391	0.18018	-58.77591	216.661	1034.57	-1.3984	0.54883	0.16162
1.144	-34.801	96.716	1467.401	-2.0796	0.57178	0.23828	-54.3184	10.622	48.98	-0.068359	0.12988	-0.072266	50.7186	-88.452	988.159	-0.54639	0.21045	-0.0097656	33.283	53.556	23.6228	-0.061035	0.0039063	-0.10742	125.7351	-114.205	1316.185	-0.9161	0.6635	-0.096103	46.7984	12.142	953.8271	-1.5503	0.75928	0.18506	-67.3906	156.9815	1018.845	-1.3555	0.53906	0.15576
1.146	-37.151	89.186	1480.439	-2.0789	0.5813	0.22974	-39.287	43.435	35.8705	-0.041015	0.13086	-0.073535	51.884	-149.103	997.742	-0.68164	0.19248	0.018164	53.5553	8.5535	31.8668	-0.074219	0.023926	-0.10498	92.04	-132.0836	1343.2537	-0.85224	0.71344	-0.1239	55.701	-55.855	974.2132	-1.4902	0.75879	0.18848	-49.448	196.455	991.151	-1.333	0.53223	0.1499
1.148	38.029	126.542	1479.25	-2.0762	0.60059	0.22656	-50.462	10.008	28.092	-0.009473	0.14336	-0.088965	50.73	-134.369	968.473	-0.83671	0.16797	0.051172	64.992	11.5055	40.623	-0.077148	0.037842	-0.10645	68.3957	-105.4449	1334.16	-0.80604	0.70328	-0.11678	49.3213	-93.875	977.9068	-1.3823	0.74854	0.17432	-62.4185	154.9742	963.344	-1.2905	0.51318	0.146
1.15	9.138	186.594	1422.8116	-2.041	0.61572	0.22949	-66.956	19.137	48.1971	0.017481	0.14453	-0.089355	-22.5719	-132.309	953.8068	-1.0215	0.14258	0.091406	39.751	25.8484	45.809	-0.075195	0.050293	-0.10449	56.913	-173.999	1396.1486	-0.82617	0.66895	-0.083984	11.625	-163.6866	967.47	-1.3096	0.7295	0.16992	-27.186	151.6609	975.039	-1.2593	0.49781	0.14356
1.152	20.13	141.702	1421.2255	-2.0176	0.61816	0.22217	-57.2094	9.034	46.7551	0.046387	0.14726	-0.099608	-42.1334	-70.694	967.815	-1.2272	0.11699	0.13086	67.9809	-16.6141	57.545	-0.069824	0.064941	-0.10693	59.753	-155.216	1448.034	-0.96414	0.64629	-0.050849	6.065	-235.837	1036.038	-1.2495	0.71045	0.16064	-4.064	200.859	930.974	-1.2324	0.4873	0.1416
1.154	70.6143	159.133	1426.003	-1.9585	0.61963	0.2124	-41.196	-47.658	105.222	0.064453	0.15186	-0.10547	-54.7488	-31.1193	956.026	-1.4492	0.10156	0.16846	33.577	2.29346	56.825	-0.059082	0.074707	-0.1084	33.94	-141.879	1459.196	-1.165	0.65335	-0.024848	13.501	-232.242	1067.932	-1.1714	0.69385	0.14209	1.326	156.1794	897.1	-1.1875	0.46484	0.14063
1.156	25.471	131.245	1408.485	-1.9248	0.61328	0.20655	-2.935	-15.419	152.987	0.087695	0.15596	-0.11367	-122.415	-52.769	968.452	-1.6877	0.096973	0.20645	15.285	-12.63068	40.8883	-0.042969	0.092773	-0.11084	23.114	-175.552	1491.874	-1.3511	0.68233	-0.0098206	-60.243	-281.293	1078.256	-1.146	0.6958	0.13184	26.929	203.843	858.554	-1.1636	0.45605	0.12939
1.158	70.6435	73.2467	1416.608	-1.8999	0.61182	0.20166	-5.931	-17.3189	169.872	0.1083	0.1666	-0.11748	-117.689	-48.003	968.341	-1.9098	0.104	0.24561	44.523	-32.119	50.896	-0.03003	0.099364	-0.11108	-1.997	-104.6172	1499.007	-1.497	0.70383	0.016564	-69.955	-285.586	1125.993	-1.1074	0.70508	0.12939	20.057	223.246	806.675	-1.1265	0.44385	0.125
1.16	70.379	92.1703	1389.021	-1.8652	0.60645	0.19531	6.48400000000001	-5.0888	214.865	0.11494	0.17636	-0.12529	-134.05	-32.743	946.186	-2.116	0.12862	0.26436	6.343	12.3848	14.711	-0.015137	0.10986	-0.11377	-31.446	-126.4248	1512.652	-1.5913	0.71729	0.014648	-77.242	-249.546	1141.804	-1.106	0.72754	0.12524	38.387	197.816	808.793	-1.0984	0.43091	0.12305
1.162	61.3847	35.899	1372.126	-1.8574	0.59961	0.19141	10.421	47.579	233.27839	0.12422	0.17891	-0.13125	-114.472	-6.08199999999999	993.83	-2.2879	0.17032	0.26377	-3.617	-13.9973	14.4218	0.010742	0.12012	-0.12061	-9.18	-144.82711	1551.611	-1.6638	0.71924	0.019691	-79.598	-242.392	1206.5714	-1.1211	0.75	0.12549	63.323	241.783	772.674	-1.0674	0.41797	0.12158
1.164	102.084	34.645	1366.378	-1.8315	0.59424	0.18848	-0.232999999999997	32.5563	281.322	0.13184	0.18799	-0.13428	-77.278	39.647	982.705	-2.4004	0.22266	0.24658	-21.735	-7.9235	46.8381	0.020996	0.12842	-0.12451	-2.179	-74.644	1522.395	-1.7241	0.71488	0.019687	-85.119	-147.5749	1258.866	-1.1582	0.76758	0.10693	46.04	179.9622	730.12	-1.0269	0.40088	0.11377
1.166	79.0809	93.256	1326.3022	-1.8125	0.58301	0.18432	18.067	80.414	367.154	0.12549	0.1959	-0.13623	-104.483	16.073	950.647	-2.4347	0.29081	0.22022	-56.2617	8.017	43.413	0.04834	0.13721	-0.12939	-27.504	-114.564	1499.5655	-1.777	0.70389	0.018209	-113.959	-91.061	1249.409	-1.1758	0.76465	0.098633	71.1038	160.5525	693.701	-1.0073	0.39307	0.10449
1.168	49.242	77.771	1336.1967	-1.7969	0.57324	0.17871	10.79	114.946	438.5259	0.11025	0.20273	-0.13496	-65.1166	-55.428	969.15	-2.387	0.37644	0.18956	-24.766	-34.1795	63.238	0.062745	0.14624	-0.13331	-45.004	-55.386	1498.02	-1.813	0.70249	0.0095733	-132.608	-113.135	1293.461	-1.2109	0.73633	0.077637	69.7433	171.5734	641.725	-0.96631	0.37256	0.10498
1.17	85.39	151.79249	1313.04	-1.7637	0.55371	0.1709	45.01516	110.1479	560.993	0.08252	0.20742	-0.13184	-47.8455	-117.496	977.872	-2.2683	0.45925	0.15597	-26.162	-12.783	78.261	0.07373	0.15771	-0.13818	-69.6242	-5.626	1466.3168	-1.8394	0.68994	0.00048828	-118.773	-73.451	1296.352	-1.2723	0.72876	0.066894	66.91277	132.187	618.371	-0.92651	0.36108	0.096923
1.172	34.584	171.39	1279.048	-1.7495	0.54736	0.17676	58.671	160.038	654.09	0.040625	0.20918	-0.13301	-73.3276	-196.8448	1049.8652	-2.1068	0.51288	0.12394	-56.9504	-26.521	65.957	0.087891	0.17041	-0.14209	-64.762	-41.4814	1488.6549	-1.8595	0.68973	-0.0086843	-86.553	-124.256	1299.052	-1.3506	0.72656	0.058594	69.4565	180.954	589.5891	-0.89404	0.3501	0.096191
1.174	43.796	150.916	1288.748	-1.7163	0.53271	0.17139	20.704	141.459	717.41	-0.010254	0.21436	-0.12451	-41.014	-215.69232	1110.424	-1.9312	0.54639	0.077637	-30.471	-61.2597	87.432	0.085449	0.17627	-0.14307	-48.857	37.6625	1484.326	-1.8807	0.69181	-0.018344	-51.395	-128.353	1319.2441	-1.4648	0.74512	0.0625	55.7602	186.523	552.3465	-0.85547	0.3291	0.084961
1.176	16.405	207.201	1261.404	-1.6951	0.52173	0.17187	10.3941	119.999	810.54783	-0.079687	0.21817	-0.12149	-85.105	-204.6909	1130.329	-1.7305	0.53055	0.032111	-47.531	-9.329	66.3737	0.08252	0.18359	-0.15234	-51.57	-5.5401	1459.198	-1.8928	0.69141	-0.038719	-74.833	-84.09	1309.9372	-1.5093	0.75244	0.056641	30.826	146.68902	547.0312	-0.83301	0.32227	0.083008
1.178	-32.371	178.458	1233.152	-1.6738	0.51855	0.17188	31.5357	118.183	879.149	-0.14961	0.22041	-0.11338	-117.922	-235.343	1170.36	-1.5262	0.47798	-0.022996	-51.5747	-36.576	90.823	0.0708	0.19043	-0.15479	-21.208	-35.7422	1489.305	-1.913	0.7017	-0.052747	-96.508	-126.827	1336.281	-1.5977	0.76367	0.059082	33.98	193.001	526.975	-0.78613	0.30078	0.07373
1.18	-4.353	190.44	1194.943	-1.6445	0.50586	0.16943	39.63	46.172	929.889	-0.22031	0.2251	-0.11182	-70.30213	-229.044	1192.304	-1.3262	0.42211	-0.082003	-13.162	-12.2704	152.5647	0.050781	0.19775	-0.16016	-13.409	22.808	1490.186	-1.9219	0.71094	-0.070313	-72.3246	-113.6281	1379.2924	-1.6499	0.77148	0.054199	22.739	146.092	494.65	-0.75171	0.29102	0.066406
1.182	-40.57	220.542	1118.92274	-1.623	0.50293	0.17236	52.387	10.174	978.295	-0.29902	0.23632	-0.10332	-59.2372	-222.335	1201.2529	-1.1461	0.36091	-0.12699	-58.277	15.4485	206.6674	0.01416	0.20313	-0.15479	-9.041	-24.624	1505.601	-1.9379	0.7207	-0.080128	-74.33	-117.26204	1395.0625	-1.7065	0.78369	0.050293	6.945	132.35	479.602	-0.71924	0.27832	0.057617
1.184	-58.332	168.0369	1112.5154	-1.582	0.49023	0.1665	42.238	-41.158	993.656	-0.38037	0.2417	-0.09375	-3.6	-196.238	1278.8605	-1.0078	0.33594	-0.1582	-25.023	-18.6784	264.7338	-0.01123	0.20703	-0.15479	46.538	9.07	1534.758	-1.9449	0.72155	-0.094486	-46.2894	-192.297	1469.866	-1.771	0.7876	0.046387	-14.227	123.507	434.224	-0.67725	0.26318	0.060059
1.186	-26.65	201.2963	1086.8017	-1.5528	0.47364	0.16211	33.282	-148.3486	1043.422	-0.46709	0.25684	-0.086133	29.035	-116.9388	1309.4421	-0.9363	0.37774	-0.1778	-24.926	34.1827	328.5343	-0.069824	0.21143	-0.1499	67.9199	9.769	1515.907	-1.9538	0.7165	-0.10501	-27.19	-164.80522	1509.94	-1.8042	0.78955	0.043945	-33.835	71.092	394.1457	-0.65967	0.25244	0.058594
1.188	-72.339	181.761	1055.2675	-1.5137	0.45801	0.1626	25.469	-173.9094	1077.838	-0.56055	0.27363	-0.077246	21.343	-103.425	1324.176	-0.91554	0.46616	-0.19093	-46.98	64.838	400.9245	-0.12134	0.2168	-0.14868	87.2667	-69.0508	1537.309	-1.961	0.71317	-0.12082	-26.243	-190.564	1522.191	-1.8687	0.78857	0.036133	-46.9515	101.9053	354.1685	-0.62012	0.23828	0.05127
1.19	-31.382	143.6751	1058.282	-1.4722	0.43799	0.15625	-11.91	-210.007	1061.335	-0.66719	0.28027	-0.062793	100.529	-105.318	1368.55	-0.91086	0.5669	-0.22988	-16.005	71.9004	507.754	-0.17285	0.22168	-0.14502	104.5474	-12.5881	1532.065	-1.959	0.70117	-0.13672	4.49	-188.31	1564.094	-1.9089	0.79223	0.034668	-66.8597	106.511	311.35584	-0.59448	0.22925	0.04834
1.192	-38.47	164.9276	1034.583	-1.4512	0.42383	0.15771	-51.051	-210.468	1067.118	-0.78564	0.29619	-0.05166	113.221	-84.901	1329.643	-0.87763	0.63522	-0.26401	-41.48846	146.327	585.8551	-0.25781	0.23633	-0.13916	91.5982	-16.7916	1510.917	-1.9521	0.6921	-0.15135	34.588	-105.892	1537.969	-1.9512	0.79492	0.022461	-64.9094	93.7804	315.2801	-0.56396	0.22119	0.044922
1.194	-60.5958	115.97014	1038.496	-1.4067	0.40283	0.15576	-63.016	-146.54	1045.979	-0.92432	0.30811	-0.039063	109.9685	-116.468	1330.39806	-0.86084	0.64893	-0.26465	-3.1398	138.1	686.822	-0.29639	0.24463	-0.13867	91.531	-5.002	1538.311	-1.9493	0.66956	-0.16101	24.93568	-126.3327	1530.749	-1.9897	0.79736	0.023438	-46.2	139.514	287.653	-0.51318	0.20654	0.039551
1.196	4.43	126.6703	1028.062	-1.3762	0.38257	0.14893	-89.74	-134.181	1009.788	-1.0777	0.32471	-0.017578	140.234	-101.195	1368.0244	-0.89429	0.62603	-0.24134	9.068	146.5542	790.347	-0.38916	0.26221	-0.12646	102.2292	57.4915	1518.984	-1.9348	0.64416	-0.16963	52.6585	-87.8326	1547.294	-2.0078	0.80273	0.026367	-67.8163	90.6374	263.771	-0.48242	0.20557	0.038574
1.198	-13.892	168.405	957.081	-1.3477	0.36914	0.13916	-111.676	-76.65	990.82	-1.2573	0.33193	0.014551	59.684	-72.376	1349.016	-0.98563	0.61206	-0.21452	-14.046	154.8	856.685	-0.47095	0.27198	-0.11621	87.9413	-11.158	1469.41	-1.9347	0.62149	-0.18007	62.7172	-46.487	1514.988	-2.0288	0.80713	0.037598	-51.8416	96.227	235.604	-0.4209	0.19971	0.030273
1.2	-17.459	132.749	948.7835	-1.2988	0.34766	0.13428	-142.025	-24.0483	958.878	-1.4546	0.35537	0.055957	59.9848	-67.24745	1401.558	-1.1053	0.60395	-0.20493	51.0032	78.538	931.9203	-0.56689	0.28027	-0.10107	93.4679	23.5063	1467.469	-1.9355	0.60352	-0.1875	34.065	-70.7669	1545.053	-2.044	0.80762	0.036133	-58.3475	106.086	211.737	-0.36108	0.20044	0.020263
1.202	15.479	171.1243	889.0927	-1.2769	0.33936	0.13281	-174.021	-25.28	991.367	-1.6737	0.38525	0.089453	50.9444	-43.473	1406.0535	-1.2009	0.59536	-0.19308	34.899	59.197	1000.445	-0.71191	0.30664	-0.081055	88.2007	59.597	1443.078	-1.9351	0.58369	-0.2003	50.4524	2.513	1534.942	-2.0605	0.80859	0.047363	-53.0083	49.27	207.485	-0.3042	0.1958	0.015137
1.204	-23.305	185.326	838.7101	-1.2319	0.32373	0.12207	-135.824	9.435	1041.3	-1.894	0.40674	0.11621	4.802	-73.593	1421.1408	-1.2969	0.58008	-0.17969	27.372	-5.912	1023.128	-0.78711	0.32031	-0.069824	61.651	42.609	1437.986	-1.9394	0.56182	-0.20967	30.5322	-25.4503	1505.9883	-2.0659	0.80908	0.056641	-26.325	84.13	191.621	-0.22803	0.18799	0.0083008
1.206	47.417	170.4828	829.485	-1.1941	0.31104	0.11792	-130.617	-2.23599999999999	1028.751	-2.0935	0.43203	0.13662	67.9113	-112.855	1506.847	-1.3734	0.56594	-0.16697	74.1063	-110.602	1075.535	-0.97021	0.34326	-0.057617	101.5168	138.557	1429.831	-1.939	0.5458	-0.21982	19.27	-56.8527	1533.5331	-2.0762	0.80566	0.061523	-53.5274	84.865	152.2612	-0.1875	0.17725	-0.0029297
1.208	68.6675	212.0644	773.759	-1.1548	0.30029	0.11523	-110.033	-40.53	1022.5939	-2.2575	0.44571	0.13623	26.22	-98.2161	1504.344	-1.4595	0.55478	-0.15299	67.8727	-131	1054.789	-1.1226	0.36597	-0.039795	59.383	106.587	1393.3436	-1.9445	0.54424	-0.22783	6.145	-3.6162	1505.48	-2.0801	0.81055	0.075684	-43.293	71.9685	136.728	-0.11377	0.1665	-0.014648
1.21	64.2896	164.3299	756.08	-1.1113	0.28711	0.10742	-45.8838	-51.316	1015.0499	-2.3547	0.45781	0.1292	-18.037	-135.714	1538.296	-1.545	0.54987	-0.14087	51.2284	-176.3975	1027.734	-1.2847	0.38916	-0.022949	38.727	68.825	1396.4055	-1.9443	0.53906	-0.229	-37.6115	-22.9571	1485.169	-2.0826	0.80664	0.091064	7.953	112.008	137.035	-0.051758	0.15308	-0.026367
1.212	93.771	162.458	721.689	-1.0825	0.28516	0.10156	-50.826	-107.089	989.621	-2.3776	0.48438	0.11328	21.1261	-120.0078	1579.026	-1.6425	0.54948	-0.12588	12.9605	-164.155	1047.569	-1.519	0.41748	-0.0019531	51.034	108.103	1375.4	-1.9404	0.54394	-0.24551	-43.399	33.5086	1527.4324	-2.0776	0.79736	0.10645	-0.805999999999997	72.53	133.4421	-0.0024414	0.13477	-0.029785
1.214	65.7548	197.846	643.59	-1.0386	0.27295	0.09375	-34.523	-157.648	1022.19	-2.3398	0.52539	0.087891	-20.794	-90.531	1568.473	-1.7417	0.55225	-0.11084	-74.997	-95.795	1025.412	-1.6465	0.43018	0.015625	10.012	43.9462	1372.638	-1.9202	0.54424	-0.2624	-45.1739	70.934	1535.5622	-2.0762	0.78125	0.12744	19.49	53.733	142.451	0.07373	0.11377	-0.04834
1.216	67.3747	186.346	616.77	-1.0034	0.26416	0.096191	-17.683	-185.125	1046.174	-2.2207	0.58135	0.060937	-10.561	-111.012	1596.345	-1.8309	0.5492	-0.10166	-57.4194	-108.538	1035.722	-1.8804	0.46777	0.053223	1.835	87.066	1383.953	-1.8859	0.53408	-0.27841	-49.9422	-9.446	1576.365	-2.073	0.76147	0.14551	45.1244	53.206	116.748	0.10254	0.10254	-0.059082
1.218	99.6239	232.708	575.507	-0.96631	0.25781	0.096191	-31.492	-257	1098.248	-2.0694	0.62412	0.03252	-14.088	-56.284	1557.9811	-1.9155	0.54235	-0.096088	-63.099	-79.6	1042.74	-2.0381	0.49682	0.090576	-44.171	88.7174	1359.192	-1.8693	0.52383	-0.28887	-31.9038	19.574	1589.23	-2.0742	0.74219	0.15967	51.4076	-0.984999999999999	107.396	0.16846	0.086426	-0.069336
1.22	37.956	221.938	550.649	-0.91797	0.24658	0.091797	4.06	-281.209	1175.65	-1.8928	0.63272	0.0043944	-92.89393	-35.997	1520.9863	-1.984	0.53593	-0.097526	-107.783	-79.5916	1037.893	-2.1821	0.51611	0.11914	-70.9714	29.195	1324.528	-1.8633	0.52051	-0.29443	-57.9461	-28.4523	1564.464	-2.0703	0.72266	0.18994	80.6865	29.8491	100.558	0.2063	0.064209	-0.074707
1.222	99.1922	187.656	566.771	-0.89404	0.23682	0.081055	8.377	-283.605	1198.032	-1.6996	0.59473	-0.024219	-72.1628	-30.317	1544.1	-2.0413	0.51718	-0.10094	-131.783	-97.892	1077.819	-2.332	0.55566	0.11523	-40.748	84.7752	1283.565	-1.8622	0.5331	-0.3043	-79.807	-64.3304	1587.058	-2.0762	0.71387	0.20459	71.6451	24.3305	77.01146	0.24658	0.05127	-0.086426
1.224	61.96812	204.609	527.5771	-0.84521	0.22021	0.083008	8.525	-290.672	1257.892	-1.4878	0.54639	-0.063965	-93.9375	30.4744	1520.808	-2.084	0.49414	-0.10352	-141.209	-31.154	1067.941	-2.3784	0.5708	0.10449	-69.6007	61.507	1248.132	-1.8512	0.53653	-0.30996	-60.001	-2.181	1558.059	-2.082	0.70996	0.21875	41.949	26.15	77.367	0.28662	0.027344	-0.096191
1.226	17.132	138.134	526.694	-0.80494	0.20874	0.083252	60.6842	-229.334	1288.951	-1.294	0.4752	-0.10479	-95.821	-9.2296	1547.187	-2.1204	0.48379	-0.10725	-98.171	-19.348	1028.608	-2.3906	0.64063	0.084473	-57.774	75.044	1247.7225	-1.834	0.54746	-0.31778	-96.348	-36.5695	1505.5871	-2.073	0.7063	0.2334	60.9164	90.069	67.35728	0.30566	0.016602	-0.10156
1.228	23.893	139.029	514.386	-0.77148	0.19922	0.075684	37.079	-183.998	1267.11615	-1.1336	0.43447	-0.11983	-27.755	-12.72317	1540.322	-2.153	0.47065	-0.11094	-51.0725	-36.709	1007.944	-2.3325	0.68505	0.069581	-49.647	165.619	1226.514	-1.8109	0.55166	-0.32295	-77.586	-9.3441	1500.968	-2.062	0.69189	0.23047	60.3235	58.931	69.6031	0.33984	-0.003418	-0.10986
1.23	-29.741	143.556	470.339	-0.7207	0.18701	0.069824	62.225	-160.1874	1314.899	-1.0352	0.42666	-0.11435	-83.2171	14.4707	1506.8897	-2.1755	0.45286	-0.1173	-54.667	-49.311	993.977	-2.2417	0.71533	0.05127	-51.362	115.8933	1212.998	-1.7769	0.55225	-0.32764	-88.202	27.0609	1461.6207	-2.0249	0.67627	0.23877	39.12	59.024	90.269	0.35596	-0.021241	-0.11353
1.232	-30.461	114.902	433.237	-0.69629	0.18164	0.068359	124.813	-108.402	1335.412	-0.99355	0.48809	-0.12744	-66.2428	-13.58889	1522.596	-2.1924	0.43594	-0.1213	-31.733	-136.179	1022.772	-2.0737	0.72314	0.026855	-8.611	160.036	1201.488	-1.7555	0.54131	-0.33457	-101.394	-10.9301	1471.344	-2.0117	0.66455	0.24219	10.041	56.18	83.891	0.36768	-0.022949	-0.12549
1.234	-12.856	132.94624	380.1609	-0.65234	0.16748	0.061523	86.4607	-135.519	1350.085	-0.94873	0.55322	-0.13916	-1.663	52.852	1511.8044	-2.1953	0.41699	-0.12598	-21.031	-170.948	1092.622	-1.9585	0.69971	0.014648	-6.403	170.465	1182.73	-1.7309	0.53818	-0.33203	-44.2878	71.621	1489.948	-1.9922	0.65332	0.24561	29.537	12.2765	78.899	0.38672	-0.036133	-0.13135
1.236	-85.7348	135.092	349.072	-0.6189	0.1565	0.053223	112.729	-120.3	1382.418	-0.89219	0.60234	-0.16524	-31.473	68.3725	1516.494	-2.2003	0.3881	-0.12728	-45.411	-183.34	1115.599	-1.6816	0.62695	-0.033203	0.845999999999997	142.502	1169.777	-1.7149	0.5292	-0.32734	-56.032	76.106	1459.462	-1.9727	0.6543	0.24292	15.172	46.484	64.563	0.38721	-0.040527	-0.12842
1.238	-55.9469	117.684	363.737	-0.59521	0.14355	0.049805	103.979	-82.067	1340.904	-0.83428	0.61943	-0.16533	27.67	27.882	1559.24949	-2.1946	0.36346	-0.13296	-46.83	-258.971	1169.384	-1.4724	0.57544	-0.062012	37.636	225.32	1128.993	-1.6979	0.51866	-0.31748	-48.6231	58.355	1457.356	-1.9414	0.6582	0.24658	-11.874	30.073	39.411	0.38916	-0.046387	-0.13184
1.24	-70.6877	142.049	335.48	-0.56299	0.12891	0.043457	55.348	-98.486	1361.461	-0.83311	0.60381	-0.14502	50.474	36.73585	1558.567	-2.1895	0.34106	-0.13631	-44.485	-274.553	1183.834	-1.2944	0.5415	-0.092285	26.467	208.965	1075.661	-1.6836	0.50586	-0.30469	1.815	96.787	1419.388	-1.8828	0.6543	0.2373	-17.266	24.25106	30.165	0.38233	-0.044434	-0.1333
1.242	-80.439	106.3	315.122	-0.54248	0.12451	0.041504	74.2239	-60.24	1355.37	-0.89746	0.60098	-0.1211	31.265	-31.0663	1560.891	-2.1914	0.3238	-0.13691	-24.902	-299.741	1167.0114	-1.1348	0.5083	-0.11523	9.482	189.3122	1058.974	-1.6752	0.49902	-0.29385	-20.419	47.081	1386.216	-1.8555	0.64941	0.23291	-41.08	68.479	25.078	0.37549	-0.040527	-0.13232
1.244	-57.6515	113.651	296.289	-0.5083	0.11328	0.032715	14.312	-63.516	1358.7894	-1.0151	0.60596	-0.093262	91.815	-29.662	1582.347	-2.1929	0.31006	-0.13281	2.14100000000001	-319.143	1223.2379	-1.084	0.51367	-0.11182	33.885	222.4062	1037.4896	-1.6637	0.49004	-0.27578	11.857	80.572	1384.589	-1.7954	0.63916	0.22998	-40.838	45.099	27.7706	0.35156	-0.043457	-0.125
1.246	-73.5896	126.432	259.819	-0.46826	0.10962	0.038086	20.424	-119.9087	1429.392	-1.1555	0.61875	-0.080664	59.748	3.3158	1545.554	-2.1971	0.29625	-0.13799	-0.116	-222.451	1255.0001	-1.0386	0.55713	-0.104	59.822	135.981	1033.8337	-1.6516	0.48223	-0.25703	13.9274	123.08	1359.7595	-1.7585	0.63013	0.22901	-32.461	37.043	61.364	0.33838	-0.041016	-0.1167
1.248	-48.7406	110.816	237.913	-0.42773	0.11035	0.033691	8.828	-111.7584	1478.654	-1.282	0.62989	-0.061133	83.1837	-32.1222	1527.993	-2.2015	0.28912	-0.13391	37.034	-209.887	1298.80283	-1.0645	0.62549	-0.1062	69.8971	178.5889	1022.083	-1.6401	0.47315	-0.2372	12.3518	66.6902	1350.74765	-1.728	0.62012	0.2251	-61.9612	19.0518	55.683	0.29199	-0.048828	-0.1084
1.25	-13.724	148.689	202.573	-0.35303	0.10986	0.023926	-24.862	-153.737	1518.937	-1.3875	0.63301	-0.053711	122.9176	5.721	1501.816	-2.2109	0.2774	-0.13623	79.559	-169.894	1343.786	-1.0918	0.70313	-0.11768	89.546	172.4733	1000.184	-1.627	0.45801	-0.21631	51.3884	88.6878	1345.566	-1.6929	0.60791	0.22803	-76.3273	-24.8003	58.744	0.25488	-0.040039	-0.10327
1.252	-79.941	139.5	174.418	-0.31641	0.1123	0.019043	-26.2386	-171.253	1559.574	-1.4834	0.63535	-0.039648	62.551	13.355	1442.224	-2.2235	0.27402	-0.13465	129.928	-127.766	1319.42	-1.0898	0.7373	-0.14551	73.947	133.59	995.018	-1.6149	0.44746	-0.1958	5.709	36.653	1326.672	-1.668	0.60547	0.22559	-31.52	9.116	53.2724	0.22021	-0.039063	-0.093262
1.254	-25.144	116.989	187.378	-0.22998	0.11084	0.010742	-25.653	-123.1972	1533.036	-1.5757	0.62939	-0.03125	101.8588	-0.00200000000000244	1441.4079	-2.2358	0.29248	-0.12207	156.698	-185.7332	1335.007	-1.0835	0.71729	-0.14063	70.47911	209.919	962.868	-1.5983	0.43613	-0.1751	14.68	8.078	1320.225	-1.6406	0.58789	0.22168	-54.1965	12.416	28.5543	0.16602	-0.032715	-0.089355
1.256	-12.078	115.482	167.66	-0.16724	0.11621	-0.0004883	-43.839	-159.3205	1532.419	-1.6726	0.62334	-0.034277	116.881	73.879	1427.826	-2.2453	0.31542	-0.12411	152.8861	-145.749	1338.771	-1.1284	0.67627	-0.11182	62.0204	183.584	917.2134	-1.5827	0.42675	-0.15635	53.0297	72.4725	1289.563	-1.6111	0.57349	0.22241	-46.658	5.5072	42.1029	0.1377	-0.025879	-0.077148
1.258	-18.931	57.791	164.624	-0.10547	0.1123	-0.0097656	8.267	-125.382	1537.993	-1.766	0.61855	-0.033789	57.886	48.327	1414.2037	-2.23	0.33055	-0.13436	151.198	-115.552	1319.0298	-1.207	0.65674	-0.094238	64.53	180.1755	885.4279	-1.5611	0.4126	-0.13945	26.72214	34.847	1236.5252	-1.5874	0.5708	0.22266	-30.051	31.3857	31.4781	0.08252	-0.018555	-0.072266
1.26	29.491	43.8	180.817	-0.010254	0.095703	-0.024902	-8.671	-100.322	1514.457	-1.8582	0.61934	-0.037696	126.602	65.002	1423.425	-2.1909	0.3337	-0.14648	140.507	-129.205	1341.67	-1.2964	0.65283	-0.09082	43.277	214.717	857.9266	-1.5313	0.40332	-0.12451	33.227	65.801	1225.1366	-1.5581	0.55127	0.22266	-49.001	0.440800000000001	24.5195	0.03833	-0.0097654	-0.064453
1.262	2.538	21.0111	157.898	0.02002	0.086914	-0.032227	-38.873	-133.722	1543.264	-1.9441	0.61445	-0.038867	46.735	100.981	1364.902	-2.1582	0.33145	-0.14892	123.01	-65.277	1330.333	-1.3901	0.66064	-0.083496	4.196	172.42358	831.5243	-1.5015	0.3917	-0.11133	14.701	111.85304	1191.3952	-1.5405	0.5415	0.22266	-29.948	20.9178	45.555	-0.00048828	-0.003418	-0.056152
1.264	31.609	-7.7947	169.763	0.091797	0.069336	-0.050293	-5.829	-80.896	1546.984	-2.0195	0.61719	-0.046875	33.679	66.638	1365.359	-2.1499	0.34033	-0.146	65.6038	-100.159	1350.889	-1.4331	0.65674	-0.07959	-7.617	231.944	814.789	-1.4691	0.38007	-0.097656	-9.196	90.8023	1200.263	-1.5122	0.52979	0.21875	3.663	35.0047	39.4366	-0.049316	0.0053711	-0.052246
1.266	69.0231	13.63	134.407	0.13964	0.060303	-0.063477	-50.412	-84.0228	1508.33835	-2.0684	0.6167	-0.057129	64.308	109.508	1356.08	-2.1566	0.36573	-0.14346	52.416	-117.156	1418.4085	-1.521	0.65088	-0.07666	-7.132	228.917	776.732	-1.4285	0.36563	-0.083203	24.584	179.542	1193.372	-1.4871	0.5149	0.2229	-0.611000000000004	-11.4854	54.424	-0.072754	0.0087891	-0.05127
1.268	46.3943	11.219	105.9692	0.18066	0.049316	-0.077148	-16.728	-57.2121	1514.2443	-2.101	0.61797	-0.076074	-23.358	105.028	1310.9594	-2.1453	0.39463	-0.146	58.863	-77.3944	1445.204	-1.6032	0.64575	-0.076905	-45.8428	181.451	766.237	-1.3905	0.35166	-0.07168	-15.221	167.473	1142.3153	-1.4688	0.50537	0.21924	8.559	5.746	40.885	-0.11279	0.017578	-0.047363
1.27	85.2339	18.333	119.921	0.23047	0.031738	-0.094238	-18.803	20.8615	1486.4533	-2.1194	0.62148	-0.095215	-10.531	80.5316	1322.4053	-2.1067	0.41651	-0.15069	57.04	-124.876	1491.415	-1.6948	0.64502	-0.073242	-46.199	208.355	720.521	-1.3472	0.33838	-0.05957	-30.2596	142.428	1131.85	-1.4331	0.48877	0.22021	31.858	-6.1799	13.8436	-0.13037	0.027588	-0.046631
1.272	63.5979	47.257	92.65	0.25098	0.031738	-0.098145	-17.422	7.111	1475.69107	-2.1228	0.63565	-0.11397	-44.439	105.9299	1275.2706	-2.057	0.42265	-0.14961	34.876	-99.3561	1526.699	-1.8164	0.64746	-0.082031	-51.538	171.5411	653.6786	-1.3026	0.32617	-0.050488	-38.746	190.253	1080.226	-1.4136	0.48193	0.21436	40.379	0.9229	13.7883	-0.14453	0.036621	-0.043945
1.274	29.853	31.5176	85.861	0.29248	0.018555	-0.11328	41.406	29.4167	1514.747	-2.1152	0.64063	-0.13525	-87.9149	49.841	1275.543	-1.999	0.41895	-0.14941	42.988	-107.3071	1521.238	-1.8823	0.64697	-0.078613	-62.2919	189.933	614.2377	-1.2601	0.30938	-0.041113	-46.5892	143.6336	1042.01227	-1.3765	0.46924	0.21484	52.5605	39.611	18.5064	-0.15381	0.044434	-0.046387
1.276	59.5521	32.2078	101.492	0.31518	0.0070801	-0.12427	20.386	17.5356	1513.184	-2.0959	0.64238	-0.1583	-34.06	56.624	1252.82	-1.9456	0.41455	-0.15088	36.243	-172.152	1569.39	-1.9824	0.6582	-0.095703	-47.2309	232.681	568.7934	-1.207	0.29766	-0.032129	-27.303	174.737	1019.42248	-1.3457	0.45215	0.2102	45.217	25.1085	17.344	-0.15381	0.050293	-0.050293
1.278	12.193	21.96506	75.404	0.33154	-0.0048828	-0.12695	48.011	-58.6659	1550.085	-2.0726	0.63369	-0.17734	-81.6114	69.6433	1210.3127	-1.8984	0.4043	-0.14834	37.699	-98.244	1557.884	-2.0388	0.66187	-0.1106	-73.273	174.178	581.5625	-1.1614	0.29209	-0.020899	-67.0031	190.162	974.0253	-1.312	0.43604	0.20215	54.533	31.1447	36.4543	-0.14648	0.064941	-0.055664
1.28	23.297	-3.15704	90.447	0.34961	-0.0097656	-0.14209	118.818	-34.35601	1568.453	-2.0507	0.62041	-0.19024	-73.83826	51.62304	1219.9428	-1.8563	0.40508	-0.14639	26.658	-104.655	1520.886	-2.0776	0.67822	-0.12793	-68.2785	195.568	559.874	-1.1069	0.28027	-0.016113	-60.886	132.5044	965.44777	-1.272	0.42041	0.19434	55.7509	30.353	23.9735	-0.13501	0.078858	-0.062256
1.282	51.3079	30.5948	59.783	0.35986	-0.015137	-0.14648	85.2993	-49.0913	1529.526	-2.0231	0.60371	-0.21025	-33.162	109.486	1198.689	-1.8086	0.39981	-0.14463	12.33	-81.424	1530.375	-2.1152	0.69629	-0.15771	-59.8727	166.546	519.8	-1.0632	0.27256	-0.008203	-21.075	188.547	942.989	-1.2515	0.4126	0.19336	50.4037	-10.8231	40.179	-0.11963	0.07959	-0.074707
1.284	-14.832	41.867	23.353	0.3667	-0.022949	-0.15088	114.1751	-51.015	1520.4102	-1.9985	0.58838	-0.22119	-71.60077	128.15	1157.099	-1.7598	0.3916	-0.13965	-10.808	13.095	1514.1773	-2.125	0.70313	-0.17139	-50.7944	135.832	521.526	-1.016	0.26455	0.0024414	-68.9705	176.44	935.674	-1.209	0.3877	0.18652	33.701	-10.4083	53.869	-0.096191	0.094727	-0.08252
1.286	4.141	50.929	26.27	0.36767	-0.02832	-0.15381	112.8509	-2.5862	1487.5563	-1.9678	0.57207	-0.23779	-17.551	133.29	1147.052	-1.7125	0.38555	-0.13261	-37.917	-45.697	1530.431	-2.1245	0.71924	-0.19238	-54.6462	174.279	498.012	-0.96719	0.25908	0.0098629	-58.2356	165.926	945.643	-1.1762	0.37304	0.18457	21.666	-11.5357	21.8311	-0.085938	0.098633	-0.085938
1.288	-39.487	55.858	7.096	0.36133	-0.033203	-0.15967	83.283	-53.109	1495.4105	-1.9465	0.55654	-0.24473	-14.047	199.274	1112.357	-1.6632	0.37568	-0.12774	-34.067	-9.107	1555.582	-2.115	0.72192	-0.21289	-54.7729	140.62	481.627	-0.92685	0.25244	0.014746	-9.544	190.507	906.006	-1.1499	0.36182	0.17627	26.755	-9.9907	26.439	-0.049316	0.10791	-0.097168
1.29	-72.6453	24.98023	27.98173	0.35156	-0.033203	-0.16406	129.8614	-44.516	1530.978	-1.9305	0.53975	-0.24668	-41.745	189.629	1109.113	-1.6163	0.37021	-0.11992	-34.12	5.266	1519.56	-2.0991	0.7251	-0.23486	-6.563	144.4863	451.151	-0.87695	0.24609	0.014648	-29.761	120.2109	882.251	-1.1074	0.34375	0.17188	14.037	41.076	4.8844	-0.027832	0.11767	-0.10864
1.292	-7.431	16.8811	41.567	0.3418	-0.03125	-0.15796	97.3156	-30.7389	1499.497	-1.9248	0.52373	-0.24863	9.994	207.515	1094.606	-1.5694	0.3583	-0.1081	-18.808	-50.348	1543.872	-2.0659	0.72217	-0.25342	-16.75	149.8552	375.6661	-0.83057	0.24502	0.026074	-10.432	156.806	837.529	-1.0874	0.33838	0.16748	-24.355	18.2978	5.792	-0.00048828	0.12646	-0.11719
1.294	-47.9732	-0.3623	27.4054	0.32178	-0.020996	-0.16016	64.139	-61.298	1511.688	-1.9331	0.51221	-0.24854	-23.62	215.778	1043.1818	-1.5288	0.35059	-0.098633	1.793	37.658	1520.902	-2.0457	0.72095	-0.27197	-6.101	95.324	356.4077	-0.78545	0.23623	0.033203	20.296	187.564	795.1332	-1.0371	0.32764	0.15967	-25.715	28.03	37.1976	0.033203	0.13184	-0.13037
1.296	-50.1356	-22.2366	58.478	0.29492	-0.030273	-0.14453	113.421	23.833	1482.847	-1.9441	0.50332	-0.2418	-2.935	174.8615	1043.649	-1.493	0.34063	-0.085547	-2.198	33.441	1488.3971	-2.0249	0.72119	-0.2793	30.606	126.1315	341.354	-0.73701	0.23975	0.039453	-4.342	162.2765	789.386	-1.0037	0.31714	0.15113	-23.447	35.691	17.5168	0.057129	0.14209	-0.13818
1.298	-36.0807	1.665	42.934	0.27881	-0.021973	-0.14453	31.947	46.0828	1435.6231	-1.9652	0.50088	-0.2375	63.7428	201.5638	1002.17	-1.4585	0.33272	-0.072558	32.965	32.7935	1512.1855	-1.9956	0.7124	-0.29736	32.46	113.5575	312.213	-0.6959	0.23828	0.043652	37.464	213.822	748.939	-0.97363	0.31006	0.14844	-37.934	3.47	39.693	0.077637	0.15088	-0.14551
1.3	-90.214	4.409	13.9541	0.23486	-0.0092773	-0.1333	51.958	64.233	1411.22	-1.9816	0.49932	-0.23281	32.856	188.1237	969.796	-1.4272	0.32646	-0.065918	63.426	73.2469	1517.285	-1.9902	0.70508	-0.29883	64.166	84.4525	311.748	-0.64014	0.23779	0.049805	56.015	182.7112	699.145	-0.92969	0.29688	0.13574	-41.8653	24.6689	76.463	0.093262	0.16064	-0.15088
1.302	-39.057	8.372	24.4923	0.19946	-0.0046387	-0.12671	67.412	125.235	1366.85	-2.0055	0.48945	-0.22187	83.7805	179.5608	940.4775	-1.4019	0.32139	-0.048536	91.632	-36.288	1552.692	-1.9629	0.69727	-0.30859	62.4719	125.958	280.065	-0.58623	0.2419	0.050977	50.918	158.975	677.215	-0.90381	0.29297	0.13477	-59.4484	-11.61	69.185	0.097168	0.16943	-0.15186
1.304	-56.051	31.927	-5.9295	0.1665	0.00097656	-0.11572	19.298	63.616	1378.8464	-2.0313	0.49219	-0.20313	70.8806	212.316	909.035	-1.3726	0.31689	-0.041992	118.5928	-27.491	1569.126	-1.9561	0.69336	-0.3125	57.9636	88.6656	248.716	-0.5374	0.23984	0.056836	39.91429	203.161	638.281	-0.86865	0.27393	0.12109	-44.03	-33.464	72.923	0.10205	0.17871	-0.16016
1.306	-60.9951	17.4037	21.21287	0.11182	0.016113	-0.10254	72.978	81.207	1407.029	-2.0612	0.50537	-0.19658	33.489	174.8652	907.8662	-1.341	0.31133	-0.028613	98.0899	-29.4322	1537.688	-1.9507	0.68604	-0.31299	86.0362	90.4697	238.638	-0.48545	0.24101	0.062304	34.3869	143.4599	622.265	-0.83594	0.26783	0.11841	-34.329	5.847	57.8749	0.095703	0.18823	-0.15552
1.308	7.237	35.399	29.1159	0.085449	0.018555	-0.097656	17.496	89.285	1384.759	-2.0765	0.51846	-0.20137	102.708	176.1755	901.778	-1.3128	0.30517	-0.018359	87.9871	-80.719	1543.562	-1.9526	0.67822	-0.30859	78.62289	116.5374	197.5077	-0.43906	0.2375	0.06836	79.0105	169.191	589.692	-0.80469	0.26172	0.11475	-67.5972	-2.537	77.602	0.091797	0.19141	-0.15723
1.31	-29.3271	43.075	9.971	0.022461	0.03125	-0.078125	-11.507	46.327	1379.364	-2.0659	0.51728	-0.20488	72.0311	179.185	865.507	-1.2792	0.29971	-0.009375	113.7319	-9.6798	1535.496	-1.9546	0.67822	-0.30615	49.894	83.967	190.831	-0.3916	0.23438	0.071777	43.533	165.294	526.8874	-0.76563	0.25244	0.10449	-26.748	21.3317	141.4388	0.070801	0.20459	-0.15283
1.312	-2.381	32.6704	27.24241	-0.017578	0.044678	-0.067383	28.388	87.941	1355.24	-2.0334	0.50606	-0.20361	59.3632	154.2978	869.932	-1.2487	0.2919	0.0046875	111.5832	-35.9102	1487.895	-1.9688	0.67139	-0.30127	37.923	116.638	170.788488	-0.34951	0.23174	0.071289	20.143	142.86111	503.553	-0.74658	0.24854	0.099121	-6.807	44.64	165.379	0.052246	0.21338	-0.14893
1.314	17.839	43.226	33.7328	-0.061523	0.050781	-0.062988	-57.461	64.0879	1313.7061	-2.0229	0.49854	-0.20801	56.6932	199.531	837.338	-1.2188	0.2832	0.010254	119.2971	-38.901	1468.1293	-1.9724	0.6731	-0.29638	37.5912	91.27	148.229	-0.30586	0.23106	0.078516	37.976	204.603	484.7674	-0.71045	0.2373	0.093262	-7.709	14.0581	211.965512	0.0068359	0.2207	-0.13428
1.316	-3.938	34.37834	19.8765	-0.10596	0.066406	-0.049316	-27.748	42.7692	1285.1966	-2.0143	0.50029	-0.20976	-8.332	184.18	802.713	-1.1827	0.28154	0.02041	120.693	41.7882	1424.0081	-1.9761	0.6665	-0.28662	9.067	38.0295	159.751	-0.2582	0.2377	0.08164	10.689	182.977	459.743	-0.68676	0.22998	0.089112	4.763	31.4588	284.219	-0.04126	0.22754	-0.12671
1.318	53.972	46.732	23.69126	-0.12891	0.075684	-0.049805	-12.375	87.31965	1256.17601	-2.0085	0.50957	-0.2083	12.997	186.919	759.726	-1.1488	0.27832	0.029688	80.38	-1.454	1424.907	-1.9858	0.66455	-0.27051	-6.427	59.545	137.443	-0.21328	0.24336	0.082715	23.668	159.686	476.417	-0.65674	0.2251	0.087891	6.191	22.0706	355.808	-0.09082	0.23145	-0.12012
1.32	45.354	71.542	10.8075	-0.16748	0.099121	-0.047852	-57.3	52.1259	1274.7826	-1.985	0.5166	-0.20635	-22.1172	207.831	713.895	-1.1168	0.27285	0.036328	82.737	63.951	1442.038	-1.9937	0.66846	-0.26563	-2.919	26.4866	124.9754	-0.16162	0.24561	0.080566	2.498	151.263	441.208	-0.62549	0.21533	0.081055	-10.862	53.2382	470.522	-0.16553	0.23584	-0.1123
1.322	45.1247	54.261	31.61378	-0.18676	0.10815	-0.044922	-6.96	94.19	1286.986	-1.9569	0.52754	-0.20351	-43.441	172.7489	680.0945	-1.083	0.26836	0.047168	89.818	82.282	1403.229	-1.9956	0.67139	-0.2666	-19.866	38.5116	116.86	-0.11328	0.24678	0.087598	-34.9758	80.5422	407.946	-0.60107	0.21631	0.080078	12.887	133.384	544.883	-0.2085	0.23486	-0.10693
1.324	75.5784	50.646	61.942	-0.20361	0.11963	-0.039551	-10.647	121.587	1271.285	-1.9136	0.51807	-0.2085	-37.865	182.25837	653.827	-1.0503	0.26318	0.055664	81.992	21.6788	1378.303	-1.9687	0.66455	-0.27221	-47.7406	60.128	89.7276	-0.059473	0.24951	0.089649	-13.431	94.179	396.197	-0.55713	0.20459	0.066895	3.044	142.204	625.8469	-0.29102	0.23633	-0.10156
1.326	39.337	26.098	31.763	-0.21338	0.13867	-0.04248	0.997	102.999	1242.568	-1.8709	0.51465	-0.20557	-83.8125	186.045	605.899	-1.0147	0.26113	0.066016	84.153	88.125	1355.0753	-1.9453	0.64844	-0.26221	-52.0658	15.9305	87.2075	-0.0036132	0.25108	0.091992	-34.191	105.541	335.698	-0.51587	0.20947	0.071777	4.06	170.005	740.7836	-0.35717	0.24316	-0.091309
1.328	65.3432	-10.9948	52.404	-0.21533	0.146	-0.049805	55.487	170.798	1199.796	-1.8293	0.50605	-0.20303	-58.7048	156.4684	595.69	-0.97744	0.26436	0.06914	49.004	55.928	1324.4506	-1.9272	0.63428	-0.25244	-55.4157	46.749	73.429	0.055176	0.25088	0.098143	-63.753	69.1096	316.20234	-0.47412	0.20947	0.072266	14.73579	172.99	837.0682	-0.42871	0.24756	-0.084473
1.33	62.9281	-5.8116	54.0614	-0.21387	0.16162	-0.054199	21.089	160.432	1173.593	-1.7891	0.49551	-0.20029	-42.4723	185.901	552.979	-0.93994	0.2624	0.070704	45.129	59.5545	1331.081	-1.9238	0.63379	-0.25195	-57.8565	36.083	56.4459	0.10449	0.24707	0.094238	-56.0934	105.3022	290.32655	-0.40088	0.2041	0.062988	13.1123	99.136	919.9993	-0.54004	0.25439	-0.07373
1.332	23.875	-17.5092	53.63	-0.20215	0.17896	-0.062989	60.904	167.61	1158.753	-1.7517	0.48877	-0.19228	-83.496	160.601	518.8189	-0.89863	0.26133	0.082422	13.166	131.457	1304.93	-1.9102	0.625	-0.24268	-34.808	29.5815	88.007	0.15547	0.24317	0.10264	-70.3883	86.9775	259.8642	-0.37158	0.19971	0.058105	44.353	70.53	1002.702	-0.60645	0.26074	-0.061035
1.334	57.74	-1.2067	65.458	-0.18848	0.19141	-0.069336	85.44307	210.195	1113.8994	-1.7148	0.48047	-0.18408	-34.734	152.592	506.746	-0.86523	0.25488	0.087402	-29.135	51.995	1289.5939	-1.8826	0.62622	-0.24219	-44.915	71.722	71.838	0.19737	0.2417	0.10918	-48.64898	86.135	261.268	-0.2998	0.19531	0.050781	33.394	-0.305	1043.728	-0.74268	0.27148	-0.042969
1.336	22.732	25.1009	36.468773	-0.16162	0.20557	-0.07666	38.878	151.34	1085.5311	-1.6813	0.47461	-0.17119	-63.5332	192.1	454.382	-0.82676	0.25703	0.0875	-21.024	79.8243	1281.205	-1.8516	0.61816	-0.23877	-58.2357	46.758	66.52	0.24111	0.23857	0.10801	-41.2217	101.11	244.651	-0.24243	0.19312	0.042969	44.974	-83.464	1106.626	-0.87109	0.28174	-0.022949
1.338	-14.905	17.3914	48.9896	-0.14795	0.21338	-0.083984	67.247	166.9023	1080.835	-1.6425	0.47198	-0.1625	-88.02	156.788	459.0057	-0.78584	0.25771	0.091406	-33.971	76.2512	1245.03	-1.7969	0.58691	-0.22754	-35.049	62.234	75.113	0.27842	0.22168	0.11543	-67.0099	48.1917	240.696	-0.19238	0.18506	0.034668	69.6261	-130.999	1133.147	-1.0137	0.29102	0.0024414
1.34	-0.611000000000004	14.231	79.914	-0.10889	0.22607	-0.094727	55.54	174.751	1052.866	-1.6077	0.46534	-0.14883	-22.312	176.698	435.8262	-0.74639	0.25889	0.091016	-61.77	17.731	1232.7076	-1.7656	0.58105	-0.22412	-33.74	66.286	44.569	0.31396	0.21338	0.11719	-52.668	71.377	214.429	-0.12256	0.17529	0.023926	39.4667	-207.595	1095.093	-1.2334	0.30859	0.037109
1.342	-45.555	0.542999999999999	70.249	-0.074952	0.23657	-0.10327	51.419	137.2519	1038.33	-1.5738	0.45664	-0.1416	-63.9939	153.726	400.9571	-0.71143	0.25469	0.09668	-31.729	103.998	1203.505	-1.7163	0.55811	-0.22754	-26.873	18.4477	49.4917	0.33828	0.19521	0.11992	-33.177	74.135	164.309	-0.086426	0.16602	0.014648	28.5578	-214.176	1100.828	-1.3574	0.32227	0.0625
1.344	-43.2099	-14.934	90.774	-0.045898	0.24805	-0.1084	88.6687	187.1036	1020.651	-1.5405	0.44971	-0.12744	-22.183	107.1879	404.117	-0.66943	0.24658	0.10107	-28.781	84.0301	1186.7448	-1.6736	0.53687	-0.21485	-16.273	42.331	43.859	0.35791	0.19033	0.12364	-17.196	64.483	141.9996	-0.025391	0.15234	0.0014648	-31.2057	-175.292	1095.245	-1.627	0.354	0.11279
1.346	-31.862	-17.864	98.709	-0.0024414	0.25635	-0.13184	36.827	145.3763	997.359	-1.5038	0.4376	-0.11973	2.542	123.4906	366.677	-0.63115	0.24356	0.099609	-19.882	100.814	1161.0913	-1.6367	0.51758	-0.21045	-17.751	31.051	22.4419	0.36729	0.17002	0.12559	-18.849	91.077	124.9185	0.022217	0.14087	-0.010986	-101.61	-164.824	1098.437	-1.8401	0.3855	0.16162
1.348	-70.761	-29.998	106.106	0.013184	0.2583	-0.12842	64.6132	139.0797	988.256	-1.4651	0.43154	-0.10693	-32.641	97.6934	349.094	-0.58926	0.23877	0.1	20.071	178.833	1127.1722	-1.5835	0.49268	-0.20459	1.172	14.0416	43.341	0.37149	0.15576	0.13633	-35.8535	60.8173	121.253	0.061035	0.12988	-0.028809	-84.7771	-117.917	1096.36	-2.0562	0.41846	0.19922
1.35	-29.654	-53.6933	126.868	0.044922	0.27344	-0.1416	75.0478	170.9226	940.338	-1.4276	0.41982	-0.09834	29.728	91.0599	341.683	-0.54356	0.23447	0.1043	4.373	134.621	1096.782	-1.5542	0.48486	-0.2002	30.945	33.0369	50.038	0.37109	0.15039	0.13525	5.55	64.188	143.2935	0.1123	0.10742	-0.046875	-117.127	-105.324	1039.779	-2.3335	0.46875	0.23486
1.352	-40.168	-34.5572	111.731	0.057617	0.27417	-0.1477	10.267	138.71415	912.101	-1.3932	0.41074	-0.08916	33.363	104.403	293.469	-0.49805	0.23203	0.11191	14.804	197.674	1107.8046	-1.4995	0.45605	-0.19287	37.058	-0.887	43.789	0.36016	0.15117	0.13515	21.867	79.353	114.317	0.14355	0.10254	-0.056152	-180.836	-106.673	1062.636	-2.457	0.48779	0.21924
1.354	-55.8	-26.6106	146.114	0.060059	0.28125	-0.1543	43.965	174.9422	886.773	-1.3535	0.40234	-0.084473	43.064	69.0466	260.235	-0.45557	0.23096	0.10791	26.508	221.238	1082.9474	-1.4585	0.44092	-0.1809	50.637	7.2241	56.843	0.35508	0.14433	0.14151	22.461	23.7985	114.674	0.19922	0.083984	-0.072754	-176.977	-36.882	1092.751	-2.5776	0.52979	0.19336
1.356	-10.912	12.8489	222.3868	0.052246	0.28809	-0.15527	13.526	191.525	850.369	-1.3223	0.39981	-0.069824	82.7469	81.439	212.114	-0.4124	0.22656	0.11036	25.773	171.3255	1061.0186	-1.4238	0.42285	-0.17139	56.2784	31.7125	43.066	0.34765	0.13925	0.15518	52.344	22.946	112.175	0.23145	0.072021	-0.087158	-181.662	4.558	1071.415	-2.577	0.54663	0.15796
1.358	-55.8546	28.0171	282.68	0.039551	0.28857	-0.15723	-20.982	160.602	844.254	-1.2824	0.39414	-0.062793	41.937	88.9693	183.3	-0.36114	0.23008	0.11113	34.784	231.512	1020.232	-1.373	0.39453	-0.15527	53.9664	-2.22103	50.664	0.32051	0.14424	0.16075	39.065	7.693	75.3261	0.25586	0.053711	-0.1001	-150.991	30.926	1075.4073	-2.5054	0.58252	0.125
1.36	-63.23445	10.7885	370.456	0.0024414	0.2915	-0.15088	4.408	192.436	802.547	-1.2461	0.3914	-0.05459	63.5816	89.8685	194.848	-0.31114	0.22656	0.11387	34.146	173.508	985.677	-1.3496	0.38086	-0.14648	68.8043	34.814	60.778	0.29199	0.14209	0.15869	53.421	7.9849	82.667	0.29297	0.040039	-0.11279	-104.673	46.526	1025.507	-2.3101	0.62256	0.099609
1.362	-40.3769	41.3672	438.245	-0.036132	0.29712	-0.14551	-66.8399	166.2202	764.075	-1.2163	0.38428	-0.046387	71.0566	117.669	184.575	-0.25967	0.22314	0.11699	56.808	166.2295	976.019	-1.3086	0.36719	-0.13037	59.9715	12.821	45.238	0.26445	0.14053	0.15967	73.8284	66.014	74.3783	0.3042	0.034668	-0.11963	-103.051	-32.806	1003.28	-2.1909	0.62354	0.085449
1.364	-82.69	64.7993	512.9776	-0.084961	0.30078	-0.13623	-35.433	171.1248	734.287	-1.1772	0.37891	-0.039551	29.928	105.557	168.679	-0.20752	0.22021	0.11621	77.31162	218.268	929.0177	-1.279	0.35327	-0.12402	52.51	-1.92797	51.305	0.24883	0.13887	0.1626	27.0798	36.66876	75.71841	0.33447	0.020508	-0.13477	-67.6117	-99.918	1047.4641	-1.9194	0.57471	0.044434
1.366	-34.887	104.4045	651.386	-0.15967	0.30469	-0.13379	-27.266	199.823	670.999	-1.1501	0.37149	-0.029004	78.456	82.809	180.945	-0.15459	0.21436	0.11455	53.7433	158.15291	913.7199	-1.2539	0.33887	-0.11426	41.9451	34.376	37.5019	0.2336	0.13067	0.16377	27.038	42.327	86.1042	0.34961	-0.00097656	-0.13818	-50.4052	-147.611	1039.662	-1.6843	0.49877	0.0073241
1.368	-53.328	163.733	722.1498	-0.19678	0.30615	-0.12939	-72.1895	174.149	635.0008	-1.1206	0.3708	-0.019434	39.5	94.39	136.617	-0.09766	0.20859	0.11582	72.6322	195.268	908.9267	-1.2129	0.32715	-0.095703	44.71	3.03048	26.9214	0.21123	0.12461	0.15732	51.601	49.99	64.709	0.35205	-0.0039063	-0.14648	-86.462	-231.5721	1076.847	-1.4707	0.43311	-0.038574
1.37	-67.475	170.357	809.39	-0.28857	0.30566	-0.11816	-32.877	200.842	594.0367	-1.0897	0.36611	-0.012793	22.259	73.941	137.727	-0.045313	0.20703	0.12168	72.53281	190.873	882.869	-1.1948	0.31787	-0.085449	37.661	21.14324	38.524	0.19385	0.1123	0.15381	7.372	20.9762	51.9288	0.35645	-0.021484	-0.14746	-63.4495	-240.7148	1142.767	-1.2222	0.37354	-0.10693
1.372	0.0185999999999997	148.158	878.903	-0.36987	0.30689	-0.10938	-65.9597	182.402	563.536	-1.0629	0.36601	-0.0019531	39.204	95.508	103.8573	0.008789	0.20215	0.12383	74.4367	138.5648	876.447	-1.1553	0.30762	-0.074219	-12.142	30.3388	28.9667	0.16826	0.11289	0.14258	12.849	50.451	62.373	0.34863	-0.031494	-0.15405	-69.6984	-273.657	1148.952	-1.1167	0.34521	-0.12646
1.374	-24.4446	100.355	910.2214	-0.46045	0.30225	-0.097168	-57.634	142.0858	583.6588	-1.0327	0.36426	0.0073242	-29.626	79.837	68.46	0.057129	0.19775	0.12451	57.179	190.731	859.115	-1.1267	0.30102	-0.06128	-0.0360000000000014	-12.5829	41.001	0.14942	0.11231	0.1334	0.905999999999999	39.308	51.133	0.33301	-0.037598	-0.14355	-32.815	-290.714	1200.367	-0.94482	0.32568	-0.14014
1.376	14.935	24.283	988.859	-0.59766	0.29688	-0.069336	-18.706	180.43	560.302	-1.0045	0.36387	0.0098633	-16.802	33.5313	91.59326	0.1124	0.19102	0.12236	54.4852	151.145	818.111	-1.0923	0.28906	-0.044922	7.114	23.8517	31.2762	0.1334	0.10527	0.13301	-19.42	26.508	31.889	0.30078	-0.057617	-0.15088	-1.402	-238.914	1209.293	-0.89721	0.34253	-0.1499
1.378	43.161	-24.081	1018.951	-0.67188	0.29297	-0.052246	-60.78934	157.024	544.846	-0.97197	0.3626	0.016211	-17.235	21.15677	79.432	0.1625	0.18096	0.12627	32.718	158.225	808.635	-1.0522	0.28809	-0.039063	-34.438	8.8731	31.128	0.11641	0.10254	0.12968	-2.076	64.642	24.2806	0.28174	-0.060547	-0.14893	-21.946	-219.948	1240.9726	-0.88623	0.42139	-0.15283
1.38	20.903	-72.916	1014.545	-0.85889	0.28955	-0.015137	4.794	162.87	527.134	-0.93955	0.36142	0.020508	-77.1531	-0.732299999999999	72.114	0.20391	0.1665	0.13252	5.131	205.71	737.934	-1.0381	0.28613	-0.031738	-38.691	-2.49488	43.404	0.1001	0.099609	0.12988	-23.527	49.544	5.8161	0.23633	-0.074707	-0.13965	45.698	-176.425	1306.832	-0.88428	0.50244	-0.18604
1.382	64.3135	-128.08	1028.33	-1.0151	0.28882	0.011963	-9.315	171.545	467.863	-0.90224	0.35566	0.02793	-42.681	11.5273	102.377	0.24766	0.15528	0.13603	-15.598	148.9776	708.451	-0.99268	0.27393	-0.018555	-51.214	32.994	40.975	0.083887	0.10244	0.12187	-32.159	58.302	42.209	0.20215	-0.079101	-0.13232	70.2881	-127.3416	1310.657	-0.85449	0.53418	-0.19043
1.384	31.8577	-145.146	996.431	-1.1831	0.30127	0.041016	-12.962	121.357	452.743	-0.86084	0.3501	0.030762	-56.049	49.707	81.338	0.27979	0.13477	0.13525	-32.205	190.879	694.329	-0.96338	0.27002	-0.0073241	-52.9496	9.7835	30.417	0.06543	0.1083	0.11963	-38.834	61.3	48.758	0.15967	-0.083984	-0.12256	74.6554	-154.699	1317.437	-0.80371	0.52148	-0.18604
1.386	-16.1045	-163.583	981.158	-1.4272	0.31494	0.06543	50.244	136.142	412.5674	-0.82139	0.34531	0.0375	-79.88861	47.824	81.175	0.31181	0.12207	0.13945	-37.54	190.391	637.0867	-0.92969	0.26953	0.0014648	-50.518	9.0692	30.1927	0.04668	0.11025	0.11885	-47.102	24.1284	44.672	0.10352	-0.088867	-0.11572	147.615	-157.236	1339.774	-0.8291	0.50977	-0.1582
1.388	-14.482	-136.177	987.3981	-1.5522	0.3208	0.07959	13.744	131.3042	361.918	-0.78818	0.33955	0.043066	-36.407	55.229	70.185	0.33828	0.10664	0.1456	-40.968	140.195	616.7969	-0.88525	0.26416	0.012207	-55.3235	15.1827	27.1679	0.025781	0.11406	0.1165	-37.931	38.0805	46.438	0.075684	-0.092285	-0.10938	135.693	-147.32	1310.755	-0.91406	0.50391	-0.13184
1.39	-93.37	-81.815	954.8509	-1.7949	0.34961	0.10547	32.973	113.9956	370.1547	-0.75069	0.33565	0.048535	-75.2586	55.954	29.745	0.35664	0.092969	0.14873	-38.047	180.336	559.733	-0.86328	0.26172	0.020996	-69.71474	-32.9623	34.6422	0.0087891	0.12402	0.11572	-45.0176	18.0491	35.9948	0.012207	-0.094238	-0.096191	119.5287	-138.062	1326.679	-1.1138	0.52295	-0.089355
1.392	-86.376	-60.337	958.705	-1.9489	0.37769	0.11938	64.56673	145.56464	343.609	-0.71328	0.32676	0.054981	-57.729	22.2252	63.1541	0.36836	0.071875	0.15576	-64.5729	128.2669	537.151	-0.8208	0.2583	0.027344	-24.592	11.3705	41.553	-0.0074217	0.13057	0.11416	-36.933	-16.4074	58.892	-0.029053	-0.093018	-0.083252	125.92	-65.23	1304.623	-1.2305	0.54102	-0.078125
1.394	-89.797	-33.1492	956.497	-2.0718	0.40527	0.13477	38.241	115.93243	329.43	-0.68018	0.32471	0.064941	-31.563	46.506	55.394	0.36719	0.055664	0.16406	-47.5151	135.48	532.364	-0.78564	0.25562	0.0354	-16.792	8.9926	18.0211	-0.013086	0.1417	0.11816	-39.351	12.1737	33.546	-0.06543	-0.087402	-0.074219	65.1601	-50.709	1299.789	-1.436	0.5835	-0.043945
1.396	-157.125	-8.765	940.618	-2.166	0.42969	0.14111	56.405693	116.275	310.903	-0.64111	0.31963	0.07207	-69.0201	50.149	51.966	0.36426	0.037012	0.16758	-33.978	171.151	481.597	-0.74561	0.25635	0.036133	-41.422	-2.0774	28.5935	-0.02207	0.1542	0.11699	-50.1729	5.3366	8.0605	-0.11328	-0.078125	-0.066406	47.323	-80.5313	1359.263	-1.5747	0.61109	-0.031738
1.398	-128.638	-20.708	967.146	-2.1777	0.44531	0.14307	56.1644	132.335	269.801	-0.60752	0.30732	0.073437	-4.9	47.533	51.871	0.35469	0.020215	0.17578	-39.673	114.676	453.948	-0.69482	0.2583	0.04541	-15.813	35.067	25.119	-0.022168	0.16982	0.11553	-23.685	37.927	31.9484	-0.13086	-0.069336	-0.068359	57.107	-85.602	1387.7223	-1.7026	0.63721	-0.015137
1.4	-127.327	12.576	953.895	-2.1499	0.47607	0.14648	34.183	103.899	265.034	-0.56885	0.30147	0.0875	-18.591	50.027	32.7838	0.3418	0.0041993	0.18008	-37.944	150.556	423.6261	-0.67139	0.24463	0.044922	-8.206	7.7373	25.3638	-0.01709	0.18262	0.11475	-14.287	43.88	39.816	-0.15723	-0.061035	-0.0625	21.531	-149.953	1441.386	-1.8555	0.67871	-0.0068359
1.402	-107.95	23.722	951.2565	-2.073	0.49536	0.13306	72.7725	133.86	230.252	-0.53115	0.29834	0.093066	-9.575	17.8855	34.3122	0.31358	-0.010156	0.18535	-59.6894	137.867	388.069	-0.62061	0.24561	0.053711	6.748	19.2835	31.14518	-0.0096681	0.19306	0.10967	-7.925	-10.9707	61.716	-0.16724	-0.057373	-0.065674	23.369	-148.301	1507.035	-1.9194	0.69775	0
1.404	-48.0754	-17.741	948.60364	-1.98	0.50049	0.11328	47.702	128.088	192.6753	-0.48975	0.28516	0.099121	46.676	28.3515	30.106	0.28955	-0.016113	0.19287	-23.106	106.0338	397.1319	-0.57934	0.24463	0.05957	36.923	44.012	21.283	-0.0030274	0.208	0.10567	22.935	6.4836	59.014	-0.17041	-0.048828	-0.069336	-26.992	-123.216	1515.404	-2.0283	0.73242	-0.0019531
1.406	-62.1822	-47.732	914.862	-1.7964	0.49658	0.07959	32.811	98.492	186.5876	-0.43643	0.27715	0.10781	14.621	38.37	16.522	0.25879	-0.026269	0.19551	-4.738	148.241	368.312	-0.53467	0.23975	0.065918	37.512	0.4334	59.388	0.0028321	0.22246	0.10254	5.683	-1.4282	17.0646	-0.16602	-0.030273	-0.081055	-23.933	-159.109	1560.973	-2.0857	0.74682	-0.017822
1.408	-50.376	-138.772	940.643	-1.6934	0.4834	0.058594	41.123	108.851	183.596	-0.38223	0.27217	0.11416	52.006	9.7696	48.7679	0.22979	-0.038476	0.20107	-5.988	75.711	344.547	-0.47559	0.24219	0.074707	31.832	24.40512	62.503	0.021777	0.23174	0.09082	14.995	4.4744	44.515	-0.16309	-0.019531	-0.085449	-0.673999999999999	-112.335	1571.717	-2.1226	0.75244	-0.03418
1.41	-22.034	-190.053	1006.384	-1.4868	0.43994	0.013184	-3.864	65.361	185.718	-0.3209	0.27099	0.1165	46.993	18.636	59.404	0.19815	-0.04082	0.20264	9.759	52.046	330.391	-0.44092	0.23877	0.077637	65.6969	-0.7858	42.7828	0.030762	0.2373	0.087402	53.8716	39.478	39.233	-0.13623	0.0097656	-0.09668	-16.609	-110.001	1537.412	-2.1304	0.75244	-0.05127
1.412	-87.4916	-208.364	1051.977	-1.3484	0.40893	-0.018555	-2.183	55.952	189.819	-0.25615	0.27178	0.12021	30.666	-8.6251	60.385	0.16826	-0.044922	0.20088	35.305	79.1936	283.49	-0.36914	0.23975	0.083008	75.9126	-17.1495	41.138	0.045019	0.24912	0.082129	22.657	13.3485	13.2553	-0.1123	0.03125	-0.10938	-6.98	-119.402	1534.4828	-2.1304	0.75244	-0.063965
1.414	-79.678	-261.868	1122.479	-1.2163	0.3833	-0.057617	-38.5485	57.376	157.584	-0.19189	0.26514	0.12109	97.947	-19.9074	72.853	0.13721	-0.056641	0.20703	59.5471	50.533	252.3	-0.30982	0.23657	0.084717	53.994	10.076	61.9386	0.054199	0.25772	0.072071	29.916	23.4838	28.1749	-0.088379	0.056152	-0.12402	-12.611	-55.071	1512.7419	-2.1304	0.74463	-0.094238
1.416	-60.9869	-254.666	1146.773	-1.0762	0.375	-0.099121	-49.308	27.16	154.054	-0.12822	0.25713	0.12344	64.8477	6.7438	41.8682	0.10879	-0.050781	0.20146	59.365	101.948	221.8262	-0.24902	0.23633	0.089844	61.253	-27.561	84.226	0.064746	0.26553	0.069336	54.4427	38.0533	11.0395	-0.053223	0.087402	-0.13281	-67.888	-74.174	1515.778	-2.1191	0.74267	-0.11279
1.418	-51.2894	-247.899	1171.24	-1.019	0.37451	-0.10205	-5.48200000000001	42.594	126.797	-0.063965	0.25166	0.12109	45.773	-4.444	57.982	0.091797	-0.052832	0.20459	58.428	97.0112	186.863	-0.16455	0.23291	0.091309	53.538	-31.985	91.2762	0.067675	0.27675	0.063769	41.76	2.49018	43.435	-0.036621	0.10352	-0.14063	-25.276	-60.1521	1541.669	-2.0977	0.74219	-0.13281
1.42	19.06	-260.658	1222.457	-0.95703	0.38428	-0.13623	-60.051	33.535	75.8922	-0.010449	0.24775	0.12109	82.633	18.0185	50.035	0.061718	-0.053613	0.20811	48.549	65.387	183.685	-0.12451	0.22559	0.097168	31.7016	-20.394	88.5492	0.067871	0.28906	0.056641	35.084	18.1042	56.079	-0.0019531	0.12939	-0.15332	-57.034	-29.361	1518.718	-2.064	0.73584	-0.15771
1.422	21.719	-172.01	1223.824	-0.93409	0.41699	-0.14038	-49.479	33.76	88.178	0.04834	0.2417	0.12237	10.899	31.638	9.8784	0.038965	-0.047656	0.20332	60.2858	106.389	162.038	-0.037109	0.22803	0.094238	14.0415	-55.3367	138.195	0.071973	0.29873	0.052636	27.862	-2.2379	30.121	0.022705	0.1499	-0.16113	-62.7223	-78.69	1524.113	-2.0488	0.72852	-0.16504
1.424	31.166	-154.6552	1257.775	-0.94434	0.46484	-0.14063	-27.309	52.882	77.977	0.098633	0.23535	0.11621	39.512	1.371	21.132	0.018066	-0.047852	0.20215	76.257	65.2763	159.9577	0.022461	0.21582	0.09375	22.1214	-10.132	189.023	0.066407	0.30752	0.050977	3.483	-25.5647	28.512	0.045898	0.17188	-0.1665	-3.177	-22.0588	1519.842	-2.0151	0.71338	-0.18506
1.426	86.90575	-141.116	1318.03	-0.96582	0.52539	-0.14697	-71.1416	32.691	103.443	0.14873	0.23174	0.11904	43.327	9.8874	18.8882	-0.00097656	-0.047559	0.20195	50.9205	65.3323	178.356	0.081055	0.2085	0.097656	-25.05178	-1.852	223.898	0.058594	0.32354	0.044726	26.7542	-9.848	21.8795	0.069824	0.18652	-0.17139	-44.468	6.0177	1475.767	-1.9978	0.69555	-0.2002
1.428	82.498	-117.888	1307.822	-0.97998	0.5415	-0.14404	-18.61	36.49	120.879	0.19297	0.22295	0.11562	-17.692	-6.3762	28.4103	-0.024218	-0.038867	0.19873	25.426	92.582	157.745	0.15576	0.20117	0.10303	-22.267	11.0338	300.1412	0.048047	0.33887	0.038965	14.228	-35.5768	25.5409	0.077148	0.19678	-0.1709	-28.28	11.605	1498.4145	-1.9844	0.67578	-0.21094
1.43	109.456	-178.676	1321.596	-1.0288	0.5415	-0.11377	-26.814	38.737	96.661	0.22617	0.21006	0.1168	-2.227	4.889	40.312	-0.038672	-0.029492	0.19678	27.889	58.232	138.365	0.18506	0.19092	0.1001	-11.382	71.943	375.568	0.039063	0.35693	0.040527	-5.666	-13.50116	36.9958	0.091797	0.20801	-0.16943	25.972	67.7498	1502.7342	-1.9585	0.6416	-0.22656
1.432	143.399	-153.8157	1320.286	-1.1159	0.53198	-0.092775	-46.538	19.7087	88.678	0.25108	0.20117	0.11612	-31.418	40.4851	18.883	-0.053711	-0.011035	0.19394	29.192	105.501	101.473	0.25049	0.17822	0.099609	-49.913	74.15	502.07	0.02334	0.37119	0.031348	-31.694	18.1726	24.9862	0.098143	0.22192	-0.17188	14.743	-14.948	1512.0738	-1.9487	0.62158	-0.22998
1.434	108.74	-112.726	1311.68948	-1.2329	0.54004	-0.072266	13.512	50.811	68.905	0.27637	0.19775	0.1123	-62.7857	24.71	34.3737	-0.056641	0.0029297	0.19238	-3.012	89.308	73.828	0.28442	0.17212	0.10327	-37.718	99.559	651.8508	0.0033203	0.38096	0.026856	-40.418	9.961	42.7996	0.097168	0.22656	-0.16895	108.586	-70.3038	1535.502	-1.939	0.5874	-0.23438
1.436	87.454	-128.9661	1355.32426	-1.3999	0.56689	-0.037598	-35.408	48.034	20.4935	0.29317	0.18427	0.11396	-27.495	18.0481	39.622	-0.063379	0.022266	0.19102	-9.803	53.4848	90.442	0.31396	0.17041	0.11035	-18.586	144.405	741.5515	-0.020508	0.39345	0.02334	-13.628	21.793	68.523	0.088867	0.23047	-0.16699	95.716	-66.7539	1494.799	-1.9314	0.56372	-0.23462
1.438	28.7	-54.654	1325.235	-1.4707	0.57617	-0.024902	-25.315	36.267	28.85788	0.30302	0.17383	0.11504	-50.593	27.5029	9.0402	-0.063379	0.048731	0.1877	-10.399	84.397	83.0183	0.3584	0.15771	0.11035	-43.79	109.125	858.2788	-0.05293	0.40508	0.020801	-61.5575	-20.815	63.618	0.083984	0.23682	-0.16797	91.565	-109.328	1510.16	-1.9316	0.54443	-0.23438
1.44	15.203	-105.8425	1359.953	-1.5991	0.59912	0.0014648	38.039	41.23107	24.0456	0.30302	0.16367	0.11855	-54.7917	6.0564	12.681	-0.059082	0.069824	0.18301	-28.755	30.1139	70.5832	0.37256	0.15186	0.11426	-9.925	117.83	971.447	-0.083984	0.41797	0.018555	-54.875	-50.8295	89.2492	0.059082	0.23145	-0.16699	117.468	-39.47	1516.755	-1.9375	0.5293	-0.23535
1.442	58.1489	-154.684	1448.437	-1.7168	0.62207	0.022949	3.963	-3.0462	34.07	0.29863	0.16094	0.12187	-48.6086	18.3976	12.5307	-0.055469	0.08584	0.18164	-45.583	32.708	86.246	0.39258	0.13281	0.12207	-8.871	67.698	1063.936	-0.12188	0.42861	0.018262	-5.775	-21.818	88.66	0.032715	0.23047	-0.16089	72.091	-25.8757	1478.898	-1.9351	0.52295	-0.23047
1.444	8.653	-145.018	1475.82	-1.7676	0.62695	0.027344	47.416	-2.6116	66.788	0.29346	0.15234	0.12402	-84.085	6.475	33.734	-0.046875	0.104	0.18066	-54.2763	45.0958	90.999	0.3999	0.11621	0.13232	-3.867	-1.779	1156.416	-0.15801	0.4376	0.0167	-23.825	-9.567	117.563	0.0039063	0.22168	-0.15723	78.8188	-35.456	1460.0277	-1.9395	0.50293	-0.2334
1.446	18.024	-199.842	1512.732	-1.8662	0.65234	0.036133	48.353	8.8163	44.173	0.28086	0.14307	0.13467	-42.464	-24.9245	57.959	-0.042187	0.11924	0.1752	-54.786	12.852	93.72	0.3999	0.11328	0.13281	35.497	-30.942	1189.625	-0.19434	0.44854	0.0167	-5.793	9.741	163.755	-0.054199	0.2041	-0.14453	90.4518	20.255	1421.9401	-1.9429	0.49268	-0.23145
1.448	21.558	-155.377	1520.758	-1.9197	0.6604	0.043945	38.614	0.7123	50.707	0.26738	0.13721	0.13614	-39.755	-7.047	26.0228	-0.030762	0.13389	0.16885	-19.487	70.636	79.861	0.40234	0.10254	0.14209	44.731	-120.06272	1204.844	-0.2418	0.45176	0.017773	-24.641	33.945	170.5252	-0.083008	0.19727	-0.14404	34.146	-7.448	1417.4029	-1.9487	0.48975	-0.22412
1.45	-43.4665	-118.923	1516.61	-1.9741	0.67334	0.043945	77.4723	26.795	54.965	0.25176	0.14072	0.13496	-43.2626	-24.599	34.569	-0.019043	0.14756	0.16572	-25.361	80.554	38.5767	0.39111	0.08667	0.14819	61.15	-170.003	1211.905	-0.3042	0.4624	0.016113	-46.153	18.8154	217.366	-0.15381	0.18604	-0.13135	79.13732	25.4296	1436.995	-1.9507	0.50049	-0.23438
1.452	-34.6915	-168.5739	1544.21	-2.0273	0.69336	0.023438	37.57	15.4878	25.7398	0.23584	0.13604	0.13994	-0.0280000000000058	10.0738	36.469	0.0024414	0.15488	0.15274	-47.095	63.396	51.3715	0.37061	0.091309	0.14648	91.571	-183.335	1193.888	-0.38242	0.45967	0.02002	-4.434	66.895	294.595	-0.21533	0.17237	-0.13184	37.108	83.624	1405.046	-1.9414	0.49902	-0.24536
1.454	-27.449	-120.741	1516.5549	-2.0508	0.70117	0.01123	55.982	2.14368	25.0067	0.21289	0.13184	0.14697	-42.396	40.148	14.6623	0.019043	0.16846	0.14795	-51.441	90.093	64.575	0.35254	0.080078	0.15479	126.061	-221.892	1181.87	-0.48428	0.4501	0.017188	-21.3709	83.737	380.4398	-0.27246	0.16211	-0.12793	24.688	44.401	1396.556	-1.9272	0.49463	-0.25342
1.456	-54.445	-126.576	1498.024	-2.0708	0.71143	-0.012695	58.41907	22.488	8.3497	0.20107	0.12656	0.15195	7.255	38.735	32.2506	0.037012	0.18037	0.14531	-47.017	37.0704	59.588	0.3418	0.073242	0.15869	158.131	-183.635	1157.985	-0.61709	0.43955	0.021094	-54.405	72.8032	493.955	-0.35547	0.14893	-0.12744	73.812	86.556	1374.284	-1.9058	0.49365	-0.27051
1.458	-50.962	-126.5476	1534.3171	-2.0767	0.71631	-0.031494	16.359	5.1186	23.1494	0.18184	0.12236	0.15918	19.302	53.488	32.2413	0.051758	0.18809	0.13564	-26.778	32.05	66.856	0.29639	0.074219	0.15869	156.18	-149.902	1104.545	-0.77861	0.42256	0.032129	-21.1561	109.4113	572.965	-0.40283	0.14014	-0.12793	25.979	87.597	1329.6263	-1.9038	0.48975	-0.26709
1.46	-118.026	-28.708	1503.60037	-2.0723	0.70898	-0.04834	32.952	20.4902	49.025	0.16035	0.13095	0.15605	-5.224	17.4797	45.8633	0.060351	0.19629	0.13525	-20.668	34.1912	48.052	0.26758	0.06958	0.16333	180.425	-135.527	1101.163	-0.96289	0.40234	0.042969	-40.253	101.2418	645.774	-0.50879	0.11914	-0.12158	30.386	73.565	1339.189	-1.8979	0.50244	-0.26221
1.462	-98.852	-51.678	1510.199	-2.0503	0.68701	-0.077637	9.851	21.861	19.4097	0.14512	0.12588	0.1542	73.8129	-19.6613	80.85	0.067481	0.2082	0.13174	-7.05	-10.218	63.54	0.24072	0.060547	0.16748	206.101	-76.272	1091.353	-1.1759	0.39932	0.048828	-3.6313	128.864	740.62	-0.59912	0.098146	-0.11645	40.601	134.465	1311.3719	-1.8874	0.51294	-0.26489
1.464	-53.902	-12.6053	1522.4067	-2.0444	0.6665	-0.087891	-2.317	5.2068	31.0677	0.13281	0.11865	0.15674	45.991	-13.7244	68.869	0.068848	0.21826	0.12891	4.692	27.8544	59.798	0.19336	0.055664	0.1665	197.9108	-45.5848	1064.011	-1.4125	0.40537	0.062012	17.1578	138.448	801.9208	-0.70117	0.082031	-0.10547	-53.292	96.588	1310.0469	-1.8691	0.51758	-0.26074
1.466	-84.466	22.68	1486.7854	-2.0249	0.64111	-0.11035	17.289	32.112	35.706	0.11152	0.12022	0.15849	37.336	-15.375	90.089	0.064356	0.22354	0.12734	8.714	31.9224	25.032	0.16602	0.047852	0.16895	209.662	-19.063	1085.331	-1.648	0.42529	0.078809	-20.615	94.423	850.947	-0.86621	0.057129	-0.086426	-29.583	82.9739	1308.453	-1.8242	0.52148	-0.27002
1.468	-44.913	-39.631062	1519.652	-2.0183	0.61646	-0.12329	-35.234	26.209	21.7673	0.10244	0.11748	0.15381	90.721	8.516	100.022	0.062207	0.23565	0.12715	40.175	25.342	25.0523	0.11768	0.053711	0.16846	204.968	28.365	1043.4558	-1.8693	0.45664	0.090235	23.896	86.14	922.928	-0.95654	0.046387	-0.07373	-47.54	87.135	1245.958	-1.8047	0.52148	-0.26904
1.47	-36.806	45.2228	1513.046	-1.9976	0.59229	-0.14746	-23.126	25.83747	30.8623	0.085645	0.11397	0.14912	34.1902	11.939	106.7663	0.053223	0.24775	0.12793	34.303	52.659	28.86465	0.088379	0.052734	0.16651	174.666	-15.067	1043.763	-2.062	0.50439	0.10547	37.066	34.3356	937.721	-1.1558	0.035645	-0.043945	-81.089	20.17	1254.095	-1.7632	0.52002	-0.27002
1.472	-49.3866	39.608	1514.6182	-1.9805	0.56641	-0.17188	-14.707	44.64	5.7469	0.080176	0.10791	0.14736	45.0231	-19.115	135.1874	0.038379	0.25439	0.1291	51.7663	-14.1644	49.013	0.064941	0.052246	0.17773	151.887	-51.112	1047.3455	-2.1995	0.54444	0.11289	53.9147	-61.706	1009.703	-1.3162	0.041504	-0.01123	-47.568	74.925	1250.081	-1.7403	0.51098	-0.27051
1.474	9.986	17.775	1542.8752	-1.9644	0.54932	-0.17334	-70.1623	26.641	4.0734	0.068848	0.10352	0.14697	55.187	-11.1661	157.077	0.023438	0.26709	0.13574	58.605	-14.1264	65.974	0.03125	0.052734	0.16895	116.001	-95.451	1016.628	-2.261	0.57656	0.12695	56.3615	-116.2105	1026.298	-1.4766	0.061523	0.013672	-62.1449	96.1592	1212.6	-1.709	0.50586	-0.25879
1.476	-1.938	52.694	1529.8364	-1.9473	0.52344	-0.18555	-29.942	30.96	38.766	0.067285	0.1084	0.14209	-23.3388	1.195	235.0201	0.008789	0.27305	0.13545	46.36408	5.3088	61.492	0.018066	0.04834	0.17383	66.1531	-174.397	1062.648	-2.2488	0.60742	0.13867	25.096	-171.692	1000.263	-1.7026	0.10596	0.060547	-33.094	102.247	1218.873	-1.6772	0.49951	-0.25342
1.478	41.102	-44.054	1546.633	-1.9394	0.50586	-0.19946	-37.455	23.6579	35.4616	0.062598	0.11572	0.13936	3.025	7.412	368.237	-0.011719	0.27812	0.1373	52.6298	-33.091	73.373	-0.0078125	0.042969	0.1709	64.967	-211.522	1090.7161	-2.149	0.63574	0.13916	-0.813000000000001	-156.632	1011.323	-1.8159	0.13965	0.091309	-2.812	178.471	1181.178	-1.6577	0.50146	-0.24414
1.48	85.675	-48.783	1547.999	-1.9414	0.49414	-0.20898	-57.8331	1.055	53.739	0.059864	0.12744	0.14014	20.611	57.5108	461.77	-0.0375	0.28047	0.14512	41.959	5.2434	71.311	-0.020019	0.044189	0.16992	-14.277	-251.751	1057.7971	-1.9878	0.65869	0.14014	-45.1364	-92.679	986.44	-2.0195	0.21777	0.11768	-20.916	149.83	1161.51805	-1.627	0.49902	-0.23828
1.482	37.1648	-22.3882	1538.74	-1.9448	0.48486	-0.22119	-23.241	13.72553	50.621	0.056836	0.13466	0.14619	-3.523	61.7942	574.4312	-0.066602	0.2834	0.15166	29.917	-1.5079	24.7517	-0.024902	0.044434	0.17041	-61.3288	-297.761	1097.4729	-1.7792	0.65303	0.12793	-65.1081	-77.118	987.383	-2.1431	0.29444	0.12573	37.51	172.264	1145.519	-1.5935	0.4978	-0.24292
1.484	70.0603	-63.639	1564.849	-1.9507	0.47705	-0.22412	-44.8714	14.8866	32.506	0.051758	0.14014	0.14746	17.564	93.031	681.5908	-0.094727	0.28564	0.15967	31.615	-5.4524	10.9591	-0.030762	0.041992	0.17041	-76.4232	-272.885	1135.297	-1.5765	0.63486	0.11855	-57.868	-54.387	1004.595	-2.2363	0.36914	0.1333	36.133	201.09	1118.722	-1.5508	0.48926	-0.23535
1.486	68.4191	8.4465	1561.047	-1.9746	0.47754	-0.21973	-34.999	2.651	53.07	0.049707	0.1499	0.14698	-15.144	129.368	775.373	-0.13233	0.28232	0.1581	7.297	44.714	-16.558	-0.034668	0.048828	0.16455	-125.88	-279.445	1172.999	-1.3906	0.59736	0.097462	-96.046	-52.178	967.792	-2.2832	0.47656	0.12939	24.297	163.273	1101.34	-1.4956	0.47803	-0.22119
1.488	58.7813	-7.041	1503.076	-1.9873	0.48877	-0.2268	0.709000000000003	26.1314	26.435	0.045117	0.16074	0.15205	0.244	125.577	899.3722	-0.16914	0.28252	0.15996	-5.628	-5.71887	2.2784	-0.031738	0.058105	0.16602	-116.434	-250.102	1233.156	-1.2377	0.54395	0.078515	-123.126	-65.834	1004.57	-2.2808	0.52686	0.12207	58.4294	187.9	1086.025	-1.4761	0.46729	-0.21289
1.49	90.36	-20.064	1480.955	-1.9995	0.50342	-0.22949	-44.442	11.3239	16.8376	0.044727	0.17441	0.15166	19.761	128.924	965.74	-0.21015	0.27745	0.15996	-5.724	-3.12125	30.484	-0.032715	0.061036	0.17163	-124.575	-176.7805	1237.82	-1.1187	0.49365	0.060059	-117.566	-26.259	1026.083	-2.2012	0.61133	0.095215	8.45	159.711	1051.37	-1.4263	0.45264	-0.20459
1.492	53.311	65.0107	1453.232	-1.998	0.51465	-0.23828	-4.79	18.3242	39.51	0.050684	0.18359	0.15146	-30.418	62.90875	1038.711	-0.26104	0.27315	0.15518	-14.848	8.554	27.7908	-0.026367	0.067871	0.17725	-164.468	-154.287	1267.122	-1.0417	0.46396	0.049023	-134.417	-23.618	1027.89	-2.0904	0.66455	0.079346	52.571	144.9022	1032.779	-1.394	0.43701	-0.19506
1.494	63.55952	38.932	1452.385	-1.9937	0.51221	-0.23779	23.76	30.262	35.2118	0.051758	0.19385	0.146	17.179	-25.405	1121.134	-0.31592	0.2666	0.15527	-25.048	-26.1898	24.514	-0.022461	0.078613	0.17773	-129.936	-110.025	1284.172	-0.99404	0.46299	0.057031	-86.981	-29.3	1036.956	-1.9585	0.68701	0.059082	93.4767	189.6428	984.4501	-1.3628	0.4209	-0.18604
1.496	77.01891	91.66	1458.526	-2.0024	0.51025	-0.22998	5.445	7.041	57.789	0.060547	0.2043	0.14375	20.322	-74.542	1150.146	-0.39102	0.25342	0.15391	-34.16	11.60357	32.3923	-0.019531	0.087402	0.17773	-122.629	-65.334	1218.138	-0.99639	0.49775	0.076172	-28.854	-48.272	993.7448	-1.752	0.66797	0.023438	48.626	162.0619	953.728	-1.3164	0.40527	-0.17041
1.498	29.168	122.682	1414.58	-2.0056	0.52026	-0.23486	46.2215	31.4668	66.579	0.062793	0.21436	0.14024	21.598	-163.75	1170.682	-0.48623	0.23076	0.1582	-49.0342	13.46524	24.868	-0.010254	0.092773	0.18799	-113.399	-91.948	1241.206	-1.021	0.58682	0.077734	-61.172	-95.847	975.602	-1.6401	0.64404	0.00048828	57.022	177.7821	962.98	-1.2925	0.39404	-0.17041
1.5	40.335	41.015	1429.72	-2.0098	0.53125	-0.23242	27.577	17.3207	40.705	0.072168	0.21631	0.13242	78.62	-192.452	1172.149	-0.61045	0.2003	0.16523	-56.135	13.100409	14.9067	-0.0078124	0.099366	0.18384	-69.9811	-44.277	1260.0042	-1.0313	0.67773	0.058105	-38.843	-110.086	1030.175	-1.3965	0.57813	-0.048828	55.5095	174.95323	923.61	-1.2466	0.37598	-0.15576
1.502	25.969	93.719	1409.367	-1.998	0.54688	-0.22852	53.013	8.693	61.175	0.08623	0.22695	0.12441	30.711	-191.655	1122.006	-0.75293	0.16406	0.16689	-64.48288	60.631	-11.76008	-0.0019531	0.10693	0.18506	-122.526	-67.291	1271.7592	-0.98858	0.70263	0.037012	-39.301	-137.08	1053.361	-1.2322	0.52905	-0.072754	61.8661	127.209	927.381	-1.2133	0.35791	-0.1438
1.504	-11.229	80.276	1375.538	-1.9844	0.55078	-0.22949	67.6397	29.341	49.816	0.097168	0.22754	0.11865	95.335	-212.852	1119.595	-0.92969	0.12695	0.17432	-53.9654	14.8968	-10.678	0.0073242	0.11133	0.18359	-87.648	-106.267	1322.819	-0.95918	0.66543	0.027734	-64.2773	-209.2845	1099.0298	-1.0957	0.49219	-0.1001	75.0879	149.0257	913.032	-1.1812	0.34912	-0.12939
1.506	-6.026	84.1778	1363.939	-1.9531	0.55859	-0.22656	25.348	7.8631	44.271	0.10596	0.23193	0.11416	120.963	-178.751	1083.366	-1.1217	0.10322	0.18975	-51.5273	1.8744	23.885	0.0097656	0.11572	0.18262	-53.454	-97.8909	1322.963	-0.98809	0.617	0.019141	-22.837	-238.275	1140.666	-0.97363	0.47266	-0.11914	31.179	135.3	868.383	-1.1426	0.32813	-0.11572
1.508	-48.5	127.102	1332.4285	-1.9307	0.55957	-0.21802	61.9879	-1.213	72.002	0.1123	0.23633	0.10976	94.832	-131.584	1048.9842	-1.3288	0.093164	0.21182	-27.28	-1.1899	24.0966	0.016113	0.11719	0.18164	-71.511	-168.255	1367.91	-1.0801	0.58691	0.0074219	-51.9144	-266.079	1147.93	-0.93506	0.48877	-0.11377	34.854	141.017	844.65	-1.123	0.31934	-0.11279
1.51	-92.596	34.218	1321.3518	-1.9121	0.55762	-0.21289	42.94	-11.6114	57.406	0.11308	0.24102	0.10664	148.971	-123.71	1086.755	-1.5565	0.083399	0.20869	-23.255	-47.621	36.869	0.019776	0.11841	0.1836	-2.464	-186.668	1426.021	-1.2109	0.58105	-0.0063477	-37.565	-278.357	1204.54	-0.91748	0.55908	-0.10254	10.969	202.056	782.706	-1.082	0.2959	-0.098145
1.512	-53.165	32.475	1310.86	-1.894	0.55518	-0.2041	23.241	-45.242	87.316	0.11514	0.24932	0.098341	141.19	-60.2444	1071.864	-1.7752	0.090332	0.21299	-28.998	-0.353999999999999	39.517	0.029297	0.12012	0.1748	2.882	-164.6447	1399.3	-1.3442	0.60264	-0.015625	18.057	-232.491	1217.565	-0.93506	0.62061	-0.11719	-49.3414	174.721	746.1305	-1.0564	0.28442	-0.086181
1.514	-85.114	44.3493	1289.023	-1.8823	0.55908	-0.2002	40.061	-51.6786	112.603	0.10938	0.25342	0.098145	155.2435	-20.796	1082.628	-1.9624	0.10498	0.2207	-10.68	13.263	48.343	0.032715	0.12158	0.17773	41.471	-201.162	1457.898	-1.4636	0.62813	-0.020801	13.382	-191.444	1216.3375	-0.93896	0.65869	-0.12988	-39.3519	186.727	741.226	-1.0327	0.27393	-0.070801
1.516	-65.7879	2.023	1284.754	-1.8569	0.55518	-0.18896	-14.025	-42.0592	98.0214	0.10459	0.25889	0.093066	188.301	-0.655000000000001	1087.387	-2.1293	0.14355	0.21289	-15.363	-3.58	68.123	0.030762	0.12598	0.18018	84.938	-156.756	1493.82	-1.5593	0.65196	-0.027442	47.903	-148.54352	1259.6184	-0.94775	0.62695	-0.12354	-57.7169	172.4309	693.07	-0.99805	0.26367	-0.061035
1.518	-51.0836	84.209	1263.772	-1.8296	0.55859	-0.18286	-17.086	-24.9665	154.767	0.095215	0.26729	0.091601	142.2886	21.639	1055.619	-2.2417	0.20918	0.19551	4.444	25.195	53.8378	0.025879	0.1333	0.17432	58.322	-155.0103	1513.206	-1.6435	0.66748	-0.03291	71.5514	-100.746	1266.83393	-1.0051	0.59741	-0.10376	-61.1091	122.685	678.368	-0.97705	0.26416	-0.051758
1.52	-75.6088	79.714	1237.924	-1.7988	0.55176	-0.17871	6.116	6.4444	189.05	0.082324	0.27705	0.088086	135.338	-35.168	1043.099	-2.2913	0.28067	0.18613	18.05	-9.142	53.561	0.023682	0.1377	0.17066	131.474	-148.4467	1569.365	-1.7178	0.67676	-0.042969	76.9678	-122.568	1295.555	-1.0996	0.58203	-0.087891	-30.038	155.52639	628.205	-0.93945	0.25391	-0.033203
1.522	-15.021	97.9635	1216.5248	-1.752	0.53418	-0.16602	-68.184	12.8272	245.1343	0.067285	0.28476	0.090332	125.642	-76.962	1019.595	-2.2735	0.36474	0.17559	26.481	-0.883000000000003	86.2117	0.01416	0.14502	0.17627	136.713	-91.637	1535.837	-1.7777	0.68487	-0.041894	123.76783	-134.671	1316.857	-1.2383	0.58984	-0.066895	-101.276	138.3948	587.008	-0.91065	0.24903	-0.022949
1.524	-30.035	174.145	1170.2264	-1.7241	0.52588	-0.16357	-28.474	37.2361	334.4488	0.049316	0.29346	0.089355	77.121	-97.786	992.047	-2.187	0.44971	0.16992	29.7404	-3.652	104.449	-0.0039063	0.15674	0.17139	87.224	-101.154	1508.224	-1.8335	0.69229	-0.041309	108.6711	-111.463	1278.0671	-1.3042	0.59326	-0.054199	-63.67275	154.185	567.083	-0.8833	0.24268	-0.012207
1.526	-15.67	124.013	1164.338	-1.6733	0.50732	-0.15088	-16.269	74.0359	403.9746	0.027832	0.30166	0.086035	64.374	-190.461	1056.707	-2.0515	0.50596	0.15058	26.4918	-58.8029	135.221	-0.015625	0.15625	0.16406	100.0719	-80.942	1532.112	-1.8882	0.70478	-0.039356	109.41	-117.995	1304.97632	-1.4097	0.59229	-0.031738	-32.534	183.986	521.913	-0.83545	0.23438	0.0024414
1.528	9.896	156.7916	1140.4286	-1.6382	0.48926	-0.14404	-56.29	74.609	539.6134	0.010157	0.31104	0.085938	26.1688	-218.381	1088.4646	-1.8815	0.53604	0.14131	22.9078	-19.854	168.343	-0.044434	0.16943	0.16992	59.2384	-19.7247	1489.915	-1.9315	0.71055	-0.033203	121.76	-72.532	1331.466	-1.4809	0.57763	-0.018066	-70.7707	143.219	495.7366	-0.81641	0.23438	0.0063477
1.53	-17.69	190.816	1090.7182	-1.6011	0.47314	-0.13916	2.69199999999999	107.47	667.69	-0.011719	0.31416	0.087891	-26.983	-275.729	1102.6863	-1.7019	0.54463	0.11787	15.3208	-8.4668	201.0606	-0.070068	0.17822	0.16675	49.2094	-52.3903	1473.3306	-1.9663	0.72119	-0.030762	47.803	-61.938	1317.010032	-1.5527	0.56836	-0.012207	-36.898	157.799	480.108	-0.77002	0.22314	0.023438
1.532	21.564	142.5964	1087.577	-1.5581	0.44629	-0.12646	-33.453	112.511	749.253	-0.036524	0.32002	0.083887	-11.947	-335.271	1137.633	-1.5314	0.50849	0.088379	39.0434	-0.3863	283.192	-0.096191	0.19043	0.1709	65.3406	-17.8636	1477.86396	-1.9873	0.72441	-0.035742	44.55	-94.449	1378.55266	-1.6479	0.57275	-0.012207	-63.19433	157.153	456.7737	-0.74048	0.22387	0.02539
1.534	18.041	193.226	1058.923	-1.5366	0.43555	-0.12256	-26.329	84.801	854.692083	-0.064453	0.32324	0.084961	-85.02	-289.839	1151.781	-1.377	0.45703	0.053711	44.758	49.42	333.925	-0.13379	0.20654	0.16748	-16.472	-23.766	1453.312	-1.9948	0.73135	-0.038965	49.555	-74.005	1399.341	-1.6968	0.57861	-0.022461	-41.259	145.417	458.646	-0.70898	0.22168	0.032715
1.536	27.3571	159.523	1030.4516	-1.4917	0.4126	-0.11328	24.248	72.764	914.5898	-0.094822	0.32978	0.085938	-102.051	-271.782	1221.49	-1.2445	0.40899	0.030567	30.205	43.157	410.985	-0.15234	0.2124	0.16455	-16.431	-54.6651	1496.8194	-1.9933	0.73681	-0.036621	2.178	-103.298	1432.118	-1.7925	0.59814	-0.03418	-7.305	161.959	429.65	-0.66211	0.21484	0.044434
1.538	61.3755	146.938	997.2631	-1.4576	0.39698	-0.10889	-16.103	23.8022	984.24828	-0.1249	0.33633	0.08545	-92.238	-220.286	1266.506	-1.1401	0.40489	0.025293	31.152	78.065	525.21	-0.19482	0.229	0.16406	-5.688	13.729	1486.647	-1.9918	0.73672	-0.034473	51.033	-97.909	1495.158	-1.8552	0.61524	-0.038575	-21.527	120.131	380.509	-0.63818	0.21729	0.050781
1.54	53.83372	197.616	948.48	-1.4199	0.38184	-0.1001	22.976	-25.947	1063.415	-0.1628	0.34219	0.085058	-126.809	-135.652	1273.394	-1.0933	0.45566	0.01748	24.36	115.875	640.4361	-0.23438	0.24219	0.16382	-61.043	-14.945	1486.8691	-1.9937	0.74072	-0.032715	14.056	-79.12308	1488.297	-1.9048	0.62549	-0.050293	4.327	100.5131	382.136	-0.58887	0.21191	0.056641
1.542	66.15049	153.432	945.872	-1.3706	0.36523	-0.09082	39.673	-59.763	1090.636	-0.2167	0.34482	0.08457	-100.667	-156.874	1299.12	-1.0672	0.53653	0.0088866	10.381	90.179	770.528	-0.2832	0.2583	0.16211	-15.658	-25.74	1545.974	-1.9981	0.73467	-0.023535	9.907	-120.29054	1526.253	-1.9585	0.63721	-0.06543	35.749	128.51774	325.996	-0.54224	0.21167	0.061768
1.544	53.5648	192.427	945.4998	-1.3457	0.3584	-0.092773	53.352	-127.825	1127.779	-0.28271	0.34131	0.083008	-122.757	-113.24	1292.699	-1.04	0.625	-0.014648	23.69	97.507	849.87	-0.37012	0.27393	0.16211	-42.5812	-18.092	1536.988	-2.009	0.72871	-0.016113	55.585	-102.699	1573.03	-1.9766	0.64258	-0.077637	39.4804	112.75204	320.752	-0.49414	0.21094	0.067383
1.546	47.1936	185.709	921.307	-1.2944	0.34033	-0.075684	111.881	-163.738	1142.731	-0.37119	0.33428	0.083691	-143.605	-76.896	1282.6852	-0.99637	0.6626	-0.025195	7.047	67.773	892.298	-0.42334	0.27686	0.16504	-98.919	-79.4682	1549.664	-2.0203	0.72129	-0.0086914	9.817	-82.494	1540.507	-2.0117	0.65625	-0.10205	76.5283	138.1123	298.0531	-0.41748	0.21143	0.07666
1.548	77.1286	112.4179	929.861	-1.251	0.33008	-0.073486	111.422	-190.828	1117.512	-0.48203	0.31845	0.080762	-84.9589	-92.859	1311.527	-0.97139	0.63935	-0.011621	-33.778	18.677	958.656	-0.55322	0.28467	0.17236	-41.65183	-26.3471	1559.212	-2.0349	0.7167	0.0011719	24.036	-87.845	1554.4	-2.0347	0.66895	-0.11939	32.355	123.04227	256.839	-0.37939	0.20947	0.078613
1.55	36.1108	163.199	879.155	-1.2124	0.31934	-0.066895	128.989	-196.619	1114.587	-0.60976	0.30361	0.088964	-105.658	-13.512	1287.8904	-1.0163	0.5874	0.012989	-21.514	6.484	1014.806	-0.67066	0.28906	0.17163	-116.467	-21.446	1538.158	-2.0483	0.70947	0.0068359	-4.159	-20.099	1521.8114	-2.0547	0.66699	-0.13672	51.848	89.9975	254.1746	-0.30176	0.20703	0.085938
1.552	-1.207	145.518	853.326	-1.1616	0.3042	-0.059082	172.232	-149.544	1075.537	-0.76602	0.28867	0.09785	-92.606	-53.181	1297.6105	-1.0978	0.55791	0.012402	4.634	-64.777	1023.591	-0.80273	0.29639	0.18018	-108.311	-45.549	1538.527	-2.0506	0.69277	0.029394	-84.112	-16.808	1510.351	-2.0757	0.66455	-0.15088	83.1877	108.151	224.529	-0.24683	0.20508	0.090088
1.554	12.708	181.769	814.826	-1.1338	0.29688	-0.05127	127.866	-98.816	1030.6316	-0.93213	0.27393	0.10645	-36.56769	-95.637	1335.533	-1.1968	0.54053	0.0087891	6.998	-112.38278	1008.346	-1.0068	0.29492	0.18604	-76.701	5.479	1504.226	-2.0555	0.675	0.04541	-25.621	-5.2695	1525.6376	-2.0806	0.66016	-0.16992	39.658	85.304	213.288	-0.18652	0.20215	0.097168
1.556	-44.244	252.112	759.802	-1.0918	0.28516	-0.043945	179.0039	-74.696	1029.9001	-1.1204	0.26885	0.11396	-86.127	-65.548	1335.595	-1.286	0.53301	0.0033203	-0.497	-130.27	966.563	-1.1172	0.30273	0.19189	-114.827	-26.8361	1457.7932	-2.0601	0.65547	0.067676	-35.119	24.2484	1493.3454	-2.0898	0.65332	-0.19336	72.9505	92.052	230.62	-0.10938	0.19043	0.097168
1.558	-35.2961	194.3135	728.3749	-1.0589	0.28027	-0.035889	167.7746	-38.296	1011.136	-1.3312	0.27471	0.11836	-31.7173	-150.189	1398.775	-1.374	0.52637	-0.0045899	14.824	-193.147	962.466	-1.3496	0.32227	0.19287	-47.868	-8.9108	1482.726	-2.0648	0.63145	0.079492	-31.257	-30.7808	1496.8912	-2.0899	0.64258	-0.20899	54.2984	116.484	204.951	-0.065918	0.19141	0.10986
1.56	-63.4532	198.645	697.13851	-1.0234	0.27832	-0.029297	131.7122	-38	1037.246	-1.5401	0.2958	0.12305	6.154	-116.449	1425.064	-1.4533	0.51817	-0.012793	39.422	-154.842	950.395	-1.5307	0.34619	0.19702	-46.3483	57.939	1464.2	-2.0581	0.60205	0.095215	9.475	-7.35638	1536.13	-2.0801	0.62891	-0.22363	4.605	88.261	190.629	0.0087891	0.18701	0.11475
1.562	-82.73	187.412	664.519	-0.98584	0.27588	-0.021973	171.057	-25.695	1081.512	-1.7387	0.32158	0.12754	-29.586	-101.8237	1437.452	-1.5374	0.51368	-0.0098633	39.961	-117.898	907.8403	-1.7026	0.37256	0.20508	-32.566	38.584	1467.454	-2.0514	0.57861	0.11924	-34.421	20.0552	1534.083	-2.0586	0.60547	-0.23535	46.409	106.981	168.77	0.067139	0.1792	0.11743
1.564	-44.9292	151.8765	657.728	-0.96436	0.271	-0.01416	106.368	-5.99300000000001	1044.9566	-1.9043	0.35742	0.13037	55.077	-157.916	1496.121	-1.6245	0.52393	-0.010742	44.794	-99.074	918.802	-1.8921	0.41113	0.21973	57.739	100.803	1462.099	-2.0648	0.56504	0.14766	18.611	13.115	1570.456	-2.0488	0.5918	-0.24365	-6.784	87.2641	128.3782	0.1167	0.17627	0.11719
1.566	-66.7604	204.044	615.923	-0.92236	0.26563	-0.0043945	93.9431	-41.567	1056.70198	-2.0309	0.39424	0.12256	55.024	-105.24	1495.769	-1.6998	0.53809	-0.011328	64.768	-33.9971	909.693	-1.9624	0.43604	0.21875	43.022	115.03	1421.951	-2.084	0.58106	0.16797	71.202	68.733	1541.8809	-2.0234	0.56055	-0.25781	-41.599	60.6	136.7977	0.17969	0.17334	0.11523
1.568	-73.7177	183.496	599.55	-0.89429	0.26465	-0.0021973	98.856	-82.133	1050.5167	-2.0992	0.43906	0.12422	73.7714	-147.78963	1535.223	-1.7644	0.55351	-0.0095702	58.31	-25.651	903.679	-2.0444	0.49316	0.20898	58.246	88.217	1436.3635	-2.093	0.59424	0.17188	24.953	14.6572	1504.24	-2.0064	0.54151	-0.26709	-9.756	66.5426	143.366	0.20801	0.16748	0.11621
1.57	-45.655	184.184	555.492	-0.85547	0.26367	0.0083008	17.209	-119.66	1013.512	-2.1129	0.47891	0.12656	128.071	-147.509	1562.111	-1.814	0.56953	-0.0052734	75.454	-17.464	922.614	-2.0349	0.53443	0.20654	107.6982	140.856	1427.675	-2.0737	0.59424	0.1748	97.0342	-8.7095	1526.0467	-2.0044	0.52686	-0.27734	-42.7872	36.72	113.478	0.25391	0.1582	0.11914
1.572	-73.51866	227.009	504.0801	-0.80762	0.26074	0.016602	20.145	-186.9232	1059.5623	-2.0501	0.51474	0.11777	88.582	-53.32	1525.503	-1.8646	0.58623	-0.0069336	58.817	10.189	906.99	-1.9863	0.57715	0.19873	67.0881	92.703	1419.825	-2.0378	0.57304	0.17549	83.473	13.8425	1517.812	-1.9956	0.50732	-0.27637	-42.3684	17.4284	126.826	0.2876	0.1543	0.12011
1.574	-37.8522	178.669	492.5169	-0.7832	0.26367	0.012207	-6.273	-208.459	1073.6187	-1.9375	0.54492	0.11621	119.133	-99.44	1505.418	-1.9019	0.59814	-0.0068359	33.607	-23.227	916.6257	-1.8589	0.63574	0.19043	115.214	79.95388	1417.683	-2.0203	0.55996	0.18721	58.737	-36.2146	1541.109	-1.9995	0.50342	-0.26904	-54.2023	28.592	104.308	0.31348	0.15234	0.11914
1.576	-39.465	184.175	484.696	-0.73828	0.25781	0.02002	-98.758	-250.631	1116.971	-1.7968	0.5708	0.11592	93.725	-52.459	1455.784	-1.9459	0.60879	-0.0045898	52.7791	-42.108	933.129	-1.7651	0.6626	0.18945	102.147	89.7545	1371.335	-2.0332	0.56192	0.19932	99.402	-17.5561	1562.039	-2.0044	0.48779	-0.27002	-68.2806	26.0714	93.534	0.34033	0.14746	0.11865
1.578	-68.914	168.311	482.834	-0.70264	0.25855	0.02832	-82.415	-295.916	1198.717	-1.6531	0.57676	0.11211	45.036	-20.9304	1412.3645	-1.9871	0.62695	-0.002539	48.986	-79.192	881.225	-1.5815	0.68799	0.17676	86.4617	23.755	1350.613	-2.045	0.57178	0.20215	56.302	-22.511	1520.001	-2.0193	0.48413	-0.26269	-29.235	67.221	77.793	0.35205	0.14502	0.11963
1.58	-8.761	111.30223	486.154	-0.66797	0.25391	0.032715	-121.416	-277.392	1196.36	-1.5324	0.57636	0.10157	84.188	-60.217	1433.0796	-2.0328	0.63907	-0.0033203	5.4503	-168.2125	893.253	-1.4497	0.68115	0.17211	137.901	72.489	1331.097	-2.0288	0.59033	0.20215	96.903121	-63.451	1499.093	-2.0347	0.48633	-0.26709	-35.186	80.76	67.0721	0.36768	0.14551	0.12158
1.582	-12.261	133.146	435.851	-0.62549	0.25049	0.041016	-148.532	-264.704	1218.846	-1.4265	0.55527	0.0875	41.682	23.1193	1447.0549	-2.0742	0.65381	0.00048827	26.64	-199.307	945.252	-1.3237	0.65771	0.16064	91.418	75.438	1296.199	-2.0064	0.59922	0.21133	116.4118	14.808	1442.129	-2.0444	0.49756	-0.26123	-57.1366	53.705	82.0967	0.36792	0.14429	0.12744
1.584	-15.587	85.50412	419.636	-0.60742	0.24707	0.041992	-108.326	-224.755	1243.703	-1.314	0.53125	0.074219	13.466	-0.563000000000002	1453.527	-2.1108	0.66064	0	-3.061	-252.364	959.3197	-1.1563	0.61133	0.13232	90.3734	57.673	1307.079	-1.9637	0.60625	0.21181	41.154	39.09	1406.202	-2.043	0.49902	-0.2627	-44.9199	47.1294	89.607	0.37256	0.1377	0.12988
1.586	42.032	82.4	393.774	-0.56445	0.24316	0.054199	-167.686	-151.241	1234.155	-1.2119	0.50937	0.068848	21.8051	-20.2822	1474.6817	-2.1378	0.66377	0.0057617	-36.61407	-280.383	1002.549	-1.0698	0.60205	0.11816	87.838	115.7847	1268.0152	-1.9242	0.60742	0.21025	90.797	75.941	1416.543	-2.0313	0.50488	-0.26855	-55.3174	12.9205	85.998	0.35596	0.13672	0.13428
1.588	12.871	122.8691	351.337	-0.5354	0.24097	0.059814	-126.434	-141.958	1271.258	-1.1297	0.50195	0.071875	-12.506	56.06315	1456.2546	-2.1543	0.66875	0.0094726	-40.092	-247.034	1018.4565	-0.93311	0.57373	0.097168	50.093	96.253	1261.432	-1.8875	0.60098	0.20625	66.893	118.853	1396.1195	-2.0153	0.50708	-0.26953	-11.695	9.41563	84.789	0.34668	0.13379	0.12988
1.59	68.1819	91.522	314.4304	-0.50391	0.23828	0.066406	-101.599	-87.003	1282.918	-1.0609	0.52148	0.079687	-22.744	-16.812	1486.732	-2.1715	0.66718	0.011035	-97.573	-267.084	1045.9324	-0.86816	0.56445	0.092529	84.3464	131.805	1275.065	-1.8574	0.59277	0.20605	46.45	57.136	1385.3679	-2.0015	0.5083	-0.26807	-21.832	30.615	54.66	0.3208	0.12744	0.14502
1.592	74.448	114.5682	279.279	-0.45752	0.23096	0.067383	-129.18	-72.495	1291.787	-1.0305	0.57305	0.086133	-13.255	23.236	1502.229	-2.1694	0.66377	0.01416	-92.078	-228.145	1126.261	-0.83203	0.58496	0.088867	37.768	186.799	1241.785	-1.8301	0.58672	0.20879	109.8851	51.921	1366.429	-1.9795	0.51465	-0.26953	-34.03	17.2849	45.801	0.29004	0.12451	0.14747
1.594	38.4005	97.5706	251.681	-0.41382	0.23291	0.072021	-65.191	-105.143	1320.86	-1.0166	0.64258	0.079102	-60.954	31.776	1466.9454	-2.1675	0.65283	0.021973	-75.782	-151.6278	1136.8937	-0.85156	0.63867	0.078125	-13.162	163.073	1221.756	-1.8046	0.58525	0.20605	45.879	65.414	1345.457	-1.9663	0.51465	-0.26904	22.611	38.3422	36.795	0.25635	0.11816	0.14941
1.596	89.5885	53.789	260.914	-0.3667	0.23291	0.067383	-82.366	-57.442	1303.22	-0.99366	0.66494	0.068945	-75.5289	-48.6076	1494.9131	-2.1608	0.63926	0.024316	-116.131	-134.005	1174.4653	-0.87549	0.66895	0.060791	1.071	200.398	1172.708	-1.778	0.58135	0.20644	24.945	64.729	1368.585	-1.9272	0.51807	-0.2666	0.225999999999999	29.325	15.0286	0.21191	0.10938	0.15137
1.598	62.963	100.445	223.321	-0.29932	0.23535	0.080566	-90.731	-88.354	1325.96	-0.98047	0.63262	0.061231	-77.292	1.737	1498.274	-2.1495	0.6208	0.03584	-104.01	-63.016	1223.147	-0.88867	0.66016	0.044434	-51.159	188.4	1125.4985	-1.7491	0.57949	0.20566	46.783	140.371	1322.879	-1.8904	0.51416	-0.26465	37.315	-5.1244	46.3348	0.1809	0.10938	0.1543
1.6	64.8381	85.405	201.7772	-0.25732	0.23389	0.077637	-54.2724	-104.9189	1330.3399	-1.0258	0.59434	0.070996	-104.68	-46.196	1500.798	-2.1323	0.59971	0.036621	-141.1	-29.814	1217.869	-0.93652	0.61328	0.038086	-48.945	161.995	1122.8034	-1.7188	0.57422	0.20557	-25.225	114.167	1272.122	-1.855	0.51025	-0.25928	67.2933	7.0164	45.6067	0.14307	0.1084	0.15283
1.602	76.33984	94.8108	203.078	-0.18555	0.22949	0.083496	-63.692	-96.52021	1331.8553	-1.128	0.5622	0.06875	-73.0879	-75.296	1497.82	-2.1187	0.56758	0.043164	-129.303	-53.041	1258.388	-0.97607	0.59326	0.03125	-45.927	201.002	1089.985	-1.6816	0.56563	0.20537	-5.17	88.9659	1257.15	-1.8027	0.49805	-0.25488	25.401	-16.0163	37.982	0.098633	0.10107	0.15771
1.604	16.972	121.589	175.402	-0.13013	0.22876	0.088379	-13.834	-183.229	1405.112	-1.2612	0.55908	0.063477	-99.6051	-3.878	1434.008	-2.1133	0.54688	0.063477	-66.707	-26.886	1241.5064	-1.1069	0.57568	0.013672	-59.876	160.288	1064.082	-1.6476	0.55527	0.20547	-25.177	85.534	1235.7075	-1.7808	0.49756	-0.25098	73.978046	-0.3721	43.672	0.078125	0.096191	0.16357
1.606	23.064	70.1841	164.849	-0.070801	0.23096	0.09082	27.115	-188.096	1447.9	-1.3935	0.56934	0.059668	-98.629	-71.536	1415.032	-2.1191	0.55547	0.079199	-76.143	-54.541	1247.165	-1.2019	0.58325	0.0012207	-4.999	138.632	1052.702	-1.6147	0.55137	0.2039	-41.317	32.788	1249.185	-1.7363	0.49414	-0.24072	59.535	15.6714	35.3382	0.037109	0.095703	0.16162
1.608	20.122	77.0538	129.5529	0.00097656	0.2251	0.092773	14.911	-182.951	1458.389	-1.5006	0.58252	0.053518	-69.5564	-8.8175	1401.612	-2.1164	0.57715	0.085351	-85.157	-67.083	1299.1048	-1.2847	0.60596	-0.01123	-29.542	152.433	1005.381	-1.5874	0.54404	0.20488	1.062	82.9164	1249.387	-1.7107	0.48828	-0.22143	15.703	9.417	31.303	0.017822	0.088135	0.16309
1.61	-14.023	61.557	105.7452	0.031738	0.21484	0.099609	81.748	-194.957	1505.88	-1.5885	0.59775	0.046485	-83.1982	40.9545	1363.3933	-2.0785	0.58223	0.080664	-79.65	-41.475	1308.66913	-1.373	0.62012	-0.020508	-60.238	110.9059	1018.42	-1.5586	0.53906	0.21045	-59.413	117.856	1211.816	-1.6782	0.48877	-0.20947	58.4052	21.4601	51.1	-0.00048828	0.084473	0.16504
1.612	-12.799	15.4854	120.401	0.099609	0.20947	0.10107	69.5728	-106.9122	1506.488	-1.6662	0.60019	0.042091	-13.34	11.0205	1384.9881	-2.0236	0.56621	0.073437	-105.416	-102.6138	1363.0726	-1.4155	0.62744	-0.027832	6.261	167.525	1004.598	-1.5295	0.5334	0.2083	-12.368	99.283	1212.568	-1.646	0.47705	-0.18994	34.996	31.132	25.48	-0.021973	0.081543	0.16846
1.614	-54.945	41.237	103.791	0.1438	0.19532	0.10571	59.0079	-107.0829	1522.393	-1.7339	0.59619	0.030273	14.98	107.573	1386.631	-1.9863	0.54102	0.083496	-70.8106	-111.7225	1427.887	-1.4897	0.63135	-0.035156	-9.225	165.508	974.175	-1.4969	0.52695	0.20752	18.405	161.23	1169.878	-1.6304	0.46777	-0.18408	24.103	12.4453	11.3542	-0.028809	0.077148	0.16797
1.616	-57.4465	6.5026	83.915085	0.18018	0.18604	0.10889	116.82	-97.453	1532.691	-1.7999	0.58603	0.021282	18.318	107.485	1368.643	-1.9889	0.53154	0.092285	-57.2202	-125.905	1445.011	-1.5554	0.63354	-0.039063	26.89	144.809	956.607	-1.4664	0.51679	0.20557	-7.29300000000001	152.562	1152.277	-1.5933	0.45654	-0.16357	36.7977	30.9227	14.8464	-0.044434	0.071777	0.16602
1.618	-34.686	7.1286	87.3609	0.23535	0.18066	0.11523	71.007	-50.2367	1500.41	-1.8575	0.57734	0.014058	73.8238	107.317	1370.517	-2.0075	0.53867	0.10615	-37.968	-172.929	1508.144	-1.6206	0.63818	-0.041016	24.831	191.822	895.507	-1.4329	0.50811	0.20352	53.65	180.24	1135.524	-1.564	0.44506	-0.14575	-2.567	7.6163	14.2163	-0.051514	0.072266	0.16822
1.62	-84.74	41.057	79.3867	0.25391	0.1792	0.12158	68.652	-88.088	1531.573	-1.9102	0.57148	0.008587	40.4879	168.602	1321.251	-2.0098	0.55742	0.11748	3.24	-112.3924	1529.283	-1.7266	0.6416	-0.041504	-2.306	163.2827	880.456	-1.394	0.49463	0.20215	24.086	240.213	1092.5812	-1.5352	0.42969	-0.13477	-16.934	-3.8708	21.9753	-0.055176	0.074219	0.16797
1.622	-48.8455	23.8681	91.083	0.28906	0.16162	0.12354	64.41	-43.4028	1524.916	-1.9518	0.56523	0.0056667	56.524	82.418	1324.295	-1.9889	0.57549	0.12783	-20.4129	-92.7786	1512.681	-1.7734	0.64648	-0.042969	80.2605	171.763	869.042	-1.3615	0.48193	0.19746	15.423	200.37	1087.0789	-1.4883	0.41016	-0.11914	0.923999999999999	10.79027	6.9445	-0.058594	0.083496	0.16748
1.624	-41.542	59.535	67.0742	0.31714	0.15674	0.13257	-13.749	3.082	1486.766	-1.9883	0.56641	0.0019531	92.8751	88.8617	1312.465	-1.9507	0.5752	0.13086	8.7631	-81.5761	1571.48	-1.8809	0.66406	-0.050781	75.098	190.021	805.891	-1.3226	0.46826	0.19248	62.5846	201.1822	1058.551	-1.4707	0.3999	-0.11328	-47.526	3.629	16.5548	-0.058594	0.087402	0.16748
1.626	-65.0117	74.904	39.9802	0.33447	0.14941	0.13672	4.592	-27.2874	1499.704	-2.0223	0.56669	-0.0060496	69.4434	80.7666	1269.663	-1.9149	0.57207	0.13789	41.7888	-34.345	1546.865	-1.951	0.68286	-0.047608	69.213	142.921	782.286	-1.2929	0.44952	0.19131	15.965	186.4547	1024.03	-1.4272	0.37842	-0.083008	-29.734	31.7403	42.459	-0.046875	0.09668	0.16309
1.628	-31.713	52.569	61.841	0.35205	0.12549	0.15039	-46.9899	40.148	1477.602	-2.0518	0.57508	-0.0095627	105.794	14.322	1253.5025	-1.8813	0.55664	0.1461	17.581	-80.5314	1528.704	-2.0078	0.70117	-0.045898	137.042	181.361	733.397	-1.2554	0.4375	0.18818	29.39	157.2012	1031.464	-1.3935	0.36377	-0.070556	-46.9867	45.449	31.3804	-0.037109	0.10816	0.15991
1.63	-55.19	77.584	52.265	0.35742	0.11719	0.1543	-66.732	18.39	1466.949	-2.0748	0.58171	-0.0095797	70.3821	76.4468	1225.414	-1.852	0.54297	0.1461	73.735	-53.3316	1557.683	-2.0796	0.7251	-0.040527	100.4157	163.794	683.0955	-1.2202	0.42432	0.19287	64.8232	208.913	1004.152	-1.3628	0.34863	-0.061035	-45.0279	36.3937	24.5543	-0.027832	0.11621	0.15332
1.632	-39.0408	39.669	50.315	0.35059	0.1084	0.15479	-14.825	3.1223	1507.5094	-2.1056	0.58922	-0.0092899	69.1212	43.424	1235.21903	-1.82	0.53349	0.14883	27.81725	-12.38	1534.56	-2.1055	0.73438	-0.035645	117.664	147.336	662.9139	-1.1817	0.40947	0.18379	44.182	181.057	963.414	-1.3184	0.32275	-0.042969	-45.982	48.111	11.5154	-0.0073242	0.12598	0.14209
1.634	-9.818	42.127	47.141	0.3501	0.10938	0.16235	-64.288	41.7816	1503.249	-2.127	0.59961	-0.0087891	99.345	36.879	1252.267	-1.791	0.52539	0.15723	12.6527	-37.2173	1555.679	-2.1519	0.75439	-0.026855	126.408	182.3878	592.9	-1.1382	0.39658	0.18184	70.13	188.2131	940.291	-1.2974	0.31543	-0.036133	-82.737	26.4314	8.8756	0.0048828	0.13232	0.14453
1.636	-48.1984	67.01	20.3887	0.34863	0.10107	0.16699	-86.825	-24.514	1550.049	-2.15	0.60652	-0.0065982	59.6463	115.76	1214.913	-1.7606	0.5124	0.16182	59.985	5.4769	1523.973	-2.1797	0.76318	-0.016601	76.655	150.0224	583.8657	-1.0972	0.38447	0.17636	38.944	227.612	901.52887	-1.2515	0.29688	-0.016602	-38.955	5.405	43.923	0.022949	0.13867	0.14014
1.638	2.03	36.183	42.37	0.33496	0.079102	0.17676	-54.168	-8.258	1554.773	-2.1754	0.61753	-0.0082063	70.1003	65.182	1214.067	-1.7351	0.50323	0.16426	0.8452	-11.3823	1478.775	-2.2051	0.77148	-0.0087891	110.727	161.0791	573.788	-1.0626	0.37041	0.17393	50.536	179.009	898.9926	-1.2154	0.2876	-0.0031739	-51.766	11.566	25.3562	0.035157	0.14917	0.13135
1.64	19.29	54.049	41.673	0.31592	0.085938	0.17139	-121.213	-9.454	1536.945	-2.1948	0.62865	-0.0023822	67.959	122.417	1191.724	-1.7019	0.49424	0.17051	-4.623	-50.029	1505.607	-2.2227	0.76758	0.0039063	70.7253	176.97	530.056	-1.0215	0.3584	0.16846	101.6759	190.544	885.339	-1.1792	0.2749	0.0078125	-46.112	5.4348	37.173	0.049316	0.15674	0.12549
1.642	16.065	48.8	22.8566	0.29004	0.086914	0.16992	-83.611	-63.6608	1543.676	-2.2045	0.63722	0.0017615	6.368	156.883	1161.068	-1.6761	0.48134	0.17305	-12.03	4.4815	1497.6366	-2.2256	0.7666	0.01123	35.024	140.685	523.836	-0.9836	0.34844	0.16445	32.684	169.245	852.092	-1.1362	0.26221	0.024902	3.172	25.752	45.104	0.065918	0.15723	0.11426
1.644	51.214	18.82541	41.9682	0.26221	0.088868	0.17041	-92.663	7.9265	1510.0156	-2.2129	0.63379	0.010254	17.687	127.322	1145.963	-1.6445	0.47021	0.18213	-46.8659	-19.5791	1519.1848	-2.2319	0.76416	0.03125	44.605	160.278	491.338	-0.94443	0.3331	0.15898	29.748	147.7548	851.905	-1.1128	0.25537	0.035156	-29.58	33.565	35.9598	0.07373	0.15967	0.11865
1.646	36.39	43.023	36.342	0.23877	0.093262	0.17529	-125.645	0.0850000000000009	1507.043	-2.2104	0.62755	0.025325	-39.366	197.57	1099.9765	-1.6247	0.4585	0.18925	-22.2057	-1.853	1577.747	-2.2185	0.75806	0.042725	-16.686	130.9646	468.2526	-0.90459	0.32608	0.15156	20.053	199.1763	817.827	-1.062	0.24072	0.045898	-9.892	23.0226	33.061	0.081543	0.16797	0.10986
1.648	59.7937	14.9641	55.331	0.20215	0.10107	0.17139	-53.209	-3.8076	1516.499	-2.2087	0.61403	0.033915	-57.073	166.132	1080.04768	-1.6108	0.45264	0.18907	-56.75	3.799	1571.873	-2.207	0.73828	0.061035	1.567	115.1567	450.3114	-0.86172	0.31172	0.15078	-41.432	185.02	787.107	-1.0249	0.22998	0.052735	29.846	41.817	21.9973	0.085205	0.17553	0.10938
1.65	87.064	10.3025	68.756	0.18799	0.10205	0.17139	-88.851	33.697	1483.765	-2.2055	0.59867	0.048234	-41.457	152.88516	1068.531	-1.5905	0.4378	0.19102	-79.093	-67.115	1585.549	-2.1929	0.71924	0.082031	-20.679	146.573	387.03629	-0.81982	0.2959	0.14453	13.059	194.979	742.102	-0.99219	0.21484	0.072754	-8.786	18.7096	33.959	0.087891	0.18457	0.10693
1.652	45.2155	33.361	64.647	0.15088	0.10107	0.16895	-76.652	-23.5755	1492.171	-2.1873	0.5792	0.058547	-62.908	215.081	1024.003	-1.5684	0.43262	0.20176	-42.3973	-32.9268	1566.382	-2.1851	0.69971	0.091309	-75.5203	120.572	358.9131	-0.77881	0.29033	0.13867	-22.46	188.20959	665.5594	-0.94482	0.20557	0.07959	36.87	-0.0300000000000011	85.462	0.087402	0.19531	0.10596
1.654	56.1851	3.0829	70.126	0.11255	0.1084	0.16724	-26.911	14.61427	1469.618	-2.166	0.55225	0.077637	-48.099	151.1518	1028.214	-1.5464	0.4209	0.2002	-89.953	-34.8894	1521.7626	-2.1719	0.65723	0.1167	-40.912	114.275	352.453	-0.73682	0.27627	0.13027	-64.2959	155.299	636.639	-0.92188	0.20264	0.088379	47.888	-4.5778	81.342	0.088867	0.19971	0.10498
1.656	56.7812	21.753	70.822	0.083984	0.11133	0.16602	-43.2026	61.736	1443.375	-2.1694	0.53598	0.10587	-40.828	172.727	1003.219	-1.5176	0.41397	0.20312	-104.74	-45.176	1530.29402	-2.1609	0.64184	0.14112	-79.5116	109.445	307.356	-0.70127	0.26651	0.13106	-29.053	185.02703	607.9549	-0.86914	0.19336	0.093262	27.906	-33.8458	74.572	0.080078	0.2124	0.10156
1.658	37.813	29.9093	25.74	0.055664	0.11279	0.16455	15.77	58.991	1442.888	-2.1698	0.53523	0.1265	-53.26	168.66	963.906	-1.4914	0.40039	0.20556	-95.83	19.7723	1498.6932	-2.168	0.63281	0.16748	-79.8565	79.325	296.0323	-0.66435	0.25459	0.11748	-53.5912	169.755	579.977	-0.8291	0.18481	0.10473	79.0581	-19.9322	96.344	0.073486	0.22485	0.10083
1.66	53.2696	1.4462	26.1406	0.04541	0.11182	0.1626	28.764	136.056	1395.8082	-2.1624	0.54844	0.13754	-19.213	100.105	951.139	-1.4644	0.38672	0.204	-129.438	-12.7261	1469.048	-2.1875	0.65039	0.18262	-52.1497	115.927	259.979	-0.63477	0.24609	0.11182	-23.758	141.445	591.215	-0.78955	0.18311	0.11328	42.7359	-9.497	93.876	0.060547	0.23926	0.097656
1.662	3.408	39.2805	24.0296	0.02002	0.11035	0.15674	18.047	115.15	1393.6891	-2.1274	0.54302	0.14375	-34.094	165.147	916.294	-1.4337	0.37256	0.20469	-62.609	4.1809	1486.327	-2.1816	0.65527	0.18018	-80.704	102.24	239.843	-0.59385	0.23506	0.10615	-40.66	155.9416	545.81	-0.73828	0.17578	0.12549	48.1802	-14.822	124.539	0.049805	0.25439	0.10303
1.664	-20.004	14.931	30.7963	0.0046387	0.11108	0.15283	94.039	84.537	1409.4	-2.0801	0.5293	0.16113	-17.759	142.72	932.607	-1.3965	0.36133	0.20703	-97.154	46.834	1462.905	-2.1206	0.64697	0.16748	-40.6006	92.636	244.358	-0.56328	0.22266	0.10107	-63.9344	138.721	509.2762	-0.71826	0.17773	0.13184	56.213	-8.567	132.607	0.041504	0.26123	0.099609
1.666	1.62	9.4934	39.849	-0.0087891	0.11768	0.14941	51.3474	111.913	1393.249	-2.0595	0.51918	0.17028	8.744	142.9717	931.818	-1.36	0.34717	0.20391	-111.133	34.1637	1479.195	-2.0769	0.62623	0.17798	-33.268	114.175	211.603	-0.53437	0.21328	0.095215	-6.843	177.509	486.602	-0.67188	0.17529	0.14502	-0.375	-12.9675	143.379	0.012695	0.28027	0.10352
1.668	-53.9922	29.7063	26.82982	-0.01709	0.12939	0.14111	60.3415	46.9744	1417.295	-2.0634	0.52228	0.18118	-6.348	190.028	892.662	-1.3223	0.33555	0.20107	-27.9462	110.613	1453.773	-2.0659	0.60596	0.18359	-70.92996	91.311	187.84139	-0.50889	0.20068	0.089941	-23.929	209.6	445.3128	-0.63355	0.17431	0.15161	-4.054	-22.4858	226.66727	-0.0065917	0.28906	0.10889
1.67	-32.581	0.5397	62.392	-0.019043	0.13281	0.14014	77.407	76.879	1384.924	-2.0518	0.53123	0.19582	27.866	122.672	878.827	-1.286	0.32422	0.19638	-67.743	127.635	1402.2405	-2.0698	0.604	0.18994	-11.624	112.186	181.812	-0.48633	0.19189	0.087402	-37.4883	165.447	441.2148	-0.60059	0.17188	0.15869	-8.25	15.721	282.7212	-0.030762	0.29736	0.10889
1.672	-38.629	24.481	65.674	-0.015137	0.14258	0.13184	39.246	79.192	1336.888	-2.0276	0.53496	0.20873	41.26	154.3771	828.823	-1.2473	0.31514	0.19346	-46.0083	87.459	1407.11019	-2.0649	0.61377	0.19922	-13.291	102.299	143.912	-0.44883	0.18106	0.081348	-8.477	151.5017	416.5292	-0.54395	0.17773	0.1665	-8.893	29.7527	368.7812	-0.069336	0.31055	0.12158
1.674	-66.8765	33.6777	56.584	-0.011718	0.15332	0.13183	74.6294	29.085	1316.171	-1.9863	0.54004	0.20801	36.519	156.153	779.252	-1.2065	0.30127	0.18164	-19.5757	122.458	1382.6624	-2.0371	0.625	0.19824	-7.897	72.579	160.07	-0.41709	0.17188	0.075781	-34.076	114.9082	381.0139	-0.50293	0.17676	0.16748	14.282	64.4129	468.6022	-0.092285	0.31836	0.12061
1.676	-30.292	-3.33	33.0161	-0.0014648	0.15918	0.12451	59.561	92.352	1262.8853	-1.9364	0.53565	0.20809	90.1443	128.631	746.202	-1.173	0.29072	0.17822	-48.1257	76.754	1385.8935	-1.99	0.62036	0.2002	36.728	83.624	151.093	-0.3667	0.17422	0.068359	29.894	88.2742	370.321	-0.4624	0.18408	0.17529	-25.475	88.95	573.101	-0.13672	0.33643	0.12891
1.678	-66.7884	16.7024	10.8538	0.01709	0.17334	0.11914	28.278	74.327	1239.514	-1.8909	0.52	0.20907	97.3281	190.0447	687.285	-1.1433	0.28008	0.17647	17.3982	92.078	1402.021	-1.9399	0.61768	0.19824	29.201	42.844	127.063	-0.31631	0.16836	0.062891	18.585	120.3174	343.622	-0.3916	0.18994	0.18066	-22.294	102.607	709.041	-0.17358	0.35034	0.12964
1.68	-72.37006	-21.0458	22.8122	0.022461	0.17676	0.12109	52.0857	78.975	1250.758	-1.8455	0.50503	0.21366	77.9602	159.7513	648.286	-1.109	0.27031	0.17295	-5.9707	117.249	1360.788	-1.8848	0.60352	0.19385	68.9372	32.33	140.647	-0.25879	0.17139	0.060547	-6.259	92.0408	325.807	-0.36084	0.19092	0.18359	22.188	115.612	804.688	-0.22021	0.36914	0.13428
1.682	-25.928	-26.345	35.2478	0.04541	0.18408	0.11035	-14.422	144.302	1237.692	-1.8089	0.4965	0.2133	103.403	156.504	632.401	-1.0767	0.26182	0.16943	-21.9887	64.9988	1355.726	-1.8672	0.60156	0.19873	71.196	27.5444	123.247	-0.19443	0.16231	0.052051	82.4255	105.2908	319.083	-0.29102	0.19434	0.1792	-17.997	83.532	858.641	-0.30566	0.38086	0.14209
1.684	-57.2518	6.762	25.282	0.057861	0.19384	0.11377	0.828999999999997	108.358	1232.286	-1.7852	0.48633	0.20947	77.6829	203.048	592.339	-1.0464	0.25244	0.16357	36.3083	100.344	1342.164	-1.8237	0.5874	0.20117	65.2812	7.9165	106.3783	-0.13574	0.15869	0.038477	36.787	119.2671	249.6608	-0.23487	0.198	0.17822	-11.815	49.3309	922.7641	-0.35938	0.38525	0.14355
1.686	-24.892	-39.9	29.1551	0.071289	0.19775	0.11621	16.694	158.577	1214.679	-1.7493	0.48534	0.2119	111.803	153	594.314148	-1.0131	0.24414	0.16123	6.509	99.318	1296.6454	-1.8024	0.58129	0.2024	78.5227	40.5099	91.8265	-0.072851	0.15245	0.025196	42.9795	99.787	235.5886	-0.17529	0.19629	0.18018	-18.069	15.585	970.872	-0.50195	0.38184	0.14941
1.688	-15.567	-10.6119	49.29	0.089355	0.19922	0.11621	-34.572	177.112	1175.456	-1.7205	0.47741	0.20956	98.881	186.221	584.291	-0.97979	0.23691	0.15947	24.7613	80.555	1301.8645	-1.7788	0.57275	0.2041	69.6336	54.5423	68.048	-0.0074218	0.14365	0.014258	84.825	116.065	224.0221	-0.099609	0.19727	0.18164	-38.3867	-58.251	1032.376	-0.6311	0.37841	0.15821
1.69	-37.262	12.5671	35.121	0.099609	0.20654	0.11475	-23.55	161.7418	1145.503	-1.6912	0.47118	0.21312	51.0825	186.776	546.455	-0.9458	0.22988	0.15245	46.644	149.2467	1265.2573	-1.7456	0.56689	0.20654	84.0332	39.208	96.701	0.05127	0.13428	0.0024414	12.062	97.889	205.4007	-0.064453	0.19336	0.18311	32.589	-120.4482	1090.428	-0.7793	0.37109	0.16846
1.692	22.86	2.65121	32.7146	0.11523	0.20605	0.11475	-44.54	219.302	1089.1987	-1.6592	0.46327	0.21112	78.0969	135.8597	526.669	-0.9084	0.22471	0.14717	-24.4004	118.6256	1250.73829	-1.73	0.56299	0.21094	83.805	48.586	102.195	0.10518	0.12343	-0.0069336	43.323	97.018	207.0355	0.012207	0.18164	0.17871	4.48	-164.4368	1075.982	-1.0049	0.3623	0.17676
1.694	9.618	52.993	0.2058	0.11963	0.20679	0.11182	-79.5482	192.667	1053.48	-1.6348	0.45508	0.21924	38.012	164.032	464.30872	-0.87842	0.21631	0.14111	22.518	153.663	1264.297	-1.6895	0.55371	0.21094	19.503	14.1017	87.189	0.15098	0.10928	-0.011719	50.1464	129.746	162.399	0.067139	0.17212	0.17822	33.281	-202.977	1098.822	-1.1274	0.35596	0.18262
1.696	5.493	23.2617	17.3248	0.12695	0.21924	0.11475	-38.13	175.586	1051.32402	-1.6005	0.44366	0.2122	2.899	124.8954	440.413	-0.84697	0.20772	0.13721	2.157	201.252	1234.316	-1.6626	0.54834	0.20996	35.166	22.474	84.384	0.19239	0.10381	-0.028906	22.005	97.448	178.462	0.12402	0.16357	0.18018	92.594	-183.749	1091.962	-1.394	0.35596	0.19287
1.698	37.486	8.4435	35.1506	0.12598	0.21191	0.10596	-70.0057	194.931	1031.766	-1.5675	0.43702	0.21035	-8.843	113.734	432.8998	-0.81748	0.19404	0.13643	-29.1871	169.477	1231.597	-1.6304	0.53809	0.20801	39.094	41.97	62.571	0.23389	0.097949	-0.040137	24.509	99.988	181.583	0.18701	0.14844	0.16943	68.353	-148.345	1026.815	-1.5906	0.36987	0.19776
1.7	28.432	37.0869	8.0467	0.125	0.21338	0.104	-50.523	129.1262	1028.947	-1.5425	0.43467	0.21035	-39.001	149.968	399.659	-0.79561	0.18623	0.1333	-0.756	217.391	1198.021	-1.5898	0.5293	0.21338	-14.521	20.9619	68.851	0.26611	0.085449	-0.05127	7.076	102.912	147.173	0.22217	0.13818	0.16504	117.783	-119.158	1034.0977	-1.7754	0.39844	0.20361
1.702	74.781	-0.4368	41.563	0.11719	0.21631	0.104	-26.659	157.94581	991.97	-1.5092	0.42891	0.21123	-31.853	92.8741	395.28	-0.76953	0.17978	0.13809	-62.921	207.453	1150.77	-1.5723	0.52441	0.20947	5.017	40.049	53.221	0.2916	0.077539	-0.061328	-11.741	90.699	125.6816	0.28271	0.12305	0.16406	132.774	-72.113	1006.0285	-1.9766	0.44531	0.1958
1.704	55.8916	28.4964	45.176	0.11084	0.22192	0.098875	-65.1568	163.923	965.502	-1.4785	0.42285	0.21436	-43.951	121.365	369.879	-0.74414	0.17871	0.12744	-52.6457	174.964	1137.241	-1.5293	0.51758	0.2085	-35.13	30.6944	3.7343	0.31367	0.069239	-0.074512	2.06	105.545	105.7727	0.32081	0.10181	0.16235	107.563	-64.475	992.1711	-2.0479	0.47461	0.19678
1.706	59.186	9.506	54.412	0.097656	0.23047	0.096191	-0.0179999999999936	145.7323	962.683	-1.445	0.41768	0.21299	-90.858	114.257	340.504	-0.71182	0.17607	0.12617	-42.8044	224.868	1085.965	-1.497	0.51269	0.20948	-36.259	17.78093	16.6974	0.33047	0.06416	-0.085449	-26.631	64.696	96.2146	0.35107	0.087402	0.15771	163.145	-45.5767	1033.593	-2.1348	0.53516	0.18701
1.708	69.038	-30.4923	63.7689	0.080566	0.24072	0.095703	-8.672	208.194	914.02194	-1.4108	0.41416	0.20996	-46.351	86.716	336.122	-0.68018	0.17207	0.12305	-99.83	177.3738	1078.968	-1.4585	0.50439	0.2041	-20.552	26.024	39.9479	0.34258	0.057422	-0.08955	-27.265	28.0966	101.472	0.38281	0.058594	0.15723	116.49237	-5.79199999999999	1021.084	-2.1267	0.58667	0.16992
1.71	29.177	1.608	42.794	0.075195	0.24951	0.097656	-4.122	177.047	902.2658	-1.3753	0.40205	0.20644	-75.5091	124.707	276.795	-0.63916	0.16816	0.1211	-44.863	170.8771	1063.514	-1.4097	0.50049	0.20117	-88.5721	-6.6383	48.786	0.35498	0.057617	-0.094727	-31.923	41.9892	82.7835	0.40186	0.045898	0.15771	100.6041	5.917	1047.985	-2.0645	0.63281	0.15625
1.712	11.463	-18.794	77.192	0.054199	0.26123	0.092285	54.601	172.2489	877.978	-1.3384	0.396	0.20361	-81.756	98.322	244.3983	-0.59092	0.1665	0.11396	-64.36505	181.28	1031.483	-1.3843	0.49463	0.20166	-55.3272	-5.7453	55.802	0.35244	0.05332	-0.10342	-58.9203	40.435	88.365	0.41406	0.018066	0.15234	135.782	11.425	1049.419	-1.9082	0.7041	0.13574
1.714	20.363	-22.75493	141.5555	0.042725	0.26977	0.094238	13.932	208.671	834.386	-1.2983	0.38525	0.19971	-39.986	103.4151	228.15	-0.54443	0.16455	0.10645	-83.838	145.84893	1031.417	-1.334	0.48047	0.19482	-42.981	6.1043	18.2553	0.35508	0.053125	-0.10771	-20.459	64.998	127.893	0.41968	-0.0021973	0.14747	84.1377	-8.47999999999999	990.265	-1.814	0.72803	0.13086
1.716	-44.3379	24.35571	169.0105	0.03125	0.28174	0.092773	56.771	179.399	833.667	-1.2591	0.37617	0.19531	-78.3165	142.748	201.557	-0.49238	0.16221	0.099414	-48.96	202.564	1014.338	-1.2955	0.46827	0.19483	-79.353	-13.3146	27.1723	0.35274	0.061719	-0.10967	-66.12111	64.141	113.361	0.42041	-0.026855	0.15137	82.234	-76.133	1017.128	-1.6284	0.75439	0.12061
1.718	-24.827	15.8101	206.2098	0.0092773	0.29443	0.091309	89.4178	211.768	781.021	-1.2219	0.36739	0.18867	-31.047	98.771	221.59	-0.43652	0.16406	0.090039	-70.483	187.239	989.918	-1.2593	0.45557	0.19141	-47.461	5.9756	34.058	0.35039	0.061523	-0.11328	-45.655	52.286	102.27	0.4082	-0.047363	0.14551	53.017503	-118.3334	1031.456	-1.5054	0.75195	0.098631
1.72	-30.1174	55.192	275.783	-0.0048828	0.30127	0.086426	42.676	210.613	756.774	-1.1828	0.35215	0.18633	-24.533	127.609	199.939	-0.38027	0.15274	0.079492	-45.1335	163.627	978.51	-1.209	0.4375	0.18555	-73.4641	12.0121	19.5254	0.34375	0.059082	-0.11377	-14.053	69.757	60.0436	0.3999	-0.058594	0.14258	4.298	-167.399	1057.751	-1.3857	0.7334	0.070801
1.722	-71.092	84.481	360.523	-0.041992	0.30957	0.09668	101.215	177.9905	720.561	-1.1414	0.34277	0.18232	-47.6693	110.729	173.143	-0.32383	0.1498	0.075293	-6.391	194.867	912.026	-1.1831	0.43018	0.18652	-66.9129	8.20337	28.031	0.34541	0.057227	-0.11309	-61.3136	60.084	40.7075	0.36719	-0.074219	0.13574	36.571	-247.788	1119.384	-1.2261	0.68799	0.037598
1.724	-44.135	80.389	495.777	-0.075928	0.31763	0.095947	84.7109	203.733	661.3762	-1.1016	0.33496	0.17139	17.328	73.3098	178.485	-0.26758	0.14014	0.067871	-63.6956	142.2866	862.7842	-1.1304	0.41553	0.18164	-14.99	40.078	22.27	0.33242	0.053027	-0.11699	-7.934	36.79	88.328	0.34399	-0.098875	0.14038	-21.234	-251.554	1115.055	-1.1504	0.66797	0.01416
1.726	-62.128	145.944	571.921	-0.11865	0.32275	0.097168	69.9663	161.7526	635.653	-1.0606	0.32929	0.16855	11.271	98.17	153.072	-0.21504	0.13125	0.059375	-18.478	164.055	842.9058	-1.0935	0.40649	0.17505	-15.104	13.3353	27.3866	0.31875	0.059277	-0.11465	-13.837	33.6718	63.79	0.31543	-0.1123	0.14307	-73.315	-269.941	1157.551	-1.0327	0.6499	0.00097656
1.728	-74.3431	151.951	647.746	-0.17236	0.32666	0.099121	98.7945	163.58878	608.159	-1.0206	0.32275	0.16582	43.649	52.3919	152.615	-0.15957	0.12705	0.050976	-7.035	196.761	812.917	-1.0527	0.3916	0.16846	18.864	2.2834	46.647	0.29697	0.057715	-0.11318	-41.5363	9.0652	47.9327	0.26172	-0.12207	0.14209	-73.207	-263.087	1202.751	-0.98975	0.67285	-0.0029297
1.73	-26.405	136.035	760.987	-0.20801	0.33008	0.10254	43.018	190.978	564.7715	-0.9835	0.31533	0.15879	60.516	26.627	146.692	-0.10918	0.11768	0.044727	6.422	156.5187	801.589	-1.001	0.38184	0.16162	22.126	21.8278	21.6513	0.27148	0.061035	-0.10156	21.991	24.108	51.006	0.23535	-0.11572	0.13818	-130.543	-195.73	1201.698	-0.96631	0.7251	-0.0092773
1.732	-36.559	152.897	849.98823	-0.28125	0.33691	0.10254	66.474	147.229	571.164	-0.94678	0.31006	0.15391	44.671	51.8253	116.8286	-0.06084	0.10566	0.039453	44.9865	190.61244	753.535	-0.97461	0.37305	0.15527	34.571	14.7106	24.3466	0.24443	0.065039	-0.1085	8.149	28.673	45.7106	0.19238	-0.11572	0.14502	-108.158	-186.6107	1235.496	-0.96094	0.78125	-0.041016
1.734	-34.987	79.514	963.257	-0.35303	0.34009	0.104	40.601	155.974	547.275	-0.91602	0.30566	0.15039	75.4726	4.801	129.55	-0.019531	0.09375	0.029297	9.7461	161.181	680.2328	-0.93164	0.35889	0.15234	72.63	36.067	27.4968	0.2123	0.065332	-0.09932	16.378	16.4609	62.175	0.15283	-0.11474	0.14746	-104.809	-129.652	1239.8591	-0.95068	0.77979	-0.045898
1.736	-16.153	63.277	1032.745	-0.44238	0.33789	0.10596	-17.161	149.311	516.988	-0.88389	0.29834	0.14609	86.4762	37.3388	123.988	0.025098	0.084375	0.01709	34.686	145.727	665.8802	-0.89233	0.34961	0.14746	42.15	33.164	12.364	0.16855	0.068457	-0.09502	51.238	34.8108	46.7204	0.12012	-0.11133	0.1499	-160.716	-98.959	1234.878	-0.95264	0.73291	-0.043945
1.738	-26.707	-0.395000000000003	1089.438	-0.58057	0.32666	0.10938	23.089	118.1629	510.896	-0.84736	0.2915	0.14141	73.143	36.342	114.726	0.067187	0.070898	0.0095702	53.259	198.382	613.1428	-0.85547	0.33984	0.13818	49.424	18.8804	31.107	0.12588	0.071972	-0.086133	-7.347	24.7355	10.732	0.078125	-0.10547	0.15869	-112.901	-111.849	1268.4024	-1.0144	0.70092	-0.033935
1.74	10.618	-108.778	1154.012	-0.66455	0.31885	0.11719	-19.218	160.449	468.323	-0.82002	0.28447	0.13711	103.53	8.983	124.185	0.10391	0.064258	-0.002539	17.276	165.4103	583.223	-0.80811	0.32666	0.13379	86.4126	44.5336	11.691	0.085449	0.075684	-0.080566	45.5208	5.00314	38.7797	0.057617	-0.098633	0.15674	-106.603	-57.918	1262.557	-1.1128	0.68604	-0.035156
1.742	30.95	-137.849	1173.084	-0.85938	0.30566	0.12939	-43.619	126.785	433.812	-0.78271	0.27891	0.12959	58.5463	53.178	98.401	0.14317	0.052929	-0.01543	54.9114	176.7998	555.868	-0.7832	0.3125	0.13184	51.423	24.5962	24.6388	0.045605	0.079492	-0.07002	61.76271	7.301	53.342	0.027832	-0.088867	0.15723	-109.657	-59.992	1274.09	-1.2593	0.70947	-0.04541
1.744	52.331	-214.626	1148.997	-1.0889	0.29297	0.146	-20.729	123.6354	396.21	-0.74512	0.27197	0.12598	47.833	24.8262	88.619	0.17285	0.035156	-0.024414	24.472	169.9317	516.712	-0.73047	0.30127	0.12646	88.148	25.2357	56.544	0.0072268	0.086036	-0.065234	22.337	-21.9554	51.271	0.010986	-0.071533	0.16284	-48.635	-75.185	1319.372	-1.3203	0.71973	-0.051758
1.746	111.175	-244.704	1143.654	-1.2144	0.29248	0.15137	-90.695	132.637	348.919	-0.7168	0.26641	0.12227	57.004	18.998	87.5409	0.20293	0.03164	-0.034473	12.703	142.256653	513.4563	-0.6792	0.28369	0.12012	57.76526	20.4173	41.414	-0.029101	0.089941	-0.058593	46.434	-5.5763	50.56	-0.00097656	-0.054199	0.16162	-100.399	-54.121	1320.694	-1.4199	0.72656	-0.060547
1.748	92.955	-197.292	1115.466	-1.4761	0.30859	0.1582	-58.831	84.908	337.704	-0.68262	0.25498	0.1168	2.89	53.118	53.5747	0.23369	0.024024	-0.050196	35.76494	186.022	493.553	-0.65771	0.27295	0.12402	28.052	-7.829	38.441	-0.067383	0.091797	-0.051367	16.75	11.14225	23.7511	-0.0083008	-0.036133	0.16699	-76.066	-122.9024	1356.884	-1.5054	0.72314	-0.053223
1.75	128.438	-212.436	1111.044	-1.6743	0.3374	0.15771	-35.226	93.134	324.405	-0.65215	0.25029	0.11289	18.11	22.7287	63.3436	0.25596	0.014648	-0.050586	-6.358	170.129	455.72	-0.62646	0.26025	0.11328	66.6885	8.825	46.365	-0.094238	0.098145	-0.04541	36.505	4.568	34.892	-0.012695	-0.023438	0.16504	-54.0092	-119.758	1354.9689	-1.5527	0.7168	-0.054688
1.752	142.792	-165.161	1100.814	-1.8516	0.37012	0.15186	-86.5702	90.961	295.181	-0.62354	0.23955	0.10615	4.318	51.678	52.967	0.27666	0.0021484	-0.066504	-7.315	153.482	448.314	-0.59204	0.25171	0.11328	26.346	21.17	24.35821	-0.12168	0.11015	-0.046875	35.5889	11.2186	36.063	-0.011719	-0.0063477	0.16113	-97.369	-116.973	1370.6335	-1.6445	0.70898	-0.039063
1.754	139.5527	-102.765	1053.571	-2.0327	0.41455	0.14014	-45.6258	70.449	275.206	-0.59814	0.23291	0.10596	-36.956	42.853	39.472	0.30029	-0.011719	-0.07373	-18.663	158.248	398.999	-0.57129	0.24023	0.10986	1.14	15.8353	53.5685	-0.13584	0.11679	-0.047168	-14.994	-4.78188	2.504	-0.0056153	0.0095213	0.16113	-23.796	-170.049	1430.2997	-1.7247	0.71143	-0.03125
1.756	191.078	-101.927	1091.88	-2.0898	0.44141	0.13574	-58.8861	115.626	230.841	-0.57236	0.21416	0.10234	-13.429	13.2524	40.136	0.30869	-0.021778	-0.080957	-60.1777	116.686	346.391	-0.53711	0.22803	0.10449	-1.739	43.949	32.0162	-0.14522	0.12735	-0.046386	-9.471	-2.612	-1.954	-0.00048828	0.028809	0.15576	-12.886	-134.1894	1450.508	-1.8037	0.71484	-0.019043
1.758	159.5423	-38.759	1077.881	-2.1348	0.49023	0.12207	-47.7674	93.924	215.417	-0.54521	0.20615	0.1001	-75.9752	42.7706	35.322	0.3087	-0.027539	-0.08457	-25.601	120.578	333.5105	-0.52197	0.21973	0.10498	-55.3621	31.1124	33.721	-0.14639	0.13789	-0.044726	-7.116	24.705	-21.88008	0.010254	0.051758	0.14453	-7.1778	-156.3606	1492.768	-1.8984	0.71973	-0.01123
1.76	154.336	-11.653	1037.817	-2.0894	0.52295	0.10889	-2.708	97.68	195.699	-0.51357	0.19678	0.096192	-66.31255	11.397	44.418	0.31455	-0.038867	-0.090039	-61.842	118.3249	309.54948	-0.49707	0.20264	0.10254	-42.0877	27.272	58.248	-0.14746	0.14746	-0.049805	-32.277	7.953	13.266921	0.018066	0.063965	0.14453	43.089	-178.6	1555.609	-1.9414	0.72266	-0.013672
1.762	158.376	-21.101	1029.9533	-2.0029	0.55859	0.099121	-44.635	106.83	159.883	-0.47588	0.19365	0.09082	-29.437	-5.2579	46.969	0.30303	-0.046192	-0.088183	-73.091	89.0725	319.651	-0.46533	0.1958	0.097657	-31.227	26.4087	54.4152	-0.13086	0.1582	-0.05166	-16.408	16.53418	37.624	0.031738	0.085938	0.13135	32.178	-92.414	1542.112	-2.0137	0.72754	-0.016113
1.764	98.82593	9.742	979.36	-1.8228	0.57861	0.096191	-6.67	65.3935	172.089	-0.4292	0.19092	0.090332	-70.30348	10.5925	19.265	0.28955	-0.056641	-0.083984	-54.7727	123.405	289.116	-0.43848	0.18555	0.095215	-87.8062	-11.768	76.33	-0.1209	0.16553	-0.056739	-62.8791	27.4723	19.9519	0.04541	0.10425	0.1272	64.873	-111.83	1550.876	-2.0469	0.73755	-0.020264
1.766	90.1226	-61.545	970.701	-1.7271	0.58643	0.089355	14.553	74.1313	174.363	-0.37656	0.1833	0.082617	-65.5896	-21.0396	28.6698926	0.26162	-0.060059	-0.083594	-76.005	116.554	241.747	-0.3916	0.17822	0.094727	-53.584	-4.385	80.539	-0.098634	0.17569	-0.06416	-33.5131	12.459	29.833	0.060059	0.12061	0.12158	64.95	-56.60903	1519.895	-2.0703	0.74316	-0.014648
1.768	75.7938	-121.997	1004.912	-1.5435	0.59229	0.070801	-15.011	58.246	164.288	-0.32197	0.18144	0.066797	-52.805	12.3734	37.103	0.23135	-0.05791	-0.078808	-56.2714	118.949	247.83	-0.36719	0.17285	0.091309	-50.328	-6.384	46.4022	-0.071972	0.18145	-0.067188	-5.191	48.088	31.38712	0.075684	0.14307	0.1123	17.2349	-9.236	1453.277	-2.0894	0.74658	-0.01416
1.77	13.999	-130.434	995.685	-1.4033	0.56592	0.056885	47.4661	32.5055	163.05	-0.26065	0.17715	0.065234	-63.8028	16.088	21.6103	0.19189	-0.059082	-0.073339	-45.962	139.929	218.172	-0.30322	0.1665	0.077637	-76.1357	-13.911	62.0145	-0.049805	0.18799	-0.077148	-74.445	34.2567	17.9769	0.079102	0.15332	0.10596	37.204	-52.833	1477.338	-2.0933	0.74854	-0.011719
1.772	-5.1783	-232.584	1027.8985	-1.2773	0.53125	0.046875	36.57	51.5663	121.606	-0.19639	0.17119	0.054981	-30.515	-7.1292	36.388	0.14932	-0.059277	-0.064062	-58.043	105.045	213.1887	-0.25854	0.16333	0.079101	-28.2	1.388	77.4638	-0.016601	0.19307	-0.08457	-42.115	18.2903	17.218	0.093262	0.16992	0.10254	31.0103	8.6397	1481.1658	-2.103	0.73975	-0.0014648
1.774	-43.5784	-252.325	1073.675	-1.1421	0.49072	0.027344	51.708	24.3947	107.275	-0.12695	0.16211	0.044434	-62.1081	22.364	13.373	0.10449	-0.056152	-0.053223	-28.466	124.608	191.9373	-0.20654	0.15771	0.072754	-48.85	-29.519	102.062	0.011035	0.19961	-0.087695	-49.185	27.316	-23.3014	0.10156	0.1897	0.097168	-15.971	-7.168	1485.81727	-2.1074	0.72803	0.0092775
1.776	-81.396	-269.423	1085.944	-1.0835	0.479	0.019531	88.6732	22.549	101.121	-0.064356	0.15332	0.029688	-21.168	-3.597	19.8167	0.062598	-0.052734	-0.05	-50.515	109.227	150.081	-0.13867	0.14307	0.053711	-10.074	-28.298	150.137	0.037597	0.20352	-0.097071	-50.86	9.174	-5.7423	0.11035	0.20313	0.091797	9.7182	-33.09456	1513.1532	-2.1147	0.72705	0.015137
1.778	-88.709	-331.139	1141.729	-1.0034	0.48682	0.024902	39.84	43.9638	60.8083	-0.003125	0.14199	0.017383	15.027	9.5575	33.5627	0.018653	-0.042676	-0.047754	-39.146	86.016	169.283	-0.104	0.13428	0.053223	-6.335	-9.5405	161.847	0.064063	0.20732	-0.10068	15.507	3.726	34.19148	0.1167	0.23193	0.087402	-49.244	38.4851	1474.4059	-2.1187	0.70557	0.041016
1.78	-144.851	-260.239	1134.0364	-0.97803	0.52637	0.021241	71.0658	17.396	79.1787	0.05586	0.12871	-0.0025391	-9.621	49.0078	7.7238	-0.018066	-0.036035	-0.042285	-6.25	95.907	174.251	-0.040039	0.12354	0.038574	-22.554	-10.2014	231.943	0.088379	0.21631	-0.11133	-30.118	10.1789	48.0092	0.11816	0.24268	0.081055	-59.5294	-12.111	1489.4584	-2.1226	0.70264	0.056152
1.782	-153.499	-239.174	1138.9993	-0.96045	0.57275	0.0058594	70.2944	39.147	78.9265	0.11748	0.1165	-0.017285	42.076	19.2583	17.3285	-0.049805	-0.023437	-0.03418	-23.216	65.148	150.257	0.0056154	0.10962	0.026123	20.117	18.8814	299.636	0.10205	0.21543	-0.11231	-27.056	10.1306	53.411	0.11523	0.26758	0.077148	-27.9723	19.67	1503.618	-2.1304	0.69189	0.071777
1.784	-146.193	-196.2958	1216.493	-0.92041	0.5874	0	31.302	38.8796	77.2067	0.17236	0.099121	-0.03125	24.147	46.536	18.7382	-0.072754	-0.010254	-0.034668	7.807	65.8	154.705	0.040527	0.091309	0.015137	-14.037	40.6315	342.3365	0.11025	0.22363	-0.11309	31.62	46.822	48.735	0.10742	0.29272	0.075195	-61.1701	30.1904	1485.5873	-2.1287	0.6814	0.093264
1.786	-144.196	-95.747	1224.69	-0.90967	0.57275	0.0024414	70.3385	29.5729	85.196	0.21953	0.088574	-0.04834	23.784	43.521	10.32512	-0.086035	0.0017578	-0.031641	33.1874	68.686	119.127	0.09082	0.077637	0.0043945	-12.217	59.4575	425.576	0.10986	0.23613	-0.11699	12.787	38.0905	51.831	0.09375	0.31445	0.072754	-56.846	-45.6489	1511.5491	-2.1284	0.6665	0.11475
1.788	-140.405	-118.41	1239.192	-0.94336	0.52832	0.012695	29.647	62.071	65.891	0.26807	0.075391	-0.061426	89.6899	21.25457	40.452	-0.093164	0.011328	-0.034766	18.392	22.8365	112.915	0.11719	0.069336	-0.0024414	12.78967	119.583	514.084	0.098537	0.24531	-0.11777	17.818	10.386	61.4397	0.078125	0.34229	0.075195	-65.584	-10.6036	1523.69	-2.1226	0.63916	0.13428
1.79	-119.535	-74.446	1258.848	-1.0134	0.51416	0.01587	-6.04	47.847	64.569	0.31259	0.060547	-0.07627	51.4871	63.67	25.5567	-0.090429	0.022657	-0.038281	66.6322	33.9088	117.295	0.16113	0.053223	-0.024902	-27.688	145.0724	611.5746	0.073242	0.25391	-0.11426	26.613	15.8281	56.415	0.069336	0.35596	0.071289	-119.212	-27.096	1543.761	-2.1191	0.625	0.14648
1.792	-92.487	-40.715	1243.349	-1.1108	0.51514	0.0078125	31.548	50.005	72.698	0.34619	0.045313	-0.087109	57.6086	18.1399	37.878	-0.080859	0.032226	-0.04082	42.984	25.277	93.7186	0.19409	0.040039	-0.037109	14.86656	147.0483	735.001	0.042676	0.26172	-0.10937	-3.198	-9.233	52.3758	0.043457	0.38721	0.070313	-97.003	-37.9512	1548.173	-2.1191	0.60938	0.17725
1.794	-80.433	-97.327	1278.9765	-1.2417	0.51611	-0.00048828	-27.114	61.265	41.429	0.38037	0.031738	-0.1084	82.0336	8.1988	41.422	-0.063477	0.040039	-0.041992	38.499	15.1075	107.609	0.22705	0.026367	-0.049316	12.0194	155.617	818.5114	0.0016602	0.26309	-0.10391	47.5582	-7.947	97.93	0.02539	0.40601	0.068603	-107.695	28.3817	1508.547	-2.1172	0.60791	0.19433
1.796	-84.536	-28.137	1263.3345	-1.3042	0.51416	-0.003418	-20.19	26.892	49.6339	0.40654	0.013379	-0.10488	32.348	16.5688	19.4199	-0.046973	0.046875	-0.048047	64.3929	37.4201	111.483	0.2627	0.0048828	-0.069824	-32.674	118.533	889.1171	-0.045606	0.26347	-0.099219	31.4796	-7.382	127.188	-0.0024414	0.42627	0.068848	-105.894	-21.2784	1475.785	-2.1133	0.62207	0.20703
1.798	-80.046	-46.708	1249.757	-1.4058	0.51904	-0.0083008	-13.083	45.544	26.7861	0.41738	-0.0024414	-0.1126	60.1452	-9.3631	34.6852	-0.02959	0.052441	-0.053125	22.695	18.1326	101.871	0.28125	-0.0024414	-0.072266	39.583	74.391	970.782	-0.098729	0.26856	-0.097559	3.248	-37.493	149.915	-0.049316	0.43994	0.061523	-93.445	10.827	1455.348	-2.0938	0.63086	0.20752
1.8	-50.9112	-92.13364	1327.4726	-1.4812	0.52002	-0.0095216	-50.265	30.9175	22.0263	0.42285	-0.014551	-0.11963	56.391	17.5262	47.045	-0.0073242	0.063379	-0.0625	24.559	22.176	102.28	0.30469	-0.021484	-0.09668	24.6561	16.2841	1001.123	-0.15869	0.27344	-0.09668	22.1685	-14.3609	171.99	-0.07666	0.45117	0.064453	-124.901	52.08	1434.3983	-2.061	0.62451	0.20117
1.802	-37.8671	-54.266	1346.7086	-1.5566	0.52539	0.0024414	-23.775	4.4808	51.335	0.4251	-0.024512	-0.12598	11.957	20.3936	49.039	0.0096679	0.071875	-0.061523	32.2946	41.427	74.524	0.31934	-0.027832	-0.10352	-6.97	-56.45	1044.595	-0.21367	0.27871	-0.093066	-12.214	-3.0787	193.1099	-0.13623	0.46631	0.0625	-78.193	22.6964	1446.93893	-2.0034	0.59424	0.20215
1.804	4.614	-148.979	1414.467	-1.6641	0.55078	0.019531	-64.3506	20.5784	35.439	0.41357	-0.034668	-0.12891	26.281	0.0116000000000001	65.881	0.026855	0.078613	-0.066406	4.239	20.8872	68.617	0.32959	-0.039063	-0.11768	32.5136	-89.1528	1062.565	-0.27832	0.28848	-0.091504	7.219	9.0808	251.9127	-0.1897	0.47681	0.071289	-59.9039	103.562	1442.624	-1.9909	0.57202	0.21924
1.806	28.466	-146.579	1473.434	-1.7358	0.55908	0.026367	-72.9861	-3.672	54.299	0.4	-0.027735	-0.13067	-15.78	20.338	61.148	0.049317	0.088086	-0.072754	23.959	30.204	57.873	0.33643	-0.052734	-0.12598	-42.182	-147.298	1033.9285	-0.35723	0.29785	-0.085254	-17.544	41.5725	326.8282	-0.24561	0.48975	0.070801	-59.603	102.516	1434.973	-1.9995	0.57275	0.21777
1.808	23.3521	-117.3393	1472.408	-1.8652	0.58203	0.034668	-34.372	-8.11	63.613	0.38633	-0.029394	-0.12978	-34.6107	-19.377	74.016	0.066504	0.095214	-0.079883	-13.29	9.606	14.1797	0.33203	-0.058594	-0.12646	-35.997	-185.959	1057.823	-0.44902	0.29951	-0.075	-50.853	39.1147	414.424	-0.3252	0.5	0.066895	27.627	90.146	1438.255	-1.998	0.59814	0.23096
1.81	59.8381	-185.205	1515.028	-1.9538	0.60034	0.039307	-77.3011	13.954	36.8451	0.36836	-0.02627	-0.12783	-29.656	-19.51	94.561	0.083691	0.10888	-0.087695	-43.962	2.7485	26.4395	0.33398	-0.071289	-0.13916	-61.331	-184.382	1051.678	-0.55078	0.3125	-0.068359	11.06	54.7243	537.1154	-0.36279	0.51025	0.061035	0.19	162.683	1402.316	-1.9805	0.60742	0.22705
1.812	87.868	-116.6307	1507.351	-2.0391	0.61914	0.036133	-43.301	7.45	41.678	0.33818	-0.025879	-0.12675	-56.0396	12.446	88.319	0.09746	0.11573	-0.091602	-5.618	25.3698	29.009	0.3291	-0.077393	-0.14258	-123.354	-174.479	1054.436	-0.675	0.31855	-0.055567	-12.276	86.391	629.505	-0.46533	0.51563	0.066406	4.1097	108.367	1397.684	-1.9253	0.61572	0.229
1.814	86.094	-122.653	1493.507	-2.1128	0.65088	0.025879	-27.793	43.342	19.064	0.30225	-0.017578	-0.12549	-29.134	-16.0617	125.837	0.1084	0.12256	-0.097656	-37.487	3.3688	40.895	0.32227	-0.080078	-0.14307	-120.059	-114.262	1072.541	-0.81807	0.3211	-0.034375	-4.689	86.479	757.643	-0.56323	0.52026	0.065918	55.8074	123.804	1404.407	-1.8767	0.60913	0.23047
1.816	101.762	-133.649	1515.3324	-2.1401	0.6665	0.024414	-58.3989	42.7735	23.3258	0.26533	-0.016309	-0.11504	-37.374	38.077	139.5287	0.1164	0.13028	-0.10645	-40.708	-4.9275	64.512	0.30029	-0.084961	-0.14795	-173.472	-63.939	1043.969	-0.98171	0.3332	-0.021875	24.722	104.159	865.69	-0.67334	0.51416	0.064453	11.073	128.17	1380.677	-1.8354	0.60254	0.229
1.818	86.405	-49.839	1509.285	-2.1719	0.70898	0.01416	0.898000000000003	22.7541	54.174	0.22647	-0.011621	-0.11152	-75.07	51.097	163.3532	0.12022	0.13809	-0.11133	-48.04307	7.3518	22.3666	0.28955	-0.083496	-0.14648	-195.026	-47.497	1061.488	-1.1592	0.3499	-0.0018554	-28.789	94.016	917.935	-0.85107	0.50732	0.069824	80.864	38.077	1362.2692	-1.7896	0.58838	0.22754
1.82	81.723	-86.382	1517.12	-2.1836	0.7334	0.0078125	-10.049	38.44	45.556	0.18311	-0.0022461	-0.1084	-51.757	36.61304	219.319	0.11709	0.14824	-0.11328	-69.285	-9.9924	15.2023	0.26611	-0.083008	-0.14111	-189.013	-18.821	1059.265	-1.3608	0.37549	0.022461	10.69	44.9521	990.399	-0.95654	0.50049	0.071777	54.15722	74.601	1318.4834	-1.7739	0.58057	0.22705
1.822	51.0673	-43.8115	1537.797	-2.1875	0.74609	0.0019531	10.208	3.888	44.408	0.13809	0.0037109	-0.10215	-56.903	72.076	268.288	0.10703	0.15498	-0.1164	-20.686	16.5417	31.6593	0.24414	-0.074707	-0.13819	-244.66	3.66	1037.3348	-1.5753	0.40635	0.060547	14.957	12.136	1015.119	-1.1753	0.49463	0.07373	27.533	64.189	1291.357	-1.7422	0.57617	0.22852
1.824	18.447	16.9765	1489.531	-2.1797	0.75781	0.00048828	72.7249	2.8705	53.851	0.097656	0.013672	-0.091309	-71.55	59.9655	358.763	0.085938	0.16211	-0.11865	-61.246	4.4839	11.5186	0.21533	-0.067871	-0.12646	-153.429	23.107	1057.6062	-1.7909	0.43759	0.10469	-49.2082	-72.395	1054.155	-1.4058	0.49268	0.074219	68.5472	57.714	1312.597	-1.7182	0.573	0.22925
1.826	15.378	-46.704	1482.1805	-2.1719	0.75488	0.0024414	19.978	23.8296	41.621	0.053418	0.020996	-0.086817	-47.0612	90.015	441.059	0.063867	0.17159	-0.12578	-52.16	-7.8845	14.1164	0.16553	-0.065918	-0.11914	-101.938	18.673	1058.3404	-1.996	0.47471	0.14531	45.381	-136.248	1084.411	-1.519	0.50146	0.075195	37.437	138.199	1291.643	-1.6948	0.5708	0.22852
1.828	-14.946	16.5579	1482.8792	-2.1616	0.74756	0	39.197	9.2408	33.153	0.0084964	0.037012	-0.077832	-83.847	124.576	503.116	0.03418	0.17442	-0.11934	-24.232	9.51717	4.61853	0.13965	-0.062988	-0.11426	-110.177	-18.105	1053.4831	-2.1837	0.50986	0.16865	28.188	-147.748	1051.654	-1.7383	0.53418	0.071289	29.0055	101.5889	1272.3967	-1.6616	0.56494	0.23193
1.83	-65.5292	3.092	1456.844	-2.1597	0.73438	0.0026855	60.699	32.6109	16.75638896	-0.034082	0.047949	-0.068848	-45.992	99.157	600.678	-0.0044922	0.17519	-0.11894	-47.0017	4.0327	-4.8027	0.089355	-0.053223	-0.1001	-61.164	-107.248	1079.567	-2.3242	0.54102	0.16602	31.806	-176.593	1066.428	-1.8706	0.57812	0.067382	46.1504	135.1753	1251.74	-1.6484	0.55762	0.229
1.832	-79.77	-38.0954	1493.3054	-2.1484	0.7207	0.013184	25.681	21.4736	0.90792	-0.072656	0.055762	-0.061621	-50.007	135.894	690.8576	-0.052051	0.17715	-0.12237	-9.713	18.72966	43.169	0.046143	-0.044434	-0.090088	-77.627	-154.982	1071.701	-2.3857	0.54785	0.16709	83.483	-159.784	1059.333	-1.9727	0.62207	0.053711	7.587	162.761	1214.298	-1.6152	0.54199	0.23975
1.834	-55.1936	37.0441	1513.7	-2.1421	0.70264	0.018555	85.4892	-9.23295	42.98	-0.10645	0.066406	-0.056641	-80.03	136.459	752.505	-0.10107	0.1792	-0.12305	1.739	35.768	20.5969	0.010254	-0.036621	-0.07959	-77.151	-204.024	1118.7324	-2.378	0.55713	0.14268	60.997	-143.761	1026.094	-2.0405	0.68896	0.051758	8.91	129.1284	1204.094	-1.5976	0.5354	0.23584
1.836	-81.429	-47.9783	1542.028	-2.1309	0.69824	0.025391	46.812	5.6403	44.891	-0.13418	0.07168	-0.05039	-9.8031	92.4738	837.3573	-0.16436	0.18252	-0.11611	-22.126	25.6271	18.834573	-0.037598	-0.026367	-0.077148	-40.4195	-229.909	1174.958	-2.2874	0.56884	0.11845	111.582	-134.22	1017.488	-2.0371	0.7168	0.055664	-22.032	206.67	1173.43	-1.5747	0.52979	0.23438
1.838	-94.101	-44.839	1561.15	-2.1206	0.68018	0.039063	34.949	-12.33936	51.696	-0.15733	0.083691	-0.047265	4.162	93.52	862.037	-0.22695	0.18506	-0.10762	25.232	40.58	13.41829	-0.056641	-0.01709	-0.074219	-70.114	-221.327	1165.445	-2.1367	0.58027	0.097365	121.188	-63.009	968.75351	-1.9629	0.78516	0.054688	-49.1192	203.585	1137.9069	-1.5488	0.51953	0.23145
1.84	-91.25	-10.749	1528.519	-2.114	0.66333	0.047607	70.056	-5.97229	58.27	-0.17607	0.092676	-0.044531	18.665	-0.327999999999999	929.198	-0.30703	0.18819	-0.10332	13.872	32.359	-9.9151	-0.092773	-0.0024414	-0.065918	-36.2571	-247.158	1213.762	-1.9683	0.57666	0.066406	98.972	-23.1516	956.143	-1.8522	0.82886	0.054688	-27.492	166.496	1113.1098	-1.5264	0.51074	0.22852
1.842	-105.447	-96.463	1537.573	-2.1152	0.64453	0.054199	7.366	19.852	34.8795	-0.19228	0.10049	-0.043555	47.805	-74.6056	984.355	-0.39287	0.19033	-0.093945	22.161	26.184	7.2706	-0.10987	0.0078125	-0.065186	14.898	-234.647	1244.098	-1.7879	0.55605	0.041016	130.1086	-12.268	982.449	-1.7148	0.85547	0.057129	-49.649	197.27	1074.623	-1.4917	0.50537	0.23535
1.844	-114.77	-44.562	1542.619	-2.1167	0.62061	0.079102	27.98	-5.826	49.779	-0.19531	0.11865	-0.041016	29.433	-120.089	966.265	-0.4917	0.18994	-0.084961	50.9397	45.482	18.3449	-0.12256	0.018066	-0.068359	-5.362	-217.819	1272.133	-1.6211	0.51719	0.014258	99.718	6.003	978.226	-1.5059	0.88086	0.041504	-62.7819	138.5277	1055.8044	-1.4588	0.49683	0.22681
1.846	-110.512	-83.505	1489.2586	-2.1211	0.62695	0.10059	21.707	17.02616	25.7405	-0.19814	0.12334	-0.04082	69.548	-189.1737	963.404	-0.60381	0.19385	-0.068262	30.53	35.619	9.5778	-0.13281	0.029785	-0.065918	47.9996	-207.737	1357.706	-1.4637	0.46211	-0.017773	96.8721	-12.129	999.087	-1.3901	0.87744	0.03418	-33.986	178.6398	1039.661	-1.4277	0.49121	0.22559
1.848	-89.693	-113.886	1498.4536	-2.1245	0.65771	0.11035	-26.999	30.969	3.3548	-0.19238	0.13906	-0.04541	41.789	-167.343	963.07	-0.73037	0.19424	-0.054492	49.353	40.077	40.025	-0.13721	0.037109	-0.066406	73.8216	-141.9783	1358.855	-1.324	0.41797	-0.049805	107.946	-25.302	1001.1506	-1.1831	0.83643	0.029785	-89.2351	201.148	995.082	-1.3823	0.47021	0.22168
1.85	-74.796	-17.65517	1472.352	-2.0909	0.66602	0.099119	-6.697	10.22613	23.817	-0.18653	0.14766	-0.049316	-6.386	-137.331	951.189	-0.86982	0.19775	-0.027539	57.4699	53.26	31.326	-0.13135	0.053223	-0.07373	72.117	-122.505	1367.382	-1.2026	0.38818	-0.080566	54.5879	-22.366	971.0867	-1.0659	0.79687	0.016846	-61.86445	138.78081	992.732	-1.3633	0.45605	0.21533
1.852	-71.374	-53.016	1459.047	-2.0288	0.64697	0.092773	-49.341	36.636	23.71807	-0.17363	0.1623	-0.052637	-17.804	-123.173	975.699	-1.0264	0.20527	0.0035155	23.793	16.9654	34.411	-0.12402	0.064941	-0.081055	121.285	-123.109	1359.924	-1.1266	0.38819	-0.094727	62.03	-75.277	993.8562	-0.96533	0.76611	0.0058594	-42.208	159.4241	946.456	-1.3145	0.43359	0.20996
1.854	-62.6138	12.6922	1441.743	-1.978	0.6167	0.10156	-49.914	5.9464	37.346	-0.14893	0.17432	-0.05957	-33.7248	-59.972	937.6895	-1.1992	0.21924	0.030273	49.5208	31.17	54.49	-0.11426	0.076172	-0.087402	105.955	-95.525	1324.121	-1.0804	0.42324	-0.083495	26.153	-111.6	974.321	-0.89795	0.7583	0	-72.7	130.0706	925.922	-1.278	0.41407	0.21021
1.856	-25.811	94.227	1417.3677	-1.9839	0.61182	0.10938	-23.441	1.38863	44.374	-0.1208	0.18047	-0.06123	-66.8118	-65.77	923.0915	-1.3892	0.23486	0.067187	20.288	18.90342	37.735	-0.087891	0.09375	-0.09668	86.2454	-125.966	1342.294	-1.0856	0.49356	-0.080372	-25.12	-171.946	970.688	-0.89893	0.77783	-0.0087891	-13.431	129.6856	938.775	-1.2417	0.40186	0.19922
1.858	-8.895	42.424	1433.3872	-2.0078	0.62109	0.11963	-59.2788	6.636	40.654	-0.096292	0.19355	-0.067774	-103.26	-64.424	947.118	-1.5981	0.25742	0.10869	17.573	3.295	57.652	-0.072754	0.10107	-0.099609	74.6364	-109.097	1357.522	-1.092	0.57325	-0.10391	-5.452	-252.082	1028.3	-0.92334	0.83838	-0.024902	-37.267	202.828	901.236	-1.1987	0.37646	0.19727
1.86	42.2427	113.832	1423.835	-2.0059	0.63818	0.12597	-32.633	-39.064	75.129	-0.064648	0.1998	-0.074805	-166.283	-2.471	945.769	-1.8062	0.27344	0.14697	24.291	12.2239	54.002	-0.039063	0.11914	-0.10986	18.666	-88.121	1354.429	-1.0425	0.63037	-0.13428	-62.2556	-237.91	1085.9085	-0.93823	0.85279	-0.037354	-16.5	180.909	877.324	-1.1753	0.36377	0.19482
1.862	40.2964	97.044	1405.113	-1.9839	0.65674	0.12939	-18.006	-15.6598	69.9292	-0.033008	0.20518	-0.085156	-125.91	2.986	943.831	-2.0117	0.30586	0.18487	-34.423	-0.652000000000001	47.0309	-0.01831	0.1289	-0.12036	13.5102	-131.858	1422.035	-0.98876	0.63545	-0.14717	-107.8	-251.586	1150.171	-0.94287	0.83252	-0.038086	21.001	210.688	831.412	-1.1304	0.34277	0.18945
1.864	66.24095	38.5315	1410.0033	-1.9365	0.65234	0.13379	-90.674	-4.124	67.8643	-0.0048828	0.21143	-0.093262	-81.41	44.997	941.433	-2.1968	0.33936	0.2085	-14.626	8.149	83.071	0.010254	0.1416	-0.12842	-14.796	-108.912	1445.226	-0.99286	0.62002	-0.12783	-85.44	-246.51	1205.851	-0.98193	0.77002	-0.026367	-16.604	221.044	773.751	-1.0903	0.32959	0.18286
1.866	78.411	106.718	1376.5516	-1.9136	0.6499	0.13525	-10.059	-8.607	111.8515	0.021484	0.21582	-0.10029	-88.322	47.363	915.657	-2.3394	0.3711	0.21397	-7.371	17.9255	74.482	0.046875	0.15283	-0.14551	-51.929	-122.725	1471.769	-1.0722	0.61104	-0.10753	-121.942	-156.6649	1185.628	-1.0234	0.74707	-0.023926	48.862	170.4875	772.309	-1.0581	0.31641	0.17188
1.868	46.2747	48.9214	1358.461	-1.875	0.6416	0.13623	0.741	30.5996	121.4997	0.045019	0.22276	-0.10352	-72.3862	-31.688	932.963	-2.4319	0.40205	0.21025	-51.161	-12.529	106.135	0.0625	0.1582	-0.14941	3.647	-141.347	1532.526	-1.2105	0.62284	-0.087014	-98.656	-147.926	1232.27	-1.1343	0.71143	-0.026855	78.9443	200.654	726.835	-1.0093	0.29834	0.16748
1.87	66.8877	71.177	1341.5042	-1.8526	0.6294	0.13842	-5.13200000000001	9.3894	179.8425	0.07041	0.22353	-0.10469	-73.0102	-53.498	952.383	-2.4385	0.44541	0.19267	-24.353	-26.133	136.097	0.087402	0.17285	-0.15527	-54.2731	-87.68363	1534.47	-1.3564	0.65625	-0.080078	-100.583	-84.545	1244.793	-1.2317	0.70678	-0.026856	44.9775	180.423	682.0329	-0.98828	0.28711	0.16699
1.872	81.726	100.852	1312.648	-1.8301	0.62598	0.13428	30.854	6.2761	244.5803	0.085254	0.23057	-0.11416	-64.8078	-105.098	973.901	-2.3525	0.48554	0.17344	-24.795	-53.26	126.432	0.098633	0.18359	-0.16113	-78.981	-113.9481	1556.657	-1.4777	0.68097	-0.076074	-133.67	-42.327	1242.64	-1.3325	0.71143	-0.016602	66.6609	156.896	654.9609	-0.94287	0.271	0.15332
1.874	44.2096	5.79	1325.736	-1.8105	0.61621	0.14307	-29.362	49.28	291.1843	0.087891	0.23584	-0.11475	-46.8043	-173.423	1053.016	-2.2124	0.51416	0.16016	-31.845	-69.983	146.673	0.1001	0.19287	-0.15918	-47.1983	-104.9913	1576.642	-1.5649	0.69963	-0.07666	-87.134	-81.215	1280.1929	-1.4644	0.70166	-0.015625	32.08	202.746	610.4215	-0.90673	0.26123	0.14868
1.876	41.2091	65.42792	1315.987	-1.7969	0.61914	0.146	-0.516999999999999	48.4915	393.3465	0.08125	0.24707	-0.11416	-79.5106	-167.623	1070.168	-2.0302	0.51845	0.14394	-4.631	-33.426	153.522	0.088867	0.20264	-0.15967	-87.443	-91.945	1553.237	-1.6317	0.71877	-0.075878	-97.711	-44.942	1275.81165	-1.5273	0.69824	-0.017578	59.6613	163.5663	580.3025	-0.87695	0.25488	0.14307
1.878	45.2826	49.008	1285.966	-1.7798	0.6167	0.15234	12.375	113.4713	473.7588	0.061621	0.25782	-0.11484	-69.6308	-232.346	1114.591	-1.8308	0.49805	0.10674	-47.311	-32.135	185.9198	0.078613	0.20654	-0.16699	-51.0366	-137.915	1575.576	-1.6933	0.72628	-0.075192	-91.705	-59.984	1298.1739	-1.644	0.69678	-0.011719	88.46596	195.109	557.4703	-0.82959	0.23828	0.13477
1.88	34.694	29.15	1300.114	-1.7634	0.61255	0.15625	-30.8859	149.956	543.914	0.033887	0.26641	-0.11094	-57.216	-237.616	1155.287	-1.6258	0.45078	0.070801	-28.201	-13.7715	264.7655	0.039551	0.2168	-0.16602	-46.761	-70.503	1536.2979	-1.7476	0.73779	-0.071777	-41.1771	-78.73	1358.429	-1.728	0.70215	-0.0073242	38.043	201.543	532.2739	-0.80615	0.23145	0.12988
1.882	3.84999999999999	139.96	1257.101	-1.7397	0.60791	0.16016	5.5532	153.8289	629.472	-0.0063476	0.27491	-0.10049	-61.8998	-203.122	1162.8716	-1.4202	0.40478	0.030469	-13.084	9.9273	325.1082	0.0046387	0.22364	-0.1582	-99.627	-48.005	1514.858	-1.8074	0.7366	-0.075379	-80.3055	-27.174	1349.702	-1.8022	0.70605	-0.0053711	62.3939	144.4541	529.31	-0.76563	0.22852	0.11816
1.884	-21.318	110.704	1233.4268	-1.7046	0.59619	0.15918	5.4554	197.068	708.313	-0.057129	0.28467	-0.098633	-36.84	-230.211	1223.896	-1.2241	0.354	-0.0068359	-60.884	4.006	398.638	-0.040039	0.22852	-0.14893	-63.2956	-58.8735424	1539.477	-1.8615	0.74386	-0.078601	-78.544	-76.447	1382.821	-1.8809	0.7168	-0.0024414	16.858	172.616	510.519	-0.72705	0.22216	0.11401
1.886	-15.023	162.185	1230.756	-1.687	0.58643	0.16162	-4.1719	162.118	824.6058	-0.11797	0.28359	-0.091601	-0.853000000000002	-137.817	1281.256	-1.0839	0.31748	-0.03457	-34.1212	42.4131	524.697	-0.11816	0.23584	-0.1416	-99.114	8.355	1503.7124	-1.9052	0.74074	-0.087153	-44.56985	-82.9148	1417.441	-1.9141	0.72266	-0.0039063	-4.522	150.198	469.728	-0.69531	0.20996	0.1084
1.888	-24.344	214.522	1198.486	-1.6582	0.58203	0.16357	17.1037	112.57	941.954	-0.18311	0.28184	-0.08291	44.802	-99.7914	1301.771	-0.9995	0.31709	-0.045606	-58.769	67.6604	624.522	-0.15576	0.24707	-0.13818	-55.6267	-33.0061	1498.7632	-1.9376	0.73924	-0.094291	-50.402	-84.1341	1435.596	-1.9761	0.74463	-0.0039063	19.137	117.37132	451.188	-0.65576	0.20215	0.098145
1.89	-66.9353	158.31	1179.919	-1.6358	0.58008	0.16284	-22.456	83.229	1005.031	-0.2585	0.28457	-0.075879	78.2191	-126.0858	1330.128	-0.98623	0.37881	-0.049902	-50.9375	89.599	745.209	-0.24902	0.25781	-0.12695	7.517	-12.8146	1498.1838	-1.9604	0.73779	-0.10889	15.057	-163.293	1520.354	-2.0105	0.76538	-0.0068359	-42.137	136.69	406.9381	-0.6416	0.19775	0.095215
1.892	-74.06	223.132	1158.027	-1.6128	0.57861	0.16406	26.094	-11.137	1057.961	-0.33662	0.2874	-0.070508	98.3387	-74.038	1310.336	-0.98877	0.4585	-0.070313	-7.379	115.614	820.19	-0.33471	0.26929	-0.11743	-52.5912	27.3249	1488.546	-1.9844	0.73834	-0.12716	7.624	-122.916	1530.892	-2.0469	0.78516	-0.0043945	-35.098	107.9252	395.396	-0.61035	0.1875	0.085938
1.894	-76.4056	195.778	1116.914	-1.5776	0.56348	0.16113	41.113	-49.712	1084.828	-0.4209	0.29248	-0.057129	115.687	-118.637	1320.318	-0.97021	0.521	-0.098633	-37.6339	91.164	852.017	-0.42822	0.27539	-0.10498	-7.888	-17.2137	1516.6003	-1.9977	0.73856	-0.1373	8.96	-122.67	1540.547	-2.0698	0.80322	-0.0053711	-38.1125	138.3285	361.395	-0.58813	0.18115	0.082275
1.896	-66.3508	153.7257	1107.206	-1.5569	0.55444	0.1604	-2.373	-101.486	1075.105	-0.52735	0.29483	-0.050293	145.106	-118.108	1349.92	-0.94062	0.53886	-0.12051	20.98	51.442	926.2378	-0.57275	0.2876	-0.087402	36.238	29.756	1504.2214	-2.0118	0.73216	-0.14957	66.927	-128.876	1580.898	-2.084	0.80469	-0.0039063	-94.908	153.009	328.542	-0.5625	0.17529	0.075684
1.898	-55.8709	201.993	1051.5619	-1.5293	0.54492	0.15674	22.758	-171.857	1082.436	-0.64443	0.29502	-0.027051	115.912	-57.145	1327.261	-0.93828	0.51523	-0.10205	43.873	24.8182	989.286	-0.70581	0.29297	-0.056397	7.435	18.012	1501.2431	-2.0226	0.73014	-0.15831	43.2404	-46.048	1548.976	-2.1016	0.81055	0.0058594	-55.7798	101.621	340.855	-0.53076	0.1665	0.070313
1.9	-64.3517	125.603	1037.597	-1.4868	0.52783	0.15527	-29.9338	-158.828	1064.056	-0.77803	0.2958	-0.0083007	92.073	-95.817	1363.316	-0.99923	0.49649	-0.087598	0.530000000000001	-40.612	1051.035	-0.84619	0.30225	-0.035645	98.027	-35.093	1537.652	-2.0347	0.72314	-0.17236	58.3403	-82.6192	1554.994	-2.1167	0.80909	0.017334	-62.77671	101.344	306.027	-0.49829	0.1604	0.066406
1.902	-52.47	142.4445	1049.763	-1.4663	0.52197	0.15332	-62.571	-171.899	1071.989	-0.93145	0.29443	0.013965	69.8376	-48.759	1391.692	-1.1146	0.49765	-0.069532	58.4965	-85.292	1080.044	-1.0723	0.32422	0.0078125	86.856	2.666	1523.105	-2.0488	0.71487	-0.18514	98.334	-61.512	1563.484	-2.1289	0.80176	0.023926	-78.56545	68.887	275.889	-0.46289	0.15527	0.060059
1.904	-51.8106	171.334	1027.402	-1.4141	0.50586	0.14795	-65.8033	-168.24	1109.741	-1.0996	0.2959	0.04834	36.152	-51.375	1405.4924	-1.2432	0.51172	-0.061523	40.5617	-145.0451	1040.604	-1.1929	0.3335	0.026367	89.1749	-36.4764	1524.374	-2.056	0.70594	-0.19568	22.106	-15.756	1535.443	-2.1343	0.79541	0.036133	-30.976	70.06077	235.3665	-0.40771	0.15137	0.044434
1.906	-44.91	113.1133	1022.532	-1.3845	0.48804	0.14331	-135.624	-117.017	1079.22	-1.2971	0.3087	0.078516	63.936	-102.244	1466.55	-1.3499	0.52705	-0.041699	29.1226	-206.925	1029.01	-1.4688	0.35449	0.074707	91.883	-9.709	1524.85	-2.0558	0.69011	-0.21529	56.2426	-76.666	1538.4	-2.1401	0.7915	0.038086	-66.8913	125.72	202.5267	-0.375	0.1499	0.044922
1.908	-16.088	178.724	995.817	-1.3472	0.4751	0.14014	-133.604	-119.628	1072.37	-1.5071	0.32998	0.10879	47.298	-61.544	1492.201	-1.439	0.53487	-0.03125	31.406	-196.746	1014.301	-1.7036	0.38086	0.11108	36.916	30.9081	1483.4051	-2.0479	0.67491	-0.22436	17.715	-13.2585	1499.17	-2.1309	0.79102	0.054199	-67.198	98.043	219.7468	-0.30518	0.14893	0.03418
1.91	2.121	151.029	969.2	-1.3008	0.45703	0.12988	-142.564	-55.9759	1064.129	-1.7176	0.35615	0.14472	38.6609	-116.288	1525.151	-1.5104	0.53994	-0.023827	-55.4151	-160.119	962.7722	-1.9453	0.41016	0.1416	73.3797	-15.814	1487.396	-2.0288	0.64502	-0.24268	-30.7729	-2.8217	1453.079	-2.125	0.78076	0.064453	-26.86	107.428	209.073	-0.2522	0.14624	0.024902
1.912	27.996	121.169	962.183	-1.2788	0.4458	0.125	-204.503	-2.47	1050.452	-1.9252	0.39239	0.17334	22.026	-145.211	1573.326	-1.586	0.54228	-0.015234	-53.3085	-98.39	970.347	-2.2671	0.46533	0.14014	82.713444	33.841	1456.781	-1.9934	0.61511	-0.2552	17.684	-31.431	1492.756	-2.1128	0.77783	0.077148	-53.6133	96.701	183.096	-0.19775	0.14502	0.011719
1.914	46.2557	190.327	894.682	-1.2363	0.42969	0.12402	-168.312	6.413	1049.2562	-2.1167	0.42334	0.19971	9.433	-97.2143	1552.612	-1.6616	0.54541	-0.015625	-70.9799	-42.8113	962.5857	-2.4063	0.48535	0.13623	47.694	24.54742	1430.911	-1.9662	0.58017	-0.26409	-35.962	50.57	1485.963	-2.0913	0.75244	0.091797	-3.36	49.5857	191.175	-0.12891	0.13477	0.0048828
1.916	49.5758	141.53	854.379	-1.1958	0.41822	0.11523	-144.704	32.557	1038.3855	-2.2628	0.45127	0.21494	8.988	-142.552	1554.785	-1.7296	0.55088	-0.014356	-146.364	-52.726	975.324	-2.5757	0.52783	0.12549	54.274	20.6806	1439.838	-1.9539	0.54914	-0.27374	-51.116	12.2745	1505.46	-2.0859	0.73438	0.098633	-15.511	73.428	170.185	-0.092773	0.12646	-0.00097656
1.918	64.4975	174.911	829.068	-1.1582	0.4082	0.11328	-131.29	-0.0630000000000024	1020.4339	-2.3645	0.47539	0.22265	-7.83600000000001	-72.812	1551.6239	-1.7956	0.55713	-0.012987	-131.792	-42.484	1013.478	-2.614	0.57007	0.11157	11.194	107.909	1415.639	-1.9415	0.5273	-0.28008	-16.1861	18.4425	1550.837	-2.0874	0.70361	0.12354	-12.2	52.527	164.18	-0.024414	0.11719	-0.019043
1.92	83.7196	200.8354	790.615	-1.1128	0.3999	0.098633	-65.8564	-78.807	1055.837	-2.3875	0.49961	0.21524	-59.909	-32.062	1514.33	-1.8518	0.55713	-0.013771	-140.512	-16.017	989.055	-2.5854	0.61768	0.088867	8.78400000000001	72.696	1412.965	-1.9336	0.5127	-0.27148	-84.534	39.976	1541.485	-2.1006	0.71485	0.13745	35.298	29.13	151.2957	0.022705	0.11084	-0.03125
1.922	80.154	157.228	774.7636	-1.0903	0.38525	0.098633	-83.7178	-85.832	1052.96	-2.3202	0.51748	0.19775	-59.539	-74.3579	1533.6917	-1.9094	0.56328	-0.019138	-105.382	-4.259	1014.011	-2.4414	0.69727	0.060059	36.433	90.828	1390.258	-1.947	0.49148	-0.27668	-71.378	-46.3815	1552.136	-2.105	0.73291	0.146	17.454	42.15	112.035	0.064941	0.098633	-0.041016
1.924	99.8284	210.827	718.6974	-1.0366	0.37842	0.092285	-60.2139	-163.659	1068.4185	-2.1851	0.53662	0.17969	-53.825	11.162	1536.823	-1.9585	0.5708	-0.034668	-48.6469	6.69	1018.714	-2.3457	0.72949	0.05127	-30.82	110.196	1341.5763	-1.9585	0.48327	-0.2712	-88.44	-0.668000000000003	1540.266	-2.0859	0.73633	0.15137	46.2371	-6.647	110.044	0.11621	0.085449	-0.055664
1.926	85.2204	163.4342	673.2048	-1.0029	0.3667	0.085449	-32.626	-225.1387	1118.683	-2.0154	0.53545	0.15869	-65.2421	-9.726	1540.92	-2.009	0.57461	-0.048055	-62.9927	-38.51	972.291	-2.1211	0.75781	0.022461	-2.79	62.4835	1338.208	-1.9715	0.48747	-0.26923	-123.079	-11.367	1511.75152	-2.0562	0.73096	0.14648	71.4952	5.615	109.442	0.14063	0.07959	-0.064453
1.928	80.2079	132.637	666.9976	-0.96289	0.35791	0.076172	-74.6802	-242.348	1111.82403	-1.8297	0.52148	0.12871	-52.077	-30.397	1560.831	-2.0534	0.58136	-0.059397	-25.373	-130.491	989.433	-1.9189	0.72558	-0.012451	-2.788	104.243	1336.056	-1.9769	0.49667	-0.26955	-111.398	-49.855	1526.0407	-2.0054	0.70361	0.14355	26.03	30.3199	84.17	0.18262	0.071289	-0.074707
1.93	79.472	178.856	630.6519	-0.90625	0.34277	0.074707	-14.832	-305.34	1143.8402	-1.6406	0.4793	0.091601	-52.145	41.147	1521.7703	-2.0909	0.58917	-0.080878	-12.723	-159.589	1017.071	-1.7046	0.67822	-0.060059	-69.9004	86.916	1314.652	-1.9785	0.51172	-0.28125	-126.723	26.0035	1495.974	-1.9996	0.69433	0.15235	71.3899	29.9625	105.223	0.2124	0.055908	-0.080078
1.932	62.0809	122.102	592.914	-0.88574	0.33887	0.063965	18.496	-268.413	1171.525	-1.4619	0.42168	0.054102	-59.581	-5.3498	1495.495	-2.1172	0.58966	-0.1007	-70.7163	-190.36	1076.797	-1.4131	0.60742	-0.11963	-34.664	41.6191	1300.443	-1.9605	0.50668	-0.28752	-84.855	-24.387	1476.199	-2.0098	0.69922	0.16553	32.326	71.011	97.311	0.23975	0.047852	-0.089844
1.934	50.696	142.3822	567.5019	-0.83545	0.32422	0.05957	-16.051	-230.973	1204.0375	-1.2925	0.36963	0.0087891	-33.754	51.636	1487.514	-2.1323	0.59229	-0.11963	-51.027	-206.326	1155.452	-1.2715	0.58105	-0.14063	-65.772	76.6	1264.222	-1.9337	0.50316	-0.29165	-63.016	3.6983	1490.802	-2.0215	0.7207	0.17139	22.058	35.294	81.697	0.26904	0.03418	-0.10059
1.936	10.678	167.373	526.7715	-0.80346	0.31128	0.056885	4.683	-246.449	1290.149	-1.1421	0.32978	-0.024609	-21.87	86.112	1461.291	-2.1413	0.58937	-0.14245	-73.3912	-215.091	1149.533	-1.0664	0.55078	-0.17236	-88.7785	23.991	1255.271	-1.915	0.50043	-0.29385	-112.692	61.502	1475.396	-2.0137	0.73047	0.17578	69.8343	3.9025	68.6784	0.2832	0.026367	-0.10303
1.938	-7.207	115.3161	529.5469	-0.77881	0.30029	0.053711	19.741	-162.449	1315.306	-1.0339	0.30947	-0.047168	16.126	24.9324	1520.5826	-2.143	0.57604	-0.1591	-81.508	-258.122	1166.825	-0.97828	0.55908	-0.17919	-44.413	64.292	1224.854	-1.9002	0.50543	-0.29802	-67.719	13.326	1474.173	-1.9741	0.73486	0.1792	8.317	25.0912	40.1124	0.30225	0.011719	-0.11523
1.94	-25.338	166.305	492.8311	-0.74365	0.28271	0.044922	67.4064	-165.293	1338.048	-0.96787	0.32744	-0.046386	61.151	67.3278	1549.256	-2.1305	0.55653	-0.18291	-24.389	-273.249	1212.364	-0.92969	0.60449	-0.18555	-71.12943	106.94	1204.758	-1.8901	0.51416	-0.29541	-23.556	106.638	1444.127	-1.9424	0.72657	0.17773	23.851	19.8578	52.81	0.31616	0.0083008	-0.12182
1.942	-49.0577	135.291	468.8213	-0.72412	0.27881	0.04248	91.5511	-147.6643	1363.833	-0.96787	0.39482	-0.042188	47.9235	3.533	1538.949	-2.1085	0.5361	-0.20454	-29.255	-230.099	1235.395	-0.90283	0.70557	-0.20068	-32.609	81.0161	1201.1196	-1.873	0.52503	-0.29571	-47.174	104.583	1404.093	-1.9141	0.72461	0.17773	13.81	60.685	53.064	0.32422	-0.00048828	-0.12207
1.944	-48.3677	105.9178	472.286	-0.69385	0.26611	0.040527	90.9245	-89.735	1342.754	-0.99414	0.48242	-0.049316	72.63338	-25.37	1556.637	-2.0776	0.51318	-0.22314	18.07	-198.486	1303.996	-0.896	0.75244	-0.21436	-19.262	134.605	1181.403	-1.8494	0.53399	-0.29589	-1.796	81.2332	1407.8446	-1.8828	0.71289	0.18408	-33.727	78.639	37.485	0.32422	-0.015137	-0.12891
1.946	-58.22149	134.864	420.279	-0.66675	0.25293	0.039551	114.026	-118.361	1342.981	-0.98594	0.55019	-0.069238	80.9735	26.3734	1536.2	-2.0392	0.48782	-0.24209	56.343	-120.229	1321.188	-0.8457	0.81055	-0.24023	-33.614	120.231	1167.873	-1.8097	0.53869	-0.29198	-6.133	155.806	1405.795	-1.8691	0.70703	0.18701	-5.187	33.063	32.182	0.32666	-0.018555	-0.125
1.948	-78.4404	86.137	383.767	-0.63428	0.25244	0.037598	108.6686	-71.692	1332.475	-0.96905	0.56064	-0.083691	72.1209	-24.028	1517.284	-2.006	0.45356	-0.2611	51.791	-98.115	1302.9219	-0.83081	0.80493	-0.21973	31.839	119.55	1167.323	-1.7707	0.53975	-0.29081	4.339	120.023	1405.685	-1.8477	0.70508	0.19385	-29.953	31.955	23.8652	0.31445	-0.029785	-0.125
1.95	-92.4787	121.313	333.9624	-0.5918	0.25	0.037598	49.891	-50.203	1314.047	-0.98584	0.54697	-0.072754	111.8608	28.331	1486.297	-1.9808	0.43141	-0.27442	134.39	-118.411	1337.057	-0.87598	0.77637	-0.18164	24.032	184.059	1126.294	-1.7378	0.53467	-0.2876	44.742	130.761	1420.745	-1.8325	0.69336	0.18897	-39.1938	4.253	33.9558	0.31347	-0.036622	-0.11914
1.952	-77.938	160.226	289.3375	-0.56152	0.24268	0.029297	55.5876	-112.2076	1366.387	-1.0746	0.5418	-0.059473	106.5947	63.977	1424.6846	-1.965	0.40994	-0.28476	155.32	-92.521	1331.705	-1.0293	0.76563	-0.13672	36.2489	146.404	1098.889	-1.6971	0.52794	-0.28058	8.58502	147.344	1388.513	-1.8101	0.68604	0.2002	-11.111	6.1849	41.212	0.30371	-0.038086	-0.1167
1.954	-60.4067	119.15	286.2625	-0.49658	0.24316	0.026367	30.791	-70.178	1407.7929	-1.1987	0.55518	-0.060059	82.4259	14.556	1451.631	-1.9585	0.39893	-0.28955	136.834	-112.911	1346.443	-1.1206	0.76807	-0.12012	73.3718	165.8634	1057.2218	-1.6597	0.52394	-0.27932	35.011	50.494	1371.646	-1.7866	0.67041	0.2041	-61.1235	43.366	18.7083	0.28418	-0.041992	-0.10547
1.956	-47.212	160.045	272.589	-0.45288	0.23999	0.0271	11.853	-115.149	1440.032	-1.3291	0.5877	-0.048828	88.47678	86.008	1450.867	-1.9724	0.38447	-0.29384	132.18	-117.4	1374.004	-1.2852	0.76953	-0.085449	11.261	187.0432	1017.977	-1.6268	0.51768	-0.26251	46.16364	78.491	1360.684	-1.7695	0.66406	0.20361	-67.6413	8.7206	17.8204	0.26611	-0.040527	-0.104
1.958	-68.9	120.746	253.54	-0.40332	0.23828	0.021973	2.139	-143.606	1488.216	-1.4434	0.61719	-0.036523	97.0909	63.949	1419.65	-1.9858	0.37362	-0.30021	66.4615	-81.52	1352.6879	-1.3765	0.76123	-0.067627	60.9478	144.505	1005.213	-1.593	0.50821	-0.25606	28.404	77.692	1293.6207	-1.7344	0.64648	0.20557	-64.051	9.7348	18.45853	0.23096	-0.045898	-0.092773
1.96	-34.4933	102.633	250.209	-0.33594	0.22754	0.018066	-35.4901	-82.855	1488.165	-1.5477	0.63868	-0.026758	106.1558	69.471	1401.804	-2.0039	0.3816	-0.29708	60.896	-136.002	1392.2877	-1.4648	0.75	-0.055176	43.7848	184.7344	979.5817	-1.5581	0.50244	-0.24414	42.7316	58.141	1298.878	-1.7075	0.64063	0.20533	-83.0223	12.6292	12.1746	0.19825	-0.04541	-0.08545
1.962	-25.02	138.675	223.89	-0.30029	0.22021	0.010742	-32.0798	-144.011	1533.822	-1.6404	0.65371	-0.020996	86.92	144.98	1360.284	-2.0221	0.39043	-0.30011	70.7948	-133.693	1409.3116	-1.5605	0.74023	-0.050293	22.933	157.1351	966.0314	-1.5231	0.48789	-0.22802	18.848	137.4673	1296.488	-1.687	0.62549	0.20508	-19.82	0.340999999999999	47.713	0.16895	-0.041016	-0.077148
1.964	-28.753	77.194	212.471	-0.24072	0.20264	0.011719	-36.472	-131.7176	1564.93	-1.7334	0.66211	-0.018555	56.762	91.51	1340.587	-2.0215	0.39697	-0.31445	15.746	-130.18	1424.53474	-1.6206	0.73291	-0.053711	95.137	140.61	959.137	-1.4871	0.47607	-0.21533	24.1032	94.3122	1270.1041	-1.6582	0.6123	0.21387	-45.2785	46.246	45.4211	0.11572	-0.038574	-0.076172
1.966	-23.824	107.862	191.65833	-0.19751	0.18628	0.0024414	-58.391	-109.276	1536.372	-1.8224	0.67452	-0.011719	62.193	133.582	1325.846	-2.0042	0.40098	-0.31606	45.816	-161.721	1503.542	-1.7168	0.72559	-0.057617	37.2249	188.379	918.073	-1.4523	0.46631	-0.204	34.252	107.9014	1272.64	-1.6387	0.60352	0.2124	-50.7818	29.5848	45.7741	0.089844	-0.032715	-0.068848
1.968	-3.15	126.994	160.6401	-0.15039	0.17627	-0.0029297	-17.189	-154.609	1561.202	-1.8976	0.6793	-0.016993	38.085	145.788	1288.6759	-2.0027	0.39196	-0.31661	30.589	-124.566	1501.735	-1.7756	0.7185	-0.061523	24.275	153.58	913.675	-1.4144	0.45058	-0.19043	-22.647	171.118	1256.142	-1.6089	0.58838	0.2085	-3.975	29.587	46.5317	0.04834	-0.029297	-0.068848
1.97	35.715	74.9116	178.383	-0.098145	0.1499	-0.01123	-23.22	-60.233	1566.711	-1.9472	0.67812	-0.013477	5.188	70.8876	1315.972	-2.0101	0.39474	-0.31584	-7.979	-143.731	1518.178	-1.8398	0.70898	-0.067383	43.8891	171.8506	895.17	-1.3789	0.44043	-0.17383	-15.56	135.605	1272.952	-1.5817	0.57251	0.20825	-10.783	46.429	10.2028	0.016113	-0.025635	-0.064697
1.972	41.713	96.115	176.53	-0.066406	0.13623	-0.015137	-58.4686	-57.995	1542.675	-1.975	0.68476	-0.031738	-3.785	127.254	1302.503	-2.0133	0.41092	-0.32426	36.444	-165.11	1550.724	-1.9155	0.69678	-0.075195	-6.668	183.894	844.4863	-1.3434	0.42617	-0.16367	-12.834	212.658	1230.963	-1.5508	0.55664	0.20459	31.197	9.52151	8.683	-0.010254	-0.018555	-0.063477
1.974	63.78576	50.65708	162.01	-0.014648	0.11182	-0.029297	-47.15	-67.486	1548.496	-1.9819	0.69678	-0.04834	-46.205	82.3499	1273.983	-1.9902	0.43164	-0.3291	13.6	-127.385	1538.926	-1.9473	0.68945	-0.077637	10.294	160.6446	834.1916	-1.3136	0.41104	-0.14912	-36.2015	204.88	1149.0514	-1.5029	0.53223	0.21338	30.932	23.6972	21.913	-0.043945	-0.011719	-0.064453
1.976	82.33065	32.2337	168.343	0.023437	0.091553	-0.033936	-73.137	5.831	1506.004	-1.9845	0.70283	-0.063379	-39.817	64.383	1263.29	-1.9554	0.43967	-0.32212	4.031	-158.3796	1555.513	-2.002	0.69141	-0.10254	-37.51022	212.47	786.8787	-1.2772	0.40127	-0.13662	-29.543	156.898	1112.422	-1.4705	0.51294	0.20142	-10.427	44.011	28.6536	-0.058105	-0.0083008	-0.063965
1.978	62.93506	61.616	125.481	0.054688	0.074219	-0.037598	-57.616	-61.3405	1513.469	-1.9811	0.70752	-0.080859	-42.084	116.2276	1218.472	-1.9081	0.44496	-0.32038	-1.218	-108.018	1526.4318	-2.042	0.69531	-0.11767	-61.143938	187.673	777.942	-1.2453	0.38672	-0.12442	-64.064	207.511	1088.53482	-1.4395	0.49512	0.19629	62.2372	30.2769	52.735	-0.07959	-0.00048828	-0.072266
1.98	78.2837	6.669	126.448	0.099609	0.061523	-0.047852	-36.238	-28.684	1536.59	-1.9734	0.7083	-0.10078	-82.6664	54.274	1208.6593	-1.8661	0.44574	-0.31296	-77.9537	-39.353	1458.614	-2.0737	0.70166	-0.13574	-44.2317	175.333	764.184	-1.2124	0.37451	-0.10742	-78.9238	157.53601	1094.6294	-1.3843	0.47314	0.1958	47.4646	55.729	57.215	-0.095215	0.0078127	-0.069092
1.982	77.78126	39.81811	114.418	0.11865	0.051758	-0.05127	-45.7436	21.611	1514.7854	-1.9654	0.69902	-0.11133	-37.33	96.4761	1191.3103	-1.8318	0.44334	-0.30738	-51.23	-53.4249	1476.618	-2.1055	0.71094	-0.15576	-93.412	190.129	709.43	-1.1814	0.36601	-0.098341	-40.548	181.221	1075.211	-1.3574	0.45605	0.19531	39.6337	17.2434	47.615	-0.10449	0.01416	-0.07666
1.984	59.1107	56.3763	96.7698	0.16016	0.038574	-0.05957	-2.486	-35.774	1530.4415	-1.9629	0.6875	-0.12305	-29.332	124.518	1147.8334	-1.8003	0.44385	-0.3042	-44.478	14.0913	1477.5025	-2.1133	0.71387	-0.17285	-89.901	153.7561	681.0058	-1.1536	0.35068	-0.083496	-84.267	201.996	1041.082	-1.3101	0.44092	0.18604	90.1492	-11.0348	45.601	-0.10938	0.022461	-0.083008
1.986	41.162	36.1869	103.0508	0.18286	0.022461	-0.064453	-3.538	38.8965	1524.7389	-1.959	0.67813	-0.1293	-20.717	97.1587	1163.504	-1.7777	0.43954	-0.29067	-72.313	-8.316	1472.8984	-2.1152	0.7168	-0.19727	-63.78	174.5304	632.1101	-1.1254	0.34092	-0.069043	-42.2314	127.26	1038.029	-1.2735	0.42529	0.1792	39.763	6.2329	26.8474	-0.10742	0.029785	-0.087891
1.988	31.155	88.13	100.624	0.21045	0.00097656	-0.064941	6.462	10.019	1505.8907	-1.9629	0.66357	-0.14004	-7.893	186.676	1154.252	-1.7468	0.43925	-0.2812	-16.377	-41.966	1493.066	-2.114	0.70435	-0.21338	-83.044	190.697	602.722	-1.1011	0.33135	-0.055664	-47.547	170.578	1010.379	-1.2363	0.40625	0.17188	44.29	0.2925	25.0364	-0.094727	0.046387	-0.098145
1.99	6.855	50.875	105.087	0.23291	-0.0073242	-0.078125	63.155	-36.4275	1526.626	-1.9703	0.6499	-0.14473	-2.469	176.14	1133.09	-1.7136	0.43337	-0.27065	-55.916	-3.948	1458.3725	-2.1035	0.69727	-0.23633	-54.0094	171.746	593.642	-1.0767	0.32617	-0.044434	-50.8437	157.369	981.923	-1.1895	0.38721	0.16943	43.0797	24.6198	39.504	-0.077637	0.055908	-0.10644
1.992	-6.936	44.838	108.395	0.24658	-0.016602	-0.080566	68.4433	10.736	1524.052	-1.9771	0.63193	-0.15186	11.038	170.981	1111.771	-1.6809	0.42819	-0.25278	-66.8222	-49.28568	1469.6676	-2.0854	0.68604	-0.26367	-63.3893	211.834	540.58	-1.0492	0.32148	-0.028613	0.725000000000001	132.5319	957.0763	-1.1675	0.37646	0.16211	-0.975999999999999	16.2334	41.9905	-0.057129	0.071289	-0.11328
1.994	-8.647	52.742	79.949	0.25586	-0.033203	-0.083984	74.6575	-63.4059	1532.26	-1.9746	0.60742	-0.1582	2.359	224.446	1057.0196	-1.6479	0.42822	-0.24463	16.084	-6.018	1475.01611	-2.0776	0.68213	-0.27246	-84.429	187.104	529.07582	-1.0245	0.3167	-0.016699	-19.577	193.584	908.2139	-1.125	0.36377	0.15674	34.156	-17.1026	54.7734	-0.025879	0.086426	-0.12061
1.996	-9.649	-7.31772	63.347	0.26611	-0.039795	-0.089599	86.6516	-52.115	1540.37	-1.9786	0.58174	-0.16025	8.13500000000001	151.223	1036.9104	-1.615	0.41393	-0.22934	10.682	26.468	1450.426	-2.0425	0.67529	-0.30029	-21.489	185.384	518.56	-1.0015	0.30966	0.00087884	-2.609	148.84463	897.0743	-1.0901	0.35229	0.15284	19.995	9.6351	46.791	-0.011719	0.094727	-0.12646
1.998	-35.5672	11.3992	74.786	0.27441	-0.055664	-0.089844	66.73234	-19.2753	1525.887	-1.9784	0.55743	-0.1666	36.759	196.60108	1018.342	-1.5773	0.40403	-0.21636	56.366	-23.895	1489.2838	-2.0244	0.65332	-0.3042	-64.852	198.149	495.707	-0.97568	0.31035	0.0085935	31.57	169.3451	874.373	-1.0596	0.33936	0.14648	-16.542	7.537	54.065	0.015625	0.11133	-0.13623
2	-49.037	14.5004	50.9542	0.26758	-0.068359	-0.094238	82.0741	-74.822	1511.94	-1.9925	0.53243	-0.17832	55.2894	209.187	964.1762	-1.543	0.38922	-0.21172	68.134	20.698	1492.826	-2.0039	0.64453	-0.31348	-28.6988	160.489	498.306	-0.95313	0.30859	0.020508	18.059	204.869	836.722	-1.0137	0.32471	0.14209	-6.507	-5.941	68.022	0.03711	0.11963	-0.1416
2.002	-61.4029	0.386200000000001	44.147	0.26221	-0.070801	-0.091797	65.177	19.121	1466.807	-1.9997	0.51299	-0.17334	67.40477	161.794	959.3025	-1.511	0.38308	-0.19196	42.194	-8.769	1478.034	-1.979	0.62549	-0.32471	7.61	164.052	465.984	-0.92275	0.3042	0.03125	59.4965	157.9383	813.021	-0.99365	0.31885	0.1333	-49.7556	17.761	59.663	0.059082	0.13184	-0.14941
2.004	-74.147	43.032	27.7081	0.25098	-0.080078	-0.094238	55.214	7.846	1421.9722	-2.0112	0.49316	-0.17139	70.6354	206.847	934.0041	-1.4722	0.37061	-0.17725	108.468	-25.063	1508.051	-1.9741	0.62256	-0.32471	-34.586	149.181	421.651	-0.88799	0.3081	0.045313	58.584	199.407	768.113	-0.95459	0.30322	0.12939	-45.836	-32.664	67.468	0.078613	0.13428	-0.15527
2.006	-67.0595	4.4367	37.799	0.23047	-0.086426	-0.093995	69.875	11.205	1449.698	-2.0222	0.4708	-0.17588	57.3575	161.5533	912.95684	-1.4351	0.35343	-0.16437	68.2952	23.1353	1482.072	-1.9722	0.6123	-0.33154	25.508	122.8687	402.755	-0.85517	0.30107	0.050781	52.9948	177.3437	715.386	-0.9248	0.29492	0.12353	-20.826	-28.9085	56.2627	0.078613	0.14209	-0.15674
2.008	-37.247	-8.72	61.769	0.20996	-0.087891	-0.092773	44.672	91.556	1446.185	-2.0344	0.45566	-0.18067	78.67108	159.8429	909.5908	-1.4005	0.34181	-0.15392	69.07	-12.267	1475.953	-1.9646	0.60424	-0.3313	35.734	142.4238	357.167	-0.8208	0.30146	0.057129	71.8187	150.091	678.221	-0.88721	0.2876	0.11621	-57.5884	-31.3	62.5185	0.094727	0.15186	-0.15967
2.01	-59.7427	5.913	36.2533	0.18408	-0.082031	-0.094727	18.791	29.2529	1441.661	-2.0472	0.44355	-0.18262	77.5274	208.873	871.9158	-1.3633	0.32736	-0.14142	131.331	20.431	1461.009	-1.9663	0.59619	-0.32178	17.172	113.5833	339.796	-0.78613	0.2959	0.060547	41.772	221.38	616.284	-0.84717	0.27393	0.10938	-37.881	-62.0123	96.7744	0.09375	0.15747	-0.16138
2.012	-62.788	-35.43	38.746	0.17236	-0.081055	-0.087891	40.745	59.407	1419.397	-2.0553	0.43828	-0.18984	56.1811	146.524	869.614	-1.3229	0.31485	-0.12627	71.979	55.9707	1402.2162	-1.9805	0.5957	-0.31006	75.5679	107.535	337.918	-0.74922	0.29531	0.068359	52.0862	169.6569	605.991	-0.82813	0.26758	0.10693	-33.088	-15.919	116.7418	0.085938	0.16797	-0.16406
2.014	-34.103	2.834	42.282	0.13037	-0.074707	-0.079102	24.702	93.067	1375.718	-2.0542	0.43652	-0.19775	50.1874	189.052	850.247	-1.2832	0.30225	-0.1123	85.15317	36.3548	1393.801	-1.9844	0.60742	-0.30811	45.883	120.4956	310.07	-0.70625	0.29239	0.077832	70.792	183.9059	587.3908	-0.79053	0.25342	0.10107	-46.6289	-6.175	164.078	0.066406	0.1748	-0.16113
2.016	-35.8665	15.5819	23.6358	0.099609	-0.064209	-0.077393	16.266	34.91495	1355.024	-2.0383	0.42871	-0.21162	24.004	193.011	791.245	-1.2488	0.2871	-0.097068	79.906	121.47	1386.52	-1.9844	0.61133	-0.30713	63.4644	80.8142	294.845	-0.66485	0.28847	0.084863	35.151	209.314	547.7811	-0.75318	0.24634	0.092529	-7.23	-5.203	217.991	0.054199	0.17578	-0.15723
2.018	-20.998	-4.86903	16.562	0.067383	-0.056641	-0.082031	-4.082	110.286	1324.77402	-2.0242	0.4211	-0.21768	11.681	159.0579	768.676	-1.2125	0.27617	-0.078513	68.793	112.367	1389.834	-1.9649	0.61035	-0.3086	77.9739	93.9283	276.146	-0.61973	0.28681	0.091308	48.9337	173.3457	541.5414	-0.72021	0.24072	0.09082	-41.322	14.39439	254.35	0.0048828	0.18018	-0.15234
2.02	-8.86199999999999	49.238	-9.3395	0.03125	-0.04834	-0.067383	-35.776	80.388	1301.598208	-2.0207	0.42656	-0.22471	-16.227	217.895	733.586	-1.1812	0.26836	-0.066793	92.703	84.432	1409.816	-1.9468	0.59912	-0.29834	26.784	100.131	230.0355	-0.57178	0.28174	0.094727	22.54	221.236	510.481	-0.68164	0.22705	0.07666	-15.718	-15.4818	325.9257	-0.035889	0.18066	-0.15479
2.022	9.419	32.096	-7.3503	0.014648	-0.041016	-0.068359	-14.877	47.9921	1311.775	-2.0221	0.43896	-0.23037	-43.3597	190.184	710.4352	-1.1557	0.2586	-0.048631	55.826	127.813	1369.488	-1.9414	0.58496	-0.28711	63.22635	82.6952	225.556	-0.51855	0.28262	0.10586	-2.472	185.274	493.839	-0.66064	0.21973	0.083984	-25.016	35.468	387.36	-0.079102	0.18213	-0.14795
2.024	44.751	28.2022	44.704	-0.016602	-0.026855	-0.06543	-33.209	90.19	1311.339	-2.0098	0.44922	-0.23242	-52.0571	184.14117	688.285	-1.125	0.25	-0.03418	45.4	72.599	1361.169	-1.9404	0.58398	-0.28906	48.1101	113.891	185.314	-0.46602	0.28477	0.10781	8.78	114.4688	487.971	-0.61328	0.20313	0.064453	-77.128	107.735	459.762	-0.14209	0.19141	-0.14453
2.026	32.8857	42.9693	29.4967	-0.033203	-0.018067	-0.067871	-56.79564	9.936	1302.36	-1.9933	0.46387	-0.24179	-73.2962	218.98	632.478	-1.098	0.24883	-0.020899	62.405	87.625	1358.059	-1.9336	0.58301	-0.27832	14.116	97.341	160.6523	-0.41289	0.27969	0.1164	-47.355	139.335	421.599	-0.58691	0.19189	0.064209	-38.446	123.391	587.8822	-0.17578	0.19189	-0.14453
2.028	48.47	-19.0725	22.276	-0.041992	-0.0043945	-0.068848	-49.768	47.9	1285.54	-1.964	0.47275	-0.24717	-73.837	151.303	599.713	-1.068	0.24531	-0.005763	-10.516	103.793	1317.146	-1.9111	0.58448	-0.27563	16.216	85.3614	170.737	-0.35713	0.26748	0.12529	-41.5901	112.6868	380.365	-0.56006	0.18652	0.058594	-53.587	165.068	693.964	-0.25293	0.20313	-0.13721
2.03	62.785	14.1205	17.2748	-0.041016	0.00048828	-0.075684	-52.19	91.8187	1236.7049	-1.9296	0.47588	-0.24795	-69.2635	183.03	574.036	-1.0402	0.24648	0.0075189	-21.102	49.016	1332.13	-1.8706	0.57715	-0.271	-39.666	92.914	140.799	-0.29297	0.26123	0.13086	-39.483	142.518	364.9255	-0.52295	0.17236	0.058105	-35.5833	135.583	782.21	-0.31446	0.20459	-0.12133
2.032	70.8581	15.9965	2.60886	-0.039551	0.0073242	-0.080078	-45.618	61.376	1224.1099	-1.8937	0.47266	-0.25137	-71.9864	193.432	544.693	-1.0069	0.24336	0.016015	-25.837	104.8032	1280.883	-1.814	0.56885	-0.26855	-16.848	56.587	141.407	-0.23779	0.25332	0.13125	-78.0844	163.16	340.504	-0.50586	0.16553	0.057617	30.3166	90.5407	831.575	-0.39258	0.20508	-0.11084
2.034	57.169	3.8495	23.6021	-0.023926	0.021484	-0.09082	-32.915	161.615	1201.6016	-1.8628	0.479	-0.25098	-61.7611	174.045	517.303	-0.97461	0.24316	0.027832	-78.7548	80.524	1262.859	-1.7808	0.56299	-0.26318	-28.719	59.7539	132.162	-0.17988	0.24717	0.14082	-41.543	99.19118	353.886	-0.46777	0.15625	0.053223	15.078	97.367	863.552	-0.51318	0.20752	-0.097656
2.036	52.327	64.781	20.6042	-0.010498	0.031494	-0.10303	-24.605	134.965	1175.1708	-1.8322	0.48203	-0.24707	-49.54971	233.448	469.6076	-0.93662	0.24668	0.039355	-19.668	60.938	1258.625	-1.7241	0.54395	-0.25928	-83.0345	40.744	95.748	-0.12403	0.23935	0.14863	-50.1894	127.09	312.302	-0.42431	0.15429	0.047851	32.014	24.6544	927.139	-0.57861	0.2124	-0.082031
2.038	48.5286	35.272	3.882	0.013184	0.041504	-0.1123	4.114	127.476	1177.478	-1.8079	0.48174	-0.23974	-71.059	194.149	467.4486	-0.90156	0.23867	0.049219	-45.9	107.8016	1235.005	-1.6853	0.52881	-0.24976	-21.549	20.1911	104.228	-0.063086	0.23389	0.15137	-90.887	107.56	280.57	-0.38281	0.1499	0.046387	51.571	-7.324	976.145	-0.73047	0.2168	-0.055664
2.04	57.1917	23.07809	54.372	0.039551	0.059082	-0.12158	11.209	194.288	1151.341	-1.7837	0.48525	-0.2331	-63.5302	188.73	463.3505	-0.85937	0.23867	0.059765	-73.7446	70.9129	1228.607	-1.646	0.51807	-0.24268	-60.4369	42.5022	62.01471	-0.003418	0.23096	0.16113	-22.128	82.138	294.72	-0.32031	0.14502	0.038574	11.459	-40.219	958.415	-0.85937	0.22168	-0.030762
2.042	26.676	28.863	35.28661	0.054199	0.060059	-0.12842	14.498	144.652	1142.416	-1.7559	0.47988	-0.22392	-49.6365	204.38	440.579	-0.81836	0.23301	0.070996	-18.238	105.93	1208.286	-1.5996	0.50195	-0.22949	-77.5	36.354	62.0335	0.048926	0.22314	0.16191	-57.5411	116.941	245.059	-0.29053	0.14209	0.032715	70.16	-113.002	962.602	-1.0039	0.23535	-0.0029297
2.044	8.329	-5.801	48.328	0.079102	0.078613	-0.12842	30.014	194.855	1127.895	-1.7266	0.47754	-0.21094	-29.365	134.581	420.6779	-0.77881	0.23291	0.077148	-48.459	128.289	1159.647	-1.5742	0.49463	-0.22314	-25.039	39.4968	69.8869	0.095019	0.21308	0.16358	-60.05	82.34	218.158	-0.21973	0.13525	0.026855	22.4487	-111.536	957.468	-1.2148	0.25586	0.026367
2.046	9.526	28.460344	40.458	0.089599	0.068603	-0.15503	33.027	202.653	1081.7003	-1.6953	0.46856	-0.19668	-28.05	157.598	404.194	-0.74405	0.22842	0.086914	10.019	97.269	1141.135	-1.5317	0.47314	-0.21484	-91.0447	52.803	60.5617	0.13916	0.20332	0.16787	-25.652	109.5741	186.7442	-0.16382	0.12964	0.020507	-23.2175	-118.88	974.253	-1.3359	0.27686	0.042969
2.048	-0.728999999999999	23.9651	17.3958	0.11621	0.049805	-0.13086	40.172	132.588	1060.0673	-1.6637	0.46465	-0.19043	-25.01	140.577	382.071	-0.70566	0.2251	0.092871	18.67	175.017	1111.23	-1.4947	0.46338	-0.19604	-41.195	31.501	89.687	0.18633	0.1957	0.16446	-56.195	129.376	152.4438	-0.11426	0.12109	0.0097656	-35.6078	-96.366	970.013	-1.5762	0.31641	0.081543
2.05	-33.78	3.9318	45.8461	0.087891	0.09668	-0.146	38.4498	189.5607	1027.7089	-1.6375	0.45215	-0.18145	10.512	99.84551	371.116	-0.66855	0.22588	0.10459	-10.09	178.804	1085.21	-1.4551	0.44971	-0.19141	6.428	43.768	76.703	0.23047	0.1875	0.15918	12.523	81.9339	185.984	-0.05127	0.10449	-0.0048828	-93.282	-24.3313	939.855	-1.771	0.34961	0.10376
2.052	-58.3583	38.1152	49.1158	0.090578	0.1228	-0.20239	37.0815	153.1011	1003.1743	-1.6032	0.44678	-0.16396	33.344	144.787	319.298	-0.62832	0.22226	0.11211	32.747	170.2412	1066.8063	-1.4038	0.43701	-0.17725	-37.477	42.654	54.331	0.26416	0.17422	0.16045	8.58	100.888	177.881	-0.014648	0.10254	-0.0073242	-81.896	-37.528	934.945	-1.957	0.39258	0.11279
2.054	-45.46325	7.531	61.721	0.14551	0.12695	-0.18604	37.36	146.083	1010.56	-1.5757	0.43262	-0.15332	45.9259	93.8698	287.2091	-0.58203	0.22559	0.11523	1.94799999999999	193.727	1034.683	-1.366	0.42505	-0.16822	6.408	14.6455	67.539	0.29219	0.16035	0.16289	-8.938	69.707	164.159	0.046875	0.083496	-0.01709	-107.431	-44.2503	938.554	-2.168	0.44824	0.11572
2.056	-54.2705	8.553	97.316	0.18945	0.12793	-0.17041	27.09	195.75	979.488	-1.5364	0.42334	-0.14297	54.699	93.947	272.0182	-0.52871	0.22705	0.11768	19.043	115.007	1017.907	-1.3271	0.4082	-0.15625	-1.789	38.196	50.13	0.31719	0.15137	0.16055	42.531	37.586	159.85	0.085205	0.071533	-0.026123	-142.839	-12.31	939.94	-2.2712	0.47486	0.11865
2.058	-63.1651	20.647	111.194	0.18848	0.13916	-0.1792	54.2305	125.9634	968.791	-1.5086	0.41094	-0.12929	45.1766	125.5816	241.0966	-0.47637	0.22559	0.12432	70.65148	127.457	997.075	-1.2832	0.39063	-0.14063	-25.079	31.1251	26.34	0.33975	0.13965	0.15771	34.195	52.314	128.606	0.12207	0.059082	-0.040039	-102.795	-21.542	964.6132	-2.3301	0.49609	0.1084
2.06	-51.2751	-25.311	124.718	0.18066	0.16016	-0.18652	39.899	153.81	955.761	-1.477	0.39922	-0.12188	76.4174	77.523	235.3046	-0.41348	0.22402	0.12901	27.295	140.0304	957.892	-1.2637	0.37988	-0.13965	22.763	32.7815	20.737	0.36035	0.12793	0.15234	80.4529	-5.93929	127.95	0.1665	0.041016	-0.054199	-104.009	39.09	973.391	-2.3359	0.54004	0.096191
2.062	-33.369	5.111	149.543	0.17236	0.17383	-0.18555	14.476	174.022	924.386	-1.4418	0.38691	-0.10762	68.0949	112.5122	228.078	-0.35391	0.22275	0.13418	67.8362	107.272	948.622	-1.2168	0.36914	-0.12695	27.213	40.562	-0.284699999999999	0.37061	0.11875	0.15498	64.3596	6.269	100.6704	0.18701	0.030273	-0.058594	-88.932	42.137	980.8836	-2.3066	0.56055	0.09375
2.064	-31.381	10.7506	151.422	0.15332	0.18262	-0.18652	28.2839	128.4684	918.363	-1.4019	0.37354	-0.095215	52.61257	100.249	200.245	-0.28955	0.22363	0.1377	70.1697	163.8722	897.495	-1.186	0.35717	-0.11694	56.2026	12.9899	31.1804	0.37598	0.11465	0.15088	25.631	28.65082	92.341	0.22412	0.0068359	-0.07373	-39.04	-50.224	1002.382	-2.2188	0.60449	0.077148
2.066	-17.715	-16.50372	219.953	0.11182	0.19189	-0.18164	6.536	200.125	867.289	-1.3645	0.35899	-0.083887	67.6352	73.31717	200.356	-0.22295	0.22343	0.14385	44.137	154.6413	866.394	-1.1567	0.34814	-0.10645	71.4182	30.0774	52.174	0.37051	0.10176	0.15322	76.785	19.4363	100.3368	0.24341	-0.0080565	-0.081543	-46.443	-92.067	987.2021	-2.1218	0.63599	0.064209
2.068	-18.203	43.9343	269.9702	0.085938	0.19434	-0.17285	-15.1	169.499	820.4086	-1.3284	0.34531	-0.068262	43.7219	129.775	158.168	-0.16162	0.22021	0.14912	83.349	146.468	868.3513	-1.1133	0.33594	-0.09668	37.921	38.8842	38.609	0.36641	0.10693	0.15713	41.432	43.3402	109.986	0.26367	-0.025879	-0.086914	-36.562	-184.889	1012.0611	-2.0117	0.64063	0.050293
2.07	-48.694986	44.645	325.94	0.022461	0.19531	-0.17383	-48.689	163.5376	800.056	-1.2898	0.33242	-0.059668	38.4742	94.316	139.5531	-0.093261	0.21748	0.15264	56.7624	184.561	839.3276	-1.0933	0.32324	-0.089355	78.4216	28.4406	53.165	0.36377	0.10645	0.15723	15.291	10.261	96.705	0.28027	-0.040039	-0.098145	-41.846	-214.4811	1082.521	-1.8281	0.61133	0.020996
2.072	-37.729	94.054	411.6527	-0.031006	0.20289	-0.16431	-65.278	206.812	760.455	-1.2549	0.3209	-0.044433	14.098	96.457	131.3725	-0.03125	0.21162	0.15654	46.521	144.9472	829.133	-1.0586	0.31836	-0.077637	65.8383	36.172	40.023	0.3582	0.10605	0.15791	50.8442	-10.6961	100.194	0.28223	-0.04248	-0.10449	-79.2521	-182.457	1121.934	-1.7188	0.58984	0.00048828
2.074	-41.97756	135.414	476.924	-0.09082	0.20605	-0.15576	-57.9681	144.2532	730.397	-1.2222	0.31299	-0.034668	3.137	103.325	112.4183	0.031738	0.20703	0.15576	42.0318	177.958	809.809	-1.03	0.30713	-0.070069	56.187	12.7861	42.55728	0.34629	0.10498	0.15918	-5.537	20.1856	72.218	0.2959	-0.064941	-0.10547	-54.9551	-239.009	1159.222	-1.4785	0.54199	-0.041016
2.076	-36.2938	107.0837	577.928	-0.18457	0.20654	-0.14209	-63.5613	170.182	694.738	-1.1915	0.30059	-0.0056641	-1.78	20.109	108.6326	0.08291	0.20967	0.1628	-17.589	178.592	767.926	-1.0034	0.29834	-0.064453	76.7852	14.9807	50.4695	0.32832	0.11123	0.15449	5.016	0.669599999999999	49.611	0.29541	-0.076904	-0.11206	-54.869	-227.248	1156.4588	-1.3093	0.50073	-0.072998
2.078	-17.5646	146.01	673.136	-0.23389	0.20947	-0.13818	-81.235	172.367	665.075	-1.1637	0.28946	-0.0055664	-9.347	26.77524	106.324	0.13652	0.20693	0.16328	3.336	158.992	730.172	-0.97266	0.28711	-0.058594	15.631	47.337	13.64119	0.30996	0.10996	0.1545	10.216	24.5276	41.6457	0.28906	-0.085449	-0.10693	-36.0656	-212.833	1169.593	-1.1694	0.4751	-0.094238
2.08	13.9658	139.1413	713.403	-0.34668	0.21094	-0.12354	-65.655	132.128	644.714	-1.1351	0.2789	0.0088866	-46.8953	2.1689	88.1904	0.18652	0.20264	0.16016	-29.803	208.816	673.7709	-0.95313	0.28711	-0.047852	35.492	20.8142	42.853	0.29102	0.10547	0.15088	-51.069	36.12	13.843	0.28564	-0.10254	-0.10986	20.643	-225.326	1251.874	-1.0601	0.49561	-0.099121
2.082	36.4583	91.45655	793.40079	-0.43482	0.21704	-0.11939	-75.29	195.803	603.078	-1.105	0.27393	0.023047	-66.17938	-15.5941	110.451	0.23828	0.20479	0.1626	-57.6801	195.021	627.614	-0.91602	0.2793	-0.038574	17.568	14.6893	54.585	0.27471	0.10674	0.15186	-18.311	21.9191	22.551	0.28125	-0.098145	-0.1167	26.64	-126.856	1291.099	-1.0366	0.52881	-0.10645
2.084	56.7305	96.484	844.294	-0.52832	0.229	-0.11182	-71.1837	160.838	565.7271	-1.0776	0.26709	0.036133	-53.95	52.546	88.563	0.27783	0.19141	0.16211	-28.764	187.7908	621.9172	-0.88819	0.27758	-0.033204	-40.3	2.561	44.086	0.26543	0.09707	0.15791	-39.423	60.41	18.8566	0.26953	-0.098633	-0.11914	43.486	-120.112	1322.375	-1.02	0.61377	-0.12744
2.086	42.624	20.728	888.179	-0.65723	0.24609	-0.10059	-39.288	152.455	538.67657	-1.0486	0.26241	0.04668	-53.3623	22.47891	59.961	0.31035	0.1916	0.16602	-64.9043	204.427	589.4311	-0.86084	0.27783	-0.027344	5.75	-14.96	45.053	0.23106	0.093164	0.15322	-49.31616	37.9014	20.7791	0.25781	-0.09961	-0.11865	91.7616	-130.363	1350.449	-0.99072	0.65747	-0.1582
2.088	47.369	-29.7467	941.648	-0.72803	0.25488	-0.098633	-72.024	179.477	518.029	-1.0158	0.25625	0.056738	-56.419	27.5522	63.5064	0.3376	0.1874	0.16397	-56.2803	157.329	569.89351	-0.81787	0.27783	-0.024414	-20.883	28.9149	30.0029	0.19531	0.095508	0.14365	-22.37	4.8053	43.113	0.23779	-0.10254	-0.11621	99.4063	-98.456	1322.546	-0.95313	0.65137	-0.16992
2.09	82.1594	-59.815	945.479	-0.87158	0.28516	-0.072754	-52.6983	130.795	528.423	-0.97988	0.25742	0.065332	-75.1976	49.412	39.8036	0.3665	0.17998	0.16904	-22.015	179.653	542.924	-0.80029	0.27539	-0.019531	-54.722	21.1724	33.274	0.16309	0.097168	0.14209	-75.8914	23.2008	37.8138	0.21533	-0.098633	-0.11572	137.583	-143.145	1333.06971	-0.96143	0.60205	-0.14404
2.092	89.752	-155.9478	948.015	-0.9944	0.31152	-0.067627	-15.743	165.539	504.458	-0.93809	0.2542	0.074512	-62.3727	12.257	60.06679	0.38281	0.17637	0.16719	-72.2508	180.598	516.909	-0.75488	0.27051	-0.010254	-12.248	20.4705	42.494	0.14521	0.097462	0.13926	-63.2394	-10.733	28.1152	0.1958	-0.10059	-0.1084	130.699	-94.117	1341.156	-1.0049	0.57617	-0.13428
2.094	43.976	-178.981	960.89	-1.1284	0.34277	-0.04541	-27.2216	152.564	465.867	-0.89453	0.25195	0.083008	-46.318	52.232	70.593	0.40186	0.16943	0.1709	-38.082	161.397	517.233	-0.71802	0.2727	-0.0031738	-77.318	31.872	28.4638	0.13418	0.10322	0.13867	-21.179	14.14831	10.123	0.16455	-0.098633	-0.10449	83.0481	-31.285	1339.85	-1.123	0.55469	-0.10986
2.096	1.58907	-184.813	938.972	-1.3042	0.37646	-0.024902	8.548	97.11	438.614	-0.84434	0.25274	0.091308	-46.5186	42.863	41.13	0.40752	0.15899	0.17246	-32.776	190.327	478.226	-0.68018	0.27344	-0.0014648	-57.1193	15.3285	30.20672	0.11895	0.10517	0.1293	-68.548	14.76934	7.21765	0.13086	-0.099122	-0.099122	69.5858	-72.1606	1379.213	-1.2107	0.54664	-0.095457
2.098	-19.4661	-181.386	942.9	-1.394	0.39893	-0.0087891	0.716999999999999	135.5339	400.384	-0.79394	0.25215	0.10059	-21.959	13.4086	56.148	0.40645	0.15244	0.17373	-67.9722	174.988	445.851	-0.62939	0.26807	0.0053711	-11.174	26.715077	45.8239	0.10479	0.10732	0.12412	-54.514	-4.2255	24.1194	0.10107	-0.099121	-0.090332	23.351	-45.108	1410.2041	-1.2969	0.54883	-0.078125
2.1	-32.5697	-104.032	928.761	-1.5938	0.43457	0.022461	14.699	115.3385	372.3349	-0.74551	0.24902	0.10254	-23.091	49.991	32.9131	0.40566	0.15049	0.17607	-22.152	173.85	434.9237	-0.60645	0.26855	0.0073242	-67.6415	26.273	51.6793	0.085938	0.10938	0.12158	-36.539	38.158	19.5163	0.061523	-0.091797	-0.093262	28.872	-110.642	1437.646	-1.3979	0.53564	-0.067871
2.102	-71.72	-96.641	895.0322	-1.7371	0.45801	0.045654	37.214	118.8633	348.9669	-0.69727	0.24961	0.10371	6.177	17.3553	18.9601	0.39707	0.13359	0.17832	-49.0191	182.5	418.043	-0.54932	0.26514	0.022461	-40.738	-6.836	56.102	0.072852	0.12402	0.11768	-26.575	36.0201	20.5207	0.038086	-0.088379	-0.084961	56.761	-175.99	1503.432	-1.4492	0.53564	-0.061523
2.104	-86.633	-81.475	910.79	-1.8691	0.48242	0.057617	32.009	145.164	312.6878	-0.64258	0.24512	0.11035	13.012	44.876	12.6396	0.37451	0.12939	0.18359	-30.621	125.199	418.174	-0.51098	0.26197	0.024903	-37.351	22.5474	25.59437	0.062793	0.13633	0.12071	25.185	26.0632	43.242	0.0029297	-0.075684	-0.079102	27.786	-116.3767	1511.265	-1.5601	0.52979	-0.054688
2.106	-125.687	-4.623	896.732	-2.0054	0.49951	0.07373	51.9905	78.468	305.5193	-0.59795	0.23994	0.11494	13.956	68.119	-0.570399999999999	0.34727	0.13516	0.18379	6.832	129.64609	393.24	-0.47021	0.2583	0.032715	-35.355	2.049	25.1601	0.051855	0.14883	0.12031	-20.522	24.6552	42.5448	-0.020264	-0.068115	-0.075196	9.786	-147.481	1533.217	-1.6501	0.53442	-0.043702
2.108	-132.717	8.716	928.504	-2.0371	0.50195	0.075195	64.2279	105.4808	295.921	-0.55147	0.2419	0.11924	26.658	19.4956	25.5293	0.31914	0.13262	0.18408	-24.108	113.8735	344.462	-0.42139	0.25439	0.035156	8.613	-16.6988	41.592	0.043848	0.16025	0.125	24.373	-12.3382	42.036	-0.041504	-0.060059	-0.074219	9.545	-91.2016	1537.479	-1.7397	0.53857	-0.039063
2.11	-113.692	36.182	948.099	-2.0684	0.49414	0.072266	49.1266	122.004	258.7986	-0.50303	0.2415	0.11924	43.273	32.587	33.887	0.28985	0.12598	0.18916	46.824	87.54122	341.83	-0.39355	0.24219	0.043457	-17.582	3.4825	25.69	0.039063	0.17432	0.12598	39.296	23.589	28.803	-0.063477	-0.047852	-0.073242	-14.509	-46.425	1515.3549	-1.8511	0.5415	-0.036621
2.112	-88.671	31.139	910.3955	-2.0457	0.49048	0.054688	64.02764	88.5288	256.3974	-0.45401	0.24131	0.12061	56.3552	1.9247	24.657	0.2543	0.12432	0.19131	62.9455	119.142	300.571	-0.34326	0.23682	0.05127	1.21400000000001	-24.4158	44.66	0.037695	0.18652	0.12354	15.443	52.645	-19.2065	-0.070313	-0.043945	-0.071777	-6.744	-106.0731	1565.219	-1.9058	0.53955	-0.040039
2.114	-73.4805	-51.976	920.952	-1.998	0.49512	0.02832	31.465	140.528	229.922	-0.39941	0.24365	0.12256	76.618	-18.6769	60.145	0.21973	0.12354	0.19092	37.9703	102.293	274.3157	-0.30224	0.23072	0.053711	13.602	6.449	34.346	0.036914	0.20352	0.12559	73.084	38.7634	18.5695	-0.085938	-0.029785	-0.070313	-3.73199999999999	-37.996	1575.111	-2	0.54004	-0.043945
2.116	-35.298	-73.71	931.172	-1.8862	0.50537	-0.0014648	23.352	98.826	214.6682	-0.34346	0.24638	0.12129	63.9032	19.4279	71.81	0.18134	0.11728	0.18808	76.1158	96.7882	256.035	-0.25732	0.22168	0.061523	18.063	24.8019	39.59	0.040821	0.21563	0.1248	36.03	65.633	29.125	-0.095947	-0.018311	-0.074218	-31.72	-32.562	1559.005	-2.061	0.54395	-0.052491
2.118	-35.788	-123.522	945.419	-1.8242	0.50586	-0.019531	41.005	92.396	200.7119	-0.28281	0.25039	0.12529	53.9905	-5.1757	55.039	0.14512	0.11709	0.18906	22.67	115.767	232.2107	-0.19824	0.21924	0.062012	68.774	-10.0477	67.015	0.04834	0.2292	0.12393	27.501	48.271	33.496	-0.104	-0.003418	-0.071777	-52.083	-44.304	1581.558	-2.1191	0.5459	-0.055664
2.12	-35.771	-160.345	1023.5085	-1.6929	0.49756	-0.051758	-3.037	124.162	164.64279	-0.22305	0.25313	0.1292	65.506	28.6344	51.102	0.11621	0.1167	0.19102	69.0139	87.096	245.781	-0.16211	0.21582	0.063965	44.267	-5.833	56.568	0.05127	0.24219	0.11914	68.8396	26.90163	42.425	-0.10645	0.011719	-0.074707	-73.4416	38.4568	1547.958	-2.1816	0.54883	-0.067871
2.122	-36.364	-142.653	1056.9843	-1.5762	0.47779	-0.08081	11.398	67.2215	158.1711	-0.15938	0.2502	0.12841	44.511	53.627	8.6814	0.089063	0.11191	0.19277	82.1848	99.4547	230.314	-0.098145	0.21631	0.07373	47.002	-24.9371	61.1689	0.063965	0.25615	0.11563	38.4346	46.991	39.267	-0.10693	0.018066	-0.075195	-59.6732	-12.15671	1544.665	-2.207	0.55371	-0.079102
2.124	-37.174	-208.4655	1080.641	-1.4487	0.44971	-0.10059	-13.929	81.386	160.981	-0.098145	0.25342	0.12305	42.316	9.6628	17.3905	0.068359	0.11084	0.19092	17.014	79.837	204.355	-0.040527	0.21411	0.068848	101.205	-21.2888	73.2099	0.06582	0.26504	0.10928	43.4944	-6.7195	66.709	-0.10254	0.036621	-0.077148	-30.903	11.6223	1536.9773	-2.2417	0.55713	-0.097168
2.126	-32.299	-237.709	1134.713	-1.2925	0.41162	-0.12256	-44.65	71.674	140.369	-0.038965	0.25547	0.13291	19.764	31.071	30.6863	0.048632	0.11211	0.18262	45.2358	50.2437	210.475	0.011719	0.20898	0.069824	48.6708	2.178	80.418	0.073242	0.2752	0.10264	31.659	-7.0762	61.91	-0.099609	0.049316	-0.086914	-39.946	55.747	1495.609	-2.2569	0.55468	-0.11451
2.128	-3.576	-233.633	1163.919	-1.2378	0.40283	-0.13232	-31.059	24.7386	136.924	0.017383	0.25078	0.13467	7.032	26.45	9.9827	0.033008	0.11591	0.18233	1.707	69.4216	173.171	0.081543	0.20459	0.081543	62.8511	-35.4676	92.8184	0.07832	0.27783	0.09883	3.48	2.6447	23.421	-0.093262	0.054199	-0.086914	-31.924	-4.117	1526.9971	-2.2637	0.55469	-0.12451
2.13	0.983000000000004	-257.527	1232.499	-1.1753	0.42041	-0.12891	-46.2513	62.614	106.7125	0.073633	0.25117	0.13271	1.224	9.0935	37.993	0.022851	0.11787	0.17841	-6.95	48.032	152.628	0.1167	0.20459	0.081055	42.37	-35.6257	103.4951	0.083496	0.28564	0.089844	28.465	-9.0516	29.6383	-0.079102	0.068848	-0.09082	-24.457	63.95	1557.366	-2.252	0.54102	-0.16211
2.132	31.562	-185.987	1292.908	-1.1721	0.46435	-0.1311	-41.8699	20.9872	111.475	0.13457	0.24932	0.13379	-22.8797	38.571	44.282	0.01709	0.11972	0.17344	22.541	38.426	146.4059	0.17285	0.19238	0.07959	-15.428	-32.802	96.082	0.079297	0.28974	0.086914	-15.432	17.8077	63.24	-0.069092	0.076904	-0.096435	1.031	58.217	1562.719	-2.2476	0.5376	-0.17139
2.134	72.3629	-138.7358	1286.078	-1.1772	0.52393	-0.14209	-31.824	33.589	112.268	0.18311	0.24365	0.13037	-42.3011	8.38	51.519	0.0097656	0.125	0.16846	-39.015	52.3821868	106.9863	0.2129	0.18261	0.092773	28.4365	-43.5446	173.1347	0.07666	0.30088	0.080566	-32.786	-7.968	81.493	-0.053711	0.087402	-0.10156	71.4349	-2.438	1584.449	-2.2148	0.52441	-0.18994
2.136	104.7723	-132.962	1318.215	-1.1816	0.58789	-0.14697	-53.8943	74.783	81.572	0.2291	0.23467	0.13701	-38.631	28.3528	44.752	0.0079102	0.13272	0.1627	-24.615	16.8245	109.1822	0.24316	0.17578	0.10254	-16.22171	7.1214	229.509	0.069629	0.30791	0.080957	-12.25	-20.4385	91.414	-0.035156	0.10205	-0.11035	82.0509	23.271	1565.767	-2.1879	0.52198	-0.21045
2.138	128.427	-76.95	1325.377	-1.1812	0.59521	-0.14551	-45.8403	48.586	88.008	0.27216	0.22509	0.13857	-28.577	62.601	10.5249	0.0086914	0.14131	0.1583	-9.921	27.521	95.411	0.27832	0.16553	0.10303	-65.735	23.2835	314.3418	0.052539	0.32266	0.079004	-57.4027	-1.438	68.615	-0.028809	0.10889	-0.10986	80.0088	-53.454	1572.165	-2.1558	0.51807	-0.22412
2.14	127.4662	-75.565	1294.9859	-1.2378	0.59229	-0.12354	-42.07	75.547	81.893	0.30264	0.21494	0.1417	-58.4768	26.175	16.2955	0.011817	0.15029	0.15205	-81.8671	27.8085	88.039	0.29639	0.16309	0.10938	-3.088	46.30769	419.57047	0.032715	0.33643	0.081543	-27.6425	-43.1422	103.865	-0.020996	0.1167	-0.11768	94.662	-28.7381	1573.68	-2.1191	0.50195	-0.24023
2.142	164.47	-70.47	1342.522	-1.3149	0.59716	-0.10645	-42.165	54.238	90.55	0.33272	0.2086	0.14278	-63.7059	50.838	33.6049	0.015039	0.15234	0.14736	-46.9932	0.41126	104.061	0.3291	0.14209	0.11621	-40.977	92.711	527.676	0.0072264	0.35176	0.07959	-32.239	-44.787	114.66	-0.016357	0.12182	-0.11865	71.6291	43.759	1532.0984	-2.103	0.50146	-0.24463
2.144	169.713	-22.199	1342.051	-1.4004	0.60742	-0.088379	-22.36	0.57542	90.568	0.35596	0.19775	0.14697	-61.3507	17.46256	34.983	0.024414	0.16113	0.14453	-53.17697	37.355	83.061	0.3313	0.12915	0.11889	-67.162	95.616	665.662	-0.025683	0.36563	0.079102	-68.8355	-56.352	104.15	-0.016113	0.12939	-0.11816	73.8378	-4.328	1557.285	-2.082	0.49609	-0.25195
2.146	83.2522	-65.741	1359.016	-1.5088	0.61035	-0.081055	-26.029	42.574	74.77	0.38037	0.18515	0.14941	-44.536	-36.799	55.133	0.033789	0.16719	0.13701	-66.7761	36.775	68.5167	0.33545	0.12744	0.11963	-27.225	126.079	792.888	-0.062012	0.37773	0.081445	-30.862	-76.1929	111.221	-0.025879	0.14307	-0.12354	103.1670146	61.0322	1539.321	-2.071	0.49487	-0.2605
2.148	90.2667	-70.9792	1395.071	-1.5449	0.61279	-0.071289	-10.567	17.9655	73.419	0.38906	0.17871	0.14961	-36.554	-9.967	50.2	0.045117	0.1708	0.13164	-7.234	52.263	55.907	0.3374	0.12256	0.12451	-67.028	139.544	873.89	-0.1	0.39014	0.083789	-51.41	-21.179	121.6781	-0.034668	0.14795	-0.12793	96.9369	43.369	1500.184	-2.0664	0.49023	-0.25977
2.15	92.25181	-89.7581	1378.828	-1.6035	0.60254	-0.064453	11.963	18.9142	66.298	0.39375	0.16621	0.15625	-48.3029	-42.7547	59.094	0.056445	0.18135	0.12969	-55.3539	75.484	31.5558	0.34375	0.11816	0.125	-29.66	100.048	979.4925	-0.13867	0.40625	0.078125	-48.7636	-5.969	181.7024	-0.052734	0.15771	-0.12354	96.253	15.659	1491.245	-2.0659	0.49463	-0.25391
2.152	61.191	-134.664	1440.12	-1.6491	0.58862	-0.057129	3.303	45.073	37.992	0.39502	0.15596	0.16005	-32.402	-19.460966	78.133	0.064453	0.18115	0.12617	-64.7926	46.54	47.059	0.3457	0.10791	0.13428	-26.426	72.4369	1063.661	-0.17217	0.41885	0.080566	2.392	-11.3773	253.067	-0.076172	0.16187	-0.1206	72.701	106.32	1457.236	-2.0723	0.5	-0.25439
2.154	61.999	-93.62023	1474.998	-1.6987	0.58545	-0.0625	31.1	1.7	28.34309	0.3833	0.14209	0.16309	-19.772	21.2298	36.9984	0.074219	0.19189	0.12305	-40.051	59.193	37.8031	0.3313	0.10816	0.13134	-51.1729	-8.898	1134.231	-0.20146	0.43428	0.070801	-47.403	20.41106	289.8005	-0.10059	0.17188	-0.1167	87.326	70.822	1445.6877	-2.0776	0.51807	-0.24756
2.156	14.181	-103.626	1469.797	-1.7749	0.58252	-0.060059	41.509	34.2641	26.982	0.37022	0.14189	0.16377	1.373	-13.67888	37.99	0.081543	0.19795	0.11963	-36.772	42.854	19.21	0.32031	0.10107	0.13281	22.965	-96.867	1185.821	-0.22802	0.45498	0.061426	-48.372	3.26084112	354.712	-0.15234	0.18457	-0.11279	86.8778	97.522	1457.321	-2.0769	0.52783	-0.25781
2.158	20.271	-138.053	1533.757	-1.8125	0.57715	-0.067383	37.3987	29.731	33.52	0.35274	0.13437	0.16817	11.25	20.2537	61.3902	0.083399	0.20352	0.1125	0.786999999999999	4.8499	32.4413	0.30273	0.099609	0.13867	-4.98	-129.125	1159.975	-0.2626	0.46905	0.059082	-32.67	39.2441	449.639	-0.17578	0.19336	-0.10791	62.516	127.82	1417.9196	-2.0542	0.53174	-0.26221
2.16	31.176	-120.113	1552.986	-1.8906	0.57813	-0.080078	62.4747	-14.86	65.848	0.32813	0.12539	0.17012	27.954	-3.074	67.8162	0.085743	0.20664	0.11054	-24.746	13.8751	25.5532	0.28955	0.09082	0.14111	35.496	-184.9664	1167.605	-0.31348	0.47656	0.053223	-69.107	77.927	521.8	-0.24365	0.20068	-0.10449	59.418	48.5053	1402.4182	-2.0313	0.52344	-0.26465
2.162	-13.952	-168.186	1556.429	-1.9451	0.57983	-0.091309	31.8	24.5985	49.792	0.30039	0.11318	0.17286	29.763	-53.5146	108.323	0.082324	0.2125	0.104	-10.118	9.7219	28.712	0.25586	0.096191	0.14453	73.974	-193.317	1150.873	-0.38281	0.48135	0.050586	-19.271	83.1744	619.732	-0.30664	0.21118	-0.096189	36.473	116.6	1394.906	-2.0269	0.52002	-0.26123
2.164	17.948	-152.72	1571.838	-1.9839	0.58447	-0.11084	54.0786	-11.86353	43.835	0.27295	0.10791	0.16846	51.0253	-19.839	103.689	0.079102	0.2168	0.099609	50.8423	38.545	24.749	0.21436	0.10425	0.14575	57.839	-177.953	1116.423	-0.48438	0.48183	0.053906	-28.32829	147.281	686.048	-0.38281	0.21387	-0.087891	8.515	120.217	1383.938	-2.0352	0.52246	-0.25098
2.166	7.954	-98.517	1515.049	-2.021	0.58447	-0.1377	72.51602	6.0226	45.913	0.24102	0.10254	0.1667	42.3178	-46.5871	123.8086	0.072168	0.22666	0.096875	13.399	66.034	6.272	0.18457	0.10693	0.15088	124.063	-187.563	1102.067	-0.61641	0.47363	0.054297	-56.122	137.058	756.885	-0.49463	0.22021	-0.078613	2.496	89.6042	1385.244	-2.033	0.53247	-0.24732
2.168	-44.972	-94.008	1518.37	-2.0288	0.58252	-0.15332	31.705	26.7005	36.036	0.20351	0.094726	0.16856	25.978	-24.097	173.843	0.064551	0.23536	0.095215	33.566	28.991	22.225	0.14795	0.099609	0.16064	113.944	-124.101	1074.951	-0.77588	0.45918	0.056445	22.2884	102.1482	839.9132	-0.56104	0.22266	-0.069824	-36.35	139.557	1352.781	-2.0117	0.5376	-0.24512
2.17	-27.3	-17.69	1494.802	-2.0425	0.57959	-0.16211	33.702	-8.67193	26.0894	0.16875	0.093554	0.16817	50.3589	20.6251	193.7912	0.050879	0.24746	0.090528	57.785	26.512091	35.059	0.12012	0.097656	0.1626	100.574	-78.303	1065.863	-0.96045	0.44775	0.063477	12.893	95.712	879.079	-0.70557	0.23291	-0.050293	-40.754	37.522	1316.33	-1.9668	0.5332	-0.23828
2.172	-55.69	5.261	1462.044	-2.0451	0.5774	-0.18481	13.612	31.1935	12.5646	0.13603	0.077246	0.1708	27.389	1.105	221.676	0.027246	0.2586	0.08584	43.776	27.885	27.596	0.091309	0.095215	0.15527	162.488	-62.7743	1090.056	-1.1697	0.43555	0.064941	3.402	13.2809	927.36	-0.82642	0.23902	-0.032959	-47.854	41.37	1301.925	-1.9395	0.52539	-0.23535
2.174	-42.678	-13.776	1517.202	-2.0405	0.57178	-0.20215	-8.172	34.107	7.244	0.099609	0.071289	0.17627	22.639	62.4647	292.757	0.0019531	0.26953	0.084473	77.6225	21.482	54.85	0.058349	0.089844	0.15722	142.9677	1.909	1068.174	-1.3976	0.43916	0.069824	46.055	-26.312	965.536	-0.97266	0.2417	-0.0063477	-50.26	97.261	1269.046	-1.8867	0.51367	-0.22754
2.176	-0.796999999999997	29.866	1497.402	-2.0371	0.56348	-0.22363	20.541	-8.3475	35.018	0.062402	0.06416	0.17529	32.753	69.0653	381.113	-0.032226	0.27237	0.084571	44.9254	43.582	56.897	0.031738	0.10107	0.15039	150.443	9.803	1073.006	-1.6331	0.45752	0.074121	27.0909	-67.417	926.343	-1.187	0.25732	0.038574	-25.902	61.933	1259.3271	-1.8493	0.50366	-0.21753
2.178	-30.399	-9.7853	1484.857	-2.0313	0.55664	-0.22949	-15.001	21.944	36.7428	0.035352	0.053028	0.17842	14.855	53.2292	543.882	-0.07207	0.28438	0.085644	18.011	18.4465	41.143	0.003418	0.09668	0.15137	174.016	-1.607	1068.72	-1.8465	0.48398	0.07334	68.143	-133.2497	924.821	-1.3027	0.25879	0.057617	-24.633	165.604	1229.9397	-1.8164	0.48828	-0.21191
2.18	21.572	12.0875	1509.607	-2.0352	0.54297	-0.24316	-25.423	-18.1356	25.679	0.0095703	0.050293	0.18311	10.873	107.711	656.891	-0.11152	0.29102	0.089941	70.6314	23.196	36.617	-0.0048828	0.10156	0.15479	96.534	8.01000000000001	996.897	-2.0249	0.52002	0.074707	17.678	-123.034	904.502	-1.5547	0.28125	0.10449	-29.238	176.492	1189.4595	-1.7729	0.47119	-0.19434
2.182	34.784	46.1273	1491.972	-2.0342	0.53809	-0.24926	-17.841	-3.1241	28.5261	-0.0083985	0.051074	0.17822	11.677	88.987	760.3139	-0.15733	0.30136	0.08711	15.583	56.655	-0.1539	-0.019531	0.10498	0.14941	105.561	-81.146	990.544	-2.1454	0.56826	0.079004	-27.9934	-106.856	879.8209	-1.7371	0.30176	0.13965	-20.834	151.1536	1191.283	-1.7461	0.4624	-0.19141
2.184	33.1	-3.869	1518.661	-2.0249	0.5249	-0.25537	-37.081	38.2505	18.4553	-0.019531	0.050781	0.17773	17.788	90.509	871.7714	-0.20166	0.30908	0.086914	15.056	35.226	15.80314	-0.031006	0.1084	0.1455	76.57	-125.301	999.895	-2.2042	0.61455	0.077734	-46.319	-85.908	914.792	-1.916	0.32764	0.17139	11.414	226.79	1152.472	-1.7124	0.44482	-0.17676
2.186	114.2454	13.758	1518.681	-2.0176	0.5166	-0.26953	-32.1	6.5112	29.99483	-0.033106	0.050879	0.179	-0.800000000000004	110.706	931.016	-0.24746	0.31768	0.090625	16.61	48.939	34.731	-0.037109	0.11475	0.14453	22.963	-171.30429	1003.648	-2.1788	0.64932	0.081641	-81.94	-11.20497	888.924	-2.1245	0.38037	0.17822	8.833	171.6656	1129.7394	-1.6734	0.43555	-0.16187
2.188	91.34	-23.151	1483.172	-2.0132	0.5083	-0.26709	-45.451	40.988	25.6416	-0.034668	0.054199	0.17314	-9.334	46.8486	1005.449	-0.29922	0.32578	0.093652	-44.51	42.374	30.131	-0.039063	0.12598	0.13525	35.0941	-264.883	1077.591	-2.0821	0.68672	0.089062	-52.1107	-35.75	899.371	-2.1934	0.4043	0.17236	29.862	209.063	1118.53	-1.6479	0.42725	-0.15723
2.19	94.9752	-63.569	1510.5131	-2.0059	0.49609	-0.26563	-50.006	38.645	7.3137	-0.031934	0.059277	0.17002	-22.594	31.876	1066.652	-0.35469	0.33437	0.0917	-8.969	15.78849	54.29	-0.040039	0.1333	0.13135	-17.142	-271.9	1083.864	-1.9395	0.7041	0.09375	-98.759	-45.01	910.791	-2.2671	0.45361	0.16602	21.974	231.481	1084.916	-1.6016	0.41211	-0.13867
2.192	127.872	-3.9642	1495.3974	-1.9988	0.48462	-0.26294	-35.314	9.27775	23.6347	-0.020996	0.067969	0.16856	-26.4417	-37.362	1093.769	-0.41983	0.342	0.090234	-23.865	23.1572	60.509	-0.032227	0.14209	0.13135	-84.117	-324.745	1096.835	-1.7743	0.71963	0.084668	-151.013	-11.092	888.13	-2.2586	0.49511	0.15357	31.36	154.5716	1057.51	-1.5742	0.40039	-0.12939
2.194	105.0299	-34.639	1476.018	-2.002	0.47656	-0.26172	-35.023	50.857	19.68397	-0.019531	0.075684	0.16162	-13.856	-146.7342	1141.444	-0.5	0.3457	0.087891	-54.6709	6.728	62.218	-0.027343	0.14941	0.1272	-103.229	-338.279	1156.937	-1.605	0.7126	0.07793	-104.191	-26.815	913.557	-2.2124	0.54443	0.13867	41.901	208.043	1022.839	-1.5249	0.38818	-0.11768
2.196	142.8403	-34.2606	1493.489	-2.0059	0.47461	-0.25293	-28.156	3.6228	38.1263	9.766e-05	0.089356	0.15635	-0.129999999999995	-160.1384	1126.357	-0.60312	0.34727	0.085156	-9.757	3.4436	72.549	-0.021484	0.15479	0.12061	-156.512	-243.477	1162.373	-1.4472	0.67432	0.067382	-71.03	22.255	909.3775	-2.0913	0.59717	0.10547	56.812	189.6461	980.454	-1.492	0.37989	-0.10839
2.198	127.1643	-3.539	1445.73	-2.0059	0.46973	-0.24951	-22.274	-4.6626	46.37	0.015625	0.09668	0.15108	-2.58900000000001	-211.436	1103.548	-0.72559	0.34326	0.078418	-63.499	30.4495	43.701	-0.0039063	0.1626	0.11963	-150.442	-223.572	1176.9741	-1.3156	0.64619	0.045312	-77.362	21.746	878.855	-2.0093	0.61182	0.091309	69.523	171.251	992.9655	-1.4512	0.36816	-0.099121
2.2	98.894	-29.314	1414.989	-2.0117	0.45703	-0.2373	-30.475	24.8723	27.3899	0.026563	0.10762	0.14248	16.031	-204.497	1096.5	-0.87051	0.3253	0.075684	-53.3678	15.2562	32.2895	0.0053711	0.17188	0.11865	-146.907	-149.6477	1196.841	-1.1948	0.60596	0.025391	-29.575	-65.808	920.10512	-1.8042	0.61182	0.044922	68.8962	231.004	956.4209	-1.3984	0.35547	-0.087891
2.202	153.439	36.5187	1422.537	-2.0117	0.45703	-0.23389	-0.689	-9.9257	36.1919	0.045508	0.11709	0.13818	22.238	-138.842	1025.958	-1.0377	0.31123	0.076563	-39.5605	29.932	22.2192	0.021484	0.18115	0.10693	-167.112	-93.105	1202.433	-1.1079	0.58975	0.014648	-29.772	-66.494	923.08614	-1.6267	0.57813	0.0090332	71.344	165.848	936.083	-1.3691	0.34961	-0.081055
2.204	109.3305	84.956	1386.2221	-2.0098	0.46094	-0.23242	6.84399999999999	36.263	21.4963	0.05957	0.12598	0.13184	30.718	-131.75	989.1821	-1.2246	0.30322	0.073242	-77.622	10.97808	38.072	0.040039	0.18994	0.097168	-135.787	-141.511	1253.503	-1.034	0.58418	0.0044922	-34.375	-133.778	967.8821	-1.4355	0.54883	-0.031738	70.53478	179.4454	916.466	-1.314	0.33691	-0.070313
2.206	86.76	97.746	1383.6597	-2.002	0.46484	-0.22266	4.723	41.01	19.368	0.072656	0.13614	0.12637	68.19	-64.645	984.1406	-1.423	0.30342	0.071875	-14.213	-34.931	52.627	0.048828	0.19629	0.089355	-154.75	-81.113	1250.967	-0.98594	0.60723	0.0017578	-23.079	-184.4889	1044.41	-1.1895	0.49414	-0.077637	58.3895	189.926	891.964	-1.2554	0.32324	-0.05957
2.208	110.674	159.061	1351.2997	-1.992	0.47387	-0.22021	25.939	14.6423	46.5724	0.083887	0.14727	0.12236	56.796	-40.3753	986.849	-1.6222	0.31612	0.072168	-31.65	-12.1132	44.7074	0.069824	0.20117	0.083984	-142.469	-87.237	1234.9098	-0.96963	0.65303	0.0071289	-69.9777	-192.7433	1046.59	-1.0835	0.47021	-0.097656	66.1261	135.8291	884.491	-1.228	0.31689	-0.052246
2.21	49.828	111.475	1295.19	-1.981	0.48145	-0.22314	33.739	52.353	55.175	0.097558	0.15156	0.11689	63.851	-43.588	1021.547	-1.8018	0.33838	0.078809	-39.4607	-15.3762	51.444	0.084472	0.20825	0.079834	-75.413	-114.764	1266.722	-0.97705	0.7124	0.0092773	-24.45	-260.214	1081.716	-0.91992	0.4502	-0.12891	46.84	207.528	832.807	-1.1802	0.30518	-0.040039
2.212	55.191	92.741	1323.053	-1.9434	0.49316	-0.22852	46.98197	-2.376	74.716	0.10791	0.16084	0.11201	91.905	8.19200000000001	1038.494	-1.9622	0.37022	0.085058	8.344	-6.6976	63.529	0.09375	0.21338	0.069824	-122.562	-56.509	1242.1528	-0.97529	0.74814	-0.0081054	-2.102	-239.231	1111.608	-0.84863	0.46094	-0.12719	14.473	222.214	783.2452	-1.1396	0.30346	-0.02832
2.214	54.364	99.965	1299.905	-1.9253	0.49268	-0.22412	72.4003	-23.1449	96.799	0.11426	0.17188	0.10645	76.189	-1.78899999999999	1017.901	-2.0723	0.41553	0.10742	-21.39	18.0664	34.7729	0.10449	0.22559	0.070801	-113.03	-110.5616	1252.298	-0.96347	0.7332	-0.021582	-9.721	-195.717	1129.049	-0.81152	0.49414	-0.11182	-5.146	209.95927	755.739	-1.1045	0.29639	-0.021484
2.216	-3.837	46.613	1308.437	-1.896	0.50049	-0.22021	39.847	-1.928	74.802	0.11475	0.18232	0.10049	72.236	-48.369	1003.8494	-2.1264	0.46943	0.11074	2.434	-4.9819	40.8618	0.10791	0.22461	0.067871	-79.095	-116.405	1294.105	-0.9666	0.68633	-0.031348	15.304	-200.033	1210.821	-0.83008	0.5625	-0.12354	-22.4	263.899	722.4489	-1.0547	0.29492	-0.0073242
2.218	30.171	79.875	1313.942	-1.8721	0.50659	-0.22363	71.4183	-43.9174	85.399	0.10948	0.19355	0.098635	51.989	-55.178	962.1645	-2.1227	0.52364	0.121	38.879	19.2578	17.915	0.099609	0.23682	0.067383	-82.198	-110.1558	1334.4303	-1.0218	0.64209	-0.042188	21.183	-112.7176	1247.256	-0.83936	0.60205	-0.12256	-20.215	187.7902	690.3939	-1.0313	0.29102	-0.0048828
2.22	-10.612	66.7353	1260.237	-1.8379	0.50195	-0.21973	50.884	-2.546	90.7825	0.10283	0.20762	0.09082	37.5527	-129.5	951.051	-2.0449	0.57168	0.12334	11.008	22.574	12.741	0.092773	0.24536	0.068848	-43.097	-212.876	1423.586	-1.1055	0.61523	-0.052246	75.5634	-113.28	1275.0223	-0.84131	0.64209	-0.12939	-15.059	204.478	661.975	-0.97998	0.29004	0.003418
2.222	-30.314	40.896	1258.292	-1.7847	0.51025	-0.22119	14.239	0.649999999999999	73.644	0.093653	0.22149	0.088574	24.191	-164.1992	991.188	-1.9156	0.61933	0.12256	61.67362	-18.0139	67.096	0.080078	0.25488	0.068848	-38.061	-174.81	1451.494	-1.2045	0.60332	-0.060156	93.4976	-128.3662	1312.857	-0.86084	0.62646	-0.11938	-42.8693	204.578	621.042	-0.94117	0.29004	0.012207
2.224	-7.109	88.677	1211.1606	-1.752	0.50488	-0.2207	18.873	-33.85303	112.8966	0.081543	0.23682	0.081543	8.04133	-207.411	1001.392	-1.7578	0.65039	0.12256	36.476	-20.7473	71.828	0.054688	0.26758	0.069336	0.9909	-169.3636	1463.428	-1.3065	0.60244	-0.057032	97.3371	-80.078	1310.639	-0.92578	0.59766	-0.092285	-44.87	135.5939	602.496	-0.9043	0.29443	0.018066
2.226	-63.295	55.17	1204.4657	-1.689	0.49463	-0.21191	-2.748	6.371	149.462	0.065137	0.24922	0.076269	-32.2083	-298.43	1035.5603	-1.6021	0.65615	0.11826	26.567	-52.4699	66.126	0.044922	0.27832	0.076172	64.7827	-188.4475	1516.038	-1.3984	0.60908	-0.052735	121.642	-124.961	1320.439	-1.0815	0.57568	-0.058105	-54.971	187.467	564.1	-0.8418	0.30029	0.028809
2.228	-24.044	73.4833	1225.526	-1.6433	0.48804	-0.21021	-13.63618	-2.495	207.456	0.053711	0.26348	0.072364	-25.454	-307.635	1081.332	-1.4633	0.64297	0.098047	77.904	-56.8867	79.91	0.01416	0.29248	0.081543	61.1396	-87.005	1503.454	-1.4862	0.61553	-0.04541	118.7607	-103.366	1338.85	-1.1772	0.56885	-0.047363	-55.0147	175.264	519.55	-0.82129	0.29639	0.027832
2.23	-6.012	109.391	1188.309	-1.6035	0.47754	-0.20703	-19.6484	16.85284	286.891	0.037305	0.2791	0.069238	-66.848	-312.098	1103.408	-1.3492	0.61485	0.077735	29.48	-36.098	74.4991	-0.011963	0.30395	0.082519	80.446	-107.434	1493.831	-1.5703	0.625	-0.037598	83.71	-63.974	1303.526	-1.3394	0.56299	-0.026855	-33.725	172.0189	490.243	-0.76318	0.30127	0.03125
2.232	-19.279	77.6219	1184.181	-1.5396	0.46533	-0.19873	-15.094	67.48	354.144	0.021387	0.29258	0.064844	-106.797	-316.134	1165.89	-1.2402	0.58184	0.055664	33.772	-48.5197	102.244	-0.034668	0.31543	0.087402	93.999	-92.8091	1507.99	-1.6595	0.62686	-0.027637	72.1835	-117.41	1337.701	-1.4461	0.56225	-0.018799	-65.9523	216.044	460.5097	-0.72387	0.30274	0.039795
2.234	42.263	142.708	1167.362	-1.5137	0.45508	-0.19531	-28.307	47.6703	441.49	-0.0058594	0.30615	0.064453	-92.667	-210.219	1173.108	-1.1382	0.56689	0.036133	24.3852	-4.2278	112.7	-0.069824	0.33008	0.089844	62.393	-31.243	1494.0695	-1.7507	0.62783	-0.019922	31.097	-70.4753	1382.48469	-1.5391	0.56641	-0.010742	-41.8314	148.5834	466.2429	-0.68213	0.3042	0.041992
2.236	28.045	171.57	1131.177	-1.4629	0.43945	-0.18408	-37.642	105.459	544.6538	-0.031446	0.31582	0.062695	-115.777	-170.0307	1196.019	-1.0493	0.5585	0.016992	-33.3013	23.5758	130.124	-0.086426	0.3374	0.095703	62.473	-99.574	1500.489	-1.8331	0.63017	-0.0089844	18.12	-102.704	1411.7554	-1.646	0.56494	-0.0083008	-37.157	155.502	451.403	-0.62744	0.31006	0.049805
[truncated: 11,881 more rows]
