# Supplementary material for: Reliability and Validity of Running Cadence and Stance Time Derived from Instrumented Wireless Earbuds
Source: Sensors (Basel). 2021 Nov 30;21(23):7995. doi: 10.3390/s21237995 (PMC8659722; doi:10.3390/s21237995)
Supplement: Supplementary file 1 [file sensors-21-07995-s001.zip › Data_P11_speeds_1.csv]

time	S7kmh_force_plate_1	S7kmh_force_plate_2	S7kmh_force_plate_3	S7kmh_earbuds_1	S7kmh_earbuds_2	S7kmh_earbuds_3	S10kmh_force_plate_1	S10kmh_force_plate_2	S10kmh_force_plate_3	S10kmh_earbuds_1	S10kmh_earbuds_2	S10kmh_earbuds_3	S13kmh_force_plate_1	S13kmh_force_plate_2	S13kmh_force_plate_3	S13kmh_earbuds_1	S13kmh_earbuds_2	S13kmh_earbuds_3	max_force_plate_1	max_force_plate_2	max_force_plate_3	max_earbuds_1	max_earbuds_2	max_earbuds_3
0	-51.515	-96.35758	774.1456	-0.66846	0.41748	0.12061	-18.9553	72.1983	245.008	-0.076703	0.16949	-0.06269	-107.874	-278.692	1433.59892	-1.2349	1.1323	-0.0078125	NaN	NaN	NaN	NaN	NaN	NaN
0.002	-51.165	-89.9426	776.753	-0.64795	0.40527	0.11963	-18.1934	87.0801	197.6283	-0.03144	0.15503	-0.068901	-83.924	-122.333	1488.614	-1.3755	1.1548	-0.01416	NaN	NaN	NaN	NaN	NaN	NaN
0.004	-63.395	-88.409	752.16	-0.62451	0.396	0.11133	-37.7678	62.926	185.2467	0.008845	0.14782	-0.07652	-48.509	-139.728	1558.009	-1.4736	1.1758	-0.010742	NaN	NaN	NaN	NaN	NaN	NaN
0.006	-33.801442	-83.2784	738.502	-0.61475	0.38477	0.1084	-8.5048	102.112	186.217	0.049805	0.13379	-0.084961	-80.577	-92.299	1560.949	-1.5723	1.1992	-0.01123	NaN	NaN	NaN	NaN	NaN	NaN
0.008	-44.778	-71.763499	733.308	-0.58984	0.37451	0.10352	-21.5162	82.868	171.307	0.082196	0.11945	-0.093118	3.2215	-77.091	1548.872	-1.6816	1.249	-0.011719	NaN	NaN	NaN	NaN	NaN	NaN
0.01	-59.644	-54.1088	701.7058	-0.57446	0.36841	0.098635	-2.4646	52.0324	194.118	0.11874	0.11411	-0.10344	-27.8498	-87.246	1513.075	-1.74	1.2786	-0.0085451	NaN	NaN	NaN	NaN	NaN	NaN
0.012	-43.882	-55.5454	670.71036	-0.55957	0.35986	0.09668	33.8338	65.9333	170.548	0.14985	0.099544	-0.10679	-25.6949	-21.464	1503.364	-1.7949	1.3008	-0.003418	NaN	NaN	NaN	NaN	NaN	NaN
0.014	-48.865	-51.0195	643.9364	-0.53857	0.34717	0.089355	13.5777	26.343	150.021	0.17911	0.093407	-0.11573	-47.5584	-89.655	1497.01	-1.8516	1.3203	0.00097656	NaN	NaN	NaN	NaN	NaN	NaN
0.016	-38.792	-57.7091	637.6807	-0.52588	0.34326	0.087402	41.88024	43.47171	130.584	0.20313	0.083008	-0.12988	-44.7151	-61.893	1502.917	-1.8804	1.3228	0.0083008	NaN	NaN	NaN	NaN	NaN	NaN
0.018	-45.084	-61.6415	646.154	-0.50684	0.33398	0.080078	44.631	63.66166	93.0625	0.2255	0.070229	-0.13209	-23.6817	-161.675	1549.94557	-1.9175	1.3208	0.01709	NaN	NaN	NaN	NaN	NaN	NaN
0.02	-17.2931	-67.19984	630.9581	-0.4939	0.32593	0.075684	30.0437	25.013	113.18495	0.24095	0.058135	-0.13965	-49.4405	-160.833	1615.018	-1.9353	1.3157	0.02539	NaN	NaN	NaN	NaN	NaN	NaN
0.022	-21.9629	-59.11197	626.1781	-0.479	0.31885	0.070313	49.9997	39.9018	101.9314	0.25423	0.048637	-0.14381	0.0140000000000011	-236.353	1650.717	-1.9453	1.3027	0.032715	NaN	NaN	NaN	NaN	NaN	NaN
0.024	-35.8497	-48.3346	628.4967	-0.46191	0.30957	0.066895	39.305	1.144	85.7687	0.25977	0.037157	-0.146	-29.532	-209.898	1680.319	-1.9487	1.2837	0.042969	NaN	NaN	NaN	NaN	NaN	NaN
0.026	-18.80951	-54.231	594.2535	-0.45068	0.30322	0.064941	51.732	-29.6812	95.671	0.25977	0.021484	-0.146	26.595	-189.492	1680.542	-1.9453	1.2793	0.050293	NaN	NaN	NaN	NaN	NaN	NaN
0.028	-9.0499	-44.46229	566.6403	-0.4292	0.2915	0.058105	42.425	-4.6103	90.519	0.26121	0.0099634	-0.14211	12.667	-195.485	1705.468	-1.9409	1.2524	0.062988	NaN	NaN	NaN	NaN	NaN	NaN
0.03	-3.3878	-42.52176	567.662	-0.41309	0.2832	0.048828	25.60631	-22.5735	80.805	0.25211	0.0070697	-0.12728	51.192	-127.187	1711.37	-1.9428	1.2329	0.073974	NaN	NaN	NaN	NaN	NaN	NaN
0.032	-1.2077	-44.7466	537.9727	-0.39795	0.27637	0.047852	33.6863	9.2977	64.4349	0.23127	0.00066928	-0.14049	61.441	-166.541	1712.462	-1.9487	1.2173	0.085938	NaN	NaN	NaN	NaN	NaN	NaN
0.034	-1.633	-43.307	543.707	-0.38037	0.26416	0.038086	12.21101	28.2237	23.03	0.21949	-0.0076765	-0.14614	61.095	-52.72	1698.397	-1.9604	1.1938	0.090332	NaN	NaN	NaN	NaN	NaN	NaN
0.036	-11.56505	-37.9617	526.025	-0.36499	0.25953	0.037354	-3.159	5.707	29.053	0.21729	-0.0058594	-0.12402	65.952	-87.4668	1665.08	-1.9624	1.1821	0.094727	NaN	NaN	NaN	NaN	NaN	NaN
0.038	-9.3488	-29.503	531.0382	-0.3501	0.25146	0.032227	14.938	42.9151	48.6515	0.19865	-0.0058781	-0.11998	-7.265	0.225000000000001	1623.9279	-1.957	1.1504	0.10352	NaN	NaN	NaN	NaN	NaN	NaN
0.04	-14.41	-35.5977	519.264	-0.33105	0.2417	0.030762	-17.1268	41.7785	31.9783	0.17979	-0.0069138	-0.12193	18.8954	-23.9657	1578.9413	-1.9434	1.1343	0.10962	NaN	NaN	NaN	NaN	NaN	NaN
0.042	-26.90704	-23.6366	484.1383	-0.32178	0.23926	0.027344	-4.402	32.526	41.479	0.16307	-0.009151	-0.11563	-21.496	7.7302	1543.566	-1.9258	1.1074	0.10596	NaN	NaN	NaN	NaN	NaN	NaN
0.044	-15.2849	-3.607	472.3726	-0.30029	0.22803	0.024414	-2.846	42.898	25.2961	0.1376	-0.021337	-0.11362	12.093	5.697	1532.764	-1.8979	1.0864	0.11182	NaN	NaN	NaN	NaN	NaN	NaN
0.046	-16.11917	-0.911999999999999	463.478	-0.2854	0.22534	0.020752	-46.237	-9.198	36.0368	0.12061	-0.026855	-0.10449	-17.315	-8.747643	1548.954	-1.8848	1.0742	0.11426	NaN	NaN	NaN	NaN	NaN	NaN
0.048	-18.4404	-9.471	452.194	-0.2749	0.21582	0.019531	-24.735	-9.265	28.534	0.097538	-0.030636	-0.10221	-24.6389	33.2023	1538.215	-1.8569	1.0571	0.11426	NaN	NaN	NaN	NaN	NaN	NaN
0.05	-33.3371	-13.32	432.638	-0.2583	0.20996	0.020996	-19.4741	8.8902	-17.2174	0.073941	-0.03315	-0.10162	-31.1141	-6.892	1541.4221	-1.8396	1.054	0.11353	NaN	NaN	NaN	NaN	NaN	NaN
0.052	-24.081	-10.548	425.9729	-0.25146	0.20508	0.02002	-32.207	-4.705	-14.2227	0.048611	-0.027939	-0.097703	-28.954	59.494	1532.519	-1.8257	1.0522	0.11523	NaN	NaN	NaN	NaN	NaN	NaN
0.054	-44.428	-4.108	424.8	-0.23633	0.19873	0.016113	-19.344	35.557	0.6419	0.028248	-0.030702	-0.097764	12.354	-14.405	1555.395	-1.8008	1.0527	0.12158	NaN	NaN	NaN	NaN	NaN	NaN
0.056	-52.695	-4.1659	428.847	-0.22631	0.19018	0.015381	-20.4577	25.1612	5.44077	0.0053711	-0.028809	-0.092773	-30.176	28.011	1589.681	-1.7925	1.0552	0.12598	NaN	NaN	NaN	NaN	NaN	NaN
0.058	-37.878	-0.8821	404.1318	-0.21924	0.18604	0.015137	-18.3077	0.2129	28.308	-0.020981	-0.024016	-0.089446	16.198	-39.1234	1581.427	-1.7729	1.0571	0.13379	NaN	NaN	NaN	NaN	NaN	NaN
0.06	-47.976	-8.878	402.825	-0.20752	0.17773	0.016113	9.33315	22.4529	29.7074	-0.042846	-0.018066	-0.083257	-56.204	-13.4365	1575.444	-1.7683	1.0594	0.13891	NaN	NaN	NaN	NaN	NaN	NaN
0.062	-45.196	-16.3403	393.709	-0.20459	0.1748	0.011719	8.0736	-20.3373	63.649	-0.062372	-0.009024	-0.085126	-14.1467	-28.209	1547.72	-1.7559	1.0605	0.14307	NaN	NaN	NaN	NaN	NaN	NaN
0.064	-56.409	-8.932	386.668	-0.19629	0.16699	0.01416	5.298	1.814	80.905	-0.077947	-0.002042	-0.086641	-64.475	-22.6466	1547.594	-1.7422	1.0625	0.15674	NaN	NaN	NaN	NaN	NaN	NaN
0.066	-13.31833	-10.298	352.603	-0.19018	0.16553	0.012451	22.6977	26.13574	33.6615	-0.090332	0.003418	-0.089355	-25.2213	28.674	1486.375	-1.7339	1.0513	0.16211	NaN	NaN	NaN	NaN	NaN	NaN
0.068	-30.185	1.696	349.391	-0.18604	0.15869	0.0073242	12.689	18.0768	4.327	-0.09658	0.014738	-0.090332	-48.5874	-8.878	1461.691	-1.7007	1.0474	0.16406	NaN	NaN	NaN	NaN	NaN	NaN
0.07	-35.557	-1.365	348.338	-0.17627	0.15234	0.010742	37.7989	59.214	-1.009	-0.10059	0.025378	-0.096094	-42.30098	71.76675	1436.715	-1.6728	1.0347	0.16773	NaN	NaN	NaN	NaN	NaN	NaN
0.072	-9.5022	-10.6244	332.957	-0.17578	0.15381	0.0078125	36.3986	30.8526	-2.5586	-0.095517	0.039439	-0.095313	-33.1806	38.9343	1449.757	-1.6289	1.0195	0.16553	NaN	NaN	NaN	NaN	NaN	NaN
0.074	-10.0704	-2.5957	329.859	-0.17285	0.14795	0.0097656	57.2354	8.3811	27.74	-0.093067	0.049993	-0.10273	-20.8841	132.7	1443.569	-1.5698	0.99463	0.15967	NaN	NaN	NaN	NaN	NaN	NaN
0.076	-19.5933	-8.51701	335.078	-0.16895	0.146	0.0080566	62.613	32.2103	28.8614	-0.083496	0.063477	-0.10596	41.8061	109.31	1403.5209	-1.5425	0.98291	0.15918	NaN	NaN	NaN	NaN	NaN	NaN
0.078	-11.6019	-5.0437	333.119	-0.16064	0.14111	0.0029297	23.5643	-12.7221	41.62006	-0.074703	0.072756	-0.10938	9.825	171.629	1373.66828	-1.4961	0.96191	0.15527	NaN	NaN	NaN	NaN	NaN	NaN
0.08	12.5509	-6.38991	313.713	-0.1582	0.13428	0.0068359	52.258	5.4332	74.818	-0.064058	0.078127	-0.11094	49.8833	163.819	1339.6652	-1.4656	0.94507	0.1499	NaN	NaN	NaN	NaN	NaN	NaN
0.082	2.10079	5.398	282.2702	-0.16064	0.13428	0.0029297	32.2277	16.7372	41.4118	-0.050778	0.085939	-0.11485	15.154	182.253	1354.4	-1.437	0.93408	0.14404	NaN	NaN	NaN	NaN	NaN	NaN
0.084	10.9625	4.2984	283.617	-0.15625	0.13477	-0.0014648	33.1719	-4.72454	22.8102	-0.03701	0.09834	-0.11855	62.6496	184.074	1327.36	-1.4004	0.91504	0.13916	NaN	NaN	NaN	NaN	NaN	NaN
0.086	18.3427	-2.62248	287.749	-0.15577	0.13086	-0.0031739	47.3673	39.201	7.195	-0.018066	0.1123	-0.11768	54.1487	123.1062	1315.852	-1.375	0.90625	0.1333	NaN	NaN	NaN	NaN	NaN	NaN
0.088	9.7368	-0.9047352	284.333	-0.15527	0.12598	-0.0073242	-2.0479	16.1796	22.6556	-9.3694e-07	0.11308	-0.13184	52.6705	134.722	1276.491	-1.332	0.8877	0.12793	NaN	NaN	NaN	NaN	NaN	NaN
0.09	20.3047	5.4495	284.881	-0.15576	0.12842	-0.0083008	16.1693	5.2148	59.731	0.020018	0.11972	-0.13838	30.584	50.589	1232.025	-1.3064	0.87183	0.12061	NaN	NaN	NaN	NaN	NaN	NaN
0.092	19.9753	5.6975	273.7291	-0.16016	0.12451	-0.01123	37.6653	12.0558	49.6322	0.043065	0.12832	-0.1415	21.76	111.504	1191.5306	-1.2729	0.85791	0.11621	NaN	NaN	NaN	NaN	NaN	NaN
0.094	21.8381	-3.2707	296.359	-0.1626	0.12598	-0.011719	-29.0867	-48.69	44.75	0.062499	0.13535	-0.14804	57.079	81.232	1158.283	-1.2344	0.83789	0.11035	NaN	NaN	NaN	NaN	NaN	NaN
0.096	10.580088	1.2005	281.075	-0.15991	0.1206	-0.013672	-10.135	-25.3594	47.856	0.081543	0.14893	-0.15234	39.563	155.6288	1146.8834	-1.2158	0.83203	0.10889	NaN	NaN	NaN	NaN	NaN	NaN
0.098	12.9253	-0.369	271.533	-0.16113	0.12012	-0.016602	19.7863	-10.4147	41.2772	0.098146	0.15459	-0.15644	66.3664	121.217	1112.6457	-1.1743	0.80713	0.099121	NaN	NaN	NaN	NaN	NaN	NaN
0.1	-3.2761	-4.13832	263.83	-0.16309	0.11963	-0.017578	-42.2391	-13.1504	18.28	0.1125	0.16006	-0.16094	33.876	154.7756	1104.059	-1.1494	0.78907	0.095459	NaN	NaN	NaN	NaN	NaN	NaN
0.102	-0.85	-0.0801999999999996	260.1125	-0.16553	0.11865	-0.01709	-3.5718	37.158	9.926	0.12617	0.16279	-0.16015	41.875	159.4611	1050.9181	-1.126	0.77539	0.088867	NaN	NaN	NaN	NaN	NaN	NaN
0.104	-1.5076	7.998718	252.4756	-0.16895	0.11426	-0.019531	-30.6016	3.823	8.744	0.13486	0.16641	-0.16406	39.04	185.598	1038.699	-1.0913	0.75244	0.081055	NaN	NaN	NaN	NaN	NaN	NaN
0.106	-0.412800000000001	12.4618	259.402	-0.17383	0.11866	-0.019043	-39.9849	-8.8522	54.7329	0.13867	0.17041	-0.1665	34.033	233.251	979.1315	-1.0757	0.74756	0.081543	NaN	NaN	NaN	NaN	NaN	NaN
0.108	-1.3208	8.9464	259.55	-0.17578	0.11035	-0.025879	-10.04	-2.219	58.101	0.13457	0.16884	-0.16914	7.799	199.223	945.658	-1.0386	0.72705	0.069824	NaN	NaN	NaN	NaN	NaN	NaN
0.11	-20.3893	8.0428	255.765	-0.19043	0.1123	-0.022949	-20.0065	-60.26	67.316	0.12695	0.17714	-0.14297	-7.863	240.608	888.7837	-1.0073	0.7085	0.06665	NaN	NaN	NaN	NaN	NaN	NaN
0.112	-1.9269	8.2462	252.367	-0.19629	0.10938	-0.024414	-3.906	-38.756	78.068	0.085548	0.18691	-0.16719	6.158	158.323	856.4533	-0.97217	0.68994	0.064453	NaN	NaN	NaN	NaN	NaN	NaN
0.114	-28.0596	2.9839	255.009	-0.20752	0.10938	-0.025391	1.3918	-44.897	93.136	0.055273	0.18457	-0.17607	-32.818	229.055	839.9191	-0.93164	0.66797	0.05957	NaN	NaN	NaN	NaN	NaN	NaN
0.116	-15.0625	7.1987	266.484	-0.21752	0.11109	-0.027588	33.83	-67.9065	134.78	0.019531	0.18115	-0.1665	-1.879	162.8846	782.427	-0.91064	0.65381	0.051758	NaN	NaN	NaN	NaN	NaN	NaN
0.118	-16.6417	6.6661	256.3209	-0.22656	0.10938	-0.027344	47.8603	-25.3747	131.326	-0.030176	0.18897	-0.15908	-25.882	204.306	746.8597	-0.85938	0.63086	0.04248	NaN	NaN	NaN	NaN	NaN	NaN
0.12	-6.98313	11.4193	242.2008	-0.23926	0.1123	-0.027832	26.175	-32.284	157.644	-0.091993	0.19717	-0.16045	-1.182	168.05454	686.1744	-0.82422	0.60938	0.043945	NaN	NaN	NaN	NaN	NaN	NaN
0.122	-21.9014	21.3621	253.4923	-0.24951	0.10742	-0.02832	53.193	-17.6106	228.332	-0.1584	0.2042	-0.16084	-30.016	177.256	676.152	-0.78711	0.58789	0.040039	NaN	NaN	NaN	NaN	NaN	NaN
0.124	-23.713	30.196	266.074	-0.2666	0.1123	-0.026855	34.009	11.893	284.5861	-0.22832	0.2082	-0.1625	-1.27	169.124	641.53	-0.74414	0.56152	0.03125	NaN	NaN	NaN	NaN	NaN	NaN
0.126	-1.8742	17.8746	265.0005	-0.27906	0.11377	-0.028565	6.45468	15.2975	348.9128	-0.2998	0.21338	-0.15234	9.874	131.794	651.397	-0.72266	0.54492	0.029785	NaN	NaN	NaN	NaN	NaN	NaN
0.128	-11.4322	18.1098	282.919	-0.29248	0.11572	-0.027344	37.4	58.577	466.279	-0.38935	0.22783	-0.15781	17.764	168.604	610.5404	-0.68066	0.50781	0.028809	NaN	NaN	NaN	NaN	NaN	NaN
0.13	-11.7568	9.6625	290.662	-0.3125	0.11816	-0.029297	23.60036	79.6956	529.366	-0.48897	0.2458	-0.16484	7.375	133.832	578.338	-0.6482	0.48975	0.027343	NaN	NaN	NaN	NaN	NaN	NaN
0.132	0.86903	-0.3567	289.106	-0.3252	0.11914	-0.028809	-13.8017	78.8129	637.069	-0.58897	0.26221	-0.16641	4.727	212.82	529.602	-0.61963	0.46777	0.020508	NaN	NaN	NaN	NaN	NaN	NaN
0.134	15.0347	12.5913	292.35	-0.34717	0.12061	-0.021484	32.337	125.842	736.365	-0.704	0.28477	-0.16045	26.237	158.438	471.88	-0.57129	0.43896	0.019043	NaN	NaN	NaN	NaN	NaN	NaN
0.136	3.14406	19.23307	284.7823	-0.36572	0.11816	-0.021484	10.9179	134.152	768.356	-0.8335	0.31396	-0.14893	8.821	204.506	446.8	-0.54736	0.4209	0.016113	NaN	NaN	NaN	NaN	NaN	NaN
0.138	-23.7256	23.73119	308.7876	-0.38379	0.12305	-0.020508	-9.7767	107.298	856.253	-0.97792	0.33603	-0.13809	47.6491	112.083	386.13	-0.49121	0.39697	0.013672	NaN	NaN	NaN	NaN	NaN	NaN
0.14	20.2355	23.4976	326.073	-0.40771	0.12549	-0.018555	47.8209	80.24	934.885	-1.1406	0.36719	-0.11465	0.337	120.476	370.376	-0.4419	0.38159	0.0043945	NaN	NaN	NaN	NaN	NaN	NaN
0.142	0.8443	27.4062	320.308	-0.41943	0.13037	-0.015137	19.086	-13.56	961.402	-1.3133	0.39531	-0.077148	22.21715	80.46	305.1804	-0.39795	0.35596	0.010254	NaN	NaN	NaN	NaN	NaN	NaN
0.144	-0.3217	26.3973	337.435	-0.44482	0.13525	-0.011719	23.4832	-80.181	1015.428	-1.5098	0.42627	-0.040332	1.63	83.725	279.945	-0.34131	0.32568	0.0024414	NaN	NaN	NaN	NaN	NaN	NaN
0.146	4.88261	20.8188	353.23	-0.45947	0.13721	-0.0092774	49.569	-126.416	996.417	-1.7168	0.4668	0.010254	22.702	105.738	244.0822	-0.31494	0.31055	-0.0048828	NaN	NaN	NaN	NaN	NaN	NaN
0.148	13.9983	38.8168	362.645	-0.48047	0.14502	-0.0058594	6.937	-187.3303	1028.944	-1.9342	0.50254	0.062695	25.102	88.3714	219.3753	-0.25195	0.28223	-0.0073242	NaN	NaN	NaN	NaN	NaN	NaN
0.15	-7.8201	52.564	363.456	-0.49951	0.14063	-0.003418	10.708	-171.137	1038.98	-2.152	0.5373	0.080371	33.4727	135.771	198.7519	-0.1958	0.25928	-0.011474	NaN	NaN	NaN	NaN	NaN	NaN
0.152	-19.5351	46.8184	362.59	-0.5083	0.14893	-0.0024414	-29.3754	-152.144	968.913	-2.327	0.5959	0.085059	20.265	86.2939	177.4983	-0.14404	0.23145	-0.017578	NaN	NaN	NaN	NaN	NaN	NaN
0.154	-9.543868	37.2727	390.2239	-0.52734	0.15234	-0.00097656	-53.2898	-122.07	957.214	-2.433	0.65742	0.082324	-16.8622	129.625	190.2213	-0.068359	0.20068	-0.024414	NaN	NaN	NaN	NaN	NaN	NaN
0.156	-10.495	35.5359	409.2709	-0.5398	0.15772	-0.0021973	-58.691	-79.088	921.743	-2.4722	0.73486	0.068359	13.439	43.9352	168.812	-0.006592	0.17554	-0.034912	NaN	NaN	NaN	NaN	NaN	NaN
0.158	-5.1871	47.055	429.668	-0.55225	0.1582	-0.00048828	-93.993	-85.684	942.245	-2.4145	0.80928	0.051855	-18.678	85.322	171.858	0.056641	0.14746	-0.052246	NaN	NaN	NaN	NaN	NaN	NaN
0.16	-27.039	48.788	431.007	-0.57275	0.16553	0.0029297	-87.437	-70.056	961.54	-2.3011	0.88486	0.031446	-3.699	39.0907	133.028	0.13086	0.11279	-0.070313	NaN	NaN	NaN	NaN	NaN	NaN
0.162	-18.3009	41.016	444.77	-0.58398	0.16699	-0.00048828	-86.143	-26.759	943.72	-2.1187	0.91729	0.0076172	-43.4216	58.37	130.75	0.15918	0.09375	-0.078125	NaN	NaN	NaN	NaN	NaN	NaN
0.164	-29.2526	37.683	450.182	-0.60352	0.17773	0.0014648	-96.332	-27.432	955.481	-1.8729	0.8666	-0.011426	-0.416000000000004	36.0955	115.448	0.2251	0.066895	-0.10156	NaN	NaN	NaN	NaN	NaN	NaN
0.166	-13.096	38.12	460.366	-0.61987	0.17994	-0.0019531	-42.019	-23.309	973.134	-1.6113	0.76953	-0.04541	-51.4855	28.2488	117.377	0.25879	0.042237	-0.11889	NaN	NaN	NaN	NaN	NaN	NaN
0.168	-27.3389	37.7373	494.069	-0.63477	0.18408	0.00048828	-24.7426	-43.484	921.7039	-1.3701	0.65791	-0.074121	-27.067	42.179	104.532	0.29102	0.026367	-0.12109	NaN	NaN	NaN	NaN	NaN	NaN
0.17	-17.3246	48.6474	517.1509	-0.65967	0.1958	-0.00097656	-4.187	-94.168	932.826	-1.1714	0.56006	-0.097754	-18.574	-6.892	92.6298	0.33691	-0.0024414	-0.14453	NaN	NaN	NaN	NaN	NaN	NaN
0.172	-16.7496	46.3092	534.809	-0.6836	0.19898	0.00097654	45.3094	-106.465	964.141	-1.0159	0.50693	-0.12119	-32.0093	20.3463	68.1576	0.34717	-0.016602	-0.15869	NaN	NaN	NaN	NaN	NaN	NaN
0.174	-36.853	41.2444	545.396	-0.70703	0.20117	-0.00097656	-12.196	-168.208	984.783	-0.91709	0.4917	-0.14639	-10.744	-32.203	49.426	0.36719	-0.036133	-0.17041	NaN	NaN	NaN	NaN	NaN	NaN
0.176	-41.782	30.58669	568.092	-0.74121	0.21289	0.0048828	18.19	-254.809	1079.178	-0.85693	0.51465	-0.16846	-14.82	32.9412	51.336	0.37647	-0.056396	-0.17382	NaN	NaN	NaN	NaN	NaN	NaN
0.178	-16.068	44.317	579.545	-0.76025	0.21875	0.003418	35.658	-274.346	1084.789	-0.82607	0.5499	-0.18506	8.403	-9.14	50.48	0.37207	-0.071777	-0.18262	NaN	NaN	NaN	NaN	NaN	NaN
0.18	-8.3013	50.916	574.436	-0.80615	0.23193	0.0063477	-10.758	-304.373	1105.7048	-0.81631	0.57998	-0.19375	-30.2965	39.485	78.583	0.35986	-0.091309	-0.19043	NaN	NaN	NaN	NaN	NaN	NaN
0.182	-18.7144	49.921	579.055	-0.83178	0.23779	0.0043945	35.4799	-307.427	1181.332	-0.81943	0.60655	-0.20156	21.725	23.14743	51.0151	0.34277	-0.092773	-0.19434	NaN	NaN	NaN	NaN	NaN	NaN
0.184	-14.3824	55.102	611.144	-0.86719	0.25391	0.0048828	22.4514	-259.162	1191.873	-0.8331	0.62705	-0.2084	-13.8295	65.731	48.808	0.31641	-0.095703	-0.19482	NaN	NaN	NaN	NaN	NaN	NaN
0.186	19.4834	53.3344	619.263	-0.91113	0.26074	0.01123	17.015	-242.943	1244.653	-0.86572	0.64697	-0.20361	14.347	67.072	12.133	0.29395	-0.090577	-0.1941	NaN	NaN	NaN	NaN	NaN	NaN
0.188	-8.5439	64.318	643.1	-0.93506	0.27197	0.012695	74.413	-180.235	1269.481	-0.92314	0.65342	-0.1957	7.738	60.8019	23.564	0.25977	-0.083984	-0.19434	NaN	NaN	NaN	NaN	NaN	NaN
0.19	-1.1243	60.683	666.3332	-0.97607	0.28174	0.019043	48.2916	-141.0074	1259.4979	-1.0078	0.66094	-0.18476	9.20699999999999	51.626	19.8414	0.21973	-0.073242	-0.18457	NaN	NaN	NaN	NaN	NaN	NaN
0.192	-2.895853	57.99334	691.649	-1.0088	0.29248	0.02417	83.768	-154.0517	1327.076	-1.1051	0.66914	-0.16563	34.859	-17.9241	12.1069	0.19922	-0.074219	-0.18115	NaN	NaN	NaN	NaN	NaN	NaN
0.194	-9.2664	70.3744	714.524	-1.041	0.30078	0.026367	120.396	-120.426	1325.298	-1.2061	0.67656	-0.14941	22.411	-14.2125	12.1082	0.16113	-0.062988	-0.15869	NaN	NaN	NaN	NaN	NaN	NaN
0.196	-11.7106	73.0134	690.469	-1.0811	0.31445	0.033203	81.559	-125.218	1294.5914	-1.3149	0.69189	-0.13672	55.0204	-52.27	18.0783	0.13623	-0.054688	-0.14844	NaN	NaN	NaN	NaN	NaN	NaN
0.198	-4.6592	65.9396	708.367	-1.0962	0.32275	0.037598	82.763	-130.621	1327.5575	-1.4256	0.70703	-0.13818	11.825	15.0502	28.325	0.10352	-0.054688	-0.14063	NaN	NaN	NaN	NaN	NaN	NaN
0.2	4.45402	59.44127	726.761	-1.1309	0.32666	0.043945	60.679	-80.496	1313.628	-1.5315	0.72861	-0.13838	64.3667	14.9784	12.743	0.077148	-0.041992	-0.13916	NaN	NaN	NaN	NaN	NaN	NaN
0.202	-0.57171	56.0317	729.514	-1.1531	0.33643	0.046142	28.4297	-122.189	1350.322	-1.6315	0.74892	-0.14619	-0.2839	62.167	14.2089	0.063965	-0.04834	-0.1333	NaN	NaN	NaN	NaN	NaN	NaN
0.204	-5.9383	72.3853	736.67	-1.1797	0.3457	0.046387	43.3548	-107.0818	1393.57683	-1.7238	0.77051	-0.15156	26.263	26.5722	25.023	0.04248	-0.052246	-0.12695	NaN	NaN	NaN	NaN	NaN	NaN
0.206	-23.9877	75.0493	759.752	-1.1997	0.35205	0.061035	-19.3407	-102.2382	1386.272	-1.812	0.7915	-0.16162	-9.707	21.5759	64.131	0.015381	-0.050537	-0.12354	NaN	NaN	NaN	NaN	NaN	NaN
0.208	4.4871	69.013	792.297	-1.2124	0.35986	0.050781	3.373	-142.981	1468.516	-1.9093	0.81416	-0.17207	25.448	0.818	43.551	-0.0083008	-0.048828	-0.12256	NaN	NaN	NaN	NaN	NaN	NaN
0.21	-20.0422	75.712232	796.809	-1.2285	0.37109	0.056152	43.379	-109.918	1498.28	-1.9957	0.83633	-0.17939	-4.565	0.499499999999999	52.303	-0.030273	-0.04541	-0.12012	NaN	NaN	NaN	NaN	NaN	NaN
0.212	-13.2356	69.4693	808.0318	-1.2358	0.3794	0.057129	-31.263	-143.26	1501.046	-2.08	0.84571	-0.19111	5.529	15.058	32.878	-0.041504	-0.035645	-0.11719	NaN	NaN	NaN	NaN	NaN	NaN
0.214	-37.448	79.1743	811.844	-1.248	0.38281	0.056641	12.257	-162.553	1555.598	-2.1532	0.86514	-0.21006	-6.186	20.0874	24.9782	-0.060059	-0.024902	-0.11426	NaN	NaN	NaN	NaN	NaN	NaN
0.216	-37.0639	86.1626	820.522	-1.2515	0.39697	0.058105	13.994	-114.5035	1540.607	-2.2109	0.87305	-0.22559	-32.1412	40.211	13.9619	-0.076904	-0.02295	-0.1167	NaN	NaN	NaN	NaN	NaN	NaN
0.218	-45.422	89.7613	827.18	-1.2559	0.4043	0.059082	1.389	-126.661	1564.074	-2.2515	0.87432	-0.24443	-1.974	16.4545	8.0925	-0.089355	-0.015625	-0.11572	NaN	NaN	NaN	NaN	NaN	NaN
0.22	-40.217	95.869	822.233	-1.2578	0.41309	0.05127	46.2828	-90.142	1571.638	-2.282	0.86826	-0.26241	-24.5051	28.6578	35.1835	-0.10791	-0.0019531	-0.12158	NaN	NaN	NaN	NaN	NaN	NaN
0.222	-34.2338	87.46579	847.69	-1.2573	0.42114	0.053467	-14.208	-41.274	1522.664	-2.2897	0.86591	-0.28193	5.959	-1.971	23.3135	-0.11279	0.0043945	-0.12109	NaN	NaN	NaN	NaN	NaN	NaN
0.224	-43.182	87.8436	861.001	-1.2554	0.43018	0.052246	-23.0491	-60.499	1541.733	-2.2787	0.85645	-0.3	-46.326	4.58	44.409	-0.11768	0.01416	-0.12012	NaN	NaN	NaN	NaN	NaN	NaN
0.226	-32.0569	96.2894	854.6643	-1.2549	0.44141	0.049805	12.374	-5.558	1539.9418	-2.252	0.84375	-0.31836	-17.119	-2.983	2.10065	-0.12207	0.026123	-0.1206	NaN	NaN	NaN	NaN	NaN	NaN
0.228	-25.5528	97.3905	869.7669	-1.2515	0.44971	0.04541	-22.268	-0.41	1518.52	-2.2134	0.82764	-0.33223	-36.838	3.736	38.2367	-0.125	0.03418	-0.12305	NaN	NaN	NaN	NaN	NaN	NaN
0.23	-32.6114	109.9537	888.155	-1.2539	0.4541	0.033691	17.202	-12.7158	1570.606	-2.1722	0.8125	-0.3416	0.119999999999997	-6.666	30.338	-0.1167	0.047363	-0.12842	NaN	NaN	NaN	NaN	NaN	NaN
0.232	-12.3238	113.1757	888.9	-1.2534	0.46435	0.03247	32.582	28.9938	1545.842	-2.1367	0.79648	-0.3545	-27.7693	3.8649	61.276	-0.11133	0.050781	-0.12646	NaN	NaN	NaN	NaN	NaN	NaN
0.234	-28.77198	114.0254	883.151	-1.2554	0.46973	0.036621	-1.499	-0.0410000000000004	1560.568	-2.1063	0.78496	-0.36465	-6.802	-1.633	50.104	-0.088379	0.058105	-0.13281	NaN	NaN	NaN	NaN	NaN	NaN
0.236	-15.6944	107.313	891.758	-1.2676	0.47363	0.032715	72.7639	3.212	1583.56	-2.0874	0.77197	-0.36572	11.975	21.4631	41.275	-0.06543	0.064209	-0.13135	NaN	NaN	NaN	NaN	NaN	NaN
0.238	-31.801	117.1599	902.732	-1.2695	0.48047	0.031738	51.3626	20.2586	1554.291	-2.0753	0.76474	-0.36836	-6.657	13.6172	26.3217	-0.038086	0.063477	-0.13721	NaN	NaN	NaN	NaN	NaN	NaN
0.24	-10.7224	133.1446	923.728	-1.2905	0.48096	0.027832	47.5111	-29.617	1591.676	-2.0668	0.75762	-0.36777	11.713	12.8384	6.1362	-0.003418	0.069824	-0.15234	NaN	NaN	NaN	NaN	NaN	NaN
0.242	-23.337	146.9838	908.883	-1.3111	0.4878	0.032226	99.505	3.2133	1588.986	-2.0543	0.74902	-0.36777	10.011	-4.6001	10.22384	0.012695	0.069336	-0.14648	NaN	NaN	NaN	NaN	NaN	NaN
0.244	-10.559	143.2035	917.9	-1.3379	0.49414	0.029785	61.5297	-14.9829	1538.19965	-2.0498	0.73906	-0.35684	28.244	-13.8719	-14.46819	0.049805	0.07373	-0.14844	NaN	NaN	NaN	NaN	NaN	NaN
0.246	-5.7947	129.908	918.9858	-1.3711	0.50684	0.026855	85.207	-60.923	1584.767	-2.041	0.74219	-0.35156	18.6693	-6.1685	20.81038	0.074951	0.07666	-0.15112	NaN	NaN	NaN	NaN	NaN	NaN
0.248	-1.1746	135.7071	916.1357	-1.3823	0.51318	0.02832	76.971	-24.0416	1567.698	-2.0342	0.73457	-0.34336	27.983	1.839	4.6734	0.097168	0.07959	-0.15381	NaN	NaN	NaN	NaN	NaN	NaN
0.25	8.14813	147.7633	917.8682	-1.4102	0.52539	0.026367	49.0918	-66.134	1582.597	-2.0265	0.72422	-0.34082	5.2327	23.961	38.625	0.12305	0.082031	-0.15918	NaN	NaN	NaN	NaN	NaN	NaN
0.252	-21.7562	148.513	920.1391	-1.4356	0.53662	0.025391	109.288	-53.788	1578.76	-2.0203	0.72422	-0.33457	31.689	29.5087	1.428	0.13477	0.083008	-0.15674	NaN	NaN	NaN	NaN	NaN	NaN
0.254	-1.7714	148.5853	928.8077	-1.4507	0.54346	0.025879	71.2022	7.354	1502.005	-2.015	0.72637	-0.32959	25.8752	62.663	24.1858	0.15186	0.095215	-0.15918	NaN	NaN	NaN	NaN	NaN	NaN
0.256	-14.6793	150.0935	920.5704	-1.4819	0.55713	0.025391	62.2965849	-2.563	1502.127	-2.0073	0.72314	-0.32471	21.145	34.3678	8.925	0.16382	0.10083	-0.1604	NaN	NaN	NaN	NaN	NaN	NaN
0.258	-9.3492	159.4551	937.574	-1.4937	0.56055	0.023438	84.6998	64.5048	1479.227	-1.992	0.72109	-0.32002	12.978	35.9411	30.2981	0.1709	0.11084	-0.16455	NaN	NaN	NaN	NaN	NaN	NaN
0.26	-14.3779	167.51	948.977	-1.521	0.57568	0.020508	13.154	80.096	1434.257	-1.964	0.71416	-0.31787	31.449	-18.6721	46.515	0.16748	0.11768	-0.15869	NaN	NaN	NaN	NaN	NaN	NaN
0.262	-11.3209	160.01889	946.0488	-1.5456	0.58325	0.01831	55.183	47.7699	1463.1811	-1.937	0.69736	-0.31865	-0.251999999999999	10.2662	20.4225	0.17139	0.125	-0.16113	NaN	NaN	NaN	NaN	NaN	NaN
0.264	-23.843	159.578	938.9571	-1.5742	0.59082	0.02002	74.33	81.614	1424.483	-1.9084	0.69394	-0.31094	-5.18005	-18.5542	50.913	0.1665	0.13818	-0.16602	NaN	NaN	NaN	NaN	NaN	NaN
0.266	-35.26	151.9368	937.5128	-1.6172	0.60059	0.016113	10.565	40.9065	1426.937	-1.877	0.69336	-0.30273	-1.49	18.9855	5.632	0.16308	0.14405	-0.16578	NaN	NaN	NaN	NaN	NaN	NaN
0.268	-28.145	159.5496	964.655	-1.6445	0.60352	0.018555	68.56089	42.9822	1439.379	-1.8475	0.6833	-0.30703	-15.4045	1.6402	44.417	0.16016	0.14795	-0.16748	NaN	NaN	NaN	NaN	NaN	NaN
0.27	-17.8265	174.1416	992.91	-1.6953	0.60547	0.021484	17.535	92.498	1391.444	-1.8151	0.67608	-0.30147	-4.61799999999999	14.235	23.5553	0.14893	0.16064	-0.17334	NaN	NaN	NaN	NaN	NaN	NaN
0.272	-34.2786	196.2205	1008.3931	-1.7263	0.61303	0.019775	-8.149	40.406	1373.16657	-1.7765	0.66553	-0.29873	-18.2976	5.69255	73.9616	0.14063	0.16797	-0.17822	NaN	NaN	NaN	NaN	NaN	NaN
0.274	-57.378	209.9407	1034.6002	-1.7573	0.61377	0.024414	19.245	71.072	1329.642	-1.744	0.6541	-0.29258	-4.457	-21.813	79.962	0.12158	0.18848	-0.18408	NaN	NaN	NaN	NaN	NaN	NaN
0.276	-69.2499	229.4917	1064.03081	-1.7969	0.61816	0.025879	-44.11422	64.381	1295.912	-1.7109	0.64063	-0.28516	-26.16053	-16.579	135.081	0.096191	0.21313	-0.18872	NaN	NaN	NaN	NaN	NaN	NaN
0.278	-59.4012	252.248	1097.8209	-1.8218	0.61963	0.024902	5.712	36.005	1318.4411	-1.6757	0.62744	-0.27793	-4.922	-40.921	143.461	0.062012	0.2334	-0.19336	NaN	NaN	NaN	NaN	NaN	NaN
0.28	-71.5374	278.964	1122.895	-1.8608	0.62158	0.02832	28.312	104.3701	1297.56	-1.6431	0.61338	-0.26963	-3.811	24.5184	188.934	-0.0087891	0.26563	-0.19336	NaN	NaN	NaN	NaN	NaN	NaN
0.282	-71.825	288.9286	1152.046	-1.8819	0.62207	0.03125	-9.109	83.5206	1300.316	-1.6138	0.60752	-0.26065	27.546	5.948	215.64	-0.046387	0.28662	-0.19385	NaN	NaN	NaN	NaN	NaN	NaN
0.284	-89.465	307.216	1177.918	-1.8999	0.62549	0.032715	41.7266	105.7805	1287.592	-1.5837	0.59306	-0.25048	16.473	52.482	272.405	-0.14453	0.31934	-0.1875	NaN	NaN	NaN	NaN	NaN	NaN
0.286	-59.92033	305.688	1189.447	-1.9058	0.62744	0.041504	21.6915	158.176	1225.156	-1.5547	0.58398	-0.24512	10.384	-15.7169	334.2482	-0.22045	0.34619	-0.18823	NaN	NaN	NaN	NaN	NaN	NaN
0.288	-87.1987	293.361	1183.7802	-1.9077	0.62744	0.039063	44.3262	133.7055	1215.7269	-1.5282	0.5667	-0.23701	-45.616	35.1991	400.8443	-0.31152	0.38086	-0.18994	NaN	NaN	NaN	NaN	NaN	NaN
0.29	-99.4723	261.5894	1213.1019	-1.8867	0.63379	0.04248	71.2705	198.17	1164.4837	-1.4987	0.55517	-0.22403	-53.947	20.974	503.8863	-0.42676	0.43799	-0.19238	NaN	NaN	NaN	NaN	NaN	NaN
0.292	-84.8969	256.724	1225.14	-1.8562	0.63428	0.043457	5.919	202.632	1133.583	-1.4671	0.53916	-0.21231	-23.3939	87.269	563.38677	-0.49268	0.47363	-0.19287	NaN	NaN	NaN	NaN	NaN	NaN
0.294	-63.8134	240.649	1207.235	-1.8066	0.63672	0.043457	53.4928	186.9791	1149.8666	-1.4377	0.52227	-0.20547	-28.5467	64.8914	681.832	-0.62988	0.55664	-0.19043	NaN	NaN	NaN	NaN	NaN	NaN
0.296	-67.8084	220.192	1180.644	-1.7266	0.62891	0.036133	70.501	227.39	1085.3624	-1.3984	0.50195	-0.19287	-25.9023	68.9416	758.41	-0.74902	0.62061	-0.1853	NaN	NaN	NaN	NaN	NaN	NaN
0.298	-75.8779	192.3603	1159.459	-1.6792	0.62939	0.030762	31.608	168.2835	1070.7456	-1.3566	0.47813	-0.18476	-51.289	54.233	870.28449	-0.88672	0.67773	-0.17529	NaN	NaN	NaN	NaN	NaN	NaN
0.3	-60.0011	162.03796	1161.133	-1.5918	0.61133	0.024902	54.1039	176.5013	1063.807	-1.3112	0.46026	-0.17569	-22.4628	23.932	972.3252	-1.0972	0.7583	-0.14795	NaN	NaN	NaN	NaN	NaN	NaN
0.302	-60.0675	140.79659	1156.952	-1.5349	0.5979	0.014893	49.6225	197.456	1032.081	-1.2695	0.43252	-0.16513	-20.1465	24.5451	1068.558	-1.28	0.80981	-0.11206	NaN	NaN	NaN	NaN	NaN	NaN
0.304	-73.4502	136.6553	1161.331	-1.4858	0.59131	0.0063477	61.56	169.7433	1034.827	-1.2266	0.41592	-0.15439	8.422	-59.296	1098.882	-1.4878	0.854	-0.072266	NaN	NaN	NaN	NaN	NaN	NaN
0.306	-76.61492	131.3484	1173.246	-1.4316	0.58203	-0.0097656	76.55	207.1952	977.214	-1.1914	0.39258	-0.14307	-20.4453	-68.421	1105.545	-1.793	0.91992	-0.021973	NaN	NaN	NaN	NaN	NaN	NaN
0.308	-72.5258	134.336	1174.616	-1.4092	0.5791	-0.017578	33.61338	188.2316	933.7735	-1.1517	0.37969	-0.12881	39.472	-171.9815	1097.97	-1.9453	0.95313	-0.00048828	NaN	NaN	NaN	NaN	NaN	NaN
0.31	-84.749	133.58875	1153.969	-1.3535	0.5752	-0.037598	55.9454	165.07	956.316	-1.1163	0.36308	-0.11807	36.2215	-163.4064	1096.761	-2.2319	1.0415	0.030273	NaN	NaN	NaN	NaN	NaN	NaN
0.312	-78.694	130.4787	1146.797	-1.2983	0.57275	-0.052246	56.2116	213.285	914.033	-1.0827	0.34277	-0.10674	6.044	-240.521	1099.408	-2.3894	1.133	0.024414	NaN	NaN	NaN	NaN	NaN	NaN
0.314	-81.252	132.655	1146.174	-1.2715	0.57227	-0.068359	7.1806	181.434	900.254	-1.0466	0.33164	-0.094629	-35.16	-185.931	1124.152	-2.4766	1.2305	0.020508	NaN	NaN	NaN	NaN	NaN	NaN
0.316	-73.0818	129.724	1140.12	-1.2163	0.56592	-0.08252	42.4604	195.593	876.173	-1.0156	0.31348	-0.07959	-62.4266	-189.797	1106.875	-2.4526	1.3267	0.0068359	NaN	NaN	NaN	NaN	NaN	NaN
0.318	-99.149	125.209	1130.751	-1.1836	0.56152	-0.094239	-8.58	202.733	831.615	-0.98076	0.30078	-0.067675	-73.644	-129.92	1092.619	-2.3726	1.3755	-0.003418	NaN	NaN	NaN	NaN	NaN	NaN
0.32	-83.012	102.6151	1118.976	-1.1504	0.55859	-0.10645	-18.4825	170.8571	818.85	-0.94131	0.2917	-0.05752	-75.9208	-119.434	1081.826	-2.0913	1.4028	-0.022461	NaN	NaN	NaN	NaN	NaN	NaN
0.322	-62.01431	90.53746	1124.99	-1.1147	0.55225	-0.125	27.3349	208.049	758.822	-0.91006	0.28623	-0.048145	-75.237	-90.28	1078.236	-1.8162	1.3435	-0.045898	NaN	NaN	NaN	NaN	NaN	NaN
0.324	-65.263	78.2564	1114.383	-1.0952	0.55322	-0.12939	-45.381	200.8015	685.3993	-0.87305	0.27226	-0.035547	-111.164	-43.487	1107.7813	-1.5449	1.2402	-0.081543	NaN	NaN	NaN	NaN	NaN	NaN
0.326	-72.112	72.9573	1086.2676	-1.0508	0.55664	-0.14697	-11.639	178.256	683.95	-0.83252	0.26025	-0.024414	-77.348	-56.723	1125.33	-1.2344	1.0605	-0.11621	NaN	NaN	NaN	NaN	NaN	NaN
0.328	-56.023	49.3107	1071.7275	-1.0186	0.55664	-0.16235	4.449	207.21937	633.957	-0.79394	0.25772	-0.014551	-92.866	-26.511	1144.6854	-1.103	0.9751	-0.12305	NaN	NaN	NaN	NaN	NaN	NaN
0.33	-52.897	42.6694	1054.8178	-0.99414	0.55762	-0.17236	-42.0441	170.4052	618.418	-0.75293	0.24863	-0.0060547	-33.928	-108.736	1166.279	-0.89893	0.83643	-0.12109	NaN	NaN	NaN	NaN	NaN	NaN
0.332	-41.511	37.5711	1034.05	-0.94678	0.56299	-0.18701	7.3014	185.965	597.72	-0.71504	0.24278	0.0083985	-2.2777	-104.231	1186.3604	-0.82935	0.79321	-0.12744	NaN	NaN	NaN	NaN	NaN	NaN
0.334	-39.945	19.90089	1032.3	-0.92773	0.56445	-0.1958	-24.0964	176.199	573.846	-0.67539	0.23682	0.020019	23.438	-200.712	1222.9362	-0.79883	0.77344	-0.12695	NaN	NaN	NaN	NaN	NaN	NaN
0.336	-15.3686	-7.9727	1029.891	-0.89648	0.57422	-0.21191	-3.771	128.6181	566.368	-0.63379	0.22461	0.022949	-6.332	-181.55	1246.2851	-0.78809	0.7793	-0.12695	NaN	NaN	NaN	NaN	NaN	NaN
0.338	-4.3729	-27.14	1011.453	-0.87281	0.57251	-0.22046	20.928	166.908	514.917	-0.59316	0.21358	0.033008	-12.167	-275.397	1286.3535	-0.80811	0.81396	-0.13623	NaN	NaN	NaN	NaN	NaN	NaN
0.34	10.187	-33.9542	979.4497	-0.86084	0.57861	-0.23242	-11.2801	159.218	473.6765	-0.54834	0.20459	0.043555	-37.0527	-271.078	1338.085	-0.86523	0.93164	-0.15088	NaN	NaN	NaN	NaN	NaN	NaN
0.342	9.825	-46.3898	973.687	-0.8457	0.58008	-0.24121	22.6625	145.6915	456.0265	-0.49873	0.19599	0.048633	-40.055	-321.034	1377.1467	-0.93359	1.0176	-0.15283	NaN	NaN	NaN	NaN	NaN	NaN
0.344	42.1051	-67.1799	975.994	-0.8374	0.58252	-0.24365	16.5566	148.2035	405.616	-0.44942	0.18769	0.051563	1.971	-304.345	1419.603	-0.99756	1.0825	-0.1582	NaN	NaN	NaN	NaN	NaN	NaN
0.346	69.39405	-92.2586	962.839	-0.83594	0.58594	-0.25195	-0.342000000000002	82.903	405.08	-0.3999	0.17871	0.058594	-9.255	-274.235	1485.205	-1.0391	1.0762	-0.16943	NaN	NaN	NaN	NaN	NaN	NaN
0.348	59.7607	-111.4109	928.5829	-0.84937	0.59107	-0.25806	33.04113	94.243	391.972	-0.34648	0.17148	0.062207	-9.384	-228.722	1521.407	-1.0742	1.0635	-0.1709	NaN	NaN	NaN	NaN	NaN	NaN
0.35	59.096	-145.84	932.1084	-0.86279	0.59521	-0.26074	20.2787	101.567	342.415	-0.29219	0.16591	0.070019	-3.232	-155.2001	1557.136	-1.2046	1.0688	-0.16406	NaN	NaN	NaN	NaN	NaN	NaN
0.352	71.8539	-149.82	940.628	-0.88037	0.60791	-0.2666	50.998	85.161	347.256	-0.23477	0.16006	0.071973	47.319	-152.574	1587.173	-1.3115	1.1084	-0.16675	NaN	NaN	NaN	NaN	NaN	NaN
0.354	78.8686	-148.776	951.546	-0.89111	0.61768	-0.27148	58.554	119.1246	300.9	-0.17891	0.15058	0.075391	57.904	-99.453	1573.229	-1.4004	1.1563	-0.16748	NaN	NaN	NaN	NaN	NaN	NaN
0.356	60.9152	-140.994	920.4483	-0.91992	0.625	-0.26855	17.848	102.5331	259.2687	-0.12207	0.13916	0.07373	100.2052	-146.605	1573.363	-1.4683	1.2271	-0.18506	NaN	NaN	NaN	NaN	NaN	NaN
0.358	59.62763	-149.589	916.7956	-0.948	0.63697	-0.27295	55.474	98.9898	245.9574	-0.062988	0.13252	0.076367	75.026	-89.394	1557.744	-1.4937	1.2505	-0.18994	NaN	NaN	NaN	NaN	NaN	NaN
0.36	69.68214	-150.793	935.303	-0.97998	0.64893	-0.2627	47.31	120.957	198.682	-9.772e-05	0.12998	0.084473	82.9911	-118.037	1542.815	-1.5391	1.2734	-0.21436	NaN	NaN	NaN	NaN	NaN	NaN
0.362	70.0895	-152.8307	920.087	-1.0366	0.65674	-0.25586	11.564	76.199082	201.871	0.053809	0.12022	0.08291	64.2616	-40.134	1551.464	-1.5671	1.2757	-0.22925	NaN	NaN	NaN	NaN	NaN	NaN
0.364	50.653	-150.4137	904.1299	-1.0605	0.66016	-0.25684	62.953	90.12674	214.461	0.10283	0.11006	0.085059	36.072	-81.9897	1582.174	-1.605	1.2798	-0.24512	NaN	NaN	NaN	NaN	NaN	NaN
0.366	60.852	-160.8535	907.7193	-1.1147	0.66943	-0.24756	8.654	82.5469	175.8478	0.14551	0.104	0.085938	8.864	-62.271	1610.278	-1.647	1.2778	-0.25684	NaN	NaN	NaN	NaN	NaN	NaN
0.368	62.4283	-167.85194	933.9543	-1.1499	0.68017	-0.2461	-1.9777	66.752	167.8189	0.18975	0.096973	0.088086	-2.169	-110.808	1653.034	-1.6772	1.2817	-0.27002	NaN	NaN	NaN	NaN	NaN	NaN
0.37	57.86	-170.7773	930.5465	-1.1851	0.68701	-0.23975	16.7574	92.316	139.842	0.23252	0.090821	0.094922	28.369	-90.259	1684.289	-1.7397	1.2974	-0.29248	NaN	NaN	NaN	NaN	NaN	NaN
0.372	44.6586	-165.098	917.1415	-1.23	0.6958	-0.23193	-22.59395	58.388	127.9594	0.26885	0.086524	0.096875	-3.22	-94.645	1681.334	-1.7888	1.3186	-0.3042	NaN	NaN	NaN	NaN	NaN	NaN
0.374	49.271	-169.6428	915.7904	-1.2461	0.69922	-0.22607	-2.964	50.9603	122.5832	0.29561	0.081446	0.098729	2.338	-76.228	1696.698	-1.8218	1.3325	-0.31689	NaN	NaN	NaN	NaN	NaN	NaN
0.376	44.8015	-166.5005	931.7132	-1.271	0.69971	-0.22607	-22.1502	57.8914	79.356	0.32373	0.07373	0.09668	7.3997	-90.5924	1697.053	-1.8608	1.3325	-0.32764	NaN	NaN	NaN	NaN	NaN	NaN
0.378	31.245	-169.5046	933.7001	-1.2908	0.7024	-0.22046	-47.8563	35.1614	94.711	0.34238	0.070996	0.10254	33.453	-115.933	1712.514	-1.8716	1.3423	-0.34082	NaN	NaN	NaN	NaN	NaN	NaN
0.38	35.862	-171.762	933.6789	-1.3125	0.70313	-0.21191	8.2898	41.7693	92.962	0.35478	0.070801	0.10674	23.5396	-81.3994	1695.418	-1.8745	1.3384	-0.36377	NaN	NaN	NaN	NaN	NaN	NaN
0.382	47.872	-189.1857	957.394	-1.3198	0.69971	-0.21045	-30.693	31.0654	104.056	0.36065	0.071191	0.11338	47.531	-71.524	1686.6	-1.8604	1.3174	-0.36914	NaN	NaN	NaN	NaN	NaN	NaN
0.384	40.991	-187.3139	973.154	-1.3213	0.69531	-0.21191	-21.44084	35.382	96.069	0.36377	0.064453	0.11933	3.673	-0.162000000000006	1666.316	-1.8394	1.2935	-0.37451	NaN	NaN	NaN	NaN	NaN	NaN
0.386	37.187	-180.8012	968.667	-1.3159	0.68408	-0.21533	-15.5952	63.368	78.825	0.36865	0.064941	0.12549	-17.126	3.371	1639.7902	-1.8081	1.2505	-0.38623	NaN	NaN	NaN	NaN	NaN	NaN
0.388	41.836	-169.8312	973.6094	-1.3101	0.67529	-0.2124	-20.2289	55.178	81.009	0.3584	0.064649	0.12363	-27.428	54.6655	1593.6683	-1.7988	1.2266	-0.39111	NaN	NaN	NaN	NaN	NaN	NaN
0.39	56.9745	-163.0219	980.5381	-1.3062	0.66455	-0.21533	1.043	48.485	79.365	0.34775	0.054687	0.12998	-35.904	18.7596	1588.682	-1.7832	1.1953	-0.4082	NaN	NaN	NaN	NaN	NaN	NaN
0.392	64.015	-159.391248	989.667	-1.292	0.65234	-0.21484	-9.388	64.196	46.8868	0.3376	0.052343	0.13506	-32.409	56.593	1578.9316	-1.7779	1.1802	-0.42017	NaN	NaN	NaN	NaN	NaN	NaN
0.394	53.7538	-148.389	964.687	-1.2886	0.64697	-0.21436	-35.9879	33.8684	36.8725	0.32168	0.043359	0.13926	-11.761	26.745	1597.169	-1.7754	1.1738	-0.41602	NaN	NaN	NaN	NaN	NaN	NaN
0.396	62.287	-156.5445	969.825	-1.2832	0.63281	-0.21484	35.5775	42.039	31.472	0.30322	0.036621	0.14453	7.759	93.4972	1583.693	-1.7813	1.1631	-0.41992	NaN	NaN	NaN	NaN	NaN	NaN
0.398	65.7102	-145.187	980.093	-1.2829	0.62231	-0.21485	1.5644	23.478	44.602	0.28408	0.038672	0.14404	9.75	88.449	1566.2571	-1.7769	1.1626	-0.42139	NaN	NaN	NaN	NaN	NaN	NaN
0.4	78.9393	-150.5053	979.2975	-1.2852	0.60938	-0.21777	7.892	-0.9358	73.46	0.2627	0.03291	0.14531	40.455	124.084	1537.3578	-1.7773	1.1563	-0.42822	NaN	NaN	NaN	NaN	NaN	NaN
0.402	64.7711	-144.4782	965.1	-1.293	0.59375	-0.21533	38.1765	24.7572	43.976	0.24277	0.025488	0.14882	51.5317	74.058	1538.567	-1.7673	1.1526	-0.43335	NaN	NaN	NaN	NaN	NaN	NaN
0.404	66.7885	-146.703	953.39038	-1.2915	0.59229	-0.21533	0.0690000000000008	17.3184	43.632	0.21953	0.019336	0.15078	63.543	77.02	1545.15	-1.7578	1.1445	-0.43945	NaN	NaN	NaN	NaN	NaN	NaN
0.406	78.7194	-124.7574	966.221	-1.2886	0.57764	-0.21387	65.826	19.9341	60.819	0.19434	0.0092773	0.15234	84.205	46.176	1551.434	-1.7422	1.1406	-0.44434	NaN	NaN	NaN	NaN	NaN	NaN
0.408	93.7877	-117.5047	958.025	-1.2856	0.56543	-0.21509	53.748	25.1752	28.413	0.1667	0.0092773	0.14707	69.912	34.5423	1540.221	-1.7305	1.1328	-0.44727	NaN	NaN	NaN	NaN	NaN	NaN
0.41	72.5868	-118.1041	954.009	-1.2773	0.55664	-0.21436	26.4566	-9.3717	33.8733	0.1378	0.011816	0.14512	56.6781	27.566	1527.476	-1.7046	1.1294	-0.45459	NaN	NaN	NaN	NaN	NaN	NaN
0.412	73.8805	-124.544	966.228	-1.2603	0.5415	-0.21436	57.651	3.9588	36.261	0.11475	0.013379	0.14199	70.052	27.188	1498.777	-1.6704	1.1158	-0.45825	NaN	NaN	NaN	NaN	NaN	NaN
0.414	68.869	-131.3902	980.637	-1.2524	0.53564	-0.2168	33.9769	-3.8829	33.5041	0.086816	0.016699	0.14707	50.6317	76.38	1465.637	-1.6387	1.1055	-0.46094	NaN	NaN	NaN	NaN	NaN	NaN
0.416	69.5316	-133.0153	961.139	-1.23	0.5249	-0.21143	50.544	-26.8396	68.949	0.063965	0.020508	0.14551	66.682	97.064	1445.053	-1.5806	1.1001	-0.46045	NaN	NaN	NaN	NaN	NaN	NaN
0.418	43.9173	-124.5991	947.2521	-1.2129	0.51465	-0.21167	33.0435	-12.0083	54.506	0.036621	0.030566	0.15049	63.6928	156.65737	1423.619	-1.5596	1.0918	-0.46484	NaN	NaN	NaN	NaN	NaN	NaN
0.42	56.723	-112.9978	942.5223	-1.1934	0.50781	-0.20996	-9.24	-11.615	33.485	0.013086	0.038281	0.15224	35.024	145.888	1426.323	-1.5112	1.0767	-0.45264	NaN	NaN	NaN	NaN	NaN	NaN
0.422	51.8634	-103.9671	940.407	-1.1646	0.49756	-0.20166	24.9941	5.04194	36.206	-0.0087893	0.045312	0.15264	48.16	197.763	1405.762	-1.4844	1.0674	-0.44751	NaN	NaN	NaN	NaN	NaN	NaN
0.424	33.226	-94.0519	919.847	-1.1484	0.49219	-0.20361	17.9373	24.3615	16.46922	-0.020703	0.061035	0.15781	47.7235	161.5754	1359.2481	-1.4546	1.0649	-0.44385	NaN	NaN	NaN	NaN	NaN	NaN
0.426	21.952	-94.3705	907.603	-1.1206	0.48682	-0.19434	-14.5694	0.688000000000001	14.0612	-0.035156	0.072266	0.16357	35.801	213.831	1316.9655	-1.418	1.0586	-0.4375	NaN	NaN	NaN	NaN	NaN	NaN
0.428	28.9635	-100.9693	909.6	-1.0949	0.48315	-0.18945	-0.449	1.529	16.8819	-0.046387	0.085059	0.16865	44.8587	175.244	1279.7567	-1.3999	1.0493	-0.43262	NaN	NaN	NaN	NaN	NaN	NaN
0.43	33.7757	-99.0651	914.87	-1.0742	0.47461	-0.18408	-33.70584	-4.7451	4.01158	-0.061328	0.098145	0.17256	25.14	242.805	1262.049	-1.3652	1.0313	-0.41797	NaN	NaN	NaN	NaN	NaN	NaN
0.432	27.75	-96.9962	897.796	-1.0405	0.46924	-0.17139	7.311	-15.855	26.9207	-0.069922	0.11221	0.17842	9.116	232.736	1238.442	-1.335	1.0195	-0.40308	NaN	NaN	NaN	NaN	NaN	NaN
0.434	9.45	-89.62788	862.0963	-1.0249	0.46729	-0.17529	-1.654	4.146	30.967	-0.072266	0.12705	0.18369	10.605	265.511	1213.4652	-1.3096	1	-0.39258	NaN	NaN	NaN	NaN	NaN	NaN
0.436	22.665	-78.1426	841.5624	-0.9834	0.45898	-0.16504	-38.2553	-9.803	27.2857	-0.07666	0.14014	0.18896	-15.4532	210.737	1185.6141	-1.2705	0.97656	-0.37891	NaN	NaN	NaN	NaN	NaN	NaN
0.438	7.826	-75.4412	836.3098	-0.95947	0.45459	-0.16846	11.625	4.43188	33.131	-0.077734	0.15313	0.19219	-24.481	203.063	1166.792	-1.2573	0.96143	-0.36426	NaN	NaN	NaN	NaN	NaN	NaN
0.44	24.3936	-66.99	826.214	-0.93311	0.45459	-0.15967	-25.3112	26.014	3.9452	-0.06875	0.16806	0.1918	-41.1238	179.392	1120.767	-1.2109	0.93555	-0.33203	NaN	NaN	NaN	NaN	NaN	NaN
0.442	23.927	-77.9511	814.959	-0.88623	0.4458	-0.15088	-38.276	-3.6989	25.35671	-0.059766	0.18174	0.19453	-34.619	191.112	1081.555	-1.1755	0.91724	-0.3313	NaN	NaN	NaN	NaN	NaN	NaN
0.444	25.7674	-75.3252	811.592	-0.87305	0.44385	-0.15186	23.43116	-0.0175000000000001	20.11075	-0.048828	0.19219	0.19541	-31.0491	207.9707	1057.8573	-1.144	0.89307	-0.31787	NaN	NaN	NaN	NaN	NaN	NaN
0.446	32.407	-75.40678	798.823	-0.82959	0.43018	-0.1499	-32.6653	-16.2701	-3.4349	-0.03125	0.20117	0.18652	-23.913	208.071	1018.99721	-1.1025	0.85742	-0.29297	NaN	NaN	NaN	NaN	NaN	NaN
0.448	31.236	-87.002	771.627	-0.79053	0.42236	-0.14209	-18.591	-16.7802	18.515	-0.014453	0.20625	0.18652	-19.57	240.72	982.19921	-1.0633	0.8352	-0.27881	NaN	NaN	NaN	NaN	NaN	NaN
0.45	38.007	-82.914	751.033	-0.77295	0.41943	-0.13916	32.4629	18.7539	3.8273	0.00097656	0.21739	0.18506	0.127000000000002	235.296	951.8867	-1.0269	0.80322	-0.26318	NaN	NaN	NaN	NaN	NaN	NaN
0.452	43.9268	-76.771	740.234	-0.73828	0.40625	-0.13623	-10.8654	2.8205	12.586	0.016602	0.22637	0.1792	10.146	300.679	905.5071	-0.9751	0.77197	-0.2373	NaN	NaN	NaN	NaN	NaN	NaN
0.454	57.28	-69.847	717.1536	-0.7085	0.39893	-0.1333	29.6148	5.9775	50.943	0.030469	0.23438	0.17949	8.898	279.877	895.928	-0.94971	0.75342	-0.2251	NaN	NaN	NaN	NaN	NaN	NaN
0.456	48.3727	-64.2991	693.448	-0.68701	0.39795	-0.12549	23.7945	24.855	24.7517	0.044922	0.23926	0.17285	19.757	315.687	858.744	-0.90186	0.72119	-0.20459	NaN	NaN	NaN	NaN	NaN	NaN
0.458	46.302	-63.7115	682.424	-0.65039	0.38428	-0.12354	23.6407	9.4356	27.6898	0.056641	0.24551	0.16816	15.546	253.424	815.218	-0.86206	0.69263	-0.18848	NaN	NaN	NaN	NaN	NaN	NaN
0.46	56.0509	-53.2635	689.288	-0.6377	0.37695	-0.11914	67.084	23.733	33.122	0.065821	0.25849	0.16856	16.976	263.2072	769.84657	-0.82861	0.66357	-0.17041	NaN	NaN	NaN	NaN	NaN	NaN
0.462	61.40538	-48.1981	662.084	-0.60449	0.36719	-0.11914	14.108	33.315	8.171	0.071289	0.26552	0.16543	-7.0708	205.095	726.1318	-0.77881	0.63037	-0.14307	NaN	NaN	NaN	NaN	NaN	NaN
0.464	61.6604	-40.6299	644.714	-0.5835	0.36303	-0.10937	34.8048	16.9002	24.8683	0.079297	0.26963	0.15879	4.868	236.747	690.4824	-0.75586	0.61426	-0.13867	NaN	NaN	NaN	NaN	NaN	NaN
0.466	64.5217	-34.3879	630.855	-0.55957	0.35547	-0.10547	63.872	27.8887	5.8505	0.084473	0.28125	0.15674	11.784	220.6269	654.327	-0.71436	0.57861	-0.11182	NaN	NaN	NaN	NaN	NaN	NaN
0.468	72.485	-30.597	605.124	-0.53467	0.34668	-0.10205	26.3431	11.442	18.2393	0.085156	0.29248	0.15537	46.12	261.135	628.056	-0.67554	0.55591	-0.092041	NaN	NaN	NaN	NaN	NaN	NaN
0.47	63.4378	-27.1757	587.3022	-0.52148	0.34082	-0.10059	40.071	-11.348	63.73	0.082812	0.30928	0.14892	16.06936	236.84	586.035	-0.646	0.52979	-0.071289	NaN	NaN	NaN	NaN	NaN	NaN
0.472	48.3375	-21.8817	574.5947	-0.49756	0.33252	-0.088867	28.848	-4.936	60.096	0.072266	0.32099	0.1458	27.333	215.4434	571.177	-0.60205	0.49854	-0.050293	NaN	NaN	NaN	NaN	NaN	NaN
0.474	54.18	-29.521	564.619	-0.47558	0.32226	-0.085449	-0.471	-32.171	83.455	0.056055	0.33311	0.14492	34.5023	180.169	525.1397	-0.58301	0.4873	-0.043945	NaN	NaN	NaN	NaN	NaN	NaN
0.476	37.416	-25.0287	555.074	-0.46094	0.31494	-0.08252	24.321	-16.169	94.92	0.028809	0.34277	0.13867	26.461	174.792	511.232	-0.53955	0.45557	-0.016602	NaN	NaN	NaN	NaN	NaN	NaN
0.478	32.391	-26.9261	532.3547	-0.4375	0.30518	-0.07959	-8.7101	-21.034	85.5713	-0.0017578	0.35273	0.14424	8.5556	199.482	470.1	-0.51245	0.43286	-0.0021973	NaN	NaN	NaN	NaN	NaN	NaN
0.48	38.817	-27.2121	529.0238	-0.42285	0.30176	-0.07666	3.6648	-38.9467	119.8912	-0.038281	0.36299	0.14336	28.9414	183.2419	443.599	-0.46875	0.4082	0.0092773	NaN	NaN	NaN	NaN	NaN	NaN
0.482	52.72407	-27.158	504.7805	-0.40479	0.28613	-0.065918	-22.849	-11.8034	139.7261	-0.077344	0.37276	0.13906	-10.5614	192.124	403.753	-0.41406	0.3667	0.028809	NaN	NaN	NaN	NaN	NaN	NaN
0.484	32.957	-28.9872	495.7239	-0.38672	0.281	-0.064453	-65.616	-20.7702	177.6166	-0.12324	0.38037	0.1418	-22.694	141.1778	351.707	-0.38574	0.35791	0.040527	NaN	NaN	NaN	NaN	NaN	NaN
0.486	40.5523	-18.1582	473.3495	-0.37207	0.27539	-0.061523	-13.447	3.5464	283.045	-0.17139	0.39893	0.14404	-41.67029	156.511	322.9042	-0.31738	0.3125	0.055176	NaN	NaN	NaN	NaN	NaN	NaN
0.488	33.495	-21.9493	465.392	-0.35547	0.26074	-0.05957	-59.748	31.7459	373.109	-0.23818	0.41279	0.14131	-33.6468	114.9906	275.54194	-0.26172	0.28589	0.065185	NaN	NaN	NaN	NaN	NaN	NaN
0.49	16.455	-16.441	465.784	-0.34717	0.25537	-0.052246	-72.735	36.51306	495.169	-0.31797	0.43184	0.14326	-21.231	140.3306	265.349	-0.20557	0.26807	0.070801	NaN	NaN	NaN	NaN	NaN	NaN
0.492	28.08	-13.4312	464.986	-0.3252	0.24854	-0.051758	5.235	68.3531	602.658	-0.41992	0.44629	0.14287	-17.063	88.948	219.9	-0.12109	0.22314	0.081543	NaN	NaN	NaN	NaN	NaN	NaN
0.494	38.603	-15.0083	434.232	-0.31055	0.23731	-0.050049	-39.787	90.8555	677.481	-0.5543	0.45947	0.15362	-14.226	117.8427	208.166	-0.087402	0.19971	0.086914	NaN	NaN	NaN	NaN	NaN	NaN
0.496	31.442	-24.1728	430.6724	-0.2959	0.22754	-0.043945	-35.286	98.258	818.479	-0.7207	0.46484	0.16455	-27.1734	71.6066	160.3908	-0.01123	0.16699	0.095215	NaN	NaN	NaN	NaN	NaN	NaN
0.498	33.747	-14.5756	410.4878	-0.27979	0.21875	-0.039063	15.977	106.592	908.4337	-0.91465	0.46836	0.17344	-18.619	99.728	173.0729	0.032471	0.13916	0.10059	NaN	NaN	NaN	NaN	NaN	NaN
0.5	32.2078	-7.0258	385.9858	-0.26709	0.21484	-0.038086	-20.301	54.639	994.3853	-1.1226	0.47236	0.18144	-40.4333	84.636	150.101	0.077637	0.10986	0.11133	NaN	NaN	NaN	NaN	NaN	NaN
0.502	35.768	-6.285	382.4641	-0.24854	0.20264	-0.032715	31.444	-12.373	1097.925	-1.3538	0.48135	0.18223	-22.281	116.837	156.491	0.12256	0.07959	0.11768	NaN	NaN	NaN	NaN	NaN	NaN
0.504	37.3146	-1.6563	372.8814	-0.2373	0.19824	-0.033936	51.128	-70.017	1155.349	-1.5809	0.49697	0.18662	-24.0426	110.329	125.043	0.14551	0.062012	0.12549	NaN	NaN	NaN	NaN	NaN	NaN
0.506	52.58	1.4563	376.821	-0.22803	0.19238	-0.022461	57.553	-154.879	1202.426	-1.8008	0.51855	0.17822	-6.445	97.053	118.078	0.19287	0.02832	0.1333	NaN	NaN	NaN	NaN	NaN	NaN
0.508	58.379	8.5	357.203	-0.21484	0.18066	-0.023926	121.661	-196.3208	1219.383	-2.0048	0.55186	0.16113	-11.3082	65.23	100.4899	0.21704	0.018067	0.1355	NaN	NaN	NaN	NaN	NaN	NaN
0.51	52.4003	-0.537500000000001	352.751	-0.20898	0.17969	-0.01709	124.273	-236.971	1160.162	-2.1587	0.5958	0.14024	-12.635	25.938	94.7146	0.24121	0.0024414	0.1416	NaN	NaN	NaN	NaN	NaN	NaN
0.512	57.926451	6.1221	360.969	-0.19434	0.17188	-0.015137	157.566	-266.904	1140.581	-2.2681	0.66143	0.12148	-12.2903	30.5873	72.4642	0.26074	-0.016113	0.15088	NaN	NaN	NaN	NaN	NaN	NaN
0.514	44.8176	16.7538	351.4632	-0.18774	0.16504	-0.012695	187.3183	-223.08	1111.9243	-2.3024	0.74951	0.10664	13.107	23.381	70.2116	0.25781	-0.022461	0.15088	NaN	NaN	NaN	NaN	NaN	NaN
0.516	46.3714	20.0155	320.3662	-0.18701	0.15967	-0.0097656	169.9788	-188.39	1065.72	-2.2715	0.85547	0.089355	23.1201	54.878	72.696	0.25488	-0.024414	0.16406	NaN	NaN	NaN	NaN	NaN	NaN
0.518	49.7448	14.1268	309.8416	-0.18066	0.15186	-0.0029297	219.2062	-160.965	1093.1991	-2.1676	0.96592	0.08252	41.53	27.9112	49.657	0.25317	-0.039795	0.16113	NaN	NaN	NaN	NaN	NaN	NaN
0.52	52.8899	6.95816	302.3212	-0.17627	0.15039	-0.00048828	188.43829	-127.05	1081.541	-2.0211	1.0553	0.070312	42.8922	49.259	51.96	0.25049	-0.042969	0.16602	NaN	NaN	NaN	NaN	NaN	NaN
0.522	36.8538	-0.5046	311.155	-0.17188	0.14355	0.00097656	160.139	-107.9528	1113.352	-1.8387	1.083	0.049219	17.832	14.34081	23.8012	0.24707	-0.041504	0.17236	NaN	NaN	NaN	NaN	NaN	NaN
0.524	37.2746	15.1566	312.39	-0.16944	0.14136	0.0070801	206.153	-69.328	1149.86	-1.6303	1.0369	0.03125	17.816	45.039	33.8899	0.24219	-0.052246	0.17969	NaN	NaN	NaN	NaN	NaN	NaN
0.526	42.2748	16.31875	296.581	-0.17188	0.13574	0.0087891	182.122	-23.527	1102.567	-1.4199	0.94727	0.020996	13.623	8.5945	20.75853	0.21875	-0.054199	0.17188	NaN	NaN	NaN	NaN	NaN	NaN
0.528	40.6993	8.3388	295.7556	-0.17041	0.1333	0.011719	167.314	-33.264	1081.624	-1.2465	0.83857	0.012988	16.755	50.391	53.285	0.2146	-0.057618	0.17334	NaN	NaN	NaN	NaN	NaN	NaN
0.53	27.062	0.0827999999999998	299.012	-0.17139	0.13281	0.01416	149.842	-59.002	1043.065	-1.1112	0.74639	0.020312	23.8523	23.2221	25.5489	0.20361	-0.052246	0.17139	NaN	NaN	NaN	NaN	NaN	NaN
0.532	13.099	4.7297	288.2753	-0.17188	0.13135	0.019531	82.9756	-87.188	1022.851	-1.0195	0.69287	0.025391	32.841	52.923	49.585	0.18506	-0.036133	0.16943	NaN	NaN	NaN	NaN	NaN	NaN
0.534	13.304	5.6468	290.01	-0.18042	0.12427	0.022705	89.662	-154.537	1097.638	-0.96494	0.69404	0.03418	5.606	15.3654	17.3297	0.18799	-0.035156	0.17334	NaN	NaN	NaN	NaN	NaN	NaN
0.536	15.4454	17.813	279.331	-0.17969	0.125	0.022461	61.193	-194.8384	1118.59	-0.94043	0.70703	0.04834	1.343	24.5748	29.2599	0.18945	-0.020508	0.1709	NaN	NaN	NaN	NaN	NaN	NaN
0.538	2.404	11.5073	278.395	-0.18457	0.11963	0.025391	-16.7833	-267.465	1146.537	-0.94336	0.73867	0.070117	-22.2242	15.5205	22.5631	0.19238	-0.020752	0.16748	NaN	NaN	NaN	NaN	NaN	NaN
0.54	-3.008	13.3132	272.726	-0.18848	0.11523	0.024414	6.6701	-352.31	1225.031	-0.9499	0.75517	0.080664	1.316	9.9278	33.837	0.19482	-0.016602	0.16162	NaN	NaN	NaN	NaN	NaN	NaN
0.542	3.87	2.2851	287.222	-0.19189	0.11621	0.033203	-57.2144	-335.538	1221.155	-0.9667	0.75244	0.08418	-3.705	0.515000000000001	18.3485	0.19922	-0.017578	0.16162	NaN	NaN	NaN	NaN	NaN	NaN
0.544	21.265	18.0591	283.468	-0.19898	0.11255	0.033448	-99.332	-324.718	1233.624	-0.99217	0.76123	0.074609	-0.278000000000006	-22.8959	29.982185	0.20361	-0.014648	0.1543	NaN	NaN	NaN	NaN	NaN	NaN
0.546	4.853	8.7323	276.311	-0.2041	0.1123	0.035645	-76.92	-266.594	1258.3349	-1.0313	0.77344	0.047852	-32.7479	-7.243	28.387	0.2002	-0.0014648	0.15137	NaN	NaN	NaN	NaN	NaN	NaN
0.548	4.09	8.7012	279.3473	-0.21729	0.10938	0.035645	-116.598	-179.752	1249.409	-1.0794	0.78623	0.026953	-31.395	-11.6322	31.244	0.19263	0.0007324	0.146	NaN	NaN	NaN	NaN	NaN	NaN
0.55	11.5953	-2.755	301.084	-0.22217	0.11035	0.036133	-93.421	-189.86	1336.8055	-1.1436	0.79883	-0.0024414	-42.2211	34.577	49.061	0.18555	0.0058594	0.14063	NaN	NaN	NaN	NaN	NaN	NaN
0.552	8.696	2.5612	290.199	-0.23584	0.1123	0.037109	-56.284	-152.416	1356.727	-1.2104	0.81407	-0.030957	-23.682	7.6879	31.844	0.16748	0.02002	0.1333	NaN	NaN	NaN	NaN	NaN	NaN
0.554	17.3345	7.8538	270.277	-0.24536	0.11206	0.038574	-77.851	-131.965	1353.139	-1.2741	0.83135	-0.049609	-7.145	45.5093	49.805	0.15869	0.025879	0.12744	NaN	NaN	NaN	NaN	NaN	NaN
0.556	15.428	10.0314	279.249	-0.25684	0.11572	0.038086	-3.71506	-153.346	1410.123	-1.3403	0.8501	-0.053711	2.175	1.241	23.32977	0.13867	0.040039	0.11963	NaN	NaN	NaN	NaN	NaN	NaN
0.558	19.7885	12.8816	284.408	-0.26367	0.11816	0.037109	-32.2116	-98.693	1380.534	-1.4155	0.86924	-0.058203	-8.96	24.9574	30.023	0.125	0.060791	0.11377	NaN	NaN	NaN	NaN	NaN	NaN
0.56	28.5755	23.7417	293.635	-0.26953	0.12061	0.038086	-61.195	-107.083	1359.68	-1.4894	0.88994	-0.064746	-12.4036	-10.644	12.6133	0.1084	0.077637	0.11279	NaN	NaN	NaN	NaN	NaN	NaN
0.562	22.9879	19.07003	282.733	-0.27734	0.12256	0.037598	-15.6046	-121.722	1337.2	-1.5659	0.91494	-0.062793	-22.994	5.6013	26.3335	0.087402	0.10889	0.10205	NaN	NaN	NaN	NaN	NaN	NaN
0.564	34.2613	11.6716	289.214	-0.28637	0.12695	0.035889	-45.897	-106.5034	1320.255	-1.6397	0.93965	-0.053809	-9.1663	-12.259	3.6079	0.078125	0.12988	0.096191	NaN	NaN	NaN	NaN	NaN	NaN
0.566	42.42555	-2.86	319.791	-0.29004	0.12793	0.035645	-3.898	-186.646	1429.7343	-1.7134	0.95947	-0.047363	21.318	22.9065	20.8788	0.058105	0.1543	0.092285	NaN	NaN	NaN	NaN	NaN	NaN
0.568	29.9859	4.345	308.348	-0.2998	0.12842	0.032715	24.958	-183.933	1479.219	-1.793	0.97051	-0.034082	38.519	19.9602	12.29268	0.040772	0.17773	0.099121	NaN	NaN	NaN	NaN	NaN	NaN
0.57	27.8874	13.4232	287.4976	-0.30713	0.13184	0.03418	36.3606	-168.756	1511.552	-1.8738	0.9791	-0.016406	33.407	15.8091	32.853	0.03125	0.20117	0.094238	NaN	NaN	NaN	NaN	NaN	NaN
0.572	28.3856	20.1408	291.376	-0.31201	0.13721	0.030762	97.776	-224.549	1566.233	-1.9441	0.98379	-0.00039066	3.3224	10.0264	22.565	0.020996	0.22656	0.099609	NaN	NaN	NaN	NaN	NaN	NaN
0.574	35.7525	15.79248	299.4623	-0.31885	0.13965	0.031006	97.562	-172.3588	1560.479	-2.0169	0.98994	0.015918	8.005	-6.5733	15.9857	0.013672	0.23926	0.10498	NaN	NaN	NaN	NaN	NaN	NaN
0.576	2.133	14.9734	312.902	-0.32422	0.146	0.031738	129.278	-190.6408	1582.449	-2.0801	0.99609	0.027832	25.3204	8.9754	17.5354	0.010254	0.26904	0.11328	NaN	NaN	NaN	NaN	NaN	NaN
0.578	30.5533	8.17308	302.2389	-0.3335	0.1499	0.030762	169.597	-178.521	1604.245	-2.131	0.99668	0.03584	32.765	-18.3088	31.817	0.015136	0.28564	0.11963	NaN	NaN	NaN	NaN	NaN	NaN
0.58	29.80699	5.3798	327.458	-0.33545	0.15527	0.031738	127.831	-93.8274	1557.522	-2.1729	0.99677	0.053613	33.4829	26.459	44.354	0.019043	0.30225	0.12744	NaN	NaN	NaN	NaN	NaN	NaN
0.582	29.1221	5.8414	351.434	-0.35254	0.15625	0.027832	119.629	-123.871	1569.026	-2.1991	1.0026	0.058691	23.644	2.586	25.5509	0.027832	0.32178	0.1333	NaN	NaN	NaN	NaN	NaN	NaN
0.584	-11.8967	4.3206	347.359	-0.35987	0.16553	0.029541	108.307	-80.806	1594.376	-2.2157	1.0106	0.065332	17.309	51.205	35	0.032715	0.33008	0.13477	NaN	NaN	NaN	NaN	NaN	NaN
0.586	8.358	4.1192	341.7631	-0.37451	0.17139	0.026855	36.012	-58.317116	1558.796	-2.2148	1.0176	0.069336	-0.0140000000000011	1.847	-1.9154	0.041992	0.3457	0.13867	NaN	NaN	NaN	NaN	NaN	NaN
0.588	18.427	9.0537	352.638	-0.38867	0.17432	0.027832	72.246	-99.639	1560.728	-2.1986	1.0127	0.081348	-11.657	39.225	26.7539	0.053466	0.35278	0.13501	NaN	NaN	NaN	NaN	NaN	NaN
0.59	8.931	7.452	368.874	-0.39942	0.18116	0.022705	51.983	-32.9623	1533.577	-2.1757	0.99385	0.099122	9.806	-11.396	5.164	0.066895	0.35938	0.1333	NaN	NaN	NaN	NaN	NaN	NaN
0.592	-10.2394	13.3606	380.4	-0.41797	0.18701	0.024414	2.111	-55.785	1522.04	-2.1499	0.9665	0.10693	16.798	37.307	6.8604	0.084473	0.36475	0.13818	NaN	NaN	NaN	NaN	NaN	NaN
0.594	-7.843	13.09528	372.0802	-0.43848	0.19678	0.021973	25.2471	-64.662	1535.87102	-2.1179	0.93838	0.11904	2.576	9.0891	1.9537	0.092773	0.37597	0.13233	NaN	NaN	NaN	NaN	NaN	NaN
0.596	-0.687999999999999	16.6888	376.9715	-0.45459	0.19629	0.018555	5.352	-2.491	1492.918	-2.0894	0.90674	0.12891	-16.608	32.6708	36.677	0.10498	0.37939	0.12939	NaN	NaN	NaN	NaN	NaN	NaN
0.598	-2.471	18.0376	399.813	-0.47656	0.20508	0.014648	1.414	-56.822	1504.6	-2.0648	0.88418	0.1419	-44.204	12.8	42.7166	0.11084	0.38525	0.12842	NaN	NaN	NaN	NaN	NaN	NaN
0.6	-13.5355	19.7244	411.059	-0.4956	0.20947	0.015137	13.893	-45.861	1550.0297	-2.0387	0.86523	0.15322	-25.327	21.54924	76.988	0.11426	0.39697	0.13184	NaN	NaN	NaN	NaN	NaN	NaN
0.602	-7.939	15.7193	421.849	-0.51514	0.21094	0.014648	-45.3829	-30.029	1535.0589	-2.0144	0.84454	0.17002	-24.7072	5.665	56.508	0.11182	0.40039	0.12891	NaN	NaN	NaN	NaN	NaN	NaN
0.604	11.6561	25.9338	430.7975	-0.53906	0.21777	0.016113	-22.5435	-75.28	1564.486	-1.9968	0.83096	0.18066	7.158	-14.035	84.506	0.10571	0.40698	0.12354	NaN	NaN	NaN	NaN	NaN	NaN
0.606	10.4806	36.7579	448.1483	-0.55127	0.21973	0.01123	-20.5886	-13.284	1552.804	-1.978	0.8208	0.19287	-33.3721	-24.27	95.814	0.092285	0.41797	0.11621	NaN	NaN	NaN	NaN	NaN	NaN
0.608	-3.264	42.8627	463.1128	-0.57275	0.22217	0.010254	-59.065	-40.037	1552.164	-1.9598	0.80703	0.20664	3.218	-72.1367	104.099	0.062012	0.43359	0.11914	NaN	NaN	NaN	NaN	NaN	NaN
0.61	12.4393	37.651	492.671	-0.59277	0.22876	0.011475	-19.822	-77.347	1557.244	-1.9433	0.79571	0.21631	-19.1001	-68.913	91.0864	0.041504	0.43848	0.125	NaN	NaN	NaN	NaN	NaN	NaN
0.612	33.9791	31.0819	495.305	-0.61279	0.23145	0.0073242	-26.936	-22.8848	1477.375	-1.9356	0.79883	0.22568	-15.262	-124.936	99.466	-0.01709	0.46045	0.12549	NaN	NaN	NaN	NaN	NaN	NaN
0.614	20.9992	31.639	491.5423	-0.63525	0.23926	0.0087891	-36.004	-71.95	1454.064	-1.9286	0.79131	0.2372	-40.378	-94.1877	166.5911	-0.06543	0.47119	0.12719	NaN	NaN	NaN	NaN	NaN	NaN
0.616	14.347	24.0254	513.473	-0.64941	0.23926	0.0092773	-14.039	-7.849	1452.38	-1.9063	0.78613	0.24951	-10.652	-114	229.214	-0.10986	0.48291	0.13379	NaN	NaN	NaN	NaN	NaN	NaN
0.618	22.4052	26.4736	532.315	-0.67822	0.24561	0.0053711	-37.042	40.451	1450.1937	-1.8748	0.76855	0.25908	-13.7474	-34.341	312.082	-0.17578	0.50391	0.13965	NaN	NaN	NaN	NaN	NaN	NaN
0.62	36.1994	27.7902	558.187	-0.69776	0.25025	0.0073242	51.5746	1.1111	1475.971	-1.8383	0.75566	0.26133	-3.2263	-52.3457	375.58351	-0.20654	0.51611	0.13818	NaN	NaN	NaN	NaN	NaN	NaN
0.622	40.0256	33.34074	552.0497	-0.71924	0.25732	0.0063477	83.61	77.283	1445.061	-1.8043	0.74277	0.26485	-1.486	-9.453	502.9336	-0.26514	0.55127	0.13721	NaN	NaN	NaN	NaN	NaN	NaN
0.624	38.9797	37.6801	560.8718	-0.7417	0.25928	0.0024414	58.764	61.395	1439.004	-1.7648	0.73252	0.26494	0.126999999999999	-42.657	628.488	-0.32495	0.58154	0.13257	NaN	NaN	NaN	NaN	NaN	NaN
0.626	24.496	41.3675	587.1505	-0.75928	0.26318	-0.00097656	130.385	59.487	1448.823	-1.7363	0.72656	0.26611	8.812	35.1535	785.507	-0.39307	0.61377	0.125	NaN	NaN	NaN	NaN	NaN	NaN
0.628	44.9406	48.1886	609.614	-0.78662	0.27197	0.00097656	95.107	124.469	1413.349	-1.7051	0.725	0.26455	46.926	58.904	932.479	-0.52344	0.65527	0.11523	NaN	NaN	NaN	NaN	NaN	NaN
0.63	35.7988	52.996	613.624	-0.80445	0.27075	-0.0024414	98.373	58.3071	1408.037	-1.6753	0.72901	0.26475	58.506	79.316	1077.64	-0.6123	0.67969	0.11279	NaN	NaN	NaN	NaN	NaN	NaN
0.632	27.2067	41.6867	630.783	-0.82178	0.26904	-0.0024414	119.412	76.6321	1373.1535	-1.6471	0.72978	0.2628	29.769	50.0662	1178.28142	-0.81641	0.73047	0.10449	NaN	NaN	NaN	NaN	NaN	NaN
0.634	15.2664	37.9946	646.295	-0.85156	0.27148	0.00097656	91.459	79.3153	1350.8588	-1.6194	0.72812	0.25449	16.072	-8.58	1263.323	-1.0066	0.77221	0.10083	NaN	NaN	NaN	NaN	NaN	NaN
0.636	32.7081	44.4013	654.47	-0.86328	0.27051	-0.0019531	142.146	23.428	1361.001	-1.5938	0.73242	0.24561	3.375	-46.962	1294.756	-1.2197	0.81445	0.10156	NaN	NaN	NaN	NaN	NaN	NaN
0.638	17.8996	61.641	647.7217	-0.89258	0.2793	0.00048828	119.67	87.378	1325.318	-1.5662	0.73066	0.24942	38.67329	-146.102	1329.407	-1.5269	0.8833	0.099609	NaN	NaN	NaN	NaN	NaN	NaN
0.64	23.666	77.779	655.3604	-0.91845	0.28076	-0.00097655	85.3436	78.5727	1298.1395	-1.5374	0.72705	0.24453	68.105	-176.47	1308.892	-1.6758	0.91992	0.10254	NaN	NaN	NaN	NaN	NaN	NaN
0.642	7.564	73.849	695.058	-0.94141	0.28516	-0.0043945	102.585	59.393	1300.165	-1.5062	0.72862	0.23867	93.064	-258.128	1246.264	-1.9644	0.99854	0.10352	NaN	NaN	NaN	NaN	NaN	NaN
0.644	23.285	75.4042	699.1658	-0.97607	0.2876	-0.0039063	66.3191	105.6418	1266.665	-1.4703	0.72364	0.23447	116.1771	-224.317	1167.255	-2.1206	1.059	0.11718	NaN	NaN	NaN	NaN	NaN	NaN
0.646	18.5126	71.5528	718.992	-0.98828	0.29395	-0.0048828	74.5751	55.062	1264.166	-1.4351	0.72119	0.23047	128.671	-260.7	1106.94052	-2.2344	1.1367	0.11377	NaN	NaN	NaN	NaN	NaN	NaN
0.648	10.161	61.4173	739.072	-1.0171	0.30322	-0.0068359	90.4671	102.1852	1237.688	-1.3997	0.7126	0.22539	98.832	-161.622	1070.715	-2.2324	1.2402	0.098145	NaN	NaN	NaN	NaN	NaN	NaN
0.65	25.0179	69.9235	753.233	-1.0386	0.30518	-0.0056153	42.14	149.948	1202.56	-1.3624	0.70596	0.21982	86.314	-172.12	1066.574	-2.1479	1.2856	0.09375	NaN	NaN	NaN	NaN	NaN	NaN
0.652	8.012	77.4554	768.987	-1.0586	0.31055	-0.0068359	55.206	128.9983	1189.747	-1.3276	0.69697	0.21474	110.133	-87.05711	1075.07	-1.8677	1.3384	0.095703	NaN	NaN	NaN	NaN	NaN	NaN
0.654	13.338	93.43	748.386	-1.0874	0.31738	-0.010254	36.599	203.454	1147.56	-1.291	0.6875	0.2041	112.3575	-107.858	1067.027	-1.5965	1.344	0.098632	NaN	NaN	NaN	NaN	NaN	NaN
0.656	11.294	99.012	760.222	-1.0957	0.32422	-0.013672	-1.189	174.399	1127.5281	-1.2515	0.67529	0.19629	88.994	-33.136	1102.8	-1.3262	1.2949	0.10596	NaN	NaN	NaN	NaN	NaN	NaN
0.658	28.104	89.643	790.14	-1.1128	0.33252	-0.010742	24.085	140.4468	1114.263	-1.2145	0.65762	0.1913	45.1575	-35.19	1095.291	-1.0601	1.1548	0.10645	NaN	NaN	NaN	NaN	NaN	NaN
0.66	26.7805	85.9454	806.62	-1.1297	0.344	-0.01294	-3.191	169.663	1070.134	-1.1757	0.64502	0.19336	75.011	-37.14	1099.6207	-0.96143	1.0923	0.095215	NaN	NaN	NaN	NaN	NaN	NaN
0.662	28.797	88.12745	818.241	-1.1401	0.35107	-0.014648	2.628	84.977	1073.216	-1.1339	0.63135	0.18125	35.65399	-57.859	1053.594	-0.81006	0.95947	0.087891	NaN	NaN	NaN	NaN	NaN	NaN
0.664	52.7455	96.7542	829.109	-1.1484	0.36523	-0.010254	12.988	116.787	1026.569	-1.0992	0.61055	0.17178	18.6174	-127.469	1068.644	-0.73291	0.92188	0.066407	NaN	NaN	NaN	NaN	NaN	NaN
0.666	47.3415	100.0699	844.087	-1.1533	0.37012	-0.012207	-29.542	132.276601	964.9434	-1.0645	0.59473	0.16846	-35.418	-158.815	1111.099	-0.69336	0.91602	0.053711	NaN	NaN	NaN	NaN	NaN	NaN
0.668	41.0863	108.0503	845.445	-1.1538	0.38525	-0.011719	20.8	103.984	955.6681	-1.029	0.58115	0.15752	9.507	-272.374	1188.357	-0.65332	0.95752	0.04248	NaN	NaN	NaN	NaN	NaN	NaN
0.67	53.0223	100.87476	855.379	-1.1582	0.39795	-0.010742	28.992	171.563	910.9788	-1.0004	0.56719	0.15146	-34.385	-301.771	1226.097	-0.64307	0.9751	0.047363	NaN	NaN	NaN	NaN	NaN	NaN
0.672	51.2045	110.3095	856.146	-1.1577	0.40674	-0.014648	30.623	139.73	903.263	-0.96875	0.5496	0.14639	-64.1762	-393.892	1242.197	-0.63135	1.0396	0.02832	NaN	NaN	NaN	NaN	NaN	NaN
0.674	65.964	118.2473	869.956	-1.1519	0.42529	-0.014648	89.0807	139.936	898.656	-0.93584	0.53681	0.14101	-109.259	-377.074	1278.04	-0.65234	1.0894	0.00048825	NaN	NaN	NaN	NaN	NaN	NaN
0.676	46.2764	124.3704	885.153	-1.1504	0.43457	-0.012695	60.0915	193.426	860.983	-0.9043	0.51953	0.1333	-117.283	-404.61	1327.223	-0.68604	1.1274	-0.016113	NaN	NaN	NaN	NaN	NaN	NaN
0.678	54.0466	119.7958	890.881	-1.1499	0.45068	-0.017578	77.3691	149.1205	867.98	-0.8749	0.50459	0.13252	-113.249	-298.872	1366.851	-0.77148	1.1406	-0.054688	NaN	NaN	NaN	NaN	NaN	NaN
0.68	53.9684	118.4963	910.735	-1.1516	0.45996	-0.021729	119.964	158.8506	798.614	-0.84503	0.48877	0.12549	-102.375	-255.007	1401.6228	-0.81396	1.1431	-0.069336	NaN	NaN	NaN	NaN	NaN	NaN
0.682	67.1821	120.522	908.807	-1.1577	0.479	-0.010742	90.093	155.0119	738.8917	-0.81573	0.47198	0.11768	-76.131	-133.78	1433.152	-0.92725	1.1499	-0.098145	NaN	NaN	NaN	NaN	NaN	NaN
0.684	47.22794	120.8649	909.836	-1.1792	0.48779	-0.022461	111.677	123.288	713.233	-0.78321	0.45469	0.11953	-96.888	-120.836	1473.373	-1.0147	1.1689	-0.11328	NaN	NaN	NaN	NaN	NaN	NaN
0.686	40.5614	120.5743	920.591	-1.1909	0.48975	-0.023926	105.251	188.67506	643.352	-0.74756	0.43408	0.11035	-63.355	-77.885	1461.641	-1.0835	1.1821	-0.12061	NaN	NaN	NaN	NaN	NaN	NaN
0.688	48.3599	132.38627	931.493	-1.2227	0.50391	-0.03125	91.402	158.3204	634.5833	-0.70809	0.41786	0.10625	-58.4576	-62.18	1452.78	-1.1694	1.229	-0.12549	NaN	NaN	NaN	NaN	NaN	NaN
0.69	54.3621	147.6719	919.708	-1.2505	0.51612	-0.033447	125.095	132.509	603.2366	-0.66491	0.40047	0.09951	-32.088	-59.33	1462.466	-1.2222	1.2505	-0.12646	NaN	NaN	NaN	NaN	NaN	NaN
0.692	45.755123	149.184	916.0269	-1.2769	0.52783	-0.039551	77.774	162.1991	545.139	-0.62153	0.38211	0.092862	-53.80786	-66.448	1467.61156	-1.3262	1.2852	-0.12598	NaN	NaN	NaN	NaN	NaN	NaN
0.694	34.117	153.1027	922.242	-1.3027	0.54248	-0.046875	77.487	105.6879	553.9929	-0.58004	0.36053	0.080952	-49.3421	-118.749	1452.056	-1.4087	1.311	-0.1167	NaN	NaN	NaN	NaN	NaN	NaN
0.696	34.6446	158.3102	925.759	-1.3159	0.54932	-0.046875	87.411	134.4566	514.83	-0.53711	0.3418	0.075684	-34.374	-115.454	1441.729	-1.4917	1.3247	-0.11084	NaN	NaN	NaN	NaN	NaN	NaN
0.698	29.704	157.7666	933.057	-1.3296	0.56396	-0.054199	52.3957	144.301	488.993	-0.49635	0.33039	0.06633	-31.427	-165.036	1477.076	-1.6011	1.3384	-0.094238	NaN	NaN	NaN	NaN	NaN	NaN
0.7	18.716	158.2714	940.223	-1.3374	0.57593	-0.056884	60.4128	123.6257	469.0622	-0.45607	0.31187	0.060166	-35.2528	-139.743	1548.8703	-1.6523	1.3516	-0.085938	NaN	NaN	NaN	NaN	NaN	NaN
0.702	19.451	160.002	947.868	-1.3413	0.58936	-0.062988	6.57	169.773	412.282	-0.41939	0.29431	0.05317	-0.292000000000002	-178.341	1591.962	-1.7422	1.3691	-0.072266	NaN	NaN	NaN	NaN	NaN	NaN
0.704	27.307	170.165	947.767	-1.3398	0.5957	-0.070801	0.724	144.615	400.9142	-0.38052	0.28143	0.045924	33.0718	-145.26863	1623.099	-1.7947	1.3831	-0.06543	NaN	NaN	NaN	NaN	NaN	NaN
0.706	29.382	187.812	926.59	-1.3335	0.60107	-0.071777	7.355	136.361	384.378	-0.3418	0.2666	0.040039	34.1802	-204.161	1665.48	-1.8472	1.395	-0.061035	NaN	NaN	NaN	NaN	NaN	NaN
0.708	21.779	180.4318	916.7263	-1.3218	0.61377	-0.078125	-66.516	158.737	344.9055	-0.29987	0.25254	0.035156	45.665	-145.086	1680.254	-1.9004	1.4102	-0.052734	NaN	NaN	NaN	NaN	NaN	NaN
0.71	23.895	190.266	915.444	-1.3103	0.62036	-0.079346	-38.6078	98.481	356.253	-0.25458	0.23971	0.028273	65.134	-156.733	1692.605	-1.9233	1.4185	-0.049316	NaN	NaN	NaN	NaN	NaN	NaN
0.712	35.041	190.163	928.3146	-1.2969	0.625	-0.083496	-30.9405	98.968	321.893	-0.20942	0.23236	0.015903	101.073	-66.728	1666.771	-1.9609	1.4219	-0.035156	NaN	NaN	NaN	NaN	NaN	NaN
0.714	39.3916	199.1669	919.6347	-1.2749	0.62939	-0.087402	-63.8724	80.565	302.064	-0.1648	0.22187	0.010809	60.577	-72.0803	1641.0249	-1.9831	1.4153	-0.023194	NaN	NaN	NaN	NaN	NaN	NaN
0.716	30.116	184.61905	919.646	-1.2637	0.63525	-0.084961	-17.558	52.9643	275.951	-0.12012	0.20947	0.00097656	30.439	-15.61	1609.6925	-1.9902	1.4121	-0.023438	NaN	NaN	NaN	NaN	NaN	NaN
0.718	39.0949	182.6405	927.615	-1.2417	0.64111	-0.084473	-50.718	91.074	221.2617	-0.074882	0.19699	-0.0050734	14.7502	-26.954	1601.2613	-1.98	1.3853	-0.0092773	NaN	NaN	NaN	NaN	NaN	NaN
0.72	43.67625	193.1827	925.574	-1.2341	0.64234	-0.083008	-50.483	77.868	219.8764	-0.028754	0.18016	-0.010603	40.43	-7.356	1593.3639	-1.9624	1.3735	-0.0043945	NaN	NaN	NaN	NaN	NaN	NaN
0.722	25.0597	212.322	908.1552	-1.2207	0.64844	-0.082031	-8.631	85.192	202.474	0.011273	0.16913	-0.019184	-0.4873	-0.486499999999999	1589.3547	-1.9219	1.3379	-0.0019531	NaN	NaN	NaN	NaN	NaN	NaN
0.724	50.0169	206.4505	887.6001	-1.2168	0.65625	-0.077148	-47.4205	111.264	181.225	0.04881	0.15789	-0.030067	6.723	4.0087	1576.7608	-1.8833	1.313	-0.0046387	NaN	NaN	NaN	NaN	NaN	NaN
0.726	41.7627	212.9958	897.7837	-1.2202	0.65967	-0.071777	-14.3042	63.1117	198.834	0.089844	0.14111	-0.040039	-25.335	11.3266	1539.9427	-1.8398	1.2949	-0.0087891	NaN	NaN	NaN	NaN	NaN	NaN
0.728	44.8479	218.3365	900.9735	-1.2534	0.66846	-0.062012	10.002	73.708	185.087	0.12935	0.13138	-0.05109	-31.69	13.3589	1529.7766	-1.7832	1.2715	-0.010742	NaN	NaN	NaN	NaN	NaN	NaN
0.73	45.7737	219.284	913.561	-1.3179	0.67236	-0.04248	-13.5961	55.693	184.562	0.1642	0.1197	-0.063478	-20.811	45.834	1524.996	-1.7593	1.2681	-0.010254	NaN	NaN	NaN	NaN	NaN	NaN
0.732	70.5136	232.8917	927.3247	-1.3594	0.67773	-0.046875	47.3368	35.2121	171.702	0.20032	0.10776	-0.078227	-17.442	18.576	1553.62952	-1.73	1.2505	-0.0078125	NaN	NaN	NaN	NaN	NaN	NaN
0.734	55.99389	263.415	951.3039	-1.4453	0.6875	-0.033203	35.6994	77.608	123.7257	0.23827	0.099584	-0.083014	6.3	58.2557	1594.105	-1.7129	1.25	-0.0036621	NaN	NaN	NaN	NaN	NaN	NaN
0.736	58.895	293.518	976.706	-1.5125	0.69727	-0.024658	36.6407	50.183	118.9855	0.26563	0.082031	-0.10547	-19.3605	2.84	1608.895	-1.707	1.2441	-0.00097656	NaN	NaN	NaN	NaN	NaN	NaN
0.738	65.86888	300.9832	1009.005	-1.5723	0.70313	-0.024414	86.134	35.412	107.1386	0.28393	0.076312	-0.11041	-20.672	29.843	1595.876	-1.6914	1.2383	-0.0014648	NaN	NaN	NaN	NaN	NaN	NaN
0.74	59.149	311.7594	1036.9206	-1.6387	0.71973	-0.016113	61.5297	29.357	90.4694	0.299	0.06548	-0.12462	-54.454	-45.03	1596.767	-1.6804	1.2278	0.0095214	NaN	NaN	NaN	NaN	NaN	NaN
0.742	79.4973	313.291	1060.7998	-1.668	0.72266	-0.014648	73.568	-14.47	106.194	0.30888	0.055635	-0.13426	-26.325	-1.402	1558.119	-1.666	1.2227	0.023438	NaN	NaN	NaN	NaN	NaN	NaN
0.744	79.421	320.668	1073.9085	-1.7007	0.73486	-0.013184	77.738	11.118	94.722	0.31299	0.042691	-0.13422	-33.4394	-44.2699	1537.609	-1.6563	1.2168	0.031738	NaN	NaN	NaN	NaN	NaN	NaN
0.746	57.445	322.955	1079.144	-1.7077	0.73901	-0.010498	46.205	0.529999999999999	99.512	0.3125	0.032227	-0.13623	-34.853	8.069	1479.53	-1.6499	1.2153	0.034668	NaN	NaN	NaN	NaN	NaN	NaN
0.748	71.003	310.146	1087.969	-1.7026	0.74658	-0.012207	85.818	-12.9689	98.92	0.30738	0.026756	-0.14574	-36.135	-16.706	1467.436	-1.6226	1.2095	0.036621	NaN	NaN	NaN	NaN	NaN	NaN
0.75	121.13443	290.719	1076.458	-1.6748	0.74805	-0.013184	42.5871	19.3831	70.546	0.29814	0.021029	-0.14829	-25.495	56.7106	1459.321	-1.6075	1.1914	0.040283	NaN	NaN	NaN	NaN	NaN	NaN
0.752	112.893	263.223	1079.981	-1.6514	0.74805	-0.0053711	16.3415	14.4177	60.156	0.28387	0.017745	-0.15257	-2.7146	77.653	1457.3735	-1.603	1.1753	0.050293	NaN	NaN	NaN	NaN	NaN	NaN
0.754	90.199	240.2443	1083.2932	-1.5967	0.74512	-0.0053711	36.3761	24.3681	59.7266	0.26506	0.020043	-0.15034	21.571	136.657	1419.496	-1.5835	1.1597	0.052246	NaN	NaN	NaN	NaN	NaN	NaN
0.756	112.8791	216.8915	1096.869	-1.5506	0.73609	-0.0061036	6.94	31.3659	53.57707	0.24561	0.019043	-0.14941	54.2332	153.876	1404.783	-1.5664	1.1465	0.053711	NaN	NaN	NaN	NaN	NaN	NaN
0.758	112.6423	194.7666	1088.374	-1.4937	0.73291	-0.0014648	5.185	0.265000000000001	63.28	0.21721	0.020701	-0.14196	31.242	169.345	1385.31	-1.5249	1.1274	0.059082	NaN	NaN	NaN	NaN	NaN	NaN
0.76	111.2889	185.641	1076.248	-1.4277	0.7168	0.0048828	-2.723	23.05153	36.539	0.18651	0.016835	-0.1395	56.4008	182.307	1379.723	-1.4932	1.1104	0.053466	NaN	NaN	NaN	NaN	NaN	NaN
0.762	121.4684	150.6715	1077.253	-1.3921	0.71533	0.0087891	-36.8869	8.6936	30.033	0.15447	0.019912	-0.13998	50.34	162.423	1362.469	-1.4683	1.0923	0.058594	NaN	NaN	NaN	NaN	NaN	NaN
0.764	144.0837	135.5666	1080.691	-1.332	0.7041	0.010742	2.662	-11.0601	27.4796	0.11596	0.019633	-0.13427	95.138	182.652	1335.02	-1.4331	1.0767	0.060547	NaN	NaN	NaN	NaN	NaN	NaN
0.766	134.127	124.3561	1080.519	-1.2905	0.69775	0.023682	-41.9234	15.8984	9.2837	0.080078	0.023438	-0.13037	44.107	129.8681	1300.9137	-1.4155	1.063	0.060059	NaN	NaN	NaN	NaN	NaN	NaN
0.768	116.02125	115.282	1068.486	-1.2539	0.69141	0.02832	-65.959	-6.3601	3.2714	0.048758	0.027437	-0.12842	54.907	173.334	1245.748	-1.3823	1.0376	0.059082	NaN	NaN	NaN	NaN	NaN	NaN
0.77	118.5298	94.54678	1085.492	-1.2109	0.6875	0.036621	-39.421	4.7263	7.2733	0.01869	0.029882	-0.12657	39.716	125.647	1203.5468	-1.3592	1.0218	0.062012	NaN	NaN	NaN	NaN	NaN	NaN
0.772	111.9204	82.7676	1104.209	-1.1958	0.68994	0.04248	-65.962	28.891	-2.0823	-0.0082838	0.030664	-0.12461	72.613	178.7536	1171.164	-1.3281	1.0039	0.061523	NaN	NaN	NaN	NaN	NaN	NaN
0.774	141.754	71.6548	1096.235	-1.1675	0.68115	0.051758	-32.504	-2.2275	16.91063	-0.036026	0.037889	-0.11534	50.5262	108.278	1179.8557	-1.2866	0.97705	0.055176	NaN	NaN	NaN	NaN	NaN	NaN
0.776	117.3737	58.6635	1082.665	-1.1484	0.6792	0.056885	-18.779	20.2428	20.7315	-0.059082	0.045898	-0.11133	79.196	156.1688	1147.0175	-1.2632	0.95752	0.058105	NaN	NaN	NaN	NaN	NaN	NaN
0.778	109.58449	40.28759	1074.609	-1.1289	0.67773	0.0625	-67.203	6.464	18.9249	-0.083599	0.049807	-0.11015	37.1262	111.5309	1136.174	-1.21	0.92969	0.059082	NaN	NaN	NaN	NaN	NaN	NaN
0.78	89.628	30.1538	1093.79	-1.1172	0.66895	0.071289	-2.97	-10.2729	47.536	-0.10469	0.056351	-0.10596	55.003	200.214	1090.107	-1.1727	0.90747	0.054199	NaN	NaN	NaN	NaN	NaN	NaN
0.782	88.64802	26.9795	1085.0507	-1.1094	0.66797	0.07959	4.0895	24.221	33.4093	-0.11798	0.06338	-0.10322	41.42636	197.045	1075.903	-1.1309	0.88281	0.049805	NaN	NaN	NaN	NaN	NaN	NaN
0.784	84.2347	13.87821	1089.8693	-1.0977	0.66602	0.074219	8.7186	1.068	29.261	-0.1333	0.072559	-0.098634	23.81	272.885	1009.1687	-1.0845	0.85205	0.046387	NaN	NaN	NaN	NaN	NaN	NaN
0.786	62.411	-7.2331	1109.863	-1.0915	0.66284	0.07837	43.2429	12.7758	17.4783	-0.1377	0.079102	-0.1001	19.298	256.904	988.967	-1.0586	0.83496	0.047363	NaN	NaN	NaN	NaN	NaN	NaN
0.788	55.9119	-19.2887	1120.002	-1.0874	0.66064	0.083008	19.1573	31.998	-4.8525	-0.14199	0.082421	-0.098732	18.523	255.022	919.36811	-1.0088	0.80469	0.040527	NaN	NaN	NaN	NaN	NaN	NaN
0.79	19.128	-28.7201	1096.989	-1.0879	0.65918	0.087402	59.338	16.0065	6.6868	-0.14082	0.08789	-0.10068	-16.8826	235.4748	902.153	-0.97266	0.77783	0.043945	NaN	NaN	NaN	NaN	NaN	NaN
0.792	4.9986	-32.8413	1080.434	-1.0874	0.66357	0.089844	53.239	29.589	25.337	-0.13106	0.092578	-0.09834	-36.341	206.6692	851.7722	-0.93115	0.75439	0.034668	NaN	NaN	NaN	NaN	NaN	NaN
0.794	-10.20084	-55.2287	1082.691	-1.0967	0.66406	0.10596	34.8361	14.1118	19.156	-0.12236	0.094043	-0.10098	-3.442	208.2551	819.593	-0.87695	0.7168	0.029297	NaN	NaN	NaN	NaN	NaN	NaN
0.796	-15.4736	-82.872885	1093.302	-1.1013	0.67016	0.10742	84.04	-10.9144	42.231	-0.10938	0.10254	-0.104	-21.085	186.684	763.4	-0.84863	0.70117	0.029297	NaN	NaN	NaN	NaN	NaN	NaN
0.798	-29.9928	-113.962	1078.599	-1.1074	0.67188	0.1167	62.145	19.7797	36.7245	-0.091894	0.10176	-0.10391	2.548	212.193	735.056	-0.79346	0.66064	0.024414	NaN	NaN	NaN	NaN	NaN	NaN
0.8	-40.625	-147.086	1062.641	-1.1147	0.68115	0.12744	74.685	18.8729	35.967	-0.075586	0.10752	-0.10596	-9.993	168.6044	706.855	-0.75416	0.63794	0.020508	NaN	NaN	NaN	NaN	NaN	NaN
0.802	-32.0908	-164.5736	1040.003	-1.1152	0.68066	0.12988	68.228	32.104	36.247	-0.056445	0.10947	-0.10635	-1.118	219.173	675.684	-0.71729	0.61377	0.01416	NaN	NaN	NaN	NaN	NaN	NaN
0.804	-31.849	-176.47	1027.116	-1.1089	0.69385	0.13477	9.852	44.659	8.4888	-0.036523	0.10889	-0.10996	-7.334	166.957	650.6986	-0.66846	0.57373	0.01123	NaN	NaN	NaN	NaN	NaN	NaN
0.806	-45.231	-165.9555	1018.106	-1.1136	0.69214	0.14624	44.8954	18.0285	28.5258	-0.01416	0.11182	-0.11035	18.358	220.872	607.4894	-0.64209	0.55713	0.012695	NaN	NaN	NaN	NaN	NaN	NaN
0.808	-52.45	-165.7878	987.901	-1.1138	0.70166	0.15332	58.955	23.1065	40.215	0.005566	0.11143	-0.11631	16.26	150.9722	588.198	-0.59814	0.52002	0.010742	NaN	NaN	NaN	NaN	NaN	NaN
0.81	-37.078	-170.7401	967.988	-1.126	0.70898	0.16211	1.2765	-1.5159	43.458	0.02207	0.11211	-0.11474	10.388	186.228	528.885	-0.56128	0.49341	0.0061035	NaN	NaN	NaN	NaN	NaN	NaN
0.812	-40.347	-170.982	957.584	-1.1362	0.71729	0.16211	17.3678	-27.671	65.805	0.043555	0.10899	-0.11943	8.714	128.1123	505.002	-0.521	0.46729	0.0043945	NaN	NaN	NaN	NaN	NaN	NaN
0.814	-56.683	-166.064	955.45	-1.1577	0.72705	0.16406	-17.4195	-1.38609	33.81063	0.058398	0.10967	-0.12168	44.31	168.431	450.984	-0.46875	0.43262	0.0083008	NaN	NaN	NaN	NaN	NaN	NaN
0.816	-32.404	-167.6176	948.196	-1.1724	0.73438	0.16504	-28.3607	-13.4658	35.9973	0.066895	0.1084	-0.12158	46.851	127.1133	428.756	-0.44043	0.41943	-0.0019531	NaN	NaN	NaN	NaN	NaN	NaN
0.818	-35.843	-169.9703	945.077	-1.1855	0.74414	0.16309	0.726999999999999	1.0711	32.753	0.080078	0.11172	-0.12217	22.493	147.9139	362.15454	-0.38232	0.38086	0.0068359	NaN	NaN	NaN	NaN	NaN	NaN
0.82	-24.3069	-163.3308	929.148	-1.2012	0.75391	0.15967	-74.598	19.01	10.9927	0.089746	0.11035	-0.11885	23.243	121.484	322.6151	-0.33471	0.35864	0.00097656	NaN	NaN	NaN	NaN	NaN	NaN
0.822	-49.793	-164.613	936.2486	-1.2075	0.75635	0.15625	-38.4198	-5.14547	33.964	0.096777	0.1166	-0.12275	34.362	111.108	252.009	-0.29346	0.33398	0.0024414	NaN	NaN	NaN	NaN	NaN	NaN
0.824	-22.0338	-165.461	948.4662	-1.2222	0.76514	0.14844	-15.126	12.87	25.8456	0.1001	0.11533	-0.12061	32.1642	90.8053	248.0322	-0.24316	0.30029	2.0816e-14	NaN	NaN	NaN	NaN	NaN	NaN
0.826	-14.7481	-164.407	962.5657	-1.2302	0.76392	0.14258	-57.763	11.9557	35.528	0.10352	0.11279	-0.12158	28.63	68.5211	216.5047	-0.22217	0.28369	-0.00097656	NaN	NaN	NaN	NaN	NaN	NaN
0.828	-11.107	-157.7358	959.9631	-1.2402	0.76758	0.13281	-14.4308	-18.432	64.569	0.097558	0.11474	-0.12881	30.6197	97.52	223.203	-0.17236	0.25342	-0.0043945	NaN	NaN	NaN	NaN	NaN	NaN
0.83	-20.002	-180.868	976.3307	-1.2437	0.77002	0.12305	-30.0596	-15.5122	53.005	0.092285	0.12129	-0.13047	13.004	74.552	193.944	-0.12744	0.22656	-0.0039062	NaN	NaN	NaN	NaN	NaN	NaN
0.832	-27.287	-196.988	976.9479	-1.25	0.76563	0.125	-23.1975	-42.0802	54.529	0.080567	0.12715	-0.13828	32.3064	122.279	168.2952	-0.09082	0.20313	-0.0087891	NaN	NaN	NaN	NaN	NaN	NaN
0.834	-12.2858	-202.192	986.49	-1.2344	0.76367	0.1123	19.7667	-38.667	60.7775	0.064844	0.13213	-0.14922	-20.138	74.8552	149.70861	-0.037109	0.17529	-0.0097656	NaN	NaN	NaN	NaN	NaN	NaN
0.836	-28.6496	-186.7995	990.35	-1.2175	0.76733	0.10449	-19.27327	-6.632	64.0383	0.038574	0.14453	-0.1416	-10.466	130.564	142.5088	-0.0087891	0.15771	-0.019043	NaN	NaN	NaN	NaN	NaN	NaN
0.838	-29.0443	-187.353	998.6719	-1.2026	0.76416	0.094727	-0.850999999999999	-26.59365	112.623	-0.002637	0.15381	-0.14609	0.875	61.59352	138.5968	0.046875	0.12549	-0.027344	NaN	NaN	NaN	NaN	NaN	NaN
0.84	-40.06675	-192.092	1018.671	-1.1719	0.75977	0.090332	54.8679	-4.2875	140.0858	-0.054688	0.16553	-0.14443	-13.596	107.868	116.7276	0.095947	0.10693	-0.037841	NaN	NaN	NaN	NaN	NaN	NaN
0.842	-27.1244	-184.043	1013.4828	-1.1582	0.75586	0.087891	41.635	1.344	172.9893	-0.11328	0.18233	-0.14912	-50.277	16.5007	122.308	0.13672	0.081543	-0.047363	NaN	NaN	NaN	NaN	NaN	NaN
0.844	-31.744	-172.0418	1016.4324	-1.1343	0.75146	0.078125	80.589	-13.844	249.8214	-0.18174	0.19609	-0.14795	-47.949	37.153	88.2534	0.18701	0.041016	-0.050781	NaN	NaN	NaN	NaN	NaN	NaN
0.846	-52.27	-154.6362	1020.3878	-1.1232	0.74927	0.076416	52.682	17.476	302.3348	-0.25879	0.21289	-0.15088	-27.5855	-18.7925	101.864	0.20557	0.02832	-0.061523	NaN	NaN	NaN	NaN	NaN	NaN
0.848	-40.5747	-145.8263	1026.6501	-1.1152	0.74805	0.076172	38.7483	27.828	394.8619	-0.33994	0.23555	-0.15957	-21.318	35.4976	69.687	0.24512	0.0073242	-0.076172	NaN	NaN	NaN	NaN	NaN	NaN
0.85	-51.14	-139.449	1021.997	-1.1167	0.74463	0.07373	72.206	66.379	481.8176	-0.43086	0.258	-0.15703	-17.1289	29.1467	81.999	0.27709	-0.017334	-0.084961	NaN	NaN	NaN	NaN	NaN	NaN
0.852	-46.3312	-138.881	1022.635	-1.123	0.74219	0.074219	1.9436	136.47	543.868	-0.53164	0.28769	-0.15821	-26.441	58.247	66.785	0.28955	-0.027344	-0.094727	NaN	NaN	NaN	NaN	NaN	NaN
0.854	-59.192	-141.972	1007.428	-1.144	0.74072	0.077148	22.3141	130.9899	669.133	-0.65694	0.31826	-0.1458	-35.046	25.519	82.674	0.30273	-0.044922	-0.10938	NaN	NaN	NaN	NaN	NaN	NaN
0.856	-53.5316	-144.38	1013.154	-1.1574	0.7356	0.073242	18.889185	149.201	757.995	-0.79639	0.34717	-0.12451	-14.191	19.2553	59.1111	0.30615	-0.050781	-0.11621	NaN	NaN	NaN	NaN	NaN	NaN
0.858	-50.392	-146.382	1013.533	-1.1733	0.73486	0.08252	-8.84	125.27	852.991	-0.96297	0.37607	-0.0917	-10.2066	26.466	69.624	0.31738	-0.062012	-0.11963	NaN	NaN	NaN	NaN	NaN	NaN
0.86	-63.838	-144.354	1008.3434	-1.189	0.73096	0.084473	32.2564	64.143	950.533	-1.162	0.40713	-0.051367	2.94	4.2464	55.45	0.30981	-0.065674	-0.12426	NaN	NaN	NaN	NaN	NaN	NaN
0.862	-67.176	-152.2994	997.9553	-1.1973	0.73047	0.089355	0.47754	41.38308	1015.1	-1.3788	0.44541	0.0060546	9.554	46.157	61.927	0.31104	-0.069336	-0.13086	NaN	NaN	NaN	NaN	NaN	NaN
0.864	-59.759	-157.247	1008.4948	-1.2012	0.72656	0.087891	-21.6986	-47.304	1069.586	-1.6236	0.48897	0.055273	7.097	28.826	37.5902	0.28613	-0.071289	-0.1416	NaN	NaN	NaN	NaN	NaN	NaN
0.866	-32.541	-160.0227	1020.721	-1.1914	0.7168	0.086426	2.115	-129.3878	1113.139	-1.8862	0.55127	0.11328	19.7142	73.744	23.8818	0.27734	-0.06543	-0.14014	NaN	NaN	NaN	NaN	NaN	NaN
0.868	-35.061	-170.899	1026.508	-1.1855	0.70898	0.086914	-33.442	-164.5286	1081.689	-2.1409	0.6083	0.14414	30.27	12.2465	23.7284	0.23682	-0.070313	-0.12646	NaN	NaN	NaN	NaN	NaN	NaN
0.87	-32.349	-169.3953	1019.878	-1.166	0.70313	0.081055	-50.0242	-210.925	1084.8835	-2.3667	0.66806	0.14727	28.6948	34.342	30.06338	0.1958	-0.060303	-0.125	NaN	NaN	NaN	NaN	NaN	NaN
0.872	-27.6	-154.7477	1014.538	-1.1494	0.69678	0.083252	-62.8513	-193.643	1090.041	-2.5354	0.74463	0.1414	23.534	-33.525	20.952251	0.16064	-0.047852	-0.12207	NaN	NaN	NaN	NaN	NaN	NaN
0.874	-13.3285	-124.2647	997.445	-1.1304	0.68896	0.085449	-132.739	-170.933	1093.302	-2.6027	0.83281	0.14814	48.509	18.1729	9.4109	0.11377	-0.044434	-0.11719	NaN	NaN	NaN	NaN	NaN	NaN
0.876	-16.5174	-123.0087	1000.421	-1.105	0.67627	0.079102	-122.8061	-168.496	1125.195	-2.5933	0.93604	0.15527	33.0301	-26.016	32.5147	0.098145	-0.037598	-0.11426	NaN	NaN	NaN	NaN	NaN	NaN
0.878	-17.0321	-115.605	982.77	-1.0894	0.66797	0.07666	-172.158	-113.798	1101.442	-2.5249	1.0388	0.13916	48.096	13.3397	22.1093	0.05957	-0.027832	-0.10742	NaN	NaN	NaN	NaN	NaN	NaN
0.88	15.1022	-118.9051	973.794	-1.0542	0.65967	0.075195	-189.729	-100.9	1080.954	-2.3668	1.0898	0.12451	28.9949	-34.666	52.964	0.035156	-0.018066	-0.11035	NaN	NaN	NaN	NaN	NaN	NaN
0.882	-10.1438	-110.9962	954.2728	-1.0295	0.65161	0.075683	-170.019	-75.8851	1094.15	-2.1137	1.0539	0.1085	24.778	8.346	16.2377	0.022461	-0.02002	-0.10596	NaN	NaN	NaN	NaN	NaN	NaN
0.884	7.7123	-107.7417	947.299	-1.0029	0.64453	0.070313	-203.994	3.88699999999999	1071.843	-1.8187	0.95088	0.092286	-16.9532	4.6024	40.184	-0.011719	-0.012207	-0.10596	NaN	NaN	NaN	NaN	NaN	NaN
0.886	2.48019	-96.7126	951.219	-0.96436	0.62939	0.062012	-165.687	11.644	1067.963	-1.5449	0.80469	0.0625	12.303	42.568	27.6289	-0.033203	-0.010742	-0.10474	NaN	NaN	NaN	NaN	NaN	NaN
0.888	23.472	-88.7751	939.195	-0.94873	0.62354	0.060059	-119.476	22.334	1040.21849	-1.31	0.68057	0.038965	-13.4103	30.339	46.902	-0.050781	-0.0024414	-0.104	NaN	NaN	NaN	NaN	NaN	NaN
0.89	1.8742	-92.6361	932.4187	-0.90967	0.60986	0.060059	-115.905	12.646	1020.5488	-1.1316	0.58906	0.0085939	1.161	4.920976	20.3316	-0.066406	0.0063477	-0.10303	NaN	NaN	NaN	NaN	NaN	NaN
0.892	-7.7218	-100.5832	909.2864	-0.88404	0.59986	0.055176	-49.635	-93.568	1042.9179	-0.98945	0.5375	-0.017578	-2.1282	3.622	20.678	-0.068359	0.01123	-0.1001	NaN	NaN	NaN	NaN	NaN	NaN
0.894	3.7696	-106.9107	899.987	-0.85303	0.59033	0.055664	-42.18	-133.865	1045.7575	-0.89551	0.52207	-0.046386	-20.693	-28.8917	-9.10281	-0.075684	0.013184	-0.10352	NaN	NaN	NaN	NaN	NaN	NaN
0.896	-7.49808	-101.2628	899.64	-0.81787	0.57471	0.05127	-41.423	-184.604	1061.818	-0.8418	0.54102	-0.075195	-30.9769	0.466800000000001	13.1108	-0.077148	0.02124	-0.10523	NaN	NaN	NaN	NaN	NaN	NaN
0.898	-6.31629	-97.8327	891.272	-0.80078	0.56445	0.047852	-17.9367	-237.934	1132.13	-0.80098	0.5749	-0.10586	-21.937	-3.9111	20.3706	-0.080566	0.028809	-0.10498	NaN	NaN	NaN	NaN	NaN	NaN
0.9	-21.9241	-109.87045	860.921	-0.75537	0.55225	0.049316	-31.999	-232.95	1153.633	-0.77226	0.60742	-0.13477	-20.967	64.443	21.241	-0.094727	0.036621	-0.10938	NaN	NaN	NaN	NaN	NaN	NaN
0.902	-7.9448	-112.9922	847.174	-0.73194	0.54151	0.043945	-14.57402	-285.131	1167.5391	-0.75234	0.62227	-0.15547	-41.7719	24.7311	12.729	-0.096191	0.046387	-0.1084	NaN	NaN	NaN	NaN	NaN	NaN
0.904	-24.7087	-112.436	839.468	-0.70801	0.52734	0.039063	18.0616	-295.999	1212.4556	-0.7416	0.61933	-0.16905	-7.493	51.32	11.763	-0.10059	0.059082	-0.11084	NaN	NaN	NaN	NaN	NaN	NaN
0.906	-28.8937	-109.221	827.048	-0.67969	0.51172	0.039551	0.9479	-246.374	1238.19882	-0.7583	0.61572	-0.17432	-45.8217	-18.6939	28.757	-0.095215	0.062744	-0.11255	NaN	NaN	NaN	NaN	NaN	NaN
0.908	-26.27	-100.9977	815.842	-0.66309	0.50586	0.042969	17.6422	-262.749	1326.601	-0.81045	0.60781	-0.15947	-40.231	24.7279	32.2118	-0.07959	0.070313	-0.11719	NaN	NaN	NaN	NaN	NaN	NaN
0.91	-27.406	-88.37269	797.683	-0.63477	0.48779	0.036133	32.3877	-200.481	1360.825	-0.90185	0.60596	-0.13887	-12.7255	-12.38484	53.835	-0.058105	0.082031	-0.12158	NaN	NaN	NaN	NaN	NaN	NaN
0.912	-31.557	-74.8408	774.0458	-0.61475	0.48144	0.032715	36.271	-178.7409	1354.068	-1.0241	0.61416	-0.12597	6.035	29.2888	24.862	-0.046875	0.085449	-0.12695	NaN	NaN	NaN	NaN	NaN	NaN
0.914	-65.445	-88.718	755.943	-0.5957	0.47363	0.032715	100.429	-219.323	1380.198	-1.1677	0.63838	-0.11484	-9.7771	-1.8771	50.706	-0.0087891	0.097168	-0.12158	NaN	NaN	NaN	NaN	NaN	NaN
0.916	-41.667	-75.7469	741.392	-0.57764	0.45557	0.027344	86.838	-166.561	1354.548	-1.3081	0.6665	-0.10352	16.386	9.6884	27.1107	0.01416	0.095214	-0.12695	NaN	NaN	NaN	NaN	NaN	NaN
0.918	-33.67	-63.7358	734.183	-0.56494	0.44971	0.027344	73.23	-172.472	1329.0796	-1.442	0.70469	-0.10136	6.21391	16.6008	23.224	0.039551	0.10303	-0.12744	NaN	NaN	NaN	NaN	NaN	NaN
0.92	-26.7519	-46.498	706.337	-0.54639	0.43799	0.029297	90.407	-158.927	1343.235	-1.5574	0.7541	-0.10332	16.388	32.0279	0.0881000000000001	0.069824	0.10498	-0.12891	NaN	NaN	NaN	NaN	NaN	NaN
0.922	-39.08	-52.3473	685.7369	-0.53393	0.42773	0.021484	23.8436	-78.667	1330.214	-1.6586	0.79942	-0.11426	44.246	40.65	27.141	0.078613	0.10303	-0.13037	NaN	NaN	NaN	NaN	NaN	NaN
0.924	-26.5943	-47.8881	670.901	-0.52686	0.41357	0.019531	-24.1766	-121.3126	1373.405	-1.741	0.84043	-0.12412	23.264	3.8411	22.2585	0.09668	0.10303	-0.13428	NaN	NaN	NaN	NaN	NaN	NaN
0.926	-19.01261	-51.89175	665.389	-0.50635	0.40674	0.01416	-18.3614	-112.349	1424.4274	-1.8081	0.87744	-0.13623	21.986	19.8453	28.2156	0.10156	0.10474	-0.13135	NaN	NaN	NaN	NaN	NaN	NaN
0.928	-20.6489	-42.617	647.8452	-0.50195	0.40234	0.016113	-34.634	-110.472	1449.9673	-1.876	0.91582	-0.15147	45.25	-11.93969	28.306	0.11035	0.10352	-0.12646	NaN	NaN	NaN	NaN	NaN	NaN
0.93	-9.22352	-59.256	639.9475	-0.48535	0.39404	0.0092773	-36.171	-160.048	1526.311	-1.9362	0.94267	-0.16318	43.46734	42.197	32.8049	0.11963	0.10938	-0.12402	NaN	NaN	NaN	NaN	NaN	NaN
0.932	-4.1727	-58.8107	633.458	-0.47535	0.38306	0.0065918	-63.084	-96.27532	1541.843	-2.0026	0.96299	-0.17412	3.716	0.6417	48.698	0.125	0.11328	-0.12451	NaN	NaN	NaN	NaN	NaN	NaN
0.934	3.4913	-53.6738	622.745	-0.46436	0.37646	0.0043945	-64.632	-106.1236	1561.814	-2.0569	0.98096	-0.19267	34.418	58.828	33.849	0.12305	0.11621	-0.125	NaN	NaN	NaN	NaN	NaN	NaN
0.936	-12.9551	-56.3671	606.501	-0.44629	0.36426	0.0024414	-31.9647	-146.924	1606.979	-2.105	0.99658	-0.20654	15.353	5.928316	34.411	0.12768	0.11743	-0.12598	NaN	NaN	NaN	NaN	NaN	NaN
0.938	-5.57944	-51.3735	580.092	-0.43945	0.36279	0.00048828	-55.29	-100.249	1580.203	-2.1379	1.0133	-0.23428	30.389	50.396	9.9758	0.13184	0.12402	-0.1377	NaN	NaN	NaN	NaN	NaN	NaN
0.94	9.7588	-46.2477	574.275	-0.4248	0.34863	-0.003418	-39.175	-165.893	1581.3177	-2.1519	1.0271	-0.26582	21.4953	-24.588	52.051	0.1333	0.13037	-0.12451	NaN	NaN	NaN	NaN	NaN	NaN
0.942	2.41433	-33.2218	553.271	-0.40992	0.33838	-0.0068359	-18.2812	-125.8679	1603.312	-2.1566	1.0356	-0.29317	11.197	-7.3158	24.872	0.13281	0.13281	-0.13281	NaN	NaN	NaN	NaN	NaN	NaN
0.944	-1.692	-32.9641	541.02	-0.39795	0.32959	-0.0087891	-41.553	-70.999	1563.9101	-2.1464	1.0532	-0.31475	-30.473	-41.323	30.9775	0.13232	0.13721	-0.13721	NaN	NaN	NaN	NaN	NaN	NaN
0.946	-3.694	-37.0324	529.796	-0.38037	0.3208	-0.01123	-32.1297	-117.8251	1581.282	-2.125	1.0625	-0.33984	-4.51300000000001	-11.2775	27.6754	0.12646	0.13867	-0.14453	NaN	NaN	NaN	NaN	NaN	NaN
0.948	14.2599	-35.7165	525.038	-0.36523	0.31348	-0.010254	-56.578	-43.219	1555.833	-2.0946	1.0605	-0.35909	-23.836	-32.5718	67.218	0.12646	0.14453	-0.14941	NaN	NaN	NaN	NaN	NaN	NaN
0.95	-16.9334	-27.75055	505.3223	-0.34961	0.30273	-0.016602	-46.728	-56.568	1540.65328	-2.0667	1.0518	-0.37715	-15.516	-21.944	73.6738	0.12207	0.15479	-0.16162	NaN	NaN	NaN	NaN	NaN	NaN
0.952	-14.0467	-21.1092	502.055	-0.33398	0.29175	-0.018311	6.466	-81.998	1583.196	-2.0347	1.0346	-0.38887	-16.1767	-20.303	117.414	0.11328	0.16357	-0.16553	NaN	NaN	NaN	NaN	NaN	NaN
0.954	-18.756	-13.5939	473.0146	-0.31885	0.29004	-0.026367	-3.4883	22.59687	1554.271	-2.0038	1.0118	-0.40088	-3.717	-18.522	118.4393	0.099121	0.18164	-0.17773	NaN	NaN	NaN	NaN	NaN	NaN
0.956	-27.3053	-3.7382	460.543	-0.30029	0.27295	-0.020996	5.1036	0.9958	1553.093	-1.9883	0.99414	-0.4082	-10.922	12.0693	176.742	0.071289	0.19848	-0.18286	NaN	NaN	NaN	NaN	NaN	NaN
0.958	-30.7234	-2.986	440.6968	-0.29199	0.26953	-0.024902	39.237	45.779	1570.8125	-1.9819	0.98262	-0.41611	0.865000000000002	-2.758	213.7805	0.03125	0.21436	-0.18506	NaN	NaN	NaN	NaN	NaN	NaN
0.96	-54.643	-11.8437	426.318	-0.27979	0.25732	-0.022949	39.227	72.213	1544.0636	-1.9753	0.97276	-0.42041	-14.769	27.486	273.7322	-0.045898	0.24854	-0.18848	NaN	NaN	NaN	NaN	NaN	NaN
0.962	-19.7007	-16.347	425.786	-0.2666	0.24975	-0.026367	48.6381	-19.5043	1560.7198	-1.9757	0.96612	-0.41846	-5.984	-18.3794	312.375	-0.091797	0.26074	-0.18408	NaN	NaN	NaN	NaN	NaN	NaN
0.964	-38.037	-16.1747	409.045	-0.25586	0.24219	-0.029297	79.562	11.367	1571.459	-1.973	0.96221	-0.41611	-11.779	55.3811	405.5483	-0.20508	0.29834	-0.18506	NaN	NaN	NaN	NaN	NaN	NaN
0.966	-52.71	0.305	404.7919	-0.24072	0.23779	-0.030762	57.441	-23.7721	1566.007	-1.9668	0.95898	-0.41113	-51.975	48.3423	510.983	-0.2959	0.32641	-0.177	NaN	NaN	NaN	NaN	NaN	NaN
0.968	-54.262	-13.42144	401.175	-0.23438	0.22949	-0.033691	72.961	-55.825	1603.431	-1.9572	0.94238	-0.39658	-52.099	138.752	579.9827	-0.39893	0.36719	-0.18018	NaN	NaN	NaN	NaN	NaN	NaN
0.97	-27.5407	-12.1165	401.403	-0.21338	0.22021	-0.035156	63.403	5.35	1564.715	-1.9566	0.92832	-0.38945	-53.209	102.564	679.0512	-0.53955	0.43262	-0.16992	NaN	NaN	NaN	NaN	NaN	NaN
0.972	-43.809	-5.3575	378.6424	-0.1997	0.21533	-0.039063	37.138	-69.085	1536.266	-1.9566	0.92207	-0.3875	-53.634	139.399	746.122	-0.61719	0.4668	-0.16309	NaN	NaN	NaN	NaN	NaN	NaN
0.974	-51.976	7.5391	364.1259	-0.19043	0.20215	-0.039063	41.21405	-44.8071	1522.6455	-1.9434	0.91113	-0.37802	-53.1968	74.5866	878.856	-0.7915	0.55322	-0.14844	NaN	NaN	NaN	NaN	NaN	NaN
0.976	-36.2976	4.9194	355.114	-0.17969	0.19434	-0.042969	14.964	3.32	1485.4477	-1.9253	0.89307	-0.36572	-10.074	64.689	969.7896	-0.94773	0.62109	-0.12989	NaN	NaN	NaN	NaN	NaN	NaN
0.978	-29.2079	-0.456	359.044	-0.1709	0.18604	-0.043457	33.5463	-30.848	1497.02	-1.901	0.88262	-0.36767	-9.6241	7.5065	1057.93	-1.1201	0.67969	-0.10156	NaN	NaN	NaN	NaN	NaN	NaN
0.98	-17.7952	1.311	335.79	-0.16553	0.18066	-0.040527	11.648	57.5127	1495.023	-1.8867	0.87734	-0.36807	3.799	-19.313	1087.496	-1.3784	0.75049	-0.05127	NaN	NaN	NaN	NaN	NaN	NaN
0.982	-28.282	1.7716	308.9978	-0.15967	0.17261	-0.047851	-10.6921	52.2722	1474.38	-1.8586	0.87265	-0.3626	11.2312	-69.612	1127.778	-1.5225	0.79297	-0.020996	NaN	NaN	NaN	NaN	NaN	NaN
0.984	0.1946	-3.0086	310.9849	-0.15186	0.16455	-0.048828	14.6402	17.401	1467.279	-1.8355	0.86133	-0.36328	35.039	-140.582	1109.436	-1.8086	0.87207	0.030762	NaN	NaN	NaN	NaN	NaN	NaN
0.986	3.340286	-4.31632	326.393	-0.15332	0.15625	-0.049316	8.794	95.844	1418.546	-1.8062	0.8501	-0.35107	36.209	-166.7092	1102.295	-2.0241	0.93725	0.068603	NaN	NaN	NaN	NaN	NaN	NaN
0.988	-0.7855	8.8944	308.9821	-0.15332	0.15527	-0.04834	-0.0720000000000027	44.3423	1388.6522	-1.7723	0.82774	-0.35107	27.491	-225.861	1081.718	-2.2144	0.99463	0.083496	NaN	NaN	NaN	NaN	NaN	NaN
0.99	-3.8448	11.9942	296.5436	-0.14844	0.1499	-0.047363	-10.738	84.403	1359.22933	-1.7386	0.82012	-0.34844	-8.5056	-184.453	1097.788	-2.3804	1.1021	0.09082	NaN	NaN	NaN	NaN	NaN	NaN
0.992	10.9563	15.7611	282.1858	-0.14721	0.14331	-0.04956	-24.06	136.563	1309.6827	-1.7031	0.80801	-0.34258	-62.478	-199.244	1093.421	-2.4194	1.1646	0.085938	NaN	NaN	NaN	NaN	NaN	NaN
0.994	28.431	7.48482	299.982	-0.14453	0.13916	-0.047363	-25.101	55.345	1309.1317	-1.6659	0.79912	-0.33994	-65.3573	-137.74	1073.642	-2.4019	1.2876	0.066895	NaN	NaN	NaN	NaN	NaN	NaN
0.996	-4.9933	7.8459	285.843	-0.14404	0.12988	-0.048828	-14.602	102.5664	1302.0684	-1.6289	0.78516	-0.33301	-84.909	-165.053	1047.997	-2.2828	1.354	0.043701	NaN	NaN	NaN	NaN	NaN	NaN
0.998	9.7043	0.7681	264.5487	-0.14258	0.12451	-0.047363	-55.502	48.108	1282.7205	-1.5917	0.7792	-0.32627	-91.912	-76.2756	1043.146	-2.0835	1.3696	0.011719	NaN	NaN	NaN	NaN	NaN	NaN
1	21.1745	-1.96404	267.823	-0.14404	0.11816	-0.045898	-34.2009	13.75	1290.799	-1.5527	0.7668	-0.32139	-115.397	-77.308	1090.581	-1.7261	1.2661	-0.040039	NaN	NaN	NaN	NaN	NaN	NaN
1.002	11.34974	5.2799	274.856	-0.14893	0.11499	-0.041016	-28.09907	97.733	1262.443	-1.518	0.75625	-0.31084	-80.766	-9.114	1100.301	-1.5347	1.1724	-0.067871	NaN	NaN	NaN	NaN	NaN	NaN
1.004	11.47993	-1.1759	269.951	-0.1499	0.10889	-0.036621	-28.7021	64.8233	1243.128	-1.4825	0.74287	-0.30537	-88.534	-52.164	1132.071	-1.1792	0.9751	-0.12646	NaN	NaN	NaN	NaN	NaN	NaN
1.006	-4.6886	-3.9439	270.752	-0.15234	0.10547	-0.038086	-1.592	101.47096	1218.3258	-1.4473	0.73047	-0.29883	-31.63	-96.636	1133.5863	-0.97976	0.85962	-0.16748	NaN	NaN	NaN	NaN	NaN	NaN
1.008	13.5236	-2.3231	256.197	-0.15601	0.10132	-0.037842	-1.318	133.32	1175.8777	-1.4093	0.71924	-0.28643	-32.7125	-181.797	1164.8937	-0.84131	0.79541	-0.20117	NaN	NaN	NaN	NaN	NaN	NaN
1.01	-10.9794	6.08124	262.318	-0.15723	0.1001	-0.035156	38.1677	78.222	1165.143	-1.3761	0.69854	-0.27452	3.635	-233.259	1180.413	-0.71484	0.74316	-0.23828	NaN	NaN	NaN	NaN	NaN	NaN
1.012	6.5528	12.0288	257.463	-0.16309	0.094238	-0.034668	58.951	162.533	1128.9992	-1.339	0.6833	-0.26865	-18.631	-240.36	1234.3636	-0.6875	0.74219	-0.25195	NaN	NaN	NaN	NaN	NaN	NaN
1.014	-29.338	6.56	251.91	-0.16699	0.089355	-0.033691	48.791	158.629	1116.6424	-1.3018	0.66728	-0.25439	-16.091	-276.548	1271.525	-0.66211	0.78125	-0.28906	NaN	NaN	NaN	NaN	NaN	NaN
1.016	-6.2821	2.83923	247.48	-0.17578	0.086914	-0.032715	52.064	136.1084	1106.535	-1.2617	0.64453	-0.24365	-51.743	-277.268	1341.873	-0.68188	0.83911	-0.33178	NaN	NaN	NaN	NaN	NaN	NaN
1.018	-23.05	2.7093	230.233	-0.1853	0.083008	-0.032471	48.85	195.547	1065.678	-1.2313	0.63047	-0.23554	-40.473	-325.826	1376.2799	-0.70752	0.9126	-0.33887	NaN	NaN	NaN	NaN	NaN	NaN
1.02	-41.092	9.1855	241.951	-0.19482	0.083984	-0.032227	51.946	125.868	1052.56	-1.1966	0.61338	-0.221	-14.8541	-309.036	1445.441	-0.79297	0.99902	-0.3252	NaN	NaN	NaN	NaN	NaN	NaN
1.022	-19.7382	11.9336	242.392	-0.20801	0.082031	-0.029297	33.92876	160.2888	1001.2337	-1.1626	0.59737	-0.20928	-26.968	-318.907	1511.596	-0.83154	1.0298	-0.32422	NaN	NaN	NaN	NaN	NaN	NaN
1.024	-5.343	9.4839	246.618	-0.21582	0.079102	-0.027832	34.662	201.007	945.969	-1.1279	0.58359	-0.19414	-24.486	-242.737	1563.892	-0.93359	1.0469	-0.32324	NaN	NaN	NaN	NaN	NaN	NaN
1.026	-0.125	16.8705	246.6906	-0.229	0.076172	-0.027344	24.3915	157.617	924.073	-1.0991	0.56689	-0.18066	-19.548	-202.502	1595.211	-1.103	1.0688	-0.31201	NaN	NaN	NaN	NaN	NaN	NaN
1.028	-36	13.9862	242.9849	-0.24439	0.07544	-0.024414	24.8187	228.426	900.2477	-1.0717	0.55322	-0.16553	43.528	-143.018	1610.888	-1.1973	1.0918	-0.3125	NaN	NaN	NaN	NaN	NaN	NaN
1.03	-0.646199999999999	11.7929	249.694	-0.25391	0.074219	-0.03418	21.5441	192.145	895.4697	-1.0465	0.54258	-0.15097	56.237	-144.705	1622.414	-1.375	1.1563	-0.2959	NaN	NaN	NaN	NaN	NaN	NaN
1.032	-4.3883	7.6582	255.306	-0.27295	0.072266	-0.024902	4.659587	158.1841	899.135	-1.0152	0.52695	-0.13379	108.9223	-130.712	1603.8714	-1.4787	1.2165	-0.2998	NaN	NaN	NaN	NaN	NaN	NaN
1.034	-21.4634	19.3525	246.95704	-0.28564	0.07373	-0.026367	-5.6783	195.963	876.72	-0.98379	0.5166	-0.1164	74.003	-121.272	1627.0695	-1.5698	1.2778	-0.29834	NaN	NaN	NaN	NaN	NaN	NaN
1.036	-13.739	8.45881	258.845	-0.30908	0.072754	-0.022461	-4.12559	134.036	878.028	-0.94873	0.5083	-0.11133	96.062	-92.577	1599.356	-1.6694	1.3501	-0.32471	NaN	NaN	NaN	NaN	NaN	NaN
1.038	14.84158	10.219	272.731	-0.32422	0.074219	-0.02417	-1.4462	172.889	836.899	-0.9248	0.49981	-0.093163	26.605	-48.443	1617.719	-1.707	1.373	-0.33594	NaN	NaN	NaN	NaN	NaN	NaN
1.04	11.3003	12.952	281.45	-0.34521	0.074707	-0.02002	-36.182	201.129	772.697	-0.89121	0.49258	-0.079883	49.8051	-56.165	1607.112	-1.7676	1.4023	-0.35205	NaN	NaN	NaN	NaN	NaN	NaN
1.042	-3.5333	20.6207	289.67	-0.36914	0.081055	-0.021973	-36.8054	154.8337	736.2771	-0.86113	0.48086	-0.063867	22.45	-80.456	1661.7168	-1.8149	1.4253	-0.3501	NaN	NaN	NaN	NaN	NaN	NaN
1.044	19.6677	12.6862	293.549	-0.38428	0.081543	-0.018066	-54.484	197.904	689.836	-0.8293	0.46894	-0.053516	30.544	-117.91	1687.062	-1.8711	1.4199	-0.35645	NaN	NaN	NaN	NaN	NaN	NaN
1.046	14.1238	11.203	303.3215	-0.40137	0.084961	-0.021973	-51.929	148.1861	677.177	-0.79492	0.45801	-0.041016	-12.254	-110.195	1748.021	-1.9214	1.4517	-0.40771	NaN	NaN	NaN	NaN	NaN	NaN
1.048	17.7012	15.5293	314.083	-0.42651	0.087158	-0.02124	-47.952	127.972	652.366	-0.75694	0.44941	-0.028027	-26.69	-85.2068	1772.132	-1.937	1.4595	-0.41846	NaN	NaN	NaN	NaN	NaN	NaN
1.05	25.88077	16.8356	309.9863	-0.44189	0.087891	-0.019531	-71.163	172.434	624.329	-0.71719	0.44023	-0.017773	1.299	-56.905	1823.059	-1.9492	1.4805	-0.43115	NaN	NaN	NaN	NaN	NaN	NaN
1.052	13.9887	13.5227	322.3296	-0.46631	0.092285	-0.015625	-40.372	126.5437	622.132	-0.67657	0.43242	-0.0029296	-14.837	-76.665	1810.977	-1.9656	1.4973	-0.45093	NaN	NaN	NaN	NaN	NaN	NaN
1.054	18.5403	21.7675	347.949	-0.48047	0.092285	-0.020508	-28.0522	155.9021	581.969	-0.63662	0.41885	0.0090819	41.737	-74.715	1801.179	-1.9746	1.5	-0.47266	NaN	NaN	NaN	NaN	NaN	NaN
1.056	14.6319	34.715	350.495	-0.49902	0.10205	-0.018066	-19.8722	173.995	530.999	-0.59863	0.4082	0.018555	32.207	-120.1338	1790.694	-1.9629	1.4883	-0.48242	NaN	NaN	NaN	NaN	NaN	NaN
1.058	4.7616	34.2849	361.249	-0.5166	0.10718	-0.01416	-7.9861	142.6082	487.4995	-0.55166	0.396	0.027149	48.512	-84.052	1768.391	-1.9624	1.4771	-0.48389	NaN	NaN	NaN	NaN	NaN	NaN
1.06	-23.0186	37.8982	376.671	-0.53271	0.1167	-0.01416	-17.88718	195.973	442.123	-0.50801	0.37676	0.038184	-4.832	-77.232	1771.195	-1.9546	1.4438	-0.50146	NaN	NaN	NaN	NaN	NaN	NaN
1.062	22.1097	36.93	392.8046	-0.55811	0.12402	-0.011719	-10.378	165.981	442.7676	-0.45761	0.36465	0.050293	2.967	-14.66	1715.0708	-1.9483	1.419	-0.50342	NaN	NaN	NaN	NaN	NaN	NaN
1.064	1.78	32.8527	414.346	-0.57031	0.12598	-0.01123	20.37138	130.4276	433.392	-0.4086	0.35156	0.062207	-46.2204	-1.559	1713.983	-1.9395	1.3945	-0.51318	NaN	NaN	NaN	NaN	NaN	NaN
1.066	-11.0533	32.7765	414.5124	-0.59131	0.13623	-0.011719	12.7433	146.457	404.525	-0.35107	0.33594	0.075684	-36.57	30.0801	1676.766	-1.9355	1.3848	-0.53711	NaN	NaN	NaN	NaN	NaN	NaN
1.068	-9.5386	31.55542	430.538	-0.61328	0.14331	-0.0097656	22.8366	84.116	394.546	-0.29424	0.32266	0.082422	-60.357	30.244	1690.093	-1.9272	1.3774	-0.53857	NaN	NaN	NaN	NaN	NaN	NaN
1.07	-8.9419	29.017	442.819	-0.62646	0.14844	-0.010254	52.628	98.493	379.571	-0.23789	0.3126	0.09209	-23.72	60.2491	1653.466	-1.9141	1.3652	-0.52734	NaN	NaN	NaN	NaN	NaN	NaN
1.072	-10.0067	33.513	457.7368	-0.6543	0.16309	-0.0087891	34.6784	111.8388	343.197	-0.17773	0.29854	0.10381	-30.41115	72.599	1674.15976	-1.9167	1.3533	-0.53198	NaN	NaN	NaN	NaN	NaN	NaN
1.074	-35.3461	35.328	475.953	-0.66602	0.16504	-0.0078125	60.208	71.603	318.091	-0.11738	0.28779	0.11299	-18.113	78.191	1650.988	-1.9238	1.3457	-0.54297	NaN	NaN	NaN	NaN	NaN	NaN
1.076	-10.6912	40.586	480.4232	-0.69141	0.17676	-0.012695	40.8535	109.71	274.021	-0.064453	0.26758	0.12109	16.872	76.004	1668	-1.9316	1.3408	-0.54492	NaN	NaN	NaN	NaN	NaN	NaN
1.078	-16.586	41.2341	498.698	-0.70703	0.17822	-0.015137	37.516	60.325	251.0006	-0.0092772	0.25654	0.13125	63.767	39.1001	1641.223	-1.9219	1.3398	-0.54102	NaN	NaN	NaN	NaN	NaN	NaN
1.08	-14.1858	49.065	514.9777	-0.72461	0.18848	-0.0083008	71.044	39.998	254.256	0.044629	0.24151	0.14112	103.5138	33.225	1633.159	-1.9219	1.3262	-0.54492	NaN	NaN	NaN	NaN	NaN	NaN
1.082	-27.4753	38.74873	532.0191	-0.75586	0.20068	-0.010254	33.4167	77.539	218.772	0.093066	0.23174	0.14463	81.598	15.321	1622.0633	-1.9109	1.3391	-0.5498	NaN	NaN	NaN	NaN	NaN	NaN
1.084	-12.9514	43.0538	562.031	-0.76904	0.20264	-0.015625	38.795	44.1451	207.63	0.13808	0.22275	0.1461	95.284	49.778	1615.237	-1.8926	1.3359	-0.55371	NaN	NaN	NaN	NaN	NaN	NaN
1.086	1.16193	47.563	569.6775	-0.79639	0.21826	-0.0092773	16.4352	70.7794	211.59	0.18896	0.20605	0.14941	52.9897	23.6506	1592.512	-1.8652	1.334	-0.5498	NaN	NaN	NaN	NaN	NaN	NaN
1.088	-6.0002	49.067	580.118	-0.82642	0.22242	-0.011718	-3.6258	75.023	180.762	0.2294	0.20176	0.1415	89.0689	52.459	1553.122	-1.853	1.3247	-0.54248	NaN	NaN	NaN	NaN	NaN	NaN
1.09	-7.2624	45.9638	589.671	-0.84766	0.23584	-0.01123	13.6005	49.5492	175.571	0.27236	0.19297	0.13955	56.289	7.498	1533.066	-1.8184	1.3145	-0.54199	NaN	NaN	NaN	NaN	NaN	NaN
1.092	-0.0471000000000004	51.9981	605.635	-0.8877	0.24414	-0.010254	-30.9983	94.415	129.6308	0.30908	0.18242	0.14229	74.485	56.555	1474.9013	-1.793	1.2979	-0.542	NaN	NaN	NaN	NaN	NaN	NaN
1.094	18.4275	70.952	619.7222	-0.90039	0.25	-0.010254	-17.7701	76.431	114.932	0.33731	0.16474	0.13935	55.6933	53.004	1496.814	-1.7598	1.2813	-0.53125	NaN	NaN	NaN	NaN	NaN	NaN
1.096	4.76412	62.444	632.497	-0.93994	0.27051	-0.013184	-21.4313	50.7124	124.0351	0.35693	0.15723	0.13428	62.45	136.7366	1450.121	-1.7085	1.2642	-0.5249	NaN	NaN	NaN	NaN	NaN	NaN
1.098	4.07607	51.1961	645.1998	-0.96338	0.28394	-0.015381	-41.4152	66.822	90.5392	0.38369	0.13877	0.13301	26.96	163.272	1467.036	-1.687	1.2524	-0.52979	NaN	NaN	NaN	NaN	NaN	NaN
1.1	17.3712	46.8582	661.7872	-0.98877	0.29297	-0.015137	-15.996	18.7747	88.0918	0.40332	0.12451	0.13232	59.325	220.589	1414.0987	-1.6304	1.229	-0.51904	NaN	NaN	NaN	NaN	NaN	NaN
1.102	5.73881	64.3309	671.8776	-1.021	0.30908	-0.015137	-34.6685	29.214	84.641	0.39942	0.11787	0.12451	79.4551	211.718	1406.993	-1.5796	1.2036	-0.50537	NaN	NaN	NaN	NaN	NaN	NaN
1.104	21.4566	75.1529	703.411	-1.0391	0.31445	-0.014648	-38.045	36.4552	78.527	0.39864	0.11572	0.12305	57.75	232.819	1336.8788	-1.5386	1.1802	-0.49316	NaN	NaN	NaN	NaN	NaN	NaN
1.106	-2.0749	77.921	723.552	-1.0713	0.32324	-0.0019531	-22.98029	8.9517	97.074	0.39355	0.096191	0.12354	59.6915	214.829	1334.6451	-1.4819	1.1509	-0.47412	NaN	NaN	NaN	NaN	NaN	NaN
1.108	20.7543	74.0808	718.195	-1.0867	0.33545	-0.0051269	-23.736	59.979	65.153	0.38311	0.0999	0.12549	9.935	218.735	1276.36543	-1.4512	1.1328	-0.46289	NaN	NaN	NaN	NaN	NaN	NaN
1.11	-1.9606	76.9754	725.876	-1.1035	0.33984	0.0014648	-20.0791	43.094	49.4932	0.36045	0.097851	0.12168	10.133	210.768	1285.224	-1.3882	1.0942	-0.44385	NaN	NaN	NaN	NaN	NaN	NaN
1.112	6.6012	85.8134	733.1344	-1.1294	0.35352	0.0058594	8.242	29.6151	73.064	0.34053	0.096679	0.12129	-21.421	187.7083	1249.6	-1.3443	1.0659	-0.42383	NaN	NaN	NaN	NaN	NaN	NaN
1.114	-7.52162	89.5176	756.654	-1.1445	0.3623	0.0087891	-12.9502	52.7	54.919	0.30869	0.093457	0.12012	-21.072	188.971	1214.141	-1.2988	1.0391	-0.41016	NaN	NaN	NaN	NaN	NaN	NaN
1.116	-3.416	89.9868	779.034	-1.1621	0.37305	0.012695	12.122	8.7837	69.756	0.28369	0.087402	0.12158	-47.161	156.955	1180.826	-1.2344	1	-0.38574	NaN	NaN	NaN	NaN	NaN	NaN
1.118	-11.2151	96.3797	775.4525	-1.1753	0.37744	0.013916	27.2724	38.107	62.26	0.25947	0.083496	0.11836	-34.8722	199.1	1126.947	-1.2026	0.979	-0.36475	NaN	NaN	NaN	NaN	NaN	NaN
1.12	-36.88	96.3165	778.809	-1.1851	0.39014	0.019531	15.2153	36.868	42.908	0.22246	0.078907	0.11758	-64.3446	184.694	1126.323	-1.1465	0.93555	-0.3374	NaN	NaN	NaN	NaN	NaN	NaN
1.122	-16.2946	94.7767	804.084	-1.189	0.40186	0.022461	54.1152	4.3356	52.31	0.18339	0.080078	0.11836	-35.7655	247.418	1081.718	-1.1094	0.90625	-0.3169	NaN	NaN	NaN	NaN	NaN	NaN
1.124	-28.831	88.9327	826.456	-1.1904	0.4043	0.022461	33.0749	39.429	15.9615	0.14336	0.082617	0.11816	-42.00843	219.223	1051.032	-1.0757	0.875	-0.29541	NaN	NaN	NaN	NaN	NaN	NaN
1.126	-29.199	108.754	838.61	-1.1909	0.42139	0.027832	39.4689	20.7537	19.03739	0.1084	0.089355	0.12598	1.629	259.237	975.91704	-1.0298	0.84229	-0.25732	NaN	NaN	NaN	NaN	NaN	NaN
1.128	-27.1929	101.5006	828.3104	-1.1865	0.42578	0.031738	58.283	22.1811	20.6949	0.083691	0.090527	0.12862	14.124	221.088	969.401	-1.0039	0.82617	-0.24268	NaN	NaN	NaN	NaN	NaN	NaN
1.13	-28.885	110.686	842.395	-1.1855	0.43359	0.031738	36.4145	50.411	24.1316	0.058692	0.095312	0.12969	32.024	278.937	918.915	-0.96826	0.78955	-0.21436	NaN	NaN	NaN	NaN	NaN	NaN
1.132	-32.604	104.2865	861.727	-1.1797	0.44336	0.031738	65.405	-4.3043	32.278	0.034472	0.097266	0.12969	14.4345	257.84	940.361	-0.93653	0.77002	-0.19141	NaN	NaN	NaN	NaN	NaN	NaN
1.134	-40.976	106.192	871.973	-1.1738	0.44531	0.028809	54.143	10.47182	36.223	0.0097654	0.10323	0.13692	19.844	295.924	848.3491	-0.9082	0.74219	-0.17285	NaN	NaN	NaN	NaN	NaN	NaN
1.136	-28.9887	96.0305	867.027	-1.1694	0.45557	0.029785	31.1084	-0.365500000000001	44.557	-0.013672	0.10742	0.13379	2.9378	241.9625	816.449	-0.85547	0.71484	-0.14502	NaN	NaN	NaN	NaN	NaN	NaN
1.138	-10.7271	101.35763	893.043	-1.1706	0.46704	0.028809	56.085	-22.42	61.434	-0.028613	0.11836	0.14013	-17.499	245.406	740.0774	-0.82813	0.69531	-0.12158	NaN	NaN	NaN	NaN	NaN	NaN
1.14	-16.2966	117.7754	895.799	-1.1641	0.47266	0.024414	17.9848	18.3216	47.6326	-0.044727	0.11787	0.14638	24.4245	198.809	700.4944	-0.7793	0.66211	-0.10449	NaN	NaN	NaN	NaN	NaN	NaN
1.142	-32.581	121.2981	905.54	-1.1738	0.48584	0.021973	13.0181	-15.3895	41.102	-0.054883	0.12725	0.1499	5.241	215.361	622.0163	-0.72461	0.64307	-0.086426	NaN	NaN	NaN	NaN	NaN	NaN
1.144	-8.698	117.8065	903.258	-1.1772	0.49072	0.022461	6.122	-3.395	37.924	-0.058594	0.12569	0.15175	29.9622	199.079	627.157	-0.67969	0.62109	-0.074707	NaN	NaN	NaN	NaN	NaN	NaN
1.146	4.196	112.9776	913.76	-1.2002	0.49902	0.013672	-26.728	20.4663	16.0698	-0.056152	0.12207	0.15332	21.66	195.5656	583.07	-0.61914	0.58398	-0.04834	NaN	NaN	NaN	NaN	NaN	NaN
1.148	-7.3938	134.6033	920.452	-1.2256	0.50635	0.02002	7.709	-27.4879	26.256	-0.048535	0.12461	0.15322	30.59	186.61478	568.935	-0.58984	0.56494	-0.037109	NaN	NaN	NaN	NaN	NaN	NaN
1.15	0.1975	131.1658	927.201	-1.2388	0.51709	0.016602	-15.984	-0.6124	27.929	-0.044238	0.1292	0.15782	7.769	176.1959	539.551	-0.52881	0.53271	-0.010254	NaN	NaN	NaN	NaN	NaN	NaN
1.152	-1.8167	135.0385	924.092	-1.2715	0.52441	0.02002	-41.7368	-2.65757	15.9817	-0.034863	0.12881	0.15977	56.244	199.163	493.0537	-0.48853	0.50049	0.0051269	NaN	NaN	NaN	NaN	NaN	NaN
1.154	17.2863	139.706	930.477	-1.2994	0.53418	0.022217	-14.222	-9.2118	37.263	-0.026757	0.1292	0.15986	19.061	186.616	469.23	-0.44629	0.47266	0.018066	NaN	NaN	NaN	NaN	NaN	NaN
1.156	-9.6218	150.572	922.612	-1.334	0.54004	0.020508	-18.1093	24.0192	37.0651	-0.014648	0.1333	0.16016	34.9777	198.011	435.385	-0.38379	0.4375	0.036133	NaN	NaN	NaN	NaN	NaN	NaN
1.158	9.1813	152.025392	922.6786	-1.3779	0.55859	0.026367	-6.1901	-7.4758	30.577	-0.003125	0.13526	0.16387	-8.72300000000001	158.6085	392.378	-0.34912	0.41943	0.04248	NaN	NaN	NaN	NaN	NaN	NaN
1.16	4.5865	153.66805	924.1976	-1.4038	0.56689	0.029297	-16.0968	1.5524	26.2705	0.0055664	0.13955	0.16074	-3.095	168.075	309.5967	-0.27881	0.38428	0.062012	NaN	NaN	NaN	NaN	NaN	NaN
1.162	2.2385	148.7072	921.4306	-1.4458	0.58447	0.029297	-46.01	29.806	9.1064	0.017676	0.13603	0.15996	-38.1478	114.0141	300.0465	-0.21777	0.35767	0.073974	NaN	NaN	NaN	NaN	NaN	NaN
1.164	-6.7808	157.54237	929.103	-1.4694	0.59839	0.029053	-14.1797	-3.502182	14.6081	0.029492	0.13945	0.15869	-23.185	134.0352	233.615	-0.16455	0.32617	0.083984	NaN	NaN	NaN	NaN	NaN	NaN
1.166	-18.8078	154.22986	919.954	-1.4995	0.60986	0.029785	-3.156	15.5145	20.4927	0.038086	0.14063	0.15625	-44.316	95.86726	249.137	-0.083984	0.2959	0.098145	NaN	NaN	NaN	NaN	NaN	NaN
1.168	15.12063	162.8333	937.446	-1.5352	0.62402	0.021484	-11.3458	-7.8752	19.4322	0.046778	0.1414	0.15654	-36.741	144.486	184.5235	-0.048828	0.27148	0.10156	NaN	NaN	NaN	NaN	NaN	NaN
1.17	-8.7391	151.03615	935.1128	-1.5566	0.63477	0.018066	11.4698	-41.673	25.9697	0.052344	0.14336	0.15596	-25.4252	105.9686	193.286	0.037598	0.23438	0.11816	NaN	NaN	NaN	NaN	NaN	NaN
1.172	-27.481	150.4199	952.212	-1.6094	0.64844	0.01709	2.8681	-5.7171	18.8178	0.055078	0.14297	0.14971	-40.5626	138.802	145.5858	0.11572	0.2085	0.1333	NaN	NaN	NaN	NaN	NaN	NaN
1.174	-36.787	154.1749	947.048	-1.647	0.6621	0.015625	23.9226	-21.1098	20.825	0.058887	0.14463	0.14834	-28.31429	73.8683	163.8721	0.14648	0.18994	0.13525	NaN	NaN	NaN	NaN	NaN	NaN
1.176	-13.2878	166.5604	961.763	-1.689	0.67041	0.013672	43.3843	-3.411	32.4487	0.069824	0.14746	0.146	-15.525	111.723	117.872	0.2124	0.15625	0.14648	NaN	NaN	NaN	NaN	NaN	NaN
1.178	-20.5616	192.2213	996.8857	-1.7559	0.6875	0.018066	26.3185	29.453	8.4905	0.077051	0.14512	0.14189	-14.5648	75.55	130.1733	0.24487	0.13086	0.1582	NaN	NaN	NaN	NaN	NaN	NaN
1.18	-58.183	211.7015	1017.3451	-1.7837	0.68896	0.0029297	57.301	6.1687	16.641	0.083399	0.1457	0.1376	-30.506	111.603	105.521	0.28369	0.11133	0.17236	NaN	NaN	NaN	NaN	NaN	NaN
1.182	-47.784	212.0957	1047.1277	-1.8477	0.70313	0.012207	59.694	30.64	21.7719	0.090039	0.14687	0.13369	-8.302	62.47	138.373	0.31836	0.07666	0.17822	NaN	NaN	NaN	NaN	NaN	NaN
1.184	-57.746	227.1908	1071.6759	-1.8904	0.71289	0.0073242	47.319	21.8622	19.6816	0.093262	0.15371	0.12803	-14.77	91.628	98.646	0.33398	0.070313	0.18115	NaN	NaN	NaN	NaN	NaN	NaN
1.186	-74.053	248.3667	1107.2548	-1.9258	0.71973	0.0068359	44.84	-4.8081	49.929	0.094238	0.15869	0.1167	4.029	38.3549	96.304	0.36328	0.040527	0.18506	NaN	NaN	NaN	NaN	NaN	NaN
1.188	-90.498	270.4484	1146.4417	-1.9688	0.72656	0.0068359	20.9065	24.2346	49.841	0.091308	0.16328	0.11562	-11.032	55.0963	81.404	0.36304	0.033448	0.18994	NaN	NaN	NaN	NaN	NaN	NaN
1.19	-78.7795	289.749	1173.774	-1.9839	0.73486	0.0063477	39.432	-15.044	40.2667	0.081543	0.17598	0.11181	22.2796	4.528	68.389	0.36768	0.024414	0.18994	NaN	NaN	NaN	NaN	NaN	NaN
1.192	-74.827	307.917	1189.481	-1.9995	0.73193	0.0048828	66.8124	-18.728	54.366	0.063965	0.18731	0.10713	8.272	18.621	44.158	0.34521	0.012695	0.20557	NaN	NaN	NaN	NaN	NaN	NaN
1.194	-79.3619	309.714	1191.322	-2.0008	0.73267	0.0029297	22.706	-7.578	45.24439	0.041504	0.1961	0.10986	37.6307	4.419	38.554	0.3374	0.023438	0.19824	NaN	NaN	NaN	NaN	NaN	NaN
1.196	-76.2943	272.3873	1185.5438	-1.9897	0.729	0.0029297	11.8225	-54.7527	77.986	0.0092773	0.2085	0.11768	16.87	12.885	31.8164	0.31836	-0.0019531	0.21094	NaN	NaN	NaN	NaN	NaN	NaN
1.198	-98.2548	249.3433	1208.7307	-1.9492	0.72461	-0.00048828	-4.6181	-25.262	109.099	-0.028125	0.22178	0.11953	47.7667	14.6764	28.2461	0.31104	-0.0065918	0.22265	NaN	NaN	NaN	NaN	NaN	NaN
1.2	-79.6089	240.585	1205.4919	-1.9199	0.71924	-0.00097656	-31.9485	-17.094	124.8787	-0.066406	0.23477	0.12129	30.92	6.748	59.515	0.29834	-0.020996	0.229	NaN	NaN	NaN	NaN	NaN	NaN
1.202	-90.36567	226.228	1200.1591	-1.8394	0.70459	-0.0029297	-12.1035	-37.1677	207.301	-0.10899	0.25	0.12325	29.8341	17.3899	33.5826	0.26416	-0.019043	0.23291	NaN	NaN	NaN	NaN	NaN	NaN
1.204	-67.7809	200.1973	1199.526	-1.7674	0.69068	-0.0056152	-50.585	4.8386	267.318	-0.15674	0.26943	0.12344	26.084	16.6955	44.754	0.24902	-0.0024414	0.22705	NaN	NaN	NaN	NaN	NaN	NaN
1.206	-69.7274	171.83309	1177.526	-1.6895	0.67285	-0.0029297	-56.456	-0.4111	343.161	-0.21436	0.28857	0.12598	50.3642	42.603	31.513	0.23145	-0.011719	0.24316	NaN	NaN	NaN	NaN	NaN	NaN
1.208	-64.0359	153.11254	1176.698	-1.5957	0.64355	-0.01709	-15.136	33.0147	431.86	-0.28584	0.31563	0.13066	16.125	13.8082	44.722	0.21509	-0.0048829	0.24805	NaN	NaN	NaN	NaN	NaN	NaN
1.21	-76.0053	145.2439	1182.6425	-1.5449	0.63086	-0.021484	-17.318	91.206	534.0668	-0.37881	0.33789	0.13428	-1.385	29.3135	16.5445	0.21484	-0.0019531	0.25391	NaN	NaN	NaN	NaN	NaN	NaN
1.212	-93.7	136.6953	1172.0722	-1.4595	0.60986	-0.030273	-12.208	85.4322	674.5184	-0.48896	0.35938	0.13506	-12.89	-23.2444	10.8003	0.21094	-0.0063477	0.25195	NaN	NaN	NaN	NaN	NaN	NaN
1.214	-80.8361	127.5115	1195.959	-1.3962	0.59692	-0.037354	-29.782	117.39	781.3917	-0.62803	0.37998	0.13877	-8.606	16.9299	-18.3377	0.21387	-0.0024414	0.24756	NaN	NaN	NaN	NaN	NaN	NaN
1.216	-89.1208	116.1114	1183.332	-1.3413	0.58447	-0.043457	-4.5	107.301	834.8311	-0.78467	0.40137	0.14502	-14.023	-25.7196	18.1765	0.20752	-0.00048828	0.24609	NaN	NaN	NaN	NaN	NaN	NaN
1.218	-73.901	122.0062	1178.17	-1.2676	0.57031	-0.05957	23.112	45.042	913.743	-0.96366	0.42441	0.15166	-2.578	23.7398	0.1292	0.22046	-0.0051269	0.24585	NaN	NaN	NaN	NaN	NaN	NaN
1.22	-85.483	112.134	1173.952	-1.2363	0.57031	-0.063965	-2.052	43.2607	977.063	-1.1609	0.44736	0.16328	-22.1761	-24.9531	30.6226	0.22119	-0.0097656	0.23975	NaN	NaN	NaN	NaN	NaN	NaN
1.222	-85.1954	117.911	1181.967	-1.1738	0.55664	-0.071289	4.3203	-42.547	1056.488	-1.3679	0.47861	0.17109	-28.762	28.4194	12.77444	0.20898	-0.0087891	0.2334	NaN	NaN	NaN	NaN	NaN	NaN
1.224	-96.394	121.051	1179.451	-1.1308	0.55176	-0.081299	62.624	-105.4926	1083.131	-1.5722	0.51416	0.19375	-23.4398	-21.0247	31.865	0.20264	-0.014648	0.2334	NaN	NaN	NaN	NaN	NaN	NaN
1.226	-90.804	116.691	1178.993	-1.0957	0.55273	-0.092773	81.856	-123.5154	1039.869	-1.7773	0.55469	0.19971	-38.129	30.8141	20.0145	0.1958	-0.0083008	0.22314	NaN	NaN	NaN	NaN	NaN	NaN
1.228	-75.125	92.4249	1163.758	-1.0552	0.54639	-0.1001	103.532	-202.449	1022.297	-1.9561	0.60761	0.20596	-13.698	-10.0926	50.847	0.18237	-0.0024414	0.21631	NaN	NaN	NaN	NaN	NaN	NaN
1.23	-66.2291	70.2588	1154.631	-1.0356	0.54297	-0.10938	118.387	-199.613	1017.369	-2.0876	0.67588	0.20732	-23.988	45.522	16.7301	0.17383	0.0029297	0.21387	NaN	NaN	NaN	NaN	NaN	NaN
1.232	-64.846	61.0495	1135.188	-0.9917	0.5459	-0.11816	123.0741	-165.047	967.374	-2.1489	0.75205	0.19834	-14.863	14.8471	19.2613	0.1543	0.013184	0.21045	NaN	NaN	NaN	NaN	NaN	NaN
1.234	-78.1	50.6508	1122.049	-0.95947	0.54346	-0.12158	167.7909	-138.465	955.2338	-2.1508	0.83086	0.18447	-14.549	58.16	16.96274	0.14014	0.017578	0.20508	NaN	NaN	NaN	NaN	NaN	NaN
1.236	-63.36	41.5567	1097.334	-0.91992	0.5459	-0.13477	140.5754	-74.093	941.7856	-2.0718	0.92627	0.17383	-14.537	11.47692	32.349	0.11475	0.026855	0.20654	NaN	NaN	NaN	NaN	NaN	NaN
1.238	-36.675	18.3277	1077.108	-0.875	0.5459	-0.14551	124.577	-79.987	935.591	-1.9136	1.0025	0.16934	-22.713	38.4712	36.394	0.1001	0.031738	0.20752	NaN	NaN	NaN	NaN	NaN	NaN
1.24	-44.99	21.6055	1060.575	-0.84717	0.54346	-0.15527	148.16	-81.631	978.758	-1.7085	1.0404	0.16465	10.4999	-12.5003	6.3894	0.083496	0.035645	0.19824	NaN	NaN	NaN	NaN	NaN	NaN
1.242	-10.40466	-5.9956	1052.761	-0.80664	0.54883	-0.16602	126.692	-24.806	952.646	-1.4741	1.0247	0.1459	15.712	14.8416	21.7937	0.065918	0.050781	0.20264	NaN	NaN	NaN	NaN	NaN	NaN
1.244	-10.9895	-18.0334	1037.02	-0.77246	0.55029	-0.18066	132.57	-22.693	949.7177	-1.2415	0.94365	0.1207	7.0644	-2.5051	33.8631	0.055176	0.058105	0.19727	NaN	NaN	NaN	NaN	NaN	NaN
1.246	27.3348	-22.1973	1005.048	-0.74951	0.55713	-0.19238	86.073	-11.955	947.698	-1.04	0.83984	0.087891	13.467	33.4552	36.673	0.04541	0.078613	0.19482	NaN	NaN	NaN	NaN	NaN	NaN
1.248	7.7823	-26.986	984.5551	-0.72168	0.56445	-0.2085	64.624	-15.808	907.616	-0.87705	0.72724	0.059961	41.145	13.1922	26.2801	0.041016	0.090332	0.19385	NaN	NaN	NaN	NaN	NaN	NaN
1.25	28.613	-56.271193	981.443	-0.71045	0.56982	-0.21777	63.05	-93.641	918.124	-0.7499	0.63935	0.039257	33.015	24.8357	40.712	0.039063	0.10352	0.19092	NaN	NaN	NaN	NaN	NaN	NaN
1.252	53.8051	-85.8497	977.918	-0.70459	0.58057	-0.2334	43.6209	-130.124	953.52	-0.67061	0.58818	0.014649	33.1885	5.6445	41.0258	0.041016	0.12695	0.18555	NaN	NaN	NaN	NaN	NaN	NaN
1.254	55.1158	-107.9668	957.104	-0.70459	0.59546	-0.24121	-11.6577	-187.725	994.336	-0.64072	0.5751	-0.0037109	8.215	13.5725	53.9	0.043945	0.13574	0.18408	NaN	NaN	NaN	NaN	NaN	NaN
1.256	54.2821	-117.4418	929.884	-0.71094	0.60156	-0.24951	-28.1522	-277.404	1078.389	-0.64209	0.58643	-0.017578	49.8386	17.0849	35.99	0.055664	0.15527	0.18457	NaN	NaN	NaN	NaN	NaN	NaN
1.258	58.6905	-130.4057	922.582	-0.72754	0.625	-0.26367	-67.05	-259.019	1080.337	-0.66797	0.61562	-0.021387	27.7962	20.2727	36.1819	0.064209	0.17065	0.18286	NaN	NaN	NaN	NaN	NaN	NaN
1.26	74.8681	-139.27	922.842	-0.74414	0.63672	-0.2627	-114.322	-305.777	1099.785	-0.70791	0.6458	-0.016504	26.6395	0.7599	30.6657	0.078613	0.18066	0.18359	NaN	NaN	NaN	NaN	NaN	NaN
1.262	65.36282	-139.2159	909.4625	-0.77881	0.65771	-0.27881	-132.796	-293.443	1133.852	-0.76689	0.68213	-0.034082	11.316	-16.67233	32.26	0.092285	0.19092	0.17871	NaN	NaN	NaN	NaN	NaN	NaN
1.264	80.119	-148.727	900.141	-0.81128	0.67749	-0.28369	-131.036	-215.707	1137.70874	-0.84522	0.725	-0.042871	0.0429999999999993	0.7873	3.004	0.10107	0.19775	0.17969	NaN	NaN	NaN	NaN	NaN	NaN
1.266	62.4043	-162.016	885.501	-0.85107	0.69775	-0.28564	-101.593	-214.581	1208.1585	-0.95264	0.76709	-0.049316	1.117	-3.4637	24.3872	0.11719	0.21045	0.18945	NaN	NaN	NaN	NaN	NaN	NaN
1.268	71.113	-170.448	909.673	-0.8999	0.72217	-0.29346	-99.058	-136.171	1250.555	-1.0716	0.80732	-0.058594	16.732	38.314	4.99967	0.12329	0.21582	0.18775	NaN	NaN	NaN	NaN	NaN	NaN
1.27	64.71152	-159.5764	905.981	-0.93359	0.73242	-0.29834	-117.356	-98.612	1266.351	-1.1851	0.84277	-0.065039	-19.852	17.7895	42.972	0.12939	0.22314	0.19189	NaN	NaN	NaN	NaN	NaN	NaN
1.272	54.4303	-152.6032	904.346	-0.99609	0.75391	-0.29883	-77.614	-126.301	1294.118	-1.298	0.87754	-0.072851	-16.4495	29.9396	20.3028	0.12646	0.23486	0.1875	NaN	NaN	NaN	NaN	NaN	NaN
1.274	44.156	-158.4054	902.388	-1.0408	0.76831	-0.302	-53.849	-64.364	1296.192	-1.3964	0.90742	-0.07627	-10.424	-15.2245	17.3378	0.12549	0.23486	0.1875	NaN	NaN	NaN	NaN	NaN	NaN
1.276	46.7892	-166.098	900.021	-1.0894	0.77979	-0.29785	-26.7043	-78.536	1297.424	-1.4878	0.93799	-0.077637	-19.147	10.796	12.9245	0.12207	0.24023	0.18994	NaN	NaN	NaN	NaN	NaN	NaN
1.278	58.6616	-166.5261	899.7875	-1.1426	0.79297	-0.29395	-25.3758246	-87.005	1316.625	-1.5753	0.96377	-0.081641	-57.6212	-17.42197	41.077	0.11768	0.24536	0.18677	NaN	NaN	NaN	NaN	NaN	NaN
1.28	47.119	-172.4562	893.1319	-1.1694	0.80127	-0.29639	-41.949	-31.913	1298.222	-1.6437	0.99346	-0.078027	-16.152	34.856	19.09048	0.11182	0.24902	0.18213	NaN	NaN	NaN	NaN	NaN	NaN
1.282	38.69	-176.1276	915.5862	-1.2104	0.81006	-0.29004	-40.852	-103.695	1332.221	-1.7062	1.0216	-0.07334	-24.3272	5.904	30.8675	0.10059	0.25537	0.18164	NaN	NaN	NaN	NaN	NaN	NaN
1.284	43.166	-183.9668	923.9083	-1.2378	0.81592	-0.28564	-8.829	-102.343	1402.0065	-1.7621	1.0508	-0.071485	-22.445	43.441	1.2951	0.098633	0.25537	0.18164	NaN	NaN	NaN	NaN	NaN	NaN
1.286	38.836	-183.78964	930.6821	-1.2593	0.81689	-0.28271	10.94703	-108.216	1446.469	-1.8027	1.0703	-0.057129	-27.2235	-20.7456	13.279396	0.090332	0.25684	0.17334	NaN	NaN	NaN	NaN	NaN	NaN
1.288	40.879	-187.11051	932.7022	-1.2832	0.81982	-0.27393	30.0023	-172.069	1516.594	-1.8363	1.0793	-0.039746	-19.869	16.7267	22.3156	0.082275	0.25635	0.16845	NaN	NaN	NaN	NaN	NaN	NaN
1.29	40.878	-189.7315	929.3073	-1.2937	0.81372	-0.27026	69.79	-112.7023	1543.295	-1.8727	1.0902	-0.023047	-25.886	-28.2966	23.7705	0.077148	0.26123	0.17383	NaN	NaN	NaN	NaN	NaN	NaN
1.292	60.319	-181.7268	948.013	-1.2983	0.80615	-0.26807	73.296	-130.158	1543.753	-1.9028	1.0883	-0.010156	-1.167	30.0347	46.509	0.064941	0.26611	0.17969	NaN	NaN	NaN	NaN	NaN	NaN
1.294	27.639	-162.67412	959.976	-1.2949	0.79297	-0.26416	102.206	-134.732	1581.766	-1.9313	1.0754	0.0037109	15.2404	-39.2923	59.603	0.063965	0.27295	0.18359	NaN	NaN	NaN	NaN	NaN	NaN
1.296	38.393	-153.1751	961.023	-1.2925	0.78369	-0.26123	122.828	-64.373	1557.831	-1.9531	1.0586	0.014648	9.181	-2.789	67.24	0.040527	0.28174	0.18945	NaN	NaN	NaN	NaN	NaN	NaN
1.298	55.8392	-162.8629	975.255	-1.2729	0.76416	-0.26318	89.604	-113.533	1561.5375	-1.9775	1.0457	0.023535	11.935	-52.003	94.315	0.023438	0.29443	0.19336	NaN	NaN	NaN	NaN	NaN	NaN
1.3	50.9838	-172.6728	967.6104	-1.261	0.74829	-0.2649	100.494	-76.3657	1595.859	-1.9963	1.027	0.028906	5.892	-2.039	117.8834	0.0024414	0.3042	0.19336	NaN	NaN	NaN	NaN	NaN	NaN
1.302	51.3459	-166.7765	957.8772	-1.248	0.73438	-0.26758	69.148	-50.1849	1568.532	-2.0053	1.0164	0.034765	-3.76543	-49.879	157.8488	-0.040527	0.31885	0.19873	NaN	NaN	NaN	NaN	NaN	NaN
1.304	65.8299	-152.02035	958.287	-1.2378	0.71338	-0.271	39.188	-78.376	1578.622	-2.0125	1.0082	0.041797	0.0659999999999989	8.645	197.976	-0.071777	0.32129	0.2041	NaN	NaN	NaN	NaN	NaN	NaN
1.306	84.6051	-142.4849	960.781	-1.2358	0.71338	-0.27783	34.651	-5.9935	1556.751	-2.0171	1.0044	0.052734	-4.3058	-49.94	251.7558	-0.13184	0.33496	0.21191	NaN	NaN	NaN	NaN	NaN	NaN
1.308	63.8789	-121.661	956.8299	-1.2358	0.69385	-0.27197	-2.854	-20.6265	1523.7761	-2.0166	0.99825	0.063281	-0.0140000000000011	-12.4436	324.412	-0.18457	0.34839	0.21485	NaN	NaN	NaN	NaN	NaN	NaN
1.31	83.767	-134.2154	941.3404	-1.238	0.68237	-0.2771	-8.0317	-38.113	1558.958	-2.0194	0.98877	0.067383	30.0516	-63.898	437.0741	-0.24365	0.35986	0.21045	NaN	NaN	NaN	NaN	NaN	NaN
1.312	62.6204	-139.3569	937.01275	-1.2446	0.67627	-0.28125	-21.2774	28.8222	1518.2141	-2.0163	0.97627	0.083008	-14.639	6.7965	544.3178	-0.32813	0.39258	0.20361	NaN	NaN	NaN	NaN	NaN	NaN
1.314	80.9091	-137.0707	956.096	-1.2461	0.66016	-0.27979	-75.905	-17.4055	1502.432	-2.0128	0.96182	0.087598	26.921	3.35398	687.105	-0.37646	0.40967	0.19824	NaN	NaN	NaN	NaN	NaN	NaN
1.316	70.6666	-116.206	948.8034	-1.2378	0.65918	-0.27832	-48.3227	0.61863	1561.2264	-2.0112	0.95557	0.098633	25.785	83.673	828.939	-0.49365	0.45557	0.19141	NaN	NaN	NaN	NaN	NaN	NaN
1.318	59.2727	-108.648	953.305	-1.2285	0.64648	-0.28125	-35.969	32.1313	1561.221	-2.0053	0.94707	0.10215	41.31	71.848	968.8327	-0.63672	0.50586	0.18262	NaN	NaN	NaN	NaN	NaN	NaN
1.32	60.369	-118.94375	945.835	-1.2085	0.64405	-0.27686	-54.687	-42.6993	1587.031	-1.989	0.93994	0.10918	24.792	72.928	1084.456	-0.7251	0.53271	0.17578	NaN	NaN	NaN	NaN	NaN	NaN
1.322	57.131	-126.1101	938.713	-1.1953	0.63672	-0.27686	-32.6867	15.925	1587.231	-1.9718	0.92666	0.11269	55.505	-2.508	1158.8573	-0.92188	0.60059	0.15771	NaN	NaN	NaN	NaN	NaN	NaN
1.324	45.7126	-119.1704	946.115	-1.1772	0.62646	-0.26904	-75.045	-21.4869	1568.568	-1.9612	0.91963	0.11631	-22.879	-39.53	1220.879	-1.0918	0.65332	0.15039	NaN	NaN	NaN	NaN	NaN	NaN
1.326	33.418	-113.5966	932.373	-1.1655	0.62354	-0.26514	-67.116	-56.745	1603.219	-1.9492	0.9082	0.12109	-0.15827	-117.498	1257.439	-1.2847	0.70752	0.14014	NaN	NaN	NaN	NaN	NaN	NaN
1.328	35.3923	-97.9653	934.203	-1.1367	0.62109	-0.26563	-35.262	9.5708	1571.671	-1.942	0.90645	0.13135	14.3272	-167.391	1241.147	-1.5488	0.7832	0.11865	NaN	NaN	NaN	NaN	NaN	NaN
1.33	43.9424	-104.42068	922.557	-1.1199	0.61108	-0.25415	-70.135	-56.1269	1524.6	-1.9339	0.90489	0.13457	60.6664	-220.9084	1191.441	-1.6714	0.83057	0.10693	NaN	NaN	NaN	NaN	NaN	NaN
1.332	29.2111	-95.0855	895.1188	-1.0972	0.61084	-0.24756	-25.1681	-31.621	1518.5729	-1.9258	0.90996	0.14238	74.305	-240.272	1142.114	-1.9116	0.92041	0.081543	NaN	NaN	NaN	NaN	NaN	NaN
1.334	-0.241999999999997	-96.22813	881.2214	-1.0625	0.60547	-0.23828	-35.2114	14.88	1489.65741	-1.9114	0.9169	0.14668	111.28	-235.874	1085.334	-2.0359	1.0003	0.068848	NaN	NaN	NaN	NaN	NaN	NaN
1.336	10.7214	-81.075	877.827	-1.0503	0.60596	-0.23145	-33.30012	-26.557	1506.0083	-1.8882	0.90967	0.15479	77.244	-210.25	1072.3806	-2.0991	1.0747	0.056641	NaN	NaN	NaN	NaN	NaN	NaN
1.338	10.913	-72.486	874.324	-1.0132	0.60156	-0.21973	45.445	93.931	1504.539	-1.8532	0.8956	0.15645	58.281	-152.654	1010.309	-2.0718	1.188	0.027832	NaN	NaN	NaN	NaN	NaN	NaN
1.34	-18.5756	-63.915	869.052	-0.99171	0.60009	-0.21167	23.4758	86.183	1470.0964	-1.8192	0.8875	0.16084	61.995	-137.054	1021.104	-2.0137	1.2422	0.017578	NaN	NaN	NaN	NaN	NaN	NaN
1.342	2.141	-68.8514	854.614	-0.9668	0.59668	-0.19971	54.431	73.01	1501.153	-1.7988	0.87188	0.1581	59.266	-96.588	1046.3987	-1.791	1.3262	0.010254	NaN	NaN	NaN	NaN	NaN	NaN
1.344	3.772	-73.83461	847.013	-0.93115	0.58984	-0.18896	80.578	150.746	1458.649	-1.7708	0.86826	0.15567	34.062	-100.01	1082.132	-1.5972	1.3296	0.0031738	NaN	NaN	NaN	NaN	NaN	NaN
1.346	19.268	-61.493	839.697	-0.91553	0.58057	-0.17676	68.556	98.0199	1435.852	-1.748	0.8584	0.1499	67.9112	-40.16	1091.225	-1.4019	1.2876	-0.014648	NaN	NaN	NaN	NaN	NaN	NaN
1.348	-4.648	-54.325	822.395	-0.87891	0.57813	-0.16553	99.017	135.689	1426.749	-1.7257	0.85986	0.15303	45.61656	-69.18	1083.519	-1.1226	1.1489	-0.018555	NaN	NaN	NaN	NaN	NaN	NaN
1.35	2.888	-63.1398	795.593	-0.85522	0.57007	-0.15771	68.223	154.255	1399.396	-1.7015	0.854	0.15293	39.12771	-25.79	1056.408	-1.0117	1.082	-0.013672	NaN	NaN	NaN	NaN	NaN	NaN
1.352	34.186	-69.5819	781.417	-0.82959	0.56104	-0.14941	60.588	70.38	1409.054	-1.6816	0.85362	0.15371	40.088	-103.703	1094.376	-0.87549	1.0161	-0.027344	NaN	NaN	NaN	NaN	NaN	NaN
1.354	17.9468	-53.6627	768.677	-0.79541	0.55615	-0.13037	93.645	110.4843	1394.542	-1.6621	0.84727	0.15176	30.298	-129.831	1098.612	-0.81592	0.99805	-0.030273	NaN	NaN	NaN	NaN	NaN	NaN
1.356	27.7508	-63.1182	768.358	-0.7793	0.54688	-0.12793	45.868	84.778	1355.0503	-1.6411	0.84229	0.14844	9.6034	-269.836	1142.168	-0.76123	1.0239	-0.029785	NaN	NaN	NaN	NaN	NaN	NaN
1.358	23.227	-67.2821	748.373	-0.74609	0.53613	-0.12109	36.1664	62.91	1379.056	-1.6243	0.83662	0.14483	-18.9544	-312.285	1164.36954	-0.7334	1.084	-0.021484	NaN	NaN	NaN	NaN	NaN	NaN
1.36	47.4015	-66.1439	755.519	-0.71875	0.53125	-0.1106	44.4094	132.408	1351.658	-1.602	0.82676	0.1375	-56.53	-411.049	1221.094	-0.72412	1.1079	-0.011719	NaN	NaN	NaN	NaN	NaN	NaN
1.362	39.3311	-62.2211	724.073	-0.68701	0.52197	-0.10791	25.62579	88.061	1312.86481	-1.5765	0.81465	0.1375	-101.258	-365.466	1248.547	-0.74609	1.1445	-0.0048828	NaN	NaN	NaN	NaN	NaN	NaN
1.364	40.2524	-56.3072	697.406	-0.65625	0.50781	-0.09375	10.0462	125.7199	1298.0244	-1.5519	0.80166	0.13555	-103.667	-367.99	1330.293	-0.79736	1.1665	-0.026855	NaN	NaN	NaN	NaN	NaN	NaN
1.366	52.5645	-54.5688	693.489	-0.63867	0.50391	-0.089844	16.4949	170.518	1250.9571	-1.521	0.78271	0.13281	-116.701	-269.723	1351.407	-0.8667	1.187	-0.039551	NaN	NaN	NaN	NaN	NaN	NaN
1.368	55.2709	-50.0766	669.9351	-0.60547	0.49023	-0.07666	-22.107	131.2908	1278.631	-1.495	0.76319	0.12793	-116.674	-253.789	1433.222	-0.98438	1.1914	-0.048828	NaN	NaN	NaN	NaN	NaN	NaN
1.37	53.12614	-39.4799	657.9369	-0.58447	0.47754	-0.071289	-1.624	216.355	1253.785	-1.466	0.74551	0.12363	-90.072	-151.146	1458.047	-1.0488	1.1846	-0.046387	NaN	NaN	NaN	NaN	NaN	NaN
1.372	43.5102	-39.1036	639.006	-0.56445	0.46289	-0.062012	-19.0403	197.935	1214.37	-1.4312	0.72715	0.12636	-79.983	-135.896	1498.987	-1.1895	1.1895	-0.058105	NaN	NaN	NaN	NaN	NaN	NaN
1.374	34.7009	-34.077	617.686	-0.53271	0.45166	-0.052246	-47.4634	175.071	1210.756	-1.3956	0.70557	0.12646	-81.15	-54.94	1505.035	-1.301	1.1985	-0.057861	NaN	NaN	NaN	NaN	NaN	NaN
1.376	40.01141	-26.5869	608.034	-0.52197	0.4458	-0.04834	-36.9485	242.023	1162.48	-1.3594	0.68945	0.12402	-33.4154	-72.962	1505.759	-1.4014	1.2129	-0.059082	NaN	NaN	NaN	NaN	NaN	NaN
1.378	38.8651	-27.3203	600.854	-0.49414	0.43164	-0.032715	-48.909	176.9168	1135.054	-1.3209	0.66816	0.12285	-26.948	-41.16	1472.3939	-1.5332	1.2422	-0.053223	NaN	NaN	NaN	NaN	NaN	NaN
1.38	29.339	-31.2574	588.72	-0.47266	0.42066	-0.031006	-29.4036	193.5777	1109.134	-1.2871	0.6496	0.12081	-5.9755	-90.11	1489.7435	-1.5938	1.2578	-0.053711	NaN	NaN	NaN	NaN	NaN	NaN
1.382	35.76237	-35.4247	564.479	-0.44873	0.40674	-0.024902	-49.7592	202.8983	1049.9361	-1.2492	0.63123	0.1208	-21.215	-72.879	1504.1469	-1.7065	1.2739	-0.046875	NaN	NaN	NaN	NaN	NaN	NaN
1.384	40.6862	-37.931	540.03341	-0.42676	0.38965	-0.01709	-55.6708	134.609	1042.9701	-1.2107	0.61913	0.11211	-36.4359	-103.541	1522.596	-1.7742	1.2757	-0.041992	NaN	NaN	NaN	NaN	NaN	NaN
1.386	5.726	-22.3959	535.27843	-0.41357	0.38428	-0.016602	-9.241	195.889	1020.901	-1.1675	0.59717	0.11328	-68.348	-82.244	1555.1559	-1.8418	1.2734	-0.034668	NaN	NaN	NaN	NaN	NaN	NaN
1.388	12.378	-19.05992	528.2084	-0.38818	0.36768	-0.0087891	-9.6715	168.645	999.363	-1.1245	0.57991	0.11113	-37.9495	-131.845	1583.9752	-1.9199	1.2549	-0.025391	NaN	NaN	NaN	NaN	NaN	NaN
1.39	15.461	-19.5391	512.949	-0.37232	0.3562	0.0024414	11.693	142.164	1009.42	-1.0815	0.56529	0.11251	-24.07	-127.157	1645.932	-1.9468	1.2563	-0.019531	NaN	NaN	NaN	NaN	NaN	NaN
1.392	33.8105	-18.6009	497.1909	-0.35889	0.34326	0.0063477	50.269	194.376	975.724	-1.0426	0.5489	0.11172	11.271	-159.97	1661.694	-1.9995	1.2466	-0.0087891	NaN	NaN	NaN	NaN	NaN	NaN
1.394	-8.272	-25.7171	494.4845	-0.33447	0.32568	0.014648	47.7923	142.802	947.807	-0.99869	0.53159	0.10997	37.7035	-140.967	1684.761	-2.0342	1.2363	-6.9389e-15	NaN	NaN	NaN	NaN	NaN	NaN
1.396	5.539	-21.606	483.237	-0.3252	0.3208	0.022949	76.1035	175.8163	908.756	-0.95654	0.51904	0.10889	81.251	-140.111	1709.751	-2.0664	1.2363	0.0053711	NaN	NaN	NaN	NaN	NaN	NaN
1.398	18.823	-18.4344	472.575	-0.30859	0.30127	0.02832	70.968	203.88477	853.6869	-0.91348	0.50096	0.10715	49.538	-94.075	1739.884	-2.0952	1.2349	0.016602	NaN	NaN	NaN	NaN	NaN	NaN
1.4	19.881	0.83	454.5454	-0.2959	0.29052	0.032715	58.2858	147.251	815.3585	-0.87686	0.48414	0.10846	63.926	-57.1488	1697.8707	-2.1133	1.2285	0.01416	NaN	NaN	NaN	NaN	NaN	NaN
1.402	17.85	-8.32	449.1359	-0.28467	0.27832	0.039063	91.716	212.0147	779.559	-0.8373	0.46736	0.10372	78.625	-28.828	1683.3208	-2.1172	1.2207	0.028809	NaN	NaN	NaN	NaN	NaN	NaN
1.404	23.259	-13.3069	424.4411	-0.26904	0.2583	0.048828	71.691	167.249	731.92495	-0.79564	0.45058	0.099361	56.4272	-10.458	1627.9508	-2.104	1.2173	0.040283	NaN	NaN	NaN	NaN	NaN	NaN
1.406	22.356	-12.0345	426.878	-0.26123	0.25195	0.050781	81.633	143.96	722.259	-0.75391	0.42969	0.10205	41.4701	-0.795999999999999	1638.99	-2.0859	1.209	0.053711	NaN	NaN	NaN	NaN	NaN	NaN
1.408	21.234	6.9388	413.4895	-0.25293	0.23828	0.055664	65.434	198.155	673.897	-0.71869	0.41099	0.099739	11.962	9.474	1605.596	-2.0566	1.1992	0.054688	NaN	NaN	NaN	NaN	NaN	NaN
1.41	31.5975	-4.61452	415.044	-0.24194	0.22607	0.060058	45.288	130.377	649.1873	-0.67818	0.39344	0.09112	0.503	17.68	1593.4911	-2.0229	1.1938	0.056152	NaN	NaN	NaN	NaN	NaN	NaN
1.412	46.3028	-6.9375	404.621	-0.2334	0.21484	0.066895	72.089	164.8332	619.8816	-0.63809	0.37726	0.086376	-32.463	34.394	1548.229	-1.9707	1.1758	0.069824	NaN	NaN	NaN	NaN	NaN	NaN
1.414	47.3516	-13.2452	385.645	-0.22119	0.19824	0.067383	42.0266	178.684	549.35	-0.60158	0.3593	0.080115	-34.2386	23.6803	1550.288	-1.9336	1.1578	0.073242	NaN	NaN	NaN	NaN	NaN	NaN
1.416	54.4499	1.8644	361.2266	-0.21338	0.18945	0.074219	16.4316	141.9119	544	-0.56348	0.34082	0.074707	-51.4556	51.8574	1528.722	-1.8965	1.1445	0.068359	NaN	NaN	NaN	NaN	NaN	NaN
1.418	47.1182	3.89023	350.335	-0.2002	0.17822	0.077637	7.6938	203.13	503.3034	-0.5295	0.32608	0.06975	-27.181	53.171	1543.2207	-1.8594	1.1172	0.068359	NaN	NaN	NaN	NaN	NaN	NaN
1.42	50.4967	5.40069	348.5837	-0.19287	0.16724	0.076416	-11.35349	164.387	473.7443	-0.49092	0.30867	0.06345	-29.2293	85.532	1553.1442	-1.8374	1.1118	0.07373	NaN	NaN	NaN	NaN	NaN	NaN
1.422	44.72684	10.5193	345.99246	-0.18311	0.15771	0.080078	-27.6324	132.4033	476.05	-0.45436	0.28619	0.057387	-40.8312	58.5019	1585.999	-1.8047	1.0879	0.085449	NaN	NaN	NaN	NaN	NaN	NaN
1.424	55.7131	9.9252	344.2409	-0.17676	0.14453	0.080078	-52.796	165.865	437.672	-0.41766	0.27009	0.047889	-56.714	69.472	1586.924	-1.7866	1.0796	0.084717	NaN	NaN	NaN	NaN	NaN	NaN
1.426	51.1619	2.9213	336.6344	-0.16651	0.13843	0.080567	-61.897	111.9712	423.326	-0.38086	0.25439	0.046387	-44.624	18.465	1594.569	-1.7793	1.0664	0.090332	NaN	NaN	NaN	NaN	NaN	NaN
1.428	60.6794	14.5731	332.632	-0.1582	0.125	0.081543	-63.948	129.66	402.519	-0.33983	0.23643	0.035466	-75.225	34.2959	1569.99	-1.7632	1.0532	0.10156	NaN	NaN	NaN	NaN	NaN	NaN
1.43	51.6849	13.0878	314.893	-0.14697	0.12158	0.084961	-46.95	124.752	353.973	-0.29515	0.2232	0.032842	-36.9927	4.378	1558.754	-1.7578	1.0459	0.11035	NaN	NaN	NaN	NaN	NaN	NaN
1.432	19.797	14.324	314.013	-0.146	0.11133	0.086914	-66.118	83.64625	328.8859	-0.25159	0.21377	0.033312	-69.8057	41.622	1529.444	-1.7378	1.0396	0.11621	NaN	NaN	NaN	NaN	NaN	NaN
1.434	28.2815	13.1328	292.92057	-0.14258	0.104	0.086426	-57.028	130.103	297.5645	-0.19828	0.19994	0.027471	-63.485	37.364	1509.295	-1.7127	1.0325	0.12012	NaN	NaN	NaN	NaN	NaN	NaN
1.436	22.2194	14.0592	285.2864	-0.14039	0.098635	0.085694	-43.016	109.208	261.2654	-0.146	0.19189	0.019043	-78.029	88.167	1464.567	-1.6831	1.0142	0.12793	NaN	NaN	NaN	NaN	NaN	NaN
1.438	30.1592	13.7494	288.729	-0.1377	0.091797	0.083984	-31.2232	106.158	270.675	-0.094063	0.17808	0.021109	-48.563	66.945	1449.183	-1.6582	0.99219	0.1333	NaN	NaN	NaN	NaN	NaN	NaN
1.44	-4.313	13.8145	290.385	-0.13623	0.085938	0.083496	-21.9439	125.942	239.872	-0.040261	0.16585	0.018013	-28.775	118.1825	1445.162	-1.644	0.99072	0.13818	NaN	NaN	NaN	NaN	NaN	NaN
1.442	15.925	19.6768	292.637	-0.13477	0.082031	0.086426	-38.2947	69.7943	231.728	0.0040891	0.15401	0.0082284	9.299	110.0975	1440.341	-1.6016	0.98047	0.14502	NaN	NaN	NaN	NaN	NaN	NaN
1.444	24.3441	21.462	291.672	-0.14209	0.07959	0.08252	-9.625	100.935	237.6	0.04914	0.14373	0.0036557	27.969	197.658	1410.014	-1.5652	0.96119	0.14429	NaN	NaN	NaN	NaN	NaN	NaN
1.446	-2.199	25.1135	283.6748	-0.14869	0.080322	0.082031	7.4921	105.134	202.97	0.087402	0.12744	-0.0019531	27.4649	195.602	1372.5508	-1.5347	0.94775	0.15039	NaN	NaN	NaN	NaN	NaN	NaN
1.448	-18.7202	26.2518	289.817	-0.15381	0.076172	0.084473	24.1576	65.9026	203.928	0.12729	0.11754	-0.0088266	28.992	249.717	1355.5704	-1.5034	0.91846	0.14551	NaN	NaN	NaN	NaN	NaN	NaN
1.45	10.6222	12.453	275.501	-0.16504	0.07373	0.084473	8.6925	103.971	178.299	0.16027	0.099501	-0.018385	44.5629	211.694	1365.187	-1.4937	0.90479	0.14697	NaN	NaN	NaN	NaN	NaN	NaN
1.452	21.8311	8.7139	278.114	-0.17041	0.072266	0.083008	18.834	62.2153	148.6253	0.18523	0.08122	-0.025416	62.6929	227.218	1339.936	-1.4805	0.88086	0.14551	NaN	NaN	NaN	NaN	NaN	NaN
1.454	-22.7815	24.918	266.3954	-0.18018	0.077637	0.086914	78.398	63.0155	145.941	0.20346	0.067649	-0.037622	81.929	187.6962	1312.522	-1.4646	0.86695	0.14869	NaN	NaN	NaN	NaN	NaN	NaN
1.456	-15.2225	22.4796	273.7991	-0.19116	0.070801	0.081543	80.921	84.71	127.744	0.21924	0.053711	-0.046387	72.1365	207.768	1282.574	-1.4448	0.85205	0.14648	NaN	NaN	NaN	NaN	NaN	NaN
1.458	25.90828	17.6062	295.331	-0.19531	0.069336	0.080078	67.942	20.794	143.959	0.23124	0.044544	-0.055943	62.361	155.89	1250.076	-1.4121	0.83398	0.14893	NaN	NaN	NaN	NaN	NaN	NaN
1.46	14.197	7.8949	282.911	-0.21387	0.069336	0.08252	77.285	15.379	142.065	0.23896	0.035657	-0.062491	23.637	181.503	1193.6779	-1.3921	0.81885	0.14844	NaN	NaN	NaN	NaN	NaN	NaN
1.462	-18.92	4.4885	281.5614	-0.21729	0.071289	0.082031	74.53	5.248	120.404	0.24052	0.028225	-0.072646	35.0326	137.333	1155.396	-1.353	0.7915	0.15527	NaN	NaN	NaN	NaN	NaN	NaN
1.464	17.7331	9.0698	295.285	-0.23291	0.072754	0.081055	57.695	-12.8362	126.835	0.24434	0.023151	-0.077733	48.311	184.657	1117.451	-1.3081	0.76416	0.15186	NaN	NaN	NaN	NaN	NaN	NaN
1.466	52.867	7.213	292.318	-0.24292	0.072998	0.081299	68.259	34.0151	113.193	0.24609	0.016602	-0.085449	39.4699	174.53	1110.1724	-1.2871	0.75	0.146	NaN	NaN	NaN	NaN	NaN	NaN
1.468	9.123	20.5498	290.729	-0.25488	0.074707	0.080566	29.3414	18.233	89.983	0.24365	0.0095687	-0.087891	38.362	237.567	1088.683	-1.2339	0.71826	0.13965	NaN	NaN	NaN	NaN	NaN	NaN
1.47	16.368	14.8549	278.0767	-0.26563	0.071289	0.080566	12.046	31.5779	89.2296	0.23848	0.003418	-0.091407	23.325	252.863	1053.625	-1.1973	0.69165	0.13819	NaN	NaN	NaN	NaN	NaN	NaN
1.472	33.6711	8.5777	289.862	-0.27588	0.075684	0.07666	18.6822	58.866	61.2937	0.22324	0.003418	-0.094923	0.475999999999999	301.843	1019.249	-1.1538	0.6665	0.13232	NaN	NaN	NaN	NaN	NaN	NaN
1.474	64.467	22.7152	305.248	-0.29639	0.077637	0.077148	2.1132	13.09	71.122	0.21191	0.00078116	-0.097265	1.922	276.663	1002.7	-1.0972	0.63232	0.12061	NaN	NaN	NaN	NaN	NaN	NaN
1.476	17.0148	18.1549	288.715	-0.30542	0.075684	0.070068	-14.0554	25.2982	89.968	0.19873	-1.6652e-14	-0.097168	-8.376	297.288	953.848	-1.0645	0.62109	0.11475	NaN	NaN	NaN	NaN	NaN	NaN
1.478	4.418	16.4487	305.381	-0.31836	0.07959	0.066895	-17.1186	8.03245	68.56	0.18359	-0.00029314	-0.099021	-19.683	262.151	908.9069	-1.0098	0.58984	0.10596	NaN	NaN	NaN	NaN	NaN	NaN
1.48	58.87	19.6586	324.988	-0.33984	0.079102	0.068359	-11.55	-20.9796	67.23	0.16621	-0.00058618	-0.10059	-21.378	289.778	866.254	-0.96241	0.56201	0.10083	NaN	NaN	NaN	NaN	NaN	NaN
1.482	29.503	17.3692	327.601	-0.33936	0.08252	0.069824	-25.7281	24.0338	26.1	0.14941	0.0017577	-0.094728	-40.9048	270.5742	810.73891	-0.91748	0.53857	0.091797	NaN	NaN	NaN	NaN	NaN	NaN
1.484	23.6698	8.888792	308.5723	-0.3584	0.089844	0.06543	-60.666	7.1757	9.21	0.12959	0.0088863	-0.097071	-50.065	270.714	759.1603	-0.86572	0.50635	0.08252	NaN	NaN	NaN	NaN	NaN	NaN
1.486	11.523	8.1147	304.2646	-0.37452	0.092774	0.064941	-46.1464	9.1922	15.12	0.11523	0.0083008	-0.099609	-51.69671	230.0424	728.5206	-0.8374	0.49561	0.077637	NaN	NaN	NaN	NaN	NaN	NaN
1.488	46.62	15.3803	341.539	-0.38477	0.094238	0.062012	-48.756	29.4124	1.308	0.094825	0.010058	-0.1	-34.966	219.727	683.8902	-0.78076	0.46826	0.075195	NaN	NaN	NaN	NaN	NaN	NaN
1.49	22.657	23.967	356.269	-0.40381	0.104	0.062012	-25.7541	-6.5148	9.6683	0.072753	0.014551	-0.10127	-23.6021	203.8417	684.048	-0.74317	0.44434	0.064942	NaN	NaN	NaN	NaN	NaN	NaN
1.492	-4.657	19.0417	338.3946	-0.41113	0.10742	0.056641	-25.467	13.0912	22.0456	0.046972	0.018067	-0.097754	-13.177	211.98	666.436	-0.70459	0.42432	0.061523	NaN	NaN	NaN	NaN	NaN	NaN
1.494	6.8231	17.1197	355.4977	-0.43066	0.10986	0.052734	-46.722	-2.333	30.2661	0.017187	0.022461	-0.098731	-2.42	214.0124	631.318	-0.66016	0.38818	0.058594	NaN	NaN	NaN	NaN	NaN	NaN
1.496	21.0786	6.6812	381.651	-0.44092	0.1211	0.055664	-19.2717	-33.8983	57.297	-0.0053711	0.029297	-0.10059	-3.333	217.293	602.226	-0.63672	0.37988	0.057129	NaN	NaN	NaN	NaN	NaN	NaN
1.498	-4.86	-8.1969	387.218	-0.45459	0.12744	0.052734	12.7371	7.752	30.866	-0.033203	0.039844	-0.097558	-2.969	221.445	557.062	-0.5835	0.35889	0.05127	NaN	NaN	NaN	NaN	NaN	NaN
1.5	-21.5767	9.35439	382.439	-0.46875	0.13721	0.05127	7.7507	-8.0924	11.5362	-0.05625	0.055469	-0.094629	15.093	199.472	503.2154	-0.55372	0.33741	0.04956	NaN	NaN	NaN	NaN	NaN	NaN
1.502	4.0888	13.07495	375.5504	-0.47559	0.1377	0.049316	32.8548	-0.4923	23.761	-0.080859	0.06875	-0.092675	30.764	205.715	471.746	-0.5249	0.31494	0.045898	NaN	NaN	NaN	NaN	NaN	NaN
1.504	16.44946	19.5555	392.403	-0.49414	0.14795	0.04834	42.5341	32.721	-0.794000000000002	-0.098438	0.082324	-0.095313	39.8303	188.4083	450.519	-0.48145	0.28613	0.044434	NaN	NaN	NaN	NaN	NaN	NaN
1.506	-5.49	7.99258	416.677	-0.50928	0.15283	0.040772	40.0442	6.96449	-1.052	-0.11426	0.09375	-0.095703	33.1522	187.2279	396.499	-0.46777	0.28027	0.048828	NaN	NaN	NaN	NaN	NaN	NaN
1.508	-21.305	-1.7053	413.7717	-0.51953	0.15527	0.03418	50.0503	27.289	9.41348	-0.12022	0.10605	-0.091504	43.362	132.084	357.354	-0.43701	0.25537	0.053223	NaN	NaN	NaN	NaN	NaN	NaN
1.51	10.474	25.9013	418.2179	-0.54736	0.16895	0.029297	47.302	22.5781	-3.0113	-0.13135	0.12148	-0.099219	27.2605	122.307	286.004	-0.41602	0.23609	0.05542	NaN	NaN	NaN	NaN	NaN	NaN
1.512	21.5346	30.5584	449.407	-0.55957	0.1748	0.024414	70.667	-14.41499	35.569	-0.13135	0.13789	-0.10586	15.169	84.84	254.629	-0.38672	0.2168	0.053711	NaN	NaN	NaN	NaN	NaN	NaN
1.514	-9.7066	31.9725	449.2659	-0.59131	0.18457	0.024902	68.302	10.64836	44.21508	-0.12881	0.15381	-0.11035	17.623	127.4791	234.49373	-0.3457	0.19873	0.054688	NaN	NaN	NaN	NaN	NaN	NaN
1.516	-9.375	28.699	472.416	-0.6189	0.19116	0.019775	69.59	-1.454655	18.2678	-0.1167	0.16455	-0.11523	44.18366	111.6023	224.303	-0.32568	0.18604	0.050293	NaN	NaN	NaN	NaN	NaN	NaN
1.518	13.4217	27.37819	477.243	-0.64502	0.20313	0.01709	49.0814	26.1694	29.2248	-0.10274	0.18096	-0.11739	43.4813	156.25	191.0212	-0.27295	0.16602	0.041992	NaN	NaN	NaN	NaN	NaN	NaN
1.52	43.79	40.5822	488.171	-0.67578	0.21777	0.017578	34.2808	61.307	8.3705	-0.08584	0.1958	-0.12315	22.094	104.4854	186.771	-0.23194	0.14722	0.039307	NaN	NaN	NaN	NaN	NaN	NaN
1.522	-9.1901	36.3313	496.2154	-0.69482	0.22656	0.017578	40.5161	27.049	29.6787	-0.066699	0.20596	-0.12979	-11.992	116.802	167.8047	-0.18896	0.13281	0.030273	NaN	NaN	NaN	NaN	NaN	NaN
1.524	7.58	22.7743	526.269	-0.72021	0.24121	0.01709	29.0589	42.829	35.889	-0.04707	0.21484	-0.13447	-26.5846	59.437	174.2108	-0.1333	0.10742	0.025879	NaN	NaN	NaN	NaN	NaN	NaN
1.526	52.0396	28.4098	530.674	-0.73731	0.25391	0.012695	18.6772	10.69578	16.0367	-0.026855	0.22314	-0.14014	-20.99	95.853	155.1305	-0.10938	0.093262	0.014648	NaN	NaN	NaN	NaN	NaN	NaN
1.528	38.6636	46.6674	538.1131	-0.75195	0.26074	0.0097656	-6.672	-23.04688	47.9354	-0.0071288	0.23193	-0.1457	-26.0619	44.11571	137.696	-0.056641	0.068848	0.003418	NaN	NaN	NaN	NaN	NaN	NaN
1.53	21.1681	46.893	562.772	-0.76709	0.27881	0.0097656	5.074	12.876	51.989	0.010937	0.24228	-0.15088	-37.19	80.331	108.255	-0.015381	0.048584	-0.009033	NaN	NaN	NaN	NaN	NaN	NaN
1.532	14.137	25.4039	573.74	-0.77686	0.28809	0.01123	-20.8132	-14.4574	39.6818	0.03125	0.25479	-0.15947	-29.7127	20.6973	101.9	0.028809	0.03125	-0.019531	NaN	NaN	NaN	NaN	NaN	NaN
1.534	39.65869	22.2495	585.5912	-0.79639	0.30127	0.0058594	-23.831	4.1099	44.532	0.041211	0.26074	-0.15976	-28.494	57.431	73.5795	0.069824	0.0092773	-0.042969	NaN	NaN	NaN	NaN	NaN	NaN
1.536	23.436	44.5026	587.4011	-0.81347	0.31176	0.0051269	-53.149	26.0704	8.0492	0.053711	0.27148	-0.15967	-37.2572	2.8006	85.2822	0.091797	-0.0019531	-0.051758	NaN	NaN	NaN	NaN	NaN	NaN
1.538	25.7031	52.0285	614.6563	-0.8291	0.31934	0.0014648	-51.621	3.0177	21.08806	0.061035	0.27617	-0.16543	-44.234	57.73	57.244	0.13281	-0.018555	-0.075684	NaN	NaN	NaN	NaN	NaN	NaN
1.54	17.1523	43.9589	630.088	-0.85156	0.33203	-0.00048828	-25.0987	30.252	39.459	0.067578	0.28154	-0.16475	-39.9356	9.6309	74.097	0.1587	-0.033691	-0.080322	NaN	NaN	NaN	NaN	NaN	NaN
1.542	23.8144	46.2214	643.525	-0.86279	0.33838	-0.0039063	-36.6723	22.165	41.5261	0.072265	0.28233	-0.16435	-27.407	60.851	44.782	0.17822	-0.04541	-0.091797	NaN	NaN	NaN	NaN	NaN	NaN
1.544	25.1414	57.6951	636.7703	-0.88672	0.34961	-0.0087891	-35.5963	2.391029	49.406	0.072266	0.28291	-0.1667	-22.6428	6.727	41.602	0.19141	-0.044434	-0.11475	NaN	NaN	NaN	NaN	NaN	NaN
1.546	11.3961	66.919	672.459	-0.90185	0.35693	-0.010498	-25.3049	20.561968	53.912	0.069824	0.2832	-0.16406	-26.39	41.381	44.449	0.19189	-0.050781	-0.11621	NaN	NaN	NaN	NaN	NaN	NaN
1.548	6.6001	65.6965	689.982	-0.91602	0.3667	-0.012207	-17.4417	-33.501	59.69	0.064746	0.28613	-0.16416	-15.052	-1.8546	46.3234	0.19482	-0.061523	-0.12207	NaN	NaN	NaN	NaN	NaN	NaN
1.55	20.8494	68.293	692.565	-0.93555	0.375	-0.022949	-9.237	-54.053	72.765	0.048926	0.28985	-0.1668	-10.216	57.822	26.1579	0.18848	-0.065918	-0.12378	NaN	NaN	NaN	NaN	NaN	NaN
1.552	19.778	65.1852	706.437	-0.94727	0.375	-0.025879	-2.192	-19.9366	50.0601	0.026661	0.28906	-0.17149	14.92588	38.334	32.564	0.17432	-0.070801	-0.125	NaN	NaN	NaN	NaN	NaN	NaN
1.554	3.723	60.5408	708.8514	-0.96582	0.39453	-0.029297	-8.1101	-45.7332	56.144	-0.0038086	0.29404	-0.16728	32.932	75.364	14.4461	0.16748	-0.063965	-0.13232	NaN	NaN	NaN	NaN	NaN	NaN
1.556	-16.213	74.4028	741.228	-0.98316	0.39722	-0.034424	26.647	-19.97	102.06335	-0.048828	0.29736	-0.17041	30.6636	13.0679	31.0146	0.15771	-0.062988	-0.13916	NaN	NaN	NaN	NaN	NaN	NaN
1.558	10.238	87.375	747.83	-0.99365	0.40674	-0.042969	52.5262	-42.764	122.058	-0.1002	0.29804	-0.17666	31.81	14.6927	32.48	0.14941	-0.062988	-0.13232	NaN	NaN	NaN	NaN	NaN	NaN
1.56	9.7354	97.119	751.1101	-1.0098	0.41895	-0.045898	57.425	-65.772	164.8037	-0.15322	0.30742	-0.1669	41.47178	-32.265	23.3892	0.15014	-0.062012	-0.1294	NaN	NaN	NaN	NaN	NaN	NaN
1.562	3.38	86.9358	774.209	-1.0132	0.42139	-0.04834	80.511	-24.747	205.726	-0.21221	0.31289	-0.16768	51.0255	-10.667	23.972	0.13916	-0.064453	-0.12988	NaN	NaN	NaN	NaN	NaN	NaN
1.564	-0.439	88.108177	781.5489	-1.0215	0.43359	-0.05957	84.398	-31.8822	256.601	-0.28106	0.32686	-0.16767	28.5989	-23.13918	32.13	0.13135	-0.056152	-0.13623	NaN	NaN	NaN	NaN	NaN	NaN
1.566	41.06169	102.6568	802.031	-1.0313	0.44238	-0.066406	66.166	-10.3266	358.319	-0.35205	0.33887	-0.17236	29.483	16.7239	17.9742	0.12549	-0.050781	-0.12646	NaN	NaN	NaN	NaN	NaN	NaN
1.568	14.7054	117.204	820.07	-1.0337	0.45313	-0.067871	46.622	44.9104	415.67213	-0.43145	0.35537	-0.18028	44.213	23.5371	37.6148	0.12598	-0.047852	-0.12354	NaN	NaN	NaN	NaN	NaN	NaN
1.57	19.474	107.6175	815.281	-1.0488	0.46484	-0.071777	32.238	53.257	493.786	-0.51982	0.37021	-0.1876	39.93	38.563	30.912	0.12451	-0.047119	-0.11596	NaN	NaN	NaN	NaN	NaN	NaN
1.572	25.135	102.1443	840.838	-1.0556	0.47559	-0.073974	32.688	115.506	616.534	-0.61826	0.38975	-0.18994	11.015	25.81	33.2909	0.11865	-0.040039	-0.11426	NaN	NaN	NaN	NaN	NaN	NaN
1.574	36.5118	114.8991	846.718	-1.064	0.48779	-0.072754	5.60951	134.9855	712.74	-0.73692	0.41953	-0.18428	0.0700000000000003	13.6756	45.831	0.10693	-0.030762	-0.11377	NaN	NaN	NaN	NaN	NaN	NaN
1.576	44.48449	129.361	864.548	-1.0776	0.50244	-0.077637	13.1942	121.82	862.0593	-0.87305	0.44727	-0.17529	-5.863	4.8153	33.745	0.10205	-0.024902	-0.11914	NaN	NaN	NaN	NaN	NaN	NaN
1.578	33.1916	129.215	875.627	-1.0864	0.51514	-0.077637	2.9398	136.982	936.8214	-1.0381	0.48242	-0.15684	22.109	8.0992	43.1889	0.087402	-0.010254	-0.11426	NaN	NaN	NaN	NaN	NaN	NaN
1.58	54.9289	111.6174	869.57	-1.0957	0.52539	-0.068359	-1.8651	64.065	1000.2645	-1.2284	0.52627	-0.13525	3.676	12.3859	43.211	0.073731	0.0041504	-0.11353	NaN	NaN	NaN	NaN	NaN	NaN
1.582	34.496	117.2429	873.5194	-1.1064	0.53955	-0.070313	3.744	-9.272	1102.505	-1.4331	0.57783	-0.11025	-3.965	-9.816	24.6542	0.057129	0.018555	-0.11279	NaN	NaN	NaN	NaN	NaN	NaN
1.584	52.1628	133.3582	895.9276	-1.1113	0.55078	-0.070313	3.059	-54.036	1112.859	-1.6646	0.61104	-0.074805	-45.349	14.7474	13.7877	0.022949	0.03418	-0.11523	NaN	NaN	NaN	NaN	NaN	NaN
1.586	47.9399	137.1465	916.336	-1.1147	0.56885	-0.070313	-10.209	-153.7103	1127.69	-1.8887	0.66797	-0.043945	-37.983	3.4076	1.371	0.0063477	0.039063	-0.11133	NaN	NaN	NaN	NaN	NaN	NaN
1.588	43.8745	137.643	926.804	-1.1206	0.57275	-0.071777	-2.146	-163.8912	1102.292	-2.085	0.70644	0.0012696	-53.918	39.168	-4.0065	-0.026855	0.068359	-0.11914	NaN	NaN	NaN	NaN	NaN	NaN
1.59	45.0713	130.4266	927.411	-1.1304	0.58643	-0.075195	-32.7098	-170.848	1064.0055	-2.2538	0.7458	0.037207	-22.0851	9.7106	43.027	-0.047363	0.079834	-0.10962	NaN	NaN	NaN	NaN	NaN	NaN
1.592	43.7045	135.284	932.698	-1.1404	0.59595	-0.076905	-69.402	-181.48	1088.322	-2.3807	0.79541	0.04502	-33.6696	18.0295	25.654	-0.062012	0.09375	-0.11963	NaN	NaN	NaN	NaN	NaN	NaN
1.594	47.79214	140.7215	955.345	-1.1563	0.60156	-0.083984	-71.4071113	-132.486	1081.235	-2.4105	0.84688	0.048926	-15.529	-23.5422	32.579	-0.08252	0.11914	-0.11816	NaN	NaN	NaN	NaN	NaN	NaN
1.596	40.62508	157.922	957.484	-1.189	0.60986	-0.083008	-104.1424	-132.351	1041.13	-2.3672	0.89063	0.046387	-30.577	0.950000000000001	20.7373	-0.085938	0.13232	-0.12061	NaN	NaN	NaN	NaN	NaN	NaN
1.598	35.2679	158.3841	960.523	-1.2031	0.61523	-0.083008	-124.486	-110.711	1054.124	-2.236	0.94034	0.029297	-36.4783	-16.553	33.6316	-0.08252	0.15576	-0.12891	NaN	NaN	NaN	NaN	NaN	NaN
1.6	29.624	153.3004	947.628	-1.2446	0.62842	-0.088379	-106.195	-47.521	1043.258	-2.0426	0.95488	0.012793	-29.182	33.1749	40.62	-0.082276	0.18066	-0.13183	NaN	NaN	NaN	NaN	NaN	NaN
1.602	10.007	152.96796	946.2359	-1.2722	0.63892	-0.091797	-134.3	-27.722	1044.427	-1.8031	0.91153	-0.013769	4.038	12.7623	40.943	-0.07373	0.19922	-0.13623	NaN	NaN	NaN	NaN	NaN	NaN
1.604	34.1864	164.3692	962.149	-1.3003	0.64697	-0.098145	-122.565	30.157	1031.185	-1.559	0.82461	-0.044922	8.85	50.746	13.3875	-0.061035	0.21777	-0.1377	NaN	NaN	NaN	NaN	NaN	NaN
1.606	27.2563	178.1899	972.377	-1.3296	0.65869	-0.10205	-74.914	55.184	988.402	-1.332	0.72852	-0.075195	20.9774	0.2223	21.20287	-0.051758	0.22656	-0.13818	NaN	NaN	NaN	NaN	NaN	NaN
1.608	13.161	178.7565	980.754	-1.3413	0.66357	-0.10449	-33.749	11.164	988.2248	-1.139	0.63623	-0.098827	7.451	31.322	5.7703	-0.033691	0.23975	-0.14355	NaN	NaN	NaN	NaN	NaN	NaN
1.61	11.047	177.5998	981.162	-1.3574	0.67188	-0.11572	7.885	-15.586	985.7112	-0.98597	0.57734	-0.12666	11.545	-16.8427	13.06597	-0.014648	0.25195	-0.14355	NaN	NaN	NaN	NaN	NaN	NaN
1.612	36.5615	181.039	967.328	-1.3562	0.67505	-0.1189	12.3726	-85.396	983.269	-0.87227	0.55429	-0.15869	21.297	22.8973	-1.2974	-0.0048828	0.25879	-0.1416	NaN	NaN	NaN	NaN	NaN	NaN
1.614	6.142	200.1809	966.767	-1.3574	0.67969	-0.12451	10.209	-168.859	1056.566	-0.79619	0.56465	-0.18955	50.79	-13.0091	30.8675	0.016113	0.26611	-0.15479	NaN	NaN	NaN	NaN	NaN	NaN
1.616	6.656	205.9738	972.041	-1.3433	0.68506	-0.13135	23.8093	-193.023	1098.21	-0.74365	0.59229	-0.21484	30.219	36.049	25.3693	0.031494	0.27515	-0.156	NaN	NaN	NaN	NaN	NaN	NaN
1.618	10.189	195.0099	966.959	-1.3296	0.68799	-0.13379	18.3186	-264.098	1106.998	-0.71455	0.63193	-0.23916	45.9492	0.798900000000001	48.719	0.046875	0.28027	-0.16113	NaN	NaN	NaN	NaN	NaN	NaN
1.62	24.703	196.1417	966.367	-1.3081	0.68994	-0.13525	30.9619	-295.735	1121.88	-0.71172	0.67285	-0.26894	33.827	63.456	20.69258	0.06543	0.28174	-0.16895	NaN	NaN	NaN	NaN	NaN	NaN
1.622	17.912	209.8967	952.015852	-1.2866	0.68994	-0.13794	44.3039	-266.314	1116.9635	-0.71484	0.69941	-0.28613	28.0923	20.5189	53.5279	0.071777	0.28564	-0.17236	NaN	NaN	NaN	NaN	NaN	NaN
1.624	25.086	213.9567	957.69	-1.2676	0.69141	-0.13867	9.982	-275.337	1177.2029	-0.74102	0.71152	-0.28262	17.412	50.1852	34.8428	0.087402	0.29248	-0.18555	NaN	NaN	NaN	NaN	NaN	NaN
1.626	52.868	209.4161	966.327	-1.2476	0.69189	-0.13965	53.3033	-223.953	1253.734	-0.7915	0.72119	-0.26514	25.1663	-25.6726	68.241	0.093261	0.302	-0.19067	NaN	NaN	NaN	NaN	NaN	NaN
1.628	28.5961	210.8651	951.874	-1.2456	0.69824	-0.13818	46.5075	-181.645	1264.024	-0.88682	0.73584	-0.23408	27.734	-20.086	65.708	0.090332	0.30762	-0.19775	NaN	NaN	NaN	NaN	NaN	NaN
1.63	18.654	219.1918	950.1321	-1.2559	0.69531	-0.12793	61.3831	-198.643	1319.686	-1.0137	0.75586	-0.20293	18.214	-89.683	93.738	0.075684	0.32178	-0.20557	NaN	NaN	NaN	NaN	NaN	NaN
1.632	29.6532	210.7103	952.8953	-1.2801	0.70142	-0.13159	119.268	-142.039	1319.178	-1.1609	0.78828	-0.17949	3.149	-51.671	102.873	0.063477	0.32813	-0.20117	NaN	NaN	NaN	NaN	NaN	NaN
1.634	50.7281	201.8116	974.489	-1.3208	0.70947	-0.12891	85.31	-143.173	1289.845	-1.299	0.82559	-0.15977	-13.902	-82.4143	142.3403	0.021484	0.34229	-0.20264	NaN	NaN	NaN	NaN	NaN	NaN
1.636	32.8406	209.6738	970.2926	-1.3906	0.71484	-0.11816	117.215	-140.116	1296.486	-1.4312	0.86768	-0.16357	0.82	-28.111	152.26	-0.016113	0.35864	-0.19898	NaN	NaN	NaN	NaN	NaN	NaN
1.638	28.2878	222.2213	971.82313	-1.4277	0.72168	-0.11182	119.25	-71.269	1244.646	-1.5376	0.91904	-0.17119	6.777	-31.6479	225.129	-0.068848	0.36768	-0.19824	NaN	NaN	NaN	NaN	NaN	NaN
1.64	50.6832	242.8297	1004.756	-1.5059	0.73438	-0.10303	39.604	-101.277	1259.875	-1.6233	0.96377	-0.17666	9.032	2.167	278.1511	-0.13623	0.38916	-0.18994	NaN	NaN	NaN	NaN	NaN	NaN
1.642	46.6141	271.6011	1032.458	-1.5595	0.73779	-0.095947	59.9781	-91.5	1309.663	-1.6859	1.0013	-0.18056	-5.494	-19.5853	373.859	-0.17578	0.39844	-0.18799	NaN	NaN	NaN	NaN	NaN	NaN
1.644	49.82597	301.624	1050.767	-1.6152	0.73828	-0.085449	34.5227	-100.2188	1317.372	-1.7494	1.0334	-0.19024	-14.852	18.3458	461.4372	-0.26221	0.42334	-0.17969	NaN	NaN	NaN	NaN	NaN	NaN
1.646	61.8883	292.8825	1062.8015	-1.6738	0.74512	-0.075195	-10.78	-160.689	1398.3419	-1.8027	1.0605	-0.20508	-70.922	19.6121	565.6769	-0.33764	0.4436	-0.17554	NaN	NaN	NaN	NaN	NaN	NaN
1.648	61.6278	288.5498	1098.3807	-1.6987	0.74951	-0.070313	27.7034	-126.085	1444.508	-1.8508	1.082	-0.21455	-83.513	66.105	664.295	-0.42285	0.45996	-0.16455	NaN	NaN	NaN	NaN	NaN	NaN
1.65	58.604	299.8391	1124.172	-1.7476	0.75244	-0.063965	-7.574	-132.37	1448.007	-1.8871	1.0969	-0.22978	-87.855	83.161	786.6985	-0.56592	0.49072	-0.14697	NaN	NaN	NaN	NaN	NaN	NaN
1.652	62.688	322.229	1142.724	-1.7571	0.75659	-0.059814	-1.522	-167.428	1496.041	-1.9164	1.109	-0.25283	-69.411	112.127	887.8924	-0.64746	0.50977	-0.13184	NaN	NaN	NaN	NaN	NaN	NaN
1.654	81.616	326.331	1133.245	-1.7632	0.76025	-0.058105	27.651	-118.5539	1483.484	-1.9312	1.1102	-0.28379	-80.168	105.1768	1023.309	-0.83984	0.5498	-0.10547	NaN	NaN	NaN	NaN	NaN	NaN
1.656	82.818	305.806	1125.7799	-1.7461	0.76367	-0.046875	0.425000000000001	-164.77	1498.9258	-1.9316	1.1055	-0.30273	-63.194	78.504	1096.08717	-1.0078	0.58715	-0.06958	NaN	NaN	NaN	NaN	NaN	NaN
1.658	100.356	281.0305	1126.7347	-1.7305	0.76172	-0.045898	46.0762	-153.768	1548.269	-1.9255	1.089	-0.32432	-68.32	21.5394	1151.0989	-1.1992	0.62012	-0.032715	NaN	NaN	NaN	NaN	NaN	NaN
1.66	82.037	265.9665	1144.9622	-1.6753	0.76221	-0.036621	36.4288	-101.0951	1512.0514	-1.9226	1.0641	-0.35254	-35.1217	-34.165	1182.313	-1.4961	0.67578	0.02832	NaN	NaN	NaN	NaN	NaN	NaN
1.662	107.669	249.3013	1140.6465	-1.6267	0.75757	-0.033935	15.983	-128.1307	1522.4561	-1.9118	1.0437	-0.36894	-26.6266	-79.6293	1182.339	-1.6563	0.71094	0.058594	NaN	NaN	NaN	NaN	NaN	NaN
1.664	127.322	232.688	1129.367	-1.5659	0.74854	-0.029785	40.897	-62.494	1516.8022	-1.896	1.0204	-0.38613	30.2852	-139.6493	1179.409	-2.0171	0.771	0.12061	NaN	NaN	NaN	NaN	NaN	NaN
1.666	122.8727	200.446	1126.287	-1.4839	0.74268	-0.01709	-2.121	-43.186	1482.1079	-1.8857	0.99805	-0.39893	34.3295	-161.094	1149.711	-2.2771	0.82641	0.13941	NaN	NaN	NaN	NaN	NaN	NaN
1.668	101.5554	173.1112	1120.8486	-1.4434	0.73633	-0.016602	-1.992	-40.51	1514.103	-1.8744	0.97764	-0.40947	24.629	-188.607	1130.105	-2.5015	0.88916	0.13623	NaN	NaN	NaN	NaN	NaN	NaN
1.67	108.422	152.1256	1121.1098	-1.3726	0.73096	-0.0039063	36.851	34.1997	1503.286	-1.8734	0.94854	-0.41905	-16.8638	-164.925	1087.112	-2.6758	0.98633	0.11523	NaN	NaN	NaN	NaN	NaN	NaN
1.672	143.9182	141.4443	1114.553	-1.3205	0.73071	0.0061033	8.7027	3.3178	1482.914	-1.8815	0.92471	-0.42451	-27.119	-157.751	1070.488	-2.6973	1.0381	0.11475	NaN	NaN	NaN	NaN	NaN	NaN
1.674	113.0734	149.9801	1103.9184	-1.2734	0.7334	0.015137	51.7919	20.2184	1534.8121	-1.8996	0.90937	-0.43379	-53.3159	-113.046	1044.5271	-2.6128	1.1694	0.071777	NaN	NaN	NaN	NaN	NaN	NaN
1.676	105.6341	132.0827	1118.557	-1.2173	0.74268	0.025879	42.1428	52.691	1514.7724	-1.9233	0.896	-0.43701	-51.8883	-110.942	1051.778	-2.4109	1.2282	0.037598	NaN	NaN	NaN	NaN	NaN	NaN
1.678	126.0436	123.3045	1107.574	-1.1948	0.74951	0.030273	27.435	-2.8246	1525.6787	-1.9417	0.88681	-0.44219	-55.213	-62.953	1052.428	-2.1172	1.2207	0.0019531	NaN	NaN	NaN	NaN	NaN	NaN
1.68	134.4036	114.7634	1081.442	-1.1499	0.76025	0.040039	90.57	27.287	1557.106	-1.9672	0.87852	-0.44453	-75.853	-80.937	1098.107	-1.668	1.0742	-0.066406	NaN	NaN	NaN	NaN	NaN	NaN
1.682	104.5254	108.408	1067.7362	-1.1179	0.76684	0.043945	49.4519	7.209	1540.724	-1.9808	0.87734	-0.45195	-80.224	-53.992	1088.7517	-1.4609	0.97461	-0.10303	NaN	NaN	NaN	NaN	NaN	NaN
1.684	101.2086	82.5344	1058.889	-1.0898	0.77441	0.048828	64.9602	-36.399	1562.281	-1.9879	0.86719	-0.44844	-49.229	-77.425	1124.526	-1.1011	0.8208	-0.1709	NaN	NaN	NaN	NaN	NaN	NaN
1.686	95.2267	57.2139	1063.17	-1.0547	0.78125	0.05127	128.444	-1.845	1556.496	-1.98	0.85986	-0.44629	-13.981	-94.417	1136.12477	-0.90943	0.7478	-0.21387	NaN	NaN	NaN	NaN	NaN	NaN
1.688	84.79544	70.195	1039.6734	-1.0459	0.79004	0.049805	46.3013	-42.638	1544.59	-1.9696	0.85733	-0.44717	21.641	-157.156	1172.1494	-0.77002	0.71826	-0.25391	NaN	NaN	NaN	NaN	NaN	NaN
1.69	87.7	67.98	1028.973137	-1.0156	0.7959	0.05127	57.855	-46.048	1574.203	-1.9488	0.85283	-0.4457	18.028	-213.933	1205.8504	-0.64404	0.74658	-0.29736	NaN	NaN	NaN	NaN	NaN	NaN
1.692	59.17337	40.9046	1025.0853	-0.99905	0.80566	0.052002	51.7355	-12.344	1529.985	-1.9258	0.84463	-0.44531	-12.565	-263.1572	1256.0879	-0.61426	0.77002	-0.30615	NaN	NaN	NaN	NaN	NaN	NaN
1.694	29.814	30.0365	1017.567	-0.979	0.81592	0.058594	33.642	-38.3472	1497.327	-1.9028	0.84229	-0.44639	-46.731	-307.419	1276.146	-0.62256	0.84619	-0.31787	NaN	NaN	NaN	NaN	NaN	NaN
1.696	18.946	15.0943	1002.414	-0.95898	0.82715	0.058594	59.6332	27.777	1485.907	-1.8901	0.84424	-0.45068	-57.554	-339.813	1342.2419	-0.66797	0.92114	-0.30859	NaN	NaN	NaN	NaN	NaN	NaN
1.698	11.4738	19.4147	994.094	-0.95459	0.83057	0.057617	13.027	54.2399	1462.641	-1.8676	0.85176	-0.44903	-70.1245	-326.759	1381.2923	-0.73584	0.99268	-0.29541	NaN	NaN	NaN	NaN	NaN	NaN
1.7	-11.7864	-1.3215	991.332	-0.94531	0.83984	0.062012	24.285	44.1873	1494.801	-1.8426	0.85	-0.44482	-51.4478	-319.51	1444.643	-0.82275	1.0122	-0.27881	NaN	NaN	NaN	NaN	NaN	NaN
1.702	-42.0903	-24.0164	991.261	-0.94214	0.84839	0.066162	82.104	113.221	1470.61	-1.8132	0.84414	-0.44521	-29.956	-270.473	1496.317	-0.88037	1.0024	-0.26318	NaN	NaN	NaN	NaN	NaN	NaN
1.704	-32.481	-54.8236	971.694	-0.94336	0.84766	0.070801	10.7579	80.084	1434.1248	-1.775	0.8375	-0.44101	-29.5392	-226.217	1541.168	-1.0742	0.97266	-0.22656	NaN	NaN	NaN	NaN	NaN	NaN
1.706	-49.353	-82.5487	962.465	-0.94336	0.85742	0.071777	44.7333	91.501	1427.1281	-1.7383	0.83008	-0.43848	-18.183	-187.94	1533.958	-1.2685	0.99512	-0.19824	NaN	NaN	NaN	NaN	NaN	NaN
1.708	-51.069	-94.7955	956.905	-0.94898	0.85864	0.074463	37.776	125.262	1388.0114	-1.7048	0.82373	-0.43115	18.052	-158.992	1563.437	-1.4556	1.0317	-0.17627	NaN	NaN	NaN	NaN	NaN	NaN
1.71	-65.01	-95.7352	939.69	-0.9541	0.86816	0.084961	2.474	83.5303	1401.048	-1.6786	0.81289	-0.42344	60.419	-131.535	1543.437	-1.6699	1.1113	-0.16602	NaN	NaN	NaN	NaN	NaN	NaN
1.712	-62.205	-111.229	930.408	-0.95898	0.875	0.084961	40.318	116.125	1384.941	-1.6582	0.81055	-0.41718	60.4951	-120.091	1537.332	-1.752	1.1445	-0.16992	NaN	NaN	NaN	NaN	NaN	NaN
1.714	-60.867	-130.3977	918.863	-0.96094	0.87891	0.084473	-8.824	81.194	1347.037	-1.633	0.80742	-0.40977	103.799	-102.629	1537.701	-1.8828	1.1914	-0.16406	NaN	NaN	NaN	NaN	NaN	NaN
1.716	-80.4	-147.5566	905.24	-0.97412	0.88525	0.086914	-15.959	18.136	1361.983	-1.6074	0.7959	-0.40332	68.848	-100.119	1535.4439	-1.9428	1.2119	-0.17285	NaN	NaN	NaN	NaN	NaN	NaN
1.718	-57.162	-149.687	887.116	-0.9856	0.89087	0.08667	26.6348	55.473	1341.374	-1.5803	0.78926	-0.38887	40.7656	-74.607	1539.655	-1.9902	1.2148	-0.18359	NaN	NaN	NaN	NaN	NaN	NaN
1.72	-44.9736	-135.980144	878.6951	-0.99414	0.89258	0.086914	-19.724	37.426	1331.379	-1.5535	0.7789	-0.37949	20.86856	-89.5078	1576.555	-2.0273	1.2168	-0.20459	NaN	NaN	NaN	NaN	NaN	NaN
1.722	-49.565	-136.8729	890.947	-1.0176	0.90234	0.086426	27.453	80.523	1325.31	-1.5285	0.76719	-0.36777	20.0855	-94.9733	1580.089	-2.0366	1.2153	-0.21924	NaN	NaN	NaN	NaN	NaN	NaN
1.724	-55.77	-136.6921	883.751	-1.0283	0.9043	0.085449	29.0593	126.078	1276.8401	-1.5008	0.75	-0.35039	14.326	-115.856	1645.6	-2.0371	1.2129	-0.24854	NaN	NaN	NaN	NaN	NaN	NaN
1.726	-49.489	-139.8881	872.769	-1.0464	0.90479	0.080566	20.395	90.249	1257.6519	-1.4707	0.73828	-0.33887	26.325	-117.501	1687.715	-2.024	1.1997	-0.2705	NaN	NaN	NaN	NaN	NaN	NaN
1.728	-41.5126	-132.0045	893.053	-1.0594	0.90502	0.082276	86.932	134.07444	1227.8851	-1.4444	0.71787	-0.32334	26.723	-119.838	1713.298	-1.9917	1.186	-0.28516	NaN	NaN	NaN	NaN	NaN	NaN
1.73	-36.4161	-142.3138	899.125	-1.0698	0.89795	0.074219	51.9091	150.9672	1202.6756	-1.4171	0.69814	-0.30938	42.1	-118.45335	1719.492	-1.9507	1.1509	-0.30322	NaN	NaN	NaN	NaN	NaN	NaN
1.732	-38.9555	-153.95503	917.465	-1.082	0.89844	0.061523	51.4728	151.6515	1221.655	-1.3831	0.67822	-0.29727	30.1547	-124.056	1692.581	-1.9336	1.1387	-0.31445	NaN	NaN	NaN	NaN	NaN	NaN
1.734	-20.573	-158.5757	897.78974	-1.0879	0.89453	0.056641	83.989	213.159	1178.408	-1.3497	0.66397	-0.27354	52.802	-108.578	1700.602	-1.9038	1.1079	-0.33252	NaN	NaN	NaN	NaN	NaN	NaN
1.736	-29.6845	-159.0082	916.7885	-1.0952	0.88818	0.054199	43.7371	167.9402	1139.7256	-1.3159	0.64307	-0.26611	40.88	-103.0425	1689.788	-1.8875	1.093	-0.34131	NaN	NaN	NaN	NaN	NaN	NaN
1.738	-9.937	-165.9841	943.938	-1.1006	0.87647	0.049805	58.4599	181.0155	1100.833	-1.2859	0.62041	-0.2538	58.721	-59.991	1683.048	-1.8809	1.0742	-0.3418	NaN	NaN	NaN	NaN	NaN	NaN
1.74	-24.95923	-189.583	951.437	-1.1011	0.86963	0.048828	45.0556	204.2485	1049.631	-1.2502	0.59941	-0.24189	19.34	-35.614	1647.281	-1.8789	1.0605	-0.34717	NaN	NaN	NaN	NaN	NaN	NaN
1.742	-28.3409	-192.648	949.141	-1.1016	0.85352	0.046387	2.445	164.542	1050.377	-1.2139	0.57871	-0.22471	-18.784	-4.136	1612.3963	-1.8887	1.0566	-0.35059	NaN	NaN	NaN	NaN	NaN	NaN
1.744	-18.875	-180.134	975.1399	-1.0996	0.8457	0.046387	41.635	211.306	1033.9474	-1.1843	0.55791	-0.21143	-60.8057	-5.9739	1602.0833	-1.9023	1.0469	-0.34961	NaN	NaN	NaN	NaN	NaN	NaN
1.746	-24.6639	-177.738	991.156	-1.0938	0.83203	0.045898	36.4775	193.6783	996.373	-1.1523	0.53223	-0.20215	-64.0173	32.0428	1602.0441	-1.9165	1.0406	-0.34009	NaN	NaN	NaN	NaN	NaN	NaN
1.748	-22.7061	-179.152	998.1	-1.0798	0.82544	0.048584	39.621	147.302	990.818	-1.1188	0.51435	-0.18506	-60.9817	60.3554	1595.2652	-1.9336	1.0332	-0.33398	NaN	NaN	NaN	NaN	NaN	NaN
1.75	-33.515	-176.37	991.807	-1.0635	0.81836	0.046875	51.008	187.0956	955.008	-1.0859	0.49551	-0.16904	-50.5442	85.962	1596.00842	-1.9546	1.0298	-0.33496	NaN	NaN	NaN	NaN	NaN	NaN
1.752	-24.5506	-172.443	996.4244	-1.0449	0.80859	0.045898	4.2733	148.3207	954.76	-1.0562	0.48067	-0.15655	-23.966	90.396	1586.198	-1.9624	1.0239	-0.32959	NaN	NaN	NaN	NaN	NaN	NaN
1.754	-44.8662	-165.9466	1018.198	-1.0327	0.80713	0.055664	41.3305	186.176	938.4	-1.0282	0.46865	-0.13994	-14.629	68.08	1589.078	-1.9702	1.0259	-0.32715	NaN	NaN	NaN	NaN	NaN	NaN
1.756	-64.769	-165.0448	998.668	-1.02	0.7915	0.053223	23.8289	217.627	876.9491	-0.99365	0.44824	-0.12207	-7.471	64.8	1573.023	-1.9663	1.0298	-0.32568	NaN	NaN	NaN	NaN	NaN	NaN
1.758	-43.4229	-149.9643	984.1178	-1.0234	0.7832	0.051514	-22.3016	178.9976	864.7103	-0.97061	0.43194	-0.10508	20.427	42.77	1587.7201	-1.9644	1.0288	-0.32373	NaN	NaN	NaN	NaN	NaN	NaN
1.76	-36.923	-138.68934	991.8345	-1.0278	0.77881	0.054688	4.817	222.916	802.756	-0.94434	0.41758	-0.09707	39.094	19.4176	1577.5802	-1.957	1.0254	-0.32666	NaN	NaN	NaN	NaN	NaN	NaN
1.762	-49.891	-130.1192	982.6414	-1.0566	0.76758	0.061035	-26.3146	200.203	770.513	-0.9166	0.4043	-0.076757	37.87	13.6833	1595.409	-1.936	1.0225	-0.33008	NaN	NaN	NaN	NaN	NaN	NaN
1.764	-33.3428	-119.238	983.902	-1.0659	0.76465	0.057129	-22.8839	184.356	771.627	-0.8833	0.39053	-0.059277	40.399	23.2303	1558.919	-1.9102	1.0117	-0.32813	NaN	NaN	NaN	NaN	NaN	NaN
1.766	-41.183	-118.33	985.778	-1.0898	0.76123	0.05957	-13.2806	215.892	712.335	-0.85352	0.37646	-0.045898	25.5203	34.231	1547.922	-1.8882	1.0103	-0.33057	NaN	NaN	NaN	NaN	NaN	NaN
1.768	-54.458	-128.69	985.77051	-1.0984	0.75903	0.062256	-51.187	167.9525	694.555	-0.81953	0.36416	-0.02998	28.2294	69.52	1530.5	-1.8823	1.0044	-0.32764	NaN	NaN	NaN	NaN	NaN	NaN
1.77	-61.854	-136.842	999.519	-1.1035	0.75684	0.06543	-4.2849	187.8675	662.006	-0.78701	0.34482	-0.015722	16.533	76.851	1515.063	-1.8594	1.002	-0.32813	NaN	NaN	NaN	NaN	NaN	NaN
1.772	-38.752	-149.1099	988.0338	-1.1016	0.74805	0.067871	6.3748	205.062	609.082	-0.74912	0.33076	-0.0016602	29.852	118.453	1460.432	-1.8377	0.99537	-0.32373	NaN	NaN	NaN	NaN	NaN	NaN
1.774	-33.702	-134.0715	991.222	-1.103	0.74658	0.067383	-1.784	173.791	590.0962	-0.71338	0.31436	0.011426	27.219	135.325	1478.103	-1.8125	0.98828	-0.31885	NaN	NaN	NaN	NaN	NaN	NaN
1.776	-26.825	-129.988972	995.377	-1.0898	0.73438	0.064453	14.574	206.068	550.977	-0.68066	0.30078	0.023926	65.8085	171.284	1420.506	-1.7734	0.97852	-0.32324	NaN	NaN	NaN	NaN	NaN	NaN
1.778	-39.931	-143.067	980.766	-1.0776	0.72607	0.064942	-0.542999999999999	185.657	526.40429	-0.64024	0.28027	0.033789	42.31756	175.419	1432.413	-1.7476	0.9751	-0.32568	NaN	NaN	NaN	NaN	NaN	NaN
1.78	-17.2897	-147.6585	974.264	-1.0601	0.71338	0.068848	28.733	159.457	522.281	-0.5999	0.26435	0.047461	55.92179	208.389	1370.333	-1.7012	0.95313	-0.31592	NaN	NaN	NaN	NaN	NaN	NaN
1.782	-16.3717	-141.4271	984.386	-1.0371	0.70508	0.063965	36.756	190.521	481.55	-0.56084	0.24873	0.060352	30.6207	212.767	1341.2581	-1.6556	0.93872	-0.30957	NaN	NaN	NaN	NaN	NaN	NaN
1.784	-3.4664	-132.051	985.799	-1.0293	0.70215	0.06543	16.21425	120.2134	493.023	-0.51563	0.22715	0.066211	58.28426	243.608	1296.682	-1.6108	0.91943	-0.30029	NaN	NaN	NaN	NaN	NaN	NaN
1.786	1.6912	-128.8274	970.022	-1.0039	0.69336	0.062988	56.609	124.888	476.024	-0.47607	0.21191	0.077637	27.0895	238.048	1295.435	-1.5483	0.90479	-0.29248	NaN	NaN	NaN	NaN	NaN	NaN
1.788	10.4737	-111.65796	940.9236	-0.97924	0.68188	0.060546	31.0115	128.126	425.086	-0.43174	0.19414	0.087207	12.029	262.047	1248.007	-1.5249	0.88525	-0.2915	NaN	NaN	NaN	NaN	NaN	NaN
1.79	8.200604	-86.7117	936.7688	-0.95654	0.67725	0.05957	18.263	102.339	397.674	-0.38789	0.18028	0.099024	-16.303	208.05	1243.128	-1.4683	0.86377	-0.26563	NaN	NaN	NaN	NaN	NaN	NaN
1.792	13.1573	-72.7248	929.4988	-0.92529	0.6665	0.055664	61.373	142.3269	351.808	-0.33984	0.16972	0.11309	-41.1892	199.4377	1165.6229	-1.4251	0.84791	-0.25659	NaN	NaN	NaN	NaN	NaN	NaN
1.794	9.8472	-72.3828	922.3198	-0.90967	0.6626	0.053223	25.027	110.382	323.667	-0.29424	0.15186	0.1209	-81.298	161.252	1173.587	-1.3848	0.82324	-0.24365	NaN	NaN	NaN	NaN	NaN	NaN
1.796	-9.3413	-70.107	922.24	-0.87842	0.64795	0.054199	69.6331	85.405	331.995	-0.24268	0.13672	0.12939	-56.6775	175.5813	1128.612	-1.3296	0.79736	-0.2251	NaN	NaN	NaN	NaN	NaN	NaN
1.798	0.136999999999999	-75.1402	912.957	-0.85547	0.63819	0.050049	62.318	98.4715	289.434	-0.18789	0.12578	0.13887	-58.9081	178.018	1132.382	-1.3022	0.7876	-0.21582	NaN	NaN	NaN	NaN	NaN	NaN
1.8	1.4846	-77.9172	907.873	-0.83008	0.62891	0.047852	20.133	60.831	262.5494	-0.13721	0.11396	0.1461	-25.696	228.231	1065.666	-1.2456	0.7583	-0.20068	NaN	NaN	NaN	NaN	NaN	NaN
1.802	-1.0191	-76.4767	887.077	-0.79639	0.61475	0.041016	61.801	78.3689	266.612	-0.079004	0.10303	0.14844	-45.5621	225.70231	1037.527	-1.1928	0.73364	-0.18384	NaN	NaN	NaN	NaN	NaN	NaN
1.804	7.0347	-75.3	863.9761	-0.7793	0.61133	0.031738	35.5834	85.6761	231.788	-0.024805	0.087403	0.15644	-29.1914	263.484	979.8267	-1.1479	0.71143	-0.17334	NaN	NaN	NaN	NaN	NaN	NaN
1.806	-17.3556	-80.9828	857.8265	-0.74756	0.59424	0.036133	7.08	60.9707	224.0432	0.02832	0.073242	0.16211	-46.21	262.432	964.098	-1.0815	0.67822	-0.16504	NaN	NaN	NaN	NaN	NaN	NaN
1.808	-22.0145	-87.3988	847.241	-0.71948	0.58081	0.035645	38.3363	99.5851	177.6391	0.07041	0.064356	0.16357	-16.209	274.597	917.8095	-1.0488	0.66602	-0.1543	NaN	NaN	NaN	NaN	NaN	NaN
1.81	-16.5358	-92.149	831.536	-0.69189	0.5708	0.03418	-6.1481	77.2877	157.0719	0.11319	0.046387	0.16328	-29.1401	268.318	894.814	-0.98779	0.63135	-0.13916	NaN	NaN	NaN	NaN	NaN	NaN
1.812	-12.647	-76.344	823.588	-0.65967	0.55518	0.021973	-16.9235	63.15761	172.117	0.1456	0.041308	0.1625	-1.795	267.164	822.287	-0.94116	0.60718	-0.12598	NaN	NaN	NaN	NaN	NaN	NaN
1.814	-26.034	-75.55086	831.017	-0.646	0.54932	0.023438	6.06	72.9475	148.9041	0.18145	0.027148	0.15898	-24.24047	236.431	782.871	-0.89746	0.58203	-0.10889	NaN	NaN	NaN	NaN	NaN	NaN
1.816	-18.5619	-75.8853	808.477	-0.61719	0.53711	0.018555	-29.2671	30.0511	134.1015	0.2124	0.018555	0.15967	-32.11362	238.2715	736.4162	-0.82764	0.54639	-0.094238	NaN	NaN	NaN	NaN	NaN	NaN
1.818	-36.8306	-78.0888	769.688	-0.59204	0.52588	0.015381	-13.56	40.541	132.32	0.24658	0.0081056	0.16435	-54.0065	229.54	699.8489	-0.79932	0.53076	-0.085449	NaN	NaN	NaN	NaN	NaN	NaN
1.82	-40.695	-61.6347	758.659	-0.57422	0.51563	0.012695	-13.521	17.7211	107.652	0.26328	-0.003125	0.16035	-12.553	255.373	671.355	-0.74023	0.50293	-0.066895	NaN	NaN	NaN	NaN	NaN	NaN
1.822	-46.986	-55.8133	755.268	-0.5498	0.49902	0.0068359	-15.803	-8.9224	121.613	0.2875	-0.014844	0.16387	14.191	242.8216	638.117	-0.69409	0.47778	-0.055664	NaN	NaN	NaN	NaN	NaN	NaN
1.824	-31.338	-49.7067	743.74	-0.53467	0.49658	0.0048828	16.0126	35.3366	94.0045	0.29287	-0.015723	0.16035	36.7913	216.5498	589.212	-0.64893	0.45557	-0.04248	NaN	NaN	NaN	NaN	NaN	NaN
1.826	-13.69971	-46.383	714.456	-0.51807	0.48145	0.0019531	-26.761	36.7552	54.944	0.29199	-0.019043	0.16211	37.7413	189.202	561.653	-0.59326	0.42383	-0.027344	NaN	NaN	NaN	NaN	NaN	NaN
1.828	-36.61	-38.94	705.084	-0.50219	0.46997	0.0029296	3.583	51.404	88.9787	0.29375	-0.021289	0.16524	43.1822	175.15	532.609	-0.56299	0.40869	-0.023438	NaN	NaN	NaN	NaN	NaN	NaN
1.83	-35.236	-39.1997	677.789	-0.48926	0.46289	-0.0014648	2.485	60.855	66.375	0.29414	-0.023829	0.16777	47.8506	174.494	499.764	-0.50537	0.38525	-0.0048828	NaN	NaN	NaN	NaN	NaN	NaN
1.832	-13.81964	-42.996	663.494	-0.47266	0.4502	0.00048828	-19.709	18.8322	59.96	0.28672	-0.024219	0.1752	48.51276	164.131	499.963	-0.469	0.36255	0.0019531	NaN	NaN	NaN	NaN	NaN	NaN
1.834	-3.5544	-31.2559	635.5055	-0.46582	0.44336	-0.0053711	27.3824	44.913	73.965	0.27441	-0.026758	0.17187	44.319	162.3587	431.389	-0.42627	0.3418	0.014648	NaN	NaN	NaN	NaN	NaN	NaN
1.836	-16.7715	-31.0017187	643.205	-0.45264	0.43213	-0.0043945	0.9179	41.041	41.725	0.26123	-0.024902	0.17773	23.064	162.0935	384.74	-0.36572	0.31787	0.035156	NaN	NaN	NaN	NaN	NaN	NaN
1.838	-4.94694	-38.689	629.533	-0.44019	0.42407	-0.0039063	26.0771	15.0178	63.665	0.24267	-0.028418	0.1834	21.522	163.905	322.8449	-0.3335	0.30518	0.030273	NaN	NaN	NaN	NaN	NaN	NaN
1.84	-8.9427	-44.059	617.814	-0.43311	0.41162	-0.0043945	55.225	36.902	53.237	0.2292	-0.025195	0.18477	-6.443	146.499	302.4396	-0.26074	0.28369	0.038086	NaN	NaN	NaN	NaN	NaN	NaN
1.842	-2.88695	-33.81587	604.772	-0.41895	0.40234	-0.003418	-4.455	21.62189	13.118	0.21631	-0.021289	0.18711	-24.825	137.8981	261.97	-0.20801	0.26123	0.04834	NaN	NaN	NaN	NaN	NaN	NaN
1.844	1.4809	-33.2048	601.871	-0.41236	0.39136	-0.0024414	41.0345	35.634	15.185	0.19883	-0.026367	0.19082	-25.4587	102.7987	249.1294	-0.15088	0.24902	0.051758	NaN	NaN	NaN	NaN	NaN	NaN
1.846	3.038	-30.359	589.718	-0.40234	0.38232	-0.0048828	48.88	55.849	6.2008	0.17578	-0.022461	0.19141	-29.475	109.4118	185.0602	-0.067871	0.22607	0.0625	NaN	NaN	NaN	NaN	NaN	NaN
1.848	14.2544	-19.7721	571.908	-0.38818	0.36768	-0.0043945	24.104	21.9956	31.11	0.14951	-0.02168	0.19365	-0.989000000000001	83.5533	191.995	-0.022949	0.21045	0.067871	NaN	NaN	NaN	NaN	NaN	NaN
1.85	11.375	-19.2358	550.206	-0.38135	0.36035	-0.0048828	44.0497	24.5679	50.59	0.12998	-0.024707	0.19804	8.59	102.725	152.469	0.054199	0.18457	0.077148	NaN	NaN	NaN	NaN	NaN	NaN
1.852	1.147	-20.8074	531.259	-0.36816	0.35352	-0.0014648	44.104	0.0332999999999997	27.19788	0.10459	-0.022754	0.20273	-32.9695	93.962	166.617	0.11743	0.16529	0.082763	NaN	NaN	NaN	NaN	NaN	NaN
1.854	1.7047	-31.8316	534.209	-0.35449	0.33594	-0.0063479	28.7228	-13.7982	44.467	0.084863	-0.023828	0.20196	-31.506	128.077	129.769	0.17188	0.14307	0.088867	NaN	NaN	NaN	NaN	NaN	NaN
1.856	0.56767	-24.8691	500.68502	-0.34131	0.32617	-0.0092773	54.699	14.17306	58.482	0.067871	-0.023438	0.20166	-45.8485	101.255	131.331	0.2334	0.11426	0.096191	NaN	NaN	NaN	NaN	NaN	NaN
1.858	-1.78406	-10.3644	504.6409	-0.32568	0.31299	-0.0097656	20.7214	-3.2078	36.28	0.046289	-0.015527	0.2044	-25.671	117.162	101.148	0.25732	0.11084	0.10107	NaN	NaN	NaN	NaN	NaN	NaN
1.86	-19.2239	-1.3983	486.3161	-0.32373	0.30469	-0.0097656	3.629	7.4956	45.1147	0.025781	-0.011621	0.20566	-43.0398	66.9658	113.81	0.31982	0.084961	0.1123	NaN	NaN	NaN	NaN	NaN	NaN
1.862	-9.1124	-6.006331	466.817	-0.30664	0.29297	-0.0078125	9.5692	28.50622	15.4937	0.0078125	-0.0018555	0.20605	-21.761	62.073	96.747	0.33496	0.064209	0.125	NaN	NaN	NaN	NaN	NaN	NaN
1.864	-11.9648	-7.3827	456.7994	-0.29834	0.28393	-0.011231	-22.2687	1.63781	25.9748	-0.0081056	0.0069336	0.21143	-31.3878	14.574	98.75	0.34619	0.055664	0.12158	NaN	NaN	NaN	NaN	NaN	NaN
1.866	-18.8067	2.6932	450.0135	-0.28955	0.2749	-0.012695	12.8679	19.1946	49.4559	-0.022461	0.011719	0.21289	-43.781	40.857	65.807	0.3584	0.058594	0.12695	NaN	NaN	NaN	NaN	NaN	NaN
1.868	-35.745	-5.9832	449.074	-0.27783	0.26172	-0.0097656	-13.20412	-3.95929	20.497	-0.034375	0.017871	0.21846	-26.4029	17.151	81.821	0.37061	0.044922	0.13867	NaN	NaN	NaN	NaN	NaN	NaN
1.87	-30.033	-0.5329	426.7686	-0.27002	0.25684	-0.0083008	-18.4074	-13.69067	41.0276	-0.047168	0.024024	0.22392	-6.411	58.661	64.153	0.34814	0.039551	0.15283	NaN	NaN	NaN	NaN	NaN	NaN
1.872	-24.24	-0.0137999999999998	399.319	-0.25928	0.24854	-0.01416	6.1615	18.5837	30.0349	-0.053418	0.030273	0.22392	13.4742	36.754	51.548	0.32788	0.037109	0.15454	NaN	NaN	NaN	NaN	NaN	NaN
1.874	-43.886	-0.0461	406.448	-0.25439	0.24145	-0.012207	-17.6087	-2.0152	25.5689	-0.057519	0.037793	0.22647	45.6	60.017	35.844	0.3042	0.026855	0.16748	NaN	NaN	NaN	NaN	NaN	NaN
1.876	-21.852	-0.7473	399.634	-0.24756	0.23096	-0.01123	-2.699	-3.00283	45.1563	-0.0625	0.04248	0.22949	26.3019	25.9442	40.6107	0.27734	0.01709	0.18652	NaN	NaN	NaN	NaN	NaN	NaN
1.878	-20.2986	-7.2224	397.186	-0.23877	0.229	-0.016113	-13.175	14.2742	5.769	-0.067969	0.049414	0.23389	38.003	30.6475	45.3477	0.25684	0.0068359	0.18848	NaN	NaN	NaN	NaN	NaN	NaN
1.88	-26.6653	6.9594	378.6687	-0.23486	0.21729	-0.012695	-40.7477	-1.5299	24.0219	-0.068945	0.054004	0.23135	12.557	-3.27068	63.831	0.23242	0.0029297	0.19434	NaN	NaN	NaN	NaN	NaN	NaN
1.882	-53.013	-0.4011	374.5877	-0.22656	0.2124	-0.018066	22.133	25.96	37.319	-0.066211	0.060254	0.23486	44.3819	16.971	29.912	0.21363	-0.003418	0.20312	NaN	NaN	NaN	NaN	NaN	NaN
1.884	-32.4363	-2.63821	375.726	-0.22412	0.20313	-0.016602	2.8964	13.0911	24.3697	-0.058398	0.060547	0.23457	40.8096	4.1908	28.873	0.20117	-0.013672	0.21094	NaN	NaN	NaN	NaN	NaN	NaN
1.886	8.9006	3.94493	351.803	-0.22168	0.19824	-0.014648	-20.4498	-23.8971	45.6002	-0.05127	0.062012	0.22754	52.0375	31.982	32.7626	0.16162	-0.01123	0.21729	NaN	NaN	NaN	NaN	NaN	NaN
1.888	7.6988	8.8889	339.0022	-0.22266	0.18994	-0.018555	23.5432301	-13.088	43.4346	-0.03623	0.063281	0.22646	18.402	14.649	30.822	0.14893	-0.011719	0.21777	NaN	NaN	NaN	NaN	NaN	NaN
1.89	-13.8084	15.9806	327.76927	-0.22168	0.18799	-0.020508	3.6247	-32.77	16.1998	-0.02041	0.064453	0.21905	9.846	41.235	21.1027	0.13477	-0.02002	0.22461	NaN	NaN	NaN	NaN	NaN	NaN
1.892	1.9004	7.29565	343.89	-0.22266	0.18164	-0.020508	22.719	-16.6856	32.181	-0.0020508	0.064062	0.21553	6.164	14.004	13.119	0.12671	-0.013916	0.23218	NaN	NaN	NaN	NaN	NaN	NaN
1.894	22.309	18.3101	344.148	-0.22241	0.17627	-0.021241	43.8554	9.712	12.213	0.01416	0.066504	0.20987	24.732	3.175	13.956	0.12646	-0.016113	0.23389	NaN	NaN	NaN	NaN	NaN	NaN
1.896	21.4874	26.8694	325.65737	-0.22363	0.17236	-0.018066	-7.89	-12.0453	15.193	0.031738	0.070801	0.20215	0.381999999999998	-41.549	34.122	0.11475	-0.019043	0.23291	NaN	NaN	NaN	NaN	NaN	NaN
1.898	1.9231	20.4465	323.2579	-0.22998	0.16602	-0.018555	48.0513	20.4418	36.1126	0.04541	0.07334	0.19511	15.92	-22.55	40.6561	0.1123	-0.020508	0.23047	NaN	NaN	NaN	NaN	NaN	NaN
1.9	34.45389	7.52262	322.656	-0.23096	0.16162	-0.021973	44.358	18.6361	7.6365	0.056934	0.078711	0.18721	-5.157	-17.118	12.5485	0.11816	-0.026855	0.2334	NaN	NaN	NaN	NaN	NaN	NaN
1.902	38.1403	10.9062	321.613	-0.23438	0.15918	-0.025391	39.3873	-9.718	30.312	0.066309	0.089258	0.17627	-7.698	15.438	36.47	0.12354	-0.027344	0.22754	NaN	NaN	NaN	NaN	NaN	NaN
1.904	23.2644	19.6364	316.52	-0.23755	0.15283	-0.018555	44.986	17.6278	34.0739	0.073535	0.099804	0.16631	-35.645	16.37	40.316	0.12354	-0.026367	0.22461	NaN	NaN	NaN	NaN	NaN	NaN
1.906	13.06774	22.782	313.2539	-0.23779	0.15283	-0.019531	10.1581	0.114800000000001	32.5735	0.081055	0.11279	0.15674	-27.768	30.0908	17.662643	0.12988	-0.025879	0.2207	NaN	NaN	NaN	NaN	NaN	NaN
1.908	30.24	13.1379	316.417	-0.23779	0.14893	-0.021484	44.4407	-0.0809999999999995	39.488	0.094824	0.12754	0.14971	-24.445	23.2724	11.9261	0.13281	-0.027344	0.21533	NaN	NaN	NaN	NaN	NaN	NaN
1.91	29.79396	10.3835	322.044	-0.23975	0.1499	-0.021973	34.4822	9.1689	9.87	0.097071	0.1458	0.13193	-24.2859	29.409	9.46324	0.13574	-0.025879	0.21045	NaN	NaN	NaN	NaN	NaN	NaN
1.912	19.0312	10.436	311.051	-0.23828	0.14697	-0.019043	-0.276999999999997	-29.8827	34.677	0.098633	0.16963	0.11787	-26.728	22.2518	22.424	0.13525	-0.019043	0.20801	NaN	NaN	NaN	NaN	NaN	NaN
1.914	10.676	8.5569	312.696	-0.24048	0.14355	-0.016113	25.3448	-8.176	48.964	0.093164	0.18984	0.10947	-46.1526	12.954	44.536	0.1333	-0.019043	0.19873	NaN	NaN	NaN	NaN	NaN	NaN
1.916	15.7121	13.8768	309.532	-0.2417	0.14453	-0.013672	1.8412	-13.702	47.6276	0.081055	0.20898	0.094727	-38.711	-3.221	23.498	0.12598	-0.0068359	0.19727	NaN	NaN	NaN	NaN	NaN	NaN
1.918	8.4786	20.5023	311.203	-0.24365	0.14551	-0.012207	-7.8030514	-42.334	95.289	0.060254	0.23291	0.086426	-11.038	4.488	16.9765	0.11792	0.0043945	0.19702	NaN	NaN	NaN	NaN	NaN	NaN
1.92	-4.235	6.3958	314.88	-0.24316	0.14844	-0.01416	-2.74435	-34.954	121.413	0.031934	0.25303	0.079297	-11.974	9.2068	9.0429	0.10498	0.016602	0.19434	NaN	NaN	NaN	NaN	NaN	NaN
1.922	-5.774567	3.5127	309.335	-0.24902	0.15088	-0.01416	-44.806	-65.55	150.045	-0.0020507	0.27959	0.072266	16.8074	20.85725	26.1042	0.095215	0.031738	0.19971	NaN	NaN	NaN	NaN	NaN	NaN
1.924	1.08	5.3602	303.632	-0.25415	0.15454	-0.010498	-21.7964	-60.337	193.647	-0.039649	0.31006	0.06709	2.23399999999999	31.732	16.26294	0.086914	0.039551	0.19531	NaN	NaN	NaN	NaN	NaN	NaN
1.926	-2.485	14.00868	298.54	-0.26416	0.15576	-0.01123	-21.1619	-9.5183	223.5046	-0.080566	0.33789	0.054688	15.29	25.612	34.9834	0.076172	0.064941	0.1958	NaN	NaN	NaN	NaN	NaN	NaN
1.928	-13.631	19.6866	309.649	-0.27197	0.15869	-0.0087891	-72.877	-6.4015	284.212	-0.13105	0.37344	0.042969	-12.687	12.6658	23.2796	0.072754	0.084472	0.19263	NaN	NaN	NaN	NaN	NaN	NaN
1.93	-4.028	19.3845	322.045	-0.27734	0.16211	-0.0083008	-13.1315	37.3146	395.87758	-0.19805	0.40918	0.033496	18.1	-1.5107	52.07	0.069336	0.099121	0.18799	NaN	NaN	NaN	NaN	NaN	NaN
1.932	-2.9868	17.5065	317.046	-0.2915	0.16602	-0.0053711	-19.485	66.5889	471.4977	-0.27774	0.4416	0.015918	28.331	-9.6836	43.135	0.066406	0.12402	0.18799	NaN	NaN	NaN	NaN	NaN	NaN
1.934	-14.9936	9.1188	305.983	-0.29663	0.16773	-0.0048828	-32.871	69.012	598.4684	-0.3835	0.48057	0.0024414	29.3377	3.989	60.168	0.062988	0.13623	0.18555	NaN	NaN	NaN	NaN	NaN	NaN
1.936	-35.163	-0.1865	314.962	-0.30469	0.16504	-0.003418	20.84	120.827	730.103	-0.51807	0.52002	-0.01123	52.5468	32.858	19.78003	0.062988	0.1582	0.1792	NaN	NaN	NaN	NaN	NaN	NaN
1.938	0.955	6.3962	319.712	-0.31494	0.16943	0.00097656	-8.05	105.467	832.479	-0.6751	0.56279	-0.018164	23.181	33.218	42.931	0.073486	0.17822	0.17505	NaN	NaN	NaN	NaN	NaN	NaN
1.94	2.8265	15.4242	316.93	-0.31934	0.17188	0.0039063	6.508	85.056	940.898	-0.85235	0.60918	-0.022168	21.826	30.9857	17.8184	0.07959	0.19336	0.17871	NaN	NaN	NaN	NaN	NaN	NaN
1.942	1.312	22.091	310.655	-0.32568	0.17432	0.003418	34.5068	70.754	975.479	-1.0496	0.65644	-0.01709	36.5875	6.9021	15.6519	0.083496	0.20996	0.17041	NaN	NaN	NaN	NaN	NaN	NaN
1.944	-3.8693	14.5572	316.9434	-0.3291	0.17724	0.0048828	7.9663	-4.395	1034.217	-1.2652	0.70625	-0.010742	26.326	8.451	-3.856	0.088867	0.21631	0.16699	NaN	NaN	NaN	NaN	NaN	NaN
1.946	18.2901	5.3204	327.207	-0.33496	0.18115	0.0068359	35.197	-51.244	1086.364	-1.4897	0.76807	-0.0024414	14.6761	1.722	34.813	0.098633	0.23389	0.16455	NaN	NaN	NaN	NaN	NaN	NaN
1.948	15.3752	6.38472	337.005	-0.33301	0.18359	0.0073242	63.358	-128.504	1094.638	-1.714	0.83652	0.0022461	25.221	27.9585	23.6413	0.10473	0.24194	0.16675	NaN	NaN	NaN	NaN	NaN	NaN
1.95	9.109	10.74872	337.114	-0.33594	0.18457	0.0048828	96.299	-200.032	1086.088	-1.9047	0.91133	0.018457	-3.548	19.1526	56.942	0.10498	0.25049	0.15967	NaN	NaN	NaN	NaN	NaN	NaN
1.952	13.2446	15.751	349.823	-0.33838	0.19238	0.0078125	103.6574	-199.817	1066.679	-2.061	0.98633	0.025489	-11.468	26.7791	25.5358	0.10693	0.25488	0.16455	NaN	NaN	NaN	NaN	NaN	NaN
1.954	15.6181	8.0995	337.138	-0.34205	0.19189	0.0046387	94.0056	-211.024	1034.857	-2.1491	1.074	0.017773	-21.9684	1.4682	27.605	0.10498	0.26025	0.1626	NaN	NaN	NaN	NaN	NaN	NaN
1.956	2.1265	5.6619	337.138	-0.34277	0.19434	0.0078125	135.628	-203.941	1047.734	-2.1504	1.1523	0.018066	-7.797	9.135	20.6995	0.10156	0.26563	0.16162	NaN	NaN	NaN	NaN	NaN	NaN
1.958	7.9416	7.6887	340.1359	-0.34717	0.19482	0.0078125	149.366	-164.895	1005.578	-2.0434	1.2233	0.021875	-18.9138	-2.153	42.464	0.094239	0.27222	0.16528	NaN	NaN	NaN	NaN	NaN	NaN
1.96	0.508	2.1531	365.448	-0.34814	0.19727	0.010254	104.0691	-150.825	977.006	-1.8691	1.2548	0.036621	-12.33	12.4862	27.813	0.086426	0.27783	0.17041	NaN	NaN	NaN	NaN	NaN	NaN
1.962	19.4325	13.9015	368.178	-0.35498	0.20166	0.0063477	126.632	-110.79	992.785	-1.6612	1.2751	0.04834	-28.7295	-17.4811	58.756	0.068848	0.28662	0.17432	NaN	NaN	NaN	NaN	NaN	NaN
1.964	3.3923	12.4807	372.8788	-0.3645	0.2041	0.0061035	85.77	-59.8403	971.9369	-1.4723	1.2628	0.038574	-39.3038	-29.848	28.877	0.059082	0.28809	0.16797	NaN	NaN	NaN	NaN	NaN	NaN
1.966	-17.1482	14.4318	377.2422	-0.36963	0.20996	0.0048828	56.2149	-41.778	1002.808	-1.2925	1.1968	0.037598	-31.4184	-63.114	46.6776	0.033691	0.30176	0.17041	NaN	NaN	NaN	NaN	NaN	NaN
1.968	-4.312	8.2087	397.526	-0.3833	0.21338	0.0068359	103.683	-23.26	996.147	-1.1378	1.0899	0.040039	-19.017	-43.157	68.623	0.015625	0.3125	0.1748	NaN	NaN	NaN	NaN	NaN	NaN
1.97	-2.457	14.9304	395.148	-0.38916	0.21533	0.0073242	34.48	-38.315	969.473	-1.0181	0.98945	0.031641	-15.412	-55.8978	84.561	-0.0068359	0.32715	0.18018	NaN	NaN	NaN	NaN	NaN	NaN
1.972	-6.2564	13.1286	397.3922	-0.40918	0.22021	0.0039063	29.1621	-102.725	1003.715	-0.93799	0.91641	0.023828	-4.758	-22.754	107.647	-0.045898	0.34082	0.18018	NaN	NaN	NaN	NaN	NaN	NaN
1.974	-24.9669	13.2071	413.7429	-0.42359	0.22583	-3.4694e-15	41.6249	-146.745	1016.6613	-0.88457	0.87852	0.016699	-22.48286	-54.368	132.739	-0.064453	0.34961	0.18018	NaN	NaN	NaN	NaN	NaN	NaN
1.976	-23.8584	21.8973	421.294	-0.43848	0.2334	0.0014648	-37.263	-207.574	1026.086	-0.84326	0.85791	0.018066	-38.46427	-67.444	165.55151	-0.11377	0.36963	0.18115	NaN	NaN	NaN	NaN	NaN	NaN
1.978	-27.118	34.2363	431.445	-0.46582	0.24414	-0.0024414	-21.015	-273.157	1071.0051	-0.82646	0.8497	0.014746	-34.413	-96.805	205.2553	-0.14917	0.38842	0.18335	NaN	NaN	NaN	NaN	NaN	NaN
1.98	-28.193	36.1672	436.0816	-0.47803	0.24512	-0.0083008	-42.863	-288.394	1052.543	-0.829	0.84892	-0.00039063	-26.2307	-65.0169	289.357	-0.1875	0.40576	0.18359	NaN	NaN	NaN	NaN	NaN	NaN
1.982	-49.721	30.2253	455.818	-0.50928	0.26123	-0.0043945	-113.908	-325.718	1087.512	-0.84072	0.85674	-0.0082032	-38.368	-31.25	385.4227	-0.24219	0.44092	0.17432	NaN	NaN	NaN	NaN	NaN	NaN
1.984	-32.383	31.6936	454.423	-0.54443	0.27637	-0.014648	-80.849	-328.126	1140.656	-0.87305	0.84726	-0.029199	43.8956	13.9404	521.6943	-0.26709	0.4585	0.1792	NaN	NaN	NaN	NaN	NaN	NaN
1.986	-13.5274	48.8251	466.573	-0.56494	0.27979	-0.01416	-115.569	-279.846	1172.981	-0.93311	0.83447	-0.044922	17.096	12.635	653.3043	-0.34033	0.49268	0.17773	NaN	NaN	NaN	NaN	NaN	NaN
1.988	-17.1555	46.4093	487.656	-0.60547	0.29443	-0.021484	-124.884	-262.417	1268.9	-1.0105	0.83174	-0.063574	35.798	54.516	808.136	-0.41504	0.51343	0.16895	NaN	NaN	NaN	NaN	NaN	NaN
1.99	-35.161	57.494	498.274	-0.63428	0.31103	-0.02124	-92.109	-207.39	1317.922	-1.0939	0.83408	-0.085645	54.49	47.118	944.523	-0.51221	0.5376	0.17432	NaN	NaN	NaN	NaN	NaN	NaN
1.992	-24.2959	47.5755	502.8188	-0.66797	0.32129	-0.022461	-96.762	-153.652	1318.077	-1.1673	0.85595	-0.10713	66.59	46.5615	1067.392	-0.68115	0.56299	0.17139	NaN	NaN	NaN	NaN	NaN	NaN
1.994	-16.4516	63.64	510.23562	-0.7124	0.34131	-0.022949	-48.483	-143.757	1350.003	-1.2304	0.88838	-0.12822	26.171	17.977	1147.758	-0.78418	0.58398	0.17139	NaN	NaN	NaN	NaN	NaN	NaN
1.996	-12.324	64.9487	526.0594	-0.73779	0.34619	-0.022461	-55.062	-67.014	1311.4606	-1.2871	0.92578	-0.14648	43.9888	0.558	1231.075	-1.0176	0.62109	0.17383	NaN	NaN	NaN	NaN	NaN	NaN
1.998	-12.3574	67.22	562.706	-0.79053	0.36572	-0.021484	-64.699	-68.114	1315.463	-1.3465	0.96485	-0.15323	56.0657	-71.518	1278.928	-1.2202	0.66016	0.17334	NaN	NaN	NaN	NaN	NaN	NaN
2	-3.971	57.677	563.402	-0.82983	0.38354	-0.024902	-9.0605	-72.52	1352.735	-1.4097	1.0036	-0.1582	70	-136.867	1300.088	-1.4258	0.70801	0.17139	NaN	NaN	NaN	NaN	NaN	NaN
2.002	-6.8676	53.6527	567.7268	-0.86719	0.39844	-0.017578	-30.511	-58.548	1341.903	-1.4784	1.0349	-0.15782	80.1306	-208.359	1243.97	-1.7266	0.77734	0.1582	NaN	NaN	NaN	NaN	NaN	NaN
2.004	-6.5209	50.3446	597.497	-0.91357	0.41992	-0.02002	-28.3323	-125.77077	1385.1127	-1.5592	1.057	-0.14941	108.116	-228.231	1220.194	-1.8628	0.81787	0.16309	NaN	NaN	NaN	NaN	NaN	NaN
2.006	-11.0828	52.30006	622.991	-0.93848	0.43018	-0.018555	4.1826	-124.669	1418.008	-1.6382	1.0845	-0.13721	124.308	-241.502	1137.516	-2.0996	0.90332	0.17041	NaN	NaN	NaN	NaN	NaN	NaN
2.008	13.4408	62.962	619.3322	-0.98291	0.44141	-0.01709	-26.1756	-117.3577	1452.764	-1.7096	1.1072	-0.13086	131.054	-194.977	1100.019	-2.2036	0.97168	0.15772	NaN	NaN	NaN	NaN	NaN	NaN
2.01	5.1406	64.5411	629.7955	-1.0086	0.45386	-0.01538	42.1749	-164.154	1518.824	-1.7789	1.1316	-0.11084	145.282	-191.526	1056.2575	-2.2402	1.0488	0.14844	NaN	NaN	NaN	NaN	NaN	NaN
2.012	-6.4581	65.98881	644.63506	-1.0308	0.46729	-0.014648	49.476	-125.5922	1504.712	-1.8364	1.1555	-0.10381	129.733	-146.487	1037.556	-2.1694	1.1587	0.12988	NaN	NaN	NaN	NaN	NaN	NaN
2.014	-6.491	68.8852	673.046	-1.0542	0.48291	-0.015137	18.4454	-162.312	1516.827	-1.8829	1.1788	-0.093946	109.992	-150.3499	1038.776	-2.0796	1.2173	0.13037	NaN	NaN	NaN	NaN	NaN	NaN
2.016	2.576	69.2394	685.165	-1.0649	0.49072	-0.012207	99.254	-191.131	1590.4	-1.9199	1.1953	-0.089844	97.823	-96.497	1091.505	-1.8394	1.2778	0.11523	NaN	NaN	NaN	NaN	NaN	NaN
2.018	-14.9524	78.368	693.299	-1.0762	0.5	-0.014648	75.872	-144.104	1600.292	-1.9487	1.2079	-0.083691	82.572	-59.141	1081.9976	-1.6145	1.2449	0.094972	NaN	NaN	NaN	NaN	NaN	NaN
2.02	-32.453	82.61	707.165	-1.083	0.50683	-0.012695	67.97	-147.12	1629.749	-1.964	1.2061	-0.078711	85.4456	-5.61999999999999	1142.408	-1.3921	1.1665	0.066895	NaN	NaN	NaN	NaN	NaN	NaN
2.022	-19.9087	86.335	715.779	-1.0845	0.51416	-0.012695	98.941	-90.9807	1622.778	-1.9796	1.203	-0.073242	102.9151	-27.97	1146.564	-1.1445	1.0283	0.04834	NaN	NaN	NaN	NaN	NaN	NaN
2.024	-17.3671	91.269	722.22	-1.0859	0.51855	-0.011719	22.564	-50.984	1587.076	-1.9939	1.1931	-0.069727	54.416	-85.955	1139.377	-1.0449	0.9668	0.038086	NaN	NaN	NaN	NaN	NaN	NaN
2.026	-21.3653	104.51	726.3812	-1.0859	0.52539	-0.0083008	21.2	-85.5575	1601.175	-2.002	1.1758	-0.060547	29.3584	-179.172	1136.023	-0.89307	0.90869	0.012695	NaN	NaN	NaN	NaN	NaN	NaN
2.028	-36.791	99.852224	765.589	-1.0815	0.52783	-0.016113	27.886	-40.4521	1571.212	-2.0014	1.1612	-0.049121	-16.4615	-261.575	1181.587	-0.82056	0.90649	0.0063476	NaN	NaN	NaN	NaN	NaN	NaN
2.03	-35.319	101.2359	773.143	-1.0796	0.53222	-0.016845	-33.53	-41.0673	1550.1376	-1.9949	1.1404	-0.040625	-10.398	-317.871	1206.483	-0.77881	0.93994	0.00048828	NaN	NaN	NaN	NaN	NaN	NaN
2.032	-33.4406	100.164	765.156	-1.0762	0.53125	-0.018555	-15.5318	-52.798	1581.5863	-1.9949	1.1138	-0.024609	-36.668	-351.673	1272.611	-0.78271	1.0044	0.0043945	NaN	NaN	NaN	NaN	NaN	NaN
2.034	-59.176	104.159	782.414	-1.0737	0.54004	-0.019531	-67.878	3.1526	1551.8879	-1.9917	1.09	-0.020215	-39.408	-356.299	1291.237	-0.80811	1.0356	0.018066	NaN	NaN	NaN	NaN	NaN	NaN
2.036	-45.9	104.096	790.146	-1.0718	0.54053	-0.019531	-76.57	-39.644	1542.239	-1.9941	1.0762	-0.0083008	-80.775	-379.38	1347.771	-0.88428	1.0786	0.0073242	NaN	NaN	NaN	NaN	NaN	NaN
2.038	-39.877	92.7409	800.648	-1.0796	0.54736	-0.016113	-39.234	-30.441	1549.1347	-1.9867	1.0652	0.0059571	-102.078	-329.059	1384.2874	-0.95337	1.0813	-0.019287	NaN	NaN	NaN	NaN	NaN	NaN
2.04	-39.14	104.862	813.484	-1.0887	0.55469	-0.01416	-76.683	3.666	1540.4346	-1.9835	1.0602	0.012793	-123.34	-299.507	1439.117305	-1.0273	1.0801	-0.030762	NaN	NaN	NaN	NaN	NaN	NaN
2.042	-26.988	105.2589	814.2479	-1.1055	0.56055	-0.013184	-47.888	-61.9578	1604.187	-1.9897	1.054	0.015918	-75.272	-186.693	1481.1044	-1.1875	1.0791	-0.032227	NaN	NaN	NaN	NaN	NaN	NaN
2.044	-22.081918	109.0832	832.56	-1.1304	0.56494	-0.01123	-37.505	-9.551	1608.462	-1.9835	1.0555	0.024414	-40.991	-162.847	1558.533	-1.2671	1.0903	-0.03125	NaN	NaN	NaN	NaN	NaN	NaN
2.046	-20.7906	109.92922	837.755	-1.1401	0.5708	-0.010254	-90.686	-35.467	1603.794	-1.9648	1.0381	0.038574	-4.561	-106.525	1544.28	-1.4155	1.106	-0.013184	NaN	NaN	NaN	NaN	NaN	NaN
2.048	-34.338	121.1931	847.827	-1.1655	0.57764	-0.0053711	-56.499	-68.371	1595.113	-1.9593	1.0306	0.041992	6.67	-120.932	1512.033	-1.5645	1.1406	-0.0043945	NaN	NaN	NaN	NaN	NaN	NaN
2.05	-24.653	122.0944	858.691	-1.1853	0.58716	-0.0048828	-73.619	-22.2765	1562.8252	-1.9569	1.0308	0.046582	5.972	-71.76	1480.9482	-1.6348	1.1621	-0.0019531	NaN	NaN	NaN	NaN	NaN	NaN
2.052	-12.52053	116.395762	864.644	-1.2026	0.59766	-0.0024414	-86.719	-78.926	1551.3151	-1.9585	1.0237	0.057519	-37.7355	-80.688	1498.61	-1.7866	1.1978	0.019043	NaN	NaN	NaN	NaN	NaN	NaN
2.054	9.9585	110.30316	854.97	-1.2349	0.60986	-0.0039063	-14.4937	-44.8909	1524.2107	-1.9539	1.0195	0.066504	-34.739	-35.381	1520.812	-1.8989	1.2119	0.028564	NaN	NaN	NaN	NaN	NaN	NaN
2.056	-6.1703	112.7638	862.59	-1.2534	0.61523	-0.0063477	-63.232	-12.4562	1495.6929	-1.9473	1.0176	0.069336	-37.443	-107.116	1532.7581	-1.9976	1.2183	0.032227	NaN	NaN	NaN	NaN	NaN	NaN
2.058	-1.2104	111.7962	878.607	-1.2969	0.62695	-0.0043945	-34.1879	-43.458	1511.447	-1.9323	1.022	0.083398	13.379	-100.47	1546.097	-2.0938	1.2168	0.047852	NaN	NaN	NaN	NaN	NaN	NaN
2.06	10.7555	118.4926	889.465	-1.3359	0.64038	-0.0090332	12.45039	21.2721	1513.3	-1.9183	1.0208	0.079493	17.027	-193.06	1583.738	-2.125	1.2168	0.05127	NaN	NaN	NaN	NaN	NaN	NaN
2.062	10.3763	127.626	875.5553	-1.375	0.65234	-0.01123	-17.6797	24.4574	1485.446	-1.8901	1.0154	0.087696	11.766	-181.024	1606.834	-2.1621	1.209	0.054688	NaN	NaN	NaN	NaN	NaN	NaN
2.064	5.4152	124.736	886.0245	-1.4302	0.67285	-0.0078125	43.008	37.19774	1464.436	-1.8633	1.0028	0.092383	6.743	-219.893	1667.286	-2.1684	1.2139	0.058838	NaN	NaN	NaN	NaN	NaN	NaN
2.066	11.639	106.8356	920.564	-1.4546	0.68115	-0.010254	37.568	116.257	1423.872	-1.8315	0.99268	0.094727	20.983	-147.8081	1682.99	-2.1699	1.2129	0.056152	NaN	NaN	NaN	NaN	NaN	NaN
2.068	21.0185	100.4599	935.377	-1.502	0.69922	-0.015625	14.5799	88.001	1419.474	-1.7972	0.97705	0.099024	46.5178	-162.134	1727.383	-2.1538	1.2065	0.057617	NaN	NaN	NaN	NaN	NaN	NaN
2.07	1.09985	100.6213	955.931	-1.5376	0.71142	-0.013184	65.744	109.973	1406.6676	-1.7597	0.96651	0.10205	103.517	-91.845	1742.094	-2.1538	1.2017	0.063477	NaN	NaN	NaN	NaN	NaN	NaN
2.072	-5.9507	120.0387	970.309	-1.5776	0.73096	-0.014648	29.5075	111.955	1382.1529	-1.7234	0.96064	0.10166	112.674	-111.075	1730.19	-2.1421	1.1938	0.068359	NaN	NaN	NaN	NaN	NaN	NaN
2.074	-15.0576	136.588	1010.736	-1.6362	0.74854	-0.01123	60.843	43.8191	1393.285	-1.6836	0.94883	0.097168	105.148	-45.229	1720.587	-2.1367	1.188	0.074219	NaN	NaN	NaN	NaN	NaN	NaN
2.076	-14.6519	159.7536	1027.5496	-1.6655	0.76025	-0.015137	55.843	82.0868	1400.465	-1.6421	0.93799	0.092285	55.4998	-67.487	1682.7293	-2.1245	1.1753	0.082031	NaN	NaN	NaN	NaN	NaN	NaN
2.078	-34.886	180.7579	1062.747	-1.7358	0.78027	-0.010254	-6.18067	61.9454	1374.427	-1.6014	0.93096	0.094922	2.524	-15.364	1647.0738	-2.103	1.1597	0.092773	NaN	NaN	NaN	NaN	NaN	NaN
2.08	-51.119	206.207179	1108.513	-1.7859	0.79712	-0.013184	40.064	43.501	1337.824	-1.5612	0.92275	0.089939	4.588	-40.16588	1623.489	-2.0874	1.1509	0.098633	NaN	NaN	NaN	NaN	NaN	NaN
2.082	-48.0385	227.2961	1172.489	-1.8354	0.81885	-0.015625	5.767177	112.4465	1277.434	-1.5229	0.91258	0.085247	22.021	-3.1831	1598.014	-2.0508	1.123	0.10449	NaN	NaN	NaN	NaN	NaN	NaN
2.084	-48.107	235.775	1210.161	-1.8999	0.84424	-0.019043	-26.9017	71.787	1273.373	-1.4873	0.89315	0.082427	40.572	-20.6726	1567.232	-2.0164	1.1077	0.10352	NaN	NaN	NaN	NaN	NaN	NaN
2.086	-56.568	258.832	1248.817	-1.9316	0.85352	-0.019531	14.325	99.352	1265.5377	-1.4531	0.88086	0.083496	-13.027	39.465	1545.446	-1.9819	1.0942	0.10498	NaN	NaN	NaN	NaN	NaN	NaN
2.088	-71.333	253.248	1292.738	-1.9727	0.87402	-0.018555	-36.1952	129.629	1242.93	-1.4146	0.86752	0.082919	-23.174	36.95351	1524.731	-1.9355	1.0625	0.11475	NaN	NaN	NaN	NaN	NaN	NaN
2.09	-61.5628	238.273	1303.585	-1.9932	0.89063	-0.020508	-31.968	110.486	1244.661	-1.3817	0.85105	0.087725	-55.5214	64.902	1546.622	-1.9141	1.0566	0.12109	NaN	NaN	NaN	NaN	NaN	NaN
2.092	-65.032	210.752	1297.487	-1.9985	0.90283	-0.024902	-9.38388	173.241	1222.227	-1.3376	0.83423	0.080683	-19.761	47.4801	1569.7001	-1.8843	1.0337	0.12598	NaN	NaN	NaN	NaN	NaN	NaN
2.094	-74.148	188.4941	1310.2012	-1.9805	0.91602	-0.023438	-52.112	166.073	1219.764	-1.2998	0.81675	0.083587	-1.563	38.5809	1609.059	-1.8621	1.013	0.13256	NaN	NaN	NaN	NaN	NaN	NaN
2.096	-66.393	159.2244	1318.7264	-1.959	0.91406	-0.023926	-13.94629	166.917	1196.183	-1.2617	0.79883	0.081543	35.18	5.671	1612.228	-1.8413	0.99658	0.14063	NaN	NaN	NaN	NaN	NaN	NaN
2.098	-48.8851	127.1898	1335.075	-1.8862	0.90381	-0.030273	-31.3288	220.576	1116.8075	-1.2252	0.78175	0.085068	-18.658	9.0589	1613.314	-1.8398	0.98828	0.15088	NaN	NaN	NaN	NaN	NaN	NaN
2.1	-17.4667	96.9438	1316.892	-1.8064	0.89404	-0.028809	-55.784	169.819	1086.4298	-1.188	0.76089	0.083282	-27.2962	11.4219	1574.708	-1.8379	0.98828	0.15576	NaN	NaN	NaN	NaN	NaN	NaN
2.102	-37.3476	67.1288	1304.346	-1.7256	0.87891	-0.025391	-33.1872	177.6897	1066.507	-1.1549	0.73931	0.080507	-66.2195	38.0686	1558.531	-1.8203	0.99805	0.15723	NaN	NaN	NaN	NaN	NaN	NaN
2.104	-36.7932	47.581	1303.1558	-1.5972	0.85205	-0.04541	-64.723	177.3157	1039.543	-1.1199	0.71803	0.080487	-44.2463	43.444	1520.876	-1.7979	0.98389	0.15893	NaN	NaN	NaN	NaN	NaN	NaN
2.106	-26.90571	49.261	1311.542	-1.5308	0.83154	-0.056152	-32.0527	121.324	1041.331	-1.0801	0.69727	0.08252	-24.121	39.639	1519.28	-1.7827	0.97119	0.15967	NaN	NaN	NaN	NaN	NaN	NaN
2.108	-20.4593	71.76853	1309.917	-1.4175	0.80322	-0.074219	-8.2072	158.8322	1003.997	-1.0543	0.68148	0.08668	8.826	40.979	1473.065	-1.7656	0.95313	0.1709	NaN	NaN	NaN	NaN	NaN	NaN
2.11	-12.486	82.6741	1311.869	-1.3387	0.78589	-0.089111	-42.054	135.0838	997.24	-1.0191	0.65988	0.082267	-11.293	37.227	1465.094	-1.7554	0.94971	0.16797	NaN	NaN	NaN	NaN	NaN	NaN
2.112	-20.9218	90.6269	1314.557	-1.271	0.77002	-0.10205	23.9146	128.114	970.232	-0.98321	0.64473	0.077445	-16.522	83.903	1438.968	-1.7026	0.94287	0.1582	NaN	NaN	NaN	NaN	NaN	NaN
2.114	-13.4371	84.26	1299.707	-1.2012	0.75977	-0.11572	38.5981	184.4564	910	-0.94869	0.62247	0.075214	-16.846	123.524	1445.541	-1.6582	0.92822	0.14965	NaN	NaN	NaN	NaN	NaN	NaN
2.116	-33.797	94.9168	1279.72	-1.1738	0.75098	-0.12305	15.1	163.6359	901.1654	-0.91406	0.60352	0.068848	42.669	181.07	1399.198	-1.6128	0.9126	0.15186	NaN	NaN	NaN	NaN	NaN	NaN
2.118	-23.7986	103.963	1271.848	-1.123	0.74219	-0.13184	84.773	199.8887	869.648	-0.87642	0.5818	0.066134	73.016	193.89	1406.031	-1.564	0.8833	0.146	NaN	NaN	NaN	NaN	NaN	NaN
2.12	-26.2749	87.24	1256.543	-1.0891	0.73071	-0.14698	42.803	197.4723	833.831	-0.84236	0.55934	0.06052	96.7218	235.541	1348.69635	-1.5449	0.87305	0.14209	NaN	NaN	NaN	NaN	NaN	NaN
2.122	-9.2101	64.531	1223.634	-1.0571	0.72461	-0.15576	79.931	143.218	823.288	-0.80403	0.53439	0.058543	77.4494	232.143	1357.131	-1.5117	0.85352	0.13818	NaN	NaN	NaN	NaN	NaN	NaN
2.124	6.29355	36.9759	1193.367	-1.0142	0.70947	-0.17725	89.025	173.044	770.562	-0.76835	0.51394	0.055973	65.916959	256.374	1324.382	-1.4846	0.83814	0.1333	NaN	NaN	NaN	NaN	NaN	NaN
2.126	16.3839	15.3289	1166.408	-0.97583	0.70972	-0.19678	37.361	150.1391	740.618	-0.73047	0.48633	0.05127	54.6803	201.108	1314.825	-1.4629	0.82031	0.12842	NaN	NaN	NaN	NaN	NaN	NaN
2.128	22.6568	-2.2129	1155.8959	-0.93555	0.69922	-0.20557	70.996	147.4659	719.813	-0.6952	0.46513	0.044565	57.4588	182.269	1279.446	-1.4253	0.81104	0.12549	NaN	NaN	NaN	NaN	NaN	NaN
2.13	2.754	-13.6139	1121.7995	-0.87549	0.68994	-0.22705	45.19618	179.5059	638.4362	-0.66151	0.44266	0.039756	74.0119	111.306	1242.922	-1.4038	0.79541	0.12891	NaN	NaN	NaN	NaN	NaN	NaN
2.132	14.1905	-25.1281	1088.8512	-0.84766	0.67969	-0.24219	37.52591	130.569	596.114	-0.62509	0.42167	0.033111	91.5263	137.619	1173.488	-1.3589	0.77393	0.12109	NaN	NaN	NaN	NaN	NaN	NaN
2.134	11.081	-53.6741	1076.261	-0.78516	0.67773	-0.25781	71.995	152.539	559.186	-0.59258	0.40134	0.032481	69.2874	134.318	1150.557	-1.3232	0.75977	0.12085	NaN	NaN	NaN	NaN	NaN	NaN
2.136	30.2085	-79.3132	1051.673	-0.74439	0.67554	-0.2749	6.1347	163.2544	533.042	-0.56055	0.38379	0.023926	53.076	191.1097	1112.319	-1.2832	0.73926	0.11865	NaN	NaN	NaN	NaN	NaN	NaN
2.138	35.011	-98.608	1029.176	-0.71436	0.67334	-0.28564	46.675	138.09583	545.417	-0.52504	0.36413	0.016647	39.806	173.333	1090.415	-1.2422	0.71289	0.12109	NaN	NaN	NaN	NaN	NaN	NaN
2.14	30.666	-111.2613	1002.32	-0.68799	0.67627	-0.29932	21.5485	159.1665	505.685	-0.49591	0.3425	0.012781	32.636	225.429	1061.602	-1.2222	0.69678	0.11328	NaN	NaN	NaN	NaN	NaN	NaN
2.142	40.981	-125.25341	980.8807	-0.68115	0.67627	-0.30615	-21.61	127.488	486.771	-0.463	0.32174	0.0082284	50.281	195.6003	1037.556	-1.1851	0.66895	0.10742	NaN	NaN	NaN	NaN	NaN	NaN
2.144	40.489	-125.6589	961.0198	-0.68115	0.68994	-0.31592	1.782	118.2947	466.817	-0.4258	0.30351	0.006943	62.943	253.897	1010.578	-1.1504	0.64795	0.1084	NaN	NaN	NaN	NaN	NaN	NaN
2.146	65.60841	-128.83	935.6818	-0.70801	0.70215	-0.32422	-49.45	157.48	405.3142	-0.38818	0.28857	-1.6717e-14	61.0346	238.818	980.818	-1.1177	0.63525	0.10156	NaN	NaN	NaN	NaN	NaN	NaN
2.148	64.692	-142.225	942.1161	-0.73682	0.71924	-0.32275	-36.90047	128.961	392.729	-0.343	0.27105	-0.0017603	12.294	284.672	920.088	-1.0757	0.60791	0.097656	NaN	NaN	NaN	NaN	NaN	NaN
2.15	75.7084	-154.943	952.261	-0.80469	0.74609	-0.32129	-9.8849	146.099	348.1773	-0.29499	0.25551	-0.0038055	-5.509	245.77	867.0828	-1.0522	0.59521	0.095703	NaN	NaN	NaN	NaN	NaN	NaN
2.152	76.9285	-163.668	946.445	-0.84375	0.76074	-0.31543	-78.666	125.949	315.8087	-0.24036	0.24146	-0.0081356	-42.526	257.736	831.159	-1.0078	0.56738	0.092285	NaN	NaN	NaN	NaN	NaN	NaN
2.154	67.315	-161.2937	941.788	-0.93018	0.7876	-0.31641	-45.944	94.286	316.807	-0.18682	0.22283	-0.013875	-18.695	203.405	771.2118	-0.9712	0.55176	0.084717	NaN	NaN	NaN	NaN	NaN	NaN
2.156	74.5572	-167.1688	957.047	-1.0085	0.80884	-0.30884	-3.2072	123.466	284.963	-0.12939	0.21387	-0.023926	-3.517	227.3735	736.2799	-0.93164	0.5293	0.077637	NaN	NaN	NaN	NaN	NaN	NaN
2.158	57.669	-172.6904	986.557	-1.0762	0.83203	-0.30273	-56.296	90.305	277.259	-0.070355	0.19202	-0.02461	-0.356000000000002	191.894	662.4263	-0.87451	0.51074	0.067383	NaN	NaN	NaN	NaN	NaN	NaN
2.16	88.93	-179.4442	981.556	-1.1577	0.85986	-0.2998	-2.583	73.976648	280.501	-0.024667	0.17481	-0.034458	-7.202	212.406	653.136	-0.85547	0.49512	0.060059	NaN	NaN	NaN	NaN	NaN	NaN
2.162	71.684	-185.3117	968.5264	-1.1953	0.86914	-0.29785	-22.8557	94.635	228.248	0.02574	0.16076	-0.045793	-28.747	176.4226	606.6815	-0.79834	0.47217	0.055664	NaN	NaN	NaN	NaN	NaN	NaN
2.164	77.9825	-192.6413	990.739	-1.2534	0.8833	-0.29688	-27.8423	64.932	211.01545	0.071077	0.13761	-0.054976	-35.893	183	601.529	-0.76611	0.45166	0.04419	NaN	NaN	NaN	NaN	NaN	NaN
2.166	80.2665	-199.576	1013.482	-1.2839	0.89429	-0.29737	24.604	103.015	185.2801	0.11182	0.11865	-0.06543	6.641	156.942	565.157	-0.73193	0.43701	0.037598	NaN	NaN	NaN	NaN	NaN	NaN
2.168	89.4252	-200.4785	1013.775	-1.3086	0.89844	-0.29541	-24.6699	98.843	175.5361	0.14571	0.104	-0.076955	35.825	181.362	557.01	-0.68848	0.40967	0.036621	NaN	NaN	NaN	NaN	NaN	NaN
2.17	97.6476	-196.6283	1006.403	-1.3198	0.89893	-0.29395	28.7594	84.166	186.859	0.1797	0.090132	-0.087406	39.93017	176.257	518.365	-0.66455	0.3999	0.032715	NaN	NaN	NaN	NaN	NaN	NaN
2.172	81.148	-204.8153	1016.972	-1.3242	0.89258	-0.29688	33.7493	106.944	163.841	0.20391	0.076854	-0.099127	32.983	197.704	492.918	-0.61084	0.37744	0.026367	NaN	NaN	NaN	NaN	NaN	NaN
2.174	97.987	-208.6876	1021.427	-1.3154	0.88086	-0.30029	19.691	79.775	161.572	0.22471	0.063182	-0.11035	18.932	182.979	419.784	-0.57495	0.36377	0.021485	NaN	NaN	NaN	NaN	NaN	NaN
2.176	83.8874	-194.9359	1002.195	-1.3025	0.86694	-0.30616	78.407	54.5814	163.631	0.24512	0.052734	-0.11816	8.677	158.847	391.171	-0.53271	0.34131	0.021484	NaN	NaN	NaN	NaN	NaN	NaN
2.178	83.3204	-168.94802	1013.568	-1.2832	0.84961	-0.30469	54.571	55.2082	143.815	0.25977	0.043947	-0.12412	40.46	111.4985	322.6375	-0.48193	0.32324	0.015137	NaN	NaN	NaN	NaN	NaN	NaN
2.18	80.104	-152.00981	1006.2053	-1.2524	0.82764	-0.31689	61.332	20.6644	136.718	0.26767	0.039942	-0.12656	20.721	105.92	295.1527	-0.44971	0.31689	0.01416	NaN	NaN	NaN	NaN	NaN	NaN
2.182	82.8085	-145.165	1013.344	-1.2383	0.81445	-0.31787	91.26	36.629	116.12	0.27705	0.03252	-0.13398	43.8099	101.4863	246.8199	-0.38916	0.29932	0.0043945	NaN	NaN	NaN	NaN	NaN	NaN
2.184	79.067	-151.832	1003.273	-1.2129	0.79785	-0.32813	33.7539	29.6284	80.4964	0.28155	0.024902	-0.1291	26.46738	119.6431	229.064	-0.33667	0.28491	0.0048828	NaN	NaN	NaN	NaN	NaN	NaN
2.186	66.971	-153.2284	1008.588	-1.1992	0.78491	-0.3252	41.646	9.3772	107.013	0.2793	0.024414	-0.13721	7.175	97.501	196.19109	-0.2876	0.26709	0.0019531	NaN	NaN	NaN	NaN	NaN	NaN
2.188	73.841	-143.6207	1021.391	-1.1909	0.76855	-0.3291	49.039	35.323	95.412	0.2751	0.024218	-0.13662	2.99	95.4163	204.1579	-0.21777	0.24805	-0.011719	NaN	NaN	NaN	NaN	NaN	NaN
2.19	70.6692	-139.1035	1029.031	-1.1934	0.75098	-0.33301	15.181	10.2544	95.407	0.27099	0.023926	-0.13828	18.246	88.011	163.55	-0.17871	0.23242	-0.016113	NaN	NaN	NaN	NaN	NaN	NaN
2.192	80.5371	-135.207	1006.852	-1.1953	0.74219	-0.32471	40.3485	19.5692	108.392	0.26358	0.018457	-0.13828	29.612	94.534	158.151	-0.099609	0.21094	-0.033203	NaN	NaN	NaN	NaN	NaN	NaN
2.194	78.753	-146.646	997.398	-1.2031	0.72852	-0.32471	-3.1678	30.1326	93.603	0.25059	0.021094	-0.13379	32.5333	101.104	143.926	-0.018066	0.18555	-0.042969	NaN	NaN	NaN	NaN	NaN	NaN
2.196	82.2327	-151.9143	993.694	-1.2058	0.71752	-0.32495	0.2469	-2.3	97.102	0.23145	0.022949	-0.13428	-3.711	89.5501	150.956	0.01416	0.1748	-0.05127	NaN	NaN	NaN	NaN	NaN	NaN
2.198	84.068	-145.61	989.179	-1.209	0.70898	-0.32715	31.7875	25.8494	79.238	0.2123	0.018555	-0.1249	-31.609	76.426	142.736	0.08252	0.14893	-0.067871	NaN	NaN	NaN	NaN	NaN	NaN
2.2	79.4133	-131.0241	978.691	-1.1987	0.6958	-0.32422	-51.912	10.8587	45.5994	0.19307	0.017187	-0.1209	-34.986	49.478	122.297	0.13184	0.12671	-0.086182	NaN	NaN	NaN	NaN	NaN	NaN
2.202	90.5492	-134.806	979.508	-1.189	0.68604	-0.32861	-17.331	5.11702	41.2744	0.1669	0.014063	-0.11699	-19.126	46.434	86.8052	0.17578	0.10205	-0.099121	NaN	NaN	NaN	NaN	NaN	NaN
2.204	73.0973	-134.111	976.548	-1.1616	0.67139	-0.32373	-23.763	28.433	25.2179	0.14307	0.011426	-0.11338	-43.2948	23.3381	98.327	0.22998	0.081543	-0.11963	NaN	NaN	NaN	NaN	NaN	NaN
2.206	81.4345	-142.197	971.726	-1.1433	0.65308	-0.31861	-60.5802	2.689	32.3851	0.11719	0.016602	-0.10449	-19.953	33.3642	92.007	0.24756	0.067383	-0.13477	NaN	NaN	NaN	NaN	NaN	NaN
2.208	60.664	-126.746	951.516	-1.1206	0.64014	-0.31641	-0.443000000000001	12.37626	36.622	0.087598	0.01084	-0.10166	-42.8399	12.234	79.219	0.27686	0.045898	-0.1499	NaN	NaN	NaN	NaN	NaN	NaN
2.21	87.7104	-108.0041	943.9691	-1.0918	0.62207	-0.31055	-41.943	12.09051	11.0348	0.062988	0.013086	-0.10166	-20.402	30.951	58.7962	0.30737	0.028565	-0.16016	NaN	NaN	NaN	NaN	NaN	NaN
2.212	75.3199	-83.7422	947.954	-1.0767	0.61768	-0.30664	-41.659	-11.6019	38.48	0.037207	0.013477	-0.099316	-37.9429	-4.2536	39.9321	0.31689	0.013184	-0.16504	NaN	NaN	NaN	NaN	NaN	NaN
2.214	87.2058	-74.1556	911.4567	-1.0425	0.60791	-0.30029	10.806	-1.405	27.281	0.016113	0.014648	-0.1002	-23.139	2.069	26.034	0.32227	0.0039063	-0.18115	NaN	NaN	NaN	NaN	NaN	NaN
2.216	77.2965	-76.49	898.7506	-1.0137	0.60156	-0.29736	-44.2201	-13.4149	19.2402	-0.0063477	0.016113	-0.099121	-36.327	-17.9513	46.148	0.32422	-0.0029297	-0.18018	NaN	NaN	NaN	NaN	NaN	NaN
2.218	79.4035	-79.585	888.6196	-0.98779	0.59814	-0.29639	-18.3261	-11.9765	21.7636	-0.024902	0.024512	-0.097461	10.948	41.6116	33.214	0.32813	-0.01416	-0.18701	NaN	NaN	NaN	NaN	NaN	NaN
2.22	84.552	-84.3366	892.314	-0.95117	0.5791	-0.28564	6.0632	14.329	11.91238	-0.038476	0.027441	-0.10019	17.695	32.817	53.69	0.31006	-0.027832	-0.18555	NaN	NaN	NaN	NaN	NaN	NaN
2.222	72.8363	-81.34959	870.5269	-0.93506	0.57861	-0.28076	1.182	-8.337	32.663	-0.047852	0.034863	-0.098242	4.915	53.5419	42.747	0.28662	-0.032715	-0.18506	NaN	NaN	NaN	NaN	NaN	NaN
2.224	74.1679	-69.3687	855.3563	-0.89844	0.56836	-0.27344	44.2043	-3.2413	36.255	-0.05166	0.038867	-0.1002	6.938	14.1529	52.626	0.25195	-0.036621	-0.17285	NaN	NaN	NaN	NaN	NaN	NaN
2.226	63.081	-72.589	839.5943	-0.87182	0.55835	-0.26782	6.9362	16.7395	3.78106	-0.049316	0.044434	-0.099609	1.401	27.6592	10.7725	0.23389	-0.035645	-0.17383	NaN	NaN	NaN	NaN	NaN	NaN
2.228	69.5301	-68.3997	829.673	-0.84961	0.55469	-0.2666	31.4598	-7.55574	17.578547	-0.05	0.052442	-0.10371	14.484	-5.0009	-7.299	0.19775	-0.025879	-0.16455	NaN	NaN	NaN	NaN	NaN	NaN
2.23	49.481	-75.471	804.9839	-0.81299	0.54346	-0.25732	77.61	15.7469	30.375	-0.046875	0.062891	-0.10224	40.77064	29.306	10.3167	0.17407	-0.016846	-0.15259	NaN	NaN	NaN	NaN	NaN	NaN
2.232	49.068	-72.502	803.6377	-0.7998	0.53516	-0.24805	39.4891	5.36358	10.832	-0.033594	0.066797	-0.10732	31.669	-12.0257	21.4184	0.15039	-0.015137	-0.14746	NaN	NaN	NaN	NaN	NaN	NaN
2.234	57.05	-70.5382	800.824	-0.77002	0.52783	-0.23926	74.325	-11.2489	19.1869	-0.022559	0.070312	-0.10654	33.4556	16.0774	17.7605	0.12256	-0.011719	-0.1333	NaN	NaN	NaN	NaN	NaN	NaN
2.236	45.5403	-66.39828	784.524	-0.74511	0.52246	-0.23584	45.6058	18.9787	-6.7021	-0.0092773	0.076172	-0.11279	38.026	-17.808	1.5482	0.10938	-0.0039063	-0.13574	NaN	NaN	NaN	NaN	NaN	NaN
2.238	50.8338	-61.67825	753.334	-0.72168	0.5127	-0.22852	26.1075	15.17808	10.9777	0.012305	0.077246	-0.11485	22.7767	24.8329	7.7885	0.080566	-0.003418	-0.12451	NaN	NaN	NaN	NaN	NaN	NaN
2.24	47.4309	-59.4656	733.9979	-0.69775	0.50391	-0.2207	73.387	33.0488	31.959	0.033789	0.081543	-0.12051	22.013	-9.6295	36.584	0.064697	-0.00048825	-0.12427	NaN	NaN	NaN	NaN	NaN	NaN
2.242	51.667	-41.397	718.5794	-0.68555	0.49805	-0.21582	28.194	45.089	13.2599	0.051367	0.083496	-0.12636	45.8918	33.092	55.309	0.061523	-0.00097656	-0.11963	NaN	NaN	NaN	NaN	NaN	NaN
2.244	51.427	-35.672	706.214	-0.65625	0.48633	-0.20996	19.0952	17.9774	32.441	0.069824	0.084668	-0.1335	19.545	13.44	27.9368	0.047852	0.0053711	-0.11523	NaN	NaN	NaN	NaN	NaN	NaN
2.246	63.0567	-20.76	681.9693	-0.63843	0.4768	-0.19751	30.3714	23.91	34.125	0.088867	0.088867	-0.13672	3.098	53.466	27.929	0.05127	0.003418	-0.11475	NaN	NaN	NaN	NaN	NaN	NaN
2.248	38.17	-18.151	683.445	-0.61963	0.46826	-0.18799	-7.688	6.9479	28.048	0.10889	0.091504	-0.14277	19.433	4.784	25.9276	0.050293	0.0048828	-0.11572	NaN	NaN	NaN	NaN	NaN	NaN
2.25	35.765	-18.2947	668.958	-0.59863	0.46143	-0.17969	28.66943	-3.2557	50.858	0.12871	0.096776	-0.14795	-34.935	26.473	33.11	0.048828	0.0046387	-0.11866	NaN	NaN	NaN	NaN	NaN	NaN
2.252	52.6929	-30.7771	649.938	-0.58691	0.44971	-0.17871	5.5	11.2292	13.4316	0.14317	0.10381	-0.15342	-21.175	-6.9095	30.724	0.041992	6.245e-14	-0.12354	NaN	NaN	NaN	NaN	NaN	NaN
2.254	38.307	-21.2207	630.4854	-0.5708	0.44092	-0.15625	-55.899	1.6416	19.5562	0.15449	0.11142	-0.15615	1.602	36.111	35.79273	0.039063	0.003418	-0.12891	NaN	NaN	NaN	NaN	NaN	NaN
2.256	39.7612	-14.08617	616.6707	-0.5603	0.43042	-0.15772	-2.556	11.2535	42.634	0.1626	0.11621	-0.15771	-8.291	15.04118	27.2067	0.035645	0.0073242	-0.12842	NaN	NaN	NaN	NaN	NaN	NaN
2.258	26.229	-11.3856	613.629	-0.54883	0.41992	-0.14844	-29.9603	26.3588	26.5571	0.16826	0.12061	-0.15752	-30.0841	26.685	50.43	0.021484	0.019531	-0.12744	NaN	NaN	NaN	NaN	NaN	NaN
2.26	65.2642	-8.7015	590.72	-0.53027	0.41016	-0.14063	-29.72219	3.917	57.119	0.17432	0.12891	-0.15459	-20.89	-2.995	15.9144	0.015381	0.027099	-0.13061	NaN	NaN	NaN	NaN	NaN	NaN
2.262	50.87	-10.76	577.289	-0.51905	0.39991	-0.13184	-22.4656	0.0538999999999996	64.94	0.1708	0.1332	-0.15771	-47.2853	11.3616	7.543	0.0039063	0.032227	-0.12988	NaN	NaN	NaN	NaN	NaN	NaN
2.264	53.058	-9.392	572.167	-0.50537	0.3916	-0.12646	-58.475	-12.485	61.603	0.16133	0.13604	-0.15752	-18.027	2.0989	0.714000000000002	-0.00048828	0.047852	-0.13965	NaN	NaN	NaN	NaN	NaN	NaN
2.266	66.413	-20.0433	576.685	-0.48633	0.37842	-0.11572	-10.3258	-28.521	84.553	0.14453	0.14697	-0.1626	-27.1301	8.69644	38.402	-0.0043945	0.053223	-0.13818	NaN	NaN	NaN	NaN	NaN	NaN
2.268	60.075808	-11.351	557.076	-0.47803	0.37354	-0.11279	-3.0307	-9.54	60.43	0.11709	0.15488	-0.1584	-11.609	2.7853	52.077	0.00048828	0.070313	-0.14551	NaN	NaN	NaN	NaN	NaN	NaN
2.27	55.0148	-0.449	541.108	-0.45752	0.36084	-0.10645	-50.072	-41.593	82.1881	0.081836	0.16943	-0.1624	-20.296	15.7024	71.39	-2.0816e-14	0.086426	-0.14697	NaN	NaN	NaN	NaN	NaN	NaN
2.272	38.946	-4.98764	534.248	-0.44238	0.34936	-0.099364	26.854	-48.6912	107.1387	0.036914	0.18271	-0.16279	6.461	21.0319	39.643	0.0039063	0.097168	-0.15381	NaN	NaN	NaN	NaN	NaN	NaN
2.274	63.5621	-7.75621	522.733	-0.42871	0.33594	-0.094727	20.978	-30.159	112.3928	-0.01416	0.2041	-0.16338	-30.5229	14.10885	45.122	0.019043	0.10742	-0.15527	NaN	NaN	NaN	NaN	NaN	NaN
2.276	44.208	-5.662	508.198	-0.4043	0.32568	-0.089355	35.309	-33.53	166.396	-0.067871	0.22656	-0.16406	12.54	-1.588	29.8074	0.026855	0.11865	-0.15869	NaN	NaN	NaN	NaN	NaN	NaN
2.278	43.4008	-6.7442	499.6	-0.39404	0.31982	-0.083984	55.7997	-4.7932	207.95	-0.12363	0.2502	-0.16445	7.93	-10.146	31.454	0.036621	0.13037	-0.15771	NaN	NaN	NaN	NaN	NaN	NaN
2.28	42.0675	-7.51487	477.343	-0.37109	0.30615	-0.081543	5.38	-10.5858	252.063	-0.1914	0.27031	-0.16914	19.057	10.705	-5.3753	0.051514	0.14014	-0.15795	NaN	NaN	NaN	NaN	NaN	NaN
2.282	36.0109	-10.7233	466.777	-0.35009	0.2937	-0.075683	58.1956	-18.34136	325.786	-0.26055	0.30351	-0.17266	29.5941	2.59	9.7096	0.060059	0.1499	-0.16064	NaN	NaN	NaN	NaN	NaN	NaN
2.284	45.9454	-0.7752	463.229	-0.33545	0.28271	-0.073242	46.336	28.462	373.0469	-0.34521	0.33438	-0.16553	36.3301	15.4808	7.3937	0.070801	0.15381	-0.15918	NaN	NaN	NaN	NaN	NaN	NaN
2.286	40.4277	-6.2222	451.457	-0.31152	0.27051	-0.067871	-12.614	46.054	446.533	-0.44092	0.35986	-0.16113	5.118	-9.1703	14.8649	0.077148	0.1626	-0.16016	NaN	NaN	NaN	NaN	NaN	NaN
2.288	50.0274	-7.9537	439.182	-0.29785	0.26563	-0.068359	28.69	79.376	546.9051	-0.55342	0.39688	-0.15537	23.572	25.1884	2.3256	0.08252	0.16943	-0.16162	NaN	NaN	NaN	NaN	NaN	NaN
2.29	29.163	-3.9494	414.7288	-0.2749	0.25244	-0.06543	-23.9022	122.142	627.7517	-0.67646	0.43447	-0.1459	29.0007	16.9208	21.9175	0.09082	0.17505	-0.1626	NaN	NaN	NaN	NaN	NaN	NaN
2.292	42.0999	8.39616	403.4672	-0.26001	0.24658	-0.061035	-32.1261	118.0916	728.6072	-0.82295	0.48096	-0.13379	45.51807	53.997	32.2187	0.096191	0.17871	-0.16406	NaN	NaN	NaN	NaN	NaN	NaN
2.294	25.987	8.33322	411.595	-0.24707	0.23682	-0.05957	28.3843	113.471	814.7031	-0.9924	0.52676	-0.11631	30.006	21.0577	53.636	0.1001	0.18896	-0.16357	NaN	NaN	NaN	NaN	NaN	NaN
2.296	26.6727	14.3342	419.685	-0.229	0.23193	-0.058105	-7.363	77.339	868.535	-1.1797	0.57422	-0.095703	45.403	24.362	26.9712	0.099121	0.19336	-0.16699	NaN	NaN	NaN	NaN	NaN	NaN
2.298	35.0239	-1.5655	392.464	-0.21484	0.22412	-0.054199	9.7259	1.24	947.845	-1.3845	0.62353	-0.066504	-4.074	-15.86883	-8.6787	0.097168	0.20215	-0.1709	NaN	NaN	NaN	NaN	NaN	NaN
2.3	27.431	-8.90621	377.322	-0.2041	0.21484	-0.049316	11.5293	-23.905	962.607	-1.5988	0.65976	-0.029981	1.02	18.61757	6.036	0.089844	0.20874	-0.17211	NaN	NaN	NaN	NaN	NaN	NaN
2.302	13.397	-8.87743	379.696	-0.19165	0.20996	-0.050781	-11.6076	-90.0974	981.5674	-1.825	0.71797	0.0008788	-3.581	-7.11824	52.634	0.086914	0.21777	-0.17139	NaN	NaN	NaN	NaN	NaN	NaN
2.304	15.643	-9.2481	379.083	-0.18652	0.20215	-0.050293	27.2719	-140.824	1001.3307	-2.0399	0.77725	0.031641	-7.688	15.2927	62.798	0.075684	0.22168	-0.17676	NaN	NaN	NaN	NaN	NaN	NaN
2.306	42.0883	1.24205	363.001	-0.17871	0.19629	-0.043945	-29.553	-148.809	974.1992	-2.2241	0.83838	0.041504	-1.129	-35.2425	75.626	0.068359	0.22363	-0.18555	NaN	NaN	NaN	NaN	NaN	NaN
2.308	26.103	-2.931	336.2248	-0.17676	0.19287	-0.040039	-69.673	-187.132	981.7771	-2.3305	0.90576	0.02666	-14.326	-6.016	74.958	0.054688	0.23047	-0.18994	NaN	NaN	NaN	NaN	NaN	NaN
2.31	20.475	-5.52018	338.894	-0.16943	0.18262	-0.029297	-55.3092	-157.594	990.511	-2.3488	0.98019	0.027832	-30.8816	-45.998	108.819	0.043457	0.24145	-0.19604	NaN	NaN	NaN	NaN	NaN	NaN
2.312	36.67886	-10.1937	337.661	-0.16528	0.18774	-0.031982	-128.351	-113.7	980.169	-2.2737	1.038	0.016894	-8.165	6.464	165.601	0.017578	0.25293	-0.20654	NaN	NaN	NaN	NaN	NaN	NaN
2.314	33.2825	2.4883	321.325	-0.16309	0.18311	-0.026367	-123.6461	-107.308	1011.929	-2.1137	1.089	0.0047852	15.701	2.0935	224.1922	-0.029785	0.26563	-0.21045	NaN	NaN	NaN	NaN	NaN	NaN
2.316	33.0725	21.3692	316.572	-0.16162	0.18311	-0.021973	-102.7843	-69.38	986.638	-1.9043	1.1113	-0.019531	14.879	69.009	266.5244	-0.062988	0.27783	-0.21143	NaN	NaN	NaN	NaN	NaN	NaN
2.318	22.122	15.5123	325.921	-0.16504	0.17334	-0.02002	-149.956	-69.46171	970.904	-1.6541	1.0701	-0.050098	15.01	31.8823	341.3492	-0.13574	0.29688	-0.20947	NaN	NaN	NaN	NaN	NaN	NaN
2.32	30.3885	7.2811	322.731	-0.16943	0.17236	-0.01709	-104.823	-41.783	973.5935	-1.4136	0.98076	-0.079101	-26.1076	63.0521	434.3842	-0.21216	0.3125	-0.21411	NaN	NaN	NaN	NaN	NaN	NaN
2.322	24.2561	4.5425	299.981	-0.16748	0.16895	-0.013672	-132.411	7.781	947.867	-1.1929	0.86943	-0.099805	-62.385	56.1763	527.5707	-0.29785	0.33154	-0.21094	NaN	NaN	NaN	NaN	NaN	NaN
2.324	30.2703	3.6433	292.38924	-0.16943	0.1665	-0.016602	-90.24	9.803	958.554	-1.0199	0.76719	-0.11699	-66.547	125.857	623.983	-0.42334	0.36084	-0.20264	NaN	NaN	NaN	NaN	NaN	NaN
2.326	34.3714	-4.3982	305.371	-0.17139	0.16846	-0.0039063	-21.4659	-30.462	982.7214	-0.88184	0.69922	-0.13135	-56.929	93.616	716.907	-0.49756	0.37842	-0.19678	NaN	NaN	NaN	NaN	NaN	NaN
2.328	29.3508	4.4431	299.58	-0.1748	0.16699	-0.012695	-46.515	-66.091	970.169	-0.7917	0.66904	-0.14414	-76.458	117.999	827.917	-0.65039	0.42676	-0.1792	NaN	NaN	NaN	NaN	NaN	NaN
2.33	24.801	10.75082	287.5917	-0.17578	0.16602	-0.0043945	0.1276	-157.449	1022.858	-0.73125	0.66602	-0.15391	-58.400516	50.634	902.7815	-0.78662	0.46948	-0.16162	NaN	NaN	NaN	NaN	NaN	NaN
2.332	21.1161	7.75389	280.5705	-0.18091	0.16626	-0.0026856	-6.1276	-173.795	1061.388	-0.69141	0.68906	-0.16094	-45.918	49.5311	997.8585	-0.94287	0.50928	-0.14014	NaN	NaN	NaN	NaN	NaN	NaN
2.334	34.4901	-8.77311	279.7015	-0.18408	0.16162	-0.0043945	-16.5783	-188.51	1080.507	-0.68174	0.73936	-0.17354	-28.3804	-1.4177	1063.756	-1.1812	0.56885	-0.088379	NaN	NaN	NaN	NaN	NaN	NaN
2.336	1.4	-4.33942	294.908	-0.1875	0.16309	0.00048828	9.2839	-229.353	1111.895	-0.68701	0.79541	-0.18018	-24.9457	-5.565	1148.603	-1.3198	0.60303	-0.061035	NaN	NaN	NaN	NaN	NaN	NaN
2.338	35.9226	6.28468	289.7899	-0.19141	0.16504	0.0019531	-3.996	-210.273	1097.3822	-0.70469	0.82305	-0.18105	5.902	-80.8	1195.996	-1.6348	0.6543	0.018555	NaN	NaN	NaN	NaN	NaN	NaN
2.34	20.1861	7.65798	288.037	-0.19727	0.16553	0.0053711	-5.184	-225.305	1129.05781	-0.74687	0.83359	-0.17071	30.2439	-130.703	1192.776	-1.9863	0.7168	0.083496	NaN	NaN	NaN	NaN	NaN	NaN
2.342	20.881	18.7429	289.923	-0.20264	0.16675	0.0048828	62.04738	-227.978	1208.8	-0.81562	0.83984	-0.15976	57.486	-188.176	1172.058	-2.1675	0.75635	0.13037	NaN	NaN	NaN	NaN	NaN	NaN
2.344	8.131	8.7232	282.2	-0.20654	0.16406	0.0048828	39.33243	-175.719	1249.903	-0.91406	0.85078	-0.1459	32.34844	-221.389	1186.605	-2.4995	0.83447	0.1416	NaN	NaN	NaN	NaN	NaN	NaN
2.346	17.445	9.4081	286.999	-0.21729	0.16504	0.01123	56.772	-183.588	1300.511	-1.0288	0.85596	-0.12988	-0.7244	-233.333	1129.979	-2.6811	0.90332	0.13648	NaN	NaN	NaN	NaN	NaN	NaN
2.348	15.0708	11.8805	293.146	-0.22021	0.16553	0.014648	88.859	-149.0153	1335.204	-1.1497	0.86474	-0.11543	-52.6916	-207.126	1127.589	-2.7734	0.9668	0.12793	NaN	NaN	NaN	NaN	NaN	NaN
2.35	11.3664	17.9556	289.1641	-0.22754	0.16748	0.013672	71.406	-123.296	1313.815	-1.2667	0.87197	-0.096973	-54.201	-174.074	1061.7175	-2.7539	1.0947	0.090332	NaN	NaN	NaN	NaN	NaN	NaN
2.352	20.2573	19.7408	282.2894	-0.23975	0.16431	0.023926	109.073	-152.5693	1303.814	-1.3694	0.88643	-0.087598	-77.838	-138.534	1061.427	-2.6909	1.186	0.062988	NaN	NaN	NaN	NaN	NaN	NaN
2.354	3.577	11.4847	282.0786	-0.24805	0.16211	0.021484	92.0488	-102.634	1274.1896	-1.4591	0.91475	-0.090039	-65.386	-87.313	1066.6712	-2.4004	1.2637	0.03125	NaN	NaN	NaN	NaN	NaN	NaN
2.356	7.399	14.7155	301.228	-0.26172	0.16553	0.030762	60.7131	-93.307	1277.271	-1.5376	0.94385	-0.090332	-90.056	-69.8573	1130.883	-2.0906	1.2141	0.001953	NaN	NaN	NaN	NaN	NaN	NaN
2.358	10.391	16.5398	291.1456	-0.271	0.1626	0.030762	72.381	-109.084	1321.958	-1.6056	0.96778	-0.098244	-86.58	-22.713	1107.9035	-1.771	1.0825	-0.040527	NaN	NaN	NaN	NaN	NaN	NaN
2.36	26.9516	26.111	283.37943	-0.28271	0.16309	0.036133	9.2469	-80.661	1318.5595	-1.6655	0.9876	-0.10791	-71.776	-75.192	1149.875	-1.4053	0.87891	-0.11084	NaN	NaN	NaN	NaN	NaN	NaN
2.362	13.481	27.045	302.809	-0.29761	0.16723	0.037842	9.5844	-146.462	1382.44	-1.723	1.0051	-0.1251	-48.6644	-79.411	1146.2779	-1.2461	0.7959	-0.14355	NaN	NaN	NaN	NaN	NaN	NaN
2.364	15.4347	25.9181	321.071	-0.30859	0.1709	0.038574	14.675	-149.011	1428.725	-1.7656	1.0239	-0.14765	-26.861	-164.823	1182.578	-0.99023	0.71387	-0.19092	NaN	NaN	NaN	NaN	NaN	NaN
2.366	25.1363	23.6708	320.454	-0.31982	0.1709	0.045898	-27.59891	-119.119	1447.473	-1.7969	1.0352	-0.16162	34.965	-170.103	1209.6935	-0.87329	0.70142	-0.21435	NaN	NaN	NaN	NaN	NaN	NaN
2.368	17.09	19.0974	314.058	-0.33203	0.17041	0.04248	16.6742	-147.097	1473.948	-1.8256	1.0412	-0.18545	12.13	-253.402	1248.476	-0.81445	0.71094	-0.24854	NaN	NaN	NaN	NaN	NaN	NaN
2.37	32.3558	17.3224	322.2324	-0.34424	0.17529	0.041504	3.718	-103.527	1461.887	-1.8465	1.0457	-0.20244	-37.351	-243.005	1274.012	-0.82178	0.77588	-0.25146	NaN	NaN	NaN	NaN	NaN	NaN
2.372	19.289	15.1435	343.641	-0.35302	0.17334	0.042725	-45.3546	-108.037	1472.0334	-1.8594	1.0453	-0.22159	-47.515	-333.824	1320.2661	-0.84766	0.82813	-0.23828	NaN	NaN	NaN	NaN	NaN	NaN
2.374	28.5771	12.71241	340.425	-0.36328	0.17871	0.041992	15.408	-142.81	1527.507	-1.8809	1.042	-0.24258	-23.542	-297.332	1372.9063	-0.95557	0.96338	-0.25928	NaN	NaN	NaN	NaN	NaN	NaN
2.376	33.30474	22.1022	325.6678	-0.37695	0.18555	0.031738	-3.689	-85.5665	1523.604	-1.896	1.0405	-0.25928	-21.891	-363.37	1478.543	-0.99779	1.0354	-0.28735	NaN	NaN	NaN	NaN	NaN	NaN
2.378	17.3248	30.381	341.866	-0.38477	0.18457	0.025879	2.506	-113.2005	1524.046	-1.9116	1.0427	-0.2792	0.0479999999999983	-291.502	1530.375	-1.0112	1.0298	-0.29053	NaN	NaN	NaN	NaN	NaN	NaN
2.38	40.4662	26.4718	360.296	-0.39844	0.19629	0.035645	15.058	-89.1817	1525.3337	-1.9223	1.0473	-0.2916	-0.402000000000001	-338.635	1581.69	-1.1108	0.99072	-0.25586	NaN	NaN	NaN	NaN	NaN	NaN
2.382	14.81	23.8252	368.587	-0.40943	0.20142	0.032471	-37.0592	-43.489	1496.7744	-1.9223	1.0512	-0.30879	-10.187	-220.43	1591.639	-1.2109	0.97852	-0.23926	NaN	NaN	NaN	NaN	NaN	NaN
2.384	41.331	29.966	370.003	-0.41895	0.20703	0.031738	-0.364000000000001	-77.5309	1498.653	-1.9119	1.0455	-0.32725	6.323	-230.69	1613.923	-1.4219	1.002	-0.22314	NaN	NaN	NaN	NaN	NaN	NaN
2.386	20.444	39.059	389.109	-0.43701	0.21582	0.024414	19.342	-14.943	1484.1738	-1.8921	1.0415	-0.34131	65.415	-110.696	1586.2821	-1.5454	1.0317	-0.21411	NaN	NaN	NaN	NaN	NaN	NaN
2.388	33.4665	34.3595	410.248	-0.44336	0.21875	0.022949	-2.532	-9.252	1463.132	-1.8623	1.0275	-0.35713	113.917	-124.292	1606.246	-1.6519	1.0708	-0.2041	NaN	NaN	NaN	NaN	NaN	NaN
2.39	31.3347	28.3893	407.655	-0.45703	0.22949	0.014648	35.8945	-43.866	1503.95	-1.8354	1.0068	-0.37021	111.6596	-47.353	1596.108	-1.7793	1.1133	-0.22266	NaN	NaN	NaN	NaN	NaN	NaN
2.392	30.143	30.1717	408.945	-0.46655	0.23706	0.0063476	24.6837	18.3813	1492.421	-1.8202	0.98525	-0.37569	87.342	-105.816	1597.805	-1.832	1.127	-0.22461	NaN	NaN	NaN	NaN	NaN	NaN
2.394	22.25205	34.1128	420.852	-0.47461	0.24609	0.0029297	41.611	-13.0224	1494.869	-1.813	0.97178	-0.37939	70.2977	-50.315	1591.173	-1.9175	1.1255	-0.22168	NaN	NaN	NaN	NaN	NaN	NaN
2.396	18.161	35.8962	440.739	-0.49023	0.2583	-0.0043945	70.038	-13.7071	1520.6008	-1.8164	0.96094	-0.38672	57.172	-114.84	1607.98	-1.9687	1.1269	-0.23071	NaN	NaN	NaN	NaN	NaN	NaN
2.398	31.54116	36.9619	440.7	-0.48926	0.26416	-0.011719	52.72801	15.176	1513.349	-1.8207	0.95215	-0.38174	44.989	-81.0739	1643.269	-2.0132	1.1274	-0.2417	NaN	NaN	NaN	NaN	NaN	NaN
2.4	23.372	33.3539	452.712	-0.50293	0.27246	-0.018555	93.885	-43.879	1534.813	-1.8292	0.94541	-0.38037	40.998	-132.411	1665.0033	-2.0601	1.1274	-0.25244	NaN	NaN	NaN	NaN	NaN	NaN
2.402	23.2903	31.3848	475.521	-0.52002	0.28857	-0.027344	91.563	-0.559999999999999	1518.41	-1.835	0.94736	-0.37724	31.282	-88.541	1694.336	-2.0796	1.1274	-0.26123	NaN	NaN	NaN	NaN	NaN	NaN
2.404	28.8267	19.651	491.814	-0.52881	0.29102	-0.023926	64.474	9.414	1483.873	-1.8266	0.93984	-0.37363	29.905	-117.876	1725.129	-2.1128	1.1353	-0.28174	NaN	NaN	NaN	NaN	NaN	NaN
2.406	29.1101	27.0047	515.983	-0.54248	0.30127	-0.035156	78.243	-42.892	1504.4244	-1.8135	0.92773	-0.37402	-6.908	-90.748	1737.525	-2.1189	1.1341	-0.29712	NaN	NaN	NaN	NaN	NaN	NaN
2.408	23.476	28.00744	513.523	-0.55909	0.30883	-0.044678	61.6923	17.3547	1493.2255	-1.8125	0.92207	-0.35938	9.076	-128.77	1761.634	-2.1172	1.1348	-0.30908	NaN	NaN	NaN	NaN	NaN	NaN
2.41	38.0412	43.4925	529.069	-0.57666	0.31641	-0.048828	49.8741	-14.0361	1472.391	-1.812	0.92627	-0.36318	20.242	-121.8228	1784.324	-2.1147	1.1294	-0.32568	NaN	NaN	NaN	NaN	NaN	NaN
2.412	35.2478	42.677	535.27	-0.60352	0.33057	-0.056152	85.3409	3.932	1464.992	-1.8003	0.92627	-0.35225	55.215	-142.0372	1769.637	-2.1069	1.1235	-0.3335	NaN	NaN	NaN	NaN	NaN	NaN
2.414	17.387	38.8174	540.372	-0.61523	0.33594	-0.058105	34.835	63.648	1423.202	-1.7864	0.92138	-0.34522	58.28	-106.245	1735.938	-2.084	1.1074	-0.34961	NaN	NaN	NaN	NaN	NaN	NaN
2.416	35.7802	35.7724	561.164	-0.646	0.34717	-0.063477	35.658	9.1641	1441.084	-1.7715	0.92383	-0.34961	42.659	-88.482	1686.925	-2.0667	1.0901	-0.35693	NaN	NaN	NaN	NaN	NaN	NaN
2.418	30.1564	35.06063	578.516	-0.66821	0.36059	-0.064209	65.84235	71.002	1456.166	-1.756	0.92168	-0.34434	17.766	-38.725	1669.141	-2.0503	1.0708	-0.36084	NaN	NaN	NaN	NaN	NaN	NaN
2.42	39.3235	27.3324	590.565	-0.69824	0.37158	-0.065918	19.042	77.305	1420.369	-1.7262	0.91719	-0.34239	-15.536	-22.23	1637.487	-2.0303	1.0332	-0.36816	NaN	NaN	NaN	NaN	NaN	NaN
2.422	37.051	30.1431	598.8529	-0.73389	0.37939	-0.067871	43.03816	49.2738	1418.9943	-1.6887	0.90547	-0.34121	-42.024	27.3328	1612.909	-2.021	1.0142	-0.37012	NaN	NaN	NaN	NaN	NaN	NaN
2.424	41.7832	35.55086	621.953	-0.74658	0.38818	-0.073242	17.582	125.029	1368.9293	-1.6485	0.89756	-0.34043	-51.3618	48.85652	1595.337	-2.0024	0.99463	-0.37549	NaN	NaN	NaN	NaN	NaN	NaN
2.426	50.07	39.5654	637.873	-0.77881	0.39893	-0.072754	-6.538	83.8128	1345.424	-1.6094	0.88965	-0.33643	-25.567	64.1502	1616.908	-1.9976	0.98096	-0.38013	NaN	NaN	NaN	NaN	NaN	NaN
2.428	42.3517	42.3563	635.344	-0.80689	0.40552	-0.072022	24.761	92.1104	1335.023	-1.5673	0.87881	-0.33349	-21.738	74.0723	1600.20475	-1.9863	0.9707	-0.38086	NaN	NaN	NaN	NaN	NaN	NaN
2.43	56.0032	44.2801	642.6852	-0.8335	0.41162	-0.073242	-12.499	118.496	1302.987	-1.5309	0.87051	-0.33545	-14.912	74.297	1598.16	-1.9688	0.95508	-0.38477	NaN	NaN	NaN	NaN	NaN	NaN
2.432	29.212	62.3718	665.088	-0.87109	0.42334	-0.073242	-5.975	32.282	1316.203	-1.4965	0.85489	-0.32764	-7.539	83.569	1571.2093	-1.9624	0.94971	-0.37646	NaN	NaN	NaN	NaN	NaN	NaN
2.434	67.5494	62.8344	686.544	-0.88672	0.42969	-0.072754	-10.184	67.2827	1317.061	-1.4599	0.84404	-0.32373	23.528	46.143	1589.337	-1.9531	0.94336	-0.38232	NaN	NaN	NaN	NaN	NaN	NaN
2.436	40.0974	53.7504	687.571	-0.92139	0.43896	-0.067383	-31.5323	60.8324	1295.574	-1.4272	0.82471	-0.32031	61.077	61.031	1572.606	-1.9402	0.94799	-0.38281	NaN	NaN	NaN	NaN	NaN	NaN
2.438	39.77	59.6726	692.6969	-0.94678	0.44849	-0.069336	16.65	50.051	1281.65	-1.4012	0.80928	-0.31357	93.7763	39.428	1584.792	-1.9277	0.94531	-0.38818	NaN	NaN	NaN	NaN	NaN	NaN
2.44	35.542	62.5159	717.441	-0.96826	0.45654	-0.067871	17.245	156.4062	1238.4894	-1.3742	0.79111	-0.30879	103.4811	67.356	1560.6152	-1.918	0.94336	-0.37891	NaN	NaN	NaN	NaN	NaN	NaN
2.442	47.58	74.31522	711.2036	-0.99951	0.46533	-0.069336	12.598	129.482	1216.266	-1.3476	0.77705	-0.30098	82.362	30.033	1570.899	-1.9077	0.94385	-0.37842	NaN	NaN	NaN	NaN	NaN	NaN
2.444	54.7418	80.8621	719.1559	-1.0112	0.47559	-0.068848	38.881	146.553	1195.9539	-1.3225	0.75977	-0.29375	51.642	29.594	1539.506	-1.894	0.94287	-0.38037	NaN	NaN	NaN	NaN	NaN	NaN
2.446	25.256	87.5301	735.7428	-1.0317	0.4917	-0.073242	29.61094	182.564	1154.23	-1.2949	0.74414	-0.28369	45.08	0.0120000000000005	1540.655	-1.8767	0.94262	-0.3767	NaN	NaN	NaN	NaN	NaN	NaN
2.448	60.9125	90.2386	755.1	-1.04	0.5	-0.068603	52.696	109.012	1158.266	-1.2692	0.72373	-0.28047	63.198	61.201	1510.307	-1.8589	0.9458	-0.37646	NaN	NaN	NaN	NaN	NaN	NaN
2.45	57.284	80.31	766.735	-1.0547	0.51172	-0.072754	60.213	162.8004	1152.579	-1.2398	0.70459	-0.27334	83.7853	61.893	1500.313	-1.8237	0.94775	-0.37256	NaN	NaN	NaN	NaN	NaN	NaN
2.452	53.106359	98.556	766.3844	-1.063	0.52832	-0.067871	45.3135	149.527	1143.441	-1.2085	0.68819	-0.26279	47.3245	153.4691	1444.23	-1.8062	0.95166	-0.3667	NaN	NaN	NaN	NaN	NaN	NaN
2.454	32.253	100.4814	789.285	-1.0703	0.52832	-0.077637	73.056	119.219	1104.338	-1.1815	0.67295	-0.25459	37.3849	144.722	1416.389	-1.7598	0.94727	-0.35596	NaN	NaN	NaN	NaN	NaN	NaN
2.456	49.6248	103.929	805.313	-1.0781	0.54199	-0.074707	49.2571	187.6555	1021.405	-1.1548	0.65088	-0.24072	23.532	232.743	1370.504	-1.7237	0.93799	-0.34546	NaN	NaN	NaN	NaN	NaN	NaN
2.458	52.54	96.87063	807.527	-1.085	0.54883	-0.079346	43.86021	147.643	1007.633	-1.1274	0.63525	-0.23311	48.5338	219.955	1342.734	-1.7051	0.9248	-0.33984	NaN	NaN	NaN	NaN	NaN	NaN
2.46	30.062	106.6904	808.41382	-1.084	0.55762	-0.081543	50.5044	175.875	999.708	-1.1044	0.61455	-0.21768	45.486	270.032	1304.699	-1.6479	0.90088	-0.33057	NaN	NaN	NaN	NaN	NaN	NaN
2.462	54.091	104.58324	824.2948	-1.0859	0.56934	-0.085449	27.69667	206.5676	979.4009	-1.0798	0.59306	-0.21182	70.071	216.905	1297.028	-1.6289	0.89453	-0.32227	NaN	NaN	NaN	NaN	NaN	NaN
2.464	48.9759	113.151	848.5	-1.0894	0.57764	-0.081055	76.788	143.339	972.134	-1.0627	0.57363	-0.19453	35.986	245.269	1278.948	-1.5679	0.87744	-0.30811	NaN	NaN	NaN	NaN	NaN	NaN
2.466	61.9305	123.1033	849.822	-1.0859	0.58691	-0.084473	42.089	173.1029709	931.427	-1.0425	0.55322	-0.18213	5.8193	178.684	1260.216	-1.5232	0.85181	-0.30152	NaN	NaN	NaN	NaN	NaN	NaN
2.468	50.429	122.5336	849.0872	-1.0936	0.59351	-0.084229	-5.2714	150.5273	923.003	-1.0219	0.53906	-0.17061	-23.123	219.985	1235.664	-1.4839	0.82666	-0.28564	NaN	NaN	NaN	NaN	NaN	NaN
2.47	50.429	129.25	869.779	-1.0952	0.60107	-0.085938	36.98714	137.5709	913.595	-0.99979	0.52382	-0.15683	-39.0301	164.9137	1166.7371	-1.4199	0.79688	-0.27393	NaN	NaN	NaN	NaN	NaN	NaN
2.472	55.6503	132.8312	889.985	-1.1089	0.60693	-0.089844	10.305	206.214	845.7019	-0.97363	0.51054	-0.14199	-60.017	220.57849	1125.5021	-1.3901	0.78955	-0.26611	NaN	NaN	NaN	NaN	NaN	NaN
2.474	44.4857	142.922	876.2982	-1.123	0.61523	-0.086426	-16.8852	192.293	817.1	-0.94678	0.49795	-0.12881	-53.4268	170.471	1084.6795	-1.3237	0.76221	-0.25098	NaN	NaN	NaN	NaN	NaN	NaN
2.476	66.0395	148.2909	883.3667	-1.146	0.63135	-0.087891	-3.49	201.5831	786.527	-0.92725	0.48877	-0.11084	-61.3271	236.367	1040.9626	-1.2815	0.73755	-0.24146	NaN	NaN	NaN	NaN	NaN	NaN
2.478	37.881	157.8236	891.568	-1.1706	0.64087	-0.087402	-37.933	208.518	746.844	-0.89756	0.47646	-0.10274	-46.958	184.535	1022.7058	-1.2363	0.71484	-0.22754	NaN	NaN	NaN	NaN	NaN	NaN
2.48	69.832	176.866	894.5195	-1.1958	0.65088	-0.090332	-13.71274	152.6917	737.249	-0.86895	0.46445	-0.085059	-32.3057	222.348	1006.525	-1.1675	0.68408	-0.20361	NaN	NaN	NaN	NaN	NaN	NaN
2.482	38.548	177.423	899.193	-1.2314	0.66406	-0.088867	-32.1242	192.967	694.932	-0.83691	0.45351	-0.070215	-29.5298	180.9242	975.324	-1.1177	0.65772	-0.18775	NaN	NaN	NaN	NaN	NaN	NaN
2.484	55.3122	169.512	908.803	-1.248	0.66797	-0.092773	-63.074	175.466	680.664	-0.80869	0.44072	-0.051172	-32.655	260.436	943.388	-1.0757	0.62842	-0.17139	NaN	NaN	NaN	NaN	NaN	NaN
2.486	57.3369	163.2745	928.811	-1.271	0.68408	-0.092773	-21.109	142.3955	662.041	-0.77295	0.42334	-0.041992	5.6227	254.81	896.926	-1.0254	0.58789	-0.15967	NaN	NaN	NaN	NaN	NaN	NaN
2.488	55.499	173.5555	931.32	-1.2839	0.6936	-0.094239	-44.426	174.723	597.879	-0.73994	0.40586	-0.028906	-6.919	314.608	857.29	-0.99414	0.57422	-0.1416	NaN	NaN	NaN	NaN	NaN	NaN
2.49	55.8941	183.417	929.498	-1.2949	0.69531	-0.098145	-26.271	154.01072	583.5179	-0.70254	0.39287	-0.016309	10.342	264.107	802.0547	-0.94482	0.54736	-0.12354	NaN	NaN	NaN	NaN	NaN	NaN
2.492	49.32	193.48	928.9413	-1.3003	0.70361	-0.095703	-11.2361	189.566	541.0771	-0.66035	0.38037	-0.0061524	-1.007	282.998	741.446	-0.89893	0.52588	-0.1084	NaN	NaN	NaN	NaN	NaN	NaN
2.494	61.69325	189.6309	937.628	-1.3003	0.70459	-0.099121	-40.495	214.458	518.5575	-0.61845	0.36436	0.0070314	-19.2924	231.9519	691.133	-0.85547	0.50195	-0.089844	NaN	NaN	NaN	NaN	NaN	NaN
2.496	35.987	192.9656	916.761	-1.3003	0.71143	-0.098633	4.926	163.087	524.003	-0.5752	0.34863	0.019043	-14.483	258.464	652.6704	-0.80664	0.4707	-0.074707	NaN	NaN	NaN	NaN	NaN	NaN
2.498	49.181	199.966	921.9299	-1.2905	0.71021	-0.097413	-22.393	184.403	465.74	-0.53037	0.33555	0.02832	20.6317	207.883	632.24	-0.7832	0.46094	-0.064941	NaN	NaN	NaN	NaN	NaN	NaN
2.5	40.443	199.563	937.568	-1.2832	0.70898	-0.095703	-24.3177	155.729	453.432	-0.48818	0.32178	0.037793	24.91	220.4142	622.533	-0.72412	0.43115	-0.04541	NaN	NaN	NaN	NaN	NaN	NaN
2.502	50.7631	203.0836	962.489	-1.2598	0.71289	-0.092773	58.593	119.5733	462.621	-0.44248	0.30537	0.052637	38.3162	185.54	561.972	-0.68433	0.40796	-0.033936	NaN	NaN	NaN	NaN	NaN	NaN
2.504	47.8	194.3552	949.552	-1.2456	0.71436	-0.097656	24.9017	141.198	422.298	-0.3959	0.28916	0.059277	30.6218	211.236	540.131	-0.63867	0.38721	-0.018555	NaN	NaN	NaN	NaN	NaN	NaN
2.506	38.579	199.76511	939.616	-1.2266	0.71094	-0.095703	23.8006	102.8855	398.6	-0.34375	0.27686	0.06543	32.8043	193.4452	511.478	-0.58496	0.35742	0.00048828	NaN	NaN	NaN	NaN	NaN	NaN
2.508	49.8764	204.8157	939.401	-1.2073	0.71264	-0.087402	43.474	120.675	352.278	-0.29638	0.26318	0.072265	27.83	199.608	487.931	-0.55957	0.34326	0.0048828	NaN	NaN	NaN	NaN	NaN	NaN
2.51	49.321	223.737	930.739	-1.1938	0.7124	-0.086426	-0.304499999999999	143.434	312.8175	-0.24453	0.24502	0.081836	29.2772	183.417	448.4791	-0.50342	0.31641	0.023438	NaN	NaN	NaN	NaN	NaN	NaN
2.512	46.8468	227.673	925.327	-1.1797	0.71191	-0.08252	50.756	101.3632	316.744	-0.19102	0.23526	0.088086	31.498	176.505	403.024	-0.44898	0.29956	0.033447	NaN	NaN	NaN	NaN	NaN	NaN
2.514	34.858	227.705	916.117	-1.1733	0.71533	-0.083008	63.563	116.0544	285.199	-0.13584	0.21787	0.092383	28.63254	149.035	354.3037	-0.39453	0.27539	0.039551	NaN	NaN	NaN	NaN	NaN	NaN
2.516	36.367	221.8167	927.068	-1.1831	0.71729	-0.07959	26.69149	85.4592	271.257	-0.085449	0.20313	0.10498	5.557	130.3485	339.168	-0.31592	0.25391	0.052734	NaN	NaN	NaN	NaN	NaN	NaN
2.518	43.9355	220.4287	948	-1.2094	0.72314	-0.075928	44.224	64.749	266.018	-0.033789	0.18789	0.10625	-27.18	116.4313	303.204	-0.27734	0.24512	0.056641	NaN	NaN	NaN	NaN	NaN	NaN
2.52	54.67838	223.9155	936.2706	-1.252	0.72852	-0.07666	22.7656	94.2643	231.307	0.01709	0.17246	0.10869	-15.532	119.41291	275.942	-0.20068	0.21582	0.066406	NaN	NaN	NaN	NaN	NaN	NaN
2.522	49.532	232.1145	965.425	-1.3218	0.74365	-0.071289	22.9222	56.2602	235.246	0.071777	0.15528	0.11416	-20.611	131.72014	238.6429	-0.14649	0.19727	0.070312	NaN	NaN	NaN	NaN	NaN	NaN
2.524	33.052	268.7052	988.207	-1.3569	0.75049	-0.067383	15.011	66.703	195.9623	0.1166	0.13935	0.11738	-34.8263	114.528	194.4246	-0.094727	0.17676	0.076172	NaN	NaN	NaN	NaN	NaN	NaN
2.526	61.822	292.947	1016.991	-1.4277	0.76172	-0.049316	-15.69	87.428	165.3526	0.16064	0.11914	0.11523	-34.3956	107.284	152.9781	-0.018555	0.1543	0.091797	NaN	NaN	NaN	NaN	NaN	NaN
2.528	57.555	305.2436	1030.2913	-1.4749	0.78247	-0.057861	13.7398	56.4553	167.0721	0.2044	0.11406	0.11494	-40.3215	72.1131	150.5753	0.012695	0.14014	0.091797	NaN	NaN	NaN	NaN	NaN	NaN
2.53	77.5996	298.487	1056.1247	-1.5151	0.79443	-0.049316	-21.2123	86.992	134.614	0.2416	0.099027	0.11484	-48.9778	104.53	116.568	0.084473	0.12256	0.099609	NaN	NaN	NaN	NaN	NaN	NaN
2.532	78.143	292.7076	1093.103	-1.5601	0.81299	-0.044434	-36.237	52.7167	141.28	0.2666	0.083789	0.11211	-44.91751	78.438	110.8108	0.12939	0.10865	0.10547	NaN	NaN	NaN	NaN	NaN	NaN
2.534	86.877	310.8583	1104.524	-1.5781	0.81836	-0.041992	-1.862	20.947	131.0007	0.28897	0.07461	0.10791	-31.6709	87.945	120.3652	0.17725	0.091309	0.11182	NaN	NaN	NaN	NaN	NaN	NaN
2.536	94.8467	319.808	1110.406	-1.6016	0.83008	-0.033691	-39.5604	30.10511	111.2921	0.31055	0.058594	0.11279	-29.0895	64.63	122.642	0.23389	0.078125	0.11523	NaN	NaN	NaN	NaN	NaN	NaN
2.538	92.165	317.287	1108.834	-1.5969	0.8396	-0.030517	-23.2913	0.0903999999999998	112.958	0.31904	0.045996	0.1125	-24.27	89.705	125.086	0.26123	0.064941	0.12354	NaN	NaN	NaN	NaN	NaN	NaN
2.54	123.85395	296.0968	1119.899	-1.582	0.85059	-0.02832	0.694999999999999	8.742	83.935	0.32197	0.031543	0.1085	-30.91861	43.2631336	97.872	0.30518	0.056152	0.12256	NaN	NaN	NaN	NaN	NaN	NaN
2.542	120.122	266.279	1116.244	-1.541	0.85742	-0.026367	-57.451	37.283	70.67762	0.31572	0.025293	0.10967	-14.215	75.046	85.4026	0.3418	0.041504	0.12915	NaN	NaN	NaN	NaN	NaN	NaN
2.544	143.4727	248.91862	1109.2181	-1.5054	0.85888	-0.024658	-29.9205	16.1467	79.5446	0.31016	0.022266	0.11269	-13.096	25.3783	81.778	0.36719	0.030273	0.13525	NaN	NaN	NaN	NaN	NaN	NaN
2.546	122.7793	231.79901	1091.9278	-1.4624	0.85986	-0.02002	-1.296	57.731	64.130071	0.2998	0.013184	0.1084	-14.768	50.367	45.5661	0.38574	0.023438	0.13965	NaN	NaN	NaN	NaN	NaN	NaN
2.548	143.733	216.99594	1095.486	-1.4063	0.85938	-0.018555	-10.6755	35.49	63.08386	0.28887	0.0071289	0.11533	0.199999999999999	-11.606	38.706	0.39209	0.012695	0.14551	NaN	NaN	NaN	NaN	NaN	NaN
2.55	138.2205	192.5184	1077.775	-1.3823	0.85596	-0.010742	19.837	14.3942	60.4847	0.27099	0.0064453	0.11153	24.99	31.0769	12.085	0.39746	0.00097656	0.15234	NaN	NaN	NaN	NaN	NaN	NaN
2.552	142.1519	166.5552	1077.028	-1.3452	0.86377	-0.0073242	-23.318	29.1748	50.908	0.24912	0.0033203	0.11425	33.1551	-10.6745	51.623	0.38159	-0.0041504	0.16137	NaN	NaN	NaN	NaN	NaN	NaN
2.554	150.2549	136.347	1083.412	-1.3182	0.85864	0.01001	-2.272	1.61791	51.148	0.2251	0.00087888	0.11455	31.774	41.3496	56.698	0.37207	-0.011719	0.1709	NaN	NaN	NaN	NaN	NaN	NaN
2.556	130.1381	115.114	1079.2145	-1.2944	0.86377	0.015625	48.28	25.175	43.669	0.2002	0.00097656	0.11914	27.5456	5.367	41.507	0.33496	-0.025391	0.18066	NaN	NaN	NaN	NaN	NaN	NaN
2.558	128.8716	115.338	1076.6302	-1.2642	0.86768	0.029785	30.116	42.7429	31.5036	0.17968	-0.0021484	0.10986	20.083	68.549	22.5568	0.31641	-0.025879	0.18457	NaN	NaN	NaN	NaN	NaN	NaN
2.56	119.1705	117.96615	1081.482	-1.2461	0.86914	0.035645	33.9483	-7.3257	23.3513	0.15703	-0.009082	0.11182	53.818	10.596	41.248	0.28857	-0.040527	0.20313	NaN	NaN	NaN	NaN	NaN	NaN
2.562	134.3006	108.87	1077.2207	-1.2217	0.87402	0.045898	40.1168	39.573	20.8965	0.12969	-0.0075195	0.11182	40.994	43.337	32.654	0.24902	-0.033936	0.20019	NaN	NaN	NaN	NaN	NaN	NaN
2.564	137.5888	99.9693	1073.594	-1.1953	0.87647	0.051513	26.1395	33.104	10.9870823	0.10469	-0.0073242	0.11318	39.938	0.258000000000001	44.096	0.23047	-0.035156	0.20752	NaN	NaN	NaN	NaN	NaN	NaN
2.566	111.9595	90.061	1065.3986	-1.1797	0.875	0.052734	65.414	24.5462	25.1335	0.083496	0.00048828	0.11475	24.686	44.754	4.5365	0.19482	-0.04541	0.2251	NaN	NaN	NaN	NaN	NaN	NaN
2.568	103.056	65.5185	1073.4378	-1.1479	0.87158	0.058594	41.026	48.873	39.02	0.059473	0.0006836	0.12041	-3.888	3.59328	5.2699	0.19385	-0.040527	0.22314	NaN	NaN	NaN	NaN	NaN	NaN
2.57	81.741	51.1053	1098.983	-1.1333	0.87061	0.06543	33.4448	-20.0944	42.114	0.035059	0.010156	0.12109	-8.56	36.514	37.3288	0.17041	-0.031738	0.22168	NaN	NaN	NaN	NaN	NaN	NaN
2.572	88.617	46.6963	1098.1054	-1.1069	0.86768	0.064453	57.202	-12.3916	39.8484	0.013183	0.020703	0.1207	-1.642	-26.716	38.562	0.16236	-0.029785	0.21924	NaN	NaN	NaN	NaN	NaN	NaN
2.574	61.4091	48.2212	1089.4497	-1.0918	0.86426	0.068116	20.29	7.806	15.6735	-0.0075196	0.030957	0.12568	-10.078	12.6216	35.167	0.15967	-0.033691	0.22559	NaN	NaN	NaN	NaN	NaN	NaN
2.576	57.254	32.405	1093.7626	-1.0713	0.86719	0.077148	43.3161	-15.523	27.9688	-0.02832	0.04541	0.12988	2.177	-25.3832	33.898	0.13672	-0.038086	0.21777	NaN	NaN	NaN	NaN	NaN	NaN
2.578	16.104	10.9391	1097.304	-1.0488	0.86523	0.074707	10.249	45.591	37.786	-0.037305	0.056348	0.13232	-16.036	11.37753	38.434	0.13721	-0.040527	0.21436	NaN	NaN	NaN	NaN	NaN	NaN
2.58	12.003	2.2155	1080.3216	-1.0469	0.86719	0.076172	-18.036	22.3204	19.4817	-0.046679	0.066015	0.13438	-35.5952	-5.4968	23.7238	0.12207	-0.041504	0.20508	NaN	NaN	NaN	NaN	NaN	NaN
2.582	-6.7461	-30.7026	1066.46108	-1.0352	0.86719	0.084473	24.3702	11.3413	28.8975	-0.049414	0.078125	0.13789	-28.505	19.9057	16.9731	0.12158	-0.040039	0.19971	NaN	NaN	NaN	NaN	NaN	NaN
2.584	-26.894	-53.27	1076.398	-1.0258	0.86719	0.092529	-31.1143	35.569	9.514	-0.053809	0.086328	0.14433	-12.025	6.6311	-6.092	0.12061	-0.043457	0.1958	NaN	NaN	NaN	NaN	NaN	NaN
2.586	-11.2621	-77.2537	1089.823	-1.0195	0.86816	0.099121	0.1732	-14.8129	45.927	-0.049805	0.099121	0.14453	-25.842	26.2434	25.6048	0.11768	-0.034668	0.18115	NaN	NaN	NaN	NaN	NaN	NaN
2.588	-12.3067	-104.6755	1068.385	-1.0078	0.87109	0.10986	-3.015	9.9177	58.6636	-0.041895	0.1085	0.14736	-15.9458	14.8316	46.7639	0.11719	-0.033203	0.17676	NaN	NaN	NaN	NaN	NaN	NaN
2.59	-3.424	-122.6501	1044.595	-0.99756	0.87646	0.11523	-36.71919	17.008	33.9382	-0.03711	0.1206	0.14834	-37.177	33.7858	39.0677	0.11963	-0.026367	0.16846	NaN	NaN	NaN	NaN	NaN	NaN
2.592	-42.393	-135.8777	1026.7658	-0.99023	0.875	0.12402	-11.6633	-2.0264	22.4506	-0.026172	0.13311	0.15224	-38.3238	22.5867	27.999	0.11743	-0.017334	0.16114	NaN	NaN	NaN	NaN	NaN	NaN
2.594	-35.3086	-141.4307	1008.677	-0.98194	0.88477	0.13086	-20.3744	34.426	0.5195	-0.015332	0.13935	0.15234	-25.77	14.0221	28.726	0.11035	-0.010254	0.16113	NaN	NaN	NaN	NaN	NaN	NaN
2.596	-41.449	-144.6402	984.384	-0.97949	0.89258	0.13281	-41.5729	1.5442	21.3418	-0.0029297	0.1543	0.15576	-2.489	-1.2461	18.8709	0.092773	0.010254	0.15625	NaN	NaN	NaN	NaN	NaN	NaN
2.598	-41.092	-148.1361	964.1368	-0.98633	0.90137	0.13428	15.338	3.1914	38.458	0.0051758	0.16309	0.15869	-4.739	-15.809	26.7127	0.080566	0.018066	0.16016	NaN	NaN	NaN	NaN	NaN	NaN
2.6	-48.09	-159.8568	969.711	-0.99023	0.90625	0.13525	-26.6438	21.7047	20.0671	0.016016	0.17412	0.15928	18.233	12.5754	-2.167	0.061035	0.038086	0.16211	NaN	NaN	NaN	NaN	NaN	NaN
2.602	-40.158	-164.908	970.955	-1.0156	0.91992	0.13965	-7.1982	-9.3497	37.516	0.023828	0.18311	0.16006	12.652	3.7169	6.2614	0.048829	0.052246	0.16064	NaN	NaN	NaN	NaN	NaN	NaN
2.604	-16.6269	-164.93	958.534	-1.0306	0.93189	0.12841	-7.7667	-0.4748	57.0717	0.028516	0.19355	0.15811	13.835	25.0669	15.8021	0.038574	0.064453	0.16064	NaN	NaN	NaN	NaN	NaN	NaN
2.606	-46.806	-144.6829	945.319	-1.0488	0.94141	0.12646	-14.415	-21.743	35.927	0.032715	0.20508	0.16357	17.441	0.0642999999999994	49.424	0.032715	0.098633	0.16553	NaN	NaN	NaN	NaN	NaN	NaN
2.608	-41.4525	-134.499	942.2842	-1.0625	0.95703	0.11279	34.9954	-34.565	26.9372	0.036426	0.20849	0.16074	43.84109	19.1244	33.73	0.026855	0.11084	0.16602	NaN	NaN	NaN	NaN	NaN	NaN
2.61	-27.002	-141.516	942.298	-1.0684	0.95996	0.10791	16.2879	15.131	9.5859	0.039746	0.21162	0.1581	35.054	-11.5481	46.5747	0.030273	0.13965	0.16797	NaN	NaN	NaN	NaN	NaN	NaN
2.612	-38.1439	-136.586	937.097	-1.0796	0.96924	0.094238	28.4263	9.021	22.6938	0.038184	0.22256	0.15693	28.1212	28.966	35.884	0.037109	0.16333	0.17529	NaN	NaN	NaN	NaN	NaN	NaN
2.614	-21.4426	-154.402	943.2439	-1.0855	0.97266	0.087402	58.416	0.615	48.543	0.039258	0.23193	0.1499	34.393	8.7059	51.395	0.040039	0.18604	0.17725	NaN	NaN	NaN	NaN	NaN	NaN
2.616	-34.6611	-165.291	961.45	-1.0957	0.97656	0.078613	19.0434	1.5485	35.5985	0.034668	0.24268	0.14697	24.073	46.831	23.153	0.051758	0.21094	0.18018	NaN	NaN	NaN	NaN	NaN	NaN
2.618	-26.4135	-171.4872	974.8831	-1.1035	0.98242	0.069824	41.3096	-31.0427	40.9534	0.037988	0.25147	0.14092	15.675	1.8041	15.191	0.060547	0.22266	0.1792	NaN	NaN	NaN	NaN	NaN	NaN
2.62	-52.21888	-191.6863	986.389	-1.1074	0.97949	0.066406	62.8757	-27.7882	58.046	0.04043	0.2626	0.13496	13.712	33.715	2.6525	0.07959	0.24951	0.18604	NaN	NaN	NaN	NaN	NaN	NaN
2.622	-48.2981	-213.154	995.878	-1.1074	0.97656	0.056152	46.7114	-23.873	71.172	0.029492	0.27432	0.13262	14.378	-19.159	17.3346	0.088379	0.26147	0.18311	NaN	NaN	NaN	NaN	NaN	NaN
2.624	-44.2228	-221.526	999.998	-1.0972	0.97705	0.052978	77.975	-44.5905116	65.9325	0.014648	0.28653	0.12442	27.269	47.015	34.6512	0.098145	0.27881	0.18408	NaN	NaN	NaN	NaN	NaN	NaN
2.626	-41.8657	-208.129	995.038	-1.084	0.97656	0.061523	37.297	-22.5623	57.917	-0.00048828	0.29785	0.12109	0.523	10.85364	32.7321	0.1167	0.29346	0.18164	NaN	NaN	NaN	NaN	NaN	NaN
2.628	-49.7739	-195.0967	991.228	-1.0566	0.9668	0.04834	-10.1003	-43.5084	54.944	-0.025293	0.31123	0.11797	-9.974	50.718	23.032	0.12158	0.30664	0.17798	NaN	NaN	NaN	NaN	NaN	NaN
2.63	-58.2202	-183.7745	1021.073	-1.0381	0.96289	0.04541	34.9382	-68.724	93.688	-0.045996	0.3209	0.11602	-23.3862	-19.806	22.4202	0.12305	0.31592	0.17383	NaN	NaN	NaN	NaN	NaN	NaN
2.632	-47.420514	-183.6729	1039.644	-1.0112	0.95264	0.041992	1.458	-43.766	123.986	-0.068262	0.33535	0.1086	-13.801	19.9551	21.024	0.12207	0.32471	0.16943	NaN	NaN	NaN	NaN	NaN	NaN
2.634	-57.5872	-177.4318	1033.727	-1.0025	0.9458	0.040528	-30.845	-55.3879	166.4704	-0.09043	0.34844	0.10381	-30.8488	-12.4797	36.737	0.12012	0.32813	0.17041	NaN	NaN	NaN	NaN	NaN	NaN
2.636	-53.166	-182.5227	1026.763	-0.99512	0.94336	0.043945	-24.0124	-22.6205	222.5188	-0.11328	0.36816	0.10254	-9.339	58.391	33.35	0.11035	0.34619	0.1709	NaN	NaN	NaN	NaN	NaN	NaN
2.638	-61.148	-169.2378	1029.256	-1.0078	0.93555	0.04834	-41.315	12.52748	286.209	-0.15156	0.3914	0.08916	-17.6291	10.593	33.257	0.097411	0.3457	0.1687	NaN	NaN	NaN	NaN	NaN	NaN
2.64	-46.8454	-152.422	1034.286	-1.019	0.93799	0.049805	0.2369	7.5224	398.4851	-0.20469	0.4083	0.077539	-35.518	39.8603	34.024	0.080078	0.35254	0.17041	NaN	NaN	NaN	NaN	NaN	NaN
2.642	-61.403	-138.254	1014.003	-1.0449	0.93359	0.056641	11.224	70.185	506.345	-0.28243	0.42197	0.068164	-33.2322	-33.183	51.13	0.052246	0.37549	0.1748	NaN	NaN	NaN	NaN	NaN	NaN
2.644	-56.572	-147.077	1011.277	-1.0686	0.92994	0.061523	-32.226	77.979	613.631	-0.3873	0.43418	0.059082	-20.635	-5.63	28.6407	0.039063	0.38281	0.18359	NaN	NaN	NaN	NaN	NaN	NaN
2.646	-50.955	-162.9922	1030.082	-1.0859	0.92969	0.064941	-6.95	83.6631	740.415	-0.51416	0.44336	0.047363	-10.662	-70.277	76.582	0.01123	0.41016	0.18262	NaN	NaN	NaN	NaN	NaN	NaN
2.648	-48.524	-179.065	1036.471	-1.1084	0.92676	0.076172	-16.779	126.905	810.1893	-0.67315	0.45322	0.048828	-8.779	-18.407	71.453	-0.0097656	0.42871	0.18579	NaN	NaN	NaN	NaN	NaN	NaN
2.65	-39.3008	-180.63	1035.0276	-1.1108	0.92188	0.078613	7.989	81.485	925.706	-0.84873	0.4669	0.052637	-4.858	-68.103	98.718	-0.030273	0.44238	0.19092	NaN	NaN	NaN	NaN	NaN	NaN
2.652	-59.304	-180.041	1033.6637	-1.1167	0.9126	0.080566	5.866	40.925	996.2	-1.0553	0.49463	0.06084	-24.813	-29.87	92.5785	-0.064453	0.46143	0.18994	NaN	NaN	NaN	NaN	NaN	NaN
2.654	-44.618	-167.7386	1031.311	-1.1127	0.90088	0.089111	-3.6976	-18.596	1034.135	-1.2782	0.53467	0.062988	-18.1965	-72.7479	133.732	-0.07666	0.47217	0.19482	NaN	NaN	NaN	NaN	NaN	NaN
2.656	-32.756	-174.6955	1022.241	-1.103	0.88916	0.088379	68.866	-103.45	1084.363	-1.5078	0.58398	0.068848	-2.228	-25.019	163.059	-0.11914	0.48438	0.19336	NaN	NaN	NaN	NaN	NaN	NaN
2.658	-24.1255	-177.9563	1018.414	-1.0845	0.86768	0.088379	77.5546	-121.5649	1077.934	-1.7269	0.64004	0.074121	-3.7615	-54.7902	267.2564	-0.15625	0.49219	0.19483	NaN	NaN	NaN	NaN	NaN	NaN
2.66	-30.232	-186.415	1034.193	-1.0684	0.85742	0.090332	86.6574	-158.63	1057.145	-1.9231	0.70273	0.084863	-17.4651	-1.367	338.482	-0.19727	0.49805	0.19922	NaN	NaN	NaN	NaN	NaN	NaN
2.662	-14.7201	-172.7904	1043.905	-1.041	0.8418	0.090332	135.53651	-194.327	1039.383	-2.0781	0.77891	0.091894	-2.815	-21.6641	445.974	-0.26318	0.51318	0.20654	NaN	NaN	NaN	NaN	NaN	NaN
2.664	-2.1399	-158.714	1023.583	-1.0183	0.82739	0.085449	129.021	-158.196	991.689	-2.1676	0.85234	0.088867	4.429	10.6	560.2128	-0.30762	0.52344	0.20215	NaN	NaN	NaN	NaN	NaN	NaN
2.666	-23.3724	-141.3578	997.89504	-0.99707	0.81152	0.086426	156.781	-150.03	972.14	-2.187	0.93213	0.089355	24.857	2.824	710.295	-0.39453	0.55078	0.20068	NaN	NaN	NaN	NaN	NaN	NaN
2.668	-20.5298	-136.004	971.9175	-0.96436	0.79541	0.082031	189.425	-115.035	981.744	-2.1133	1.017	0.104	39.452	56.999	882.066	-0.4795	0.57373	0.19482	NaN	NaN	NaN	NaN	NaN	NaN
2.67	-1.40125	-133.451	954.5287	-0.94873	0.78467	0.082031	154.1092	-63.885	945.23	-1.9575	1.086	0.11924	47.754	62.821	1017.109	-0.58154	0.59619	0.19092	NaN	NaN	NaN	NaN	NaN	NaN
2.672	-2.27008	-113.78219	947.6763	-0.91602	0.7666	0.075684	185.134	-59.4448	956.826	-1.7642	1.1192	0.12822	52.94	71.103	1119.0556	-0.75146	0.63525	0.18066	NaN	NaN	NaN	NaN	NaN	NaN
2.674	-12.8969	-109.4362	945.966	-0.88746	0.75122	0.070557	193.74	-4.613	998.041	-1.548	1.1019	0.13096	43.158	29.241	1193.1313	-0.85547	0.65723	0.17285	NaN	NaN	NaN	NaN	NaN	NaN
2.676	-25.1661	-114.2553	961.221	-0.86084	0.74268	0.07373	149.066	22.83	978.483	-1.3262	1.0215	0.12354	6.989	-40.828	1269.139	-1.085	0.69434	0.16309	NaN	NaN	NaN	NaN	NaN	NaN
2.678	-0.741	-112.2736	958.912	-0.82617	0.7168	0.061523	145.248	-8.76299999999999	978.75226	-1.1297	0.90879	0.11113	21.5448	-113.387	1318.587	-1.2827	0.72265	0.15601	NaN	NaN	NaN	NaN	NaN	NaN
2.68	-30.1524	-105.5953	920.5114	-0.81201	0.70947	0.062012	127.523	-4.44199999999999	938.148	-0.96914	0.80273	0.088184	64.357	-197.831	1283.408	-1.4824	0.75781	0.14795	NaN	NaN	NaN	NaN	NaN	NaN
2.682	-10.4705	-107.9613	912.6257	-0.78174	0.6875	0.055176	115.207	-80.471	915.93	-0.84375	0.72031	0.062402	82.927	-231.4276	1249.789	-1.7471	0.83105	0.14258	NaN	NaN	NaN	NaN	NaN	NaN
2.684	-13.6006	-105.5025	902.2621	-0.75	0.66797	0.04834	88.66	-163.5499	964.862	-0.73535	0.67266	0.04248	80.677	-269.334	1211.419	-1.8628	0.87549	0.14014	NaN	NaN	NaN	NaN	NaN	NaN
2.686	-4.2528	-101.5071	883.86022	-0.73779	0.65771	0.047852	37.4894	-184.3346	980.5607	-0.65918	0.65479	0.035645	118.32	-234.22	1129.829	-2.0503	0.9126	0.14502	NaN	NaN	NaN	NaN	NaN	NaN
2.688	-16.8163	-97.8794	876.937	-0.70703	0.63672	0.041992	26.53069	-274.768	1034.231	-0.62334	0.65635	0.026172	124.032	-217.02	1085.1115	-2.1264	0.97119	0.13892	NaN	NaN	NaN	NaN	NaN	NaN
2.69	-18.6789	-118.3483	877.954	-0.6853	0.62426	0.037353	-20.249	-312.468	1068.879	-0.61768	0.67002	0.030078	116.919	-140.773	1019.026	-2.1406	1.0352	0.13525	NaN	NaN	NaN	NaN	NaN	NaN
2.692	-25.6014	-135.736	886.858	-0.66357	0.60791	0.032715	-84.272	-314.701	1068.534	-0.64775	0.69775	0.035547	95.086	-139.88	1025.709	-2.0132	1.1196	0.125	NaN	NaN	NaN	NaN	NaN	NaN
2.694	-28.5485	-124.8023	865.379	-0.63623	0.59424	0.027344	-66.778	-331.65	1108.4453	-0.70186	0.72705	0.036621	73.568	-81.02094	1043.218	-1.894	1.1567	0.13135	NaN	NaN	NaN	NaN	NaN	NaN
2.696	-25.3645	-103.4283	824.4349	-0.62256	0.5874	0.029297	-91.165	-225.129	1134.924	-0.77588	0.75244	0.038574	105.5263	-86.141	1082.704	-1.6304	1.1909	0.12061	NaN	NaN	NaN	NaN	NaN	NaN
2.698	-33.418	-83.9115	800.69703	-0.59961	0.56348	0.02002	-121.176	-173.395	1162.2773	-0.8876	0.78799	0.038672	88.635	-7.41	1085.402	-1.42	1.1484	0.10328	NaN	NaN	NaN	NaN	NaN	NaN
2.7	-30.215	-72.3983	794.4631	-0.57691	0.55029	0.020019	-95.267	-171.235	1221.242	-1.0187	0.82354	0.031738	90.6286	-34.23	1121.143	-1.2241	1.061	0.091797	NaN	NaN	NaN	NaN	NaN	NaN
2.702	-30.984	-72.722	762.5721	-0.55566	0.53906	0.016113	-94.435	-103.517	1216.602	-1.148	0.86455	0.016504	62.6612	-31.17	1074.7046	-1.0083	0.93994	0.078613	NaN	NaN	NaN	NaN	NaN	NaN
2.704	-27.783	-71.7108	756.5793	-0.53906	0.52344	0.0039063	-71.927	-137.464	1239.6441	-1.2635	0.90645	0.00097658	60.395	-113.865	1050.135	-0.92334	0.88428	0.072266	NaN	NaN	NaN	NaN	NaN	NaN
2.706	-23.4156	-64.681	757.791	-0.53125	0.51758	0.0068359	-51.401	-95.24	1272.26	-1.3555	0.95117	-0.0097656	29.5324	-136.165	1064.122	-0.8291	0.81836	0.054199	NaN	NaN	NaN	NaN	NaN	NaN
2.708	-14.5272	-55.777	760.956	-0.50977	0.50488	0.0029297	-67.149	-45.201	1262.288	-1.4248	0.98965	-0.024219	4.6009	-240.387	1120.371	-0.79444	0.82861	0.033936	NaN	NaN	NaN	NaN	NaN	NaN
2.71	-13.8349	-47.637	731.036	-0.49756	0.49536	-0.00073242	-31.18	-90.671	1285.7422	-1.4789	1.0274	-0.031348	-10.845	-302.396	1169.6971	-0.78125	0.87305	0.037109	NaN	NaN	NaN	NaN	NaN	NaN
2.712	-40.285	-38.371	704.322	-0.4873	0.48633	-0.0043945	-29.762	-41.983	1257.833	-1.5262	1.0614	-0.036425	-22.07694	-416.392	1246.765	-0.80811	0.90967	0.048828	NaN	NaN	NaN	NaN	NaN	NaN
2.714	-11.5289	-37.9844	688.7675	-0.47217	0.47119	-0.0053711	-40.996	-81.8735	1239.686	-1.5664	1.0922	-0.03418	-74.3708	-435.213	1250.288	-0.82666	0.93604	0.074219	NaN	NaN	NaN	NaN	NaN	NaN
2.716	-21.6336	-45.94729	674.985	-0.46729	0.46924	-0.012207	16.41	-163.776	1312.041	-1.6035	1.1113	-0.035156	-101.383	-454.3	1327.102	-0.92285	0.96094	0.042969	NaN	NaN	NaN	NaN	NaN	NaN
2.718	-5.4862	-37.859	647.598	-0.45605	0.45654	-0.018555	23.04	-135.217	1379.407	-1.6312	1.1246	-0.031445	-111.201	-347.604	1358.646	-1.0015	0.97217	-0.025635	NaN	NaN	NaN	NaN	NaN	NaN
2.72	-24.426	-45.5836	642.5441	-0.44653	0.44653	-0.018067	45.1936	-196.784	1438.503	-1.651	1.1243	-0.027148	-106.536	-265.411	1433.937	-1.0449	0.99707	-0.010254	NaN	NaN	NaN	NaN	NaN	NaN
2.722	-19.5754	-52.5055	659.584	-0.43945	0.4375	-0.025391	72.285	-185.953	1488.331	-1.6678	1.1239	-0.024414	-82.318	-147.702	1466.035	-1.1777	1.0059	-0.00097656	NaN	NaN	NaN	NaN	NaN	NaN
2.724	-0.9483	-55.8782	654.11	-0.42529	0.43018	-0.026367	78.296	-131.84083	1484.618	-1.6831	1.1142	-0.01748	-58.403	-127.373	1475.782	-1.2534	1.0181	-0.0058594	NaN	NaN	NaN	NaN	NaN	NaN
2.726	-12.7334	-45.1861	636.555	-0.4165	0.42383	-0.027344	123.576	-173.133	1516.425	-1.6987	1.1001	-0.016602	-64.233	-104.89	1476.903	-1.3877	1.0391	0.00048828	NaN	NaN	NaN	NaN	NaN	NaN
2.728	-0.8046	-35.9783	614.7766	-0.3999	0.4126	-0.032227	159.108	-94.42	1514.081	-1.7215	1.092	-0.013574	-23.9306	-108.08	1484.654	-1.4868	1.0576	0.01001	NaN	NaN	NaN	NaN	NaN	NaN
2.73	-4.75734	-37.37587	614.707	-0.38916	0.40405	-0.038819	135.022	-63.44	1481.844	-1.7448	1.0813	-0.0050781	-18.815	-75.99	1500.511	-1.5801	1.084	0.01416	NaN	NaN	NaN	NaN	NaN	NaN
2.732	-12.6693	-26.735	597.604	-0.37842	0.39697	-0.037598	138.111	-69.197	1535.5935	-1.773	1.0736	-0.0015625	-9.6869	-59.991	1498.8156	-1.7168	1.1094	0.010254	NaN	NaN	NaN	NaN	NaN	NaN
2.734	-20.838	-16.771	558.7321	-0.36475	0.38135	-0.041016	112.186	-16.864	1551.844	-1.803	1.0771	0.0051758	-26.5772	-58.448	1491.146	-1.7871	1.125	0.012207	NaN	NaN	NaN	NaN	NaN	NaN
2.736	-13.5418	-29.5072	549.4565	-0.36133	0.37891	-0.044922	97.081	-70.6816	1513.9195	-1.8262	1.084	0.013184	-33.61637	-97.309	1496.655	-1.9155	1.1509	0.0029297	NaN	NaN	NaN	NaN	NaN	NaN
2.738	-18.6551	-37.3945	565.565	-0.34863	0.36719	-0.048828	101.65	-74.158	1522.067	-1.8463	1.0861	0.014941	-32.121	-122.388	1510.964	-1.9939	1.1521	0.02295	NaN	NaN	NaN	NaN	NaN	NaN
2.74	-23.0094	-30.3115	552.934	-0.33325	0.35669	-0.053467	62.1166	-0.536000000000001	1486.279	-1.8551	1.0816	0.019727	-2.164	-144.025	1560.083	-2.0566	1.1543	0.026367	NaN	NaN	NaN	NaN	NaN	NaN
2.742	-21.0719	-32.47069	530.455	-0.32227	0.34473	-0.052734	50.6206	-37.786	1494.1487	-1.8566	1.0707	0.030273	10.184	-135.4952	1644.635	-2.1191	1.1523	0.037598	NaN	NaN	NaN	NaN	NaN	NaN
2.744	-20.22337	-19.5996	489.7454	-0.30469	0.33594	-0.058105	18.019	23.043	1491.293	-1.86	1.0533	0.038672	11.085	-135.176	1684.765	-2.1309	1.1582	0.044434	NaN	NaN	NaN	NaN	NaN	NaN
2.746	-27.421	-16.05581	510.424	-0.29346	0.33008	-0.058105	-5.896	34.4708	1445.695	-1.8608	1.0415	0.047363	13.654	-163.9938	1713.872	-2.1641	1.1699	0.055176	NaN	NaN	NaN	NaN	NaN	NaN
2.748	-29.881	-14.8161	492.671	-0.28027	0.31738	-0.058594	-15.3105	-31.93	1506.404	-1.8636	1.0239	0.053125	68.876	-171.877	1730.084	-2.1814	1.1731	0.059326	NaN	NaN	NaN	NaN	NaN	NaN
2.75	-25.387	-20.8925	480.059	-0.26783	0.31079	-0.064453	-6.774	12.043	1564.863	-1.8628	1.0025	0.063184	92.357	-162.3873	1750.425	-2.1909	1.1724	0.070313	NaN	NaN	NaN	NaN	NaN	NaN
2.752	-23.562	-20.77	460.64	-0.25635	0.30518	-0.067871	-23.5533	-42.8452	1566.535	-1.8612	0.9837	0.06709	87.526	-102.8763	1732.683	-2.2007	1.1743	0.08252	NaN	NaN	NaN	NaN	NaN	NaN
2.754	-33.7713	-15.9516	463.623	-0.24805	0.29492	-0.065918	-25.957	-49.5008	1595	-1.8561	0.9706	0.075195	85.936	-58.344	1719.305	-2.2026	1.1743	0.084473	NaN	NaN	NaN	NaN	NaN	NaN
2.756	-38.658	-22.81782	455.469	-0.24316	0.29004	-0.06543	-59.0567	5.34	1556.393	-1.853	0.95361	0.082031	66.9936	-25.4561	1681.789	-2.189	1.1763	0.079102	NaN	NaN	NaN	NaN	NaN	NaN
2.758	-38.371	-16.74184	452.179	-0.23242	0.28223	-0.066406	-59.6001	-64.454	1564.683	-1.8511	0.94834	0.093067	28.235	-16.852	1674.2005	-2.167	1.1724	0.083984	NaN	NaN	NaN	NaN	NaN	NaN
2.76	-23.9842	-12.0806	436.954	-0.22558	0.27466	-0.06665	-21.559	-17.9987	1562.53	-1.8511	0.93408	0.097951	12.109	-10.3042	1643.76523	-2.1348	1.1689	0.080566	NaN	NaN	NaN	NaN	NaN	NaN
2.762	-24.6427	-21.2442	422.201	-0.21924	0.26563	-0.069824	-38.7325	-21.3942	1531.097	-1.8499	0.92744	0.10498	41.8872	-26.529	1619.02	-2.0679	1.1538	0.084473	NaN	NaN	NaN	NaN	NaN	NaN
2.764	-7.2847	-22.2654	402.488	-0.21533	0.25391	-0.072266	-36.0415	-61.5921	1528.698	-1.8504	0.9211	0.11319	23.054	-5.73	1594.378	-2.0313	1.1426	0.092773	NaN	NaN	NaN	NaN	NaN	NaN
2.766	-36.511	-19.43047	382.759	-0.21436	0.25293	-0.069824	-32.5713	20.046	1507.828	-1.8477	0.91602	0.11768	3.38	10.6855	1597.957	-1.98	1.1235	0.099609	NaN	NaN	NaN	NaN	NaN	NaN
2.768	-8.6829	-15.018	397.577	-0.20752	0.24707	-0.069336	-33.33413	-1.379	1484.54203	-1.8292	0.90674	0.12305	-27.1266	66.816	1547.388	-1.947	1.1116	0.097168	NaN	NaN	NaN	NaN	NaN	NaN
2.77	-4.3347	-22.5035	381.507	-0.20556	0.23877	-0.070556	3.755	21.862	1486.039	-1.8133	0.89903	0.12568	-8.516	62	1583.923	-1.9233	1.0923	0.104	NaN	NaN	NaN	NaN	NaN	NaN
2.772	-19.03	-19.3531	366.7138	-0.20703	0.23389	-0.067383	34.9532	88.908	1469.034	-1.7867	0.88652	0.12764	14.23	52.358	1585.3268	-1.9019	1.0698	0.12305	NaN	NaN	NaN	NaN	NaN	NaN
2.774	-13.1827	-19.0682	358.1943	-0.20801	0.22559	-0.065918	54.8779	23.139	1482.966	-1.7648	0.87461	0.13017	-2.1	10.139	1622.86	-1.8892	1.0528	0.1289	NaN	NaN	NaN	NaN	NaN	NaN
2.776	1.6063	-12.8321	359.065	-0.21045	0.22803	-0.07666	99.306	78.59	1488.411	-1.7495	0.86182	0.13672	-36.003	21.459	1610.1279	-1.8804	1.0356	0.13916	NaN	NaN	NaN	NaN	NaN	NaN
2.778	8.1959	-7.3743	365.102	-0.21191	0.21973	-0.058594	109.076	101.257	1463.98	-1.7303	0.85234	0.13682	-45.902	12.074	1606.128	-1.8687	1.0356	0.14258	NaN	NaN	NaN	NaN	NaN	NaN
2.78	-20.9204	3.0356	350.946	-0.21363	0.21875	-0.067383	116.857	67.0003	1448.6479	-1.714	0.8414	0.13603	-56.9155	33.159	1601.744	-1.8604	1.0391	0.14746	NaN	NaN	NaN	NaN	NaN	NaN
2.782	0.6583	-8.3583	334.861	-0.21924	0.21631	-0.064941	113.052	128.625	1429.9526	-1.6953	0.83515	0.13565	-57.0301	-14.743	1602.034	-1.8345	1.0454	0.15723	NaN	NaN	NaN	NaN	NaN	NaN
2.784	14.16721	-14.6496	333.698	-0.22412	0.21484	-0.064453	99.729	66.538	1395.887	-1.6729	0.83134	0.1375	-49.602	-8.042	1561.843	-1.8113	1.0345	0.15235	NaN	NaN	NaN	NaN	NaN	NaN
2.786	-0.7256	-14.132	329.212	-0.22412	0.20801	-0.063477	107.716	47.66	1377.0462	-1.6519	0.82275	0.13281	-43.2561	-26.792	1548.927	-1.7891	1.0195	0.16162	NaN	NaN	NaN	NaN	NaN	NaN
2.788	0.9565	-15.5857	313.88278	-0.22705	0.20361	-0.060547	120.364	91.433	1340.1497	-1.6297	0.8133	0.13096	-47.3429	30.776	1497.572	-1.7808	1.0044	0.1626	NaN	NaN	NaN	NaN	NaN	NaN
2.79	-2.2792	-25.8202	325.1133	-0.22778	0.20337	-0.05957	91.202	11.753	1348.446	-1.6062	0.80775	0.12843	-53.746	59.25	1505.862	-1.7729	0.99463	0.17285	NaN	NaN	NaN	NaN	NaN	NaN
2.792	10.3139	-21.2071	322.9297	-0.22656	0.19922	-0.05957	107.527	69.659	1353.106	-1.5832	0.79643	0.12608	-15.46	142.329	1464.931	-1.7319	0.99072	0.17578	NaN	NaN	NaN	NaN	NaN	NaN
2.794	-22.3	-11.09465	311.7955	-0.22852	0.19531	-0.058105	79.621	89.8884	1321.605	-1.5594	0.78598	0.12549	32.156	135.492	1452.2088	-1.6953	0.98633	0.17651	NaN	NaN	NaN	NaN	NaN	NaN
2.796	-9.7727	-15.0353	300.4062	-0.22705	0.19531	-0.058594	79.553	67.386	1314.1703	-1.5332	0.77734	0.12256	48.332	178.027	1419.871	-1.6543	0.97559	0.17627	NaN	NaN	NaN	NaN	NaN	NaN
2.798	-9.8933	-13.51828	304.799	-0.22852	0.19189	-0.056641	53.5007	166.893	1273.6962	-1.5037	0.76409	0.12094	48.1926	160.166	1386.9526	-1.6094	0.95313	0.1792	NaN	NaN	NaN	NaN	NaN	NaN
2.8	-5.4549	1.7465	308.522	-0.23023	0.19141	-0.048096	30.0782	158.091	1232.861	-1.4745	0.74339	0.11963	48.438	205.688	1369.2046	-1.5894	0.93994	0.18164	NaN	NaN	NaN	NaN	NaN	NaN
2.802	-3.286	-5.1625	291.855	-0.2251	0.18848	-0.053711	45.621	177.509	1230.5092	-1.4464	0.73066	0.11762	46.3162	205.626	1392.489	-1.5728	0.91943	0.17822	NaN	NaN	NaN	NaN	NaN	NaN
2.804	-12.9102	-10.4178	286.6051	-0.22559	0.18262	-0.054688	26.224	232.075	1192.9276	-1.4204	0.71189	0.11441	65.0643	236.173	1375.042	-1.5613	0.90405	0.17969	NaN	NaN	NaN	NaN	NaN	NaN
2.806	-7.4371	-4.9555	302.4457	-0.22949	0.18652	-0.052246	-2.946	146.285	1201.396	-1.3887	0.69922	0.11084	60.6738	193.8486	1348.479	-1.5439	0.88867	0.18213	NaN	NaN	NaN	NaN	NaN	NaN
2.808	-11.0661	11.3132	288.9817	-0.23193	0.18457	-0.053711	-15.664	186.493	1176.493	-1.3543	0.68693	0.113	77.403	185.26908	1298.016	-1.5146	0.86914	0.17285	NaN	NaN	NaN	NaN	NaN	NaN
2.81	9.1329	8.4815	290.9442	-0.23047	0.18677	-0.050293	-40.2783	179.559	1139.739	-1.3209	0.67016	0.10286	52.358	142.98	1226.8489	-1.4941	0.86133	0.17627	NaN	NaN	NaN	NaN	NaN	NaN
2.812	-20.9155	13.6802	275.1257	-0.23291	0.18604	-0.049805	-21.256	132.15959	1116.84	-1.2887	0.65632	0.10498	66.028	168.843	1193.0076	-1.4473	0.8418	0.17236	NaN	NaN	NaN	NaN	NaN	NaN
2.814	-6.5609	23.5161	282.074	-0.2334	0.18408	-0.046387	-32.108	205.008	1067.0369	-1.254	0.63712	0.099631	56.6911	162.369	1175.6996	-1.4114	0.82055	0.16187	NaN	NaN	NaN	NaN	NaN	NaN
2.816	-6.3713	24.1831	273.894	-0.23535	0.18408	-0.048828	-42.5272	163.8543	1052.422	-1.2212	0.61768	0.095215	72.2388	183.10264	1145.258	-1.3672	0.80371	0.16211	NaN	NaN	NaN	NaN	NaN	NaN
2.818	-6.5859	9.5889	266.8177	-0.23926	0.18896	-0.04834	-27.044	168.1014	1035.457	-1.1799	0.59879	0.089065	63.5362	153.588	1158.09	-1.3125	0.76953	0.15137	NaN	NaN	NaN	NaN	NaN	NaN
2.82	-8.3973	-0.25737	278.397	-0.24561	0.18701	-0.04541	-0.324999999999999	204.219	1007.938	-1.142	0.58131	0.085372	92.398	172.401	1119.954	-1.2886	0.75244	0.146	NaN	NaN	NaN	NaN	NaN	NaN
2.822	-2.5186	3.99733	281.7191	-0.24951	0.18652	-0.04834	19.3	126.035	1004.827	-1.1034	0.56412	0.078536	64.2607	203.432	1078.444	-1.2285	0.71875	0.13623	NaN	NaN	NaN	NaN	NaN	NaN
2.824	2.2891	9.6089	289.23737	-0.2583	0.18555	-0.046875	43.291	178.521	994.858	-1.0635	0.54527	0.077321	66.206	267.387	1045.131	-1.1873	0.698	0.13013	NaN	NaN	NaN	NaN	NaN	NaN
2.826	-7.0558	21.0034	273.5504	-0.26904	0.18896	-0.040772	45.1783	188.357	974.558	-1.019	0.5249	0.070313	29.419	296.759	1003.23	-1.146	0.67822	0.12354	NaN	NaN	NaN	NaN	NaN	NaN
2.828	11.684	19.8347	290.8285	-0.28174	0.19189	-0.039063	78.296	156.9605	942.354	-0.98047	0.50563	0.066078	28.082	315.793	929.1454	-1.0952	0.64697	0.11719	NaN	NaN	NaN	NaN	NaN	NaN
2.83	13.8667	21.5831	297.323	-0.29736	0.19434	-0.04248	72.175	224.675	899.715	-0.93617	0.48975	0.061213	-18.539	272.7402	897.0693	-1.064	0.62842	0.11621	NaN	NaN	NaN	NaN	NaN	NaN
2.832	6.5161	16.7731	299.396	-0.30859	0.19629	-0.041504	88.613	164.905	841.233	-0.90123	0.46455	0.054814	-1.677	234.7452	814.718	-1.021	0.59814	0.10547	NaN	NaN	NaN	NaN	NaN	NaN
2.834	-4.427	13.577	292.304	-0.31787	0.20264	-0.040527	101.92	183.138	814.3462	-0.86313	0.44856	0.051377	-11.979	209.635	802.2345	-0.97681	0.57715	0.10693	NaN	NaN	NaN	NaN	NaN	NaN
2.836	-0.07753	13.8719	316.48	-0.3291	0.20215	-0.040283	103.492	229.044	773.0526	-0.82568	0.43018	0.046387	-24.284	202.1355	773.87	-0.93701	0.55908	0.094727	NaN	NaN	NaN	NaN	NaN	NaN
2.838	8.3882	13.5596	324.98	-0.34131	0.20752	-0.039551	113.001	151.109	745.588	-0.78752	0.41161	0.036509	-40.14	210.8002	737.787	-0.88232	0.53174	0.091309	NaN	NaN	NaN	NaN	NaN	NaN
2.84	-17.7637	19.2841	322.6333	-0.3584	0.21631	-0.039063	98.088	192.8397	715.787	-0.75048	0.39403	0.037287	-33.973	214.994	708.95	-0.85254	0.5166	0.081055	NaN	NaN	NaN	NaN	NaN	NaN
2.842	7.9106	30.3921	320.654	-0.3667	0.21338	-0.040527	91.585	151.527	673.406	-0.70848	0.376	0.027819	-30.452	205.759	648.32	-0.79688	0.49219	0.074219	NaN	NaN	NaN	NaN	NaN	NaN
2.844	-0.0760000000000005	35.4603	330.8273	-0.38379	0.22266	-0.033691	110.976	113.558	660.253	-0.67103	0.35782	0.023615	12.754	171.4839	617.915	-0.76563	0.47168	0.070557	NaN	NaN	NaN	NaN	NaN	NaN
2.846	0.500999999999999	49.029	350.525	-0.39502	0.22656	-0.034912	86.137	173.0368	625.596	-0.6333	0.34326	0.015625	39.057	182.1048	580.0138	-0.73193	0.44824	0.064941	NaN	NaN	NaN	NaN	NaN	NaN
2.848	-8.6877	43.092	352.127	-0.40771	0.22949	-0.035156	71.085	142.021	575.313	-0.59227	0.32738	0.0089569	5.594	183.901	550.59686	-0.68506	0.42822	0.061035	NaN	NaN	NaN	NaN	NaN	NaN
2.85	-16.6485	33.893	363.754	-0.42334	0.23389	-0.037598	59.3397	163.884	550.8974	-0.55747	0.31575	0.0060135	10.435	220.195	521.59	-0.66309	0.41406	0.060547	NaN	NaN	NaN	NaN	NaN	NaN
2.852	2.43814	31.0088	378.531	-0.42383	0.23438	-0.037109	24.755	187.0415	509.5184	-0.52471	0.29622	-0.0049206	35.8856	188.211	476.372	-0.61475	0.38916	0.05127	NaN	NaN	NaN	NaN	NaN	NaN
2.854	-15.1283	41.817	383.095	-0.44287	0.24561	-0.033203	5.182	130.831	493.1299	-0.49409	0.27851	-0.011059	7.91	175.4205	431.981	-0.57349	0.37476	0.04834	NaN	NaN	NaN	NaN	NaN	NaN
2.856	2.6721	36.4663	394.112	-0.4502	0.25513	-0.03125	-5.908	165.922	475.857	-0.46338	0.26709	-0.019531	44.25	130.0714	424.139	-0.53271	0.35791	0.046387	NaN	NaN	NaN	NaN	NaN	NaN
2.858	-26.331	36.4438	404.614	-0.46045	0.26074	-0.028809	-31.8961	138.731	442.982	-0.43557	0.25694	-0.019232	51.3497	147.3712	346.6421	-0.47852	0.33252	0.041504	NaN	NaN	NaN	NaN	NaN	NaN
2.86	-3.9102	32.84224	434.665	-0.47607	0.26904	-0.032227	-40.36458	85.9521	447.711	-0.40648	0.24573	-0.024902	32.4002	123.68983	308.3059	-0.44385	0.31934	0.038574	NaN	NaN	NaN	NaN	NaN	NaN
2.862	-19.3353	39.6009	433.964	-0.48486	0.26807	-0.030273	-48.8297	116.573	407.001	-0.37718	0.23048	-0.024123	19.066	154.36	252.6116	-0.3916	0.29883	0.037109	NaN	NaN	NaN	NaN	NaN	NaN
2.864	-11.8723	43.4672	434.357	-0.50391	0.28271	-0.025879	-53.973	75.96	350.28757	-0.3423	0.21739	-0.027734	8.739	110.3978	216.76	-0.34668	0.27881	0.025879	NaN	NaN	NaN	NaN	NaN	NaN
2.866	-18.1112	39.946	468.011	-0.51342	0.28882	-0.027099	-47.1189	100.6892	312.664	-0.29932	0.20752	-0.030273	29.942	133.12	174.685	-0.30078	0.25879	0.018555	NaN	NaN	NaN	NaN	NaN	NaN
2.868	-8.4922	40.2925	481.721	-0.52686	0.29346	-0.026367	-68.953	130.061	269.818	-0.25751	0.19785	-0.035743	65.716	78.3747	181.6753	-0.24561	0.23291	0.015137	NaN	NaN	NaN	NaN	NaN	NaN
2.87	3.1385	42.33258	475.01	-0.55762	0.30273	-0.023926	-47.498	72.91	282.484	-0.21132	0.19228	-0.037306	72.6773	117.692	156.6844	-0.22168	0.22021	0.010254	NaN	NaN	NaN	NaN	NaN	NaN
2.872	-13.11303	42.7693	476.6012	-0.57129	0.30908	-0.022461	-41.4883	108.601	250.3495	-0.16678	0.18291	-0.042775	16.1499	83.646	205.333	-0.1709	0.19141	0.0024414	NaN	NaN	NaN	NaN	NaN	NaN
2.874	-11.79018	42.6764	510.9206	-0.59863	0.32422	-0.018066	-48.728	86.041	236.7799	-0.10996	0.17343	-0.046387	0.872	124.965	170.536	-0.12452	0.17139	-0.0043945	NaN	NaN	NaN	NaN	NaN	NaN
2.876	2.6154	43.43505	537.941	-0.62354	0.33325	-0.017822	-9.54	68.0808	255.819	-0.055176	0.16211	-0.053223	4.221	91.797	164.559	-0.07666	0.15723	-0.012207	NaN	NaN	NaN	NaN	NaN	NaN
2.878	7.4099	40.2192	553.498	-0.65137	0.34326	-0.01416	-9.977	119.27	223.522	-0.0068388	0.15068	-0.063183	-16.12	107.157	116.52552	-0.022949	0.13428	-0.017578	NaN	NaN	NaN	NaN	NaN	NaN
2.88	-16.6094	46.1063	544.422	-0.69678	0.35986	-0.013184	0.763000000000002	75.283	218.184	0.041305	0.14082	-0.064257	0.634	25.606	119.9602	0.0073242	0.12158	-0.026855	NaN	NaN	NaN	NaN	NaN	NaN
2.882	-0.5534	53.5074	559.764	-0.71973	0.36523	-0.0097656	27.7651	91.344	180.199	0.09326	0.12637	-0.075195	-32.301	60.563	68.70224	0.071289	0.095703	-0.036621	NaN	NaN	NaN	NaN	NaN	NaN
2.884	8.5071	49.2105	584.561	-0.76318	0.38135	-0.012207	5.8746	103.887	135.652	0.13516	0.1123	-0.09121	-32.8686	23.5632	91.193	0.11474	0.078369	-0.053223	NaN	NaN	NaN	NaN	NaN	NaN
2.886	-6.0948	51.1716	582.9641	-0.80005	0.39282	-0.0078125	53.915	52.4417	155.41	0.1748	0.10352	-0.10205	-31.593	69.692	46.5387	0.14746	0.069336	-0.055664	NaN	NaN	NaN	NaN	NaN	NaN
2.888	1.1732	41.3919	607.928	-0.83447	0.40625	-0.012695	74.277	71.7222	150.908	0.21152	0.095605	-0.10449	-40.924	21.2527	95.479	0.20898	0.041504	-0.075684	NaN	NaN	NaN	NaN	NaN	NaN
2.89	-4.7725	44.4628	621.92	-0.88721	0.42432	-0.011719	82.511	55.6466	129.04	0.24345	0.085937	-0.10801	-29.891	40.651	78.979	0.22803	0.030762	-0.080566	NaN	NaN	NaN	NaN	NaN	NaN
2.892	9.3446	47.469	666.432	-0.90918	0.43164	-0.013672	84.952	23.1124	129.96	0.2626	0.074609	-0.11777	-31.7896	-2.796	74.111	0.25488	0.016113	-0.10352	NaN	NaN	NaN	NaN	NaN	NaN
2.894	-23.4381	60.27552	659.686	-0.95264	0.44971	-0.0083008	68.479	51.627	112.705	0.2749	0.068164	-0.11846	-6.16	42.084	43.781	0.27514	0.0046387	-0.11108	NaN	NaN	NaN	NaN	NaN	NaN
2.896	-11.5935	61.332	662.1355	-0.98559	0.46216	-0.0075684	104.16	6.50415	112.026	0.28223	0.065918	-0.12598	-18.897505	10.1934	37.317	0.29248	-0.01123	-0.12109	NaN	NaN	NaN	NaN	NaN	NaN
2.898	-1.02801	66.5183	680.79	-1.0156	0.47363	-0.0092773	77.236	30.4191	114.672	0.28477	0.051758	-0.12696	-32.849	39.5234	31.4098	0.30615	-0.019043	-0.12744	NaN	NaN	NaN	NaN	NaN	NaN
2.9	-23.264	75.2003	689.694	-1.0508	0.49023	-0.013672	47.398	57.419	96.371	0.28613	0.044922	-0.12881	-27.19663	4.5939	44.84108	0.31055	-0.02832	-0.13867	NaN	NaN	NaN	NaN	NaN	NaN
2.902	-12.6665	82.048	693.4964	-1.062	0.50146	-0.013184	70.974	28.601	93.5105	0.28027	0.048438	-0.12959	-14.591	32.27474	3.949	0.30322	-0.041992	-0.14648	NaN	NaN	NaN	NaN	NaN	NaN
2.904	-23.4734	68.0988	707.0944	-1.084	0.51563	-0.0058594	40.2957	68.209	104.206	0.27061	0.043848	-0.13418	-1.285	4.2445	4.6785	0.29688	-0.043945	-0.14501	NaN	NaN	NaN	NaN	NaN	NaN
2.906	-3.0729	67.17301	727.4252	-1.0933	0.52808	-0.0048828	4.5651	42.157	92.503	0.26123	0.041504	-0.12891	16.911	31.5598	28.8356	0.2876	-0.045898	-0.14502	NaN	NaN	NaN	NaN	NaN	NaN
2.908	-33.536	75.9701	753.956	-1.0986	0.53906	-0.0048828	18.0516	25.0479	91.877	0.24248	0.041016	-0.12783	17.859	5.3284	44.944	0.26367	-0.049805	-0.1416	NaN	NaN	NaN	NaN	NaN	NaN
2.91	-23.6104	80.98157	757.351	-1.1084	0.54492	-0.0024414	0.262	56.035	70.727	0.22002	0.038281	-0.11934	32.0215	18.4239	34.618	0.25049	-0.046875	-0.14502	NaN	NaN	NaN	NaN	NaN	NaN
2.912	-32.177	91.9223	763.6846	-1.1094	0.55078	-0.00097656	-38.057	10.6362	72.585	0.1958	0.033594	-0.11231	31.8575	-11.0207	9.0562	0.2251	-0.044434	-0.13721	NaN	NaN	NaN	NaN	NaN	NaN
2.914	-24.5629	97.2741	774.1937	-1.0986	0.56104	0	-11.847	20.0651	78.645	0.16611	0.032031	-0.11152	30.853	-16.92741	10.90883	0.20435	-0.047119	-0.13819	NaN	NaN	NaN	NaN	NaN	NaN
2.916	-19.0032	95.4955	775.3054	-1.0969	0.56592	0.0019531	-52.3378	24.611	36.106	0.13965	0.029297	-0.10547	37.3969	-32.48698	27.958	0.18994	-0.040039	-0.13379	NaN	NaN	NaN	NaN	NaN	NaN
2.918	-37.589	91.2502	786.6022	-1.0894	0.57471	-0.00048828	-48.4774	-9.0455	28.173	0.10713	0.028809	-0.10195	49.544	-0.856999999999999	15.7485	0.1665	-0.040527	-0.12891	NaN	NaN	NaN	NaN	NaN	NaN
2.92	-33.793	81.8293	813.121	-1.0781	0.58008	0.0014648	-46.026	30.247	32.237	0.08291	0.033301	-0.093652	34.2597	31.247	6.8	0.15039	-0.043213	-0.125	NaN	NaN	NaN	NaN	NaN	NaN
2.922	-1.62	91.3271	817.139	-1.0718	0.58154	0.0048828	-51.402	13.867	31.477	0.059472	0.03916	-0.093262	33.0355	46.7402	18.5284	0.13623	-0.043945	-0.12402	NaN	NaN	NaN	NaN	NaN	NaN
2.924	-15.4559	98.6919	826.5321	-1.0669	0.5874	0.0039063	-37.0511	-6.4099	57.376	0.036719	0.04375	-0.089257	10.026	30.019	23.694	0.10986	-0.04248	-0.11816	NaN	NaN	NaN	NaN	NaN	NaN
2.926	-25.172	101.7369	837.4968	-1.0593	0.5979	0.0053711	-61.362	27.817	34.887374	0.013184	0.050781	-0.082031	0.209	12.3865	51.843	0.099121	-0.041016	-0.11719	NaN	NaN	NaN	NaN	NaN	NaN
2.928	-10.8184	116.555	854.974	-1.0645	0.60352	0.0063477	-35.597	-11.7411	46.519	-0.014356	0.052051	-0.075	-0.619	14.0214	22.2356	0.086914	-0.037109	-0.11377	NaN	NaN	NaN	NaN	NaN	NaN
2.93	-2.1825	118.6985	866.951	-1.0752	0.61719	0.0039063	-15.646	3.1568	64.13	-0.039844	0.055567	-0.075781	30.4524	16.1119	36.424	0.080566	-0.033691	-0.11011	NaN	NaN	NaN	NaN	NaN	NaN
2.932	-20.703	126.3679	847.9445	-1.0811	0.62256	0.0063477	-27.2222	6.0812	33.4155	-0.067969	0.061426	-0.059375	1.881	26.29	32.3098	0.070801	-0.03125	-0.10986	NaN	NaN	NaN	NaN	NaN	NaN
2.934	-12.3408	128.683	853.1865	-1.1021	0.6333	0.0063477	10.762	-34.5844	34.1525	-0.094726	0.066894	-0.058008	-12.895	10.7459	25.269	0.049316	-0.025391	-0.10938	NaN	NaN	NaN	NaN	NaN	NaN
2.936	8.454	122.4567	872.085	-1.114	0.64282	0.0073242	16.369	6.9614	6.566	-0.12061	0.076172	-0.054688	-42.659	27.356	-9.7608	0.043457	-0.018066	-0.10889	NaN	NaN	NaN	NaN	NaN	NaN
2.938	7.4711	130.0121	882.467	-1.1362	0.65283	0.0063477	35.583	-1.5109	11.4926	-0.14082	0.086817	-0.049805	-7.76	21.9215	4.7412	0.024902	-0.010254	-0.10742	NaN	NaN	NaN	NaN	NaN	NaN
2.94	-17.2663	132.2389	879.215	-1.1582	0.66602	0.0083008	53.965	-11.34965	29.35	-0.15576	0.094629	-0.043555	-22.844	45.421	10.881	0.012207	-0.00097655	-0.10864	NaN	NaN	NaN	NaN	NaN	NaN
2.942	-4.524962	137.0094	886.96	-1.1704	0.67383	0.0078125	58.268	12.0849	14.8698	-0.17216	0.10244	-0.038867	-9.078	9.5629	67.815	-0.0068359	0.0087891	-0.10986	NaN	NaN	NaN	NaN	NaN	NaN
2.944	8.1212	140.7595	905.153	-1.1992	0.68555	0.011719	72.498	-27.4083	18.4455	-0.17754	0.10899	-0.037793	-27.047	12.5666	60.094	-0.023438	0.032227	-0.11133	NaN	NaN	NaN	NaN	NaN	NaN
2.946	3.1697	156.704	912.26	-1.2185	0.69556	0.013672	67.135	-2.801	36.897	-0.18164	0.11865	-0.035156	-44.3565	-13.766166	40.1307	-0.023926	0.039551	-0.11182	NaN	NaN	NaN	NaN	NaN	NaN
2.948	0.3347	161.219	895.7794	-1.2437	0.70947	0.011719	60.87	17.9098	7.5518	-0.18076	0.12227	-0.036817	-45.4398	8.2826	35.555	-0.029297	0.062012	-0.11865	NaN	NaN	NaN	NaN	NaN	NaN
2.95	-9.07054	163.772	892.887	-1.2671	0.73291	0.010742	88.033	-6.233	25.364	-0.17441	0.12695	-0.038379	-21.4237	-22.7718	41.077	-0.0271	0.079834	-0.12329	NaN	NaN	NaN	NaN	NaN	NaN
2.952	16.6358	153.2678	908.154	-1.2759	0.73877	0.0024414	53.745	35.5172	18.3765	-0.16504	0.13125	-0.044629	-30.374	17.8388	30.5026	-0.025879	0.096191	-0.12988	NaN	NaN	NaN	NaN	NaN	NaN
2.954	-19.3291	165.147	910.047	-1.2988	0.74609	0.0068359	36.095	11.0159	1.092	-0.146	0.14336	-0.051758	5.277	10.8442	47.129	-0.020508	0.11377	-0.12939	NaN	NaN	NaN	NaN	NaN	NaN
2.956	10.0412	160.546	913.56	-1.3115	0.75586	0.0056153	66.019	-5.93794	22.7356	-0.12549	0.15137	-0.052246	12.512	49.522	-0.9409	-0.013184	0.12549	-0.13379	NaN	NaN	NaN	NaN	NaN	NaN
2.958	-5.5248	158.78931	917.205	-1.3184	0.76563	0.00097656	49.4233	22.9541	19.8158	-0.10195	0.1625	-0.066602	8.4176	13.2023	38.078	-0.0058594	0.14063	-0.13037	NaN	NaN	NaN	NaN	NaN	NaN
2.96	-10.70176	172.8636	925.26	-1.3262	0.77832	-0.00097656	31.4654	-4.66097	26.4849	-0.080078	0.16767	-0.073926	0.481999999999999	23.7369	30.963	0.0012207	0.15356	-0.13428	NaN	NaN	NaN	NaN	NaN	NaN
2.962	-9.9227	182.7473	914.386	-1.3311	0.78614	-0.0073243	19.116	15.9584	35.655	-0.05	0.17041	-0.086426	18.546	-23.1343	37.191	0.0078125	0.16455	-0.14014	NaN	NaN	NaN	NaN	NaN	NaN
2.964	-4.8864	185.271	912.348	-1.3438	0.79883	-0.013672	-25.47918	20.6984	21.8408	-0.015137	0.17695	-0.10146	7.969	8.4866	11.4726	0.012695	0.17773	-0.13574	NaN	NaN	NaN	NaN	NaN	NaN
2.966	-9.5977	182.077	930.999	-1.3711	0.81445	-0.011719	-10.9535	-13.3816	22.0634	0.011719	0.18164	-0.10986	28.0826	-18.3819	29.024	0.012695	0.18945	-0.13184	NaN	NaN	NaN	NaN	NaN	NaN
2.968	-8.0172	178.648	946.908	-1.3882	0.81982	-0.015625	-23.0131	20.3722	19.949	0.038281	0.18516	-0.12236	47.3189	26.5365	18.636	0.025391	0.20264	-0.13916	NaN	NaN	NaN	NaN	NaN	NaN
2.97	-10.78299	184.974	940.874	-1.4468	0.83838	-0.019531	-49.83	-4.8985	12.584	0.066015	0.18516	-0.13145	35.94945	10.1403	34.389	0.03247	0.21093	-0.13965	NaN	NaN	NaN	NaN	NaN	NaN
2.972	-22.8939	204.309	966.506	-1.4934	0.85132	-0.014892	-54.8305	-5.8041	27.1557	0.08711	0.16445	-0.13418	31.038	46.339	-0.814	0.043457	0.22412	-0.14014	NaN	NaN	NaN	NaN	NaN	NaN
2.974	-27.5526	227.2131	1015.9	-1.5444	0.86963	-0.015137	-50.4789	40.1867	33.332	0.11514	0.20664	-0.084277	26.2573	12.6227	9.81	0.058105	0.23682	-0.15137	NaN	NaN	NaN	NaN	NaN	NaN
2.976	-25.5138	257.5556	1036.7164	-1.627	0.89648	-0.018555	-47.823	1.901	51.822	0.082031	0.2002	-0.16797	27.858	34.9192	13.6433	0.0625	0.23877	-0.15137	NaN	NaN	NaN	NaN	NaN	NaN
2.978	-40.218	275.5466	1064.5191	-1.6636	0.90479	-0.017578	-49.532	10.582	67.71	0.11562	0.20332	-0.16367	25.6064	-16.1661	35.7465	0.071777	0.25098	-0.16309	NaN	NaN	NaN	NaN	NaN	NaN
2.98	-51.7113	278.38456	1087.376	-1.7339	0.92822	-0.022461	-51.252	5.005	68.922	0.14277	0.20352	-0.1456	49.168	3.788	43.3008	0.074951	0.25927	-0.16431	NaN	NaN	NaN	NaN	NaN	NaN
2.982	-44.4102	298.432	1098.273	-1.7737	0.94555	-0.023193	-36.086	-52.1241	82.113	0.14004	0.21328	-0.14912	2.1335	-32.555	42.138	0.077148	0.27051	-0.16943	NaN	NaN	NaN	NaN	NaN	NaN
2.984	-47.9655	305.67	1134.346	-1.8027	0.95898	-0.023926	-11.8281	-21.38	89.543	0.11455	0.22187	-0.15527	-0.211000000000006	-14.704	43.3023	0.068359	0.28125	-0.16602	NaN	NaN	NaN	NaN	NaN	NaN
2.986	-56.266	303.375	1141.402	-1.8081	0.96924	-0.029785	-18.7491	-41.998	95.068	0.088867	0.22461	-0.1499	-15.71	-48.316	58.98246	0.063477	0.29053	-0.16895	NaN	NaN	NaN	NaN	NaN	NaN
2.988	-62.896	286.0726	1145.355	-1.7988	0.9707	-0.035156	8.428	-54.7175	139.219	0.042871	0.23584	-0.14404	-24.512	-6.118	52.886	0.047363	0.29102	-0.17334	NaN	NaN	NaN	NaN	NaN	NaN
2.99	-39.65873	266.9018	1143.074	-1.748	0.96875	-0.046387	27.077	-30.034	160.574	-0.011426	0.24434	-0.14473	-28.7785	-7.7179	95.1218	0.026368	0.30566	-0.17359	NaN	NaN	NaN	NaN	NaN	NaN
2.992	-47.4368	261.80371	1127.77325	-1.6801	0.95459	-0.058594	41.9957	-64.95	196.5085	-0.077051	0.25879	-0.14785	11.427	27.03	143.136	0.0019531	0.31689	-0.17725	NaN	NaN	NaN	NaN	NaN	NaN
2.994	-65.2245	249.774	1137.165	-1.5972	0.93213	-0.06543	35.5213	-15.4135	273.0885	-0.15313	0.27636	-0.14746	-2.081	13.1829	215.753	-0.044434	0.32813	-0.1748	NaN	NaN	NaN	NaN	NaN	NaN
2.996	-62.8597	235.0815	1134.24	-1.4663	0.88916	-0.066895	37.995	16.6276	354.52	-0.23535	0.29639	-0.15332	6.238	11.525	272.529	-0.069824	0.33203	-0.17578	NaN	NaN	NaN	NaN	NaN	NaN
2.998	-38.4704	211.2251	1116.406	-1.4038	0.8667	-0.080078	54.232	27.561	459.022	-0.32422	0.31533	-0.15996	-9.941	-18.0544	323.3439	-0.14551	0.34717	-0.17578	NaN	NaN	NaN	NaN	NaN	NaN
3	-60.4466	195.7563	1086.355	-1.2891	0.8291	-0.090332	29.1966	86.634	550.104	-0.4247	0.33388	-0.16152	-33.902	15.4689	393.70726	-0.20605	0.35596	-0.17334	NaN	NaN	NaN	NaN	NaN	NaN
3.002	-62.177	160.4628	1069.182	-1.2095	0.80273	-0.096923	2.411	89.342	628.0279	-0.53721	0.35811	-0.16152	-52.104	47.6487	503.7977	-0.27832	0.36963	-0.16895	NaN	NaN	NaN	NaN	NaN	NaN
3.004	-71.981	145.0323	1079.945	-1.1353	0.78369	-0.10791	9.994	106.448	750.9567	-0.66592	0.3833	-0.15059	-27.5467	94.33	613.944	-0.39111	0.39453	-0.15918	NaN	NaN	NaN	NaN	NaN	NaN
3.006	-57.2583	139.2799	1103.987	-1.0586	0.76172	-0.12207	-10.641	152.144	858.187	-0.80908	0.41064	-0.12891	-66.59	122.289	688.1405	-0.4585	0.4126	-0.15039	NaN	NaN	NaN	NaN	NaN	NaN
3.008	-68.6044	139.8204	1096.9271	-1.0249	0.75439	-0.12451	-2.385	104.1522	927.3793	-0.97966	0.43516	-0.10449	-78.997	118.278	803.6973	-0.604	0.4458	-0.1333	NaN	NaN	NaN	NaN	NaN	NaN
3.01	-72.9921	134.1771	1079.9781	-0.96338	0.74268	-0.12744	18.9483	72.925	1005.515	-1.1722	0.45517	-0.056836	-94.201	88.60422	899.296	-0.72436	0.48022	-0.1145	NaN	NaN	NaN	NaN	NaN	NaN
3.012	-63.643	120.2055	1097.367	-0.9358	0.72974	-0.13037	-5.71994	16.1387	1033.358	-1.4011	0.4708	-0.0083984	-93.023	54.714	1038.6637	-0.86475	0.51221	-0.085938	NaN	NaN	NaN	NaN	NaN	NaN
3.014	-62.853	117.9711	1079.039	-0.91357	0.71924	-0.1333	-2.52	-82.0831	1092.487	-1.6598	0.47832	0.053711	-68.928	21.5414	1148.699	-1.0879	0.56006	-0.039063	NaN	NaN	NaN	NaN	NaN	NaN
3.016	-76.995	112.88	1068.8425	-0.90332	0.70703	-0.13281	-0.286000000000001	-113.73	1112.72	-1.9468	0.51807	0.13525	-9.3909	-23.279	1221.605	-1.2124	0.58057	-0.01416	NaN	NaN	NaN	NaN	NaN	NaN
3.018	-72.588	103.828	1066.5058	-0.8999	0.70264	-0.13281	6.0416	-178.0539	1066.762	-2.2358	0.56055	0.17021	-6.344	-68.988	1254.647	-1.5112	0.63135	0.046875	NaN	NaN	NaN	NaN	NaN	NaN
3.02	-61.5517	85.5237	1078.8577	-0.90039	0.69141	-0.13379	-31.38056	-226.146	1062.905	-2.4746	0.61054	0.14189	4.49	-143.5904	1245.85	-1.7575	0.677	0.098388	NaN	NaN	NaN	NaN	NaN	NaN
3.022	-52.6998	61.1288	1080.532	-0.89648	0.68457	-0.13428	-90.813	-185.089	1044.885	-2.5918	0.68398	0.10908	27.3905	-184.8149	1222.211	-2.021	0.72119	0.15088	NaN	NaN	NaN	NaN	NaN	NaN
3.024	-47.9386	48.419	1058.99544	-0.88672	0.67969	-0.13428	-99.4467	-187.303	1008.834	-2.579	0.76788	0.086719	27.2636	-216.3823	1192.3677	-2.375	0.79492	0.18848	NaN	NaN	NaN	NaN	NaN	NaN
3.026	-42.194	35.844	1058.655	-0.87891	0.6748	-0.13965	-116.202	-124.086	997.692	-2.4355	0.85156	0.083984	-4.3425	-212.136	1156.7155	-2.5273	0.85059	0.19971	NaN	NaN	NaN	NaN	NaN	NaN
3.028	-48.077	38.6505	1069.996	-0.87158	0.67334	-0.146	-150.445	-67.97	970.947	-2.2237	0.93604	0.055762	-9.316	-207.591	1157.757	-2.7358	0.96729	0.19775	NaN	NaN	NaN	NaN	NaN	NaN
3.03	-36.031	38.1233	1048.541	-0.85156	0.67188	-0.15039	-156.847	-72.175	980.049	-1.9726	0.97549	0.041894	-52.7042	-187.046	1119.491	-2.7644	1.0656	0.18286	NaN	NaN	NaN	NaN	NaN	NaN
3.032	-16.8454	15.51616	1029.094	-0.83984	0.67481	-0.15503	-162.392	-22.247	1005.199	-1.7007	0.9208	0.012988	-82.757	-176.761	1090.93	-2.7339	1.2036	0.13086	NaN	NaN	NaN	NaN	NaN	NaN
3.034	-0.831000000000001	-10.917	1016.348	-0.83008	0.67383	-0.15771	-145.679	-6.529	1004.893	-1.4403	0.80303	-0.017578	-70.697	-130.485	1075.202	-2.4453	1.3164	0.096191	NaN	NaN	NaN	NaN	NaN	NaN
3.036	14.3018	-34.0352	1018.393	-0.81592	0.67432	-0.16846	-109.661	-30.012	995.34833	-1.2241	0.67432	-0.04834	-105.752	-89.7106	1087.0894	-2.2358	1.3052	0.079102	NaN	NaN	NaN	NaN	NaN	NaN
3.038	28.68055	-49.1783	1016.129	-0.8125	0.67773	-0.17334	-74.316	-8.96599999999999	976.342	-1.0559	0.57832	-0.081836	-114.697	-29.195	1094.7145	-1.7598	1.1855	0.018066	NaN	NaN	NaN	NaN	NaN	NaN
3.04	39.5088	-64.7629	1002.6039	-0.79883	0.67969	-0.18213	-30.8108	-62.006	950.691	-0.92568	0.52178	-0.1126	-97.142	-1.087	1131.909	-1.4285	1.0559	-0.044922	NaN	NaN	NaN	NaN	NaN	NaN
3.042	43.6112	-75.7444	985.8383	-0.79346	0.68457	-0.19238	-0.602999999999998	-115.109	952.772	-0.83037	0.5124	-0.14658	-53.998	-15.931	1115.75257	-1.125	0.93164	-0.10254	NaN	NaN	NaN	NaN	NaN	NaN
3.044	59.273	-90.5277	987.6169	-0.78516	0.68359	-0.19727	-3.726	-138.245	963.288	-0.77324	0.54805	-0.1795	-39.3153	-76.797	1139.0865	-0.78125	0.80176	-0.18164	NaN	NaN	NaN	NaN	NaN	NaN
3.046	73.75723	-97.25	964.433	-0.78516	0.69141	-0.21094	-12.9259	-219.158	1023.405	-0.73877	0.6001	-0.20459	15.992	-162.544	1130.323	-0.66309	0.76465	-0.20801	NaN	NaN	NaN	NaN	NaN	NaN
3.048	79.20125	-116.4668	965.631	-0.78711	0.69238	-0.21875	-2.2695	-255.006	1122.927	-0.73447	0.67529	-0.24853	-13.19	-227.336	1170.974	-0.48877	0.75244	-0.23633	NaN	NaN	NaN	NaN	NaN	NaN
3.05	78.992	-135.4399	959.291	-0.79297	0.69922	-0.23145	9.3076	-264.962	1138.996	-0.75615	0.75713	-0.27998	-29.534	-269.335	1208.27	-0.42261	0.75196	-0.25659	NaN	NaN	NaN	NaN	NaN	NaN
3.052	85.525	-158.74	950.025	-0.80664	0.71192	-0.23852	9.1042	-300.83	1161.06	-0.78779	0.80205	-0.28662	-44.0609	-304.5401	1270.651	-0.40479	0.76416	-0.25098	NaN	NaN	NaN	NaN	NaN	NaN
3.054	60.3657	-162.3914	948.171	-0.82178	0.72119	-0.25	40.1545	-237.944	1188.112	-0.84717	0.83174	-0.29463	-33.127	-313.6054	1302.717	-0.4624	0.8833	-0.27051	NaN	NaN	NaN	NaN	NaN	NaN
3.056	58.5354	-168.992	938.0742	-0.84961	0.73633	-0.25977	38.01276	-220.538	1221.2265	-0.93359	0.84961	-0.29785	-42.62073	-337.16	1385.803	-0.49121	0.95361	-0.29932	NaN	NaN	NaN	NaN	NaN	NaN
3.058	67.48177	-173.297	946.365	-0.86865	0.74561	-0.26123	60.7041	-193.357	1285.2952	-1.068	0.81465	-0.32402	-27.661	-336.053	1433.22	-0.49072	1.0078	-0.33398	NaN	NaN	NaN	NaN	NaN	NaN
3.06	59.75564	-164.215	926.4991	-0.90674	0.76221	-0.26416	103.577	-105.13	1285.618	-1.1592	0.88838	-0.18584	-45.188	-319.073	1473.369	-0.53711	0.99122	-0.31885	NaN	NaN	NaN	NaN	NaN	NaN
3.062	52.6532	-155.2815	910.2591	-0.94605	0.77857	-0.26928	109.522	-133.105	1319.105	-1.319	0.91611	-0.2499	-28.197	-243.446	1511.025	-0.66406	0.98047	-0.2876	NaN	NaN	NaN	NaN	NaN	NaN
3.064	52.7722	-154.099	911.989	-0.97998	0.7915	-0.27197	117.431	-135.98	1372.42	-1.4212	0.96631	-0.27256	-11.319	-204.312	1559.668	-0.97607	1.0005	-0.25537	NaN	NaN	NaN	NaN	NaN	NaN
3.066	57.7901	-154.042	941.225	-1.0269	0.81299	-0.26953	106.429	-120.209	1347.762	-1.4766	1.0039	-0.2334	55.278	-150.858	1584.43	-1.2116	1.0344	-0.23365	NaN	NaN	NaN	NaN	NaN	NaN
3.068	42.913	-162.592	932.86	-1.0513	0.82275	-0.26904	97.091	-145.427	1327.272	-1.5459	1.0565	-0.2043	80.7728	-147.554	1576.26	-1.4272	1.0825	-0.21289	NaN	NaN	NaN	NaN	NaN	NaN
3.07	45.5	-174.754	938.3316	-1.0859	0.83984	-0.27539	79.846	-89.159	1319.5925	-1.6301	1.0957	-0.20254	108.452	-123.507	1552.089	-1.6563	1.168	-0.22559	NaN	NaN	NaN	NaN	NaN	NaN
3.072	58.371	-193.10195	950.765	-1.1101	0.85474	-0.27613	26.4771	-73.698	1303.223	-1.693	1.1289	-0.19786	78.1689	-115.348	1553.684	-1.7515	1.2056	-0.24365	NaN	NaN	NaN	NaN	NaN	NaN
3.074	56.3789	-189.2699	970.468	-1.1328	0.86523	-0.27588	-4.3968	-113.492	1347.583	-1.739	1.1583	-0.1873	55.5865	-69.414	1553.665	-1.9077	1.2642	-0.25537	NaN	NaN	NaN	NaN	NaN	NaN
3.076	50.673	-173.279	957.02119	-1.1504	0.875	-0.27686	2.915	-88.6511	1383.729	-1.7788	1.1802	-0.18896	54.234	-59.398	1571.465	-1.9997	1.2756	-0.2727	NaN	NaN	NaN	NaN	NaN	NaN
3.078	31.638	-171.9417	963.7868	-1.1543	0.88281	-0.27148	-5.349	-149.071	1447.895	-1.8126	1.1897	-0.20273	53.571	-32.052	1566.345	-2.0742	1.2813	-0.29102	NaN	NaN	NaN	NaN	NaN	NaN
3.08	40.585	-174.371	977.545	-1.1665	0.8833	-0.27783	-26.8696	-170.429	1528.925	-1.827	1.2024	-0.21816	45.7176	-102.203	1579.41	-2.1523	1.2754	-0.31641	NaN	NaN	NaN	NaN	NaN	NaN
3.082	58.993	-190.6344	997.803	-1.1667	0.8855	-0.28101	-21.7444	-131.147	1532.999	-1.8297	1.1996	-0.23847	25.897	-120.351	1640.201	-2.1807	1.2617	-0.32617	NaN	NaN	NaN	NaN	NaN	NaN
3.084	60.353	-191.5622	1015.377	-1.1655	0.88037	-0.28125	-21.0093	-178.837	1537.267	-1.8276	1.1934	-0.2626	-8.96	-156.731	1682.741	-2.2129	1.2441	-0.35986	NaN	NaN	NaN	NaN	NaN	NaN
3.086	57.192	-198.606	1014.819	-1.1563	0.88086	-0.2832	7.118	-120.3519	1535.95	-1.8184	1.1816	-0.29395	4.173	-125.124	1733.969	-2.2195	1.2254	-0.37573	NaN	NaN	NaN	NaN	NaN	NaN
3.088	73.1411	-197.085	1031.734	-1.1504	0.87891	-0.29053	-20.228	-114.0688	1492.22408	-1.8031	1.1637	-0.3125	8.171	-134.075	1773.735	-2.2065	1.2075	-0.39209	NaN	NaN	NaN	NaN	NaN	NaN
3.09	68.874	-189.894	1034.017	-1.1426	0.87305	-0.30176	-24.619	-146.189	1512.5765	-1.7882	1.1447	-0.33408	16.687	-115.6384	1777.07	-2.1753	1.1841	-0.42725	NaN	NaN	NaN	NaN	NaN	NaN
3.092	79.0796	-161.4887	1022.34	-1.1396	0.86865	-0.30469	3.565	-73.06	1515.379	-1.7772	1.1267	-0.35908	14.193	-150.939	1739.364	-2.1499	1.1704	-0.43994	NaN	NaN	NaN	NaN	NaN	NaN
3.094	89.5398	-147.9628	1009.199	-1.1421	0.86768	-0.30664	-33.7341	-93.257	1502.8508	-1.7625	1.1066	-0.38008	42.581	-116.4415	1709.489	-2.1094	1.1484	-0.45703	NaN	NaN	NaN	NaN	NaN	NaN
3.096	95.5151	-140.876	1013.124	-1.1582	0.8623	-0.31055	-27.935	-90.3006	1524.068	-1.7554	1.0864	-0.39795	26.731	-109.632	1667.487	-2.0916	1.1302	-0.4602	NaN	NaN	NaN	NaN	NaN	NaN
3.098	98.3928	-155.542	1028.677	-1.1597	0.86084	-0.31104	-10.993	-35.5735	1488.585	-1.7435	1.0597	-0.42197	-14.739	-39.514	1666.103	-2.0796	1.1177	-0.4585	NaN	NaN	NaN	NaN	NaN	NaN
3.1	86.5174	-155.8291	1024.595	-1.1704	0.854	-0.31592	-16.446	-78.016	1476.8141	-1.7401	1.0353	-0.43369	-31.5036	-39.537	1670.53471	-2.0742	1.0781	-0.45117	NaN	NaN	NaN	NaN	NaN	NaN
3.102	94.937	-162.1306	1020.244	-1.1738	0.84668	-0.31641	43.3833	-21.073	1494.8573	-1.7327	1.0161	-0.43877	-47.99625	-6.5482	1664.798	-2.084	1.0605	-0.44629	NaN	NaN	NaN	NaN	NaN	NaN
3.104	88.392	-166.575	1032.901	-1.1655	0.84033	-0.31641	32.2942	14.4536	1444.591	-1.7366	1.0087	-0.44209	-31.539	2.0387	1631.378	-2.1113	1.0313	-0.43018	NaN	NaN	NaN	NaN	NaN	NaN
3.106	101.295	-161.044	1014.273	-1.1553	0.82617	-0.31982	38.0419	-19.7726	1468.184	-1.7495	1.0005	-0.45264	-57.7905	38.0072	1620.24	-2.1257	1.0095	-0.427	NaN	NaN	NaN	NaN	NaN	NaN
3.108	80.0467	-148.4278	988.511	-1.1416	0.81933	-0.31836	77.146	26.9264	1506.6313	-1.7613	0.9875	-0.45684	-31.477	63.902	1587.4525	-2.1504	1.002	-0.41602	NaN	NaN	NaN	NaN	NaN	NaN
3.11	80.119314	-142.77255	982.3092	-1.1289	0.81055	-0.31689	62.768	-28.9679	1516.786	-1.7754	0.98008	-0.45371	-61.9057	84.698	1608.04212	-2.1851	1.0005	-0.40381	NaN	NaN	NaN	NaN	NaN	NaN
3.112	77.7496	-145.9279	997.821	-1.1089	0.79785	-0.31543	80.539	-48.7471	1541.376	-1.7883	0.97187	-0.45293	-30.612	90.183	1571.64	-2.2026	0.99463	-0.39893	NaN	NaN	NaN	NaN	NaN	NaN
3.114	57.7584	-141.9422	1001.571	-1.0991	0.78955	-0.31348	110.886	-3.165	1523.04	-1.796	0.97314	-0.45107	-22.496	67.939	1589.9084	-2.2266	0.97656	-0.39746	NaN	NaN	NaN	NaN	NaN	NaN
3.116	67.0885	-154.209	1004.79	-1.0825	0.7749	-0.30811	65.418	-65.344	1512.131	-1.7949	0.9668	-0.45117	52.5184	31.8433	1586.2415	-2.2358	0.97022	-0.40332	NaN	NaN	NaN	NaN	NaN	NaN
3.118	49.395	-163.521	991.124	-1.0644	0.76929	-0.30224	105.459	-17.2046	1515.757	-1.7931	0.96396	-0.44912	58.8233	11.0523	1621.056	-2.2378	0.95947	-0.40088	NaN	NaN	NaN	NaN	NaN	NaN
3.12	54.36	-158.262	981.267	-1.0469	0.75781	-0.29199	87.107	4.789	1471.945	-1.7769	0.95996	-0.45273	73.8988	11.58	1589.4199	-2.23	0.95557	-0.39014	NaN	NaN	NaN	NaN	NaN	NaN
3.122	28.714	-131.4405	964.3939	-1.0229	0.7417	-0.28418	46.4251	-43.615	1464.396	-1.7617	0.9502	-0.44414	42.9541	29.438	1590.017	-2.2188	0.95898	-0.38916	NaN	NaN	NaN	NaN	NaN	NaN
3.124	23.537	-123.75578	936.3363	-1.0112	0.73291	-0.27637	57.602	11.222	1466.4869	-1.7526	0.95009	-0.44268	38.445	42.316	1569.732	-2.189	0.96143	-0.40918	NaN	NaN	NaN	NaN	NaN	NaN
3.126	32.55	-117.599	930.192	-0.98535	0.7207	-0.2666	35.1188	-17.9155	1442.0444	-1.7378	0.95752	-0.43994	31.715	31.582	1578.997	-2.1414	0.96265	-0.41846	NaN	NaN	NaN	NaN	NaN	NaN
3.128	19.113	-115.9881	921.686	-0.96167	0.71167	-0.25561	44.9095	4.7134	1456.737	-1.7104	0.9502	-0.4336	93.9539	27.825	1534.674	-2.0938	0.95508	-0.41846	NaN	NaN	NaN	NaN	NaN	NaN
3.13	19.967	-98.2332	908.635	-0.94092	0.70166	-0.25195	46.2488	98.005	1419.361	-1.6914	0.94571	-0.43242	69.0867	42.871	1519.599	-2.02	0.94775	-0.41455	NaN	NaN	NaN	NaN	NaN	NaN
3.132	22.902	-100.4226	902.134	-0.91357	0.68506	-0.23389	1.735	48.458	1399.2718	-1.6696	0.93476	-0.41914	58.9372	91.461	1464.7285	-1.9897	0.93994	-0.41162	NaN	NaN	NaN	NaN	NaN	NaN
3.134	13.52	-101.85356	892.602	-0.89893	0.67627	-0.23096	27.754	97.294	1399.307	-1.6439	0.92647	-0.41865	28.864	130.056	1456.1798	-1.9214	0.92822	-0.40967	NaN	NaN	NaN	NaN	NaN	NaN
3.136	16.385	-104.5365	878.1672	-0.87305	0.66016	-0.21582	23.477	98.327	1349.8676	-1.6187	0.9126	-0.40771	43.397	185.666	1429.3444	-1.8753	0.91871	-0.40137	NaN	NaN	NaN	NaN	NaN	NaN
3.138	9.552	-88.7032	857.30612	-0.85278	0.6477	-0.20776	13.343	51.386	1354.10178	-1.5932	0.89521	-0.40264	47.565	204.171	1428.655	-1.8237	0.91455	-0.396	NaN	NaN	NaN	NaN	NaN	NaN
3.14	14.528	-95.3356	837.4125	-0.83203	0.63574	-0.19971	13.29	113.307	1356.376	-1.5682	0.88164	-0.38994	76.9957	234.876	1382.1483	-1.7559	0.89258	-0.38086	NaN	NaN	NaN	NaN	NaN	NaN
3.142	25.179	-80.8805	828.909	-0.80225	0.62158	-0.18604	-27.146	83.02299	1333.754	-1.5526	0.8707	-0.3833	60.8914	212.599	1375.05	-1.7192	0.90088	-0.36279	NaN	NaN	NaN	NaN	NaN	NaN
3.144	53.2555	-82.1489	822.975	-0.78711	0.61328	-0.18115	-1.122	80.88773	1344.01	-1.5311	0.85996	-0.37363	39.8761	228.28	1313.077	-1.6582	0.88965	-0.37598	NaN	NaN	NaN	NaN	NaN	NaN
3.146	47.2025	-79.4931	807.713	-0.75342	0.59619	-0.17041	-16.114	112.475	1293.837	-1.5112	0.8501	-0.36719	-12.344	202.2368	1308.977	-1.5996	0.87695	-0.36548	NaN	NaN	NaN	NaN	NaN	NaN
3.148	46.18743	-86.02409	789.021	-0.73437	0.5835	-0.16162	-55.686	42.624	1268.2979	-1.4951	0.83301	-0.35488	-6.332	220.031	1250.263	-1.5308	0.85889	-0.34131	NaN	NaN	NaN	NaN	NaN	NaN
3.15	53.6573	-90.3876	788.492	-0.70703	0.56836	-0.15332	-3.742	72.8135	1277.074	-1.473	0.81318	-0.34482	-48.4419	191.421	1232.7723	-1.4648	0.82422	-0.31934	NaN	NaN	NaN	NaN	NaN	NaN
3.152	66.562	-86.483	761.6671	-0.68115	0.55127	-0.14795	-3.74	98.003	1240.86	-1.4437	0.80654	-0.32959	-25.8995	188.7233	1182.581	-1.4272	0.81104	-0.31396	NaN	NaN	NaN	NaN	NaN	NaN
3.154	52.14139	-83.783	742.2571	-0.66553	0.54443	-0.13818	-2.399	73.3416	1268.506	-1.4177	0.79102	-0.3251	-49.5007	152.542	1176.791	-1.3633	0.77539	-0.29736	NaN	NaN	NaN	NaN	NaN	NaN
3.156	53.3773	-78.6476	711.0589	-0.63623	0.52588	-0.12988	28.88282	150.406	1243.121	-1.3843	0.77197	-0.32373	-63.493	175.7201	1131.791	-1.3152	0.75024	-0.27734	NaN	NaN	NaN	NaN	NaN	NaN
3.158	73.1393	-64.3953	706.523	-0.61279	0.5166	-0.125	26.2451	114.1825	1206.233	-1.3592	0.75859	-0.31006	-58.6159	175.31	1140.357	-1.2646	0.7207	-0.25732	NaN	NaN	NaN	NaN	NaN	NaN
3.16	83.152	-53.2683	686.748	-0.59082	0.50391	-0.11182	61.01468	123.7668	1198.267	-1.3265	0.74228	-0.29961	-42.5916	217.853	1091.746	-1.2026	0.68994	-0.23682	NaN	NaN	NaN	NaN	NaN	NaN
3.162	43.92969	-51.4243	668.5727	-0.56006	0.48828	-0.10693	79.652	192.385	1162.875	-1.2999	0.72744	-0.2875	-33.9474	223.372	1041.693	-1.1733	0.67432	-0.21875	NaN	NaN	NaN	NaN	NaN	NaN
3.164	51.1422	-42.63	655.503	-0.54834	0.47803	-0.099609	57.101	154.5906	1146.866	-1.2724	0.70459	-0.27471	-19.5356	242.574	999.913	-1.1133	0.64453	-0.19287	NaN	NaN	NaN	NaN	NaN	NaN
3.166	68.821	-36.1905	654.525	-0.52002	0.46143	-0.090332	77.318	188.4206	1118.307	-1.2441	0.68555	-0.26465	-2.327	247.655	939.6525	-1.0603	0.61792	-0.17457	NaN	NaN	NaN	NaN	NaN	NaN
3.168	50.9142	-29.6825	627.3895	-0.50049	0.4502	-0.084473	41.121	167.702	1081.337	-1.2082	0.66758	-0.25576	-2.55	271.681	904.4007	-1.0093	0.59326	-0.15576	NaN	NaN	NaN	NaN	NaN	NaN
3.17	28.5517	-30.8306	595.5824	-0.48584	0.4375	-0.081055	52.31292	110.378	1079.187	-1.1771	0.64717	-0.24463	-23.2316	269.876	880.129	-0.94873	0.55713	-0.12695	NaN	NaN	NaN	NaN	NaN	NaN
3.172	47.8391	-37.8476	581.6658	-0.46094	0.4248	-0.069336	81.255	170.39	1039.7212	-1.1446	0.63116	-0.23408	-32.5628	289.779	847.08375	-0.93115	0.54053	-0.11865	NaN	NaN	NaN	NaN	NaN	NaN
3.174	32.4314	-25.026	567.976	-0.44873	0.4165	-0.069824	29.81221	140.048	1013.3947	-1.1088	0.60723	-0.22041	-25.4349	268.664	797.0955	-0.87158	0.51025	-0.097656	NaN	NaN	NaN	NaN	NaN	NaN
3.176	27.8389	-16.499	563.532	-0.43018	0.40234	-0.049316	44.272	168.5843	997.883	-1.0757	0.59131	-0.20654	-9.8483	263.032	759.462	-0.8313	0.48706	-0.080078	NaN	NaN	NaN	NaN	NaN	NaN
3.178	15.009	-20.928	541.491	-0.41308	0.38989	-0.046631	50.804	201.4066	961.702	-1.0438	0.57236	-0.19326	-6.084	240.7824	690.004	-0.78906	0.46484	-0.063477	NaN	NaN	NaN	NaN	NaN	NaN
3.18	21.453	-22.252	539.6136	-0.3999	0.37939	-0.040527	20.04005	140.061	958.122	-1.0155	0.55556	-0.18115	20.148	241.395	671.65	-0.72266	0.43018	-0.045898	NaN	NaN	NaN	NaN	NaN	NaN
3.182	11.215	-22.1399	532.7019	-0.38086	0.36719	-0.032227	38.113	172.6779	939.879	-0.98506	0.53525	-0.16514	28.852	220.0522	615.6661	-0.68896	0.42236	-0.033203	NaN	NaN	NaN	NaN	NaN	NaN
3.184	7.758	-24.65215	524.939	-0.37012	0.35742	-0.033203	5.3977	165.528	902.619	-0.95654	0.52334	-0.14658	7.196	222.3768	603.3226	-0.62646	0.39502	-0.021484	NaN	NaN	NaN	NaN	NaN	NaN
3.186	14.893	-24.54	502.789	-0.34619	0.34717	-0.023926	-4.451	130.8623	887.257	-0.92773	0.51367	-0.1333	40.7507	216.6605	555.1142	-0.57788	0.37939	-0.0009766	NaN	NaN	NaN	NaN	NaN	NaN
3.188	18.8247	-22.614	492.06	-0.33398	0.33447	-0.019776	7.2985	178.2059	850.53	-0.90381	0.4956	-0.11612	27.890757	215.2183	558.552	-0.53223	0.34961	0.016113	NaN	NaN	NaN	NaN	NaN	NaN
3.19	16.492	-16.281	473.0908	-0.32178	0.32568	-0.015625	-43.442	150.439	799.085	-0.87266	0.48086	-0.1001	59.648	209.17	525.606	-0.47852	0.32031	0.034668	NaN	NaN	NaN	NaN	NaN	NaN
3.192	16.867	-18.546	460.152	-0.30566	0.31152	-0.0083008	-63.237	169.0161	782.256	-0.85469	0.46914	-0.086035	45.0311	198.954	513.783	-0.45508	0.30469	0.046875	NaN	NaN	NaN	NaN	NaN	NaN
3.194	21.692	-7.594	452.554	-0.29639	0.30615	-0.0043945	-30.151	195.156	735.0127	-0.82608	0.4583	-0.073535	26.932	188.002	443.464	-0.3999	0.2832	0.069336	NaN	NaN	NaN	NaN	NaN	NaN
3.196	42.1651	-7.579	458.656	-0.2793	0.29639	0.00048828	-35.7505	135.834	714.5779	-0.80078	0.44238	-0.064453	-29.2858	163.0562	417.892	-0.35157	0.26929	0.083984	NaN	NaN	NaN	NaN	NaN	NaN
3.198	40.7686	-6.0239	432.8054	-0.26489	0.2854	0.0046387	-37.79679	175.1536	674.3482	-0.77178	0.43232	-0.048437	-12.229	151.52575	337.144	-0.29932	0.25342	0.092285	NaN	NaN	NaN	NaN	NaN	NaN
3.2	27.404	-15.3033	416.8475	-0.25049	0.27393	0.0024414	-62.579	181.6036	627.1373	-0.74179	0.41954	-0.03418	-26.66821	134.555	320.533	-0.22754	0.229	0.11279	NaN	NaN	NaN	NaN	NaN	NaN
3.202	45.2349	-8.0977	406.4928	-0.23193	0.2583	0.0092773	-32.8808	157.666	620.647	-0.70743	0.4039	-0.02168	-13.806	156.593	254.024	-0.19092	0.21924	0.11621	NaN	NaN	NaN	NaN	NaN	NaN
3.204	63.6265	-10.55498	408.723	-0.22217	0.25977	0.010742	7.297	202.752	583.24	-0.67353	0.39502	-0.011231	-14.975	132.484	237.6373	-0.11963	0.19727	0.12549	NaN	NaN	NaN	NaN	NaN	NaN
3.206	66.6204	2.2605	366.417	-0.20215	0.24805	0.020996	-23.6022	144.728	557.9061	-0.64014	0.38135	0.0043945	-29.154	135.1037	195.1544	-0.062012	0.1836	0.12793	NaN	NaN	NaN	NaN	NaN	NaN
3.208	36.529	-4.0372	362.276	-0.19604	0.24243	0.019043	-16.03545	153.0777	538.827	-0.60517	0.36406	0.017676	-58.5801	115.9739	208.15	-0.012207	0.16602	0.13086	NaN	NaN	NaN	NaN	NaN	NaN
3.21	79.0987	-1.1302	366.944	-0.18652	0.23193	0.021484	-16.488	192.873	497.536	-0.56641	0.35088	0.030273	-21.124	133.368	172.29	0.055664	0.14063	0.14014	NaN	NaN	NaN	NaN	NaN	NaN
3.212	76.014	1.6694	372.323	-0.17285	0.22314	0.027832	-5.6948	164.391	492.84483	-0.52695	0.33995	0.038867	-25.423	107.453	191.742	0.097655	0.11744	0.1438	NaN	NaN	NaN	NaN	NaN	NaN
3.214	41.4233	0.5443	350.664	-0.16406	0.21924	0.029785	29.4207	201.659	477.562	-0.49228	0.32979	0.053906	-20.389	98.684	142.4521	0.12842	0.104	0.15234	NaN	NaN	NaN	NaN	NaN	NaN
3.216	37.6946	-1.1313	340.956	-0.1499	0.20605	0.030273	14.0047	162.609	428.088	-0.45313	0.3208	0.066406	-32.9083	67.2521	141.717	0.16846	0.081543	0.16064	NaN	NaN	NaN	NaN	NaN	NaN
3.218	74.3887	-13.92002	346.079	-0.14135	0.19824	0.031006	34.3741	110.1007	419.935	-0.41308	0.30439	0.080469	-33.54	82.04	101.136	0.18848	0.069824	0.16406	NaN	NaN	NaN	NaN	NaN	NaN
3.22	48.95979	-10.5667	326.068	-0.13379	0.19043	0.035156	59.448	128.4372	388.366	-0.36836	0.29511	0.091602	-65.243	67.224	98.0078	0.23877	0.052246	0.16797	NaN	NaN	NaN	NaN	NaN	NaN
3.222	28.481	-7.8447	303.9226	-0.12891	0.18555	0.037109	60.163	92.7931	381.025	-0.32461	0.28262	0.1041	-7.785	90.125	84.9799	0.25537	0.031738	0.17212	NaN	NaN	NaN	NaN	NaN	NaN
3.224	26.9177	-1.2474	287.0474	-0.12598	0.18262	0.035645	54.58	100.8057	371.934	-0.27568	0.26924	0.11904	-16.747	40.546	103.544	0.28223	0.032715	0.17188	NaN	NaN	NaN	NaN	NaN	NaN
3.226	54.642	-0.842099999999999	297.143	-0.12012	0.17578	0.043457	50.47	123.98324	327.072	-0.22754	0.25537	0.13135	-2.058	36.8732	78.702	0.2959	0.013184	0.17871	NaN	NaN	NaN	NaN	NaN	NaN
3.228	15.538	-5.89137	284.724	-0.11914	0.17261	0.043457	55.0737	90.38	299.5497	-0.18056	0.23672	0.13984	15.942	1.151	84.702	0.30127	0.0063477	0.17969	NaN	NaN	NaN	NaN	NaN	NaN
3.23	5.575	3.1775	278.8285	-0.11475	0.16895	0.043457	53.4718	126.354	267.4169	-0.12686	0.22881	0.15195	23.065	19.5913	68.762	0.31885	-0.0029297	0.19043	NaN	NaN	NaN	NaN	NaN	NaN
3.232	29.1187	18.5053	276.481	-0.11475	0.1626	0.043945	41.4087	105.254	247.336	-0.077246	0.21201	0.16015	-3.799	3.0424	53.58	0.31396	-0.0080566	0.19091	NaN	NaN	NaN	NaN	NaN	NaN
3.234	14.628	7.7956	284.684	-0.11133	0.16016	0.045898	39.7799	85.591	257.892	-0.021875	0.20459	0.16738	41.9293	25.9855	31.1958	0.31348	-0.022949	0.19629	NaN	NaN	NaN	NaN	NaN	NaN
3.236	-35.4682	-7.1414	271.6328	-0.11914	0.15625	0.05127	25.4848	106.409	236.679	0.038086	0.18359	0.17334	38.4066	17.5234	27.6204	0.29053	-0.030273	0.2002	NaN	NaN	NaN	NaN	NaN	NaN
3.238	-23.827	-5.53671	264.2887	-0.12744	0.15674	0.054688	10.0944	58.2377	229.949	0.08779	0.17539	0.17578	38.3261	52.2794	21.6879	0.27979	-0.028809	0.20313	NaN	NaN	NaN	NaN	NaN	NaN
3.24	27.1666	0.584596	258.602	-0.12891	0.15625	0.054688	10.466	67.23141	209.219	0.13691	0.17139	0.18359	46.60881	34.1311	16.6057	0.2583	-0.039551	0.22168	NaN	NaN	NaN	NaN	NaN	NaN
3.242	19.4913	12.0224	262.49	-0.1377	0.15283	0.058594	-20.0636	77.4159	159.0906	0.17989	0.15342	0.18789	43.518	45.66	36.5139	0.23584	-0.038574	0.22192	NaN	NaN	NaN	NaN	NaN	NaN
3.244	-24.596	3.2571	236.9793	-0.14135	0.1521	0.061767	-25.0836	50.138	165.1201	0.21699	0.13926	0.18779	-0.608999999999998	23.08059	34.55	0.21973	-0.046387	0.23389	NaN	NaN	NaN	NaN	NaN	NaN
3.246	2.113	4.4329	244.9876	-0.15137	0.14844	0.061523	-10.344	90.961	139.6117	0.24414	0.12402	0.18896	24.7382	38.92	28.649	0.19043	-0.047852	0.24316	NaN	NaN	NaN	NaN	NaN	NaN
3.248	37.483	16.9332	260.0712	-0.16357	0.14893	0.064941	-43.811	58.1577	120.7719	0.26094	0.11787	0.19082	10.253	13.6359	25.4863	0.17773	-0.047363	0.24219	NaN	NaN	NaN	NaN	NaN	NaN
3.25	8.63	-1.8613	273.271	-0.17236	0.15088	0.075684	-33.0983	22.2668	131.516	0.27334	0.10927	0.19316	16.321	15.5875	22.318	0.16064	-0.05127	0.25049	NaN	NaN	NaN	NaN	NaN	NaN
3.252	2.017	-9.5689	258.9725	-0.18604	0.14648	0.07373	-31.6235	29.6496	119.284	0.28779	0.099511	0.19238	12.287	-11.2782	19.5808	0.15479	-0.047852	0.25806	NaN	NaN	NaN	NaN	NaN	NaN
3.254	36.20647	-11.442	269.184	-0.19898	0.15137	0.076905	-34.9132	-13.6896	101.405	0.29453	0.086231	0.20127	-1.014	14.1317	22.80426	0.1499	-0.044434	0.25244	NaN	NaN	NaN	NaN	NaN	NaN
3.256	58.629	-0.4221	277.835	-0.21436	0.15186	0.077148	0.318000000000001	21.6321	112.355	0.29395	0.079102	0.20361	-19.198	3.5104	11.5589	0.14746	-0.04541	0.25586	NaN	NaN	NaN	NaN	NaN	NaN
3.258	25.8254	11.98964	249.1057	-0.23047	0.15332	0.07959	1.474	50.3537	80.7326	0.28691	0.074707	0.20488	-15.9234	19.3876	14.4091	0.14453	-0.047852	0.25635	NaN	NaN	NaN	NaN	NaN	NaN
3.26	12.847	17.3193	249.0297	-0.24219	0.1543	0.085449	-29.9628	21.973	85.244	0.27666	0.069532	0.21025	-30.745	-5.566	41.882	0.14795	-0.047363	0.24512	NaN	NaN	NaN	NaN	NaN	NaN
3.262	46.742	29.723	258.187	-0.26367	0.15918	0.086914	3.991	55.5505	78.041	0.25986	0.073437	0.21299	-35.985	8.2697	50.202	0.1521	-0.049073	0.24072	NaN	NaN	NaN	NaN	NaN	NaN
3.264	60.9018	14.5516	271.603	-0.27979	0.16064	0.090088	1.332	23.8786	60.63139	0.25078	0.069238	0.2207	0.202999999999999	-6.1525	56.715	0.15283	-0.04834	0.23486	NaN	NaN	NaN	NaN	NaN	NaN
3.266	55.998	12.5034	275.686	-0.29639	0.1626	0.096191	8.285	8.0541	79.187	0.24023	0.068359	0.23096	-8.043	23.6525	57.196	0.14502	-0.043457	0.21875	NaN	NaN	NaN	NaN	NaN	NaN
3.268	40.8519	11.6634	270.2611	-0.31689	0.1665	0.099121	26.5039	30.9807	64.984	0.22529	0.071582	0.22383	-60.5109	-3.4204	28.318	0.13965	-0.04248	0.2168	NaN	NaN	NaN	NaN	NaN	NaN
3.27	55.851	27.0016	277.5891	-0.33301	0.16943	0.10303	23.5952	-3.6391	53.692	0.20762	0.071387	0.22373	-36.1923	21.976	17.6133	0.13574	-0.036621	0.20459	NaN	NaN	NaN	NaN	NaN	NaN
3.272	75.289	21.9284	299.096	-0.35547	0.17529	0.10498	47.9354	19.5137	25.046	0.18847	0.074512	0.22295	-29.1	25.97	-0.2278	0.13062	-0.03125	0.19385	NaN	NaN	NaN	NaN	NaN	NaN
3.274	3.169	17.5011	282.6149	-0.37524	0.18164	0.10839	65.8	20.367	-4.89992	0.16767	0.07666	0.22793	-6.435	48.402	4.1518	0.125	-0.021973	0.18311	NaN	NaN	NaN	NaN	NaN	NaN
3.276	23.9484	31.659	275.4495	-0.38867	0.1792	0.10498	38.0322	-3.74	13.891	0.14795	0.078613	0.22119	13.566	26.8162	12.9155	0.11475	-0.015137	0.17773	NaN	NaN	NaN	NaN	NaN	NaN
3.278	50.7941	51.427	298.9184	-0.41064	0.18701	0.11035	55.315	32.7327	27.339	0.12764	0.082129	0.21689	-0.255000000000003	-0.62851	41.63	0.10693	-0.010742	0.16895	NaN	NaN	NaN	NaN	NaN	NaN
3.28	39.0729	34.243	330.355	-0.42188	0.19141	0.10596	57.766	19.399	28.2737	0.10938	0.079981	0.20674	-23.835	-16.6674	17.4717	0.098633	0	0.16211	NaN	NaN	NaN	NaN	NaN	NaN
3.282	-6.168	19.63838	336.027	-0.43799	0.19287	0.11035	51.4148	15.5645	40.076	0.091406	0.078418	0.20557	0.987000000000002	-8.6865	42.429	0.083496	0.011719	0.15918	NaN	NaN	NaN	NaN	NaN	NaN
3.284	-3.199	5.0444	343.481	-0.44873	0.20191	0.10717	37.687	40.394	25.598	0.07207	0.077246	0.19697	32.9573	2.033	33.821	0.079102	0.027344	0.15918	NaN	NaN	NaN	NaN	NaN	NaN
3.286	32.1382	22.915	363.019	-0.45947	0.20752	0.10596	36.7687	-14.5207	31.7423	0.053711	0.083008	0.19189	19.432	5.69478	54.114	0.052734	0.044922	0.16699	NaN	NaN	NaN	NaN	NaN	NaN
3.288	13.5146	18.7809	360.7675	-0.47461	0.21289	0.10449	58.3171	11.537	49.535	0.032715	0.088574	0.18682	57.1357	-0.6807	26.708	0.04248	0.055664	0.16455	NaN	NaN	NaN	NaN	NaN	NaN
3.29	-15.057	12.0922	367.4193	-0.48242	0.2168	0.10059	30.707	12.8	8.5401	0.013574	0.097656	0.17969	27.9122	8.983	16.3554	0.026367	0.076172	0.16797	NaN	NaN	NaN	NaN	NaN	NaN
3.292	1.957	9.2734	385.93	-0.49805	0.22461	0.09668	1.973	-15.7237	11.9162	-0.005957	0.1043	0.17266	-1.599	32.1749	-13.078	0.018067	0.088134	0.1709	NaN	NaN	NaN	NaN	NaN	NaN
3.294	9.538	27.465	387.8632	-0.50708	0.23071	0.092285	-1.8927	19.1036	27.66902	-0.013184	0.11582	0.16543	32.0909	19.4203	38.648	0.010742	0.10156	0.1709	NaN	NaN	NaN	NaN	NaN	NaN
3.296	-5.304	35.363	411.51	-0.51367	0.2373	0.093262	-25.7755	8.3869	13.9019	-0.025391	0.12598	0.15869	46.268	10.009	38.29	0.012695	0.11572	0.17236	NaN	NaN	NaN	NaN	NaN	NaN
3.298	-18.2173	33.117	423.056	-0.53125	0.24463	0.088867	3.112	15.9402	31.4954	-0.02461	0.13789	0.15381	27.855	-14.8573	40.657	0.017578	0.13135	0.17627	NaN	NaN	NaN	NaN	NaN	NaN
3.3	4.233	11.7075	437.732	-0.54199	0.24707	0.083008	-17.318	33.783	16.9057	-0.022559	0.14931	0.14785	33.272	2.471	13.6278	0.025879	0.14746	0.17676	NaN	NaN	NaN	NaN	NaN	NaN
3.302	15.487	34.215	463.538	-0.55811	0.25928	0.080566	-47.768	-3.2059	24.4345	-0.019433	0.15947	0.14043	27.9913	4.333	27.8829	0.037842	0.16137	0.17163	NaN	NaN	NaN	NaN	NaN	NaN
3.304	-1.995	35.9254	473.554	-0.56738	0.26392	0.071533	-28.8306	19.8355	46.1406	-0.013965	0.16582	0.13682	0.68	32.2383	20.7714	0.049316	0.16992	0.1709	NaN	NaN	NaN	NaN	NaN	NaN
3.306	13.2079	44.193	471.1274	-0.58203	0.26953	0.066895	-19.2524	28.9108	27.48	-0.0048828	0.18213	0.13623	-15.957	38.4392	8.62167	0.068359	0.18213	0.16797	NaN	NaN	NaN	NaN	NaN	NaN
3.308	20.94267	35.01565	488.626	-0.59814	0.28467	0.05957	-33.5593	-0.137	30.1206	0.003418	0.18926	0.12676	-8.994	55.662	-4.269	0.079102	0.18994	0.1665	NaN	NaN	NaN	NaN	NaN	NaN
3.31	35.181	38.56064	498.9301	-0.60889	0.29297	0.060059	-14.271	26.6605	29.949	0.011914	0.19658	0.12334	-7.738	34.054	-4.95155	0.098633	0.19727	0.15967	NaN	NaN	NaN	NaN	NaN	NaN
3.312	14.134	46.6993	513.763	-0.62695	0.30273	0.055176	-31.2161	10.58922	12.9602	0.025586	0.20596	0.11748	10.649	29.5785	24.3063	0.11352	0.20239	0.15137	NaN	NaN	NaN	NaN	NaN	NaN
3.314	38.5539	52.547	528.771	-0.6416	0.3125	0.049805	-17.239	13.3389	20.5981	0.039258	0.20996	0.11006	-26.355	-0.0373999999999999	59.984	0.12256	0.20264	0.14697	NaN	NaN	NaN	NaN	NaN	NaN
3.316	43.716	48.239	539.418	-0.65527	0.32031	0.041992	5.7138	43.541	21.4339	0.05957	0.21924	0.098145	-35.121	16.758	44.51	0.12646	0.21582	0.14307	NaN	NaN	NaN	NaN	NaN	NaN
3.318	42.5284	33.4475	571.569	-0.67871	0.33008	0.034668	-6.2942	-5.2401	38.039	0.075097	0.22559	0.095898	-33.3919	-8.8764	42.587	0.12598	0.22266	0.14209	NaN	NaN	NaN	NaN	NaN	NaN
3.32	31.6418	28.7551	577.431	-0.68359	0.3335	0.033691	9.334	-4.6042	63.09	0.093556	0.23243	0.09082	-15.957	15.803	45.616	0.11816	0.229	0.14063	NaN	NaN	NaN	NaN	NaN	NaN
3.322	42.8419	24.933	601.158	-0.70508	0.34473	0.029785	16.7332	-9.7537	42.688	0.10605	0.23907	0.080664	-30.727	-18.1009	25.8939	0.10108	0.23803	0.1399	NaN	NaN	NaN	NaN	NaN	NaN
3.324	46.1183	44.33211	611.307	-0.71607	0.35425	0.021973	35.4599	-35.015	34.4781	0.11885	0.24375	0.07832	1.282	21.853	28.329	0.082031	0.24365	0.13916	NaN	NaN	NaN	NaN	NaN	NaN
3.326	52.266	58.0037	609.2708	-0.72607	0.36279	0.016602	46.1553	10.3246	22.6904	0.12305	0.25195	0.076172	-23.979	9.868	7.749	0.059082	0.25	0.14697	NaN	NaN	NaN	NaN	NaN	NaN
3.328	35.234	50.67855	624.109	-0.7417	0.3667	0.0083008	24.50718	4.209	20.0558	0.12764	0.25752	0.073437	-27.0247	30.5352	7.461	0.045898	0.25732	0.14844	NaN	NaN	NaN	NaN	NaN	NaN
3.33	19.221	47.1119	636.87	-0.75	0.37305	0.0039063	49.3347	9.307	39.1675	0.12901	0.25732	0.072852	-24.2912	-7.2636	32.973	0.026367	0.26807	0.1582	NaN	NaN	NaN	NaN	NaN	NaN
3.332	37.796714	44.6144	670.929	-0.76758	0.38379	-0.0058594	63.071	27.85727	29.8103	0.12744	0.26358	0.069727	-5.351	-13.639	79.548	0.0092776	0.27686	0.16601	NaN	NaN	NaN	NaN	NaN	NaN
3.334	37.4783	50.753	670.406	-0.77832	0.39234	-0.015625	64.892	-16.4844	48.929	0.12071	0.26699	0.065234	-0.356000000000002	-56.8348	75.349	-0.0083008	0.28418	0.17871	NaN	NaN	NaN	NaN	NaN	NaN
3.336	13.066	41.128	695.177	-0.79297	0.39844	-0.023926	42.9278	-20.0601	73.436	0.11133	0.27295	0.062012	24.689	-26.148	120.666	-0.025879	0.28906	0.18652	NaN	NaN	NaN	NaN	NaN	NaN
3.338	12.472	31.9957	700.11	-0.80859	0.40918	-0.03125	42.8779	-28.3649	63.316	0.091309	0.27461	0.057129	27.0724	-40.565	117.955	-0.036133	0.29541	0.18896	NaN	NaN	NaN	NaN	NaN	NaN
3.34	25.8723	42.2323	713.305	-0.81836	0.41895	-0.036133	42.7332	-46.94771	59.291	0.065527	0.28652	0.055957	-11.6793	0.535000000000004	145.9833	-0.063477	0.30811	0.19189	NaN	NaN	NaN	NaN	NaN	NaN
3.342	10.253	71.0178	712.006	-0.83984	0.43066	-0.040039	65.91	-13.163	48.834	0.028809	0.29551	0.052051	-9.4947	-14.855	162.436	-0.09082	0.31518	0.19629	NaN	NaN	NaN	NaN	NaN	NaN
3.344	5.7333	74.9376	721.8477	-0.85645	0.44482	-0.044434	9.5315	-43.0313	49.5136	-0.013379	0.30488	0.053906	-18.6438	11.8819	196.112	-0.12256	0.32227	0.2041	NaN	NaN	NaN	NaN	NaN	NaN
3.346	8.132	72.9235	737.4	-0.87891	0.45508	-0.050293	-15.385	-59.306	73.311	-0.058105	0.31445	0.054688	-12.8009	-19.251	254.853	-0.18213	0.32666	0.20703	NaN	NaN	NaN	NaN	NaN	NaN
3.348	17.631	68.2041	754.98	-0.89453	0.47217	-0.051758	2.1751	-45.6064	92.234	-0.10508	0.32568	0.059082	11.9594	-15.3487	404.889	-0.21484	0.33643	0.20947	NaN	NaN	NaN	NaN	NaN	NaN
3.35	-1.563	74.4033	772.075	-0.90576	0.48096	-0.057129	-22.1631	-71.558	122.994	-0.14385	0.33994	0.06211	5.255	-14.7176	512.534	-0.29346	0.35645	0.20996	NaN	NaN	NaN	NaN	NaN	NaN
3.352	7.124	70.5338	788.744	-0.92725	0.49072	-0.063477	-42.203	-43.6436	209.796	-0.18642	0.35517	0.064062	-29.206	34.45199	643.908	-0.36328	0.37304	0.20142	NaN	NaN	NaN	NaN	NaN	NaN
3.354	13.911	63.7305	798.145	-0.94409	0.50171	-0.06372	-57.91	-24.6745	260.73	-0.22929	0.37715	0.059472	7.477	58.841	760.8452	-0.44238	0.39063	0.19873	NaN	NaN	NaN	NaN	NaN	NaN
3.356	19.631	66.5927	806.418	-0.96094	0.51465	-0.069824	-52.172	-39.457	336.884	-0.2832	0.4043	0.049805	33.562	96.157	917.6282	-0.5752	0.41797	0.18262	NaN	NaN	NaN	NaN	NaN	NaN
3.358	40.8408	87.4848	811.186	-0.98047	0.52734	-0.069336	-12.7598	26.0996	416.5059	-0.34639	0.4292	0.032324	40.109	67.779	1019.705	-0.6958	0.44433	0.18164	NaN	NaN	NaN	NaN	NaN	NaN
3.36	38.823	93.4408	792.7795	-0.98828	0.53906	-0.069824	-27.873	48.2797	510.805	-0.42949	0.45479	0.010938	34.105	48.823	1118.9505	-0.8291	0.47168	0.16992	NaN	NaN	NaN	NaN	NaN	NaN
3.362	27.5497	108.2783	821.8298	-1.0054	0.55713	-0.071777	-31.381	70.1688	648.273	-0.53223	0.479	-0.011719	28.857	-10.103	1161.92399	-1.0327	0.52783	0.16357	NaN	NaN	NaN	NaN	NaN	NaN
3.364	55.0263	99.4939	845.469	-1.0166	0.56592	-0.073486	-20.102	114.353	768.952	-0.66309	0.49472	-0.029199	-19.074	-42.39	1229.685	-1.1475	0.55859	0.16895	NaN	NaN	NaN	NaN	NaN	NaN
3.366	70.2532	107.7423	844.663	-1.0308	0.58057	-0.073242	-30.862	93.317	859.009	-0.8125	0.51855	-0.04541	1.2054	-133.767	1264.069	-1.396	0.62598	0.15381	NaN	NaN	NaN	NaN	NaN	NaN
3.368	47.5428	99.5432	861.6149	-1.0469	0.5918	-0.072754	5.729	88.684	957.5638	-0.9916	0.53467	-0.058301	33.256	-205.934	1277.13	-1.5981	0.67822	0.13794	NaN	NaN	NaN	NaN	NaN	NaN
3.37	51.659	101.5758	880.549	-1.0542	0.59619	-0.077148	7.51938	50.1089	1039.895	-1.1894	0.55039	-0.071973	74.462	-253.3024	1199.99	-1.7827	0.74561	0.13135	NaN	NaN	NaN	NaN	NaN	NaN
3.372	74.715	108.2277	882.579	-1.0605	0.6123	-0.072754	1.2304	-39.781	1127.927	-1.407	0.57344	-0.085254	71.914	-259.469	1188.624	-1.9727	0.85547	0.14111	NaN	NaN	NaN	NaN	NaN	NaN
3.374	64.3815	121.7061	883.767	-1.0652	0.62109	-0.077636	60.649	-68.804	1167.403	-1.6211	0.5875	-0.081836	131.254	-220.934	1127.83	-2.0503	0.91064	0.13818	NaN	NaN	NaN	NaN	NaN	NaN
3.376	45.6778	120.1985	869.7058	-1.0703	0.63086	-0.071289	74.859	-122.088	1128.424	-1.8296	0.61963	-0.067383	81.855	-175.253	1109.3157	-2.144	1.0259	0.10938	NaN	NaN	NaN	NaN	NaN	NaN
3.378	75.0784	123.4002	888.0754	-1.0728	0.64111	-0.077637	98.8619	-167.806	1126.566	-2.0108	0.6584	-0.029004	96.577	-118.561	1070.698	-2.1255	1.1177	0.10498	NaN	NaN	NaN	NaN	NaN	NaN
3.38	75.1936	135.5807	904.58	-1.0764	0.6504	-0.082519	121.4595	-159.947	1096.506	-2.1436	0.70634	0.012402	88.923	-106.01	1076.1824	-2.0444	1.2114	0.10059	NaN	NaN	NaN	NaN	NaN	NaN
3.382	56.5757	136.134	900.0703	-1.0874	0.65869	-0.087891	133.3322	-185.003	1050.6992	-2.2093	0.77588	0.033106	103.417	-93.838	1079.9952	-1.8398	1.293	0.089355	NaN	NaN	NaN	NaN	NaN	NaN
3.384	50.9546	122.7303	904.2281	-1.1035	0.66992	-0.091797	153.2447	-155.405	1038.8249	-2.1746	0.85703	0.041504	68.688	-89.503	1160.435	-1.7222	1.3188	0.09082	NaN	NaN	NaN	NaN	NaN	NaN
3.386	56.3479	116.9181	925.403	-1.1187	0.68018	-0.091309	152.41	-95.95	986.972	-2.0537	0.94141	0.059082	90.1308	-42.58	1160.719	-1.4238	1.2676	0.05127	NaN	NaN	NaN	NaN	NaN	NaN
3.388	49.3303	134.8614	936.0979	-1.1543	0.69238	-0.09375	129.875	-101.341	1002.525	-1.8496	0.99825	0.077832	64.695	-61.902	1175.939	-1.2259	1.1965	0.046387	NaN	NaN	NaN	NaN	NaN	NaN
3.39	44.5592	158.969	928.4656	-1.1821	0.70263	-0.099852	157.734	-63.83	1044.612	-1.6245	1.0177	0.091797	68.583	-40.89	1138.0544	-1.0244	1.1094	0.036621	NaN	NaN	NaN	NaN	NaN	NaN
3.392	42.5296	159.5053	921.627	-1.2104	0.71045	-0.10303	141.367	-43.15	1012.418	-1.4147	0.9829	0.097657	44.193	-153.342	1140.32	-0.84619	1.0239	0.013184	NaN	NaN	NaN	NaN	NaN	NaN
3.394	48.8823	168.6109	911.8294	-1.2383	0.72656	-0.11279	113.561	-19.575	1019.075	-1.2391	0.91221	0.10556	52.4245	-174.382	1142.038	-0.79102	1.0195	0.0014648	NaN	NaN	NaN	NaN	NaN	NaN
3.396	20.41	177.298	914.5127	-1.2539	0.73389	-0.11426	109.748	28.622	1018.71487	-1.1099	0.81982	0.1084	6.748	-293.961	1197.671	-0.7207	1.0366	-0.033691	NaN	NaN	NaN	NaN	NaN	NaN
3.398	10.775	178.027	921.5338	-1.2676	0.75	-0.12207	63.795	-5.53399999999999	992.195	-1.0309	0.74971	0.11025	-10.266	-295.03	1234.17	-0.71631	1.062	-0.038086	NaN	NaN	NaN	NaN	NaN	NaN
3.4	27.717	175.2239	937.431	-1.2754	0.75781	-0.12867	65.759	-59.265	1001.587	-0.97617	0.71016	0.10869	-47.905	-390.949	1303.84	-0.73975	1.0952	-0.016113	NaN	NaN	NaN	NaN	NaN	NaN
3.402	31.815	177.623	946.908	-1.2754	0.7666	-0.13086	61.286	-110.041	992.076	-0.93164	0.71016	0.11143	-87.053	-365.931	1363.975	-0.80225	1.1245	0.030273	NaN	NaN	NaN	NaN	NaN	NaN
3.404	28.031	177.2677	928.9389	-1.2554	0.77393	-0.14014	-9.3383	-209.609	1025.423	-0.89785	0.72285	0.11387	-112.217	-393.351	1403.693	-0.84326	1.1138	0.043457	NaN	NaN	NaN	NaN	NaN	NaN
3.406	23.229	180.0479	921.6826	-1.248	0.77734	-0.1416	-32.18415	-256.163	1111.364	-0.87842	0.74072	0.10547	-88.065	-283.073	1436.604	-1.0059	1.0703	-0.104	NaN	NaN	NaN	NaN	NaN	NaN
3.408	29.197	191.786	922.4264	-1.2188	0.7793	-0.14502	-63.044	-293.778	1126.755	-0.86807	0.76065	0.093945	-88.509	-260.119	1481.249	-1.0595	1.0855	-0.076416	NaN	NaN	NaN	NaN	NaN	NaN
3.41	57.2909	203.647	927.725	-1.1926	0.7854	-0.14575	-117.438	-339.969	1148.094	-0.87138	0.78291	0.063867	-74.472	-125.522	1499.447	-1.1538	1.0767	-0.053223	NaN	NaN	NaN	NaN	NaN	NaN
3.412	50.2789	216.421	912.301	-1.166	0.78516	-0.14551	-117.119	-305.817	1160.843	-0.8999	0.79893	0.031836	-80.132	-149.676	1525.851	-1.3296	1.0981	-0.066895	NaN	NaN	NaN	NaN	NaN	NaN
3.414	23.088	205.4305	891.8216	-1.1348	0.78125	-0.14941	-139.136	-263.482	1161.899	-0.94365	0.81553	-0.0048826	-46.5343	-88.478	1507.551	-1.3999	1.1079	-0.054688	NaN	NaN	NaN	NaN	NaN	NaN
3.416	50.0442	213.111	906.516	-1.1191	0.7832	-0.14795	-123.33	-231.084	1237.871	-1.0234	0.83301	-0.041016	-36.3703	-144.998	1509.996	-1.5405	1.1138	-0.04248	NaN	NaN	NaN	NaN	NaN	NaN
3.418	69.5487	210.0453	915.155	-1.0913	0.78174	-0.14404	-97.476	-151.3839	1256.126	-1.1159	0.85577	-0.068945	-29.9164	-91.776	1519.7083	-1.6429	1.1292	-0.035644	NaN	NaN	NaN	NaN	NaN	NaN
3.42	50.65623	211.7251	923.654	-1.0776	0.78858	-0.14404	-122.582	-137.145	1259.8551	-1.2046	0.88604	-0.086036	-33.003	-112.48	1548.6206	-1.75	1.1387	-0.036133	NaN	NaN	NaN	NaN	NaN	NaN
3.422	42.0176	203.35449	906.062	-1.0659	0.78857	-0.14014	-82.016	-120.645	1325.115	-1.2811	0.92353	-0.10791	-30.5644	-51.857	1559.3156	-1.877	1.1406	-0.024414	NaN	NaN	NaN	NaN	NaN	NaN
3.424	61.4801	198.6596	897.965	-1.0542	0.7915	-0.13818	-72.532	-80.245	1318.527	-1.3461	0.96875	-0.11973	-43.2126	-86.3595	1568.5609	-1.9434	1.1377	-0.019043	NaN	NaN	NaN	NaN	NaN	NaN
3.426	79.362	217.7198	876.139	-1.0522	0.78955	-0.13721	-70.881	-102.851	1329.726	-1.4019	1.0083	-0.12549	-63.06522	-80.962	1607.688	-2.0522	1.1294	-0.020508	NaN	NaN	NaN	NaN	NaN	NaN
3.428	44.7466	238.413	866.6527	-1.0596	0.79883	-0.13379	-16.5121	-65.837	1335.665	-1.4538	1.0471	-0.12588	-11.461	-153.195	1661.889	-2.1196	1.1206	-0.01831	NaN	NaN	NaN	NaN	NaN	NaN
3.43	71.76	242.542	880.13	-1.0825	0.80273	-0.12622	-58.905	-54.23	1265.324	-1.5051	1.0725	-0.12686	1.87	-139.223	1709.378	-2.1836	1.1055	-0.032227	NaN	NaN	NaN	NaN	NaN	NaN
3.432	71.2758	230.431	891.219	-1.1353	0.80811	-0.12646	-44.009	-86.7709	1306.4	-1.55	1.0869	-0.11904	22.51	-149.0161	1741.759	-2.2402	1.1152	-0.023926	NaN	NaN	NaN	NaN	NaN	NaN
3.434	67.9097	239.7122	905.0544	-1.2344	0.81348	-0.12158	7.696	-91.358	1328.217	-1.5945	1.0954	-0.10254	21.477	-107.3349	1741.413	-2.2617	1.123	-0.016602	NaN	NaN	NaN	NaN	NaN	NaN
3.436	47.911	270.031	926.3303	-1.2925	0.81885	-0.11572	-30.3343	-147.053	1365.693	-1.6343	1.0942	-0.087891	75.13	-115.89581	1762.5	-2.3008	1.1523	-0.03125	NaN	NaN	NaN	NaN	NaN	NaN
3.438	56.991	289.149	964.353	-1.396	0.83643	-0.095703	42.861	-197.592	1474.379	-1.6707	1.0836	-0.076074	75.072	-74.63339	1780.918	-2.3045	1.1741	-0.027833	NaN	NaN	NaN	NaN	NaN	NaN
3.44	97.788	317.0696	1014.219	-1.4732	0.84619	-0.084472	56.009	-175.606	1491.725	-1.6995	1.0774	-0.060254	100.042	-71.5804	1749.4228	-2.3047	1.1943	-0.014648	NaN	NaN	NaN	NaN	NaN	NaN
3.442	46.048	328.6399	1026.036	-1.5347	0.85791	-0.077148	46.881	-196.255	1518.172	-1.7273	1.0732	-0.04541	66.318	-46.9377	1734.044	-2.2944	1.2036	0	NaN	NaN	NaN	NaN	NaN	NaN
3.444	69.768	321.7667	1025.75332	-1.5952	0.86768	-0.069336	120.32	-160.522	1537.745	-1.754	1.0722	-0.035351	51.3577	-10.295	1707.601	-2.293	1.209	0.0087891	NaN	NaN	NaN	NaN	NaN	NaN
3.446	84.291	319.59	1040.679	-1.6113	0.87109	-0.061035	77.48	-94.57979	1492.54687	-1.7813	1.0684	-0.028809	16.7261	-5.0548	1705.273	-2.2651	1.2017	0.027344	NaN	NaN	NaN	NaN	NaN	NaN
3.448	79.884	326.201	1053.264	-1.6187	0.86572	-0.062988	76.534	-106.9011	1513.9401	-1.7979	1.0647	-0.020019	26.822	25.8027	1670.5127	-2.2449	1.1931	0.041748	NaN	NaN	NaN	NaN	NaN	NaN
3.45	74.009	311.944	1064.593	-1.5991	0.85791	-0.062256	102.905	-55.675	1519.841	-1.8178	1.0594	-0.010449	17.4118	9.995	1650.0556	-2.2163	1.1782	0.055664	NaN	NaN	NaN	NaN	NaN	NaN
3.452	86.859	265.74701	1045.317	-1.5542	0.854	-0.065918	38.419	-62.902	1499.687	-1.8374	1.0532	-0.01084	26.76	24.9075	1587.256	-2.1797	1.1543	0.066406	NaN	NaN	NaN	NaN	NaN	NaN
3.454	109.52782	234.5417	1030.2775	-1.459	0.8418	-0.076172	40.223	-93.4642	1524.758	-1.8458	1.0475	-0.0013672	-1.981	8.763	1605.753	-2.1597	1.1489	0.075684	NaN	NaN	NaN	NaN	NaN	NaN
3.456	100.651	218.6145	1040.665	-1.4038	0.83447	-0.072754	7.2032	-30.789	1491.7337	-1.8428	1.0332	0.012207	-7.618	56.561	1586.203	-2.1211	1.125	0.089355	NaN	NaN	NaN	NaN	NaN	NaN
3.458	116.644	199.46522	1037.461	-1.2886	0.81299	-0.061523	-30.911	-50.9778	1486.7678	-1.8373	1.008	0.020997	-9.881	50.261	1610.136	-2.0923	1.1123	0.098878	NaN	NaN	NaN	NaN	NaN	NaN
3.46	105.885	168.5211	1026.707	-1.2207	0.79004	-0.055176	-3.251	-12.0402	1490.354	-1.83	0.98515	0.030762	16.094	77.476	1615.959	-2.062	1.0923	0.1084	NaN	NaN	NaN	NaN	NaN	NaN
3.462	110.9508	160.80861	1023.444	-1.1641	0.77344	-0.050781	-62.77	30.575	1435.569	-1.8211	0.96133	0.038965	-14.973	1.356	1636.709	-2.0288	1.0806	0.11816	NaN	NaN	NaN	NaN	NaN	NaN
3.464	123.2639	142.6196	1006.74	-1.1016	0.75879	-0.046387	-80.969	-3.6412	1448.816	-1.8145	0.94639	0.052247	-39.7918	17.537	1605.072	-2.0117	1.0723	0.12354	NaN	NaN	NaN	NaN	NaN	NaN
3.466	133.4259	121.38554	1007.929	-1.0801	0.75	-0.043457	-61.287	35.5263	1484.9108	-1.8042	0.93604	0.060059	-60.588	-24.9793	1617.03	-1.9883	1.0645	0.14404	NaN	NaN	NaN	NaN	NaN	NaN
3.468	127.6555	91.5325	1025.32	-1.0425	0.75439	-0.035645	-102.715	5.26600000000001	1505.548	-1.8013	0.92891	0.070312	-80.075	34.465	1572.5666	-1.9751	1.0649	0.15747	NaN	NaN	NaN	NaN	NaN	NaN
3.47	115.4388	79.5488	1035.154	-1.0222	0.75513	-0.033691	-65.683	-41.725	1564.548	-1.7956	0.9251	0.075972	-84.794	7.47199999999999	1574.209	-1.9468	1.061	0.1543	NaN	NaN	NaN	NaN	NaN	NaN
3.472	131.584	66.432	1019.9933	-1.002	0.75977	-0.026367	-64.733	-4.457	1536.257	-1.7952	0.92236	0.085742	-77.0479	53.625	1543.881	-1.8848	1.0449	0.14453	NaN	NaN	NaN	NaN	NaN	NaN
3.474	112.1941	60.0514	1035.666	-0.98242	0.76758	-0.01123	-113.143	-53.974	1518.2	-1.793	0.9167	0.092576	-57.391	16.557	1531.278	-1.8555	1.0332	0.14844	NaN	NaN	NaN	NaN	NaN	NaN
3.476	110.1455	56.0887	1043.831	-0.98096	0.76416	-0.0043945	-57.369	-39.8684	1546.78	-1.793	0.91797	0.098633	-50.2559	76.4198	1484.802	-1.814	1.022	0.1543	NaN	NaN	NaN	NaN	NaN	NaN
3.478	127.354	27.77061	1040.267	-0.98975	0.75439	-0.01416	-73.773	-8.6027	1513.278	-1.782	0.91758	0.10302	-15.6964	54.6337	1474.685	-1.7859	1.0188	0.15332	NaN	NaN	NaN	NaN	NaN	NaN
3.48	98.2055	13.1694	1035.3721	-1.0017	0.75513	-0.011719	-81.754	-55.965	1499.814	-1.7679	0.92656	0.11084	-14.488	149.728	1440.275	-1.7539	1.0195	0.15674	NaN	NaN	NaN	NaN	NaN	NaN
3.482	71.4591	0.5443	1035.28043	-1.0137	0.75586	0	-28.939	-29.18486	1495.591	-1.7477	0.92812	0.10772	30.994	138.04	1424.476	-1.6929	1.0181	0.15039	NaN	NaN	NaN	NaN	NaN	NaN
3.484	73.9509	-18.5699	1055.2151	-1.0352	0.76855	0.003418	-71.216	-39.825	1462.015	-1.7209	0.93389	0.10977	47.5331	217.888	1385.9991	-1.6621	1.0098	0.14697	NaN	NaN	NaN	NaN	NaN	NaN
3.486	73.017	-23.7512	1079.855	-1.0483	0.77197	0.0097656	-27.7474	-50.582	1467.31	-1.6909	0.93213	0.11133	46.5481	182.412	1356.0527	-1.6133	0.98242	0.15283	NaN	NaN	NaN	NaN	NaN	NaN
3.488	29.0044	-33.1994	1086.6145	-1.0737	0.78174	0.01709	2.8277	44.7188	1429.335	-1.6647	0.92834	0.11554	42.885	237.321	1321.2038	-1.5772	0.96875	0.1438	NaN	NaN	NaN	NaN	NaN	NaN
3.49	20.563	-51.19	1092.6577	-1.0864	0.7876	0.021972	-15.6826	40.5395	1396.75333	-1.6426	0.91848	0.11719	68.44329	176.4021	1333.946	-1.5483	0.94971	0.1377	NaN	NaN	NaN	NaN	NaN	NaN
3.492	0.864999999999998	-73.313	1097.94	-1.0952	0.78809	0.030762	62.923	70.4266	1429.741	-1.621	0.90951	0.12378	39.962	239.753	1321.768	-1.498	0.92773	0.13672	NaN	NaN	NaN	NaN	NaN	NaN
3.494	-19.9651	-70.3018	1081.567	-1.1152	0.78906	0.040039	55.48	105.376	1391.326	-1.6034	0.89866	0.12062	66.2994	185.8201	1277.735	-1.4688	0.90918	0.13916	NaN	NaN	NaN	NaN	NaN	NaN
3.496	-34.8833	-64.929	1084.1848	-1.1191	0.78711	0.042969	66.085	59.1885	1397.31	-1.5898	0.89453	0.12256	65.3638	218.799	1242.568	-1.418	0.88672	0.13379	NaN	NaN	NaN	NaN	NaN	NaN
3.498	-31.826	-98.9995	1070.769	-1.1177	0.78271	0.057129	100.644	106.763	1392.383	-1.5742	0.89559	0.11835	86.548	147.356	1193.496	-1.3735	0.86816	0.13208	NaN	NaN	NaN	NaN	NaN	NaN
3.5	-32.0715	-142.4858	1067.113	-1.1177	0.78369	0.065918	42.709	93.5813	1375.0974	-1.5576	0.89198	0.11448	82.169	171.433	1141.45	-1.332	0.8457	0.12402	NaN	NaN	NaN	NaN	NaN	NaN
3.502	-54.655	-166.21524	1045.122	-1.1133	0.78125	0.079102	85.562	63.556	1373.472	-1.5392	0.88758	0.11343	95.8117	136.23	1107.132	-1.271	0.81885	0.11133	NaN	NaN	NaN	NaN	NaN	NaN
3.504	-39.4104	-175.24926	1040.826	-1.1035	0.78125	0.085449	83.087	97.915	1323.0939	-1.5216	0.88476	0.11032	74.941	206.3998	1087.537	-1.221	0.79224	0.11084	NaN	NaN	NaN	NaN	NaN	NaN
3.506	-52.394	-177.3288	1021.678	-1.1016	0.78223	0.095703	19.7094	32.218	1286.202	-1.5093	0.87549	0.1001	59.8387	184.8365	1046.677	-1.1792	0.76807	0.10156	NaN	NaN	NaN	NaN	NaN	NaN
3.508	-55.96	-173.3469	993.4816	-1.1035	0.78711	0.10205	62.51	29.03	1292.1985	-1.4909	0.87243	0.099058	60.897	235.87	1057.247	-1.1206	0.73682	0.094727	NaN	NaN	NaN	NaN	NaN	NaN
3.51	-54.011	-164.71264	971.7343	-1.1084	0.79004	0.10986	30.373	62.16	1268.643	-1.4732	0.86406	0.096254	67.2778	209.379	985.941	-1.0825	0.72314	0.089844	NaN	NaN	NaN	NaN	NaN	NaN
3.512	-45.388	-152.7268	954.223	-1.1172	0.7959	0.11914	-0.6357	31.754	1269.4092	-1.4567	0.85417	0.094253	36.64	258.547	963.08	-1.0347	0.69385	0.08252	NaN	NaN	NaN	NaN	NaN	NaN
3.514	-36.692	-155.8994	940.278	-1.1328	0.80176	0.12305	27.2834	105.5182	1254.112	-1.4374	0.84526	0.089862	46.029	245.967	910.927	-1.0044	0.67188	0.077881	NaN	NaN	NaN	NaN	NaN	NaN
3.516	-52.411	-164.2538	935.524	-1.1421	0.80518	0.12744	-27.2566	116.1729	1214.4204	-1.4141	0.83203	0.084961	-20.066	274.756	863.655	-0.96484	0.65332	0.070313	NaN	NaN	NaN	NaN	NaN	NaN
3.518	-32.3748	-166.0132	941.932	-1.1582	0.8125	0.12793	-11.651	128.6359	1208.705	-1.3891	0.8128	0.081407	-27.627	250.585	788.33867	-0.91992	0.62305	0.062988	NaN	NaN	NaN	NaN	NaN	NaN
3.52	-37.092	-170.0615	935.7778	-1.1777	0.82031	0.12646	-3.9901	200.136	1167.8885	-1.3619	0.79646	0.075014	-24.012	255.0392	753.215	-0.89551	0.60742	0.060547	NaN	NaN	NaN	NaN	NaN	NaN
3.522	-45.6477	-163.987	938.087	-1.1782	0.82471	0.12451	-54.704	168.178	1148.3871	-1.3317	0.77765	0.066535	-12.978	214.057	684.22	-0.85303	0.57666	0.059082	NaN	NaN	NaN	NaN	NaN	NaN
3.524	-12.738	-163.789	933.058	-1.1895	0.82617	0.125	-23.3526	184.566	1142.2364	-1.3023	0.75754	0.06496	-23.219	208.5344	684.827	-0.82642	0.55738	0.056397	NaN	NaN	NaN	NaN	NaN	NaN
3.526	-14.9511	-152.051	921.9825	-1.1968	0.83057	0.1145	-56.695	206.621	1101.812	-1.2729	0.74268	0.0625	-25.994	176.8346	640.0198	-0.7959	0.54199	0.04834	NaN	NaN	NaN	NaN	NaN	NaN
3.528	-7.0888	-159.87	938.9814	-1.209	0.82617	0.11572	-56.288	159.132	1088.996	-1.2441	0.72521	0.056125	-49.667	189.346	600.771	-0.74512	0.51074	0.043457	NaN	NaN	NaN	NaN	NaN	NaN
3.53	-28.0833	-176.0773	949.7433	-1.2163	0.82666	0.10938	-10.306	202.106	1052.981	-1.2141	0.70825	0.050123	-43.88	180.791	557.1658	-0.71875	0.49805	0.041992	NaN	NaN	NaN	NaN	NaN	NaN
3.532	-20.013	-197.4967	962.2814	-1.2163	0.82861	0.10596	-76.07	171.396	1015.3043	-1.1881	0.6906	0.047898	-11.785	170.351	545.519	-0.66211	0.47461	0.037598	NaN	NaN	NaN	NaN	NaN	NaN
3.534	-42.365	-196.8159	993.927	-1.2129	0.82422	0.10156	-28.8673	144.833	1010.9849	-1.159	0.67092	0.046555	21.41	162.162	503.211	-0.61084	0.45874	0.033936	NaN	NaN	NaN	NaN	NaN	NaN
3.536	-32.8726	-206.226	999.123	-1.2056	0.82471	0.09375	-6.337	196.994	956.3912	-1.1328	0.6543	0.044434	10.216	150.3456	482.275	-0.56348	0.44385	0.033691	NaN	NaN	NaN	NaN	NaN	NaN
3.538	-36.1251	-208.726	994.925	-1.1948	0.82275	0.092773	-41.286	156.5449	956.62744	-1.1068	0.63917	0.040277	21.376	165.099	415.223	-0.49512	0.42285	0.025391	NaN	NaN	NaN	NaN	NaN	NaN
3.54	-48.0341	-186.252	1002.845	-1.1753	0.81885	0.084473	29.16822	166.1967	958.276	-1.0762	0.62191	0.038231	10.607	161.1502	380.797	-0.46289	0.41016	0.023926	NaN	NaN	NaN	NaN	NaN	NaN
3.542	-53.6015	-153.072	998.2391	-1.1636	0.8208	0.077148	8.1976	172.15	932.226	-1.0468	0.60282	0.032428	10.135	170.383	326.5978	-0.396	0.39014	0.016113	NaN	NaN	NaN	NaN	NaN	NaN
3.544	-69.708	-148.251	1008.6456	-1.1504	0.81836	0.072266	26.914	139.679	929.885	-1.0111	0.58646	0.029428	37.8572	128.891	316.031	-0.35303	0.37231	0.0087891	NaN	NaN	NaN	NaN	NaN	NaN
3.546	-64.926	-158.8537	1046.262	-1.1394	0.81763	0.06543	80.358	190.67	899.593	-0.97559	0.56641	0.025391	42.8624	125.0733	275.543	-0.31348	0.35742	0	NaN	NaN	NaN	NaN	NaN	NaN
3.548	-74.123	-151.3781	1055.665	-1.1367	0.81641	0.058594	50.305	183.266	852.039	-0.94051	0.55112	0.021177	39.1268	80.061	223.8736	-0.2627	0.33105	-0.012695	NaN	NaN	NaN	NaN	NaN	NaN
3.55	-53.3385	-132.171	1060.524	-1.1465	0.81445	0.049316	59.761	179.3104	826.986	-0.90407	0.53302	0.016671	39.981	101.523	195.3434	-0.23682	0.31689	-0.01709	NaN	NaN	NaN	NaN	NaN	NaN
3.552	-65.0358	-137.159	1037.371	-1.1523	0.81641	0.051758	71.288	228.6664	764.146	-0.87246	0.5143	0.013184	32.824	89.5947	163.4438	-0.18359	0.29297	-0.02832	NaN	NaN	NaN	NaN	NaN	NaN
3.554	-73.255	-139.702	1017.157	-1.1646	0.81689	0.057617	87.158	195.0513	723.34382	-0.83362	0.49889	0.0077048	37.515	129.239	143.423	-0.1355	0.28223	-0.029297	NaN	NaN	NaN	NaN	NaN	NaN
3.556	-92.664	-138.701	1009.3954	-1.1795	0.81665	0.055909	95.541	199.384	714.137	-0.80029	0.47803	0.00097656	68.0099	102.906	154.9725	-0.086426	0.26514	-0.036133	NaN	NaN	NaN	NaN	NaN	NaN
3.558	-83.745	-135.826	1026.875	-1.1899	0.81787	0.064941	60.327	186.5954	660.784	-0.7638	0.46066	0.00019265	84.66	123.443	141.2642	-0.03418	0.24658	-0.05957	NaN	NaN	NaN	NaN	NaN	NaN
3.56	-81.819	-154.1975	1037.114	-1.1929	0.81299	0.066406	49.2207	133.5883	648.261	-0.73061	0.44211	-0.0051605	41.0884	64.042	139.756	0.0029297	0.2334	-0.062988	NaN	NaN	NaN	NaN	NaN	NaN
3.562	-75.741	-164.40403	1048.968	-1.1953	0.80957	0.06543	93.699	167.7215	610.393	-0.69544	0.41907	-0.0090874	14.443	94.705	156.107	0.062988	0.20605	-0.075684	NaN	NaN	NaN	NaN	NaN	NaN
3.564	-53.43079	-178.353	1057.527	-1.187	0.80127	0.067871	41.384	144.5326	580.6881	-0.66613	0.4005	-0.016402	10.38	47.9303	135.909	0.11328	0.19384	-0.087647	NaN	NaN	NaN	NaN	NaN	NaN
3.566	-70.392	-180.445	1058.41	-1.1755	0.79468	0.069336	28.0681	142.8041	568.2112	-0.63281	0.38086	-0.020996	-25.107	77.169	101.2621	0.15771	0.17822	-0.1001	NaN	NaN	NaN	NaN	NaN	NaN
3.568	-63.746	-173.53	1043.851	-1.1577	0.7915	0.072266	16.5322	179.2219	524.9817	-0.6041	0.36455	-0.025391	-21.567	17.632	99.522	0.21045	0.14844	-0.11963	NaN	NaN	NaN	NaN	NaN	NaN
3.57	-45.196	-161.6985	1029.711	-1.1284	0.77588	0.077637	-30.91977	150.5666	491.4823	-0.58017	0.3499	-0.030177	-24.297	32.209	68.205	0.23633	0.13184	-0.12988	NaN	NaN	NaN	NaN	NaN	NaN
3.572	-21.272	-147.8644	1015.573	-1.1167	0.76807	0.078125	-5.102	157.147	487.36	-0.55321	0.33232	-0.030565	-26.285	-8.2186	63.878	0.27588	0.11475	-0.15332	NaN	NaN	NaN	NaN	NaN	NaN
3.574	-25.847	-151.707	1008.36	-1.0933	0.75146	0.085938	-60.813	143.9638	450.728	-0.52685	0.31338	-0.033495	-20.494	48.846	65.548	0.30005	0.089356	-0.15991	NaN	NaN	NaN	NaN	NaN	NaN
3.576	-31.2153	-147.09	1004.322	-1.073	0.74487	0.091797	-72.48	92.3809	460.452	-0.49658	0.29297	-0.03125	-16.685	16.7732	57.4793	0.31641	0.068848	-0.17041	NaN	NaN	NaN	NaN	NaN	NaN
3.578	13.2924	-138.6152	1006.34	-1.0488	0.73633	0.090332	-9.7237	108.42745	429.443	-0.46299	0.28291	-0.035254	-38.211	54.741	75.099	0.32227	0.049805	-0.18408	NaN	NaN	NaN	NaN	NaN	NaN
3.58	-9.97	-115.3934	993.216	-1.0127	0.71484	0.096191	-53.217	91.9421	373.276	-0.42647	0.26728	-0.033106	-36.0965	-7.075	64.219	0.3208	0.046875	-0.19434	NaN	NaN	NaN	NaN	NaN	NaN
3.582	-7.1677	-108.54	962.961	-0.99561	0.71143	0.098145	-43.211	82.709	351.0588	-0.3749	0.25283	-0.025684	-12.966	33.384	49.807	0.32861	0.030273	-0.1958	NaN	NaN	NaN	NaN	NaN	NaN
3.584	-19.2963	-118.786	952.4263	-0.96289	0.69238	0.095703	-70.018	104.063	295.351	-0.32158	0.24053	-0.026562	-14.903	-3.8532	39.788	0.3169	0.019043	-0.19824	NaN	NaN	NaN	NaN	NaN	NaN
3.586	17.6564	-108.5732	929.8983	-0.93579	0.67505	0.096192	-71.484	79.685	286.4408	-0.26465	0.22998	-0.030273	-27.387	38.4603	41.335	0.29492	0.016602	-0.20068	NaN	NaN	NaN	NaN	NaN	NaN
3.588	8.3127	-96.4996	935.8514	-0.91211	0.66406	0.095215	-15.38	100.73281	270.0171	-0.20693	0.20987	-0.033887	-25.346	-2.1701	32.6868	0.26172	0.018066	-0.20459	NaN	NaN	NaN	NaN	NaN	NaN
3.59	-15.7608	-99.2642	936.797	-0.88086	0.64746	0.091309	-39.76	99.1878	243.396	-0.1541	0.19453	-0.042578	-33.9769	43.0827	11.3051	0.24658	0.018066	-0.20215	NaN	NaN	NaN	NaN	NaN	NaN
3.592	6.3481	-112.222	937.012	-0.86865	0.63525	0.092773	-23.357	67.48255	243.609	-0.097851	0.17734	-0.04375	-12.3399	6.8743	-7.2205	0.21387	0.017578	-0.19629	NaN	NaN	NaN	NaN	NaN	NaN
3.594	-22.9734	-112.093	938.288	-0.83154	0.61768	0.091309	8.3513	91.6388	221.228	-0.045019	0.15547	-0.058301	9.876	36.608	2.1661	0.1919	0.019775	-0.19165	NaN	NaN	NaN	NaN	NaN	NaN
3.596	-21.3784	-95.1895	908.6072	-0.80957	0.60644	0.08667	-2.43	82.239	200.5921	0.0043945	0.13818	-0.072754	38.0768	-16.13268	29.547	0.15723	0.029785	-0.18652	NaN	NaN	NaN	NaN	NaN	NaN
3.598	-26.7636	-104.722	884.6196	-0.78711	0.59473	0.086914	48.576	83.3356	198.3239	0.057227	0.11484	-0.082715	28.123	7.2352	38.817	0.12354	0.039551	-0.17822	NaN	NaN	NaN	NaN	NaN	NaN
3.6	-15.8013	-101.4471	878.751	-0.75586	0.57715	0.087891	22.1809	107.328	156.852	0.098241	0.098825	-0.094043	55.788	-22.9742	17.8688	0.10645	0.041992	-0.1709	NaN	NaN	NaN	NaN	NaN	NaN
3.602	-33.901	-100.552	871.978	-0.73975	0.57373	0.08252	17.184	64.26147	158.948	0.14278	0.084375	-0.1042	17.449	-2.670843	25.9044	0.072754	0.044434	-0.16455	NaN	NaN	NaN	NaN	NaN	NaN
3.604	-35.68	-103.0995	848.2157	-0.71045	0.55615	0.075684	84.766	65.1634	153.5423	0.18204	0.067285	-0.1209	37.2645	-20.9003	22.2129	0.049805	0.047363	-0.15503	NaN	NaN	NaN	NaN	NaN	NaN
3.606	-42.77	-113.33	841.007	-0.69263	0.54615	0.074218	52.275	52.3318	135.1821	0.2124	0.055664	-0.12793	49.172	10.9773	41.272	0.022461	0.052734	-0.1543	NaN	NaN	NaN	NaN	NaN	NaN
3.608	-47.3867	-97.2505	832.33	-0.67188	0.53613	0.075195	66.572	20.9159	140.1133	0.24619	0.040625	-0.14023	50.2787	22.6757	12.6034	-0.0019531	0.049316	-0.13867	NaN	NaN	NaN	NaN	NaN	NaN
3.61	-47.736	-84.3633	826.075	-0.64307	0.52393	0.06543	93.575	37.6958	124.019	0.27041	0.028516	-0.15156	24.358	48.562	20.3084	-0.015625	0.052734	-0.13965	NaN	NaN	NaN	NaN	NaN	NaN
3.612	-63.549	-79.5644	808.5	-0.63428	0.51709	0.066406	51.208	12.3974	105.014	0.28916	0.015235	-0.15781	37.785	36.693	-8.5384	-0.032227	0.056152	-0.1333	NaN	NaN	NaN	NaN	NaN	NaN
3.614	-51.721	-69.5938	761.8128	-0.60693	0.50439	0.05957	89.577	14.78469	106.144	0.30723	-2.4647e-08	-0.15947	-9.523	12.5854	34.875	-0.037598	0.060547	-0.13256	NaN	NaN	NaN	NaN	NaN	NaN
3.616	-48.512	-49.867	736.4534	-0.58911	0.50025	0.054932	59.503	42.8603	78.5694	0.31104	-0.0048828	-0.1665	18.162	3.2054	36.393	-0.043457	0.057129	-0.13379	NaN	NaN	NaN	NaN	NaN	NaN
3.618	-41.0071	-42.272	731.1609	-0.56592	0.48877	0.052734	12.628	21.1985	104.678	0.31289	-0.0091796	-0.16875	22.385	8.8727	46.203	-0.04834	0.062012	-0.12744	NaN	NaN	NaN	NaN	NaN	NaN
3.62	-49.151	-52.529	722.501	-0.54492	0.47754	0.046875	40.7397	52.353	106.2021	0.31308	-0.013867	-0.16856	31.0514	23.5478	33.5627	-0.052246	0.061035	-0.12402	NaN	NaN	NaN	NaN	NaN	NaN
3.622	-34.3109	-59.699	715.736	-0.53955	0.47119	0.044434	9.6328	42.711	78.474	0.30059	-0.016602	-0.16425	-21.825	17.7674	33.5422	-0.064941	0.06543	-0.11963	NaN	NaN	NaN	NaN	NaN	NaN
3.624	-20.2832	-53.213	695.7873	-0.51904	0.46484	0.04541	-13.548	33.9142	89.637	0.28701	-0.023047	-0.16875	-31.625	34.2029	1.711	-0.074951	0.066406	-0.11377	NaN	NaN	NaN	NaN	NaN	NaN
3.626	-30.2004	-38.286	680.0785	-0.50048	0.45508	0.036377	-7.8356	52.252	75.131	0.27441	-0.015137	-0.16699	-41.7348	31.2996	5.5233	-0.083008	0.070313	-0.11475	NaN	NaN	NaN	NaN	NaN	NaN
3.628	-22.651	-36.7149	681.371	-0.48438	0.44922	0.034668	-36.7673	36.2117	70.093	0.25595	-0.014355	-0.16182	-28.0368	53.0887	7.3633	-0.088379	0.072754	-0.10352	NaN	NaN	NaN	NaN	NaN	NaN
3.63	-13.6461	-43.3869	656.294	-0.46826	0.43799	0.032227	-11.62	42.6594	61.549	0.23887	-0.014453	-0.15537	-27.427	2.6464	43.248	-0.091797	0.078613	-0.10205	NaN	NaN	NaN	NaN	NaN	NaN
3.632	23.9038	-38.5044	628.5948	-0.46094	0.43457	0.028809	-32.9993	44.381	22.667	0.21426	-0.0054687	-0.15498	-31.642	7.54163	63.938	-0.087891	0.084961	-0.099609	NaN	NaN	NaN	NaN	NaN	NaN
3.634	-16.85652	-39.579	617.4339	-0.44678	0.42236	0.022949	-62.206	6.7655	17.719	0.1876	0.00019534	-0.15078	-44.5891	-37.7703	59.668	-0.07959	0.092041	-0.10254	NaN	NaN	NaN	NaN	NaN	NaN
3.636	-29.1694	-42.5426	608.042	-0.43408	0.4187	0.02124	-32.6167	16.3322	37.1776	0.16309	0.0053711	-0.13965	-29.4241	17.51275	31.271	-0.065918	0.092285	-0.099121	NaN	NaN	NaN	NaN	NaN	NaN
3.638	19.1706	-46.7461	610.246	-0.42041	0.40527	0.021973	-48.699	9.2526	31.912	0.12481	0.014844	-0.14053	-39.2727	-3.2713	55.489	-0.047852	0.10449	-0.11572	NaN	NaN	NaN	NaN	NaN	NaN
3.64	9.1392	-35.297	600.778	-0.40576	0.39893	0.015137	-25.461	0.0489999999999995	50.446	0.092578	0.02334	-0.13926	-21.473	30.4536	37.928	-0.033691	0.1084	-0.11963	NaN	NaN	NaN	NaN	NaN	NaN
3.642	-2.0027	-30.3337	578.8835	-0.39795	0.39111	0.0087891	-7.6133	24.77	52.9222	0.060937	0.029981	-0.13301	-5.457	-9.2986	41.2855	-0.0058594	0.11035	-0.125	NaN	NaN	NaN	NaN	NaN	NaN
3.644	-6.0821	-20.39795	556.76258	-0.38184	0.38086	0.01123	-60.658	-13.82389	37.7865	0.033106	0.044043	-0.13321	0.197999999999997	39.803	1.9347	0.019775	0.11572	-0.13086	NaN	NaN	NaN	NaN	NaN	NaN
3.646	19.3966	-15.7005	555.685	-0.36768	0.37745	0.0053711	-6.582	-3.7142	48.2103	0.0083008	0.052734	-0.12939	2.588	0.8619	-2.3788	0.037109	0.11475	-0.13721	NaN	NaN	NaN	NaN	NaN	NaN
3.648	-13.6478	0.911	534.586	-0.3584	0.36865	0.0019531	-5.728	9.758	24.2144	-0.017285	0.061231	-0.1294	8.638	37.686	10.7382	0.070801	0.12744	-0.14746	NaN	NaN	NaN	NaN	NaN	NaN
3.65	-18.7973	-6.6639	521.796	-0.34131	0.35693	-0.00097656	7.6459	-5.63622	30.8943	-0.03623	0.069336	-0.13066	4.112	-23.6189	34.8019	0.088867	0.12744	-0.156	NaN	NaN	NaN	NaN	NaN	NaN
3.652	-19.0733	-17.1297	512.558	-0.33301	0.35205	-0.010254	44.681	16.17453	44.06	-0.053028	0.083008	-0.13106	2.025	14.1707	23.9843	0.11133	0.13037	-0.16162	NaN	NaN	NaN	NaN	NaN	NaN
3.654	-8.9225	-15.805	515.605	-0.31592	0.34375	-0.0092773	3.098	-1.48	23.3419	-0.071289	0.088184	-0.13057	51.2145	-16.83298	28.8318	0.13574	0.13184	-0.17383	NaN	NaN	NaN	NaN	NaN	NaN
3.656	-35.127	-7.559	496.849	-0.30517	0.33325	-0.010742	44.6742	-8.88015	25.59	-0.085449	0.10303	-0.12646	43.11621	35.713	36.3953	0.15088	0.13916	-0.17871	NaN	NaN	NaN	NaN	NaN	NaN
3.658	-50.185	-6.9485	471.433	-0.2915	0.32666	-0.020508	74.78	9.6849	29.6443	-0.092969	0.11573	-0.12773	49.56294	2.5924	53.665	0.17285	0.14893	-0.18945	NaN	NaN	NaN	NaN	NaN	NaN
3.66	-22.9226	-8.4123	471.004	-0.27441	0.31689	-0.018066	38.6021	-17.631	27.437	-0.10049	0.13301	-0.1249	44.8535	52.898	30.376	0.18335	0.15503	-0.18946	NaN	NaN	NaN	NaN	NaN	NaN
3.662	-37.137	2.0678	459.29	-0.26098	0.30737	-0.024659	68.377	9.28848	32.117	-0.10127	0.14707	-0.12295	39.4225	1.18914	0.788	0.19043	0.16064	-0.19727	NaN	NaN	NaN	NaN	NaN	NaN
3.664	-42.545	0.825999999999999	436.1719	-0.25	0.3042	-0.025391	72.981	21.3448	6.1294	-0.099998	0.15957	-0.12051	24.6957	15.9233	13.925	0.20264	0.17041	-0.20898	NaN	NaN	NaN	NaN	NaN	NaN
3.666	-59.966	-15.4155	438.759	-0.23438	0.28711	-0.031738	57.224	-4.3983	7.2167	-0.094238	0.17139	-0.12061	42.12237	-59.721	52.2555	0.20068	0.17725	-0.20996	NaN	NaN	NaN	NaN	NaN	NaN
3.668	-32.23	-19.7659	421.218	-0.22363	0.28662	-0.032227	74.246	20.556	13.918	-0.083008	0.18682	-0.12178	17.653	-42.641	92.682	0.19531	0.18604	-0.21582	NaN	NaN	NaN	NaN	NaN	NaN
3.67	-51.977	-22.5005	428.788	-0.21289	0.27441	-0.038086	26.3126	6.0714	12.817	-0.071192	0.1957	-0.12373	11.843	-75.1486	120.471	0.18604	0.19531	-0.2168	NaN	NaN	NaN	NaN	NaN	NaN
3.672	-44.038	-16.1069	416.454	-0.20068	0.26831	-0.039551	31.1115	-6.06967	33.182	-0.05752	0.20547	-0.12451	20.55	9.827	151.122	0.16455	0.2085	-0.21631	NaN	NaN	NaN	NaN	NaN	NaN
3.674	-23.0655	-11.7542	400.944	-0.19092	0.26025	-0.042969	51.1537	6.9444	33.51	-0.037598	0.20996	-0.12197	20.062	18.6325	212.149	0.11914	0.22559	-0.21973	NaN	NaN	NaN	NaN	NaN	NaN
3.676	-21.0295	-7.7479	395.608	-0.18701	0.25146	-0.037109	6.7341	-17.484	25.587	-0.02002	0.21924	-0.12891	3.825	79.514	263.67	0.090332	0.23535	-0.21973	NaN	NaN	NaN	NaN	NaN	NaN
3.678	-17.3877	2.3477	367.09	-0.18115	0.24951	-0.037598	9.6187	-2.7492	48.692	-0.0023438	0.22558	-0.13008	20.298	57.3634	308.188	0.0063477	0.25488	-0.21631	NaN	NaN	NaN	NaN	NaN	NaN
3.68	-48.636	1.3705	348.8	-0.17627	0.24072	-0.041992	-8.052	9.5773	15.8136	0.016992	0.22852	-0.12988	-35.898	96.927	385.5714	-0.072265	0.27319	-0.20899	NaN	NaN	NaN	NaN	NaN	NaN
3.682	-6.5507	5.050936	346.597	-0.17529	0.23267	-0.03833	-14.118	-10.6835	12.6496	0.039648	0.23164	-0.1416	-29.021	87.194	479.4287	-0.15576	0.28662	-0.2041	NaN	NaN	NaN	NaN	NaN	NaN
3.684	16.7698	-1.1626	338.207	-0.17188	0.22656	-0.038086	-20.5574	17.1872	13.052275	0.058496	0.2334	-0.14824	-84.964	120.77	587.32	-0.28174	0.31494	-0.20264	NaN	NaN	NaN	NaN	NaN	NaN
3.686	-3.4261	-4.0982	334.036	-0.16895	0.21484	-0.037598	-62.21	3.0134	2.139	0.07666	0.23828	-0.15918	-93.238	110.163	673.474	-0.35059	0.32227	-0.20215	NaN	NaN	NaN	NaN	NaN	NaN
3.688	10.577	-8.17884	329.145	-0.16748	0.21533	-0.038086	-50.738	-3.6749	41.53812	0.093652	0.24561	-0.16465	-105.705	119.658	731.443	-0.49121	0.36084	-0.20166	NaN	NaN	NaN	NaN	NaN	NaN
3.69	20.9726	-6.6426	316.554	-0.16895	0.20703	-0.037598	-16.3494	8.305	35.5384	0.10098	0.2545	-0.17266	-85.766	99.569	802.5578	-0.59912	0.39306	-0.2019	NaN	NaN	NaN	NaN	NaN	NaN
3.692	24.9199	-0.0553999999999997	321.37	-0.16968	0.20044	-0.037598	-60.223	-8.426	47.7311	0.10684	0.26504	-0.17852	-97.87	84.531	901.655	-0.72119	0.43115	-0.20215	NaN	NaN	NaN	NaN	NaN	NaN
3.694	0.9527	20.2973	301.4222	-0.16797	0.19092	-0.033691	-19.7553	-7.522	79.072	0.094824	0.27197	-0.18272	-68.001	50.412	972.4076	-0.88428	0.48975	-0.19922	NaN	NaN	NaN	NaN	NaN	NaN
3.696	3.8784	19.27	293.6944	-0.16895	0.1875	-0.034668	-28.721	-11.561	71.597	0.083008	0.27539	-0.18164	-53.901	16.947	1024.656	-0.97314	0.51416	-0.18848	NaN	NaN	NaN	NaN	NaN	NaN
3.698	22.0894	6.2038	287.346	-0.16943	0.18018	-0.040527	-50.211	-40.575	89.685	0.060547	0.28135	-0.18242	-53.438	-34.338	1036.427	-1.1812	0.56689	-0.1543	NaN	NaN	NaN	NaN	NaN	NaN
3.7	22.4042	-5.62949	287.097	-0.16455	0.17529	-0.039551	28.3384	-28.483	100.181	0.028711	0.2834	-0.18135	-32.6837	-117.4757	1058.026	-1.3645	0.60864	-0.11597	NaN	NaN	NaN	NaN	NaN	NaN
3.702	1.7649	-9.7741	281.878	-0.16748	0.16748	-0.034668	10.21	-58.163	101.8565	-0.006445	0.29278	-0.17549	9.859	-168.5563	1080.422	-1.5605	0.64355	-0.068848	NaN	NaN	NaN	NaN	NaN	NaN
3.704	0.41178	-18.6181	288.799	-0.16846	0.16064	-0.035156	22.786	-57.513	166.1085	-0.058691	0.29971	-0.17305	-6.555	-218.049	1100.912	-1.853	0.67041	0.018555	NaN	NaN	NaN	NaN	NaN	NaN
3.706	20.85007	-17.6579	297.505	-0.16748	0.15039	-0.035645	52.1543	-28.49962	203.1263	-0.11035	0.31445	-0.17676	-0.3115	-180.1186	1075.529	-2.0078	0.69629	0.062988	NaN	NaN	NaN	NaN	NaN	NaN
3.708	-5.1356	-12.0515	292.034	-0.16748	0.14746	-0.034668	7.946	-27.81493	251.3078	-0.17461	0.33301	-0.18428	-21.7393	-178.856	1092.801	-2.3198	0.76611	0.12109	NaN	NaN	NaN	NaN	NaN	NaN
3.71	-21.36658	1.7936	264.611	-0.17041	0.13867	-0.032715	43.059	-2.3859	352.5951	-0.23633	0.34619	-0.19131	-54.519	-121.561	1049.283	-2.5022	0.82202	0.12012	NaN	NaN	NaN	NaN	NaN	NaN
3.712	-22.5116	-0.362	260.6167	-0.16894	0.13574	-0.035645	22.9077	28.9238	442.71	-0.31445	0.36884	-0.20186	-70.566	-155.631	1022.257	-2.6191	0.89063	0.10889	NaN	NaN	NaN	NaN	NaN	NaN
3.714	-0.0699999999999985	1.86166	257.247	-0.17139	0.13379	-0.033203	-0.811	56.8169	555.539	-0.4043	0.38926	-0.21367	-56.565	-84.853	970.6138	-2.6211	1.0234	0.11475	NaN	NaN	NaN	NaN	NaN	NaN
3.716	-33.613	0.748399999999999	255.128	-0.17334	0.12695	-0.030762	36.6122	113.087	649.053	-0.50928	0.42139	-0.21777	-62.575	-104.119	972.0158	-2.5977	1.1074	0.098145	NaN	NaN	NaN	NaN	NaN	NaN
3.718	-23.4695	3.9077	255.616	-0.17725	0.12402	-0.036133	-9.879	143.7025	723.4978	-0.63466	0.45371	-0.22539	-70.121	-18.617	975.722	-2.4077	1.2183	0.080078	NaN	NaN	NaN	NaN	NaN	NaN
3.72	-24.8355	-10.4978	256.258	-0.18555	0.1167	-0.037598	-23.863	154.375	850.6596	-0.77285	0.48907	-0.22519	-85.581	-68.939	1033.064	-2.1599	1.1917	0.058106	NaN	NaN	NaN	NaN	NaN	NaN
3.722	-31.2151	-4.6638	253.086	-0.19434	0.11402	-0.0354	1.229	143.128	954.116	-0.94043	0.52539	-0.21465	-77.616	-27.273	1040.15362	-1.8794	1.1079	0.026367	NaN	NaN	NaN	NaN	NaN	NaN
3.724	-19.7052	3.87901	257.382	-0.20215	0.11523	-0.042969	-18.802	83.412	992.103	-1.1248	0.56348	-0.19551	-33.3876	-136.783	1058.125	-1.5015	0.93408	-0.037598	NaN	NaN	NaN	NaN	NaN	NaN
3.726	-32.6421	15.3548	254.72547	-0.21484	0.10156	-0.039063	12.5792	11.8205	1058.861	-1.332	0.59766	-0.15527	7.555	-125.958	1060.3949	-1.3315	0.85205	-0.067871	NaN	NaN	NaN	NaN	NaN	NaN
3.728	2.6884	25.1841	250.31513	-0.21924	0.10449	-0.036621	-11.4939	-46.6098	1090.915	-1.5684	0.6418	-0.11963	16.324	-225.45	1132.8775	-1.0791	0.75391	-0.13867	NaN	NaN	NaN	NaN	NaN	NaN
3.73	-10.5463	21.9017	247.2315	-0.23926	0.10498	-0.037109	-41.652	-117.238	1116.833	-1.8234	0.69209	-0.082324	-2.451	-188.226	1159.717	-0.95508	0.72266	-0.18384	NaN	NaN	NaN	NaN	NaN	NaN
3.732	-6.8274	21.2943	248.0401	-0.25049	0.10523	-0.039307	18.8358	-148.14293	1104.132	-2.0589	0.74131	-0.047559	-14.337	-277.5255	1203.369	-0.86523	0.70703	-0.22266	NaN	NaN	NaN	NaN	NaN	NaN
3.734	-3.8541	12.8802	258.809	-0.26367	0.10449	-0.038086	-31.66076	-190.719	1018.336	-2.2359	0.79472	-0.029394	-56.5635	-240.5814	1229.617	-0.81396	0.69971	-0.23242	NaN	NaN	NaN	NaN	NaN	NaN
3.736	1.0196	8.9591	266.468	-0.28125	0.10352	-0.040039	-50.9604	-213.435	1019.864	-2.3394	0.85791	-0.041504	-40.5304	-310.257	1286.3713	-0.81982	0.72607	-0.21631	NaN	NaN	NaN	NaN	NaN	NaN
3.738	17.9376	14.4372	271.122	-0.28809	0.10547	-0.040527	-64.2923	-175.716	1005.206	-2.3278	0.92627	-0.045508	-35.122	-272.707	1371.307	-0.88867	0.83789	-0.22656	NaN	NaN	NaN	NaN	NaN	NaN
3.74	-5.869	19.8835	278.5426	-0.30859	0.11182	-0.040527	-140.174	-133.333	974.005	-2.2167	1.004	-0.054101	-45.6976	-288.168	1443.818	-0.92065	0.91162	-0.24463	NaN	NaN	NaN	NaN	NaN	NaN
3.742	18.4757	16.3776	290.2808	-0.32398	0.11402	-0.04248	-102.7799	-88.399	978.155	-2.0217	1.0536	-0.050977	-64.45746	-191.829	1481.043	-0.90771	0.93115	-0.25342	NaN	NaN	NaN	NaN	NaN	NaN
3.744	27.1095	25.1608	301.034	-0.33545	0.11426	-0.043945	-133.86	-37.5978	949.028	-1.7831	1.0704	-0.070313	-51.663	-186.1962	1525.455	-0.93799	0.90088	-0.22607	NaN	NaN	NaN	NaN	NaN	NaN
3.746	21.9353	24.9849	311.595	-0.35547	0.12012	-0.047852	-169.93	-23.331	962.541	-1.5269	1.02	-0.07373	-9.608	-132.357	1559.321	-1.0044	0.88916	-0.21484	NaN	NaN	NaN	NaN	NaN	NaN
3.748	17.1095	29.198	307.9105	-0.36475	0.12061	-0.04541	-118.663	-8.47499999999999	988.922	-1.2739	0.90849	-0.080469	29.987	-154.539	1552.064	-1.1772	0.90674	-0.20264	NaN	NaN	NaN	NaN	NaN	NaN
3.75	3.0151	20.298	312.5609	-0.38281	0.12695	-0.043945	-110.005	13.808	932.371	-1.0606	0.78223	-0.089649	76.969	-105.733	1535.6145	-1.3015	0.93969	-0.19971	NaN	NaN	NaN	NaN	NaN	NaN
3.752	22.589747	18.6578	318.3543	-0.39648	0.12745	-0.041748	-72.057	-5.253	937.595	-0.8832	0.66973	-0.087695	95.552	-123.874	1526.7876	-1.4121	0.97461	-0.20117	NaN	NaN	NaN	NaN	NaN	NaN
3.754	4.2879	28.0976	326.743	-0.4126	0.13232	-0.043945	-16.4534	-30.472	930.234	-0.7583	0.59228	-0.091895	47.5289	-68.543	1540.127	-1.5386	1.0259	-0.22168	NaN	NaN	NaN	NaN	NaN	NaN
3.756	9.3731	34.501	350.298	-0.42822	0.13477	-0.041016	-34.694	-88.124	900.707	-0.66211	0.55371	-0.09082	21.6323	-63.278	1584.963	-1.603	1.0532	-0.23096	NaN	NaN	NaN	NaN	NaN	NaN
3.758	-0.5772	30.8261	358.334	-0.4375	0.13672	-0.039063	26.033	-166.55828	921.98	-0.60684	0.5498	-0.1167	18.8322	-43.982	1604.9717	-1.7144	1.0952	-0.24902	NaN	NaN	NaN	NaN	NaN	NaN
3.76	3.0307	30.9179	373.143	-0.45459	0.14502	-0.040039	35.4874	-205.171	927.274	-0.57324	0.58145	-0.13183	39.6774	-66.83715	1627.491	-1.7888	1.0925	-0.26831	NaN	NaN	NaN	NaN	NaN	NaN
3.762	-17.2246	35.2396	388.2603	-0.47192	0.15332	-0.038086	-10.675	-265.271	967.251	-0.57793	0.64356	-0.15449	26.462	-84.858	1690.657	-1.8608	1.0864	-0.29102	NaN	NaN	NaN	NaN	NaN	NaN
3.764	-29.718	52.622	406.42	-0.48633	0.15625	-0.036621	28.625	-305.96	1066.451	-0.60821	0.69766	-0.17422	7.368	-86.113	1705.684	-1.9316	1.0928	-0.30762	NaN	NaN	NaN	NaN	NaN	NaN
3.766	-20.9707	45.985	418.306	-0.50391	0.16553	-0.035156	31.4442	-278.045	1078.152	-0.65039	0.73438	-0.18359	-5.1215	-83.064	1740.659	-1.9609	1.0977	-0.31104	NaN	NaN	NaN	NaN	NaN	NaN
3.768	-10.04653	41.653	415.359	-0.51172	0.1709	-0.033691	46.871	-282.688	1118.964	-0.71328	0.74883	-0.18848	10.0948	-76.731	1745.335	-2.0132	1.0923	-0.34326	NaN	NaN	NaN	NaN	NaN	NaN
3.77	-25.9209	41.413	421.8827	-0.53125	0.18311	-0.033203	70.766	-245.014	1152.2573	-0.79502	0.76533	-0.18984	13.7141	-113.752	1761.91	-2.0366	1.0874	-0.36718	NaN	NaN	NaN	NaN	NaN	NaN
3.772	-47.874	31.3646	445.0998	-0.55078	0.18579	-0.031005	41.8255	-188.455	1166.474	-0.8997	0.78565	-0.18594	20.199	-125.434	1755.397	-2.0547	1.084	-0.37891	NaN	NaN	NaN	NaN	NaN	NaN
3.774	-15.3527	33.6331	469.08	-0.56543	0.19141	-0.026855	109.37	-168.796	1235.06756	-1.0236	0.82226	-0.17217	57.559	-146.687	1751.665	-2.0605	1.0723	-0.39795	NaN	NaN	NaN	NaN	NaN	NaN
3.776	-43.848	40.9023	488.613	-0.58936	0.19482	-0.026855	123.016	-100.974	1241.2003	-1.146	0.86768	-0.15771	73.581	-98.2179	1742.871	-2.0723	1.0723	-0.40088	NaN	NaN	NaN	NaN	NaN	NaN
3.778	-39.003	54.349	494.014	-0.60156	0.19824	-0.02832	91.479	-80.727	1252.95	-1.2678	0.91973	-0.13789	35.696	-82.452	1743.026	-2.0776	1.0728	-0.41846	NaN	NaN	NaN	NaN	NaN	NaN
3.78	-36.807	41.26547	512.103	-0.63672	0.20801	-0.020508	124.084	-123.067	1322.783	-1.3823	0.9794	-0.12968	-7.095	-25.225	1693.965	-2.0837	1.0569	-0.42066	NaN	NaN	NaN	NaN	NaN	NaN
3.782	-22.713	51.1726	518.132	-0.6626	0.21192	-0.019531	101.686	-102.05	1317.486	-1.4835	1.0267	-0.12812	-18.4948	-46.6389	1696.6218	-2.0854	1.0493	-0.41943	NaN	NaN	NaN	NaN	NaN	NaN
3.784	-6.23454	54.317	533.028	-0.69043	0.21777	-0.015137	72.526	-115.368	1305.0747	-1.5719	1.0727	-0.12617	-43.555	20.2577	1658.737	-2.0972	1.0396	-0.42871	NaN	NaN	NaN	NaN	NaN	NaN
3.786	-14.1018	48.0485	556.868	-0.73242	0.22803	-0.01123	74.197	-92.965	1301.335	-1.6382	1.106	-0.13086	-51.92262	25.783	1651.0383	-2.103	1.0396	-0.42725	NaN	NaN	NaN	NaN	NaN	NaN
3.788	-17.4122	41.3068	570.947	-0.75537	0.23096	-0.0092773	-12.2705	-44.784	1299.854	-1.6935	1.1268	-0.1419	-64.82117	105.343	1645.5376	-2.1069	1.0317	-0.43018	NaN	NaN	NaN	NaN	NaN	NaN
3.79	-11.0829	44.6037	586.282	-0.79883	0.2373	-0.0073242	-16.836	-100.5544	1372.5579	-1.734	1.1453	-0.16465	-48.4973	90.69	1659.3716	-2.1118	1.0225	-0.43017	NaN	NaN	NaN	NaN	NaN	NaN
3.792	15.4405	58.24	606.366	-0.83472	0.24683	-0.0056153	18.565	-104.602	1421.887	-1.7617	1.1684	-0.17754	-52.514531	121.968	1644.2083	-2.1172	1.0156	-0.43457	NaN	NaN	NaN	NaN	NaN	NaN
3.794	2.97591	54.39932	625.263	-0.87061	0.25439	-0.0019531	-24.1289	-139.5658	1443.817	-1.7798	1.1765	-0.19004	-22.843	55.251	1664.205	-2.1265	1.0083	-0.43408	NaN	NaN	NaN	NaN	NaN	NaN
3.796	-16.7148	54.0166	630.194	-0.91992	0.26367	0.0043945	-6.7308	-197.712	1538.055	-1.7988	1.1836	-0.20605	7.453	63.307	1647.021	-2.1308	1.004	-0.4248	NaN	NaN	NaN	NaN	NaN	NaN
3.798	20.4833	52.3747	644.571	-0.95971	0.27173	0.010986	-11.0041	-150.5387	1557.005	-1.8162	1.1807	-0.22744	49.318	14.367	1651.903	-2.1309	0.99609	-0.42285	NaN	NaN	NaN	NaN	NaN	NaN
3.8	10.685	62.2324	655.931	-0.99512	0.2832	0.014648	-40.76	-166.3275	1553.673	-1.8249	1.1727	-0.25664	50.032	60.529	1636.249	-2.1382	0.98291	-0.42041	NaN	NaN	NaN	NaN	NaN	NaN
3.802	19.7733	62.18402	676.192	-1.0469	0.29199	0.02002	14.238	-142.619	1541.974	-1.8284	1.1615	-0.2832	48.96227	30.023	1611.7497	-2.1382	0.98291	-0.41553	NaN	NaN	NaN	NaN	NaN	NaN
3.804	-10.2372	51.8876	695.813	-1.0698	0.29932	0.024414	-29.8174	-73.49	1501.737	-1.8214	1.1552	-0.3122	26.64	86.657	1575.7666	-2.1343	0.97314	-0.41357	NaN	NaN	NaN	NaN	NaN	NaN
3.806	18.6726	49.1857	713.721	-1.125	0.31445	0.032227	-39.8921	-119.3329	1515.8155	-1.8101	1.1411	-0.3418	35.6366	36.843	1589.319	-2.1368	0.96924	-0.40967	NaN	NaN	NaN	NaN	NaN	NaN
3.808	-4.47188	63.6002	717.765	-1.1589	0.32422	0.03833	-8.391	-77.786	1521.922	-1.7897	1.1221	-0.35586	18.905	86.925	1569.579	-2.125	0.9668	-0.4082	NaN	NaN	NaN	NaN	NaN	NaN
3.81	-7.7228	75.2727	734.4822	-1.1895	0.33789	0.041016	-48.4258	-58.551	1493.9497	-1.7672	1.1035	-0.37696	56.602	65.077	1570.007	-2.1016	0.95605	-0.39941	NaN	NaN	NaN	NaN	NaN	NaN
3.812	2.9931	77.4663	742.593	-1.2266	0.35352	0.040039	-32.48043	-85.347	1533.042	-1.7418	1.0773	-0.39063	61.117	145.7248	1533.2	-2.084	0.95898	-0.39258	NaN	NaN	NaN	NaN	NaN	NaN
3.814	-12.2245	85.12613	748.362	-1.2422	0.36328	0.047363	-22.1766	-16.5516	1518.978	-1.7105	1.0481	-0.40323	42.03803	141.467	1506.978	-2.0361	0.94922	-0.38184	NaN	NaN	NaN	NaN	NaN	NaN
3.816	-17.5873	89.2493	761.7	-1.2578	0.37793	0.050781	-0.0549999999999997	-28.109	1520.042	-1.6855	1.0137	-0.41357	29.878	203.599	1488.246	-1.9985	0.94824	-0.37818	NaN	NaN	NaN	NaN	NaN	NaN
3.818	-39.677	84.6217	768.662	-1.2676	0.39209	0.045898	66.2041	-19.2538	1537.428	-1.671	0.98721	-0.42451	53.315	162.426	1459.4747	-1.9565	0.94385	-0.37451	NaN	NaN	NaN	NaN	NaN	NaN
3.82	-19.4488	76.3424	780.615	-1.2725	0.40039	0.044434	11.834	40.82	1490.868	-1.6691	0.96963	-0.43486	71.2682	226.037	1413.2174	-1.8999	0.93311	-0.36768	NaN	NaN	NaN	NaN	NaN	NaN
3.822	-41.701	75.9627	805.669	-1.2695	0.41211	0.049805	37.948	-12.3851	1524.557	-1.6796	0.95908	-0.4372	69.8097	204.408	1382.4266	-1.8613	0.92773	-0.36133	NaN	NaN	NaN	NaN	NaN	NaN
3.824	-37.054	94.4564	805.2974	-1.269	0.41895	0.043457	77.909	3.92067	1560.762	-1.694	0.95332	-0.43437	52.417	269.454	1325.9535	-1.7925	0.91064	-0.34912	NaN	NaN	NaN	NaN	NaN	NaN
3.826	-43.829	99.9224	829.282	-1.269	0.43408	0.04834	39.0089	-6.077	1557.0924	-1.7144	0.94092	-0.4292	21.6414	235.312	1329.162	-1.7415	0.89576	-0.33863	NaN	NaN	NaN	NaN	NaN	NaN
3.828	-36.374	105.2185	833.357	-1.2593	0.43823	0.049072	87.655	-60.986	1579.346	-1.735	0.94229	-0.42119	-2.521	265.508	1298.435	-1.6836	0.875	-0.32813	NaN	NaN	NaN	NaN	NaN	NaN
3.83	-41.383	108.1002	832.768	-1.2534	0.44873	0.04834	98.07	-21.3209	1551.556	-1.7628	0.93877	-0.41983	-12.1628	197.157	1269.384	-1.6016	0.83984	-0.30518	NaN	NaN	NaN	NaN	NaN	NaN
3.832	-42.522	107.7555	846.8032	-1.2441	0.45898	0.046875	61.468	-55.223	1529.842	-1.7776	0.93955	-0.40928	-41.4279	203.4029	1241.547	-1.5586	0.83008	-0.30322	NaN	NaN	NaN	NaN	NaN	NaN
3.834	-34.7173	93.979	851.431	-1.2461	0.4668	0.05127	89.513	-61.548	1560.038	-1.7938	0.94756	-0.40391	-41.517	163.676	1184.971	-1.4819	0.79346	-0.28369	NaN	NaN	NaN	NaN	NaN	NaN
3.836	-31.203	98.312	864.727	-1.2397	0.47803	0.05127	62.3	-8.404	1491.088	-1.7964	0.95361	-0.40332	-46.5742	204.46	1155.734	-1.4226	0.76294	-0.26538	NaN	NaN	NaN	NaN	NaN	NaN
3.838	-16.7488	110.9335	869.745	-1.242	0.48852	0.050293	63.887	-45.14346	1477.6023	-1.7988	0.95977	-0.4	-33.3465	218.366	1114.6303	-1.3706	0.73682	-0.24854	NaN	NaN	NaN	NaN	NaN	NaN
3.84	-26.1654	108.50603	887.667	-1.2461	0.49805	0.047363	68.7549	6.586	1475.0964	-1.7867	0.96572	-0.39873	-51.80126	272.666	1073.635	-1.3027	0.70508	-0.22217	NaN	NaN	NaN	NaN	NaN	NaN
3.842	-10.1391	108.8413	895.706	-1.2578	0.50781	0.049316	11.53	41.02048	1447.9444	-1.771	0.97041	-0.39795	-50.729	245.7375	1036.199	-1.2651	0.68604	-0.21289	NaN	NaN	NaN	NaN	NaN	NaN
3.844	-6.04825	112.0424	900.816	-1.2617	0.51172	0.045898	32.099	34.71631	1450.4291	-1.7472	0.96885	-0.40029	-21.028	253.808	998.268	-1.1973	0.6543	-0.18213	NaN	NaN	NaN	NaN	NaN	NaN
3.846	-0.777	128.163	899.412	-1.269	0.52002	0.049316	36.01276	99.258	1426.2714	-1.7227	0.96289	-0.39844	-43.9132	244.179	965.75	-1.1521	0.62427	-0.16553	NaN	NaN	NaN	NaN	NaN	NaN
3.848	-0.7047	134.108	898.3566	-1.2866	0.5249	0.041504	0.542000000000002	90.799	1406.5051	-1.6919	0.95772	-0.39736	-18.89	272.518	927.381	-1.1089	0.60205	-0.14941	NaN	NaN	NaN	NaN	NaN	NaN
3.85	-8.8686	133.1612	906.5287	-1.3008	0.52832	0.040527	40.712	65.351	1420.815	-1.6585	0.94854	-0.39189	-15.2275	265.452	891.275	-1.0405	0.57275	-0.12598	NaN	NaN	NaN	NaN	NaN	NaN
3.852	28.7059	134.8472	906.362	-1.3237	0.53955	0.039551	13.944	99.255	1369.777	-1.6253	0.94033	-0.39189	-28.6749	273.629	822.361	-1.0098	0.55078	-0.11719	NaN	NaN	NaN	NaN	NaN	NaN
3.854	13.8103	139.8419	902.3576	-1.3335	0.54443	0.036133	0.512	60.75	1344.9373	-1.5964	0.93565	-0.38799	-39.2121	254.2043	784.1527	-0.95166	0.51807	-0.093262	NaN	NaN	NaN	NaN	NaN	NaN
3.856	15.0909	146.8395	920.8403	-1.3491	0.55127	0.039063	19.004	87.045	1326.45	-1.5684	0.91992	-0.39063	-34.904	254.97116	728.507	-0.9021	0.49927	-0.071778	NaN	NaN	NaN	NaN	NaN	NaN
3.858	16.1483	146.3151	930.419	-1.3652	0.5586	0.037842	-28.532	93.486	1280.5895	-1.5372	0.91475	-0.38047	-44.5755	269.9108	688.793	-0.85938	0.47852	-0.052734	NaN	NaN	NaN	NaN	NaN	NaN
3.86	11.7122	146.8277	934.643	-1.3789	0.56738	0.037598	6.625	28.978	1283.8936	-1.5117	0.90274	-0.37666	-18.1416	273.9753	650.005	-0.79932	0.44971	-0.042969	NaN	NaN	NaN	NaN	NaN	NaN
3.862	8.6226	162.661	927.8228	-1.3999	0.57568	0.038574	-8.023	57.279	1252.1874	-1.477	0.88594	-0.37002	6.9095	268.0327	624.399	-0.76611	0.43799	-0.033203	NaN	NaN	NaN	NaN	NaN	NaN
3.864	-11.99918	172.269	920.4603	-1.4058	0.58057	0.034668	-30.432	25.336	1242.6741	-1.4493	0.86905	-0.3667	25.6017	227.0085	599.719	-0.70313	0.41016	-0.011719	NaN	NaN	NaN	NaN	NaN	NaN
3.866	21.7275	170.128	915.3376	-1.4277	0.59766	0.027832	14.723	29.677	1258.171	-1.4219	0.8457	-0.3584	14.263	209.119	564.621	-0.66528	0.38647	0.0092775	NaN	NaN	NaN	NaN	NaN	NaN
3.868	-9.9073	165.878	920.6753	-1.45	0.6101	0.029297	-12.674	100.785	1239.247	-1.3883	0.82774	-0.35303	18.4213	186.819	531.485	-0.62744	0.36279	0.025879	NaN	NaN	NaN	NaN	NaN	NaN
3.87	-17.7978	160.875	935.1485	-1.48	0.61963	0.027344	18.706	70.845	1236.064	-1.3559	0.81054	-0.34511	31.051	202.114	496.758	-0.58398	0.33203	0.044922	NaN	NaN	NaN	NaN	NaN	NaN
3.872	-22.541	146.7012	950.8373	-1.5327	0.62939	0.021973	64.7033	126.851	1190.772	-1.3242	0.78438	-0.33809	57.0008	185.273	464.803	-0.55811	0.31494	0.055176	NaN	NaN	NaN	NaN	NaN	NaN
3.874	-17.8922	155.0637	961.79	-1.5645	0.63867	0.024902	22.5021	158.71	1153.0269	-1.2913	0.7626	-0.33095	28.681	217.494	420.8319	-0.50586	0.28857	0.066406	NaN	NaN	NaN	NaN	NaN	NaN
3.876	-41.704	188.146	990.406	-1.6255	0.65088	0.020996	91.176	136.5707	1167.963	-1.2603	0.73877	-0.32275	26.9894	182.3583	395.85	-0.46167	0.26856	0.081543	NaN	NaN	NaN	NaN	NaN	NaN
3.878	-49.175	225.423	1015.215	-1.674	0.66089	0.016114	92.729	200.061	1139.025	-1.2302	0.71827	-0.31182	14.629	191.1122	346.2821	-0.40869	0.25732	0.091797	NaN	NaN	NaN	NaN	NaN	NaN
3.88	-43.932	229.0963	1034.3926	-1.7202	0.67578	0.013672	31.84068	172.592	1118.438	-1.203	0.69326	-0.30586	5.263	132.4535	331.834	-0.3335	0.23096	0.10156	NaN	NaN	NaN	NaN	NaN	NaN
3.882	-47.974	237.9607	1050.2155	-1.7886	0.68799	0.011719	77.163	151.715	1094.094	-1.1768	0.66943	-0.29648	-17.377	141.10373	287.989	-0.29834	0.21826	0.10645	NaN	NaN	NaN	NaN	NaN	NaN
3.884	-63.3897	243.1193	1073.8826	-1.8257	0.6958	0.0092773	35.9726	172.685	1059.059	-1.1529	0.65049	-0.28506	-21.2869	93.417	250.248	-0.22852	0.19922	0.11182	NaN	NaN	NaN	NaN	NaN	NaN
3.886	-83.764	258.873	1123.509	-1.8882	0.70557	0.0058594	61.207	122.0626	1052.99	-1.1265	0.63525	-0.26807	-38.683	134.67	199.135	-0.17114	0.17896	0.12524	NaN	NaN	NaN	NaN	NaN	NaN
3.888	-69.0021	273.079	1161.496	-1.9275	0.71412	0.0019531	68.601	159.4734	1027.086	-1.1035	0.61543	-0.25654	-11.4589	94.66587	183.484	-0.10938	0.16162	0.12988	NaN	NaN	NaN	NaN	NaN	NaN
3.89	-71.09	295.18	1166.809	-1.959	0.71973	0.0063477	37.904	170.4244	982.94354	-1.0835	0.59561	-0.246	-15.468	127.634	158.365	-0.04541	0.14111	0.14063	NaN	NaN	NaN	NaN	NaN	NaN
3.892	-78.947	309.369	1174.017	-1.9863	0.73047	0	61.707	140.417	985.9532	-1.0667	0.57802	-0.23233	-20.5145	85.4792	163.6214	-0.018066	0.12793	0.14355	NaN	NaN	NaN	NaN	NaN	NaN
3.894	-77.158	294.0654	1197.594	-1.9839	0.729	0.0043945	21.54	196.4555	961.487	-1.0488	0.56338	-0.21377	-38.388	136.316	116.829	0.046875	0.09082	0.15674	NaN	NaN	NaN	NaN	NaN	NaN
3.896	-90.6967	276.2393	1185.888	-1.9683	0.73096	0.003418	25.7583	160.8284	962.956	-1.0332	0.54395	-0.19873	-25.0592	88.822	126.898	0.097168	0.079346	0.1604	NaN	NaN	NaN	NaN	NaN	NaN
3.898	-59.4882	250.0055	1186.538	-1.9311	0.73095	0.0024414	31.20501	146.834	943.022	-1.0177	0.53506	-0.18467	-37.1637	117.416	104.343	0.13477	0.063965	0.16357	NaN	NaN	NaN	NaN	NaN	NaN
3.9	-79.7023	232.8581	1185.309	-1.8809	0.72461	-0.0014648	-13.2186	182.412	908.186	-1.0001	0.5251	-0.16885	-33.6412	34.9059	131.199	0.17725	0.050293	0.16504	NaN	NaN	NaN	NaN	NaN	NaN
3.902	-55.5123	210.3658	1183.204	-1.7866	0.71533	0.0029297	-4.0921	140.8436	891.323	-0.98447	0.51181	-0.15439	-24.88	56.76	105.081	0.20215	0.043945	0.1709	NaN	NaN	NaN	NaN	NaN	NaN
3.904	-54.983	175.49333	1182.023	-1.7339	0.70752	0.0039063	-2.4961	180.489	844.717	-0.9668	0.50567	-0.14297	-33.5363	-8.934	92.366	0.24365	0.024902	0.17529	NaN	NaN	NaN	NaN	NaN	NaN
3.906	-46.50875	153.0999	1161.731	-1.6304	0.68408	-0.0039063	-65.64	176.4453	783.4775	-0.94531	0.49414	-0.12598	-35.98	38.465	54.0032	0.2754	0.014892	0.18408	NaN	NaN	NaN	NaN	NaN	NaN
3.908	-51.8967	140.586	1148.00788	-1.5615	0.66748	-0.0085449	-44.812	152.414	761.147	-0.925	0.48213	-0.11113	-4.1422	4.849	59.412	0.29248	-0.0043945	0.18408	NaN	NaN	NaN	NaN	NaN	NaN
3.91	-77.3015	141.3164	1164.0762	-1.4941	0.65234	-0.012207	-34.1813	197.785	714.6968	-0.89951	0.46826	-0.095606	-23.468	53.7686	26.753	0.2998	-0.0058594	0.19189	NaN	NaN	NaN	NaN	NaN	NaN
3.912	-51.499	137.5796	1177.936	-1.416	0.63086	-0.02002	-76.103	165	694.4186	-0.87568	0.45537	-0.083496	4.8102	7.883	34.5145	0.29785	-0.021973	0.19678	NaN	NaN	NaN	NaN	NaN	NaN
3.914	-70.428971	142.4144	1160.498	-1.3823	0.62744	-0.026855	-37.315	177.095	673.725	-0.84805	0.4461	-0.070703	26.331	30.9825	28.3306	0.28857	-0.034668	0.22021	NaN	NaN	NaN	NaN	NaN	NaN
3.916	-62.597	134.2512	1156.295	-1.3145	0.62012	-0.029785	-50.448	203.099	621.403	-0.81641	0.42969	-0.055176	20.2501	-21.955	39.683	0.27319	-0.045654	0.22607	NaN	NaN	NaN	NaN	NaN	NaN
3.918	-89.646	121.541	1148.284	-1.2722	0.60791	-0.038086	-31.599	157.5196	634.23	-0.77891	0.41914	-0.042969	13.772	4.211	46.73	0.25244	-0.053711	0.23145	NaN	NaN	NaN	NaN	NaN	NaN
3.92	-61.5054	107.9147	1152.382	-1.2285	0.59961	-0.043457	-9.272	176.843	599.727	-0.74561	0.40146	-0.033887	24.2259	-21.5907	24.7234	0.23828	-0.061035	0.24902	NaN	NaN	NaN	NaN	NaN	NaN
3.922	-77.058	101.4437	1160.402	-1.1758	0.58105	-0.055664	-48.105	165.079	555.779	-0.70654	0.39131	-0.020996	23.303	37.2886	13.2854	0.2251	-0.068359	0.25391	NaN	NaN	NaN	NaN	NaN	NaN
3.924	-80.5319	109.5393	1168.362	-1.1577	0.5708	-0.061035	-8.5434	146.5712	541.283	-0.66534	0.37705	-0.010059	45.7819	27.53	12.011	0.20752	-0.07373	0.25781	NaN	NaN	NaN	NaN	NaN	NaN
3.926	-64.478	98.2793	1161.073	-1.1069	0.56006	-0.060059	-28.0868	190.883	501.939	-0.62646	0.36768	-0.0019531	50.457	63.689	27.504	0.19898	-0.08374	0.27001	NaN	NaN	NaN	NaN	NaN	NaN
3.928	-67.5765	79.8369	1139.68	-1.0769	0.54858	-0.072998	1.7831	173.244	496.0782	-0.5834	0.35039	0.0043945	23.4544	40.6724	28.1074	0.19092	-0.086426	0.27637	NaN	NaN	NaN	NaN	NaN	NaN
3.93	-66.25	73.5534	1114.944	-1.0449	0.53906	-0.081543	55.274	156.7046	481.874	-0.54278	0.33496	0.020606	9.525	37.4112	16.077	0.18262	-0.091797	0.27393	NaN	NaN	NaN	NaN	NaN	NaN
3.932	-72.033	61.2879	1101.387	-0.99609	0.53223	-0.092285	2.3517	160.87	439.089	-0.50215	0.32246	0.028418	16.7966	13.7346	13.142	0.18164	-0.094727	0.2749	NaN	NaN	NaN	NaN	NaN	NaN
3.934	-71.551	43.5386	1081.79	-0.97852	0.52734	-0.097168	46.783	102.017	440.152	-0.45684	0.30889	0.03916	-10.73	5.5669	33.8918	0.18555	-0.095703	0.27783	NaN	NaN	NaN	NaN	NaN	NaN
3.936	-65.168	18.5327	1067.723	-0.93555	0.51953	-0.10938	59.206	120.7411	403.735	-0.40771	0.29541	0.04541	14.628	-11.0592	31.89006	0.19189	-0.098633	0.27734	NaN	NaN	NaN	NaN	NaN	NaN
3.938	-51.29	6.01525	1056.5944	-0.88867	0.5166	-0.125	30.6767	127.3011	382.008	-0.3625	0.27764	0.059668	14.41	-6.028	42.0954	0.19629	-0.096191	0.27344	NaN	NaN	NaN	NaN	NaN	NaN
3.94	-13.51991	-17.5227	1053.458	-0.86572	0.52002	-0.13037	67.13	111.2111	353.077	-0.31054	0.26435	0.070996	-4.787	7.479	11.5545	0.20459	-0.10693	0.26953	NaN	NaN	NaN	NaN	NaN	NaN
3.942	-22.1643	-24.1483	1040.301	-0.82324	0.51855	-0.14746	34.026	138.6266	305.649	-0.26016	0.24522	0.076855	-0.936	10.728	26.1736	0.20703	-0.10425	0.2605	NaN	NaN	NaN	NaN	NaN	NaN
3.944	-7.596	-14.9621	1009.626	-0.80053	0.52124	-0.15674	17.841	114.534	289.173	-0.20762	0.23145	0.085156	-6.291	27.427	22.6713	0.21582	-0.10596	0.25098	NaN	NaN	NaN	NaN	NaN	NaN
3.946	-0.446	-9.188	979.4365	-0.78076	0.5249	-0.16553	68.107	123.487	286.879	-0.14697	0.21582	0.094238	-28.3155	16.5282	45.2725	0.22754	-0.098145	0.24658	NaN	NaN	NaN	NaN	NaN	NaN
3.948	20.087	-29.453	965.3888	-0.76123	0.52979	-0.17676	11.2927	144.51	253.72	-0.089843	0.19775	0.10254	-25.032	34.3491	19.5657	0.22656	-0.097656	0.23926	NaN	NaN	NaN	NaN	NaN	NaN
3.95	29.3743	-69.004	950.804	-0.75586	0.53027	-0.18018	23.4902	114.13	252.07	-0.035742	0.18145	0.10762	-11.781	7.139	62.992	0.23047	-0.088379	0.2207	NaN	NaN	NaN	NaN	NaN	NaN
3.952	37.4803	-100.487	946.0296	-0.75537	0.54346	-0.19434	37.2	126.008	236.39	0.020508	0.16153	0.11426	-34.8393	28.222	37.879	0.23242	-0.078613	0.21314	NaN	NaN	NaN	NaN	NaN	NaN
3.954	63.322	-126.4658	945.882	-0.76245	0.55322	-0.20166	-22.8943	103.482	213.8	0.074121	0.14199	0.11904	-22.248	-20.1145	48.086	0.22998	-0.071777	0.20215	NaN	NaN	NaN	NaN	NaN	NaN
3.956	53.2957	-137.7327	937.588	-0.77295	0.56592	-0.21094	22.5194	71.8365	205.335	0.12451	0.12646	0.11572	-19.562	11.9957	23.0477	0.2207	-0.05957	0.19434	NaN	NaN	NaN	NaN	NaN	NaN
3.958	62.5082	-137.794	919.0757	-0.78857	0.58057	-0.21631	-20.88634	77.2201	159.6783	0.17148	0.10771	0.11308	-39.0681	-7.633	-1.7252	0.21143	-0.04541	0.18311	NaN	NaN	NaN	NaN	NaN	NaN
3.96	54.4544	-125.5046	890.4146	-0.8042	0.59619	-0.22266	-36.783	56.8724	162.602	0.21699	0.090723	0.11279	-3.451	44.48	2.1765	0.18408	-0.030762	0.18164	NaN	NaN	NaN	NaN	NaN	NaN
3.962	72.4338	-130.7318	884.03158	-0.83252	0.60791	-0.23096	-13.0925	62.2229	141.715	0.25019	0.074316	0.10576	9.558	17.2211	35.6735	0.16895	-0.01709	0.18091	NaN	NaN	NaN	NaN	NaN	NaN
3.964	49.753	-140.1914	888.099	-0.86109	0.62402	-0.23096	-51.268	62.532	130.14	0.28183	0.060449	0.1042	-2.795	48.756	14.807	0.14453	0.0039063	0.1748	NaN	NaN	NaN	NaN	NaN	NaN
3.966	79.13	-152.749	891.844	-0.896	0.63916	-0.23975	-25.7512	28.7549	123.368	0.31641	0.051758	0.10205	0.762	-21.7727	22.889	0.11426	0.029297	0.16992	NaN	NaN	NaN	NaN	NaN	NaN
3.968	57.1502	-161.835	897.01	-0.94189	0.6582	-0.23926	-37.3964	40.02829	120.156	0.34238	0.038281	0.094531	6.752	1.976734	30.1219	0.10107	0.044434	0.1748	NaN	NaN	NaN	NaN	NaN	NaN
3.97	44.4059	-163.6812	899.65	-0.9707	0.66602	-0.24023	-48.216	38.011	124.91	0.36094	0.026758	0.090429	-0.5642	-43.104	59.747	0.079102	0.077148	0.16797	NaN	NaN	NaN	NaN	NaN	NaN
3.972	40.0921	-164.4092	900.5013	-1.019	0.68799	-0.23975	7.2475	30.4689	121.279	0.37695	0.015821	0.084961	18.668	14.5944	53.299	0.073975	0.10596	0.16822	NaN	NaN	NaN	NaN	NaN	NaN
3.974	43.5992	-162.6686	878.3912	-1.0608	0.70264	-0.23633	-15.241	44.1076	102.604	0.38066	0.0074219	0.084571	41.3514	-13.4275	49.3629	0.069336	0.13135	0.16943	NaN	NaN	NaN	NaN	NaN	NaN
3.976	48.2402	-153.571	884.8128	-1.0957	0.71582	-0.23291	-29.3457	26.5637	96.085	0.38721	0.0024414	0.07959	22.654	41.3275	-0.951000000000001	0.06543	0.16357	0.16992	NaN	NaN	NaN	NaN	NaN	NaN
3.978	35.251	-147.752	880.2512	-1.1406	0.73047	-0.2334	17.4183	23.993	90.326	0.38701	0.0040039	0.083398	39.223	-11.08133	25.832	0.065918	0.18164	0.16895	NaN	NaN	NaN	NaN	NaN	NaN
3.98	40.422	-150.466	891.94	-1.1582	0.74023	-0.23145	-12.2028	27.4007	60.418	0.3791	-0.00039062	0.078809	22.329	29.2487	-10.015	0.071289	0.20557	0.16211	NaN	NaN	NaN	NaN	NaN	NaN
3.982	41.561	-166.788	908.564	-1.1909	0.75244	-0.23145	21.3769	4.1003	65.951	0.37168	-0.00039062	0.078809	10.8175	-11.5605	10.566	0.072754	0.2229	0.16651	NaN	NaN	NaN	NaN	NaN	NaN
3.984	30.383	-166.887	918.2724	-1.2163	0.76123	-0.23023	42.428	32.0545	48.403	0.35137	0.00058592	0.07627	14.815	38.007	1.005	0.07959	0.24023	0.15527	NaN	NaN	NaN	NaN	NaN	NaN
3.986	27.276	-186.5583	935.284	-1.2378	0.76611	-0.22705	-13.2833	15.4841	24.8449	0.32764	0.0029297	0.081055	34.84848	2.083	45.454	0.085449	0.2583	0.15625	NaN	NaN	NaN	NaN	NaN	NaN
3.988	29.703	-191.2992	930.3964	-1.2515	0.771	-0.22461	61.669	9.998	39.825	0.30117	0.0083985	0.080273	21.459	44.602	22.1784	0.091797	0.26611	0.15381	NaN	NaN	NaN	NaN	NaN	NaN
3.99	37.942	-179.88565	925.8123	-1.2637	0.76953	-0.22217	48.625	16.552	16.1885	0.27217	0.016699	0.084375	11.6357	1.64181	40.578	0.10498	0.27734	0.15869	NaN	NaN	NaN	NaN	NaN	NaN
3.992	26.222	-155.542	939.959	-1.2749	0.77002	-0.21973	48.1896	-2.0334	20.0217	0.23896	0.022168	0.083594	-16.862	54.5803	0.5316	0.10644	0.28564	0.15478	NaN	NaN	NaN	NaN	NaN	NaN
3.994	28.567	-145.9138	961.852	-1.2812	0.76465	-0.21363	82.098	4.239	42.4284	0.19941	0.025879	0.093262	-36.3645	16.9585	20.11012	0.10596	0.29199	0.1543	NaN	NaN	NaN	NaN	NaN	NaN
3.996	39.404	-143.36	967.881	-1.2773	0.75879	-0.21387	18.998	21.479	27.0681	0.16211	0.029297	0.10596	-3.461	51.742	17.6799	0.10205	0.30029	0.15234	NaN	NaN	NaN	NaN	NaN	NaN
[truncated: 28,002 more rows]
